# Supplementary material
Source: HighWire-hosted journal article supplement (https://rmdopen.bmj.com/content/8/2/e002672)
Supplement: inline-supplementary-material-1 [file inline-supplementary-material-1.pdf]

## ONLINE SUPPLEMENTAL MATERIALS

### **Dysregulated long non-coding RNA in Sjögren's Disease impacts both interferon and adaptive immune responses**

Michelle L. Joachims<sup>1,2,†</sup>, Bhuwan Khatri<sup>1,†</sup>, Chuang Li<sup>1,†</sup>, Kandice L. Tessneer<sup>1,†</sup>, John A. Ice<sup>2,†,‡</sup>, Anna M. Stolarczyk<sup>1</sup>, Nicolas Means<sup>3</sup>, Kiely M. Grundahl<sup>1</sup>, Stuart B. Glenn<sup>1</sup>, Jennifer A. Kelly<sup>1</sup>, David M. Lewis<sup>4</sup>, Lida Radfar<sup>5</sup>, Donald U. Stone<sup>6</sup>, Joel M. Guthridge<sup>2,3,7</sup>, Judith A. James<sup>2,3,7</sup>, R. Hal Scofield<sup>2,7,8</sup>, Graham B. Wiley<sup>1</sup>, Jonathan D. Wren<sup>1</sup>, Patrick M. Gaffney<sup>1</sup>, Courtney G. Montgomery<sup>1</sup>, Kathy L. Sivils<sup>2,§</sup>, Astrid Rasmussen<sup>1</sup>, A. Darise Farris<sup>2</sup>, Indra Adrianto<sup>9</sup>, and Christopher J. Lessard<sup>1,3\*</sup>

<sup>1</sup>Genes and Human Disease Research Program, Oklahoma Medical Research Foundation; Oklahoma City, OK, USA; <sup>2</sup>Arthritis and Clinical Immunology Research Program, Oklahoma Medical Research Foundation; Oklahoma City, OK, USA; <sup>3</sup>Department of Pathology, University of Oklahoma Health Sciences Center; Oklahoma City, OK, USA; <sup>4</sup>Department of Oral and Maxillofacial Pathology, University of Oklahoma College of Dentistry; Oklahoma City, OK, USA; <sup>5</sup>Oral Diagnosis and Radiology Department, University of Oklahoma College of Dentistry; Oklahoma City, OK, USA; <sup>6</sup>Department of Ophthalmology, University of Oklahoma Health Sciences Center; Oklahoma City, OK, USA; <sup>7</sup>Department of Medicine, University of Oklahoma Health Sciences Center; Oklahoma City, OK, USA; <sup>8</sup>US Department of Veterans Affairs Medical Center; Oklahoma City, OK, USA; <sup>9</sup>Center for Bioinformatics, Department of Public Health Sciences, Henry Ford Health System; Detroit, MI, USA.

\*Corresponding Author:

825 NE 13<sup>th</sup> Street  
Oklahoma City, OK 73104  
Telephone: 405-271-2539  
Fax: 405-271-2539  
Email: [chris-lessard@omrf.org](mailto:chris-lessard@omrf.org)

<sup>†</sup>These authors contributed equally to the manuscript

<sup>‡</sup>Current address: Department of Nutritional Sciences, Oklahoma State University, 301 Nancy Randolph Davis Building, Room 411, Stillwater, OK 74078, USA

<sup>§</sup>Current address: Translational Sciences, The Janssen Pharmaceutical Companies of Johnson & Johnson, Janssen Pharmaceutical R&D, 1400 McKean Rd, Spring House, PA 19477, USA

**ONLINE SUPPLEMENTAL MATERIALS: TABLE of CONTENTS**

|                                                      |       |
|------------------------------------------------------|-------|
| Online Supplemental Materials and Methods .....      | p. 3  |
| Online Supplemental References .....                 | p. 12 |
| Online Supplemental Note: URLs .....                 | p. 14 |
| Online Supplemental Figures and Figure Legends ..... | p. 15 |
| Online Supplemental Tables (List) .....              | p. 24 |



## **ONLINE SUPPLEMENTAL MATERIALS and METHODS**

### **Subjects and Classification**

All research received prior approval from the Institutional Review Boards at the Oklahoma Medical Research Foundation (OMRF IRB 12-03, 20-08). Informed consent was obtained prior to clinical evaluation at the University of Minnesota or OMRF Sjögren's Research Clinics [1]. The 2002 American-European Consensus Group (AECG) Criteria was used to classify SjD cases at enrollment (**Supplemental Table 1**) [2]. All HCs had no diagnosis of an autoimmune disease, were not taking immunomodulatory medications, and had no family history of autoimmunity. Oral, ocular, and physical exams included salivary flow measurements, labial salivary gland biopsies, Schirmer's tests, ocular surface staining, and review of systems. Anti-Ro autoantibodies were measured using BioRad Bioplex 2200 ANA assay (Hercules, CA).

### **Patient and Public Involvement**

This study leveraged pre-existing banked whole blood RNA. Therefore, it was not appropriate or possible to involve patients or the public in the design, conduct, reporting, or dissemination plans of our research.

### **Peripheral Blood RNA Transcript Isolation**

Whole blood RNA was collected into PAXGene tubes (BD) and extracted with on-column DNase digestion (Qiagen). Excess globin transcripts were removed using GLOBINclear™ (Ambion). RNA concentrations were measured by NanoDrop spectrophotometer. RNA quality was assessed using the RNA 6000 Nano kit (Bioanalyzer 2100, Agilent; RIN scores >8).

### **Peripheral Blood RNA-Sequencing, Quality Control Measures, and Statistical Analysis**

Sequencing libraries were prepared using 250ng of whole-blood RNA (NuGEN Encore Complete RNA-seq Library kit). Paired-end 100bp RNA sequencing was performed on the Illumina HiSeq 2000, multiplexing 6 samples per lane (4 cases and 2 controls). FASTQC v0.11.5 was used to assess quality raw sequence data. Trimmomatic v0.35 was used to remove low-quality reads [3]. HISAT2 v.2.0.4 was used to align quality controlled FASTQ files to the human genome (GRCh38) [4]. Aligned files were sorted to bam files using SAMTOOLS v1.9 [5]. Read counts-per-gene or transcript were generated using featureCount v1.6.3 from the Subread package [6]. Transcripts with greater than zero mean read counts in at least one third of samples were retained. DESeq2 v1.30.1 [7] applied a negative binomial generalized linear model to identify differentially expressed transcripts ( $\text{Log}_2\text{FC} \geq 1$  or  $\leq -1$ ;  $P_{\text{adj}} \leq 0.05$ ). Gene annotation was performed using Ensembl release 102 in R package biomaRt [6].

### **Deconvolution Analyses of Peripheral Blood RNA-Sequencing Data**

Raw reads were converted to FPKM for each sample by calculation of gene length using reference Homo\_sapiens\_GRCh38\_106.gtf (Ensembl), calculation of average fragment length using PICARD, and using countToFPKM R package. Bioconductor package ‘quantiseqr’ was used for deconvolution. The FPKM count data were fed into quantiseqr, choosing TIL10 signature matrix for non-tumor data, and run for deconvolution. The TIL10 signature matrix was used to quantify 10 different immune cell types: B cells, classically activated (M1) macrophages, alternatively activated (M2) macrophages, monocytes, neutrophils, natural killer (NK) cells, non-regulatory (helper) CD4+ T cells, cytotoxic CD8+ T cells, regulatory CD4+ T (Treg) cells, myeloid dendritic cells, and other uncharacterized cells) in bulk blood transcriptomics data. The deconvoluted cell

fractions data were analyzed by ANOVA and pairwise t-test for multiple groups to assess differences between cell fractions in HC, SJD<sup>Ro+</sup> and SJD<sup>Ro-</sup> subjects (**Supplemental Figure 1**).

### **Pathway Analyses of Differentially Expressed pcRNAs**

*Gene Set Enrichment Analysis (GSEA)* [8,9]: Two expression matrices were used to rank 12000 pcRNAs (top 6000 up- and down-regulated) by FC using SJD<sup>Ro+</sup> vs. HC or SJD<sup>Ro-</sup> vs. HC RNA-seq data. Using the GSEA stand-alone, 1604 gene sets were tested using the C2 Reactome Canonical Pathways comprised of curated gene sets downloaded from MSigDB (v7.4) using 1000 permutations per subphenotype. Weighted enrichment statistic and a *t*-test gene-ranking metric were reported (**Supplemental Tables 7-8**).

*Blood Module Analysis* [10–12]: Modular repertoire analysis was performed on normalized counts from whole blood RNA-seq datasets using BoodGen3Module in R. The reference modular repertoire consisted of 382 pre-determined co-expressed blood transcriptional modules arranged into 38 “aggregates” based on patterns of transcript abundance changes. Individual SJD cases were compared to HCs using the ‘individualcomparison’ function and were reported as the percentage of increased or decreased transcript expression relative to HCs (FC >1.5; absolute difference in expression values of 10). Heatmaps were generated using the ‘fingerprintplot’ function (**Figures 1G-L; Supplemental Figures 2B-D**).

*Ingenuity Pathway Analysis (IPA)*: IPA (Qiagen; Ver. 52912811) was used to evaluate DE transcripts from the RNA-seq analyses for role in all available canonical pathways and visualized using the comparison analysis function (**Supplemental Figure 2A**). Z-scores calculated relative

to healthy controls (applied threshold:  $-7 < z\text{-score} < 4$ ) and reported in tabular format (**Supplemental Tables 9-11, 25**).

*Gene Ontology (GO) Pathway Analysis:* The GO Enrichment Analysis web tool [13] was used to evaluate potential functional relationships between the DE transcripts from the RNA-seq analyses and reported as GO adjusted p-values (**Supplemental Table 19**). Note: All *RSAD2*-correlated transcripts ( $r > 0.7$  or  $< -0.6$ ) were input into the GO analysis.

### ***RSAD2* and *LINC01871* Correlation Analyses**

Five primary expression matrices were constructed using all aligned transcripts from normalized RNA-seq data: 1) All SjD cases and HCs; 2) All SjD cases; 3) All HCs; 4) Only SjD<sup>Ro+</sup> cases; 5) Only SjD<sup>Ro-</sup> cases. Pearson's correlation statistic  $r$  was calculated for each target gene (*RSAD2*: **Supplemental Table 13**; *LINC01871*: **Supplemental Table 18**) against all transcripts in a pairwise manner using `cor.test` function in R (significance threshold:  $r \geq 0.65$  or  $\leq -0.6$ ; p-value  $< 0.05$ ). Pairwise correlation matrices were visualized as correlograms using `CorrPlot` in R (**Figures 2A, 3A**).

Transcripts correlated with *RSAD2* were used to create an expression matrix for individual-level expression clustering and used to test transcripts that were both correlated with *RSAD2* and DE in the whole blood RNA-seq analyses (**Figures 2B**). Fold change expression of each transcript in SjD cases was calculated by dividing with the mean expression of that transcript in HCs followed by log transformation. Z-scores were computed for all correlated transcripts using `scale` function in R. K-means ( $k = 3$ ) clustering was performed using `ComplexHeatmap` package in R.

### Cell Culture and Stimulations

HSB-2 and Kasumi-3 cell lines (American Type Culture Collection; ATTC.org) were cultured per manufacturer instructions [14,15]. *Stimulations*: cells were resuspended ( $1 \times 10^6$  cells/mL) in complete media, and rested for 2h. Cells were stimulated using Universal Type I interferon (150U/mL; R&D Systems), IFN $\gamma$  (2800U/mL; R&D Systems), or PMA/I (final concentration 100ng/mL and 1000ng/mL, respectively) for indicated time points. Where indicated, cells were pre-treated with FK506 (Tacrolimus), Rapamycin (both at 2.5 $\mu$ M in DMSO; Selleck Chemicals) or DMSO for 1h or overnight as indicated. At each timepoint, cells were pelleted and solubilized in TRIzol Reagent (ThermoFisher). Unstimulated cells at each point were used as normalization controls.

### Isolation and stimulation of human CD3<sup>+</sup> T cells

Human PBMCs were isolated from buffy coats (Oklahoma Blood Institute), frozen for viability in 90% FBS/10% DMSO, and stored in liquid nitrogen. PBMCs from 4 donors (2 male, 2 female) were thawed, washed twice in complete media (RPMI with 10%FBS and 1X Pen/Strep), and checked for viability using trypan blue staining. PBMC viability of >90% [Range: 91-99%] was confirmed, then human CD3<sup>+</sup> T cells were purified by negative selection using the Human T cell enrichment kit (EasySep Negative selection, StemCell Technologies). T cell purity was assessed using flow cytometry for CD3<sup>+</sup> cells (range: 92-99%). *PMA/I stimulations*: CD3<sup>+</sup> T cells were treated for ~18h with either 2.5 $\mu$ M FK506 or DMSO in complete media, then plated, stimulated with PMA/I, and harvested at indicated timepoints. *Anti-CD3/CD28 stimulations*: CD3<sup>+</sup> T cells were treated ~18h with FK506 or DMSO as above then incubated with anti-CD3/CD28

activator beads (Dynabeads Human T Activator; Invitrogen) and harvested at indicated timepoints. Unstimulated cells at each point were used as normalization controls.

### **RNA purification, cDNA Synthesis, and RT-qPCR**

RNA was extracted from TRIzol-solubilized cells using column-based purification (ZymoResearch, Irving, CA). RNA was quantified using Quant-iT RiboGreen RNA assay (Thermo Fisher) and quality assessed by TapeStation (Agilent). cDNA was synthesized using iScript cDNA synthesis kit (Bio-Rad, CA) and quantitated by Quant-It PicoGreen dsDNA assay (Thermo Fisher). Quantitative real-time PCR (qPCR) was performed using SYBR Green I Master Mix (Roche) with validated primers (**Supplemental Table 26**) in duplicates. Cycle and melting curves were analyzed to ensure amplification of a unique target amplicon. Relative expression of the target transcript to reference genes was analyzed by comparative CT method [16] and statistical comparisons were made using unpaired t-tests (for normally distributed data) or Mann-Whitney tests (non-normally distributed). All statistical calculations were performed using GraphPad Prism (GraphPad Software, La Jolla California USA).

### **Bioinformatics Analysis of *LINC01871***

LncRNAs of interest were visualized using ENCODE and other datasets using the UCSC Genome Browser (hg19 for *Homo sapiens*) to assess gene features. GeneFriends [17], FuncPred [18], and lncRNA2function [19] were used to assess co-expression networks using publicly available data from disparate RNA-seq studies (**Supplemental Tables 15-17**). Multiple queries were performed using available annotations (e.g., HGNC gene symbol, Ensembl ID, Entrez ID) to ensure the

transcript presence or absence in each database. GSEA and IPA were performed as previously described.

### **Analysis of single cell RNA-sequencing data from minor salivary gland cells**

Previously published single cell RNA-sequencing data from the minor salivary gland was obtained from the COVID 19 Cell Atlas (<https://www.covid19cellatlas.org/>) dbGaP dataset (phs002446.v1.p1) [20,21]. The data (.h5ad file) was converted into an Robject using R package 'sceasy'. Seurat functions 'DimPlot' was used to generate subpopulations (**Supplemental Figure 3I**). 'FeaturePlot' was used to assess expression of *LINC01871* in cell subpopulations and 'VlnPlot' to create violin plots of *LINC01871* expression subpopulations of minor salivary gland cells (**Supplemental Figure 3I, J**).

### **CRISPR editing of the *LINC01871* locus in HSB-2 Cells**

A pool of 4 CRISPR guides, designed using CRISPOR [22] were selected to target the *LINC01871* locus (**Supplemental Figure 4A; Supplemental Table 20**). Guide RNAs (crRNAs) and ATTO-550 labeled tracrRNA (IDT) were used as ribonucleoprotein complexes (RNPs) with the Alt-R CRISPR-Cas9 enzyme (IDT) for transfection of HSB-2 cells with the Neon Transfection System (ThermoFisher) following the RNP protocol from IDT. Single ATTO-550 expressing cells were sorted 24h post-transfection into 96-well plates containing 50% HSB-2 conditioned media using a Mo-Flo XDP cell sorter (Beckman Coulter). Single cell clones were expanded for ~3 weeks before use.

### **Cas-mediated PCR-free enrichment for Nanopore sequencing**

Cas-mediated PCR-free enrichment was performed using a modified Nanopore protocol [23]. Genomic DNA was extracted from  $5 \times 10^6$  HSB-2 cells using the Gentra Puregene Cell Kit (QIAGEN). CHOPCHOP (83) was used to design four crRNA probes targeting upstream and downstream of *LINC01871* (**Supplemental Figure 4C; Supplemental Table 22**). Alt-R CRISPR-Cas9 crRNAs, Alt-R CRISPR-Cas9 tracrRNA, and Alt-R S.p. HiFi Cas9 Nuclease V3 (IDT) were used to create RNPs. Ligation Sequencing Kit (Nanopore) and NEBNext Quick T4 DNA ligase (NEB) were used for sequencing adapter ligation and DNA purified by bead clean-up (Agencourt AMPure XP beads (Beckman Coulter) at 0.3x volume). Libraries were sequenced on an Oxford Nanopore MinION Flongle flowcell, running for 24h with onboard basecalling set to “High Accuracy”, then raw reads were aligned to the human hg38 reference genome using minimap2.

#### **Characterization of CRISPR-edited *LINC01871*<sup>-/-</sup> HSB-2 cells (clone 4121)**

*Growth curve experiments:* Log phase HSB-2 and *LINC01871*<sup>-/-</sup> cells were suspended in fresh media (RPMI, 10% FBS, penicillin/streptomycin) at a density of  $0.5 \times 10^6$  cells/mL, then 2 mL ( $1.0 \times 10^6$  cells) were added to each well of a 24-well plate. Cell number and viability were assessed at indicated timepoints. *Surface and intracellular protein levels:* Flow cytometry was used to assess protein levels in  $1 \times 10^6$  unmodified HSB-2 cells and *LINC01871*<sup>-/-</sup> cells using antibodies to the following proteins: CD8a, CD44, CD226, CD183 (*CXCR3*), and CD30 (*TNFRSF8*) from BD Biosciences; T-Bet (*TBX21*) and Aiolos (*IKZF3*) from Biolegend (**Supplemental Table 27**). Respective isotype control antibodies were included and used to determine gating. Prior to intracellular protein staining and flow cytometry, cells were fixed and permeabilized using BD Fix and Perm Kit (BD Biosciences). Flow cytometric data was collected with FACSCelesta (BD Biosciences) and analyzed with FlowJo V10 (Ashland, OR). GraphPad Prism was used for



statistical analysis of mean fluorescence intensity (MFI) data. Isotype control staining was minimal and approximately equal in unmodified HSB-2 cells and *LINC01871*<sup>-/-</sup> cells; therefore, total gated events were used for MFI analyses. *Secreted protein levels*: LEGENDplex assay (Biolegend) hematopoietic stem cell panel and vascular inflammation panel 1 were used to assess secreted protein levels in supernatants collected from unmodified HSB-2 and *LINC01871*<sup>-/-</sup> cells at the 96h time point of the growth curve assay. Analyte values were compared using an unpaired t-test (GraphPad Prism).

### ***LINC01871*<sup>-/-</sup> RNA-seq Analysis, Quality Control, and Statistical Analysis**

Sequencing libraries were prepared and RNA-sequencing performed in triplicate as described in the whole-blood RNA-seq protocol using 250ng of total RNA from the *LINC01871*<sup>-/-</sup> and HSB-2 cell lines. An average of 58,052 transcripts per sample was obtained from the RNA-seq experiment. DESeq2 v1.24 [7] applied a negative binomial generalized linear model to identify DE transcripts with a  $\text{Log}_2\text{FC} \geq 1.0$  or  $\leq -1.0$  and  $P_{\text{adj}} \leq 0.05$ . All analyses were performed in the R Bioconductor suite.

## ONLINE SUPPLEMENTAL REFERENCES

- 1 Rasmussen A, Ice JA, Li H, *et al.* Comparison of the American-European Consensus Group Sjögren's syndrome classification criteria to newly proposed American College of Rheumatology criteria in a large, carefully characterised sicca cohort. *Annals of the Rheumatic Diseases*. 2014;**73**:31–8. doi:10.1136/annrheumdis-2013-203845
- 2 Vitali C, Bombardieri S, Jonsson R, *et al.* Classification criteria for Sjögren's syndrome: a revised version of the European criteria proposed by the American-European Consensus Group. *Annals of the Rheumatic Diseases* 2002;**61**:554. doi:10.1136/ARD.61.6.554
- 3 Bolger AM, Lohse M, Usadel B. Trimmomatic: a flexible trimmer for Illumina sequence data. *Bioinformatics* 2014;**30**:2114. doi:10.1093/BIOINFORMATICS/BTU170
- 4 Kim D, Paggi JM, Park C, *et al.* Graph-based genome alignment and genotyping with HISAT2 and HISAT-genotype. *Nat Biotechnol* 2019;**37**:907–15. doi:10.1038/S41587-019-0201-4
- 5 Li H, Handsaker B, Wysoker A, *et al.* The Sequence Alignment/Map format and SAMtools. *Bioinformatics* 2009;**25**:2078–9. doi:10.1093/BIOINFORMATICS/BTP352
- 6 Durinck S, Spellman PT, Birney E, *et al.* Mapping identifiers for the integration of genomic datasets with the R/Bioconductor package biomaRt. *Nature Protocols* 2009 **4**:8 2009;**4**:1184–91. doi:10.1038/nprot.2009.97
- 7 Osabe T, Shimizu K, Kadota K. Differential expression analysis using a model-based gene clustering algorithm for RNA-seq data. *BMC Bioinformatics* 2021;**22**. doi:10.1186/S12859-021-04438-4
- 8 Subramanian A, Kuehn H, Gould J, *et al.* GSEA-P: a desktop application for Gene Set Enrichment Analysis. *Bioinformatics* 2007;**23**:3251–3. doi:10.1093/BIOINFORMATICS/BTM369
- 9 Subramanian A, Tamayo P, Mootha VK, *et al.* Gene set enrichment analysis: a knowledge-based approach for interpreting genome-wide expression profiles. *Proc Natl Acad Sci U S A* 2005;**102**:15545–50. doi:10.1073/PNAS.0506580102
- 10 Rinchai D, Roelands J, Toufiq M, *et al.* BloodGen3Module: Blood transcriptional module repertoire analysis and visualization using R. *Bioinformatics* 2021;**37**:2382–9. doi:10.1093/BIOINFORMATICS/BTAB121
- 11 Li S, Roupnel N, Duraisingham S, *et al.* Molecular signatures of antibody responses derived from a systems biology study of five human vaccines. *Nat Immunol* 2014;**15**:195–204. doi:10.1038/NI.2789
- 12 Chaussabel D, Quinn C, Shen J, *et al.* A modular analysis framework for blood genomics studies: application to systemic lupus erythematosus. *Immunity* 2008;**29**:150–64. doi:10.1016/J.IMMUNI.2008.05.012
- 13 Carbon S, Douglass E, Dunn N, *et al.* The Gene Ontology Resource: 20 years and still GOing strong. *Nucleic Acids Res* 2019;**47**:D330–8. doi:10.1093/NAR/GKY1055
- 14 Wright DD, Sefton BM, Kamps MP. Oncogenic activation of the Lck protein accompanies translocation of the LCK gene in the human HSB2 T-cell leukemia. *Mol Cell Biol* 1994;**14**:2429–37. doi:10.1128/MCB.14.4.2429-2437.1994
- 15 Burnett R, Thirman M, Rowley J, *et al.* Molecular Analysis of the T-Cell Acute Lymphoblastic Leukemia-Associated t(1;7)(p34;q34) That Fuses LCK and TCRB. *Blood* 1994;**84**:1232–6. doi:10.1182/BLOOD.V84.4.1232.1232

- 16 Schmittgen TD, Livak KJ. Analyzing real-time PCR data by the comparative C(T) method. *Nat Protoc* 2008;**3**:1101–8. doi:10.1038/NPROT.2008.73
- 17 van Dam S, Craig T, de Magalhães JP. GeneFriends: a human RNA-seq-based gene and transcript co-expression database. *Nucleic Acids Res* 2015;**43**:D1124–32. doi:10.1093/NAR/GKU1042
- 18 Perron U, Provero P, Molineris I. In silico prediction of lncRNA function using tissue specific and evolutionary conserved expression. *BMC Bioinformatics* 2017;**18**. doi:10.1186/S12859-017-1535-X
- 19 Jiang Q, Ma R, Wang J, *et al.* LncRNA2Function: a comprehensive resource for functional investigation of human lncRNAs based on RNA-seq data. *BMC Genomics* 2015;**16 Suppl 3**. doi:10.1186/1471-2164-16-S3-S2
- 20 Huang N, Pérez P, Kato T, *et al.* SARS-CoV-2 infection of the oral cavity and saliva. *Nat Med* 2021;**27**:892–903. doi:10.1038/S41591-021-01296-8
- 21 Yin H, Pranzatelli TJF, French BN, *et al.* Sclerosing Sialadenitis Is Associated With Salivary Gland Hypofunction and a Unique Gene Expression Profile in Sjögren’s Syndrome. *Front Immunol* 2021;**12**. doi:10.3389/FIMMU.2021.699722
- 22 Haeussler M, Schönig K, Eckert H, *et al.* Evaluation of off-target and on-target scoring algorithms and integration into the guide RNA selection tool CRISPOR. *Genome Biology* 2016;**17**:1–12. doi:10.1186/S13059-016-1012-2/FIGURES/5
- 23 Watson CM, Crinnion LA, Simmonds J, *et al.* Long-read nanopore sequencing enables accurate confirmation of a recurrent PMS2 insertion-deletion variant located in a region of complex genomic architecture. *Cancer Genet* 2021;**256–257**:122–6. doi:10.1016/J.CANCERGEN.2021.05.012
- 24 Labun K, Montague TG, Krause M, *et al.* CHOPCHOP v3: expanding the CRISPR web toolbox beyond genome editing. *Nucleic Acids Res* 2019;**47**:W171–4. doi:10.1093/NAR/GKZ365

## ONLINE SUPPLEMENTAL NOTE

### URLs for publicly available data leveraged in this study:

Blueprint Epigenome Cell Type-Specific RNA-seq Data: <http://www.blueprint-epigenome.eu/>

Comprehensive Gene Annotation of *LINC01871* using UCSC Genome Browser on Human (GRCh37/hg19): [https://genome.ucsc.edu/cgi-bin/hgTracks?db=hg19&lastVirtModeType=default&lastVirtModeExtraState=&virtModeType=default&virtMode=0&nonVirtPosition=&position=chr2%3A7857202%2D7879278&hgsid=1312519475\\_jaGeccDa6NZay86DsW80Qlm0CPEl](https://genome.ucsc.edu/cgi-bin/hgTracks?db=hg19&lastVirtModeType=default&lastVirtModeExtraState=&virtModeType=default&virtMode=0&nonVirtPosition=&position=chr2%3A7857202%2D7879278&hgsid=1312519475_jaGeccDa6NZay86DsW80Qlm0CPEl)

Databases of Genotypes and Phenotypes (dbGaP): <https://www.ncbi.nlm.nih.gov/gap;phs002446.v1.p1>

FASTQC v0.11.5: <http://www.bioinformatics.babraham.ac.uk/projects/fastqc/>

GraphPad Software: [www.graphpad.com](http://www.graphpad.com)

NCBI Gene Expression Omnibus: <https://www.ncbi.nlm.nih.gov/geo/>

## ONLINE SUPPLEMENTAL FIGURES

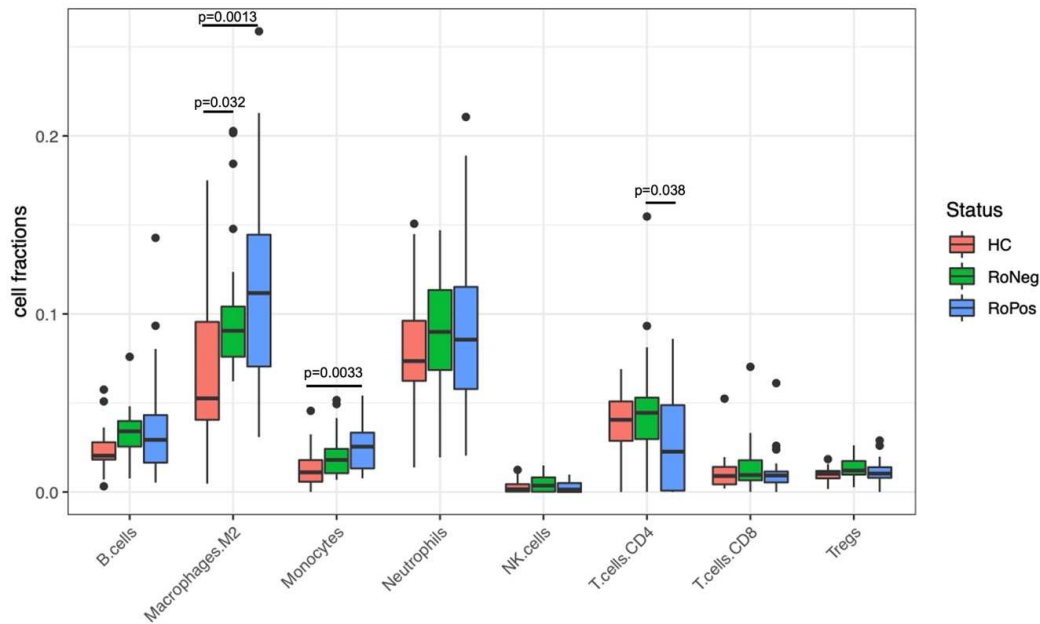

**Supplemental Figure 1.** Immune cell type composition in whole blood samples of Sjd<sup>R0+</sup>, Sjd<sup>R0-</sup>, and healthy control (HC) subjects. Deconvolution of bulk RNA-seq reads was performed using quanTIseq and the RNA-seq-derived signature matrix to quantify 10 different immune cell types from each dataset. Statistical significance determined by pairwise t-test analysis; significant p-values are indicated.





**Supplemental Figure 2. Bioinformatic analyses of differently expressed transcripts identified Sjögren's disease subphenotype-specific differences in implicated disease pathways.** (A) Ingenuity Pathway Analysis (IPA) Program identified canonical pathways that were enriched for the differentially expressed transcripts in the SjD<sup>All</sup> vs. HC, SjD<sup>Ro+</sup> vs. HC, and SjD<sup>Ro-</sup> vs. HC RNA-seq analyses. Analyses were reported as a z-score relative to the HC (applied threshold of z-score >7 and < 4). (B-D) Complete blood module analyses reported as fingerprint heatmaps displaying annotated module aggregates across individual SjD<sup>Ro+</sup> (B, purple; C) or SjD<sup>Ro-</sup> (B, green; D) subjects arranged via hierarchical clustering. Color gradient indicates the proportion of DE transcripts, where at least 20% of constitutive transcripts were DE in at least one subject. Color gradient indicates the proportion of DE transcripts ranging from red (100% of transcripts increased) to blue (100% of transcripts decreased), respective to HCs, in each indicated module.



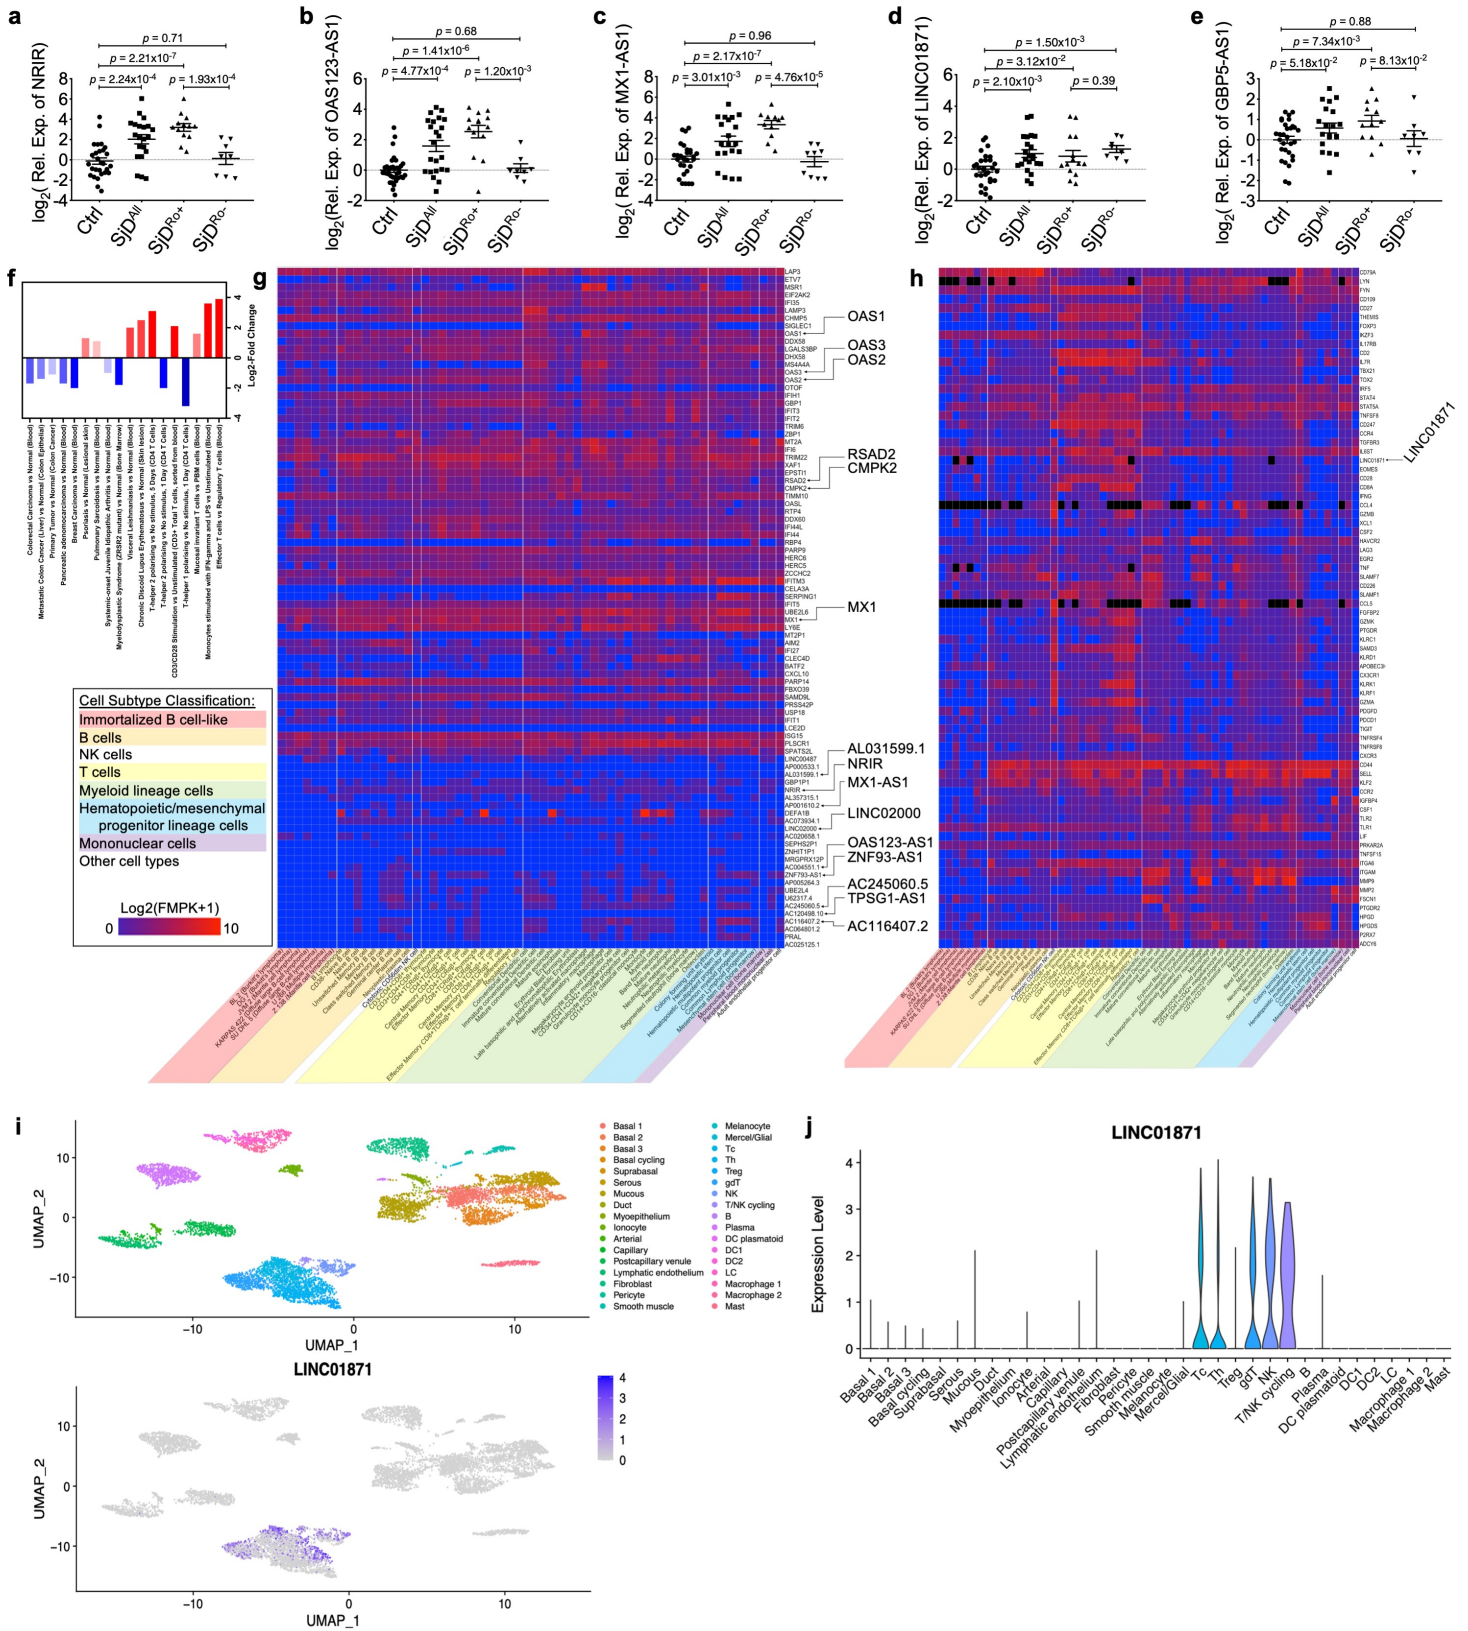



**Supplemental Figure 3. Whole blood RNA-seq identified several long non-coding RNAs that are differentially expressed in Sjögren's disease. (A-E)** Independent replication of differentially expressed (DE) lncRNAs from independent whole blood RNA samples (n=14 SjD<sup>Ro+</sup>; n=8 SjD<sup>Ro-</sup>; n=24 HC) using qPCR: **(A)** *NRIR*, **(B)** *OAS123-AS1*, **(C)** *MX1-AS1*, **(D)** *LINC01871*, **(E)** *GBP5-AS1*. qPCR analyses were normalized to the house-keeping transcript, *HMBS*, and expressed as natural log-transformed values. Statistical significance determined by unpaired t-test; significant p-values are indicated. **(F)** Data derived from the Gene Expression Atlas database (ENSG00000235576; LINC01871) indicating the relative gene expression of *LINC01871* in various cells and tissues/diseases. Blue bars indicate negative correlation with *LINC01871* expression. Red bars indicate positive correlation with *LINC01871* expression. **(G)** Blueprint Epigenome RNA-seq data from 62 cell types was leveraged to identify immune cell type-specific expression patterns of 91 DE transcripts from the SjD whole blood RNA-seq analyses that have established roles in type I and II interferon signaling or were correlated with *RSAD2* expression. **(H)** Blueprint Epigenome RNA-seq data from 62 cell types was leveraged to identify immune cell type-specific expression patterns of 76 differentially expression transcripts that correlated with *LINC01871* expression. Blueprint Epigenome RNA-seq data in **(G)** and **(H)** are shown as heatmaps of log<sub>2</sub>(FMPK+1) values. **(I)** UMAP of published single cell RNA sequencing data from minor salivary glands (dbGaP phs002446.v1.p1) delineates cell population contribution by cell type. **(J)** Cell type-specific expression level of *LINC01871* detected in single cell RNA-seq data from minor salivary gland shown in I.

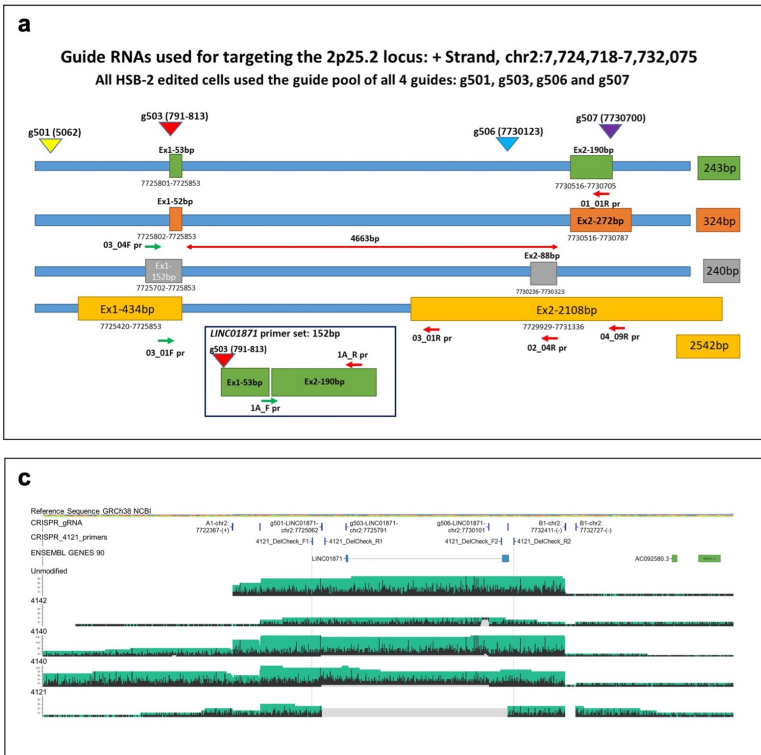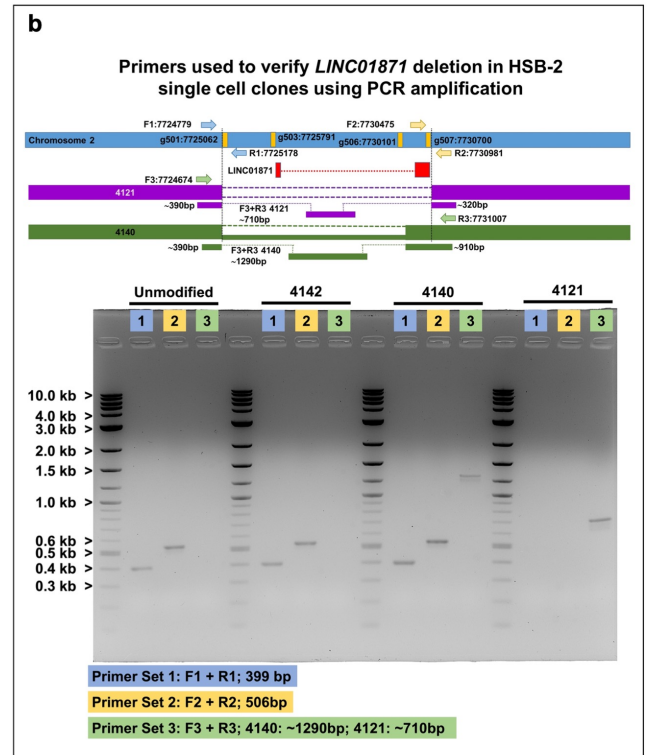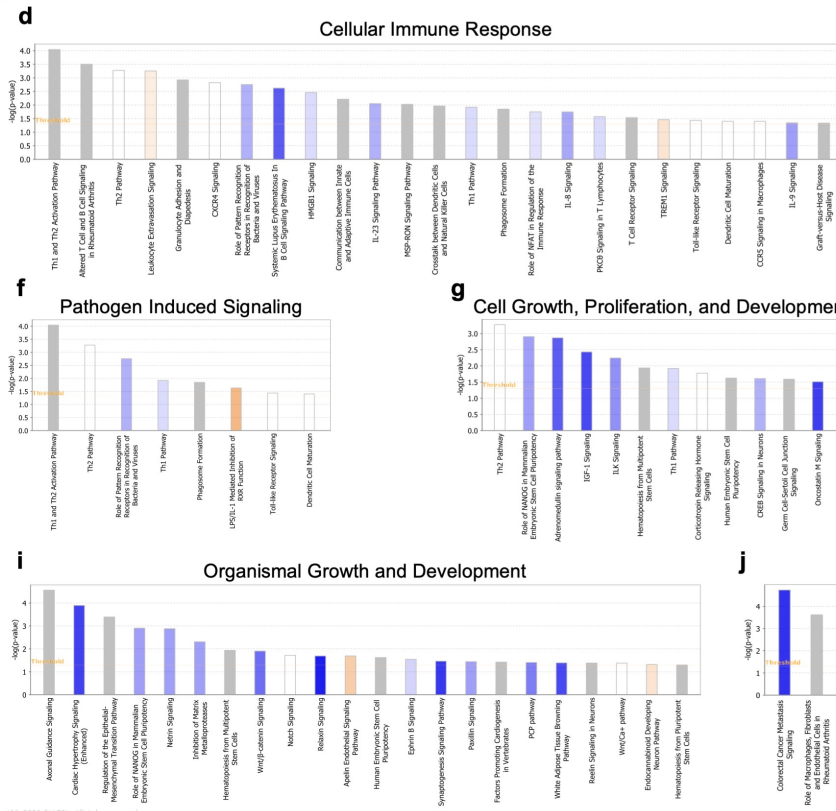

**Supplemental Figure 4. RNA-seq analysis of CRISPR-targeted deletion of *LINC01871* in HSB-2 cells identified differentially expressed transcripts that implicate *LINC01871* function in several pathways.** (A) Schematic depiction of the position of the guide RNAs used to target the *LINC01871* interval for CRISPR editing. (B) Schematic depiction of the primers used to distinguish the different CRISPR-edits in the single cell clones 4142, 4140, and 4121 (hereafter *LINC01871*<sup>-/-</sup>), compared to the unmodified parental HSB-2 cell line using PCR amplification and representative image of the PCR amplification to distinguish the single cell clones 4142, 4140, and 4121, compared to the unmodified parental HSB-2 cell line. (C) Oxford Nanopore minion sequencing of CRISPR-targeted single clones 4142, 4140, and 4121, compared to unmodified HSB-2 cells. Clone 4121 showed homozygous deletion of *LINC01871* locus, while clone 4140 showed a heterozygous deletion of *LINC01871* and clone 4142 showed incomplete deletion of one strand of DNA. (D-J) Ingenuity Pathway Analysis (IPA) of the differentially expressed transcripts from the *LINC01871*<sup>-/-</sup> (clone 4121) v. unmodified parental HSB-2 RNA-seq analysis implicated *LINC01871* function in several canonical pathways involved in (D) cellular immune response, (E) cytokine signaling, (F) pathogen-induced signaling, (G) cell growth, proliferation, and development, (H) apoptosis and cancer signaling, (I) organismal growth and development, and (J) disease-specific pathways. Analyses reported as  $-\log(p\text{-value})$  with applied threshold of  $>1.5$ .

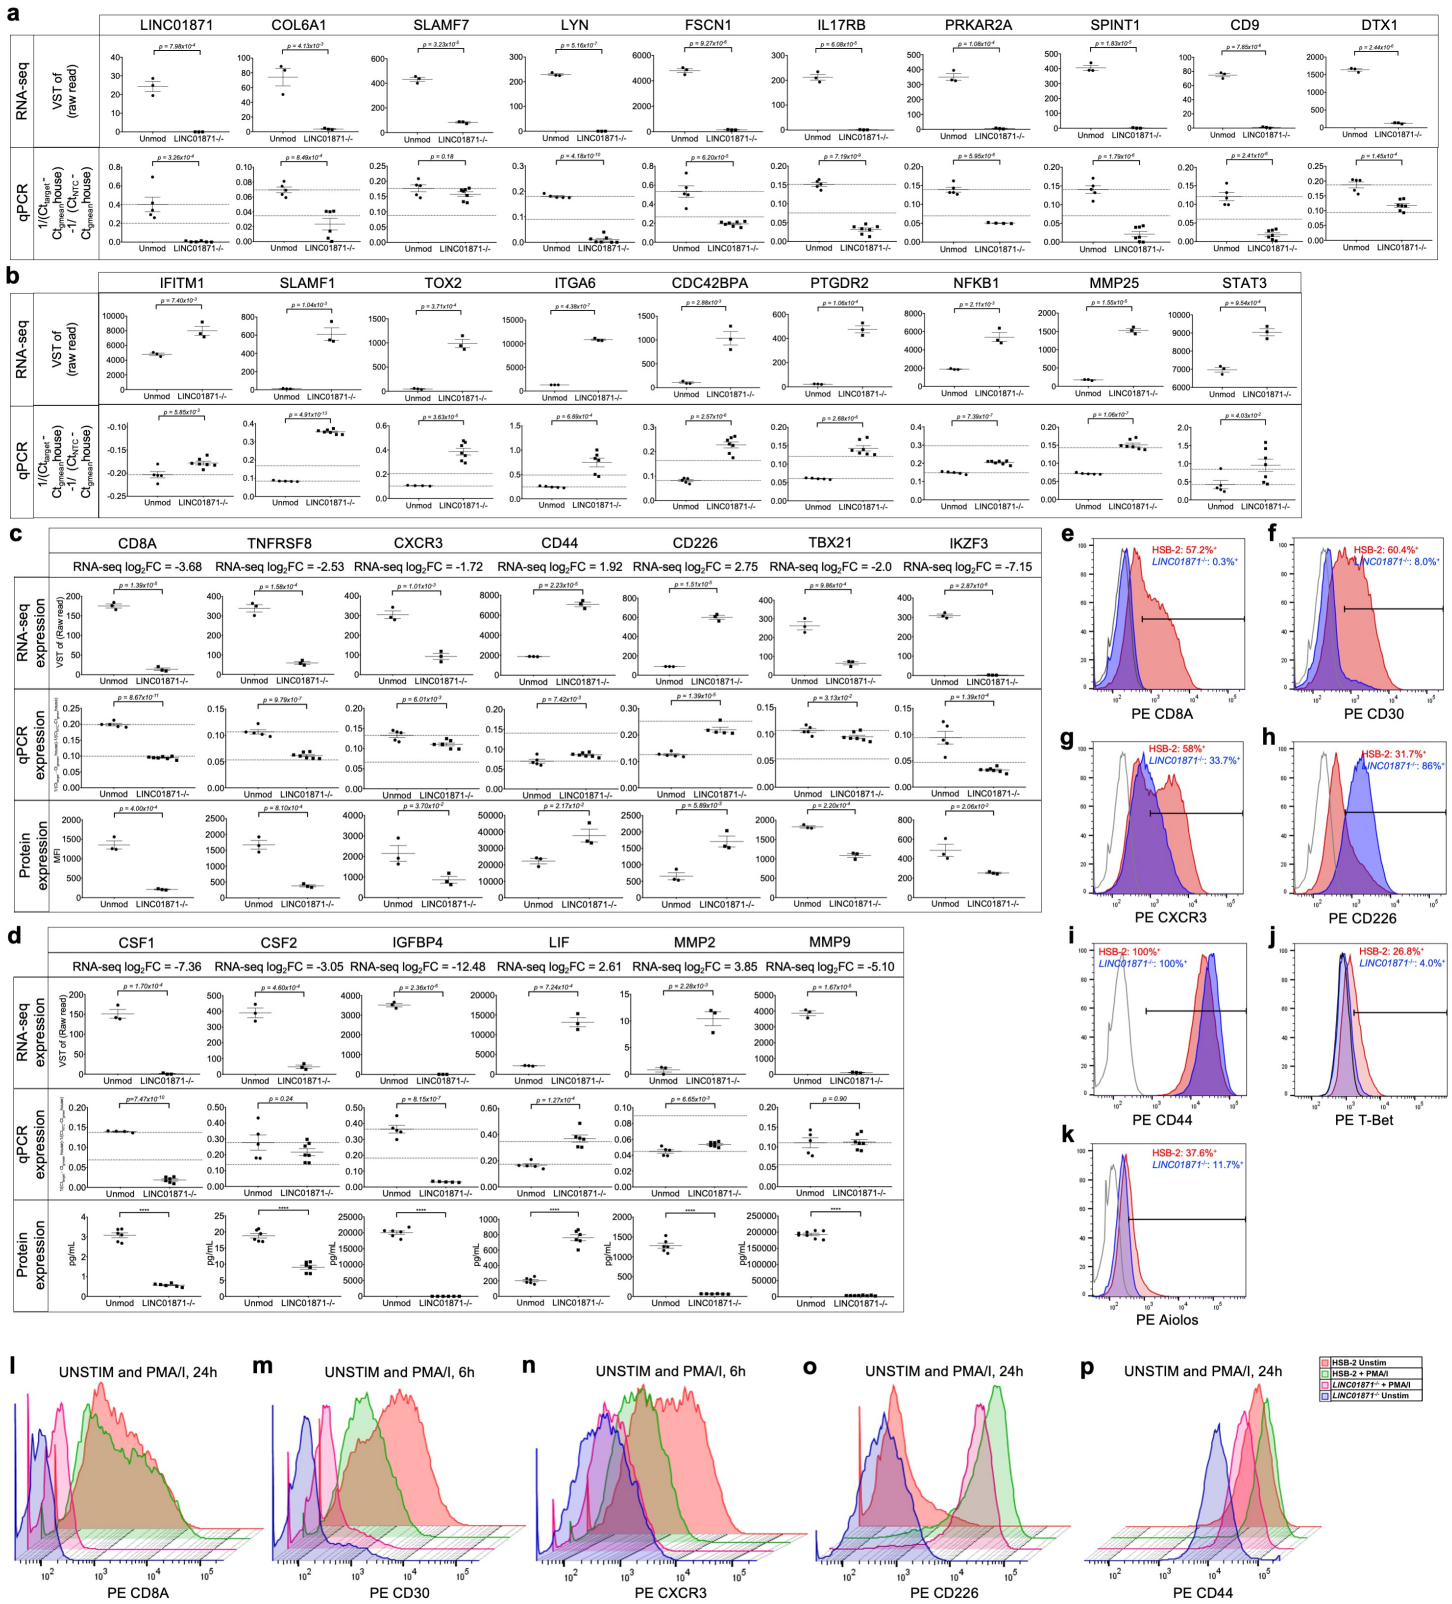

**Supplemental Figure 5. *LINC01871* deletion in HSB-2 cells significantly altered the expression of immune regulatory transcripts, growth factors, secreted inflammatory modulators, surface and intracellular proteins, and response to PMA/I stimulation. (A-D)** RT-qPCR was performed using independent biological samples of *LINC01871*<sup>-/-</sup> cells and unmodified parental HSB-2 cells to measure the expression of **(A,B)** select immune regulatory transcripts (A: *LINC01871*, *COL6A1*, *SLAMF7*, *LYN*, *FSCN1*, *IL17RB*, *PRKAR2A*, *SPINT1*, *CD9*, *DTX1*; B: *IFITM1*, *SLAMF1*, *TOX2*, *ITGA6*, *CDC42BPA*, *PTGDR2*, *NFKB1*, *MMP25*, *STAT3*), **(C)** transcripts of key T cell regulatory proteins (*CD8A*, *TNFRSF8*, *CXCR3*, *CD44*, *CD226*, *TBX21*, *IKZF3*), and **(D)** growth factors and inflammatory modulator transcripts (*CSF1*, *CSF2*, *IGFBP4*, *LIF*, *MMP2*, *MMP9*). **(C)** Flow cytometry was used to measure protein levels of key T cell regulatory proteins (displayed as mean fluorescence intensity (MFI)) in *LINC01871*<sup>-/-</sup> cells and unmodified parental HSB-2 cells. **(D)** Legendplex Multiplex bead-based ELISA assay was used to measure soluble/secreted protein levels (reported as pg protein/mL) in the supernatants of *LINC01871*<sup>-/-</sup> cells and unmodified parental HSB-2 cell lines collected at the 96h timepoint of the growth curve assay. Statistical significance determined by unpaired t-test and p-values indicated in A-D. **(E-K)** Representative flow histograms of the flow cytometry analyses performed to measure surface cell markers/proteins ((E) CD8A, (F) CD30, (G) CXCR5, (H) CD226, (I) CD44) or intracellular proteins ((J) T-bet, (K) Aiolos) in *LINC01871*<sup>-/-</sup> cells and unmodified parental HSB-2 cells. Gray unfilled histograms are antibody-specific isotype controls; red filled histograms show expression in unmodified parental HSB-2 cells; blue filled histograms show expression in *LINC01871*<sup>-/-</sup> cells. **(L-P)** Representative flow histograms of the flow cytometry analysis performed to measure changes in cell surface marker/protein expression ((L) CD8A, (M) CD30, (N) CXCR3, (O) CD226, (P) CD44) in *LINC01871*<sup>-/-</sup> cells and unmodified parental HSB-2 cells after PMA/I stimulation time course. Representative flow histograms show the peak expression time point for each respective protein.

## LIST OF ONLINE SUPPLEMENTAL TABLES

**Supplemental Table 1.** Clinical and demographic information of whole blood RNA-seq SjD cases and healthy controls (HCs).

**Supplemental Table 2.** Differentially expressed transcripts from the whole blood RNA-seq analysis of all SjD cases compared to healthy controls (SjD<sup>All</sup> vs. HC analysis).

**Supplemental Table 3.** Differentially expressed transcripts from the whole blood RNA-seq analysis of the anti-Ro positive SjD cases compared to healthy controls (SjD<sup>Ro+</sup> vs. HC analysis).

**Supplemental Table 4.** Differentially expressed transcripts from the whole blood RNA-seq analysis of the anti-Ro negative SjD cases compared to healthy controls (SjD<sup>Ro-</sup> vs. HC analysis).

**Supplemental Table 5.** Differentially expressed transcripts from the whole blood RNA-seq analysis of the anti-Ro positive compared to anti-Ro negative SjD cases (SjD<sup>Ro+</sup> vs. SjD<sup>Ro-</sup> analysis).

**Supplemental Table 6.** Summary report of the differentially expressed transcript biotypes identified in the SjD whole blood RNA-seq analyses.

**Supplemental Table 7.** Gene Set Enrichment Analysis (GSEA) of differentially expressed transcripts from the SjD<sup>Ro+</sup> whole blood RNA-seq analysis.

**Supplemental Table 8.** Gene Set Enrichment Analysis (GSEA) of differentially expressed transcripts from the SjD<sup>Ro-</sup> whole blood RNA-seq analysis.

**Supplemental Table 9.** Ingenuity Pathway Analysis (IPA) of differentially expressed transcripts from the SjD<sup>All</sup> whole blood RNA-seq analysis.

**Supplemental Table 10.** Ingenuity Pathway Analysis (IPA) of differentially expressed transcripts from the SjD<sup>Ro+</sup> whole blood RNA-seq analysis.

**Supplemental Table 11.** Ingenuity Pathway Analysis (IPA) of differentially expressed transcripts from the SjD<sup>Ro-</sup> whole blood RNA-seq analysis.

**Supplemental Table 12.** SjD subphenotype unique pathways of interest identified by cross comparing the SjD<sup>Ro+</sup> and SjD<sup>Ro-</sup> pathway analyses.

**Supplemental Table 13.** *RSAD2* correlation analyses of the differentially expressed transcripts from all three SjD whole blood RNA-seq analyses.

**Supplemental Table 14.** LncRNAs correlated with *RSAD2* expression in SjD whole blood RNA-seq analyses.

**Supplemental Table 15.** Gene Friends bioinformatic analysis of *LINC01871* function.



**Supplemental Table 16.** FuncPred analysis of *LINC01871* function.

**Supplemental Table 17.** IncRNA2function analysis of *LINC01871* function.

**Supplemental Table 18.** *LINC01871* correlation analyses of the differentially expressed transcripts from all three SJD whole blood RNA-seq analyses.

**Supplemental Table 19.** Geno Ontology (GO) pathway analysis of *LINC01871* function.

**Supplemental Table 20.** Guides used to target the gene *LINC01871* in HSB-2 cells.

**Supplemental Table 21.** Primers used to validate *LINC01871* deletion in CRISPR-edited HSB-2 cells using PCR amplification.

**Supplemental Table 22.** Guides used to protect the area of modification in the single cell clone, *LINC01871*<sup>-/-</sup>, for Cas-mediated PCR-free enrichment for Nanopore sequencing.

**Supplemental Table 23.** RNA-seq analysis of the *LINC01871*<sup>-/-</sup> CRISPR-edited single cell HSB-2 clone compared to unmodified HSB-2 parental cell line.

**Supplemental Table 24.** Biotype classification of the differentially expressed transcripts for the *LINC01871*<sup>-/-</sup> RNA-seq analysis.

**Supplemental Table 25.** Ingenuity Pathway Analysis (IPA) of the differentially expressed transcript list from the *LINC01871*<sup>-/-</sup> RNA-seq analysis.

**Supplemental Table 26.** Master table of the RT-qPCR primers used throughout the manuscript.

**Supplemental Table 27.** Master table of the antibodies and clones used throughout the manuscript.

**Supplemental Table 1: Clinical and demographic information of whole blood RNA-seq SjD cases and healthy controls (HCs)**

| Demographic Information                 |                                                                | HC (n=27)   | SjD <sup>Ro+</sup> (n=27) | SjD <sup>Ro-</sup> (n=23) |
|-----------------------------------------|----------------------------------------------------------------|-------------|---------------------------|---------------------------|
| <b>Sex</b>                              | Male (%)                                                       | 2 (7.4)     | 2 (7.4)                   | 3 (13.0)                  |
|                                         | Female (%)                                                     | 25 (92.6)   | 25 (92.6)                 | 20 (87.0)                 |
| <b>Race *</b>                           | White (%)                                                      | 27 (100)    | 22 (81.5)                 | 16 (69.6)                 |
|                                         | More than one race (%)                                         | 0 (0)       | 5 (18.5)                  | 7 (30.4)                  |
| <b>Ethnicity</b>                        | Non-Hispanic (%)                                               | 11 (40.7)   | 27 (100)                  | 23 (100)                  |
|                                         | Hispanic (%)                                                   | 0 (0)       | 0 (0)                     | 0 (0)                     |
|                                         | Data Not Reported (%)                                          | 16 (59.3)   | 0 (0)                     | 0 (0)                     |
| <b>Age **</b>                           | Mean (SD)                                                      | 43.1 (17.8) | 58.3 (13.5)               | 60.6 (14.7)               |
|                                         | Median                                                         | 42          | 60                        | 61                        |
| <b>SjD Clinical Diagnostic Criteria</b> |                                                                |             |                           |                           |
|                                         | Dry Eyes (%)                                                   |             | 27 (100)                  | 23 (100)                  |
|                                         | Dry Mouth (%)                                                  |             | 27 (100)                  | 23 (100)                  |
|                                         | Lissamine Green - vBS Positive (%)                             |             | 20 (74.1)                 | 11 (47.8)                 |
|                                         | Lissamine Green - OSS Positive (%)                             |             | 21 (77.8)                 | 11 (47.8)                 |
|                                         | Schirmer's Test Positive (%)                                   |             | 14 (51.9)                 | 13 (56.5)                 |
|                                         | WUSF Positive (%)                                              |             | 22 (81.5)                 | 17 (73.9)                 |
|                                         | Lip Biopsy Focal Lymphocyte<br>Aialadenitis (FLS) Positive (%) |             | 20 (74.1)                 | 23 (100)                  |
|                                         | anti-Ro + (%)                                                  |             | 27 (100)                  | 0 (0)                     |
|                                         | anti-La + (%)                                                  |             | 19 (70.4)                 | 0 (0)                     |
| <b>Other Reported Diseases</b>          |                                                                |             |                           |                           |
|                                         | AITD                                                           |             | 3 (11.1)                  | 1 (4.3)                   |
|                                         | Fibromyalgia                                                   |             | 1 (3.7)                   | 2 (8.7)                   |
|                                         | SLE                                                            |             | 1 (3.7)                   | 0 (0)                     |
|                                         | Lymphoma                                                       |             | 2 (7.4)                   | 0 (0)                     |
|                                         | Primary Biliary Cirrhosis                                      |             | 0 (0)                     | 1 (4.3)                   |
|                                         | Psoriasis                                                      |             | 0 (0)                     | 2 (8.7)                   |
|                                         | No Additional Disease                                          |             | 21 (77.8)                 | 17 (73.9)                 |

\* p=0.0025 for SjD<sup>Ro-</sup> vs HC by Fisher's exact test

\*\* p=0.001 for HC vs SjD<sup>Ro-</sup> vs HC, p=0.0005 for SjD<sup>Ro+</sup> vs HC by unpaired t-test, Welch's correction



Supplemental Table 2. Differentially expressed transcripts from the whole blood RNA-seq analysis of all SJD cases compared to healthy controls (SJD<sup>All</sup> analysis)

| ENSEMBL_GENE_ID | Gene Name               | Chr | Chr_Start position | Chr_end position | Gene Length | gene_biotype                       | SJD <sup>All</sup> vs. HC |          |          |
|-----------------|-------------------------|-----|--------------------|------------------|-------------|------------------------------------|---------------------------|----------|----------|
|                 |                         |     |                    |                  |             |                                    | Log2FC                    | pval     | padj     |
| ENSG00000165949 | IFI27                   | 14  | 94104836           | 94116698         | 11862       | protein coding                     | 4.74                      | 9.37E-18 | 3.90E-14 |
| ENSG00000134321 | RSAD2                   | 2   | 6865806            | 6898239          | 32433       | protein coding                     | 2.25                      | 1.06E-07 | 1.69E-05 |
| ENSG00000137959 | IFI44L                  | 1   | 78619922           | 78646145         | 26223       | protein coding                     | 1.99                      | 4.94E-06 | 3.09E-04 |
| ENSG00000239719 | AC004890.1              | 7   | 149191043          | 149191223        | 180         | processed pseudogene               | 1.95                      | 1.48E-07 | 2.15E-05 |
| ENSG00000143546 | S100A8                  | 1   | 153390032          | 153391073        | 1041        | protein coding                     | 1.91                      | 6.72E-11 | 3.03E-08 |
| ENSG00000185745 | IFIT1                   | 10  | 89392546           | 89406487         | 13941       | protein coding                     | 1.84                      | 5.91E-07 | 6.66E-05 |
| ENSG00000226098 | SEC11B                  | 8   | 54522799           | 54523297         | 498         | processed pseudogene               | 1.83                      | 6.74E-03 | 3.67E-02 |
| ENSG00000137965 | IFI44                   | 1   | 78649796           | 78664078         | 14282       | protein coding                     | 1.82                      | 1.44E-06 | 1.27E-04 |
| ENSG00000244398 | AC116533.1              | 11  | 16974693           | 16975013         | 320         | processed pseudogene               | 1.72                      | 2.88E-09 | 9.25E-07 |
| ENSG00000111331 | OAS3                    | 12  | 112938444          | 112973251        | 34807       | protein coding                     | 1.68                      | 5.38E-07 | 6.25E-05 |
| ENSG00000244158 | CALHM6-AS1              | 6   | 116460739          | 116463692        | 2953        | lncRNA-antisense                   | 1.68                      | 1.27E-05 | 6.12E-04 |
| ENSG00000187608 | ISG15                   | 1   | 1001138            | 1014540          | 13402       | protein coding                     | 1.66                      | 3.68E-06 | 2.47E-04 |
| ENSG00000160932 | LY8E                    | 8   | 143017982          | 143023832        | 5850        | protein coding                     | 1.65                      | 7.80E-07 | 8.12E-05 |
| ENSG00000204397 | CARD16                  | 11  | 105041326          | 105101431        | 60105       | protein coding                     | 1.63                      | 8.93E-20 | 6.76E-16 |
| ENSG00000133106 | EPSTH1                  | 13  | 42886388           | 42992271         | 105883      | protein coding                     | 1.61                      | 1.75E-07 | 2.52E-05 |
| ENSG00000279296 | PRAL                    | 17  | 6772831            | 6776116          | 3285        | TEC                                | 1.59                      | 1.69E-06 | 1.43E-04 |
| ENSG00000121552 | CSTA                    | 3   | 122325248          | 122341969        | 16721       | protein coding                     | 1.59                      | 2.20E-15 | 3.41E-12 |
| ENSG00000237748 | UQCRRBP1                | X   | 56737242           | 56737577         | 335         | processed pseudogene               | 1.59                      | 2.91E-06 | 2.11E-04 |
| ENSG00000237568 | AC099063.1 (GBP5-AS1)   | 1   | 89260582           | 89269754         | 9172        | lncRNA-antisense                   | 1.58                      | 2.37E-07 | 3.20E-05 |
| ENSG00000119917 | IFIT3                   | 10  | 89327997           | 89340971         | 12974       | protein coding                     | 1.58                      | 1.15E-07 | 1.78E-05 |
| ENSG00000254224 | AP003465.1 (UQRB-AS1)   | 8   | 96235427           | 96239149         | 3722        | lncRNA-antisense                   | 1.57                      | 1.85E-05 | 8.02E-04 |
| ENSG00000152348 | ATG10                   | 5   | 81972023           | 82276857         | 304834      | protein coding                     | 1.56                      | 2.92E-11 | 1.52E-08 |
| ENSG00000140379 | BCL2A1                  | 15  | 79960892           | 79971196         | 10304       | protein coding                     | 1.53                      | 1.99E-12 | 1.39E-09 |
| ENSG00000231409 | AC018868.1              | 15  | 34943080           | 34943394         | 314         | processed pseudogene               | 1.52                      | 3.16E-07 | 4.02E-05 |
| ENSG00000149131 | SERPINC1                | 11  | 57597387           | 57619171         | 21784       | protein coding                     | 1.52                      | 7.76E-08 | 1.34E-05 |
| ENSG00000156467 | UQCRRB                  | 8   | 96222947           | 96235546         | 12599       | protein coding                     | 1.52                      | 5.35E-17 | 1.35E-13 |
| ENSG00000227008 | AL009174.1              | X   | 133670971          | 133671386        | 415         | processed pseudogene               | 1.52                      | 6.62E-09 | 1.76E-06 |
| ENSG00000213178 | RPL22P1                 | 3   | 169483671          | 169484080        | 409         | processed pseudogene               | 1.52                      | 3.12E-13 | 2.57E-10 |
| ENSG00000258666 | AL157871.4              | 14  | 100333790          | 100354061        | 20271       | lncRNA-antisense                   | 1.51                      | 3.32E-07 | 4.15E-05 |
| ENSG00000224094 | RPS24P8                 | 3   | 45159774           | 45160175         | 401         | processed pseudogene               | 1.50                      | 4.42E-07 | 5.28E-05 |
| ENSG00000134326 | CMMPK2                  | 2   | 6840570            | 6866635          | 26065       | protein coding                     | 1.48                      | 8.82E-06 | 4.66E-04 |
| ENSG00000249532 | MIR302CHG (LARP7-AS1)   | 4   | 112646476          | 112650051        | 3575        | lncRNA-antisense                   | 1.48                      | 4.00E-06 | 2.62E-04 |
| ENSG00000235828 | RPL36AP26               | 7   | 15701435           | 15701752         | 317         | processed pseudogene               | 1.48                      | 1.08E-03 | 1.16E-02 |
| ENSG00000126709 | IF16                    | 1   | 27666064           | 27672198         | 6134        | protein coding                     | 1.45                      | 1.27E-06 | 1.16E-04 |
| ENSG00000251062 | AC025459.1              | 5   | 32887990           | 32888145         | 155         | processed pseudogene               | 1.45                      | 2.27E-04 | 4.26E-03 |
| ENSG00000138646 | HERC5                   | 4   | 88457119           | 88506163         | 49044       | protein coding                     | 1.44                      | 3.52E-06 | 2.42E-04 |
| ENSG00000089127 | OAS1                    | 12  | 112906783          | 112933222        | 26439       | protein coding                     | 1.44                      | 9.53E-07 | 9.28E-05 |
| ENSG00000119013 | NDUFB3                  | 2   | 201071433          | 201085750        | 14317       | protein coding                     | 1.44                      | 3.49E-14 | 4.26E-11 |
| ENSG00000228007 | AC011933.1              | 17  | 75338827           | 75339147         | 320         | processed pseudogene               | 1.43                      | 1.27E-04 | 2.93E-03 |
| ENSG00000225912 | RPL26P36                | X   | 92676519           | 92676954         | 435         | processed pseudogene               | 1.43                      | 1.45E-06 | 1.27E-04 |
| ENSG00000228318 | AP001610.2 (MX1-AS1)    | 21  | 41441056           | 41445708         | 4652        | lncRNA-antisense                   | 1.43                      | 2.41E-04 | 4.44E-03 |
| ENSG00000256393 | RPL41P5                 | 12  | 93083598           | 93083675         | 77          | processed pseudogene               | 1.42                      | 2.31E-04 | 4.32E-03 |
| ENSG00000170860 | LSM3                    | 3   | 14178817           | 14201122         | 22305       | protein coding                     | 1.38                      | 1.32E-16 | 2.95E-13 |
| ENSG00000163221 | S100A12                 | 1   | 153373711          | 153375621        | 1910        | protein coding                     | 1.37                      | 3.34E-07 | 4.15E-05 |
| ENSG00000234287 | AC099560.2              | 3   | 40761545           | 40761799         | 254         | processed pseudogene               | 1.37                      | 2.15E-07 | 2.97E-05 |
| ENSG00000180211 | FO393411.1              | 6   | 39958414           | 39958833         | 419         | processed pseudogene               | 1.36                      | 1.21E-07 | 1.83E-05 |
| ENSG00000168062 | BATF2                   | 11  | 64987945           | 64997018         | 9073        | protein coding                     | 1.35                      | 3.14E-07 | 4.02E-05 |
| ENSG00000125356 | NDUF1A                  | X   | 119871832          | 119876682        | 4830        | protein coding                     | 1.35                      | 6.08E-17 | 1.44E-13 |
| ENSG00000169385 | RNASE3                  | 14  | 20955487           | 20956436         | 949         | protein coding                     | 1.35                      | 7.80E-08 | 1.34E-05 |
| ENSG00000125691 | RPL23                   | 17  | 38847860           | 38853764         | 5904        | protein coding                     | 1.34                      | 1.10E-08 | 2.65E-06 |
| ENSG00000270077 | AP003117.1              | 8   | 97144170           | 97144723         | 553         | lncRNA-sense intronic              | 1.33                      | 1.08E-06 | 1.02E-04 |
| ENSG00000161970 | RPL26                   | 17  | 8377516            | 8383213          | 5697        | protein coding                     | 1.31                      | 1.00E-06 | 9.62E-05 |
| ENSG00000241612 | AC114728.1              | 4   | 19813749           | 19814231         | 482         | processed pseudogene               | 1.31                      | 2.06E-05 | 8.56E-04 |
| ENSG00000157601 | MX1                     | 21  | 41420304           | 41459214         | 38910       | protein coding                     | 1.30                      | 2.77E-05 | 1.04E-03 |
| ENSG00000111335 | OAS2                    | 12  | 112978395          | 113011723        | 33328       | protein coding                     | 1.30                      | 1.12E-06 | 1.05E-04 |
| ENSG00000219451 | RPL23P8                 | 7   | 20827326           | 20827753         | 427         | processed pseudogene               | 1.28                      | 1.10E-03 | 1.17E-02 |
| ENSG00000230837 | RPL31P2                 | 20  | 33752167           | 33752543         | 376         | processed pseudogene               | 1.28                      | 1.13E-03 | 1.19E-02 |
| ENSG00000232112 | TMA7                    | 3   | 48440257           | 48444208         | 3951        | protein coding                     | 1.28                      | 1.30E-11 | 7.43E-09 |
| ENSG00000259007 | AL358333.3              | 14  | 51967003           | 51969800         | 2797        | lncRNA-antisense                   | 1.27                      | 1.14E-05 | 5.70E-04 |
| ENSG00000253683 | AC027309.2              | 5   | 17265652           | 172656713        | 191         | processed pseudogene               | 1.27                      | 4.50E-11 | 2.13E-08 |
| ENSG00000136810 | TXN                     | 9   | 110243810          | 110256507        | 12697       | protein coding                     | 1.27                      | 3.69E-13 | 2.98E-10 |
| ENSG00000184979 | USP18                   | 22  | 18150170           | 18177397         | 27227       | protein coding                     | 1.26                      | 7.32E-04 | 9.06E-03 |
| ENSG00000225492 | GBP1P1                  | 1   | 89407679           | 89426243         | 18564       | transcribed unprocessed pseudogene | 1.25                      | 1.66E-04 | 3.48E-03 |
| ENSG00000277978 | AC010542.5              | 16  | 6656620            | 66566001         | 381         | lncRNA-antisense                   | 1.25                      | 1.68E-06 | 1.42E-04 |
| ENSG00000234742 | AC144530.1              | 3   | 197850400          | 197850954        | 554         | processed pseudogene               | 1.25                      | 4.15E-06 | 2.69E-04 |
| ENSG00000156411 | ATP5MPL                 | 14  | 103912288          | 103928269        | 15981       | protein coding                     | 1.25                      | 2.36E-12 | 1.63E-09 |
| ENSG00000147604 | RPL7                    | 8   | 73290242           | 73295789         | 5547        | protein coding                     | 1.25                      | 4.55E-08 | 8.61E-06 |
| ENSG00000257452 | AC004551.1 (OAS123-AS1) | 12  | 112907628          | 113017751        | 110123      | lncRNA-antisense                   | 1.24                      | 2.24E-03 | 1.83E-02 |
| ENSG00000142089 | IFITM3                  | 11  | 319676             | 327537           | 7861        | protein coding                     | 1.24                      | 3.47E-06 | 2.39E-04 |
| ENSG00000123610 | TNFAIP6                 | 2   | 151357592          | 151380046        | 22454       | protein coding                     | 1.23                      | 3.57E-09 | 1.13E-06 |
| ENSG00000169397 | RNASE3                  | 14  | 20891399           | 20892348         | 949         | protein coding                     | 1.23                      | 1.78E-04 | 3.65E-03 |
| ENSG00000118298 | CA14                    | 1   | 150257251          | 150265078        | 7827        | protein coding                     | 1.23                      | 1.52E-03 | 1.42E-02 |
| ENSG00000137970 | RPL7P9                  | 1   | 96678874           | 96679620         | 746         | processed pseudogene               | 1.22                      | 1.42E-08 | 3.28E-06 |
| ENSG00000258985 | AL352979.2              | 14  | 53036755           | 53038251         | 1496        | lncRNA-antisense                   | 1.22                      | 3.27E-03 | 2.33E-02 |
| ENSG00000274422 | AC245060.5              | 22  | 22283928           | 22287220         | 3292        | lncRNA                             | 1.22                      | 1.55E-05 | 6.99E-04 |
| ENSG00000169020 | ATP5ME                  | 4   | 672436             | 674330           | 1894        | protein coding                     | 1.20                      | 3.20E-16 | 6.05E-13 |
| ENSG00000168653 | NDUF5                   | 1   | 39026318           | 39034636         | 8318        | protein coding                     | 1.20                      | 4.20E-12 | 2.69E-09 |
| ENSG00000150337 | FCGR1A                  | 1   | 149782671          | 149792518        | 9847        | protein coding                     | 1.20                      | 7.55E-08 | 1.32E-05 |
| ENSG00000110079 | MS4A4A                  | 11  | 60185702           | 60317944         | 132242      | protein coding                     | 1.20                      | 1.03E-07 | 1.66E-05 |
| ENSG00000162840 | MT2P1                   | 4   | 68376323           | 68376505         | 182         | processed pseudogene               | 1.19                      | 4.36E-04 | 6.52E-03 |
| ENSG00000240509 | RPL34P18                | 8   | 93957338           | 93957691         | 353         | processed pseudogene               | 1.18                      | 8.76E-05 | 2.32E-03 |
| ENSG00000237729 | AC002075.2              | 7   | 93669826           | 93670077         | 251         | processed pseudogene               | 1.18                      | 7.97E-08 | 1.37E-05 |
| ENSG00000152766 | ANKRD22                 | 10  | 88819896           | 88851844         | 31948       | protein coding                     | 1.18                      | 4.48E-05 | 1.44E-03 |
| ENSG00000228802 | AC073641.1              | 2   | 223965701          | 223967706        | 2005        | lncRNA-antisense                   | 1.17                      | 1.37E-03 | 1.34E-02 |

|                 |            |    |           |           |        |                      |       |          |          |
|-----------------|------------|----|-----------|-----------|--------|----------------------|-------|----------|----------|
| ENSG0000164104  | HMGB2      | 4  | 173331376 | 173334432 | 3056   | protein coding       | 1.17  | 7.83E-12 | 4.86E-09 |
| ENSG00000225964 | NRIR       | 2  | 6819463   | 6840464   | 21001  | lncRNA-antisense     | 1.17  | 6.87E-04 | 8.75E-03 |
| ENSG00000204472 | AIF1       | 6  | 31615217  | 31617021  | 1804   | protein coding       | 1.16  | 3.06E-20 | 2.90E-16 |
| ENSG00000235576 | LINC01871  | 2  | 7725801   | 7730705   | 4904   | lncRNA               | 1.16  | 1.16E-07 | 1.78E-05 |
| ENSG00000138772 | ANKX3      | 4  | 78551747  | 78610451  | 58704  | protein coding       | 1.15  | 2.25E-06 | 1.75E-04 |
| ENSG00000127184 | COX7C      | 5  | 86617928  | 86620962  | 3034   | protein coding       | 1.15  | 3.75E-10 | 1.47E-07 |
| ENSG00000166527 | CLEC4D     | 12 | 8509475   | 8522366   | 12891  | protein coding       | 1.15  | 3.47E-06 | 2.39E-04 |
| ENSG00000078081 | LAMP3      | 3  | 183122215 | 183163839 | 41624  | protein coding       | 1.15  | 1.40E-05 | 6.54E-04 |
| ENSG00000132530 | XAF1       | 17 | 6755447   | 6775647   | 20200  | protein coding       | 1.14  | 8.51E-06 | 4.54E-04 |
| ENSG00000254373 | AC112191.2 | 5  | 160258253 | 160258585 | 332    | processed pseudogene | 1.14  | 7.57E-04 | 9.26E-03 |
| ENSG00000123689 | G0S2       | 1  | 209675412 | 209676390 | 978    | protein coding       | 1.14  | 2.03E-05 | 8.52E-04 |
| ENSG00000135114 | OASL       | 12 | 121019111 | 121039242 | 20131  | protein coding       | 1.14  | 3.53E-05 | 1.23E-03 |
| ENSG00000140319 | SRP14      | 15 | 40035690  | 40039181  | 3491   | protein coding       | 1.14  | 3.22E-23 | 1.22E-18 |
| ENSG00000234964 | FABP5P7    | 11 | 59781318  | 59781722  | 404    | processed pseudogene | 1.14  | 1.25E-05 | 6.05E-04 |
| ENSG00000138326 | RPS24      | 10 | 78033760  | 78056813  | 23053  | protein coding       | 1.13  | 7.29E-08 | 1.28E-05 |
| ENSG00000288528 | AP000942.5 | 11 | 102316173 | 102328586 | 12413  | lncRNA               | 1.13  | 3.01E-04 | 5.14E-03 |
| ENSG00000245970 | AP003352.1 | 8  | 98041726  | 98044121  | 2395   | lncRNA-antisense     | 1.13  | 5.92E-06 | 3.54E-04 |
| ENSG00000169245 | CXCL10     | 4  | 76021118  | 76023497  | 2379   | protein coding       | 1.13  | 3.40E-04 | 5.60E-03 |
| ENSG00000136514 | RTMP       | 3  | 187368385 | 187372076 | 3691   | protein coding       | 1.12  | 5.03E-06 | 3.13E-04 |
| ENSG00000196683 | TOMM7      | 7  | 22812628  | 22822852  | 10224  | protein coding       | 1.12  | 1.02E-08 | 2.51E-06 |
| ENSG00000109475 | RPL34      | 4  | 108620566 | 108630412 | 9846   | protein coding       | 1.12  | 3.02E-05 | 1.10E-03 |
| ENSG00000242951 | AC007182.2 | 14 | 75595805  | 75596206  | 401    | processed pseudogene | 1.12  | 2.90E-05 | 1.07E-03 |
| ENSG00000155368 | DBI        | 2  | 119366921 | 119372560 | 5639   | protein coding       | 1.12  | 2.60E-13 | 2.18E-10 |
| ENSG00000269246 | AC011445.1 | 19 | 39341773  | 39341945  | 172    | lncRNA               | 1.12  | 7.81E-09 | 2.01E-06 |
| ENSG00000135046 | ANKX1      | 9  | 73151865  | 73170393  | 18528  | protein coding       | 1.12  | 2.62E-14 | 3.43E-11 |
| ENSG00000234268 | AP000936.3 | 11 | 117035797 | 117036051 | 254    | processed pseudogene | 1.11  | 1.78E-07 | 2.52E-05 |
| ENSG00000213942 | AC005840.1 | 12 | 6409637   | 6410013   | 376    | processed pseudogene | 1.11  | 3.93E-04 | 6.13E-03 |
| ENSG00000154723 | ATP5PF     | 21 | 25716503  | 25735673  | 19170  | protein coding       | 1.11  | 1.03E-17 | 3.90E-14 |
| ENSG00000163568 | AIM2       | 1  | 159062484 | 159147096 | 84612  | protein coding       | 1.11  | 8.19E-08 | 1.39E-05 |
| ENSG00000105205 | CLC        | 19 | 39731255  | 39738029  | 6774   | protein coding       | 1.09  | 5.62E-05 | 1.69E-03 |
| ENSG00000241494 | AL355032.1 | 14 | 101677943 | 101678380 | 437    | processed pseudogene | 1.09  | 9.08E-04 | 1.04E-02 |
| ENSG00000100300 | ETV7       | 6  | 36354091  | 36387800  | 33709  | protein coding       | 1.09  | 5.02E-05 | 1.57E-03 |
| ENSG00000119922 | IFIT2      | 10 | 89283694  | 89309271  | 25577  | protein coding       | 1.09  | 4.89E-06 | 3.07E-04 |
| ENSG00000269621 | AL589765.7 | 1  | 151755541 | 151759911 | 4370   | lncRNA-antisense     | 1.08  | 1.79E-03 | 1.58E-02 |
| ENSG00000244380 | AC134772.1 | 3  | 48440352  | 48446656  | 6304   | lncRNA-antisense     | 1.08  | 3.71E-04 | 5.92E-03 |
| ENSG00000143977 | SNRPG      | 2  | 70281362  | 70293740  | 12378  | protein coding       | 1.08  | 1.75E-10 | 7.55E-08 |
| ENSG00000092841 | MYL6       | 12 | 56158346  | 56163496  | 5150   | protein coding       | 1.08  | 5.87E-18 | 3.11E-14 |
| ENSG00000233223 | AC016876.1 | 17 | 7581964   | 7584086   | 2122   | lncRNA-antisense     | 1.07  | 3.11E-05 | 1.13E-03 |
| ENSG00000185641 | AC034236.1 | 5  | 116051917 | 116052289 | 372    | processed pseudogene | 1.06  | 3.88E-10 | 1.50E-07 |
| ENSG00000163736 | PPPB       | 4  | 73986439  | 73988190  | 1751   | protein coding       | 1.06  | 1.91E-06 | 1.56E-04 |
| ENSG00000220842 | RPL21P16   | 10 | 120354701 | 120355183 | 482    | processed pseudogene | 1.05  | 1.96E-07 | 2.77E-05 |
| ENSG00000259544 | AC021739.3 | 15 | 85726115  | 85727227  | 1112   | lncRNA-antisense     | 1.04  | 1.13E-03 | 1.19E-02 |
| ENSG00000279225 | AC138305.3 | 16 | 63397707  | 63397946  | 239    | TEC                  | 1.04  | 3.95E-03 | 2.84E-02 |
| ENSG00000229605 | RPL21P93   | 10 | 28898996  | 28899484  | 488    | processed pseudogene | 1.04  | 2.51E-06 | 1.90E-04 |
| ENSG00000041357 | PSMA4      | 15 | 78540405  | 78552417  | 12012  | protein coding       | 1.04  | 9.86E-15 | 1.33E-11 |
| ENSG00000273272 | UG2317.3   | 22 | 50541108  | 50543011  | 1903   | lncRNA               | 1.03  | 7.88E-07 | 8.18E-05 |
| ENSG00000115541 | HSPF1      | 2  | 197500140 | 197503449 | 3309   | protein coding       | 1.03  | 3.87E-12 | 2.57E-09 |
| ENSG00000100632 | ERH        | 14 | 69380128  | 69398299  | 18171  | protein coding       | 1.03  | 5.92E-21 | 8.61E-17 |
| ENSG00000227081 | AC005912.1 | 12 | 3211663   | 3211917   | 254    | processed pseudogene | 1.03  | 9.99E-07 | 9.60E-05 |
| ENSG00000137628 | DDX6       | 4  | 168216294 | 168318804 | 102510 | protein coding       | 1.03  | 3.06E-05 | 1.12E-03 |
| ENSG00000115128 | SF3B6      | 2  | 24067586  | 24076373  | 8787   | protein coding       | 1.02  | 8.55E-15 | 1.20E-11 |
| ENSG00000274629 | AC073052.1 | 2  | 224464682 | 224474500 | 9818   | lncRNA-antisense     | 1.02  | 7.75E-05 | 2.13E-03 |
| ENSG00000279364 | AC114546.3 | 15 | 34978351  | 34980084  | 1733   | TEC                  | 1.01  | 9.03E-04 | 1.03E-02 |
| ENSG00000236312 | RPL34P34   | 19 | 22368599  | 22368952  | 353    | processed pseudogene | 1.01  | 2.49E-03 | 1.95E-02 |
| ENSG00000230291 | AC078817.1 | 12 | 80102899  | 80103333  | 434    | processed pseudogene | 1.01  | 2.82E-05 | 1.05E-03 |
| ENSG00000264235 | AP005329.1 | 18 | 3255436   | 3261850   | 6414   | lncRNA-antisense     | 1.01  | 1.06E-05 | 5.38E-04 |
| ENSG00000130755 | GMFG       | 19 | 39328353  | 39342372  | 14019  | protein coding       | 1.01  | 2.51E-15 | 3.65E-12 |
| ENSG00000088827 | SIGLEC1    | 20 | 3686970   | 3707128   | 20158  | protein coding       | 1.01  | 2.92E-03 | 2.17E-02 |
| ENSG00000117228 | GBP1       | 1  | 89052319  | 89052330  | 12911  | protein coding       | 1.01  | 7.21E-07 | 7.77E-05 |
| ENSG00000131174 | COX7B      | X  | 77899440  | 77907376  | 7936   | protein coding       | 1.00  | 2.71E-07 | 3.60E-05 |
| ENSG00000236439 | AC099336.2 | 1  | 202471864 | 202472117 | 253    | processed pseudogene | 1.00  | 5.21E-05 | 1.60E-03 |
| ENSG00000226084 | AC113935.1 | 1  | 77129114  | 77129668  | 554    | processed pseudogene | 1.00  | 2.36E-06 | 1.80E-04 |
| ENSG00000230629 | RPS23P8    | X  | 70962964  | 70963293  | 329    | processed pseudogene | 1.00  | 1.53E-08 | 3.49E-06 |
| ENSG00000168491 | CCDC110    | 4  | 185445182 | 185471752 | 26570  | protein coding       | -1.00 | 8.40E-03 | 4.24E-02 |
| ENSG00000235770 | LINC00607  | 2  | 215611563 | 215848954 | 237391 | lncRNA               | -1.00 | 3.65E-03 | 2.50E-02 |
| ENSG00000133121 | STARD13    | 13 | 33103137  | 33350630  | 247493 | protein coding       | -1.00 | 3.87E-04 | 6.08E-03 |
| ENSG00000168454 | TXNDC2     | 18 | 9885726   | 9889275   | 3549   | protein coding       | -1.00 | 8.53E-03 | 4.28E-02 |
| ENSG00000275410 | HNF1B      | 17 | 37686431  | 37745105  | 58674  | protein coding       | -1.00 | 1.02E-02 | 4.81E-02 |
| ENSG00000225885 | AC023590.1 | 8  | 118282139 | 118400605 | 118466 | lncRNA-antisense     | -1.00 | 8.42E-04 | 9.87E-03 |
| ENSG00000152953 | STK32B     | 4  | 5051480   | 5000994   | 449514 | protein coding       | -1.00 | 6.85E-04 | 8.72E-03 |
| ENSG00000070729 | CNGB1      | 16 | 57882340  | 57971128  | 88788  | protein coding       | -1.00 | 2.32E-03 | 1.87E-02 |
| ENSG00000229727 | AC013460.1 | 2  | 7383227   | 7450544   | 67317  | lncRNA               | -1.00 | 2.69E-04 | 4.78E-03 |
| ENSG00000158023 | CFAP251    | 12 | 121918592 | 122003927 | 85335  | protein coding       | -1.00 | 8.24E-06 | 4.47E-04 |
| ENSG00000135454 | B4GALNT1   | 12 | 57623409  | 57633239  | 9830   | protein coding       | -1.00 | 5.77E-03 | 3.33E-02 |
| ENSG00000251600 | AC107223.1 | 4  | 143559457 | 144343750 | 784293 | lncRNA               | -1.00 | 3.52E-05 | 1.23E-03 |
| ENSG00000283128 | AC090403.2 | 7  | 155474256 | 155644406 | 170150 | lncRNA               | -1.00 | 7.95E-03 | 4.09E-02 |
| ENSG00000268804 | LINC02132  | 16 | 85935281  | 85936223  | 942    | lncRNA               | -1.00 | 3.30E-03 | 2.35E-02 |
| ENSG00000148357 | HMCN2      | 9  | 130265882 | 130434123 | 168241 | protein coding       | -1.00 | 1.05E-03 | 1.13E-02 |
| ENSG00000182902 | SLC25A18   | 22 | 17563450  | 17590995  | 27545  | protein coding       | -1.00 | 3.48E-03 | 2.43E-02 |
| ENSG00000064270 | ATP2C2     | 16 | 84368527  | 84464187  | 95660  | protein coding       | -1.00 | 2.10E-04 | 4.04E-03 |
| ENSG00000215483 | LINC00598  | 13 | 40079106  | 40535807  | 456701 | lncRNA               | -1.00 | 6.08E-07 | 6.73E-05 |
| ENSG00000134874 | DZIP1      | 13 | 95578202  | 95644706  | 66504  | protein coding       | -1.00 | 1.69E-03 | 1.53E-02 |
| ENSG00000165323 | FAT3       | 11 | 92352096  | 92896470  | 544374 | protein coding       | -1.00 | 2.15E-03 | 1.79E-02 |
| ENSG00000104728 | ARHGFE10   | 8  | 1823926   | 1958641   | 134715 | protein coding       | -1.01 | 6.79E-04 | 8.68E-03 |
| ENSG00000254166 | CASC19     | 8  | 127072694 | 127227541 | 154847 | lncRNA               | -1.01 | 1.06E-04 | 2.62E-03 |
| ENSG00000168490 | PHYHIP     | 8  | 22219703  | 22232101  | 12398  | protein coding       | -1.01 | 1.27E-03 | 1.28E-02 |
| ENSG00000265749 | AC135178.4 | 17 | 8365563   | 8381328   | 15765  | lncRNA-antisense     | -1.01 | 7.15E-03 | 3.82E-02 |
| ENSG00000095713 | CTRAC1     | 10 | 97865000  | 98030828  | 165828 | protein coding       | -1.01 | 9.24E-03 | 4.50E-02 |
| ENSG00000167377 | ZNF23      | 16 | 71447597  | 71463095  | 15498  | protein coding       | -1.01 | 1.31E-04 | 3.00E-03 |
| ENSG00000219438 | TAF5       | 22 | 48489553  | 48850912  | 361359 | protein coding       | -1.01 | 6.15E-03 | 3.47E-02 |

|                 |             |    |           |           |        |                                    |       |          |          |
|-----------------|-------------|----|-----------|-----------|--------|------------------------------------|-------|----------|----------|
| ENSG00000230592 | RPSAP8      | X  | 100155885 | 100156773 | 888    | processed pseudogene               | -1.01 | 1.79E-04 | 3.65E-03 |
| ENSG00000104213 | PDGFRL      | 8  | 17576433  | 17644071  | 67638  | protein coding                     | -1.01 | 7.02E-03 | 3.78E-02 |
| ENSG00000142798 | HSPG2       | 1  | 21822244  | 21937310  | 115066 | protein coding                     | -1.01 | 3.97E-05 | 1.32E-03 |
| ENSG00000255769 | GOLGA2P10   | 15 | 82472993  | 82513950  | 40957  | transcribed unprocessed pseudogene | -1.01 | 6.56E-04 | 8.50E-03 |
| ENSG0000093009  | CDC45       | 22 | 19479457  | 19520612  | 41155  | protein coding                     | -1.01 | 1.88E-03 | 1.63E-02 |
| ENSG00000213397 | HAUS7       | X  | 153447666 | 153495516 | 47850  | protein coding                     | -1.01 | 7.03E-04 | 8.84E-03 |
| ENSG00000136944 | LMX1B       | 9  | 126613928 | 126701032 | 87104  | protein coding                     | -1.01 | 2.60E-03 | 2.02E-02 |
| ENSG00000266433 | TBC1D3P5    | 17 | 27417690  | 27431623  | 13933  | transcribed unprocessed pseudogene | -1.01 | 8.51E-03 | 4.27E-02 |
| ENSG00000238098 | ABCA17P     | 16 | 2339150   | 2426699   | 87549  | transcribed unitary pseudogene     | -1.01 | 2.89E-03 | 2.15E-02 |
| ENSG00000125337 | KIF25       | 6  | 167996241 | 168045095 | 48854  | protein coding                     | -1.01 | 2.08E-03 | 1.75E-02 |
| ENSG00000101198 | NKAIN4      | 20 | 63240784  | 63272694  | 31910  | protein coding                     | -1.01 | 8.72E-03 | 4.34E-02 |
| ENSG00000129204 | USP6        | 17 | 5116032   | 5175034   | 59002  | protein coding                     | -1.01 | 2.82E-04 | 4.92E-03 |
| ENSG00000280604 | AJ239328.1  | 21 | 45914296  | 45919483  | 5187   | lncRNA-sense overlapping           | -1.01 | 2.31E-04 | 4.32E-03 |
| ENSG00000273654 | AC020904.2  | 19 | 18022403  | 18032099  | 9696   | transcribed processed pseudogene   | -1.01 | 1.57E-03 | 1.46E-02 |
| ENSG00000273387 | AC005005.3  | 22 | 31082156  | 31083565  | 1409   | lncRNA-antisense                   | -1.01 | 1.03E-02 | 4.82E-02 |
| ENSG00000144821 | MHY15       | 3  | 108380368 | 108529322 | 148954 | protein coding                     | -1.01 | 6.18E-04 | 8.20E-03 |
| ENSG00000250132 | AC004803.1  | 12 | 974133    | 991190    | 17057  | lncRNA-antisense                   | -1.01 | 3.26E-04 | 5.44E-03 |
| ENSG00000234494 | SP2-AS1     | 17 | 47897330  | 47941410  | 44080  | lncRNA-antisense                   | -1.01 | 3.49E-03 | 2.43E-02 |
| ENSG00000254449 | SP3A3P2     | 11 | 123597946 | 123599452 | 1506   | processed pseudogene               | -1.01 | 9.70E-03 | 4.64E-02 |
| ENSG00000225556 | CFZAD2      | 1  | 151837819 | 151840557 | 2738   | protein coding                     | -1.01 | 4.74E-03 | 2.95E-02 |
| ENSG00000066056 | TIE1        | 1  | 43300982  | 43323108  | 22126  | protein coding                     | -1.01 | 2.21E-04 | 4.18E-03 |
| ENSG00000164929 | BAALC       | 8  | 103140713 | 103230305 | 89592  | protein coding                     | -1.01 | 4.73E-03 | 2.95E-02 |
| ENSG00000189056 | RELN        | 7  | 103471784 | 103989658 | 517874 | protein coding                     | -1.01 | 6.33E-04 | 8.32E-03 |
| ENSG00000230626 | AC011005.1  | 7  | 129126518 | 129130793 | 4275   | protein coding                     | -1.01 | 2.98E-03 | 2.20E-02 |
| ENSG00000172901 | LVRN        | 5  | 115962454 | 116027619 | 65165  | protein coding                     | -1.01 | 3.49E-03 | 2.44E-02 |
| ENSG00000179270 | PCARE       | 2  | 29060976  | 29074523  | 13547  | protein coding                     | -1.01 | 9.40E-03 | 4.55E-02 |
| ENSG00000164675 | IQUB        | 7  | 123452193 | 123535077 | 82884  | protein coding                     | -1.01 | 6.98E-03 | 3.76E-02 |
| ENSG00000246308 | AC11635.1   | 11 | 10809204  | 10822931  | 13727  | lncRNA-antisense                   | -1.01 | 6.66E-03 | 3.65E-02 |
| ENSG00000254872 | LINC02688   | 11 | 1049880   | 1055749   | 5869   | lncRNA                             | -1.01 | 5.77E-03 | 3.33E-02 |
| ENSG00000149506 | ZP1         | 11 | 60867562  | 60875693  | 8131   | protein coding                     | -1.02 | 6.84E-03 | 3.72E-02 |
| ENSG00000183535 | COL18A1-AS1 | 21 | 45419716  | 45425070  | 5354   | lncRNA-antisense                   | -1.02 | 7.63E-03 | 3.98E-02 |
| ENSG00000260971 | AC119674.1  | 1  | 56154545  | 56477687  | 323142 | lncRNA                             | -1.02 | 4.75E-03 | 2.95E-02 |
| ENSG00000243323 | PTPRVP      | 1  | 202168051 | 202189455 | 21404  | transcribed unitary pseudogene     | -1.02 | 3.03E-04 | 5.16E-03 |
| ENSG00000140009 | ESR2        | 14 | 64084232  | 64338112  | 253880 | protein coding                     | -1.02 | 7.56E-05 | 2.09E-03 |
| ENSG00000065361 | ERBB3       | 12 | 56076799  | 56103505  | 26706  | protein coding                     | -1.02 | 5.07E-04 | 7.16E-03 |
| ENSG00000235885 | LINC01828   | 2  | 67086446  | 67311439  | 224993 | lncRNA                             | -1.02 | 8.77E-03 | 4.36E-02 |
| ENSG00000246379 | AC040168.1  | 16 | 55984009  | 56191118  | 207109 | lncRNA                             | -1.02 | 2.01E-03 | 1.71E-02 |
| ENSG00000152931 | PART1       | 5  | 60487713  | 60548813  | 61100  | lncRNA                             | -1.02 | 1.53E-03 | 1.43E-02 |
| ENSG00000078898 | BPIFB2      | 20 | 33007704  | 33023703  | 15999  | protein coding                     | -1.02 | 1.02E-02 | 4.80E-02 |
| ENSG00000180777 | ANKRD30B    | 18 | 14728272  | 14854038  | 125766 | protein coding                     | -1.02 | 8.58E-03 | 4.29E-02 |
| ENSG00000001626 | CFTR        | 7  | 117287120 | 117715971 | 428851 | protein coding                     | -1.02 | 2.05E-03 | 1.73E-02 |
| ENSG00000090530 | P3H2        | 3  | 189956728 | 190122437 | 165709 | protein coding                     | -1.02 | 8.20E-04 | 9.70E-03 |
| ENSG00000085552 | IGSF9       | 1  | 159927039 | 159945613 | 18574  | protein coding                     | -1.02 | 1.24E-02 | 1.26E-02 |
| ENSG00000173157 | ADAMT20     | 12 | 43353866  | 43552203  | 198337 | protein coding                     | -1.02 | 5.98E-03 | 3.41E-02 |
| ENSG00000196550 | FAM72A      | 1  | 206186179 | 206204414 | 18235  | protein coding                     | -1.02 | 2.08E-03 | 1.75E-02 |
| ENSG00000122367 | LDB3        | 10 | 86668507  | 86736072  | 67565  | protein coding                     | -1.02 | 1.16E-03 | 1.21E-02 |
| ENSG00000257298 | AC008147.2  | 12 | 50185580  | 50191363  | 5783   | lncRNA-sense intronic              | -1.02 | 2.11E-03 | 1.76E-02 |
| ENSG00000177359 | AC024940.1  | 12 | 31111652  | 31201235  | 89583  | transcribed unprocessed pseudogene | -1.02 | 1.32E-04 | 3.01E-03 |
| ENSG00000112769 | LAMA4       | 6  | 112107931 | 112254939 | 147008 | protein coding                     | -1.02 | 3.52E-03 | 2.45E-02 |
| ENSG00000250305 | TRMT9B      | 8  | 12945642  | 13031503  | 85861  | protein coding                     | -1.02 | 1.74E-03 | 1.55E-02 |
| ENSG00000239887 | C1orf226    | 1  | 162378841 | 162386812 | 7971   | protein coding                     | -1.02 | 1.84E-03 | 1.61E-02 |
| ENSG00000267374 | MIR924HG    | 18 | 39206917  | 39800322  | 593405 | lncRNA                             | -1.02 | 1.32E-03 | 1.31E-02 |
| ENSG00000125851 | PKS2C       | 20 | 17226107  | 17484578  | 258471 | protein coding                     | -1.02 | 7.56E-03 | 3.96E-02 |
| ENSG00000246877 | DNM1P35     | 15 | 75727670  | 75738623  | 10953  | lncRNA-antisense                   | -1.02 | 1.00E-02 | 4.74E-02 |
| ENSG00000103021 | CCDC113     | 16 | 58231157  | 58283936  | 52679  | protein coding                     | -1.02 | 5.99E-03 | 3.41E-02 |
| ENSG00000226659 | AC021028.1  | 10 | 80529597  | 80535942  | 6345   | lncRNA-antisense                   | -1.02 | 2.71E-04 | 4.81E-03 |
| ENSG00000003096 | KLHL13      | X  | 117897813 | 118117340 | 219527 | protein coding                     | -1.02 | 1.06E-03 | 1.14E-02 |
| ENSG00000172031 | EPHX4       | 1  | 92029985  | 92063538  | 33553  | protein coding                     | -1.02 | 5.12E-04 | 7.20E-03 |
| ENSG00000261329 | AC016597.1  | 16 | 27678940  | 27718806  | 39866  | lncRNA-antisense                   | -1.02 | 4.12E-03 | 2.71E-02 |
| ENSG00000164488 | DACT2       | 6  | 168292830 | 168319777 | 26947  | protein coding                     | -1.02 | 8.48E-03 | 4.26E-02 |
| ENSG00000171962 | DRC3        | 17 | 17972813  | 18016889  | 44076  | protein coding                     | -1.02 | 2.81E-04 | 4.91E-03 |
| ENSG00000062524 | LTK         | 15 | 41503637  | 41513887  | 10250  | protein coding                     | -1.02 | 3.56E-06 | 2.43E-04 |
| ENSG00000226026 | AC092802.1  | 1  | 95161676  | 95233982  | 72306  | lncRNA-antisense                   | -1.02 | 1.96E-03 | 1.68E-02 |
| ENSG00000070915 | SLC12A3     | 16 | 56865207  | 56915850  | 50643  | protein coding                     | -1.02 | 5.73E-04 | 7.80E-03 |
| ENSG00000162877 | PM20D1      | 1  | 205828025 | 205850132 | 22107  | protein coding                     | -1.02 | 8.16E-04 | 9.68E-03 |
| ENSG00000036565 | SLC18A1     | 8  | 20144855  | 20183206  | 38351  | protein coding                     | -1.02 | 1.47E-03 | 1.40E-02 |
| ENSG00000189229 | AC09277.1   | 3  | 6490460   | 6736750   | 246290 | lncRNA                             | -1.02 | 6.32E-03 | 3.53E-02 |
| ENSG00000268584 | AC073389.1  | 10 | 73625996  | 73626790  | 794    | lncRNA-antisense                   | -1.02 | 1.04E-02 | 4.87E-02 |
| ENSG00000286909 | AC024560.4  | 3  | 197649303 | 197651482 | 2179   | lncRNA                             | -1.02 | 6.54E-04 | 8.50E-03 |
| ENSG00000116774 | QLFML3      | 1  | 113979391 | 114035572 | 56181  | protein coding                     | -1.02 | 8.67E-03 | 4.32E-02 |
| ENSG00000109265 | CRACD       | 4  | 56049073  | 56328625  | 279552 | protein coding                     | -1.03 | 1.28E-04 | 2.91E-03 |
| ENSG00000263740 | RN7SL4P     | 3  | 15738515  | 15738809  | 294    | misc RNA                           | -1.03 | 6.82E-03 | 3.71E-02 |
| ENSG00000050767 | COL23A1     | 5  | 178237618 | 178590393 | 352775 | protein coding                     | -1.03 | 1.80E-02 | 1.60E-02 |
| ENSG00000267270 | PARD6G-AS1  | 18 | 80147924  | 80179839  | 31915  | lncRNA-antisense                   | -1.03 | 4.25E-06 | 2.75E-04 |
| ENSG00000157765 | SLC34A2     | 4  | 25648011  | 25678748  | 30737  | protein coding                     | -1.03 | 3.13E-03 | 2.27E-02 |
| ENSG00000172828 | CES3        | 16 | 66961245  | 66975149  | 13904  | protein coding                     | -1.03 | 3.02E-03 | 2.22E-02 |
| ENSG00000182752 | PAPPA       | 9  | 116153791 | 116402321 | 248530 | protein coding                     | -1.03 | 1.43E-04 | 3.16E-03 |
| ENSG00000108821 | COL1A1      | 17 | 50184101  | 50201632  | 17531  | protein coding                     | -1.03 | 3.44E-04 | 5.62E-03 |
| ENSG00000188611 | ASA2        | 10 | 50182778  | 50279720  | 96942  | protein coding                     | -1.03 | 3.36E-04 | 5.56E-03 |
| ENSG00000156113 | KGNMA1      | 10 | 76869601  | 77638369  | 768768 | protein coding                     | -1.03 | 6.88E-06 | 3.97E-04 |
| ENSG00000235100 | AL157400.3  | 10 | 89667181  | 89701274  | 34093  | lncRNA                             | -1.03 | 2.13E-03 | 1.78E-02 |
| ENSG00000228526 | MIR34AHG    | 1  | 9148011   | 9198906   | 50895  | lncRNA                             | -1.03 | 8.04E-05 | 2.18E-03 |
| ENSG00000186868 | MAPT        | 17 | 45894551  | 46028334  | 133783 | protein coding                     | -1.03 | 3.84E-06 | 2.54E-04 |
| ENSG00000219607 | PPP1R3G     | 6  | 5085341   | 5089487   | 4146   | protein coding                     | -1.03 | 1.44E-03 | 1.38E-02 |
| ENSG00000049283 | EPN3        | 17 | 50532682  | 50543750  | 11068  | protein coding                     | -1.03 | 1.04E-02 | 4.87E-02 |
| ENSG00000104313 | EYA1        | 8  | 71197433  | 71592025  | 394592 | protein coding                     | -1.03 | 4.74E-03 | 2.95E-02 |
| ENSG00000162949 | CAPN13      | 2  | 30722771  | 30820542  | 97771  | protein coding                     | -1.03 | 4.81E-03 | 2.97E-02 |
| ENSG00000158270 | COLEC12     | 18 | 316737    | 500722    | 183985 | protein coding                     | -1.03 | 6.35E-04 | 8.33E-03 |
| ENSG00000163792 | TCF2        | 2  | 27149004  | 27156974  | 7970   | protein coding                     | -1.03 | 3.29E-03 | 2.34E-02 |
| ENSG00000225077 | LINC00337   | 1  | 6234692   | 6239444   | 4752   | lncRNA                             | -1.03 | 9.68E-03 | 4.64E-02 |

|                 |             |    |           |           |        |                                    |       |          |          |
|-----------------|-------------|----|-----------|-----------|--------|------------------------------------|-------|----------|----------|
| ENSG00000215895 | HSPA5P1     | 1  | 38708931  | 38710890  | 1959   | processed_pseudogene               | -1.03 | 7.36E-03 | 3.90E-02 |
| ENSG00000158525 | CPA5        | 7  | 130344816 | 130368730 | 23914  | protein coding                     | -1.03 | 4.72E-03 | 2.94E-02 |
| ENSG00000001617 | SEMA3F      | 3  | 50155045  | 50189075  | 34030  | protein coding                     | -1.03 | 6.59E-03 | 3.62E-02 |
| ENSG00000109991 | P2RX3       | 11 | 57338352  | 57372396  | 34044  | protein coding                     | -1.03 | 5.25E-03 | 3.14E-02 |
| ENSG00000095464 | PDE6C       | 10 | 93612537  | 93666010  | 53473  | protein coding                     | -1.03 | 3.64E-03 | 2.50E-02 |
| ENSG00000165970 | SLC6A5      | 11 | 20599594  | 20659285  | 59691  | protein coding                     | -1.03 | 3.39E-03 | 2.39E-02 |
| ENSG00000163687 | DNASE1L3    | 3  | 58192257  | 58214697  | 22440  | protein coding                     | -1.03 | 5.72E-05 | 1.70E-03 |
| ENSG00000250733 | C8orf17     | 8  | 139931172 | 139933942 | 2770   | TEC                                | -1.03 | 9.16E-03 | 4.48E-02 |
| ENSG00000182329 | KIAA2012    | 2  | 202073255 | 202205188 | 131933 | protein coding                     | -1.03 | 3.43E-03 | 2.41E-02 |
| ENSG00000181378 | CFAP65      | 2  | 219002846 | 219041527 | 38681  | protein coding                     | -1.03 | 4.25E-03 | 2.76E-02 |
| ENSG00000178222 | RNF212      | 4  | 1056250   | 1113564   | 57314  | protein coding                     | -1.03 | 2.37E-05 | 9.42E-04 |
| ENSG00000137936 | BCAR3       | 1  | 93561741  | 93847150  | 285409 | protein coding                     | -1.03 | 4.85E-05 | 1.53E-03 |
| ENSG00000159450 | TCHH        | 1  | 152106317 | 152115454 | 9137   | protein coding                     | -1.03 | 6.27E-03 | 3.51E-02 |
| ENSG00000175985 | PLEKH01     | 14 | 69484692  | 69531551  | 46859  | protein coding                     | -1.03 | 1.72E-03 | 1.54E-02 |
| ENSG00000149201 | CCDC81      | 11 | 86374736  | 86423109  | 48373  | protein coding                     | -1.03 | 3.39E-04 | 5.58E-03 |
| ENSG00000197905 | TEAD4       | 12 | 2959330   | 3040676   | 81346  | protein coding                     | -1.03 | 4.96E-03 | 3.03E-02 |
| ENSG00000250802 | ZBED3-AS1   | 5  | 77086688  | 77166909  | 80221  | lncRNA-antisense                   | -1.03 | 6.39E-06 | 3.77E-04 |
| ENSG00000183248 | PRR36       | 19 | 7868719   | 7874390   | 5671   | protein coding                     | -1.03 | 2.74E-03 | 2.09E-02 |
| ENSG00000257495 | KRT73-AS1   | 12 | 52601467  | 52615305  | 13838  | lncRNA-antisense                   | -1.03 | 1.32E-04 | 3.01E-03 |
| ENSG00000151655 | ITIH2       | 10 | 7703316   | 7749520   | 46204  | protein coding                     | -1.03 | 3.48E-03 | 2.43E-02 |
| ENSG00000167619 | TMEM145     | 19 | 42313309  | 42325064  | 11755  | protein coding                     | -1.03 | 9.25E-03 | 4.51E-02 |
| ENSG00000204745 | AC083899.1  | 2  | 87125198  | 87196629  | 71431  | unprocessed_pseudogene             | -1.04 | 7.76E-04 | 9.41E-03 |
| ENSG00000177103 | DSCAML1     | 11 | 117427772 | 117817525 | 389753 | protein coding                     | -1.04 | 2.77E-04 | 4.87E-03 |
| ENSG00000141750 | STAC2       | 17 | 39210541  | 39225945  | 15404  | protein coding                     | -1.04 | 6.16E-03 | 3.47E-02 |
| ENSG00000171790 | SLFNL1      | 1  | 41015597  | 41023237  | 7640   | protein coding                     | -1.04 | 3.60E-05 | 1.24E-03 |
| ENSG00000164904 | ALDH7A1     | 5  | 126531200 | 126595362 | 64162  | protein coding                     | -1.04 | 2.15E-05 | 8.78E-04 |
| ENSG00000162374 | ELAVL4      | 1  | 50024029  | 50203772  | 179743 | protein coding                     | -1.04 | 6.13E-04 | 8.15E-03 |
| ENSG00000146839 | ZAN         | 7  | 100733595 | 100797797 | 64202  | protein coding                     | -1.04 | 6.49E-04 | 8.46E-03 |
| ENSG00000227855 | DPY19L2P3   | 7  | 29650227  | 29742594  | 92367  | transcribed_unprocessed_pseudogene | -1.04 | 5.71E-03 | 3.31E-02 |
| ENSG00000105479 | CCDC114     | 19 | 48296457  | 48321971  | 25514  | protein coding                     | -1.04 | 1.28E-06 | 1.16E-04 |
| ENSG00000214185 | XPOP1       | 20 | 34213495  | 34215892  | 2397   | processed_pseudogene               | -1.04 | 9.82E-03 | 4.69E-02 |
| ENSG00000100626 | GALNT16     | 14 | 69259277  | 69357033  | 97756  | protein coding                     | -1.04 | 5.00E-03 | 3.04E-02 |
| ENSG00000185689 | C6orf201    | 6  | 4079206   | 4130951   | 51745  | protein coding                     | -1.04 | 1.14E-03 | 1.20E-02 |
| ENSG00000288597 | AC234782.2  | X  | 103707034 | 103919047 | 212013 | lncRNA                             | -1.04 | 2.68E-04 | 4.77E-03 |
| ENSG00000116141 | MARK1       | 1  | 220528136 | 220664461 | 136325 | protein coding                     | -1.04 | 9.14E-04 | 1.04E-02 |
| ENSG00000204110 | LINC02520   | 6  | 37507348  | 37535616  | 28268  | lncRNA                             | -1.04 | 4.11E-03 | 2.70E-02 |
| ENSG00000139287 | TPH2        | 12 | 71938845  | 72186618  | 247773 | protein coding                     | -1.04 | 7.05E-03 | 3.79E-02 |
| ENSG00000104611 | SH2DA4      | 8  | 19313693  | 19396218  | 82525  | protein coding                     | -1.04 | 8.07E-03 | 4.13E-02 |
| ENSG00000111907 | TPD52L1     | 6  | 125119049 | 125264407 | 145358 | protein coding                     | -1.04 | 4.89E-03 | 3.00E-02 |
| ENSG00000170835 | CEL         | 9  | 133061978 | 133071863 | 9885   | protein coding                     | -1.04 | 8.70E-04 | 1.01E-02 |
| ENSG00000226706 | AL161452.1  | 9  | 135503273 | 135506447 | 3174   | lncRNA-antisense                   | -1.04 | 5.37E-03 | 3.17E-02 |
| ENSG00000279278 | AC245060.6  | 22 | 22264601  | 22273020  | 8419   | lncRNA                             | -1.04 | 4.79E-04 | 6.93E-03 |
| ENSG00000222005 | LINC01118   | 2  | 46698940  | 46822804  | 123864 | lncRNA-sense overlapping           | -1.04 | 7.58E-05 | 2.09E-03 |
| ENSG00000104067 | TJP1        | 15 | 29699367  | 29968915  | 269548 | protein coding                     | -1.04 | 1.53E-03 | 1.43E-02 |
| ENSG00000086159 | AQP6        | 12 | 49967194  | 49977139  | 9945   | protein coding                     | -1.04 | 8.40E-03 | 4.24E-02 |
| ENSG00000122254 | HHS32       | 16 | 22814162  | 22916338  | 102176 | protein coding                     | -1.04 | 1.04E-02 | 4.87E-02 |
| ENSG00000273297 | AC009275.1  | 7  | 134368737 | 134432534 | 63797  | lncRNA                             | -1.04 | 3.24E-03 | 2.32E-02 |
| ENSG00000132837 | DMGDH       | 5  | 78997564  | 79236038  | 238474 | protein coding                     | -1.04 | 6.59E-04 | 8.53E-03 |
| ENSG00000124780 | CNKK17      | 6  | 39299001  | 39314461  | 15460  | protein coding                     | -1.04 | 5.99E-04 | 8.04E-03 |
| ENSG00000180638 | SLC47A2     | 17 | 19678288  | 19718979  | 40691  | protein coding                     | -1.04 | 1.04E-03 | 1.13E-02 |
| ENSG00000126337 | KRT36       | 17 | 41486136  | 41492546  | 6410   | protein coding                     | -1.04 | 1.02E-02 | 4.80E-02 |
| ENSG00000188112 | C6orf132    | 6  | 42101119  | 42142620  | 41501  | protein coding                     | -1.04 | 1.05E-02 | 4.89E-02 |
| ENSG00000273079 | GRIN2B      | 12 | 13437942  | 13982002  | 544060 | protein coding                     | -1.04 | 1.37E-04 | 3.08E-03 |
| ENSG00000197410 | DCHS2       | 4  | 154231742 | 154491799 | 280057 | protein coding                     | -1.04 | 1.89E-04 | 3.78E-03 |
| ENSG00000145832 | SLC25A48    | 5  | 135579202 | 135889770 | 310568 | protein coding                     | -1.04 | 5.15E-03 | 3.10E-02 |
| ENSG00000271447 | MMP28       | 17 | 35756249  | 35795707  | 39458  | protein coding                     | -1.04 | 3.74E-05 | 1.28E-03 |
| ENSG00000180251 | SLC9A4      | 2  | 102473226 | 102533972 | 60746  | protein coding                     | -1.04 | 9.30E-03 | 4.52E-02 |
| ENSG00000157335 | CLEC18C     | 16 | 70173322  | 70187361  | 14039  | protein coding                     | -1.04 | 1.05E-02 | 4.91E-02 |
| ENSG00000250900 | TRIMT-AS1   | 5  | 181195496 | 181203103 | 7607   | lncRNA-antisense                   | -1.04 | 5.09E-03 | 3.08E-02 |
| ENSG00000196581 | AJAP1       | 1  | 4654609   | 4792534   | 137925 | protein coding                     | -1.04 | 4.37E-04 | 6.52E-03 |
| ENSG00000286010 | AC108925.1  | 8  | 127663280 | 127670990 | 7710   | lncRNA                             | -1.04 | 8.43E-06 | 4.52E-04 |
| ENSG00000214534 | ZNF705E     | 11 | 71814045  | 71821548  | 7503   | protein coding                     | -1.04 | 6.79E-03 | 3.70E-02 |
| ENSG00000187980 | PLA2G2C     | 1  | 20161253  | 20186518  | 25265  | protein coding                     | -1.05 | 1.50E-04 | 3.27E-03 |
| ENSG00000197893 | NRAP        | 10 | 113588714 | 113664070 | 75356  | protein coding                     | -1.05 | 4.87E-03 | 2.99E-02 |
| ENSG00000115705 | TPO         | 2  | 1374066   | 1543711   | 169645 | protein coding                     | -1.05 | 6.28E-04 | 8.29E-03 |
| ENSG00000064309 | CDON        | 11 | 125955796 | 126063335 | 107539 | protein coding                     | -1.05 | 1.44E-05 | 6.68E-04 |
| ENSG00000141639 | MAPK4       | 18 | 50560087  | 50731826  | 171739 | protein coding                     | -1.05 | 4.85E-03 | 2.99E-02 |
| ENSG00000203799 | CCDC162P    | 6  | 109165831 | 109355063 | 189232 | transcribed_unitary_pseudogene     | -1.05 | 5.99E-05 | 1.75E-03 |
| ENSG00000249715 | FER1L5      | 2  | 96642737  | 96704887  | 62150  | protein coding                     | -1.05 | 4.42E-03 | 2.82E-02 |
| ENSG00000108813 | DLX4        | 17 | 49968970  | 49974959  | 5989   | protein coding                     | -1.05 | 9.13E-05 | 2.38E-03 |
| ENSG00000263547 | AC011095.1  | 18 | 76122968  | 76145259  | 22291  | lncRNA                             | -1.05 | 8.45E-03 | 4.26E-02 |
| ENSG00000171914 | TLN2        | 15 | 62390526  | 62844631  | 454105 | protein coding                     | -1.05 | 5.80E-06 | 3.48E-04 |
| ENSG00000204832 | ST8SIA6-AS1 | 10 | 17386919  | 17445758  | 58839  | lncRNA-antisense                   | -1.05 | 8.58E-03 | 4.29E-02 |
| ENSG00000177614 | PGBD5       | 1  | 230314490 | 230426332 | 11842  | protein coding                     | -1.05 | 4.04E-03 | 2.68E-02 |
| ENSG00000164078 | MST1R       | 3  | 49887002  | 49903873  | 16871  | protein coding                     | -1.05 | 5.66E-04 | 7.75E-03 |
| ENSG00000185823 | NPAP1       | 15 | 24675775  | 24683393  | 7618   | protein coding                     | -1.05 | 4.55E-03 | 2.88E-02 |
| ENSG00000009950 | MLXIPL      | 7  | 73593194  | 73624543  | 31349  | protein coding                     | -1.05 | 1.74E-03 | 1.55E-02 |
| ENSG00000237232 | ZNF295-AS1  | 21 | 42009194  | 42055130  | 45936  | lncRNA                             | -1.05 | 3.60E-04 | 5.79E-03 |
| ENSG00000229961 | AL357143.1  | 1  | 157171116 | 157191963 | 20847  | transcribed_unprocessed_pseudogene | -1.05 | 4.13E-04 | 6.32E-03 |
| ENSG00000260386 | LDC1P       | 1  | 31500085  | 31509648  | 9563   | transcribed_unitary_pseudogene     | -1.05 | 6.07E-03 | 3.44E-02 |
| ENSG00000153233 | PTPR        | 12 | 70638073  | 70920738  | 282665 | protein coding                     | -1.05 | 1.02E-02 | 4.81E-02 |
| ENSG00000107719 | PALD1       | 10 | 70478767  | 70568450  | 89683  | protein coding                     | -1.05 | 1.04E-04 | 2.59E-03 |
| ENSG00000172236 | TPSAB1      | 16 | 1240379   | 1242554   | 2175   | protein coding                     | -1.05 | 1.03E-02 | 4.82E-02 |
| ENSG00000142627 | EPHA2       | 1  | 16124337  | 16156069  | 31732  | protein coding                     | -1.05 | 1.13E-03 | 1.19E-02 |
| ENSG00000285650 | AL157827.2  | 9  | 92600094  | 92612368  | 12274  | lncRNA-antisense                   | -1.05 | 7.26E-03 | 3.86E-02 |
| ENSG00000082497 | SERTAD4     | 1  | 210232796 | 210246631 | 13835  | protein coding                     | -1.05 | 9.46E-03 | 4.57E-02 |
| ENSG00000084710 | EFR3B       | 2  | 25042076  | 25159135  | 117059 | protein coding                     | -1.05 | 3.15E-04 | 5.31E-03 |
| ENSG00000174640 | SLC02A1     | 3  | 133932701 | 134052184 | 119483 | protein coding                     | -1.05 | 9.23E-04 | 1.05E-02 |
| ENSG00000249593 | AC011405.1  | 5  | 139012647 | 139051203 | 38556  | lncRNA-antisense                   | -1.05 | 3.96E-03 | 2.64E-02 |
| ENSG00000021826 | CPS1        | 2  | 210477682 | 210679107 | 201425 | protein coding                     | -1.05 | 2.46E-03 | 1.94E-02 |



|                 |            |    |           |           |         |                                    |       |          |          |
|-----------------|------------|----|-----------|-----------|---------|------------------------------------|-------|----------|----------|
| ENSG00000178184 | PARD6G     | 18 | 80157232  | 80247514  | 90282   | protein coding                     | -1.05 | 4.55E-03 | 2.88E-02 |
| ENSG00000229140 | CDC26      | 8  | 128634199 | 129683770 | 1049571 | lncRNA                             | -1.05 | 9.59E-08 | 1.57E-05 |
| ENSG00000261054 | AC036108.2 | 15 | 99128832  | 99131806  | 2974    | lncRNA-antisense                   | -1.05 | 4.58E-03 | 2.89E-02 |
| ENSG00000233208 | LINC00642  | 14 | 90453571  | 90490763  | 37192   | lncRNA                             | -1.05 | 3.38E-03 | 2.39E-02 |
| ENSG00000165495 | PKNOX2     | 11 | 125164687 | 125433389 | 268702  | protein coding                     | -1.05 | 3.46E-03 | 2.42E-02 |
| ENSG00000164082 | GRM2       | 3  | 51707068  | 51718613  | 11545   | protein coding                     | -1.05 | 1.89E-05 | 8.11E-04 |
| ENSG00000197467 | COL13A1    | 10 | 69801880  | 69964275  | 162395  | protein coding                     | -1.05 | 6.42E-06 | 3.78E-04 |
| ENSG00000233723 | LINC01122  | 2  | 58427799  | 59063766  | 635967  | lncRNA                             | -1.05 | 4.50E-03 | 2.86E-02 |
| ENSG00000234945 | GTF3C2-AS1 | 2  | 27335520  | 27342599  | 7079    | lncRNA-antisense                   | -1.05 | 1.69E-03 | 1.52E-02 |
| ENSG00000162105 | SHANK2     | 11 | 70467856  | 71252577  | 784721  | protein coding                     | -1.05 | 7.00E-04 | 8.82E-03 |
| ENSG00000173567 | ADGRF3     | 2  | 26308173  | 26346817  | 38644   | protein coding                     | -1.05 | 1.34E-04 | 3.04E-03 |
| ENSG00000134765 | DSC1       | 18 | 31129236  | 31162856  | 33620   | protein coding                     | -1.05 | 1.54E-03 | 1.44E-02 |
| ENSG00000261079 | AC009053.2 | 16 | 74367462  | 74369826  | 2364    | lncRNA                             | -1.05 | 6.79E-04 | 8.68E-03 |
| ENSG00000233593 | LINC02609  | 1  | 90769086  | 90851658  | 82572   | lncRNA                             | -1.05 | 9.93E-04 | 1.10E-02 |
| ENSG00000166268 | MYRFL      | 12 | 69825227  | 69959097  | 133870  | protein coding                     | -1.05 | 8.15E-03 | 4.16E-02 |
| ENSG00000143552 | NUP210L    | 1  | 153992685 | 154155116 | 162431  | protein coding                     | -1.05 | 7.44E-05 | 2.07E-03 |
| ENSG00000145794 | MEGF1      | 5  | 127290796 | 127465737 | 174941  | protein coding                     | -1.05 | 3.69E-03 | 2.52E-02 |
| ENSG00000114455 | HHLA2      | 3  | 108296490 | 108378285 | 81795   | protein coding                     | -1.05 | 7.36E-03 | 3.90E-02 |
| ENSG00000121653 | MAPK8IP1   | 11 | 45885651  | 45906465  | 20814   | protein coding                     | -1.05 | 2.52E-04 | 4.56E-03 |
| ENSG00000228918 | LINC01344  | 1  | 182096338 | 182314061 | 217723  | lncRNA                             | -1.05 | 6.15E-03 | 3.47E-02 |
| ENSG00000066382 | MPPE2D     | 11 | 30384493  | 30586872  | 202379  | protein coding                     | -1.05 | 4.91E-04 | 7.03E-03 |
| ENSG00000112541 | PDE10A     | 6  | 165327287 | 165988078 | 660791  | protein coding                     | -1.05 | 3.92E-05 | 1.32E-03 |
| ENSG00000197181 | PIWIL2     | 8  | 22275316  | 22357568  | 82252   | protein coding                     | -1.05 | 1.04E-04 | 2.59E-03 |
| ENSG00000117407 | ARTN       | 1  | 43933320  | 43937240  | 3920    | protein coding                     | -1.05 | 7.16E-03 | 3.83E-02 |
| ENSG00000124915 | MYRF-AS1   | 11 | 61746493  | 61757655  | 11162   | lncRNA                             | -1.06 | 3.93E-03 | 2.63E-02 |
| ENSG00000159871 | LYPD5      | 19 | 43785874  | 43827206  | 41332   | protein coding                     | -1.06 | 2.44E-04 | 4.46E-03 |
| ENSG00000007384 | RHBDP1     | 16 | 58059     | 76355     | 18296   | protein coding                     | -1.06 | 3.79E-03 | 2.57E-02 |
| ENSG00000204991 | SPIRE2     | 16 | 89818179  | 89871319  | 53140   | protein coding                     | -1.06 | 9.90E-05 | 2.51E-03 |
| ENSG00000205436 | EXO3C14    | 14 | 103100144 | 103110559 | 10415   | protein coding                     | -1.06 | 2.21E-03 | 1.82E-02 |
| ENSG00000141756 | FKBP10     | 17 | 41812680  | 41823213  | 10533   | protein coding                     | -1.06 | 2.06E-03 | 1.74E-02 |
| ENSG00000070886 | EPHA8      | 1  | 22563489  | 22603595  | 40106   | protein coding                     | -1.06 | 2.84E-03 | 2.13E-02 |
| ENSG00000130477 | UNC13A     | 19 | 17601328  | 17688365  | 87037   | protein coding                     | -1.06 | 6.58E-03 | 3.62E-02 |
| ENSG00000250754 | LINC02436  | 4  | 185051081 | 185115500 | 64419   | lncRNA                             | -1.06 | 5.50E-03 | 3.22E-02 |
| ENSG00000064042 | LIMCH1     | 4  | 41359607  | 41700044  | 340437  | protein coding                     | -1.06 | 2.94E-04 | 5.06E-03 |
| ENSG0000039580  | RA14       | 5  | 34665328  | 34832612  | 176284  | protein coding                     | -1.06 | 8.85E-04 | 1.02E-02 |
| ENSG00000178636 | AC092656.1 | 4  | 119192773 | 119212644 | 19871   | transcribed processed pseudogene   | -1.06 | 1.05E-02 | 4.88E-02 |
| ENSG0000019505  | SYT13      | 11 | 45240302  | 45286341  | 46039   | protein coding                     | -1.06 | 2.39E-03 | 1.90E-02 |
| ENSG00000101098 | RIMS4      | 20 | 44751808  | 44810546  | 58738   | protein coding                     | -1.06 | 5.27E-03 | 3.14E-02 |
| ENSG00000075702 | WDR62      | 19 | 36054881  | 36105108  | 50227   | protein coding                     | -1.06 | 6.28E-06 | 3.71E-04 |
| ENSG00000164619 | BMPER      | 7  | 33904308  | 34156427  | 252119  | protein coding                     | -1.06 | 2.50E-03 | 1.96E-02 |
| ENSG00000263818 | RDM1P5     | 17 | 39057019  | 39113190  | 56171   | transcribed processed pseudogene   | -1.06 | 5.93E-03 | 3.39E-02 |
| ENSG00000081248 | CACNA1S    | 1  | 201039512 | 201112451 | 72939   | protein coding                     | -1.06 | 4.30E-03 | 2.78E-02 |
| ENSG00000272235 | AL590438.1 | 1  | 3306636   | 3310096   | 3460    | lncRNA                             | -1.06 | 1.02E-02 | 4.81E-02 |
| ENSG00000144395 | CCDC150    | 2  | 196639554 | 196763490 | 123936  | protein coding                     | -1.06 | 2.60E-04 | 4.67E-03 |
| ENSG00000182156 | ENPP7      | 17 | 79730943  | 79742219  | 11276   | protein coding                     | -1.06 | 9.24E-03 | 4.50E-02 |
| ENSG00000154277 | UCHL1      | 4  | 41256413  | 41268455  | 12042   | protein coding                     | -1.06 | 5.93E-03 | 3.39E-02 |
| ENSG00000203131 | LINC02841  | 10 | 123356450 | 123537767 | 181317  | lncRNA                             | -1.06 | 8.06E-06 | 4.58E-04 |
| ENSG00000124116 | WFDC3      | 20 | 45747944  | 45791932  | 43988   | protein coding                     | -1.06 | 6.85E-03 | 3.72E-02 |
| ENSG00000047936 | ROS1       | 6  | 117287353 | 117425942 | 138589  | protein coding                     | -1.06 | 7.31E-03 | 3.88E-02 |
| ENSG00000171094 | ALK        | 2  | 29192774  | 29921586  | 728812  | protein coding                     | -1.06 | 9.71E-05 | 2.48E-03 |
| ENSG00000108684 | ASIC2      | 17 | 33013087  | 34174964  | 1161877 | protein coding                     | -1.06 | 7.07E-04 | 8.86E-03 |
| ENSG00000100433 | KCNK10     | 14 | 88180103  | 88326907  | 146804  | protein coding                     | -1.06 | 8.95E-04 | 1.03E-02 |
| ENSG00000117245 | KIF17      | 1  | 20664014  | 20718017  | 54003   | protein coding                     | -1.06 | 1.76E-03 | 1.56E-02 |
| ENSG00000237988 | QR21P      | 6  | 29550407  | 29557721  | 7314    | protein coding                     | -1.06 | 2.90E-03 | 2.16E-02 |
| ENSG00000281912 | LINC01144  | 1  | 45303910  | 45305619  | 1709    | lncRNA                             | -1.06 | 1.11E-03 | 1.18E-02 |
| ENSG00000137878 | GCOM1      | 15 | 57591908  | 57714745  | 122837  | protein coding                     | -1.06 | 5.82E-05 | 1.72E-03 |
| ENSG00000225465 | RFPL1S     | 22 | 29436534  | 29478868  | 42334   | lncRNA-antisense                   | -1.06 | 7.72E-06 | 4.27E-04 |
| ENSG00000177350 | RPL13AP3   | 14 | 55766177  | 55767717  | 1540    | transcribed processed pseudogene   | -1.06 | 5.75E-03 | 3.32E-02 |
| ENSG00000256553 | TRAV1-2    | 14 | 21642889  | 21643578  | 689     | TR V gene                          | -1.06 | 1.67E-04 | 3.49E-03 |
| ENSG00000189325 | BNIP5      | 6  | 36315761  | 36336888  | 21127   | protein coding                     | -1.06 | 6.30E-03 | 3.52E-02 |
| ENSG00000260105 | AOC4P      | 17 | 42865922  | 42874369  | 8447    | transcribed unprocessed pseudogene | -1.06 | 7.84E-03 | 4.06E-02 |
| ENSG00000175773 | ZBTB44-DT  | 11 | 130314993 | 130403657 | 88664   | lncRNA                             | -1.06 | 2.79E-04 | 4.89E-03 |
| ENSG00000258405 | ZNF578     | 19 | 52453553  | 52518882  | 63329   | protein coding                     | -1.06 | 2.46E-04 | 4.49E-03 |
| ENSG00000163286 | ALPG       | 2  | 232406844 | 232410714 | 3870    | protein coding                     | -1.06 | 3.57E-03 | 2.47E-02 |
| ENSG00000142677 | IL22RA1    | 1  | 24119771  | 24143140  | 23369   | protein coding                     | -1.06 | 7.83E-03 | 4.05E-02 |
| ENSG00000229676 | ZNF492     | 19 | 22634324  | 22667671  | 33347   | protein coding                     | -1.07 | 9.10E-03 | 4.46E-02 |
| ENSG00000171435 | KSR2       | 12 | 117453012 | 117968990 | 515978  | protein coding                     | -1.07 | 1.70E-04 | 3.54E-03 |
| ENSG00000136931 | NRS1A      | 9  | 124481236 | 124507420 | 26184   | protein coding                     | -1.07 | 4.64E-03 | 2.91E-02 |
| ENSG00000197915 | HRNR       | 1  | 152212076 | 152224193 | 12117   | protein coding                     | -1.07 | 1.22E-03 | 1.25E-02 |
| ENSG00000235172 | LINC01366  | 5  | 170307722 | 170335508 | 27786   | lncRNA                             | -1.07 | 8.84E-03 | 4.38E-02 |
| ENSG00000262454 | MIR193BHG  | 16 | 14301389  | 14331067  | 29678   | lncRNA                             | -1.07 | 1.59E-03 | 1.47E-02 |
| ENSG00000088305 | DNMT3B     | 20 | 32762385  | 32809356  | 46971   | protein coding                     | -1.07 | 2.85E-04 | 4.94E-03 |
| ENSG00000132874 | SLC14A2    | 18 | 45212995  | 45683688  | 470693  | protein coding                     | -1.07 | 2.10E-03 | 1.76E-02 |
| ENSG00000091513 | TF         | 3  | 133746040 | 133796641 | 50601   | protein coding                     | -1.07 | 7.59E-05 | 2.09E-03 |
| ENSG00000203690 | TCPL0L3    | 6  | 167357033 | 167384510 | 27477   | transcribed unprocessed pseudogene | -1.07 | 1.07E-02 | 4.96E-02 |
| ENSG00000183722 | LHFPL6     | 13 | 39209116  | 39603528  | 394412  | protein coding                     | -1.07 | 2.59E-03 | 2.01E-02 |
| ENSG00000124334 | IL9R       | X  | 155997581 | 156010817 | 13236   | protein coding                     | -1.07 | 3.47E-03 | 2.42E-02 |
| ENSG00000169436 | COL22A1    | 8  | 138588235 | 138914041 | 325806  | protein coding                     | -1.07 | 1.67E-03 | 1.52E-02 |
| ENSG00000174727 | IGF1       | 12 | 102395874 | 102481744 | 85870   | protein coding                     | -1.07 | 3.76E-03 | 2.56E-02 |
| ENSG00000178243 | C9orf62    | 9  | 135343249 | 135346562 | 3313    | lncRNA                             | -1.07 | 1.02E-02 | 4.80E-02 |
| ENSG00000272970 | AC107294.2 | 3  | 184712245 | 184740104 | 27859   | lncRNA                             | -1.07 | 6.60E-03 | 3.62E-02 |
| ENSG00000286688 | AP002748.6 | 11 | 66514306  | 66519720  | 5414    | lncRNA                             | -1.07 | 4.16E-03 | 2.72E-02 |
| ENSG00000079841 | RIMS1      | 6  | 71886703  | 72403143  | 516440  | protein coding                     | -1.07 | 7.58E-03 | 3.97E-02 |
| ENSG00000196273 | LINC00523  | 14 | 100657250 | 100676069 | 18819   | lncRNA                             | -1.07 | 1.05E-02 | 4.88E-02 |
| ENSG00000112499 | SLC22A2    | 6  | 160171061 | 160277638 | 106577  | protein coding                     | -1.07 | 3.90E-03 | 2.62E-02 |
| ENSG00000119698 | PPP4R4     | 14 | 94146128  | 94279734  | 133606  | protein coding                     | -1.07 | 1.94E-03 | 1.67E-02 |
| ENSG00000281406 | BACAT1     | 1  | 205434885 | 205457091 | 22206   | protein coding                     | -1.07 | 3.31E-03 | 2.35E-02 |
| ENSG00000268182 | SMIM17     | 19 | 56643159  | 56657247  | 14088   | protein coding                     | -1.07 | 7.74E-03 | 4.02E-02 |
| ENSG00000091622 | PITPNM3    | 17 | 6451263   | 6556555   | 105292  | protein coding                     | -1.07 | 1.94E-04 | 3.84E-03 |
| ENSG00000177788 | AL162595.1 | 1  | 229256892 | 229271242 | 14350   | lncRNA-bidirectional promoter      | -1.07 | 1.39E-03 | 1.35E-02 |

|                 |            |    |           |           |         |                                    |       |          |          |
|-----------------|------------|----|-----------|-----------|---------|------------------------------------|-------|----------|----------|
| ENSG00000132854 | KANK4      | 1  | 62236165  | 62319434  | 83269   | protein coding                     | -1.07 | 1.23E-03 | 1.25E-02 |
| ENSG00000163710 | PCOLCE2    | 3  | 142815922 | 142889206 | 73284   | protein coding                     | -1.07 | 4.52E-03 | 2.86E-02 |
| ENSG00000129195 | PIMREG     | 17 | 6444441   | 6451469   | 7028    | protein coding                     | -1.07 | 6.03E-03 | 3.43E-02 |
| ENSG00000105976 | MET        | 7  | 116672196 | 116798377 | 126181  | protein coding                     | -1.07 | 7.27E-03 | 3.87E-02 |
| ENSG00000157224 | CLDN12     | 7  | 90383721  | 90513402  | 129681  | protein coding                     | -1.07 | 8.90E-05 | 2.34E-03 |
| ENSG00000207041 | RNU6-3P    | X  | 141118030 | 141118136 | 106     | snRNA                              | -1.07 | 2.22E-04 | 4.19E-03 |
| ENSG00000136449 | MYCBPAP    | 17 | 50508384  | 50531501  | 23117   | protein coding                     | -1.07 | 5.72E-04 | 7.79E-03 |
| ENSG00000137203 | TFAP2A     | 6  | 10393186  | 10419659  | 26473   | protein coding                     | -1.07 | 3.32E-03 | 2.36E-02 |
| ENSG00000150873 | C2orf50    | 2  | 11133128  | 11151317  | 18189   | protein coding                     | -1.07 | 7.65E-04 | 9.32E-03 |
| ENSG00000260288 | ACO19294.2 | 15 | 75737820  | 75763322  | 25502   | lncRNA                             | -1.07 | 1.70E-04 | 3.54E-03 |
| ENSG00000088340 | FER1L4     | 20 | 35558737  | 35607562  | 48825   | transcribed unitary pseudogene     | -1.07 | 2.29E-03 | 1.86E-02 |
| ENSG00000103175 | WDFC1      | 16 | 84294846  | 84329844  | 34998   | protein coding                     | -1.07 | 2.34E-03 | 1.88E-02 |
| ENSG00000151468 | CCDC3      | 10 | 12896625  | 13099652  | 203027  | protein coding                     | -1.07 | 2.06E-03 | 1.74E-02 |
| ENSG00000158008 | EXTL1      | 1  | 26019884  | 26036464  | 16580   | protein coding                     | -1.07 | 4.25E-03 | 2.76E-02 |
| ENSG00000287338 | AL929091.1 | 1  | 223091872 | 223103335 | 11463   | lncRNA                             | -1.07 | 1.18E-03 | 1.23E-02 |
| ENSG00000284713 | SMIM38     | 11 | 69155478  | 69159752  | 4274    | protein coding                     | -1.07 | 5.42E-03 | 3.19E-02 |
| ENSG00000140955 | ADAD2      | 16 | 84191138  | 84197168  | 6030    | protein coding                     | -1.07 | 1.56E-03 | 1.45E-02 |
| ENSG00000159915 | ZNF233     | 19 | 44259880  | 44275317  | 15437   | protein coding                     | -1.07 | 9.52E-04 | 1.07E-02 |
| ENSG00000258628 | RHPN2P1    | 15 | 20228620  | 20277503  | 48883   | unprocessed pseudogene             | -1.08 | 7.41E-03 | 3.91E-02 |
| ENSG00000127129 | EDN2       | 1  | 41478775  | 41484683  | 5908    | protein coding                     | -1.08 | 7.04E-03 | 3.78E-02 |
| ENSG00000266602 | AP005262.1 | 18 | 1509022   | 2049510   | 540488  | lncRNA                             | -1.08 | 7.03E-03 | 3.78E-02 |
| ENSG00000178445 | GLDC       | 9  | 6532467   | 6645729   | 113262  | protein coding                     | -1.08 | 1.15E-03 | 1.20E-02 |
| ENSG00000132793 | LPIN3      | 20 | 41340821  | 41360582  | 19761   | protein coding                     | -1.08 | 2.65E-03 | 2.04E-02 |
| ENSG00000170959 | DCDC1      | 11 | 30830369  | 31369810  | 539441  | protein coding                     | -1.08 | 2.52E-04 | 4.56E-03 |
| ENSG00000188467 | SLC24A5    | 15 | 48120990  | 48142672  | 21682   | protein coding                     | -1.08 | 4.93E-03 | 3.02E-02 |
| ENSG00000168367 | LINC00917  | 16 | 86331632  | 86349688  | 18056   | lncRNA                             | -1.08 | 3.93E-03 | 2.63E-02 |
| ENSG00000198597 | ZNF536     | 19 | 30228290  | 30713538  | 485248  | protein coding                     | -1.08 | 7.69E-03 | 4.00E-02 |
| ENSG00000268869 | ESPNP      | 1  | 16687339  | 16720157  | 32818   | transcribed unprocessed pseudogene | -1.08 | 2.40E-03 | 1.90E-02 |
| ENSG00000135697 | BCO1       | 16 | 81238689  | 81291142  | 52453   | protein coding                     | -1.08 | 1.17E-02 | 4.95E-02 |
| ENSG00000137648 | TMPSRD4    | 11 | 118077012 | 118121890 | 44878   | protein coding                     | -1.08 | 7.02E-03 | 3.78E-02 |
| ENSG00000092621 | PHGDH      | 1  | 119648411 | 119744218 | 95807   | protein coding                     | -1.08 | 5.52E-08 | 1.02E-05 |
| ENSG00000287346 | AL132712.2 | 14 | 103873148 | 103880381 | 7233    | lncRNA                             | -1.08 | 2.59E-04 | 4.66E-03 |
| ENSG00000130413 | STK33      | 11 | 8391868   | 8594289   | 202421  | protein coding                     | -1.08 | 1.10E-04 | 2.68E-03 |
| ENSG00000196091 | MYBPC1     | 12 | 101568353 | 101686028 | 117675  | protein coding                     | -1.08 | 4.71E-03 | 2.94E-02 |
| ENSG00000169783 | LINGO1     | 15 | 77613027  | 77820900  | 207873  | protein coding                     | -1.08 | 2.09E-03 | 1.76E-02 |
| ENSG00000162592 | CCDC27     | 1  | 3746460   | 3771645   | 25185   | protein coding                     | -1.08 | 7.86E-04 | 9.48E-03 |
| ENSG00000132204 | LINC00470  | 18 | 1254383   | 1408344   | 153961  | lncRNA                             | -1.08 | 3.76E-03 | 2.56E-02 |
| ENSG00000138028 | GREYF1     | 2  | 27098889  | 27119128  | 20239   | protein coding                     | -1.08 | 4.56E-03 | 2.88E-02 |
| ENSG00000203930 | LINC00632  | X  | 140709562 | 140793215 | 83653   | lncRNA-antisense                   | -1.08 | 1.54E-04 | 3.32E-03 |
| ENSG00000147465 | STAR       | 8  | 38142700  | 38150992  | 8292    | protein coding                     | -1.08 | 2.96E-03 | 2.18E-02 |
| ENSG00000241935 | HOGA1      | 10 | 97584323  | 97612802  | 28479   | protein coding                     | -1.08 | 8.71E-03 | 4.34E-02 |
| ENSG00000250420 | AACSP1     | 5  | 178764861 | 178818435 | 53574   | transcribed unprocessed pseudogene | -1.08 | 6.03E-03 | 3.43E-02 |
| ENSG00000136531 | NCN2A      | 2  | 165194993 | 165392310 | 197317  | protein coding                     | -1.08 | 5.04E-04 | 7.14E-03 |
| ENSG00000169946 | ZFPM2      | 8  | 104590733 | 105804539 | 1213806 | protein coding                     | -1.08 | 4.76E-03 | 2.96E-02 |
| ENSG00000070019 | GUCY2C     | 12 | 14612632  | 14696599  | 83967   | protein coding                     | -1.08 | 8.03E-04 | 9.59E-03 |
| ENSG00000215568 | GAB4       | 22 | 16961936  | 17008222  | 46286   | protein coding                     | -1.08 | 2.38E-03 | 1.89E-02 |
| ENSG00000277152 | AC110048.2 | 15 | 66860303  | 66867023  | 6720    | lncRNA                             | -1.08 | 4.42E-06 | 2.83E-04 |
| ENSG00000185250 | PPLI6      | 6  | 109390215 | 109441171 | 50956   | protein coding                     | -1.08 | 8.57E-04 | 9.97E-03 |
| ENSG00000166819 | PLIN1      | 15 | 89664367  | 89679427  | 15060   | protein coding                     | -1.08 | 7.72E-04 | 9.38E-03 |
| ENSG00000087303 | NID2       | 14 | 52004803  | 52069228  | 64425   | protein coding                     | -1.08 | 1.46E-04 | 3.21E-03 |
| ENSG00000152137 | HSPB8      | 12 | 119171555 | 119224855 | 53300   | protein coding                     | -1.08 | 1.08E-02 | 4.98E-02 |
| ENSG00000227517 | LINC01483  | 17 | 69577251  | 69903000  | 325749  | lncRNA                             | -1.08 | 4.96E-03 | 3.03E-02 |
| ENSG00000275383 | AC126773.6 | 16 | 68591382  | 68594424  | 3042    | lncRNA                             | -1.08 | 1.67E-04 | 3.50E-03 |
| ENSG00000146938 | NLGN4X     | X  | 5840637   | 6228867   | 388230  | protein coding                     | -1.08 | 8.29E-03 | 4.21E-02 |
| ENSG00000284606 | AC105233.4 | 8  | 8059572   | 8199973   | 140401  | lncRNA                             | -1.08 | 3.43E-05 | 1.21E-03 |
| ENSG00000092445 | TYRO3      | 15 | 41557675  | 41583589  | 25914   | protein coding                     | -1.08 | 1.20E-03 | 1.24E-02 |
| ENSG00000288568 | AC092720.3 | 16 | 87492555  | 87516940  | 24385   | lncRNA                             | -1.08 | 1.36E-03 | 1.33E-02 |
| ENSG00000232006 | AC005537.1 | 7  | 42954135  | 43113931  | 159796  | lncRNA                             | -1.08 | 2.15E-03 | 1.79E-02 |
| ENSG00000107130 | NC51       | 9  | 130172404 | 130237303 | 64899   | protein coding                     | -1.08 | 1.01E-04 | 2.54E-03 |
| ENSG00000002746 | HECW1      | 7  | 43112629  | 43566001  | 453372  | protein coding                     | -1.08 | 8.10E-04 | 9.64E-03 |
| ENSG00000105792 | CFAP89     | 7  | 90245174  | 90311063  | 65889   | protein coding                     | -1.08 | 5.21E-03 | 3.13E-02 |
| ENSG00000167723 | TRPV3      | 17 | 3510502   | 3557812   | 47310   | protein coding                     | -1.08 | 1.03E-05 | 5.30E-04 |
| ENSG00000236404 | VLDLR-AS1  | 9  | 2421597   | 2643359   | 221762  | lncRNA-antisense                   | -1.09 | 5.29E-03 | 3.15E-02 |
| ENSG00000261996 | AC004706.1 | 17 | 6653464   | 6655009   | 1545    | lncRNA                             | -1.09 | 1.08E-02 | 4.98E-02 |
| ENSG00000092054 | MYH7       | 14 | 23412740  | 23435660  | 22920   | protein coding                     | -1.09 | 6.33E-03 | 3.53E-02 |
| ENSG00000175262 | C1orf127   | 1  | 10946471  | 10982037  | 35566   | protein coding                     | -1.09 | 7.47E-04 | 9.18E-03 |
| ENSG00000272720 | AL022322.1 | 22 | 38090127  | 38091559  | 1432    | lncRNA                             | -1.09 | 8.19E-03 | 4.17E-02 |
| ENSG00000202538 | RNU4-2     | 12 | 120291763 | 120291903 | 140     | snRNA                              | -1.09 | 1.28E-03 | 1.28E-02 |
| ENSG00000182070 | ORS2A1     | 11 | 5143219   | 5154757   | 11538   | protein coding                     | -1.09 | 7.44E-04 | 9.15E-03 |
| ENSG00000103855 | CD276      | 15 | 73683966  | 73714514  | 30548   | protein coding                     | -1.09 | 1.11E-04 | 2.69E-03 |
| ENSG00000168078 | PBK        | 8  | 27809624  | 27838082  | 28458   | protein coding                     | -1.09 | 9.18E-03 | 4.48E-02 |
| ENSG00000285094 | LINC01488  | 11 | 69481662  | 69494952  | 13290   | lncRNA                             | -1.09 | 7.67E-03 | 4.00E-02 |
| ENSG00000143850 | PLEKHA6    | 1  | 204218853 | 204377665 | 158812  | protein coding                     | -1.09 | 4.97E-05 | 1.56E-03 |
| ENSG00000250198 | LINC02199  | 5  | 8839700   | 8898052   | 58352   | lncRNA                             | -1.09 | 4.43E-03 | 2.83E-02 |
| ENSG00000143036 | SLC44A3    | 1  | 94820342  | 94895246  | 74904   | protein coding                     | -1.09 | 5.93E-03 | 3.39E-02 |
| ENSG00000165863 | C1orf82    | 10 | 116663696 | 116670264 | 6568    | protein coding                     | -1.09 | 9.89E-03 | 4.71E-02 |
| ENSG00000138136 | LBX1       | 10 | 101226195 | 101229794 | 3599    | protein coding                     | -1.09 | 5.80E-03 | 3.34E-02 |
| ENSG00000247157 | LINC01252  | 12 | 11548030  | 11590369  | 42339   | lncRNA                             | -1.09 | 2.98E-04 | 5.11E-03 |
| ENSG00000170419 | VSTM2A     | 7  | 54542325  | 54571080  | 28755   | protein coding                     | -1.09 | 5.63E-03 | 3.27E-02 |
| ENSG00000089723 | OTUB2      | 14 | 94026340  | 94048930  | 22590   | protein coding                     | -1.09 | 6.46E-04 | 8.43E-03 |
| ENSG00000142661 | MYO13      | 1  | 24056035  | 24112135  | 56100   | protein coding                     | -1.09 | 3.76E-03 | 2.56E-02 |
| ENSG00000183317 | EPHA10     | 1  | 37713880  | 37765133  | 51253   | protein coding                     | -1.09 | 2.84E-04 | 4.94E-03 |
| ENSG00000251396 | LINC01301  | 8  | 60289928  | 60516795  | 226867  | lncRNA                             | -1.09 | 1.70E-03 | 1.53E-02 |
| ENSG00000106018 | VIPR2      | 7  | 159028175 | 159144867 | 116692  | protein coding                     | -1.09 | 2.93E-05 | 1.08E-03 |
| ENSG00000287403 | AC016245.2 | 17 | 80824170  | 80828900  | 2730    | lncRNA                             | -1.09 | 9.48E-03 | 4.58E-02 |
| ENSG00000108852 | MPP2       | 17 | 43875357  | 43909711  | 34354   | protein coding                     | -1.09 | 1.01E-04 | 2.54E-03 |
| ENSG00000224209 | LINC00466  | 1  | 63159083  | 63317274  | 158191  | lncRNA                             | -1.09 | 6.33E-04 | 8.32E-03 |
| ENSG00000166558 | SLC38A8    | 16 | 84009667  | 84042795  | 33128   | protein coding                     | -1.09 | 4.77E-03 | 2.96E-02 |
| ENSG00000206195 | DUXAP8     | 22 | 15784959  | 15829984  | 45025   | lncRNA                             | -1.09 | 7.90E-03 | 4.07E-02 |
| ENSG00000083307 | GRHL2      | 8  | 101492439 | 101669726 | 177287  | protein coding                     | -1.09 | 7.93E-03 | 4.08E-02 |

|                  |            |    |           |           |         |                                    |       |          |          |
|------------------|------------|----|-----------|-----------|---------|------------------------------------|-------|----------|----------|
| ENSG00000211784  | TRAV10     | 14 | 21825472  | 21826075  | 603     | TR V_gene                          | -1.09 | 1.07E-03 | 1.16E-02 |
| ENSG0000082684   | SEMA5B     | 3  | 122909082 | 123028605 | 119523  | protein coding                     | -1.09 | 1.19E-04 | 2.80E-03 |
| ENSG00000115423  | DNAH6      | 2  | 84516455  | 84819589  | 303134  | protein coding                     | -1.09 | 5.78E-09 | 1.61E-06 |
| ENSG00000186889  | TMEM17     | 2  | 62500218  | 62511894  | 11676   | protein coding                     | -1.09 | 4.48E-03 | 2.84E-02 |
| ENSG00000228791  | THRBS-AS1  | 3  | 24494087  | 24681711  | 187624  | lncRNA                             | -1.09 | 4.98E-03 | 3.04E-02 |
| ENSG00000253394  | LINC00534  | 8  | 90221341  | 90687863  | 466522  | lncRNA                             | -1.09 | 2.44E-04 | 4.46E-03 |
| ENSG00000259692  | AC104041.1 | 15 | 81633426  | 82013579  | 380153  | lncRNA                             | -1.09 | 1.04E-03 | 1.13E-02 |
| ENSG0000088756   | ARHGAP28   | 18 | 6729716   | 6915716   | 186000  | protein coding                     | -1.09 | 3.74E-03 | 2.55E-02 |
| ENSG00000152078  | TLCD4      | 1  | 95117355  | 95197607  | 80252   | protein coding                     | -1.09 | 7.22E-07 | 7.77E-05 |
| ENSG00000150760  | DOCK1      | 10 | 126905409 | 127452517 | 547108  | protein coding                     | -1.09 | 3.57E-07 | 4.35E-05 |
| ENSG00000101144  | BMP7       | 20 | 57168753  | 57266641  | 97888   | protein coding                     | -1.09 | 2.07E-03 | 1.74E-02 |
| ENSG00000202217  | RN7SKP47   | 9  | 74799895  | 74800222  | 327     | misc RNA                           | -1.09 | 2.77E-03 | 2.10E-02 |
| ENSG00000164175  | SLC45A2    | 5  | 33944623  | 33984693  | 40070   | protein coding                     | -1.09 | 6.34E-03 | 3.53E-02 |
| ENSG00000111783  | RFX4       | 12 | 106583004 | 106762803 | 179799  | protein coding                     | -1.09 | 8.14E-03 | 4.16E-02 |
| ENSG00000154639  | CXADR      | 21 | 17513043  | 17593579  | 80536   | protein coding                     | -1.09 | 1.78E-03 | 1.58E-02 |
| ENSG00000166510  | CCDC68     | 18 | 54901509  | 54959461  | 57952   | protein coding                     | -1.09 | 4.85E-03 | 2.99E-02 |
| ENSG00000234261  | AL138720.1 | 6  | 14661829  | 15090170  | 428344  | lncRNA                             | -1.09 | 6.38E-03 | 3.55E-02 |
| ENSG00000169418  | NPR1       | 1  | 153678688 | 153693992 | 15304   | protein coding                     | -1.10 | 3.19E-03 | 2.29E-02 |
| ENSG00000100122  | CRYBB1     | 22 | 26599278  | 26618027  | 18749   | protein coding                     | -1.10 | 5.88E-03 | 3.37E-02 |
| ENSG00000136859  | ANGPTL2    | 9  | 127087348 | 127122635 | 35287   | protein coding                     | -1.10 | 5.13E-03 | 3.10E-02 |
| ENSG00000135436  | FAM186B    | 12 | 49582885  | 49605639  | 22754   | protein coding                     | -1.10 | 8.70E-04 | 1.01E-02 |
| ENSG00000204929  | AC007389.1 | 2  | 65436711  | 66200373  | 763662  | lncRNA                             | -1.10 | 3.71E-03 | 2.53E-02 |
| ENSG00000136848  | DAB2IP     | 9  | 121567057 | 121785530 | 218473  | protein coding                     | -1.10 | 3.27E-04 | 5.45E-03 |
| ENSG00000273628  | AL354798.1 | 13 | 24933006  | 24936796  | 3790    | unprocessed pseudogene             | -1.10 | 1.06E-02 | 4.93E-02 |
| ENSG00000158815  | FGF17      | 8  | 22042398  | 22048809  | 6411    | protein coding                     | -1.10 | 6.94E-03 | 3.75E-02 |
| ENSG00000127329  | PTPRB      | 12 | 70515870  | 70637440  | 121570  | protein coding                     | -1.10 | 1.45E-05 | 6.70E-04 |
| ENSG00000104338  | PRSS3      | 9  | 33750679  | 33799231  | 48552   | protein coding                     | -1.10 | 9.28E-03 | 4.51E-02 |
| ENSG00000131080  | EDA2R      | X  | 66595637  | 66639298  | 43661   | protein coding                     | -1.10 | 5.88E-03 | 3.37E-02 |
| ENSG00000166359  | WDR88      | 19 | 33132090  | 33175799  | 43709   | protein coding                     | -1.10 | 2.04E-03 | 1.73E-02 |
| ENSG00000263761  | GDF2       | 10 | 47322454  | 47327588  | 5134    | protein coding                     | -1.10 | 1.05E-02 | 4.88E-02 |
| ENSG00000151067  | CACNA1C    | 12 | 1970786   | 2697950   | 727164  | protein coding                     | -1.10 | 1.98E-04 | 3.89E-03 |
| ENSG00000228623  | ZNF883     | 9  | 112957722 | 113012227 | 54505   | transcribed unprocessed pseudogene | -1.10 | 6.41E-03 | 3.56E-02 |
| ENSG00000078328  | RBFOX1     | 16 | 5239802   | 7713340   | 2473538 | protein coding                     | -1.10 | 4.76E-05 | 1.51E-03 |
| ENSG0000015592   | STMN4      | 8  | 27235323  | 27258420  | 23097   | protein coding                     | -1.10 | 8.39E-03 | 4.24E-02 |
| ENSG00000214820  | MPRIIP1    | 3  | 44579938  | 44581026  | 1088    | processed pseudogene               | -1.10 | 9.47E-04 | 1.06E-02 |
| ENSG00000206538  | VGLL3      | 3  | 86876388  | 86991149  | 114761  | protein coding                     | -1.10 | 1.07E-02 | 4.95E-02 |
| ENSG00000182048  | TRPC2      | 11 | 3609901   | 3637559   | 27658   | transcribed unprocessed pseudogene | -1.10 | 1.51E-03 | 1.42E-02 |
| ENSG00000157890  | MEGF11     | 15 | 65895079  | 66253747  | 358668  | protein coding                     | -1.10 | 3.99E-05 | 1.33E-03 |
| ENSG00000278570  | NR2E3      | 15 | 71792638  | 71818259  | 25621   | protein coding                     | -1.10 | 6.48E-03 | 3.58E-02 |
| ENSG00000235597  | LINC01102  | 2  | 104430130 | 104532747 | 102617  | lncRNA                             | -1.10 | 2.62E-03 | 2.02E-02 |
| ENSG00000164684  | ZNF704     | 8  | 80628451  | 80874781  | 246330  | protein coding                     | -1.10 | 4.47E-04 | 6.61E-03 |
| ENSG00000280159  | AC016583.1 | 5  | 54643557  | 54645987  | 2430    | TEC                                | -1.10 | 4.21E-04 | 6.39E-03 |
| ENSG00000165125  | TRPV6      | 7  | 142871208 | 142885745 | 14537   | protein coding                     | -1.10 | 2.38E-03 | 1.89E-02 |
| ENSG00000178201  | VN1R1      | 19 | 57454790  | 57457142  | 2352    | protein coding                     | -1.10 | 9.52E-03 | 4.59E-02 |
| ENSG00000121068  | TBX2       | 17 | 61399843  | 61409466  | 9623    | protein coding                     | -1.10 | 1.27E-03 | 1.28E-02 |
| ENSG00000185958  | FAM186A    | 12 | 50326230  | 50396622  | 70392   | protein coding                     | -1.10 | 1.19E-03 | 1.24E-02 |
| ENSG00000214770  | AL161756.1 | 14 | 64329431  | 64338639  | 9208    | lncRNA-antisense                   | -1.10 | 7.71E-04 | 9.38E-03 |
| ENSG00000260287  | TBC1D3G    | 17 | 36323884  | 36334759  | 10875   | protein coding                     | -1.10 | 1.09E-03 | 1.16E-02 |
| ENSG00000260918  | AC107398.3 | 4  | 47431960  | 47438959  | 6999    | lncRNA-sense overlapping           | -1.10 | 8.51E-03 | 4.27E-02 |
| ENSG00000214612  | RPS19P1    | 20 | 18504633  | 18505066  | 433     | processed pseudogene               | -1.10 | 5.63E-03 | 3.27E-02 |
| ENSG00000183324  | REC114     | 15 | 73443164  | 73560013  | 116849  | protein coding                     | -1.10 | 7.39E-03 | 3.90E-02 |
| ENSG00000245651  | AC083805.1 | 12 | 57869834  | 57896482  | 26648   | lncRNA                             | -1.10 | 5.73E-03 | 3.31E-02 |
| ENSG00000176495  | OR5AN1     | 11 | 59358895  | 59371714  | 12819   | protein coding                     | -1.10 | 6.31E-03 | 3.52E-02 |
| ENSG00000086570  | FAT2       | 5  | 151504093 | 151568944 | 64851   | protein coding                     | -1.10 | 2.36E-04 | 4.37E-03 |
| ENSG00000153707  | PTPRD      | 9  | 8314246   | 10612723  | 2298477 | protein coding                     | -1.10 | 4.99E-03 | 3.04E-02 |
| ENSG00000241484  | ARHGAP8    | 22 | 44752558  | 44862788  | 110230  | protein coding                     | -1.10 | 1.52E-03 | 1.42E-02 |
| ENSG00000099724  | MASP2      | 1  | 11026523  | 11047239  | 20716   | protein coding                     | -1.10 | 1.58E-05 | 7.10E-04 |
| ENSG00000249628  | LINC00942  | 12 | 1500525   | 1504424   | 3899    | lncRNA                             | -1.10 | 7.27E-03 | 3.87E-02 |
| ENSG00000113361  | CDH6       | 5  | 31193686  | 31329146  | 135460  | protein coding                     | -1.10 | 5.84E-04 | 7.90E-03 |
| ENSG00000168032  | ENTPD3     | 3  | 40387184  | 40428744  | 41560   | protein coding                     | -1.11 | 5.91E-03 | 3.38E-02 |
| ENSG00000185585  | OLFML2A    | 9  | 124777133 | 124814885 | 37752   | protein coding                     | -1.11 | 2.45E-04 | 4.46E-03 |
| ENSG00000170615  | SLC26A5    | 7  | 103352730 | 103446207 | 93477   | protein coding                     | -1.11 | 5.45E-03 | 3.21E-02 |
| ENSG00000128422  | KRT17      | 17 | 41619442  | 41624842  | 5400    | protein coding                     | -1.11 | 3.46E-03 | 2.42E-02 |
| ENSG00000143355  | LHX9       | 1  | 197911902 | 197935478 | 23576   | protein coding                     | -1.11 | 1.45E-03 | 1.38E-02 |
| ENSG00000213225  | NOC2LP1    | 2  | 130229379 | 130232106 | 2727    | transcribed processed pseudogene   | -1.11 | 5.99E-03 | 3.41E-02 |
| ENSG00000179213  | SIGLEC1L   | 19 | 51246348  | 51269330  | 22982   | protein coding                     | -1.11 | 8.46E-03 | 4.26E-02 |
| ENSG00000259293  | LIPC-AS1   | 15 | 58434890  | 58498735  | 63845   | lncRNA-antisense                   | -1.11 | 1.06E-02 | 4.93E-02 |
| ENSG00000214016  | RPSAP1     | X  | 44741087  | 44741964  | 877     | processed pseudogene               | -1.11 | 8.52E-03 | 4.27E-02 |
| ENSG00000154080  | CHST9      | 18 | 26906481  | 27185308  | 278827  | protein coding                     | -1.11 | 2.89E-03 | 2.15E-02 |
| ENSG00000228110  | ST13P19    | 1  | 210285636 | 210267241 | 1605    | processed pseudogene               | -1.11 | 3.43E-03 | 2.41E-02 |
| ENSG00000104967  | NOVA2      | 19 | 45933734  | 45974044  | 40310   | protein coding                     | -1.11 | 5.61E-03 | 3.26E-02 |
| ENSG00000160345  | C9orf116   | 9  | 135495181 | 135501734 | 6553    | protein coding                     | -1.11 | 3.75E-03 | 2.55E-02 |
| ENSG00000157578  | LCA5L      | 21 | 39405844  | 39445805  | 39961   | protein coding                     | -1.11 | 4.64E-04 | 6.78E-03 |
| ENSG00000272150  | NBPF25P    | 1  | 145572345 | 145607858 | 35513   | transcribed unprocessed pseudogene | -1.11 | 1.02E-06 | 9.79E-05 |
| ENSG00000131620  | ANO1       | 11 | 70078302  | 70189528  | 111226  | protein coding                     | -1.11 | 3.61E-03 | 2.49E-02 |
| ENSG00000166833  | NAV2       | 11 | 19350724  | 20121601  | 770877  | protein coding                     | -1.11 | 2.76E-06 | 2.03E-04 |
| ENSG00000154556  | SORBS2     | 4  | 185585444 | 185956652 | 371208  | protein coding                     | -1.11 | 6.47E-05 | 1.85E-03 |
| ENSG00000280418  | AC007326.2 | 22 | 18951934  | 18959512  | 7578    | lncRNA                             | -1.11 | 2.21E-03 | 1.82E-02 |
| ENSG00000146006  | LRRTM2     | 5  | 138868921 | 138875368 | 6447    | protein coding                     | -1.11 | 6.85E-03 | 3.72E-02 |
| ENSG00000230805  | AL132709.7 | 14 | 101071978 | 101077910 | 5932    | lncRNA                             | -1.11 | 5.10E-03 | 3.08E-02 |
| ENSG00000167306  | MYO5B      | 18 | 49822789  | 50195147  | 372358  | protein coding                     | -1.11 | 5.18E-05 | 1.60E-03 |
| ENSG00000204653  | ASPDH      | 19 | 50511600  | 50514690  | 3090    | protein coding                     | -1.11 | 4.55E-04 | 6.70E-03 |
| ENSG00000285367  | AC087564.1 | 16 | 51150770  | 51442519  | 291749  | lncRNA                             | -1.11 | 1.89E-03 | 1.64E-02 |
| ENSG000000005108 | THSD7A     | 7  | 11370365  | 11832198  | 461833  | protein coding                     | -1.11 | 4.32E-05 | 1.40E-03 |
| ENSG00000163092  | XIRP2      | 2  | 166888480 | 167259753 | 371273  | protein coding                     | -1.11 | 4.21E-03 | 2.74E-02 |
| ENSG00000189375  | TBC1D28    | 17 | 18634247  | 18644427  | 10180   | protein coding                     | -1.11 | 5.56E-03 | 3.24E-02 |
| ENSG00000134757  | DSG3       | 18 | 31447741  | 31478702  | 30961   | protein coding                     | -1.11 | 9.94E-03 | 4.72E-02 |
| ENSG00000240497  | AC092919.1 | 3  | 171459248 | 171469702 | 10454   | lncRNA                             | -1.11 | 1.24E-03 | 1.26E-02 |
| ENSG00000220785  | MTMR9L     | 1  | 32231658  | 32241620  | 9962    | transcribed unprocessed pseudogene | -1.11 | 1.48E-03 | 1.41E-02 |
| ENSG00000253943  | KRT18P37   | 8  | 41511240  | 41512521  | 1281    | processed pseudogene               | -1.11 | 3.97E-04 | 6.16E-03 |

|                 |            |    |           |           |        |                                    |       |          |          |
|-----------------|------------|----|-----------|-----------|--------|------------------------------------|-------|----------|----------|
| ENSG00000174332 | GLIS1      | 1  | 53506237  | 53738106  | 231869 | protein coding                     | -1.11 | 2.22E-03 | 1.82E-02 |
| ENSG00000237515 | SHISA9     | 16 | 12901598  | 13240416  | 338818 | protein coding                     | -1.11 | 3.40E-03 | 2.39E-02 |
| ENSG00000154262 | ABCA6      | 17 | 69078702  | 69141895  | 63193  | protein coding                     | -1.11 | 1.98E-05 | 8.38E-04 |
| ENSG00000183454 | GRIN2A     | 16 | 9753404   | 10182928  | 429524 | protein coding                     | -1.11 | 3.38E-04 | 5.57E-03 |
| ENSG00000197763 | TXNRD3     | 3  | 126571779 | 126655124 | 83345  | protein coding                     | -1.11 | 2.11E-05 | 8.65E-04 |
| ENSG00000175785 | PRIMA1     | 14 | 93718298  | 93788485  | 70187  | protein coding                     | -1.11 | 9.23E-03 | 4.50E-02 |
| ENSG00000070159 | PTPN3      | 9  | 109375466 | 109498313 | 122847 | protein coding                     | -1.11 | 4.64E-04 | 6.78E-03 |
| ENSG00000158571 | PKFB1      | X  | 54932961  | 54998534  | 65573  | protein coding                     | -1.11 | 1.19E-03 | 1.23E-02 |
| ENSG00000146700 | SSC4D      | 7  | 76389334  | 76409697  | 20363  | protein coding                     | -1.11 | 1.50E-03 | 1.42E-02 |
| ENSG00000283828 | AL137002.2 | 13 | 113149432 | 113154002 | 4570   | lncRNA-antisense                   | -1.11 | 2.89E-03 | 2.15E-02 |
| ENSG00000112812 | PRSS16     | 6  | 27247701  | 27256624  | 8923   | protein coding                     | -1.11 | 1.22E-04 | 2.87E-03 |
| ENSG00000088280 | ASAP3      | 1  | 23428563  | 23484568  | 56005  | protein coding                     | -1.11 | 1.89E-04 | 3.78E-03 |
| ENSG00000137834 | SMAD6      | 15 | 66702236  | 66782849  | 80613  | protein coding                     | -1.12 | 2.96E-04 | 5.09E-03 |
| ENSG00000261713 | SSTR5-AS1  | 16 | 1064093   | 1078731   | 14638  | lncRNA                             | -1.12 | 7.27E-03 | 3.87E-02 |
| ENSG00000260661 | AC116903.2 | 15 | 92148752  | 92331037  | 182285 | lncRNA-antisense                   | -1.12 | 5.17E-03 | 3.11E-02 |
| ENSG00000165643 | SOHLH1     | 9  | 135693407 | 135704498 | 11091  | protein coding                     | -1.12 | 2.02E-03 | 1.72E-02 |
| ENSG00000165370 | GPR101     | X  | 137023929 | 137033995 | 10066  | protein coding                     | -1.12 | 6.52E-03 | 3.60E-02 |
| ENSG00000143107 | FNDCT7     | 1  | 108712908 | 108742749 | 29841  | protein coding                     | -1.12 | 5.34E-03 | 3.16E-02 |
| ENSG00000261649 | GOLGA6L7   | 15 | 28841833  | 28848675  | 6842   | protein coding                     | -1.12 | 9.05E-03 | 4.44E-02 |
| ENSG00000278746 | RN7SL60P0  | 14 | 32442341  | 32442639  | 298    | misc RNA                           | -1.12 | 1.32E-03 | 1.31E-02 |
| ENSG00000235478 | LINC01664  | 22 | 17121560  | 17132104  | 10544  | lncRNA                             | -1.12 | 7.22E-03 | 3.85E-02 |
| ENSG00000203734 | ECT2L2     | 6  | 138795911 | 138904070 | 108159 | protein coding                     | -1.12 | 1.13E-03 | 1.19E-02 |
| ENSG00000251568 | ALG3P1     | 5  | 5375723   | 5376836   | 1113   | processed pseudogene               | -1.12 | 7.15E-03 | 3.83E-02 |
| ENSG00000215218 | UBE2QL1    | 5  | 6448859   | 6496723   | 47864  | protein coding                     | -1.12 | 8.65E-03 | 4.31E-02 |
| ENSG00000205853 | RFPL3S     | 22 | 32359886  | 32382106  | 22220  | lncRNA                             | -1.12 | 6.02E-06 | 3.58E-04 |
| ENSG00000154678 | PDE1C      | 7  | 31751179  | 32428131  | 676952 | protein coding                     | -1.12 | 7.45E-04 | 9.15E-03 |
| ENSG00000242147 | LASTR      | 10 | 5594984   | 5632566   | 37582  | lncRNA                             | -1.12 | 6.89E-03 | 3.73E-02 |
| ENSG00000230102 | LINC02028  | 3  | 194005259 | 194071025 | 65766  | lncRNA                             | -1.12 | 4.23E-03 | 2.75E-02 |
| ENSG00000198010 | DLGAP2     | 8  | 737628    | 1708476   | 970848 | protein coding                     | -1.12 | 7.61E-04 | 9.30E-03 |
| ENSG00000241644 | INMT       | 7  | 30697985  | 30757602  | 59617  | protein coding                     | -1.12 | 8.83E-04 | 1.02E-02 |
| ENSG00000276462 | BX255923.2 | 9  | 41100793  | 41119909  | 19116  | lncRNA                             | -1.12 | 4.81E-03 | 2.98E-02 |
| ENSG00000255390 | AC091564.4 | 11 | 6621451   | 6622322   | 871    | lncRNA-antisense                   | -1.12 | 1.06E-02 | 4.92E-02 |
| ENSG00000285679 | AC079142.1 | X  | 7928443   | 8374386   | 445943 | lncRNA-antisense                   | -1.12 | 9.75E-03 | 4.66E-02 |
| ENSG00000070748 | CHAT       | 10 | 49609095  | 49667942  | 58847  | protein coding                     | -1.12 | 1.37E-03 | 1.34E-02 |
| ENSG00000159263 | SIM2       | 21 | 36699115  | 36749917  | 50802  | protein coding                     | -1.12 | 1.67E-03 | 1.51E-02 |
| ENSG00000168743 | NPNT       | 4  | 10589475  | 106004027 | 109252 | protein coding                     | -1.12 | 7.74E-03 | 4.02E-02 |
| ENSG00000168306 | ACOX2      | 3  | 58505136  | 58537283  | 32147  | protein coding                     | -1.12 | 1.43E-03 | 1.38E-02 |
| ENSG00000101276 | SLC52A3    | 20 | 760080    | 776015    | 15935  | protein coding                     | -1.12 | 2.47E-03 | 1.94E-02 |
| ENSG00000136928 | GABBR2     | 9  | 98288109  | 98708935  | 420826 | protein coding                     | -1.12 | 2.37E-03 | 1.89E-02 |
| ENSG00000116833 | NRSA2      | 1  | 200027614 | 200177420 | 149806 | protein coding                     | -1.12 | 7.61E-03 | 3.98E-02 |
| ENSG00000241651 | AC099340.1 | 4  | 128069014 | 128069612 | 598    | processed pseudogene               | -1.12 | 8.45E-04 | 9.88E-03 |
| ENSG00000185933 | CALHM1     | 10 | 103453240 | 103458900 | 5660   | protein coding                     | -1.12 | 4.11E-03 | 2.70E-02 |
| ENSG00000151572 | ANO4       | 12 | 100717526 | 101128641 | 411115 | protein coding                     | -1.12 | 4.54E-03 | 2.87E-02 |
| ENSG00000131711 | MARP1B     | 5  | 72107234  | 72209565  | 102331 | protein coding                     | -1.12 | 8.58E-06 | 4.58E-04 |
| ENSG00000236303 | LINC02646  | 10 | 130213488 | 130483193 | 269705 | lncRNA                             | -1.12 | 6.73E-03 | 3.67E-02 |
| ENSG00000250120 | PCDH1A10   | 5  | 140855883 | 141012347 | 156464 | protein coding                     | -1.12 | 3.65E-03 | 2.50E-02 |
| ENSG00000286084 | AL096794.1 | 6  | 105403207 | 105588802 | 185595 | lncRNA-bidirectional promoter      | -1.12 | 5.32E-03 | 3.16E-02 |
| ENSG00000161647 | MPP3       | 17 | 43800799  | 43833170  | 32371  | protein coding                     | -1.12 | 1.23E-04 | 2.87E-03 |
| ENSG0000019144  | PHLDB1     | 11 | 118606440 | 118658031 | 51591  | protein coding                     | -1.12 | 7.15E-07 | 7.74E-05 |
| ENSG00000231437 | LINC01750  | 1  | 111989770 | 111998842 | 9072   | lncRNA                             | -1.12 | 1.02E-02 | 4.79E-02 |
| ENSG00000110900 | TSPAN11    | 12 | 30926428  | 30996602  | 70174  | protein coding                     | -1.12 | 1.50E-03 | 1.41E-02 |
| ENSG00000202260 | RN7SKP69   | 20 | 17576206  | 17576510  | 304    | misc RNA                           | -1.12 | 2.22E-03 | 1.82E-02 |
| ENSG00000188783 | PRELP      | 1  | 203475806 | 203491352 | 15546  | protein coding                     | -1.12 | 3.91E-03 | 2.62E-02 |
| ENSG00000124159 | MATN4      | 20 | 45293445  | 45308529  | 15084  | protein coding                     | -1.12 | 3.71E-03 | 2.54E-02 |
| ENSG00000175175 | PPM1E      | 17 | 58755854  | 58985179  | 229325 | protein coding                     | -1.12 | 3.69E-03 | 2.52E-02 |
| ENSG00000136881 | BAAT       | 9  | 101354182 | 101385400 | 31218  | protein coding                     | -1.12 | 2.10E-03 | 1.76E-02 |
| ENSG00000231431 | FAR2P4     | 2  | 131279290 | 131309068 | 29778  | transcribed unprocessed pseudogene | -1.12 | 1.04E-02 | 4.87E-02 |
| ENSG00000283638 | AC002407.1 | X  | 134168911 | 134174089 | 5178   | lncRNA                             | -1.12 | 7.83E-03 | 4.05E-02 |
| ENSG00000126562 | WNK4       | 17 | 42780610  | 42797066  | 16456  | protein coding                     | -1.12 | 1.77E-03 | 1.57E-02 |
| ENSG00000188916 | INSY2A     | 10 | 127135426 | 127196591 | 61165  | protein coding                     | -1.12 | 2.02E-03 | 1.72E-02 |
| ENSG00000166415 | WDR72      | 15 | 53513741  | 53762878  | 249137 | protein coding                     | -1.12 | 1.69E-03 | 1.53E-02 |
| ENSG00000230262 | LINC02603  | 9  | 94176492  | 94259545  | 83053  | lncRNA                             | -1.12 | 1.53E-03 | 1.43E-02 |
| ENSG00000186081 | KRT5       | 12 | 52514575  | 52520530  | 5955   | protein coding                     | -1.12 | 6.68E-04 | 8.60E-03 |
| ENSG00000141161 | UNC45B     | 17 | 35147817  | 35189345  | 41528  | protein coding                     | -1.12 | 1.47E-04 | 3.22E-03 |
| ENSG00000105559 | PLEKHA4    | 19 | 48837097  | 48868617  | 31520  | protein coding                     | -1.12 | 4.12E-04 | 6.32E-03 |
| ENSG00000247416 | AP000802.1 | 11 | 112959279 | 112963460 | 4181   | lncRNA-antisense                   | -1.12 | 6.78E-03 | 3.69E-02 |
| ENSG00000171877 | FRMD5      | 15 | 43870761  | 44195271  | 324510 | protein coding                     | -1.12 | 1.78E-03 | 1.68E-02 |
| ENSG00000249345 | LINC02405  | 12 | 126915199 | 127060565 | 145366 | lncRNA                             | -1.12 | 4.15E-03 | 2.72E-02 |
| ENSG00000101353 | MROH8      | 20 | 37101226  | 37179588  | 78362  | protein coding                     | -1.12 | 7.00E-06 | 4.00E-04 |
| ENSG00000134917 | ADAMT58    | 11 | 130404923 | 130428609 | 23686  | protein coding                     | -1.12 | 1.32E-03 | 1.31E-02 |
| ENSG00000139219 | COL2A1     | 12 | 47972967  | 48004554  | 31587  | protein coding                     | -1.12 | 2.64E-03 | 2.03E-02 |
| ENSG00000167419 | LPO        | 17 | 58218548  | 58268518  | 49970  | protein coding                     | -1.12 | 1.01E-04 | 2.55E-03 |
| ENSG00000233623 | PGAM1P11   | 1  | 10058671  | 10059648  | 977    | processed pseudogene               | -1.12 | 5.74E-03 | 3.32E-02 |
| ENSG00000152128 | TMEM163    | 2  | 134455759 | 134719000 | 263241 | protein coding                     | -1.12 | 1.47E-04 | 3.21E-03 |
| ENSG00000110436 | SLC1A2     | 11 | 35251205  | 35420063  | 168858 | protein coding                     | -1.12 | 1.48E-04 | 3.24E-03 |
| ENSG00000243316 | GUCY2GP    | 10 | 112308181 | 112356574 | 48393  | transcribed unitary pseudogene     | -1.13 | 9.05E-03 | 4.44E-02 |
| ENSG00000286151 | AL732406.1 | 1  | 157400927 | 157417259 | 16332  | unprocessed pseudogene             | -1.13 | 2.84E-03 | 2.13E-02 |
| ENSG00000226476 | LINC01748  | 1  | 60515716  | 60640507  | 124791 | lncRNA                             | -1.13 | 1.37E-03 | 1.34E-02 |
| ENSG00000279839 | AL512383.1 | 1  | 3205988   | 3208664   | 2676   | TEC                                | -1.13 | 2.25E-03 | 1.83E-02 |
| ENSG00000096088 | PGC        | 6  | 41736711  | 41754109  | 17398  | protein coding                     | -1.13 | 1.08E-02 | 4.98E-02 |
| ENSG00000103546 | SLC6A2     | 16 | 56655604  | 55706192  | 50588  | protein coding                     | -1.13 | 6.09E-03 | 3.45E-02 |
| ENSG00000180264 | ADGR2      | 9  | 124451425 | 124478589 | 27164  | protein coding                     | -1.13 | 2.39E-03 | 1.90E-02 |
| ENSG00000136235 | GNPMB      | 7  | 23235967  | 23275108  | 39141  | protein coding                     | -1.13 | 2.16E-04 | 4.11E-03 |
| ENSG00000256546 | AC156455.1 | 12 | 122063306 | 122068616 | 5310   | lncRNA                             | -1.13 | 1.43E-03 | 1.38E-02 |
| ENSG00000163618 | CADPS      | 3  | 62398346  | 62875416  | 477070 | protein coding                     | -1.13 | 1.90E-04 | 3.79E-03 |
| ENSG00000185634 | SHC4       | 15 | 48823741  | 48963919  | 140178 | protein coding                     | -1.13 | 7.40E-04 | 9.12E-03 |
| ENSG00000146648 | EGFR       | 7  | 55019017  | 55211628  | 192611 | protein coding                     | -1.13 | 5.14E-04 | 7.23E-03 |
| ENSG00000186715 | MST1L      | 1  | 16754910  | 16770237  | 15327  | transcribed unprocessed pseudogene | -1.13 | 1.85E-03 | 1.62E-02 |
| ENSG00000095587 | TLL2       | 10 | 96364608  | 96513926  | 149318 | protein coding                     | -1.13 | 1.69E-04 | 3.52E-03 |
| ENSG00000129009 | ISLR       | 15 | 74173710  | 74176872  | 3162   | protein coding                     | -1.13 | 8.01E-03 | 4.12E-02 |



|                 |             |    |           |           |         |                                   |       |          |          |
|-----------------|-------------|----|-----------|-----------|---------|-----------------------------------|-------|----------|----------|
| ENSG0000198732  | SMOC1       | 14 | 69854131  | 70032366  | 178235  | protein coding                    | -1.13 | 5.28E-04 | 7.39E-03 |
| ENSG0000068615  | REEP1       | 2  | 86213993  | 86338083  | 124909  | protein coding                    | -1.13 | 7.09E-04 | 8.88E-03 |
| ENSG0000280953  | LINC01163   | 10 | 128181032 | 128317726 | 136694  | lncRNA                            | -1.13 | 1.30E-05 | 6.23E-04 |
| ENSG0000258551  | CRAT37      | 15 | 91408708  | 91605873  | 197165  | lncRNA                            | -1.13 | 5.80E-03 | 3.34E-02 |
| ENSG0000154096  | THY1        | 11 | 119415476 | 119424985 | 9509    | protein coding                    | -1.13 | 1.96E-03 | 1.68E-02 |
| ENSG0000233746  | LINC00656   | 20 | 23125068  | 23132635  | 7567    | lncRNA                            | -1.13 | 1.09E-03 | 1.16E-02 |
| ENSG0000226674  | TEX41       | 2  | 144666312 | 145262988 | 596676  | lncRNA                            | -1.13 | 2.74E-04 | 4.84E-03 |
| ENSG00000214198 | TTC41P      | 12 | 103843749 | 103930211 | 86462   | transcribed unitary pseudogene    | -1.13 | 8.26E-06 | 4.47E-04 |
| ENSG0000003989  | SLC7A2      | 8  | 17497088  | 17570573  | 73485   | protein coding                    | -1.13 | 4.99E-03 | 3.04E-02 |
| ENSG0000163673  | DCLK3       | 3  | 36712422  | 36764349  | 51927   | protein coding                    | -1.13 | 7.19E-03 | 3.84E-02 |
| ENSG0000171016  | PYGO1       | 15 | 55538884  | 55588947  | 50063   | protein coding                    | -1.13 | 4.69E-03 | 2.93E-02 |
| ENSG0000226746  | SMCR5       | 17 | 17776686  | 17779529  | 2843    | lncRNA-antisense                  | -1.13 | 9.60E-03 | 4.61E-02 |
| ENSG0000196990  | FAM163B     | 9  | 133577081 | 133609389 | 32308   | protein coding                    | -1.13 | 8.12E-03 | 4.15E-02 |
| ENSG0000169684  | CHRNA5      | 15 | 78565520  | 78595269  | 29749   | protein coding                    | -1.13 | 2.04E-04 | 3.96E-03 |
| ENSG0000146950  | SHROOM2     | X  | 9786429   | 9949443   | 163014  | protein coding                    | -1.13 | 4.75E-04 | 6.88E-03 |
| ENSG0000203520  | AP000753.1  | 11 | 63616308  | 63621671  | 5363    | lncRNA-antisense                  | -1.13 | 7.51E-03 | 3.94E-02 |
| ENSG0000186487  | MYT1L       | 2  | 1789113   | 2331664   | 542551  | protein coding                    | -1.13 | 5.36E-05 | 1.63E-03 |
| ENSG0000101115  | SALL4       | 20 | 51782331  | 51802521  | 20190   | protein coding                    | -1.13 | 3.80E-04 | 6.01E-03 |
| ENSG0000260423  | LINC02367   | 12 | 9347056   | 9400387   | 53331   | lncRNA                            | -1.13 | 3.08E-04 | 5.23E-03 |
| ENSG0000259905  | PWRN1       | 15 | 24101827  | 24823365  | 721538  | lncRNA                            | -1.13 | 3.83E-04 | 6.04E-03 |
| ENSG0000053108  | FSTL4       | 5  | 133196455 | 133612541 | 416086  | protein coding                    | -1.13 | 4.16E-05 | 1.37E-03 |
| ENSG0000269235  | ZNF350-AS1  | 19 | 51949134  | 51981367  | 32233   | lncRNA-antisense                  | -1.13 | 5.32E-03 | 3.16E-02 |
| ENSG0000172478  | MAB21L4     | 2  | 240886048 | 240896889 | 10841   | protein coding                    | -1.13 | 7.49E-03 | 3.94E-02 |
| ENSG0000189410  | SH2D5       | 1  | 20719731  | 20732837  | 13106   | protein coding                    | -1.13 | 8.86E-05 | 2.33E-03 |
| ENSG0000239899  | RNLSL74P    | 2  | 11584773  | 11585047  | 274     | misc RNA                          | -1.13 | 1.08E-03 | 1.16E-02 |
| ENSG0000214797  | AP02358.1   | 11 | 59268876  | 59284033  | 15157   | lncRNA                            | -1.13 | 3.49E-03 | 2.43E-02 |
| ENSG0000109684  | CLNK        | 4  | 10486395  | 10684768  | 198373  | protein coding                    | -1.13 | 3.11E-04 | 5.26E-03 |
| ENSG0000206172  | HBA1        | 16 | 176680    | 177522    | 842     | protein coding                    | -1.13 | 4.15E-03 | 2.72E-02 |
| ENSG0000287425  | AP03371.4   | 11 | 73983449  | 73985562  | 2113    | lncRNA                            | -1.13 | 5.19E-03 | 3.12E-02 |
| ENSG0000172987  | HPSE2       | 10 | 98457077  | 99235862  | 778785  | protein coding                    | -1.13 | 1.52E-03 | 1.42E-02 |
| ENSG0000146477  | SLC22A3     | 6  | 160348378 | 160452577 | 104199  | protein coding                    | -1.14 | 8.18E-03 | 4.17E-02 |
| ENSG0000144908  | ALDH1L1     | 3  | 126103562 | 126197994 | 94432   | protein coding                    | -1.14 | 5.65E-05 | 1.69E-03 |
| ENSG0000229205  | LINC00200   | 10 | 1159768   | 1289426   | 129658  | lncRNA                            | -1.14 | 6.74E-04 | 8.64E-03 |
| ENSG0000130561  | SAG         | 2  | 233307816 | 233347055 | 39239   | protein coding                    | -1.14 | 1.46E-04 | 3.21E-03 |
| ENSG0000214946  | TBC1D26     | 17 | 15732247  | 15749192  | 16945   | protein coding                    | -1.14 | 1.03E-02 | 4.83E-02 |
| ENSG0000188693  | CYP51A1-AS1 | 7  | 92134604  | 92180725  | 46121   | lncRNA-antisense                  | -1.14 | 5.28E-03 | 3.15E-02 |
| ENSG0000036530  | CYP46A1     | 14 | 99684298  | 99727301  | 43003   | protein coding                    | -1.14 | 2.09E-05 | 8.61E-04 |
| ENSG0000261730  | AL034346.1  | 6  | 1383790   | 1385066   | 1276    | lncRNA-antisense                  | -1.14 | 9.83E-03 | 4.69E-02 |
| ENSG0000258754  | LINC01579   | 15 | 93718542  | 94070898  | 352356  | lncRNA                            | -1.14 | 1.31E-03 | 1.30E-02 |
| ENSG0000239921  | LINC01471   | 3  | 127480690 | 127537817 | 57127   | lncRNA                            | -1.14 | 1.11E-03 | 1.17E-02 |
| ENSG0000167011  | NAT16       | 7  | 101170496 | 101180293 | 9797    | protein coding                    | -1.14 | 8.37E-03 | 4.23E-02 |
| ENSG0000206043  | C18orf63    | 18 | 74315839  | 74359189  | 43350   | protein coding                    | -1.14 | 1.04E-02 | 4.87E-02 |
| ENSG0000253819  | LINC01151   | 8  | 122485194 | 122733804 | 248610  | lncRNA                            | -1.14 | 1.68E-04 | 3.51E-03 |
| ENSG0000242950  | ERVW-1      | 7  | 92468380  | 92477986  | 9606    | protein coding                    | -1.14 | 5.05E-03 | 3.06E-02 |
| ENSG0000132938  | MUTUS2      | 13 | 28820348  | 29505947  | 685599  | protein coding                    | -1.14 | 1.41E-04 | 3.14E-03 |
| ENSG0000154914  | UPF43       | 17 | 9644698   | 9729687   | 84989   | protein coding                    | -1.14 | 4.70E-04 | 6.84E-03 |
| ENSG0000230524  | COL6A4P1    | 3  | 15151833  | 15205959  | 54126   | transcribed unprocessed pseudogen | -1.14 | 1.06E-02 | 4.93E-02 |
| ENSG0000287566  | AL732437.3  | 10 | 5549637   | 5554329   | 4692    | lncRNA                            | -1.14 | 8.93E-03 | 4.40E-02 |
| ENSG0000235370  | DNM1P51     | 15 | 84398316  | 84411701  | 13385   | transcribed unprocessed pseudogen | -1.14 | 1.05E-02 | 4.89E-02 |
| ENSG0000138759  | FRAS1       | 4  | 78057323  | 78544269  | 486946  | protein coding                    | -1.14 | 2.05E-04 | 3.97E-03 |
| ENSG0000172296  | SPTLC3      | 20 | 13008972  | 13169103  | 160131  | protein coding                    | -1.14 | 7.78E-05 | 2.13E-03 |
| ENSG0000134398  | ERN2        | 16 | 23690310  | 23713226  | 22916   | protein coding                    | -1.14 | 1.93E-03 | 1.67E-02 |
| ENSG0000269113  | TRABD2B     | 1  | 47760528  | 47997385  | 236857  | protein coding                    | -1.14 | 1.32E-03 | 1.30E-02 |
| ENSG0000227110  | LINC01-AS1  | 3  | 7951263   | 8611924   | 680661  | lncRNA-antisense                  | -1.14 | 2.69E-03 | 2.06E-02 |
| ENSG0000260573  | AC007493.1  | 16 | 50407184  | 50546347  | 139163  | lncRNA                            | -1.14 | 2.07E-03 | 1.74E-02 |
| ENSG0000182326  | C1S         | 12 | 6988259   | 7071032   | 82773   | protein coding                    | -1.14 | 1.98E-04 | 3.88E-03 |
| ENSG0000119147  | ECRG4       | 2  | 106063246 | 106078155 | 14909   | protein coding                    | -1.14 | 1.93E-03 | 1.66E-02 |
| ENSG0000168447  | SCNN1B      | 16 | 23278231  | 23381294  | 103063  | protein coding                    | -1.14 | 1.03E-02 | 4.85E-02 |
| ENSG0000171246  | NPTX1       | 17 | 80466834  | 80477843  | 11009   | protein coding                    | -1.14 | 1.56E-04 | 3.35E-03 |
| ENSG0000180113  | TDRD6       | 6  | 46687875  | 46704319  | 16444   | protein coding                    | -1.14 | 1.03E-03 | 1.12E-02 |
| ENSG0000144810  | COL8A1      | 3  | 99638475  | 99799226  | 160751  | protein coding                    | -1.14 | 5.65E-03 | 3.28E-02 |
| ENSG0000162669  | HFM1        | 1  | 91260766  | 91404856  | 144090  | protein coding                    | -1.14 | 5.03E-04 | 7.14E-03 |
| ENSG0000121898  | CPXM2       | 10 | 123706207 | 123940267 | 234060  | protein coding                    | -1.14 | 1.23E-04 | 2.88E-03 |
| ENSG0000254180  | AC004083.1  | 8  | 90198389  | 90620077  | 421688  | lncRNA                            | -1.14 | 1.58E-03 | 1.46E-02 |
| ENSG0000253190  | AC084082.1  | 8  | 66112667  | 66126632  | 13965   | lncRNA                            | -1.14 | 8.77E-03 | 4.35E-02 |
| ENSG0000286551  | AL355836.2  | 14 | 101133730 | 101151988 | 18258   | lncRNA                            | -1.14 | 6.56E-03 | 3.61E-02 |
| ENSG0000248809  | LINC01095   | 4  | 146077717 | 146121913 | 44196   | lncRNA                            | -1.14 | 8.16E-03 | 4.16E-02 |
| ENSG0000107018  | RLN1        | 9  | 5334930   | 5339876   | 4946    | protein coding                    | -1.14 | 6.70E-03 | 3.66E-02 |
| ENSG0000123843  | C4BPB       | 1  | 207088860 | 207099993 | 11133   | protein coding                    | -1.14 | 8.30E-03 | 4.21E-02 |
| ENSG0000183715  | OPCML       | 11 | 132414977 | 133532519 | 1117542 | protein coding                    | -1.14 | 1.60E-03 | 1.47E-02 |
| ENSG0000139445  | FOXN4       | 12 | 109277978 | 109309284 | 31306   | protein coding                    | -1.14 | 5.80E-03 | 3.34E-02 |
| ENSG0000174038  | C9orf131    | 9  | 35041095  | 35045986  | 4891    | protein coding                    | -1.14 | 8.59E-03 | 4.29E-02 |
| ENSG0000285205  | AL121612.2  | 14 | 94770271  | 94774858  | 4587    | lncRNA-bidirectional promoter     | -1.14 | 2.36E-03 | 1.89E-02 |
| ENSG0000186326  | RGS9BP      | 19 | 32675848  | 32678300  | 2452    | protein coding                    | -1.14 | 9.69E-03 | 4.64E-02 |
| ENSG0000133083  | DCLK1       | 13 | 35768652  | 36131382  | 362730  | protein coding                    | -1.15 | 8.31E-04 | 9.78E-03 |
| ENSG0000158296  | SLC13A3     | 20 | 46557823  | 46684467  | 126644  | protein coding                    | -1.15 | 1.28E-04 | 2.94E-03 |
| ENSG0000135063  | FAM189A2    | 9  | 69324567  | 69392558  | 67991   | protein coding                    | -1.15 | 1.20E-03 | 1.24E-02 |
| ENSG0000177108  | ZDHHC22     | 14 | 77131270  | 77142734  | 11464   | protein coding                    | -1.15 | 7.69E-03 | 4.00E-02 |
| ENSG0000003137  | CYP26B1     | 2  | 72129238  | 72148038  | 18800   | protein coding                    | -1.15 | 1.38E-03 | 1.35E-02 |
| ENSG0000116147  | TNR         | 1  | 175315194 | 175743616 | 428422  | protein coding                    | -1.15 | 2.00E-05 | 8.44E-04 |
| ENSG0000185267  | CDNF        | 10 | 14819245  | 14838575  | 19330   | protein coding                    | -1.15 | 1.75E-04 | 3.61E-03 |
| ENSG0000163518  | FCRL4       | 1  | 157573747 | 157598085 | 24338   | protein coding                    | -1.15 | 4.83E-03 | 2.98E-02 |
| ENSG0000062038  | CDH3        | 16 | 68636189  | 68722616  | 86427   | protein coding                    | -1.15 | 1.98E-03 | 1.69E-02 |
| ENSG0000104237  | RP1         | 8  | 54509422  | 54871720  | 362298  | protein coding                    | -1.15 | 3.11E-04 | 5.25E-03 |
| ENSG0000147488  | ST18        | 8  | 52110839  | 52460959  | 350120  | protein coding                    | -1.15 | 4.53E-05 | 1.46E-03 |
| ENSG0000287809  | AC005632.6  | 16 | 21511635  | 21515131  | 3496    | lncRNA                            | -1.15 | 5.03E-03 | 3.05E-02 |
| ENSG0000125319  | HROB        | 17 | 44141906  | 44162476  | 20570   | protein coding                    | -1.15 | 1.55E-03 | 1.44E-02 |
| ENSG0000272636  | DOC2B       | 7  | 142789    | 181650    | 38861   | protein coding                    | -1.15 | 5.04E-04 | 7.14E-03 |
| ENSG0000164089  | ETNPPL      | 4  | 108742048 | 108763054 | 21006   | protein coding                    | -1.15 | 7.83E-03 | 4.05E-02 |
| ENSG0000108823  | SGCA        | 17 | 50164214  | 50175928  | 11714   | protein coding                    | -1.15 | 2.51E-04 | 4.55E-03 |

|                 |             |    |           |           |        |                                    |       |          |          |
|-----------------|-------------|----|-----------|-----------|--------|------------------------------------|-------|----------|----------|
| ENSG00000170412 | GPRC5C      | 17 | 74424851  | 74451653  | 26802  | protein coding                     | -1.15 | 1.90E-04 | 3.79E-03 |
| ENSG00000249267 | LINC00939   | 12 | 125958688 | 125983665 | 24977  | lncRNA                             | -1.15 | 4.18E-03 | 2.73E-02 |
| ENSG00000261873 | SMIM36      | 17 | 55448433  | 55511444  | 63011  | protein coding                     | -1.15 | 1.00E-02 | 4.74E-02 |
| ENSG00000143195 | ILDR2       | 1  | 166895711 | 166975540 | 79829  | protein coding                     | -1.15 | 7.44E-07 | 7.93E-05 |
| ENSG00000154493 | C10orf190   | 10 | 126424997 | 126798708 | 373711 | protein coding                     | -1.15 | 2.51E-03 | 1.96E-02 |
| ENSG00000076344 | RGS11       | 16 | 268301    | 275980    | 7679   | protein coding                     | -1.15 | 2.23E-03 | 1.83E-02 |
| ENSG00000286652 | AL021918.5  | 6  | 27473194  | 27494436  | 21242  | lncRNA                             | -1.15 | 8.49E-03 | 4.27E-02 |
| ENSG00000279412 | AC020763.3  | 16 | 70713987  | 70716890  | 2903   | TEC                                | -1.15 | 4.34E-03 | 2.79E-02 |
| ENSG00000236699 | ARHGEF38    | 4  | 105552620 | 105708093 | 155473 | protein coding                     | -1.15 | 1.14E-03 | 1.20E-02 |
| ENSG00000080293 | SCFR        | 2  | 119439843 | 119525301 | 85458  | protein coding                     | -1.15 | 1.51E-03 | 1.42E-02 |
| ENSG00000253230 | MIR124-1HG  | 8  | 9899871   | 9906678   | 6807   | lncRNA                             | -1.15 | 1.86E-03 | 1.63E-02 |
| ENSG00000197446 | CYP2F1      | 19 | 41114432  | 41128381  | 13949  | protein coding                     | -1.15 | 9.95E-03 | 4.73E-02 |
| ENSG00000268355 | AC243960.3  | 19 | 41531206  | 41532174  | 968    | lncRNA                             | -1.15 | 9.51E-03 | 4.59E-02 |
| ENSG00000180287 | PLD5        | 1  | 242082986 | 242524697 | 441711 | protein coding                     | -1.15 | 2.07E-03 | 1.74E-02 |
| ENSG00000183914 | DNAH2       | 17 | 7717354   | 7833744   | 116390 | protein coding                     | -1.15 | 5.43E-04 | 7.56E-03 |
| ENSG00000206535 | LNP1        | 3  | 100401532 | 100456319 | 54787  | protein coding                     | -1.15 | 3.83E-03 | 2.58E-02 |
| ENSG00000130234 | ACE2        | X  | 15494566  | 15607236  | 112670 | protein coding                     | -1.15 | 3.37E-03 | 2.38E-02 |
| ENSG00000256654 | AC005906.2  | 12 | 4909867   | 5026012   | 116145 | lncRNA                             | -1.15 | 2.03E-03 | 1.72E-02 |
| ENSG00000182667 | NTM         | 11 | 131370478 | 132336822 | 966344 | protein coding                     | -1.15 | 6.64E-04 | 8.57E-03 |
| ENSG00000235049 | LINC00940   | 12 | 1929202   | 1936574   | 7372   | lncRNA                             | -1.15 | 2.11E-03 | 1.76E-02 |
| ENSG00000234156 | AL359636.2  | 9  | 122403407 | 122639685 | 236278 | lncRNA-antisense                   | -1.15 | 9.89E-04 | 1.09E-02 |
| ENSG00000171533 | MAP6        | 11 | 75586918  | 75669120  | 82202  | protein coding                     | -1.15 | 4.42E-04 | 6.57E-03 |
| ENSG00000227392 | HPN-AS1     | 19 | 35042902  | 35106307  | 63405  | lncRNA-antisense                   | -1.15 | 5.84E-03 | 3.36E-02 |
| ENSG00000260372 | AQP4-AS1    | 18 | 26655737  | 27190698  | 534961 | lncRNA-antisense                   | -1.15 | 7.15E-04 | 8.91E-03 |
| ENSG00000129744 | ART1        | 11 | 3645128   | 3664416   | 19288  | protein coding                     | -1.15 | 6.27E-03 | 3.51E-02 |
| ENSG00000205592 | MUC19       | 12 | 40393395  | 40570832  | 177437 | protein coding                     | -1.15 | 4.19E-05 | 1.37E-03 |
| ENSG00000271911 | AL357054.3  | 6  | 761675    | 780648    | 18973  | lncRNA                             | -1.15 | 6.40E-03 | 3.56E-02 |
| ENSG00000111262 | KCNA1       | 12 | 4909905   | 4918256   | 8351   | protein coding                     | -1.15 | 1.75E-03 | 1.66E-02 |
| ENSG00000244405 | ETV5        | 3  | 186046314 | 186110318 | 64004  | protein coding                     | -1.15 | 1.50E-04 | 3.27E-03 |
| ENSG00000145949 | MYLK4       | 6  | 2663629   | 2750922   | 87293  | protein coding                     | -1.15 | 8.67E-07 | 8.76E-05 |
| ENSG00000188501 | LCTL        | 15 | 66547179  | 66565979  | 18800  | protein coding                     | -1.15 | 1.26E-03 | 1.27E-02 |
| ENSG00000178928 | TPRX1       | 19 | 47801243  | 47819051  | 17808  | protein coding                     | -1.15 | 1.09E-02 | 4.99E-02 |
| ENSG00000132932 | ATP8A2      | 13 | 25371974  | 26025851  | 653877 | protein coding                     | -1.16 | 1.32E-06 | 1.19E-04 |
| ENSG00000285564 | AL031121.2  | 6  | 163338363 | 163346744 | 8381   | lncRNA                             | -1.16 | 2.35E-03 | 1.88E-02 |
| ENSG00000242715 | CCDC169     | 13 | 36222008  | 36297840  | 75832  | protein coding                     | -1.16 | 8.88E-03 | 4.39E-02 |
| ENSG00000218336 | TENM3       | 4  | 182143987 | 182803024 | 659037 | protein coding                     | -1.16 | 4.71E-05 | 1.50E-03 |
| ENSG00000168959 | GRM5        | 11 | 88504576  | 89065945  | 561369 | protein coding                     | -1.16 | 8.45E-03 | 4.26E-02 |
| ENSG00000187905 | LRRC74B     | 22 | 21045960  | 21064168  | 18208  | protein coding                     | -1.16 | 6.32E-04 | 8.32E-03 |
| ENSG00000163395 | IGFN1       | 1  | 201190824 | 201228952 | 38128  | protein coding                     | -1.16 | 2.76E-04 | 4.86E-03 |
| ENSG00000009765 | IYD         | 6  | 150368892 | 150405969 | 30777  | protein coding                     | -1.16 | 9.85E-04 | 1.09E-02 |
| ENSG00000257307 | AL162311.2  | 14 | 35881001  | 35881709  | 708    | processed pseudogene               | -1.16 | 4.80E-04 | 6.93E-03 |
| ENSG00000146147 | MLIP        | 6  | 53929982  | 54266280  | 336298 | protein coding                     | -1.16 | 5.23E-03 | 3.13E-02 |
| ENSG00000261670 | AC012213.2  | 8  | 103464389 | 103468985 | 4596   | lncRNA                             | -1.16 | 8.94E-03 | 4.41E-02 |
| ENSG00000169933 | FRMPD4      | X  | 11822423  | 12724523  | 902100 | protein coding                     | -1.16 | 2.41E-03 | 1.91E-02 |
| ENSG00000103832 | GOLGA8UP    | 15 | 30791573  | 30801859  | 10286  | unprocessed pseudogene             | -1.16 | 5.86E-03 | 3.37E-02 |
| ENSG00000288107 | AL731789.2  | 10 | 133565797 | 133629507 | 63710  | lncRNA                             | -1.16 | 7.74E-04 | 9.40E-03 |
| ENSG00000108602 | ALDH3A1     | 17 | 19737984  | 19748943  | 10959  | protein coding                     | -1.16 | 8.53E-04 | 9.93E-03 |
| ENSG00000261126 | RFBADN      | 18 | 80046900  | 80095482  | 48582  | lncRNA                             | -1.16 | 2.12E-03 | 1.77E-02 |
| ENSG00000237807 | AC022034.1  | 8  | 53493523  | 53524336  | 30813  | lncRNA                             | -1.16 | 5.05E-03 | 3.06E-02 |
| ENSG00000268686 | AC010643.1  | 19 | 49368558  | 49388091  | 19533  | lncRNA-antisense                   | -1.16 | 8.66E-03 | 4.32E-02 |
| ENSG00000253406 | AC012613.2  | 5  | 149216523 | 149276805 | 60282  | lncRNA-antisense                   | -1.16 | 9.58E-03 | 4.61E-02 |
| ENSG00000123243 | ITIH5       | 10 | 7559270   | 7666998   | 107728 | protein coding                     | -1.16 | 3.83E-03 | 2.59E-02 |
| ENSG00000084628 | NKAIN1      | 1  | 31179745  | 31239887  | 60142  | protein coding                     | -1.16 | 5.60E-03 | 3.26E-02 |
| ENSG00000148123 | PLPPR1      | 9  | 101028727 | 101325135 | 296408 | protein coding                     | -1.16 | 8.69E-03 | 4.33E-02 |
| ENSG00000080166 | DCT         | 13 | 94436811  | 94479682  | 42871  | protein coding                     | -1.16 | 2.16E-03 | 1.79E-02 |
| ENSG00000116285 | ERRF1       | 1  | 8004404   | 8026309   | 21905  | protein coding                     | -1.16 | 1.74E-05 | 7.67E-04 |
| ENSG00000251372 | LINC00499   | 4  | 138309613 | 138663403 | 353790 | lncRNA                             | -1.16 | 2.01E-03 | 1.71E-02 |
| ENSG00000251365 | LINC02236   | 5  | 6765891   | 6833120   | 67229  | lncRNA                             | -1.16 | 3.94E-03 | 2.64E-02 |
| ENSG00000262786 | AC005224.1  | 17 | 14295512  | 14297600  | 2088   | lncRNA                             | -1.16 | 1.06E-02 | 4.93E-02 |
| ENSG00000163909 | HEYL        | 1  | 39623435  | 39639643  | 16208  | protein coding                     | -1.16 | 3.76E-03 | 2.56E-02 |
| ENSG00000142149 | HUNK        | 21 | 31873020  | 32044633  | 171613 | protein coding                     | -1.16 | 1.77E-03 | 1.57E-02 |
| ENSG00000223756 | TSSC2       | 11 | 3380961   | 3408978   | 28017  | transcribed unprocessed pseudogene | -1.16 | 2.74E-03 | 2.09E-02 |
| ENSG00000168049 | PASD1       | X  | 151563675 | 151676739 | 113064 | protein coding                     | -1.16 | 9.99E-03 | 4.74E-02 |
| ENSG00000148734 | NPFFR1      | 10 | 70247329  | 70284004  | 36675  | protein coding                     | -1.16 | 6.30E-04 | 8.31E-03 |
| ENSG00000130711 | PRDM12      | 9  | 130664594 | 130682986 | 18392  | protein coding                     | -1.16 | 7.61E-03 | 3.98E-02 |
| ENSG00000233896 | PDYN-AS1    | 20 | 1947246   | 2030028   | 82782  | lncRNA-antisense                   | -1.16 | 7.52E-03 | 3.95E-02 |
| ENSG00000144045 | DOX1        | 2  | 74518131  | 74526281  | 8150   | protein coding                     | -1.16 | 6.56E-03 | 3.61E-02 |
| ENSG00000271086 | NAMA        | 9  | 99355337  | 99377240  | 21903  | lncRNA                             | -1.16 | 2.10E-03 | 1.76E-02 |
| ENSG00000056487 | PHF21B      | 22 | 44881162  | 45010005  | 128843 | protein coding                     | -1.16 | 1.86E-04 | 3.74E-03 |
| ENSG00000164318 | EGFLAM      | 5  | 38258409  | 38465480  | 207071 | protein coding                     | -1.16 | 1.86E-03 | 1.62E-02 |
| ENSG00000168243 | GNG4        | 1  | 235547685 | 235650754 | 103069 | protein coding                     | -1.16 | 5.74E-04 | 7.81E-03 |
| ENSG00000106038 | EVX1        | 7  | 27242700  | 27250493  | 7793   | protein coding                     | -1.16 | 3.44E-03 | 2.41E-02 |
| ENSG00000147689 | FAM83A      | 8  | 123178960 | 123210079 | 31119  | protein coding                     | -1.16 | 4.12E-06 | 2.68E-04 |
| ENSG00000285517 | AC010198.2  | 12 | 30795458  | 30879268  | 83810  | lncRNA                             | -1.16 | 9.43E-05 | 2.43E-03 |
| ENSG00000248587 | GDNF-AS1    | 5  | 37811589  | 37953827  | 142238 | lncRNA-antisense                   | -1.16 | 6.76E-04 | 8.66E-03 |
| ENSG00000256263 | DDX11L8     | 12 | 12310     | 13501     | 1191   | unprocessed pseudogene             | -1.16 | 1.46E-03 | 1.39E-02 |
| ENSG00000166153 | DEPDC4      | 12 | 100203669 | 100267079 | 63410  | protein coding                     | -1.16 | 9.53E-03 | 4.54E-02 |
| ENSG00000092345 | DAZL        | 3  | 16586792  | 16670306  | 83514  | protein coding                     | -1.16 | 4.63E-03 | 2.91E-02 |
| ENSG00000144285 | SCN1A       | 2  | 165984641 | 166149214 | 164573 | protein coding                     | -1.16 | 1.62E-03 | 1.49E-02 |
| ENSG00000064787 | BCAS1       | 20 | 53936777  | 54070594  | 133817 | protein coding                     | -1.16 | 3.32E-05 | 1.18E-03 |
| ENSG00000263400 | TMEM220-AS1 | 17 | 10729777  | 10815164  | 85387  | lncRNA-antisense                   | -1.16 | 7.99E-05 | 2.18E-03 |
| ENSG00000166073 | GPR176      | 15 | 39799008  | 39920266  | 121258 | protein coding                     | -1.16 | 4.33E-03 | 2.79E-02 |
| ENSG00000215529 | EFCAB8      | 20 | 32858923  | 32961609  | 102686 | protein coding                     | -1.16 | 1.30E-08 | 3.06E-06 |
| ENSG00000267136 | AP005131.1  | 18 | 13514520  | 13522888  | 8368   | lncRNA-antisense                   | -1.16 | 4.96E-03 | 3.03E-02 |
| ENSG00000136895 | GARNL3      | 9  | 127224265 | 127393660 | 169395 | protein coding                     | -1.16 | 2.35E-08 | 5.05E-06 |
| ENSG00000163354 | DCST2       | 1  | 155018520 | 155033781 | 15261  | protein coding                     | -1.16 | 2.90E-04 | 5.01E-03 |
| ENSG00000131941 | RHPN2       | 19 | 32978592  | 33064888  | 86296  | protein coding                     | -1.16 | 2.68E-04 | 4.77E-03 |
| ENSG00000258168 | AC025569.1  | 12 | 70468080  | 70543040  | 74960  | lncRNA-antisense                   | -1.16 | 9.55E-04 | 1.07E-02 |
| ENSG00000155886 | SLC24A2     | 9  | 19507452  | 19786928  | 279476 | protein coding                     | -1.16 | 1.45E-03 | 1.39E-02 |
| ENSG00000139971 | ARMH4       | 14 | 57999735  | 58298139  | 298404 | protein coding                     | -1.16 | 5.47E-03 | 3.21E-02 |

|                 |            |    |           |           |         |                                    |       |          |          |
|-----------------|------------|----|-----------|-----------|---------|------------------------------------|-------|----------|----------|
| ENSG0000050555  | LAMC3      | 9  | 131009174 | 131094473 | 85299   | protein coding                     | -1.16 | 8.68E-05 | 2.31E-03 |
| ENSG00000172000 | ZNF556     | 19 | 2867335   | 2883445   | 16110   | protein coding                     | -1.16 | 2.09E-03 | 1.75E-02 |
| ENSG00000111218 | PRMT8      | 12 | 3381349   | 3593973   | 212624  | protein coding                     | -1.17 | 4.29E-04 | 6.46E-03 |
| ENSG00000075673 | ATP12A     | 13 | 24680408  | 24712472  | 32064   | protein coding                     | -1.17 | 3.21E-03 | 2.30E-02 |
| ENSG00000230246 | SPATA31C1  | 9  | 87914493  | 87923505  | 9012    | transcribed unprocessed pseudogene | -1.17 | 7.08E-03 | 3.79E-02 |
| ENSG00000103852 | TTC23      | 15 | 99136323  | 99251223  | 114900  | protein coding                     | -1.17 | 5.39E-05 | 1.64E-03 |
| ENSG00000273674 | AC021752.1 | 15 | 50839875  | 50908603  | 68728   | lncRNA                             | -1.17 | 7.57E-04 | 9.26E-03 |
| ENSG00000226987 | AL157938.1 | 9  | 131240687 | 131241724 | 1037    | processed pseudogene               | -1.17 | 6.40E-03 | 3.56E-02 |
| ENSG00000175426 | PCSK1      | 5  | 96390333  | 96434143  | 43810   | protein coding                     | -1.17 | 9.46E-03 | 4.57E-02 |
| ENSG00000184949 | FAM227A    | 22 | 38578120  | 38656629  | 78509   | protein coding                     | -1.17 | 1.89E-03 | 1.64E-02 |
| ENSG00000123201 | GUCY1B2    | 13 | 50994511  | 51080862  | 86351   | transcribed unitary pseudogene     | -1.17 | 1.59E-03 | 1.47E-02 |
| ENSG00000261003 | AL008628.1 | 6  | 170441139 | 170419325 | 5186    | lncRNA-sense overlapping           | -1.17 | 2.00E-04 | 3.91E-03 |
| ENSG00000179603 | GRM8       | 7  | 126438598 | 127253093 | 814495  | protein coding                     | -1.17 | 8.96E-03 | 4.41E-02 |
| ENSG00000178568 | ERBB4      | 2  | 211375717 | 212538841 | 1163124 | protein coding                     | -1.17 | 1.46E-03 | 1.39E-02 |
| ENSG00000136160 | EDNRB      | 13 | 77895481  | 77975529  | 80048   | protein coding                     | -1.17 | 4.92E-03 | 3.01E-02 |
| ENSG00000154065 | ANKRD29    | 18 | 23598926  | 23662911  | 63985   | protein coding                     | -1.17 | 1.34E-03 | 1.32E-02 |
| ENSG00000180422 | LINC00304  | 16 | 89159146  | 89164245  | 5099    | lncRNA                             | -1.17 | 1.33E-03 | 1.31E-02 |
| ENSG00000232716 | AC018831.3 | 7  | 130840204 | 130843725 | 3521    | processed pseudogene               | -1.17 | 4.30E-03 | 2.78E-02 |
| ENSG00000155052 | CNTNAP5    | 2  | 124025287 | 124915287 | 890000  | protein coding                     | -1.17 | 5.99E-03 | 3.41E-02 |
| ENSG00000281880 | PAUPAR     | 11 | 31812307  | 32002405  | 190098  | lncRNA                             | -1.17 | 2.19E-03 | 1.81E-02 |
| ENSG00000278771 | RN7SL3     | 14 | 49853616  | 49853914  | 298     | misc RNA                           | -1.17 | 1.18E-04 | 2.79E-03 |
| ENSG00000267719 | LINC02078  | 17 | 79707266  | 79712317  | 5051    | lncRNA                             | -1.17 | 6.26E-03 | 3.51E-02 |
| ENSG00000184828 | ZBTB7C     | 18 | 48026672  | 48410752  | 384080  | protein coding                     | -1.17 | 5.50E-05 | 1.66E-03 |
| ENSG00000250742 | LINC02381  | 12 | 54126082  | 54147485  | 21403   | lncRNA                             | -1.17 | 8.09E-04 | 9.63E-03 |
| ENSG00000205622 | AP001042.1 | 21 | 38812878  | 38956467  | 143589  | lncRNA                             | -1.17 | 6.46E-04 | 8.43E-03 |
| ENSG00000281692 | PACRG-AS1  | 6  | 163306907 | 163324530 | 17623   | lncRNA-antisense                   | -1.17 | 3.03E-03 | 2.22E-02 |
| ENSG00000166104 | AC126323.1 | 15 | 62227896  | 62253235  | 25339   | transcribed unprocessed pseudogene | -1.17 | 9.20E-04 | 1.04E-02 |
| ENSG00000163827 | LRRC2      | 3  | 46515385  | 46580099  | 64714   | protein coding                     | -1.17 | 3.58E-04 | 5.78E-03 |
| ENSG00000256612 | CYP2B7P    | 19 | 40924219  | 40950660  | 26441   | transcribed unprocessed pseudogene | -1.17 | 2.68E-03 | 2.05E-02 |
| ENSG00000171303 | CKNKC3     | 2  | 26692690  | 26733420  | 40730   | protein coding                     | -1.17 | 1.59E-03 | 1.47E-02 |
| ENSG00000154864 | PIEZO2     | 18 | 10666483  | 11149569  | 483086  | protein coding                     | -1.17 | 6.89E-05 | 1.95E-03 |
| ENSG00000261812 | TUBB8P7    | 16 | 90093154  | 90096354  | 3200    | transcribed unprocessed pseudogene | -1.17 | 6.99E-03 | 3.77E-02 |
| ENSG00000164287 | CDC20B     | 5  | 55112971  | 55173177  | 60206   | protein coding                     | -1.17 | 4.83E-03 | 2.98E-02 |
| ENSG00000196758 | AC079612.1 | 2  | 239578301 | 239586094 | 7793    | lncRNA                             | -1.17 | 1.05E-02 | 4.89E-02 |
| ENSG00000232520 | GCSIR      | 2  | 230886474 | 230904693 | 18219   | lncRNA-antisense                   | -1.17 | 4.97E-03 | 3.03E-02 |
| ENSG00000197594 | ENPP1      | 6  | 131808016 | 131895155 | 87139   | protein coding                     | -1.17 | 4.92E-04 | 7.04E-03 |
| ENSG00000234177 | LINC01114  | 2  | 104746638 | 104757719 | 11081   | lncRNA                             | -1.17 | 1.08E-02 | 4.98E-02 |
| ENSG00000261404 | AC138627.1 | 16 | 73943078  | 74296762  | 353684  | lncRNA                             | -1.17 | 1.48E-04 | 3.23E-03 |
| ENSG00000213087 | AL356535.1 | 6  | 151225550 | 151225947 | 397     | processed pseudogene               | -1.17 | 5.22E-03 | 3.13E-02 |
| ENSG00000117971 | CHRNA8     | 15 | 78624111  | 78727754  | 103643  | protein coding                     | -1.17 | 4.35E-04 | 6.51E-03 |
| ENSG00000214353 | VAC14-AS1  | 16 | 70755035  | 70773251  | 18216   | lncRNA-antisense                   | -1.17 | 2.90E-05 | 1.07E-03 |
| ENSG00000130635 | COL5A1     | 9  | 134641803 | 134844843 | 203040  | protein coding                     | -1.17 | 1.07E-04 | 2.64E-03 |
| ENSG00000106852 | LHX6       | 9  | 122202577 | 122229626 | 27049   | protein coding                     | -1.18 | 1.95E-03 | 1.68E-02 |
| ENSG00000186115 | CYP4F2     | 19 | 15878023  | 15898077  | 20054   | protein coding                     | -1.18 | 1.03E-03 | 1.12E-02 |
| ENSG00000127530 | OR7C1      | 19 | 14789260  | 14835376  | 46116   | protein coding                     | -1.18 | 8.53E-04 | 9.93E-03 |
| ENSG00000129988 | LBP        | 20 | 38346482  | 38377013  | 30531   | protein coding                     | -1.18 | 8.92E-04 | 1.02E-02 |
| ENSG00000261043 | AC019294.3 | 15 | 75759501  | 75762405  | 2904    | lncRNA                             | -1.18 | 9.88E-04 | 1.09E-02 |
| ENSG00000267549 | AC006116.7 | 19 | 56314703  | 56365316  | 50613   | lncRNA-antisense                   | -1.18 | 6.88E-04 | 8.75E-03 |
| ENSG00000185652 | NTF3       | 12 | 5432108   | 5521536   | 89428   | protein coding                     | -1.18 | 6.79E-03 | 3.70E-02 |
| ENSG00000120332 | TNN1       | 1  | 175067833 | 175148075 | 80242   | protein coding                     | -1.18 | 4.32E-03 | 2.78E-02 |
| ENSG00000087250 | MT3        | 16 | 56589074  | 56591088  | 2014    | protein coding                     | -1.18 | 1.65E-03 | 1.50E-02 |
| ENSG00000128573 | FOXP2      | 7  | 114086327 | 114693772 | 607445  | protein coding                     | -1.18 | 1.78E-04 | 3.65E-03 |
| ENSG00000233296 | TMEM18-DT  | 2  | 677186    | 697382    | 20196   | lncRNA-antisense                   | -1.18 | 1.13E-03 | 1.19E-02 |
| ENSG00000133519 | ZDHHC8P1   | 22 | 23390606  | 23402726  | 12120   | transcribed unprocessed pseudogene | -1.18 | 2.24E-03 | 1.83E-02 |
| ENSG00000157214 | STAP2      | 7  | 90167590  | 90238137  | 70547   | protein coding                     | -1.18 | 4.69E-03 | 2.93E-02 |
| ENSG00000197702 | PARVA      | 11 | 12377563  | 12533356  | 157793  | protein coding                     | -1.18 | 5.05E-05 | 1.57E-03 |
| ENSG00000198570 | R3D3       | 1  | 211476522 | 211492162 | 15640   | protein coding                     | -1.18 | 4.79E-03 | 2.97E-02 |
| ENSG00000130943 | PKDREJ     | 22 | 46255663  | 46263343  | 7680    | protein coding                     | -1.18 | 4.44E-03 | 2.83E-02 |
| ENSG00000230623 | AC104461.1 | 1  | 200333193 | 200478669 | 145476  | lncRNA                             | -1.18 | 5.12E-03 | 3.09E-02 |
| ENSG00000232633 | AC079465.1 | 5  | 113323028 | 113437174 | 114146  | lncRNA-antisense                   | -1.18 | 8.59E-03 | 4.30E-02 |
| ENSG00000196090 | PTPRP      | 20 | 42072752  | 43189970  | 1117218 | protein coding                     | -1.18 | 1.01E-03 | 1.11E-02 |
| ENSG00000229536 | LINC02572  | 2  | 129825126 | 129877664 | 52538   | lncRNA                             | -1.18 | 4.32E-03 | 2.78E-02 |
| ENSG00000276067 | SLC23A4P   | 7  | 135246113 | 135317752 | 71639   | transcribed unprocessed pseudogene | -1.18 | 1.52E-03 | 1.42E-02 |
| ENSG00000072315 | TRPC5      | X  | 111774315 | 112082776 | 308461  | protein coding                     | -1.18 | 6.44E-03 | 3.57E-02 |
| ENSG00000197099 | AC068631.1 | 3  | 186579476 | 186772986 | 193510  | lncRNA-antisense                   | -1.18 | 2.56E-06 | 1.92E-04 |
| ENSG00000166444 | DENND2B    | 11 | 8693351   | 8910951   | 217600  | protein coding                     | -1.18 | 5.15E-06 | 3.18E-04 |
| ENSG00000214128 | TMEM213    | 7  | 138797952 | 138838101 | 40149   | protein coding                     | -1.18 | 4.82E-03 | 2.98E-02 |
| ENSG00000138152 | BTBD16     | 10 | 122271296 | 122338159 | 66863   | protein coding                     | -1.18 | 9.80E-04 | 1.09E-02 |
| ENSG00000140623 | SEPTIN12   | 16 | 4777606   | 4788398   | 10792   | protein coding                     | -1.18 | 8.61E-03 | 4.30E-02 |
| ENSG00000143341 | HMCN1      | 1  | 185734391 | 186190949 | 456558  | protein coding                     | -1.18 | 7.92E-05 | 2.16E-03 |
| ENSG00000204248 | COL11A2    | 6  | 33162681  | 33192499  | 29818   | protein coding                     | -1.18 | 7.43E-06 | 4.17E-04 |
| ENSG00000158955 | WNT9B      | 17 | 46833201  | 46886730  | 53529   | protein coding                     | -1.18 | 1.70E-03 | 1.53E-02 |
| ENSG00000106128 | GHRHR      | 7  | 30938669  | 30993254  | 54585   | protein coding                     | -1.18 | 2.03E-03 | 2.03E-02 |
| ENSG00000221947 | XKR9       | 8  | 70669339  | 70790371  | 121032  | protein coding                     | -1.18 | 1.00E-02 | 4.75E-02 |
| ENSG00000130176 | CNN1       | 19 | 11538767  | 11550323  | 11556   | protein coding                     | -1.18 | 2.44E-04 | 4.46E-03 |
| ENSG00000285486 | AC003043.2 | 17 | 44276368  | 44281182  | 4814    | lncRNA                             | -1.18 | 3.30E-03 | 2.35E-02 |
| ENSG00000246851 | AL157938.3 | 9  | 131189910 | 131194205 | 4295    | lncRNA-antisense                   | -1.18 | 2.86E-04 | 4.96E-03 |
| ENSG00000084636 | COL16A1    | 1  | 31652263  | 31704319  | 52056   | protein coding                     | -1.18 | 1.71E-03 | 1.54E-02 |
| ENSG00000099954 | CECR2      | 22 | 17359949  | 17558149  | 198200  | protein coding                     | -1.18 | 4.25E-08 | 8.13E-06 |
| ENSG00000072133 | RPS6K6     | X  | 84058346  | 84188199  | 129853  | protein coding                     | -1.18 | 2.15E-03 | 1.79E-02 |
| ENSG00000177133 | PRDM16-DT  | 1  | 3059615   | 3068437   | 8822    | lncRNA-antisense                   | -1.18 | 5.50E-03 | 3.22E-02 |
| ENSG00000264057 | AC103810.1 | 17 | 64927634  | 64934203  | 6569    | transcribed unprocessed pseudogene | -1.18 | 3.35E-03 | 2.37E-02 |
| ENSG00000235438 | ESRRAP2    | 13 | 21260015  | 21295003  | 34988   | transcribed processed pseudogene   | -1.18 | 8.36E-03 | 4.23E-02 |
| ENSG00000132972 | RNF17      | 13 | 24764169  | 24879921  | 115752  | protein coding                     | -1.18 | 9.12E-03 | 4.46E-02 |
| ENSG00000162728 | KCNJ9      | 1  | 160081538 | 160090563 | 9025    | protein coding                     | -1.18 | 1.07E-02 | 4.95E-02 |
| ENSG00000140600 | SH3GL3     | 15 | 83447228  | 83618743  | 171515  | protein coding                     | -1.19 | 7.77E-03 | 4.03E-02 |
| ENSG00000230561 | CCDC192    | 5  | 127703389 | 127941634 | 238245  | protein coding                     | -1.19 | 9.53E-03 | 4.59E-02 |
| ENSG00000242017 | ALG1L15P   | 3  | 156044155 | 156044948 | 793     | processed pseudogene               | -1.19 | 6.79E-03 | 3.70E-02 |
| ENSG00000246465 | AC138904.1 | 16 | 28284885  | 28292064  | 7179    | lncRNA                             | -1.19 | 7.20E-03 | 3.84E-02 |
| ENSG00000204529 | GUCY2EP    | 11 | 76694041  | 76719801  | 25760   | transcribed unprocessed pseudogene | -1.19 | 1.70E-03 | 1.53E-02 |

|                 |            |    |           |           |         |                                    |       |          |          |
|-----------------|------------|----|-----------|-----------|---------|------------------------------------|-------|----------|----------|
| ENSG0000006047  | YBX2       | 17 | 7288263   | 7294639   | 6376    | protein coding                     | -1.19 | 6.37E-03 | 3.55E-02 |
| ENSG00000231128 | AL137856.1 | 1  | 113812379 | 113870159 | 57780   | lncRNA-antisense                   | -1.19 | 7.62E-03 | 3.98E-02 |
| ENSG0000188803  | SHISA6     | 17 | 11241213  | 11564063  | 322850  | protein coding                     | -1.19 | 7.29E-04 | 9.04E-03 |
| ENSG00000225937 | PCA3       | 9  | 76691980  | 76863307  | 171327  | lncRNA-antisense                   | -1.19 | 4.32E-04 | 6.48E-03 |
| ENSG0000123572  | NRK        | X  | 105822539 | 105958610 | 136071  | protein coding                     | -1.19 | 6.58E-03 | 3.62E-02 |
| ENSG0000180934  | OR56A1     | 11 | 6019336   | 6034338   | 15002   | protein coding                     | -1.19 | 4.47E-03 | 2.85E-02 |
| ENSG00000254254 | AC012349.1 | 8  | 56445807  | 56556513  | 110706  | lncRNA-antisense                   | -1.19 | 1.06E-03 | 1.15E-02 |
| ENSG0000154316  | TDH        | 8  | 11339637  | 11368452  | 28815   | transcribed unitary pseudogene     | -1.19 | 2.95E-03 | 2.18E-02 |
| ENSG0000184144  | CNTN2      | 1  | 205042937 | 205078289 | 35352   | protein coding                     | -1.19 | 1.37E-03 | 1.34E-02 |
| ENSG00000228061 | AC131571.1 | 11 | 31618124  | 31767953  | 149829  | lncRNA-antisense                   | -1.19 | 2.04E-03 | 1.73E-02 |
| ENSG0000149380  | P4HA3      | 11 | 74235801  | 74311640  | 75839   | protein coding                     | -1.19 | 1.84E-03 | 1.61E-02 |
| ENSG0000151917  | BEND6      | 6  | 56955107  | 57027346  | 72239   | protein coding                     | -1.19 | 4.88E-03 | 3.00E-02 |
| ENSG00000263331 | AC008551.1 | 16 | 21120758  | 21130108  | 9350    | lncRNA-antisense                   | -1.19 | 8.39E-03 | 4.24E-02 |
| ENSG0000104722  | NEFM       | 8  | 24913758  | 24919098  | 5340    | protein coding                     | -1.19 | 3.54E-04 | 5.73E-03 |
| ENSG0000143473  | KCNH1      | 1  | 210676823 | 211134165 | 457342  | protein coding                     | -1.19 | 1.34E-03 | 1.32E-02 |
| ENSG00000205795 | CYS1       | 2  | 10056780  | 10080944  | 24164   | protein coding                     | -1.19 | 6.57E-03 | 3.61E-02 |
| ENSG0000115648  | MLPH       | 2  | 237485428 | 237555322 | 69894   | protein coding                     | -1.19 | 2.14E-05 | 8.77E-04 |
| ENSG00000205488 | CALML3-AS1 | 10 | 5510036   | 5526246   | 16210   | lncRNA-antisense                   | -1.19 | 7.76E-04 | 9.41E-03 |
| ENSG0000141738  | GRB7       | 17 | 39737927  | 39747291  | 9364    | protein coding                     | -1.19 | 3.64E-03 | 2.50E-02 |
| ENSG0000184486  | POU3F2     | 6  | 98834574  | 98839458  | 4884    | protein coding                     | -1.19 | 8.00E-03 | 4.11E-02 |
| ENSG00000272510 | AL121992.3 | 1  | 15565611  | 15565956  | 345     | lncRNA-antisense                   | -1.19 | 8.48E-03 | 4.27E-02 |
| ENSG00000258429 | PDF        | 16 | 69326913  | 69330588  | 3675    | protein coding                     | -1.19 | 8.75E-03 | 4.35E-02 |
| ENSG00000271978 | AL359643.2 | 6  | 5031756   | 5054423   | 22667   | lncRNA                             | -1.19 | 1.03E-02 | 4.82E-02 |
| ENSG00000265933 | LINC00868  | 18 | 6919496   | 6929966   | 10470   | lncRNA                             | -1.19 | 1.67E-03 | 1.51E-02 |
| ENSG0000185666  | SYN3       | 22 | 32507820  | 33058381  | 550561  | protein coding                     | -1.19 | 1.16E-05 | 5.78E-04 |
| ENSG00000264968 | AC090844.2 | 17 | 39927742  | 39939601  | 11859   | lncRNA                             | -1.19 | 6.73E-03 | 3.67E-02 |
| ENSG0000122863  | CHST3      | 10 | 71964395  | 72013558  | 49163   | protein coding                     | -1.19 | 9.05E-04 | 1.03E-02 |
| ENSG0000092607  | TBX15      | 1  | 118883046 | 118989556 | 106510  | protein coding                     | -1.19 | 3.56E-03 | 2.47E-02 |
| ENSG0000168334  | XIRP1      | 3  | 39183210  | 39192596  | 9386    | protein coding                     | -1.19 | 3.33E-03 | 2.36E-02 |
| ENSG0000100302  | RASD2      | 22 | 35540831  | 35553999  | 13168   | protein coding                     | -1.19 | 6.56E-03 | 3.61E-02 |
| ENSG0000181264  | TLCD5      | 11 | 120325296 | 120333686 | 8390    | protein coding                     | -1.19 | 9.96E-03 | 4.73E-02 |
| ENSG0000046604  | DSG2       | 18 | 31498177  | 31549008  | 50831   | protein coding                     | -1.19 | 2.46E-03 | 1.93E-02 |
| ENSG00000232139 | LINC00867  | 10 | 118341437 | 118398468 | 57031   | lncRNA                             | -1.19 | 1.07E-02 | 4.95E-02 |
| ENSG00000259275 | AC087477.2 | 15 | 96354237  | 96405235  | 50998   | lncRNA                             | -1.19 | 4.66E-03 | 2.92E-02 |
| ENSG0000153789  | CIBAR2     | 16 | 85098358  | 85112472  | 14114   | protein coding                     | -1.19 | 8.92E-03 | 4.40E-02 |
| ENSG0000173698  | ADGRG2     | X  | 18989307  | 19122637  | 133330  | protein coding                     | -1.19 | 3.85E-07 | 4.65E-05 |
| ENSG00000272631 | AC067750.1 | 10 | 86749754  | 86756298  | 6544    | lncRNA-antisense                   | -1.19 | 3.42E-04 | 5.61E-03 |
| ENSG0000181995  | LINC00301  | 11 | 60615729  | 60687267  | 71538   | transcribed unitary pseudogene     | -1.19 | 1.00E-02 | 4.74E-02 |
| ENSG00000231119 | AL031666.1 | 20 | 47352561  | 47354633  | 2072    | lncRNA-antisense                   | -1.19 | 9.04E-03 | 4.44E-02 |
| ENSG0000152208  | GRID2      | 4  | 92303966  | 93810157  | 1506191 | protein coding                     | -1.19 | 4.04E-03 | 2.68E-02 |
| ENSG00000259203 | AC018044.1 | 15 | 52800168  | 52805972  | 5804    | lncRNA                             | -1.19 | 8.95E-03 | 4.41E-02 |
| ENSG0000162456  | KNCN       | 1  | 46545641  | 46551647  | 6006    | protein coding                     | -1.19 | 9.03E-03 | 4.43E-02 |
| ENSG0000157510  | AFAP1L1    | 5  | 149271859 | 149343637 | 71778   | protein coding                     | -1.19 | 6.25E-05 | 1.80E-03 |
| ENSG0000126231  | PROZ       | 13 | 113158648 | 113172386 | 13738   | protein coding                     | -1.20 | 1.76E-03 | 1.56E-02 |
| ENSG0000198963  | RORB       | 9  | 74497335  | 74693177  | 195842  | protein coding                     | -1.20 | 8.13E-04 | 9.66E-03 |
| ENSG0000159337  | PLA2G4D    | 15 | 42067009  | 42094562  | 27553   | protein coding                     | -1.20 | 8.44E-04 | 9.88E-03 |
| ENSG0000174482  | LINGO2     | 9  | 27948078  | 28670286  | 722208  | protein coding                     | -1.20 | 1.29E-03 | 1.29E-02 |
| ENSG0000173227  | SYT12      | 11 | 67006778  | 67050883  | 44085   | protein coding                     | -1.20 | 2.41E-03 | 1.91E-02 |
| ENSG00000261420 | AL022069.1 | 6  | 166383189 | 166384824 | 1635    | lncRNA-antisense                   | -1.20 | 3.33E-03 | 2.36E-02 |
| ENSG00000279993 | AC078925.3 | 12 | 131025561 | 131028060 | 2499    | TEC                                | -1.20 | 8.82E-03 | 4.37E-02 |
| ENSG0000158786  | PLA2G2F    | 1  | 20139323  | 20150381  | 11058   | protein coding                     | -1.20 | 5.14E-04 | 7.23E-03 |
| ENSG00000267452 | LINC02073  | 17 | 51336646  | 51521401  | 184755  | lncRNA                             | -1.20 | 1.85E-04 | 3.73E-03 |
| ENSG0000189275  | LINC01164  | 10 | 131772398 | 131790199 | 17801   | lncRNA                             | -1.20 | 4.97E-03 | 3.03E-02 |
| ENSG00000287119 | AC092580.4 | 2  | 7671330   | 7675736   | 4406    | lncRNA                             | -1.20 | 8.36E-03 | 4.23E-02 |
| ENSG00000237975 | FLG-AS1    | 1  | 152168125 | 152445456 | 277331  | lncRNA-antisense                   | -1.20 | 3.55E-04 | 5.74E-03 |
| ENSG00000205426 | KRT81      | 12 | 52285913  | 52291534  | 5621    | protein coding                     | -1.20 | 1.28E-03 | 1.28E-02 |
| ENSG00000278685 | IQCA1L     | 7  | 151190873 | 151205496 | 14623   | protein coding                     | -1.20 | 2.38E-04 | 4.39E-03 |
| ENSG00000262966 | AC005695.1 | 17 | 9171068   | 9179118   | 8050    | lncRNA-antisense                   | -1.20 | 1.00E-03 | 1.10E-02 |
| ENSG0000070778  | PTPN21     | 14 | 88465778  | 88555007  | 89229   | protein coding                     | -1.20 | 1.78E-04 | 3.65E-03 |
| ENSG0000164591  | MYOZ3      | 5  | 150660882 | 150679368 | 18486   | protein coding                     | -1.20 | 3.05E-03 | 2.23E-02 |
| ENSG0000172061  | LRRC15     | 3  | 194355249 | 194369743 | 14494   | protein coding                     | -1.20 | 6.83E-04 | 8.71E-03 |
| ENSG00000233221 | AC133785.1 | 2  | 130830978 | 130836994 | 6016    | lncRNA-antisense                   | -1.20 | 5.43E-03 | 3.20E-02 |
| ENSG0000170858  | LILRP2     | 19 | 54707916  | 54713453  | 5537    | transcribed processed pseudogene   | -1.20 | 9.93E-03 | 4.72E-02 |
| ENSG0000169894  | MUC3A      | 7  | 100949534 | 100968347 | 18813   | protein coding                     | -1.20 | 3.32E-04 | 5.52E-03 |
| ENSG00000280560 | LINC01374  | 10 | 89853595  | 90225443  | 371848  | lncRNA                             | -1.20 | 2.90E-03 | 2.16E-02 |
| ENSG00000244968 | LIFR-AS1   | 5  | 38556765  | 38671216  | 114451  | lncRNA-antisense                   | -1.20 | 1.02E-03 | 1.12E-02 |
| ENSG0000124440  | HIF3A      | 19 | 46297042  | 46343433  | 46391   | protein coding                     | -1.20 | 4.63E-04 | 6.78E-03 |
| ENSG0000149596  | JPH2       | 20 | 44106590  | 44187188  | 80598   | protein coding                     | -1.20 | 7.37E-04 | 9.10E-03 |
| ENSG00000275734 | AC010538.1 | 16 | 89671568  | 89685304  | 13736   | lncRNA-sense overlapping           | -1.20 | 1.41E-03 | 1.36E-02 |
| ENSG0000137204  | SLC22A7    | 6  | 43295694  | 43305538  | 9844    | protein coding                     | -1.20 | 1.64E-03 | 1.50E-02 |
| ENSG00000002079 | MYH16      | 7  | 99238829  | 99311130  | 72301   | transcribed unitary pseudogene     | -1.20 | 7.27E-04 | 9.02E-03 |
| ENSG00000234537 | AL354751.1 | 9  | 92132398  | 92138629  | 6231    | unprocessed pseudogene             | -1.20 | 7.31E-03 | 3.88E-02 |
| ENSG00000232732 | AC097717.1 | 2  | 199867396 | 199911159 | 43763   | lncRNA                             | -1.20 | 1.25E-03 | 1.25E-02 |
| ENSG00000243910 | TUBA4B     | 2  | 219253243 | 219272197 | 18954   | protein coding                     | -1.20 | 6.48E-03 | 3.58E-02 |
| ENSG00000086205 | FOLH1      | 11 | 49145092  | 49208638  | 63546   | protein coding                     | -1.20 | 6.28E-03 | 3.51E-02 |
| ENSG0000124140  | SLC12A5    | 20 | 46021690  | 46060150  | 38460   | protein coding                     | -1.20 | 1.08E-04 | 2.65E-03 |
| ENSG0000162692  | VCAM1      | 1  | 100719742 | 100739045 | 19303   | protein coding                     | -1.20 | 5.94E-03 | 3.39E-02 |
| ENSG00000234457 | AC008960.1 | 7  | 36305631  | 36305904  | 273     | processed pseudogene               | -1.20 | 6.06E-03 | 3.44E-02 |
| ENSG00000227888 | FAM66A     | 8  | 12362019  | 12388296  | 26277   | lncRNA                             | -1.20 | 1.07E-02 | 4.94E-02 |
| ENSG00000223553 | SMPD4P1    | 22 | 20602595  | 20656914  | 54319   | transcribed unprocessed pseudogene | -1.20 | 3.25E-04 | 5.43E-03 |
| ENSG0000173947  | PIFO       | 1  | 111346600 | 111353013 | 6413    | protein coding                     | -1.20 | 2.95E-03 | 2.18E-02 |
| ENSG00000069535 | MAOB       | X  | 43766610  | 43882450  | 115840  | protein coding                     | -1.20 | 5.27E-03 | 3.14E-02 |
| ENSG0000167080  | B4GALNT2   | 17 | 49132460  | 49176840  | 44380   | protein coding                     | -1.20 | 1.63E-03 | 1.49E-02 |
| ENSG0000102313  | ITIH6      | X  | 54748918  | 54798255  | 49337   | protein coding                     | -1.20 | 6.20E-03 | 3.52E-02 |
| ENSG00000285781 | AL117340.1 | 10 | 31362799  | 31364049  | 1250    | unprocessed pseudogene             | -1.20 | 8.81E-03 | 4.37E-02 |
| ENSG00000260470 | AC023794.5 | 12 | 54145069  | 54147225  | 2156    | lncRNA                             | -1.20 | 4.63E-03 | 2.91E-02 |
| ENSG0000036828  | CASR       | 3  | 122183668 | 122291629 | 107961  | protein coding                     | -1.20 | 1.04E-04 | 2.59E-03 |
| ENSG0000169181  | GSG1L      | 16 | 27787528  | 28063714  | 276186  | protein coding                     | -1.20 | 6.19E-04 | 8.21E-03 |
| ENSG0000165061  | ZMAT4      | 8  | 40530590  | 40897833  | 367243  | protein coding                     | -1.20 | 1.26E-03 | 1.27E-02 |
| ENSG00000287918 | AF274853.1 | X  | 151303384 | 151397142 | 93758   | lncRNA                             | -1.20 | 2.15E-03 | 1.79E-02 |



|                 |            |    |           |           |         |                                    |       |          |          |
|-----------------|------------|----|-----------|-----------|---------|------------------------------------|-------|----------|----------|
| ENSG0000164972  | C9orf24    | 9  | 34379019  | 34397810  | 18791   | protein coding                     | -1.20 | 2.60E-03 | 2.02E-02 |
| ENSG00000226686 | LINC015535 | 19 | 37251885  | 37265535  | 13650   | lncRNA                             | -1.20 | 1.79E-04 | 3.65E-03 |
| ENSG00000137868 | STRAB6     | 15 | 74179466  | 74212267  | 32801   | protein coding                     | -1.20 | 3.65E-03 | 2.50E-02 |
| ENSG00000270112 | AC090241.2 | 18 | 46756487  | 46802449  | 45962   | lncRNA                             | -1.20 | 3.58E-04 | 5.77E-03 |
| ENSG00000285108 | AC103718.1 | 8  | 129685401 | 129723023 | 37622   | lncRNA                             | -1.20 | 2.37E-03 | 1.89E-02 |
| ENSG00000203808 | BVES-AS1   | 6  | 105136308 | 105169952 | 33644   | lncRNA-antisense                   | -1.20 | 2.17E-03 | 1.80E-02 |
| ENSG00000272168 | CASC15     | 6  | 21664185  | 22654455  | 990270  | lncRNA                             | -1.20 | 1.50E-06 | 1.32E-04 |
| ENSG00000133105 | RXFP2      | 13 | 31739526  | 31803389  | 63863   | protein coding                     | -1.20 | 5.12E-03 | 3.09E-02 |
| ENSG00000254211 | LINC01485  | 5  | 173778527 | 173809039 | 30512   | lncRNA                             | -1.20 | 1.72E-03 | 1.54E-02 |
| ENSG00000227733 | AC239809.3 | 1  | 148159213 | 148255012 | 95799   | lncRNA                             | -1.20 | 1.01E-04 | 2.54E-03 |
| ENSG00000137699 | TRIM29     | 11 | 120111286 | 120185529 | 74243   | protein coding                     | -1.20 | 9.81E-04 | 1.09E-02 |
| ENSG00000120549 | KIAA1217   | 10 | 23694746  | 24547848  | 853102  | protein coding                     | -1.20 | 1.41E-04 | 3.13E-03 |
| ENSG00000284668 | LINC02780  | 1  | 3976133   | 4012704   | 36571   | lncRNA                             | -1.21 | 7.41E-03 | 3.91E-02 |
| ENSG00000263574 | AC125421.1 | 17 | 73737854  | 73756932  | 19078   | lncRNA                             | -1.21 | 6.64E-03 | 3.64E-02 |
| ENSG00000027644 | INSRR      | 1  | 156840063 | 156859117 | 19054   | protein coding                     | -1.21 | 7.59E-03 | 3.97E-02 |
| ENSG00000168676 | KCTD19     | 16 | 67289428  | 67326760  | 37332   | protein coding                     | -1.21 | 6.71E-04 | 8.63E-03 |
| ENSG00000173077 | DELEC1     | 9  | 114850968 | 115402644 | 551676  | lncRNA                             | -1.21 | 2.57E-04 | 4.63E-03 |
| ENSG00000102678 | FGF9       | 13 | 21671073  | 21704498  | 33425   | protein coding                     | -1.21 | 2.43E-04 | 4.46E-03 |
| ENSG00000236172 | MIR7515HG  | 2  | 6615389   | 6651104   | 35715   | lncRNA                             | -1.21 | 3.95E-03 | 2.64E-02 |
| ENSG00000186190 | BPIFB3     | 20 | 33055424  | 33073628  | 18204   | protein coding                     | -1.21 | 2.13E-03 | 1.77E-02 |
| ENSG00000094755 | GABRP      | 5  | 170763350 | 170814047 | 50697   | protein coding                     | -1.21 | 1.76E-03 | 1.56E-02 |
| ENSG00000184058 | TBX1       | 22 | 19756703  | 19783593  | 26890   | protein coding                     | -1.21 | 2.26E-04 | 4.24E-03 |
| ENSG00000275340 | FGD5P1     | 3  | 13933056  | 13937477  | 4421    | transcribed unprocessed pseudogene | -1.21 | 2.65E-03 | 2.04E-02 |
| ENSG00000124493 | GRM4       | 6  | 34018643  | 34155622  | 136979  | protein coding                     | -1.21 | 1.66E-04 | 3.48E-03 |
| ENSG00000161609 | KASH5      | 19 | 49388219  | 49417990  | 29771   | protein coding                     | -1.21 | 1.46E-03 | 1.39E-02 |
| ENSG00000101049 | SGK2       | 20 | 43558968  | 43588237  | 29269   | protein coding                     | -1.21 | 2.50E-05 | 9.74E-04 |
| ENSG00000286502 | AL645768.1 | 9  | 134770651 | 134775671 | 5020    | lncRNA                             | -1.21 | 6.43E-03 | 3.57E-02 |
| ENSG00000248994 | AC124852.1 | 5  | 1931064   | 2119926   | 188862  | lncRNA                             | -1.21 | 1.19E-03 | 1.23E-02 |
| ENSG00000115461 | IGFBP5     | 2  | 216672105 | 216695549 | 23444   | protein coding                     | -1.21 | 4.35E-04 | 6.51E-03 |
| ENSG00000259347 | AC087482.1 | 15 | 66984103  | 67065268  | 81165   | lncRNA-antisense                   | -1.21 | 4.06E-03 | 2.69E-02 |
| ENSG00000273111 | LYPD4      | 19 | 41837074  | 41844697  | 7623    | protein coding                     | -1.21 | 3.40E-03 | 2.40E-02 |
| ENSG00000236991 | EDRF1-AS1  | 10 | 125725634 | 125752110 | 26476   | lncRNA-antisense                   | -1.21 | 2.09E-03 | 1.76E-02 |
| ENSG00000278916 | CEP83-DT   | 12 | 94460003  | 94462484  | 2481    | lncRNA                             | -1.21 | 5.61E-03 | 3.26E-02 |
| ENSG00000287454 | AC008149.2 | 12 | 96229563  | 96235650  | 6087    | lncRNA                             | -1.21 | 6.68E-06 | 3.89E-04 |
| ENSG00000187908 | DMBT1      | 10 | 122560665 | 122643736 | 83071   | protein coding                     | -1.21 | 1.97E-04 | 3.88E-03 |
| ENSG00000231290 | APCDD1L-DT | 20 | 58515379  | 58619888  | 104509  | lncRNA                             | -1.21 | 3.23E-04 | 5.41E-03 |
| ENSG00000162399 | BSND       | 1  | 54998933  | 55017172  | 18239   | protein coding                     | -1.21 | 6.24E-03 | 3.50E-02 |
| ENSG00000185904 | LINC00839  | 10 | 42475480  | 42495337  | 19857   | lncRNA                             | -1.21 | 6.28E-03 | 3.52E-02 |
| ENSG00000250848 | AC021087.2 | 5  | 288833    | 290321    | 1488    | processed pseudogene               | -1.21 | 8.39E-03 | 4.24E-02 |
| ENSG00000166862 | CACNG2     | 22 | 36560857  | 36703752  | 142895  | protein coding                     | -1.21 | 6.36E-03 | 3.54E-02 |
| ENSG00000115183 | TANC1      | 2  | 158968640 | 159232659 | 264019  | protein coding                     | -1.21 | 6.77E-07 | 7.39E-05 |
| ENSG00000236519 | LINC01424  | 21 | 44802577  | 44804717  | 2140    | lncRNA-antisense                   | -1.21 | 3.71E-03 | 2.53E-02 |
| ENSG00000198046 | ZNF667     | 19 | 56439325  | 56478065  | 38740   | protein coding                     | -1.21 | 1.75E-05 | 7.72E-04 |
| ENSG00000169752 | NRG4       | 15 | 75935969  | 76059795  | 123826  | protein coding                     | -1.21 | 2.09E-04 | 4.03E-03 |
| ENSG00000226571 | AL592429.2 | 6  | 139271362 | 139667284 | 395922  | lncRNA-antisense                   | -1.21 | 7.56E-07 | 8.02E-05 |
| ENSG00000163702 | IL17RC     | 3  | 9917074   | 9933630   | 16556   | protein coding                     | -1.21 | 2.71E-06 | 2.01E-04 |
| ENSG00000166866 | MYO1A      | 12 | 57028517  | 57051198  | 22681   | protein coding                     | -1.21 | 1.66E-04 | 3.48E-03 |
| ENSG00000163017 | ACTG2      | 2  | 73892314  | 73919865  | 27551   | protein coding                     | -1.21 | 5.97E-03 | 3.41E-02 |
| ENSG00000228718 | LINC02521  | 6  | 2617144   | 2640001   | 22857   | lncRNA                             | -1.21 | 8.58E-03 | 4.29E-02 |
| ENSG00000101955 | SRPX       | X  | 38149336  | 38220924  | 71588   | protein coding                     | -1.21 | 4.90E-03 | 3.01E-02 |
| ENSG00000266501 | ATG12P1    | 17 | 73067870  | 73068288  | 418     | processed pseudogene               | -1.21 | 6.17E-03 | 3.47E-02 |
| ENSG00000204442 | FAM155A    | 13 | 107163510 | 107867496 | 703986  | protein coding                     | -1.21 | 9.84E-03 | 4.70E-02 |
| ENSG00000159261 | CLDN14     | 21 | 36460621  | 36576569  | 115948  | protein coding                     | -1.21 | 1.69E-03 | 1.52E-02 |
| ENSG00000157542 | KCNJ6      | 21 | 37607373  | 38121345  | 513972  | protein coding                     | -1.21 | 3.38E-04 | 5.57E-03 |
| ENSG00000228549 | BX284668.2 | 1  | 16870945  | 16883659  | 12714   | lncRNA                             | -1.21 | 1.79E-03 | 1.58E-02 |
| ENSG00000224582 | LINC01015  | 6  | 29528721  | 29533665  | 4944    | lncRNA                             | -1.21 | 9.49E-04 | 1.06E-02 |
| ENSG00000167634 | NLRP7      | 19 | 54923509  | 54966312  | 42803   | protein coding                     | -1.21 | 4.28E-04 | 6.45E-03 |
| ENSG00000186094 | AGBL4      | 1  | 48532854  | 50023954  | 1491100 | protein coding                     | -1.22 | 1.07E-03 | 1.16E-02 |
| ENSG00000101638 | ST8IA5     | 18 | 46667821  | 46759257  | 91436   | protein coding                     | -1.22 | 2.76E-05 | 1.04E-03 |
| ENSG00000173838 | MARCFH10   | 17 | 62701314  | 62808344  | 107030  | protein coding                     | -1.22 | 4.64E-04 | 6.78E-03 |
| ENSG00000165091 | TMC1       | 9  | 72521608  | 72838297  | 316689  | protein coding                     | -1.22 | 4.22E-04 | 6.39E-03 |
| ENSG00000125207 | PWIL1      | 12 | 130337887 | 130372637 | 34750   | protein coding                     | -1.22 | 1.02E-03 | 1.12E-02 |
| ENSG00000250241 | AC10583.1  | 4  | 133075311 | 133149147 | 73836   | lncRNA                             | -1.22 | 3.25E-03 | 2.32E-02 |
| ENSG00000148225 | WDR31      | 9  | 113313222 | 113340298 | 27076   | protein coding                     | -1.22 | 9.48E-04 | 1.06E-02 |
| ENSG00000240216 | CPHL1P     | 3  | 149229356 | 149291800 | 62444   | transcribed unitary pseudogene     | -1.22 | 9.12E-03 | 4.46E-02 |
| ENSG00000262898 | AC139099.2 | 17 | 83135734  | 83221442  | 85708   | lncRNA                             | -1.22 | 3.33E-03 | 2.36E-02 |
| ENSG00000240086 | AC092969.1 | 3  | 135138469 | 135439888 | 301419  | lncRNA-antisense                   | -1.22 | 4.18E-04 | 6.36E-03 |
| ENSG00000259495 | AC016705.2 | 15 | 80344853  | 80404214  | 59361   | lncRNA                             | -1.22 | 2.67E-03 | 2.05E-02 |
| ENSG00000108231 | LG11       | 10 | 93757840  | 93806272  | 48432   | protein coding                     | -1.22 | 4.21E-04 | 6.39E-03 |
| ENSG00000186510 | CLCNKA     | 1  | 16018875  | 16034050  | 15175   | protein coding                     | -1.22 | 8.30E-04 | 9.78E-03 |
| ENSG00000231881 | AL109615.2 | 6  | 44058792  | 44089288  | 30496   | lncRNA                             | -1.22 | 3.78E-04 | 5.99E-03 |
| ENSG00000285697 | AC002059.3 | 22 | 29387909  | 29417757  | 29848   | transcribed unprocessed pseudogene | -1.22 | 7.89E-03 | 4.07E-02 |
| ENSG00000180616 | SSTR2      | 17 | 73165010  | 73176633  | 11623   | protein coding                     | -1.22 | 7.21E-04 | 8.97E-03 |
| ENSG00000262185 | LINC02861  | 16 | 3930806   | 3950586   | 19780   | lncRNA                             | -1.22 | 3.23E-03 | 2.31E-02 |
| ENSG00000249896 | LINC02495  | 4  | 6200733   | 6239937   | 39204   | transcribed unprocessed pseudogene | -1.22 | 1.49E-05 | 6.81E-04 |
| ENSG00000164946 | FREM1      | 9  | 14737152  | 14910995  | 173843  | protein coding                     | -1.22 | 4.16E-04 | 6.34E-03 |
| ENSG00000125046 | SSUH2      | 3  | 8619400   | 8745040   | 125640  | protein coding                     | -1.22 | 6.18E-04 | 8.20E-03 |
| ENSG00000065325 | GLP2R      | 17 | 9822206   | 9892099   | 69893   | protein coding                     | -1.22 | 4.12E-03 | 2.71E-02 |
| ENSG00000146755 | TRIM50     | 7  | 73312536  | 73328082  | 15546   | protein coding                     | -1.22 | 6.61E-03 | 3.63E-02 |
| ENSG00000130707 | ASS1       | 9  | 13044961  | 130501274 | 56313   | protein coding                     | -1.22 | 5.47E-04 | 7.58E-03 |
| ENSG00000221955 | SLC12A8    | 3  | 125082636 | 125212864 | 130228  | protein coding                     | -1.22 | 5.33E-05 | 1.63E-03 |
| ENSG00000142515 | KLK3       | 19 | 50854915  | 50860764  | 5849    | protein coding                     | -1.22 | 4.60E-03 | 2.89E-02 |
| ENSG00000113073 | SLCA49     | 5  | 140360194 | 140375141 | 14947   | protein coding                     | -1.22 | 2.20E-04 | 4.16E-03 |
| ENSG00000282057 | AC092807.3 | 1  | 85482281  | 85578250  | 95969   | lncRNA                             | -1.22 | 1.04E-02 | 4.87E-02 |
| ENSG00000126952 | NXF5       | X  | 101832112 | 101857577 | 25465   | protein coding                     | -1.22 | 9.04E-03 | 4.44E-02 |
| ENSG00000144406 | UNC80      | 2  | 209771832 | 209999300 | 227468  | protein coding                     | -1.22 | 3.73E-04 | 5.93E-03 |
| ENSG00000119283 | TRIM67     | 1  | 231162112 | 231221556 | 59444   | protein coding                     | -1.22 | 5.05E-05 | 1.57E-03 |
| ENSG00000263724 | DLAGP1-AS3 | 18 | 3878058   | 3897069   | 19011   | lncRNA-antisense                   | -1.22 | 1.05E-03 | 1.14E-02 |
| ENSG00000161243 | FBXO27     | 19 | 38990714  | 39032785  | 42071   | protein coding                     | -1.22 | 2.32E-03 | 1.87E-02 |
| ENSG00000140873 | ADAMTS18   | 16 | 77247813  | 77435034  | 187221  | protein coding                     | -1.22 | 9.64E-04 | 1.08E-02 |

|                 |             |    |           |           |         |                                    |       |          |          |
|-----------------|-------------|----|-----------|-----------|---------|------------------------------------|-------|----------|----------|
| ENSG0000069018  | TRPC7       | 5  | 136212745 | 136365545 | 152800  | protein coding                     | -1.22 | 2.21E-03 | 1.82E-02 |
| ENSG00000143839 | REN         | 1  | 204154819 | 204190324 | 35505   | protein coding                     | -1.22 | 8.93E-03 | 4.40E-02 |
| ENSG00000151025 | GPR158      | 10 | 25174802  | 25602229  | 427427  | protein coding                     | -1.22 | 4.53E-03 | 2.87E-02 |
| ENSG00000100167 | SEPTIN3     | 22 | 41969475  | 41998221  | 28746   | protein coding                     | -1.22 | 1.26E-03 | 1.27E-02 |
| ENSG00000149948 | HMG2A       | 12 | 65824460  | 65966291  | 141831  | protein coding                     | -1.22 | 1.18E-04 | 2.79E-03 |
| ENSG00000259362 | AC046168.1  | 15 | 77525540  | 77534110  | 8570    | lncRNA                             | -1.22 | 6.85E-03 | 3.72E-02 |
| ENSG00000180525 | PRR26       | 10 | 649948    | 669581    | 19633   | lncRNA                             | -1.22 | 3.84E-04 | 6.05E-03 |
| ENSG00000159289 | GOLGA6A     | 15 | 74069857  | 74082550  | 12693   | protein coding                     | -1.22 | 1.61E-03 | 1.48E-02 |
| ENSG00000133477 | FAM83F      | 22 | 39994954  | 40043534  | 48580   | protein coding                     | -1.22 | 2.64E-05 | 1.01E-03 |
| ENSG00000154553 | PDLIM3      | 4  | 185500660 | 185535507 | 34847   | protein coding                     | -1.22 | 1.43E-03 | 1.38E-02 |
| ENSG00000154783 | FGD5        | 3  | 14810853  | 14934571  | 123718  | protein coding                     | -1.22 | 3.43E-04 | 5.62E-03 |
| ENSG00000205301 | MGAT4D      | 4  | 140442262 | 140498377 | 56115   | protein coding                     | -1.22 | 4.09E-03 | 2.70E-02 |
| ENSG00000100604 | CHGA        | 14 | 92923150  | 92935285  | 12135   | protein coding                     | -1.22 | 6.88E-04 | 8.75E-03 |
| ENSG00000170214 | ADRA1B      | 5  | 159865080 | 159973012 | 107932  | protein coding                     | -1.22 | 8.35E-03 | 4.23E-02 |
| ENSG00000138083 | SIX3        | 2  | 44941702  | 44946071  | 4369    | protein coding                     | -1.22 | 5.52E-03 | 3.23E-02 |
| ENSG00000186832 | KRT16       | 17 | 41609778  | 41615899  | 6121    | protein coding                     | -1.22 | 3.58E-03 | 2.47E-02 |
| ENSG00000185532 | PRKJ1       | 10 | 50990888  | 52298423  | 1307535 | protein coding                     | -1.22 | 6.59E-04 | 8.53E-03 |
| ENSG00000144852 | NR112       | 3  | 119780484 | 119818485 | 38001   | protein coding                     | -1.22 | 2.56E-03 | 2.00E-02 |
| ENSG00000241226 | RN7SL836P   | 19 | 45651510  | 45651805  | 295     | misc RNA                           | -1.22 | 6.05E-03 | 3.44E-02 |
| ENSG00000184984 | CHRM5       | 15 | 33968497  | 34067458  | 98961   | protein coding                     | -1.22 | 4.98E-03 | 3.04E-02 |
| ENSG00000166840 | GLYTL1      | 11 | 58905398  | 59043527  | 138129  | protein coding                     | -1.22 | 6.56E-03 | 3.61E-02 |
| ENSG00000158966 | CACAT1      | 1  | 64470129  | 64693058  | 222929  | protein coding                     | -1.23 | 5.74E-07 | 6.56E-05 |
| ENSG00000160808 | MYL3        | 3  | 46835111  | 46882172  | 47061   | protein coding                     | -1.23 | 8.05E-03 | 4.12E-02 |
| ENSG00000105929 | ATP6V0A4    | 7  | 138706294 | 138799560 | 93266   | protein coding                     | -1.23 | 3.95E-03 | 2.64E-02 |
| ENSG00000168481 | LG13        | 8  | 22146830  | 22157084  | 10254   | protein coding                     | -1.23 | 2.58E-03 | 2.00E-02 |
| ENSG00000187323 | DCC         | 18 | 52340197  | 53535903  | 1195706 | protein coding                     | -1.23 | 5.01E-04 | 7.12E-03 |
| ENSG00000213171 | LINGO4      | 1  | 151800264 | 151805419 | 5155    | protein coding                     | -1.23 | 2.80E-03 | 2.11E-02 |
| ENSG00000177453 | NIM1K       | 5  | 43192071  | 43280850  | 88779   | protein coding                     | -1.23 | 3.88E-05 | 1.31E-03 |
| ENSG00000181626 | ANKRD62     | 18 | 12093843  | 12129764  | 35921   | protein coding                     | -1.23 | 1.44E-03 | 1.38E-02 |
| ENSG00000164303 | ENPP6       | 4  | 184088706 | 184221230 | 132524  | protein coding                     | -1.23 | 5.56E-03 | 3.24E-02 |
| ENSG00000124564 | SLC17A3     | 6  | 25833066  | 25882286  | 49220   | protein coding                     | -1.23 | 5.36E-03 | 3.17E-02 |
| ENSG00000160339 | FCN2        | 9  | 134880810 | 134887523 | 6713    | protein coding                     | -1.23 | 3.30E-03 | 2.35E-02 |
| ENSG00000154175 | ABI3BP      | 3  | 100749156 | 100993515 | 244359  | protein coding                     | -1.23 | 1.10E-04 | 2.68E-03 |
| ENSG00000163638 | ADAMTS9     | 3  | 64515654  | 64688000  | 172346  | protein coding                     | -1.23 | 6.52E-04 | 8.49E-03 |
| ENSG00000188659 | SAXO2       | 15 | 82262810  | 82284930  | 22120   | protein coding                     | -1.23 | 3.17E-04 | 5.32E-03 |
| ENSG00000079112 | CDH17       | 8  | 94127162  | 94217303  | 90141   | protein coding                     | -1.23 | 4.33E-03 | 2.79E-02 |
| ENSG00000236975 | LINC02814   | 1  | 229087114 | 229205428 | 118214  | lncRNA                             | -1.23 | 7.34E-03 | 3.89E-02 |
| ENSG00000135824 | RGS8        | 1  | 182641816 | 182684576 | 42760   | protein coding                     | -1.23 | 9.38E-04 | 1.06E-02 |
| ENSG00000251151 | HOXC-AS3    | 12 | 53981509  | 53985519  | 4010    | lncRNA                             | -1.23 | 6.77E-03 | 3.69E-02 |
| ENSG00000165186 | PTCHD1      | X  | 23334849  | 23404374  | 69525   | protein coding                     | -1.23 | 1.63E-03 | 1.49E-02 |
| ENSG00000205126 | ACCSL       | 11 | 44047981  | 44059977  | 11996   | protein coding                     | -1.23 | 8.78E-03 | 4.35E-02 |
| ENSG00000284745 | AL589702.1  | 1  | 2960658   | 2968707   | 8049    | lncRNA                             | -1.23 | 3.76E-03 | 2.56E-02 |
| ENSG00000157703 | SVOP1       | 7  | 138594285 | 138701362 | 107077  | protein coding                     | -1.23 | 1.35E-03 | 1.33E-02 |
| ENSG00000174498 | IGDCC3      | 15 | 65327127  | 65378002  | 50875   | protein coding                     | -1.23 | 3.35E-04 | 5.55E-03 |
| ENSG00000134376 | CRB1        | 1  | 197268204 | 197478455 | 210251  | protein coding                     | -1.23 | 2.04E-05 | 8.54E-04 |
| ENSG00000101311 | FERMT1      | 20 | 6074845   | 6123030   | 48185   | protein coding                     | -1.23 | 1.26E-03 | 1.27E-02 |
| ENSG00000171004 | HS6ST2      | X  | 132626016 | 132961395 | 335379  | protein coding                     | -1.23 | 4.63E-03 | 2.91E-02 |
| ENSG00000135373 | EHF         | 11 | 34621093  | 34663288  | 42195   | protein coding                     | -1.23 | 9.50E-05 | 2.44E-03 |
| ENSG00000141665 | FBXO15      | 18 | 74073353  | 74147843  | 74490   | protein coding                     | -1.23 | 2.83E-05 | 1.06E-03 |
| ENSG00000154997 | SEPTIN14    | 7  | 55793540  | 55862755  | 69215   | protein coding                     | -1.23 | 6.11E-03 | 3.45E-02 |
| ENSG00000163749 | CDC158      | 4  | 76312997  | 76421868  | 108871  | protein coding                     | -1.23 | 1.40E-03 | 1.36E-02 |
| ENSG00000225361 | PPP1R26-AS1 | 9  | 135462727 | 135480777 | 18050   | lncRNA-antisense                   | -1.23 | 3.20E-05 | 1.15E-03 |
| ENSG00000227877 | MRLN        | 10 | 59736692  | 59756041  | 19349   | protein coding                     | -1.23 | 1.04E-02 | 4.86E-02 |
| ENSG00000165757 | JCAD        | 10 | 30012803  | 30115494  | 102691  | protein coding                     | -1.23 | 1.94E-04 | 3.84E-03 |
| ENSG00000251209 | LINC00923   | 15 | 97572185  | 97875650  | 303465  | lncRNA                             | -1.23 | 1.49E-05 | 6.82E-04 |
| ENSG00000163701 | IL17RE      | 3  | 9902612   | 9916402   | 13790   | protein coding                     | -1.23 | 3.48E-04 | 5.66E-03 |
| ENSG00000249738 | AC00891.1   | 5  | 159310745 | 159805536 | 494791  | lncRNA-antisense                   | -1.23 | 1.37E-05 | 6.42E-04 |
| ENSG00000162706 | CADM3       | 1  | 159171609 | 159203313 | 31704   | protein coding                     | -1.23 | 8.63E-03 | 4.31E-02 |
| ENSG00000185070 | FLRT2       | 14 | 85530144  | 85654428  | 124284  | protein coding                     | -1.23 | 5.78E-05 | 1.71E-03 |
| ENSG00000124743 | KLHL31      | 6  | 53647916  | 53665756  | 17840   | protein coding                     | -1.23 | 2.24E-03 | 1.83E-02 |
| ENSG00000253837 | AC09197.1   | 8  | 23336171  | 23366125  | 29954   | lncRNA                             | -1.23 | 1.79E-03 | 1.58E-02 |
| ENSG00000156194 | PPEF2       | 4  | 75859864  | 75902571  | 42707   | protein coding                     | -1.23 | 3.79E-04 | 5.99E-03 |
| ENSG00000188958 | UTS2B       | 3  | 191267168 | 191330536 | 63368   | protein coding                     | -1.23 | 3.12E-03 | 2.26E-02 |
| ENSG00000113594 | LIFR        | 5  | 38474668  | 38608354  | 133686  | protein coding                     | -1.23 | 1.08E-04 | 2.65E-03 |
| ENSG00000126266 | FFAR1       | 19 | 35351552  | 35353862  | 2310    | protein coding                     | -1.24 | 8.27E-03 | 4.20E-02 |
| ENSG00000169218 | RSP01       | 1  | 37611350  | 37634892  | 23542   | protein coding                     | -1.24 | 1.66E-03 | 1.51E-02 |
| ENSG00000274253 | AC138649.1  | 15 | 22757841  | 22778741  | 20900   | lncRNA-sense overlapping           | -1.24 | 3.61E-04 | 5.80E-03 |
| ENSG00000280222 | AL365209.1  | 1  | 18109389  | 18115861  | 6472    | TEC                                | -1.24 | 2.26E-03 | 1.84E-02 |
| ENSG00000119125 | GDA         | 9  | 72114595  | 72257193  | 142598  | protein coding                     | -1.24 | 1.26E-03 | 1.27E-02 |
| ENSG00000121446 | RGSL1       | 1  | 182409192 | 182560599 | 151407  | protein coding                     | -1.24 | 2.07E-04 | 4.01E-03 |
| ENSG00000204603 | LINC01257   | 12 | 131165011 | 131232940 | 67929   | lncRNA                             | -1.24 | 2.68E-03 | 2.04E-02 |
| ENSG00000183242 | WT1-AS      | 11 | 32435518  | 32458769  | 23251   | lncRNA-bidirectional promoter      | -1.24 | 7.08E-04 | 8.87E-03 |
| ENSG00000287950 | AC009432.2  | 15 | 94455469  | 94550572  | 95103   | lncRNA                             | -1.24 | 1.56E-03 | 1.45E-02 |
| ENSG00000109625 | CPZ         | 4  | 8592660   | 8619759   | 27099   | protein coding                     | -1.24 | 5.04E-03 | 3.06E-02 |
| ENSG00000185313 | SCN10A      | 3  | 38696802  | 38816286  | 119484  | protein coding                     | -1.24 | 6.37E-04 | 8.36E-03 |
| ENSG00000287229 | AC09731.1   | 12 | 113863402 | 113871597 | 8195    | lncRNA                             | -1.24 | 1.03E-02 | 4.85E-02 |
| ENSG00000259520 | AC051619.4  | 15 | 45235930  | 45279251  | 43321   | lncRNA-antisense                   | -1.24 | 1.51E-04 | 3.27E-03 |
| ENSG00000177675 | CD163L1     | 12 | 7346685   | 7479897   | 133212  | protein coding                     | -1.24 | 4.07E-04 | 6.28E-03 |
| ENSG00000226145 | KRT16P6     | 17 | 16817983  | 16822579  | 4596    | transcribed unprocessed pseudogene | -1.24 | 6.34E-03 | 3.53E-02 |
| ENSG00000186334 | SLC36A3     | 5  | 151276358 | 151303766 | 27408   | protein coding                     | -1.24 | 8.66E-03 | 4.32E-02 |
| ENSG00000272808 | AC015712.6  | 15 | 100849831 | 100876836 | 27005   | lncRNA                             | -1.24 | 3.82E-03 | 2.58E-02 |
| ENSG00000189014 | SHLD2P3     | 10 | 47689707  | 47730436  | 40729   | unprocessed pseudogene             | -1.24 | 5.44E-03 | 3.20E-02 |
| ENSG00000230140 | NPAS2-AS1   | 2  | 100970767 | 100977766 | 6999    | lncRNA-antisense                   | -1.24 | 7.89E-03 | 4.07E-02 |
| ENSG00000178645 | C10orf53    | 10 | 49679651  | 49710261  | 30610   | protein coding                     | -1.24 | 9.50E-03 | 4.58E-02 |
| ENSG00000231407 | GORAB-AS1   | 1  | 170460453 | 170532647 | 72194   | lncRNA-antisense                   | -1.24 | 2.85E-03 | 2.13E-02 |
| ENSG00000253741 | LNCOC1      | 8  | 142701857 | 142727016 | 25159   | lncRNA-antisense                   | -1.24 | 1.20E-03 | 1.24E-02 |
| ENSG00000166961 | MS4A15      | 11 | 60756867  | 60776733  | 19866   | protein coding                     | -1.24 | 2.72E-03 | 2.08E-02 |
| ENSG00000169604 | ANTXR1      | 2  | 69013179  | 69249327  | 236148  | protein coding                     | -1.24 | 1.60E-03 | 1.47E-02 |
| ENSG00000113578 | FGF1        | 5  | 142592178 | 142698070 | 105892  | protein coding                     | -1.24 | 6.59E-03 | 3.62E-02 |
| ENSG00000183230 | CTNNA3      | 10 | 65912523  | 67696195  | 1783672 | protein coding                     | -1.24 | 3.80E-03 | 2.57E-02 |

|                 |             |    |           |           |        |                                    |       |          |          |
|-----------------|-------------|----|-----------|-----------|--------|------------------------------------|-------|----------|----------|
| ENSG00000112562 | SMOC2       | 6  | 168441151 | 168673445 | 232294 | protein coding                     | -1.24 | 6.07E-04 | 8.09E-03 |
| ENSG00000186732 | MPPE1D      | 22 | 43411196  | 43507848  | 96652  | protein coding                     | -1.24 | 1.34E-04 | 3.04E-03 |
| ENSG00000246523 | FZDA-DT     | 11 | 86955616  | 87021909  | 66293  | lncRNA                             | -1.24 | 8.47E-03 | 4.26E-02 |
| ENSG00000230876 | LINC00486   | 2  | 32825359  | 32926693  | 101334 | lncRNA                             | -1.24 | 1.63E-03 | 1.49E-02 |
| ENSG00000167759 | KLK13       | 19 | 51055626  | 51065114  | 9488   | protein coding                     | -1.24 | 1.09E-02 | 4.99E-02 |
| ENSG00000162779 | AXDND1      | 1  | 179365720 | 179554735 | 189015 | protein coding                     | -1.24 | 5.29E-03 | 3.15E-02 |
| ENSG00000142623 | PADI1       | 1  | 17205128  | 17246007  | 40879  | protein coding                     | -1.24 | 2.20E-03 | 1.81E-02 |
| ENSG00000279588 | AC087762.2  | 15 | 100782417 | 100786189 | 3772   | TEC                                | -1.24 | 9.19E-03 | 4.49E-02 |
| ENSG00000160882 | CYP11B1     | 8  | 142872356 | 142879846 | 7490   | protein coding                     | -1.24 | 2.11E-04 | 4.05E-03 |
| ENSG00000274756 | AC243732.1  | 17 | 36574462  | 36575325  | 863    | processed pseudogene               | -1.24 | 7.89E-03 | 4.07E-02 |
| ENSG00000159307 | SCUBE1      | 22 | 43197280  | 43343372  | 146092 | protein coding                     | -1.24 | 1.39E-06 | 1.24E-04 |
| ENSG00000100344 | PNPLA3      | 22 | 43923792  | 43964488  | 40696  | protein coding                     | -1.24 | 8.01E-04 | 9.58E-03 |
| ENSG00000234667 | ACTBP13     | 3  | 49873347  | 49877305  | 3958   | unitary pseudogene                 | -1.24 | 6.37E-03 | 3.54E-02 |
| ENSG00000157653 | C9orf43     | 9  | 113410054 | 113429690 | 19636  | protein coding                     | -1.24 | 2.96E-04 | 5.09E-03 |
| ENSG00000155719 | OEOA        | 16 | 21663968  | 21761935  | 97967  | protein coding                     | -1.24 | 1.29E-03 | 1.29E-02 |
| ENSG00000158220 | ESYT3       | 3  | 138434586 | 138481686 | 47100  | protein coding                     | -1.24 | 1.15E-04 | 2.76E-03 |
| ENSG00000180347 | ITPR1D1     | 7  | 31514071  | 31658720  | 144649 | protein coding                     | -1.24 | 1.91E-03 | 1.65E-02 |
| ENSG00000234419 | CICP13      | 1  | 222468094 | 222470882 | 2788   | processed pseudogene               | -1.24 | 5.33E-03 | 3.16E-02 |
| ENSG00000267391 | MIR122HG    | 18 | 58445788  | 58453766  | 7978   | lncRNA                             | -1.25 | 2.61E-03 | 2.02E-02 |
| ENSG00000177138 | FAM9B       | X  | 9024232   | 9295682   | 271450 | protein coding                     | -1.25 | 1.43E-03 | 1.38E-02 |
| ENSG00000143199 | ADCY10      | 1  | 167809386 | 167914215 | 104829 | protein coding                     | -1.25 | 2.76E-05 | 1.04E-03 |
| ENSG00000257838 | TOAP1       | 16 | 22545698  | 22576865  | 31167  | transcribed unprocessed pseudogene | -1.25 | 9.31E-03 | 4.52E-02 |
| ENSG00000279249 | AC007614.1  | 16 | 49282021  | 49350504  | 68483  | lncRNA-antisense                   | -1.25 | 1.21E-04 | 2.84E-03 |
| ENSG00000168748 | CA7         | 16 | 66844414  | 66854153  | 9739   | protein coding                     | -1.25 | 7.88E-03 | 4.07E-02 |
| ENSG00000136425 | CIB2        | 15 | 78104606  | 78131535  | 26929  | protein coding                     | -1.25 | 4.73E-06 | 2.99E-04 |
| ENSG00000157131 | C8A         | 1  | 56854797  | 56918223  | 63426  | protein coding                     | -1.25 | 3.96E-03 | 2.64E-02 |
| ENSG00000197140 | ADAM32      | 8  | 39106990  | 39284917  | 177927 | protein coding                     | -1.25 | 1.63E-04 | 3.45E-03 |
| ENSG00000280660 | AL157396.1  | 10 | 93762453  | 93771991  | 9538   | lncRNA-sense intronic              | -1.25 | 2.81E-03 | 2.12E-02 |
| ENSG00000274776 | AC090241.7  | 18 | 46786699  | 46789297  | 2598   | lncRNA                             | -1.25 | 1.37E-03 | 1.34E-02 |
| ENSG00000259088 | AL137779.2  | 14 | 101796555 | 101810321 | 13766  | lncRNA-antisense                   | -1.25 | 7.32E-03 | 3.88E-02 |
| ENSG00000144061 | NHPH1       | 2  | 110122311 | 110205066 | 82755  | protein coding                     | -1.25 | 6.51E-06 | 3.82E-04 |
| ENSG00000134760 | DSG1        | 18 | 31318160  | 31359246  | 41086  | protein coding                     | -1.25 | 9.49E-03 | 4.58E-02 |
| ENSG00000230417 | LINC00595   | 10 | 78179185  | 78551355  | 372170 | lncRNA                             | -1.25 | 8.22E-06 | 4.47E-04 |
| ENSG00000227240 | AL136456.1  | 1  | 193473224 | 194198708 | 725484 | lncRNA                             | -1.25 | 8.62E-03 | 4.30E-02 |
| ENSG00000250899 | AC125807.2  | 12 | 3041437   | 3044950   | 3513   | lncRNA                             | -1.25 | 4.26E-03 | 2.76E-02 |
| ENSG00000238273 | AC108508.1  | 2  | 105363038 | 105378839 | 15801  | lncRNA-antisense                   | -1.25 | 1.30E-03 | 1.30E-02 |
| ENSG00000226954 | AL023802.1  | 22 | 49718053  | 49724506  | 6453   | lncRNA                             | -1.25 | 1.91E-03 | 1.65E-02 |
| ENSG00000234817 | ECI2-DT     | 6  | 4136072   | 4157385   | 21313  | lncRNA                             | -1.25 | 3.64E-03 | 2.50E-02 |
| ENSG00000243016 | AC112482.1  | 3  | 127221194 | 127221881 | 687    | unprocessed pseudogene             | -1.25 | 8.50E-03 | 4.27E-02 |
| ENSG00000101463 | SYNDIG1     | 20 | 24469629  | 24666616  | 196987 | protein coding                     | -1.25 | 3.86E-03 | 2.60E-02 |
| ENSG00000187720 | THSD4       | 15 | 71096952  | 71783383  | 686431 | protein coding                     | -1.25 | 2.41E-05 | 9.52E-04 |
| ENSG00000103599 | IQCH        | 15 | 67254786  | 67502260  | 247474 | protein coding                     | -1.25 | 2.60E-05 | 9.99E-04 |
| ENSG00000143217 | NECTIN4     | 1  | 161070998 | 161089558 | 18560  | protein coding                     | -1.25 | 8.18E-03 | 4.17E-02 |
| ENSG00000258584 | FAM181A-AS1 | 14 | 93904730  | 93927066  | 22336  | lncRNA-antisense                   | -1.25 | 1.67E-03 | 1.51E-02 |
| ENSG00000117122 | MFPAP2      | 1  | 16974502  | 16980632  | 6130   | protein coding                     | -1.25 | 1.73E-03 | 1.55E-02 |
| ENSG00000179826 | MRGPRX3     | 11 | 18120955  | 18138480  | 17525  | protein coding                     | -1.25 | 3.72E-03 | 2.54E-02 |
| ENSG00000287335 | AL139351.3  | 20 | 48025245  | 48060271  | 35026  | lncRNA                             | -1.25 | 3.06E-03 | 2.24E-02 |
| ENSG00000223403 | MEG9        | 14 | 101068283 | 101072937 | 4654   | lncRNA                             | -1.25 | 2.14E-03 | 1.78E-02 |
| ENSG00000228189 | LINC02843   | 9  | 88627063  | 88652180  | 25117  | lncRNA                             | -1.25 | 4.74E-03 | 2.95E-02 |
| ENSG00000286757 | AL137139.2  | 13 | 99841879  | 99957167  | 115288 | lncRNA                             | -1.25 | 1.05E-04 | 2.60E-03 |
| ENSG00000167580 | AQP2        | 12 | 49950737  | 49958878  | 8141   | protein coding                     | -1.25 | 3.63E-03 | 2.50E-02 |
| ENSG00000205929 | C21orf62    | 21 | 32790673  | 32813743  | 23070  | protein coding                     | -1.25 | 8.32E-03 | 4.22E-02 |
| ENSG00000250986 | LINC02600   | 4  | 3758748   | 3763390   | 4642   | lncRNA                             | -1.25 | 1.52E-03 | 1.42E-02 |
| ENSG00000155754 | C2C6D6      | 2  | 201487421 | 201619178 | 131757 | protein coding                     | -1.25 | 5.51E-04 | 7.61E-03 |
| ENSG00000159495 | TGM7        | 15 | 43276271  | 43302255  | 25984  | protein coding                     | -1.25 | 2.37E-03 | 1.89E-02 |
| ENSG00000091129 | NRCAM       | 7  | 108147623 | 108456717 | 309094 | protein coding                     | -1.25 | 6.18E-06 | 3.66E-04 |
| ENSG00000254746 | AC103855.2  | 11 | 45486867  | 45542487  | 55620  | lncRNA                             | -1.25 | 3.89E-03 | 2.62E-02 |
| ENSG00000189143 | CLND4       | 7  | 73799542  | 73832693  | 33151  | protein coding                     | -1.25 | 1.13E-03 | 1.19E-02 |
| ENSG00000133958 | UNC79       | 14 | 93333219  | 93707876  | 374657 | protein coding                     | -1.25 | 5.81E-05 | 1.71E-03 |
| ENSG00000141519 | CDC40       | 17 | 80036632  | 80100613  | 63981  | protein coding                     | -1.25 | 1.36E-04 | 3.06E-03 |
| ENSG00000275212 | LINC02826   | 12 | 125983702 | 126043485 | 59783  | lncRNA                             | -1.25 | 4.43E-03 | 2.83E-02 |
| ENSG00000285634 | AL583827.1  | 9  | 85369591  | 85444230  | 74639  | lncRNA                             | -1.25 | 7.10E-03 | 3.80E-02 |
| ENSG00000272674 | PCDHB16     | 5  | 141181399 | 141186399 | 5000   | protein coding                     | -1.25 | 3.05E-03 | 2.23E-02 |
| ENSG00000277215 | SPANXA2-OT1 | X  | 141177284 | 141649927 | 472643 | lncRNA                             | -1.25 | 4.79E-03 | 2.97E-02 |
| ENSG00000124143 | ARHGAP40    | 20 | 38601934  | 38651035  | 49101  | protein coding                     | -1.26 | 2.90E-03 | 2.16E-02 |
| ENSG00000258451 | EGILA       | 14 | 20693480  | 20707120  | 13640  | lncRNA-antisense                   | -1.26 | 8.91E-03 | 4.40E-02 |
| ENSG00000091128 | LAMB4       | 7  | 108023548 | 108130361 | 106813 | protein coding                     | -1.26 | 1.29E-03 | 1.29E-02 |
| ENSG00000287031 | AC093307.1  | 5  | 6378674   | 6411690   | 33016  | lncRNA                             | -1.26 | 8.53E-03 | 4.28E-02 |
| ENSG00000204291 | COL15A1     | 9  | 98943179  | 99070792  | 127613 | protein coding                     | -1.26 | 8.05E-05 | 2.19E-03 |
| ENSG00000230387 | AL118508.1  | 20 | 23179272  | 23190419  | 11147  | lncRNA                             | -1.26 | 1.12E-03 | 1.18E-02 |
| ENSG00000237667 | LINC01115   | 2  | 779840    | 868608    | 88768  | lncRNA                             | -1.26 | 5.60E-06 | 3.39E-04 |
| ENSG00000161270 | NPHS1       | 19 | 35825372  | 35869287  | 43915  | protein coding                     | -1.26 | 9.61E-04 | 1.07E-02 |
| ENSG00000269473 | AC012313.8  | 19 | 58440448  | 58445849  | 5401   | lncRNA                             | -1.26 | 4.82E-04 | 6.95E-03 |
| ENSG00000165449 | SLC16A9     | 10 | 59650761  | 59736002  | 85241  | protein coding                     | -1.26 | 5.23E-03 | 3.13E-02 |
| ENSG00000226622 | AC092155.1  | 2  | 62533681  | 62662829  | 129148 | lncRNA-antisense                   | -1.26 | 2.90E-03 | 2.16E-02 |
| ENSG00000141434 | MPE1B       | 18 | 32185069  | 32220404  | 35335  | protein coding                     | -1.26 | 1.01E-02 | 4.79E-02 |
| ENSG00000172900 | ACTE1P      | 11 | 71382601  | 71423423  | 40822  | transcribed unitary pseudogene     | -1.26 | 7.37E-04 | 9.10E-03 |
| ENSG00000245768 | AC106793.1  | 16 | 58733910  | 59199395  | 465485 | lncRNA                             | -1.26 | 3.45E-03 | 2.41E-02 |
| ENSG00000226101 | LINC02097   | 17 | 72072333  | 72103035  | 30702  | lncRNA                             | -1.26 | 9.51E-03 | 4.59E-02 |
| ENSG00000162733 | DDR2        | 1  | 162631373 | 162787405 | 156032 | protein coding                     | -1.26 | 3.41E-06 | 2.38E-04 |
| ENSG00000214832 | UPF3A2      | 17 | 20375369  | 20376840  | 1471   | transcribed processed pseudogene   | -1.26 | 1.50E-04 | 3.27E-03 |
| ENSG00000152086 | TUBA3E      | 2  | 130191745 | 130198439 | 6694   | protein coding                     | -1.26 | 6.15E-03 | 3.47E-02 |
| ENSG00000122012 | SV2C        | 5  | 76083383  | 76353939  | 270556 | protein coding                     | -1.26 | 3.47E-05 | 1.21E-03 |
| ENSG00000262081 | IL9RP4      | 18 | 80140     | 88570     | 8430   | unprocessed pseudogene             | -1.26 | 4.99E-03 | 3.04E-02 |
| ENSG00000223561 | AC005165.1  | 7  | 25593304  | 25751032  | 157728 | lncRNA                             | -1.26 | 2.26E-05 | 9.10E-04 |
| ENSG00000149633 | KIAA1755    | 20 | 38210503  | 38260772  | 50269  | protein coding                     | -1.26 | 1.84E-04 | 3.72E-03 |
| ENSG00000185303 | SFPA2       | 10 | 79555852  | 79560407  | 4555   | protein coding                     | -1.26 | 4.07E-02 | 2.69E-02 |
| ENSG00000167281 | RBFOX3      | 17 | 79089345  | 79516148  | 426803 | protein coding                     | -1.26 | 3.26E-05 | 1.16E-03 |
| ENSG00000103460 | TOX3        | 16 | 52436417  | 52547802  | 11385  | protein coding                     | -1.26 | 4.12E-03 | 2.71E-02 |
| ENSG00000142619 | PADI3       | 1  | 17249098  | 17284233  | 35135  | protein coding                     | -1.26 | 3.89E-03 | 2.61E-02 |

|                 |             |    |           |           |        |                                    |       |          |          |
|-----------------|-------------|----|-----------|-----------|--------|------------------------------------|-------|----------|----------|
| ENSG00000267387 | AC020931.1  | 19 | 10089032  | 10090377  | 1345   | lncRNA-antisense                   | -1.26 | 2.15E-03 | 1.79E-02 |
| ENSG00000182013 | PNMABA      | 19 | 46466491  | 46471563  | 5072   | protein coding                     | -1.26 | 4.77E-03 | 2.96E-02 |
| ENSG00000249245 | NCOA4P3     | 4  | 145624159 | 145626035 | 1876   | processed pseudogene               | -1.26 | 7.99E-03 | 4.10E-02 |
| ENSG00000253608 | AC022915.2  | 8  | 48551567  | 48698510  | 146943 | lncRNA-antisense                   | -1.26 | 5.18E-03 | 3.11E-02 |
| ENSG00000271013 | LRRC37A9P   | 17 | 35912635  | 35918010  | 5375   | processed pseudogene               | -1.26 | 1.65E-03 | 1.50E-02 |
| ENSG00000179046 | TRIML2      | 4  | 188091273 | 188109603 | 18330  | protein coding                     | -1.26 | 6.94E-03 | 3.75E-02 |
| ENSG00000235749 | AL390860.1  | 1  | 247639630 | 247761255 | 121625 | lncRNA-antisense                   | -1.26 | 7.23E-03 | 3.85E-02 |
| ENSG00000164692 | COL1A2      | 7  | 94394895  | 94431227  | 36332  | protein coding                     | -1.26 | 2.55E-04 | 4.61E-03 |
| ENSG00000240771 | ARHGFE25    | 12 | 57610180  | 57617245  | 7065   | protein coding                     | -1.26 | 1.08E-02 | 4.98E-02 |
| ENSG00000163689 | CFAP20DC    | 3  | 58717365  | 59050084  | 332719 | protein coding                     | -1.26 | 8.85E-05 | 2.33E-03 |
| ENSG00000102287 | GABRE       | X  | 151953124 | 151974680 | 21556  | protein coding                     | -1.26 | 3.00E-05 | 1.10E-03 |
| ENSG00000248954 | AC027801.2  | 17 | 49887598  | 49900893  | 13295  | lncRNA                             | -1.26 | 5.02E-03 | 3.05E-02 |
| ENSG00000147082 | CCNB3       | X  | 50202713  | 50351914  | 149201 | protein coding                     | -1.26 | 5.50E-04 | 7.61E-03 |
| ENSG00000283945 | LINC00032   | 9  | 27245680  | 27284869  | 39189  | transcribed unprocessed pseudogene | -1.26 | 3.87E-03 | 2.60E-02 |
| ENSG00000160868 | CYP3A4      | 7  | 99756960  | 99784248  | 27288  | protein coding                     | -1.26 | 9.08E-03 | 4.45E-02 |
| ENSG00000249669 | CARMN       | 5  | 149406689 | 149432835 | 26146  | lncRNA                             | -1.26 | 1.05E-04 | 2.60E-03 |
| ENSG00000140481 | CCDC33      | 15 | 74202705  | 74336472  | 133767 | protein coding                     | -1.26 | 1.24E-04 | 2.89E-03 |
| ENSG00000184194 | GPR173      | X  | 53048789  | 53080615  | 31826  | protein coding                     | -1.26 | 2.74E-03 | 2.09E-02 |
| ENSG00000110427 | KIAA1549L   | 11 | 33376108  | 33674102  | 297994 | protein coding                     | -1.26 | 4.00E-05 | 1.33E-03 |
| ENSG00000214653 | HNRNP3P3    | X  | 140032344 | 140033480 | 1136   | processed pseudogene               | -1.26 | 2.79E-03 | 2.11E-02 |
| ENSG00000225683 | PACRG-AS3   | 6  | 163163830 | 163192038 | 28208  | lncRNA-antisense                   | -1.26 | 9.84E-04 | 1.09E-02 |
| ENSG00000234948 | LINC01524   | 20 | 52192159  | 52670578  | 478419 | lncRNA                             | -1.26 | 2.27E-06 | 1.76E-04 |
| ENSG00000171815 | PCDH1       | 5  | 141051374 | 141059346 | 7972   | protein coding                     | -1.26 | 4.35E-03 | 2.79E-02 |
| ENSG00000286262 | BX322557.2  | 21 | 45299299  | 45302964  | 3035   | lncRNA                             | -1.26 | 2.53E-03 | 1.97E-02 |
| ENSG00000176771 | NCKAP5      | 2  | 132671788 | 133568463 | 896675 | protein coding                     | -1.26 | 1.42E-04 | 3.14E-03 |
| ENSG00000117069 | ST6GALNAC5  | 1  | 76867480  | 77067546  | 200066 | protein coding                     | -1.26 | 1.46E-03 | 1.39E-02 |
| ENSG00000253831 | ETV3L       | 1  | 157092043 | 157112412 | 20369  | protein coding                     | -1.26 | 4.04E-03 | 2.68E-02 |
| ENSG00000153404 | PLEKHG4B    | 5  | 92151     | 189972    | 97821  | protein coding                     | -1.26 | 9.87E-05 | 2.51E-03 |
| ENSG00000143921 | ABCG8       | 2  | 43831942  | 43882988  | 51046  | protein coding                     | -1.26 | 2.23E-03 | 1.83E-02 |
| ENSG00000215704 | CELA2B      | 1  | 15465909  | 15491395  | 25486  | protein coding                     | -1.26 | 5.04E-03 | 3.06E-02 |
| ENSG00000131095 | GFAP        | 17 | 44903159  | 44916937  | 13778  | protein coding                     | -1.26 | 1.64E-04 | 3.46E-03 |
| ENSG00000148677 | ANKRD1      | 10 | 90912096  | 90921087  | 8991   | protein coding                     | -1.26 | 7.28E-04 | 9.03E-03 |
| ENSG00000237938 | AL450998.2  | 1  | 15720312  | 15738896  | 16584  | lncRNA-antisense                   | -1.26 | 2.84E-03 | 2.13E-02 |
| ENSG00000287621 | AC021851.2  | 2  | 183253652 | 183495501 | 241849 | lncRNA                             | -1.26 | 9.87E-03 | 4.71E-02 |
| ENSG00000196660 | SLC30A10    | 1  | 219685427 | 219958647 | 273220 | protein coding                     | -1.27 | 3.78E-04 | 5.99E-03 |
| ENSG00000250934 | AC016924.1  | 3  | 126266747 | 126291525 | 24778  | lncRNA                             | -1.27 | 1.52E-03 | 1.43E-02 |
| ENSG00000260734 | TLE7        | 16 | 71429980  | 71442054  | 12074  | protein coding                     | -1.27 | 7.61E-03 | 3.98E-02 |
| ENSG00000178722 | C5orf64     | 5  | 61610424  | 61793401  | 182977 | lncRNA                             | -1.27 | 1.72E-04 | 3.57E-03 |
| ENSG00000253311 | LINC01847   | 5  | 159698586 | 159937766 | 239180 | lncRNA-antisense                   | -1.27 | 4.86E-03 | 2.99E-02 |
| ENSG00000230699 | AL645608.2  | 1  | 911435    | 914948    | 3513   | lncRNA                             | -1.27 | 1.61E-03 | 1.48E-02 |
| ENSG00000182585 | EPGN        | 4  | 74308470  | 74316789  | 8319   | protein coding                     | -1.27 | 6.61E-03 | 3.63E-02 |
| ENSG00000233396 | LINC01719   | 1  | 146052566 | 146061948 | 9382   | lncRNA                             | -1.27 | 3.51E-03 | 2.45E-02 |
| ENSG00000170927 | PKHD1       | 6  | 51615299  | 52087613  | 472314 | protein coding                     | -1.27 | 1.24E-03 | 1.26E-02 |
| ENSG00000283380 | AL807742.1  | X  | 20769718  | 21374265  | 604547 | lncRNA                             | -1.27 | 1.49E-03 | 1.41E-02 |
| ENSG00000264026 | LINC02002   | 17 | 72342692  | 72355136  | 12444  | lncRNA                             | -1.27 | 5.69E-03 | 3.30E-02 |
| ENSG00000144481 | TRPM8       | 2  | 233917373 | 234019522 | 102149 | protein coding                     | -1.27 | 7.02E-04 | 8.83E-03 |
| ENSG00000249961 | TERF1       | 16 | 66754640  | 66801620  | 46980  | protein coding                     | -1.27 | 1.02E-03 | 1.11E-02 |
| ENSG00000263089 | AC007114.2  | 17 | 57092145  | 57098425  | 4280   | lncRNA-antisense                   | -1.27 | 2.52E-03 | 1.97E-02 |
| ENSG00000125398 | SOX9        | 17 | 72121020  | 72126416  | 5396   | protein coding                     | -1.27 | 3.11E-03 | 2.26E-02 |
| ENSG00000259974 | LINC00261   | 20 | 22547671  | 22578642  | 30971  | lncRNA                             | -1.27 | 8.51E-03 | 4.27E-02 |
| ENSG00000287079 | AL109806.2  | 20 | 56550605  | 56555579  | 4974   | lncRNA                             | -1.27 | 2.28E-03 | 1.85E-02 |
| ENSG00000267339 | LINC00906   | 19 | 28883430  | 28970874  | 87444  | lncRNA                             | -1.27 | 3.07E-03 | 2.24E-02 |
| ENSG00000234869 | AL021392.1  | 22 | 46541495  | 46548196  | 6701   | lncRNA-antisense                   | -1.27 | 6.69E-03 | 3.66E-02 |
| ENSG00000266916 | ZNF793-AS1  | 19 | 37497159  | 37507122  | 9963   | lncRNA-antisense                   | -1.27 | 2.10E-03 | 1.76E-02 |
| ENSG00000169213 | RAB3B       | 1  | 51907956  | 51907000  | 82744  | protein coding                     | -1.27 | 7.14E-04 | 8.91E-03 |
| ENSG00000128655 | PDE11A      | 2  | 177623244 | 178072777 | 449533 | protein coding                     | -1.27 | 8.47E-04 | 9.90E-03 |
| ENSG00000283078 | AL137077.2  | 20 | 62066830  | 62068437  | 1607   | lncRNA                             | -1.27 | 1.82E-03 | 1.60E-02 |
| ENSG00000073712 | FERM2T2     | 14 | 52857268  | 52952435  | 95167  | protein coding                     | -1.27 | 1.87E-04 | 3.75E-03 |
| ENSG00000041982 | TNC         | 9  | 115019575 | 115118257 | 98682  | protein coding                     | -1.27 | 1.19E-04 | 2.80E-03 |
| ENSG00000250770 | AC005865.1  | 12 | 3296202   | 3366122   | 69920  | transcribed unprocessed pseudogene | -1.27 | 3.36E-03 | 2.38E-02 |
| ENSG00000260254 | AP000997.3  | 11 | 115638563 | 115646962 | 8399   | lncRNA                             | -1.27 | 1.41E-04 | 3.13E-03 |
| ENSG00000109794 | FAM149A     | 4  | 186104419 | 186172667 | 68248  | protein coding                     | -1.27 | 1.51E-04 | 3.27E-03 |
| ENSG00000264672 | SEPTIN4-AS1 | 17 | 58519837  | 58557799  | 37962  | lncRNA-antisense                   | -1.27 | 9.06E-03 | 4.44E-02 |
| ENSG00000187726 | DNAJB13     | 11 | 73951026  | 73970366  | 19340  | protein coding                     | -1.27 | 9.64E-04 | 1.08E-02 |
| ENSG00000154258 | ABCA9       | 17 | 68974488  | 69060949  | 86461  | protein coding                     | -1.27 | 2.90E-03 | 2.16E-02 |
| ENSG00000104415 | CCN4        | 8  | 133191039 | 133231690 | 40651  | protein coding                     | -1.27 | 3.27E-03 | 2.34E-02 |
| ENSG00000227544 | AC018647.1  | 7  | 35715032  | 35734924  | 19892  | lncRNA                             | -1.27 | 1.10E-03 | 1.17E-02 |
| ENSG00000117154 | IGSF21      | 1  | 18107798  | 18378483  | 270685 | protein coding                     | -1.27 | 9.36E-04 | 1.06E-02 |
| ENSG00000136872 | ALDOB       | 9  | 101420560 | 101449664 | 29104  | protein coding                     | -1.27 | 8.03E-03 | 4.12E-02 |
| ENSG00000184454 | NCMAP       | 1  | 24556087  | 24609328  | 53241  | protein coding                     | -1.27 | 4.26E-03 | 2.76E-02 |
| ENSG00000171532 | NEUROD2     | 17 | 39603536  | 39609777  | 6241   | protein coding                     | -1.27 | 3.80E-04 | 6.01E-03 |
| ENSG00000244411 | KRTAP5-7    | 11 | 71527267  | 71528669  | 1402   | protein coding                     | -1.27 | 9.67E-03 | 4.64E-02 |
| ENSG00000124818 | OPN5        | 6  | 47781982  | 47832780  | 50798  | protein coding                     | -1.27 | 6.85E-03 | 3.72E-02 |
| ENSG00000183379 | SYNDIG1L    | 14 | 74405894  | 74426210  | 20316  | protein coding                     | -1.27 | 4.15E-03 | 2.72E-02 |
| ENSG00000224655 | LINC01823   | 2  | 121779133 | 121809962 | 30829  | lncRNA                             | -1.27 | 3.94E-04 | 6.13E-03 |
| ENSG00000245522 | LINC02709   | 11 | 9754770   | 9759533   | 4763   | lncRNA                             | -1.27 | 6.01E-03 | 3.42E-02 |
| ENSG00000178233 | TMEM151B    | 6  | 44270450  | 44307506  | 37056  | protein coding                     | -1.27 | 5.29E-03 | 3.15E-02 |
| ENSG00000134160 | TRPM1       | 15 | 31001061  | 31161273  | 160212 | protein coding                     | -1.27 | 1.41E-03 | 1.37E-02 |
| ENSG00000230333 | AC004160.1  | 7  | 11180902  | 11520175  | 339273 | lncRNA                             | -1.27 | 3.28E-03 | 2.34E-02 |
| ENSG00000224715 | Z82186.1    | 22 | 47345569  | 47373541  | 27972  | lncRNA                             | -1.27 | 2.45E-03 | 1.93E-02 |
| ENSG00000226903 | LINC00354   | 13 | 111865136 | 111901264 | 36128  | lncRNA                             | -1.28 | 2.09E-03 | 1.75E-02 |
| ENSG00000151388 | ADAMT512    | 5  | 33523535  | 33892019  | 368484 | protein coding                     | -1.28 | 3.91E-04 | 6.11E-03 |
| ENSG00000166250 | CLMP        | 11 | 123069872 | 123195248 | 125376 | protein coding                     | -1.28 | 2.49E-04 | 4.53E-03 |
| ENSG00000226808 | LINC00840   | 10 | 43778946  | 43901004  | 122058 | lncRNA                             | -1.28 | 2.80E-03 | 2.11E-02 |
| ENSG00000129028 | THAP10      | 15 | 70881342  | 70892433  | 11091  | protein coding                     | -1.28 | 6.80E-03 | 3.70E-02 |
| ENSG00000226482 | ADIPOQ-AS1  | 3  | 186851886 | 186856123 | 4237   | lncRNA-antisense                   | -1.28 | 7.11E-03 | 3.81E-02 |
| ENSG00000148702 | HABP2       | 10 | 113550837 | 113589602 | 38765  | protein coding                     | -1.28 | 1.62E-03 | 1.49E-02 |
| ENSG00000259345 | AC013652.1  | 15 | 38865322  | 39427195  | 561873 | lncRNA                             | -1.28 | 3.13E-04 | 5.27E-03 |
| ENSG00000066629 | EML1        | 14 | 99737693  | 99942060  | 204367 | protein coding                     | -1.28 | 1.11E-04 | 2.69E-03 |
| ENSG00000213290 | PGK1P2      | 19 | 12559571  | 12561105  | 1534   | processed pseudogene               | -1.28 | 2.29E-03 | 1.86E-02 |



|                 |             |    |           |           |        |                                    |       |          |          |
|-----------------|-------------|----|-----------|-----------|--------|------------------------------------|-------|----------|----------|
| ENSG00000267053 | AC092296.2  | 19 | 36304564  | 36321274  | 16710  | lncRNA                             | -1.28 | 3.87E-04 | 6.08E-03 |
| ENSG00000078725 | BRINP1      | 9  | 119153458 | 119369435 | 215977 | protein coding                     | -1.28 | 2.65E-03 | 2.04E-02 |
| ENSG00000104901 | DKL1        | 19 | 49361783  | 49375116  | 13333  | protein coding                     | -1.28 | 7.79E-03 | 4.04E-02 |
| ENSG00000165194 | PCDH19      | X  | 100291644 | 100410273 | 118629 | protein coding                     | -1.28 | 1.98E-04 | 3.89E-03 |
| ENSG00000105143 | SLC1A6      | 19 | 14950034  | 15022990  | 72956  | protein coding                     | -1.28 | 6.69E-04 | 8.60E-03 |
| ENSG00000178882 | RFLNA       | 12 | 123973241 | 124316024 | 342783 | protein coding                     | -1.28 | 1.21E-03 | 1.24E-02 |
| ENSG00000248538 | AC022784.1  | 8  | 9151695   | 9425524   | 273829 | lncRNA                             | -1.28 | 3.25E-06 | 2.30E-04 |
| ENSG00000268970 | AC022150.2  | 19 | 52597699  | 52598887  | 1188   | lncRNA-sense intronic              | -1.28 | 1.08E-02 | 4.96E-02 |
| ENSG00000145626 | UGT3A1      | 5  | 35951006  | 36001028  | 50022  | protein coding                     | -1.28 | 1.02E-03 | 1.11E-02 |
| ENSG00000132915 | PDE6A       | 5  | 149857953 | 149944793 | 86840  | protein coding                     | -1.28 | 3.43E-03 | 2.41E-02 |
| ENSG00000144452 | ABCA12      | 2  | 214931542 | 215138626 | 207084 | protein coding                     | -1.28 | 1.82E-03 | 1.60E-02 |
| ENSG00000225670 | CADM3-AS1   | 1  | 159194325 | 159207973 | 13648  | lncRNA-antisense                   | -1.28 | 5.23E-03 | 3.13E-02 |
| ENSG00000223764 | LINC02593   | 1  | 916865    | 921016    | 4151   | lncRNA                             | -1.28 | 1.21E-03 | 1.24E-02 |
| ENSG00000214617 | SLC6A10P    | 16 | 32877469  | 32885501  | 8032   | transcribed unprocessed pseudogene | -1.28 | 1.28E-03 | 1.28E-02 |
| ENSG00000258545 | RHOF1-AS1   | X  | 120036236 | 120146854 | 110618 | lncRNA-antisense                   | -1.28 | 3.66E-03 | 2.51E-02 |
| ENSG00000260188 | AC002464.1  | 6  | 110477907 | 110479436 | 1529   | lncRNA-antisense                   | -1.28 | 7.86E-03 | 4.06E-02 |
| ENSG00000146267 | FAXC        | 6  | 99271168  | 99350062  | 78894  | protein coding                     | -1.28 | 2.78E-03 | 2.10E-02 |
| ENSG00000256995 | AC084816.1  | 12 | 22699859  | 23188807  | 488948 | lncRNA                             | -1.28 | 4.93E-03 | 3.02E-02 |
| ENSG00000206075 | SERPINB5    | 18 | 63476958  | 63505085  | 28127  | protein coding                     | -1.28 | 1.00E-02 | 4.74E-02 |
| LINC000234722   | LINC01287   | 7  | 153355365 | 153413985 | 58620  | lncRNA                             | -1.28 | 6.34E-04 | 8.32E-03 |
| ENSG00000197616 | MYH6        | 14 | 23381982  | 23408273  | 26291  | protein coding                     | -1.28 | 1.99E-03 | 1.71E-02 |
| ENSG00000236155 | ZPLD2P      | 1  | 26209741  | 26229840  | 20099  | transcribed unprocessed pseudogene | -1.28 | 1.39E-03 | 1.35E-02 |
| ENSG00000113389 | NPR3        | 5  | 32689070  | 32791724  | 102654 | protein coding                     | -1.28 | 1.21E-04 | 2.85E-03 |
| ENSG00000279443 | ALS13497.1  | 1  | 28544460  | 28546542  | 2082   | TEC                                | -1.28 | 2.33E-03 | 1.87E-02 |
| ENSG00000117650 | NEK2        | 1  | 211658657 | 211675630 | 16973  | protein coding                     | -1.28 | 9.85E-04 | 1.09E-02 |
| ENSG00000230563 | AL121757.1  | 20 | 5445838   | 5475483   | 29645  | lncRNA                             | -1.28 | 5.73E-03 | 3.32E-02 |
| ENSG00000249364 | AC112206.2  | 5  | 67379378  | 67806600  | 427222 | lncRNA                             | -1.28 | 5.48E-03 | 3.21E-02 |
| ENSG00000254423 | AC087203.1  | 8  | 12374366  | 12375546  | 1180   | processed pseudogene               | -1.28 | 3.83E-03 | 2.59E-02 |
| ENSG00000156427 | FGF18       | 5  | 171419647 | 171457626 | 37979  | protein coding                     | -1.28 | 1.32E-03 | 1.31E-02 |
| ENSG00000255082 | GRM5-AS1    | 11 | 88504576  | 88524054  | 19478  | lncRNA-antisense                   | -1.28 | 4.23E-03 | 2.75E-02 |
| ENSG00000230731 | ALS589745.1 | 13 | 44234118  | 44256596  | 22478  | lncRNA                             | -1.28 | 3.30E-03 | 2.35E-02 |
| ENSG00000233602 | ERIS-IT1    | 1  | 44243408  | 44244273  | 865    | lncRNA-sense intronic              | -1.29 | 3.24E-03 | 2.32E-02 |
| ENSG00000186628 | FSD2        | 15 | 82755362  | 82806070  | 50708  | protein coding                     | -1.29 | 4.30E-05 | 1.40E-03 |
| ENSG00000141314 | RHBDL3      | 17 | 32265832  | 32324659  | 58827  | protein coding                     | -1.29 | 1.64E-03 | 1.49E-02 |
| ENSG00000255093 | AP002008.2  | 11 | 111448450 | 111475397 | 26947  | transcribed unitary pseudogene     | -1.29 | 1.35E-04 | 3.05E-03 |
| ENSG00000197587 | DMBX1       | 1  | 46489836  | 46516216  | 26380  | protein coding                     | -1.29 | 1.20E-03 | 1.24E-02 |
| ENSG00000169758 | TMEM266     | 15 | 76059958  | 76229121  | 169163 | protein coding                     | -1.29 | 2.45E-05 | 9.60E-04 |
| ENSG00000215018 | COL28A1     | 7  | 7356203   | 7353873   | 179670 | protein coding                     | -1.29 | 1.08E-03 | 1.16E-02 |
| ENSG00000198883 | PNMA5       | X  | 152988824 | 152994116 | 5292   | protein coding                     | -1.29 | 3.12E-04 | 5.26E-03 |
| ENSG00000197241 | SLC2A7      | 1  | 9003300   | 9026345   | 23045  | protein coding                     | -1.29 | 4.73E-03 | 2.95E-02 |
| ENSG00000164756 | SLC30A8     | 8  | 116950273 | 117176714 | 226441 | protein coding                     | -1.29 | 2.98E-03 | 2.20E-02 |
| ENSG00000159173 | TNNI1       | 1  | 201403768 | 201429866 | 26098  | protein coding                     | -1.29 | 4.61E-04 | 6.76E-03 |
| ENSG00000115380 | EFEMP1      | 2  | 55865967  | 55924139  | 58172  | protein coding                     | -1.29 | 4.34E-03 | 2.79E-02 |
| ENSG00000204655 | MOG         | 6  | 29657002  | 29672372  | 15370  | protein coding                     | -1.29 | 8.49E-03 | 4.27E-02 |
| ENSG00000103241 | FOXF1       | 16 | 86510527  | 86515422  | 4895   | protein coding                     | -1.29 | 2.62E-03 | 2.03E-02 |
| ENSG00000165588 | OTX2        | 14 | 56799905  | 56816693  | 16788  | protein coding                     | -1.29 | 8.74E-03 | 4.35E-02 |
| ENSG00000170484 | KRT74       | 12 | 52565782  | 52573843  | 8061   | protein coding                     | -1.29 | 1.88E-03 | 1.64E-02 |
| ENSG00000185069 | KRT76       | 12 | 52768155  | 52777345  | 9190   | protein coding                     | -1.29 | 8.70E-03 | 4.33E-02 |
| ENSG00000234546 | LINCTAM34A  | 1  | 9182004   | 9196284   | 14280  | lncRNA                             | -1.29 | 2.83E-03 | 2.13E-02 |
| ENSG00000281538 | AC254562.3  | 22 | 42138060  | 42139726  | 1666   | lncRNA                             | -1.29 | 4.85E-03 | 2.99E-02 |
| ENSG00000091428 | UAPCE4      | 2  | 172735274 | 173052893 | 317619 | protein coding                     | -1.29 | 1.52E-04 | 3.29E-03 |
| ENSG00000232725 | US211.1     | X  | 153735626 | 153766478 | 30852  | lncRNA-antisense                   | -1.29 | 3.57E-03 | 2.47E-02 |
| ENSG00000117525 | F3          | 1  | 94529173  | 94541759  | 12586  | protein coding                     | -1.29 | 1.52E-04 | 3.28E-03 |
| ENSG00000187715 | KBTBD12     | 3  | 127915232 | 127987671 | 72439  | protein coding                     | -1.29 | 1.04E-03 | 1.13E-02 |
| ENSG00000114757 | PEX5L       | 3  | 179794958 | 180037053 | 242095 | protein coding                     | -1.29 | 1.03E-03 | 1.12E-02 |
| ENSG00000261456 | TUBB8       | 10 | 46888     | 74163     | 27275  | protein coding                     | -1.29 | 1.86E-03 | 1.51E-02 |
| ENSG00000120440 | TLL2        | 6  | 167325071 | 167359503 | 34432  | protein coding                     | -1.29 | 9.23E-03 | 4.50E-02 |
| ENSG00000178150 | ZNF114      | 19 | 48270081  | 48287608  | 17527  | protein coding                     | -1.29 | 5.84E-03 | 3.36E-02 |
| ENSG00000279135 | AL512652.2  | 13 | 20712431  | 20714146  | 1715   | TEC                                | -1.29 | 7.64E-03 | 3.98E-02 |
| ENSG00000229951 | FLJ31356    | 2  | 28384409  | 28394672  | 10263  | lncRNA-antisense                   | -1.29 | 1.22E-03 | 1.25E-02 |
| ENSG00000163873 | GRIK3       | 1  | 36795527  | 37034515  | 238988 | protein coding                     | -1.29 | 4.16E-04 | 6.34E-03 |
| ENSG00000286462 | AC092850.2  | 12 | 131310045 | 131312811 | 2766   | lncRNA                             | -1.29 | 2.30E-03 | 1.86E-02 |
| ENSG00000229326 | RPL17P15    | 2  | 119698623 | 119700151 | 1528   | processed pseudogene               | -1.29 | 7.93E-03 | 4.08E-02 |
| ENSG00000204764 | RANBP17     | 5  | 170861870 | 171300015 | 438145 | protein coding                     | -1.29 | 5.96E-05 | 1.75E-03 |
| ENSG00000224259 | LINC01133   | 1  | 159958035 | 159984750 | 26715  | lncRNA                             | -1.29 | 9.38E-03 | 4.54E-02 |
| ENSG00000128052 | KDR         | 4  | 55078481  | 55125595  | 47114  | protein coding                     | -1.29 | 1.79E-04 | 3.66E-03 |
| ENSG00000226759 | DAB1-AS1    | 1  | 57860532  | 57880905  | 20373  | lncRNA-antisense                   | -1.29 | 4.35E-03 | 2.79E-02 |
| ENSG00000157103 | SLCA1       | 3  | 10992186  | 11039247  | 47061  | protein coding                     | -1.29 | 1.01E-04 | 2.54E-03 |
| ENSG00000130032 | PRRG3       | X  | 151694607 | 151705924 | 11317  | protein coding                     | -1.29 | 5.87E-04 | 7.94E-03 |
| ENSG00000235271 | Z97353.2    | 22 | 26903292  | 26920935  | 17643  | lncRNA                             | -1.29 | 2.98E-03 | 2.20E-02 |
| ENSG00000248724 | NPHP3-AS1   | 3  | 132721750 | 132874223 | 152473 | lncRNA-antisense                   | -1.29 | 2.70E-04 | 4.79E-03 |
| ENSG00000174527 | MYO1H       | 12 | 109347903 | 109455523 | 107620 | protein coding                     | -1.29 | 2.32E-04 | 4.33E-03 |
| ENSG00000183470 | FLJ40288    | 7  | 132648794 | 132728769 | 79975  | lncRNA                             | -1.29 | 7.55E-03 | 3.96E-02 |
| ENSG00000183571 | PGPEPL1     | 15 | 98968229  | 99007792  | 39563  | protein coding                     | -1.30 | 3.30E-03 | 2.35E-02 |
| ENSG00000203650 | LINC01285   | X  | 118839539 | 118919669 | 80130  | lncRNA                             | -1.30 | 2.08E-03 | 1.75E-02 |
| ENSG00000273540 | AGBL1       | 15 | 86079973  | 87029052  | 949079 | protein coding                     | -1.30 | 1.66E-04 | 3.48E-03 |
| ENSG00000137872 | SEMA6D      | 15 | 47184101  | 47774228  | 590127 | protein coding                     | -1.30 | 1.16E-03 | 1.21E-02 |
| ENSG00000129221 | AIF1        | 17 | 6393693   | 6435199   | 41506  | protein coding                     | -1.30 | 2.12E-03 | 1.77E-02 |
| ENSG00000272274 | LINC00551   | 13 | 106568261 | 106716679 | 148418 | lncRNA                             | -1.30 | 1.32E-03 | 1.31E-02 |
| ENSG00000128849 | CNGL1       | 15 | 57375967  | 57550717  | 174750 | protein coding                     | -1.30 | 2.58E-05 | 9.95E-04 |
| ENSG00000089250 | NOS1        | 12 | 117208142 | 117452170 | 244028 | protein coding                     | -1.30 | 1.49E-04 | 3.25E-03 |
| ENSG00000277399 | GPR179      | 17 | 38324571  | 38343956  | 19385  | protein coding                     | -1.30 | 2.60E-04 | 4.66E-03 |
| ENSG00000232420 | IL9RP2      | 10 | 80394     | 86265     | 5871   | unprocessed pseudogene             | -1.30 | 4.50E-03 | 2.86E-02 |
| ENSG00000095981 | KCNK16      | 6  | 39314698  | 39322968  | 8270   | protein coding                     | -1.30 | 5.02E-03 | 3.05E-02 |
| ENSG00000144191 | CNGA3       | 2  | 98346188  | 98398601  | 52413  | protein coding                     | -1.30 | 2.18E-03 | 1.80E-02 |
| ENSG00000275016 | AC015574.1  | 15 | 95638316  | 95826499  | 188183 | lncRNA                             | -1.30 | 5.86E-04 | 7.93E-03 |
| ENSG00000130829 | DUSP9       | X  | 153642492 | 153651326 | 8834   | protein coding                     | -1.30 | 3.03E-03 | 2.22E-02 |
| ENSG00000099869 | IGF2-AS     | 11 | 2140501   | 2148666   | 8165   | lncRNA-antisense                   | -1.30 | 2.01E-03 | 1.71E-02 |
| ENSG00000284705 | AL596257.1  | 1  | 36703953  | 36710582  | 6629   | lncRNA                             | -1.30 | 2.14E-03 | 1.78E-02 |
| ENSG00000234139 | AL035420.1  | 20 | 36051491  | 36085703  | 34212  | lncRNA                             | -1.30 | 1.58E-03 | 1.46E-02 |

|                 |            |    |           |           |        |                                  |       |          |          |
|-----------------|------------|----|-----------|-----------|--------|----------------------------------|-------|----------|----------|
| ENSG0000163817  | SLC6A20    | 3  | 45755449  | 45796536  | 41087  | protein coding                   | -1.30 | 5.51E-05 | 1.67E-03 |
| ENSG00000258702 | AL137786.1 | 14 | 96592399  | 96605974  | 13575  | lncRNA                           | -1.30 | 5.96E-04 | 8.01E-03 |
| ENSG00000212710 | CTAGE1     | 18 | 22413599  | 22417915  | 4316   | protein coding                   | -1.30 | 3.04E-03 | 2.22E-02 |
| ENSG00000157060 | SHCBP1L    | 1  | 182899865 | 182953525 | 53660  | protein coding                   | -1.30 | 7.09E-03 | 3.80E-02 |
| ENSG0000018625  | ATP1A2     | 1  | 160115759 | 160143591 | 27832  | protein coding                   | -1.30 | 7.73E-04 | 9.39E-03 |
| ENSG00000166257 | SCN3B      | 11 | 123629187 | 123655244 | 26057  | protein coding                   | -1.30 | 1.33E-04 | 3.02E-03 |
| ENSG00000231703 | AL354993.1 | 20 | 53397661  | 53412910  | 15249  | lncRNA-antisense                 | -1.30 | 2.68E-03 | 2.05E-02 |
| ENSG00000163075 | CFAP221    | 2  | 119544432 | 119662251 | 117819 | protein coding                   | -1.30 | 1.04E-03 | 1.13E-02 |
| ENSG00000235012 | JCADP1     | 21 | 39525583  | 39529855  | 4272   | processed_pseudogene             | -1.30 | 2.05E-03 | 1.73E-02 |
| ENSG00000185518 | SV2B       | 15 | 91099950  | 91302565  | 202615 | protein coding                   | -1.30 | 2.23E-04 | 4.21E-03 |
| ENSG00000112186 | CAP2       | 6  | 17393505  | 17557790  | 164285 | protein coding                   | -1.30 | 2.72E-03 | 2.07E-02 |
| ENSG00000134873 | CLDN10     | 13 | 95433604  | 95579759  | 146155 | protein coding                   | -1.30 | 3.00E-03 | 2.21E-02 |
| ENSG00000156486 | KCNS2      | 8  | 98426958  | 98432853  | 5895   | protein coding                   | -1.30 | 9.47E-04 | 1.06E-02 |
| ENSG00000128254 | C22orf24   | 22 | 31925519  | 31945518  | 19999  | lncRNA                           | -1.30 | 2.08E-05 | 8.59E-04 |
| ENSG00000137869 | CYP19A1    | 15 | 51208057  | 51338601  | 130544 | protein coding                   | -1.30 | 1.07E-03 | 1.15E-02 |
| ENSG00000184012 | TMPRSS2    | 21 | 41464300  | 41531116  | 66816  | protein coding                   | -1.30 | 2.76E-04 | 4.86E-03 |
| ENSG00000104413 | ESRP1      | 8  | 94641074  | 94707466  | 66392  | protein coding                   | -1.30 | 5.99E-04 | 8.04E-03 |
| ENSG00000170091 | NSG2       | 5  | 174045706 | 174243501 | 197795 | protein coding                   | -1.30 | 1.99E-03 | 1.70E-02 |
| ENSG00000255774 | LINC02747  | 11 | 69475567  | 69481545  | 5978   | lncRNA                           | -1.30 | 3.37E-03 | 2.38E-02 |
| ENSG00000165566 | AMER2      | 13 | 25161684  | 25172288  | 10604  | protein coding                   | -1.30 | 1.55E-03 | 1.44E-02 |
| ENSG00000249464 | LINC01091  | 4  | 123539026 | 123962698 | 423672 | lncRNA                           | -1.30 | 4.01E-04 | 6.20E-03 |
| ENSG00000158816 | VWA5B1     | 1  | 20290919  | 20354894  | 63975  | protein coding                   | -1.30 | 9.32E-05 | 2.41E-03 |
| ENSG00000154478 | GPR26      | 10 | 123666355 | 123697399 | 31044  | protein coding                   | -1.30 | 3.31E-04 | 5.50E-03 |
| ENSG00000164695 | CHMP4C     | 8  | 81732448  | 81759515  | 27067  | protein coding                   | -1.30 | 3.57E-03 | 2.47E-02 |
| ENSG00000237361 | TUSC8      | 13 | 44400250  | 44405984  | 5734   | lncRNA                           | -1.30 | 2.86E-03 | 2.14E-02 |
| ENSG00000250974 | LINC02196  | 5  | 6839460   | 7219291   | 379831 | lncRNA                           | -1.30 | 4.81E-03 | 2.98E-02 |
| ENSG00000154438 | ASZ1       | 7  | 117363222 | 117428123 | 64901  | protein coding                   | -1.30 | 7.66E-03 | 3.99E-02 |
| ENSG00000261115 | TMEM178B   | 7  | 141074064 | 141480380 | 406316 | protein coding                   | -1.30 | 2.18E-05 | 8.88E-04 |
| ENSG00000226757 | PP12613    | 4  | 121764585 | 121766814 | 2229   | lncRNA-antisense                 | -1.30 | 6.01E-03 | 3.42E-02 |
| ENSG00000165837 | ERIC6B     | 13 | 45534522  | 45615739  | 81217  | protein coding                   | -1.30 | 1.57E-03 | 1.46E-02 |
| ENSG00000279071 | AC073592.3 | 12 | 124537844 | 124539677 | 1833   | TEC                              | -1.30 | 1.76E-03 | 1.56E-02 |
| ENSG00000148053 | NTRK2      | 9  | 84668551  | 85027054  | 358503 | protein coding                   | -1.30 | 1.72E-05 | 7.58E-04 |
| ENSG00000226937 | CEP164P1   | 10 | 45002222  | 45078066  | 73844  | transcribed_processed_pseudogene | -1.30 | 1.44E-03 | 1.38E-02 |
| ENSG00000170011 | MYRIP      | 3  | 39808914  | 40260321  | 451407 | protein coding                   | -1.30 | 5.34E-05 | 1.63E-03 |
| ENSG00000166159 | LRTM2      | 12 | 1820267   | 1836753   | 16486  | protein coding                   | -1.31 | 1.06E-03 | 1.15E-02 |
| ENSG00000137948 | BRDT       | 1  | 91949371  | 92014426  | 65055  | protein coding                   | -1.31 | 1.22E-03 | 1.25E-02 |
| ENSG00000277270 | AL160412.1 | 20 | 61432868  | 61437630  | 4762   | lncRNA                           | -1.31 | 3.05E-03 | 2.23E-02 |
| ENSG00000216921 | FAM240C    | 2  | 241893988 | 241902551 | 8563   | protein coding                   | -1.31 | 8.44E-03 | 4.26E-02 |
| ENSG00000060642 | TMEM98     | 17 | 32927910  | 32945106  | 17196  | protein coding                   | -1.31 | 1.62E-04 | 3.44E-03 |
| ENSG00000069431 | ABCC9      | 12 | 21797401  | 21942529  | 145128 | protein coding                   | -1.31 | 2.87E-04 | 4.97E-03 |
| ENSG00000186369 | LINC00643  | 14 | 62114353  | 62130962  | 16609  | transcribed_unitary_pseudogene   | -1.31 | 4.04E-03 | 2.68E-02 |
| ENSG00000223573 | TINCR      | 19 | 5558167   | 5578349   | 20182  | protein coding                   | -1.31 | 5.91E-04 | 7.96E-03 |
| ENSG00000141748 | ARL5C      | 17 | 39156894  | 39167484  | 10590  | protein coding                   | -1.31 | 6.20E-03 | 3.48E-02 |
| ENSG00000179133 | C10orf67   | 10 | 23202696  | 23344845  | 142149 | protein coding                   | -1.31 | 2.52E-04 | 4.56E-03 |
| ENSG00000165891 | E2F7       | 12 | 77021248  | 77065569  | 44321  | protein coding                   | -1.31 | 8.30E-05 | 2.25E-03 |
| ENSG00000077279 | DCX        | X  | 111293779 | 111412429 | 118650 | protein coding                   | -1.31 | 4.96E-04 | 7.07E-03 |
| ENSG00000265485 | LINC01915  | 18 | 24534551  | 24708542  | 173991 | lncRNA                           | -1.31 | 1.86E-04 | 3.74E-03 |
| ENSG00000230453 | ANKRD18B   | 9  | 33524394  | 33573009  | 48615  | protein coding                   | -1.31 | 9.27E-04 | 1.05E-02 |
| ENSG00000224893 | LINC02840  | 6  | 152754903 | 152875991 | 121088 | lncRNA                           | -1.31 | 4.29E-03 | 2.78E-02 |
| ENSG00000238290 | AL034417.2 | 1  | 8026738   | 8122702   | 95964  | lncRNA                           | -1.31 | 3.48E-03 | 2.43E-02 |
| ENSG00000258609 | LINC-ROR   | 18 | 57054558  | 57072119  | 17561  | lncRNA                           | -1.31 | 6.05E-03 | 3.44E-02 |
| ENSG00000166407 | LMO1       | 11 | 8224309   | 8268716   | 44407  | protein coding                   | -1.31 | 1.61E-03 | 1.48E-02 |
| ENSG00000279017 | AC098476.1 | 3  | 45749627  | 45750651  | 1024   | TEC                              | -1.31 | 4.16E-03 | 2.72E-02 |
| ENSG00000231898 | MYO3B-AS1  | 2  | 170332085 | 170408564 | 76479  | lncRNA-antisense                 | -1.31 | 5.12E-04 | 7.20E-03 |
| ENSG00000007174 | DNAH9      | 17 | 11598470  | 11969748  | 371278 | protein coding                   | -1.31 | 3.58E-05 | 1.24E-03 |
| ENSG00000233251 | AC007743.1 | 2  | 56173534  | 56185870  | 12336  | lncRNA-antisense                 | -1.31 | 8.31E-03 | 4.22E-02 |
| ENSG00000264359 | NEK4P2     | 17 | 16666107  | 16667118  | 1011   | processed_pseudogene             | -1.31 | 1.08E-02 | 4.98E-02 |
| ENSG00000232825 | AL445433.2 | 1  | 99004276  | 99244794  | 240518 | lncRNA-antisense                 | -1.31 | 9.18E-03 | 4.49E-02 |
| ENSG00000233421 | LINC01783  | 1  | 16533886  | 16536172  | 2286   | lncRNA                           | -1.31 | 7.96E-04 | 9.53E-03 |
| ENSG00000205325 | AC005863.1 | 17 | 14767583  | 14780686  | 13103  | lncRNA                           | -1.31 | 9.92E-03 | 4.72E-02 |
| ENSG00000241933 | DENND6A-DT | 3  | 57693205  | 57696596  | 3391   | lncRNA                           | -1.31 | 8.35E-03 | 4.23E-02 |
| ENSG00000198691 | ABCA4      | 1  | 93992834  | 94121148  | 128314 | protein coding                   | -1.31 | 3.76E-04 | 5.96E-03 |
| ENSG00000283095 | FP565171.1 | 10 | 131891640 | 131895297 | 3657   | lncRNA                           | -1.31 | 8.00E-03 | 4.36E-02 |
| ENSG00000221977 | OR4E2      | 14 | 21653835  | 21667642  | 13807  | protein coding                   | -1.31 | 7.38E-03 | 3.90E-02 |
| ENSG00000142621 | FHAD1      | 1  | 15247272  | 15400283  | 153011 | protein coding                   | -1.31 | 2.02E-08 | 4.47E-06 |
| ENSG00000152527 | PLEKH2     | 2  | 43637260  | 43767987  | 130727 | protein coding                   | -1.31 | 1.72E-06 | 1.44E-04 |
| ENSG00000126856 | PRDM7      | 16 | 90056566  | 90092072  | 35506  | protein coding                   | -1.31 | 6.83E-03 | 3.71E-02 |
| ENSG00000174667 | ORD74      | 19 | 9210276   | 9219589   | 9313   | protein coding                   | -1.31 | 8.88E-03 | 4.39E-02 |
| ENSG00000133863 | TEX15      | 8  | 30831544  | 30913008  | 81464  | protein coding                   | -1.31 | 3.81E-03 | 2.58E-02 |
| ENSG00000233395 | LINC00841  | 10 | 43909244  | 43981102  | 71858  | lncRNA                           | -1.31 | 9.31E-04 | 9.78E-03 |
| ENSG00000227906 | SNAP25-AS1 | 20 | 10006381  | 10368776  | 362395 | lncRNA-antisense                 | -1.32 | 2.17E-04 | 4.12E-03 |
| ENSG00000196341 | OR8D1      | 11 | 124302831 | 124315099 | 12268  | protein coding                   | -1.32 | 5.02E-03 | 3.05E-02 |
| ENSG00000247809 | NR2F2-AS1  | 15 | 96110040  | 96327361  | 217321 | lncRNA-antisense                 | -1.32 | 4.42E-05 | 1.43E-03 |
| ENSG00000224310 | LINC01567  | 16 | 24661422  | 24671062  | 9640   | lncRNA                           | -1.32 | 7.88E-03 | 4.07E-02 |
| ENSG00000260664 | AC004158.1 | 16 | 72425948  | 72533892  | 107944 | lncRNA                           | -1.32 | 6.43E-03 | 3.57E-02 |
| ENSG00000286572 | AL592146.2 | 1  | 204064533 | 204073965 | 9432   | lncRNA                           | -1.32 | 2.96E-03 | 2.19E-02 |
| ENSG00000257178 | AC103702.1 | 17 | 48579630  | 48582259  | 2629   | lncRNA-sense intronic            | -1.32 | 2.32E-03 | 1.87E-02 |
| ENSG00000106125 | MINDY4     | 7  | 30771417  | 30892387  | 120970 | protein coding                   | -1.32 | 1.50E-03 | 1.41E-02 |
| ENSG00000222806 | RNA5SP225  | 6  | 153420438 | 153420572 | 134    | rRNA_pseudogene                  | -1.32 | 8.59E-04 | 9.98E-03 |
| ENSG00000135931 | ARMC9      | 2  | 231198546 | 231376848 | 178302 | protein coding                   | -1.32 | 8.11E-06 | 4.42E-04 |
| ENSG00000267252 | LINC01255  | 18 | 11486205  | 11523807  | 36882  | lncRNA                           | -1.32 | 5.08E-04 | 7.17E-03 |
| ENSG00000182704 | TSKU       | 11 | 76782251  | 76798153  | 15902  | protein coding                   | -1.32 | 4.30E-04 | 6.47E-03 |
| ENSG00000261959 | AC015909.3 | 17 | 50163523  | 50165316  | 1793   | lncRNA-antisense                 | -1.32 | 6.11E-03 | 3.45E-02 |
| ENSG00000260337 | AC091544.4 | 15 | 92592574  | 92596462  | 3888   | lncRNA                           | -1.32 | 3.31E-03 | 2.35E-02 |
| ENSG00000230079 | STK24P1    | X  | 136295690 | 136300298 | 4608   | processed_pseudogene             | -1.32 | 5.04E-03 | 3.06E-02 |
| ENSG00000237588 | AL590666.3 | 1  | 156687695 | 156691997 | 4302   | lncRNA                           | -1.32 | 4.31E-03 | 2.78E-02 |
| ENSG00000282556 | AC068733.3 | 11 | 6319140   | 6360454   | 41314  | lncRNA                           | -1.32 | 4.85E-04 | 6.98E-03 |
| ENSG00000153292 | ADGRF1     | 6  | 46997708  | 47042350  | 44642  | protein coding                   | -1.32 | 5.69E-04 | 7.78E-03 |
| ENSG00000184845 | DRD1       | 5  | 175440036 | 175444182 | 4146   | protein coding                   | -1.32 | 9.85E-03 | 4.70E-02 |
| ENSG00000177414 | UBE2U      | 1  | 64203627  | 64267368  | 63741  | protein coding                   | -1.32 | 6.90E-03 | 3.74E-02 |

|                 |             |    |           |           |        |                                    |       |          |          |
|-----------------|-------------|----|-----------|-----------|--------|------------------------------------|-------|----------|----------|
| ENSG00000258583 | LINC01500   | 14 | 58646631  | 59184247  | 537616 | lncRNA                             | -1.32 | 1.63E-04 | 3.45E-03 |
| ENSG00000241352 | AC007688.2  | 12 | 12850982  | 12851740  | 758    | processed_pseudogene               | -1.32 | 6.19E-03 | 3.48E-02 |
| ENSG00000243295 | AC128121.3  | 3  | 59050164  | 59754808  | 704644 | lncRNA                             | -1.32 | 4.08E-03 | 2.69E-02 |
| ENSG00000186442 | KRT3        | 12 | 52789685  | 52796117  | 6432   | protein coding                     | -1.32 | 3.76E-03 | 2.56E-02 |
| ENSG00000234899 | SOX9-AS1    | 17 | 72067099  | 72237203  | 170104 | lncRNA                             | -1.32 | 2.67E-05 | 1.02E-03 |
| ENSG00000261239 | ANKRD26P1   | 16 | 46469341  | 46569097  | 99756  | transcribed_unprocessed_pseudogene | -1.32 | 1.38E-03 | 1.34E-02 |
| ENSG00000279388 | AC073578.3  | 12 | 131478844 | 131483034 | 4190   | TEC                                | -1.32 | 2.90E-03 | 2.16E-02 |
| ENSG00000227036 | LINC00511   | 17 | 72290091  | 72640472  | 350381 | lncRNA                             | -1.32 | 1.46E-08 | 3.34E-06 |
| ENSG00000263142 | LRRRC37A17P | 17 | 46978481  | 47054569  | 76088  | transcribed_unprocessed_pseudogene | -1.32 | 4.84E-06 | 3.04E-04 |
| ENSG00000279539 | AC006486.2  | 19 | 42242775  | 42244973  | 2198   | TEC                                | -1.32 | 4.56E-03 | 2.88E-02 |
| ENSG00000226496 | LINC00323   | 21 | 41141493  | 41148198  | 6705   | lncRNA-antisense                   | -1.32 | 1.36E-03 | 1.34E-02 |
| ENSG00000273032 | DGCR5       | 22 | 18970439  | 19031242  | 60803  | lncRNA                             | -1.32 | 1.76E-05 | 7.73E-04 |
| ENSG00000165325 | DEUP1       | 11 | 93329971  | 93438487  | 108516 | protein coding                     | -1.32 | 4.30E-03 | 2.78E-02 |
| ENSG00000280109 | PLAC4       | 21 | 41175231  | 41186788  | 11557  | lncRNA-antisense                   | -1.32 | 3.57E-05 | 1.24E-03 |
| ENSG00000245248 | USP2-AS1    | 11 | 119364359 | 119526664 | 162305 | lncRNA-antisense                   | -1.32 | 3.95E-04 | 6.15E-03 |
| ENSG00000186523 | FAM86B1     | 8  | 12182096  | 12194133  | 12037  | protein coding                     | -1.32 | 1.13E-03 | 1.19E-02 |
| ENSG00000185294 | SPPL2C      | 17 | 45844881  | 45847067  | 2186   | protein coding                     | -1.32 | 4.01E-03 | 2.67E-02 |
| ENSG00000166573 | GALR1       | 18 | 77249848  | 77277900  | 28052  | protein coding                     | -1.32 | 1.58E-03 | 1.46E-02 |
| ENSG00000163631 | ALB         | 4  | 73397114  | 73421482  | 24368  | protein coding                     | -1.32 | 3.69E-03 | 2.52E-02 |
| ENSG00000121905 | HPCA        | 1  | 32885994  | 32898441  | 12447  | protein coding                     | -1.32 | 4.02E-03 | 2.67E-02 |
| ENSG00000253767 | PCDHGA8     | 5  | 141390157 | 141512979 | 122822 | protein coding                     | -1.32 | 4.93E-04 | 7.05E-03 |
| ENSG00000214796 | TUBA5P      | 1  | 202851828 | 202861620 | 9792   | transcribed_unprocessed_pseudogene | -1.32 | 4.55E-03 | 2.88E-02 |
| ENSG00000214650 | AC073592.1  | 12 | 124513222 | 124516798 | 3576   | lncRNA                             | -1.32 | 7.38E-03 | 3.90E-02 |
| ENSG00000196460 | RFX8        | 2  | 101397359 | 101475112 | 77753  | protein coding                     | -1.32 | 3.87E-04 | 6.08E-03 |
| ENSG00000138207 | RBP4        | 10 | 93591687  | 93601744  | 10057  | protein coding                     | -1.32 | 4.51E-03 | 2.86E-02 |
| ENSG00000272595 | OR10AH1P    | 7  | 5103719   | 5120245   | 16526  | transcribed_unprocessed_pseudogene | -1.32 | 1.05E-03 | 1.13E-02 |
| ENSG00000476717 | ANO2        | 12 | 5531869   | 5946232   | 414363 | protein coding                     | -1.32 | 1.84E-04 | 3.72E-03 |
| ENSG00000181333 | HEPHL1      | 11 | 94021354  | 94114208  | 92854  | protein coding                     | -1.32 | 3.37E-04 | 5.57E-03 |
| ENSG00000162267 | ITIH3       | 3  | 52794768  | 52809009  | 14241  | protein coding                     | -1.32 | 4.55E-04 | 6.70E-03 |
| ENSG00000260190 | AL087752.5  | 9  | 136937169 | 136937988 | 819    | lncRNA-sense overlapping           | -1.32 | 3.05E-03 | 2.23E-02 |
| ENSG00000275591 | XKR5        | 8  | 6808517   | 6835524   | 27007  | protein coding                     | -1.32 | 6.80E-04 | 8.69E-03 |
| ENSG00000073670 | ADAM11      | 17 | 44758988  | 44781846  | 22858  | protein coding                     | -1.32 | 7.88E-06 | 4.35E-04 |
| ENSG00000231863 | AL139393.1  | 6  | 160931080 | 160985624 | 54544  | lncRNA-antisense                   | -1.32 | 2.02E-03 | 1.72E-02 |
| ENSG00000228412 | LNC-LBCS    | 6  | 19323428  | 19839080  | 515652 | lncRNA-antisense                   | -1.32 | 4.21E-04 | 6.39E-03 |
| ENSG00000173908 | KRT28       | 17 | 40792196  | 40799959  | 7763   | protein coding                     | -1.32 | 6.03E-03 | 3.43E-02 |
| ENSG00000236467 | KCNMA1-AS1  | 10 | 76888044  | 76980624  | 92580  | lncRNA-antisense                   | -1.32 | 4.58E-04 | 6.73E-03 |
| ENSG00000239445 | ST3GAL6-AS1 | 3  | 98706236  | 98732757  | 26521  | lncRNA-antisense                   | -1.32 | 4.11E-04 | 6.31E-03 |
| ENSG00000214611 | CYP3A43     | 7  | 99828013  | 99866102  | 38089  | protein coding                     | -1.32 | 6.46E-03 | 3.58E-02 |
| ENSG00000203392 | AC105020.1  | 15 | 75678548  | 75680752  | 2204   | lncRNA-antisense                   | -1.32 | 1.56E-04 | 3.35E-03 |
| ENSG00000243024 | AC012158.1  | 12 | 64222337  | 64397065  | 174728 | transcribed_processed_pseudogene   | -1.32 | 7.04E-03 | 3.78E-02 |
| ENSG00000142698 | C1orf94     | 1  | 34166883  | 34219131  | 52248  | protein coding                     | -1.32 | 1.42E-03 | 1.37E-02 |
| ENSG00000184022 | OR2T10      | 1  | 248590487 | 248597700 | 7213   | protein coding                     | -1.32 | 8.75E-03 | 4.35E-02 |
| ENSG00000165164 | CFAP47      | X  | 35919734  | 36385317  | 465583 | protein coding                     | -1.32 | 1.52E-03 | 1.43E-02 |
| ENSG00000259921 | AC022819.1  | 15 | 99157231  | 99161140  | 3909   | lncRNA-sense intronic              | -1.32 | 2.35E-03 | 1.88E-02 |
| ENSG00000173809 | TDRD12      | 19 | 32719753  | 32829580  | 109827 | protein coding                     | -1.32 | 8.87E-07 | 8.84E-05 |
| ENSG00000259374 | NDUFB4P11   | 14 | 103139675 | 103141959 | 2284   | transcribed_processed_pseudogene   | -1.32 | 3.57E-03 | 2.47E-02 |
| ENSG00000197408 | CYP2B6      | 19 | 40991282  | 41018398  | 27116  | protein coding                     | -1.32 | 9.00E-03 | 4.42E-02 |
| ENSG00000117215 | PLA2G2D     | 1  | 20111939  | 20119566  | 7627   | protein coding                     | -1.32 | 2.32E-04 | 4.32E-03 |
| ENSG00000175147 | TMEM51-AS1  | 1  | 15111815  | 15153618  | 41803  | lncRNA-antisense                   | -1.32 | 5.66E-05 | 1.69E-03 |
| ENSG00000075429 | CACNG5      | 17 | 66835117  | 66894751  | 59634  | protein coding                     | -1.32 | 3.63E-04 | 5.83E-03 |
| ENSG00000245614 | DX11-AS1    | 12 | 31019434  | 31073847  | 54413  | lncRNA-antisense                   | -1.32 | 4.23E-04 | 6.40E-03 |
| ENSG00000184937 | WT1         | 11 | 32387775  | 32435564  | 47789  | protein coding                     | -1.32 | 6.49E-05 | 1.85E-03 |
| ENSG00000259426 | AC02737.3   | 15 | 69396904  | 69415029  | 18125  | lncRNA-antisense                   | -1.32 | 2.28E-03 | 1.85E-02 |
| ENSG00000137809 | ITGA11      | 15 | 68296532  | 68432163  | 135631 | protein coding                     | -1.32 | 1.34E-05 | 6.33E-04 |
| ENSG00000242686 | PDE6B-AS1   | 4  | 652850    | 656213    | 3363   | lncRNA-antisense                   | -1.32 | 3.37E-04 | 5.57E-03 |
| ENSG00000268926 | AL354861.3  | 9  | 95772323  | 95776282  | 3959   | lncRNA                             | -1.32 | 4.23E-03 | 2.75E-02 |
| ENSG00000129596 | CDO1        | 5  | 115804733 | 115816659 | 11926  | protein coding                     | -1.32 | 9.94E-03 | 4.72E-02 |
| ENSG00000167798 | C3P1        | 19 | 10037803  | 10074135  | 36332  | transcribed_unprocessed_pseudogene | -1.32 | 5.87E-04 | 7.93E-03 |
| ENSG00000264424 | MYH4        | 17 | 10443290  | 10469559  | 26269  | protein coding                     | -1.32 | 1.06E-04 | 2.62E-03 |
| ENSG00000287600 | AC122719.3  | 5  | 904319    | 912587    | 8268   | lncRNA                             | -1.32 | 2.86E-03 | 2.14E-02 |
| ENSG00000285527 | AC136285.3  | 16 | 87129857  | 87133107  | 3250   | lncRNA                             | -1.32 | 2.22E-03 | 1.82E-02 |
| ENSG00000241449 | AC092666.1  | 7  | 150033653 | 150076655 | 43002  | lncRNA                             | -1.32 | 1.84E-04 | 3.72E-03 |
| ENSG00000171772 | SYCE1       | 10 | 133553901 | 133569835 | 15934  | protein coding                     | -1.32 | 3.55E-05 | 1.23E-03 |
| ENSG00000227237 | AL672291.1  | 1  | 248859164 | 248864796 | 5632   | lncRNA-antisense                   | -1.32 | 2.34E-03 | 1.88E-02 |
| ENSG00000288531 | AL669831.7  | 1  | 860226    | 868202    | 7976   | lncRNA                             | -1.32 | 1.88E-04 | 3.76E-03 |
| ENSG00000260034 | LCMT1-AS2   | 16 | 25140577  | 25149032  | 8455   | lncRNA-antisense                   | -1.32 | 1.87E-04 | 3.75E-03 |
| ENSG00000109576 | AADAT       | 4  | 170060222 | 170091699 | 31477  | protein coding                     | -1.32 | 3.20E-03 | 2.30E-02 |
| ENSG00000287759 | AL353151.2  | 9  | 4741741   | 4759639   | 17898  | lncRNA                             | -1.32 | 2.90E-03 | 2.16E-02 |
| ENSG00000123901 | GPR83       | 11 | 94377316  | 94401419  | 24103  | protein coding                     | -1.32 | 2.15E-04 | 4.10E-03 |
| ENSG00000158315 | RHBDL2      | 1  | 38885807  | 38941830  | 56023  | protein coding                     | -1.32 | 4.46E-03 | 2.84E-02 |
| ENSG00000101871 | MID1        | X  | 10445310  | 10833654  | 388344 | protein coding                     | -1.32 | 7.81E-05 | 2.14E-03 |
| ENSG00000114638 | UPK1B       | 3  | 119173517 | 119205143 | 31626  | protein coding                     | -1.32 | 1.44E-03 | 1.38E-02 |
| ENSG00000100234 | TIMP3       | 22 | 32801705  | 32863041  | 61336  | protein coding                     | -1.32 | 3.34E-04 | 5.54E-03 |
| ENSG00000255484 | LINC02764   | 11 | 112534220 | 112555802 | 21582  | lncRNA                             | -1.32 | 3.96E-03 | 2.65E-02 |
| ENSG00000164556 | FAM183BP    | 7  | 38685346  | 38687037  | 1691   | processed_pseudogene               | -1.32 | 1.15E-03 | 1.21E-02 |
| ENSG00000196972 | SMIM10L2B   | X  | 135094985 | 135098712 | 3727   | protein coding                     | -1.32 | 9.61E-03 | 4.62E-02 |
| ENSG00000165695 | AK8         | 9  | 132725578 | 132878777 | 153199 | protein coding                     | -1.32 | 2.58E-05 | 9.95E-04 |
| ENSG00000284676 | AL645944.2  | 1  | 29755175  | 29790597  | 35422  | lncRNA                             | -1.32 | 6.89E-03 | 3.73E-02 |
| ENSG00000137142 | IGFBPL1     | 9  | 38406528  | 38424454  | 17926  | protein coding                     | -1.32 | 1.38E-03 | 1.34E-02 |
| ENSG00000170500 | LONRF2      | 2  | 100271875 | 100322501 | 50626  | protein coding                     | -1.32 | 2.91E-05 | 1.07E-03 |
| ENSG00000270533 | CR382285.1  | 21 | 9975017   | 10119309  | 144292 | transcribed_processed_pseudogene   | -1.32 | 3.00E-03 | 2.21E-02 |
| ENSG00000186526 | CYP4F8      | 19 | 15615218  | 15630639  | 15421  | protein coding                     | -1.32 | 4.03E-04 | 6.24E-03 |
| ENSG00000170827 | CELP        | 9  | 133079900 | 133087355 | 7455   | transcribed_unprocessed_pseudogene | -1.32 | 2.46E-03 | 1.94E-02 |
| ENSG00000284656 | AL645937.4  | 6  | 29162475  | 29166201  | 3726   | lncRNA                             | -1.32 | 1.06E-02 | 4.92E-02 |
| ENSG00000163982 | OTOP1       | 4  | 4188726   | 4226929   | 38203  | protein coding                     | -1.32 | 1.77E-03 | 1.57E-02 |
| ENSG00000233217 | MROH3P      | 1  | 200917460 | 20096668  | 49208  | transcribed_unitary_pseudogene     | -1.32 | 9.34E-04 | 1.05E-02 |
| ENSG00000260102 | LINC01070   | 13 | 112197350 | 112201000 | 3650   | lncRNA                             | -1.32 | 6.86E-04 | 1.01E-02 |
| ENSG00000129451 | KLK10       | 19 | 51012739  | 51020175  | 7436   | protein coding                     | -1.32 | 8.28E-04 | 9.77E-03 |
| ENSG00000286156 | AC028273.1  | 2  | 94195806  | 94208379  | 12573  | transcribed_unprocessed_pseudogene | -1.32 | 2.47E-03 | 1.94E-02 |
| ENSG00000259422 | AC091100.1  | 15 | 76174891  | 76181486  | 6595   | lncRNA-antisense                   | -1.32 | 1.13E-03 | 1.19E-02 |

|                 |               |    |           |           |        |                                   |       |          |          |
|-----------------|---------------|----|-----------|-----------|--------|-----------------------------------|-------|----------|----------|
| ENSG00000259156 | CHEK2P2       | 15 | 20282744  | 20291586  | 8842   | transcribed_unprocessed_pseudogen | -1.34 | 3.85E-03 | 2.60E-02 |
| ENSG00000260518 | BMS1P8        | 16 | 33687025  | 33707213  | 20188  | transcribed_unprocessed_pseudogen | -1.34 | 4.61E-03 | 2.90E-02 |
| ENSG00000157219 | HTR5A         | 7  | 155070324 | 155087392 | 17068  | protein coding                    | -1.34 | 3.90E-03 | 2.62E-02 |
| ENSG00000183840 | GPR39         | 2  | 132416805 | 132646582 | 229777 | protein coding                    | -1.34 | 5.28E-04 | 7.39E-03 |
| ENSG00000234810 | AL603840.1    | 1  | 55329288  | 56070513  | 741225 | lncRNA                            | -1.34 | 1.11E-04 | 2.70E-03 |
| ENSG00000125409 | TEKT3         | 17 | 15303811  | 15341632  | 37821  | protein coding                    | -1.34 | 1.49E-03 | 1.41E-02 |
| ENSG00000172519 | OR10H5        | 19 | 15787661  | 15801025  | 13364  | protein coding                    | -1.34 | 3.04E-03 | 2.23E-02 |
| ENSG00000183921 | SDR42E2       | 16 | 22165583  | 22191754  | 26171  | protein coding                    | -1.34 | 4.88E-04 | 7.00E-03 |
| ENSG00000249326 | CTD-2194D22.4 | 5  | 1887332   | 1900493   | 13161  | lncRNA-antisense                  | -1.34 | 5.49E-03 | 3.22E-02 |
| ENSG00000254656 | RTL1          | 14 | 100879753 | 100903722 | 23969  | protein coding                    | -1.34 | 2.44E-04 | 4.46E-03 |
| ENSG00000197653 | DNAH10        | 12 | 123762188 | 123935720 | 173532 | protein coding                    | -1.34 | 3.17E-08 | 6.36E-06 |
| ENSG00000077943 | ITGA8         | 10 | 15513954  | 15719922  | 205968 | protein coding                    | -1.34 | 1.04E-04 | 2.59E-03 |
| ENSG00000125414 | MYH2          | 17 | 10521148  | 10549700  | 28552  | protein coding                    | -1.34 | 2.45E-03 | 1.93E-02 |
| ENSG00000253267 | DLGAP2-AS1    | 8  | 1565509   | 1622417   | 56908  | lncRNA-antisense                  | -1.34 | 4.97E-03 | 3.03E-02 |
| ENSG00000150510 | FAM124A       | 13 | 51222334  | 51284239  | 61905  | protein coding                    | -1.34 | 2.09E-05 | 8.61E-04 |
| ENSG00000179008 | C14orf39      | 14 | 60396469  | 60515543  | 119074 | protein coding                    | -1.34 | 1.03E-02 | 4.83E-02 |
| ENSG00000244593 | AC025062.1    | 8  | 18383274  | 18383917  | 643    | processed_pseudogene              | -1.34 | 1.18E-03 | 1.22E-02 |
| ENSG00000122133 | PAEP          | 9  | 135561756 | 135566955 | 5199   | protein coding                    | -1.34 | 9.17E-04 | 1.04E-02 |
| ENSG00000187672 | ERC2          | 3  | 55508311  | 56486467  | 960156 | protein coding                    | -1.34 | 8.27E-05 | 2.24E-03 |
| ENSG00000248896 | AC105001.1    | 8  | 10729314  | 10772910  | 43596  | lncRNA-antisense                  | -1.34 | 3.53E-03 | 2.45E-02 |
| ENSG00000124557 | BTN1A1        | 6  | 26501221  | 26510422  | 9201   | protein coding                    | -1.34 | 1.05E-03 | 1.14E-02 |
| ENSG00000112494 | UNC93A        | 6  | 167271169 | 167316014 | 44845  | protein coding                    | -1.34 | 2.71E-03 | 2.07E-02 |
| ENSG00000105388 | CEACAM5       | 19 | 41708585  | 41730433  | 21848  | protein coding                    | -1.34 | 3.90E-03 | 2.62E-02 |
| ENSG00000102468 | HTR2A         | 13 | 46831546  | 46897076  | 65530  | protein coding                    | -1.34 | 4.78E-03 | 2.89E-02 |
| ENSG00000224973 | LARGE-AS1     | 22 | 33725007  | 33750843  | 25836  | lncRNA                            | -1.34 | 1.49E-03 | 1.41E-02 |
| ENSG00000287630 | AC011370.1    | 5  | 147725551 | 147728464 | 2913   | lncRNA                            | -1.34 | 6.56E-03 | 3.61E-02 |
| ENSG00000117501 | MROH9         | 1  | 170935471 | 171064765 | 129294 | protein coding                    | -1.34 | 4.86E-03 | 2.99E-02 |
| ENSG00000170748 | RBMXL2        | 11 | 7088898   | 7091148   | 2150   | protein coding                    | -1.34 | 6.30E-03 | 3.52E-02 |
| ENSG00000287463 | AC110620.2    | 2  | 134718188 | 134725474 | 7286   | lncRNA                            | -1.34 | 1.98E-03 | 1.69E-02 |
| ENSG00000224167 | LINC01357     | 1  | 112849821 | 112877871 | 28050  | lncRNA                            | -1.34 | 8.87E-03 | 4.39E-02 |
| ENSG00000204179 | PTPN20        | 10 | 46911396  | 47002488  | 91092  | protein coding                    | -1.34 | 3.80E-03 | 2.57E-02 |
| ENSG00000185739 | SRL           | 16 | 4189374   | 4242080   | 52706  | protein coding                    | -1.34 | 4.38E-04 | 6.53E-03 |
| ENSG00000259234 | ANKRD34C-AS1  | 15 | 79141939  | 79283949  | 142010 | lncRNA                            | -1.34 | 6.86E-04 | 8.74E-03 |
| ENSG00000267280 | TBX2-AS1      | 17 | 61393456  | 61411555  | 18099  | lncRNA-antisense                  | -1.34 | 4.99E-03 | 3.04E-02 |
| ENSG00000240023 | AL13163.1     | 14 | 35388121  | 35389069  | 948    | processed_pseudogene              | -1.34 | 6.02E-03 | 3.42E-02 |
| ENSG00000160886 | LY6K          | 8  | 142700111 | 142705127 | 5016   | protein coding                    | -1.34 | 4.24E-03 | 2.75E-02 |
| ENSG00000185842 | DNAH14        | 1  | 224896262 | 225399292 | 503030 | protein coding                    | -1.34 | 1.24E-07 | 1.86E-05 |
| ENSG00000274565 | AC080038.1    | 17 | 62626437  | 62627590  | 1153   | lncRNA-antisense                  | -1.34 | 9.80E-03 | 4.68E-02 |
| ENSG00000281641 | SAMD12-AS1    | 8  | 118620498 | 118906155 | 285657 | lncRNA                            | -1.34 | 9.02E-03 | 4.43E-02 |
| ENSG00000235189 | AL034405.1    | X  | 129869064 | 129957528 | 88464  | lncRNA-antisense                  | -1.34 | 7.54E-03 | 3.95E-02 |
| ENSG00000131386 | GALNT15       | 3  | 16174680  | 16231982  | 57312  | protein coding                    | -1.34 | 1.59E-03 | 1.47E-02 |
| ENSG00000286232 | AL365229.1    | 20 | 61267525  | 61271827  | 4302   | lncRNA                            | -1.34 | 1.07E-03 | 1.15E-02 |
| ENSG00000234394 | AL353608.3    | 9  | 68306528  | 68330626  | 24098  | lncRNA                            | -1.35 | 4.05E-03 | 2.68E-02 |
| ENSG00000120820 | GLT1D2        | 12 | 103988984 | 104064183 | 75199  | protein coding                    | -1.35 | 3.47E-03 | 2.42E-02 |
| ENSG00000286837 | AC087533.1    | 8  | 42842989  | 42844876  | 1887   | lncRNA                            | -1.35 | 1.74E-03 | 1.55E-02 |
| ENSG00000178084 | HTR3C         | 3  | 184053047 | 184060673 | 7626   | protein coding                    | -1.35 | 8.67E-03 | 4.32E-02 |
| ENSG00000260876 | LINC01229     | 16 | 79676048  | 79809716  | 133668 | lncRNA                            | -1.35 | 3.90E-05 | 1.31E-03 |
| ENSG00000214691 | LINC01913     | 2  | 41860155  | 41894050  | 33895  | lncRNA                            | -1.35 | 4.01E-03 | 2.67E-02 |
| ENSG00000205856 | C22orf42      | 22 | 32149006  | 32159322  | 10316  | protein coding                    | -1.35 | 9.57E-03 | 4.61E-02 |
| ENSG00000146857 | STRA8         | 7  | 135231979 | 135258492 | 26513  | protein coding                    | -1.35 | 4.07E-03 | 2.69E-02 |
| ENSG00000231817 | LINC01198     | 13 | 46455131  | 46515958  | 60827  | lncRNA                            | -1.35 | 1.18E-03 | 1.22E-02 |
| ENSG00000228793 | AL033523.1    | 6  | 3585101   | 3720081   | 134980 | lncRNA                            | -1.35 | 1.86E-05 | 8.05E-04 |
| ENSG00000235726 | AC010148.1    | 2  | 234803808 | 234913384 | 109576 | lncRNA                            | -1.35 | 3.87E-04 | 6.08E-03 |
| ENSG00000119715 | ESRRB         | 14 | 76310712  | 76501837  | 191125 | protein coding                    | -1.35 | 7.27E-04 | 9.02E-03 |
| ENSG00000258502 | LINC02290     | 14 | 66111557  | 66131716  | 20159  | lncRNA                            | -1.35 | 2.41E-03 | 1.91E-02 |
| ENSG00000124721 | DNAH8         | 6  | 38715311  | 39030792  | 315481 | protein coding                    | -1.35 | 2.36E-06 | 1.80E-04 |
| ENSG00000095777 | MYO3A         | 10 | 25934229  | 26212532  | 278303 | protein coding                    | -1.35 | 2.42E-05 | 9.53E-04 |
| ENSG00000205266 | KRT17P5       | 17 | 18415728  | 18425097  | 9369   | transcribed_unprocessed_pseudogen | -1.35 | 5.81E-03 | 3.35E-02 |
| ENSG00000156218 | ADAMTSL3      | 15 | 83654088  | 84039842  | 385754 | protein coding                    | -1.35 | 4.12E-06 | 2.68E-04 |
| ENSG00000224728 | IMPDH1P8      | 3  | 15878047  | 15879571  | 1524   | processed_pseudogene              | -1.35 | 9.46E-04 | 1.06E-02 |
| ENSG00000256340 | ABCC6P1       | 16 | 18571162  | 18598328  | 27166  | transcribed_unprocessed_pseudogen | -1.35 | 6.56E-04 | 8.50E-03 |
| ENSG00000215262 | KCNU1         | 8  | 36784324  | 36936125  | 151801 | protein coding                    | -1.35 | 8.83E-03 | 4.37E-02 |
| ENSG00000138315 | QIT3          | 10 | 72893584  | 72933036  | 39452  | protein coding                    | -1.35 | 1.43E-03 | 1.38E-02 |
| ENSG00000276715 | YWHAEP7       | 17 | 37828305  | 37884743  | 56438  | transcribed_unprocessed_pseudogen | -1.35 | 1.70E-03 | 1.53E-02 |
| ENSG00000204706 | MAMDC2-AS1    | 9  | 70033921  | 70175888  | 141967 | lncRNA-antisense                  | -1.35 | 3.04E-05 | 1.11E-03 |
| ENSG00000106025 | TPSPAN12      | 7  | 120787320 | 120858402 | 71082  | protein coding                    | -1.35 | 2.89E-03 | 2.15E-02 |
| ENSG00000224184 | MIR3681HG     | 2  | 11833926  | 12702913  | 868987 | lncRNA                            | -1.35 | 1.46E-04 | 3.21E-03 |
| ENSG00000205129 | C4orf47       | 4  | 185426249 | 185449826 | 23577  | protein coding                    | -1.35 | 6.30E-03 | 3.52E-02 |
| ENSG00000202357 | Y RNA         | 19 | 11408772  | 11408880  | 108    | misc RNA                          | -1.35 | 3.60E-06 | 2.45E-04 |
| ENSG00000286125 | AC006115.2    | 19 | 56669941  | 56823395  | 153454 | lncRNA                            | -1.35 | 3.18E-06 | 2.26E-04 |
| ENSG00000101327 | PDYN          | 20 | 1978757   | 1994285   | 15528  | protein coding                    | -1.35 | 7.20E-03 | 3.84E-02 |
| ENSG00000146276 | GABRR1        | 6  | 89177504  | 89231278  | 53774  | protein coding                    | -1.35 | 7.44E-03 | 3.92E-02 |
| ENSG00000102290 | PCDH11X       | X  | 91779261  | 92623230  | 843969 | protein coding                    | -1.35 | 1.68E-03 | 1.52E-02 |
| ENSG00000286457 | AC009560.3    | 15 | 60634503  | 60640915  | 6412   | lncRNA                            | -1.35 | 1.01E-02 | 4.77E-02 |
| ENSG00000164007 | CLDN19        | 1  | 42733093  | 42740254  | 7161   | protein coding                    | -1.35 | 1.60E-03 | 1.47E-02 |
| ENSG00000158258 | CLSTN2        | 3  | 139935185 | 140577397 | 642212 | protein coding                    | -1.35 | 5.08E-05 | 1.58E-03 |
| ENSG00000042304 | C2orf83       | 2  | 227610090 | 227648606 | 38516  | protein coding                    | -1.35 | 1.04E-02 | 4.87E-02 |
| ENSG00000230317 | LINC01284     | X  | 51095836  | 51224432  | 128596 | lncRNA                            | -1.35 | 3.69E-07 | 4.48E-05 |
| ENSG00000140459 | CYP11A1       | 15 | 74337759  | 74367646  | 29887  | protein coding                    | -1.35 | 2.51E-04 | 4.55E-03 |
| ENSG00000224272 | AC131097.2    | 2  | 241808312 | 241812016 | 3704   | lncRNA-antisense                  | -1.35 | 1.97E-03 | 1.69E-02 |
| ENSG00000286063 | AL121888.1    | 20 | 48324812  | 48367976  | 43164  | lncRNA                            | -1.35 | 6.92E-04 | 8.78E-03 |
| ENSG00000205634 | LINC00898     | 22 | 47612231  | 47631569  | 19338  | lncRNA                            | -1.35 | 7.12E-04 | 8.90E-03 |
| ENSG00000258785 | LINC01580     | 15 | 93894431  | 93984150  | 89719  | lncRNA                            | -1.35 | 1.56E-04 | 3.35E-03 |
| ENSG00000133454 | MYO18B        | 22 | 25742144  | 26031045  | 288901 | protein coding                    | -1.35 | 1.50E-05 | 6.84E-04 |
| ENSG00000165633 | VSTM4         | 10 | 49014236  | 49115522  | 101286 | protein coding                    | -1.35 | 5.55E-04 | 7.66E-03 |
| ENSG00000126878 | AIF1L         | 9  | 131096476 | 131123152 | 26676  | protein coding                    | -1.35 | 3.28E-04 | 5.44E-03 |
| ENSG00000259669 | AC084759.2    | 15 | 53946709  | 53984010  | 37301  | lncRNA                            | -1.35 | 5.25E-03 | 3.14E-02 |
| ENSG00000137860 | SLC28A2       | 15 | 45252234  | 45277846  | 25612  | protein coding                    | -1.35 | 4.48E-04 | 6.62E-03 |
| ENSG00000235731 | LINC02250     | 15 | 25456271  | 25578813  | 122542 | lncRNA                            | -1.35 | 4.33E-04 | 6.49E-03 |
| ENSG00000250634 | LINC01182     | 4  | 13654374  | 14003756  | 349382 | lncRNA                            | -1.36 | 1.58E-04 | 3.37E-03 |



|                 |            |    |           |           |        |                                    |       |          |          |
|-----------------|------------|----|-----------|-----------|--------|------------------------------------|-------|----------|----------|
| ENSG00000101349 | PAK5       | 20 | 9537370   | 9839076   | 301706 | protein coding                     | -1.36 | 6.46E-03 | 3.58E-02 |
| ENSG00000273372 | SFTPD-AS1  | 10 | 79968213  | 79973213  | 5000   | lncRNA-antisense                   | -1.36 | 7.19E-03 | 3.84E-02 |
| ENSG00000179314 | WSDC1      | 17 | 6057807   | 6124427   | 66620  | protein coding                     | -1.36 | 1.35E-04 | 3.05E-03 |
| ENSG00000203908 | KHDC3L     | 6  | 73362658  | 73364171  | 1513   | protein coding                     | -1.36 | 7.96E-03 | 4.09E-02 |
| ENSG00000188000 | ORD2D      | 19 | 9178979   | 9188818   | 9839   | protein coding                     | -1.36 | 7.38E-03 | 3.90E-02 |
| ENSG00000284744 | AL591163.1 | 1  | 6767954   | 6770038   | 2084   | lncRNA                             | -1.36 | 3.01E-03 | 2.21E-02 |
| ENSG00000196979 | GPRACR     | 9  | 130140610 | 130144219 | 3609   | lncRNA                             | -1.36 | 4.96E-03 | 3.03E-02 |
| ENSG00000203805 | PLPP4      | 10 | 120457227 | 120592065 | 134838 | protein coding                     | -1.36 | 2.70E-03 | 2.06E-02 |
| ENSG00000188558 | OR2G6      | 1  | 248508073 | 248527337 | 19264  | protein coding                     | -1.36 | 5.69E-03 | 3.30E-02 |
| ENSG00000108381 | ASPA       | 17 | 3472374   | 3503405   | 31031  | protein coding                     | -1.36 | 5.88E-03 | 3.37E-02 |
| ENSG00000232294 | AL031674.1 | 20 | 52671735  | 52699472  | 27737  | lncRNA                             | -1.36 | 7.51E-03 | 3.94E-02 |
| ENSG00000178796 | RIAD1      | 1  | 151710433 | 151729805 | 19372  | protein coding                     | -1.36 | 4.33E-03 | 2.79E-02 |
| ENSG00000134569 | LRP4       | 11 | 46856717  | 46918642  | 61925  | protein coding                     | -1.36 | 5.11E-05 | 1.58E-03 |
| ENSG00000233183 | AL138889.1 | 6  | 33891327  | 33927631  | 36304  | lncRNA                             | -1.36 | 7.84E-05 | 2.15E-03 |
| ENSG00000056998 | GYG2       | X  | 2828822   | 2882820   | 53998  | protein coding                     | -1.36 | 3.55E-03 | 2.46E-02 |
| ENSG00000232759 | AC002480.1 | 7  | 22563337  | 22573996  | 10659  | lncRNA-antisense                   | -1.36 | 2.23E-03 | 1.82E-02 |
| ENSG00000254519 | AC044839.1 | 11 | 45722279  | 45748029  | 25750  | lncRNA                             | -1.36 | 1.75E-04 | 3.62E-03 |
| ENSG00000140285 | FGF7       | 15 | 49423237  | 49488775  | 65538  | protein coding                     | -1.36 | 1.93E-03 | 1.67E-02 |
| ENSG00000257762 | LINC02401  | 12 | 103547751 | 103578947 | 31196  | lncRNA                             | -1.36 | 9.96E-03 | 4.73E-02 |
| ENSG00000197125 | ORBB8      | 11 | 124437445 | 124445696 | 8251   | protein coding                     | -1.36 | 2.09E-03 | 1.75E-02 |
| ENSG00000164049 | FBXW12     | 3  | 48372219  | 48401259  | 29040  | protein coding                     | -1.36 | 5.49E-03 | 3.22E-02 |
| ENSG00000224795 | NTM-AS1    | 11 | 131622451 | 131663583 | 41132  | lncRNA                             | -1.36 | 5.91E-03 | 3.38E-02 |
| ENSG00000100170 | SLSA1      | 22 | 32043261  | 32113029  | 69768  | protein coding                     | -1.36 | 6.00E-04 | 8.05E-03 |
| ENSG00000169208 | OR10G3     | 14 | 21568520  | 21580076  | 11556  | protein coding                     | -1.36 | 6.38E-03 | 3.55E-02 |
| ENSG00000162598 | C1orf87    | 1  | 59987269  | 60073770  | 86501  | protein coding                     | -1.36 | 1.20E-03 | 1.24E-02 |
| ENSG00000163810 | TGM4       | 3  | 44874608  | 44914990  | 40382  | protein coding                     | -1.36 | 2.60E-04 | 4.67E-03 |
| ENSG00000286117 | AL121894.3 | 20 | 23656151  | 23674888  | 18737  | lncRNA                             | -1.36 | 3.30E-03 | 2.35E-02 |
| ENSG00000130540 | SULT14A1   | 22 | 43824509  | 43862513  | 38004  | protein coding                     | -1.36 | 7.57E-04 | 9.26E-03 |
| ENSG00000267199 | AP01029.2  | 18 | 12438890  | 12448205  | 9315   | lncRNA-antisense                   | -1.36 | 9.01E-04 | 1.03E-02 |
| ENSG00000171388 | APLN       | X  | 129645259 | 129654956 | 9697   | protein coding                     | -1.36 | 2.24E-03 | 1.83E-02 |
| ENSG00000158055 | GRHL3      | 1  | 24319357  | 24364482  | 45125  | protein coding                     | -1.36 | 1.48E-03 | 1.41E-02 |
| ENSG00000118271 | TTR        | 18 | 31557009  | 31598833  | 41824  | protein coding                     | -1.36 | 7.42E-03 | 3.91E-02 |
| ENSG00000287859 | AC008507.4 | 19 | 30058229  | 30060797  | 2568   | lncRNA                             | -1.36 | 1.10E-04 | 2.68E-03 |
| ENSG00000265843 | LINC01029  | 18 | 77970637  | 77993731  | 23094  | lncRNA                             | -1.36 | 1.05E-02 | 4.91E-02 |
| ENSG00000170485 | NPAS2      | 2  | 100820139 | 100896829 | 176890 | protein coding                     | -1.36 | 6.66E-09 | 1.76E-06 |
| ENSG00000205562 | AL049775.1 | 14 | 85518871  | 85531585  | 12714  | lncRNA                             | -1.36 | 2.97E-03 | 2.19E-02 |
| ENSG00000181126 | HLA-V      | 6  | 29790954  | 29797811  | 6857   | transcribed_unprocessed_pseudogene | -1.36 | 4.50E-05 | 1.45E-03 |
| ENSG00000149488 | TMC2       | 20 | 2536607   | 2641784   | 105177 | protein coding                     | -1.36 | 1.02E-04 | 2.56E-03 |
| ENSG00000137090 | DMRT1      | 9  | 841690    | 969090    | 127400 | protein coding                     | -1.36 | 3.95E-04 | 6.15E-03 |
| ENSG00000229563 | LINC01204  | X  | 45505388  | 45632121  | 126733 | lncRNA                             | -1.36 | 2.19E-04 | 4.15E-03 |
| ENSG00000230483 | AC124057.1 | 11 | 2404515   | 2407908   | 3393   | lncRNA-antisense                   | -1.36 | 8.40E-03 | 4.24E-02 |
| ENSG00000188316 | ENO4       | 10 | 116849499 | 116911788 | 62289  | protein coding                     | -1.36 | 1.28E-03 | 1.28E-02 |
| ENSG00000131914 | LIN28A     | 1  | 26410817  | 26429728  | 18911  | protein coding                     | -1.36 | 1.09E-02 | 4.98E-02 |
| ENSG00000225321 | LINC01427  | 20 | 22263065  | 22284029  | 20964  | lncRNA                             | -1.36 | 9.65E-04 | 1.08E-02 |
| ENSG00000281732 | Z84468.1   | 22 | 48538900  | 48547387  | 8487   | lncRNA                             | -1.36 | 4.21E-04 | 6.39E-03 |
| ENSG00000285300 | AC073176.2 | 10 | 70927055  | 71077810  | 150755 | lncRNA                             | -1.36 | 1.16E-03 | 1.21E-02 |
| ENSG00000279273 | AC120024.4 | 17 | 80463451  | 80465593  | 2142   | TEC                                | -1.36 | 1.04E-02 | 4.87E-02 |
| ENSG00000286627 | AP005900.1 | 18 | 8012257   | 8016565   | 4308   | lncRNA                             | -1.36 | 7.93E-03 | 4.08E-02 |
| ENSG00000267670 | AC022098.2 | 19 | 14030855  | 14031557  | 702    | lncRNA-antisense                   | -1.36 | 1.50E-03 | 1.41E-02 |
| ENSG00000233304 | LINC01346  | 1  | 3940486   | 3955262   | 14776  | lncRNA                             | -1.36 | 4.65E-04 | 6.79E-03 |
| ENSG00000186976 | EFCAB6     | 22 | 43528744  | 43812337  | 283593 | protein coding                     | -1.36 | 1.43E-05 | 6.66E-04 |
| ENSG00000187048 | CYP4A11    | 1  | 46929177  | 46941484  | 12307  | protein coding                     | -1.36 | 7.48E-04 | 9.18E-03 |
| ENSG00000227620 | ALG18P     | 11 | 67785273  | 67792335  | 7062   | unprocessed_pseudogene             | -1.36 | 5.46E-03 | 3.21E-02 |
| ENSG00000185247 | MAGEFA1    | X  | 149688228 | 149717268 | 29040  | protein coding                     | -1.36 | 6.15E-03 | 3.47E-02 |
| ENSG00000287306 | AC016821.1 | 10 | 69510166  | 69544257  | 34091  | lncRNA                             | -1.36 | 1.77E-03 | 1.57E-02 |
| ENSG00000039139 | DNAH5      | 5  | 13690331  | 13944543  | 254212 | protein coding                     | -1.36 | 2.09E-05 | 8.61E-04 |
| ENSG00000254092 | AC021613.1 | 8  | 20942863  | 21298168  | 355305 | lncRNA                             | -1.36 | 1.32E-05 | 6.26E-04 |
| ENSG00000186191 | BPIFB4     | 20 | 33079644  | 33111751  | 32107  | protein coding                     | -1.36 | 9.05E-04 | 1.03E-02 |
| ENSG00000197322 | C17orf102  | 17 | 34574123  | 34579369  | 5246   | lncRNA-bidirectional_promoter      | -1.36 | 9.07E-03 | 4.45E-02 |
| ENSG00000007171 | NOS2       | 17 | 27756766  | 27800529  | 43763  | protein coding                     | -1.36 | 6.78E-04 | 8.68E-03 |
| ENSG00000237720 | AC011995.2 | 2  | 2707368   | 2840512   | 133144 | lncRNA                             | -1.36 | 2.04E-04 | 3.96E-03 |
| ENSG00000174740 | PABPC5     | X  | 91434595  | 91438584  | 3989   | protein coding                     | -1.36 | 1.03E-02 | 4.83E-02 |
| ENSG00000121335 | PRB2       | 12 | 11391540  | 11501041  | 109501 | protein coding                     | -1.37 | 4.60E-03 | 2.90E-02 |
| ENSG00000244301 | AOX3P      | 2  | 200678233 | 200734109 | 55876  | transcribed_unprocessed_pseudogene | -1.37 | 2.56E-03 | 1.99E-02 |
| ENSG00000286418 | AC018716.2 | 11 | 45397590  | 45412745  | 15155  | lncRNA                             | -1.37 | 8.36E-03 | 4.23E-02 |
| ENSG00000186723 | OR10H1     | 19 | 15804549  | 15815664  | 11115  | protein coding                     | -1.37 | 5.89E-03 | 3.38E-02 |
| ENSG00000287279 | AL121932.2 | 6  | 28634861  | 28649538  | 14677  | lncRNA                             | -1.37 | 5.02E-03 | 3.05E-02 |
| ENSG00000177947 | ODF3       | 11 | 196761    | 200261    | 3500   | protein coding                     | -1.37 | 3.23E-03 | 2.31E-02 |
| ENSG00000147206 | NXF3       | X  | 103075810 | 103093143 | 17333  | protein coding                     | -1.37 | 1.15E-03 | 1.20E-02 |
| ENSG00000122176 | FMOD       | 1  | 203340628 | 203351758 | 11130  | protein coding                     | -1.37 | 2.24E-03 | 1.83E-02 |
| ENSG00000234345 | ELF2P1     | X  | 103910305 | 103911352 | 1047   | processed_pseudogene               | -1.37 | 1.83E-03 | 1.61E-02 |
| ENSG00000285763 | AL358777.3 | 6  | 10659498  | 10692860  | 33362  | lncRNA-antisense                   | -1.37 | 2.02E-03 | 1.72E-02 |
| ENSG00000279467 | AP000350.8 | 22 | 23865248  | 23873277  | 8029   | lncRNA-antisense                   | -1.37 | 2.67E-04 | 4.76E-03 |
| ENSG00000078295 | ADCY2      | 5  | 7396138   | 7830081   | 433943 | protein coding                     | -1.37 | 9.22E-06 | 4.84E-04 |
| ENSG00000254997 | KRTAP5-9   | 11 | 71548420  | 71549608  | 1188   | protein coding                     | -1.37 | 4.51E-03 | 2.86E-02 |
| ENSG00000237574 | LINC01856  | 2  | 129923177 | 129946703 | 23526  | lncRNA                             | -1.37 | 2.89E-03 | 2.15E-02 |
| ENSG00000179709 | NLRP8      | 19 | 55947832  | 55988629  | 40797  | protein coding                     | -1.37 | 8.33E-03 | 4.22E-02 |
| ENSG00000170689 | HOXB9      | 17 | 48621156  | 48628358  | 5202   | protein coding                     | -1.37 | 2.93E-03 | 2.17E-02 |
| ENSG00000151577 | DRD3       | 3  | 114127580 | 114199407 | 71827  | protein coding                     | -1.37 | 9.08E-03 | 4.45E-02 |
| ENSG00000279674 | AC123769.1 | 17 | 34000789  | 34006772  | 5983   | TEC                                | -1.37 | 2.36E-03 | 1.89E-02 |
| ENSG00000175604 | AC007601.1 | 16 | 12086746  | 12090302  | 3556   | lncRNA-antisense                   | -1.37 | 4.44E-03 | 2.83E-02 |
| ENSG00000132677 | RHBG       | 1  | 156369211 | 156385219 | 16008  | protein coding                     | -1.37 | 1.58E-03 | 1.46E-02 |
| ENSG00000258458 | AL160314.2 | 14 | 22701476  | 22766562  | 65086  | lncRNA                             | -1.37 | 5.70E-04 | 7.78E-03 |
| ENSG00000204669 | C9orf57    | 9  | 72051376  | 72072721  | 21345  | protein coding                     | -1.37 | 1.07E-02 | 4.95E-02 |
| ENSG00000171124 | FUT3       | 19 | 5842888   | 5851474   | 8586   | protein coding                     | -1.37 | 4.70E-03 | 2.93E-02 |
| ENSG00000162594 | IL23R      | 1  | 67138907  | 67259979  | 121072 | protein coding                     | -1.37 | 2.66E-04 | 4.75E-03 |
| ENSG00000267014 | LINC01532  | 19 | 29002319  | 29015160  | 12841  | lncRNA                             | -1.37 | 3.72E-03 | 2.54E-02 |
| ENSG00000007952 | NOX1       | X  | 100843324 | 100874359 | 31035  | protein coding                     | -1.37 | 1.00E-02 | 4.74E-02 |
| ENSG00000224786 | CETNP4     | 4  | 122728532 | 122732482 | 3950   | transcribed_unitary_pseudogene     | -1.37 | 6.85E-03 | 3.72E-02 |
| ENSG00000163531 | NFASC      | 1  | 204826651 | 205022822 | 194171 | protein coding                     | -1.37 | 8.08E-06 | 4.42E-04 |

|                  |             |    |           |           |        |                                    |       |          |          |
|------------------|-------------|----|-----------|-----------|--------|------------------------------------|-------|----------|----------|
| ENSG00000226374  | LINC01345   | 1  | 3944547   | 3949024   | 4477   | lncRNA                             | -1.37 | 3.09E-03 | 2.25E-02 |
| ENSG00000223930  | AC117453.1  | 3  | 178164008 | 178385479 | 221471 | lncRNA-antisense                   | -1.37 | 4.08E-04 | 6.29E-03 |
| ENSG00000182264  | IZUMO1      | 19 | 48740852  | 48746909  | 6057   | protein coding                     | -1.37 | 5.30E-03 | 3.15E-02 |
| ENSG00000171357  | LURAP1      | 1  | 46203334  | 46221256  | 17922  | protein coding                     | -1.37 | 8.02E-04 | 9.58E-03 |
| ENSG00000171346  | KRT15       | 17 | 41513745  | 41522529  | 8784   | protein coding                     | -1.37 | 1.23E-03 | 1.26E-02 |
| ENSG00000178795  | GDPD4       | 11 | 77216558  | 77301687  | 85129  | protein coding                     | -1.37 | 2.76E-03 | 2.09E-02 |
| ENSG00000237339  | LINC01502   | 9  | 135574935 | 135587112 | 12177  | lncRNA                             | -1.37 | 1.09E-04 | 2.67E-03 |
| ENSG00000267777  | LINC01791   | 19 | 31167457  | 31225143  | 57686  | lncRNA                             | -1.37 | 6.62E-03 | 3.63E-02 |
| ENSG00000180998  | GPR137C     | 14 | 52552836  | 52637713  | 84877  | protein coding                     | -1.37 | 1.62E-03 | 1.49E-02 |
| ENSG00000285867  | BX470102.2  | 1  | 153586813 | 153606283 | 19470  | lncRNA                             | -1.37 | 5.55E-03 | 3.24E-02 |
| ENSG00000142910  | TINAGL1     | 1  | 31576485  | 31587686  | 11201  | protein coding                     | -1.37 | 2.33E-04 | 4.33E-03 |
| ENSG00000227061  | AC079779.1  | 2  | 197569    | 209892    | 12323  | lncRNA-antisense                   | -1.37 | 9.68E-04 | 1.08E-02 |
| ENSG00000226237  | GAS1RR      | 9  | 86948666  | 87002033  | 53367  | lncRNA                             | -1.37 | 1.24E-03 | 1.26E-02 |
| ENSG00000215838  | AL451074.1  | 1  | 165698750 | 165709968 | 11218  | transcribed processed pseudogene   | -1.37 | 5.80E-03 | 3.34E-02 |
| ENSG00000259125  | LRP1-AS     | 12 | 57144620  | 57147619  | 2999   | lncRNA-antisense                   | -1.37 | 1.00E-02 | 4.74E-02 |
| ENSG00000280200  | AC073862.5  | 12 | 130976786 | 130978812 | 2026   | TEC                                | -1.37 | 1.03E-02 | 4.82E-02 |
| ENSG00000110887  | DAO         | 12 | 108858932 | 108901043 | 42111  | protein coding                     | -1.37 | 1.14E-03 | 1.20E-02 |
| ENSG00000285841  | AC005692.3  | 7  | 141392155 | 141396517 | 4362   | lncRNA                             | -1.37 | 9.42E-03 | 4.56E-02 |
| ENSG00000175121  | WFDC5       | 20 | 45109452  | 45115172  | 5720   | protein coding                     | -1.37 | 8.03E-03 | 4.12E-02 |
| ENSG00000257711  | AC079385.2  | 12 | 106678583 | 106684707 | 6124   | lncRNA-antisense                   | -1.37 | 5.52E-03 | 3.23E-02 |
| ENSG00000233515  | LINC01518   | 10 | 42644445  | 42691723  | 47278  | lncRNA                             | -1.37 | 5.31E-03 | 3.16E-02 |
| ENSG00000205420  | KRT6A       | 12 | 52487176  | 52493257  | 6081   | protein coding                     | -1.37 | 1.99E-03 | 1.70E-02 |
| ENSG00000230927  | TMBIM7P     | 7  | 92412550  | 92447813  | 35263  | transcribed unitary pseudogene     | -1.37 | 4.88E-03 | 3.00E-02 |
| ENSG00000139364  | TMEM132B    | 12 | 125186836 | 125662377 | 475541 | protein coding                     | -1.37 | 1.06E-04 | 2.61E-03 |
| ENSG00000226519  | LINC00390   | 13 | 44094822  | 44147762  | 52940  | lncRNA                             | -1.37 | 9.21E-04 | 1.05E-02 |
| ENSG00000161940  | BCL6B       | 17 | 7023050   | 7030290   | 7240   | protein coding                     | -1.37 | 9.50E-04 | 1.07E-02 |
| ENSG00000196335  | STK31       | 7  | 23710203  | 23832513  | 122310 | protein coding                     | -1.37 | 1.19E-05 | 5.86E-04 |
| ENSG00000230716  | KRT87P      | 11 | 119602875 | 119604306 | 1431   | processed pseudogene               | -1.37 | 1.08E-02 | 4.98E-02 |
| ENSG00000063438  | AHRR        | 5  | 321759    | 438291    | 116532 | protein coding                     | -1.38 | 8.20E-05 | 2.22E-03 |
| ENSG00000141449  | GREB1L      | 18 | 21242242  | 21255417  | 283175 | protein coding                     | -1.38 | 2.11E-06 | 1.69E-04 |
| ENSG00000186103  | ARGFX       | 3  | 121567949 | 121590622 | 22673  | protein coding                     | -1.38 | 2.16E-03 | 1.79E-02 |
| ENSG00000258457  | AL132780.2  | 14 | 22982698  | 22999078  | 16380  | lncRNA-antisense                   | -1.38 | 2.47E-03 | 1.94E-02 |
| ENSG000000089101 | CFAP61      | 20 | 20052514  | 20360703  | 308189 | protein coding                     | -1.38 | 1.50E-04 | 3.27E-03 |
| ENSG00000249635  | AC109361.1  | 4  | 106003317 | 106022478 | 19161  | lncRNA-antisense                   | -1.38 | 6.41E-03 | 3.56E-02 |
| ENSG00000140522  | RLBP1       | 15 | 89209869  | 89221614  | 11745  | protein coding                     | -1.38 | 5.55E-03 | 3.24E-02 |
| ENSG00000255491  | AC100858.2  | 8  | 124811042 | 124857516 | 46474  | lncRNA                             | -1.38 | 1.55E-05 | 7.00E-04 |
| ENSG00000204128  | C2orf72     | 2  | 231037523 | 231049719 | 12196  | protein coding                     | -1.38 | 3.91E-03 | 2.62E-02 |
| ENSG00000228021  | AL158835.1  | 10 | 125683229 | 125709677 | 26448  | lncRNA                             | -1.38 | 7.90E-04 | 9.49E-03 |
| ENSG00000196639  | HRH1        | 3  | 11137093  | 11263557  | 126464 | protein coding                     | -1.38 | 1.69E-04 | 3.52E-03 |
| ENSG00000285940  | AC098999.1  | 18 | 37565281  | 37762131  | 196850 | lncRNA-antisense                   | -1.38 | 2.41E-04 | 4.43E-03 |
| ENSG00000166111  | SVOP        | 12 | 108907741 | 109021068 | 113327 | protein coding                     | -1.38 | 6.18E-05 | 1.78E-03 |
| ENSG00000257279  | AC127164.1  | 12 | 116977442 | 116987337 | 9895   | lncRNA-antisense                   | -1.38 | 1.44E-03 | 1.38E-02 |
| ENSG00000161133  | USP41       | 22 | 20350578  | 20390758  | 40180  | protein coding                     | -1.38 | 2.23E-03 | 1.83E-02 |
| ENSG00000106536  | POU6F2      | 7  | 38977909  | 39493095  | 515186 | protein coding                     | -1.38 | 4.45E-05 | 1.44E-03 |
| ENSG00000133710  | SPINK5      | 5  | 148025683 | 148137382 | 111699 | protein coding                     | -1.38 | 6.94E-03 | 3.75E-02 |
| ENSG00000168619  | ADAM18      | 8  | 39584489  | 39730065  | 145576 | protein coding                     | -1.38 | 7.23E-03 | 3.85E-02 |
| ENSG00000283529  | AL035685.1  | 20 | 49318337  | 49441654  | 123317 | transcribed unprocessed pseudogene | -1.38 | 2.10E-05 | 8.64E-04 |
| ENSG00000164128  | NPY1R       | 4  | 163323962 | 163344832 | 20870  | protein coding                     | -1.38 | 9.03E-03 | 4.44E-02 |
| ENSG00000235142  | LINC02532   | 6  | 106705334 | 106788148 | 82814  | lncRNA                             | -1.38 | 3.79E-04 | 5.99E-03 |
| ENSG00000236539  | HNRNP1P54   | 1  | 179447602 | 179457315 | 9713   | processed pseudogene               | -1.38 | 9.66E-04 | 1.08E-02 |
| ENSG00000203729  | LINC00272   | 1  | 182407621 | 182414815 | 7194   | lncRNA                             | -1.38 | 2.31E-03 | 1.86E-02 |
| ENSG00000177992  | SPATA31E    | 9  | 87882877  | 87888903  | 6026   | protein coding                     | -1.38 | 4.64E-04 | 6.78E-03 |
| ENSG00000166450  | PRTG        | 15 | 55611544  | 55743152  | 131608 | protein coding                     | -1.38 | 2.77E-05 | 1.04E-03 |
| ENSG00000259236  | GOLGA8VP    | 15 | 101771758 | 101781989 | 10231  | unprocessed pseudogene             | -1.38 | 2.78E-03 | 2.09E-02 |
| ENSG00000249740  | OSMR-AS1    | 5  | 38682581  | 38845829  | 163248 | lncRNA                             | -1.38 | 2.42E-03 | 1.91E-02 |
| ENSG00000285707  | AL008720.1  | 22 | 48254903  | 48259116  | 4213   | lncRNA                             | -1.38 | 2.41E-03 | 1.91E-02 |
| ENSG00000261647  | IMPDH1P11   | 16 | 10111382  | 10112885  | 1503   | processed pseudogene               | -1.38 | 5.85E-03 | 3.36E-02 |
| ENSG00000164900  | CLCA1       | 1  | 86468368  | 86500259  | 31891  | protein coding                     | -1.38 | 8.90E-03 | 4.39E-02 |
| ENSG00000163145  | C10TNF7     | 4  | 15339818  | 15446167  | 106349 | protein coding                     | -1.38 | 2.53E-04 | 4.57E-03 |
| ENSG00000188523  | CFAP77      | 9  | 132410043 | 132573319 | 163276 | protein coding                     | -1.38 | 1.53E-03 | 1.43E-02 |
| ENSG00000139292  | LRP1        | 12 | 71439798  | 71586310  | 146512 | protein coding                     | -1.38 | 2.21E-03 | 1.82E-02 |
| ENSG00000232445  | EMSLR       | 7  | 101308270 | 101314800 | 6530   | lncRNA-antisense                   | -1.38 | 1.51E-04 | 3.28E-03 |
| ENSG00000137745  | MMP13       | 11 | 102942995 | 102955732 | 12737  | protein coding                     | -1.38 | 8.50E-03 | 4.27E-02 |
| ENSG00000110245  | APOC3       | 11 | 116829706 | 116833072 | 3366   | protein coding                     | -1.38 | 1.02E-02 | 4.81E-02 |
| ENSG00000228933  | AC107419.1  | X  | 27174920  | 27399006  | 224086 | lncRNA                             | -1.38 | 1.70E-03 | 1.53E-02 |
| ENSG00000167757  | KLK11       | 19 | 51022216  | 51028039  | 5823   | protein coding                     | -1.38 | 2.35E-03 | 1.88E-02 |
| ENSG00000112504  | NR1H4       | 12 | 100473708 | 100564414 | 90706  | protein coding                     | -1.38 | 1.05E-02 | 4.90E-02 |
| ENSG00000283654  | LMLN2       | 14 | 23099062  | 23104989  | 5927   | protein coding                     | -1.38 | 1.24E-03 | 1.26E-02 |
| ENSG00000228862  | AC068389.1  | 8  | 60629662  | 60653561  | 23899  | lncRNA                             | -1.38 | 8.70E-04 | 1.01E-02 |
| ENSG00000251249  | AC097375.3  | 4  | 151955991 | 151969381 | 13390  | lncRNA                             | -1.38 | 9.69E-03 | 4.64E-02 |
| ENSG00000254040  | AC103719.1  | 8  | 21023276  | 21030368  | 7092   | lncRNA                             | -1.38 | 7.42E-03 | 3.91E-02 |
| ENSG00000266869  | AC005993.1  | 14 | 71848606  | 71928596  | 79990  | lncRNA                             | -1.38 | 8.26E-03 | 4.20E-02 |
| ENSG00000004948  | CALCR       | 7  | 93424486  | 93574730  | 150244 | protein coding                     | -1.39 | 2.24E-03 | 1.83E-02 |
| ENSG00000264666  | AC020558.1  | 17 | 17591428  | 17610485  | 19057  | lncRNA-antisense                   | -1.39 | 9.51E-03 | 4.69E-02 |
| ENSG00000174226  | SNX3        | 8  | 100572889 | 100663415 | 90526  | protein coding                     | -1.39 | 1.14E-03 | 1.20E-02 |
| ENSG00000232803  | SLCO4A1-AS1 | 20 | 62663019  | 62666724  | 3705   | lncRNA-antisense                   | -1.39 | 6.26E-03 | 3.51E-02 |
| ENSG00000171903  | CYP4F11     | 19 | 15912367  | 15934867  | 22500  | protein coding                     | -1.39 | 1.89E-03 | 1.64E-02 |
| ENSG00000173404  | INSM1       | 20 | 20368104  | 20370949  | 2845   | protein coding                     | -1.39 | 5.45E-03 | 3.21E-02 |
| ENSG00000245694  | CRNDE       | 16 | 54845189  | 54929189  | 84000  | lncRNA                             | -1.39 | 2.20E-05 | 8.90E-04 |
| ENSG00000204398  | AL359649.1  | 13 | 111588201 | 111672608 | 84407  | lncRNA                             | -1.39 | 4.15E-03 | 2.72E-02 |
| ENSG00000235501  | AC105942.1  | 1  | 94927361  | 94963616  | 36255  | lncRNA-antisense                   | -1.39 | 2.37E-04 | 4.38E-03 |
| ENSG00000224790  | AP000704.1  | 21 | 36966461  | 36975164  | 8703   | lncRNA                             | -1.39 | 2.88E-05 | 1.07E-03 |
| ENSG00000221836  | OR2A5       | 7  | 144048948 | 144058845 | 9897   | protein coding                     | -1.39 | 5.73E-04 | 7.80E-03 |
| ENSG00000263745  | AP005230.1  | 18 | 1883524   | 2489426   | 605902 | lncRNA                             | -1.39 | 1.06E-03 | 1.15E-02 |
| ENSG00000187527  | ATP13A5     | 3  | 193274789 | 193378820 | 104031 | protein coding                     | -1.39 | 3.65E-04 | 5.84E-03 |
| ENSG00000127325  | BEST3       | 12 | 69643360  | 69699476  | 56116  | protein coding                     | -1.39 | 9.44E-04 | 1.06E-02 |
| ENSG00000183833  | CFAP91      | 3  | 119703022 | 119767102 | 64080  | protein coding                     | -1.39 | 6.89E-03 | 3.73E-02 |
| ENSG00000075035  | WSDC2       | 12 | 108129288 | 108250537 | 121249 | protein coding                     | -1.39 | 5.32E-05 | 1.62E-03 |
| ENSG00000143469  | SYT14       | 1  | 209900923 | 210171389 | 270466 | protein coding                     | -1.39 | 5.71E-04 | 7.79E-03 |
| ENSG00000170537  | TMC7        | 16 | 18983934  | 19063942  | 80008  | protein coding                     | -1.39 | 1.05E-04 | 2.61E-03 |



|                 |            |    |           |           |        |                                    |       |          |          |
|-----------------|------------|----|-----------|-----------|--------|------------------------------------|-------|----------|----------|
| ENSG00000128510 | CPA4       | 7  | 130293134 | 130324180 | 31046  | protein coding                     | -1.39 | 2.77E-03 | 2.10E-02 |
| ENSG00000006788 | MYH13      | 17 | 10300865  | 10373130  | 72265  | protein coding                     | -1.39 | 1.60E-04 | 3.39E-03 |
| ENSG00000157399 | ARSL       | X  | 2934521   | 2968475   | 33954  | protein coding                     | -1.39 | 2.66E-03 | 2.05E-02 |
| ENSG00000213853 | EMP2       | 16 | 10528422  | 10580632  | 52210  | protein coding                     | -1.39 | 3.99E-05 | 1.33E-03 |
| ENSG00000118492 | ADGB       | 6  | 146598967 | 146815462 | 216495 | protein coding                     | -1.39 | 3.09E-04 | 5.24E-03 |
| ENSG00000265646 | TUFMP1     | 17 | 27082690  | 27084036  | 1346   | processed pseudogene               | -1.39 | 1.98E-04 | 3.89E-03 |
| ENSG00000113262 | GRM6       | 5  | 178977587 | 178996206 | 18619  | protein coding                     | -1.39 | 2.64E-04 | 4.72E-03 |
| ENSG00000203971 | AL354984.1 | 20 | 57957126  | 57960176  | 3050   | lncRNA                             | -1.39 | 9.98E-03 | 4.74E-02 |
| ENSG00000229021 | AL450992.1 | 1  | 151994531 | 152042774 | 48243  | lncRNA-antisense                   | -1.39 | 2.10E-03 | 1.76E-02 |
| ENSG00000134962 | KLK        | 4  | 39406930  | 39451533  | 44603  | protein coding                     | -1.39 | 1.44E-03 | 1.38E-02 |
| ENSG00000240405 | SAMMSON    | 3  | 69999550  | 70518064  | 518514 | lncRNA                             | -1.39 | 1.92E-05 | 8.22E-04 |
| ENSG00000284703 | AL805961.1 | 1  | 4012921   | 4019508   | 6587   | lncRNA                             | -1.39 | 2.22E-03 | 1.82E-02 |
| ENSG00000135917 | SLC19A3    | 2  | 227683763 | 227718028 | 34265  | protein coding                     | -1.39 | 1.46E-03 | 1.39E-02 |
| ENSG00000286518 | AL354743.1 | 1  | 3367815   | 3373928   | 6113   | lncRNA                             | -1.39 | 2.35E-03 | 1.88E-02 |
| ENSG00000257259 | LINC02388  | 12 | 58566959  | 58781747  | 215788 | lncRNA                             | -1.39 | 5.49E-03 | 3.22E-02 |
| ENSG00000169344 | UMOD       | 16 | 20333052  | 20356301  | 23249  | protein coding                     | -1.39 | 7.43E-04 | 9.15E-03 |
| ENSG00000214866 | DCDC2C     | 2  | 3703575   | 3848008   | 144433 | protein coding                     | -1.39 | 1.18E-03 | 1.22E-02 |
| ENSG00000248159 | HSPA8P11   | 8  | 30237382  | 30240997  | 3615   | processed pseudogene               | -1.39 | 1.03E-02 | 4.84E-02 |
| ENSG00000287117 | AC105916.1 | 4  | 9567474   | 9691786   | 124312 | lncRNA                             | -1.39 | 4.90E-03 | 3.01E-02 |
| ENSG00000233639 | PANTR1     | 2  | 104794848 | 104853183 | 58335  | lncRNA                             | -1.39 | 8.18E-04 | 9.69E-03 |
| ENSG00000114547 | RPN1B      | 3  | 125969160 | 125983454 | 14294  | protein coding                     | -1.39 | 2.80E-03 | 2.11E-02 |
| ENSG00000269186 | LINC01082  | 16 | 86195954  | 86199720  | 3766   | lncRNA                             | -1.40 | 6.14E-03 | 3.46E-02 |
| ENSG00000261170 | AC09053.3  | 16 | 74422120  | 74441937  | 19817  | lncRNA-antisense                   | -1.40 | 3.07E-04 | 5.20E-03 |
| ENSG00000226453 | LINC02542  | 6  | 81844602  | 82169391  | 324789 | lncRNA                             | -1.40 | 2.03E-03 | 1.72E-02 |
| ENSG00000261623 | LINC02179  | 16 | 49466106  | 49469875  | 3769   | lncRNA                             | -1.40 | 4.01E-03 | 2.67E-02 |
| ENSG00000229608 | GOLGA2P4   | 22 | 42784462  | 42787100  | 2638   | unprocessed pseudogene             | -1.40 | 3.79E-03 | 2.57E-02 |
| ENSG00000162897 | FCAMR      | 1  | 206957965 | 206970625 | 12600  | protein coding                     | -1.40 | 6.14E-03 | 3.46E-02 |
| ENSG00000230710 | LINC00332  | 13 | 40172505  | 40195361  | 22856  | lncRNA                             | -1.40 | 1.70E-03 | 1.53E-02 |
| ENSG00000260790 | AC092338.2 | 16 | 22374859  | 22378180  | 3321   | lncRNA-antisense                   | -1.40 | 6.11E-03 | 3.45E-02 |
| ENSG00000261751 | AC007603.1 | 16 | 49920730  | 49924154  | 3424   | lncRNA                             | -1.40 | 7.34E-03 | 3.89E-02 |
| ENSG00000246863 | GPR176-DT  | 15 | 39921042  | 39925880  | 4838   | lncRNA                             | -1.40 | 1.28E-03 | 1.28E-02 |
| ENSG00000162409 | PKRAA2     | 1  | 56645314  | 56715335  | 70021  | protein coding                     | -1.40 | 9.30E-04 | 1.05E-02 |
| ENSG00000279712 | FP32530.3  | 22 | 47916728  | 47926284  | 9536   | lncRNA                             | -1.40 | 2.00E-04 | 3.92E-03 |
| ENSG00000153930 | ANKFN1     | 17 | 55882301  | 56511659  | 629358 | protein coding                     | -1.40 | 9.43E-05 | 2.43E-03 |
| ENSG00000140798 | ABCC12     | 16 | 48081006  | 48156018  | 75012  | protein coding                     | -1.40 | 5.86E-05 | 1.73E-03 |
| ENSG00000279440 | AL008638.3 | 22 | 27019369  | 27024550  | 5181   | lncRNA                             | -1.40 | 1.93E-03 | 1.66E-02 |
| ENSG00000147041 | SYTL5      | X  | 38006553  | 38128819  | 122266 | protein coding                     | -1.40 | 4.11E-03 | 2.70E-02 |
| ENSG00000054938 | CHRD1L     | 11 | 74696429  | 74731426  | 34997  | protein coding                     | -1.40 | 4.73E-04 | 6.86E-03 |
| ENSG00000183549 | ACSM5      | 16 | 20409534  | 20441336  | 31802  | protein coding                     | -1.40 | 4.80E-04 | 6.93E-03 |
| ENSG00000129167 | TPH1       | 11 | 18017564  | 18042426  | 24862  | protein coding                     | -1.40 | 2.83E-06 | 2.07E-04 |
| ENSG00000113722 | CDX1       | 5  | 150168778 | 150184558 | 17780  | protein coding                     | -1.40 | 5.03E-03 | 3.05E-02 |
| ENSG00000179774 | ATOH7      | 10 | 68230595  | 68232113  | 1518   | protein coding                     | -1.40 | 7.72E-03 | 4.02E-02 |
| ENSG00000197085 | NPSR1-AS1  | 7  | 34346512  | 34871582  | 525070 | lncRNA                             | -1.40 | 4.58E-03 | 2.89E-02 |
| ENSG00000219773 | RPSAP45    | 6  | 112355841 | 112356714 | 873    | processed pseudogene               | -1.40 | 8.60E-03 | 4.30E-02 |
| ENSG00000284543 | LINC01226  | 1  | 31506226  | 31583306  | 7080   | lncRNA                             | -1.40 | 1.49E-05 | 6.82E-04 |
| ENSG00000172320 | OR5A1      | 11 | 59436469  | 59451380  | 14911  | protein coding                     | -1.40 | 2.06E-03 | 1.74E-02 |
| ENSG00000176381 | PRR18      | 6  | 166305300 | 166308448 | 3148   | protein coding                     | -1.40 | 1.47E-03 | 1.40E-02 |
| ENSG00000053747 | LAMA3      | 18 | 23689453  | 23956222  | 266769 | protein coding                     | -1.40 | 9.43E-07 | 9.23E-05 |
| ENSG00000236700 | LINC01010  | 6  | 134343307 | 134504581 | 161274 | lncRNA                             | -1.40 | 2.04E-03 | 1.73E-02 |
| ENSG00000287677 | AC025839.1 | 8  | 141581658 | 141662209 | 80551  | lncRNA                             | -1.40 | 8.72E-05 | 2.31E-03 |
| ENSG00000215372 | ZNF705G    | 7  | 7355517   | 7385558   | 30041  | protein coding                     | -1.40 | 5.22E-03 | 3.13E-02 |
| ENSG00000267166 | AC007993.1 | 18 | 43922775  | 43927388  | 4613   | unprocessed pseudogene             | -1.40 | 3.92E-03 | 2.63E-02 |
| ENSG00000136011 | STAB2      | 12 | 103587273 | 103766719 | 179446 | protein coding                     | -1.40 | 1.25E-05 | 6.06E-04 |
| ENSG00000286886 | AJ011931.2 | 21 | 45861830  | 45888638  | 26808  | lncRNA                             | -1.40 | 3.03E-03 | 2.22E-02 |
| ENSG00000089225 | TBX5       | 12 | 114353911 | 114408442 | 54531  | protein coding                     | -1.40 | 1.37E-03 | 1.34E-02 |
| ENSG00000258630 | LINC02292  | 14 | 95319483  | 95335757  | 16274  | lncRNA                             | -1.40 | 1.35E-03 | 1.33E-02 |
| ENSG00000286667 | AC010641.2 | 19 | 382725    | 387533    | 4808   | lncRNA                             | -1.40 | 2.56E-04 | 4.61E-03 |
| ENSG00000177181 | RIMKLA     | 1  | 42380792  | 42424232  | 43440  | protein coding                     | -1.40 | 3.61E-06 | 2.45E-04 |
| ENSG00000153246 | PLAZR1     | 2  | 159932006 | 160062615 | 130609 | protein coding                     | -1.41 | 3.38E-04 | 5.57E-03 |
| ENSG00000205363 | INSY1N     | 15 | 73735431  | 73752747  | 17316  | protein coding                     | -1.41 | 8.33E-04 | 9.80E-03 |
| ENSG00000230133 | LINC01721  | 20 | 24063255  | 24226013  | 162758 | lncRNA                             | -1.41 | 4.94E-04 | 7.05E-03 |
| ENSG00000240253 | FAR2P3     | 2  | 130690133 | 130718831 | 28698  | transcribed unprocessed pseudogene | -1.41 | 4.67E-03 | 2.92E-02 |
| ENSG00000100078 | PLAZG3     | 22 | 31134807  | 31140508  | 5701   | protein coding                     | -1.41 | 4.00E-03 | 2.66E-02 |
| ENSG00000152592 | DMP1       | 4  | 87650280  | 87664361  | 14081  | protein coding                     | -1.41 | 3.20E-03 | 2.30E-02 |
| ENSG00000145451 | GLRA3      | 4  | 174636920 | 174829247 | 192327 | protein coding                     | -1.41 | 3.97E-03 | 2.65E-02 |
| ENSG00000168398 | BDKRB2     | 14 | 96204679  | 96244166  | 39487  | protein coding                     | -1.41 | 7.04E-04 | 8.84E-03 |
| ENSG00000286144 | Z97056.2   | 22 | 38416565  | 38423933  | 7368   | lncRNA                             | -1.41 | 1.07E-02 | 4.95E-02 |
| ENSG00000138347 | MYPN       | 10 | 68106117  | 68212017  | 105900 | protein coding                     | -1.41 | 1.13E-03 | 1.19E-02 |
| ENSG00000184507 | NUTM1      | 15 | 34343315  | 34357737  | 14422  | protein coding                     | -1.41 | 7.22E-04 | 8.98E-03 |
| ENSG00000280639 | LINC02204  | 15 | 70570958  | 70586606  | 15648  | lncRNA                             | -1.41 | 4.45E-03 | 2.84E-02 |
| ENSG00000263571 | AC004147.2 | 17 | 34155566  | 34165736  | 10170  | lncRNA                             | -1.41 | 3.48E-03 | 2.42E-02 |
| ENSG00000285569 | AC099344.3 | 2  | 11405508  | 11427186  | 21678  | lncRNA                             | -1.41 | 2.80E-04 | 4.90E-03 |
| ENSG00000227304 | AC067942.1 | 4  | 82494786  | 82496278  | 1492   | transcribed processed pseudogene   | -1.41 | 2.80E-03 | 1.95E-02 |
| ENSG00000258710 | LINC01193  | 15 | 20940380  | 21058440  | 118600 | lncRNA                             | -1.41 | 7.22E-03 | 3.85E-02 |
| ENSG00000203987 | AL772363.1 | 9  | 137867925 | 137892570 | 24645  | lncRNA-antisense                   | -1.41 | 2.40E-04 | 4.42E-03 |
| ENSG00000167749 | KLK4       | 19 | 50906352  | 50910738  | 4386   | protein coding                     | -1.41 | 1.07E-03 | 1.15E-02 |
| ENSG00000286069 | AC078968.2 | 12 | 53739611  | 53898976  | 159365 | lncRNA                             | -1.41 | 4.70E-03 | 2.93E-02 |
| ENSG00000126218 | F10        | 13 | 113122799 | 113149529 | 26730  | protein coding                     | -1.41 | 5.69E-04 | 7.78E-03 |
| ENSG00000270792 | AL050403.2 | 20 | 10672695  | 10994924  | 322229 | lncRNA-antisense                   | -1.41 | 1.60E-03 | 1.47E-02 |
| ENSG00000137766 | UNC13C     | 15 | 53978201  | 54633414  | 655213 | protein coding                     | -1.41 | 2.12E-04 | 4.07E-03 |
| ENSG00000226051 | ZNF503-AS1 | 10 | 75243568  | 75373500  | 129932 | lncRNA                             | -1.41 | 1.22E-04 | 2.86E-03 |
| ENSG00000287486 | AC114291.1 | 5  | 1252006   | 1255976   | 3970   | lncRNA                             | -1.41 | 4.15E-03 | 2.72E-02 |
| ENSG00000260714 | AC133552.1 | 16 | 25015978  | 25021023  | 5045   | processed pseudogene               | -1.41 | 3.06E-04 | 5.20E-03 |
| ENSG00000226377 | AC084809.1 | 17 | 32876759  | 32881070  | 4311   | lncRNA-antisense                   | -1.41 | 5.89E-03 | 3.37E-02 |
| ENSG00000188643 | S100A16    | 1  | 153606886 | 153613145 | 6259   | protein coding                     | -1.41 | 9.35E-03 | 4.54E-02 |
| ENSG00000198838 | RYR3       | 15 | 33310962  | 33866121  | 555159 | protein coding                     | -1.41 | 5.53E-09 | 1.55E-06 |
| ENSG00000285980 | AP003025.2 | 11 | 131542030 | 131581145 | 39115  | lncRNA-antisense                   | -1.41 | 2.15E-03 | 1.79E-02 |
| ENSG00000135248 | FAM71F1    | 7  | 128709061 | 128731743 | 22682  | protein coding                     | -1.41 | 5.82E-03 | 3.35E-02 |
| ENSG00000234080 | AL596275.1 | 1  | 50326131  | 50327007  | 876    | processed pseudogene               | -1.41 | 9.33E-04 | 1.05E-02 |
| ENSG00000113905 | HRG        | 3  | 186660216 | 186678234 | 18018  | protein coding                     | -1.41 | 1.07E-03 | 1.15E-02 |

|                 |             |    |           |           |        |                                    |       |          |          |
|-----------------|-------------|----|-----------|-----------|--------|------------------------------------|-------|----------|----------|
| ENSG00000249816 | LINC00964   | 8  | 124823702 | 124962531 | 138829 | lncRNA                             | -1.41 | 4.16E-04 | 6.34E-03 |
| ENSG00000221818 | EBF2        | 8  | 25841725  | 26045413  | 203688 | protein coding                     | -1.41 | 1.77E-04 | 3.63E-03 |
| ENSG00000159217 | IGF2BP1     | 17 | 48997385  | 49056145  | 58760  | protein coding                     | -1.41 | 1.24E-03 | 1.26E-02 |
| ENSG00000286708 | AP003783.1  | 11 | 70886090  | 70896305  | 10215  | lncRNA                             | -1.41 | 7.87E-04 | 9.48E-03 |
| ENSG00000148408 | CACNA1B     | 9  | 137877782 | 138124624 | 246842 | protein coding                     | -1.41 | 1.32E-05 | 6.26E-04 |
| ENSG00000132561 | MATN2       | 8  | 97868840  | 98036724  | 167884 | protein coding                     | -1.41 | 1.29E-05 | 6.19E-04 |
| ENSG00000171495 | MROH2B      | 5  | 40998017  | 41071342  | 73325  | protein coding                     | -1.41 | 7.94E-04 | 9.52E-03 |
| ENSG00000223991 | AC104809.1  | 2  | 240981515 | 240986072 | 4557   | lncRNA-antisense                   | -1.41 | 1.02E-03 | 1.12E-02 |
| ENSG00000243478 | AOX2P       | 2  | 200738608 | 200794239 | 55631  | transcribed unprocessed pseudogene | -1.41 | 5.60E-04 | 7.69E-03 |
| ENSG00000224190 | LINC02667   | 10 | 128912810 | 128916429 | 3619   | lncRNA                             | -1.41 | 1.08E-02 | 4.98E-02 |
| ENSG00000265798 | AC138207.6  | 17 | 31038575  | 31059121  | 20546  | transcribed unprocessed pseudogene | -1.41 | 2.12E-03 | 1.77E-02 |
| ENSG00000259144 | RANBP20P    | 14 | 20720742  | 20723127  | 2385   | processed pseudogene               | -1.41 | 4.14E-03 | 2.72E-02 |
| ENSG00000225493 | LINC01107   | 2  | 238510690 | 238555054 | 44364  | lncRNA                             | -1.41 | 1.28E-03 | 1.28E-02 |
| ENSG00000197176 | LINC02291   | 14 | 97632647  | 97686658  | 54011  | lncRNA                             | -1.41 | 1.07E-02 | 4.93E-02 |
| ENSG00000267421 | AC005498.2  | 19 | 56536156  | 56538575  | 2419   | lncRNA                             | -1.41 | 7.93E-03 | 4.08E-02 |
| ENSG00000229404 | LINC00858   | 10 | 84267747  | 84294659  | 26912  | lncRNA                             | -1.41 | 2.86E-03 | 2.14E-02 |
| ENSG00000232190 | LINC02181   | 16 | 87057784  | 87070105  | 12321  | lncRNA                             | -1.41 | 1.29E-03 | 1.29E-02 |
| ENSG00000279091 | AC028523.2  | 15 | 97533738  | 97541476  | 7738   | TEC                                | -1.41 | 1.34E-03 | 1.32E-02 |
| ENSG00000156968 | MPV17L      | 16 | 15395754  | 15413271  | 17517  | protein coding                     | -1.41 | 5.32E-04 | 7.43E-03 |
| ENSG00000188089 | PLAZGA2     | 15 | 41981582  | 42051190  | 69608  | protein coding                     | -1.41 | 2.37E-04 | 4.39E-03 |
| ENSG00000177757 | FAM87B      | 1  | 817371    | 819837    | 2466   | lncRNA                             | -1.41 | 3.90E-03 | 2.62E-02 |
| ENSG00000261231 | LINC02133   | 16 | 47724568  | 47908431  | 183863 | lncRNA                             | -1.41 | 6.39E-03 | 3.55E-02 |
| ENSG00000183853 | KIRREL1     | 1  | 157993273 | 158100262 | 106989 | protein coding                     | -1.42 | 1.88E-05 | 8.09E-04 |
| ENSG00000230894 | AL133284.1  | 9  | 116567636 | 116586328 | 18692  | lncRNA-antisense                   | -1.42 | 4.69E-03 | 2.93E-02 |
| ENSG00000007216 | SLC13A2     | 17 | 28473293  | 28497781  | 24488  | protein coding                     | -1.42 | 6.27E-04 | 8.29E-03 |
| ENSG00000203740 | METTL11B    | 1  | 170145959 | 170168866 | 22907  | protein coding                     | -1.42 | 1.04E-02 | 4.87E-02 |
| ENSG00000251537 | AC005324.2  | 17 | 15571491  | 15651653  | 80162  | protein coding                     | -1.42 | 2.79E-03 | 2.11E-02 |
| ENSG00000229867 | STEAP3-AS1  | 2  | 119244422 | 119270714 | 26292  | lncRNA-antisense                   | -1.42 | 3.03E-05 | 1.11E-03 |
| ENSG00000262833 | AC016245.1  | 17 | 80801640  | 80805632  | 3992   | lncRNA-antisense                   | -1.42 | 4.09E-04 | 6.29E-03 |
| ENSG00000124467 | PSG8        | 19 | 42752686  | 42855691  | 103005 | protein coding                     | -1.42 | 1.06E-02 | 4.93E-02 |
| ENSG00000267260 | AC020928.1  | 19 | 36773112  | 36777078  | 3966   | lncRNA                             | -1.42 | 1.26E-04 | 2.91E-03 |
| ENSG00000261786 | AC006058.1  | 3  | 44117299  | 44122365  | 5066   | lncRNA                             | -1.42 | 9.18E-04 | 1.04E-02 |
| ENSG00000264985 | AC124804.1  | 17 | 73513469  | 73521407  | 7938   | lncRNA-antisense                   | -1.42 | 8.08E-04 | 9.63E-03 |
| ENSG00000226409 | AL450332.1  | 6  | 125370034 | 125445193 | 75159  | lncRNA                             | -1.42 | 4.06E-03 | 2.69E-02 |
| ENSG00000167355 | OR51B5      | 11 | 5303444   | 5505652   | 202208 | protein coding                     | -1.42 | 5.16E-03 | 3.11E-02 |
| ENSG00000166923 | GREM1       | 15 | 32718004  | 32745106  | 27102  | protein coding                     | -1.42 | 1.82E-06 | 1.50E-04 |
| ENSG00000185837 | HDHD5-AS1   | 22 | 17159384  | 17165445  | 6061   | lncRNA-antisense                   | -1.42 | 1.06E-02 | 4.92E-02 |
| ENSG00000238123 | MID1IP1-AS1 | X  | 38801568  | 38803883  | 2315   | lncRNA-antisense                   | -1.42 | 6.41E-03 | 3.56E-02 |
| ENSG00000232234 | AL355499.1  | 6  | 81027111  | 8343139   | 240428 | lncRNA-bidirectional promoter      | -1.42 | 1.11E-03 | 1.18E-02 |
| ENSG00000077274 | CAPN6       | X  | 111245099 | 111270483 | 25384  | protein coding                     | -1.42 | 9.75E-03 | 4.66E-02 |
| ENSG00000153446 | C16orf89    | 16 | 5044122   | 5066110   | 21988  | protein coding                     | -1.42 | 1.81E-03 | 1.59E-02 |
| ENSG00000124237 | C20orf85    | 20 | 58150902  | 58161150  | 10248  | protein coding                     | -1.42 | 1.05E-02 | 4.90E-02 |
| ENSG00000279725 | AL391005.1  | 10 | 127734562 | 127738996 | 2434   | TEC                                | -1.42 | 1.79E-03 | 1.58E-02 |
| ENSG00000282375 | AC100797.4  | 8  | 738548    | 740374    | 1826   | lncRNA                             | -1.42 | 3.29E-03 | 2.34E-02 |
| ENSG00000121904 | CMSD2       | 1  | 33513999  | 34165842  | 651843 | protein coding                     | -1.42 | 1.22E-05 | 5.99E-04 |
| ENSG00000237999 | ACTG1P19    | 9  | 100731240 | 100732355 | 1115   | processed pseudogene               | -1.42 | 6.19E-03 | 3.48E-02 |
| ENSG00000237986 | CELFA2-AS2  | 10 | 11071541  | 11105773  | 34232  | lncRNA-antisense                   | -1.42 | 3.87E-03 | 2.61E-02 |
| ENSG00000243083 | LINC00870   | 3  | 72151236  | 72207776  | 56540  | lncRNA                             | -1.42 | 7.15E-04 | 8.91E-03 |
| ENSG00000102359 | SRPX2       | X  | 100644195 | 100675788 | 31593  | protein coding                     | -1.42 | 8.39E-04 | 9.85E-03 |
| ENSG00000250133 | HOXC-AS2    | 12 | 53993810  | 53996785  | 2975   | lncRNA                             | -1.42 | 1.19E-03 | 1.23E-02 |
| ENSG00000124253 | PCK1        | 20 | 57561080  | 57568121  | 7041   | protein coding                     | -1.42 | 2.09E-04 | 4.03E-03 |
| ENSG00000241469 | LINC00635   | 3  | 107840228 | 107882250 | 42022  | lncRNA                             | -1.42 | 1.99E-04 | 3.91E-03 |
| ENSG00000101670 | LIPG        | 18 | 49560699  | 49599185  | 38486  | protein coding                     | -1.42 | 7.57E-06 | 4.22E-04 |
| ENSG00000250007 | AC087457.1  | 15 | 34755084  | 34813505  | 58421  | lncRNA-antisense                   | -1.42 | 3.03E-03 | 2.22E-02 |
| ENSG00000135409 | AMHR2       | 12 | 53423855  | 53431672  | 7817   | protein coding                     | -1.42 | 4.65E-03 | 2.91E-02 |
| ENSG00000189332 | SLC25A51P4  | 11 | 18209138  | 18214562  | 5424   | transcribed unprocessed pseudogene | -1.42 | 2.95E-03 | 2.18E-02 |
| ENSG00000260289 | AC093515.1  | 16 | 7878799   | 8112756   | 233957 | lncRNA                             | -1.43 | 6.50E-03 | 3.59E-02 |
| ENSG00000171804 | WDR87       | 19 | 37884823  | 37906677  | 21854  | protein coding                     | -1.43 | 2.13E-04 | 4.08E-03 |
| ENSG00000130612 | CYP2G1P     | 19 | 40890826  | 40912357  | 21531  | transcribed unprocessed pseudogene | -1.43 | 1.23E-03 | 1.25E-02 |
| ENSG00000186393 | KRT26       | 17 | 40766238  | 40772162  | 5924   | protein coding                     | -1.43 | 5.16E-03 | 3.11E-02 |
| ENSG00000197641 | SERPINB13   | 18 | 63586989  | 63604639  | 17650  | protein coding                     | -1.43 | 5.44E-04 | 7.57E-03 |
| ENSG00000235034 | C19orf81    | 19 | 50649445  | 50659310  | 9865   | protein coding                     | -1.43 | 1.08E-02 | 4.98E-02 |
| ENSG00000090512 | FETUB3      | 3  | 186635969 | 186653141 | 17172  | protein coding                     | -1.43 | 4.60E-03 | 2.90E-02 |
| ENSG00000153558 | FBXL2       | 3  | 33277025  | 33403662  | 126637 | protein coding                     | -1.43 | 6.86E-06 | 3.97E-04 |
| ENSG00000097079 | PAX7        | 1  | 18630846  | 18748866  | 118020 | protein coding                     | -1.43 | 7.74E-05 | 2.13E-03 |
| ENSG00000259818 | AL606760.3  | 1  | 53220663  | 53224253  | 3590   | lncRNA-antisense                   | -1.43 | 7.23E-03 | 3.85E-02 |
| ENSG00000122194 | PLG         | 6  | 160702238 | 160754097 | 51859  | protein coding                     | -1.43 | 6.08E-04 | 8.09E-03 |
| ENSG00000112041 | TULP1       | 6  | 35497874  | 35512896  | 15022  | protein coding                     | -1.43 | 1.94E-04 | 3.83E-03 |
| ENSG00000141316 | SPACA3      | 17 | 32970376  | 32997877  | 27501  | protein coding                     | -1.43 | 3.73E-03 | 2.54E-02 |
| ENSG00000212766 | EWSAT1      | 15 | 69072926  | 69095820  | 22894  | lncRNA                             | -1.43 | 3.39E-03 | 2.39E-02 |
| ENSG00000241544 | LINC02029   | 3  | 157081738 | 157088547 | 6809   | lncRNA                             | -1.43 | 1.08E-02 | 4.98E-02 |
| ENSG00000223813 | AC007255.1  | 7  | 29514224  | 29563670  | 49446  | lncRNA-antisense                   | -1.43 | 4.19E-03 | 2.73E-02 |
| ENSG00000094796 | KRT31       | 17 | 41393721  | 41397608  | 3887   | protein coding                     | -1.43 | 1.83E-03 | 1.61E-02 |
| ENSG00000234736 | FAM170B-AS1 | 10 | 49121839  | 49151547  | 29708  | lncRNA-antisense                   | -1.43 | 1.39E-03 | 1.35E-02 |
| ENSG00000280273 | AF131216.4  | 8  | 11283481  | 11285068  | 1587   | lncRNA-antisense                   | -1.43 | 5.56E-03 | 3.25E-02 |
| ENSG00000261697 | AC010531.4  | 16 | 87262759  | 87292438  | 29679  | lncRNA-sense intronic              | -1.43 | 1.72E-03 | 1.54E-02 |
| ENSG00000287005 | AC09018.2   | 3  | 195260632 | 195263628 | 2996   | lncRNA                             | -1.43 | 3.47E-05 | 1.21E-03 |
| ENSG00000166596 | CFAP52      | 17 | 9576627   | 9643447   | 66820  | protein coding                     | -1.43 | 2.00E-03 | 1.71E-02 |
| ENSG00000148602 | LRR1T       | 10 | 84231520  | 84241546  | 10026  | protein coding                     | -1.43 | 2.37E-03 | 1.89E-02 |
| ENSG00000231095 | GYG1P3      | 1  | 55222379  | 55223372  | 993    | processed pseudogene               | -1.43 | 9.13E-03 | 4.47E-02 |
| ENSG00000069482 | GAL         | 11 | 68683779  | 68691175  | 7396   | protein coding                     | -1.43 | 8.52E-04 | 9.93E-03 |
| ENSG00000263326 | AC133552.4  | 16 | 25071490  | 25072727  | 1237   | unprocessed pseudogene             | -1.43 | 9.70E-03 | 4.64E-02 |
| ENSG00000287964 | AC066580.1  | 3  | 11060973  | 11091548  | 30575  | lncRNA                             | -1.43 | 9.70E-03 | 4.64E-02 |
| ENSG00000277531 | PNMABC      | 19 | 46424697  | 46428951  | 4254   | protein coding                     | -1.43 | 1.22E-03 | 1.25E-02 |
| ENSG00000278638 | AC244093.5  | 17 | 37045228  | 37052890  | 7662   | lncRNA-antisense                   | -1.43 | 8.45E-03 | 4.26E-02 |
| ENSG00000260704 | LINC00543   | 13 | 27953526  | 27955370  | 1844   | lncRNA                             | -1.43 | 2.37E-03 | 1.89E-02 |
| ENSG00000268505 | AC135012.3  | 16 | 86192793  | 86198913  | 6120   | lncRNA                             | -1.43 | 1.63E-03 | 1.49E-02 |
| ENSG00000164283 | ESM1        | 5  | 54977867  | 55022671  | 44804  | protein coding                     | -1.43 | 8.38E-04 | 9.84E-03 |
| ENSG00000116329 | OPRD1       | 1  | 28812142  | 28871267  | 59125  | protein coding                     | -1.43 | 1.60E-04 | 3.40E-03 |
| ENSG00000245384 | CXXC4-AS1   | 4  | 104490849 | 104734546 | 243697 | lncRNA-antisense                   | -1.43 | 6.01E-04 | 8.05E-03 |

|                 |              |    |           |           |        |                                    |       |          |          |
|-----------------|--------------|----|-----------|-----------|--------|------------------------------------|-------|----------|----------|
| ENSG00000262703 | AC009121.2   | 16 | 11348143  | 11349321  | 1178   | lncRNA-antisense                   | -1.43 | 6.12E-03 | 3.45E-02 |
| ENSG0000087245  | MMP2         | 16 | 55389700  | 55506691  | 116991 | protein coding                     | -1.43 | 2.02E-04 | 3.94E-03 |
| ENSG00000143631 | FLG          | 1  | 152302165 | 152325239 | 23074  | protein coding                     | -1.43 | 2.20E-04 | 4.16E-03 |
| ENSG00000244383 | FAM3D-AS1    | 3  | 58607080  | 58644491  | 37411  | lncRNA-antisense                   | -1.43 | 6.71E-03 | 3.67E-02 |
| ENSG00000134363 | FST          | 5  | 53480626  | 53487134  | 6508   | protein coding                     | -1.43 | 3.41E-03 | 2.40E-02 |
| ENSG00000255248 | MIR100HG     | 11 | 122028325 | 122556721 | 528396 | lncRNA                             | -1.43 | 2.22E-06 | 1.74E-04 |
| ENSG00000255537 | AP000708.1   | 11 | 125495214 | 125499528 | 4314   | lncRNA-bidirectional promoter      | -1.43 | 4.15E-03 | 2.72E-02 |
| ENSG00000230863 | AL137803.1   | 1  | 75641178  | 75724049  | 82871  | transcribed_processed_pseudogene   | -1.43 | 5.35E-03 | 3.17E-02 |
| ENSG00000255867 | DENND5B-AS1  | 12 | 31589923  | 31615666  | 25743  | lncRNA-antisense                   | -1.43 | 1.07E-02 | 4.94E-02 |
| ENSG00000101938 | CHRD1        | X  | 110673856 | 110795819 | 121963 | protein coding                     | -1.43 | 8.96E-04 | 1.03E-02 |
| ENSG00000164746 | C7orf57      | 7  | 48035511  | 48061304  | 25793  | protein coding                     | -1.43 | 8.69E-04 | 1.01E-02 |
| ENSG00000146038 | DCDC2        | 6  | 24171755  | 24358059  | 186304 | protein coding                     | -1.43 | 2.44E-03 | 1.93E-02 |
| ENSG00000237596 | AL138828.1   | 6  | 135991936 | 136225751 | 233815 | lncRNA-antisense                   | -1.43 | 7.93E-05 | 2.16E-03 |
| ENSG00000285040 | AC092723.4   | 16 | 85963328  | 85985386  | 22058  | lncRNA                             | -1.43 | 7.49E-03 | 3.94E-02 |
| ENSG00000183034 | OTOP2        | 17 | 74922950  | 74933912  | 10962  | protein coding                     | -1.43 | 2.44E-03 | 1.93E-02 |
| ENSG00000157782 | CABP1        | 12 | 120640552 | 120667324 | 26772  | protein coding                     | -1.43 | 1.48E-05 | 6.80E-04 |
| ENSG00000285820 | AL157829.1   | 9  | 116838144 | 116877264 | 39120  | lncRNA-antisense                   | -1.43 | 8.52E-03 | 4.27E-02 |
| ENSG00000274461 | AC023282.1   | 10 | 120608580 | 120825317 | 216737 | lncRNA                             | -1.43 | 5.79E-04 | 7.85E-03 |
| ENSG00000235824 | LINC00837    | 10 | 28789188  | 28796113  | 6925   | lncRNA                             | -1.43 | 5.92E-03 | 3.38E-02 |
| ENSG00000272154 | AC244517.2   | 5  | 141100242 | 141174391 | 74149  | lncRNA-antisense                   | -1.43 | 9.38E-03 | 4.54E-02 |
| ENSG00000185002 | RF6          | 6  | 116877212 | 116932161 | 54949  | protein coding                     | -1.43 | 7.64E-03 | 3.99E-02 |
| ENSG00000237159 | CNTFR-AS1    | 9  | 34568012  | 34583072  | 15060  | lncRNA-antisense                   | -1.43 | 4.84E-03 | 2.98E-02 |
| ENSG00000277022 | AL031663.3   | 20 | 45435272  | 45448325  | 13053  | lncRNA                             | -1.43 | 1.45E-03 | 1.39E-02 |
| ENSG00000118322 | ATP10B       | 5  | 160563120 | 160852214 | 289094 | protein coding                     | -1.44 | 8.15E-04 | 9.67E-03 |
| ENSG00000236507 | BX470209.2   | 9  | 89797880  | 89803100  | 5220   | lncRNA                             | -1.44 | 3.23E-03 | 2.31E-02 |
| ENSG00000148942 | SLC5A12      | 11 | 26667020  | 26723427  | 56407  | protein coding                     | -1.44 | 3.03E-03 | 2.22E-02 |
| ENSG00000224271 | AL117329.1   | 22 | 47630827  | 48023004  | 392177 | lncRNA                             | -1.44 | 8.96E-07 | 8.89E-05 |
| ENSG00000175344 | CHRNA7       | 15 | 31923438  | 32173018  | 249580 | protein coding                     | -1.44 | 1.25E-05 | 6.06E-04 |
| ENSG00000279685 | MAPT-IT1     | 17 | 45895783  | 45898798  | 3015   | lncRNA-sense intronic              | -1.44 | 1.70E-03 | 1.53E-02 |
| ENSG00000169194 | IL13         | 5  | 132656263 | 132661110 | 4847   | protein coding                     | -1.44 | 1.66E-03 | 1.51E-02 |
| ENSG00000286622 | AC034111.2   | 8  | 9984004   | 10055041  | 71037  | lncRNA                             | -1.44 | 4.85E-03 | 2.99E-02 |
| ENSG00000130950 | NUTM2F       | 9  | 94318196  | 94328644  | 10448  | protein coding                     | -1.44 | 4.44E-04 | 6.59E-03 |
| ENSG00000286720 | AC097375.5   | 4  | 151988526 | 152045275 | 56749  | lncRNA                             | -1.44 | 4.72E-03 | 2.94E-02 |
| ENSG00000268649 | AL132655.2   | 20 | 58817132  | 58817725  | 593    | lncRNA                             | -1.44 | 3.76E-03 | 2.56E-02 |
| ENSG00000264515 | AC011474.1   | 19 | 29287011  | 29525752  | 238741 | lncRNA                             | -1.44 | 5.81E-04 | 7.87E-03 |
| ENSG00000270885 | RASL10B      | 17 | 35731639  | 35743521  | 11882  | protein coding                     | -1.44 | 8.19E-06 | 4.47E-04 |
| ENSG00000182632 | CENYL2       | 10 | 42408168  | 42475349  | 67181  | transcribed_unprocessed_pseudogene | -1.44 | 2.00E-03 | 1.71E-02 |
| ENSG00000273218 | AC005776.2   | 19 | 15346068  | 15348417  | 2349   | lncRNA                             | -1.44 | 4.16E-03 | 2.72E-02 |
| ENSG00000226627 | SHANK2-AS1   | 11 | 70626441  | 70635658  | 9217   | lncRNA-antisense                   | -1.44 | 7.42E-04 | 9.15E-03 |
| ENSG00000166922 | SCG5         | 15 | 32641676  | 32697098  | 55422  | protein coding                     | -1.44 | 1.32E-04 | 3.01E-03 |
| ENSG00000280278 | FLJ30679     | 16 | 86555320  | 86557299  | 1979   | TEC                                | -1.44 | 7.42E-03 | 3.91E-02 |
| ENSG00000071539 | TRIP13       | 5  | 892884    | 919357    | 26473  | protein coding                     | -1.44 | 3.78E-05 | 1.29E-03 |
| ENSG00000102195 | GPR50        | X  | 151176584 | 151181465 | 4881   | protein coding                     | -1.44 | 6.27E-03 | 3.51E-02 |
| ENSG00000286615 | AC011416.4   | 5  | 127231977 | 127290731 | 58754  | lncRNA                             | -1.44 | 5.50E-04 | 7.61E-03 |
| ENSG00000134042 | MRO          | 18 | 50795120  | 50825402  | 30282  | protein coding                     | -1.44 | 1.54E-03 | 1.44E-02 |
| ENSG00000236780 | LINC01829    | 2  | 67123357  | 67397980  | 274623 | lncRNA-antisense                   | -1.44 | 3.36E-04 | 5.56E-03 |
| ENSG00000223646 | AC002463.1   | 7  | 112616440 | 112896625 | 280185 | lncRNA                             | -1.44 | 2.13E-04 | 4.08E-03 |
| ENSG00000253279 | LINC02209    | 8  | 29920560  | 29953724  | 33164  | lncRNA                             | -1.44 | 9.83E-03 | 4.69E-02 |
| ENSG00000241111 | PRICKLE2-AS1 | 3  | 64067964  | 64103131  | 35167  | lncRNA-antisense                   | -1.44 | 2.98E-03 | 2.20E-02 |
| ENSG00000287090 | AC116345.4   | 5  | 73195314  | 73201973  | 6659   | lncRNA                             | -1.44 | 7.34E-03 | 3.89E-02 |
| ENSG00000175267 | VWA3A        | 16 | 22092538  | 22156964  | 64426  | protein coding                     | -1.44 | 8.31E-06 | 4.48E-04 |
| ENSG00000171431 | KRT20        | 17 | 40875889  | 40885242  | 9353   | protein coding                     | -1.44 | 9.37E-03 | 4.54E-02 |
| ENSG00000286812 | AP001120.5   | 18 | 11758977  | 11786181  | 27204  | lncRNA                             | -1.44 | 1.45E-03 | 1.39E-02 |
| ENSG00000203985 | LDLRAD1      | 1  | 54007298  | 54018186  | 10888  | protein coding                     | -1.44 | 3.75E-03 | 2.55E-02 |
| ENSG00000123094 | RASSF8       | 12 | 25959029  | 26079892  | 120863 | protein coding                     | -1.44 | 1.76E-04 | 3.63E-03 |
| ENSG00000175699 | CCDC197      | 14 | 93987225  | 94008863  | 21638  | protein coding                     | -1.44 | 8.35E-04 | 9.82E-03 |
| ENSG00000234913 | AC016027.2   | 22 | 18004270  | 18007308  | 3038   | lncRNA-sense intronic              | -1.44 | 9.00E-03 | 4.42E-02 |
| ENSG00000163762 | TM4SF18      | 3  | 149318498 | 149334414 | 15916  | protein coding                     | -1.44 | 4.08E-03 | 2.69E-02 |
| ENSG00000255967 | HADHAP2      | 12 | 8634367   | 8637608   | 3241   | processed_pseudogene               | -1.44 | 2.67E-03 | 2.05E-02 |
| ENSG00000141028 | CDRT15P1     | 17 | 14024514  | 14025488  | 974    | unprocessed_pseudogene             | -1.44 | 7.09E-03 | 3.80E-02 |
| ENSG00000232265 | LINC02805    | 1  | 148156139 | 148186980 | 30841  | lncRNA                             | -1.44 | 3.42E-04 | 5.61E-03 |
| ENSG00000156009 | MAGEA8       | X  | 149881141 | 149885835 | 4694   | protein coding                     | -1.44 | 8.56E-03 | 4.29E-02 |
| ENSG00000257790 | EIF4A1P4     | 12 | 53153272  | 53154484  | 1212   | processed_pseudogene               | -1.44 | 7.95E-03 | 4.09E-02 |
| ENSG00000158560 | DYNC111      | 7  | 95772506  | 96110322  | 337816 | protein coding                     | -1.44 | 2.79E-04 | 4.89E-03 |
| ENSG00000285735 | LINC02717    | 11 | 134994982 | 135007779 | 12797  | lncRNA                             | -1.44 | 6.64E-03 | 3.64E-02 |
| ENSG00000234093 | RPS15AP11    | 1  | 44780331  | 44780715  | 384    | processed_pseudogene               | -1.45 | 6.32E-03 | 3.53E-02 |
| ENSG00000130055 | GDPD2        | X  | 70423031  | 70433390  | 10359  | protein coding                     | -1.45 | 4.39E-03 | 2.81E-02 |
| ENSG00000173114 | LRRN3        | 7  | 111091006 | 111125454 | 34448  | protein coding                     | -1.45 | 9.98E-07 | 9.60E-05 |
| ENSG00000226250 | LINC00408    | 13 | 18905419  | 18935554  | 30135  | lncRNA                             | -1.45 | 7.46E-03 | 3.93E-02 |
| ENSG00000272692 | AC010997.4   | 10 | 75409142  | 75411842  | 2700   | lncRNA                             | -1.45 | 8.75E-03 | 4.35E-02 |
| ENSG00000234962 | LINC00700    | 10 | 1989076   | 2015005   | 25929  | lncRNA                             | -1.45 | 6.81E-04 | 8.70E-03 |
| ENSG00000143494 | VASH2        | 1  | 212950520 | 212992037 | 41517  | protein coding                     | -1.45 | 1.24E-06 | 1.14E-04 |
| ENSG00000227059 | ANHX         | 12 | 133218312 | 133235877 | 17565  | protein coding                     | -1.45 | 8.64E-04 | 1.00E-02 |
| ENSG00000277150 | F8A3         | X  | 155456914 | 155458620 | 1706   | protein coding                     | -1.45 | 4.70E-04 | 6.84E-03 |
| ENSG00000214043 | LINC02347    | 12 | 126438837 | 126472790 | 33953  | lncRNA                             | -1.45 | 5.94E-04 | 8.00E-03 |
| ENSG00000186603 | HPDL         | 1  | 45326895  | 45328679  | 1784   | protein coding                     | -1.45 | 1.92E-04 | 3.82E-03 |
| ENSG00000230866 | LINC02558    | 22 | 31970823  | 32037995  | 61712  | lncRNA                             | -1.45 | 6.98E-03 | 3.76E-02 |
| ENSG00000256115 | LINC02443    | 12 | 5226196   | 5244199   | 18003  | lncRNA                             | -1.45 | 2.86E-03 | 2.14E-02 |
| ENSG00000237624 | OXCT2P1      | 1  | 39514956  | 39516490  | 1534   | unprocessed_pseudogene             | -1.45 | 8.19E-03 | 4.17E-02 |
| ENSG00000275427 | AF067845.2   | 8  | 1296034   | 1302607   | 6573   | lncRNA                             | -1.45 | 2.18E-03 | 1.80E-02 |
| ENSG00000153822 | CKN1J16      | 17 | 70053429  | 70135608  | 82179  | protein coding                     | -1.45 | 1.22E-03 | 1.25E-02 |
| ENSG00000204581 | ACOXL-AS1    | 2  | 111098345 | 111116407 | 18062  | lncRNA-antisense                   | -1.45 | 5.77E-04 | 7.84E-03 |
| ENSG00000286046 | AC093898.1   | 4  | 18418662  | 18888662  | 470000 | lncRNA                             | -1.45 | 3.80E-03 | 2.57E-02 |
| ENSG00000152670 | DDX4         | 5  | 55738017  | 55817157  | 79140  | protein coding                     | -1.45 | 4.71E-04 | 6.85E-03 |
| ENSG00000198491 | AC007920.1   | 3  | 187197090 | 187207629 | 10539  | lncRNA-antisense                   | -1.45 | 9.00E-03 | 4.42E-02 |
| ENSG00000285402 | AC244230.2   | 10 | 46375752  | 46537864  | 162112 | lncRNA                             | -1.45 | 8.03E-03 | 4.12E-02 |
| ENSG00000144730 | IL17RD       | 3  | 57089982  | 57170306  | 80324  | protein coding                     | -1.45 | 8.05E-05 | 2.29E-03 |
| ENSG00000166473 | PKD1L2       | 16 | 81100875  | 81220370  | 119495 | polymorphic_pseudogene             | -1.45 | 2.60E-05 | 9.99E-04 |
| ENSG00000203697 | CAFN8        | 1  | 223538007 | 223665723 | 127716 | protein coding                     | -1.45 | 1.05E-06 | 9.98E-05 |
| ENSG00000269707 | AC018730.1   | 2  | 104853285 | 104927722 | 74437  | lncRNA-sense overlapping           | -1.45 | 5.15E-03 | 3.10E-02 |

|                 |              |    |           |           |        |                                    |       |          |          |
|-----------------|--------------|----|-----------|-----------|--------|------------------------------------|-------|----------|----------|
| ENSG00000268621 | IGFL2-AS1    | 19 | 46189029  | 46203160  | 14131  | lncRNA                             | -1.45 | 5.06E-03 | 3.06E-02 |
| ENSG00000141485 | SLC13A5      | 17 | 6684719   | 6713377   | 28658  | protein coding                     | -1.45 | 3.53E-06 | 2.42E-04 |
| ENSG00000107562 | CXCL12       | 10 | 44370165  | 44386493  | 16328  | protein coding                     | -1.45 | 6.30E-05 | 1.81E-03 |
| ENSG00000102024 | PLS3         | X  | 115561174 | 115650861 | 89687  | protein coding                     | -1.45 | 1.05E-03 | 1.14E-02 |
| ENSG00000278338 | VWA8-AS1     | 13 | 41955808  | 41981565  | 25757  | lncRNA-antisense                   | -1.45 | 5.47E-03 | 3.21E-02 |
| ENSG00000259709 | AC023906.4   | 15 | 52124561  | 52140246  | 15685  | lncRNA-antisense                   | -1.45 | 1.34E-03 | 1.32E-02 |
| ENSG00000219565 | ZNF259P1     | 6  | 108782126 | 108787053 | 4927   | transcribed processed pseudogene   | -1.45 | 8.47E-03 | 4.26E-02 |
| ENSG00000187242 | KRT12        | 17 | 40861303  | 40867223  | 5920   | protein coding                     | -1.46 | 5.97E-04 | 8.03E-03 |
| ENSG00000170790 | OR10A2       | 11 | 6863057   | 6874717   | 11660  | protein coding                     | -1.46 | 2.20E-03 | 1.81E-02 |
| ENSG00000087842 | PIR          | X  | 15384799  | 15493564  | 108765 | protein coding                     | -1.46 | 2.51E-03 | 1.96E-02 |
| ENSG00000288029 | AC115282.2   | 3  | 54033988  | 54058864  | 24876  | lncRNA                             | -1.46 | 4.22E-03 | 2.75E-02 |
| ENSG00000187955 | COL14A1      | 8  | 120059780 | 120373573 | 313793 | protein coding                     | -1.46 | 8.96E-05 | 2.35E-03 |
| ENSG00000229240 | LINC00710    | 10 | 10917866  | 10952234  | 34368  | lncRNA                             | -1.46 | 3.68E-03 | 2.52E-02 |
| ENSG00000204091 | TDRG1        | 6  | 40334775  | 40387590  | 52815  | lncRNA-antisense                   | -1.46 | 2.25E-03 | 1.83E-02 |
| ENSG00000261795 | AC093627.7   | 7  | 161765    | 164972    | 3207   | lncRNA                             | -1.46 | 1.14E-03 | 1.20E-02 |
| ENSG00000287879 | AC114341.2   | 18 | 79959579  | 79963178  | 3599   | lncRNA                             | -1.46 | 3.04E-04 | 5.18E-03 |
| ENSG00000231482 | AC105450.1   | 2  | 1366234   | 1580747   | 214513 | lncRNA                             | -1.46 | 2.06E-03 | 1.74E-02 |
| ENSG00000101251 | SEL1L2       | 20 | 13849247  | 13996443  | 147196 | protein coding                     | -1.46 | 1.94E-04 | 3.84E-03 |
| ENSG00000284674 | LINC02781    | 1  | 4973381   | 4981568   | 8187   | lncRNA                             | -1.46 | 3.73E-03 | 2.54E-02 |
| ENSG00000253369 | AC022034.3   | 8  | 53394110  | 53484067  | 89957  | lncRNA                             | -1.46 | 6.96E-03 | 3.76E-02 |
| ENSG00000140538 | NTRK3        | 15 | 87859751  | 88256768  | 397017 | protein coding                     | -1.46 | 1.39E-08 | 3.22E-06 |
| ENSG00000148848 | ADAM12       | 10 | 126012381 | 126388455 | 376074 | protein coding                     | -1.46 | 2.25E-15 | 3.41E-12 |
| ENSG00000100320 | RBFOX2       | 22 | 35738736  | 36028824  | 290088 | protein coding                     | -1.46 | 2.95E-07 | 3.85E-05 |
| ENSG00000265763 | ZNF488       | 10 | 47365496  | 47384293  | 18797  | protein coding                     | -1.46 | 1.82E-03 | 1.60E-02 |
| ENSG00000123999 | INH4         | 2  | 219569162 | 219575711 | 6549   | protein coding                     | -1.46 | 4.27E-03 | 2.77E-02 |
| ENSG00000255883 | FUNDC2P1     | 5  | 73506885  | 73509254  | 569    | processed pseudogene               | -1.46 | 1.79E-03 | 1.58E-02 |
| ENSG00000283162 | AL390726.5   | 9  | 38433696  | 38543880  | 110184 | transcribed unprocessed pseudogene | -1.46 | 1.41E-03 | 1.36E-02 |
| ENSG00000132554 | RG522        | 8  | 99960936  | 100131268 | 170332 | protein coding                     | -1.46 | 2.19E-05 | 8.89E-04 |
| ENSG00000231738 | TSPAN19      | 12 | 85014311  | 85036277  | 21966  | protein coding                     | -1.46 | 1.01E-02 | 4.79E-02 |
| ENSG00000175697 | GPR156       | 3  | 120164645 | 120285222 | 120577 | protein coding                     | -1.46 | 6.08E-04 | 8.09E-03 |
| ENSG00000258952 | SALRNA1      | 14 | 60639216  | 60642589  | 3373   | lncRNA                             | -1.46 | 2.85E-03 | 2.13E-02 |
| ENSG00000165685 | TMEM52B      | 12 | 10170542  | 10191801  | 21259  | protein coding                     | -1.46 | 3.67E-04 | 5.87E-03 |
| ENSG00000197253 | TPSB2        | 16 | 1227272   | 1230184   | 2912   | protein coding                     | -1.46 | 4.42E-04 | 6.57E-03 |
| ENSG00000260477 | LINC01584    | 15 | 86078809  | 86116747  | 37938  | lncRNA-antisense                   | -1.46 | 1.22E-03 | 1.25E-02 |
| ENSG00000267489 | LINC01837    | 19 | 31797666  | 32072113  | 274447 | lncRNA                             | -1.46 | 1.97E-04 | 3.89E-03 |
| ENSG00000287514 | AL450267.2   | 9  | 36779475  | 36830456  | 50981  | lncRNA                             | -1.46 | 5.68E-04 | 7.77E-03 |
| ENSG00000267091 | CTBP2P7      | 19 | 36496916  | 36498159  | 1243   | processed pseudogene               | -1.46 | 5.51E-03 | 3.22E-02 |
| ENSG00000166828 | SCNN1G       | 16 | 23182745  | 23216883  | 34138  | protein coding                     | -1.46 | 4.66E-04 | 6.79E-03 |
| ENSG00000225511 | LINC00475    | 9  | 92141298  | 92160114  | 18816  | transcribed unprocessed pseudogene | -1.46 | 3.54E-04 | 5.74E-03 |
| ENSG00000105697 | HAMP         | 19 | 35280716  | 35285143  | 4427   | protein coding                     | -1.46 | 1.20E-03 | 1.24E-02 |
| ENSG00000174460 | ZCCHC12      | X  | 118823824 | 118826968 | 3144   | protein coding                     | -1.46 | 3.94E-03 | 2.64E-02 |
| ENSG00000150556 | LYPD6B       | 2  | 149038107 | 149215262 | 177155 | protein coding                     | -1.46 | 2.05E-05 | 8.55E-04 |
| ENSG00000158022 | TRIM63       | 1  | 26051301  | 26068436  | 17135  | protein coding                     | -1.46 | 8.06E-03 | 4.13E-02 |
| ENSG00000204663 | CST13P       | 20 | 23519146  | 23542018  | 22872  | transcribed unprocessed pseudogene | -1.46 | 6.15E-03 | 3.47E-02 |
| ENSG00000173093 | CDC6C3       | 12 | 110846769 | 110907535 | 60766  | protein coding                     | -1.46 | 1.23E-03 | 1.25E-02 |
| ENSG00000280425 | AL357673.2   | 1  | 54137746  | 54142980  | 5234   | lncRNA-antisense                   | -1.46 | 1.35E-03 | 1.33E-02 |
| ENSG00000166984 | TCPI0L2      | 6  | 167146414 | 167196913 | 50499  | protein coding                     | -1.47 | 1.16E-04 | 2.77E-03 |
| ENSG00000184254 | ALDH1A3      | 15 | 100877714 | 100916626 | 38912  | protein coding                     | -1.47 | 2.15E-05 | 8.78E-04 |
| ENSG00000117507 | FMO6P        | 1  | 171137740 | 171161568 | 23828  | transcribed unitary pseudogene     | -1.47 | 9.27E-03 | 4.51E-02 |
| ENSG0000062096  | ARSF         | X  | 3041471   | 3112727   | 71256  | protein coding                     | -1.47 | 5.65E-03 | 3.28E-02 |
| ENSG00000234512 | TLR12P       | 1  | 33466249  | 33468954  | 2705   | unitary pseudogene                 | -1.47 | 4.36E-03 | 2.80E-02 |
| ENSG00000188859 | FAM78B       | 1  | 166057426 | 166167001 | 109575 | protein coding                     | -1.47 | 5.54E-05 | 1.67E-03 |
| ENSG00000283297 | TEX52        | 12 | 2849046   | 2857039   | 7993   | protein coding                     | -1.47 | 9.65E-03 | 4.63E-02 |
| ENSG00000264876 | AP005209.1   | 18 | 10321380  | 10372387  | 51007  | lncRNA                             | -1.47 | 7.80E-03 | 4.04E-02 |
| ENSG00000226650 | KIF4B        | 5  | 155013755 | 155018141 | 4386   | protein coding                     | -1.47 | 7.30E-03 | 3.88E-02 |
| ENSG00000285627 | AC005343.4   | 12 | 1741197   | 1747099   | 5902   | lncRNA-antisense                   | -1.47 | 5.32E-03 | 3.16E-02 |
| ENSG00000077935 | SMC1B        | 22 | 45344063  | 45413619  | 69556  | protein coding                     | -1.47 | 1.21E-05 | 5.95E-04 |
| ENSG00000128276 | RFLP3        | 22 | 32354885  | 32361161  | 6276   | protein coding                     | -1.47 | 9.90E-03 | 4.71E-02 |
| ENSG00000233295 | FAM9A20P     | 8  | 7295014   | 7298024   | 3010   | unprocessed pseudogene             | -1.47 | 9.57E-03 | 4.61E-02 |
| ENSG00000268282 | AC010328.2   | 19 | 53004040  | 53005150  | 1110   | processed pseudogene               | -1.47 | 3.53E-03 | 2.45E-02 |
| ENSG00000264151 | AC090403.1   | 18 | 27335968  | 27595164  | 259196 | lncRNA                             | -1.47 | 5.40E-03 | 3.18E-02 |
| ENSG00000250286 | AC021491.2   | 17 | 50525520  | 50538761  | 13241  | lncRNA                             | -1.47 | 6.96E-03 | 3.76E-02 |
| ENSG00000259218 | LINC00928    | 15 | 89504909  | 89524049  | 19140  | lncRNA                             | -1.47 | 3.78E-03 | 2.56E-02 |
| ENSG00000163632 | C3orf49      | 3  | 63819299  | 63848636  | 29337  | protein coding                     | -1.47 | 5.96E-03 | 3.40E-02 |
| ENSG00000134853 | PDGFRA       | 4  | 54229280  | 54298245  | 68965  | protein coding                     | -1.47 | 1.82E-04 | 3.70E-03 |
| ENSG00000224853 | LINC00393    | 13 | 73413473  | 73661891  | 248418 | lncRNA                             | -1.47 | 2.95E-03 | 2.18E-02 |
| ENSG00000196600 | SLC22A25     | 11 | 63163776  | 63229652  | 65876  | protein coding                     | -1.47 | 2.00E-03 | 1.71E-02 |
| ENSG00000254561 | AP003393.1   | 11 | 119608423 | 119659284 | 50861  | lncRNA-antisense                   | -1.47 | 4.99E-04 | 7.10E-03 |
| ENSG00000250493 | AP004147.1   | 11 | 120867933 | 120894797 | 26864  | lncRNA-antisense                   | -1.47 | 3.46E-04 | 5.64E-03 |
| ENSG00000109832 | DDX25        | 11 | 125903348 | 125943702 | 40354  | protein coding                     | -1.47 | 5.61E-05 | 1.68E-03 |
| ENSG00000140557 | ST8SIA2      | 15 | 92393881  | 92468728  | 74847  | protein coding                     | -1.47 | 6.65E-05 | 1.89E-03 |
| ENSG00000261019 | AC010132.4   | 7  | 42901272  | 42902639  | 1367   | lncRNA                             | -1.47 | 7.76E-03 | 4.03E-02 |
| ENSG00000077522 | ACTN2        | 1  | 236664141 | 236764631 | 100490 | protein coding                     | -1.47 | 4.81E-05 | 1.52E-03 |
| ENSG00000276087 | AC008073.3   | 2  | 24124366  | 24190436  | 66070  | protein coding                     | -1.47 | 9.85E-03 | 4.70E-02 |
| ENSG00000224081 | SLC44A3-AS1  | 1  | 94613814  | 94855426  | 241612 | transcribed processed pseudogene   | -1.47 | 4.81E-07 | 5.67E-05 |
| ENSG00000067177 | PHKA1        | X  | 72578814  | 72714319  | 135505 | protein coding                     | -1.47 | 2.03E-05 | 8.52E-04 |
| ENSG00000232517 | CSPG4BP      | 5  | 54808210  | 54872551  | 64341  | unitary pseudogene                 | -1.47 | 1.93E-04 | 3.82E-03 |
| ENSG00000249131 | PSD2-AS1     | 5  | 139740951 | 139747406 | 6455   | lncRNA                             | -1.47 | 1.95E-03 | 1.68E-02 |
| ENSG00000258240 | AC002351.1   | 12 | 110951683 | 110957820 | 6137   | lncRNA                             | -1.47 | 4.07E-03 | 2.69E-02 |
| ENSG00000203585 | LINC02408    | 12 | 67443105  | 67590771  | 147666 | lncRNA                             | -1.47 | 5.45E-03 | 3.21E-02 |
| ENSG00000229770 | AL022337.1   | 22 | 26161905  | 26169341  | 7436   | lncRNA-bidirectional promoter      | -1.47 | 3.16E-03 | 2.28E-02 |
| ENSG00000204711 | C9orf135     | 9  | 69820817  | 69906227  | 85410  | protein coding                     | -1.47 | 5.35E-03 | 3.17E-02 |
| ENSG00000196632 | WNK3         | X  | 54192823  | 54358642  | 165819 | protein coding                     | -1.47 | 7.36E-06 | 4.16E-04 |
| ENSG00000177553 | C1orf167-AS1 | 1  | 11777077  | 11779619  | 2542   | lncRNA-antisense                   | -1.47 | 7.04E-03 | 3.78E-02 |
| ENSG00000231439 | WASIR2       | 16 | 22910     | 25123     | 2213   | lncRNA                             | -1.47 | 3.07E-03 | 2.24E-02 |
| ENSG00000155761 | SPAG17       | 1  | 117953590 | 118185228 | 231638 | protein coding                     | -1.47 | 1.12E-05 | 5.61E-04 |
| ENSG00000237212 | AL449403.1   | 9  | 96065740  | 96101912  | 36172  | lncRNA                             | -1.47 | 8.15E-04 | 9.93E-03 |
| ENSG00000287464 | AC100810.7   | 8  | 1810823   | 1817113   | 6290   | lncRNA                             | -1.47 | 2.65E-03 | 2.04E-02 |
| ENSG00000258460 | AL355096.1   | 14 | 101332511 | 101335497 | 2986   | lncRNA                             | -1.47 | 7.63E-03 | 3.98E-02 |
| ENSG00000275763 | ZNF516-DT    | 18 | 76495521  | 76498088  | 2567   | lncRNA                             | -1.47 | 4.10E-03 | 2.70E-02 |



|                 |             |    |           |           |        |                                    |       |          |          |
|-----------------|-------------|----|-----------|-----------|--------|------------------------------------|-------|----------|----------|
| ENSG00000275038 | AC091980.2  | 5  | 171305980 | 171309777 | 3797   | lncRNA-antisense                   | -1.47 | 1.33E-03 | 1.32E-02 |
| ENSG00000227947 | LINC01738   | 1  | 47688463  | 47704029  | 15566  | lncRNA                             | -1.47 | 9.44E-03 | 4.57E-02 |
| ENSG00000166948 | TGM6        | 20 | 2380901   | 2432753   | 51852  | protein coding                     | -1.47 | 1.23E-03 | 1.25E-02 |
| ENSG00000164129 | NPY5R       | 4  | 163343892 | 163351934 | 8042   | protein coding                     | -1.47 | 7.72E-03 | 4.02E-02 |
| ENSG00000152661 | GJA1        | 6  | 121435595 | 121449727 | 14132  | protein coding                     | -1.48 | 4.11E-03 | 2.70E-02 |
| ENSG00000255346 | NOX5        | 15 | 68930525  | 69062762  | 132237 | protein coding                     | -1.48 | 2.20E-04 | 4.16E-03 |
| ENSG00000286058 | AC018865.2  | 2  | 130026845 | 130051131 | 24286  | lncRNA                             | -1.48 | 7.74E-03 | 4.02E-02 |
| ENSG00000250423 | KIAA1210    | X  | 119078635 | 119150579 | 71944  | protein coding                     | -1.48 | 1.20E-03 | 1.24E-02 |
| ENSG00000132429 | POPDC3      | 6  | 105157900 | 105180014 | 22114  | protein coding                     | -1.48 | 8.58E-03 | 4.29E-02 |
| ENSG00000241322 | CDRT1       | 17 | 15565483  | 15619704  | 54221  | protein coding                     | -1.48 | 9.75E-06 | 5.03E-04 |
| ENSG00000255258 | LINC02743   | 11 | 133783671 | 133810376 | 26705  | lncRNA                             | -1.48 | 8.13E-03 | 4.15E-02 |
| ENSG00000237686 | AL109615.3  | 6  | 43995723  | 44074652  | 78929  | lncRNA-antisense                   | -1.48 | 1.71E-03 | 1.54E-02 |
| ENSG00000237767 | LINC01370   | 20 | 40004216  | 40011323  | 7107   | lncRNA                             | -1.48 | 5.82E-03 | 3.35E-02 |
| ENSG00000251391 | AC092353.1  | 5  | 66298394  | 66393521  | 95127  | lncRNA                             | -1.48 | 3.70E-03 | 2.53E-02 |
| ENSG00000188153 | COL4A5      | X  | 108439838 | 108697545 | 257707 | protein coding                     | -1.48 | 3.25E-04 | 5.43E-03 |
| ENSG00000200314 | Y RNA       | 6  | 106454828 | 106454929 | 101    | misc RNA                           | -1.48 | 2.16E-03 | 1.79E-02 |
| ENSG00000079101 | CLUL1       | 18 | 596988    | 650334    | 53346  | protein coding                     | -1.48 | 3.56E-03 | 2.47E-02 |
| ENSG00000204362 | LINC02783   | 1  | 17189783  | 17197617  | 7834   | lncRNA                             | -1.48 | 2.01E-03 | 1.71E-02 |
| ENSG00000235366 | LINC01055   | 13 | 45680184  | 45701184  | 21000  | lncRNA                             | -1.48 | 9.90E-03 | 4.71E-02 |
| ENSG00000214553 | LRRC37A11P  | 17 | 39027277  | 39053205  | 25928  | transcribed unprocessed pseudogene | -1.48 | 2.88E-04 | 4.99E-03 |
| ENSG00000205424 | PCBP3-AS1   | 21 | 45827961  | 45837987  | 10026  | lncRNA-antisense                   | -1.48 | 2.77E-04 | 4.87E-03 |
| ENSG00000167751 | KLK2        | 19 | 50861568  | 50880567  | 18999  | protein coding                     | -1.48 | 3.69E-04 | 5.89E-03 |
| ENSG00000131737 | KRT34       | 17 | 41377650  | 41382403  | 4753   | protein coding                     | -1.48 | 4.96E-03 | 3.03E-02 |
| ENSG00000204869 | IGFL4       | 19 | 46039748  | 46077118  | 37370  | protein coding                     | -1.48 | 9.97E-04 | 1.10E-02 |
| ENSG00000215277 | RNF212B     | 14 | 23185316  | 23273477  | 88161  | protein coding                     | -1.48 | 1.53E-03 | 1.43E-02 |
| ENSG00000204952 | FBXO47      | 17 | 38936432  | 38967403  | 30971  | protein coding                     | -1.48 | 3.41E-03 | 2.40E-02 |
| ENSG00000279480 | AC138466.4  | 12 | 132200436 | 132201287 | 851    | TEC                                | -1.48 | 9.65E-03 | 4.63E-02 |
| ENSG00000127241 | MASP1       | 3  | 187217282 | 187291980 | 74698  | protein coding                     | -1.48 | 1.08E-05 | 5.48E-04 |
| ENSG00000287372 | AL627316.1  | 1  | 90388193  | 90420396  | 32203  | lncRNA                             | -1.48 | 7.58E-03 | 3.97E-02 |
| ENSG00000235054 | LINC01777   | 1  | 4412027   | 4424689   | 12662  | lncRNA                             | -1.48 | 4.57E-04 | 6.72E-03 |
| ENSG00000181143 | MUC16       | 19 | 8848844   | 8981342   | 132498 | protein coding                     | -1.48 | 7.75E-13 | 5.41E-10 |
| ENSG00000226133 | LINC02794   | 1  | 48050659  | 48091736  | 41077  | lncRNA                             | -1.48 | 4.94E-03 | 3.02E-02 |
| ENSG00000137225 | CAPN11      | 6  | 44158811  | 44184401  | 25590  | protein coding                     | -1.48 | 5.58E-05 | 1.68E-03 |
| ENSG00000161850 | KRT82       | 12 | 52393931  | 52406335  | 12404  | protein coding                     | -1.48 | 8.80E-04 | 1.01E-02 |
| ENSG00000148082 | SHC3        | 9  | 89005771  | 89178818  | 173047 | protein coding                     | -1.48 | 2.35E-06 | 1.80E-04 |
| ENSG00000279160 | AC009336.2  | 2  | 176189919 | 176192538 | 2619   | TEC                                | -1.48 | 1.06E-02 | 4.93E-02 |
| ENSG00000261177 | AC135012.1  | 16 | 86081409  | 86089526  | 8117   | lncRNA                             | -1.48 | 2.95E-05 | 1.08E-03 |
| ENSG00000226191 | CLK3P2      | 1  | 247936061 | 247937513 | 1452   | processed pseudogene               | -1.48 | 7.35E-03 | 3.90E-02 |
| ENSG00000172554 | SNTG2       | 2  | 950849    | 1367613   | 416764 | protein coding                     | -1.48 | 8.00E-06 | 4.38E-04 |
| ENSG00000279852 | AC083964.2  | 8  | 486117    | 488512    | 2395   | TEC                                | -1.48 | 3.77E-03 | 2.56E-02 |
| ENSG00000184374 | COLEC10     | 8  | 118995452 | 119108455 | 113003 | protein coding                     | -1.48 | 9.27E-03 | 4.51E-02 |
| ENSG00000073598 | FNDC8       | 17 | 35121615  | 35130732  | 9117   | protein coding                     | -1.48 | 2.05E-03 | 1.73E-02 |
| ENSG00000074410 | CAI2        | 15 | 63321378  | 63381846  | 60468  | protein coding                     | -1.48 | 1.04E-05 | 5.30E-04 |
| ENSG00000187079 | TEAD1       | 11 | 12674421  | 12944737  | 270316 | protein coding                     | -1.48 | 3.80E-06 | 2.62E-04 |
| ENSG00000262313 | AC127496.3  | 17 | 80940418  | 80942033  | 1615   | lncRNA-antisense                   | -1.48 | 2.14E-03 | 1.78E-02 |
| ENSG00000283538 | AC005972.3  | 17 | 62910021  | 62968549  | 58528  | lncRNA                             | -1.48 | 5.50E-04 | 7.61E-03 |
| ENSG00000172379 | ARN2        | 15 | 80404350  | 80597933  | 193583 | protein coding                     | -1.48 | 1.93E-05 | 8.24E-04 |
| ENSG00000179813 | FAM216B     | 13 | 42781550  | 42791549  | 9999   | protein coding                     | -1.48 | 5.75E-03 | 3.32E-02 |
| ENSG00000225526 | MKRN2OS     | 3  | 12514934  | 12561059  | 46125  | protein coding                     | -1.48 | 1.36E-03 | 1.33E-02 |
| ENSG00000257398 | AC126177.3  | 12 | 107809483 | 107864562 | 55079  | lncRNA                             | -1.49 | 3.35E-04 | 5.55E-03 |
| ENSG00000135888 | GPCR5A      | 12 | 12891559  | 12917937  | 26378  | protein coding                     | -1.49 | 3.23E-03 | 2.31E-02 |
| ENSG00000187855 | ASCL4       | 12 | 107774385 | 107776644 | 2259   | protein coding                     | -1.49 | 3.59E-03 | 2.48E-02 |
| ENSG00000151632 | AKR1C2      | 10 | 4987400   | 5018031   | 30631  | protein coding                     | -1.49 | 7.37E-04 | 9.10E-03 |
| ENSG00000268949 | MRPS17P1    | 1  | 44988705  | 44991834  | 3129   | processed pseudogene               | -1.49 | 3.64E-03 | 2.50E-02 |
| ENSG00000179447 | SLC24A3-AS1 | 20 | 19242302  | 19284596  | 42294  | lncRNA-antisense                   | -1.49 | 1.92E-03 | 1.66E-02 |
| ENSG00000213856 | VDAC1P2     | X  | 49632500  | 49633349  | 849    | processed pseudogene               | -1.49 | 1.08E-02 | 4.97E-02 |
| ENSG00000214491 | SEC14L6     | 22 | 30522799  | 30546682  | 23883  | protein coding                     | -1.49 | 2.77E-03 | 2.10E-02 |
| ENSG00000233111 | RAB1C       | 9  | 37636688  | 37637293  | 605    | processed pseudogene               | -1.49 | 1.35E-03 | 2.26E-02 |
| ENSG00000165124 | SVEP1       | 9  | 110365248 | 110579880 | 214632 | protein coding                     | -1.49 | 1.25E-05 | 6.07E-04 |
| ENSG00000108417 | KRT37       | 17 | 41420547  | 41424585  | 4038   | protein coding                     | -1.49 | 1.43E-03 | 1.38E-02 |
| ENSG00000259541 | AP001150.1  | 11 | 120249759 | 120265932 | 16173  | lncRNA-antisense                   | -1.49 | 2.17E-03 | 1.80E-02 |
| ENSG00000130368 | MAS1        | 6  | 159890988 | 159917447 | 26459  | protein coding                     | -1.49 | 4.84E-04 | 6.96E-03 |
| ENSG00000250072 | SH3TC2-DT   | 5  | 149063254 | 149129578 | 66324  | lncRNA                             | -1.49 | 7.53E-03 | 3.95E-02 |
| ENSG00000143536 | CRNN        | 1  | 152409243 | 152414263 | 5020   | protein coding                     | -1.49 | 4.61E-03 | 2.90E-02 |
| ENSG0000007062  | PROM1       | 4  | 15963076  | 16084378  | 121302 | protein coding                     | -1.49 | 1.29E-05 | 6.19E-04 |
| ENSG00000226631 | SLC9A3P3    | 10 | 50025135  | 50027363  | 2228   | processed pseudogene               | -1.49 | 2.43E-03 | 1.92E-02 |
| ENSG00000168418 | KCNGB4      | 16 | 84218667  | 84239750  | 21083  | protein coding                     | -1.49 | 2.07E-05 | 8.57E-04 |
| ENSG00000187537 | POTEG       | 14 | 19402486  | 19434341  | 31855  | protein coding                     | -1.49 | 2.00E-03 | 1.71E-02 |
| ENSG00000170324 | FRMPD2      | 10 | 48153088  | 48274696  | 121608 | protein coding                     | -1.49 | 1.16E-05 | 5.78E-04 |
| ENSG00000250979 | AC022905.1  | 8  | 72202751  | 72251565  | 48814  | unprocessed pseudogene             | -1.49 | 7.95E-04 | 9.53E-03 |
| ENSG00000157111 | TMEM171     | 5  | 73120569  | 73131809  | 11240  | protein coding                     | -1.49 | 4.84E-04 | 6.96E-03 |
| ENSG00000237525 | AC012668.3  | 2  | 215533133 | 215713895 | 180762 | lncRNA                             | -1.49 | 2.32E-03 | 1.87E-02 |
| ENSG00000229976 | AL118523.1  | 20 | 39757202  | 39815097  | 57895  | lncRNA                             | -1.49 | 4.24E-03 | 2.75E-02 |
| ENSG00000214719 | AC005562.1  | 17 | 30576464  | 30672789  | 96325  | lncRNA                             | -1.49 | 2.29E-06 | 2.12E-04 |
| ENSG00000238099 | LINC01625   | 6  | 139435636 | 139474658 | 39022  | lncRNA                             | -1.49 | 5.93E-04 | 7.40E-03 |
| ENSG00000122180 | MYOQ        | 1  | 203083129 | 203086012 | 2883   | protein coding                     | -1.49 | 6.65E-03 | 3.65E-02 |
| ENSG00000286393 | Z97192.4    | 22 | 49662312  | 49664968  | 2656   | lncRNA                             | -1.49 | 1.10E-03 | 1.17E-02 |
| ENSG00000249026 | CTNNA1P1    | 5  | 115389643 | 115392370 | 2727   | processed pseudogene               | -1.49 | 5.24E-03 | 3.13E-02 |
| ENSG00000163072 | NOSTRIN     | 2  | 168786539 | 168865514 | 78975  | protein coding                     | -1.49 | 4.98E-04 | 7.09E-03 |
| ENSG00000254968 | LINC02763   | 11 | 112393118 | 112624567 | 231449 | lncRNA                             | -1.49 | 6.01E-04 | 8.05E-03 |
| ENSG00000251191 | LINC00589   | X  | 29673922  | 29748109  | 74187  | lncRNA                             | -1.49 | 7.22E-03 | 3.85E-02 |
| ENSG00000236751 | LINC01186   | 8  | 46256759  | 46327680  | 70921  | lncRNA                             | -1.49 | 6.44E-03 | 3.57E-02 |
| ENSG00000233821 | ENOX1-AS1   | 13 | 43543918  | 43548056  | 4138   | lncRNA                             | -1.49 | 7.07E-03 | 3.79E-02 |
| ENSG00000166509 | CLEC3A      | 16 | 78022515  | 78066761  | 44246  | protein coding                     | -1.49 | 9.94E-03 | 4.72E-02 |
| ENSG00000134533 | RERG        | 12 | 15107783  | 15348675  | 240892 | protein coding                     | -1.49 | 9.75E-04 | 1.08E-02 |
| ENSG00000287088 | AP001066.1  | 21 | 44530172  | 44533145  | 2973   | lncRNA                             | -1.49 | 4.91E-03 | 3.01E-02 |
| ENSG00000227098 | AC073636.1  | 2  | 176830839 | 176849428 | 18589  | lncRNA                             | -1.49 | 6.02E-03 | 3.42E-02 |
| ENSG00000287786 | AC113615.2  | 4  | 6178186   | 6184925   | 6739   | lncRNA                             | -1.49 | 5.54E-03 | 3.24E-02 |
| ENSG00000176601 | MAP3K19     | 2  | 134964485 | 135047468 | 82983  | protein coding                     | -1.49 | 3.49E-04 | 5.67E-03 |
| ENSG00000173702 | MUC13       | 3  | 124905442 | 124953819 | 48377  | protein coding                     | -1.49 | 8.02E-04 | 9.58E-03 |

|                 |              |    |           |           |        |                                    |       |          |          |
|-----------------|--------------|----|-----------|-----------|--------|------------------------------------|-------|----------|----------|
| ENSG00000223843 | EFCAB6-AS1   | 22 | 43516107  | 43560063  | 43956  | lncRNA-antisense                   | -1.49 | 6.27E-04 | 8.29E-03 |
| ENSG00000260555 | AC092681.2   | 7  | 150000752 | 150005124 | 4372   | lncRNA                             | -1.50 | 2.74E-03 | 2.09E-02 |
| ENSG00000287133 | AC007279.1   | 2  | 201643398 | 201645990 | 2592   | lncRNA                             | -1.50 | 7.53E-03 | 3.95E-02 |
| ENSG00000182366 | FAM87A       | 8  | 375931    | 384079    | 8148   | lncRNA                             | -1.50 | 1.80E-04 | 3.67E-03 |
| ENSG00000215246 | AC116351.1   | 5  | 987180    | 997308    | 10128  | lncRNA-antisense                   | -1.50 | 1.56E-03 | 1.45E-02 |
| ENSG00000279302 | AC013643.3   | 8  | 27701194  | 27703789  | 2595   | TEC                                | -1.50 | 2.63E-03 | 2.03E-02 |
| ENSG00000261190 | C16orf97     | 16 | 52005487  | 52078474  | 72987  | lncRNA                             | -1.50 | 8.69E-03 | 4.33E-02 |
| ENSG00000236109 | AC013402.3   | 2  | 104583138 | 104621767 | 38629  | lncRNA                             | -1.50 | 8.90E-03 | 4.39E-02 |
| ENSG00000280217 | AC126564.1   | 12 | 131235511 | 131237523 | 2012   | TEC                                | -1.50 | 1.89E-03 | 1.64E-02 |
| ENSG00000213509 | PPIAP16      | 3  | 57941818  | 57942304  | 486    | processed pseudogene               | -1.50 | 4.45E-03 | 2.84E-02 |
| ENSG00000263878 | DLGAP1-AS4   | 18 | 3962353   | 4024150   | 61797  | lncRNA-antisense                   | -1.50 | 3.59E-03 | 2.48E-02 |
| ENSG00000249717 | PARM1-AS1    | 4  | 74955974  | 74970362  | 14388  | lncRNA-antisense                   | -1.50 | 7.07E-03 | 3.79E-02 |
| ENSG00000273024 | INTS4P2      | 7  | 65647823  | 65718688  | 70865  | transcribed unprocessed pseudogene | -1.50 | 4.63E-03 | 2.91E-02 |
| ENSG00000185985 | SLITRK2      | X  | 145817829 | 145829856 | 12027  | protein coding                     | -1.50 | 7.31E-05 | 2.04E-03 |
| ENSG00000282021 | AC100810.3   | 8  | 1758208   | 1760447   | 2239   | lncRNA                             | -1.50 | 8.40E-04 | 9.85E-03 |
| ENSG00000288537 | AL162391.2   | 9  | 126270121 | 126275918 | 5797   | lncRNA                             | -1.50 | 7.17E-03 | 3.83E-02 |
| ENSG00000175318 | GRAMD2A      | 15 | 72159806  | 72197787  | 37981  | protein coding                     | -1.50 | 6.90E-06 | 3.98E-04 |
| ENSG00000235023 | AP001626.1   | 21 | 42648271  | 42651244  | 2973   | lncRNA-antisense                   | -1.50 | 6.88E-04 | 8.75E-03 |
| ENSG00000286618 | AC131944.1   | 4  | 87974385  | 88008477  | 34092  | lncRNA                             | -1.50 | 5.37E-03 | 3.17E-02 |
| ENSG00000287044 | AL139106.1   | 6  | 108441880 | 108558286 | 116406 | lncRNA                             | -1.50 | 3.42E-03 | 2.40E-02 |
| ENSG00000188124 | OR2A2        | 11 | 6756626   | 6771976   | 6350   | protein coding                     | -1.50 | 3.41E-03 | 2.40E-02 |
| ENSG00000227790 | SPECC1P1     | 17 | 15829369  | 15908632  | 79263  | transcribed unprocessed pseudogene | -1.50 | 1.01E-02 | 4.77E-02 |
| ENSG00000286505 | AC087468.2   | 15 | 84913144  | 84915705  | 2561   | lncRNA                             | -1.50 | 5.03E-03 | 3.05E-02 |
| ENSG00000234279 | LINC01937    | 2  | 238554541 | 238740849 | 186308 | lncRNA                             | -1.50 | 1.02E-02 | 4.79E-02 |
| ENSG00000171560 | FGA          | 4  | 154583128 | 154590745 | 7617   | protein coding                     | -1.50 | 4.43E-03 | 2.83E-02 |
| ENSG00000186867 | QRFRP        | 4  | 121328642 | 121381059 | 52417  | protein coding                     | -1.50 | 1.97E-03 | 1.69E-02 |
| ENSG00000261634 | AC026992.2   | 15 | 69278328  | 69298795  | 20467  | lncRNA-antisense                   | -1.50 | 1.23E-03 | 1.25E-02 |
| ENSG00000137819 | PAQR5        | 15 | 69298912  | 69407780  | 108868 | protein coding                     | -1.50 | 4.09E-04 | 6.29E-03 |
| ENSG00000235979 | AC004448.2   | 17 | 19417769  | 19492991  | 75222  | lncRNA                             | -1.50 | 6.63E-04 | 8.56E-03 |
| ENSG00000237728 | CAMTA1-AS2   | 1  | 7382487   | 7389754   | 7267   | lncRNA-antisense                   | -1.50 | 6.66E-03 | 3.65E-02 |
| ENSG00000178125 | PPP1R42      | 8  | 66964099  | 67056604  | 92505  | protein coding                     | -1.50 | 8.45E-03 | 4.26E-02 |
| ENSG00000202354 | RNY3         | 7  | 148983755 | 148983856 | 101    | misc RNA                           | -1.50 | 6.88E-04 | 8.75E-03 |
| ENSG00000259854 | AP005233.1   | 11 | 69414307  | 69416832  | 2525   | lncRNA                             | -1.50 | 3.92E-04 | 6.12E-03 |
| ENSG00000267026 | AL136084.1   | 9  | 98847172  | 98872415  | 25243  | lncRNA-antisense                   | -1.50 | 2.91E-04 | 5.01E-03 |
| ENSG00000164669 | INTS4P1      | 7  | 65141032  | 65234216  | 93184  | transcribed unprocessed pseudogene | -1.50 | 3.59E-05 | 1.24E-03 |
| ENSG00000102048 | ASB9         | X  | 15235288  | 15270467  | 35179  | protein coding                     | -1.50 | 1.30E-03 | 1.29E-02 |
| ENSG00000168631 | MUC13        | 6  | 30934523  | 30954221  | 19698  | protein coding                     | -1.50 | 4.69E-03 | 2.93E-02 |
| ENSG00000227868 | TEX46        | 1  | 23010834  | 23015852  | 5018   | protein coding                     | -1.50 | 8.11E-03 | 4.15E-02 |
| ENSG00000280309 | AC023300.3   | 15 | 74299503  | 74304527  | 5024   | TEC                                | -1.50 | 1.06E-03 | 1.15E-02 |
| ENSG00000145692 | BHMT         | 5  | 79111809  | 79132288  | 20479  | protein coding                     | -1.50 | 2.70E-03 | 2.06E-02 |
| ENSG00000272321 | AP003355.2   | 8  | 98436669  | 98439290  | 2621   | lncRNA-antisense                   | -1.50 | 2.07E-03 | 1.74E-02 |
| ENSG00000237343 | AC246785.3   | 1  | 144418113 | 144419192 | 1079   | lncRNA                             | -1.50 | 4.85E-03 | 2.99E-02 |
| ENSG00000280182 | AC131888.1   | 16 | 81261924  | 81264091  | 2167   | TEC                                | -1.50 | 5.34E-03 | 3.16E-02 |
| ENSG00000137821 | LRRCA9       | 15 | 70853239  | 71053658  | 200419 | protein coding                     | -1.50 | 2.43E-05 | 9.53E-04 |
| ENSG00000184809 | B3GAL15-AS1  | 21 | 39597147  | 39612910  | 15763  | lncRNA-antisense                   | -1.50 | 1.16E-04 | 2.78E-03 |
| ENSG00000226835 | ARHGAP29-AS1 | 1  | 94247819  | 94411036  | 163217 | lncRNA                             | -1.51 | 5.76E-04 | 7.83E-03 |
| ENSG00000236501 | AC074286.1   | 2  | 176989418 | 177164656 | 175238 | lncRNA                             | -1.51 | 4.88E-04 | 7.00E-03 |
| ENSG00000204933 | CD177P1      | 19 | 43372742  | 43379123  | 6381   | unprocessed pseudogene             | -1.51 | 4.35E-03 | 2.79E-02 |
| ENSG00000159398 | CESSA        | 16 | 55846154  | 55956031  | 109877 | protein coding                     | -1.51 | 5.57E-04 | 7.67E-03 |
| ENSG00000236230 | AL356108.1   | 1  | 222088806 | 222389103 | 300297 | lncRNA                             | -1.51 | 9.60E-03 | 4.61E-02 |
| ENSG00000229212 | AC044860.1   | 15 | 85180200  | 85234795  | 54595  | transcribed unprocessed pseudogene | -1.51 | 1.09E-02 | 5.00E-02 |
| ENSG00000234693 | RIPOR3-AS1   | 20 | 50645471  | 50662275  | 16804  | lncRNA-antisense                   | -1.51 | 7.33E-03 | 3.89E-02 |
| ENSG00000224743 | TEX26-AS1    | 13 | 30881933  | 30933846  | 51913  | lncRNA-antisense                   | -1.51 | 1.43E-03 | 1.38E-02 |
| ENSG00000156076 | WIF1         | 12 | 65050626  | 65121305  | 70679  | protein coding                     | -1.51 | 1.26E-03 | 1.27E-02 |
| ENSG00000288253 | AC010332.3   | 19 | 52453580  | 52458936  | 5256   | lncRNA                             | -1.51 | 3.79E-06 | 2.52E-04 |
| ENSG00000280073 | AL157996.1   | 14 | 69357010  | 69359308  | 2298   | TEC                                | -1.51 | 2.93E-03 | 2.17E-02 |
| ENSG00000188039 | NWD1         | 19 | 16719847  | 16817963  | 98116  | protein coding                     | -1.51 | 1.69E-05 | 7.47E-04 |
| ENSG00000286032 | FP236383.6   | 21 | 8465254   | 8465586   | 332    | TEC                                | -1.51 | 1.89E-03 | 1.64E-02 |
| ENSG00000279217 | Z95114.1     | 22 | 36071000  | 36085573  | 14573  | lncRNA                             | -1.51 | 2.33E-04 | 4.33E-03 |
| ENSG00000260392 | AC090518.1   | 15 | 56542952  | 56629592  | 86640  | lncRNA                             | -1.51 | 1.50E-03 | 1.42E-02 |
| ENSG00000242611 | AC093627.6   | 7  | 77038     | 81178     | 4140   | lncRNA                             | -1.51 | 1.14E-03 | 1.20E-02 |
| ENSG00000249743 | AC116345.1   | 5  | 73213930  | 73295258  | 81328  | lncRNA                             | -1.51 | 9.26E-04 | 1.05E-02 |
| ENSG00000254094 | AC078852.2   | 4  | 1356581   | 1358075   | 1494   | lncRNA-sense intronic              | -1.51 | 3.49E-03 | 2.43E-02 |
| ENSG00000273396 | LINC01396    | 4  | 4844188   | 4850827   | 6639   | lncRNA                             | -1.51 | 1.75E-03 | 1.56E-02 |
| ENSG00000287029 | AL162713.2   | 13 | 43786781  | 43814798  | 28017  | lncRNA                             | -1.51 | 2.26E-03 | 1.84E-02 |
| ENSG00000171872 | KLF17        | 1  | 44118821  | 44135140  | 16319  | protein coding                     | -1.51 | 1.92E-04 | 3.82E-03 |
| ENSG00000229037 | MRPL32P2     | X  | 53807776  | 53808623  | 847    | processed pseudogene               | -1.51 | 4.69E-03 | 2.93E-02 |
| ENSG00000199622 | RN7SKP20     | X  | 13596236  | 13596548  | 312    | misc RNA                           | -1.51 | 4.87E-03 | 2.99E-02 |
| ENSG00000253554 | LINC01414    | 8  | 63687179  | 64369176  | 681997 | lncRNA                             | -1.51 | 3.24E-03 | 2.32E-02 |
| ENSG00000219073 | CEL3A3B      | 1  | 21977022  | 21998642  | 21620  | protein coding                     | -1.51 | 8.30E-03 | 4.21E-02 |
| ENSG00000249695 | AC028369.1   | 12 | 137411    | 149169    | 11758  | lncRNA-antisense                   | -1.51 | 1.82E-04 | 3.70E-03 |
| ENSG00000273644 | AC215522.1   | 7  | 37032     | 37477     | 445    | processed pseudogene               | -1.51 | 6.19E-03 | 3.48E-02 |
| ENSG00000257639 | AC005632.2   | 16 | 21532945  | 21550373  | 17428  | unprocessed pseudogene             | -1.51 | 3.09E-03 | 2.25E-02 |
| ENSG00000260848 | AC092114.1   | 16 | 73543927  | 73569309  | 25382  | lncRNA                             | -1.51 | 4.75E-03 | 2.95E-02 |
| ENSG00000275830 | AL390755.1   | 13 | 109988097 | 110129136 | 141039 | lncRNA                             | -1.51 | 8.38E-04 | 9.84E-03 |
| ENSG00000130649 | CYP2E1       | 10 | 133520406 | 133561220 | 40814  | protein coding                     | -1.51 | 3.30E-08 | 6.54E-06 |
| ENSG00000227115 | LINC01630    | 18 | 51346249  | 51643939  | 297690 | lncRNA                             | -1.51 | 3.32E-06 | 2.33E-04 |
| ENSG00000286990 | AC016026.2   | 22 | 17800722  | 17802035  | 1313   | lncRNA                             | -1.52 | 6.22E-03 | 3.49E-02 |
| ENSG00000124391 | IL17C        | 16 | 88638572  | 88640468  | 1896   | protein coding                     | -1.52 | 9.94E-04 | 1.10E-02 |
| ENSG00000186513 | OR9Q2        | 11 | 58189070  | 58194053  | 4983   | protein coding                     | -1.52 | 2.29E-03 | 1.86E-02 |
| ENSG00000281450 | PANDAR       | 6  | 36673621  | 36675126  | 1505   | lncRNA                             | -1.52 | 9.76E-03 | 4.67E-02 |
| ENSG00000101440 | ASIP         | 20 | 34194569  | 34269344  | 74775  | protein coding                     | -1.52 | 4.76E-03 | 2.95E-02 |
| ENSG00000284601 | AL590440.2   | 1  | 54974900  | 54980464  | 5564   | lncRNA-bidirectional promoter      | -1.52 | 3.98E-03 | 2.66E-02 |
| ENSG00000104760 | FGL1         | 8  | 17864380  | 17910365  | 45985  | protein coding                     | -1.52 | 1.99E-03 | 1.70E-02 |
| ENSG00000170848 | PSG6         | 19 | 42902086  | 42919563  | 17477  | protein coding                     | -1.52 | 3.44E-04 | 5.62E-03 |
| ENSG00000109255 | NMU          | 4  | 55595229  | 55636698  | 41469  | protein coding                     | -1.52 | 5.44E-03 | 3.20E-02 |
| ENSG00000259256 | LINC01895    | 18 | 3347696   | 3383532   | 35836  | lncRNA                             | -1.52 | 9.29E-03 | 4.51E-02 |
| ENSG00000268066 | FMR1-AS1     | X  | 147909431 | 147911817 | 2386   | lncRNA                             | -1.52 | 2.30E-03 | 1.86E-02 |
| ENSG00000204695 | OR14J1       | 6  | 29301701  | 29313017  | 11316  | protein coding                     | -1.52 | 1.27E-03 | 1.28E-02 |
| ENSG00000173673 | HES3         | 1  | 6244179   | 6245578   | 1399   | protein coding                     | -1.52 | 4.00E-03 | 2.66E-02 |



|                 |             |    |           |           |        |                                    |       |          |          |
|-----------------|-------------|----|-----------|-----------|--------|------------------------------------|-------|----------|----------|
| ENSG00000261742 | LINC00922   | 16 | 65284496  | 65576345  | 291849 | lncRNA                             | -1.52 | 4.61E-03 | 2.90E-02 |
| ENSG00000283608 | AL031056.2  | 6  | 149246095 | 149255415 | 9320   | lncRNA                             | -1.52 | 5.69E-03 | 3.30E-02 |
| ENSG00000162753 | SLC9C2      | 1  | 173500460 | 173603072 | 102812 | protein coding                     | -1.52 | 1.27E-04 | 2.93E-03 |
| ENSG00000232451 | AC018467.1  | 2  | 23018125  | 23199056  | 180931 | lncRNA                             | -1.52 | 2.93E-03 | 2.17E-02 |
| ENSG00000286733 | LINC02348   | 15 | 101602786 | 101614531 | 11745  | lncRNA                             | -1.52 | 8.50E-06 | 4.54E-04 |
| ENSG00000286414 | AL390791.1  | 9  | 88735041  | 88803716  | 68675  | lncRNA                             | -1.52 | 6.58E-03 | 3.62E-02 |
| ENSG00000175329 | ISX         | 22 | 35066136  | 35087387  | 21251  | protein coding                     | -1.52 | 3.80E-03 | 2.57E-02 |
| ENSG00000233399 | LINC01648   | 1  | 30013952  | 30037612  | 23660  | lncRNA                             | -1.52 | 5.72E-03 | 3.31E-02 |
| ENSG00000259447 | AC013652.2  | 15 | 39300418  | 39310782  | 10364  | lncRNA                             | -1.52 | 9.95E-03 | 4.73E-02 |
| ENSG00000287707 | AC115284.4  | 3  | 51927071  | 51932483  | 5162   | lncRNA                             | -1.52 | 2.02E-04 | 3.94E-03 |
| ENSG00000243818 | AC021074.3  | 3  | 142912116 | 142942537 | 30421  | lncRNA-antisense                   | -1.52 | 3.18E-03 | 2.29E-02 |
| ENSG00000243710 | CFAP57      | 1  | 43172330  | 43254358  | 82028  | protein coding                     | -1.52 | 1.31E-05 | 6.26E-04 |
| ENSG00000151812 | SLC35F4     | 14 | 57563920  | 57982194  | 418274 | protein coding                     | -1.52 | 8.97E-04 | 1.03E-02 |
| ENSG00000265222 | AC079336.2  | 17 | 32509954  | 32523424  | 13470  | lncRNA-sense intronic              | -1.52 | 8.89E-03 | 4.39E-02 |
| ENSG00000243193 | PRKAR2B-AS1 | 7  | 107066591 | 107133733 | 67142  | lncRNA                             | -1.52 | 4.31E-03 | 2.78E-02 |
| ENSG00000232762 | AL355483.2  | 1  | 53304536  | 53307462  | 2926   | lncRNA-antisense                   | -1.52 | 4.43E-03 | 2.83E-02 |
| ENSG00000175311 | ANKS4B      | 16 | 21233699  | 21253850  | 20151  | protein coding                     | -1.52 | 7.77E-04 | 9.41E-03 |
| ENSG00000285080 | AC068724.3  | 15 | 43106225  | 43185779  | 79554  | lncRNA-antisense                   | -1.52 | 3.44E-03 | 2.41E-02 |
| ENSG00000157884 | CIB4        | 2  | 26581205  | 26641366  | 60161  | protein coding                     | -1.52 | 9.98E-03 | 4.74E-02 |
| ENSG00000286722 | AC009244.1  | 7  | 129366827 | 129374486 | 7659   | lncRNA                             | -1.52 | 5.21E-03 | 3.13E-02 |
| ENSG00000253771 | TPTE2P1     | 13 | 24924677  | 24968847  | 43810  | transcribed unprocessed pseudogene | -1.52 | 9.89E-04 | 1.09E-02 |
| ENSG00000286326 | Z95115.2    | 22 | 26597028  | 26611453  | 14425  | lncRNA                             | -1.52 | 2.82E-05 | 1.05E-03 |
| ENSG00000230508 | RPL19P21    | X  | 150993501 | 150994091 | 590    | processed pseudogene               | -1.52 | 9.26E-04 | 1.05E-02 |
| ENSG00000224318 | CHL1-AS2    | 3  | 109707    | 197341    | 87634  | lncRNA                             | -1.52 | 4.02E-03 | 2.67E-02 |
| ENSG00000176654 | NANOGP1     | 12 | 7890801   | 79001140  | 9339   | transcribed unprocessed pseudogene | -1.52 | 6.96E-03 | 3.76E-02 |
| ENSG00000268416 | AC010329.1  | 19 | 20746923  | 20755250  | 8327   | lncRNA                             | -1.52 | 1.44E-03 | 1.38E-02 |
| ENSG00000205212 | CCDC14ANL   | 17 | 20836447  | 20896140  | 59693  | transcribed unprocessed pseudogene | -1.52 | 6.00E-04 | 8.05E-03 |
| ENSG00000180667 | YOD1        | 1  | 207043849 | 207052980 | 9131   | protein coding                     | -1.52 | 1.74E-13 | 1.57E-10 |
| ENSG00000230461 | PROX1-AS1   | 1  | 213817751 | 213988508 | 170757 | lncRNA                             | -1.52 | 6.00E-05 | 1.75E-03 |
| ENSG00000239218 | RPS20P2     | 8  | 38434347  | 38435664  | 1317   | transcribed processed pseudogene   | -1.52 | 7.53E-03 | 3.95E-02 |
| ENSG00000255216 | AP001360.1  | 11 | 120008044 | 120013620 | 5576   | lncRNA                             | -1.52 | 2.99E-04 | 5.12E-03 |
| ENSG00000227764 | LINC01693   | 1  | 211639440 | 211654627 | 15187  | lncRNA                             | -1.52 | 3.79E-03 | 2.57E-02 |
| ENSG00000228127 | LINC01649   | 1  | 115904855 | 115931616 | 26761  | lncRNA                             | -1.52 | 8.02E-03 | 4.12E-02 |
| ENSG00000205143 | ARID3C      | 9  | 34621379  | 34628086  | 6707   | protein coding                     | -1.52 | 1.11E-03 | 1.18E-02 |
| ENSG00000086717 | PPEF1       | X  | 18675909  | 18827921  | 152012 | protein coding                     | -1.52 | 4.50E-05 | 1.45E-03 |
| ENSG00000278891 | AC105101.1  | 18 | 48147634  | 48150864  | 3230   | TEC                                | -1.52 | 2.01E-03 | 1.71E-02 |
| ENSG00000260788 | AC009063.2  | 16 | 83720402  | 83772974  | 52572  | lncRNA-antisense                   | -1.52 | 1.10E-04 | 2.68E-03 |
| ENSG00000064655 | EY2A        | 20 | 46894624  | 47188844  | 294220 | protein coding                     | -1.52 | 5.58E-05 | 1.68E-03 |
| ENSG00000186377 | CYP4X1      | 1  | 47023669  | 47050751  | 27082  | protein coding                     | -1.53 | 5.60E-04 | 7.69E-03 |
| ENSG00000285769 | AP003100.2  | 11 | 112637342 | 112751131 | 113789 | lncRNA                             | -1.53 | 2.36E-04 | 4.37E-03 |
| ENSG00000170423 | KRT78       | 12 | 52837904  | 52849092  | 11288  | protein coding                     | -1.53 | 1.47E-03 | 1.40E-02 |
| ENSG00000147255 | IGSF1       | X  | 131273506 | 131578899 | 305393 | protein coding                     | -1.53 | 4.23E-05 | 1.38E-03 |
| ENSG00000223806 | LINC00114   | 21 | 38733890  | 38747460  | 13570  | lncRNA                             | -1.53 | 4.03E-03 | 2.67E-02 |
| ENSG00000268388 | FENDDR      | 16 | 86474529  | 86509099  | 34570  | lncRNA                             | -1.53 | 1.21E-05 | 5.95E-04 |
| ENSG00000286785 | LINC01622   | 6  | 958323    | 1101400   | 143077 | lncRNA                             | -1.53 | 5.45E-04 | 7.57E-03 |
| ENSG00000261762 | AC027228.2  | 15 | 78589123  | 78591276  | 2153   | lncRNA-antisense                   | -1.53 | 1.00E-02 | 4.75E-02 |
| ENSG00000264448 | MIR378D2HG  | 8  | 93915734  | 93916682  | 948    | lncRNA                             | -1.53 | 9.58E-03 | 4.61E-02 |
| ENSG00000121101 | TEX14       | 17 | 58556678  | 58692055  | 135377 | protein coding                     | -1.53 | 1.83E-06 | 1.51E-04 |
| ENSG00000183643 | C15orf32    | 15 | 92471654  | 92501117  | 29463  | lncRNA                             | -1.53 | 1.09E-02 | 5.00E-02 |
| ENSG00000101448 | EPPIN       | 20 | 45540626  | 45547752  | 7126   | protein coding                     | -1.53 | 4.16E-03 | 2.72E-02 |
| ENSG00000287242 | AC073593.2  | 12 | 124786783 | 124808790 | 22007  | lncRNA                             | -1.53 | 8.63E-03 | 4.31E-02 |
| ENSG00000224609 | HSD5D       | 1  | 59131932  | 59296491  | 164559 | lncRNA                             | -1.53 | 2.70E-06 | 2.00E-04 |
| ENSG00000175832 | ETV4        | 17 | 43527844  | 43579620  | 51776  | protein coding                     | -1.53 | 1.21E-04 | 2.84E-03 |
| ENSG00000259720 | AC009562.1  | 15 | 30992171  | 31042302  | 50131  | lncRNA-antisense                   | -1.53 | 8.66E-03 | 4.32E-02 |
| ENSG00000153012 | LIG2        | 4  | 24998847  | 25030946  | 32099  | protein coding                     | -1.53 | 3.36E-04 | 5.56E-03 |
| ENSG00000226673 | LINC01108   | 6  | 14280127  | 14285454  | 5327   | lncRNA                             | -1.53 | 1.73E-03 | 1.54E-02 |
| ENSG00000280277 | AL079342.3  | 6  | 88964527  | 88966587  | 2080   | TEC                                | -1.53 | 5.74E-03 | 3.32E-02 |
| ENSG00000287354 | AL034351.4  | 1  | 210362861 | 210366948 | 4087   | lncRNA                             | -1.53 | 7.07E-03 | 3.79E-02 |
| ENSG00000185467 | KPNA7       | 7  | 99173574  | 99207506  | 33932  | protein coding                     | -1.53 | 3.53E-03 | 2.45E-02 |
| ENSG00000144290 | SLCA4A      | 2  | 161424332 | 161985282 | 509590 | protein coding                     | -1.53 | 6.69E-06 | 3.89E-04 |
| ENSG00000279220 | PRP1-AS     | 2  | 206203543 | 206265326 | 61783  | lncRNA                             | -1.53 | 6.34E-03 | 3.53E-02 |
| ENSG00000269102 | AC010320.3  | 19 | 52284780  | 52297920  | 13140  | lncRNA-antisense                   | -1.53 | 1.06E-02 | 4.91E-02 |
| ENSG00000130957 | FBP2        | 9  | 94558720  | 94593824  | 35104  | protein coding                     | -1.53 | 5.21E-03 | 3.13E-02 |
| ENSG00000279460 | AC112243.1  | 4  | 184984277 | 184988127 | 3850   | TEC                                | -1.53 | 4.78E-03 | 2.96E-02 |
| ENSG00000172146 | OR1A1       | 17 | 3207539   | 3218896   | 11357  | protein coding                     | -1.53 | 1.52E-03 | 1.43E-02 |
| ENSG00000177462 | OR2T8       | 1  | 247920252 | 247921956 | 1704   | protein coding                     | -1.53 | 7.40E-03 | 3.91E-02 |
| ENSG00000251455 | AC092611.1  | 4  | 151674483 | 151677893 | 3410   | lncRNA-antisense                   | -1.53 | 1.27E-03 | 1.28E-02 |
| ENSG00000280061 | AC011504.1  | 19 | 30553956  | 30558058  | 4102   | TEC                                | -1.53 | 2.18E-03 | 1.81E-02 |
| ENSG00000225057 | AC012485.1  | 2  | 238231684 | 238255633 | 23949  | lncRNA                             | -1.53 | 1.27E-03 | 1.28E-02 |
| ENSG00000233048 | LINC01722   | 20 | 12865202  | 12952519  | 87317  | lncRNA                             | -1.53 | 2.75E-03 | 2.09E-02 |
| ENSG00000257884 | AL512310.7  | 14 | 19677837  | 19680104  | 2267   | transcribed processed pseudogene   | -1.53 | 2.02E-04 | 3.94E-03 |
| ENSG00000174990 | CASA        | 16 | 87881546  | 87936580  | 55034  | protein coding                     | -1.53 | 3.54E-04 | 5.74E-03 |
| ENSG00000284837 | AC007846.1  | 17 | 5772234   | 5930696   | 158462 | lncRNA                             | -1.53 | 7.43E-03 | 3.92E-02 |
| ENSG00000236908 | LINC02827   | 12 | 3318718   | 3325343   | 6625   | lncRNA                             | -1.53 | 4.23E-03 | 2.75E-02 |
| ENSG00000238276 | AL354863.1  | 10 | 118241468 | 118267710 | 26242  | lncRNA                             | -1.53 | 6.16E-04 | 8.18E-03 |
| ENSG00000120952 | PRAMEF2     | 1  | 12857086  | 12861909  | 4823   | protein coding                     | -1.53 | 5.06E-03 | 3.07E-02 |
| ENSG00000203688 | LINC02487   | 6  | 167679626 | 167696290 | 16664  | lncRNA                             | -1.53 | 1.42E-03 | 1.37E-02 |
| ENSG00000257771 | LINC02395   | 12 | 49900311  | 49932784  | 32453  | lncRNA                             | -1.54 | 8.37E-05 | 2.26E-03 |
| ENSG00000150175 | FRMPD2B     | 10 | 46870858  | 46894562  | 23704  | unprocessed pseudogene             | -1.54 | 7.29E-03 | 3.87E-02 |
| ENSG00000163581 | SLC2A2      | 3  | 170996347 | 171026743 | 30396  | protein coding                     | -1.54 | 4.45E-03 | 2.84E-02 |
| ENSG00000287003 | AC008674.1  | 5  | 173757562 | 173773164 | 15602  | lncRNA                             | -1.54 | 5.63E-03 | 3.27E-02 |
| ENSG00000285269 | AL160269.1  | 9  | 96235331  | 96352058  | 116727 | protein coding                     | -1.54 | 1.41E-03 | 1.37E-02 |
| ENSG00000287756 | AL031293.1  | 1  | 14774469  | 14777727  | 3258   | lncRNA                             | -1.54 | 6.13E-03 | 3.46E-02 |
| ENSG00000236130 | PTCSC2      | 9  | 97699625  | 97853080  | 153455 | lncRNA                             | -1.54 | 3.62E-04 | 5.81E-03 |
| ENSG00000196132 | MYT1        | 20 | 64102394  | 64242253  | 139859 | protein coding                     | -1.54 | 1.79E-05 | 7.85E-04 |
| ENSG00000259925 | AC130456.2  | 16 | 19343647  | 19401693  | 58046  | lncRNA                             | -1.54 | 6.16E-03 | 3.47E-02 |
| ENSG00000167858 | TEK1        | 17 | 6789133   | 6831761   | 42628  | protein coding                     | -1.54 | 7.32E-04 | 9.06E-03 |
| ENSG00000172324 | OR5A2       | 11 | 59416969  | 59426412  | 9443   | protein coding                     | -1.54 | 2.34E-03 | 1.88E-02 |
| ENSG00000145283 | SLC10A6     | 4  | 86823468  | 86849384  | 25916  | protein coding                     | -1.54 | 4.85E-03 | 2.99E-02 |
| ENSG00000188869 | TMC3        | 15 | 81331088  | 81374213  | 43125  | protein coding                     | -1.54 | 9.18E-05 | 2.39E-03 |

|                 |             |    |           |           |         |                                    |       |          |          |
|-----------------|-------------|----|-----------|-----------|---------|------------------------------------|-------|----------|----------|
| ENSG00000235790 | PEF1-AS1    | 1  | 31644049  | 31660162  | 16113   | lncRNA-antisense                   | -1.54 | 1.55E-05 | 6.99E-04 |
| ENSG00000267440 | LINC02594   | 17 | 43679341  | 43706709  | 27368   | lncRNA                             | -1.54 | 6.66E-03 | 3.65E-02 |
| ENSG00000231009 | CUBN1P1     | 10 | 42694371  | 42714575  | 20204   | unprocessed pseudogene             | -1.54 | 9.66E-03 | 4.63E-02 |
| ENSG00000255428 | AP002008.3  | 11 | 111414242 | 111418186 | 3944    | lncRNA-sense intronic              | -1.54 | 5.28E-03 | 3.15E-02 |
| ENSG00000249550 | LINC01234   | 12 | 113583886 | 113773726 | 189840  | lncRNA                             | -1.54 | 4.21E-05 | 1.38E-03 |
| ENSG00000204296 | TSPB1       | 6  | 32288526  | 32371912  | 83386   | protein coding                     | -1.54 | 2.05E-03 | 1.73E-02 |
| ENSG00000233542 | AL391845.2  | 1  | 2013213   | 2015639   | 2426    | lncRNA-antisense                   | -1.54 | 7.85E-04 | 9.47E-03 |
| ENSG00000174502 | SLC26A9     | 1  | 205913048 | 205943460 | 30412   | protein coding                     | -1.54 | 9.67E-05 | 2.47E-03 |
| ENSG00000287055 | AL359813.1  | 6  | 43370026  | 43425283  | 55257   | lncRNA                             | -1.54 | 4.28E-03 | 2.77E-02 |
| ENSG00000284430 | AC020912.1  | 19 | 31100304  | 31147981  | 47677   | lncRNA                             | -1.54 | 2.09E-04 | 4.02E-03 |
| ENSG00000138068 | SULT6B1     | 2  | 37167820  | 37196598  | 28778   | protein coding                     | -1.54 | 4.70E-03 | 2.93E-02 |
| ENSG00000272702 | AC010913.1  | 2  | 73113018  | 73115907  | 2889    | lncRNA                             | -1.54 | 8.97E-03 | 4.41E-02 |
| ENSG00000123560 | PLP1        | X  | 103773718 | 103792619 | 18901   | protein coding                     | -1.54 | 1.16E-03 | 1.21E-02 |
| ENSG00000272372 | AC009102.2  | 16 | 56351886  | 56353524  | 1638    | lncRNA-antisense                   | -1.54 | 1.15E-03 | 1.20E-02 |
| ENSG00000225249 | LINC00378   | 13 | 60618991  | 61176758  | 557767  | lncRNA                             | -1.54 | 1.68E-03 | 1.52E-02 |
| ENSG00000287792 | AC140118.2  | 12 | 131350844 | 131371721 | 20877   | lncRNA                             | -1.54 | 4.17E-04 | 6.35E-03 |
| ENSG00000241635 | UGT1A1      | 2  | 233760270 | 233773300 | 13030   | protein coding                     | -1.54 | 4.15E-03 | 2.72E-02 |
| ENSG00000170961 | HAS2        | 8  | 121612116 | 121641440 | 29324   | protein coding                     | -1.54 | 3.10E-03 | 2.25E-02 |
| ENSG00000279796 | AL133384.2  | 10 | 114424445 | 114427398 | 2953    | TEC                                | -1.54 | 1.00E-03 | 1.11E-02 |
| ENSG00000261260 | AC106736.1  | 16 | 71288775  | 71309963  | 21188   | lncRNA                             | -1.54 | 2.73E-03 | 2.08E-02 |
| ENSG00000145321 | GC          | 4  | 71741696  | 71804041  | 62345   | protein coding                     | -1.54 | 5.70E-03 | 3.30E-02 |
| ENSG00000237775 | DDR1-DT     | 6  | 30866982  | 30875918  | 8936    | lncRNA-antisense                   | -1.54 | 5.32E-03 | 3.16E-02 |
| ENSG00000132321 | IQCA1       | 2  | 236324147 | 236507535 | 183388  | protein coding                     | -1.54 | 2.88E-05 | 1.07E-03 |
| ENSG00000283554 | LINC02341   | 13 | 42339188  | 42485956  | 146768  | lncRNA                             | -1.54 | 3.64E-03 | 2.50E-02 |
| ENSG00000233503 | HNRNPLP1    | 6  | 7481094   | 7482594   | 1500    | processed pseudogene               | -1.54 | 3.82E-03 | 2.58E-02 |
| ENSG00000287278 | AL353800.2  | 10 | 33384891  | 33390935  | 6044    | lncRNA                             | -1.54 | 7.78E-03 | 4.04E-02 |
| ENSG00000198580 | AC073343.1  | 7  | 6673494   | 6676366   | 2872    | unprocessed pseudogene             | -1.54 | 9.35E-03 | 4.54E-02 |
| ENSG00000188910 | GJB3        | 3  | 34781214  | 34786369  | 5155    | protein coding                     | -1.54 | 5.71E-04 | 7.79E-03 |
| ENSG0000027020  | AL590096.1  | 13 | 20564708  | 20567045  | 2337    | lncRNA-antisense                   | -1.55 | 2.44E-03 | 1.93E-02 |
| ENSG00000234255 | AC012370.2  | 2  | 65439838  | 65456571  | 16733   | lncRNA                             | -1.55 | 7.86E-03 | 4.06E-02 |
| ENSG00000197532 | ORY1        | 1  | 158544550 | 158554405 | 9855    | protein coding                     | -1.55 | 8.02E-03 | 4.12E-02 |
| ENSG00000231548 | OR55B1P     | 11 | 4146112   | 4151104   | 4992    | transcribed unitary pseudogene     | -1.55 | 8.46E-03 | 4.26E-02 |
| ENSG00000223949 | ROR1-AS1    | 1  | 64094379  | 64171342  | 76963   | lncRNA-antisense                   | -1.55 | 3.28E-04 | 5.47E-03 |
| ENSG00000172689 | MS4A10      | 11 | 60785333  | 60801305  | 15972   | protein coding                     | -1.55 | 8.76E-05 | 2.32E-03 |
| ENSG00000227043 | LINC01682   | 1  | 229812917 | 229892046 | 79129   | lncRNA                             | -1.55 | 2.78E-03 | 2.10E-02 |
| ENSG00000271602 | KRT8P49     | 11 | 4722740   | 47247171  | 1431    | processed pseudogene               | -1.55 | 1.06E-02 | 4.93E-02 |
| ENSG0000010379  | SLC6A13     | 12 | 220621    | 2262873   | 42252   | protein coding                     | -1.55 | 1.20E-05 | 5.89E-04 |
| ENSG00000285804 | AC025774.1  | 5  | 72087782  | 72108000  | 20218   | lncRNA-antisense                   | -1.55 | 4.98E-03 | 3.04E-02 |
| ENSG00000267308 | LINC01764   | 19 | 15827005  | 15835853  | 8848    | lncRNA                             | -1.55 | 2.90E-03 | 2.16E-02 |
| ENSG00000287583 | AC018685.3  | 2  | 2697490   | 2701812   | 4322    | lncRNA                             | -1.55 | 2.09E-04 | 4.03E-03 |
| ENSG00000261175 | LINC02188   | 16 | 86710122  | 86742083  | 31961   | lncRNA                             | -1.55 | 1.04E-04 | 2.59E-03 |
| ENSG00000100867 | DHRS2       | 14 | 23630115  | 23645639  | 15524   | protein coding                     | -1.55 | 6.84E-05 | 1.93E-03 |
| ENSG00000165192 | ASB11       | X  | 15281697  | 15315640  | 33943   | protein coding                     | -1.55 | 4.23E-03 | 2.75E-02 |
| ENSG00000278725 | AC020765.4  | 16 | 28602340  | 28604519  | 2179    | unprocessed pseudogene             | -1.55 | 5.40E-03 | 3.18E-02 |
| ENSG00000235779 | AC079779.3  | 2  | 290941    | 314373    | 23432   | lncRNA                             | -1.55 | 2.02E-04 | 3.94E-03 |
| ENSG00000184647 | PRSS55      | 8  | 10525532  | 10554166  | 28634   | protein coding                     | -1.55 | 1.26E-04 | 2.91E-03 |
| ENSG00000285051 | SLC7A14-AS1 | 3  | 170448639 | 170860993 | 412354  | lncRNA                             | -1.55 | 2.05E-05 | 8.56E-04 |
| ENSG00000285606 | AC079200.1  | 8  | 10275499  | 10279737  | 4238    | lncRNA-antisense                   | -1.55 | 2.15E-03 | 1.79E-02 |
| ENSG00000197565 | COL4A6      | X  | 108155607 | 108439497 | 283890  | protein coding                     | -1.55 | 3.32E-05 | 1.18E-03 |
| ENSG00000176253 | OR4K13      | 14 | 20029399  | 20036038  | 6639    | protein coding                     | -1.55 | 3.28E-03 | 2.34E-02 |
| ENSG00000276170 | AC244153.1  | 17 | 38450394  | 38452444  | 2050    | lncRNA                             | -1.55 | 3.53E-03 | 2.45E-02 |
| ENSG00000259523 | AC022613.2  | 15 | 29822631  | 29824081  | 1450    | lncRNA-antisense                   | -1.55 | 3.62E-03 | 2.50E-02 |
| ENSG00000173769 | TOPAZ1      | 3  | 44241886  | 44332098  | 90212   | protein coding                     | -1.55 | 4.29E-04 | 6.45E-03 |
| ENSG00000258590 | NBEAF1      | 15 | 20657638  | 20688408  | 30770   | transcribed unprocessed pseudogene | -1.55 | 9.48E-06 | 4.93E-04 |
| ENSG00000133020 | MYH8        | 17 | 10390322  | 10421950  | 31628   | protein coding                     | -1.55 | 4.41E-05 | 1.43E-03 |
| ENSG00000286353 | AC115282.1  | 3  | 54057690  | 54125377  | 67687   | lncRNA                             | -1.55 | 5.78E-03 | 3.33E-02 |
| ENSG00000287243 | THCAT155    | 12 | 3483714   | 3492819   | 9105    | lncRNA                             | -1.55 | 1.08E-03 | 1.16E-02 |
| ENSG00000238212 | LINC02096   | 17 | 14834557  | 14957216  | 122659  | lncRNA                             | -1.55 | 1.10E-03 | 1.17E-02 |
| ENSG00000277159 | AL139384.2  | 13 | 112602828 | 112606417 | 3589    | lncRNA                             | -1.55 | 1.24E-03 | 1.26E-02 |
| ENSG00000226288 | ORS212      | 11 | 4581743   | 4593340   | 11597   | protein coding                     | -1.55 | 4.90E-03 | 3.01E-02 |
| ENSG00000213822 | CEACAM18    | 19 | 51478622  | 51490952  | 12330   | protein coding                     | -1.55 | 2.35E-03 | 1.88E-02 |
| ENSG00000198028 | ZNF560      | 19 | 9466355   | 9498616   | 32261   | protein coding                     | -1.55 | 5.61E-03 | 3.26E-02 |
| ENSG00000286773 | AL353593.3  | 1  | 228329467 | 228331191 | 1724    | lncRNA                             | -1.56 | 9.31E-03 | 4.52E-02 |
| ENSG00000260071 | AC012178.1  | 16 | 9365540   | 9518325   | 152785  | lncRNA                             | -1.56 | 3.60E-04 | 5.79E-03 |
| ENSG00000198300 | PEG3        | 19 | 56810077  | 56840728  | 30651   | protein coding                     | -1.56 | 1.29E-04 | 2.96E-03 |
| ENSG00000259648 | AL132640.2  | 14 | 67614929  | 67616626  | 1697    | transcribed processed pseudogene   | -1.56 | 5.60E-03 | 3.26E-02 |
| ENSG00000112761 | CCN6        | 6  | 112054075 | 112069866 | 15611   | protein coding                     | -1.56 | 4.62E-03 | 2.90E-02 |
| ENSG00000149452 | SLC22A8     | 11 | 62989154  | 63015841  | 26687   | protein coding                     | -1.56 | 7.16E-05 | 2.01E-03 |
| ENSG00000178997 | EXD1        | 15 | 41182725  | 41230743  | 48018   | protein coding                     | -1.56 | 1.55E-03 | 1.45E-02 |
| ENSG00000267247 | AP005264.2  | 18 | 12230411  | 12231573  | 1162    | lncRNA                             | -1.56 | 9.53E-03 | 4.59E-02 |
| ENSG00000259705 | AC084757.3  | 15 | 48645951  | 48652016  | 6065    | lncRNA                             | -1.56 | 6.42E-03 | 3.56E-02 |
| ENSG00000173335 | CS19        | 20 | 23602410  | 23605917  | 3507    | protein coding                     | -1.56 | 6.38E-03 | 3.55E-02 |
| ENSG00000234949 | AC104667.2  | 2  | 237591020 | 237595981 | 4961    | lncRNA-antisense                   | -1.56 | 5.52E-03 | 3.23E-02 |
| ENSG00000183862 | CNGA2       | X  | 151738451 | 151745304 | 6853    | protein coding                     | -1.56 | 3.64E-03 | 2.50E-02 |
| ENSG00000140945 | CDH13       | 16 | 82626965  | 83800640  | 1173675 | protein coding                     | -1.56 | 2.22E-06 | 1.74E-04 |
| ENSG00000276975 | HYDIN2      | 1  | 146472566 | 146914294 | 441728  | transcribed unprocessed pseudogene | -1.56 | 1.27E-05 | 6.11E-04 |
| ENSG00000260613 | Z98885.2    | 22 | 49832449  | 49838901  | 6452    | lncRNA                             | -1.56 | 4.87E-03 | 2.99E-02 |
| ENSG00000285424 | AL162718.1  | 6  | 4304942   | 4583871   | 278929  | lncRNA                             | -1.56 | 2.86E-03 | 2.14E-02 |
| ENSG00000255583 | AC084357.3  | 12 | 63682523  | 63724935  | 42412   | transcribed unprocessed pseudogene | -1.56 | 6.97E-03 | 3.76E-02 |
| ENSG00000264589 | MAPT-AS1    | 17 | 45799390  | 45895680  | 96290   | lncRNA-antisense                   | -1.56 | 1.45E-05 | 6.71E-04 |
| ENSG00000171360 | KRT38       | 17 | 41436154  | 41440983  | 4829    | protein coding                     | -1.56 | 3.85E-03 | 2.59E-02 |
| ENSG00000179165 | PXT1        | 6  | 36390551  | 36442854  | 52303   | protein coding                     | -1.56 | 3.13E-03 | 2.27E-02 |
| ENSG00000254863 | LINC02744   | 11 | 119987952 | 119995037 | 7085    | lncRNA                             | -1.56 | 2.34E-03 | 1.88E-02 |
| ENSG00000234988 | LINC01849   | 2  | 100603752 | 100611542 | 7790    | lncRNA                             | -1.56 | 2.45E-03 | 1.93E-02 |
| ENSG00000231764 | DLX6-AS1    | 7  | 96955141  | 97014088  | 58947   | lncRNA-antisense                   | -1.56 | 6.96E-06 | 3.99E-04 |
| ENSG00000226521 | AC087499.2  | 17 | 20716481  | 20737127  | 20646   | transcribed unprocessed pseudogene | -1.56 | 1.44E-03 | 1.38E-02 |
| ENSG00000204616 | TRIM31      | 6  | 30102897  | 30113090  | 10193   | protein coding                     | -1.56 | 5.72E-04 | 7.79E-03 |
| ENSG00000204532 | ZSCAN5C     | 19 | 56202301  | 56209452  | 7151    | protein coding                     | -1.56 | 4.51E-03 | 2.86E-02 |
| ENSG00000183778 | B3GANL5     | 21 | 39556442  | 39673137  | 116695  | protein coding                     | -1.56 | 1.79E-06 | 1.48E-04 |
| ENSG00000165078 | CPA6        | 8  | 67422038  | 67746378  | 324340  | protein coding                     | -1.56 | 1.28E-03 | 1.28E-02 |

|                |             |    |           |           |        |                                    |       |          |          |
|----------------|-------------|----|-----------|-----------|--------|------------------------------------|-------|----------|----------|
| ENSG0000284708 | AL031731.1  | 1  | 11623558  | 11643416  | 19858  | lncRNA-antisense                   | -1.56 | 5.48E-03 | 3.22E-02 |
| ENSG0000198535 | C2CD4A      | 15 | 62066977  | 62070917  | 3940   | protein coding                     | -1.56 | 1.12E-03 | 1.18E-02 |
| ENSG0000101333 | PLCB4       | 20 | 9068763   | 9481242   | 412479 | protein coding                     | -1.56 | 3.31E-06 | 2.33E-04 |
| ENSG0000182035 | ADIG        | 20 | 38581195  | 38588463  | 7268   | protein coding                     | -1.56 | 1.20E-03 | 1.24E-02 |
| ENSG0000204518 | AADACL4     | 1  | 12644547  | 12667086  | 22539  | protein coding                     | -1.56 | 1.85E-03 | 1.62E-02 |
| ENSG0000200867 | RN7SKP36    | 4  | 7112088   | 7112399   | 311    | misc RNA                           | -1.56 | 6.04E-03 | 3.43E-02 |
| ENSG0000214803 | AC090921.1  | 8  | 124192671 | 124247398 | 54727  | lncRNA                             | -1.56 | 9.39E-03 | 4.55E-02 |
| ENSG0000280395 | AL034546.1  | 22 | 50092745  | 50096437  | 3692   | lncRNA-sense overlapping           | -1.56 | 6.31E-03 | 3.52E-02 |
| ENSG0000231256 | CFAP97D1    | 17 | 43780435  | 43787620  | 7185   | protein coding                     | -1.56 | 3.70E-04 | 5.91E-03 |
| ENSG0000255087 | AP001993.1  | 11 | 127021736 | 127172363 | 150627 | lncRNA                             | -1.56 | 6.61E-06 | 3.86E-04 |
| ENSG0000286538 | AC008798.2  | 19 | 29838532  | 29841818  | 3286   | lncRNA                             | -1.56 | 3.92E-03 | 2.63E-02 |
| ENSG0000204897 | KRT25       | 17 | 40748021  | 40755331  | 7310   | protein coding                     | -1.56 | 6.81E-03 | 3.71E-02 |
| ENSG0000164744 | SUN3        | 7  | 47987148  | 48029119  | 41971  | protein coding                     | -1.56 | 1.24E-04 | 2.89E-03 |
| ENSG0000246740 | PLA2G4E-AS1 | 15 | 41972763  | 41999094  | 26331  | lncRNA-antisense                   | -1.56 | 6.02E-04 | 8.05E-03 |
| ENSG0000169126 | ARMC4       | 10 | 27775186  | 27999079  | 223893 | protein coding                     | -1.56 | 2.67E-04 | 4.76E-03 |
| ENSG0000134020 | PEBP4       | 8  | 22713251  | 23000000  | 286749 | protein coding                     | -1.56 | 4.30E-05 | 1.40E-03 |
| ENSG0000102239 | BRS3        | X  | 136487947 | 136493780 | 5833   | protein coding                     | -1.56 | 5.49E-03 | 3.22E-02 |
| ENSG0000250041 | AC069360.1  | 11 | 10884158  | 10899384  | 15206  | lncRNA                             | -1.56 | 2.77E-03 | 2.10E-02 |
| ENSG0000182261 | NLRP10      | 11 | 7957537   | 7965426   | 7889   | protein coding                     | -1.56 | 1.19E-03 | 1.23E-02 |
| ENSG0000237222 | LINC01968   | 3  | 194708093 | 194826008 | 117915 | lncRNA                             | -1.56 | 1.48E-04 | 3.24E-03 |
| ENSG0000235033 | DAAM2-AS1   | 6  | 39881804  | 39900071  | 18267  | lncRNA-antisense                   | -1.56 | 4.00E-06 | 2.62E-04 |
| ENSG0000235358 | AC093151.2  | 1  | 41242373  | 41284861  | 42488  | lncRNA                             | -1.56 | 2.19E-05 | 8.89E-04 |
| ENSG0000095627 | TDRD1       | 10 | 114179270 | 114232304 | 53034  | protein coding                     | -1.56 | 1.01E-04 | 2.54E-03 |
| ENSG0000132911 | NMUR2       | 5  | 152391546 | 152433368 | 41822  | protein coding                     | -1.56 | 5.91E-03 | 3.38E-02 |
| ENSG0000204393 | NOL4L-DT    | 20 | 32564992  | 32608893  | 43901  | lncRNA                             | -1.57 | 3.30E-03 | 2.35E-02 |
| ENSG0000273987 | AC121761.2  | 12 | 75333798  | 75334486  | 688    | lncRNA-sense intronic              | -1.57 | 7.81E-03 | 4.04E-02 |
| ENSG0000202412 | RNY3P13     | 3  | 129818932 | 129819033 | 101    | misc RNA                           | -1.57 | 2.64E-03 | 2.03E-02 |
| ENSG0000166292 | TMEM100     | 17 | 55719627  | 55732121  | 12494  | protein coding                     | -1.57 | 7.62E-03 | 3.98E-02 |
| ENSG0000287161 | AC093519.2  | 16 | 86899356  | 86961268  | 61912  | lncRNA                             | -1.57 | 3.68E-04 | 5.88E-03 |
| ENSG0000207546 | MIR548C     | 12 | 64622509  | 64622605  | 96     | miRNA                              | -1.57 | 6.05E-03 | 3.44E-02 |
| ENSG0000286592 | LINC02885   | 22 | 34756676  | 35002862  | 246186 | lncRNA                             | -1.57 | 8.62E-03 | 4.30E-02 |
| ENSG0000185662 | SMIM23      | 5  | 171782432 | 171796126 | 13694  | protein coding                     | -1.57 | 3.68E-03 | 2.52E-02 |
| ENSG0000253164 | AC023403.1  | 8  | 20350210  | 20372769  | 22559  | lncRNA                             | -1.57 | 5.16E-03 | 3.11E-02 |
| ENSG0000071203 | MS4A12      | 11 | 60492778  | 60507430  | 14652  | protein coding                     | -1.57 | 3.69E-03 | 2.52E-02 |
| ENSG0000284513 | AC006063.2  | 12 | 4960113   | 4963450   | 3337   | lncRNA                             | -1.57 | 8.60E-03 | 4.30E-02 |
| ENSG0000288162 | AL596442.4  | 6  | 170135374 | 170142926 | 7552   | lncRNA                             | -1.57 | 6.71E-03 | 3.67E-02 |
| ENSG0000163705 | FANCD2OS    | 3  | 10081317  | 10108255  | 26938  | protein coding                     | -1.57 | 2.45E-03 | 1.93E-02 |
| ENSG0000225742 | LINC02302   | 3  | 194202392 | 194250203 | 47811  | lncRNA                             | -1.57 | 1.52E-03 | 1.43E-02 |
| ENSG000027268  | LHX1-DT     | 17 | 36861674  | 36936670  | 74996  | lncRNA-antisense                   | -1.57 | 6.38E-04 | 8.37E-03 |
| ENSG0000179428 | IL6-AS1     | 7  | 22725395  | 22727620  | 2225   | lncRNA-antisense                   | -1.57 | 4.01E-03 | 2.67E-02 |
| ENSG0000237626 | AL161629.1  | 9  | 89825964  | 90019549  | 193585 | lncRNA                             | -1.57 | 9.23E-05 | 2.39E-03 |
| ENSG0000280011 | AL031595.2  | 22 | 44210442  | 44229512  | 19070  | lncRNA-antisense                   | -1.57 | 9.56E-07 | 9.28E-05 |
| ENSG0000253238 | AC034114.2  | 8  | 80265907  | 80484481  | 218574 | lncRNA                             | -1.57 | 9.13E-04 | 1.04E-02 |
| ENSG0000235470 | NEURL1-AS1  | 10 | 103479603 | 103517393 | 37790  | lncRNA-antisense                   | -1.57 | 5.34E-03 | 3.16E-02 |
| ENSG0000201221 | RNU4-40P    | 20 | 35887659  | 35887801  | 142    | snRNA                              | -1.57 | 7.50E-03 | 3.94E-02 |
| ENSG0000229717 | AC110615.1  | 4  | 75822966  | 75838389  | 15423  | lncRNA-antisense                   | -1.57 | 1.04E-02 | 4.87E-02 |
| ENSG0000261504 | LINC01686   | 1  | 182615254 | 182616629 | 1375   | lncRNA                             | -1.57 | 2.29E-03 | 1.86E-02 |
| ENSG0000233363 | AC006019.2  | 7  | 154092201 | 154096043 | 3842   | lncRNA-antisense                   | -1.57 | 5.01E-03 | 3.04E-02 |
| ENSG0000237224 | AL157832.2  | 10 | 129693722 | 129702117 | 8395   | lncRNA-antisense                   | -1.57 | 4.35E-04 | 6.51E-03 |
| ENSG0000268654 | MIMT1       | 19 | 56840866  | 56848556  | 7690   | lncRNA                             | -1.58 | 6.80E-03 | 3.70E-02 |
| ENSG0000211452 | DIO1        | 1  | 53891239  | 53911086  | 19847  | protein coding                     | -1.58 | 3.04E-04 | 5.18E-03 |
| ENSG0000164616 | FBXL21P     | 5  | 135930317 | 135951591 | 21274  | transcribed unitary pseudogene     | -1.58 | 2.23E-03 | 1.83E-02 |
| ENSG0000254008 | LINC00051   | 8  | 142198356 | 142209003 | 10647  | lncRNA-antisense                   | -1.58 | 2.26E-03 | 1.84E-02 |
| ENSG0000257943 | AC084879.1  | 12 | 95311312  | 95442482  | 131170 | transcribed unitary pseudogene     | -1.58 | 3.30E-03 | 2.35E-02 |
| ENSG0000276710 | CSPG4P10    | 15 | 82459472  | 82477258  | 17786  | transcribed unprocessed pseudogene | -1.58 | 2.46E-06 | 1.87E-04 |
| ENSG0000163793 | DNAJC5G     | 2  | 27275433  | 27281499  | 6066   | protein coding                     | -1.58 | 3.96E-03 | 2.64E-02 |
| ENSG0000260913 | LINC01254   | 18 | 10405133  | 10414515  | 9382   | lncRNA                             | -1.58 | 6.02E-04 | 8.05E-03 |
| ENSG0000233760 | AC004947.1  | 7  | 26551686  | 26558880  | 7194   | lncRNA                             | -1.58 | 1.76E-03 | 1.56E-02 |
| ENSG0000152254 | G6PC2       | 2  | 168901291 | 168910000 | 8709   | protein coding                     | -1.58 | 7.75E-03 | 4.02E-02 |
| ENSG0000282419 | TEX13D      | X  | 124426249 | 124336863 | 90614  | protein coding                     | -1.58 | 6.96E-04 | 8.80E-03 |
| ENSG0000230666 | CEACAM22P   | 19 | 44537058  | 44620821  | 83763  | transcribed unprocessed pseudogene | -1.58 | 3.13E-04 | 5.27E-03 |
| ENSG0000058085 | LAMC2       | 1  | 183186238 | 183245127 | 58889  | protein coding                     | -1.58 | 1.69E-04 | 3.52E-03 |
| ENSG0000180806 | HOXC9       | 12 | 53994895  | 54003337  | 8442   | protein coding                     | -1.58 | 1.11E-03 | 1.18E-02 |
| ENSG0000267313 | KC6         | 18 | 41465783  | 41632185  | 166402 | lncRNA                             | -1.58 | 1.54E-03 | 1.44E-02 |
| ENSG0000121388 | AL139327.1  | 13 | 19182038  | 19187618  | 5580   | transcribed unprocessed pseudogene | -1.58 | 7.63E-03 | 3.98E-02 |
| ENSG0000224679 | MED15P4     | 2  | 131535187 | 131536988 | 1801   | unprocessed pseudogene             | -1.58 | 2.59E-03 | 2.01E-02 |
| ENSG0000226277 | AC105393.1  | 2  | 421057    | 424059    | 3002   | lncRNA                             | -1.58 | 1.31E-03 | 1.30E-02 |
| ENSG0000204033 | LRI2        | 10 | 84220571  | 84225544  | 4973   | protein coding                     | -1.58 | 2.20E-03 | 1.81E-02 |
| ENSG0000183760 | ACP7        | 19 | 39083913  | 39111493  | 27580  | protein coding                     | -1.58 | 3.05E-04 | 5.19E-03 |
| ENSG0000267646 | AC008543.5  | 19 | 11796084  | 11798598  | 2514   | lncRNA-antisense                   | -1.58 | 5.99E-03 | 3.41E-02 |
| ENSG0000137674 | MMP20       | 11 | 102576832 | 102625332 | 48500  | protein coding                     | -1.58 | 2.44E-03 | 1.93E-02 |
| ENSG0000168356 | SCN11A      | 3  | 38845764  | 39052157  | 206393 | protein coding                     | -1.58 | 2.55E-07 | 3.41E-05 |
| ENSG0000181123 | AC004832.1  | 22 | 30475364  | 30492804  | 17440  | lncRNA-antisense                   | -1.58 | 4.58E-04 | 6.73E-03 |
| ENSG0000223944 | AL353604.1  | 1  | 37154761  | 37325100  | 170339 | lncRNA                             | -1.58 | 1.49E-03 | 1.41E-02 |
| ENSG0000169327 | OR5AU1      | 14 | 21148370  | 21159060  | 10690  | protein coding                     | -1.58 | 6.64E-04 | 8.57E-03 |
| ENSG0000273274 | ZBTBB8      | 1  | 32465072  | 32496686  | 31614  | protein coding                     | -1.59 | 1.02E-04 | 2.55E-03 |
| ENSG0000285812 | AL390719.3  | 1  | 1097585   | 1104598   | 7013   | lncRNA-antisense                   | -1.59 | 1.68E-03 | 1.52E-02 |
| ENSG0000188828 | GLRA4       | X  | 103702210 | 103728655 | 26445  | protein coding                     | -1.59 | 3.50E-04 | 5.69E-03 |
| ENSG0000141934 | PLPP2       | 19 | 281040    | 291403    | 10363  | protein coding                     | -1.59 | 8.74E-06 | 4.64E-04 |
| ENSG0000226562 | CYP4F26P    | 9  | 33580695  | 33607874  | 27179  | lncRNA                             | -1.59 | 1.86E-03 | 1.62E-02 |
| ENSG0000259420 | AC046168.2  | 15 | 77568970  | 77608888  | 39918  | lncRNA                             | -1.59 | 3.28E-03 | 2.34E-02 |
| ENSG0000154975 | CA10        | 17 | 51630313  | 52160017  | 529704 | protein coding                     | -1.59 | 5.63E-05 | 1.69E-03 |
| ENSG0000244675 | AC108676.1  | 3  | 194496317 | 194501503 | 5186   | lncRNA-sense overlapping           | -1.59 | 1.50E-03 | 1.42E-02 |
| ENSG0000280623 | PCAT14      | 22 | 23536881  | 23547797  | 10916  | lncRNA                             | -1.59 | 1.43E-03 | 1.38E-02 |
| ENSG0000171671 | SHANK2-AS3  | 11 | 70862790  | 70865115  | 2325   | lncRNA-antisense                   | -1.59 | 4.87E-03 | 2.99E-02 |
| ENSG0000117472 | TPSPAN1     | 1  | 46175073  | 46185962  | 10889  | protein coding                     | -1.59 | 3.67E-03 | 2.52E-02 |
| ENSG0000243167 | RPS10P28    | 19 | 42670005  | 42670816  | 811    | processed pseudogene               | -1.59 | 9.74E-03 | 4.66E-02 |
| ENSG0000268864 | AC011487.2  | 19 | 53599628  | 53608451  | 8823   | transcribed unprocessed pseudogene | -1.59 | 6.97E-04 | 8.80E-03 |
| ENSG0000260777 | AC061975.1  | 17 | 28263634  | 28266369  | 2735   | lncRNA                             | -1.59 | 6.35E-03 | 3.55E-02 |
| ENSG0000205497 | OR51A4      | 11 | 4942831   | 4947605   | 4774   | protein coding                     | -1.59 | 6.69E-03 | 3.66E-02 |

|                 |            |    |           |           |        |                                    |       |          |          |
|-----------------|------------|----|-----------|-----------|--------|------------------------------------|-------|----------|----------|
| ENSG00000138356 | AOX1       | 2  | 200586014 | 200677064 | 91050  | protein coding                     | -1.59 | 8.13E-05 | 2.20E-03 |
| ENSG00000231317 | AC091812.1 | 7  | 55656768  | 55678490  | 21722  | unprocessed pseudogene             | -1.59 | 7.67E-03 | 4.00E-02 |
| ENSG00000259361 | LINC00927  | 15 | 80263068  | 80341805  | 78737  | lncRNA                             | -1.59 | 1.25E-03 | 1.27E-02 |
| ENSG00000238266 | LINC00707  | 10 | 6779549   | 6879450   | 99901  | lncRNA                             | -1.59 | 2.90E-04 | 5.00E-03 |
| ENSG00000285750 | AL157385.2 | 10 | 24816331  | 24822950  | 6619   | lncRNA                             | -1.59 | 8.28E-03 | 4.21E-02 |
| ENSG00000231754 | AL512380.1 | 6  | 21521678  | 21523783  | 2105   | lncRNA                             | -1.59 | 6.79E-03 | 3.70E-02 |
| ENSG00000230023 | LINC02800  | 1  | 24200240  | 24211693  | 11453  | lncRNA                             | -1.59 | 7.02E-03 | 3.78E-02 |
| ENSG00000287608 | AC022137.3 | 19 | 53434661  | 53473936  | 39275  | lncRNA                             | -1.59 | 2.01E-03 | 1.71E-02 |
| ENSG00000255556 | AC087203.2 | 8  | 12378679  | 12380265  | 1586   | processed pseudogene               | -1.59 | 1.12E-04 | 2.71E-03 |
| ENSG00000236052 | LINC01643  | 22 | 34017422  | 34218796  | 201374 | lncRNA                             | -1.59 | 1.42E-04 | 3.15E-03 |
| ENSG00000215478 | CESS5A1    | 22 | 23359603  | 23387731  | 28128  | transcribed unprocessed pseudogene | -1.59 | 7.92E-03 | 4.08E-02 |
| ENSG00000168509 | HJV        | 1  | 146017468 | 146036746 | 19278  | protein coding                     | -1.59 | 2.37E-03 | 1.89E-02 |
| ENSG00000279628 | AC131280.1 | 15 | 20658900  | 20664970  | 6070   | TEC                                | -1.59 | 2.20E-05 | 8.90E-04 |
| ENSG00000197309 | OR10D3     | 11 | 124183345 | 124188780 | 5435   | protein coding                     | -1.59 | 6.91E-03 | 3.74E-02 |
| ENSG00000132464 | ENAM       | 4  | 70628744  | 70646824  | 18080  | protein coding                     | -1.59 | 3.52E-03 | 2.45E-02 |
| ENSG00000233684 | LINC01865  | 2  | 317912    | 342118    | 24206  | lncRNA                             | -1.59 | 5.00E-03 | 3.04E-02 |
| ENSG00000277535 | AL772284.1 | X  | 119073226 | 119076373 | 3147   | protein coding                     | -1.59 | 7.76E-03 | 4.03E-02 |
| ENSG00000267733 | AP005264.4 | 18 | 12201982  | 12223539  | 21557  | transcribed processed pseudogene   | -1.59 | 3.46E-05 | 1.21E-03 |
| ENSG00000228392 | AL162391.1 | 9  | 126286999 | 126298593 | 11594  | lncRNA                             | -1.59 | 1.71E-04 | 3.55E-03 |
| ENSG00000254645 | AC087379.1 | 11 | 15701265  | 15758898  | 57633  | lncRNA                             | -1.60 | 4.48E-03 | 2.85E-02 |
| ENSG00000234170 | LINC02645  | 10 | 2368561   | 2502200   | 133639 | lncRNA                             | -1.60 | 6.61E-05 | 1.88E-03 |
| ENSG00000205312 | KRT17P4    | 17 | 16847635  | 16852777  | 5142   | transcribed unprocessed pseudogene | -1.60 | 3.46E-03 | 2.42E-02 |
| ENSG00000172421 | EFCAB3     | 17 | 62343941  | 62416480  | 72539  | protein coding                     | -1.60 | 1.23E-03 | 1.25E-02 |
| ENSG00000157330 | C1orf158   | 1  | 12746200  | 12763699  | 17499  | protein coding                     | -1.60 | 4.94E-04 | 7.05E-03 |
| ENSG00000255968 | AC024145.1 | 12 | 26318953  | 26421462  | 102509 | lncRNA-antisense                   | -1.60 | 7.23E-03 | 3.85E-02 |
| ENSG00000274403 | AC090510.2 | 15 | 42726583  | 42727211  | 628    | lncRNA-antisense                   | -1.60 | 9.45E-03 | 4.57E-02 |
| ENSG00000254983 | AC025300.1 | 11 | 12303533  | 12308216  | 4683   | lncRNA-sense intronic              | -1.60 | 8.34E-03 | 4.22E-02 |
| ENSG00000253302 | STAU2-AS1  | 8  | 73420004  | 73441526  | 21522  | lncRNA-antisense                   | -1.60 | 2.71E-03 | 2.07E-02 |
| ENSG00000244681 | MTHFD2P1   | 3  | 95654423  | 95683193  | 28770  | transcribed processed pseudogene   | -1.60 | 4.23E-03 | 2.75E-02 |
| ENSG00000253633 | AP002852.1 | 8  | 102528740 | 102539943 | 11203  | lncRNA                             | -1.60 | 2.02E-03 | 1.72E-02 |
| ENSG00000232926 | AC000078.1 | 22 | 19887289  | 19887970  | 681    | processed pseudogene               | -1.60 | 5.18E-03 | 3.12E-02 |
| ENSG00000267413 | LINC01901  | 18 | 39841174  | 39924840  | 83666  | lncRNA                             | -1.60 | 7.70E-03 | 4.01E-02 |
| ENSG00000215009 | ACSM4      | 12 | 7304284   | 7328724   | 24440  | protein coding                     | -1.60 | 3.93E-03 | 2.63E-02 |
| ENSG00000253574 | AC021744.1 | 8  | 139911238 | 139916620 | 5382   | lncRNA-antisense                   | -1.60 | 9.32E-03 | 4.52E-02 |
| ENSG00000226869 | LHFPL3-AS1 | 7  | 104738597 | 104804107 | 65510  | lncRNA                             | -1.60 | 3.75E-03 | 2.55E-02 |
| ENSG00000260120 | AC104066.3 | 4  | 52680609  | 52692999  | 12390  | lncRNA                             | -1.60 | 8.44E-03 | 4.26E-02 |
| ENSG00000248698 | LINC01085  | 4  | 14111968  | 14140052  | 28084  | transcribed processed pseudogene   | -1.60 | 5.37E-03 | 3.18E-02 |
| ENSG00000279110 | AL022323.3 | 22 | 25052122  | 25065241  | 13119  | lncRNA-antisense                   | -1.60 | 3.36E-07 | 4.15E-05 |
| ENSG00000253678 | AC104964.1 | 8  | 10476591  | 10479446  | 2855   | lncRNA                             | -1.60 | 4.32E-03 | 2.79E-02 |
| ENSG00000126785 | RHOJ       | 14 | 63204114  | 63293508  | 89394  | protein coding                     | -1.60 | 1.12E-03 | 1.18E-02 |
| ENSG00000271755 | AL031118.1 | 6  | 27404010  | 27408964  | 2954   | lncRNA                             | -1.60 | 5.12E-03 | 3.09E-02 |
| ENSG00000267150 | AC006557.1 | 18 | 14089935  | 14091019  | 1084   | lncRNA-antisense                   | -1.60 | 9.69E-03 | 4.64E-02 |
| ENSG00000101306 | MYLK2      | 20 | 31819308  | 31834689  | 15381  | protein coding                     | -1.60 | 2.78E-04 | 4.87E-03 |
| ENSG00000145888 | GLRA1      | 5  | 151822513 | 151924851 | 102338 | protein coding                     | -1.60 | 2.85E-03 | 2.13E-02 |
| ENSG00000176635 | HORMAD2    | 22 | 30080464  | 30177075  | 96611  | protein coding                     | -1.60 | 7.63E-03 | 3.98E-02 |
| ENSG00000279581 | AC073862.2 | 12 | 130980667 | 130981367 | 700    | TEC                                | -1.60 | 1.07E-02 | 4.93E-02 |
| ENSG00000164326 | CARTPT     | 5  | 71719275  | 71721048  | 1773   | protein coding                     | -1.60 | 8.82E-03 | 4.37E-02 |
| ENSG00000215866 | LINC01356  | 1  | 112820170 | 112850643 | 30473  | lncRNA                             | -1.60 | 4.62E-05 | 1.48E-03 |
| ENSG00000261610 | AP000265.1 | 21 | 32259804  | 32261585  | 1781   | lncRNA                             | -1.60 | 2.46E-04 | 4.49E-03 |
| ENSG00000233478 | AL031280.1 | 1  | 25644544  | 25659111  | 14567  | lncRNA-antisense                   | -1.60 | 4.31E-04 | 6.47E-03 |
| ENSG00000280177 | AC004408.2 | 17 | 39165073  | 39167849  | 2776   | TEC                                | -1.60 | 3.72E-04 | 5.93E-03 |
| ENSG00000224090 | AC097468.1 | 2  | 219002215 | 219015721 | 13506  | lncRNA-antisense                   | -1.60 | 1.08E-02 | 4.98E-02 |
| ENSG00000243319 | FGF14-IT1  | 13 | 102293237 | 102394519 | 102192 | lncRNA-sense intronic              | -1.60 | 6.07E-03 | 3.44E-02 |
| ENSG00000183888 | SRARP      | 1  | 16004236  | 16008807  | 4571   | protein coding                     | -1.60 | 1.37E-03 | 1.34E-02 |
| ENSG00000265313 | LINC01476  | 17 | 59422088  | 59526946  | 104858 | lncRNA                             | -1.60 | 9.25E-05 | 2.39E-03 |
| ENSG00000286033 | CR381670.2 | 21 | 8762386   | 8836565   | 74179  | lncRNA                             | -1.60 | 1.75E-04 | 3.61E-03 |
| ENSG00000167755 | KLK6       | 19 | 50958631  | 50969673  | 11042  | protein coding                     | -1.60 | 1.81E-03 | 1.59E-02 |
| ENSG00000258535 | AL079307.1 | 14 | 51765276  | 51825422  | 60146  | lncRNA-sense overlapping           | -1.60 | 3.38E-04 | 5.57E-03 |
| ENSG00000266976 | AC079466.1 | 19 | 28606688  | 28615229  | 8541   | lncRNA                             | -1.60 | 1.35E-03 | 1.33E-02 |
| ENSG00000164188 | RANBP3L    | 5  | 36246913  | 36302114  | 55201  | protein coding                     | -1.60 | 1.01E-03 | 1.11E-02 |
| ENSG00000189280 | GJB5       | 1  | 34755047  | 34758512  | 3465   | protein coding                     | -1.60 | 4.29E-03 | 2.78E-02 |
| ENSG00000260019 | LINC01992  | 17 | 27928924  | 27991787  | 62863  | lncRNA                             | -1.60 | 1.75E-04 | 3.61E-03 |
| ENSG00000225279 | AL121987.1 | 1  | 160062461 | 160080769 | 18308  | lncRNA-antisense                   | -1.61 | 5.53E-03 | 3.23E-02 |
| ENSG00000286113 | AC022868.1 | 8  | 73879046  | 73882733  | 3687   | lncRNA-bidirectional promoter      | -1.61 | 8.11E-03 | 4.15E-02 |
| ENSG00000263278 | AC233701.1 | 17 | 79598032  | 79603921  | 5889   | lncRNA-sense intronic              | -1.61 | 6.27E-04 | 8.29E-03 |
| ENSG00000258464 | AL160237.1 | 14 | 23699797  | 23729757  | 29960  | lncRNA                             | -1.61 | 6.96E-04 | 8.80E-03 |
| ENSG00000170983 | LINC00208  | 8  | 11576257  | 11582817  | 6560   | lncRNA                             | -1.61 | 1.22E-03 | 1.25E-02 |
| ENSG00000269444 | AC011491.2 | 19 | 6386762   | 6390400   | 3638   | lncRNA-sense overlapping           | -1.61 | 9.16E-03 | 4.48E-02 |
| ENSG00000259555 | AC067863.1 | 15 | 78625895  | 78628193  | 2298   | lncRNA-antisense                   | -1.61 | 5.32E-03 | 3.16E-02 |
| ENSG00000228789 | HCG22      | 6  | 31053450  | 31059890  | 6440   | transcribed unitary pseudogene     | -1.61 | 2.50E-03 | 1.96E-02 |
| ENSG00000229537 | LINC01739  | 1  | 62975751  | 63022504  | 46753  | lncRNA                             | -1.61 | 4.37E-03 | 2.80E-02 |
| ENSG00000272381 | LINC02664  | 10 | 31187715  | 31261910  | 74195  | lncRNA                             | -1.61 | 8.07E-04 | 9.61E-03 |
| ENSG00000227375 | DLG1-AS1   | 3  | 197298252 | 197303755 | 5503   | lncRNA-antisense                   | -1.61 | 2.49E-03 | 1.95E-02 |
| ENSG00000082126 | MP4        | 2  | 201644870 | 201698694 | 53824  | protein coding                     | -1.61 | 4.03E-05 | 1.33E-03 |
| ENSG00000153904 | DDAH1      | 1  | 85318481  | 85578363  | 259882 | protein coding                     | -1.61 | 1.31E-05 | 6.26E-04 |
| ENSG00000276807 | AC022188.1 | 15 | 73730048  | 73731711  | 1663   | lncRNA                             | -1.61 | 4.96E-03 | 3.03E-02 |
| ENSG00000105550 | FGF21      | 19 | 48755524  | 48758333  | 2809   | protein coding                     | -1.61 | 7.43E-03 | 3.92E-02 |
| ENSG00000274659 | LINC02371  | 12 | 2740064   | 2746662   | 6598   | lncRNA                             | -1.61 | 7.45E-04 | 9.15E-03 |
| ENSG00000285985 | LINC02689  | 11 | 1350359   | 1364286   | 13927  | lncRNA                             | -1.61 | 5.73E-04 | 7.80E-03 |
| ENSG00000188959 | C9orf152   | 9  | 110190048 | 110208189 | 18141  | protein coding                     | -1.61 | 2.13E-04 | 4.08E-03 |
| ENSG00000237579 | LINC01514  | 10 | 101173630 | 101194147 | 17841  | lncRNA                             | -1.61 | 4.61E-03 | 2.90E-02 |
| ENSG00000204290 | BTNL2      | 6  | 32393963  | 32407128  | 13165  | protein coding                     | -1.61 | 4.53E-03 | 2.87E-02 |
| ENSG00000220256 | AC093802.1 | 2  | 239762860 | 239824764 | 61904  | lncRNA                             | -1.61 | 3.24E-05 | 1.16E-03 |
| ENSG00000267640 | AC016582.3 | 19 | 37817359  | 37832160  | 14801  | transcribed unprocessed pseudogene | -1.61 | 1.55E-06 | 1.34E-04 |
| ENSG00000232655 | LINC01656  | 22 | 44443327  | 44444788  | 1461   | lncRNA                             | -1.61 | 5.90E-03 | 3.38E-02 |
| ENSG00000188488 | SERPINA5   | 14 | 94561442  | 94593118  | 31676  | protein coding                     | -1.61 | 7.66E-04 | 9.33E-03 |
| ENSG00000237038 | USP17L8    | 8  | 7971661   | 7973253   | 1592   | protein coding                     | -1.61 | 1.54E-04 | 3.20E-03 |
| ENSG00000281196 | LINC00934  | 12 | 119283825 | 119303380 | 19555  | lncRNA                             | -1.61 | 1.08E-02 | 4.97E-02 |
| ENSG00000266573 | AC018697.1 | 18 | 24725762  | 24986980  | 261218 | lncRNA                             | -1.61 | 5.75E-05 | 2.09E-03 |
| ENSG00000197421 | GGT3P      | 22 | 18773665  | 18843399  | 69734  | transcribed unprocessed pseudogene | -1.61 | 3.06E-03 | 2.24E-02 |



|                 |             |    |           |           |        |                                    |       |          |          |
|-----------------|-------------|----|-----------|-----------|--------|------------------------------------|-------|----------|----------|
| ENSG0000204688  | OR2H1       | 6  | 29457181  | 29464328  | 7147   | protein coding                     | -1.61 | 4.79E-03 | 2.97E-02 |
| ENSG0000268104  | SLC6A14     | X  | 116436606 | 116461458 | 24852  | protein coding                     | -1.61 | 4.45E-03 | 2.84E-02 |
| ENSG0000236819  | LINC01563   | 17 | 21075362  | 21092351  | 16989  | lncRNA                             | -1.61 | 6.00E-03 | 3.42E-02 |
| ENSG0000260604  | AL590004.3  | 6  | 3904920   | 3911979   | 7059   | lncRNA                             | -1.61 | 2.03E-04 | 3.94E-03 |
| ENSG0000261664  | TTC39A-AS1  | 1  | 51329654  | 51335324  | 5670   | lncRNA-antisense                   | -1.61 | 3.11E-03 | 2.26E-02 |
| ENSG0000230990  | AL049649.1  | 20 | 11234170  | 11301525  | 67355  | lncRNA                             | -1.61 | 2.88E-03 | 2.15E-02 |
| ENSG0000160062  | ZBTB8A      | 1  | 32539427  | 32605941  | 66514  | protein coding                     | -1.61 | 4.09E-04 | 6.29E-03 |
| ENSG0000205054  | LINC01121   | 2  | 45164816  | 45323397  | 158581 | lncRNA                             | -1.62 | 1.17E-05 | 5.80E-04 |
| ENSG0000250799  | PRODH2      | 19 | 35799988  | 35813299  | 13311  | protein coding                     | -1.62 | 1.18E-04 | 2.79E-03 |
| ENSG0000163364  | LINC01116   | 2  | 176629572 | 176637931 | 8359   | lncRNA                             | -1.62 | 1.35E-03 | 1.33E-02 |
| ENSG0000237880  | LINC01885   | 2  | 107382715 | 107748270 | 365555 | lncRNA                             | -1.62 | 5.41E-03 | 3.19E-02 |
| ENSG00002288610 | AL161669.4  | 14 | 103118351 | 103120147 | 1796   | lncRNA                             | -1.62 | 7.24E-03 | 3.85E-02 |
| ENSG0000227066  | Z98257.1    | 1  | 20154171  | 20160568  | 6397   | lncRNA                             | -1.62 | 5.68E-04 | 7.77E-03 |
| ENSG0000166535  | A2M1        | 12 | 8822621   | 8887001   | 64380  | protein coding                     | -1.62 | 1.98E-04 | 3.89E-03 |
| ENSG0000233321  | LINC02669   | 10 | 3433508   | 3502915   | 69407  | lncRNA                             | -1.62 | 4.73E-06 | 2.99E-04 |
| ENSG0000197428  | OR51D1      | 11 | 4637477   | 4643060   | 5583   | protein coding                     | -1.62 | 2.81E-03 | 2.12E-02 |
| ENSG0000262979  | AC124319.1  | 17 | 80315651  | 80316633  | 982    | lncRNA-sense intronic              | -1.62 | 2.50E-03 | 1.95E-02 |
| ENSG0000253286  | AC135166.1  | 8  | 123614219 | 123667248 | 53029  | lncRNA-antisense                   | -1.62 | 4.59E-03 | 2.89E-02 |
| ENSG0000256533  | AP002373.2  | 11 | 114453064 | 114454123 | 1059   | processed pseudogene               | -1.62 | 2.81E-03 | 2.12E-02 |
| ENSG0000249094  | AC007834.1  | 12 | 109880676 | 109888467 | 7791   | lncRNA                             | -1.62 | 2.19E-03 | 1.81E-02 |
| ENSG0000230523  | LINC01756   | 1  | 29329620  | 29350114  | 20494  | lncRNA                             | -1.62 | 1.17E-03 | 1.21E-02 |
| ENSG0000103310  | ZP2         | 16 | 21197450  | 21214510  | 17060  | protein coding                     | -1.62 | 2.55E-03 | 1.99E-02 |
| ENSG0000170613  | FAM71B      | 5  | 157161846 | 157166264 | 4418   | protein coding                     | -1.62 | 4.51E-03 | 2.86E-02 |
| ENSG0000228016  | RAPGEF4-AS1 | 2  | 172677141 | 172736206 | 59065  | lncRNA-antisense                   | -1.62 | 1.60E-03 | 1.47E-02 |
| ENSG0000227630  | LINC01132   | 1  | 234724042 | 234736720 | 12678  | lncRNA                             | -1.62 | 1.09E-03 | 1.16E-02 |
| ENSG0000169006  | NTSR2       | 2  | 11658178  | 11670195  | 12017  | protein coding                     | -1.62 | 2.22E-04 | 4.19E-03 |
| ENSG0000258933  | LINC02279   | 14 | 94960277  | 94962976  | 2699   | lncRNA                             | -1.62 | 4.37E-03 | 2.80E-02 |
| ENSG0000183709  | IFNL2       | 19 | 39268396  | 39270188  | 1792   | protein coding                     | -1.62 | 4.08E-03 | 2.69E-02 |
| ENSG0000268532  | LINC02135   | 16 | 86286427  | 86293389  | 6962   | lncRNA                             | -1.62 | 4.19E-04 | 6.37E-03 |
| ENSG0000239810  | PRAMEF11    | 1  | 12824605  | 12831410  | 6805   | protein coding                     | -1.62 | 6.09E-03 | 3.45E-02 |
| ENSG0000212232  | SNORD17     | 20 | 17962710  | 17962946  | 236    | snoRNA                             | -1.62 | 4.04E-05 | 1.34E-03 |
| ENSG0000232084  | LINC01104   | 2  | 100208254 | 100251484 | 43230  | lncRNA                             | -1.62 | 2.14E-03 | 1.78E-02 |
| ENSG0000269504  | AC003973.1  | 19 | 22017898  | 22052370  | 34472  | lncRNA                             | -1.62 | 6.95E-04 | 8.80E-03 |
| ENSG0000265750  | AC090772.3  | 18 | 24159509  | 24162211  | 2702   | lncRNA                             | -1.62 | 5.34E-03 | 3.16E-02 |
| ENSG0000125999  | BP1FB1      | 20 | 33273480  | 33309871  | 36391  | protein coding                     | -1.62 | 1.07E-04 | 2.64E-03 |
| ENSG0000233780  | HNRNP1P30   | 13 | 20938564  | 20949599  | 11035  | transcribed processed pseudogene   | -1.62 | 2.91E-03 | 2.16E-02 |
| ENSG0000183246  | RIMBP3C     | 22 | 21545678  | 21551461  | 5783   | protein coding                     | -1.62 | 1.64E-03 | 1.50E-02 |
| ENSG0000271034  | AC139700.1  | 3  | 70125070  | 70126609  | 1539   | processed pseudogene               | -1.62 | 6.31E-03 | 3.52E-02 |
| ENSG0000267075  | AC015818.8  | 17 | 20545371  | 20549952  | 4581   | lncRNA                             | -1.62 | 7.91E-03 | 4.08E-02 |
| ENSG0000162493  | PDPN        | 1  | 13583465  | 13617957  | 34492  | protein coding                     | -1.62 | 2.22E-04 | 4.19E-03 |
| ENSG0000013293  | SLC7A14     | 3  | 170459548 | 170586075 | 126527 | protein coding                     | -1.63 | 1.08E-04 | 2.65E-03 |
| ENSG0000259008  | AL355834.1  | 14 | 57355446  | 57359410  | 3964   | lncRNA                             | -1.63 | 3.43E-03 | 2.41E-02 |
| ENSG0000256150  | ITFG2-AS1   | 12 | 2695765   | 2812902   | 117137 | lncRNA                             | -1.63 | 1.75E-03 | 1.66E-02 |
| ENSG0000257582  | LINC01475   | 10 | 99526350  | 99531177  | 4827   | lncRNA                             | -1.63 | 2.44E-03 | 1.93E-02 |
| ENSG0000255693  | LINC02389   | 12 | 64883394  | 64990646  | 107252 | lncRNA                             | -1.63 | 5.91E-03 | 3.38E-02 |
| ENSG0000127472  | PLA2G5      | 1  | 20028179  | 20091911  | 63732  | protein coding                     | -1.63 | 1.21E-04 | 2.84E-03 |
| ENSG0000167098  | SUN5        | 20 | 32983773  | 33004433  | 20660  | protein coding                     | -1.63 | 3.59E-03 | 2.48E-02 |
| ENSG0000225868  | AC018582.1  | 19 | 37823722  | 37855215  | 31493  | transcribed unprocessed pseudogene | -1.63 | 3.96E-04 | 6.16E-03 |
| ENSG0000224540  | TFDP1P1     | 1  | 209232196 | 209233419 | 1223   | processed pseudogene               | -1.63 | 9.37E-03 | 4.54E-02 |
| ENSG0000244310  | AC093904.3  | 2  | 9110457   | 9116947   | 6490   | lncRNA                             | -1.63 | 1.01E-02 | 4.76E-02 |
| ENSG0000253955  | AC008663.2  | 5  | 173578275 | 173585068 | 6793   | lncRNA-antisense                   | -1.63 | 5.04E-04 | 7.14E-03 |
| ENSG0000169876  | MUC17       | 7  | 101020072 | 101058859 | 38787  | protein coding                     | -1.63 | 8.25E-06 | 4.47E-04 |
| ENSG0000278890  | FP325330.2  | 22 | 48052646  | 48058275  | 5629   | lncRNA                             | -1.63 | 1.89E-05 | 8.12E-04 |
| ENSG0000284693  | LINC02806   | 1  | 9425094   | 9440564   | 15470  | lncRNA                             | -1.63 | 2.19E-03 | 1.81E-02 |
| ENSG0000224689  | ZNF812P     | 19 | 9689924   | 9700776   | 10852  | transcribed unprocessed pseudogene | -1.63 | 1.31E-03 | 1.30E-02 |
| ENSG0000258705  | AC245505.2  | 14 | 22011910  | 22014964  | 3054   | processed pseudogene               | -1.63 | 2.32E-03 | 1.87E-02 |
| ENSG0000258100  | LINC02823   | 12 | 91327045  | 91368607  | 41562  | lncRNA                             | -1.63 | 6.91E-03 | 3.74E-02 |
| ENSG00002286339 | Z99496.1    | 6  | 118565660 | 118576840 | 11180  | lncRNA                             | -1.63 | 1.87E-03 | 1.63E-02 |
| ENSG0000197332  | AC008543.1  | 19 | 11639754  | 11686569  | 46815  | lncRNA                             | -1.63 | 5.69E-03 | 3.30E-02 |
| ENSG0000283365  | AC007603.3  | 16 | 49954985  | 49986730  | 13745  | unitary pseudogene                 | -1.63 | 6.32E-03 | 3.53E-02 |
| ENSG0000215853  | RPTN        | 1  | 152153595 | 152159228 | 5633   | protein coding                     | -1.63 | 3.32E-03 | 2.36E-02 |
| ENSG0000267204  | LINC01782   | 19 | 32102088  | 32105916  | 3828   | lncRNA                             | -1.63 | 8.48E-04 | 9.91E-03 |
| ENSG0000104938  | CLEC4M      | 19 | 7763210   | 7769605   | 6395   | protein coding                     | -1.63 | 5.09E-03 | 3.08E-02 |
| ENSG0000233143  | DIRC3-AS1   | 2  | 217261699 | 217336120 | 74421  | lncRNA                             | -1.63 | 8.54E-04 | 9.94E-03 |
| ENSG0000264630  | PRKCA-AS1   | 17 | 66398069  | 66416854  | 18785  | lncRNA-antisense                   | -1.63 | 6.33E-04 | 8.32E-03 |
| ENSG0000267779  | LINC01533   | 19 | 32025808  | 32073809  | 48001  | lncRNA                             | -1.63 | 9.60E-05 | 2.46E-03 |
| ENSG0000187979  | FAM230D     | 22 | 18178038  | 18205915  | 27877  | lncRNA-antisense                   | -1.63 | 3.78E-03 | 2.57E-02 |
| ENSG0000101892  | ATP1B4      | X  | 120362085 | 120383249 | 21164  | protein coding                     | -1.63 | 4.56E-03 | 2.88E-02 |
| ENSG0000279968  | CCDC28A-AS1 | 6  | 138725211 | 138773652 | 48441  | lncRNA                             | -1.63 | 6.30E-04 | 8.31E-03 |
| ENSG0000130377  | ACSBG2      | 19 | 6135247   | 6193094   | 57847  | protein coding                     | -1.63 | 3.88E-04 | 6.09E-03 |
| ENSG0000158486  | DNAH3       | 16 | 20933111  | 21159441  | 226330 | protein coding                     | -1.63 | 2.51E-06 | 1.90E-04 |
| ENSG0000203963  | Ctorf141    | 1  | 67092165  | 67231853  | 139688 | protein coding                     | -1.63 | 1.63E-03 | 1.49E-02 |
| ENSG0000272217  | AL645940.1  | 6  | 33246075  | 33246856  | 781    | lncRNA                             | -1.63 | 4.08E-03 | 2.69E-02 |
| ENSG0000157423  | HYD1        | 16 | 70802084  | 71230722  | 428638 | protein coding                     | -1.63 | 1.67E-06 | 1.42E-04 |
| ENSG0000174567  | GOLT1A      | 1  | 204198163 | 204213988 | 15825  | protein coding                     | -1.63 | 1.03E-03 | 1.13E-02 |
| ENSG0000225718  | AC092100.1  | 7  | 69186821  | 69430923  | 244102 | lncRNA                             | -1.64 | 3.07E-03 | 2.24E-02 |
| ENSG0000226985  | LINC01203   | X  | 13333952  | 13403035  | 69083  | lncRNA                             | -1.64 | 8.40E-05 | 2.26E-03 |
| ENSG0000233932  | CTXN2       | 15 | 48178122  | 48203758  | 25636  | protein coding                     | -1.64 | 2.51E-03 | 1.96E-02 |
| ENSG0000222976  | RN7SKP94    | 17 | 57789449  | 57789732  | 283    | misc RNA                           | -1.64 | 1.63E-03 | 1.49E-02 |
| ENSG0000287636  | AC005229.5  | 7  | 148584818 | 148625479 | 40661  | lncRNA                             | -1.64 | 4.38E-03 | 2.81E-02 |
| ENSG0000238062  | SPATA3-AS1  | 2  | 230984368 | 230996032 | 11664  | lncRNA                             | -1.64 | 9.89E-05 | 2.51E-03 |
| ENSG0000286218  | AC005040.2  | 2  | 106933739 | 106996534 | 62795  | lncRNA                             | -1.64 | 2.92E-04 | 5.03E-03 |
| ENSG0000228075  | BOD1L2      | 18 | 57147087  | 57150410  | 3323   | protein coding                     | -1.64 | 8.91E-04 | 1.02E-02 |
| ENSG0000248100  | AC087257.1  | 12 | 27547050  | 27552773  | 5723   | lncRNA                             | -1.64 | 6.77E-03 | 3.69E-02 |
| ENSG0000167104  | BPIFB6      | 20 | 33031648  | 33044047  | 12399  | protein coding                     | -1.64 | 2.91E-04 | 5.02E-03 |
| ENSG0000152583  | SPARCL1     | 4  | 87473335  | 87531061  | 57726  | protein coding                     | -1.64 | 3.23E-03 | 2.31E-02 |
| ENSG0000275431  | AC244100.2  | 17 | 35983656  | 35990270  | 6614   | lncRNA-antisense                   | -1.64 | 1.71E-04 | 3.55E-03 |
| ENSG0000250748  | AC025419.1  | 12 | 65466820  | 65642372  | 175552 | lncRNA                             | -1.64 | 1.76E-04 | 3.62E-03 |
| ENSG0000021852  | C8B         | 1  | 56929207  | 56966140  | 36933  | protein coding                     | -1.64 | 1.92E-03 | 1.66E-02 |
| ENSG0000259175  | AC108451.1  | 15 | 80554609  | 80562944  | 8335   | lncRNA-antisense                   | -1.64 | 2.19E-03 | 1.81E-02 |



|                 |             |    |           |           |        |                                    |       |          |          |
|-----------------|-------------|----|-----------|-----------|--------|------------------------------------|-------|----------|----------|
| ENSG00000237991 | RPL35P1     | 1  | 236981339 | 236981708 | 369    | processed_pseudogene               | -1.64 | 2.32E-04 | 4.32E-03 |
| ENSG00000263946 | AC015818.3  | 17 | 20554971  | 20559410  | 4439   | transcribed_processed_pseudogene   | -1.64 | 8.42E-03 | 4.25E-02 |
| ENSG00000132297 | HHLA1       | 8  | 132061486 | 132111159 | 49673  | protein_coding                     | -1.64 | 1.05E-04 | 2.59E-03 |
| ENSG00000104140 | RHOV        | 15 | 40872214  | 40874234  | 2020   | protein_coding                     | -1.64 | 1.48E-03 | 1.40E-02 |
| ENSG00000148798 | INA         | 10 | 103277138 | 103290346 | 13208  | protein_coding                     | -1.64 | 1.55E-04 | 3.33E-03 |
| ENSG00000187857 | OR6C75      | 12 | 55362975  | 55369279  | 6304   | protein_coding                     | -1.64 | 9.28E-04 | 1.05E-02 |
| ENSG00000235156 | TMEM30CP    | 3  | 100185687 | 100211766 | 26079  | transcribed_unitary_pseudogene     | -1.64 | 9.28E-03 | 4.51E-02 |
| ENSG00000226140 | LINC02654   | 10 | 16276871  | 16295858  | 18987  | lncRNA                             | -1.64 | 6.71E-03 | 3.67E-02 |
| ENSG00000184999 | SLC22A10    | 11 | 63137867  | 63369718  | 231851 | protein_coding                     | -1.64 | 7.30E-04 | 9.05E-03 |
| ENSG00000225882 | LINC01456   | X  | 17970197  | 18104644  | 134447 | lncRNA                             | -1.64 | 8.95E-03 | 4.41E-02 |
| ENSG00000286950 | AC087588.2  | 12 | 32755510  | 32756463  | 953    | lncRNA                             | -1.64 | 1.00E-02 | 4.75E-02 |
| ENSG00000225746 | MEG8        | 14 | 100894770 | 101038859 | 144089 | lncRNA                             | -1.64 | 1.27E-08 | 3.02E-06 |
| ENSG00000206142 | FAM230H     | 22 | 21300990  | 21325042  | 24052  | lncRNA                             | -1.64 | 4.29E-03 | 2.78E-02 |
| ENSG00000075290 | WNT8B       | 10 | 100463009 | 100483744 | 20735  | protein_coding                     | -1.64 | 1.60E-03 | 1.47E-02 |
| ENSG00000187173 | LCE2A       | 1  | 152698345 | 152699442 | 1097   | protein_coding                     | -1.64 | 8.61E-03 | 4.30E-02 |
| ENSG00000286043 | AC091214.1  | 12 | 82673070  | 82686632  | 13562  | lncRNA                             | -1.64 | 6.08E-03 | 3.44E-02 |
| ENSG00000172137 | CALB2       | 16 | 71358713  | 71390436  | 31723  | protein_coding                     | -1.64 | 4.36E-04 | 6.52E-03 |
| ENSG00000228607 | AC099342.1  | 7  | 20296637  | 20314512  | 17875  | lncRNA                             | -1.64 | 8.58E-03 | 4.29E-02 |
| ENSG00000249478 | AC010307.3  | 5  | 133243764 | 133248781 | 5017   | lncRNA-antisense                   | -1.64 | 1.05E-03 | 1.14E-02 |
| ENSG00000280310 | AC092437.1  | 4  | 4820405   | 4821452   | 1047   | TEC                                | -1.64 | 6.68E-03 | 3.66E-02 |
| ENSG00000185792 | NLRP9       | 19 | 55708438  | 55738402  | 29964  | protein_coding                     | -1.64 | 4.65E-04 | 6.79E-03 |
| ENSG00000156575 | PRG3        | 11 | 57376769  | 57381150  | 4381   | protein_coding                     | -1.64 | 1.09E-02 | 4.98E-02 |
| ENSG00000253656 | AC09087.1   | 8  | 130595299 | 130655712 | 60413  | lncRNA                             | -1.64 | 3.19E-03 | 2.29E-02 |
| ENSG00000257985 | AC004801.4  | 12 | 48011304  | 48025469  | 14165  | lncRNA-antisense                   | -1.64 | 8.44E-03 | 4.26E-02 |
| ENSG00000206422 | LRRC30      | 18 | 7231125   | 7232047   | 922    | protein_coding                     | -1.64 | 6.11E-03 | 3.45E-02 |
| ENSG00000287136 | AC073578.5  | 12 | 131457018 | 131458324 | 1306   | lncRNA                             | -1.64 | 1.00E-02 | 4.75E-02 |
| ENSG00000257829 | AC121157.1  | 12 | 52306616  | 52308371  | 1755   | lncRNA-antisense                   | -1.65 | 9.89E-03 | 4.71E-02 |
| ENSG00000141338 | ABCAB       | 17 | 68867289  | 68955392  | 88103  | protein_coding                     | -1.65 | 2.25E-07 | 3.07E-05 |
| ENSG00000287084 | AL355337.1  | 6  | 142671980 | 142681267 | 9287   | lncRNA                             | -1.65 | 1.82E-03 | 1.60E-02 |
| ENSG00000179676 | LINC00305   | 18 | 64079989  | 64149088  | 69099  | lncRNA                             | -1.65 | 2.64E-03 | 2.03E-02 |
| ENSG00000260469 | INSY1-AS1   | 15 | 73752317  | 73770613  | 18296  | lncRNA                             | -1.65 | 4.46E-03 | 2.84E-02 |
| ENSG00000196946 | ZNF705A     | 12 | 8157034   | 8188537   | 31503  | protein_coding                     | -1.65 | 9.23E-03 | 4.50E-02 |
| ENSG00000230753 | ZNF341-AS1  | 20 | 33787373  | 33811109  | 23736  | lncRNA-antisense                   | -1.65 | 7.04E-03 | 3.78E-02 |
| ENSG00000249306 | LINC01411   | 5  | 174336295 | 174532457 | 196162 | lncRNA                             | -1.65 | 3.69E-05 | 1.27E-03 |
| ENSG00000232685 | LINC00442   | 13 | 19008259  | 19026802  | 18543  | lncRNA-antisense                   | -1.65 | 1.08E-02 | 4.97E-02 |
| ENSG00000203395 | AC015969.1  | 2  | 68361214  | 68365584  | 4370   | lncRNA-antisense                   | -1.65 | 4.51E-03 | 2.86E-02 |
| ENSG00000235343 | LINC01665   | 22 | 16746628  | 16748645  | 2017   | lncRNA                             | -1.65 | 6.93E-03 | 3.75E-02 |
| ENSG00000084734 | GCKR        | 2  | 27496839  | 27523684  | 26845  | protein_coding                     | -1.65 | 2.77E-04 | 4.87E-03 |
| ENSG00000285996 | AC006116.9  | 19 | 56380230  | 56383924  | 3694   | lncRNA-antisense                   | -1.65 | 1.23E-05 | 6.01E-04 |
| ENSG00000234721 | LINC02092   | 17 | 73786675  | 73800966  | 14291  | lncRNA                             | -1.65 | 5.39E-04 | 7.51E-03 |
| ENSG00000261227 | AC140912.1  | 16 | 73232055  | 73233970  | 1915   | lncRNA                             | -1.65 | 3.17E-03 | 2.28E-02 |
| ENSG00000287045 | AC072028.1  | 3  | 142687982 | 142723881 | 35899  | lncRNA                             | -1.65 | 6.45E-03 | 3.57E-02 |
| ENSG00000285100 | AL359555.2  | 20 | 38270778  | 38274020  | 3242   | lncRNA                             | -1.65 | 5.70E-04 | 7.78E-03 |
| ENSG00000229401 | MIR5689HG   | 6  | 10434316  | 10456781  | 22465  | lncRNA                             | -1.65 | 7.66E-03 | 3.99E-02 |
| ENSG00000231367 | LINC02613   | 2  | 38406527  | 38515934  | 109407 | lncRNA                             | -1.65 | 8.76E-04 | 1.01E-02 |
| ENSG00000258729 | AL355102.3  | 14 | 96275046  | 96276723  | 1677   | lncRNA                             | -1.65 | 9.83E-03 | 4.69E-02 |
| ENSG00000258779 | LINC01568   | 16 | 73386771  | 73504954  | 118183 | lncRNA                             | -1.65 | 9.56E-06 | 4.96E-04 |
| ENSG00000229116 | AL137026.1  | 10 | 44282489  | 44293998  | 11509  | lncRNA                             | -1.65 | 4.97E-04 | 7.08E-03 |
| ENSG00000285773 | AL161893.1  | 13 | 30388785  | 30404967  | 16182  | lncRNA                             | -1.65 | 2.36E-03 | 1.89E-02 |
| ENSG00000285595 | AC105114.2  | 18 | 25196663  | 25218241  | 21578  | lncRNA-antisense                   | -1.65 | 3.69E-03 | 2.53E-02 |
| ENSG00000256124 | LINC01152   | 17 | 72030291  | 72041310  | 11019  | lncRNA                             | -1.65 | 1.85E-03 | 1.62E-02 |
| ENSG00000254299 | LINC01944   | 5  | 172543403 | 172559202 | 15799  | lncRNA                             | -1.65 | 4.48E-03 | 2.85E-02 |
| ENSG00000259425 | AC011767.1  | 15 | 22770523  | 22776199  | 5676   | transcribed_unprocessed_pseudogene | -1.65 | 1.58E-04 | 3.37E-03 |
| ENSG00000169347 | GP2         | 16 | 20309574  | 20327808  | 18234  | protein_coding                     | -1.65 | 1.91E-04 | 3.80E-03 |
| ENSG00000255345 | AP002957.1  | 11 | 79092848  | 79098003  | 5155   | lncRNA                             | -1.65 | 2.39E-03 | 1.90E-02 |
| ENSG00000287581 | AC016549.1  | 5  | 14356886  | 14359285  | 2399   | lncRNA                             | -1.65 | 1.33E-03 | 1.32E-02 |
| ENSG00000231421 | AC011840.1  | 17 | 30573471  | 30577000  | 3529   | lncRNA                             | -1.65 | 5.48E-04 | 7.59E-03 |
| ENSG00000280870 | MIR325HG    | X  | 76656866  | 77014532  | 357666 | lncRNA                             | -1.65 | 4.83E-03 | 2.98E-02 |
| ENSG00000203995 | ZYG11A      | 1  | 52842511  | 52894998  | 52487  | protein_coding                     | -1.65 | 2.70E-05 | 1.02E-03 |
| ENSG00000163915 | IGF2BP2-AS1 | 3  | 185712528 | 185729787 | 17259  | lncRNA-antisense                   | -1.65 | 1.20E-03 | 1.24E-02 |
| ENSG00000233372 | AL137076.1  | 1  | 30140263  | 30141607  | 1344   | lncRNA                             | -1.65 | 1.02E-03 | 1.11E-02 |
| ENSG00000204640 | NMS         | 2  | 100470482 | 100483280 | 12798  | protein_coding                     | -1.65 | 1.02E-02 | 4.80E-02 |
| ENSG00000224346 | BICD1P1     | 2  | 200844240 | 200845461 | 1221   | processed_pseudogene               | -1.65 | 2.43E-03 | 1.92E-02 |
| ENSG00000233756 | DSCAM-IT1   | 21 | 40615378  | 40630767  | 15389  | lncRNA-sense intronic              | -1.65 | 5.06E-03 | 3.06E-02 |
| ENSG00000136943 | CTSV        | 9  | 97029677  | 97039643  | 9966   | protein_coding                     | -1.65 | 1.97E-04 | 3.89E-03 |
| ENSG00000270110 | AL353953.2  | 1  | 228295549 | 228303002 | 7453   | lncRNA-antisense                   | -1.65 | 5.18E-03 | 3.12E-02 |
| ENSG00000285675 | AC023385.1  | 8  | 10118005  | 10147423  | 29418  | lncRNA-antisense                   | -1.65 | 2.35E-03 | 1.88E-02 |
| ENSG00000287452 | AL391477.1  | 1  | 181962889 | 181998985 | 36096  | lncRNA                             | -1.66 | 1.00E-03 | 1.10E-02 |
| ENSG00000285672 | AL160396.2  | 13 | 114275326 | 114277323 | 1997   | lncRNA                             | -1.66 | 7.18E-03 | 3.84E-02 |
| ENSG00000171724 | VAT1L       | 16 | 77788564  | 77980107  | 191543 | protein_coding                     | -1.66 | 5.75E-05 | 1.70E-03 |
| ENSG00000165182 | CXorf58     | X  | 23908006  | 23939509  | 31503  | protein_coding                     | -1.66 | 2.45E-03 | 1.93E-02 |
| ENSG00000286805 | AL138716.1  | 6  | 161435098 | 161446016 | 10918  | lncRNA                             | -1.66 | 7.99E-03 | 4.10E-02 |
| ENSG00000272815 | AC098850.4  | 17 | 16788057  | 16816540  | 28483  | lncRNA                             | -1.66 | 4.09E-03 | 2.69E-02 |
| ENSG00000226516 | FAM138B     | 2  | 113577382 | 113578852 | 1470   | lncRNA                             | -1.66 | 6.85E-03 | 3.72E-02 |
| ENSG00000231298 | MANCR       | 10 | 4650158   | 4678185   | 28027  | lncRNA                             | -1.66 | 5.77E-03 | 3.33E-02 |
| ENSG00000183273 | CDC60       | 12 | 119334712 | 119541040 | 206328 | protein_coding                     | -1.66 | 6.31E-04 | 8.31E-03 |
| ENSG00000260505 | AC096644.3  | 1  | 220401122 | 220404033 | 2911   | lncRNA                             | -1.66 | 1.00E-02 | 4.75E-02 |
| ENSG00000265702 | AC005821.1  | 17 | 62699244  | 62754973  | 55729  | lncRNA-antisense                   | -1.66 | 1.79E-04 | 3.65E-03 |
| ENSG00000273792 | AC022898.2  | 15 | 60847757  | 60849068  | 1311   | lncRNA-sense intronic              | -1.66 | 5.62E-03 | 3.27E-02 |
| ENSG00000253199 | LINC02153   | 8  | 20972021  | 20995119  | 23098  | lncRNA                             | -1.66 | 5.75E-04 | 7.82E-03 |
| ENSG00000167139 | TBC1D21     | 15 | 73873564  | 73889214  | 15650  | protein_coding                     | -1.66 | 1.33E-04 | 3.02E-03 |
| ENSG00000229349 | ACTG1P9     | 6  | 46204729  | 46207386  | 2657   | processed_pseudogene               | -1.66 | 4.25E-04 | 7.35E-03 |
| ENSG00000244588 | RAD21L1     | 20 | 1228056   | 1296421   | 70365  | protein_coding                     | -1.66 | 7.31E-04 | 9.05E-03 |
| ENSG00000198203 | SLT1C2      | 2  | 108286639 | 108309915 | 21276  | protein_coding                     | -1.66 | 4.22E-05 | 1.38E-03 |
| ENSG00000276627 | AL117372.1  | 20 | 60755001  | 60767279  | 12278  | lncRNA                             | -1.66 | 1.23E-04 | 2.87E-03 |
| ENSG00000239552 | HOXB-AS2    | 17 | 48557262  | 48560333  | 3071   | lncRNA-antisense                   | -1.66 | 7.48E-03 | 3.94E-02 |
| ENSG00000158077 | NLRP14      | 11 | 7020479   | 7071526   | 51047  | protein_coding                     | -1.66 | 5.69E-05 | 1.69E-03 |
| ENSG00000235486 | ANAPC1P6    | 2  | 106369724 | 106378247 | 8523   | unprocessed_pseudogene             | -1.66 | 8.06E-03 | 4.13E-02 |
| ENSG00000120729 | MYOT        | 5  | 137867858 | 137887851 | 19993  | protein_coding                     | -1.66 | 8.52E-04 | 9.93E-03 |
| ENSG00000172742 | OR4D9       | 11 | 59511368  | 59520703  | 9335   | protein_coding                     | -1.66 | 4.46E-04 | 6.61E-03 |

|                 |                 |    |           |           |        |                                    |       |          |          |
|-----------------|-----------------|----|-----------|-----------|--------|------------------------------------|-------|----------|----------|
| ENSG00000287623 | AC037193.1      | 3  | 9100803   | 9104078   | 3275   | lncRNA                             | -1.66 | 6.84E-03 | 3.72E-02 |
| ENSG00000253698 | AC138601.1      | 5  | 178350867 | 178352250 | 1383   | lncRNA-antisense                   | -1.66 | 1.03E-02 | 4.83E-02 |
| ENSG00000279301 | ORZT11          | 1  | 248623557 | 248635091 | 11534  | protein coding                     | -1.66 | 6.03E-03 | 3.43E-02 |
| ENSG00000280312 | Z83836.1        | 22 | 47259366  | 47261007  | 1641   | TEC                                | -1.66 | 1.04E-02 | 4.87E-02 |
| ENSG00000006059 | KRT133A         | 17 | 41346092  | 41350828  | 4736   | protein coding                     | -1.66 | 8.73E-04 | 1.01E-02 |
| ENSG00000103023 | PRSS54          | 16 | 58279997  | 58295047  | 15050  | protein coding                     | -1.66 | 7.43E-04 | 9.15E-03 |
| ENSG00000240048 | DDX50P2         | 3  | 154352136 | 154354799 | 2663   | processed pseudogene               | -1.66 | 4.34E-03 | 2.79E-02 |
| ENSG00000224647 | AC026954.1      | 17 | 7330452   | 7335413   | 4961   | unitary pseudogene                 | -1.66 | 3.18E-03 | 2.29E-02 |
| ENSG00000286115 | AC010092.1      | 2  | 170890393 | 170914873 | 24480  | lncRNA                             | -1.66 | 7.49E-03 | 3.94E-02 |
| ENSG00000206903 | SNORA24B        | 15 | 65285461  | 65285591  | 130    | snoRNA                             | -1.66 | 6.11E-03 | 3.45E-02 |
| ENSG00000249346 | LINC01016       | 6  | 33867506  | 33896914  | 29408  | lncRNA                             | -1.66 | 1.14E-05 | 5.69E-04 |
| ENSG00000271615 | ACTG1P22        | 2  | 57755428  | 57766052  | 10624  | transcribed processed pseudogene   | -1.66 | 8.95E-03 | 4.41E-02 |
| ENSG00000232936 | AL157400.2      | 10 | 89645272  | 89652144  | 6872   | lncRNA-antisense                   | -1.66 | 8.22E-03 | 4.18E-02 |
| ENSG00000228151 | AC004941.1      | 7  | 149398204 | 149401456 | 3252   | lncRNA-antisense                   | -1.67 | 2.67E-04 | 4.76E-03 |
| ENSG00000162365 | CYP4A22         | 1  | 47137435  | 47149735  | 12300  | protein coding                     | -1.67 | 1.91E-04 | 3.80E-03 |
| ENSG00000188525 | AC010969.1      | 2  | 10001757  | 10006030  | 4273   | lncRNA-antisense                   | -1.67 | 1.85E-03 | 1.62E-02 |
| ENSG00000207081 | AC091133.6      | 17 | 48899131  | 48899748  | 617    | processed pseudogene               | -1.67 | 4.97E-03 | 3.03E-02 |
| ENSG00000196131 | VN1R2           | 19 | 53258292  | 53261837  | 3545   | protein coding                     | -1.67 | 1.02E-02 | 4.79E-02 |
| ENSG00000180532 | ZSCAN4          | 19 | 57668935  | 57679152  | 10217  | protein coding                     | -1.67 | 2.84E-03 | 2.13E-02 |
| ENSG00000173572 | NLRP13          | 19 | 55891699  | 55932336  | 40637  | protein coding                     | -1.67 | 1.24E-04 | 2.89E-03 |
| ENSG00000277631 | PGM5P3-AS1      | 9  | 72670     | 89850     | 17180  | lncRNA                             | -1.67 | 5.00E-03 | 3.04E-02 |
| ENSG00000152954 | NRSN1           | 6  | 24126186  | 24154900  | 28714  | protein coding                     | -1.67 | 6.61E-04 | 8.54E-03 |
| ENSG00000262950 | AC007861.1      | 16 | 49442910  | 49454109  | 11199  | lncRNA                             | -1.67 | 8.70E-04 | 1.01E-02 |
| ENSG00000229957 | AL031687.1      | 20 | 46168404  | 46171237  | 2833   | lncRNA                             | -1.67 | 4.56E-03 | 2.88E-02 |
| ENSG00000236963 | LINC01141       | 1  | 20360579  | 20431234  | 70655  | lncRNA                             | -1.67 | 4.71E-05 | 1.50E-03 |
| ENSG00000234141 | AC006042.3      | 7  | 7948853   | 7950709   | 856    | lncRNA-antisense                   | -1.67 | 9.93E-03 | 4.72E-02 |
| ENSG00000261033 | AC005730.2      | 17 | 20008051  | 20009234  | 1183   | lncRNA-antisense                   | -1.67 | 1.78E-03 | 1.58E-02 |
| ENSG00000286884 | AC012060.1      | 15 | 26261669  | 26265918  | 4249   | lncRNA                             | -1.67 | 6.06E-03 | 3.44E-02 |
| ENSG00000260338 | LINC010570      | 16 | 5596856   | 5616373   | 19517  | lncRNA-antisense                   | -1.67 | 1.79E-04 | 3.66E-03 |
| ENSG00000234983 | AC010132.2      | 7  | 42918741  | 42920084  | 1343   | processed pseudogene               | -1.67 | 8.51E-03 | 4.27E-02 |
| ENSG00000257060 | AC091078.1      | 15 | 93230034  | 93569483  | 339449 | lncRNA                             | -1.67 | 6.10E-05 | 1.77E-03 |
| ENSG00000284665 | AC002472.4      | 22 | 21071082  | 21081018  | 9936   | unprocessed pseudogene             | -1.67 | 6.59E-03 | 3.62E-02 |
| ENSG00000287408 | AC027811.1      | 15 | 79331591  | 79337277  | 5686   | lncRNA                             | -1.67 | 1.25E-04 | 2.91E-03 |
| ENSG00000259417 | CTXND1          | 15 | 80195481  | 80252213  | 56732  | protein coding                     | -1.67 | 1.47E-05 | 6.75E-04 |
| ENSG00000178586 | OROB3           | 2  | 240045077 | 240047027 | 1950   | protein coding                     | -1.67 | 7.29E-03 | 3.87E-02 |
| ENSG00000174930 | VN2R1P          | 3  | 156019646 | 156037647 | 18001  | unitary pseudogene                 | -1.67 | 5.89E-03 | 3.37E-02 |
| ENSG00000229613 | LINC01501       | 9  | 90462899  | 90583821  | 120922 | lncRNA                             | -1.67 | 8.53E-04 | 9.93E-03 |
| ENSG00000250026 | TMPPRS11BNL     | 4  | 68184081  | 68218080  | 33999  | transcribed unprocessed pseudogene | -1.67 | 7.61E-03 | 3.98E-02 |
| ENSG00000266248 | AC011474.2      | 19 | 29489775  | 29526948  | 37173  | lncRNA-antisense                   | -1.67 | 6.17E-03 | 3.47E-02 |
| ENSG00000249031 | SUMO2P6         | 5  | 174561776 | 174562063 | 287    | processed pseudogene               | -1.67 | 8.95E-03 | 4.41E-02 |
| ENSG00000110680 | CALCA           | 11 | 14966668  | 14972351  | 5683   | protein coding                     | -1.67 | 1.10E-03 | 1.17E-02 |
| ENSG00000102243 | VGLL1           | X  | 136532215 | 136556807 | 24592  | protein coding                     | -1.67 | 8.63E-03 | 4.31E-02 |
| ENSG00000261435 | AL592164.1      | X  | 39837536  | 39848358  | 10822  | lncRNA                             | -1.67 | 7.46E-03 | 3.93E-02 |
| ENSG00000169302 | STK32A          | 5  | 147234963 | 147387855 | 152892 | protein coding                     | -1.67 | 2.26E-05 | 9.10E-04 |
| ENSG00000267594 | CYP4F24P        | 19 | 15760241  | 15779909  | 19668  | unprocessed pseudogene             | -1.68 | 2.75E-04 | 4.85E-03 |
| ENSG00000279261 | PP26T2          | 1  | 234757619 | 234760056 | 2437   | lncRNA                             | -1.68 | 2.67E-03 | 2.05E-02 |
| ENSG00000176194 | CIDEA           | 18 | 12254361  | 12277595  | 23234  | protein coding                     | -1.68 | 2.35E-04 | 4.36E-03 |
| ENSG00000176840 | MIR7-3HG        | 19 | 4769031   | 4785077   | 16046  | lncRNA                             | -1.68 | 4.28E-03 | 2.77E-02 |
| ENSG00000224666 | ETV7-AS1        | 6  | 36386831  | 36393462  | 6631   | lncRNA-antisense                   | -1.68 | 3.19E-03 | 2.29E-02 |
| ENSG00000184148 | SPRR4           | 1  | 152970648 | 152972574 | 1926   | protein coding                     | -1.68 | 8.12E-03 | 4.15E-02 |
| ENSG00000158445 | KCNB1           | 20 | 49293394  | 49484297  | 190903 | protein coding                     | -1.68 | 1.14E-07 | 1.78E-05 |
| ENSG00000253227 | AC090192.2      | 8  | 124271667 | 124279580 | 7913   | lncRNA                             | -1.68 | 7.09E-04 | 8.88E-03 |
| ENSG00000274492 | AL121768.1      | 14 | 88819608  | 88822151  | 2543   | lncRNA                             | -1.68 | 2.86E-03 | 2.14E-02 |
| ENSG00000197748 | CFAP43          | 10 | 104129888 | 104232364 | 102476 | protein coding                     | -1.68 | 2.18E-05 | 8.88E-04 |
| ENSG00000269927 | AC004817.3      | 3  | 71141125  | 71143253  | 2128   | lncRNA                             | -1.68 | 4.28E-03 | 2.77E-02 |
| ENSG00000234238 | AC022498.1      | 14 | 188107072 | 188147310 | 40238  | lncRNA                             | -1.68 | 7.10E-03 | 3.80E-02 |
| ENSG00000169035 | KLK7            | 19 | 50976468  | 50984099  | 7631   | protein coding                     | -1.68 | 2.19E-03 | 1.81E-02 |
| ENSG00000106823 | ECM2            | 9  | 92493554  | 92536655  | 43101  | protein coding                     | -1.68 | 1.75E-04 | 3.62E-03 |
| ENSG00000256292 | LINC02376       | 12 | 127274265 | 127284328 | 10063  | lncRNA                             | -1.68 | 3.46E-03 | 2.42E-02 |
| ENSG00000138039 | LHCGR           | 2  | 48686774  | 48755730  | 68956  | protein coding                     | -1.68 | 4.64E-03 | 2.91E-02 |
| ENSG00000236769 | LINC02659       | 10 | 43900874  | 43912369  | 11495  | lncRNA                             | -1.68 | 7.19E-03 | 3.84E-02 |
| ENSG00000143520 | FLG2            | 1  | 152348735 | 152360006 | 11271  | protein coding                     | -1.68 | 2.43E-05 | 9.53E-04 |
| ENSG00000286179 | AL139351.2      | 20 | 48007875  | 48022237  | 14362  | lncRNA                             | -1.68 | 1.92E-03 | 1.66E-02 |
| ENSG00000282386 | AL358472.4      | 1  | 153964361 | 153965070 | 709    | lncRNA-antisense                   | -1.68 | 5.71E-03 | 3.31E-02 |
| ENSG00000280356 | AL021877.2      | 22 | 34641179  | 34651862  | 10683  | lncRNA                             | -1.68 | 3.42E-05 | 1.20E-03 |
| ENSG00000223720 | AL109659.1      | 1  | 48172972  | 48206857  | 33885  | lncRNA                             | -1.68 | 8.37E-03 | 4.23E-02 |
| ENSG00000259370 | AC103740.1      | 15 | 62827675  | 62884034  | 56359  | lncRNA-antisense                   | -1.68 | 2.38E-04 | 4.39E-03 |
| ENSG00000286933 | AL022170.1      | 6  | 25632673  | 25640931  | 8258   | lncRNA                             | -1.68 | 2.14E-03 | 1.78E-02 |
| ENSG00000226308 | AL122058.1      | 20 | 57266797  | 57282998  | 16201  | lncRNA                             | -1.68 | 8.12E-04 | 9.65E-03 |
| ENSG00000286364 | AL512308.1      | 6  | 453398    | 477829    | 24438  | lncRNA                             | -1.68 | 1.27E-03 | 1.28E-02 |
| ENSG00000140478 | GOLGA6D         | 15 | 75282835  | 75295807  | 12972  | protein coding                     | -1.68 | 8.69E-03 | 4.33E-02 |
| ENSG00000231884 | NDUFB1P1        | 3  | 48181547  | 48181726  | 179    | processed pseudogene               | -1.68 | 4.83E-03 | 2.98E-02 |
| ENSG00000169064 | ZBFX            | 3  | 167239843 | 167407874 | 168031 | protein coding                     | -1.68 | 1.11E-03 | 1.18E-02 |
| ENSG00000172458 | IL17D           | 13 | 20702127  | 20723098  | 20971  | protein coding                     | -1.68 | 2.73E-05 | 1.03E-03 |
| ENSG00000278895 | AC008507.3      | 19 | 29915862  | 29917830  | 1968   | TEC                                | -1.68 | 7.70E-03 | 4.01E-02 |
| ENSG00000287232 | AC079848.2      | 3  | 126213204 | 126247714 | 34510  | lncRNA                             | -1.68 | 1.91E-04 | 3.80E-03 |
| ENSG00000288577 | AL117334.1      | 20 | 3406380   | 3410036   | 3656   | lncRNA                             | -1.69 | 8.42E-03 | 4.25E-02 |
| ENSG00000176855 | KRT18P28        | 1  | 182959074 | 182960405 | 1331   | processed pseudogene               | -1.69 | 9.39E-03 | 4.55E-02 |
| ENSG00000142973 | CYP4B1          | 1  | 46757838  | 46819413  | 61575  | protein coding                     | -1.69 | 4.68E-05 | 1.49E-03 |
| ENSG00000229380 | PRKAR1B-AS2     | 7  | 561958    | 565619    | 3661   | lncRNA-antisense                   | -1.69 | 8.25E-03 | 4.19E-02 |
| ENSG00000280078 | AC016526.3      | 14 | 76279173  | 76283103  | 3930   | TEC                                | -1.69 | 8.65E-05 | 2.30E-03 |
| ENSG00000152034 | MCHR2           | 6  | 99918519  | 99994247  | 75728  | protein coding                     | -1.69 | 3.10E-03 | 2.25E-02 |
| ENSG00000174844 | DNAH12          | 3  | 57293699  | 57544344  | 250645 | protein coding                     | -1.69 | 7.76E-09 | 2.01E-06 |
| ENSG00000220891 | LL22NCO3-83E9.3 | 22 | 22559343  | 22566602  | 7259   | lncRNA-antisense                   | -1.69 | 6.61E-04 | 8.55E-03 |
| ENSG00000265359 | AC004231.4      | 17 | 40850800  | 40863282  | 12482  | lncRNA-antisense                   | -1.69 | 1.02E-02 | 4.80E-02 |
| ENSG00000279887 | AC046158.4      | 16 | 78525189  | 78526535  | 1346   | TEC                                | -1.69 | 1.06E-02 | 4.93E-02 |
| ENSG00000117148 | ACTL8           | 1  | 17755333  | 17827063  | 71730  | protein coding                     | -1.69 | 1.42E-04 | 3.14E-03 |
| ENSG00000242412 | DBIL5P2         | 2  | 63117851  | 63119542  | 1691   | transcribed processed pseudogene   | -1.69 | 1.94E-03 | 1.67E-02 |
| ENSG00000184571 | PWIL3           | 22 | 24719034  | 24774720  | 55686  | protein coding                     | -1.69 | 3.86E-05 | 1.31E-03 |
| ENSG00000254737 | OR10G4          | 11 | 124012997 | 124018732 | 5735   | protein coding                     | -1.69 | 4.64E-03 | 2.91E-02 |

|                  |             |    |           |           |        |                                    |       |          |          |
|------------------|-------------|----|-----------|-----------|--------|------------------------------------|-------|----------|----------|
| ENSG00000274775  | Z82195.2    | X  | 130445085 | 130524257 | 79172  | transcribed_unprocessed_pseudogene | -1.69 | 2.89E-07 | 3.80E-05 |
| ENSG00000235180  | LINC00601   | 10 | 126413869 | 126421879 | 8010   | lncRNA                             | -1.69 | 7.73E-03 | 4.02E-02 |
| ENSG00000267723  | AC011509.2  | 19 | 14254189  | 14293205  | 39016  | lncRNA                             | -1.69 | 9.28E-03 | 4.51E-02 |
| ENSG00000237166  | LINC01792   | 2  | 200711535 | 200735186 | 23651  | lncRNA                             | -1.69 | 3.96E-04 | 6.16E-03 |
| ENSG00000228639  | ROCR        | 17 | 72021851  | 72058073  | 36222  | lncRNA                             | -1.69 | 1.58E-03 | 1.46E-02 |
| ENSG00000175202  | HIGD2B      | 15 | 72675798  | 72686182  | 10384  | protein_coding                     | -1.69 | 7.35E-03 | 3.89E-02 |
| ENSG00000286331  | AC011388.1  | 5  | 150427904 | 150429906 | 2002   | lncRNA                             | -1.69 | 1.02E-02 | 4.81E-02 |
| ENSG00000160472  | TMEM190     | 19 | 55376826  | 55378246  | 1420   | protein_coding                     | -1.69 | 9.57E-03 | 4.61E-02 |
| ENSG00000285644  | AC108448.3  | 11 | 3057538   | 3064707   | 7169   | lncRNA-antisense                   | -1.69 | 5.05E-04 | 7.14E-03 |
| ENSG00000234859  | AC003958.2  | 17 | 41402416  | 41425049  | 22633  | lncRNA-antisense                   | -1.69 | 3.78E-04 | 5.99E-03 |
| ENSG00000237972  | TUBG1P      | 7  | 43918697  | 43920054  | 1357   | processed_pseudogene               | -1.69 | 2.88E-03 | 2.15E-02 |
| ENSG00000164627  | KIF6        | 6  | 39329990  | 39725408  | 395418 | protein_coding                     | -1.69 | 7.34E-05 | 2.04E-03 |
| ENSG00000116721  | PRAMEF1     | 1  | 12791397  | 12796628  | 5231   | protein_coding                     | -1.69 | 2.57E-03 | 2.00E-02 |
| ENSG00000125850  | OVOL2       | 20 | 17956979  | 18059188  | 102209 | protein_coding                     | -1.69 | 2.42E-04 | 4.45E-03 |
| ENSG00000230371  | KARS1P2     | 13 | 113130416 | 113132054 | 1638   | processed_pseudogene               | -1.69 | 7.03E-03 | 3.78E-02 |
| ENSG00000287268  | AL050350.1  | 6  | 110341973 | 110354563 | 12590  | lncRNA                             | -1.69 | 2.00E-05 | 8.43E-04 |
| ENSG00000231831  | MTHFD1P1    | X  | 57392646  | 57395409  | 2763   | processed_pseudogene               | -1.69 | 2.95E-03 | 2.18E-02 |
| ENSG00000257896  | AC093012.1  | 12 | 43736628  | 43741067  | 4439   | transcribed_unprocessed_pseudogene | -1.69 | 6.47E-03 | 3.58E-02 |
| ENSG00000227705  | AL391097.2  | 20 | 53196229  | 53208705  | 12476  | lncRNA-antisense                   | -1.70 | 7.80E-03 | 4.04E-02 |
| ENSG00000142615  | CEL2A2      | 1  | 15456728  | 15472091  | 15363  | protein_coding                     | -1.70 | 2.82E-03 | 2.12E-02 |
| ENSG00000286406  | AC138776.1  | 22 | 11827523  | 11910358  | 82835  | transcribed_unprocessed_pseudogene | -1.70 | 1.00E-02 | 4.74E-02 |
| ENSG00000166670  | MMP10       | 11 | 102770502 | 102780628 | 10126  | protein_coding                     | -1.70 | 5.73E-03 | 3.31E-02 |
| ENSG00000147257  | GPC3        | X  | 133535745 | 133985594 | 449849 | protein_coding                     | -1.70 | 4.26E-04 | 6.44E-03 |
| ENSG00000287433  | AC107222.2  | 4  | 184100482 | 184106038 | 5556   | lncRNA                             | -1.70 | 1.07E-03 | 1.15E-02 |
| ENSG00000287519  | AC004921.2  | 7  | 77487317  | 77498965  | 11648  | lncRNA                             | -1.70 | 3.12E-03 | 2.26E-02 |
| ENSG00000189433  | GJB4        | 1  | 34759740  | 34762327  | 2587   | protein_coding                     | -1.70 | 6.97E-04 | 8.80E-03 |
| ENSG00000231057  | AC096637.2  | 1  | 211675749 | 211690103 | 14354  | lncRNA-antisense                   | -1.70 | 3.93E-04 | 6.13E-03 |
| ENSG00000266979  | LINC01180   | 17 | 44646364  | 44650349  | 3985   | lncRNA                             | -1.70 | 1.70E-03 | 1.63E-02 |
| ENSG00000260266  | PPIAP46     | 15 | 74350768  | 74364620  | 13852  | transcribed_processed_pseudogene   | -1.70 | 1.11E-03 | 1.18E-02 |
| ENSG00000264016  | AC015908.3  | 17 | 10741257  | 10769089  | 27832  | lncRNA                             | -1.70 | 5.44E-03 | 3.20E-02 |
| ENSG00000261261  | AC028462.4  | 16 | 52622115  | 52677747  | 5632   | lncRNA                             | -1.70 | 4.13E-03 | 2.71E-02 |
| ENSG00000287656  | AL591069.1  | 6  | 160369200 | 160386934 | 17734  | lncRNA                             | -1.70 | 1.08E-02 | 4.98E-02 |
| ENSG00000182545  | RNASE10     | 14 | 20505537  | 20511169  | 5632   | protein_coding                     | -1.70 | 8.78E-03 | 4.36E-02 |
| ENSG00000248736  | AC094105.2  | 5  | 2921496   | 2967955   | 46459  | lncRNA                             | -1.70 | 7.70E-05 | 2.12E-03 |
| ENSG00000101076  | HNF4A       | 20 | 44355700  | 44434596  | 78896  | protein_coding                     | -1.70 | 4.39E-07 | 5.27E-05 |
| ENSG00000248469  | AC139491.1  | 5  | 176049678 | 176062021 | 12343  | lncRNA-antisense                   | -1.70 | 1.69E-03 | 1.52E-02 |
| ENSG00000182950  | ODF3L1      | 15 | 75724041  | 75727688  | 3647   | protein_coding                     | -1.70 | 6.77E-04 | 8.68E-03 |
| ENSG00000170925  | TEX13B      | X  | 107980864 | 107982370 | 1506   | protein_coding                     | -1.70 | 8.63E-03 | 4.31E-02 |
| ENSG00000160505  | NLRP4       | 19 | 55836540  | 55881855  | 45315  | protein_coding                     | -1.70 | 1.30E-04 | 2.99E-03 |
| ENSG00000275805  | AC090206.1  | 18 | 26565723  | 26575626  | 9903   | lncRNA-sense intronic              | -1.70 | 1.75E-03 | 1.56E-02 |
| ENSG00000131864  | USP29       | 19 | 57119138  | 57131926  | 12788  | protein_coding                     | -1.70 | 3.72E-04 | 5.93E-03 |
| ENSG00000187185  | AC092118.1  | 16 | 57798186  | 57816946  | 18760  | lncRNA                             | -1.70 | 4.46E-04 | 6.61E-03 |
| ENSG00000280219  | AC093908.1  | 4  | 147487971 | 147496062 | 8091   | TEC                                | -1.70 | 1.89E-03 | 1.64E-02 |
| ENSG00000285899  | AL023574.1  | X  | 43279560  | 43438657  | 159097 | lncRNA                             | -1.70 | 4.14E-03 | 2.71E-02 |
| ENSG00000271609  | AC005632.4  | 16 | 21538487  | 21538794  | 307    | processed_pseudogene               | -1.70 | 7.35E-03 | 3.89E-02 |
| ENSG00000226668  | AL136981.1  | 9  | 92882567  | 92899608  | 17041  | transcribed_unprocessed_pseudogene | -1.70 | 3.82E-04 | 6.03E-03 |
| ENSG00000237463  | LRRCS2-AS1  | 1  | 165476838 | 165582155 | 105317 | lncRNA-antisense                   | -1.70 | 2.24E-06 | 1.75E-04 |
| ENSG00000155890  | TRIM42      | 3  | 140678064 | 140701150 | 23086  | protein_coding                     | -1.70 | 7.63E-04 | 9.31E-03 |
| ENSG00000259153  | AC004816.1  | 14 | 70809841  | 70815994  | 6153   | lncRNA                             | -1.71 | 1.79E-03 | 1.58E-02 |
| ENSG00000214146  | LINC02026   | 3  | 193957372 | 194003760 | 46388  | lncRNA                             | -1.71 | 9.59E-05 | 2.46E-03 |
| ENSG00000134812  | CBL1F       | 11 | 59829273  | 59845499  | 16226  | protein_coding                     | -1.71 | 6.05E-04 | 8.07E-03 |
| ENSG000000011677 | GABRA3      | X  | 152166234 | 152451315 | 285081 | protein_coding                     | -1.71 | 7.91E-04 | 9.50E-03 |
| ENSG00000242221  | PSG2        | 19 | 43064209  | 43083045  | 18836  | protein_coding                     | -1.71 | 8.74E-05 | 2.32E-03 |
| ENSG00000280415  | AC005252.3  | 12 | 125858862 | 125861119 | 2257   | TEC                                | -1.71 | 7.61E-03 | 3.98E-02 |
| ENSG00000259876  | AC101033.1  | 16 | 12556353  | 12557694  | 1341   | lncRNA-antisense                   | -1.71 | 9.99E-03 | 4.74E-02 |
| ENSG00000204928  | GRXCR2      | 5  | 145858521 | 145937126 | 78605  | protein_coding                     | -1.71 | 1.54E-03 | 1.44E-02 |
| ENSG00000287009  | AC021037.1  | 10 | 96129055  | 96130528  | 1473   | lncRNA                             | -1.71 | 1.19E-04 | 2.80E-03 |
| ENSG00000204949  | FAM83A-AS1  | 8  | 123196536 | 123202743 | 6207   | lncRNA-antisense                   | -1.71 | 6.08E-03 | 3.44E-02 |
| ENSG00000231933  | MYO18B-AS1  | 22 | 25876854  | 25903247  | 26393  | lncRNA-antisense                   | -1.71 | 1.42E-04 | 3.14E-03 |
| ENSG00000246022  | ALDH1L1-AS2 | 3  | 126180012 | 126210169 | 30157  | lncRNA-antisense                   | -1.71 | 1.06E-03 | 1.15E-02 |
| ENSG00000287570  | AL035447.1  | 20 | 44181111  | 44182712  | 16101  | lncRNA                             | -1.71 | 8.57E-03 | 4.29E-02 |
| ENSG00000173250  | GPR151      | 5  | 146513103 | 146516190 | 3087   | protein_coding                     | -1.71 | 3.24E-03 | 2.32E-02 |
| ENSG00000279085  | AL022323.2  | 22 | 25009685  | 25015072  | 5387   | lncRNA-antisense                   | -1.71 | 1.31E-04 | 3.00E-03 |
| ENSG00000163216  | SPRR2D      | 1  | 153039732 | 153041931 | 2199   | protein_coding                     | -1.71 | 6.11E-03 | 3.45E-02 |
| ENSG00000283175  | AC007920.2  | 3  | 187291272 | 187297933 | 6661   | lncRNA-antisense                   | -1.71 | 6.53E-03 | 3.60E-02 |
| ENSG00000230637  | AL022324.1  | 22 | 25327252  | 25339975  | 12723  | unprocessed_pseudogene             | -1.71 | 8.31E-03 | 4.22E-02 |
| ENSG00000273777  | CEACAM20    | 19 | 44501677  | 44529788  | 28111  | protein_coding                     | -1.71 | 1.68E-04 | 3.51E-03 |
| ENSG00000286527  | AL116665.2  | 14 | 32200433  | 32201736  | 1303   | lncRNA                             | -1.71 | 6.43E-03 | 3.57E-02 |
| ENSG00000288090  | AC010163.3  | 10 | 78288059  | 78290565  | 2506   | lncRNA                             | -1.71 | 7.83E-03 | 4.05E-02 |
| ENSG00000265273  | PGDP1       | 18 | 31962178  | 31963618  | 1440   | processed_pseudogene               | -1.71 | 3.25E-05 | 1.16E-03 |
| ENSG00000262294  | AC129507.2  | 17 | 352638    | 357581    | 4943   | lncRNA-antisense                   | -1.71 | 6.51E-03 | 3.59E-02 |
| ENSG00000246695  | RASSF8-AS1  | 12 | 25936683  | 25959785  | 23082  | lncRNA-antisense                   | -1.71 | 5.01E-06 | 3.13E-04 |
| ENSG00000088386  | SLC15A1     | 13 | 98683801  | 98752672  | 68871  | protein_coding                     | -1.72 | 7.29E-05 | 2.03E-03 |
| ENSG00000170703  | TLL6        | 17 | 48762235  | 48817214  | 54979  | protein_coding                     | -1.72 | 4.73E-06 | 2.99E-04 |
| ENSG00000236466  | AL035670.1  | 6  | 46492052  | 46606162  | 114110 | lncRNA-antisense                   | -1.72 | 3.01E-04 | 5.15E-03 |
| ENSG00000205414  | AC007608.1  | 16 | 50606076  | 50613684  | 7608   | lncRNA-antisense                   | -1.72 | 2.71E-03 | 2.07E-02 |
| ENSG00000100191  | SLC5A4      | 22 | 32218464  | 32255347  | 36883  | protein_coding                     | -1.72 | 7.86E-05 | 2.15E-03 |
| ENSG00000242440  | LINC02046   | 3  | 148279682 | 148401084 | 121402 | lncRNA                             | -1.72 | 1.50E-03 | 1.41E-02 |
| ENSG00000259404  | EFL1P1      | 15 | 84080168  | 84126604  | 46436  | transcribed_unprocessed_pseudogene | -1.72 | 1.24E-04 | 2.90E-03 |
| ENSG00000235166  | LINC01440   | 20 | 55408898  | 55684915  | 276017 | lncRNA                             | -1.72 | 2.18E-03 | 1.80E-02 |
| ENSG00000253606  | AFG3L2P1    | 8  | 43270198  | 43271960  | 1762   | processed_pseudogene               | -1.72 | 5.53E-03 | 3.24E-02 |
| ENSG00000280285  | AC108215.1  | 4  | 56662469  | 56665694  | 3225   | TEC                                | -1.72 | 3.86E-03 | 2.60E-02 |
| ENSG00000258197  | NKX2-2-AS1  | 20 | 21511447  | 21512309  | 862    | lncRNA-antisense                   | -1.72 | 3.55E-03 | 2.46E-02 |
| ENSG00000116031  | CD207       | 2  | 70830211  | 70835816  | 5605   | protein_coding                     | -1.72 | 6.81E-05 | 1.93E-03 |
| ENSG00000198217  | OR51H2P     | 11 | 4871717   | 4878117   | 6400   | transcribed_unprocessed_pseudogene | -1.72 | 7.90E-03 | 4.07E-02 |
| ENSG00000229010  | AL116172.1  | 1  | 23140325  | 23141142  | 817    | processed_pseudogene               | -1.72 | 1.61E-03 | 1.48E-02 |
| ENSG00000232536  | AL365436.2  | 1  | 151540516 | 151561855 | 21339  | lncRNA-sense intronic              | -1.72 | 5.91E-03 | 3.38E-02 |
| ENSG00000287190  | AC239799.2  | 1  | 146050441 | 146052244 | 1803   | lncRNA                             | -1.72 | 8.06E-03 | 4.13E-02 |
| ENSG00000236648  | LINC02810   | 1  | 17717625  | 17749978  | 32353  | lncRNA                             | -1.72 | 2.67E-04 | 4.76E-03 |
| ENSG00000184608  | FAM167A-AS1 | 8  | 11368402  | 11438658  | 70256  | lncRNA-antisense                   | -1.72 | 4.29E-05 | 1.40E-03 |

|                 |              |    |           |           |        |                                    |       |          |          |
|-----------------|--------------|----|-----------|-----------|--------|------------------------------------|-------|----------|----------|
| ENSG00000287325 | AC138647.2   | 8  | 141507333 | 141509785 | 2452   | lncRNA                             | -1.72 | 4.85E-03 | 2.99E-02 |
| ENSG00000126752 | SSX1         | X  | 48255392  | 48267444  | 12052  | protein coding                     | -1.72 | 3.49E-03 | 2.44E-02 |
| ENSG00000287671 | AC068418.3   | 17 | 21442805  | 21451525  | 8720   | lncRNA                             | -1.72 | 6.12E-05 | 1.77E-03 |
| ENSG00000260973 | AC009021.2   | 16 | 22610531  | 22612196  | 1665   | lncRNA                             | -1.72 | 4.16E-03 | 2.72E-02 |
| ENSG00000112936 | C7           | 5  | 40909497  | 40984643  | 75146  | protein coding                     | -1.72 | 2.57E-04 | 4.63E-03 |
| ENSG00000235711 | ANKRD34C     | 15 | 79293285  | 79298235  | 4950   | protein coding                     | -1.72 | 3.03E-04 | 5.17E-03 |
| ENSG00000287163 | AC018558.6   | 16 | 35450898  | 35452987  | 2089   | lncRNA                             | -1.72 | 7.14E-03 | 3.82E-02 |
| ENSG00000230010 | AL049646.1   | 20 | 18289343  | 18359300  | 69957  | lncRNA                             | -1.72 | 1.86E-04 | 3.75E-03 |
| ENSG00000234277 | LINC01641    | 1  | 227393554 | 227431035 | 37481  | lncRNA                             | -1.72 | 3.34E-03 | 2.37E-02 |
| ENSG00000261303 | AC022748.2   | 15 | 78660644  | 78736684  | 76040  | transcribed unprocessed pseudogene | -1.72 | 7.24E-05 | 2.03E-03 |
| ENSG00000213724 | PRDX2P2      | 10 | 34965069  | 34966259  | 1190   | processed pseudogene               | -1.72 | 3.86E-03 | 2.60E-02 |
| ENSG00000253871 | AC068075.1   | 8  | 57341021  | 57365444  | 24423  | lncRNA                             | -1.72 | 2.47E-04 | 4.49E-03 |
| ENSG00000213212 | NCLP1        | 9  | 136812788 | 136815536 | 2748   | processed pseudogene               | -1.72 | 6.45E-03 | 3.57E-02 |
| ENSG00000244342 | LINC00698    | 3  | 62950430  | 63125062  | 174632 | lncRNA                             | -1.72 | 2.91E-03 | 2.16E-02 |
| ENSG00000262772 | LINC01977    | 17 | 79819083  | 79827704  | 8621   | lncRNA                             | -1.72 | 1.18E-04 | 2.79E-03 |
| ENSG00000229558 | SACS-AS1     | 13 | 23418971  | 23428869  | 9898   | lncRNA                             | -1.73 | 6.40E-04 | 8.39E-03 |
| ENSG00000102021 | LUZP4        | X  | 115289715 | 115307563 | 17848  | protein coding                     | -1.73 | 8.50E-03 | 4.27E-02 |
| ENSG00000267141 | AC012615.4   | 19 | 1860250   | 1862019   | 1769   | lncRNA-antisense                   | -1.73 | 6.03E-03 | 3.43E-02 |
| ENSG00000177993 | ZNRF3-AS1    | 22 | 29024999  | 29031476  | 6477   | lncRNA-antisense                   | -1.73 | 9.71E-04 | 1.08E-02 |
| ENSG00000269037 | LINC01838    | 19 | 34905315  | 34908188  | 2873   | lncRNA                             | -1.73 | 3.03E-03 | 2.22E-02 |
| ENSG00000205858 | LRRC72       | 7  | 16526825  | 16581568  | 54743  | protein coding                     | -1.73 | 1.39E-03 | 1.35E-02 |
| ENSG00000259419 | HNRNPCC3     | 15 | 79236332  | 79237206  | 874    | processed pseudogene               | -1.73 | 6.91E-04 | 8.77E-03 |
| ENSG00000287526 | AC016587.1   | 19 | 33997289  | 34066283  | 68994  | lncRNA                             | -1.73 | 3.84E-03 | 2.59E-02 |
| ENSG00000166118 | SPATA19      | 11 | 133840631 | 133845538 | 4907   | protein coding                     | -1.73 | 6.45E-03 | 3.57E-02 |
| ENSG00000163331 | DAPL1        | 2  | 158795317 | 158862781 | 67464  | protein coding                     | -1.73 | 8.03E-03 | 4.12E-02 |
| ENSG00000149124 | GLYAT        | 11 | 58640426  | 58731974  | 91548  | protein coding                     | -1.73 | 8.33E-04 | 9.80E-03 |
| ENSG00000229828 | PDE4DIPP1    | 1  | 148080598 | 148093883 | 13285  | unprocessed pseudogene             | -1.73 | 6.77E-03 | 3.69E-02 |
| ENSG00000277561 | GOLGA81P     | 15 | 22606022  | 22617854  | 11832  | transcribed unprocessed pseudogene | -1.73 | 2.59E-06 | 1.94E-04 |
| ENSG00000287326 | AL589787.1   | 10 | 126425930 | 126460957 | 35027  | lncRNA                             | -1.73 | 1.04E-04 | 2.59E-03 |
| ENSG00000283213 | AC130466.1   | 16 | 22066289  | 22813680  | 7391   | lncRNA                             | -1.73 | 1.86E-04 | 3.74E-03 |
| ENSG00000227685 | LINC02088    | 17 | 20612912  | 20633234  | 20322  | lncRNA                             | -1.73 | 2.33E-03 | 1.87E-02 |
| ENSG00000236274 | AC004865.1   | 1  | 35509742  | 35511438  | 1696   | processed pseudogene               | -1.73 | 8.49E-03 | 4.27E-02 |
| ENSG00000214141 | ACTN4P2      | 1  | 37776670  | 37779418  | 2748   | processed pseudogene               | -1.73 | 1.99E-03 | 1.70E-02 |
| ENSG00000276478 | AL772337.4   | 9  | 87799501  | 87821803  | 22302  | unprocessed pseudogene             | -1.73 | 6.66E-03 | 3.65E-02 |
| ENSG00000248245 | AC010307.2   | 5  | 133160438 | 133224413 | 63975  | lncRNA-antisense                   | -1.73 | 5.60E-03 | 3.26E-02 |
| ENSG00000168314 | MOBP         | 3  | 39467198  | 39529479  | 62281  | protein coding                     | -1.73 | 3.43E-06 | 2.39E-04 |
| ENSG00000109061 | MYH1         | 17 | 10492307  | 10518542  | 26235  | protein coding                     | -1.73 | 2.07E-05 | 8.57E-04 |
| ENSG00000247867 | AP001922.1   | 11 | 75758455  | 75768647  | 10192  | lncRNA-antisense                   | -1.74 | 3.39E-03 | 2.39E-02 |
| ENSG00000233951 | RCC2P3       | 7  | 138122202 | 138124595 | 2393   | processed pseudogene               | -1.74 | 7.13E-04 | 8.91E-03 |
| ENSG00000286041 | AC074139.1   | 19 | 32127334  | 32184504  | 51710  | lncRNA                             | -1.74 | 5.30E-03 | 3.15E-02 |
| ENSG00000184459 | BP1FC        | 22 | 32413847  | 32464484  | 50637  | protein coding                     | -1.74 | 3.95E-04 | 6.15E-03 |
| ENSG00000267908 | ZSCAN5DP     | 19 | 56244043  | 56247482  | 3439   | unprocessed pseudogene             | -1.74 | 6.39E-03 | 3.55E-02 |
| ENSG00000235881 | AC114776.1   | 2  | 110709575 | 110716595 | 7020   | lncRNA                             | -1.74 | 2.45E-03 | 1.93E-02 |
| ENSG00000228480 | AC130464.1   | 16 | 26354796  | 26358355  | 3559   | unprocessed pseudogene             | -1.74 | 2.82E-03 | 2.12E-02 |
| ENSG00000226792 | C13orf42     | 13 | 51082119  | 51200252  | 118133 | protein coding                     | -1.74 | 2.42E-05 | 9.53E-04 |
| ENSG00000249001 | AC093895.1   | 4  | 87568035  | 87733956  | 165921 | lncRNA-antisense                   | -1.74 | 7.83E-03 | 4.05E-02 |
| ENSG00000182824 | FAM239P4     | 22 | 18733914  | 18757906  | 23992  | lncRNA                             | -1.74 | 2.30E-03 | 1.86E-02 |
| ENSG00000156920 | ADGRG4       | X  | 136300963 | 136416890 | 115927 | protein coding                     | -1.74 | 2.33E-04 | 4.33E-03 |
| ENSG00000254417 | LINC02584    | 11 | 70072434  | 70075433  | 2999   | lncRNA-antisense                   | -1.74 | 7.59E-03 | 3.97E-02 |
| ENSG00000218672 | AC008060.1   | 7  | 155382076 | 155396356 | 14280  | lncRNA                             | -1.74 | 8.94E-04 | 1.03E-02 |
| ENSG00000227406 | RNF6P1       | 21 | 39373763  | 39377066  | 3303   | processed pseudogene               | -1.74 | 5.27E-03 | 3.14E-02 |
| ENSG00000231258 | ZSW1MSP2     | 17 | 20583758  | 20591180  | 7422   | unprocessed pseudogene             | -1.74 | 1.19E-03 | 1.58E-02 |
| ENSG00000275014 | RN7SL166P    | 13 | 19736975  | 19737254  | 279    | misc RNA                           | -1.74 | 4.03E-04 | 6.24E-03 |
| ENSG00000116039 | ATP6V1B1     | 2  | 70935900  | 70965431  | 29531  | protein coding                     | -1.74 | 1.41E-03 | 1.37E-02 |
| ENSG00000258603 | AC005225.2   | 14 | 73555115  | 73633941  | 78826  | lncRNA-antisense                   | -1.74 | 8.52E-04 | 9.93E-03 |
| ENSG00000236643 | AL354928.1   | 9  | 124770123 | 124772927 | 2804   | lncRNA-antisense                   | -1.74 | 2.03E-03 | 1.72E-02 |
| ENSG00000182645 | CCDC172      | 10 | 116324448 | 116380029 | 55581  | protein coding                     | -1.74 | 3.82E-03 | 2.58E-02 |
| ENSG00000244227 | LRRC77P      | 3  | 167864773 | 167924011 | 59238  | transcribed unitary pseudogene     | -1.74 | 1.02E-04 | 2.55E-03 |
| ENSG00000225172 | AC096631.1   | 1  | 198973379 | 198985506 | 12127  | lncRNA                             | -1.74 | 4.21E-03 | 2.74E-02 |
| ENSG00000261453 | LINC01735    | 1  | 208606564 | 208614295 | 7731   | lncRNA                             | -1.74 | 2.03E-03 | 1.72E-02 |
| ENSG00000230952 | AC099344.1   | 2  | 11357515  | 11365636  | 8121   | lncRNA                             | -1.74 | 5.22E-03 | 3.13E-02 |
| ENSG00000205444 | KU-MEL-3     | 6  | 4610612   | 4611919   | 1307   | lncRNA                             | -1.74 | 6.64E-03 | 3.64E-02 |
| ENSG00000282142 | AC245187.2   | 8  | 2517898   | 2556440   | 38542  | lncRNA                             | -1.74 | 7.92E-03 | 4.08E-02 |
| ENSG00000267333 | ASNSP6       | 18 | 11745626  | 11747581  | 1955   | processed pseudogene               | -1.74 | 6.49E-03 | 3.58E-02 |
| ENSG00000203280 | KIAA1671-AS1 | 22 | 25102433  | 25112692  | 10259  | lncRNA-antisense                   | -1.74 | 5.37E-04 | 7.48E-03 |
| ENSG00000262815 | AC087501.2   | 17 | 9464742   | 9467422   | 2680   | lncRNA-antisense                   | -1.74 | 8.44E-03 | 4.26E-02 |
| ENSG00000180785 | OR51E1       | 11 | 4643420   | 4655488   | 12068  | protein coding                     | -1.74 | 4.36E-04 | 6.52E-03 |
| ENSG00000204684 | AL133464.1   | 20 | 22371216  | 22471557  | 100341 | lncRNA                             | -1.75 | 1.46E-05 | 6.72E-04 |
| ENSG00000116726 | PRAMEF12     | 1  | 12773738  | 12777906  | 4168   | protein coding                     | -1.75 | 1.48E-05 | 6.80E-04 |
| ENSG00000256146 | AC006206.1   | 12 | 5315961   | 5319347   | 3386   | lncRNA                             | -1.75 | 5.04E-04 | 7.14E-03 |
| ENSG00000174898 | CATSPERD     | 19 | 5720637   | 5778734   | 58097  | protein coding                     | -1.75 | 1.15E-06 | 1.07E-04 |
| ENSG00000243715 | CACNA2D3-AS1 | 3  | 54874605  | 54901255  | 26650  | lncRNA-antisense                   | -1.75 | 9.57E-03 | 4.61E-02 |
| ENSG00000224287 | MSL3P1       | 2  | 233865437 | 233868444 | 3007   | transcribed processed pseudogene   | -1.75 | 6.89E-03 | 3.73E-02 |
| ENSG00000230987 | AL359976.1   | 1  | 189989570 | 189993097 | 3527   | processed pseudogene               | -1.75 | 7.11E-03 | 3.81E-02 |
| ENSG00000288045 | AL352979.4   | 14 | 52951432  | 52952864  | 1432   | lncRNA                             | -1.75 | 4.18E-03 | 2.73E-02 |
| ENSG00000285520 | AL353586.1   | 10 | 12877459  | 12965275  | 87816  | lncRNA-antisense                   | -1.75 | 2.77E-04 | 4.87E-03 |
| ENSG00000256022 | LINC02411    | 12 | 127631248 | 127636488 | 5240   | lncRNA                             | -1.75 | 1.49E-03 | 1.41E-02 |
| ENSG00000260765 | CES1P2       | 16 | 55728115  | 55750111  | 21996  | unprocessed pseudogene             | -1.75 | 1.50E-03 | 1.41E-02 |
| ENSG00000273877 | AC236972.3   | X  | 153225849 | 153230357 | 4708   | lncRNA                             | -1.75 | 1.02E-02 | 4.80E-02 |
| ENSG00000237524 | TEX51        | 2  | 126898864 | 126902097 | 3233   | protein coding                     | -1.75 | 2.82E-03 | 2.12E-02 |
| ENSG00000260860 | AC126773.5   | 16 | 68651056  | 68651948  | 892    | processed pseudogene               | -1.75 | 3.01E-03 | 2.21E-02 |
| ENSG00000116882 | HO2          | 1  | 119368779 | 119394130 | 25351  | protein coding                     | -1.75 | 1.79E-03 | 1.58E-02 |
| ENSG00000267535 | LINC00868    | 17 | 76849840  | 76861836  | 11996  | lncRNA                             | -1.75 | 8.23E-03 | 4.19E-02 |
| ENSG00000243479 | MINX1-AS1    | 7  | 157010805 | 157016426 | 5621   | lncRNA                             | -1.75 | 1.06E-03 | 1.15E-02 |
| ENSG00000262292 | AC007952.5   | 17 | 19160789  | 19162274  | 1485   | lncRNA                             | -1.75 | 5.91E-03 | 3.38E-02 |
| ENSG00000198798 | MAGEB3       | X  | 30230436  | 30237492  | 7056   | protein coding                     | -1.75 | 1.07E-02 | 4.95E-02 |
| ENSG00000258550 | OR7E108P     | 14 | 51763056  | 51764076  | 1020   | unprocessed pseudogene             | -1.75 | 1.07E-02 | 4.95E-02 |
| ENSG00000248215 | LINC02505    | 4  | 36496128  | 36641939  | 145811 | lncRNA                             | -1.75 | 1.02E-02 | 4.80E-02 |
| ENSG00000226527 | AP000289.1   | 21 | 33110867  | 33123725  | 12858  | lncRNA                             | -1.75 | 9.46E-04 | 1.06E-02 |
| ENSG00000287836 | AC016168.4   | 17 | 76831684  | 76841099  | 9415   | lncRNA                             | -1.75 | 4.17E-03 | 2.72E-02 |



|                 |            |    |           |           |        |                                    |       |          |          |
|-----------------|------------|----|-----------|-----------|--------|------------------------------------|-------|----------|----------|
| ENSG00000286266 | AC104370.1 | 8  | 127578473 | 127636867 | 58394  | lncRNA                             | -1.75 | 3.98E-04 | 6.16E-03 |
| ENSG00000259964 | THSD4-AS1  | 15 | 71147650  | 71189064  | 41414  | lncRNA-antisense                   | -1.75 | 6.48E-04 | 8.44E-03 |
| ENSG00000285786 | AC074325.1 | 10 | 48246525  | 48248512  | 1987   | lncRNA-antisense                   | -1.75 | 8.13E-03 | 4.15E-02 |
| ENSG00000244067 | GSTA2      | 6  | 52750087  | 52763475  | 13388  | protein coding                     | -1.75 | 3.54E-03 | 2.46E-02 |
| ENSG00000287831 | AL135926.2 | 1  | 168898633 | 168902836 | 4203   | lncRNA                             | -1.75 | 7.04E-03 | 3.78E-02 |
| ENSG00000157502 | PWWP3B     | X  | 106168305 | 106208956 | 40651  | protein coding                     | -1.75 | 2.95E-03 | 2.18E-02 |
| ENSG00000260616 | AC007728.1 | 16 | 50783859  | 50803338  | 19479  | lncRNA-antisense                   | -1.75 | 6.89E-03 | 3.73E-02 |
| ENSG00000268153 | AC005176.1 | 19 | 39638685  | 39642401  | 3716   | transcribed unprocessed pseudogene | -1.75 | 6.84E-03 | 3.72E-02 |
| ENSG00000267443 | AC10641.1  | 19 | 397589    | 399173    | 1584   | lncRNA                             | -1.75 | 1.37E-03 | 1.34E-02 |
| ENSG00000212658 | KRTAP29.1  | 17 | 41301826  | 41302851  | 1025   | protein coding                     | -1.75 | 8.05E-03 | 4.12E-02 |
| ENSG00000224109 | CENPL3     | X  | 51617024  | 51618968  | 1944   | protein coding                     | -1.75 | 7.16E-03 | 3.83E-02 |
| ENSG00000066813 | ACSM2B     | 16 | 20536226  | 20576427  | 42021  | protein coding                     | -1.76 | 3.97E-05 | 1.32E-03 |
| ENSG00000248590 | GLDCP1     | 4  | 56593004  | 56595681  | 2677   | transcribed processed pseudogene   | -1.76 | 2.30E-03 | 1.86E-02 |
| ENSG00000226629 | LINC00974  | 17 | 41549606  | 41554495  | 4889   | lncRNA                             | -1.76 | 2.80E-03 | 2.11E-02 |
| ENSG00000105549 | THEG       | 19 | 361747    | 376026    | 14279  | protein coding                     | -1.76 | 3.43E-06 | 2.39E-04 |
| ENSG00000268089 | GABRQ      | X  | 152637895 | 152657542 | 19647  | protein coding                     | -1.76 | 4.24E-05 | 1.38E-03 |
| ENSG00000205215 | KRT17P7    | 17 | 20519312  | 20528687  | 9375   | transcribed unprocessed pseudogene | -1.76 | 5.09E-04 | 7.18E-03 |
| ENSG00000159708 | LRRC36     | 16 | 67326798  | 67385204  | 58406  | protein coding                     | -1.76 | 2.73E-07 | 3.61E-05 |
| ENSG00000237521 | OR7E24     | 19 | 9247344   | 9252625   | 5281   | protein coding                     | -1.76 | 6.04E-03 | 3.43E-02 |
| ENSG00000227582 | ADGRF5P1   | 9  | 62860873  | 62864957  | 4084   | transcribed processed pseudogene   | -1.76 | 2.44E-03 | 1.93E-02 |
| ENSG00000256417 | AC060206.2 | 12 | 5290480   | 5383653   | 93173  | lncRNA                             | -1.76 | 4.17E-04 | 6.35E-03 |
| ENSG00000171864 | PRND       | 20 | 4721909   | 4728460   | 6551   | protein coding                     | -1.76 | 3.15E-04 | 5.30E-03 |
| ENSG00000261738 | MIR3976HG  | 18 | 5721812   | 5876328   | 154516 | lncRNA                             | -1.76 | 9.37E-07 | 9.19E-05 |
| ENSG00000288022 | AC117488.1 | 3  | 125061448 | 125063710 | 2262   | lncRNA                             | -1.76 | 6.43E-03 | 3.57E-02 |
| ENSG00000242741 | LINC02005  | 3  | 73805754  | 73902960  | 97206  | lncRNA                             | -1.76 | 1.06E-02 | 4.92E-02 |
| ENSG00000286826 | AL136129.1 | 6  | 169097799 | 169102428 | 4629   | lncRNA                             | -1.76 | 9.05E-03 | 4.44E-02 |
| ENSG00000249184 | AC107074.1 | 4  | 151798917 | 151833097 | 34180  | lncRNA                             | -1.76 | 7.16E-03 | 3.83E-02 |
| ENSG00000254081 | LINC01299  | 8  | 65526738  | 65562781  | 36043  | lncRNA                             | -1.76 | 3.23E-03 | 2.31E-02 |
| ENSG00000214814 | FER1L6     | 8  | 123851987 | 124120061 | 268074 | protein coding                     | -1.76 | 6.72E-06 | 3.90E-04 |
| ENSG00000285706 | AL807776.1 | 9  | 98798466  | 98807564  | 9098   | lncRNA-bidirectional promoter      | -1.76 | 7.37E-03 | 3.90E-02 |
| ENSG00000124089 | MCR3       | 20 | 56248732  | 56249815  | 1083   | protein coding                     | -1.76 | 3.43E-03 | 2.41E-02 |
| ENSG00000140093 | SERPINA10  | 14 | 94280460  | 94293268  | 12808  | protein coding                     | -1.76 | 7.88E-05 | 2.15E-03 |
| ENSG00000187686 | KRT18P59   | 11 | 125113161 | 125126781 | 13620  | transcribed processed pseudogene   | -1.76 | 1.70E-04 | 3.53E-03 |
| ENSG00000279076 | AL136140.2 | 6  | 44551577  | 44553281  | 1704   | TEC                                | -1.76 | 6.48E-03 | 3.58E-02 |
| ENSG00000279733 | AP001642.1 | 11 | 88165575  | 88167691  | 2116   | TEC                                | -1.76 | 9.27E-03 | 4.51E-02 |
| ENSG00000228055 | FAM245A    | 10 | 87396561  | 87435035  | 38474  | lncRNA                             | -1.76 | 4.65E-03 | 2.91E-02 |
| ENSG00000179577 | AP03471.1  | 8  | 104419512 | 104421500 | 1988   | lncRNA-sense intronic              | -1.76 | 1.95E-03 | 1.68E-02 |
| ENSG00000227538 | HNRNPPF1   | 1  | 42040597  | 42041729  | 1132   | processed pseudogene               | -1.76 | 3.99E-03 | 2.66E-02 |
| ENSG00000171819 | ANGPTL7    | 1  | 11189355  | 11195981  | 6626   | protein coding                     | -1.76 | 8.87E-05 | 2.34E-03 |
| ENSG00000174914 | OR9G1      | 11 | 56699095  | 56703884  | 4789   | protein coding                     | -1.76 | 2.02E-03 | 1.72E-02 |
| ENSG00000229699 | AL161636.1 | 1  | 153174518 | 153191676 | 17158  | lncRNA                             | -1.77 | 2.86E-03 | 2.14E-02 |
| ENSG00000172986 | GXYLT2     | 3  | 72888046  | 72998138  | 110092 | protein coding                     | -1.77 | 4.85E-05 | 1.53E-03 |
| ENSG00000224074 | LINC00691  | 3  | 24096269  | 24103238  | 6969   | lncRNA                             | -1.77 | 8.44E-04 | 9.88E-03 |
| ENSG00000267879 | AC011483.1 | 19 | 50968193  | 51012129  | 43936  | lncRNA-antisense                   | -1.77 | 5.87E-03 | 3.37E-02 |
| ENSG00000256596 | AC026358.1 | 12 | 124206228 | 124209018 | 2790   | lncRNA                             | -1.77 | 2.69E-03 | 2.06E-02 |
| ENSG00000268940 | CT45A1     | X  | 135713453 | 135723539 | 10086  | protein coding                     | -1.77 | 3.81E-06 | 2.53E-04 |
| ENSG00000261632 | AC022872.1 | 15 | 71972206  | 72040265  | 68059  | lncRNA-antisense                   | -1.77 | 9.39E-03 | 4.55E-02 |
| ENSG00000267712 | LINC01539  | 18 | 56083356  | 56137536  | 54180  | lncRNA                             | -1.77 | 3.87E-04 | 6.08E-03 |
| ENSG00000219932 | RPL12P8    | 10 | 67874332  | 67874911  | 579    | processed pseudogene               | -1.77 | 3.80E-04 | 6.01E-03 |
| ENSG00000287272 | AC007786.4 | 19 | 29268976  | 29298576  | 29600  | lncRNA                             | -1.77 | 1.64E-04 | 3.45E-03 |
| ENSG00000267650 | AC008742.1 | 19 | 9995997   | 9997163   | 1166   | lncRNA-antisense                   | -1.77 | 6.30E-03 | 3.52E-02 |
| ENSG00000185940 | KRTAP5-5   | 11 | 1629775   | 1630707   | 932    | protein coding                     | -1.77 | 8.85E-03 | 4.38E-02 |
| ENSG00000279914 | AL008638.5 | 22 | 27040197  | 27041494  | 1297   | lncRNA                             | -1.77 | 4.80E-03 | 2.97E-02 |
| ENSG00000228135 | LINC01494  | 2  | 218900811 | 218930636 | 29825  | lncRNA-antisense                   | -1.77 | 5.82E-03 | 3.15E-02 |
| ENSG00000125997 | BPIFB9P    | 20 | 33347720  | 33354444  | 6724   | transcribed unitary pseudogene     | -1.77 | 1.60E-04 | 3.39E-03 |
| ENSG00000171056 | SOX7       | 8  | 10723768  | 10730511  | 6743   | protein coding                     | -1.77 | 4.83E-05 | 1.52E-03 |
| ENSG00000260062 | GOLGA2P11  | 15 | 62253730  | 62270680  | 16950  | transcribed unprocessed pseudogene | -1.77 | 3.43E-05 | 1.21E-03 |
| ENSG00000254242 | AC100849.2 | 8  | 19091703  | 19145449  | 53746  | lncRNA                             | -1.77 | 3.93E-04 | 6.13E-03 |
| ENSG00000260887 | CASC22     | 16 | 52258564  | 52280638  | 22074  | lncRNA                             | -1.77 | 4.82E-03 | 2.98E-02 |
| ENSG00000226235 | LEMD1-AS1  | 1  | 205373252 | 205387440 | 14188  | lncRNA-antisense                   | -1.77 | 1.04E-03 | 1.13E-02 |
| ENSG00000249003 | CLUHP4     | 4  | 190057902 | 190063005 | 5103   | unprocessed pseudogene             | -1.77 | 4.26E-03 | 2.76E-02 |
| ENSG00000227711 | AL451054.1 | 1  | 227509028 | 227510618 | 1590   | unprocessed pseudogene             | -1.77 | 2.15E-03 | 1.79E-02 |
| ENSG00000272485 | AL392183.1 | 6  | 774747    | 780214    | 5467   | lncRNA                             | -1.77 | 5.29E-03 | 3.15E-02 |
| ENSG00000287391 | AC103871.1 | 15 | 87638688  | 87668488  | 29800  | lncRNA                             | -1.77 | 7.41E-03 | 3.91E-02 |
| ENSG00000277870 | FAM230A    | 22 | 18422244  | 18500594  | 78350  | lncRNA                             | -1.77 | 3.57E-03 | 2.47E-02 |
| ENSG00000184735 | DDX53      | X  | 22999960  | 23003589  | 3629   | protein coding                     | -1.77 | 2.60E-03 | 2.02E-02 |
| ENSG00000244471 | AL137058.1 | 13 | 62488993  | 62587095  | 98102  | transcribed unprocessed pseudogene | -1.77 | 6.07E-05 | 1.76E-03 |
| ENSG00000288541 | AL353732.2 | 9  | 21410969  | 21422960  | 11991  | lncRNA                             | -1.77 | 2.21E-05 | 8.94E-04 |
| ENSG00000229031 | MTCO1P25   | 7  | 69331835  | 69333633  | 1798   | unprocessed pseudogene             | -1.77 | 8.32E-03 | 4.22E-02 |
| ENSG00000258909 | AC091078.2 | 15 | 93416850  | 93422576  | 5726   | lncRNA                             | -1.78 | 8.51E-04 | 9.93E-03 |
| ENSG00000227391 | SALL1P1    | X  | 49664844  | 49668680  | 3836   | processed pseudogene               | -1.78 | 2.29E-03 | 1.86E-02 |
| ENSG00000277544 | AC104073.3 | 7  | 65290429  | 65292776  | 2347   | unprocessed pseudogene             | -1.78 | 9.27E-03 | 4.51E-02 |
| ENSG00000275645 | AC068338.3 | 15 | 75346744  | 75347161  | 417    | lncRNA-antisense                   | -1.78 | 8.43E-04 | 9.87E-03 |
| ENSG00000171509 | RFXP1      | 4  | 158315311 | 158653372 | 338061 | protein coding                     | -1.78 | 1.42E-05 | 6.64E-04 |
| ENSG00000253415 | AC016877.2 | 8  | 98904603  | 98905671  | 1068   | processed pseudogene               | -1.78 | 6.53E-03 | 3.60E-02 |
| ENSG00000205866 | FAM99A     | 11 | 1665597   | 1667856   | 2259   | lncRNA                             | -1.78 | 1.46E-03 | 1.39E-02 |
| ENSG00000256897 | AC018410.1 | 11 | 47220218  | 47221751  | 1533   | lncRNA-antisense                   | -1.78 | 7.72E-03 | 4.02E-02 |
| ENSG00000288079 | AC028329.1 | 3  | 113259786 | 113266824 | 7038   | lncRNA                             | -1.78 | 5.44E-04 | 7.57E-03 |
| ENSG00000261020 | AC132825.3 | 17 | 22420022  | 22424731  | 4709   | lncRNA                             | -1.78 | 8.98E-04 | 1.03E-02 |
| ENSG00000253172 | AC008378.1 | 5  | 173144162 | 173145039 | 877    | lncRNA-antisense                   | -1.78 | 9.15E-03 | 4.48E-02 |
| ENSG00000286208 | AC093838.1 | 2  | 131555007 | 131568599 | 13592  | lncRNA                             | -1.78 | 1.50E-03 | 1.42E-02 |
| ENSG00000134588 | USP26      | X  | 133024631 | 133097109 | 72478  | protein coding                     | -1.78 | 3.11E-03 | 2.26E-02 |
| ENSG00000279525 | AC002451.2 | 7  | 95542145  | 95544542  | 2397   | TEC                                | -1.78 | 3.78E-03 | 2.57E-02 |
| ENSG00000283535 | AC07064.4  | 22 | 16844399  | 16846357  | 1958   | unprocessed pseudogene             | -1.78 | 2.86E-03 | 2.14E-02 |
| ENSG00000256195 | AP002518.1 | 11 | 114343052 | 114396219 | 53167  | lncRNA-antisense                   | -1.78 | 2.89E-04 | 4.99E-03 |
| ENSG00000287666 | AP00821.2  | 11 | 126121889 | 126128081 | 6192   | lncRNA                             | -1.78 | 2.03E-03 | 1.72E-02 |
| ENSG00000227932 | SELENO1P   | 10 | 26664206  | 26697295  | 33089  | transcribed unitary pseudogene     | -1.78 | 8.92E-03 | 4.40E-02 |
| ENSG00000276188 | AC069234.4 | 12 | 120709112 | 120709523 | 411    | lncRNA                             | -1.78 | 1.56E-03 | 1.45E-02 |
| ENSG00000182963 | GJC1       | 17 | 44798448  | 44830816  | 32368  | protein coding                     | -1.78 | 4.37E-05 | 1.42E-03 |
| ENSG00000101074 | R3HDM1     | 20 | 44337043  | 44351238  | 14195  | protein coding                     | -1.78 | 3.60E-04 | 5.79E-03 |



|                 |            |    |           |           |        |                                    |       |          |          |
|-----------------|------------|----|-----------|-----------|--------|------------------------------------|-------|----------|----------|
| ENSG00000225427 | LINC00331  | 13 | 78786272  | 78840051  | 53779  | lncRNA                             | -1.78 | 8.11E-04 | 9.65E-03 |
| ENSG00000287399 | AC011503.4 | 19 | 23897321  | 23899495  | 2174   | lncRNA                             | -1.78 | 8.01E-03 | 4.12E-02 |
| ENSG00000248942 | LINC01335  | 5  | 74258689  | 74321255  | 62566  | lncRNA                             | -1.78 | 4.34E-03 | 2.79E-02 |
| ENSG00000259708 | AC090607.3 | 15 | 78250502  | 78264156  | 13654  | lncRNA-antisense                   | -1.78 | 3.93E-03 | 2.63E-02 |
| ENSG00000240268 | MOXD2P     | 7  | 142240740 | 142247067 | 6327   | transcribed unprocessed pseudogene | -1.78 | 1.64E-04 | 3.46E-03 |
| ENSG00000124678 | TCP11      | 6  | 35118071  | 35148610  | 30539  | protein coding                     | -1.79 | 2.19E-04 | 4.15E-03 |
| ENSG00000166569 | CPLX4      | 18 | 59275156  | 59318649  | 43493  | protein coding                     | -1.79 | 1.07E-03 | 1.15E-02 |
| ENSG00000188257 | PLA2G2A    | 1  | 19975431  | 19980416  | 4985   | protein coding                     | -1.79 | 1.04E-03 | 1.13E-02 |
| ENSG00000258010 | AC016705.1 | 15 | 80433795  | 80445152  | 11357  | lncRNA-antisense                   | -1.79 | 1.60E-03 | 1.47E-02 |
| ENSG00000234593 | KAZN-AS1   | 1  | 14338825  | 14419973  | 81148  | lncRNA                             | -1.79 | 3.18E-05 | 1.14E-03 |
| ENSG00000287813 | AC016705.3 | 15 | 80440294  | 80442751  | 2457   | lncRNA                             | -1.79 | 6.53E-03 | 3.60E-02 |
| ENSG00000273287 | AL008718.2 | 22 | 45262273  | 45263585  | 1312   | lncRNA                             | -1.79 | 1.91E-03 | 1.65E-02 |
| ENSG00000286816 | AP005273.2 | 11 | 64486136  | 64490674  | 4538   | lncRNA                             | -1.79 | 7.04E-03 | 3.78E-02 |
| ENSG00000234999 | SNRPPCP19  | 7  | 24906135  | 24906594  | 459    | processed pseudogene               | -1.79 | 5.32E-03 | 3.16E-02 |
| ENSG00000273819 | ENPP7P7    | 11 | 67812557  | 67873367  | 60810  | unprocessed pseudogene             | -1.79 | 1.04E-02 | 4.87E-02 |
| ENSG00000232900 | AL050403.1 | 20 | 10875333  | 10909279  | 32946  | lncRNA                             | -1.79 | 7.77E-04 | 9.41E-03 |
| ENSG00000018607 | ZNF806     | 2  | 132304806 | 132326855 | 23049  | transcribed unprocessed pseudogene | -1.79 | 1.54E-04 | 3.32E-03 |
| ENSG00000225980 | OR7E19P    | 19 | 9265440   | 9268819   | 3379   | transcribed unprocessed pseudogene | -1.79 | 6.51E-03 | 3.59E-02 |
| ENSG00000285914 | AC022440.1 | 5  | 171724575 | 171737519 | 12944  | lncRNA                             | -1.79 | 2.37E-03 | 1.89E-02 |
| ENSG00000263862 | LINC01543  | 18 | 26421139  | 26438041  | 16902  | lncRNA                             | -1.79 | 2.86E-03 | 2.14E-02 |
| ENSG00000224072 | VEZTP1     | X  | 46454097  | 46457199  | 3102   | processed pseudogene               | -1.79 | 1.03E-03 | 1.13E-02 |
| ENSG00000263050 | AC090617.5 | 17 | 2043475   | 2044968   | 1493   | lncRNA                             | -1.79 | 8.17E-03 | 4.17E-02 |
| ENSG00000183668 | PSG9       | 19 | 43211791  | 43269530  | 57739  | protein coding                     | -1.79 | 4.38E-04 | 6.54E-03 |
| ENSG00000270314 | AC007161.2 | 7  | 7735743   | 7736851   | 1108   | processed pseudogene               | -1.79 | 9.27E-03 | 4.51E-02 |
| ENSG00000228740 | GABRG3-AS1 | 15 | 27038978  | 27161319  | 122341 | lncRNA-antisense                   | -1.79 | 4.27E-04 | 6.45E-03 |
| ENSG00000286641 | AC108073.3 | 4  | 187942164 | 187963345 | 21181  | lncRNA                             | -1.79 | 1.10E-03 | 1.17E-02 |
| ENSG00000258676 | AC091544.2 | 15 | 92580741  | 92600545  | 19804  | lncRNA                             | -1.79 | 1.86E-04 | 3.74E-03 |
| ENSG00000260972 | Z98259.1   | 1  | 5492978   | 5494674   | 1696   | lncRNA                             | -1.79 | 1.86E-03 | 1.62E-02 |
| ENSG00000269445 | AC067969.2 | 19 | 38526954  | 38528555  | 1601   | lncRNA-antisense                   | -1.79 | 7.41E-03 | 3.91E-02 |
| ENSG00000233570 | LINC00690  | 3  | 16524771  | 16541903  | 17132  | lncRNA                             | -1.79 | 8.59E-03 | 4.30E-02 |
| ENSG00000106819 | ASP1       | 9  | 92456205  | 92482506  | 26301  | protein coding                     | -1.79 | 1.04E-03 | 1.13E-02 |
| ENSG00000287120 | AL138773.1 | 10 | 9292842   | 9309772   | 16930  | lncRNA                             | -1.79 | 7.50E-03 | 3.94E-02 |
| ENSG00000267101 | AC090376.1 | 18 | 45104361  | 45181382  | 77021  | lncRNA                             | -1.79 | 1.68E-03 | 1.52E-02 |
| ENSG00000279657 | AL161901.1 | 13 | 60730176  | 60733600  | 3424   | TEC                                | -1.79 | 6.27E-03 | 3.51E-02 |
| ENSG00000225216 | AC007362.1 | 2  | 205756469 | 205764006 | 7537   | lncRNA-antisense                   | -1.79 | 1.88E-03 | 1.64E-02 |
| ENSG00000125571 | IL37       | 2  | 112912971 | 112918882 | 5911   | protein coding                     | -1.79 | 5.26E-03 | 3.14E-02 |
| ENSG00000287469 | AC044798.3 | 16 | 49072543  | 49275579  | 203036 | lncRNA                             | -1.79 | 1.54E-05 | 6.98E-04 |
| ENSG00000254109 | RBPMS-AS1  | 8  | 30382119  | 30385401  | 3282   | lncRNA-antisense                   | -1.80 | 2.47E-03 | 1.94E-02 |
| ENSG00000286241 | AC080089.2 | 4  | 119686538 | 119693563 | 7025   | lncRNA                             | -1.80 | 2.58E-03 | 2.00E-02 |
| ENSG00000158901 | WFC8       | 20 | 45551153  | 45579326  | 28173  | protein coding                     | -1.80 | 6.12E-03 | 3.46E-02 |
| ENSG00000229305 | AL358876.1 | 1  | 8189824   | 8192770   | 2946   | processed pseudogene               | -1.80 | 5.99E-03 | 3.41E-02 |
| ENSG00000136155 | SCEL       | 13 | 77535674  | 77645263  | 109589 | protein coding                     | -1.80 | 2.36E-04 | 4.37E-03 |
| ENSG00000146521 | LINC01558  | 6  | 167784537 | 167796872 | 12335  | lncRNA                             | -1.80 | 2.00E-05 | 8.44E-04 |
| ENSG00000226829 | AC093655.1 | 7  | 68149548  | 68319676  | 170128 | lncRNA                             | -1.80 | 4.99E-03 | 3.04E-02 |
| ENSG00000260617 | AC138028.5 | 16 | 88741631  | 88742367  | 736    | lncRNA-antisense                   | -1.80 | 3.17E-03 | 2.29E-02 |
| ENSG00000286073 | AL138900.2 | 1  | 157287267 | 157310655 | 23388  | unprocessed pseudogene             | -1.80 | 2.62E-03 | 2.03E-02 |
| ENSG00000278110 | SUSD2P2    | 22 | 18623339  | 18625289  | 1950   | unprocessed pseudogene             | -1.80 | 5.29E-03 | 3.15E-02 |
| ENSG00000259637 | DNM1P38    | 15 | 82531653  | 82534139  | 2486   | unprocessed pseudogene             | -1.80 | 1.29E-03 | 1.29E-02 |
| ENSG00000167754 | KLK5       | 19 | 50943303  | 50953093  | 9790   | protein coding                     | -1.80 | 7.97E-04 | 9.54E-03 |
| ENSG00000183067 | IGSF5      | 21 | 39745407  | 39802096  | 56689  | protein coding                     | -1.80 | 1.49E-04 | 3.26E-03 |
| ENSG00000280002 | AC078925.4 | 12 | 130988312 | 130990028 | 1716   | TEC                                | -1.80 | 5.25E-03 | 3.14E-02 |
| ENSG00000261586 | AC068987.3 | 12 | 51817899  | 51820150  | 2251   | lncRNA                             | -1.80 | 6.26E-04 | 8.28E-03 |
| ENSG00000249436 | LINC-0003  | 5  | 57574027  | 57619816  | 45789  | lncRNA                             | -1.80 | 3.22E-04 | 5.41E-03 |
| ENSG00000254934 | LINC00678  | 11 | 27617626  | 27634627  | 17001  | lncRNA                             | -1.80 | 1.07E-02 | 4.95E-02 |
| ENSG00000256407 | AL357673.1 | 1  | 54132686  | 54200073  | 67387  | protein coding                     | -1.80 | 2.10E-03 | 1.76E-02 |
| ENSG00000225652 | KCNMA1-AS3 | 10 | 77350851  | 77376613  | 25762  | lncRNA-antisense                   | -1.80 | 3.29E-03 | 2.34E-02 |
| ENSG00000259702 | AC024337.1 | 15 | 96045341  | 96064357  | 19016  | lncRNA                             | -1.80 | 7.38E-03 | 3.90E-02 |
| ENSG00000256659 | LINC02368  | 12 | 128116730 | 128123103 | 6373   | lncRNA                             | -1.80 | 6.97E-04 | 8.80E-03 |
| ENSG00000285797 | AL512658.2 | 6  | 156350579 | 156390246 | 39667  | lncRNA                             | -1.80 | 1.44E-03 | 1.38E-02 |
| ENSG00000286289 | AL133482.1 | 10 | 113482069 | 113492054 | 9985   | lncRNA                             | -1.80 | 2.58E-03 | 2.00E-02 |
| ENSG00000284692 | Z98259.3   | 1  | 5478736   | 5493057   | 14321  | lncRNA                             | -1.80 | 1.88E-03 | 1.64E-02 |
| ENSG00000283973 | AC095795.1 | 1  | 42959065  | 42961864  | 2799   | lncRNA                             | -1.80 | 8.50E-04 | 9.93E-03 |
| ENSG00000169594 | BNC1       | 15 | 83255903  | 83284714  | 28811  | protein coding                     | -1.80 | 4.04E-04 | 6.24E-03 |
| ENSG00000170054 | SERPINA9   | 14 | 94462717  | 94479689  | 16972  | protein coding                     | -1.80 | 9.36E-04 | 1.06E-02 |
| ENSG00000197233 | OR1J2      | 9  | 122510802 | 122511743 | 941    | protein coding                     | -1.80 | 6.34E-03 | 3.53E-02 |
| ENSG00000196970 | NXF4       | X  | 102549965 | 102571695 | 21730  | transcribed unprocessed pseudogene | -1.80 | 5.69E-04 | 7.77E-03 |
| ENSG00000261018 | AC002101.1 | 9  | 133611798 | 133633099 | 21301  | lncRNA-antisense                   | -1.80 | 1.19E-03 | 1.23E-02 |
| ENSG00000245688 | AC008659.1 | 5  | 178438681 | 178443094 | 4413   | lncRNA-sense intronic              | -1.80 | 8.29E-03 | 4.21E-02 |
| ENSG00000278522 | POTEB3     | 15 | 21405401  | 21440499  | 35098  | protein coding                     | -1.81 | 1.83E-03 | 1.60E-02 |
| ENSG00000230221 | AL157384.1 | 9  | 95292338  | 95294810  | 2472   | processed pseudogene               | -1.81 | 6.28E-04 | 8.29E-03 |
| ENSG00000258990 | MPPE1P1    | 14 | 89110148  | 89111223  | 1075   | processed pseudogene               | -1.81 | 8.93E-03 | 4.40E-02 |
| ENSG00000171561 | OR2AT4     | 11 | 75081753  | 75096876  | 15123  | protein coding                     | -1.81 | 8.79E-06 | 4.65E-04 |
| ENSG00000270816 | LINC00221  | 14 | 106482435 | 106521073 | 38638  | lncRNA                             | -1.81 | 2.82E-05 | 1.05E-03 |
| ENSG00000232736 | AC007551.1 | 7  | 35768122  | 35768640  | 518    | processed pseudogene               | -1.81 | 7.54E-03 | 3.95E-02 |
| ENSG00000226741 | LINC02554  | 22 | 27307777  | 27318501  | 10724  | lncRNA                             | -1.81 | 5.02E-05 | 1.57E-03 |
| ENSG00000283000 | LINC02635  | 10 | 34969881  | 34975578  | 5697   | lncRNA                             | -1.81 | 3.95E-03 | 2.64E-02 |
| ENSG00000228459 | LINC01546  | X  | 3271544   | 3286138   | 14594  | lncRNA                             | -1.81 | 1.79E-03 | 1.58E-02 |
| ENSG00000251613 | AC063979.1 | 5  | 72687112  | 72771733  | 84621  | lncRNA                             | -1.81 | 8.52E-03 | 4.27E-02 |
| ENSG00000243349 | AL358394.2 | 10 | 45147394  | 45171389  | 23995  | lncRNA                             | -1.81 | 1.84E-03 | 1.61E-02 |
| ENSG00000268581 | SIGLEC18P  | 19 | 51119987  | 51122965  | 2978   | unprocessed pseudogene             | -1.81 | 2.42E-04 | 4.45E-03 |
| ENSG00000272937 | OR6U2P     | 12 | 55608043  | 55615878  | 7835   | transcribed unprocessed pseudogene | -1.81 | 2.36E-03 | 1.89E-02 |
| ENSG00000162039 | MEIOB      | 16 | 1833986   | 1884294   | 50308  | protein coding                     | -1.81 | 7.55E-04 | 9.24E-03 |
| ENSG00000228452 | AC098484.1 | 1  | 42775813  | 42776790  | 977    | lncRNA-antisense                   | -1.81 | 1.04E-02 | 4.88E-02 |
| ENSG00000171931 | FBXW10     | 17 | 18744026  | 18779349  | 35323  | protein coding                     | -1.81 | 1.61E-05 | 7.21E-04 |
| ENSG00000271850 | LINC02343  | 13 | 34347986  | 34616216  | 268230 | lncRNA                             | -1.81 | 3.36E-03 | 2.38E-02 |
| ENSG00000224222 | LINC02636  | 10 | 69994276  | 70019496  | 25220  | lncRNA                             | -1.81 | 2.24E-03 | 1.83E-02 |
| ENSG00000240687 | AC082651.1 | 2  | 9638745   | 9712920   | 74175  | lncRNA                             | -1.81 | 6.18E-04 | 8.20E-03 |
| ENSG00000249210 | GAPDHP38   | 19 | 46558641  | 46559642  | 1001   | processed pseudogene               | -1.82 | 7.35E-03 | 3.89E-02 |
| ENSG00000261522 | AL845331.2 | 2  | 94575976  | 94587183  | 11207  | transcribed unprocessed pseudogene | -1.82 | 1.16E-03 | 1.21E-02 |
| ENSG00000248851 | AC006427.1 | 4  | 16307456  | 16308167  | 711    | processed pseudogene               | -1.82 | 1.06E-02 | 4.93E-02 |

|                 |              |    |           |           |        |                                    |       |          |          |
|-----------------|--------------|----|-----------|-----------|--------|------------------------------------|-------|----------|----------|
| ENSG00000259731 | AC022929.1   | 15 | 38756552  | 38759413  | 2861   | lncRNA                             | -1.82 | 9.04E-03 | 4.44E-02 |
| ENSG00000267478 | AP002414.3   | 18 | 12091674  | 12093141  | 1467   | processed_pseudogene               | -1.82 | 1.88E-03 | 1.64E-02 |
| ENSG00000231606 | AL357873.1   | 1  | 14221887  | 14304445  | 82558  | lncRNA                             | -1.82 | 2.25E-04 | 4.23E-03 |
| ENSG00000234380 | LINC01426    | 21 | 34745757  | 34784886  | 39129  | lncRNA                             | -1.82 | 4.20E-05 | 1.38E-03 |
| ENSG00000285662 | FAM245B      | 10 | 46721002  | 46751738  | 30736  | lncRNA                             | -1.82 | 2.48E-03 | 1.95E-02 |
| ENSG00000280276 | AC009229.4   | 2  | 38121935  | 38123881  | 1946   | TEC                                | -1.82 | 3.48E-03 | 2.43E-02 |
| ENSG00000086696 | HSD17B2      | 16 | 82035004  | 82098534  | 63530  | protein coding                     | -1.82 | 3.63E-06 | 2.45E-04 |
| ENSG00000280693 | SH3PX2A-AS1  | 10 | 103745966 | 103755423 | 9457   | lncRNA-antisense                   | -1.82 | 6.15E-05 | 1.78E-03 |
| ENSG00000213514 | AL731556.1   | 10 | 77730766  | 77734769  | 4003   | processed_pseudogene               | -1.82 | 5.43E-04 | 7.56E-03 |
| ENSG00000229658 | PABPC1P9     | 22 | 16423943  | 16426031  | 2088   | unprocessed_pseudogene             | -1.82 | 3.52E-03 | 2.45E-02 |
| ENSG00000145192 | AHS3         | 3  | 186613060 | 186621318 | 8258   | protein coding                     | -1.82 | 1.41E-04 | 3.13E-03 |
| ENSG00000272281 | TPTE2P2      | 13 | 52219344  | 52334277  | 114933 | transcribed_unprocessed_pseudogene | -1.82 | 7.41E-06 | 4.17E-04 |
| ENSG00000224982 | TMEM233      | 12 | 119593774 | 119643075 | 49301  | protein coding                     | -1.82 | 6.89E-04 | 8.76E-03 |
| ENSG00000234522 | AC073587.1   | 10 | 120434983 | 120440376 | 5393   | unprocessed_pseudogene             | -1.82 | 6.02E-03 | 3.42E-02 |
| ENSG00000259659 | AC009996.1   | 15 | 44557829  | 44559188  | 1359   | lncRNA-sense intronic              | -1.82 | 1.08E-02 | 4.97E-02 |
| ENSG00000278965 | AC122713.2   | 5  | 180078357 | 180081691 | 3334   | TEC                                | -1.82 | 1.68E-04 | 3.51E-03 |
| ENSG00000204700 | OR2J2        | 6  | 29170907  | 29175811  | 4904   | protein coding                     | -1.82 | 3.03E-03 | 2.22E-02 |
| ENSG00000267741 | UBE2L4       | 19 | 9774497   | 9774960   | 463    | processed_pseudogene               | -1.82 | 7.77E-03 | 4.03E-02 |
| ENSG00000166763 | STRCP1       | 15 | 43699441  | 43718260  | 18819  | transcribed_unprocessed_pseudogene | -1.82 | 2.17E-04 | 4.12E-03 |
| ENSG00000239254 | AC009220.2   | 7  | 139172516 | 139174266 | 1750   | processed_pseudogene               | -1.82 | 4.14E-03 | 2.71E-02 |
| ENSG00000266014 | AC103808.4   | 18 | 76232927  | 76252044  | 19117  | lncRNA                             | -1.82 | 1.42E-03 | 1.37E-02 |
| ENSG00000178248 | FAM230I      | 22 | 23462086  | 23486980  | 24894  | lncRNA                             | -1.82 | 9.71E-04 | 1.08E-02 |
| ENSG00000198183 | BPIFA1       | 20 | 33235995  | 33243311  | 7316   | protein coding                     | -1.82 | 9.31E-04 | 1.05E-02 |
| ENSG00000279668 | AC024610.2   | 17 | 33827699  | 34079100  | 25140  | lncRNA                             | -1.82 | 5.38E-07 | 6.25E-05 |
| ENSG00000261592 | AC010531.3   | 16 | 87396704  | 87400295  | 3591   | lncRNA-antisense                   | -1.82 | 1.36E-03 | 1.33E-02 |
| ENSG00000228750 | LINC01672    | 1  | 6724637   | 6730012   | 5375   | lncRNA                             | -1.82 | 4.13E-04 | 6.32E-03 |
| ENSG00000279682 | AC120338.1   | X  | 7489659   | 7491199   | 1540   | TEC                                | -1.83 | 8.88E-03 | 4.39E-02 |
| ENSG00000256694 | AC026369.2   | 12 | 164664    | 166321    | 1657   | lncRNA-antisense                   | -1.83 | 3.46E-03 | 2.42E-02 |
| ENSG00000254401 | LINC02752    | 11 | 11020883  | 11183611  | 162728 | lncRNA                             | -1.83 | 2.83E-04 | 4.93E-03 |
| ENSG00000265542 | AC015845.2   | 17 | 57771946  | 57834749  | 62803  | lncRNA                             | -1.83 | 3.62E-03 | 2.50E-02 |
| ENSG00000224539 | SAGE4P       | X  | 135598927 | 135615431 | 16504  | unprocessed_pseudogene             | -1.83 | 4.88E-04 | 7.00E-03 |
| ENSG00000135750 | KCNK1        | 1  | 233614106 | 233672514 | 58408  | protein coding                     | -1.83 | 3.68E-06 | 2.47E-04 |
| ENSG00000198125 | MB           | 22 | 35606764  | 35637951  | 31187  | protein coding                     | -1.83 | 5.68E-05 | 1.69E-03 |
| ENSG00000173239 | LIPM         | 10 | 88802730  | 88820546  | 17816  | protein coding                     | -1.83 | 4.08E-03 | 2.69E-02 |
| ENSG00000132840 | BHMT2        | 5  | 79069767  | 79090069  | 20302  | protein coding                     | -1.83 | 9.69E-05 | 2.47E-03 |
| ENSG00000120498 | TEX11        | X  | 70528940  | 70908711  | 379771 | protein coding                     | -1.83 | 2.60E-05 | 1.00E-03 |
| ENSG00000230598 | AL645937.3   | 6  | 29212886  | 29216933  | 4047   | transcribed_unprocessed_pseudogene | -1.83 | 5.64E-03 | 3.27E-02 |
| ENSG00000267215 | AC040963.1   | 18 | 59081911  | 59085920  | 4009   | lncRNA                             | -1.83 | 9.87E-04 | 1.09E-02 |
| ENSG00000236208 | C10orf71-AS1 | 10 | 49296112  | 49299018  | 2906   | lncRNA-antisense                   | -1.83 | 6.00E-03 | 3.42E-02 |
| ENSG00000283568 | 5 S rRNA     | 20 | 29297095  | 29297246  | 151    | rRNA                               | -1.83 | 1.04E-02 | 4.85E-02 |
| ENSG00000204880 | KRTAP4-8     | 17 | 41096981  | 41098142  | 1161   | protein coding                     | -1.83 | 9.70E-03 | 4.64E-02 |
| ENSG00000176798 | OR51L1       | 11 | 4994851   | 5005536   | 10685  | protein coding                     | -1.83 | 1.15E-04 | 2.75E-03 |
| ENSG00000228056 | CFL1P3       | 1  | 63843196  | 63843685  | 489    | processed_pseudogene               | -1.83 | 7.09E-03 | 3.80E-02 |
| ENSG00000230258 | AC005208.1   | 17 | 70017324  | 70128859  | 111535 | lncRNA-antisense                   | -1.83 | 4.10E-03 | 2.70E-02 |
| ENSG00000261426 | AC144833.1   | 15 | 27362310  | 27366398  | 4088   | lncRNA-sense intronic              | -1.83 | 2.60E-03 | 2.02E-02 |
| ENSG00000215296 | TMCO5B       | 15 | 33235552  | 33247621  | 12069  | transcribed_unitary_pseudogene     | -1.83 | 1.14E-03 | 1.20E-02 |
| ENSG00000259882 | AC142384.1   | 16 | 33577502  | 33622547  | 45045  | unprocessed_pseudogene             | -1.83 | 5.36E-03 | 3.17E-02 |
| ENSG00000231768 | LINC01354    | 1  | 234527887 | 234531803 | 3916   | lncRNA                             | -1.83 | 2.30E-04 | 4.30E-03 |
| ENSG00000285919 | AC087639.2   | 15 | 68880663  | 68928941  | 48278  | lncRNA-antisense                   | -1.83 | 7.21E-04 | 8.97E-03 |
| ENSG00000088926 | F11          | 4  | 186266189 | 186289681 | 23492  | protein coding                     | -1.83 | 2.54E-05 | 9.88E-04 |
| ENSG00000253235 | AC11149.1    | 8  | 73326991  | 73370601  | 43610  | lncRNA                             | -1.83 | 7.90E-03 | 4.07E-02 |
| ENSG00000173124 | ACSM6        | 10 | 95194200  | 95228928  | 34728  | protein coding                     | -1.83 | 3.64E-04 | 5.84E-03 |
| ENSG00000204006 | C1orf185     | 1  | 51102221  | 51148086  | 45865  | protein coding                     | -1.83 | 9.31E-03 | 4.52E-02 |
| ENSG00000165694 | FRMD7        | X  | 132076990 | 132128020 | 51030  | protein coding                     | -1.83 | 2.03E-04 | 3.95E-03 |
| ENSG00000237937 | LINC02702    | 11 | 116639422 | 116658295 | 18873  | lncRNA                             | -1.83 | 3.64E-03 | 2.50E-02 |
| ENSG00000286792 | AC005703.6   | 17 | 15266848  | 15311760  | 44912  | lncRNA                             | -1.83 | 7.92E-03 | 4.08E-02 |
| ENSG00000174339 | OR2Y1        | 5  | 180739042 | 180740099 | 1057   | protein coding                     | -1.84 | 8.88E-03 | 4.39E-02 |
| ENSG00000260782 | AC007225.1   | 16 | 46789898  | 46792040  | 2142   | processed_pseudogene               | -1.84 | 3.27E-03 | 2.33E-02 |
| ENSG00000259735 | AC092868.2   | 15 | 59348648  | 59359889  | 11241  | lncRNA-sense intronic              | -1.84 | 5.84E-03 | 3.36E-02 |
| ENSG00000259776 | AC093426.1   | 1  | 239247808 | 239250818 | 3010   | lncRNA                             | -1.84 | 1.96E-03 | 1.68E-02 |
| ENSG00000266535 | AC008133.1   | 17 | 33111858  | 33131743  | 19885  | lncRNA-antisense                   | -1.84 | 3.24E-03 | 2.32E-02 |
| ENSG00000217165 | ANKRD18EP    | 6  | 39110321  | 39112952  | 2631   | processed_pseudogene               | -1.84 | 1.64E-03 | 1.50E-02 |
| ENSG00000237423 | LINC01522    | 20 | 47976739  | 47990127  | 13388  | lncRNA                             | -1.84 | 1.27E-04 | 2.92E-03 |
| ENSG00000278770 | Melazoa_SRP  | 17 | 45526466  | 45526746  | 280    | misc RNA                           | -1.84 | 5.57E-03 | 3.25E-02 |
| ENSG00000250230 | AP002754.1   | 11 | 61588442  | 61607550  | 19108  | lncRNA                             | -1.84 | 3.25E-05 | 1.16E-03 |
| ENSG00000269729 | AC006262.2   | 19 | 46163893  | 46180647  | 16754  | lncRNA                             | -1.84 | 1.01E-02 | 4.78E-02 |
| ENSG00000230657 | PRB4         | 12 | 11307077  | 11310436  | 3359   | protein coding                     | -1.84 | 4.99E-03 | 3.04E-02 |
| ENSG00000114248 | LRRRC31      | 3  | 169839172 | 169869935 | 30763  | protein coding                     | -1.84 | 6.08E-04 | 8.09E-03 |
| ENSG00000101435 | CST9L        | 20 | 23564732  | 23568484  | 3752   | protein coding                     | -1.84 | 7.56E-03 | 3.96E-02 |
| ENSG00000287963 | AC010476.2   | 5  | 155087430 | 155199252 | 111822 | lncRNA                             | -1.84 | 1.75E-04 | 3.61E-03 |
| ENSG00000178596 | GAPDHP29     | 1  | 94302038  | 94303022  | 984    | processed_pseudogene               | -1.84 | 5.52E-03 | 3.23E-02 |
| ENSG00000252010 | SCARNA5      | 2  | 233275727 | 233276002 | 275    | scaRNA                             | -1.84 | 3.33E-06 | 2.33E-04 |
| ENSG00000234626 | AL021937.3   | 22 | 32327064  | 32343105  | 16041  | lncRNA-antisense                   | -1.84 | 1.02E-03 | 1.12E-02 |
| ENSG00000279717 | AC005336.3   | 19 | 15904556  | 15907234  | 2678   | TEC                                | -1.84 | 3.88E-03 | 2.61E-02 |
| ENSG00000170923 | OR7G2        | 19 | 9100407   | 9107475   | 7068   | protein coding                     | -1.84 | 7.52E-04 | 9.21E-03 |
| ENSG00000277211 | AC092132.2   | 16 | 20155648  | 20158391  | 2743   | processed_pseudogene               | -1.84 | 5.51E-03 | 3.23E-02 |
| ENSG00000230324 | LINC01734    | 20 | 39213777  | 39224748  | 10971  | lncRNA                             | -1.84 | 6.11E-03 | 3.45E-02 |
| ENSG00000250374 | TRIM75P      | 4  | 165053864 | 165060554 | 6690   | protein coding                     | -1.85 | 5.98E-03 | 3.41E-02 |
| ENSG00000204480 | PRAMEF19     | 1  | 13369067  | 13371900  | 2833   | protein coding                     | -1.85 | 7.62E-04 | 9.31E-03 |
| ENSG00000167117 | ANKRD40CL    | 17 | 50761029  | 50767557  | 6528   | protein coding                     | -1.85 | 8.41E-04 | 9.86E-03 |
| ENSG00000279791 | AC018892.3   | 2  | 97094935  | 97097433  | 2498   | TEC                                | -1.85 | 8.02E-05 | 2.18E-03 |
| ENSG00000223528 | AL359094.1   | 10 | 126988095 | 127026507 | 38412  | lncRNA-antisense                   | -1.85 | 2.28E-05 | 9.11E-04 |
| ENSG00000233508 | AL021395.1   | 20 | 43189998  | 43202599  | 12601  | lncRNA                             | -1.85 | 4.15E-04 | 6.34E-03 |
| ENSG00000233067 | PTCHD1-AS    | X  | 22191895  | 22235358  | 43463  | lncRNA                             | -1.85 | 7.77E-03 | 4.03E-02 |
| ENSG00000288555 | AF222685.1   | 21 | 15190406  | 15224394  | 33988  | lncRNA                             | -1.85 | 9.69E-03 | 4.64E-02 |
| ENSG00000236866 | AL157902.1   | 1  | 117596832 | 117605770 | 8938   | lncRNA-antisense                   | -1.85 | 1.14E-03 | 1.20E-02 |
| ENSG00000183644 | HOATZ        | 11 | 111514785 | 111537031 | 22246  | protein coding                     | -1.85 | 4.68E-04 | 6.82E-03 |
| ENSG00000198650 | TAT          | 16 | 71565660  | 71577092  | 11432  | protein coding                     | -1.85 | 6.00E-06 | 3.58E-04 |
| ENSG00000257376 | AC079601.2   | 12 | 42431665  | 42433357  | 1692   | processed_pseudogene               | -1.85 | 1.14E-03 | 1.20E-02 |
| ENSG00000270035 | AL359881.2   | 1  | 7698303   | 7698872   | 569    | lncRNA                             | -1.85 | 5.46E-03 | 3.21E-02 |

|                 |             |    |           |           |         |                                    |       |          |          |
|-----------------|-------------|----|-----------|-----------|---------|------------------------------------|-------|----------|----------|
| ENSG00000132958 | TPTE2       | 13 | 19422877  | 19536762  | 113885  | protein coding                     | -1.85 | 5.21E-05 | 1.60E-03 |
| ENSG00000103316 | CRYM        | 16 | 21238874  | 21303083  | 64209   | protein coding                     | -1.85 | 2.03E-07 | 2.83E-05 |
| ENSG00000231707 | PABPC1P1    | 4  | 39973444  | 39974338  | 894     | processed pseudogene               | -1.85 | 1.26E-03 | 1.27E-02 |
| ENSG00000179546 | HTR1D       | 1  | 23191895  | 23194729  | 2834    | protein coding                     | -1.85 | 2.53E-04 | 4.57E-03 |
| ENSG00000247324 | AC010547.1  | 16 | 71462278  | 71465941  | 3663    | lncRNA-antisense                   | -1.85 | 2.94E-05 | 1.08E-03 |
| ENSG00000181733 | QRZ21       | 19 | 8721634   | 8732160   | 10526   | protein coding                     | -1.85 | 1.81E-03 | 1.59E-02 |
| ENSG00000269651 | AC022146.1  | 19 | 8173272   | 8175567   | 2295    | unprocessed pseudogene             | -1.85 | 9.86E-03 | 4.70E-02 |
| ENSG00000132639 | SNAP25      | 20 | 10218830  | 10307418  | 88588   | protein coding                     | -1.85 | 5.27E-06 | 3.25E-04 |
| ENSG00000260862 | AC099506.1  | 16 | 82773319  | 82829638  | 56319   | lncRNA-sense intronic              | -1.85 | 2.43E-04 | 4.46E-03 |
| ENSG00000228141 | AC105339.1  | 15 | 82710471  | 82714029  | 3558    | transcribed unitary pseudogene     | -1.85 | 3.09E-05 | 1.12E-03 |
| ENSG00000241388 | HNF1A-AS1   | 12 | 120941728 | 120980965 | 39237   | lncRNA                             | -1.85 | 1.58E-04 | 3.36E-03 |
| ENSG00000253932 | AC019270.1  | 8  | 13338574  | 13342754  | 4180    | lncRNA-antisense                   | -1.86 | 3.10E-03 | 2.25E-02 |
| ENSG00000231971 | CT69        | 6  | 134428239 | 134520585 | 92346   | lncRNA                             | -1.86 | 4.49E-03 | 2.86E-02 |
| ENSG00000236013 | AL357146.1  | 6  | 139976352 | 140093721 | 117369  | lncRNA                             | -1.86 | 1.62E-03 | 1.48E-02 |
| ENSG00000134216 | CHIA        | 1  | 111290851 | 111320566 | 29715   | protein coding                     | -1.86 | 3.93E-04 | 6.13E-03 |
| ENSG00000187847 | OR7E2P5     | 19 | 9198354   | 9210067   | 11713   | transcribed unprocessed pseudogene | -1.86 | 1.27E-05 | 6.14E-04 |
| ENSG00000227929 | SRGAP3-AS3  | 3  | 9216895   | 9219508   | 2613    | lncRNA-antisense                   | -1.86 | 2.58E-03 | 2.00E-02 |
| ENSG00000286732 | AC091181.2  | 17 | 57253236  | 57255855  | 2619    | lncRNA                             | -1.86 | 4.06E-03 | 2.69E-02 |
| ENSG00000204941 | PSG5        | 19 | 43166256  | 43186536  | 20280   | protein coding                     | -1.86 | 1.29E-04 | 2.96E-03 |
| ENSG00000106809 | OGN         | 9  | 92383268  | 92404696  | 21428   | protein coding                     | -1.86 | 3.15E-04 | 5.30E-03 |
| ENSG00000267617 | AC007795.1  | 19 | 28869507  | 28879176  | 9669    | lncRNA                             | -1.86 | 6.19E-03 | 3.48E-02 |
| ENSG00000184166 | OR1D2       | 17 | 3088484   | 3104422   | 15938   | protein coding                     | -1.86 | 2.30E-04 | 4.30E-03 |
| ENSG00000235432 | AL636074.2  | 1  | 20692734  | 20694013  | 1279    | unprocessed pseudogene             | -1.86 | 5.22E-03 | 3.13E-02 |
| ENSG00000215110 | UGT2B25P    | 4  | 69389492  | 69402081  | 12589   | processed pseudogene               | -1.86 | 8.83E-03 | 4.38E-02 |
| ENSG00000197171 | AL672167.1  | 6  | 29223973  | 29229263  | 68990   | transcribed unprocessed pseudogene | -1.86 | 1.24E-03 | 1.26E-02 |
| ENSG00000176198 | OR11H4      | 14 | 20239286  | 20244349  | 5063    | protein coding                     | -1.86 | 1.02E-02 | 4.79E-02 |
| ENSG00000226413 | OR8T1P      | 12 | 48442030  | 48442947  | 917     | unprocessed pseudogene             | -1.86 | 7.90E-03 | 4.07E-02 |
| ENSG00000227091 | SLC6A17-AS1 | 1  | 110165948 | 110172489 | 6541    | lncRNA-antisense                   | -1.86 | 3.83E-04 | 6.03E-03 |
| ENSG00000235430 | ZSWIM5P1    | 17 | 15768717  | 15771426  | 2709    | processed pseudogene               | -1.86 | 7.47E-04 | 4.98E-03 |
| ENSG00000162723 | SLAMF9      | 1  | 159951492 | 159954237 | 2745    | protein coding                     | -1.86 | 6.06E-03 | 3.44E-02 |
| ENSG00000263667 | AL035696.3  | 6  | 181466    | 205519    | 24053   | lncRNA                             | -1.86 | 2.86E-04 | 4.96E-03 |
| ENSG00000224071 | DNMT3AP1    | 2  | 66820684  | 66822570  | 1886    | processed pseudogene               | -1.86 | 2.52E-03 | 1.97E-02 |
| ENSG00000132031 | MATN3       | 2  | 19992052  | 20012668  | 2016    | protein coding                     | -1.86 | 5.74E-05 | 1.70E-03 |
| ENSG00000233017 | AL121832.1  | 20 | 62427827  | 62447677  | 19850   | lncRNA-antisense                   | -1.86 | 1.08E-03 | 1.16E-02 |
| ENSG00000179873 | NLRP11      | 19 | 55785397  | 55836800  | 51403   | protein coding                     | -1.87 | 1.14E-05 | 5.69E-04 |
| ENSG00000237290 | LINC01343   | 1  | 38209034  | 38214806  | 5772    | lncRNA                             | -1.87 | 1.03E-04 | 2.57E-03 |
| ENSG00000274808 | TBC1D3B     | 17 | 36166681  | 36176636  | 10955   | protein coding                     | -1.87 | 2.53E-04 | 4.57E-03 |
| ENSG00000224682 | SOC55P2     | 9  | 135447446 | 135450154 | 2708    | processed pseudogene               | -1.87 | 8.95E-04 | 1.03E-02 |
| ENSG00000234855 | SLT1-AS1    | 10 | 97102756  | 97104355  | 1599    | lncRNA-antisense                   | -1.87 | 1.22E-03 | 1.25E-02 |
| ENSG00000257510 | LINC02402   | 12 | 42615221  | 42646547  | 31326   | lncRNA                             | -1.87 | 3.93E-03 | 2.63E-02 |
| ENSG00000261195 | AC027130.1  | 16 | 19761172  | 19768099  | 4927    | lncRNA-antisense                   | -1.87 | 8.87E-03 | 4.39E-02 |
| ENSG00000136698 | CFC1        | 2  | 130592165 | 130599575 | 7410    | protein coding                     | -1.87 | 7.89E-03 | 4.07E-02 |
| ENSG00000204478 | PRAMEF20    | 1  | 13416351  | 13421328  | 4977    | protein coding                     | -1.87 | 6.07E-05 | 1.76E-03 |
| ENSG00000234754 | LINC02117   | 1  | 221330080 | 221336489 | 6409    | lncRNA                             | -1.87 | 5.32E-03 | 3.16E-02 |
| ENSG00000248317 | AC111194.1  | 4  | 54943626  | 54957832  | 14206   | lncRNA                             | -1.87 | 8.63E-03 | 4.31E-02 |
| ENSG00000226913 | BNS-DT      | 3  | 49549306  | 49554366  | 5060    | lncRNA                             | -1.87 | 9.68E-04 | 1.08E-02 |
| ENSG00000185479 | KRT6B       | 12 | 52446651  | 52452146  | 5495    | protein coding                     | -1.87 | 7.02E-05 | 1.98E-03 |
| ENSG00000169340 | PDILT       | 16 | 20359175  | 20404737  | 45562   | protein coding                     | -1.87 | 2.01E-04 | 3.93E-03 |
| ENSG00000264813 | AC113554.1  | 17 | 63484823  | 63521848  | 37025   | protein coding                     | -1.87 | 4.07E-03 | 2.69E-02 |
| ENSG00000280306 | AC137056.2  | 16 | 20487702  | 20489659  | 1957    | TEC                                | -1.87 | 4.35E-03 | 2.79E-02 |
| ENSG00000259570 | AC243562.1  | 15 | 84394512  | 84395514  | 1002    | unprocessed pseudogene             | -1.87 | 4.06E-03 | 2.69E-02 |
| ENSG00000213770 | FAM210CP    | 10 | 27349717  | 27350290  | 573     | processed pseudogene               | -1.87 | 3.54E-03 | 2.46E-02 |
| ENSG00000226469 | ADAM1B      | 12 | 111927018 | 111929017 | 1999    | unitary pseudogene                 | -1.87 | 9.08E-04 | 1.04E-02 |
| ENSG00000217455 | AC073316.1  | 7  | 3140234   | 3174654   | 34420   | lncRNA                             | -1.87 | 1.95E-05 | 8.28E-04 |
| ENSG00000164871 | SPAG11B     | 8  | 7442684   | 7463674   | 20990   | protein coding                     | -1.87 | 2.96E-03 | 2.19E-02 |
| ENSG00000224565 | LINC01754   | 20 | 47391925  | 47412327  | 20402   | lncRNA                             | -1.87 | 1.32E-03 | 1.31E-02 |
| ENSG00000244573 | RPL30P11    | 12 | 14356842  | 14365503  | 8661    | transcribed processed pseudogene   | -1.87 | 5.57E-03 | 3.25E-02 |
| ENSG00000229486 | AC104454.1  | 1  | 84015865  | 84018371  | 2506    | processed pseudogene               | -1.87 | 1.88E-03 | 1.64E-02 |
| ENSG00000227145 | IL21-AS1    | 4  | 122618983 | 122689156 | 70173   | lncRNA-antisense                   | -1.87 | 2.12E-04 | 4.07E-03 |
| ENSG00000224971 | SUMO2P3     | 7  | 55732144  | 55732431  | 287     | processed pseudogene               | -1.87 | 2.98E-03 | 2.19E-02 |
| ENSG00000237510 | GPAT2P1     | 2  | 95789654  | 95800166  | 10512   | transcribed unprocessed pseudogene | -1.87 | 2.55E-05 | 9.88E-04 |
| ENSG00000250480 | AC034244.2  | 5  | 57120796  | 57122624  | 1828    | processed pseudogene               | -1.88 | 6.10E-03 | 3.45E-02 |
| ENSG00000233457 | AL353705.2  | 9  | 78150532  | 78151193  | 661     | processed pseudogene               | -1.88 | 4.85E-03 | 2.99E-02 |
| ENSG00000238178 | AC078993.1  | X  | 16152941  | 16170869  | 17928   | lncRNA-antisense                   | -1.88 | 2.59E-03 | 2.01E-02 |
| ENSG00000280291 | AC016251.1  | 15 | 96294935  | 96298023  | 3088    | TEC                                | -1.88 | 1.45E-03 | 1.39E-02 |
| ENSG00000196832 | OR11G2      | 14 | 20190894  | 20201075  | 10181   | protein coding                     | -1.88 | 1.39E-04 | 3.11E-03 |
| ENSG00000115593 | SMYD1       | 2  | 88067825  | 88113384  | 45559   | protein coding                     | -1.88 | 5.28E-05 | 1.62E-03 |
| ENSG00000201412 | Y RNA       | 10 | 92710499  | 92710608  | 109     | misc RNA                           | -1.88 | 4.24E-03 | 2.76E-02 |
| ENSG00000243137 | PSG4        | 19 | 43192702  | 43207299  | 14597   | protein coding                     | -1.88 | 2.37E-05 | 9.42E-04 |
| ENSG00000287533 | AC011477.8  | 19 | 19757951  | 19774809  | 16858   | lncRNA                             | -1.88 | 2.80E-03 | 2.11E-02 |
| ENSG00000285939 | AC034268.2  | 17 | 53276760  | 54365634  | 1088874 | lncRNA-antisense                   | -1.88 | 3.14E-03 | 2.27E-02 |
| ENSG00000237439 | Z83839.1    | 22 | 32129689  | 32130612  | 923     | transcribed unprocessed pseudogene | -1.88 | 5.41E-03 | 3.19E-02 |
| ENSG00000279358 | AP02833.3   | 11 | 126934886 | 126937150 | 2264    | TEC                                | -1.88 | 3.66E-03 | 2.51E-02 |
| ENSG00000280419 | AC10531.8   | 16 | 87296949  | 87297633  | 684     | TEC                                | -1.88 | 8.33E-03 | 4.22E-02 |
| ENSG00000263232 | ATP5F1AP3   | 16 | 72005037  | 72006543  | 1506    | processed pseudogene               | -1.88 | 1.58E-03 | 1.46E-02 |
| ENSG00000213727 | AP000533.1  | 22 | 15572089  | 15573265  | 1176    | processed pseudogene               | -1.88 | 9.95E-03 | 4.73E-02 |
| ENSG00000213487 | ASS1P4      | X  | 3367149   | 3368382   | 1233    | processed pseudogene               | -1.88 | 7.23E-03 | 3.85E-02 |
| ENSG00000248529 | AC028746.1  | 5  | 61658474  | 61698432  | 39958   | lncRNA-antisense                   | -1.88 | 8.83E-05 | 2.33E-03 |
| ENSG00000236027 | PATE3       | 11 | 125788127 | 125791600 | 3473    | protein coding                     | -1.88 | 1.09E-02 | 4.99E-02 |
| ENSG00000185385 | OR7A17      | 19 | 14878203  | 14886132  | 7929    | protein coding                     | -1.88 | 5.76E-04 | 7.82E-03 |
| ENSG00000172156 | CCL11       | 17 | 34285742  | 34288334  | 2592    | protein coding                     | -1.88 | 6.36E-03 | 3.54E-02 |
| ENSG00000203643 | AC012456.1  | 2  | 11721619  | 11724222  | 2603    | lncRNA-antisense                   | -1.89 | 2.63E-03 | 2.03E-02 |
| ENSG00000253868 | FER1L6-AS2  | 8  | 124044395 | 124171522 | 127127  | lncRNA-antisense                   | -1.89 | 2.13E-04 | 4.08E-03 |
| ENSG00000261304 | LINC002252  | 15 | 34651135  | 34671095  | 19960   | lncRNA                             | -1.89 | 6.87E-03 | 3.72E-02 |
| ENSG00000264859 | DSG2-AS1    | 18 | 31542146  | 31556948  | 14802   | lncRNA-antisense                   | -1.89 | 9.86E-04 | 1.09E-02 |
| ENSG00000171489 | SPAC45      | X  | 48004336  | 48009729  | 5393    | protein coding                     | -1.89 | 2.23E-03 | 1.83E-02 |
| ENSG00000240790 | AC073934.1  | 7  | 12764685  | 127652012 | 7327    | lncRNA-antisense                   | -1.89 | 3.43E-03 | 2.41E-02 |
| ENSG00000225582 | AC011193.1  | 17 | 34479272  | 34482148  | 2876    | lncRNA                             | -1.89 | 4.17E-03 | 2.72E-02 |
| ENSG00000269124 | AC007193.2  | 19 | 46320197  | 46340004  | 19807   | lncRNA-antisense                   | -1.89 | 2.31E-03 | 1.86E-02 |
| ENSG00000287552 | AC109925.1  | 4  | 94315486  | 94343041  | 27555   | lncRNA                             | -1.89 | 1.44E-03 | 1.38E-02 |

|                 |            |    |           |           |        |                                    |       |          |          |
|-----------------|------------|----|-----------|-----------|--------|------------------------------------|-------|----------|----------|
| ENSG00000123307 | NEUROD4    | 12 | 55019974  | 55030017  | 10043  | protein coding                     | -1.89 | 4.67E-04 | 6.80E-03 |
| ENSG00000171942 | OR10H2     | 19 | 15728020  | 15729060  | 1040   | protein coding                     | -1.89 | 3.80E-03 | 2.57E-02 |
| ENSG00000288068 | AC027088.5 | 15 | 68985795  | 68998679  | 12884  | lncRNA                             | -1.89 | 4.77E-04 | 6.91E-03 |
| ENSG00000287415 | AC099541.2 | 3  | 40869548  | 40875980  | 6432   | lncRNA                             | -1.89 | 1.64E-03 | 1.50E-02 |
| ENSG00000184330 | S100A7A    | 1  | 153416520 | 153423222 | 6702   | protein coding                     | -1.89 | 1.52E-04 | 3.29E-03 |
| ENSG00000260551 | PWRN2      | 15 | 24162754  | 24169948  | 7194   | lncRNA                             | -1.89 | 6.30E-04 | 8.31E-03 |
| ENSG00000278920 | AC005005.4 | 22 | 31051630  | 31068327  | 16697  | lncRNA-sense overlapping           | -1.89 | 6.18E-06 | 3.66E-04 |
| ENSG00000260343 | LINC01043  | 13 | 112313467 | 112321758 | 8291   | lncRNA                             | -1.89 | 4.18E-05 | 1.37E-03 |
| ENSG00000256056 | AC087257.2 | 12 | 27592461  | 27594039  | 1578   | unprocessed pseudogene             | -1.89 | 1.00E-02 | 4.74E-02 |
| ENSG00000243130 | PSG11      | 19 | 43007656  | 43026474  | 18818  | protein coding                     | -1.89 | 2.06E-04 | 3.98E-03 |
| ENSG00000287619 | AL021308.1 | X  | 103563917 | 103573278 | 9361   | lncRNA                             | -1.89 | 1.06E-02 | 4.93E-02 |
| ENSG00000279200 | AC020558.5 | 17 | 17616043  | 17617745  | 1702   | TEC                                | -1.89 | 2.08E-04 | 4.01E-03 |
| ENSG00000226206 | BX470209.1 | 9  | 89799695  | 89821753  | 22058  | lncRNA                             | -1.89 | 7.05E-03 | 3.79E-02 |
| ENSG00000235434 | AL391883.1 | 1  | 19814367  | 19819502  | 5135   | lncRNA-antisense                   | -1.89 | 6.06E-03 | 3.44E-02 |
| ENSG00000196166 | C8orf86    | 8  | 38510834  | 38560939  | 50105  | lncRNA                             | -1.89 | 5.15E-04 | 7.24E-03 |
| ENSG00000270226 | AC006548.2 | 22 | 17012404  | 17012932  | 528    | processed pseudogene               | -1.89 | 1.08E-02 | 4.98E-02 |
| ENSG00000286325 | AC124861.3 | 2  | 240184716 | 240187878 | 3162   | lncRNA                             | -1.89 | 1.04E-02 | 4.85E-02 |
| ENSG00000273001 | AL731533.2 | 20 | 3065424   | 3066001   | 577    | lncRNA                             | -1.89 | 6.42E-03 | 3.56E-02 |
| ENSG00000232837 | LINC01700  | 21 | 38974429  | 38977774  | 3345   | lncRNA                             | -1.89 | 7.90E-03 | 4.07E-02 |
| ENSG00000259283 | AC109462.1 | 16 | 55259969  | 55333588  | 73619  | lncRNA-antisense                   | -1.90 | 1.03E-02 | 4.82E-02 |
| ENSG00000228397 | LINC01635  | 1  | 22023990  | 22026048  | 2058   | lncRNA                             | -1.90 | 4.15E-04 | 6.34E-03 |
| ENSG00000104055 | TGM5       | 15 | 43232590  | 43266928  | 34338  | protein coding                     | -1.90 | 3.38E-04 | 5.57E-03 |
| ENSG00000226440 | LAMA4-AS1  | 1  | 112236093 | 112307009 | 70916  | lncRNA-antisense                   | -1.90 | 1.56E-03 | 1.45E-02 |
| ENSG00000230630 | DNM3OS     | 6  | 172138397 | 172144840 | 6443   | lncRNA-antisense                   | -1.90 | 1.69E-03 | 1.53E-02 |
| ENSG00000287275 | AC011451.4 | 19 | 9458119   | 9462388   | 4269   | lncRNA                             | -1.90 | 9.35E-04 | 1.05E-02 |
| ENSG00000268754 | LINC01081  | 16 | 86221420  | 86301303  | 79883  | lncRNA                             | -1.90 | 3.18E-04 | 5.31E-03 |
| ENSG00000258039 | AC117377.1 | 12 | 99093359  | 99105011  | 11652  | lncRNA-antisense                   | -1.90 | 1.08E-02 | 4.97E-02 |
| ENSG00000230500 | MXK-AS1    | 10 | 27744786  | 27767794  | 23008  | lncRNA-antisense                   | -1.90 | 9.40E-04 | 1.06E-02 |
| ENSG00000135324 | MRAP2      | 6  | 84033772  | 84090881  | 57109  | protein coding                     | -1.90 | 5.08E-03 | 3.08E-02 |
| ENSG00000285775 | AC109136.1 | 16 | 55045700  | 55049318  | 3618   | lncRNA                             | -1.90 | 1.22E-03 | 1.25E-02 |
| ENSG00000260762 | ACSM5P1    | 16 | 20586550  | 20607107  | 20557  | unprocessed pseudogene             | -1.90 | 1.63E-04 | 3.45E-03 |
| ENSG00000254443 | AC068733.1 | 11 | 6362799   | 6365267   | 2468   | lncRNA                             | -1.90 | 1.25E-03 | 1.27E-02 |
| ENSG00000259299 | AC061965.2 | 15 | 29233673  | 29235137  | 1464   | processed pseudogene               | -1.90 | 1.40E-03 | 1.36E-02 |
| ENSG00000226567 | LINC00606  | 3  | 10759350  | 10764209  | 4859   | lncRNA                             | -1.90 | 5.75E-04 | 7.81E-03 |
| ENSG00000069122 | ADGRF5     | 6  | 46862522  | 46954943  | 102421 | protein coding                     | -1.90 | 3.99E-06 | 2.62E-04 |
| ENSG00000163530 | DPFA2      | 3  | 109293788 | 109316517 | 22729  | protein coding                     | -1.90 | 4.77E-04 | 6.91E-03 |
| ENSG00000259724 | LINC01581  | 15 | 93905405  | 94107938  | 20533  | lncRNA                             | -1.90 | 1.12E-04 | 2.71E-03 |
| ENSG00000267465 | AC011525.2 | 19 | 31588159  | 31593786  | 5627   | lncRNA                             | -1.90 | 8.48E-05 | 2.27E-03 |
| ENSG00000260896 | ARLNC1     | 16 | 80826074  | 80892682  | 66608  | lncRNA                             | -1.90 | 2.23E-06 | 1.74E-04 |
| ENSG00000263887 | AC053481.2 | 17 | 62282702  | 62297026  | 14324  | transcribed unprocessed pseudogene | -1.90 | 2.84E-05 | 1.06E-03 |
| ENSG00000258823 | AL160314.3 | 14 | 22723476  | 22726572  | 3096   | transcribed unprocessed pseudogene | -1.90 | 1.07E-02 | 4.93E-02 |
| ENSG00000073754 | CD5L       | 1  | 157830911 | 157898256 | 67345  | protein coding                     | -1.90 | 4.75E-05 | 1.51E-03 |
| ENSG00000261095 | AC136285.1 | 16 | 87212122  | 87226430  | 14308  | lncRNA                             | -1.90 | 2.22E-03 | 1.82E-02 |
| ENSG00000258647 | LINC00930  | 15 | 92567817  | 92574529  | 6712   | lncRNA                             | -1.90 | 9.42E-06 | 4.92E-04 |
| ENSG00000228323 | MYADM-AS1  | 19 | 53854581  | 53869107  | 14526  | lncRNA-antisense                   | -1.90 | 3.26E-04 | 5.45E-03 |
| ENSG00000260202 | AL109954.1 | 20 | 23481645  | 23519054  | 37409  | lncRNA                             | -1.90 | 1.23E-03 | 1.25E-02 |
| ENSG00000215165 | TCEA1P3    | 9  | 38478471  | 38479350  | 879    | processed pseudogene               | -1.90 | 7.65E-03 | 3.99E-02 |
| ENSG00000228876 | AC010745.2 | 2  | 16224047  | 16333978  | 109931 | lncRNA                             | -1.90 | 1.20E-05 | 5.89E-04 |
| ENSG00000279442 | AP000542.2 | 22 | 15298378  | 15304556  | 6178   | lncRNA                             | -1.91 | 9.19E-03 | 4.49E-02 |
| ENSG00000267127 | AC090360.1 | 18 | 80034346  | 80097088  | 62742  | protein coding                     | -1.91 | 1.63E-05 | 7.25E-04 |
| ENSG00000256540 | AC007406.3 | 12 | 166856    | 182399    | 15543  | lncRNA                             | -1.91 | 1.90E-04 | 3.79E-03 |
| ENSG00000237282 | LINC00051  | 20 | 18379049  | 18381484  | 2435   | lncRNA-antisense                   | -1.91 | 7.91E-03 | 4.08E-02 |
| ENSG00000259867 | AC105411.1 | 16 | 80154979  | 80563354  | 408375 | lncRNA-antisense                   | -1.91 | 9.33E-06 | 4.89E-04 |
| ENSG00000286790 | AC010494.1 | 16 | 19180748  | 19184060  | 3312   | lncRNA                             | -1.91 | 7.97E-04 | 9.54E-03 |
| ENSG00000273172 | LINC02091  | 17 | 183824    | 191587    | 7763   | lncRNA                             | -1.91 | 2.70E-03 | 2.06E-02 |
| ENSG00000258481 | AL133240.1 | 14 | 92253493  | 92263656  | 10163  | lncRNA                             | -1.91 | 8.81E-03 | 4.37E-02 |
| ENSG00000273492 | AP000229.1 | 21 | 26170871  | 26217381  | 46510  | lncRNA                             | -1.91 | 9.25E-04 | 1.05E-02 |
| ENSG00000188280 | FAM230G    | 22 | 20338805  | 20354372  | 15567  | lncRNA-antisense                   | -1.91 | 1.26E-04 | 2.92E-03 |
| ENSG00000146233 | CYP39A1    | 6  | 46549580  | 46652830  | 103250 | protein coding                     | -1.91 | 2.16E-04 | 4.11E-03 |
| ENSG00000287983 | AL035251.1 | 20 | 39231115  | 39233836  | 2721   | lncRNA                             | -1.91 | 9.52E-05 | 2.44E-03 |
| ENSG00000258534 | AL132712.1 | 14 | 103854366 | 103880111 | 25745  | lncRNA                             | -1.91 | 6.57E-03 | 3.61E-02 |
| ENSG00000262267 | U95743.1   | 16 | 13728654  | 13779760  | 51106  | lncRNA                             | -1.91 | 1.49E-03 | 1.41E-02 |
| ENSG00000268460 | AC006262.1 | 19 | 46201552  | 46214838  | 13286  | lncRNA                             | -1.91 | 1.56E-06 | 1.35E-04 |
| ENSG00000276729 | Melaza SRP | 19 | 50019019  | 50019320  | 301    | misc RNA                           | -1.91 | 8.79E-03 | 4.36E-02 |
| ENSG00000261210 | CLEC19A    | 16 | 19285731  | 19322145  | 36414  | protein coding                     | -1.91 | 2.16E-05 | 8.80E-04 |
| ENSG00000229316 | HMBG1P45   | 1  | 50398825  | 50399773  | 948    | processed pseudogene               | -1.91 | 1.06E-02 | 4.93E-02 |
| ENSG00000267961 | OR10B1P    | 19 | 15141105  | 15142062  | 957    | unprocessed pseudogene             | -1.91 | 2.79E-03 | 2.11E-02 |
| ENSG00000131059 | BP1FA3     | 20 | 33217310  | 33227806  | 10496  | protein coding                     | -1.91 | 3.11E-04 | 5.26E-03 |
| ENSG00000135355 | GJA10      | 6  | 89894469  | 89921760  | 27291  | protein coding                     | -1.91 | 4.23E-03 | 2.75E-02 |
| ENSG00000270547 | LINC01235  | 9  | 13406380  | 13488125  | 81745  | lncRNA                             | -1.91 | 7.18E-04 | 8.94E-03 |
| ENSG00000287224 | AC099791.4 | 1  | 61588049  | 61589904  | 1855   | lncRNA                             | -1.91 | 2.24E-03 | 1.83E-02 |
| ENSG00000212901 | KRTAP3-1   | 17 | 41008521  | 41019324  | 10803  | protein coding                     | -1.91 | 1.06E-02 | 4.93E-02 |
| ENSG00000240522 | RPL7AP10   | 19 | 21149648  | 21150438  | 790    | processed pseudogene               | -1.91 | 5.15E-03 | 3.10E-02 |
| ENSG00000259281 | LINGO1-AS2 | 15 | 77660052  | 77668074  | 8022   | lncRNA-antisense                   | -1.91 | 1.33E-03 | 1.31E-02 |
| ENSG00000224322 | AC04009.1  | 7  | 27361591  | 27410358  | 48767  | lncRNA                             | -1.91 | 6.17E-03 | 3.47E-02 |
| ENSG00000183747 | ACSM2A     | 16 | 20451461  | 20487669  | 36208  | protein coding                     | -1.91 | 2.21E-06 | 1.74E-04 |
| ENSG00000227482 | AL157702.2 | 9  | 113650956 | 113682855 | 31899  | lncRNA                             | -1.91 | 8.95E-03 | 4.41E-02 |
| ENSG00000166787 | SAA3P      | 11 | 18112472  | 18116132  | 3660   | transcribed unprocessed pseudogene | -1.91 | 4.17E-03 | 2.72E-02 |
| ENSG00000198930 | CSAG1      | X  | 152727484 | 152733735 | 6251   | protein coding                     | -1.92 | 1.04E-02 | 4.86E-02 |
| ENSG00000183929 | DUSP5P1    | 1  | 228650241 | 228651379 | 1138   | processed pseudogene               | -1.92 | 4.47E-03 | 2.77E-02 |
| ENSG00000172752 | COL6A5     | 3  | 130345516 | 130484844 | 139328 | protein coding                     | -1.92 | 2.73E-08 | 5.66E-06 |
| ENSG00000179136 | LINC00670  | 17 | 12549764  | 12642854  | 93090  | lncRNA                             | -1.92 | 2.29E-04 | 4.28E-03 |
| ENSG00000164294 | GPX8       | 5  | 55160167  | 55167297  | 7130   | protein coding                     | -1.92 | 1.08E-03 | 1.16E-02 |
| ENSG00000279579 | LINC01666  | 21 | 8759077   | 8761335   | 2258   | lncRNA                             | -1.92 | 1.91E-04 | 3.80E-03 |
| ENSG00000228620 | Z97056.1   | 22 | 38424288  | 38427336  | 3048   | lncRNA-antisense                   | -1.92 | 3.37E-03 | 2.38E-02 |
| ENSG00000141946 | ZIM3       | 19 | 57134096  | 57145202  | 11106  | protein coding                     | -1.92 | 1.30E-03 | 1.29E-02 |
| ENSG00000258497 | AL359682.1 | 14 | 101257332 | 101278318 | 20986  | lncRNA                             | -1.92 | 4.51E-03 | 2.86E-02 |
| ENSG00000260072 | AC008938.1 | 16 | 24472798  | 24495177  | 22379  | lncRNA                             | -1.92 | 8.57E-07 | 8.68E-05 |
| ENSG00000261409 | AL035425.3 | X  | 108719949 | 108724944 | 4995   | lncRNA-sense overlapping           | -1.92 | 4.87E-03 | 2.99E-02 |
| ENSG00000166959 | MS4A8      | 11 | 60699585  | 60715807  | 16222  | protein coding                     | -1.92 | 8.66E-05 | 2.30E-03 |



|                 |             |    |           |           |        |                                    |       |          |          |
|-----------------|-------------|----|-----------|-----------|--------|------------------------------------|-------|----------|----------|
| ENSG00000287708 | AL137017.1  | 9  | 14395791  | 14472407  | 76616  | lncRNA                             | -1.92 | 8.29E-04 | 9.77E-03 |
| ENSG00000274279 | SPATA31E3P  | 15 | 22401208  | 22406944  | 5736   | unprocessed_pseudogene             | -1.92 | 4.07E-03 | 2.69E-02 |
| ENSG00000211961 | IGHV1-45    | 14 | 106506996 | 106507491 | 495    | IG V gene                          | -1.92 | 2.06E-03 | 1.74E-02 |
| ENSG00000255203 | OR7E2P      | 11 | 86857059  | 86857947  | 888    | unprocessed_pseudogene             | -1.92 | 1.02E-02 | 4.79E-02 |
| ENSG00000187569 | DP3A3       | 12 | 7711433   | 7717559   | 6126   | protein coding                     | -1.92 | 7.45E-03 | 3.92E-02 |
| ENSG00000175676 | GOLGA8DP    | 15 | 23157366  | 23170711  | 13345  | transcribed_unprocessed_pseudogene | -1.92 | 6.08E-04 | 8.09E-03 |
| ENSG00000124092 | CTCF        | 20 | 57495966  | 57525652  | 29686  | protein coding                     | -1.92 | 6.87E-06 | 3.97E-04 |
| ENSG00000233405 | LINC01046   | 13 | 21224521  | 21235204  | 10683  | lncRNA                             | -1.93 | 1.15E-03 | 1.20E-02 |
| ENSG00000260564 | AL161912.2  | 9  | 79889001  | 79892007  | 3006   | lncRNA                             | -1.93 | 5.71E-03 | 3.31E-02 |
| ENSG00000221933 | OR2A25      | 7  | 144069811 | 14407580  | 6059   | protein coding                     | -1.93 | 1.53E-03 | 1.43E-02 |
| ENSG00000235584 | AC008288.1  | 2  | 95660588  | 95668727  | 8139   | lncRNA                             | -1.93 | 5.19E-05 | 1.60E-03 |
| ENSG00000185860 | CCDC190     | 1  | 162824458 | 162868815 | 44357  | protein coding                     | -1.93 | 6.30E-05 | 1.81E-03 |
| ENSG00000170426 | SDR9C7      | 12 | 56923133  | 56934408  | 11275  | protein coding                     | -1.93 | 2.83E-03 | 2.12E-02 |
| ENSG00000144837 | PLA1A       | 3  | 119597875 | 119629811 | 31936  | protein coding                     | -1.93 | 1.39E-05 | 6.50E-04 |
| ENSG00000286442 | AL512603.1  | 10 | 23575012  | 23586224  | 11212  | lncRNA                             | -1.93 | 2.02E-03 | 1.72E-02 |
| ENSG00000287727 | AL139423.2  | 1  | 10612222  | 10616452  | 4230   | lncRNA                             | -1.93 | 2.93E-04 | 5.04E-03 |
| ENSG00000274554 | AC083806.2  | 12 | 116948738 | 116951422 | 2684   | lncRNA-antisense                   | -1.93 | 2.10E-03 | 1.76E-02 |
| ENSG00000254265 | AC100810.2  | 8  | 1730206   | 1731452   | 1246   | processed_pseudogene               | -1.93 | 3.60E-03 | 2.48E-02 |
| ENSG00000284883 | AC021066.2  | 12 | 52263948  | 52267461  | 3513   | unprocessed_pseudogene             | -1.93 | 2.21E-03 | 1.82E-02 |
| ENSG00000284240 | LINC02801   | 1  | 87212669  | 87264741  | 52072  | lncRNA                             | -1.93 | 1.08E-04 | 2.65E-03 |
| ENSG00000227742 | CALR4P      | 1  | 51561866  | 51594897  | 33031  | transcribed_unitary_pseudogene     | -1.93 | 4.87E-05 | 1.53E-03 |
| ENSG00000287184 | AC007269.1  | 7  | 159107761 | 159109216 | 1455   | lncRNA                             | -1.93 | 7.06E-03 | 3.79E-02 |
| ENSG00000285875 | AL035446.2  | 6  | 140575788 | 140898381 | 322593 | lncRNA                             | -1.93 | 3.20E-03 | 2.30E-02 |
| ENSG00000196754 | S100A2      | 1  | 153561108 | 153567890 | 6782   | protein coding                     | -1.93 | 1.96E-05 | 8.31E-04 |
| ENSG00000275152 | CCL16       | 17 | 35976493  | 35981497  | 5004   | protein coding                     | -1.93 | 3.92E-05 | 1.32E-03 |
| ENSG00000198136 | SERPINA3    | 14 | 94612384  | 94624055  | 11671  | protein coding                     | -1.93 | 7.68E-05 | 2.21E-03 |
| ENSG00000235160 | LINC02248   | 15 | 26395037  | 26455217  | 60180  | lncRNA                             | -1.93 | 1.68E-04 | 3.51E-03 |
| ENSG00000235062 | BCRP5       | 22 | 20697962  | 20698934  | 972    | unprocessed_pseudogene             | -1.93 | 3.48E-03 | 2.43E-02 |
| ENSG00000234481 | AC117945.1  | 1  | 36769812  | 36775768  | 5956   | lncRNA-antisense                   | -1.93 | 6.38E-03 | 3.55E-02 |
| ENSG00000278626 | AC023310.4  | 15 | 20642799  | 20643448  | 649    | lncRNA                             | -1.93 | 7.79E-03 | 4.04E-02 |
| ENSG00000286493 | AC069214.1  | 12 | 120904702 | 120907937 | 3235   | lncRNA                             | -1.94 | 8.34E-03 | 4.23E-02 |
| ENSG00000227438 | AP001471.1  | 21 | 46093264  | 46097530  | 4266   | lncRNA-antisense                   | -1.94 | 4.47E-04 | 6.61E-03 |
| ENSG00000229636 | KRT8P21     | 1  | 73104792  | 73106282  | 1490   | processed_pseudogene               | -1.94 | 5.26E-03 | 3.14E-02 |
| ENSG00000237664 | LINC00316   | 21 | 45338590  | 45341990  | 3400   | lncRNA                             | -1.94 | 1.02E-02 | 4.80E-02 |
| ENSG00000249584 | LINC02225   | 5  | 57890327  | 57899162  | 8835   | lncRNA                             | -1.94 | 2.66E-03 | 2.04E-02 |
| ENSG00000129151 | BBXO1       | 11 | 27040725  | 27127809  | 87084  | protein coding                     | -1.94 | 2.67E-03 | 2.05E-02 |
| ENSG00000254846 | AL355075.1  | 14 | 20344233  | 20346888  | 2655   | lncRNA-antisense                   | -1.94 | 6.84E-03 | 3.72E-02 |
| ENSG00000223728 | AC239801.1  | 1  | 147840962 | 147842359 | 1397   | processed_pseudogene               | -1.94 | 2.64E-03 | 2.03E-02 |
| ENSG00000250328 | MGC32805    | 5  | 122436497 | 122479087 | 42590  | lncRNA-antisense                   | -1.94 | 9.19E-05 | 2.39E-03 |
| ENSG00000228307 | OR2S1P      | 9  | 35962195  | 36014623  | 52428  | transcribed_unprocessed_pseudogene | -1.94 | 2.21E-03 | 1.82E-02 |
| ENSG00000229988 | HBBP1       | 11 | 5241105   | 5243537   | 2432   | transcribed_unprocessed_pseudogene | -1.94 | 3.18E-03 | 2.28E-02 |
| ENSG00000229606 | LINC01718   | 20 | 61079049  | 61083750  | 4701   | lncRNA                             | -1.94 | 2.78E-04 | 4.88E-03 |
| ENSG00000261624 | NDUF810P2   | 7  | 141351977 | 141352768 | 791    | processed_pseudogene               | -1.94 | 6.18E-03 | 3.48E-02 |
| ENSG00000268473 | AC092327.1  | 16 | 86434830  | 86435884  | 1054   | processed_pseudogene               | -1.94 | 1.68E-03 | 1.52E-02 |
| ENSG00000230506 | AL354824.1  | 20 | 10172522  | 10200824  | 28302  | lncRNA                             | -1.94 | 4.57E-03 | 2.88E-02 |
| ENSG00000285613 | AC099482.2  | 16 | 23167577  | 23186395  | 18818  | lncRNA                             | -1.94 | 2.31E-03 | 1.86E-02 |
| ENSG00000232615 | AC028412.2  | 5  | 1614836   | 1616334   | 1498   | processed_pseudogene               | -1.94 | 5.04E-04 | 7.14E-03 |
| ENSG00000234967 | AL357558.2  | 20 | 47950797  | 47954808  | 4011   | lncRNA                             | -1.94 | 1.73E-04 | 3.58E-03 |
| ENSG00000233002 | TBC1D26-AS1 | 17 | 15735023  | 15749192  | 14169  | lncRNA-antisense                   | -1.94 | 5.72E-05 | 1.70E-03 |
| ENSG00000251352 | AC122714.2  | 5  | 180671892 | 180672598 | 706    | processed_pseudogene               | -1.95 | 1.27E-03 | 1.28E-02 |
| ENSG00000287829 | AC002542.6  | 7  | 117091678 | 117097262 | 5584   | lncRNA                             | -1.95 | 1.06E-02 | 4.91E-02 |
| ENSG00000255353 | ASS1P13     | 11 | 107176286 | 107177530 | 1244   | processed_pseudogene               | -1.95 | 2.70E-03 | 2.06E-02 |
| ENSG00000254039 | AC027801.4  | 17 | 49914403  | 49932918  | 18515  | lncRNA                             | -1.95 | 7.29E-03 | 3.87E-02 |
| ENSG00000285555 | AC005293.1  | 12 | 2332861   | 2335702   | 2841   | lncRNA-antisense                   | -1.95 | 1.59E-03 | 1.47E-02 |
| ENSG00000232328 | AC084030.1  | 2  | 236733289 | 236754363 | 21074  | lncRNA                             | -1.95 | 8.47E-05 | 2.27E-03 |
| ENSG00000163815 | CLEC3B      | 3  | 45001548  | 45036071  | 34523  | protein coding                     | -1.95 | 1.08E-03 | 1.15E-02 |
| ENSG00000165076 | PRSS37      | 7  | 141836300 | 141841487 | 5187   | protein coding                     | -1.95 | 3.38E-04 | 5.57E-03 |
| ENSG00000251011 | TMEM108-AS1 | 3  | 133245603 | 133257207 | 11604  | lncRNA-antisense                   | -1.95 | 8.38E-03 | 4.24E-02 |
| ENSG00000236546 | MYCL-AS1    | 1  | 39897745  | 39899098  | 1353   | lncRNA-antisense                   | -1.95 | 9.12E-03 | 4.46E-02 |
| ENSG00000257658 | AC004217.2  | 12 | 112321759 | 112323089 | 1330   | processed_pseudogene               | -1.95 | 1.07E-02 | 4.95E-02 |
| ENSG00000265000 | MARCHF10-DT | 17 | 62808500  | 62836371  | 27871  | lncRNA                             | -1.95 | 2.13E-03 | 1.78E-02 |
| ENSG00000250708 | LINC02269   | 4  | 173699082 | 174001488 | 302406 | lncRNA                             | -1.95 | 3.39E-04 | 5.58E-03 |
| ENSG00000170369 | CST2        | 20 | 23823769  | 23826729  | 2960   | protein coding                     | -1.95 | 2.06E-03 | 1.74E-02 |
| ENSG00000283342 | NBPF13P     | 1  | 147099482 | 147124285 | 24803  | unprocessed_pseudogene             | -1.95 | 2.92E-05 | 1.08E-03 |
| ENSG00000256944 | AP003721.3  | 11 | 60913166  | 60914052  | 886    | lncRNA-antisense                   | -1.95 | 5.88E-03 | 3.37E-02 |
| ENSG00000215498 | FAM230B     | 22 | 21167758  | 21192156  | 24398  | lncRNA                             | -1.95 | 5.95E-07 | 6.67E-05 |
| ENSG00000285666 | AC006972.1  | 7  | 76818377  | 76903041  | 84664  | lncRNA                             | -1.95 | 1.02E-02 | 4.81E-02 |
| ENSG00000196109 | ZNF676      | 19 | 22179089  | 22215801  | 36712  | protein coding                     | -1.95 | 9.37E-05 | 2.41E-03 |
| ENSG00000287560 | AL731533.3  | 10 | 3042535   | 3047083   | 4548   | lncRNA                             | -1.95 | 3.56E-03 | 2.46E-02 |
| ENSG00000270279 | AL132655.3  | 20 | 58754351  | 58756838  | 2487   | lncRNA                             | -1.95 | 2.39E-03 | 1.90E-02 |
| ENSG00000268941 | LINC01711   | 20 | 58634772  | 58635738  | 966    | lncRNA                             | -1.95 | 2.03E-03 | 1.72E-02 |
| ENSG00000267259 | ERVE-1      | 17 | 28232590  | 28235281  | 2691   | lncRNA                             | -1.95 | 3.00E-04 | 5.13E-03 |
| ENSG00000212724 | KRTAP2-3    | 17 | 41059240  | 41060114  | 874    | protein coding                     | -1.96 | 1.73E-03 | 1.55E-02 |
| ENSG00000282943 | AC004784.1  | 19 | 42977463  | 43171515  | 194052 | lncRNA-antisense                   | -1.96 | 1.24E-03 | 1.26E-02 |
| ENSG00000165197 | VEGFD       | X  | 15345596  | 15384413  | 38817  | protein coding                     | -1.96 | 1.99E-03 | 1.71E-02 |
| ENSG00000283039 | KLF18       | 1  | 44137821  | 44141631  | 3810   | protein coding                     | -1.96 | 4.41E-04 | 6.57E-03 |
| ENSG00000280113 | AL357140.3  | 1  | 9826289   | 9828271   | 1982   | TEC                                | -1.96 | 2.30E-03 | 1.86E-02 |
| ENSG00000230485 | AC000077.1  | 22 | 19630750  | 19633574  | 2824   | processed_pseudogene               | -1.96 | 6.56E-04 | 8.50E-03 |
| ENSG00000227555 | MIR4290HG   | 9  | 90020654  | 90041499  | 20845  | lncRNA                             | -1.96 | 3.43E-04 | 5.62E-03 |
| ENSG00000188991 | SLC15A5     | 12 | 16188485  | 16277685  | 89200  | protein coding                     | -1.96 | 1.25E-03 | 1.26E-02 |
| ENSG0000046774  | MAGEC2      | X  | 142202342 | 142205290 | 2948   | protein coding                     | -1.96 | 1.95E-03 | 1.67E-02 |
| ENSG00000215833 | QRS1L1P1    | 1  | 168449672 | 168451211 | 1539   | processed_pseudogene               | -1.96 | 7.50E-03 | 3.94E-02 |
| ENSG00000265514 | LINC01892   | 18 | 5081171   | 5098780   | 17609  | lncRNA                             | -1.96 | 1.84E-03 | 1.61E-02 |
| ENSG00000287135 | AC010884.1  | 2  | 104928803 | 104936467 | 7664   | lncRNA                             | -1.96 | 4.16E-04 | 6.34E-03 |
| ENSG00000177143 | CETN1       | 18 | 580380    | 582114    | 1734   | protein coding                     | -1.96 | 1.75E-03 | 1.56E-02 |
| ENSG00000257700 | AC055716.3  | 12 | 52692605  | 52696788  | 4183   | lncRNA-antisense                   | -1.96 | 5.86E-03 | 3.36E-02 |
| ENSG00000203472 | AC009163.1  | 16 | 75475896  | 75495407  | 19511  | lncRNA-antisense                   | -1.96 | 1.36E-03 | 1.34E-02 |
| ENSG00000274766 | BX027579.2  | 13 | 113883667 | 113887149 | 3482   | lncRNA                             | -1.96 | 1.82E-03 | 1.60E-02 |
| ENSG00000279752 | AC011389.2  | 5  | 169012148 | 169013146 | 998    | TEC                                | -1.96 | 9.29E-03 | 4.51E-02 |
| ENSG00000187988 | KCTD9P3     | 9  | 37477149  | 37478317  | 1168   | processed_pseudogene               | -1.97 | 1.89E-03 | 1.64E-02 |



|                 |             |    |           |           |        |                                    |       |          |          |
|-----------------|-------------|----|-----------|-----------|--------|------------------------------------|-------|----------|----------|
| ENSG00000287960 | AC008567.3  | 19 | 9507820   | 9514539   | 6719   | lncRNA                             | -1.97 | 1.28E-03 | 1.28E-02 |
| ENSG00000122548 | KIAA0087    | 7  | 26533121  | 26538788  | 5667   | lncRNA                             | -1.97 | 6.94E-04 | 8.80E-03 |
| ENSG00000258776 | AL161757.4  | 14 | 56817570  | 56893710  | 76140  | lncRNA                             | -1.97 | 1.45E-03 | 1.39E-02 |
| ENSG00000286818 | AC008496.3  | 5  | 79840797  | 79845239  | 4442   | lncRNA                             | -1.97 | 6.59E-04 | 8.53E-03 |
| ENSG00000186847 | KRT14       | 17 | 41582279  | 41586895  | 4616   | protein coding                     | -1.97 | 3.60E-05 | 1.24E-03 |
| ENSG00000213921 | LEUTX       | 19 | 39776595  | 39786291  | 9696   | protein coding                     | -1.97 | 8.73E-03 | 4.34E-02 |
| ENSG00000176256 | HMG4        | 1  | 33860475  | 33864791  | 4316   | protein coding                     | -1.97 | 8.61E-05 | 2.30E-03 |
| ENSG00000236473 | KRT43P      | 17 | 41448183  | 41454055  | 5872   | unprocessed pseudogene             | -1.97 | 2.23E-03 | 1.83E-02 |
| ENSG00000225731 | PDE9A-AS1   | 21 | 42733594  | 42741758  | 8164   | lncRNA-antisense                   | -1.97 | 4.40E-03 | 2.82E-02 |
| ENSG00000230533 | AL356234.2  | 6  | 137657998 | 137763984 | 105986 | lncRNA                             | -1.97 | 7.16E-04 | 8.91E-03 |
| ENSG00000235660 | LINC00345   | 13 | 52482804  | 52489216  | 6412   | lncRNA                             | -1.97 | 2.83E-03 | 2.12E-02 |
| ENSG00000226005 | LINC02660   | 10 | 3911889   | 3935817   | 23928  | lncRNA                             | -1.97 | 4.49E-03 | 2.85E-02 |
| ENSG00000158516 | CPA2        | 7  | 130266863 | 130289798 | 22935  | protein coding                     | -1.97 | 2.34E-05 | 9.32E-04 |
| ENSG00000238158 | AL391422.3  | 6  | 3831933   | 3855737   | 23804  | lncRNA-sense overlapping           | -1.97 | 7.60E-03 | 3.98E-02 |
| ENSG00000255092 | AC010768.2  | 11 | 44606170  | 44608101  | 1931   | lncRNA-antisense                   | -1.97 | 3.11E-04 | 5.26E-03 |
| ENSG00000250659 | AP001363.1  | 11 | 62537312  | 62542018  | 4706   | lncRNA-antisense                   | -1.97 | 5.86E-03 | 3.37E-02 |
| ENSG00000286240 | AL034422.1  | 20 | 37338886  | 37344109  | 5223   | lncRNA                             | -1.97 | 3.00E-03 | 2.21E-02 |
| ENSG00000285855 | Z72006.1    | 22 | 48403462  | 48415571  | 12109  | lncRNA                             | -1.97 | 7.65E-06 | 4.25E-04 |
| ENSG00000237121 | PIEZO1P2    | 20 | 58740532  | 58783821  | 43289  | unprocessed pseudogene             | -1.97 | 8.98E-05 | 2.35E-03 |
| ENSG00000230790 | AC012456.2  | 2  | 11740997  | 11745301  | 4304   | lncRNA-antisense                   | -1.97 | 2.93E-03 | 2.17E-02 |
| ENSG00000235875 | ARHGEF7-AS2 | 13 | 111113812 | 111115678 | 1866   | lncRNA-antisense                   | -1.98 | 5.99E-03 | 3.41E-02 |
| ENSG00000279391 | AC116456.2  | 11 | 8075573   | 8077781   | 2208   | TEC                                | -1.98 | 2.20E-03 | 1.81E-02 |
| ENSG00000284666 | Z98259.2    | 1  | 5480787   | 5482028   | 1241   | lncRNA                             | -1.98 | 5.57E-03 | 3.25E-02 |
| ENSG00000256424 | LINC02414   | 12 | 131639396 | 131661823 | 22427  | lncRNA                             | -1.98 | 4.20E-03 | 2.74E-02 |
| ENSG00000225166 | AC012462.1  | 2  | 215453688 | 215486639 | 32951  | lncRNA                             | -1.98 | 4.39E-03 | 2.81E-02 |
| ENSG00000235253 | AC010240.2  | 5  | 132942932 | 132945050 | 2118   | processed pseudogene               | -1.98 | 5.10E-05 | 1.58E-03 |
| ENSG00000230399 | RBBP8P1     | X  | 118632375 | 118634218 | 1843   | processed pseudogene               | -1.98 | 2.76E-03 | 2.09E-02 |
| ENSG00000260880 | HCCAT5      | 16 | 73092349  | 73099337  | 6988   | lncRNA                             | -1.98 | 3.88E-04 | 6.09E-03 |
| ENSG00000227841 | MTND5P31    | 2  | 201556892 | 201558265 | 1373   | unprocessed pseudogene             | -1.98 | 4.94E-03 | 3.02E-02 |
| ENSG00000203648 | AC007618.1  | 12 | 2659937   | 2660969   | 1032   | processed pseudogene               | -1.98 | 9.56E-03 | 4.60E-02 |
| ENSG00000271519 | AL590065.1  | X  | 35864858  | 35869631  | 4773   | processed pseudogene               | -1.98 | 2.19E-03 | 1.81E-02 |
| ENSG00000225929 | AC000036.1  | 22 | 50735825  | 50738139  | 2314   | lncRNA-antisense                   | -1.98 | 8.72E-03 | 4.34E-02 |
| ENSG00000287470 | AP001037.1  | 21 | 38503562  | 38543336  | 39774  | lncRNA                             | -1.98 | 5.88E-03 | 3.37E-02 |
| ENSG00000265182 | SRP72P1     | 18 | 49495147  | 49496896  | 1749   | processed pseudogene               | -1.98 | 7.27E-03 | 3.87E-02 |
| ENSG00000213358 | AC092933.1  | 3  | 196527339 | 196528791 | 1452   | unprocessed pseudogene             | -1.98 | 7.04E-04 | 8.84E-03 |
| ENSG00000183671 | GPR1        | 2  | 206175316 | 206218047 | 42731  | protein coding                     | -1.98 | 7.25E-04 | 9.01E-03 |
| ENSG00000287324 | AL096828.6  | 20 | 63116218  | 63117205  | 987    | lncRNA                             | -1.98 | 5.93E-03 | 3.39E-02 |
| ENSG00000250295 | RDH10-AS1   | 8  | 73297711  | 73356461  | 58750  | lncRNA-antisense                   | -1.98 | 1.29E-03 | 1.29E-02 |
| ENSG00000198759 | EGFL6       | X  | 13569601  | 13633575  | 63974  | protein coding                     | -1.98 | 6.16E-06 | 3.66E-04 |
| ENSG00000223419 | AC006022.1  | 7  | 30742431  | 30742818  | 387    | processed pseudogene               | -1.98 | 5.50E-03 | 3.22E-02 |
| ENSG00000286645 | AC013287.1  | 2  | 25000147  | 25010274  | 10127  | lncRNA                             | -1.98 | 6.04E-04 | 8.07E-03 |
| ENSG00000225708 | AL354984.2  | 20 | 58069054  | 58072070  | 3016   | lncRNA                             | -1.98 | 4.26E-03 | 2.76E-02 |
| ENSG00000260586 | AC064799.2  | 15 | 71332120  | 71352460  | 20340  | lncRNA-sense intronic              | -1.98 | 2.13E-03 | 1.78E-02 |
| ENSG00000267424 | AC020934.1  | 19 | 12825711  | 12832983  | 7272   | lncRNA-antisense                   | -1.98 | 2.62E-03 | 2.02E-02 |
| ENSG00000261617 | LINC02177   | 16 | 9355588   | 9408093   | 52505  | lncRNA                             | -1.98 | 7.02E-05 | 1.98E-03 |
| ENSG00000258866 | AL390254.1  | 14 | 95047353  | 95050957  | 3604   | lncRNA                             | -1.98 | 6.53E-03 | 3.60E-02 |
| ENSG00000288605 | AC007461.1  | 17 | 72033772  | 72220948  | 187176 | lncRNA                             | -1.99 | 7.62E-03 | 3.98E-02 |
| ENSG00000183559 | C10orf120   | 10 | 122697709 | 122699846 | 2137   | protein coding                     | -1.99 | 3.84E-03 | 2.59E-02 |
| ENSG00000254256 | RPSAP71     | 5  | 171365595 | 171367693 | 2098   | processed pseudogene               | -1.99 | 5.70E-03 | 3.30E-02 |
| ENSG00000287687 | AC007387.2  | 2  | 74723873  | 74778780  | 54907  | lncRNA                             | -1.99 | 2.45E-03 | 1.93E-02 |
| ENSG00000237623 | NICN2P      | X  | 47273366  | 47274390  | 1024   | processed pseudogene               | -1.99 | 6.87E-03 | 3.72E-02 |
| ENSG00000255433 | LINC02735   | 11 | 56848478  | 56878078  | 29600  | lncRNA                             | -1.99 | 8.24E-03 | 4.19E-02 |
| ENSG00000237614 | AC073257.2  | 2  | 120542905 | 120545249 | 2344   | lncRNA                             | -1.99 | 5.91E-04 | 7.96E-03 |
| ENSG00000115598 | IL1RL2      | 2  | 102187006 | 102240002 | 52996  | protein coding                     | -1.99 | 2.07E-05 | 8.57E-04 |
| ENSG00000226506 | AC007463.1  | 2  | 7886767   | 7899725   | 12958  | lncRNA                             | -1.99 | 4.75E-03 | 2.95E-02 |
| ENSG00000255352 | PPP1R10P1   | 11 | 130789231 | 130791025 | 1794   | processed pseudogene               | -1.99 | 2.59E-03 | 2.01E-02 |
| ENSG00000231648 | LINC01698   | 1  | 209367662 | 209380518 | 12856  | lncRNA                             | -1.99 | 7.49E-04 | 9.18E-03 |
| ENSG00000241278 | ENPP7P4     | 3  | 125848223 | 125909372 | 61149  | transcribed unprocessed pseudogene | -1.99 | 6.72E-03 | 3.67E-02 |
| ENSG00000203855 | HSD3BP4     | 1  | 119564066 | 119572067 | 8001   | unprocessed pseudogene             | -1.99 | 8.58E-03 | 4.29E-02 |
| ENSG00000288021 | AL450338.1  | 6  | 85949690  | 85998263  | 48573  | lncRNA                             | -2.00 | 9.66E-03 | 4.63E-02 |
| ENSG00000259757 | AC091891.1  | 5  | 2736662   | 2737759   | 1097   | lncRNA                             | -2.00 | 1.02E-02 | 4.79E-02 |
| ENSG00000215808 | LINC01139   | 1  | 238476542 | 238486060 | 9518   | lncRNA                             | -2.00 | 5.60E-04 | 7.69E-03 |
| ENSG00000229967 | MAGEA4-AS1  | X  | 151904431 | 151913968 | 9537   | lncRNA-antisense                   | -2.00 | 9.31E-04 | 1.05E-02 |
| ENSG00000116748 | AMPD1       | 1  | 114673090 | 114695618 | 22528  | protein coding                     | -2.00 | 3.50E-04 | 5.68E-03 |
| ENSG00000171403 | KRT9        | 17 | 41565836  | 41572059  | 6223   | protein coding                     | -2.00 | 2.09E-04 | 4.03E-03 |
| ENSG00000234724 | HDAC1P1     | 10 | 94137748  | 94139500  | 1752   | processed pseudogene               | -2.00 | 2.61E-03 | 2.02E-02 |
| ENSG00000227158 | AC073621.1  | 7  | 17422681  | 17423704  | 1023   | processed pseudogene               | -2.00 | 6.20E-03 | 3.48E-02 |
| ENSG00000189099 | PRSS48      | 4  | 151277171 | 151291453 | 14282  | protein coding                     | -2.00 | 2.30E-03 | 1.86E-02 |
| ENSG00000270171 | AL359881.3  | 1  | 7693124   | 7694944   | 1720   | lncRNA                             | -2.00 | 2.67E-04 | 4.76E-03 |
| ENSG00000231924 | PSG1        | 19 | 42866464  | 42879822  | 13358  | protein coding                     | -2.00 | 4.08E-04 | 6.29E-03 |
| ENSG00000255057 | AP003041.1  | 11 | 130008586 | 130009765 | 1179   | processed pseudogene               | -2.00 | 2.94E-03 | 2.18E-02 |
| ENSG00000236474 | GCNT1P1     | 20 | 18420160  | 18421454  | 1294   | processed pseudogene               | -2.00 | 8.55E-03 | 4.29E-02 |
| ENSG00000203859 | HSD3B2      | 1  | 119414931 | 119423035 | 8104   | protein coding                     | -2.00 | 1.10E-03 | 1.17E-02 |
| ENSG00000159527 | PGLYRP3     | 1  | 153297862 | 153310718 | 12856  | protein coding                     | -2.00 | 4.21E-04 | 6.39E-03 |
| ENSG00000237223 | SULT1C2P1   | 2  | 108322238 | 108353799 | 31561  | transcribed unprocessed pseudogene | -2.00 | 5.22E-03 | 3.13E-02 |
| ENSG00000264673 | AC098850.1  | 17 | 16788248  | 16789234  | 986    | lncRNA-antisense                   | -2.00 | 9.78E-03 | 4.68E-02 |
| ENSG00000260209 | AP000842.3  | 11 | 125873031 | 125874528 | 1497   | lncRNA                             | -2.00 | 3.20E-03 | 2.30E-02 |
| ENSG00000261514 | LINC01976   | 17 | 43938363  | 43938959  | 586    | lncRNA                             | -2.00 | 1.39E-03 | 1.35E-02 |
| ENSG00000250501 | AC093766.1  | 4  | 138773537 | 138803567 | 30030  | lncRNA                             | -2.01 | 2.12E-04 | 4.07E-03 |
| ENSG00000285016 | AC017002.3  | 2  | 111429324 | 111699033 | 269709 | lncRNA                             | -2.01 | 4.96E-03 | 3.03E-02 |
| ENSG00000280220 | AL157414.3  | 20 | 57161822  | 57163775  | 1953   | TEC                                | -2.01 | 7.83E-04 | 9.45E-03 |
| ENSG00000277526 | AC245123.1  | 8  | 2562813   | 2623382   | 60569  | lncRNA                             | -2.01 | 8.34E-05 | 2.25E-03 |
| ENSG00000286801 | BX546033.1  | 22 | 43507824  | 43513727  | 5903   | lncRNA                             | -2.01 | 3.26E-04 | 5.44E-03 |
| ENSG00000223602 | AC125634.1  | 9  | 64878790  | 64889063  | 10273  | unprocessed pseudogene             | -2.01 | 9.59E-03 | 4.61E-02 |
| ENSG00000268564 | AC003956.1  | 19 | 15124160  | 15126174  | 2014   | lncRNA-antisense                   | -2.01 | 5.23E-03 | 3.13E-02 |
| ENSG00000269054 | AC012313.6  | 19 | 58362583  | 58367593  | 5010   | lncRNA-antisense                   | -2.01 | 4.35E-06 | 2.79E-04 |
| ENSG00000253408 | AC083973.1  | 8  | 42233674  | 42271266  | 37592  | lncRNA-antisense                   | -2.01 | 2.07E-05 | 8.57E-04 |
| ENSG00000232527 | LINC02802   | 1  | 144227029 | 144250326 | 23297  | lncRNA                             | -2.01 | 1.01E-02 | 4.77E-02 |
| ENSG00000241832 | CECR3       | 22 | 17256859  | 17266733  | 9874   | lncRNA                             | -2.01 | 2.45E-03 | 1.93E-02 |
| ENSG00000283072 | AL158175.1  | 20 | 22684958  | 22746991  | 62033  | lncRNA                             | -2.01 | 2.75E-05 | 1.04E-03 |

|                 |             |    |           |           |        |                                    |       |          |          |
|-----------------|-------------|----|-----------|-----------|--------|------------------------------------|-------|----------|----------|
| ENSG00000272874 | AL034548.1  | 20 | 267186    | 268857    | 1671   | lncRNA                             | -2.01 | 1.38E-03 | 1.34E-02 |
| ENSG00000182854 | OR4F15      | 15 | 101812202 | 101820197 | 7995   | protein coding                     | -2.01 | 1.77E-03 | 1.57E-02 |
| ENSG00000161652 | IZUMO2      | 19 | 50152548  | 50163195  | 10647  | protein coding                     | -2.01 | 2.05E-04 | 3.97E-03 |
| ENSG00000286651 | PRSS43P     | 3  | 46753045  | 46756857  | 3812   | transcribed unitary pseudogene     | -2.01 | 5.32E-03 | 3.16E-02 |
| ENSG00000285648 | AC137735.2  | 17 | 73926421  | 73949906  | 23485  | lncRNA                             | -2.01 | 1.40E-03 | 1.36E-02 |
| ENSG00000280380 | AC009831.4  | 18 | 31982899  | 31986087  | 3188   | TEC                                | -2.01 | 4.69E-04 | 6.83E-03 |
| ENSG00000258907 | PSMB3P1     | 12 | 55654558  | 55655168  | 610    | processed pseudogene               | -2.02 | 8.54E-03 | 4.28E-02 |
| ENSG00000284632 | AL354702.1  | 1  | 38754216  | 38815979  | 61763  | lncRNA                             | -2.02 | 2.05E-04 | 3.97E-03 |
| ENSG00000279652 | Z82217.1    | 22 | 35992321  | 36000469  | 8148   | lncRNA                             | -2.02 | 1.88E-05 | 8.09E-04 |
| ENSG00000255282 | WTAPP1      | 11 | 102746968 | 102836766 | 89798  | transcribed processed pseudogene   | -2.02 | 5.91E-05 | 1.74E-03 |
| ENSG00000204479 | PRAMEF17    | 1  | 13389632  | 13392629  | 2997   | protein coding                     | -2.02 | 5.37E-04 | 7.48E-03 |
| ENSG00000225233 | AL592402.1  | 1  | 213492288 | 213579267 | 86979  | lncRNA                             | -2.02 | 4.18E-03 | 2.73E-02 |
| ENSG00000183566 | BPIFA4P     | 20 | 33193585  | 33210462  | 16877  | transcribed unprocessed pseudogene | -2.02 | 1.58E-04 | 3.37E-03 |
| ENSG00000229345 | AL392185.1  | 9  | 95599438  | 95606326  | 6888   | lncRNA                             | -2.02 | 3.12E-03 | 2.26E-02 |
| ENSG00000246820 | RIC3-DT     | 11 | 8169167   | 8178903   | 9736   | lncRNA                             | -2.02 | 9.27E-05 | 2.40E-03 |
| ENSG00000101890 | GUCY2F      | X  | 109372906 | 109482066 | 109180 | protein coding                     | -2.02 | 1.94E-05 | 8.28E-04 |
| ENSG00000277957 | SEN3-EIF4A1 | 17 | 7563287   | 7578715   | 15428  | protein coding                     | -2.02 | 3.35E-03 | 2.37E-02 |
| ENSG0000007908  | SELE        | 1  | 169722640 | 169764705 | 42065  | protein coding                     | -2.02 | 4.25E-04 | 6.42E-03 |
| ENSG00000180383 | DEFB124     | 20 | 31465506  | 31476757  | 11251  | protein coding                     | -2.02 | 5.89E-03 | 3.37E-02 |
| ENSG00000232743 | ELF2P3      | 9  | 87816465  | 87817970  | 1505   | processed pseudogene               | -2.02 | 3.78E-03 | 2.57E-02 |
| ENSG00000284516 | VAMP9P      | 4  | 82284971  | 82340013  | 55042  | transcribed unitary pseudogene     | -2.02 | 9.72E-04 | 1.08E-02 |
| ENSG00000254659 | LINC02715   | 11 | 109741625 | 109823893 | 82268  | lncRNA                             | -2.02 | 2.76E-03 | 2.10E-02 |
| ENSG00000165935 | SMCO2       | 12 | 27466810  | 27502185  | 35375  | protein coding                     | -2.02 | 1.58E-03 | 1.46E-02 |
| ENSG00000243978 | RTL9        | X  | 110358816 | 110456334 | 97518  | protein coding                     | -2.03 | 3.56E-05 | 1.24E-03 |
| ENSG00000267638 | AC023855.1  | 17 | 44115912  | 44120595  | 4683   | lncRNA-antisense                   | -2.03 | 2.30E-03 | 1.86E-02 |
| ENSG00000227586 | RPS26P39    | 10 | 123171535 | 123171875 | 340    | processed pseudogene               | -2.03 | 1.61E-05 | 7.21E-04 |
| ENSG00000279006 | AL022323.1  | 22 | 25048967  | 25051966  | 2999   | lncRNA-antisense                   | -2.03 | 2.01E-05 | 8.47E-04 |
| ENSG00000260488 | AC007216.1  | 16 | 11976851  | 11977850  | 999    | lncRNA-antisense                   | -2.03 | 3.41E-03 | 2.40E-02 |
| ENSG00000198974 | MIR30E      | 1  | 40754355  | 40754446  | 91     | miRNA                              | -2.03 | 4.47E-03 | 2.85E-02 |
| ENSG00000261637 | LINC02127   | 16 | 51017544  | 51035784  | 18240  | lncRNA                             | -2.03 | 5.25E-04 | 7.36E-03 |
| ENSG00000260385 | AL356961.1  | 13 | 112083549 | 112085471 | 1922   | lncRNA                             | -2.03 | 1.08E-03 | 1.16E-02 |
| ENSG00000285530 | AL445928.2  | 1  | 100220488 | 100253414 | 32926  | lncRNA-antisense                   | -2.03 | 5.26E-05 | 1.61E-03 |
| ENSG00000159961 | OR3A3       | 17 | 3411370   | 3424070   | 12700  | protein coding                     | -2.03 | 1.31E-05 | 6.26E-04 |
| ENSG00000261669 | AC008731.1  | 16 | 24803451  | 24819739  | 16288  | lncRNA-antisense                   | -2.03 | 3.13E-03 | 2.26E-02 |
| ENSG00000253805 | AC245164.1  | 8  | 2033508   | 2035587   | 2079   | lncRNA                             | -2.03 | 2.74E-03 | 2.09E-02 |
| ENSG00000229562 | ZFYVE9P1    | X  | 137660519 | 137662242 | 1723   | processed pseudogene               | -2.03 | 1.20E-03 | 1.24E-02 |
| ENSG00000241219 | AC078785.2  | 3  | 113050912 | 113063443 | 12531  | lncRNA                             | -2.03 | 1.44E-03 | 1.38E-02 |
| ENSG00000140465 | CYP1A1      | 15 | 74719542  | 74725536  | 5994   | protein coding                     | -2.03 | 5.45E-04 | 7.57E-03 |
| ENSG00000237136 | C4orf51     | 4  | 145680146 | 145771032 | 90886  | protein coding                     | -2.03 | 4.86E-03 | 2.99E-02 |
| ENSG00000288010 | AL035587.3  | 6  | 42893761  | 42903072  | 9311   | lncRNA                             | -2.03 | 7.36E-03 | 3.90E-02 |
| ENSG00000286829 | AC093798.1  | 2  | 24402995  | 24413292  | 10297  | lncRNA                             | -2.03 | 7.36E-04 | 9.10E-03 |
| ENSG00000285856 | AL353704.1  | 13 | 111148196 | 111153171 | 4975   | lncRNA-antisense                   | -2.03 | 1.50E-03 | 1.41E-02 |
| ENSG00000238107 | LINC02806   | 1  | 148295180 | 148297556 | 2376   | lncRNA                             | -2.03 | 9.83E-03 | 4.69E-02 |
| ENSG00000232166 | AL122008.2  | 1  | 234284972 | 234285541 | 569    | processed pseudogene               | -2.03 | 4.89E-03 | 3.00E-02 |
| ENSG00000228741 | AL445985.1  | 13 | 23979810  | 24035027  | 55217  | lncRNA                             | -2.03 | 5.23E-03 | 3.13E-02 |
| ENSG00000242267 | SKINT1L     | 1  | 48096092  | 48182428  | 86336  | transcribed unprocessed pseudogene | -2.03 | 8.95E-05 | 2.35E-03 |
| ENSG00000094661 | OR11H       | 19 | 15082211  | 15092970  | 10759  | protein coding                     | -2.03 | 7.45E-07 | 7.93E-05 |
| ENSG00000180259 | PRNT        | 20 | 4731279   | 4740668   | 9389   | lncRNA                             | -2.04 | 2.55E-03 | 1.98E-02 |
| ENSG00000205362 | MT1A        | 16 | 56638666  | 56640087  | 1421   | protein coding                     | -2.04 | 6.96E-03 | 3.76E-02 |
| ENSG00000288070 | AC016902.1  | 11 | 112822806 | 112835124 | 12318  | lncRNA                             | -2.04 | 6.82E-03 | 3.71E-02 |
| ENSG00000111700 | SLCO1B3     | 12 | 20810702  | 20916911  | 106209 | protein coding                     | -2.04 | 4.12E-03 | 2.71E-02 |
| ENSG00000266586 | AC091027.2  | 18 | 78908629  | 78918993  | 10364  | lncRNA                             | -2.04 | 5.48E-03 | 3.21E-02 |
| ENSG00000224404 | Z68323.1    | 22 | 34191194  | 34210564  | 19370  | lncRNA                             | -2.04 | 1.80E-05 | 7.85E-04 |
| ENSG00000261465 | AC099518.4  | 16 | 19062144  | 19067691  | 5547   | lncRNA-antisense                   | -2.05 | 1.09E-04 | 3.79E-03 |
| ENSG00000234726 | AC245060.3  | 22 | 22228719  | 22230469  | 1750   | processed pseudogene               | -2.05 | 1.21E-03 | 1.24E-02 |
| ENSG00000279786 | AC105235.1  | 8  | 140820599 | 140822414 | 1815   | TEC                                | -2.05 | 9.03E-04 | 1.03E-02 |
| ENSG00000278898 | AC087045.3  | 8  | 134764809 | 134767276 | 2467   | TEC                                | -2.05 | 1.85E-03 | 1.62E-02 |
| ENSG00000175664 | TEX26       | 13 | 30932656  | 30975500  | 42844  | protein coding                     | -2.05 | 1.54E-04 | 3.31E-03 |
| ENSG00000282759 | AC026950.2  | 8  | 891251    | 893112    | 1861   | lncRNA                             | -2.05 | 1.27E-03 | 1.28E-02 |
| ENSG00000251292 | ERVH-1      | 4  | 23723262  | 23733579  | 10317  | lncRNA                             | -2.05 | 1.41E-03 | 1.37E-02 |
| ENSG00000188784 | PLA2G2E     | 1  | 19920009  | 19923617  | 3608   | protein coding                     | -2.05 | 3.30E-05 | 1.17E-03 |
| ENSG00000267589 | AC011444.4  | 19 | 6072823   | 6073527   | 704    | processed pseudogene               | -2.05 | 1.78E-04 | 3.65E-03 |
| ENSG00000280268 | AC025125.1  | 17 | 3439923   | 3441844   | 1921   | TEC                                | -2.05 | 5.25E-03 | 3.14E-02 |
| ENSG00000229913 | AL360295.1  | 1  | 56823679  | 56826920  | 3241   | lncRNA-antisense                   | -2.05 | 2.20E-03 | 1.81E-02 |
| ENSG00000286501 | AC018545.1  | 3  | 150339478 | 150343210 | 3732   | lncRNA                             | -2.05 | 2.20E-04 | 4.16E-03 |
| ENSG00000232913 | PLCE1-AS2   | 10 | 94081950  | 94108814  | 26864  | lncRNA-antisense                   | -2.05 | 3.72E-05 | 1.27E-03 |
| ENSG00000279774 | AL590483.3  | 1  | 244064330 | 244067909 | 3579   | TEC                                | -2.05 | 2.25E-05 | 9.09E-04 |
| ENSG00000287251 | AP003062.2  | 11 | 134945118 | 134980574 | 35456  | lncRNA                             | -2.05 | 1.50E-05 | 6.84E-04 |
| ENSG00000235268 | KDM4E       | 11 | 95025258  | 95027596  | 2338   | protein coding                     | -2.05 | 3.75E-04 | 5.95E-03 |
| ENSG00000276397 | LINC01879   | 17 | 76686058  | 76693636  | 7578   | lncRNA                             | -2.06 | 8.85E-04 | 1.02E-02 |
| ENSG00000287422 | AL442071.2  | 1  | 39226670  | 39238620  | 11950  | lncRNA                             | -2.06 | 1.01E-03 | 1.11E-02 |
| ENSG00000286448 | AP066222.2  | 1  | 266855    | 268655    | 1800   | lncRNA                             | -2.06 | 1.98E-03 | 1.70E-02 |
| ENSG00000288006 | AC137735.2  | 17 | 73912190  | 73931436  | 19246  | lncRNA                             | -2.06 | 6.66E-04 | 8.57E-03 |
| ENSG00000225877 | PSG8-AS1    | 19 | 42821863  | 42826878  | 5015   | lncRNA                             | -2.06 | 5.11E-04 | 7.19E-03 |
| ENSG00000283459 | AC009804.2  | 12 | 114894632 | 114898529 | 3897   | lncRNA                             | -2.06 | 6.45E-04 | 8.43E-03 |
| ENSG00000244094 | SPRR2F      | 1  | 153112121 | 153113516 | 1395   | protein coding                     | -2.06 | 6.81E-03 | 3.71E-02 |
| ENSG00000264486 | AC061975.4  | 17 | 28256438  | 28265551  | 9113   | lncRNA                             | -2.06 | 2.15E-03 | 1.79E-02 |
| ENSG00000172497 | ACOT12      | 5  | 81329996  | 81394179  | 64183  | protein coding                     | -2.06 | 4.19E-05 | 1.38E-03 |
| ENSG00000253974 | NRG1-IT1    | 8  | 32026210  | 32139495  | 113285 | lncRNA-sense intronic              | -2.06 | 5.38E-03 | 3.18E-02 |
| ENSG00000135569 | TAA85       | 6  | 132588673 | 132589686 | 1013   | protein coding                     | -2.06 | 5.48E-03 | 3.22E-02 |
| ENSG00000253298 | LINC01845   | 5  | 159448556 | 159466291 | 17735  | lncRNA                             | -2.06 | 1.82E-04 | 3.70E-03 |
| ENSG00000255512 | LINC02684   | 11 | 135061781 | 135075908 | 14127  | lncRNA                             | -2.06 | 1.31E-04 | 2.99E-03 |
| ENSG00000228717 | AF013593.1  | X  | 151226229 | 151227715 | 1486   | processed pseudogene               | -2.06 | 4.86E-03 | 2.99E-02 |
| ENSG00000112214 | FHL5        | 6  | 96562548  | 96616636  | 54088  | protein coding                     | -2.06 | 2.64E-03 | 2.03E-02 |
| ENSG00000274443 | C8orf89     | 8  | 73241329  | 73259502  | 18173  | protein coding                     | -2.07 | 7.06E-03 | 3.79E-02 |
| ENSG00000237417 | XRCC6P1     | 10 | 93206857  | 93209627  | 2770   | processed pseudogene               | -2.07 | 5.07E-05 | 1.58E-03 |
| ENSG00000229275 | BX284656.1  | 22 | 48141542  | 48143229  | 1687   | lncRNA                             | -2.07 | 1.99E-04 | 3.90E-03 |
| ENSG00000254966 | AC103974.1  | 11 | 18706537  | 18740568  | 34031  | lncRNA-antisense                   | -2.07 | 1.86E-04 | 3.74E-03 |
| ENSG00000267133 | AC011518.1  | 19 | 32103154  | 32106544  | 3390   | lncRNA                             | -2.07 | 4.21E-04 | 4.17E-03 |
| ENSG00000285842 | AP000820.2  | 11 | 95571040  | 95748715  | 177675 | lncRNA                             | -2.07 | 1.02E-03 | 1.11E-02 |

|                 |            |    |           |           |        |                                   |       |          |          |
|-----------------|------------|----|-----------|-----------|--------|-----------------------------------|-------|----------|----------|
| ENSG00000216560 | LINC00955  | 4  | 3576869   | 3590711   | 13842  | lncRNA                            | -2.07 | 1.26E-05 | 6.10E-04 |
| ENSG00000248684 | BIN2P2     | 5  | 75910565  | 75911867  | 1302   | processed_pseudogene              | -2.07 | 8.06E-04 | 9.61E-03 |
| ENSG00000287906 | AC127526.5 | 11 | 3475280   | 3477065   | 1785   | lncRNA                            | -2.07 | 7.25E-04 | 9.01E-03 |
| ENSG00000226625 | RBM17P1    | 9  | 39154075  | 39155479  | 1404   | processed_pseudogene              | -2.07 | 2.61E-03 | 2.02E-02 |
| ENSG00000227463 | AL390838.1 | 9  | 84059298  | 84098984  | 39686  | lncRNA                            | -2.07 | 3.65E-05 | 1.26E-03 |
| ENSG00000278703 | AC100847.1 | 18 | 57588611  | 57589091  | 480    | lncRNA                            | -2.07 | 2.48E-03 | 1.94E-02 |
| ENSG00000285347 | AL359555.4 | 20 | 38260175  | 38293892  | 33717  | lncRNA-antisense                  | -2.07 | 1.09E-04 | 2.67E-03 |
| ENSG00000250247 | SEPHS2P1   | 5  | 14960232  | 14961393  | 1161   | processed_pseudogene              | -2.07 | 7.38E-04 | 9.11E-03 |
| ENSG00000197487 | GALP       | 19 | 56176008  | 56185775  | 9767   | protein coding                    | -2.07 | 8.42E-04 | 9.87E-03 |
| ENSG00000270929 | SRD5A3P1   | 11 | 59898185  | 59899133  | 948    | processed_pseudogene              | -2.07 | 5.46E-03 | 3.21E-02 |
| ENSG00000286036 | AC017099.2 | 2  | 97618638  | 97638417  | 19779  | lncRNA                            | -2.07 | 1.47E-04 | 3.22E-03 |
| ENSG00000287661 | AL391844.1 | 1  | 48552991  | 48558106  | 5115   | lncRNA                            | -2.07 | 4.12E-03 | 2.71E-02 |
| ENSG00000258233 | ARHGAP42P5 | 14 | 18623852  | 18626787  | 2935   | processed_pseudogene              | -2.08 | 1.48E-03 | 1.41E-02 |
| ENSG00000287652 | AC000082.1 | 22 | 19520572  | 19522769  | 2197   | lncRNA                            | -2.08 | 4.24E-04 | 6.41E-03 |
| ENSG00000165584 | SSX3       | X  | 48346427  | 48356707  | 10280  | protein coding                    | -2.08 | 1.43E-03 | 1.38E-02 |
| ENSG00000268318 | LINC01872  | 19 | 51271266  | 51281234  | 9968   | lncRNA                            | -2.08 | 5.76E-03 | 3.33E-02 |
| ENSG00000280025 | AL008638.6 | 22 | 27102766  | 27107019  | 4253   | lncRNA                            | -2.08 | 1.85E-06 | 1.52E-04 |
| ENSG00000186160 | CYP4Z1     | 1  | 47067231  | 47118318  | 51087  | protein coding                    | -2.08 | 2.29E-04 | 4.29E-03 |
| ENSG00000270818 | AL445675.1 | 1  | 242882066 | 242883475 | 1409   | processed_pseudogene              | -2.08 | 6.44E-03 | 3.57E-02 |
| ENSG00000237268 | AC092447.7 | 7  | 56421857  | 56448375  | 26518  | transcribed_unprocessed_pseudogen | -2.08 | 6.89E-04 | 8.76E-03 |
| ENSG00000107295 | SH3GL2     | 9  | 17579066  | 17797124  | 218058 | protein coding                    | -2.08 | 2.03E-05 | 8.52E-04 |
| ENSG00000253141 | AC008632.1 | 5  | 173463484 | 173484584 | 21100  | lncRNA                            | -2.08 | 3.45E-04 | 5.64E-03 |
| ENSG00000255335 | LINC02729  | 11 | 17695266  | 17696994  | 1728   | lncRNA-antisense                  | -2.08 | 3.00E-04 | 5.14E-03 |
| ENSG00000287563 | AP006219.3 | 18 | 10406558  | 10422360  | 15802  | lncRNA                            | -2.08 | 9.44E-04 | 1.06E-02 |
| ENSG00000253547 | TUBA7P     | 11 | 63046785  | 63048126  | 1341   | processed_pseudogene              | -2.08 | 5.08E-03 | 3.07E-02 |
| ENSG00000280236 | OR12D2     | 6  | 29395631  | 29398008  | 2377   | protein coding                    | -2.08 | 1.05E-03 | 1.14E-02 |
| ENSG00000268053 | AC007785.2 | 19 | 46111079  | 46113863  | 2784   | processed_pseudogene              | -2.08 | 2.34E-03 | 1.88E-02 |
| ENSG00000286400 | AC110926.1 | 2  | 127141976 | 127143793 | 1817   | lncRNA                            | -2.09 | 2.57E-03 | 2.00E-02 |
| ENSG00000215834 | FM09P      | 1  | 166603916 | 166631400 | 27484  | transcribed_unprocessed_pseudogen | -2.09 | 8.49E-04 | 9.93E-03 |
| ENSG00000285819 | AC131180.1 | 2  | 131191641 | 131209211 | 17570  | lncRNA                            | -2.09 | 4.66E-03 | 2.92E-02 |
| ENSG00000287280 | AC009878.2 | 15 | 26403480  | 26477840  | 74360  | lncRNA                            | -2.09 | 6.10E-03 | 3.45E-02 |
| ENSG00000276172 | ELMO2P1    | 15 | 23083094  | 23121324  | 38230  | transcribed_unprocessed_pseudogen | -2.09 | 9.01E-04 | 1.03E-02 |
| ENSG00000254350 | AC091979.1 | 5  | 158424585 | 158452758 | 28173  | lncRNA                            | -2.09 | 5.30E-03 | 3.15E-02 |
| ENSG00000286979 | AC005234.2 | 2  | 70629657  | 70648761  | 19104  | lncRNA                            | -2.09 | 3.28E-03 | 2.34E-02 |
| ENSG00000275989 | AL442128.1 | 13 | 110945478 | 110971603 | 26125  | transcribed_unprocessed_pseudogen | -2.09 | 4.61E-04 | 6.77E-03 |
| ENSG00000235525 | FTLP1      | 20 | 45975249  | 45976075  | 826    | processed_pseudogene              | -2.09 | 2.72E-03 | 2.07E-02 |
| ENSG00000285640 | AP01999.2  | 11 | 134685044 | 134702004 | 16960  | lncRNA                            | -2.09 | 2.02E-03 | 3.94E-03 |
| ENSG00000256915 | AC090023.2 | 12 | 65622273  | 65663299  | 41026  | lncRNA                            | -2.09 | 3.98E-04 | 2.66E-02 |
| ENSG00000229863 | AC097358.1 | 3  | 57134142  | 57134723  | 581    | processed_pseudogene              | -2.09 | 4.09E-03 | 2.69E-02 |
| ENSG00000221878 | PSG7       | 19 | 42924132  | 42937207  | 13075  | protein coding                    | -2.09 | 2.02E-04 | 3.94E-03 |
| ENSG00000248903 | AP000867.1 | 11 | 71568680  | 71568934  | 254    | processed_pseudogene              | -2.10 | 4.21E-03 | 2.74E-02 |
| ENSG00000164399 | IL3        | 5  | 132060655 | 132063204 | 2549   | protein coding                    | -2.10 | 8.37E-04 | 9.83E-03 |
| ENSG00000229221 | HNRNPA1P6  | 2  | 63751697  | 63752630  | 933    | processed_pseudogene              | -2.10 | 4.52E-03 | 2.87E-02 |
| ENSG00000221932 | HEPN1      | 11 | 124919244 | 124920677 | 1433   | protein coding                    | -2.10 | 2.25E-03 | 1.83E-02 |
| ENSG00000286659 | Z99716.2   | 22 | 42070949  | 42071488  | 539    | lncRNA                            | -2.10 | 6.55E-04 | 8.50E-03 |
| ENSG00000260459 | FTLP14     | 16 | 68822587  | 68823070  | 483    | processed_pseudogene              | -2.10 | 4.59E-04 | 6.75E-03 |
| ENSG00000251211 | AC136632.2 | 5  | 178165702 | 178166562 | 860    | processed_pseudogene              | -2.10 | 6.42E-04 | 8.40E-03 |
| ENSG00000219891 | ZSCAN12P1  | 6  | 28091154  | 28093664  | 2510   | transcribed_unprocessed_pseudogen | -2.10 | 1.16E-04 | 2.77E-03 |
| ENSG00000222784 | RN7SKP91   | 1  | 30843823  | 30844110  | 287    | misc RNA                          | -2.10 | 4.68E-03 | 2.92E-02 |
| ENSG00000283758 | PMIS2      | 19 | 35586161  | 35587296  | 1135   | protein coding                    | -2.10 | 4.13E-03 | 2.71E-02 |
| ENSG00000287144 | AC097511.1 | 4  | 137943022 | 138051288 | 108266 | lncRNA                            | -2.10 | 3.52E-03 | 2.45E-02 |
| ENSG00000205359 | SLCO06A1   | 5  | 102371774 | 102499016 | 127242 | protein coding                    | -2.10 | 3.91E-05 | 1.31E-03 |
| ENSG00000285734 | AC005414.1 | 12 | 2440189   | 2457392   | 17203  | lncRNA-antisense                  | -2.11 | 2.02E-04 | 3.94E-03 |
| ENSG00000172377 | OR9H1      | 11 | 58116742  | 58125530  | 8788   | protein coding                    | -2.11 | 2.25E-03 | 1.83E-02 |
| ENSG00000203408 | OR6C71P    | 12 | 55376742  | 55378797  | 2055   | transcribed_unprocessed_pseudogen | -2.11 | 5.62E-03 | 3.27E-02 |
| ENSG00000165583 | SSX5       | X  | 48186220  | 48198763  | 10543  | protein coding                    | -2.11 | 1.20E-03 | 1.24E-02 |
| ENSG00000267052 | AC005050.1 | 7  | 106569876 | 106598908 | 29032  | lncRNA                            | -2.11 | 7.24E-04 | 9.00E-03 |
| ENSG00000236257 | EL24P2     | 1  | 158454198 | 158455273 | 1075   | processed_pseudogene              | -2.11 | 1.21E-03 | 1.24E-02 |
| ENSG00000131050 | BP1FA2     | 20 | 33161768  | 33181412  | 19644  | protein coding                    | -2.11 | 5.21E-05 | 1.60E-03 |
| ENSG00000258692 | SALL4P7    | 14 | 60493766  | 60496885  | 3119   | transcribed_processed_pseudogene  | -2.11 | 9.27E-04 | 1.05E-02 |
| ENSG00000286658 | AC005153.1 | 7  | 50641725  | 50643868  | 2143   | lncRNA                            | -2.11 | 9.07E-04 | 1.03E-02 |
| ENSG00000231163 | C5MD2-AS1  | 1  | 33868953  | 33893726  | 24773  | lncRNA-antisense                  | -2.11 | 1.84E-05 | 8.00E-04 |
| ENSG00000155918 | RAET1L     | 6  | 150018334 | 150025532 | 7198   | protein coding                    | -2.11 | 4.60E-04 | 6.75E-03 |
| ENSG00000224294 | PINCR      | X  | 43176994  | 43226598  | 49604  | lncRNA                            | -2.11 | 4.66E-03 | 2.92E-02 |
| ENSG00000234423 | LINC01250  | 2  | 2895048   | 3126026   | 230978 | lncRNA                            | -2.11 | 5.50E-06 | 3.35E-04 |
| ENSG00000288172 | AL356419.1 | 10 | 117579854 | 117593896 | 14042  | lncRNA                            | -2.11 | 2.46E-03 | 1.93E-02 |
| ENSG00000234634 | LINC02093  | 17 | 13299184  | 13306771  | 7587   | lncRNA                            | -2.12 | 3.94E-03 | 2.64E-02 |
| ENSG00000230342 | FANCD2P2   | 3  | 11859674  | 11891172  | 31498  | unprocessed_pseudogene            | -2.12 | 4.91E-04 | 7.03E-03 |
| ENSG00000266466 | AC233702.7 | 17 | 21532974  | 21542786  | 9812   | lncRNA-antisense                  | -2.12 | 4.71E-03 | 2.94E-02 |
| ENSG00000240708 | LINC02030  | 3  | 55226862  | 55300738  | 73876  | lncRNA                            | -2.12 | 1.48E-03 | 1.40E-02 |
| ENSG00000236497 | LINC01744  | 1  | 232727251 | 232751299 | 24048  | lncRNA                            | -2.12 | 1.58E-03 | 1.46E-02 |
| ENSG00000216915 | GPR89P     | 6  | 27737000  | 27738494  | 1494   | processed_pseudogene              | -2.12 | 2.40E-03 | 1.91E-02 |
| ENSG00000233670 | PIRT       | 17 | 10822470  | 10838087  | 15617  | protein coding                    | -2.12 | 2.65E-05 | 1.01E-03 |
| ENSG00000274178 | PRAMEF28P  | 1  | 13029339  | 13032130  | 2791   | unprocessed_pseudogene            | -2.12 | 4.22E-03 | 2.75E-02 |
| ENSG00000211641 | IJLV11-55  | 22 | 22201663  | 22202161  | 498    | IG V gene                         | -2.12 | 5.16E-03 | 3.11E-02 |
| ENSG00000260351 | AC024270.1 | 15 | 83022571  | 83090782  | 68211  | lncRNA-antisense                  | -2.12 | 3.95E-04 | 6.15E-03 |
| ENSG00000245975 | AC090515.2 | 15 | 58768072  | 58770974  | 2902   | lncRNA                            | -2.12 | 1.80E-04 | 3.66E-03 |
| ENSG00000213979 | RPL7AP14   | 20 | 37444733  | 37445534  | 801    | processed_pseudogene              | -2.12 | 6.73E-04 | 8.64E-03 |
| ENSG00000155622 | XAGE2      | X  | 52369021  | 52375680  | 6659   | protein coding                    | -2.12 | 3.88E-03 | 2.61E-02 |
| ENSG00000169154 | GOT1L1     | 8  | 37934281  | 37940124  | 5843   | protein coding                    | -2.12 | 2.57E-03 | 2.00E-02 |
| ENSG00000146678 | IGFBP1     | 7  | 45888360  | 45893660  | 5300   | protein coding                    | -2.12 | 1.92E-04 | 3.82E-03 |
| ENSG00000235645 | LINC02651  | 10 | 69684899  | 69692452  | 7553   | lncRNA                            | -2.12 | 6.19E-03 | 3.48E-02 |
| ENSG00000272108 | AC244517.1 | 5  | 141118680 | 141120765 | 2085   | lncRNA                            | -2.12 | 5.76E-03 | 3.33E-02 |
| ENSG00000170820 | FSHR       | 2  | 48962157  | 49154527  | 192370 | protein coding                    | -2.13 | 1.08E-04 | 2.66E-03 |
| ENSG00000231565 | NEK2P2     | 22 | 15611759  | 15613096  | 1337   | processed_pseudogene              | -2.13 | 4.33E-03 | 2.79E-02 |
| ENSG00000287904 | AL138708.1 | 13 | 31838752  | 31846539  | 7787   | lncRNA                            | -2.13 | 3.41E-03 | 2.40E-02 |
| ENSG00000260230 | FRRS1L     | 9  | 109130293 | 109167249 | 36956  | protein coding                    | -2.13 | 4.62E-09 | 1.38E-06 |
| ENSG00000286770 | AC100825.1 | 15 | 68483202  | 68487149  | 3947   | lncRNA                            | -2.13 | 2.90E-04 | 5.01E-03 |
| ENSG00000221826 | PSG3       | 19 | 42721638  | 42740481  | 18843  | protein coding                    | -2.13 | 2.80E-04 | 4.90E-03 |
| ENSG00000257958 | AC008125.1 | 12 | 115077325 | 115080153 | 2828   | lncRNA                            | -2.13 | 4.93E-04 | 7.05E-03 |

|                 |              |    |           |           |        |                                    |       |          |          |
|-----------------|--------------|----|-----------|-----------|--------|------------------------------------|-------|----------|----------|
| ENSG00000261097 | LINC00563    | 13 | 46296445  | 46297844  | 1399   | lncRNA                             | -2.13 | 6.93E-06 | 3.98E-04 |
| ENSG00000235115 | CHCHD2P8     | 13 | 28107431  | 28107877  | 446    | processed_pseudogene               | -2.13 | 5.30E-03 | 3.15E-02 |
| ENSG00000214249 | CTAGE11P     | 13 | 75237944  | 75240296  | 2352   | processed_pseudogene               | -2.13 | 8.66E-04 | 1.00E-02 |
| ENSG00000184210 | DGAT2L6      | X  | 70177483  | 70205704  | 28221  | protein_coding                     | -2.13 | 2.70E-03 | 2.07E-02 |
| ENSG00000196734 | LCE1B        | 1  | 152811971 | 152813108 | 1137   | protein_coding                     | -2.13 | 1.37E-03 | 1.34E-02 |
| ENSG00000250406 | AC109811.1   | 4  | 144851572 | 144874787 | 23215  | lncRNA                             | -2.13 | 8.18E-04 | 9.69E-03 |
| ENSG00000225815 | AC092669.1   | 2  | 66327349  | 66328984  | 1635   | lncRNA                             | -2.13 | 3.50E-03 | 2.44E-02 |
| ENSG00000237672 | KRR1P1       | 13 | 20070250  | 20072136  | 1886   | processed_pseudogene               | -2.13 | 4.07E-03 | 2.69E-02 |
| ENSG00000286146 | FP236383.9   | 21 | 8420675   | 8421003   | 328    | TEC                                | -2.13 | 5.77E-05 | 1.71E-03 |
| ENSG00000288002 | AC091912.3   | 5  | 8207019   | 8366437   | 159418 | lncRNA                             | -2.14 | 1.02E-03 | 1.11E-02 |
| ENSG00000226431 | AL121929.1   | 10 | 103549075 | 103550964 | 1889   | lncRNA-sense intronic              | -2.14 | 1.65E-03 | 1.50E-02 |
| ENSG00000171433 | GLOD5        | X  | 48761747  | 48773648  | 11901  | protein_coding                     | -2.14 | 1.14E-04 | 2.73E-03 |
| ENSG00000213959 | AL035419.1   | 20 | 38614913  | 38615476  | 563    | processed_pseudogene               | -2.14 | 7.38E-04 | 9.11E-03 |
| ENSG00000279151 | AL021920.1   | 1  | 16701546  | 16705594  | 4048   | lncRNA                             | -2.14 | 3.22E-03 | 2.31E-02 |
| ENSG00000253557 | AC100849.1   | 8  | 19084992  | 19259469  | 174477 | lncRNA                             | -2.14 | 3.77E-04 | 5.88E-03 |
| ENSG00000108688 | CCL7         | 17 | 34270221  | 34272242  | 2021   | protein_coding                     | -2.14 | 6.27E-03 | 3.51E-02 |
| ENSG00000286425 | AL773573.1   | 21 | 41007244  | 41037362  | 30118  | lncRNA                             | -2.14 | 5.17E-04 | 7.25E-03 |
| ENSG00000280038 | DNM1P41      | 15 | 84166547  | 84169896  | 3349   | TEC                                | -2.14 | 1.26E-03 | 1.27E-02 |
| ENSG00000285945 | AC242022.2   | 1  | 2768091   | 2784733   | 16642  | lncRNA                             | -2.14 | 4.83E-03 | 2.98E-02 |
| ENSG00000213480 | AC093816.1   | 4  | 121369433 | 121370345 | 912    | processed_pseudogene               | -2.14 | 4.68E-03 | 2.93E-02 |
| ENSG00000265844 | AC100863.1   | 18 | 77180106  | 77235430  | 55324  | lncRNA                             | -2.14 | 1.51E-03 | 1.42E-02 |
| ENSG00000287724 | AC096536.3   | 1  | 54874672  | 54883664  | 8992   | lncRNA                             | -2.14 | 3.69E-04 | 5.89E-03 |
| ENSG00000182916 | TCEAL7       | X  | 103330229 | 103332326 | 2097   | protein_coding                     | -2.14 | 6.27E-03 | 3.51E-02 |
| ENSG00000214825 | EI24P3       | 3  | 44524744  | 44525805  | 1061   | processed_pseudogene               | -2.14 | 4.52E-03 | 2.87E-02 |
| ENSG00000223829 | AC004870.2   | 7  | 46969644  | 47027481  | 57837  | lncRNA                             | -2.14 | 1.36E-03 | 1.34E-02 |
| ENSG00000241984 | RPL7AP2      | 14 | 39156742  | 39157852  | 1110   | processed_pseudogene               | -2.14 | 4.15E-03 | 2.72E-02 |
| ENSG00000254529 | MRGPRX7P     | 11 | 18863558  | 18864509  | 951    | unprocessed_pseudogene             | -2.15 | 8.57E-04 | 9.97E-03 |
| ENSG00000236121 | HAUS6P2      | 20 | 31341371  | 31344471  | 3100   | processed_pseudogene               | -2.15 | 5.57E-04 | 7.67E-03 |
| ENSG00000167916 | KRT24        | 17 | 40697991  | 40703752  | 5761   | protein_coding                     | -2.15 | 5.42E-05 | 1.64E-03 |
| ENSG00000233995 | AP000547.1   | 22 | 16572027  | 16574637  | 2610   | unprocessed_pseudogene             | -2.16 | 3.86E-03 | 2.60E-02 |
| ENSG00000182898 | TCHHL1       | 1  | 152084141 | 152089064 | 4923   | protein_coding                     | -2.16 | 4.62E-05 | 1.48E-03 |
| ENSG00000238040 | SALL4P2      | X  | 129871309 | 129877567 | 6258   | processed_pseudogene               | -2.16 | 9.80E-04 | 1.09E-02 |
| ENSG00000243832 | LINC02000    | 3  | 134055256 | 134057648 | 2392   | lncRNA                             | -2.16 | 3.62E-03 | 2.49E-02 |
| ENSG00000188860 | KRTAP17-1    | 17 | 41314912  | 41315710  | 798    | protein_coding                     | -2.16 | 8.27E-04 | 9.76E-03 |
| ENSG00000206145 | PZRXP6       | 22 | 21035243  | 21045017  | 9774   | transcribed_unprocessed_pseudogene | -2.16 | 3.42E-04 | 5.61E-03 |
| ENSG00000260750 | AC092720.1   | 16 | 87595131  | 87600337  | 5206   | lncRNA                             | -2.16 | 4.01E-05 | 1.33E-03 |
| ENSG00000259542 | AC087477.5   | 15 | 96393146  | 96405189  | 12043  | lncRNA                             | -2.16 | 2.08E-03 | 1.75E-02 |
| ENSG00000280114 | AL021920.2   | 1  | 16681097  | 16688749  | 7652   | unprocessed_pseudogene             | -2.16 | 3.93E-04 | 6.13E-03 |
| ENSG00000204776 | IGKV1OR-3    | 9  | 65770955  | 65771434  | 479    | IG_V_pseudogene                    | -2.16 | 2.03E-03 | 1.72E-02 |
| ENSG00000184650 | ODF4         | 17 | 8339840   | 8346048   | 6208   | protein_coding                     | -2.16 | 1.17E-03 | 1.22E-02 |
| ENSG00000257848 | AC074029.1   | 12 | 48171590  | 48173353  | 1763   | processed_pseudogene               | -2.16 | 1.72E-03 | 1.54E-02 |
| ENSG00000231461 | HLA-DPA2     | 6  | 33091753  | 33097295  | 5542   | unprocessed_pseudogene             | -2.16 | 2.04E-03 | 1.73E-02 |
| ENSG00000224054 | AL022163.1   | X  | 44466691  | 44468955  | 2284   | processed_pseudogene               | -2.16 | 3.92E-03 | 2.63E-02 |
| ENSG00000232624 | LINC01517    | 10 | 28743506  | 28941910  | 198404 | lncRNA                             | -2.17 | 6.29E-09 | 1.70E-06 |
| ENSG00000120289 | MAGEB4       | X  | 30242000  | 30244187  | 2187   | protein_coding                     | -2.17 | 1.80E-03 | 1.58E-02 |
| ENSG00000231957 | GNAI2P2      | 10 | 78068623  | 78069538  | 915    | processed_pseudogene               | -2.17 | 8.65E-04 | 1.00E-02 |
| ENSG00000223587 | LINC01986    | 3  | 11745     | 24849     | 13104  | lncRNA                             | -2.17 | 3.45E-04 | 5.64E-03 |
| ENSG00000238169 | LINC01053    | 13 | 25168969  | 25190643  | 21674  | lncRNA-antisense                   | -2.17 | 1.24E-03 | 1.26E-02 |
| ENSG00000258516 | AL133167.1   | 14 | 95828763  | 95866486  | 37723  | lncRNA                             | -2.17 | 2.01E-03 | 1.71E-02 |
| ENSG00000244705 | AC020658.1   | 15 | 40312352  | 40313289  | 937    | processed_pseudogene               | -2.17 | 3.80E-04 | 6.01E-03 |
| ENSG00000286752 | AC022509.5   | 12 | 26139249  | 26167741  | 28492  | lncRNA                             | -2.18 | 1.86E-03 | 1.62E-02 |
| ENSG00000179363 | TMEM31       | X  | 103710909 | 103714032 | 3123   | protein_coding                     | -2.18 | 7.87E-04 | 9.48E-03 |
| ENSG00000274340 | AC032011.1   | 15 | 62387327  | 62388875  | 1548   | lncRNA                             | -2.18 | 1.93E-04 | 3.82E-03 |
| ENSG00000203189 | AC008267.2   | 7  | 66427949  | 66453634  | 25685  | transcribed_unprocessed_pseudogene | -2.18 | 9.83E-07 | 9.49E-05 |
| ENSG00000234984 | FMO10P       | 1  | 166665885 | 166682196 | 16311  | unprocessed_pseudogene             | -2.18 | 2.91E-03 | 2.16E-02 |
| ENSG00000176754 | LINC00303    | 1  | 204032447 | 204041265 | 8818   | lncRNA                             | -2.18 | 1.84E-05 | 7.98E-04 |
| ENSG00000241104 | CEACAMP10    | 19 | 43211791  | 43248646  | 36855  | transcribed_processed_pseudogene   | -2.18 | 3.45E-04 | 5.63E-03 |
| ENSG00000269931 | AL078623.1   | 20 | 12934877  | 12937097  | 2220   | lncRNA                             | -2.18 | 3.40E-03 | 2.40E-02 |
| ENSG00000228528 | AC068057.1   | 2  | 104702650 | 104705813 | 3163   | lncRNA                             | -2.18 | 5.32E-04 | 7.43E-03 |
| ENSG00000233157 | Z97055.1     | 22 | 43759199  | 43759910  | 711    | processed_pseudogene               | -2.18 | 2.34E-03 | 1.88E-02 |
| ENSG00000286630 | AL133240.2   | 14 | 92294771  | 92297648  | 2877   | lncRNA                             | -2.18 | 5.44E-03 | 3.20E-02 |
| ENSG00000230304 | CICP6        | 3  | 198223497 | 198226310 | 2813   | processed_pseudogene               | -2.18 | 5.76E-03 | 3.33E-02 |
| ENSG00000122145 | TBX22        | X  | 80014753  | 80031774  | 17021  | protein_coding                     | -2.18 | 4.70E-04 | 6.84E-03 |
| ENSG00000226083 | SLC39A12-AS1 | 10 | 18001786  | 18010562  | 8776   | lncRNA-antisense                   | -2.18 | 6.66E-04 | 8.57E-03 |
| ENSG00000278505 | C17orf78     | 17 | 37375985  | 37392708  | 16723  | protein_coding                     | -2.18 | 5.61E-04 | 7.69E-03 |
| ENSG00000197595 | ATP11AUN     | 13 | 112647044 | 112684497 | 37453  | lncRNA                             | -2.18 | 4.93E-06 | 3.09E-04 |
| ENSG00000245059 | AC092718.1   | 16 | 81077319  | 81078861  | 1542   | lncRNA                             | -2.19 | 1.28E-04 | 2.95E-03 |
| ENSG00000244921 | MTCYBP1      | 5  | 134923303 | 134924049 | 746    | processed_pseudogene               | -2.19 | 4.79E-04 | 6.93E-03 |
| ENSG00000260141 | AC145350.2   | 16 | 33043609  | 33095431  | 51822  | lncRNA                             | -2.19 | 2.33E-04 | 4.33E-03 |
| ENSG00000262497 | FAM187B2P    | 19 | 35232291  | 35233003  | 712    | unprocessed_pseudogene             | -2.19 | 1.47E-03 | 1.40E-02 |
| ENSG00000251205 | AC018598.2   | 5  | 143531331 | 143598434 | 67103  | lncRNA                             | -2.19 | 1.32E-04 | 3.01E-03 |
| ENSG00000204754 | LINC01951    | 5  | 174919082 | 174995513 | 76431  | lncRNA                             | -2.19 | 1.01E-03 | 1.11E-02 |
| ENSG00000288108 | AC126768.3   | 5  | 1931058   | 1933985   | 2927   | lncRNA                             | -2.19 | 2.64E-03 | 2.03E-02 |
| ENSG00000286059 | AC005538.3   | 2  | 233977872 | 233980018 | 2146   | lncRNA-antisense                   | -2.20 | 2.96E-03 | 2.19E-02 |
| ENSG00000250819 | LINC02493    | 4  | 17171757  | 17186079  | 14322  | lncRNA                             | -2.20 | 5.59E-04 | 7.68E-03 |
| ENSG00000161594 | KLHL10       | 17 | 41835685  | 41848384  | 12699  | protein_coding                     | -2.20 | 1.29E-05 | 6.19E-04 |
| ENSG00000235838 | HSP90AB7P    | 10 | 9721963   | 9724416   | 2453   | processed_pseudogene               | -2.20 | 3.07E-04 | 5.20E-03 |
| ENSG00000225129 | AL035250.1   | 20 | 59352195  | 59357774  | 5579   | lncRNA                             | -2.20 | 1.33E-03 | 1.31E-02 |
| ENSG00000258883 | NBEAP4       | 15 | 21250180  | 21260147  | 9967   | unprocessed_pseudogene             | -2.20 | 3.26E-03 | 2.33E-02 |
| ENSG00000227412 | SBK33P1      | 9  | 85492579  | 85494094  | 1515   | processed_pseudogene               | -2.21 | 2.19E-03 | 1.81E-02 |
| ENSG00000287307 | AC005772.2   | 17 | 15062087  | 15104517  | 42430  | lncRNA                             | -2.21 | 5.64E-06 | 3.41E-04 |
| ENSG00000253116 | AC027698.1   | 8  | 58091442  | 58106294  | 14852  | lncRNA                             | -2.21 | 7.89E-04 | 9.49E-03 |
| ENSG00000265927 | AC125421.2   | 17 | 73831572  | 73836019  | 4447   | lncRNA                             | -2.21 | 6.65E-04 | 8.57E-03 |
| ENSG00000231382 | NBPF21P      | 3  | 36616006  | 36637457  | 21451  | unprocessed_pseudogene             | -2.21 | 4.93E-04 | 7.05E-03 |
| ENSG00000281386 | AP003500.1   | 11 | 129591493 | 129612110 | 20617  | lncRNA                             | -2.21 | 3.22E-03 | 2.31E-02 |
| ENSG00000279848 | AL008638.4   | 22 | 27044001  | 27045315  | 1314   | lncRNA                             | -2.21 | 2.58E-03 | 2.00E-02 |
| ENSG00000235038 | AL445193.2   | 1  | 58060139  | 58080274  | 20135  | lncRNA                             | -2.22 | 9.09E-04 | 1.04E-02 |
| ENSG00000226921 | LINC00454    | 13 | 113878489 | 113883651 | 5162   | lncRNA                             | -2.22 | 3.89E-06 | 2.57E-04 |
| ENSG00000274064 | AC040978.1   | 8  | 140039756 | 140041037 | 1281   | processed_pseudogene               | -2.22 | 4.39E-04 | 6.49E-03 |
| ENSG00000223572 | CKMT1A       | 15 | 43692886  | 43699222  | 6336   | protein_coding                     | -2.22 | 4.38E-03 | 2.81E-02 |



|                 |             |    |           |           |        |                                    |       |          |          |
|-----------------|-------------|----|-----------|-----------|--------|------------------------------------|-------|----------|----------|
| ENSG00000277718 | LINC02255   | 15 | 74379083  | 74390535  | 11452  | lncRNA                             | -2.22 | 1.69E-03 | 1.52E-02 |
| ENSG00000276409 | CCL14       | 17 | 35983288  | 35987004  | 3716   | protein coding                     | -2.22 | 1.24E-03 | 1.26E-02 |
| ENSG00000242272 | AK2P2       | 2  | 31823413  | 31823817  | 404    | processed pseudogene               | -2.23 | 9.22E-05 | 2.39E-03 |
| ENSG00000218027 | AL512329.1  | 6  | 1513698   | 1515289   | 1591   | processed pseudogene               | -2.23 | 2.24E-04 | 4.21E-03 |
| ENSG00000225807 | AC069281.1  | 7  | 100509416 | 100520205 | 10789  | lncRNA                             | -2.23 | 2.44E-03 | 1.93E-02 |
| ENSG00000157965 | SSX8P       | X  | 52622935  | 52633948  | 11013  | transcribed unprocessed pseudogene | -2.23 | 1.65E-04 | 3.47E-03 |
| ENSG00000272975 | MYHAS       | 17 | 10383144  | 10623886  | 240742 | lncRNA-antisense                   | -2.24 | 1.90E-04 | 3.79E-03 |
| ENSG00000254237 | AC021242.2  | 8  | 9367898   | 9436205   | 68307  | lncRNA                             | -2.24 | 1.49E-05 | 6.81E-04 |
| ENSG00000204481 | PRAMEF14    | 1  | 13341892  | 13347134  | 5242   | protein coding                     | -2.24 | 1.59E-04 | 3.38E-03 |
| ENSG00000282863 | AC012560.1  | 10 | 78179174  | 78675109  | 495935 | lncRNA                             | -2.24 | 1.37E-03 | 1.34E-02 |
| ENSG00000231137 | RBM22P5     | 9  | 76286494  | 76288081  | 1587   | processed pseudogene               | -2.24 | 7.14E-04 | 8.91E-03 |
| ENSG00000271676 | AC104771.1  | 4  | 77112495  | 77113458  | 963    | processed pseudogene               | -2.24 | 2.33E-03 | 1.87E-02 |
| ENSG00000255808 | PDE2A-AS1   | 11 | 72643237  | 72659407  | 16170  | lncRNA-antisense                   | -2.24 | 1.14E-04 | 2.75E-03 |
| ENSG00000231381 | RNF2P1      | 9  | 6668999   | 6670008   | 1009   | processed pseudogene               | -2.24 | 1.01E-03 | 1.11E-02 |
| ENSG00000231201 | AF12757.2   | 21 | 14971470  | 14992854  | 21384  | lncRNA-antisense                   | -2.24 | 1.10E-03 | 1.17E-02 |
| ENSG00000238120 | LINC01589   | 22 | 45604432  | 45605621  | 1189   | lncRNA-antisense                   | -2.24 | 3.52E-03 | 2.45E-02 |
| ENSG00000137709 | POU2F3      | 11 | 120236640 | 120319945 | 83305  | protein coding                     | -2.24 | 6.22E-09 | 1.70E-06 |
| ENSG00000224570 | AC097063.1  | 1  | 65576129  | 65578380  | 2251   | processed pseudogene               | -2.24 | 3.79E-03 | 2.57E-02 |
| ENSG00000175772 | LINC01106   | 2  | 110375138 | 110384442 | 9304   | lncRNA                             | -2.24 | 8.80E-05 | 2.32E-03 |
| ENSG00000261068 | AL512274.1  | 6  | 42092233  | 42094259  | 2026   | lncRNA                             | -2.25 | 2.35E-03 | 1.88E-02 |
| ENSG00000272642 | AP03121.1   | 11 | 127188885 | 127223449 | 34564  | lncRNA                             | -2.25 | 2.07E-03 | 1.74E-02 |
| ENSG00000237595 | LINC01275   | 20 | 50162765  | 50166216  | 3451   | lncRNA                             | -2.25 | 8.99E-05 | 2.35E-03 |
| ENSG00000230375 | GSTA1P      | 6  | 52847910  | 52870329  | 22419  | unprocessed pseudogene             | -2.25 | 2.76E-04 | 4.86E-03 |
| ENSG00000213424 | KRT22       | 17 | 40654665  | 40665181  | 10516  | protein coding                     | -2.26 | 7.83E-04 | 9.45E-03 |
| ENSG00000255146 | AP04247.2   | 11 | 58044110  | 58060138  | 16028  | lncRNA                             | -2.26 | 1.91E-03 | 1.66E-02 |
| ENSG00000285754 | AC008170.1  | 2  | 34134371  | 34220575  | 86204  | lncRNA                             | -2.26 | 6.83E-04 | 8.72E-03 |
| ENSG00000233492 | AL133325.2  | 20 | 21530122  | 21535665  | 5543   | lncRNA                             | -2.26 | 7.94E-04 | 9.52E-03 |
| ENSG00000230937 | MIR205HG    | 1  | 209428817 | 209432838 | 4021   | lncRNA                             | -2.26 | 7.76E-06 | 4.29E-04 |
| ENSG00000287381 | AC012433.2  | 18 | 50647315  | 50651212  | 3897   | lncRNA                             | -2.26 | 1.33E-03 | 1.31E-02 |
| ENSG00000232196 | MTRNR2L4    | 16 | 3370979   | 3372668   | 1689   | protein coding                     | -2.26 | 6.45E-04 | 8.42E-03 |
| ENSG00000279747 | AC130456.6  | 16 | 19503861  | 19504625  | 769    | TEC                                | -2.27 | 1.80E-03 | 1.58E-02 |
| ENSG00000227496 | AC099066.2  | 1  | 225700264 | 225752258 | 51994  | lncRNA                             | -2.27 | 3.09E-06 | 2.20E-04 |
| ENSG00000228539 | AL157413.1  | 20 | 24491472  | 24502345  | 10873  | lncRNA-antisense                   | -2.27 | 7.25E-05 | 2.03E-03 |
| ENSG00000232423 | PRAMEF6     | 1  | 12938472  | 12947580  | 9108   | protein coding                     | -2.27 | 4.16E-04 | 6.34E-03 |
| ENSG00000203870 | SMIM9       | X  | 154823348 | 154834662 | 11314  | protein coding                     | -2.28 | 7.18E-04 | 8.94E-03 |
| ENSG00000281852 | LINC00891   | X  | 71697196  | 71706455  | 9259   | lncRNA                             | -2.28 | 1.07E-03 | 1.15E-02 |
| ENSG00000166396 | SERPINB7    | 18 | 63752935  | 63805376  | 52441  | protein coding                     | -2.28 | 9.41E-06 | 4.92E-04 |
| ENSG00000259111 | AL079307.2  | 14 | 51750560  | 51763114  | 12554  | lncRNA                             | -2.28 | 1.58E-03 | 1.46E-02 |
| ENSG00000285861 | AC028991.2  | 8  | 3409133   | 3426587   | 17454  | lncRNA-antisense                   | -2.28 | 1.72E-03 | 1.54E-02 |
| ENSG00000111701 | APOBEC1     | 12 | 7649400   | 7665908   | 16508  | protein coding                     | -2.28 | 9.30E-04 | 1.05E-02 |
| ENSG00000279604 | AC092723.2  | 16 | 86035627  | 86036419  | 792    | TEC                                | -2.28 | 2.34E-03 | 1.88E-02 |
| ENSG00000286668 | AL391730.2  | 1  | 40939294  | 40945524  | 6230   | lncRNA                             | -2.28 | 1.11E-03 | 1.18E-02 |
| ENSG00000241818 | SCG5-AS1    | 15 | 32656084  | 32673065  | 16981  | lncRNA-antisense                   | -2.28 | 2.01E-03 | 1.71E-02 |
| ENSG00000268101 | CYP2G2P     | 19 | 41050449  | 41062444  | 11995  | unprocessed pseudogene             | -2.28 | 1.67E-04 | 3.49E-03 |
| ENSG00000235494 | AL590705.2  | 9  | 97222602  | 97235017  | 12415  | lncRNA                             | -2.29 | 3.97E-04 | 6.16E-03 |
| ENSG00000204709 | LINC01556   | 6  | 28943877  | 28944537  | 660    | lncRNA                             | -2.29 | 1.30E-03 | 1.29E-02 |
| ENSG00000189398 | OR7E12P     | 11 | 3390780   | 3391752   | 972    | unprocessed pseudogene             | -2.29 | 1.05E-04 | 2.60E-03 |
| ENSG00000278480 | ZBTB2P1     | 1  | 15226373  | 15227549  | 1176   | processed pseudogene               | -2.29 | 1.10E-03 | 1.17E-02 |
| ENSG00000286092 | AC117503.5  | 12 | 123713408 | 123723169 | 9761   | lncRNA-antisense                   | -2.29 | 1.57E-03 | 1.46E-02 |
| ENSG00000285603 | AL035893.1  | 6  | 2227803   | 2230261   | 2458   | lncRNA-antisense                   | -2.29 | 1.22E-03 | 1.25E-02 |
| ENSG00000124900 | TRIM51      | 11 | 55883297  | 55891810  | 8513   | protein coding                     | -2.29 | 1.64E-03 | 1.50E-02 |
| ENSG00000214102 | WEE2        | 7  | 141708353 | 141731271 | 22918  | protein coding                     | -2.29 | 8.76E-06 | 4.64E-04 |
| ENSG00000262953 | E1F4A1P9    | 17 | 2586330   | 2587866   | 1536   | processed pseudogene               | -2.29 | 3.13E-05 | 1.13E-03 |
| ENSG00000174156 | GSTA3       | 6  | 52896639  | 52909698  | 13059  | protein coding                     | -2.29 | 3.89E-04 | 6.09E-03 |
| ENSG00000287972 | AC073648.7  | 4  | 9078949   | 9092530   | 15581  | lncRNA                             | -2.29 | 1.23E-04 | 2.88E-03 |
| ENSG00000105141 | CASP14      | 19 | 15049480  | 15058293  | 8813   | protein coding                     | -2.29 | 8.95E-05 | 2.35E-03 |
| ENSG00000285593 | AC055872.2  | 17 | 6373833   | 6375080   | 1247   | lncRNA                             | -2.29 | 2.93E-03 | 2.17E-02 |
| ENSG00000223492 | AL391097.1  | 20 | 53168643  | 53179550  | 10907  | lncRNA-antisense                   | -2.29 | 4.79E-04 | 6.93E-03 |
| ENSG00000242515 | UGT1A10     | 2  | 233636454 | 233773305 | 136851 | protein coding                     | -2.30 | 2.00E-03 | 1.71E-02 |
| ENSG00000266114 | AC015908.4  | 17 | 10792059  | 10794985  | 2926   | lncRNA                             | -2.30 | 5.57E-04 | 7.67E-03 |
| ENSG00000258390 | LINC02318   | 14 | 95573520  | 95582305  | 8785   | lncRNA                             | -2.30 | 3.10E-05 | 1.12E-03 |
| ENSG00000261302 | AC106779.1  | 16 | 56708450  | 56730010  | 21560  | lncRNA-antisense                   | -2.30 | 1.98E-05 | 8.38E-04 |
| ENSG00000255394 | C8orf49     | 8  | 11761256  | 11763223  | 1967   | lncRNA                             | -2.30 | 9.82E-04 | 1.09E-02 |
| ENSG00000253556 | MTCO1P4     | 8  | 103088796 | 103090671 | 1875   | processed pseudogene               | -2.31 | 1.44E-03 | 1.38E-02 |
| ENSG00000229145 | ACTBP1      | X  | 46288016  | 46289128  | 1112   | processed pseudogene               | -2.31 | 3.16E-05 | 1.14E-03 |
| ENSG00000248717 | LINC02222   | 5  | 180684766 | 180686546 | 1780   | lncRNA                             | -2.31 | 2.12E-03 | 1.77E-02 |
| ENSG00000237899 | AL031289.1  | 1  | 40669089  | 40687588  | 18499  | lncRNA                             | -2.31 | 1.45E-03 | 1.39E-02 |
| ENSG00000260832 | AC125793.1  | 16 | 82953230  | 82990298  | 37068  | lncRNA-antisense                   | -2.31 | 1.31E-03 | 1.30E-02 |
| ENSG00000286911 | AC095333.3  | 12 | 9347028   | 9350947   | 3919   | lncRNA                             | -2.31 | 1.21E-03 | 1.24E-02 |
| ENSG00000259093 | AL137191.1  | 14 | 63122888  | 63178190  | 55302  | lncRNA                             | -2.31 | 1.21E-03 | 1.24E-02 |
| ENSG00000000005 | TNMD        | X  | 100584936 | 100599885 | 14949  | protein coding                     | -2.32 | 2.50E-03 | 1.95E-02 |
| ENSG00000163209 | SPRR3       | 1  | 153001747 | 153003856 | 2109   | protein coding                     | -2.32 | 5.60E-05 | 1.68E-03 |
| ENSG00000232596 | LINC01646   | 1  | 4571481   | 4594016   | 22535  | lncRNA                             | -2.32 | 1.57E-06 | 1.35E-04 |
| ENSG00000249497 | LINC02075   | 17 | 49457861  | 49461749  | 3888   | lncRNA                             | -2.32 | 8.86E-04 | 1.02E-02 |
| ENSG00000250025 | AC011396.2  | 5  | 146307098 | 146376963 | 69865  | lncRNA-antisense                   | -2.32 | 2.34E-03 | 1.88E-02 |
| ENSG00000214970 | AC005323.1  | 17 | 10579040  | 10623036  | 43996  | lncRNA-antisense                   | -2.32 | 1.05E-03 | 1.14E-02 |
| ENSG00000288069 | AF064866.1  | 21 | 40736318  | 40754888  | 18570  | lncRNA                             | -2.32 | 7.77E-04 | 9.41E-03 |
| ENSG00000255128 | HSPD1P3     | 8  | 7418991   | 7420546   | 1555   | processed pseudogene               | -2.33 | 5.96E-04 | 8.01E-03 |
| ENSG00000149507 | OOSP2       | 11 | 60040409  | 60048044  | 7635   | protein coding                     | -2.33 | 2.54E-04 | 4.59E-03 |
| ENSG00000282975 | LINC02034   | 3  | 127537937 | 127540485 | 2548   | lncRNA                             | -2.33 | 3.90E-04 | 6.11E-03 |
| ENSG00000229607 | AL137027.1  | 1  | 30810378  | 30815553  | 5175   | lncRNA                             | -2.33 | 2.19E-03 | 1.81E-02 |
| ENSG00000253966 | AC008514.2  | 5  | 170896929 | 170904461 | 7532   | processed pseudogene               | -2.33 | 8.33E-04 | 9.80E-03 |
| ENSG00000249509 | NEUROG2-AS1 | 4  | 112515385 | 112546881 | 31496  | lncRNA-antisense                   | -2.33 | 2.82E-04 | 4.92E-03 |
| ENSG00000274261 | AC137078.2  | 20 | 48406777  | 48410716  | 3939   | lncRNA                             | -2.34 | 6.94E-04 | 8.80E-03 |
| ENSG00000187223 | LCE2D       | 1  | 152663380 | 152664659 | 1279   | protein coding                     | -2.34 | 1.69E-05 | 7.47E-04 |
| ENSG00000255277 | ABCC6P2     | 16 | 14820792  | 14824702  | 3910   | transcribed unprocessed pseudogene | -2.34 | 1.17E-03 | 1.22E-02 |
| ENSG00000261595 | AL603832.2  | 1  | 112715672 | 112717796 | 2124   | lncRNA-antisense                   | -2.34 | 1.58E-04 | 3.36E-03 |
| ENSG00000254290 | AC124067.4  | 8  | 37597480  | 37599858  | 2378   | lncRNA                             | -2.34 | 1.55E-06 | 1.34E-04 |
| ENSG00000173389 | IQCF1       | 3  | 51894876  | 51903353  | 8477   | protein coding                     | -2.34 | 1.13E-03 | 1.19E-02 |
| ENSG00000136834 | OR1J1       | 9  | 122476958 | 122477926 | 968    | protein coding                     | -2.35 | 7.06E-04 | 8.86E-03 |



|                 |                         |    |           |           |        |                                    |       |          |          |
|-----------------|-------------------------|----|-----------|-----------|--------|------------------------------------|-------|----------|----------|
| ENSG00000212961 | HNRNPA1P40              | 11 | 74354443  | 74355720  | 1277   | processed_pseudogene               | -2.35 | 4.49E-04 | 6.64E-03 |
| ENSG00000140527 | WDR93                   | 15 | 89690811  | 89743638  | 52827  | protein_coding                     | -2.35 | 3.77E-07 | 4.57E-05 |
| ENSG00000204193 | TXNDC8                  | 9  | 110303476 | 110337884 | 34408  | protein_coding                     | -2.35 | 9.33E-05 | 2.41E-03 |
| ENSG00000235295 | LINC01634               | 22 | 18029385  | 18037968  | 8583   | lncRNA                             | -2.35 | 4.04E-05 | 1.34E-03 |
| ENSG00000224781 | EIF4A2P4                | X  | 52832704  | 52833899  | 1195   | processed_pseudogene               | -2.36 | 3.60E-04 | 5.79E-03 |
| ENSG00000230423 | AL672310.1              | 6  | 170615515 | 170738536 | 123021 | lncRNA                             | -2.36 | 3.65E-06 | 2.47E-04 |
| ENSG00000237402 | CAMTA1-IT1              | 1  | 7368942   | 7370270   | 1328   | lncRNA-sense_intronic              | -2.36 | 2.96E-04 | 5.09E-03 |
| ENSG00000259306 | AC020891.2              | 15 | 51315841  | 51321996  | 6155   | lncRNA                             | -2.36 | 8.89E-04 | 1.02E-02 |
| ENSG00000275585 | AC241377.2              | 1  | 120985692 | 121052167 | 66475  | transcribed_unprocessed_pseudogene | -2.36 | 7.65E-05 | 2.11E-03 |
| ENSG00000237613 | FAM138A                 | 1  | 34554     | 36081     | 1527   | lncRNA                             | -2.36 | 1.83E-04 | 3.71E-03 |
| ENSG00000238215 | AL513185.3              | 10 | 72643011  | 72644650  | 1639   | processed_pseudogene               | -2.36 | 8.56E-04 | 9.96E-03 |
| ENSG00000257316 | ASS1P14                 | 12 | 32985838  | 32987070  | 1232   | processed_pseudogene               | -2.36 | 7.14E-04 | 8.91E-03 |
| ENSG00000268483 | RPL7AP69                | 19 | 57065334  | 57066139  | 805    | processed_pseudogene               | -2.37 | 2.16E-03 | 1.79E-02 |
| ENSG00000261741 | FRG2KP                  | 16 | 31563082  | 31567716  | 4634   | transcribed_unprocessed_pseudogene | -2.37 | 6.81E-04 | 8.70E-03 |
| ENSG00000233427 | AL009181.1              | 1  | 28870483  | 28877336  | 6853   | lncRNA-antisense                   | -2.37 | 1.65E-04 | 3.48E-03 |
| ENSG00000206129 | AC006305.1              | 18 | 56003613  | 56191262  | 187649 | lncRNA                             | -2.37 | 1.76E-05 | 7.73E-04 |
| ENSG00000259478 | AC024651.1              | 15 | 97982509  | 97991142  | 8633   | lncRNA                             | -2.38 | 1.78E-03 | 1.58E-02 |
| ENSG00000261104 | AC093904.4              | 2  | 9106593   | 9109865   | 3272   | lncRNA                             | -2.38 | 5.63E-06 | 3.41E-04 |
| ENSG00000284739 | BX005132.1              | 1  | 4963954   | 4973298   | 9344   | lncRNA                             | -2.38 | 9.55E-04 | 1.07E-02 |
| ENSG00000253130 | AC114550.1              | 8  | 8561386   | 8574038   | 12652  | lncRNA                             | -2.38 | 4.72E-05 | 1.50E-03 |
| ENSG00000124260 | MAGEA10                 | X  | 152133310 | 152138578 | 5268   | protein_coding                     | -2.38 | 2.02E-04 | 3.94E-03 |
| ENSG00000237194 | SNAI1P1                 | 2  | 209808804 | 209809580 | 776    | processed_pseudogene               | -2.39 | 2.59E-04 | 4.65E-03 |
| ENSG00000180483 | DEFB119                 | 20 | 31377164  | 31390590  | 13426  | protein_coding                     | -2.39 | 8.53E-04 | 9.93E-03 |
| ENSG00000236335 | AL161638.2              | 1  | 30409560  | 30411638  | 2078   | lncRNA                             | -2.39 | 1.02E-03 | 1.11E-02 |
| ENSG00000236545 | AP001619.2              | 21 | 41870633  | 41872054  | 1421   | lncRNA-antisense                   | -2.40 | 1.20E-03 | 1.24E-02 |
| ENSG00000226812 | AL117382.1 (R3HDM1-AS1) | 20 | 44347552  | 44355185  | 7633   | lncRNA-antisense                   | -2.40 | 6.05E-04 | 8.07E-03 |
| ENSG00000255250 | AP003059.2              | 11 | 86727355  | 86765467  | 38112  | lncRNA                             | -2.40 | 5.67E-04 | 7.75E-03 |
| ENSG00000179172 | HNRNPCL1                | 1  | 12847377  | 12848720  | 1343   | protein_coding                     | -2.40 | 5.10E-04 | 7.18E-03 |
| ENSG00000152595 | MEPE                    | 4  | 87821411  | 87846817  | 25406  | protein_coding                     | -2.41 | 8.92E-04 | 1.02E-02 |
| ENSG00000286498 | AL132982.1              | 6  | 161353679 | 161355350 | 1671   | lncRNA                             | -2.41 | 7.84E-04 | 9.46E-03 |
| ENSG00000258553 | AL157911.1              | 14 | 59969116  | 60091783  | 122667 | lncRNA-antisense                   | -2.41 | 9.45E-05 | 2.43E-03 |
| ENSG00000286250 | AL161945.1              | 20 | 52840936  | 52843775  | 2839   | lncRNA                             | -2.42 | 1.42E-03 | 1.37E-02 |
| ENSG00000184029 | DSCR4                   | 21 | 37951425  | 38121360  | 169935 | lncRNA                             | -2.42 | 1.17E-04 | 2.78E-03 |
| ENSG00000258433 | AC087633.1              | 15 | 95034108  | 95047108  | 13000  | lncRNA                             | -2.42 | 1.88E-03 | 1.64E-02 |
| ENSG00000267927 | AC010320.1              | 19 | 52171158  | 52177002  | 5844   | lncRNA-antisense                   | -2.42 | 5.68E-06 | 3.43E-04 |
| ENSG00000285615 | AL359508.1              | 10 | 129372194 | 129380753 | 8559   | lncRNA                             | -2.42 | 3.37E-04 | 5.57E-03 |
| ENSG00000274328 | AC007551.2              | 7  | 35847038  | 35847426  | 388    | processed_pseudogene               | -2.42 | 2.98E-04 | 5.10E-03 |
| ENSG00000187545 | PRAMEF1                 | 1  | 12892896  | 12898270  | 5374   | protein_coding                     | -2.42 | 1.02E-04 | 2.55E-03 |
| ENSG00000227599 | PTPRT-AS1               | 20 | 42968743  | 42971492  | 2749   | lncRNA-antisense                   | -2.42 | 5.47E-04 | 7.58E-03 |
| ENSG00000278593 | AC104394.1              | 2  | 234743542 | 234745606 | 2064   | unprocessed_pseudogene             | -2.43 | 5.81E-04 | 7.87E-03 |
| ENSG00000286052 | AL109955.1              | 20 | 57442742  | 57458298  | 15556  | lncRNA                             | -2.43 | 4.75E-05 | 1.51E-03 |
| ENSG00000261250 | AL160286.3 (XDNND1-AS1) | 1  | 179543201 | 179548922 | 5721   | lncRNA-antisense                   | -2.43 | 1.56E-04 | 3.35E-03 |
| ENSG00000196859 | KRT39                   | 17 | 40958417  | 40966948  | 8531   | protein_coding                     | -2.43 | 1.67E-03 | 1.51E-02 |
| ENSG00000284748 | AL513220.1              | 1  | 37596126  | 37607336  | 11210  | lncRNA-bidirectional_promoter      | -2.43 | 1.04E-04 | 2.59E-03 |
| ENSG00000287171 | AC006062.1              | X  | 8487165   | 8504564   | 17399  | lncRNA                             | -2.43 | 1.82E-05 | 7.94E-04 |
| ENSG00000282012 | AP000357.2              | 22 | 24691122  | 24696003  | 4881   | lncRNA                             | -2.43 | 1.01E-03 | 1.11E-02 |
| ENSG00000256377 | AC009509.1              | 12 | 27696388  | 27710803  | 14415  | lncRNA-antisense                   | -2.44 | 4.97E-06 | 3.10E-04 |
| ENSG00000220248 | ZNF402P                 | 22 | 16857619  | 16860718  | 3099   | processed_pseudogene               | -2.44 | 7.24E-05 | 2.03E-03 |
| ENSG00000225198 | SXXP3                   | X  | 48156367  | 48166350  | 9983   | unprocessed_pseudogene             | -2.44 | 7.46E-04 | 9.16E-03 |
| ENSG00000271232 | CARS1P1                 | 15 | 68749501  | 68750691  | 1190   | processed_pseudogene               | -2.44 | 8.67E-04 | 1.01E-02 |
| ENSG00000286842 | AL353752.2              | 9  | 87436215  | 87445795  | 9580   | lncRNA                             | -2.44 | 2.19E-04 | 4.16E-03 |
| ENSG00000248545 | AC105290.1              | 4  | 25529177  | 25619468  | 90291  | lncRNA                             | -2.45 | 9.44E-04 | 1.06E-02 |
| ENSG00000180016 | OR1E1                   | 17 | 3397104   | 33984110  | 1306   | protein_coding                     | -2.45 | 4.64E-04 | 6.78E-03 |
| ENSG00000250894 | PRAMEF31P               | 1  | 13245863  | 13248652  | 2789   | unprocessed_pseudogene             | -2.45 | 3.85E-06 | 2.42E-04 |
| ENSG00000225315 | AL591178.1              | 1  | 24040835  | 24086799  | 45964  | lncRNA-antisense                   | -2.45 | 1.00E-04 | 2.53E-03 |
| ENSG00000269526 | ERVV-1                  | 19 | 53013921  | 53016122  | 2201   | protein_coding                     | -2.45 | 1.12E-03 | 1.18E-02 |
| ENSG00000231253 | LINC01640               | 22 | 33104330  | 33145861  | 41531  | lncRNA                             | -2.45 | 1.20E-04 | 2.84E-03 |
| ENSG00000159516 | SPRR2G                  | 1  | 153149582 | 153150890 | 1308   | protein_coding                     | -2.46 | 4.80E-04 | 6.93E-03 |
| ENSG00000188984 | AADACL3                 | 1  | 12716110  | 12728760  | 12650  | protein_coding                     | -2.46 | 8.86E-07 | 8.84E-05 |
| ENSG00000230525 | LINC01799               | 2  | 66904436  | 66971462  | 67026  | lncRNA                             | -2.46 | 6.11E-04 | 8.12E-03 |
| ENSG00000227527 | AC096540.1              | 1  | 42335386  | 42338376  | 2990   | lncRNA-sense_overlapping           | -2.46 | 3.50E-04 | 5.68E-03 |
| ENSG00000262558 | AC129507.3              | 17 | 354737    | 356882    | 2145   | lncRNA-antisense                   | -2.46 | 2.84E-04 | 4.94E-03 |
| ENSG00000270474 | IGHV3-29                | 14 | 106356145 | 106356591 | 446    | IG_V_pseudogene                    | -2.46 | 3.87E-04 | 6.08E-03 |
| ENSG00000283473 | FAM240A                 | 3  | 46612435  | 46628543  | 14108  | protein_coding                     | -2.46 | 1.46E-03 | 1.39E-02 |
| ENSG00000287443 | AL357588.3              | 20 | 47974137  | 47977584  | 3447   | lncRNA                             | -2.47 | 1.36E-04 | 3.07E-03 |
| ENSG00000287173 | AL356157.3              | 10 | 44509708  | 44515421  | 5713   | lncRNA                             | -2.48 | 1.23E-03 | 1.26E-02 |
| ENSG00000256847 | CCND2P1                 | 11 | 63243085  | 63244004  | 919    | processed_pseudogene               | -2.48 | 6.33E-04 | 8.32E-03 |
| ENSG00000232628 | AC092809.2              | 1  | 224208741 | 224213625 | 4884   | lncRNA-sense_intronic              | -2.48 | 1.94E-05 | 8.28E-04 |
| ENSG00000154198 | CYP4Z2P                 | 1  | 46843095  | 46900437  | 57342  | transcribed_unprocessed_pseudogene | -2.48 | 6.57E-05 | 1.87E-03 |
| ENSG00000236495 | AL158168.1              | 10 | 14652689  | 14661691  | 9002   | lncRNA-antisense                   | -2.48 | 5.07E-05 | 1.58E-03 |
| ENSG00000260756 | AC131649.1              | 16 | 10351440  | 10352752  | 1312   | lncRNA                             | -2.49 | 1.18E-04 | 2.79E-03 |
| ENSG00000203825 | AC239859.1              | 1  | 143541768 | 143572834 | 31066  | unprocessed_pseudogene             | -2.49 | 7.79E-07 | 8.12E-05 |
| ENSG00000287349 | AC108477.2              | 4  | 183725830 | 183732570 | 6740   | lncRNA                             | -2.50 | 5.89E-04 | 7.94E-03 |
| ENSG00000227838 | AL121885.2              | 22 | 27676559  | 27714970  | 38411  | lncRNA                             | -2.51 | 4.03E-04 | 6.24E-03 |
| ENSG00000258354 | AC138932.1              | 16 | 14909887  | 14911345  | 1458   | lncRNA                             | -2.51 | 1.31E-03 | 1.30E-02 |
| ENSG00000279142 | AC009108.4              | 16 | 86595189  | 86597639  | 2450   | TEC                                | -2.52 | 3.81E-05 | 1.29E-03 |
| ENSG00000260990 | Z94057.1 (TNR-AS1)      | 1  | 175307218 | 175335459 | 28241  | lncRNA-antisense                   | -2.52 | 4.30E-04 | 6.47E-03 |
| ENSG00000239345 | HNRNPA1P26              | X  | 100855288 | 100856379 | 1091   | processed_pseudogene               | -2.52 | 4.90E-04 | 7.02E-03 |
| ENSG00000286324 | AL033381.3              | 6  | 1111367   | 1114329   | 2962   | lncRNA                             | -2.53 | 2.67E-05 | 1.02E-03 |
| ENSG00000260239 | LINC02533               | 6  | 4488798   | 4495769   | 6971   | lncRNA                             | -2.53 | 7.09E-05 | 1.99E-03 |
| ENSG00000255420 | CASC23                  | 11 | 8011278   | 8016520   | 5242   | lncRNA-antisense                   | -2.53 | 2.43E-04 | 4.46E-03 |
| ENSG00000223716 | AL135785.1              | 9  | 38360427  | 38376430  | 16003  | lncRNA                             | -2.53 | 3.75E-04 | 5.95E-03 |
| ENSG00000258783 | KRT18P6                 | 14 | 35511825  | 35513089  | 1264   | processed_pseudogene               | -2.55 | 4.41E-04 | 6.56E-03 |
| ENSG00000282882 | AC027045.2              | 17 | 9764186   | 9805100   | 40914  | lncRNA                             | -2.55 | 3.64E-05 | 1.26E-03 |
| ENSG00000234575 | CTSLP8                  | 9  | 87844154  | 87847314  | 3160   | unprocessed_pseudogene             | -2.56 | 3.21E-05 | 1.15E-03 |
| ENSG00000206072 | SERPINB11               | 18 | 63647579  | 63726432  | 78853  | protein_coding                     | -2.56 | 8.35E-06 | 4.49E-04 |
| ENSG00000225328 | LINC01594               | 2  | 108167125 | 108217886 | 50761  | lncRNA-antisense                   | -2.57 | 2.81E-04 | 4.91E-03 |
| ENSG00000241563 | CORT                    | 1  | 10450031  | 10451998  | 1967   | protein_coding                     | -2.59 | 6.42E-04 | 8.40E-03 |
| ENSG00000230978 | LINC00160               | 21 | 34723807  | 34737204  | 13397  | lncRNA                             | -2.59 | 1.79E-04 | 3.66E-03 |
| ENSG00000258942 | AL358332.1              | 14 | 51344914  | 51385603  | 40689  | lncRNA                             | -2.59 | 3.92E-04 | 6.12E-03 |

|                 |            |    |           |           |       |                                    |       |          |          |
|-----------------|------------|----|-----------|-----------|-------|------------------------------------|-------|----------|----------|
| ENSG00000287435 | AC069404.1 | 2  | 73305941  | 73307890  | 1949  | lncRNA                             | -2.59 | 1.85E-04 | 3.73E-03 |
| ENSG00000262962 | KARS1P3    | 16 | 68002432  | 68004952  | 2520  | unprocessed_pseudogene             | -2.59 | 1.33E-04 | 3.02E-03 |
| ENSG00000279251 | AC015726.3 | 17 | 19855747  | 19856164  | 417   | TEC                                | -2.59 | 4.70E-04 | 6.84E-03 |
| ENSG00000286594 | AL133493.2 | 21 | 45607386  | 45609194  | 1808  | lncRNA                             | -2.60 | 1.87E-04 | 3.75E-03 |
| ENSG0000036473  | OTC        | X  | 38352586  | 38421446  | 68860 | protein_coding                     | -2.60 | 3.01E-05 | 1.10E-03 |
| ENSG00000231235 | CTNBL1P1   | X  | 46418450  | 46420079  | 1629  | processed_pseudogene               | -2.60 | 2.03E-04 | 3.95E-03 |
| ENSG00000259732 | AC092757.2 | 15 | 59121034  | 59133250  | 12216 | lncRNA-sense overlapping           | -2.61 | 5.05E-04 | 7.14E-03 |
| ENSG00000261524 | ABC810P3   | 15 | 28402868  | 28405033  | 2165  | processed_pseudogene               | -2.62 | 2.69E-04 | 4.78E-03 |
| ENSG00000236173 | AL049612.1 | 6  | 169809318 | 169811012 | 784   | lncRNA                             | -2.62 | 1.43E-04 | 3.16E-03 |
| ENSG00000131482 | G6PC       | 17 | 42900797  | 42914438  | 13641 | protein_coding                     | -2.64 | 8.08E-07 | 8.33E-05 |
| ENSG00000229853 | AL034418.1 | 20 | 47630266  | 47631438  | 1172  | processed_pseudogene               | -2.66 | 9.07E-05 | 2.36E-03 |
| ENSG00000203783 | PRR9       | 1  | 153217584 | 153219310 | 1726  | protein_coding                     | -2.67 | 2.74E-05 | 1.04E-03 |
| ENSG00000237746 | ZNF101P1   | 10 | 28338554  | 28340942  | 2388  | processed_pseudogene               | -2.67 | 1.40E-04 | 3.12E-03 |
| ENSG00000284670 | AC092128.1 | 16 | 73940639  | 73941781  | 1142  | translated_processed_pseudogene    | -2.68 | 1.24E-04 | 2.89E-03 |
| ENSG00000288023 | AL157936.1 | 9  | 94725871  | 94726575  | 704   | lncRNA                             | -2.68 | 1.25E-04 | 2.90E-03 |
| ENSG00000250591 | PRSS3P1    | 7  | 142760415 | 142763943 | 3528  | unprocessed_pseudogene             | -2.68 | 3.11E-05 | 1.13E-03 |
| ENSG00000287082 | AP001042.3 | 21 | 38857539  | 38858861  | 1322  | lncRNA                             | -2.68 | 2.00E-04 | 3.92E-03 |
| ENSG00000287197 | AC096675.1 | 1  | 204822664 | 204829274 | 6610  | lncRNA                             | -2.73 | 9.87E-06 | 5.07E-04 |
| ENSG00000260311 | AC138907.1 | 16 | 32663925  | 32666533  | 2608  | lncRNA                             | -2.73 | 1.11E-05 | 5.59E-04 |
| ENSG00000229292 | RFPL4AL1   | 19 | 55769118  | 55773420  | 4302  | protein_coding                     | -2.73 | 9.27E-05 | 2.40E-03 |
| ENSG00000288024 | AC005301.2 | 22 | 16725072  | 16747761  | 22689 | lncRNA                             | -2.73 | 8.62E-05 | 2.30E-03 |
| ENSG00000188655 | RNASE9     | 14 | 20556093  | 20560931  | 4838  | protein_coding                     | -2.74 | 1.57E-04 | 3.36E-03 |
| ENSG00000215520 | RPS4XP4    | 1  | 20525989  | 20526751  | 762   | processed_pseudogene               | -2.75 | 2.64E-04 | 4.72E-03 |
| ENSG00000253968 | AC016573.1 | 5  | 173383941 | 173451591 | 67650 | lncRNA                             | -2.75 | 7.35E-06 | 4.16E-04 |
| ENSG00000235594 | AL139824.2 | 20 | 56267872  | 56269231  | 1359  | processed_pseudogene               | -2.79 | 4.59E-05 | 1.47E-03 |
| ENSG00000287668 | AL132990.1 | 14 | 94545310  | 94547782  | 2452  | lncRNA                             | -2.80 | 1.79E-06 | 1.48E-04 |
| ENSG00000230051 | AL020994.2 | 22 | 27331634  | 27379265  | 47631 | lncRNA                             | -2.80 | 3.29E-08 | 6.54E-06 |
| ENSG00000276702 | AC010809.3 | 15 | 33850538  | 33851178  | 640   | lncRNA-antisense                   | -2.80 | 7.79E-05 | 2.14E-03 |
| ENSG00000189196 | LINC00994  | 3  | 64078361  | 64087363  | 9002  | lncRNA                             | -2.81 | 3.18E-06 | 2.26E-04 |
| ENSG00000125888 | BANF2      | 20 | 17693672  | 17735871  | 42199 | protein_coding                     | -2.83 | 1.12E-06 | 1.05E-04 |
| ENSG00000179636 | TPPP2      | 14 | 21024109  | 21036276  | 12167 | protein_coding                     | -2.84 | 2.93E-06 | 2.12E-04 |
| ENSG00000142789 | CELA3A     | 1  | 22001657  | 22012542  | 10885 | protein_coding                     | -2.87 | 1.12E-05 | 5.61E-04 |
| ENSG00000275894 | AL021578.1 | 20 | 45345115  | 45345823  | 708   | lncRNA-sense intronic              | -2.87 | 4.56E-06 | 2.91E-04 |
| ENSG00000287703 | AC099565.1 | 1  | 34640157  | 34685732  | 45575 | lncRNA                             | -2.90 | 1.51E-05 | 6.85E-04 |
| ENSG00000248257 | PSG10P     | 19 | 42839368  | 42855718  | 16350 | transcribed_unprocessed_pseudogene | -2.90 | 1.64E-06 | 1.41E-04 |
| ENSG00000273851 | AC027088.4 | 15 | 69022230  | 69024176  | 1946  | transcribed_processed_pseudogene   | -2.90 | 4.78E-05 | 1.51E-03 |
| ENSG00000266667 | AC005703.3 | 17 | 15379864  | 15417878  | 38014 | lncRNA                             | -2.92 | 1.04E-06 | 9.95E-05 |
| ENSG00000284710 | Z98257.2   | 1  | 20272018  | 20275005  | 2987  | lncRNA                             | -2.95 | 1.83E-06 | 1.51E-04 |
| ENSG00000255313 | AC100858.1 | 8  | 124936328 | 124943765 | 7437  | lncRNA                             | -3.01 | 1.39E-05 | 6.51E-04 |
| ENSG00000229028 | KRT223P    | 17 | 40717235  | 40721932  | 4697  | transcribed_unprocessed_pseudogene | -3.02 | 2.10E-06 | 1.69E-04 |
| ENSG00000204978 | ERICH4     | 19 | 41443156  | 41444765  | 1609  | protein_coding                     | -3.02 | 1.34E-05 | 6.33E-04 |
| ENSG00000180068 | OR3A4P     | 17 | 3309986   | 3311446   | 1460  | transcribed_unprocessed_pseudogene | -3.08 | 9.09E-06 | 4.79E-04 |
| ENSG00000287107 | AL136102.1 | 20 | 48120269  | 48136844  | 16575 | lncRNA                             | -3.12 | 2.24E-06 | 1.75E-04 |
| ENSG00000258684 | BMS1P16    | 15 | 21160305  | 21167357  | 7052  | unprocessed_pseudogene             | -3.29 | 1.30E-06 | 1.17E-04 |
| ENSG00000267354 | AC091151.2 | 18 | 45507202  | 45550183  | 42981 | lncRNA-sense intronic              | -3.31 | 9.53E-09 | 2.36E-06 |
| ENSG00000229571 | PRAMEF25   | 1  | 13068677  | 13077884  | 9207  | protein_coding                     | -3.46 | 7.70E-07 | 8.10E-05 |
| ENSG00000249818 | AC097375.2 | 4  | 151904932 | 151928710 | 23778 | lncRNA                             | -3.56 | 4.88E-10 | 1.87E-07 |

Supplemental Table 3. Differentially expressed transcripts from the whole blood RNA-seq analysis of the anti-Ro positive SjD cases compared to healthy controls (SjD<sup>Ro+</sup> analysis).

| ENSEMBL_GENE_ID | Gene Name               | Chr | Chr_Start<br>position | Chr_end_<br>position | Gene<br>Length | gene_biotype                     | SjD <sup>Ro+</sup> vs. HC |          |          |
|-----------------|-------------------------|-----|-----------------------|----------------------|----------------|----------------------------------|---------------------------|----------|----------|
|                 |                         |     |                       |                      |                |                                  | Log2FC                    | pval     | padj     |
| ENSG00000165949 | IFI27                   | 14  | 94104836              | 94116698             | 11862          | protein coding                   | 3.36                      | 1.46E-07 | 2.39E-05 |
| ENSG00000134321 | RSAD2                   | 2   | 8865806               | 8898239              | 32433          | protein coding                   | 2.95                      | 6.52E-12 | 7.82E-09 |
| ENSG00000137959 | IFI44L                  | 1   | 78619922              | 78646145             | 26223          | protein coding                   | 2.72                      | 1.42E-09 | 4.98E-07 |
| ENSG00000137965 | IFI44                   | 1   | 78649796              | 78664078             | 14282          | protein coding                   | 2.50                      | 1.56E-10 | 8.30E-08 |
| ENSG00000185745 | IFIT1                   | 10  | 89392546              | 89406487             | 13941          | protein coding                   | 2.49                      | 2.05E-10 | 1.02E-07 |
| ENSG00000111331 | OAS3                    | 12  | 112938444             | 1.13E+08             | 34807          | protein coding                   | 2.31                      | 8.75E-12 | 9.85E-09 |
| ENSG00000187608 | ISG15                   | 1   | 1001138               | 1014540              | 13402          | protein coding                   | 2.30                      | 3.25E-10 | 1.47E-07 |
| ENSG00000160932 | LY6E                    | 8   | 143017982             | 1.43E+08             | 5850           | protein coding                   | 2.28                      | 8.65E-12 | 9.85E-09 |
| ENSG00000279296 | PRAL                    | 17  | 6772831               | 6776116              | 3285           | TEC                              | 2.16                      | 1.57E-11 | 1.48E-08 |
| ENSG00000133106 | EPST11                  | 13  | 42886388              | 42992271             | 105883         | protein coding                   | 2.15                      | 5.15E-11 | 3.75E-08 |
| ENSG00000119917 | IFIT3                   | 10  | 89327997              | 89340971             | 12974          | protein coding                   | 2.15                      | 3.35E-12 | 4.98E-09 |
| ENSG00000143546 | S100A8                  | 1   | 153390032             | 1.53E+08             | 1041           | protein coding                   | 2.13                      | 6.34E-09 | 1.75E-06 |
| ENSG00000134326 | CMPPK2                  | 2   | 6840570               | 6866635              | 26065          | protein coding                   | 2.10                      | 5.53E-10 | 2.27E-07 |
| ENSG00000228318 | AP001610.2 (MX1-AS1)    | 21  | 41441056              | 41445708             | 4652           | lncRNA-antisense                 | 2.07                      | 1.88E-08 | 4.36E-06 |
| ENSG00000149131 | SERPING1                | 11  | 57597387              | 57619171             | 21784          | protein coding                   | 2.06                      | 2.46E-12 | 4.18E-09 |
| ENSG00000089127 | OAS1                    | 12  | 112906783             | 1.13E+08             | 26439          | protein coding                   | 2.04                      | 4.14E-12 | 5.69E-09 |
| ENSG00000126709 | IFI6                    | 1   | 27666064              | 27672198             | 6134           | protein coding                   | 2.03                      | 7.07E-11 | 4.61E-08 |
| ENSG00000138646 | HERC5                   | 4   | 88457119              | 88506163             | 49044          | protein coding                   | 2.03                      | 1.40E-10 | 7.88E-08 |
| ENSG00000239719 | AC004890.1              | 7   | 149191043             | 1.49E+08             | 180            | processed pseudogene             | 1.94                      | 4.22E-05 | 2.05E-03 |
| ENSG00000184979 | USP18                   | 22  | 18150170              | 18177397             | 27227          | protein coding                   | 1.92                      | 5.65E-07 | 7.24E-05 |
| ENSG00000238015 | AC104837.2              | 1   | 78666272              | 78666695             | 423            | processed pseudogene             | 1.89                      | 5.71E-03 | 4.51E-02 |
| ENSG00000157601 | MX1                     | 21  | 41420304              | 41459214             | 38910          | protein coding                   | 1.89                      | 3.57E-09 | 1.07E-06 |
| ENSG00000111335 | OAS2                    | 12  | 112978395             | 1.13E+08             | 33328          | protein coding                   | 1.86                      | 3.69E-12 | 5.27E-09 |
| ENSG00000257452 | AC004551.1 (OAS123-AS1) | 12  | 112907628             | 1.13E+08             | 110123         | lncRNA-antisense                 | 1.83                      | 2.78E-06 | 2.61E-04 |
| ENSG00000204397 | CARD16                  | 11  | 105041326             | 1.05E+08             | 60105          | protein coding                   | 1.82                      | 1.23E-15 | 1.43E-11 |
| ENSG00000244158 | CALHM6-AS1              | 6   | 116460739             | 1.16E+08             | 2953           | lncRNA-antisense                 | 1.80                      | 1.01E-06 | 1.13E-04 |
| ENSG00000256393 | RPL41P5                 | 12  | 93083598              | 93083675             | 77             | processed pseudogene             | 1.79                      | 1.60E-05 | 9.93E-04 |
| ENSG00000225964 | NRIR                    | 2   | 6819463               | 6840464              | 21001          | lncRNA-antisense                 | 1.78                      | 4.60E-07 | 6.10E-05 |
| ENSG00000168062 | BATF2                   | 11  | 64987945              | 64997018             | 9073           | protein coding                   | 1.76                      | 9.45E-10 | 3.51E-07 |
| ENSG00000142089 | IFITM3                  | 11  | 319676                | 327537               | 7861           | protein coding                   | 1.74                      | 1.03E-09 | 3.74E-07 |
| ENSG00000140379 | BCL2A1                  | 15  | 79960892              | 79971196             | 10304          | protein coding                   | 1.72                      | 1.81E-10 | 9.22E-08 |
| ENSG00000237568 | AC099063.1 (GBP5-AS1)   | 1   | 89260582              | 89269754             | 9172           | lncRNA-antisense                 | 1.72                      | 1.60E-07 | 2.54E-05 |
| ENSG00000135114 | OASL                    | 12  | 121019111             | 1.21E+08             | 20131          | protein coding                   | 1.70                      | 1.46E-10 | 7.96E-08 |
| ENSG00000254224 | AP003465.1 (UQRB-AS1)   | 8   | 96235427              | 96239149             | 3722           | lncRNA-antisense                 | 1.70                      | 8.69E-05 | 3.39E-03 |
| ENSG00000121552 | CSTA                    | 3   | 122325248             | 1.22E+08             | 16721          | protein coding                   | 1.70                      | 4.95E-11 | 3.68E-08 |
| ENSG00000244398 | AC116533.1              | 11  | 16974693              | 16975013             | 320            | processed pseudogene             | 1.68                      | 1.31E-05 | 8.60E-04 |
| ENSG00000132530 | XAF1                    | 17  | 6755447               | 6775647              | 20200          | protein coding                   | 1.67                      | 1.78E-10 | 9.19E-08 |
| ENSG00000225492 | GBP1P1                  | 1   | 89407679              | 89426243             | 18564          | inscribed unprocessed pseudogene | 1.67                      | 3.06E-06 | 2.81E-04 |
| ENSG00000088827 | SIGLEC1                 | 20  | 3686970               | 3707128              | 20158          | protein coding                   | 1.67                      | 2.36E-07 | 3.57E-05 |
| ENSG00000078081 | LAMP3                   | 3   | 183122215             | 1.83E+08             | 41624          | protein coding                   | 1.66                      | 1.38E-09 | 4.88E-07 |
| ENSG00000235828 | RPL36AP26               | 7   | 15701435              | 15701752             | 317            | processed pseudogene             | 1.65                      | 4.43E-03 | 3.89E-02 |
| ENSG00000258666 | AL157871.4              | 14  | 100333790             | 1E+08                | 20271          | lncRNA-antisense                 | 1.64                      | 5.54E-08 | 1.08E-05 |
| ENSG00000110079 | MS4A4A                  | 11  | 60185702              | 60317944             | 132242         | protein coding                   | 1.63                      | 7.00E-10 | 2.74E-07 |
| ENSG00000237748 | UQCRRB1                 | X   | 56737242              | 56737577             | 335            | processed pseudogene             | 1.62                      | 2.37E-04 | 6.40E-03 |
| ENSG00000136514 | RTP4                    | 3   | 187368385             | 1.87E+08             | 3691           | protein coding                   | 1.62                      | 4.02E-10 | 1.76E-07 |
| ENSG00000162840 | MT2P1                   | 4   | 68376323              | 68376505             | 182            | processed pseudogene             | 1.61                      | 5.23E-06 | 4.32E-04 |
| ENSG00000169385 | RNA52                   | 14  | 20955487              | 20956436             | 949            | protein coding                   | 1.60                      | 2.88E-08 | 6.22E-06 |
| ENSG00000119922 | IFIT2                   | 10  | 89283694              | 89309271             | 25577          | protein coding                   | 1.59                      | 6.71E-11 | 4.53E-08 |
| ENSG00000224094 | RPS24P8                 | 3   | 45159774              | 45160175             | 401            | processed pseudogene             | 1.58                      | 1.10E-04 | 3.94E-03 |
| ENSG00000163221 | S100A12                 | 1   | 153373711             | 1.53E+08             | 1910           | protein coding                   | 1.57                      | 2.84E-06 | 2.65E-04 |
| ENSG00000249532 | MIR302CHG (LARP7-AS1)   | 4   | 112646476             | 1.13E+08             | 3575           | lncRNA-antisense                 | 1.57                      | 1.13E-05 | 7.70E-04 |
| ENSG00000227008 | AL009174.1              | X   | 133670971             | 1.34E+08             | 415            | processed pseudogene             | 1.56                      | 1.37E-06 | 1.46E-04 |
| ENSG00000196141 | SPATS2L                 | 2   | 200305881             | 2E+08                | 176383         | protein coding                   | 1.56                      | 6.47E-09 | 1.75E-06 |
| ENSG00000123689 | G0S2                    | 1   | 209675412             | 2.1E+08              | 978            | protein coding                   | 1.56                      | 1.43E-07 | 2.37E-05 |
| ENSG00000118298 | CA14                    | 1   | 150257251             | 1.5E+08              | 7827           | protein coding                   | 1.55                      | 1.70E-04 | 5.18E-03 |
| ENSG00000240247 | DEFA1B                  | 8   | 6996766               | 6999195              | 2429           | protein coding                   | 1.55                      | 7.14E-04 | 1.31E-02 |
| ENSG00000230837 | RPL31P2                 | 20  | 33752167              | 33752543             | 376            | processed pseudogene             | 1.54                      | 6.35E-04 | 1.21E-02 |
| ENSG00000119013 | NDUFB3                  | 2   | 201071433             | 2.01E+08             | 14317          | protein coding                   | 1.54                      | 2.83E-10 | 1.31E-07 |
| ENSG00000238025 | ZDHHC4P1                | 13  | 42933858              | 42934892             | 1034           | processed pseudogene             | 1.54                      | 3.28E-03 | 3.25E-02 |
| ENSG00000156467 | UQCRB                   | 8   | 96222947              | 96235546             | 12599          | protein coding                   | 1.54                      | 1.50E-10 | 8.08E-08 |
| ENSG00000123610 | TNFAIP6                 | 2   | 151357592             | 1.51E+08             | 22454          | protein coding                   | 1.53                      | 4.21E-11 | 3.19E-08 |
| ENSG00000152348 | ATG10                   | 5   | 81972023              | 82276857             | 304834         | protein coding                   | 1.53                      | 3.05E-09 | 9.35E-07 |
| ENSG00000137628 | DDX60                   | 4   | 168216294             | 1.68E+08             | 102510         | protein coding                   | 1.52                      | 4.93E-09 | 1.41E-06 |
| ENSG0000010030  | ETV7                    | 6   | 36354091              | 36387800             | 33709          | protein coding                   | 1.49                      | 7.59E-07 | 9.21E-05 |
| ENSG00000205837 | LINC00487               | 2   | 6728177               | 6770311              | 42134          | lncRNA                           | 1.49                      | 4.73E-03 | 4.04E-02 |
| ENSG00000231409 | AC018868.1              | 15  | 34943080              | 34943394             | 314            | processed pseudogene             | 1.48                      | 1.83E-04 | 5.43E-03 |
| ENSG00000152766 | ANKRD22                 | 10  | 88819896              | 88851844             | 31948          | protein coding                   | 1.47                      | 6.80E-07 | 8.48E-05 |
| ENSG00000270077 | AP003117.1              | 8   | 97144170              | 97144723             | 553            | lncRNA-sense intronic            | 1.47                      | 2.41E-06 | 2.31E-04 |
| ENSG00000169245 | CXCL10                  | 4   | 76021118              | 76023497             | 2379           | protein coding                   | 1.47                      | 3.72E-06 | 3.28E-04 |
| ENSG00000258985 | AL352979.2              | 14  | 53036755              | 53038251             | 1496           | lncRNA-antisense                 | 1.47                      | 6.07E-04 | 1.18E-02 |
| ENSG00000196565 | HBG2                    | 11  | 5253188               | 5505605              | 252417         | protein coding                   | 1.44                      | 6.63E-03 | 4.93E-02 |
| ENSG00000273272 | U62317.3                | 22  | 50541108              | 50543011             | 1903           | lncRNA                           | 1.44                      | 3.78E-10 | 1.67E-07 |
| ENSG00000169397 | RNASE3                  | 14  | 20891399              | 20892348             | 949            | protein coding                   | 1.44                      | 6.86E-05 | 2.86E-03 |
| ENSG00000251062 | AC025459.1              | 5   | 32887990              | 32888145             | 155            | processed pseudogene             | 1.44                      | 6.03E-03 | 4.66E-02 |
| ENSG00000166527 | CLEC4D                  | 12  | 8509475               | 8522366              | 12891          | protein coding                   | 1.43                      | 3.55E-07 | 4.99E-05 |
| ENSG00000180211 | FO393411.1              | 6   | 39958414              | 39958833             | 419            | processed pseudogene             | 1.42                      | 2.07E-05 | 1.20E-03 |
| ENSG00000170860 | LSM3                    | 3   | 14178817              | 14201122             | 22305          | protein coding                   | 1.41                      | 2.78E-10 | 1.30E-07 |
| ENSG00000225912 | RPL26P36                | X   | 92676519              | 92676954             | 435            | processed pseudogene             | 1.40                      | 2.60E-04 | 6.77E-03 |
| ENSG00000173369 | C1QB                    | 1   | 22652762              | 22661637             | 8875           | protein coding                   | 1.39                      | 2.23E-04 | 6.10E-03 |
| ENSG00000150337 | FCGR1A                  | 1   | 149782671             | 1.5E+08              | 9847           | protein coding                   | 1.39                      | 7.04E-08 | 1.31E-05 |

|                 |            |    |           |          |        |                      |      |          |          |
|-----------------|------------|----|-----------|----------|--------|----------------------|------|----------|----------|
| ENSG00000228007 | AC011933.1 | 17 | 75338827  | 75339147 | 320    | processed pseudogene | 1.39 | 5.58E-03 | 4.46E-02 |
| ENSG00000213178 | RPL22P1    | 3  | 169483671 | 169E+08  | 409    | processed pseudogene | 1.39 | 2.02E-07 | 3.08E-05 |
| ENSG00000234287 | AC099560.2 | 3  | 40761545  | 40761799 | 254    | processed pseudogene | 1.38 | 8.18E-05 | 3.23E-03 |
| ENSG00000188290 | HE54       | 1  | 998962    | 1000172  | 1210   | protein coding       | 1.37 | 2.06E-05 | 1.20E-03 |
| ENSG00000241612 | AC114728.1 | 4  | 19813749  | 19814231 | 482    | processed pseudogene | 1.37 | 8.35E-04 | 1.44E-02 |
| ENSG00000125356 | NDUFA1     | X  | 119871832 | 1.2E+08  | 4830   | protein coding       | 1.37 | 7.16E-10 | 2.74E-07 |
| ENSG00000164104 | HMG2       | 4  | 173331376 | 1.73E+08 | 3056   | protein coding       | 1.35 | 1.06E-10 | 6.24E-08 |
| ENSG00000163568 | AIM2       | 1  | 159062484 | 1.59E+08 | 84612  | protein coding       | 1.35 | 2.08E-08 | 4.73E-06 |
| ENSG00000272558 | U91328.2   | 6  | 25983812  | 25999167 | 15355  | lncRNA-antisense     | 1.35 | 3.76E-03 | 3.55E-02 |
| ENSG00000277978 | AC010542.5 | 16 | 66565620  | 66566001 | 381    | lncRNA-antisense     | 1.35 | 3.03E-06 | 2.80E-04 |
| ENSG00000138772 | ANXA3      | 4  | 78551747  | 78610451 | 58704  | protein coding       | 1.35 | 2.06E-06 | 2.06E-04 |
| ENSG00000136810 | TXN        | 9  | 110243810 | 1.1E+08  | 12697  | protein coding       | 1.34 | 1.99E-09 | 6.61E-07 |
| ENSG00000232112 | TMA7       | 3  | 48440257  | 48444208 | 3951   | protein coding       | 1.33 | 3.62E-08 | 7.60E-06 |
| ENSG00000125691 | RPL23      | 17 | 38847860  | 38853764 | 5904   | protein coding       | 1.33 | 1.36E-05 | 8.80E-04 |
| ENSG00000188313 | PLSCR1     | 3  | 146515180 | 1.47E+08 | 29676  | protein coding       | 1.33 | 5.81E-10 | 2.30E-07 |
| ENSG00000055332 | E1F2AK2    | 2  | 37099210  | 37157065 | 57855  | protein coding       | 1.32 | 1.57E-12 | 3.12E-09 |
| ENSG00000233223 | AC016876.1 | 17 | 7581964   | 7584086  | 2122   | lncRNA-antisense     | 1.31 | 1.88E-06 | 1.91E-04 |
| ENSG00000117228 | GBP1       | 1  | 89052319  | 89065230 | 12911  | protein coding       | 1.31 | 6.47E-09 | 1.75E-06 |
| ENSG00000156411 | ATP5MPL    | 14 | 103912288 | 1.04E+08 | 15981  | protein coding       | 1.30 | 2.19E-08 | 4.96E-06 |
| ENSG00000259007 | AL358333.3 | 14 | 51967003  | 51969800 | 2797   | lncRNA-antisense     | 1.29 | 3.03E-05 | 1.58E-03 |
| ENSG00000161970 | RPL26      | 17 | 8377516   | 8383213  | 5697   | protein coding       | 1.28 | 3.02E-04 | 7.47E-03 |
| ENSG00000234742 | AC144530.1 | 3  | 197850400 | 1.98E+08 | 554    | processed pseudogene | 1.27 | 3.39E-04 | 8.09E-03 |
| ENSG00000086065 | CHMP5      | 9  | 33264879  | 33282070 | 17191  | protein coding       | 1.27 | 8.08E-14 | 3.00E-10 |
| ENSG00000253683 | AC027309.2 | 5  | 172656522 | 1.73E+08 | 191    | processed pseudogene | 1.27 | 1.25E-07 | 2.14E-05 |
| ENSG00000125148 | MT2A       | 16 | 56608584  | 56609497 | 913    | protein coding       | 1.27 | 2.99E-10 | 1.37E-07 |
| ENSG00000269246 | AC011445.1 | 19 | 39341773  | 39341945 | 172    | lncRNA               | 1.26 | 5.83E-08 | 1.12E-05 |
| ENSG00000168653 | NDUFS5     | 1  | 39026318  | 39034636 | 8318   | protein coding       | 1.25 | 1.44E-07 | 2.37E-05 |
| ENSG00000163736 | PPBP       | 4  | 73986439  | 73988190 | 1751   | protein coding       | 1.24 | 3.22E-06 | 2.91E-04 |
| ENSG00000204472 | AIF1       | 6  | 31615217  | 31617021 | 1804   | protein coding       | 1.23 | 1.85E-15 | 1.43E-11 |
| ENSG00000274422 | AC245060.5 | 22 | 22283928  | 22287220 | 3292   | lncRNA               | 1.22 | 4.13E-04 | 9.18E-03 |
| ENSG00000244380 | AC134772.1 | 3  | 48440352  | 48446656 | 6304   | lncRNA-antisense     | 1.22 | 2.11E-04 | 5.91E-03 |
| ENSG00000169020 | ATP5ME     | 4  | 672436    | 674330   | 1894   | protein coding       | 1.22 | 1.32E-10 | 7.52E-08 |
| ENSG00000245970 | AP00352.1  | 8  | 98041726  | 98044121 | 2395   | lncRNA-antisense     | 1.21 | 1.53E-05 | 9.65E-04 |
| ENSG00000152778 | IFIT5      | 10 | 89414568  | 89420997 | 6429   | protein coding       | 1.20 | 9.25E-09 | 2.35E-06 |
| ENSG00000137970 | RPL7P9     | 1  | 96678874  | 96679620 | 746    | processed pseudogene | 1.20 | 2.04E-05 | 1.19E-03 |
| ENSG00000272666 | KLHDC7B-DT | 22 | 50542305  | 50542906 | 601    | lncRNA               | 1.20 | 1.57E-04 | 4.95E-03 |
| ENSG00000141664 | ZCHHC2     | 18 | 62523025  | 62587709 | 64684  | protein coding       | 1.20 | 3.27E-12 | 4.98E-09 |
| ENSG00000279236 | AC064801.2 | 18 | 62551203  | 62552505 | 1302   | TEC                  | 1.20 | 1.11E-07 | 1.96E-05 |
| ENSG00000173801 | JUP        | 17 | 41754604  | 41786931 | 32327  | protein coding       | 1.19 | 1.56E-05 | 9.80E-04 |
| ENSG00000228802 | AC073641.1 | 2  | 223965701 | 2.24E+08 | 2005   | lncRNA-antisense     | 1.19 | 4.25E-03 | 3.82E-02 |
| ENSG00000107201 | DDX58      | 9  | 32455302  | 32526208 | 70906  | protein coding       | 1.19 | 7.98E-11 | 4.94E-08 |
| ENSG00000158869 | FCER1G     | 1  | 161215234 | 1.61E+08 | 5465   | protein coding       | 1.18 | 1.27E-13 | 4.29E-10 |
| ENSG00000264235 | AP005329.1 | 18 | 3255436   | 3261850  | 6414   | lncRNA-antisense     | 1.17 | 3.06E-06 | 2.81E-04 |
| ENSG00000143977 | SNRPG      | 2  | 70281362  | 70293740 | 12378  | protein coding       | 1.17 | 1.32E-08 | 3.17E-06 |
| ENSG00000269621 | AL589765.7 | 1  | 151755541 | 1.52E+08 | 4370   | lncRNA-antisense     | 1.17 | 2.68E-03 | 2.89E-02 |
| ENSG00000108679 | LGAL3BP    | 17 | 78971238  | 78979947 | 8709   | protein coding       | 1.17 | 9.66E-07 | 1.10E-04 |
| ENSG00000177409 | SAMD9L     | 7  | 93130056  | 93148385 | 18329  | protein coding       | 1.17 | 4.22E-09 | 1.24E-06 |
| ENSG00000140319 | SRP14      | 15 | 40035690  | 40039181 | 3491   | protein coding       | 1.17 | 1.07E-15 | 1.43E-11 |
| ENSG00000135046 | ANXA1      | 9  | 73151865  | 73170393 | 18528  | protein coding       | 1.17 | 2.33E-09 | 7.53E-07 |
| ENSG00000133169 | BEX1       | X  | 103062651 | 1.03E+08 | 1520   | protein coding       | 1.17 | 4.62E-03 | 3.99E-02 |
| ENSG00000260943 | LINC02555  | 12 | 40140926  | 40142876 | 1950   | lncRNA               | 1.16 | 1.71E-05 | 1.04E-03 |
| ENSG00000127184 | COX7C      | 5  | 86617928  | 86620962 | 3034   | protein coding       | 1.16 | 1.25E-06 | 1.35E-04 |
| ENSG00000203760 | CENPW      | 6  | 126340115 | 1.26E+08 | 8760   | protein coding       | 1.16 | 3.12E-04 | 7.64E-03 |
| ENSG00000041357 | PSMA4      | 15 | 78540405  | 78552417 | 12012  | protein coding       | 1.15 | 9.52E-13 | 2.36E-09 |
| ENSG00000235957 | COX7CP1    | 13 | 49187479  | 49187670 | 191    | processed pseudogene | 1.15 | 2.45E-03 | 2.75E-02 |
| ENSG00000237729 | AC02075.2  | 7  | 93669826  | 93670077 | 251    | processed pseudogene | 1.15 | 6.30E-05 | 2.70E-03 |
| ENSG00000138326 | RPS24      | 10 | 78033760  | 78056813 | 23053  | protein coding       | 1.15 | 1.31E-05 | 8.60E-04 |
| ENSG00000002549 | LAP3       | 4  | 17577192  | 17607972 | 30780  | protein coding       | 1.15 | 5.54E-08 | 1.08E-05 |
| ENSG00000279364 | AC114546.3 | 15 | 34978351  | 34980084 | 1733   | TEC                  | 1.15 | 4.59E-04 | 9.78E-03 |
| ENSG00000154723 | ATP5PF     | 21 | 25716503  | 25735673 | 19170  | protein coding       | 1.15 | 1.13E-12 | 2.63E-09 |
| ENSG00000268049 | AP001011.1 | 18 | 2688564   | 2833065  | 144501 | lncRNA-antisense     | 1.15 | 1.28E-05 | 8.44E-04 |
| ENSG00000092841 | MYL6       | 12 | 56158346  | 56163496 | 5150   | protein coding       | 1.14 | 6.68E-13 | 2.00E-09 |
| ENSG00000213942 | AC005840.1 | 12 | 6409637   | 6410013  | 376    | processed pseudogene | 1.14 | 5.41E-03 | 4.37E-02 |
| ENSG00000155368 | DBI        | 2  | 119366921 | 1.19E+08 | 5639   | protein coding       | 1.14 | 2.15E-09 | 6.99E-07 |
| ENSG00000147604 | RPL7       | 8  | 73290242  | 73295789 | 5547   | protein coding       | 1.14 | 1.17E-04 | 4.09E-03 |
| ENSG00000115267 | IFIH1      | 2  | 162267074 | 1.62E+08 | 51610  | protein coding       | 1.13 | 7.66E-11 | 4.90E-08 |
| ENSG00000248188 | AC005798.1 | 4  | 15743196  | 15743582 | 386    | processed pseudogene | 1.13 | 4.23E-04 | 9.31E-03 |
| ENSG00000197561 | ELANE      | 19 | 851014    | 856247   | 5233   | protein coding       | 1.13 | 7.81E-04 | 1.38E-02 |
| ENSG00000173193 | PARP14     | 3  | 122680839 | 1.23E+08 | 50001  | protein coding       | 1.13 | 2.47E-12 | 4.18E-09 |
| ENSG00000159189 | C1QC       | 1  | 22643633  | 22648110 | 4477   | protein coding       | 1.13 | 2.71E-03 | 2.91E-02 |
| ENSG00000240509 | RPL34P18   | 8  | 93957338  | 93957691 | 353    | processed pseudogene | 1.12 | 4.64E-03 | 4.00E-02 |
| ENSG00000234964 | FABP5P7    | 11 | 59781318  | 59781722 | 404    | processed pseudogene | 1.12 | 6.80E-04 | 1.26E-02 |
| ENSG00000068079 | IFI35      | 17 | 43006740  | 43014456 | 7716   | protein coding       | 1.12 | 3.22E-11 | 2.66E-08 |
| ENSG00000100632 | ERH        | 14 | 69380128  | 69398299 | 18171  | protein coding       | 1.11 | 1.10E-15 | 1.43E-11 |
| ENSG00000257017 | HP         | 16 | 72054505  | 72061055 | 6550   | protein coding       | 1.11 | 3.48E-03 | 3.38E-02 |
| ENSG00000124256 | ZBP1       | 20 | 57603846  | 57620576 | 16730  | protein coding       | 1.11 | 8.35E-13 | 2.21E-09 |
| ENSG00000105205 | CLC        | 19 | 39731255  | 39738029 | 6774   | protein coding       | 1.10 | 6.76E-04 | 1.26E-02 |
| ENSG00000134809 | TIMM10     | 11 | 57528464  | 57530803 | 2339   | protein coding       | 1.09 | 3.91E-08 | 8.03E-06 |
| ENSG00000115128 | SF3B6      | 2  | 24067586  | 24076373 | 8787   | protein coding       | 1.09 | 3.52E-11 | 2.84E-08 |
| ENSG00000137757 | CASP5      | 11 | 104994235 | 1.05E+08 | 28933  | protein coding       | 1.08 | 1.07E-06 | 1.18E-04 |
| ENSG00000131174 | COX7B      | X  | 77899440  | 77907376 | 7936   | protein coding       | 1.08 | 2.30E-06 | 2.24E-04 |
| ENSG00000234268 | AP000936.3 | 11 | 117035797 | 1.17E+08 | 254    | processed pseudogene | 1.08 | 6.95E-05 | 2.89E-03 |
| ENSG00000129757 | CDKN1C     | 11 | 2883213   | 2885775  | 2562   | protein coding       | 1.08 | 3.14E-06 | 2.87E-04 |
| ENSG00000242951 | AC007182.2 | 14 | 75595805  | 75596206 | 401    | processed pseudogene | 1.07 | 1.93E-03 | 2.36E-02 |
| ENSG00000229605 | RPL21P93   | 10 | 28898996  | 28899484 | 488    | processed pseudogene | 1.06 | 1.30E-04 | 4.40E-03 |
| ENSG00000154451 | GBP5       | 1  | 89258950  | 89272804 | 13854  | protein coding       | 1.06 | 6.18E-07 | 7.77E-05 |
| ENSG00000109475 | RPL34      | 4  | 108620566 | 1.09E+08 | 9846   | protein coding       | 1.05 | 2.57E-03 | 2.82E-02 |



|                 |             |    |           |          |         |                        |       |          |          |
|-----------------|-------------|----|-----------|----------|---------|------------------------|-------|----------|----------|
| ENSG00000121236 | TRIM6       | 11 | 5596109   | 5612958  | 16849   | protein coding         | 1.05  | 1.38E-03 | 1.94E-02 |
| ENSG00000272742 | AC135457.1  | 5  | 139364677 | 1.39E+08 | 5040    | lncRNA-antisense       | 1.05  | 5.25E-05 | 2.39E-03 |
| ENSG00000223722 | IFITM3P2    | 12 | 31754720  | 31755121 | 401     | processed pseudogene   | 1.05  | 1.12E-03 | 1.70E-02 |
| ENSG00000244716 | BX679664.3  | 1  | 108992282 | 1.09E+08 | 554     | processed pseudogene   | 1.05  | 1.39E-03 | 1.95E-02 |
| ENSG00000259678 | AC066613.2  | 15 | 51414097  | 51498833 | 84736   | lncRNA-antisense       | 1.04  | 1.50E-03 | 2.04E-02 |
| ENSG00000138642 | HERC6       | 4  | 88378739  | 88443097 | 64358   | protein coding         | 1.04  | 8.83E-07 | 1.04E-04 |
| ENSG00000132274 | TRIM22      | 11 | 5689697   | 5737089  | 47392   | protein coding         | 1.04  | 7.41E-09 | 1.96E-06 |
| ENSG00000185339 | TCN2        | 22 | 30607003  | 30627271 | 20268   | protein coding         | 1.04  | 9.39E-07 | 1.09E-04 |
| ENSG00000104918 | RETN        | 19 | 7669049   | 7670455  | 1406    | protein coding         | 1.04  | 3.41E-04 | 8.13E-03 |
| ENSG00000167088 | SNRPD1      | 18 | 21612314  | 21633524 | 21210   | protein coding         | 1.04  | 1.43E-10 | 7.92E-08 |
| ENSG00000274629 | AC073052.1  | 2  | 224464682 | 2.24E+08 | 9818    | lncRNA-antisense       | 1.04  | 1.38E-04 | 4.53E-03 |
| ENSG00000288528 | AP000942.5  | 11 | 102316173 | 1.02E+08 | 12413   | lncRNA                 | 1.04  | 6.81E-03 | 4.99E-02 |
| ENSG00000130755 | GMFG        | 19 | 39328353  | 39342372 | 14019   | protein coding         | 1.03  | 5.73E-11 | 4.02E-08 |
| ENSG00000156587 | UBE2L6      | 11 | 57551656  | 57568284 | 16628   | protein coding         | 1.03  | 1.01E-11 | 1.04E-08 |
| ENSG00000140932 | CMTM2       | 16 | 66579448  | 66588275 | 8827    | protein coding         | 1.03  | 1.95E-07 | 3.00E-05 |
| ENSG00000138496 | PARP9       | 3  | 222527924 | 1.23E+08 | 36653   | protein coding         | 1.02  | 6.98E-13 | 2.00E-09 |
| ENSG00000277511 | AC116407.2  | 17 | 32127595  | 32128454 | 859     | lncRNA                 | 1.02  | 1.43E-04 | 4.66E-03 |
| ENSG00000267379 | AC08569.1   | 19 | 14402717  | 14408723 | 6006    | lncRNA-antisense       | 1.02  | 1.62E-03 | 1.66E-02 |
| ENSG00000267484 | AC027319.1  | 19 | 4838332   | 4838907  | 575     | lncRNA-antisense       | 1.02  | 8.89E-04 | 1.50E-02 |
| ENSG00000196683 | TOMM7       | 7  | 22812628  | 22822852 | 10224   | protein coding         | 1.02  | 6.22E-05 | 2.67E-03 |
| ENSG00000234389 | AC007278.1  | 2  | 102438713 | 1.02E+08 | 1762    | lncRNA-sense intronic  | 1.02  | 6.55E-04 | 1.24E-02 |
| ENSG00000211895 | IGHA1       | 14 | 105703995 | 1.06E+08 | 4670    | IG C gene              | 1.01  | 7.52E-04 | 1.35E-02 |
| ENSG00000235576 | LINC01871   | 2  | 7725801   | 7730705  | 4904    | lncRNA                 | 1.01  | 8.28E-05 | 3.26E-03 |
| ENSG00000108771 | DHX58       | 17 | 42101404  | 42112714 | 11310   | protein coding         | 1.01  | 2.05E-09 | 6.75E-07 |
| ENSG00000115541 | HSPF1       | 2  | 197500140 | 1.98E+08 | 3309    | protein coding         | 1.01  | 7.50E-08 | 1.38E-05 |
| ENSG00000212664 | AC064799.1  | 15 | 71341158  | 71341712 | 554     | processed pseudogene   | 1.01  | 2.15E-03 | 2.54E-02 |
| ENSG00000257764 | AC020656.1  | 12 | 69353493  | 69354225 | 732     | lncRNA-antisense       | 1.01  | 6.06E-04 | 1.17E-02 |
| ENSG00000265784 | AC006441.3  | 17 | 38918801  | 38921769 | 2968    | lncRNA-antisense       | 1.01  | 2.55E-04 | 6.68E-03 |
| ENSG00000338945 | MSR1        | 8  | 16107878  | 16567490 | 459612  | protein coding         | 1.00  | 3.89E-05 | 1.94E-03 |
| ENSG00000269570 | AP001350.1  | 11 | 58611119  | 58612642 | 1523    | lncRNA-antisense       | 1.00  | 2.19E-03 | 2.57E-02 |
| ENSG00000134398 | ERN2        | 16 | 23690310  | 23713226 | 22916   | protein coding         | -1.00 | 4.96E-03 | 4.15E-02 |
| ENSG00000134121 | CHL1        | 3  | 196763    | 409417   | 212654  | protein coding         | -1.00 | 2.49E-03 | 2.78E-02 |
| ENSG00000116285 | ERRF1       | 1  | 8004404   | 8026309  | 21905   | protein coding         | -1.00 | 1.26E-03 | 1.84E-02 |
| ENSG00000185634 | SHC4        | 15 | 48823741  | 48963919 | 140178  | protein coding         | -1.00 | 2.29E-03 | 2.64E-02 |
| ENSG00000108813 | DLX4        | 17 | 49968970  | 49974959 | 5989    | protein coding         | -1.00 | 3.00E-04 | 7.44E-03 |
| ENSG00000187720 | THSD4       | 15 | 71096952  | 71783383 | 686431  | protein coding         | -1.00 | 3.30E-04 | 7.96E-03 |
| ENSG00000187672 | ERC2        | 3  | 55508311  | 56468467 | 960156  | protein coding         | -1.00 | 1.52E-03 | 2.05E-02 |
| ENSG00000185958 | FAM186A     | 12 | 50326230  | 50396622 | 70392   | protein coding         | -1.00 | 1.28E-03 | 1.86E-02 |
| ENSG00000173838 | MARCFH10    | 17 | 62701314  | 62808344 | 107030  | protein coding         | -1.00 | 1.46E-03 | 2.00E-02 |
| ENSG00000170927 | PKHD1       | 6  | 51615299  | 52087613 | 472314  | protein coding         | -1.00 | 3.12E-03 | 3.16E-02 |
| ENSG00000211802 | TRAV22      | 14 | 22070557  | 22071208 | 651     | TR V gene              | -1.00 | 5.96E-03 | 4.63E-02 |
| ENSG00000205622 | AP001042.1  | 21 | 38812878  | 38956467 | 143589  | lncRNA                 | -1.00 | 2.88E-03 | 3.01E-02 |
| ENSG00000179133 | C10orf67    | 10 | 23202696  | 23344845 | 142149  | protein coding         | -1.00 | 4.60E-03 | 3.99E-02 |
| ENSG00000006042 | TMEM98      | 17 | 32927910  | 32945106 | 17196   | protein coding         | -1.00 | 4.68E-03 | 4.02E-02 |
| ENSG00000066629 | EML1        | 14 | 99737693  | 99942060 | 204367  | protein coding         | -1.00 | 1.93E-03 | 2.36E-02 |
| ENSG00000137834 | SMAD6       | 15 | 66702236  | 66782849 | 80613   | protein coding         | -1.00 | 2.10E-03 | 2.50E-02 |
| ENSG00000154175 | ABI3BP      | 3  | 100749156 | 1.01E+08 | 244359  | protein coding         | -1.01 | 2.06E-03 | 2.46E-02 |
| ENSG00000112769 | LAMA4       | 6  | 112107931 | 1.12E+08 | 147008  | protein coding         | -1.01 | 2.84E-03 | 3.00E-02 |
| ENSG00000185532 | PRKG1       | 10 | 50990888  | 52298423 | 1307535 | protein coding         | -1.01 | 4.09E-03 | 3.74E-02 |
| ENSG00000184144 | CNTN2       | 1  | 205042937 | 2.05E+08 | 35352   | protein coding         | -1.01 | 5.72E-03 | 4.52E-02 |
| ENSG00000169291 | SHE         | 1  | 154469772 | 1.55E+08 | 32640   | protein coding         | -1.01 | 6.43E-03 | 4.83E-02 |
| ENSG00000169031 | COL4A3      | 2  | 227164624 | 2.27E+08 | 150168  | protein coding         | -1.01 | 6.66E-05 | 2.81E-03 |
| ENSG00000047617 | ANO2        | 12 | 5531869   | 5946232  | 414363  | protein coding         | -1.01 | 4.21E-03 | 3.80E-02 |
| ENSG00000204745 | AC083899.1  | 2  | 87125198  | 87196629 | 71431   | unprocessed pseudogene | -1.01 | 4.64E-03 | 4.00E-02 |
| ENSG00000178445 | GLDC        | 9  | 6532467   | 6645729  | 113262  | protein coding         | -1.01 | 3.83E-03 | 3.60E-02 |
| ENSG00000174514 | MFS04A      | 1  | 205568885 | 2.06E+08 | 34033   | protein coding         | -1.01 | 2.42E-03 | 2.73E-02 |
| ENSG00000138759 | FRAS1       | 4  | 78057323  | 78544269 | 486946  | protein coding         | -1.01 | 4.58E-04 | 9.77E-03 |
| ENSG00000070019 | GUCY2C      | 12 | 14612632  | 14696599 | 83967   | protein coding         | -1.01 | 3.52E-03 | 3.41E-02 |
| ENSG00000184661 | CDCA2       | 8  | 25459199  | 25507911 | 48712   | protein coding         | -1.01 | 1.88E-03 | 2.32E-02 |
| ENSG00000197467 | COL13A1     | 10 | 69801880  | 69964275 | 162395  | protein coding         | -1.01 | 1.01E-04 | 3.72E-03 |
| ENSG00000138152 | BTBD16      | 10 | 122271296 | 1.22E+08 | 66863   | protein coding         | -1.01 | 2.60E-03 | 2.84E-02 |
| ENSG00000115705 | TPO         | 2  | 1374066   | 1543711  | 169645  | protein coding         | -1.01 | 9.76E-04 | 1.58E-02 |
| ENSG00000115461 | IGFBP5      | 2  | 216672105 | 2.17E+08 | 23444   | protein coding         | -1.01 | 2.73E-03 | 2.93E-02 |
| ENSG00000260306 | AC092375.2  | 16 | 21794095  | 21795759 | 1664    | lncRNA                 | -1.01 | 1.24E-03 | 1.82E-02 |
| ENSG00000261115 | TMEM178B    | 7  | 141074064 | 1.41E+08 | 406316  | protein coding         | -1.01 | 2.59E-03 | 2.84E-02 |
| ENSG00000263400 | TMEM220-AS1 | 17 | 10729777  | 10815164 | 85387   | lncRNA-antisense       | -1.01 | 4.75E-03 | 4.05E-02 |
| ENSG00000143850 | PLEKHA6     | 1  | 204218853 | 2.04E+08 | 158812  | protein coding         | -1.01 | 4.63E-04 | 9.82E-03 |
| ENSG00000187905 | LRRK74B     | 22 | 21045960  | 21064168 | 18208   | protein coding         | -1.01 | 1.99E-03 | 2.41E-02 |
| ENSG00000187323 | DCC         | 18 | 52340197  | 53535903 | 1195706 | protein coding         | -1.01 | 5.40E-03 | 4.36E-02 |
| ENSG00000082684 | SEMA5B      | 3  | 122909082 | 1.23E+08 | 119523  | protein coding         | -1.01 | 4.26E-04 | 9.34E-03 |
| ENSG00000230417 | LINC00595   | 10 | 78179185  | 78551355 | 372170  | lncRNA                 | -1.01 | 6.49E-04 | 1.23E-02 |
| ENSG00000233183 | AL138889.1  | 6  | 33891327  | 33927631 | 36304   | lncRNA                 | -1.01 | 2.06E-04 | 5.82E-03 |
| ENSG00000036530 | CYP46A1     | 14 | 99684298  | 99727301 | 43003   | protein coding         | -1.01 | 5.01E-04 | 1.04E-02 |
| ENSG00000177338 | LINC00469   | 17 | 73749270  | 73828520 | 79250   | lncRNA                 | -1.01 | 1.93E-03 | 2.35E-02 |
| ENSG00000144395 | CCDC150     | 2  | 196639554 | 1.97E+08 | 123936  | protein coding         | -1.02 | 1.13E-03 | 1.72E-02 |
| ENSG00000166833 | NAV2        | 11 | 19350724  | 20121601 | 770877  | protein coding         | -1.02 | 5.54E-06 | 4.51E-04 |
| ENSG00000003137 | CYP26B1     | 2  | 72129238  | 72148038 | 18800   | protein coding         | -1.02 | 2.18E-03 | 2.56E-02 |
| ENSG00000267710 | EDDM13      | 19 | 56272748  | 56310454 | 37706   | protein coding         | -1.02 | 4.24E-03 | 3.82E-02 |
| ENSG00000275383 | AC126773.6  | 16 | 68591382  | 68594424 | 3042    | lncRNA                 | -1.02 | 1.78E-03 | 2.24E-02 |
| ENSG00000171533 | MAP6        | 11 | 75586918  | 75669120 | 82202   | protein coding         | -1.02 | 5.24E-03 | 4.29E-02 |
| ENSG00000177692 | DNAJC28     | 21 | 33485530  | 33491716 | 6186    | protein coding         | -1.02 | 1.57E-03 | 2.08E-02 |
| ENSG00000117971 | CHRNBA      | 15 | 78624111  | 78727754 | 103643  | protein coding         | -1.02 | 4.18E-03 | 3.78E-02 |
| ENSG00000145700 | ANKRD31     | 5  | 75068275  | 75236911 | 168636  | protein coding         | -1.02 | 1.11E-04 | 3.95E-03 |
| ENSG00000162733 | DDR2        | 1  | 162631373 | 1.63E+08 | 156032  | protein coding         | -1.02 | 1.50E-04 | 4.82E-03 |
| ENSG00000279631 | AL158211.5  | 10 | 22252072  | 22254589 | 2517    | TEC                    | -1.02 | 2.68E-03 | 2.89E-02 |
| ENSG00000177551 | NHLH2       | 1  | 115836377 | 1.16E+08 | 7540    | protein coding         | -1.02 | 6.64E-03 | 4.93E-02 |
| ENSG00000163689 | CFAP20DC    | 3  | 58717365  | 59050084 | 332719  | protein coding         | -1.02 | 1.34E-03 | 1.91E-02 |



|                 |            |    |           |          |        |                                    |       |          |          |
|-----------------|------------|----|-----------|----------|--------|------------------------------------|-------|----------|----------|
| ENSG00000176771 | NCKAP5     | 2  | 132671788 | 1.34E+08 | 896675 | protein coding                     | -1.02 | 5.36E-03 | 4.34E-02 |
| ENSG00000285940 | AC009899.1 | 18 | 37565281  | 37762131 | 196850 | lncRNA-antisense                   | -1.02 | 5.30E-03 | 4.31E-02 |
| ENSG00000245248 | USP2-AS1   | 11 | 119364359 | 1.2E+08  | 162305 | lncRNA-antisense                   | -1.02 | 2.29E-03 | 2.64E-02 |
| ENSG00000102287 | GABRE      | X  | 151953124 | 1.52E+08 | 21556  | protein coding                     | -1.02 | 2.60E-03 | 2.84E-02 |
| ENSG00000140009 | ESR2       | 14 | 64084232  | 64338112 | 253880 | protein coding                     | -1.02 | 4.99E-04 | 1.04E-02 |
| ENSG00000165643 | SOHLH1     | 9  | 135693407 | 1.36E+08 | 11091  | protein coding                     | -1.02 | 2.40E-03 | 2.72E-02 |
| ENSG00000276476 | LINC00540  | 13 | 22040972  | 22276526 | 235554 | lncRNA                             | -1.02 | 2.05E-03 | 2.46E-02 |
| ENSG00000184949 | FAM227A    | 22 | 38578120  | 38656629 | 78509  | protein coding                     | -1.02 | 6.76E-03 | 4.97E-02 |
| ENSG00000115648 | MLPH       | 2  | 237485428 | 2.38E+08 | 69894  | protein coding                     | -1.02 | 3.08E-04 | 7.58E-03 |
| ENSG00000154864 | PIEZO2     | 18 | 10666483  | 11149569 | 483086 | protein coding                     | -1.02 | 6.69E-04 | 1.25E-02 |
| ENSG00000101311 | FERMT1     | 20 | 6074845   | 6123030  | 48185  | protein coding                     | -1.02 | 5.72E-03 | 4.51E-02 |
| ENSG00000106536 | POU6F2     | 7  | 38977909  | 39493095 | 515186 | protein coding                     | -1.02 | 4.97E-03 | 4.16E-02 |
| ENSG00000131095 | GFAP       | 17 | 44903159  | 44916937 | 13778  | protein coding                     | -1.02 | 4.34E-03 | 3.85E-02 |
| ENSG00000225914 | TSBP1-AS1  | 6  | 32254640  | 32407763 | 153123 | lncRNA-antisense                   | -1.02 | 1.45E-03 | 2.00E-02 |
| ENSG00000099954 | CECR2      | 22 | 17359949  | 17558149 | 198200 | protein coding                     | -1.02 | 1.01E-05 | 7.20E-04 |
| ENSG00000133454 | MYO18B     | 22 | 25742144  | 26031045 | 288901 | protein coding                     | -1.03 | 6.67E-04 | 1.25E-02 |
| ENSG00000143061 | IGSF3      | 1  | 116574399 | 1.17E+08 | 93356  | protein coding                     | -1.03 | 2.45E-03 | 2.75E-02 |
| ENSG00000206077 | ZDHHC11B   | 5  | 710355    | 784729   | 74374  | protein coding                     | -1.03 | 5.07E-04 | 1.05E-02 |
| ENSG00000143450 | OAZ3       | 1  | 151762899 | 1.52E+08 | 8435   | protein coding                     | -1.03 | 1.03E-03 | 1.63E-02 |
| ENSG00000107130 | NCS1       | 9  | 130172404 | 1.3E+08  | 64899  | protein coding                     | -1.03 | 5.29E-04 | 1.07E-02 |
| ENSG00000123243 | ITIH5      | 10 | 7559270   | 7666998  | 107728 | protein coding                     | -1.03 | 5.70E-03 | 4.50E-02 |
| ENSG00000255093 | AP02008.2  | 11 | 111448450 | 1.11E+08 | 26947  | transcribed unitary pseudogene     | -1.03 | 1.55E-03 | 2.08E-02 |
| ENSG00000149201 | CDC81      | 11 | 86374736  | 86423109 | 48373  | protein coding                     | -1.03 | 3.43E-03 | 3.35E-02 |
| ENSG00000002079 | MYH16      | 7  | 99238829  | 99311130 | 72301  | transcribed unitary pseudogene     | -1.03 | 5.18E-03 | 4.27E-02 |
| ENSG00000174640 | SLC02A1    | 3  | 133932701 | 1.34E+08 | 119483 | protein coding                     | -1.03 | 7.91E-04 | 1.39E-02 |
| ENSG00000228775 | WEE2-AS1   | 7  | 141704003 | 1.42E+08 | 34343  | lncRNA-antisense                   | -1.03 | 3.15E-04 | 7.70E-03 |
| ENSG00000185267 | CDNF       | 10 | 14819245  | 14838575 | 19330  | protein coding                     | -1.03 | 2.79E-03 | 2.96E-02 |
| ENSG00000170835 | CEL        | 9  | 133061978 | 1.33E+08 | 9885   | protein coding                     | -1.03 | 4.74E-03 | 4.05E-02 |
| ENSG00000250120 | PCDH410    | 5  | 140855883 | 1.41E+08 | 156464 | protein coding                     | -1.03 | 4.40E-03 | 3.88E-02 |
| ENSG00000137936 | BCAR3      | 1  | 93561741  | 93847150 | 285409 | protein coding                     | -1.03 | 3.57E-04 | 8.38E-03 |
| ENSG00000170412 | GPRC5C     | 17 | 74424851  | 74451653 | 26802  | protein coding                     | -1.03 | 8.64E-04 | 1.47E-02 |
| ENSG00000229961 | AL357143.1 | 1  | 157171116 | 1.57E+08 | 20847  | transcribed unprocessed pseudogene | -1.03 | 4.39E-03 | 3.87E-02 |
| ENSG00000133958 | UNC79      | 14 | 93333219  | 93707876 | 374657 | protein coding                     | -1.03 | 1.25E-03 | 1.83E-02 |
| ENSG00000172346 | CSDC2      | 22 | 41561010  | 41577741 | 16731  | protein coding                     | -1.03 | 1.33E-03 | 1.91E-02 |
| ENSG00000232040 | ZBED9      | 6  | 28570535  | 28616212 | 45677  | protein coding                     | -1.03 | 5.09E-03 | 4.22E-02 |
| ENSG00000128849 | CGNL1      | 15 | 57375967  | 57550717 | 174750 | protein coding                     | -1.03 | 2.44E-04 | 6.51E-03 |
| ENSG00000169758 | TMEM266    | 15 | 76059958  | 76229121 | 169163 | protein coding                     | -1.03 | 4.26E-04 | 9.34E-03 |
| ENSG00000180777 | ANKRD30B   | 18 | 14728272  | 14854038 | 125766 | protein coding                     | -1.03 | 4.74E-03 | 4.05E-02 |
| ENSG00000132204 | LINC00470  | 18 | 1254383   | 1408344  | 153961 | lncRNA                             | -1.03 | 2.93E-03 | 3.04E-02 |
| ENSG00000237975 | FLG-AS1    | 1  | 152168125 | 1.52E+08 | 277331 | lncRNA-antisense                   | -1.03 | 1.80E-03 | 2.26E-02 |
| ENSG00000249667 | LINC01259  | 4  | 38509767  | 38518056 | 8289   | lncRNA                             | -1.04 | 5.76E-05 | 2.54E-03 |
| ENSG00000204706 | MAMDC2-AS1 | 9  | 70033921  | 70175888 | 141967 | lncRNA-antisense                   | -1.04 | 3.35E-03 | 3.30E-02 |
| ENSG00000119283 | TRIM67     | 1  | 231162112 | 2.31E+08 | 59444  | protein coding                     | -1.04 | 8.91E-04 | 1.50E-02 |
| ENSG00000145949 | MYLK4      | 6  | 2663629   | 2750922  | 87293  | protein coding                     | -1.04 | 4.48E-05 | 2.14E-03 |
| ENSG00000135063 | FAM189A2   | 9  | 69324567  | 69392558 | 67991  | protein coding                     | -1.04 | 3.00E-03 | 3.08E-02 |
| ENSG00000130635 | COL5A1     | 9  | 134641803 | 1.35E+08 | 203040 | protein coding                     | -1.04 | 2.33E-03 | 2.67E-02 |
| ENSG00000181126 | HLA-V      | 6  | 29790954  | 29797811 | 6857   | transcribed unprocessed pseudogene | -1.04 | 3.90E-03 | 6.63E-02 |
| ENSG00000223930 | AC117453.1 | 3  | 178164008 | 1.78E+08 | 221471 | lncRNA-antisense                   | -1.04 | 5.57E-03 | 4.46E-02 |
| ENSG00000286167 | AC105402.1 | 2  | 148909406 | 1.49E+08 | 17848  | lncRNA-antisense                   | -1.04 | 3.60E-03 | 3.46E-02 |
| ENSG00000124721 | DNAH8      | 6  | 38715311  | 39030792 | 315481 | protein coding                     | -1.04 | 7.08E-04 | 1.30E-02 |
| ENSG00000157851 | DPYSL5     | 2  | 26847747  | 26950351 | 102604 | protein coding                     | -1.04 | 4.78E-03 | 4.07E-02 |
| ENSG00000117215 | PLA2G2D    | 1  | 20111939  | 20119566 | 7627   | protein coding                     | -1.05 | 6.57E-03 | 4.89E-02 |
| ENSG00000171246 | NPTX1      | 17 | 80466834  | 80477843 | 11009  | protein coding                     | -1.05 | 1.37E-03 | 1.94E-02 |
| ENSG00000125414 | MYH2       | 17 | 10521148  | 10549700 | 28552  | protein coding                     | -1.05 | 5.98E-03 | 4.63E-02 |
| ENSG00000163702 | IL17RC     | 3  | 9917074   | 9933630  | 16556  | protein coding                     | -1.05 | 2.99E-04 | 7.44E-03 |
| ENSG00000127362 | TAS2R3     | 7  | 141764097 | 1.42E+08 | 1100   | protein coding                     | -1.05 | 1.52E-03 | 2.06E-02 |
| ENSG00000274220 | AC009163.7 | 16 | 75433836  | 75436392 | 2556   | lncRNA                             | -1.05 | 4.40E-03 | 3.88E-02 |
| ENSG00000069431 | ABCC9      | 12 | 21797401  | 21942529 | 145128 | protein coding                     | -1.05 | 1.34E-03 | 1.91E-02 |
| ENSG00000117525 | F3         | 1  | 94529173  | 94541759 | 12586  | protein coding                     | -1.05 | 5.93E-03 | 4.62E-02 |
| ENSG00000183549 | ACSM5      | 16 | 20409534  | 20441336 | 31802  | protein coding                     | -1.05 | 4.44E-03 | 3.90E-02 |
| ENSG00000147082 | CCNB3      | X  | 50202713  | 50351914 | 149201 | protein coding                     | -1.05 | 6.09E-03 | 4.68E-02 |
| ENSG00000078295 | ADCY2      | 5  | 7396138   | 7830081  | 433943 | protein coding                     | -1.05 | 2.41E-04 | 6.46E-03 |
| ENSG00000122367 | LDB3       | 10 | 86668507  | 86736072 | 67565  | protein coding                     | -1.05 | 6.28E-04 | 1.21E-02 |
| ENSG00000115183 | TANC1      | 2  | 158968640 | 1.59E+08 | 264019 | protein coding                     | -1.05 | 2.59E-06 | 2.45E-04 |
| ENSG00000225937 | PCA3       | 9  | 76691980  | 76863307 | 171327 | lncRNA-antisense                   | -1.05 | 1.32E-03 | 1.90E-02 |
| ENSG00000246339 | EXTL3-AS1  | 8  | 28690215  | 28702030 | 11815  | lncRNA-antisense                   | -1.05 | 9.43E-04 | 1.55E-02 |
| ENSG00000165186 | PTCHD1     | X  | 23334849  | 23404374 | 69525  | protein coding                     | -1.05 | 6.22E-03 | 4.74E-02 |
| ENSG00000112812 | PRSS16     | 6  | 27247701  | 27256624 | 8923   | protein coding                     | -1.05 | 1.54E-04 | 4.88E-03 |
| ENSG00000253943 | KRT18P37   | 8  | 41511240  | 41512521 | 1281   | processed pseudogene               | -1.05 | 2.65E-03 | 2.87E-02 |
| ENSG00000261079 | AC009053.2 | 16 | 74367462  | 74369826 | 2364   | lncRNA                             | -1.05 | 2.53E-03 | 2.80E-02 |
| ENSG00000104237 | RP1        | 8  | 54509422  | 54871720 | 362298 | protein coding                     | -1.05 | 2.82E-04 | 7.14E-03 |
| ENSG00000170011 | MYRIP      | 3  | 39808914  | 40260321 | 451407 | protein coding                     | -1.05 | 1.00E-03 | 1.61E-02 |
| ENSG00000249669 | CARMN      | 5  | 149406689 | 1.49E+08 | 26146  | lncRNA                             | -1.05 | 9.72E-04 | 1.58E-02 |
| ENSG00000009765 | YD         | 6  | 150368892 | 1.5E+08  | 37077  | protein coding                     | -1.06 | 3.98E-03 | 3.68E-02 |
| ENSG00000140798 | ABCC12     | 16 | 48081006  | 48156018 | 75012  | protein coding                     | -1.06 | 1.17E-03 | 1.76E-02 |
| ENSG00000204991 | SPIRE2     | 16 | 89818179  | 89871319 | 53140  | protein coding                     | -1.06 | 9.77E-05 | 3.68E-03 |
| ENSG00000162877 | PM20D1     | 1  | 205828025 | 2.06E+08 | 22107  | protein coding                     | -1.06 | 2.26E-03 | 2.62E-02 |
| ENSG00000163817 | SLC6A20    | 3  | 45755449  | 45796536 | 41087  | protein coding                     | -1.06 | 1.38E-03 | 1.94E-02 |
| ENSG00000169783 | LINGO1     | 15 | 77613027  | 77820900 | 207873 | protein coding                     | -1.06 | 3.74E-03 | 3.54E-02 |
| ENSG00000281692 | PACRG-AS1  | 6  | 163306907 | 1.63E+08 | 17623  | lncRNA-antisense                   | -1.06 | 6.42E-03 | 4.83E-02 |
| ENSG00000175773 | ZBTB44-DT  | 11 | 130314993 | 1.3E+08  | 88664  | lncRNA                             | -1.06 | 9.95E-05 | 6.63E-03 |
| ENSG00000058335 | RASGRF1    | 15 | 78959906  | 79090780 | 130874 | protein coding                     | -1.06 | 7.45E-05 | 3.01E-03 |
| ENSG00000189143 | CLDN4      | 7  | 73799542  | 73832693 | 33151  | protein coding                     | -1.06 | 3.38E-03 | 3.32E-02 |
| ENSG00000141485 | SLC13A5    | 17 | 6684719   | 6713377  | 28658  | protein coding                     | -1.06 | 3.29E-04 | 7.93E-03 |
| ENSG00000173698 | ADRG2      | X  | 18989307  | 19122637 | 133330 | protein coding                     | -1.06 | 1.07E-05 | 7.52E-04 |
| ENSG00000005108 | THSD7A     | 7  | 11370365  | 11832198 | 461833 | protein coding                     | -1.06 | 6.31E-04 | 1.21E-02 |
| ENSG00000259345 | AC013652.1 | 15 | 38865322  | 39427195 | 561873 | lncRNA                             | -1.06 | 5.84E-03 | 4.57E-02 |

|                 |             |    |           |          |        |                               |       |          |          |
|-----------------|-------------|----|-----------|----------|--------|-------------------------------|-------|----------|----------|
| ENSG00000205213 | LGR4        | 11 | 27365961  | 27472790 | 106829 | protein coding                | -1.06 | 3.75E-04 | 8.63E-03 |
| ENSG00000133477 | FAM83F      | 22 | 39994954  | 40043534 | 48580  | protein coding                | -1.06 | 4.75E-04 | 1.00E-02 |
| ENSG00000197763 | TXNRD3      | 3  | 126571779 | 1.27E+08 | 83345  | protein coding                | -1.06 | 4.90E-04 | 1.02E-02 |
| ENSG00000041982 | TNC         | 9  | 115019575 | 1.15E+08 | 98682  | protein coding                | -1.06 | 1.46E-03 | 2.00E-02 |
| ENSG00000151388 | ADAMTS12    | 5  | 33523535  | 33892019 | 368484 | protein coding                | -1.06 | 1.13E-03 | 1.72E-02 |
| ENSG00000262655 | SPON1       | 11 | 13962723  | 14268133 | 305410 | protein coding                | -1.06 | 3.75E-04 | 8.63E-03 |
| ENSG00000159263 | SIM2        | 21 | 36699115  | 36749917 | 50802  | protein coding                | -1.06 | 5.36E-04 | 1.08E-02 |
| ENSG00000225361 | PPP1R26-AS1 | 9  | 135462727 | 1.35E+08 | 18050  | lncRNA-antisense              | -1.06 | 8.96E-04 | 1.51E-02 |
| ENSG00000158955 | WNT9B       | 17 | 46833201  | 46886730 | 53529  | protein coding                | -1.06 | 5.02E-03 | 4.19E-02 |
| ENSG00000263142 | LRRRC37A17P | 17 | 46978481  | 47054569 | 76088  | incribed unprocessed pseudoge | -1.06 | 4.22E-04 | 9.30E-03 |
| ENSG00000101049 | SGK2        | 20 | 43558968  | 43588237 | 29269  | protein coding                | -1.06 | 7.42E-04 | 1.34E-02 |
| ENSG00000236699 | ARHGEF38    | 4  | 105552620 | 1.06E+08 | 155473 | protein coding                | -1.06 | 4.54E-03 | 3.96E-02 |
| ENSG00000187980 | PLA2G2C     | 1  | 20161253  | 20186518 | 25265  | protein coding                | -1.07 | 7.61E-04 | 1.36E-02 |
| ENSG00000258583 | LINC01500   | 14 | 58646631  | 59184247 | 537616 | lncRNA                        | -1.07 | 1.68E-03 | 2.17E-02 |
| ENSG00000127329 | PTPRB       | 12 | 70515870  | 70637440 | 121570 | protein coding                | -1.07 | 2.17E-04 | 5.99E-03 |
| ENSG00000265190 | ANXA8       | 10 | 47460162  | 47484158 | 23996  | protein coding                | -1.07 | 5.06E-03 | 4.21E-02 |
| ENSG00000109794 | FAM149A     | 4  | 186104419 | 1.86E+08 | 68248  | protein coding                | -1.07 | 2.14E-03 | 2.53E-02 |
| ENSG00000149596 | JPH2        | 20 | 44106590  | 44187188 | 80598  | protein coding                | -1.07 | 3.14E-03 | 3.18E-02 |
| ENSG00000164946 | FREM1       | 9  | 14737152  | 14910995 | 173843 | protein coding                | -1.07 | 2.16E-03 | 2.55E-02 |
| ENSG00000198929 | NOS1AP      | 1  | 162069691 | 1.62E+08 | 300784 | protein coding                | -1.07 | 4.99E-04 | 1.04E-02 |
| ENSG00000165091 | TMC1        | 9  | 72521608  | 72838297 | 316689 | protein coding                | -1.07 | 6.33E-03 | 4.79E-02 |
| ENSG00000204653 | ASPDH       | 19 | 50511600  | 50514690 | 3090   | protein coding                | -1.07 | 1.71E-03 | 2.20E-02 |
| ENSG00000183853 | KIRREL1     | 1  | 157993273 | 1.58E+08 | 106989 | protein coding                | -1.07 | 1.05E-03 | 1.65E-02 |
| ENSG00000171804 | WDR87       | 19 | 37884823  | 37906677 | 21854  | protein coding                | -1.07 | 5.72E-03 | 4.51E-02 |
| ENSG00000241644 | INMT        | 7  | 30697985  | 30757602 | 59617  | protein coding                | -1.07 | 3.06E-03 | 3.11E-02 |
| ENSG00000136928 | GABBR2      | 9  | 98288109  | 98708935 | 420826 | protein coding                | -1.07 | 2.76E-03 | 2.94E-02 |
| ENSG00000261054 | AC036108.2  | 15 | 99128832  | 99131806 | 2974   | lncRNA-antisense              | -1.07 | 5.06E-03 | 4.21E-02 |
| ENSG00000197099 | AC068631.1  | 3  | 186579476 | 1.87E+08 | 193510 | lncRNA-antisense              | -1.07 | 7.91E-05 | 3.14E-03 |
| ENSG00000128655 | PDE11A      | 2  | 177623244 | 1.78E+08 | 449533 | protein coding                | -1.07 | 4.28E-03 | 3.83E-02 |
| ENSG00000116983 | HPCAL4      | 1  | 39678648  | 39691485 | 12837  | protein coding                | -1.07 | 8.67E-07 | 1.03E-04 |
| ENSG00000160963 | COL26A1     | 7  | 101362875 | 1.02E+08 | 196149 | protein coding                | -1.07 | 1.10E-03 | 1.69E-02 |
| ENSG00000112041 | TULP1       | 6  | 35497874  | 35512896 | 15022  | protein coding                | -1.07 | 4.61E-03 | 3.99E-02 |
| ENSG00000166104 | AC126323.1  | 15 | 62227896  | 62253235 | 25339  | incribed unprocessed pseudoge | -1.07 | 5.45E-03 | 4.38E-02 |
| ENSG00000215529 | EFCAB8      | 20 | 32858923  | 32961609 | 102686 | protein coding                | -1.07 | 1.50E-07 | 2.44E-05 |
| ENSG00000140481 | CCDC33      | 15 | 74202705  | 74336472 | 133767 | protein coding                | -1.07 | 7.62E-04 | 1.36E-02 |
| ENSG00000050555 | LAMC3       | 9  | 131009174 | 1.31E+08 | 85299  | protein coding                | -1.07 | 8.07E-04 | 1.41E-02 |
| ENSG00000171532 | NEUROD2     | 17 | 39603536  | 39609777 | 6241   | protein coding                | -1.07 | 5.84E-03 | 4.58E-02 |
| ENSG00000124780 | KGNK17      | 6  | 39299001  | 39314461 | 15460  | protein coding                | -1.07 | 1.62E-03 | 2.12E-02 |
| ENSG00000134201 | GSTM5       | 1  | 109711780 | 1.1E+08  | 63648  | protein coding                | -1.07 | 5.58E-03 | 4.46E-02 |
| ENSG00000089723 | OTUB2       | 14 | 94026340  | 94048930 | 22590  | protein coding                | -1.07 | 2.20E-03 | 2.57E-02 |
| ENSG00000221955 | SLC12A8     | 3  | 125082636 | 1.25E+08 | 130228 | protein coding                | -1.07 | 4.41E-04 | 9.54E-03 |
| ENSG00000131386 | GALNT15     | 3  | 16174680  | 16231992 | 57312  | protein coding                | -1.07 | 5.74E-03 | 4.53E-02 |
| ENSG00000145626 | UGT3A1      | 5  | 35951006  | 36001028 | 50022  | protein coding                | -1.07 | 3.55E-03 | 3.43E-02 |
| ENSG00000136944 | LMX1B       | 9  | 126613928 | 1.27E+08 | 87104  | protein coding                | -1.07 | 1.51E-03 | 2.04E-02 |
| ENSG00000183840 | GPR39       | 2  | 132416805 | 1.33E+08 | 229777 | protein coding                | -1.07 | 3.82E-03 | 3.59E-02 |
| ENSG00000260288 | AC019294.2  | 15 | 75737820  | 75763322 | 25502  | lncRNA                        | -1.07 | 9.05E-04 | 1.52E-02 |
| ENSG00000183248 | PRR36       | 19 | 7868719   | 7874390  | 5671   | protein coding                | -1.08 | 6.19E-03 | 4.73E-02 |
| ENSG00000102359 | SRPX2       | X  | 100644195 | 1.01E+08 | 31593  | protein coding                | -1.08 | 5.08E-03 | 4.21E-02 |
| ENSG00000277152 | AC110048.2  | 15 | 66860303  | 66867023 | 6720   | lncRNA                        | -1.08 | 1.41E-04 | 4.59E-03 |
| ENSG00000158816 | VWASB1      | 1  | 20290919  | 20354894 | 63975  | protein coding                | -1.08 | 3.82E-04 | 8.75E-03 |
| ENSG00000121594 | CD80        | 3  | 119524293 | 1.2E+08  | 35321  | protein coding                | -1.08 | 2.29E-03 | 2.64E-02 |
| ENSG00000180113 | TDRD6       | 6  | 46687875  | 46704319 | 16444  | protein coding                | -1.08 | 4.77E-03 | 4.06E-02 |
| ENSG00000113073 | SLC4A9      | 5  | 140360194 | 1.4E+08  | 14947  | protein coding                | -1.08 | 1.41E-03 | 1.96E-02 |
| ENSG00000255491 | AC100858.2  | 8  | 124811042 | 1.25E+08 | 46474  | lncRNA                        | -1.08 | 3.59E-03 | 3.45E-02 |
| ENSG00000235142 | LINC02532   | 6  | 106705334 | 1.07E+08 | 82814  | lncRNA                        | -1.08 | 6.14E-03 | 4.70E-02 |
| ENSG00000230262 | LINC02603   | 9  | 94176492  | 94259545 | 83053  | lncRNA                        | -1.08 | 2.51E-03 | 2.79E-02 |
| ENSG00000147689 | FAM83A      | 8  | 123178960 | 1.23E+08 | 31119  | protein coding                | -1.08 | 1.22E-04 | 4.23E-03 |
| ENSG00000113645 | WWC1        | 5  | 168291645 | 1.68E+08 | 180658 | protein coding                | -1.08 | 3.18E-05 | 1.65E-03 |
| ENSG00000204529 | GUCY2EP     | 11 | 76694041  | 76719801 | 25760  | incribed unprocessed pseudoge | -1.08 | 3.28E-03 | 3.25E-02 |
| ENSG00000250493 | AP004147.1  | 11 | 120867933 | 1.21E+08 | 26864  | lncRNA-antisense              | -1.08 | 4.55E-03 | 3.97E-02 |
| ENSG00000174498 | IGDC33      | 15 | 65327127  | 65378002 | 50875  | protein coding                | -1.08 | 2.89E-03 | 3.02E-02 |
| ENSG00000182983 | ZNF662      | 3  | 42906142  | 42919334 | 13192  | protein coding                | -1.08 | 7.07E-04 | 1.30E-02 |
| ENSG00000188089 | PLA2G4E     | 15 | 41981582  | 42051190 | 69608  | protein coding                | -1.08 | 1.89E-03 | 2.32E-02 |
| ENSG00000235100 | AL157400.3  | 10 | 89667181  | 89701274 | 34093  | lncRNA                        | -1.08 | 5.38E-03 | 4.35E-02 |
| ENSG00000122012 | SV2C        | 5  | 76083383  | 76353939 | 270556 | protein coding                | -1.08 | 7.27E-04 | 1.32E-02 |
| ENSG00000285569 | AC099344.3  | 2  | 11405508  | 11427186 | 21678  | lncRNA                        | -1.08 | 4.82E-03 | 4.09E-02 |
| ENSG00000143494 | VASH2       | 1  | 212950520 | 2.13E+08 | 41517  | protein coding                | -1.08 | 3.54E-04 | 8.32E-03 |
| ENSG00000166444 | DENN2B      | 11 | 8693351   | 8910951  | 217600 | protein coding                | -1.08 | 3.22E-05 | 1.67E-03 |
| ENSG00000165566 | AMER2       | 13 | 25161684  | 25172288 | 10604  | protein coding                | -1.09 | 6.48E-03 | 4.85E-02 |
| ENSG00000177181 | RIMKLA      | 1  | 42380792  | 42424232 | 43440  | protein coding                | -1.09 | 4.45E-04 | 9.58E-03 |
| ENSG00000186115 | CYP4F2      | 19 | 15878023  | 15898077 | 20054  | protein coding                | -1.09 | 3.55E-03 | 3.43E-02 |
| ENSG00000148408 | CACNA1B     | 9  | 137877782 | 1.38E+08 | 246842 | protein coding                | -1.09 | 9.64E-04 | 1.58E-02 |
| ENSG00000153404 | PLEKHG4B    | 5  | 92151     | 189972   | 97821  | protein coding                | -1.09 | 1.26E-03 | 1.84E-02 |
| ENSG00000092621 | PHGDH       | 1  | 119648411 | 1.2E+08  | 95807  | protein coding                | -1.09 | 6.86E-08 | 1.29E-05 |
| ENSG00000158258 | CLSTN2      | 3  | 139935185 | 1.41E+08 | 642212 | protein coding                | -1.09 | 7.76E-04 | 1.38E-02 |
| ENSG00000205853 | RFPL3S      | 22 | 32359886  | 32382106 | 22220  | lncRNA                        | -1.09 | 1.67E-04 | 5.12E-03 |
| ENSG00000166535 | A2ML1       | 12 | 8822621   | 8887001  | 64380  | protein coding                | -1.09 | 3.55E-03 | 3.43E-02 |
| ENSG00000240405 | SAMMSON     | 3  | 69999550  | 70518064 | 518514 | lncRNA                        | -1.09 | 3.44E-04 | 8.20E-03 |
| ENSG00000240497 | AC092919.1  | 3  | 171459248 | 1.71E+08 | 10454  | lncRNA                        | -1.09 | 1.70E-03 | 2.19E-02 |
| ENSG00000261003 | AL008628.1  | 6  | 170414139 | 1.7E+08  | 5186   | lncRNA-sense overlapping      | -1.09 | 1.33E-03 | 1.90E-02 |
| ENSG00000185518 | SV2B        | 15 | 91099950  | 91302565 | 202615 | protein coding                | -1.09 | 1.84E-03 | 2.28E-02 |
| ENSG00000230317 | LINC01284   | X  | 51095836  | 51224432 | 128596 | lncRNA                        | -1.09 | 1.31E-04 | 4.41E-03 |
| ENSG00000132793 | LPIN3       | 20 | 41340821  | 41360582 | 19761  | protein coding                | -1.09 | 4.21E-03 | 3.80E-02 |
| ENSG00000226519 | LINC00390   | 13 | 44094822  | 44147762 | 52940  | lncRNA                        | -1.09 | 4.47E-03 | 3.92E-02 |
| ENSG00000261043 | AC019294.3  | 15 | 75759501  | 75762405 | 2904   | lncRNA                        | -1.09 | 2.50E-03 | 2.78E-02 |
| ENSG00000197915 | HRNR        | 1  | 152212076 | 1.52E+08 | 12117  | protein coding                | -1.09 | 1.71E-03 | 2.19E-02 |
| ENSG00000068615 | REEP1       | 2  | 86213993  | 86338083 | 124090 | protein coding                | -1.09 | 4.75E-03 | 4.05E-02 |

|                 |            |    |           |          |        |                                    |       |          |          |
|-----------------|------------|----|-----------|----------|--------|------------------------------------|-------|----------|----------|
| ENSG00000113594 | LIFR       | 5  | 38474668  | 38608354 | 133686 | protein coding                     | -1.09 | 3.60E-04 | 8.40E-03 |
| ENSG00000142627 | EPHA2      | 1  | 16124337  | 16156069 | 31732  | protein coding                     | -1.09 | 8.86E-04 | 1.50E-02 |
| ENSG00000120549 | KIAA1217   | 10 | 23694746  | 24547848 | 853102 | protein coding                     | -1.09 | 8.88E-04 | 1.50E-02 |
| ENSG00000233639 | PANTR1     | 2  | 104794848 | 1.05E+08 | 58335  | lncRNA                             | -1.09 | 4.79E-03 | 4.07E-02 |
| ENSG00000211786 | TRAV8-2    | 14 | 21846537  | 21847221 | 684    | TR V gene                          | -1.09 | 2.11E-03 | 2.50E-02 |
| ENSG00000287454 | AC008149.2 | 12 | 96229563  | 96235650 | 6087   | lncRNA                             | -1.09 | 1.81E-04 | 5.40E-03 |
| ENSG00000286084 | AL096794.1 | 6  | 105403207 | 1.06E+08 | 185595 | RNA-bidirectional promoter lncRNA  | -1.09 | 5.81E-03 | 4.56E-02 |
| ENSG00000201358 | RN7SKP193  | 14 | 50068568  | 50068873 | 305    | misc RNA                           | -1.10 | 5.94E-03 | 4.62E-02 |
| ENSG00000091128 | LAMB4      | 7  | 108023548 | 1.08E+08 | 106813 | protein coding                     | -1.10 | 5.77E-03 | 4.54E-02 |
| ENSG00000188501 | LCTL       | 15 | 66547179  | 66565979 | 18800  | protein coding                     | -1.10 | 5.31E-03 | 4.32E-02 |
| ENSG00000149948 | HMGGA2     | 12 | 65824460  | 65966291 | 141831 | protein coding                     | -1.10 | 2.81E-04 | 7.13E-03 |
| ENSG00000228061 | AC131571.1 | 11 | 31618124  | 31767953 | 149829 | lncRNA-antisense                   | -1.10 | 3.09E-03 | 3.13E-02 |
| ENSG00000227733 | AC239809.3 | 1  | 148159213 | 1.48E+08 | 95799  | lncRNA                             | -1.10 | 3.21E-04 | 7.77E-03 |
| ENSG00000226125 | LINC01907  | 2  | 230690065 | 2.31E+08 | 10464  | lncRNA                             | -1.10 | 5.16E-03 | 4.26E-02 |
| ENSG00000213397 | HAUS7      | X  | 153447666 | 1.53E+08 | 47850  | protein coding                     | -1.10 | 8.45E-04 | 1.45E-02 |
| ENSG00000091137 | SLC26A4    | 7  | 107660828 | 1.08E+08 | 56981  | protein coding                     | -1.10 | 2.71E-03 | 2.91E-02 |
| ENSG00000175147 | TMEM51-AS1 | 1  | 15111815  | 15153618 | 41803  | lncRNA-antisense                   | -1.10 | 2.47E-03 | 2.76E-02 |
| ENSG00000241469 | LINC00635  | 3  | 107840228 | 1.08E+08 | 42022  | lncRNA                             | -1.10 | 1.80E-03 | 2.26E-02 |
| ENSG00000119125 | GDA        | 9  | 72114595  | 72257193 | 142598 | protein coding                     | -1.10 | 5.91E-03 | 4.61E-02 |
| ENSG00000124140 | SLC12A5    | 20 | 46021690  | 46060150 | 38460  | protein coding                     | -1.10 | 7.13E-04 | 1.31E-02 |
| ENSG00000204603 | LINC01257  | 12 | 131165011 | 1.31E+08 | 67929  | lncRNA                             | -1.10 | 4.99E-03 | 4.17E-02 |
| ENSG00000287005 | AC90018.2  | 3  | 195260632 | 1.95E+08 | 2996   | lncRNA                             | -1.10 | 2.35E-03 | 2.68E-02 |
| ENSG00000134917 | ADAMT58    | 11 | 130404923 | 1.3E+08  | 23686  | protein coding                     | -1.10 | 3.69E-03 | 3.51E-02 |
| ENSG00000253364 | COPDA1     | 14 | 105647924 | 1.06E+08 | 1133   | lncRNA                             | -1.10 | 4.58E-03 | 3.98E-02 |
| ENSG00000160282 | FTCD       | 21 | 46136262  | 46155579 | 19317  | protein coding                     | -1.10 | 4.88E-04 | 1.02E-02 |
| ENSG00000165124 | SVEP1      | 9  | 110365248 | 1.11E+08 | 214632 | protein coding                     | -1.10 | 1.51E-03 | 2.04E-02 |
| ENSG00000121653 | MAPK8IP1   | 11 | 45885651  | 45906465 | 20814  | protein coding                     | -1.10 | 8.87E-04 | 1.50E-02 |
| ENSG00000254092 | AC021613.1 | 8  | 20942863  | 21298168 | 355305 | lncRNA                             | -1.10 | 9.92E-05 | 3.69E-03 |
| ENSG00000163810 | TGM4       | 3  | 44874608  | 44914990 | 40382  | protein coding                     | -1.10 | 3.55E-03 | 3.43E-02 |
| ENSG00000164669 | INTS4P1    | 7  | 65141032  | 65234216 | 93184  | transcribed unprocessed pseudogene | -1.10 | 3.39E-03 | 3.32E-02 |
| ENSG00000237720 | AC011995.2 | 2  | 2707368   | 2840512  | 133144 | lncRNA                             | -1.11 | 2.81E-03 | 2.98E-02 |
| ENSG00000165194 | PCDH19     | X  | 100291644 | 1E+08    | 118629 | protein coding                     | -1.11 | 1.51E-03 | 2.04E-02 |
| ENSG00000241288 | LINC02614  | 3  | 125827238 | 1.26E+08 | 89146  | lncRNA                             | -1.11 | 1.75E-05 | 1.06E-03 |
| ENSG00000235760 | MSH2-OT1   | 2  | 47527008  | 47535199 | 8191   | lncRNA-antisense                   | -1.11 | 6.72E-03 | 4.96E-02 |
| ENSG00000237596 | AL138828.1 | 6  | 135991936 | 1.36E+08 | 233815 | lncRNA-antisense                   | -1.11 | 1.17E-03 | 1.76E-02 |
| ENSG00000273297 | AC009275.1 | 7  | 134368737 | 1.34E+08 | 63797  | lncRNA                             | -1.11 | 3.93E-03 | 3.65E-02 |
| ENSG00000185313 | SCN10A     | 3  | 38696802  | 38816286 | 119484 | protein coding                     | -1.11 | 1.75E-03 | 2.22E-02 |
| ENSG00000148053 | NTRK2      | 9  | 84688551  | 85027054 | 358503 | protein coding                     | -1.11 | 5.40E-04 | 1.09E-02 |
| ENSG00000259097 | AL163931.1 | 14 | 98068161  | 98205143 | 136982 | lncRNA                             | -1.11 | 2.58E-03 | 2.83E-02 |
| ENSG00000283828 | AL137002.2 | 13 | 113149432 | 1.13E+08 | 4570   | lncRNA-antisense                   | -1.11 | 4.64E-03 | 4.00E-02 |
| ENSG00000197702 | PARVA      | 11 | 12377563  | 12535356 | 157793 | protein coding                     | -1.11 | 2.66E-04 | 6.86E-03 |
| ENSG00000062524 | LTK        | 15 | 41503637  | 41513887 | 10250  | protein coding                     | -1.11 | 8.49E-06 | 6.34E-04 |
| ENSG00000230461 | PROX1-AS1  | 1  | 213817751 | 2.14E+08 | 170757 | lncRNA                             | -1.11 | 2.40E-03 | 2.71E-02 |
| ENSG00000261170 | AC009053.3 | 16 | 74422120  | 74441937 | 19817  | lncRNA-antisense                   | -1.11 | 6.67E-03 | 4.94E-02 |
| ENSG00000238099 | LINC01625  | 6  | 139435636 | 1.39E+08 | 39022  | lncRNA                             | -1.11 | 5.97E-03 | 4.63E-02 |
| ENSG00000133519 | ZDHHC8P1   | 22 | 23390606  | 23402722 | 12120  | transcribed unprocessed pseudogene | -1.11 | 4.10E-03 | 3.74E-02 |
| ENSG00000149633 | KIAA1755   | 20 | 38210503  | 38260776 | 50269  | protein coding                     | -1.11 | 1.10E-03 | 1.69E-02 |
| ENSG00000269473 | AC012313.8 | 19 | 58440448  | 58445849 | 5401   | lncRNA                             | -1.11 | 4.92E-03 | 4.13E-02 |
| ENSG00000158865 | SLC5A11    | 16 | 24845841  | 24911628 | 65787  | protein coding                     | -1.11 | 1.34E-03 | 1.91E-02 |
| ENSG00000064787 | BCAS1      | 20 | 53936777  | 54070594 | 133817 | protein coding                     | -1.11 | 5.13E-04 | 1.06E-02 |
| ENSG00000121446 | RGS11      | 1  | 182409192 | 1.83E+08 | 151407 | protein coding                     | -1.11 | 9.55E-04 | 1.57E-02 |
| ENSG00000198046 | TRP67      | 19 | 56439325  | 56478065 | 38740  | protein coding                     | -1.11 | 5.49E-04 | 1.10E-02 |
| ENSG00000135740 | SLC9A5     | 16 | 67237683  | 67272191 | 34508  | protein coding                     | -1.11 | 1.91E-04 | 5.57E-03 |
| ENSG00000215160 | OR7E122P   | 3  | 8682943   | 8693701  | 10758  | transcribed unprocessed pseudogene | -1.11 | 4.68E-03 | 4.02E-02 |
| ENSG00000135931 | ARMC9      | 2  | 231198546 | 2.31E+08 | 178302 | protein coding                     | -1.11 | 1.60E-04 | 4.99E-03 |
| ENSG00000078898 | BPIFB2     | 20 | 33007704  | 33023703 | 15999  | protein coding                     | -1.11 | 4.34E-03 | 3.85E-02 |
| ENSG00000073670 | ADAM11     | 17 | 44758988  | 44781846 | 22858  | protein coding                     | -1.11 | 4.59E-04 | 9.79E-03 |
| ENSG00000186976 | EFCAB6     | 22 | 43528744  | 43812337 | 283593 | protein coding                     | -1.11 | 9.17E-05 | 3.52E-03 |
| ENSG00000172296 | SPTLC3     | 20 | 13008972  | 13169103 | 160131 | protein coding                     | -1.11 | 4.45E-04 | 9.58E-03 |
| ENSG00000231817 | LINC01198  | 13 | 46455131  | 46515958 | 60827  | lncRNA                             | -1.12 | 5.68E-03 | 4.50E-02 |
| ENSG00000230592 | RPSAP8     | X  | 100155885 | 1E+08    | 888    | processed pseudogene               | -1.12 | 1.21E-03 | 1.79E-02 |
| ENSG00000069018 | TRPC7      | 5  | 136212745 | 1.36E+08 | 152800 | protein coding                     | -1.12 | 5.19E-03 | 4.27E-02 |
| ENSG00000283380 | AL807742.1 | X  | 20769718  | 21374265 | 604547 | lncRNA                             | -1.12 | 4.38E-03 | 3.86E-02 |
| ENSG00000141448 | GATA6      | 18 | 22169589  | 22202528 | 32939  | protein coding                     | -1.12 | 4.29E-03 | 3.83E-02 |
| ENSG00000151572 | ANO4       | 12 | 100717526 | 1.01E+08 | 411115 | protein coding                     | -1.12 | 1.77E-03 | 2.24E-02 |
| ENSG00000237232 | ZNF295-AS1 | 21 | 42009194  | 42055130 | 45936  | lncRNA                             | -1.12 | 8.02E-04 | 1.41E-02 |
| ENSG00000170485 | NPAS2      | 2  | 100820139 | 1.01E+08 | 176690 | protein coding                     | -1.12 | 1.25E-05 | 8.36E-04 |
| ENSG00000283529 | AL035685.1 | 20 | 49318337  | 49441654 | 123317 | transcribed unprocessed pseudogene | -1.12 | 7.84E-04 | 1.38E-02 |
| ENSG00000257307 | AL162311.2 | 14 | 35881001  | 35881709 | 708    | processed pseudogene               | -1.12 | 5.74E-03 | 4.53E-02 |
| ENSG00000075035 | WSDC2      | 12 | 108129288 | 1.08E+08 | 121249 | protein coding                     | -1.12 | 2.96E-04 | 7.41E-03 |
| ENSG00000132854 | KANAK4     | 1  | 62236165  | 62319434 | 83269  | protein coding                     | -1.12 | 1.66E-03 | 2.16E-02 |
| ENSG00000144061 | NPHP1      | 2  | 110122311 | 1.1E+08  | 82755  | protein coding                     | -1.12 | 4.45E-04 | 9.58E-03 |
| ENSG00000184937 | WT1        | 11 | 32387775  | 32435564 | 47789  | protein coding                     | -1.12 | 2.03E-03 | 2.44E-02 |
| ENSG00000214353 | VAC14-AS1  | 16 | 70755035  | 70773251 | 18216  | lncRNA-antisense                   | -1.12 | 1.33E-04 | 4.45E-03 |
| ENSG00000241449 | AC092666.1 | 7  | 150033653 | 1.5E+08  | 43002  | lncRNA                             | -1.12 | 2.54E-03 | 2.81E-02 |
| ENSG00000205054 | LINC01121  | 2  | 45164816  | 45323397 | 158581 | lncRNA                             | -1.12 | 1.01E-03 | 1.62E-02 |
| ENSG00000171772 | SYCE1      | 10 | 133553901 | 1.34E+08 | 15934  | protein coding                     | -1.12 | 2.21E-03 | 2.59E-02 |
| ENSG00000171790 | SLFN1      | 1  | 41015597  | 41023237 | 7640   | protein coding                     | -1.12 | 1.68E-04 | 5.14E-03 |
| ENSG00000166159 | LRTM2      | 12 | 1820267   | 1836753  | 16486  | protein coding                     | -1.12 | 4.13E-03 | 3.76E-02 |
| ENSG00000237667 | LINC01115  | 2  | 779840    | 868608   | 88768  | lncRNA                             | -1.12 | 7.05E-05 | 2.92E-03 |
| ENSG00000184507 | NUTM1      | 15 | 34343315  | 34357737 | 14422  | protein coding                     | -1.12 | 6.51E-03 | 4.87E-02 |
| ENSG00000101638 | ST8SIA5    | 18 | 46667821  | 46759257 | 91436  | protein coding                     | -1.12 | 5.90E-05 | 2.58E-03 |
| ENSG00000184194 | GPR173     | X  | 53048789  | 53080615 | 31826  | protein coding                     | -1.12 | 3.80E-03 | 3.57E-02 |
| ENSG00000255248 | MIR100HG   | 11 | 122028325 | 1.23E+08 | 528396 | lncRNA                             | -1.12 | 4.31E-05 | 2.09E-03 |
| ENSG00000260423 | LINC02367  | 12 | 9347056   | 9400387  | 53331  | lncRNA                             | -1.13 | 1.54E-03 | 2.07E-02 |
| ENSG00000105559 | PLEKHA4    | 19 | 48837097  | 48868617 | 31520  | protein coding                     | -1.13 | 1.84E-03 | 2.29E-02 |
| ENSG00000250634 | LINC01182  | 4  | 13654374  | 14003756 | 349382 | lncRNA                             | -1.13 | 5.36E-03 | 4.34E-02 |

|                 |             |    |           |          |        |                                    |       |          |          |
|-----------------|-------------|----|-----------|----------|--------|------------------------------------|-------|----------|----------|
| ENSG00000264589 | MAPT-AS1    | 17 | 45799390  | 45895680 | 96290  | lncRNA-antisense                   | -1.13 | 2.06E-03 | 2.46E-02 |
| ENSG00000146648 | EGFR        | 7  | 55019017  | 55211628 | 192611 | protein coding                     | -1.13 | 7.51E-04 | 1.35E-02 |
| ENSG00000227036 | LINC00511   | 17 | 72290091  | 72640472 | 350381 | lncRNA                             | -1.13 | 2.59E-06 | 2.45E-04 |
| ENSG00000221539 | SNORD99     | 1  | 28578749  | 28578822 | 73     | snoRNA                             | -1.13 | 4.29E-06 | 3.69E-04 |
| ENSG00000180347 | ITPRD1      | 7  | 31514071  | 31658720 | 144649 | protein coding                     | -1.13 | 2.38E-03 | 2.70E-02 |
| ENSG00000273674 | AC021752.1  | 15 | 50839875  | 50908603 | 68728  | lncRNA                             | -1.13 | 3.22E-03 | 3.22E-02 |
| ENSG00000242686 | PDE6B-AS1   | 4  | 652850    | 656213   | 3363   | lncRNA-antisense                   | -1.13 | 2.15E-03 | 2.54E-02 |
| ENSG00000171303 | KCNK3       | 2  | 26692690  | 26733420 | 40730  | protein coding                     | -1.13 | 2.58E-03 | 2.83E-02 |
| ENSG00000163638 | ADAMTS9     | 3  | 64515654  | 64688000 | 172346 | protein coding                     | -1.13 | 3.22E-03 | 3.22E-02 |
| ENSG00000169181 | GSG1L       | 16 | 27787528  | 28063714 | 276186 | protein coding                     | -1.13 | 2.16E-03 | 2.55E-02 |
| ENSG00000141519 | CCDC40      | 17 | 80036632  | 80100613 | 63981  | protein coding                     | -1.13 | 3.21E-03 | 3.22E-02 |
| ENSG00000225465 | RFPL1S      | 22 | 29436534  | 29478868 | 42334  | lncRNA-antisense                   | -1.13 | 6.10E-05 | 2.63E-03 |
| ENSG00000057593 | F7          | 13 | 113105788 | 1.13E+08 | 14897  | protein coding                     | -1.13 | 3.90E-03 | 3.63E-02 |
| ENSG00000134873 | CLDN10      | 13 | 95433604  | 95579759 | 146155 | protein coding                     | -1.13 | 6.20E-03 | 4.73E-02 |
| ENSG00000144452 | ABCA12      | 2  | 214931542 | 2.15E+08 | 207084 | protein coding                     | -1.13 | 3.31E-03 | 3.28E-02 |
| ENSG00000286708 | AP003783.1  | 11 | 70886090  | 70896305 | 10215  | lncRNA                             | -1.13 | 4.97E-03 | 4.16E-02 |
| ENSG00000234899 | SOX9-AS1    | 17 | 72067099  | 72237203 | 170104 | lncRNA                             | -1.13 | 5.18E-04 | 1.06E-02 |
| ENSG00000204764 | RANBP17     | 5  | 170861870 | 1.71E+08 | 438145 | protein coding                     | -1.13 | 1.49E-03 | 2.03E-02 |
| ENSG00000250802 | ZBED3-AS1   | 5  | 77086688  | 77166909 | 80221  | lncRNA-antisense                   | -1.13 | 7.07E-06 | 5.49E-04 |
| ENSG00000228252 | COL6A4P2    | 3  | 130212823 | 1.3E+08  | 60983  | transcribed unitary pseudogene     | -1.13 | 2.97E-03 | 3.07E-02 |
| ENSG00000165695 | AK8         | 9  | 132725578 | 1.33E+08 | 153199 | protein coding                     | -1.13 | 6.14E-04 | 1.19E-02 |
| ENSG00000254519 | AC044839.1  | 11 | 45722279  | 45748029 | 25750  | lncRNA                             | -1.14 | 6.94E-04 | 1.28E-02 |
| ENSG00000144730 | IL17RD      | 3  | 57089982  | 57170306 | 80324  | protein coding                     | -1.14 | 1.80E-03 | 2.26E-02 |
| ENSG00000258785 | LINC01580   | 15 | 93894431  | 93984150 | 89719  | lncRNA                             | -1.14 | 3.82E-03 | 3.59E-02 |
| ENSG00000204248 | COL11A2     | 6  | 33162681  | 33192499 | 29818  | protein coding                     | -1.14 | 4.29E-05 | 2.08E-03 |
| ENSG00000103460 | TOX3        | 16 | 52436417  | 52547802 | 111385 | protein coding                     | -1.14 | 6.39E-03 | 4.81E-02 |
| ENSG00000172379 | ARNT2       | 15 | 80404350  | 80597933 | 193583 | protein coding                     | -1.14 | 4.52E-04 | 9.69E-03 |
| ENSG00000230133 | LINC01721   | 20 | 24063255  | 24226013 | 162758 | lncRNA                             | -1.14 | 3.26E-03 | 3.24E-02 |
| ENSG00000279217 | Z95114.1    | 22 | 36071000  | 36085573 | 14573  | lncRNA                             | -1.14 | 1.63E-03 | 2.13E-02 |
| ENSG00000187908 | DMBT1       | 10 | 122560665 | 1.23E+08 | 83071  | protein coding                     | -1.14 | 2.85E-04 | 7.22E-03 |
| ENSG00000116329 | OPRD1       | 1  | 28812142  | 28871267 | 59125  | protein coding                     | -1.14 | 3.78E-03 | 3.56E-02 |
| ENSG00000166073 | GPR176      | 15 | 39799008  | 39920266 | 121258 | protein coding                     | -1.14 | 3.69E-03 | 3.51E-02 |
| ENSG00000134376 | CRB1        | 1  | 197268204 | 1.97E+08 | 210251 | protein coding                     | -1.14 | 7.03E-05 | 2.91E-03 |
| ENSG00000110900 | TSPAN11     | 12 | 30926428  | 30996602 | 70174  | protein coding                     | -1.14 | 1.66E-03 | 2.16E-02 |
| ENSG00000101871 | MID1        | X  | 10445310  | 10833654 | 388344 | protein coding                     | -1.14 | 5.48E-04 | 1.10E-02 |
| ENSG00000166510 | CCDC68      | 18 | 54901509  | 54959461 | 57952  | protein coding                     | -1.14 | 6.22E-03 | 4.74E-02 |
| ENSG00000139445 | FOXN4       | 12 | 109277978 | 1.09E+08 | 31306  | protein coding                     | -1.14 | 4.04E-03 | 3.71E-02 |
| ENSG00000279278 | AC245060.6  | 22 | 22264601  | 22273020 | 8419   | lncRNA                             | -1.14 | 4.83E-04 | 1.01E-02 |
| ENSG00000104332 | SFRP1       | 8  | 41261962  | 41309473 | 47511  | protein coding                     | -1.14 | 6.55E-03 | 4.89E-02 |
| ENSG00000245694 | CRNDE       | 16 | 54845189  | 54929189 | 84000  | lncRNA                             | -1.14 | 1.31E-03 | 1.88E-02 |
| ENSG00000233395 | LINC00841   | 10 | 43909244  | 43981102 | 71858  | lncRNA                             | -1.14 | 1.87E-03 | 2.31E-02 |
| ENSG00000203896 | LIME1       | 20 | 63736283  | 63739103 | 2820   | protein coding                     | -1.14 | 3.98E-03 | 3.68E-02 |
| ENSG00000207041 | RNU6-3P     | X  | 141118030 | 1.41E+08 | 106    | snRNA                              | -1.15 | 1.26E-04 | 4.31E-03 |
| ENSG00000268257 | AIRN        | 6  | 160003291 | 1.6E+08  | 4373   | lncRNA-antisense                   | -1.15 | 1.09E-03 | 1.69E-02 |
| ENSG00000279249 | AC007614.1  | 16 | 49282021  | 49350504 | 68483  | lncRNA-antisense                   | -1.15 | 2.30E-05 | 1.30E-03 |
| ENSG00000269113 | TRABD2B     | 1  | 47760528  | 47997385 | 236857 | protein coding                     | -1.15 | 2.71E-03 | 2.91E-02 |
| ENSG00000284745 | AL589702.1  | 1  | 2960658   | 2968707  | 8049   | lncRNA                             | -1.15 | 6.51E-03 | 4.87E-02 |
| ENSG00000166923 | GREM1       | 15 | 32718004  | 32745106 | 27102  | protein coding                     | -1.15 | 3.85E-04 | 8.79E-03 |
| ENSG00000237339 | LINC01502   | 9  | 135574935 | 1.36E+08 | 12177  | lncRNA                             | -1.15 | 1.06E-03 | 1.65E-02 |
| ENSG00000070915 | SLC12A3     | 16 | 56865207  | 56915850 | 50643  | protein coding                     | -1.15 | 3.16E-04 | 7.71E-03 |
| ENSG00000148082 | SHC3        | 9  | 89005771  | 89178818 | 173047 | protein coding                     | -1.15 | 1.31E-04 | 4.41E-03 |
| ENSG00000279712 | FP325330.3  | 22 | 47916728  | 47926264 | 9536   | lncRNA                             | -1.15 | 1.26E-03 | 1.84E-02 |
| ENSG00000153930 | ANKFN1      | 17 | 55882301  | 56511659 | 629358 | protein coding                     | -1.15 | 7.22E-04 | 1.32E-02 |
| ENSG00000246308 | AC116535.1  | 11 | 10809204  | 10822931 | 13727  | lncRNA-antisense                   | -1.15 | 4.06E-03 | 3.72E-02 |
| ENSG00000112562 | SMOC2       | 6  | 168441151 | 1.69E+08 | 232294 | protein coding                     | -1.15 | 1.98E-03 | 2.40E-02 |
| ENSG00000176601 | MAP3K19     | 2  | 134964485 | 1.35E+08 | 82983  | protein coding                     | -1.15 | 2.14E-03 | 2.53E-02 |
| ENSG00000230453 | ANKRD18B    | 9  | 33524394  | 33573009 | 48615  | protein coding                     | -1.15 | 3.98E-03 | 3.68E-02 |
| ENSG00000184012 | TMPRSS2     | 21 | 41464300  | 41531116 | 66816  | protein coding                     | -1.15 | 1.44E-03 | 1.98E-02 |
| ENSG00000076344 | RGS11       | 16 | 268301    | 275980   | 7679   | protein coding                     | -1.15 | 5.07E-03 | 4.21E-02 |
| ENSG00000157653 | C9orf43     | 9  | 113410054 | 1.13E+08 | 19636  | protein coding                     | -1.15 | 2.46E-03 | 2.76E-02 |
| ENSG00000184809 | B3GAL15-AS1 | 21 | 39597147  | 39612910 | 15763  | lncRNA-antisense                   | -1.15 | 1.61E-03 | 2.12E-02 |
| ENSG00000278685 | IQCA1L      | 7  | 151190873 | 1.51E+08 | 14623  | protein coding                     | -1.15 | 1.69E-03 | 2.18E-02 |
| ENSG00000169684 | CHRNA5      | 15 | 78565520  | 78595269 | 29749  | protein coding                     | -1.15 | 2.46E-04 | 6.53E-03 |
| ENSG00000281912 | LINC01144   | 1  | 45303910  | 45305619 | 1709   | lncRNA                             | -1.15 | 4.31E-03 | 3.84E-02 |
| ENSG00000172900 | ACTE1P      | 11 | 71382601  | 71423423 | 40822  | transcribed unitary pseudogene     | -1.15 | 1.36E-03 | 1.92E-02 |
| ENSG00000077935 | SMC1B       | 22 | 45344063  | 45413619 | 69556  | protein coding                     | -1.16 | 5.25E-04 | 1.07E-02 |
| ENSG00000268926 | AL354861.3  | 9  | 95772323  | 95776282 | 3959   | lncRNA                             | -1.16 | 6.48E-03 | 4.85E-02 |
| ENSG00000100170 | SLC5A1      | 22 | 32043261  | 32113029 | 69768  | protein coding                     | -1.16 | 3.52E-03 | 3.41E-02 |
| ENSG00000229205 | LINC02020   | 10 | 1159768   | 1289426  | 129658 | lncRNA                             | -1.16 | 9.97E-04 | 1.60E-02 |
| ENSG00000112499 | SLC22A2     | 6  | 160171061 | 1.6E+08  | 106577 | protein coding                     | -1.16 | 2.89E-03 | 3.02E-02 |
| ENSG00000121904 | CSMD2       | 1  | 33513999  | 34165842 | 651843 | protein coding                     | -1.16 | 2.44E-04 | 6.51E-03 |
| ENSG00000168398 | BDKRB2      | 14 | 96204679  | 96244166 | 39487  | protein coding                     | -1.16 | 5.19E-03 | 4.27E-02 |
| ENSG00000104967 | NOVA2       | 19 | 45933734  | 45974044 | 40310  | protein coding                     | -1.16 | 6.73E-03 | 4.96E-02 |
| ENSG00000227855 | DPY19L2P3   | 7  | 29650227  | 29742594 | 92367  | transcribed unprocessed pseudogene | -1.16 | 3.33E-03 | 3.29E-02 |
| ENSG00000260034 | LCMT1-AS2   | 16 | 25140577  | 25149032 | 8455   | lncRNA-antisense                   | -1.16 | 2.04E-03 | 2.45E-02 |
| ENSG00000196263 | ZNF471      | 19 | 56507850  | 56530221 | 22371  | protein coding                     | -1.16 | 1.00E-03 | 1.61E-02 |
| ENSG00000280159 | AC016583.1  | 5  | 54643557  | 54645987 | 2430   | TEC                                | -1.16 | 1.08E-03 | 1.67E-02 |
| ENSG00000239887 | C1orf226    | 1  | 162378841 | 1.62E+08 | 7971   | protein coding                     | -1.16 | 6.65E-04 | 1.25E-02 |
| ENSG00000137766 | UNC13C      | 15 | 53978201  | 54633414 | 655213 | protein coding                     | -1.16 | 1.74E-03 | 2.21E-02 |
| ENSG00000214770 | AL161756.1  | 14 | 64329431  | 64338639 | 9208   | lncRNA-antisense                   | -1.16 | 1.48E-03 | 2.02E-02 |
| ENSG00000101670 | LIFP        | 18 | 49560699  | 49599185 | 38486  | protein coding                     | -1.16 | 1.55E-04 | 4.89E-03 |
| ENSG00000149380 | PHA3        | 11 | 74235801  | 74311640 | 75839  | protein coding                     | -1.16 | 4.90E-03 | 4.13E-02 |
| ENSG00000273032 | DGCR5       | 22 | 18970439  | 19031242 | 60803  | lncRNA                             | -1.16 | 4.58E-04 | 9.77E-03 |
| ENSG00000174527 | MYO1H       | 12 | 109347903 | 1.09E+08 | 107620 | protein coding                     | -1.16 | 1.02E-03 | 1.63E-02 |
| ENSG00000264958 | ALOX12P1    | 17 | 30529688  | 30542416 | 12728  | unprocessed pseudogene             | -1.16 | 6.20E-04 | 1.20E-02 |
| ENSG00000153558 | FBXL2       | 3  | 33277025  | 33403662 | 126637 | protein coding                     | -1.17 | 1.74E-04 | 5.29E-03 |
| ENSG00000112394 | SLC16A10    | 6  | 111087503 | 1.11E+08 | 143691 | protein coding                     | -1.17 | 7.23E-05 | 2.95E-03 |



|                 |              |    |           |          |        |                                      |       |          |          |
|-----------------|--------------|----|-----------|----------|--------|--------------------------------------|-------|----------|----------|
| ENSG00000178722 | C5orf64      | 5  | 61610424  | 61793401 | 182977 | lncRNA                               | -1.17 | 3.49E-04 | 8.24E-03 |
| ENSG00000249738 | AC008691.1   | 5  | 159310745 | 1.6E+08  | 494791 | lncRNA-antisense                     | -1.17 | 9.61E-05 | 3.63E-03 |
| ENSG00000103599 | IQCH         | 15 | 67254786  | 67502260 | 247474 | protein coding                       | -1.17 | 1.54E-04 | 4.88E-03 |
| ENSG00000122133 | PAEP         | 9  | 135561756 | 1.36E+08 | 5199   | protein coding                       | -1.17 | 5.03E-03 | 4.19E-02 |
| ENSG00000205795 | CYS1         | 2  | 10056780  | 10080944 | 24164  | protein coding                       | -1.17 | 6.44E-03 | 4.83E-02 |
| ENSG00000182704 | TSKU         | 11 | 76782251  | 76798153 | 15902  | protein coding                       | -1.17 | 5.52E-03 | 4.43E-02 |
| ENSG00000143512 | HHP1L2       | 1  | 222522258 | 2.23E+08 | 25846  | protein coding                       | -1.17 | 1.03E-03 | 1.63E-02 |
| ENSG00000259234 | ANKRD34C-AS1 | 15 | 79141939  | 79283949 | 142010 | lncRNA                               | -1.17 | 3.64E-03 | 3.48E-02 |
| ENSG00000163749 | CCDC158      | 4  | 76312997  | 76421868 | 108871 | protein coding                       | -1.17 | 6.53E-03 | 4.88E-02 |
| ENSG00000128052 | KDR          | 4  | 55078481  | 55125595 | 47114  | protein coding                       | -1.17 | 2.08E-04 | 5.86E-03 |
| ENSG00000204291 | COL15A1      | 9  | 98943179  | 99070792 | 127613 | protein coding                       | -1.17 | 1.03E-04 | 3.77E-03 |
| ENSG00000161850 | KRT82        | 12 | 52393931  | 52406335 | 12404  | protein coding                       | -1.17 | 3.78E-03 | 3.56E-02 |
| ENSG00000160882 | CYP11B1      | 8  | 142872356 | 1.43E+08 | 7490   | protein coding                       | -1.17 | 1.31E-03 | 1.88E-02 |
| ENSG00000163624 | CDS1         | 4  | 84583127  | 84651334 | 68207  | protein coding                       | -1.17 | 1.61E-03 | 2.12E-02 |
| ENSG00000232633 | AC079465.1   | 5  | 113323028 | 1.13E+08 | 114146 | lncRNA-antisense                     | -1.17 | 5.80E-03 | 4.56E-02 |
| ENSG00000278987 | AL031009.1   | 16 | 1688355   | 1690536  | 2181   | TEC                                  | -1.17 | 1.96E-03 | 1.93E-02 |
| ENSG00000163873 | GRIK3        | 1  | 36795527  | 37034515 | 238988 | protein coding                       | -1.17 | 5.16E-03 | 4.26E-02 |
| ENSG00000203650 | LINC01285    | X  | 118839539 | 1.19E+08 | 80130  | lncRNA                               | -1.17 | 5.12E-03 | 4.23E-02 |
| ENSG00000169344 | UMOD         | 16 | 20333052  | 20356301 | 23249  | protein coding                       | -1.17 | 2.51E-03 | 2.79E-02 |
| ENSG00000130368 | MAS1         | 6  | 159890988 | 1.6E+08  | 26459  | protein coding                       | -1.17 | 6.11E-03 | 4.69E-02 |
| ENSG00000249896 | LINC02495    | 4  | 6200733   | 6239937  | 39204  | inscribed unprocessed pseudogene     | -1.17 | 2.09E-04 | 5.89E-03 |
| ENSG00000007216 | SLC13A2      | 17 | 28473293  | 28497781 | 24488  | protein coding                       | -1.18 | 3.06E-03 | 3.12E-02 |
| ENSG00000185736 | ADARB2       | 10 | 1177313   | 1737525  | 560212 | protein coding                       | -1.18 | 1.79E-04 | 5.36E-03 |
| ENSG00000225556 | C2CD4D       | 1  | 151837819 | 1.52E+08 | 2738   | protein coding                       | -1.18 | 2.74E-03 | 2.93E-02 |
| ENSG00000186628 | FSD2         | 15 | 82755362  | 82806070 | 50708  | protein coding                       | -1.18 | 3.17E-04 | 7.71E-03 |
| ENSG00000156486 | KCNS2        | 8  | 98426958  | 98432853 | 5895   | protein coding                       | -1.18 | 2.87E-03 | 3.01E-02 |
| ENSG00000156218 | ADAMTSL3     | 15 | 83654088  | 84039842 | 385754 | protein coding                       | -1.18 | 1.71E-04 | 5.21E-03 |
| ENSG00000257495 | KRT73-AS1    | 12 | 52601467  | 52615305 | 13838  | lncRNA-antisense                     | -1.18 | 5.06E-04 | 1.05E-02 |
| ENSG00000149452 | SLC22A8      | 11 | 62989154  | 63015841 | 26687  | protein coding                       | -1.18 | 2.24E-03 | 2.61E-02 |
| ENSG00000157782 | CABP1        | 12 | 120640552 | 1.21E+08 | 26772  | protein coding                       | -1.18 | 1.47E-03 | 2.02E-02 |
| ENSG00000274253 | AC138649.1   | 15 | 22757841  | 22778741 | 20900  | lncRNA-sense overlapping             | -1.18 | 2.09E-03 | 2.49E-02 |
| ENSG00000267252 | LINC01255    | 18 | 11486205  | 11523087 | 36882  | lncRNA                               | -1.18 | 2.57E-03 | 2.82E-02 |
| ENSG00000287268 | AL050350.1   | 6  | 110341973 | 1.1E+08  | 12590  | lncRNA                               | -1.18 | 4.72E-03 | 4.03E-02 |
| ENSG00000054938 | CHRD12       | 11 | 74696429  | 74731426 | 34997  | protein coding                       | -1.18 | 2.45E-03 | 2.75E-02 |
| ENSG00000162493 | PDPN         | 1  | 13583465  | 13617957 | 34492  | protein coding                       | -1.18 | 3.79E-03 | 3.57E-02 |
| ENSG00000167281 | RBFOX3       | 17 | 79089345  | 79516148 | 426803 | protein coding                       | -1.18 | 1.35E-03 | 1.91E-02 |
| ENSG00000094755 | GABRP        | 5  | 170763350 | 1.71E+08 | 50697  | protein coding                       | -1.18 | 1.38E-03 | 1.94E-02 |
| ENSG00000236467 | KCNMA1-AS1   | 10 | 76888044  | 76980624 | 92580  | lncRNA-antisense                     | -1.18 | 1.83E-03 | 2.28E-02 |
| ENSG00000108602 | ALDH3A1      | 17 | 19737984  | 19748943 | 10959  | protein coding                       | -1.18 | 1.88E-03 | 2.32E-02 |
| ENSG00000183242 | WT1-AS       | 11 | 32435518  | 32458769 | 23251  | lncRNA-bidirectional promoter lncRNA | -1.18 | 4.05E-03 | 3.71E-02 |
| ENSG00000286366 | AC005052.2   | X  | 119791971 | 1.2E+08  | 18978  | lncRNA                               | -1.18 | 1.75E-03 | 2.22E-02 |
| ENSG00000249464 | LINC01091    | 4  | 123539026 | 1.24E+08 | 423672 | lncRNA                               | -1.18 | 1.59E-03 | 2.10E-02 |
| ENSG00000203697 | CAPN8        | 1  | 223538007 | 2.24E+08 | 127716 | protein coding                       | -1.18 | 2.10E-04 | 5.91E-03 |
| ENSG00000159289 | GOLGA6A      | 15 | 74069857  | 74082550 | 12693  | protein coding                       | -1.18 | 3.45E-03 | 3.36E-02 |
| ENSG00000159337 | PLA2G4D      | 15 | 42067009  | 42094562 | 27553  | protein coding                       | -1.18 | 2.67E-03 | 2.88E-02 |
| ENSG00000197253 | TPSB2        | 16 | 1227272   | 1230184  | 2912   | protein coding                       | -1.18 | 4.36E-03 | 3.86E-02 |
| ENSG00000131260 | ANO1         | 11 | 70078302  | 70189528 | 111226 | protein coding                       | -1.19 | 7.93E-04 | 1.39E-02 |
| ENSG00000136011 | STAB2        | 12 | 103587273 | 1.04E+08 | 179446 | protein coding                       | -1.19 | 3.92E-04 | 8.90E-03 |
| ENSG00000188659 | SAXO2        | 15 | 82262810  | 82284930 | 22120  | protein coding                       | -1.19 | 1.15E-03 | 1.74E-02 |
| ENSG00000136895 | GARNL3       | 9  | 127224265 | 1.27E+08 | 169395 | protein coding                       | -1.19 | 4.29E-06 | 3.69E-04 |
| ENSG00000205634 | LINC00898    | 22 | 47612231  | 47631569 | 19338  | lncRNA                               | -1.19 | 3.69E-03 | 3.51E-02 |
| ENSG00000158966 | CACHD1       | 1  | 64470129  | 64693058 | 222929 | protein coding                       | -1.19 | 9.08E-06 | 6.69E-04 |
| ENSG00000157103 | SLC6A1       | 3  | 10992186  | 11039247 | 47061  | protein coding                       | -1.19 | 1.99E-04 | 5.71E-03 |
| ENSG00000198838 | RYR3         | 15 | 33310962  | 33866121 | 555159 | protein coding                       | -1.19 | 1.13E-06 | 1.23E-04 |
| ENSG00000188316 | ENR4         | 10 | 116849499 | 1.17E+08 | 62289  | protein coding                       | -1.19 | 5.64E-03 | 4.48E-02 |
| ENSG00000132915 | PDE6A        | 5  | 149857953 | 1.5E+08  | 86840  | protein coding                       | -1.19 | 5.88E-03 | 4.60E-02 |
| ENSG00000110427 | KIAA1549L    | 11 | 33376108  | 33674102 | 297994 | protein coding                       | -1.19 | 9.30E-05 | 3.54E-03 |
| ENSG00000132561 | MATN2        | 8  | 97868840  | 98036724 | 167884 | protein coding                       | -1.19 | 8.53E-04 | 1.46E-02 |
| ENSG00000172519 | OR10H5       | 19 | 15787661  | 15801025 | 13364  | protein coding                       | -1.19 | 5.05E-03 | 4.20E-02 |
| ENSG00000166450 | PRTG         | 15 | 55611544  | 55743152 | 131608 | protein coding                       | -1.19 | 4.76E-05 | 2.24E-03 |
| ENSG00000235979 | AC004448.2   | 17 | 19417769  | 19492991 | 75222  | lncRNA                               | -1.19 | 6.20E-03 | 4.73E-02 |
| ENSG00000132554 | RGS22        | 8  | 99960936  | 1E+08    | 170332 | protein coding                       | -1.19 | 1.76E-04 | 5.32E-03 |
| ENSG00000225683 | PACRG-AS3    | 6  | 163163830 | 1.63E+08 | 28208  | lncRNA-antisense                     | -1.19 | 1.62E-03 | 2.12E-02 |
| ENSG00000144369 | FAM171B      | 2  | 186694060 | 1.87E+08 | 71899  | protein coding                       | -1.19 | 2.42E-03 | 2.73E-02 |
| ENSG00000181333 | HEP1L1       | 11 | 94021354  | 94114208 | 92854  | protein coding                       | -1.19 | 2.75E-03 | 2.94E-02 |
| ENSG00000165633 | VSTM4        | 10 | 49014236  | 49115522 | 101286 | protein coding                       | -1.19 | 1.89E-03 | 2.33E-02 |
| ENSG00000254656 | RTL1         | 14 | 100879753 | 1.01E+08 | 23969  | protein coding                       | -1.19 | 1.87E-03 | 2.31E-02 |
| ENSG00000287950 | AC009432.2   | 15 | 94455469  | 94550572 | 95103  | lncRNA                               | -1.19 | 2.34E-03 | 2.67E-02 |
| ENSG00000224271 | AL117329.1   | 22 | 47630827  | 48023004 | 392177 | lncRNA                               | -1.19 | 9.84E-05 | 3.68E-03 |
| ENSG00000272150 | NBPF25P      | 1  | 145572345 | 1.46E+08 | 35513  | inscribed unprocessed pseudogene     | -1.19 | 9.43E-06 | 6.84E-04 |
| ENSG00000135373 | EHF          | 11 | 34621093  | 34663288 | 42195  | protein coding                       | -1.19 | 3.92E-04 | 8.90E-03 |
| ENSG00000143036 | SLC44A3      | 1  | 94820342  | 94895246 | 74904  | protein coding                       | -1.19 | 6.76E-03 | 4.97E-02 |
| ENSG00000102024 | PLS3         | X  | 115561174 | 1.16E+08 | 89687  | protein coding                       | -1.19 | 6.70E-03 | 4.95E-02 |
| ENSG00000166573 | GALR1        | 18 | 77249848  | 77277900 | 28052  | protein coding                       | -1.20 | 2.67E-03 | 2.88E-02 |
| ENSG00000137809 | ITGA11       | 15 | 68296532  | 68432163 | 135631 | protein coding                       | -1.20 | 1.54E-04 | 4.88E-03 |
| ENSG00000258535 | AL079307.1   | 14 | 51765276  | 51825422 | 60146  | lncRNA-sense overlapping             | -1.20 | 6.59E-03 | 4.91E-02 |
| ENSG00000267053 | AC092296.2   | 19 | 36304564  | 36321274 | 16710  | lncRNA                               | -1.20 | 1.80E-03 | 2.11E-02 |
| ENSG00000232265 | LINC02805    | 1  | 148156139 | 1.48E+08 | 30841  | lncRNA                               | -1.20 | 2.16E-03 | 2.55E-02 |
| ENSG00000140538 | NTRK3        | 15 | 87859751  | 88256768 | 397017 | protein coding                       | -1.20 | 1.01E-06 | 1.13E-04 |
| ENSG00000203987 | AL772363.1   | 9  | 137867925 | 1.38E+08 | 24645  | lncRNA-antisense                     | -1.20 | 2.10E-03 | 2.50E-02 |
| ENSG00000234722 | LINC01287    | 7  | 153355365 | 1.53E+08 | 58620  | lncRNA                               | -1.20 | 5.88E-04 | 1.15E-02 |
| ENSG00000110169 | HPX          | 11 | 6431049   | 6442617  | 11568  | protein coding                       | -1.20 | 3.66E-03 | 3.50E-02 |
| ENSG00000214043 | LINC02347    | 12 | 126438837 | 1.26E+08 | 33953  | lncRNA                               | -1.20 | 3.09E-03 | 3.14E-02 |
| ENSG00000165685 | TMEM52B      | 12 | 10170542  | 10191801 | 21259  | protein coding                       | -1.20 | 5.61E-03 | 4.47E-02 |
| ENSG00000147206 | NXF3         | X  | 103075810 | 1.03E+08 | 17333  | protein coding                       | -1.20 | 3.99E-03 | 3.68E-02 |
| ENSG00000228793 | AL033523.1   | 6  | 3585101   | 3720081  | 134980 | lncRNA                               | -1.20 | 1.75E-04 | 5.30E-03 |
| ENSG00000185250 | PPL6         | 6  | 109390215 | 1.09E+08 | 50956  | protein coding                       | -1.20 | 2.03E-03 | 2.44E-02 |

|                 |             |    |           |          |        |                                  |       |          |          |
|-----------------|-------------|----|-----------|----------|--------|----------------------------------|-------|----------|----------|
| ENSG00000282419 | TEX13D      | X  | 124246249 | 1.24E+08 | 90614  | protein coding                   | -1.20 | 3.65E-03 | 3.49E-02 |
| ENSG00000287335 | AL139351.3  | 20 | 48025245  | 48060271 | 35026  | lncRNA                           | -1.20 | 5.37E-03 | 4.35E-02 |
| ENSG00000230387 | AL118508.1  | 20 | 23179272  | 23190419 | 11147  | lncRNA                           | -1.20 | 2.61E-03 | 2.85E-02 |
| ENSG00000287306 | AC016821.1  | 10 | 69510166  | 69544257 | 34091  | lncRNA                           | -1.20 | 5.53E-03 | 4.44E-02 |
| ENSG00000185666 | SYN3        | 22 | 32507820  | 33058381 | 550561 | protein coding                   | -1.20 | 6.59E-05 | 2.78E-03 |
| ENSG00000134042 | MRO         | 18 | 50795120  | 50825402 | 30282  | protein coding                   | -1.20 | 6.64E-03 | 4.93E-02 |
| ENSG00000284606 | AC105233.4  | 8  | 8059572   | 8199973  | 140401 | lncRNA                           | -1.20 | 2.22E-04 | 6.10E-03 |
| ENSG00000166257 | SCN3B       | 11 | 123629187 | 1.24E+08 | 26057  | protein coding                   | -1.21 | 3.70E-04 | 8.53E-03 |
| ENSG00000257398 | AC126177.3  | 12 | 107809483 | 1.08E+08 | 55079  | lncRNA                           | -1.21 | 5.19E-03 | 4.27E-02 |
| ENSG00000238212 | LINC02096   | 17 | 14834557  | 14957216 | 122659 | lncRNA                           | -1.21 | 5.58E-03 | 4.46E-02 |
| ENSG00000126337 | KRT36       | 17 | 41486136  | 41492546 | 6410   | protein coding                   | -1.21 | 4.08E-03 | 3.73E-02 |
| ENSG00000159495 | TGM7        | 15 | 43276271  | 43302255 | 25984  | protein coding                   | -1.21 | 3.56E-03 | 3.43E-02 |
| ENSG00000283213 | AC130466.1  | 16 | 22806289  | 22813680 | 7391   | lncRNA                           | -1.21 | 5.38E-03 | 4.35E-02 |
| ENSG00000229867 | STEAP3-AS1  | 2  | 119244422 | 1.19E+08 | 26292  | lncRNA-antisense                 | -1.21 | 1.20E-03 | 1.78E-02 |
| ENSG00000236501 | AC074286.1  | 2  | 176989418 | 1.77E+08 | 175238 | lncRNA                           | -1.21 | 3.17E-03 | 3.19E-02 |
| ENSG00000142910 | TINAGL1     | 1  | 31576485  | 31587686 | 11201  | protein coding                   | -1.21 | 6.89E-04 | 1.28E-02 |
| ENSG00000224184 | MIR3681HG   | 2  | 11833926  | 12702913 | 868987 | lncRNA                           | -1.21 | 8.31E-04 | 1.44E-02 |
| ENSG00000197653 | DNAH10      | 12 | 123762188 | 1.24E+08 | 173532 | protein coding                   | -1.21 | 5.84E-07 | 7.41E-05 |
| ENSG00000185842 | DNAH14      | 1  | 224896262 | 2.25E+08 | 503030 | protein coding                   | -1.21 | 1.18E-06 | 1.29E-04 |
| ENSG00000089250 | NOS1        | 12 | 117208142 | 1.17E+08 | 244028 | protein coding                   | -1.21 | 1.65E-04 | 5.09E-03 |
| ENSG00000104722 | NEFM        | 8  | 24913758  | 24919098 | 5340   | protein coding                   | -1.21 | 2.57E-03 | 2.82E-02 |
| ENSG00000235726 | AC101148.1  | 2  | 234803808 | 2.35E+08 | 109576 | lncRNA                           | -1.21 | 2.63E-03 | 2.86E-02 |
| ENSG00000228110 | ST13P19     | 1  | 210265636 | 2.1E+08  | 1605   | processed pseudogene             | -1.21 | 3.26E-03 | 3.24E-02 |
| ENSG00000162267 | ITIH3       | 3  | 52794768  | 52809009 | 14241  | protein coding                   | -1.21 | 1.47E-03 | 2.01E-02 |
| ENSG00000270885 | RASL10B     | 17 | 35731639  | 35743521 | 11882  | protein coding                   | -1.21 | 7.67E-04 | 1.36E-02 |
| ENSG00000123901 | GPR83       | 11 | 94377316  | 94401419 | 24103  | protein coding                   | -1.21 | 2.32E-03 | 2.66E-02 |
| ENSG00000137727 | ARHGAP20    | 11 | 110577042 | 1.11E+08 | 136147 | protein coding                   | -1.21 | 4.92E-04 | 1.02E-02 |
| ENSG00000142621 | FHAD1       | 1  | 15247272  | 15400283 | 153011 | protein coding                   | -1.21 | 4.18E-07 | 5.64E-05 |
| ENSG00000170537 | TM7C        | 16 | 18983934  | 19063942 | 80008  | protein coding                   | -1.21 | 4.36E-04 | 9.48E-03 |
| ENSG00000255774 | LINC02747   | 11 | 69475567  | 69481545 | 5978   | lncRNA                           | -1.21 | 5.92E-03 | 4.61E-02 |
| ENSG00000286125 | AC006115.2  | 19 | 56669941  | 56823395 | 153454 | lncRNA                           | -1.21 | 1.26E-04 | 4.31E-03 |
| ENSG00000161270 | NPHS1       | 19 | 35825372  | 35869287 | 43915  | protein coding                   | -1.21 | 9.18E-04 | 1.53E-02 |
| ENSG00000197565 | COL4A6      | X  | 108155607 | 1.08E+08 | 283890 | protein coding                   | -1.21 | 4.12E-03 | 3.75E-02 |
| ENSG00000166948 | TGM6        | 20 | 2380901   | 2432753  | 51852  | protein coding                   | -1.21 | 2.29E-03 | 2.64E-02 |
| ENSG00000108852 | MPP2        | 17 | 43875357  | 43909711 | 34354  | protein coding                   | -1.21 | 1.52E-04 | 4.87E-03 |
| ENSG00000243478 | AOX2P       | 2  | 200738608 | 2.01E+08 | 55631  | inscribed unprocessed pseudogene | -1.21 | 5.26E-03 | 4.30E-02 |
| ENSG00000235054 | LINC01777   | 1  | 4412027   | 4424689  | 12662  | lncRNA                           | -1.21 | 1.74E-03 | 2.22E-02 |
| ENSG00000128254 | C22orf24    | 22 | 31925519  | 31945518 | 19999  | lncRNA                           | -1.21 | 1.73E-04 | 5.25E-03 |
| ENSG00000161940 | BCL6B       | 17 | 7023050   | 7030290  | 7240   | protein coding                   | -1.21 | 3.58E-03 | 3.45E-02 |
| ENSG00000228021 | AL158835.1  | 10 | 125683229 | 1.26E+08 | 26448  | lncRNA                           | -1.21 | 4.71E-03 | 4.03E-02 |
| ENSG00000166407 | LMO1        | 11 | 8224309   | 8268716  | 44407  | protein coding                   | -1.22 | 6.51E-03 | 4.87E-02 |
| ENSG00000225511 | LINC00475   | 9  | 92141298  | 92160114 | 18816  | inscribed unprocessed pseudogene | -1.22 | 6.04E-03 | 4.66E-02 |
| ENSG00000235033 | DAAM2-AS1   | 6  | 39881804  | 39900071 | 18267  | lncRNA-antisense                 | -1.22 | 1.64E-04 | 5.08E-03 |
| ENSG00000177453 | NIM1K       | 5  | 43192071  | 43280850 | 88779  | protein coding                   | -1.22 | 2.99E-04 | 7.44E-03 |
| ENSG00000254427 | LINC02696   | 11 | 45355371  | 45367490 | 12119  | lncRNA                           | -1.22 | 4.71E-05 | 2.23E-03 |
| ENSG00000247809 | NR2F2-AS1   | 15 | 96110040  | 96327361 | 217321 | lncRNA-antisense                 | -1.22 | 8.78E-05 | 3.40E-03 |
| ENSG00000273777 | CEACAM20    | 19 | 44501677  | 44529788 | 28111  | protein coding                   | -1.22 | 5.80E-03 | 4.56E-02 |
| ENSG00000063438 | AHRR        | 5  | 321759    | 438291   | 116532 | protein coding                   | -1.22 | 4.27E-04 | 9.34E-03 |
| ENSG00000183760 | ACP7        | 19 | 39083913  | 39111493 | 27580  | protein coding                   | -1.22 | 5.56E-03 | 4.46E-02 |
| ENSG00000249593 | AC011405.1  | 5  | 139012647 | 1.39E+08 | 38556  | lncRNA-antisense                 | -1.22 | 3.73E-03 | 3.54E-02 |
| ENSG00000261713 | SSTR5-AS1   | 16 | 1064093   | 1078731  | 14638  | lncRNA                           | -1.22 | 2.91E-03 | 3.03E-02 |
| ENSG00000198203 | SULT1C2     | 2  | 108288639 | 1.08E+08 | 21276  | protein coding                   | -1.22 | 2.63E-03 | 2.86E-02 |
| ENSG00000141934 | PLPP2       | 19 | 281040    | 291403   | 10363  | protein coding                   | -1.22 | 8.33E-04 | 1.44E-02 |
| ENSG00000244405 | ETV5        | 3  | 186046314 | 1.86E+08 | 64004  | protein coding                   | -1.22 | 9.83E-05 | 3.68E-03 |
| ENSG00000226571 | AL592429.2  | 6  | 139271362 | 1.4E+08  | 395922 | lncRNA-antisense                 | -1.22 | 1.12E-06 | 6.71E-04 |
| ENSG00000137819 | PAQR5       | 15 | 69298912  | 69407780 | 108868 | protein coding                   | -1.22 | 3.82E-03 | 3.59E-02 |
| ENSG00000286010 | AC108925.1  | 8  | 127663280 | 1.28E+08 | 7710   | lncRNA                           | -1.22 | 2.21E-05 | 1.26E-03 |
| ENSG00000280109 | PLAC4       | 21 | 41175231  | 41186788 | 11557  | lncRNA-antisense                 | -1.22 | 1.54E-04 | 4.88E-03 |
| ENSG00000173947 | P1FO        | 1  | 111346600 | 1.11E+08 | 6413   | protein coding                   | -1.22 | 5.03E-03 | 4.19E-02 |
| ENSG00000168418 | KCNG4       | 16 | 84218667  | 84239750 | 21083  | protein coding                   | -1.22 | 1.42E-03 | 1.97E-02 |
| ENSG00000143469 | SYT14       | 1  | 209900923 | 2.1E+08  | 270466 | protein coding                   | -1.22 | 1.92E-03 | 2.35E-02 |
| ENSG00000166250 | CLMP        | 11 | 123069872 | 1.23E+08 | 125376 | protein coding                   | -1.22 | 1.29E-03 | 1.87E-02 |
| ENSG00000153012 | LG12        | 4  | 24998847  | 25030946 | 32099  | protein coding                   | -1.23 | 2.99E-03 | 3.08E-02 |
| ENSG00000277270 | AL160412.1  | 20 | 61432868  | 61437630 | 4762   | lncRNA                           | -1.23 | 3.64E-03 | 3.48E-02 |
| ENSG00000126878 | AIF1L       | 9  | 131096476 | 1.31E+08 | 26676  | protein coding                   | -1.23 | 1.78E-03 | 2.25E-02 |
| ENSG00000223561 | AC005165.1  | 7  | 25593304  | 25751032 | 157728 | lncRNA                           | -1.23 | 1.17E-04 | 4.11E-03 |
| ENSG00000086717 | PPEF1       | X  | 18675909  | 18827921 | 152012 | protein coding                   | -1.23 | 2.03E-03 | 2.44E-02 |
| ENSG00000186510 | CLCNKA      | 1  | 16018875  | 16034050 | 15175  | protein coding                   | -1.23 | 6.75E-04 | 1.26E-02 |
| ENSG00000157131 | C8A         | 1  | 56854797  | 56918223 | 63426  | protein coding                   | -1.23 | 3.28E-03 | 3.25E-02 |
| ENSG00000277531 | PNMA8C      | 19 | 46424697  | 46428951 | 4254   | protein coding                   | -1.23 | 5.38E-03 | 4.35E-02 |
| ENSG00000101463 | SYNDIG1     | 20 | 24469629  | 24666616 | 196987 | protein coding                   | -1.23 | 6.29E-03 | 4.78E-02 |
| ENSG00000123094 | RASSF8      | 12 | 25959029  | 26079892 | 120863 | protein coding                   | -1.23 | 3.05E-03 | 3.11E-02 |
| ENSG00000285707 | AL008720.1  | 22 | 48254903  | 48259116 | 4213   | lncRNA                           | -1.23 | 6.08E-03 | 4.68E-02 |
| ENSG00000171903 | CYP4F11     | 19 | 15912367  | 15934867 | 22500  | protein coding                   | -1.23 | 6.32E-03 | 4.79E-02 |
| ENSG00000007174 | DNAH9       | 17 | 11598470  | 11969748 | 371278 | protein coding                   | -1.23 | 1.17E-05 | 7.94E-04 |
| ENSG00000133020 | MYH8        | 17 | 10390322  | 10421950 | 31628  | protein coding                   | -1.23 | 1.30E-03 | 1.88E-02 |
| ENSG00000263745 | AP005230.1  | 18 | 1883524   | 2489426  | 605902 | lncRNA                           | -1.23 | 5.88E-03 | 4.60E-02 |
| ENSG00000235049 | LINC00940   | 12 | 1929202   | 1936574  | 7372   | lncRNA                           | -1.23 | 3.15E-03 | 3.18E-02 |
| ENSG00000140557 | ST8SIA2     | 15 | 92393881  | 92468728 | 74847  | protein coding                   | -1.23 | 1.34E-03 | 1.91E-02 |
| ENSG00000259426 | AC027237.3  | 15 | 69396904  | 69415029 | 18125  | lncRNA-antisense                 | -1.23 | 5.73E-03 | 4.52E-02 |
| ENSG00000261529 | AC100774.1  | 15 | 25345633  | 25347235 | 1602   | lncRNA-sense intronic            | -1.23 | 1.71E-03 | 2.19E-02 |
| ENSG00000239445 | ST3GAL6-AS1 | 3  | 98706236  | 98732757 | 26521  | lncRNA-antisense                 | -1.23 | 6.47E-04 | 1.23E-02 |
| ENSG00000249628 | LINC00942   | 12 | 1500525   | 1504424  | 3899   | lncRNA                           | -1.24 | 6.23E-03 | 4.74E-02 |
| ENSG00000249478 | AC010307.3  | 5  | 133243764 | 1.33E+08 | 5017   | lncRNA-antisense                 | -1.24 | 5.71E-03 | 4.51E-02 |
| ENSG00000152670 | DDX4        | 5  | 55738017  | 55817157 | 79140  | protein coding                   | -1.24 | 4.14E-03 | 3.76E-02 |
| ENSG00000183778 | B3GALT5     | 21 | 39556442  | 39673137 | 116695 | protein coding                   | -1.24 | 3.45E-04 | 8.21E-03 |
| ENSG00000226659 | AC021028.1  | 10 | 80529597  | 80535942 | 6345   | lncRNA-antisense                 | -1.24 | 7.97E-06 | 6.08E-04 |

|                 |             |    |           |          |        |                                    |       |          |          |
|-----------------|-------------|----|-----------|----------|--------|------------------------------------|-------|----------|----------|
| ENSG00000154639 | CXADR       | 21 | 17513043  | 17593579 | 80536  | protein coding                     | -1.24 | 6.23E-04 | 1.20E-02 |
| ENSG00000170615 | SLC26A5     | 7  | 103352730 | 1.03E+08 | 93477  | protein coding                     | -1.24 | 5.34E-03 | 4.34E-02 |
| ENSG00000158560 | DYNC111     | 7  | 95772506  | 96110322 | 337816 | protein coding                     | -1.24 | 4.04E-03 | 3.71E-02 |
| ENSG00000152954 | NRSN1       | 6  | 24126186  | 24154900 | 28714  | protein coding                     | -1.24 | 4.44E-03 | 3.90E-02 |
| ENSG00000214832 | UPF3AP2     | 17 | 20375369  | 20376840 | 1471   | transcribed processed pseudogene   | -1.24 | 1.50E-03 | 2.04E-02 |
| ENSG00000120820 | GLT8D2      | 12 | 103988984 | 1.04E+08 | 75199  | protein coding                     | -1.24 | 6.69E-03 | 4.94E-02 |
| ENSG00000255769 | GOLGA2P10   | 15 | 82472993  | 82513950 | 40957  | transcribed unprocessed pseudogene | -1.24 | 2.17E-04 | 5.99E-03 |
| ENSG00000257884 | AL512310.7  | 14 | 19677837  | 19680104 | 2267   | transcribed processed pseudogene   | -1.24 | 2.56E-03 | 2.82E-02 |
| ENSG00000154975 | CA10        | 17 | 51630313  | 52160017 | 529704 | protein coding                     | -1.24 | 1.64E-03 | 2.14E-02 |
| ENSG00000250423 | KIAA1210    | X  | 119078635 | 1.19E+08 | 71944  | protein coding                     | -1.24 | 5.88E-03 | 4.60E-02 |
| ENSG00000214652 | ZNF727      | 7  | 64045434  | 64085339 | 39905  | protein coding                     | -1.24 | 1.26E-04 | 4.32E-03 |
| ENSG00000267489 | LINC01837   | 19 | 31797666  | 32072113 | 274447 | lncRNA                             | -1.24 | 5.13E-04 | 1.06E-02 |
| ENSG00000258702 | AL137786.1  | 14 | 96592399  | 96605974 | 13575  | lncRNA                             | -1.24 | 2.40E-03 | 2.71E-02 |
| ENSG00000197748 | CFAP43      | 10 | 104129888 | 1.04E+08 | 102476 | protein coding                     | -1.24 | 9.13E-04 | 1.52E-02 |
| ENSG00000119715 | ESRRB       | 14 | 76310712  | 76501837 | 191125 | protein coding                     | -1.24 | 3.05E-03 | 3.11E-02 |
| ENSG00000153246 | PLA2R1      | 2  | 159932006 | 1.6E+08  | 130609 | protein coding                     | -1.24 | 4.27E-04 | 9.34E-03 |
| ENSG00000224609 | HSD52       | 1  | 59131932  | 59296491 | 164559 | lncRNA                             | -1.24 | 1.14E-03 | 1.73E-02 |
| ENSG00000259370 | AC103740.1  | 15 | 62827675  | 62884034 | 56359  | lncRNA-antisense                   | -1.24 | 4.91E-03 | 4.13E-02 |
| ENSG00000275016 | AC015574.1  | 15 | 95638316  | 95826499 | 188183 | lncRNA                             | -1.24 | 1.04E-03 | 1.64E-02 |
| ENSG00000285679 | AC079142.1  | X  | 7928443   | 8374386  | 445943 | lncRNA-antisense                   | -1.24 | 6.79E-03 | 4.99E-02 |
| ENSG00000188916 | INSYNA      | 10 | 127135426 | 1.27E+08 | 61165  | protein coding                     | -1.25 | 3.87E-03 | 3.61E-02 |
| ENSG00000166473 | PKD1L2      | 16 | 81100875  | 81220370 | 119495 | polymorphic pseudogene             | -1.25 | 4.05E-04 | 9.06E-03 |
| ENSG00000246863 | GPR176-DT   | 15 | 39921042  | 39925880 | 4838   | lncRNA                             | -1.25 | 3.70E-03 | 3.52E-02 |
| ENSG00000168491 | CCDC110     | 4  | 185445182 | 1.85E+08 | 26570  | protein coding                     | -1.25 | 5.38E-03 | 4.35E-02 |
| ENSG00000254561 | AP003393.1  | 11 | 119608423 | 1.2E+08  | 50861  | lncRNA-antisense                   | -1.25 | 1.62E-03 | 2.12E-02 |
| ENSG00000286733 | LINC02348   | 15 | 101602786 | 1.02E+08 | 11745  | lncRNA                             | -1.25 | 1.85E-04 | 5.46E-03 |
| ENSG00000175745 | NR2F1       | 5  | 93583222  | 93594611 | 11389  | protein coding                     | -1.25 | 3.82E-03 | 3.59E-02 |
| ENSG00000260714 | AC133552.1  | 16 | 25015978  | 25021023 | 5045   | processed pseudogene               | -1.25 | 3.19E-03 | 3.20E-02 |
| ENSG00000170091 | NSG2        | 5  | 174045706 | 1.74E+08 | 197795 | protein coding                     | -1.25 | 4.21E-03 | 3.80E-02 |
| ENSG00000233321 | LINC02669   | 10 | 3433508   | 3502915  | 69407  | lncRNA                             | -1.25 | 1.42E-03 | 1.97E-02 |
| ENSG00000168481 | LG13        | 8  | 22146830  | 22157084 | 10254  | protein coding                     | -1.25 | 1.43E-03 | 1.98E-02 |
| ENSG00000174502 | SLC26A9     | 1  | 205913048 | 2.06E+08 | 30412  | protein coding                     | -1.25 | 1.16E-03 | 1.75E-02 |
| ENSG00000130176 | CNN1        | 19 | 11538767  | 11550323 | 11556  | protein coding                     | -1.25 | 1.11E-04 | 3.95E-03 |
| ENSG00000230010 | AL049646.1  | 20 | 18289343  | 18359300 | 69957  | lncRNA                             | -1.25 | 4.53E-03 | 3.95E-02 |
| ENSG00000198300 | PEG3        | 19 | 56810077  | 56840728 | 30651  | protein coding                     | -1.25 | 7.97E-04 | 1.40E-02 |
| ENSG00000245614 | DDX11-AS1   | 12 | 31019434  | 31073847 | 54413  | lncRNA-antisense                   | -1.25 | 1.92E-03 | 2.35E-02 |
| ENSG00000261610 | AP00265.1   | 21 | 32259804  | 32261585 | 1781   | lncRNA                             | -1.25 | 4.71E-03 | 4.03E-02 |
| ENSG00000258647 | LINC00930   | 15 | 92567817  | 92574529 | 6712   | lncRNA                             | -1.25 | 1.73E-03 | 2.21E-02 |
| ENSG00000155761 | SPAG17      | 1  | 117953590 | 1.18E+08 | 231638 | protein coding                     | -1.25 | 3.96E-04 | 8.93E-03 |
| ENSG00000177992 | SPATA31E1   | 9  | 87882877  | 87888903 | 6026   | protein coding                     | -1.25 | 4.26E-04 | 9.34E-03 |
| ENSG00000198691 | ABCA4       | 1  | 93992834  | 94121148 | 128314 | protein coding                     | -1.25 | 1.04E-03 | 1.64E-02 |
| ENSG00000183273 | CCDC60      | 12 | 119334712 | 1.2E+08  | 206328 | protein coding                     | -1.25 | 6.70E-03 | 4.95E-02 |
| ENSG00000266573 | AC018697.1  | 18 | 24725762  | 24986980 | 261218 | lncRNA                             | -1.25 | 2.37E-03 | 2.69E-02 |
| ENSG00000226792 | C13orf42    | 13 | 51082119  | 51200252 | 118133 | protein coding                     | -1.25 | 2.30E-03 | 2.65E-02 |
| ENSG00000245768 | AC106793.1  | 16 | 58733910  | 59199395 | 465485 | lncRNA                             | -1.25 | 6.44E-03 | 4.83E-02 |
| ENSG00000140093 | SERPINA10   | 14 | 94280460  | 94293268 | 12808  | protein coding                     | -1.25 | 5.19E-03 | 4.27E-02 |
| ENSG0000007062  | PROM1       | 4  | 15963076  | 16084378 | 121302 | protein coding                     | -1.26 | 3.77E-04 | 8.66E-03 |
| ENSG00000255346 | NOX5        | 15 | 68930525  | 69062762 | 132237 | protein coding                     | -1.26 | 1.66E-03 | 2.16E-02 |
| ENSG00000123560 | PLP1        | X  | 103773718 | 1.04E+08 | 18901  | protein coding                     | -1.26 | 6.29E-03 | 4.78E-02 |
| ENSG00000129451 | KLK10       | 19 | 51012739  | 51020175 | 7436   | protein coding                     | -1.26 | 1.02E-03 | 1.63E-02 |
| ENSG00000158055 | GRHL3       | 1  | 24319357  | 24364482 | 45125  | protein coding                     | -1.26 | 5.69E-03 | 4.50E-02 |
| ENSG00000287677 | AC025839.1  | 8  | 141581658 | 1.42E+08 | 80551  | lncRNA                             | -1.26 | 7.45E-04 | 1.34E-02 |
| ENSG00000136750 | GAD2        | 10 | 26216665  | 26304558 | 87893  | protein coding                     | -1.26 | 5.23E-04 | 1.07E-02 |
| ENSG00000279685 | MAPT-IT1    | 17 | 45895783  | 45898798 | 3015   | lncRNA-sense intronic              | -1.26 | 3.04E-03 | 3.10E-02 |
| ENSG00000271447 | MMP28       | 17 | 35756249  | 35795707 | 39458  | protein coding                     | -1.26 | 5.31E-05 | 2.40E-03 |
| ENSG00000274659 | LINC02371   | 12 | 2740064   | 2746662  | 6598   | lncRNA                             | -1.26 | 4.34E-03 | 3.85E-02 |
| ENSG00000256612 | CYP2B7P     | 19 | 40924219  | 40950660 | 26441  | transcribed unprocessed pseudogene | -1.26 | 2.92E-03 | 3.03E-02 |
| ENSG00000143520 | FLG2        | 1  | 152348735 | 1.52E+08 | 11271  | protein coding                     | -1.26 | 3.54E-04 | 8.32E-03 |
| ENSG00000155530 | LRGUK       | 7  | 134127299 | 1.34E+08 | 137292 | protein coding                     | -1.26 | 2.87E-04 | 7.22E-03 |
| ENSG00000173809 | TDRD12      | 19 | 32719753  | 32829580 | 109827 | protein coding                     | -1.26 | 1.63E-05 | 1.00E-03 |
| ENSG00000137225 | CAPN11      | 6  | 44158811  | 44184401 | 25590  | protein coding                     | -1.26 | 1.16E-03 | 1.75E-02 |
| ENSG00000233304 | LINC01346   | 1  | 3940486   | 3955262  | 14776  | lncRNA                             | -1.26 | 1.53E-03 | 2.06E-02 |
| ENSG00000287514 | AL450267.2  | 9  | 36779475  | 36830456 | 50981  | lncRNA                             | -1.26 | 2.44E-04 | 6.51E-03 |
| ENSG00000227115 | LINC01630   | 18 | 51346249  | 51643939 | 297690 | lncRNA                             | -1.26 | 5.99E-05 | 2.60E-03 |
| ENSG00000071539 | TRIP13      | 5  | 892884    | 919357   | 26473  | protein coding                     | -1.26 | 3.83E-04 | 8.76E-03 |
| ENSG00000126218 | F10         | 13 | 113122799 | 1.13E+08 | 26730  | protein coding                     | -1.26 | 1.53E-03 | 2.06E-02 |
| ENSG00000087245 | MMP2        | 16 | 55389700  | 55506691 | 116991 | protein coding                     | -1.26 | 1.84E-03 | 2.29E-02 |
| ENSG00000130829 | DUSP9       | X  | 153642492 | 1.54E+08 | 8834   | protein coding                     | -1.26 | 5.60E-03 | 4.47E-02 |
| ENSG00000148702 | HABP2       | 10 | 113550837 | 1.14E+08 | 38765  | protein coding                     | -1.27 | 8.19E-04 | 1.42E-02 |
| ENSG00000174482 | LINGO2      | 9  | 27948078  | 28670286 | 722208 | protein coding                     | -1.27 | 2.47E-03 | 2.76E-02 |
| ENSG00000214719 | AC005562.1  | 17 | 30576464  | 30672789 | 96325  | lncRNA                             | -1.27 | 2.91E-04 | 7.30E-03 |
| ENSG00000279467 | AP000350.8  | 22 | 23865248  | 23873277 | 8029   | lncRNA-antisense                   | -1.27 | 1.60E-03 | 2.11E-02 |
| ENSG00000095627 | TDRD1       | 10 | 114179270 | 1.14E+08 | 53034  | protein coding                     | -1.27 | 1.80E-03 | 2.26E-02 |
| ENSG00000250986 | LINC02600   | 4  | 3758748   | 3763390  | 4642   | lncRNA                             | -1.27 | 2.53E-03 | 2.80E-02 |
| ENSG00000142623 | PADI1       | 1  | 17205128  | 17246007 | 40879  | protein coding                     | -1.27 | 1.19E-03 | 1.78E-02 |
| ENSG00000253311 | LINC01847   | 5  | 159698586 | 1.6E+08  | 239180 | lncRNA-antisense                   | -1.27 | 6.21E-03 | 4.74E-02 |
| ENSG00000273111 | LYPD4       | 19 | 41837074  | 41844697 | 7623   | protein coding                     | -1.27 | 5.64E-03 | 4.48E-02 |
| ENSG00000165863 | C10orf82    | 10 | 116663696 | 1.17E+08 | 6568   | protein coding                     | -1.27 | 4.05E-03 | 3.71E-02 |
| ENSG00000170500 | LONRF2      | 2  | 100271875 | 1E+08    | 50626  | protein coding                     | -1.27 | 1.05E-04 | 3.82E-03 |
| ENSG00000224081 | SLC44A3-AS1 | 1  | 94613814  | 94855426 | 241612 | transcribed processed pseudogene   | -1.27 | 4.00E-05 | 1.97E-03 |
| ENSG00000225868 | AC016582.1  | 19 | 37823722  | 37855215 | 31493  | transcribed unprocessed pseudogene | -1.27 | 4.58E-03 | 3.98E-02 |
| ENSG00000124334 | IL9R        | X  | 155997581 | 1.56E+08 | 13326  | protein coding                     | -1.27 | 1.32E-03 | 1.90E-02 |
| ENSG00000141314 | RHBDL3      | 17 | 32265832  | 32324659 | 58827  | protein coding                     | -1.27 | 1.85E-03 | 2.29E-02 |
| ENSG00000260071 | AC012178.1  | 16 | 9365540   | 9518325  | 152785 | lncRNA                             | -1.27 | 1.85E-03 | 2.30E-02 |
| ENSG00000075429 | CACNG5      | 17 | 66835117  | 66894751 | 59634  | protein coding                     | -1.27 | 4.37E-04 | 9.48E-03 |
| ENSG00000130950 | NUTM2F      | 9  | 94318196  | 94328644 | 10448  | protein coding                     | -1.27 | 1.97E-03 | 2.39E-02 |
| ENSG00000234948 | LINC01524   | 20 | 52192159  | 52670578 | 478419 | lncRNA                             | -1.28 | 1.01E-05 | 7.23E-04 |

|                 |            |    |           |          |        |                                |       |          |          |
|-----------------|------------|----|-----------|----------|--------|--------------------------------|-------|----------|----------|
| ENSG00000261420 | AL022069.1 | 6  | 166383189 | 1.66E+08 | 1635   | lncRNA-antisense               | -1.28 | 4.26E-03 | 3.82E-02 |
| ENSG00000170848 | PSG6       | 19 | 42902086  | 42919563 | 17477  | protein coding                 | -1.28 | 3.03E-03 | 3.10E-02 |
| ENSG00000243710 | CFAP57     | 1  | 43172330  | 43254358 | 82028  | protein coding                 | -1.28 | 3.93E-04 | 8.90E-03 |
| ENSG00000172320 | OR5A1      | 11 | 59436469  | 59451380 | 14911  | protein coding                 | -1.28 | 6.53E-03 | 4.88E-02 |
| ENSG00000167139 | TBC1D21    | 15 | 73873564  | 73889214 | 15650  | protein coding                 | -1.28 | 2.93E-03 | 3.05E-02 |
| ENSG00000166828 | SCNN1G     | 16 | 23182745  | 23216883 | 34138  | protein coding                 | -1.28 | 2.85E-03 | 3.00E-02 |
| ENSG00000272595 | OR10AH1P   | 7  | 5103719   | 5120245  | 16526  | inscribed_unprocessed_pseudoge | -1.28 | 1.58E-03 | 2.10E-02 |
| ENSG00000279085 | AL022323.2 | 22 | 25009685  | 25015072 | 5387   | lncRNA-antisense               | -1.28 | 2.82E-03 | 2.98E-02 |
| ENSG00000102678 | FGF9       | 13 | 21671073  | 21704498 | 33425  | protein coding                 | -1.28 | 3.67E-04 | 8.51E-03 |
| ENSG00000039139 | DNAH5      | 5  | 13690331  | 13944543 | 254212 | protein coding                 | -1.28 | 8.22E-05 | 3.25E-03 |
| ENSG00000138083 | SIX3       | 2  | 44941702  | 44946071 | 4369   | protein coding                 | -1.28 | 5.13E-03 | 4.24E-02 |
| ENSG00000166359 | WDR88      | 19 | 33132090  | 33175799 | 43709  | protein coding                 | -1.28 | 6.64E-04 | 1.25E-02 |
| ENSG00000236963 | LINC01141  | 1  | 20360579  | 20431234 | 70655  | lncRNA                         | -1.28 | 3.23E-03 | 3.23E-02 |
| ENSG00000286326 | Z95115.2   | 22 | 26597028  | 26611453 | 14425  | lncRNA                         | -1.28 | 6.82E-04 | 1.27E-02 |
| ENSG00000267779 | LINC01533  | 19 | 32025808  | 32073809 | 48001  | lncRNA                         | -1.28 | 2.02E-03 | 2.43E-02 |
| ENSG00000164287 | CDC20B     | 5  | 55112971  | 55173177 | 60206  | protein coding                 | -1.28 | 2.66E-03 | 2.87E-02 |
| ENSG00000237938 | AL450998.2 | 1  | 15720312  | 15736896 | 16584  | lncRNA-antisense               | -1.28 | 4.15E-03 | 3.77E-02 |
| ENSG00000201098 | RNY1       | 7  | 148987136 | 1.49E+08 | 112    | misc RNA                       | -1.28 | 1.61E-06 | 1.67E-04 |
| ENSG00000270638 | AL023806.1 | 6  | 145735570 | 1.46E+08 | 1648   | lncRNA                         | -1.28 | 2.29E-04 | 6.22E-03 |
| ENSG00000064218 | DMRT3      | 9  | 976655    | 991732   | 15077  | protein coding                 | -1.28 | 5.40E-03 | 4.36E-02 |
| ENSG00000223646 | AC002463.1 | 7  | 112616440 | 1.13E+08 | 280185 | lncRNA                         | -1.29 | 1.33E-03 | 1.90E-02 |
| ENSG00000212232 | SNORD17    | 20 | 17962710  | 17962946 | 236    | snoRNA                         | -1.29 | 2.25E-03 | 2.61E-02 |
| ENSG00000089101 | CFAP61     | 20 | 20052514  | 20360703 | 308189 | protein coding                 | -1.29 | 1.99E-04 | 5.72E-03 |
| ENSG00000213853 | EMP2       | 16 | 10528422  | 10580362 | 52210  | protein coding                 | -1.29 | 1.25E-04 | 4.28E-03 |
| ENSG00000267452 | LINC02073  | 17 | 51336646  | 51521401 | 184755 | lncRNA                         | -1.29 | 9.71E-05 | 3.66E-03 |
| ENSG00000108417 | KRT37      | 17 | 41420547  | 41424585 | 4038   | protein coding                 | -1.29 | 6.81E-03 | 4.99E-02 |
| ENSG00000280356 | AL021877.2 | 22 | 34641179  | 34651862 | 10683  | lncRNA                         | -1.29 | 6.85E-04 | 1.27E-02 |
| ENSG00000235172 | LINC01366  | 5  | 170307722 | 1.7E+08  | 27786  | lncRNA                         | -1.29 | 5.25E-03 | 4.29E-02 |
| ENSG00000285996 | AC006116.9 | 19 | 56380230  | 56383924 | 3694   | lncRNA-antisense               | -1.29 | 1.32E-03 | 1.90E-02 |
| ENSG00000053747 | LAMA3      | 18 | 23689453  | 23956222 | 266769 | protein coding                 | -1.29 | 3.02E-05 | 1.58E-03 |
| ENSG00000158077 | NLRP14     | 11 | 7020479   | 7071526  | 51047  | protein coding                 | -1.29 | 1.45E-03 | 2.00E-02 |
| ENSG00000275152 | CCL16      | 17 | 35976493  | 35981497 | 5004   | protein coding                 | -1.29 | 3.00E-03 | 3.09E-02 |
| ENSG00000237361 | TUSC8      | 13 | 44400250  | 44405984 | 5734   | lncRNA                         | -1.29 | 5.91E-03 | 4.61E-02 |
| ENSG00000100867 | DHRS2      | 14 | 23630115  | 23645639 | 15524  | protein coding                 | -1.29 | 2.94E-04 | 7.36E-03 |
| ENSG00000235358 | AC093151.2 | 1  | 41242373  | 41284861 | 42488  | lncRNA                         | -1.29 | 1.47E-03 | 2.02E-02 |
| ENSG00000231290 | APCDD1L-DT | 20 | 58515379  | 58619888 | 104509 | lncRNA                         | -1.29 | 2.19E-04 | 6.04E-03 |
| ENSG00000228412 | LNC-LBCS   | 6  | 19323428  | 19839080 | 515652 | lncRNA-antisense               | -1.29 | 3.96E-04 | 8.93E-03 |
| ENSG00000226937 | CEP164P1   | 10 | 45002222  | 45076066 | 73844  | anscribed processed pseudogen  | -1.29 | 3.37E-03 | 3.31E-02 |
| ENSG00000139364 | TMEM132B   | 12 | 125186836 | 1.26E+08 | 475441 | protein coding                 | -1.29 | 1.23E-04 | 4.25E-03 |
| ENSG00000255556 | AC087203.2 | 8  | 12378679  | 12380265 | 1586   | processed pseudogene           | -1.29 | 5.59E-03 | 4.47E-02 |
| ENSG00000250900 | TRIM7-AS1  | 5  | 181195496 | 1.81E+08 | 7607   | lncRNA-antisense               | -1.29 | 3.61E-03 | 3.46E-02 |
| ENSG00000150510 | FAM124A    | 13 | 51222334  | 51284239 | 61905  | protein coding                 | -1.29 | 1.24E-04 | 4.26E-03 |
| ENSG00000259275 | AC087477.2 | 15 | 96354237  | 96405235 | 50998  | lncRNA                         | -1.29 | 4.78E-03 | 4.07E-02 |
| ENSG00000268388 | FENDRR     | 16 | 86474529  | 86509099 | 34570  | lncRNA                         | -1.29 | 1.13E-04 | 3.99E-03 |
| ENSG00000286462 | AC092850.2 | 12 | 131310045 | 1.31E+08 | 2766   | lncRNA                         | -1.29 | 5.53E-03 | 4.44E-02 |
| ENSG00000143921 | ABC8       | 2  | 43831942  | 43882988 | 51046  | protein coding                 | -1.29 | 6.66E-04 | 1.25E-02 |
| ENSG00000279440 | AL008638.3 | 22 | 27019369  | 27024550 | 5181   | lncRNA                         | -1.30 | 5.27E-03 | 4.30E-02 |
| ENSG00000187079 | TEAD1      | 11 | 12674421  | 12944737 | 270316 | protein coding                 | -1.30 | 4.12E-04 | 9.17E-03 |
| ENSG00000196758 | AC079612.1 | 2  | 239578301 | 2.4E+08  | 7793   | lncRNA                         | -1.30 | 2.53E-03 | 2.80E-02 |
| ENSG00000226903 | LINC00354  | 13 | 111865136 | 1.12E+08 | 36128  | lncRNA                         | -1.30 | 2.95E-03 | 3.06E-02 |
| ENSG00000100234 | TIMP3      | 22 | 32801705  | 32863041 | 61336  | protein coding                 | -1.30 | 3.62E-04 | 8.43E-03 |
| ENSG00000101306 | MYLK2      | 20 | 31819308  | 31834689 | 15381  | protein coding                 | -1.30 | 3.05E-03 | 3.11E-02 |
| ENSG00000179314 | WSCR1      | 17 | 6057807   | 6124427  | 66620  | protein coding                 | -1.30 | 1.64E-04 | 5.08E-03 |
| ENSG00000185985 | SLITRK2    | X  | 145817829 | 1.46E+08 | 12027  | protein coding                 | -1.30 | 1.19E-03 | 1.78E-02 |
| ENSG00000265313 | LINC01476  | 17 | 59422088  | 59526946 | 104858 | lncRNA                         | -1.30 | 1.44E-03 | 1.98E-02 |
| ENSG00000144191 | CNGA3      | 2  | 98346188  | 98398601 | 52413  | protein coding                 | -1.30 | 4.09E-03 | 3.73E-02 |
| ENSG00000109832 | DDX25      | 11 | 125903348 | 1.26E+08 | 40354  | protein coding                 | -1.30 | 1.75E-04 | 5.29E-03 |
| ENSG00000188523 | CFAP77     | 9  | 132410043 | 1.33E+08 | 163276 | protein coding                 | -1.30 | 5.04E-03 | 4.20E-02 |
| ENSG00000127472 | PLA2G5     | 1  | 20028179  | 20091911 | 63732  | protein coding                 | -1.30 | 2.18E-03 | 2.56E-02 |
| ENSG00000275830 | AL390755.1 | 13 | 109988097 | 1.1E+08  | 141039 | lncRNA                         | -1.30 | 5.60E-03 | 4.47E-02 |
| ENSG00000170324 | FRMPD2     | 10 | 48153088  | 48274696 | 121608 | protein coding                 | -1.30 | 1.51E-04 | 4.82E-03 |
| ENSG00000117122 | MFAP2      | 1  | 16974502  | 16980632 | 6130   | protein coding                 | -1.30 | 2.78E-03 | 2.95E-02 |
| ENSG00000243295 | AC126121.3 | 3  | 59050164  | 59754808 | 704644 | lncRNA                         | -1.30 | 5.20E-03 | 4.27E-02 |
| ENSG00000130612 | CYP2G1P    | 19 | 40890826  | 40912357 | 21531  | inscribed_unprocessed_pseudoge | -1.30 | 3.48E-03 | 3.38E-02 |
| ENSG00000147255 | IGSF1      | X  | 131273506 | 1.32E+08 | 305393 | protein coding                 | -1.30 | 8.40E-04 | 1.44E-02 |
| ENSG00000235731 | LINC02250  | 15 | 25456271  | 25578813 | 122542 | lncRNA                         | -1.30 | 5.52E-04 | 1.10E-02 |
| ENSG00000163701 | IL17RE     | 3  | 9902612   | 9916402  | 13790  | protein coding                 | -1.30 | 4.48E-04 | 9.63E-03 |
| ENSG00000135917 | SLC19A3    | 2  | 227683763 | 2.28E+08 | 34265  | protein coding                 | -1.30 | 2.82E-03 | 2.98E-02 |
| ENSG00000151812 | SLC35F4    | 14 | 57563920  | 57982194 | 418274 | protein coding                 | -1.30 | 4.32E-03 | 3.85E-02 |
| ENSG00000181143 | MUC16      | 19 | 8848844   | 8981342  | 132498 | protein coding                 | -1.31 | 1.26E-09 | 4.49E-07 |
| ENSG00000169347 | GP2        | 16 | 20309574  | 20327808 | 18234  | protein coding                 | -1.31 | 8.48E-04 | 1.45E-02 |
| ENSG00000286218 | AC005040.2 | 2  | 106933739 | 1.07E+08 | 62795  | lncRNA                         | -1.31 | 3.88E-03 | 3.62E-02 |
| ENSG00000169876 | MUC17      | 7  | 101020072 | 1.01E+08 | 38787  | protein coding                 | -1.31 | 1.81E-04 | 5.40E-03 |
| ENSG00000287272 | AC007786.4 | 19 | 29268976  | 29298576 | 29600  | lncRNA                         | -1.31 | 2.65E-03 | 2.87E-02 |
| ENSG00000164318 | EGFLAM     | 5  | 38258409  | 38465480 | 207071 | protein coding                 | -1.31 | 1.72E-03 | 2.20E-02 |
| ENSG00000229563 | LINC01204  | X  | 45505388  | 45632121 | 126733 | lncRNA                         | -1.31 | 9.39E-04 | 1.55E-02 |
| ENSG00000180998 | GPR137C    | 14 | 52552836  | 52637713 | 84877  | protein coding                 | -1.31 | 6.15E-03 | 4.71E-02 |
| ENSG00000121101 | TEX14      | 17 | 58556678  | 58692055 | 135377 | protein coding                 | -1.31 | 1.83E-04 | 5.43E-03 |
| ENSG00000277399 | GPR179     | 17 | 38324571  | 38343956 | 19385  | protein coding                 | -1.31 | 2.49E-04 | 6.57E-03 |
| ENSG00000261231 | LINC02133  | 16 | 47724568  | 47908431 | 183863 | lncRNA                         | -1.31 | 6.77E-03 | 4.98E-02 |
| ENSG00000122863 | CHST3      | 10 | 71964395  | 72013558 | 49163  | protein coding                 | -1.31 | 4.00E-04 | 8.99E-03 |
| ENSG00000113262 | GRM6       | 5  | 178977587 | 1.79E+08 | 18619  | protein coding                 | -1.31 | 1.94E-04 | 5.62E-03 |
| ENSG00000281732 | Z84468.1   | 22 | 48538900  | 48547387 | 8487   | lncRNA                         | -1.31 | 1.01E-03 | 1.61E-02 |
| ENSG00000058085 | LAMC2      | 1  | 183186238 | 1.83E+08 | 58889  | protein coding                 | -1.31 | 9.53E-04 | 1.56E-02 |
| ENSG00000214653 | HNRNPAP3P3 | X  | 140032344 | 1.4E+08  | 1136   | processed pseudogene           | -1.31 | 3.54E-03 | 3.43E-02 |
| ENSG00000287707 | AC115284.4 | 3  | 51927071  | 51932483 | 5412   | lncRNA                         | -1.31 | 1.19E-03 | 1.78E-02 |
| ENSG00000137860 | SLC28A2    | 15 | 45252234  | 45277846 | 25612  | protein coding                 | -1.31 | 8.37E-04 | 1.44E-02 |



|                 |              |    |           |          |        |                                      |       |          |          |
|-----------------|--------------|----|-----------|----------|--------|--------------------------------------|-------|----------|----------|
| ENSG00000226051 | ZNF503-AS1   | 10 | 75243568  | 75373500 | 129932 | lncRNA                               | -1.31 | 1.43E-03 | 1.98E-02 |
| ENSG00000267026 | AL136084.1   | 9  | 98847172  | 98872415 | 25243  | lncRNA-antisense                     | -1.31 | 2.31E-03 | 2.65E-02 |
| ENSG00000177138 | FAM9B        | X  | 9024232   | 9295682  | 271450 | protein coding                       | -1.31 | 2.77E-03 | 2.95E-02 |
| ENSG00000255216 | AP01360.1    | 11 | 12008044  | 1.2E+08  | 5576   | lncRNA                               | -1.31 | 1.47E-03 | 2.02E-02 |
| ENSG00000187955 | COL14A1      | 8  | 120059780 | 1.2E+08  | 313793 | protein coding                       | -1.31 | 2.52E-04 | 6.63E-03 |
| ENSG00000287884 | AC005594.1   | 19 | 4692021   | 4694340  | 2319   | lncRNA                               | -1.31 | 2.87E-03 | 3.01E-02 |
| ENSG00000134569 | LRP4         | 11 | 46856717  | 46918642 | 61925  | protein coding                       | -1.31 | 7.61E-05 | 3.05E-03 |
| ENSG00000102038 | SMARCA1      | X  | 129446501 | 1.3E+08  | 76999  | protein coding                       | -1.31 | 2.96E-03 | 3.06E-02 |
| ENSG00000188153 | COL4A5       | X  | 108439838 | 1.09E+08 | 257707 | protein coding                       | -1.31 | 1.85E-04 | 5.46E-03 |
| ENSG0000099869  | IGF2-AS      | 11 | 2140501   | 2148666  | 8165   | lncRNA-antisense                     | -1.31 | 3.27E-03 | 3.25E-02 |
| ENSG00000183921 | SDR42E2      | 16 | 22165583  | 22191754 | 26171  | protein coding                       | -1.31 | 1.12E-03 | 1.71E-02 |
| ENSG00000221818 | EBF2         | 8  | 25841725  | 26045413 | 203688 | protein coding                       | -1.31 | 4.67E-04 | 9.89E-03 |
| ENSG00000154258 | ABCA9        | 17 | 68974488  | 69060949 | 86461  | protein coding                       | -1.32 | 5.27E-04 | 1.07E-02 |
| ENSG00000226627 | SHANK2-AS1   | 11 | 70626441  | 70635658 | 9217   | lncRNA-antisense                     | -1.32 | 4.74E-03 | 4.05E-02 |
| ENSG00000270533 | CR382285.1   | 21 | 9975017   | 10119309 | 144292 | transcribed processed pseudogene     | -1.32 | 5.31E-03 | 4.32E-02 |
| ENSG00000204616 | TRIM31       | 6  | 30102897  | 30113090 | 10193  | protein coding                       | -1.32 | 3.94E-03 | 3.65E-02 |
| ENSG00000205424 | PCBP3-AS1    | 21 | 45827961  | 45837987 | 10026  | lncRNA-antisense                     | -1.32 | 1.01E-03 | 1.61E-02 |
| ENSG00000149488 | TMC2         | 20 | 2536607   | 2641784  | 105177 | protein coding                       | -1.32 | 1.04E-04 | 3.78E-03 |
| ENSG00000175344 | CHRNA7       | 15 | 31923438  | 32173018 | 249580 | protein coding                       | -1.32 | 1.41E-04 | 4.62E-03 |
| ENSG00000229240 | LINC00710    | 10 | 10917866  | 10952234 | 34368  | lncRNA                               | -1.32 | 5.36E-03 | 4.34E-02 |
| ENSG00000187857 | OR6C75       | 12 | 55362975  | 55369279 | 6304   | protein coding                       | -1.32 | 6.43E-03 | 4.83E-02 |
| ENSG00000196132 | MYT1         | 20 | 64102394  | 64242253 | 139859 | protein coding                       | -1.32 | 6.51E-05 | 2.77E-03 |
| ENSG00000101251 | SEL1L2       | 20 | 13849247  | 13996443 | 147196 | protein coding                       | -1.32 | 1.32E-03 | 1.90E-02 |
| ENSG00000224689 | ZNF812P      | 19 | 9689924   | 9700776  | 10852  | transcribed unprocessed pseudogene   | -1.32 | 6.39E-03 | 4.81E-02 |
| ENSG00000167858 | TEKT1        | 17 | 6789133   | 6831761  | 42628  | protein coding                       | -1.32 | 4.01E-03 | 3.69E-02 |
| ENSG00000253771 | TPTE2P1      | 13 | 24924677  | 24968487 | 43810  | transcribed unprocessed pseudogene   | -1.32 | 4.33E-03 | 3.85E-02 |
| ENSG00000112936 | C7           | 5  | 40909497  | 40984643 | 75146  | protein coding                       | -1.32 | 2.79E-03 | 2.96E-02 |
| ENSG00000139971 | ARMH4        | 14 | 57999735  | 58298139 | 298404 | protein coding                       | -1.32 | 1.80E-03 | 2.26E-02 |
| ENSG00000143473 | KCNH1        | 1  | 210676823 | 2.11E+08 | 457342 | protein coding                       | -1.32 | 4.29E-04 | 9.36E-03 |
| ENSG00000283078 | AL137077.2   | 20 | 62066830  | 62068437 | 1607   | lncRNA                               | -1.32 | 4.70E-03 | 4.03E-02 |
| ENSG00000162598 | C1orf87      | 1  | 59987269  | 60073770 | 86501  | protein coding                       | -1.33 | 5.17E-03 | 4.26E-02 |
| ENSG00000172554 | SNTG2        | 2  | 950849    | 1367613  | 416764 | protein coding                       | -1.33 | 2.27E-04 | 6.18E-03 |
| ENSG00000248954 | AC027801.2   | 17 | 49887598  | 49900893 | 13295  | lncRNA                               | -1.33 | 3.53E-03 | 3.41E-02 |
| ENSG00000134533 | RERG         | 12 | 15107783  | 15348675 | 240892 | protein coding                       | -1.33 | 5.08E-03 | 4.21E-02 |
| ENSG00000235501 | AC105942.1   | 1  | 94927361  | 94963616 | 36255  | lncRNA-antisense                     | -1.33 | 1.65E-03 | 2.15E-02 |
| ENSG00000186191 | BPIFB4       | 20 | 33079644  | 33111751 | 32107  | protein coding                       | -1.33 | 1.44E-03 | 1.99E-02 |
| ENSG00000246820 | RIC3-DT      | 11 | 8169167   | 8178903  | 9736   | lncRNA                               | -1.33 | 6.56E-03 | 4.89E-02 |
| ENSG00000187726 | DNAJB13      | 11 | 73951026  | 73970366 | 19340  | protein coding                       | -1.33 | 2.24E-03 | 2.60E-02 |
| ENSG00000260661 | AC116903.2   | 15 | 92148752  | 92331037 | 182285 | lncRNA-antisense                     | -1.33 | 3.13E-03 | 3.17E-02 |
| ENSG00000262332 | AC136624.1   | 16 | 16223027  | 16224261 | 1234   | lncRNA-antisense                     | -1.33 | 4.22E-03 | 3.81E-02 |
| ENSG00000205212 | CCDC144NL    | 17 | 20836447  | 20896140 | 59693  | transcribed unprocessed pseudogene   | -1.33 | 4.26E-03 | 3.82E-02 |
| ENSG00000286232 | AL365229.1   | 20 | 61267525  | 61271827 | 4302   | lncRNA                               | -1.33 | 1.07E-03 | 1.67E-02 |
| ENSG00000163531 | NFASC        | 1  | 204828651 | 2.05E+08 | 194171 | protein coding                       | -1.33 | 2.52E-05 | 1.39E-03 |
| ENSG00000267733 | AP005264.4   | 18 | 12201982  | 12223539 | 21557  | transcribed processed pseudogene     | -1.33 | 4.87E-04 | 1.02E-02 |
| ENSG00000186603 | HPDL         | 1  | 45326895  | 45328679 | 1784   | protein coding                       | -1.33 | 3.58E-03 | 3.45E-02 |
| ENSG00000148602 | LRIT1        | 10 | 84231520  | 84241546 | 10026  | protein coding                       | -1.33 | 6.37E-03 | 4.81E-02 |
| ENSG00000231340 | ACTG1P10     | X  | 53142832  | 53143913 | 1081   | processed pseudogene                 | -1.33 | 2.48E-03 | 2.77E-02 |
| ENSG00000226277 | AC105393.1   | 2  | 421057    | 424059   | 3002   | lncRNA                               | -1.33 | 4.61E-03 | 3.99E-02 |
| ENSG00000265702 | AC005821.1   | 17 | 62699244  | 62754973 | 55729  | lncRNA-antisense                     | -1.33 | 2.88E-03 | 3.01E-02 |
| ENSG00000268864 | AC011487.2   | 19 | 53599628  | 53608451 | 8823   | transcribed unprocessed pseudogene   | -1.33 | 3.75E-03 | 3.54E-02 |
| ENSG00000166922 | SCG5         | 15 | 32641676  | 32697098 | 55422  | protein coding                       | -1.33 | 9.38E-04 | 1.55E-02 |
| ENSG00000181995 | LINC00301    | 11 | 60615729  | 60687267 | 71538  | transcribed unitary pseudogene       | -1.33 | 6.24E-03 | 4.75E-02 |
| ENSG00000249695 | AC026369.1   | 12 | 1374111   | 1491669  | 11758  | lncRNA-antisense                     | -1.33 | 6.77E-04 | 1.26E-02 |
| ENSG00000280693 | SH3PYD2A-AS1 | 10 | 103745966 | 1.04E+08 | 9457   | lncRNA-antisense                     | -1.34 | 1.21E-03 | 1.79E-02 |
| ENSG00000184571 | PIWIL3       | 22 | 24719034  | 24774720 | 55686  | protein coding                       | -1.34 | 9.04E-04 | 1.52E-02 |
| ENSG00000173769 | TOPAZ1       | 3  | 44241886  | 44332098 | 90212  | protein coding                       | -1.34 | 6.65E-04 | 1.25E-02 |
| ENSG00000123201 | GUCY1B2      | 13 | 50994511  | 51080862 | 86351  | transcribed unitary pseudogene       | -1.34 | 2.62E-04 | 6.80E-03 |
| ENSG00000158486 | DNAH3        | 16 | 20933111  | 21159441 | 226330 | protein coding                       | -1.34 | 2.62E-04 | 6.80E-03 |
| ENSG00000211784 | TRAV10       | 14 | 21825472  | 21826075 | 603    | TR V gene                            | -1.34 | 5.95E-04 | 1.16E-02 |
| ENSG00000286176 | AC116317.1   | 4  | 6292369   | 6308636  | 16267  | lncRNA-bidirectional promoter lncRNA | -1.34 | 6.54E-03 | 4.88E-02 |
| ENSG00000238273 | AC108058.1   | 2  | 105363038 | 1.05E+08 | 15801  | lncRNA-antisense                     | -1.34 | 3.07E-03 | 3.12E-02 |
| ENSG00000165164 | CFAP47       | X  | 35919734  | 36385317 | 465583 | protein coding                       | -1.34 | 2.00E-03 | 2.42E-02 |
| ENSG00000184254 | ALDH1A3      | 15 | 100877714 | 1.01E+08 | 38912  | protein coding                       | -1.34 | 8.79E-05 | 3.40E-03 |
| ENSG00000286063 | AL121888.1   | 20 | 48324812  | 48367976 | 43164  | lncRNA                               | -1.34 | 8.11E-04 | 1.41E-02 |
| ENSG00000233951 | RCC2P3       | 7  | 138122202 | 1.38E+08 | 2393   | processed pseudogene                 | -1.34 | 3.23E-03 | 3.22E-02 |
| ENSG00000172137 | CALB2        | 16 | 71358713  | 71390436 | 31723  | protein coding                       | -1.34 | 4.05E-03 | 3.72E-02 |
| ENSG00000230524 | COL6A4P1     | 3  | 15151833  | 15205959 | 54126  | transcribed unprocessed pseudogene   | -1.34 | 3.07E-03 | 3.12E-02 |
| ENSG00000286266 | AC104370.1   | 8  | 127578473 | 1.28E+08 | 58394  | lncRNA                               | -1.34 | 5.75E-03 | 4.53E-02 |
| ENSG00000271180 | COX5AP1      | 14 | 55240622  | 55241080 | 458    | processed pseudogene                 | -1.34 | 4.51E-03 | 3.94E-02 |
| ENSG00000202260 | RN7SKP69     | 20 | 17576206  | 17576510 | 304    | misc RNA                             | -1.34 | 3.99E-03 | 3.68E-02 |
| ENSG00000232234 | AL355499.1   | 6  | 8102711   | 8343139  | 240428 | lncRNA-bidirectional promoter lncRNA | -1.34 | 1.95E-03 | 2.37E-02 |
| ENSG00000260019 | LINC01992    | 17 | 27928924  | 27991787 | 62863  | lncRNA                               | -1.34 | 6.46E-04 | 1.23E-02 |
| ENSG00000257178 | AC103702.1   | 17 | 48579630  | 48582259 | 2629   | lncRNA-sense intronic                | -1.34 | 6.73E-03 | 4.96E-02 |
| ENSG00000241651 | AC099340.1   | 4  | 128069014 | 1.28E+08 | 598    | processed pseudogene                 | -1.34 | 1.60E-03 | 2.11E-02 |
| ENSG00000124253 | PCK1         | 20 | 57561080  | 57568121 | 7041   | protein coding                       | -1.34 | 5.29E-04 | 1.07E-02 |
| ENSG00000249550 | LINC01234    | 12 | 113583886 | 1.14E+08 | 189840 | lncRNA                               | -1.34 | 1.34E-04 | 4.45E-03 |
| ENSG00000064655 | EYA2         | 20 | 46894624  | 47188844 | 294220 | protein coding                       | -1.34 | 1.21E-03 | 1.79E-02 |
| ENSG00000138315 | OIT3         | 10 | 72893584  | 72933036 | 39452  | protein coding                       | -1.34 | 2.99E-03 | 3.08E-02 |
| ENSG00000134765 | DSC1         | 18 | 31129236  | 31162856 | 33620  | protein coding                       | -1.35 | 1.38E-04 | 4.53E-03 |
| ENSG00000115593 | SMYD1        | 2  | 88067825  | 88113384 | 45559  | protein coding                       | -1.35 | 2.38E-03 | 2.70E-02 |
| ENSG00000167104 | BPIFB6       | 20 | 33031648  | 33044407 | 12399  | protein coding                       | -1.35 | 1.43E-03 | 1.97E-02 |
| ENSG00000279443 | AL513497.1   | 1  | 28544460  | 28546542 | 2082   | TEC                                  | -1.35 | 6.30E-03 | 4.78E-02 |
| ENSG00000170703 | TTL6         | 17 | 48762235  | 48817214 | 54979  | protein coding                       | -1.35 | 1.56E-04 | 4.90E-03 |
| ENSG00000232716 | AC016831.3   | 7  | 130840204 | 1.31E+08 | 3521   | processed pseudogene                 | -1.35 | 4.59E-03 | 3.98E-02 |
| ENSG00000136425 | CIB2         | 15 | 78104606  | 78131535 | 26929  | protein coding                       | -1.35 | 2.24E-05 | 1.27E-03 |
| ENSG00000146038 | DCDC2        | 6  | 24171755  | 24358059 | 186304 | protein coding                       | -1.35 | 5.53E-03 | 4.44E-02 |
| ENSG00000198125 | MB           | 22 | 35606764  | 35637951 | 31187  | protein coding                       | -1.35 | 3.05E-03 | 3.11E-02 |

|                 |             |    |           |          |        |                                    |       |          |          |
|-----------------|-------------|----|-----------|----------|--------|------------------------------------|-------|----------|----------|
| ENSG00000235711 | ANKRD34C    | 15 | 79293285  | 79298235 | 4950   | protein coding                     | -1.35 | 3.19E-03 | 3.20E-02 |
| ENSG00000253871 | AC068075.1  | 8  | 57341021  | 57365444 | 24423  | lncRNA                             | -1.35 | 2.66E-03 | 2.88E-02 |
| ENSG00000225321 | LINC01427   | 20 | 22263065  | 22284029 | 20964  | lncRNA                             | -1.35 | 8.43E-04 | 1.45E-02 |
| ENSG00000232517 | CSPG4BP     | 5  | 54808210  | 54872551 | 64341  | unitary pseudogene                 | -1.35 | 1.45E-03 | 1.99E-02 |
| ENSG00000258545 | RHOXF1-AS1  | X  | 120036236 | 1.2E+08  | 110618 | lncRNA-antisense                   | -1.35 | 3.98E-03 | 3.68E-02 |
| ENSG00000285051 | SLC7A14-AS1 | 3  | 170448639 | 1.71E+08 | 412354 | lncRNA                             | -1.35 | 2.63E-04 | 6.80E-03 |
| ENSG0000013293  | SLC7A14     | 3  | 170459548 | 1.71E+08 | 126527 | protein coding                     | -1.35 | 4.01E-04 | 9.01E-03 |
| ENSG00000226453 | LINC02542   | 6  | 81844602  | 82169391 | 324789 | lncRNA                             | -1.35 | 4.35E-03 | 3.86E-02 |
| ENSG00000232328 | AC084030.1  | 2  | 236733289 | 2.37E+08 | 21074  | lncRNA                             | -1.35 | 2.71E-03 | 2.91E-02 |
| ENSG00000179447 | SLC24A3-AS1 | 20 | 19242302  | 19284596 | 42294  | lncRNA-antisense                   | -1.35 | 5.50E-03 | 4.42E-02 |
| ENSG00000272510 | AL121992.3  | 1  | 15565611  | 15565956 | 345    | lncRNA-antisense                   | -1.35 | 6.56E-03 | 4.89E-02 |
| ENSG00000163072 | NOSTRIN     | 2  | 168786539 | 1.69E+08 | 78975  | protein coding                     | -1.35 | 3.83E-03 | 3.60E-02 |
| ENSG00000261623 | LINC02179   | 16 | 49466106  | 49469875 | 3769   | lncRNA                             | -1.35 | 2.63E-03 | 2.86E-02 |
| ENSG00000284430 | AC020912.1  | 19 | 31100304  | 31147981 | 47677  | lncRNA                             | -1.35 | 1.06E-03 | 1.66E-02 |
| ENSG00000125999 | BP1FB1      | 20 | 33273480  | 33309871 | 36391  | protein coding                     | -1.35 | 6.60E-04 | 1.24E-02 |
| ENSG00000238062 | SPATA3-AS1  | 2  | 230984368 | 2.31E+08 | 11664  | lncRNA                             | -1.35 | 1.92E-03 | 2.35E-02 |
| ENSG00000285205 | AL121612.2  | 14 | 94770271  | 94774858 | 4587   | RNA-bidirectional promoter lncRNA  | -1.35 | 1.47E-04 | 4.75E-03 |
| ENSG00000285100 | AL359555.2  | 20 | 38270778  | 38274020 | 3242   | lncRNA                             | -1.36 | 6.07E-03 | 4.68E-02 |
| ENSG00000143631 | FLG         | 1  | 152302165 | 1.52E+08 | 23074  | protein coding                     | -1.36 | 4.68E-05 | 2.21E-03 |
| ENSG00000220256 | AC093802.1  | 2  | 239762860 | 2.4E+08  | 61904  | lncRNA                             | -1.36 | 1.50E-04 | 4.80E-03 |
| ENSG00000237626 | AL161629.1  | 9  | 89825964  | 90019549 | 193585 | lncRNA                             | -1.36 | 6.03E-04 | 1.17E-02 |
| ENSG00000273274 | ZBT88B      | 1  | 32465072  | 32496686 | 31614  | protein coding                     | -1.36 | 6.47E-04 | 1.23E-02 |
| ENSG00000237222 | LINC01968   | 3  | 194708093 | 1.95E+08 | 117915 | lncRNA                             | -1.36 | 6.36E-04 | 1.21E-02 |
| ENSG00000185739 | SRL         | 16 | 4189374   | 4242080  | 52706  | protein coding                     | -1.36 | 2.16E-04 | 5.99E-03 |
| ENSG00000164007 | CLDN19      | 1  | 42733093  | 42740254 | 7161   | protein coding                     | -1.36 | 1.62E-03 | 2.13E-02 |
| ENSG00000101353 | MROH8       | 20 | 37101226  | 37179588 | 78362  | protein coding                     | -1.36 | 5.42E-08 | 1.07E-05 |
| ENSG00000231898 | MYO3B-AS1   | 2  | 170332085 | 1.7E+08  | 76479  | lncRNA-antisense                   | -1.36 | 9.99E-04 | 1.61E-02 |
| ENSG00000287232 | AC079848.2  | 3  | 126213204 | 1.26E+08 | 34510  | lncRNA                             | -1.36 | 2.19E-03 | 2.57E-02 |
| ENSG00000215866 | LINC01356   | 1  | 112820170 | 1.13E+08 | 30473  | lncRNA                             | -1.36 | 7.11E-04 | 1.31E-02 |
| ENSG00000228392 | AL162391.1  | 9  | 126286999 | 1.26E+08 | 11594  | lncRNA                             | -1.36 | 1.89E-03 | 2.32E-02 |
| ENSG00000241322 | CDRT1       | 17 | 15565483  | 15619704 | 54221  | protein coding                     | -1.36 | 8.36E-05 | 3.28E-03 |
| ENSG00000175267 | VWA3A       | 16 | 22092538  | 22156964 | 64426  | protein coding                     | -1.36 | 1.20E-04 | 4.17E-03 |
| ENSG00000188859 | FAM78B      | 1  | 166057426 | 1.66E+08 | 109575 | protein coding                     | -1.36 | 7.86E-04 | 1.39E-02 |
| ENSG00000121905 | HPCA        | 1  | 32885994  | 32898441 | 12447  | protein coding                     | -1.37 | 4.28E-03 | 3.83E-02 |
| ENSG00000132321 | IQCA1       | 2  | 236324147 | 2.37E+08 | 183388 | protein coding                     | -1.37 | 1.19E-04 | 4.14E-03 |
| ENSG00000101938 | CHRDL1      | X  | 110673856 | 1.11E+08 | 121963 | protein coding                     | -1.37 | 1.91E-03 | 2.34E-02 |
| ENSG00000286615 | AC011416.4  | 5  | 127231977 | 1.27E+08 | 58754  | lncRNA                             | -1.37 | 2.23E-04 | 6.11E-03 |
| ENSG00000159398 | CES5A       | 16 | 55846154  | 55956031 | 109877 | protein coding                     | -1.37 | 1.38E-03 | 1.94E-02 |
| ENSG00000233478 | AL031280.1  | 1  | 25644544  | 25659111 | 14567  | lncRNA-antisense                   | -1.37 | 2.71E-03 | 2.91E-02 |
| ENSG00000178233 | TMEM151B    | 6  | 44270450  | 44307506 | 37056  | protein coding                     | -1.37 | 2.58E-03 | 2.83E-02 |
| ENSG00000165588 | OTX2        | 14 | 56799905  | 56816693 | 16788  | protein coding                     | -1.37 | 2.66E-03 | 2.87E-02 |
| ENSG00000287408 | AC027811.1  | 15 | 79331591  | 79337277 | 5686   | lncRNA                             | -1.37 | 3.68E-03 | 3.51E-02 |
| ENSG00000168356 | SCN11A      | 3  | 38845764  | 39052157 | 206393 | protein coding                     | -1.37 | 5.70E-05 | 2.52E-03 |
| ENSG00000237038 | USP17L8     | 8  | 7971661   | 7973253  | 1592   | protein coding                     | -1.37 | 6.25E-04 | 1.20E-02 |
| ENSG00000284543 | LINC01226   | 1  | 31506226  | 31583306 | 77080  | lncRNA                             | -1.37 | 1.21E-04 | 4.20E-03 |
| ENSG00000166984 | TCP10L2     | 6  | 167146414 | 1.67E+08 | 50499  | protein coding                     | -1.37 | 1.85E-04 | 5.46E-03 |
| ENSG00000117501 | MROH9       | 1  | 170935471 | 1.71E+08 | 129294 | protein coding                     | -1.38 | 6.37E-03 | 4.81E-02 |
| ENSG00000233760 | AC004947.1  | 7  | 26551686  | 26558880 | 7194   | lncRNA                             | -1.38 | 4.60E-03 | 3.99E-02 |
| ENSG00000283654 | MLN2        | 14 | 23099062  | 23104989 | 5927   | protein coding                     | -1.38 | 5.20E-03 | 4.27E-02 |
| ENSG00000157423 | HYDIN       | 16 | 70802084  | 71230722 | 428638 | protein coding                     | -1.38 | 1.02E-04 | 3.75E-03 |
| ENSG00000130649 | CYP2E1      | 10 | 133520406 | 1.34E+08 | 40814  | protein coding                     | -1.38 | 5.37E-06 | 4.40E-04 |
| ENSG00000265646 | TUFMP1      | 17 | 27082690  | 27084036 | 1346   | processed pseudogene               | -1.38 | 1.69E-03 | 2.18E-02 |
| ENSG00000158571 | PKFB1       | X  | 54932961  | 54998534 | 65573  | protein coding                     | -1.38 | 9.00E-04 | 1.51E-02 |
| ENSG00000095777 | MYO3A       | 10 | 25934229  | 26212532 | 278303 | protein coding                     | -1.38 | 4.17E-05 | 2.04E-03 |
| ENSG00000286667 | AC010641.2  | 19 | 382725    | 387533   | 4808   | lncRNA                             | -1.38 | 5.76E-04 | 1.13E-02 |
| ENSG00000257771 | LINC02395   | 12 | 49900311  | 49932764 | 32453  | lncRNA                             | -1.38 | 4.14E-04 | 9.19E-03 |
| ENSG00000259422 | AC091100.1  | 15 | 76174891  | 76181486 | 6595   | lncRNA-antisense                   | -1.38 | 1.51E-03 | 2.04E-02 |
| ENSG00000260876 | LINC01229   | 16 | 79676048  | 79809716 | 133668 | lncRNA                             | -1.38 | 1.03E-04 | 3.78E-03 |
| ENSG00000250974 | LINC02196   | 5  | 6839460   | 7219291  | 379831 | lncRNA                             | -1.38 | 4.23E-03 | 3.81E-02 |
| ENSG00000171483 | SSX6P       | X  | 48107992  | 48120210 | 12218  | transcribed unprocessed pseudogene | -1.38 | 6.46E-03 | 4.84E-02 |
| ENSG00000198670 | LPA         | 6  | 160531482 | 1.61E+08 | 132793 | protein coding                     | -1.38 | 2.65E-03 | 2.87E-02 |
| ENSG00000100320 | RBFOX2      | 22 | 35738736  | 36028824 | 290088 | protein coding                     | -1.38 | 1.08E-05 | 7.54E-04 |
| ENSG00000137142 | IGFBP1L1    | 9  | 38406528  | 38424454 | 17926  | protein coding                     | -1.38 | 2.30E-03 | 2.65E-02 |
| ENSG00000188000 | ORT7D2      | 19 | 9178979   | 9188818  | 9839   | protein coding                     | -1.38 | 4.37E-03 | 3.86E-02 |
| ENSG00000175697 | GPR156      | 3  | 120164645 | 1.2E+08  | 120577 | protein coding                     | -1.38 | 1.21E-03 | 1.79E-02 |
| ENSG00000280011 | AL031595.2  | 22 | 44210442  | 44229512 | 19070  | lncRNA-antisense                   | -1.38 | 7.20E-05 | 2.95E-03 |
| ENSG00000261795 | AC093627.7  | 7  | 161765    | 164972   | 3207   | lncRNA                             | -1.38 | 4.91E-03 | 4.13E-02 |
| ENSG00000267640 | AC016582.3  | 19 | 37817359  | 37832160 | 14801  | transcribed unprocessed pseudogene | -1.38 | 1.93E-04 | 5.60E-03 |
| ENSG00000067177 | PHKA1       | X  | 72578814  | 72714319 | 135505 | protein coding                     | -1.38 | 1.01E-04 | 3.71E-03 |
| ENSG00000182366 | FAM87A      | 8  | 375931    | 384079   | 8148   | lncRNA                             | -1.38 | 6.97E-04 | 1.29E-02 |
| ENSG00000279791 | AC018892.3  | 2  | 97094935  | 97097433 | 2498   | TEC                                | -1.38 | 1.74E-03 | 2.21E-02 |
| ENSG00000204296 | TSPB1       | 6  | 32288526  | 32371912 | 83386  | protein coding                     | -1.38 | 6.81E-03 | 4.99E-02 |
| ENSG00000262772 | LINC01977   | 17 | 79819083  | 79827704 | 8621   | lncRNA                             | -1.39 | 2.19E-03 | 2.57E-02 |
| ENSG00000244227 | LRRC77P     | 3  | 167864773 | 1.68E+08 | 59238  | transcribed unitary pseudogene     | -1.39 | 1.37E-03 | 1.94E-02 |
| ENSG00000285520 | AL353586.1  | 10 | 12877459  | 12965275 | 87816  | lncRNA-antisense                   | -1.39 | 4.26E-03 | 3.82E-02 |
| ENSG00000226985 | LINC01203   | X  | 13333952  | 13403035 | 69083  | lncRNA                             | -1.39 | 1.06E-03 | 1.66E-02 |
| ENSG00000287792 | AC140118.2  | 12 | 131350844 | 1.31E+08 | 20877  | lncRNA                             | -1.39 | 3.08E-03 | 3.12E-02 |
| ENSG00000230140 | NPAS2-AS1   | 2  | 100970767 | 1.01E+08 | 6999   | lncRNA-antisense                   | -1.39 | 5.06E-03 | 4.21E-02 |
| ENSG00000082126 | MPP4        | 2  | 201644870 | 2.02E+08 | 53824  | protein coding                     | -1.39 | 1.44E-04 | 4.68E-03 |
| ENSG00000204941 | PSG5        | 19 | 43166256  | 43186536 | 20280  | protein coding                     | -1.39 | 2.97E-03 | 3.07E-02 |
| ENSG00000130032 | PRRG3       | X  | 151694607 | 1.52E+08 | 11317  | protein coding                     | -1.39 | 2.70E-04 | 6.94E-03 |
| ENSG00000129167 | TPH1        | 11 | 18017564  | 18042426 | 24862  | protein coding                     | -1.39 | 4.85E-05 | 2.27E-03 |
| ENSG00000103023 | PRSS54      | 16 | 58279997  | 58295047 | 15050  | protein coding                     | -1.39 | 4.40E-03 | 3.88E-02 |
| ENSG00000254746 | AC103855.2  | 11 | 45486867  | 45542487 | 55620  | lncRNA                             | -1.39 | 4.96E-03 | 4.16E-02 |
| ENSG00000198883 | PNMA5       | X  | 152988824 | 1.53E+08 | 5292   | protein coding                     | -1.39 | 2.12E-04 | 5.93E-03 |
| ENSG00000118322 | ATP10B      | 5  | 160563120 | 1.61E+08 | 289094 | protein coding                     | -1.39 | 4.60E-03 | 3.99E-02 |
| ENSG00000126785 | RHOJ        | 14 | 63204114  | 63293508 | 89394  | protein coding                     | -1.39 | 5.20E-03 | 4.27E-02 |

|                 |            |    |           |          |         |                                    |       |          |          |
|-----------------|------------|----|-----------|----------|---------|------------------------------------|-------|----------|----------|
| ENSG00000231933 | MYO18B-AS1 | 22 | 25876854  | 25903247 | 26393   | lncRNA-antisense                   | -1.39 | 1.74E-03 | 2.21E-02 |
| ENSG00000203729 | LINC00272  | 1  | 182407621 | 1.82E+08 | 7194    | lncRNA                             | -1.39 | 4.60E-03 | 3.99E-02 |
| ENSG00000112494 | UNC93A     | 6  | 167271169 | 1.67E+08 | 44845   | protein coding                     | -1.39 | 2.35E-03 | 2.68E-02 |
| ENSG00000237574 | LINC01856  | 2  | 129923177 | 1.3E+08  | 23526   | lncRNA                             | -1.39 | 5.58E-03 | 4.46E-02 |
| ENSG00000141338 | ABCA8      | 17 | 68867289  | 68955392 | 88103   | protein coding                     | -1.39 | 1.11E-05 | 7.61E-04 |
| ENSG00000224790 | AP000704.1 | 21 | 36966461  | 36975164 | 8703    | lncRNA                             | -1.39 | 7.59E-05 | 3.05E-03 |
| ENSG00000226631 | SLC9A3P3   | 10 | 50025135  | 50027363 | 2228    | processed pseudogene               | -1.39 | 4.27E-03 | 3.82E-02 |
| ENSG00000137090 | DMRT1      | 9  | 841690    | 969090   | 127400  | protein coding                     | -1.39 | 7.98E-04 | 1.40E-02 |
| ENSG00000266527 | AC005697.2 | 17 | 27874645  | 27881237 | 6592    | lncRNA-antisense                   | -1.39 | 5.59E-03 | 4.47E-02 |
| ENSG00000261177 | AC135012.1 | 16 | 86081409  | 86089526 | 8117    | lncRNA                             | -1.39 | 1.29E-04 | 4.38E-03 |
| ENSG00000260062 | GOLGA2P11  | 15 | 62253730  | 62270680 | 16950   | transcribed unprocessed pseudogene | -1.39 | 8.06E-04 | 1.41E-02 |
| ENSG00000264026 | LINC02003  | 17 | 72342692  | 72355136 | 12444   | lncRNA                             | -1.40 | 3.25E-03 | 3.24E-02 |
| ENSG00000113905 | HRG        | 3  | 186660216 | 1.87E+08 | 18018   | protein coding                     | -1.40 | 1.51E-03 | 2.05E-02 |
| ENSG00000225746 | MEG8       | 14 | 100894770 | 1.01E+08 | 144089  | lncRNA                             | -1.40 | 3.82E-07 | 5.27E-05 |
| ENSG00000179046 | TRIML2     | 4  | 188091273 | 1.88E+08 | 18330   | protein coding                     | -1.40 | 4.53E-03 | 3.95E-02 |
| ENSG00000287879 | AC114341.2 | 18 | 79959579  | 79963178 | 3599    | lncRNA                             | -1.40 | 6.49E-04 | 1.23E-02 |
| ENSG00000163145 | C1Q TNF7   | 4  | 15339818  | 15446167 | 106349  | protein coding                     | -1.40 | 7.08E-04 | 1.30E-02 |
| ENSG00000272688 | LHX1-DT    | 17 | 36861674  | 36936670 | 74996   | lncRNA-antisense                   | -1.40 | 4.45E-03 | 3.91E-02 |
| ENSG00000260102 | LINC01070  | 13 | 112197350 | 1.12E+08 | 3650    | lncRNA                             | -1.40 | 4.92E-04 | 1.02E-02 |
| ENSG00000235779 | AC079179.3 | 2  | 290941    | 314373   | 23432   | lncRNA                             | -1.40 | 1.39E-03 | 1.94E-02 |
| ENSG00000175699 | CCDC197    | 14 | 93987225  | 94008863 | 21638   | protein coding                     | -1.40 | 1.35E-03 | 1.91E-02 |
| ENSG00000004948 | CALCR      | 7  | 93424486  | 93574730 | 150244  | protein coding                     | -1.40 | 1.82E-03 | 2.27E-02 |
| ENSG00000260788 | AC09063.2  | 16 | 83720402  | 83772974 | 52572   | lncRNA-antisense                   | -1.40 | 1.35E-03 | 1.91E-02 |
| ENSG00000230358 | SPDY21     | 7  | 67278714  | 67286664 | 7950    | protein coding                     | -1.40 | 1.38E-03 | 1.94E-02 |
| ENSG00000196632 | WNK3       | X  | 54192823  | 54358642 | 165819  | protein coding                     | -1.40 | 1.08E-05 | 7.53E-04 |
| ENSG00000226686 | LINC01535  | 19 | 37251885  | 37265535 | 13650   | lncRNA                             | -1.40 | 6.79E-05 | 2.84E-03 |
| ENSG00000107562 | CXCL12     | 10 | 44370165  | 44386493 | 16328   | protein coding                     | -1.40 | 8.37E-04 | 1.44E-02 |
| ENSG00000250748 | AC025419.1 | 12 | 65466820  | 65642372 | 175552  | lncRNA                             | -1.40 | 1.57E-03 | 2.09E-02 |
| ENSG00000164627 | KIF6       | 6  | 39329990  | 39725408 | 395418  | protein coding                     | -1.40 | 7.28E-04 | 1.32E-02 |
| ENSG00000235790 | PEF1-AS1   | 1  | 31644049  | 31660162 | 16113   | lncRNA-antisense                   | -1.40 | 3.18E-04 | 7.74E-03 |
| ENSG00000215246 | AC116351.1 | 5  | 987180    | 997308   | 10128   | lncRNA-antisense                   | -1.40 | 3.62E-03 | 3.47E-02 |
| ENSG00000184459 | BPFC       | 22 | 32413847  | 32464484 | 50637   | protein coding                     | -1.40 | 6.29E-03 | 4.78E-02 |
| ENSG00000166111 | SVOP       | 12 | 108907741 | 1.09E+08 | 113327  | protein coding                     | -1.40 | 1.90E-04 | 5.55E-03 |
| ENSG00000223573 | TINCR      | 19 | 5558167   | 5578349  | 20182   | protein coding                     | -1.40 | 1.64E-04 | 5.08E-03 |
| ENSG00000157330 | C1orf158   | 1  | 12746200  | 12763699 | 17499   | protein coding                     | -1.40 | 1.08E-03 | 1.67E-02 |
| ENSG00000188869 | TMC3       | 15 | 81331088  | 81374213 | 43125   | protein coding                     | -1.40 | 6.22E-04 | 1.20E-02 |
| ENSG00000250979 | AC022905.1 | 8  | 72202751  | 72251565 | 48814   | unprocessed pseudogene             | -1.40 | 4.45E-03 | 3.90E-02 |
| ENSG00000141449 | GREB1L     | 18 | 21242242  | 21525417 | 283175  | protein coding                     | -1.40 | 1.34E-05 | 8.72E-04 |
| ENSG00000268532 | LINC02135  | 16 | 86286427  | 86293389 | 6962    | lncRNA                             | -1.40 | 2.11E-03 | 2.51E-02 |
| ENSG00000162753 | SLC9C2     | 1  | 173500460 | 1.74E+08 | 102612  | protein coding                     | -1.40 | 9.21E-04 | 1.53E-02 |
| ENSG00000267594 | CYP4F2P    | 19 | 15760241  | 15779909 | 19668   | unprocessed pseudogene             | -1.40 | 4.31E-03 | 3.84E-02 |
| ENSG00000187242 | KRT12      | 17 | 40861303  | 40867223 | 5920    | protein coding                     | -1.40 | 3.06E-03 | 3.11E-02 |
| ENSG00000127241 | MASP1      | 3  | 187217282 | 1.87E+08 | 74698   | protein coding                     | -1.41 | 2.65E-05 | 1.44E-03 |
| ENSG00000174898 | CATSPERD   | 19 | 5720637   | 5778734  | 58097   | protein coding                     | -1.41 | 2.89E-05 | 1.53E-03 |
| ENSG00000262185 | LINC02861  | 16 | 3930806   | 3950586  | 19780   | lncRNA                             | -1.41 | 2.77E-03 | 2.95E-02 |
| ENSG00000153904 | DDAH1      | 1  | 85318481  | 85578363 | 259882  | protein coding                     | -1.41 | 1.68E-04 | 5.14E-03 |
| ENSG00000180667 | YOD1       | 1  | 207043849 | 2.07E+08 | 9131    | protein coding                     | -1.41 | 5.81E-08 | 1.12E-05 |
| ENSG00000179546 | HTR1D      | 1  | 23191895  | 23194729 | 2834    | protein coding                     | -1.41 | 6.43E-03 | 4.83E-02 |
| ENSG00000162594 | IL23R      | 1  | 67138907  | 67259979 | 121072  | protein coding                     | -1.41 | 1.25E-03 | 1.83E-02 |
| ENSG00000132297 | HHLA1      | 8  | 132061486 | 1.32E+08 | 49673   | protein coding                     | -1.41 | 1.24E-03 | 1.82E-02 |
| ENSG00000240268 | MOXD2P     | 7  | 142240740 | 1.42E+08 | 6327    | transcribed unprocessed pseudogene | -1.41 | 8.24E-04 | 1.43E-02 |
| ENSG00000170790 | OR10A2     | 11 | 8863057   | 8874717  | 11660   | protein coding                     | -1.41 | 4.20E-03 | 3.80E-02 |
| ENSG00000176984 | AP000679.1 | 11 | 120168977 | 1.2E+08  | 2702    | lncRNA-antisense                   | -1.41 | 5.99E-03 | 4.64E-02 |
| ENSG00000232084 | LINC01104  | 2  | 100208254 | 1E+08    | 43230   | lncRNA                             | -1.41 | 4.94E-03 | 4.14E-02 |
| ENSG00000140945 | CDH13      | 16 | 82626965  | 83800640 | 1173675 | protein coding                     | -1.41 | 1.54E-06 | 1.62E-04 |
| ENSG00000185247 | MAGEA11    | X  | 149688228 | 1.5E+08  | 29040   | protein coding                     | -1.41 | 3.86E-03 | 3.61E-02 |
| ENSG00000269416 | LINC01224  | 19 | 23399233  | 23416075 | 16842   | lncRNA                             | -1.41 | 6.23E-03 | 4.74E-02 |
| ENSG00000233143 | DIRC3-A    | 2  | 217261699 | 2.17E+08 | 74421   | lncRNA                             | -1.41 | 2.57E-03 | 2.82E-02 |
| ENSG00000275431 | AC244100.2 | 17 | 35983656  | 35990270 | 6614    | lncRNA-antisense                   | -1.41 | 3.49E-03 | 3.39E-02 |
| ENSG00000267127 | AC090360.1 | 18 | 80034346  | 80097088 | 62742   | protein coding                     | -1.41 | 9.30E-04 | 1.54E-02 |
| ENSG00000256553 | TRAV1-2    | 14 | 21642889  | 21643578 | 689     | TR V gene                          | -1.41 | 5.19E-06 | 4.31E-04 |
| ENSG00000265273 | PGDP1      | 18 | 31962178  | 31963618 | 1440    | processed pseudogene               | -1.41 | 4.10E-03 | 3.74E-02 |
| ENSG00000268505 | AC135012.3 | 16 | 86192793  | 86198913 | 6120    | lncRNA                             | -1.41 | 1.90E-03 | 2.33E-02 |
| ENSG00000287433 | AC107222.2 | 4  | 184100482 | 1.84E+08 | 5556    | lncRNA                             | -1.41 | 6.03E-03 | 4.66E-02 |
| ENSG00000272381 | LINC02664  | 10 | 31187715  | 31261910 | 74195   | lncRNA                             | -1.41 | 4.28E-03 | 3.83E-02 |
| ENSG00000169327 | OR5AU1     | 14 | 21148370  | 21159060 | 10690   | protein coding                     | -1.41 | 3.10E-03 | 3.14E-02 |
| ENSG00000258779 | LINC01568  | 16 | 73386771  | 73504954 | 118183  | lncRNA                             | -1.41 | 1.59E-04 | 4.97E-03 |
| ENSG00000196553 | CCDC196    | 14 | 66411704  | 66498677 | 86973   | protein coding                     | -1.41 | 3.02E-03 | 3.09E-02 |
| ENSG00000278965 | AC122713.2 | 5  | 180078357 | 1.8E+08  | 3334    | TEC                                | -1.41 | 2.04E-03 | 2.45E-02 |
| ENSG00000280623 | PCAT14     | 22 | 23536881  | 23547797 | 10916   | lncRNA                             | -1.42 | 6.37E-03 | 4.81E-02 |
| ENSG00000160505 | NLRP4      | 19 | 55836540  | 55881855 | 45315   | protein coding                     | -1.42 | 1.22E-03 | 1.81E-02 |
| ENSG00000171819 | ANGPTL7    | 1  | 11189355  | 11195981 | 6626    | protein coding                     | -1.42 | 1.05E-03 | 1.64E-02 |
| ENSG00000148798 | INA        | 10 | 103277138 | 1.03E+08 | 13208   | protein coding                     | -1.42 | 1.42E-03 | 1.97E-02 |
| ENSG00000127325 | BEST3      | 12 | 69643360  | 69699476 | 56116   | protein coding                     | -1.42 | 6.66E-04 | 1.25E-02 |
| ENSG00000284653 | AL357509.1 | 1  | 18015712  | 18045612 | 29900   | lncRNA                             | -1.42 | 5.35E-03 | 4.34E-02 |
| ENSG00000231606 | AL357873.1 | 1  | 14221887  | 14304445 | 82558   | lncRNA                             | -1.42 | 2.00E-03 | 2.41E-02 |
| ENSG00000169302 | STK32A     | 5  | 147234963 | 1.47E+08 | 152892  | protein coding                     | -1.42 | 8.72E-05 | 3.39E-03 |
| ENSG00000229021 | AL450992.1 | 1  | 151994531 | 1.52E+08 | 48243   | lncRNA-antisense                   | -1.42 | 5.14E-03 | 4.25E-02 |
| ENSG00000267280 | TBX2-AS1   | 17 | 61393456  | 61411555 | 18099   | lncRNA-antisense                   | -1.42 | 4.42E-03 | 3.89E-02 |
| ENSG00000163673 | DCLK3      | 3  | 36712422  | 36764349 | 51927   | protein coding                     | -1.42 | 1.84E-03 | 2.28E-02 |
| ENSG00000176381 | PRR18      | 6  | 166305300 | 1.66E+08 | 3148    | protein coding                     | -1.42 | 1.67E-03 | 2.16E-02 |
| ENSG00000187537 | POTEG      | 14 | 19402486  | 19434341 | 31855   | protein coding                     | -1.42 | 3.24E-03 | 3.23E-02 |
| ENSG00000173572 | NLRP13     | 19 | 55891699  | 55932336 | 40637   | protein coding                     | -1.42 | 2.29E-03 | 2.64E-02 |
| ENSG00000235160 | LINC02248  | 15 | 26395037  | 26455217 | 60180   | lncRNA                             | -1.42 | 4.94E-03 | 4.15E-02 |
| ENSG00000134853 | PDGFRA     | 4  | 54229280  | 54298245 | 68965   | protein coding                     | -1.42 | 1.04E-04 | 3.78E-03 |
| ENSG00000204695 | OR14J1     | 6  | 29301701  | 29313017 | 11316   | protein coding                     | -1.42 | 1.91E-03 | 2.34E-02 |
| ENSG00000174990 | CASA       | 16 | 87881546  | 87936580 | 55034   | protein coding                     | -1.42 | 3.91E-04 | 8.90E-03 |

|                 |             |    |           |           |        |                                  |       |          |          |
|-----------------|-------------|----|-----------|-----------|--------|----------------------------------|-------|----------|----------|
| ENSG00000287161 | AC093519.2  | 16 | 86899356  | 86961268  | 61912  | lncRNA                           | -1.42 | 1.13E-03 | 1.72E-02 |
| ENSG00000196639 | HRH1        | 3  | 11137093  | 11263557  | 126464 | protein coding                   | -1.42 | 2.36E-04 | 6.38E-03 |
| ENSG00000261738 | MIR3976HG   | 18 | 5721812   | 5876328   | 154516 | lncRNA                           | -1.42 | 4.91E-05 | 2.29E-03 |
| ENSG00000286033 | CR381670.2  | 21 | 8762386   | 8836565   | 74179  | lncRNA                           | -1.42 | 8.58E-04 | 1.46E-02 |
| ENSG00000257175 | CR383656.1  | 14 | 18634955  | 18637208  | 2253   | processed pseudogene             | -1.42 | 1.86E-03 | 2.31E-02 |
| ENSG00000130377 | ACSBG2      | 19 | 6135247   | 6193094   | 57847  | protein coding                   | -1.42 | 1.79E-03 | 2.25E-02 |
| ENSG00000185888 | PRSS38      | 1  | 227815693 | 2.28E+08  | 30777  | protein coding                   | -1.43 | 5.40E-03 | 4.36E-02 |
| ENSG00000254008 | LINC00051   | 8  | 142198356 | 1.42E+08  | 10647  | lncRNA-antisense                 | -1.43 | 3.88E-03 | 3.62E-02 |
| ENSG00000101333 | PLCB4       | 20 | 9068763   | 9481242   | 412479 | protein coding                   | -1.43 | 2.60E-05 | 1.42E-03 |
| ENSG00000136943 | CTSV        | 9  | 97029677  | 97039643  | 9966   | protein coding                   | -1.43 | 2.25E-03 | 2.61E-02 |
| ENSG00000255087 | AP001993.1  | 11 | 127021736 | 1.27E+08  | 150627 | lncRNA                           | -1.43 | 8.64E-06 | 6.45E-04 |
| ENSG00000227764 | LINC01693   | 1  | 211639440 | 2.12E+08  | 15187  | lncRNA                           | -1.43 | 6.80E-03 | 4.99E-02 |
| ENSG00000233217 | MROH3P      | 1  | 200917460 | 2.01E+08  | 49208  | transcribed unitary pseudogene   | -1.43 | 4.03E-04 | 9.03E-03 |
| ENSG00000223528 | AL359094.1  | 10 | 126988095 | 1.27E+08  | 38412  | lncRNA-antisense                 | -1.43 | 5.95E-04 | 1.16E-02 |
| ENSG00000125997 | BPIFB9P     | 20 | 33347720  | 33354444  | 6724   | transcribed unitary pseudogene   | -1.43 | 3.86E-03 | 3.61E-02 |
| ENSG00000066813 | ACSM2B      | 16 | 20536226  | 20576427  | 40201  | protein coding                   | -1.43 | 3.33E-04 | 8.00E-03 |
| ENSG00000094796 | KRT31       | 17 | 44193721  | 441397608 | 3887   | protein coding                   | -1.44 | 4.03E-03 | 3.70E-02 |
| ENSG00000163915 | IGF2BP2-AS1 | 3  | 185712528 | 1.86E+08  | 17259  | lncRNA-antisense                 | -1.44 | 4.39E-03 | 3.87E-02 |
| ENSG00000136155 | SCEL        | 13 | 77535674  | 77645263  | 109589 | protein coding                   | -1.44 | 4.35E-03 | 3.86E-02 |
| ENSG00000225427 | LINC00331   | 13 | 78786272  | 78840051  | 53779  | lncRNA                           | -1.44 | 5.83E-03 | 4.57E-02 |
| ENSG00000267204 | LINC01782   | 19 | 32102088  | 32105916  | 3828   | lncRNA                           | -1.44 | 4.53E-03 | 3.96E-02 |
| ENSG00000228151 | AC004941.1  | 7  | 149398204 | 1.49E+08  | 3252   | lncRNA-antisense                 | -1.44 | 3.61E-03 | 3.46E-02 |
| ENSG00000173114 | LRRN3       | 7  | 111091006 | 1.11E+08  | 34448  | protein coding                   | -1.44 | 2.33E-05 | 1.31E-03 |
| ENSG00000184647 | PRSS55      | 8  | 10525532  | 10554166  | 28634  | protein coding                   | -1.44 | 8.28E-04 | 1.43E-02 |
| ENSG00000236130 | PTCSC2      | 9  | 97699625  | 97853080  | 153455 | lncRNA                           | -1.44 | 1.06E-03 | 1.65E-02 |
| ENSG00000147041 | SYTL5       | X  | 38006553  | 38128819  | 122266 | protein coding                   | -1.44 | 3.69E-03 | 3.52E-02 |
| ENSG00000087842 | PIR         | X  | 15384799  | 15493564  | 108765 | protein coding                   | -1.44 | 2.50E-03 | 2.78E-02 |
| ENSG00000282556 | AC068733.3  | 11 | 6319140   | 6360454   | 41314  | lncRNA                           | -1.44 | 5.56E-04 | 1.11E-02 |
| ENSG00000279852 | AC083964.2  | 8  | 486117    | 488512    | 2395   | TEC                              | -1.44 | 3.81E-03 | 3.58E-02 |
| ENSG00000261786 | AC06058.1   | 3  | 44117299  | 44122365  | 5066   | lncRNA                           | -1.44 | 1.63E-03 | 2.14E-02 |
| ENSG00000287963 | AC010476.2  | 5  | 155087430 | 1.55E+08  | 111822 | lncRNA                           | -1.44 | 3.87E-03 | 3.61E-02 |
| ENSG00000074410 | CA12        | 15 | 63321378  | 63381846  | 60468  | protein coding                   | -1.44 | 2.42E-05 | 1.34E-03 |
| ENSG00000152527 | PLEKH2H     | 2  | 43637260  | 43767987  | 130727 | protein coding                   | -1.44 | 1.10E-05 | 7.60E-04 |
| ENSG00000232445 | EMSLR       | 7  | 101308270 | 1.01E+08  | 6530   | lncRNA-antisense                 | -1.44 | 3.14E-04 | 7.69E-03 |
| ENSG00000202538 | RNU4-2      | 12 | 120291763 | 1.2E+08   | 140    | snRNA                            | -1.45 | 2.56E-04 | 6.70E-03 |
| ENSG00000072315 | TRPC5       | X  | 111774315 | 1.12E+08  | 308461 | protein coding                   | -1.45 | 5.69E-04 | 1.12E-02 |
| ENSG00000175318 | GRAMD2A     | 15 | 72159806  | 72197787  | 37981  | protein coding                   | -1.45 | 1.97E-05 | 1.16E-03 |
| ENSG00000284676 | AL645944.2  | 1  | 29755175  | 29790597  | 35422  | lncRNA                           | -1.45 | 1.01E-03 | 1.61E-02 |
| ENSG00000214553 | LRR3C7A11P  | 17 | 39027277  | 39053205  | 25928  | inscribed unprocessed pseudogene | -1.45 | 5.82E-04 | 1.14E-02 |
| ENSG00000177947 | ODF3        | 11 | 196761    | 200261    | 3500   | protein coding                   | -1.45 | 2.86E-03 | 3.00E-02 |
| ENSG00000277022 | AL031663.3  | 20 | 45435272  | 45448325  | 13053  | lncRNA                           | -1.45 | 3.05E-03 | 3.11E-02 |
| ENSG00000137821 | LRRCA9      | 15 | 70853239  | 71053658  | 200419 | protein coding                   | -1.45 | 8.71E-05 | 3.39E-03 |
| ENSG00000134363 | FST         | 5  | 53480626  | 53487134  | 6508   | protein coding                   | -1.45 | 5.09E-03 | 4.22E-02 |
| ENSG00000164556 | FAM183BP    | 7  | 38685346  | 38687037  | 1691   | processed pseudogene             | -1.45 | 6.40E-04 | 1.22E-02 |
| ENSG00000247416 | AP000802.1  | 11 | 112959279 | 1.13E+08  | 4181   | lncRNA-antisense                 | -1.45 | 1.01E-03 | 1.61E-02 |
| ENSG00000204033 | LRIT2       | 10 | 84220571  | 84225544  | 4973   | protein coding                   | -1.45 | 6.16E-03 | 4.72E-02 |
| ENSG00000236780 | LINC01829   | 2  | 67123357  | 67397980  | 274623 | lncRNA-antisense                 | -1.45 | 6.46E-04 | 1.23E-02 |
| ENSG00000257943 | AC084879.1  | 12 | 95311312  | 95442482  | 131170 | transcribed unitary pseudogene   | -1.45 | 5.86E-03 | 4.59E-02 |
| ENSG00000196460 | RFX8        | 2  | 101397359 | 1.01E+08  | 77753  | protein coding                   | -1.45 | 1.81E-04 | 5.40E-03 |
| ENSG00000260190 | AL807752.5  | 9  | 136937169 | 1.37E+08  | 819    | lncRNA-sense overlapping         | -1.45 | 1.51E-03 | 2.04E-02 |
| ENSG00000231057 | AC096637.2  | 1  | 211675749 | 2.12E+08  | 14354  | lncRNA-antisense                 | -1.45 | 4.25E-03 | 3.82E-02 |
| ENSG00000241388 | HNF1A-AS1   | 12 | 120941728 | 1.21E+08  | 39237  | lncRNA                           | -1.45 | 2.80E-03 | 2.97E-02 |
| ENSG00000261697 | AC010531.4  | 16 | 87262759  | 87292438  | 29679  | lncRNA-sense intronic            | -1.45 | 3.93E-03 | 3.65E-02 |
| ENSG00000117069 | ST6GALNAC5  | 1  | 76867480  | 77067546  | 200066 | protein coding                   | -1.45 | 1.84E-04 | 5.46E-03 |
| ENSG00000286032 | FP236383.6  | 21 | 8465254   | 8465586   | 332    | TEC                              | -1.45 | 6.44E-03 | 4.83E-02 |
| ENSG00000237463 | LRR3C52-AS1 | 1  | 165476838 | 1.66E+08  | 105317 | lncRNA-antisense                 | -1.46 | 7.17E-05 | 2.95E-03 |
| ENSG00000255282 | WTAPP1      | 11 | 102746968 | 1.03E+08  | 89798  | inscribed processed pseudogene   | -1.46 | 2.21E-03 | 2.59E-02 |
| ENSG00000226377 | AC084809.1  | 17 | 32876759  | 32881070  | 4311   | lncRNA-antisense                 | -1.46 | 6.19E-03 | 4.73E-02 |
| ENSG00000124678 | TCP11       | 6  | 35118071  | 35148610  | 30539  | protein coding                   | -1.46 | 2.63E-03 | 2.86E-02 |
| ENSG00000246640 | PICART1     | 17 | 50050349  | 50055739  | 5390   | lncRNA                           | -1.46 | 5.86E-03 | 4.59E-02 |
| ENSG00000278975 | HYDIN2      | 1  | 146472566 | 1.47E+08  | 441728 | inscribed unprocessed pseudogene | -1.46 | 1.15E-04 | 4.07E-03 |
| ENSG00000116882 | HAO2        | 1  | 119368779 | 1.19E+08  | 25351  | protein coding                   | -1.46 | 3.62E-03 | 3.47E-02 |
| ENSG00000166763 | STRCP1      | 15 | 43699441  | 43718260  | 18819  | inscribed unprocessed pseudogene | -1.46 | 3.88E-03 | 3.62E-02 |
| ENSG00000247324 | AC010547.1  | 16 | 71462278  | 71465941  | 3663   | lncRNA-antisense                 | -1.46 | 1.69E-03 | 2.18E-02 |
| ENSG00000260188 | AC002464.1  | 6  | 110477907 | 1.1E+08   | 1529   | lncRNA-antisense                 | -1.46 | 6.13E-03 | 4.70E-02 |
| ENSG00000231764 | DLX6-AS1    | 7  | 96955141  | 97014088  | 58947  | lncRNA-antisense                 | -1.46 | 4.74E-05 | 2.24E-03 |
| ENSG00000237588 | AL566866.3  | 1  | 156687695 | 1.57E+08  | 4302   | lncRNA                           | -1.46 | 1.01E-03 | 1.61E-02 |
| ENSG00000230666 | CEACAM22P   | 19 | 44537058  | 44620821  | 83763  | inscribed unprocessed pseudogene | -1.46 | 3.36E-04 | 8.04E-03 |
| ENSG00000246695 | RASSF8-AS1  | 12 | 25936683  | 25959765  | 23082  | lncRNA-antisense                 | -1.46 | 2.43E-05 | 1.35E-03 |
| ENSG00000069482 | GAL         | 11 | 68683779  | 68691175  | 7396   | protein coding                   | -1.46 | 1.67E-03 | 2.16E-02 |
| ENSG00000231924 | PSG1        | 19 | 42866464  | 42879822  | 13358  | protein coding                   | -1.46 | 4.74E-03 | 4.05E-02 |
| ENSG00000172742 | OR4D9       | 11 | 59511368  | 59520703  | 9335   | protein coding                   | -1.46 | 1.96E-03 | 2.38E-02 |
| ENSG00000167751 | KLK2        | 19 | 50861568  | 50880567  | 18999  | protein coding                   | -1.46 | 3.47E-04 | 8.21E-03 |
| ENSG00000234394 | AL353608.3  | 9  | 68306528  | 68330626  | 24098  | lncRNA                           | -1.47 | 3.13E-03 | 3.16E-02 |
| ENSG00000244593 | AC025062.1  | 8  | 18383274  | 18383917  | 643    | processed pseudogene             | -1.47 | 4.27E-03 | 3.82E-02 |
| ENSG00000171560 | FGA         | 4  | 154583128 | 1.55E+08  | 7617   | protein coding                   | -1.47 | 6.34E-03 | 4.79E-02 |
| ENSG00000166959 | MS4A8       | 11 | 60699585  | 60715807  | 16222  | protein coding                   | -1.47 | 2.44E-03 | 2.74E-02 |
| ENSG00000188674 | C2orf80     | 2  | 208165343 | 2.08E+08  | 24687  | protein coding                   | -1.47 | 5.42E-03 | 4.37E-02 |
| ENSG00000261175 | LINC02188   | 16 | 86710122  | 86742083  | 31961  | lncRNA                           | -1.47 | 1.66E-04 | 5.11E-03 |
| ENSG00000243130 | PSG11       | 19 | 43007656  | 43026474  | 18818  | protein coding                   | -1.47 | 3.42E-03 | 3.35E-02 |
| ENSG00000198650 | TAT         | 16 | 71565660  | 71577092  | 11432  | protein coding                   | -1.47 | 5.24E-04 | 1.07E-02 |
| ENSG00000254423 | AC087203.1  | 8  | 12374366  | 12375546  | 1180   | processed pseudogene             | -1.47 | 9.49E-04 | 1.56E-02 |
| ENSG00000069122 | ADGRF5      | 6  | 46852522  | 46954943  | 102421 | protein coding                   | -1.47 | 2.74E-04 | 7.02E-03 |
| ENSG00000255484 | LINC02764   | 11 | 112534220 | 1.13E+08  | 21582  | lncRNA                           | -1.47 | 6.74E-03 | 4.97E-02 |
| ENSG00000214814 | FER1L6      | 8  | 123851987 | 1.24E+08  | 268074 | protein coding                   | -1.47 | 1.48E-04 | 4.78E-03 |
| ENSG00000184608 | FAM167A-AS1 | 8  | 11368402  | 11438658  | 70256  | lncRNA-antisense                 | -1.47 | 7.20E-05 | 2.95E-03 |
| ENSG00000230523 | LINC01756   | 1  | 29329620  | 29350114  | 20494  | lncRNA                           | -1.48 | 4.80E-03 | 4.07E-02 |



|                 |              |    |           |          |        |                                   |       |          |          |
|-----------------|--------------|----|-----------|----------|--------|-----------------------------------|-------|----------|----------|
| ENSG00000203688 | LINC02487    | 6  | 167679626 | 1.68E+08 | 16664  | lncRNA                            | -1.48 | 1.04E-03 | 1.64E-02 |
| ENSG00000285985 | LINC02689    | 11 | 1350359   | 1364286  | 13927  | lncRNA                            | -1.48 | 1.03E-03 | 1.63E-02 |
| ENSG00000282886 | PTMAP12      | 9  | 94347234  | 94347563 | 329    | processed pseudogene              | -1.48 | 2.50E-03 | 2.78E-02 |
| ENSG00000279688 | AC024610.2   | 17 | 33827699  | 34079100 | 251401 | lncRNA                            | -1.48 | 5.84E-05 | 2.50E-03 |
| ENSG00000259425 | AC011767.1   | 15 | 22770523  | 22776199 | 5676   | inscribed unprocessed pseudogene  | -1.48 | 1.16E-03 | 1.75E-02 |
| ENSG00000138356 | AOX1         | 2  | 200586014 | 2.01E+08 | 91050  | protein coding                    | -1.48 | 1.86E-04 | 5.47E-03 |
| ENSG00000164746 | C7orf57      | 7  | 48035511  | 48061304 | 25793  | protein coding                    | -1.48 | 9.94E-04 | 1.60E-02 |
| ENSG00000101076 | HNF4A        | 20 | 44355700  | 44434596 | 78896  | protein coding                    | -1.48 | 1.05E-06 | 1.16E-04 |
| ENSG00000170484 | KRT74        | 12 | 52565782  | 52573843 | 8061   | protein coding                    | -1.48 | 7.79E-04 | 1.38E-02 |
| ENSG00000287671 | AC068418.3   | 17 | 21442805  | 21451525 | 8720   | lncRNA                            | -1.48 | 7.22E-05 | 2.95E-03 |
| ENSG00000018607 | ZNF806       | 2  | 132304806 | 1.32E+08 | 22049  | inscribed unprocessed pseudogene  | -1.48 | 3.35E-03 | 3.30E-02 |
| ENSG00000259709 | AC023906.4   | 15 | 52124561  | 52140246 | 15685  | lncRNA-antisense                  | -1.48 | 5.91E-03 | 4.61E-02 |
| ENSG00000011677 | GABRA3       | X  | 152166234 | 1.52E+08 | 285081 | protein coding                    | -1.48 | 2.19E-03 | 2.57E-02 |
| ENSG00000226835 | ARHGAP29-AS1 | 1  | 94247819  | 94411036 | 163217 | lncRNA                            | -1.48 | 5.26E-04 | 1.07E-02 |
| ENSG00000229116 | AL137026.1   | 10 | 44282489  | 44293998 | 11509  | lncRNA                            | -1.48 | 2.00E-03 | 2.41E-02 |
| ENSG00000284601 | AL590440.2   | 1  | 54974900  | 54980464 | 5564   | RNA-bidirectional promoter lncRNA | -1.48 | 6.41E-03 | 4.82E-02 |
| ENSG00000161652 | IZUMO2       | 19 | 50152548  | 50163195 | 10647  | protein coding                    | -1.49 | 5.99E-03 | 4.64E-02 |
| ENSG00000142973 | CYP4B1       | 1  | 46757838  | 46819413 | 61575  | protein coding                    | -1.49 | 1.96E-04 | 5.65E-03 |
| ENSG00000205312 | KRT17P4      | 17 | 16847635  | 16852777 | 5142   | inscribed unprocessed pseudogene  | -1.49 | 4.43E-03 | 3.89E-02 |
| ENSG00000009709 | PAX7         | 1  | 18630846  | 18748866 | 118020 | protein coding                    | -1.49 | 1.84E-05 | 1.11E-03 |
| ENSG00000253047 | AL356356.1   | 1  | 150600539 | 1.51E+08 | 120    | snoRNA                            | -1.49 | 1.24E-03 | 1.83E-02 |
| ENSG00000187185 | AC092118.1   | 16 | 57798186  | 57816946 | 18760  | lncRNA                            | -1.49 | 4.10E-03 | 3.74E-02 |
| ENSG00000286785 | LINC01622    | 6  | 958323    | 1101400  | 143077 | lncRNA                            | -1.49 | 4.76E-04 | 1.00E-02 |
| ENSG00000279725 | AL391005.1   | 10 | 127734562 | 1.28E+08 | 2434   | TEC                               | -1.49 | 1.57E-03 | 2.09E-02 |
| ENSG00000267313 | KC6          | 18 | 41465783  | 41632185 | 166402 | lncRNA                            | -1.49 | 4.07E-03 | 3.73E-02 |
| ENSG00000180806 | HOCXC9       | 12 | 53994895  | 54003337 | 8442   | protein coding                    | -1.49 | 4.99E-03 | 4.18E-02 |
| ENSG00000221882 | OR3A2        | 17 | 3276942   | 3386317  | 109375 | protein coding                    | -1.49 | 3.24E-04 | 7.84E-03 |
| ENSG00000182963 | GJC1         | 17 | 44798448  | 44830816 | 32368  | protein coding                    | -1.49 | 4.53E-04 | 9.71E-03 |
| ENSG00000196335 | STK31        | 7  | 23710203  | 23832513 | 122310 | protein coding                    | -1.49 | 2.71E-05 | 1.46E-03 |
| ENSG00000234080 | AL596275.1   | 1  | 50326131  | 50327007 | 876    | processed pseudogene              | -1.49 | 1.22E-03 | 1.81E-02 |
| ENSG00000229613 | LINC01501    | 9  | 90462899  | 90583821 | 120922 | lncRNA                            | -1.49 | 5.44E-03 | 4.38E-02 |
| ENSG00000183833 | CFAP91       | 3  | 119703022 | 1.2E+08  | 64080  | protein coding                    | -1.50 | 5.03E-03 | 4.20E-02 |
| ENSG00000168314 | MOBP         | 3  | 39467198  | 39529479 | 62281  | protein coding                    | -1.50 | 3.34E-05 | 1.72E-03 |
| ENSG00000262833 | AC016245.1   | 17 | 80801640  | 80805632 | 3992   | lncRNA-antisense                  | -1.50 | 5.29E-04 | 1.07E-02 |
| ENSG00000256022 | LINC02411    | 12 | 127631248 | 1.28E+08 | 5240   | lncRNA                            | -1.50 | 6.75E-03 | 4.97E-02 |
| ENSG00000203392 | AC105020.1   | 15 | 75678548  | 75680752 | 2204   | lncRNA-antisense                  | -1.50 | 1.66E-04 | 5.10E-03 |
| ENSG00000288253 | AC010332.3   | 19 | 52453580  | 52458836 | 5256   | lncRNA                            | -1.50 | 2.18E-05 | 1.25E-03 |
| ENSG00000267260 | AC020928.1   | 19 | 36773112  | 36777078 | 3966   | lncRNA                            | -1.50 | 2.85E-04 | 7.20E-03 |
| ENSG00000196754 | S100A2       | 1  | 153561108 | 1.54E+08 | 6782   | protein coding                    | -1.50 | 9.46E-04 | 1.56E-02 |
| ENSG00000264151 | AC090403.1   | 18 | 27335968  | 27595164 | 259196 | lncRNA                            | -1.50 | 6.74E-03 | 4.97E-02 |
| ENSG00000162365 | CYP4A22      | 1  | 47137435  | 47149735 | 12300  | protein coding                    | -1.50 | 6.00E-04 | 1.17E-02 |
| ENSG00000260338 | LINC01570    | 16 | 5596856   | 5616373  | 19517  | lncRNA-antisense                  | -1.50 | 9.98E-04 | 1.61E-02 |
| ENSG00000232420 | IL9RP2       | 10 | 80394     | 86265    | 5871   | unprocessed pseudogene            | -1.50 | 4.13E-04 | 9.18E-03 |
| ENSG00000234913 | AC016027.2   | 22 | 18004270  | 18007308 | 3038   | lncRNA-sense intronic             | -1.50 | 6.29E-03 | 4.78E-02 |
| ENSG00000174567 | GOLT1A       | 1  | 204198163 | 2.04E+08 | 15825  | protein coding                    | -1.50 | 3.52E-03 | 3.41E-02 |
| ENSG00000260913 | LINC01254    | 18 | 10405133  | 10414515 | 9382   | lncRNA                            | -1.50 | 1.42E-03 | 1.97E-02 |
| ENSG00000088386 | SLC15A1      | 13 | 98683801  | 98752672 | 68871  | protein coding                    | -1.50 | 7.71E-04 | 1.37E-02 |
| ENSG00000279796 | AL133384.2   | 10 | 114424445 | 1.14E+08 | 2953   | TEC                               | -1.50 | 1.31E-03 | 1.89E-02 |
| ENSG00000226374 | LINC01345    | 1  | 3944547   | 3949024  | 4477   | lncRNA                            | -1.50 | 1.78E-03 | 2.25E-02 |
| ENSG00000171864 | PRND         | 20 | 4721909   | 4728460  | 6551   | protein coding                    | -1.50 | 3.29E-03 | 3.26E-02 |
| ENSG00000258590 | NBEAP1       | 15 | 20657638  | 20688408 | 30770  | inscribed unprocessed pseudogene  | -1.50 | 7.21E-05 | 2.95E-03 |
| ENSG00000260604 | AL590004.3   | 6  | 3904920   | 3911979  | 7059   | lncRNA                            | -1.50 | 1.11E-03 | 1.70E-02 |
| ENSG00000279579 | LINC01666    | 21 | 8759077   | 8761335  | 2258   | lncRNA                            | -1.50 | 4.71E-03 | 4.03E-02 |
| ENSG00000251391 | AC092353.1   | 5  | 66298394  | 66393521 | 95127  | lncRNA                            | -1.50 | 5.38E-03 | 4.35E-02 |
| ENSG00000144290 | SLC4A10      | 2  | 161424332 | 1.62E+08 | 560950 | protein coding                    | -1.50 | 1.33E-04 | 4.44E-03 |
| ENSG00000186377 | CYP4X1       | 1  | 47023669  | 47050751 | 27082  | protein coding                    | -1.50 | 1.03E-03 | 1.63E-02 |
| ENSG00000287581 | AC016549.1   | 5  | 14356886  | 14359285 | 2399   | lncRNA                            | -1.50 | 1.07E-03 | 1.67E-02 |
| ENSG00000249306 | LINC01411    | 5  | 174336295 | 1.75E+08 | 196162 | lncRNA                            | -1.50 | 2.09E-04 | 5.87E-03 |
| ENSG00000188039 | NWD1         | 19 | 16719847  | 16817963 | 98116  | protein coding                    | -1.51 | 4.16E-05 | 2.04E-03 |
| ENSG00000233421 | LINC01783    | 1  | 16533886  | 16536172 | 2286   | lncRNA                            | -1.51 | 1.35E-04 | 4.48E-03 |
| ENSG00000206633 | SNORA80B     | 2  | 10446714  | 10446849 | 135    | snoRNA                            | -1.51 | 4.65E-03 | 4.01E-02 |
| ENSG00000257259 | LINC02388    | 12 | 58565959  | 58781747 | 215788 | lncRNA                            | -1.51 | 1.08E-03 | 1.67E-02 |
| ENSG00000171561 | OR2AT4       | 11 | 75081753  | 75096876 | 15123  | protein coding                    | -1.51 | 1.30E-04 | 4.40E-03 |
| ENSG00000204663 | CST13P       | 20 | 23519146  | 23542018 | 22872  | inscribed unprocessed pseudogene  | -1.51 | 6.10E-03 | 4.69E-02 |
| ENSG00000104055 | TGM5         | 15 | 43232590  | 43266928 | 34338  | protein coding                    | -1.51 | 9.47E-04 | 1.56E-02 |
| ENSG00000250799 | PRODH2       | 19 | 35799988  | 35813299 | 13311  | protein coding                    | -1.51 | 9.92E-04 | 1.60E-02 |
| ENSG00000279110 | AL022323.3   | 22 | 25052122  | 25065241 | 13119  | lncRNA-antisense                  | -1.51 | 1.16E-04 | 4.08E-03 |
| ENSG00000260862 | AC099506.1   | 16 | 82773319  | 82829638 | 56319  | lncRNA-sense intronic             | -1.51 | 2.49E-03 | 2.78E-02 |
| ENSG00000183747 | ACSM2A       | 16 | 20451461  | 20487669 | 36208  | protein coding                    | -1.51 | 3.94E-05 | 1.95E-03 |
| ENSG00000106809 | OGN          | 9  | 92383268  | 92404696 | 21428  | protein coding                    | -1.51 | 3.34E-03 | 3.29E-02 |
| ENSG00000239444 | AL353604.1   | 1  | 37154761  | 37325100 | 170339 | lncRNA                            | -1.51 | 1.76E-03 | 2.24E-02 |
| ENSG00000170054 | SERPINA9     | 14 | 94462717  | 94479689 | 16972  | protein coding                    | -1.51 | 5.36E-03 | 4.34E-02 |
| ENSG00000286812 | AP001120.5   | 18 | 11758977  | 11786181 | 27204  | lncRNA                            | -1.51 | 5.15E-04 | 1.06E-02 |
| ENSG00000171872 | KLF17        | 1  | 44118821  | 44135140 | 16319  | protein coding                    | -1.51 | 3.61E-04 | 8.41E-03 |
| ENSG00000176194 | CIDEA        | 18 | 12254361  | 12277595 | 23234  | protein coding                    | -1.51 | 6.36E-04 | 1.21E-02 |
| ENSG00000180532 | ZSCAN4       | 19 | 57668935  | 57679152 | 10217  | protein coding                    | -1.51 | 4.20E-03 | 3.80E-02 |
| ENSG00000145692 | BHMT         | 5  | 79111809  | 79132288 | 20479  | protein coding                    | -1.52 | 4.32E-03 | 3.85E-02 |
| ENSG00000188280 | FAM230G      | 22 | 20338805  | 20354372 | 15567  | lncRNA-antisense                  | -1.52 | 2.71E-03 | 2.91E-02 |
| ENSG00000106823 | ECM2         | 9  | 92493554  | 92536655 | 43101  | protein coding                    | -1.52 | 1.97E-03 | 2.39E-02 |
| ENSG00000254968 | LINC02763    | 11 | 112393118 | 1.13E+08 | 231449 | lncRNA                            | -1.52 | 2.91E-03 | 3.03E-02 |
| ENSG00000223949 | ROR1-AS1     | 1  | 64094379  | 64171342 | 76963  | lncRNA-antisense                  | -1.52 | 6.85E-04 | 1.27E-02 |
| ENSG00000259417 | CTXND1       | 15 | 80195481  | 80252213 | 56732  | protein coding                    | -1.52 | 4.37E-05 | 2.10E-03 |
| ENSG00000188257 | PLA2G2A      | 1  | 19975431  | 19980416 | 4985   | protein coding                    | -1.52 | 3.60E-03 | 3.46E-02 |
| ENSG00000188828 | GLRA4        | X  | 103702210 | 1.04E+08 | 26445  | protein coding                    | -1.52 | 5.44E-04 | 1.09E-02 |
| ENSG00000233399 | LINC01648    | 1  | 30013952  | 30037612 | 23660  | lncRNA                            | -1.52 | 3.33E-03 | 3.29E-02 |
| ENSG00000253199 | LINC02153    | 8  | 20972021  | 20995119 | 23098  | lncRNA                            | -1.52 | 1.43E-03 | 1.97E-02 |
| ENSG00000185467 | KPNA7        | 7  | 99173574  | 99207506 | 33932  | protein coding                    | -1.53 | 5.79E-03 | 4.55E-02 |

|                 |                 |    |           |          |        |                                  |       |          |          |
|-----------------|-----------------|----|-----------|----------|--------|----------------------------------|-------|----------|----------|
| ENSG00000253227 | AC090192.2      | 8  | 124271667 | 1.24E+08 | 7913   | lncRNA                           | -1.53 | 2.00E-03 | 2.41E-02 |
| ENSG00000287486 | AC114291.1      | 5  | 1252006   | 1255976  | 3970   | lncRNA                           | -1.53 | 1.56E-03 | 2.08E-02 |
| ENSG00000109061 | MYH1            | 17 | 10492307  | 10518542 | 26235  | protein coding                   | -1.53 | 1.60E-04 | 4.99E-03 |
| ENSG00000259520 | AC051619.4      | 15 | 45235930  | 45279251 | 43321  | lncRNA-antisense                 | -1.53 | 5.63E-05 | 2.50E-03 |
| ENSG00000285530 | AL445928.2      | 1  | 100220488 | 1E+08    | 32926  | lncRNA-antisense                 | -1.53 | 2.86E-03 | 3.00E-02 |
| ENSG00000084734 | GCKR            | 2  | 27496839  | 27523684 | 26845  | protein coding                   | -1.53 | 7.29E-04 | 1.33E-02 |
| ENSG00000233508 | AL021395.1      | 20 | 43189998  | 43202599 | 12601  | lncRNA                           | -1.53 | 5.83E-03 | 4.57E-02 |
| ENSG00000170214 | ADRA1B          | 5  | 159865080 | 1.6E+08  | 107932 | protein coding                   | -1.53 | 2.17E-03 | 2.55E-02 |
| ENSG00000183668 | PSG9            | 19 | 43211791  | 43269530 | 57739  | protein coding                   | -1.53 | 1.22E-03 | 1.80E-02 |
| ENSG00000229558 | SACS-AS1        | 13 | 23418971  | 23428869 | 9898   | lncRNA                           | -1.53 | 3.42E-03 | 3.35E-02 |
| ENSG00000246022 | ALDH1L1-AS2     | 3  | 126180012 | 1.26E+08 | 30157  | lncRNA-antisense                 | -1.53 | 2.84E-03 | 3.00E-02 |
| ENSG00000100191 | SLS5A4          | 22 | 32218464  | 32255347 | 36883  | protein coding                   | -1.53 | 1.11E-03 | 1.70E-02 |
| ENSG00000165076 | PRSS37          | 7  | 141836300 | 1.42E+08 | 5187   | protein coding                   | -1.53 | 3.36E-03 | 3.30E-02 |
| ENSG00000236700 | LINC01010       | 6  | 134343307 | 1.35E+08 | 161274 | lncRNA                           | -1.54 | 1.97E-03 | 2.39E-02 |
| ENSG00000252010 | SCARN5          | 2  | 233275727 | 2.33E+08 | 275    | scaRNA                           | -1.54 | 4.69E-04 | 9.92E-03 |
| ENSG00000204969 | PCDH2           | 5  | 140794852 | 1.41E+08 | 217495 | protein coding                   | -1.54 | 2.84E-03 | 3.00E-02 |
| ENSG00000227463 | AL390838.1      | 9  | 84059298  | 84098984 | 39686  | lncRNA                           | -1.54 | 1.73E-03 | 2.21E-02 |
| ENSG00000249131 | PSD2-AS1        | 5  | 139740951 | 1.4E+08  | 6455   | lncRNA                           | -1.54 | 2.59E-03 | 2.84E-02 |
| ENSG00000225742 | LINC02036       | 3  | 194202392 | 1.94E+08 | 47811  | lncRNA                           | -1.54 | 2.63E-03 | 2.86E-02 |
| ENSG00000158445 | KCNB1           | 20 | 49293394  | 49484297 | 190903 | protein coding                   | -1.54 | 1.97E-06 | 1.99E-04 |
| ENSG00000135409 | AMHR2           | 12 | 53423855  | 53431672 | 7817   | protein coding                   | -1.54 | 1.66E-03 | 2.16E-02 |
| ENSG00000152592 | DMP1            | 4  | 87650280  | 87664361 | 14081  | protein coding                   | -1.54 | 3.93E-03 | 3.65E-02 |
| ENSG00000091129 | NRCAM           | 7  | 108147623 | 1.08E+08 | 309094 | protein coding                   | -1.54 | 5.67E-09 | 1.58E-06 |
| ENSG00000226741 | LINC02554       | 22 | 27307777  | 27318501 | 10724  | lncRNA                           | -1.54 | 3.61E-04 | 8.41E-03 |
| ENSG00000267259 | ERVE-1          | 17 | 28232590  | 28235281 | 2691   | lncRNA                           | -1.54 | 4.32E-03 | 3.85E-02 |
| ENSG00000226133 | LINC02794       | 1  | 48050659  | 48091736 | 41077  | lncRNA                           | -1.54 | 6.64E-03 | 4.93E-02 |
| ENSG00000187048 | CYP4A11         | 1  | 46929177  | 46941484 | 12307  | protein coding                   | -1.54 | 6.59E-04 | 1.24E-02 |
| ENSG00000278891 | AC105101.1      | 18 | 48147634  | 48150864 | 3230   | TEC                              | -1.54 | 7.80E-04 | 1.38E-02 |
| ENSG00000250133 | HOXC-AS2        | 12 | 53993810  | 53996785 | 2975   | lncRNA                           | -1.54 | 1.67E-03 | 2.16E-02 |
| ENSG00000276710 | CSPG4P10        | 15 | 82459472  | 82477258 | 17786  | inscribed unprocessed pseudogene | -1.54 | 2.03E-04 | 5.79E-03 |
| ENSG00000169340 | PDILT           | 16 | 20359175  | 20404737 | 45562  | protein coding                   | -1.54 | 1.59E-03 | 2.10E-02 |
| ENSG00000259404 | EFL1P1          | 15 | 84080168  | 84126604 | 46436  | inscribed unprocessed pseudogene | -1.54 | 1.32E-03 | 1.89E-02 |
| ENSG00000146521 | LINC01558       | 6  | 167784537 | 1.68E+08 | 12335  | lncRNA                           | -1.55 | 2.70E-04 | 6.94E-03 |
| ENSG00000174226 | SNX31           | 8  | 100572889 | 1.01E+08 | 90526  | protein coding                   | -1.55 | 7.35E-04 | 1.33E-02 |
| ENSG00000233342 | AL139393.2      | 6  | 160926269 | 1.61E+08 | 16841  | lncRNA                           | -1.55 | 6.65E-03 | 4.93E-02 |
| ENSG00000228876 | AC010745.2      | 2  | 16224047  | 16333978 | 10931  | lncRNA                           | -1.55 | 4.47E-04 | 9.61E-03 |
| ENSG00000268754 | LINC01081       | 16 | 86221420  | 86301303 | 79883  | lncRNA                           | -1.55 | 1.43E-03 | 1.98E-02 |
| ENSG00000236052 | LINC01643       | 22 | 34017422  | 34218796 | 201374 | lncRNA                           | -1.55 | 5.91E-05 | 2.58E-03 |
| ENSG00000264968 | AC090844.2      | 17 | 39927742  | 39939601 | 11859  | lncRNA                           | -1.55 | 2.12E-03 | 2.52E-02 |
| ENSG00000213514 | AL731556.1      | 10 | 77730766  | 77734769 | 4003   | processed pseudogene             | -1.55 | 3.34E-03 | 3.30E-02 |
| ENSG00000185385 | OR7A17          | 19 | 14878203  | 14886132 | 7929   | protein coding                   | -1.55 | 6.65E-03 | 4.93E-02 |
| ENSG00000213772 | EIF1P7          | 2  | 9271292   | 9271628  | 336    | processed pseudogene             | -1.55 | 1.10E-03 | 1.69E-02 |
| ENSG00000227742 | CALR4P          | 1  | 51561866  | 51594897 | 33031  | transcribed unitary pseudogene   | -1.55 | 8.67E-04 | 1.48E-02 |
| ENSG00000279652 | Z82217.1        | 22 | 35992321  | 36000469 | 8148   | lncRNA                           | -1.55 | 3.32E-04 | 7.99E-03 |
| ENSG00000204481 | PRAMEF14        | 1  | 13341892  | 13347134 | 5242   | protein coding                   | -1.55 | 5.06E-03 | 4.20E-02 |
| ENSG00000260492 | CISTR           | 12 | 53746337  | 53757227 | 10890  | lncRNA                           | -1.55 | 6.46E-03 | 4.84E-02 |
| ENSG00000189280 | GJB5            | 1  | 34755047  | 34758122 | 3465   | protein coding                   | -1.55 | 6.59E-03 | 4.91E-02 |
| ENSG00000163581 | SLOC2A2         | 3  | 170996347 | 1.71E+08 | 30396  | protein coding                   | -1.55 | 1.41E-03 | 1.96E-02 |
| ENSG00000220891 | LL22NC03-63E9.3 | 22 | 22559343  | 22566602 | 7259   | lncRNA-antisense                 | -1.55 | 3.11E-03 | 3.15E-02 |
| ENSG00000198759 | EGLF6           | X  | 13569601  | 13633575 | 63974  | protein coding                   | -1.55 | 3.55E-04 | 8.33E-03 |
| ENSG00000288079 | AC026329.1      | 3  | 113259786 | 1.13E+08 | 7038   | lncRNA                           | -1.56 | 6.26E-03 | 4.76E-02 |
| ENSG00000226496 | LINC00323       | 21 | 41141493  | 41148198 | 6705   | lncRNA-antisense                 | -1.56 | 2.18E-03 | 2.56E-02 |
| ENSG00000219891 | ZSCAN12P1       | 6  | 28091154  | 28093664 | 2510   | inscribed unprocessed pseudogene | -1.56 | 3.02E-03 | 3.09E-02 |
| ENSG00000260790 | AC092338.2      | 16 | 22374859  | 22378180 | 3321   | lncRNA-antisense                 | -1.56 | 5.11E-03 | 4.23E-02 |
| ENSG00000010379 | SLC6A13         | 12 | 220621    | 262873   | 42252  | protein coding                   | -1.56 | 2.71E-05 | 1.46E-03 |
| ENSG00000201852 | C8B             | 1  | 56929207  | 56966140 | 36933  | protein coding                   | -1.56 | 5.65E-03 | 4.49E-02 |
| ENSG00000129991 | TNNI3           | 19 | 55151767  | 55157773 | 6006   | protein coding                   | -1.56 | 3.26E-03 | 3.24E-02 |
| ENSG00000204518 | AADACL4         | 1  | 12644547  | 12667086 | 22539  | protein coding                   | -1.56 | 2.33E-03 | 2.67E-02 |
| ENSG00000237224 | AL157832.2      | 10 | 129693722 | 1.3E+08  | 8395   | lncRNA-antisense                 | -1.56 | 8.04E-04 | 1.41E-02 |
| ENSG00000171724 | VAT1L           | 16 | 77788564  | 77980107 | 191543 | protein coding                   | -1.56 | 2.05E-04 | 5.81E-03 |
| ENSG00000171931 | FBXW10          | 17 | 18744026  | 18779349 | 35323  | protein coding                   | -1.56 | 2.80E-04 | 7.13E-03 |
| ENSG00000285954 | AC119428.2      | 1  | 53344031  | 53365473 | 21442  | lncRNA                           | -1.56 | 5.20E-03 | 4.27E-02 |
| ENSG00000229010 | AL161672.1      | 1  | 23140325  | 23141142 | 817    | processed pseudogene             | -1.56 | 6.08E-03 | 4.68E-02 |
| ENSG00000254299 | LINC01944       | 5  | 172543403 | 1.73E+08 | 15799  | lncRNA                           | -1.56 | 6.56E-03 | 4.89E-02 |
| ENSG00000233295 | FAM90A20P       | 8  | 7295014   | 7298024  | 3010   | unprocessed pseudogene           | -1.56 | 4.92E-03 | 4.13E-02 |
| ENSG00000260613 | Z98885.2        | 22 | 49832449  | 49838901 | 6452   | lncRNA                           | -1.56 | 5.79E-03 | 4.55E-02 |
| ENSG00000182035 | ADIG            | 20 | 38581195  | 38588463 | 7268   | protein coding                   | -1.56 | 1.53E-03 | 2.06E-02 |
| ENSG00000178125 | PPP1R42         | 8  | 66964099  | 67056604 | 92505  | protein coding                   | -1.56 | 6.17E-03 | 4.72E-02 |
| ENSG00000077522 | ACTN2           | 1  | 236664141 | 2.37E+08 | 100490 | protein coding                   | -1.56 | 7.25E-05 | 2.95E-03 |
| ENSG00000205420 | KRT6A           | 12 | 52487176  | 52493257 | 6081   | protein coding                   | -1.56 | 6.05E-04 | 1.17E-02 |
| ENSG00000196109 | ZNF676          | 19 | 22179089  | 22215801 | 36712  | protein coding                   | -1.57 | 3.06E-03 | 3.11E-02 |
| ENSG00000236819 | LINC01563       | 17 | 21075362  | 21092351 | 16989  | lncRNA                           | -1.57 | 5.25E-03 | 4.29E-02 |
| ENSG00000248159 | HSPA8P11        | 8  | 30237382  | 30240997 | 3615   | processed pseudogene             | -1.57 | 3.09E-03 | 3.14E-02 |
| ENSG00000225249 | LINC00378       | 13 | 60618991  | 61176758 | 55767  | lncRNA                           | -1.57 | 1.70E-03 | 2.19E-02 |
| ENSG00000260618 | AC025917.1      | 15 | 52577842  | 52598709 | 20867  | lncRNA-antisense                 | -1.57 | 5.69E-04 | 1.12E-02 |
| ENSG00000236643 | AL354928.1      | 9  | 124770123 | 1.25E+08 | 2804   | lncRNA-antisense                 | -1.57 | 6.12E-03 | 4.69E-02 |
| ENSG00000272281 | TPTE2P2         | 13 | 52219344  | 52334277 | 114933 | inscribed unprocessed pseudogene | -1.57 | 6.15E-04 | 1.19E-02 |
| ENSG00000169594 | BNC1            | 15 | 83255903  | 83284714 | 28811  | protein coding                   | -1.57 | 2.91E-03 | 3.03E-02 |
| ENSG00000286179 | AL139351.2      | 20 | 48007875  | 48022237 | 14362  | lncRNA                           | -1.57 | 3.90E-03 | 3.63E-02 |
| ENSG00000214146 | LINC02026       | 3  | 193957372 | 1.94E+08 | 46388  | lncRNA                           | -1.57 | 3.61E-04 | 8.41E-03 |
| ENSG00000204684 | AL133464.1      | 20 | 22371216  | 22471557 | 100341 | lncRNA                           | -1.57 | 1.16E-04 | 4.08E-03 |
| ENSG00000254863 | LINC02744       | 11 | 119987952 | 1.2E+08  | 7085   | lncRNA                           | -1.57 | 2.15E-03 | 2.54E-02 |
| ENSG00000268581 | SIGLEC18P       | 19 | 51119987  | 51122965 | 2978   | unprocessed pseudogene           | -1.57 | 2.14E-03 | 2.53E-02 |
| ENSG00000287859 | AC008507.4      | 19 | 30058229  | 30060797 | 2568   | lncRNA                           | -1.57 | 1.26E-04 | 4.32E-03 |
| ENSG00000285402 | AC244230.2      | 10 | 46375752  | 46537864 | 162112 | lncRNA                           | -1.57 | 6.66E-03 | 4.93E-02 |
| ENSG00000116721 | PRAMEF1         | 1  | 12791397  | 12796628 | 5231   | protein coding                   | -1.57 | 4.93E-03 | 4.14E-02 |
| ENSG00000287009 | AC021037.1      | 10 | 96129055  | 96130528 | 1473   | lncRNA                           | -1.58 | 6.38E-04 | 1.22E-02 |

|                 |             |    |           |          |        |                                    |       |          |          |
|-----------------|-------------|----|-----------|----------|--------|------------------------------------|-------|----------|----------|
| ENSG00000286561 | AC011092.3  | 11 | 9982753   | 10000290 | 17537  | lncRNA                             | -1.58 | 4.26E-03 | 3.82E-02 |
| ENSG00000246740 | PLA2G4E-AS1 | 15 | 41972763  | 41999094 | 26331  | lncRNA-antisense                   | -1.58 | 7.70E-04 | 1.37E-02 |
| ENSG00000101327 | PDYN        | 20 | 1978757   | 1994285  | 15528  | protein coding                     | -1.58 | 3.72E-03 | 3.53E-02 |
| ENSG00000261303 | AC022748.2  | 15 | 78660644  | 78736684 | 76040  | transcribed unprocessed pseudogene | -1.58 | 1.93E-04 | 5.61E-03 |
| ENSG00000248529 | AC026746.1  | 5  | 61658474  | 61698432 | 39958  | lncRNA-antisense                   | -1.58 | 8.24E-04 | 1.43E-02 |
| ENSG00000260266 | PIIP46      | 15 | 74350768  | 74364620 | 13852  | transcribed processed pseudogene   | -1.58 | 7.79E-04 | 1.38E-02 |
| ENSG00000137674 | MMP20       | 11 | 102576832 | 1.03E+08 | 48500  | protein coding                     | -1.58 | 2.34E-03 | 2.67E-02 |
| ENSG00000203995 | ZYG11A      | 1  | 52842511  | 52894998 | 52487  | protein coding                     | -1.58 | 4.48E-05 | 2.14E-03 |
| ENSG00000257060 | AC091078.1  | 15 | 93230034  | 93569483 | 33949  | lncRNA                             | -1.58 | 1.11E-04 | 3.96E-03 |
| ENSG00000284240 | LINC02801   | 1  | 87212669  | 87264741 | 52072  | lncRNA                             | -1.58 | 9.16E-04 | 1.53E-02 |
| ENSG00000257639 | AC005632.2  | 16 | 21532945  | 21550373 | 17428  | unprocessed pseudogene             | -1.58 | 3.40E-03 | 3.33E-02 |
| ENSG00000204480 | PRAMEF19    | 1  | 13369067  | 13371900 | 2833   | protein coding                     | -1.58 | 4.57E-03 | 3.97E-02 |
| ENSG00000116726 | PRAMEF12    | 1  | 12773738  | 12777906 | 4168   | protein coding                     | -1.59 | 2.76E-04 | 7.05E-03 |
| ENSG00000150556 | LYPD6B      | 2  | 149038107 | 1.49E+08 | 177155 | protein coding                     | -1.59 | 5.63E-05 | 2.50E-03 |
| ENSG00000156920 | ADGRG4      | X  | 136300963 | 1.36E+08 | 115927 | protein coding                     | -1.59 | 6.95E-04 | 1.29E-02 |
| ENSG00000230079 | STK24P1     | X  | 136295690 | 1.36E+08 | 4608   | processed pseudogene               | -1.59 | 2.07E-03 | 2.47E-02 |
| ENSG00000148848 | ADAM12      | 10 | 126012381 | 1.26E+08 | 376074 | protein coding                     | -1.59 | 2.30E-15 | 1.43E-11 |
| ENSG00000188959 | C9orf152    | 9  | 110190048 | 1.1E+08  | 18141  | protein coding                     | -1.59 | 1.31E-03 | 1.89E-02 |
| ENSG00000258909 | AC091078.2  | 15 | 93416850  | 93422576 | 5726   | lncRNA                             | -1.59 | 5.19E-03 | 4.27E-02 |
| ENSG00000229349 | ACTG1P9     | 6  | 46204729  | 46207386 | 2657   | processed pseudogene               | -1.59 | 8.80E-04 | 1.49E-02 |
| ENSG00000253633 | AP002852.1  | 8  | 102528740 | 1.03E+08 | 11203  | lncRNA                             | -1.59 | 5.94E-03 | 4.62E-02 |
| ENSG00000105549 | THEG        | 19 | 361747    | 376026   | 14279  | protein coding                     | -1.59 | 1.10E-04 | 3.94E-03 |
| ENSG00000285804 | AC025774.1  | 5  | 72087782  | 72108000 | 20218  | lncRNA-antisense                   | -1.59 | 1.70E-03 | 2.18E-02 |
| ENSG00000226235 | LEM1-AS1    | 1  | 205373252 | 2.05E+08 | 14188  | lncRNA-antisense                   | -1.59 | 4.08E-03 | 3.73E-02 |
| ENSG00000211452 | DIO1        | 1  | 53891239  | 53911086 | 19847  | protein coding                     | -1.59 | 2.42E-04 | 6.47E-03 |
| ENSG00000226650 | KIF4B       | 5  | 155013755 | 1.55E+08 | 4386   | protein coding                     | -1.59 | 6.32E-03 | 4.79E-02 |
| ENSG00000235268 | KDM4E       | 11 | 95025258  | 95027596 | 2338   | protein coding                     | -1.59 | 5.67E-03 | 4.49E-02 |
| ENSG00000234593 | KAZN-AS1    | 1  | 14338825  | 14419973 | 81148  | lncRNA                             | -1.59 | 3.00E-04 | 7.45E-03 |
| ENSG00000226567 | LINC00606   | 3  | 10759350  | 10764209 | 4859   | lncRNA                             | -1.59 | 2.83E-03 | 2.99E-02 |
| ENSG00000260765 | CES1P2      | 16 | 55728115  | 55750111 | 21996  | unprocessed pseudogene             | -1.59 | 2.47E-03 | 2.76E-02 |
| ENSG00000287727 | AL139423.2  | 1  | 10612222  | 10616452 | 4230   | lncRNA                             | -1.59 | 2.34E-03 | 2.67E-02 |
| ENSG00000237423 | LINC01522   | 20 | 47976739  | 47990127 | 13388  | lncRNA                             | -1.60 | 7.65E-04 | 1.36E-02 |
| ENSG00000196166 | C8orf86     | 8  | 38510834  | 38560939 | 50105  | lncRNA                             | -1.60 | 5.26E-03 | 4.30E-02 |
| ENSG00000279628 | AC131280.1  | 15 | 20658900  | 20664970 | 6070   | TEC                                | -1.60 | 1.50E-05 | 9.54E-04 |
| ENSG00000225057 | AC012485.1  | 2  | 238231684 | 2.38E+08 | 23949  | lncRNA                             | -1.60 | 7.62E-04 | 1.36E-02 |
| ENSG00000256115 | LINC02443   | 12 | 5226196   | 5244199  | 18003  | lncRNA                             | -1.60 | 1.16E-03 | 1.75E-02 |
| ENSG00000174844 | DNAH12      | 3  | 57293699  | 57544344 | 250645 | protein coding                     | -1.60 | 9.80E-07 | 1.11E-04 |
| ENSG00000231439 | WASIR2      | 16 | 22910     | 25123    | 2213   | lncRNA                             | -1.60 | 1.40E-03 | 1.95E-02 |
| ENSG00000062096 | ARFS        | X  | 3041471   | 3112727  | 71256  | protein coding                     | -1.60 | 1.61E-03 | 2.12E-02 |
| ENSG00000234170 | LINC02645   | 10 | 2368561   | 2502200  | 133639 | lncRNA                             | -1.60 | 1.79E-04 | 5.36E-03 |
| ENSG00000180785 | OR51E1      | 11 | 4643420   | 4655488  | 12068  | protein coding                     | -1.60 | 2.15E-03 | 2.54E-02 |
| ENSG00000231768 | LINC01354   | 1  | 234527887 | 2.35E+08 | 3916   | lncRNA                             | -1.60 | 1.33E-03 | 1.91E-02 |
| ENSG00000280425 | AL357673.2  | 1  | 54137746  | 54142980 | 5234   | lncRNA-antisense                   | -1.61 | 5.47E-04 | 1.10E-02 |
| ENSG00000234721 | LINC02092   | 17 | 73786675  | 73800966 | 14291  | lncRNA                             | -1.61 | 9.70E-04 | 1.58E-02 |
| ENSG00000186523 | FAM86B1     | 8  | 12182096  | 12194133 | 12037  | protein coding                     | -1.61 | 1.89E-04 | 5.53E-03 |
| ENSG00000287171 | AC006062.1  | X  | 8487165   | 8504564  | 17399  | lncRNA                             | -1.61 | 2.26E-03 | 2.62E-02 |
| ENSG00000237972 | TUBG1P      | 7  | 43918697  | 43920054 | 1357   | processed pseudogene               | -1.61 | 4.50E-03 | 3.94E-02 |
| ENSG00000223843 | EFCAB6-AS1  | 22 | 43516107  | 43560063 | 43956  | lncRNA-antisense                   | -1.61 | 4.27E-04 | 9.34E-03 |
| ENSG00000278890 | FP325330.2  | 22 | 48052646  | 48058275 | 5629   | lncRNA                             | -1.61 | 9.52E-06 | 6.89E-04 |
| ENSG00000261504 | LINC01686   | 1  | 182615254 | 1.83E+08 | 1375   | lncRNA                             | -1.61 | 1.74E-03 | 2.21E-02 |
| ENSG00000256124 | LINC01152   | 17 | 72030291  | 72041310 | 11019  | lncRNA                             | -1.61 | 5.00E-03 | 4.18E-02 |
| ENSG00000236466 | AL035670.1  | 6  | 46492052  | 46606162 | 114110 | lncRNA-antisense                   | -1.62 | 1.60E-03 | 2.11E-02 |
| ENSG00000256540 | AC007406.3  | 12 | 166856    | 182399   | 15543  | lncRNA                             | -1.62 | 1.42E-03 | 1.97E-02 |
| ENSG00000256407 | AL357673.1  | 1  | 54132686  | 54200073 | 67387  | protein coding                     | -1.62 | 6.82E-03 | 5.00E-02 |
| ENSG00000162039 | MEIOB       | 16 | 1833986   | 1884294  | 50308  | protein coding                     | -1.62 | 6.59E-03 | 4.91E-02 |
| ENSG00000279699 | AC004264.2  | 22 | 30275215  | 30276951 | 1736   | TEC                                | -1.62 | 6.67E-03 | 4.94E-02 |
| ENSG00000259724 | LINC01581   | 15 | 93905405  | 94107938 | 202533 | lncRNA                             | -1.62 | 5.75E-04 | 1.13E-02 |
| ENSG00000287983 | AL035251.1  | 20 | 39231115  | 39233836 | 2721   | lncRNA                             | -1.62 | 1.19E-03 | 1.78E-02 |
| ENSG00000171403 | KRT9        | 17 | 41565836  | 41572059 | 6223   | protein coding                     | -1.62 | 2.87E-03 | 3.01E-02 |
| ENSG00000264772 | AC016876.2  | 17 | 7572826   | 7582024  | 9198   | lncRNA                             | -1.62 | 1.83E-03 | 2.28E-02 |
| ENSG00000237991 | RPL35P1     | 1  | 236981339 | 2.37E+08 | 369    | processed pseudogene               | -1.62 | 2.58E-03 | 2.83E-02 |
| ENSG00000166569 | CPLX4       | 18 | 59275156  | 59318649 | 43493  | protein coding                     | -1.62 | 1.20E-03 | 1.78E-02 |
| ENSG00000221878 | PSG7        | 19 | 42924132  | 42937207 | 13075  | protein coding                     | -1.62 | 2.85E-03 | 3.00E-02 |
| ENSG00000279200 | AC020558.5  | 17 | 17616043  | 17617745 | 1702   | TEC                                | -1.63 | 3.85E-03 | 3.60E-02 |
| ENSG00000250230 | AP002754.1  | 11 | 61588442  | 61607550 | 19108  | lncRNA                             | -1.63 | 2.63E-04 | 6.80E-03 |
| ENSG00000283072 | AL158175.1  | 20 | 22684958  | 22746991 | 62033  | lncRNA                             | -1.63 | 8.81E-04 | 1.49E-02 |
| ENSG00000270816 | LINC00221   | 14 | 106482435 | 1.07E+08 | 38638  | lncRNA                             | -1.63 | 2.70E-04 | 6.94E-03 |
| ENSG00000267712 | LINC01539   | 18 | 56083356  | 56137536 | 54180  | lncRNA                             | -1.63 | 1.78E-03 | 2.25E-02 |
| ENSG00000282021 | AC100810.3  | 8  | 1758208   | 1760447  | 2239   | lncRNA                             | -1.63 | 5.37E-04 | 1.08E-02 |
| ENSG00000138039 | LHCGR       | 2  | 48686774  | 48755730 | 68956  | protein coding                     | -1.63 | 6.41E-03 | 4.82E-02 |
| ENSG00000242221 | PSG2        | 19 | 43064209  | 43083045 | 18836  | protein coding                     | -1.63 | 1.26E-05 | 8.36E-04 |
| ENSG00000170923 | ORTG2       | 19 | 9100407   | 9107475  | 7068   | protein coding                     | -1.63 | 1.50E-03 | 2.04E-02 |
| ENSG00000177994 | C2orf7      | 2  | 54330034  | 54383742 | 53708  | protein coding                     | -1.63 | 6.63E-03 | 4.93E-02 |
| ENSG00000116031 | CD207       | 2  | 70830211  | 70835816 | 5605   | protein coding                     | -1.63 | 4.29E-04 | 9.36E-03 |
| ENSG00000215296 | TMC05B      | 15 | 33235552  | 33247621 | 12069  | transcribed unitary pseudogene     | -1.63 | 1.11E-03 | 1.70E-02 |
| ENSG00000212766 | EWAS1       | 15 | 69072926  | 69095820 | 22894  | lncRNA                             | -1.63 | 1.80E-03 | 2.26E-02 |
| ENSG00000285797 | AL512658.2  | 6  | 156350579 | 1.56E+08 | 39667  | lncRNA                             | -1.63 | 4.35E-03 | 3.86E-02 |
| ENSG00000285855 | Z72006.1    | 22 | 48403462  | 48415571 | 12109  | lncRNA                             | -1.64 | 1.14E-04 | 4.03E-03 |
| ENSG00000215498 | FAM230B     | 22 | 21167758  | 21192156 | 24398  | lncRNA                             | -1.64 | 2.38E-04 | 6.42E-03 |
| ENSG00000134020 | PBP4        | 8  | 22713251  | 23000000 | 286749 | protein coding                     | -1.64 | 4.42E-04 | 9.55E-03 |
| ENSG00000199677 | Y RNA       | 5  | 132993099 | 1.33E+08 | 101    | misc RNA                           | -1.64 | 1.74E-03 | 2.22E-02 |
| ENSG00000256417 | AC006206.2  | 12 | 5290480   | 5383653  | 93173  | lncRNA                             | -1.64 | 8.33E-04 | 1.44E-02 |
| ENSG00000132840 | BHMT2       | 5  | 79069767  | 79090069 | 20302  | protein coding                     | -1.64 | 4.36E-04 | 9.48E-03 |
| ENSG00000249346 | LINC01016   | 6  | 33867506  | 33896919 | 29408  | lncRNA                             | -1.64 | 4.51E-05 | 2.15E-03 |
| ENSG00000236121 | HAUS6P2     | 20 | 31341371  | 31344471 | 3100   | processed pseudogene               | -1.64 | 4.32E-03 | 3.85E-02 |
| ENSG00000287583 | AC018685.3  | 2  | 2697490   | 2701812  | 4322   | lncRNA                             | -1.64 | 1.51E-04 | 4.82E-03 |
| ENSG00000169006 | NTSR2       | 2  | 11658178  | 11670195 | 12017  | protein coding                     | -1.64 | 1.34E-04 | 4.45E-03 |

|                 |             |    |           |          |        |                                  |       |          |          |
|-----------------|-------------|----|-----------|----------|--------|----------------------------------|-------|----------|----------|
| ENSG00000286933 | AL022170.1  | 6  | 25632673  | 25640931 | 8258   | lncRNA                           | -1.64 | 4.17E-03 | 3.78E-02 |
| ENSG00000226668 | AL136981.1  | 9  | 92882567  | 92899608 | 17041  | inscribed unprocessed pseudogene | -1.65 | 6.04E-04 | 1.17E-02 |
| ENSG00000259541 | AP001150.1  | 11 | 120249759 | 1.2E+08  | 16173  | lncRNA-antisense                 | -1.65 | 3.69E-04 | 8.52E-03 |
| ENSG00000230960 | AL109910.1  | 6  | 170254334 | 1.7E+08  | 8235   | lncRNA-antisense                 | -1.65 | 5.72E-03 | 4.52E-02 |
| ENSG00000230221 | AL157384.1  | 9  | 95292338  | 95294810 | 2472   | processed pseudogene             | -1.65 | 5.07E-03 | 4.21E-02 |
| ENSG00000267421 | AC005498.2  | 19 | 56536156  | 56538575 | 2419   | lncRNA                           | -1.65 | 5.58E-03 | 4.46E-02 |
| ENSG00000267178 | PHF5CP      | 19 | 19588091  | 19588415 | 324    | processed pseudogene             | -1.65 | 8.94E-04 | 1.51E-02 |
| ENSG00000253868 | FER1L6-AS2  | 8  | 124044395 | 1.24E+08 | 127127 | lncRNA-antisense                 | -1.65 | 1.79E-03 | 2.25E-02 |
| ENSG00000286036 | AC017099.2  | 2  | 97618638  | 97638417 | 19779  | lncRNA                           | -1.65 | 2.76E-03 | 2.94E-02 |
| ENSG00000243193 | PRKAR2B-AS1 | 7  | 107066591 | 1.07E+08 | 67142  | lncRNA                           | -1.65 | 9.30E-04 | 1.54E-02 |
| ENSG00000272710 | AC090164.3  | 15 | 101522597 | 1.02E+08 | 2142   | lncRNA                           | -1.65 | 1.77E-03 | 2.24E-02 |
| ENSG00000259523 | AC022613.2  | 15 | 29822631  | 29824081 | 1450   | lncRNA-antisense                 | -1.65 | 3.59E-03 | 3.45E-02 |
| ENSG00000234380 | LINC01426   | 21 | 34745757  | 34784886 | 39129  | lncRNA                           | -1.65 | 8.50E-04 | 1.45E-02 |
| ENSG00000261522 | AL845331.2  | 2  | 94575976  | 94587183 | 11207  | inscribed unprocessed pseudogene | -1.65 | 1.56E-03 | 2.08E-02 |
| ENSG00000182950 | ODF3L1      | 15 | 75724041  | 75727688 | 3647   | protein coding                   | -1.65 | 2.91E-03 | 3.03E-02 |
| ENSG00000120498 | TEX11       | X  | 70528940  | 70908711 | 379771 | protein coding                   | -1.65 | 2.17E-04 | 5.99E-03 |
| ENSG00000277535 | AL772284.1  | X  | 119073226 | 1.19E+08 | 3147   | protein coding                   | -1.65 | 4.58E-03 | 3.98E-02 |
| ENSG00000006059 | KRT33A      | 17 | 41346092  | 41350828 | 4736   | protein coding                   | -1.66 | 2.51E-03 | 2.79E-02 |
| ENSG00000228862 | AC068389.1  | 8  | 60629662  | 60653561 | 23899  | lncRNA                           | -1.66 | 3.63E-04 | 8.43E-03 |
| ENSG00000260469 | INSY1N1-AS1 | 15 | 73752317  | 73770613 | 18296  | lncRNA                           | -1.66 | 4.50E-03 | 3.94E-02 |
| ENSG00000263438 | LINC01919   | 18 | 53568439  | 53629990 | 61551  | lncRNA                           | -1.66 | 4.83E-03 | 4.09E-02 |
| ENSG00000231258 | ZSWIM5P2    | 17 | 20583758  | 20591180 | 7422   | unprocessed pseudogene           | -1.66 | 4.01E-03 | 3.69E-02 |
| ENSG00000226409 | AL450332.1  | 6  | 125370034 | 1.25E+08 | 75159  | lncRNA                           | -1.66 | 5.92E-04 | 1.16E-02 |
| ENSG00000149124 | GLYAT       | 11 | 58640426  | 58731974 | 91548  | protein coding                   | -1.66 | 1.49E-03 | 2.04E-02 |
| ENSG00000260551 | PWRN2       | 15 | 24162754  | 24169948 | 7194   | lncRNA                           | -1.66 | 3.02E-03 | 3.09E-02 |
| ENSG00000225493 | LINC01107   | 2  | 238510690 | 2.39E+08 | 44364  | lncRNA                           | -1.67 | 4.31E-04 | 9.39E-03 |
| ENSG00000117148 | ACTL8       | 1  | 17755333  | 17827063 | 71730  | protein coding                   | -1.67 | 2.04E-04 | 5.80E-03 |
| ENSG00000233670 | PIRT        | 17 | 10822470  | 10838087 | 15617  | protein coding                   | -1.67 | 6.68E-04 | 1.25E-02 |
| ENSG00000185837 | HDHDS-AS1   | 22 | 17159384  | 17165445 | 6061   | lncRNA-antisense                 | -1.67 | 5.14E-03 | 4.25E-02 |
| ENSG00000268460 | AC006262.1  | 19 | 46201552  | 46214838 | 13286  | lncRNA                           | -1.67 | 1.34E-05 | 8.72E-04 |
| ENSG00000279391 | AC116456.2  | 11 | 8075573   | 8077781  | 2208   | TEC                              | -1.67 | 6.63E-03 | 4.93E-02 |
| ENSG00000175832 | ETV4        | 17 | 43527844  | 43579620 | 51776  | protein coding                   | -1.67 | 7.49E-05 | 3.02E-03 |
| ENSG00000224222 | LINC02636   | 10 | 69994276  | 70019496 | 25220  | lncRNA                           | -1.67 | 4.35E-03 | 3.86E-02 |
| ENSG00000274775 | Z82195.2    | X  | 130445085 | 1.31E+08 | 79172  | inscribed unprocessed pseudogene | -1.67 | 9.42E-07 | 1.09E-04 |
| ENSG00000171056 | SOX7        | 8  | 10723768  | 10730511 | 6743   | protein coding                   | -1.67 | 3.01E-04 | 7.46E-03 |
| ENSG00000268940 | CT45A1      | X  | 135713453 | 1.36E+08 | 10086  | protein coding                   | -1.67 | 3.25E-06 | 2.92E-04 |
| ENSG00000213509 | PPIAP16     | 3  | 57941818  | 57942304 | 486    | processed pseudogene             | -1.67 | 5.48E-03 | 4.41E-02 |
| ENSG00000253678 | AC104964.1  | 8  | 10476591  | 10479446 | 2855   | lncRNA                           | -1.68 | 2.84E-03 | 3.00E-02 |
| ENSG00000255967 | HADHAP2     | 12 | 8634367   | 8637608  | 3241   | processed pseudogene             | -1.68 | 3.93E-03 | 3.65E-02 |
| ENSG00000224539 | SAGE4P      | X  | 135598927 | 1.36E+08 | 16504  | unprocessed pseudogene           | -1.68 | 8.34E-04 | 1.44E-02 |
| ENSG00000172752 | COL6A5      | 3  | 130345516 | 1.3E+08  | 139328 | protein coding                   | -1.68 | 9.38E-07 | 1.09E-04 |
| ENSG00000255750 | AC022509.1  | 12 | 26229548  | 26319720 | 90172  | lncRNA-antisense                 | -1.68 | 5.28E-03 | 4.30E-02 |
| ENSG00000163815 | CLEC3B      | 3  | 45001548  | 45036071 | 34523  | protein coding                   | -1.68 | 5.11E-03 | 4.23E-02 |
| ENSG00000228141 | AC105339.1  | 15 | 82710471  | 82714029 | 3558   | transcribed unitary pseudogene   | -1.68 | 2.13E-04 | 5.94E-03 |
| ENSG00000214866 | DCDC2C      | 2  | 3703575   | 3848008  | 144433 | protein coding                   | -1.68 | 1.71E-05 | 1.04E-03 |
| ENSG00000282943 | AC004784.1  | 19 | 42977463  | 43171515 | 194052 | lncRNA-antisense                 | -1.68 | 5.88E-03 | 4.60E-02 |
| ENSG00000248736 | AC094105.2  | 5  | 2921496   | 2967955  | 46459  | lncRNA                           | -1.68 | 1.88E-04 | 5.53E-03 |
| ENSG00000230023 | LINC02800   | 1  | 24200240  | 24211693 | 11453  | lncRNA                           | -1.68 | 4.07E-03 | 3.72E-02 |
| ENSG00000260896 | ARLNC1      | 16 | 80826074  | 80892682 | 66608  | lncRNA                           | -1.68 | 3.59E-05 | 1.81E-03 |
| ENSG00000158022 | TRIM63      | 1  | 26051301  | 26068436 | 17135  | protein coding                   | -1.68 | 9.39E-04 | 1.55E-02 |
| ENSG00000253298 | LINC01845   | 5  | 159448556 | 1.59E+08 | 17735  | lncRNA                           | -1.68 | 2.72E-03 | 2.92E-02 |
| ENSG00000125398 | SOX9        | 17 | 72121020  | 72126416 | 5396   | protein coding                   | -1.68 | 7.76E-05 | 3.10E-03 |
| ENSG00000170423 | KRT78       | 12 | 52837804  | 52849092 | 11288  | protein coding                   | -1.68 | 4.64E-04 | 9.84E-03 |
| ENSG00000159527 | PGLYRP3     | 1  | 153297862 | 1.53E+08 | 12856  | protein coding                   | -1.69 | 2.23E-03 | 2.59E-02 |
| ENSG00000230500 | MXK-AS1     | 10 | 27744786  | 27767794 | 23008  | lncRNA-antisense                 | -1.69 | 4.51E-03 | 3.94E-02 |
| ENSG00000267670 | AC022098.2  | 19 | 14030855  | 14031557 | 702    | lncRNA-antisense                 | -1.69 | 3.47E-04 | 8.21E-03 |
| ENSG00000285571 | AL513548.4  | 6  | 26677003  | 26683211 | 6208   | lncRNA                           | -1.69 | 2.50E-03 | 2.78E-02 |
| ENSG00000187847 | OR7E25P     | 19 | 9198354   | 9210067  | 11713  | inscribed unprocessed pseudogene | -1.69 | 2.47E-04 | 6.54E-03 |
| ENSG00000226440 | LAMA4-AS1   | 6  | 112236093 | 1.12E+08 | 70916  | lncRNA-antisense                 | -1.69 | 3.13E-03 | 3.17E-02 |
| ENSG00000124391 | IL17C       | 16 | 88638572  | 88640468 | 1896   | protein coding                   | -1.69 | 1.41E-03 | 1.97E-02 |
| ENSG00000179873 | NLRP11      | 19 | 55785397  | 55836800 | 51403  | protein coding                   | -1.69 | 1.50E-04 | 4.80E-03 |
| ENSG00000233396 | LINC01719   | 1  | 146052566 | 1.46E+08 | 9382   | lncRNA                           | -1.69 | 7.52E-04 | 1.35E-02 |
| ENSG00000284837 | AC007846.1  | 17 | 5772234   | 5930696  | 158462 | lncRNA                           | -1.69 | 2.37E-03 | 2.69E-02 |
| ENSG00000176798 | OR51L1      | 11 | 4994851   | 5005536  | 10685  | protein coding                   | -1.69 | 2.64E-04 | 6.84E-03 |
| ENSG00000267465 | AC011525.2  | 19 | 31588159  | 31593786 | 5627   | lncRNA                           | -1.69 | 7.14E-04 | 1.31E-02 |
| ENSG00000258464 | AL160237.1  | 14 | 23699797  | 23729757 | 29960  | lncRNA                           | -1.70 | 1.03E-03 | 1.63E-02 |
| ENSG00000284632 | AL354702.1  | 1  | 38754216  | 38815979 | 61763  | lncRNA                           | -1.70 | 1.45E-03 | 1.99E-02 |
| ENSG00000237510 | GPAT2P1     | 2  | 95789654  | 95800166 | 10512  | inscribed unprocessed pseudogene | -1.70 | 1.31E-04 | 4.41E-03 |
| ENSG00000268089 | GABRP       | X  | 152637895 | 1.53E+08 | 19647  | protein coding                   | -1.70 | 1.21E-04 | 4.20E-03 |
| ENSG00000259867 | AC105411.1  | 16 | 80154979  | 80563354 | 408375 | lncRNA-antisense                 | -1.70 | 6.87E-05 | 2.86E-03 |
| ENSG00000131737 | KRT34       | 17 | 41377650  | 41382403 | 4753   | protein coding                   | -1.70 | 8.14E-04 | 1.42E-02 |
| ENSG00000183034 | OTOP2       | 17 | 74922950  | 74933912 | 10962  | protein coding                   | -1.70 | 5.26E-04 | 1.07E-02 |
| ENSG00000234988 | LINC01849   | 2  | 100603752 | 1.01E+08 | 7790   | lncRNA                           | -1.70 | 1.50E-03 | 2.04E-02 |
| ENSG00000245059 | AC092718.1  | 16 | 81077319  | 81078861 | 1542   | lncRNA                           | -1.70 | 1.92E-03 | 2.35E-02 |
| ENSG00000280057 | AL022069.2  | 6  | 166388136 | 1.66E+08 | 1784   | TEC                              | -1.70 | 3.86E-03 | 3.61E-02 |
| ENSG00000197176 | LINC02291   | 14 | 97632647  | 97686658 | 54011  | lncRNA                           | -1.70 | 3.74E-03 | 3.54E-02 |
| ENSG00000128510 | CPA4        | 7  | 130293134 | 1.3E+08  | 31046  | protein coding                   | -1.70 | 1.46E-04 | 4.72E-03 |
| ENSG00000235470 | NEURL1-AS1  | 10 | 103479603 | 1.04E+08 | 37790  | lncRNA-antisense                 | -1.70 | 1.79E-03 | 2.25E-02 |
| ENSG00000157111 | TMEM171     | 5  | 73120569  | 73131809 | 11240  | protein coding                   | -1.70 | 7.41E-04 | 1.34E-02 |
| ENSG00000086896 | HSD17B2     | 16 | 82035004  | 82098534 | 63530  | protein coding                   | -1.71 | 1.42E-05 | 9.15E-04 |
| ENSG00000228397 | LINC01635   | 1  | 22023990  | 22026048 | 2058   | lncRNA                           | -1.71 | 1.81E-03 | 2.26E-02 |
| ENSG00000165583 | SSX5        | X  | 48186220  | 48196763 | 10543  | protein coding                   | -1.71 | 5.70E-03 | 4.50E-02 |
| ENSG00000250494 | AC078852.2  | 4  | 1356581   | 1358075  | 1494   | lncRNA-sense intronic            | -1.71 | 5.94E-03 | 4.62E-02 |
| ENSG00000254401 | LINC02752   | 11 | 11020883  | 11183611 | 162728 | lncRNA                           | -1.71 | 1.46E-04 | 4.73E-03 |
| ENSG00000221826 | PSG3        | 19 | 42721638  | 42740481 | 18843  | protein coding                   | -1.71 | 3.95E-03 | 3.66E-02 |
| ENSG00000204478 | PRAMEF20    | 1  | 13416351  | 13421328 | 4977   | protein coding                   | -1.71 | 8.00E-04 | 1.40E-02 |
| ENSG00000278920 | AC005005.4  | 22 | 31051630  | 31068327 | 16697  | lncRNA-sense overlapping         | -1.71 | 5.81E-05 | 2.55E-03 |



|                 |            |    |           |          |        |                                  |       |          |          |
|-----------------|------------|----|-----------|----------|--------|----------------------------------|-------|----------|----------|
| ENSG00000232725 | U52111.1   | X  | 153735626 | 1.54E+08 | 30852  | lncRNA-antisense                 | -1.71 | 8.54E-05 | 3.34E-03 |
| ENSG00000232423 | PRAMEF6    | 1  | 12938472  | 12947580 | 9108   | protein coding                   | -1.71 | 6.36E-03 | 4.81E-02 |
| ENSG00000145192 | AHSG       | 3  | 186613060 | 1.87E+08 | 8258   | protein coding                   | -1.71 | 3.92E-04 | 8.90E-03 |
| ENSG00000234967 | AL357558.2 | 20 | 47950797  | 47954808 | 4011   | lncRNA                           | -1.72 | 3.71E-04 | 8.55E-03 |
| ENSG00000165204 | OR1K1      | 9  | 122800123 | 1.23E+08 | 950    | protein coding                   | -1.72 | 5.98E-03 | 4.63E-02 |
| ENSG00000271519 | AL590065.1 | X  | 35864858  | 35869631 | 4773   | processed pseudogene             | -1.72 | 6.37E-03 | 4.81E-02 |
| ENSG00000260072 | AC008938.1 | 16 | 24472798  | 24495177 | 22379  | lncRNA                           | -1.72 | 1.21E-05 | 8.12E-04 |
| ENSG00000258952 | SALRNA1    | 14 | 60639216  | 60642589 | 3373   | lncRNA                           | -1.72 | 5.63E-04 | 1.12E-02 |
| ENSG00000279774 | AL590483.3 | 1  | 244064330 | 2.44E+08 | 3579   | TEC                              | -1.72 | 2.20E-04 | 6.06E-03 |
| ENSG00000226469 | ADAM1B     | 12 | 111927018 | 1.12E+08 | 1999   | unitary pseudogene               | -1.72 | 4.10E-03 | 3.74E-02 |
| ENSG00000243137 | PSG.4      | 19 | 43192702  | 43207299 | 14597  | protein coding                   | -1.72 | 9.81E-05 | 3.68E-03 |
| ENSG00000287469 | AC044798.3 | 16 | 49072543  | 49275579 | 203036 | lncRNA                           | -1.72 | 5.28E-05 | 2.40E-03 |
| ENSG00000181123 | AC004832.1 | 22 | 30475364  | 30492804 | 17440  | lncRNA-antisense                 | -1.72 | 1.55E-04 | 4.88E-03 |
| ENSG00000183566 | BPIFA4P    | 20 | 33193585  | 33210462 | 16877  | inscribed unprocessed pseudogene | -1.72 | 1.17E-03 | 1.76E-02 |
| ENSG00000167098 | SUN5       | 20 | 32983773  | 33004433 | 20660  | protein coding                   | -1.73 | 9.28E-04 | 1.54E-02 |
| ENSG00000263667 | AL035696.3 | 6  | 181466    | 205519   | 24053  | lncRNA                           | -1.73 | 5.67E-04 | 1.12E-02 |
| ENSG00000253267 | DLGAP2-AS1 | 8  | 1565509   | 1622417  | 56908  | lncRNA-antisense                 | -1.73 | 4.71E-04 | 9.93E-03 |
| ENSG00000287242 | AC073593.2 | 12 | 124786783 | 1.25E+08 | 22007  | lncRNA                           | -1.73 | 4.28E-03 | 3.83E-02 |
| ENSG00000179676 | LINC00305  | 18 | 64079989  | 64149088 | 69099  | lncRNA                           | -1.73 | 2.76E-03 | 2.94E-02 |
| ENSG00000259420 | AC046168.2 | 15 | 77568970  | 77608888 | 39918  | lncRNA                           | -1.73 | 1.43E-03 | 1.97E-02 |
| ENSG00000178997 | EXD1       | 15 | 41182725  | 41230743 | 48018  | protein coding                   | -1.73 | 2.46E-04 | 6.53E-03 |
| ENSG00000088926 | F11        | 4  | 186266189 | 1.86E+08 | 23492  | protein coding                   | -1.73 | 5.35E-05 | 2.41E-03 |
| ENSG00000073754 | CD5L       | 1  | 157830911 | 1.58E+08 | 67345  | protein coding                   | -1.73 | 5.02E-04 | 1.04E-02 |
| ENSG00000237121 | PIEZO1P2   | 20 | 58740532  | 58783821 | 43289  | unprocessed pseudogene           | -1.73 | 3.50E-04 | 8.26E-03 |
| ENSG00000206422 | LRR30      | 18 | 7231125   | 7232047  | 922    | protein coding                   | -1.73 | 4.64E-03 | 4.00E-02 |
| ENSG00000281560 | LSINCT5    | 5  | 2712591   | 2715237  | 2646   | lncRNA                           | -1.73 | 1.97E-03 | 2.39E-02 |
| ENSG00000260343 | LINC01043  | 13 | 112313467 | 1.12E+08 | 8291   | lncRNA                           | -1.73 | 3.18E-04 | 7.74E-03 |
| ENSG00000183888 | SRARP      | 1  | 16004236  | 16008807 | 4571   | protein coding                   | -1.73 | 4.60E-04 | 9.79E-03 |
| ENSG00000264876 | AP005209.1 | 18 | 10321380  | 10372387 | 51007  | lncRNA                           | -1.73 | 1.30E-03 | 1.88E-02 |
| ENSG00000286353 | AC115282.1 | 3  | 54057690  | 54125377 | 67687  | lncRNA                           | -1.73 | 3.72E-03 | 3.53E-02 |
| ENSG00000286801 | BX546033.1 | 22 | 43507824  | 43513727 | 5903   | lncRNA                           | -1.73 | 5.93E-04 | 1.16E-02 |
| ENSG00000164283 | ESM1       | 5  | 54977867  | 55022671 | 44804  | protein coding                   | -1.73 | 7.58E-04 | 1.36E-02 |
| ENSG00000286289 | AL133482.1 | 10 | 113482069 | 1.13E+08 | 9985   | lncRNA                           | -1.73 | 6.80E-03 | 4.99E-02 |
| ENSG00000259447 | AC013652.2 | 15 | 39300418  | 39310782 | 10364  | lncRNA                           | -1.73 | 6.38E-03 | 4.81E-02 |
| ENSG00000261465 | AC099518.4 | 16 | 19062144  | 19067691 | 5547   | lncRNA-antisense                 | -1.74 | 2.24E-03 | 2.60E-02 |
| ENSG00000265574 | WDR45BP1   | 17 | 32111562  | 32112590 | 1028   | processed pseudogene             | -1.74 | 6.67E-03 | 4.94E-02 |
| ENSG0000007908  | SELE       | 1  | 169722640 | 1.7E+08  | 42065  | protein coding                   | -1.74 | 4.53E-03 | 3.95E-02 |
| ENSG00000185792 | NLRP9      | 19 | 55708438  | 55738402 | 29964  | protein coding                   | -1.74 | 5.13E-04 | 1.06E-02 |
| ENSG00000170820 | FSHR       | 2  | 48962157  | 49154527 | 192370 | protein coding                   | -1.74 | 1.71E-03 | 2.20E-02 |
| ENSG00000259674 | AC092688.1 | 15 | 59406963  | 59408154 | 1191   | processed pseudogene             | -1.74 | 4.35E-03 | 3.86E-02 |
| ENSG00000205858 | LRR37      | 7  | 16526825  | 16581568 | 54743  | protein coding                   | -1.74 | 2.99E-03 | 3.08E-02 |
| ENSG00000229275 | BX284656.1 | 22 | 48141542  | 48143229 | 1687   | lncRNA                           | -1.74 | 1.88E-03 | 2.32E-02 |
| ENSG00000286641 | AC108073.3 | 4  | 187942164 | 1.88E+08 | 21181  | lncRNA                           | -1.74 | 1.48E-03 | 2.02E-02 |
| ENSG00000255583 | AC084357.3 | 12 | 63682523  | 63724935 | 42412  | inscribed unprocessed pseudogene | -1.74 | 6.12E-03 | 4.69E-02 |
| ENSG00000227066 | Z98257.1   | 1  | 20154171  | 20160568 | 6397   | lncRNA                           | -1.74 | 3.01E-04 | 7.46E-03 |
| ENSG00000124092 | CTCFL      | 20 | 57495966  | 57525652 | 29686  | protein coding                   | -1.74 | 6.50E-05 | 2.76E-03 |
| ENSG00000203963 | C1orf141   | 1  | 67092165  | 67231853 | 139688 | protein coding                   | -1.74 | 1.03E-03 | 1.63E-02 |
| ENSG00000287133 | AC007279.1 | 2  | 201643398 | 2.02E+08 | 2592   | lncRNA                           | -1.74 | 6.32E-03 | 4.79E-02 |
| ENSG00000253408 | AC083973.1 | 8  | 42233674  | 42271266 | 37592  | lncRNA-antisense                 | -1.74 | 4.23E-04 | 9.31E-03 |
| ENSG00000279006 | AL022323.1 | 22 | 25048967  | 25051966 | 2999   | lncRNA-antisense                 | -1.74 | 4.62E-04 | 9.81E-03 |
| ENSG00000256195 | AP020518.1 | 11 | 114343052 | 1.14E+08 | 53167  | lncRNA-antisense                 | -1.75 | 1.43E-03 | 1.98E-02 |
| ENSG00000234279 | LINC01937  | 2  | 238554541 | 2.39E+08 | 186308 | lncRNA                           | -1.75 | 5.12E-03 | 4.23E-02 |
| ENSG00000184735 | DDX53      | X  | 22999960  | 23003589 | 3629   | protein coding                   | -1.75 | 2.56E-03 | 2.82E-02 |
| ENSG00000263278 | AC233701.1 | 17 | 79598032  | 79603921 | 5889   | lncRNA-sense intronic            | -1.75 | 8.24E-05 | 3.25E-03 |
| ENSG00000261018 | AC002101.1 | 9  | 133611798 | 1.34E+08 | 21301  | lncRNA-antisense                 | -1.75 | 3.04E-03 | 3.10E-02 |
| ENSG00000255512 | LINC02684  | 11 | 135061781 | 1.35E+08 | 14127  | lncRNA                           | -1.75 | 1.51E-03 | 2.04E-02 |
| ENSG00000114248 | LRR31      | 3  | 169839172 | 1.7E+08  | 30763  | protein coding                   | -1.75 | 2.33E-03 | 2.67E-02 |
| ENSG00000287307 | AC005772.2 | 17 | 15062087  | 15104517 | 42430  | lncRNA                           | -1.75 | 4.38E-04 | 9.51E-03 |
| ENSG00000275989 | AL442128.1 | 13 | 110945478 | 1.11E+08 | 26125  | inscribed unprocessed pseudogene | -1.75 | 5.65E-03 | 4.49E-02 |
| ENSG00000230630 | DNM3OS     | 1  | 172138397 | 1.72E+08 | 6443   | lncRNA-antisense                 | -1.75 | 5.81E-03 | 4.56E-02 |
| ENSG00000243479 | MNX1-AS1   | 7  | 157010805 | 1.57E+08 | 5621   | lncRNA                           | -1.75 | 3.44E-03 | 3.36E-02 |
| ENSG00000131059 | BPIFA3     | 20 | 33217310  | 33227806 | 10496  | protein coding                   | -1.75 | 5.44E-04 | 1.09E-02 |
| ENSG00000185662 | SMIM23     | 5  | 171782432 | 1.72E+08 | 13694  | protein coding                   | -1.75 | 2.53E-03 | 2.80E-02 |
| ENSG00000186160 | CYP4Z1     | 1  | 47067231  | 47118318 | 51087  | protein coding                   | -1.75 | 1.90E-03 | 2.33E-02 |
| ENSG00000279358 | AP002833.3 | 11 | 126934886 | 1.27E+08 | 2264   | TEC                              | -1.75 | 5.37E-03 | 4.35E-02 |
| ENSG00000155890 | TRIM42     | 3  | 140678064 | 1.41E+08 | 23086  | protein coding                   | -1.75 | 1.27E-03 | 1.85E-02 |
| ENSG00000286501 | AC018545.1 | 3  | 150339478 | 1.5E+08  | 3732   | lncRNA                           | -1.75 | 1.94E-03 | 2.36E-02 |
| ENSG00000203643 | AC012456.1 | 2  | 11721619  | 11724222 | 2603   | lncRNA-antisense                 | -1.76 | 2.84E-03 | 3.00E-02 |
| ENSG00000260762 | ACSM5P1    | 16 | 20586550  | 20607107 | 20557  | unprocessed pseudogene           | -1.76 | 6.60E-04 | 1.24E-02 |
| ENSG00000229976 | AL118523.1 | 20 | 39757202  | 39815097 | 57895  | lncRNA                           | -1.76 | 2.47E-03 | 2.77E-02 |
| ENSG00000172458 | IL17D      | 13 | 20702127  | 20723098 | 20971  | protein coding                   | -1.76 | 7.19E-05 | 2.95E-03 |
| ENSG00000227438 | AP001471.1 | 21 | 46093264  | 46097530 | 4266   | lncRNA-antisense                 | -1.76 | 3.20E-03 | 3.21E-02 |
| ENSG00000158516 | CPA2       | 7  | 130266863 | 1.3E+08  | 22935  | protein coding                   | -1.76 | 1.19E-04 | 4.16E-03 |
| ENSG00000242267 | SKINT1L    | 1  | 48096092  | 48182428 | 86336  | inscribed unprocessed pseudogene | -1.76 | 5.53E-04 | 1.10E-02 |
| ENSG00000227304 | AC067942.1 | 4  | 82494786  | 82496278 | 1492   | inscribed processed pseudogene   | -1.76 | 8.15E-04 | 1.42E-02 |
| ENSG00000260459 | FTLP14     | 16 | 68822587  | 68823070 | 483    | processed pseudogene             | -1.76 | 6.03E-03 | 4.66E-02 |
| ENSG00000257582 | LINC01475  | 10 | 99526350  | 99531177 | 4827   | lncRNA                           | -1.76 | 1.28E-03 | 1.86E-02 |
| ENSG00000102243 | VGLL1      | X  | 136532215 | 1.37E+08 | 24592  | protein coding                   | -1.77 | 5.82E-03 | 4.57E-02 |
| ENSG00000249840 | GAPDPHP76  | 19 | 11585246  | 11587135 | 1889   | unprocessed pseudogene           | -1.77 | 5.85E-03 | 4.58E-02 |
| ENSG00000204479 | PRAMEF17   | 1  | 13389632  | 13392629 | 2997   | protein coding                   | -1.77 | 4.88E-03 | 4.11E-02 |
| ENSG00000267646 | AC008543.5 | 19 | 11796084  | 11798598 | 2514   | lncRNA-antisense                 | -1.77 | 2.98E-03 | 3.08E-02 |
| ENSG00000237579 | LINC01514  | 10 | 101176306 | 1.01E+08 | 17841  | lncRNA                           | -1.77 | 2.70E-03 | 2.91E-02 |
| ENSG00000254081 | LINC01299  | 8  | 65526738  | 65562781 | 36043  | lncRNA                           | -1.77 | 3.89E-03 | 3.62E-02 |
| ENSG00000235430 | ZSWIM5P1   | 17 | 15768717  | 15771426 | 2709   | processed pseudogene             | -1.77 | 6.80E-04 | 1.26E-02 |
| ENSG00000220248 | ZNF402P    | 22 | 16857619  | 16860718 | 3099   | processed pseudogene             | -1.77 | 5.04E-03 | 4.20E-02 |
| ENSG00000144820 | ADGRG7     | 3  | 100609601 | 1.01E+08 | 85878  | protein coding                   | -1.77 | 4.49E-05 | 2.14E-03 |
| ENSG00000227630 | LINC01132  | 1  | 234724042 | 2.35E+08 | 12678  | lncRNA                           | -1.77 | 1.19E-03 | 1.77E-02 |

|                 |            |    |           |          |        |                                    |       |          |          |
|-----------------|------------|----|-----------|----------|--------|------------------------------------|-------|----------|----------|
| ENSG00000183929 | DUSP5P1    | 1  | 228650241 | 2.29E+08 | 1138   | processed pseudogene               | -1.78 | 6.78E-03 | 4.98E-02 |
| ENSG00000280380 | AC009831.4 | 18 | 31982899  | 31986087 | 3188   | TEC                                | -1.78 | 1.79E-03 | 2.25E-02 |
| ENSG00000276172 | ELMO2P1    | 15 | 23083094  | 23121324 | 38230  | transcribed unprocessed pseudogene | -1.78 | 4.64E-03 | 4.00E-02 |
| ENSG00000169064 | ZBBX       | 3  | 167239843 | 1.67E+08 | 168031 | protein coding                     | -1.78 | 5.55E-04 | 1.11E-02 |
| ENSG00000202354 | RNY3       | 7  | 148983755 | 1.49E+08 | 101    | misc RNA                           | -1.78 | 3.17E-04 | 7.71E-03 |
| ENSG00000189433 | GJB4       | 1  | 34759740  | 34762327 | 2587   | protein coding                     | -1.78 | 2.90E-04 | 7.28E-03 |
| ENSG00000259669 | AC084759.2 | 15 | 53946709  | 53984010 | 37301  | lncRNA                             | -1.78 | 9.73E-04 | 1.58E-02 |
| ENSG00000274492 | AL121768.1 | 14 | 88819608  | 88822151 | 2543   | lncRNA                             | -1.78 | 1.78E-03 | 2.25E-02 |
| ENSG00000286364 | AL512308.1 | 6  | 453391    | 477829   | 24438  | lncRNA                             | -1.78 | 4.93E-04 | 1.03E-02 |
| ENSG00000196832 | OR11G2     | 14 | 20190894  | 20201075 | 10181  | protein coding                     | -1.78 | 3.31E-04 | 7.98E-03 |
| ENSG00000147257 | GPC3       | X  | 133535745 | 1.34E+08 | 449849 | protein coding                     | -1.78 | 6.25E-04 | 1.20E-02 |
| ENSG00000183067 | IGSF5      | 21 | 39745407  | 39802096 | 56689  | protein coding                     | -1.78 | 5.18E-04 | 1.06E-02 |
| ENSG00000234423 | LINC01250  | 2  | 2895048   | 3126026  | 230978 | lncRNA                             | -1.78 | 1.10E-04 | 3.94E-03 |
| ENSG00000125850 | OVOL2      | 20 | 17956979  | 18059188 | 102209 | protein coding                     | -1.79 | 1.23E-03 | 1.81E-02 |
| ENSG00000283535 | AC007064.4 | 22 | 16844399  | 16846357 | 1958   | unprocessed pseudogene             | -1.79 | 4.60E-03 | 3.99E-02 |
| ENSG00000146233 | CYP39A1    | 6  | 46549580  | 46652830 | 103250 | protein coding                     | -1.79 | 5.55E-04 | 1.11E-02 |
| ENSG00000249026 | CTNNA1P1   | 5  | 115389643 | 1.15E+08 | 2727   | processed pseudogene               | -1.79 | 2.81E-03 | 2.98E-02 |
| ENSG00000278522 | POTEB3     | 15 | 21405401  | 21440499 | 35098  | protein coding                     | -1.79 | 4.65E-03 | 4.01E-02 |
| ENSG00000173908 | KRT28      | 17 | 40792196  | 40799959 | 7763   | protein coding                     | -1.79 | 4.40E-04 | 9.53E-03 |
| ENSG00000226829 | AC093655.1 | 7  | 68149548  | 68319676 | 170128 | lncRNA                             | -1.79 | 5.83E-03 | 4.57E-02 |
| ENSG00000106819 | ASPN       | 9  | 92456205  | 92482506 | 26301  | protein coding                     | -1.79 | 1.50E-03 | 2.04E-02 |
| ENSG00000225418 | KLR1C5P    | 10 | 5122087   | 5135226  | 13139  | unprocessed pseudogene             | -1.79 | 5.68E-03 | 4.50E-02 |
| ENSG00000283039 | KLF18      | 1  | 44137821  | 44141631 | 3810   | protein coding                     | -1.79 | 1.39E-03 | 1.95E-02 |
| ENSG00000216560 | LINC00955  | 4  | 3576869   | 3590711  | 13842  | lncRNA                             | -1.79 | 7.83E-05 | 3.12E-03 |
| ENSG00000288022 | AC117488.1 | 3  | 125061448 | 1.25E+08 | 2262   | lncRNA                             | -1.79 | 3.58E-03 | 3.45E-02 |
| ENSG00000132639 | SNAP25     | 20 | 10218830  | 10307418 | 88588  | protein coding                     | -1.79 | 4.41E-05 | 2.12E-03 |
| ENSG00000255335 | LINC02729  | 11 | 17695266  | 17696994 | 1728   | lncRNA-antisense                   | -1.79 | 3.26E-03 | 3.24E-02 |
| ENSG00000258676 | AC091544.2 | 15 | 92058741  | 92600545 | 19804  | lncRNA                             | -1.80 | 4.21E-04 | 9.28E-03 |
| ENSG00000263887 | AC053481.2 | 17 | 62282702  | 62297026 | 14324  | transcribed unprocessed pseudogene | -1.80 | 8.76E-04 | 1.49E-02 |
| ENSG00000132031 | MATN3      | 2  | 19992052  | 20012668 | 20616  | protein coding                     | -1.80 | 2.60E-04 | 6.77E-03 |
| ENSG00000267589 | AC011444.4 | 19 | 6072823   | 6073527  | 704    | processed pseudogene               | -1.80 | 2.15E-03 | 2.54E-02 |
| ENSG00000173124 | ACSM6      | 10 | 95194200  | 95228928 | 34728  | protein coding                     | -1.80 | 3.33E-04 | 8.00E-03 |
| ENSG00000286146 | FP236383.9 | 21 | 8420675   | 8421003  | 328    | TEC                                | -1.80 | 1.82E-03 | 2.27E-02 |
| ENSG00000165694 | FRMD7      | X  | 132076990 | 1.32E+08 | 51030  | protein coding                     | -1.80 | 5.39E-04 | 1.09E-02 |
| ENSG00000227582 | ADGRF5P1   | 9  | 62860873  | 62864957 | 4084   | transcribed processed pseudogene   | -1.80 | 2.37E-03 | 2.69E-02 |
| ENSG00000231009 | CUBN1P     | 10 | 42694371  | 42714575 | 20204  | unprocessed pseudogene             | -1.80 | 6.64E-03 | 4.93E-02 |
| ENSG00000188991 | SLC15A5    | 12 | 16188485  | 16277685 | 89200  | protein coding                     | -1.80 | 3.72E-03 | 3.53E-02 |
| ENSG00000231367 | LINC02613  | 2  | 38406527  | 38515934 | 109407 | lncRNA                             | -1.80 | 2.75E-04 | 7.05E-03 |
| ENSG00000223598 | AL138733.1 | 6  | 151088103 | 1.51E+08 | 140344 | lncRNA-antisense                   | -1.80 | 5.96E-03 | 4.63E-02 |
| ENSG00000253833 | DSTN3P     | 8  | 73984493  | 73984883 | 390    | processed pseudogene               | -1.81 | 4.92E-03 | 4.14E-02 |
| ENSG00000254443 | AC068733.1 | 11 | 6362799   | 6365267  | 2468   | lncRNA                             | -1.81 | 3.17E-03 | 3.19E-02 |
| ENSG00000287422 | AL442071.2 | 1  | 39226670  | 39238620 | 11950  | lncRNA                             | -1.81 | 3.68E-03 | 3.51E-02 |
| ENSG00000115598 | IL1RL2     | 2  | 102187006 | 1.02E+08 | 52996  | protein coding                     | -1.81 | 1.11E-04 | 3.95E-03 |
| ENSG00000287251 | AP003062.2 | 11 | 134945118 | 1.35E+08 | 35456  | lncRNA                             | -1.81 | 3.46E-04 | 8.21E-03 |
| ENSG00000260298 | ACTG1P16   | 16 | 50058150  | 50059231 | 1081   | transcribed processed pseudogene   | -1.81 | 6.01E-03 | 4.64E-02 |
| ENSG00000230782 | AL807761.4 | 9  | 106974833 | 1.07E+08 | 128155 | lncRNA-antisense                   | -1.81 | 4.44E-03 | 3.90E-02 |
| ENSG00000261435 | AL592164.1 | X  | 39837536  | 39848358 | 10822  | lncRNA                             | -1.81 | 2.94E-03 | 3.05E-02 |
| ENSG00000260880 | HCCAT5     | 16 | 73092349  | 73099337 | 6988   | lncRNA                             | -1.81 | 8.64E-04 | 1.47E-02 |
| ENSG00000285706 | AL807776.1 | 9  | 98798466  | 98807564 | 9098   | RNA-bidirectional promoter lncRNA  | -1.81 | 3.50E-03 | 3.39E-02 |
| ENSG00000267091 | CTBP2P7    | 19 | 36496916  | 36498159 | 1243   | processed pseudogene               | -1.81 | 1.03E-03 | 1.63E-02 |
| ENSG00000287275 | AC011451.4 | 19 | 9458119   | 9462388  | 4269   | lncRNA                             | -1.81 | 3.26E-03 | 3.24E-02 |
| ENSG00000140465 | CYP1A1     | 15 | 74719542  | 74725536 | 5994   | protein coding                     | -1.82 | 3.65E-03 | 3.49E-02 |
| ENSG00000256596 | AC026358.1 | 12 | 124206228 | 1.24E+08 | 2790   | lncRNA                             | -1.82 | 2.40E-03 | 2.72E-02 |
| ENSG00000185479 | KRT6B      | 12 | 52446651  | 52452146 | 5495   | protein coding                     | -1.82 | 1.00E-04 | 3.71E-03 |
| ENSG00000173239 | LIPM       | 10 | 88820730  | 88820546 | 17816  | protein coding                     | -1.82 | 4.56E-03 | 3.97E-02 |
| ENSG00000222976 | RNYSKP94   | 17 | 57789449  | 57789732 | 283    | misc RNA                           | -1.82 | 3.29E-03 | 3.26E-02 |
| ENSG00000267961 | OR10B1P    | 19 | 15141105  | 15142062 | 957    | unprocessed pseudogene             | -1.82 | 6.73E-03 | 4.96E-02 |
| ENSG00000174460 | ZCCHC12    | X  | 118823824 | 1.19E+08 | 3144   | protein coding                     | -1.82 | 6.35E-04 | 1.21E-02 |
| ENSG00000280078 | AC016526.3 | 14 | 76279173  | 76283103 | 3930   | TEC                                | -1.82 | 1.69E-04 | 5.18E-03 |
| ENSG00000172986 | GXYLT2     | 3  | 72888046  | 72998138 | 110092 | protein coding                     | -1.82 | 2.26E-04 | 6.18E-03 |
| ENSG00000267239 | AP01198.1  | 18 | 13203774  | 13216367 | 12593  | lncRNA-antisense                   | -1.82 | 2.35E-03 | 2.68E-02 |
| ENSG00000277561 | GOLGA8IP   | 15 | 22606022  | 22617854 | 11832  | transcribed unprocessed pseudogene | -1.83 | 8.44E-07 | 1.01E-04 |
| ENSG00000256292 | LINC02376  | 12 | 127274265 | 1.27E+08 | 10063  | lncRNA                             | -1.83 | 3.00E-03 | 3.09E-02 |
| ENSG00000175202 | HIGD2B     | 15 | 72675798  | 72686182 | 10384  | protein coding                     | -1.83 | 2.98E-03 | 3.08E-02 |
| ENSG00000286324 | AL033381.3 | 6  | 1111367   | 1114329  | 2962   | lncRNA                             | -1.83 | 3.82E-03 | 3.59E-02 |
| ENSG00000120729 | MYOT       | 5  | 137867858 | 1.38E+08 | 19993  | protein coding                     | -1.83 | 9.07E-04 | 1.52E-02 |
| ENSG00000243818 | AC021074.3 | 3  | 142912116 | 1.43E+08 | 30421  | lncRNA-antisense                   | -1.83 | 2.08E-04 | 5.86E-03 |
| ENSG00000253415 | AC016877.2 | 8  | 98904603  | 98905671 | 1068   | processed pseudogene               | -1.83 | 4.66E-03 | 4.01E-02 |
| ENSG00000237290 | LINC01343  | 1  | 38209034  | 38214806 | 5772   | lncRNA                             | -1.83 | 1.35E-04 | 4.48E-03 |
| ENSG00000181211 | HECW1-IT1  | 7  | 43117896  | 43163187 | 45291  | lncRNA-sense intronic              | -1.83 | 5.79E-03 | 4.55E-02 |
| ENSG00000287708 | AL137017.1 | 9  | 14395791  | 14472407 | 76816  | lncRNA                             | -1.83 | 1.16E-03 | 1.75E-02 |
| ENSG00000135750 | KCNK1      | 1  | 233614106 | 2.34E+08 | 58408  | protein coding                     | -1.83 | 1.58E-05 | 9.86E-04 |
| ENSG00000144837 | PLA1A      | 3  | 119597875 | 1.2E+08  | 31936  | protein coding                     | -1.84 | 2.31E-04 | 6.28E-03 |
| ENSG00000121388 | AL139327.1 | 13 | 19182038  | 19187618 | 5580   | transcribed unprocessed pseudogene | -1.84 | 2.57E-03 | 2.82E-02 |
| ENSG00000285347 | AL359555.4 | 20 | 38260175  | 38293892 | 33717  | lncRNA-antisense                   | -1.84 | 4.54E-04 | 9.71E-03 |
| ENSG00000214141 | ACTN4P2    | 1  | 37776670  | 37779418 | 2748   | processed pseudogene               | -1.84 | 2.24E-03 | 2.61E-02 |
| ENSG00000263946 | AC015818.3 | 17 | 20554971  | 20559410 | 4439   | transcribed processed pseudogene   | -1.84 | 4.83E-03 | 4.09E-02 |
| ENSG00000259708 | AC090607.3 | 15 | 78250502  | 78264156 | 13654  | lncRNA-antisense                   | -1.84 | 5.26E-03 | 4.30E-02 |
| ENSG00000287972 | AC073648.7 | 4  | 9076949   | 9092530  | 15581  | lncRNA                             | -1.84 | 2.62E-03 | 2.86E-02 |
| ENSG00000233780 | HNRNPA1P30 | 13 | 20938564  | 20949599 | 11035  | transcribed processed pseudogene   | -1.84 | 3.04E-03 | 3.10E-02 |
| ENSG00000275645 | AC068338.3 | 15 | 75346744  | 75347161 | 417    | lncRNA-antisense                   | -1.84 | 3.49E-03 | 3.39E-02 |
| ENSG00000140478 | GOLGA6D    | 15 | 75282835  | 75295807 | 12972  | protein coding                     | -1.84 | 5.29E-03 | 4.31E-02 |
| ENSG00000284883 | AC021066.2 | 12 | 52263948  | 52267461 | 3513   | unprocessed pseudogene             | -1.84 | 3.96E-03 | 3.67E-02 |
| ENSG00000124089 | MC3R       | 20 | 56248732  | 56249815 | 1083   | protein coding                     | -1.84 | 1.07E-03 | 1.67E-02 |
| ENSG00000205866 | FAM99A     | 11 | 1665597   | 1667856  | 2259   | lncRNA                             | -1.84 | 7.89E-04 | 1.39E-02 |
| ENSG00000226527 | AP000289.1 | 21 | 33110867  | 33123725 | 12858  | lncRNA                             | -1.84 | 6.53E-04 | 1.23E-02 |
| ENSG00000134812 | CBLLIF     | 11 | 59829273  | 59845499 | 16226  | protein coding                     | -1.84 | 7.36E-04 | 1.33E-02 |

|                 |                         |    |           |          |        |                                  |       |          |          |
|-----------------|-------------------------|----|-----------|----------|--------|----------------------------------|-------|----------|----------|
| ENSG00000250501 | AC093766.1              | 4  | 138773537 | 1.39E+08 | 30030  | lncRNA                           | -1.84 | 2.53E-03 | 2.80E-02 |
| ENSG00000156575 | PRG3                    | 11 | 57376769  | 57381150 | 4381   | protein coding                   | -1.84 | 5.04E-03 | 4.20E-02 |
| ENSG00000259776 | AC093426.1              | 1  | 239247808 | 2.39E+08 | 3010   | lncRNA                           | -1.84 | 1.66E-03 | 2.16E-02 |
| ENSG00000249584 | LINC02225               | 5  | 57890327  | 57899162 | 8835   | lncRNA                           | -1.84 | 2.50E-03 | 2.78E-02 |
| ENSG00000262294 | AC129507.2              | 17 | 352638    | 357581   | 4943   | lncRNA-antisense                 | -1.84 | 5.34E-03 | 4.34E-02 |
| ENSG00000288097 | AP002448.1              | 11 | 111320379 | 1.11E+08 | 3437   | lncRNA                           | -1.84 | 1.90E-03 | 2.34E-02 |
| ENSG00000231163 | CSMD2-AS1               | 1  | 33868953  | 33893726 | 24773  | lncRNA-antisense                 | -1.85 | 9.29E-05 | 3.54E-03 |
| ENSG00000240687 | AC082651.1              | 2  | 9638745   | 9712920  | 74175  | lncRNA                           | -1.85 | 9.00E-04 | 1.51E-02 |
| ENSG00000287189 | AL121956.7              | 6  | 166309572 | 1.66E+08 | 7898   | lncRNA                           | -1.85 | 4.77E-03 | 4.06E-02 |
| ENSG00000198183 | BPIFA1                  | 20 | 33235995  | 33243311 | 7316   | protein coding                   | -1.85 | 4.60E-04 | 9.79E-03 |
| ENSG00000287577 | AC009533.4              | 12 | 9348030   | 9349268  | 1238   | lncRNA                           | -1.85 | 3.74E-03 | 3.54E-02 |
| ENSG00000287326 | AL589787.1              | 10 | 126425930 | 1.26E+08 | 35027  | lncRNA                           | -1.85 | 4.09E-04 | 9.13E-03 |
| ENSG00000286645 | AC013267.1              | 2  | 25000147  | 25010274 | 10127  | lncRNA                           | -1.85 | 1.17E-03 | 1.76E-02 |
| ENSG00000170613 | FAM71B                  | 5  | 157161846 | 1.57E+08 | 4418   | protein coding                   | -1.86 | 1.74E-03 | 2.21E-02 |
| ENSG00000251205 | AC016598.2              | 5  | 143531331 | 1.44E+08 | 67103  | lncRNA                           | -1.86 | 1.54E-03 | 2.06E-02 |
| ENSG00000261210 | CLEC19A                 | 16 | 19285731  | 19322145 | 36414  | protein coding                   | -1.86 | 4.87E-05 | 2.28E-03 |
| ENSG00000224072 | VEZTP1                  | X  | 46454097  | 46457199 | 3102   | processed pseudogene             | -1.86 | 1.91E-03 | 2.34E-02 |
| ENSG00000103316 | CRYM                    | 16 | 21238874  | 21303083 | 64209  | protein coding                   | -1.86 | 1.11E-06 | 1.22E-04 |
| ENSG00000177993 | ZNRF3-AS1               | 22 | 29024999  | 29031476 | 6477   | lncRNA-antisense                 | -1.86 | 1.74E-03 | 2.22E-02 |
| ENSG00000233503 | HNRNPLP1                | 6  | 7481094   | 7482594  | 1500   | processed pseudogene             | -1.86 | 1.66E-03 | 2.16E-02 |
| ENSG00000175684 | TEX26                   | 13 | 30932656  | 30975500 | 42844  | protein coding                   | -1.86 | 7.40E-04 | 1.34E-02 |
| ENSG00000263326 | AC133552.4              | 16 | 25071490  | 25072727 | 1237   | unprocessed pseudogene           | -1.86 | 4.00E-03 | 3.69E-02 |
| ENSG00000176754 | LINC00303               | 1  | 204032447 | 2.04E+08 | 8818   | lncRNA                           | -1.86 | 2.62E-04 | 6.80E-03 |
| ENSG00000223587 | LINC01986               | 3  | 11745     | 24849    | 13104  | lncRNA                           | -1.87 | 2.36E-03 | 2.68E-02 |
| ENSG00000283342 | NBPF13P                 | 1  | 147099482 | 1.47E+08 | 24803  | unprocessed pseudogene           | -1.87 | 4.72E-05 | 2.23E-03 |
| ENSG00000262815 | AC087501.2              | 17 | 9464742   | 9467422  | 2680   | lncRNA-antisense                 | -1.87 | 5.24E-03 | 4.29E-02 |
| ENSG00000225328 | LINC01594               | 2  | 108167125 | 1.08E+08 | 50761  | lncRNA-antisense                 | -1.87 | 6.43E-03 | 4.83E-02 |
| ENSG00000267052 | AC005050.1              | 7  | 106569876 | 1.07E+08 | 29032  | lncRNA                           | -1.87 | 4.00E-03 | 3.69E-02 |
| ENSG00000224982 | TMEM233                 | 12 | 119593774 | 1.2E+08  | 49301  | protein coding                   | -1.87 | 8.44E-04 | 1.45E-02 |
| ENSG00000286144 | Z97056.2                | 22 | 38416565  | 38423933 | 7368   | lncRNA                           | -1.87 | 2.26E-03 | 2.62E-02 |
| ENSG00000224404 | Z68323.1                | 22 | 34191194  | 34210564 | 19370  | lncRNA                           | -1.87 | 7.51E-05 | 3.02E-03 |
| ENSG00000160181 | TFF2                    | 21 | 42346357  | 42350997 | 4640   | protein coding                   | -1.87 | 3.33E-03 | 3.28E-02 |
| ENSG00000245975 | AC090515.2              | 15 | 58768072  | 58770974 | 2902   | lncRNA                           | -1.87 | 1.96E-03 | 2.38E-02 |
| ENSG00000234859 | AC003958.2              | 17 | 41402416  | 41425049 | 22633  | lncRNA-antisense                 | -1.87 | 1.38E-04 | 4.54E-03 |
| ENSG00000235881 | AC114776.1              | 2  | 110709575 | 1.11E+08 | 7020   | lncRNA                           | -1.87 | 2.85E-03 | 3.00E-02 |
| ENSG00000287724 | AC096536.3              | 1  | 54874672  | 54883664 | 8992   | lncRNA                           | -1.88 | 3.43E-03 | 3.35E-02 |
| ENSG00000146678 | IGFBP1                  | 7  | 45888360  | 45893660 | 5300   | protein coding                   | -1.88 | 2.79E-03 | 2.96E-02 |
| ENSG00000155918 | RAET1L                  | 6  | 150018334 | 1.5E+08  | 7198   | protein coding                   | -1.88 | 2.43E-03 | 2.74E-02 |
| ENSG00000278898 | AC087045.3              | 8  | 134764809 | 1.35E+08 | 2467   | TEC                              | -1.88 | 4.40E-03 | 3.88E-02 |
| ENSG00000227496 | AC099066.2              | 1  | 225700264 | 2.26E+08 | 51994  | lncRNA                           | -1.88 | 6.12E-05 | 2.64E-03 |
| ENSG00000280025 | AL008638.6              | 22 | 27102766  | 27107019 | 4253   | lncRNA                           | -1.88 | 2.24E-05 | 1.27E-03 |
| ENSG00000274628 | AL669942.1              | 9  | 66047084  | 66055006 | 7922   | inscribed unprocessed pseudogene | -1.88 | 3.92E-04 | 8.90E-03 |
| ENSG00000254083 | LINC01591               | 8  | 135234131 | 1.35E+08 | 65588  | lncRNA                           | -1.88 | 5.54E-03 | 4.44E-02 |
| ENSG00000107295 | SH3GL2                  | 9  | 17579066  | 17797124 | 218058 | protein coding                   | -1.88 | 1.84E-04 | 5.45E-03 |
| ENSG00000197487 | GALP                    | 19 | 56176008  | 56185775 | 9767   | protein coding                   | -1.88 | 3.70E-03 | 3.52E-02 |
| ENSG00000270171 | AL359881.3              | 1  | 7693124   | 7694844  | 1720   | lncRNA                           | -1.88 | 1.24E-03 | 1.82E-02 |
| ENSG00000105825 | TFPI2                   | 7  | 93885396  | 93890753 | 5357   | protein coding                   | -1.88 | 1.11E-03 | 1.70E-02 |
| ENSG00000101074 | R3HDM1L                 | 20 | 44337043  | 44351238 | 14195  | protein coding                   | -1.88 | 4.20E-04 | 9.27E-03 |
| ENSG00000272485 | AL392183.1              | 6  | 774747    | 780214   | 5467   | lncRNA                           | -1.88 | 4.05E-03 | 3.71E-02 |
| ENSG00000256659 | LINC02368               | 12 | 128116730 | 1.28E+08 | 6373   | lncRNA                           | -1.88 | 7.06E-04 | 1.30E-02 |
| ENSG00000250026 | TMPPRS11BNL             | 4  | 68184081  | 68218080 | 33999  | inscribed unprocessed pseudogene | -1.88 | 5.36E-03 | 4.35E-02 |
| ENSG00000233405 | LINC01046               | 13 | 21224521  | 21235204 | 10683  | lncRNA                           | -1.89 | 1.33E-03 | 1.90E-02 |
| ENSG00000273024 | INTS4P2                 | 7  | 65647823  | 65718688 | 70865  | inscribed unprocessed pseudogene | -1.89 | 7.20E-04 | 1.32E-02 |
| ENSG00000235295 | LINC01634               | 22 | 18029385  | 18037968 | 8583   | lncRNA                           | -1.89 | 1.52E-03 | 2.05E-02 |
| ENSG00000158901 | WFDCh                   | 20 | 45551153  | 45579326 | 28173  | protein coding                   | -1.89 | 6.61E-03 | 4.92E-02 |
| ENSG00000198217 | OR51H2P                 | 11 | 4871717   | 4878117  | 6400   | inscribed unprocessed pseudogene | -1.89 | 5.65E-03 | 4.49E-02 |
| ENSG00000288002 | AC091912.3              | 5  | 8207019   | 8366437  | 159418 | lncRNA                           | -1.89 | 5.98E-03 | 4.63E-02 |
| ENSG00000274340 | AC032011.1              | 15 | 62387327  | 62388875 | 1548   | lncRNA                           | -1.90 | 1.98E-03 | 2.40E-02 |
| ENSG00000277020 | AL590096.1              | 13 | 20564708  | 20567045 | 2337   | lncRNA-antisense                 | -1.90 | 7.09E-04 | 1.30E-02 |
| ENSG00000253130 | AC114550.1              | 8  | 8561386   | 8574038  | 12652  | lncRNA                           | -1.90 | 9.36E-04 | 1.55E-02 |
| ENSG00000285856 | AL353704.1              | 13 | 111148196 | 1.11E+08 | 4975   | lncRNA-antisense                 | -1.90 | 4.38E-03 | 3.87E-02 |
| ENSG00000274403 | AC090510.2              | 15 | 42726583  | 42727211 | 628    | lncRNA-antisense                 | -1.90 | 3.49E-03 | 3.39E-02 |
| ENSG00000229606 | LINC01718               | 20 | 61079049  | 61083750 | 4701   | lncRNA                           | -1.90 | 4.44E-04 | 9.58E-03 |
| ENSG00000132958 | TPT2                    | 13 | 19422877  | 19536762 | 113885 | protein coding                   | -1.90 | 2.41E-04 | 6.46E-03 |
| ENSG00000267443 | AC010641.1              | 19 | 397589    | 399173   | 1584   | lncRNA                           | -1.91 | 1.72E-03 | 2.20E-02 |
| ENSG00000229967 | MAGEA4-AS1              | X  | 151904431 | 1.52E+08 | 9537   | lncRNA-antisense                 | -1.91 | 1.38E-03 | 1.94E-02 |
| ENSG00000244471 | AL137058.1              | 13 | 52488993  | 52587095 | 98102  | inscribed unprocessed pseudogene | -1.91 | 1.15E-04 | 4.06E-03 |
| ENSG00000264859 | DSG2-AS1                | 18 | 31542146  | 31556948 | 14802  | lncRNA-antisense                 | -1.91 | 1.77E-03 | 2.24E-02 |
| ENSG00000112214 | FHL5                    | 6  | 96562548  | 96616636 | 54088  | protein coding                   | -1.91 | 4.41E-03 | 3.88E-02 |
| ENSG00000282375 | AC100797.4              | 8  | 738548    | 740374   | 1826   | lncRNA                           | -1.91 | 1.30E-04 | 4.40E-03 |
| ENSG00000231382 | NBPF21P                 | 3  | 36616006  | 36637457 | 21451  | unprocessed pseudogene           | -1.91 | 4.81E-03 | 4.08E-02 |
| ENSG00000232624 | LINC01517               | 10 | 28743506  | 28941910 | 198404 | lncRNA                           | -1.91 | 2.67E-08 | 5.88E-06 |
| ENSG00000172497 | ACOT12                  | 5  | 81329996  | 81394179 | 64183  | protein coding                   | -1.91 | 2.87E-04 | 7.22E-03 |
| ENSG00000163530 | DPPA2                   | 3  | 109293788 | 1.09E+08 | 22729  | protein coding                   | -1.91 | 2.27E-03 | 2.63E-02 |
| ENSG00000261250 | AL160286.3 (AXDND1-AS1) | 1  | 179543201 | 1.8E+08  | 5721   | lncRNA-antisense                 | -1.91 | 2.63E-03 | 2.86E-02 |
| ENSG00000284665 | AC002472.4              | 22 | 21071082  | 21081018 | 9936   | unprocessed pseudogene           | -1.91 | 3.13E-03 | 3.16E-02 |
| ENSG00000243167 | RPS10P28                | 19 | 42670005  | 42670816 | 811    | processed pseudogene             | -1.91 | 3.05E-03 | 3.11E-02 |
| ENSG00000260230 | FRRS1L                  | 9  | 109130293 | 1.09E+08 | 36956  | protein coding                   | -1.91 | 3.68E-08 | 7.69E-06 |
| ENSG00000223418 | LIMK2P1                 | X  | 11704123  | 11705590 | 1467   | processed pseudogene             | -1.91 | 2.57E-03 | 2.82E-02 |
| ENSG00000094661 | OR111                   | 19 | 15082211  | 15092970 | 10759  | protein coding                   | -1.91 | 7.01E-06 | 5.45E-04 |
| ENSG00000183671 | GPR1                    | 2  | 206175316 | 2.06E+08 | 42731  | protein coding                   | -1.91 | 4.08E-04 | 9.11E-03 |
| ENSG00000259299 | AC061965.2              | 15 | 29233673  | 29235137 | 1464   | processed pseudogene             | -1.91 | 5.57E-03 | 4.46E-02 |
| ENSG00000236013 | AL357146.1              | 6  | 139976352 | 1.4E+08  | 117369 | lncRNA                           | -1.91 | 7.42E-04 | 1.34E-02 |
| ENSG00000232913 | PLCE1-AS2               | 10 | 94081950  | 94108814 | 26864  | lncRNA-antisense                 | -1.92 | 4.35E-05 | 2.10E-03 |
| ENSG00000273492 | AP000229.1              | 21 | 26170871  | 26217381 | 46510  | lncRNA                           | -1.92 | 1.59E-03 | 2.10E-02 |
| ENSG00000280515 | SALRNA2                 | 15 | 70635249  | 70637314 | 2065   | lncRNA                           | -1.92 | 4.76E-03 | 4.05E-02 |
| ENSG00000225216 | AC007362.1              | 2  | 205756469 | 2.06E+08 | 7537   | lncRNA-antisense                 | -1.92 | 1.19E-03 | 1.78E-02 |

|                 |              |    |           |          |        |                                    |       |          |          |
|-----------------|--------------|----|-----------|----------|--------|------------------------------------|-------|----------|----------|
| ENSG00000253932 | AC019270.1   | 8  | 13338574  | 13342754 | 4180   | lncRNA-antisense                   | -1.92 | 1.71E-03 | 2.20E-02 |
| ENSG00000253955 | AC008663.2   | 5  | 173578275 | 1.74E+08 | 6793   | lncRNA-antisense                   | -1.93 | 1.16E-04 | 4.08E-03 |
| ENSG00000243715 | CACNA2D3-AS1 | 3  | 54874605  | 54901255 | 26650  | lncRNA-antisense                   | -1.93 | 3.46E-03 | 3.36E-02 |
| ENSG00000230485 | AC000077.1   | 22 | 19603750  | 19633574 | 2824   | processed pseudogene               | -1.93 | 1.42E-03 | 1.97E-02 |
| ENSG00000286442 | AL512603.1   | 10 | 23575012  | 23586224 | 11212  | lncRNA                             | -1.94 | 4.64E-03 | 4.00E-02 |
| ENSG00000217455 | AC073316.1   | 7  | 3140234   | 3174654  | 34420  | lncRNA                             | -1.94 | 8.98E-05 | 3.46E-03 |
| ENSG00000265359 | AC004231.4   | 17 | 40850800  | 40863282 | 12482  | lncRNA-antisense                   | -1.94 | 3.31E-03 | 3.27E-02 |
| ENSG00000287443 | AL357558.3   | 20 | 47974137  | 47977584 | 3447   | lncRNA                             | -1.94 | 2.76E-03 | 2.95E-02 |
| ENSG00000204505 | PRAMEF9      | 1  | 13172455  | 13179464 | 7009   | protein coding                     | -1.94 | 4.12E-03 | 3.75E-02 |
| ENSG00000250406 | AC109811.1   | 4  | 144851572 | 1.45E+08 | 23215  | lncRNA                             | -1.94 | 3.64E-03 | 3.48E-02 |
| ENSG00000185860 | CCDC190      | 1  | 162824458 | 1.63E+08 | 44357  | protein coding                     | -1.94 | 2.85E-05 | 1.51E-03 |
| ENSG00000225582 | AC011193.1   | 17 | 34479272  | 34482148 | 2876   | lncRNA                             | -1.94 | 5.67E-03 | 4.50E-02 |
| ENSG00000203825 | AC239859.1   | 1  | 143541768 | 1.44E+08 | 31066  | unprocessed pseudogene             | -1.94 | 6.34E-05 | 2.71E-03 |
| ENSG00000250328 | MGC32805     | 5  | 122436497 | 1.22E+08 | 42590  | lncRNA-antisense                   | -1.94 | 2.76E-04 | 7.05E-03 |
| ENSG00000122145 | TBX22        | X  | 80014753  | 80031774 | 17021  | protein coding                     | -1.94 | 2.53E-03 | 2.80E-02 |
| ENSG00000261617 | LINC02177    | 16 | 9355588   | 9408093  | 52505  | lncRNA                             | -1.95 | 9.12E-05 | 3.50E-03 |
| ENSG00000267638 | AC023855.1   | 17 | 44115912  | 44120595 | 4683   | lncRNA-antisense                   | -1.95 | 4.56E-03 | 3.97E-02 |
| ENSG00000257097 | CLIP1-AS1    | 12 | 122395542 | 1.22E+08 | 5315   | lncRNA                             | -1.95 | 2.16E-03 | 2.55E-02 |
| ENSG00000272874 | AL034548.1   | 20 | 267186    | 268857   | 1671   | lncRNA                             | -1.95 | 1.78E-03 | 2.24E-02 |
| ENSG00000228539 | AL157413.1   | 20 | 24491472  | 24502345 | 10873  | lncRNA-antisense                   | -1.95 | 6.44E-04 | 1.23E-02 |
| ENSG00000159708 | LRRC36       | 16 | 67326798  | 67385204 | 58406  | protein coding                     | -1.95 | 9.15E-07 | 1.07E-04 |
| ENSG00000269054 | AC012313.6   | 19 | 58362583  | 58367593 | 5010   | lncRNA-antisense                   | -1.95 | 6.74E-05 | 2.83E-03 |
| ENSG00000243978 | RTL9         | X  | 110358816 | 1.1E+08  | 97518  | protein coding                     | -1.95 | 9.95E-05 | 3.69E-03 |
| ENSG00000249436 | LINC0003     | 5  | 57574027  | 57619816 | 45789  | lncRNA                             | -1.95 | 6.78E-05 | 2.84E-03 |
| ENSG00000262962 | KARS1P3      | 16 | 68002432  | 68004952 | 2520   | unprocessed pseudogene             | -1.96 | 5.57E-03 | 4.46E-02 |
| ENSG00000255420 | CASC23       | 11 | 8011278   | 8016520  | 5242   | lncRNA-antisense                   | -1.96 | 5.92E-03 | 4.61E-02 |
| ENSG00000215808 | LINC01139    | 1  | 238476542 | 2.38E+08 | 9518   | lncRNA                             | -1.96 | 6.69E-04 | 1.25E-02 |
| ENSG00000175676 | GOLGA8DP     | 15 | 23157366  | 23170711 | 13345  | transcribed unprocessed pseudogene | -1.96 | 1.28E-03 | 1.86E-02 |
| ENSG00000224682 | SOC5SP2      | 9  | 135447446 | 1.35E+08 | 2708   | processed pseudogene               | -1.96 | 4.08E-04 | 9.10E-03 |
| ENSG00000288541 | AL353732.2   | 9  | 21410969  | 21422960 | 11991  | lncRNA                             | -1.96 | 2.52E-06 | 2.39E-04 |
| ENSG00000255838 | AC069262.1   | 12 | 128944274 | 1.29E+08 | 929    | unprocessed pseudogene             | -1.96 | 6.04E-03 | 4.66E-02 |
| ENSG00000259585 | RBM17P4      | 15 | 35298249  | 35299440 | 1191   | processed pseudogene               | -1.96 | 1.37E-03 | 1.94E-02 |
| ENSG00000233002 | TBC1D26-AS1  | 17 | 15735023  | 15749192 | 14169  | lncRNA-antisense                   | -1.96 | 4.97E-05 | 2.31E-03 |
| ENSG00000231482 | AC105450.1   | 2  | 1366234   | 1580747  | 214513 | lncRNA                             | -1.96 | 7.47E-05 | 3.02E-03 |
| ENSG00000213424 | KRT222       | 17 | 40654665  | 40665181 | 10516  | protein coding                     | -1.96 | 6.49E-03 | 4.86E-02 |
| ENSG00000227586 | RP526P39     | 10 | 123171535 | 1.23E+08 | 340    | processed pseudogene               | -1.96 | 5.10E-04 | 1.05E-02 |
| ENSG00000235584 | AC008268.1   | 2  | 95660588  | 95668727 | 8139   | lncRNA                             | -1.96 | 6.40E-05 | 2.73E-03 |
| ENSG00000286668 | AL391730.2   | 1  | 40939294  | 40945524 | 6230   | lncRNA                             | -1.97 | 3.27E-03 | 3.25E-02 |
| ENSG00000229305 | AL358876.1   | 1  | 8189824   | 8192770  | 2946   | processed pseudogene               | -1.97 | 6.29E-03 | 4.78E-02 |
| ENSG00000258776 | AL161757.4   | 14 | 56817570  | 56893710 | 76140  | lncRNA                             | -1.97 | 1.50E-03 | 2.04E-02 |
| ENSG00000287169 | AC107050.1   | 4  | 186701579 | 1.87E+08 | 2507   | lncRNA                             | -1.97 | 5.00E-03 | 4.18E-02 |
| ENSG00000260750 | AC092720.1   | 16 | 87595131  | 87600337 | 5206   | lncRNA                             | -1.97 | 4.65E-04 | 9.86E-03 |
| ENSG00000286770 | AC100825.1   | 15 | 68483202  | 68487149 | 3947   | lncRNA                             | -1.97 | 9.77E-04 | 1.58E-02 |
| ENSG00000140527 | WDR93        | 15 | 89690811  | 89743638 | 52827  | protein coding                     | -1.98 | 1.02E-04 | 3.75E-03 |
| ENSG00000267927 | AC010320.1   | 19 | 52171158  | 52177002 | 5844   | lncRNA-antisense                   | -1.98 | 1.94E-04 | 5.61E-03 |
| ENSG00000213724 | PRDX2P2      | 10 | 34965069  | 34966259 | 1190   | processed pseudogene               | -1.98 | 1.51E-03 | 2.05E-02 |
| ENSG00000286240 | AL034422.1   | 20 | 37338886  | 37344109 | 5223   | lncRNA                             | -1.98 | 4.99E-03 | 4.17E-02 |
| ENSG00000200314 | Y RNA        | 6  | 106454828 | 1.06E+08 | 101    | misc RNA                           | -1.98 | 3.53E-04 | 8.31E-03 |
| ENSG00000248215 | LINC02505    | 4  | 36496128  | 36641939 | 145811 | lncRNA                             | -1.98 | 6.33E-03 | 4.79E-02 |
| ENSG00000229913 | AL380295.1   | 1  | 56823679  | 56826920 | 3241   | lncRNA-antisense                   | -1.98 | 5.33E-03 | 4.33E-02 |
| ENSG00000204754 | LINC01951    | 5  | 174919082 | 1.75E+08 | 76431  | lncRNA                             | -1.98 | 4.68E-03 | 4.02E-02 |
| ENSG00000203870 | SMIM9        | X  | 154823348 | 1.55E+08 | 11314  | protein coding                     | -1.98 | 3.30E-03 | 3.27E-02 |
| ENSG00000250708 | LINC02269    | 4  | 173699082 | 1.74E+08 | 302406 | lncRNA                             | -1.98 | 4.11E-04 | 9.16E-03 |
| ENSG00000266535 | AC008133.1   | 17 | 33111858  | 33131743 | 19885  | lncRNA-antisense                   | -1.98 | 1.08E-03 | 1.67E-02 |
| ENSG00000288610 | AL161869.4   | 14 | 103118351 | 1.03E+08 | 1796   | lncRNA                             | -1.99 | 1.18E-03 | 1.77E-02 |
| ENSG00000265943 | AC090912.1   | 18 | 22699481  | 22933764 | 234283 | lncRNA-antisense                   | -1.99 | 4.55E-03 | 3.97E-02 |
| ENSG00000285630 | AL590068.3   | 10 | 30587706  | 30591092 | 3386   | lncRNA                             | -1.99 | 2.96E-03 | 3.06E-02 |
| ENSG00000197595 | ATP11AUN     | 13 | 112647044 | 1.13E+08 | 37453  | lncRNA                             | -1.99 | 6.54E-05 | 2.77E-03 |
| ENSG00000228016 | RAPGEF4-AS1  | 2  | 172677141 | 1.73E+08 | 59065  | lncRNA-antisense                   | -1.99 | 4.54E-05 | 2.16E-03 |
| ENSG00000278480 | ZBTB2P1      | 1  | 15226373  | 15227549 | 1176   | processed pseudogene               | -1.99 | 6.05E-03 | 4.67E-02 |
| ENSG00000186847 | KRT14        | 17 | 41582279  | 41586895 | 4616   | protein coding                     | -1.99 | 2.55E-04 | 6.68E-03 |
| ENSG00000287278 | AL353800.2   | 10 | 33384891  | 33390935 | 6044   | lncRNA                             | -1.99 | 1.36E-03 | 1.93E-02 |
| ENSG00000278589 | ZACNP1       | 4  | 108415220 | 1.08E+08 | 1419   | unprocessed pseudogene             | -1.99 | 2.77E-03 | 2.95E-02 |
| ENSG00000287381 | AC012433.2   | 18 | 50647315  | 50651212 | 3897   | lncRNA                             | -1.99 | 5.17E-03 | 4.26E-02 |
| ENSG00000274808 | TBC1D3B      | 17 | 36165681  | 36176636 | 10955  | protein coding                     | -2.00 | 1.79E-04 | 5.36E-03 |
| ENSG00000287464 | AC100810.7   | 8  | 1810823   | 1817113  | 6290   | lncRNA                             | -2.00 | 3.38E-04 | 8.08E-03 |
| ENSG00000228620 | Z97056.1     | 22 | 38424288  | 38427336 | 3048   | lncRNA-antisense                   | -2.00 | 6.23E-03 | 4.74E-02 |
| ENSG00000182854 | OR4F15       | 15 | 101812202 | 1.02E+08 | 7995   | protein coding                     | -2.00 | 4.26E-03 | 3.82E-02 |
| ENSG00000254265 | AC100810.2   | 8  | 1730206   | 1731452  | 1246   | processed pseudogene               | -2.00 | 3.16E-03 | 3.19E-02 |
| ENSG00000225129 | AL035250.1   | 20 | 59352195  | 59357774 | 5579   | lncRNA                             | -2.01 | 6.08E-03 | 4.68E-02 |
| ENSG00000261131 | AC012186.2   | 16 | 46660696  | 46661591 | 895    | lncRNA-sense intronic              | -2.01 | 6.47E-03 | 4.85E-02 |
| ENSG00000101890 | GUCY2F       | X  | 109372906 | 1.09E+08 | 109180 | protein coding                     | -2.01 | 3.47E-05 | 1.76E-03 |
| ENSG00000222806 | RNA5SP225    | 6  | 153420438 | 1.53E+08 | 134    | rRNA pseudogene                    | -2.01 | 6.96E-06 | 5.43E-04 |
| ENSG00000237268 | AC092447.7   | 7  | 56421857  | 56448375 | 26518  | transcribed unprocessed pseudogene | -2.01 | 1.07E-03 | 1.67E-02 |
| ENSG00000101435 | CST9L        | 20 | 23564732  | 23568484 | 3752   | protein coding                     | -2.01 | 3.77E-03 | 3.56E-02 |
| ENSG00000248698 | LINC01085    | 4  | 14111968  | 14140052 | 28084  | transcribed processed pseudogene   | -2.01 | 2.19E-03 | 2.57E-02 |
| ENSG00000201221 | RNU4-40P     | 20 | 35887659  | 35887801 | 142    | snRNA                              | -2.02 | 3.94E-03 | 3.65E-02 |
| ENSG00000232628 | AC092809.2   | 1  | 224208741 | 2.24E+08 | 4884   | lncRNA-sense intronic              | -2.02 | 8.23E-04 | 1.43E-02 |
| ENSG00000202357 | Y RNA        | 19 | 11408772  | 11408880 | 108    | misc RNA                           | -2.02 | 2.46E-10 | 1.19E-07 |
| ENSG00000159961 | OR3A3        | 17 | 3411370   | 3424070  | 12700  | protein coding                     | -2.02 | 4.50E-05 | 2.15E-03 |
| ENSG00000207546 | MIR548C      | 12 | 64622509  | 64622605 | 96     | miRNA                              | -2.02 | 2.67E-03 | 2.88E-02 |
| ENSG00000230937 | MIR205HG     | 1  | 209428817 | 2.09E+08 | 4021   | lncRNA                             | -2.02 | 2.00E-04 | 5.72E-03 |
| ENSG00000250894 | PRAMEF31P    | 1  | 13245863  | 13248652 | 2789   | unprocessed pseudogene             | -2.02 | 1.89E-04 | 5.53E-03 |
| ENSG00000231253 | LINC01640    | 22 | 33104330  | 33145861 | 41531  | lncRNA                             | -2.02 | 1.04E-03 | 1.64E-02 |
| ENSG00000196136 | SERPINA3     | 14 | 94612384  | 94624055 | 11671  | protein coding                     | -2.02 | 4.16E-05 | 2.04E-03 |
| ENSG00000253557 | AC100849.1   | 8  | 19084992  | 19259469 | 174477 | lncRNA                             | -2.02 | 1.12E-03 | 1.70E-02 |
| ENSG00000231421 | AC011840.1   | 17 | 30573471  | 30577000 | 3529   | lncRNA                             | -2.02 | 3.46E-05 | 1.76E-03 |



|                 |            |    |           |          |        |                                   |       |          |          |
|-----------------|------------|----|-----------|----------|--------|-----------------------------------|-------|----------|----------|
| ENSG00000230423 | AL672310.1 | 6  | 170615515 | 1.71E+08 | 123021 | lncRNA                            | -2.02 | 9.32E-05 | 3.55E-03 |
| ENSG00000174156 | GSTA3      | 6  | 52896639  | 52909698 | 13059  | protein coding                    | -2.03 | 2.52E-03 | 2.79E-02 |
| ENSG00000286842 | AL353752.2 | 9  | 87436215  | 87445795 | 9580   | lncRNA                            | -2.03 | 2.06E-03 | 2.46E-02 |
| ENSG00000251211 | AC136632.2 | 5  | 178165702 | 1.78E+08 | 860    | processed pseudogene              | -2.04 | 2.86E-03 | 3.00E-02 |
| ENSG00000259419 | HNRNP33    | 15 | 79236332  | 79237206 | 874    | processed pseudogene              | -2.04 | 3.58E-04 | 8.38E-03 |
| ENSG00000225731 | PDE9A-AS1  | 21 | 42733594  | 42741758 | 8164   | lncRNA-antisense                  | -2.04 | 3.62E-03 | 3.47E-02 |
| ENSG00000242536 | AC079943.2 | 3  | 157814822 | 1.58E+08 | 274175 | lncRNA                            | -2.04 | 1.54E-03 | 2.07E-02 |
| ENSG00000235253 | AC010240.2 | 5  | 132942932 | 1.33E+08 | 2118   | processed pseudogene              | -2.04 | 3.44E-04 | 8.20E-03 |
| ENSG00000250247 | SEPHS2P1   | 5  | 14960232  | 14961393 | 1161   | processed pseudogene              | -2.04 | 3.14E-03 | 3.17E-02 |
| ENSG00000260209 | AP000842.3 | 11 | 125873031 | 1.26E+08 | 1497   | lncRNA                            | -2.05 | 5.23E-03 | 4.28E-02 |
| ENSG00000238215 | AL513185.3 | 10 | 72643011  | 72644650 | 1639   | processed pseudogene              | -2.05 | 3.86E-03 | 3.61E-02 |
| ENSG00000237194 | SNAI1P1    | 2  | 209808804 | 2.1E+08  | 776    | processed pseudogene              | -2.05 | 4.27E-03 | 3.82E-02 |
| ENSG00000224071 | DNMT3AP1   | 2  | 66820684  | 66822570 | 1886   | processed pseudogene              | -2.05 | 8.15E-04 | 1.42E-02 |
| ENSG00000257376 | AC079601.2 | 12 | 42431665  | 42433357 | 1692   | processed pseudogene              | -2.05 | 8.46E-04 | 1.45E-02 |
| ENSG00000286113 | AC022868.1 | 8  | 73879046  | 73882733 | 3687   | RNA-bidirectional promoter lncRNA | -2.05 | 2.54E-03 | 2.81E-02 |
| ENSG00000167916 | KRT24      | 17 | 40697991  | 40703752 | 5761   | protein coding                    | -2.05 | 3.84E-05 | 1.92E-03 |
| ENSG00000286041 | AC074139.1 | 19 | 32127334  | 32184504 | 57170  | lncRNA                            | -2.05 | 2.22E-03 | 2.59E-02 |
| ENSG00000248340 | PIMREGP4   | 4  | 26873561  | 26874349 | 788    | processed pseudogene              | -2.05 | 5.82E-03 | 4.57E-02 |
| ENSG00000260141 | AC145350.2 | 16 | 33043609  | 33095431 | 51822  | lncRNA                            | -2.06 | 1.76E-03 | 2.23E-02 |
| ENSG00000285640 | AP001999.2 | 11 | 134685044 | 1.35E+08 | 16960  | lncRNA                            | -2.06 | 4.15E-04 | 9.20E-03 |
| ENSG00000284748 | AL513220.1 | 1  | 37596126  | 37607336 | 11210  | RNA-bidirectional promoter lncRNA | -2.06 | 2.01E-03 | 2.42E-02 |
| ENSG00000183644 | HOATZ      | 11 | 111514785 | 1.12E+08 | 22246  | protein coding                    | -2.06 | 2.76E-04 | 7.05E-03 |
| ENSG00000233427 | AL009181.1 | 1  | 28870483  | 28877336 | 6853   | lncRNA-antisense                  | -2.06 | 8.81E-04 | 1.49E-02 |
| ENSG00000184166 | OR1D2      | 17 | 3088484   | 3104422  | 15938  | protein coding                    | -2.06 | 7.42E-05 | 3.01E-03 |
| ENSG00000206145 | P2RX6P     | 22 | 21035243  | 21045017 | 9774   | inscribed unprocessed pseudogene  | -2.06 | 1.58E-03 | 2.10E-02 |
| ENSG00000287533 | AC011477.8 | 19 | 19757951  | 19774809 | 16858  | lncRNA                            | -2.06 | 2.49E-03 | 2.78E-02 |
| ENSG00000232615 | AC026412.2 | 5  | 1614836   | 1616334  | 1498   | processed pseudogene              | -2.07 | 1.17E-03 | 1.76E-02 |
| ENSG00000285875 | AL035446.2 | 6  | 140575788 | 1.41E+08 | 322593 | lncRNA                            | -2.07 | 4.35E-03 | 3.86E-02 |
| ENSG00000283459 | AC009804.2 | 12 | 114894632 | 1.15E+08 | 3897   | lncRNA                            | -2.07 | 3.58E-04 | 8.38E-03 |
| ENSG00000203783 | PRR9       | 1  | 153217584 | 1.53E+08 | 1726   | protein coding                    | -2.07 | 1.56E-03 | 2.08E-02 |
| ENSG00000137709 | POU2F3     | 11 | 120236640 | 1.2E+08  | 83305  | protein coding                    | -2.07 | 2.37E-08 | 5.32E-06 |
| ENSG00000230508 | RPL19P21   | X  | 150993501 | 1.51E+08 | 590    | processed pseudogene              | -2.07 | 3.50E-04 | 8.26E-03 |
| ENSG00000224565 | LINC01754  | 20 | 47391925  | 47412327 | 20402  | lncRNA                            | -2.07 | 8.41E-04 | 1.44E-02 |
| ENSG00000176256 | HMG4       | 1  | 33860475  | 33864791 | 4316   | protein coding                    | -2.07 | 4.05E-05 | 1.99E-03 |
| ENSG00000261104 | AC093904.4 | 2  | 9106593   | 9109865  | 3272   | lncRNA                            | -2.07 | 3.97E-05 | 1.96E-03 |
| ENSG00000227729 | RD3L       | 14 | 103940426 | 1.04E+08 | 2135   | protein coding                    | -2.07 | 5.75E-03 | 4.53E-02 |
| ENSG00000233932 | CTXN2      | 15 | 48178122  | 48203758 | 25636  | protein coding                    | -2.08 | 2.78E-04 | 7.10E-03 |
| ENSG00000237439 | Z83839.1   | 22 | 32129689  | 32130612 | 923    | inscribed unprocessed pseudogene  | -2.08 | 6.29E-03 | 4.78E-02 |
| ENSG00000237595 | LINC01275  | 20 | 50162765  | 50166216 | 3451   | lncRNA                            | -2.08 | 1.29E-03 | 1.87E-02 |
| ENSG00000276409 | CCL14      | 17 | 35983288  | 35987004 | 3716   | protein coding                    | -2.08 | 5.36E-03 | 4.34E-02 |
| ENSG00000258534 | AL132712.1 | 14 | 103854366 | 1.04E+08 | 25745  | lncRNA                            | -2.08 | 2.73E-03 | 2.92E-02 |
| ENSG00000259093 | AL137191.1 | 14 | 63122888  | 63178190 | 55302  | lncRNA                            | -2.08 | 4.24E-03 | 3.82E-02 |
| ENSG00000279142 | AC009108.4 | 16 | 86595189  | 86597639 | 2450   | TEC                               | -2.08 | 4.85E-04 | 1.02E-02 |
| ENSG00000204193 | TXNDC8     | 9  | 110303476 | 1.1E+08  | 34408  | protein coding                    | -2.08 | 9.05E-04 | 1.52E-02 |
| ENSG00000260756 | AC131649.1 | 16 | 10351440  | 10352752 | 1312   | lncRNA                            | -2.08 | 9.65E-04 | 1.58E-02 |
| ENSG00000277526 | AC245123.1 | 8  | 2562813   | 2623382  | 60569  | lncRNA                            | -2.09 | 2.56E-04 | 6.68E-03 |
| ENSG00000287552 | AC109925.1 | 4  | 94315486  | 94343041 | 27555  | lncRNA                            | -2.09 | 4.16E-04 | 9.12E-03 |
| ENSG00000229145 | ACTBP1     | X  | 46288016  | 46289128 | 1112   | processed pseudogene              | -2.09 | 5.33E-04 | 1.08E-02 |
| ENSG00000235494 | AL590705.2 | 9  | 97222602  | 97235017 | 12415  | lncRNA                            | -2.09 | 1.68E-03 | 2.17E-02 |
| ENSG00000237589 | HMG1P32    | 19 | 53767971  | 53768553 | 582    | processed pseudogene              | -2.09 | 3.42E-03 | 3.34E-02 |
| ENSG00000245928 | SDAT1-AS1  | 4  | 75980790  | 76005942 | 25152  | lncRNA-antisense                  | -2.09 | 2.72E-03 | 2.91E-02 |
| ENSG00000286498 | AL132982.1 | 6  | 161353679 | 1.61E+08 | 1671   | lncRNA                            | -2.09 | 4.92E-03 | 4.13E-02 |
| ENSG00000164871 | SPAG11B    | 8  | 7442684   | 7463674  | 20990  | protein coding                    | -2.10 | 1.65E-03 | 2.15E-02 |
| ENSG00000249186 | AC140125.3 | 5  | 177856262 | 1.78E+08 | 14965  | lncRNA-antisense                  | -2.10 | 3.66E-03 | 3.50E-02 |
| ENSG00000164399 | IL3        | 5  | 132060655 | 1.32E+08 | 2549   | protein coding                    | -2.10 | 1.91E-03 | 2.34E-02 |
| ENSG00000203472 | AC009163.1 | 16 | 75475896  | 75495407 | 19511  | lncRNA-antisense                  | -2.10 | 2.88E-03 | 3.01E-02 |
| ENSG00000258497 | AL359682.1 | 14 | 101257332 | 1.01E+08 | 20986  | lncRNA                            | -2.10 | 3.91E-03 | 3.63E-02 |
| ENSG00000236866 | AL157902.1 | 1  | 117596832 | 1.18E+08 | 8938   | lncRNA-antisense                  | -2.10 | 1.22E-03 | 1.81E-02 |
| ENSG00000260782 | AC007225.1 | 16 | 46789898  | 46792040 | 2142   | processed pseudogene              | -2.10 | 1.27E-03 | 1.85E-02 |
| ENSG00000206072 | SERPINB11  | 18 | 63647579  | 63726432 | 78853  | protein coding                    | -2.10 | 3.92E-04 | 8.90E-03 |
| ENSG00000254039 | AC027801.4 | 17 | 49914403  | 49932918 | 18515  | lncRNA                            | -2.10 | 5.66E-03 | 4.49E-02 |
| ENSG00000232196 | MTRNR2L4   | 16 | 3370979   | 3372668  | 1689   | protein coding                    | -2.11 | 4.05E-03 | 3.71E-02 |
| ENSG00000231513 | E2F6P4     | X  | 136097835 | 1.36E+08 | 513    | processed pseudogene              | -2.11 | 5.99E-03 | 4.64E-02 |
| ENSG00000232596 | LINC01646  | 1  | 4571481   | 4594016  | 22535  | lncRNA                            | -2.11 | 3.19E-06 | 2.90E-04 |
| ENSG00000166396 | SERPINB7   | 18 | 63752935  | 63805376 | 52441  | protein coding                    | -2.11 | 1.84E-04 | 5.45E-03 |
| ENSG00000244067 | GSTA2      | 6  | 52750087  | 52763475 | 13388  | protein coding                    | -2.11 | 1.74E-03 | 2.21E-02 |
| ENSG00000123307 | NEUROD4    | 12 | 55019974  | 55030017 | 10043  | protein coding                    | -2.11 | 2.99E-04 | 7.44E-03 |
| ENSG00000234726 | AC245060.3 | 22 | 22228719  | 22230469 | 1750   | processed pseudogene              | -2.11 | 5.29E-04 | 1.07E-02 |
| ENSG00000169154 | GOT1L1     | 8  | 37934281  | 37940124 | 5843   | protein coding                    | -2.11 | 3.07E-03 | 3.12E-02 |
| ENSG00000227555 | MIR4290HG  | 9  | 90020654  | 90041499 | 20845  | lncRNA                            | -2.12 | 1.61E-05 | 9.96E-04 |
| ENSG00000288007 | AC092803.4 | 1  | 212559363 | 2.13E+08 | 2036   | lncRNA                            | -2.12 | 4.86E-04 | 1.02E-02 |
| ENSG00000213908 | CYP2A7P1   | 19 | 41024268  | 41027720 | 3452   | unprocessed pseudogene            | -2.12 | 6.89E-04 | 1.28E-02 |
| ENSG00000231381 | RNF2P1     | 9  | 6668999   | 6670008  | 1009   | processed pseudogene              | -2.12 | 4.10E-03 | 3.74E-02 |
| ENSG00000214970 | AC005323.1 | 17 | 10579040  | 10623036 | 43996  | lncRNA-antisense                  | -2.12 | 4.95E-03 | 4.15E-02 |
| ENSG00000237402 | CAMTA1-IT1 | 1  | 7368942   | 7370270  | 1328   | lncRNA-sense intronic             | -2.13 | 1.70E-03 | 2.19E-02 |
| ENSG00000280285 | AC108215.1 | 4  | 56662469  | 56665694 | 3225   | TEC                               | -2.13 | 6.75E-04 | 1.26E-02 |
| ENSG00000214249 | CTAGE11P   | 13 | 75237944  | 75240296 | 2352   | processed pseudogene              | -2.13 | 2.86E-03 | 3.00E-02 |
| ENSG00000254109 | RBPMS-AS1  | 8  | 30382119  | 30385401 | 3282   | lncRNA-antisense                  | -2.13 | 5.06E-04 | 1.04E-02 |
| ENSG00000230533 | AL356234.2 | 6  | 137657998 | 1.38E+08 | 105986 | lncRNA                            | -2.13 | 9.60E-04 | 1.57E-02 |
| ENSG00000278703 | AC100847.1 | 18 | 57588611  | 57589091 | 480    | lncRNA                            | -2.13 | 5.19E-03 | 4.27E-02 |
| ENSG00000188655 | RNASE9     | 14 | 20556093  | 20560931 | 4838   | protein coding                    | -2.13 | 2.43E-03 | 2.73E-02 |
| ENSG00000286461 | AC024730.1 | 7  | 154544169 | 1.55E+08 | 3116   | lncRNA                            | -2.14 | 3.71E-03 | 3.52E-02 |
| ENSG00000248942 | LINC01335  | 5  | 74258689  | 74321255 | 62566  | lncRNA                            | -2.14 | 1.31E-03 | 1.89E-02 |
| ENSG00000218027 | AL512329.1 | 6  | 1513698   | 1515289  | 1591   | processed pseudogene              | -2.14 | 3.10E-04 | 7.61E-03 |
| ENSG00000229828 | PDE4DIP1   | 1  | 148080598 | 1.48E+08 | 13285  | unprocessed pseudogene            | -2.14 | 2.36E-03 | 2.69E-02 |
| ENSG00000254529 | MRGPRX7P   | 11 | 18863558  | 18864509 | 951    | unprocessed pseudogene            | -2.14 | 1.61E-03 | 2.12E-02 |
| ENSG00000258553 | AL157911.1 | 14 | 59969116  | 60091783 | 122667 | lncRNA-antisense                  | -2.14 | 1.13E-03 | 1.71E-02 |

|                 |            |    |           |          |        |                                    |       |          |          |
|-----------------|------------|----|-----------|----------|--------|------------------------------------|-------|----------|----------|
| ENSG00000285734 | AC005414.1 | 12 | 2440189   | 2457392  | 17203  | lncRNA-antisense                   | -2.14 | 1.83E-04 | 5.43E-03 |
| ENSG00000226542 | AC114814.1 | 2  | 235084822 | 2.35E+08 | 3764   | lncRNA                             | -2.14 | 2.73E-03 | 2.92E-02 |
| ENSG00000221888 | OR1C1      | 1  | 247754846 | 2.48E+08 | 5710   | protein coding                     | -2.14 | 4.33E-03 | 3.85E-02 |
| ENSG00000171509 | RXFP1      | 4  | 158315311 | 1.59E+08 | 338061 | protein coding                     | -2.14 | 1.59E-07 | 2.54E-05 |
| ENSG00000261584 | AL513548.1 | 6  | 26686241  | 26687964 | 1723   | lncRNA                             | -2.15 | 4.56E-03 | 3.97E-02 |
| ENSG00000184650 | ODF4       | 17 | 8339840   | 8346048  | 6208   | protein coding                     | -2.15 | 3.23E-03 | 3.22E-02 |
| ENSG00000272975 | MYHAS      | 17 | 10383144  | 10623886 | 240742 | lncRNA-antisense                   | -2.15 | 4.65E-04 | 9.86E-03 |
| ENSG00000231957 | GNAI2P2    | 10 | 78068623  | 78069538 | 915    | processed pseudogene               | -2.15 | 3.50E-03 | 3.39E-02 |
| ENSG00000178596 | GAPDHP29   | 1  | 94302038  | 94303022 | 984    | processed pseudogene               | -2.15 | 3.30E-03 | 3.26E-02 |
| ENSG00000184029 | DSCR4      | 21 | 37951425  | 38121360 | 169935 | lncRNA                             | -2.15 | 2.40E-04 | 6.45E-03 |
| ENSG00000227599 | PTPRT-AS1  | 20 | 42968743  | 42971492 | 2749   | lncRNA-antisense                   | -2.15 | 1.95E-03 | 2.37E-02 |
| ENSG00000267193 | AC091151.1 | 18 | 45573084  | 45575504 | 2420   | lncRNA-antisense                   | -2.16 | 3.16E-03 | 3.19E-02 |
| ENSG00000282863 | AC012560.1 | 10 | 78179174  | 78675109 | 495935 | lncRNA                             | -2.16 | 2.21E-03 | 2.59E-02 |
| ENSG00000260239 | LINC02533  | 6  | 4488798   | 4495769  | 6971   | lncRNA                             | -2.16 | 3.74E-03 | 3.54E-02 |
| ENSG00000152595 | MEPE       | 4  | 87821411  | 87846817 | 25406  | protein coding                     | -2.16 | 2.83E-03 | 2.99E-02 |
| ENSG00000142789 | CELA3A     | 1  | 22001657  | 22012542 | 10885  | protein coding                     | -2.16 | 7.27E-04 | 1.32E-02 |
| ENSG00000250374 | TRIM75P    | 4  | 165053864 | 1.65E+08 | 6690   | protein coding                     | -2.16 | 3.17E-03 | 3.19E-02 |
| ENSG00000227145 | IL21-AS1   | 4  | 122618983 | 1.23E+08 | 70173  | lncRNA-antisense                   | -2.16 | 4.13E-05 | 2.03E-03 |
| ENSG00000163209 | SPRR3      | 1  | 153001747 | 1.53E+08 | 2109   | protein coding                     | -2.16 | 4.70E-04 | 9.93E-03 |
| ENSG00000236173 | AL049612.1 | 6  | 169809318 | 1.7E+08  | 784    | lncRNA                             | -2.16 | 3.35E-03 | 3.30E-02 |
| ENSG00000238110 | AL353572.2 | 9  | 87944276  | 87945023 | 747    | processed pseudogene               | -2.16 | 2.12E-03 | 2.52E-02 |
| ENSG00000205279 | CTXN3      | 5  | 127649044 | 1.28E+08 | 9586   | protein coding                     | -2.16 | 2.23E-03 | 2.59E-02 |
| ENSG00000179363 | TMEM31     | X  | 103710909 | 1.04E+08 | 3123   | protein coding                     | -2.16 | 1.40E-03 | 1.95E-02 |
| ENSG00000237934 | AL590729.1 | 1  | 29223933  | 29224816 | 883    | lncRNA-antisense                   | -2.16 | 4.50E-03 | 3.94E-02 |
| ENSG00000224781 | EIF4A2P4   | X  | 52832704  | 52833899 | 1195   | processed pseudogene               | -2.16 | 5.61E-03 | 4.47E-02 |
| ENSG00000224294 | PINCR      | X  | 43176994  | 43226598 | 49604  | lncRNA                             | -2.16 | 2.31E-03 | 2.65E-02 |
| ENSG00000196970 | NXF4       | X  | 102549965 | 1.03E+08 | 21730  | transcribed unprocessed pseudogene | -2.16 | 1.18E-05 | 7.99E-04 |
| ENSG00000240522 | RPL7AP10   | 19 | 21149648  | 21150438 | 790    | processed pseudogene               | -2.16 | 6.30E-03 | 4.78E-02 |
| ENSG00000264813 | AC113554.1 | 17 | 63484823  | 63521848 | 37025  | protein coding                     | -2.17 | 1.12E-03 | 1.71E-02 |
| ENSG00000228528 | AC068057.1 | 2  | 104702650 | 1.05E+08 | 3163   | lncRNA                             | -2.17 | 7.13E-04 | 1.31E-02 |
| ENSG00000283973 | AC099795.1 | 1  | 42959065  | 42961864 | 2799   | lncRNA                             | -2.17 | 5.68E-04 | 1.12E-02 |
| ENSG00000255146 | AP004247.2 | 11 | 58044110  | 58060138 | 16028  | lncRNA                             | -2.17 | 3.45E-03 | 3.36E-02 |
| ENSG00000131050 | BPIFA2     | 20 | 33161768  | 33181412 | 19644  | protein coding                     | -2.17 | 5.82E-05 | 2.55E-03 |
| ENSG00000261636 | LINC02191  | 16 | 25419812  | 25433686 | 13874  | lncRNA                             | -2.17 | 6.30E-03 | 4.78E-02 |
| ENSG00000187545 | PRAMEF10   | 1  | 12892896  | 12898270 | 5374   | protein coding                     | -2.17 | 1.68E-03 | 2.17E-02 |
| ENSG00000278593 | AC104394.1 | 2  | 234743542 | 2.35E+08 | 2064   | unprocessed pseudogene             | -2.17 | 3.32E-03 | 3.28E-02 |
| ENSG00000250819 | LINC02493  | 4  | 17171757  | 17186079 | 14322  | lncRNA                             | -2.17 | 1.42E-03 | 1.97E-02 |
| ENSG00000228570 | NUTM2E     | 10 | 79841358  | 79850878 | 9520   | protein coding                     | -2.17 | 6.54E-04 | 1.23E-02 |
| ENSG00000235115 | CHCHD2P8   | 13 | 28107431  | 28107877 | 446    | processed pseudogene               | -2.18 | 3.74E-03 | 3.54E-02 |
| ENSG00000125888 | BANF2      | 20 | 17693672  | 17735871 | 42199  | protein coding                     | -2.18 | 2.94E-04 | 7.37E-03 |
| ENSG00000279604 | AC092723.2 | 16 | 86035627  | 86036419 | 792    | TEC                                | -2.18 | 2.35E-03 | 2.68E-02 |
| ENSG00000277150 | F8A3       | X  | 155456914 | 1.55E+08 | 1706   | protein coding                     | -2.18 | 2.35E-06 | 2.28E-04 |
| ENSG00000280255 | AC004947.2 | 7  | 26538378  | 26541048 | 2670   | TEC                                | -2.19 | 2.63E-03 | 2.86E-02 |
| ENSG00000286082 | AL133493.1 | 21 | 45596364  | 45625675 | 29311  | lncRNA                             | -2.19 | 9.14E-04 | 1.53E-02 |
| ENSG00000242042 | LINC01743  | 1  | 246516039 | 2.47E+08 | 8248   | lncRNA                             | -2.19 | 6.00E-03 | 4.64E-02 |
| ENSG00000232771 | PPP1R26P5  | 22 | 21341595  | 21345258 | 3663   | processed pseudogene               | -2.19 | 2.12E-03 | 2.52E-02 |
| ENSG00000288069 | AF064866.1 | 21 | 40736318  | 40754888 | 18570  | lncRNA                             | -2.19 | 1.73E-03 | 2.21E-02 |
| ENSG00000249031 | SUMO2P6    | 5  | 174561776 | 1.75E+08 | 287    | processed pseudogene               | -2.19 | 6.05E-03 | 4.67E-02 |
| ENSG00000229288 | AL451142.2 | 9  | 88187735  | 88190202 | 2467   | processed pseudogene               | -2.19 | 6.74E-03 | 4.97E-02 |
| ENSG00000260617 | AC138028.5 | 16 | 88741631  | 88742367 | 736    | lncRNA-antisense                   | -2.19 | 2.94E-03 | 3.05E-02 |
| ENSG00000226921 | LINC00454  | 13 | 113878489 | 1.14E+08 | 5162   | lncRNA                             | -2.19 | 2.25E-06 | 2.21E-04 |
| ENSG00000175772 | LINC01106  | 2  | 110375138 | 1.1E+08  | 9304   | lncRNA                             | -2.19 | 9.12E-04 | 1.52E-02 |
| ENSG00000134216 | CHIA       | 1  | 111290851 | 1.11E+08 | 29715  | protein coding                     | -2.20 | 9.64E-06 | 6.96E-04 |
| ENSG00000274892 | AC011487.3 | 19 | 53512092  | 53512616 | 524    | unprocessed pseudogene             | -2.20 | 4.66E-03 | 4.01E-02 |
| ENSG00000204709 | LINC01556  | 6  | 28943877  | 28944537 | 680    | lncRNA                             | -2.20 | 4.18E-03 | 3.78E-02 |
| ENSG00000206903 | SNORA24B   | 15 | 65285461  | 65285591 | 130    | snoRNA                             | -2.20 | 9.30E-04 | 1.54E-02 |
| ENSG00000259702 | AC024337.1 | 15 | 96045341  | 96064357 | 19016  | lncRNA                             | -2.20 | 1.52E-03 | 2.05E-02 |
| ENSG00000240790 | AC073934.1 | 7  | 127644685 | 1.28E+08 | 7327   | lncRNA-antisense                   | -2.20 | 1.37E-03 | 1.93E-02 |
| ENSG00000237373 | BRWD1-IT1  | 21 | 39217093  | 39219805 | 2712   | lncRNA-sense overlapping           | -2.20 | 3.68E-04 | 8.51E-03 |
| ENSG00000284670 | AC092128.1 | 16 | 73940639  | 73941781 | 1142   | transcribed processed pseudogene   | -2.21 | 2.87E-03 | 3.01E-02 |
| ENSG00000287055 | AL359813.1 | 6  | 43370026  | 43425283 | 55257  | lncRNA                             | -2.21 | 1.21E-04 | 4.19E-03 |
| ENSG00000237417 | XRCC6P1    | 10 | 93206857  | 93209627 | 2770   | processed pseudogene               | -2.22 | 5.51E-05 | 2.47E-03 |
| ENSG00000230375 | GSTA1P     | 6  | 52847910  | 52870329 | 22419  | unprocessed pseudogene             | -2.22 | 1.10E-03 | 1.69E-02 |
| ENSG00000221996 | OR52B4     | 11 | 4367263   | 4368386  | 1123   | protein coding                     | -2.22 | 6.47E-03 | 4.85E-02 |
| ENSG00000215833 | QRSL1P1    | 1  | 168449672 | 1.68E+08 | 1539   | processed pseudogene               | -2.22 | 4.60E-03 | 3.99E-02 |
| ENSG00000259876 | AC010333.1 | 16 | 12556353  | 12557694 | 1341   | lncRNA-antisense                   | -2.23 | 1.78E-03 | 2.24E-02 |
| ENSG00000199622 | RN7SKP20   | X  | 13596236  | 13596548 | 312    | misc RNA                           | -2.23 | 1.05E-03 | 1.64E-02 |
| ENSG00000232166 | AL122008.2 | 1  | 234284972 | 2.34E+08 | 569    | processed pseudogene               | -2.23 | 5.03E-03 | 4.19E-02 |
| ENSG00000105141 | CASP14     | 19 | 15049480  | 15058293 | 8813   | protein coding                     | -2.23 | 9.21E-05 | 3.53E-03 |
| ENSG00000268941 | LINC01711  | 20 | 58634772  | 58635738 | 966    | lncRNA                             | -2.23 | 2.04E-04 | 5.80E-03 |
| ENSG00000287059 | AC090004.2 | 3  | 14038647  | 14047181 | 8534   | lncRNA                             | -2.23 | 6.73E-03 | 4.96E-02 |
| ENSG00000230189 | AC008267.2 | 7  | 66427949  | 66453634 | 25685  | transcribed unprocessed pseudogene | -2.23 | 6.07E-06 | 4.87E-04 |
| ENSG00000255353 | ASS1P13    | 11 | 107176286 | 1.07E+08 | 1244   | processed pseudogene               | -2.23 | 2.50E-03 | 2.78E-02 |
| ENSG00000286752 | AC022509.5 | 12 | 26139249  | 26167741 | 28492  | lncRNA                             | -2.24 | 3.16E-03 | 3.18E-02 |
| ENSG00000223720 | AL109659.1 | 1  | 48172972  | 48206857 | 33885  | lncRNA                             | -2.24 | 9.02E-04 | 1.52E-02 |
| ENSG00000278505 | C17orf78   | 17 | 37375985  | 37392708 | 16723  | protein coding                     | -2.24 | 4.46E-04 | 9.59E-03 |
| ENSG00000229607 | AL137027.1 | 1  | 30810378  | 30815553 | 5175   | lncRNA                             | -2.24 | 5.97E-03 | 4.63E-02 |
| ENSG00000232736 | AC007551.1 | 7  | 35788122  | 35788640 | 518    | processed pseudogene               | -2.24 | 6.63E-03 | 4.93E-02 |
| ENSG00000282692 | AC129915.3 | 8  | 1018757   | 1019704  | 947    | lncRNA                             | -2.24 | 4.63E-03 | 4.00E-02 |
| ENSG00000205359 | SLCO6A1    | 5  | 102371774 | 1.02E+08 | 127242 | protein coding                     | -2.24 | 2.02E-05 | 1.18E-03 |
| ENSG00000225125 | RANP4      | X  | 136807223 | 1.37E+08 | 654    | processed pseudogene               | -2.24 | 1.61E-03 | 2.12E-02 |
| ENSG00000249497 | LINC02075  | 17 | 49457861  | 49461749 | 3888   | lncRNA                             | -2.24 | 1.00E-03 | 1.61E-02 |
| ENSG00000260571 | BNIP3P5    | 15 | 42313687  | 42314386 | 699    | processed pseudogene               | -2.24 | 9.66E-04 | 1.58E-02 |
| ENSG00000248317 | AC111194.1 | 4  | 54943626  | 54957832 | 14206  | lncRNA                             | -2.24 | 4.08E-03 | 3.73E-02 |
| ENSG00000286400 | AC110926.1 | 2  | 127141976 | 1.27E+08 | 1817   | lncRNA                             | -2.25 | 9.23E-04 | 1.53E-02 |
| ENSG00000230051 | AL020994.2 | 22 | 27331634  | 27379265 | 47631  | lncRNA                             | -2.25 | 2.28E-06 | 2.23E-04 |
| ENSG00000225877 | PSG8-AS1   | 19 | 42821863  | 42826878 | 5015   | lncRNA                             | -2.25 | 2.66E-04 | 6.88E-03 |

|                 |            |    |           |          |        |                                    |       |          |          |
|-----------------|------------|----|-----------|----------|--------|------------------------------------|-------|----------|----------|
| ENSG00000255451 | AC010768.4 | 11 | 44468464  | 44470429 | 1965   | lncRNA                             | -2.25 | 1.88E-03 | 2.32E-02 |
| ENSG00000233492 | AL133325.2 | 20 | 21530122  | 21535665 | 5543   | lncRNA                             | -2.25 | 1.41E-03 | 1.97E-02 |
| ENSG00000233064 | AL136307.1 | 6  | 5851506   | 5870220  | 18714  | lncRNA                             | -2.25 | 3.40E-03 | 3.33E-02 |
| ENSG00000254237 | AC021242.2 | 8  | 9367898   | 9436205  | 68307  | lncRNA                             | -2.25 | 3.23E-05 | 1.67E-03 |
| ENSG00000287906 | AC127526.5 | 11 | 3475280   | 3477065  | 1785   | lncRNA                             | -2.25 | 1.87E-03 | 2.31E-02 |
| ENSG00000230637 | AL227524.1 | 22 | 25327252  | 25339975 | 12723  | unprocessed pseudogene             | -2.25 | 6.48E-04 | 1.23E-02 |
| ENSG00000223440 | AL589642.1 | 9  | 32633454  | 32648685 | 15231  | lncRNA-antisense                   | -2.26 | 1.36E-03 | 1.92E-02 |
| ENSG00000131482 | G6PC       | 17 | 42900797  | 42914438 | 13641  | protein coding                     | -2.26 | 1.88E-05 | 1.13E-03 |
| ENSG00000286052 | AL109955.1 | 20 | 57442742  | 57458298 | 15556  | lncRNA                             | -2.26 | 3.15E-04 | 7.69E-03 |
| ENSG00000250535 | GMNC       | 3  | 190852737 | 1.91E+08 | 39692  | protein coding                     | -2.26 | 2.06E-03 | 2.47E-02 |
| ENSG00000272937 | OR6U2P     | 12 | 55608043  | 55615878 | 7835   | transcribed unprocessed pseudogene | -2.27 | 3.92E-04 | 8.90E-03 |
| ENSG00000277718 | LINC02255  | 15 | 74379083  | 74390535 | 11452  | lncRNA                             | -2.27 | 2.94E-03 | 3.05E-02 |
| ENSG00000173389 | IQCF1      | 3  | 51894876  | 51903353 | 8477   | protein coding                     | -2.27 | 4.72E-03 | 4.03E-02 |
| ENSG00000256377 | AC009509.1 | 12 | 27696388  | 27710803 | 14415  | lncRNA-antisense                   | -2.27 | 2.35E-05 | 1.32E-03 |
| ENSG00000237664 | LINC00316  | 21 | 45338590  | 45341990 | 3400   | lncRNA                             | -2.27 | 4.00E-03 | 3.69E-02 |
| ENSG00000135324 | MRAP2      | 6  | 84033772  | 84090881 | 57109  | protein coding                     | -2.27 | 1.74E-03 | 2.21E-02 |
| ENSG00000226516 | FAM138B    | 2  | 113577382 | 1.14E+08 | 1470   | lncRNA                             | -2.27 | 2.41E-04 | 6.46E-03 |
| ENSG00000275014 | RN7SL166P  | 13 | 19736975  | 19737254 | 279    | misc RNA                           | -2.28 | 1.21E-04 | 4.20E-03 |
| ENSG00000232743 | ELF2P3     | 9  | 87816465  | 87817970 | 1505   | processed pseudogene               | -2.28 | 2.13E-03 | 2.53E-02 |
| ENSG00000261586 | AC068987.3 | 12 | 51817899  | 51820150 | 2251   | lncRNA                             | -2.28 | 9.56E-05 | 3.61E-03 |
| ENSG00000257316 | ASS1P14    | 12 | 32985838  | 32987070 | 1232   | processed pseudogene               | -2.28 | 1.53E-03 | 2.06E-02 |
| ENSG00000276397 | LINC01879  | 18 | 76686058  | 76693636 | 7578   | lncRNA                             | -2.28 | 4.62E-04 | 9.81E-03 |
| ENSG00000157965 | SSX8P      | X  | 52622935  | 52633948 | 11013  | transcribed unprocessed pseudogene | -2.28 | 1.12E-04 | 3.98E-03 |
| ENSG00000255808 | PDE2A-AS1  | 11 | 72643237  | 72659407 | 16170  | lncRNA-antisense                   | -2.28 | 4.67E-04 | 9.89E-03 |
| ENSG00000228717 | AF013593.1 | X  | 151226229 | 1.51E+08 | 1486   | processed pseudogene               | -2.28 | 2.20E-03 | 2.57E-02 |
| ENSG00000261669 | AC008731.1 | 16 | 24803451  | 24819739 | 16288  | lncRNA-antisense                   | -2.28 | 1.86E-03 | 2.30E-02 |
| ENSG00000288006 | AC137335.3 | 17 | 73912190  | 73931436 | 19246  | lncRNA                             | -2.29 | 1.13E-03 | 1.71E-02 |
| ENSG00000271232 | CAR51P1    | 15 | 68749501  | 68750691 | 1190   | processed pseudogene               | -2.29 | 4.36E-03 | 3.86E-02 |
| ENSG00000259535 | RPL21P12   | 14 | 103148597 | 1.03E+08 | 811    | processed pseudogene               | -2.29 | 5.64E-03 | 4.48E-02 |
| ENSG00000236495 | AL158168.1 | 10 | 14652689  | 14661691 | 9002   | lncRNA-antisense                   | -2.29 | 3.46E-04 | 8.21E-03 |
| ENSG00000255128 | HSPD1P3    | 8  | 7418991   | 7420546  | 1555   | processed pseudogene               | -2.29 | 2.12E-03 | 2.52E-02 |
| ENSG00000120289 | MAGEB4     | X  | 30242000  | 30244187 | 2187   | protein coding                     | -2.29 | 1.79E-03 | 2.25E-02 |
| ENSG00000286911 | AC009533.3 | 12 | 9347028   | 9350947  | 3919   | lncRNA                             | -2.29 | 2.31E-03 | 2.66E-02 |
| ENSG00000230399 | RBBP8P1    | X  | 118632375 | 1.19E+08 | 1843   | processed pseudogene               | -2.29 | 1.63E-03 | 2.13E-02 |
| ENSG00000229316 | HMG1P45    | 1  | 50398825  | 50399773 | 948    | processed pseudogene               | -2.30 | 2.48E-03 | 2.77E-02 |
| ENSG00000233316 | DSRC10     | 21 | 38206156  | 38208644 | 2488   | lncRNA-sense intronic              | -2.30 | 2.33E-03 | 2.67E-02 |
| ENSG00000186860 | KRTAP17-1  | 17 | 41314912  | 41315710 | 798    | protein coding                     | -2.30 | 1.60E-03 | 2.11E-02 |
| ENSG00000188784 | PLA2G2E    | 1  | 19920009  | 19923617 | 3608   | protein coding                     | -2.30 | 1.60E-05 | 9.94E-04 |
| ENSG00000242515 | UGT1A10    | 2  | 233636454 | 2.34E+08 | 136851 | protein coding                     | -2.31 | 2.92E-03 | 3.03E-02 |
| ENSG00000235038 | AL445193.2 | 1  | 58060139  | 58080274 | 20135  | lncRNA                             | -2.31 | 1.39E-03 | 1.95E-02 |
| ENSG00000234141 | AC006042.3 | 7  | 7949853   | 7950709  | 856    | lncRNA-antisense                   | -2.31 | 2.25E-03 | 2.61E-02 |
| ENSG00000102048 | ASB9       | X  | 15235288  | 15270467 | 35179  | protein coding                     | -2.31 | 9.04E-07 | 1.06E-04 |
| ENSG00000197421 | GGT3P      | 22 | 18773665  | 18843399 | 69734  | transcribed unprocessed pseudogene | -2.31 | 6.63E-06 | 5.25E-04 |
| ENSG00000214102 | WEE2       | 7  | 141708353 | 1.42E+08 | 22918  | protein coding                     | -2.32 | 2.65E-05 | 1.44E-03 |
| ENSG00000257958 | AC008125.1 | 12 | 115077325 | 1.15E+08 | 2828   | lncRNA                             | -2.32 | 1.00E-04 | 3.71E-03 |
| ENSG00000266114 | AC015908.4 | 17 | 10792059  | 10794985 | 2926   | lncRNA                             | -2.32 | 1.24E-03 | 1.82E-02 |
| ENSG00000241104 | CEACAMP10  | 19 | 43211791  | 43248646 | 36855  | transcribed processed pseudogene   | -2.32 | 5.07E-05 | 2.33E-03 |
| ENSG00000172377 | OR9I1      | 11 | 58116742  | 58125530 | 8788   | protein coding                     | -2.32 | 8.41E-04 | 1.44E-02 |
| ENSG00000223572 | CKMT1A     | 15 | 43692886  | 43699222 | 6336   | protein coding                     | -2.32 | 4.00E-03 | 3.69E-02 |
| ENSG00000257700 | AC055716.3 | 12 | 52692605  | 52696788 | 4183   | lncRNA-antisense                   | -2.33 | 2.61E-03 | 2.85E-02 |
| ENSG00000198974 | MIR30E     | 1  | 40754355  | 40754446 | 91     | miRNA                              | -2.33 | 2.75E-03 | 2.94E-02 |
| ENSG00000189196 | LINC00994  | 3  | 64078361  | 64087363 | 9002   | lncRNA                             | -2.33 | 2.45E-04 | 6.53E-03 |
| ENSG00000233457 | AL353705.2 | 9  | 78150532  | 78151193 | 661    | processed pseudogene               | -2.33 | 1.12E-03 | 1.70E-02 |
| ENSG00000180988 | OR52N2     | 11 | 5820314   | 5821348  | 1034   | protein coding                     | -2.34 | 4.12E-03 | 3.75E-02 |
| ENSG00000238169 | LINC01053  | 13 | 25168969  | 25190643 | 21674  | lncRNA-antisense                   | -2.34 | 4.35E-04 | 9.48E-03 |
| ENSG00000250480 | AC034244.2 | 5  | 57120796  | 57122624 | 1828   | processed pseudogene               | -2.34 | 1.51E-03 | 2.04E-02 |
| ENSG00000254290 | AC124067.4 | 8  | 37597480  | 37599858 | 2378   | lncRNA                             | -2.34 | 1.43E-06 | 1.51E-04 |
| ENSG00000231137 | RBM22P5    | 9  | 76286494  | 76288081 | 1587   | processed pseudogene               | -2.34 | 1.03E-03 | 1.63E-02 |
| ENSG00000223492 | AL391097.1 | 20 | 53168643  | 53179550 | 10907  | lncRNA-antisense                   | -2.34 | 1.27E-03 | 1.85E-02 |
| ENSG00000272642 | AP003121.1 | 11 | 127188885 | 1.27E+08 | 34564  | lncRNA                             | -2.34 | 1.89E-03 | 2.33E-02 |
| ENSG00000202412 | RNY3P13    | 3  | 129818932 | 1.3E+08  | 101    | misc RNA                           | -2.35 | 5.32E-05 | 2.40E-03 |
| ENSG00000250295 | RDH10-AS1  | 8  | 73297711  | 73356461 | 58750  | lncRNA-antisense                   | -2.35 | 1.31E-04 | 4.41E-03 |
| ENSG00000286092 | AC117503.5 | 12 | 123713408 | 1.24E+08 | 9761   | lncRNA-antisense                   | -2.35 | 1.65E-03 | 2.15E-02 |
| ENSG00000280114 | AL021920.2 | 1  | 16681097  | 16688749 | 7652   | unprocessed pseudogene             | -2.35 | 9.99E-05 | 3.70E-03 |
| ENSG00000235838 | HSP90A87P  | 10 | 9721963   | 9724416  | 2453   | processed pseudogene               | -2.36 | 2.17E-04 | 5.99E-03 |
| ENSG00000238178 | AC078993.1 | X  | 16152941  | 16170869 | 17928  | lncRNA-antisense                   | -2.36 | 1.26E-04 | 4.32E-03 |
| ENSG00000171433 | GLOD5      | X  | 48761747  | 48773648 | 11901  | protein coding                     | -2.36 | 2.11E-05 | 1.22E-03 |
| ENSG00000260011 | AC132938.1 | 17 | 82381110  | 82382690 | 1580   | lncRNA                             | -2.36 | 2.23E-03 | 2.60E-02 |
| ENSG00000279251 | AC015726.3 | 17 | 19855747  | 19856164 | 417    | TEC                                | -2.36 | 4.56E-03 | 3.97E-02 |
| ENSG00000280268 | AC025125.1 | 17 | 3439923   | 3441844  | 1921   | TEC                                | -2.38 | 2.04E-03 | 2.45E-02 |
| ENSG00000269526 | ERVV-1     | 19 | 53013921  | 53016122 | 2201   | protein coding                     | -2.38 | 1.84E-03 | 2.29E-02 |
| ENSG00000256847 | CCND2P1    | 11 | 63243085  | 63244004 | 919    | processed pseudogene               | -2.38 | 1.79E-03 | 2.25E-02 |
| ENSG00000260433 | LINC01917  | 18 | 53480825  | 53581107 | 100282 | lncRNA                             | -2.38 | 6.79E-03 | 4.99E-02 |
| ENSG00000250591 | PRSS3P1    | 7  | 142760415 | 1.43E+08 | 3528   | unprocessed pseudogene             | -2.38 | 3.74E-04 | 8.61E-03 |
| ENSG00000285615 | AL359508.1 | 10 | 129372194 | 1.29E+08 | 8559   | lncRNA                             | -2.38 | 3.93E-04 | 8.90E-03 |
| ENSG00000232837 | LINC01700  | 21 | 38974429  | 38977774 | 3345   | lncRNA                             | -2.39 | 1.07E-03 | 1.67E-02 |
| ENSG00000036473 | OTC        | X  | 38352586  | 38421446 | 68860  | protein coding                     | -2.39 | 7.21E-04 | 1.32E-02 |
| ENSG00000188984 | AADACL3    | 1  | 12716110  | 12728760 | 12650  | protein coding                     | -2.39 | 8.20E-07 | 9.85E-05 |
| ENSG00000253141 | AC008632.1 | 5  | 173463484 | 1.73E+08 | 21100  | lncRNA                             | -2.40 | 4.34E-05 | 2.10E-03 |
| ENSG00000149507 | OOSP2      | 11 | 60040409  | 60048044 | 7635   | protein coding                     | -2.40 | 1.83E-04 | 5.43E-03 |
| ENSG00000253574 | AC021744.1 | 8  | 139911238 | 1.4E+08  | 5382   | lncRNA-antisense                   | -2.40 | 9.47E-05 | 3.59E-03 |
| ENSG00000260832 | AC125793.1 | 16 | 82953230  | 82990298 | 37068  | lncRNA-antisense                   | -2.40 | 5.10E-04 | 1.05E-02 |
| ENSG00000206129 | AC006305.1 | 18 | 56003613  | 56191262 | 187649 | lncRNA                             | -2.40 | 8.75E-05 | 3.39E-03 |
| ENSG00000269931 | AL078823.1 | 20 | 12934877  | 12937097 | 2220   | lncRNA                             | -2.41 | 2.28E-03 | 2.63E-02 |
| ENSG00000259732 | AC092757.2 | 15 | 59121034  | 59133250 | 12216  | lncRNA-sense overlapping           | -2.41 | 2.34E-03 | 2.67E-02 |
| ENSG00000189099 | PRSS48     | 4  | 151277171 | 1.51E+08 | 14282  | protein coding                     | -2.41 | 7.92E-04 | 1.39E-02 |
| ENSG00000254966 | AC103974.1 | 11 | 18706537  | 18740568 | 34031  | lncRNA-antisense                   | -2.42 | 9.52E-05 | 3.60E-03 |

|                 |             |    |           |          |        |                                    |       |          |          |
|-----------------|-------------|----|-----------|----------|--------|------------------------------------|-------|----------|----------|
| ENSG00000161594 | KLHL10      | 17 | 41835685  | 41848384 | 12699  | protein coding                     | -2.42 | 4.85E-06 | 4.10E-04 |
| ENSG00000249509 | NEUROG2-AS1 | 4  | 112515385 | 1.13E+08 | 31496  | lncRNA-antisense                   | -2.42 | 1.12E-03 | 1.71E-02 |
| ENSG00000286947 | AC022467.2  | 15 | 48524308  | 48526051 | 1743   | lncRNA                             | -2.42 | 1.68E-03 | 2.17E-02 |
| ENSG00000206754 | SNORD101    | 6  | 132815307 | 1.33E+08 | 72     | snoRNA                             | -2.42 | 5.90E-03 | 4.60E-02 |
| ENSG00000275585 | AC241377.2  | 1  | 120985692 | 1.21E+08 | 66475  | transcribed unprocessed pseudogene | -2.42 | 3.39E-04 | 8.09E-03 |
| ENSG00000285899 | AL023574.1  | X  | 43279560  | 43438657 | 159097 | lncRNA                             | -2.43 | 5.41E-04 | 1.09E-02 |
| ENSG00000261302 | AC106779.1  | 16 | 56708450  | 56730010 | 21560  | lncRNA-antisense                   | -2.44 | 3.40E-05 | 1.74E-03 |
| ENSG00000233995 | AP000547.1  | 22 | 16572027  | 16574637 | 2610   | unprocessed pseudogene             | -2.44 | 1.41E-03 | 1.97E-02 |
| ENSG00000261097 | LINC00563   | 13 | 46296445  | 46297844 | 1399   | lncRNA                             | -2.44 | 1.19E-06 | 1.30E-04 |
| ENSG00000258783 | KRT18P6     | 14 | 35511825  | 35513089 | 1264   | processed pseudogene               | -2.45 | 6.90E-04 | 1.28E-02 |
| ENSG00000180016 | OR1E1       | 17 | 3397104   | 3398410  | 1306   | protein coding                     | -2.45 | 1.78E-03 | 2.25E-02 |
| ENSG00000182898 | TCHHL1      | 1  | 152084141 | 1.52E+08 | 4923   | protein coding                     | -2.45 | 1.63E-05 | 1.00E-03 |
| ENSG00000230525 | LINC01799   | 2  | 66904436  | 66971462 | 67026  | lncRNA                             | -2.45 | 1.44E-03 | 1.98E-02 |
| ENSG00000266466 | AC233702.7  | 17 | 21532974  | 21542786 | 9812   | lncRNA-antisense                   | -2.45 | 1.77E-03 | 2.24E-02 |
| ENSG00000274328 | AC007551.2  | 7  | 35847038  | 35847426 | 388    | processed pseudogene               | -2.45 | 8.29E-04 | 1.43E-02 |
| ENSG00000230598 | AL645937.3  | 6  | 29212886  | 29216933 | 4047   | transcribed unprocessed pseudogene | -2.47 | 3.96E-04 | 8.93E-03 |
| ENSG00000270474 | IGHV3-29    | 14 | 106356145 | 1.06E+08 | 446    | IG V pseudogene                    | -2.47 | 5.00E-04 | 1.04E-02 |
| ENSG00000287703 | AC099565.1  | 1  | 34640157  | 34685732 | 45575  | lncRNA                             | -2.47 | 1.68E-04 | 5.14E-03 |
| ENSG00000227150 | AL669970.2  | 9  | 134552738 | 1.35E+08 | 1159   | lncRNA                             | -2.48 | 9.71E-04 | 1.58E-02 |
| ENSG00000237614 | AC073257.2  | 2  | 120542905 | 1.21E+08 | 2344   | lncRNA                             | -2.49 | 3.47E-05 | 1.76E-03 |
| ENSG00000258039 | AC117377.1  | 12 | 99093359  | 99105011 | 11652  | lncRNA-antisense                   | -2.49 | 2.42E-03 | 2.73E-02 |
| ENSG00000260351 | AC024270.1  | 15 | 83022571  | 83090782 | 68211  | lncRNA-antisense                   | -2.49 | 1.25E-03 | 1.83E-02 |
| ENSG00000224462 | C4BPAP1     | 1  | 207165496 | 2.07E+08 | 18414  | unprocessed pseudogene             | -2.49 | 1.39E-03 | 1.94E-02 |
| ENSG00000265844 | AC100863.1  | 18 | 77180106  | 77235430 | 55324  | lncRNA                             | -2.50 | 9.07E-04 | 1.52E-02 |
| ENSG00000284739 | BX005132.1  | 1  | 4963954   | 4973298  | 9344   | lncRNA                             | -2.51 | 1.07E-03 | 1.67E-02 |
| ENSG00000258390 | LINC02318   | 14 | 95573520  | 95582305 | 8785   | lncRNA                             | -2.51 | 2.07E-05 | 1.20E-03 |
| ENSG00000274554 | AC083806.2  | 12 | 116948738 | 1.17E+08 | 2684   | lncRNA-antisense                   | -2.51 | 2.18E-05 | 1.25E-03 |
| ENSG00000287904 | AL138708.1  | 13 | 31838752  | 31846539 | 7787   | lncRNA                             | -2.51 | 2.31E-03 | 2.65E-02 |
| ENSG00000212724 | KRTAP2-3    | 17 | 41059240  | 41060114 | 874    | protein coding                     | -2.52 | 1.32E-04 | 4.42E-03 |
| ENSG00000287349 | AC108477.2  | 4  | 183725830 | 1.84E+08 | 6740   | lncRNA                             | -2.52 | 6.46E-04 | 1.23E-02 |
| ENSG00000189398 | OR7E12P     | 11 | 3390780   | 3391752  | 972    | unprocessed pseudogene             | -2.52 | 8.75E-05 | 3.39E-03 |
| ENSG00000258942 | AL358332.1  | 14 | 51344914  | 51385603 | 40689  | lncRNA                             | -2.52 | 1.56E-03 | 2.08E-02 |
| ENSG00000266667 | AC005703.3  | 17 | 15379864  | 15417878 | 38014  | lncRNA                             | -2.53 | 5.22E-05 | 2.39E-03 |
| ENSG00000154198 | CYP4ZP2     | 1  | 46843095  | 46900437 | 57342  | transcribed unprocessed pseudogene | -2.54 | 2.78E-05 | 1.48E-03 |
| ENSG00000225315 | AL591178.1  | 1  | 24040835  | 24086799 | 45964  | lncRNA-antisense                   | -2.54 | 2.46E-04 | 6.53E-03 |
| ENSG00000268053 | AC007785.2  | 19 | 46111079  | 46113863 | 2784   | processed pseudogene               | -2.54 | 3.46E-04 | 8.21E-03 |
| ENSG00000274766 | BX027579.2  | 13 | 113883667 | 1.14E+08 | 3482   | lncRNA                             | -2.54 | 8.62E-05 | 3.37E-03 |
| ENSG00000282882 | AC027045.2  | 17 | 9764186   | 9805100  | 40914  | lncRNA                             | -2.55 | 8.67E-05 | 3.38E-03 |
| ENSG00000261524 | ABC10P3     | 15 | 28402868  | 28405033 | 2165   | processed pseudogene               | -2.55 | 2.22E-03 | 2.59E-02 |
| ENSG00000234575 | CTS1LP8     | 9  | 87844154  | 87847314 | 3160   | unprocessed pseudogene             | -2.56 | 5.93E-05 | 2.58E-03 |
| ENSG00000273851 | AC027088.4  | 15 | 69022230  | 69024176 | 1946   | transcribed processed pseudogene   | -2.56 | 3.51E-04 | 8.26E-03 |
| ENSG00000284710 | Z98257.2    | 1  | 20272018  | 20275005 | 2987   | lncRNA                             | -2.56 | 1.17E-04 | 4.09E-03 |
| ENSG00000261595 | AL603832.2  | 1  | 112715672 | 1.13E+08 | 2124   | lncRNA-antisense                   | -2.57 | 2.74E-05 | 1.47E-03 |
| ENSG00000223716 | AL135785.1  | 9  | 38360427  | 38376430 | 16003  | lncRNA                             | -2.57 | 2.07E-04 | 5.85E-03 |
| ENSG00000251613 | AC063979.1  | 5  | 72687112  | 72771733 | 84621  | lncRNA                             | -2.58 | 2.54E-04 | 6.65E-03 |
| ENSG00000248590 | GLDCP1      | 4  | 56593004  | 56595681 | 2677   | transcribed processed pseudogene   | -2.58 | 1.17E-05 | 7.94E-04 |
| ENSG00000285754 | AC008170.1  | 2  | 34134371  | 34220575 | 86204  | lncRNA                             | -2.58 | 2.33E-04 | 6.31E-03 |
| ENSG00000258866 | AL390254.1  | 14 | 95047353  | 95050957 | 3604   | lncRNA                             | -2.59 | 2.65E-04 | 6.85E-03 |
| ENSG00000236473 | KRT43P      | 17 | 41448183  | 41454055 | 5872   | unprocessed pseudogene             | -2.60 | 1.18E-04 | 4.12E-03 |
| ENSG00000229863 | AC097358.1  | 3  | 57134142  | 57134723 | 581    | processed pseudogene               | -2.60 | 3.07E-03 | 3.12E-02 |
| ENSG00000242272 | AK2P2       | 2  | 31823413  | 31823817 | 404    | processed pseudogene               | -2.61 | 8.26E-05 | 3.25E-03 |
| ENSG00000262558 | AC129507.3  | 17 | 354737    | 356882   | 2145   | lncRNA-antisense                   | -2.61 | 2.44E-04 | 6.51E-03 |
| ENSG00000288605 | AC007461.1  | 17 | 72033772  | 72220948 | 187176 | lncRNA                             | -2.61 | 9.71E-04 | 1.58E-02 |
| ENSG00000229292 | RFLP4AL1    | 19 | 55769118  | 55773420 | 4302   | protein coding                     | -2.62 | 5.64E-04 | 1.12E-02 |
| ENSG00000286594 | AL133493.2  | 21 | 45607386  | 45609194 | 1808   | lncRNA                             | -2.62 | 2.45E-04 | 6.53E-03 |
| ENSG00000184330 | S100A7A     | 1  | 153416520 | 1.53E+08 | 6702   | protein coding                     | -2.62 | 9.04E-08 | 1.65E-05 |
| ENSG00000280236 | OR12D2      | 6  | 29395631  | 29398008 | 2377   | protein coding                     | -2.63 | 6.07E-05 | 2.63E-03 |
| ENSG00000287163 | AC018558.6  | 16 | 35450898  | 35452987 | 2089   | lncRNA                             | -2.63 | 3.63E-04 | 8.44E-03 |
| ENSG00000287668 | AL132990.1  | 14 | 94545310  | 94547762 | 2452   | lncRNA                             | -2.64 | 1.28E-05 | 8.44E-04 |
| ENSG00000288023 | AL157936.1  | 9  | 94725871  | 94726575 | 704    | lncRNA                             | -2.64 | 4.90E-04 | 1.02E-02 |
| ENSG00000262953 | EIF4A1P9    | 17 | 2586330   | 2587866  | 1536   | processed pseudogene               | -2.66 | 1.99E-05 | 1.17E-03 |
| ENSG00000249736 | LINC02242   | 5  | 67632266  | 67646789 | 14523  | lncRNA                             | -2.67 | 2.55E-04 | 6.67E-03 |
| ENSG00000187223 | LCE2D       | 1  | 152663380 | 1.53E+08 | 1279   | protein coding                     | -2.67 | 1.93E-05 | 1.14E-03 |
| ENSG00000260385 | AL356961.1  | 13 | 112083549 | 1.12E+08 | 1922   | lncRNA                             | -2.68 | 4.87E-05 | 2.28E-03 |
| ENSG00000286250 | AL161945.1  | 20 | 52840936  | 52843775 | 2839   | lncRNA                             | -2.68 | 2.07E-03 | 2.48E-02 |
| ENSG00000287197 | AC096675.1  | 1  | 204822664 | 2.05E+08 | 6610   | lncRNA                             | -2.68 | 1.20E-05 | 8.06E-04 |
| ENSG00000212961 | HNRNP1P40   | 11 | 74354443  | 74355720 | 1277   | processed pseudogene               | -2.68 | 2.70E-04 | 6.94E-03 |
| ENSG00000287082 | AP001042.3  | 21 | 38857539  | 38858861 | 1322   | lncRNA                             | -2.68 | 6.72E-04 | 1.26E-02 |
| ENSG00000255313 | AC100858.1  | 8  | 124936328 | 1.25E+08 | 7437   | lncRNA                             | -2.69 | 2.22E-04 | 6.10E-03 |
| ENSG00000243832 | LINC02000   | 3  | 134055256 | 1.34E+08 | 2392   | lncRNA                             | -2.70 | 5.02E-04 | 1.04E-02 |
| ENSG00000259294 | AC005096.1  | 7  | 101822247 | 1.02E+08 | 2482   | lncRNA-antisense                   | -2.71 | 1.39E-03 | 1.94E-02 |
| ENSG00000266963 | AC005625.1  | 19 | 38361795  | 38362484 | 689    | lncRNA-antisense                   | -2.72 | 9.84E-04 | 1.59E-02 |
| ENSG00000258907 | PSMB3P1     | 12 | 55654558  | 55655168 | 610    | processed pseudogene               | -2.72 | 2.98E-03 | 3.08E-02 |
| ENSG00000227838 | AL121885.2  | 22 | 27676559  | 27714970 | 38411  | lncRNA                             | -2.72 | 3.46E-04 | 8.21E-03 |
| ENSG00000259108 | LINC01595   | 19 | 47863409  | 47865459 | 2050   | lncRNA                             | -2.73 | 4.01E-04 | 9.01E-03 |
| ENSG00000288108 | AC126768.3  | 5  | 1931058   | 1933985  | 2927   | lncRNA                             | -2.73 | 5.43E-04 | 1.09E-02 |
| ENSG00000274261 | AL137078.2  | 20 | 48406777  | 48410716 | 3939   | lncRNA                             | -2.74 | 1.05E-04 | 3.81E-03 |
| ENSG00000179636 | TPP2        | 14 | 21024109  | 21036276 | 12167  | protein coding                     | -2.74 | 1.15E-05 | 7.85E-04 |
| ENSG00000230342 | FANCD2P2    | 3  | 11859674  | 11891172 | 31498  | unprocessed pseudogene             | -2.75 | 1.59E-05 | 9.89E-04 |
| ENSG00000213959 | AL035419.1  | 20 | 38614913  | 38615476 | 563    | processed pseudogene               | -2.77 | 2.56E-05 | 1.41E-03 |
| ENSG00000231235 | CTNINBL1P1  | X  | 46418450  | 46420079 | 1629   | processed pseudogene               | -2.77 | 1.66E-04 | 5.11E-03 |
| ENSG00000227527 | AC096540.1  | 1  | 42335386  | 42338376 | 2990   | lncRNA-sense overlapping           | -2.77 | 3.95E-04 | 8.93E-03 |
| ENSG00000248545 | AC105290.1  | 4  | 25529177  | 25619468 | 90291  | lncRNA                             | -2.79 | 1.82E-04 | 5.41E-03 |
| ENSG00000248257 | PSG10P      | 19 | 42839368  | 42855718 | 16350  | transcribed unprocessed pseudogene | -2.82 | 1.27E-05 | 8.39E-04 |
| ENSG00000285619 | AL449214.1  | 3  | 128181402 | 1.28E+08 | 13050  | lncRNA-antisense                   | -2.83 | 9.48E-04 | 1.56E-02 |
| ENSG00000124900 | TRIM51      | 11 | 55883297  | 55891810 | 8513   | protein coding                     | -2.83 | 2.08E-04 | 5.87E-03 |
| ENSG00000260311 | AC138907.1  | 16 | 32663925  | 32666533 | 2608   | lncRNA                             | -2.84 | 4.84E-05 | 2.27E-03 |



|                 |                         |    |           |          |       |                                  |       |          |          |
|-----------------|-------------------------|----|-----------|----------|-------|----------------------------------|-------|----------|----------|
| ENSG00000272438 | AL645608.6              | 1  | 904834    | 915976   | 11142 | lncRNA                           | -2.85 | 1.03E-03 | 1.63E-02 |
| ENSG00000287107 | AL136102.1              | 20 | 48120269  | 48136844 | 16575 | lncRNA                           | -2.86 | 9.03E-05 | 3.48E-03 |
| ENSG00000124260 | MAGEA10                 | X  | 152133310 | 1.52E+08 | 5268  | protein coding                   | -2.87 | 3.39E-05 | 1.74E-03 |
| ENSG00000286659 | Z99716.2                | 22 | 42070949  | 42071488 | 539   | lncRNA                           | -2.88 | 3.76E-05 | 1.88E-03 |
| ENSG00000288024 | AC005301.2              | 22 | 16725072  | 16747761 | 22689 | lncRNA                           | -2.88 | 1.74E-04 | 5.29E-03 |
| ENSG00000258883 | NBEAP4                  | 15 | 21250180  | 21260147 | 9967  | unprocessed_pseudogene           | -2.92 | 4.01E-04 | 9.01E-03 |
| ENSG00000279786 | AC105235.1              | 8  | 140820599 | 1.41E+08 | 1815  | TEC                              | -2.93 | 7.51E-05 | 3.02E-03 |
| ENSG00000279747 | AC130456.6              | 16 | 19503861  | 19504625 | 764   | TEC                              | -2.94 | 2.32E-04 | 6.29E-03 |
| ENSG00000256056 | AC087257.2              | 12 | 27592461  | 27594039 | 1578  | unprocessed_pseudogene           | -2.94 | 3.02E-04 | 7.47E-03 |
| ENSG00000236674 | AL049636.1              | 1  | 63359823  | 63361179 | 1356  | processed_pseudogene             | -2.95 | 2.39E-04 | 6.45E-03 |
| ENSG00000204978 | ERICH4                  | 19 | 41443156  | 41444765 | 1609  | protein coding                   | -2.97 | 2.16E-04 | 5.99E-03 |
| ENSG00000230978 | LINC00160               | 21 | 34723807  | 34737204 | 13397 | lncRNA                           | -2.97 | 5.25E-05 | 2.39E-03 |
| ENSG00000229853 | AL034418.1              | 20 | 47630266  | 47631438 | 1172  | processed_pseudogene             | -3.00 | 6.91E-05 | 2.88E-03 |
| ENSG00000259111 | AL079307.2              | 14 | 51750560  | 51763114 | 12554 | lncRNA                           | -3.01 | 1.43E-04 | 4.66E-03 |
| ENSG00000267354 | AC091151.2              | 18 | 45507202  | 45550183 | 42981 | lncRNA-sense intronic            | -3.03 | 2.31E-06 | 2.24E-04 |
| ENSG00000229028 | KRT223P                 | 17 | 40717235  | 40721932 | 4697  | inscribed_unprocessed_pseudogene | -3.04 | 9.31E-06 | 6.79E-04 |
| ENSG00000287435 | AC069404.1              | 2  | 73305941  | 73307890 | 1949  | lncRNA                           | -3.04 | 1.98E-04 | 5.69E-03 |
| ENSG00000136834 | OR1J1                   | 9  | 122476958 | 1.22E+08 | 968   | protein coding                   | -3.06 | 1.36E-05 | 8.80E-04 |
| ENSG00000276702 | AC010809.3              | 15 | 33850538  | 33851178 | 640   | lncRNA-antisense                 | -3.08 | 1.95E-04 | 5.63E-03 |
| ENSG00000224361 | AC011239.1 (KLHL29-AS1) | 2  | 23507043  | 23524344 | 17301 | lncRNA-antisense                 | -3.09 | 5.59E-05 | 2.49E-03 |
| ENSG00000285819 | AC131180.1              | 2  | 131191641 | 1.31E+08 | 17570 | lncRNA                           | -3.11 | 2.40E-04 | 6.45E-03 |
| ENSG00000237746 | ZNF101P1                | 10 | 28338554  | 28340942 | 2388  | processed_pseudogene             | -3.11 | 1.77E-05 | 1.07E-03 |
| ENSG00000258684 | BMS1P16                 | 15 | 21160305  | 21167357 | 7052  | unprocessed_pseudogene           | -3.13 | 5.25E-05 | 2.39E-03 |
| ENSG00000260990 | Z94057.1 (TNR-AS1)      | 1  | 175307218 | 1.75E+08 | 28241 | lncRNA-antisense                 | -3.16 | 1.49E-05 | 9.46E-04 |
| ENSG00000253966 | AC008514.2              | 5  | 170896929 | 1.71E+08 | 7532  | processed_pseudogene             | -3.16 | 1.80E-04 | 5.38E-03 |
| ENSG00000241563 | CORT                    | 1  | 10450031  | 10451998 | 1967  | protein coding                   | -3.22 | 1.10E-04 | 3.95E-03 |
| ENSG00000229571 | PRAMEF25                | 1  | 13068677  | 13077884 | 9207  | protein coding                   | -3.24 | 3.93E-05 | 1.95E-03 |
| ENSG00000253968 | AC016573.1              | 5  | 173383941 | 1.73E+08 | 67650 | lncRNA                           | -3.24 | 5.07E-06 | 4.23E-04 |
| ENSG00000249818 | AC097375.2              | 4  | 151904932 | 1.52E+08 | 23778 | lncRNA                           | -3.25 | 1.95E-07 | 3.00E-05 |
| ENSG00000275894 | AL021578.1              | 20 | 45345115  | 45345823 | 708   | lncRNA-sense intronic            | -3.35 | 3.56E-06 | 3.18E-04 |
| ENSG00000235594 | AL139824.2              | 20 | 56267872  | 56269231 | 1359  | processed_pseudogene             | -3.37 | 2.51E-06 | 2.39E-04 |
| ENSG00000287173 | AL356157.3              | 10 | 44509708  | 44515421 | 5713  | lncRNA                           | -3.41 | 2.97E-05 | 1.56E-03 |
| ENSG00000255250 | AP003059.2              | 11 | 86727355  | 86765467 | 38112 | lncRNA                           | -3.49 | 9.93E-06 | 7.12E-04 |
| ENSG00000237672 | KRR1P1                  | 13 | 20070250  | 20072136 | 1886  | processed_pseudogene             | -3.55 | 1.07E-05 | 7.52E-04 |
| ENSG00000180068 | OR3A4P                  | 17 | 3309986   | 3311446  | 1460  | inscribed_unprocessed_pseudogene | -3.91 | 2.10E-07 | 3.19E-05 |

Supplemental Table 4. Differentially expressed transcripts from the whole blood RNA-seq analysis of the anti-Ro negative SJD cases compared to healthy controls (SJD<sup>Ro-</sup> analysis)

| ENSEMBL_GENE_ID | Gene Name                | Chr | Chr_Start_position | Chr_end_position | Gene Length | gene_biotype          | SJD <sup>Ro-</sup> vs. HC |          |          |
|-----------------|--------------------------|-----|--------------------|------------------|-------------|-----------------------|---------------------------|----------|----------|
|                 |                          |     |                    |                  |             |                       | Log2FC                    | pval     | padj     |
| ENSG00000239719 | AC004890.1               | 7   | 149191043          | 149191223        | 180         | processed_pseudogene  | 2.00                      | 7.85E-06 | 3.54E-04 |
| ENSG00000259038 | AL121820.2 (RAD51L1-AS1) | 14  | 68627166           | 68628445         | 1279        | lncRNA-antisense      | 1.98                      | 1.11E-02 | 4.80E-02 |
| ENSG00000241494 | AL355032.1               | 14  | 101677943          | 101678380        | 437         | processed_pseudogene  | 1.84                      | 8.28E-07 | 7.62E-05 |
| ENSG00000286104 | AC016623.3               | 19  | 58575445           | 58601316         | 2571        | lncRNA                | 1.84                      | 1.08E-02 | 4.71E-02 |
| ENSG00000244398 | AC116533.1               | 11  | 16974693           | 16975013         | 320         | processed_pseudogene  | 1.77                      | 1.33E-05 | 5.07E-04 |
| ENSG00000213178 | RPL22P1                  | 3   | 169483671          | 169484080        | 409         | processed_pseudogene  | 1.66                      | 3.33E-09 | 1.69E-06 |
| ENSG00000152348 | ATG10                    | 5   | 81972023           | 82276857         | 304834      | protein_coding        | 1.60                      | 1.15E-08 | 4.07E-06 |
| ENSG00000143546 | S100A8                   | 1   | 153390032          | 153391073        | 1041        | protein_coding        | 1.60                      | 1.83E-05 | 6.17E-04 |
| ENSG00000219451 | RPL23P8                  | 7   | 20827326           | 20827753         | 427         | processed_pseudogene  | 1.60                      | 2.89E-04 | 4.05E-03 |
| ENSG00000231409 | AC018868.1               | 15  | 34943080           | 34943394         | 314         | processed_pseudogene  | 1.59                      | 1.06E-04 | 2.04E-03 |
| ENSG00000237748 | UQCRRP1                  | X   | 56737242           | 56737577         | 335         | processed_pseudogene  | 1.56                      | 6.60E-04 | 7.02E-03 |
| ENSG00000244158 | CALHM6-AS1               | 6   | 116460739          | 116463692        | 2953        | lncRNA-antisense      | 1.54                      | 1.31E-03 | 1.12E-02 |
| ENSG00000156467 | UQCRCB                   | 8   | 96222947           | 96235546         | 12599       | protein_coding        | 1.51                      | 2.07E-09 | 1.14E-06 |
| ENSG00000251062 | AC025459.1               | 5   | 32887990           | 32888145         | 155         | processed_pseudogene  | 1.51                      | 2.92E-03 | 1.94E-02 |
| ENSG00000225912 | RPL26P36                 | X   | 92676519           | 92676954         | 435         | processed_pseudogene  | 1.49                      | 2.21E-04 | 3.38E-03 |
| ENSG00000228007 | AC011933.1               | 17  | 75338827           | 75339147         | 320         | processed_pseudogene  | 1.48                      | 3.30E-03 | 2.11E-02 |
| ENSG00000227008 | AL009174.1               | X   | 133670971          | 133671386        | 415         | processed_pseudogene  | 1.47                      | 2.45E-05 | 7.49E-04 |
| ENSG00000121552 | CSTA                     | 3   | 122325248          | 122341969        | 16721       | protein_coding        | 1.46                      | 3.74E-08 | 9.08E-06 |
| ENSG00000237568 | AC099063.1 (GBP5-AS1)    | 1   | 89260582           | 89269754         | 9172        | lncRNA-antisense      | 1.42                      | 1.01E-04 | 1.99E-03 |
| ENSG00000224094 | RPS24P8                  | 3   | 45159774           | 45160175         | 401         | processed_pseudogene  | 1.42                      | 3.13E-04 | 4.26E-03 |
| ENSG00000254224 | AP003465.1 (UQRB-AS1)    | 8   | 96235427           | 96239149         | 3722        | lncRNA-antisense      | 1.41                      | 4.60E-03 | 2.64E-02 |
| ENSG00000204397 | CARD16                   | 11  | 105041326          | 105101431        | 60105       | protein_coding        | 1.38                      | 3.03E-10 | 3.10E-07 |
| ENSG00000249532 | MIR302CHG (LARP7-AS1)    | 4   | 112646476          | 112650051        | 3575        | lncRNA-antisense      | 1.38                      | 1.60E-03 | 1.28E-02 |
| ENSG00000234287 | AC099560.2               | 3   | 40761545           | 40761799         | 254         | processed_pseudogene  | 1.37                      | 1.53E-04 | 2.63E-03 |
| ENSG00000147604 | RPL7                     | 8   | 73290242           | 73295789         | 5547        | protein_coding        | 1.37                      | 5.78E-06 | 2.86E-04 |
| ENSG00000170860 | LSM3                     | 3   | 14178817           | 14201122         | 22305       | protein_coding        | 1.36                      | 1.04E-08 | 3.87E-06 |
| ENSG00000125691 | RPL23                    | 17  | 38847860           | 38853764         | 5904        | protein_coding        | 1.36                      | 2.82E-05 | 8.19E-04 |
| ENSG00000161970 | RPL26                    | 17  | 8377516            | 8383213          | 5697        | protein_coding        | 1.35                      | 3.05E-04 | 4.20E-03 |
| ENSG00000258666 | AL157871.4               | 14  | 100333790          | 100354061        | 20271       | lncRNA-antisense      | 1.34                      | 1.56E-04 | 2.66E-03 |
| ENSG00000125356 | NDUFA1                   | X   | 119871832          | 119876662        | 4830        | protein_coding        | 1.34                      | 5.33E-09 | 2.24E-06 |
| ENSG00000235576 | LINC01871                | 2   | 7725801            | 7730705          | 4904        | lncRNA                | 1.33                      | 8.38E-07 | 7.67E-05 |
| ENSG00000119013 | NDUFB3                   | 2   | 201071433          | 201085750        | 14317       | protein_coding        | 1.31                      | 4.23E-08 | 9.82E-06 |
| ENSG00000180211 | FC393411.1               | 6   | 39958414           | 39958833         | 419         | processed_pseudogene  | 1.30                      | 2.85E-04 | 4.01E-03 |
| ENSG00000140379 | BCL2A1                   | 15  | 79960892           | 79971196         | 10304       | protein_coding        | 1.28                      | 8.27E-08 | 1.51E-05 |
| ENSG00000253683 | AC027309.2               | 5   | 172656522          | 172656713        | 191         | processed_pseudogene  | 1.27                      | 9.57E-08 | 1.67E-05 |
| ENSG00000241612 | AC114728.1               | 4   | 19813749           | 19814231         | 482         | processed_pseudogene  | 1.26                      | 1.47E-03 | 1.21E-02 |
| ENSG00000259007 | AL358333.3               | 14  | 51967003           | 51969800         | 2797        | lncRNA-antisense      | 1.26                      | 2.32E-04 | 3.50E-03 |
| ENSG00000240509 | RPL34P18                 | 8   | 93957338           | 93957691         | 353         | processed_pseudogene  | 1.26                      | 2.56E-03 | 1.77E-02 |
| ENSG00000288528 | AP000942.5               | 11  | 102316173          | 102328586        | 12413       | lncRNA                | 1.25                      | 4.65E-04 | 5.54E-03 |
| ENSG00000137970 | RPL7P9                   | 1   | 96678874           | 96679620         | 746         | processed_pseudogene  | 1.25                      | 3.38E-05 | 9.31E-04 |
| ENSG00000196683 | TOMM7                    | 7   | 22812628           | 22822852         | 10224       | protein_coding        | 1.24                      | 4.84E-06 | 2.52E-04 |
| ENSG00000234742 | AC144530.1               | 3   | 197850400          | 197850954        | 554         | processed_pseudogene  | 1.23                      | 9.68E-04 | 9.10E-03 |
| ENSG00000237729 | AC002075.2               | 7   | 93669826           | 93670077         | 251         | processed_pseudogene  | 1.23                      | 4.45E-05 | 1.12E-03 |
| ENSG00000274422 | AC245060.5               | 22  | 22283928           | 22287220         | 3292        | lncRNA                | 1.22                      | 4.45E-04 | 5.39E-03 |
| ENSG00000230629 | RPS23P8                  | X   | 70962964           | 70963293         | 329         | processed_pseudogene  | 1.22                      | 5.40E-07 | 5.64E-05 |
| ENSG00000232112 | TMA7                     | 3   | 48440257           | 48444208         | 3951        | protein_coding        | 1.21                      | 2.70E-06 | 1.70E-04 |
| ENSG00000236312 | RPL34P34                 | 19  | 22368599           | 22368952         | 353         | processed_pseudogene  | 1.21                      | 5.58E-03 | 3.01E-02 |
| ENSG00000169020 | ATP5ME                   | 4   | 672436             | 674330           | 1894        | protein_coding        | 1.20                      | 2.14E-08 | 6.28E-06 |
| ENSG00000156411 | ATP5MPL                  | 14  | 103912288          | 103928269        | 15981       | protein_coding        | 1.20                      | 1.13E-06 | 9.24E-05 |
| ENSG00000109475 | RPL34                    | 4   | 108620566          | 108630412        | 9846        | protein_coding        | 1.19                      | 1.24E-03 | 1.08E-02 |
| ENSG00000185641 | AC034236.1               | 5   | 116051917          | 116052289        | 372         | processed_pseudogene  | 1.19                      | 3.90E-07 | 4.53E-05 |
| ENSG00000136810 | TXN                      | 9   | 110243810          | 110256507        | 12697       | protein_coding        | 1.19                      | 1.29E-08 | 4.35E-06 |
| ENSG00000242951 | AC007182.2               | 14  | 75595805           | 75596206         | 401         | processed_pseudogene  | 1.19                      | 6.03E-04 | 6.60E-03 |
| ENSG00000228802 | AC073641.1               | 2   | 223965701          | 223967706        | 2005        | lncRNA-antisense      | 1.17                      | 6.58E-03 | 3.37E-02 |
| ENSG00000234964 | FABP5P7                  | 11  | 59781318           | 59781722         | 404         | processed_pseudogene  | 1.17                      | 2.14E-04 | 3.31E-03 |
| ENSG00000220842 | RPL21P16                 | 10  | 120354701          | 120355183        | 482         | processed_pseudogene  | 1.16                      | 2.46E-05 | 7.52E-04 |
| ENSG00000168653 | NDUFS5                   | 1   | 39026318           | 39034636         | 8318        | protein_coding        | 1.16                      | 3.04E-06 | 1.84E-04 |
| ENSG00000234268 | AP000936.3               | 11  | 117035797          | 117036051        | 254         | processed_pseudogene  | 1.16                      | 3.84E-05 | 1.02E-03 |
| ENSG00000270077 | AP003117.1               | 8   | 97144170           | 97144723         | 553         | lncRNA-sense intronic | 1.15                      | 2.61E-04 | 3.79E-03 |
| ENSG00000254373 | AC112191.2               | 5   | 160258253          | 160258585        | 332         | processed_pseudogene  | 1.15                      | 1.08E-02 | 4.70E-02 |
| ENSG00000127184 | COX7C                    | 5   | 86617928           | 86620962         | 3034        | protein_coding        | 1.15                      | 1.09E-05 | 4.40E-04 |
| ENSG00000277978 | AC010542.5               | 16  | 66565620           | 66566001         | 381         | lncRNA-antisense      | 1.14                      | 3.14E-04 | 4.27E-03 |
| ENSG00000236439 | AC099336.2               | 1   | 202471864          | 202472117        | 253         | processed_pseudogene  | 1.13                      | 8.89E-04 | 8.59E-03 |
| ENSG00000226084 | AC113935.1               | 1   | 77129114           | 77129668         | 554         | processed_pseudogene  | 1.13                      | 1.02E-04 | 2.00E-03 |
| ENSG00000138326 | RPS24                    | 10  | 78033760           | 78056813         | 23053       | protein_coding        | 1.12                      | 5.82E-05 | 1.36E-03 |
| ENSG00000163993 | S100P                    | 4   | 6693878            | 6697170          | 3292        | protein_coding        | 1.12                      | 7.74E-05 | 1.66E-03 |
| ENSG00000140319 | SRP14                    | 15  | 40035690           | 40039181         | 3491        | protein_coding        | 1.11                      | 8.17E-14 | 1.32E-09 |
| ENSG00000155368 | DBI                      | 2   | 119366921          | 119372560        | 5639        | protein_coding        | 1.10                      | 4.22E-08 | 9.82E-06 |
| ENSG00000163221 | S100A12                  | 1   | 153373711          | 153375621        | 1910        | protein_coding        | 1.10                      | 1.74E-04 | 2.89E-03 |
| ENSG00000105205 | CLC                      | 19  | 39731255           | 39738029         | 6774        | protein_coding        | 1.10                      | 2.66E-04 | 3.85E-03 |
| ENSG00000204472 | AIF1                     | 6   | 31615217           | 31617021         | 1804        | protein_coding        | 1.09                      | 4.46E-12 | 1.69E-08 |
| ENSG00000227081 | AC005912.1               | 12  | 3211663            | 3211917          | 254         | processed_pseudogene  | 1.07                      | 2.50E-04 | 3.68E-03 |
| ENSG00000115541 | HSPF1                    | 2   | 197500140          | 197503449        | 3309        | protein_coding        | 1.07                      | 2.88E-08 | 7.78E-06 |
| ENSG00000154723 | ATP5PF                   | 21  | 25716503           | 25735673         | 19170       | protein_coding        | 1.07                      | 1.09E-10 | 1.28E-07 |
| ENSG00000135046 | ANXA1                    | 9   | 73151865           | 73170393         | 18528       | protein_coding        | 1.07                      | 5.68E-08 | 1.22E-05 |
| ENSG00000177954 | RPS27                    | 1   | 153990762          | 153992155        | 1393        | protein_coding        | 1.06                      | 1.15E-04 | 2.16E-03 |
| ENSG00000259544 | AC021739.3               | 15  | 85726115           | 85727227         | 1112        | lncRNA-antisense      | 1.06                      | 5.69E-03 | 3.06E-02 |
| ENSG00000230291 | AC078817.1               | 12  | 80102899           | 80103333         | 434         | processed_pseudogene  | 1.06                      | 2.14E-03 | 1.57E-02 |
| ENSG00000279276 | AC130454.1               | 16  | 23962951           | 23963351         | 400         | TEC                   | 1.05                      | 3.43E-03 | 2.16E-02 |
| ENSG00000245970 | AP003352.1               | 8   | 98041726           | 98044121         | 2395        | lncRNA-antisense      | 1.04                      | 3.47E-04 | 4.56E-03 |
| ENSG00000186468 | RPS23                    | 5   | 82273320           | 82278396         | 5076        | protein_coding        | 1.04                      | 1.73E-06 | 1.28E-04 |
| ENSG00000229605 | RPL21P93                 | 10  | 28898996           | 28899484         | 488         | processed_pseudogene  | 1.02                      | 2.33E-04 | 3.52E-03 |
| ENSG00000092841 | MYL6                     | 12  | 56158346           | 56163496         | 5150        | protein_coding        | 1.01                      | 8.09E-11 | 1.18E-07 |

|                 |            |    |           |           |         |                                    |       |          |          |
|-----------------|------------|----|-----------|-----------|---------|------------------------------------|-------|----------|----------|
| ENSG00000240036 | AC104563.1 | 11 | 27581680  | 27582055  | 375     | processed_pseudogene               | 1.00  | 9.44E-04 | 8.95E-03 |
| ENSG00000274629 | AC073052.1 | 2  | 224464682 | 224474500 | 9818    | lncRNA-antisense                   | 1.00  | 1.04E-03 | 9.54E-03 |
| ENSG00000272150 | NBPF25P    | 1  | 145572345 | 145607858 | 35513   | transcribed_unprocessed_pseudogene | -1.00 | 2.16E-04 | 3.34E-03 |
| ENSG00000157856 | DRC1       | 2  | 26401920  | 26456711  | 54791   | protein_coding                     | -1.00 | 2.26E-03 | 1.63E-02 |
| ENSG00000188766 | SPRED3     | 19 | 38388421  | 38399587  | 11166   | protein_coding                     | -1.00 | 2.51E-03 | 1.75E-02 |
| ENSG00000116117 | PARD3B     | 2  | 204545475 | 205620162 | 1074687 | protein_coding                     | -1.00 | 1.50E-03 | 1.23E-02 |
| ENSG00000117013 | KCNQ4      | 1  | 40783787  | 40840452  | 56665   | protein_coding                     | -1.00 | 4.96E-03 | 2.79E-02 |
| ENSG00000146453 | PNLDC1     | 6  | 159800249 | 159820704 | 20455   | protein_coding                     | -1.00 | 5.48E-04 | 6.19E-03 |
| ENSG00000198796 | ALPK2      | 18 | 58481247  | 58629091  | 147844  | protein_coding                     | -1.00 | 2.39E-03 | 1.69E-02 |
| ENSG00000182912 | TSPFAR-AS2 | 21 | 44517216  | 44525952  | 8736    | lncRNA-antisense                   | -1.00 | 1.04E-03 | 9.55E-03 |
| ENSG00000226855 | RPSAP17    | 1  | 154378207 | 154379089 | 882     | processed_pseudogene               | -1.00 | 1.29E-04 | 2.34E-03 |
| ENSG00000228624 | HDAC2-AS2  | 6  | 113969701 | 114471705 | 502004  | lncRNA-antisense                   | -1.00 | 3.68E-03 | 2.27E-02 |
| ENSG00000167377 | ZNF23      | 16 | 71447597  | 71463095  | 15498   | protein_coding                     | -1.00 | 1.19E-03 | 1.04E-02 |
| ENSG00000132854 | KANK4      | 1  | 62236165  | 62319434  | 83269   | protein_coding                     | -1.00 | 3.95E-03 | 2.37E-02 |
| ENSG00000279267 | AL078621.1 | 2  | 113605867 | 113607908 | 2041    | TEC                                | -1.01 | 4.94E-04 | 5.77E-03 |
| ENSG00000254319 | AC246817.2 | 8  | 2648075   | 2728577   | 80502   | lncRNA                             | -1.01 | 7.66E-03 | 3.73E-02 |
| ENSG00000179023 | KLHDC7A    | 1  | 18480982  | 18486126  | 5144    | protein_coding                     | -1.01 | 4.34E-03 | 2.54E-02 |
| ENSG00000160345 | C9orf116   | 9  | 135495181 | 135501734 | 6553    | protein_coding                     | -1.01 | 1.01E-02 | 4.50E-02 |
| ENSG00000147724 | FAM135B    | 8  | 138130023 | 138497261 | 367238  | protein_coding                     | -1.01 | 2.22E-03 | 1.61E-02 |
| ENSG00000179915 | NRXN1      | 2  | 49918503  | 51225575  | 1307072 | protein_coding                     | -1.01 | 8.55E-06 | 3.73E-04 |
| ENSG00000286281 | AL353152.2 | 6  | 14210293  | 14214374  | 4081    | lncRNA                             | -1.01 | 1.01E-02 | 4.50E-02 |
| ENSG00000128482 | RNF112     | 17 | 19411125  | 19417276  | 6151    | protein_coding                     | -1.01 | 2.90E-03 | 1.93E-02 |
| ENSG00000232044 | SILC1      | 2  | 5932543   | 6003510   | 70967   | lncRNA                             | -1.01 | 4.95E-03 | 2.78E-02 |
| ENSG00000280604 | AJ239328.1 | 21 | 45914296  | 45919483  | 5187    | lncRNA-sense overlapping           | -1.01 | 2.22E-03 | 1.61E-02 |
| ENSG00000175984 | DENND2C    | 1  | 114582848 | 114670422 | 87574   | protein_coding                     | -1.01 | 2.67E-04 | 3.86E-03 |
| ENSG00000279803 | AC009090.5 | 16 | 57142652  | 57144936  | 2284    | TEC                                | -1.01 | 4.61E-03 | 2.65E-02 |
| ENSG00000236409 | NRADDP     | 3  | 47010824  | 47013665  | 2641    | transcribed_unitary_pseudogene     | -1.01 | 5.83E-03 | 3.11E-02 |
| ENSG00000114993 | RTKN       | 2  | 74425835  | 74442222  | 16587   | protein_coding                     | -1.01 | 1.26E-03 | 1.09E-02 |
| ENSG00000162461 | SLC25A34   | 1  | 15736258  | 15741392  | 5134    | protein_coding                     | -1.01 | 9.22E-06 | 3.96E-04 |
| ENSG00000065833 | ME1        | 6  | 83210402  | 83431051  | 220649  | protein_coding                     | -1.01 | 2.48E-03 | 1.74E-02 |
| ENSG00000181378 | CFAP65     | 2  | 219002846 | 219041527 | 38681   | protein_coding                     | -1.01 | 3.61E-03 | 2.24E-02 |
| ENSG00000149295 | DRD2       | 11 | 113409605 | 113475691 | 66086   | protein_coding                     | -1.01 | 7.75E-03 | 3.75E-02 |
| ENSG00000215386 | MIR99AHG   | 21 | 15928296  | 16645467  | 71717   | lncRNA                             | -1.01 | 3.42E-04 | 4.52E-03 |
| ENSG00000111012 | CYP27B1    | 12 | 57762334  | 57768986  | 6652    | protein_coding                     | -1.01 | 1.06E-02 | 4.66E-02 |
| ENSG00000128578 | STRIP2     | 7  | 129434432 | 129488399 | 53967   | protein_coding                     | -1.01 | 2.73E-04 | 3.91E-03 |
| ENSG00000133216 | EPHB2      | 1  | 22710839  | 22921500  | 210661  | protein_coding                     | -1.01 | 3.89E-07 | 4.53E-05 |
| ENSG00000117425 | PTCH2      | 1  | 44819844  | 44843253  | 23409   | protein_coding                     | -1.01 | 5.41E-04 | 6.13E-03 |
| ENSG00000143147 | GPR161     | 1  | 168079543 | 168137667 | 58124   | protein_coding                     | -1.01 | 1.10E-03 | 9.88E-03 |
| ENSG00000130720 | FIBCD1     | 9  | 130902438 | 130939286 | 36848   | protein_coding                     | -1.01 | 5.55E-03 | 3.00E-02 |
| ENSG00000168952 | STXBP6     | 14 | 24809656  | 25050297  | 240641  | protein_coding                     | -1.01 | 2.45E-03 | 1.72E-02 |
| ENSG00000198722 | UNC13B     | 9  | 35161992  | 35405338  | 243346  | protein_coding                     | -1.01 | 2.91E-06 | 1.79E-04 |
| ENSG00000197670 | AL157838.1 | 20 | 53552770  | 53575863  | 23093   | lncRNA-antisense                   | -1.01 | 7.06E-03 | 3.53E-02 |
| ENSG00000143858 | SYT2       | 1  | 202590596 | 202710454 | 119858  | protein_coding                     | -1.01 | 8.92E-04 | 8.61E-03 |
| ENSG00000187980 | PLA2G2C    | 1  | 20161253  | 20186518  | 25265   | protein_coding                     | -1.01 | 3.56E-04 | 4.62E-03 |
| ENSG00000280159 | AC016583.1 | 5  | 54643557  | 54645987  | 2430    | TEC                                | -1.01 | 3.53E-03 | 2.20E-02 |
| ENSG00000170624 | SGCD       | 5  | 155870344 | 156767788 | 897444  | protein_coding                     | -1.01 | 3.22E-03 | 2.07E-02 |
| ENSG00000235823 | OLMALINC   | 10 | 100373099 | 100454043 | 80944   | lncRNA                             | -1.02 | 1.86E-06 | 1.35E-04 |
| ENSG00000158352 | SHROOM4    | X  | 50591647  | 50814302  | 222655  | protein_coding                     | -1.02 | 3.30E-04 | 4.42E-03 |
| ENSG00000145103 | ILDR1      | 3  | 121987323 | 122022247 | 34924   | protein_coding                     | -1.02 | 1.57E-03 | 1.27E-02 |
| ENSG00000179057 | IGSF22     | 11 | 18704312  | 18726230  | 21918   | protein_coding                     | -1.02 | 1.38E-04 | 2.44E-03 |
| ENSG00000196951 | SCOC-AS1   | 4  | 140283724 | 140373403 | 89679   | lncRNA-antisense                   | -1.02 | 1.16E-03 | 1.02E-02 |
| ENSG00000160145 | KALRN      | 3  | 124080023 | 124276325 | 646302  | protein_coding                     | -1.02 | 4.37E-08 | 9.91E-06 |
| ENSG00000261390 | MAFTRR     | 16 | 79715220  | 79770651  | 55431   | lncRNA                             | -1.02 | 1.60E-03 | 1.28E-02 |
| ENSG00000128591 | FLNC       | 7  | 128830406 | 128859274 | 28868   | protein_coding                     | -1.02 | 1.66E-03 | 1.31E-02 |
| ENSG00000166349 | RAG1       | 11 | 36510709  | 36593156  | 82447   | protein_coding                     | -1.02 | 2.21E-03 | 1.61E-02 |
| ENSG00000164237 | CMBL       | 5  | 10275875  | 10307902  | 32027   | protein_coding                     | -1.02 | 4.24E-03 | 2.50E-02 |
| ENSG00000186615 | KTN1-AS1   | 14 | 55496786  | 55580888  | 84102   | lncRNA-antisense                   | -1.02 | 9.07E-04 | 8.71E-03 |
| ENSG00000104888 | SLC17A7    | 19 | 49429401  | 49442360  | 12959   | protein_coding                     | -1.02 | 8.53E-03 | 4.00E-02 |
| ENSG00000197915 | HRNR       | 1  | 152212076 | 152224193 | 12117   | protein_coding                     | -1.02 | 4.97E-03 | 2.79E-02 |
| ENSG00000256988 | AC005833.2 | 12 | 4804499   | 4830747   | 26248   | lncRNA                             | -1.02 | 4.74E-03 | 2.70E-02 |
| ENSG00000115194 | SLC30A3    | 2  | 27253684  | 27275817  | 22133   | protein_coding                     | -1.02 | 4.61E-03 | 2.64E-02 |
| ENSG00000250132 | AC004903.1 | 12 | 974133    | 991190    | 17057   | lncRNA-antisense                   | -1.02 | 2.10E-03 | 1.55E-02 |
| ENSG00000170370 | EMX2       | 10 | 117542445 | 117549546 | 7101    | protein_coding                     | -1.02 | 3.49E-03 | 2.19E-02 |
| ENSG00000155269 | GPR78      | 4  | 8558725   | 8619761   | 61036   | protein_coding                     | -1.02 | 5.75E-03 | 3.08E-02 |
| ENSG00000214770 | AL161756.1 | 14 | 64329431  | 64338639  | 9208    | lncRNA-antisense                   | -1.02 | 7.54E-03 | 3.69E-02 |
| ENSG00000140807 | NKD1       | 16 | 50548396  | 50649249  | 100853  | protein_coding                     | -1.02 | 9.53E-10 | 6.68E-07 |
| ENSG00000225885 | AC023590.1 | 8  | 118282139 | 118400605 | 118466  | lncRNA-antisense                   | -1.02 | 2.86E-03 | 1.91E-02 |
| ENSG00000114270 | COL7A1     | 3  | 48564073  | 48595267  | 31194   | protein_coding                     | -1.02 | 2.88E-03 | 1.92E-02 |
| ENSG00000123454 | DBH        | 9  | 133636363 | 133659329 | 22966   | protein_coding                     | -1.02 | 5.54E-03 | 3.00E-02 |
| ENSG00000137936 | BCAR3      | 1  | 93561741  | 93847150  | 285409  | protein_coding                     | -1.02 | 2.36E-04 | 3.56E-03 |
| ENSG00000167549 | CORO6      | 17 | 29614756  | 29622907  | 8151    | protein_coding                     | -1.02 | 1.81E-04 | 2.96E-03 |
| ENSG00000274386 | TMEM269    | 1  | 42785007  | 42816619  | 31612   | protein_coding                     | -1.02 | 2.79E-03 | 1.88E-02 |
| ENSG00000288721 | AC010623.1 | 5  | 81408517  | 81411867  | 3350    | lncRNA                             | -1.02 | 1.00E-03 | 9.31E-03 |
| ENSG00000136206 | SPDYE1     | 7  | 43997897  | 44010122  | 12225   | protein_coding                     | -1.02 | 3.84E-03 | 2.33E-02 |
| ENSG00000177599 | ZNF491     | 19 | 11797667  | 11809622  | 11955   | protein_coding                     | -1.02 | 5.31E-03 | 2.91E-02 |
| ENSG00000185561 | TLCD2      | 17 | 1702816   | 1710377   | 7561    | protein_coding                     | -1.02 | 3.84E-04 | 4.89E-03 |
| ENSG00000102383 | ZDHHC15    | X  | 75368427  | 75523502  | 155075  | protein_coding                     | -1.02 | 7.57E-03 | 3.70E-02 |
| ENSG00000112769 | LAMA4      | 6  | 112107931 | 112254939 | 147008  | protein_coding                     | -1.02 | 9.41E-03 | 4.28E-02 |
| ENSG00000129173 | E2F8       | 11 | 19224063  | 19241620  | 17557   | protein_coding                     | -1.02 | 7.63E-03 | 3.72E-02 |
| ENSG00000213373 | LINC00671  | 17 | 42874670  | 42898704  | 24034   | lncRNA                             | -1.02 | 3.61E-03 | 2.24E-02 |
| ENSG00000253392 | AC119403.1 | 19 | 2908371   | 2926817   | 18446   | lncRNA-antisense                   | -1.02 | 2.53E-03 | 1.76E-02 |
| ENSG00000100479 | POLE2      | 14 | 49643555  | 49688422  | 44867   | protein_coding                     | -1.02 | 1.96E-04 | 3.13E-03 |
| ENSG00000140057 | AK7        | 14 | 96392128  | 96489427  | 97299   | protein_coding                     | -1.02 | 6.79E-03 | 3.44E-02 |
| ENSG00000149201 | CDC81      | 11 | 86374736  | 86423109  | 48373   | protein_coding                     | -1.02 | 1.04E-03 | 2.56E-03 |
| ENSG00000275620 | FLJ16779   | 20 | 63253978  | 63261615  | 7637    | lncRNA-antisense                   | -1.03 | 1.15E-02 | 4.93E-02 |
| ENSG00000186281 | GPAT2      | 2  | 96021946  | 96039451  | 17505   | protein_coding                     | -1.03 | 1.02E-05 | 4.18E-04 |
| ENSG00000230513 | THAP7-AS1  | 22 | 21001886  | 21010342  | 8456    | lncRNA-antisense                   | -1.03 | 7.74E-06 | 3.51E-04 |
| ENSG00000214514 | KRT42P     | 17 | 41626327  | 41640199  | 13872   | transcribed_unprocessed_pseudogene | -1.03 | 1.11E-02 | 4.79E-02 |
| ENSG00000074590 | NUAK1      | 12 | 106063340 | 106140033 | 76693   | protein_coding                     | -1.03 | 2.56E-03 | 1.77E-02 |
| ENSG00000198870 | STKLD1     | 9  | 133376366 | 133406096 | 29730   | protein_coding                     | -1.03 | 8.76E-04 | 8.51E-03 |

|                 |            |    |           |           |         |                                    |       |          |          |
|-----------------|------------|----|-----------|-----------|---------|------------------------------------|-------|----------|----------|
| ENSG00000204851 | PNMA8B     | 19 | 46486906  | 46495879  | 8973    | protein coding                     | -1.03 | 5.86E-03 | 3.12E-02 |
| ENSG00000122877 | EGR2       | 10 | 62811996  | 62919900  | 107904  | protein coding                     | -1.03 | 2.40E-03 | 1.70E-02 |
| ENSG00000092295 | TGM1       | 14 | 24249114  | 24264432  | 15318   | protein coding                     | -1.03 | 6.26E-04 | 6.75E-03 |
| ENSG00000130643 | CALY       | 10 | 133324072 | 133336935 | 12863   | protein coding                     | -1.03 | 6.31E-03 | 3.28E-02 |
| ENSG00000159625 | DRC7       | 16 | 57694793  | 57731805  | 37012   | protein coding                     | -1.03 | 1.64E-04 | 2.75E-03 |
| ENSG00000268912 | AC012313.5 | 19 | 58428632  | 58431148  | 2516    | lncRNA                             | -1.03 | 3.13E-03 | 2.03E-02 |
| ENSG00000134775 | FHOD3      | 18 | 36297714  | 36780055  | 482341  | protein coding                     | -1.03 | 3.15E-03 | 2.04E-02 |
| ENSG00000153093 | ACOXL      | 2  | 110732539 | 111120610 | 388071  | protein coding                     | -1.03 | 1.03E-04 | 2.02E-03 |
| ENSG00000074276 | CDHR2      | 5  | 176542511 | 176595774 | 53463   | protein coding                     | -1.03 | 1.10E-04 | 2.10E-03 |
| ENSG00000159905 | ZNF221     | 19 | 43951223  | 43967509  | 16486   | protein coding                     | -1.03 | 2.30E-05 | 7.20E-04 |
| ENSG00000261079 | AC009053.2 | 16 | 74367462  | 74369826  | 2364    | lncRNA                             | -1.03 | 3.23E-03 | 2.08E-02 |
| ENSG00000242473 | KIR2DP1    | 19 | 54755023  | 54767371  | 12348   | unprocessed pseudogene             | -1.03 | 5.27E-03 | 2.90E-02 |
| ENSG00000151322 | NPAS3      | 14 | 32934396  | 33804176  | 869780  | protein coding                     | -1.03 | 9.37E-03 | 4.27E-02 |
| ENSG00000130508 | PXDN       | 2  | 1631887   | 1744852   | 112965  | protein coding                     | -1.03 | 5.37E-03 | 2.94E-02 |
| ENSG00000278983 | AC048380.2 | 18 | 48564795  | 48568342  | 3547    | TEC                                | -1.03 | 9.78E-04 | 9.17E-03 |
| ENSG00000147485 | PXDNL      | 8  | 51319577  | 51809445  | 489868  | protein coding                     | -1.03 | 1.17E-04 | 2.18E-03 |
| ENSG00000102854 | MSLN       | 16 | 760734    | 768865    | 8131    | protein coding                     | -1.03 | 7.42E-03 | 3.65E-02 |
| ENSG0000021645  | NRXN3      | 14 | 78170373  | 79868291  | 1697918 | protein coding                     | -1.03 | 1.60E-03 | 1.28E-02 |
| ENSG00000183682 | BMP8A      | 1  | 39491636  | 39529869  | 38233   | protein coding                     | -1.03 | 5.15E-03 | 2.85E-02 |
| ENSG00000158859 | ADAMT54    | 1  | 161184302 | 161199054 | 14752   | protein coding                     | -1.03 | 4.84E-04 | 5.70E-03 |
| ENSG00000172995 | ARRP21     | 3  | 35638945  | 35794496  | 155551  | protein coding                     | -1.03 | 3.10E-03 | 2.02E-02 |
| ENSG00000250056 | LINC01018  | 5  | 6582136   | 6600288   | 18152   | lncRNA                             | -1.03 | 1.17E-02 | 4.97E-02 |
| ENSG00000146966 | DENND2A    | 7  | 140518420 | 140673993 | 155573  | protein coding                     | -1.03 | 1.06E-02 | 4.64E-02 |
| ENSG00000157927 | RADIL      | 7  | 4797055   | 4883716   | 86661   | protein coding                     | -1.03 | 4.58E-03 | 2.64E-02 |
| ENSG00000287367 | AC016583.2 | 5  | 54663327  | 54737057  | 73730   | lncRNA                             | -1.04 | 5.36E-03 | 2.93E-02 |
| ENSG00000129159 | KCNC1      | 11 | 17734774  | 17856804  | 122030  | protein coding                     | -1.04 | 5.43E-05 | 1.30E-03 |
| ENSG00000147536 | GINS4      | 8  | 41529218  | 41545030  | 15812   | protein coding                     | -1.04 | 1.44E-05 | 5.36E-04 |
| ENSG00000182902 | SLC25A18   | 22 | 17563450  | 17590995  | 27545   | protein coding                     | -1.04 | 6.45E-03 | 3.33E-02 |
| ENSG00000065328 | MCM10      | 10 | 13161558  | 13211110  | 49552   | protein coding                     | -1.04 | 2.02E-03 | 1.51E-02 |
| ENSG00000171587 | DSCAM      | 21 | 40010999  | 40847158  | 836159  | protein coding                     | -1.04 | 6.22E-03 | 3.25E-02 |
| ENSG00000204991 | SPIRE2     | 16 | 89818179  | 89871319  | 53140   | protein coding                     | -1.04 | 1.20E-03 | 1.05E-02 |
| ENSG00000074181 | NOTCH3     | 19 | 15159038  | 15200995  | 41957   | protein coding                     | -1.04 | 2.41E-04 | 3.60E-03 |
| ENSG00000130822 | PNCK       | X  | 153669733 | 153689010 | 19277   | protein coding                     | -1.04 | 4.69E-03 | 2.68E-02 |
| ENSG00000169862 | CTNND2     | 5  | 10971836  | 11904446  | 932610  | protein coding                     | -1.04 | 7.56E-03 | 3.69E-02 |
| ENSG00000133401 | PDZD2      | 5  | 31639131  | 32110932  | 471801  | protein coding                     | -1.04 | 1.60E-05 | 5.67E-04 |
| ENSG00000170835 | CEL        | 9  | 133061978 | 133071863 | 9885    | protein coding                     | -1.04 | 2.30E-03 | 1.65E-02 |
| ENSG00000283031 | AC009242.1 | 2  | 23667208  | 23685453  | 18245   | lncRNA                             | -1.04 | 8.17E-03 | 3.89E-02 |
| ENSG00000134901 | POGLUT2    | 13 | 102784281 | 102798976 | 14695   | protein coding                     | -1.04 | 5.68E-03 | 3.05E-02 |
| ENSG00000141527 | CARD14     | 17 | 80169992  | 80209331  | 39339   | protein coding                     | -1.04 | 6.47E-04 | 6.93E-03 |
| ENSG00000260339 | HEXA-AS1   | 15 | 72376113  | 72378788  | 2675    | lncRNA-antisense                   | -1.04 | 3.47E-03 | 2.18E-02 |
| ENSG00000128833 | MYO5C      | 15 | 52192322  | 52295804  | 103482  | protein coding                     | -1.04 | 1.48E-05 | 5.45E-04 |
| ENSG00000130294 | KIF1A      | 2  | 240713761 | 240824293 | 110532  | protein coding                     | -1.04 | 3.76E-03 | 2.30E-02 |
| ENSG00000106853 | PTGR1      | 9  | 111549722 | 111599893 | 50171   | protein coding                     | -1.04 | 1.02E-02 | 4.53E-02 |
| ENSG00000132793 | LPIN3      | 20 | 41340821  | 41360582  | 19761   | protein coding                     | -1.04 | 7.04E-03 | 3.52E-02 |
| ENSG00000071282 | LMCD1      | 3  | 8501807   | 8574668   | 72861   | protein coding                     | -1.04 | 2.12E-04 | 3.29E-03 |
| ENSG00000104967 | NOVA2      | 19 | 45933734  | 45974044  | 40310   | protein coding                     | -1.04 | 8.15E-03 | 3.89E-02 |
| ENSG00000175773 | ZBTB44-DT  | 11 | 130314993 | 130403657 | 88664   | lncRNA                             | -1.04 | 3.00E-03 | 1.98E-02 |
| ENSG00000175084 | DES        | 2  | 219418377 | 219426734 | 8357    | protein coding                     | -1.05 | 1.28E-03 | 1.10E-02 |
| ENSG00000229727 | AC013460.1 | 2  | 7383227   | 7405044   | 67317   | lncRNA                             | -1.05 | 5.34E-04 | 6.08E-03 |
| ENSG00000101489 | CELF4      | 18 | 37243040  | 37565827  | 322787  | protein coding                     | -1.05 | 5.82E-03 | 3.10E-02 |
| ENSG00000122863 | CHST3      | 10 | 71964395  | 72013558  | 49163   | protein coding                     | -1.05 | 1.02E-02 | 4.53E-02 |
| ENSG00000183196 | CHST6      | 16 | 75472052  | 75495445  | 23393   | protein coding                     | -1.05 | 9.35E-03 | 4.26E-02 |
| ENSG00000160469 | BRSK1      | 19 | 55282072  | 55312562  | 30490   | protein coding                     | -1.05 | 2.55E-04 | 3.73E-03 |
| ENSG00000127423 | AUNIP      | 1  | 25831913  | 25859458  | 27545   | protein coding                     | -1.05 | 6.23E-03 | 3.25E-02 |
| ENSG00000092621 | PHGDH      | 1  | 119648411 | 119744218 | 95807   | protein coding                     | -1.05 | 2.12E-05 | 6.79E-04 |
| ENSG00000115353 | TACR1      | 2  | 75046463  | 75199520  | 153057  | protein coding                     | -1.05 | 7.69E-03 | 3.73E-02 |
| ENSG00000163293 | NIPAL1     | 4  | 47914142  | 48040173  | 126031  | protein coding                     | -1.05 | 5.35E-03 | 2.93E-02 |
| ENSG00000206557 | TRIM71     | 3  | 32817997  | 32897824  | 79827   | protein coding                     | -1.05 | 1.82E-03 | 1.40E-02 |
| ENSG00000247228 | AC009060.1 | 16 | 70138337  | 70173483  | 35146   | lncRNA-antisense                   | -1.05 | 8.31E-04 | 8.24E-03 |
| ENSG00000267272 | LINC01140  | 1  | 87129765  | 87169198  | 39433   | lncRNA                             | -1.05 | 2.45E-03 | 1.72E-02 |
| ENSG00000135903 | PAX3       | 2  | 222199887 | 222298998 | 99111   | protein coding                     | -1.05 | 8.19E-03 | 3.90E-02 |
| ENSG00000235109 | ZSCAN31    | 6  | 28324693  | 28356271  | 31578   | protein coding                     | -1.05 | 1.89E-03 | 1.44E-02 |
| ENSG00000247081 | BAALC-AS1  | 8  | 103153394 | 103298772 | 145378  | lncRNA-antisense                   | -1.05 | 8.08E-04 | 8.09E-03 |
| ENSG00000134548 | SPX        | 12 | 21526296  | 21541249  | 14953   | protein coding                     | -1.05 | 1.49E-04 | 2.56E-03 |
| ENSG00000164929 | BAALC      | 8  | 103140713 | 103230305 | 89592   | protein coding                     | -1.05 | 8.16E-03 | 3.89E-02 |
| ENSG00000143333 | RGS16      | 1  | 182598623 | 182604389 | 5766    | protein coding                     | -1.05 | 5.52E-03 | 3.00E-02 |
| ENSG00000204745 | AC083899.1 | 2  | 87125198  | 87196629  | 71431   | unprocessed pseudogene             | -1.05 | 2.21E-03 | 1.60E-02 |
| ENSG00000185567 | AHNAK2     | 14 | 104937244 | 104978374 | 41130   | protein coding                     | -1.05 | 2.48E-03 | 1.74E-02 |
| ENSG00000006704 | GTF2IRD1   | 7  | 74453790  | 74602605  | 148815  | protein coding                     | -1.05 | 2.19E-03 | 1.60E-02 |
| ENSG00000140839 | CLEC18B    | 16 | 74408270  | 74421953  | 13683   | protein coding                     | -1.05 | 1.15E-03 | 1.02E-02 |
| ENSG00000235138 | AL445931.1 | 9  | 134054290 | 134058805 | 4515    | lncRNA-antisense                   | -1.05 | 1.17E-02 | 5.00E-02 |
| ENSG00000260589 | STAM-AS1   | 10 | 17641284  | 17643878  | 2594    | lncRNA-antisense                   | -1.05 | 2.67E-03 | 1.83E-02 |
| ENSG00000188368 | PRR19      | 19 | 42302098  | 42310821  | 8723    | protein coding                     | -1.05 | 3.72E-03 | 2.28E-02 |
| ENSG00000243323 | PTRPRV     | 1  | 202168051 | 202189455 | 21404   | unitary pseudogene                 | -1.05 | 7.05E-04 | 7.34E-03 |
| ENSG00000230749 | MEIS1-AS2  | 2  | 66439088  | 66444221  | 5133    | lncRNA-antisense                   | -1.05 | 4.98E-03 | 2.79E-02 |
| ENSG00000085741 | WNT11      | 11 | 76186325  | 76210736  | 24411   | protein coding                     | -1.05 | 1.58E-03 | 1.27E-02 |
| ENSG00000163491 | NEK10      | 3  | 27110085  | 27369460  | 259375  | protein coding                     | -1.05 | 1.99E-04 | 3.16E-03 |
| ENSG00000273654 | AC020904.2 | 19 | 18022403  | 18032099  | 9696    | transcribed processed pseudogene   | -1.05 | 7.66E-03 | 3.73E-02 |
| ENSG00000183873 | SCN5A      | 3  | 38548057  | 38649687  | 101630  | protein coding                     | -1.05 | 6.28E-03 | 3.27E-02 |
| ENSG00000165152 | PGAP4      | 9  | 101473170 | 101533537 | 60367   | protein coding                     | -1.05 | 7.53E-03 | 3.68E-02 |
| ENSG00000090889 | KIF4A      | X  | 70290104  | 70420886  | 130782  | protein coding                     | -1.05 | 3.49E-03 | 2.19E-02 |
| ENSG00000236548 | RNF217-AS1 | 6  | 124644434 | 124963165 | 318731  | lncRNA-antisense                   | -1.05 | 4.46E-04 | 5.40E-03 |
| ENSG00000230303 | AL353743.2 | 9  | 85783668  | 85805154  | 21486   | lncRNA                             | -1.06 | 2.72E-03 | 1.85E-02 |
| ENSG00000229961 | AL357143.1 | 1  | 157171116 | 157191963 | 20847   | transcribed unprocessed pseudogene | -1.06 | 3.49E-04 | 4.56E-03 |
| ENSG00000159214 | CCDC24     | 1  | 43991359  | 43996528  | 5169    | protein coding                     | -1.06 | 7.28E-04 | 7.52E-03 |
| ENSG00000285728 | AC098484.4 | 1  | 42658687  | 42682160  | 23473   | lncRNA-antisense                   | -1.06 | 1.20E-03 | 1.05E-02 |
| ENSG00000137731 | FXYD2      | 11 | 117800844 | 117828696 | 27854   | protein coding                     | -1.06 | 8.26E-04 | 8.20E-03 |
| ENSG00000259577 | CERNA1     | 15 | 52179999  | 52206915  | 26916   | lncRNA                             | -1.06 | 3.79E-03 | 2.31E-02 |
| ENSG00000253764 | AC019257.1 | 8  | 1971153   | 1974637   | 3484    | lncRNA                             | -1.06 | 8.41E-03 | 3.97E-02 |
| ENSG00000156466 | GDF6       | 8  | 96142333  | 96160806  | 18473   | protein coding                     | -1.06 | 8.92E-03 | 4.13E-02 |



|                 |             |    |           |           |         |                                    |       |          |          |
|-----------------|-------------|----|-----------|-----------|---------|------------------------------------|-------|----------|----------|
| ENSG00000260288 | AC019294.2  | 15 | 75737820  | 75763322  | 25502   | lncRNA                             | -1.06 | 6.98E-04 | 7.29E-03 |
| ENSG00000237505 | PKN2-AS1    | 1  | 87620803  | 88685204  | 1064401 | lncRNA-antisense                   | -1.06 | 1.64E-03 | 1.30E-02 |
| ENSG00000139835 | GRTP1       | 13 | 113324163 | 113364148 | 39985   | protein coding                     | -1.06 | 1.03E-02 | 4.58E-02 |
| ENSG00000166682 | TMPRSS5     | 11 | 113687547 | 113706373 | 18826   | protein coding                     | -1.06 | 7.39E-05 | 1.61E-03 |
| ENSG00000236107 | SCN1A-AS1   | 2  | 165957188 | 166390771 | 433583  | lncRNA-antisense                   | -1.06 | 3.36E-03 | 2.13E-02 |
| ENSG00000276116 | FUT8-AS1    | 14 | 65411170  | 65412690  | 1520    | lncRNA-antisense                   | -1.06 | 9.01E-03 | 4.15E-02 |
| ENSG00000204311 | PJVK        | 2  | 178451346 | 178462102 | 10756   | protein coding                     | -1.06 | 1.07E-03 | 9.72E-03 |
| ENSG00000196935 | SRGAP1      | 12 | 63844700  | 64162217  | 317517  | protein coding                     | -1.06 | 5.92E-05 | 1.37E-03 |
| ENSG00000286943 | AP001992.2  | 11 | 74931724  | 74936937  | 5213    | lncRNA                             | -1.06 | 3.30E-03 | 2.11E-02 |
| ENSG00000081479 | LRP2        | 2  | 169127109 | 169362534 | 235425  | protein coding                     | -1.06 | 4.02E-04 | 5.05E-03 |
| ENSG00000234568 | BIN2P1      | 4  | 82275071  | 82278600  | 1529    | processed pseudogene               | -1.06 | 9.42E-03 | 4.28E-02 |
| ENSG00000244405 | ETV5        | 3  | 186046314 | 186110318 | 64004   | protein coding                     | -1.06 | 3.55E-03 | 2.21E-02 |
| ENSG00000183166 | CALN1       | 7  | 71779491  | 72447151  | 667660  | protein coding                     | -1.06 | 4.22E-03 | 2.49E-02 |
| ENSG00000236021 | AL591043.2  | 1  | 176207648 | 176447919 | 240271  | lncRNA-antisense                   | -1.06 | 1.87E-03 | 1.43E-02 |
| ENSG00000108018 | SORCS1      | 10 | 106573663 | 107164534 | 590871  | protein coding                     | -1.06 | 1.00E-02 | 4.49E-02 |
| ENSG00000085831 | TTC39A      | 1  | 51287258  | 51345116  | 57858   | protein coding                     | -1.06 | 3.10E-04 | 4.24E-03 |
| ENSG00000176584 | DMBT1L1     | 10 | 122729429 | 122826868 | 97439   | transcribed unitary pseudogene     | -1.06 | 3.06E-03 | 2.00E-02 |
| ENSG00000231133 | HAR1B       | 20 | 63090806  | 63102631  | 11825   | lncRNA                             | -1.06 | 4.87E-04 | 5.72E-03 |
| ENSG00000115657 | ABCB6       | 2  | 219209772 | 219218994 | 9222    | protein coding                     | -1.06 | 1.68E-03 | 1.32E-02 |
| ENSG00000164626 | KCNK5       | 6  | 39188971  | 39229475  | 40504   | protein coding                     | -1.06 | 5.88E-04 | 6.50E-03 |
| ENSG00000174640 | SLCO2A1     | 3  | 133932701 | 134052184 | 119483  | protein coding                     | -1.06 | 2.33E-03 | 1.66E-02 |
| ENSG00000117834 | SLC5A9      | 1  | 48222685  | 48248644  | 25959   | protein coding                     | -1.06 | 4.45E-05 | 1.12E-03 |
| ENSG00000151892 | GFR1        | 10 | 116056925 | 116273284 | 216359  | protein coding                     | -1.06 | 7.92E-03 | 3.81E-02 |
| ENSG00000285966 | AC007686.4  | 14 | 76958098  | 77000609  | 42511   | lncRNA                             | -1.07 | 5.24E-03 | 2.89E-02 |
| ENSG00000167889 | MGAT5B      | 17 | 76868404  | 76950393  | 81989   | protein coding                     | -1.07 | 4.62E-03 | 2.65E-02 |
| ENSG00000183535 | COL18A1-AS1 | 21 | 45419716  | 45425070  | 5354    | lncRNA-antisense                   | -1.07 | 7.56E-03 | 3.69E-02 |
| ENSG00000145536 | ADAMTS16    | 5  | 5140330   | 5320304   | 179974  | protein coding                     | -1.07 | 1.09E-02 | 4.73E-02 |
| ENSG00000144550 | CPNE9       | 3  | 9703826   | 9729908   | 26082   | protein coding                     | -1.07 | 4.17E-03 | 2.47E-02 |
| ENSG00000284959 | AC007262.2  | 14 | 81012099  | 81170429  | 158330  | lncRNA-antisense                   | -1.07 | 4.82E-05 | 1.19E-03 |
| ENSG00000197980 | LEKR1       | 3  | 156825481 | 157046129 | 220648  | protein coding                     | -1.07 | 1.02E-03 | 9.40E-03 |
| ENSG00000162738 | VANGL2      | 1  | 160400564 | 160428670 | 28106   | protein coding                     | -1.07 | 9.88E-03 | 4.43E-02 |
| ENSG00000227373 | RABGAP1L-DT | 1  | 174110268 | 174160165 | 49897   | lncRNA                             | -1.07 | 8.90E-04 | 8.60E-03 |
| ENSG00000279954 | BX324167.2  | 22 | 45875932  | 45879247  | 3315    | lncRNA-antisense                   | -1.07 | 5.95E-03 | 3.15E-02 |
| ENSG00000268015 | AC010320.2  | 19 | 52222225  | 52231294  | 9069    | lncRNA-antisense                   | -1.07 | 9.55E-03 | 4.32E-02 |
| ENSG00000177614 | PGBD5       | 1  | 230314490 | 230426332 | 111842  | protein coding                     | -1.07 | 5.64E-03 | 3.04E-02 |
| ENSG00000124159 | MATN4       | 20 | 45293445  | 45308529  | 15084   | protein coding                     | -1.07 | 8.40E-03 | 3.96E-02 |
| ENSG00000130558 | OLFM1       | 9  | 135075422 | 135121180 | 45758   | protein coding                     | -1.07 | 1.23E-05 | 4.80E-04 |
| ENSG00000275410 | HNF1B       | 17 | 37686431  | 37745105  | 58674   | protein coding                     | -1.07 | 1.03E-02 | 4.57E-02 |
| ENSG00000175820 | CCDC168     | 13 | 102729367 | 102759072 | 29705   | protein coding                     | -1.07 | 2.09E-03 | 1.54E-02 |
| ENSG00000187134 | AKR1C1      | 10 | 4963253   | 4983283   | 20030   | protein coding                     | -1.07 | 1.10E-03 | 9.89E-03 |
| ENSG00000124232 | RBPJL       | 20 | 45306840  | 45317824  | 10984   | protein coding                     | -1.07 | 9.67E-03 | 4.36E-02 |
| ENSG00000198788 | MUC2        | 11 | 1074875   | 1110511   | 35636   | protein coding                     | -1.07 | 8.02E-03 | 3.84E-02 |
| ENSG00000288597 | AC234782.2  | X  | 103707034 | 103919047 | 212013  | lncRNA                             | -1.07 | 1.14E-03 | 1.01E-02 |
| ENSG00000156959 | LHFPL4      | 3  | 9498361   | 9553822   | 55461   | protein coding                     | -1.07 | 2.60E-03 | 1.79E-02 |
| ENSG00000226252 | AL135960.1  | 1  | 47225797  | 47230750  | 4953    | lncRNA-antisense                   | -1.07 | 4.87E-04 | 5.72E-03 |
| ENSG00000188582 | PAQR9       | 3  | 142949164 | 142963674 | 14510   | protein coding                     | -1.07 | 4.74E-03 | 2.70E-02 |
| ENSG00000166402 | TUB         | 11 | 8019244   | 8106243   | 86999   | protein coding                     | -1.07 | 2.02E-05 | 6.60E-04 |
| ENSG00000118997 | DNAH7       | 2  | 195737703 | 196068837 | 331134  | protein coding                     | -1.07 | 1.30E-04 | 2.35E-03 |
| ENSG00000276747 | PADI6       | 1  | 17372196  | 17401699  | 29503   | protein coding                     | -1.07 | 7.40E-03 | 3.64E-02 |
| ENSG00000124205 | EDN3        | 20 | 59300443  | 59325992  | 25549   | protein coding                     | -1.07 | 1.01E-02 | 4.52E-02 |
| ENSG00000237352 | LINC01358   | 1  | 58933643  | 59240555  | 306912  | lncRNA                             | -1.07 | 2.79E-03 | 1.88E-02 |
| ENSG00000186185 | KIF18B      | 17 | 44924709  | 44947773  | 23064   | protein coding                     | -1.07 | 8.46E-04 | 8.32E-03 |
| ENSG00000253669 | GASAL1      | 8  | 102805517 | 102810039 | 4522    | lncRNA                             | -1.07 | 4.54E-03 | 2.62E-02 |
| ENSG00000184361 | SPATA32     | 17 | 45254393  | 45262094  | 7701    | protein coding                     | -1.08 | 4.37E-03 | 2.55E-02 |
| ENSG00000115705 | TPO         | 2  | 1374066   | 1543711   | 169645  | protein coding                     | -1.08 | 1.41E-03 | 1.17E-02 |
| ENSG00000183785 | TUBA8       | 22 | 18110331  | 18148554  | 36223   | protein coding                     | -1.08 | 2.03E-03 | 1.51E-02 |
| ENSG00000124615 | MOCS1       | 6  | 39899578  | 39934551  | 34973   | protein coding                     | -1.08 | 5.78E-04 | 6.42E-03 |
| ENSG0000027152  | AC110048.2  | 15 | 66860303  | 66867203  | 6720    | lncRNA                             | -1.08 | 2.45E-05 | 7.49E-04 |
| ENSG00000108813 | DLX4        | 17 | 49968970  | 49974959  | 5989    | protein coding                     | -1.08 | 7.93E-04 | 7.97E-03 |
| ENSG00000212993 | POU5F1B     | 8  | 127322183 | 127420066 | 97883   | protein coding                     | -1.08 | 3.50E-04 | 4.58E-03 |
| ENSG00000152377 | SPOCK1      | 5  | 136975298 | 137598379 | 623081  | protein coding                     | -1.08 | 1.79E-04 | 2.94E-03 |
| ENSG00000274605 | PCCA-DT     | 13 | 100053074 | 100088950 | 35876   | lncRNA                             | -1.08 | 1.56E-03 | 1.26E-02 |
| ENSG00000160188 | RSPH1       | 21 | 42472486  | 42496246  | 23760   | protein coding                     | -1.08 | 8.32E-03 | 3.94E-02 |
| ENSG00000226496 | LINC00323   | 21 | 41141493  | 41148198  | 6705    | lncRNA-antisense                   | -1.08 | 1.14E-02 | 4.88E-02 |
| ENSG00000267452 | LINC02073   | 17 | 51336646  | 51521401  | 184755  | lncRNA                             | -1.08 | 1.04E-03 | 9.53E-03 |
| ENSG00000283709 | FAM238C     | 10 | 26931206  | 26944418  | 13212   | transcribed unprocessed pseudogene | -1.08 | 7.99E-04 | 8.02E-03 |
| ENSG00000075391 | RASAL2      | 1  | 178094104 | 178484147 | 390043  | protein coding                     | -1.08 | 1.12E-04 | 2.13E-03 |
| ENSG00000117791 | MTARC2      | 1  | 220748225 | 220784815 | 36590   | protein coding                     | -1.08 | 2.93E-03 | 1.95E-02 |
| ENSG00000214711 | CAPN14      | 2  | 31173056  | 31233858  | 60802   | protein coding                     | -1.08 | 6.41E-05 | 1.46E-03 |
| ENSG00000007372 | PAX6        | 11 | 31784779  | 31817961  | 33182   | protein coding                     | -1.08 | 7.93E-03 | 3.81E-02 |
| ENSG00000196878 | LAMB3       | 1  | 209614870 | 209652425 | 37555   | protein coding                     | -1.08 | 3.91E-04 | 4.95E-03 |
| ENSG00000176349 | AC104129.1  | 7  | 1838586   | 1849931   | 11345   | lncRNA-antisense                   | -1.08 | 3.81E-03 | 2.32E-02 |
| ENSG00000079215 | SLC1A3      | 5  | 36606355  | 36688334  | 81979   | protein coding                     | -1.08 | 1.48E-04 | 2.56E-03 |
| ENSG00000054690 | PLEKH11     | 14 | 67533290  | 67589612  | 56322   | protein coding                     | -1.08 | 1.14E-03 | 1.02E-02 |
| ENSG00000232722 | MROH4P      | 8  | 142567260 | 142577881 | 10621   | transcribed unitary pseudogene     | -1.08 | 9.15E-03 | 4.20E-02 |
| ENSG00000179242 | CDH4        | 20 | 61252261  | 61940617  | 688356  | protein coding                     | -1.08 | 4.15E-04 | 5.15E-03 |
| ENSG00000107147 | KCNT1       | 9  | 135702185 | 135795508 | 93323   | protein coding                     | -1.08 | 1.10E-03 | 9.90E-03 |
| ENSG00000198400 | NTRK1       | 1  | 156815640 | 156881850 | 66210   | protein coding                     | -1.08 | 1.28E-03 | 1.10E-02 |
| ENSG00000119630 | PGF         | 14 | 74941834  | 74955626  | 13792   | protein coding                     | -1.08 | 8.18E-03 | 3.89E-02 |
| ENSG00000115850 | LCT         | 2  | 135787850 | 135837184 | 49334   | protein coding                     | -1.08 | 7.04E-03 | 3.52E-02 |
| ENSG00000227963 | RBM15-AS1   | 1  | 110286375 | 110339171 | 52796   | lncRNA-antisense                   | -1.08 | 1.64E-04 | 2.75E-03 |
| ENSG00000149646 | CNBD2       | 20 | 35954564  | 36030700  | 76136   | protein coding                     | -1.08 | 1.60E-05 | 5.67E-04 |
| ENSG00000143476 | DTL         | 1  | 212035553 | 212107400 | 71847   | protein coding                     | -1.08 | 1.06E-03 | 9.65E-03 |
| ENSG00000119508 | NR4A3       | 9  | 99821855  | 99868891  | 45036   | protein coding                     | -1.08 | 5.32E-04 | 6.06E-03 |
| ENSG00000168502 | MTCL1       | 18 | 8705661   | 8832778   | 127117  | protein coding                     | -1.09 | 6.84E-05 | 1.53E-03 |
| ENSG00000182648 | LINC01006   | 7  | 156388922 | 156640654 | 251732  | lncRNA                             | -1.09 | 1.01E-05 | 4.15E-04 |
| ENSG00000169684 | CHRNA5      | 15 | 78565520  | 78595269  | 29749   | protein coding                     | -1.09 | 1.69E-03 | 1.33E-02 |
| ENSG00000072832 | CRMP1       | 4  | 5748084   | 5893086   | 145002  | protein coding                     | -1.09 | 1.96E-03 | 1.48E-02 |
| ENSG00000064309 | CDON        | 11 | 125955796 | 126063335 | 107539  | protein coding                     | -1.09 | 8.84E-05 | 1.81E-03 |
| ENSG00000088538 | DOCK3       | 3  | 50674927  | 51384198  | 709271  | protein coding                     | -1.09 | 1.70E-06 | 1.27E-04 |

|                 |             |    |           |           |         |                                      |       |          |          |
|-----------------|-------------|----|-----------|-----------|---------|--------------------------------------|-------|----------|----------|
| ENSG0000105877  | DNAH11      | 7  | 21543039  | 21901839  | 358800  | protein coding                       | -1.09 | 3.52E-06 | 2.02E-04 |
| ENSG0000161082  | CEL5        | 19 | 3224661   | 3297076   | 72415   | protein coding                       | -1.09 | 7.84E-03 | 3.78E-02 |
| ENSG00000085276 | MECOM       | 3  | 169083499 | 169663775 | 580276  | protein coding                       | -1.09 | 3.01E-03 | 1.98E-02 |
| ENSG00000174807 | CD248       | 11 | 66314494  | 66317044  | 2550    | protein coding                       | -1.09 | 2.87E-04 | 4.03E-03 |
| ENSG00000080573 | COL5A3      | 19 | 9959561   | 10010504  | 50943   | protein coding                       | -1.09 | 3.28E-04 | 4.40E-03 |
| ENSG0000121075  | TBX4        | 17 | 61452404  | 61485110  | 32706   | protein coding                       | -1.09 | 8.94E-03 | 4.13E-02 |
| ENSG00000224418 | STK24-AS1   | 13 | 98577244  | 98578830  | 1586    | lncRNA-antisense                     | -1.09 | 7.85E-03 | 3.79E-02 |
| ENSG00000130176 | CNN1        | 19 | 11538767  | 11550323  | 11556   | protein coding                       | -1.09 | 6.91E-03 | 3.48E-02 |
| ENSG00000166856 | GPR182      | 12 | 56994492  | 56998447  | 3955    | protein coding                       | -1.09 | 1.08E-02 | 4.71E-02 |
| ENSG00000110900 | TSPAN11     | 12 | 30926428  | 30996602  | 70174   | protein coding                       | -1.09 | 3.77E-03 | 2.30E-02 |
| ENSG00000181585 | TMIE        | 3  | 46694528  | 46710886  | 16358   | protein coding                       | -1.09 | 1.28E-03 | 1.10E-02 |
| ENSG00000112276 | BVES        | 6  | 105096822 | 105137157 | 40335   | protein coding                       | -1.09 | 9.08E-03 | 4.18E-02 |
| ENSG00000197467 | COL13A1     | 10 | 69801880  | 69964275  | 162395  | protein coding                       | -1.09 | 4.97E-06 | 2.58E-04 |
| ENSG00000246477 | AF131216.1  | 8  | 11315859  | 11325429  | 9570    | lncRNA-antisense                     | -1.09 | 1.04E-02 | 4.60E-02 |
| ENSG00000279982 | AL162274.3  | 10 | 131996738 | 131999846 | 3108    | TEC                                  | -1.09 | 1.44E-03 | 1.19E-02 |
| ENSG00000122778 | KIAA1549    | 7  | 138831381 | 138981389 | 150008  | protein coding                       | -1.09 | 2.44E-04 | 3.63E-03 |
| ENSG00000287543 | AC013486.1  | 15 | 74040190  | 74043332  | 3142    | lncRNA                               | -1.09 | 1.19E-03 | 1.04E-02 |
| ENSG00000142798 | HSPG2       | 1  | 21822244  | 21937310  | 115066  | protein coding                       | -1.09 | 1.47E-04 | 2.55E-03 |
| ENSG00000206535 | LNP1        | 3  | 100401532 | 100456319 | 54787   | protein coding                       | -1.09 | 7.52E-03 | 3.68E-02 |
| ENSG00000089723 | OTUB2       | 14 | 94026340  | 94048930  | 22590   | protein coding                       | -1.09 | 1.83E-03 | 1.41E-02 |
| ENSG00000242512 | LINC01206   | 3  | 181952343 | 182035644 | 83301   | lncRNA                               | -1.09 | 2.74E-03 | 1.86E-02 |
| ENSG00000169783 | LINGO1      | 15 | 77613027  | 77820900  | 207873  | protein coding                       | -1.09 | 5.17E-03 | 2.86E-02 |
| ENSG00000156564 | LRFN2       | 6  | 40391591  | 40587364  | 195773  | protein coding                       | -1.09 | 6.84E-03 | 3.46E-02 |
| ENSG00000006283 | CACNA1G     | 17 | 50560715  | 50627474  | 66759   | protein coding                       | -1.09 | 1.09E-02 | 4.73E-02 |
| ENSG00000198643 | FAM3D       | 3  | 58633946  | 58666834  | 32888   | protein coding                       | -1.09 | 6.27E-03 | 3.27E-02 |
| ENSG00000081277 | PKP1        | 1  | 201283452 | 201332993 | 49541   | protein coding                       | -1.09 | 6.14E-03 | 3.22E-02 |
| ENSG00000060709 | RIMBP2      | 12 | 130396137 | 130716281 | 320144  | protein coding                       | -1.09 | 5.76E-03 | 3.08E-02 |
| ENSG00000186806 | VSIG10L     | 19 | 51331536  | 51342124  | 10588   | protein coding                       | -1.09 | 1.57E-04 | 2.67E-03 |
| ENSG00000172867 | KRT2        | 12 | 52644558  | 52652211  | 7653    | protein coding                       | -1.09 | 9.45E-03 | 4.29E-02 |
| ENSG00000258057 | BCDIN3D-AS1 | 12 | 49827913  | 49841143  | 13230   | lncRNA-antisense                     | -1.09 | 7.88E-04 | 7.94E-03 |
| ENSG00000117114 | ADGRL2      | 1  | 81306147  | 81992436  | 686289  | protein coding                       | -1.10 | 1.04E-02 | 4.60E-02 |
| ENSG00000212939 | Z97192.1    | 22 | 49548681  | 49556473  | 7792    | lncRNA                               | -1.10 | 1.03E-02 | 4.57E-02 |
| ENSG00000086967 | MYBPC2      | 19 | 50432892  | 50466321  | 33429   | protein coding                       | -1.10 | 7.14E-04 | 7.43E-03 |
| ENSG00000117707 | PROX1       | 1  | 213983181 | 214041510 | 58329   | protein coding                       | -1.10 | 3.53E-03 | 2.20E-02 |
| ENSG00000214870 | AC004540.1  | 7  | 26398593  | 26497595  | 99002   | lncRNA                               | -1.10 | 4.97E-04 | 5.79E-03 |
| ENSG00000183117 | C5MD1       | 8  | 2935353   | 4994972   | 2059619 | protein coding                       | -1.10 | 3.07E-04 | 4.21E-03 |
| ENSG00000242262 | AC092597.1  | 4  | 47706372  | 47706987  | 615     | processed_pseudogene                 | -1.10 | 4.81E-04 | 5.67E-03 |
| ENSG00000270977 | AC015849.5  | 17 | 35893707  | 35911651  | 17944   | transcribed processed_pseudogene     | -1.10 | 1.52E-03 | 1.23E-02 |
| ENSG00000130997 | POLN        | 4  | 2071918   | 2242121   | 170203  | protein coding                       | -1.10 | 1.78E-04 | 2.92E-03 |
| ENSG00000169744 | LDB2        | 4  | 16501541  | 16898678  | 397137  | protein coding                       | -1.10 | 9.08E-04 | 8.72E-03 |
| ENSG00000260456 | C16orf95    | 16 | 87083562  | 87317420  | 233858  | protein coding                       | -1.10 | 1.93E-04 | 3.09E-03 |
| ENSG00000229205 | LINC00200   | 10 | 1159768   | 1289426   | 129658  | lncRNA                               | -1.10 | 3.78E-03 | 2.31E-02 |
| ENSG00000102935 | ZNF423      | 16 | 49487524  | 49857919  | 370395  | protein coding                       | -1.10 | 1.62E-03 | 1.29E-02 |
| ENSG00000286381 | AL078622.1  | 22 | 49047484  | 49052549  | 5065    | lncRNA                               | -1.10 | 8.57E-04 | 8.39E-03 |
| ENSG00000222005 | LINC01118   | 2  | 46698940  | 46822804  | 123864  | lncRNA-sense overlapping             | -1.10 | 3.48E-04 | 4.56E-03 |
| ENSG00000283828 | AL137002.2  | 13 | 113149432 | 113154002 | 4570    | lncRNA-antisense                     | -1.10 | 6.88E-03 | 3.47E-02 |
| ENSG00000174482 | LINGO2      | 9  | 27948078  | 28670286  | 722208  | protein coding                       | -1.10 | 8.11E-03 | 3.87E-02 |
| ENSG00000178222 | RNF212      | 4  | 1056250   | 1113564   | 57314   | protein coding                       | -1.10 | 1.47E-04 | 2.54E-03 |
| ENSG00000176912 | TYMSOS      | 18 | 630886    | 658340    | 27454   | lncRNA-bidirectional promoter lncRNA | -1.10 | 1.10E-02 | 4.76E-02 |
| ENSG00000126467 | TSKS        | 19 | 49739753  | 49763306  | 23553   | protein coding                       | -1.10 | 8.57E-04 | 8.39E-03 |
| ENSG00000158008 | EXTL1       | 1  | 26019884  | 26036464  | 16580   | protein coding                       | -1.10 | 4.82E-03 | 2.73E-02 |
| ENSG00000116761 | CTH         | 1  | 70411218  | 70439851  | 28633   | protein coding                       | -1.10 | 3.18E-03 | 2.05E-02 |
| ENSG00000196876 | SCN8A       | 12 | 51590266  | 51812864  | 222598  | protein coding                       | -1.10 | 2.61E-06 | 1.67E-04 |
| ENSG00000117983 | MUC5B       | 11 | 1223066   | 1262172   | 39106   | protein coding                       | -1.10 | 6.40E-04 | 6.87E-03 |
| ENSG00000273387 | AC005005.3  | 22 | 31082156  | 31083565  | 1409    | lncRNA-antisense                     | -1.10 | 8.42E-03 | 3.97E-02 |
| ENSG00000150667 | FSIP1       | 15 | 39588357  | 39782841  | 194484  | protein coding                       | -1.10 | 3.14E-03 | 2.04E-02 |
| ENSG00000180336 | MEIOC       | 17 | 44656404  | 44690308  | 33904   | protein coding                       | -1.10 | 7.65E-04 | 7.78E-03 |
| ENSG00000228065 | LINC01515   | 10 | 65570338  | 65880289  | 309951  | lncRNA                               | -1.10 | 2.62E-03 | 1.80E-02 |
| ENSG00000149403 | GRIK4       | 11 | 120511746 | 120988906 | 477160  | protein coding                       | -1.10 | 3.32E-04 | 3.50E-03 |
| ENSG00000142959 | BEST4       | 1  | 44783585  | 44788170  | 4585    | protein coding                       | -1.10 | 4.36E-03 | 2.55E-02 |
| ENSG00000160051 | IQCC        | 1  | 32205671  | 32208682  | 3011    | protein coding                       | -1.10 | 2.98E-03 | 1.97E-02 |
| ENSG00000286458 | AC083870.1  | 7  | 134816543 | 134998153 | 181610  | lncRNA                               | -1.10 | 1.09E-02 | 4.73E-02 |
| ENSG00000144395 | CCDC150     | 2  | 196639554 | 196763490 | 123936  | protein coding                       | -1.10 | 5.39E-04 | 6.12E-03 |
| ENSG00000162458 | FBLIM1      | 1  | 15756607  | 15786594  | 29987   | protein coding                       | -1.10 | 1.08E-02 | 4.70E-02 |
| ENSG00000171811 | CFAP46      | 10 | 132808392 | 132942823 | 134431  | protein coding                       | -1.10 | 1.38E-03 | 1.16E-02 |
| ENSG00000287760 | AC099521.3  | 16 | 68448843  | 68450002  | 1159    | lncRNA                               | -1.10 | 3.20E-04 | 4.32E-03 |
| ENSG00000198597 | ZNF536      | 19 | 30228290  | 30713538  | 485248  | protein coding                       | -1.11 | 9.24E-03 | 4.22E-02 |
| ENSG00000177640 | CASC2       | 10 | 118046279 | 118210158 | 163879  | lncRNA-antisense                     | -1.11 | 3.16E-03 | 2.05E-02 |
| ENSG00000166819 | PLIN1       | 15 | 89664367  | 89679427  | 15060   | protein coding                       | -1.11 | 3.28E-04 | 4.40E-03 |
| ENSG00000175161 | CADM2       | 3  | 84958989  | 86074429  | 1115440 | protein coding                       | -1.11 | 7.39E-03 | 3.64E-02 |
| ENSG00000198626 | RYR2        | 1  | 237042184 | 237833988 | 791804  | protein coding                       | -1.11 | 5.20E-04 | 5.97E-03 |
| ENSG00000231290 | APCDD1L-DT  | 20 | 58515379  | 58619888  | 104509  | lncRNA                               | -1.11 | 4.04E-03 | 2.41E-02 |
| ENSG00000120875 | DUSP4       | 8  | 29333064  | 29350684  | 17620   | protein coding                       | -1.11 | 4.81E-04 | 5.68E-03 |
| ENSG00000197181 | PIWIL2      | 8  | 22275316  | 22357568  | 82252   | protein coding                       | -1.11 | 3.36E-04 | 4.46E-03 |
| ENSG00000232860 | SMG7-AS1    | 1  | 183460874 | 183472265 | 11391   | lncRNA                               | -1.11 | 6.67E-03 | 3.40E-02 |
| ENSG0000021488  | SLC7A9      | 19 | 32830509  | 32869767  | 39258   | protein coding                       | -1.11 | 4.55E-03 | 2.63E-02 |
| ENSG00000182256 | GABRG3      | 15 | 26971181  | 27541984  | 570803  | protein coding                       | -1.11 | 8.25E-03 | 3.91E-02 |
| ENSG00000259845 | HERC2P10    | 15 | 30815271  | 30844153  | 28882   | unprocessed_pseudogene               | -1.11 | 4.98E-03 | 2.79E-02 |
| ENSG00000233421 | LINC01783   | 1  | 16533886  | 16536172  | 2286    | lncRNA                               | -1.11 | 6.99E-03 | 3.50E-02 |
| ENSG00000152104 | PTPN14      | 1  | 214348700 | 214552449 | 203749  | protein coding                       | -1.11 | 8.32E-05 | 1.74E-03 |
| ENSG00000157680 | DGKI        | 7  | 137381037 | 137847092 | 466055  | protein coding                       | -1.11 | 2.97E-03 | 1.97E-02 |
| ENSG00000129204 | USP6        | 17 | 5116032   | 5175034   | 59002   | protein coding                       | -1.11 | 4.11E-04 | 5.12E-03 |
| ENSG00000206384 | COL6A6      | 3  | 130560334 | 130678155 | 117821  | protein coding                       | -1.11 | 2.97E-03 | 1.96E-02 |
| ENSG00000204614 | TRIM40      | 6  | 30136124  | 30148735  | 12611   | protein coding                       | -1.11 | 9.24E-03 | 4.23E-02 |
| ENSG00000079156 | OSBPL6      | 2  | 178194481 | 178402893 | 208412  | protein coding                       | -1.11 | 1.31E-04 | 2.35E-03 |
| ENSG00000102678 | FGF9        | 13 | 21671073  | 21704498  | 33425   | protein coding                       | -1.11 | 5.24E-03 | 2.89E-02 |
| ENSG00000184350 | MRGPRE      | 11 | 3225030   | 3232417   | 7387    | protein coding                       | -1.11 | 9.26E-03 | 4.23E-02 |
| ENSG00000240497 | AC092919.1  | 3  | 171459248 | 171469702 | 10454   | lncRNA                               | -1.11 | 5.27E-03 | 2.90E-02 |
| ENSG00000286215 | AL356534.1  | 6  | 126304223 | 127213609 | 909386  | transcribed processed_pseudogene     | -1.11 | 1.20E-03 | 1.05E-02 |
| ENSG00000250733 | C8orf17     | 8  | 139931172 | 139933942 | 2770    | TEC                                  | -1.11 | 1.09E-02 | 4.74E-02 |

|                 |              |    |           |           |         |                                      |       |          |          |
|-----------------|--------------|----|-----------|-----------|---------|--------------------------------------|-------|----------|----------|
| ENSG00000205209 | SCGB2B2      | 19 | 34593329  | 34675699  | 82370   | protein coding                       | -1.11 | 9.63E-04 | 9.07E-03 |
| ENSG00000260971 | AC119674.1   | 1  | 56154545  | 56477687  | 323142  | lncRNA                               | -1.11 | 7.66E-03 | 3.73E-02 |
| ENSG00000107719 | PALD1        | 10 | 70478767  | 70568450  | 89683   | protein coding                       | -1.11 | 2.05E-04 | 3.23E-03 |
| ENSG00000184347 | SLIT3        | 5  | 168661733 | 169301139 | 639406  | protein coding                       | -1.11 | 5.31E-03 | 2.91E-02 |
| ENSG00000136425 | CIB2         | 15 | 78104606  | 78131535  | 26929   | protein coding                       | -1.11 | 2.38E-05 | 7.36E-04 |
| ENSG00000169855 | ROBO1        | 3  | 78597239  | 79767998  | 1170759 | protein coding                       | -1.11 | 1.87E-03 | 1.43E-02 |
| ENSG00000174804 | FZD4         | 11 | 86945679  | 86955395  | 9716    | protein coding                       | -1.11 | 1.94E-03 | 1.47E-02 |
| ENSG00000243069 | ARHGFE26-AS1 | 3  | 154024401 | 154121347 | 96946   | lncRNA                               | -1.11 | 7.76E-03 | 3.76E-02 |
| ENSG00000269113 | TRABD2B      | 1  | 47760528  | 47997385  | 236857  | protein coding                       | -1.11 | 3.81E-03 | 2.32E-02 |
| ENSG00000091536 | MYO15A       | 17 | 18108706  | 18179802  | 71096   | protein coding                       | -1.11 | 7.40E-04 | 7.59E-03 |
| ENSG00000128342 | LIF          | 22 | 30240453  | 30246759  | 6306    | protein coding                       | -1.11 | 8.39E-03 | 3.96E-02 |
| ENSG00000105559 | PLEKHA4      | 19 | 48837097  | 48868617  | 31520   | protein coding                       | -1.11 | 7.59E-04 | 7.73E-03 |
| ENSG00000167695 | TLCD3A       | 17 | 732412    | 742968    | 10556   | protein coding                       | -1.11 | 6.81E-04 | 7.18E-03 |
| ENSG00000146648 | EGFR         | 7  | 55019017  | 55211628  | 192611  | protein coding                       | -1.12 | 1.42E-03 | 1.18E-02 |
| ENSG00000065361 | ERBB3        | 12 | 56076799  | 56103505  | 26706   | protein coding                       | -1.12 | 3.61E-04 | 4.68E-03 |
| ENSG00000153303 | FRMD1        | 6  | 168053166 | 168101511 | 48345   | protein coding                       | -1.12 | 6.59E-04 | 7.02E-03 |
| ENSG00000186340 | THBS2        | 6  | 169215780 | 169254050 | 38270   | protein coding                       | -1.12 | 2.27E-03 | 1.63E-02 |
| ENSG00000267287 | AC068473.3   | 18 | 79576460  | 79589010  | 12550   | lncRNA                               | -1.12 | 5.20E-03 | 2.87E-02 |
| ENSG00000142513 | ACP4         | 19 | 50790415  | 50795219  | 4804    | protein coding                       | -1.12 | 1.06E-02 | 4.64E-02 |
| ENSG00000144857 | BOC          | 3  | 113211003 | 113287459 | 76456   | protein coding                       | -1.12 | 4.04E-04 | 5.06E-03 |
| ENSG00000244161 | FLNB-AS1     | 3  | 58162547  | 58170636  | 8089    | lncRNA-antisense                     | -1.12 | 5.61E-03 | 3.03E-02 |
| ENSG00000260796 | AC145285.3   | 16 | 28820570  | 28822033  | 1463    | lncRNA-antisense                     | -1.12 | 1.99E-03 | 1.49E-02 |
| ENSG00000284523 | AC004834.1   | 7  | 99252452  | 99252828  | 73374   | lncRNA-antisense                     | -1.12 | 8.39E-03 | 3.96E-02 |
| ENSG00000112319 | EYAA4        | 6  | 133240598 | 133532126 | 291530  | protein coding                       | -1.12 | 1.05E-02 | 4.63E-02 |
| ENSG00000127329 | PTPRB        | 12 | 70515870  | 70637440  | 121570  | protein coding                       | -1.12 | 1.14E-05 | 4.52E-04 |
| ENSG00000100593 | ISM2         | 14 | 77474394  | 77498816  | 24422   | protein coding                       | -1.12 | 6.33E-04 | 6.81E-03 |
| ENSG00000145147 | SLIT2        | 4  | 20251905  | 20620561  | 368656  | protein coding                       | -1.12 | 2.12E-03 | 1.56E-02 |
| ENSG00000260423 | LINC02367    | 12 | 9347056   | 9400387   | 53331   | lncRNA                               | -1.12 | 3.23E-03 | 2.08E-02 |
| ENSG00000119946 | CNNM1        | 10 | 99329356  | 99394330  | 64974   | protein coding                       | -1.12 | 5.02E-03 | 2.80E-02 |
| ENSG00000166147 | FBN1         | 15 | 48408313  | 48454721  | 237408  | protein coding                       | -1.12 | 1.14E-04 | 2.14E-03 |
| ENSG00000162572 | SCNN1D       | 1  | 1280436   | 1292029   | 11593   | protein coding                       | -1.12 | 3.95E-09 | 1.87E-06 |
| ENSG00000144724 | PTPRG        | 3  | 61561569  | 62297609  | 736040  | protein coding                       | -1.12 | 4.96E-05 | 1.21E-03 |
| ENSG00000164309 | CMYA5        | 5  | 79689836  | 79800240  | 110404  | protein coding                       | -1.12 | 6.63E-04 | 7.03E-03 |
| ENSG00000064270 | ATP2C2       | 16 | 84368527  | 84464187  | 95660   | protein coding                       | -1.12 | 5.39E-04 | 6.12E-03 |
| ENSG00000145113 | MUC4         | 3  | 195746765 | 195811973 | 65208   | protein coding                       | -1.12 | 1.73E-03 | 1.35E-02 |
| ENSG00000164082 | GRM2         | 3  | 51707068  | 51718613  | 11545   | protein coding                       | -1.12 | 2.61E-04 | 3.79E-03 |
| ENSG00000173567 | ADGRF3       | 2  | 26308173  | 26346817  | 38644   | protein coding                       | -1.12 | 6.70E-04 | 7.08E-03 |
| ENSG00000108602 | ALDH3A1      | 17 | 19737984  | 19748943  | 10959   | protein coding                       | -1.12 | 1.07E-03 | 9.74E-03 |
| ENSG00000278599 | TBC1D3E      | 17 | 38127951  | 38138862  | 10911   | protein coding                       | -1.12 | 5.16E-03 | 2.86E-02 |
| ENSG00000130226 | DPP6         | 7  | 153887097 | 154894285 | 1007188 | protein coding                       | -1.12 | 2.09E-04 | 3.26E-03 |
| ENSG00000139767 | SRRM4        | 12 | 118981541 | 119163051 | 181510  | protein coding                       | -1.12 | 1.40E-03 | 1.16E-02 |
| ENSG00000165309 | ARMC3        | 10 | 22928024  | 23038523  | 110499  | protein coding                       | -1.12 | 2.88E-04 | 4.04E-03 |
| ENSG00000136895 | GARNL3       | 9  | 127224265 | 127393660 | 169395  | protein coding                       | -1.12 | 2.83E-07 | 3.64E-05 |
| ENSG00000124882 | EREG         | 4  | 74365145  | 74388749  | 23604   | protein coding                       | -1.12 | 5.29E-03 | 2.90E-02 |
| ENSG00000251600 | AC107223.1   | 4  | 143559457 | 144343750 | 784293  | lncRNA                               | -1.12 | 4.06E-05 | 1.05E-03 |
| ENSG00000132204 | LINC00470    | 18 | 1254383   | 1408344   | 153961  | lncRNA                               | -1.12 | 5.69E-03 | 3.06E-02 |
| ENSG00000185689 | C6orf201     | 6  | 4079206   | 4130951   | 51745   | protein coding                       | -1.12 | 1.86E-03 | 1.42E-02 |
| ENSG00000133121 | STAR1D3      | 13 | 33103137  | 33350630  | 247493  | protein coding                       | -1.13 | 1.26E-03 | 1.09E-02 |
| ENSG00000232453 | LINC02777    | 1  | 58882868  | 58931897  | 49029   | lncRNA                               | -1.13 | 6.00E-03 | 3.17E-02 |
| ENSG00000170558 | CDH2         | 18 | 27932879  | 28117946  | 245067  | protein coding                       | -1.13 | 1.31E-04 | 2.37E-03 |
| ENSG00000100065 | CARD10       | 22 | 37490362  | 37519542  | 29180   | protein coding                       | -1.13 | 3.33E-03 | 2.12E-02 |
| ENSG00000224413 | AP001476.1   | 21 | 46037052  | 46039807  | 2755    | lncRNA                               | -1.13 | 9.76E-03 | 4.39E-02 |
| ENSG00000164283 | ESM1         | 5  | 54977867  | 55022671  | 44804   | protein coding                       | -1.13 | 5.05E-03 | 2.82E-02 |
| ENSG00000165995 | CACNB2       | 10 | 18140424  | 18543557  | 403133  | protein coding                       | -1.13 | 6.37E-05 | 1.45E-03 |
| ENSG00000146216 | TTBK1        | 6  | 43243481  | 43288258  | 44777   | protein coding                       | -1.13 | 4.66E-03 | 2.67E-02 |
| ENSG00000197506 | SLC28A3      | 9  | 84275457  | 84340758  | 65301   | protein coding                       | -1.13 | 2.42E-04 | 3.61E-03 |
| ENSG00000060656 | PTPRU        | 1  | 29236516  | 29326813  | 90297   | protein coding                       | -1.13 | 1.67E-03 | 1.32E-02 |
| ENSG00000124839 | RAB17        | 2  | 237574322 | 237601614 | 27292   | protein coding                       | -1.13 | 9.02E-03 | 4.16E-02 |
| ENSG00000102466 | FGF14        | 13 | 101710804 | 102402457 | 691653  | protein coding                       | -1.13 | 3.31E-03 | 2.11E-02 |
| ENSG00000081803 | CADPS2       | 7  | 122318411 | 122886759 | 568348  | protein coding                       | -1.13 | 3.88E-03 | 2.35E-02 |
| ENSG00000157087 | ATP2B2       | 3  | 10324023  | 10708007  | 383984  | protein coding                       | -1.13 | 3.00E-04 | 4.15E-03 |
| ENSG00000186188 | FFAR4        | 10 | 93566665  | 93604480  | 37815   | protein coding                       | -1.13 | 1.06E-03 | 9.69E-03 |
| ENSG00000169562 | GJB1         | X  | 71212811  | 71225516  | 12705   | protein coding                       | -1.13 | 6.26E-03 | 3.26E-02 |
| ENSG00000113739 | STC2         | 5  | 173314713 | 173329503 | 14790   | protein coding                       | -1.13 | 3.70E-03 | 2.28E-02 |
| ENSG00000186952 | TMEM232      | 5  | 110289233 | 110738956 | 449723  | protein coding                       | -1.13 | 1.44E-03 | 1.19E-02 |
| ENSG00000141668 | CBLN2        | 18 | 72536680  | 72638521  | 101841  | protein coding                       | -1.13 | 5.84E-03 | 3.11E-02 |
| ENSG00000172901 | LVRN         | 5  | 115962454 | 116027619 | 65165   | protein coding                       | -1.13 | 4.96E-03 | 2.79E-02 |
| ENSG00000273706 | LHX1         | 17 | 36936785  | 36944612  | 7827    | protein coding                       | -1.13 | 7.58E-03 | 3.70E-02 |
| ENSG00000235927 | NEXN-AS1     | 1  | 77881348  | 77889539  | 8191    | lncRNA-antisense                     | -1.13 | 5.57E-03 | 3.01E-02 |
| ENSG00000134917 | ADAMT58      | 11 | 130404923 | 130428609 | 23686   | protein coding                       | -1.13 | 2.22E-03 | 1.61E-02 |
| ENSG00000242628 | AC009228.1   | 2  | 24210650  | 24222201  | 11551   | lncRNA-antisense                     | -1.13 | 1.18E-03 | 1.04E-02 |
| ENSG00000137203 | TFAP2A       | 6  | 10393186  | 10419659  | 26473   | protein coding                       | -1.13 | 3.52E-03 | 2.20E-02 |
| ENSG00000076344 | RGS11        | 16 | 268301    | 275980    | 7679    | protein coding                       | -1.13 | 3.42E-03 | 2.16E-02 |
| ENSG00000238273 | AC108058.1   | 2  | 105363038 | 105378839 | 15801   | lncRNA-antisense                     | -1.13 | 7.49E-03 | 3.67E-02 |
| ENSG00000205853 | RFPL3S       | 22 | 32359886  | 32382106  | 22220   | lncRNA                               | -1.13 | 1.64E-05 | 5.73E-04 |
| ENSG00000211644 | IGLV1-51     | 22 | 22322472  | 22322969  | 497     | IG V gene                            | -1.13 | 1.10E-02 | 4.76E-02 |
| ENSG00000102302 | FGD1         | X  | 54445454  | 54496234  | 50780   | protein coding                       | -1.13 | 1.59E-03 | 1.27E-02 |
| ENSG00000214944 | ARHGFE28     | 5  | 73626158  | 73941993  | 315835  | protein coding                       | -1.14 | 3.23E-05 | 8.96E-04 |
| ENSG00000203801 | LINC00222    | 6  | 108751654 | 108769942 | 18288   | lncRNA                               | -1.14 | 5.09E-03 | 2.83E-02 |
| ENSG00000136367 | ZFHX2        | 14 | 23520857  | 23556192  | 35335   | protein coding                       | -1.14 | 2.69E-05 | 7.93E-04 |
| ENSG00000105792 | CFAP69       | 7  | 90245174  | 90311063  | 65889   | protein coding                       | -1.14 | 4.95E-03 | 2.78E-02 |
| ENSG00000287859 | AC008507.4   | 19 | 30058229  | 30060797  | 2568    | lncRNA                               | -1.14 | 2.27E-03 | 1.63E-02 |
| ENSG00000121270 | ABC11        | 16 | 48165773  | 48247568  | 81795   | protein coding                       | -1.14 | 8.34E-04 | 8.25E-03 |
| ENSG00000277287 | AL109976.1   | 20 | 3239705   | 3245382   | 5677    | lncRNA                               | -1.14 | 6.52E-03 | 3.35E-02 |
| ENSG0000003096  | KLHL13       | X  | 117897813 | 118117340 | 219527  | protein coding                       | -1.14 | 4.19E-04 | 5.17E-03 |
| ENSG00000067445 | TRO          | X  | 54920462  | 54931431  | 10969   | protein coding                       | -1.14 | 1.01E-03 | 9.38E-03 |
| ENSG00000165269 | AQP7         | 9  | 33383179  | 33402682  | 19503   | protein coding                       | -1.14 | 5.62E-03 | 3.03E-02 |
| ENSG00000070729 | CNGB1        | 16 | 57882340  | 57971128  | 88788   | protein coding                       | -1.14 | 9.71E-04 | 9.13E-03 |
| ENSG00000286084 | AL096794.1   | 6  | 105403207 | 105588802 | 185595  | lncRNA-bidirectional promoter lncRNA | -1.14 | 1.16E-02 | 4.96E-02 |
| ENSG00000107130 | NCS1         | 9  | 130172404 | 130237303 | 64899   | protein coding                       | -1.14 | 2.47E-04 | 3.66E-03 |

|                 |            |    |           |           |        |                                    |       |          |          |
|-----------------|------------|----|-----------|-----------|--------|------------------------------------|-------|----------|----------|
| ENSG00000178965 | ERICH3     | 1  | 74568117  | 74673792  | 105675 | protein coding                     | -1.14 | 4.13E-03 | 2.45E-02 |
| ENSG00000088305 | DNMT3B     | 20 | 32762385  | 32809356  | 46971  | protein coding                     | -1.14 | 2.12E-04 | 3.29E-03 |
| ENSG00000204653 | ASPDH      | 19 | 50511600  | 50514690  | 3090   | protein coding                     | -1.14 | 1.83E-03 | 1.41E-02 |
| ENSG00000205978 | NYNRIN     | 14 | 24399003  | 24419283  | 20280  | protein coding                     | -1.14 | 2.80E-04 | 3.98E-03 |
| ENSG00000163701 | IL17RE     | 3  | 9902612   | 9916402   | 13790  | protein coding                     | -1.14 | 2.61E-03 | 1.80E-02 |
| ENSG00000275383 | AC126773.6 | 16 | 68591382  | 68594424  | 3042   | lncRNA                             | -1.14 | 3.14E-04 | 4.27E-03 |
| ENSG00000100968 | NFATC4     | 14 | 24365673  | 24379604  | 13931  | protein coding                     | -1.14 | 6.43E-03 | 3.32E-02 |
| ENSG00000233928 | AL591501.1 | X  | 33726337  | 34346527  | 620190 | lncRNA                             | -1.14 | 1.06E-02 | 4.66E-02 |
| ENSG00000105479 | CCDC114    | 19 | 48296457  | 48321971  | 25514  | protein coding                     | -1.14 | 1.22E-06 | 9.76E-05 |
| ENSG00000167588 | GPD1       | 12 | 50103982  | 50111313  | 7331   | protein coding                     | -1.14 | 6.20E-04 | 6.73E-03 |
| ENSG00000187498 | COL4A1     | 13 | 110148963 | 110307157 | 158194 | protein coding                     | -1.14 | 1.44E-04 | 2.52E-03 |
| ENSG00000157765 | SLC34A2    | 4  | 25648011  | 25678748  | 30737  | protein coding                     | -1.14 | 2.93E-03 | 1.94E-02 |
| ENSG00000101438 | SLC32A1    | 20 | 38724486  | 38729372  | 4886   | protein coding                     | -1.14 | 7.18E-03 | 3.57E-02 |
| ENSG00000157224 | CLDN12     | 7  | 90383721  | 90513402  | 129681 | protein coding                     | -1.14 | 1.75E-04 | 2.90E-03 |
| ENSG00000203392 | AC105020.1 | 15 | 75678548  | 75680752  | 2204   | lncRNA-antisense                   | -1.14 | 1.20E-03 | 1.05E-02 |
| ENSG00000142279 | WTIP       | 19 | 34481758  | 34512304  | 30546  | protein coding                     | -1.14 | 1.91E-04 | 3.07E-03 |
| ENSG00000163687 | DNASE1L3   | 3  | 58192257  | 58214697  | 22440  | protein coding                     | -1.14 | 1.85E-04 | 3.01E-03 |
| ENSG00000166813 | KIF7       | 15 | 89608789  | 89655467  | 46678  | protein coding                     | -1.14 | 1.43E-03 | 1.19E-02 |
| ENSG00000088340 | FER1L4     | 20 | 35558737  | 35607562  | 48825  | transcribed unitary pseudogene     | -1.14 | 1.89E-03 | 1.44E-02 |
| ENSG00000198768 | APCDD1L    | 20 | 58459101  | 58515399  | 56298  | protein coding                     | -1.14 | 2.06E-03 | 1.53E-03 |
| ENSG00000135643 | KCNMB4     | 12 | 70366290  | 70434292  | 68002  | protein coding                     | -1.14 | 6.50E-05 | 1.47E-03 |
| ENSG00000179846 | NKPD1      | 19 | 45149750  | 45160815  | 11065  | protein coding                     | -1.14 | 7.22E-04 | 7.48E-03 |
| ENSG00000087116 | ADAMT5     | 5  | 179110853 | 179345461 | 234608 | protein coding                     | -1.14 | 6.89E-04 | 7.24E-03 |
| ENSG00000126787 | DLGAP5     | 14 | 55148112  | 55191608  | 43496  | protein coding                     | -1.14 | 1.69E-03 | 1.33E-02 |
| ENSG00000261794 | GOLGA8H    | 15 | 30604126  | 30614561  | 10435  | protein coding                     | -1.14 | 4.72E-03 | 2.70E-02 |
| ENSG00000249700 | SRD5A3-AS1 | 4  | 55363971  | 55395847  | 31876  | lncRNA                             | -1.14 | 1.07E-03 | 9.74E-03 |
| ENSG00000046889 | PREX2      | 8  | 67952046  | 68237032  | 284986 | protein coding                     | -1.15 | 4.76E-03 | 2.71E-02 |
| ENSG00000178445 | GLDC       | 9  | 6532467   | 6645729   | 113262 | protein coding                     | -1.15 | 1.01E-03 | 9.37E-03 |
| ENSG00000104722 | NEFM       | 8  | 24913758  | 24919098  | 5340   | protein coding                     | -1.15 | 1.61E-03 | 1.29E-02 |
| ENSG00000256802 | AC022613.1 | 15 | 29674990  | 29680957  | 5967   | lncRNA-antisense                   | -1.15 | 1.04E-02 | 4.58E-02 |
| ENSG00000257522 | AL133166.1 | 14 | 29210986  | 29392048  | 181062 | lncRNA                             | -1.15 | 1.02E-02 | 4.52E-02 |
| ENSG00000196353 | CPNE4      | 3  | 131533555 | 132285410 | 751855 | protein coding                     | -1.15 | 5.17E-04 | 5.95E-03 |
| ENSG00000171094 | ALK        | 2  | 29192774  | 29215866  | 728812 | protein coding                     | -1.15 | 3.33E-04 | 4.44E-03 |
| ENSG00000117407 | ARTN       | 1  | 43933320  | 43937240  | 3920   | protein coding                     | -1.15 | 1.15E-02 | 4.94E-02 |
| ENSG00000172296 | SPTLC3     | 20 | 13008972  | 13169103  | 160131 | protein coding                     | -1.15 | 4.11E-04 | 5.12E-03 |
| ENSG00000005108 | THSD7A     | 7  | 11370365  | 11832198  | 461833 | protein coding                     | -1.15 | 2.78E-04 | 3.96E-03 |
| ENSG00000180730 | SHISA2     | 13 | 26044597  | 26052016  | 7419   | protein coding                     | -1.15 | 5.43E-03 | 2.96E-02 |
| ENSG00000160460 | SPTBN4     | 19 | 40466241  | 40576464  | 110223 | protein coding                     | -1.15 | 6.20E-04 | 6.72E-03 |
| ENSG00000235257 | ITGA9-AS1  | 3  | 37693655  | 37861802  | 168147 | lncRNA                             | -1.15 | 1.59E-05 | 5.65E-04 |
| ENSG00000140297 | GCNT3      | 15 | 59594875  | 59640239  | 45364  | protein coding                     | -1.15 | 2.13E-04 | 3.30E-03 |
| ENSG00000243819 | RN7SL832P  | 2  | 10690344  | 10692099  | 1755   | lncRNA                             | -1.15 | 2.05E-03 | 1.52E-02 |
| ENSG00000129946 | SHC2       | 19 | 416583    | 460996    | 44413  | protein coding                     | -1.15 | 1.78E-03 | 1.38E-02 |
| ENSG00000165409 | TSHR       | 14 | 80954989  | 81146306  | 191317 | protein coding                     | -1.15 | 2.81E-04 | 3.98E-03 |
| ENSG00000241956 | AC109466.1 | 5  | 164296696 | 165171643 | 874947 | lncRNA-antisense                   | -1.15 | 1.03E-02 | 4.58E-02 |
| ENSG00000284848 | LINC02359  | 12 | 126094112 | 126177632 | 83520  | lncRNA                             | -1.15 | 1.14E-02 | 4.90E-02 |
| ENSG00000065320 | NTN1       | 17 | 9021510   | 9244000   | 222490 | protein coding                     | -1.15 | 1.71E-03 | 1.34E-02 |
| ENSG00000179362 | HMGNP46    | 15 | 45511136  | 45586290  | 75154  | transcribed processed pseudogene   | -1.15 | 9.99E-03 | 4.47E-02 |
| ENSG00000152932 | RAB3C      | 5  | 58582221  | 58859394  | 277173 | protein coding                     | -1.15 | 7.59E-03 | 3.70E-02 |
| ENSG00000110786 | PTPN5      | 11 | 18727928  | 18792721  | 64793  | protein coding                     | -1.15 | 1.22E-03 | 1.06E-02 |
| ENSG00000257298 | AC008147.2 | 12 | 50185580  | 50191363  | 5783   | lncRNA-sense intronic              | -1.15 | 6.05E-04 | 6.61E-03 |
| ENSG00000110328 | GALNT18    | 11 | 11270877  | 11622005  | 351128 | protein coding                     | -1.15 | 1.78E-03 | 1.38E-02 |
| ENSG00000171956 | FOXB1      | 15 | 60004234  | 60061730  | 57496  | protein coding                     | -1.15 | 2.27E-03 | 1.63E-02 |
| ENSG00000068615 | REEP1      | 2  | 86213993  | 86338083  | 124090 | protein coding                     | -1.15 | 1.80E-03 | 1.39E-02 |
| ENSG00000070019 | GUCY2C     | 12 | 14612632  | 14696599  | 83967  | protein coding                     | -1.15 | 1.35E-03 | 1.14E-02 |
| ENSG00000187172 | BAGE2      | 21 | 10413477  | 10516431  | 102954 | transcribed unprocessed pseudogene | -1.15 | 2.33E-03 | 1.66E-02 |
| ENSG00000163792 | TCF23      | 2  | 27149004  | 27156974  | 7970   | protein coding                     | -1.15 | 7.44E-03 | 3.66E-02 |
| ENSG00000152578 | GRIA4      | 11 | 10560994  | 105982092 | 372098 | protein coding                     | -1.15 | 8.27E-03 | 3.92E-02 |
| ENSG00000286504 | AC092745.4 | 12 | 8282677   | 8286518   | 3841   | lncRNA                             | -1.15 | 4.06E-03 | 2.42E-02 |
| ENSG00000230262 | LINC02603  | 9  | 94176492  | 94259545  | 83053  | lncRNA                             | -1.15 | 4.73E-03 | 2.70E-02 |
| ENSG00000134207 | SYT6       | 1  | 114089291 | 114153880 | 64589  | protein coding                     | -1.16 | 2.43E-03 | 1.71E-02 |
| ENSG00000166268 | MYRFL      | 12 | 69825227  | 69959097  | 133870 | protein coding                     | -1.16 | 5.52E-03 | 3.00E-02 |
| ENSG00000178636 | AC092856.1 | 4  | 119192773 | 119212644 | 19871  | transcribed processed pseudogene   | -1.16 | 9.52E-03 | 4.31E-02 |
| ENSG00000147256 | ARHGAP36   | X  | 131058346 | 13109885  | 31539  | protein coding                     | -1.16 | 5.07E-03 | 2.83E-02 |
| ENSG00000272153 | AL365330.1 | 1  | 3785008   | 3785538   | 530    | lncRNA-antisense                   | -1.16 | 9.42E-03 | 4.28E-02 |
| ENSG00000073734 | ABCB11     | 2  | 168915498 | 169031324 | 115826 | protein coding                     | -1.16 | 8.31E-03 | 3.93E-02 |
| ENSG00000158683 | PKD1L1     | 7  | 47740202  | 47948466  | 208264 | protein coding                     | -1.16 | 3.52E-06 | 2.02E-04 |
| ENSG00000272989 | LINC02012  | 3  | 197505262 | 197506986 | 1724   | lncRNA                             | -1.16 | 6.98E-03 | 3.50E-02 |
| ENSG00000166394 | CYB5R2     | 11 | 7665100   | 7677222   | 12122  | protein coding                     | -1.16 | 1.80E-04 | 2.95E-03 |
| ENSG00000162782 | TDRD5      | 1  | 179591613 | 179691222 | 99659  | protein coding                     | -1.16 | 3.77E-03 | 2.30E-02 |
| ENSG00000173805 | HAP1       | 17 | 41717742  | 41734644  | 16902  | protein coding                     | -1.16 | 3.63E-03 | 2.25E-02 |
| ENSG00000132681 | ATPIA4     | 1  | 160151596 | 16018690  | 35394  | protein coding                     | -1.16 | 3.74E-03 | 2.29E-02 |
| ENSG00000159871 | LYPD5      | 19 | 43785874  | 43827206  | 41332  | protein coding                     | -1.16 | 4.66E-04 | 5.55E-03 |
| ENSG00000204967 | PCDHA4     | 5  | 140806929 | 141012347 | 205418 | protein coding                     | -1.16 | 6.32E-03 | 3.28E-02 |
| ENSG00000091986 | CCDC80     | 3  | 112596797 | 112649530 | 52733  | protein coding                     | -1.16 | 1.64E-03 | 1.31E-02 |
| ENSG00000112246 | SIM1       | 6  | 100385009 | 100464921 | 79912  | protein coding                     | -1.16 | 4.93E-03 | 2.78E-02 |
| ENSG00000109927 | TECTA      | 11 | 121101243 | 121191490 | 90247  | protein coding                     | -1.16 | 1.82E-05 | 6.17E-04 |
| ENSG00000138615 | CILP       | 15 | 65194760  | 65211473  | 16713  | protein coding                     | -1.16 | 3.10E-05 | 8.74E-04 |
| ENSG00000136010 | ALDH1L2    | 12 | 105019784 | 105107643 | 87859  | protein coding                     | -1.16 | 1.56E-04 | 2.66E-03 |
| ENSG00000235888 | AF064858.1 | 21 | 38988569  | 39062894  | 74325  | lncRNA                             | -1.16 | 1.44E-04 | 2.52E-03 |
| ENSG00000266718 | AC079336.5 | 17 | 32495536  | 32500910  | 5374   | lncRNA-antisense                   | -1.16 | 2.41E-03 | 1.70E-02 |
| ENSG00000234884 | AL022329.1 | 22 | 25561117  | 25564719  | 3602   | lncRNA-antisense                   | -1.16 | 1.06E-02 | 4.66E-02 |
| ENSG00000162576 | MXRA8      | 1  | 1352689   | 1361777   | 9088   | protein coding                     | -1.16 | 8.58E-04 | 8.39E-03 |
| ENSG00000198883 | PNMA5      | X  | 152988824 | 152994116 | 5292   | protein coding                     | -1.16 | 4.75E-03 | 2.70E-02 |
| ENSG00000135436 | FAM186B    | 12 | 49582885  | 49605639  | 22754  | protein coding                     | -1.16 | 1.12E-03 | 1.00E-02 |
| ENSG00000177138 | FAM9B      | X  | 9024232   | 9295682   | 271450 | protein coding                     | -1.16 | 3.96E-03 | 2.37E-02 |
| ENSG00000187942 | LDLRAD2    | 1  | 21812265  | 21825225  | 12960  | protein coding                     | -1.16 | 3.79E-04 | 4.84E-03 |
| ENSG00000120756 | PLS1       | 3  | 142596393 | 14271366  | 117271 | protein coding                     | -1.16 | 4.68E-05 | 1.17E-03 |
| ENSG00000082497 | SERTAD4    | 1  | 210232796 | 210246631 | 13835  | protein coding                     | -1.16 | 9.62E-03 | 4.35E-02 |
| ENSG00000146555 | SDK1       | 7  | 3301252   | 4269000   | 967748 | protein coding                     | -1.16 | 1.79E-05 | 6.08E-04 |
| ENSG00000276203 | ANKRD20A3P | 9  | 66106815  | 66179474  | 72659  | protein coding                     | -1.16 | 5.02E-03 | 2.81E-02 |



|                 |            |    |           |           |         |                                      |       |          |          |
|-----------------|------------|----|-----------|-----------|---------|--------------------------------------|-------|----------|----------|
| ENSG00000197763 | TXNRD3     | 3  | 126571779 | 126655124 | 83345   | protein coding                       | -1.16 | 7.23E-05 | 1.58E-03 |
| ENSG00000138193 | PLCE1      | 10 | 93993931  | 94332823  | 338892  | protein coding                       | -1.16 | 3.15E-05 | 8.83E-04 |
| ENSG00000246662 | LINC00535  | 8  | 93213302  | 93700433  | 487131  | lncRNA-antisense                     | -1.16 | 8.57E-03 | 4.02E-02 |
| ENSG00000149043 | SYT8       | 11 | 1828307   | 1837521   | 9214    | protein coding                       | -1.16 | 5.45E-03 | 2.97E-02 |
| ENSG00000135094 | SDS        | 12 | 113392445 | 113426301 | 33856   | protein coding                       | -1.16 | 3.02E-03 | 1.99E-02 |
| ENSG00000150656 | CNDP1      | 18 | 74534500  | 74587212  | 52712   | protein coding                       | -1.16 | 1.91E-03 | 1.45E-02 |
| ENSG00000100206 | DMC1       | 22 | 38518948  | 38570204  | 51256   | protein coding                       | -1.16 | 1.12E-02 | 4.82E-02 |
| ENSG00000153976 | HS3ST3A1   | 17 | 13494032  | 13601929  | 107897  | protein coding                       | -1.16 | 9.64E-03 | 4.36E-02 |
| ENSG00000152527 | PLEKHH2    | 2  | 43637260  | 43767987  | 130727  | protein coding                       | -1.16 | 1.14E-05 | 4.52E-04 |
| ENSG00000104728 | ARHGEF10   | 8  | 1823926   | 1958641   | 134715  | protein coding                       | -1.16 | 1.39E-03 | 1.16E-02 |
| ENSG00000136928 | GABBR2     | 9  | 98288109  | 98708935  | 420826  | protein coding                       | -1.16 | 5.69E-03 | 3.06E-02 |
| ENSG00000241644 | INMT       | 7  | 30697985  | 30757602  | 59617   | protein coding                       | -1.16 | 2.02E-03 | 1.50E-02 |
| ENSG00000283361 | CFAP97D2   | 13 | 114154691 | 114223084 | 68393   | protein coding                       | -1.16 | 1.71E-03 | 1.34E-02 |
| ENSG00000279080 | AL022322.2 | 22 | 38130216  | 38150612  | 20396   | lncRNA-antisense                     | -1.16 | 2.72E-05 | 7.99E-04 |
| ENSG00000253943 | KRT18P37   | 8  | 41511240  | 41512521  | 1281    | processed_pseudogene                 | -1.16 | 2.69E-03 | 1.84E-02 |
| ENSG00000248213 | CICP16     | 4  | 118635970 | 118638782 | 2812    | processed_pseudogene                 | -1.16 | 4.37E-03 | 2.55E-02 |
| ENSG00000143850 | FLKHA6     | 1  | 204218853 | 204377665 | 158812  | protein coding                       | -1.16 | 4.54E-05 | 1.14E-03 |
| ENSG00000139926 | FRMD6      | 14 | 51489100  | 51730727  | 241627  | protein coding                       | -1.16 | 5.24E-04 | 6.00E-03 |
| ENSG00000144619 | CNTN4      | 3  | 2098813   | 3057959   | 959146  | protein coding                       | -1.17 | 6.79E-03 | 3.44E-02 |
| ENSG00000243629 | LINC00890  | 3  | 157081667 | 157128595 | 46928   | lncRNA                               | -1.17 | 3.87E-03 | 2.34E-02 |
| ENSG00000149090 | PAMR1      | 11 | 35431823  | 35530300  | 98477   | protein coding                       | -1.17 | 4.76E-03 | 2.71E-02 |
| ENSG00000258986 | TMEM179    | 14 | 104474678 | 104605647 | 130969  | protein coding                       | -1.17 | 3.03E-03 | 1.99E-02 |
| ENSG00000185666 | SYN3       | 22 | 32507820  | 33058381  | 550561  | protein coding                       | -1.17 | 2.16E-05 | 6.86E-04 |
| ENSG00000147465 | STAR       | 8  | 38142700  | 38150992  | 8292    | protein coding                       | -1.17 | 1.05E-02 | 4.63E-02 |
| ENSG00000187048 | CYP4A11    | 1  | 46929177  | 46941484  | 12307   | protein coding                       | -1.17 | 7.08E-03 | 3.54E-02 |
| ENSG00000198723 | TEX45      | 19 | 7492976   | 7508450   | 15474   | protein coding                       | -1.17 | 4.61E-03 | 2.65E-02 |
| ENSG00000196167 | COLCA1     | 11 | 111290787 | 111305498 | 14711   | lncRNA-antisense                     | -1.17 | 2.60E-04 | 3.78E-03 |
| ENSG00000226571 | AL592429.2 | 6  | 139271362 | 139667284 | 395922  | lncRNA-antisense                     | -1.17 | 3.45E-05 | 9.45E-04 |
| ENSG00000262576 | PCDHGA4    | 5  | 141355021 | 141512975 | 157954  | protein coding                       | -1.17 | 6.66E-03 | 3.40E-02 |
| ENSG00000196460 | RFX8       | 2  | 101397359 | 101475112 | 77753   | protein coding                       | -1.17 | 7.01E-03 | 3.51E-02 |
| ENSG00000105357 | MYH14      | 19 | 50188186  | 50310542  | 122356  | protein coding                       | -1.17 | 1.04E-03 | 9.57E-03 |
| ENSG00000261996 | AC004706.1 | 17 | 6653464   | 6655009   | 1545    | lncRNA                               | -1.17 | 7.95E-03 | 3.82E-02 |
| ENSG00000214797 | AP002358.1 | 11 | 59268876  | 59284033  | 15157   | lncRNA                               | -1.17 | 4.04E-03 | 2.41E-02 |
| ENSG00000082684 | SEMA5B     | 3  | 122909082 | 123028605 | 119523  | protein coding                       | -1.17 | 4.59E-04 | 5.50E-03 |
| ENSG00000134762 | DSC3       | 18 | 30989365  | 31042815  | 53450   | protein coding                       | -1.17 | 9.51E-03 | 4.31E-02 |
| ENSG00000132164 | SLC6A11    | 3  | 10816201  | 10940714  | 124513  | protein coding                       | -1.17 | 3.37E-03 | 2.14E-02 |
| ENSG00000273084 | AC092171.5 | 7  | 5428731   | 5429672   | 941     | lncRNA                               | -1.17 | 7.72E-03 | 3.75E-02 |
| ENSG00000122966 | CIT        | 12 | 119685791 | 119877320 | 191529  | protein coding                       | -1.17 | 6.64E-07 | 6.61E-05 |
| ENSG00000079841 | RIMS1      | 6  | 71886703  | 72403143  | 516440  | protein coding                       | -1.17 | 7.05E-03 | 3.53E-02 |
| ENSG00000177511 | ST8SIA3    | 18 | 57352557  | 57371731  | 19174   | protein coding                       | -1.17 | 6.51E-03 | 3.35E-02 |
| ENSG00000159263 | SIM2       | 21 | 36699115  | 36749917  | 50802   | protein coding                       | -1.17 | 6.58E-03 | 3.38E-02 |
| ENSG00000108576 | SLC6A4     | 17 | 30194319  | 30236002  | 41683   | protein coding                       | -1.17 | 1.76E-04 | 2.90E-03 |
| ENSG00000282556 | AC068733.3 | 11 | 6319140   | 6360454   | 41314   | lncRNA                               | -1.17 | 4.43E-03 | 2.58E-02 |
| ENSG00000173705 | SUSD5      | 3  | 33150043  | 33218810  | 68767   | protein coding                       | -1.17 | 3.70E-03 | 2.28E-02 |
| ENSG00000225206 | MIR137HG   | 1  | 97933474  | 98049863  | 116389  | lncRNA                               | -1.17 | 6.01E-03 | 3.17E-02 |
| ENSG00000272549 | LINC02538  | 6  | 167666840 | 167679270 | 12430   | lncRNA                               | -1.17 | 5.83E-03 | 3.10E-02 |
| ENSG00000169184 | MN1        | 22 | 27748277  | 27801756  | 53479   | protein coding                       | -1.17 | 1.50E-05 | 5.48E-04 |
| ENSG00000143552 | NUP210L    | 1  | 153992685 | 154155116 | 162431  | protein coding                       | -1.17 | 6.19E-04 | 6.72E-03 |
| ENSG00000163909 | HEYL       | 1  | 39623435  | 39639643  | 16208   | protein coding                       | -1.17 | 7.89E-03 | 3.80E-02 |
| ENSG00000135773 | CAPN9      | 1  | 230747384 | 230802003 | 54619   | protein coding                       | -1.17 | 9.23E-03 | 4.22E-02 |
| ENSG00000155875 | SAXO1      | 9  | 18858906  | 19049358  | 190452  | protein coding                       | -1.17 | 5.29E-04 | 6.05E-03 |
| ENSG00000080031 | PTPRH      | 19 | 55181247  | 55209506  | 28259   | protein coding                       | -1.17 | 7.38E-04 | 7.58E-03 |
| ENSG00000168878 | SFTPB      | 2  | 85657314  | 85668741  | 11427   | protein coding                       | -1.17 | 4.41E-03 | 2.57E-02 |
| ENSG00000156140 | ADAMT53    | 4  | 72280969  | 72569221  | 288252  | protein coding                       | -1.18 | 7.28E-03 | 3.60E-02 |
| ENSG00000145864 | GABBR2     | 5  | 161288429 | 161549044 | 260615  | protein coding                       | -1.18 | 1.43E-03 | 1.19E-02 |
| ENSG00000088367 | EPB41L1    | 20 | 36091504  | 36232799  | 141295  | protein coding                       | -1.18 | 2.59E-04 | 3.77E-03 |
| ENSG00000233654 | AC108047.1 | 2  | 190534855 | 190569776 | 34921   | lncRNA-antisense                     | -1.18 | 7.75E-03 | 3.75E-02 |
| ENSG00000111907 | TPD52L1    | 6  | 125119049 | 125264407 | 145358  | protein coding                       | -1.18 | 4.48E-03 | 2.60E-02 |
| ENSG00000104611 | SH2D4A     | 8  | 19313693  | 19396218  | 82525   | protein coding                       | -1.18 | 6.05E-03 | 3.19E-02 |
| ENSG00000106258 | CYP3A5     | 7  | 99648194  | 99679998  | 31804   | protein coding                       | -1.18 | 3.61E-04 | 4.68E-03 |
| ENSG00000229847 | EMX2OS     | 10 | 117473215 | 117545068 | 71853   | lncRNA-antisense                     | -1.18 | 1.36E-03 | 1.15E-02 |
| ENSG00000141750 | STAC2      | 17 | 39210541  | 39225945  | 15404   | protein coding                       | -1.18 | 2.85E-03 | 1.90E-02 |
| ENSG00000223466 | LINC01825  | 2  | 195532945 | 195540287 | 7342    | lncRNA                               | -1.18 | 5.00E-03 | 2.80E-02 |
| ENSG00000130032 | PRRG3      | X  | 151694607 | 151705924 | 11317   | protein coding                       | -1.18 | 5.82E-03 | 3.10E-02 |
| ENSG00000124915 | MYRF-AS1   | 11 | 61746493  | 61757655  | 11162   | lncRNA                               | -1.18 | 5.54E-03 | 3.00E-02 |
| ENSG00000142945 | KIF2C      | 1  | 44739818  | 44767767  | 27949   | protein coding                       | -1.18 | 2.34E-03 | 1.67E-02 |
| ENSG00000256713 | PGA5       | 11 | 61241175  | 61251444  | 10269   | protein coding                       | -1.18 | 1.07E-02 | 4.69E-02 |
| ENSG00000146839 | ZAN        | 7  | 100733595 | 100797797 | 64202   | protein coding                       | -1.18 | 1.68E-03 | 1.32E-02 |
| ENSG00000280916 | FOXQ1      | 6  | 1601654   | 1607354   | 5700    | lncRNA                               | -1.18 | 1.17E-02 | 5.00E-02 |
| ENSG00000233593 | LINC02609  | 1  | 90769086  | 90851658  | 82572   | lncRNA                               | -1.18 | 1.95E-03 | 1.47E-02 |
| ENSG00000250208 | FZD10-AS1  | 12 | 130144315 | 130162256 | 17941   | lncRNA                               | -1.18 | 1.03E-03 | 9.47E-03 |
| ENSG00000112812 | PRSS16     | 6  | 27247701  | 27256624  | 8923    | protein coding                       | -1.18 | 9.28E-04 | 8.87E-03 |
| ENSG00000171962 | DRC3       | 17 | 17972813  | 18016889  | 44076   | protein coding                       | -1.18 | 2.12E-05 | 6.79E-04 |
| ENSG00000198576 | ARC        | 8  | 142611049 | 142614479 | 3430    | protein coding                       | -1.18 | 6.26E-03 | 3.26E-02 |
| ENSG00000136535 | TBR1       | 2  | 161416297 | 161425870 | 9573    | protein coding                       | -1.18 | 7.12E-03 | 3.55E-02 |
| ENSG00000179528 | LBX2       | 2  | 74497517  | 74503316  | 5799    | protein coding                       | -1.18 | 2.83E-04 | 4.01E-03 |
| ENSG00000164488 | DACT2      | 6  | 168292830 | 168319777 | 26947   | protein coding                       | -1.18 | 1.00E-02 | 4.48E-02 |
| ENSG00000229140 | CCDC26     | 8  | 128634199 | 129683770 | 1049571 | lncRNA                               | -1.18 | 3.35E-07 | 4.11E-05 |
| ENSG00000049283 | EPN3       | 17 | 50532682  | 50543750  | 11068   | protein coding                       | -1.18 | 1.10E-02 | 4.77E-02 |
| ENSG00000238098 | ABCA17P    | 16 | 2339150   | 2426699   | 87549   | transcribed unitary pseudogene       | -1.18 | 1.47E-03 | 1.21E-03 |
| ENSG00000090530 | P3H2       | 3  | 189956728 | 190122437 | 165709  | protein coding                       | -1.18 | 4.33E-04 | 5.29E-03 |
| ENSG00000229589 | ACVR2B-AS1 | 3  | 38451027  | 38454820  | 3793    | lncRNA-antisense                     | -1.18 | 8.61E-03 | 4.03E-02 |
| ENSG00000163833 | FBXO4P     | 3  | 121593379 | 121630295 | 36916   | protein coding                       | -1.18 | 6.40E-03 | 3.31E-02 |
| ENSG00000278530 | CHMP1B2P   | X  | 80228489  | 80335364  | 106875  | transcribed unitary pseudogene       | -1.18 | 6.73E-03 | 3.42E-02 |
| ENSG00000167772 | ANGPTL4    | 19 | 8363289   | 8374370   | 11081   | protein coding                       | -1.18 | 8.32E-03 | 3.94E-02 |
| ENSG00000228526 | MIR34AHG   | 1  | 9148011   | 9198906   | 50895   | lncRNA                               | -1.18 | 1.45E-05 | 5.36E-04 |
| ENSG00000197893 | NRAP       | 10 | 113588714 | 113664070 | 75356   | protein coding                       | -1.18 | 5.40E-03 | 2.95E-02 |
| ENSG00000131746 | TNS4       | 17 | 40475828  | 40501623  | 25795   | protein coding                       | -1.18 | 1.92E-04 | 3.07E-03 |
| ENSG00000144668 | ITGA9      | 3  | 37452115  | 37823507  | 371392  | protein coding                       | -1.18 | 3.05E-06 | 1.84E-04 |
| ENSG00000255458 | AC108471.2 | 4  | 39639107  | 39666879  | 27772   | lncRNA-bidirectional promoter lncRNA | -1.18 | 2.47E-03 | 1.73E-02 |

|                 |             |    |           |           |         |                                      |       |          |          |
|-----------------|-------------|----|-----------|-----------|---------|--------------------------------------|-------|----------|----------|
| ENSG00000189013 | KIR2DL4     | 19 | 54803535  | 54814517  | 10982   | protein coding                       | -1.18 | 3.35E-03 | 2.13E-02 |
| ENSG00000257307 | AL162311.2  | 14 | 35881001  | 35881709  | 708     | processed_pseudogene                 | -1.19 | 1.88E-03 | 1.43E-02 |
| ENSG00000117122 | MFAP2       | 1  | 16974502  | 16980632  | 6130    | protein coding                       | -1.19 | 5.60E-03 | 3.02E-02 |
| ENSG00000100884 | CPNE6       | 14 | 24070837  | 24078100  | 7263    | protein coding                       | -1.19 | 7.73E-03 | 3.75E-02 |
| ENSG00000230131 | LINC02641   | 10 | 123356450 | 123537767 | 181317  | lncRNA                               | -1.19 | 2.17E-06 | 1.49E-04 |
| ENSG0000070886  | EPHA8       | 1  | 22563489  | 22603595  | 40106   | protein coding                       | -1.19 | 3.95E-03 | 2.37E-02 |
| ENSG00000263761 | GDF2        | 10 | 47322454  | 47327588  | 5134    | protein coding                       | -1.19 | 1.05E-02 | 4.62E-02 |
| ENSG00000281406 | BLACAT1     | 1  | 205434885 | 205457091 | 22206   | protein coding                       | -1.19 | 3.96E-03 | 2.38E-02 |
| ENSG00000169946 | ZFPM2       | 8  | 104590733 | 105804539 | 1213806 | protein coding                       | -1.19 | 2.52E-03 | 1.75E-02 |
| ENSG00000157064 | NMNAT2      | 1  | 183248237 | 183418380 | 170143  | protein coding                       | -1.19 | 2.21E-03 | 1.60E-02 |
| ENSG00000119547 | ONECUT2     | 18 | 57435374  | 57491298  | 55924   | protein coding                       | -1.19 | 4.53E-03 | 2.62E-02 |
| ENSG00000168481 | LG3         | 8  | 22146830  | 22157084  | 10254   | protein coding                       | -1.19 | 9.20E-03 | 4.21E-02 |
| ENSG00000206432 | TMEM200C    | 18 | 5882072   | 5895955   | 13883   | protein coding                       | -1.19 | 9.19E-04 | 8.79E-03 |
| ENSG00000159915 | ZNF233      | 19 | 44259880  | 44275317  | 15437   | protein coding                       | -1.19 | 8.68E-04 | 8.46E-03 |
| ENSG00000204241 | LINC02731   | 11 | 134032216 | 134067936 | 35720   | lncRNA                               | -1.19 | 3.09E-05 | 8.74E-04 |
| ENSG00000188958 | UTS2B       | 3  | 191267168 | 191330536 | 63368   | protein coding                       | -1.19 | 5.13E-03 | 2.84E-02 |
| ENSG00000176678 | FOXL1       | 16 | 86576368  | 86583478  | 7110    | protein coding                       | -1.19 | 8.28E-03 | 3.92E-02 |
| ENSG00000041515 | MYO16       | 13 | 108596152 | 109208005 | 611853  | protein coding                       | -1.19 | 4.40E-04 | 5.35E-03 |
| ENSG00000075218 | GTSE1       | 22 | 46296870  | 46330810  | 33940   | protein coding                       | -1.19 | 3.90E-04 | 4.95E-03 |
| ENSG00000258405 | ZNF578      | 19 | 52453553  | 52516882  | 63329   | protein coding                       | -1.19 | 1.89E-02 | 3.05E-03 |
| ENSG00000223573 | TINCR       | 19 | 5558167   | 5578349   | 20182   | protein coding                       | -1.19 | 5.09E-03 | 2.83E-02 |
| ENSG00000196482 | ESRRG       | 1  | 216503246 | 217137755 | 634509  | protein coding                       | -1.19 | 4.17E-03 | 2.47E-02 |
| ENSG00000154380 | ENAH        | 1  | 225486835 | 225653142 | 166307  | protein coding                       | -1.19 | 7.37E-06 | 3.38E-04 |
| ENSG00000134193 | REG4        | 1  | 119794017 | 119811580 | 17563   | protein coding                       | -1.19 | 8.21E-03 | 3.90E-02 |
| ENSG00000283078 | AL137077.2  | 20 | 62066830  | 62068437  | 1607    | lncRNA                               | -1.19 | 8.96E-03 | 4.14E-02 |
| ENSG00000257851 | HNRNPA3P10  | 12 | 51712469  | 51713606  | 1137    | processed_pseudogene                 | -1.19 | 8.17E-03 | 3.89E-02 |
| ENSG00000187726 | DNAJB13     | 11 | 73951026  | 73970366  | 19340   | protein coding                       | -1.19 | 3.67E-03 | 2.26E-02 |
| ENSG00000246250 | AC087521.2  | 11 | 43827517  | 43880726  | 53209   | lncRNA-antisense                     | -1.19 | 2.20E-03 | 1.60E-02 |
| ENSG00000145832 | SLC25A48    | 5  | 135579202 | 13588970  | 310568  | protein coding                       | -1.19 | 3.89E-03 | 2.35E-02 |
| ENSG00000130762 | ARHGFE16    | 1  | 3454665   | 3481113   | 26448   | protein coding                       | -1.19 | 7.83E-03 | 3.78E-02 |
| ENSG00000129195 | PIMREG      | 17 | 6444441   | 6451469   | 7028    | protein coding                       | -1.19 | 1.12E-02 | 4.84E-02 |
| ENSG00000188130 | MAPK12      | 22 | 50245450  | 50261176  | 16266   | protein coding                       | -1.19 | 1.14E-03 | 1.01E-02 |
| ENSG00000186510 | CLCNKA      | 1  | 16018875  | 16034050  | 15175   | protein coding                       | -1.19 | 2.86E-03 | 1.91E-02 |
| ENSG00000164556 | FAM183BP    | 7  | 38685346  | 38687037  | 1691    | processed_pseudogene                 | -1.19 | 1.03E-02 | 4.56E-02 |
| ENSG00000161973 | CCDC42      | 17 | 8729935   | 8745219   | 15284   | protein coding                       | -1.19 | 1.06E-02 | 4.65E-02 |
| ENSG00000170477 | KRT4        | 12 | 52806549  | 52814116  | 7567    | protein coding                       | -1.19 | 9.32E-03 | 4.25E-02 |
| ENSG00000083067 | TRPM3       | 9  | 70529060  | 71446904  | 917844  | protein coding                       | -1.19 | 1.75E-03 | 1.36E-02 |
| ENSG00000288540 | AL008720.2  | 22 | 48320412  | 48333199  | 12787   | lncRNA                               | -1.20 | 9.88E-03 | 4.43E-02 |
| ENSG00000197410 | DCHS2       | 4  | 154231742 | 154491799 | 260057  | protein coding                       | -1.20 | 1.56E-04 | 2.66E-03 |
| ENSG00000169071 | ROR2        | 9  | 91563091  | 91950228  | 387137  | protein coding                       | -1.20 | 9.85E-04 | 9.21E-03 |
| ENSG00000149380 | PAHA3       | 11 | 74235801  | 74311640  | 75839   | protein coding                       | -1.20 | 4.92E-03 | 2.77E-02 |
| ENSG00000275832 | ARHGAP23    | 17 | 38419280  | 38512385  | 93105   | protein coding                       | -1.20 | 1.33E-06 | 1.03E-04 |
| ENSG00000164066 | INTU        | 4  | 127623271 | 127726737 | 103466  | protein coding                       | -1.20 | 2.88E-04 | 4.05E-03 |
| ENSG00000273674 | AC021752.1  | 15 | 50839875  | 50908603  | 68728   | lncRNA                               | -1.20 | 1.67E-03 | 1.32E-02 |
| ENSG00000142623 | PADI1       | 1  | 17205128  | 17246007  | 40879   | protein coding                       | -1.20 | 1.08E-02 | 4.70E-02 |
| ENSG00000144821 | MYH15       | 3  | 108380368 | 108529322 | 148954  | protein coding                       | -1.20 | 3.09E-04 | 4.24E-03 |
| ENSG00000267750 | RUNDC3A-AS1 | 17 | 44299574  | 44315315  | 15741   | lncRNA-antisense                     | -1.20 | 7.37E-05 | 1.60E-03 |
| ENSG00000177294 | FBXO39      | 17 | 6776215   | 6797101   | 20886   | protein coding                       | -1.20 | 6.97E-04 | 7.28E-03 |
| ENSG00000175264 | CHST1       | 11 | 45647689  | 45665622  | 17933   | protein coding                       | -1.20 | 2.88E-03 | 1.92E-02 |
| ENSG00000159337 | PLA2G4D     | 15 | 42067009  | 42094562  | 27553   | protein coding                       | -1.20 | 1.40E-03 | 1.17E-02 |
| ENSG00000132837 | DMGDH       | 5  | 78997564  | 79236038  | 238474  | protein coding                       | -1.20 | 1.09E-03 | 9.83E-03 |
| ENSG00000137962 | ARHGAP29    | 1  | 94148988  | 94275068  | 126080  | protein coding                       | -1.20 | 1.39E-04 | 2.45E-03 |
| ENSG00000164078 | MST1R       | 3  | 49887002  | 49903873  | 16871   | protein coding                       | -1.20 | 7.08E-04 | 7.37E-03 |
| ENSG00000233602 | ERI3-IT1    | 1  | 44243408  | 44244273  | 865     | lncRNA-sense intronic                | -1.20 | 1.00E-02 | 4.48E-02 |
| ENSG00000234945 | GTF3C2-AS1  | 2  | 27335520  | 27342599  | 7079    | lncRNA-antisense                     | -1.20 | 1.06E-03 | 9.68E-03 |
| ENSG00000215915 | ATAD3C      | 1  | 1449689   | 1470163   | 20474   | protein coding                       | -1.20 | 3.16E-05 | 8.87E-04 |
| ENSG00000217416 | ISCA1P1     | 5  | 62776877  | 62777263  | 386     | processed_pseudogene                 | -1.20 | 1.73E-03 | 1.35E-02 |
| ENSG00000228818 | AL359918.1  | 1  | 240142670 | 240145389 | 2719    | processed_pseudogene                 | -1.20 | 1.14E-02 | 4.88E-02 |
| ENSG00000228058 | LINC01736   | 1  | 230002372 | 230007195 | 4823    | lncRNA                               | -1.20 | 2.43E-03 | 1.71E-02 |
| ENSG00000138316 | ADAMTS14    | 10 | 70672506  | 70762441  | 89935   | protein coding                       | -1.20 | 3.76E-03 | 2.30E-02 |
| ENSG00000285091 | AL109840.2  | 20 | 58916000  | 58981169  | 65169   | lncRNA-bidirectional promoter lncRNA | -1.20 | 8.59E-03 | 4.02E-02 |
| ENSG00000226581 | LINC02848   | 7  | 63900313  | 63925202  | 24889   | lncRNA                               | -1.20 | 1.82E-04 | 2.97E-03 |
| ENSG00000109265 | CRACD       | 4  | 56049073  | 56328625  | 279552  | protein coding                       | -1.20 | 7.90E-05 | 1.68E-03 |
| ENSG00000171487 | NLRP5       | 19 | 55999726  | 56061810  | 62084   | protein coding                       | -1.20 | 3.36E-03 | 2.13E-02 |
| ENSG00000183317 | EPHA10      | 1  | 37713880  | 37765133  | 51253   | protein coding                       | -1.20 | 1.39E-04 | 2.45E-03 |
| ENSG00000182379 | NXP4        | 12 | 57216794  | 57226449  | 9655    | protein coding                       | -1.20 | 7.36E-03 | 3.63E-02 |
| ENSG00000182747 | SLC35D3     | 6  | 136922301 | 136925660 | 3359    | protein coding                       | -1.20 | 5.77E-03 | 3.09E-02 |
| ENSG00000187957 | DNER        | 2  | 229357629 | 229714555 | 356926  | protein coding                       | -1.20 | 5.05E-03 | 2.82E-02 |
| ENSG00000075891 | PAX2        | 10 | 100735603 | 100829944 | 94341   | protein coding                       | -1.20 | 8.18E-04 | 8.15E-03 |
| ENSG00000286909 | AC024560.4  | 3  | 197649303 | 197651482 | 2179    | lncRNA                               | -1.20 | 7.94E-04 | 7.97E-03 |
| ENSG00000187783 | TMEM72      | 10 | 44911316  | 44937010  | 25694   | protein coding                       | -1.20 | 7.38E-03 | 3.64E-02 |
| ENSG00000170421 | KRT8        | 12 | 52897187  | 52949954  | 52767   | protein coding                       | -1.21 | 1.81E-05 | 6.14E-04 |
| ENSG00000280007 | AC008079.1  | 22 | 18110759  | 18131154  | 20395   | lncRNA-antisense                     | -1.21 | 5.26E-06 | 2.68E-04 |
| ENSG00000272078 | AL139423.1  | 1  | 10639241  | 10654333  | 15092   | lncRNA-antisense                     | -1.21 | 3.40E-04 | 4.50E-03 |
| ENSG00000136931 | NR5A1       | 9  | 124481236 | 124507420 | 26184   | protein coding                       | -1.21 | 7.03E-03 | 3.52E-02 |
| ENSG00000132671 | SSTR4       | 20 | 23035312  | 23039237  | 3925    | protein coding                       | -1.21 | 7.66E-03 | 3.73E-02 |
| ENSG00000110237 | ARHGFE17    | 11 | 73308276  | 73369388  | 61112   | protein coding                       | -1.21 | 1.07E-05 | 4.32E-04 |
| ENSG00000140832 | MARVELD3    | 16 | 71626161  | 71642114  | 15953   | protein coding                       | -1.21 | 9.55E-04 | 9.03E-03 |
| ENSG00000245468 | LINC02447   | 4  | 7093776   | 7103394   | 9618    | lncRNA                               | -1.21 | 8.21E-05 | 1.72E-03 |
| ENSG00000170153 | RNF150      | 4  | 140859807 | 141212877 | 353070  | protein coding                       | -1.21 | 3.79E-03 | 2.31E-02 |
| ENSG00000151025 | GPR158      | 10 | 25174802  | 25602229  | 427427  | protein coding                       | -1.21 | 8.94E-03 | 4.13E-02 |
| ENSG00000272970 | AC107294.2  | 3  | 184712245 | 18474010  | 27859   | lncRNA                               | -1.21 | 7.01E-03 | 3.51E-02 |
| ENSG00000237187 | NR2F1-AS1   | 5  | 93360779  | 93585649  | 224870  | lncRNA-antisense                     | -1.21 | 2.90E-04 | 4.06E-03 |
| ENSG00000130413 | STK33       | 11 | 8391868   | 8594289   | 202421  | protein coding                       | -1.21 | 1.00E-04 | 1.98E-03 |
| ENSG00000213225 | NOC2L1P1    | 2  | 130229379 | 130232106 | 2727    | transcribed processed_pseudogene     | -1.21 | 8.36E-03 | 3.95E-02 |
| ENSG00000171303 | KCNK3       | 2  | 26692690  | 26733420  | 40730   | protein coding                       | -1.21 | 3.52E-03 | 2.20E-02 |
| ENSG00000152931 | PART1       | 5  | 60487713  | 60548813  | 61100   | lncRNA                               | -1.21 | 1.32E-03 | 1.12E-02 |
| ENSG00000166833 | NAV2        | 11 | 19350274  | 20121601  | 770877  | protein coding                       | -1.21 | 2.71E-05 | 7.97E-04 |
| ENSG00000188501 | LCTL        | 15 | 66547179  | 66565979  | 18800   | protein coding                       | -1.21 | 1.03E-03 | 9.50E-03 |
| ENSG00000101282 | RSPO4       | 20 | 958452    | 1002311   | 43859   | protein coding                       | -1.21 | 6.75E-03 | 3.43E-02 |

|                 |            |    |           |           |         |                                      |       |          |          |
|-----------------|------------|----|-----------|-----------|---------|--------------------------------------|-------|----------|----------|
| ENSG00000135424 | ITGA7      | 12 | 55684568  | 55716043  | 31475   | protein coding                       | -1.21 | 5.91E-06 | 2.89E-04 |
| ENSG00000006611 | USH1C      | 11 | 17493895  | 17544416  | 50521   | protein coding                       | -1.21 | 2.58E-03 | 1.79E-02 |
| ENSG00000177359 | AC024940.1 | 12 | 31111652  | 31201235  | 89583   | transcribed unprocessed pseudogene   | -1.21 | 1.82E-04 | 2.97E-03 |
| ENSG00000130037 | KCNA5      | 12 | 5043879   | 5046788   | 2909    | protein coding                       | -1.21 | 3.32E-03 | 2.12E-02 |
| ENSG00000174370 | C11orf45   | 11 | 128899565 | 128906035 | 6470    | protein coding                       | -1.21 | 3.00E-03 | 1.98E-02 |
| ENSG00000180113 | TDRD6      | 6  | 46687875  | 46704319  | 16444   | protein coding                       | -1.21 | 7.72E-04 | 7.83E-03 |
| ENSG00000202217 | RN7SKP47   | 9  | 74799895  | 74800222  | 327     | misc RNA                             | -1.21 | 4.89E-03 | 2.76E-02 |
| ENSG00000116774 | OLFML3     | 1  | 113979391 | 114035572 | 56181   | protein coding                       | -1.21 | 3.64E-03 | 2.25E-02 |
| ENSG00000236039 | AC019117.1 | 7  | 17405479  | 17558909  | 153430  | lncRNA                               | -1.21 | 9.42E-03 | 4.28E-02 |
| ENSG00000119147 | ECRG4      | 2  | 106063246 | 106078155 | 14909   | protein coding                       | -1.21 | 2.86E-03 | 1.91E-02 |
| ENSG00000168309 | FAM107A    | 3  | 58564117  | 58627610  | 63493   | protein coding                       | -1.21 | 1.49E-03 | 1.22E-02 |
| ENSG00000150873 | Czor50     | 2  | 11133128  | 11151317  | 18189   | protein coding                       | -1.21 | 4.20E-04 | 5.18E-03 |
| ENSG00000187391 | MAGI2      | 7  | 78017055  | 79453667  | 1436612 | protein coding                       | -1.21 | 3.82E-05 | 1.01E-03 |
| ENSG00000251602 | AL928654.1 | 14 | 105416884 | 105419739 | 2855    | lncRNA-antisense                     | -1.21 | 2.28E-03 | 1.64E-02 |
| ENSG00000162571 | TLL10      | 1  | 1173880   | 1197936   | 24056   | protein coding                       | -1.21 | 3.03E-03 | 1.99E-02 |
| ENSG00000161681 | SHANK1     | 19 | 50659255  | 50719802  | 60547   | protein coding                       | -1.21 | 1.47E-04 | 2.54E-03 |
| ENSG00000064787 | BCAS1      | 20 | 53936777  | 54070594  | 133817  | protein coding                       | -1.21 | 7.58E-05 | 1.64E-03 |
| ENSG00000143921 | ABCG8      | 2  | 43831942  | 43882988  | 51046   | protein coding                       | -1.21 | 4.01E-03 | 2.40E-02 |
| ENSG00000256925 | ADGRA1-AS1 | 10 | 133083073 | 133088491 | 5418    | lncRNA-antisense                     | -1.21 | 6.47E-03 | 3.33E-02 |
| ENSG00000185958 | FAM186A    | 12 | 50326230  | 50396622  | 70392   | protein coding                       | -1.21 | 3.43E-03 | 2.16E-02 |
| ENSG00000150760 | DOCK1      | 10 | 126905409 | 127452517 | 547108  | protein coding                       | -1.21 | 1.56E-06 | 1.18E-04 |
| ENSG00000248936 | AC027607.1 | 4  | 37588087  | 37588875  | 788     | lncRNA-antisense                     | -1.21 | 5.54E-03 | 3.00E-02 |
| ENSG00000229569 | AL356753.1 | 10 | 79000484  | 79003803  | 3319    | lncRNA                               | -1.21 | 5.19E-03 | 2.87E-02 |
| ENSG00000277020 | AL590096.1 | 13 | 20564708  | 20567045  | 2337    | lncRNA-antisense                     | -1.22 | 1.12E-02 | 4.82E-02 |
| ENSG00000204248 | COL11A2    | 6  | 33162681  | 33192499  | 29818   | protein coding                       | -1.22 | 7.56E-05 | 1.64E-03 |
| ENSG00000104213 | PDGFRL     | 8  | 15756433  | 17644071  | 67638   | protein coding                       | -1.22 | 1.93E-03 | 1.46E-02 |
| ENSG00000168702 | LRP1B      | 2  | 140231423 | 142131016 | 1899593 | protein coding                       | -1.22 | 1.01E-03 | 9.34E-03 |
| ENSG00000156687 | UNC5D      | 8  | 35235475  | 35796550  | 561075  | protein coding                       | -1.22 | 6.76E-03 | 3.43E-02 |
| ENSG00000186715 | MST1L      | 1  | 16754910  | 16770237  | 15327   | transcribed unprocessed pseudogene   | -1.22 | 1.76E-03 | 1.37E-02 |
| ENSG00000261251 | Z97055.2   | 22 | 43812456  | 43817394  | 4938    | lncRNA-antisense                     | -1.22 | 1.63E-04 | 2.75E-03 |
| ENSG00000009950 | MLXIPL     | 7  | 73593194  | 73624543  | 31349   | protein coding                       | -1.22 | 1.53E-03 | 1.24E-02 |
| ENSG00000122574 | WPF3       | 7  | 29806486  | 29917066  | 110580  | protein coding                       | -1.22 | 6.72E-03 | 3.42E-02 |
| ENSG00000087250 | MT3        | 16 | 56589074  | 56591088  | 2014    | protein coding                       | -1.22 | 2.84E-03 | 1.90E-02 |
| ENSG00000165643 | SOHLH1     | 9  | 135693407 | 135704498 | 11091   | protein coding                       | -1.22 | 3.20E-03 | 2.07E-02 |
| ENSG00000173320 | STOX2      | 4  | 183797892 | 184023526 | 225834  | protein coding                       | -1.22 | 3.63E-04 | 4.69E-03 |
| ENSG00000185942 | NKAIN3     | 8  | 62248591  | 63014200  | 765409  | protein coding                       | -1.22 | 1.28E-05 | 4.96E-04 |
| ENSG00000250986 | LINC02600  | 4  | 3758748   | 3763390   | 4642    | lncRNA                               | -1.22 | 5.35E-03 | 2.93E-02 |
| ENSG00000270823 | AC007938.2 | 7  | 130495794 | 130498427 | 2633    | lncRNA-antisense                     | -1.22 | 2.25E-03 | 1.63E-02 |
| ENSG00000267270 | PARD6G-AS1 | 18 | 80147924  | 80179839  | 31915   | lncRNA-antisense                     | -1.22 | 8.85E-07 | 8.00E-05 |
| ENSG00000058335 | RASGRF1    | 15 | 78959906  | 79090780  | 130874  | protein coding                       | -1.22 | 3.67E-04 | 4.73E-03 |
| ENSG00000205084 | TMEM231    | 16 | 75536741  | 75556268  | 19527   | protein coding                       | -1.22 | 7.55E-04 | 7.71E-03 |
| ENSG00000285219 | HULC       | 6  | 8435568   | 8294133   | 858565  | lncRNA-bidirectional promoter lncRNA | -1.22 | 3.92E-05 | 1.03E-03 |
| ENSG00000151067 | CACNA1C    | 12 | 1970786   | 2697950   | 727164  | protein coding                       | -1.22 | 4.15E-04 | 5.15E-03 |
| ENSG00000277363 | SRCIN1     | 17 | 38530031  | 38605952  | 75921   | protein coding                       | -1.22 | 4.29E-04 | 5.24E-03 |
| ENSG00000234457 | AC006960.1 | 7  | 36305631  | 36305904  | 273     | processed pseudogene                 | -1.22 | 6.76E-03 | 3.43E-02 |
| ENSG00000251322 | SHANK3     | 22 | 50674415  | 50733298  | 58883   | protein coding                       | -1.22 | 1.13E-03 | 1.01E-02 |
| ENSG00000233217 | MROH3P     | 1  | 200917460 | 200966668 | 49208   | transcribed unitary pseudogene       | -1.22 | 4.29E-03 | 2.52E-02 |
| ENSG00000242114 | MTFP1      | 22 | 30425623  | 30429054  | 3431    | protein coding                       | -1.22 | 9.15E-03 | 4.20E-02 |
| ENSG00000250120 | PCDHA10    | 5  | 140855883 | 141012347 | 156464  | protein coding                       | -1.22 | 8.03E-03 | 3.84E-02 |
| ENSG00000106571 | GLI3       | 7  | 41960949  | 42264100  | 303151  | protein coding                       | -1.22 | 8.75E-05 | 1.80E-05 |
| ENSG00000186868 | MAPT       | 17 | 45894551  | 46028334  | 133783  | protein coding                       | -1.22 | 9.02E-07 | 8.05E-05 |
| ENSG00000180581 | SRP9P1     | 10 | 91807179  | 91807439  | 260     | processed pseudogene                 | -1.22 | 1.37E-03 | 1.15E-02 |
| ENSG00000167780 | SOAT2      | 12 | 53103486  | 53124535  | 21049   | protein coding                       | -1.22 | 1.06E-03 | 9.67E-03 |
| ENSG00000135097 | MSI1       | 12 | 120341330 | 120369164 | 27834   | protein coding                       | -1.22 | 8.14E-03 | 3.88E-02 |
| ENSG00000175874 | CREG2      | 2  | 101345550 | 101387030 | 41953   | protein coding                       | -1.22 | 5.33E-03 | 2.92E-02 |
| ENSG00000260400 | AL513534.2 | 10 | 68698500  | 68700794  | 2294    | lncRNA-sense overlapping             | -1.22 | 2.25E-03 | 1.62E-02 |
| ENSG00000094755 | GABRP      | 5  | 170763350 | 170814047 | 50697   | protein coding                       | -1.22 | 8.83E-03 | 4.10E-02 |
| ENSG00000156097 | GPR61      | 1  | 109539872 | 109548406 | 8534    | protein coding                       | -1.22 | 1.54E-03 | 1.25E-02 |
| ENSG00000130045 | NXNL2      | 9  | 88534033  | 88584274  | 50241   | protein coding                       | -1.22 | 4.10E-03 | 2.44E-02 |
| ENSG00000132927 | CLDN11     | 3  | 170418668 | 170454733 | 35865   | protein coding                       | -1.22 | 5.99E-03 | 3.16E-02 |
| ENSG00000136859 | ANGPTL2    | 9  | 127087348 | 127122635 | 35287   | protein coding                       | -1.22 | 2.68E-03 | 1.83E-02 |
| ENSG00000214353 | VAC14-AS1  | 16 | 70755035  | 70773251  | 18216   | lncRNA-antisense                     | -1.22 | 2.29E-04 | 3.48E-03 |
| ENSG00000174358 | SLC6A19    | 5  | 1201595   | 1225111   | 23516   | protein coding                       | -1.22 | 4.44E-05 | 1.12E-03 |
| ENSG00000256263 | DDX11L8    | 12 | 12310     | 13501     | 1191    | unprocessed pseudogene               | -1.22 | 2.91E-03 | 1.94E-02 |
| ENSG00000142611 | PRDM16     | 1  | 3069168   | 3438621   | 369453  | protein coding                       | -1.22 | 5.07E-04 | 5.87E-03 |
| ENSG00000080644 | CHRNA3     | 15 | 78593052  | 78621295  | 28243   | protein coding                       | -1.22 | 5.52E-03 | 2.99E-02 |
| ENSG00000230658 | KLHL7-DT   | 7  | 23100214  | 23105703  | 5489    | lncRNA                               | -1.22 | 7.67E-03 | 3.73E-02 |
| ENSG00000164099 | PRSS12     | 4  | 118280038 | 118353003 | 72965   | protein coding                       | -1.23 | 3.22E-03 | 2.07E-02 |
| ENSG00000143412 | ANXA9      | 1  | 150982249 | 150995634 | 13385   | protein coding                       | -1.23 | 1.38E-04 | 2.45E-03 |
| ENSG00000286654 | AC092636.1 | 2  | 96912549  | 96917272  | 4723    | lncRNA                               | -1.23 | 7.43E-03 | 3.65E-02 |
| ENSG00000226374 | LINC01345  | 1  | 3944547   | 3949024   | 4477    | lncRNA                               | -1.23 | 6.02E-03 | 3.18E-02 |
| ENSG00000231437 | LINC01750  | 1  | 111989770 | 111998842 | 9072    | lncRNA                               | -1.23 | 1.07E-02 | 4.69E-02 |
| ENSG00000233922 | LINC01694  | 21 | 45593654  | 45603088  | 9434    | lncRNA                               | -1.23 | 1.51E-03 | 1.23E-02 |
| ENSG00000283445 | AL136985.3 | 1  | 58715609  | 58771295  | 55686   | lncRNA                               | -1.23 | 1.14E-02 | 4.89E-02 |
| ENSG00000177453 | NIM1K      | 5  | 43192071  | 43280850  | 88779   | protein coding                       | -1.23 | 2.46E-04 | 3.65E-03 |
| ENSG00000122735 | DNAI1      | 9  | 34457414  | 34520988  | 63574   | protein coding                       | -1.23 | 6.63E-03 | 3.39E-02 |
| ENSG00000112379 | ARFGEF3    | 6  | 138161939 | 138344663 | 182724  | protein coding                       | -1.23 | 2.92E-04 | 4.08E-03 |
| ENSG00000253831 | ETV3L      | 1  | 157092043 | 157112412 | 20369   | protein coding                       | -1.23 | 8.22E-03 | 3.90E-02 |
| ENSG00000131730 | CKMT2      | 5  | 81233320  | 81266398  | 33078   | protein coding                       | -1.23 | 1.17E-03 | 1.03E-02 |
| ENSG00000078401 | EDN1       | 6  | 12290361  | 12297194  | 6833    | protein coding                       | -1.23 | 1.59E-03 | 1.27E-02 |
| ENSG00000131885 | KRT17P1    | 17 | 16840895  | 16845881  | 4986    | transcribed unprocessed pseudogene   | -1.23 | 9.51E-03 | 4.31E-02 |
| ENSG00000262312 | AC004494.1 | 16 | 3542739   | 3545875   | 3046    | lncRNA-antisense                     | -1.23 | 1.56E-03 | 1.26E-02 |
| ENSG00000273213 | H3-2       | 1  | 143894544 | 143905966 | 11422   | protein coding                       | -1.23 | 6.73E-03 | 3.42E-02 |
| ENSG00000148357 | HMCN2      | 9  | 130265882 | 130434123 | 168241  | protein coding                       | -1.23 | 5.75E-04 | 6.40E-03 |
| ENSG00000238198 | LRIG2-DT   | 1  | 113011687 | 113073113 | 61426   | lncRNA                               | -1.23 | 2.37E-03 | 1.68E-02 |
| ENSG00000158023 | CFAP251    | 12 | 121918592 | 122003927 | 85335   | protein coding                       | -1.23 | 1.14E-05 | 4.52E-04 |
| ENSG00000178184 | PARP6G     | 18 | 80157232  | 80247514  | 90282   | protein coding                       | -1.23 | 5.03E-03 | 2.81E-02 |
| ENSG00000162552 | WN74       | 1  | 22117313  | 22143969  | 26656   | protein coding                       | -1.23 | 6.79E-04 | 7.16E-03 |
| ENSG00000226903 | LINC00354  | 13 | 111865136 | 111901264 | 36128   | lncRNA                               | -1.23 | 6.02E-03 | 3.18E-02 |
| ENSG00000158525 | CPA5       | 7  | 130344816 | 130368730 | 23914   | protein coding                       | -1.23 | 2.26E-03 | 1.63E-02 |

|                 |             |    |           |           |         |                                    |       |          |          |
|-----------------|-------------|----|-----------|-----------|---------|------------------------------------|-------|----------|----------|
| ENSG00000231204 | AC011752.1  | 2  | 21317660  | 21561313  | 243653  | lncRNA                             | -1.23 | 8.29E-03 | 3.92E-02 |
| ENSG00000166448 | TMEM130     | 7  | 98846488  | 98870771  | 24283   | protein coding                     | -1.23 | 6.54E-03 | 3.36E-02 |
| ENSG00000152580 | IGSF10      | 3  | 151425384 | 151458709 | 33325   | protein coding                     | -1.23 | 6.04E-04 | 6.60E-03 |
| ENSG00000154548 | SRSF12      | 6  | 89095959  | 89118071  | 22112   | protein coding                     | -1.23 | 1.01E-02 | 4.50E-02 |
| ENSG00000075702 | WDR62       | 19 | 36054881  | 36105108  | 50227   | protein coding                     | -1.24 | 2.78E-06 | 1.73E-04 |
| ENSG00000101198 | NKAIN4      | 20 | 63240784  | 63272694  | 31910   | protein coding                     | -1.24 | 7.52E-03 | 3.68E-02 |
| ENSG00000254810 | AP001189.3  | 11 | 76654169  | 76656712  | 2543    | lncRNA                             | -1.24 | 9.18E-03 | 4.21E-02 |
| ENSG00000258811 | AL583810.2  | 14 | 104842663 | 104845916 | 3253    | lncRNA                             | -1.24 | 1.35E-03 | 1.14E-02 |
| ENSG00000137834 | SMAD6       | 15 | 66702236  | 66782849  | 80613   | protein coding                     | -1.24 | 3.52E-04 | 4.60E-03 |
| ENSG00000196335 | STK31       | 7  | 23710203  | 23832513  | 122310  | protein coding                     | -1.24 | 2.12E-04 | 3.29E-03 |
| ENSG00000144642 | RBMS3       | 3  | 28574791  | 30010391  | 1435600 | protein coding                     | -1.24 | 1.62E-05 | 5.71E-04 |
| ENSG00000259848 | AC097374.1  | 2  | 94867486  | 94947341  | 79855   | transcribed unprocessed pseudogene | -1.24 | 4.54E-04 | 5.46E-03 |
| ENSG00000168454 | TXNDC2      | 18 | 9885726   | 9889275   | 3549    | protein coding                     | -1.24 | 6.35E-03 | 3.29E-02 |
| ENSG00000115423 | DNAH6       | 2  | 84516455  | 84819589  | 303134  | protein coding                     | -1.24 | 1.90E-08 | 5.72E-06 |
| ENSG00000173699 | SPATA3      | 2  | 230990324 | 231025055 | 34731   | protein coding                     | -1.24 | 4.51E-03 | 2.61E-02 |
| ENSG00000145934 | TENM2       | 5  | 167284799 | 168264157 | 979358  | protein coding                     | -1.24 | 8.58E-04 | 8.39E-03 |
| ENSG00000261693 | AC134682.1  | 8  | 142403652 | 142407028 | 3376    | lncRNA-antisense                   | -1.24 | 8.11E-03 | 3.87E-02 |
| ENSG00000144057 | STGAL2      | 2  | 106801600 | 106887108 | 85508   | protein coding                     | -1.24 | 4.94E-03 | 2.78E-02 |
| ENSG00000179776 | CDH5        | 16 | 66366622  | 66404784  | 38162   | protein coding                     | -1.24 | 6.66E-04 | 7.06E-03 |
| ENSG00000229766 | AL021396.1  | 20 | 8019180   | 8043512   | 24332   | lncRNA-antisense                   | -1.24 | 7.29E-03 | 3.60E-02 |
| ENSG00000234948 | LINC01524   | 20 | 52192159  | 52670578  | 478419  | lncRNA                             | -1.24 | 3.29E-05 | 9.08E-04 |
| ENSG00000164199 | ADGRV1      | 5  | 90529344  | 91164437  | 635093  | protein coding                     | -1.24 | 1.27E-05 | 4.93E-04 |
| ENSG00000258479 | LINC00640   | 14 | 51333068  | 51365557  | 32489   | lncRNA                             | -1.24 | 1.11E-02 | 4.79E-02 |
| ENSG00000167105 | TMEM92      | 17 | 50271406  | 50281485  | 10079   | protein coding                     | -1.24 | 3.14E-03 | 2.04E-02 |
| ENSG00000205436 | EXOC3L4     | 14 | 103100144 | 103110559 | 10415   | protein coding                     | -1.24 | 1.07E-03 | 9.71E-03 |
| ENSG00000152822 | GRM1        | 6  | 146027646 | 146437601 | 409955  | protein coding                     | -1.24 | 1.60E-03 | 1.28E-02 |
| ENSG00000261003 | AL008628.1  | 6  | 170414139 | 170419325 | 5186    | lncRNA-sense overlapping           | -1.24 | 4.50E-04 | 5.43E-03 |
| ENSG00000177469 | CAVIN1      | 17 | 42402449  | 42423256  | 20807   | protein coding                     | -1.24 | 1.14E-03 | 1.01E-02 |
| ENSG00000278685 | IQCA1L      | 7  | 151190873 | 151205496 | 14623   | protein coding                     | -1.24 | 2.46E-04 | 3.65E-03 |
| ENSG00000179270 | PCARE       | 2  | 29060976  | 29074523  | 13547   | protein coding                     | -1.24 | 5.91E-03 | 3.14E-02 |
| ENSG00000143107 | FNDC7       | 1  | 108712908 | 108742749 | 29841   | protein coding                     | -1.24 | 7.51E-03 | 3.68E-02 |
| ENSG00000146221 | TCTE1       | 6  | 44278734  | 44297698  | 18964   | protein coding                     | -1.24 | 4.05E-05 | 1.05E-03 |
| ENSG00000169247 | SH3TC2      | 5  | 148923639 | 149063163 | 139524  | protein coding                     | -1.24 | 3.23E-06 | 1.93E-04 |
| ENSG00000174332 | GLIS1       | 1  | 53506237  | 53738106  | 231869  | protein coding                     | -1.24 | 2.67E-03 | 1.82E-02 |
| ENSG00000212807 | OR2A42      | 7  | 144228244 | 144239605 | 11361   | protein coding                     | -1.24 | 6.23E-03 | 3.25E-02 |
| ENSG00000116141 | MARK1       | 1  | 220528136 | 220664461 | 136325  | protein coding                     | -1.24 | 1.26E-03 | 1.09E-02 |
| ENSG00000253865 | AC131025.1  | 5  | 149372174 | 149375116 | 2942    | lncRNA-antisense                   | -1.24 | 4.01E-03 | 2.40E-02 |
| ENSG00000224924 | LINC00320   | 21 | 20651450  | 20803816  | 152366  | lncRNA                             | -1.24 | 3.24E-03 | 2.08E-02 |
| ENSG00000229956 | ZRANB2-AS2  | 1  | 71081324  | 71489976  | 408652  | lncRNA                             | -1.24 | 2.29E-06 | 1.53E-04 |
| ENSG00000272172 | AC138696.2  | 8  | 143290399 | 143290621 | 222     | lncRNA-antisense                   | -1.24 | 8.98E-03 | 4.14E-02 |
| ENSG00000232006 | AC005537.1  | 7  | 42954135  | 43113931  | 159796  | lncRNA                             | -1.24 | 2.37E-03 | 1.68E-02 |
| ENSG00000236699 | ARHGFB38    | 4  | 105552620 | 105708093 | 155473  | protein coding                     | -1.25 | 1.93E-03 | 1.46E-02 |
| ENSG00000175868 | CALCB       | 11 | 14904997  | 15082342  | 177345  | protein coding                     | -1.25 | 2.93E-03 | 1.94E-02 |
| ENSG00000253452 | AC124290.1  | 8  | 35862123  | 36191194  | 329071  | lncRNA                             | -1.25 | 9.81E-03 | 4.41E-02 |
| ENSG00000272235 | AL590438.1  | 1  | 3306636   | 3310096   | 3460    | lncRNA                             | -1.25 | 6.98E-03 | 3.50E-02 |
| ENSG00000214248 | AC010336.1  | 19 | 7898804   | 7903542   | 4738    | lncRNA-antisense                   | -1.25 | 2.91E-05 | 8.40E-04 |
| ENSG00000263818 | RDM1P5      | 17 | 39057019  | 39113190  | 56171   | transcribed processed pseudogene   | -1.25 | 2.73E-03 | 1.86E-02 |
| ENSG00000107807 | TLX1        | 10 | 101131300 | 101137789 | 6489    | protein coding                     | -1.25 | 5.50E-03 | 2.99E-02 |
| ENSG00000179213 | SIGLEC1     | 19 | 51246348  | 51269330  | 22982   | protein coding                     | -1.25 | 8.89E-03 | 4.12E-02 |
| ENSG00000234667 | ACTBP13     | 3  | 49873347  | 49877305  | 3958    | unitary pseudogene                 | -1.25 | 5.69E-03 | 3.06E-02 |
| ENSG00000254872 | LINC02688   | 11 | 1049880   | 1055749   | 5869    | lncRNA                             | -1.25 | 1.84E-03 | 1.41E-02 |
| ENSG00000287614 | AL158198.2  | 6  | 20265720  | 20307200  | 41480   | lncRNA                             | -1.25 | 6.10E-03 | 3.20E-02 |
| ENSG00000157890 | MEGF11      | 15 | 65895079  | 66253747  | 356668  | protein coding                     | -1.25 | 3.51E-05 | 9.57E-04 |
| ENSG00000218416 | AC110619.1  | 2  | 240449315 | 240456714 | 7399    | lncRNA                             | -1.25 | 2.42E-03 | 1.71E-02 |
| ENSG00000233705 | SLC26A4-AS1 | 7  | 107650260 | 107662204 | 11944   | lncRNA-antisense                   | -1.25 | 4.26E-03 | 2.51E-02 |
| ENSG00000147689 | FAM83A      | 8  | 123178960 | 123210079 | 31119   | protein coding                     | -1.25 | 1.01E-05 | 4.17E-04 |
| ENSG00000091704 | CPA1        | 7  | 130380339 | 130388114 | 7775    | protein coding                     | -1.25 | 3.49E-03 | 2.19E-02 |
| ENSG00000118972 | FGF23       | 12 | 4368227   | 4379712   | 11485   | protein coding                     | -1.25 | 8.99E-03 | 4.15E-02 |
| ENSG00000272138 | LINC01607   | 8  | 79768110  | 79802842  | 34732   | lncRNA                             | -1.25 | 4.47E-03 | 2.60E-02 |
| ENSG00000165762 | OR4K2       | 14 | 19875142  | 19883932  | 8790    | protein coding                     | -1.25 | 7.11E-03 | 3.55E-02 |
| ENSG00000166558 | SLC38A8     | 16 | 84009667  | 84042795  | 33128   | protein coding                     | -1.25 | 3.76E-03 | 2.30E-02 |
| ENSG00000159289 | GOLGA6A     | 15 | 74069857  | 74082550  | 12693   | protein coding                     | -1.25 | 3.47E-03 | 2.18E-02 |
| ENSG00000128242 | GAL3ST1     | 22 | 30554635  | 30574665  | 20030   | protein coding                     | -1.25 | 9.47E-04 | 8.97E-03 |
| ENSG00000172031 | EPHX4       | 1  | 92029985  | 92063538  | 33553   | protein coding                     | -1.25 | 3.68E-05 | 9.91E-04 |
| ENSG00000188162 | OTOG        | 11 | 17547259  | 17647150  | 99891   | protein coding                     | -1.25 | 1.18E-03 | 1.04E-02 |
| ENSG00000138696 | BMPR1B      | 4  | 94757955  | 95158448  | 400493  | protein coding                     | -1.25 | 9.35E-03 | 4.26E-02 |
| ENSG00000235481 | UBE2R2-AS1  | 9  | 33775183  | 33818795  | 43612   | lncRNA-antisense                   | -1.25 | 5.40E-03 | 2.95E-02 |
| ENSG00000279069 | AC015813.5  | 17 | 58006674  | 58008187  | 1513    | TEC                                | -1.25 | 2.31E-03 | 1.66E-02 |
| ENSG00000168743 | NPNT        | 4  | 105894775 | 106004227 | 109252  | protein coding                     | -1.25 | 4.91E-03 | 2.77E-02 |
| ENSG00000120907 | ADRA1A      | 8  | 26748150  | 26867278  | 119128  | protein coding                     | -1.25 | 8.97E-03 | 4.14E-02 |
| ENSG00000253311 | LINC01847   | 5  | 159698586 | 159937766 | 239180  | lncRNA-antisense                   | -1.25 | 1.12E-02 | 4.82E-02 |
| ENSG00000104237 | RP1         | 8  | 54509422  | 54871720  | 362298  | protein coding                     | -1.25 | 5.74E-04 | 6.39E-03 |
| ENSG00000171246 | NPTX1       | 17 | 80466834  | 80477843  | 11009   | protein coding                     | -1.25 | 1.14E-04 | 2.13E-03 |
| ENSG00000215483 | LINC00598   | 13 | 40079106  | 40535807  | 456701  | lncRNA                             | -1.25 | 1.71E-06 | 5.28E-06 |
| ENSG00000160307 | S100B       | 21 | 46598604  | 46605208  | 6604    | protein coding                     | -1.25 | 2.33E-03 | 1.66E-02 |
| ENSG00000266433 | TBC1D3P5    | 17 | 27417690  | 27431623  | 13933   | transcribed unprocessed pseudogene | -1.25 | 3.22E-03 | 2.07E-02 |
| ENSG00000133519 | ZDHHC8P1    | 22 | 23390606  | 23402726  | 12120   | transcribed unprocessed pseudogene | -1.25 | 2.78E-03 | 1.88E-02 |
| ENSG00000272791 | AC073389.3  | 10 | 73630556  | 73631490  | 934     | lncRNA                             | -1.25 | 7.88E-03 | 3.80E-02 |
| ENSG00000231898 | MYO3B-AS1   | 2  | 170332085 | 170408564 | 76479   | lncRNA-antisense                   | -1.25 | 1.99E-03 | 1.49E-02 |
| ENSG00000197702 | PARVA       | 11 | 12377563  | 12535356  | 157793  | protein coding                     | -1.25 | 5.98E-05 | 1.38E-03 |
| ENSG00000177103 | DSCAML1     | 11 | 117427772 | 117817525 | 389753  | protein coding                     | -1.25 | 5.01E-05 | 1.22E-03 |
| ENSG00000073146 | MOV10L1     | 22 | 50089879  | 50161690  | 71811   | protein coding                     | -1.25 | 5.80E-03 | 3.10E-02 |
| ENSG00000284070 | AP000356.2  | 22 | 24654171  | 24651657  | 6486    | lncRNA-antisense                   | -1.25 | 6.25E-03 | 3.26E-02 |
| ENSG00000158966 | CACHD1      | 1  | 64470129  | 64693058  | 222929  | protein coding                     | -1.25 | 6.80E-06 | 3.19E-04 |
| ENSG00000198967 | OR10Z1      | 1  | 158605268 | 158612514 | 7246    | protein coding                     | -1.25 | 5.31E-03 | 2.91E-02 |
| ENSG00000138792 | ENPEP       | 4  | 110365733 | 110565285 | 199552  | protein coding                     | -1.25 | 1.15E-03 | 1.02E-02 |
| ENSG00000165370 | GPR101      | X  | 137023929 | 137033995 | 10066   | protein coding                     | -1.25 | 3.42E-03 | 2.16E-02 |
| ENSG00000227128 | LBX1-AS1    | 10 | 101229577 | 101270148 | 40571   | lncRNA                             | -1.26 | 4.50E-03 | 2.61E-02 |
| ENSG00000215218 | UBE2QL1     | 5  | 6448859   | 6496723   | 47864   | protein coding                     | -1.26 | 4.62E-03 | 2.65E-02 |
| ENSG00000263547 | AC011095.1  | 18 | 76122968  | 76145259  | 22291   | lncRNA                             | -1.26 | 4.07E-03 | 2.42E-02 |



|                 |            |    |           |           |         |                                      |       |          |          |
|-----------------|------------|----|-----------|-----------|---------|--------------------------------------|-------|----------|----------|
| ENSG0000081138  | CDH7       | 18 | 65750252  | 65890337  | 140085  | protein coding                       | -1.26 | 3.17E-03 | 2.05E-02 |
| ENSG0000099869  | IGF2-AS    | 11 | 2140501   | 2148666   | 8165    | lncRNA-antisense                     | -1.26 | 6.29E-03 | 3.27E-02 |
| ENSG0000255929  | AP00043.2  | 11 | 94545330  | 94740355  | 195025  | lncRNA-antisense                     | -1.26 | 9.04E-03 | 4.16E-02 |
| ENSG0000249896  | LINC02495  | 4  | 6200733   | 6239937   | 39204   | transcribed unprocessed pseudogene   | -1.26 | 4.40E-05 | 1.12E-03 |
| ENSG0000219607  | PPP1R3G    | 6  | 5085341   | 5089487   | 4146    | protein coding                       | -1.26 | 1.84E-04 | 2.99E-03 |
| ENSG0000204434  | POTEKP     | 2  | 131591752 | 131628147 | 36395   | unprocessed pseudogene               | -1.26 | 1.95E-03 | 1.47E-02 |
| ENSG0000206579  | XKR4       | 8  | 55102028  | 55542054  | 440026  | protein coding                       | -1.26 | 2.45E-03 | 1.72E-02 |
| ENSG0000157131  | C8A        | 1  | 56854797  | 56918223  | 63426   | protein coding                       | -1.26 | 1.07E-02 | 4.69E-02 |
| ENSG0000227744  | LINC01940  | 2  | 238919302 | 238926269 | 6967    | lncRNA                               | -1.26 | 8.63E-03 | 4.03E-02 |
| ENSG00002286100 | AL008725.1 | 20 | 44864435  | 44885604  | 21169   | lncRNA-bidirectional promoter lncRNA | -1.26 | 1.68E-03 | 1.32E-02 |
| ENSG0000244953  | AC087521.1 | 11 | 43943787  | 43947206  | 3419    | lncRNA                               | -1.26 | 5.78E-03 | 3.09E-02 |
| ENSG0000175175  | PPM1E      | 17 | 58755854  | 58955179  | 229325  | protein coding                       | -1.26 | 3.46E-03 | 2.17E-02 |
| ENSG0000130711  | PRDM12     | 9  | 130664594 | 130682986 | 18392   | protein coding                       | -1.26 | 8.23E-03 | 3.91E-02 |
| ENSG0000287403  | AC016245.2 | 17 | 80824170  | 80826900  | 2730    | lncRNA                               | -1.26 | 5.33E-03 | 2.92E-02 |
| ENSG0000107186  | MPDZ       | 9  | 13105706  | 13279692  | 173986  | protein coding                       | -1.26 | 1.08E-03 | 9.77E-03 |
| ENSG0000158125  | XDH        | 2  | 31334321  | 31414742  | 80421   | protein coding                       | -1.26 | 3.12E-03 | 2.03E-02 |
| ENSG0000148704  | VAX1       | 10 | 117128521 | 117138301 | 9780    | protein coding                       | -1.26 | 4.49E-03 | 2.60E-02 |
| ENSG0000260102  | LINC01070  | 13 | 112197350 | 112201000 | 3650    | lncRNA                               | -1.26 | 5.91E-03 | 3.13E-02 |
| ENSG0000066056  | TIE1       | 1  | 43300982  | 43323108  | 22126   | protein coding                       | -1.26 | 4.42E-05 | 1.12E-03 |
| ENSG0000178928  | TPRX1      | 19 | 47801243  | 47819051  | 17808   | protein coding                       | -1.26 | 6.79E-03 | 3.44E-02 |
| ENSG0000136531  | SCN2A      | 2  | 165194993 | 165392310 | 197317  | protein coding                       | -1.26 | 6.11E-04 | 6.66E-03 |
| ENSG0000207065  | GAS2L2     | 17 | 35744511  | 35753239  | 8728    | protein coding                       | -1.26 | 2.68E-03 | 1.83E-02 |
| ENSG0000259666  | LINGO1-AS1 | 15 | 77641764  | 77652292  | 10528   | lncRNA-antisense                     | -1.26 | 8.20E-03 | 3.90E-02 |
| ENSG0000187616  | MYMK       | 9  | 133514586 | 133528612 | 14026   | protein coding                       | -1.26 | 1.10E-02 | 4.78E-02 |
| ENSG0000230333  | AC004160.1 | 7  | 11180902  | 11520175  | 339273  | lncRNA                               | -1.26 | 1.07E-02 | 4.67E-02 |
| ENSG0000214832  | UPF3AP2    | 17 | 20375369  | 20376840  | 1471    | transcribed processed pseudogene     | -1.26 | 1.43E-03 | 1.19E-02 |
| ENSG0000247151  | CSTF3-DT   | 11 | 33161657  | 33191598  | 29941   | lncRNA                               | -1.26 | 8.96E-04 | 8.64E-03 |
| ENSG0000176769  | TCERG1L    | 10 | 131092391 | 131311721 | 219330  | protein coding                       | -1.26 | 1.70E-03 | 1.33E-02 |
| ENSG0000251396  | LINC01301  | 8  | 60289928  | 60516795  | 226867  | lncRNA                               | -1.26 | 9.75E-04 | 9.15E-03 |
| ENSG0000112038  | OPRM1      | 6  | 154010496 | 154246867 | 236371  | protein coding                       | -1.26 | 1.26E-04 | 2.29E-03 |
| ENSG0000214145  | LINC00887  | 3  | 194296191 | 194322871 | 26680   | lncRNA                               | -1.26 | 1.14E-02 | 4.89E-02 |
| ENSG0000168679  | SLC16A4    | 1  | 110362851 | 110391082 | 28231   | protein coding                       | -1.26 | 1.55E-04 | 2.65E-03 |
| ENSG0000070748  | CHAT       | 10 | 49609095  | 49667942  | 58847   | protein coding                       | -1.26 | 1.36E-03 | 1.15E-02 |
| ENSG0000287684  | AL392172.1 | 1  | 222743356 | 222773149 | 29793   | lncRNA                               | -1.26 | 1.77E-03 | 1.37E-02 |
| ENSG0000183114  | FAM43B     | 1  | 20552573  | 20555020  | 2447    | protein coding                       | -1.26 | 3.71E-03 | 2.28E-02 |
| ENSG0000135373  | EHF        | 11 | 34621093  | 34663288  | 42195   | protein coding                       | -1.26 | 3.00E-04 | 4.16E-03 |
| ENSG0000189014  | SHLD2P3    | 10 | 47689707  | 47730436  | 40729   | unprocessed pseudogene               | -1.26 | 6.39E-03 | 3.30E-02 |
| ENSG0000183722  | LHFPL6     | 13 | 39209116  | 39603528  | 394412  | protein coding                       | -1.26 | 3.48E-04 | 4.56E-03 |
| ENSG0000124664  | SPDEF      | 6  | 34537802  | 34556333  | 18531   | protein coding                       | -1.26 | 5.14E-03 | 2.85E-02 |
| ENSG0000178568  | ERBB4      | 2  | 211375717 | 212538841 | 1163124 | protein coding                       | -1.26 | 2.23E-03 | 1.62E-02 |
| ENSG0000198570  | RD3        | 1  | 211476522 | 211492162 | 15640   | protein coding                       | -1.26 | 2.82E-03 | 1.89E-02 |
| ENSG0000121905  | HPCA       | 1  | 32885994  | 32898441  | 12447   | protein coding                       | -1.26 | 8.39E-03 | 3.96E-02 |
| ENSG0000215529  | EFCAB8     | 20 | 32858923  | 32961609  | 102686  | protein coding                       | -1.26 | 1.06E-07 | 1.79E-05 |
| ENSG0000255874  | PRECS1T    | 13 | 110863987 | 110870251 | 6264    | lncRNA                               | -1.26 | 3.46E-03 | 2.17E-02 |
| ENSG0000261241  | LINC02128  | 16 | 50840017  | 50901063  | 61046   | lncRNA                               | -1.26 | 4.17E-03 | 2.47E-02 |
| ENSG0000152078  | TLCD4      | 1  | 95117355  | 95197607  | 80252   | protein coding                       | -1.26 | 3.02E-07 | 3.85E-05 |
| ENSG0000177947  | ODF3       | 11 | 196761    | 200261    | 3500    | protein coding                       | -1.26 | 1.13E-02 | 4.86E-02 |
| ENSG0000104313  | EYA1       | 8  | 71197433  | 71592025  | 394592  | protein coding                       | -1.26 | 3.53E-03 | 2.20E-02 |
| ENSG0000177807  | KCNJ10     | 1  | 159998651 | 160070160 | 71509   | protein coding                       | -1.26 | 7.29E-03 | 3.61E-02 |
| ENSG0000254718  | AL157756.1 | 14 | 60240121  | 60248765  | 8644    | lncRNA-antisense                     | -1.26 | 4.34E-04 | 5.29E-03 |
| ENSG0000183856  | IQGAP3     | 1  | 156525405 | 156572604 | 47199   | protein coding                       | -1.26 | 6.30E-03 | 3.27E-02 |
| ENSG0000249173  | LINC01093  | 4  | 184892858 | 184899553 | 6695    | lncRNA                               | -1.27 | 1.68E-03 | 1.32E-02 |
| ENSG0000101463  | SYNDIG1    | 20 | 24469629  | 24666616  | 196987  | protein coding                       | -1.27 | 7.24E-03 | 3.59E-02 |
| ENSG0000095713  | CRTAC1     | 10 | 97865000  | 98030828  | 165828  | protein coding                       | -1.27 | 3.91E-03 | 2.36E-02 |
| ENSG0000185267  | CDNF       | 10 | 14819245  | 14838575  | 19330   | protein coding                       | -1.27 | 3.05E-04 | 4.21E-03 |
| ENSG0000287437  | AL161662.1 | 14 | 90291516  | 90294942  | 3426    | lncRNA                               | -1.27 | 4.64E-03 | 2.66E-02 |
| ENSG0000050555  | LAMC3      | 9  | 131009174 | 131094473 | 85299   | protein coding                       | -1.27 | 1.78E-04 | 2.93E-03 |
| ENSG0000137142  | IGFBP1L    | 9  | 38406528  | 38424454  | 17926   | protein coding                       | -1.27 | 5.21E-03 | 2.87E-02 |
| ENSG0000182329  | KIAA2012   | 2  | 202073255 | 202205188 | 131933  | protein coding                       | -1.27 | 3.55E-03 | 2.22E-02 |
| ENSG0000122756  | CNTFR      | 9  | 34551432  | 34590140  | 38708   | protein coding                       | -1.27 | 1.12E-02 | 4.82E-02 |
| ENSG0000157111  | TMEM171    | 5  | 73120569  | 73131809  | 11240   | protein coding                       | -1.27 | 4.06E-03 | 2.42E-02 |
| ENSG0000135063  | FAM189A2   | 9  | 69324567  | 69329558  | 67991   | protein coding                       | -1.27 | 1.02E-03 | 9.40E-03 |
| ENSG0000230626  | AC011005.1 | 7  | 129126518 | 129130793 | 4275    | protein coding                       | -1.27 | 1.38E-03 | 1.15E-02 |
| ENSG0000072133  | RPS6KA6    | X  | 84058346  | 84188199  | 129853  | protein coding                       | -1.27 | 2.34E-03 | 1.67E-02 |
| ENSG0000287950  | AC009432.2 | 15 | 94455469  | 94550572  | 95103   | lncRNA                               | -1.27 | 8.99E-03 | 4.14E-02 |
| ENSG0000277481  | PKD1L3     | 16 | 71929538  | 71999978  | 70440   | protein coding                       | -1.27 | 3.44E-04 | 4.53E-03 |
| ENSG0000112494  | UNC93A     | 6  | 167271169 | 167316014 | 44845   | protein coding                       | -1.27 | 7.86E-03 | 3.79E-02 |
| ENSG0000113430  | IRX4       | 5  | 1877413   | 1887236   | 9823    | protein coding                       | -1.27 | 1.69E-03 | 1.33E-02 |
| ENSG0000225637  | AP001046.1 | 21 | 43363332  | 43366566  | 3234    | lncRNA                               | -1.27 | 8.80E-03 | 4.09E-02 |
| ENSG0000258913  | LINC02691  | 14 | 104223584 | 104288069 | 64485   | lncRNA                               | -1.27 | 7.22E-03 | 3.59E-02 |
| ENSG0000050767  | COL23A1    | 5  | 178237618 | 178590393 | 352775  | protein coding                       | -1.27 | 9.92E-04 | 9.28E-03 |
| ENSG0000203727  | SAMD5      | 6  | 147508690 | 147737547 | 228857  | protein coding                       | -1.27 | 6.55E-03 | 3.36E-02 |
| ENSG0000088280  | ASAP3      | 1  | 23428563  | 23484568  | 56005   | protein coding                       | -1.27 | 4.44E-05 | 1.12E-03 |
| ENSG0000130234  | ACE2       | X  | 15494566  | 15607236  | 112670  | protein coding                       | -1.27 | 1.82E-03 | 1.40E-02 |
| ENSG0000009765  | IYD        | 6  | 150368892 | 150405969 | 37077   | protein coding                       | -1.27 | 5.00E-04 | 5.82E-03 |
| ENSG0000140600  | SH3GL3     | 15 | 83447228  | 83618743  | 171515  | protein coding                       | -1.27 | 8.91E-03 | 4.12E-02 |
| ENSG00000006116 | CACNG3     | 16 | 24256335  | 24362412  | 106077  | protein coding                       | -1.27 | 7.95E-03 | 3.82E-02 |
| ENSG0000259209  | AC004943.1 | 16 | 72805998  | 72809872  | 3874    | lncRNA-antisense                     | -1.27 | 6.85E-03 | 3.46E-02 |
| ENSG0000277399  | GPR179     | 17 | 38324571  | 38343956  | 19385   | protein coding                       | -1.27 | 1.27E-03 | 1.09E-02 |
| ENSG0000185737  | NRG3       | 10 | 81875194  | 82987179  | 111985  | protein coding                       | -1.27 | 5.99E-03 | 3.17E-02 |
| ENSG0000186115  | CYP4F2     | 19 | 15878023  | 15898077  | 20054   | protein coding                       | -1.27 | 2.07E-03 | 1.53E-02 |
| ENSG0000164742  | ADCY1      | 7  | 45574140  | 45723116  | 148976  | protein coding                       | -1.27 | 6.57E-05 | 1.48E-03 |
| ENSG0000188659  | SAXO2      | 15 | 82262810  | 82284930  | 22120   | protein coding                       | -1.27 | 4.54E-04 | 5.46E-03 |
| ENSG0000261043  | AC019294.3 | 15 | 75759501  | 75762405  | 2904    | lncRNA                               | -1.27 | 1.09E-03 | 9.82E-03 |
| ENSG0000169083  | AR         | X  | 67544021  | 67730619  | 186598  | protein coding                       | -1.27 | 7.30E-04 | 7.53E-03 |
| ENSG0000259422  | AC091100.1 | 15 | 76174891  | 76181486  | 6595    | lncRNA-antisense                     | -1.27 | 2.18E-03 | 1.59E-02 |
| ENSG0000285722  | AC207130.1 | 22 | 49372924  | 49377119  | 4195    | lncRNA                               | -1.27 | 7.21E-03 | 3.58E-02 |
| ENSG0000172828  | CES3       | 16 | 66961245  | 66975149  | 13904   | protein coding                       | -1.27 | 1.11E-03 | 9.97E-03 |
| ENSG0000116833  | NR5A2      | 1  | 200027614 | 200177420 | 149806  | protein coding                       | -1.27 | 7.32E-03 | 3.61E-02 |
| ENSG0000144191  | CNGA3      | 2  | 98346188  | 98398601  | 52413   | protein coding                       | -1.28 | 6.24E-03 | 3.25E-02 |

|                 |            |    |           |           |         |                                      |       |          |          |
|-----------------|------------|----|-----------|-----------|---------|--------------------------------------|-------|----------|----------|
| ENSG00000167771 | RCOR2      | 11 | 63911230  | 63917164  | 5934    | protein coding                       | -1.28 | 1.11E-03 | 9.92E-03 |
| ENSG00000134871 | COL4A2     | 13 | 110305812 | 110513209 | 207397  | protein coding                       | -1.28 | 7.82E-06 | 3.53E-04 |
| ENSG00000214820 | MPRIIP1    | 3  | 44579938  | 44581202  | 1088    | processed pseudogene                 | -1.28 | 1.12E-03 | 1.00E-02 |
| ENSG00000185634 | SHC4       | 15 | 48823741  | 48963919  | 140178  | protein coding                       | -1.28 | 8.70E-04 | 8.47E-03 |
| ENSG00000169515 | CDC8       | 19 | 46410329  | 46413564  | 3235    | protein coding                       | -1.28 | 3.13E-03 | 2.04E-02 |
| ENSG00000226746 | SMCR5      | 17 | 17776686  | 17779529  | 2843    | lncRNA-antisense                     | -1.28 | 7.79E-03 | 3.77E-02 |
| ENSG00000158270 | COLEC12    | 18 | 316737    | 500722    | 183985  | protein coding                       | -1.28 | 7.84E-05 | 1.67E-03 |
| ENSG00000139988 | RDH12      | 14 | 67701886  | 67734451  | 32565   | protein coding                       | -1.28 | 5.58E-03 | 3.01E-02 |
| ENSG00000185652 | NTF3       | 12 | 5432108   | 5521536   | 89428   | protein coding                       | -1.28 | 6.00E-03 | 3.17E-02 |
| ENSG00000167693 | NXN        | 17 | 799310    | 979776    | 180466  | protein coding                       | -1.28 | 7.33E-07 | 6.98E-05 |
| ENSG00000124302 | CHST8      | 19 | 33621953  | 33773509  | 151556  | protein coding                       | -1.28 | 3.18E-04 | 4.31E-03 |
| ENSG00000169436 | COL22A1    | 8  | 138588235 | 138914041 | 325806  | protein coding                       | -1.28 | 2.08E-04 | 3.26E-03 |
| ENSG00000093009 | CDC45      | 22 | 19479457  | 19520612  | 41155   | protein coding                       | -1.28 | 3.14E-04 | 4.27E-03 |
| ENSG00000178919 | FOXE1      | 9  | 97853226  | 97856717  | 3491    | protein coding                       | -1.28 | 1.15E-02 | 4.91E-02 |
| ENSG00000154316 | TDH        | 8  | 11339637  | 11368452  | 28815   | transcribed unitary pseudogene       | -1.28 | 6.06E-03 | 3.19E-02 |
| ENSG00000091513 | TF         | 3  | 133746040 | 133796641 | 50601   | protein coding                       | -1.28 | 2.79E-05 | 8.14E-04 |
| ENSG00000223561 | AC005165.1 | 7  | 25593304  | 25751032  | 157728  | lncRNA                               | -1.28 | 9.37E-05 | 1.89E-03 |
| ENSG00000225335 | AC016027.1 | 22 | 18076527  | 18078884  | 2357    | lncRNA-antisense                     | -1.28 | 2.96E-04 | 4.12E-03 |
| ENSG00000145248 | SLC10A4    | 4  | 48483343  | 48489526  | 6183    | protein coding                       | -1.28 | 7.22E-03 | 3.58E-02 |
| ENSG00000036530 | CYP46A1    | 14 | 99684298  | 99727301  | 43003   | protein coding                       | -1.28 | 5.68E-05 | 5.76E-04 |
| ENSG00000146700 | SSC4D      | 7  | 76389334  | 76409697  | 20363   | protein coding                       | -1.28 | 6.55E-04 | 6.99E-03 |
| ENSG00000286462 | AC092850.2 | 12 | 131310045 | 131312811 | 2766    | lncRNA                               | -1.28 | 3.54E-03 | 2.21E-02 |
| ENSG00000183154 | AC138356.1 | 8  | 37734761  | 37737426  | 2665    | lncRNA-antisense                     | -1.28 | 1.63E-03 | 1.30E-02 |
| ENSG00000250133 | HOXC-AS2   | 12 | 53993810  | 53996785  | 2975    | lncRNA                               | -1.28 | 9.37E-03 | 4.27E-02 |
| ENSG00000236337 | FMR1-IT1   | X  | 147946941 | 147947583 | 642     | lncRNA-sense intronic                | -1.28 | 1.06E-02 | 4.66E-02 |
| ENSG00000078328 | RBFOX1     | 16 | 5238802   | 7713340   | 2473538 | protein coding                       | -1.28 | 2.35E-05 | 7.29E-04 |
| ENSG00000148702 | HABP2      | 10 | 113550837 | 113599602 | 38765   | protein coding                       | -1.28 | 5.48E-03 | 2.98E-02 |
| ENSG00000197496 | SLC2A10    | 20 | 46709649  | 46736347  | 26698   | protein coding                       | -1.28 | 1.14E-03 | 1.02E-02 |
| ENSG00000250302 | LINC01618  | 4  | 52712394  | 52866821  | 154427  | lncRNA                               | -1.28 | 9.57E-03 | 4.33E-02 |
| ENSG00000171435 | KSR2       | 12 | 117453012 | 117968990 | 515978  | protein coding                       | -1.28 | 1.13E-04 | 2.13E-03 |
| ENSG00000257178 | AC103702.1 | 17 | 48579630  | 48582259  | 2629    | lncRNA-sense intronic                | -1.28 | 4.53E-03 | 2.62E-02 |
| ENSG00000183775 | KCTD16     | 5  | 144170873 | 144485686 | 314813  | protein coding                       | -1.28 | 1.41E-03 | 1.18E-02 |
| ENSG00000083307 | GRHL2      | 8  | 101492439 | 101669726 | 177287  | protein coding                       | -1.28 | 7.75E-03 | 3.75E-02 |
| ENSG00000166444 | DENND2B    | 11 | 8693351   | 8910951   | 217600  | protein coding                       | -1.28 | 1.43E-05 | 5.32E-04 |
| ENSG00000239332 | LINC01119  | 2  | 46816697  | 46899007  | 42310   | lncRNA                               | -1.28 | 8.09E-03 | 3.86E-02 |
| ENSG00000229089 | ANKRD20A8P | 2  | 94791103  | 94857282  | 66179   | transcribed unprocessed pseudogene   | -1.28 | 8.69E-03 | 4.05E-02 |
| ENSG00000114455 | HHLA2      | 3  | 108296490 | 108378285 | 81795   | protein coding                       | -1.28 | 4.34E-03 | 2.54E-02 |
| ENSG00000134757 | DSG3       | 18 | 31447741  | 31478702  | 30961   | protein coding                       | -1.28 | 7.69E-03 | 3.73E-02 |
| ENSG00000286257 | AL137100.3 | 14 | 56951008  | 57060715  | 109707  | lncRNA                               | -1.28 | 9.05E-03 | 4.16E-02 |
| ENSG00000145949 | MYLK4      | 6  | 2663629   | 2750922   | 87293   | protein coding                       | -1.28 | 3.82E-07 | 4.50E-05 |
| ENSG00000170412 | GPRC5C     | 17 | 74424851  | 74451653  | 28802   | protein coding                       | -1.28 | 1.30E-04 | 2.35E-03 |
| ENSG00000196208 | GREB1      | 2  | 11482341  | 11642788  | 160447  | protein coding                       | -1.28 | 4.24E-04 | 5.21E-03 |
| ENSG00000205277 | MUC12      | 7  | 100969623 | 101018949 | 49326   | protein coding                       | -1.28 | 2.48E-04 | 3.67E-03 |
| ENSG00000256115 | LINC02443  | 12 | 5226196   | 5244199   | 18003   | lncRNA                               | -1.28 | 8.62E-03 | 4.03E-02 |
| ENSG00000169181 | GSGL1      | 16 | 27787528  | 28063714  | 276186  | protein coding                       | -1.28 | 5.94E-04 | 6.54E-03 |
| ENSG00000234350 | AC007405.1 | 2  | 170700368 | 170813670 | 113302  | lncRNA                               | -1.28 | 1.53E-03 | 1.24E-02 |
| ENSG00000187908 | DMBT1      | 10 | 122560665 | 122643736 | 83071   | protein coding                       | -1.28 | 5.95E-04 | 6.55E-03 |
| ENSG00000171658 | NMRAL2P    | 3  | 185959943 | 185980872 | 20929   | transcribed unprocessed pseudogene   | -1.28 | 5.30E-04 | 6.05E-03 |
| ENSG00000226476 | LINC01748  | 1  | 60515716  | 60640507  | 124791  | lncRNA                               | -1.28 | 2.48E-03 | 1.74E-02 |
| ENSG00000198010 | DLGAP2     | 8  | 737628    | 1708476   | 970848  | protein coding                       | -1.28 | 1.22E-03 | 1.06E-02 |
| ENSG00000141314 | RHBDL3     | 17 | 32265832  | 32324659  | 58827   | protein coding                       | -1.29 | 3.56E-03 | 2.22E-02 |
| ENSG00000166104 | AC126323.1 | 15 | 62227896  | 62253235  | 25339   | transcribed unprocessed pseudogene   | -1.29 | 6.58E-04 | 7.01E-03 |
| ENSG00000178947 | SMIM10L2A  | X  | 135421944 | 135428075 | 6131    | protein coding                       | -1.29 | 4.14E-04 | 5.14E-03 |
| ENSG00000142661 | MYOM3      | 1  | 24056035  | 24112135  | 56100   | protein coding                       | -1.29 | 4.79E-03 | 2.72E-02 |
| ENSG00000151617 | EDNRA      | 4  | 147480917 | 147544954 | 64037   | protein coding                       | -1.29 | 1.16E-02 | 4.94E-02 |
| ENSG00000089199 | CHGB       | 20 | 5911510   | 5925353   | 13843   | protein coding                       | -1.29 | 7.61E-04 | 7.75E-03 |
| ENSG00000204624 | DISP3      | 1  | 11479155  | 11537551  | 58396   | protein coding                       | -1.29 | 2.47E-04 | 3.65E-03 |
| ENSG00000149050 | ZNF214     | 11 | 6997085   | 7020364   | 23261   | protein coding                       | -1.29 | 1.04E-02 | 4.60E-02 |
| ENSG00000274253 | AC138649.1 | 15 | 22757841  | 22778741  | 20900   | lncRNA-sense overlapping             | -1.29 | 9.07E-04 | 8.71E-03 |
| ENSG00000120645 | IQSEC3     | 12 | 66767     | 178455    | 111688  | protein coding                       | -1.29 | 3.70E-06 | 2.10E-04 |
| ENSG00000162433 | AK4        | 1  | 65147549  | 65232145  | 84596   | protein coding                       | -1.29 | 3.48E-04 | 4.56E-03 |
| ENSG00000271119 | AC026412.3 | 5  | 1594626   | 1611467   | 16841   | lncRNA                               | -1.29 | 2.96E-03 | 1.96E-02 |
| ENSG00000005001 | PRSS22     | 16 | 2852730   | 2858170   | 5440    | protein coding                       | -1.29 | 6.08E-04 | 6.64E-03 |
| ENSG00000145920 | CPLX2      | 5  | 175796310 | 175884021 | 87711   | protein coding                       | -1.29 | 1.54E-05 | 5.57E-04 |
| ENSG00000260619 | AC068870.1 | 15 | 80990804  | 80993258  | 2454    | lncRNA                               | -1.29 | 2.58E-03 | 1.79E-02 |
| ENSG00000156413 | FUT6       | 19 | 5830408   | 5839722   | 9314    | protein coding                       | -1.29 | 5.61E-03 | 3.02E-02 |
| ENSG00000214189 | ZNF788P    | 19 | 12092263  | 12137235  | 44972   | transcribed unprocessed pseudogene   | -1.29 | 2.17E-04 | 3.35E-03 |
| ENSG00000102174 | PHOX       | X  | 22032325  | 22251310  | 218985  | protein coding                       | -1.29 | 3.42E-05 | 9.40E-04 |
| ENSG00000287185 | AC041005.1 | 8  | 25179113  | 25184234  | 5121    | lncRNA                               | -1.29 | 2.76E-03 | 1.87E-02 |
| ENSG00000233579 | KRT8P15    | 2  | 202840331 | 202841781 | 1450    | processed pseudogene                 | -1.29 | 6.30E-03 | 3.27E-02 |
| ENSG00000162105 | SHANK2     | 11 | 70467856  | 71252577  | 784721  | protein coding                       | -1.29 | 1.63E-04 | 2.74E-03 |
| ENSG00000006071 | ABCC8      | 11 | 17392498  | 17476879  | 84381   | protein coding                       | -1.29 | 1.21E-03 | 1.05E-02 |
| ENSG00000285454 | AC111006.1 | 4  | 42151028  | 42268110  | 117082  | lncRNA                               | -1.29 | 1.02E-02 | 4.53E-02 |
| ENSG00000262454 | MIR193BHG  | 16 | 14301389  | 14331067  | 29678   | lncRNA                               | -1.29 | 9.92E-04 | 9.26E-03 |
| ENSG00000266733 | TBC1D29P   | 17 | 30553502  | 30563493  | 9991    | transcribed unprocessed pseudogene   | -1.29 | 6.90E-04 | 7.24E-03 |
| ENSG00000279905 | AC063926.3 | 12 | 130425004 | 130430661 | 5657    | TEC                                  | -1.29 | 6.76E-03 | 3.43E-02 |
| ENSG00000232125 | DYTN       | 2  | 206651621 | 206721570 | 69949   | protein coding                       | -1.29 | 2.91E-04 | 4.06E-03 |
| ENSG00000122641 | INHBA      | 7  | 41667168  | 41705834  | 38666   | protein coding                       | -1.29 | 3.18E-04 | 4.31E-03 |
| ENSG00000249267 | LINC00939  | 12 | 125958688 | 125983665 | 24977   | lncRNA                               | -1.29 | 4.97E-03 | 2.79E-02 |
| ENSG00000242759 | LINC00882  | 3  | 106449775 | 107240671 | 790896  | lncRNA                               | -1.29 | 6.68E-04 | 7.07E-03 |
| ENSG00000241743 | XACT       | X  | 113616300 | 114059289 | 442989  | lncRNA                               | -1.29 | 2.53E-07 | 3.39E-05 |
| ENSG00000183287 | CCBE1      | 18 | 59430939  | 59697662  | 266723  | protein coding                       | -1.29 | 5.57E-03 | 3.01E-02 |
| ENSG00000112164 | GLP1R      | 6  | 39048781  | 39091303  | 42522   | protein coding                       | -1.29 | 1.13E-03 | 1.00E-02 |
| ENSG00000143171 | RXRG       | 1  | 165400922 | 165445355 | 44433   | protein coding                       | -1.29 | 4.60E-03 | 2.64E-02 |
| ENSG00000148948 | LRRC4C     | 11 | 40114203  | 41459773  | 1345570 | protein coding                       | -1.29 | 3.50E-03 | 2.19E-02 |
| ENSG00000108001 | EBF3       | 10 | 129835233 | 129973053 | 137820  | protein coding                       | -1.29 | 7.39E-04 | 7.58E-03 |
| ENSG00000176920 | FUT2       | 19 | 48695971  | 48705951  | 9980    | protein coding                       | -1.29 | 7.38E-03 | 3.64E-02 |
| ENSG00000204128 | C2orf72    | 2  | 231037523 | 231049719 | 12196   | protein coding                       | -1.29 | 8.42E-03 | 3.97E-02 |
| ENSG00000042781 | USH2A      | 1  | 215622891 | 216423448 | 800557  | protein coding                       | -1.29 | 5.69E-05 | 1.34E-03 |
| ENSG00000183242 | WT1-AS     | 11 | 32435518  | 32458769  | 23251   | lncRNA-bidirectional promoter lncRNA | -1.29 | 8.36E-04 | 8.27E-03 |

|                |            |    |           |           |        |                                    |       |          |          |
|----------------|------------|----|-----------|-----------|--------|------------------------------------|-------|----------|----------|
| ENSG0000104804 | TULP2      | 19 | 48880967  | 48898744  | 17777  | protein coding                     | -1.29 | 5.61E-03 | 3.02E-02 |
| ENSG0000224209 | LINC00466  | 1  | 63159083  | 63317274  | 158191 | lncRNA                             | -1.29 | 4.69E-04 | 5.57E-03 |
| ENSG0000171502 | COL24A1    | 1  | 85729233  | 86156943  | 427710 | protein coding                     | -1.29 | 7.27E-05 | 1.59E-03 |
| ENSG0000161270 | NPHS1      | 19 | 35825372  | 35869287  | 43915  | protein coding                     | -1.29 | 2.88E-03 | 1.92E-02 |
| ENSG0000286551 | AL355836.2 | 14 | 101133730 | 101151988 | 18258  | lncRNA                             | -1.29 | 7.51E-03 | 3.68E-02 |
| ENSG0000206187 | LINC02346  | 15 | 25902119  | 26053123  | 151004 | lncRNA                             | -1.29 | 5.87E-04 | 6.49E-03 |
| ENSG0000228061 | AC131571.1 | 11 | 31618124  | 31767953  | 149829 | lncRNA-antisense                   | -1.29 | 5.11E-03 | 2.84E-02 |
| ENSG0000280081 | LINC01667  | 21 | 9781910   | 9838011   | 56101  | transcribed processed pseudogene   | -1.29 | 2.58E-03 | 1.79E-02 |
| ENSG0000189275 | LINC01164  | 10 | 131772398 | 131790199 | 17801  | lncRNA                             | -1.29 | 7.59E-03 | 3.70E-02 |
| ENSG0000262619 | LINC00621  | 13 | 22859050  | 22916369  | 57319  | lncRNA                             | -1.29 | 8.62E-03 | 4.03E-02 |
| ENSG0000138759 | FRAS1      | 4  | 78057323  | 78544269  | 486946 | protein coding                     | -1.30 | 1.87E-04 | 3.03E-03 |
| ENSG0000267123 | SCAT1      | 17 | 78605233  | 78632155  | 26922  | lncRNA                             | -1.30 | 3.47E-04 | 4.56E-03 |
| ENSG0000138136 | LBX1       | 10 | 101226195 | 101229794 | 3599   | protein coding                     | -1.30 | 2.01E-03 | 1.50E-02 |
| ENSG0000218358 | RAET1K     | 6  | 149998019 | 150005157 | 7138   | transcribed unprocessed pseudogene | -1.30 | 8.81E-03 | 4.09E-02 |
| ENSG0000177238 | TRIM72     | 16 | 31214091  | 31231537  | 17446  | protein coding                     | -1.30 | 1.67E-03 | 1.32E-02 |
| ENSG0000215895 | HSPA5P1    | 1  | 38708931  | 38710890  | 1959   | processed pseudogene               | -1.30 | 8.07E-03 | 3.86E-02 |
| ENSG0000230294 | LINC02370  | 12 | 131347470 | 131367555 | 20085  | lncRNA                             | -1.30 | 9.69E-03 | 4.37E-02 |
| ENSG0000101680 | LAMA1      | 18 | 6941742   | 7117797   | 176055 | protein coding                     | -1.30 | 3.65E-04 | 4.71E-03 |
| ENSG0000103742 | IGDCC4     | 15 | 65381484  | 65422947  | 41463  | protein coding                     | -1.30 | 2.63E-05 | 7.82E-04 |
| ENSG0000117501 | MROH9      | 1  | 170935471 | 171064765 | 129294 | protein coding                     | -1.30 | 7.18E-03 | 3.57E-02 |
| ENSG0000163749 | CCDC158    | 4  | 76312997  | 76421868  | 108871 | protein coding                     | -1.30 | 3.26E-03 | 2.09E-02 |
| ENSG0000171004 | HS6ST2     | X  | 132626016 | 132961395 | 335379 | protein coding                     | -1.30 | 7.13E-03 | 3.56E-02 |
| ENSG0000096088 | PGC        | 6  | 41736711  | 41754109  | 17398  | protein coding                     | -1.30 | 6.83E-03 | 3.45E-02 |
| ENSG0000204529 | GUCY2EP    | 11 | 76694041  | 76719801  | 25760  | transcribed unprocessed pseudogene | -1.30 | 2.69E-03 | 1.83E-02 |
| ENSG0000260876 | LINC01229  | 16 | 79676048  | 79809716  | 133668 | lncRNA                             | -1.30 | 2.02E-04 | 3.20E-03 |
| ENSG0000149054 | ZNF215     | 11 | 6926404   | 7001004   | 74600  | protein coding                     | -1.30 | 6.60E-04 | 7.02E-03 |
| ENSG0000140937 | CDH11      | 16 | 64943753  | 65126112  | 182359 | protein coding                     | -1.30 | 2.64E-04 | 3.83E-03 |
| ENSG0000137648 | TMPRSS4    | 11 | 118077012 | 118121890 | 44878  | protein coding                     | -1.30 | 3.80E-03 | 2.31E-02 |
| ENSG0000004846 | ABCBS5     | 7  | 20615207  | 20777038  | 161831 | protein coding                     | -1.30 | 9.54E-04 | 9.02E-03 |
| ENSG0000251568 | ALG3P1     | 5  | 5375723   | 5376836   | 1113   | processed pseudogene               | -1.30 | 3.03E-03 | 1.99E-02 |
| ENSG0000161647 | MPP3       | 17 | 43800799  | 43833170  | 32371  | protein coding                     | -1.30 | 2.63E-05 | 7.83E-04 |
| ENSG0000281692 | PACRG-AS1  | 6  | 163306907 | 163324530 | 17623  | lncRNA-antisense                   | -1.30 | 4.47E-03 | 2.60E-02 |
| ENSG0000226937 | CEP164P1   | 10 | 45002222  | 45076066  | 73844  | transcribed processed pseudogene   | -1.30 | 4.31E-03 | 2.53E-02 |
| ENSG0000114019 | AMOTL2     | 3  | 134355347 | 134375479 | 20132  | protein coding                     | -1.30 | 1.37E-03 | 1.15E-02 |
| ENSG0000003137 | CYP26B1    | 2  | 72129238  | 72148038  | 18800  | protein coding                     | -1.30 | 1.06E-03 | 9.69E-03 |
| ENSG0000197380 | DACT3      | 19 | 46647551  | 46661182  | 13631  | protein coding                     | -1.30 | 1.07E-03 | 9.73E-03 |
| ENSG0000152092 | ASTN1      | 1  | 176857302 | 177164973 | 307671 | protein coding                     | -1.30 | 7.61E-04 | 7.75E-03 |
| ENSG0000165164 | CFAP47     | X  | 35919734  | 36385317  | 465583 | protein coding                     | -1.30 | 1.99E-03 | 1.49E-02 |
| ENSG0000146477 | SLC22A3    | 6  | 160348378 | 160452577 | 104199 | protein coding                     | -1.30 | 3.13E-03 | 2.03E-02 |
| ENSG0000286262 | BX322557.2 | 21 | 45299929  | 45302964  | 3035   | lncRNA                             | -1.30 | 8.06E-03 | 3.85E-02 |
| ENSG0000214946 | TBC1D26    | 17 | 15732247  | 15749192  | 16945  | protein coding                     | -1.30 | 4.18E-03 | 2.47E-02 |
| ENSG0000215571 | GRK6P1     | 13 | 21319156  | 21320866  | 1710   | processed pseudogene               | -1.30 | 1.12E-03 | 9.98E-03 |
| ENSG0000167306 | MYO5B      | 18 | 49822789  | 50195147  | 372358 | protein coding                     | -1.30 | 9.90E-06 | 4.12E-04 |
| ENSG0000287335 | AL139351.3 | 20 | 48025245  | 48060271  | 35026  | lncRNA                             | -1.30 | 3.63E-03 | 2.25E-02 |
| ENSG0000198844 | ARHGEF15   | 17 | 8310241   | 8322514   | 12273  | protein coding                     | -1.30 | 1.40E-03 | 1.17E-02 |
| ENSG0000255267 | LINC02687  | 11 | 45371397  | 45388511  | 17114  | lncRNA                             | -1.30 | 7.00E-03 | 3.51E-02 |
| ENSG0000280425 | AL35776.2  | 1  | 54137746  | 54142980  | 5234   | lncRNA-antisense                   | -1.30 | 7.97E-03 | 3.82E-02 |
| ENSG0000055957 | ITIH1      | 3  | 52777595  | 52792068  | 14473  | protein coding                     | -1.30 | 2.29E-03 | 1.64E-02 |
| ENSG0000230387 | AL118508.1 | 20 | 23179272  | 23190419  | 11147  | lncRNA                             | -1.30 | 3.59E-03 | 2.23E-02 |
| ENSG0000234156 | AL359636.2 | 9  | 122403407 | 122639685 | 236278 | lncRNA-antisense                   | -1.30 | 5.86E-04 | 6.48E-03 |
| ENSG0000152953 | STK32B     | 4  | 5051480   | 5000994   | 449514 | protein coding                     | -1.30 | 5.47E-05 | 1.30E-03 |
| ENSG0000148848 | ADAM12     | 10 | 126012381 | 126388455 | 376074 | protein coding                     | -1.30 | 6.81E-10 | 5.33E-07 |
| ENSG0000095777 | MYO3A      | 10 | 25934229  | 26212532  | 278303 | protein coding                     | -1.30 | 1.90E-04 | 3.06E-03 |
| ENSG0000141161 | UNC45B     | 17 | 35147817  | 35189345  | 41528  | protein coding                     | -1.30 | 6.03E-05 | 1.39E-03 |
| ENSG0000281958 | TRBJ1-4    | 7  | 142788225 | 142788275 | 50     | TR J gene                          | -1.30 | 4.35E-03 | 2.54E-02 |
| ENSG0000087495 | PHACTR3    | 20 | 59577509  | 59847711  | 270202 | protein coding                     | -1.30 | 4.96E-04 | 5.78E-03 |
| ENSG0000196550 | FAM72A     | 1  | 206186179 | 206204414 | 18235  | protein coding                     | -1.30 | 2.77E-03 | 1.77E-02 |
| ENSG0000237361 | TUSC8      | 13 | 44400250  | 44405984  | 5734   | lncRNA                             | -1.30 | 9.16E-03 | 4.20E-02 |
| ENSG0000164684 | ZNF704     | 8  | 80628451  | 80874781  | 246330 | protein coding                     | -1.30 | 2.09E-04 | 3.26E-03 |
| ENSG0000139219 | COL2A1     | 12 | 47972967  | 48004554  | 31587  | protein coding                     | -1.30 | 2.75E-03 | 1.86E-02 |
| ENSG0000234080 | AL596275.1 | 1  | 50326131  | 50327007  | 876    | processed pseudogene               | -1.30 | 6.73E-03 | 3.42E-02 |
| ENSG0000232445 | EMSLR1     | 7  | 101308270 | 101314800 | 6530   | lncRNA-antisense                   | -1.30 | 1.17E-03 | 1.03E-02 |
| ENSG0000154262 | ABCA6      | 17 | 69078702  | 69141895  | 63193  | protein coding                     | -1.31 | 2.01E-05 | 6.56E-04 |
| ENSG0000196639 | HRH1       | 3  | 11137093  | 11263557  | 126464 | protein coding                     | -1.31 | 3.81E-03 | 2.32E-02 |
| ENSG0000249738 | AC008691.1 | 5  | 159310745 | 159805536 | 494791 | lncRNA-antisense                   | -1.31 | 9.24E-06 | 3.96E-04 |
| ENSG0000159495 | TGM7       | 15 | 43276271  | 43302255  | 25984  | protein coding                     | -1.31 | 2.96E-03 | 1.96E-02 |
| ENSG0000185585 | OLFML2A    | 9  | 124777133 | 124814885 | 37752  | protein coding                     | -1.31 | 9.66E-05 | 1.94E-03 |
| ENSG0000228791 | THRB-AS1   | 3  | 24494087  | 24681711  | 187624 | lncRNA                             | -1.31 | 6.18E-04 | 6.71E-03 |
| ENSG0000185040 | SPDYE16    | 7  | 76531319  | 76541459  | 10140  | protein coding                     | -1.31 | 9.44E-03 | 4.29E-02 |
| ENSG0000134398 | ERN2       | 16 | 23690310  | 23713226  | 22916  | protein coding                     | -1.31 | 2.01E-03 | 1.50E-02 |
| ENSG0000119973 | PRLHR      | 10 | 118589997 | 118595648 | 5651   | protein coding                     | -1.31 | 1.53E-03 | 1.24E-02 |
| ENSG0000276128 | AL591441.1 | 9  | 42974855  | 43045120  | 70265  | transcribed processed pseudogene   | -1.31 | 8.92E-03 | 4.12E-02 |
| ENSG0000260287 | TBC1D3G    | 17 | 36323884  | 36334759  | 10875  | protein coding                     | -1.31 | 5.12E-04 | 5.91E-03 |
| ENSG0000168263 | KCNV2      | 9  | 2717510   | 2730037   | 12527  | protein coding                     | -1.31 | 4.63E-03 | 2.66E-02 |
| ENSG0000255145 | STX17-AS1  | 9  | 99397024  | 99906605  | 509581 | lncRNA-antisense                   | -1.31 | 5.62E-03 | 3.03E-02 |
| ENSG0000101825 | MXRA5      | X  | 3308565   | 3346562   | 38087  | protein coding                     | -1.31 | 7.46E-03 | 3.66E-02 |
| ENSG0000234494 | SP2-AS1    | 17 | 47897330  | 47941410  | 44080  | lncRNA-antisense                   | -1.31 | 1.58E-03 | 1.27E-02 |
| ENSG0000185739 | SRL        | 16 | 4189374   | 4242080   | 52706  | protein coding                     | -1.31 | 3.11E-03 | 2.03E-02 |
| ENSG0000231793 | DOC2GP     | 11 | 67612651  | 67616257  | 3606   | transcribed unitary pseudogene     | -1.31 | 9.49E-06 | 4.03E-04 |
| ENSG0000226757 | PP12613    | 4  | 121764585 | 121768814 | 2229   | lncRNA-antisense                   | -1.31 | 1.05E-02 | 4.63E-02 |
| ENSG0000160323 | ADAMTS13   | 9  | 133414358 | 133459402 | 45044  | protein coding                     | -1.31 | 1.14E-05 | 4.53E-04 |
| ENSG0000272701 | MESTIT1    | 7  | 130486042 | 130491033 | 4991   | lncRNA-antisense                   | -1.31 | 1.10E-02 | 4.78E-02 |
| ENSG0000197099 | AC068631.1 | 3  | 186579476 | 186772986 | 193510 | lncRNA-antisense                   | -1.31 | 4.33E-07 | 4.82E-05 |
| ENSG0000171533 | MAP6       | 11 | 75586918  | 75669120  | 82202  | protein coding                     | -1.31 | 2.73E-04 | 3.91E-03 |
| ENSG0000224863 | LINC01398  | 1  | 46446600  | 46451317  | 4717   | lncRNA                             | -1.31 | 8.81E-03 | 4.03E-02 |
| ENSG0000224809 | LINC01095  | 4  | 146077717 | 146121913 | 44196  | lncRNA                             | -1.31 | 6.39E-03 | 3.30E-02 |
| ENSG0000144045 | DQX1       | 2  | 74518131  | 74526281  | 8150   | protein coding                     | -1.31 | 4.90E-03 | 2.77E-02 |
| ENSG0000236303 | LINC02646  | 10 | 130213488 | 130483193 | 269705 | lncRNA                             | -1.31 | 5.67E-03 | 3.05E-02 |
| ENSG0000162594 | IL23R      | 1  | 67138907  | 67259979  | 121072 | protein coding                     | -1.31 | 6.72E-04 | 7.10E-03 |
| ENSG0000262833 | AC016245.1 | 17 | 80801640  | 80805632  | 3992   | lncRNA-antisense                   | -1.31 | 3.21E-03 | 2.07E-02 |

|                 |            |    |           |           |         |                                      |       |          |          |
|-----------------|------------|----|-----------|-----------|---------|--------------------------------------|-------|----------|----------|
| ENSG00000137090 | DMRT1      | 9  | 841690    | 969090    | 127400  | protein coding                       | -1.31 | 2.64E-03 | 1.81E-02 |
| ENSG00000174680 | GRIK1-AS1  | 21 | 29748175  | 29764002  | 15827   | lncRNA-antisense                     | -1.31 | 4.40E-03 | 2.57E-02 |
| ENSG00000180287 | PLD5       | 1  | 242082986 | 242524697 | 441711  | protein coding                       | -1.31 | 6.84E-04 | 7.04E-03 |
| ENSG00000259541 | AP001150.1 | 11 | 120249759 | 120265932 | 16173   | lncRNA-antisense                     | -1.31 | 8.67E-03 | 4.05E-02 |
| ENSG00000132874 | SLC14A2    | 18 | 45212995  | 45683688  | 470693  | protein coding                       | -1.31 | 2.09E-04 | 3.26E-03 |
| ENSG00000180251 | SLC9A4     | 2  | 102473226 | 102533972 | 60746   | protein coding                       | -1.31 | 3.27E-03 | 2.09E-02 |
| ENSG00000123243 | ITI5       | 10 | 7559270   | 7666998   | 107728  | protein coding                       | -1.31 | 3.62E-03 | 2.24E-02 |
| ENSG00000124140 | SLC12A5    | 20 | 46021690  | 46060150  | 38460   | protein coding                       | -1.31 | 5.20E-05 | 1.25E-03 |
| ENSG00000214198 | TTC41P     | 12 | 103843749 | 103930211 | 86462   | transcribed unitary pseudogene       | -1.31 | 3.96E-05 | 1.04E-03 |
| ENSG00000158955 | WNT9B      | 17 | 46833201  | 46886730  | 53529   | protein coding                       | -1.31 | 2.65E-03 | 1.82E-02 |
| ENSG00000115414 | FN1        | 2  | 215360440 | 215436073 | 75633   | protein coding                       | -1.31 | 4.27E-05 | 1.09E-03 |
| ENSG00000130829 | DUSP9      | X  | 153642492 | 153651326 | 8834    | protein coding                       | -1.31 | 8.40E-03 | 3.96E-02 |
| ENSG00000128683 | GAD1       | 2  | 170813213 | 170861151 | 47938   | protein coding                       | -1.31 | 3.42E-04 | 4.52E-03 |
| ENSG00000176406 | RIMS2      | 8  | 103500696 | 104256094 | 755398  | protein coding                       | -1.31 | 3.54E-04 | 4.61E-03 |
| ENSG00000144908 | ALDH1L1    | 3  | 126103562 | 126197994 | 94432   | protein coding                       | -1.31 | 2.81E-04 | 3.98E-03 |
| ENSG00000166250 | CLMP       | 11 | 123069872 | 123195248 | 125376  | protein coding                       | -1.32 | 9.96E-04 | 9.28E-03 |
| ENSG00000110881 | ASIC1      | 12 | 50057548  | 50083611  | 28063   | protein coding                       | -1.32 | 1.46E-05 | 5.40E-04 |
| ENSG00000232117 | LINC00384  | 13 | 30151886  | 30159621  | 7735    | lncRNA                               | -1.32 | 8.77E-04 | 8.51E-03 |
| ENSG00000079393 | DUSP13     | 10 | 75094432  | 75109221  | 14789   | protein coding                       | -1.32 | 1.90E-03 | 1.45E-02 |
| ENSG00000038295 | TLL1       | 4  | 165873237 | 166104457 | 231220  | protein coding                       | -1.32 | 3.20E-03 | 2.07E-02 |
| ENSG00000158815 | FGF17      | 8  | 22042398  | 22048809  | 6411    | protein coding                       | -1.32 | 3.36E-03 | 2.13E-02 |
| ENSG00000151338 | MIPOL1     | 14 | 37197913  | 37552361  | 354448  | protein coding                       | -1.32 | 1.01E-04 | 1.99E-03 |
| ENSG00000163239 | TDRD10     | 1  | 154502219 | 154548147 | 45928   | protein coding                       | -1.32 | 6.95E-03 | 3.49E-02 |
| ENSG00000177788 | AL162595.1 | 1  | 229256892 | 229271242 | 14350   | lncRNA-bidirectional promoter lncRNA | -1.32 | 1.04E-04 | 2.03E-03 |
| ENSG00000121068 | TBX2       | 17 | 61399843  | 61409466  | 9623    | protein coding                       | -1.32 | 6.50E-04 | 6.96E-03 |
| ENSG00000247213 | LINC01498  | 12 | 108434130 | 108515023 | 80893   | lncRNA-antisense                     | -1.32 | 7.93E-03 | 3.81E-02 |
| ENSG00000242017 | ALG1L15P   | 3  | 156044155 | 156044948 | 793     | processed pseudogene                 | -1.32 | 3.58E-03 | 2.23E-02 |
| ENSG00000132938 | MTUS2      | 13 | 28820348  | 29505947  | 685599  | protein coding                       | -1.32 | 1.10E-04 | 2.09E-03 |
| ENSG00000165323 | FAT3       | 11 | 92352096  | 92896470  | 544374  | protein coding                       | -1.32 | 1.92E-04 | 3.07E-03 |
| ENSG00000284745 | AL589702.1 | 1  | 2960658   | 2968707   | 8049    | lncRNA                               | -1.32 | 4.54E-03 | 2.62E-02 |
| ENSG00000180638 | SLC47A2    | 17 | 19678288  | 19718979  | 40691   | protein coding                       | -1.32 | 1.02E-04 | 2.00E-03 |
| ENSG00000204179 | PTPN20     | 10 | 46911396  | 47002488  | 91092   | protein coding                       | -1.32 | 7.49E-03 | 3.67E-02 |
| ENSG00000147117 | ZNF157     | X  | 47370578  | 47414498  | 43920   | protein coding                       | -1.32 | 4.76E-03 | 2.71E-02 |
| ENSG00000239572 | AC108749.1 | 3  | 87641412  | 87793629  | 152217  | lncRNA                               | -1.32 | 2.94E-03 | 1.95E-02 |
| ENSG00000154040 | CABYR      | 18 | 24138987  | 24161600  | 22613   | protein coding                       | -1.32 | 5.30E-04 | 6.05E-03 |
| ENSG00000129474 | AJUBA      | 14 | 22971177  | 22982551  | 11374   | protein coding                       | -1.32 | 4.03E-05 | 1.05E-03 |
| ENSG00000227695 | DNMBP-AS1  | 10 | 99927010  | 99959050  | 32040   | lncRNA-antisense                     | -1.32 | 1.79E-03 | 1.39E-02 |
| ENSG00000084674 | APOB       | 2  | 21001429  | 21044073  | 42644   | protein coding                       | -1.32 | 3.40E-04 | 4.50E-03 |
| ENSG00000214128 | TMEM213    | 7  | 138797952 | 138838101 | 40149   | protein coding                       | -1.32 | 1.86E-03 | 1.42E-02 |
| ENSG00000140955 | ADAD2      | 16 | 84191138  | 84197168  | 6030    | protein coding                       | -1.32 | 8.84E-04 | 8.43E-03 |
| ENSG00000124391 | IL17C      | 16 | 88638572  | 88640468  | 1896    | protein coding                       | -1.32 | 1.07E-02 | 4.67E-02 |
| ENSG00000259362 | AC046168.1 | 15 | 77525540  | 77534110  | 8570    | lncRNA                               | -1.32 | 6.43E-03 | 3.32E-02 |
| ENSG00000150556 | LYPD6B     | 2  | 149038107 | 149215622 | 177155  | protein coding                       | -1.32 | 2.62E-04 | 3.80E-03 |
| ENSG00000225689 | AL008633.1 | X  | 128027322 | 129326707 | 1299385 | lncRNA                               | -1.32 | 9.13E-03 | 4.19E-02 |
| ENSG00000001626 | CFTR       | 7  | 117287120 | 117715971 | 428851  | protein coding                       | -1.32 | 3.76E-04 | 4.81E-03 |
| ENSG00000223756 | TSSC2      | 11 | 3380961   | 3408978   | 28017   | transcribed unprocessed pseudogene   | -1.32 | 2.07E-03 | 1.53E-02 |
| ENSG00000103449 | SALL1      | 16 | 51135975  | 51151367  | 15392   | protein coding                       | -1.32 | 2.14E-03 | 1.57E-02 |
| ENSG00000100626 | GALNT16    | 14 | 69259277  | 69357033  | 97756   | protein coding                       | -1.32 | 5.60E-04 | 6.28E-03 |
| ENSG00000267260 | AC020928.1 | 19 | 36773112  | 36777078  | 3966    | lncRNA                               | -1.32 | 1.03E-03 | 9.50E-03 |
| ENSG00000162692 | VCAM1      | 1  | 100719742 | 100739045 | 19303   | protein coding                       | -1.32 | 3.47E-03 | 2.18E-02 |
| ENSG00000245522 | LINC02709  | 11 | 9754770   | 9759533   | 4763    | lncRNA                               | -1.32 | 1.05E-02 | 4.64E-02 |
| ENSG00000246877 | DNM1P35    | 15 | 75727670  | 75738623  | 10953   | lncRNA-antisense                     | -1.32 | 3.71E-03 | 2.28E-02 |
| ENSG00000138944 | SHSAL1     | 22 | 44243665  | 44312951  | 69286   | protein coding                       | -1.32 | 1.63E-03 | 1.30E-02 |
| ENSG00000198046 | ZNF667     | 19 | 56439325  | 56478065  | 38740   | protein coding                       | -1.32 | 1.28E-06 | 1.01E-04 |
| ENSG00000160882 | CYP11B1    | 8  | 142872356 | 142879846 | 7490    | protein coding                       | -1.32 | 2.26E-04 | 3.45E-03 |
| ENSG00000112414 | ADGRG6     | 6  | 142301854 | 142446266 | 144412  | protein coding                       | -1.32 | 5.20E-04 | 5.97E-03 |
| ENSG00000101638 | ST8SIA5    | 18 | 46667821  | 46759257  | 91436   | protein coding                       | -1.32 | 7.78E-05 | 1.66E-03 |
| ENSG00000227733 | AC239809.3 | 1  | 148159213 | 148255012 | 95799   | lncRNA                               | -1.32 | 2.80E-04 | 3.98E-03 |
| ENSG00000123407 | HOXC12     | 12 | 53954903  | 53958956  | 4053    | protein coding                       | -1.32 | 9.71E-03 | 4.38E-02 |
| ENSG00000271171 | LINC00904  | 19 | 34891605  | 34905139  | 13534   | lncRNA                               | -1.32 | 9.18E-03 | 4.21E-02 |
| ENSG00000279725 | AL391005.1 | 10 | 127734562 | 127736996 | 2434    | TEC                                  | -1.32 | 8.27E-03 | 3.92E-02 |
| ENSG00000118729 | CASQ2      | 1  | 115700021 | 115768714 | 68693   | protein coding                       | -1.32 | 1.06E-02 | 4.65E-02 |
| ENSG00000135480 | KRT7       | 12 | 52232520  | 52252186  | 19666   | protein coding                       | -1.32 | 2.95E-04 | 4.11E-03 |
| ENSG00000234929 | AC018685.2 | 2  | 2638178   | 2696285   | 58107   | lncRNA                               | -1.32 | 5.89E-03 | 3.13E-02 |
| ENSG00000163286 | ALPG       | 2  | 232406844 | 232410714 | 3870    | protein coding                       | -1.32 | 5.40E-04 | 6.13E-03 |
| ENSG00000231028 | LINC00271  | 6  | 135497422 | 135813990 | 316568  | lncRNA                               | -1.32 | 1.27E-05 | 4.93E-04 |
| ENSG00000248222 | SLIT3-AS1  | 5  | 169013227 | 169037998 | 24771   | lncRNA-antisense                     | -1.32 | 8.77E-03 | 4.08E-02 |
| ENSG00000233221 | AC133785.1 | 2  | 130830978 | 130836994 | 6016    | lncRNA-antisense                     | -1.32 | 3.92E-03 | 2.36E-02 |
| ENSG00000281344 | HELLPAR    | 12 | 102197585 | 102402596 | 205011  | lncRNA-macro lncRNA                  | -1.32 | 4.00E-08 | 9.47E-06 |
| ENSG00000261649 | GOLGA6L7   | 15 | 28841833  | 28848675  | 6842    | protein coding                       | -1.32 | 5.99E-03 | 3.17E-02 |
| ENSG00000149451 | ADAM33     | 20 | 3667965   | 3682246   | 14281   | protein coding                       | -1.32 | 9.06E-05 | 1.84E-03 |
| ENSG00000106078 | COBL       | 7  | 51016212  | 51316818  | 300606  | protein coding                       | -1.32 | 2.39E-04 | 3.59E-03 |
| ENSG00000185483 | ROR1       | 1  | 63774017  | 64181498  | 407481  | protein coding                       | -1.32 | 3.27E-04 | 4.39E-03 |
| ENSG00000251138 | LINC02882  | 12 | 73820315  | 74402600  | 582285  | lncRNA                               | -1.32 | 9.65E-04 | 9.09E-03 |
| ENSG00000233746 | LINC00656  | 20 | 23125068  | 23132635  | 7567    | lncRNA                               | -1.33 | 5.52E-04 | 6.22E-03 |
| ENSG00000399877 | BEST2      | 19 | 12751702  | 12758458  | 6756    | protein coding                       | -1.33 | 8.20E-03 | 3.90E-02 |
| ENSG00000235749 | AL390860.1 | 1  | 247639630 | 247761255 | 121625  | lncRNA-antisense                     | -1.33 | 8.27E-03 | 3.92E-02 |
| ENSG00000215568 | GAB4       | 22 | 16961936  | 17008222  | 46286   | protein coding                       | -1.33 | 2.75E-04 | 3.92E-03 |
| ENSG00000182752 | PAPPA      | 9  | 116153791 | 116402321 | 248530  | protein coding                       | -1.33 | 7.93E-05 | 1.69E-03 |
| ENSG00000264964 | AP001033.1 | 18 | 9310522   | 9334445   | 23923   | lncRNA                               | -1.33 | 3.20E-03 | 2.06E-02 |
| ENSG00000077942 | FBLN1      | 22 | 45502238  | 45601135  | 98897   | protein coding                       | -1.33 | 9.53E-05 | 1.92E-03 |
| ENSG00000135472 | FAM2       | 12 | 49866896  | 49904217  | 37321   | protein coding                       | -1.33 | 1.20E-04 | 2.23E-03 |
| ENSG00000251381 | LINC00958  | 11 | 12961541  | 12989597  | 28056   | lncRNA                               | -1.33 | 2.82E-03 | 1.90E-02 |
| ENSG00000177350 | RPL13AP3   | 14 | 55766177  | 55767717  | 1540    | transcribed processed pseudogene     | -1.33 | 2.83E-03 | 1.90E-02 |
| ENSG00000134376 | CRB1       | 1  | 197268204 | 197478455 | 210251  | protein coding                       | -1.33 | 1.86E-04 | 3.02E-03 |
| ENSG00000165349 | SLCTA3     | X  | 70925579  | 70931125  | 5546    | protein coding                       | -1.33 | 5.54E-03 | 3.00E-02 |
| ENSG00000101276 | SLC52A3    | 20 | 760080    | 776015    | 15935   | protein coding                       | -1.33 | 2.49E-03 | 1.74E-02 |
| ENSG00000145794 | MEGF10     | 5  | 127290796 | 127465377 | 174941  | protein coding                       | -1.33 | 7.31E-04 | 7.53E-03 |
| ENSG00000232057 | AC093390.1 | 2  | 1824412   | 1828667   | 4255    | lncRNA-antisense                     | -1.33 | 6.26E-03 | 3.26E-02 |
| ENSG00000174233 | ADCY6      | 12 | 48766194  | 48789037  | 22843   | protein coding                       | -1.33 | 2.87E-04 | 4.03E-03 |



|                 |             |    |           |           |        |                                  |       |          |          |
|-----------------|-------------|----|-----------|-----------|--------|----------------------------------|-------|----------|----------|
| ENSG00000229272 | AL157388.1  | 10 | 118784563 | 119029544 | 244981 | lncRNA-antisense                 | -1.33 | 8.05E-03 | 3.85E-02 |
| ENSG00000164007 | CLDN19      | 1  | 42733093  | 42740254  | 7161   | protein coding                   | -1.33 | 4.08E-03 | 2.43E-02 |
| ENSG00000162374 | ELAVL4      | 1  | 50024029  | 50203772  | 179743 | protein coding                   | -1.33 | 2.69E-04 | 3.87E-03 |
| ENSG00000235351 | AC114730.3  | 2  | 241724615 | 241725693 | 1078   | lncRNA-antisense                 | -1.33 | 1.07E-02 | 4.69E-02 |
| ENSG00000223947 | AC016738.1  | 2  | 100993676 | 101002244 | 8568   | lncRNA-antisense                 | -1.33 | 1.16E-02 | 4.94E-02 |
| ENSG00000213023 | SYT3        | 19 | 50621307  | 50639881  | 18574  | protein coding                   | -1.33 | 1.07E-02 | 4.67E-02 |
| ENSG00000137878 | GCOM1       | 15 | 57591908  | 57714745  | 122837 | protein coding                   | -1.33 | 2.17E-05 | 6.90E-04 |
| ENSG00000166069 | TMCO5A      | 15 | 37921939  | 37967724  | 45785  | protein coding                   | -1.33 | 1.16E-02 | 4.95E-02 |
| ENSG00000148735 | PLEKHS1     | 10 | 113751262 | 113783429 | 32167  | protein coding                   | -1.33 | 5.11E-03 | 2.84E-02 |
| ENSG00000166111 | SVOP        | 12 | 108907741 | 109021068 | 113327 | protein coding                   | -1.33 | 3.16E-04 | 4.29E-03 |
| ENSG00000253955 | AC008663.2  | 5  | 173578275 | 173585068 | 6793   | lncRNA-antisense                 | -1.33 | 4.92E-03 | 2.77E-02 |
| ENSG00000112619 | PRPH2       | 6  | 42696598  | 42722597  | 25999  | protein coding                   | -1.33 | 9.97E-03 | 4.46E-02 |
| ENSG00000276545 | PCDHGB9P    | 5  | 141439853 | 141442449 | 2596   | unprocessed pseudogene           | -1.33 | 3.33E-03 | 2.12E-02 |
| ENSG00000154556 | SORBS2      | 4  | 185585444 | 185956652 | 371208 | protein coding                   | -1.33 | 3.27E-05 | 9.05E-04 |
| ENSG00000141449 | GREB1L      | 18 | 21242242  | 21525417  | 283175 | protein coding                   | -1.33 | 1.44E-05 | 5.36E-04 |
| ENSG00000287454 | AC008149.2  | 12 | 96229563  | 96235650  | 6087   | lncRNA                           | -1.33 | 5.04E-05 | 1.23E-03 |
| ENSG00000116183 | PAPPA2      | 1  | 176463171 | 176845601 | 382430 | protein coding                   | -1.33 | 1.67E-04 | 2.79E-03 |
| ENSG00000108821 | COL1A1      | 17 | 50184101  | 50201632  | 17531  | protein coding                   | -1.33 | 2.43E-05 | 7.46E-04 |
| ENSG00000119698 | PPP4R4      | 14 | 94146128  | 94279734  | 133606 | protein coding                   | -1.33 | 1.25E-04 | 2.29E-03 |
| ENSG00000187905 | LRRC74B     | 22 | 21045960  | 21064168  | 18208  | protein coding                   | -1.33 | 6.18E-04 | 6.72E-03 |
| ENSG00000264006 | AKR1C8P     | 10 | 5154140   | 5185187   | 31047  | protein coding                   | -1.33 | 6.29E-03 | 3.27E-02 |
| ENSG00000092445 | TYRO3       | 15 | 41557675  | 41583589  | 25914  | protein coding                   | -1.33 | 3.25E-04 | 4.37E-03 |
| ENSG00000238290 | AL034417.2  | 1  | 8026738   | 8122702   | 95964  | lncRNA                           | -1.33 | 8.01E-03 | 3.84E-02 |
| ENSG00000101144 | BMP7        | 20 | 57168753  | 57266641  | 97888  | protein coding                   | -1.33 | 4.00E-04 | 5.04E-03 |
| ENSG00000184949 | FAM227A     | 22 | 38578120  | 38656629  | 78509  | protein coding                   | -1.33 | 2.15E-03 | 1.58E-02 |
| ENSG00000233718 | MYCNOS      | 2  | 15918350  | 15942249  | 23899  | lncRNA-antisense                 | -1.33 | 4.38E-03 | 2.56E-02 |
| ENSG00000224025 | AL353616.1  | 9  | 68609125  | 68611984  | 2859   | processed pseudogene             | -1.33 | 4.30E-03 | 2.53E-02 |
| ENSG00000101955 | SRPX        | X  | 38149336  | 38220924  | 71588  | protein coding                   | -1.33 | 3.95E-03 | 2.37E-02 |
| ENSG00000256193 | LINC00507   | 12 | 127914707 | 127960028 | 45321  | lncRNA                           | -1.33 | 1.03E-02 | 4.58E-02 |
| ENSG00000250992 | AC139491.3  | 5  | 176036593 | 176042888 | 6295   | lncRNA-antisense                 | -1.33 | 4.52E-03 | 2.61E-02 |
| ENSG00000092345 | DAZL        | 3  | 16586792  | 16670306  | 83514  | protein coding                   | -1.33 | 2.82E-03 | 1.89E-02 |
| ENSG00000152430 | BOLL        | 2  | 197726879 | 197786762 | 59883  | protein coding                   | -1.33 | 6.68E-03 | 3.41E-02 |
| ENSG00000237807 | AC022034.1  | 8  | 53493523  | 53524336  | 30813  | lncRNA                           | -1.33 | 2.52E-03 | 1.75E-02 |
| ENSG00000168658 | VWA3B       | 2  | 98087116  | 98313299  | 226183 | protein coding                   | -1.33 | 8.43E-05 | 1.75E-03 |
| ENSG00000303034 | MUSK        | 9  | 110668779 | 110806558 | 137779 | protein coding                   | -1.33 | 2.14E-03 | 1.57E-02 |
| ENSG00000131126 | TEX101      | 19 | 43401496  | 43418597  | 17101  | protein coding                   | -1.33 | 6.50E-03 | 3.34E-02 |
| ENSG00000189292 | ALKAL2      | 2  | 279558    | 288851    | 9293   | protein coding                   | -1.33 | 6.57E-03 | 3.37E-02 |
| ENSG00000263400 | TMEM220-AS1 | 17 | 10729777  | 10815164  | 85387  | lncRNA-antisense                 | -1.33 | 4.92E-06 | 2.55E-04 |
| ENSG00000260918 | AC107398.3  | 4  | 47431960  | 47438959  | 6999   | lncRNA-sense overlapping         | -1.33 | 1.71E-03 | 1.34E-02 |
| ENSG00000104059 | FAM189A1    | 15 | 29120254  | 29570723  | 450469 | protein coding                   | -1.33 | 2.07E-04 | 3.24E-03 |
| ENSG00000120549 | KIAA1217    | 10 | 23694746  | 24547848  | 853102 | protein coding                   | -1.33 | 1.19E-04 | 2.21E-03 |
| ENSG00000136848 | DAB2IP      | 9  | 121567057 | 121785530 | 218473 | protein coding                   | -1.33 | 8.44E-05 | 1.75E-03 |
| ENSG00000260386 | LDC1P       | 1  | 31500085  | 31509648  | 9563   | transcribed unitary pseudogene   | -1.33 | 1.87E-03 | 1.43E-02 |
| ENSG00000150551 | LYPD1       | 2  | 132643286 | 132671579 | 28293  | protein coding                   | -1.34 | 9.39E-03 | 4.27E-02 |
| ENSG00000069018 | TRPC7       | 5  | 136212745 | 136365545 | 152800 | protein coding                   | -1.34 | 2.38E-03 | 1.69E-02 |
| ENSG00000110427 | KJAA1549L   | 11 | 33376108  | 33674102  | 297994 | protein coding                   | -1.34 | 1.19E-04 | 2.21E-03 |
| ENSG00000161180 | CCDC116     | 22 | 21632716  | 21637329  | 4613   | protein coding                   | -1.34 | 5.83E-03 | 3.10E-02 |
| ENSG00000205231 | TLL10-AS1   | 1  | 1173056   | 1179555   | 6499   | lncRNA-antisense                 | -1.34 | 3.41E-03 | 2.16E-02 |
| ENSG00000105664 | COMP        | 19 | 18782773  | 18791305  | 8532   | protein coding                   | -1.34 | 2.73E-04 | 3.90E-03 |
| ENSG00000117245 | KIF17       | 1  | 20664014  | 20718017  | 54003  | protein coding                   | -1.34 | 5.54E-04 | 6.24E-03 |
| ENSG00000270533 | CR382285.1  | 21 | 9975017   | 10119309  | 144292 | transcribed processed pseudogene | -1.34 | 4.97E-03 | 2.79E-02 |
| ENSG00000131080 | EDA2R       | X  | 66595637  | 66639298  | 43661  | protein coding                   | -1.34 | 3.93E-03 | 2.37E-02 |
| ENSG00000225683 | PACRG-AS3   | 6  | 163163830 | 163192038 | 28208  | lncRNA-antisense                 | -1.34 | 1.78E-03 | 1.38E-02 |
| ENSG00000180422 | LINC00304   | 16 | 89159146  | 89164245  | 5099   | lncRNA                           | -1.34 | 7.27E-04 | 7.52E-03 |
| ENSG00000146147 | MLIP        | 6  | 53929982  | 54266280  | 336298 | protein coding                   | -1.34 | 3.21E-03 | 2.07E-02 |
| ENSG00000238063 | LINC01685   | 1  | 38474825  | 38516520  | 41695  | lncRNA                           | -1.34 | 1.73E-04 | 2.87E-03 |
| ENSG00000248713 | C4orf54     | 4  | 99636529  | 99654648  | 18119  | protein coding                   | -1.34 | 3.97E-04 | 5.01E-03 |
| ENSG00000138315 | OIT3        | 10 | 72893584  | 72933036  | 39452  | protein coding                   | -1.34 | 2.62E-03 | 1.80E-02 |
| ENSG00000253686 | LINC01484   | 5  | 173707614 | 173746279 | 38665  | lncRNA                           | -1.34 | 1.50E-03 | 1.23E-02 |
| ENSG00000125319 | HROB        | 17 | 44141906  | 44162476  | 20570  | protein coding                   | -1.34 | 8.69E-04 | 8.46E-03 |
| ENSG00000116285 | ERRF1       | 1  | 8004404   | 8026309   | 21905  | protein coding                   | -1.34 | 7.97E-06 | 3.57E-04 |
| ENSG00000237126 | AC073254.1  | 2  | 232580948 | 232611971 | 31023  | lncRNA-antisense                 | -1.34 | 1.34E-03 | 1.13E-02 |
| ENSG00000132972 | RNF17       | 13 | 24764169  | 24879921  | 115752 | protein coding                   | -1.34 | 8.07E-03 | 3.86E-02 |
| ENSG00000139287 | TPH2        | 12 | 71938845  | 72186618  | 247773 | protein coding                   | -1.34 | 1.86E-03 | 1.42E-02 |
| ENSG00000163362 | INAVA       | 1  | 200891048 | 200915742 | 24694  | protein coding                   | -1.34 | 1.54E-03 | 1.25E-02 |
| ENSG00000140534 | TICRR       | 15 | 89575469  | 89631056  | 55587  | protein coding                   | -1.34 | 3.61E-04 | 4.68E-03 |
| ENSG00000203729 | LINC00272   | 1  | 182407621 | 182414815 | 7194   | lncRNA                           | -1.34 | 8.83E-03 | 4.10E-02 |
| ENSG00000112562 | SMOC2       | 6  | 168441151 | 168673445 | 232294 | protein coding                   | -1.34 | 6.02E-04 | 6.60E-03 |
| ENSG00000171016 | PYGO1       | 15 | 55538884  | 55588947  | 50063  | protein coding                   | -1.34 | 3.87E-03 | 2.34E-02 |
| ENSG00000219438 | TAF5        | 22 | 48489553  | 48850912  | 361359 | protein coding                   | -1.34 | 1.14E-03 | 1.02E-02 |
| ENSG00000164089 | ETNPPL      | 4  | 108742048 | 108763054 | 21006  | protein coding                   | -1.34 | 7.85E-03 | 3.79E-02 |
| ENSG00000111704 | NANOG       | 12 | 7787794   | 7799146   | 11352  | protein coding                   | -1.34 | 5.99E-03 | 3.17E-02 |
| ENSG00000157653 | C9orf43     | 9  | 113410054 | 113429690 | 19636  | protein coding                   | -1.34 | 2.36E-04 | 3.55E-03 |
| ENSG00000249601 | LINC01187   | 5  | 170191579 | 170199141 | 7562   | lncRNA                           | -1.34 | 4.83E-03 | 2.74E-02 |
| ENSG00000103599 | IQCH        | 15 | 67254786  | 67502260  | 247474 | protein coding                   | -1.34 | 1.53E-04 | 2.63E-03 |
| ENSG00000130635 | COL5A1      | 9  | 134641803 | 134844843 | 203040 | protein coding                   | -1.34 | 2.11E-05 | 6.76E-04 |
| ENSG00000110436 | SLC1A2      | 11 | 35251205  | 35420063  | 168858 | protein coding                   | -1.34 | 7.61E-05 | 1.64E-03 |
| ENSG00000183914 | DNAH2       | 17 | 7717354   | 7833744   | 116390 | protein coding                   | -1.34 | 4.66E-04 | 5.55E-03 |
| ENSG00000163638 | ADAMT5      | 3  | 64515654  | 64688000  | 172346 | protein coding                   | -1.34 | 1.03E-03 | 9.50E-03 |
| ENSG00000233208 | LINC00642   | 14 | 90453571  | 90490763  | 37192  | lncRNA                           | -1.34 | 8.16E-04 | 8.14E-03 |
| ENSG00000154678 | PDE1C       | 7  | 31751179  | 32428131  | 678952 | protein coding                   | -1.34 | 4.55E-04 | 5.46E-03 |
| ENSG00000234817 | ECI2-DT     | 6  | 4136072   | 4157385   | 21313  | lncRNA                           | -1.34 | 5.93E-03 | 3.14E-02 |
| ENSG00000172000 | ZNF556      | 19 | 2867335   | 2883445   | 16110  | protein coding                   | -1.34 | 1.18E-03 | 1.04E-02 |
| ENSG00000090709 | PAX7        | 1  | 18630846  | 18748866  | 118020 | protein coding                   | -1.34 | 2.94E-03 | 1.95E-02 |
| ENSG00000161243 | FBXO27      | 19 | 38990714  | 39032785  | 42071  | protein coding                   | -1.34 | 1.47E-03 | 1.21E-02 |
| ENSG00000279711 | AP004782.1  | 11 | 133064697 | 133068129 | 3432   | TEC                              | -1.34 | 1.17E-02 | 4.98E-02 |
| ENSG00000267549 | AC006116.7  | 19 | 56314703  | 56365316  | 50613  | lncRNA-antisense                 | -1.34 | 7.02E-04 | 7.32E-03 |
| ENSG00000103375 | AQP8        | 16 | 25215731  | 25228932  | 13201  | protein coding                   | -1.34 | 1.11E-02 | 4.80E-02 |
| ENSG00000124564 | SLC17A3     | 6  | 25833066  | 25882286  | 49220  | protein coding                   | -1.34 | 7.84E-03 | 3.79E-02 |
| ENSG00000178662 | CSRNP3      | 2  | 165469647 | 165689407 | 219760 | protein coding                   | -1.34 | 3.89E-03 | 2.35E-02 |

|                 |            |    |           |           |        |                                      |       |          |          |
|-----------------|------------|----|-----------|-----------|--------|--------------------------------------|-------|----------|----------|
| ENSG00000147041 | SYTL5      | X  | 38006553  | 38128819  | 122266 | protein coding                       | -1.34 | 6.45E-03 | 3.32E-02 |
| ENSG00000204291 | COL15A1    | 9  | 98943179  | 99070792  | 127613 | protein coding                       | -1.34 | 2.42E-04 | 3.61E-03 |
| ENSG00000159450 | TCHH       | 1  | 152106317 | 152115454 | 9137   | protein coding                       | -1.34 | 1.72E-03 | 1.35E-02 |
| ENSG00000200397 | Y RNA      | 7  | 87218611  | 87218712  | 101    | misc RNA                             | -1.34 | 1.15E-02 | 4.93E-02 |
| ENSG00000148123 | PLPPR1     | 9  | 101028727 | 101325135 | 296408 | protein coding                       | -1.34 | 8.24E-03 | 3.91E-02 |
| ENSG00000138771 | SHROOM3    | 4  | 76435229  | 76783253  | 348024 | protein coding                       | -1.34 | 3.88E-05 | 1.02E-03 |
| ENSG00000189149 | CRYM-AS1   | 16 | 21300849  | 21339037  | 38188  | transcribed unitary pseudogene       | -1.34 | 2.67E-03 | 1.83E-02 |
| ENSG00000243295 | AC126121.3 | 3  | 59050164  | 59754808  | 704644 | lncRNA                               | -1.34 | 6.60E-03 | 3.38E-02 |
| ENSG00000165181 | SHOC1      | 9  | 111686173 | 111795008 | 108835 | protein coding                       | -1.34 | 4.74E-05 | 1.18E-03 |
| ENSG00000164393 | ADGRF2     | 6  | 47656436  | 47697797  | 41361  | protein coding                       | -1.35 | 8.01E-03 | 3.84E-02 |
| ENSG00000163092 | XIRP2      | 2  | 166888480 | 167259753 | 371273 | protein coding                       | -1.35 | 2.30E-03 | 1.65E-02 |
| ENSG00000167281 | RBFOX3     | 17 | 79089345  | 79516148  | 426803 | protein coding                       | -1.35 | 1.06E-05 | 4.30E-04 |
| ENSG00000109132 | PHOX2B     | 4  | 41744082  | 41748725  | 4643   | protein coding                       | -1.35 | 3.32E-03 | 2.11E-02 |
| ENSG00000127325 | BEST3      | 12 | 69643360  | 69699476  | 56116  | protein coding                       | -1.35 | 3.24E-03 | 2.08E-02 |
| ENSG00000143768 | LEFTY2     | 1  | 225936598 | 225941383 | 4785   | protein coding                       | -1.35 | 2.36E-03 | 1.68E-02 |
| ENSG00000137573 | SULF1      | 8  | 69466624  | 69660915  | 194291 | protein coding                       | -1.35 | 3.59E-04 | 4.65E-03 |
| ENSG00000069535 | MAOB       | X  | 43766610  | 43882450  | 115840 | protein coding                       | -1.35 | 8.14E-03 | 3.88E-02 |
| ENSG00000256654 | AC005906.2 | 12 | 4909867   | 5026012   | 116145 | lncRNA                               | -1.35 | 1.55E-03 | 1.25E-02 |
| ENSG00000245651 | AC083805.1 | 12 | 57869834  | 57896482  | 26648  | lncRNA                               | -1.35 | 3.07E-03 | 2.01E-02 |
| ENSG00000198221 | AFDN-DT    | 6  | 167822103 | 167826812 | 4709   | lncRNA                               | -1.35 | 6.22E-03 | 3.25E-02 |
| ENSG00000237840 | FAM21FP    | 10 | 45706431  | 45727231  | 20800  | transcribed unprocessed pseudogene   | -1.35 | 1.04E-05 | 4.23E-04 |
| ENSG00000173698 | ADGRG2     | X  | 18989307  | 19122637  | 133330 | protein coding                       | -1.35 | 2.78E-07 | 3.63E-05 |
| ENSG00000258910 | LINC01956  | 2  | 118766965 | 118835110 | 68145  | lncRNA                               | -1.35 | 7.67E-03 | 3.73E-02 |
| ENSG00000106688 | SLC1A1     | 9  | 4490468   | 4587469   | 97001  | protein coding                       | -1.35 | 4.81E-03 | 2.73E-02 |
| ENSG00000228549 | BX284668.2 | 1  | 16870945  | 16883659  | 12714  | lncRNA                               | -1.35 | 5.45E-04 | 6.16E-03 |
| ENSG00000205126 | ACCSL      | 11 | 44047981  | 44059977  | 11996  | protein coding                       | -1.35 | 4.03E-03 | 2.41E-02 |
| ENSG00000218336 | TENM3      | 4  | 182143987 | 182803024 | 659037 | protein coding                       | -1.35 | 8.77E-06 | 3.80E-04 |
| ENSG00000271776 | AL445209.1 | 13 | 78596129  | 78599619  | 3490   | lncRNA-antisense                     | -1.35 | 5.70E-03 | 3.06E-02 |
| ENSG00000282021 | AC100810.3 | 8  | 1758208   | 1760447   | 2239   | lncRNA                               | -1.35 | 6.63E-03 | 3.39E-02 |
| ENSG00000108511 | HOXB6      | 17 | 48595751  | 48604992  | 9241   | protein coding                       | -1.35 | 2.29E-03 | 1.64E-02 |
| ENSG00000213171 | LINGO4     | 1  | 151800264 | 151805419 | 5155   | protein coding                       | -1.35 | 2.97E-03 | 1.97E-02 |
| ENSG00000173662 | TAS1R1     | 1  | 6555307   | 6579755   | 24448  | protein coding                       | -1.35 | 6.10E-03 | 3.20E-02 |
| ENSG00000120327 | PCDHB14    | 5  | 141222932 | 141227759 | 4827   | protein coding                       | -1.35 | 9.63E-03 | 4.35E-02 |
| ENSG00000184454 | NCMAP      | 1  | 24556087  | 24609328  | 53241  | protein coding                       | -1.35 | 8.46E-03 | 3.98E-02 |
| ENSG00000154133 | ROBO4      | 11 | 124883691 | 124898500 | 14809  | protein coding                       | -1.35 | 1.50E-03 | 1.22E-02 |
| ENSG00000258702 | AL137786.1 | 14 | 96592399  | 96605974  | 13575  | lncRNA                               | -1.35 | 1.41E-03 | 1.18E-02 |
| ENSG00000183454 | GRIN2A     | 16 | 9753404   | 10182928  | 429524 | protein coding                       | -1.35 | 2.53E-04 | 3.71E-03 |
| ENSG00000225937 | PCA3       | 9  | 76691980  | 76863307  | 171327 | lncRNA-antisense                     | -1.35 | 3.81E-04 | 4.86E-03 |
| ENSG00000286063 | AL121888.1 | 20 | 48324812  | 48367976  | 43164  | lncRNA                               | -1.35 | 1.14E-03 | 1.01E-02 |
| ENSG00000204961 | PCDHA9     | 5  | 140847772 | 141012347 | 164575 | protein coding                       | -1.35 | 6.26E-03 | 3.26E-02 |
| ENSG00000179002 | TAS1R2     | 1  | 18839599  | 18859682  | 20083  | protein coding                       | -1.35 | 2.03E-03 | 1.51E-02 |
| ENSG00000104537 | ANXA13     | 8  | 123680794 | 123737402 | 56608  | protein coding                       | -1.35 | 1.09E-02 | 4.73E-02 |
| ENSG00000286812 | AP001120.5 | 18 | 11758977  | 11786181  | 27204  | lncRNA                               | -1.35 | 1.04E-02 | 4.60E-02 |
| ENSG00000176381 | PRR18      | 6  | 166305300 | 166308448 | 3148   | protein coding                       | -1.35 | 8.58E-03 | 4.02E-02 |
| ENSG00000154864 | PIEZO2     | 18 | 10666483  | 11149569  | 483086 | protein coding                       | -1.35 | 2.55E-05 | 7.68E-04 |
| ENSG00000170959 | DCDC1      | 11 | 30830369  | 31369810  | 539441 | protein coding                       | -1.35 | 8.36E-05 | 1.74E-03 |
| ENSG00000163145 | C10TNF7    | 4  | 15339818  | 15446167  | 106349 | protein coding                       | -1.35 | 8.49E-04 | 8.33E-03 |
| ENSG00000197322 | C17orf102  | 17 | 34574123  | 34579369  | 5246   | lncRNA-bidirectional promoter lncRNA | -1.35 | 1.06E-02 | 4.67E-02 |
| ENSG00000144229 | THSD7B     | 2  | 136765545 | 137677718 | 912173 | protein coding                       | -1.35 | 6.31E-03 | 3.28E-02 |
| ENSG00000170091 | NSG2       | 5  | 174045706 | 174243501 | 197795 | protein coding                       | -1.35 | 1.74E-03 | 1.92E-02 |
| ENSG00000275016 | AC015574.1 | 15 | 95638316  | 95826499  | 188183 | lncRNA                               | -1.35 | 5.98E-04 | 6.58E-03 |
| ENSG00000279249 | AC007614.1 | 16 | 49282021  | 49350504  | 68483  | lncRNA-antisense                     | -1.35 | 1.07E-03 | 9.72E-03 |
| ENSG00000179431 | FJX1       | 11 | 35618460  | 35620865  | 2405   | protein coding                       | -1.35 | 7.48E-03 | 3.67E-02 |
| ENSG00000275734 | AC010538.1 | 16 | 89671568  | 89685304  | 13736  | lncRNA-sense overlapping             | -1.35 | 1.71E-03 | 1.34E-02 |
| ENSG00000130477 | UNC13A     | 19 | 17601328  | 17688365  | 87037  | protein coding                       | -1.35 | 2.57E-03 | 1.78E-02 |
| ENSG00000143839 | REN        | 1  | 204154819 | 204190324 | 35505  | protein coding                       | -1.35 | 5.55E-03 | 3.00E-02 |
| ENSG00000104368 | PLAT       | 8  | 42174718  | 42207709  | 32991  | protein coding                       | -1.35 | 3.02E-05 | 8.62E-04 |
| ENSG00000183921 | SDRA2E2    | 16 | 22165583  | 22191754  | 26171  | protein coding                       | -1.36 | 4.94E-04 | 5.77E-03 |
| ENSG00000280418 | AC007326.2 | 22 | 18951934  | 18959512  | 7578   | lncRNA                               | -1.36 | 6.16E-04 | 6.70E-03 |
| ENSG00000149596 | JPH2       | 20 | 44106590  | 44187188  | 80598  | protein coding                       | -1.36 | 1.29E-03 | 1.10E-02 |
| ENSG00000286232 | AL365229.1 | 20 | 61267525  | 61271827  | 4302   | lncRNA                               | -1.36 | 3.12E-03 | 2.03E-02 |
| ENSG00000229021 | AL450992.1 | 1  | 151994531 | 152042774 | 48243  | lncRNA-antisense                     | -1.36 | 3.84E-03 | 2.33E-02 |
| ENSG00000228412 | LNC-LBCS   | 6  | 19323428  | 19839080  | 515652 | lncRNA-antisense                     | -1.36 | 1.33E-03 | 1.13E-02 |
| ENSG00000077522 | ACTN2      | 1  | 236664141 | 236764631 | 100490 | protein coding                       | -1.36 | 4.38E-04 | 5.33E-03 |
| ENSG00000279019 | AC009090.4 | 16 | 57140896  | 57144586  | 3690   | TEC                                  | -1.36 | 1.57E-03 | 1.27E-02 |
| ENSG00000084710 | EFR3B      | 2  | 25042076  | 25159135  | 117059 | protein coding                       | -1.36 | 4.45E-06 | 2.38E-04 |
| ENSG00000120658 | ENOX1      | 13 | 43213518  | 43786908  | 573390 | protein coding                       | -1.36 | 4.75E-03 | 2.70E-02 |
| ENSG00000170423 | KRT78      | 12 | 52837804  | 52849092  | 11288  | protein coding                       | -1.36 | 7.23E-03 | 3.59E-02 |
| ENSG00000267909 | CCDC177    | 14 | 69569799  | 69574871  | 5072   | protein coding                       | -1.36 | 4.54E-03 | 2.62E-02 |
| ENSG00000285094 | LINC01488  | 11 | 69481662  | 69494952  | 13290  | lncRNA                               | -1.36 | 1.20E-03 | 1.05E-02 |
| ENSG00000171914 | TLN2       | 15 | 62390526  | 62844631  | 454105 | protein coding                       | -1.36 | 3.94E-08 | 9.44E-06 |
| ENSG00000223843 | EFCAB6-AS1 | 22 | 43516107  | 43560063  | 43956  | lncRNA-antisense                     | -1.36 | 5.27E-03 | 2.90E-02 |
| ENSG00000286449 | AC016590.4 | 19 | 37304451  | 37309641  | 5190   | lncRNA                               | -1.36 | 7.74E-03 | 3.75E-02 |
| ENSG00000140522 | RLBP1      | 15 | 89209869  | 89221614  | 11745  | protein coding                       | -1.36 | 9.48E-03 | 4.30E-02 |
| ENSG00000019144 | PHLDB1     | 11 | 118606440 | 118658031 | 51591  | protein coding                       | -1.36 | 2.65E-07 | 3.51E-05 |
| ENSG00000175445 | LPL        | 8  | 19901717  | 19967259  | 65542  | protein coding                       | -1.36 | 1.22E-04 | 2.26E-03 |
| ENSG00000260337 | AC091544.4 | 15 | 92592574  | 92596462  | 3888   | lncRNA                               | -1.36 | 1.07E-02 | 4.67E-02 |
| ENSG00000174450 | GOLGA6L2   | 15 | 23439038  | 23447243  | 8205   | protein coding                       | -1.36 | 5.10E-03 | 2.83E-02 |
| ENSG00000168959 | GRM5       | 11 | 88504576  | 89065945  | 561369 | protein coding                       | -1.36 | 7.32E-03 | 3.62E-02 |
| ENSG00000267374 | MIR924HG   | 18 | 39206917  | 39800322  | 593405 | lncRNA                               | -1.36 | 1.05E-04 | 2.03E-03 |
| ENSG00000185105 | MYADM2     | 17 | 81939645  | 81947233  | 7588   | protein coding                       | -1.36 | 7.93E-03 | 3.81E-02 |
| ENSG00000142149 | HUNK       | 21 | 31873020  | 32044633  | 171613 | protein coding                       | -1.36 | 9.06E-04 | 8.71E-03 |
| ENSG00000116147 | TNR        | 1  | 175315194 | 175743616 | 428422 | protein coding                       | -1.36 | 1.83E-06 | 1.34E-04 |
| ENSG00000164746 | C7orf57    | 7  | 48035511  | 48061304  | 25793  | protein coding                       | -1.36 | 2.09E-03 | 1.54E-02 |
| ENSG00000123843 | C4BPB      | 1  | 207088860 | 207099993 | 11133  | protein coding                       | -1.36 | 7.73E-03 | 3.75E-02 |
| ENSG00000285564 | AL031121.2 | 6  | 163338363 | 163346744 | 8381   | lncRNA                               | -1.36 | 4.28E-04 | 5.24E-03 |
| ENSG0000002746  | HECW1      | 7  | 43112629  | 43566001  | 453372 | protein coding                       | -1.36 | 6.72E-05 | 1.51E-03 |
| ENSG00000182177 | ASB18      | 2  | 236194872 | 236264409 | 69537  | protein coding                       | -1.36 | 1.43E-04 | 2.50E-03 |
| ENSG00000278746 | RN7SL60P   | 14 | 32442341  | 32442639  | 298    | misc RNA                             | -1.36 | 2.18E-03 | 1.59E-02 |
| ENSG00000135454 | B4GALNT1   | 12 | 57623409  | 57632339  | 9830   | protein coding                       | -1.36 | 6.21E-04 | 6.73E-03 |

|                 |             |    |           |           |        |                                    |       |          |          |
|-----------------|-------------|----|-----------|-----------|--------|------------------------------------|-------|----------|----------|
| ENSG00000272595 | OR10AH1P    | 7  | 5103719   | 5120245   | 16526  | transcribed_unprocessed_pseudogene | -1.36 | 2.26E-03 | 1.63E-02 |
| ENSG00000277741 | GOLGA6L17P  | 15 | 82519590  | 82526412  | 6822   | transcribed_unprocessed_pseudogene | -1.36 | 7.35E-03 | 3.63E-02 |
| ENSG00000287466 | AL355531.1  | 10 | 129621988 | 129628664 | 4676   | lncRNA                             | -1.36 | 1.46E-03 | 1.20E-02 |
| ENSG00000243766 | HOTTIP      | 7  | 27198575  | 27207259  | 8684   | lncRNA-antisense                   | -1.36 | 1.09E-03 | 9.80E-03 |
| ENSG00000104321 | TRPA1       | 8  | 72019917  | 72075584  | 55667  | protein_coding                     | -1.36 | 5.30E-03 | 2.91E-02 |
| ENSG00000004948 | CALCR       | 7  | 93424486  | 93574730  | 150244 | protein_coding                     | -1.36 | 9.72E-03 | 4.38E-02 |
| ENSG00000232803 | SLCO4A1-AS1 | 20 | 62663019  | 62666724  | 3705   | lncRNA-antisense                   | -1.36 | 7.21E-03 | 3.58E-02 |
| ENSG00000267107 | PCAT19      | 19 | 41449520  | 41501223  | 51703  | lncRNA                             | -1.36 | 8.48E-03 | 3.99E-02 |
| ENSG00000175832 | ETV4        | 17 | 43527844  | 43579620  | 51776  | protein_coding                     | -1.36 | 1.26E-03 | 1.09E-02 |
| ENSG00000224790 | AP000704.1  | 21 | 36966461  | 36975164  | 8703   | lncRNA                             | -1.36 | 2.69E-04 | 3.87E-03 |
| ENSG00000124743 | KLHL31      | 6  | 53647916  | 53665756  | 17840  | protein_coding                     | -1.36 | 1.67E-03 | 1.32E-02 |
| ENSG00000081248 | CACNA1S     | 1  | 201039512 | 201112451 | 72939  | protein_coding                     | -1.36 | 1.75E-03 | 1.36E-02 |
| ENSG00000249715 | FER1L5      | 2  | 96642737  | 96704887  | 62150  | protein_coding                     | -1.36 | 7.44E-04 | 7.63E-03 |
| ENSG00000195055 | SYT13       | 11 | 45240302  | 45286341  | 46039  | protein_coding                     | -1.36 | 1.39E-03 | 1.16E-02 |
| ENSG00000146857 | STRA8       | 7  | 135231979 | 135258492 | 26513  | protein_coding                     | -1.36 | 5.74E-03 | 3.07E-02 |
| ENSG00000163710 | PCOLCE2     | 3  | 142815922 | 142889206 | 73284  | protein_coding                     | -1.36 | 3.12E-03 | 2.03E-02 |
| ENSG00000122728 | TAF1L       | 9  | 32629454  | 32635669  | 6215   | protein_coding                     | -1.37 | 1.40E-03 | 1.17E-02 |
| ENSG00000224728 | IMPDH1P8    | 3  | 15878047  | 15879571  | 1524   | processed_pseudogene               | -1.37 | 2.92E-03 | 1.94E-02 |
| ENSG00000185933 | CALHM1      | 10 | 103453240 | 103458900 | 5660   | protein_coding                     | -1.37 | 2.61E-03 | 1.80E-02 |
| ENSG00000267053 | AC092296.2  | 19 | 36304564  | 36321274  | 16710  | lncRNA                             | -1.37 | 5.07E-04 | 5.87E-03 |
| ENSG00000112541 | PDE10A      | 6  | 165327287 | 165988078 | 660791 | protein_coding                     | -1.37 | 4.78E-06 | 2.51E-04 |
| ENSG00000117971 | CHRN4       | 15 | 78624111  | 78727754  | 103643 | protein_coding                     | -1.37 | 7.03E-05 | 1.56E-03 |
| ENSG00000250240 | AC008840.1  | 5  | 95701249  | 95732295  | 31046  | lncRNA-antisense                   | -1.37 | 4.30E-03 | 2.53E-02 |
| ENSG00000175262 | C1orf127    | 1  | 10946471  | 10982037  | 35566  | protein_coding                     | -1.37 | 2.12E-04 | 3.29E-03 |
| ENSG00000003989 | SLCTA2      | 8  | 17497088  | 17570573  | 73485  | protein_coding                     | -1.37 | 7.57E-04 | 7.71E-03 |
| ENSG00000070601 | FRMPD1      | 9  | 37650954  | 37746904  | 95950  | protein_coding                     | -1.37 | 6.15E-04 | 6.69E-03 |
| ENSG00000196616 | ADH1B       | 4  | 99304971  | 99352760  | 47789  | protein_coding                     | -1.37 | 3.26E-03 | 2.09E-02 |
| ENSG00000225321 | LINC01427   | 20 | 22263065  | 22284029  | 20964  | lncRNA                             | -1.37 | 5.08E-03 | 2.83E-02 |
| ENSG00000091622 | PITPNM3     | 17 | 6451263   | 6556555   | 105292 | protein_coding                     | -1.37 | 1.39E-04 | 2.45E-03 |
| ENSG00000149948 | HMG2A       | 12 | 65824460  | 65966291  | 141831 | protein_coding                     | -1.37 | 3.81E-04 | 4.85E-03 |
| ENSG00000150893 | FREM2       | 13 | 38687077  | 38887131  | 200054 | protein_coding                     | -1.37 | 6.44E-04 | 6.91E-03 |
| ENSG00000171759 | PAH         | 12 | 102836889 | 102958410 | 121521 | protein_coding                     | -1.37 | 2.48E-03 | 1.74E-02 |
| ENSG00000204381 | LAYN        | 11 | 111540280 | 111561745 | 21465  | protein_coding                     | -1.37 | 1.17E-04 | 2.18E-03 |
| ENSG00000069482 | GAL         | 11 | 68683779  | 68691175  | 7396   | protein_coding                     | -1.37 | 4.83E-03 | 2.74E-02 |
| ENSG00000283654 | LMLN2       | 14 | 23099062  | 23104989  | 5927   | protein_coding                     | -1.37 | 4.13E-03 | 2.45E-02 |
| ENSG00000205592 | MUC19       | 12 | 40393395  | 40570832  | 177437 | protein_coding                     | -1.37 | 2.33E-05 | 7.25E-04 |
| ENSG00000115221 | ITGB6       | 2  | 160099667 | 160200313 | 100646 | protein_coding                     | -1.37 | 9.07E-03 | 4.17E-02 |
| ENSG00000251372 | LINC00499   | 4  | 138309613 | 138663403 | 353790 | lncRNA                             | -1.37 | 2.94E-03 | 1.95E-02 |
| ENSG00000271732 | AL137798.1  | 1  | 16617391  | 16617729  | 338    | lncRNA                             | -1.37 | 8.26E-03 | 3.91E-02 |
| ENSG00000254756 | AP001107.6  | 11 | 66334494  | 66339875  | 5381   | lncRNA-antisense                   | -1.37 | 3.23E-03 | 2.07E-02 |
| ENSG00000152137 | HSPB8       | 12 | 119171555 | 119224855 | 53300  | protein_coding                     | -1.37 | 5.96E-03 | 3.15E-02 |
| ENSG00000100399 | CHADL       | 22 | 41229510  | 41240931  | 11421  | protein_coding                     | -1.37 | 4.94E-04 | 5.77E-03 |
| ENSG00000279071 | AC073592.3  | 12 | 124537844 | 124539677 | 1833   | TEC                                | -1.37 | 4.45E-03 | 2.59E-02 |
| ENSG00000099954 | CECR2       | 22 | 17359949  | 17558149  | 198200 | protein_coding                     | -1.37 | 3.63E-09 | 1.79E-06 |
| ENSG00000231863 | AL139393.1  | 6  | 160931080 | 160985624 | 54544  | lncRNA-antisense                   | -1.37 | 3.26E-03 | 2.09E-02 |
| ENSG00000146950 | SHROOM2     | X  | 9786429   | 9949443   | 163014 | protein_coding                     | -1.37 | 1.97E-04 | 3.13E-03 |
| ENSG00000163518 | FCRL4       | 1  | 157573747 | 157598085 | 24338  | protein_coding                     | -1.37 | 3.98E-04 | 5.02E-03 |
| ENSG00000180347 | ITPRID1     | 7  | 31514071  | 31658720  | 144649 | protein_coding                     | -1.37 | 3.22E-03 | 2.07E-02 |
| ENSG00000234722 | LINC01287   | 7  | 153355365 | 153413985 | 58620  | lncRNA                             | -1.37 | 1.57E-03 | 1.27E-02 |
| ENSG00000259905 | PWRN1       | 15 | 24101827  | 24823365  | 721538 | lncRNA                             | -1.38 | 2.10E-04 | 3.28E-03 |
| ENSG00000113211 | PCDH6B      | 5  | 141150022 | 141153287 | 3265   | protein_coding                     | -1.38 | 8.05E-03 | 3.85E-02 |
| ENSG00000261786 | AC006058.1  | 3  | 44117299  | 44122365  | 5066   | lncRNA                             | -1.38 | 3.62E-03 | 2.24E-02 |
| ENSG00000197446 | CYP2F1      | 19 | 41114432  | 41128381  | 13949  | protein_coding                     | -1.38 | 8.55E-03 | 4.01E-02 |
| ENSG00000113361 | CDH6        | 5  | 31193686  | 31329146  | 135460 | protein_coding                     | -1.38 | 7.84E-05 | 1.67E-03 |
| ENSG00000186801 | KRT5        | 12 | 52514575  | 52520530  | 5955   | protein_coding                     | -1.38 | 9.62E-04 | 9.07E-03 |
| ENSG00000204175 | GPRIN2      | 10 | 46549044  | 46555530  | 6486   | protein_coding                     | -1.38 | 2.40E-03 | 1.70E-02 |
| ENSG00000162598 | C1orf87     | 1  | 59987269  | 60073770  | 86501  | protein_coding                     | -1.38 | 2.16E-03 | 1.58E-02 |
| ENSG00000100234 | TIMP3       | 22 | 32801705  | 32863041  | 61336  | protein_coding                     | -1.38 | 4.26E-04 | 5.22E-03 |
| ENSG00000234707 | SEC61G-DT   | 7  | 54759348  | 54812727  | 53379  | lncRNA-antisense                   | -1.38 | 1.15E-02 | 4.93E-02 |
| ENSG00000185332 | TMEM105     | 17 | 81311270  | 81330674  | 19404  | lncRNA                             | -1.38 | 3.94E-03 | 2.37E-02 |
| ENSG00000255794 | RMST        | 12 | 97430884  | 97598415  | 167531 | lncRNA                             | -1.38 | 7.28E-03 | 3.60E-02 |
| ENSG00000233485 | FHAD1-AS1   | 1  | 15326680  | 15343876  | 17196  | lncRNA-antisense                   | -1.38 | 3.45E-03 | 2.17E-02 |
| ENSG00000204929 | AC007389.1  | 2  | 65436711  | 66200373  | 763662 | lncRNA                             | -1.38 | 1.99E-03 | 1.49E-02 |
| ENSG00000229921 | KIF25-AS1   | 6  | 167992822 | 167997110 | 4288   | lncRNA                             | -1.38 | 9.01E-03 | 4.15E-02 |
| ENSG00000138028 | CGREF1      | 2  | 27098889  | 27119128  | 20239  | protein_coding                     | -1.38 | 1.80E-03 | 1.39E-02 |
| ENSG00000196581 | AJAP1       | 1  | 4654609   | 4792534   | 137925 | protein_coding                     | -1.38 | 7.95E-05 | 1.69E-03 |
| ENSG00000236445 | LINC00608   | 2  | 218975393 | 218989400 | 14547  | lncRNA-antisense                   | -1.38 | 9.90E-03 | 4.44E-02 |
| ENSG00000220785 | MTMR9L      | 1  | 32231658  | 32241620  | 9962   | transcribed_unprocessed_pseudogene | -1.38 | 1.87E-04 | 3.03E-03 |
| ENSG00000198691 | ABCA4       | 1  | 93992834  | 94121148  | 128314 | protein_coding                     | -1.38 | 5.41E-04 | 6.13E-03 |
| ENSG00000198515 | CNGA1       | 4  | 47935977  | 48016681  | 80704  | protein_coding                     | -1.38 | 9.86E-03 | 4.42E-02 |
| ENSG00000166840 | GLYATL1     | 11 | 58905398  | 59043527  | 138129 | protein_coding                     | -1.38 | 1.03E-02 | 4.58E-02 |
| ENSG00000268869 | ESPNP       | 1  | 16687339  | 16720157  | 32818  | transcribed_unprocessed_pseudogene | -1.38 | 6.38E-04 | 6.85E-03 |
| ENSG00000075429 | CACNG5      | 17 | 66835117  | 66894751  | 59634  | protein_coding                     | -1.38 | 3.75E-03 | 2.30E-02 |
| ENSG00000103855 | CD276       | 15 | 73683966  | 73714514  | 30548  | protein_coding                     | -1.38 | 3.19E-05 | 8.91E-04 |
| ENSG00000236519 | LINC01424   | 21 | 44802577  | 44804717  | 2140   | lncRNA-antisense                   | -1.38 | 4.20E-03 | 2.48E-02 |
| ENSG00000238207 | AC009312.1  | 2  | 117754139 | 117804174 | 50035  | lncRNA-antisense                   | -1.38 | 1.11E-02 | 4.79E-02 |
| ENSG00000139144 | PIK3C2G     | 12 | 18242961  | 18648416  | 405455 | protein_coding                     | -1.38 | 4.18E-03 | 2.48E-02 |
| ENSG00000167723 | TRPV3       | 17 | 3510502   | 3557812   | 47310  | protein_coding                     | -1.38 | 3.70E-07 | 4.42E-05 |
| ENSG00000229656 | ITGB1-DT    | 10 | 32958437  | 33082102  | 123665 | lncRNA                             | -1.38 | 2.58E-03 | 1.78E-02 |
| ENSG00000101049 | SGK2        | 20 | 43558968  | 43588237  | 29269  | protein_coding                     | -1.38 | 2.36E-03 | 1.56E-04 |
| ENSG00000177822 | TENM3-AS1   | 4  | 181874438 | 182145249 | 270811 | lncRNA-antisense                   | -1.38 | 7.78E-03 | 3.76E-02 |
| ENSG00000230805 | AL132709.7  | 14 | 101071978 | 101077910 | 5932   | lncRNA                             | -1.38 | 2.20E-03 | 1.60E-02 |
| ENSG00000178722 | C5orf64     | 5  | 61610424  | 61793401  | 182977 | lncRNA                             | -1.38 | 2.98E-04 | 4.13E-03 |
| ENSG00000039560 | Rai14       | 5  | 34656328  | 34832612  | 176284 | protein_coding                     | -1.38 | 2.39E-05 | 7.36E-04 |
| ENSG00000132915 | PDE6A       | 5  | 149857953 | 149944793 | 86840  | protein_coding                     | -1.38 | 3.58E-03 | 2.23E-02 |
| ENSG00000228010 | AC073343.2  | 7  | 6663974   | 6708901   | 44927  | lncRNA-antisense                   | -1.38 | 3.76E-03 | 2.30E-02 |
| ENSG00000115155 | OTOF        | 2  | 26457203  | 26558756  | 101553 | protein_coding                     | -1.38 | 1.10E-03 | 9.90E-03 |
| ENSG00000065618 | COL17A1     | 10 | 104031286 | 104085880 | 54594  | protein_coding                     | -1.38 | 6.88E-06 | 3.22E-04 |
| ENSG00000259293 | LIPIC-AS1   | 15 | 58434890  | 58498735  | 63845  | lncRNA-antisense                   | -1.38 | 1.15E-02 | 4.90E-02 |
| ENSG00000258628 | RHPN2P1     | 15 | 20228620  | 20277503  | 48883  | unprocessed_pseudogene             | -1.38 | 3.22E-03 | 2.07E-02 |

|                 |               |    |           |           |         |                                    |       |          |          |
|-----------------|---------------|----|-----------|-----------|---------|------------------------------------|-------|----------|----------|
| ENSG00000150510 | FAM124A       | 13 | 51222334  | 51284239  | 61905   | protein coding                     | -1.38 | 3.85E-05 | 1.02E-03 |
| ENSG00000196932 | TMEM26        | 10 | 61406642  | 61453381  | 46739   | protein coding                     | -1.38 | 7.26E-03 | 3.60E-02 |
| ENSG00000172900 | ACTE1P        | 11 | 71382601  | 71423423  | 40822   | transcribed unitary pseudogene     | -1.38 | 4.71E-04 | 5.60E-03 |
| ENSG00000261697 | AC010531.4    | 16 | 87262759  | 87292438  | 29679   | lncRNA-sense intronic              | -1.38 | 5.83E-03 | 3.10E-02 |
| ENSG00000111783 | RFX4          | 12 | 106583004 | 106762803 | 179799  | protein coding                     | -1.38 | 2.06E-03 | 1.53E-02 |
| ENSG00000165966 | PDZRN4        | 12 | 41188320  | 41574745  | 386425  | protein coding                     | -1.38 | 9.02E-03 | 4.15E-02 |
| ENSG00000121446 | RGL1          | 1  | 182409192 | 182560599 | 151407  | protein coding                     | -1.39 | 2.33E-04 | 3.52E-03 |
| ENSG00000205622 | AP001042.1    | 21 | 38812878  | 38956467  | 143589  | lncRNA                             | -1.39 | 2.98E-04 | 4.14E-03 |
| ENSG00000260144 | AC100827.2    | 15 | 72605183  | 72612326  | 7143    | unprocessed pseudogene             | -1.39 | 3.90E-04 | 4.94E-03 |
| ENSG00000250754 | LINC02436     | 4  | 185051081 | 185115500 | 64419   | lncRNA                             | -1.39 | 1.65E-03 | 1.31E-02 |
| ENSG00000113073 | SLC4A9        | 5  | 140360194 | 140375141 | 14947   | protein coding                     | -1.39 | 4.08E-04 | 5.10E-03 |
| ENSG00000080293 | SCTR          | 2  | 119439843 | 119525301 | 85458   | protein coding                     | -1.39 | 9.07E-04 | 8.71E-03 |
| ENSG00000243910 | TUBA4B        | 2  | 219253243 | 219272197 | 18954   | protein coding                     | -1.39 | 4.89E-03 | 2.76E-02 |
| ENSG00000285108 | AC103718.1    | 8  | 129685401 | 129723023 | 37622   | lncRNA                             | -1.39 | 1.45E-03 | 1.20E-02 |
| ENSG00000127129 | EDN2          | 1  | 41478775  | 41484683  | 5908    | protein coding                     | -1.39 | 2.66E-03 | 1.82E-02 |
| ENSG00000162631 | NTNG1         | 1  | 107140007 | 107483458 | 343451  | protein coding                     | -1.39 | 2.43E-05 | 7.46E-04 |
| ENSG00000223884 | AC068481.1    | 2  | 7045329   | 7077916   | 32587   | lncRNA-antisense                   | -1.39 | 3.37E-03 | 2.14E-02 |
| ENSG00000143195 | ILDR2         | 1  | 166895711 | 166975540 | 79829   | protein coding                     | -1.39 | 9.07E-08 | 1.62E-05 |
| ENSG00000186326 | RGS9BP        | 19 | 32675848  | 32678300  | 2452    | protein coding                     | -1.39 | 8.26E-03 | 3.91E-02 |
| ENSG00000268230 | AC012313.3    | 19 | 58346854  | 58362751  | 15897   | lncRNA                             | -1.39 | 5.83E-03 | 3.10E-02 |
| ENSG00000250579 | CTD-229D710.2 | 5  | 5132101   | 5140119   | 8018    | lncRNA-antisense                   | -1.39 | 7.31E-04 | 7.53E-03 |
| ENSG00000204540 | PSORS1C1      | 6  | 31114750  | 31140092  | 25342   | protein coding                     | -1.39 | 5.56E-03 | 3.00E-02 |
| ENSG00000196990 | FAM163B       | 9  | 133577081 | 133609389 | 32308   | protein coding                     | -1.39 | 4.23E-03 | 2.49E-02 |
| ENSG00000103546 | SLC6A2        | 16 | 55655604  | 55706192  | 50588   | protein coding                     | -1.39 | 3.45E-03 | 2.17E-02 |
| ENSG00000092051 | JPH4          | 14 | 23568035  | 23578790  | 10755   | protein coding                     | -1.39 | 1.49E-06 | 1.14E-04 |
| ENSG00000136634 | IL10          | 1  | 206767602 | 206774541 | 6939    | protein coding                     | -1.39 | 2.50E-03 | 1.74E-02 |
| ENSG00000158296 | SLC13A3       | 20 | 46557823  | 46684467  | 126644  | protein coding                     | -1.39 | 2.86E-05 | 8.29E-04 |
| ENSG00000142677 | IL22RA1       | 1  | 24119771  | 24143140  | 23369   | protein coding                     | -1.39 | 2.81E-03 | 1.89E-02 |
| ENSG00000225813 | AC009299.1    | 2  | 161281902 | 161282618 | 716     | processed pseudogene               | -1.39 | 5.08E-03 | 2.83E-02 |
| ENSG00000221955 | SLC12A8       | 3  | 125082636 | 125212864 | 130228  | protein coding                     | -1.39 | 4.60E-05 | 1.15E-03 |
| ENSG00000183470 | FLJ40288      | 7  | 132648794 | 132728769 | 79975   | lncRNA                             | -1.39 | 1.06E-02 | 4.66E-02 |
| ENSG00000234988 | LINC01849     | 2  | 100603752 | 100611542 | 7790    | lncRNA                             | -1.39 | 1.17E-02 | 5.00E-02 |
| ENSG00000134569 | LRP4          | 11 | 46856717  | 46918642  | 61925   | protein coding                     | -1.39 | 8.59E-04 | 8.40E-03 |
| ENSG00000259156 | CHEK2P2       | 15 | 20282744  | 20291586  | 8842    | transcribed unprocessed pseudogene | -1.39 | 1.16E-02 | 4.97E-02 |
| ENSG00000152128 | TMEM163       | 2  | 134455759 | 134719000 | 263241  | protein coding                     | -1.39 | 6.65E-05 | 1.50E-03 |
| ENSG00000095203 | EPB41L4B      | 9  | 109171975 | 109320964 | 148989  | protein coding                     | -1.39 | 2.15E-03 | 1.58E-02 |
| ENSG00000089250 | NOS1          | 12 | 117208142 | 117452170 | 240248  | protein coding                     | -1.39 | 7.12E-04 | 7.41E-03 |
| ENSG00000136160 | EDNRB         | 13 | 77895481  | 77975529  | 80048   | protein coding                     | -1.39 | 4.90E-03 | 2.77E-02 |
| ENSG00000173809 | TDRD12        | 19 | 32719753  | 32829580  | 109827  | protein coding                     | -1.39 | 2.61E-06 | 1.67E-04 |
| ENSG00000134874 | DZIP1         | 13 | 95578202  | 95644706  | 66504   | protein coding                     | -1.39 | 1.34E-04 | 2.40E-03 |
| ENSG00000165091 | TMC1          | 9  | 72521608  | 72838297  | 316689  | protein coding                     | -1.39 | 2.21E-04 | 3.39E-03 |
| ENSG00000261803 | LINC02140     | 16 | 54365996  | 54370794  | 4798    | lncRNA                             | -1.39 | 8.08E-03 | 3.86E-02 |
| ENSG00000106038 | EVX1          | 7  | 27242700  | 27250493  | 7793    | protein coding                     | -1.39 | 1.14E-03 | 1.01E-02 |
| ENSG00000225077 | LINC00337     | 1  | 6234692   | 6239444   | 4752    | lncRNA                             | -1.39 | 2.26E-03 | 1.63E-02 |
| ENSG00000137860 | SLC28A2       | 15 | 45252234  | 45277846  | 25612   | protein coding                     | -1.39 | 2.83E-03 | 1.90E-02 |
| ENSG00000066382 | MPPED2        | 11 | 30384493  | 30586872  | 202379  | protein coding                     | -1.39 | 2.11E-04 | 3.28E-03 |
| ENSG00000258773 | AC087636.1    | 15 | 95078481  | 95105334  | 72053   | lncRNA                             | -1.39 | 1.04E-02 | 4.60E-02 |
| ENSG00000149305 | HTR3B         | 11 | 113904677 | 113949078 | 44401   | protein coding                     | -1.39 | 4.10E-03 | 2.44E-02 |
| ENSG00000128254 | C22orf24      | 22 | 31925519  | 31945518  | 19999   | lncRNA                             | -1.39 | 8.83E-05 | 1.81E-03 |
| ENSG00000185313 | SCN10A        | 3  | 38696802  | 38816286  | 119484  | protein coding                     | -1.39 | 7.26E-04 | 7.52E-03 |
| ENSG00000138152 | BTBD16        | 10 | 122271296 | 122338159 | 66863   | protein coding                     | -1.39 | 9.56E-04 | 9.04E-03 |
| ENSG00000255774 | LINC02747     | 11 | 69475567  | 69481545  | 5978    | lncRNA                             | -1.39 | 4.78E-03 | 2.72E-02 |
| ENSG00000265646 | TUFMP1        | 17 | 27082690  | 27084306  | 1346    | processed pseudogene               | -1.39 | 1.27E-03 | 1.09E-02 |
| ENSG00000128408 | RIBC2         | 22 | 45413693  | 45432509  | 18816   | protein coding                     | -1.39 | 3.48E-03 | 2.18E-02 |
| ENSG00000276067 | SLC23A4P      | 7  | 135246113 | 135317752 | 71639   | transcribed unprocessed pseudogene | -1.40 | 4.95E-04 | 5.77E-03 |
| ENSG00000253230 | MIR124-1HG    | 8  | 9898871   | 9906678   | 6807    | lncRNA                             | -1.40 | 3.29E-04 | 4.41E-03 |
| ENSG00000189229 | AC069277.1    | 3  | 6490460   | 6736750   | 246290  | lncRNA                             | -1.40 | 1.54E-03 | 1.25E-02 |
| ENSG00000124440 | HIF3A         | 19 | 46297042  | 46343433  | 46391   | protein coding                     | -1.40 | 2.11E-04 | 3.28E-03 |
| ENSG00000278811 | LINC00624     | 1  | 147258885 | 147517775 | 258990  | lncRNA-antisense                   | -1.40 | 9.77E-04 | 9.17E-03 |
| ENSG00000197905 | TEAD4         | 12 | 2959330   | 3040676   | 81346   | protein coding                     | -1.40 | 8.93E-04 | 8.61E-03 |
| ENSG00000115648 | MLPH          | 2  | 237485428 | 237555322 | 15984   | protein coding                     | -1.40 | 8.12E-06 | 3.61E-04 |
| ENSG00000103460 | TOX3          | 16 | 52436417  | 52547802  | 111385  | protein coding                     | -1.40 | 7.67E-03 | 3.73E-02 |
| ENSG00000186191 | BPIFB4        | 20 | 33079644  | 33111751  | 32107   | protein coding                     | -1.40 | 1.11E-03 | 9.94E-03 |
| ENSG00000204603 | LINC01257     | 12 | 131165011 | 131232940 | 67929   | lncRNA                             | -1.40 | 3.74E-03 | 2.29E-02 |
| ENSG00000234537 | AL354751.1    | 9  | 92132398  | 92138629  | 6231    | unprocessed pseudogene             | -1.40 | 5.45E-03 | 2.97E-02 |
| ENSG00000144061 | NPHP1         | 2  | 110122311 | 110205066 | 82755   | protein coding                     | -1.40 | 1.63E-06 | 1.23E-04 |
| ENSG00000166206 | GABRB3        | 15 | 26543546  | 26939539  | 395993  | protein coding                     | -1.40 | 3.77E-05 | 1.00E-03 |
| ENSG00000277270 | AL160412.1    | 20 | 61432868  | 61437630  | 4762    | lncRNA                             | -1.40 | 8.43E-03 | 3.97E-02 |
| ENSG00000053108 | FSTL4         | 5  | 133196455 | 133612541 | 416086  | protein coding                     | -1.40 | 5.02E-06 | 2.60E-04 |
| ENSG00000149488 | TMC2          | 20 | 2536607   | 2641784   | 105177  | protein coding                     | -1.40 | 1.30E-03 | 1.11E-02 |
| ENSG00000241484 | ARHGAP8       | 22 | 44752558  | 44862788  | 110230  | protein coding                     | -1.40 | 4.04E-04 | 5.07E-03 |
| ENSG00000129167 | TPH1          | 11 | 18017564  | 18042426  | 24862   | protein coding                     | -1.40 | 3.42E-06 | 2.00E-04 |
| ENSG00000284237 | LINC02767     | 1  | 207959292 | 207969329 | 10037   | lncRNA                             | -1.40 | 6.95E-04 | 7.27E-03 |
| ENSG00000235731 | LINC02250     | 15 | 25456271  | 25578813  | 122542  | lncRNA                             | -1.40 | 1.75E-03 | 1.36E-02 |
| ENSG00000251666 | ZNF346-IT1    | 5  | 177051714 | 177052963 | 1249    | lncRNA-sense intronic              | -1.40 | 7.25E-03 | 3.59E-02 |
| ENSG00000174628 | IQCK          | 16 | 19716456  | 19858467  | 142011  | protein coding                     | -1.40 | 6.20E-08 | 1.29E-05 |
| ENSG00000087303 | NID2          | 14 | 52004803  | 52069228  | 64425   | protein coding                     | -1.40 | 1.13E-05 | 4.50E-04 |
| ENSG00000230445 | LRRC37A6P     | 10 | 27246350  | 27259455  | 13105   | transcribed processed pseudogene   | -1.40 | 3.62E-03 | 2.24E-02 |
| ENSG00000103021 | CCDC113       | 16 | 58231157  | 58283836  | 52679   | protein coding                     | -1.40 | 1.91E-03 | 1.45E-02 |
| ENSG00000108684 | ASIC2         | 17 | 33013087  | 34174964  | 1161877 | protein coding                     | -1.40 | 1.05E-04 | 2.04E-03 |
| ENSG00000170500 | LONRF2        | 2  | 100271875 | 100322501 | 50626   | protein coding                     | -1.40 | 3.98E-05 | 1.04E-03 |
| ENSG00000236671 | PRKG1-AS1     | 10 | 52230398  | 52314507  | 84109   | lncRNA-antisense                   | -1.40 | 1.25E-03 | 1.08E-02 |
| ENSG00000225362 | CT62          | 15 | 71110244  | 71115494  | 5250    | lncRNA                             | -1.40 | 1.03E-02 | 4.56E-02 |
| ENSG00000141519 | CCDC40        | 17 | 80038632  | 80100613  | 63981   | protein coding                     | -1.40 | 4.22E-05 | 1.08E-03 |
| ENSG00000075461 | CACNG4        | 17 | 66964707  | 67033398  | 68691   | protein coding                     | -1.40 | 7.50E-04 | 7.67E-03 |
| ENSG0000011262  | KCNA1         | 12 | 4909905   | 4918256   | 8351    | protein coding                     | -1.40 | 5.02E-04 | 5.83E-03 |
| ENSG0000021826  | CP51          | 2  | 210477682 | 210679107 | 201425  | protein coding                     | -1.40 | 9.68E-05 | 1.94E-03 |
| ENSG00000178243 | C9orf62       | 9  | 135343249 | 135346562 | 3313    | lncRNA                             | -1.40 | 2.34E-03 | 1.67E-02 |
| ENSG00000135111 | TBX3          | 12 | 114670255 | 114684175 | 13920   | protein coding                     | -1.40 | 1.36E-03 | 1.14E-02 |
| ENSG00000250305 | TRMT9B        | 8  | 12945642  | 13031503  | 85861   | protein coding                     | -1.40 | 1.59E-05 | 5.66E-04 |



|                |             |    |           |           |        |                                    |       |          |          |
|----------------|-------------|----|-----------|-----------|--------|------------------------------------|-------|----------|----------|
| ENSG0000286151 | AL732406.1  | 1  | 157400927 | 157417259 | 16332  | unprocessed_pseudogene             | -1.40 | 1.99E-03 | 1.49E-02 |
| ENSG0000119125 | GDA         | 9  | 72114595  | 72257193  | 142598 | protein_coding                     | -1.40 | 1.80E-03 | 1.39E-02 |
| ENSG0000284713 | SMIM38      | 11 | 69155478  | 69159752  | 4274   | protein_coding                     | -1.40 | 7.21E-04 | 7.48E-03 |
| ENSG0000007174 | DNAH9       | 17 | 11598470  | 11969748  | 371278 | protein_coding                     | -1.40 | 2.61E-04 | 3.79E-03 |
| ENSG0000267627 | AC118757.1  | 18 | 35951803  | 35966118  | 14315  | lncRNA                             | -1.40 | 8.21E-03 | 3.90E-02 |
| ENSG0000259709 | AC023966.4  | 15 | 52124561  | 52140246  | 15685  | lncRNA-antisense                   | -1.40 | 8.41E-03 | 3.97E-02 |
| ENSG0000163531 | NFASC       | 1  | 204828651 | 205022822 | 194171 | protein_coding                     | -1.40 | 1.28E-04 | 2.33E-03 |
| ENSG0000227110 | LMCD1-AS1   | 3  | 7951263   | 8611924   | 660661 | lncRNA-antisense                   | -1.40 | 1.04E-03 | 9.57E-03 |
| ENSG0000094796 | KRT31       | 17 | 41393721  | 41397608  | 3887   | protein_coding                     | -1.40 | 8.36E-03 | 3.95E-02 |
| ENSG0000237975 | FLG-AS1     | 1  | 152168125 | 152445456 | 277331 | lncRNA-antisense                   | -1.40 | 4.68E-04 | 5.56E-03 |
| ENSG0000185823 | NPAP1       | 15 | 24675775  | 24683393  | 7618   | protein_coding                     | -1.40 | 8.74E-04 | 8.50E-03 |
| ENSG0000115183 | TANC1       | 2  | 158968640 | 159232659 | 264019 | protein_coding                     | -1.40 | 7.39E-06 | 3.39E-04 |
| ENSG0000188112 | C6orf132    | 6  | 42101119  | 42142620  | 41501  | protein_coding                     | -1.40 | 1.11E-03 | 9.97E-03 |
| ENSG0000231980 | AC011899.1  | 7  | 158027373 | 158031128 | 3755   | lncRNA-antisense                   | -1.40 | 9.67E-03 | 4.36E-02 |
| ENSG0000196277 | GRM7        | 3  | 6770001   | 7741533   | 971532 | protein_coding                     | -1.40 | 6.77E-04 | 7.14E-03 |
| ENSG0000258551 | CRAT37      | 15 | 91408708  | 91605873  | 197165 | lncRNA                             | -1.40 | 3.29E-03 | 2.10E-02 |
| ENSG0000266602 | AP005262.1  | 18 | 1509022   | 2049510   | 540488 | lncRNA                             | -1.40 | 1.36E-03 | 1.15E-02 |
| ENSG0000162592 | CCDC27      | 1  | 3746460   | 3771645   | 25185  | protein_coding                     | -1.40 | 6.23E-05 | 1.43E-03 |
| ENSG0000163702 | IL17RC      | 3  | 9917074   | 9933630   | 16556  | protein_coding                     | -1.40 | 4.92E-07 | 5.32E-05 |
| ENSG0000233723 | LINC01122   | 2  | 58427799  | 59063766  | 635967 | lncRNA                             | -1.40 | 1.72E-03 | 1.34E-02 |
| ENSG0000196273 | LINC00523   | 14 | 100657250 | 100676069 | 18819  | lncRNA                             | -1.41 | 3.48E-03 | 2.18E-02 |
| ENSG0000130561 | SAG         | 2  | 233307816 | 233347055 | 39239  | protein_coding                     | -1.41 | 3.93E-05 | 1.03E-03 |
| ENSG0000165084 | C8orf34     | 8  | 68330955  | 68819023  | 480668 | protein_coding                     | -1.41 | 3.65E-03 | 2.26E-02 |
| ENSG0000287089 | AL138889.3  | 6  | 33800142  | 33802960  | 2818   | lncRNA                             | -1.41 | 6.46E-03 | 3.33E-02 |
| ENSG0000151655 | ITIH2       | 10 | 7703316   | 7749520   | 46204  | protein_coding                     | -1.41 | 1.79E-04 | 2.94E-03 |
| ENSG0000083857 | FAT1        | 4  | 186587794 | 186726722 | 138928 | protein_coding                     | -1.41 | 1.03E-06 | 8.72E-05 |
| ENSG0000242715 | CCDC169     | 13 | 36222008  | 36297840  | 75832  | protein_coding                     | -1.41 | 3.61E-03 | 2.24E-02 |
| ENSG0000113594 | LIFR        | 5  | 38474668  | 38608354  | 133686 | protein_coding                     | -1.41 | 1.01E-04 | 1.99E-03 |
| ENSG0000088756 | ARHGAP28    | 18 | 6729716   | 6915716   | 186000 | protein_coding                     | -1.41 | 8.00E-04 | 8.03E-03 |
| ENSG0000245614 | DDX11-AS1   | 12 | 31019434  | 31073847  | 54413  | lncRNA-antisense                   | -1.41 | 2.43E-03 | 1.71E-02 |
| ENSG0000101331 | CCM2L       | 20 | 32010438  | 32032180  | 21742  | protein_coding                     | -1.41 | 1.68E-03 | 1.32E-02 |
| ENSG0000189410 | SH2D5       | 1  | 20719731  | 20732837  | 13106  | protein_coding                     | -1.41 | 3.67E-05 | 9.87E-04 |
| ENSG0000229386 | OR8B9P      | 11 | 124476963 | 124482870 | 5907   | transcribed_unprocessed_pseudogene | -1.41 | 8.26E-03 | 3.91E-02 |
| ENSG0000235770 | LINC00607   | 2  | 215611563 | 215848954 | 237391 | lncRNA                             | -1.41 | 8.23E-04 | 8.17E-03 |
| ENSG0000155886 | SLC24A2     | 9  | 19507452  | 19786928  | 279476 | protein_coding                     | -1.41 | 1.02E-03 | 9.43E-03 |
| ENSG0000166257 | SCN3B       | 11 | 123629187 | 123655244 | 26057  | protein_coding                     | -1.41 | 1.44E-04 | 2.52E-03 |
| ENSG0000183571 | PGPEP1L     | 15 | 98968229  | 99007792  | 39563  | protein_coding                     | -1.41 | 3.11E-03 | 2.02E-02 |
| ENSG0000250742 | LINC02381   | 12 | 54126082  | 54147485  | 21403  | lncRNA                             | -1.41 | 3.56E-05 | 9.69E-04 |
| ENSG0000279762 | AC005899.8  | 17 | 32423971  | 324468038 | 22067  | lncRNA-antisense                   | -1.41 | 2.31E-03 | 1.65E-02 |
| ENSG0000160867 | FGFR4       | 5  | 177086905 | 177098144 | 11239  | protein_coding                     | -1.41 | 5.18E-05 | 1.25E-03 |
| ENSG0000234123 | RHBDF1P1    | 3  | 14572852  | 14574792  | 1940   | processed_pseudogene               | -1.41 | 9.49E-03 | 4.30E-02 |
| ENSG0000186628 | FSD2        | 15 | 82755362  | 82806700  | 50708  | protein_coding                     | -1.41 | 7.38E-05 | 1.61E-03 |
| ENSG0000085552 | IGSF9       | 1  | 159927039 | 159945613 | 18574  | protein_coding                     | -1.41 | 9.84E-05 | 1.96E-03 |
| ENSG0000258461 | AC012651.1  | 15 | 42348103  | 42412317  | 64214  | protein_coding                     | -1.41 | 4.11E-04 | 5.12E-03 |
| ENSG0000287971 | AC093642.6  | 2  | 242037716 | 242041501 | 3785   | lncRNA                             | -1.41 | 9.71E-03 | 4.38E-02 |
| ENSG0000175985 | PLEKH1D1    | 14 | 69484692  | 69531551  | 46859  | protein_coding                     | -1.41 | 5.32E-05 | 1.27E-03 |
| ENSG0000206538 | VGLL3       | 3  | 86876388  | 86911449  | 114761 | protein_coding                     | -1.41 | 2.14E-03 | 1.57E-02 |
| ENSG0000234690 | EPCAM-DT    | 2  | 47192405  | 47345074  | 152669 | lncRNA                             | -1.41 | 1.05E-02 | 4.63E-02 |
| ENSG0000237667 | LINC01115   | 2  | 779840    | 869608    | 88768  | lncRNA                             | -1.41 | 3.53E-06 | 2.02E-04 |
| ENSG0000169218 | RSP01       | 1  | 37611350  | 37634892  | 23542  | protein_coding                     | -1.41 | 7.24E-04 | 7.50E-04 |
| ENSG0000236511 | LINC01231   | 9  | 3181342   | 3200445   | 19103  | lncRNA                             | -1.41 | 2.05E-03 | 1.52E-02 |
| ENSG0000251365 | LINC02236   | 5  | 6765891   | 6833120   | 67229  | lncRNA                             | -1.41 | 1.64E-03 | 1.30E-02 |
| ENSG0000284744 | AL591163.1  | 1  | 6767954   | 6770038   | 2084   | lncRNA                             | -1.41 | 5.55E-03 | 3.00E-02 |
| ENSG0000261812 | TUBB8P7     | 16 | 90093154  | 90096354  | 3200   | transcribed_unprocessed_pseudogene | -1.41 | 7.84E-03 | 3.79E-02 |
| ENSG0000277022 | AL031663.3  | 20 | 45435272  | 45448325  | 13053  | lncRNA                             | -1.41 | 4.47E-03 | 2.60E-02 |
| ENSG0000250073 | AP000866.2  | 11 | 124759129 | 124766119 | 6990   | lncRNA-antisense                   | -1.41 | 9.63E-03 | 4.35E-02 |
| ENSG0000236780 | LINC01829   | 2  | 67123357  | 67397980  | 274623 | lncRNA-antisense                   | -1.41 | 3.03E-03 | 1.99E-02 |
| ENSG0000036565 | SLC18A1     | 8  | 20144855  | 20183206  | 38351  | protein_coding                     | -1.41 | 1.14E-04 | 2.15E-03 |
| ENSG0000164946 | FREM1       | 9  | 14737152  | 14910995  | 173843 | protein_coding                     | -1.41 | 1.46E-04 | 2.53E-03 |
| ENSG0000174498 | IGDCC3      | 15 | 65327127  | 65378002  | 50875  | protein_coding                     | -1.41 | 2.60E-04 | 3.78E-03 |
| ENSG0000257083 | AC073530.1  | 12 | 66950754  | 67096410  | 145656 | lncRNA                             | -1.41 | 2.81E-03 | 1.89E-02 |
| ENSG0000100341 | PNPLA5      | 22 | 43879678  | 43892013  | 12335  | protein_coding                     | -1.42 | 1.47E-03 | 1.21E-02 |
| ENSG0000186684 | CYP27C1     | 2  | 127183832 | 127220313 | 36481  | protein_coding                     | -1.42 | 1.67E-03 | 1.32E-02 |
| ENSG0000232825 | AL445433.2  | 1  | 99004276  | 99244794  | 240518 | lncRNA-antisense                   | -1.42 | 6.84E-03 | 3.46E-02 |
| ENSG0000166407 | LMO1        | 11 | 8224309   | 8268716   | 44407  | protein_coding                     | -1.42 | 2.58E-03 | 1.79E-02 |
| ENSG0000179314 | WSCD1       | 17 | 6057807   | 6124427   | 66620  | protein_coding                     | -1.42 | 3.32E-04 | 4.43E-03 |
| ENSG0000279412 | AC020763.3  | 16 | 70713987  | 70716890  | 2903   | TEC                                | -1.42 | 1.69E-03 | 1.33E-02 |
| ENSG0000162949 | CAPN13      | 2  | 30722771  | 30820542  | 97771  | protein_coding                     | -1.42 | 1.06E-03 | 9.70E-03 |
| ENSG0000239445 | ST3GAL6-AS1 | 3  | 98706236  | 98732757  | 26521  | lncRNA-antisense                   | -1.42 | 1.21E-03 | 1.05E-02 |
| ENSG0000113905 | HRG         | 3  | 186660216 | 186678234 | 18018  | protein_coding                     | -1.42 | 4.88E-03 | 2.76E-02 |
| ENSG0000002079 | MYH16       | 7  | 99238829  | 99311130  | 72301  | transcribed_unitary_pseudogene     | -1.42 | 6.38E-05 | 1.45E-03 |
| ENSG0000168748 | CA7         | 16 | 66844414  | 66854153  | 9739   | protein_coding                     | -1.42 | 5.32E-03 | 2.92E-02 |
| ENSG0000164949 | GEM         | 8  | 94249253  | 94262350  | 13097  | protein_coding                     | -1.42 | 7.97E-03 | 3.82E-02 |
| ENSG0000233862 | AC016907.2  | 2  | 30051066  | 30143804  | 92738  | lncRNA-antisense                   | -1.42 | 3.29E-03 | 2.10E-02 |
| ENSG0000226674 | TEX41       | 2  | 144666312 | 145262988 | 596676 | lncRNA                             | -1.42 | 1.23E-04 | 2.26E-03 |
| ENSG0000250320 | EDIL3-DT    | 5  | 84382424  | 84490765  | 108341 | lncRNA-antisense                   | -1.42 | 3.67E-03 | 2.26E-02 |
| ENSG0000152086 | TUBA3E      | 2  | 130191745 | 130198439 | 6694   | protein_coding                     | -1.42 | 5.01E-03 | 2.80E-02 |
| ENSG0000129451 | KLK10       | 19 | 51012739  | 51020175  | 7436   | protein_coding                     | -1.42 | 1.82E-03 | 1.40E-02 |
| ENSG0000182070 | OR52A1      | 11 | 5143219   | 5154757   | 11538  | protein_coding                     | -1.42 | 9.39E-05 | 1.89E-03 |
| ENSG0000171060 | C8orf74     | 8  | 10672628  | 10700950  | 27962  | protein_coding                     | -1.42 | 1.38E-04 | 2.45E-03 |
| ENSG0000281880 | PAUPAR      | 11 | 31812307  | 32002405  | 190098 | lncRNA                             | -1.42 | 8.61E-04 | 8.41E-03 |
| ENSG0000166862 | CACNG2      | 22 | 36560857  | 36703752  | 142895 | protein_coding                     | -1.42 | 8.78E-03 | 4.08E-02 |
| ENSG0000156113 | KCNMA1      | 10 | 76869601  | 77638369  | 768768 | protein_coding                     | -1.42 | 1.03E-07 | 1.75E-05 |
| ENSG0000254484 | AP002336.1  | 11 | 70319928  | 70321415  | 1487   | lncRNA-sense_intronic              | -1.42 | 2.57E-03 | 1.78E-02 |
| ENSG0000286667 | AC010641.2  | 19 | 382725    | 387533    | 4808   | lncRNA                             | -1.42 | 8.50E-04 | 8.34E-03 |
| ENSG0000285517 | AC010198.2  | 12 | 30795458  | 30879268  | 83810  | lncRNA                             | -1.42 | 1.80E-05 | 1.78E-03 |
| ENSG0000122852 | SFTPA1      | 10 | 79610939  | 79615455  | 4516   | protein_coding                     | -1.42 | 1.05E-02 | 4.63E-02 |
| ENSG0000105137 | SYDE1       | 19 | 15107401  | 15114985  | 7584   | protein_coding                     | -1.42 | 3.36E-04 | 4.46E-03 |
| ENSG0000254180 | AC004083.1  | 8  | 90198389  | 90620077  | 421688 | lncRNA                             | -1.42 | 1.11E-04 | 2.10E-03 |
| ENSG0000178150 | ZNF114      | 19 | 48270081  | 48287608  | 17527  | protein_coding                     | -1.42 | 4.75E-03 | 2.71E-02 |

|                |             |    |           |           |         |                                    |       |          |          |
|----------------|-------------|----|-----------|-----------|---------|------------------------------------|-------|----------|----------|
| ENSG0000266916 | ZNF793-AS1  | 19 | 37497159  | 37507122  | 9963    | lncRNA-antisense                   | -1.42 | 2.82E-03 | 1.90E-02 |
| ENSG0000249771 | AC108210.1  | 4  | 41883061  | 41935075  | 52015   | lncRNA                             | -1.42 | 5.40E-03 | 2.95E-02 |
| ENSG0000133477 | FAM83F      | 22 | 39994954  | 40043534  | 48580   | protein coding                     | -1.42 | 2.92E-05 | 8.40E-04 |
| ENSG0000143341 | HMCN1       | 1  | 185734391 | 186190949 | 456558  | protein coding                     | -1.42 | 1.41E-05 | 5.29E-04 |
| ENSG0000257639 | AC005632.2  | 16 | 21532945  | 21550373  | 17428   | unprocessed pseudogene             | -1.42 | 1.17E-02 | 4.98E-02 |
| ENSG0000229563 | LINC01204   | X  | 45505388  | 45632121  | 126733  | lncRNA                             | -1.42 | 4.51E-04 | 5.44E-03 |
| ENSG0000285486 | AC003043.2  | 17 | 44276368  | 44281182  | 4814    | lncRNA                             | -1.42 | 2.13E-03 | 1.56E-02 |
| ENSG0000269235 | ZNF350-AS1  | 19 | 51949134  | 51981367  | 32233   | lncRNA-antisense                   | -1.42 | 3.48E-03 | 2.18E-02 |
| ENSG0000157103 | SLC6A1      | 3  | 10992186  | 11039247  | 47061   | protein coding                     | -1.42 | 2.78E-05 | 8.13E-04 |
| ENSG0000224715 | Z82186.1    | 22 | 47345569  | 47373541  | 27972   | lncRNA                             | -1.42 | 2.46E-03 | 1.72E-02 |
| ENSG0000179935 | LINC00652   | 20 | 18786065  | 18794579  | 8514    | lncRNA                             | -1.42 | 1.01E-02 | 4.52E-02 |
| ENSG0000178033 | CALHM5      | 6  | 116511639 | 116524788 | 13149   | protein coding                     | -1.42 | 7.95E-04 | 7.98E-03 |
| ENSG0000184144 | CNTN2       | 1  | 205042937 | 205078289 | 35352   | protein coding                     | -1.42 | 4.74E-04 | 5.62E-03 |
| ENSG0000235438 | ESRRAP2     | 13 | 21260015  | 21295003  | 34988   | transcribed processed pseudogene   | -1.42 | 2.44E-03 | 1.72E-02 |
| ENSG0000268686 | AC010643.1  | 19 | 49368558  | 49388091  | 19533   | lncRNA-antisense                   | -1.42 | 7.83E-03 | 3.78E-02 |
| ENSG0000258429 | PDF         | 16 | 69326913  | 69330588  | 3675    | protein coding                     | -1.42 | 3.54E-03 | 2.21E-02 |
| ENSG0000226762 | LINC02668   | 10 | 3232264   | 3258897   | 26633   | lncRNA                             | -1.42 | 7.15E-03 | 3.56E-02 |
| ENSG0000142621 | FHAD1       | 1  | 15247272  | 15400283  | 153011  | protein coding                     | -1.42 | 2.78E-07 | 3.63E-05 |
| ENSG0000141756 | FKBP10      | 17 | 41812680  | 41823213  | 10533   | protein coding                     | -1.42 | 3.08E-04 | 4.23E-03 |
| ENSG0000171509 | RXFP1       | 4  | 158315311 | 158653372 | 338061  | protein coding                     | -1.42 | 1.79E-03 | 1.39E-02 |
| ENSG0000159261 | CLDN14      | 21 | 36406021  | 36576569  | 115948  | protein coding                     | -1.42 | 7.73E-04 | 7.84E-03 |
| ENSG0000267136 | AP005131.1  | 18 | 13514520  | 13522888  | 8368    | lncRNA-antisense                   | -1.42 | 9.12E-04 | 8.74E-03 |
| ENSG0000254602 | AP00662.1   | 11 | 57638024  | 57652990  | 14766   | lncRNA-sense overlapping           | -1.42 | 5.06E-03 | 2.82E-02 |
| ENSG0000235538 | AL078602.1  | 6  | 163671577 | 16400980  | 338403  | lncRNA                             | -1.42 | 2.27E-03 | 1.63E-02 |
| ENSG0000284543 | LINC01226   | 1  | 31506226  | 31583306  | 77080   | lncRNA                             | -1.43 | 4.70E-05 | 1.17E-03 |
| ENSG0000198842 | STYXL2      | 1  | 187094075 | 187129165 | 35090   | protein coding                     | -1.43 | 2.28E-03 | 1.64E-02 |
| ENSG0000225674 | IPO7P2      | 13 | 24122065  | 24123814  | 1749    | processed pseudogene               | -1.43 | 1.06E-02 | 4.64E-02 |
| ENSG0000215859 | PDZK1P1     | 1  | 147993862 | 148014956 | 21094   | transcribed unprocessed pseudogene | -1.43 | 6.56E-03 | 3.37E-02 |
| ENSG0000145087 | STXBP5L     | 3  | 120908072 | 121424761 | 516689  | protein coding                     | -1.43 | 1.70E-03 | 1.33E-02 |
| ENSG0000247809 | NRF2F-AS1   | 15 | 96110040  | 96327361  | 217321  | lncRNA-antisense                   | -1.43 | 1.48E-04 | 2.55E-03 |
| ENSG0000269473 | AC012313.8  | 19 | 58440448  | 58445849  | 5401    | lncRNA                             | -1.43 | 2.87E-04 | 4.03E-03 |
| ENSG0000214185 | XPOP1       | 20 | 34213495  | 34215892  | 2397    | processed pseudogene               | -1.43 | 8.46E-04 | 8.32E-03 |
| ENSG0000181123 | AC004832.1  | 22 | 30475364  | 30492804  | 17440   | lncRNA-antisense                   | -1.43 | 4.39E-03 | 2.56E-02 |
| ENSG0000166317 | SYNPO2L     | 10 | 73644881  | 73663803  | 18922   | protein coding                     | -1.43 | 2.52E-03 | 1.75E-02 |
| ENSG0000274776 | AC090241.3  | 18 | 46786699  | 46789297  | 2598    | lncRNA                             | -1.43 | 6.24E-04 | 6.75E-03 |
| ENSG0000204183 | GDF5-AS1    | 20 | 35433029  | 35435450  | 2421    | lncRNA                             | -1.43 | 8.23E-03 | 3.91E-02 |
| ENSG0000280109 | PLAC4       | 21 | 41175231  | 41186788  | 11557   | lncRNA-antisense                   | -1.43 | 1.68E-04 | 2.80E-03 |
| ENSG0000262801 | U91319.1    | 16 | 13246232  | 13563388  | 317156  | lncRNA                             | -1.43 | 8.51E-03 | 3.99E-02 |
| ENSG0000154553 | PDLIM3      | 4  | 185500660 | 185535077 | 34847   | protein coding                     | -1.43 | 2.03E-04 | 3.21E-03 |
| ENSG0000259426 | AC027237.3  | 15 | 69396904  | 69415629  | 18125   | lncRNA-antisense                   | -1.43 | 4.72E-03 | 2.70E-02 |
| ENSG0000146755 | TRIM50      | 7  | 73312536  | 73328082  | 15546   | protein coding                     | -1.43 | 4.18E-03 | 2.47E-02 |
| ENSG0000173826 | KCNH6       | 17 | 63523334  | 63548977  | 25643   | protein coding                     | -1.43 | 1.06E-03 | 9.68E-03 |
| ENSG0000281732 | Z84468.1    | 22 | 48538900  | 48547387  | 8487    | lncRNA                             | -1.43 | 3.80E-04 | 4.85E-03 |
| ENSG0000224189 | HAGLR       | 2  | 176164051 | 176188958 | 24907   | lncRNA-antisense                   | -1.43 | 1.80E-03 | 1.39E-02 |
| ENSG0000259664 | LINC02254   | 15 | 97339693  | 97523442  | 183749  | lncRNA                             | -1.43 | 6.68E-03 | 3.41E-02 |
| ENSG0000261327 | AC134312.5  | 16 | 88177298  | 88186929  | 9631    | lncRNA                             | -1.43 | 3.00E-03 | 1.98E-02 |
| ENSG0000197106 | SLC6A17     | 1  | 110150494 | 110202202 | 51708   | protein coding                     | -1.43 | 6.97E-03 | 3.50E-02 |
| ENSG0000102387 | TAFL7       | X  | 101268253 | 101293057 | 24804   | protein coding                     | -1.43 | 3.96E-03 | 2.38E-02 |
| ENSG0000189320 | FAM180A     | 7  | 135728348 | 135748813 | 20465   | protein coding                     | -1.43 | 8.70E-03 | 4.06E-02 |
| ENSG0000259088 | AL137779.2  | 14 | 101796555 | 101810321 | 13766   | lncRNA-antisense                   | -1.43 | 4.61E-03 | 2.64E-02 |
| ENSG0000184194 | GPR173      | X  | 53048789  | 53008615  | 31826   | protein coding                     | -1.43 | 1.53E-03 | 1.24E-02 |
| ENSG0000285792 | AC040169.4  | 16 | 84040790  | 84045333  | 4543    | lncRNA-antisense                   | -1.43 | 5.81E-03 | 3.10E-02 |
| ENSG0000180998 | GPR137C     | 14 | 52552836  | 52637713  | 84877   | protein coding                     | -1.43 | 2.18E-03 | 1.59E-02 |
| ENSG0000213290 | PGK1P2      | 19 | 12559571  | 12561105  | 1534    | processed pseudogene               | -1.43 | 3.41E-03 | 2.15E-02 |
| ENSG0000148734 | NFFFR1      | 10 | 70247329  | 70284004  | 36675   | protein coding                     | -1.43 | 8.47E-05 | 1.76E-03 |
| ENSG0000137473 | TTC29       | 4  | 146706638 | 146945882 | 239244  | protein coding                     | -1.43 | 9.23E-03 | 4.22E-02 |
| ENSG0000164695 | CHMP4C      | 8  | 81732448  | 81759515  | 27067   | protein coding                     | -1.43 | 4.57E-03 | 2.64E-02 |
| ENSG0000234419 | CICP13      | 1  | 222468094 | 222470882 | 2788    | processed pseudogene               | -1.43 | 6.63E-03 | 3.39E-02 |
| ENSG0000272631 | AC067750.1  | 10 | 86749754  | 86756298  | 6544    | lncRNA-antisense                   | -1.43 | 2.04E-04 | 3.22E-03 |
| ENSG0000243316 | GUCY2G      | 10 | 112308181 | 112356574 | 48393   | transcribed unitary pseudogene     | -1.43 | 2.35E-03 | 1.67E-02 |
| ENSG0000163873 | GRIK3       | 1  | 36795527  | 37034515  | 238988  | protein coding                     | -1.43 | 1.57E-05 | 5.61E-04 |
| ENSG0000180438 | TPRXL       | 3  | 13937273  | 14082811  | 145538  | transcribed processed pseudogene   | -1.43 | 1.00E-02 | 4.48E-02 |
| ENSG0000108823 | SGCA        | 17 | 50164214  | 50175928  | 11714   | protein coding                     | -1.43 | 9.97E-06 | 4.13E-04 |
| ENSG0000205325 | AC005863.1  | 17 | 14767583  | 14780686  | 13103   | lncRNA                             | -1.43 | 1.10E-02 | 4.78E-02 |
| ENSG0000227630 | LINC01132   | 1  | 234724042 | 234736720 | 12678   | lncRNA                             | -1.43 | 6.35E-03 | 3.29E-02 |
| ENSG0000272848 | AL135910.1  | 6  | 169426420 | 169452475 | 26055   | lncRNA                             | -1.43 | 5.84E-03 | 3.11E-02 |
| ENSG0000166961 | MS4A15      | 11 | 60756867  | 60776733  | 19866   | protein coding                     | -1.43 | 3.58E-03 | 2.23E-02 |
| ENSG0000170465 | KRT6C       | 12 | 52468516  | 52473805  | 5289    | protein coding                     | -1.43 | 6.93E-03 | 3.49E-02 |
| ENSG0000162399 | BSND        | 1  | 54998933  | 55017172  | 18239   | protein coding                     | -1.43 | 4.85E-03 | 2.75E-02 |
| ENSG0000159184 | H0XB13      | 17 | 48724763  | 48728750  | 3987    | protein coding                     | -1.43 | 6.63E-03 | 3.39E-02 |
| ENSG0000153707 | PTPRD       | 9  | 8314246   | 10612723  | 2298477 | protein coding                     | -1.43 | 6.19E-04 | 6.72E-03 |
| ENSG0000156486 | KCNS2       | 8  | 98426958  | 98432853  | 5895    | protein coding                     | -1.44 | 2.63E-03 | 1.81E-02 |
| ENSG0000225361 | PPP1R26-AS1 | 9  | 135462727 | 135480777 | 18050   | lncRNA-antisense                   | -1.44 | 4.04E-05 | 1.05E-03 |
| ENSG0000253819 | LINC01151   | 8  | 122485194 | 122733804 | 248610  | lncRNA                             | -1.44 | 1.03E-04 | 2.01E-03 |
| ENSG0000164619 | BMPER       | 7  | 33904308  | 34156427  | 252119  | protein coding                     | -1.44 | 3.07E-04 | 4.21E-03 |
| ENSG0000249679 | AC106897.1  | 4  | 185471461 | 185507055 | 35594   | lncRNA-antisense                   | -1.44 | 9.79E-04 | 9.17E-03 |
| ENSG0000160886 | LY6K        | 8  | 142700111 | 142705127 | 5016    | protein coding                     | -1.44 | 6.19E-03 | 3.24E-02 |
| ENSG0000129437 | KLK14       | 19 | 51077495  | 51084245  | 6750    | protein coding                     | -1.44 | 7.67E-03 | 3.73E-02 |
| ENSG0000169418 | NPR1        | 1  | 153678688 | 153693992 | 15304   | protein coding                     | -1.44 | 1.04E-04 | 2.03E-03 |
| ENSG0000235501 | AC105942.1  | 1  | 94927361  | 94963616  | 36255   | lncRNA-antisense                   | -1.44 | 3.21E-04 | 4.33E-03 |
| ENSG0000163637 | PRICKLE2    | 3  | 64092236  | 64445476  | 353240  | protein coding                     | -1.44 | 2.61E-05 | 7.81E-04 |
| ENSG0000261623 | LINC02179   | 16 | 49466106  | 49469875  | 3769    | lncRNA                             | -1.44 | 8.22E-03 | 3.90E-02 |
| ENSG0000131941 | RHPN2       | 19 | 32978592  | 33064888  | 86296   | protein coding                     | -1.44 | 1.99E-05 | 6.53E-04 |
| ENSG0000125337 | KIF25       | 6  | 167996241 | 168045095 | 48854   | protein coding                     | -1.44 | 8.32E-05 | 1.74E-03 |
| ENSG0000186094 | AGBL4       | 1  | 48532854  | 50023954  | 1491100 | protein coding                     | -1.44 | 1.13E-04 | 2.13E-03 |
| ENSG0000198185 | ZNF334      | 20 | 46499630  | 46513559  | 13929   | protein coding                     | -1.44 | 1.42E-03 | 1.18E-02 |
| ENSG0000203650 | LINC01285   | X  | 118839539 | 118919669 | 80130   | lncRNA                             | -1.44 | 2.21E-03 | 1.60E-02 |
| ENSG0000149633 | KIAA1755    | 20 | 38210503  | 38260772  | 50269   | protein coding                     | -1.44 | 4.46E-05 | 1.12E-03 |
| ENSG0000230725 | AL035252.2  | 20 | 25139652  | 25149372  | 9720    | lncRNA                             | -1.44 | 1.12E-03 | 9.99E-03 |
| ENSG0000261026 | AC105046.1  | 8  | 22679013  | 22684009  | 4996    | lncRNA-sense overlapping           | -1.44 | 7.52E-03 | 3.68E-02 |

|                |               |    |           |           |        |                                    |       |          |          |
|----------------|---------------|----|-----------|-----------|--------|------------------------------------|-------|----------|----------|
| ENSG0000203734 | ECT2L         | 6  | 138795911 | 138904070 | 108159 | protein coding                     | -1.44 | 3.15E-04 | 4.28E-03 |
| ENSG0000173114 | LRRN3         | 7  | 111091006 | 111125454 | 34448  | protein coding                     | -1.44 | 1.67E-05 | 5.80E-04 |
| ENSG0000259974 | LINC00261     | 20 | 22547671  | 22578642  | 30971  | lncRNA                             | -1.44 | 7.14E-03 | 3.56E-02 |
| ENSG0000272568 | AC005162.2    | 7  | 28979967  | 29013367  | 33400  | lncRNA-antisense                   | -1.44 | 3.05E-03 | 2.00E-02 |
| ENSG0000197125 | OR8B8         | 11 | 124437445 | 124445696 | 8251   | protein coding                     | -1.44 | 1.29E-03 | 1.10E-02 |
| ENSG0000127530 | OR7C1         | 19 | 14789260  | 14835376  | 46116  | protein coding                     | -1.44 | 1.16E-04 | 2.17E-03 |
| ENSG0000225057 | AC012485.1    | 2  | 238231684 | 238255633 | 23949  | lncRNA                             | -1.44 | 4.88E-03 | 2.76E-02 |
| ENSG0000128052 | KDR           | 4  | 55078481  | 55125595  | 47114  | protein coding                     | -1.44 | 3.79E-04 | 4.84E-03 |
| ENSG0000278916 | CEP83-DT      | 12 | 94460003  | 94462484  | 2481   | lncRNA                             | -1.44 | 5.31E-03 | 2.91E-02 |
| ENSG0000215906 | LACTBL1       | 1  | 22953043  | 22965338  | 12295  | protein coding                     | -1.44 | 1.23E-03 | 1.07E-02 |
| ENSG0000154914 | USP43         | 17 | 9644698   | 9729687   | 84989  | protein coding                     | -1.44 | 7.33E-05 | 1.60E-03 |
| ENSG0000227295 | ELL2P1        | 1  | 158175850 | 158177755 | 1905   | processed pseudogene               | -1.44 | 2.28E-05 | 7.15E-04 |
| ENSG0000141738 | GRB7          | 17 | 39737927  | 39747291  | 9364   | protein coding                     | -1.44 | 1.07E-03 | 9.74E-03 |
| ENSG0000277215 | SPANXA2-OT1   | X  | 141177284 | 141649927 | 472643 | lncRNA                             | -1.44 | 3.64E-03 | 2.25E-02 |
| ENSG0000232759 | AC002480.1    | 7  | 22563337  | 22573996  | 10659  | lncRNA-antisense                   | -1.44 | 4.01E-03 | 2.40E-02 |
| ENSG0000259439 | LINC01833     | 2  | 44921077  | 44939199  | 18122  | lncRNA                             | -1.44 | 6.98E-03 | 3.50E-02 |
| ENSG0000287759 | AL353151.2    | 9  | 4741741   | 4759639   | 17898  | lncRNA                             | -1.44 | 6.26E-03 | 3.26E-02 |
| ENSG0000136881 | BAAT          | 9  | 101354182 | 101385400 | 31218  | protein coding                     | -1.44 | 4.24E-04 | 5.21E-03 |
| ENSG0000254997 | KRTAP5-9      | 11 | 71548420  | 71549608  | 1188   | protein coding                     | -1.45 | 5.17E-03 | 2.86E-02 |
| ENSG0000168671 | UGT3A2        | 5  | 36035021  | 36071358  | 36337  | protein coding                     | -1.45 | 2.02E-03 | 1.51E-02 |
| ENSG0000182667 | NTM           | 11 | 131370478 | 132336822 | 966344 | protein coding                     | -1.45 | 1.11E-04 | 2.10E-03 |
| ENSG0000226026 | AC092802.1    | 1  | 95161676  | 95233982  | 72306  | lncRNA-antisense                   | -1.45 | 1.97E-05 | 6.48E-04 |
| ENSG0000109684 | CLNK          | 4  | 10486395  | 10684768  | 198373 | protein coding                     | -1.45 | 6.89E-06 | 3.22E-04 |
| ENSG0000250198 | LINC02199     | 5  | 8839700   | 8898052   | 58352  | lncRNA                             | -1.45 | 5.45E-04 | 6.16E-03 |
| ENSG0000168490 | PHYHIP        | 8  | 22219703  | 22232101  | 12398  | protein coding                     | -1.45 | 7.79E-06 | 3.52E-04 |
| ENSG0000251538 | LINC02201     | 5  | 122828952 | 122730685 | 101733 | lncRNA                             | -1.45 | 1.02E-02 | 4.55E-02 |
| ENSG0000239921 | LINC01471     | 3  | 127480690 | 127537817 | 57127  | lncRNA                             | -1.45 | 1.24E-04 | 2.28E-03 |
| ENSG0000287918 | AF274853.1    | X  | 151303384 | 151397142 | 93758  | lncRNA                             | -1.45 | 4.18E-04 | 5.16E-03 |
| ENSG0000226453 | LINC02542     | 6  | 81844602  | 82169391  | 324789 | lncRNA                             | -1.45 | 2.40E-03 | 1.70E-02 |
| ENSG0000174527 | MYO1H         | 12 | 109347903 | 109455523 | 107620 | protein coding                     | -1.45 | 2.81E-04 | 3.98E-03 |
| ENSG0000183169 | POM121L1P     | 22 | 22639177  | 22644473  | 5296   | transcribed unprocessed pseudogene | -1.45 | 2.88E-03 | 1.92E-02 |
| ENSG0000162669 | HF1M          | 1  | 91260766  | 91404856  | 144090 | protein coding                     | -1.45 | 1.54E-04 | 2.64E-03 |
| ENSG0000268505 | AC135012.3    | 16 | 86192793  | 86198913  | 6120   | lncRNA                             | -1.45 | 2.25E-03 | 1.62E-02 |
| ENSG0000287583 | AC018685.3    | 2  | 2697490   | 2701812   | 4322   | lncRNA                             | -1.45 | 5.35E-04 | 6.08E-03 |
| ENSG0000236668 | AC006450.3    | 9  | 124006277 | 124009396 | 3119   | lncRNA-antisense                   | -1.45 | 1.11E-02 | 4.79E-02 |
| ENSG0000283380 | AL807742.1    | X  | 20769718  | 21374265  | 604547 | lncRNA                             | -1.45 | 1.88E-03 | 1.43E-02 |
| ENSG0000267199 | AP01029.2     | 18 | 12438890  | 12448205  | 9315   | lncRNA-antisense                   | -1.45 | 1.37E-03 | 1.15E-02 |
| ENSG0000246228 | CASC8         | 8  | 127289817 | 127482139 | 192322 | lncRNA-antisense                   | -1.45 | 3.80E-03 | 2.31E-02 |
| ENSG0000204625 | HCG9          | 6  | 29975112  | 29978410  | 3298   | lncRNA                             | -1.45 | 9.27E-04 | 8.86E-03 |
| ENSG0000234130 | AP2B1P1       | X  | 93222220  | 93225015  | 2795   | processed pseudogene               | -1.45 | 1.44E-03 | 1.19E-02 |
| ENSG0000176732 | PFN4          | 2  | 24114809  | 24123464  | 8655   | protein coding                     | -1.45 | 2.19E-03 | 1.60E-02 |
| ENSG0000092607 | TBX15         | 1  | 118883046 | 118999556 | 106510 | protein coding                     | -1.45 | 1.97E-03 | 1.48E-02 |
| ENSG0000039139 | DNAH5         | 5  | 13690331  | 13944553  | 254212 | protein coding                     | -1.45 | 2.91E-05 | 8.39E-04 |
| ENSG0000119283 | TRIM67        | 1  | 231162112 | 231221556 | 59444  | protein coding                     | -1.45 | 6.65E-06 | 3.15E-04 |
| ENSG0000179571 | NBPF17P       | 1  | 143595216 | 143635641 | 40425  | unprocessed pseudogene             | -1.45 | 9.14E-03 | 4.20E-02 |
| ENSG0000263278 | AC233701.1    | 17 | 79598032  | 79603921  | 5889   | lncRNA-sense intronic              | -1.45 | 4.16E-03 | 2.47E-02 |
| ENSG0000249464 | LINC01091     | 4  | 123539026 | 123962698 | 423672 | lncRNA                             | -1.45 | 7.68E-05 | 1.65E-03 |
| ENSG0000188693 | CYP51A1-AS1   | 7  | 92134604  | 92180725  | 46121  | lncRNA-antisense                   | -1.45 | 1.37E-03 | 1.15E-02 |
| ENSG0000162267 | ITIH3         | 3  | 52794768  | 52809009  | 14241  | protein coding                     | -1.45 | 4.99E-04 | 5.81E-03 |
| ENSG0000135697 | BCO1          | 16 | 81238689  | 81291142  | 52453  | protein coding                     | -1.45 | 1.89E-03 | 1.44E-02 |
| ENSG0000065325 | GLP2R         | 17 | 9822206   | 9892099   | 69893  | protein coding                     | -1.45 | 1.51E-03 | 1.23E-02 |
| ENSG0000154479 | CCDC173       | 2  | 169645425 | 169694405 | 48980  | protein coding                     | -1.45 | 5.77E-03 | 3.08E-02 |
| ENSG0000109819 | PPARGC1A      | 4  | 23755041  | 23904089  | 149048 | protein coding                     | -1.45 | 1.91E-05 | 6.37E-04 |
| ENSG0000230552 | AC092162.2    | 2  | 176723614 | 176819310 | 95696  | lncRNA                             | -1.45 | 1.01E-02 | 4.49E-02 |
| ENSG0000170858 | LILRP2        | 19 | 54707916  | 54713453  | 5537   | transcribed processed pseudogene   | -1.45 | 8.89E-03 | 4.12E-02 |
| ENSG0000109771 | LRP2BP        | 4  | 185363879 | 185395899 | 32020  | protein coding                     | -1.45 | 9.26E-08 | 1.63E-05 |
| ENSG0000233623 | PGAM1P11      | 1  | 10058671  | 10059648  | 977    | processed pseudogene               | -1.46 | 1.55E-03 | 1.25E-02 |
| ENSG0000254968 | LINC02763     | 11 | 112393118 | 112624567 | 231449 | lncRNA                             | -1.46 | 8.45E-04 | 8.32E-03 |
| ENSG0000136449 | MYCBPAP       | 17 | 50508384  | 50531501  | 23117  | protein coding                     | -1.46 | 1.31E-05 | 5.02E-04 |
| ENSG0000091128 | LAMB4         | 7  | 108023548 | 108130361 | 106813 | protein coding                     | -1.46 | 4.67E-04 | 5.56E-03 |
| ENSG0000155052 | CNTNAP5       | 2  | 124025287 | 124915287 | 89000  | protein coding                     | -1.46 | 3.59E-03 | 2.23E-02 |
| ENSG0000240021 | TEX35         | 1  | 178513109 | 178548602 | 35493  | protein coding                     | -1.46 | 8.32E-03 | 3.94E-02 |
| ENSG0000186334 | SLC36A3       | 5  | 151276358 | 151303766 | 27408  | protein coding                     | -1.46 | 8.17E-03 | 3.89E-02 |
| ENSG0000105929 | ATP6V0A4      | 7  | 138706294 | 138799560 | 93266  | protein coding                     | -1.46 | 4.84E-03 | 2.74E-02 |
| ENSG0000243016 | AC112482.1    | 3  | 127221194 | 127221881 | 687    | unprocessed pseudogene             | -1.46 | 6.20E-03 | 3.24E-02 |
| ENSG0000268964 | ERVV-2        | 19 | 53044740  | 53051680  | 6940   | protein coding                     | -1.46 | 1.10E-02 | 4.77E-02 |
| ENSG0000124116 | WFDC3         | 20 | 45747944  | 45791932  | 43988  | protein coding                     | -1.46 | 1.04E-03 | 9.52E-03 |
| ENSG0000258168 | AC025569.1    | 12 | 70468080  | 70543040  | 74960  | lncRNA-antisense                   | -1.46 | 2.83E-04 | 4.00E-03 |
| ENSG0000223518 | C5NK1A1P1     | 15 | 36798596  | 36818459  | 19863  | transcribed processed pseudogene   | -1.46 | 1.12E-02 | 4.82E-02 |
| ENSG0000224259 | LINC01133     | 1  | 159958035 | 159984750 | 26715  | lncRNA                             | -1.46 | 8.86E-03 | 4.11E-02 |
| ENSG0000196376 | SLC35F1       | 6  | 117907264 | 118317676 | 410412 | protein coding                     | -1.46 | 8.43E-03 | 3.97E-02 |
| ENSG0000100122 | CRYBB1        | 22 | 26599278  | 26618027  | 18749  | protein coding                     | -1.46 | 7.75E-04 | 7.85E-03 |
| ENSG0000158786 | PLA2G2F       | 1  | 20139323  | 20150381  | 11058  | protein coding                     | -1.46 | 1.88E-04 | 3.03E-03 |
| ENSG0000273079 | GRIN2B        | 12 | 13437942  | 13982002  | 544060 | protein coding                     | -1.46 | 4.06E-06 | 2.23E-04 |
| ENSG0000226454 | AL033380.1    | 6  | 40505507  | 40523963  | 18456  | lncRNA                             | -1.46 | 1.07E-03 | 9.74E-03 |
| ENSG0000223813 | AC007255.1    | 7  | 29514224  | 29563670  | 49446  | lncRNA-antisense                   | -1.46 | 9.89E-03 | 4.44E-02 |
| ENSG0000162897 | FCAMR         | 1  | 206957965 | 206970625 | 12660  | protein coding                     | -1.46 | 6.78E-03 | 3.43E-02 |
| ENSG0000166589 | CDH16         | 16 | 66908122  | 66918917  | 10795  | protein coding                     | -1.46 | 1.33E-03 | 1.13E-02 |
| ENSG0000237654 | AP003025.1    | 11 | 131502735 | 131540867 | 38132  | lncRNA-antisense                   | -1.46 | 2.05E-03 | 1.52E-02 |
| ENSG0000123901 | GPR83         | 11 | 94377316  | 94401149  | 24103  | protein coding                     | -1.46 | 4.27E-04 | 5.23E-03 |
| ENSG0000105976 | MET           | 7  | 116672196 | 116798377 | 126181 | protein coding                     | -1.46 | 1.39E-03 | 1.16E-02 |
| ENSG0000261404 | AC138627.1    | 16 | 73943078  | 74296762  | 353684 | lncRNA                             | -1.46 | 3.58E-05 | 9.71E-04 |
| ENSG0000249326 | CTD-2194D22.4 | 5  | 1887332   | 1900493   | 13161  | lncRNA-antisense                   | -1.46 | 3.76E-03 | 2.30E-02 |
| ENSG0000257762 | LINC02401     | 12 | 103547751 | 103578947 | 31196  | lncRNA                             | -1.46 | 1.16E-02 | 4.97E-02 |
| ENSG0000165186 | PTCHD1        | X  | 23334849  | 23404374  | 69525  | protein coding                     | -1.46 | 7.26E-04 | 7.52E-03 |
| ENSG0000271978 | AL359643.2    | 6  | 5031756   | 5054423   | 22667  | lncRNA                             | -1.46 | 5.92E-03 | 3.14E-02 |
| ENSG0000115461 | IGFBP5        | 2  | 216672105 | 216695549 | 23444  | protein coding                     | -1.46 | 1.67E-04 | 2.80E-03 |
| ENSG0000276462 | BX255923.2    | 9  | 41100793  | 41119909  | 19116  | lncRNA                             | -1.46 | 1.55E-03 | 1.25E-02 |
| ENSG0000102996 | MMP15         | 16 | 58025754  | 58046901  | 21147  | protein coding                     | -1.46 | 2.21E-06 | 1.50E-04 |
| ENSG0000280953 | LINC01163     | 10 | 128181032 | 128317726 | 136694 | lncRNA                             | -1.46 | 4.95E-07 | 5.34E-05 |

|                 |            |    |           |           |        |                                    |       |          |          |
|-----------------|------------|----|-----------|-----------|--------|------------------------------------|-------|----------|----------|
| ENSG0000075673  | ATP12A     | 13 | 24680408  | 24712472  | 32064  | protein coding                     | -1.46 | 1.75E-03 | 1.36E-02 |
| ENSG00000120820 | GLT8D2     | 12 | 103988984 | 104064183 | 75199  | protein coding                     | -1.46 | 6.69E-03 | 3.41E-02 |
| ENSG00000070159 | PTPN3      | 9  | 109375466 | 109498313 | 122847 | protein coding                     | -1.46 | 7.07E-05 | 1.56E-03 |
| ENSG00000166153 | DEPDC4     | 12 | 100203669 | 100267079 | 63410  | protein coding                     | -1.46 | 3.29E-03 | 2.10E-02 |
| ENSG00000226009 | KCNIP2-AS1 | 10 | 101818800 | 101828885 | 10085  | lncRNA-antisense                   | -1.46 | 1.16E-02 | 4.94E-02 |
| ENSG00000271911 | AL357054.3 | 6  | 761675    | 780648    | 18973  | lncRNA                             | -1.46 | 2.31E-03 | 1.65E-02 |
| ENSG00000281969 | AL592158.1 | 6  | 39818751  | 39823227  | 4476   | TEC                                | -1.46 | 1.62E-03 | 1.29E-02 |
| ENSG00000250420 | AACSP1     | 5  | 178764861 | 178818435 | 53574  | transcribed unprocessed pseudogene | -1.46 | 3.20E-04 | 4.32E-03 |
| ENSG00000215704 | CELA2B     | 1  | 15465909  | 15491395  | 25486  | protein coding                     | -1.47 | 3.89E-03 | 2.35E-02 |
| ENSG00000119715 | ESRRB      | 14 | 76310712  | 76501837  | 191125 | protein coding                     | -1.47 | 1.63E-04 | 2.75E-03 |
| ENSG00000147113 | DIPK2B     | X  | 45148373  | 45200901  | 52528  | protein coding                     | -1.47 | 7.85E-04 | 7.93E-03 |
| ENSG00000103723 | AP3B2      | 15 | 82659281  | 82709946  | 50665  | protein coding                     | -1.47 | 7.22E-08 | 1.38E-05 |
| ENSG00000205929 | C21orf62   | 21 | 32790673  | 32813743  | 23070  | protein coding                     | -1.47 | 1.02E-02 | 4.54E-02 |
| ENSG00000134020 | PEBP4      | 8  | 22713251  | 23000000  | 286749 | protein coding                     | -1.47 | 7.79E-04 | 7.88E-03 |
| ENSG00000095464 | PDE6C      | 10 | 93612537  | 93666010  | 53473  | protein coding                     | -1.47 | 6.67E-04 | 7.06E-03 |
| ENSG00000286156 | AC026273.1 | 2  | 94195806  | 94208379  | 12573  | transcribed unprocessed pseudogene | -1.47 | 2.50E-03 | 1.75E-02 |
| ENSG00000283973 | AC099795.1 | 1  | 42959065  | 42961864  | 2799   | lncRNA                             | -1.47 | 8.59E-03 | 4.02E-02 |
| ENSG00000236253 | SLC25A3P1  | 1  | 53413149  | 53440020  | 28871  | transcribed processed pseudogene   | -1.47 | 7.76E-03 | 3.76E-02 |
| ENSG00000226430 | USP17L7    | 8  | 12132417  | 12134099  | 1682   | protein coding                     | -1.47 | 1.08E-02 | 4.71E-02 |
| ENSG00000182326 | C1S        | 12 | 6988259   | 7071032   | 82773  | protein coding                     | -1.47 | 1.36E-05 | 5.13E-04 |
| ENSG00000144452 | ABCA12     | 2  | 214931542 | 215138626 | 207084 | protein coding                     | -1.47 | 2.02E-03 | 1.51E-02 |
| ENSG00000260704 | LINC00543  | 13 | 27953526  | 27955370  | 1844   | lncRNA                             | -1.47 | 2.58E-03 | 1.79E-02 |
| ENSG00000196091 | MYBPC1     | 12 | 101568353 | 101686028 | 117675 | protein coding                     | -1.47 | 7.49E-04 | 7.67E-03 |
| ENSG00000123977 | DAWI       | 2  | 227871054 | 227924344 | 53290  | protein coding                     | -1.47 | 5.54E-03 | 3.00E-02 |
| ENSG00000139364 | TMEM132B   | 12 | 125186836 | 125662377 | 475541 | protein coding                     | -1.47 | 1.40E-04 | 2.47E-03 |
| ENSG00000275088 | AC026469.1 | 16 | 85142696  | 85146001  | 3305   | lncRNA                             | -1.47 | 3.58E-03 | 2.23E-02 |
| ENSG00000225269 | LINC00705  | 10 | 4655427   | 4682722   | 27295  | lncRNA                             | -1.47 | 7.16E-03 | 3.57E-02 |
| ENSG00000241352 | AC007688.2 | 12 | 12850982  | 12851740  | 758    | processed pseudogene               | -1.47 | 7.98E-03 | 3.82E-02 |
| ENSG00000287225 | CD4468.2   | 22 | 48474135  | 48489324  | 15189  | lncRNA                             | -1.47 | 3.74E-03 | 2.29E-02 |
| ENSG00000257582 | LINC01475  | 10 | 99526350  | 99531177  | 4827   | lncRNA                             | -1.47 | 1.07E-02 | 4.69E-02 |
| ENSG00000166573 | GALR1      | 18 | 77249848  | 77277900  | 28052  | protein coding                     | -1.47 | 1.31E-03 | 1.12E-02 |
| ENSG00000287633 | AL161640.3 | 1  | 234550542 | 234554838 | 4296   | lncRNA                             | -1.47 | 9.12E-03 | 4.19E-02 |
| ENSG00000258457 | AL132780.2 | 14 | 22982698  | 22999078  | 16380  | lncRNA-antisense                   | -1.47 | 5.57E-03 | 3.01E-02 |
| ENSG00000249781 | LINC02112  | 5  | 9641305   | 9903852   | 262547 | lncRNA                             | -1.47 | 8.61E-03 | 4.03E-02 |
| ENSG00000279839 | AL512383.1 | 1  | 3205988   | 3208664   | 2676   | TEC                                | -1.47 | 3.81E-04 | 4.85E-03 |
| ENSG00000111816 | FRK        | 6  | 115931149 | 116060891 | 129742 | protein coding                     | -1.47 | 8.64E-05 | 1.79E-03 |
| ENSG00000233237 | LINC00472  | 6  | 71343427  | 71420745  | 77318  | lncRNA                             | -1.47 | 1.47E-04 | 2.55E-03 |
| ENSG00000188523 | CFAP77     | 9  | 132410043 | 132573319 | 163276 | protein coding                     | -1.47 | 1.19E-03 | 1.04E-02 |
| ENSG00000234261 | AL138720.1 | 6  | 14661829  | 15090170  | 428341 | lncRNA                             | -1.47 | 7.17E-04 | 7.45E-03 |
| ENSG00000240694 | PNMA2      | 8  | 26504701  | 26514092  | 9391   | protein coding                     | -1.47 | 8.92E-04 | 8.61E-03 |
| ENSG00000228198 | OR2M3      | 1  | 248197265 | 248212925 | 15660  | protein coding                     | -1.47 | 1.62E-03 | 1.29E-02 |
| ENSG00000102313 | ITIH6      | X  | 54748918  | 54798255  | 49337  | protein coding                     | -1.47 | 3.50E-03 | 2.19E-02 |
| ENSG00000231252 | AC099792.1 | 1  | 60659631  | 60868009  | 208378 | lncRNA                             | -1.47 | 5.20E-03 | 2.87E-02 |
| ENSG00000089101 | CFAP61     | 20 | 20052514  | 20360703  | 308189 | protein coding                     | -1.47 | 3.52E-04 | 4.60E-03 |
| ENSG00000248332 | TUB-AS1    | 11 | 8060038   | 8069373   | 9335   | lncRNA-sense intronic              | -1.47 | 4.07E-03 | 2.42E-02 |
| ENSG00000087842 | PIR        | X  | 15384799  | 15493564  | 108765 | protein coding                     | -1.48 | 6.05E-03 | 3.19E-02 |
| ENSG00000286046 | AC093998.1 | 4  | 18418662  | 18888662  | 470000 | lncRNA                             | -1.48 | 1.02E-02 | 4.54E-02 |
| ENSG00000118322 | ATP10B     | 5  | 160563120 | 160852214 | 289094 | protein coding                     | -1.48 | 5.52E-03 | 2.99E-02 |
| ENSG00000100433 | KCNK10     | 14 | 88180103  | 88326907  | 146804 | protein coding                     | -1.48 | 3.33E-06 | 1.97E-04 |
| ENSG00000229544 | NKX1-2     | 10 | 124445243 | 124450035 | 4792   | protein coding                     | -1.48 | 1.05E-02 | 4.63E-02 |
| ENSG00000227066 | Z98257.1   | 1  | 20154171  | 20160568  | 6397   | lncRNA                             | -1.48 | 4.56E-03 | 2.63E-02 |
| ENSG00000168334 | XIRP1      | 3  | 39183210  | 39192596  | 9386   | protein coding                     | -1.48 | 1.39E-03 | 1.16E-02 |
| ENSG00000230483 | AC124057.1 | 11 | 2404515   | 2407908   | 3393   | lncRNA-antisense                   | -1.48 | 8.83E-03 | 4.10E-02 |
| ENSG00000236991 | EDRF1-AS1  | 10 | 125725634 | 125752110 | 26476  | lncRNA-antisense                   | -1.48 | 2.19E-04 | 3.38E-03 |
| ENSG00000185182 | GOLGA8EP   | 15 | 22427039  | 22437902  | 10863  | transcribed unprocessed pseudogene | -1.48 | 8.17E-03 | 3.89E-02 |
| ENSG00000263089 | AC007114.2 | 17 | 57092145  | 57096425  | 4280   | lncRNA-antisense                   | -1.48 | 3.91E-04 | 4.95E-03 |
| ENSG00000285634 | SLG3827.1  | 9  | 85369591  | 85444230  | 74639  | lncRNA                             | -1.48 | 3.52E-03 | 2.20E-02 |
| ENSG00000179142 | CYP11B2    | 8  | 142910559 | 142917843 | 7284   | protein coding                     | -1.48 | 2.88E-03 | 1.92E-02 |
| ENSG00000286322 | AL356218.2 | 9  | 33401478  | 33410553  | 9075   | lncRNA                             | -1.48 | 8.50E-03 | 3.99E-02 |
| ENSG00000272636 | DOC2B      | 17 | 142789    | 181650    | 38861  | protein coding                     | -1.48 | 4.61E-05 | 1.15E-03 |
| ENSG00000231367 | LINC02613  | 2  | 38406527  | 38515934  | 109407 | lncRNA                             | -1.48 | 4.45E-03 | 2.59E-02 |
| ENSG00000130943 | PKDREJ     | 22 | 46255663  | 46263343  | 7680   | protein coding                     | -1.48 | 4.06E-03 | 2.42E-02 |
| ENSG00000233304 | LINC01346  | 1  | 3940486   | 3955262   | 14776  | lncRNA                             | -1.48 | 6.03E-04 | 6.60E-03 |
| ENSG00000178162 | FAR2P2     | 2  | 130416755 | 130431363 | 14608  | transcribed unprocessed pseudogene | -1.48 | 3.90E-04 | 4.95E-03 |
| ENSG00000198963 | RORB       | 9  | 74497335  | 74693177  | 195842 | protein coding                     | -1.48 | 4.34E-04 | 5.29E-03 |
| ENSG00000259203 | AC016044.1 | 15 | 52800168  | 52805972  | 5804   | lncRNA                             | -1.48 | 2.74E-03 | 1.86E-02 |
| ENSG00000188611 | ASAH2      | 10 | 50182778  | 50279720  | 96942  | protein coding                     | -1.48 | 1.47E-06 | 1.13E-04 |
| ENSG00000158055 | GRHL3      | 1  | 24319357  | 24364482  | 45125  | protein coding                     | -1.48 | 3.21E-04 | 4.33E-03 |
| ENSG00000189325 | BNIP5      | 6  | 36315761  | 36336888  | 21127  | protein coding                     | -1.48 | 7.77E-04 | 7.87E-03 |
| ENSG00000151577 | DRD3       | 3  | 114127580 | 114199407 | 71827  | protein coding                     | -1.48 | 9.76E-03 | 4.39E-02 |
| ENSG00000122012 | SV2C       | 5  | 76083383  | 76353939  | 270556 | protein coding                     | -1.48 | 2.00E-05 | 6.54E-04 |
| ENSG00000120729 | MYOT       | 5  | 137867858 | 137887851 | 19993  | protein coding                     | -1.48 | 7.15E-03 | 3.56E-02 |
| ENSG00000132437 | DDC        | 7  | 50458436  | 50565405  | 106969 | protein coding                     | -1.48 | 9.36E-04 | 8.91E-03 |
| ENSG00000236403 | AL353611.1 | 9  | 134936524 | 134943207 | 6683   | lncRNA                             | -1.48 | 7.63E-03 | 3.72E-02 |
| ENSG00000167751 | KLK2       | 19 | 50861568  | 50880567  | 18999  | protein coding                     | -1.48 | 1.16E-03 | 1.02E-02 |
| ENSG00000253301 | LINC01606  | 8  | 57142659  | 57244793  | 102134 | lncRNA                             | -1.48 | 2.63E-04 | 3.82E-03 |
| ENSG00000279467 | AP000350.8 | 22 | 23865248  | 23873277  | 8029   | lncRNA-antisense                   | -1.48 | 9.41E-05 | 1.90E-03 |
| ENSG00000175699 | CCDC197    | 14 | 93987225  | 94008863  | 21638  | protein coding                     | -1.48 | 2.18E-03 | 1.59E-02 |
| ENSG00000151468 | CCDC3      | 10 | 12896625  | 13099652  | 203027 | protein coding                     | -1.48 | 2.95E-04 | 4.10E-03 |
| ENSG00000231666 | LINC01704  | 1  | 158131983 | 158149810 | 17827  | lncRNA                             | -1.48 | 2.73E-03 | 1.85E-02 |
| ENSG00000181333 | HEPPL1     | 11 | 94021354  | 94114208  | 92854  | protein coding                     | -1.48 | 1.17E-04 | 2.18E-03 |
| ENSG00000184012 | TMPPRSS2   | 21 | 41464300  | 41531116  | 66816  | protein coding                     | -1.48 | 1.41E-04 | 2.48E-03 |
| ENSG00000099960 | SLC7A4     | 22 | 21028718  | 21032840  | 4122   | protein coding                     | -1.48 | 1.45E-04 | 2.52E-03 |
| ENSG00000234424 | AL353743.4 | 9  | 85753306  | 85786575  | 33269  | unprocessed pseudogene             | -1.48 | 9.56E-03 | 4.33E-02 |
| ENSG00000230927 | TMBIM7P    | 7  | 92412550  | 92447813  | 35263  | transcribed unitary pseudogene     | -1.48 | 2.95E-03 | 1.96E-02 |
| ENSG00000261126 | RBFADN     | 18 | 80046900  | 80095482  | 48582  | lncRNA                             | -1.48 | 1.69E-04 | 2.81E-03 |
| ENSG00000163395 | IGFN1      | 1  | 201190824 | 201228952 | 38128  | protein coding                     | -1.48 | 2.84E-04 | 2.99E-03 |
| ENSG00000200783 | RN7SKP180  | 17 | 72663823  | 72664152  | 329    | misc RNA                           | -1.48 | 3.91E-03 | 2.36E-02 |
| ENSG00000173673 | HES3       | 1  | 6244179   | 6245578   | 1399   | protein coding                     | -1.48 | 1.14E-02 | 4.89E-02 |
| ENSG00000163357 | DCST1      | 1  | 155033824 | 155050930 | 17106  | protein coding                     | -1.48 | 2.34E-05 | 7.27E-04 |



|                |             |    |           |           |        |                                    |       |          |          |
|----------------|-------------|----|-----------|-----------|--------|------------------------------------|-------|----------|----------|
| ENSG0000158014 | SLC30A2     | 1  | 26037252  | 26046118  | 8866   | protein coding                     | -1.48 | 6.77E-03 | 3.43E-02 |
| ENSG0000253490 | LINC02099   | 8  | 29748309  | 29798492  | 50183  | lncRNA                             | -1.48 | 4.85E-03 | 2.75E-02 |
| ENSG0000145692 | BHMT        | 5  | 79111809  | 79132288  | 20479  | protein coding                     | -1.48 | 4.11E-03 | 2.44E-02 |
| ENSG0000237775 | DDR1-DT     | 6  | 30866982  | 30875918  | 8936   | lncRNA-antisense                   | -1.48 | 1.03E-02 | 4.57E-02 |
| ENSG0000086570 | FAT2        | 5  | 151504093 | 151568944 | 64851  | protein coding                     | -1.48 | 1.67E-05 | 5.78E-04 |
| ENSG0000113262 | GRM6        | 5  | 178977587 | 178996206 | 18619  | protein coding                     | -1.48 | 5.05E-04 | 8.55E-03 |
| ENSG0000118526 | TCF21       | 6  | 133889113 | 133895553 | 6440   | protein coding                     | -1.49 | 6.84E-03 | 3.46E-02 |
| ENSG0000228630 | HOTAIR      | 12 | 53962308  | 53974956  | 12648  | lncRNA-antisense                   | -1.49 | 1.07E-02 | 4.67E-02 |
| ENSG0000153060 | TEKT5       | 16 | 10627501  | 10694390  | 67429  | protein coding                     | -1.49 | 1.14E-02 | 4.90E-02 |
| ENSG0000187268 | FAM9C       | X  | 13035617  | 13044682  | 9065   | protein coding                     | -1.49 | 2.48E-03 | 1.74E-02 |
| ENSG0000276950 | GSTT4       | 22 | 23998401  | 24005453  | 7052   | protein coding                     | -1.49 | 8.87E-04 | 8.58E-03 |
| ENSG0000267252 | LINC01255   | 18 | 11486205  | 11523087  | 36882  | lncRNA                             | -1.49 | 7.47E-04 | 7.65E-03 |
| ENSG0000254166 | CASC19      | 8  | 127072694 | 127227541 | 154847 | lncRNA                             | -1.49 | 6.71E-07 | 6.64E-05 |
| ENSG0000088002 | SULT2B1     | 19 | 48552172  | 48599425  | 47253  | protein coding                     | -1.49 | 2.65E-03 | 1.82E-02 |
| ENSG0000153404 | PLEKHG4B    | 5  | 92151     | 189972    | 97821  | protein coding                     | -1.49 | 5.60E-05 | 1.32E-03 |
| ENSG0000230699 | AL645608.2  | 1  | 911435    | 914948    | 3513   | lncRNA                             | -1.49 | 1.08E-03 | 9.77E-03 |
| ENSG0000137809 | ITGA11      | 15 | 68296532  | 68432163  | 135631 | protein coding                     | -1.49 | 7.62E-06 | 3.47E-04 |
| ENSG0000272808 | AC015712.6  | 15 | 100849831 | 100876836 | 27005  | lncRNA                             | -1.49 | 3.45E-03 | 2.17E-02 |
| ENSG0000121335 | PRB2        | 12 | 11391540  | 11501041  | 109501 | protein coding                     | -1.49 | 5.46E-03 | 2.97E-02 |
| ENSG0000171872 | KLF17       | 1  | 44118821  | 44135140  | 16319  | protein coding                     | -1.49 | 2.82E-03 | 1.89E-02 |
| ENSG0000286195 | AC007666.2  | 22 | 17521514  | 17570078  | 48564  | lncRNA-antisense                   | -1.49 | 4.85E-03 | 2.75E-02 |
| ENSG0000121898 | CPXM2       | 10 | 123706207 | 123940267 | 234060 | protein coding                     | -1.49 | 1.48E-05 | 5.45E-04 |
| ENSG0000265888 | DSCAS       | 18 | 31101583  | 31162789  | 61206  | lncRNA-antisense                   | -1.49 | 1.12E-02 | 4.82E-02 |
| ENSG0000224310 | LINC01567   | 16 | 24661422  | 24671062  | 9640   | lncRNA                             | -1.49 | 4.81E-03 | 2.73E-02 |
| ENSG0000233117 | LINC00702   | 10 | 4201141   | 4243912   | 42771  | lncRNA                             | -1.49 | 3.78E-03 | 2.31E-02 |
| ENSG0000286923 | AC004522.5  | 7  | 99997690  | 100011634 | 13944  | lncRNA                             | -1.49 | 7.86E-03 | 3.79E-02 |
| ENSG0000278891 | AC105101.1  | 18 | 48147634  | 48150864  | 3230   | TEC                                | -1.49 | 5.01E-03 | 2.80E-02 |
| ENSG0000197653 | DNAH10      | 12 | 123762188 | 123935720 | 173532 | protein coding                     | -1.49 | 7.72E-07 | 7.31E-05 |
| ENSG0000237988 | OR211P      | 6  | 29550407  | 29557721  | 7314   | protein coding                     | -1.49 | 5.28E-04 | 6.04E-03 |
| ENSG0000260305 | NTRK3-AS1   | 15 | 88252730  | 88271066  | 18336  | lncRNA                             | -1.49 | 8.82E-03 | 4.10E-02 |
| ENSG0000272950 | AC093799.1  | 7  | 98322853  | 98323430  | 577    | lncRNA-antisense                   | -1.49 | 8.59E-03 | 4.02E-02 |
| ENSG0000226203 | LINC01733   | 20 | 25955795  | 25969288  | 13493  | lncRNA                             | -1.49 | 9.58E-03 | 4.33E-02 |
| ENSG0000204764 | RANBP17     | 5  | 170861870 | 171300015 | 438145 | protein coding                     | -1.49 | 3.87E-05 | 1.02E-03 |
| ENSG0000247157 | LINC01252   | 12 | 11548030  | 11590369  | 42339  | lncRNA                             | -1.49 | 7.22E-06 | 3.33E-04 |
| ENSG0000273523 | AL139082.1  | 13 | 52128891  | 52132723  | 3832   | lncRNA-antisense                   | -1.49 | 6.30E-03 | 3.27E-02 |
| ENSG0000285081 | AC004593.1  | 7  | 29191582  | 29194109  | 2527   | lncRNA-sense intronic              | -1.49 | 5.32E-03 | 2.91E-02 |
| ENSG0000205426 | KRT81       | 12 | 52285913  | 52291534  | 5621   | protein coding                     | -1.49 | 8.03E-04 | 8.05E-03 |
| ENSG0000244694 | PTCHD4      | 6  | 47878028  | 48068689  | 190661 | protein coding                     | -1.49 | 1.02E-02 | 4.55E-02 |
| ENSG0000106018 | VIPR2       | 7  | 159028175 | 159144867 | 116692 | protein coding                     | -1.49 | 6.36E-07 | 6.47E-05 |
| ENSG0000288568 | AC092720.3  | 16 | 87492555  | 87516940  | 24385  | lncRNA                             | -1.49 | 2.82E-04 | 4.00E-03 |
| ENSG0000280257 | AC007741.1  | 2  | 65790039  | 65793533  | 3494   | TEC                                | -1.49 | 3.05E-03 | 2.00E-02 |
| ENSG0000258464 | AL160237.1  | 14 | 23699797  | 23729757  | 29960  | lncRNA                             | -1.49 | 3.67E-03 | 2.26E-02 |
| ENSG0000188039 | NWD1        | 19 | 16719847  | 16817963  | 98116  | protein coding                     | -1.49 | 1.76E-04 | 2.90E-03 |
| ENSG0000103852 | TTC23       | 15 | 99136323  | 99251223  | 114900 | protein coding                     | -1.49 | 1.98E-06 | 1.40E-04 |
| ENSG0000223553 | SMPD4P1     | 22 | 20602595  | 20656914  | 54319  | transcribed unprocessed pseudogene | -1.49 | 2.98E-04 | 4.14E-03 |
| ENSG0000283258 | AC007491.1  | 16 | 54628963  | 54657662  | 28699  | lncRNA                             | -1.49 | 1.07E-02 | 4.68E-02 |
| ENSG0000288253 | AC010332.3  | 19 | 52453580  | 52458836  | 5256   | lncRNA                             | -1.49 | 4.12E-05 | 1.07E-03 |
| ENSG0000182704 | TSKU        | 11 | 76782251  | 76798153  | 15902  | protein coding                     | -1.49 | 2.50E-04 | 3.68E-03 |
| ENSG0000230876 | LINC00486   | 2  | 32825359  | 32926693  | 101334 | lncRNA                             | -1.49 | 1.65E-03 | 1.31E-02 |
| ENSG0000275898 | AC125803.4  | 12 | 116580974 | 116583672 | 2698   | lncRNA                             | -1.49 | 2.08E-04 | 3.26E-03 |
| ENSG0000189143 | CLDN4       | 7  | 73799542  | 73832693  | 33151  | protein coding                     | -1.49 | 5.95E-04 | 6.55E-03 |
| ENSG0000206043 | C1orf63     | 18 | 74315839  | 74359189  | 43350  | protein coding                     | -1.49 | 1.54E-03 | 1.25E-02 |
| ENSG0000147647 | DPYS        | 8  | 104330324 | 104467055 | 136731 | protein coding                     | -1.49 | 1.74E-03 | 1.36E-02 |
| ENSG0000236467 | KCNMA1-AS1  | 10 | 76888044  | 76980624  | 92580  | lncRNA-antisense                   | -1.49 | 1.34E-04 | 2.40E-03 |
| ENSG0000261329 | AC16597.1   | 16 | 27678940  | 27718806  | 39866  | lncRNA-antisense                   | -1.50 | 1.84E-04 | 2.99E-03 |
| ENSG0000186723 | OR10H1      | 19 | 15804549  | 15815664  | 11115  | protein coding                     | -1.50 | 1.37E-03 | 1.15E-02 |
| ENSG0000103241 | FOXF1       | 16 | 86510527  | 86515422  | 4895   | protein coding                     | -1.50 | 5.12E-04 | 5.91E-03 |
| ENSG0000286373 | AC022387.2  | 10 | 63630672  | 63655769  | 25097  | lncRNA                             | -1.50 | 6.38E-03 | 3.30E-02 |
| ENSG0000206120 | EGFEM1P     | 3  | 168249522 | 168830599 | 581077 | transcribed unitary pseudogene     | -1.50 | 3.79E-03 | 2.31E-02 |
| ENSG0000231512 | SEPTIN14P21 | 1  | 243029512 | 243052252 | 22740  | transcribed unprocessed pseudogene | -1.50 | 1.09E-02 | 4.72E-02 |
| ENSG0000173838 | MARCFH10    | 17 | 62701314  | 62808344  | 107030 | protein coding                     | -1.50 | 3.30E-04 | 4.42E-03 |
| ENSG0000279965 | AL390755.2  | 13 | 110123208 | 110125234 | 2026   | TEC                                | -1.50 | 1.17E-02 | 4.98E-02 |
| ENSG0000283945 | LINC00032   | 9  | 27245680  | 27284869  | 39189  | transcribed unprocessed pseudogene | -1.50 | 3.13E-03 | 2.04E-02 |
| ENSG0000168676 | KCTD19      | 16 | 67289428  | 67326760  | 37332  | protein coding                     | -1.50 | 1.53E-04 | 2.62E-03 |
| ENSG0000170790 | OR10A2      | 11 | 6863057   | 6874717   | 11660  | protein coding                     | -1.50 | 3.82E-03 | 2.32E-02 |
| ENSG0000259380 | AC087473.1  | 15 | 38139595  | 38226897  | 87302  | lncRNA                             | -1.50 | 1.29E-04 | 2.34E-03 |
| ENSG0000175183 | CSRP2       | 12 | 76858709  | 76879023  | 20314  | protein coding                     | -1.50 | 3.61E-03 | 2.24E-02 |
| ENSG0000205856 | C22orf42    | 22 | 32149006  | 32159322  | 10316  | protein coding                     | -1.50 | 1.01E-02 | 4.52E-02 |
| ENSG0000285527 | AC136285.3  | 16 | 87129857  | 87133107  | 3250   | lncRNA                             | -1.50 | 1.85E-03 | 1.42E-02 |
| ENSG0000214376 | VSTM5       | 11 | 93818232  | 93850618  | 32386  | protein coding                     | -1.50 | 8.22E-04 | 8.17E-03 |
| ENSG0000167080 | B4GALNT2    | 17 | 49132460  | 49176840  | 44380  | protein coding                     | -1.50 | 4.53E-04 | 5.45E-03 |
| ENSG0000103175 | WFDC1       | 16 | 84294846  | 84329844  | 34998  | protein coding                     | -1.50 | 2.39E-04 | 3.59E-03 |
| ENSG0000234859 | AC003958.2  | 17 | 41402416  | 41425049  | 22633  | lncRNA-antisense                   | -1.50 | 2.29E-03 | 1.64E-02 |
| ENSG0000230385 | AC012507.1  | 2  | 230908852 | 230910102 | 1250   | lncRNA-antisense                   | -1.50 | 5.05E-03 | 2.82E-02 |
| ENSG0000203963 | C1orf141    | 1  | 67092165  | 67231853  | 139688 | protein coding                     | -1.50 | 7.26E-03 | 3.60E-02 |
| ENSG0000165194 | PCDH19      | X  | 100291644 | 100410273 | 118629 | protein coding                     | -1.50 | 7.64E-05 | 1.64E-03 |
| ENSG0000189056 | RELN        | 7  | 103471784 | 103989658 | 517874 | protein coding                     | -1.50 | 8.27E-06 | 3.64E-04 |
| ENSG0000172236 | TPSAB1      | 16 | 1240379   | 1242554   | 2175   | protein coding                     | -1.50 | 8.21E-04 | 8.17E-03 |
| ENSG0000186487 | MYT1L       | 2  | 1789113   | 2331664   | 542551 | protein coding                     | -1.50 | 3.28E-06 | 1.95E-04 |
| ENSG0000277837 | AC090340.1  | 18 | 57427133  | 57432112  | 4979   | lncRNA                             | -1.50 | 4.10E-03 | 2.44E-02 |
| ENSG0000223443 | USP17L2     | 8  | 12137168  | 12139077  | 1909   | protein coding                     | -1.50 | 1.59E-04 | 2.70E-03 |
| ENSG0000231426 | FILNC1      | 6  | 139677639 | 139860476 | 182837 | lncRNA                             | -1.50 | 9.93E-03 | 4.45E-02 |
| ENSG0000178804 | H1-8        | 3  | 129543214 | 129551467 | 8253   | protein coding                     | -1.50 | 2.69E-03 | 1.83E-02 |
| ENSG0000282390 | AL392083.1  | 10 | 1290018   | 1293002   | 2984   | lncRNA-sense intronic              | -1.50 | 4.84E-03 | 2.74E-02 |
| ENSG0000187855 | ASCL4       | 12 | 107774385 | 107776644 | 2259   | protein coding                     | -1.50 | 7.86E-03 | 3.79E-02 |
| ENSG0000263740 | RN7SL4P     | 3  | 15738515  | 15738809  | 294    | misc RNA                           | -1.50 | 6.24E-04 | 6.75E-03 |
| ENSG0000257137 | LINC02874   | 12 | 52205392  | 52213583  | 8191   | lncRNA                             | -1.50 | 6.32E-03 | 2.66E-02 |
| ENSG0000101938 | CHRDL1      | X  | 110673856 | 110795819 | 121963 | protein coding                     | -1.50 | 1.94E-03 | 1.46E-02 |
| ENSG0000124253 | PCK1        | 20 | 57561080  | 57568121  | 7041   | protein coding                     | -1.50 | 5.22E-04 | 5.98E-03 |
| ENSG0000142549 | IGLON5      | 19 | 51311848  | 51330354  | 18506  | protein coding                     | -1.50 | 3.41E-03 | 2.15E-02 |

|                 |              |    |           |           |         |                                      |       |          |          |
|-----------------|--------------|----|-----------|-----------|---------|--------------------------------------|-------|----------|----------|
| ENSG00000253314 | LINC00293    | 8  | 46822174  | 46907309  | 85135   | lncRNA                               | -1.50 | 8.51E-03 | 3.99E-02 |
| ENSG00000185842 | DNAH14       | 1  | 224896262 | 225399292 | 503030  | protein coding                       | -1.50 | 3.28E-07 | 4.08E-05 |
| ENSG00000135917 | SLC19A3      | 2  | 227683763 | 227718028 | 34265   | protein coding                       | -1.50 | 1.65E-03 | 1.31E-02 |
| ENSG00000235726 | AC010148.1   | 2  | 234803808 | 234913384 | 109576  | lncRNA                               | -1.50 | 2.09E-04 | 3.26E-03 |
| ENSG00000225249 | LINC00378    | 13 | 60618991  | 61176758  | 557767  | lncRNA                               | -1.50 | 6.07E-03 | 3.19E-02 |
| ENSG00000078725 | BRINP1       | 9  | 119153458 | 119369435 | 215977  | protein coding                       | -1.50 | 3.25E-03 | 2.08E-02 |
| ENSG00000107562 | CXCL12       | 10 | 44370165  | 44386493  | 16328   | protein coding                       | -1.50 | 8.47E-05 | 1.76E-03 |
| ENSG00000101311 | FERMT1       | 20 | 6074845   | 6123030   | 48185   | protein coding                       | -1.51 | 6.57E-04 | 7.01E-03 |
| ENSG00000124827 | GCM2         | 6  | 10873223  | 10882041  | 8818    | protein coding                       | -1.51 | 8.35E-03 | 3.95E-02 |
| ENSG00000140481 | CCDC33       | 15 | 74202705  | 74336472  | 133767  | protein coding                       | -1.51 | 5.11E-05 | 1.24E-03 |
| ENSG00000134853 | PDGFRA       | 4  | 54229280  | 54298245  | 68965   | protein coding                       | -1.51 | 9.51E-04 | 9.00E-03 |
| ENSG00000178401 | DNAJC22      | 12 | 49346888  | 49357546  | 10658   | protein coding                       | -1.51 | 3.67E-03 | 2.26E-02 |
| ENSG00000148584 | A1CF         | 10 | 50799409  | 50885675  | 86266   | protein coding                       | -1.51 | 1.28E-03 | 1.10E-02 |
| ENSG00000179428 | IL6-AS1      | 7  | 22725395  | 22727620  | 2225    | lncRNA-antisense                     | -1.51 | 1.16E-02 | 4.95E-02 |
| ENSG00000286193 | AC025449.2   | 5  | 37249026  | 37252617  | 3591    | lncRNA-antisense                     | -1.51 | 3.36E-03 | 2.13E-02 |
| ENSG00000106278 | PTPRZ1       | 7  | 121873089 | 122062036 | 188947  | protein coding                       | -1.51 | 2.37E-03 | 1.68E-02 |
| ENSG00000230453 | ANKRD18B     | 9  | 33524394  | 33573009  | 48615   | protein coding                       | -1.51 | 8.49E-04 | 8.33E-03 |
| ENSG00000131711 | MAP1B        | 5  | 72107234  | 72209565  | 102331  | protein coding                       | -1.51 | 8.64E-08 | 1.56E-05 |
| ENSG00000250241 | AC105383.1   | 4  | 133075311 | 133149147 | 73836   | lncRNA                               | -1.51 | 4.22E-03 | 2.49E-02 |
| ENSG00000275540 | AC011477.6   | 19 | 19740884  | 19750127  | 9243    | unprocessed pseudogene               | -1.51 | 6.57E-03 | 3.37E-03 |
| ENSG00000143631 | FLG          | 1  | 152302165 | 152325239 | 23074   | protein coding                       | -1.51 | 1.51E-03 | 1.23E-02 |
| ENSG00000286615 | AC011416.4   | 5  | 127231977 | 127290731 | 58754   | lncRNA                               | -1.51 | 2.44E-03 | 1.72E-02 |
| ENSG00000185532 | PRKG1        | 10 | 50990888  | 52298423  | 1307535 | protein coding                       | -1.51 | 2.06E-04 | 3.24E-03 |
| ENSG00000226835 | ARHGAP29-AS1 | 1  | 94247819  | 94411036  | 163217  | lncRNA                               | -1.51 | 2.48E-03 | 1.74E-02 |
| ENSG00000114805 | PLCH1        | 3  | 155375580 | 155745071 | 369491  | protein coding                       | -1.51 | 5.41E-06 | 2.73E-04 |
| ENSG00000287964 | AC066590.1   | 3  | 11060973  | 11091548  | 30575   | lncRNA                               | -1.51 | 8.86E-03 | 4.11E-02 |
| ENSG00000165449 | SLC16A9      | 10 | 59650761  | 59736002  | 85241   | protein coding                       | -1.51 | 3.46E-03 | 2.17E-02 |
| ENSG00000167098 | SUN5         | 20 | 32983773  | 33004433  | 20660   | protein coding                       | -1.51 | 1.06E-02 | 4.67E-02 |
| ENSG00000134873 | CLDN10       | 13 | 95433604  | 95579759  | 146155  | protein coding                       | -1.51 | 5.40E-03 | 2.95E-02 |
| ENSG00000256666 | LINC02700    | 11 | 94638045  | 94652884  | 14839   | lncRNA                               | -1.51 | 4.45E-03 | 2.59E-02 |
| ENSG00000074410 | CA12         | 15 | 63321378  | 63381846  | 60468   | protein coding                       | -1.51 | 8.27E-05 | 1.73E-03 |
| ENSG00000267943 | AC010328.1   | 19 | 53007512  | 53013180  | 5668    | lncRNA                               | -1.51 | 8.20E-03 | 3.90E-02 |
| ENSG00000169752 | NRG4         | 15 | 75935969  | 76059795  | 123826  | protein coding                       | -1.51 | 2.20E-04 | 3.38E-03 |
| ENSG00000102962 | CCL22        | 16 | 57358783  | 57366189  | 7406    | protein coding                       | -1.51 | 2.60E-03 | 1.79E-02 |
| ENSG00000213853 | EMP2         | 16 | 10528422  | 10580362  | 52210   | protein coding                       | -1.51 | 1.84E-04 | 2.99E-03 |
| ENSG00000228918 | LINC01344    | 1  | 182096338 | 182314061 | 217723  | lncRNA                               | -1.51 | 8.86E-04 | 8.58E-03 |
| ENSG00000101098 | RIMS4        | 20 | 44751808  | 44810546  | 58738   | protein coding                       | -1.51 | 6.35E-04 | 6.83E-03 |
| ENSG00000273032 | DGCR5        | 22 | 18970439  | 19031242  | 60803   | lncRNA                               | -1.51 | 8.27E-06 | 3.64E-04 |
| ENSG00000167759 | KLK13        | 19 | 51055626  | 51065114  | 9488    | protein coding                       | -1.51 | 3.49E-03 | 2.19E-02 |
| ENSG00000164904 | ALDH7A1      | 5  | 126531200 | 126595362 | 64162   | protein coding                       | -1.51 | 1.01E-07 | 1.74E-05 |
| ENSG00000265933 | LINC00668    | 18 | 6919496   | 6929966   | 10470   | lncRNA                               | -1.51 | 5.04E-04 | 5.84E-03 |
| ENSG00000126878 | AIF1L        | 9  | 131096476 | 131123152 | 26676   | protein coding                       | -1.51 | 7.94E-05 | 1.69E-03 |
| ENSG00000056487 | PHF21B       | 22 | 44881162  | 45010005  | 128843  | protein coding                       | -1.51 | 1.71E-05 | 5.91E-04 |
| ENSG00000221818 | EBF2         | 8  | 25841725  | 26045413  | 203688  | protein coding                       | -1.51 | 4.03E-04 | 5.06E-03 |
| ENSG00000164113 | ADAD1        | 4  | 122378966 | 122429802 | 50836   | protein coding                       | -1.51 | 5.00E-03 | 2.80E-02 |
| ENSG00000231407 | GORAB-AS1    | 1  | 170460453 | 170532647 | 72194   | lncRNA-antisense                     | -1.51 | 2.28E-03 | 1.64E-02 |
| ENSG00000123572 | NRK          | X  | 105822539 | 105958610 | 136071  | protein coding                       | -1.51 | 1.65E-03 | 1.31E-02 |
| ENSG00000138675 | FGF5         | 4  | 80266599  | 80336680  | 70081   | protein coding                       | -1.51 | 2.40E-03 | 1.70E-02 |
| ENSG00000187242 | KRT12        | 17 | 40861303  | 40867223  | 5920    | protein coding                       | -1.51 | 4.08E-04 | 5.09E-03 |
| ENSG00000266467 | RN7SL220P    | 10 | 68007718  | 68008017  | 299     | misc RNA                             | -1.51 | 7.72E-04 | 7.83E-03 |
| ENSG00000226051 | ZNF503-AS1   | 10 | 75243568  | 75373500  | 129932  | lncRNA                               | -1.51 | 1.07E-04 | 2.06E-03 |
| ENSG00000262081 | ILRP4        | 18 | 80140     | 88570     | 8430    | unprocessed pseudogene               | -1.51 | 1.54E-03 | 1.24E-02 |
| ENSG00000264956 | AC138761.1   | 17 | 22266395  | 22288301  | 21906   | lncRNA                               | -1.51 | 6.08E-03 | 3.20E-02 |
| ENSG00000268649 | AL132655.2   | 20 | 58817132  | 58817725  | 593     | lncRNA                               | -1.51 | 9.11E-03 | 4.18E-02 |
| ENSG00000187323 | DCC          | 18 | 52340197  | 53535903  | 1195706 | protein coding                       | -1.51 | 4.33E-05 | 1.11E-03 |
| ENSG00000224184 | MIR381HG     | 2  | 11833926  | 12702913  | 868987  | lncRNA                               | -1.51 | 4.57E-04 | 5.48E-03 |
| ENSG00000253608 | AC022915.2   | 8  | 48551567  | 48698510  | 146943  | lncRNA-antisense                     | -1.52 | 3.21E-03 | 2.07E-02 |
| ENSG00000169933 | FRMPD4       | X  | 11822423  | 12742523  | 902100  | protein coding                       | -1.52 | 4.69E-04 | 5.57E-03 |
| ENSG00000185467 | KPNA7        | 7  | 99173574  | 99207506  | 33932   | protein coding                       | -1.52 | 9.39E-03 | 4.27E-02 |
| ENSG00000157219 | HTR5A        | 7  | 155070324 | 155087392 | 17068   | protein coding                       | -1.52 | 2.62E-03 | 1.80E-02 |
| ENSG00000171877 | FRMD5        | 15 | 43870761  | 44195271  | 324510  | protein coding                       | -1.52 | 2.63E-04 | 3.81E-03 |
| ENSG00000186190 | BP1FB3       | 20 | 33055424  | 33073628  | 18204   | protein coding                       | -1.52 | 4.22E-04 | 5.19E-03 |
| ENSG00000134216 | CHIA         | 1  | 111290851 | 111320566 | 29715   | protein coding                       | -1.52 | 1.16E-02 | 4.95E-02 |
| ENSG00000279852 | AC083964.2   | 8  | 486117    | 488512    | 2395    | TEC                                  | -1.52 | 6.93E-03 | 3.49E-02 |
| ENSG00000134258 | VTCN1        | 1  | 117143587 | 117210960 | 67373   | protein coding                       | -1.52 | 7.13E-03 | 3.56E-02 |
| ENSG00000232234 | AL355499.1   | 6  | 8102711   | 8343139   | 240428  | lncRNA-bidirectional promoter lncRNA | -1.52 | 1.47E-03 | 1.21E-02 |
| ENSG00000176040 | TMPPRS7      | 3  | 112034843 | 112081269 | 46426   | protein coding                       | -1.52 | 1.06E-02 | 4.64E-02 |
| ENSG00000224481 | AC245100.1   | 1  | 148295895 | 148344638 | 48743   | lncRNA                               | -1.52 | 6.15E-03 | 3.22E-02 |
| ENSG00000179709 | NLRP8        | 19 | 55947832  | 55988629  | 40797   | protein coding                       | -1.52 | 5.92E-03 | 3.14E-02 |
| ENSG00000261670 | AC012213.2   | 8  | 103464389 | 103468985 | 4596    | lncRNA                               | -1.52 | 1.73E-03 | 1.35E-02 |
| ENSG00000227392 | HPN-AS1      | 19 | 35042902  | 35106307  | 63405   | lncRNA-antisense                     | -1.52 | 6.95E-04 | 7.27E-03 |
| ENSG00000214553 | LRRC37A11P   | 17 | 39027277  | 39053205  | 25928   | transcribed unprocessed pseudogene   | -1.52 | 3.62E-04 | 4.68E-03 |
| ENSG00000230710 | LINC00332    | 13 | 40172505  | 40195361  | 22856   | lncRNA                               | -1.52 | 1.54E-03 | 1.25E-02 |
| ENSG00000150672 | DLG2         | 11 | 83455012  | 85627922  | 2172910 | protein coding                       | -1.52 | 1.60E-08 | 5.00E-06 |
| ENSG00000126231 | PROZ         | 13 | 113158648 | 113172386 | 13738   | protein coding                       | -1.52 | 3.34E-04 | 4.45E-03 |
| ENSG00000109991 | P2RX3        | 11 | 57338352  | 57372396  | 34044   | protein coding                       | -1.52 | 4.36E-05 | 1.11E-03 |
| ENSG00000114757 | PEX5L        | 3  | 179794958 | 180037053 | 242095  | protein coding                       | -1.52 | 2.81E-04 | 3.98E-03 |
| ENSG00000177992 | SPATA31E1    | 9  | 87882877  | 87888903  | 6026    | protein coding                       | -1.52 | 7.26E-04 | 7.52E-03 |
| ENSG00000161609 | KASH5        | 19 | 49388219  | 49417990  | 29771   | protein coding                       | -1.52 | 5.74E-04 | 6.39E-03 |
| ENSG00000086205 | FOLH1        | 11 | 49145092  | 49208638  | 63546   | protein coding                       | -1.52 | 1.75E-03 | 1.36E-02 |
| ENSG00000258018 | LINC02457    | 12 | 116482073 | 116521047 | 38974   | lncRNA                               | -1.52 | 9.04E-03 | 4.16E-02 |
| ENSG00000260470 | AC023794.5   | 12 | 54145069  | 54147225  | 2156    | lncRNA                               | -1.52 | 2.01E-03 | 1.50E-02 |
| ENSG00000286125 | AC006115.2   | 19 | 56669941  | 56823395  | 153454  | lncRNA                               | -1.52 | 1.30E-06 | 1.02E-04 |
| ENSG00000254656 | RTL1         | 14 | 100879753 | 100903722 | 23969   | protein coding                       | -1.52 | 4.03E-05 | 1.05E-03 |
| ENSG00000179826 | MIRGPRX3     | 11 | 18120955  | 18138480  | 17525   | protein coding                       | -1.52 | 2.69E-03 | 1.83E-02 |
| ENSG0000010379  | SLC6A13      | 12 | 220621    | 262873    | 42252   | protein coding                       | -1.52 | 5.69E-05 | 1.34E-03 |
| ENSG00000285732 | AC121334.3   | 12 | 39611819  | 39614648  | 2829    | lncRNA-antisense                     | -1.52 | 6.57E-03 | 3.37E-02 |
| ENSG00000173811 | CCDC13-AS1   | 3  | 42732575  | 42746768  | 14193   | lncRNA-antisense                     | -1.52 | 1.04E-02 | 4.58E-02 |
| ENSG00000279440 | AL008638.3   | 22 | 27019369  | 27024550  | 5181    | lncRNA                               | -1.52 | 2.95E-03 | 1.95E-02 |
| ENSG00000172519 | OR10H5       | 19 | 15787661  | 15801025  | 13364   | protein coding                       | -1.52 | 3.51E-03 | 2.19E-02 |

|                 |             |    |           |           |        |                                    |       |          |          |
|-----------------|-------------|----|-----------|-----------|--------|------------------------------------|-------|----------|----------|
| ENSG00000258947 | TUBB3       | 16 | 89921392  | 89938761  | 17369  | protein coding                     | -1.52 | 1.27E-03 | 1.09E-02 |
| ENSG00000224717 | LEMD1-DT    | 1  | 205455929 | 205469024 | 13095  | lncRNA                             | -1.52 | 4.48E-03 | 2.60E-02 |
| ENSG00000171532 | NEUROD2     | 17 | 39603536  | 39609777  | 6241   | protein coding                     | -1.52 | 3.33E-04 | 4.44E-03 |
| ENSG00000228793 | AL033523.1  | 6  | 3585101   | 3720081   | 134980 | lncRNA                             | -1.52 | 1.65E-05 | 5.75E-04 |
| ENSG00000281641 | SAMD12-AS1  | 8  | 118620498 | 118906155 | 285657 | lncRNA                             | -1.52 | 7.89E-03 | 3.80E-02 |
| ENSG00000231881 | AL109615.2  | 6  | 44058792  | 44089288  | 30496  | lncRNA                             | -1.52 | 2.43E-05 | 7.46E-04 |
| ENSG00000137868 | STRA6       | 15 | 74179466  | 74212267  | 32801  | protein coding                     | -1.52 | 1.85E-03 | 1.42E-02 |
| ENSG00000254863 | LINC02744   | 11 | 119987952 | 119995037 | 7085   | lncRNA                             | -1.52 | 1.01E-02 | 4.52E-02 |
| ENSG00000264177 | AL353997.2  | 17 | 18379855  | 18388984  | 9129   | lncRNA-antisense                   | -1.52 | 7.45E-03 | 3.66E-02 |
| ENSG00000251151 | HOXC-AS3    | 12 | 53981509  | 53985519  | 4010   | lncRNA                             | -1.52 | 2.83E-03 | 1.90E-02 |
| ENSG00000109576 | AADAT       | 4  | 170060222 | 170091699 | 31477  | protein coding                     | -1.52 | 1.74E-03 | 1.36E-02 |
| ENSG00000122254 | HS3ST2      | 16 | 22814162  | 22916338  | 102176 | protein coding                     | -1.52 | 3.52E-04 | 4.60E-03 |
| ENSG00000163618 | CADPS       | 3  | 62398346  | 62875416  | 477070 | protein coding                     | -1.52 | 8.79E-06 | 3.80E-04 |
| ENSG00000228742 | LINC02577   | 7  | 106774955 | 106838480 | 63525  | lncRNA                             | -1.53 | 6.88E-03 | 3.47E-02 |
| ENSG00000148602 | LRIT1       | 10 | 84231520  | 84241546  | 10026  | protein coding                     | -1.53 | 5.09E-03 | 2.83E-02 |
| ENSG00000173641 | HSPB7       | 1  | 16014028  | 16019594  | 5566   | protein coding                     | -1.53 | 2.48E-03 | 1.74E-02 |
| ENSG00000258754 | LINC01579   | 15 | 93718542  | 94070898  | 352356 | lncRNA                             | -1.53 | 2.03E-04 | 3.20E-03 |
| ENSG00000115361 | ACADL       | 2  | 210187126 | 210225447 | 38321  | protein coding                     | -1.53 | 1.39E-03 | 1.16E-02 |
| ENSG00000271013 | LRRC37A9P   | 17 | 35912635  | 35918010  | 5375   | processed pseudogene               | -1.53 | 5.77E-04 | 6.42E-03 |
| ENSG00000175267 | VWA3A       | 16 | 22092538  | 22156964  | 64426  | protein coding                     | -1.53 | 2.69E-06 | 2.16E-04 |
| ENSG00000154175 | ABI3BP      | 3  | 100749156 | 100993515 | 244359 | protein coding                     | -1.53 | 9.35E-06 | 3.99E-04 |
| ENSG00000264404 | LINC02675   | 10 | 47588681  | 47619480  | 30799  | lncRNA                             | -1.53 | 1.13E-02 | 4.86E-02 |
| ENSG00000287879 | AC114341.2  | 18 | 79959579  | 79963178  | 3599   | lncRNA                             | -1.53 | 5.13E-04 | 5.92E-03 |
| ENSG00000203985 | LDLRAD1     | 1  | 54007298  | 54018186  | 10888  | protein coding                     | -1.53 | 7.43E-03 | 3.65E-02 |
| ENSG00000259921 | AC022819.1  | 15 | 99157231  | 99161140  | 3909   | lncRNA-sense intronic              | -1.53 | 1.02E-03 | 9.40E-03 |
| ENSG00000131914 | LIN28A      | 1  | 26410817  | 26429728  | 18911  | protein coding                     | -1.53 | 8.82E-03 | 4.10E-02 |
| ENSG00000064042 | LIMCH1      | 4  | 41359607  | 41700044  | 340437 | protein coding                     | -1.53 | 7.09E-06 | 3.30E-04 |
| ENSG00000095587 | TLL2        | 10 | 96364608  | 96513926  | 149318 | protein coding                     | -1.53 | 1.17E-06 | 9.50E-05 |
| ENSG00000172538 | FAM170B     | 10 | 49131154  | 49134021  | 2867   | protein coding                     | -1.53 | 1.18E-03 | 1.03E-02 |
| ENSG00000235597 | LINC01102   | 2  | 104430130 | 104532747 | 102617 | lncRNA                             | -1.53 | 1.36E-04 | 2.42E-03 |
| ENSG00000286333 | AC004828.2  | 14 | 72515407  | 72544622  | 29215  | lncRNA                             | -1.53 | 5.82E-03 | 3.10E-02 |
| ENSG00000215262 | KCNU1       | 8  | 36784324  | 36936125  | 151801 | protein coding                     | -1.53 | 1.09E-02 | 4.73E-02 |
| ENSG00000262786 | AC005224.1  | 17 | 14295512  | 14297600  | 2088   | lncRNA                             | -1.53 | 3.67E-03 | 2.26E-02 |
| ENSG00000287342 | AC188616.1  | 7  | 329776    | 333172    | 3396   | lncRNA                             | -1.53 | 7.38E-03 | 3.64E-02 |
| ENSG00000128655 | PDE11A      | 2  | 177623244 | 178072777 | 449533 | protein coding                     | -1.53 | 2.30E-04 | 3.48E-03 |
| ENSG00000287279 | AL121932.2  | 6  | 28634861  | 28649538  | 14677  | lncRNA                             | -1.53 | 3.02E-03 | 1.98E-02 |
| ENSG00000146038 | DDDC2       | 6  | 24171755  | 24358059  | 186304 | protein coding                     | -1.53 | 4.41E-03 | 2.57E-02 |
| ENSG00000173227 | SYT12       | 11 | 67006778  | 67050863  | 44085  | protein coding                     | -1.53 | 9.17E-04 | 8.78E-03 |
| ENSG00000286418 | AC018716.2  | 11 | 45397590  | 45412745  | 15155  | lncRNA                             | -1.53 | 3.19E-03 | 2.06E-02 |
| ENSG00000185792 | NLRP9       | 19 | 55708438  | 55738402  | 29964  | protein coding                     | -1.53 | 2.73E-03 | 1.86E-02 |
| ENSG00000155511 | GRIA1       | 5  | 153489615 | 153813869 | 324254 | protein coding                     | -1.53 | 4.22E-04 | 5.19E-03 |
| ENSG00000261795 | AC093627.7  | 7  | 161765    | 164972    | 3207   | lncRNA                             | -1.53 | 7.51E-04 | 7.67E-03 |
| ENSG00000204711 | C9orf135    | 9  | 69820817  | 69906227  | 85410  | protein coding                     | -1.53 | 1.04E-02 | 4.60E-02 |
| ENSG00000235288 | AC099329.1  | 3  | 42785087  | 42852428  | 67341  | lncRNA-antisense                   | -1.53 | 7.16E-04 | 7.45E-03 |
| ENSG00000246740 | PLA2G4E-AS1 | 15 | 41972763  | 41999094  | 26331  | lncRNA-antisense                   | -1.53 | 3.38E-03 | 2.14E-02 |
| ENSG00000154080 | CHST9       | 18 | 26906481  | 27185308  | 278827 | protein coding                     | -1.53 | 1.25E-04 | 2.29E-03 |
| ENSG00000114115 | RBP1        | 3  | 139517434 | 139539829 | 22395  | protein coding                     | -1.53 | 1.16E-03 | 1.02E-02 |
| ENSG00000279548 | AL022323.4  | 22 | 25022594  | 25024652  | 2058   | lncRNA-antisense                   | -1.53 | 8.68E-03 | 4.05E-02 |
| ENSG00000189375 | TBC1D28     | 17 | 18634247  | 18644427  | 10180  | protein coding                     | -1.53 | 5.91E-04 | 6.52E-03 |
| ENSG00000256292 | LINC02376   | 12 | 127274265 | 127284328 | 10063  | lncRNA                             | -1.53 | 8.21E-03 | 3.90E-02 |
| ENSG00000280078 | AC016526.3  | 14 | 76279173  | 76283103  | 3930   | TEC                                | -1.53 | 6.01E-04 | 6.60E-03 |
| ENSG00000286310 | AC008443.6  | 5  | 181276848 | 181277555 | 707    | lncRNA                             | -1.53 | 1.12E-02 | 4.83E-02 |
| ENSG00000249669 | CARMN       | 5  | 149406689 | 149432835 | 26146  | lncRNA                             | -1.53 | 4.46E-05 | 1.12E-03 |
| ENSG00000205976 | AC091951.1  | 5  | 7299774   | 7306592   | 6818   | unprocessed pseudogene             | -1.53 | 4.48E-03 | 2.60E-02 |
| ENSG00000100320 | RBOX2       | 22 | 35738736  | 36028824  | 290088 | protein coding                     | -1.53 | 8.16E-07 | 7.56E-05 |
| ENSG00000151276 | MAG1        | 3  | 65353525  | 66038834  | 685309 | protein coding                     | -1.54 | 4.36E-07 | 4.84E-05 |
| ENSG0000041982  | TNC         | 9  | 115019575 | 115118257 | 98682  | protein coding                     | -1.54 | 1.22E-04 | 2.84E-03 |
| ENSG00000053747 | LAMA3       | 18 | 23689453  | 23956222  | 266769 | protein coding                     | -1.54 | 2.09E-07 | 3.01E-05 |
| ENSG00000172320 | OR5A1       | 11 | 59436469  | 59451380  | 14911  | protein coding                     | -1.54 | 4.58E-03 | 2.64E-02 |
| ENSG00000148482 | SLC39A12    | 10 | 17951839  | 18043292  | 91453  | protein coding                     | -1.54 | 3.94E-03 | 2.37E-02 |
| ENSG00000248441 | LINC01197   | 15 | 95186634  | 95327129  | 140495 | lncRNA                             | -1.54 | 8.69E-05 | 1.79E-03 |
| ENSG00000171560 | FGA         | 4  | 154583128 | 154590745 | 7617   | protein coding                     | -1.54 | 8.53E-03 | 4.00E-02 |
| ENSG00000246379 | AC040168.1  | 16 | 55984009  | 56191118  | 207109 | lncRNA                             | -1.54 | 2.39E-05 | 7.36E-04 |
| ENSG00000250770 | AC005865.1  | 12 | 3296202   | 3366122   | 69920  | transcribed unprocessed pseudogene | -1.54 | 1.09E-03 | 9.82E-03 |
| ENSG00000227954 | TARID       | 6  | 133502252 | 133892802 | 390550 | lncRNA-antisense                   | -1.54 | 7.58E-04 | 7.72E-03 |
| ENSG00000287346 | AL132712.2  | 14 | 103873148 | 103880381 | 7233   | lncRNA                             | -1.54 | 1.93E-05 | 6.40E-04 |
| ENSG00000170689 | HOXB9       | 17 | 48621156  | 48626358  | 5202   | protein coding                     | -1.54 | 3.91E-03 | 2.36E-02 |
| ENSG00000242147 | LASTR       | 10 | 5594984   | 5632566   | 37582  | lncRNA                             | -1.54 | 1.92E-03 | 1.45E-02 |
| ENSG00000178094 | HTR3C       | 3  | 184053047 | 184060673 | 7626   | protein coding                     | -1.54 | 5.72E-03 | 3.07E-02 |
| ENSG00000287485 | AL451166.1  | 6  | 47374561  | 47397398  | 22837  | lncRNA                             | -1.54 | 1.10E-02 | 4.78E-02 |
| ENSG00000270112 | AC090241.2  | 18 | 46756487  | 46802449  | 45962  | lncRNA                             | -1.54 | 2.34E-06 | 1.55E-04 |
| ENSG00000225564 | LINC01492   | 9  | 103140523 | 103325034 | 184511 | lncRNA                             | -1.54 | 1.11E-02 | 4.81E-02 |
| ENSG00000159239 | AC005041.1  | 2  | 74393836  | 74421662  | 27826  | protein coding                     | -1.54 | 6.75E-03 | 3.43E-02 |
| ENSG00000186832 | KRT16       | 17 | 41609778  | 41615899  | 6121   | protein coding                     | -1.54 | 6.32E-04 | 6.81E-03 |
| ENSG00000233395 | LINC00841   | 10 | 43909244  | 43981102  | 71858  | lncRNA                             | -1.54 | 5.41E-04 | 6.13E-03 |
| ENSG00000186335 | SLC36A2     | 5  | 151314972 | 151347590 | 32618  | protein coding                     | -1.54 | 2.36E-03 | 1.68E-02 |
| ENSG00000130307 | USHBP1      | 19 | 17249171  | 17282786  | 33615  | protein coding                     | -1.54 | 1.83E-03 | 1.41E-02 |
| ENSG00000267014 | LINC01532   | 19 | 29002319  | 29015160  | 12841  | lncRNA                             | -1.54 | 2.66E-03 | 1.82E-02 |
| ENSG00000265798 | AC138207.6  | 17 | 31038575  | 31059121  | 20546  | transcribed unprocessed pseudogene | -1.54 | 2.00E-03 | 1.50E-02 |
| ENSG00000221986 | MYBPHL      | 1  | 109292365 | 109307011 | 14646  | protein coding                     | -1.54 | 7.72E-03 | 3.74E-02 |
| ENSG00000111241 | FGF6        | 12 | 4428155   | 4445614   | 17459  | protein coding                     | -1.54 | 9.84E-03 | 4.42E-02 |
| ENSG00000175697 | GPR156      | 3  | 120164645 | 120285222 | 120577 | protein coding                     | -1.54 | 8.36E-04 | 8.26E-03 |
| ENSG00000109794 | FAM149A     | 4  | 186104419 | 186172667 | 68248  | protein coding                     | -1.54 | 5.84E-05 | 1.36E-03 |
| ENSG00000265813 | RN7SL300P   | 3  | 153199700 | 153200017 | 317    | misc RNA                           | -1.54 | 3.93E-03 | 2.36E-02 |
| ENSG00000166159 | LRTM2       | 12 | 1820267   | 1836753   | 16486  | protein coding                     | -1.54 | 2.13E-04 | 3.30E-03 |
| ENSG00000249328 | AC036214.1  | 8  | 79769372  | 79871759  | 102387 | lncRNA                             | -1.54 | 4.12E-03 | 2.45E-02 |
| ENSG00000237614 | AC073257.2  | 2  | 120542905 | 120545249 | 2344   | lncRNA                             | -1.54 | 1.09E-02 | 4.75E-02 |
| ENSG00000159708 | LRRC36      | 16 | 67326798  | 67385204  | 58406  | protein coding                     | -1.54 | 1.56E-05 | 5.60E-04 |
| ENSG00000170745 | KCNK3       | 2  | 17877847  | 18361616  | 483769 | protein coding                     | -1.54 | 7.03E-03 | 3.52E-02 |
| ENSG00000261231 | LINC02133   | 16 | 47724568  | 47908431  | 183863 | lncRNA                             | -1.54 | 9.25E-03 | 4.23E-02 |

|                 |            |    |           |           |         |                                      |       |          |          |
|-----------------|------------|----|-----------|-----------|---------|--------------------------------------|-------|----------|----------|
| ENSG00000284512 | AC092718.8 | 16 | 81022316  | 81096284  | 73968   | protein coding                       | -1.54 | 1.02E-02 | 4.55E-02 |
| ENSG00000230561 | CCDC192    | 5  | 127703389 | 127941634 | 238245  | protein coding                       | -1.54 | 4.57E-03 | 2.64E-02 |
| ENSG00000211452 | DIO1       | 1  | 53891239  | 53911086  | 19847   | protein coding                       | -1.54 | 3.61E-03 | 2.24E-02 |
| ENSG00000144810 | COL8A1     | 3  | 99638475  | 99799226  | 160751  | protein coding                       | -1.54 | 1.92E-03 | 1.45E-02 |
| ENSG00000236155 | ZPLD2P     | 1  | 26209741  | 26229840  | 20099   | transcribed unprocessed pseudogene   | -1.55 | 5.00E-04 | 5.82E-03 |
| ENSG00000283128 | AC009403.2 | 7  | 155474256 | 155644406 | 170150  | lncRNA                               | -1.55 | 5.54E-04 | 6.24E-03 |
| ENSG00000186889 | TMEM17     | 2  | 62500218  | 62511894  | 11676   | protein coding                       | -1.55 | 6.25E-04 | 6.75E-03 |
| ENSG00000134812 | CBL1F      | 11 | 59829273  | 59845499  | 16226   | protein coding                       | -1.55 | 5.41E-03 | 2.95E-02 |
| ENSG00000226237 | GAS1RR     | 9  | 86948666  | 87002033  | 53367   | lncRNA                               | -1.55 | 4.62E-04 | 5.52E-03 |
| ENSG00000186377 | CYP4X1     | 1  | 47023669  | 47050751  | 27082   | protein coding                       | -1.55 | 2.54E-03 | 1.76E-02 |
| ENSG00000007384 | RHBDF1     | 16 | 58059     | 76355     | 18296   | protein coding                       | -1.55 | 4.35E-05 | 1.11E-03 |
| ENSG00000166922 | SCG5       | 15 | 32641676  | 32697098  | 55422   | protein coding                       | -1.55 | 2.13E-04 | 3.30E-03 |
| ENSG00000232613 | LINC02576  | 2  | 65030727  | 65053017  | 22290   | lncRNA-antisense                     | -1.55 | 2.84E-03 | 1.90E-02 |
| ENSG00000235271 | Z97353.2   | 22 | 26903292  | 26920935  | 17643   | lncRNA                               | -1.55 | 2.46E-03 | 1.72E-02 |
| ENSG00000281741 | AC241377.3 | 1  | 120913151 | 120914238 | 1087    | TEC                                  | -1.55 | 3.42E-04 | 4.52E-03 |
| ENSG00000223390 | AL445685.1 | 1  | 52033391  | 52044279  | 10888   | lncRNA-antisense                     | -1.55 | 2.59E-03 | 1.79E-02 |
| ENSG00000129744 | ART1       | 11 | 3645128   | 3664416   | 19288   | protein coding                       | -1.55 | 5.87E-04 | 6.49E-03 |
| ENSG00000046604 | DSG2       | 18 | 31498177  | 31549008  | 50831   | protein coding                       | -1.55 | 7.20E-04 | 7.48E-03 |
| ENSG00000253394 | LINC00534  | 8  | 90221341  | 90687863  | 466522  | lncRNA                               | -1.55 | 8.43E-06 | 3.69E-04 |
| ENSG00000196090 | PTPRT      | 20 | 42072752  | 43189970  | 1117218 | protein coding                       | -1.55 | 1.64E-05 | 5.73E-04 |
| ENSG00000267251 | AC139100.1 | 18 | 80183680  | 80202992  | 19312   | lncRNA-antisense                     | -1.55 | 6.75E-03 | 3.43E-02 |
| ENSG00000183715 | OPCML      | 11 | 132414977 | 133532519 | 1117542 | protein coding                       | -1.55 | 4.91E-04 | 5.74E-03 |
| ENSG00000229536 | LINC02572  | 2  | 129825126 | 129877664 | 52538   | lncRNA                               | -1.55 | 1.55E-04 | 2.65E-03 |
| ENSG00000278570 | NR2E3      | 15 | 71792638  | 71818259  | 25621   | protein coding                       | -1.55 | 4.12E-04 | 5.12E-03 |
| ENSG00000287600 | AC122719.3 | 5  | 904319    | 912587    | 8268    | lncRNA                               | -1.55 | 2.30E-03 | 1.64E-02 |
| ENSG00000232520 | CGSIR      | 2  | 230886474 | 230904693 | 18219   | lncRNA-antisense                     | -1.55 | 9.47E-04 | 8.97E-03 |
| ENSG00000235478 | LINC01664  | 22 | 17121560  | 17132104  | 10544   | lncRNA                               | -1.55 | 1.05E-03 | 9.62E-03 |
| ENSG00000144852 | NR112      | 3  | 119780484 | 119818485 | 38001   | protein coding                       | -1.55 | 1.10E-04 | 2.10E-03 |
| ENSG00000183230 | CTNNA3     | 10 | 65912523  | 67696195  | 1783672 | protein coding                       | -1.55 | 4.95E-04 | 5.77E-03 |
| ENSG00000166173 | LARP6      | 15 | 70829130  | 70854157  | 25027   | protein coding                       | -1.55 | 7.57E-05 | 1.64E-03 |
| ENSG00000144290 | SLC4A10    | 2  | 161424332 | 161985282 | 560950  | protein coding                       | -1.55 | 2.67E-06 | 1.69E-04 |
| ENSG00000140873 | ADAMTSL3   | 16 | 77247813  | 77443504  | 187221  | protein coding                       | -1.55 | 5.75E-05 | 1.35E-03 |
| ENSG00000260737 | LINC01227  | 16 | 80553256  | 80572808  | 19552   | lncRNA                               | -1.55 | 5.69E-03 | 3.06E-02 |
| ENSG00000185294 | SPPL2C     | 17 | 45844881  | 45847067  | 2186    | protein coding                       | -1.55 | 5.01E-03 | 2.80E-02 |
| ENSG00000286032 | FP236383.6 | 21 | 8465254   | 8465886   | 332     | TEC                                  | -1.55 | 1.11E-02 | 4.80E-02 |
| ENSG00000259347 | AC087482.1 | 15 | 66984103  | 67065268  | 81165   | lncRNA-antisense                     | -1.55 | 8.45E-04 | 8.32E-03 |
| ENSG00000124143 | ARHGAP40   | 20 | 38601934  | 38651035  | 49101   | protein coding                       | -1.55 | 1.75E-03 | 1.36E-02 |
| ENSG00000280639 | LINC02204  | 15 | 70570958  | 70586606  | 15648   | lncRNA                               | -1.55 | 6.56E-03 | 3.37E-02 |
| ENSG00000284601 | AL590440.2 | 1  | 54974900  | 54980464  | 5564    | lncRNA-bidirectional promoter lncRNA | -1.55 | 5.98E-03 | 3.16E-02 |
| ENSG00000122133 | PAEP       | 9  | 135561756 | 135566955 | 5199    | protein coding                       | -1.55 | 8.57E-04 | 8.39E-03 |
| ENSG00000147082 | CCNB3      | X  | 50202713  | 50351914  | 149201  | protein coding                       | -1.55 | 5.43E-05 | 1.30E-03 |
| ENSG00000056998 | GYG2       | X  | 2828822   | 2828220   | 53998   | protein coding                       | -1.55 | 2.67E-03 | 1.82E-02 |
| ENSG00000260034 | LCMT1-AS2  | 16 | 25140577  | 25149032  | 8455    | lncRNA-antisense                     | -1.55 | 8.72E-05 | 1.79E-03 |
| ENSG00000226145 | KRT16P6    | 17 | 16817983  | 16822579  | 4596    | transcribed unprocessed pseudogene   | -1.55 | 4.35E-03 | 2.55E-02 |
| ENSG00000223949 | ROR1-AS1   | 1  | 64094379  | 64117342  | 76963   | lncRNA-antisense                     | -1.55 | 6.25E-04 | 6.75E-03 |
| ENSG00000165633 | VSTM4      | 10 | 49014236  | 49115522  | 101286  | protein coding                       | -1.55 | 4.44E-04 | 5.38E-03 |
| ENSG00000286364 | AL512308.1 | 6  | 453391    | 477829    | 24438   | lncRNA                               | -1.55 | 1.05E-02 | 4.64E-02 |
| ENSG00000086159 | AQP6       | 12 | 49967194  | 49977139  | 9945    | protein coding                       | -1.55 | 8.23E-04 | 8.18E-03 |
| ENSG00000254211 | LINC01485  | 5  | 173778527 | 173809039 | 30512   | lncRNA                               | -1.55 | 4.49E-04 | 5.42E-03 |
| ENSG00000242866 | STRC       | 15 | 43599563  | 43618800  | 19237   | protein coding                       | -1.55 | 4.89E-03 | 2.76E-02 |
| ENSG00000267714 | AC008738.4 | 19 | 33217817  | 33222355  | 4538    | lncRNA-antisense                     | -1.55 | 3.02E-03 | 1.98E-02 |
| ENSG00000103832 | GOLGA8UP   | 15 | 30791573  | 30801859  | 10286   | unprocessed pseudogene               | -1.55 | 1.08E-03 | 9.76E-03 |
| ENSG00000261842 | AC073314.1 | 7  | 149422675 | 149424890 | 2215    | lncRNA                               | -1.55 | 7.17E-03 | 3.57E-02 |
| ENSG00000145626 | UGT3A1     | 5  | 35951006  | 36001028  | 50022   | protein coding                       | -1.55 | 7.64E-04 | 7.78E-03 |
| ENSG00000163354 | DCST2      | 1  | 155018520 | 155033781 | 15261   | protein coding                       | -1.55 | 2.69E-05 | 7.93E-04 |
| ENSG00000171496 | OR1L8      | 9  | 122567117 | 122583384 | 16287   | protein coding                       | -1.56 | 3.54E-03 | 2.21E-02 |
| ENSG00000204518 | AADACL4    | 1  | 12644547  | 12667086  | 22539   | protein coding                       | -1.56 | 6.69E-03 | 3.41E-02 |
| ENSG00000111218 | PRMT8      | 12 | 3381349   | 3393973   | 212624  | protein coding                       | -1.56 | 2.71E-05 | 7.97E-04 |
| ENSG00000133958 | UNC79      | 14 | 93333219  | 93707876  | 374657  | protein coding                       | -1.56 | 1.10E-06 | 9.16E-05 |
| ENSG00000175318 | GRAMD2A    | 15 | 72159806  | 72197787  | 37981   | protein coding                       | -1.56 | 1.71E-05 | 5.91E-04 |
| ENSG00000186442 | KRT3       | 12 | 52789685  | 52796117  | 6432    | protein coding                       | -1.56 | 1.03E-03 | 9.50E-03 |
| ENSG00000169064 | ZBBX       | 3  | 167239843 | 167407874 | 168031  | protein coding                       | -1.56 | 5.09E-03 | 2.83E-02 |
| ENSG00000110675 | ELMOD1     | 11 | 107591091 | 107666779 | 75688   | protein coding                       | -1.56 | 1.69E-03 | 1.33E-02 |
| ENSG00000166866 | MYO1A      | 12 | 57028517  | 57051198  | 22681   | protein coding                       | -1.56 | 1.11E-05 | 4.47E-04 |
| ENSG00000182035 | ADIG       | 20 | 38581195  | 38588463  | 7268    | protein coding                       | -1.56 | 2.98E-03 | 1.97E-02 |
| ENSG00000127241 | MASP1      | 3  | 187217282 | 187291980 | 74698   | protein coding                       | -1.56 | 3.44E-05 | 9.43E-04 |
| ENSG00000135824 | RGS8       | 1  | 182641816 | 182684576 | 42760   | protein coding                       | -1.56 | 1.25E-04 | 2.29E-03 |
| ENSG00000154096 | THY1       | 11 | 119415476 | 119424985 | 9509    | protein coding                       | -1.56 | 1.73E-04 | 2.87E-03 |
| ENSG00000187715 | KBTBD12    | 3  | 127915232 | 127987671 | 72439   | protein coding                       | -1.56 | 6.37E-04 | 6.85E-03 |
| ENSG00000286572 | AL592146.2 | 1  | 204064533 | 204073965 | 9432    | lncRNA                               | -1.56 | 1.35E-03 | 1.14E-02 |
| ENSG00000234899 | SOX9-AS1   | 17 | 72067099  | 72237203  | 170104  | lncRNA                               | -1.56 | 8.64E-06 | 3.76E-04 |
| ENSG00000141052 | MYOCD      | 17 | 12665890  | 12768499  | 103059  | protein coding                       | -1.56 | 5.52E-04 | 6.23E-03 |
| ENSG00000181264 | TLCD5      | 11 | 120325296 | 120333686 | 8390    | protein coding                       | -1.56 | 3.00E-03 | 1.98E-02 |
| ENSG00000167964 | RAB26      | 16 | 2140803   | 2154165   | 13362   | protein coding                       | -1.56 | 1.80E-03 | 1.39E-02 |
| ENSG00000287088 | AP001066.1 | 21 | 44530172  | 44533145  | 2973    | lncRNA                               | -1.56 | 3.67E-03 | 2.26E-02 |
| ENSG00000244752 | CRYBB2     | 22 | 25212564  | 25231870  | 19306   | protein coding                       | -1.56 | 4.05E-03 | 2.41E-02 |
| ENSG00000287041 | AC079354.2 | 2  | 202137570 | 202149627 | 12057   | lncRNA                               | -1.56 | 5.71E-03 | 3.06E-02 |
| ENSG00000137821 | LRRC49     | 15 | 70853239  | 71053658  | 200419  | protein coding                       | -1.56 | 3.74E-05 | 1.00E-03 |
| ENSG00000166984 | TCP10L2    | 6  | 167146414 | 167196913 | 50499   | protein coding                       | -1.56 | 5.18E-04 | 5.96E-03 |
| ENSG00000288107 | AL731769.2 | 10 | 133565797 | 133629507 | 63710   | lncRNA                               | -1.56 | 9.96E-06 | 4.13E-04 |
| ENSG00000148053 | NTRK2      | 9  | 84668551  | 85027054  | 358503  | protein coding                       | -1.56 | 1.79E-06 | 1.32E-04 |
| ENSG00000242950 | ERVW-1     | 7  | 92468380  | 92477986  | 9606    | protein coding                       | -1.56 | 3.49E-04 | 4.56E-03 |
| ENSG00000265043 | AC068418.2 | 17 | 21456513  | 21460215  | 3702    | lncRNA                               | -1.56 | 6.61E-03 | 3.38E-02 |
| ENSG00000063438 | AHRH       | 5  | 3217559   | 348291    | 116532  | protein coding                       | -1.56 | 6.34E-05 | 1.44E-03 |
| ENSG00000156218 | ADAMTSL3   | 15 | 83654088  | 84039842  | 385754  | protein coding                       | -1.56 | 1.87E-06 | 1.35E-04 |
| ENSG00000187537 | POTEG      | 14 | 19402486  | 19434341  | 31855   | protein coding                       | -1.56 | 3.52E-03 | 2.20E-02 |
| ENSG00000230863 | AL137803.1 | 1  | 75641178  | 75724049  | 82871   | transcribed processed pseudogene     | -1.56 | 4.51E-03 | 2.61E-02 |
| ENSG00000143001 | TMEM61     | 1  | 54980628  | 54992288  | 11660   | protein coding                       | -1.56 | 6.98E-03 | 3.50E-02 |
| ENSG00000152661 | GJA1       | 6  | 121435595 | 121449727 | 14132   | protein coding                       | -1.56 | 8.14E-03 | 3.88E-02 |
| ENSG00000240086 | AC092969.1 | 3  | 135138469 | 135439888 | 301419  | lncRNA-antisense                     | -1.56 | 1.88E-05 | 6.30E-04 |



|                 |              |    |           |           |        |                                      |       |          |          |
|-----------------|--------------|----|-----------|-----------|--------|--------------------------------------|-------|----------|----------|
| ENSG0000036828  | CASR         | 3  | 122183668 | 122291629 | 107961 | protein coding                       | -1.56 | 1.50E-05 | 5.47E-04 |
| ENSG00000228212 | OFD1P17      | 5  | 37209364  | 37212381  | 3017   | processed pseudogene                 | -1.56 | 2.60E-03 | 1.79E-02 |
| ENSG00000230417 | LINC00595    | 10 | 78179185  | 78551355  | 372170 | lncRNA                               | -1.56 | 6.18E-07 | 6.31E-05 |
| ENSG00000231095 | GYG1P3       | 1  | 55222379  | 55223372  | 993    | processed pseudogene                 | -1.56 | 1.10E-02 | 4.78E-02 |
| ENSG00000248599 | FLJ42969     | 8  | 101034868 | 101076407 | 41539  | lncRNA                               | -1.56 | 4.51E-03 | 2.61E-02 |
| ENSG00000203690 | TCP10L3      | 6  | 167357033 | 167384510 | 27477  | transcribed unprocessed pseudogene   | -1.56 | 5.72E-04 | 6.38E-03 |
| ENSG0000074317  | SNCB         | 5  | 176620082 | 176630556 | 10474  | protein coding                       | -1.56 | 7.32E-03 | 3.62E-02 |
| ENSG00000142515 | KLK3         | 19 | 50854915  | 50860764  | 5849   | protein coding                       | -1.56 | 6.05E-04 | 6.61E-03 |
| ENSG00000137204 | SLC22A7      | 6  | 43295694  | 43305538  | 9844   | protein coding                       | -1.56 | 2.64E-04 | 3.83E-03 |
| ENSG00000205634 | LINC00898    | 22 | 47612231  | 47631569  | 19338  | lncRNA                               | -1.56 | 2.68E-04 | 3.86E-03 |
| ENSG00000287306 | AC016821.1   | 10 | 69510166  | 69544257  | 34091  | lncRNA                               | -1.56 | 8.85E-04 | 8.57E-03 |
| ENSG00000260213 | AC092718.2   | 16 | 81016792  | 81035759  | 18967  | lncRNA-antisense                     | -1.56 | 7.11E-03 | 3.55E-02 |
| ENSG00000283959 | AP002851.1   | 8  | 102656464 | 102687118 | 30654  | lncRNA-bidirectional promoter lncRNA | -1.56 | 7.78E-04 | 7.87E-03 |
| ENSG00000285707 | AL008720.1   | 22 | 48254903  | 48259116  | 4213   | lncRNA                               | -1.56 | 2.35E-03 | 1.67E-02 |
| ENSG00000169717 | ACTRT2       | 1  | 3021467   | 3022903   | 1436   | protein coding                       | -1.56 | 3.06E-03 | 2.00E-02 |
| ENSG00000154493 | C10orf90     | 10 | 126424997 | 126798708 | 373711 | protein coding                       | -1.56 | 2.31E-05 | 7.21E-04 |
| ENSG00000087494 | PTH1H        | 12 | 27958084  | 27972733  | 14649  | protein coding                       | -1.56 | 2.27E-03 | 1.63E-02 |
| ENSG00000236109 | AC013402.3   | 2  | 104583138 | 104621767 | 38629  | lncRNA                               | -1.56 | 8.36E-03 | 3.95E-02 |
| ENSG00000151388 | ADAMTS12     | 5  | 33523535  | 33892019  | 368484 | protein coding                       | -1.56 | 3.44E-04 | 4.53E-03 |
| ENSG00000203930 | LINC00632    | X  | 140709562 | 140793215 | 83653  | lncRNA-antisense                     | -1.56 | 3.35E-07 | 4.11E-05 |
| ENSG00000130612 | CYP2G1P      | 19 | 40890826  | 40912357  | 21531  | transcribed unprocessed pseudogene   | -1.56 | 2.82E-03 | 1.90E-02 |
| ENSG00000257817 | AC026765.3   | 12 | 114682292 | 114767989 | 85697  | lncRNA                               | -1.56 | 6.42E-04 | 6.89E-03 |
| ENSG00000173976 | RAX2         | 19 | 3769089   | 3772228   | 3139   | protein coding                       | -1.56 | 7.94E-03 | 3.82E-02 |
| ENSG00000196632 | WNK3         | X  | 54192823  | 54358642  | 165819 | protein coding                       | -1.56 | 5.38E-06 | 2.73E-04 |
| ENSG00000234170 | LINC02645    | 10 | 2368561   | 2502200   | 133639 | lncRNA                               | -1.56 | 5.86E-04 | 6.48E-03 |
| ENSG00000259234 | ANKRD34C-AS1 | 15 | 79141939  | 79283949  | 142010 | lncRNA                               | -1.56 | 3.54E-04 | 4.61E-03 |
| ENSG00000109846 | CRYAB        | 11 | 111908564 | 111923722 | 15158  | protein coding                       | -1.57 | 1.42E-03 | 1.18E-02 |
| ENSG00000179676 | LINC00305    | 18 | 64079989  | 64149088  | 69099  | lncRNA                               | -1.57 | 7.18E-03 | 3.57E-02 |
| ENSG00000236975 | LINC02811.4  | 1  | 229087114 | 229205428 | 118314 | lncRNA                               | -1.57 | 1.16E-03 | 1.02E-02 |
| ENSG00000186603 | HPDL         | 1  | 45326895  | 45328679  | 1784   | protein coding                       | -1.57 | 1.91E-04 | 3.07E-03 |
| ENSG00000256955 | AC131009.2   | 12 | 131857420 | 131864538 | 7118   | lncRNA                               | -1.57 | 5.47E-03 | 2.98E-02 |
| ENSG00000227036 | LINC00511    | 17 | 72290091  | 72640472  | 350381 | lncRNA                               | -1.57 | 8.41E-08 | 1.52E-05 |
| ENSG00000153002 | CPB1         | 3  | 148791102 | 148860187 | 69085  | protein coding                       | -1.57 | 8.47E-03 | 3.98E-02 |
| ENSG00000143006 | DMRTB1       | 1  | 53459399  | 53467488  | 8089   | protein coding                       | -1.57 | 4.80E-04 | 5.66E-03 |
| ENSG00000067177 | PKHA1        | X  | 72578814  | 72714319  | 135505 | protein coding                       | -1.57 | 1.56E-04 | 2.66E-03 |
| ENSG00000255931 | AP003108.1   | 11 | 61496440  | 61506640  | 10209  | lncRNA                               | -1.57 | 5.76E-03 | 3.08E-02 |
| ENSG00000223403 | MEG9         | 14 | 101068283 | 101072937 | 4654   | lncRNA                               | -1.57 | 5.64E-04 | 6.31E-03 |
| ENSG00000259354 | AC025580.2   | 15 | 45448427  | 45513767  | 65340  | lncRNA-antisense                     | -1.57 | 7.51E-03 | 3.68E-02 |
| ENSG00000249647 | C5orf66-AS2  | 5  | 135236234 | 135248179 | 11945  | lncRNA                               | -1.57 | 7.30E-03 | 3.61E-02 |
| ENSG00000214324 | C3orf56      | 3  | 127193131 | 127198185 | 5054   | protein coding                       | -1.57 | 2.49E-03 | 1.74E-02 |
| ENSG00000268926 | AL354861.3   | 9  | 95772323  | 95776282  | 3959   | lncRNA                               | -1.57 | 2.25E-03 | 1.63E-02 |
| ENSG00000215018 | COL28A1      | 7  | 7356203   | 7355873   | 179670 | protein coding                       | -1.57 | 2.95E-04 | 4.11E-03 |
| ENSG00000280334 | AC009084.2   | 16 | 67006672  | 67009481  | 2809   | TEC                                  | -1.57 | 5.29E-03 | 2.91E-02 |
| ENSG00000285758 | AC036214.4   | 8  | 79891553  | 79930892  | 39339  | lncRNA-antisense                     | -1.57 | 1.03E-02 | 4.56E-02 |
| ENSG00000132932 | ATP8A2       | 13 | 25371974  | 26025851  | 653877 | protein coding                       | -1.57 | 1.85E-09 | 1.03E-06 |
| ENSG00000142224 | IL19         | 1  | 206770764 | 206842979 | 72215  | protein coding                       | -1.57 | 6.73E-04 | 7.11E-03 |
| ENSG00000120332 | TNN          | 1  | 175067833 | 175148075 | 80242  | protein coding                       | -1.57 | 1.25E-03 | 1.08E-02 |
| ENSG00000189221 | MAOA         | X  | 43654907  | 43746824  | 91917  | protein coding                       | -1.57 | 1.54E-06 | 1.17E-04 |
| ENSG00000142910 | TINAGL1      | 1  | 31576485  | 31587686  | 11201  | protein coding                       | -1.57 | 4.05E-04 | 5.07E-03 |
| ENSG00000242686 | PDE6B-AS1    | 4  | 652850    | 656213    | 3363   | lncRNA-antisense                     | -1.57 | 2.99E-04 | 4.14E-03 |
| ENSG00000177993 | ZNRF3-AS1    | 22 | 29024999  | 29031476  | 6477   | lncRNA-antisense                     | -1.57 | 6.09E-03 | 3.20E-02 |
| ENSG00000175344 | CHRNA7       | 15 | 31923438  | 32173018  | 249580 | protein coding                       | -1.57 | 2.00E-05 | 6.54E-04 |
| ENSG00000224582 | LINC01015    | 6  | 29528721  | 29533665  | 4944   | lncRNA                               | -1.57 | 8.59E-05 | 1.78E-03 |
| ENSG00000147206 | NXF3         | X  | 103075810 | 103093143 | 17333  | protein coding                       | -1.57 | 9.92E-04 | 9.26E-03 |
| ENSG00000226627 | SHANK2-AS1   | 11 | 70626441  | 70635658  | 9217   | lncRNA-antisense                     | -1.57 | 6.39E-04 | 6.86E-03 |
| ENSG00000279273 | AC120024.4   | 17 | 80463451  | 80465593  | 2142   | TEC                                  | -1.57 | 9.13E-03 | 4.19E-02 |
| ENSG00000286785 | LINC01622    | 6  | 958323    | 110400    | 143077 | lncRNA                               | -1.57 | 9.18E-04 | 8.78E-03 |
| ENSG00000122787 | AKR1D1       | 7  | 138002324 | 138118305 | 115981 | protein coding                       | -1.57 | 1.17E-03 | 1.03E-02 |
| ENSG00000243649 | CFB          | 6  | 31945650  | 31952084  | 6434   | protein coding                       | -1.57 | 4.20E-03 | 2.48E-02 |
| ENSG00000286869 | AC022276.1   | 12 | 13238582  | 13278376  | 39794  | lncRNA                               | -1.57 | 1.12E-02 | 4.84E-02 |
| ENSG00000165973 | NELL1        | 11 | 20669551  | 21575686  | 906135 | protein coding                       | -1.57 | 1.38E-03 | 1.15E-02 |
| ENSG00000234949 | AC104667.2   | 2  | 237591020 | 237595981 | 4961   | lncRNA-antisense                     | -1.57 | 1.13E-02 | 4.86E-02 |
| ENSG00000259345 | AC013652.1   | 15 | 38865322  | 39427195  | 561873 | lncRNA                               | -1.57 | 1.42E-05 | 5.31E-04 |
| ENSG00000203943 | SAMD13       | 1  | 84298366  | 84389957  | 91591  | protein coding                       | -1.57 | 9.97E-03 | 4.46E-02 |
| ENSG00000261839 | AL358933.1   | 6  | 28136849  | 28139678  | 2829   | lncRNA                               | -1.57 | 1.11E-03 | 9.97E-03 |
| ENSG00000235881 | AC114776.1   | 2  | 110709575 | 110716595 | 7020   | lncRNA                               | -1.57 | 1.17E-02 | 4.99E-02 |
| ENSG00000129028 | THAP10       | 15 | 70881342  | 70892433  | 11091  | protein coding                       | -1.57 | 5.99E-03 | 3.17E-02 |
| ENSG00000176641 | RNF152       | 18 | 61808067  | 61894247  | 86180  | protein coding                       | -1.57 | 3.42E-07 | 4.16E-05 |
| ENSG00000161940 | BCL6B        | 17 | 7023050   | 7030290   | 7240   | protein coding                       | -1.58 | 4.87E-04 | 5.72E-03 |
| ENSG00000249906 | AC006487.1   | 17 | 49505657  | 49574064  | 68407  | lncRNA-antisense                     | -1.58 | 9.44E-03 | 4.29E-02 |
| ENSG00000102287 | GABRE        | X  | 151953124 | 151974680 | 21556  | protein coding                       | -1.58 | 4.52E-06 | 2.39E-04 |
| ENSG00000288541 | AL353732.2   | 9  | 21410969  | 21422960  | 11991  | lncRNA                               | -1.58 | 3.78E-04 | 4.83E-03 |
| ENSG00000241472 | PTPRG-AS1    | 3  | 62221249  | 62369406  | 148157 | lncRNA                               | -1.58 | 3.35E-04 | 4.45E-03 |
| ENSG00000079112 | CDH17        | 8  | 94127162  | 94217303  | 90141  | protein coding                       | -1.58 | 1.37E-04 | 2.44E-03 |
| ENSG00000228021 | AL158835.1   | 10 | 125683229 | 125709677 | 26448  | lncRNA                               | -1.58 | 5.55E-04 | 6.24E-03 |
| ENSG00000137699 | TRIM29       | 11 | 120111286 | 120185529 | 74243  | protein coding                       | -1.58 | 2.67E-04 | 3.85E-03 |
| ENSG00000271086 | NAMA         | 9  | 99355337  | 99377240  | 21903  | lncRNA                               | -1.58 | 1.34E-04 | 2.39E-03 |
| ENSG00000168306 | ACOX2        | 3  | 58505136  | 58537283  | 32147  | protein coding                       | -1.58 | 8.67E-05 | 1.79E-03 |
| ENSG00000235241 | BX284668.4   | 1  | 16889095  | 16889602  | 507    | processed pseudogene                 | -1.58 | 1.07E-03 | 9.73E-03 |
| ENSG00000188859 | FAM78B       | 1  | 166057426 | 166167001 | 109575 | protein coding                       | -1.58 | 7.05E-05 | 1.56E-03 |
| ENSG00000229586 | TNPO1P3      | 17 | 20481330  | 20483991  | 2661   | processed pseudogene                 | -1.58 | 9.39E-04 | 8.92E-03 |
| ENSG00000106852 | LHX6         | 9  | 122202577 | 122229626 | 27049  | protein coding                       | -1.58 | 2.74E-04 | 3.91E-03 |
| ENSG00000279628 | AC131280.1   | 15 | 20658900  | 20664970  | 6070   | TEC                                  | -1.58 | 1.48E-04 | 2.56E-03 |
| ENSG00000125046 | SSUH2        | 3  | 8619400   | 8745040   | 125640 | protein coding                       | -1.58 | 2.44E-04 | 3.63E-04 |
| ENSG00000006047 | YBX2         | 17 | 7288263   | 7294639   | 6376   | protein coding                       | -1.58 | 1.09E-03 | 9.83E-03 |
| ENSG00000197616 | MYH6         | 14 | 23381982  | 23408273  | 26291  | protein coding                       | -1.58 | 6.20E-05 | 1.42E-03 |
| ENSG00000233783 | AP001442.1   | 21 | 25928754  | 25952614  | 23860  | lncRNA                               | -1.58 | 1.51E-03 | 1.23E-02 |
| ENSG00000270792 | AL050403.2   | 20 | 10672695  | 10994924  | 322229 | lncRNA-antisense                     | -1.58 | 2.38E-03 | 1.69E-02 |
| ENSG00000101871 | MID1         | X  | 10445310  | 10833654  | 388344 | protein coding                       | -1.58 | 2.08E-05 | 6.71E-04 |
| ENSG00000130707 | ASS1         | 9  | 130444961 | 130501274 | 56313  | protein coding                       | -1.58 | 1.39E-04 | 2.45E-03 |

|                 |            |    |           |           |        |                                      |       |          |          |
|-----------------|------------|----|-----------|-----------|--------|--------------------------------------|-------|----------|----------|
| ENSG00000287677 | AC025839.1 | 8  | 141581658 | 141662209 | 80551  | lncRNA                               | -1.58 | 3.45E-05 | 9.45E-04 |
| ENSG00000237515 | SHISA9     | 16 | 12901598  | 13204016  | 338818 | protein coding                       | -1.58 | 5.31E-04 | 6.06E-03 |
| ENSG00000255537 | AP000708.1 | 11 | 125495214 | 125499528 | 4314   | lncRNA-bidirectional promoter lncRNA | -1.58 | 2.28E-03 | 1.64E-02 |
| ENSG00000147614 | ATP6V0D2   | 8  | 85987323  | 86154225  | 166902 | protein coding                       | -1.58 | 9.01E-03 | 4.15E-02 |
| ENSG00000185518 | SV2B       | 15 | 91099950  | 91302565  | 202615 | protein coding                       | -1.58 | 3.20E-05 | 8.91E-04 |
| ENSG00000188316 | ENO4       | 10 | 116849499 | 116911788 | 62289  | protein coding                       | -1.58 | 2.00E-03 | 1.50E-02 |
| ENSG00000261177 | AC135012.1 | 16 | 86081409  | 86089526  | 8117   | lncRNA                               | -1.58 | 6.15E-05 | 1.41E-03 |
| ENSG00000125850 | OVOL2      | 20 | 17956979  | 18059188  | 102209 | protein coding                       | -1.58 | 1.27E-03 | 1.09E-02 |
| ENSG00000249635 | AC109361.1 | 4  | 106003317 | 106022478 | 19161  | lncRNA-antisense                     | -1.58 | 4.61E-03 | 2.64E-02 |
| ENSG00000170419 | VSTM2A     | 7  | 54542325  | 54571080  | 28755  | protein coding                       | -1.58 | 2.51E-04 | 3.69E-03 |
| ENSG00000187166 | H1-7       | 12 | 48328980  | 48330279  | 1299   | protein coding                       | -1.58 | 7.61E-03 | 3.71E-02 |
| ENSG00000272405 | AL365181.3 | 1  | 156641666 | 156644887 | 3221   | lncRNA-antisense                     | -1.58 | 1.27E-03 | 1.09E-02 |
| ENSG00000092054 | MYH7       | 14 | 23412740  | 23435660  | 22920  | protein coding                       | -1.58 | 9.67E-05 | 1.94E-03 |
| ENSG00000107518 | ATRNL1     | 10 | 115093365 | 115948999 | 855634 | protein coding                       | -1.58 | 6.14E-04 | 6.69E-03 |
| ENSG00000165899 | OTOGL      | 12 | 80099537  | 80380879  | 281342 | protein coding                       | -1.58 | 3.40E-05 | 9.37E-04 |
| ENSG00000253633 | AP002852.1 | 8  | 102528740 | 102539943 | 11203  | lncRNA                               | -1.58 | 5.51E-03 | 2.99E-02 |
| ENSG00000124818 | OPN5       | 6  | 47781892  | 47832780  | 50798  | protein coding                       | -1.58 | 3.95E-03 | 2.37E-02 |
| ENSG00000126218 | F10        | 13 | 113122799 | 113149529 | 26730  | protein coding                       | -1.58 | 4.18E-04 | 5.16E-03 |
| ENSG00000226631 | SLC9A3P3   | 10 | 50025135  | 50027363  | 2228   | processed pseudogene                 | -1.58 | 3.34E-03 | 2.12E-02 |
| ENSG00000119913 | TECTB      | 10 | 112283400 | 112305038 | 21638  | protein coding                       | -1.58 | 1.06E-02 | 4.66E-02 |
| ENSG00000163689 | CFAP20DC   | 3  | 58717365  | 59050084  | 332719 | protein coding                       | -1.58 | 4.17E-05 | 1.08E-03 |
| ENSG00000156150 | ALX3       | 1  | 110059870 | 110070672 | 10802  | protein coding                       | -1.58 | 1.76E-03 | 1.36E-02 |
| ENSG00000176771 | NCKAP5     | 2  | 132671788 | 133568463 | 896675 | protein coding                       | -1.58 | 1.04E-05 | 4.25E-04 |
| ENSG00000246863 | GPR176-DT  | 15 | 39921042  | 39925880  | 4838   | lncRNA                               | -1.58 | 9.13E-04 | 8.74E-03 |
| ENSG00000168367 | LINC00917  | 16 | 86331632  | 86349688  | 18056  | lncRNA                               | -1.58 | 7.37E-04 | 7.58E-03 |
| ENSG00000248994 | AC124852.1 | 5  | 1931064   | 2119926   | 188862 | lncRNA                               | -1.58 | 2.90E-04 | 4.06E-03 |
| ENSG00000262188 | LINC01978  | 17 | 79919357  | 79925999  | 6642   | lncRNA                               | -1.58 | 2.29E-03 | 1.64E-02 |
| ENSG00000084628 | NKAIN1     | 1  | 31179745  | 31239887  | 60142  | protein coding                       | -1.58 | 5.66E-04 | 6.33E-03 |
| ENSG00000273374 | AC069222.1 | 3  | 99802699  | 99806058  | 3359   | lncRNA                               | -1.58 | 2.84E-03 | 1.90E-02 |
| ENSG00000250979 | AC022905.1 | 8  | 72202751  | 72251565  | 48814  | unprocessed pseudogene               | -1.58 | 6.68E-04 | 7.07E-03 |
| ENSG00000135931 | ARMC9      | 2  | 231198546 | 231376848 | 178302 | protein coding                       | -1.58 | 9.59E-07 | 8.28E-05 |
| ENSG00000250848 | AC021087.2 | 5  | 288833    | 290321    | 1488   | processed pseudogene                 | -1.58 | 5.45E-03 | 2.97E-02 |
| ENSG00000274317 | LINC02334  | 13 | 37934298  | 38066444  | 132146 | lncRNA                               | -1.58 | 1.68E-03 | 1.32E-02 |
| ENSG00000287326 | AL589787.1 | 10 | 126425930 | 126460957 | 35027  | lncRNA                               | -1.58 | 4.22E-04 | 5.19E-03 |
| ENSG00000229672 | AL450322.2 | 10 | 3748966   | 3763712   | 14746  | lncRNA-antisense                     | -1.58 | 5.06E-03 | 2.82E-02 |
| ENSG00000264269 | AC016866.1 | 18 | 49023703  | 49048474  | 24771  | lncRNA-antisense                     | -1.58 | 2.65E-03 | 1.82E-02 |
| ENSG00000162733 | DDR2       | 1  | 162631373 | 162787405 | 156032 | protein coding                       | -1.58 | 1.44E-07 | 2.30E-05 |
| ENSG00000165695 | AK8        | 9  | 132725578 | 132878777 | 153199 | protein coding                       | -1.59 | 4.26E-06 | 2.31E-04 |
| ENSG00000267443 | AC010641.1 | 19 | 397589    | 399173    | 1584   | lncRNA                               | -1.59 | 8.69E-03 | 4.05E-02 |
| ENSG00000257403 | AC008740.1 | 16 | 21347139  | 21352138  | 4999   | unprocessed pseudogene               | -1.59 | 5.54E-03 | 3.00E-02 |
| ENSG00000283403 | AC005394.2 | 19 | 28435388  | 28727680  | 292292 | lncRNA                               | -1.59 | 9.36E-04 | 8.90E-03 |
| ENSG00000090512 | FETUB      | 3  | 186635969 | 186653141 | 17172  | protein coding                       | -1.59 | 4.00E-03 | 2.39E-02 |
| ENSG00000263745 | AP005230.1 | 18 | 1883524   | 2489426   | 605902 | lncRNA                               | -1.59 | 5.60E-04 | 6.28E-03 |
| ENSG00000172458 | IL17D      | 13 | 20702127  | 20723098  | 20971  | protein coding                       | -1.59 | 3.16E-04 | 4.29E-03 |
| ENSG00000117154 | IGSF21     | 1  | 18107798  | 18378483  | 270685 | protein coding                       | -1.59 | 2.74E-04 | 3.92E-03 |
| ENSG00000259611 | LINC01582  | 15 | 98081993  | 98103761  | 21768  | lncRNA                               | -1.59 | 9.33E-03 | 4.25E-02 |
| ENSG00000230400 | LINC01747  | 20 | 22668480  | 22685344  | 16864  | lncRNA                               | -1.59 | 3.81E-03 | 2.32E-02 |
| ENSG00000147257 | GPC3       | X  | 133535745 | 133985594 | 449849 | protein coding                       | -1.59 | 1.37E-03 | 1.15E-02 |
| ENSG00000164756 | SLC30A8    | 8  | 116950273 | 117176714 | 226441 | protein coding                       | -1.59 | 1.28E-03 | 1.10E-02 |
| ENSG00000286757 | AL137139.2 | 13 | 99841879  | 99957167  | 115288 | lncRNA                               | -1.59 | 1.90E-06 | 1.36E-04 |
| ENSG00000232732 | AC097717.1 | 2  | 199867396 | 199911159 | 43763  | lncRNA                               | -1.59 | 8.41E-05 | 1.75E-03 |
| ENSG00000230246 | SPAT A31C1 | 9  | 87914493  | 87923505  | 9012   | transcribed unprocessed pseudogene   | -1.59 | 5.82E-04 | 6.45E-03 |
| ENSG00000172478 | MAB21L4    | 2  | 240886048 | 240896889 | 10841  | protein coding                       | -1.59 | 6.36E-04 | 6.84E-03 |
| ENSG00000279796 | AL133384.2 | 10 | 114424445 | 114427398 | 2953   | TEC                                  | -1.59 | 5.47E-03 | 2.97E-02 |
| ENSG00000215246 | AC116351.1 | 5  | 987180    | 997308    | 10128  | lncRNA-antisense                     | -1.59 | 5.27E-03 | 2.90E-02 |
| ENSG00000137674 | MMP20      | 11 | 102576832 | 102625332 | 48500  | protein coding                       | -1.59 | 4.94E-03 | 2.78E-02 |
| ENSG00000259692 | AC104041.1 | 15 | 81633426  | 82013579  | 380153 | lncRNA                               | -1.59 | 4.42E-05 | 1.12E-03 |
| ENSG00000169006 | NTSR2      | 2  | 11658178  | 11670195  | 12017  | protein coding                       | -1.59 | 1.15E-03 | 1.02E-02 |
| ENSG00000223764 | LINC02593  | 1  | 916865    | 921016    | 4151   | lncRNA                               | -1.59 | 2.86E-04 | 4.02E-03 |
| ENSG00000148677 | ANKRD1     | 10 | 90912096  | 90921087  | 8991   | protein coding                       | -1.59 | 1.21E-04 | 2.24E-03 |
| ENSG00000237224 | AL157832.2 | 10 | 129693722 | 129702117 | 8395   | lncRNA-antisense                     | -1.59 | 1.01E-03 | 9.34E-03 |
| ENSG00000106331 | PAX4       | 7  | 127610292 | 127618142 | 7850   | protein coding                       | -1.59 | 3.26E-03 | 2.09E-02 |
| ENSG00000253741 | LNCOC1     | 8  | 142701857 | 142727016 | 25159  | lncRNA-antisense                     | -1.59 | 1.55E-04 | 2.65E-03 |
| ENSG00000187720 | THSD4      | 15 | 71096952  | 71783383  | 686431 | protein coding                       | -1.59 | 2.06E-05 | 6.67E-04 |
| ENSG00000165566 | AMER2      | 13 | 25161684  | 25172288  | 10604  | protein coding                       | -1.59 | 5.20E-04 | 5.97E-03 |
| ENSG00000230267 | HERC2P4    | 16 | 32103245  | 32188107  | 84862  | transcribed unprocessed pseudogene   | -1.59 | 1.85E-03 | 1.42E-02 |
| ENSG00000159307 | SCUBE1     | 22 | 43197280  | 43343372  | 146092 | protein coding                       | -1.59 | 6.09E-08 | 1.28E-05 |
| ENSG00000239705 | AL354710.2 | 9  | 125241663 | 125257071 | 15408  | lncRNA-antisense                     | -1.59 | 1.13E-02 | 4.86E-02 |
| ENSG00000124493 | GRM4       | 6  | 34018643  | 34155622  | 136979 | protein coding                       | -1.59 | 2.67E-06 | 1.69E-04 |
| ENSG00000165837 | ERIC6B     | 13 | 45534522  | 45615739  | 81217  | protein coding                       | -1.59 | 7.31E-04 | 7.54E-03 |
| ENSG00000224679 | MED15P4    | 2  | 131535187 | 131536988 | 1801   | unprocessed pseudogene               | -1.59 | 7.98E-03 | 3.82E-02 |
| ENSG00000205488 | CALML3-AS1 | 10 | 5510036   | 5526246   | 16210  | lncRNA-antisense                     | -1.59 | 1.54E-04 | 2.63E-03 |
| ENSG00000163347 | CLDN1      | 3  | 190305707 | 190322446 | 16739  | protein coding                       | -1.59 | 3.42E-03 | 2.16E-02 |
| ENSG00000174667 | OR7D4      | 19 | 9210276   | 9219589   | 9313   | protein coding                       | -1.59 | 3.02E-03 | 1.99E-02 |
| ENSG00000171944 | OR52A5     | 11 | 5128776   | 5138356   | 9580   | protein coding                       | -1.59 | 1.02E-02 | 4.53E-02 |
| ENSG00000100302 | RASD2      | 22 | 35540831  | 35553999  | 13168  | protein coding                       | -1.59 | 8.05E-04 | 8.06E-03 |
| ENSG00000225742 | LINC02036  | 3  | 194202392 | 194250203 | 47811  | lncRNA                               | -1.59 | 4.03E-03 | 2.41E-02 |
| ENSG00000287419 | AL121929.3 | 10 | 103573157 | 103583687 | 10530  | lncRNA                               | -1.59 | 1.44E-03 | 1.20E-02 |
| ENSG00000264635 | AP001020.2 | 18 | 738058    | 739662    | 1604   | lncRNA-sense intronic                | -1.59 | 2.75E-03 | 1.86E-02 |
| ENSG00000279927 | Z95114.4   | 22 | 36066533  | 36070110  | 3577   | lncRNA                               | -1.59 | 4.55E-03 | 2.62E-02 |
| ENSG00000256343 | AC095350.1 | 12 | 130651342 | 130669233 | 17891  | lncRNA                               | -1.59 | 2.43E-04 | 3.62E-03 |
| ENSG0000016490  | CLCA1      | 1  | 86468368  | 86500259  | 31891  | protein coding                       | -1.59 | 6.68E-03 | 3.41E-02 |
| ENSG00000164542 | KIAO0895   | 7  | 36324152  | 36390125  | 65973  | protein coding                       | -1.59 | 3.48E-05 | 9.51E-04 |
| ENSG00000171903 | CYP4F11    | 19 | 15912367  | 15934867  | 22500  | protein coding                       | -1.59 | 7.93E-04 | 7.97E-03 |
| ENSG00000227145 | IL21-AS1   | 4  | 122618983 | 122689156 | 70173  | lncRNA-antisense                     | -1.60 | 2.53E-03 | 1.76E-02 |
| ENSG00000258590 | NBEAP1     | 15 | 20657638  | 20688408  | 30770  | transcribed unprocessed pseudogene   | -1.60 | 6.71E-05 | 1.51E-03 |
| ENSG00000131095 | GFAP       | 17 | 44903159  | 44916937  | 13778  | protein coding                       | -1.60 | 3.56E-06 | 2.03E-04 |
| ENSG00000235050 | MLIP-AS1   | 6  | 53978549  | 54079726  | 101177 | lncRNA-antisense                     | -1.60 | 1.03E-02 | 4.58E-02 |
| ENSG00000267142 | AC092296.3 | 19 | 36421536  | 36422534  | 998    | processed pseudogene                 | -1.60 | 8.76E-03 | 4.08E-02 |
| ENSG00000287031 | AC093307.1 | 5  | 6378674   | 6411690   | 33016  | lncRNA                               | -1.60 | 3.41E-03 | 2.15E-02 |

|                 |             |    |           |           |        |                                    |       |          |          |
|-----------------|-------------|----|-----------|-----------|--------|------------------------------------|-------|----------|----------|
| ENSG00000286295 | AL450307.1  | 10 | 131776386 | 131795277 | 18891  | lncRNA                             | -1.60 | 2.61E-03 | 1.80E-02 |
| ENSG00000270393 | AC000095.1  | 22 | 19018043  | 19018916  | 873    | processed_pseudogene               | -1.60 | 4.98E-03 | 2.79E-02 |
| ENSG00000260372 | AQP4-AS1    | 18 | 26655737  | 27190698  | 534961 | lncRNA-antisense                   | -1.60 | 8.63E-05 | 1.78E-03 |
| ENSG00000062038 | CDH3        | 16 | 68636189  | 68722616  | 86427  | protein_coding                     | -1.60 | 7.07E-05 | 1.56E-03 |
| ENSG00000171772 | SYCE1       | 10 | 133553901 | 133569835 | 15934  | protein_coding                     | -1.60 | 2.89E-06 | 1.79E-04 |
| ENSG00000163646 | CLRN1       | 3  | 150926163 | 150972727 | 46564  | protein_coding                     | -1.60 | 8.21E-03 | 3.90E-02 |
| ENSG00000236714 | LINC01844   | 5  | 142716229 | 142761035 | 44806  | lncRNA                             | -1.60 | 6.75E-03 | 3.43E-02 |
| ENSG00000253154 | AC100801.1  | 8  | 85833377  | 85951083  | 117706 | lncRNA                             | -1.60 | 1.82E-03 | 1.40E-02 |
| ENSG00000233860 | SHROOM3-AS1 | 4  | 76708853  | 76802426  | 93573  | lncRNA-antisense                   | -1.60 | 4.33E-03 | 2.54E-02 |
| ENSG00000214650 | AC073592.1  | 12 | 124513222 | 124516798 | 3576   | lncRNA                             | -1.60 | 3.17E-03 | 2.05E-02 |
| ENSG00000117525 | F3          | 1  | 94529173  | 94541759  | 12586  | protein_coding                     | -1.60 | 6.12E-05 | 1.41E-03 |
| ENSG00000204398 | AL359649.1  | 13 | 111588201 | 111672608 | 84407  | lncRNA                             | -1.60 | 2.59E-03 | 1.79E-02 |
| ENSG00000260232 | PWRN4       | 15 | 23912411  | 24090821  | 178410 | lncRNA                             | -1.60 | 4.84E-04 | 5.70E-03 |
| ENSG00000230731 | AL589745.1  | 13 | 44234118  | 44256596  | 22478  | lncRNA                             | -1.60 | 1.75E-03 | 1.36E-02 |
| ENSG00000165953 | SERPINA12   | 14 | 94487274  | 94517844  | 30570  | protein_coding                     | -1.60 | 9.43E-03 | 4.28E-02 |
| ENSG00000073670 | ADAM11      | 17 | 44758988  | 44781846  | 22858  | protein_coding                     | -1.60 | 9.13E-07 | 8.08E-05 |
| ENSG00000224479 | AC104162.1  | 3  | 63741827  | 63827445  | 85618  | transcribed_unitary_pseudogene     | -1.60 | 8.21E-05 | 1.72E-03 |
| ENSG00000189433 | GJB4        | 1  | 34759740  | 34762327  | 2587   | protein_coding                     | -1.60 | 1.76E-03 | 1.37E-02 |
| ENSG00000203688 | LINC02487   | 6  | 167679628 | 167696290 | 16664  | lncRNA                             | -1.60 | 2.52E-03 | 1.75E-02 |
| ENSG00000184937 | WT1         | 11 | 32387775  | 32435564  | 47789  | protein_coding                     | -1.60 | 1.11E-05 | 4.47E-04 |
| ENSG00000158220 | ESYT3       | 3  | 138434586 | 138481686 | 47100  | protein_coding                     | -1.60 | 1.76E-05 | 6.00E-04 |
| ENSG00000132975 | GPR12       | 13 | 26755200  | 26760786  | 5586   | protein_coding                     | -1.60 | 5.84E-04 | 6.47E-03 |
| ENSG00000229326 | RPL17P15    | 2  | 119698623 | 119700151 | 1528   | processed_pseudogene               | -1.60 | 3.15E-03 | 2.04E-02 |
| ENSG00000268379 | AC025888.1  | 19 | 57175233  | 57177921  | 2688   | processed_pseudogene               | -1.60 | 3.71E-03 | 2.28E-02 |
| ENSG00000240311 | AC004224.1  | 16 | 3496201   | 3496768   | 567    | processed_pseudogene               | -1.60 | 1.47E-03 | 1.21E-02 |
| ENSG00000197430 | OPALIN      | 10 | 96343221  | 96359365  | 16144  | protein_coding                     | -1.60 | 5.44E-03 | 2.98E-02 |
| ENSG00000143199 | ADCY10      | 1  | 167809386 | 167914215 | 104829 | protein_coding                     | -1.60 | 3.45E-06 | 2.00E-04 |
| ENSG00000214141 | ACTN4P2     | 1  | 37776670  | 37779418  | 2748   | processed_pseudogene               | -1.60 | 5.57E-03 | 3.01E-02 |
| ENSG00000153246 | PLAZR1      | 2  | 159932006 | 160062615 | 130609 | protein_coding                     | -1.60 | 1.27E-03 | 1.09E-02 |
| ENSG00000203799 | CCDC162P    | 6  | 109165831 | 109355063 | 189232 | transcribed_unitary_pseudogene     | -1.60 | 3.24E-07 | 4.04E-05 |
| ENSG00000137948 | BRDT        | 1  | 91949371  | 92014426  | 65055  | protein_coding                     | -1.60 | 3.31E-04 | 4.43E-03 |
| ENSG00000259495 | AC016705.2  | 15 | 80344853  | 80404214  | 59361  | lncRNA                             | -1.60 | 3.79E-04 | 4.84E-03 |
| ENSG00000158816 | VWASB1      | 1  | 20290919  | 20354894  | 63975  | protein_coding                     | -1.60 | 5.11E-05 | 1.24E-03 |
| ENSG00000272168 | CASC15      | 6  | 21664185  | 22654455  | 990270 | lncRNA                             | -1.60 | 6.08E-08 | 1.28E-05 |
| ENSG00000249436 | LINC0003    | 5  | 57574027  | 57619816  | 45789  | lncRNA                             | -1.60 | 6.79E-03 | 3.44E-02 |
| ENSG00000145826 | LECT2       | 5  | 135922279 | 135954983 | 32704  | protein_coding                     | -1.61 | 9.03E-03 | 4.16E-02 |
| ENSG00000262096 | PCDHB19P    | 5  | 141239923 | 141243034 | 3111   | transcribed_unprocessed_pseudogene | -1.61 | 1.40E-03 | 1.17E-02 |
| ENSG00000143469 | SYT14       | 1  | 209900923 | 210171389 | 270466 | protein_coding                     | -1.61 | 1.25E-04 | 2.29E-03 |
| ENSG00000231103 | PRAMEF30P   | 1  | 12838125  | 12841357  | 3232   | unprocessed_pseudogene             | -1.61 | 7.69E-03 | 3.73E-02 |
| ENSG00000285627 | AC005343.4  | 12 | 1741197   | 1747099   | 5902   | lncRNA-antisense                   | -1.61 | 6.43E-03 | 3.32E-02 |
| ENSG00000241449 | AC092666.1  | 7  | 150033653 | 150078655 | 43002  | lncRNA                             | -1.61 | 8.66E-05 | 1.79E-03 |
| ENSG00000122180 | MYOG        | 1  | 203083129 | 203086012 | 2883   | protein_coding                     | -1.61 | 7.16E-03 | 3.57E-02 |
| ENSG00000260714 | AC133552.1  | 16 | 25015978  | 25021023  | 5045   | processed_pseudogene               | -1.61 | 2.07E-04 | 3.24E-03 |
| ENSG00000120068 | HOXB8       | 17 | 48611377  | 48615292  | 3915   | protein_coding                     | -1.61 | 3.99E-03 | 2.39E-02 |
| ENSG00000287539 | AC022966.2  | 17 | 78845345  | 78846686  | 1341   | lncRNA                             | -1.61 | 1.55E-03 | 1.25E-02 |
| ENSG00000164591 | MYOZ3       | 5  | 150660882 | 150679368 | 18486  | protein_coding                     | -1.61 | 4.64E-04 | 5.54E-03 |
| ENSG00000168079 | SCARA5      | 8  | 27869883  | 27992673  | 122790 | protein_coding                     | -1.61 | 8.30E-06 | 3.65E-04 |
| ENSG00000241322 | CDRT1       | 17 | 15565483  | 15619704  | 54221  | protein_coding                     | -1.61 | 8.00E-06 | 3.57E-04 |
| ENSG00000232517 | CSPG4BP     | 5  | 54808210  | 54872551  | 64341  | unitary_pseudogene                 | -1.61 | 6.18E-04 | 6.72E-03 |
| ENSG00000276710 | CSPG4P10    | 15 | 82459472  | 82477258  | 17786  | transcribed_unprocessed_pseudogene | -1.61 | 4.27E-07 | 4.78E-05 |
| ENSG00000203585 | LINC02408   | 12 | 67443105  | 67590771  | 147666 | lncRNA                             | -1.61 | 7.16E-03 | 3.57E-02 |
| ENSG00000267257 | AC105105.1  | 18 | 58535415  | 58538552  | 3137   | lncRNA-antisense                   | -1.61 | 3.39E-03 | 2.14E-02 |
| ENSG00000133083 | DLCK1       | 13 | 35786652  | 36131382  | 362730 | protein_coding                     | -1.61 | 2.35E-05 | 7.29E-04 |
| ENSG00000226808 | LINC00840   | 10 | 43778946  | 43901004  | 122058 | lncRNA                             | -1.61 | 5.80E-04 | 6.44E-03 |
| ENSG00000277561 | GOLGA8IP    | 15 | 22606022  | 22617854  | 11832  | transcribed_unprocessed_pseudogene | -1.61 | 4.05E-05 | 1.05E-03 |
| ENSG00000205562 | AL049775.1  | 14 | 85518871  | 85531585  | 12714  | lncRNA                             | -1.61 | 1.63E-03 | 1.30E-02 |
| ENSG00000232294 | AL031674.1  | 20 | 52671735  | 52699472  | 27737  | lncRNA                             | -1.61 | 7.25E-03 | 3.59E-02 |
| ENSG00000179603 | GRM8        | 7  | 126438598 | 127253093 | 814495 | protein_coding                     | -1.61 | 8.75E-04 | 8.50E-03 |
| ENSG00000160808 | MYL3        | 3  | 46835111  | 46882172  | 47061  | protein_coding                     | -1.61 | 2.08E-03 | 1.54E-02 |
| ENSG00000272321 | AP003355.2  | 8  | 98436669  | 98439290  | 2621   | lncRNA-antisense                   | -1.61 | 9.42E-04 | 8.94E-03 |
| ENSG00000226825 | LINC01509   | 9  | 107420191 | 107466613 | 46422  | lncRNA                             | -1.61 | 9.36E-03 | 4.26E-02 |
| ENSG00000170537 | TMC7        | 16 | 18983934  | 19063942  | 80008  | protein_coding                     | -1.61 | 6.83E-05 | 1.53E-03 |
| ENSG00000178882 | RFLNA       | 12 | 123973241 | 124316024 | 342783 | protein_coding                     | -1.61 | 4.65E-04 | 5.54E-03 |
| ENSG00000279149 | AL356750.1  | 13 | 30344672  | 30347167  | 2495   | TEC                                | -1.61 | 2.04E-03 | 1.52E-02 |
| ENSG00000248896 | AC105001.1  | 8  | 10729314  | 10772910  | 43596  | lncRNA-antisense                   | -1.62 | 2.17E-03 | 1.59E-02 |
| ENSG00000054796 | SPO11       | 20 | 57329803  | 57343994  | 14191  | protein_coding                     | -1.62 | 1.13E-02 | 4.86E-02 |
| ENSG00000184254 | ALDH1A3     | 15 | 100877714 | 100916626 | 38912  | protein_coding                     | -1.62 | 2.18E-05 | 6.90E-04 |
| ENSG00000188101 | ALOX15P2    | 9  | 92913156  | 92921560  | 8404   | unprocessed_pseudogene             | -1.62 | 3.33E-03 | 2.12E-02 |
| ENSG00000280087 | AC011481.3  | 19 | 44909375  | 44914968  | 5593   | TEC                                | -1.62 | 9.60E-04 | 9.06E-03 |
| ENSG00000009724 | MASP2       | 1  | 11026523  | 11047239  | 20716  | protein_coding                     | -1.62 | 8.07E-08 | 1.48E-05 |
| ENSG00000184486 | POU3F2      | 6  | 98834574  | 98839458  | 4884   | protein_coding                     | -1.62 | 1.80E-03 | 1.39E-02 |
| ENSG00000286941 | AC244250.4  | 22 | 22630546  | 22633849  | 3303   | lncRNA                             | -1.62 | 6.42E-03 | 3.32E-02 |
| ENSG00000255621 | AC023790.2  | 12 | 13000451  | 13004079  | 40228  | lncRNA                             | -1.62 | 9.31E-04 | 8.88E-03 |
| ENSG00000134240 | HMGCS2      | 1  | 119748002 | 119768905 | 20903  | protein_coding                     | -1.62 | 8.39E-03 | 3.96E-02 |
| ENSG00000166450 | PRTG        | 15 | 55611544  | 55743152  | 131608 | protein_coding                     | -1.62 | 4.95E-05 | 1.21E-03 |
| ENSG00000185070 | FLRT2       | 14 | 85530144  | 85654428  | 124284 | protein_coding                     | -1.62 | 1.78E-06 | 1.32E-04 |
| ENSG00000278616 | BEND3P3     | 10 | 79682997  | 79685436  | 2439   | processed_pseudogene               | -1.62 | 3.95E-04 | 4.99E-03 |
| ENSG00000204832 | ST8SIA6-AS1 | 10 | 17386919  | 17445758  | 58839  | lncRNA-antisense                   | -1.62 | 2.26E-04 | 3.45E-03 |
| ENSG00000161896 | IP6K3       | 6  | 33721662  | 33746905  | 25243  | protein_coding                     | -1.62 | 1.14E-03 | 1.02E-02 |
| ENSG00000234710 | AC060834.2  | 7  | 9621764   | 9769513   | 147749 | lncRNA                             | -1.62 | 1.12E-02 | 4.82E-02 |
| ENSG00000184828 | ZBTB7C      | 18 | 48026672  | 48410752  | 384080 | protein_coding                     | -1.62 | 2.48E-07 | 3.37E-05 |
| ENSG00000100170 | SLCSA1      | 22 | 32043261  | 32113029  | 69768  | protein_coding                     | -1.62 | 7.17E-04 | 7.45E-03 |
| ENSG00000118407 | FILIP1      | 6  | 75291859  | 75493000  | 201941 | protein_coding                     | -1.62 | 6.62E-04 | 7.03E-03 |
| ENSG00000260734 | TLE7        | 16 | 71429980  | 71442054  | 12074  | protein_coding                     | -1.62 | 2.26E-03 | 1.63E-02 |
| ENSG00000017427 | IGF1        | 12 | 102395874 | 102481744 | 85870  | protein_coding                     | -1.62 | 7.88E-06 | 3.54E-04 |
| ENSG00000130427 | EPO         | 7  | 100720468 | 100723700 | 3232   | protein_coding                     | -1.62 | 3.40E-03 | 2.15E-02 |
| ENSG00000244471 | AL137058.1  | 13 | 52488993  | 52587095  | 98102  | transcribed_unprocessed_pseudogene | -1.62 | 7.52E-04 | 7.69E-03 |
| ENSG00000204849 | SPATA31A1   | 9  | 39355669  | 39361962  | 6293   | protein_coding                     | -1.62 | 8.09E-03 | 3.86E-02 |
| ENSG00000180264 | ADGRD2      | 9  | 124451425 | 124478589 | 27164  | protein_coding                     | -1.62 | 1.37E-04 | 2.43E-03 |
| ENSG00000229649 | LINC02681   | 10 | 101252821 | 101263550 | 10729  | lncRNA                             | -1.62 | 1.05E-02 | 4.64E-02 |

|                 |            |    |           |           |        |                                    |       |          |          |
|-----------------|------------|----|-----------|-----------|--------|------------------------------------|-------|----------|----------|
| ENSG00000101251 | SEL1L2     | 20 | 13849247  | 13996443  | 147196 | protein coding                     | -1.62 | 1.06E-04 | 2.05E-03 |
| ENSG00000170929 | OR1M1      | 19 | 9087061   | 9095669   | 8608   | protein coding                     | -1.62 | 8.50E-03 | 3.99E-02 |
| ENSG00000234345 | ELF2P1     | X  | 103910305 | 103911352 | 1047   | processed pseudogene               | -1.62 | 6.68E-04 | 7.07E-03 |
| ENSG00000143355 | LHX9       | 1  | 197911902 | 197935478 | 23576  | protein coding                     | -1.62 | 1.17E-06 | 9.52E-05 |
| ENSG00000248724 | NPH3-AS1   | 3  | 132721750 | 132874223 | 152473 | lncRNA-antisense                   | -1.62 | 1.81E-05 | 6.14E-04 |
| ENSG00000177133 | PRDM16-DT  | 1  | 3059615   | 3068437   | 8822   | lncRNA-antisense                   | -1.62 | 1.80E-04 | 2.95E-03 |
| ENSG00000231427 | LINC01445  | 7  | 54330670  | 54455093  | 124423 | lncRNA                             | -1.62 | 3.31E-03 | 2.11E-02 |
| ENSG00000157510 | AFAP1L1    | 5  | 149271859 | 149343637 | 71778  | protein coding                     | -1.62 | 4.69E-06 | 2.47E-04 |
| ENSG00000170748 | RBMXL2     | 11 | 7088998   | 7091148   | 2150   | protein coding                     | -1.62 | 1.66E-03 | 1.32E-02 |
| ENSG00000197140 | ADAM32     | 8  | 39106990  | 39284917  | 177927 | protein coding                     | -1.62 | 6.97E-05 | 1.55E-03 |
| ENSG00000229484 | LINC02766  | 1  | 12527724  | 12528420  | 696    | lncRNA                             | -1.62 | 1.13E-02 | 4.85E-02 |
| ENSG00000156427 | FGF18      | 5  | 171419647 | 171457626 | 37979  | protein coding                     | -1.62 | 4.19E-04 | 5.17E-03 |
| ENSG00000288537 | AL162391.2 | 9  | 126270121 | 126275918 | 5797   | lncRNA                             | -1.62 | 7.57E-03 | 3.70E-02 |
| ENSG00000287786 | AC113615.2 | 4  | 6178186   | 6184925   | 6739   | lncRNA                             | -1.62 | 6.65E-03 | 3.40E-02 |
| ENSG00000115380 | EFEMP1     | 2  | 55865967  | 55924139  | 58172  | protein coding                     | -1.62 | 5.74E-04 | 6.40E-03 |
| ENSG00000249345 | LINC02405  | 12 | 126915199 | 127060565 | 145366 | lncRNA                             | -1.62 | 2.11E-04 | 3.28E-03 |
| ENSG00000223646 | AC002463.1 | 7  | 112616440 | 112896625 | 280185 | lncRNA                             | -1.62 | 4.77E-04 | 5.64E-03 |
| ENSG00000251652 | AC092535.4 | 4  | 1113639   | 1132977   | 19338  | lncRNA-antisense                   | -1.62 | 2.64E-03 | 1.81E-02 |
| ENSG00000171357 | LURAP1     | 1  | 46203334  | 46221256  | 17922  | protein coding                     | -1.62 | 2.03E-04 | 3.20E-03 |
| ENSG00000175426 | PCSK1      | 5  | 96390333  | 96434143  | 43810  | protein coding                     | -1.62 | 1.15E-03 | 1.02E-02 |
| ENSG00000182366 | FAM87A     | 8  | 375931    | 384079    | 8148   | lncRNA                             | -1.62 | 2.48E-04 | 3.67E-03 |
| ENSG00000204695 | OR14J1     | 6  | 29301701  | 29313017  | 11316  | protein coding                     | -1.62 | 3.92E-03 | 2.36E-02 |
| ENSG00000114547 | ROPN1B     | 3  | 125969160 | 125983454 | 14294  | protein coding                     | -1.62 | 3.10E-03 | 2.02E-02 |
| ENSG00000125514 | LINC00029  | 20 | 63034217  | 63037028  | 2811   | lncRNA                             | -1.62 | 1.03E-03 | 9.46E-03 |
| ENSG00000258785 | LINC01580  | 15 | 93894431  | 93984150  | 89719  | lncRNA                             | -1.62 | 6.22E-05 | 1.43E-03 |
| ENSG00000183644 | HOATZ      | 11 | 111514785 | 111537031 | 22246  | protein coding                     | -1.62 | 6.98E-03 | 3.50E-02 |
| ENSG00000254042 | SLIT3-AS2  | 5  | 168706567 | 168720884 | 14317  | lncRNA-antisense                   | -1.62 | 1.03E-03 | 9.46E-03 |
| ENSG00000226527 | AP000289.1 | 21 | 33110867  | 33123725  | 12858  | lncRNA                             | -1.62 | 7.39E-03 | 3.64E-02 |
| ENSG00000216921 | FAM240C    | 2  | 241893988 | 241902551 | 8563   | protein coding                     | -1.62 | 6.39E-03 | 3.30E-02 |
| ENSG00000188959 | C9orf152   | 9  | 110190048 | 110208189 | 18141  | protein coding                     | -1.62 | 6.95E-04 | 7.27E-03 |
| ENSG00000205396 | LINC00661  | 19 | 16015287  | 16027462  | 12175  | lncRNA                             | -1.63 | 4.45E-04 | 5.39E-03 |
| ENSG00000071203 | MS4A12     | 11 | 60492778  | 60507430  | 14652  | protein coding                     | -1.63 | 3.48E-03 | 2.18E-02 |
| ENSG00000250072 | SH3TC2-DT  | 5  | 149063254 | 149129578 | 66324  | lncRNA                             | -1.63 | 1.04E-02 | 4.59E-02 |
| ENSG00000230342 | FANCD2P2   | 3  | 11859674  | 11891172  | 31498  | unprocessed pseudogene             | -1.63 | 7.33E-03 | 3.62E-02 |
| ENSG00000236052 | LINC01643  | 22 | 34017422  | 34218796  | 201374 | lncRNA                             | -1.63 | 6.25E-04 | 6.75E-03 |
| ENSG00000278911 | AC015819.3 | 18 | 75103587  | 75106260  | 2673   | lncRNA                             | -1.63 | 7.25E-03 | 3.59E-02 |
| ENSG00000237401 | LINC01304  | 2  | 3957652   | 3974124   | 16472  | lncRNA                             | -1.63 | 6.25E-04 | 6.75E-03 |
| ENSG00000170827 | CELP       | 9  | 133079900 | 133087355 | 7455   | transcribed unprocessed pseudogene | -1.63 | 1.02E-03 | 9.41E-03 |
| ENSG00000100604 | CHGA       | 14 | 92923150  | 92935285  | 12135  | protein coding                     | -1.63 | 9.91E-06 | 4.12E-04 |
| ENSG00000279714 | Z95114.2   | 22 | 36091148  | 36093352  | 2204   | lncRNA                             | -1.63 | 1.36E-03 | 1.14E-02 |
| ENSG00000286886 | AJ011931.2 | 21 | 45861830  | 45888638  | 28808  | lncRNA                             | -1.63 | 5.04E-04 | 5.84E-03 |
| ENSG00000222036 | POTEM      | 14 | 18967434  | 19003752  | 36318  | protein coding                     | -1.63 | 2.70E-03 | 1.84E-02 |
| ENSG00000236114 | AL450326.2 | 10 | 43523256  | 43525177  | 1961   | unprocessed pseudogene             | -1.63 | 1.14E-02 | 4.88E-02 |
| ENSG00000172969 | FRG2C      | 3  | 75664330  | 75667220  | 2890   | protein coding                     | -1.63 | 1.12E-03 | 9.99E-03 |
| ENSG00000136697 | ILF1F10    | 2  | 113067970 | 113075843 | 7873   | protein coding                     | -1.63 | 8.22E-03 | 3.90E-02 |
| ENSG00000273218 | AC005776.2 | 19 | 15346068  | 15348417  | 2349   | lncRNA                             | -1.63 | 7.83E-03 | 3.78E-02 |
| ENSG00000157211 | CDCP2      | 1  | 54132968  | 54153770  | 20802  | protein coding                     | -1.63 | 5.49E-03 | 2.98E-02 |
| ENSG00000248844 | LINC02753  | 11 | 70056230  | 70065371  | 9141   | lncRNA                             | -1.63 | 4.08E-03 | 2.43E-02 |
| ENSG00000257129 | AC126177.1 | 12 | 107910403 | 107912620 | 2217   | transcribed processed pseudogene   | -1.63 | 9.67E-04 | 9.10E-03 |
| ENSG00000166391 | MOGAT2     | 11 | 75717838  | 75732958  | 15120  | protein coding                     | -1.63 | 1.95E-03 | 1.47E-02 |
| ENSG00000261175 | LINC02188  | 16 | 86710122  | 86742083  | 31961  | lncRNA                             | -1.63 | 2.38E-04 | 3.57E-03 |
| ENSG00000163817 | SLC6A20    | 3  | 45755449  | 45796536  | 41087  | protein coding                     | -1.63 | 6.75E-06 | 3.18E-04 |
| ENSG00000176177 | ENTHD1     | 22 | 39743044  | 39893864  | 150820 | protein coding                     | -1.63 | 5.42E-03 | 2.96E-02 |
| ENSG00000279329 | AC020910.6 | 19 | 34675717  | 34677581  | 1864   | TEC                                | -1.63 | 8.00E-05 | 1.70E-03 |
| ENSG00000197587 | DMBX1      | 1  | 46489836  | 46516216  | 26380  | protein coding                     | -1.63 | 4.15E-04 | 5.15E-03 |
| ENSG00000235034 | C19orf81   | 19 | 50649445  | 50659310  | 9865   | protein coding                     | -1.63 | 6.25E-03 | 3.28E-02 |
| ENSG00000180878 | C11orf42   | 11 | 6205557   | 6211135   | 5578   | protein coding                     | -1.63 | 1.03E-02 | 4.57E-02 |
| ENSG00000142871 | CCN1       | 1  | 85580761  | 85584589  | 3828   | protein coding                     | -1.63 | 1.89E-03 | 1.44E-02 |
| ENSG00000284618 | AL391294.1 | X  | 81000150  | 81004127  | 4067   | lncRNA                             | -1.63 | 8.55E-03 | 4.01E-02 |
| ENSG00000155890 | TRIM42     | 3  | 140678064 | 140701150 | 23086  | protein coding                     | -1.63 | 4.17E-03 | 2.47E-02 |
| ENSG00000136235 | GPNMB      | 7  | 23235967  | 23275108  | 39141  | protein coding                     | -1.63 | 3.76E-06 | 2.13E-04 |
| ENSG00000113600 | C9         | 5  | 39284140  | 39424868  | 140728 | protein coding                     | -1.63 | 5.40E-03 | 2.95E-02 |
| ENSG00000129170 | CSRP3      | 11 | 19182030  | 19210571  | 28541  | protein coding                     | -1.63 | 6.42E-03 | 3.32E-02 |
| ENSG00000197815 | AC122129.1 | 17 | 17858227  | 17860041  | 1814   | lncRNA-antisense                   | -1.63 | 3.06E-03 | 2.00E-02 |
| ENSG00000169758 | TMEM266    | 15 | 76059958  | 76229121  | 169163 | protein coding                     | -1.63 | 4.81E-06 | 2.51E-04 |
| ENSG00000154065 | ANKRD29    | 18 | 23598926  | 23662911  | 63985  | protein coding                     | -1.63 | 1.01E-04 | 1.99E-03 |
| ENSG00000165125 | TRPV6      | 7  | 142871208 | 142885745 | 14537  | protein coding                     | -1.63 | 1.34E-04 | 2.40E-03 |
| ENSG00000287516 | AL359764.2 | 1  | 241413716 | 241468661 | 54945  | lncRNA                             | -1.64 | 7.61E-05 | 1.64E-03 |
| ENSG00000227764 | LINC01693  | 1  | 211639440 | 211654627 | 15187  | lncRNA                             | -1.64 | 6.31E-03 | 3.28E-02 |
| ENSG00000087245 | MMP2       | 16 | 55389700  | 55506691  | 116991 | protein coding                     | -1.64 | 8.47E-05 | 1.76E-03 |
| ENSG00000187955 | COL14A1    | 8  | 120059780 | 120373573 | 313793 | protein coding                     | -1.64 | 2.66E-05 | 7.90E-04 |
| ENSG00000140285 | FGF7       | 15 | 49423237  | 49488775  | 65538  | protein coding                     | -1.64 | 1.65E-03 | 1.31E-02 |
| ENSG00000164129 | NPY5R      | 4  | 163343892 | 163351934 | 8042   | protein coding                     | -1.64 | 7.54E-03 | 3.69E-02 |
| ENSG00000283503 | LINC01902  | 18 | 39841709  | 39896298  | 54589  | lncRNA                             | -1.64 | 1.03E-03 | 9.48E-03 |
| ENSG00000130950 | NUTM2F     | 9  | 94318196  | 94328644  | 10448  | protein coding                     | -1.64 | 3.41E-04 | 4.51E-03 |
| ENSG00000278890 | FP325330.2 | 22 | 48052646  | 48058275  | 5629   | lncRNA                             | -1.64 | 4.21E-05 | 1.08E-03 |
| ENSG00000166415 | WDR72      | 15 | 53513741  | 53762878  | 249137 | protein coding                     | -1.64 | 8.17E-05 | 1.72E-03 |
| ENSG00000235281 | AL713851.1 | 10 | 2501600   | 2618739   | 117139 | lncRNA                             | -1.64 | 3.02E-03 | 1.98E-02 |
| ENSG00000272512 | AL645608.7 | 1  | 995966    | 998051    | 2085   | lncRNA                             | -1.64 | 2.47E-04 | 3.66E-03 |
| ENSG00000170927 | PKHD1      | 6  | 51615299  | 52087613  | 472314 | protein coding                     | -1.64 | 3.64E-04 | 4.70E-03 |
| ENSG00000233701 | PRR23C     | 3  | 139042102 | 139044892 | 2790   | protein coding                     | -1.64 | 4.18E-03 | 2.48E-02 |
| ENSG00000165495 | PKNOX2     | 11 | 125164687 | 125433389 | 268702 | protein coding                     | -1.64 | 6.25E-05 | 1.43E-03 |
| ENSG00000132677 | RHBG       | 1  | 156369211 | 156385219 | 16008  | protein coding                     | -1.64 | 4.04E-04 | 5.06E-03 |
| ENSG00000121769 | FABP3      | 1  | 31365253  | 31376850  | 11597  | protein coding                     | -1.64 | 6.20E-03 | 3.24E-02 |
| ENSG00000206195 | DUXAP8     | 22 | 15784959  | 15829984  | 45025  | lncRNA                             | -1.64 | 1.04E-03 | 9.55E-03 |
| ENSG00000236130 | PTCSC2     | 9  | 97699625  | 97853080  | 153455 | lncRNA                             | -1.64 | 1.11E-03 | 9.94E-03 |
| ENSG00000182013 | PNMA8A     | 19 | 46466491  | 46471563  | 5072   | protein coding                     | -1.64 | 9.54E-04 | 9.02E-03 |
| ENSG00000256546 | AC156455.1 | 12 | 122063306 | 122068616 | 5310   | lncRNA                             | -1.64 | 3.81E-05 | 1.01E-03 |
| ENSG00000229267 | SNHG3      | 2  | 214810181 | 214963575 | 153394 | lncRNA-antisense                   | -1.64 | 1.10E-02 | 4.78E-02 |
| ENSG00000175147 | TMEM51-AS1 | 1  | 15111815  | 15153618  | 41803  | lncRNA-antisense                   | -1.64 | 9.29E-06 | 3.97E-04 |



|                 |             |    |           |           |        |                                      |       |          |          |
|-----------------|-------------|----|-----------|-----------|--------|--------------------------------------|-------|----------|----------|
| ENSG00000162753 | SLC9C2      | 1  | 173500460 | 173603072 | 102612 | protein coding                       | -1.64 | 4.18E-04 | 5.16E-03 |
| ENSG00000173157 | ADAMTS20    | 12 | 43353866  | 43552203  | 198337 | protein coding                       | -1.64 | 2.60E-04 | 3.78E-03 |
| ENSG00000284668 | LINC02780   | 1  | 3976133   | 40127004  | 36571  | lncRNA                               | -1.64 | 1.27E-03 | 1.09E-02 |
| ENSG00000184166 | OR1D2       | 17 | 3088484   | 3104422   | 15938  | protein coding                       | -1.64 | 3.56E-03 | 2.22E-02 |
| ENSG00000187021 | PNLIPRP1    | 10 | 116590385 | 116609175 | 18790  | protein coding                       | -1.64 | 1.71E-03 | 1.34E-02 |
| ENSG00000229240 | LINC00710   | 10 | 10917866  | 10952234  | 34368  | lncRNA                               | -1.64 | 3.57E-03 | 2.22E-02 |
| ENSG00000224215 | AL606469.1  | 10 | 23343957  | 23345181  | 1224   | lncRNA-antisense                     | -1.64 | 8.22E-03 | 3.90E-02 |
| ENSG00000167634 | NLRP7       | 19 | 54923509  | 54966312  | 42803  | protein coding                       | -1.64 | 7.18E-06 | 3.33E-04 |
| ENSG00000279317 | AC006994.1  | 2  | 210171518 | 210233976 | 62458  | lncRNA-bidirectional promoter lncRNA | -1.64 | 4.76E-03 | 2.71E-02 |
| ENSG00000165970 | SLC6A5      | 11 | 20599594  | 20659285  | 59691  | protein coding                       | -1.64 | 4.44E-05 | 1.12E-03 |
| ENSG00000084636 | COL16A1     | 1  | 31652263  | 31704319  | 52056  | protein coding                       | -1.64 | 4.18E-05 | 1.08E-03 |
| ENSG00000167757 | KLK11       | 19 | 51022216  | 51028039  | 5823   | protein coding                       | -1.64 | 1.28E-03 | 1.10E-02 |
| ENSG00000170011 | MYRIP       | 3  | 39808914  | 40260321  | 451407 | protein coding                       | -1.64 | 1.29E-05 | 4.98E-04 |
| ENSG00000254367 | AC087269.1  | 8  | 8723693   | 8724799   | 58786  | lncRNA                               | -1.64 | 3.27E-03 | 2.09E-02 |
| ENSG00000157542 | KCNJ6       | 21 | 37607373  | 38121345  | 513972 | protein coding                       | -1.64 | 2.50E-05 | 7.57E-04 |
| ENSG00000237991 | RPL35P1     | 1  | 236981339 | 236981708 | 369    | processed pseudogene                 | -1.64 | 1.68E-03 | 1.32E-02 |
| ENSG00000134760 | DSG1        | 18 | 31318160  | 31359246  | 41086  | protein coding                       | -1.64 | 8.87E-04 | 8.58E-03 |
| ENSG00000140835 | CHST4       | 16 | 71525233  | 71538748  | 13515  | protein coding                       | -1.64 | 7.16E-03 | 3.57E-02 |
| ENSG00000101951 | PAGE4       | X  | 49829260  | 49834264  | 5004   | protein coding                       | -1.64 | 8.84E-03 | 4.10E-02 |
| ENSG00000286720 | AC097375.5  | 4  | 151988526 | 152045275 | 56749  | lncRNA                               | -1.64 | 5.43E-03 | 2.96E-02 |
| ENSG00000179447 | SLC24A3-AS1 | 20 | 19242302  | 19284596  | 42294  | lncRNA-antisense                     | -1.64 | 2.55E-03 | 1.77E-02 |
| ENSG00000235724 | AC009299.2  | 2  | 161222785 | 161308389 | 85604  | lncRNA-antisense                     | -1.64 | 8.61E-04 | 8.41E-03 |
| ENSG00000238123 | MID1IP1-AS1 | X  | 38801568  | 38803883  | 2315   | lncRNA-antisense                     | -1.64 | 6.33E-03 | 3.28E-02 |
| ENSG00000123307 | NEUROD4     | 12 | 55019974  | 55030017  | 10043  | protein coding                       | -1.64 | 4.04E-03 | 2.41E-02 |
| ENSG00000273396 | LINC01396   | 4  | 4844188   | 4850827   | 6639   | lncRNA                               | -1.64 | 6.01E-04 | 6.60E-03 |
| ENSG00000263142 | LRRCC37A17P | 17 | 46978481  | 47054569  | 76088  | transcribed unprocessed pseudogene   | -1.64 | 3.96E-06 | 2.19E-04 |
| ENSG00000124237 | C2orf85     | 20 | 58150902  | 58161150  | 10248  | protein coding                       | -1.64 | 6.65E-03 | 3.40E-02 |
| ENSG00000128422 | KRT17       | 17 | 41619442  | 41624842  | 5400   | protein coding                       | -1.65 | 6.39E-05 | 1.45E-03 |
| ENSG00000234093 | RPS15AP11   | 1  | 44780331  | 44780715  | 384    | processed pseudogene                 | -1.65 | 1.14E-02 | 4.88E-02 |
| ENSG00000106128 | GHRHR       | 7  | 30938669  | 30933254  | 54585  | protein coding                       | -1.65 | 5.87E-05 | 1.37E-03 |
| ENSG00000255093 | AP002008.2  | 11 | 111448450 | 111475397 | 26947  | transcribed unitary pseudogene       | -1.65 | 1.45E-05 | 5.36E-04 |
| ENSG00000182674 | KCNB2       | 8  | 72537225  | 72938349  | 401124 | protein coding                       | -1.65 | 9.73E-03 | 4.38E-02 |
| ENSG00000157060 | SHCBP1L     | 1  | 182898665 | 182953525 | 53660  | protein coding                       | -1.65 | 3.55E-03 | 2.21E-02 |
| ENSG00000285980 | AP003025.2  | 11 | 131542030 | 131581145 | 39115  | lncRNA-antisense                     | -1.65 | 2.32E-03 | 1.66E-02 |
| ENSG00000266357 | LINC02074   | 17 | 74043452  | 74154212  | 110760 | lncRNA                               | -1.65 | 7.65E-03 | 3.72E-02 |
| ENSG00000203808 | BVES-AS1    | 6  | 105136308 | 105169952 | 33644  | lncRNA-antisense                     | -1.65 | 1.19E-04 | 2.21E-03 |
| ENSG00000129221 | AIP1L       | 17 | 6393693   | 6435199   | 41506  | protein coding                       | -1.65 | 4.05E-04 | 5.07E-03 |
| ENSG00000286990 | AC016026.2  | 22 | 17800722  | 17820235  | 1313   | lncRNA                               | -1.65 | 1.09E-02 | 4.72E-02 |
| ENSG00000182048 | TRPC2       | 11 | 3609901   | 36375599  | 27658  | transcribed unprocessed pseudogene   | -1.65 | 4.65E-05 | 1.16E-03 |
| ENSG00000180667 | YOD1        | 1  | 207043849 | 207052980 | 9131   | protein coding                       | -1.65 | 7.58E-12 | 2.39E-08 |
| ENSG00000236404 | VLDLR-AS1   | 9  | 2421597   | 2643359   | 221762 | lncRNA-antisense                     | -1.65 | 7.46E-05 | 1.62E-03 |
| ENSG00000287717 | AC133637.2  | 15 | 89361157  | 89362421  | 1264   | lncRNA                               | -1.65 | 9.44E-03 | 4.29E-02 |
| ENSG00000250295 | RDH10-AS1   | 8  | 73297711  | 73356461  | 58750  | lncRNA-antisense                     | -1.65 | 1.11E-02 | 4.81E-02 |
| ENSG00000235419 | AC010149.1  | 2  | 230520594 | 230580006 | 59412  | lncRNA-antisense                     | -1.65 | 3.84E-03 | 2.33E-02 |
| ENSG00000259868 | AL163952.1  | 14 | 55896443  | 55962970  | 66527  | lncRNA                               | -1.65 | 3.77E-03 | 2.30E-02 |
| ENSG00000168619 | ADAM18      | 8  | 39584489  | 39730065  | 145576 | protein coding                       | -1.65 | 5.22E-03 | 2.88E-02 |
| ENSG00000225216 | AC007362.1  | 2  | 205756469 | 205764006 | 7537   | lncRNA-antisense                     | -1.65 | 8.91E-03 | 4.12E-02 |
| ENSG00000178055 | PRSS42P     | 3  | 46829542  | 46834095  | 4553   | transcribed unitary pseudogene       | -1.65 | 4.79E-03 | 2.72E-02 |
| ENSG00000287338 | AL929091.1  | 1  | 223091872 | 223103335 | 11463  | lncRNA                               | -1.65 | 1.74E-05 | 5.97E-04 |
| ENSG00000205293 | LINC01602   | 8  | 57855500  | 57984126  | 128626 | lncRNA                               | -1.65 | 1.12E-02 | 4.83E-02 |
| ENSG00000135858 | GPRC5A      | 12 | 12891559  | 12917937  | 26378  | protein coding                       | -1.65 | 5.88E-03 | 3.12E-02 |
| ENSG00000280118 | AC090983.1  | 15 | 24848355  | 24852253  | 3898   | lncRNA                               | -1.65 | 4.94E-03 | 2.78E-02 |
| ENSG00000165807 | PPP1R36     | 14 | 64549920  | 64589381  | 39461  | protein coding                       | -1.65 | 2.82E-03 | 1.89E-02 |
| ENSG00000188828 | GLRA4       | X  | 103702210 | 103728655 | 26445  | protein coding                       | -1.65 | 1.08E-03 | 9.78E-03 |
| ENSG00000204362 | LINC02783   | 1  | 17189783  | 17197617  | 7834   | lncRNA                               | -1.65 | 9.65E-04 | 9.09E-03 |
| ENSG00000246851 | AL157938.3  | 9  | 131189910 | 131194205 | 4295   | lncRNA-antisense                     | -1.65 | 1.08E-05 | 4.35E-04 |
| ENSG00000254519 | AC044839.1  | 11 | 45722279  | 45748209  | 25750  | lncRNA                               | -1.65 | 1.30E-04 | 2.35E-03 |
| ENSG00000128573 | FOXP2       | 7  | 114086327 | 114693772 | 607445 | protein coding                       | -1.65 | 4.34E-06 | 2.35E-04 |
| ENSG00000224655 | LINC01823   | 2  | 121779133 | 121809962 | 30829  | lncRNA                               | -1.65 | 8.33E-05 | 1.74E-03 |
| ENSG00000153237 | CCDC148     | 2  | 158171073 | 158456753 | 285680 | protein coding                       | -1.65 | 8.12E-04 | 8.11E-03 |
| ENSG00000163072 | NOSTRIN     | 2  | 168786539 | 168865514 | 78975  | protein coding                       | -1.66 | 4.18E-04 | 5.16E-03 |
| ENSG00000006059 | KRT33A      | 17 | 41346092  | 41350828  | 4736   | protein coding                       | -1.66 | 2.10E-03 | 1.55E-02 |
| ENSG00000130540 | SULT4A1     | 22 | 43824509  | 43862513  | 38004  | protein coding                       | -1.66 | 1.44E-04 | 2.52E-03 |
| ENSG00000175329 | ISX         | 22 | 35066136  | 35087387  | 21251  | protein coding                       | -1.66 | 4.47E-03 | 2.60E-02 |
| ENSG00000256278 | AC048382.1  | 15 | 84611689  | 84614969  | 3280   | lncRNA-antisense                     | -1.66 | 7.94E-03 | 3.82E-02 |
| ENSG00000227589 | TP73-AS3    | 1  | 3658938   | 3668772   | 9834   | lncRNA-antisense                     | -1.66 | 8.37E-03 | 3.95E-02 |
| ENSG00000197376 | AC089987.1  | 12 | 48507354  | 48529897  | 22543  | transcribed processed pseudogene     | -1.66 | 1.14E-02 | 4.89E-02 |
| ENSG00000071539 | TRIP13      | 5  | 892884    | 893957    | 26473  | protein coding                       | -1.66 | 1.40E-05 | 5.24E-04 |
| ENSG00000236751 | LINC01186   | X  | 46256759  | 46327680  | 70921  | lncRNA                               | -1.66 | 7.01E-03 | 3.51E-02 |
| ENSG00000185303 | SFTPA2      | 10 | 79555852  | 79560407  | 4555   | protein coding                       | -1.66 | 4.52E-04 | 5.45E-03 |
| ENSG00000124089 | MC3R        | 20 | 56248732  | 56249815  | 1083   | protein coding                       | -1.66 | 1.08E-02 | 4.71E-02 |
| ENSG00000234869 | AL021392.1  | 22 | 46541495  | 46548196  | 6701   | lncRNA-antisense                     | -1.66 | 4.18E-04 | 5.17E-03 |
| ENSG00000166869 | CHP2        | 16 | 23755026  | 23758935  | 3909   | protein coding                       | -1.66 | 5.87E-03 | 3.12E-02 |
| ENSG00000180720 | CHRM4       | 11 | 46385098  | 46386608  | 1510   | protein coding                       | -1.66 | 2.20E-03 | 1.60E-02 |
| ENSG00000117650 | NEK2        | 1  | 211658657 | 211675630 | 16973  | protein coding                       | -1.66 | 5.07E-04 | 5.87E-03 |
| ENSG00000244342 | LINC00698   | 3  | 62950430  | 63125062  | 174632 | lncRNA                               | -1.66 | 8.94E-03 | 4.13E-02 |
| ENSG00000167580 | AQP2        | 12 | 49950737  | 49958878  | 8141   | protein coding                       | -1.66 | 9.86E-04 | 9.21E-03 |
| ENSG00000285984 | AC009301.1  | 2  | 30887626  | 30897387  | 9761   | lncRNA                               | -1.66 | 8.67E-04 | 8.45E-03 |
| ENSG00000223944 | AL353604.1  | 1  | 37154761  | 37325100  | 170339 | lncRNA                               | -1.66 | 2.22E-03 | 1.61E-02 |
| ENSG00000248550 | OTX2-AS1    | 14 | 56813183  | 57152177  | 338994 | lncRNA                               | -1.66 | 5.68E-03 | 3.05E-02 |
| ENSG00000286117 | AL121894.3  | 20 | 23656151  | 23674888  | 18737  | lncRNA                               | -1.66 | 7.90E-04 | 7.95E-03 |
| ENSG00000279685 | MAPT-IT1    | 17 | 45895783  | 45898798  | 3015   | lncRNA-sense intronic                | -1.66 | 1.87E-03 | 1.42E-02 |
| ENSG00000285278 | TFAP2A-AS2  | 6  | 10404502  | 10407928  | 3426   | lncRNA-antisense                     | -1.66 | 7.06E-03 | 3.53E-02 |
| ENSG00000189280 | GJB5        | 1  | 34755047  | 34758512  | 3465   | protein coding                       | -1.66 | 7.95E-03 | 3.82E-02 |
| ENSG00000278725 | AC020765.4  | 16 | 28602340  | 28604519  | 2179   | unprocessed pseudogene               | -1.66 | 9.68E-03 | 4.37E-02 |
| ENSG00000187979 | FAM230D     | 22 | 18178038  | 18205915  | 27877  | lncRNA-antisense                     | -1.66 | 5.73E-03 | 3.07E-02 |
| ENSG00000260913 | LINC01254   | 18 | 10405133  | 10414515  | 9382   | lncRNA                               | -1.66 | 1.03E-03 | 9.46E-03 |
| ENSG00000070778 | PTPN21      | 14 | 84645778  | 84655007  | 89229  | protein coding                       | -1.66 | 1.57E-05 | 5.62E-04 |
| ENSG00000260788 | AC009063.2  | 16 | 83720402  | 83772974  | 52572  | lncRNA-antisense                     | -1.66 | 1.16E-04 | 2.18E-03 |
| ENSG00000066629 | EML1        | 14 | 99737693  | 99942060  | 204367 | protein coding                       | -1.66 | 1.29E-05 | 4.98E-04 |

|                 |            |    |           |           |        |                                    |       |          |          |
|-----------------|------------|----|-----------|-----------|--------|------------------------------------|-------|----------|----------|
| ENSG00000152591 | DSPP       | 4  | 87608529  | 87616873  | 8344   | protein coding                     | -1.66 | 5.75E-03 | 3.07E-02 |
| ENSG00000275226 | LINC00547  | 13 | 37534940  | 37551536  | 16596  | lncRNA                             | -1.66 | 8.57E-03 | 4.02E-02 |
| ENSG00000160339 | FCN2       | 9  | 134880810 | 134887523 | 6713   | protein coding                     | -1.66 | 1.05E-03 | 9.58E-03 |
| ENSG00000285697 | AC002059.3 | 22 | 29387909  | 29417757  | 29848  | transcribed unprocessed pseudogene | -1.66 | 1.00E-03 | 9.34E-03 |
| ENSG00000223788 | DIS3L2P1   | 2  | 232442034 | 232447418 | 5384   | unprocessed pseudogene             | -1.66 | 6.76E-03 | 3.43E-02 |
| ENSG00000174990 | CA5A       | 16 | 87881546  | 87936580  | 55034  | protein coding                     | -1.66 | 3.65E-04 | 4.71E-03 |
| ENSG00000187812 | AC019294.1 | 15 | 75775553  | 75786898  | 11345  | transcribed unprocessed pseudogene | -1.66 | 2.26E-03 | 1.63E-02 |
| ENSG00000069431 | ABCC9      | 12 | 21797401  | 21942529  | 145128 | protein coding                     | -1.67 | 6.21E-05 | 1.42E-03 |
| ENSG00000244558 | KCNK15-AS1 | 20 | 44694892  | 44746201  | 51129  | lncRNA-antisense                   | -1.67 | 8.80E-03 | 4.09E-02 |
| ENSG00000250934 | AC016924.1 | 3  | 126266747 | 126291525 | 24778  | lncRNA                             | -1.67 | 8.25E-05 | 1.73E-03 |
| ENSG00000197332 | AC008543.1 | 19 | 11639754  | 11686569  | 46815  | lncRNA                             | -1.67 | 7.88E-03 | 3.80E-02 |
| ENSG00000250634 | LINC01182  | 4  | 13654374  | 14003756  | 349382 | lncRNA                             | -1.67 | 9.56E-06 | 4.05E-04 |
| ENSG00000224565 | LINC01754  | 20 | 47391925  | 47412327  | 20402  | lncRNA                             | -1.67 | 5.41E-03 | 2.95E-02 |
| ENSG00000101074 | R3HDML     | 20 | 44337043  | 44351238  | 14195  | protein coding                     | -1.67 | 2.52E-03 | 1.75E-02 |
| ENSG00000112186 | CAP2       | 6  | 17393505  | 17557190  | 164285 | protein coding                     | -1.67 | 3.07E-04 | 4.22E-03 |
| ENSG00000204952 | FBXO47     | 17 | 38936432  | 38967403  | 30971  | protein coding                     | -1.67 | 3.68E-03 | 2.27E-02 |
| ENSG00000138587 | MNS1       | 15 | 56421544  | 56465137  | 43593  | protein coding                     | -1.67 | 8.42E-04 | 8.31E-03 |
| ENSG00000185960 | SHOX       | X  | 624344    | 659411    | 35067  | protein coding                     | -1.67 | 1.34E-05 | 5.11E-04 |
| ENSG00000172554 | SNTG2      | 2  | 950849    | 1367613   | 416764 | protein coding                     | -1.67 | 2.75E-06 | 1.72E-04 |
| ENSG00000248738 | AC037441.1 | 8  | 22877972  | 22888022  | 10050  | lncRNA-antisense                   | -1.67 | 5.44E-03 | 2.96E-02 |
| ENSG00000230894 | AL133284.1 | 9  | 11656736  | 116586328 | 18692  | lncRNA-antisense                   | -1.67 | 3.29E-03 | 2.10E-02 |
| ENSG00000115616 | SLC9A2     | 2  | 102619553 | 102711355 | 91802  | protein coding                     | -1.67 | 9.50E-04 | 9.00E-03 |
| ENSG00000279220 | GPR1-AS    | 2  | 206203543 | 206265326 | 61783  | lncRNA                             | -1.67 | 8.48E-03 | 3.99E-02 |
| ENSG00000264116 | AC116003.1 | 18 | 75407012  | 75426607  | 19595  | lncRNA-antisense                   | -1.67 | 2.48E-03 | 1.74E-02 |
| ENSG00000282418 | AC092811.1 | 1  | 225465021 | 225473837 | 8816   | lncRNA                             | -1.67 | 6.74E-03 | 3.43E-02 |
| ENSG00000153956 | CACNA2D1   | 7  | 81946444  | 82443777  | 497333 | protein coding                     | -1.67 | 7.65E-04 | 7.79E-03 |
| ENSG00000144285 | SCN1A      | 2  | 165984641 | 166149214 | 164573 | protein coding                     | -1.67 | 1.13E-04 | 2.14E-03 |
| ENSG00000128849 | CGNL1      | 15 | 57375967  | 57550717  | 174750 | protein coding                     | -1.67 | 5.22E-06 | 2.66E-04 |
| ENSG00000105392 | CRX        | 19 | 47819779  | 47843330  | 23551  | protein coding                     | -1.67 | 4.71E-05 | 1.71E-03 |
| ENSG00000280273 | AF131216.4 | 8  | 11283481  | 11285608  | 1587   | lncRNA-antisense                   | -1.67 | 4.77E-03 | 2.71E-02 |
| ENSG00000204442 | FAM155A    | 13 | 107163510 | 107867496 | 703986 | protein coding                     | -1.67 | 3.53E-03 | 2.20E-02 |
| ENSG00000237399 | LINC01502  | 9  | 135574935 | 135587112 | 12177  | lncRNA                             | -1.67 | 1.13E-05 | 4.50E-04 |
| ENSG00000267134 | LINC01924  | 18 | 64041555  | 64423601  | 382046 | lncRNA                             | -1.67 | 1.59E-03 | 1.28E-02 |
| ENSG00000272217 | AL645940.1 | 6  | 33246075  | 33246856  | 781    | lncRNA                             | -1.67 | 8.45E-03 | 3.98E-02 |
| ENSG00000227912 | AL441943.2 | 10 | 2150480   | 2169460   | 18980  | lncRNA                             | -1.67 | 8.54E-03 | 4.00E-02 |
| ENSG00000225526 | MKRN2OS    | 3  | 12514934  | 12561059  | 46125  | protein coding                     | -1.67 | 1.38E-03 | 1.15E-02 |
| ENSG00000243478 | AOXP2      | 2  | 200738608 | 200794239 | 55631  | transcribed unprocessed pseudogene | -1.67 | 1.99E-04 | 3.16E-03 |
| ENSG00000118271 | TTR        | 18 | 31557009  | 31598833  | 41824  | protein coding                     | -1.67 | 3.80E-03 | 2.31E-02 |
| ENSG00000159398 | CES5A      | 16 | 55846154  | 55965031  | 109877 | protein coding                     | -1.67 | 3.63E-04 | 4.69E-03 |
| ENSG00000231817 | LINC01198  | 13 | 46455131  | 46515958  | 60827  | lncRNA                             | -1.67 | 1.90E-04 | 3.06E-03 |
| ENSG00000196979 | GPRACR     | 9  | 130140610 | 130144219 | 3609   | lncRNA                             | -1.67 | 2.33E-03 | 1.66E-02 |
| ENSG00000226983 | LINC01692  | 21 | 24840550  | 25057746  | 217196 | lncRNA                             | -1.67 | 1.07E-02 | 4.68E-02 |
| ENSG00000258502 | LINC02290  | 14 | 66111557  | 66131716  | 20159  | lncRNA                             | -1.67 | 7.55E-04 | 7.71E-03 |
| ENSG00000258583 | LINC01500  | 14 | 58646631  | 59184427  | 537616 | lncRNA                             | -1.68 | 1.96E-05 | 6.46E-04 |
| ENSG00000286837 | AC087533.1 | 8  | 42842989  | 42848476  | 1887   | lncRNA                             | -1.68 | 4.78E-04 | 5.65E-03 |
| ENSG00000105143 | SLC1A6     | 19 | 14950034  | 15022990  | 72956  | protein coding                     | -1.68 | 3.48E-05 | 9.50E-04 |
| ENSG00000130649 | CYP2E1     | 10 | 133520406 | 133561220 | 40814  | protein coding                     | -1.68 | 2.73E-08 | 7.59E-06 |
| ENSG00000100344 | PNPLA3     | 22 | 43923792  | 43964488  | 40696  | protein coding                     | -1.68 | 5.87E-05 | 1.36E-03 |
| ENSG00000230102 | LINC02028  | 3  | 194005259 | 194071025 | 65766  | lncRNA                             | -1.68 | 4.64E-05 | 1.16E-03 |
| ENSG00000197594 | ENPP1      | 6  | 131808016 | 131895155 | 87139  | protein coding                     | -1.68 | 1.52E-06 | 1.16E-04 |
| ENSG00000228718 | LINC02521  | 6  | 26171444  | 26400011  | 22857  | lncRNA                             | -1.68 | 7.88E-04 | 7.94E-03 |
| ENSG00000231764 | DLX6-AS1   | 7  | 96955141  | 97014088  | 58947  | lncRNA-antisense                   | -1.68 | 3.51E-06 | 2.02E-04 |
| ENSG00000183840 | GPR39      | 2  | 132416805 | 132646582 | 229777 | protein coding                     | -1.68 | 3.38E-04 | 4.48E-03 |
| ENSG00000157578 | LCA5L      | 21 | 39405844  | 39445805  | 39961  | protein coding                     | -1.68 | 4.50E-06 | 2.39E-04 |
| ENSG00000265843 | LINC01029  | 18 | 77970637  | 77993731  | 23094  | lncRNA                             | -1.68 | 5.18E-03 | 2.86E-02 |
| ENSG00000105679 | GAPDH5     | 19 | 35533455  | 35545319  | 11864  | protein coding                     | -1.68 | 2.10E-03 | 1.55E-02 |
| ENSG00000280200 | AC073862.5 | 12 | 130976786 | 130978812 | 2026   | TEC                                | -1.68 | 6.89E-03 | 3.48E-02 |
| ENSG00000229867 | STEAP3-AS1 | 2  | 119244222 | 119270174 | 26292  | lncRNA-antisense                   | -1.68 | 5.97E-06 | 2.91E-04 |
| ENSG00000184647 | PRSS55     | 8  | 10525532  | 10554166  | 28634  | protein coding                     | -1.68 | 1.15E-05 | 4.55E-04 |
| ENSG00000276975 | HYDIN2     | 1  | 146472566 | 146914294 | 441728 | transcribed unprocessed pseudogene | -1.68 | 2.65E-06 | 1.69E-04 |
| ENSG00000148225 | WDR31      | 9  | 113313222 | 113340298 | 27076  | protein coding                     | -1.68 | 4.11E-05 | 1.07E-03 |
| ENSG00000241226 | RN7SL836P  | 19 | 45651510  | 45651805  | 295    | misc RNA                           | -1.68 | 3.17E-03 | 2.05E-02 |
| ENSG00000235493 | LINC01967  | 3  | 27916774  | 28059268  | 142494 | lncRNA                             | -1.68 | 7.95E-03 | 3.82E-02 |
| ENSG00000258458 | AL180314.2 | 14 | 22701476  | 22766562  | 65086  | lncRNA                             | -1.68 | 7.62E-05 | 1.64E-03 |
| ENSG00000259144 | RANBP20P   | 14 | 20720742  | 20723127  | 2385   | processed pseudogene               | -1.68 | 1.67E-03 | 1.32E-02 |
| ENSG00000234721 | LINC02092  | 17 | 73786675  | 73800966  | 14291  | lncRNA                             | -1.68 | 1.37E-03 | 1.15E-02 |
| ENSG00000169344 | UMOD       | 16 | 20333052  | 20356301  | 23249  | protein coding                     | -1.68 | 8.59E-04 | 8.40E-03 |
| ENSG00000141665 | FBXO15     | 18 | 74073353  | 74147843  | 74490  | protein coding                     | -1.68 | 5.23E-09 | 2.22E-06 |
| ENSG00000151917 | BEND6      | 6  | 56955107  | 57027346  | 72239  | protein coding                     | -1.68 | 2.03E-04 | 3.20E-03 |
| ENSG00000152779 | SLC16A12   | 10 | 89430299  | 89556641  | 126342 | protein coding                     | -1.68 | 3.46E-03 | 2.17E-02 |
| ENSG00000177839 | PCDHB9     | 5  | 141187127 | 141191541 | 4414   | protein coding                     | -1.68 | 1.98E-03 | 1.49E-02 |
| ENSG00000262898 | AC19099.2  | 17 | 83135734  | 83221442  | 85708  | lncRNA                             | -1.68 | 4.16E-04 | 5.15E-03 |
| ENSG00000259564 | AC009554.1 | 15 | 61834682  | 61935738  | 101056 | lncRNA-antisense                   | -1.68 | 3.45E-03 | 2.17E-02 |
| ENSG00000183578 | TNFAIP8L3  | 15 | 51056598  | 51105276  | 48678  | protein coding                     | -1.68 | 1.73E-03 | 1.35E-02 |
| ENSG00000177108 | ZDHHC22    | 14 | 77131270  | 77142734  | 11464  | protein coding                     | -1.68 | 4.52E-04 | 5.45E-03 |
| ENSG00000232406 | AL121895.1 | 20 | 36147334  | 36155760  | 8426   | lncRNA-antisense                   | -1.68 | 1.32E-03 | 1.12E-02 |
| ENSG00000267313 | KC6        | 18 | 41465783  | 41632185  | 166402 | lncRNA                             | -1.68 | 2.19E-03 | 1.60E-02 |
| ENSG00000180806 | HOXC9      | 12 | 53994895  | 54003337  | 8442   | protein coding                     | -1.68 | 3.18E-03 | 2.05E-02 |
| ENSG00000205086 | C2orf91    | 2  | 41935368  | 41956806  | 21438  | lncRNA                             | -1.68 | 3.23E-03 | 2.07E-02 |
| ENSG00000109832 | DDX25      | 11 | 125903348 | 125943702 | 40354  | protein coding                     | -1.68 | 6.77E-05 | 1.52E-03 |
| ENSG00000267665 | AC021683.3 | 17 | 77516887  | 77536601  | 19714  | lncRNA                             | -1.68 | 2.72E-04 | 3.90E-03 |
| ENSG00000188153 | COL4A5     | X  | 108439838 | 108697545 | 257707 | protein coding                     | -1.68 | 5.00E-04 | 5.82E-03 |
| ENSG00000280660 | AL157396.1 | 10 | 93762453  | 93771991  | 9538   | lncRNA-sense intronic              | -1.68 | 3.05E-05 | 8.68E-04 |
| ENSG00000249346 | LINC01016  | 6  | 33867506  | 33896914  | 29408  | lncRNA                             | -1.68 | 3.23E-05 | 8.96E-04 |
| ENSG00000157884 | CIB4       | 2  | 26581205  | 26641366  | 60161  | protein coding                     | -1.69 | 7.91E-03 | 3.81E-02 |
| ENSG00000157703 | SVOPL      | 7  | 138594285 | 138701362 | 107077 | protein coding                     | -1.69 | 2.50E-05 | 7.58E-04 |
| ENSG00000188817 | SNTN       | 3  | 63652675  | 63679020  | 26345  | protein coding                     | -1.69 | 7.61E-03 | 3.71E-03 |
| ENSG00000287117 | AC105916.1 | 4  | 9567474   | 9691786   | 124312 | lncRNA                             | -1.69 | 1.62E-03 | 1.29E-02 |
| ENSG00000170485 | NPAS2      | 2  | 100820139 | 100996829 | 176690 | protein coding                     | -1.69 | 6.21E-11 | 9.41E-08 |
| ENSG00000260254 | AP000997.3 | 11 | 115638563 | 115646962 | 8399   | lncRNA                             | -1.69 | 1.04E-05 | 4.23E-04 |

|                 |            |    |           |           |         |                                      |       |          |          |
|-----------------|------------|----|-----------|-----------|---------|--------------------------------------|-------|----------|----------|
| ENSG00000256124 | LINC01152  | 17 | 72030291  | 72041310  | 11019   | lncRNA                               | -1.69 | 2.65E-03 | 1.82E-02 |
| ENSG00000203987 | AL727363.1 | 9  | 137867925 | 137892570 | 24645   | lncRNA-antisense                     | -1.69 | 8.37E-05 | 1.74E-03 |
| ENSG00000275645 | AC068338.3 | 15 | 75346744  | 75347161  | 417     | lncRNA-antisense                     | -1.69 | 3.52E-03 | 2.20E-02 |
| ENSG00000275591 | XKR5       | 8  | 6808517   | 6835524   | 27007   | protein coding                       | -1.69 | 4.76E-05 | 1.18E-03 |
| ENSG00000237880 | LINC01885  | 2  | 107382715 | 107748270 | 365555  | lncRNA                               | -1.69 | 7.58E-03 | 3.70E-02 |
| ENSG00000235790 | PEF1-AS1   | 1  | 31644049  | 31660162  | 16113   | lncRNA-antisense                     | -1.69 | 1.99E-05 | 6.52E-04 |
| ENSG00000227582 | ADGRF5P1   | 9  | 62860873  | 62864957  | 4084    | transcribed processed pseudogene     | -1.69 | 1.00E-02 | 4.48E-02 |
| ENSG00000287243 | THCAT155   | 12 | 3483714   | 3492819   | 9105    | lncRNA                               | -1.69 | 6.82E-04 | 7.19E-03 |
| ENSG00000285736 | AC131025.3 | 5  | 149324220 | 149345333 | 21113   | lncRNA-bidirectional promoter lncRNA | -1.69 | 1.04E-02 | 4.61E-02 |
| ENSG00000279662 | AC131649.2 | 16 | 10445309  | 10449747  | 4438    | TEC                                  | -1.69 | 3.28E-03 | 2.10E-02 |
| ENSG00000104901 | DKKL1      | 19 | 49361783  | 49375116  | 13333   | protein coding                       | -1.69 | 2.03E-03 | 1.51E-02 |
| ENSG00000286505 | AC087468.2 | 15 | 84913144  | 84915705  | 2561    | lncRNA                               | -1.69 | 4.75E-03 | 2.71E-02 |
| ENSG00000187492 | CDHR4      | 3  | 49790732  | 49799873  | 9141    | protein coding                       | -1.69 | 2.03E-03 | 1.51E-02 |
| ENSG00000255970 | LINC02421  | 12 | 67709047  | 67729475  | 20428   | lncRNA                               | -1.69 | 5.11E-03 | 2.84E-02 |
| ENSG00000279096 | AL356289.2 | 1  | 48102068  | 48104736  | 2668    | TEC                                  | -1.69 | 1.12E-02 | 4.84E-02 |
| ENSG00000268621 | IGFL2-AS1  | 19 | 46189029  | 46203160  | 14131   | lncRNA                               | -1.69 | 1.12E-03 | 1.00E-02 |
| ENSG00000282916 | LINC02746  | 11 | 92913227  | 92915644  | 2417    | lncRNA                               | -1.69 | 6.24E-03 | 3.25E-02 |
| ENSG00000250509 | AC034213.1 | 5  | 180416949 | 180443240 | 28291   | lncRNA                               | -1.69 | 9.99E-03 | 4.47E-02 |
| ENSG00000287425 | AP003717.4 | 11 | 73983449  | 73985562  | 2113    | lncRNA                               | -1.69 | 1.52E-04 | 2.61E-03 |
| ENSG00000205424 | PCBP3-AS1  | 21 | 45827961  | 45837987  | 10026   | lncRNA-antisense                     | -1.69 | 1.66E-04 | 2.77E-03 |
| ENSG00000122176 | FMOD       | 1  | 203340628 | 203351758 | 11130   | protein coding                       | -1.69 | 6.07E-04 | 6.63E-03 |
| ENSG00000212710 | CTAGE1     | 18 | 22413599  | 22417915  | 4316    | protein coding                       | -1.69 | 3.33E-04 | 4.44E-03 |
| ENSG00000172986 | GXYLT2     | 3  | 72888046  | 72988138  | 110092  | protein coding                       | -1.69 | 7.84E-05 | 1.67E-03 |
| ENSG00000081818 | PCDHB4     | 5  | 141121818 | 141125623 | 3805    | protein coding                       | -1.69 | 3.27E-03 | 2.09E-02 |
| ENSG00000182083 | OR6B2      | 2  | 240028965 | 240030456 | 1491    | protein coding                       | -1.69 | 9.81E-03 | 4.41E-02 |
| ENSG00000277531 | PNMA8C     | 19 | 46424697  | 46428951  | 4254    | protein coding                       | -1.69 | 4.27E-04 | 5.23E-03 |
| ENSG00000112981 | NME5       | 5  | 138115175 | 138139443 | 24268   | protein coding                       | -1.69 | 7.88E-03 | 3.80E-02 |
| ENSG00000259737 | AC087516.2 | 15 | 36438972  | 36471016  | 32044   | lncRNA                               | -1.69 | 3.24E-03 | 2.08E-02 |
| ENSG00000254186 | AC11344.1  | 5  | 162424042 | 163437326 | 1013284 | lncRNA-antisense                     | -1.69 | 1.00E-04 | 1.98E-03 |
| ENSG00000238084 | AL031284.1 | 1  | 25398721  | 25399198  | 477     | processed pseudogene                 | -1.69 | 2.65E-03 | 1.82E-02 |
| ENSG00000134160 | TRPM1      | 15 | 31001061  | 31161273  | 160212  | protein coding                       | -1.69 | 1.21E-04 | 2.24E-03 |
| ENSG00000284674 | LINC02781  | 1  | 4973381   | 4981568   | 8187    | lncRNA                               | -1.69 | 2.18E-03 | 1.59E-02 |
| ENSG00000197953 | AADACL2    | 3  | 151733916 | 151761339 | 27423   | protein coding                       | -1.69 | 5.25E-03 | 2.89E-02 |
| ENSG00000232926 | AC000078.1 | 22 | 19887289  | 19887970  | 681     | processed pseudogene                 | -1.69 | 6.54E-03 | 3.36E-02 |
| ENSG00000109625 | CPZ        | 4  | 8592660   | 8619759   | 27099   | protein coding                       | -1.69 | 1.59E-03 | 1.28E-02 |
| ENSG00000205866 | FAM99A     | 11 | 1665597   | 1667856   | 2259    | lncRNA                               | -1.69 | 5.05E-03 | 2.82E-02 |
| ENSG00000136011 | STAB2      | 12 | 103587273 | 103766719 | 179446  | protein coding                       | -1.69 | 2.00E-07 | 2.94E-05 |
| ENSG00000285735 | LINC02717  | 11 | 134994982 | 135007779 | 12797   | lncRNA                               | -1.69 | 5.18E-03 | 2.86E-02 |
| ENSG00000166828 | SCNN1G     | 16 | 23182475  | 23216883  | 34138   | protein coding                       | -1.70 | 2.43E-04 | 3.63E-03 |
| ENSG00000198732 | SMOC1      | 14 | 69854131  | 70032366  | 178235  | protein coding                       | -1.70 | 7.15E-07 | 6.87E-05 |
| ENSG00000274775 | Z82195.2   | X  | 130445085 | 130524257 | 79172   | transcribed unprocessed pseudogene   | -1.70 | 6.46E-06 | 3.08E-04 |
| ENSG00000284696 | LINC02808  | 1  | 50229662  | 50321192  | 91530   | lncRNA                               | -1.70 | 7.23E-03 | 3.59E-02 |
| ENSG00000244122 | UGT1A7     | 2  | 233681938 | 233773299 | 91361   | protein coding                       | -1.70 | 6.49E-03 | 3.34E-02 |
| ENSG00000224072 | VEZTP1     | X  | 46454097  | 46457199  | 3102    | processed pseudogene                 | -1.70 | 4.02E-03 | 2.40E-02 |
| ENSG00000054938 | CHRDL2     | 11 | 74696429  | 74731426  | 34997   | protein coding                       | -1.70 | 2.00E-04 | 3.17E-03 |
| ENSG00000125851 | PCSK2      | 20 | 17226107  | 17484578  | 258471  | protein coding                       | -1.70 | 3.50E-05 | 9.55E-04 |
| ENSG00000280162 | AL136531.3 | 20 | 1320710   | 1324367   | 3657    | TEC                                  | -1.70 | 5.01E-04 | 5.82E-03 |
| ENSG00000284931 | AC104389.6 | 11 | 5248270   | 5254783   | 6513    | protein coding                       | -1.70 | 5.08E-03 | 2.83E-02 |
| ENSG00000100167 | SEPTIN3    | 22 | 41969475  | 41998221  | 28746   | protein coding                       | -1.70 | 3.96E-05 | 1.04E-03 |
| ENSG00000253767 | PCDHGA8    | 5  | 141390157 | 141512979 | 122822  | protein coding                       | -1.70 | 1.01E-05 | 4.15E-04 |
| ENSG00000244411 | KRTAP5-7   | 11 | 71527267  | 71528669  | 1402    | protein coding                       | -1.70 | 3.31E-03 | 2.11E-02 |
| ENSG00000248540 | AC010931.1 | 15 | 74125915  | 74129341  | 3426    | lncRNA                               | -1.70 | 1.66E-03 | 1.31E-02 |
| ENSG00000181143 | MUC16      | 19 | 8848844   | 8981342   | 132498  | protein coding                       | -1.70 | 9.14E-13 | 4.95E-09 |
| ENSG00000279804 | PRAMEF18   | 1  | 13222705  | 13226106  | 3401    | protein coding                       | -1.70 | 9.17E-03 | 4.20E-02 |
| ENSG00000230317 | LINC01284  | X  | 51095836  | 51224432  | 128596  | lncRNA                               | -1.70 | 3.19E-07 | 4.01E-05 |
| ENSG00000228838 | AL355483.1 | 1  | 53288024  | 53289706  | 1682    | lncRNA-antisense                     | -1.70 | 9.46E-03 | 4.30E-02 |
| ENSG00000232892 | RG55-AS1   | 1  | 163161675 | 163213023 | 51348   | lncRNA-antisense                     | -1.70 | 8.65E-03 | 4.04E-02 |
| ENSG00000255367 | AC127526.2 | 11 | 3481520   | 3581211   | 99691   | lncRNA                               | -1.70 | 2.85E-04 | 4.01E-03 |
| ENSG00000234546 | LNCTAM34A  | 1  | 9182004   | 9196284   | 14280   | lncRNA                               | -1.70 | 1.07E-04 | 2.06E-03 |
| ENSG00000178645 | C10orf53   | 10 | 49679651  | 49710261  | 30610   | protein coding                       | -1.70 | 2.70E-03 | 1.84E-02 |
| ENSG00000156194 | PPEF2      | 4  | 75859864  | 75902571  | 42707   | protein coding                       | -1.70 | 1.33E-05 | 5.07E-04 |
| ENSG00000112077 | RHAG       | 6  | 49605175  | 49638839  | 31664   | protein coding                       | -1.70 | 2.52E-05 | 7.61E-04 |
| ENSG00000266290 | AC015813.3 | 17 | 58078891  | 58083204  | 6313    | lncRNA                               | -1.70 | 1.27E-03 | 1.09E-02 |
| ENSG00000280278 | FLJ130679  | 16 | 86555320  | 86557299  | 1979    | TEC                                  | -1.70 | 6.20E-03 | 3.24E-02 |
| ENSG00000144644 | GADL1      | 3  | 30726200  | 30894765  | 168565  | protein coding                       | -1.70 | 1.74E-04 | 2.88E-03 |
| ENSG00000188869 | TMC3       | 15 | 81331088  | 81374213  | 43125   | protein coding                       | -1.70 | 9.98E-05 | 1.98E-03 |
| ENSG00000279110 | AL022323.3 | 22 | 25052122  | 25065241  | 13119   | lncRNA-antisense                     | -1.70 | 5.87E-08 | 1.25E-05 |
| ENSG00000165061 | ZMAT4      | 8  | 40530590  | 40897833  | 367243  | protein coding                       | -1.70 | 5.90E-05 | 1.37E-03 |
| ENSG00000117148 | ACTL8      | 1  | 17755333  | 17827063  | 71730   | protein coding                       | -1.70 | 7.87E-04 | 7.93E-03 |
| ENSG00000268144 | NIFKP6     | 19 | 51396755  | 51403526  | 6771    | processed pseudogene                 | -1.70 | 8.60E-03 | 4.02E-02 |
| ENSG00000280560 | LINC01374  | 10 | 89853595  | 90225443  | 371848  | lncRNA                               | -1.70 | 7.61E-05 | 1.64E-03 |
| ENSG00000259705 | AC084757.3 | 15 | 48645951  | 48652016  | 6065    | lncRNA                               | -1.70 | 4.89E-03 | 2.76E-02 |
| ENSG00000176495 | OR5AN1     | 11 | 59358895  | 59371714  | 12819   | protein coding                       | -1.70 | 2.50E-04 | 3.68E-03 |
| ENSG00000277013 | AC008556.1 | 19 | 33906352  | 33908391  | 2039    | lncRNA                               | -1.70 | 5.72E-03 | 3.07E-02 |
| ENSG00000159251 | ACTC1      | 15 | 34790230  | 34795549  | 5319    | protein coding                       | -1.70 | 5.54E-03 | 3.00E-02 |
| ENSG00000129988 | LBP        | 20 | 38346482  | 38377013  | 30531   | protein coding                       | -1.70 | 4.73E-05 | 1.17E-03 |
| ENSG00000134249 | ADAM30     | 1  | 119893533 | 119896515 | 2982    | protein coding                       | -1.70 | 1.06E-02 | 4.64E-02 |
| ENSG00000237986 | CEL2F-AS2  | 10 | 11071541  | 11105773  | 34232   | lncRNA-antisense                     | -1.70 | 2.93E-03 | 1.95E-02 |
| ENSG00000248752 | AC113662.1 | 5  | 125333369 | 126368755 | 1035386 | lncRNA                               | -1.70 | 2.68E-03 | 1.83E-02 |
| ENSG00000259708 | AC090607.3 | 15 | 78250502  | 78264156  | 13654   | lncRNA-antisense                     | -1.70 | 1.14E-02 | 4.90E-02 |
| ENSG00000234177 | LINC01114  | 2  | 104746638 | 104757719 | 11081   | lncRNA                               | -1.70 | 5.70E-04 | 6.37E-03 |
| ENSG00000283528 | TCAF2C     | 7  | 143639230 | 143647646 | 8416    | protein coding                       | -1.70 | 8.86E-03 | 4.11E-02 |
| ENSG00000236507 | BX470209.2 | 9  | 89797880  | 89803100  | 5220    | lncRNA                               | -1.70 | 6.51E-04 | 6.96E-03 |
| ENSG00000154783 | FGD5       | 3  | 14810853  | 14934511  | 123718  | protein coding                       | -1.70 | 5.82E-06 | 2.87E-04 |
| ENSG00000147488 | ST18       | 8  | 52110839  | 52460959  | 350120  | protein coding                       | -1.70 | 5.70E-08 | 1.22E-05 |
| ENSG00000204694 | OR11A1     | 6  | 29425504  | 29457071  | 31567   | protein coding                       | -1.70 | 6.35E-03 | 3.29E-02 |
| ENSG00000186976 | EFCAB6     | 22 | 43528744  | 43812337  | 283593  | protein coding                       | -1.70 | 1.92E-05 | 6.37E-04 |
| ENSG00000204393 | NOL4L-DT   | 20 | 32564992  | 32608893  | 43901   | lncRNA                               | -1.70 | 3.08E-03 | 2.01E-02 |
| ENSG00000230314 | ELOVL2-AS1 | 6  | 11043482  | 11079154  | 35672   | lncRNA-antisense                     | -1.70 | 2.75E-03 | 1.86E-02 |
| ENSG00000104413 | ESRP1      | 8  | 94641074  | 94707466  | 66392   | protein coding                       | -1.70 | 4.52E-05 | 1.13E-03 |

|                 |            |    |           |           |        |                                    |       |          |          |
|-----------------|------------|----|-----------|-----------|--------|------------------------------------|-------|----------|----------|
| ENSG00000176253 | OR4K13     | 14 | 20029399  | 20036038  | 6639   | protein coding                     | -1.71 | 2.23E-03 | 1.62E-02 |
| ENSG00000274808 | TBC1D3B    | 17 | 36165681  | 36176636  | 10955  | protein coding                     | -1.71 | 2.93E-03 | 1.95E-02 |
| ENSG00000249961 | TERB1      | 16 | 66754640  | 66801620  | 46980  | protein coding                     | -1.71 | 2.27E-04 | 3.45E-03 |
| ENSG00000178795 | GDPD4      | 11 | 77216558  | 77301687  | 85129  | protein coding                     | -1.71 | 1.06E-03 | 9.65E-03 |
| ENSG00000279588 | AC087762.2 | 15 | 100782417 | 100786189 | 3772   | TEC                                | -1.71 | 2.70E-03 | 1.84E-02 |
| ENSG00000266554 | LINC01443  | 18 | 14946267  | 14974215  | 27948  | lncRNA                             | -1.71 | 3.62E-03 | 2.24E-02 |
| ENSG00000224153 | LINC02054  | 3  | 184399790 | 184457891 | 58101  | lncRNA                             | -1.71 | 1.71E-03 | 1.34E-02 |
| ENSG00000274414 | AL121772.1 | 20 | 25239007  | 25245229  | 6222   | lncRNA                             | -1.71 | 8.26E-03 | 3.91E-02 |
| ENSG00000256659 | LINC02368  | 12 | 128116730 | 128123103 | 6373   | lncRNA                             | -1.71 | 1.48E-03 | 1.22E-02 |
| ENSG00000253348 | AC008514.1 | 5  | 170747047 | 170788650 | 41603  | lncRNA-antisense                   | -1.71 | 7.91E-03 | 3.81E-02 |
| ENSG00000280241 | AC079298.3 | 4  | 153948718 | 154300500 | 351782 | lncRNA-antisense                   | -1.71 | 1.60E-03 | 1.28E-02 |
| ENSG00000232762 | AL355483.2 | 1  | 53304536  | 53307462  | 2926   | lncRNA-antisense                   | -1.71 | 5.28E-03 | 2.90E-02 |
| ENSG00000214336 | FOXI3      | 2  | 88446787  | 88452693  | 5906   | protein coding                     | -1.71 | 1.06E-02 | 4.64E-02 |
| ENSG00000174038 | C9orf131   | 9  | 35041095  | 35045986  | 4891   | protein coding                     | -1.71 | 1.22E-03 | 1.06E-02 |
| ENSG00000230666 | CEACAM22P  | 19 | 44537058  | 44620821  | 83763  | transcribed unprocessed pseudogene | -1.71 | 5.74E-04 | 6.39E-03 |
| ENSG00000120054 | CPN1       | 10 | 100042193 | 100081869 | 39676  | protein coding                     | -1.71 | 3.31E-03 | 2.11E-02 |
| ENSG00000282386 | AL358472.4 | 1  | 153964361 | 153965070 | 709    | lncRNA-antisense                   | -1.71 | 9.31E-03 | 4.25E-02 |
| ENSG00000198838 | RYR3       | 15 | 33310962  | 33866121  | 555159 | protein coding                     | -1.71 | 1.56E-08 | 4.95E-06 |
| ENSG00000158560 | DYNC111    | 7  | 95772506  | 96110322  | 337816 | protein coding                     | -1.71 | 2.13E-05 | 6.79E-04 |
| ENSG00000196341 | OR8D1      | 11 | 124302831 | 124315099 | 12268  | protein coding                     | -1.71 | 3.17E-04 | 4.29E-03 |
| ENSG00000104415 | CCN4       | 8  | 133191039 | 133231690 | 40651  | protein coding                     | -1.71 | 3.56E-04 | 4.63E-03 |
| ENSG00000177757 | FAM87B     | 1  | 817371    | 819837    | 2466   | lncRNA                             | -1.71 | 2.80E-03 | 1.89E-02 |
| ENSG00000241544 | LINC02029  | 3  | 157081738 | 157088547 | 6809   | lncRNA                             | -1.71 | 7.26E-03 | 3.60E-02 |
| ENSG00000125409 | TEKT3      | 17 | 15303811  | 15341632  | 37821  | protein coding                     | -1.71 | 1.72E-04 | 2.86E-03 |
| ENSG00000279246 | AP003108.3 | 11 | 61352244  | 61354477  | 2233   | TEC                                | -1.71 | 1.15E-03 | 1.02E-02 |
| ENSG00000261257 | AP000821.1 | 11 | 126100505 | 126102413 | 1908   | lncRNA                             | -1.71 | 8.43E-03 | 3.97E-02 |
| ENSG00000134533 | RERG       | 12 | 15107783  | 15348675  | 240892 | protein coding                     | -1.71 | 8.32E-04 | 8.24E-03 |
| ENSG00000163630 | SYNPR      | 3  | 63228315  | 63616924  | 388609 | protein coding                     | -1.71 | 1.61E-03 | 1.29E-02 |
| ENSG00000260172 | LINC01413  | 15 | 57319138  | 57325039  | 5901   | lncRNA                             | -1.71 | 6.37E-03 | 3.30E-02 |
| ENSG00000229951 | FLJ31356   | 2  | 28384409  | 28394672  | 10263  | lncRNA-antisense                   | -1.71 | 1.24E-04 | 2.28E-03 |
| ENSG00000187870 | RNF11P3    | 17 | 20743333  | 20754501  | 11168  | unprocessed pseudogene             | -1.71 | 3.83E-03 | 2.32E-02 |
| ENSG00000248736 | AC094105.2 | 5  | 2921496   | 2967955   | 46459  | lncRNA                             | -1.71 | 3.23E-04 | 4.34E-03 |
| ENSG00000173404 | INSM1      | 20 | 20368104  | 20370949  | 2845   | protein coding                     | -1.71 | 4.42E-03 | 2.57E-02 |
| ENSG00000279581 | AC073862.2 | 12 | 130980667 | 130981367 | 700    | TEC                                | -1.71 | 8.98E-03 | 4.14E-02 |
| ENSG00000280053 | AC011199.1 | 3  | 126973065 | 126976426 | 3361   | TEC                                | -1.71 | 5.53E-03 | 3.00E-02 |
| ENSG00000171388 | APLN       | X  | 129645259 | 129654956 | 9697   | protein coding                     | -1.71 | 1.17E-03 | 1.03E-02 |
| ENSG00000285367 | AC087564.1 | 16 | 51150770  | 51442519  | 291749 | lncRNA                             | -1.71 | 1.02E-05 | 4.18E-04 |
| ENSG00000249740 | OSMR-AS1   | 5  | 38682581  | 38845829  | 163248 | lncRNA                             | -1.71 | 2.98E-04 | 4.14E-03 |
| ENSG00000279388 | AC073578.3 | 12 | 131478844 | 131483034 | 4190   | TEC                                | -1.71 | 5.54E-04 | 6.24E-03 |
| ENSG00000138347 | MYPN       | 10 | 68106117  | 68212017  | 105900 | protein coding                     | -1.71 | 3.12E-04 | 4.25E-03 |
| ENSG00000286933 | AL022170.1 | 6  | 25632673  | 25640931  | 8258   | lncRNA                             | -1.71 | 4.93E-03 | 2.78E-02 |
| ENSG00000164692 | COL1A2     | 7  | 94394895  | 94431227  | 36332  | protein coding                     | -1.71 | 1.01E-05 | 4.15E-04 |
| ENSG00000288575 | AL159996.1 | 9  | 86751297  | 86758347  | 7050   | lncRNA                             | -1.71 | 4.80E-03 | 2.73E-02 |
| ENSG00000145040 | UCN2       | 3  | 48561718  | 48563781  | 2063   | protein coding                     | -1.71 | 9.37E-03 | 4.26E-02 |
| ENSG00000286962 | AC027128.1 | 3  | 10914196  | 10977981  | 63785  | lncRNA                             | -1.71 | 2.19E-03 | 1.59E-02 |
| ENSG00000261115 | TMEM17B    | 7  | 141074064 | 141480380 | 406316 | protein coding                     | -1.71 | 2.09E-07 | 3.01E-05 |
| ENSG00000204532 | ZSCAN5C    | 19 | 56202301  | 56209452  | 7151   | protein coding                     | -1.71 | 5.01E-03 | 2.80E-02 |
| ENSG00000272274 | LINC00551  | 13 | 106586261 | 106716679 | 148418 | lncRNA                             | -1.71 | 4.52E-05 | 1.13E-03 |
| ENSG00000132561 | MATN2      | 8  | 97868840  | 98036724  | 167884 | protein coding                     | -1.71 | 6.95E-08 | 1.36E-05 |
| ENSG00000284705 | AL596257.1 | 1  | 36703953  | 36710582  | 6629   | lncRNA                             | -1.71 | 2.86E-04 | 4.02E-03 |
| ENSG00000224791 | KRT18P39   | 2  | 203764295 | 203765593 | 1298   | processed pseudogene               | -1.71 | 1.05E-02 | 4.62E-02 |
| ENSG00000155495 | MAGEC1     | X  | 141903894 | 141909374 | 5480   | protein coding                     | -1.71 | 6.65E-03 | 3.40E-02 |
| ENSG00000283638 | AC002407.1 | X  | 134168911 | 134174089 | 5178   | lncRNA                             | -1.72 | 1.54E-04 | 2.64E-03 |
| ENSG00000138356 | AOX1       | 2  | 200586014 | 200677064 | 91050  | protein coding                     | -1.72 | 1.30E-04 | 2.35E-03 |
| ENSG00000243276 | AC068633.1 | 3  | 118004819 | 118810836 | 806017 | lncRNA                             | -1.72 | 1.07E-02 | 4.67E-02 |
| ENSG00000260325 | HSPB9      | 17 | 42122804  | 42123352  | 548    | protein coding                     | -1.72 | 1.10E-02 | 4.78E-02 |
| ENSG00000163810 | TGM4       | 3  | 44874608  | 44914990  | 40382  | protein coding                     | -1.72 | 7.22E-05 | 1.58E-03 |
| ENSG00000205312 | KRT17P4    | 17 | 16847635  | 16852777  | 5142   | transcribed unprocessed pseudogene | -1.72 | 8.86E-03 | 4.11E-02 |
| ENSG00000147434 | CHRNA6     | 8  | 42752620  | 42796392  | 43772  | protein coding                     | -1.72 | 5.80E-03 | 3.09E-02 |
| ENSG00000123094 | RASSF8     | 12 | 25959029  | 26079892  | 120863 | protein coding                     | -1.72 | 5.67E-05 | 1.34E-03 |
| ENSG00000279301 | OR2T11     | 1  | 248623557 | 248635091 | 11534  | protein coding                     | -1.72 | 8.58E-03 | 4.02E-02 |
| ENSG00000203356 | LINC01562  | 1  | 51195095  | 51235096  | 40001  | lncRNA                             | -1.72 | 5.29E-03 | 2.90E-02 |
| ENSG00000169894 | MUC3A      | 7  | 100949534 | 100968347 | 18813  | protein coding                     | -1.72 | 1.52E-05 | 5.52E-04 |
| ENSG00000214264 | KCTD9P4    | 11 | 112180773 | 112183191 | 2418   | processed pseudogene               | -1.72 | 7.52E-03 | 3.68E-02 |
| ENSG00000234548 | LINC02020  | 3  | 186439239 | 186457299 | 18060  | lncRNA                             | -1.72 | 6.59E-03 | 3.38E-02 |
| ENSG00000105388 | CEACAM5    | 19 | 41708585  | 41730433  | 21848  | protein coding                     | -1.72 | 1.31E-03 | 1.11E-02 |
| ENSG00000288072 | AC008507.5 | 19 | 30078133  | 30085893  | 7760   | lncRNA                             | -1.72 | 9.18E-03 | 4.21E-02 |
| ENSG00000237720 | AC011995.2 | 2  | 2707368   | 2840512   | 133144 | lncRNA                             | -1.72 | 3.86E-05 | 1.02E-03 |
| ENSG00000229349 | ACTG1P9    | 6  | 46204729  | 46207386  | 2657   | processed pseudogene               | -1.72 | 2.58E-03 | 1.79E-02 |
| ENSG00000224944 | CASC6      | 6  | 91557292  | 91690428  | 133136 | lncRNA                             | -1.72 | 2.62E-03 | 1.80E-02 |
| ENSG00000260392 | AC090518.1 | 15 | 56542952  | 56629592  | 86640  | lncRNA                             | -1.72 | 1.12E-04 | 2.12E-03 |
| ENSG00000158258 | CLSTN2     | 3  | 139935185 | 140577397 | 842212 | protein coding                     | -1.72 | 1.11E-05 | 4.47E-04 |
| ENSG00000100987 | VSX1       | 20 | 25070885  | 25082141  | 11256  | protein coding                     | -1.72 | 4.00E-04 | 5.04E-03 |
| ENSG00000232190 | LINC02181  | 16 | 87057784  | 87070105  | 12321  | lncRNA                             | -1.72 | 1.61E-04 | 2.72E-03 |
| ENSG00000156009 | MAGEA8     | X  | 149881141 | 149885835 | 4694   | protein coding                     | -1.72 | 3.85E-03 | 2.33E-02 |
| ENSG00000237640 | AC004522.3 | 7  | 99929392  | 99948620  | 19228  | lncRNA-antisense                   | -1.72 | 1.00E-02 | 4.47E-02 |
| ENSG00000236384 | LINC00479  | 21 | 41711520  | 41715725  | 4255   | lncRNA                             | -1.72 | 1.67E-03 | 1.32E-02 |
| ENSG00000287463 | AC110620.2 | 2  | 134718188 | 134725474 | 7286   | lncRNA                             | -1.72 | 2.31E-04 | 3.49E-03 |
| ENSG00000286115 | AC010092.1 | 2  | 170890393 | 170914873 | 24480  | lncRNA                             | -1.72 | 1.14E-02 | 4.88E-02 |
| ENSG00000204897 | KRT25      | 17 | 40748021  | 40755331  | 7310   | protein coding                     | -1.72 | 3.67E-03 | 2.26E-02 |
| ENSG00000277041 | AC106788.1 | 16 | 22537478  | 22537584  | 106    | unprocessed pseudogene             | -1.72 | 5.22E-03 | 2.88E-02 |
| ENSG00000224190 | LINC02667  | 10 | 128912810 | 128916429 | 3619   | lncRNA                             | -1.72 | 6.23E-03 | 3.25E-02 |
| ENSG00000245694 | CRND6      | 16 | 54845189  | 54929189  | 84000  | lncRNA                             | -1.72 | 2.57E-06 | 1.66E-04 |
| ENSG00000175604 | AC007601.1 | 16 | 12086746  | 12090302  | 3556   | lncRNA-antisense                   | -1.72 | 2.75E-03 | 1.86E-02 |
| ENSG00000257943 | AC084879.1 | 12 | 95311312  | 95442482  | 131170 | transcribed unitary pseudogene     | -1.72 | 3.88E-03 | 2.35E-02 |
| ENSG00000166473 | PKD1L2     | 16 | 81100875  | 81220370  | 119495 | polymorphic pseudogene             | -1.72 | 7.36E-06 | 3.38E-04 |
| ENSG00000163827 | LRRC2      | 3  | 46515385  | 46580099  | 64714  | protein coding                     | -1.72 | 2.89E-06 | 1.79E-04 |
| ENSG00000152670 | DDX4       | 5  | 55738017  | 55817157  | 79140  | protein coding                     | -1.72 | 1.82E-04 | 2.97E-03 |
| ENSG00000287792 | AC140118.2 | 12 | 131350844 | 131371721 | 20877  | lncRNA                             | -1.72 | 2.01E-04 | 3.19E-03 |
| ENSG00000232023 | LINC01807  | 2  | 228475224 | 228841689 | 366465 | lncRNA                             | -1.72 | 1.05E-02 | 4.63E-02 |



|                 |             |    |           |           |         |                                    |       |          |          |
|-----------------|-------------|----|-----------|-----------|---------|------------------------------------|-------|----------|----------|
| ENSG00000125207 | PIWIL1      | 12 | 130337887 | 130372637 | 34750   | protein coding                     | -1.72 | 2.04E-05 | 6.61E-04 |
| ENSG00000255393 | OOSP4B      | 11 | 59978020  | 60031077  | 53057   | protein coding                     | -1.72 | 8.65E-03 | 4.04E-02 |
| ENSG00000131386 | GALNT15     | 3  | 16174680  | 16231992  | 57312   | protein coding                     | -1.72 | 3.17E-04 | 4.30E-03 |
| ENSG00000256969 | AC084375.1  | 12 | 4012902   | 4026658   | 13756   | lncRNA                             | -1.72 | 7.30E-03 | 3.61E-02 |
| ENSG0000021852  | C8B         | 1  | 56929207  | 56966140  | 36933   | protein coding                     | -1.72 | 9.30E-04 | 8.87E-03 |
| ENSG00000184984 | CHRM5       | 15 | 33968497  | 34067458  | 98961   | protein coding                     | -1.72 | 2.59E-05 | 7.77E-04 |
| ENSG00000286957 | AC097776.5  | 2  | 129877896 | 129884441 | 6545    | lncRNA                             | -1.72 | 1.94E-03 | 1.46E-02 |
| ENSG00000224081 | SLC44A3-AS1 | 1  | 94613814  | 94855426  | 241612  | transcribed processed pseudogene   | -1.73 | 7.53E-08 | 1.42E-05 |
| ENSG00000255087 | AP001993.1  | 11 | 127021736 | 127172363 | 150627  | lncRNA                             | -1.73 | 1.96E-05 | 6.46E-04 |
| ENSG00000204033 | LRI2        | 10 | 84220571  | 84225544  | 4973    | protein coding                     | -1.73 | 4.59E-03 | 2.64E-02 |
| ENSG00000233606 | OR6C66P     | 12 | 55385837  | 55392964  | 7127    | transcribed unprocessed pseudogene | -1.73 | 3.18E-03 | 2.06E-02 |
| ENSG00000155754 | C2CD6       | 2  | 201487421 | 201619178 | 131757  | protein coding                     | -1.73 | 1.03E-05 | 4.21E-04 |
| ENSG00000175356 | SCUBE2      | 11 | 9019476   | 9138114   | 118638  | protein coding                     | -1.73 | 3.87E-08 | 9.34E-06 |
| ENSG00000286157 | AC011467.6  | 19 | 22518414  | 22520580  | 2166    | lncRNA-antisense                   | -1.73 | 2.40E-03 | 1.70E-02 |
| ENSG00000257771 | LINC02395   | 12 | 49900311  | 49932764  | 32453   | lncRNA                             | -1.73 | 5.28E-05 | 1.27E-03 |
| ENSG00000254092 | AC021613.1  | 8  | 20942863  | 21298168  | 355305  | lncRNA                             | -1.73 | 5.62E-06 | 2.80E-04 |
| ENSG00000264985 | AC128404.1  | 17 | 73513469  | 73521407  | 7938    | lncRNA-antisense                   | -1.73 | 1.35E-04 | 2.40E-03 |
| ENSG00000255344 | LINC02706   | 11 | 134712539 | 134716250 | 3711    | lncRNA                             | -1.73 | 1.35E-03 | 1.14E-02 |
| ENSG00000101333 | PLCB4       | 20 | 9068763   | 9481242   | 412479  | protein coding                     | -1.73 | 6.71E-06 | 3.17E-04 |
| ENSG00000229212 | AC044860.1  | 15 | 85180200  | 85234795  | 54595   | transcribed unprocessed pseudogene | -1.73 | 9.23E-03 | 4.22E-02 |
| ENSG00000101134 | DOK5        | 20 | 54475593  | 54651169  | 175576  | protein coding                     | -1.73 | 9.56E-04 | 9.04E-03 |
| ENSG00000205858 | LRRC72      | 7  | 16526825  | 16581568  | 54743   | protein coding                     | -1.73 | 2.52E-03 | 1.75E-02 |
| ENSG00000266786 | LGAL59DP    | 17 | 27746132  | 27754954  | 8822    | unprocessed pseudogene             | -1.73 | 1.36E-03 | 1.14E-02 |
| ENSG00000235602 | POU5F1P3    | 12 | 8133772   | 8134849   | 1077    | processed pseudogene               | -1.73 | 8.26E-03 | 3.91E-02 |
| ENSG00000117215 | PLA2G2D     | 1  | 20111939  | 20119566  | 7627    | protein coding                     | -1.73 | 1.15E-05 | 4.54E-04 |
| ENSG00000261239 | ANKRD26P1   | 16 | 46469341  | 46569097  | 99756   | transcribed unprocessed pseudogene | -1.73 | 7.55E-05 | 1.64E-03 |
| ENSG00000269186 | LINC01082   | 16 | 86195954  | 86199720  | 3766    | lncRNA                             | -1.73 | 2.24E-03 | 1.62E-02 |
| ENSG00000284640 | AL590434.1  | 1  | 35141515  | 35146435  | 4920    | lncRNA                             | -1.73 | 6.08E-03 | 3.20E-02 |
| ENSG00000275212 | LINC02826   | 12 | 125983702 | 12604385  | 59783   | lncRNA                             | -1.73 | 5.69E-04 | 6.36E-03 |
| ENSG00000266242 | GRAMD4P7    | 18 | 14485806  | 14487501  | 1695    | processed pseudogene               | -1.73 | 8.19E-03 | 3.90E-02 |
| ENSG00000104067 | TJP1        | 15 | 29699367  | 29968915  | 269548  | protein coding                     | -1.73 | 7.79E-07 | 7.36E-05 |
| ENSG00000159173 | TNNI1       | 1  | 201403768 | 201429866 | 26098   | protein coding                     | -1.73 | 2.60E-05 | 7.78E-04 |
| ENSG00000187079 | TEAD1       | 11 | 12674421  | 12944737  | 270316  | protein coding                     | -1.73 | 1.07E-07 | 1.79E-05 |
| ENSG00000285974 | AC026624.1  | 15 | 82180743  | 82182700  | 1957    | lncRNA-antisense                   | -1.73 | 4.13E-03 | 2.45E-02 |
| ENSG00000138039 | LHCGR       | 2  | 48686774  | 48755730  | 68956   | protein coding                     | -1.73 | 7.22E-03 | 3.58E-02 |
| ENSG00000287514 | AL450267.2  | 9  | 36779475  | 36830456  | 50981   | lncRNA                             | -1.73 | 1.12E-03 | 1.00E-02 |
| ENSG00000276087 | AC008073.3  | 2  | 24124366  | 24190336  | 66070   | protein coding                     | -1.73 | 7.91E-03 | 3.81E-02 |
| ENSG00000223901 | AP001469.1  | 21 | 46220269  | 46225364  | 5095    | lncRNA-antisense                   | -1.73 | 2.42E-03 | 1.71E-02 |
| ENSG00000250799 | PRODH2      | 19 | 35799888  | 35813299  | 13311   | protein coding                     | -1.73 | 2.55E-04 | 3.73E-03 |
| ENSG00000262999 | AC099489.3  | 16 | 11465260  | 11473174  | 7914    | lncRNA-antisense                   | -1.73 | 3.73E-03 | 2.29E-02 |
| ENSG00000106125 | MINDY4      | 7  | 30771417  | 30892387  | 120970  | protein coding                     | -1.73 | 2.90E-04 | 4.06E-03 |
| ENSG00000179813 | FAM216B     | 13 | 42781550  | 42791549  | 9999    | protein coding                     | -1.73 | 4.36E-03 | 2.55E-02 |
| ENSG00000220238 | POTEJ       | 2  | 130611440 | 130658037 | 46597   | protein coding                     | -1.73 | 3.44E-03 | 2.17E-02 |
| ENSG00000254299 | LINC01944   | 5  | 172543403 | 172559202 | 15799   | lncRNA                             | -1.73 | 8.09E-03 | 3.86E-02 |
| ENSG00000267609 | SNX33P1     | 19 | 16034776  | 16036537  | 1761    | processed pseudogene               | -1.73 | 3.92E-03 | 2.36E-02 |
| ENSG00000267387 | AC020931.1  | 19 | 10089032  | 10090377  | 1345    | lncRNA-antisense                   | -1.73 | 2.67E-04 | 3.86E-03 |
| ENSG00000101115 | SALL4       | 20 | 51782331  | 51802521  | 20190   | protein coding                     | -1.73 | 9.26E-07 | 8.14E-05 |
| ENSG00000188386 | PPP3R2      | 9  | 101591604 | 101595021 | 3417    | protein coding                     | -1.73 | 6.44E-03 | 3.32E-02 |
| ENSG00000204296 | TSBP1       | 6  | 32288526  | 32371912  | 83396   | protein coding                     | -1.73 | 2.51E-03 | 1.75E-02 |
| ENSG00000243024 | AC012158.1  | 12 | 64222337  | 64397065  | 174728  | transcribed processed pseudogene   | -1.73 | 2.06E-03 | 1.53E-02 |
| ENSG00000203995 | ZYG11A      | 1  | 52842511  | 52894998  | 52487   | protein coding                     | -1.73 | 1.01E-04 | 1.99E-03 |
| ENSG00000163982 | OTOP1       | 4  | 4188726   | 4226929   | 38203   | protein coding                     | -1.73 | 5.71E-04 | 6.37E-03 |
| ENSG00000249695 | AC026369.1  | 12 | 137411    | 149169    | 11758   | lncRNA-antisense                   | -1.73 | 4.42E-05 | 1.12E-03 |
| ENSG00000140945 | CDH13       | 16 | 82628665  | 83800640  | 1173675 | protein coding                     | -1.74 | 5.50E-05 | 1.30E-03 |
| ENSG00000230866 | LINC02558   | 22 | 31970823  | 32037995  | 67172   | lncRNA                             | -1.74 | 5.27E-03 | 2.90E-02 |
| ENSG00000170324 | FRMPD2      | 10 | 48153088  | 48274696  | 121608  | protein coding                     | -1.74 | 3.84E-06 | 2.15E-04 |
| ENSG00000224977 | LINC02776   | 1  | 174022509 | 174022985 | 476     | lncRNA                             | -1.74 | 3.52E-03 | 2.20E-02 |
| ENSG00000227964 | LINC01429   | 20 | 51831797  | 51862912  | 31115   | lncRNA                             | -1.74 | 7.28E-03 | 3.60E-02 |
| ENSG00000146001 | PCDH18P     | 5  | 141234333 | 141237529 | 3196    | transcribed unprocessed pseudogene | -1.74 | 4.00E-03 | 2.39E-02 |
| ENSG00000259358 | DEPDC1P1    | 15 | 31765743  | 31768201  | 2458    | processed pseudogene               | -1.74 | 3.65E-03 | 2.25E-02 |
| ENSG00000235189 | AL034405.1  | X  | 129869064 | 129957528 | 88464   | lncRNA-antisense                   | -1.74 | 9.61E-04 | 9.06E-03 |
| ENSG00000268282 | AC010328.2  | 19 | 53004040  | 53005150  | 1110    | processed pseudogene               | -1.74 | 2.32E-03 | 1.66E-02 |
| ENSG00000283529 | AL035685.1  | 20 | 49318337  | 49441654  | 123317  | transcribed unprocessed pseudogene | -1.74 | 6.51E-07 | 6.54E-05 |
| ENSG00000267026 | AL136084.1  | 9  | 98847172  | 98872415  | 25243   | lncRNA-antisense                   | -1.74 | 3.42E-04 | 4.52E-03 |
| ENSG00000180934 | OR56A1      | 11 | 6019336   | 6034338   | 15002   | protein coding                     | -1.74 | 5.61E-05 | 1.32E-03 |
| ENSG00000254081 | LINC01299   | 8  | 65526738  | 65562781  | 36043   | lncRNA                             | -1.74 | 7.16E-03 | 3.56E-02 |
| ENSG00000270885 | RASL10B     | 17 | 35731639  | 35743521  | 11882   | protein coding                     | -1.74 | 9.59E-07 | 8.28E-05 |
| ENSG00000235779 | AC097979.3  | 2  | 290941    | 314373    | 23432   | lncRNA                             | -1.74 | 1.16E-04 | 2.17E-03 |
| ENSG00000079933 | FMO3        | 1  | 171090901 | 171117819 | 28918   | protein coding                     | -1.74 | 2.80E-03 | 1.88E-02 |
| ENSG00000206142 | FAM230H     | 22 | 21300990  | 21325042  | 24052   | lncRNA                             | -1.74 | 9.44E-03 | 4.29E-02 |
| ENSG00000224795 | NTM-AS1     | 11 | 131622451 | 131663583 | 41132   | lncRNA                             | -1.74 | 1.22E-03 | 1.06E-02 |
| ENSG00000120440 | TTL2        | 6  | 167325071 | 167359503 | 34432   | protein coding                     | -1.74 | 3.58E-03 | 2.23E-02 |
| ENSG00000243479 | MNX1-AS1    | 7  | 157010805 | 157016426 | 5621    | lncRNA                             | -1.74 | 3.00E-03 | 1.98E-02 |
| ENSG00000266830 | AC061975.6  | 17 | 28246454  | 28248006  | 1552    | lncRNA                             | -1.74 | 3.97E-03 | 2.38E-02 |
| ENSG00000279712 | FP32530.3   | 22 | 47916728  | 47926264  | 9536    | lncRNA                             | -1.74 | 1.77E-05 | 6.05E-04 |
| ENSG00000237525 | AC012668.3  | 2  | 215533133 | 215713895 | 180762  | lncRNA                             | -1.74 | 1.27E-03 | 1.09E-02 |
| ENSG00000162456 | KNCN        | 1  | 46545641  | 46551647  | 6006    | protein coding                     | -1.74 | 8.34E-04 | 8.25E-03 |
| ENSG00000140505 | CYP1A2      | 15 | 74748845  | 74756607  | 7762    | protein coding                     | -1.74 | 1.02E-03 | 9.43E-03 |
| ENSG00000260440 | LINC01544   | 18 | 61748082  | 61758464  | 10382   | lncRNA                             | -1.74 | 3.03E-04 | 4.19E-03 |
| ENSG00000182950 | ODF3L1      | 15 | 75724041  | 75727688  | 3647    | protein coding                     | -1.74 | 2.35E-03 | 1.68E-02 |
| ENSG00000142619 | PADI3       | 1  | 17249098  | 17284233  | 35135   | protein coding                     | -1.74 | 4.87E-04 | 5.72E-03 |
| ENSG00000250316 | AC068880.1  | 8  | 19237737  | 19241912  | 4175    | unprocessed pseudogene             | -1.74 | 3.71E-03 | 2.28E-02 |
| ENSG00000124212 | PTGIS       | 20 | 49503874  | 49568137  | 64263   | protein coding                     | -1.74 | 3.78E-04 | 4.83E-03 |
| ENSG00000006042 | TMEM98      | 17 | 32927910  | 32945106  | 17196   | protein coding                     | -1.74 | 1.46E-05 | 5.39E-04 |
| ENSG00000260604 | AL590004.3  | 6  | 3904920   | 3911979   | 7059    | lncRNA                             | -1.74 | 1.92E-05 | 6.37E-04 |
| ENSG00000287630 | AC011370.1  | 5  | 147725551 | 147728464 | 2913    | lncRNA                             | -1.74 | 9.38E-04 | 8.91E-03 |
| ENSG00000123999 | INHA        | 2  | 219569162 | 219575711 | 6549    | protein coding                     | -1.74 | 1.29E-03 | 1.10E-02 |
| ENSG00000248587 | GDNF-AS1    | 5  | 37811589  | 37953827  | 142238  | lncRNA-antisense                   | -1.74 | 2.32E-05 | 7.22E-04 |
| ENSG00000287161 | AC093519.2  | 16 | 86899356  | 86961268  | 61912   | lncRNA                             | -1.74 | 1.43E-04 | 2.50E-03 |
| ENSG00000168398 | BDKRB2      | 14 | 96204679  | 96244166  | 39487   | protein coding                     | -1.74 | 1.93E-04 | 3.08E-03 |

|                 |              |    |           |           |        |                                      |       |          |          |
|-----------------|--------------|----|-----------|-----------|--------|--------------------------------------|-------|----------|----------|
| ENSG00000153930 | ANKFN1       | 17 | 55882301  | 56511659  | 629358 | protein coding                       | -1.74 | 1.86E-05 | 6.26E-04 |
| ENSG00000095981 | KCNK16       | 6  | 39314698  | 39322968  | 8270   | protein coding                       | -1.75 | 1.11E-03 | 9.91E-03 |
| ENSG00000286620 | AC239860.3   | 1  | 145459798 | 145462007 | 2209   | TEC                                  | -1.75 | 2.44E-03 | 1.71E-02 |
| ENSG00000254008 | LINC00051    | 8  | 142198356 | 142209003 | 10647  | lncRNA-antisense                     | -1.75 | 3.98E-03 | 2.38E-02 |
| ENSG00000251537 | AC005324.2   | 17 | 15571491  | 15651653  | 80162  | protein coding                       | -1.75 | 1.67E-03 | 1.32E-02 |
| ENSG00000163218 | PGLYRP4      | 1  | 153330120 | 153348841 | 18721  | protein coding                       | -1.75 | 2.85E-03 | 1.91E-02 |
| ENSG00000287079 | AL109806.2   | 20 | 56550605  | 56555579  | 4974   | lncRNA                               | -1.75 | 5.30E-04 | 6.05E-03 |
| ENSG00000286346 | AC021613.3   | 8  | 21167240  | 21170137  | 2897   | lncRNA                               | -1.75 | 7.45E-03 | 3.66E-02 |
| ENSG00000230468 | CLUHP5       | 10 | 133657235 | 133660635 | 3400   | unprocessed pseudogene               | -1.75 | 1.05E-02 | 4.61E-02 |
| ENSG00000267568 | AC016168.2   | 17 | 76950317  | 76969156  | 18839  | lncRNA                               | -1.75 | 1.47E-03 | 1.21E-02 |
| ENSG00000100312 | ACR          | 22 | 50738196  | 50745339  | 7143   | protein coding                       | -1.75 | 4.34E-03 | 2.54E-02 |
| ENSG00000226668 | AL136981.1   | 9  | 92882567  | 92899608  | 17041  | transcribed unprocessed pseudogene   | -1.75 | 1.58E-03 | 1.27E-02 |
| ENSG00000141441 | GAREM1       | 18 | 32124877  | 32470882  | 346005 | protein coding                       | -1.75 | 7.79E-06 | 3.52E-04 |
| ENSG00000165891 | E2F7         | 12 | 77021248  | 77065569  | 44321  | protein coding                       | -1.75 | 5.11E-06 | 2.62E-04 |
| ENSG00000261348 | LINC02136    | 16 | 71366933  | 71426464  | 59531  | lncRNA                               | -1.75 | 1.25E-03 | 1.08E-02 |
| ENSG00000241111 | PRICKLE2-AS1 | 3  | 64067964  | 64103131  | 35167  | lncRNA-antisense                     | -1.75 | 1.33E-03 | 1.13E-02 |
| ENSG00000279480 | AC138466.4   | 12 | 132200436 | 132201287 | 851    | TEC                                  | -1.75 | 4.92E-03 | 2.77E-02 |
| ENSG00000280222 | AL365209.1   | 1  | 18109389  | 18115861  | 6472   | TEC                                  | -1.75 | 5.27E-05 | 1.27E-03 |
| ENSG00000254966 | AC103974.1   | 11 | 18706537  | 18740568  | 34031  | lncRNA-antisense                     | -1.75 | 3.48E-03 | 2.18E-02 |
| ENSG00000164972 | C9orf24      | 9  | 34379019  | 34397810  | 18791  | protein coding                       | -1.75 | 8.00E-05 | 1.70E-03 |
| ENSG00000091428 | RAPGEF4      | 2  | 172735274 | 173052893 | 317619 | protein coding                       | -1.75 | 1.36E-06 | 1.06E-04 |
| ENSG00000261275 | AC092447.8   | 7  | 56493124  | 56497285  | 4161   | lncRNA                               | -1.75 | 1.50E-03 | 1.23E-02 |
| ENSG00000214347 | AC011491.1   | 19 | 6393794   | 6412404   | 18610  | transcribed unitary pseudogene       | -1.75 | 8.23E-03 | 3.91E-02 |
| ENSG00000283535 | AC007064.4   | 22 | 16844399  | 16846357  | 1958   | unprocessed pseudogene               | -1.75 | 5.27E-03 | 2.90E-02 |
| ENSG00000171671 | SHANK2-AS3   | 11 | 70862790  | 70865115  | 2325   | lncRNA-antisense                     | -1.75 | 6.92E-03 | 3.49E-02 |
| ENSG00000261447 | AL162412.1   | 9  | 69672749  | 69673713  | 964    | lncRNA                               | -1.75 | 5.81E-03 | 3.10E-02 |
| ENSG00000260577 | AC126773.4   | 16 | 68644248  | 68646168  | 1920   | lncRNA-antisense                     | -1.75 | 4.99E-03 | 2.80E-02 |
| ENSG00000184845 | DRD1         | 5  | 175440036 | 175444182 | 4146   | protein coding                       | -1.75 | 1.76E-03 | 1.36E-02 |
| ENSG00000235931 | LINC01553    | 10 | 59955430  | 59960913  | 5483   | lncRNA                               | -1.75 | 3.30E-03 | 2.10E-02 |
| ENSG00000185985 | SLITRK2      | X  | 145817829 | 145829856 | 12027  | protein coding                       | -1.75 | 6.64E-05 | 1.49E-03 |
| ENSG00000285606 | AC079200.1   | 8  | 10275499  | 10279737  | 4238   | lncRNA-antisense                     | -1.75 | 7.12E-04 | 7.40E-03 |
| ENSG00000007216 | SLC13A2      | 17 | 28473293  | 28497781  | 24488  | protein coding                       | -1.75 | 5.59E-05 | 1.32E-03 |
| ENSG00000113578 | FGF1         | 5  | 142592178 | 142698070 | 105892 | protein coding                       | -1.75 | 3.37E-04 | 4.46E-03 |
| ENSG00000226488 | LINC01824    | 2  | 6495651   | 6511839   | 16188  | lncRNA                               | -1.75 | 6.99E-03 | 3.51E-02 |
| ENSG00000245248 | USP2-AS1     | 11 | 119364359 | 119526664 | 162305 | lncRNA-antisense                     | -1.75 | 3.85E-05 | 1.02E-03 |
| ENSG00000198491 | AC007920.1   | 3  | 187197090 | 187207629 | 10539  | lncRNA-antisense                     | -1.75 | 8.35E-03 | 3.95E-02 |
| ENSG00000108417 | KRT37        | 17 | 41420547  | 41424585  | 4038   | protein coding                       | -1.75 | 4.88E-04 | 5.72E-03 |
| ENSG00000285587 | AC012470.1   | 10 | 116274270 | 116281071 | 6801   | lncRNA-bidirectional promoter lncRNA | -1.75 | 1.02E-02 | 4.53E-02 |
| ENSG00000102468 | HTR2A        | 13 | 46831546  | 46897076  | 65530  | protein coding                       | -1.75 | 5.78E-04 | 6.42E-03 |
| ENSG00000064655 | EYA2         | 20 | 46894624  | 47188844  | 294220 | protein coding                       | -1.75 | 1.22E-05 | 4.76E-04 |
| ENSG00000069206 | ADAM7        | 8  | 24440930  | 24526970  | 86040  | protein coding                       | -1.76 | 7.00E-05 | 1.56E-03 |
| ENSG00000263724 | DLGAP1-AS3   | 18 | 3878058   | 3897609   | 19011  | lncRNA-antisense                     | -1.76 | 1.72E-05 | 5.93E-04 |
| ENSG00000186471 | AKAP14       | X  | 119895837 | 119920716 | 24879  | protein coding                       | -1.76 | 1.52E-03 | 1.24E-02 |
| ENSG00000172987 | HPSE2        | 10 | 98457077  | 99235862  | 778785 | protein coding                       | -1.76 | 5.51E-06 | 2.76E-04 |
| ENSG00000260848 | AC092114.1   | 16 | 73543927  | 73569309  | 25382  | lncRNA                               | -1.76 | 3.02E-03 | 1.98E-02 |
| ENSG00000224982 | TMEM233      | 12 | 119593774 | 119643075 | 49301  | protein coding                       | -1.76 | 3.19E-03 | 2.06E-02 |
| ENSG00000171885 | AQP4         | 18 | 26852043  | 26865717  | 13728  | protein coding                       | -1.76 | 1.01E-03 | 9.39E-03 |
| ENSG00000171346 | KRT15        | 17 | 41513745  | 41522529  | 8784   | protein coding                       | -1.76 | 1.48E-04 | 2.55E-03 |
| ENSG00000269846 | AL136172.1   | 20 | 37095785  | 37097178  | 1393   | lncRNA-antisense                     | -1.76 | 8.14E-03 | 3.88E-02 |
| ENSG00000244968 | LIFR-AS1     | 5  | 38556765  | 38671216  | 114451 | lncRNA-antisense                     | -1.76 | 6.17E-05 | 1.52E-03 |
| ENSG00000270165 | AC10530.1    | 16 | 67738588  | 67739922  | 1334   | lncRNA-sense intronic                | -1.76 | 5.16E-03 | 2.86E-02 |
| ENSG00000132958 | TPTE2        | 13 | 19422877  | 19536762  | 113885 | protein coding                       | -1.76 | 2.15E-04 | 3.33E-03 |
| ENSG00000197309 | OR10D3       | 11 | 124183345 | 124188780 | 5435   | protein coding                       | -1.76 | 8.57E-03 | 4.02E-02 |
| ENSG00000267057 | LINC01905    | 18 | 56031830  | 56135295  | 103465 | lncRNA                               | -1.76 | 9.98E-04 | 9.30E-03 |
| ENSG00000247345 | AC092343.1   | 5  | 59039761  | 59063503  | 23742  | lncRNA-antisense                     | -1.76 | 9.44E-03 | 4.29E-02 |
| ENSG00000267489 | LINC01837    | 19 | 31797666  | 32072113  | 274447 | lncRNA                               | -1.76 | 1.23E-04 | 2.27E-03 |
| ENSG00000267440 | LINC02594    | 17 | 43679341  | 43706709  | 27368  | lncRNA                               | -1.76 | 2.49E-03 | 1.74E-02 |
| ENSG00000169213 | RAB3B        | 1  | 51907956  | 51907000  | 82744  | protein coding                       | -1.76 | 3.41E-05 | 9.39E-04 |
| ENSG00000263375 | AC233702.2   | 17 | 21592794  | 21594180  | 1386   | processed pseudogene                 | -1.76 | 5.21E-03 | 2.87E-02 |
| ENSG00000090534 | THPO         | 3  | 184371935 | 184381968 | 10033  | protein coding                       | -1.76 | 1.94E-03 | 1.47E-02 |
| ENSG00000173077 | DELEC1       | 9  | 114850968 | 115402644 | 551676 | lncRNA                               | -1.76 | 3.50E-07 | 4.22E-05 |
| ENSG00000286069 | AC079698.2   | 12 | 53739611  | 53898976  | 159365 | lncRNA                               | -1.76 | 2.43E-03 | 1.71E-02 |
| ENSG00000179133 | C10orf67     | 10 | 23202696  | 23344845  | 142149 | protein coding                       | -1.76 | 3.30E-06 | 1.96E-04 |
| ENSG00000137766 | UNC13C       | 15 | 53978201  | 54633414  | 655213 | protein coding                       | -1.76 | 4.50E-05 | 1.13E-03 |
| ENSG00000073712 | FERMT2       | 14 | 52857268  | 52952435  | 95167  | protein coding                       | -1.76 | 4.62E-06 | 2.44E-04 |
| ENSG00000253141 | AC008632.1   | 5  | 173463484 | 173484584 | 21100  | lncRNA                               | -1.76 | 6.35E-03 | 3.29E-02 |
| ENSG00000284966 | AL138689.2   | 13 | 106491147 | 106521630 | 30483  | lncRNA-antisense                     | -1.76 | 1.05E-04 | 2.03E-03 |
| ENSG00000260351 | AC024270.1   | 15 | 83022571  | 83090782  | 68211  | lncRNA-antisense                     | -1.76 | 8.03E-03 | 3.84E-02 |
| ENSG00000285781 | AL117340.1   | 10 | 31362799  | 31364049  | 1250   | unprocessed pseudogene               | -1.76 | 1.65E-03 | 1.31E-02 |
| ENSG00000250041 | AC069360.1   | 11 | 10884158  | 10899364  | 15206  | lncRNA                               | -1.76 | 7.07E-03 | 3.53E-02 |
| ENSG00000272674 | PCDHB16      | 5  | 141181399 | 141186399 | 5000   | protein coding                       | -1.76 | 6.58E-04 | 7.02E-03 |
| ENSG00000108231 | LG11         | 10 | 93757840  | 93806272  | 48432  | protein coding                       | -1.76 | 6.02E-06 | 2.92E-04 |
| ENSG00000155761 | SPAG17       | 1  | 117953590 | 118185228 | 231638 | protein coding                       | -1.76 | 2.60E-06 | 1.67E-04 |
| ENSG00000280890 | ELDR         | 7  | 55235965  | 55255635  | 19670  | lncRNA                               | -1.76 | 6.61E-03 | 3.38E-02 |
| ENSG00000204361 | NXPE2        | 11 | 114678527 | 114707069 | 28542  | protein coding                       | -1.76 | 1.01E-02 | 4.50E-02 |
| ENSG00000282057 | AC092807.3   | 1  | 85482281  | 85578250  | 95969  | lncRNA                               | -1.76 | 1.20E-03 | 1.05E-02 |
| ENSG00000182330 | PRAMEF8      | 1  | 13281035  | 13285174  | 4139   | protein coding                       | -1.76 | 1.03E-02 | 4.57E-02 |
| ENSG00000163217 | BMP10        | 2  | 68860909  | 68871397  | 10488  | protein coding                       | -1.76 | 4.51E-03 | 2.61E-02 |
| ENSG00000131738 | KRT33B       | 17 | 41363498  | 41369813  | 6315   | protein coding                       | -1.76 | 7.28E-03 | 3.60E-02 |
| ENSG00000197532 | OR6Y1        | 1  | 158544550 | 158554405 | 9855   | protein coding                       | -1.76 | 4.70E-03 | 2.68E-02 |
| ENSG00000171724 | VAT1L        | 16 | 77788564  | 77980107  | 191543 | protein coding                       | -1.76 | 1.26E-04 | 2.31E-03 |
| ENSG00000077274 | CAPN6        | X  | 111245099 | 111270483 | 25384  | protein coding                       | -1.77 | 3.52E-03 | 2.20E-02 |
| ENSG00000115252 | PDE1A        | 2  | 182140036 | 182523192 | 383156 | protein coding                       | -1.77 | 1.34E-03 | 1.13E-02 |
| ENSG00000284623 | LINC02786    | 1  | 38129464  | 38140593  | 11129  | lncRNA                               | -1.77 | 2.21E-03 | 1.61E-02 |
| ENSG00000254561 | AP00393.1    | 11 | 119608423 | 119659284 | 50861  | lncRNA-antisense                     | -1.77 | 2.91E-04 | 4.07E-03 |
| ENSG00000244040 | IL12A-AS1    | 3  | 159902045 | 160225299 | 323254 | lncRNA-antisense                     | -1.77 | 1.44E-05 | 5.36E-04 |
| ENSG00000186732 | MPPED1       | 22 | 43411196  | 43507848  | 96652  | protein coding                       | -1.77 | 3.72E-07 | 4.43E-05 |
| ENSG00000154997 | SEPTIN14     | 7  | 55793540  | 55862755  | 69215  | protein coding                       | -1.77 | 5.34E-04 | 6.08E-03 |
| ENSG00000265158 | LRRC37A7P    | 18 | 31724198  | 31726956  | 2758   | transcribed processed pseudogene     | -1.77 | 2.83E-03 | 1.90E-02 |
| ENSG00000259560 | AC020687.1   | 15 | 87325829  | 87703852  | 378023 | lncRNA                               | -1.77 | 4.11E-03 | 2.44E-02 |

|                 |             |    |           |           |        |                                    |       |          |          |
|-----------------|-------------|----|-----------|-----------|--------|------------------------------------|-------|----------|----------|
| ENSG00000258676 | AC091544.2  | 15 | 92580741  | 92600545  | 19804  | lncRNA                             | -1.77 | 7.45E-04 | 7.64E-03 |
| ENSG00000240687 | AC082651.1  | 2  | 9638745   | 9712920   | 74175  | lncRNA                             | -1.77 | 1.50E-03 | 1.23E-02 |
| ENSG00000250893 | AC098869.2  | 4  | 40426119  | 40427585  | 1466   | lncRNA-antisense                   | -1.77 | 7.67E-03 | 3.73E-02 |
| ENSG00000165325 | DEUP1       | 11 | 93329971  | 93438487  | 108516 | protein coding                     | -1.77 | 7.04E-04 | 7.34E-03 |
| ENSG00000102290 | PCDH11X     | X  | 91779261  | 92623230  | 843969 | protein coding                     | -1.77 | 1.40E-04 | 2.46E-03 |
| ENSG00000230623 | AC104461.1  | 1  | 200333193 | 200478669 | 145476 | lncRNA                             | -1.77 | 5.09E-04 | 5.89E-03 |
| ENSG00000259125 | LRP1-AS     | 12 | 57144620  | 57147619  | 2999   | lncRNA-antisense                   | -1.77 | 5.72E-03 | 3.07E-02 |
| ENSG00000255346 | NOX5        | 15 | 68930525  | 69062762  | 132237 | protein coding                     | -1.77 | 1.18E-04 | 2.21E-03 |
| ENSG00000285985 | LINC02689   | 11 | 1350359   | 1364286   | 13927  | lncRNA                             | -1.77 | 9.88E-04 | 9.23E-03 |
| ENSG00000267719 | LINC02078   | 17 | 79707266  | 79712317  | 5051   | lncRNA                             | -1.77 | 8.71E-05 | 1.79E-03 |
| ENSG00000106410 | NOBOX       | 7  | 144397240 | 144410227 | 12987  | protein coding                     | -1.77 | 8.75E-04 | 8.50E-03 |
| ENSG00000113389 | NPR3        | 5  | 32689070  | 32791724  | 102654 | protein coding                     | -1.77 | 2.79E-07 | 3.63E-05 |
| ENSG00000137875 | BCL2L10     | 15 | 52109263  | 52112775  | 3512   | protein coding                     | -1.77 | 8.13E-03 | 3.88E-02 |
| ENSG00000137225 | CAPN11      | 6  | 44158811  | 44184401  | 25590  | protein coding                     | -1.77 | 2.87E-06 | 1.78E-04 |
| ENSG00000257060 | AC091078.1  | 15 | 93230034  | 93569483  | 339449 | lncRNA                             | -1.77 | 1.06E-04 | 2.05E-03 |
| ENSG00000226101 | LINC02097   | 17 | 72072333  | 72103305  | 30702  | lncRNA                             | -1.77 | 9.46E-04 | 8.96E-03 |
| ENSG00000198183 | BPIFA1      | 20 | 33235995  | 33243311  | 7316   | protein coding                     | -1.77 | 3.61E-03 | 2.24E-02 |
| ENSG00000226519 | LINC00390   | 13 | 44094822  | 44147762  | 52940  | lncRNA                             | -1.77 | 3.15E-04 | 4.28E-03 |
| ENSG00000137033 | IL33        | 9  | 6215786   | 6257983   | 42197  | protein coding                     | -1.77 | 9.04E-03 | 4.16E-02 |
| ENSG00000224271 | AL117329.1  | 22 | 47630827  | 48023004  | 392177 | lncRNA                             | -1.77 | 4.32E-08 | 9.91E-06 |
| ENSG00000234736 | FAM170B-AS1 | 10 | 49121839  | 49151547  | 29708  | lncRNA-antisense                   | -1.77 | 2.63E-04 | 3.82E-03 |
| ENSG00000287866 | AC009102.4  | 16 | 56282886  | 56299351  | 16465  | lncRNA                             | -1.77 | 1.07E-02 | 4.67E-02 |
| ENSG00000228779 | Z69666.1    | 16 | 125737    | 127219    | 1482   | lncRNA-antisense                   | -1.77 | 6.47E-03 | 3.33E-02 |
| ENSG00000125414 | MYH2        | 17 | 10521148  | 10549700  | 28552  | protein coding                     | -1.77 | 1.30E-03 | 1.11E-02 |
| ENSG00000280117 | AC122888.4  | 12 | 125160525 | 125164918 | 4393   | TEC                                | -1.77 | 2.80E-03 | 1.89E-02 |
| ENSG00000124557 | BTN1A1      | 6  | 26501221  | 26510422  | 9201   | protein coding                     | -1.77 | 1.22E-04 | 2.28E-03 |
| ENSG00000184058 | TBX1        | 22 | 19756703  | 19783593  | 26890  | protein coding                     | -1.77 | 1.06E-06 | 8.90E-05 |
| ENSG00000286393 | Z97192.4    | 22 | 49662312  | 49664968  | 2656   | lncRNA                             | -1.77 | 3.36E-04 | 4.46E-03 |
| ENSG00000205212 | CCDC144NL   | 17 | 20836447  | 20896140  | 59693  | transcribed unprocessed pseudogene | -1.77 | 7.82E-05 | 1.67E-03 |
| ENSG00000102195 | GRP50       | X  | 151176584 | 151181465 | 4881   | protein coding                     | -1.77 | 2.36E-03 | 1.68E-02 |
| ENSG00000079689 | SCGN        | 6  | 25652201  | 25701783  | 49582  | protein coding                     | -1.77 | 1.72E-03 | 1.35E-02 |
| ENSG00000224682 | SOC55P2     | 9  | 135447446 | 135450154 | 2708   | processed pseudogene               | -1.77 | 1.91E-03 | 1.45E-02 |
| ENSG00000255258 | LINC02743   | 11 | 133783671 | 133810376 | 28705  | lncRNA                             | -1.77 | 3.07E-03 | 2.01E-02 |
| ENSG00000277322 | GOLGA6L6    | 15 | 20531856  | 20541800  | 9944   | protein coding                     | -1.77 | 1.00E-02 | 4.47E-02 |
| ENSG00000160868 | CYP3A4      | 7  | 99756960  | 99784248  | 27288  | protein coding                     | -1.77 | 2.22E-03 | 1.61E-02 |
| ENSG00000227179 | PGBP        | 1  | 111382860 | 111391819 | 8959   | transcribed unprocessed pseudogene | -1.77 | 1.13E-02 | 4.87E-02 |
| ENSG00000230133 | LINC01721   | 20 | 24063255  | 24226013  | 162758 | lncRNA                             | -1.77 | 7.02E-05 | 1.56E-03 |
| ENSG00000232310 | AL078590.2  | 6  | 134520163 | 134689399 | 169236 | lncRNA                             | -1.77 | 2.42E-03 | 1.71E-02 |
| ENSG00000251455 | AC092811.1  | 4  | 151674483 | 151677893 | 3410   | lncRNA-antisense                   | -1.77 | 6.45E-04 | 6.92E-03 |
| ENSG00000084734 | GCKR        | 2  | 27496839  | 27523684  | 28845  | protein coding                     | -1.77 | 7.77E-04 | 7.87E-03 |
| ENSG00000234910 | IL6R1P1     | 9  | 90081297  | 90082569  | 1272   | processed pseudogene               | -1.78 | 4.59E-03 | 2.64E-02 |
| ENSG00000251216 | AC106895.2  | 4  | 173924207 | 173991024 | 66817  | lncRNA                             | -1.78 | 9.16E-03 | 4.20E-02 |
| ENSG00000253837 | AC090197.1  | 8  | 23336171  | 23366125  | 29954  | lncRNA                             | -1.78 | 1.01E-04 | 1.99E-03 |
| ENSG00000134042 | MRO         | 18 | 50795120  | 50825402  | 30282  | protein coding                     | -1.78 | 6.91E-04 | 7.24E-03 |
| ENSG00000277229 | AC084781.1  | 15 | 58454327  | 58454982  | 655    | lncRNA-sense intronic              | -1.78 | 9.28E-03 | 4.24E-02 |
| ENSG00000258584 | FAM181A-AS1 | 14 | 93904730  | 93927066  | 22336  | lncRNA-antisense                   | -1.78 | 1.55E-05 | 5.58E-04 |
| ENSG00000287750 | AL353572.4  | 9  | 88066445  | 88076975  | 10530  | lncRNA                             | -1.78 | 8.50E-03 | 3.99E-02 |
| ENSG00000235140 | AC026391.1  | 10 | 59578467  | 59650345  | 71878  | lncRNA                             | -1.78 | 7.20E-03 | 3.58E-02 |
| ENSG00000258162 | AC069228.1  | 12 | 81378042  | 81556637  | 178595 | lncRNA-antisense                   | -1.78 | 1.55E-03 | 1.25E-02 |
| ENSG00000267593 | LINC01926   | 18 | 58808468  | 58834364  | 25896  | lncRNA                             | -1.78 | 1.10E-02 | 4.78E-02 |
| ENSG00000077279 | DCX         | X  | 111293779 | 111412429 | 118650 | protein coding                     | -1.78 | 6.89E-05 | 1.54E-03 |
| ENSG00000286339 | Z99496.1    | 6  | 118565660 | 118576840 | 11180  | lncRNA                             | -1.78 | 3.38E-03 | 2.14E-02 |
| ENSG00000267530 | LINC01836   | 19 | 782755    | 786902    | 3337   | lncRNA                             | -1.78 | 2.75E-03 | 1.86E-02 |
| ENSG00000285841 | AC005692.3  | 7  | 141392155 | 141396517 | 4362   | lncRNA                             | -1.78 | 1.69E-03 | 1.33E-02 |
| ENSG00000287707 | AC115284.4  | 3  | 51927071  | 51932483  | 5412   | lncRNA                             | -1.78 | 1.96E-04 | 3.13E-03 |
| ENSG00000255234 | AP000446.1  | 11 | 83286120  | 83423516  | 137396 | lncRNA-antisense                   | -1.78 | 5.18E-03 | 2.86E-02 |
| ENSG00000075035 | WSCD2       | 12 | 108129288 | 108250537 | 121249 | protein coding                     | -1.78 | 6.05E-06 | 2.93E-04 |
| ENSG00000153558 | BFXL2       | 3  | 33277025  | 33403662  | 126637 | protein coding                     | -1.78 | 2.44E-06 | 1.60E-04 |
| ENSG00000287044 | AL139106.1  | 6  | 108441880 | 108558286 | 116406 | lncRNA                             | -1.78 | 1.29E-03 | 1.11E-02 |
| ENSG00000172061 | LRRC15      | 3  | 194355249 | 194369743 | 14494  | protein coding                     | -1.78 | 2.13E-06 | 1.47E-04 |
| ENSG00000157782 | CABP1       | 12 | 120640552 | 120667324 | 26772  | protein coding                     | -1.78 | 7.22E-08 | 1.38E-05 |
| ENSG00000232265 | LINC02805   | 1  | 148156139 | 148186980 | 30841  | lncRNA                             | -1.78 | 1.57E-04 | 2.67E-03 |
| ENSG00000224647 | AC026954.1  | 17 | 7330452   | 73354113  | 4961   | unitary pseudogene                 | -1.78 | 3.37E-03 | 2.14E-02 |
| ENSG00000251249 | AC097375.3  | 4  | 151955991 | 151969381 | 13390  | lncRNA                             | -1.78 | 3.04E-03 | 1.99E-02 |
| ENSG00000227404 | KRT8P20     | 7  | 38655205  | 38656613  | 1408   | processed pseudogene               | -1.78 | 1.04E-02 | 4.60E-02 |
| ENSG00000231574 | LINC02015   | 3  | 177816865 | 177899224 | 82359  | lncRNA                             | -1.78 | 4.39E-03 | 2.56E-02 |
| ENSG00000224272 | AC131097.2  | 2  | 241808312 | 241812016 | 3704   | lncRNA-antisense                   | -1.78 | 3.97E-04 | 5.01E-03 |
| ENSG00000237972 | TUBG1P      | 7  | 43918697  | 43920054  | 1357   | processed pseudogene               | -1.78 | 6.68E-03 | 3.40E-02 |
| ENSG00000235486 | ANAPC1P6    | 2  | 106369724 | 106378247 | 8523   | unprocessed pseudogene             | -1.78 | 7.04E-03 | 3.52E-02 |
| ENSG00000284430 | AC020912.1  | 19 | 31100304  | 31147891  | 47677  | lncRNA                             | -1.78 | 1.33E-04 | 2.39E-03 |
| ENSG00000174844 | DNAH12      | 3  | 57293699  | 57544344  | 250645 | protein coding                     | -1.78 | 7.97E-09 | 3.11E-06 |
| ENSG00000077800 | FKBP6       | 7  | 73328161  | 73358637  | 30476  | protein coding                     | -1.78 | 1.83E-03 | 1.41E-02 |
| ENSG00000188784 | PLA2G2E     | 1  | 19920009  | 19923617  | 3608   | protein coding                     | -1.78 | 1.59E-03 | 1.28E-02 |
| ENSG00000265763 | ZNF488      | 10 | 47365496  | 47384293  | 18797  | protein coding                     | -1.78 | 5.74E-04 | 6.39E-03 |
| ENSG00000132321 | IQCA1       | 2  | 236324147 | 236507535 | 183388 | protein coding                     | -1.78 | 1.69E-06 | 1.26E-04 |
| ENSG00000224973 | LARGE-AS1   | 22 | 33725007  | 33750843  | 25836  | lncRNA                             | -1.78 | 1.38E-04 | 2.45E-03 |
| ENSG00000258422 | AL160191.1  | 14 | 70187123  | 70230187  | 43064  | lncRNA-antisense                   | -1.78 | 7.75E-03 | 3.75E-02 |
| ENSG00000145975 | FAM217A     | 6  | 4049434   | 4087344   | 37910  | protein coding                     | -1.78 | 6.45E-03 | 3.33E-02 |
| ENSG00000279091 | AC026523.2  | 15 | 97533738  | 97541476  | 7738   | TEC                                | -1.78 | 2.84E-04 | 4.01E-03 |
| ENSG00000227237 | AL672291.1  | 1  | 248859164 | 248864796 | 5632   | lncRNA-antisense                   | -1.78 | 4.90E-04 | 5.74E-03 |
| ENSG00000279578 | AC04899.2   | 7  | 48847766  | 48851625  | 3859   | TEC                                | -1.78 | 9.68E-03 | 4.37E-02 |
| ENSG00000228623 | ZNF883      | 9  | 112957722 | 113012227 | 54505  | transcribed unprocessed pseudogene | -1.78 | 3.69E-05 | 9.92E-04 |
| ENSG00000189348 | FAM90A27P   | 19 | 53281559  | 53284944  | 3385   | transcribed unprocessed pseudogene | -1.78 | 9.59E-04 | 9.06E-03 |
| ENSG00000188783 | PRELP       | 1  | 203475806 | 203491352 | 15546  | protein coding                     | -1.79 | 7.06E-05 | 1.56E-03 |
| ENSG00000267506 | AC021683.2  | 17 | 77546940  | 77563243  | 16303  | lncRNA                             | -1.79 | 5.40E-04 | 6.13E-03 |
| ENSG00000279365 | AP000695.3  | 21 | 36485867  | 36487760  | 1893   | TEC                                | -1.79 | 6.52E-04 | 6.97E-03 |
| ENSG00000260995 | AL512634.1  | 9  | 79135374  | 79198314  | 62940  | lncRNA                             | -1.79 | 8.83E-03 | 4.10E-02 |
| ENSG00000126266 | FFAR1       | 19 | 35351552  | 35353862  | 2310   | protein coding                     | -1.79 | 1.11E-03 | 9.95E-03 |
| ENSG00000288047 | AP001992.3  | 11 | 119892700 | 119919966 | 27296  | lncRNA                             | -1.79 | 4.37E-03 | 2.55E-02 |
| ENSG00000198774 | RASSF9      | 12 | 85800703  | 85836409  | 35706  | protein coding                     | -1.79 | 1.06E-03 | 9.67E-03 |

|                 |            |    |           |           |        |                                    |       |          |          |
|-----------------|------------|----|-----------|-----------|--------|------------------------------------|-------|----------|----------|
| ENSG00000278638 | AC244093.5 | 17 | 37045228  | 37052890  | 7662   | lncRNA-antisense                   | -1.79 | 4.07E-03 | 2.42E-02 |
| ENSG00000262966 | AC005695.1 | 17 | 9171068   | 9179118   | 8050   | lncRNA-antisense                   | -1.79 | 3.60E-05 | 9.75E-04 |
| ENSG00000101670 | LIPG       | 18 | 49560699  | 49599185  | 38486  | protein coding                     | -1.79 | 1.22E-06 | 9.76E-05 |
| ENSG00000230523 | LINC01756  | 1  | 29329620  | 29350114  | 20494  | lncRNA                             | -1.79 | 1.19E-03 | 1.04E-02 |
| ENSG00000253771 | TPT2P1     | 13 | 24924677  | 24968487  | 43810  | transcribed unprocessed pseudogene | -1.79 | 1.51E-04 | 2.60E-03 |
| ENSG00000174567 | GOLT1A     | 1  | 204198163 | 204213988 | 15825  | protein coding                     | -1.79 | 1.92E-03 | 1.45E-02 |
| ENSG00000285040 | AC092723.4 | 16 | 85963328  | 85985386  | 22058  | lncRNA                             | -1.79 | 3.32E-03 | 2.11E-02 |
| ENSG00000213540 | TXN2P1     | 1  | 84085741  | 84086233  | 492    | processed pseudogene               | -1.79 | 1.17E-02 | 4.99E-02 |
| ENSG00000275830 | AL390755.1 | 13 | 109988097 | 110129136 | 141039 | lncRNA                             | -1.79 | 2.70E-04 | 3.88E-03 |
| ENSG00000227301 | AL356489.1 | 9  | 33719690  | 33722555  | 2865   | lncRNA                             | -1.79 | 6.60E-03 | 3.38E-02 |
| ENSG00000225857 | LINC02816  | 1  | 180906651 | 180909166 | 2515   | lncRNA                             | -1.79 | 9.33E-03 | 4.25E-02 |
| ENSG00000217455 | AC073316.1 | 7  | 3140234   | 3174654   | 34420  | lncRNA                             | -1.79 | 2.20E-04 | 3.38E-03 |
| ENSG0000047617  | ANO2       | 12 | 5531869   | 5946232   | 414363 | protein coding                     | -1.79 | 9.77E-06 | 4.10E-04 |
| ENSG00000255491 | AC100858.2 | 8  | 124811042 | 124857516 | 46474  | lncRNA                             | -1.79 | 3.87E-07 | 4.53E-05 |
| ENSG00000214491 | SEC14L6    | 22 | 30522799  | 30546682  | 23883  | protein coding                     | -1.79 | 1.38E-03 | 1.16E-02 |
| ENSG00000214719 | AC005662.1 | 17 | 30576464  | 30672789  | 96325  | lncRNA                             | -1.79 | 6.64E-08 | 1.32E-05 |
| ENSG00000138685 | FGF2       | 4  | 122826708 | 122898236 | 71528  | protein coding                     | -1.79 | 4.43E-04 | 5.37E-03 |
| ENSG00000227555 | MIR4290HG  | 9  | 90020654  | 90041499  | 20845  | lncRNA                             | -1.79 | 3.94E-03 | 2.37E-02 |
| ENSG00000236013 | AL357146.1 | 6  | 139976352 | 140093721 | 117369 | lncRNA                             | -1.79 | 7.67E-03 | 3.73E-02 |
| ENSG00000149124 | GLYAT      | 11 | 58640426  | 58731974  | 91548  | protein coding                     | -1.79 | 4.66E-03 | 2.67E-02 |
| ENSG0000027268  | LHX1-DT    | 17 | 36861674  | 36936670  | 74996  | lncRNA-antisense                   | -1.79 | 2.82E-04 | 4.00E-03 |
| ENSG00000166923 | GREM1      | 15 | 32718004  | 32745106  | 27102  | protein coding                     | -1.79 | 9.09E-09 | 3.44E-06 |
| ENSG00000255216 | AP001360.1 | 11 | 120008044 | 120013620 | 5576   | lncRNA                             | -1.79 | 6.06E-05 | 1.40E-03 |
| ENSG00000271826 | PLS3-AS1   | X  | 115518182 | 115562731 | 44549  | lncRNA-antisense                   | -1.79 | 1.01E-02 | 4.50E-02 |
| ENSG00000288531 | AL669831.7 | 1  | 860226    | 868202    | 7976   | lncRNA                             | -1.79 | 6.58E-05 | 1.48E-03 |
| ENSG00000106819 | ASPN       | 9  | 92456205  | 92482506  | 28301  | protein coding                     | -1.79 | 3.71E-03 | 2.28E-02 |
| ENSG00000215478 | CE55AP1    | 22 | 23359603  | 23387731  | 28128  | transcribed unprocessed pseudogene | -1.79 | 5.06E-03 | 2.82E-02 |
| ENSG00000175206 | NPPA       | 1  | 11845709  | 11848345  | 2636   | protein coding                     | -1.79 | 3.65E-03 | 2.25E-02 |
| ENSG00000124721 | DNAH8      | 6  | 38715311  | 39030792  | 315481 | protein coding                     | -1.79 | 1.14E-08 | 4.07E-06 |
| ENSG00000285875 | AL035446.2 | 6  | 140575788 | 140898381 | 322593 | lncRNA                             | -1.79 | 9.06E-03 | 4.17E-02 |
| ENSG00000183067 | IGSF5      | 21 | 39745407  | 39802096  | 56689  | protein coding                     | -1.79 | 7.91E-04 | 7.96E-03 |
| ENSG00000230990 | AL049649.1 | 20 | 11234170  | 11301525  | 67355  | lncRNA                             | -1.79 | 1.49E-03 | 1.22E-02 |
| ENSG00000230533 | AL356234.2 | 6  | 13765798  | 13776394  | 105986 | lncRNA                             | -1.79 | 4.35E-03 | 2.55E-02 |
| ENSG00000140557 | ST8SIA2    | 15 | 92393881  | 92468728  | 74847  | protein coding                     | -1.79 | 2.81E-07 | 3.63E-05 |
| ENSG00000249335 | AC093523.1 | 5  | 68792609  | 69007185  | 214576 | lncRNA                             | -1.79 | 7.69E-03 | 3.73E-02 |
| ENSG00000219073 | CELA3B     | 1  | 21977022  | 21998642  | 21620  | protein coding                     | -1.79 | 4.07E-03 | 2.42E-02 |
| ENSG00000234139 | AL035420.1 | 20 | 36051491  | 36085703  | 34212  | lncRNA                             | -1.79 | 4.20E-05 | 1.08E-03 |
| ENSG00000259776 | AC093426.1 | 1  | 239247808 | 239250818 | 3010   | lncRNA                             | -1.79 | 6.55E-03 | 3.36E-02 |
| ENSG00000133105 | RFXP2      | 13 | 31739526  | 31803389  | 63863  | protein coding                     | -1.79 | 7.75E-05 | 1.66E-03 |
| ENSG00000154478 | GPR26      | 10 | 123666355 | 123697399 | 31044  | protein coding                     | -1.79 | 5.03E-05 | 1.23E-03 |
| ENSG00000121904 | CSMD2      | 1  | 33513999  | 34165842  | 651843 | protein coding                     | -1.79 | 2.57E-06 | 1.66E-04 |
| ENSG00000286722 | AC009244.1 | 7  | 129366827 | 129374486 | 7659   | lncRNA                             | -1.79 | 5.05E-03 | 2.82E-02 |
| ENSG00000182459 | TEX19      | 17 | 82359247  | 82363775  | 4528   | protein coding                     | -1.79 | 3.01E-03 | 1.98E-02 |
| ENSG00000250423 | KIAA1210   | X  | 119078635 | 119150579 | 71944  | protein coding                     | -1.79 | 4.74E-04 | 5.62E-03 |
| ENSG00000287672 | AC003086.1 | 7  | 91880791  | 91886490  | 5699   | lncRNA                             | -1.79 | 2.08E-03 | 1.54E-02 |
| ENSG00000264448 | MIR378D2HG | 8  | 93915734  | 93916682  | 948    | lncRNA                             | -1.79 | 4.92E-03 | 2.77E-02 |
| ENSG00000101448 | EPPIN      | 20 | 45540626  | 45547752  | 7126   | protein coding                     | -1.80 | 2.14E-03 | 1.57E-02 |
| ENSG00000110887 | DAO        | 12 | 108858932 | 108901043 | 42111  | protein coding                     | -1.80 | 2.52E-04 | 3.70E-03 |
| ENSG00000135750 | KCNK1      | 1  | 233614106 | 233672514 | 58408  | protein coding                     | -1.80 | 1.60E-05 | 5.66E-04 |
| ENSG00000226759 | DAB1-AS1   | 1  | 57860532  | 57880905  | 20373  | lncRNA-antisense                   | -1.80 | 1.51E-04 | 2.59E-04 |
| ENSG00000287122 | AC026495.2 | 15 | 20301481  | 20331583  | 30102  | lncRNA                             | -1.80 | 2.96E-05 | 8.50E-04 |
| ENSG00000285269 | AL160269.1 | 9  | 96235331  | 96352058  | 116727 | protein coding                     | -1.80 | 7.28E-04 | 7.52E-03 |
| ENSG00000214043 | LINC02347  | 12 | 126438837 | 126472790 | 33953  | lncRNA                             | -1.80 | 1.47E-04 | 2.54E-03 |
| ENSG00000242221 | PSG2       | 19 | 43064209  | 43083045  | 18836  | protein coding                     | -1.80 | 3.03E-04 | 4.19E-03 |
| ENSG00000285905 | BMP8B-AS1  | 1  | 39779969  | 39781418  | 1449   | lncRNA                             | -1.80 | 6.48E-03 | 3.34E-02 |
| ENSG00000277870 | FAM230A    | 22 | 18422244  | 18500594  | 78350  | lncRNA                             | -1.80 | 5.57E-03 | 3.01E-02 |
| ENSG00000144481 | TRPM8      | 2  | 233917373 | 234019522 | 102149 | protein coding                     | -1.80 | 2.95E-06 | 1.81E-04 |
| ENSG00000171124 | FUT3       | 19 | 5842888   | 5851474   | 8586   | protein coding                     | -1.80 | 1.49E-03 | 1.22E-02 |
| ENSG00000280310 | AC092437.1 | 4  | 4820405   | 4821452   | 1047   | TEC                                | -1.80 | 9.83E-03 | 4.41E-02 |
| ENSG00000249550 | LINC01234  | 12 | 113583886 | 113773726 | 189840 | lncRNA                             | -1.80 | 1.61E-05 | 5.67E-04 |
| ENSG00000151812 | SLC35F4    | 14 | 57563920  | 57982194  | 418274 | protein coding                     | -1.80 | 6.90E-04 | 7.24E-03 |
| ENSG00000189152 | GRAPL      | 17 | 19127535  | 19159187  | 31652  | protein coding                     | -1.80 | 8.47E-04 | 8.33E-03 |
| ENSG00000169327 | OR5AU1     | 14 | 21148370  | 21159060  | 10690  | protein coding                     | -1.80 | 7.30E-04 | 7.53E-03 |
| ENSG00000168505 | GBX2       | 2  | 236165236 | 236168386 | 3150   | protein coding                     | -1.80 | 9.12E-04 | 8.74E-03 |
| ENSG00000168631 | MUCL3      | 6  | 30934523  | 30954221  | 19698  | protein coding                     | -1.80 | 2.15E-03 | 1.58E-02 |
| ENSG00000007171 | NOS2       | 17 | 27756766  | 27800529  | 43763  | protein coding                     | -1.80 | 7.63E-05 | 1.64E-03 |
| ENSG00000261170 | AC090953.3 | 16 | 74422120  | 74441937  | 19817  | lncRNA-antisense                   | -1.80 | 1.12E-05 | 4.48E-04 |
| ENSG00000232615 | AC026412.2 | 5  | 1614836   | 1616334   | 1498   | processed pseudogene               | -1.80 | 5.43E-03 | 2.96E-02 |
| ENSG00000261572 | AC097639.1 | 3  | 32236688  | 32238578  | 1890   | lncRNA-sense intronic              | -1.80 | 1.74E-03 | 1.36E-02 |
| ENSG00000279486 | OR2AG1     | 11 | 6783020   | 6791558   | 8538   | protein coding                     | -1.80 | 3.14E-03 | 2.04E-02 |
| ENSG00000197614 | MFAP5      | 12 | 8637346   | 8662888   | 25542  | protein coding                     | -1.80 | 7.37E-04 | 7.58E-03 |
| ENSG00000279460 | AC112243.1 | 4  | 184984277 | 184988127 | 3850   | TEC                                | -1.80 | 2.91E-03 | 1.94E-02 |
| ENSG00000247381 | PLUT       | 13 | 27819376  | 27917298  | 97922  | lncRNA                             | -1.80 | 6.79E-03 | 3.44E-02 |
| ENSG00000169604 | ANTXR1     | 2  | 69013179  | 69249327  | 236148 | protein coding                     | -1.80 | 3.10E-05 | 8.74E-04 |
| ENSG00000184735 | DDX53      | X  | 22999960  | 23003589  | 3629   | protein coding                     | -1.80 | 5.59E-03 | 3.01E-02 |
| ENSG00000287608 | AC022137.3 | 19 | 53434661  | 53473936  | 39275  | lncRNA                             | -1.80 | 1.41E-03 | 1.17E-02 |
| ENSG00000280623 | PCAT14     | 22 | 23536881  | 23547797  | 10916  | lncRNA                             | -1.80 | 8.75E-04 | 8.50E-03 |
| ENSG00000286502 | AL645768.1 | 9  | 134770651 | 134775671 | 5020   | lncRNA                             | -1.80 | 5.84E-05 | 1.36E-03 |
| ENSG00000184507 | NUMT1      | 15 | 34343315  | 34357377  | 14422  | protein coding                     | -1.80 | 2.85E-04 | 4.01E-03 |
| ENSG00000185002 | RFX6       | 6  | 116877212 | 116932161 | 54949  | protein coding                     | -1.80 | 2.84E-03 | 1.90E-02 |
| ENSG00000279879 | AC091152.4 | 17 | 44689858  | 44693340  | 3482   | TEC                                | -1.80 | 3.37E-03 | 2.14E-02 |
| ENSG00000156076 | WIF1       | 12 | 65050626  | 65121305  | 70679  | protein coding                     | -1.80 | 3.57E-04 | 4.63E-03 |
| ENSG00000165685 | TMEM52B    | 12 | 10170542  | 10191801  | 21259  | protein coding                     | -1.80 | 1.67E-04 | 2.79E-03 |
| ENSG00000225511 | LINC00475  | 9  | 92141298  | 92160114  | 18816  | transcribed unprocessed pseudogene | -1.80 | 8.41E-06 | 3.69E-04 |
| ENSG00000167941 | SOST       | 17 | 43753738  | 43758791  | 5053   | protein coding                     | -1.80 | 1.46E-04 | 2.53E-03 |
| ENSG00000231876 | AC009158.1 | 16 | 26302064  | 26340815  | 38751  | lncRNA                             | -1.80 | 8.21E-04 | 8.17E-03 |
| ENSG00000163666 | HESX1      | 3  | 57197838  | 57227066  | 29768  | protein coding                     | -1.80 | 1.20E-05 | 4.71E-04 |
| ENSG00000266903 | AC243964.3 | 19 | 44631573  | 44725217  | 93644  | lncRNA-antisense                   | -1.80 | 2.30E-03 | 1.64E-02 |
| ENSG00000234255 | AC012370.2 | 2  | 65439838  | 65456571  | 16733  | lncRNA                             | -1.80 | 4.92E-03 | 2.77E-02 |
| ENSG00000271128 | AL589743.3 | 14 | 19124807  | 19175530  | 50723  | lncRNA                             | -1.81 | 2.57E-03 | 1.78E-02 |



|                 |             |    |           |           |        |                                    |       |          |          |
|-----------------|-------------|----|-----------|-----------|--------|------------------------------------|-------|----------|----------|
| ENSG0000007062  | PROM1       | 4  | 15963076  | 16084378  | 121302 | protein coding                     | -1.81 | 9.86E-07 | 8.45E-05 |
| ENSG00000232662 | LDHBP1      | 13 | 113276616 | 113277734 | 1118   | processed_pseudogene               | -1.81 | 1.14E-02 | 4.90E-02 |
| ENSG00000261959 | AC015909.3  | 17 | 50163523  | 50163516  | 1793   | lncRNA-antisense                   | -1.81 | 9.31E-04 | 8.88E-03 |
| ENSG00000129596 | CDO1        | 5  | 115804733 | 115816659 | 11926  | protein coding                     | -1.81 | 6.22E-04 | 6.74E-03 |
| ENSG00000124467 | PSG8        | 19 | 42752686  | 42855691  | 103005 | protein coding                     | -1.81 | 2.76E-03 | 1.87E-02 |
| ENSG00000254067 | AC123767.1  | 8  | 39522976  | 39580134  | 57158  | transcribed unitary_pseudogene     | -1.81 | 1.08E-02 | 4.70E-02 |
| ENSG00000249094 | AC007834.1  | 12 | 109880676 | 109888467 | 7791   | lncRNA                             | -1.81 | 3.79E-03 | 2.31E-02 |
| ENSG00000183379 | SYNDIG1L    | 14 | 74405894  | 74426210  | 20316  | protein coding                     | -1.81 | 3.76E-05 | 1.00E-03 |
| ENSG00000233296 | TMEM18-DT   | 2  | 677186    | 697382    | 20196  | lncRNA-antisense                   | -1.81 | 1.12E-06 | 9.20E-05 |
| ENSG0000042304  | C2orf83     | 2  | 227610090 | 227648606 | 38516  | protein coding                     | -1.81 | 2.15E-03 | 1.57E-02 |
| ENSG00000163631 | ALB         | 4  | 73397114  | 73421482  | 24368  | protein coding                     | -1.81 | 4.48E-04 | 5.42E-03 |
| ENSG00000287410 | AL161941.1  | 20 | 16177933  | 16259603  | 81670  | lncRNA                             | -1.81 | 2.94E-04 | 4.09E-03 |
| ENSG00000244675 | AC108676.1  | 3  | 194496317 | 194501503 | 5186   | lncRNA-sense overlapping           | -1.81 | 9.12E-04 | 8.74E-03 |
| ENSG00000235244 | DANT2       | X  | 115694880 | 115969130 | 274250 | lncRNA                             | -1.81 | 1.24E-03 | 1.07E-02 |
| ENSG00000167419 | LPO         | 17 | 58218548  | 58268518  | 49970  | protein coding                     | -1.81 | 1.07E-10 | 1.28E-07 |
| ENSG00000227043 | LINC01682   | 1  | 229812917 | 229892046 | 79129  | lncRNA                             | -1.81 | 1.46E-03 | 1.20E-02 |
| ENSG00000255158 | AC131934.1  | 11 | 665910    | 678391    | 12481  | lncRNA-antisense                   | -1.81 | 1.03E-02 | 4.58E-02 |
| ENSG00000249364 | AC112206.2  | 5  | 67379378  | 67806600  | 427222 | lncRNA                             | -1.81 | 4.54E-04 | 5.46E-03 |
| ENSG00000089225 | TBX5        | 12 | 114353911 | 114408442 | 54531  | protein coding                     | -1.81 | 3.33E-04 | 4.44E-03 |
| ENSG00000256151 | ADGRD1-AS1  | 12 | 130990138 | 130993976 | 3838   | lncRNA                             | -1.81 | 5.39E-03 | 2.94E-02 |
| ENSG00000287336 | AL137157.1  | 1  | 172210711 | 172213499 | 2788   | lncRNA                             | -1.81 | 5.16E-03 | 2.86E-02 |
| ENSG00000285051 | SLC7A14-AS1 | 3  | 170448639 | 170860993 | 412354 | lncRNA                             | -1.81 | 4.51E-06 | 2.39E-04 |
| ENSG00000204706 | MAMDC2-AS1  | 9  | 70033921  | 70175888  | 141967 | lncRNA-antisense                   | -1.81 | 4.35E-08 | 9.91E-06 |
| ENSG00000283164 | AC012567.3  | 2  | 230924567 | 230929919 | 5352   | lncRNA-antisense                   | -1.81 | 5.10E-03 | 2.83E-02 |
| ENSG00000286583 | AC105101.2  | 18 | 48162039  | 48184725  | 22686  | lncRNA                             | -1.81 | 2.79E-03 | 1.88E-02 |
| ENSG00000249258 | AC079193.2  | 8  | 17131181  | 17149789  | 18608  | lncRNA                             | -1.81 | 1.45E-04 | 2.52E-03 |
| ENSG00000213215 | ORZF1       | 7  | 143954844 | 143997312 | 42468  | protein coding                     | -1.81 | 4.19E-03 | 2.48E-02 |
| ENSG00000287566 | AL732437.3  | 10 | 5549637   | 5554329   | 4692   | lncRNA                             | -1.81 | 1.02E-04 | 2.01E-03 |
| ENSG00000188803 | SHISA6      | 17 | 11241213  | 11564063  | 322850 | protein coding                     | -1.81 | 2.04E-06 | 1.43E-04 |
| ENSG00000235880 | AL158832.1  | 9  | 267966    | 273002    | 5036   | lncRNA-antisense                   | -1.81 | 9.67E-03 | 4.36E-02 |
| ENSG00000243083 | LINC00870   | 3  | 72151236  | 72207776  | 56540  | lncRNA                             | -1.81 | 2.06E-05 | 6.67E-04 |
| ENSG00000280011 | AL031595.2  | 22 | 44210442  | 44229512  | 19070  | lncRNA-antisense                   | -1.81 | 5.82E-09 | 2.42E-06 |
| ENSG00000286950 | AC087588.2  | 12 | 32755510  | 32756463  | 953    | lncRNA                             | -1.81 | 1.10E-02 | 4.77E-02 |
| ENSG00000285671 | AL139405.1  | 10 | 14372001  | 14377586  | 5585   | lncRNA                             | -1.81 | 1.30E-03 | 1.11E-02 |
| ENSG00000229926 | IL9RP1      | 9  | 138137095 | 138143864 | 6769   | unprocessed_pseudogene             | -1.81 | 3.30E-03 | 2.11E-02 |
| ENSG00000268089 | GABRQ       | X  | 152637895 | 152657542 | 19647  | protein coding                     | -1.82 | 9.12E-05 | 1.85E-03 |
| ENSG00000287000 | AC024651.3  | 15 | 97945208  | 97950018  | 4810   | lncRNA                             | -1.82 | 1.06E-02 | 4.66E-02 |
| ENSG00000140538 | NTRK3       | 15 | 87859751  | 88256768  | 397017 | protein coding                     | -1.82 | 1.45E-09 | 8.46E-07 |
| ENSG00000167858 | TEKT1       | 17 | 6789133   | 6831761   | 42628  | protein coding                     | -1.82 | 1.24E-04 | 2.28E-03 |
| ENSG00000172146 | OR1A1       | 17 | 3207539   | 3218896   | 11357  | protein coding                     | -1.82 | 2.80E-04 | 3.98E-03 |
| ENSG00000236172 | MIR7515HG   | 2  | 6615389   | 6651104   | 35715  | lncRNA                             | -1.82 | 2.18E-05 | 6.90E-04 |
| ENSG00000196136 | SERPINA3    | 14 | 94612384  | 94624055  | 11671  | protein coding                     | -1.82 | 1.16E-03 | 1.02E-02 |
| ENSG00000288006 | AC137735.3  | 17 | 73912190  | 73931436  | 19246  | lncRNA                             | -1.82 | 7.88E-03 | 3.80E-02 |
| ENSG00000214803 | AC090921.1  | 8  | 124192671 | 124247398 | 54727  | lncRNA                             | -1.82 | 1.08E-02 | 4.71E-02 |
| ENSG00000234512 | TLR12P      | 1  | 33466249  | 33468954  | 2705   | unitary_pseudogene                 | -1.82 | 6.84E-04 | 7.20E-03 |
| ENSG00000211654 | IGLV5-37    | 22 | 22427540  | 22428035  | 495    | IG_V_gene                          | -1.82 | 1.02E-02 | 4.55E-02 |
| ENSG00000287990 | AL358334.4  | 14 | 51022967  | 51031032  | 8065   | lncRNA                             | -1.82 | 2.30E-03 | 1.65E-02 |
| ENSG00000260633 | AC010207.1  | 3  | 134347288 | 134349233 | 1945   | lncRNA                             | -1.82 | 1.13E-02 | 4.87E-02 |
| ENSG00000205940 | HSP90AB2P   | 4  | 13333414  | 13338657  | 5243   | transcribed processed_pseudogene   | -1.82 | 7.41E-03 | 3.65E-02 |
| ENSG00000241186 | TDGF1       | 3  | 46574534  | 46582457  | 7923   | protein coding                     | -1.82 | 7.86E-03 | 3.79E-02 |
| ENSG00000177675 | CD163L1     | 12 | 7346685   | 7479897   | 133212 | protein coding                     | -1.82 | 1.22E-05 | 4.76E-04 |
| ENSG00000228620 | Z97056.1    | 22 | 38424288  | 38427336  | 3048   | lncRNA-antisense                   | -1.82 | 7.81E-03 | 3.77E-02 |
| ENSG00000276772 | AC025271.4  | 15 | 57553955  | 57555680  | 1725   | lncRNA                             | -1.82 | 7.28E-03 | 3.60E-02 |
| ENSG00000267650 | AC008742.1  | 19 | 9959597   | 9997163   | 1166   | lncRNA-antisense                   | -1.82 | 1.06E-02 | 4.66E-02 |
| ENSG00000275325 | PDCD6IP1    | 15 | 22727104  | 22744918  | 17814  | transcribed unprocessed_pseudogene | -1.82 | 6.29E-03 | 3.27E-02 |
| ENSG00000102024 | PLS3        | X  | 115561174 | 115650861 | 89687  | protein coding                     | -1.82 | 1.46E-04 | 2.53E-03 |
| ENSG00000174948 | GPR149      | 3  | 154334943 | 154403190 | 95247  | protein coding                     | -1.82 | 1.79E-03 | 1.39E-02 |
| ENSG00000258197 | NKX2-2-AS1  | 20 | 21511447  | 21512309  | 862    | lncRNA-antisense                   | -1.82 | 7.65E-03 | 3.73E-02 |
| ENSG00000278522 | POTEB3      | 15 | 21405401  | 21440499  | 35098  | protein coding                     | -1.82 | 1.95E-03 | 1.47E-02 |
| ENSG00000255883 | FUNDC2P1    | 5  | 73508685  | 73509254  | 569    | processed_pseudogene               | -1.82 | 1.09E-03 | 9.83E-03 |
| ENSG00000286326 | Z95115.2    | 22 | 26597028  | 26611453  | 14425  | lncRNA                             | -1.82 | 1.05E-04 | 2.04E-03 |
| ENSG00000256195 | AP002518.1  | 11 | 114343052 | 114396219 | 53167  | lncRNA-antisense                   | -1.82 | 6.04E-04 | 6.60E-03 |
| ENSG00000259882 | AC142384.1  | 16 | 33577502  | 33622547  | 45045  | unprocessed_pseudogene             | -1.82 | 1.08E-02 | 4.71E-02 |
| ENSG00000116031 | CD207       | 2  | 70830211  | 70835816  | 5605   | protein coding                     | -1.82 | 1.35E-04 | 2.40E-03 |
| ENSG00000238125 | SLC9A3P2    | 22 | 20652730  | 20654750  | 2020   | processed_pseudogene               | -1.82 | 5.07E-03 | 2.82E-02 |
| ENSG00000173239 | LIPM        | 10 | 88802730  | 88820546  | 17816  | protein coding                     | -1.82 | 6.08E-03 | 3.19E-02 |
| ENSG00000121101 | TEX14       | 17 | 58556678  | 58692055  | 135377 | protein coding                     | -1.82 | 1.23E-07 | 2.02E-05 |
| ENSG00000213822 | CEACAM18    | 19 | 51478622  | 51490952  | 12330  | protein coding                     | -1.82 | 4.54E-03 | 2.62E-02 |
| ENSG00000249306 | LINC01411   | 5  | 174336295 | 174532457 | 196162 | lncRNA                             | -1.82 | 7.22E-05 | 1.58E-03 |
| ENSG00000259035 | AL355838.1  | 14 | 81741002  | 82030349  | 289347 | lncRNA                             | -1.82 | 3.20E-03 | 2.07E-02 |
| ENSG00000181126 | HLA-V       | 6  | 29790954  | 29797811  | 6857   | transcribed unprocessed_pseudogene | -1.82 | 1.49E-07 | 2.33E-05 |
| ENSG00000235142 | LINC02532   | 6  | 106705334 | 106788148 | 82814  | lncRNA                             | -1.82 | 2.52E-05 | 7.62E-04 |
| ENSG00000229042 | AL031656.1  | 20 | 42685404  | 42688562  | 3158   | lncRNA-antisense                   | -1.82 | 5.00E-03 | 2.80E-02 |
| ENSG00000143536 | CRNN        | 1  | 152409243 | 152414263 | 5020   | protein coding                     | -1.82 | 2.32E-03 | 1.66E-02 |
| ENSG00000140459 | CYP11A1     | 15 | 74337759  | 74367646  | 29887  | protein coding                     | -1.82 | 9.58E-06 | 4.05E-04 |
| ENSG00000253199 | LINC02153   | 8  | 20972021  | 20995119  | 23098  | lncRNA                             | -1.83 | 3.32E-04 | 4.44E-03 |
| ENSG00000279845 | AC097372.2  | 4  | 146180851 | 146181316 | 465    | TEC                                | -1.83 | 8.23E-03 | 3.91E-02 |
| ENSG00000103316 | CRYM        | 16 | 21238874  | 21303083  | 64209  | protein coding                     | -1.83 | 3.86E-06 | 2.16E-04 |
| ENSG00000214691 | LINC01913   | 2  | 41860155  | 41894050  | 33895  | lncRNA                             | -1.83 | 5.41E-04 | 6.13E-03 |
| ENSG00000233760 | AC004947.1  | 7  | 26551686  | 26558880  | 7194   | lncRNA                             | -1.83 | 1.55E-03 | 1.25E-02 |
| ENSG00000203697 | CAPN8       | 1  | 223538007 | 223665723 | 127716 | protein coding                     | -1.83 | 9.64E-08 | 1.67E-05 |
| ENSG00000276397 | LINC01879   | 18 | 76686058  | 76693336  | 7578   | lncRNA                             | -1.83 | 4.33E-03 | 2.54E-02 |
| ENSG00000286708 | AP003783.1  | 11 | 70886090  | 70896305  | 10215  | lncRNA                             | -1.83 | 7.37E-05 | 1.60E-03 |
| ENSG00000147255 | IGSF1       | X  | 131273506 | 131578899 | 305393 | protein coding                     | -1.83 | 9.70E-07 | 8.33E-05 |
| ENSG00000075643 | MOCOS       | 18 | 36187497  | 36272157  | 84660  | protein coding                     | -1.83 | 1.91E-05 | 6.37E-04 |
| ENSG00000111339 | ART4        | 12 | 14825569  | 14843526  | 17957  | protein coding                     | -1.83 | 3.83E-03 | 2.33E-02 |
| ENSG00000237153 | AL162725.2  | 9  | 16917511  | 17114122  | 196611 | lncRNA                             | -1.83 | 2.64E-03 | 1.81E-02 |
| ENSG00000240405 | SAMMSON     | 3  | 69999550  | 70518064  | 518514 | lncRNA                             | -1.83 | 1.26E-06 | 9.97E-05 |
| ENSG00000196132 | MYT1        | 20 | 64102394  | 64242253  | 139859 | protein coding                     | -1.83 | 2.73E-06 | 1.72E-04 |
| ENSG00000142698 | C1orf94     | 1  | 34166883  | 34219131  | 52248  | protein coding                     | -1.83 | 1.08E-04 | 2.07E-03 |

|                 |                 |    |           |           |        |                                    |       |          |          |
|-----------------|-----------------|----|-----------|-----------|--------|------------------------------------|-------|----------|----------|
| ENSG00000214846 | AC114744.1      | 4  | 15730962  | 15731627  | 665    | processed_pseudogene               | -1.83 | 6.18E-03 | 3.23E-02 |
| ENSG00000261097 | LINC005643      | 13 | 46296445  | 46297844  | 1399   | lncRNA                             | -1.83 | 4.19E-04 | 5.17E-03 |
| ENSG00000232872 | CTAGE5P         | 13 | 51908218  | 51910621  | 2403   | processed_pseudogene               | -1.83 | 1.71E-03 | 1.34E-02 |
| ENSG00000144406 | UNC80           | 2  | 209771832 | 209999300 | 227468 | protein_coding                     | -1.83 | 1.05E-06 | 8.84E-05 |
| ENSG00000258460 | AL355096.1      | 14 | 101332511 | 101335497 | 2986   | lncRNA                             | -1.83 | 2.83E-03 | 1.90E-02 |
| ENSG00000272425 | AC009902.3      | 8  | 81275399  | 81277570  | 2171   | lncRNA                             | -1.83 | 9.54E-03 | 4.32E-02 |
| ENSG00000180616 | SSTR2           | 17 | 73165010  | 73176633  | 11623  | protein_coding                     | -1.83 | 2.56E-06 | 1.66E-04 |
| ENSG00000227411 | ACNATP          | 9  | 101334084 | 101339347 | 5263   | unitary_pseudogene                 | -1.83 | 3.10E-03 | 2.02E-02 |
| ENSG00000286641 | AC108073.3      | 4  | 187942164 | 187963345 | 21181  | lncRNA                             | -1.83 | 2.71E-03 | 1.85E-02 |
| ENSG00000231258 | ZSWIM5P2        | 17 | 20583758  | 20591180  | 7422   | unprocessed_pseudogene             | -1.83 | 3.07E-03 | 2.01E-02 |
| ENSG00000197085 | NPSR1-AS1       | 7  | 34346512  | 34871582  | 525070 | lncRNA                             | -1.83 | 3.43E-04 | 4.53E-03 |
| ENSG00000100078 | PLAZG3          | 22 | 31134807  | 31140508  | 5701   | protein_coding                     | -1.83 | 9.62E-04 | 9.07E-03 |
| ENSG00000233639 | PANTR1          | 2  | 104794848 | 104853183 | 58335  | lncRNA                             | -1.83 | 2.23E-04 | 3.41E-03 |
| ENSG00000286179 | AL139351.2      | 20 | 48007875  | 48022337  | 14362  | lncRNA                             | -1.83 | 9.76E-04 | 9.16E-03 |
| ENSG00000225988 | LAMP5-AS1       | 20 | 9505180   | 9514298   | 9818   | lncRNA-antisense                   | -1.83 | 2.54E-03 | 1.76E-02 |
| ENSG00000157399 | ARSL            | X  | 2934521   | 2968475   | 33954  | protein_coding                     | -1.83 | 3.68E-04 | 4.74E-03 |
| ENSG00000231317 | AC091812.1      | 7  | 55656768  | 55678490  | 21722  | unprocessed_pseudogene             | -1.83 | 7.14E-03 | 3.56E-02 |
| ENSG00000184148 | SPRR4           | 1  | 152970648 | 152972574 | 1926   | protein_coding                     | -1.83 | 9.54E-03 | 4.32E-02 |
| ENSG00000132554 | RG522           | 8  | 99960936  | 100131268 | 170332 | protein_coding                     | -1.83 | 8.88E-06 | 3.83E-04 |
| ENSG00000245598 | DACT3-AS1       | 19 | 46660364  | 46677447  | 17083  | lncRNA-antisense                   | -1.83 | 5.05E-03 | 2.82E-02 |
| ENSG00000227947 | LINC01738       | 1  | 47688463  | 47704029  | 15566  | lncRNA                             | -1.83 | 3.29E-03 | 2.10E-02 |
| ENSG00000228051 | WBP11P3         | X  | 80560146  | 80562054  | 1908   | processed_pseudogene               | -1.83 | 4.15E-03 | 2.46E-02 |
| ENSG00000166948 | TGM6            | 20 | 2380901   | 2432753   | 51852  | protein_coding                     | -1.83 | 2.55E-04 | 3.73E-03 |
| ENSG00000232306 | AC012485.2      | 2  | 238295392 | 238300620 | 5228   | lncRNA                             | -1.83 | 7.11E-03 | 3.55E-02 |
| ENSG00000231831 | MTHFD1P1        | X  | 57392646  | 57395409  | 2763   | processed_pseudogene               | -1.84 | 3.49E-03 | 2.19E-02 |
| ENSG00000186513 | OR9Q2           | 11 | 58189070  | 58194053  | 4983   | protein_coding                     | -1.84 | 1.33E-03 | 1.13E-02 |
| ENSG00000287581 | AC016549.1      | 5  | 14356886  | 14359285  | 2399   | lncRNA                             | -1.84 | 1.21E-03 | 1.06E-02 |
| ENSG00000170961 | HAS2            | 8  | 121612116 | 121644400 | 29324  | protein_coding                     | -1.84 | 1.29E-03 | 1.10E-02 |
| ENSG00000237222 | LINC01968       | 3  | 194708093 | 194826008 | 117915 | lncRNA                             | -1.84 | 3.75E-05 | 1.00E-03 |
| ENSG00000187527 | ATP13A5         | 3  | 193274789 | 193378820 | 104031 | protein_coding                     | -1.84 | 4.43E-06 | 2.38E-04 |
| ENSG00000158315 | RHBDL2          | 1  | 38885807  | 38941830  | 56023  | protein_coding                     | -1.84 | 8.94E-05 | 1.82E-03 |
| ENSG00000258609 | LINC-ROR        | 18 | 57054558  | 57072119  | 17561  | lncRNA                             | -1.84 | 1.25E-03 | 1.08E-02 |
| ENSG00000170848 | PSG6            | 19 | 42902086  | 42919563  | 17477  | protein_coding                     | -1.84 | 1.74E-04 | 2.88E-03 |
| ENSG00000188124 | OR2AG2          | 11 | 6765628   | 6771978   | 6350   | protein_coding                     | -1.84 | 1.68E-03 | 1.32E-02 |
| ENSG00000268388 | FENDRR          | 16 | 86474529  | 86509099  | 34570  | lncRNA                             | -1.84 | 5.68E-06 | 2.81E-04 |
| ENSG00000225718 | AC092100.1      | 7  | 69186821  | 69430923  | 244102 | lncRNA                             | -1.84 | 3.24E-03 | 2.08E-02 |
| ENSG00000228056 | CFL1P3          | 1  | 63843196  | 63843685  | 489    | processed_pseudogene               | -1.84 | 9.98E-03 | 4.47E-02 |
| ENSG00000102239 | BR33            | X  | 136487947 | 136493780 | 5833   | protein_coding                     | -1.84 | 4.28E-03 | 2.52E-02 |
| ENSG00000220891 | LL22NC03-63E9.3 | 22 | 22559343  | 22566602  | 7259   | lncRNA-antisense                   | -1.84 | 5.37E-04 | 6.11E-03 |
| ENSG00000248144 | ADH1C           | 4  | 99336497  | 99352746  | 16249  | protein_coding                     | -1.84 | 6.04E-03 | 3.18E-02 |
| ENSG00000280061 | AC011504.1      | 19 | 30553956  | 30558058  | 4102   | TEC                                | -1.84 | 1.77E-03 | 1.37E-02 |
| ENSG00000146267 | FAXC            | 6  | 99271168  | 99350062  | 7894   | protein_coding                     | -1.84 | 9.63E-05 | 1.93E-03 |
| ENSG00000286411 | AC002458.1      | 7  | 91030149  | 91033725  | 3576   | lncRNA                             | -1.84 | 1.11E-02 | 4.81E-02 |
| ENSG00000166049 | PASD1           | X  | 151563675 | 151676739 | 113064 | protein_coding                     | -1.84 | 2.87E-04 | 4.03E-03 |
| ENSG00000250961 | AC025470.2      | 5  | 57395060  | 57534504  | 139444 | lncRNA-antisense                   | -1.84 | 4.85E-03 | 2.75E-02 |
| ENSG00000275038 | AC091980.2      | 5  | 171305980 | 171309777 | 3797   | lncRNA-antisense                   | -1.84 | 8.60E-04 | 8.40E-03 |
| ENSG00000136487 | GH2             | 17 | 63880215  | 63881944  | 1729   | protein_coding                     | -1.84 | 9.59E-03 | 4.34E-02 |
| ENSG00000235824 | LINC00837       | 10 | 28789188  | 28796113  | 6925   | lncRNA                             | -1.84 | 3.28E-03 | 2.10E-02 |
| ENSG00000253690 | AC021678.2      | 8  | 28250063  | 28339255  | 89192  | lncRNA-antisense                   | -1.84 | 1.56E-03 | 1.26E-02 |
| ENSG00000285812 | AL390719.3      | 1  | 1097585   | 1104598   | 7013   | lncRNA-antisense                   | -1.84 | 1.27E-03 | 1.09E-02 |
| ENSG00000275722 | LYZL6           | 17 | 35934518  | 35943713  | 9195   | protein_coding                     | -1.84 | 1.53E-03 | 1.24E-02 |
| ENSG00000158445 | CNBN1           | 20 | 49293394  | 49484297  | 190903 | protein_coding                     | -1.84 | 5.72E-07 | 5.93E-05 |
| ENSG00000235012 | JCADP1          | 21 | 39525583  | 39529855  | 4272   | processed_pseudogene               | -1.84 | 4.78E-04 | 5.65E-03 |
| ENSG00000232591 | LINC02642       | 10 | 7444340   | 7472040   | 27700  | lncRNA                             | -1.84 | 8.93E-03 | 4.13E-02 |
| ENSG00000249767 | ENPP7P10        | 4  | 9079023   | 9141608   | 62585  | unprocessed_pseudogene             | -1.84 | 7.70E-03 | 3.74E-02 |
| ENSG00000176256 | HMCGB4          | 1  | 33860475  | 33864791  | 4316   | protein_coding                     | -1.84 | 8.39E-04 | 8.28E-03 |
| ENSG00000224853 | LINC00393       | 13 | 73413473  | 73661891  | 248418 | lncRNA                             | -1.84 | 1.10E-03 | 9.88E-03 |
| ENSG00000260695 | AC022164.1      | 16 | 65861112  | 65863784  | 2672   | lncRNA                             | -1.84 | 4.48E-03 | 2.60E-02 |
| ENSG00000286033 | CR381670.2      | 21 | 8762386   | 8836565   | 74179  | lncRNA                             | -1.84 | 7.49E-05 | 1.62E-03 |
| ENSG00000173769 | TOPAZ1          | 3  | 44241886  | 44332098  | 90212  | protein_coding                     | -1.84 | 2.58E-04 | 3.77E-03 |
| ENSG00000260266 | PPIAP46         | 15 | 74350768  | 74364620  | 13852  | transcribed_processed_pseudogene   | -1.85 | 2.83E-03 | 1.90E-02 |
| ENSG00000286627 | AP005900.1      | 18 | 8012257   | 8016565   | 4308   | lncRNA                             | -1.85 | 3.01E-03 | 1.98E-02 |
| ENSG00000236466 | AL035670.1      | 6  | 46492052  | 46606162  | 114110 | lncRNA-antisense                   | -1.85 | 1.57E-04 | 2.67E-03 |
| ENSG00000223784 | LINP1           | 10 | 6709530   | 6740532   | 31002  | lncRNA                             | -1.85 | 7.67E-04 | 7.79E-03 |
| ENSG00000264859 | DSG2-AS1        | 18 | 31542146  | 31556948  | 14802  | lncRNA-antisense                   | -1.85 | 3.04E-03 | 1.99E-02 |
| ENSG00000162279 | AXDND1          | 1  | 179365720 | 179554735 | 189015 | protein_coding                     | -1.85 | 3.18E-05 | 8.91E-04 |
| ENSG00000137869 | CYP19A1         | 15 | 51208057  | 51338601  | 130544 | protein_coding                     | -1.85 | 9.48E-05 | 1.91E-03 |
| ENSG00000283849 | AC092053.2      | 3  | 39152906  | 39154723  | 1817   | lncRNA-antisense                   | -1.85 | 2.09E-03 | 1.54E-02 |
| ENSG00000243710 | CFAP57          | 1  | 43172330  | 43254358  | 82028  | protein_coding                     | -1.85 | 6.06E-06 | 2.93E-04 |
| ENSG00000214146 | LINC02026       | 3  | 193957372 | 194003760 | 46388  | lncRNA                             | -1.85 | 1.91E-04 | 3.07E-03 |
| ENSG00000205497 | OR51A4          | 11 | 4942831   | 4947605   | 4774   | protein_coding                     | -1.85 | 4.20E-03 | 2.48E-02 |
| ENSG00000286799 | AC124066.1      | 17 | 19362760  | 19370236  | 7476   | lncRNA                             | -1.85 | 5.64E-03 | 3.04E-02 |
| ENSG00000169618 | PROKR1          | 2  | 68643579  | 68658251  | 14672  | protein_coding                     | -1.85 | 3.33E-03 | 2.12E-02 |
| ENSG00000226251 | LINC02608       | 1  | 212225278 | 212338977 | 13699  | lncRNA                             | -1.85 | 2.70E-04 | 3.87E-03 |
| ENSG00000281548 | LINC00895       | 22 | 19565203  | 19566839  | 1636   | lncRNA                             | -1.85 | 7.53E-03 | 3.68E-02 |
| ENSG00000133454 | MYO18B          | 22 | 25742144  | 26031045  | 288901 | protein_coding                     | -1.85 | 4.27E-07 | 4.78E-05 |
| ENSG00000197253 | TPSB2           | 16 | 1227272   | 1230184   | 2912   | protein_coding                     | -1.85 | 6.05E-04 | 6.61E-03 |
| ENSG00000272381 | LINC02664       | 10 | 31187715  | 31261910  | 74195  | lncRNA                             | -1.85 | 5.45E-04 | 6.16E-03 |
| ENSG00000104140 | RHOV            | 15 | 40872214  | 40874234  | 2020   | protein_coding                     | -1.85 | 2.18E-03 | 1.59E-02 |
| ENSG00000237626 | AL161629.1      | 9  | 89825964  | 90019549  | 193585 | lncRNA                             | -1.85 | 5.47E-05 | 1.30E-03 |
| ENSG00000233896 | PDYN-AS1        | 20 | 1947246   | 2030028   | 82782  | lncRNA-antisense                   | -1.85 | 3.01E-04 | 4.16E-03 |
| ENSG00000168243 | GN4G            | 1  | 235547685 | 235650754 | 103069 | protein_coding                     | -1.85 | 1.07E-06 | 8.96E-05 |
| ENSG00000234474 | MIR3663HG       | 10 | 117144564 | 117169108 | 24544  | lncRNA                             | -1.85 | 5.78E-03 | 3.09E-02 |
| ENSG00000251046 | ZNF969P         | 4  | 110415898 | 110418504 | 2606   | processed_pseudogene               | -1.85 | 2.76E-03 | 1.87E-02 |
| ENSG00000078295 | ADCY2           | 5  | 7396138   | 7830081   | 433943 | protein_coding                     | -1.85 | 4.66E-08 | 1.04E-05 |
| ENSG00000101440 | ASIP            | 20 | 34194569  | 34269344  | 74775  | protein_coding                     | -1.85 | 8.60E-04 | 8.40E-03 |
| ENSG00000259417 | CTXND1          | 15 | 80195481  | 80252213  | 56732  | protein_coding                     | -1.85 | 1.80E-05 | 4.30E-04 |
| ENSG00000260573 | AC007493.1      | 16 | 50407184  | 50546347  | 139163 | lncRNA                             | -1.85 | 1.35E-05 | 5.11E-04 |
| ENSG00000179994 | SPDYEP7         | 7  | 72862757  | 72871581  | 8824   | transcribed_unprocessed_pseudogene | -1.85 | 5.66E-03 | 3.05E-02 |
| ENSG00000189332 | SLC25A51P4      | 11 | 18209138  | 18214562  | 5424   | transcribed_unprocessed_pseudogene | -1.85 | 9.20E-04 | 8.80E-03 |

|                 |             |    |           |           |         |                                    |       |          |          |
|-----------------|-------------|----|-----------|-----------|---------|------------------------------------|-------|----------|----------|
| ENSG00000224931 | AC152010.1  | X  | 153122145 | 153128323 | 6178    | processed_pseudogene               | -1.85 | 5.95E-03 | 3.15E-02 |
| ENSG00000234238 | AC022498.1  | 3  | 188107072 | 188147310 | 40238   | lncRNA                             | -1.85 | 5.08E-03 | 2.83E-02 |
| ENSG00000242772 | AKP2        | 2  | 31823413  | 31823817  | 404     | processed_pseudogene               | -1.85 | 2.20E-03 | 1.60E-02 |
| ENSG00000254265 | AC100810.2  | 8  | 1730206   | 1731452   | 1246    | processed_pseudogene               | -1.85 | 6.32E-03 | 3.28E-02 |
| ENSG00000103710 | RASL12      | 15 | 65053337  | 65076690  | 23353   | protein_coding                     | -1.85 | 1.79E-03 | 1.38E-02 |
| ENSG00000168356 | SCN11A      | 3  | 38845764  | 39052157  | 206393  | protein_coding                     | -1.85 | 1.82E-11 | 4.31E-08 |
| ENSG00000157330 | C1orf158    | 1  | 12746200  | 12763699  | 17499   | protein_coding                     | -1.85 | 2.80E-04 | 3.98E-03 |
| ENSG00000187672 | ERC2        | 3  | 55508311  | 56468467  | 960156  | protein_coding                     | -1.85 | 9.36E-07 | 8.17E-05 |
| ENSG00000229116 | AL137026.1  | 10 | 44282489  | 44293998  | 11509   | lncRNA                             | -1.86 | 6.81E-04 | 7.18E-03 |
| ENSG00000246465 | AC138904.1  | 16 | 28284885  | 28292064  | 7179    | lncRNA                             | -1.86 | 5.31E-04 | 6.06E-03 |
| ENSG00000168418 | KCNG4       | 16 | 84218667  | 84239750  | 21083   | protein_coding                     | -1.86 | 2.55E-07 | 3.39E-05 |
| ENSG00000172318 | B3GALT1     | 2  | 167868948 | 167874041 | 5093    | protein_coding                     | -1.86 | 4.37E-03 | 2.55E-02 |
| ENSG00000116329 | OPRD1       | 1  | 28812142  | 28871267  | 59125   | protein_coding                     | -1.86 | 3.31E-06 | 1.96E-04 |
| ENSG00000226789 | WBP11P2     | 2  | 127247258 | 127250082 | 2824    | processed_pseudogene               | -1.86 | 3.52E-03 | 2.20E-02 |
| ENSG00000233608 | TWIST2      | 2  | 238848032 | 238910534 | 62502   | protein_coding                     | -1.86 | 4.69E-04 | 5.57E-03 |
| ENSG00000213176 | RPL13P6     | 14 | 103041469 | 103042094 | 625     | processed_pseudogene               | -1.86 | 6.77E-03 | 3.43E-02 |
| ENSG00000227115 | LINC01630   | 18 | 51346249  | 51643939  | 297690  | lncRNA                             | -1.86 | 3.31E-07 | 4.10E-05 |
| ENSG00000255082 | GRM5-AS1    | 11 | 88504576  | 88524054  | 19478   | lncRNA-antisense                   | -1.86 | 4.95E-04 | 5.77E-03 |
| ENSG00000165694 | FRMD7       | X  | 132076990 | 132128020 | 51030   | protein_coding                     | -1.86 | 6.84E-04 | 7.20E-03 |
| ENSG00000226250 | LINC00408   | 13 | 18905419  | 18935554  | 30135   | lncRNA                             | -1.86 | 2.26E-03 | 1.63E-02 |
| ENSG00000286732 | AC091181.2  | 17 | 57253236  | 57255855  | 2619    | lncRNA                             | -1.86 | 7.68E-03 | 3.73E-02 |
| ENSG00000249069 | LINC01033   | 5  | 54313564  | 54415238  | 101674  | lncRNA                             | -1.86 | 1.83E-04 | 2.98E-03 |
| ENSG00000224893 | LINC02840   | 6  | 152754903 | 152875991 | 121088  | lncRNA                             | -1.86 | 3.71E-04 | 4.76E-03 |
| ENSG00000180532 | ZSCAN4      | 19 | 57668935  | 57679152  | 10217   | protein_coding                     | -1.86 | 6.24E-03 | 3.25E-02 |
| ENSG00000232139 | LINC00867   | 10 | 118341437 | 118398468 | 57031   | lncRNA                             | -1.86 | 5.88E-04 | 6.50E-03 |
| ENSG00000236858 | AL008638.2  | 22 | 27048144  | 27061247  | 13103   | lncRNA                             | -1.86 | 2.42E-03 | 1.71E-02 |
| ENSG00000287591 | AL360169.3  | 6  | 158296671 | 158303372 | 6701    | lncRNA                             | -1.86 | 4.60E-03 | 2.64E-02 |
| ENSG00000137675 | MMP27       | 11 | 102691487 | 102705769 | 14282   | protein_coding                     | -1.86 | 7.95E-03 | 3.82E-02 |
| ENSG00000116721 | PRAMEF1     | 1  | 12791397  | 12796628  | 5231    | protein_coding                     | -1.86 | 2.39E-03 | 1.69E-02 |
| ENSG00000091583 | APOH        | 17 | 66212033  | 66256525  | 44492   | protein_coding                     | -1.86 | 5.21E-03 | 2.87E-02 |
| ENSG00000279936 | AC00806.1   | 19 | 37401404  | 37403846  | 2442    | TEC                                | -1.86 | 3.04E-04 | 4.20E-03 |
| ENSG00000231703 | AL354993.1  | 20 | 53397661  | 53412910  | 15249   | lncRNA-antisense                   | -1.86 | 3.20E-05 | 8.91E-04 |
| ENSG00000197658 | SLC22A24    | 11 | 63079940  | 63144221  | 64281   | protein_coding                     | -1.86 | 5.49E-03 | 2.98E-02 |
| ENSG00000204655 | MOG         | 6  | 29657002  | 29672372  | 15370   | protein_coding                     | -1.86 | 7.86E-04 | 7.93E-03 |
| ENSG00000261018 | AC002101.1  | 9  | 133611798 | 133633099 | 21301   | lncRNA-antisense                   | -1.86 | 1.80E-03 | 1.39E-02 |
| ENSG00000235054 | LINC01777   | 1  | 4412027   | 4424689   | 12662   | lncRNA                             | -1.86 | 9.98E-05 | 1.98E-03 |
| ENSG00000248966 | BCLAF1P1    | 5  | 110948029 | 110950780 | 2751    | processed_pseudogene               | -1.86 | 3.05E-03 | 2.00E-02 |
| ENSG00000221843 | C2orf16     | 2  | 27537386  | 27582721  | 45335   | protein_coding                     | -1.86 | 1.49E-06 | 1.14E-04 |
| ENSG00000259236 | GOLGA8VP    | 15 | 101771758 | 101781989 | 10231   | unprocessed_pseudogene             | -1.86 | 2.45E-04 | 3.64E-03 |
| ENSG00000165757 | JCAD        | 10 | 30012803  | 30115494  | 102691  | protein_coding                     | -1.86 | 6.95E-08 | 1.36E-05 |
| ENSG00000287743 | AL031289.2  | 1  | 40659848  | 40667480  | 7632    | lncRNA                             | -1.86 | 9.36E-03 | 4.28E-02 |
| ENSG00000255650 | FAM222A-AS1 | 12 | 109734166 | 109773508 | 39342   | lncRNA-antisense                   | -1.86 | 6.71E-04 | 7.10E-03 |
| ENSG00000223930 | AC117453.1  | 3  | 178164008 | 178385479 | 221471  | lncRNA-antisense                   | -1.86 | 4.87E-05 | 1.20E-03 |
| ENSG00000126785 | RHOJ        | 14 | 63204114  | 63293508  | 89394   | protein_coding                     | -1.86 | 1.10E-03 | 9.87E-03 |
| ENSG00000173124 | ACSM6       | 10 | 95194200  | 95228928  | 34728   | protein_coding                     | -1.86 | 1.38E-03 | 1.15E-02 |
| ENSG00000225877 | PSG8-AS1    | 19 | 42821863  | 42826878  | 5015    | lncRNA                             | -1.86 | 1.50E-03 | 1.22E-02 |
| ENSG00000153904 | DDAH1       | 1  | 85318481  | 85578363  | 259882  | protein_coding                     | -1.86 | 3.78E-05 | 1.01E-03 |
| ENSG00000286773 | AL353593.3  | 1  | 228329467 | 228331191 | 1724    | lncRNA                             | -1.86 | 9.23E-03 | 4.22E-02 |
| ENSG00000257501 | PAFAB1B2P2  | 12 | 97713412  | 97761859  | 48447   | transcribed_processed_pseudogene   | -1.86 | 1.72E-03 | 1.34E-02 |
| ENSG00000203837 | PNLIPRP3    | 10 | 116427847 | 116477957 | 50110   | protein_coding                     | -1.86 | 3.30E-03 | 2.10E-02 |
| ENSG00000223723 | TFDP1P2     | X  | 36962196  | 36963425  | 1229    | processed_pseudogene               | -1.86 | 6.85E-04 | 7.21E-03 |
| ENSG00000229037 | MRPL32P2    | X  | 53807776  | 53808623  | 847     | processed_pseudogene               | -1.86 | 4.87E-03 | 2.76E-02 |
| ENSG00000227098 | AC073636.1  | 2  | 176830839 | 176849428 | 18589   | lncRNA                             | -1.86 | 2.27E-03 | 1.63E-02 |
| ENSG00000230612 | AC004039.1  | 5  | 132688681 | 132723725 | 35044   | lncRNA-antisense                   | -1.86 | 1.04E-02 | 4.59E-02 |
| ENSG00000182898 | TCHHL1      | 1  | 152084141 | 152089064 | 4923    | protein_coding                     | -1.86 | 1.12E-03 | 1.00E-02 |
| ENSG00000141434 | MEP1B       | 18 | 32185069  | 32220404  | 35335   | protein_coding                     | -1.86 | 1.01E-03 | 9.38E-03 |
| ENSG00000260289 | AC093515.1  | 16 | 7878799   | 8112756   | 233957  | lncRNA                             | -1.86 | 4.88E-04 | 5.72E-03 |
| ENSG00000258240 | AC002351.1  | 12 | 110951683 | 110957820 | 6137    | lncRNA                             | -1.87 | 7.80E-04 | 7.89E-03 |
| ENSG00000175189 | INHBC       | 12 | 57434784  | 57452062  | 17278   | protein_coding                     | -1.87 | 5.20E-03 | 2.87E-02 |
| ENSG00000244383 | FAM3D-AS1   | 3  | 58607080  | 58644491  | 37411   | lncRNA-antisense                   | -1.87 | 2.10E-03 | 1.55E-02 |
| ENSG00000235584 | AC008268.1  | 2  | 95660588  | 95668727  | 8139    | lncRNA                             | -1.87 | 1.57E-04 | 2.67E-03 |
| ENSG00000203908 | KHDC3L      | 6  | 73362658  | 73364171  | 1513    | protein_coding                     | -1.87 | 1.43E-03 | 1.18E-02 |
| ENSG00000260477 | LINC01584   | 15 | 86078809  | 86116747  | 37938   | lncRNA-antisense                   | -1.87 | 2.25E-04 | 3.43E-03 |
| ENSG00000176194 | CIDEA       | 18 | 12254361  | 12277595  | 23234   | protein_coding                     | -1.87 | 1.46E-04 | 2.53E-03 |
| ENSG00000106025 | TSPAN12     | 7  | 120787320 | 120858402 | 71082   | protein_coding                     | -1.87 | 6.89E-04 | 7.23E-03 |
| ENSG00000229466 | LINC02627   | 10 | 105808225 | 105820349 | 12124   | lncRNA                             | -1.87 | 8.16E-03 | 3.89E-02 |
| ENSG00000134365 | CFHR4       | 1  | 196888014 | 196918713 | 30699   | protein_coding                     | -1.87 | 6.77E-03 | 3.43E-02 |
| ENSG00000260785 | CASC17      | 17 | 71097774  | 71202203  | 104429  | lncRNA                             | -1.87 | 8.28E-03 | 3.92E-02 |
| ENSG00000248152 | ANK2-AS1    | 4  | 112973272 | 113071962 | 98690   | lncRNA-antisense                   | -1.87 | 9.94E-04 | 9.27E-03 |
| ENSG00000198812 | LRRC10      | 12 | 69608564  | 69610907  | 2343    | protein_coding                     | -1.87 | 6.41E-03 | 3.31E-02 |
| ENSG00000287906 | AC127526.5  | 11 | 3475280   | 3477065   | 1785    | lncRNA                             | -1.87 | 5.03E-03 | 2.81E-02 |
| ENSG00000253227 | AC090192.2  | 8  | 124271667 | 124279580 | 7913    | lncRNA                             | -1.87 | 1.07E-03 | 9.71E-03 |
| ENSG00000285675 | AC023385.1  | 8  | 10118005  | 10147423  | 29418   | lncRNA-antisense                   | -1.87 | 1.91E-03 | 1.45E-02 |
| ENSG00000261227 | AC140912.1  | 16 | 73232055  | 73233970  | 1915    | lncRNA                             | -1.87 | 1.74E-03 | 1.36E-02 |
| ENSG00000227906 | SNAP25-AS1  | 20 | 10006381  | 10368776  | 362395  | lncRNA-antisense                   | -1.87 | 4.62E-06 | 2.44E-04 |
| ENSG00000206172 | HBA1        | 16 | 176680    | 177522    | 842     | protein_coding                     | -1.87 | 9.29E-05 | 1.88E-03 |
| ENSG00000268940 | CT45A1      | X  | 135713453 | 135723539 | 10086   | protein_coding                     | -1.87 | 5.75E-05 | 1.35E-03 |
| ENSG00000259425 | AC011767.1  | 15 | 22770523  | 22776199  | 5676    | transcribed_unprocessed_pseudogene | -1.87 | 8.81E-05 | 1.81E-03 |
| ENSG00000196534 | OR9K1P      | 12 | 55113077  | 55118632  | 5555    | transcribed_unitary_pseudogene     | -1.87 | 4.49E-03 | 2.60E-02 |
| ENSG00000134962 | KLB         | 4  | 39406930  | 39451533  | 44603   | protein_coding                     | -1.87 | 7.66E-05 | 1.65E-03 |
| ENSG00000283538 | AC005972.3  | 17 | 62910021  | 62968549  | 58528   | lncRNA                             | -1.87 | 4.50E-05 | 1.13E-03 |
| ENSG00000226358 | KRT8P38     | 10 | 88727485  | 88728914  | 1429    | processed_pseudogene               | -1.87 | 1.17E-02 | 4.98E-02 |
| ENSG00000180525 | PRR26       | 10 | 649948    | 669581    | 19633   | lncRNA                             | -1.87 | 3.17E-06 | 1.90E-04 |
| ENSG00000152208 | GRID2       | 4  | 92303966  | 93810157  | 1506191 | protein_coding                     | -1.87 | 1.08E-04 | 2.07E-03 |
| ENSG00000239552 | HOXB-AS2    | 17 | 48557262  | 48560333  | 3071    | lncRNA-antisense                   | -1.87 | 1.05E-02 | 4.63E-02 |
| ENSG00000176294 | OR4N2       | 14 | 19719015  | 19830253  | 111238  | protein_coding                     | -1.87 | 3.24E-03 | 2.08E-02 |
| ENSG00000187012 | LINC00207   | 22 | 44569295  | 44572453  | 3158    | lncRNA                             | -1.87 | 8.94E-04 | 8.62E-03 |
| ENSG00000162365 | CYP4A22     | 1  | 47137435  | 47149375  | 12300   | protein_coding                     | -1.87 | 1.03E-04 | 2.01E-03 |
| ENSG00000234805 | AC090505.1  | 3  | 194755589 | 194757422 | 1833    | processed_pseudogene               | -1.87 | 8.34E-04 | 8.25E-03 |
| ENSG00000126010 | GRPR        | X  | 16123565  | 16135318  | 29953   | protein_coding                     | -1.87 | 7.99E-05 | 1.69E-03 |

|                 |             |    |           |           |         |                                      |       |          |          |
|-----------------|-------------|----|-----------|-----------|---------|--------------------------------------|-------|----------|----------|
| ENSG00000233048 | LINC01722   | 20 | 12865202  | 12952519  | 87317   | lncRNA                               | -1.87 | 1.07E-03 | 9.75E-03 |
| ENSG00000175676 | GOLGA8DP    | 15 | 23157366  | 23170711  | 13345   | transcribed_unprocessed_pseudogene   | -1.87 | 3.98E-03 | 2.39E-02 |
| ENSG00000227917 | AL449043.1  | 9  | 100804    | 110138    | 9334    | lncRNA                               | -1.87 | 6.50E-03 | 3.34E-02 |
| ENSG00000226622 | AC092155.1  | 2  | 62533681  | 62662829  | 129148  | lncRNA-antisense                     | -1.87 | 8.88E-05 | 1.81E-03 |
| ENSG00000171056 | SOX7        | 8  | 10723768  | 10730511  | 6743    | protein coding                       | -1.87 | 2.59E-04 | 3.77E-03 |
| ENSG00000224865 | AC009518.1  | 7  | 131897289 | 131948953 | 51664   | lncRNA                               | -1.87 | 1.59E-04 | 2.70E-03 |
| ENSG00000163530 | DPPA2       | 3  | 109293788 | 109316517 | 22729   | protein coding                       | -1.87 | 3.99E-03 | 2.39E-02 |
| ENSG00000177181 | RIMKLA      | 1  | 42380792  | 42424232  | 43440   | protein coding                       | -1.87 | 1.33E-07 | 2.16E-05 |
| ENSG00000157214 | STEAP2      | 7  | 90167590  | 90238137  | 70547   | protein coding                       | -1.87 | 6.08E-05 | 1.40E-03 |
| ENSG00000171433 | GLD5        | X  | 48761747  | 48773648  | 11901   | protein coding                       | -1.87 | 4.03E-03 | 2.41E-02 |
| ENSG00000242100 | RPL9P32     | 19 | 29956369  | 29956988  | 619     | processed_pseudogene                 | -1.87 | 4.40E-03 | 2.57E-02 |
| ENSG00000267204 | LINC01782   | 19 | 32102088  | 32105916  | 3828    | lncRNA                               | -1.87 | 5.43E-04 | 6.14E-03 |
| ENSG00000243388 | RPL3P3      | 14 | 56978409  | 56979621  | 1212    | processed_pseudogene                 | -1.87 | 8.00E-03 | 3.83E-02 |
| ENSG00000273540 | AGBL1       | 15 | 86079973  | 87029052  | 949079  | protein coding                       | -1.87 | 4.68E-07 | 5.15E-05 |
| ENSG00000235253 | AC010240.2  | 5  | 132942932 | 132945050 | 2118    | processed_pseudogene                 | -1.88 | 6.29E-04 | 6.78E-03 |
| ENSG00000130055 | GDPD2       | X  | 70423031  | 70433390  | 10359   | protein coding                       | -1.88 | 1.39E-03 | 1.16E-02 |
| ENSG00000286289 | AL133482.1  | 10 | 113482069 | 113492054 | 9885    | lncRNA                               | -1.88 | 3.81E-03 | 2.32E-02 |
| ENSG00000287469 | AC044798.3  | 16 | 49072543  | 49275579  | 203036  | lncRNA                               | -1.88 | 1.71E-05 | 5.89E-04 |
| ENSG00000261683 | LINC00838   | 10 | 33759713  | 33772702  | 12989   | lncRNA                               | -1.88 | 7.76E-03 | 3.76E-02 |
| ENSG00000221852 | KRTAP1-5    | 17 | 41026026  | 41027208  | 1182    | protein coding                       | -1.88 | 3.78E-03 | 2.31E-02 |
| ENSG00000170605 | OR9K2       | 12 | 55126406  | 55132750  | 6344    | protein coding                       | -1.88 | 1.08E-02 | 4.70E-02 |
| ENSG00000285632 | AC084024.4  | 8  | 38223957  | 38231695  | 7738    | lncRNA-bidirectional_promoter_lncRNA | -1.88 | 1.04E-02 | 4.60E-02 |
| ENSG00000181626 | ANKRD62     | 18 | 12093843  | 12129764  | 35921   | protein coding                       | -1.88 | 1.01E-05 | 4.15E-04 |
| ENSG00000227059 | ANHX        | 12 | 133218312 | 133235877 | 17565   | protein coding                       | -1.88 | 3.76E-05 | 1.00E-03 |
| ENSG00000205108 | FAM205A     | 9  | 34723053  | 34729488  | 6435    | protein coding                       | -1.88 | 1.06E-03 | 9.66E-03 |
| ENSG00000173093 | CCDC63      | 12 | 110846769 | 110807535 | 60766   | protein coding                       | -1.88 | 1.64E-04 | 2.75E-03 |
| ENSG00000257398 | AC126177.3  | 12 | 107809483 | 107864562 | 55079   | lncRNA                               | -1.88 | 2.49E-05 | 7.57E-04 |
| ENSG00000259299 | AC061965.2  | 15 | 29233673  | 29235137  | 1464    | processed_pseudogene                 | -1.88 | 2.67E-03 | 1.83E-02 |
| ENSG00000153721 | CNKSR3      | 6  | 154387515 | 154510685 | 123170  | protein coding                       | -1.88 | 2.08E-07 | 3.01E-05 |
| ENSG00000245384 | CXXC-AS1    | 4  | 104490849 | 104734546 | 243697  | lncRNA-antisense                     | -1.88 | 4.31E-05 | 1.10E-03 |
| ENSG00000163762 | TMSF18      | 3  | 149318498 | 149334414 | 15916   | protein coding                       | -1.88 | 6.93E-04 | 7.27E-03 |
| ENSG00000219294 | PIF5K1P1    | 6  | 7986537   | 7988192   | 1655    | processed_pseudogene                 | -1.88 | 5.72E-03 | 3.07E-02 |
| ENSG00000231256 | CFAP97D1    | 17 | 43780435  | 43787620  | 7185    | protein coding                       | -1.88 | 2.66E-04 | 3.85E-03 |
| ENSG00000144820 | ADGRG7      | 3  | 100609601 | 100695479 | 85878   | protein coding                       | -1.88 | 9.96E-05 | 1.98E-03 |
| ENSG00000256987 | AC023050.5  | 12 | 31953889  | 31955268  | 1379    | processed_pseudogene                 | -1.88 | 7.22E-03 | 3.58E-02 |
| ENSG00000260802 | SERTM2      | X  | 111511662 | 111522399 | 10737   | protein coding                       | -1.88 | 1.06E-02 | 4.66E-02 |
| ENSG00000260338 | LINC01570   | 16 | 5596856   | 5616373   | 19517   | lncRNA-antisense                     | -1.88 | 3.05E-04 | 4.20E-03 |
| ENSG00000286922 | AC068787.2  | 12 | 127486938 | 127533242 | 46304   | lncRNA                               | -1.88 | 6.34E-03 | 3.29E-02 |
| ENSG00000285867 | BX470102.2  | 1  | 153586813 | 153606283 | 19470   | lncRNA                               | -1.88 | 1.50E-03 | 1.22E-02 |
| ENSG00000196301 | HLA-DRB9    | 6  | 32459821  | 32473500  | 13679   | unprocessed_pseudogene               | -1.88 | 1.12E-02 | 4.84E-02 |
| ENSG00000230563 | AL121757.1  | 20 | 5445838   | 5475483   | 29645   | lncRNA                               | -1.88 | 1.68E-04 | 2.80E-03 |
| ENSG00000061492 | WNT8A       | 5  | 138083990 | 138092365 | 8375    | protein coding                       | -1.88 | 9.66E-04 | 9.10E-03 |
| ENSG00000168032 | ENTPD3      | 3  | 40387184  | 40428744  | 41560   | protein coding                       | -1.88 | 4.80E-05 | 1.19E-03 |
| ENSG00000285540 | AC020203.2  | 10 | 114109856 | 114118700 | 8844    | lncRNA                               | -1.88 | 2.20E-04 | 3.38E-03 |
| ENSG00000254361 | AC046195.2  | 8  | 137852204 | 138019873 | 167669  | lncRNA                               | -1.88 | 1.11E-02 | 4.79E-02 |
| ENSG00000273492 | AP000229.1  | 21 | 26170871  | 26217381  | 46510   | lncRNA                               | -1.88 | 2.64E-03 | 1.81E-02 |
| ENSG00000264672 | SEPTIN4-AS1 | 17 | 58519837  | 58557799  | 37962   | lncRNA-antisense                     | -1.88 | 1.38E-03 | 1.15E-02 |
| ENSG00000225670 | CADM3-AS1   | 1  | 159194325 | 159207973 | 13648   | lncRNA-antisense                     | -1.88 | 1.20E-04 | 2.23E-03 |
| ENSG00000287636 | AC005229.5  | 7  | 148584818 | 148625479 | 40661   | lncRNA                               | -1.88 | 2.88E-03 | 1.92E-02 |
| ENSG00000255248 | MIR100HG    | 11 | 122028325 | 122556721 | 528396  | lncRNA                               | -1.88 | 1.00E-06 | 8.55E-05 |
| ENSG00000171815 | PCDHB1      | 5  | 141051374 | 141059346 | 7972    | protein coding                       | -1.88 | 2.03E-04 | 3.20E-03 |
| ENSG00000105697 | HAMP        | 19 | 35280716  | 35285143  | 4427    | protein coding                       | -1.88 | 1.80E-04 | 2.95E-03 |
| ENSG00000231119 | AL031666.1  | 20 | 47352561  | 47354633  | 2072    | lncRNA-antisense                     | -1.89 | 6.15E-04 | 6.69E-03 |
| ENSG00000233123 | LINC01007   | 7  | 101562779 | 101569006 | 6227    | lncRNA                               | -1.89 | 3.77E-03 | 2.30E-02 |
| ENSG00000286733 | LINC02348   | 15 | 101602786 | 101614531 | 11745   | lncRNA                               | -1.89 | 2.11E-06 | 1.46E-04 |
| ENSG00000196660 | SLC30A10    | 1  | 219685427 | 219958647 | 273220  | protein coding                       | -1.89 | 1.32E-05 | 5.03E-04 |
| ENSG00000229010 | AL161672.1  | 1  | 23140325  | 23141142  | 817     | processed_pseudogene                 | -1.89 | 2.76E-03 | 1.87E-02 |
| ENSG00000271755 | AL031118.1  | 6  | 27404010  | 27406964  | 2954    | lncRNA                               | -1.89 | 2.32E-03 | 1.66E-02 |
| ENSG00000163075 | CFAP221     | 2  | 119544432 | 119662251 | 117819  | protein coding                       | -1.89 | 1.53E-05 | 5.54E-04 |
| ENSG00000106823 | ECM2        | 9  | 92493554  | 92536655  | 43101   | protein coding                       | -1.89 | 5.95E-05 | 1.38E-03 |
| ENSG00000164303 | ENPP6       | 4  | 184088706 | 184221230 | 132524  | protein coding                       | -1.89 | 1.31E-04 | 2.36E-03 |
| ENSG00000165182 | CXorf58     | X  | 23908006  | 23939509  | 31503   | protein coding                       | -1.89 | 2.74E-03 | 1.86E-02 |
| ENSG00000256417 | AC006206.2  | 12 | 5290480   | 5383653   | 93173   | lncRNA                               | -1.89 | 1.36E-03 | 1.15E-02 |
| ENSG00000237290 | LINC01343   | 1  | 38209034  | 38214806  | 5772    | lncRNA                               | -1.89 | 7.66E-04 | 7.79E-03 |
| ENSG00000188580 | NKAIN2      | 6  | 123803865 | 124825640 | 1021775 | protein coding                       | -1.89 | 1.23E-03 | 1.07E-02 |
| ENSG00000219159 | AC011298.1  | 2  | 240686334 | 240690414 | 4080    | lncRNA                               | -1.89 | 2.80E-04 | 3.98E-03 |
| ENSG00000248538 | AC022784.1  | 8  | 9151695   | 9425524   | 273829  | lncRNA                               | -1.89 | 7.69E-09 | 3.03E-06 |
| ENSG00000214896 | RPSAP5      | 15 | 52885595  | 52886470  | 875     | processed_pseudogene                 | -1.89 | 6.35E-03 | 3.29E-02 |
| ENSG00000285569 | AC099344.3  | 2  | 11405508  | 11427186  | 21678   | lncRNA                               | -1.89 | 1.75E-05 | 5.99E-04 |
| ENSG00000257279 | AC127164.1  | 12 | 116977442 | 116987337 | 9895    | lncRNA-antisense                     | -1.89 | 3.46E-04 | 4.55E-03 |
| ENSG00000286816 | AP005273.2  | 11 | 64486136  | 64490674  | 4538    | lncRNA                               | -1.89 | 1.17E-02 | 4.98E-02 |
| ENSG00000287223 | Z94277.1    | X  | 42723209  | 42755892  | 32683   | lncRNA                               | -1.89 | 7.96E-03 | 3.82E-02 |
| ENSG00000287009 | AC021037.1  | 10 | 96129055  | 96130528  | 1473    | lncRNA                               | -1.89 | 3.26E-05 | 9.05E-04 |
| ENSG00000233183 | AL138889.1  | 6  | 33891327  | 33927631  | 36304   | lncRNA                               | -1.89 | 9.43E-06 | 4.01E-04 |
| ENSG00000287427 | AL390236.1  | 10 | 128026878 | 128029444 | 2566    | lncRNA                               | -1.89 | 3.11E-03 | 2.02E-02 |
| ENSG00000239828 | AC063944.1  | 3  | 107272611 | 107421338 | 148727  | lncRNA                               | -1.89 | 1.32E-04 | 2.37E-03 |
| ENSG00000285523 | AC005906.3  | 12 | 5088002   | 5092742   | 4740    | lncRNA                               | -1.89 | 6.71E-03 | 3.41E-02 |
| ENSG00000226673 | LINC01108   | 6  | 14280127  | 14285454  | 5327    | lncRNA                               | -1.89 | 2.87E-04 | 4.03E-03 |
| ENSG00000212658 | KRTAP29-1   | 17 | 41301826  | 41302851  | 1025    | protein coding                       | -1.89 | 7.62E-03 | 3.71E-02 |
| ENSG00000228392 | AL162391.1  | 9  | 126286999 | 126298593 | 11594   | lncRNA                               | -1.89 | 5.59E-05 | 1.32E-03 |
| ENSG00000239810 | PRAMEF11    | 1  | 12824605  | 12831410  | 6805    | protein coding                       | -1.89 | 2.14E-03 | 1.57E-02 |
| ENSG00000271609 | AC005632.4  | 16 | 21538487  | 21538794  | 307     | processed_pseudogene                 | -1.89 | 7.33E-03 | 3.62E-02 |
| ENSG00000287005 | AC090018.2  | 3  | 195260632 | 195263628 | 2996    | lncRNA                               | -1.89 | 3.49E-06 | 2.01E-04 |
| ENSG00000162621 | LRRRC53     | 1  | 74469376  | 74512611  | 43235   | protein coding                       | -1.89 | 5.05E-03 | 2.82E-02 |
| ENSG00000166211 | SPIC        | 12 | 101475336 | 101486997 | 11661   | protein coding                       | -1.89 | 7.89E-03 | 3.80E-02 |
| ENSG00000286442 | AL512603.1  | 10 | 23575012  | 23586224  | 11212   | lncRNA                               | -1.89 | 3.89E-03 | 2.35E-02 |
| ENSG00000284513 | AC006063.2  | 12 | 4960113   | 4963450   | 3337    | lncRNA                               | -1.90 | 5.46E-03 | 2.97E-02 |
| ENSG00000259219 | AC084855.2  | 15 | 99976481  | 99980774  | 4293    | lncRNA-antisense                     | -1.90 | 1.28E-04 | 2.33E-03 |
| ENSG00000204616 | TRIM31      | 6  | 30102897  | 30113090  | 10193   | protein coding                       | -1.90 | 1.19E-04 | 2.21E-03 |
| ENSG00000261578 | AP003119.3  | 11 | 76800364  | 76804555  | 4191    | lncRNA-sense overlapping             | -1.90 | 2.20E-03 | 1.60E-02 |



|                 |             |    |           |           |        |                                    |       |          |          |
|-----------------|-------------|----|-----------|-----------|--------|------------------------------------|-------|----------|----------|
| ENSG00000233478 | AL031280.1  | 1  | 25644544  | 25659111  | 14567  | lncRNA-antisense                   | -1.90 | 3.16E-04 | 4.29E-03 |
| ENSG00000180785 | OR51E1      | 11 | 4643420   | 4655488   | 12068  | protein coding                     | -1.90 | 5.84E-04 | 6.47E-03 |
| ENSG00000285595 | AC105114.2  | 18 | 25196663  | 25218241  | 21578  | lncRNA-antisense                   | -1.90 | 1.60E-03 | 1.28E-02 |
| ENSG00000286279 | AC108721.2  | 12 | 59322765  | 59436874  | 114109 | lncRNA                             | -1.90 | 7.11E-03 | 3.55E-02 |
| ENSG00000286635 | AC006112.1  | 16 | 6380476   | 6395578   | 15102  | lncRNA                             | -1.90 | 8.06E-03 | 3.85E-02 |
| ENSG00000288549 | AC026412.4  | 5  | 1639627   | 1644700   | 5073   | lncRNA                             | -1.90 | 1.60E-04 | 2.70E-03 |
| ENSG00000196972 | SMIM10L2B   | X  | 135094985 | 135098712 | 3727   | protein coding                     | -1.90 | 1.82E-03 | 1.40E-02 |
| ENSG00000267424 | AC020934.1  | 19 | 12825711  | 12832983  | 7272   | lncRNA-antisense                   | -1.90 | 1.08E-02 | 4.71E-02 |
| ENSG00000137819 | PAQR5       | 15 | 69298912  | 69407780  | 108868 | protein coding                     | -1.90 | 2.37E-05 | 7.34E-04 |
| ENSG00000283162 | AL390726.5  | 9  | 38433696  | 38543880  | 110184 | transcribed unprocessed pseudogene | -1.90 | 1.20E-04 | 2.23E-03 |
| ENSG00000283095 | FP565171.1  | 10 | 131891640 | 131895297 | 3657   | lncRNA                             | -1.90 | 8.81E-04 | 8.53E-03 |
| ENSG00000148408 | CACNA1B     | 9  | 137877782 | 138124624 | 246842 | protein coding                     | -1.90 | 4.02E-07 | 4.61E-05 |
| ENSG00000184478 | OR56A3      | 11 | 5938751   | 5951347   | 12596  | protein coding                     | -1.90 | 6.55E-04 | 6.99E-03 |
| ENSG00000237417 | XRCC6P1     | 10 | 93206857  | 93209627  | 2770   | processed pseudogene               | -1.90 | 1.03E-03 | 9.46E-03 |
| ENSG00000241469 | LINC00635   | 3  | 107840228 | 107882250 | 42022  | lncRNA                             | -1.90 | 3.07E-05 | 8.71E-04 |
| ENSG00000224958 | PGM5-AS1    | 9  | 68353614  | 68357893  | 4279   | lncRNA-antisense                   | -1.90 | 5.19E-03 | 2.87E-02 |
| ENSG00000173250 | GPR151      | 5  | 146513103 | 146516190 | 3078   | protein coding                     | -1.90 | 2.94E-03 | 1.95E-02 |
| ENSG00000164434 | FABP7       | 6  | 122779716 | 122784074 | 4358   | protein coding                     | -1.90 | 1.11E-02 | 4.80E-02 |
| ENSG00000100867 | DHRS2       | 14 | 23630115  | 23645639  | 15524  | protein coding                     | -1.90 | 1.24E-05 | 4.83E-04 |
| ENSG00000137872 | SEMA6D      | 15 | 47184101  | 47774228  | 590127 | protein coding                     | -1.90 | 1.31E-05 | 5.02E-04 |
| ENSG00000225156 | AC012354.1  | 2  | 44954664  | 44968762  | 14098  | lncRNA                             | -1.90 | 1.92E-03 | 1.45E-02 |
| ENSG00000277526 | AC245123.1  | 8  | 2562813   | 2623382   | 60569  | lncRNA                             | -1.90 | 8.50E-04 | 8.34E-03 |
| ENSG00000259168 | AC104002.3  | 15 | 27483035  | 27541991  | 58956  | lncRNA-antisense                   | -1.90 | 6.09E-03 | 3.20E-02 |
| ENSG00000101892 | ATP1B4      | X  | 120362085 | 120383249 | 21164  | protein coding                     | -1.90 | 2.22E-03 | 1.61E-02 |
| ENSG00000232084 | LINC01104   | 2  | 100208254 | 100251484 | 43230  | lncRNA                             | -1.90 | 8.02E-04 | 8.04E-03 |
| ENSG00000250708 | LINC02269   | 4  | 173699082 | 174001488 | 302406 | lncRNA                             | -1.90 | 1.16E-03 | 1.03E-02 |
| ENSG00000268532 | LINC02135   | 16 | 86286427  | 86293389  | 6962   | lncRNA                             | -1.90 | 3.49E-04 | 4.56E-03 |
| ENSG00000130377 | ACSBG2      | 19 | 6135247   | 6193094   | 57847  | protein coding                     | -1.90 | 2.27E-04 | 3.45E-03 |
| ENSG00000257958 | AC008125.1  | 12 | 115077325 | 115080153 | 2828   | lncRNA                             | -1.90 | 3.94E-03 | 2.37E-02 |
| ENSG00000258705 | AC245055.2  | 14 | 22011910  | 22014964  | 3054   | processed pseudogene               | -1.91 | 5.09E-04 | 5.89E-03 |
| ENSG00000229723 | LINC01054   | 13 | 114329559 | 114333948 | 4389   | lncRNA-antisense                   | -1.91 | 8.41E-03 | 3.97E-02 |
| ENSG00000205301 | MGAT4D      | 4  | 140442262 | 140498377 | 56115  | protein coding                     | -1.91 | 8.71E-05 | 1.79E-03 |
| ENSG00000172742 | OR4D9       | 11 | 59511368  | 59520703  | 9335   | protein coding                     | -1.91 | 3.01E-04 | 4.16E-03 |
| ENSG00000232685 | LINC00442   | 13 | 19008259  | 19026802  | 18543  | lncRNA-antisense                   | -1.91 | 4.23E-03 | 2.49E-02 |
| ENSG00000185860 | CCDC190     | 1  | 162824458 | 162868815 | 44357  | protein coding                     | -1.91 | 2.90E-04 | 4.06E-03 |
| ENSG00000273274 | ZBTB88      | 1  | 32465072  | 32496686  | 31614  | protein coding                     | -1.91 | 2.20E-06 | 1.50E-04 |
| ENSG00000105550 | FGF21       | 19 | 48755524  | 48758333  | 2809   | protein coding                     | -1.91 | 2.87E-03 | 1.92E-02 |
| ENSG00000261285 | AC009117.2  | 16 | 82491738  | 82575518  | 83780  | lncRNA                             | -1.91 | 2.33E-03 | 1.67E-02 |
| ENSG00000082126 | MPP4        | 2  | 201644870 | 201698994 | 53824  | protein coding                     | -1.91 | 2.35E-05 | 7.29E-04 |
| ENSG00000229613 | LINC01501   | 9  | 90462899  | 90583821  | 120922 | lncRNA                             | -1.91 | 1.05E-04 | 2.04E-03 |
| ENSG00000134940 | ACRV1       | 11 | 125671522 | 125680874 | 9352   | protein coding                     | -1.91 | 8.51E-03 | 3.99E-02 |
| ENSG00000281196 | LINC00934   | 12 | 119283825 | 119303380 | 19555  | lncRNA                             | -1.91 | 1.16E-02 | 4.96E-02 |
| ENSG00000279733 | AP001642.1  | 11 | 88165575  | 88167891  | 2116   | TEC                                | -1.91 | 1.04E-02 | 4.60E-02 |
| ENSG00000228189 | LINC02843   | 9  | 86627063  | 86652180  | 25117  | lncRNA                             | -1.91 | 5.66E-05 | 1.33E-03 |
| ENSG00000261303 | AC022748.2  | 15 | 78660644  | 78736684  | 76040  | transcribed unprocessed pseudogene | -1.91 | 7.46E-06 | 3.41E-04 |
| ENSG00000228075 | BOD1L2      | 18 | 57147087  | 57150410  | 3323   | protein coding                     | -1.91 | 1.87E-04 | 3.02E-03 |
| ENSG00000196240 | ORT2T2      | 1  | 248445512 | 248455725 | 10213  | protein coding                     | -1.91 | 5.46E-03 | 2.97E-02 |
| ENSG00000230753 | ZNF341-AS1  | 20 | 33787373  | 33811109  | 23736  | lncRNA-antisense                   | -1.91 | 4.64E-03 | 2.66E-02 |
| ENSG00000224609 | HSD52       | 1  | 59131932  | 59296491  | 164559 | lncRNA                             | -1.91 | 2.36E-08 | 6.72E-06 |
| ENSG00000256340 | ABC6P1      | 16 | 18571162  | 18598328  | 27166  | transcribed unprocessed pseudogene | -1.91 | 8.08E-05 | 1.71E-03 |
| ENSG00000213355 | CNN2P8      | 2  | 94737337  | 94738249  | 912    | processed pseudogene               | -1.91 | 8.84E-03 | 4.10E-02 |
| ENSG00000164326 | CARTPT      | 5  | 71719275  | 71721048  | 1773   | protein coding                     | -1.91 | 1.07E-02 | 4.67E-02 |
| ENSG00000182585 | EPGN        | 4  | 74308470  | 74316789  | 8319   | protein coding                     | -1.91 | 6.02E-04 | 6.60E-03 |
| ENSG00000267640 | AC016582.3  | 19 | 37817359  | 37832160  | 14801  | transcribed unprocessed pseudogene | -1.91 | 5.95E-07 | 6.10E-05 |
| ENSG00000120952 | PRAMEF2     | 1  | 12857086  | 12861909  | 4823   | protein coding                     | -1.91 | 1.23E-03 | 1.07E-02 |
| ENSG00000286043 | AC091214.1  | 12 | 82673070  | 82888632  | 13562  | lncRNA                             | -1.91 | 4.11E-03 | 2.44E-02 |
| ENSG00000228330 | AL355355.1  | 10 | 13142185  | 13142977  | 792    | processed pseudogene               | -1.91 | 4.58E-03 | 2.64E-02 |
| ENSG00000233002 | TBC1D26-AS1 | 17 | 15735023  | 15749192  | 14169  | lncRNA-antisense                   | -1.91 | 1.92E-04 | 3.08E-03 |
| ENSG00000153294 | ADGRF4      | 6  | 47685864  | 47722021  | 36157  | protein coding                     | -1.91 | 6.55E-03 | 3.36E-02 |
| ENSG00000156968 | MPV17L      | 16 | 15395754  | 15413271  | 17517  | protein coding                     | -1.91 | 4.57E-05 | 1.14E-03 |
| ENSG00000182698 | RESP18      | 2  | 219327407 | 219333177 | 5770   | protein coding                     | -1.91 | 4.69E-03 | 2.68E-02 |
| ENSG00000181101 | ENTR1P2     | 1  | 175044626 | 175045648 | 1022   | processed pseudogene               | -1.91 | 4.96E-03 | 2.79E-02 |
| ENSG00000137975 | CLCA2       | 1  | 86424171  | 86456553  | 32382  | protein coding                     | -1.91 | 2.25E-04 | 3.43E-03 |
| ENSG00000232554 | RSU1P2      | 10 | 45099487  | 45154606  | 55119  | transcribed unprocessed pseudogene | -1.91 | 3.52E-03 | 2.20E-02 |
| ENSG0000077935  | SMC1B       | 22 | 45344063  | 45413819  | 69556  | protein coding                     | -1.92 | 2.10E-06 | 1.46E-04 |
| ENSG00000280719 | PCAT5       | 10 | 35778302  | 35800920  | 22618  | lncRNA                             | -1.92 | 7.17E-03 | 3.57E-02 |
| ENSG00000258791 | LINC00520   | 14 | 55781132  | 55796731  | 15599  | lncRNA                             | -1.92 | 2.56E-04 | 3.75E-03 |
| ENSG00000231943 | PGM5P4-AS1  | 2  | 113526836 | 113542694 | 15858  | lncRNA                             | -1.92 | 4.23E-03 | 2.49E-02 |
| ENSG00000132639 | SNAP25      | 20 | 10218830  | 10307418  | 88588  | protein coding                     | -1.92 | 6.75E-06 | 3.18E-04 |
| ENSG00000226191 | CLK3P2      | 1  | 247936061 | 247937513 | 1452   | processed pseudogene               | -1.92 | 1.39E-03 | 1.16E-02 |
| ENSG00000285940 | AC009899.1  | 18 | 37565281  | 37762131  | 196850 | lncRNA-antisense                   | -1.92 | 1.37E-05 | 5.18E-04 |
| ENSG00000215866 | LINC01356   | 1  | 112820170 | 112850643 | 30473  | lncRNA                             | -1.92 | 7.19E-05 | 1.58E-03 |
| ENSG00000232511 | OR2AH1P     | 11 | 56667545  | 56674664  | 7119   | transcribed unprocessed pseudogene | -1.92 | 1.04E-02 | 4.61E-02 |
| ENSG00000188089 | PLA2G4E     | 15 | 41981582  | 42051190  | 69608  | protein coding                     | -1.92 | 1.20E-05 | 4.71E-04 |
| ENSG00000275431 | AC244100.2  | 17 | 35983656  | 35990270  | 6614   | lncRNA-antisense                   | -1.92 | 1.03E-05 | 4.21E-04 |
| ENSG00000259697 | AC126323.2  | 15 | 62196066  | 62222911  | 26845  | lncRNA                             | -1.92 | 1.89E-03 | 1.44E-02 |
| ENSG00000228789 | HCG22       | 6  | 31053450  | 31059890  | 6440   | transcribed unitary pseudogene     | -1.92 | 2.13E-03 | 1.57E-02 |
| ENSG00000268654 | MIMT1       | 19 | 56840866  | 56848556  | 7690   | lncRNA                             | -1.92 | 4.67E-03 | 2.67E-02 |
| ENSG00000286450 | AC021573.1  | 11 | 46920880  | 46929320  | 8440   | lncRNA                             | -1.92 | 7.78E-03 | 3.76E-02 |
| ENSG00000261033 | AC005730.2  | 17 | 20008051  | 20009234  | 1183   | lncRNA-antisense                   | -1.92 | 1.12E-03 | 1.00E-02 |
| ENSG00000233542 | AL391845.2  | 1  | 2013213   | 2015639   | 2426   | lncRNA-antisense                   | -1.92 | 4.62E-04 | 5.52E-03 |
| ENSG00000214929 | SPAT1A31D1  | 9  | 81988772  | 81995253  | 6481   | protein coding                     | -1.92 | 1.00E-03 | 9.33E-03 |
| ENSG00000279790 | AL590552.1  | 6  | 73971346  | 73973115  | 1769   | TEC                                | -1.92 | 6.48E-03 | 3.34E-02 |
| ENSG00000106536 | POU6F2      | 7  | 38977909  | 39493095  | 515186 | protein coding                     | -1.92 | 2.23E-07 | 3.16E-05 |
| ENSG00000246022 | ALDH1L1-AS2 | 3  | 126180012 | 126210169 | 30157  | lncRNA-antisense                   | -1.92 | 1.46E-03 | 1.20E-02 |
| ENSG00000153923 | CLCA3P      | 1  | 86634273  | 86655376  | 21103  | transcribed unprocessed pseudogene | -1.92 | 9.11E-04 | 8.74E-03 |
| ENSG00000140798 | ABCC12      | 16 | 48081006  | 48156018  | 75012  | protein coding                     | -1.92 | 1.91E-06 | 1.36E-04 |
| ENSG00000279302 | AC013643.3  | 8  | 27701194  | 27703789  | 2595   | TEC                                | -1.92 | 4.80E-04 | 5.66E-03 |
| ENSG00000226277 | AC105393.1  | 2  | 421057    | 424059    | 3002   | lncRNA                             | -1.92 | 5.30E-04 | 6.05E-03 |
| ENSG00000286400 | AC110926.1  | 2  | 127141976 | 127143793 | 1817   | lncRNA                             | -1.92 | 8.98E-03 | 4.14E-02 |

|                 |             |    |           |           |        |                                    |       |          |          |
|-----------------|-------------|----|-----------|-----------|--------|------------------------------------|-------|----------|----------|
| ENSG00000237038 | USP17L8     | 8  | 7971661   | 7973253   | 1592   | protein coding                     | -1.92 | 5.61E-04 | 6.29E-03 |
| ENSG00000124260 | MAGEA10     | X  | 152133310 | 152138578 | 5268   | protein coding                     | -1.92 | 7.16E-03 | 3.57E-02 |
| ENSG00000279593 | AL132642.2  | 14 | 93895762  | 93897759  | 1997   | TEC                                | -1.92 | 7.33E-03 | 3.62E-02 |
| ENSG00000077943 | ITGA8       | 10 | 15513954  | 15719922  | 205968 | protein coding                     | -1.92 | 2.70E-07 | 3.56E-05 |
| ENSG00000144730 | IL17RD      | 3  | 57089982  | 57170306  | 80324  | protein coding                     | -1.92 | 3.45E-06 | 2.00E-04 |
| ENSG00000141028 | CDRT15P1    | 17 | 14024514  | 14025488  | 974    | unprocessed pseudogene             | -1.92 | 9.32E-04 | 8.88E-03 |
| ENSG00000286765 | AP005899.2  | 18 | 8971624   | 8974580   | 2956   | lncRNA                             | -1.92 | 7.26E-03 | 3.60E-02 |
| ENSG00000287084 | AL355337.1  | 6  | 142671980 | 142681267 | 9287   | lncRNA                             | -1.93 | 8.53E-04 | 8.36E-03 |
| ENSG00000251400 | ALDH7A1P1   | 5  | 77290268  | 77291800  | 1532   | processed pseudogene               | -1.93 | 4.66E-03 | 2.67E-02 |
| ENSG00000262953 | EIF4A1P9    | 17 | 2586330   | 2587866   | 1536   | processed pseudogene               | -1.93 | 1.93E-03 | 1.46E-02 |
| ENSG00000259404 | EFL1P1      | 15 | 84080168  | 84128604  | 48436  | transcribed unprocessed pseudogene | -1.93 | 1.75E-04 | 2.89E-03 |
| ENSG00000257884 | AL512310.7  | 14 | 19677837  | 19680104  | 2267   | transcribed processed pseudogene   | -1.93 | 6.76E-06 | 3.18E-04 |
| ENSG00000259130 | AL133371.3  | 14 | 20870278  | 20873848  | 3570   | lncRNA                             | -1.93 | 1.02E-02 | 4.55E-02 |
| ENSG00000261873 | SMIM36      | 17 | 55448433  | 55511444  | 63011  | protein coding                     | -1.93 | 5.84E-05 | 1.36E-03 |
| ENSG00000235180 | LINC00661   | 10 | 126413869 | 126421879 | 8010   | lncRNA                             | -1.93 | 3.64E-03 | 2.25E-02 |
| ENSG00000285763 | AL358777.3  | 6  | 10659498  | 10692860  | 33362  | lncRNA-antisense                   | -1.93 | 6.98E-05 | 1.55E-03 |
| ENSG00000186847 | KRT14       | 17 | 41582279  | 41586895  | 4616   | protein coding                     | -1.93 | 7.19E-05 | 1.58E-03 |
| ENSG00000260009 | LINC02130   | 16 | 14363109  | 14370266  | 7157   | lncRNA                             | -1.93 | 1.03E-02 | 4.57E-02 |
| ENSG00000268153 | AC005176.1  | 19 | 39638685  | 39642401  | 3716   | transcribed unprocessed pseudogene | -1.93 | 7.75E-03 | 3.75E-02 |
| ENSG00000186225 | ATP1A2      | 1  | 160115759 | 160143591 | 27832  | protein coding                     | -1.93 | 6.01E-06 | 2.92E-04 |
| ENSG00000253474 | AC044893.1  | 8  | 49086301  | 49229174  | 142873 | lncRNA                             | -1.93 | 9.53E-03 | 4.32E-02 |
| ENSG00000250328 | MG3C2805    | 5  | 122436497 | 122479087 | 42590  | lncRNA-antisense                   | -1.93 | 3.47E-04 | 4.56E-03 |
| ENSG00000243319 | FGF14-IT1   | 13 | 102292327 | 102394519 | 102192 | lncRNA-sense intronic              | -1.93 | 3.81E-03 | 2.32E-02 |
| ENSG00000181798 | LINC00471   | 2  | 231508422 | 231514366 | 5944   | lncRNA                             | -1.93 | 9.94E-04 | 9.27E-03 |
| ENSG00000234381 | MED15P7     | 22 | 15635180  | 15644330  | 9150   | unprocessed pseudogene             | -1.93 | 8.41E-03 | 3.97E-02 |
| ENSG00000185479 | KRT6B       | 12 | 52448651  | 52452146  | 5495   | protein coding                     | -1.93 | 6.08E-05 | 1.40E-03 |
| ENSG00000138379 | MSTN        | 2  | 190055700 | 190062729 | 7029   | protein coding                     | -1.93 | 9.12E-04 | 8.74E-03 |
| ENSG00000145192 | AHSG        | 3  | 186613060 | 186621318 | 8258   | protein coding                     | -1.93 | 1.92E-04 | 3.08E-03 |
| ENSG00000233143 | DIRC3-AS1   | 2  | 217261699 | 217336120 | 74421  | lncRNA                             | -1.93 | 7.30E-04 | 7.53E-03 |
| ENSG00000267712 | LINC01539   | 18 | 56083356  | 56137536  | 54180  | lncRNA                             | -1.93 | 1.63E-04 | 2.75E-03 |
| ENSG00000114248 | LRR3C1      | 3  | 169839172 | 169869935 | 30763  | protein coding                     | -1.93 | 1.61E-03 | 1.29E-02 |
| ENSG00000169208 | OR10G3      | 14 | 21568520  | 21580076  | 11556  | protein coding                     | -1.93 | 2.83E-04 | 4.00E-03 |
| ENSG00000116726 | PRAMEF12    | 1  | 12773738  | 12777906  | 4168   | protein coding                     | -1.93 | 1.53E-05 | 5.54E-04 |
| ENSG00000086717 | PPEF1       | X  | 18675909  | 18827921  | 152012 | protein coding                     | -1.93 | 2.02E-06 | 1.42E-04 |
| ENSG00000156920 | ADGRG4      | X  | 136300963 | 136416890 | 115927 | protein coding                     | -1.93 | 1.44E-04 | 2.52E-03 |
| ENSG00000286428 | AL161731.1  | 9  | 126701173 | 126704691 | 3518   | lncRNA                             | -1.93 | 5.39E-04 | 6.12E-03 |
| ENSG00000182264 | IZUMO1      | 19 | 48740852  | 48746909  | 6057   | protein coding                     | -1.93 | 2.21E-04 | 3.38E-03 |
| ENSG00000165794 | SLC39A2     | 14 | 20999255  | 21001871  | 2616   | protein coding                     | -1.93 | 9.00E-03 | 4.15E-02 |
| ENSG00000284957 | AF131216.5  | 8  | 11479203  | 11481068  | 1865   | lncRNA                             | -1.93 | 9.07E-03 | 4.17E-02 |
| ENSG00000232148 | FMO11P      | 1  | 166763334 | 166792767 | 29433  | unprocessed pseudogene             | -1.93 | 5.88E-03 | 3.12E-02 |
| ENSG00000231434 | HSP90AA3P   | 1  | 158523672 | 158525838 | 2166   | processed pseudogene               | -1.93 | 2.60E-03 | 1.80E-02 |
| ENSG00000249948 | GBA3        | 4  | 22692914  | 22819575  | 126661 | polymorphic pseudogene             | -1.93 | 7.59E-03 | 3.70E-02 |
| ENSG00000267339 | LINC00906   | 19 | 28883430  | 28970874  | 87444  | lncRNA                             | -1.93 | 5.46E-05 | 1.30E-03 |
| ENSG00000268864 | AC011487.2  | 19 | 53599628  | 53608451  | 8823   | transcribed unprocessed pseudogene | -1.93 | 3.66E-04 | 4.72E-03 |
| ENSG00000278819 | AC005156.1  | 7  | 92540268  | 92557877  | 17609  | unprocessed pseudogene             | -1.93 | 8.69E-03 | 4.05E-02 |
| ENSG00000286951 | AL356113.1  | 10 | 24410183  | 24416459  | 6276   | lncRNA                             | -1.93 | 1.84E-03 | 1.41E-02 |
| ENSG00000229537 | LINC01739   | 1  | 62975751  | 63022504  | 46753  | lncRNA                             | -1.93 | 1.09E-03 | 9.83E-03 |
| ENSG00000287519 | AC004921.2  | 7  | 77487317  | 77489865  | 11648  | lncRNA                             | -1.93 | 2.42E-03 | 1.71E-02 |
| ENSG00000287136 | AC073578.5  | 12 | 131457018 | 131458324 | 1306   | lncRNA                             | -1.93 | 9.10E-03 | 4.18E-02 |
| ENSG00000235785 | AL109767.1  | 14 | 99262948  | 99264735  | 1787   | lncRNA-antisense                   | -1.94 | 1.10E-03 | 9.88E-03 |
| ENSG00000286443 | AC091178.2  | 17 | 39086976  | 39091942  | 4966   | lncRNA                             | -1.94 | 3.75E-03 | 2.30E-02 |
| ENSG00000237978 | KCNMB2-AS1  | 3  | 178526505 | 178937352 | 410847 | lncRNA-antisense                   | -1.94 | 6.30E-05 | 1.44E-03 |
| ENSG00000204669 | C9orf57     | 9  | 72051376  | 72072721  | 21345  | protein coding                     | -1.94 | 5.85E-04 | 6.47E-03 |
| ENSG00000237596 | AL138828.1  | 6  | 135991936 | 136225751 | 23815  | lncRNA-antisense                   | -1.94 | 6.74E-07 | 6.64E-05 |
| ENSG00000132031 | MATN3       | 2  | 19992052  | 20012668  | 20616  | protein coding                     | -1.94 | 1.09E-04 | 2.08E-03 |
| ENSG00000148798 | INA         | 10 | 103277138 | 103290346 | 13208  | protein coding                     | -1.94 | 1.50E-04 | 2.58E-03 |
| ENSG00000197641 | SERPINB13   | 18 | 63586989  | 63604639  | 17650  | protein coding                     | -1.94 | 2.29E-05 | 7.18E-04 |
| ENSG00000203782 | LORICRIN    | 1  | 153259687 | 153262124 | 2437   | protein coding                     | -1.94 | 1.65E-03 | 1.31E-02 |
| ENSG00000259854 | AP005233.1  | 11 | 69414307  | 69416832  | 2525   | lncRNA                             | -1.94 | 8.01E-06 | 3.57E-04 |
| ENSG00000146006 | LRR12       | 5  | 138868921 | 138875368 | 6447   | protein coding                     | -1.94 | 1.28E-05 | 4.96E-04 |
| ENSG00000088926 | F11         | 4  | 186266189 | 186289681 | 23492  | protein coding                     | -1.94 | 7.23E-05 | 1.58E-03 |
| ENSG00000264424 | MYH4        | 17 | 10443290  | 10469559  | 28269  | protein coding                     | -1.94 | 2.15E-08 | 6.28E-06 |
| ENSG00000260186 | LINC02137   | 16 | 58421326  | 58462470  | 41144  | lncRNA                             | -1.94 | 2.81E-03 | 1.89E-02 |
| ENSG00000287511 | AL109984.1  | 20 | 52072685  | 52096480  | 23795  | lncRNA                             | -1.94 | 8.88E-03 | 4.11E-02 |
| ENSG00000182632 | C6NYL2      | 10 | 42408168  | 42475349  | 67181  | transcribed unprocessed pseudogene | -1.94 | 7.72E-04 | 7.83E-03 |
| ENSG00000279076 | AL136140.2  | 6  | 44551577  | 44553281  | 1704   | TEC                                | -1.94 | 4.40E-03 | 2.57E-02 |
| ENSG00000205359 | SLOC6A1     | 5  | 102371774 | 102499016 | 127242 | protein coding                     | -1.94 | 8.11E-04 | 8.11E-03 |
| ENSG00000234438 | KBTBD13     | 15 | 65076746  | 65079948  | 3202   | protein coding                     | -1.94 | 8.22E-04 | 8.17E-03 |
| ENSG00000166509 | CLEC3A      | 16 | 78022515  | 78066761  | 44246  | protein coding                     | -1.94 | 2.09E-03 | 1.54E-02 |
| ENSG00000260209 | AP000842.3  | 11 | 125873031 | 125874528 | 1497   | lncRNA                             | -1.94 | 9.66E-03 | 4.36E-02 |
| ENSG00000039537 | C6          | 5  | 41142116  | 41261438  | 119322 | protein coding                     | -1.94 | 8.75E-04 | 8.50E-03 |
| ENSG00000227236 | AL583844.1  | 1  | 235614674 | 235616397 | 1723   | processed pseudogene               | -1.94 | 5.27E-03 | 2.90E-02 |
| ENSG00000091664 | SLC17A6     | 11 | 22338381  | 22379503  | 41122  | protein coding                     | -1.94 | 2.55E-03 | 1.77E-02 |
| ENSG00000267762 | AC048380.1  | 18 | 48673575  | 48688419  | 14844  | lncRNA-antisense                   | -1.94 | 1.05E-02 | 4.62E-02 |
| ENSG00000236643 | AL354928.1  | 9  | 124770123 | 124772927 | 2804   | lncRNA-antisense                   | -1.94 | 1.50E-03 | 1.23E-02 |
| ENSG00000260555 | AC092681.2  | 7  | 150000752 | 150005124 | 4372   | lncRNA                             | -1.94 | 4.85E-04 | 5.71E-03 |
| ENSG00000163915 | IGF2BP2-AS1 | 3  | 185712528 | 18579787  | 17259  | lncRNA-antisense                   | -1.94 | 1.03E-03 | 9.47E-03 |
| ENSG00000254040 | AC103719.1  | 8  | 21023276  | 21030368  | 7092   | lncRNA                             | -1.94 | 9.84E-04 | 9.20E-03 |
| ENSG00000288045 | AL352979.4  | 14 | 52951432  | 52952864  | 1432   | lncRNA                             | -1.94 | 2.80E-03 | 1.88E-02 |
| ENSG00000248560 | AC008620.2  | 5  | 181114106 | 181115674 | 1568   | processed pseudogene               | -1.94 | 6.20E-03 | 3.24E-02 |
| ENSG00000164900 | GBX1        | 7  | 151148589 | 151174745 | 26156  | protein coding                     | -1.94 | 1.99E-03 | 1.49E-02 |
| ENSG00000250899 | AC125807.2  | 12 | 3041437   | 3044950   | 3513   | lncRNA                             | -1.94 | 9.57E-05 | 1.92E-03 |
| ENSG00000260765 | CEP127      | 16 | 55728115  | 55750111  | 21996  | unprocessed pseudogene             | -1.94 | 1.51E-03 | 1.23E-02 |
| ENSG00000186910 | SERPINA11   | 14 | 94442464  | 94452800  | 10336  | protein coding                     | -1.94 | 4.32E-03 | 2.54E-02 |
| ENSG00000286698 | AC027612.3  | 2  | 91759462  | 91767701  | 8239   | lncRNA                             | -1.94 | 1.10E-02 | 4.78E-02 |
| ENSG00000174740 | PABPC5      | X  | 91434595  | 91438584  | 3989   | protein coding                     | -1.94 | 6.61E-04 | 7.03E-03 |
| ENSG00000236501 | AC074286.1  | 2  | 176989418 | 177164656 | 175238 | lncRNA                             | -1.94 | 1.78E-04 | 2.92E-03 |
| ENSG00000197408 | CYP2B6      | 19 | 40991282  | 41018398  | 27116  | protein coding                     | -1.95 | 7.01E-04 | 7.31E-03 |
| ENSG00000285754 | AC008170.1  | 2  | 34134371  | 34220575  | 86204  | lncRNA                             | -1.95 | 6.88E-03 | 3.47E-02 |
| ENSG00000280114 | AL021920.2  | 1  | 16681097  | 16688749  | 7652   | unprocessed pseudogene             | -1.95 | 5.88E-03 | 3.12E-02 |

|                 |            |    |           |           |        |                                    |       |          |          |
|-----------------|------------|----|-----------|-----------|--------|------------------------------------|-------|----------|----------|
| ENSG00000205266 | KRT17P5    | 17 | 18415728  | 18425097  | 9369   | transcribed unprocessed pseudogene | -1.95 | 1.08E-04 | 2.07E-03 |
| ENSG00000286622 | AC034111.2 | 8  | 9984004   | 10055041  | 71037  | lncRNA                             | -1.95 | 9.80E-04 | 9.18E-03 |
| ENSG00000261210 | CLEC11A    | 16 | 19285731  | 19322145  | 36414  | protein coding                     | -1.95 | 1.44E-04 | 2.52E-03 |
| ENSG00000229608 | GOLGA2P4   | 22 | 42784462  | 42787100  | 2638   | unprocessed pseudogene             | -1.95 | 2.73E-04 | 3.90E-03 |
| ENSG00000228151 | AC004941.1 | 7  | 149398204 | 149401456 | 3252   | lncRNA-antisense                   | -1.95 | 3.06E-04 | 4.21E-03 |
| ENSG00000183549 | ACSM5      | 16 | 20409534  | 20441336  | 31802  | protein coding                     | -1.95 | 4.49E-05 | 1.13E-03 |
| ENSG0000086696  | HSD17B2    | 16 | 82035004  | 82098534  | 63530  | protein coding                     | -1.95 | 6.37E-06 | 3.05E-04 |
| ENSG00000254135 | AC091939.1 | 5  | 158485190 | 158588546 | 103356 | lncRNA                             | -1.95 | 1.08E-03 | 9.79E-03 |
| ENSG00000130368 | MAS1       | 6  | 159890988 | 159917447 | 26459  | protein coding                     | -1.95 | 2.49E-05 | 7.56E-04 |
| ENSG00000161850 | KRT82      | 12 | 52393931  | 52406335  | 12404  | protein coding                     | -1.95 | 1.22E-04 | 2.26E-03 |
| ENSG00000233405 | LINC01046  | 13 | 21224521  | 21235204  | 10683  | lncRNA                             | -1.95 | 3.16E-03 | 2.05E-02 |
| ENSG00000142973 | CYP4B1     | 1  | 46757838  | 46819413  | 61575  | protein coding                     | -1.95 | 3.06E-05 | 8.68E-04 |
| ENSG00000234726 | AC245060.3 | 22 | 22228719  | 22230469  | 1750   | processed pseudogene               | -1.95 | 4.97E-03 | 2.79E-02 |
| ENSG00000226308 | AL122058.1 | 20 | 57266797  | 57282998  | 16201  | lncRNA                             | -1.95 | 1.28E-03 | 1.10E-02 |
| ENSG00000278338 | VWA8-AS1   | 13 | 41955808  | 41981565  | 25757  | lncRNA-antisense                   | -1.95 | 1.59E-03 | 1.28E-02 |
| ENSG00000236539 | HNRNPA1P54 | 1  | 179447602 | 179457315 | 9713   | processed pseudogene               | -1.95 | 8.06E-05 | 1.71E-03 |
| ENSG00000112041 | TULP1      | 6  | 35497874  | 35512896  | 15022  | protein coding                     | -1.95 | 6.66E-06 | 3.15E-04 |
| ENSG00000287325 | AC138647.2 | 8  | 141507333 | 141509785 | 2452   | lncRNA                             | -1.95 | 7.53E-03 | 3.68E-02 |
| ENSG00000235430 | ZSWIM5P1   | 17 | 15768717  | 15771426  | 2709   | processed pseudogene               | -1.95 | 1.12E-03 | 1.00E-02 |
| ENSG00000257711 | AC079385.2 | 12 | 106678583 | 106684707 | 6124   | lncRNA-antisense                   | -1.95 | 3.03E-05 | 8.66E-04 |
| ENSG00000183853 | KIRREL1    | 1  | 157993273 | 158100262 | 106989 | protein coding                     | -1.95 | 1.46E-08 | 4.73E-06 |
| ENSG00000123560 | PLP1       | X  | 103773718 | 103792619 | 18901  | protein coding                     | -1.95 | 2.49E-04 | 3.68E-03 |
| ENSG00000186526 | CYP4F8     | 19 | 15615218  | 15630639  | 15421  | protein coding                     | -1.95 | 1.96E-05 | 6.46E-04 |
| ENSG00000180475 | OR10Q1     | 11 | 58227882  | 58228918  | 1036   | protein coding                     | -1.95 | 6.00E-03 | 3.17E-02 |
| ENSG00000215237 | AL592293.1 | 9  | 14993312  | 15019729  | 28417  | unprocessed pseudogene             | -1.95 | 5.41E-04 | 6.13E-03 |
| ENSG00000257896 | AC083012.1 | 12 | 43736628  | 43741067  | 4439   | transcribed unprocessed pseudogene | -1.95 | 4.95E-03 | 2.78E-02 |
| ENSG00000260478 | AC007333.1 | 16 | 52238081  | 52269574  | 31493  | lncRNA                             | -1.95 | 9.91E-03 | 4.44E-02 |
| ENSG00000114638 | UPKB1      | X  | 119173517 | 119205143 | 31626  | protein coding                     | -1.95 | 2.68E-05 | 7.92E-04 |
| ENSG00000271150 | F8A3       | 3  | 155456914 | 155458620 | 1706   | protein coding                     | -1.95 | 8.89E-05 | 1.81E-03 |
| ENSG00000198022 | SAG2EP     | X  | 135673591 | 135686151 | 12560  | unprocessed pseudogene             | -1.95 | 7.85E-03 | 3.79E-02 |
| ENSG00000254506 | AP003080.1 | 11 | 101584295 | 101595156 | 10861  | transcribed processed pseudogene   | -1.95 | 6.70E-03 | 3.41E-02 |
| ENSG00000230485 | AC000077.1 | 22 | 19630750  | 19633574  | 2824   | processed pseudogene               | -1.96 | 1.66E-03 | 1.31E-02 |
| ENSG00000212961 | HNRNPA1P40 | 11 | 74354443  | 74355720  | 1277   | processed pseudogene               | -1.96 | 8.18E-03 | 3.89E-02 |
| ENSG00000238247 | RDXP3      | X  | 27517884  | 27519759  | 1875   | processed pseudogene               | -1.96 | 5.55E-03 | 3.00E-02 |
| ENSG00000145194 | ECE2       | 3  | 184276011 | 184293031 | 17020  | protein coding                     | -1.96 | 3.84E-04 | 4.89E-03 |
| ENSG00000198028 | ZNF560     | 19 | 9466355   | 9498616   | 32261  | protein coding                     | -1.96 | 4.35E-04 | 5.29E-03 |
| ENSG00000167798 | C3P1       | 19 | 10037803  | 10074135  | 36332  | transcribed unprocessed pseudogene | -1.96 | 4.70E-06 | 2.47E-04 |
| ENSG00000205830 | AC024132.1 | 4  | 27207505  | 27218404  | 10899  | lncRNA                             | -1.96 | 5.75E-03 | 3.08E-02 |
| ENSG00000286240 | AL034422.1 | 20 | 37338886  | 37344109  | 5223   | lncRNA                             | -1.96 | 7.95E-03 | 3.82E-02 |
| ENSG00000229717 | AL10615.1  | 4  | 75822966  | 75838389  | 15423  | lncRNA-antisense                   | -1.96 | 4.44E-03 | 2.59E-02 |
| ENSG00000188910 | GJB3       | 1  | 34781214  | 34786369  | 5155   | protein coding                     | -1.96 | 2.87E-05 | 8.30E-04 |
| ENSG00000159217 | IGF2BP1    | 17 | 48997385  | 49056145  | 58760  | protein coding                     | -1.96 | 1.13E-05 | 4.50E-04 |
| ENSG00000203362 | POLL-AS1   | 6  | 43588230  | 43591362  | 3132   | lncRNA-antisense                   | -1.96 | 4.91E-03 | 2.77E-02 |
| ENSG00000274261 | AL130708.2 | 20 | 48406777  | 48410716  | 3939   | lncRNA                             | -1.96 | 1.03E-02 | 4.56E-02 |
| ENSG00000229558 | SACS-AS1   | 13 | 23418971  | 23428869  | 9898   | lncRNA                             | -1.96 | 9.34E-04 | 8.90E-03 |
| ENSG00000126562 | WNK4       | 17 | 42780610  | 42797066  | 16456  | protein coding                     | -1.96 | 3.99E-07 | 4.59E-05 |
| ENSG00000105549 | THEG       | 19 | 361747    | 376026    | 14279  | protein coding                     | -1.96 | 3.99E-06 | 2.20E-04 |
| ENSG00000286884 | AC012060.1 | 15 | 26261669  | 26265918  | 4249   | lncRNA                             | -1.96 | 4.74E-03 | 2.70E-02 |
| ENSG00000287003 | AC008674.1 | 5  | 173757562 | 173773164 | 15602  | lncRNA                             | -1.96 | 9.99E-04 | 9.30E-03 |
| ENSG00000237686 | AL109615.3 | 6  | 43995723  | 44074652  | 78929  | lncRNA-antisense                   | -1.96 | 1.33E-04 | 2.39E-03 |
| ENSG00000161594 | KLHL10     | 17 | 41835685  | 41848384  | 12699  | protein coding                     | -1.96 | 1.99E-04 | 3.16E-03 |
| ENSG00000235358 | AC093151.2 | 1  | 41242373  | 41284861  | 42488  | lncRNA                             | -1.96 | 9.26E-08 | 1.63E-05 |
| ENSG00000288162 | AL596442.4 | 6  | 170135374 | 170142926 | 7552   | lncRNA                             | -1.96 | 3.02E-03 | 1.99E-02 |
| ENSG00000235023 | AP001626.1 | 21 | 42648271  | 42651244  | 2973   | lncRNA-antisense                   | -1.96 | 1.86E-05 | 6.25E-04 |
| ENSG00000235979 | AC004448.2 | 17 | 19417769  | 19492991  | 75222  | lncRNA                             | -1.96 | 3.84E-05 | 1.02E-03 |
| ENSG00000263571 | AC004147.2 | 17 | 34155566  | 34165736  | 10170  | lncRNA                             | -1.96 | 1.64E-04 | 2.75E-03 |
| ENSG00000258776 | AL161757.4 | 14 | 56817570  | 56893710  | 76140  | lncRNA                             | -1.96 | 5.28E-03 | 2.90E-02 |
| ENSG00000100191 | SLC5A4     | 22 | 32218464  | 32255347  | 36883  | protein coding                     | -1.96 | 8.95E-06 | 3.86E-04 |
| ENSG00000174502 | SLC26A9    | 1  | 205913048 | 205943460 | 30412  | protein coding                     | -1.96 | 1.98E-06 | 1.40E-04 |
| ENSG00000240253 | FAR2P3     | 2  | 130690133 | 130718831 | 28698  | transcribed unprocessed pseudogene | -1.96 | 8.26E-04 | 8.20E-03 |
| ENSG00000101323 | HAO1       | 20 | 7882985   | 7940458   | 57473  | protein coding                     | -1.96 | 9.28E-03 | 4.24E-02 |
| ENSG00000288029 | AC115282.2 | 3  | 54033988  | 54058864  | 24876  | lncRNA                             | -1.96 | 2.05E-04 | 3.23E-03 |
| ENSG00000230628 | AL160408.3 | 1  | 234669523 | 234696153 | 26630  | lncRNA                             | -1.96 | 4.41E-03 | 2.57E-02 |
| ENSG00000287029 | AL162713.2 | 13 | 43786781  | 43814798  | 28017  | lncRNA                             | -1.96 | 3.45E-04 | 4.54E-03 |
| ENSG00000114113 | RBP2       | 3  | 139452884 | 139480747 | 27863  | protein coding                     | -1.96 | 1.28E-03 | 1.10E-02 |
| ENSG00000132297 | HHLA1      | 8  | 132061486 | 132111159 | 49673  | protein coding                     | -1.96 | 1.54E-05 | 5.56E-04 |
| ENSG00000231754 | AL512380.1 | 6  | 21521678  | 21523783  | 2105   | lncRNA                             | -1.96 | 5.47E-03 | 2.97E-02 |
| ENSG00000220256 | AC093802.1 | 2  | 239762860 | 239824764 | 61904  | lncRNA                             | -1.96 | 2.18E-05 | 6.91E-04 |
| ENSG00000229486 | AC104454.1 | 1  | 84015865  | 84018371  | 2506   | processed pseudogene               | -1.96 | 2.37E-03 | 1.68E-02 |
| ENSG00000227685 | LINC02088  | 17 | 20612912  | 20633234  | 20322  | lncRNA                             | -1.96 | 1.48E-03 | 1.21E-02 |
| ENSG00000260664 | AC004158.1 | 16 | 72425948  | 72533892  | 107944 | lncRNA                             | -1.96 | 7.90E-04 | 7.96E-03 |
| ENSG00000250748 | AC025419.1 | 12 | 65466820  | 65642372  | 175552 | lncRNA                             | -1.96 | 5.04E-05 | 1.23E-03 |
| ENSG00000285810 | AC018511.6 | 10 | 75041876  | 75055754  | 13878  | lncRNA-antisense                   | -1.96 | 1.51E-03 | 1.23E-02 |
| ENSG00000227674 | LINC00355  | 13 | 63851197  | 64076044  | 224847 | lncRNA                             | -1.96 | 1.07E-03 | 9.74E-03 |
| ENSG00000262732 | AC010401.1 | 16 | 13930677  | 13935635  | 4958   | lncRNA-antisense                   | -1.97 | 1.04E-04 | 2.02E-03 |
| ENSG00000161133 | USP41      | 22 | 20350578  | 20390758  | 40180  | protein coding                     | -1.97 | 3.83E-04 | 4.87E-03 |
| ENSG00000106541 | AGR2       | 7  | 16791811  | 16833433  | 41622  | protein coding                     | -1.97 | 2.05E-03 | 1.52E-02 |
| ENSG00000058085 | LAMC2      | 1  | 183186238 | 183245127 | 58889  | protein coding                     | -1.97 | 4.58E-05 | 1.14E-03 |
| ENSG00000188558 | OR2G6      | 1  | 248508073 | 248527337 | 19264  | protein coding                     | -1.97 | 2.30E-04 | 3.49E-03 |
| ENSG00000137707 | BTG4       | 11 | 111467526 | 111512354 | 44828  | protein coding                     | -1.97 | 7.97E-03 | 3.82E-02 |
| ENSG00000165078 | CPA6       | 8  | 67422038  | 67746378  | 324340 | protein coding                     | -1.97 | 4.02E-05 | 1.05E-03 |
| ENSG00000236133 | LINC01069  | 13 | 77979817  | 77997881  | 18064  | lncRNA                             | -1.97 | 5.61E-03 | 3.02E-02 |
| ENSG00000133863 | TEX15      | 8  | 30831544  | 30913008  | 81464  | protein coding                     | -1.97 | 3.20E-04 | 4.32E-03 |
| ENSG00000283175 | AC007920.2 | 3  | 187291272 | 187297933 | 6661   | lncRNA-antisense                   | -1.97 | 3.63E-03 | 2.25E-02 |
| ENSG00000204949 | FAM83A-AS1 | 8  | 123196536 | 123202743 | 6207   | lncRNA-antisense                   | -1.97 | 5.69E-03 | 3.06E-02 |
| ENSG00000260120 | AC104066.3 | 4  | 52680609  | 52692999  | 12390  | lncRNA                             | -1.97 | 5.62E-03 | 3.03E-02 |
| ENSG00000229606 | LINC01718  | 20 | 61079049  | 61083750  | 4701   | lncRNA                             | -1.97 | 5.47E-04 | 6.17E-03 |
| ENSG00000267733 | AP005264.4 | 18 | 12201982  | 12223539  | 21557  | transcribed processed pseudogene   | -1.97 | 3.21E-06 | 1.92E-04 |
| ENSG00000183862 | CNMA2      | X  | 151738451 | 151745304 | 6853   | protein coding                     | -1.97 | 1.13E-03 | 1.00E-02 |
| ENSG00000171804 | WDR87      | 19 | 37884823  | 37906677  | 21854  | protein coding                     | -1.97 | 2.66E-06 | 1.69E-04 |

|                 |                    |    |           |           |        |                                    |       |          |          |
|-----------------|--------------------|----|-----------|-----------|--------|------------------------------------|-------|----------|----------|
| ENSG00000264515 | AC011474.1         | 19 | 29287011  | 29525752  | 238741 | lncRNA                             | -1.97 | 1.82E-05 | 6.16E-04 |
| ENSG00000196832 | OR11G2             | 14 | 20190894  | 20201075  | 10181  | protein coding                     | -1.97 | 4.47E-04 | 5.41E-03 |
| ENSG00000263574 | AC125421.1         | 17 | 73737854  | 73756932  | 19078  | lncRNA                             | -1.97 | 8.17E-05 | 1.72E-03 |
| ENSG00000258779 | LINC01568          | 16 | 73386771  | 73504954  | 118183 | lncRNA                             | -1.97 | 7.02E-07 | 6.80E-05 |
| ENSG00000286826 | AL136129.1         | 6  | 169097799 | 169102428 | 4629   | lncRNA                             | -1.97 | 7.86E-03 | 3.79E-02 |
| ENSG00000255159 | AC026894.1         | 11 | 8768778   | 8810231   | 41453  | lncRNA-antisense                   | -1.97 | 8.64E-03 | 4.04E-02 |
| ENSG00000248319 | LINC02275          | 4  | 169917761 | 169975904 | 58143  | lncRNA                             | -1.97 | 8.97E-04 | 8.64E-03 |
| ENSG00000102359 | SRPX2              | X  | 100644195 | 100675788 | 31593  | protein coding                     | -1.97 | 1.07E-05 | 4.33E-04 |
| ENSG00000273362 | AP000547.2         | 22 | 16521059  | 16527237  | 6178   | lncRNA                             | -1.97 | 8.42E-03 | 3.97E-02 |
| ENSG00000234766 | LINC01496          | X  | 51498490  | 51511005  | 12515  | lncRNA                             | -1.97 | 3.01E-03 | 1.98E-02 |
| ENSG00000136943 | CTSV               | 9  | 97029677  | 97039643  | 9966   | protein coding                     | -1.97 | 1.76E-05 | 6.02E-04 |
| ENSG00000242290 | ZBTB20-AS5         | 3  | 114445521 | 114529452 | 83931  | lncRNA                             | -1.97 | 1.76E-03 | 1.37E-02 |
| ENSG00000282996 | MPP7-DT            | 10 | 28303300  | 28307658  | 4358   | lncRNA                             | -1.97 | 4.71E-03 | 2.69E-02 |
| ENSG00000256150 | ITFG2-AS1          | 12 | 2695765   | 2812902   | 117137 | lncRNA                             | -1.97 | 1.12E-03 | 1.00E-02 |
| ENSG00000146276 | GABRR1             | 6  | 89177504  | 89231278  | 53774  | protein coding                     | -1.97 | 6.95E-04 | 7.27E-03 |
| ENSG00000279625 | AL591122.1         | 1  | 22364630  | 22366482  | 1852   | TEC                                | -1.97 | 6.10E-03 | 3.20E-02 |
| ENSG00000226954 | AL023802.1         | 22 | 49718053  | 49724506  | 6453   | lncRNA                             | -1.97 | 4.28E-06 | 2.31E-04 |
| ENSG00000186860 | KRTAP17-1          | 17 | 41314912  | 41315710  | 798    | protein coding                     | -1.97 | 3.23E-03 | 2.08E-02 |
| ENSG00000270110 | AL353593.2         | 1  | 228295549 | 228303002 | 7453   | lncRNA-antisense                   | -1.97 | 6.95E-03 | 3.49E-02 |
| ENSG00000286898 | AL049569.2         | 1  | 16976302  | 16977792  | 1490   | lncRNA                             | -1.97 | 8.56E-03 | 4.01E-02 |
| ENSG00000261453 | LINC01735          | 1  | 208606564 | 208614295 | 7731   | lncRNA                             | -1.98 | 2.03E-03 | 1.51E-02 |
| ENSG00000230323 | LINC00159          | 21 | 32080316  | 32197813  | 117497 | lncRNA                             | -1.98 | 7.70E-03 | 3.74E-02 |
| ENSG00000250060 | AC122710.1         | 5  | 6868554   | 6888087   | 19533  | lncRNA                             | -1.98 | 3.16E-03 | 2.05E-02 |
| ENSG00000238169 | LINC01053          | 13 | 25168969  | 25190643  | 21674  | lncRNA-antisense                   | -1.98 | 7.62E-03 | 3.71E-02 |
| ENSG00000240048 | DDX50P2            | 3  | 154352136 | 154354799 | 2663   | processed pseudogene               | -1.98 | 3.11E-03 | 2.02E-02 |
| ENSG00000177462 | OR2T8              | 1  | 247920252 | 247921956 | 1704   | protein coding                     | -1.98 | 2.79E-03 | 1.88E-02 |
| ENSG00000266261 | AC005324.4         | 17 | 15651590  | 15654489  | 2899   | lncRNA-antisense                   | -1.98 | 5.06E-03 | 2.82E-02 |
| ENSG00000285820 | AL17829.1          | 9  | 116838144 | 116877264 | 39120  | lncRNA-antisense                   | -1.98 | 1.84E-03 | 1.41E-02 |
| ENSG00000153012 | LG12               | 4  | 24998847  | 25030946  | 32099  | protein coding                     | -1.98 | 1.89E-05 | 6.32E-04 |
| ENSG00000269927 | AC004817.3         | 14 | 71141125  | 71134523  | 2128   | lncRNA                             | -1.98 | 5.31E-03 | 2.91E-02 |
| ENSG00000147081 | AKAP4              | X  | 50190777  | 50201007  | 10230  | protein coding                     | -1.98 | 4.23E-03 | 2.49E-02 |
| ENSG00000148082 | SHC3               | 9  | 89005771  | 89178818  | 173047 | protein coding                     | -1.98 | 6.61E-08 | 1.32E-05 |
| ENSG00000204684 | AL133464.1         | 20 | 22371216  | 22471557  | 100341 | lncRNA                             | -1.98 | 7.82E-07 | 7.36E-05 |
| ENSG00000230506 | AL354824.1         | 20 | 10172522  | 10200824  | 28302  | lncRNA                             | -1.98 | 1.13E-02 | 4.84E-02 |
| ENSG00000187185 | AC092118.1         | 16 | 57798186  | 57816946  | 18760  | lncRNA                             | -1.98 | 2.54E-04 | 3.73E-03 |
| ENSG00000170608 | FOXA3              | 19 | 45863989  | 45873797  | 9808   | protein coding                     | -1.98 | 2.04E-03 | 1.52E-02 |
| ENSG00000225746 | MEG8               | 14 | 100894770 | 101038859 | 144089 | lncRNA                             | -1.98 | 1.80E-09 | 1.02E-06 |
| ENSG00000176798 | OR51L1             | 11 | 4994851   | 5005536   | 10685  | protein coding                     | -1.98 | 1.44E-04 | 2.52E-03 |
| ENSG00000230221 | AL157384.1         | 9  | 95292338  | 95294810  | 2472   | processed pseudogene               | -1.98 | 1.64E-03 | 1.31E-02 |
| ENSG00000280039 | RNTSKP23           | 16 | 23412380  | 23416680  | 4300   | TEC                                | -1.98 | 2.21E-06 | 1.50E-04 |
| ENSG00000260019 | LINC01992          | 17 | 27928924  | 27991787  | 62863  | lncRNA                             | -1.98 | 7.90E-05 | 1.68E-03 |
| ENSG00000254401 | LINC02752          | 11 | 11020883  | 11183611  | 162728 | lncRNA                             | -1.98 | 3.52E-04 | 4.60E-03 |
| ENSG00000166569 | CPLX4              | 18 | 59275156  | 59318649  | 43493  | protein coding                     | -1.98 | 1.86E-03 | 1.42E-02 |
| ENSG00000263096 | AC007638.2         | 17 | 55271504  | 55273653  | 2149   | lncRNA-antisense                   | -1.98 | 8.61E-03 | 4.03E-02 |
| ENSG00000272372 | AC009102.2         | 16 | 56351886  | 56353524  | 1638   | lncRNA-antisense                   | -1.98 | 1.10E-04 | 2.10E-03 |
| ENSG00000226985 | LINC01203          | X  | 13333952  | 13403305  | 69083  | lncRNA                             | -1.98 | 2.62E-06 | 1.68E-04 |
| ENSG00000115963 | RND3               | 2  | 150468195 | 150539011 | 70816  | protein coding                     | -1.98 | 9.80E-04 | 9.18E-03 |
| ENSG00000224222 | LINC02636          | 10 | 69994276  | 70019496  | 25220  | lncRNA                             | -1.98 | 1.07E-03 | 9.74E-03 |
| ENSG00000205403 | CFI                | 4  | 109740694 | 109802179 | 61485  | protein coding                     | -1.99 | 1.19E-03 | 1.04E-02 |
| ENSG00000186103 | ARGFX              | 3  | 121567949 | 121590222 | 22673  | protein coding                     | -1.99 | 1.32E-04 | 2.38E-03 |
| ENSG00000231782 | LINC000575         | 4  | 82610974  | 82621610  | 10636  | lncRNA                             | -1.99 | 7.32E-03 | 3.62E-02 |
| ENSG00000215162 | LINC00269          | X  | 69179557  | 69209924  | 30367  | lncRNA                             | -1.99 | 5.55E-04 | 6.24E-03 |
| ENSG00000285740 | AC090692.3         | 11 | 35894987  | 35897735  | 2748   | lncRNA                             | -1.99 | 7.17E-03 | 3.57E-02 |
| ENSG00000249743 | AC116345.1         | 5  | 73213930  | 73295258  | 81328  | lncRNA                             | -1.99 | 2.24E-04 | 3.43E-03 |
| ENSG00000254254 | AC012349.1         | 8  | 56445807  | 56556513  | 110706 | lncRNA-antisense                   | -1.99 | 3.39E-07 | 4.14E-05 |
| ENSG00000182645 | CDC172             | 10 | 116324448 | 116380029 | 55581  | protein coding                     | -1.99 | 1.44E-03 | 1.19E-02 |
| ENSG00000237365 | AL512330.1         | 1  | 7008376   | 7014279   | 5903   | lncRNA-antisense                   | -1.99 | 6.04E-03 | 3.18E-02 |
| ENSG00000256811 | AC079360.1         | 12 | 121856259 | 121857059 | 800    | lncRNA-antisense                   | -1.99 | 1.13E-02 | 4.87E-02 |
| ENSG00000267166 | AC007993.1         | 17 | 43922775  | 43927388  | 4613   | unprocessed pseudogene             | -1.99 | 2.05E-04 | 3.23E-03 |
| ENSG00000173572 | NLRP13             | 19 | 55891699  | 55932336  | 40637  | protein coding                     | -1.99 | 2.54E-05 | 7.66E-04 |
| ENSG00000254443 | AC068733.1         | 11 | 6362799   | 6365267   | 2468   | lncRNA                             | -1.99 | 2.77E-03 | 1.87E-02 |
| ENSG00000101076 | HNF4A              | 20 | 44355700  | 44434596  | 78896  | protein coding                     | -1.99 | 9.18E-08 | 1.63E-05 |
| ENSG00000268949 | MRPS17P1           | 1  | 44988705  | 44991834  | 3129   | processed pseudogene               | -1.99 | 4.39E-04 | 5.34E-03 |
| ENSG00000178130 | FAM27E5            | 17 | 22298691  | 22299893  | 1202   | lncRNA                             | -1.99 | 5.42E-03 | 2.95E-02 |
| ENSG00000260071 | AC012178.1         | 16 | 9365540   | 9518325   | 152785 | lncRNA                             | -1.99 | 5.94E-06 | 2.90E-04 |
| ENSG00000162409 | PRKAA2             | 1  | 56645314  | 56715335  | 70021  | protein coding                     | -1.99 | 2.94E-06 | 1.80E-04 |
| ENSG00000287275 | AC011451.4         | 19 | 9458119   | 9462388   | 4269   | lncRNA                             | -1.99 | 1.51E-03 | 1.23E-02 |
| ENSG00000244301 | AOX3P              | 2  | 200678233 | 200734109 | 55876  | transcribed unprocessed pseudogene | -1.99 | 1.82E-04 | 2.97E-03 |
| ENSG00000239218 | RPS20P22           | 8  | 38434347  | 38435664  | 1317   | transcribed processed pseudogene   | -1.99 | 3.67E-03 | 2.26E-02 |
| ENSG00000260990 | Z94057.1 (TNR-AS1) | 1  | 175307218 | 175335459 | 28241  | lncRNA-antisense                   | -1.99 | 7.33E-03 | 3.62E-02 |
| ENSG00000095627 | TDRD1              | 10 | 114179270 | 114232304 | 53034  | protein coding                     | -1.99 | 1.82E-06 | 1.33E-04 |
| ENSG00000273372 | SFTPD-AS1          | 10 | 79968213  | 79973213  | 5000   | lncRNA-antisense                   | -1.99 | 1.01E-03 | 9.34E-03 |
| ENSG00000233821 | ENOX1-AS1          | 13 | 43543918  | 43548056  | 4138   | lncRNA                             | -1.99 | 9.45E-04 | 8.95E-03 |
| ENSG00000281566 | AL157778.1         | X  | 98450688  | 98892061  | 441373 | lncRNA                             | -1.99 | 1.17E-03 | 1.03E-02 |
| ENSG00000155719 | OTOA               | 16 | 21663968  | 21761935  | 97967  | protein coding                     | -1.99 | 9.15E-06 | 3.93E-04 |
| ENSG00000235062 | BCRP5              | 22 | 20697962  | 20698934  | 972    | unprocessed pseudogene             | -1.99 | 8.42E-03 | 3.97E-02 |
| ENSG00000157423 | HYDIN              | 16 | 70802084  | 71230722  | 428638 | protein coding                     | -1.99 | 4.27E-07 | 4.78E-05 |
| ENSG00000255556 | AC087203.2         | 8  | 12378679  | 12380265  | 1586   | processed pseudogene               | -1.99 | 1.57E-05 | 5.61E-04 |
| ENSG00000171431 | KRT20              | 17 | 40875889  | 40885242  | 9353   | protein coding                     | -1.99 | 1.30E-03 | 1.11E-02 |
| ENSG00000287587 | AL158216.1         | 1  | 42036143  | 42051784  | 15641  | lncRNA                             | -1.99 | 5.72E-03 | 3.07E-02 |
| ENSG00000257551 | HLX-AS1            | 1  | 220832763 | 220880140 | 47377  | lncRNA-antisense                   | -1.99 | 4.22E-03 | 2.49E-02 |
| ENSG00000153446 | C16orf89           | 16 | 5044122   | 5066110   | 21988  | protein coding                     | -1.99 | 4.40E-05 | 1.12E-03 |
| ENSG00000262406 | MMP12              | 11 | 102862736 | 102874982 | 12246  | protein coding                     | -1.99 | 7.66E-03 | 3.73E-02 |
| ENSG00000141338 | ABCA8              | 17 | 68867289  | 68955392  | 88103  | protein coding                     | -1.99 | 2.68E-08 | 7.52E-06 |
| ENSG00000205363 | INSY1              | 15 | 73735431  | 73752747  | 17316  | protein coding                     | -2.00 | 3.13E-05 | 8.79E-04 |
| ENSG00000182854 | OR4F15             | 15 | 101812202 | 101820197 | 7995   | protein coding                     | -2.00 | 8.40E-03 | 3.96E-02 |
| ENSG00000286277 | AL009177.1         | 6  | 14431683  | 14502701  | 71018  | lncRNA                             | -2.00 | 7.74E-03 | 3.75E-02 |
| ENSG00000279047 | AC244517.5         | 5  | 141046260 | 141096402 | 50142  | lncRNA-antisense                   | -2.00 | 5.19E-04 | 5.96E-03 |
| ENSG00000226235 | LEMD1-AS1          | 1  | 205373252 | 205387440 | 14188  | lncRNA-antisense                   | -2.00 | 7.84E-04 | 7.92E-03 |
| ENSG00000266979 | LINC01180          | 17 | 44646364  | 44650349  | 3985   | lncRNA                             | -2.00 | 1.47E-03 | 1.21E-02 |



|                 |            |    |           |           |        |                                      |       |          |          |
|-----------------|------------|----|-----------|-----------|--------|--------------------------------------|-------|----------|----------|
| ENSG00000259889 | AC093802.2 | 2  | 239734956 | 239735538 | 582    | lncRNA                               | -2.00 | 1.08E-02 | 4.71E-02 |
| ENSG00000270035 | AL359881.2 | 1  | 7698303   | 7698872   | 569    | lncRNA                               | -2.00 | 8.00E-03 | 3.83E-02 |
| ENSG00000287719 | AP001531.1 | 18 | 8913999   | 8919414   | 5415   | lncRNA                               | -2.00 | 4.57E-03 | 2.63E-02 |
| ENSG0000011677  | GABRA3     | X  | 152166234 | 152451315 | 285081 | protein coding                       | -2.00 | 6.60E-04 | 7.02E-03 |
| ENSG00000233681 | CEACAMP1   | 19 | 42620212  | 42633034  | 12822  | unprocessed pseudogene               | -2.00 | 8.72E-03 | 4.06E-02 |
| ENSG00000260969 | WWOX-AS1   | 16 | 78234652  | 78241989  | 7337   | lncRNA-antisense                     | -2.00 | 8.84E-03 | 4.10E-02 |
| ENSG00000228933 | AC107419.1 | X  | 27174920  | 27399006  | 224086 | lncRNA                               | -2.00 | 3.84E-05 | 1.02E-03 |
| ENSG00000205143 | ARID3C     | 9  | 34621379  | 34628086  | 6707   | protein coding                       | -2.00 | 1.16E-04 | 2.17E-03 |
| ENSG00000233124 | LINC00456  | 13 | 97168751  | 97187578  | 18827  | lncRNA                               | -2.00 | 1.17E-03 | 1.03E-02 |
| ENSG00000279669 | AC079801.1 | 21 | 5232668   | 5243833   | 11165  | lncRNA                               | -2.00 | 1.13E-02 | 4.85E-02 |
| ENSG00000286960 | AC009869.1 | 11 | 15864452  | 15883653  | 19201  | lncRNA                               | -2.00 | 2.80E-03 | 1.89E-02 |
| ENSG00000165192 | ASB11      | X  | 15281697  | 15315640  | 33943  | protein coding                       | -2.00 | 2.35E-03 | 1.68E-02 |
| ENSG00000241104 | CEACAMP10  | 19 | 43211791  | 43248646  | 36855  | transcribed processed pseudogene     | -2.00 | 5.37E-03 | 2.94E-02 |
| ENSG00000125999 | BPIFB1     | 20 | 33273480  | 33309871  | 36391  | protein coding                       | -2.00 | 2.10E-05 | 6.73E-04 |
| ENSG00000163364 | LINC01116  | 2  | 176629572 | 176637931 | 8359   | lncRNA                               | -2.00 | 5.82E-04 | 6.45E-03 |
| ENSG00000141748 | ARL5C      | 17 | 39156894  | 39167484  | 10590  | protein coding                       | -2.00 | 2.20E-04 | 3.38E-03 |
| ENSG00000046774 | MAGEC2     | X  | 142202342 | 142205290 | 2948   | protein coding                       | -2.00 | 1.83E-03 | 1.40E-02 |
| ENSG00000214050 | FBXO16     | 8  | 28348287  | 28490278  | 141991 | protein coding                       | -2.00 | 4.88E-03 | 2.76E-02 |
| ENSG00000148942 | SLC5A12    | 11 | 26667020  | 26723427  | 56407  | protein coding                       | -2.00 | 9.75E-05 | 1.94E-03 |
| ENSG00000186105 | LRRC70     | 5  | 62578819  | 62581446  | 2627   | protein coding                       | -2.00 | 1.09E-02 | 4.75E-02 |
| ENSG00000213512 | GBP7       | 1  | 89131742  | 89176009  | 44267  | protein coding                       | -2.00 | 8.44E-03 | 3.97E-02 |
| ENSG00000249816 | LINC00964  | 8  | 124823702 | 124962531 | 138829 | lncRNA                               | -2.00 | 4.40E-06 | 2.37E-04 |
| ENSG00000139304 | PTPRQ      | 12 | 80402178  | 80680273  | 278095 | protein coding                       | -2.00 | 2.56E-06 | 1.66E-04 |
| ENSG00000198300 | PEG3       | 19 | 56810077  | 56840728  | 30651  | protein coding                       | -2.00 | 5.47E-06 | 2.74E-04 |
| ENSG00000255107 | AC079089.2 | 8  | 69859264  | 69860540  | 1276   | processed pseudogene                 | -2.00 | 2.77E-03 | 1.87E-02 |
| ENSG00000258909 | AC091078.2 | 15 | 93416850  | 93422576  | 5726   | lncRNA                               | -2.00 | 4.63E-04 | 5.53E-03 |
| ENSG00000226521 | AC087499.2 | 17 | 20716481  | 20737127  | 20646  | transcribed unprocessed pseudogene   | -2.00 | 1.80E-04 | 2.95E-03 |
| ENSG00000267478 | AP020414.3 | 18 | 12091674  | 12093141  | 1467   | processed pseudogene                 | -2.00 | 1.26E-03 | 1.08E-02 |
| ENSG00000251209 | LINC00923  | 15 | 97572185  | 97875650  | 303465 | lncRNA                               | -2.00 | 4.07E-09 | 1.90E-06 |
| ENSG00000223991 | AC104809.1 | 2  | 240981515 | 240986072 | 4557   | lncRNA-antisense                     | -2.00 | 2.51E-05 | 7.60E-04 |
| ENSG00000227544 | AC018647.1 | 7  | 35715032  | 35734924  | 19892  | lncRNA                               | -2.00 | 2.31E-06 | 1.53E-04 |
| ENSG00000204928 | GRXC2R     | 5  | 145858521 | 145937126 | 78605  | protein coding                       | -2.00 | 1.90E-03 | 1.45E-02 |
| ENSG00000088386 | SLC15A1    | 13 | 98683801  | 98752672  | 68871  | protein coding                       | -2.01 | 1.57E-05 | 5.61E-04 |
| ENSG00000234942 | GRID1-AS1  | 10 | 85577731  | 85607213  | 29482  | lncRNA-antisense                     | -2.01 | 9.46E-03 | 4.29E-02 |
| ENSG00000166426 | CRABP1     | 15 | 78340353  | 78348225  | 7872   | protein coding                       | -2.01 | 4.29E-03 | 2.52E-02 |
| ENSG00000261522 | AL845331.2 | 2  | 94575976  | 94587183  | 11207  | transcribed unprocessed pseudogene   | -2.01 | 7.77E-04 | 7.86E-03 |
| ENSG00000229770 | AL022337.1 | 22 | 26161905  | 26169341  | 7436   | lncRNA-bidirectional promoter lncRNA | -2.01 | 1.43E-04 | 2.50E-03 |
| ENSG00000285797 | AL512658.2 | 6  | 156350579 | 156390246 | 39667  | lncRNA                               | -2.01 | 2.63E-03 | 1.81E-02 |
| ENSG00000205669 | AC076      | 14 | 73610945  | 73619888  | 8943   | protein coding                       | -2.01 | 4.92E-03 | 2.77E-02 |
| ENSG00000228081 | AC092810.1 | 1  | 209173014 | 209173375 | 361    | processed pseudogene                 | -2.01 | 8.13E-03 | 3.88E-02 |
| ENSG00000173702 | MUC13      | 3  | 124905442 | 124953819 | 48377  | protein coding                       | -2.01 | 8.85E-06 | 3.82E-04 |
| ENSG00000256407 | AL357673.1 | 1  | 54132686  | 54200073  | 67387  | protein coding                       | -2.01 | 2.51E-03 | 1.75E-02 |
| ENSG00000109061 | MYH1       | 17 | 10492307  | 10518542  | 26235  | protein coding                       | -2.01 | 6.24E-06 | 3.00E-04 |
| ENSG00000268038 | LINC01785  | 19 | 22615552  | 22623971  | 8419   | lncRNA                               | -2.01 | 2.11E-03 | 1.55E-02 |
| ENSG00000285914 | AC022440.1 | 5  | 171724575 | 171737519 | 12944  | lncRNA                               | -2.01 | 1.06E-03 | 9.70E-03 |
| ENSG00000225849 | MKRN7P     | 20 | 46463719  | 46477232  | 13513  | transcribed processed pseudogene     | -2.01 | 5.94E-03 | 3.15E-02 |
| ENSG00000251459 | AC013724.1 | 4  | 57490808  | 57495844  | 5036   | lncRNA                               | -2.01 | 7.57E-03 | 3.70E-02 |
| ENSG00000229699 | AL161836.1 | 1  | 153174518 | 153191676 | 17158  | lncRNA                               | -2.01 | 1.34E-03 | 1.13E-02 |
| ENSG00000075290 | WNT8B      | 10 | 100463009 | 100483744 | 20735  | protein coding                       | -2.01 | 4.86E-04 | 5.71E-03 |
| ENSG0000013293  | SLC7A14    | 3  | 170459548 | 170586075 | 126527 | protein coding                       | -2.01 | 2.26E-05 | 7.08E-04 |
| ENSG00000287708 | AL137017.1 | 9  | 14395791  | 14472407  | 76616  | lncRNA                               | -2.01 | 3.75E-03 | 2.30E-02 |
| ENSG00000220585 | DDX18P6    | 10 | 91053051  | 91055047  | 1996   | processed pseudogene                 | -2.01 | 1.09E-02 | 4.75E-02 |
| ENSG00000184374 | COLEC10    | 8  | 118995452 | 119108455 | 113003 | protein coding                       | -2.01 | 6.36E-04 | 6.84E-03 |
| ENSG00000197241 | SLC2A7     | 1  | 9003300   | 9026345   | 23045  | protein coding                       | -2.01 | 9.72E-05 | 1.94E-03 |
| ENSG00000286421 | AL360013.4 | 1  | 221555550 | 221563653 | 8103   | lncRNA                               | -2.01 | 5.56E-03 | 3.01E-02 |
| ENSG00000185674 | LYG2       | 2  | 99242246  | 99255282  | 13036  | protein coding                       | -2.01 | 1.64E-03 | 1.30E-02 |
| ENSG00000259570 | AC243562.1 | 15 | 84394512  | 84395514  | 1002   | unprocessed pseudogene               | -2.01 | 9.84E-03 | 4.42E-02 |
| ENSG00000227406 | RNF6P1     | 21 | 39373763  | 39377066  | 3303   | processed pseudogene                 | -2.01 | 7.02E-03 | 3.51E-02 |
| ENSG00000143494 | VASH2      | 1  | 212950520 | 212992037 | 41517  | protein coding                       | -2.01 | 3.28E-11 | 5.65E-08 |
| ENSG00000253125 | AC055854.1 | 8  | 22690150  | 22798616  | 108466 | lncRNA                               | -2.01 | 4.12E-04 | 5.12E-03 |
| ENSG00000102794 | ACOD1      | 13 | 76948511  | 76958638  | 101227 | protein coding                       | -2.01 | 1.46E-03 | 1.20E-02 |
| ENSG00000267961 | OR10B1P    | 19 | 15141105  | 15142062  | 957    | unprocessed pseudogene               | -2.01 | 3.87E-03 | 2.34E-02 |
| ENSG00000228768 | AC003101.1 | 17 | 31571142  | 31575659  | 4517   | lncRNA                               | -2.01 | 7.48E-03 | 3.67E-02 |
| ENSG00000271850 | LINC02343  | 13 | 34347986  | 34616216  | 268230 | lncRNA                               | -2.02 | 5.14E-03 | 2.85E-02 |
| ENSG00000267308 | LINC01764  | 19 | 15827005  | 15835853  | 8848   | lncRNA                               | -2.02 | 1.52E-03 | 1.24E-02 |
| ENSG00000172379 | ARN2T      | 15 | 80404350  | 80597933  | 193583 | protein coding                       | -2.02 | 1.81E-07 | 2.74E-05 |
| ENSG00000260340 | LINC02176  | 16 | 84928353  | 84939603  | 11250  | lncRNA                               | -2.02 | 3.72E-03 | 2.28E-02 |
| ENSG00000120289 | MAGEB4     | X  | 30242000  | 30244187  | 2187   | protein coding                       | -2.02 | 7.54E-03 | 3.69E-02 |
| ENSG00000280276 | AC009229.4 | 2  | 38121935  | 38123881  | 1946   | TEC                                  | -2.02 | 6.78E-03 | 3.43E-02 |
| ENSG00000219932 | RPL12P8    | 10 | 67874332  | 67874911  | 579    | processed pseudogene                 | -2.02 | 1.21E-03 | 1.05E-02 |
| ENSG00000275340 | FGD5P1     | 3  | 13933056  | 13937477  | 4421   | transcribed unprocessed pseudogene   | -2.02 | 2.10E-06 | 1.46E-04 |
| ENSG00000145451 | GLRA3      | 4  | 174636920 | 17482947  | 192327 | protein coding                       | -2.02 | 1.20E-04 | 2.23E-03 |
| ENSG00000258710 | LINC01193  | 15 | 20940380  | 21058440  | 118060 | lncRNA                               | -2.02 | 4.41E-04 | 5.35E-03 |
| ENSG00000118492 | ADGB       | 6  | 146598967 | 146815462 | 216495 | protein coding                       | -2.02 | 3.87E-06 | 2.16E-04 |
| ENSG00000144837 | PLA1A      | 3  | 119597875 | 119629811 | 31936  | protein coding                       | -2.02 | 2.99E-05 | 8.55E-04 |
| ENSG00000159961 | OR3A3      | 17 | 3411370   | 3424070   | 12700  | protein coding                       | -2.02 | 1.03E-04 | 2.01E-03 |
| ENSG00000229582 | AL358074.1 | 9  | 125743754 | 125746552 | 2798   | lncRNA                               | -2.02 | 1.11E-04 | 2.10E-03 |
| ENSG00000241884 | AC114401.1 | 3  | 67296300  | 67306359  | 10059  | lncRNA                               | -2.02 | 4.38E-03 | 2.56E-02 |
| ENSG00000255303 | OR5BA1P    | 11 | 57861948  | 57873588  | 11640  | transcribed unprocessed pseudogene   | -2.02 | 6.05E-04 | 6.61E-03 |
| ENSG00000286042 | LCAL1      | 6  | 79307669  | 79313384  | 5715   | lncRNA                               | -2.02 | 8.99E-04 | 8.65E-03 |
| ENSG00000261035 | AL139348.1 | 20 | 60812004  | 60814211  | 2207   | lncRNA                               | -2.02 | 1.94E-03 | 1.47E-02 |
| ENSG00000234380 | LINC01426  | 21 | 34745757  | 34784886  | 39129  | lncRNA                               | -2.02 | 2.62E-05 | 7.81E-04 |
| ENSG00000261617 | LINC02177  | 16 | 9355588   | 9408093   | 52505  | lncRNA                               | -2.02 | 7.56E-05 | 1.64E-03 |
| ENSG00000231057 | AC096837.2 | 1  | 211675749 | 211690103 | 14354  | lncRNA-antisense                     | -2.02 | 1.05E-04 | 2.04E-03 |
| ENSG00000236461 | AL162425.1 | 9  | 115119539 | 115138409 | 18870  | lncRNA                               | -2.02 | 3.92E-03 | 2.36E-02 |
| ENSG00000229404 | LINC00858  | 10 | 84267747  | 84294659  | 26912  | lncRNA                               | -2.02 | 8.41E-05 | 1.75E-03 |
| ENSG00000231749 | ABCAG-AS1  | 17 | 68944531  | 69042784  | 98253  | lncRNA-antisense                     | -2.02 | 7.69E-05 | 1.65E-03 |
| ENSG00000263887 | AC053481.2 | 17 | 62282702  | 62297026  | 14324  | transcribed unprocessed pseudogene   | -2.02 | 1.06E-04 | 2.04E-03 |
| ENSG00000256533 | AP002373.2 | 11 | 114453064 | 114454123 | 1059   | processed pseudogene                 | -2.02 | 3.71E-04 | 4.76E-03 |
| ENSG00000133020 | MYH8       | 17 | 10390322  | 10421950  | 31628  | protein coding                       | -2.02 | 6.72E-07 | 6.64E-05 |

|                 |             |    |           |           |        |                                    |       |          |          |
|-----------------|-------------|----|-----------|-----------|--------|------------------------------------|-------|----------|----------|
| ENSG00000204869 | IGFL4       | 19 | 46039748  | 46077118  | 37370  | protein coding                     | -2.02 | 2.53E-05 | 7.65E-04 |
| ENSG00000230947 | AP000356.1  | 22 | 24598054  | 24599398  | 1344   | lncRNA-sense intronic              | -2.02 | 1.12E-02 | 4.82E-02 |
| ENSG00000230638 | AL445933.1  | 1  | 41542069  | 41544310  | 2241   | processed pseudogene               | -2.02 | 5.11E-03 | 2.84E-02 |
| ENSG00000177414 | UBE2U       | 1  | 64203627  | 64267368  | 63741  | protein coding                     | -2.02 | 5.73E-04 | 6.39E-03 |
| ENSG00000261202 | Z83847.1    | 22 | 40043068  | 40044530  | 1462   | lncRNA-antisense                   | -2.02 | 1.17E-02 | 4.97E-02 |
| ENSG00000284883 | AC021066.2  | 12 | 52263948  | 52267461  | 3513   | unprocessed pseudogene             | -2.03 | 3.20E-03 | 2.06E-02 |
| ENSG00000101306 | MYLK2       | 20 | 31819308  | 31834689  | 15381  | protein coding                     | -2.03 | 1.33E-04 | 2.38E-03 |
| ENSG00000152936 | LMNTD1      | 12 | 25409307  | 25648579  | 239272 | protein coding                     | -2.03 | 4.88E-04 | 5.72E-03 |
| ENSG00000287120 | AL138773.1  | 10 | 9292842   | 9309772   | 16930  | lncRNA                             | -2.03 | 9.22E-03 | 4.22E-02 |
| ENSG00000244234 | GMCL2       | 5  | 178184505 | 178187371 | 2866   | protein coding                     | -2.03 | 1.79E-03 | 1.39E-02 |
| ENSG00000234593 | KAZN-AS1    | 1  | 14338825  | 14419973  | 81148  | lncRNA                             | -2.03 | 4.51E-05 | 1.13E-03 |
| ENSG00000273259 | AL049839.2  | 14 | 94592058  | 94624646  | 32588  | protein coding                     | -2.03 | 3.29E-03 | 2.10E-02 |
| ENSG00000238062 | SPATA3-AS1  | 2  | 230984368 | 230996032 | 11664  | lncRNA                             | -2.03 | 7.09E-06 | 3.30E-04 |
| ENSG00000139292 | LGR5        | 12 | 71439798  | 71586310  | 146512 | protein coding                     | -2.03 | 1.34E-04 | 2.40E-03 |
| ENSG00000183709 | IFNL2       | 19 | 39268396  | 39270188  | 1792   | protein coding                     | -2.03 | 1.05E-03 | 9.61E-03 |
| ENSG00000261816 | AC134312.6  | 16 | 88191486  | 88193667  | 2181   | lncRNA                             | -2.03 | 7.95E-03 | 3.82E-02 |
| ENSG00000232079 | LINC01694   | 21 | 28048404  | 28137611  | 89207  | lncRNA                             | -2.03 | 4.54E-04 | 5.46E-03 |
| ENSG00000253258 | AC068228.1  | 8  | 123181638 | 123182788 | 1150   | lncRNA-antisense                   | -2.03 | 2.49E-03 | 1.74E-02 |
| ENSG00000251670 | AC113346.2  | 5  | 174751304 | 174850725 | 99421  | lncRNA                             | -2.03 | 8.77E-03 | 4.08E-02 |
| ENSG00000286792 | AC005703.6  | 17 | 15266848  | 15311760  | 44912  | lncRNA                             | -2.03 | 8.71E-03 | 4.06E-02 |
| ENSG00000237623 | NICN2P      | X  | 47273366  | 47274390  | 1024   | processed pseudogene               | -2.03 | 7.44E-03 | 3.66E-02 |
| ENSG00000242611 | AC093627.6  | 7  | 77038     | 77038     | 4140   | lncRNA                             | -2.03 | 8.35E-05 | 1.74E-03 |
| ENSG00000215808 | LINC01139   | 1  | 238476542 | 238486060 | 9518   | lncRNA                             | -2.03 | 1.45E-03 | 1.20E-02 |
| ENSG00000264215 | AC126365.1  | 17 | 20788071  | 20789584  | 1513   | lncRNA                             | -2.03 | 9.77E-03 | 4.39E-02 |
| ENSG00000270816 | LINC00221   | 14 | 106482435 | 106521073 | 38638  | lncRNA                             | -2.03 | 2.64E-05 | 7.86E-04 |
| ENSG00000258630 | LINC02292   | 14 | 95319483  | 95357557  | 16274  | lncRNA                             | -2.03 | 1.01E-04 | 1.99E-03 |
| ENSG00000271159 | AL139384.2  | 13 | 112602828 | 112606417 | 3589   | lncRNA                             | -2.03 | 1.92E-04 | 3.07E-03 |
| ENSG00000226469 | ADAM1B      | 12 | 111927018 | 111929017 | 1999   | unitary pseudogene                 | -2.03 | 1.38E-03 | 1.15E-02 |
| ENSG00000264359 | NEK4P2      | 17 | 16666107  | 16667118  | 1011   | processed pseudogene               | -2.03 | 3.34E-04 | 4.45E-03 |
| ENSG00000184774 | MGAT4EP     | 1  | 202820266 | 202827225 | 6959   | transcribed unitary pseudogene     | -2.03 | 3.74E-03 | 2.29E-02 |
| ENSG00000101890 | GUCY2F      | X  | 109372906 | 109482086 | 109180 | protein coding                     | -2.03 | 1.42E-05 | 5.30E-04 |
| ENSG00000138207 | RBP4        | 10 | 93591687  | 93601744  | 10057  | protein coding                     | -2.03 | 1.16E-04 | 2.17E-03 |
| ENSG00000254590 | AP003396.2  | 11 | 119402792 | 119404088 | 1296   | processed pseudogene               | -2.03 | 8.21E-03 | 3.90E-02 |
| ENSG00000227375 | DLG1-AS1    | 3  | 197298252 | 197303755 | 5503   | lncRNA-antisense                   | -2.03 | 2.16E-03 | 1.58E-02 |
| ENSG00000131050 | BPIFA2      | 20 | 33161768  | 33181412  | 19644  | protein coding                     | -2.03 | 1.23E-04 | 2.27E-03 |
| ENSG00000176601 | MAP3K19     | 2  | 134964485 | 135047468 | 82983  | protein coding                     | -2.03 | 1.31E-05 | 5.02E-04 |
| ENSG00000283459 | AC009804.2  | 12 | 114894632 | 114898529 | 3897   | lncRNA                             | -2.04 | 5.32E-03 | 2.91E-02 |
| ENSG00000187223 | LCE2D       | 1  | 152663380 | 152664659 | 1279   | protein coding                     | -2.04 | 3.13E-04 | 4.26E-03 |
| ENSG00000197083 | ZNF300P1    | 5  | 150930645 | 150946289 | 15644  | transcribed unprocessed pseudogene | -2.04 | 9.51E-03 | 4.31E-02 |
| ENSG00000228135 | LINC01494   | 2  | 218900811 | 218930636 | 29825  | lncRNA-antisense                   | -2.04 | 5.93E-03 | 2.94E-02 |
| ENSG00000240216 | CPLH1P      | 3  | 149228356 | 149291800 | 62444  | transcribed unitary pseudogene     | -2.04 | 1.63E-05 | 5.73E-04 |
| ENSG00000181984 | GOLGA8P     | 15 | 20562375  | 20575696  | 13321  | unprocessed pseudogene             | -2.04 | 9.71E-04 | 9.13E-03 |
| ENSG00000262038 | AC007599.2  | 16 | 47529190  | 47529916  | 726    | lncRNA-sense intronic              | -2.04 | 5.23E-03 | 2.88E-02 |
| ENSG00000249680 | TUBA3GP     | 22 | 21065462  | 21070097  | 4635   | unprocessed pseudogene             | -2.04 | 2.37E-03 | 1.68E-02 |
| ENSG00000197849 | OR8G1       | 11 | 124241095 | 124254364 | 13269  | protein coding                     | -2.04 | 7.47E-04 | 7.65E-03 |
| ENSG00000169248 | CXCL11      | 4  | 76033682  | 76041415  | 7733   | protein coding                     | -2.04 | 8.18E-03 | 3.89E-02 |
| ENSG00000080572 | DNAAF6      | X  | 107206611 | 107244247 | 37636  | protein coding                     | -2.04 | 3.82E-03 | 2.32E-02 |
| ENSG00000237999 | ACTG1P19    | 9  | 100731240 | 100732355 | 1115   | processed pseudogene               | -2.04 | 5.33E-04 | 6.07E-03 |
| ENSG00000168314 | MOBP        | 3  | 39467198  | 39529479  | 62281  | protein coding                     | -2.04 | 2.41E-06 | 1.58E-04 |
| ENSG00000267908 | ZSCAN5DP    | 19 | 56244043  | 56247482  | 3439   | unprocessed pseudogene             | -2.04 | 3.00E-03 | 1.98E-02 |
| ENSG00000263667 | AL035696.3  | 6  | 181466    | 205519    | 24053  | lncRNA                             | -2.04 | 4.67E-04 | 5.56E-03 |
| ENSG00000258933 | LINC02279   | 14 | 94960277  | 94962976  | 2699   | lncRNA                             | -2.04 | 2.01E-03 | 1.50E-02 |
| ENSG00000198535 | C2CD4A      | 15 | 62066977  | 62070917  | 3940   | protein coding                     | -2.04 | 5.44E-05 | 1.30E-03 |
| ENSG00000230657 | PRB4        | 12 | 11307077  | 11310436  | 3359   | protein coding                     | -2.04 | 6.20E-03 | 3.24E-02 |
| ENSG00000261076 | AC016396.2  | 10 | 58325614  | 58327030  | 1416   | lncRNA                             | -2.04 | 9.94E-03 | 4.45E-02 |
| ENSG00000235838 | HSP90AB7P   | 10 | 9721963   | 9724416   | 2453   | processed pseudogene               | -2.04 | 3.15E-03 | 2.04E-02 |
| ENSG00000226562 | CYP4F26P    | 9  | 33580695  | 33607874  | 27179  | lncRNA                             | -2.04 | 5.77E-04 | 6.42E-03 |
| ENSG00000189398 | OR7E12P     | 11 | 3390780   | 3391752   | 972    | unprocessed pseudogene             | -2.04 | 2.95E-03 | 1.95E-02 |
| ENSG00000235805 | SOC55P3     | 3  | 44709311  | 44710886  | 1575   | processed pseudogene               | -2.04 | 1.11E-02 | 4.80E-02 |
| ENSG00000203643 | AC012456.1  | 2  | 11721619  | 11724222  | 2603   | lncRNA-antisense                   | -2.04 | 3.15E-03 | 2.04E-02 |
| ENSG00000183671 | GPR1        | 2  | 206175316 | 206218047 | 42731  | protein coding                     | -2.04 | 2.24E-03 | 1.62E-02 |
| ENSG00000211961 | IGHV1-45    | 14 | 106506996 | 106507491 | 495    | IG V gene                          | -2.04 | 1.95E-03 | 1.47E-02 |
| ENSG00000280309 | AC023300.3  | 15 | 74299503  | 74304527  | 5024   | TEC                                | -2.04 | 6.33E-05 | 1.44E-03 |
| ENSG00000285691 | AL445259.1  | 6  | 123519697 | 123557670 | 37973  | lncRNA-antisense                   | -2.04 | 1.15E-02 | 4.93E-02 |
| ENSG00000103023 | PRSS54      | 16 | 58279997  | 58295047  | 15050  | protein coding                     | -2.04 | 8.20E-05 | 1.72E-03 |
| ENSG00000146233 | CYP39A1     | 6  | 46549580  | 46652830  | 103250 | protein coding                     | -2.04 | 3.36E-04 | 4.46E-03 |
| ENSG00000259134 | LINC00924   | 15 | 95326528  | 95507865  | 181337 | lncRNA                             | -2.04 | 4.25E-04 | 5.21E-03 |
| ENSG00000253606 | AFG3L2P1    | 8  | 43270198  | 43271960  | 1762   | processed pseudogene               | -2.04 | 4.24E-03 | 2.50E-02 |
| ENSG00000256995 | AC084816.1  | 12 | 22699859  | 23188807  | 488948 | lncRNA                             | -2.04 | 4.84E-05 | 1.19E-03 |
| ENSG00000120498 | TEX11       | X  | 70528940  | 70908711  | 379771 | protein coding                     | -2.04 | 1.25E-05 | 4.87E-04 |
| ENSG00000259470 | KRT8P9      | 15 | 70858714  | 70860162  | 1448   | processed pseudogene               | -2.04 | 1.84E-03 | 1.41E-02 |
| ENSG00000184809 | B3GALT5-AS1 | 21 | 39597147  | 39612910  | 15763  | lncRNA-antisense                   | -2.04 | 7.19E-06 | 3.33E-04 |
| ENSG00000261647 | IMPDH1P11   | 16 | 10111382  | 10112885  | 1503   | processed pseudogene               | -2.04 | 5.58E-04 | 6.26E-03 |
| ENSG00000283342 | NBPF13P     | 1  | 147099482 | 147124285 | 24803  | unprocessed pseudogene             | -2.04 | 9.71E-05 | 1.94E-03 |
| ENSG00000184608 | FAM167A-AS1 | 8  | 11368402  | 11438658  | 70256  | lncRNA-antisense                   | -2.05 | 1.95E-05 | 6.44E-04 |
| ENSG00000226689 | LHFPL3-AS1  | 7  | 104738597 | 104804107 | 65510  | lncRNA                             | -2.05 | 9.88E-04 | 9.23E-03 |
| ENSG00000145888 | GLRA1       | 5  | 151822513 | 151924851 | 102338 | protein coding                     | -2.05 | 2.89E-04 | 4.05E-03 |
| ENSG00000163207 | IVL         | 1  | 152908546 | 152911886 | 3340   | protein coding                     | -2.05 | 4.91E-04 | 5.74E-03 |
| ENSG00000230368 | FAM41C      | 1  | 868071    | 876903    | 8832   | lncRNA                             | -2.05 | 4.08E-03 | 2.43E-02 |
| ENSG00000287955 | AL137067.3  | 9  | 99359336  | 99371887  | 12551  | lncRNA                             | -2.05 | 3.17E-03 | 2.05E-02 |
| ENSG00000186118 | TEX38       | 1  | 46668855  | 46673594  | 4739   | protein coding                     | -2.05 | 4.74E-03 | 2.70E-02 |
| ENSG00000183778 | B3GALT5     | 21 | 39556442  | 39673137  | 116695 | protein coding                     | -2.05 | 9.78E-11 | 1.23E-07 |
| ENSG00000237289 | CKMT1B      | 15 | 43593054  | 43604901  | 11847  | protein coding                     | -2.05 | 1.03E-02 | 4.58E-02 |
| ENSG00000233973 | LINC01360   | 1  | 73305609  | 73355253  | 49644  | lncRNA                             | -2.05 | 2.81E-03 | 1.89E-02 |
| ENSG00000006788 | MYH13       | 17 | 10300865  | 10373130  | 72265  | protein coding                     | -2.05 | 1.63E-06 | 1.23E-04 |
| ENSG00000153292 | ADGRF1      | 6  | 46997708  | 47042350  | 44642  | protein coding                     | -2.05 | 3.34E-06 | 1.97E-04 |
| ENSG00000186867 | QRFRP       | 4  | 121328642 | 121381059 | 52417  | protein coding                     | -2.05 | 5.30E-04 | 6.05E-03 |
| ENSG00000269054 | AC012313.6  | 19 | 58362583  | 58367593  | 5010   | lncRNA-antisense                   | -2.05 | 9.87E-06 | 4.12E-04 |
| ENSG00000169302 | STK32A      | 5  | 147234963 | 147387855 | 152892 | protein coding                     | -2.05 | 1.45E-05 | 5.36E-04 |
| ENSG00000267594 | CYP4F24P    | 19 | 15760241  | 15779909  | 19668  | unprocessed pseudogene             | -2.05 | 2.94E-05 | 8.44E-04 |

|                 |             |    |           |           |        |                                      |       |          |          |
|-----------------|-------------|----|-----------|-----------|--------|--------------------------------------|-------|----------|----------|
| ENSG0000268104  | SLC6A14     | X  | 116436606 | 116461458 | 24852  | protein coding                       | -2.05 | 2.17E-04 | 3.34E-03 |
| ENSG00000162039 | MEIOB       | 16 | 1833986   | 1884294   | 50308  | protein coding                       | -2.05 | 3.39E-04 | 4.49E-03 |
| ENSG00000279358 | AP002833.3  | 11 | 126934886 | 126937150 | 2264   | TEC                                  | -2.05 | 3.77E-03 | 2.30E-02 |
| ENSG00000236704 | CNOT4P1     | 13 | 20921664  | 20923233  | 1569   | processed pseudogene                 | -2.05 | 4.14E-03 | 2.46E-02 |
| ENSG00000270427 | NRBF2P5     | 10 | 5776071   | 5776858   | 787    | processed pseudogene                 | -2.05 | 1.10E-02 | 4.78E-02 |
| ENSG00000167104 | BPIFB6      | 20 | 33031648  | 33044047  | 12399  | protein coding                       | -2.05 | 2.38E-05 | 7.36E-04 |
| ENSG00000223806 | LINC00114   | 21 | 38733890  | 38747460  | 13570  | lncRNA                               | -2.05 | 1.87E-03 | 1.42E-02 |
| ENSG00000237008 | LAPTM4BP1   | 1  | 153379821 | 153380799 | 978    | processed pseudogene                 | -2.05 | 4.58E-03 | 2.64E-02 |
| ENSG00000249584 | LINC02225   | 5  | 57890327  | 57899162  | 8835   | lncRNA                               | -2.05 | 5.96E-03 | 3.16E-02 |
| ENSG00000287831 | AL135926.2  | 1  | 168898633 | 168902836 | 4203   | lncRNA                               | -2.05 | 4.20E-03 | 2.48E-02 |
| ENSG00000203971 | AL354984.1  | 20 | 57957126  | 57960176  | 3050   | lncRNA                               | -2.05 | 9.07E-04 | 8.71E-03 |
| ENSG00000230630 | DNM3OS      | 1  | 172138397 | 172144840 | 6443   | lncRNA-antisense                     | -2.05 | 2.50E-03 | 1.74E-02 |
| ENSG00000271382 | AC012464.3  | 12 | 93945041  | 93947813  | 2772   | lncRNA                               | -2.05 | 2.48E-03 | 1.74E-02 |
| ENSG00000237463 | LRRCS2-AS1  | 1  | 165476838 | 165582155 | 105317 | lncRNA-antisense                     | -2.06 | 3.56E-08 | 8.82E-06 |
| ENSG00000265313 | LINC01476   | 17 | 59422088  | 59526946  | 104858 | lncRNA                               | -2.06 | 1.45E-06 | 1.12E-04 |
| ENSG00000233858 | LINC02599   | 8  | 48590401  | 48594621  | 4220   | lncRNA                               | -2.06 | 6.16E-04 | 6.70E-03 |
| ENSG00000269667 | AC092723.1  | 16 | 85981750  | 85984881  | 3131   | lncRNA                               | -2.06 | 1.91E-03 | 1.45E-02 |
| ENSG00000204478 | PRAMEF20    | 1  | 13416351  | 13421328  | 4977   | protein coding                       | -2.06 | 1.44E-05 | 5.36E-04 |
| ENSG00000285734 | AC005414.1  | 12 | 2440189   | 2457392   | 17203  | lncRNA-antisense                     | -2.06 | 1.24E-03 | 1.07E-02 |
| ENSG00000272874 | AL034548.1  | 20 | 267186    | 268857    | 1671   | lncRNA                               | -2.06 | 3.29E-03 | 2.10E-02 |
| ENSG00000103310 | ZP2         | 16 | 21197450  | 21214510  | 17060  | protein coding                       | -2.06 | 5.01E-04 | 5.82E-03 |
| ENSG00000171495 | MROH2B      | 5  | 40998017  | 41071342  | 73325  | protein coding                       | -2.06 | 4.46E-06 | 2.38E-04 |
| ENSG00000276092 | AC040896.1  | 18 | 68721082  | 68721560  | 478    | lncRNA-sense intronic                | -2.06 | 5.10E-03 | 2.83E-02 |
| ENSG00000167749 | KLK4        | 19 | 50906352  | 50910738  | 4386   | protein coding                       | -2.06 | 3.78E-05 | 1.01E-03 |
| ENSG00000198326 | TMEM239     | 20 | 2816302   | 2820284   | 3982   | protein coding                       | -2.06 | 6.66E-03 | 3.40E-02 |
| ENSG00000205334 | LINC01460   | 2  | 27705786  | 27715732  | 9946   | lncRNA                               | -2.06 | 1.08E-03 | 9.79E-03 |
| ENSG00000256286 | AC078878.2  | 12 | 126874804 | 126888718 | 13914  | lncRNA                               | -2.06 | 5.73E-03 | 3.07E-02 |
| ENSG00000286963 | AC074096.1  | 2  | 29319554  | 29322114  | 32660  | lncRNA                               | -2.06 | 1.90E-03 | 1.45E-02 |
| ENSG00000187847 | OR7E25P     | 19 | 9198354   | 9210067   | 11713  | transcribed unprocessed pseudogene   | -2.06 | 4.52E-06 | 2.39E-04 |
| ENSG00000164744 | SUN3        | 7  | 47987148  | 48029119  | 41971  | protein coding                       | -2.06 | 9.05E-07 | 8.05E-05 |
| ENSG00000261548 | HLA-P       | 6  | 29800415  | 29802425  | 2010   | unprocessed pseudogene               | -2.06 | 5.94E-03 | 3.15E-02 |
| ENSG00000273980 | AL592071.1  | 10 | 133257144 | 133257551 | 407    | lncRNA                               | -2.06 | 2.08E-03 | 1.54E-02 |
| ENSG00000255085 | AF186192.2  | 8  | 144700353 | 144708517 | 8164   | transcribed unprocessed pseudogene   | -2.06 | 2.74E-03 | 1.86E-02 |
| ENSG00000158486 | DNAH3       | 16 | 20933111  | 21159441  | 226330 | protein coding                       | -2.06 | 7.91E-08 | 1.48E-05 |
| ENSG00000182352 | C17orf77    | 17 | 74584679  | 74594209  | 9530   | lncRNA-antisense                     | -2.06 | 7.49E-03 | 3.67E-02 |
| ENSG00000132840 | BHMT2       | 5  | 79069767  | 79090069  | 20302  | protein coding                       | -2.06 | 6.98E-05 | 1.55E-03 |
| ENSG00000233425 | KRT18P67    | 9  | 122837557 | 122838820 | 1263   | processed pseudogene                 | -2.06 | 4.26E-03 | 2.51E-02 |
| ENSG00000164049 | FBXW12      | 3  | 48372219  | 48401259  | 29040  | protein coding                       | -2.06 | 1.64E-04 | 2.76E-03 |
| ENSG00000287756 | AL031293.1  | 1  | 14774469  | 14777727  | 3258   | lncRNA                               | -2.06 | 1.28E-03 | 1.10E-02 |
| ENSG00000234265 | LINC01723   | 20 | 12950288  | 13008417  | 58129  | lncRNA                               | -2.06 | 3.88E-03 | 2.35E-02 |
| ENSG00000251003 | ZFPM2-AS1   | 8  | 105546089 | 106060524 | 514435 | lncRNA                               | -2.06 | 2.33E-03 | 1.66E-02 |
| ENSG00000259335 | HNRNPMP1    | 15 | 44447577  | 44494344  | 1767   | processed pseudogene                 | -2.06 | 7.43E-03 | 3.65E-02 |
| ENSG00000259928 | AC011840.2  | 17 | 30564057  | 30565576  | 1519   | lncRNA                               | -2.06 | 1.44E-03 | 1.19E-02 |
| ENSG0000015592  | STMN4       | 8  | 27235323  | 27258420  | 23097  | protein coding                       | -2.06 | 1.49E-05 | 5.46E-04 |
| ENSG00000255804 | OR6J1       | 14 | 22630929  | 22644352  | 13423  | protein coding                       | -2.06 | 2.05E-03 | 1.52E-02 |
| ENSG00000224539 | SAGE4P      | X  | 135598927 | 135615431 | 16504  | unprocessed pseudogene               | -2.06 | 1.52E-04 | 2.62E-03 |
| ENSG00000286746 | AL590807.1  | 13 | 80697177  | 81017737  | 320560 | lncRNA                               | -2.06 | 1.52E-05 | 5.52E-04 |
| ENSG00000248210 | LINC02355   | 4  | 149154279 | 149278123 | 123844 | lncRNA                               | -2.06 | 6.50E-03 | 3.34E-02 |
| ENSG00000259473 | LINC02205   | 15 | 70503907  | 70505928  | 2021   | lncRNA                               | -2.06 | 9.28E-03 | 4.24E-02 |
| ENSG00000197935 | ZNF311      | 6  | 28994785  | 29005316  | 10531  | protein coding                       | -2.06 | 1.68E-04 | 2.80E-03 |
| ENSG00000227527 | AC096540.1  | 1  | 42335386  | 42338376  | 9960   | lncRNA-sense overlapping             | -2.06 | 8.73E-03 | 4.06E-02 |
| ENSG00000261748 | AC098965.1  | 16 | 16952502  | 16953468  | 966    | processed pseudogene                 | -2.06 | 5.43E-03 | 2.96E-02 |
| ENSG00000269321 | AC01466.2   | 19 | 48145908  | 48147413  | 1505   | lncRNA-antisense                     | -2.06 | 5.13E-03 | 2.85E-02 |
| ENSG00000285100 | AL359555.2  | 20 | 38270778  | 38274020  | 3242   | lncRNA                               | -2.06 | 2.44E-05 | 7.48E-04 |
| ENSG00000163017 | ACTG2       | 2  | 73892314  | 73919865  | 27551  | protein coding                       | -2.07 | 5.45E-05 | 1.30E-03 |
| ENSG00000224318 | CHL1-AS2    | 3  | 109707    | 197341    | 87634  | lncRNA                               | -2.07 | 7.48E-04 | 7.66E-03 |
| ENSG00000279910 | AL731532.1  | 10 | 85526880  | 85531115  | 4235   | TEC                                  | -2.07 | 9.06E-03 | 4.17E-02 |
| ENSG00000251575 | C5orf64-AS1 | 5  | 61732774  | 61735715  | 2941   | lncRNA                               | -2.07 | 9.39E-03 | 4.27E-02 |
| ENSG00000242412 | DBIL5P2     | 2  | 63117851  | 63119542  | 1691   | transcribed processed pseudogene     | -2.07 | 1.10E-03 | 9.88E-03 |
| ENSG00000172457 | OR9G4       | 11 | 56741223  | 56748697  | 7474   | protein coding                       | -2.07 | 8.47E-03 | 3.98E-02 |
| ENSG00000256008 | AC125616.1  | 12 | 120628830 | 120641591 | 12761  | lncRNA-antisense                     | -2.07 | 3.20E-04 | 4.32E-03 |
| ENSG00000163216 | SPRR2D      | 1  | 153039732 | 153041931 | 2199   | protein coding                       | -2.07 | 1.48E-03 | 1.21E-02 |
| ENSG00000224666 | ETV7-AS1    | 6  | 36386831  | 36393462  | 6631   | lncRNA-antisense                     | -2.07 | 4.21E-03 | 2.49E-02 |
| ENSG00000288079 | AC026329.1  | 3  | 113259786 | 113266824 | 7038   | lncRNA                               | -2.07 | 1.08E-04 | 2.07E-03 |
| ENSG00000265107 | GJA5        | 1  | 147756199 | 147773362 | 17163  | protein coding                       | -2.07 | 5.24E-04 | 6.00E-03 |
| ENSG00000224689 | ZNF812P     | 19 | 9689924   | 9700776   | 10852  | transcribed unprocessed pseudogene   | -2.07 | 3.17E-04 | 4.29E-03 |
| ENSG00000284686 | AC119674.2  | 1  | 56173433  | 56524495  | 351062 | protein coding                       | -2.07 | 9.32E-03 | 4.25E-02 |
| ENSG00000214617 | SLC6A10P    | 16 | 32877469  | 32885501  | 8032   | transcribed unprocessed pseudogene   | -2.07 | 4.10E-06 | 2.25E-04 |
| ENSG00000256022 | LINC02411   | 12 | 127631248 | 127636488 | 5240   | lncRNA                               | -2.07 | 5.26E-04 | 6.02E-03 |
| ENSG00000253279 | LINC02209   | 8  | 29920560  | 29953724  | 33164  | lncRNA                               | -2.07 | 1.20E-03 | 1.05E-02 |
| ENSG00000114279 | FGF12       | 3  | 192139395 | 192767764 | 628369 | protein coding                       | -2.07 | 5.01E-05 | 1.22E-03 |
| ENSG00000258390 | LINC02318   | 14 | 95573520  | 95582305  | 8785   | lncRNA                               | -2.07 | 1.96E-04 | 3.13E-03 |
| ENSG00000259774 | AC243562.3  | 15 | 84422618  | 84425882  | 3264   | lncRNA                               | -2.07 | 3.52E-03 | 2.20E-02 |
| ENSG00000124568 | SLC17A1     | 6  | 25782915  | 25832052  | 49137  | protein coding                       | -2.07 | 1.27E-03 | 1.09E-02 |
| ENSG00000228613 | AC141930.1  | 2  | 1546665   | 1620113   | 73448  | lncRNA-antisense                     | -2.07 | 3.93E-03 | 2.36E-02 |
| ENSG00000287671 | AC068418.3  | 17 | 21442805  | 21451525  | 8720   | lncRNA                               | -2.07 | 2.32E-05 | 7.24E-04 |
| ENSG00000197565 | COL4A6      | X  | 108155607 | 108439497 | 283890 | protein coding                       | -2.07 | 1.35E-07 | 2.17E-05 |
| ENSG00000179873 | NLRP11      | 19 | 55785397  | 55836800  | 51403  | protein coding                       | -2.07 | 2.31E-05 | 7.20E-04 |
| ENSG00000253656 | AC090987.1  | 8  | 130595299 | 130655712 | 60413  | lncRNA                               | -2.07 | 6.91E-04 | 7.24E-03 |
| ENSG00000255345 | AP002957.1  | 11 | 79092848  | 79098003  | 5155   | lncRNA                               | -2.07 | 1.34E-03 | 1.13E-02 |
| ENSG00000284703 | AL805961.1  | 1  | 4012921   | 4019508   | 6587   | lncRNA                               | -2.07 | 1.90E-05 | 6.33E-04 |
| ENSG00000227467 | LINC01537   | 11 | 72570660  | 72573229  | 2569   | lncRNA                               | -2.07 | 8.29E-03 | 3.92E-02 |
| ENSG00000279146 | AC063926.2  | 12 | 130465008 | 130466315 | 1307   | TEC                                  | -2.07 | 1.38E-04 | 2.45E-03 |
| ENSG00000237761 | AL161646.1  | 10 | 104566931 | 104624795 | 57864  | lncRNA                               | -2.07 | 6.36E-03 | 3.29E-02 |
| ENSG00000243137 | PSG4        | 19 | 43192702  | 43207299  | 14597  | protein coding                       | -2.07 | 4.18E-05 | 1.08E-03 |
| ENSG00000278895 | AC008507.3  | 19 | 29915862  | 29917830  | 1968   | TEC                                  | -2.07 | 2.25E-03 | 1.63E-02 |
| ENSG00000260762 | ACSM5P1     | 16 | 20586550  | 20607107  | 20557  | unprocessed pseudogene               | -2.07 | 3.00E-04 | 4.16E-03 |
| ENSG00000285521 | AC119673.1  | 1  | 205775559 | 205783623 | 8064   | lncRNA-bidirectional promoter lncRNA | -2.07 | 5.70E-03 | 3.06E-02 |
| ENSG00000227929 | SRGAP3-AS3  | 3  | 9216895   | 9219508   | 2613   | lncRNA-antisense                     | -2.07 | 1.18E-03 | 1.04E-02 |
| ENSG00000253224 | PGAM5P1     | 5  | 109884610 | 109885423 | 813    | processed pseudogene                 | -2.08 | 9.74E-03 | 4.39E-02 |

|                 |            |    |           |           |         |                                    |       |          |          |
|-----------------|------------|----|-----------|-----------|---------|------------------------------------|-------|----------|----------|
| ENSG00000287146 | AC000085.1 | 22 | 19291969  | 19328901  | 36932   | lncRNA                             | -2.08 | 5.79E-03 | 3.09E-02 |
| ENSG00000261400 | AC011525.1 | 19 | 31588040  | 31595720  | 7680    | lncRNA                             | -2.08 | 4.11E-04 | 5.12E-03 |
| ENSG00000164399 | IL3        | 5  | 132060655 | 132063204 | 2549    | protein coding                     | -2.08 | 2.50E-03 | 1.74E-02 |
| ENSG00000280182 | AC131888.1 | 16 | 81261924  | 81264091  | 2167    | TEC                                | -2.08 | 5.85E-04 | 6.48E-03 |
| ENSG00000228141 | AC105339.1 | 15 | 82710471  | 82714029  | 3558    | transcribed unitary pseudogene     | -2.08 | 8.68E-06 | 3.76E-04 |
| ENSG00000286058 | AC018865.2 | 2  | 130026845 | 130051131 | 24286   | lncRNA                             | -2.08 | 7.21E-04 | 7.48E-03 |
| ENSG00000287720 | AC023480.1 | 3  | 3918709   | 4046722   | 128013  | lncRNA                             | -2.08 | 2.88E-03 | 1.92E-02 |
| ENSG00000279485 | AC016734.1 | 2  | 63517892  | 63519268  | 1376    | TEC                                | -2.08 | 9.21E-04 | 8.81E-03 |
| ENSG00000229967 | MAGEA4-AS1 | X  | 151904431 | 151913968 | 9537    | lncRNA-antisense                   | -2.08 | 5.91E-03 | 3.13E-02 |
| ENSG00000228566 | AC013287.1 | 10 | 63664664  | 64693446  | 1028782 | lncRNA                             | -2.08 | 2.20E-03 | 1.60E-02 |
| ENSG00000197291 | RAMP2-AS1  | 17 | 42753914  | 42761257  | 7343    | lncRNA                             | -2.08 | 2.58E-04 | 3.78E-03 |
| ENSG00000259356 | AC022710.1 | 15 | 100126106 | 100129743 | 3637    | lncRNA-antisense                   | -2.08 | 8.18E-04 | 8.15E-03 |
| ENSG00000203805 | PLPP4      | 10 | 120457227 | 120592065 | 134838  | protein coding                     | -2.08 | 3.80E-05 | 1.01E-03 |
| ENSG00000204091 | TDRG1      | 6  | 40334775  | 40387590  | 52815   | lncRNA-antisense                   | -2.08 | 2.96E-05 | 8.49E-04 |
| ENSG00000172137 | CALB2      | 16 | 71358713  | 71390436  | 31723   | protein coding                     | -2.08 | 1.24E-04 | 2.28E-03 |
| ENSG00000205879 | FAM90A2P   | 8  | 12172761  | 12175771  | 3010    | unprocessed pseudogene             | -2.08 | 1.14E-03 | 1.01E-02 |
| ENSG00000259553 | AC140725.1 | 15 | 101959539 | 101961408 | 1869    | lncRNA                             | -2.08 | 8.77E-04 | 8.51E-03 |
| ENSG00000246695 | RASSF8-AS1 | 12 | 25936683  | 25959765  | 23082   | lncRNA-antisense                   | -2.08 | 1.01E-06 | 8.56E-05 |
| ENSG00000183560 | IZUMO1R    | 11 | 94305592  | 94307721  | 2129    | protein coding                     | -2.08 | 3.57E-04 | 4.63E-03 |
| ENSG00000261595 | AL603832.2 | 1  | 112715672 | 11271796  | 2124    | lncRNA-antisense                   | -2.08 | 9.02E-04 | 8.68E-03 |
| ENSG00000248245 | AC010307.2 | 5  | 133160438 | 133224413 | 63975   | lncRNA-antisense                   | -2.09 | 3.44E-03 | 2.17E-02 |
| ENSG00000116981 | NT5C1A     | 1  | 39659121  | 39672038  | 12917   | protein coding                     | -2.09 | 7.79E-04 | 7.88E-03 |
| ENSG00000227586 | RPS26P39   | 10 | 123171535 | 123171875 | 340     | processed pseudogene               | -2.09 | 5.01E-04 | 5.82E-03 |
| ENSG00000264050 | AC005412.1 | 17 | 29197071  | 29197785  | 714     | processed pseudogene               | -2.09 | 1.12E-02 | 4.82E-02 |
| ENSG00000244691 | RPL10AP1   | 14 | 103412119 | 103412761 | 642     | processed pseudogene               | -2.09 | 7.65E-03 | 3.72E-02 |
| ENSG00000273586 | OR10G1P    | 14 | 21801882  | 21802825  | 943     | unprocessed pseudogene             | -2.09 | 8.87E-03 | 4.11E-02 |
| ENSG00000274528 | AC090970.2 | 15 | 52017167  | 52018032  | 865     | lncRNA-sense intronic              | -2.09 | 1.14E-02 | 4.89E-02 |
| ENSG00000244588 | RAD21L1    | 20 | 1226056   | 1296241   | 70365   | protein coding                     | -2.09 | 1.44E-04 | 2.52E-03 |
| ENSG00000235038 | AL445193.2 | 1  | 58060139  | 58080274  | 20135   | lncRNA                             | -2.09 | 2.50E-03 | 1.75E-02 |
| ENSG00000287435 | AC069404.1 | 2  | 73305941  | 73307890  | 1949    | lncRNA                             | -2.09 | 5.21E-03 | 2.87E-02 |
| ENSG00000238158 | AL391422.3 | 6  | 3831933   | 3855737   | 23804   | lncRNA-sense overlapping           | -2.09 | 6.69E-03 | 3.41E-02 |
| ENSG00000284391 | AL139398.1 | X  | 70427450  | 70435350  | 7900    | lncRNA-antisense                   | -2.09 | 8.08E-04 | 8.09E-03 |
| ENSG00000251127 | AC091173.1 | 8  | 61759094  | 61765969  | 6875    | lncRNA                             | -2.09 | 1.05E-02 | 4.62E-02 |
| ENSG00000287408 | AC027811.1 | 15 | 79331591  | 79337277  | 5686    | lncRNA                             | -2.09 | 5.44E-05 | 1.30E-03 |
| ENSG00000273963 | ENPP7P14   | 16 | 5110793   | 5148685   | 37892   | unprocessed pseudogene             | -2.09 | 8.47E-04 | 8.33E-03 |
| ENSG00000257829 | AC121757.1 | 12 | 52306616  | 52308371  | 1755    | lncRNA-antisense                   | -2.09 | 7.41E-03 | 3.64E-02 |
| ENSG00000286892 | AC084212.1 | 3  | 157579694 | 157587495 | 7801    | lncRNA                             | -2.09 | 3.91E-03 | 2.36E-02 |
| ENSG00000176605 | C14orf177  | 14 | 98711613  | 98717761  | 6148    | lncRNA                             | -2.09 | 3.02E-03 | 1.98E-02 |
| ENSG00000261610 | AP000265.1 | 21 | 32259804  | 32261585  | 1781    | lncRNA                             | -2.09 | 9.81E-06 | 4.11E-04 |
| ENSG00000203189 | AC008267.2 | 7  | 66427949  | 66453634  | 25685   | transcribed unprocessed pseudogene | -2.09 | 5.98E-05 | 1.38E-03 |
| ENSG00000183929 | DUSP5P1    | 1  | 228650241 | 228651379 | 1138    | processed pseudogene               | -2.09 | 7.45E-03 | 3.66E-02 |
| ENSG00000141485 | SLC13A5    | 17 | 6684719   | 6713377   | 28658   | protein coding                     | -2.09 | 4.98E-09 | 2.15E-06 |
| ENSG00000197683 | KRTAP26-1  | 21 | 30319124  | 30320315  | 1191    | protein coding                     | -2.09 | 9.80E-03 | 4.41E-02 |
| ENSG00000233985 | LINC01681  | 1  | 170173865 | 170304358 | 130493  | lncRNA                             | -2.09 | 3.60E-03 | 2.24E-02 |
| ENSG00000250493 | AP004147.1 | 11 | 120867933 | 120894797 | 26864   | lncRNA-antisense                   | -2.09 | 8.14E-06 | 3.61E-04 |
| ENSG00000267638 | AC023855.1 | 17 | 44115912  | 44120595  | 4683    | lncRNA-antisense                   | -2.09 | 8.65E-03 | 4.04E-02 |
| ENSG00000261810 | AC133565.1 | 16 | 10033684  | 10037297  | 3613    | lncRNA-antisense                   | -2.09 | 7.94E-03 | 3.81E-02 |
| ENSG00000196184 | OR10J1     | 1  | 159437845 | 159443078 | 5233    | protein coding                     | -2.09 | 5.28E-03 | 2.90E-02 |
| ENSG00000248851 | AC006427.1 | 4  | 16307456  | 16308167  | 711     | processed pseudogene               | -2.09 | 1.07E-02 | 4.67E-02 |
| ENSG00000279717 | AC005336.3 | 19 | 15904556  | 15907234  | 2678    | TEC                                | -2.09 | 4.57E-03 | 2.63E-02 |
| ENSG00000248138 | AC097515.1 | 4  | 16400430  | 16512187  | 111757  | lncRNA-antisense                   | -2.09 | 6.32E-03 | 3.28E-02 |
| ENSG00000249177 | MTND4P29   | 2  | 201554384 | 201556051 | 1667    | unprocessed pseudogene             | -2.09 | 9.75E-03 | 4.39E-02 |
| ENSG00000165124 | SVEP1      | 9  | 110365248 | 110579880 | 214632  | protein coding                     | -2.09 | 4.78E-09 | 2.10E-06 |
| ENSG00000258483 | LINC02251  | 15 | 98003038  | 98087384  | 84346   | lncRNA                             | -2.09 | 3.48E-04 | 4.56E-03 |
| ENSG00000079101 | CLUL1      | 18 | 596988    | 650334    | 53346   | protein coding                     | -2.09 | 3.21E-04 | 4.33E-03 |
| ENSG00000260343 | LINC01043  | 13 | 112313467 | 112321758 | 8291    | lncRNA                             | -2.09 | 1.65E-05 | 5.75E-04 |
| ENSG00000286455 | AL162400.3 | 1  | 63011197  | 63018614  | 7417    | lncRNA                             | -2.10 | 5.44E-03 | 2.96E-02 |
| ENSG00000229798 | KRT18P26   | 2  | 74306728  | 74308008  | 1280    | processed pseudogene               | -2.10 | 2.76E-03 | 1.87E-02 |
| ENSG00000279217 | Z95114.1   | 22 | 36071000  | 36085573  | 14573   | lncRNA                             | -2.10 | 6.95E-07 | 6.75E-05 |
| ENSG00000282142 | AC245187.2 | 8  | 2517898   | 2556440   | 38542   | lncRNA                             | -2.10 | 1.89E-03 | 1.44E-02 |
| ENSG00000250247 | SEPHS2P1   | 5  | 14960232  | 14961393  | 1161    | processed pseudogene               | -2.10 | 3.00E-03 | 1.98E-02 |
| ENSG00000283040 | AL669831.1 | 1  | 874529    | 877234    | 2705    | transcribed unprocessed pseudogene | -2.10 | 6.13E-03 | 3.21E-02 |
| ENSG00000237510 | GPAT2P5    | 2  | 95789654  | 95800166  | 10512   | transcribed unprocessed pseudogene | -2.10 | 3.56E-05 | 9.69E-04 |
| ENSG00000169876 | MUC17      | 7  | 101020072 | 101058859 | 38787   | protein coding                     | -2.10 | 1.90E-06 | 1.36E-04 |
| ENSG00000261121 | LINC02473  | 4  | 24659856  | 24671568  | 11712   | lncRNA                             | -2.10 | 2.67E-03 | 1.82E-02 |
| ENSG00000175728 | LINC02873  | 11 | 130672956 | 130717352 | 44396   | lncRNA                             | -2.10 | 6.97E-04 | 7.28E-03 |
| ENSG00000104938 | CLEC4M     | 19 | 7763210   | 7769605   | 6395    | protein coding                     | -2.10 | 1.47E-03 | 1.21E-02 |
| ENSG00000232675 | AL121830.1 | 20 | 19693209  | 19697576  | 4367    | lncRNA                             | -2.10 | 2.23E-03 | 1.62E-02 |
| ENSG00000286685 | AL158077.2 | 9  | 19789179  | 19894856  | 105677  | lncRNA                             | -2.10 | 3.65E-03 | 2.25E-02 |
| ENSG00000131059 | BP1FA3     | 20 | 33217310  | 33227806  | 10496   | protein coding                     | -2.10 | 8.88E-04 | 8.59E-03 |
| ENSG00000217889 | KRT18P48   | X  | 153604497 | 153605348 | 851     | processed pseudogene               | -2.10 | 8.92E-03 | 4.13E-02 |
| ENSG00000230952 | AC099344.1 | 2  | 11357515  | 11365636  | 8121    | lncRNA                             | -2.10 | 2.18E-03 | 1.59E-02 |
| ENSG00000285424 | AL162718.1 | 6  | 4304942   | 4583871   | 278929  | lncRNA                             | -2.10 | 6.47E-04 | 6.93E-03 |
| ENSG00000248991 | AC097375.1 | 4  | 151919468 | 151943933 | 24465   | lncRNA                             | -2.10 | 2.25E-03 | 1.63E-02 |
| ENSG00000272695 | GAS6-DT    | 13 | 113864112 | 113866834 | 2722    | lncRNA                             | -2.10 | 4.96E-03 | 2.79E-02 |
| ENSG00000166796 | LDHC       | 11 | 18412318  | 18452063  | 39745   | protein coding                     | -2.10 | 4.29E-04 | 5.24E-03 |
| ENSG00000279030 | AC007336.3 | 16 | 55486618  | 55488777  | 2159    | TEC                                | -2.10 | 2.23E-03 | 1.62E-02 |
| ENSG00000276170 | AC244153.1 | 17 | 38450394  | 38452444  | 2050    | lncRNA                             | -2.10 | 4.87E-04 | 5.72E-03 |
| ENSG00000198471 | RTP2       | 3  | 187698259 | 187702557 | 4298    | protein coding                     | -2.10 | 2.94E-03 | 1.95E-02 |
| ENSG00000204006 | C1orf185   | 1  | 51102221  | 51148086  | 45865   | protein coding                     | -2.10 | 5.54E-03 | 3.00E-02 |
| ENSG00000231137 | RBM22P5    | 9  | 76286494  | 76288081  | 1587    | processed pseudogene               | -2.10 | 4.20E-03 | 2.48E-02 |
| ENSG00000215296 | TMC05B     | 15 | 33235552  | 33247621  | 12069   | transcribed unitary pseudogene     | -2.10 | 7.93E-04 | 7.97E-03 |
| ENSG00000259756 | AC100839.1 | 15 | 62682916  | 62690448  | 7532    | lncRNA-antisense                   | -2.10 | 3.77E-03 | 2.30E-02 |
| ENSG00000286752 | AC022509.5 | 12 | 26139249  | 26167411  | 28492   | lncRNA                             | -2.10 | 4.93E-02 | 2.78E-02 |
| ENSG00000261664 | TTC39A-AS1 | 1  | 51329654  | 51335324  | 5670    | lncRNA-antisense                   | -2.10 | 8.11E-04 | 8.10E-03 |
| ENSG00000227061 | AC097979.1 | 2  | 197569    | 209892    | 12323   | lncRNA-antisense                   | -2.10 | 1.30E-05 | 5.00E-04 |
| ENSG00000285662 | FAM245B    | 10 | 46721002  | 46751738  | 30736   | lncRNA                             | -2.10 | 1.35E-03 | 1.14E-02 |
| ENSG00000276807 | AC022188.1 | 15 | 73730048  | 73731711  | 1663    | lncRNA                             | -2.10 | 1.39E-03 | 1.16E-02 |
| ENSG00000229522 | LINC01523  | 20 | 47983404  | 47984313  | 909     | lncRNA                             | -2.10 | 1.10E-02 | 4.78E-02 |
| ENSG00000235033 | DAAM2-AS1  | 6  | 39881804  | 39900071  | 18267   | lncRNA-antisense                   | -2.10 | 1.16E-09 | 7.59E-07 |



|                  |            |    |           |           |        |                                    |       |          |          |
|------------------|------------|----|-----------|-----------|--------|------------------------------------|-------|----------|----------|
| ENSG00000268581  | SIGLEC18P  | 19 | 51119987  | 51122965  | 2978   | unprocessed_pseudogene             | -2.10 | 1.78E-04 | 2.93E-03 |
| ENSG00000148604  | RGR        | 10 | 84230666  | 84259660  | 29294  | protein_coding                     | -2.10 | 1.05E-06 | 8.82E-05 |
| ENSG00000166670  | MMP10      | 11 | 102770502 | 102780628 | 10126  | protein_coding                     | -2.10 | 2.40E-03 | 1.70E-02 |
| ENSG00000262950  | AC007861.1 | 16 | 49442910  | 49454109  | 11199  | lncRNA                             | -2.10 | 6.55E-06 | 3.12E-04 |
| ENSG00000274279  | SPATA31E3P | 15 | 22401208  | 22406944  | 5736   | unprocessed_pseudogene             | -2.10 | 4.56E-03 | 2.63E-02 |
| ENSG00000142511  | GPR32      | 19 | 50770464  | 50771732  | 1268   | protein_coding                     | -2.10 | 1.62E-03 | 1.30E-02 |
| ENSG00000285640  | AP001999.2 | 11 | 134685044 | 134702004 | 16960  | lncRNA                             | -2.10 | 5.36E-04 | 6.10E-03 |
| ENSG00000233179  | Z82249.1   | 22 | 48448890  | 48451217  | 2327   | lncRNA                             | -2.11 | 3.40E-03 | 2.15E-02 |
| ENSG00000251533  | LINC00605  | 14 | 103187221 | 103189028 | 1807   | lncRNA                             | -2.11 | 2.54E-03 | 1.77E-02 |
| ENSG00000243978  | RTL9       | X  | 110358816 | 110456334 | 97518  | protein_coding                     | -2.11 | 1.16E-04 | 2.17E-03 |
| ENSG00000225280  | AL158013.1 | 20 | 21397740  | 21400391  | 2651   | lncRNA-antisense                   | -2.11 | 9.96E-03 | 4.46E-02 |
| ENSG00000276980  | AC008760.2 | 19 | 6716386   | 6717742   | 1356   | lncRNA-sense intronic              | -2.11 | 1.11E-02 | 4.79E-02 |
| ENSG00000154975  | CA10       | 17 | 51630313  | 52160017  | 529704 | protein_coding                     | -2.11 | 6.48E-07 | 6.54E-05 |
| ENSG00000238099  | LINC01625  | 6  | 139435636 | 139474658 | 39022  | lncRNA                             | -2.11 | 9.54E-06 | 4.05E-04 |
| ENSG00000249332  | LINC02149  | 5  | 15112120  | 15266541  | 154421 | lncRNA                             | -2.11 | 3.59E-03 | 2.23E-02 |
| ENSG00000287609  | AL589787.2 | 10 | 126393489 | 126398789 | 5300   | lncRNA                             | -2.11 | 5.92E-04 | 6.53E-03 |
| ENSG00000105894  | PTN        | 7  | 137227341 | 137343774 | 116433 | protein_coding                     | -2.11 | 1.16E-02 | 4.96E-02 |
| ENSG00000287372  | AL627316.1 | 1  | 90388193  | 90420396  | 32203  | lncRNA                             | -2.11 | 1.92E-03 | 1.46E-02 |
| ENSG00000285773  | AL161893.1 | 13 | 30388785  | 30404967  | 16182  | lncRNA                             | -2.11 | 6.64E-04 | 7.05E-03 |
| ENSG00000228397  | LINC01635  | 1  | 22023990  | 22026048  | 2058   | lncRNA                             | -2.11 | 3.34E-04 | 4.45E-03 |
| ENSG00000254946  | LINC02751  | 11 | 15552855  | 15604169  | 51314  | lncRNA                             | -2.11 | 9.62E-04 | 9.07E-03 |
| ENSG00000264449  | AP001021.1 | 18 | 5887487   | 5989369   | 101882 | lncRNA-antisense                   | -2.11 | 5.54E-04 | 6.24E-03 |
| ENSG00000279017  | AC098476.1 | 3  | 45749627  | 45750651  | 1024   | TEC                                | -2.11 | 1.87E-05 | 6.29E-04 |
| ENSG00000272514  | CFAP206    | 6  | 87407972  | 87464465  | 56493  | protein_coding                     | -2.11 | 2.82E-03 | 1.89E-02 |
| ENSG00000229887  | HNRNPA1P6  | 1  | 58047889  | 58049335  | 1446   | transcribed_unprocessed_pseudogene | -2.11 | 3.57E-03 | 2.22E-02 |
| ENSG00000225602  | MTOR-AS1   | 1  | 11143898  | 11149537  | 5639   | lncRNA-antisense                   | -2.11 | 8.45E-03 | 3.98E-02 |
| ENSG00000233372  | AL137076.1 | 1  | 30140263  | 30141607  | 1344   | lncRNA                             | -2.11 | 3.43E-04 | 4.52E-03 |
| ENSG00000184544  | DHR57C     | 17 | 9771434   | 9791592   | 20158  | protein_coding                     | -2.11 | 1.57E-03 | 1.26E-02 |
| ENSG00000217165  | ANKRD18EP  | 6  | 39110321  | 39112952  | 2631   | processed_pseudogene               | -2.11 | 1.07E-03 | 9.72E-02 |
| ENSG00000278967  | AL138847.2 | 1  | 62607766  | 62609584  | 1818   | TEC                                | -2.11 | 9.34E-03 | 4.26E-02 |
| ENSG00000253286  | AC135166.1 | 8  | 123614219 | 123667248 | 53029  | lncRNA-antisense                   | -2.11 | 1.34E-03 | 1.13E-02 |
| ENSG00000197790  | GLT5M1     | 11 | 4545191   | 4546144   | 953    | protein_coding                     | -2.11 | 1.05E-02 | 4.63E-02 |
| ENSG000002055138 | GLTPP1     | 11 | 18189000  | 18189621  | 621    | processed_pseudogene               | -2.11 | 1.47E-03 | 1.21E-02 |
| ENSG00000253702  | LINC02847  | 8  | 48597458  | 48621018  | 23560  | lncRNA                             | -2.12 | 8.84E-03 | 4.10E-02 |
| ENSG00000263727  | AP001178.1 | 18 | 653985    | 657259    | 3274   | lncRNA-sense intronic              | -2.12 | 1.17E-02 | 5.00E-02 |
| ENSG00000287433  | AC107222.2 | 4  | 184100482 | 184106038 | 5556   | lncRNA                             | -2.12 | 4.35E-04 | 5.29E-03 |
| ENSG00000238212  | LINC02096  | 17 | 14834557  | 14957216  | 122659 | lncRNA                             | -2.12 | 1.86E-04 | 3.02E-03 |
| ENSG00000127472  | PLA2G5     | 1  | 20028179  | 20091911  | 63732  | protein_coding                     | -2.12 | 6.46E-06 | 3.08E-04 |
| ENSG00000073754  | CD5L       | 1  | 157830911 | 157898256 | 67345  | protein_coding                     | -2.12 | 5.45E-06 | 2.74E-04 |
| ENSG00000259720  | AC009562.1 | 15 | 30992171  | 31042302  | 50131  | lncRNA-antisense                   | -2.12 | 1.33E-03 | 1.13E-02 |
| ENSG00000152910  | CNTNAP4    | 16 | 76277278  | 76560757  | 283479 | protein_coding                     | -2.12 | 4.56E-04 | 5.48E-03 |
| ENSG00000231768  | LINC01354  | 1  | 234527887 | 234531803 | 3916   | lncRNA                             | -2.12 | 3.94E-04 | 4.99E-03 |
| ENSG00000267391  | MIR122HG   | 18 | 58445788  | 58453766  | 7978   | lncRNA                             | -2.12 | 2.25E-06 | 1.52E-04 |
| ENSG00000278505  | C17orf78   | 17 | 37375985  | 37392708  | 16723  | protein_coding                     | -2.12 | 1.74E-03 | 1.36E-02 |
| ENSG00000277211  | AC092132.2 | 16 | 20155648  | 20158391  | 2743   | processed_pseudogene               | -2.12 | 4.46E-03 | 2.59E-02 |
| ENSG00000169040  | PMCHL2     | 5  | 71375786  | 71385993  | 10207  | transcribed_unprocessed_pseudogene | -2.12 | 1.03E-03 | 9.47E-03 |
| ENSG00000285717  | AL162719.1 | 6  | 6450356   | 6507443   | 57087  | lncRNA                             | -2.12 | 6.11E-03 | 3.20E-02 |
| ENSG00000259847  | LINC02126  | 16 | 65141751  | 65176713  | 34962  | lncRNA                             | -2.12 | 1.17E-02 | 4.98E-02 |
| ENSG00000288090  | AC010163.3 | 10 | 78289059  | 78290565  | 2506   | lncRNA                             | -2.12 | 3.87E-03 | 2.34E-02 |
| ENSG0000020219   | CCT8L1P    | 7  | 152445477 | 152447150 | 1673   | processed_pseudogene               | -2.12 | 4.15E-04 | 5.15E-03 |
| ENSG00000229913  | AL360295.1 | 1  | 56823679  | 56826920  | 3241   | lncRNA-antisense                   | -2.12 | 3.90E-03 | 2.35E-02 |
| ENSG00000160505  | NLRP4      | 19 | 55836540  | 55881855  | 45315  | protein_coding                     | -2.12 | 9.97E-06 | 4.13E-04 |
| ENSG00000250230  | AP002754.1 | 11 | 61588442  | 61607550  | 19108  | lncRNA                             | -2.12 | 6.65E-06 | 3.15E-04 |
| ENSG00000276715  | YWHAEP7    | 17 | 37828305  | 37884743  | 56438  | transcribed_unprocessed_pseudogene | -2.12 | 8.95E-07 | 8.04E-05 |
| ENSG00000230156  | LINC00443  | 13 | 106653897 | 106672177 | 18280  | lncRNA                             | -2.12 | 5.88E-03 | 3.12E-02 |
| ENSG00000282876  | Z98752.4   | 20 | 43590009  | 43590596  | 587    | lncRNA                             | -2.12 | 8.71E-03 | 4.06E-02 |
| ENSG00000169594  | BNC1       | 15 | 83255903  | 83284714  | 28811  | protein_coding                     | -2.12 | 2.54E-04 | 3.72E-03 |
| ENSG00000214249  | CTAGE11P   | 13 | 75237944  | 75240296  | 2352   | processed_pseudogene               | -2.12 | 3.94E-03 | 2.37E-02 |
| ENSG00000171864  | PRND       | 20 | 4721909   | 4728460   | 6551   | protein_coding                     | -2.12 | 4.40E-05 | 1.12E-03 |
| ENSG00000164627  | KIF6       | 6  | 39329990  | 39725408  | 395418 | protein_coding                     | -2.12 | 2.29E-06 | 1.53E-04 |
| ENSG00000235710  | TRIM67-AS1 | 1  | 231184098 | 231187627 | 3529   | lncRNA                             | -2.12 | 2.67E-03 | 1.82E-02 |
| ENSG00000260162  | AC134312.1 | 16 | 88177289  | 88178646  | 1357   | lncRNA                             | -2.12 | 1.11E-02 | 4.80E-02 |
| ENSG00000248545  | AC105290.1 | 4  | 25529177  | 25619468  | 90291  | lncRNA                             | -2.12 | 5.72E-03 | 3.07E-02 |
| ENSG00000260922  | AC009139.1 | 16 | 77234877  | 77299950  | 65073  | lncRNA-antisense                   | -2.12 | 3.22E-03 | 2.07E-02 |
| ENSG00000270171  | AL359881.3 | 1  | 7693124   | 7694844   | 1720   | lncRNA                             | -2.12 | 6.29E-04 | 6.78E-03 |
| ENSG00000212232  | SNORD17    | 20 | 17962710  | 17962946  | 236    | snoRNA                             | -2.12 | 1.13E-05 | 4.50E-04 |
| ENSG00000287796  | AC016925.3 | X  | 147879361 | 147885249 | 5888   | lncRNA                             | -2.12 | 2.00E-03 | 1.49E-02 |
| ENSG00000185069  | KRT76      | 12 | 52768155  | 52777345  | 9190   | protein_coding                     | -2.13 | 7.58E-05 | 1.64E-03 |
| ENSG00000203593  | AC005342.1 | 12 | 2004666   | 2011392   | 6726   | lncRNA-antisense                   | -2.13 | 2.33E-03 | 1.66E-02 |
| ENSG00000278920  | AC005005.4 | 22 | 31051630  | 31068327  | 16697  | lncRNA-sense overlapping           | -2.13 | 1.92E-06 | 1.37E-04 |
| ENSG00000261634  | AC026992.2 | 15 | 69278328  | 69298795  | 20467  | lncRNA-antisense                   | -2.13 | 2.47E-05 | 7.54E-04 |
| ENSG00000279137  | AL356309.3 | 9  | 126518840 | 126520773 | 1933   | TEC                                | -2.13 | 4.60E-03 | 2.64E-02 |
| ENSG00000110195  | FOLR1      | 11 | 72189558  | 72196323  | 6765   | protein_coding                     | -2.13 | 1.20E-03 | 1.05E-02 |
| ENSG00000287290  | AC093765.3 | 4  | 116751473 | 116952699 | 201226 | lncRNA                             | -2.13 | 1.09E-02 | 4.73E-02 |
| ENSG00000279261  | PP2672     | 1  | 234757619 | 234760056 | 2437   | lncRNA                             | -2.13 | 7.90E-04 | 7.95E-03 |
| ENSG00000286218  | AC005040.2 | 2  | 106933739 | 106996534 | 62795  | lncRNA                             | -2.13 | 2.08E-05 | 6.70E-04 |
| ENSG00000122194  | PLG        | 6  | 160702238 | 160754097 | 51859  | protein_coding                     | -2.13 | 4.14E-06 | 2.26E-04 |
| ENSG00000265273  | PGDP1      | 18 | 31962178  | 31963618  | 1440   | processed_pseudogene               | -2.13 | 1.46E-05 | 5.40E-04 |
| ENSG00000237159  | CNTFR-AS1  | 9  | 34568012  | 34583072  | 15060  | lncRNA-antisense                   | -2.13 | 1.47E-04 | 2.55E-03 |
| ENSG00000287452  | AL391477.1 | 1  | 181962889 | 181998985 | 36096  | lncRNA                             | -2.13 | 4.66E-04 | 5.55E-03 |
| ENSG00000170923  | OR7G2      | 19 | 9100407   | 9107475   | 7068   | protein_coding                     | -2.13 | 1.10E-03 | 9.88E-03 |
| ENSG00000188991  | SLC15A5    | 12 | 16188485  | 16277685  | 89200  | protein_coding                     | -2.13 | 1.32E-03 | 1.12E-02 |
| ENSG00000152254  | G6PC2      | 2  | 168901291 | 168910000 | 8709   | protein_coding                     | -2.13 | 1.75E-03 | 1.36E-02 |
| ENSG00000201412  | Y_RNA      | 10 | 92710499  | 92710608  | 109    | misc_RNA                           | -2.13 | 3.18E-03 | 2.05E-02 |
| ENSG00000235497  | AC012506.4 | 2  | 23375229  | 23381299  | 6070   | lncRNA                             | -2.13 | 7.67E-03 | 3.73E-02 |
| ENSG00000230176  | LINC01433  | 20 | 4192932   | 4195953   | 3021   | lncRNA-antisense                   | -2.13 | 7.95E-03 | 3.82E-02 |
| ENSG00000251307  | AC026704.1 | 5  | 55233934  | 55295201  | 61267  | lncRNA-antisense                   | -2.13 | 7.52E-03 | 3.68E-02 |
| ENSG00000164669  | INTS4P1    | 7  | 65141032  | 65234216  | 93184  | transcribed_unprocessed_pseudogene | -2.13 | 5.15E-08 | 1.12E-05 |
| ENSG00000253802  | SIRLNT     | 8  | 40298697  | 40353133  | 54436  | lncRNA                             | -2.13 | 1.03E-02 | 4.58E-02 |
| ENSG00000286645  | AC013267.1 | 2  | 25000147  | 25010274  | 10127  | lncRNA                             | -2.13 | 1.36E-03 | 1.15E-02 |

|                 |              |    |           |           |        |                                    |       |          |          |
|-----------------|--------------|----|-----------|-----------|--------|------------------------------------|-------|----------|----------|
| ENSG00000259751 | TUBAP11      | 15 | 34849137  | 34850395  | 1258   | processed_pseudogene               | -2.13 | 2.92E-03 | 1.94E-02 |
| ENSG00000141316 | SPACA3       | 17 | 32970376  | 32997877  | 27501  | protein_coding                     | -2.13 | 8.06E-06 | 3.59E-04 |
| ENSG00000258603 | AC005225.2   | 14 | 73555115  | 73633941  | 78826  | lncRNA-antisense                   | -2.13 | 6.04E-04 | 6.60E-03 |
| ENSG00000169154 | GOT1L1       | 8  | 37934281  | 37940124  | 5843   | protein_coding                     | -2.14 | 4.49E-03 | 2.60E-02 |
| ENSG00000151632 | AKR1C2       | 10 | 4987400   | 5018031   | 30631  | protein_coding                     | -2.14 | 1.84E-05 | 6.19E-04 |
| ENSG00000196600 | SLC22A25     | 11 | 63163776  | 63229652  | 65876  | protein_coding                     | -2.14 | 3.87E-05 | 1.02E-03 |
| ENSG00000261558 | LINC01859    | 19 | 23015059  | 23031818  | 16759  | lncRNA                             | -2.14 | 2.49E-03 | 1.74E-02 |
| ENSG00000169126 | ARMC4        | 10 | 27775186  | 27999079  | 223893 | protein_coding                     | -2.14 | 1.29E-05 | 4.98E-04 |
| ENSG00000284418 | AL391117.1   | 9  | 22703516  | 23438700  | 735184 | lncRNA                             | -2.14 | 1.18E-03 | 1.04E-02 |
| ENSG00000271615 | ACTG1P22     | 2  | 57755428  | 57766052  | 10624  | transcribed_processed_pseudogene   | -2.14 | 1.89E-03 | 1.44E-02 |
| ENSG00000277631 | PGM5P3-AS1   | 9  | 72670     | 89850     | 17180  | lncRNA                             | -2.14 | 2.14E-03 | 1.57E-02 |
| ENSG00000272642 | AP003121.1   | 11 | 127188885 | 127223449 | 34564  | lncRNA                             | -2.14 | 8.11E-03 | 3.87E-02 |
| ENSG00000267535 | LINC00868    | 17 | 76849840  | 76861836  | 11996  | lncRNA                             | -2.14 | 2.56E-03 | 1.77E-02 |
| ENSG00000286250 | AL161945.1   | 20 | 52840936  | 52843775  | 2839   | lncRNA                             | -2.14 | 6.68E-03 | 3.41E-02 |
| ENSG00000259504 | AC026992.1   | 15 | 69278675  | 69295322  | 16647  | lncRNA                             | -2.14 | 1.54E-03 | 1.25E-02 |
| ENSG00000265702 | AC005821.1   | 17 | 62699244  | 62754973  | 55729  | lncRNA-antisense                   | -2.14 | 2.00E-05 | 6.54E-04 |
| ENSG00000214369 | CY5BAP2      | 2  | 169790093 | 169790885 | 792    | processed_pseudogene               | -2.14 | 8.66E-03 | 4.04E-02 |
| ENSG00000253238 | AC034114.2   | 8  | 80265907  | 80484481  | 218574 | lncRNA                             | -2.14 | 2.30E-05 | 7.19E-04 |
| ENSG00000177234 | LINC01561    | 10 | 120597949 | 120600124 | 2175   | lncRNA                             | -2.14 | 2.86E-04 | 4.02E-03 |
| ENSG00000280217 | AC126564.1   | 12 | 131235511 | 131237523 | 2012   | TEC                                | -2.14 | 7.06E-05 | 1.56E-03 |
| ENSG00000278913 | AC026797.1   | 5  | 6134303   | 6137171   | 2868   | TEC                                | -2.14 | 1.65E-03 | 1.31E-02 |
| ENSG00000259594 | AC023034.1   | 15 | 81554003  | 81696780  | 142777 | lncRNA                             | -2.14 | 1.94E-03 | 1.47E-02 |
| ENSG00000286570 | AC104304.3   | 3  | 46647171  | 46661507  | 14336  | lncRNA                             | -2.14 | 6.76E-03 | 3.43E-02 |
| ENSG00000187857 | OR6C75       | 12 | 55362975  | 55369279  | 6304   | protein_coding                     | -2.14 | 5.45E-05 | 1.30E-03 |
| ENSG00000261302 | AC106779.1   | 16 | 56708450  | 56730010  | 21560  | lncRNA-antisense                   | -2.14 | 6.10E-04 | 6.65E-03 |
| ENSG00000116882 | HAO2         | 1  | 119368779 | 119394130 | 25351  | protein_coding                     | -2.14 | 5.92E-04 | 6.53E-03 |
| ENSG00000287004 | AC007686.5   | 14 | 77084689  | 77085977  | 1288   | lncRNA                             | -2.14 | 8.97E-03 | 4.14E-02 |
| ENSG00000146521 | LINC01558    | 6  | 167784537 | 167796872 | 12335  | lncRNA                             | -2.14 | 3.22E-06 | 1.92E-04 |
| ENSG00000275944 | AC244100.3   | 17 | 36001419  | 36011618  | 10199  | lncRNA-antisense                   | -2.14 | 6.85E-04 | 7.21E-03 |
| ENSG00000268066 | FMR1-AS1     | X  | 147909431 | 147911817 | 2386   | lncRNA                             | -2.15 | 3.11E-04 | 4.25E-03 |
| ENSG00000254622 | NAV2-AS4     | 11 | 19510890  | 19519896  | 9006   | lncRNA-antisense                   | -2.15 | 8.25E-03 | 3.91E-02 |
| ENSG00000174417 | TRHR         | 8  | 109086585 | 109121565 | 34980  | protein_coding                     | -2.15 | 3.39E-03 | 2.14E-02 |
| ENSG00000248469 | AC139491.1   | 5  | 176049678 | 176062021 | 12343  | lncRNA-antisense                   | -2.15 | 6.59E-04 | 7.02E-03 |
| ENSG00000260518 | BMS1P8       | 16 | 33687025  | 33707213  | 20188  | transcribed_unprocessed_pseudogene | -2.15 | 7.12E-05 | 1.57E-03 |
| ENSG00000265369 | PCAT18       | 18 | 26687621  | 26703638  | 16017  | lncRNA                             | -2.15 | 4.36E-03 | 2.55E-02 |
| ENSG00000179165 | PXT1         | 6  | 36390551  | 36442854  | 52303  | protein_coding                     | -2.15 | 9.17E-04 | 8.78E-03 |
| ENSG00000183760 | ACP7         | 19 | 39083913  | 39111493  | 27580  | protein_coding                     | -2.15 | 3.37E-06 | 1.97E-04 |
| ENSG00000232679 | LINC01705    | 1  | 222010825 | 222064773 | 53948  | lncRNA                             | -2.15 | 2.56E-03 | 1.77E-02 |
| ENSG00000170683 | OR10A3       | 11 | 7937171   | 7941708   | 4537   | protein_coding                     | -2.15 | 2.08E-03 | 1.54E-02 |
| ENSG00000277718 | LINC02255    | 15 | 74379083  | 74390535  | 11452  | lncRNA                             | -2.15 | 6.88E-03 | 3.47E-02 |
| ENSG00000124092 | CTCF1        | 20 | 57495966  | 57525652  | 29686  | protein_coding                     | -2.15 | 2.11E-06 | 1.46E-04 |
| ENSG00000007952 | NOX1         | X  | 100843324 | 100874359 | 31035  | protein_coding                     | -2.15 | 1.16E-04 | 2.17E-03 |
| ENSG00000232928 | DDX3P1       | X  | 74121012  | 74131923  | 10911  | processed_pseudogene               | -2.15 | 1.57E-03 | 1.26E-02 |
| ENSG00000257790 | EIF4A1P4     | 12 | 53153272  | 53154484  | 1212   | processed_pseudogene               | -2.15 | 1.31E-03 | 1.11E-02 |
| ENSG00000287311 | AC140121.1   | 12 | 128052122 | 128068361 | 16239  | lncRNA                             | -2.15 | 3.16E-04 | 4.29E-03 |
| ENSG00000274461 | AC023282.1   | 10 | 120608580 | 120825317 | 216737 | lncRNA                             | -2.15 | 2.07E-05 | 6.70E-04 |
| ENSG00000183668 | PSG9         | 19 | 43211791  | 43269530  | 57739  | protein_coding                     | -2.15 | 5.35E-05 | 1.28E-03 |
| ENSG00000267465 | AC011525.2   | 19 | 31588159  | 31593786  | 5627   | lncRNA                             | -2.15 | 8.33E-05 | 1.74E-03 |
| ENSG00000248482 | AC008406.1   | 5  | 135124380 | 135131249 | 6869   | lncRNA                             | -2.15 | 1.05E-02 | 4.63E-02 |
| ENSG00000283039 | KLF18        | 1  | 44137821  | 44141631  | 3810   | protein_coding                     | -2.15 | 3.98E-04 | 5.02E-03 |
| ENSG00000254529 | MRGPRX7P     | 11 | 18863558  | 18864509  | 951    | unprocessed_pseudogene             | -2.15 | 1.14E-03 | 1.02E-02 |
| ENSG00000251211 | AC136632.2   | 5  | 178165702 | 178166562 | 860    | processed_pseudogene               | -2.15 | 2.63E-03 | 1.81E-02 |
| ENSG00000284692 | Z98259.3     | 1  | 5478736   | 5493057   | 14321  | lncRNA                             | -2.15 | 1.84E-04 | 3.00E-03 |
| ENSG00000255433 | LINC02735    | 11 | 56848478  | 56878078  | 29600  | lncRNA                             | -2.15 | 1.05E-02 | 4.62E-02 |
| ENSG00000244541 | LINC01213    | 3  | 150238519 | 150244232 | 5713   | lncRNA                             | -2.15 | 1.08E-02 | 4.71E-02 |
| ENSG00000276188 | AC069234.4   | 12 | 120709112 | 120709523 | 411    | lncRNA                             | -2.15 | 1.13E-03 | 1.01E-02 |
| ENSG00000286592 | LINC02885    | 22 | 34756676  | 35002862  | 246186 | lncRNA                             | -2.15 | 1.25E-03 | 1.08E-02 |
| ENSG00000231971 | CT69         | 6  | 134428239 | 134520585 | 92346  | lncRNA                             | -2.15 | 5.69E-03 | 3.06E-02 |
| ENSG00000233854 | POU6F2-AS2   | 7  | 38980370  | 39013551  | 33181  | lncRNA-antisense                   | -2.15 | 1.61E-03 | 1.29E-02 |
| ENSG00000274659 | LINC02371    | 12 | 2740064   | 2746662   | 6598   | lncRNA                             | -2.16 | 1.43E-04 | 2.50E-03 |
| ENSG00000214651 | AL513122.1   | 9  | 121238117 | 121240089 | 1972   | processed_pseudogene               | -2.16 | 7.93E-03 | 3.81E-02 |
| ENSG00000267636 | AC008992.1   | 19 | 31421997  | 31427302  | 5305   | lncRNA                             | -2.16 | 1.12E-02 | 4.82E-02 |
| ENSG00000236208 | C10orf71-AS1 | 10 | 49296112  | 49299018  | 2906   | lncRNA-antisense                   | -2.16 | 2.93E-03 | 1.94E-02 |
| ENSG00000265485 | LINC01915    | 18 | 24534551  | 24708542  | 173991 | lncRNA                             | -2.16 | 3.73E-08 | 9.08E-06 |
| ENSG00000237268 | AC092447.7   | 7  | 56421857  | 56448375  | 26518  | transcribed_unprocessed_pseudogene | -2.16 | 1.14E-03 | 1.02E-02 |
| ENSG00000149452 | SLC22A8      | 11 | 62989154  | 63015841  | 26687  | protein_coding                     | -2.16 | 7.48E-08 | 1.42E-05 |
| ENSG00000253667 | AC100821.1   | 8  | 53971231  | 53974210  | 2979   | processed_pseudogene               | -2.16 | 1.67E-03 | 1.32E-02 |
| ENSG00000227438 | AP001471.1   | 21 | 46093264  | 46097530  | 4266   | lncRNA-antisense                   | -2.16 | 4.17E-04 | 5.16E-03 |
| ENSG00000184650 | ODF4         | 17 | 8339840   | 8346048   | 6208   | protein_coding                     | -2.16 | 2.66E-03 | 1.82E-02 |
| ENSG00000275427 | AF067845.2   | 8  | 1296034   | 1302607   | 6573   | lncRNA                             | -2.16 | 2.68E-04 | 3.86E-03 |
| ENSG00000225868 | AC016582.1   | 19 | 37823722  | 37855215  | 31493  | transcribed_unprocessed_pseudogene | -2.16 | 5.89E-06 | 2.89E-04 |
| ENSG00000274330 | AL160191.3   | 14 | 70230224  | 70232426  | 2202   | unprocessed_pseudogene             | -2.16 | 1.02E-02 | 4.55E-02 |
| ENSG00000214942 | AC113167.1   | 5  | 89900664  | 89908883  | 90219  | lncRNA                             | -2.16 | 7.65E-03 | 3.73E-02 |
| ENSG00000218823 | PAPOLB       | 7  | 4857738   | 4862030   | 4292   | protein_coding                     | -2.16 | 3.34E-04 | 4.45E-03 |
| ENSG00000272281 | TPT2P2       | 13 | 52219344  | 52334277  | 114933 | transcribed_unprocessed_pseudogene | -2.16 | 2.52E-07 | 3.39E-05 |
| ENSG00000285300 | AC073176.2   | 10 | 70927055  | 71077810  | 150755 | lncRNA                             | -2.16 | 6.62E-06 | 3.14E-04 |
| ENSG00000267779 | LINC01533    | 19 | 32025808  | 32073809  | 48001  | lncRNA                             | -2.16 | 2.67E-06 | 1.69E-04 |
| ENSG00000229720 | AL109924.1   | 6  | 169034197 | 169035642 | 1445   | lncRNA                             | -2.16 | 2.72E-03 | 1.85E-02 |
| ENSG00000271952 | LINC01954    | 2  | 10844477  | 10885118  | 40641  | lncRNA                             | -2.16 | 2.06E-03 | 1.53E-02 |
| ENSG00000266573 | AC018697.1   | 18 | 24725762  | 24986980  | 261218 | lncRNA                             | -2.16 | 9.02E-07 | 8.05E-05 |
| ENSG00000287391 | AC103871.1   | 15 | 87638688  | 87668488  | 29800  | lncRNA                             | -2.16 | 2.47E-03 | 1.73E-02 |
| ENSG00000226780 | AC244035.1   | 1  | 206117783 | 206126805 | 9022   | lncRNA-antisense                   | -2.16 | 2.48E-03 | 1.74E-02 |
| ENSG00000188257 | PLA2G2A      | 1  | 19975431  | 19980416  | 4985   | protein_coding                     | -2.16 | 3.20E-04 | 4.32E-03 |
| ENSG00000169194 | IL13         | 5  | 132656263 | 132661110 | 4847   | protein_coding                     | -2.16 | 3.85E-05 | 1.02E-03 |
| ENSG00000260326 | PHBP21       | 16 | 52934813  | 52935635  | 822    | processed_pseudogene               | -2.16 | 3.35E-03 | 2.13E-02 |
| ENSG00000250358 | LINC02200    | 5  | 112628436 | 11264283  | 14047  | lncRNA                             | -2.16 | 2.89E-03 | 1.93E-02 |
| ENSG00000129151 | BBOX1        | 11 | 27040725  | 27127809  | 87084  | protein_coding                     | -2.16 | 3.85E-03 | 2.33E-02 |
| ENSG00000117472 | TPSPAN1      | 1  | 46175073  | 46185962  | 10889  | protein_coding                     | -2.16 | 1.32E-04 | 2.37E-03 |
| ENSG00000229658 | PABPC1P9     | 22 | 16423943  | 16426031  | 2088   | unprocessed_pseudogene             | -2.17 | 6.51E-04 | 6.96E-03 |
| ENSG00000251687 | AC104791.1   | 4  | 145833118 | 145839580 | 6462   | lncRNA-antisense                   | -2.17 | 2.13E-03 | 1.57E-02 |

|                 |             |    |           |           |        |                                  |       |          |          |
|-----------------|-------------|----|-----------|-----------|--------|----------------------------------|-------|----------|----------|
| ENSG00000126752 | SSX1        | X  | 48255392  | 48267444  | 12052  | protein coding                   | -2.17 | 1.08E-03 | 9.77E-03 |
| ENSG00000231957 | GNAI2P2     | 10 | 78068623  | 78069538  | 915    | processed_pseudogene             | -2.17 | 3.37E-03 | 2.14E-02 |
| ENSG00000253554 | LINC01144   | 8  | 63687179  | 64369176  | 681997 | lncRNA                           | -2.17 | 2.41E-04 | 3.61E-03 |
| ENSG00000286866 | AC006063.3  | 12 | 4857283   | 4859904   | 2621   | lncRNA                           | -2.17 | 1.91E-03 | 1.45E-02 |
| ENSG00000224017 | LINC01449   | 7  | 41089539  | 41133507  | 43968  | lncRNA                           | -2.17 | 2.26E-03 | 1.63E-02 |
| ENSG00000157021 | CIBAR1P1    | 15 | 41163162  | 41164374  | 1212   | unprocessed_pseudogene           | -2.17 | 1.17E-02 | 4.97E-02 |
| ENSG00000235738 | AC092647.4  | 7  | 55797946  | 55798480  | 534    | processed_pseudogene             | -2.17 | 7.05E-03 | 3.53E-02 |
| ENSG00000224856 | RPL35AP36   | 22 | 43957027  | 43957348  | 321    | processed_pseudogene             | -2.17 | 6.82E-03 | 3.45E-02 |
| ENSG00000287232 | AC079848.2  | 3  | 126213204 | 126247714 | 34510  | lncRNA                           | -2.17 | 6.00E-06 | 2.92E-04 |
| ENSG00000215838 | AL451074.1  | 1  | 165698750 | 165709968 | 11218  | transcribed processed_pseudogene | -2.17 | 1.03E-04 | 2.02E-03 |
| ENSG00000205693 | MANSC4      | 12 | 27762427  | 27780236  | 17809  | protein coding                   | -2.17 | 1.09E-02 | 4.73E-02 |
| ENSG00000172689 | MS4A10      | 11 | 60785533  | 60801305  | 15972  | protein coding                   | -2.17 | 1.71E-08 | 5.28E-06 |
| ENSG00000171489 | SPACA5      | X  | 48004336  | 48009729  | 5393   | protein coding                   | -2.17 | 1.02E-03 | 9.43E-03 |
| ENSG00000259867 | AC105411.1  | 16 | 80154979  | 80563354  | 408375 | lncRNA-antisense                 | -2.17 | 7.15E-06 | 3.32E-04 |
| ENSG00000267709 | AC024592.2  | 19 | 5847467   | 5858239   | 10772  | lncRNA-antisense                 | -2.17 | 1.77E-03 | 1.37E-02 |
| ENSG00000260818 | UNGP1       | 16 | 51277852  | 51279112  | 1260   | processed_pseudogene             | -2.17 | 8.13E-03 | 3.88E-02 |
| ENSG00000094661 | OR111       | 19 | 15082211  | 15092970  | 10759  | protein coding                   | -2.17 | 3.67E-06 | 2.09E-04 |
| ENSG00000275853 | Metazoa SRP | 7  | 55731100  | 55731403  | 303    | misc RNA                         | -2.17 | 8.49E-03 | 3.99E-02 |
| ENSG00000260880 | HCCAT5      | 16 | 73092349  | 73099337  | 6988   | lncRNA                           | -2.17 | 9.94E-04 | 9.27E-03 |
| ENSG00000254975 | AP001189.4  | 11 | 76675079  | 76703195  | 28116  | lncRNA                           | -2.17 | 1.11E-02 | 4.79E-02 |
| ENSG00000228666 | KRT18P1     | 6  | 28969130  | 28970460  | 1330   | processed_pseudogene             | -2.17 | 1.49E-03 | 1.22E-02 |
| ENSG00000248505 | LINC02380   | 4  | 57424495  | 57478341  | 53846  | lncRNA                           | -2.18 | 2.75E-03 | 1.86E-02 |
| ENSG00000228496 | AC106875.1  | 2  | 11681460  | 11683328  | 1868   | lncRNA-sense intronic            | -2.18 | 2.08E-03 | 1.54E-02 |
| ENSG00000255411 | LINC02548   | 11 | 13784017  | 13848002  | 63985  | lncRNA                           | -2.18 | 2.50E-03 | 1.74E-02 |
| ENSG00000110680 | CALCA       | 11 | 14966668  | 14972351  | 5683   | protein coding                   | -2.18 | 1.04E-04 | 2.03E-03 |
| ENSG00000141934 | PLP2        | 19 | 281040    | 291403    | 10363  | protein coding                   | -2.18 | 3.73E-09 | 1.81E-06 |
| ENSG00000254066 | LINC01938   | 5  | 165220577 | 165241756 | 21179  | lncRNA                           | -2.18 | 9.69E-03 | 4.37E-02 |
| ENSG00000171931 | FBXW10      | 17 | 18744026  | 18779349  | 35323  | protein coding                   | -2.18 | 2.06E-06 | 1.44E-04 |
| ENSG00000237770 | SPATA31D2P  | 9  | 81966564  | 81972130  | 5566   | unprocessed_pseudogene           | -2.18 | 7.45E-04 | 7.64E-03 |
| ENSG00000160472 | TMEM190     | 19 | 55376826  | 55378246  | 1420   | protein coding                   | -2.18 | 4.32E-03 | 2.54E-02 |
| ENSG00000181733 | ORZ21       | 19 | 8721634   | 8732160   | 10526  | protein coding                   | -2.18 | 5.93E-04 | 6.53E-03 |
| ENSG00000233321 | LINC02669   | 10 | 3433508   | 3502915   | 69407  | lncRNA                           | -2.18 | 9.89E-10 | 6.69E-07 |
| ENSG00000283297 | TEX52       | 12 | 2849046   | 2857039   | 7993   | protein coding                   | -2.18 | 8.48E-04 | 8.33E-03 |
| ENSG00000157965 | SSX8P       | X  | 52622935  | 52633948  | 11013  | transcribed processed_pseudogene | -2.18 | 4.49E-04 | 5.43E-03 |
| ENSG00000253219 | KRT18P41    | 5  | 170140664 | 170141940 | 1276   | processed_pseudogene             | -2.18 | 2.80E-03 | 1.88E-02 |
| ENSG00000279221 | AC068254.2  | 18 | 69659837  | 69663413  | 3576   | TEC                              | -2.18 | 7.50E-03 | 3.68E-02 |
| ENSG00000234810 | AL603840.1  | 1  | 55329288  | 56070513  | 741225 | lncRNA                           | -2.18 | 5.16E-10 | 4.54E-07 |
| ENSG00000250185 | RCC2P8      | 4  | 108788745 | 108789779 | 1034   | processed_pseudogene             | -2.18 | 8.05E-03 | 3.85E-02 |
| ENSG00000080166 | DCT         | 13 | 94436811  | 94479682  | 42871  | protein coding                   | -2.18 | 9.18E-09 | 3.44E-06 |
| ENSG00000104760 | FGL1        | 8  | 17864380  | 17910365  | 45985  | protein coding                   | -2.18 | 1.74E-04 | 2.88E-03 |
| ENSG00000237166 | LINC01792   | 2  | 200711535 | 200735186 | 23651  | lncRNA                           | -2.18 | 6.27E-05 | 1.43E-03 |
| ENSG00000287324 | AL096828.6  | 20 | 63116218  | 63117205  | 987    | lncRNA                           | -2.18 | 5.90E-03 | 3.13E-02 |
| ENSG00000226440 | LAMA4-AS1   | 6  | 112236093 | 112307009 | 70916  | lncRNA-antisense                 | -2.18 | 6.71E-04 | 7.09E-03 |
| ENSG00000214814 | FERT1L6     | 8  | 123851987 | 124120061 | 268074 | protein coding                   | -2.18 | 7.51E-07 | 7.13E-05 |
| ENSG00000186198 | SLS1B       | 15 | 65045387  | 65053397  | 8010   | protein coding                   | -2.18 | 2.96E-03 | 1.96E-02 |
| ENSG00000257474 | AC027288.1  | 12 | 79540203  | 79550535  | 10332  | lncRNA                           | -2.18 | 6.78E-03 | 3.44E-02 |
| ENSG00000179363 | TMEM31      | X  | 103710909 | 103714032 | 3123   | protein coding                   | -2.18 | 2.51E-03 | 1.75E-02 |
| ENSG00000286986 | AC026736.1  | 5  | 5688805   | 5694742   | 5937   | lncRNA                           | -2.18 | 7.27E-03 | 3.60E-02 |
| ENSG00000172324 | OR5A2       | 11 | 59416969  | 59426412  | 9443   | protein coding                   | -2.18 | 1.07E-04 | 2.06E-03 |
| ENSG00000112761 | C6orf102    | 6  | 112054075 | 112069686 | 15611  | protein coding                   | -2.18 | 5.29E-04 | 6.05E-03 |
| ENSG00000244681 | MTHFD2P1    | 3  | 95654423  | 95683193  | 28770  | transcribed processed_pseudogene | -2.18 | 1.29E-03 | 1.10E-02 |
| ENSG00000269707 | AC018730.1  | 2  | 104853285 | 104927722 | 74437  | lncRNA-sense overlapping         | -2.18 | 4.92E-04 | 5.76E-03 |
| ENSG00000286601 | AC007563.3  | 2  | 216821077 | 216831910 | 10833  | lncRNA                           | -2.18 | 6.74E-03 | 3.42E-02 |
| ENSG00000255136 | AP001972.3  | 11 | 75206048  | 75241173  | 35125  | lncRNA                           | -2.18 | 5.94E-05 | 1.38E-03 |
| ENSG00000287864 | AP000345.3  | 22 | 23510154  | 23512662  | 2508   | lncRNA                           | -2.18 | 7.52E-03 | 3.68E-02 |
| ENSG00000239722 | IMP3P2      | 7  | 128693450 | 128693924 | 474    | processed_pseudogene             | -2.19 | 4.76E-03 | 2.71E-02 |
| ENSG00000285996 | AC006116.9  | 19 | 56380230  | 56383924  | 3694   | lncRNA-antisense                 | -2.19 | 3.41E-08 | 8.61E-06 |
| ENSG00000274363 | AC087742.1  | 17 | 4267691   | 4268430   | 739    | lncRNA                           | -2.19 | 7.45E-03 | 3.66E-02 |
| ENSG00000253445 | AC027309.1  | 5  | 172690454 | 172697120 | 7266   | lncRNA-antisense                 | -2.19 | 1.77E-02 | 4.99E-02 |
| ENSG00000255000 | AC139103.1  | 8  | 145047860 | 145048889 | 1029   | processed_pseudogene             | -2.19 | 8.56E-03 | 4.01E-02 |
| ENSG00000215023 | AC131097.1  | 2  | 241800916 | 241801907 | 991    | lncRNA-antisense                 | -2.19 | 4.54E-03 | 2.62E-02 |
| ENSG00000237524 | TEX51       | 2  | 126898664 | 126902097 | 3233   | protein coding                   | -2.19 | 1.83E-03 | 1.40E-02 |
| ENSG00000255808 | PDE2A-AS1   | 11 | 72643237  | 72659407  | 16170  | lncRNA-antisense                 | -2.19 | 4.27E-04 | 5.23E-03 |
| ENSG00000260896 | ARLNC1      | 16 | 80826074  | 80892682  | 66608  | lncRNA                           | -2.19 | 1.14E-06 | 9.33E-05 |
| ENSG00000228528 | AC068057.1  | 2  | 104702650 | 104705813 | 3163   | lncRNA                           | -2.19 | 2.14E-03 | 1.57E-02 |
| ENSG00000260551 | PWRN2       | 15 | 24162754  | 24169948  | 7194   | lncRNA                           | -2.19 | 4.53E-04 | 5.45E-03 |
| ENSG00000110245 | APOC3       | 11 | 116829706 | 116833072 | 3366   | protein coding                   | -2.19 | 6.01E-04 | 6.60E-03 |
| ENSG00000229676 | ZNF492      | 19 | 22634324  | 22667671  | 33347  | protein coding                   | -2.19 | 2.33E-07 | 3.27E-05 |
| ENSG00000286661 | AC02933.2   | 3  | 196598549 | 196609410 | 10861  | lncRNA                           | -2.19 | 4.13E-05 | 1.07E-03 |
| ENSG00000189023 | MAGEB16     | X  | 35798342  | 35803735  | 5393   | protein coding                   | -2.19 | 3.03E-03 | 1.99E-02 |
| ENSG00000286135 | AL603764.2  | 10 | 122672850 | 122679494 | 6644   | protein coding                   | -2.19 | 6.82E-03 | 3.45E-02 |
| ENSG00000182963 | GJC1        | 17 | 44798448  | 44830816  | 32368  | protein coding                   | -2.19 | 3.16E-06 | 1.90E-04 |
| ENSG00000237423 | LINC01522   | 20 | 47976739  | 47990127  | 13388  | lncRNA                           | -2.19 | 2.55E-05 | 7.67E-04 |
| ENSG00000233260 | RPSAP63     | X  | 133762796 | 133763683 | 887    | processed_pseudogene             | -2.19 | 9.35E-03 | 4.26E-02 |
| ENSG00000237979 | DNAJB12P1   | 2  | 65500993  | 65502138  | 1145   | processed_pseudogene             | -2.19 | 3.29E-03 | 2.10E-02 |
| ENSG00000180723 | OR51A9P     | 11 | 4660853   | 4661763   | 910    | unitary_pseudogene               | -2.19 | 9.48E-03 | 4.30E-02 |
| ENSG00000231933 | MYO18B-AS1  | 22 | 25876854  | 25903247  | 26393  | lncRNA-antisense                 | -2.19 | 5.31E-06 | 2.69E-04 |
| ENSG00000277544 | AC104073.3  | 7  | 65290429  | 65292776  | 2347   | unprocessed_pseudogene           | -2.19 | 4.12E-03 | 2.45E-02 |
| ENSG00000169393 | ELSPBP1     | 19 | 47994632  | 48025154  | 30522  | protein coding                   | -2.19 | 7.40E-03 | 3.64E-02 |
| ENSG00000260072 | AC008938.1  | 16 | 24472798  | 24495177  | 22379  | lncRNA                           | -2.19 | 3.86E-07 | 4.52E-05 |
| ENSG00000188467 | SLC24A5     | 15 | 48120990  | 48142672  | 21682  | protein coding                   | -2.19 | 4.84E-07 | 5.28E-05 |
| ENSG00000259218 | LINC00928   | 15 | 89504909  | 89524049  | 19140  | lncRNA                           | -2.19 | 3.44E-04 | 4.53E-03 |
| ENSG00000282419 | TEX13D      | X  | 124246249 | 124336863 | 90614  | protein coding                   | -2.19 | 9.01E-05 | 1.83E-03 |
| ENSG00000213514 | AL731556.1  | 10 | 77730766  | 77734769  | 4003   | processed_pseudogene             | -2.19 | 1.14E-04 | 2.15E-03 |
| ENSG00000217060 | AL135903.1  | 6  | 85286076  | 85290849  | 4773   | unprocessed_pseudogene           | -2.19 | 2.04E-03 | 1.52E-02 |
| ENSG00000254417 | LINC02584   | 11 | 70072434  | 70075433  | 2999   | lncRNA-antisense                 | -2.19 | 2.99E-03 | 1.97E-02 |
| ENSG00000118434 | SPACA1      | 6  | 88047841  | 88066838  | 18997  | protein coding                   | -2.19 | 8.51E-04 | 8.35E-03 |
| ENSG00000215277 | RNF212B     | 14 | 23185316  | 23273477  | 88161  | protein coding                   | -2.20 | 1.90E-05 | 6.35E-04 |
| ENSG00000235759 | ARHGAP42P3  | 22 | 15550904  | 15553838  | 2934   | processed_pseudogene             | -2.20 | 5.93E-03 | 3.14E-02 |
| ENSG00000253302 | STAU2-AS1   | 8  | 73420004  | 73441526  | 21522  | lncRNA-antisense                 | -2.20 | 1.23E-04 | 2.26E-03 |

|                 |             |    |           |           |        |                                    |       |          |          |
|-----------------|-------------|----|-----------|-----------|--------|------------------------------------|-------|----------|----------|
| ENSG00000261708 | DNM1P32     | 15 | 32436503  | 32439767  | 3264   | unprocessed_pseudogene             | -2.20 | 6.91E-03 | 3.48E-02 |
| ENSG00000254467 | AP002765.1  | 11 | 123668499 | 123675569 | 7070   | lncRNA                             | -2.20 | 1.78E-04 | 2.93E-03 |
| ENSG00000137745 | MMP13       | 11 | 102942995 | 102955732 | 12737  | protein_coding                     | -2.20 | 9.01E-05 | 1.83E-03 |
| ENSG00000250148 | KRT8P31     | 5  | 60743563  | 60744970  | 1407   | processed_pseudogene               | -2.20 | 1.34E-03 | 1.13E-02 |
| ENSG00000275805 | AC090206.1  | 18 | 26565723  | 26575626  | 9903   | lncRNA-sense_intronic              | -2.20 | 3.01E-04 | 4.16E-03 |
| ENSG00000255236 | AP002992.1  | 11 | 68121624  | 68130518  | 8894   | lncRNA-antisense                   | -2.20 | 1.20E-03 | 1.06E-02 |
| ENSG00000113722 | CDX1        | 5  | 150166778 | 150184558 | 17780  | protein_coding                     | -2.20 | 1.28E-04 | 2.33E-03 |
| ENSG00000237174 | AL445465.1  | 6  | 75357214  | 75399300  | 42086  | lncRNA-antisense                   | -2.20 | 1.78E-03 | 1.38E-02 |
| ENSG00000145321 | GC          | 4  | 71741696  | 71804041  | 62345  | protein_coding                     | -2.20 | 4.17E-04 | 5.16E-03 |
| ENSG00000260832 | AC125793.1  | 16 | 82953230  | 82990298  | 37068  | lncRNA-antisense                   | -2.20 | 3.72E-03 | 2.28E-02 |
| ENSG00000253868 | FER1L6-AS2  | 8  | 124044395 | 124171522 | 127127 | lncRNA-antisense                   | -2.20 | 5.48E-05 | 1.30E-03 |
| ENSG00000237704 | AP004289.2  | 8  | 99340305  | 99341761  | 1456   | processed_pseudogene               | -2.20 | 9.80E-05 | 1.95E-03 |
| ENSG00000230461 | PROX1-AS1   | 1  | 213817751 | 213988508 | 170757 | lncRNA                             | -2.20 | 2.80E-07 | 3.63E-05 |
| ENSG00000254605 | AP003555.1  | 11 | 70014858  | 70021059  | 6201   | lncRNA                             | -2.20 | 9.02E-04 | 8.68E-03 |
| ENSG00000182261 | NLRP10      | 11 | 7957537   | 7965426   | 7889   | protein_coding                     | -2.20 | 2.25E-05 | 7.06E-04 |
| ENSG00000169347 | GP2         | 16 | 20309574  | 20327808  | 18234  | protein_coding                     | -2.20 | 2.99E-06 | 1.82E-04 |
| ENSG00000142615 | CELA2A      | 1  | 15456728  | 15472091  | 15363  | protein_coding                     | -2.20 | 8.48E-04 | 8.33E-03 |
| ENSG00000170426 | SDR9C7      | 12 | 56923133  | 56934408  | 11275  | protein_coding                     | -2.20 | 3.04E-03 | 1.99E-02 |
| ENSG00000259818 | AL606760.3  | 1  | 53220663  | 53224253  | 3590   | lncRNA-antisense                   | -2.20 | 8.18E-05 | 1.72E-03 |
| ENSG00000279368 | AL031123.3  | 6  | 6685148   | 6686984   | 1836   | TEC                                | -2.20 | 2.69E-03 | 1.84E-02 |
| ENSG00000132464 | ENAM        | 4  | 70628744  | 70646824  | 18080  | protein_coding                     | -2.20 | 3.40E-04 | 4.50E-03 |
| ENSG00000237746 | ZNF101P1    | 10 | 28338554  | 28340942  | 2388   | processed_pseudogene               | -2.20 | 3.01E-03 | 1.98E-02 |
| ENSG00000258550 | OR7E106P    | 14 | 51763056  | 51764076  | 1020   | unprocessed_pseudogene             | -2.20 | 7.75E-03 | 3.75E-02 |
| ENSG00000232913 | PLCE1-AS2   | 10 | 94081950  | 94108814  | 28864  | lncRNA-antisense                   | -2.20 | 1.39E-04 | 2.45E-03 |
| ENSG00000162771 | FAM71A      | 1  | 212624474 | 212626775 | 2301   | protein_coding                     | -2.20 | 2.46E-04 | 3.65E-03 |
| ENSG00000285856 | AL353704.1  | 13 | 111148196 | 111153171 | 4975   | lncRNA-antisense                   | -2.20 | 2.93E-03 | 1.95E-02 |
| ENSG00000188488 | SERPINA5    | 14 | 94561442  | 94593118  | 31676  | protein_coding                     | -2.20 | 4.41E-06 | 2.37E-04 |
| ENSG00000243349 | AL358394.2  | 10 | 45147394  | 45171389  | 23995  | lncRNA                             | -2.20 | 3.59E-04 | 4.65E-03 |
| ENSG00000253925 | AC011369.1  | 5  | 168085329 | 168187719 | 102390 | lncRNA-antisense                   | -2.21 | 2.66E-03 | 1.82E-02 |
| ENSG00000250501 | AC093766.1  | 4  | 138773537 | 138803567 | 30030  | lncRNA                             | -2.21 | 3.06E-04 | 4.21E-03 |
| ENSG00000259153 | AC004816.1  | 14 | 70809841  | 70815994  | 6153   | lncRNA                             | -2.21 | 2.10E-04 | 3.27E-03 |
| ENSG00000258342 | AL133304.3  | 14 | 35897936  | 36068261  | 170325 | lncRNA-sense_overlapping           | -2.21 | 2.10E-04 | 3.27E-03 |
| ENSG00000205414 | AC007608.1  | 16 | 50606076  | 50613684  | 7608   | lncRNA-antisense                   | -2.21 | 4.90E-04 | 5.74E-03 |
| ENSG00000226741 | LINC02554   | 22 | 27307777  | 27318501  | 10724  | lncRNA                             | -2.21 | 9.70E-07 | 8.33E-05 |
| ENSG00000280306 | AC137056.2  | 16 | 20487702  | 20489659  | 1957   | TEC                                | -2.21 | 2.38E-03 | 1.69E-02 |
| ENSG00000280415 | AC005252.3  | 12 | 125858862 | 125861119 | 2257   | TEC                                | -2.21 | 3.25E-03 | 2.08E-02 |
| ENSG00000284739 | BX005132.1  | 1  | 4963954   | 4973298   | 9344   | lncRNA                             | -2.21 | 4.97E-03 | 2.79E-02 |
| ENSG00000233515 | LINC01518   | 10 | 42644445  | 42691223  | 47278  | lncRNA                             | -2.21 | 2.23E-05 | 7.01E-04 |
| ENSG00000213312 | RPL7AP34    | 6  | 63548708  | 63549508  | 800    | processed_pseudogene               | -2.21 | 7.07E-03 | 3.53E-02 |
| ENSG00000226965 | AC073114.1  | 7  | 110108031 | 110534757 | 426726 | lncRNA                             | -2.21 | 7.62E-03 | 3.71E-02 |
| ENSG00000162706 | CADM3       | 1  | 159171609 | 159203313 | 31704  | protein_coding                     | -2.21 | 2.42E-05 | 7.44E-04 |
| ENSG00000175121 | WFDC5       | 20 | 45109452  | 45115172  | 5720   | protein_coding                     | -2.21 | 6.48E-05 | 1.47E-03 |
| ENSG00000235343 | LINC01665   | 22 | 16746628  | 16748645  | 2017   | lncRNA                             | -2.21 | 1.21E-03 | 1.05E-02 |
| ENSG00000254702 | AP002353.1  | 11 | 107736009 | 107738718 | 2709   | processed_pseudogene               | -2.21 | 5.02E-03 | 2.81E-02 |
| ENSG00000136872 | ALDOB       | 9  | 101420560 | 101449664 | 29104  | protein_coding                     | -2.21 | 1.00E-04 | 1.98E-03 |
| ENSG00000270929 | SRD5A3P1    | 11 | 59898185  | 59899133  | 948    | processed_pseudogene               | -2.21 | 6.60E-03 | 3.38E-02 |
| ENSG00000187054 | TMPPRSS11A  | 4  | 67909395  | 67964140  | 54745  | protein_coding                     | -2.21 | 7.16E-05 | 1.58E-03 |
| ENSG00000250819 | LINC02493   | 4  | 17171757  | 17186079  | 14322  | lncRNA                             | -2.21 | 7.66E-04 | 7.79E-03 |
| ENSG00000260926 | NC016134.1  | 15 | 41609457  | 41630908  | 21451  | lncRNA                             | -2.21 | 1.73E-03 | 1.35E-02 |
| ENSG00000158077 | NLRP14      | 11 | 7020479   | 7071526   | 51047  | protein_coding                     | -2.21 | 7.53E-06 | 3.43E-04 |
| ENSG00000225365 | AC078942.1  | 7  | 158537495 | 158539879 | 2384   | lncRNA-antisense                   | -2.21 | 3.31E-03 | 2.11E-02 |
| ENSG00000218672 | AC080860.1  | 7  | 155382076 | 155396356 | 14280  | lncRNA                             | -2.21 | 1.73E-04 | 2.87E-03 |
| ENSG00000279674 | AC123769.1  | 17 | 34000789  | 34006772  | 5983   | TEC                                | -2.21 | 1.52E-05 | 5.52E-04 |
| ENSG00000231605 | LINC01363   | 1  | 167175363 | 167195792 | 20429  | lncRNA-antisense                   | -2.22 | 1.25E-03 | 1.08E-02 |
| ENSG00000260151 | LINC02673   | 10 | 27343436  | 27344917  | 1481   | lncRNA                             | -2.22 | 5.02E-03 | 2.81E-02 |
| ENSG00000287415 | AC099541.2  | 3  | 40869548  | 40875980  | 6432   | lncRNA                             | -2.22 | 1.43E-03 | 1.19E-02 |
| ENSG00000254237 | AC021242.2  | 8  | 9367898   | 9436205   | 68307  | lncRNA                             | -2.22 | 6.69E-05 | 1.50E-03 |
| ENSG00000215853 | RPTN        | 1  | 152153595 | 152159228 | 5633   | protein_coding                     | -2.22 | 2.95E-04 | 4.10E-03 |
| ENSG00000232900 | AL050403.1  | 20 | 10875333  | 10909279  | 33946  | lncRNA                             | -2.22 | 3.24E-04 | 4.37E-03 |
| ENSG00000188770 | OPTC        | 1  | 203494153 | 203508949 | 14796  | protein_coding                     | -2.22 | 1.47E-03 | 1.21E-02 |
| ENSG00000237767 | LINC01370   | 20 | 40004216  | 40011323  | 7107   | lncRNA                             | -2.22 | 3.75E-05 | 1.00E-03 |
| ENSG00000215372 | ZNF705G     | 8  | 7355517   | 7385558   | 30041  | protein_coding                     | -2.22 | 3.06E-05 | 8.68E-04 |
| ENSG00000223460 | GAPDHFP9    | 13 | 29306778  | 29307785  | 1007   | processed_pseudogene               | -2.22 | 8.58E-04 | 8.39E-03 |
| ENSG00000228480 | AC130464.1  | 16 | 26354796  | 26358355  | 3559   | unprocessed_pseudogene             | -2.22 | 7.10E-04 | 7.39E-03 |
| ENSG00000204480 | PRAMEF19    | 1  | 13369067  | 13371900  | 2833   | protein_coding                     | -2.22 | 2.96E-04 | 4.12E-03 |
| ENSG00000272815 | AC098850.4  | 17 | 16788057  | 16816540  | 28483  | lncRNA                             | -2.22 | 3.22E-04 | 4.33E-03 |
| ENSG00000181767 | OR8H2       | 11 | 56103687  | 56107658  | 3971   | protein_coding                     | -2.22 | 1.13E-02 | 4.85E-02 |
| ENSG00000125815 | CST8        | 20 | 23491101  | 23496010  | 4909   | protein_coding                     | -2.22 | 2.08E-03 | 1.54E-02 |
| ENSG00000223492 | AL391097.1  | 20 | 53168643  | 53179550  | 10907  | lncRNA-antisense                   | -2.22 | 2.24E-03 | 1.62E-02 |
| ENSG00000232936 | AL157400.2  | 10 | 89645272  | 89652144  | 6872   | lncRNA-antisense                   | -2.22 | 8.88E-04 | 8.59E-03 |
| ENSG00000259555 | AC067863.1  | 15 | 78625895  | 78628193  | 2298   | lncRNA-antisense                   | -2.22 | 1.34E-03 | 1.13E-02 |
| ENSG00000249706 | AC105384.1  | 4  | 53899871  | 53916835  | 16964  | lncRNA-sense_intronic              | -2.22 | 8.22E-03 | 3.90E-02 |
| ENSG00000227538 | HNRNPFP1    | 1  | 42040597  | 42041729  | 1132   | processed_pseudogene               | -2.22 | 1.08E-03 | 9.79E-03 |
| ENSG00000234967 | AL357558.2  | 20 | 47950797  | 47954808  | 4011   | lncRNA                             | -2.22 | 2.40E-04 | 3.60E-03 |
| ENSG00000286092 | AC117503.5  | 12 | 123713408 | 123723169 | 9761   | lncRNA-antisense                   | -2.22 | 3.35E-03 | 2.13E-02 |
| ENSG00000237605 | DYRK3-AS1   | 1  | 206634196 | 206635714 | 1518   | lncRNA-antisense                   | -2.22 | 1.05E-02 | 4.62E-02 |
| ENSG00000268460 | AC006262.1  | 19 | 46201552  | 46214838  | 13286  | lncRNA                             | -2.22 | 1.18E-05 | 4.65E-04 |
| ENSG00000249509 | NEUROG2-AS1 | 4  | 112515385 | 112546881 | 31496  | lncRNA-antisense                   | -2.22 | 2.07E-03 | 1.53E-02 |
| ENSG00000253642 | AF279873.3  | 8  | 33604856  | 34039104  | 43428  | lncRNA                             | -2.22 | 2.11E-04 | 3.28E-03 |
| ENSG00000260202 | AL109954.1  | 20 | 23481645  | 23519054  | 37409  | lncRNA                             | -2.22 | 7.48E-04 | 7.66E-03 |
| ENSG00000283568 | 5 S rRNA    | 20 | 29297095  | 29297246  | 151    | rRNA                               | -2.22 | 1.13E-02 | 4.84E-02 |
| ENSG00000254661 | LINC02682   | 11 | 15910528  | 15930951  | 20423  | lncRNA                             | -2.22 | 8.85E-05 | 1.81E-03 |
| ENSG00000221836 | OR2A5       | 7  | 144048948 | 144058845 | 9897   | protein_coding                     | -2.22 | 1.84E-06 | 1.34E-04 |
| ENSG00000235269 | LINC02331   | 14 | 53685139  | 53850882  | 165743 | lncRNA                             | -2.23 | 1.06E-02 | 4.66E-02 |
| ENSG00000262313 | AC127496.3  | 17 | 80940418  | 80942033  | 1615   | lncRNA-antisense                   | -2.23 | 1.12E-04 | 2.12E-03 |
| ENSG0000018607  | ZNF806      | 2  | 132304806 | 132326855 | 22049  | transcribed_unprocessed_pseudogene | -2.23 | 4.95E-06 | 2.57E-04 |
| ENSG00000232451 | AC018467.1  | 2  | 23018125  | 23199056  | 180931 | lncRNA                             | -2.23 | 5.99E-05 | 1.38E-03 |
| ENSG00000213365 | AP000593.1  | 11 | 72280151  | 72281178  | 1027   | processed_pseudogene               | -2.23 | 3.79E-03 | 2.31E-02 |
| ENSG00000255027 | AP000842.2  | 11 | 125903247 | 125938916 | 35669  | lncRNA-antisense                   | -2.23 | 1.01E-02 | 4.49E-02 |
| ENSG00000267879 | AC011483.1  | 19 | 50968193  | 51012129  | 43936  | lncRNA-antisense                   | -2.23 | 1.01E-03 | 9.36E-03 |



|                 |            |    |           |           |        |                                    |       |          |          |
|-----------------|------------|----|-----------|-----------|--------|------------------------------------|-------|----------|----------|
| ENSG00000261592 | AC010531.3 | 16 | 87396704  | 87400295  | 3591   | lncRNA-antisense                   | -2.23 | 1.85E-03 | 1.42E-02 |
| ENSG00000184571 | PIWIL3     | 22 | 24719034  | 24774720  | 55686  | protein coding                     | -2.23 | 5.92E-07 | 6.10E-05 |
| ENSG00000226921 | LINC00454  | 13 | 113878489 | 113883651 | 5162   | lncRNA                             | -2.23 | 2.13E-05 | 6.79E-04 |
| ENSG00000214546 | AC087491.1 | 17 | 39619613  | 39622770  | 3157   | lncRNA                             | -2.23 | 3.31E-03 | 2.11E-02 |
| ENSG00000259464 | SNRPCP18   | 15 | 101562536 | 101562974 | 438    | processed pseudogene               | -2.23 | 6.69E-03 | 3.41E-02 |
| ENSG0000066813  | ACSM2B     | 16 | 20536226  | 20576427  | 40201  | protein coding                     | -2.23 | 4.79E-06 | 2.51E-04 |
| ENSG00000251423 | AC016576.1 | 5  | 13860303  | 13901036  | 40733  | lncRNA-antisense                   | -2.23 | 5.58E-04 | 6.26E-03 |
| ENSG00000224568 | LINC01886  | 2  | 107529292 | 107556499 | 27207  | lncRNA                             | -2.23 | 6.64E-03 | 3.39E-02 |
| ENSG00000285769 | AP003100.2 | 11 | 112637342 | 112751131 | 113789 | lncRNA                             | -2.23 | 1.00E-07 | 1.73E-05 |
| ENSG00000228407 | AL139156.2 | 1  | 52160261  | 52160600  | 339    | processed pseudogene               | -2.23 | 7.93E-03 | 3.81E-02 |
| ENSG00000158516 | CPA2       | 7  | 130266863 | 130289798 | 22935  | protein coding                     | -2.23 | 2.49E-05 | 7.56E-04 |
| ENSG00000248461 | LINC02119  | 5  | 38025568  | 38184717  | 159149 | lncRNA                             | -2.23 | 4.05E-04 | 5.07E-03 |
| ENSG00000213727 | AP000533.1 | 22 | 15572089  | 15573265  | 1176   | processed pseudogene               | -2.23 | 9.91E-03 | 4.44E-02 |
| ENSG00000108947 | EFNB3      | 17 | 7705202   | 7711372   | 6170   | protein coding                     | -2.23 | 1.11E-04 | 2.10E-03 |
| ENSG00000115598 | IL1RL2     | 2  | 102187006 | 102240002 | 52996  | protein coding                     | -2.24 | 1.73E-05 | 5.93E-04 |
| ENSG00000282998 | AC009975.2 | 2  | 49202126  | 49451896  | 249770 | lncRNA                             | -2.24 | 3.44E-03 | 2.17E-02 |
| ENSG00000279606 | AC006600.2 | 17 | 56471142  | 56473647  | 2505   | TEC                                | -2.24 | 2.82E-03 | 1.89E-02 |
| ENSG00000214796 | TUBA5P     | 1  | 202851828 | 202861620 | 9792   | transcribed unprocessed pseudogene | -2.24 | 1.07E-04 | 2.06E-03 |
| ENSG00000258278 | CLUHP8     | 12 | 38082046  | 38087392  | 5346   | unprocessed pseudogene             | -2.24 | 2.63E-03 | 1.81E-02 |
| ENSG00000170054 | SERPINA9   | 14 | 94462717  | 94479689  | 16972  | protein coding                     | -2.24 | 3.96E-04 | 4.75E-03 |
| ENSG00000249003 | CLUHP4     | 4  | 190057902 | 190063005 | 5103   | unprocessed pseudogene             | -2.24 | 3.40E-03 | 2.15E-02 |
| ENSG00000227519 | AL008719.1 | 22 | 31963357  | 31970400  | 7043   | lncRNA                             | -2.24 | 4.17E-03 | 2.47E-02 |
| ENSG00000175018 | TEX36      | 10 | 125576522 | 125683163 | 106641 | protein coding                     | -2.24 | 6.97E-04 | 7.28E-03 |
| ENSG00000213383 | AC104297.1 | 3  | 17871729  | 17872598  | 869    | processed pseudogene               | -2.24 | 1.71E-03 | 1.34E-02 |
| ENSG00000279200 | AC020558.5 | 17 | 17616043  | 17617745  | 1702   | TEC                                | -2.24 | 2.14E-04 | 3.31E-03 |
| ENSG00000262147 | AC124283.2 | 17 | 82587313  | 82588411  | 1098   | lncRNA-antisense                   | -2.24 | 1.10E-02 | 4.78E-02 |
| ENSG00000237212 | AL449403.1 | 9  | 96065740  | 96101912  | 36172  | lncRNA                             | -2.24 | 3.48E-06 | 2.01E-04 |
| ENSG00000253421 | ZNHIT1P1   | 8  | 142858354 | 142858797 | 443    | processed pseudogene               | -2.24 | 1.27E-03 | 1.09E-02 |
| ENSG00000135669 | TAAR5      | 6  | 132588673 | 132589666 | 1013   | protein coding                     | -2.24 | 7.90E-03 | 3.80E-02 |
| ENSG00000282381 | AC104073.4 | 7  | 65269374  | 65306238  | 36864  | lncRNA                             | -2.24 | 9.95E-03 | 4.46E-02 |
| ENSG00000174339 | OR2Y1      | 5  | 180739042 | 180740099 | 1057   | protein coding                     | -2.24 | 3.39E-03 | 2.15E-02 |
| ENSG00000204501 | PRAMEF15   | 1  | 13315581  | 13322598  | 7017   | protein coding                     | -2.24 | 6.54E-04 | 6.99E-03 |
| ENSG00000287096 | AC005165.3 | 7  | 25750890  | 25756256  | 5366   | lncRNA                             | -2.24 | 1.87E-03 | 1.43E-02 |
| ENSG00000230978 | LINC00160  | 21 | 34723807  | 34737204  | 13397  | lncRNA                             | -2.24 | 4.25E-03 | 2.51E-02 |
| ENSG00000248103 | AC008443.2 | 5  | 181281375 | 181283652 | 2277   | lncRNA                             | -2.24 | 2.67E-04 | 3.86E-03 |
| ENSG00000184459 | BP1FC      | 22 | 32413847  | 32464484  | 50637  | protein coding                     | -2.24 | 5.77E-05 | 1.35E-03 |
| ENSG00000234145 | NAP1L4P3   | 13 | 47763460  | 47764606  | 1146   | processed pseudogene               | -2.24 | 5.10E-05 | 1.24E-03 |
| ENSG00000283405 | AL121759.2 | 20 | 21089696  | 21092539  | 2843   | lncRNA                             | -2.24 | 7.26E-03 | 3.60E-02 |
| ENSG00000151379 | MSGN1      | 2  | 17816460  | 17817798  | 1338   | protein coding                     | -2.24 | 1.05E-02 | 4.63E-02 |
| ENSG00000171561 | QR2AT4     | 11 | 75081753  | 75096876  | 15123  | protein coding                     | -2.24 | 8.13E-07 | 7.55E-05 |
| ENSG00000214102 | WEE2       | 7  | 141708353 | 141731271 | 22918  | protein coding                     | -2.24 | 9.54E-05 | 1.92E-03 |
| ENSG00000278110 | SUSD2P2    | 22 | 18623339  | 18625289  | 1950   | unprocessed pseudogene             | -2.24 | 6.97E-03 | 3.50E-02 |
| ENSG00000203859 | HSD3B2     | 1  | 119414931 | 119423056 | 8104   | protein coding                     | -2.25 | 7.29E-04 | 7.53E-03 |
| ENSG00000172752 | COL6A5     | 3  | 130345516 | 130484844 | 139328 | protein coding                     | -2.25 | 1.25E-09 | 7.79E-07 |
| ENSG00000262772 | LINC01977  | 17 | 79819083  | 79827704  | 8621   | lncRNA                             | -2.25 | 3.03E-07 | 3.85E-05 |
| ENSG00000259769 | AC127381.1 | 15 | 20046296  | 20047994  | 1698   | processed pseudogene               | -2.25 | 1.09E-02 | 4.74E-02 |
| ENSG00000260564 | AL161912.2 | 9  | 79898901  | 79892007  | 3006   | lncRNA                             | -2.25 | 5.05E-03 | 2.82E-02 |
| ENSG00000153822 | KCNJ16     | 17 | 70053429  | 70135608  | 82179  | protein coding                     | -2.25 | 7.91E-06 | 3.55E-04 |
| ENSG00000234855 | SLIT1-AS1  | 10 | 97102756  | 97104355  | 1599   | lncRNA-antisense                   | -2.25 | 1.18E-03 | 1.03E-02 |
| ENSG00000286907 | AC123512.1 | 12 | 92008052  | 92022595  | 14543  | lncRNA                             | -2.25 | 6.88E-03 | 3.47E-02 |
| ENSG00000244176 | AP003733.1 | 11 | 62011751  | 62012602  | 851    | processed pseudogene               | -2.25 | 7.81E-03 | 3.78E-02 |
| ENSG00000137673 | MMP7       | 11 | 102520508 | 102530750 | 10242  | protein coding                     | -2.25 | 2.48E-03 | 1.74E-02 |
| ENSG00000073598 | FNDC8      | 17 | 35121615  | 35130732  | 9117   | protein coding                     | -2.25 | 6.53E-05 | 1.48E-03 |
| ENSG00000112214 | FHL5       | 6  | 96562548  | 96616636  | 54088  | protein coding                     | -2.25 | 2.20E-03 | 1.60E-02 |
| ENSG00000284631 | SCYGR4     | 2  | 227616998 | 227618655 | 1657   | protein coding                     | -2.25 | 1.97E-03 | 1.48E-02 |
| ENSG00000149507 | OOSP2      | 11 | 60040409  | 60048044  | 7635   | protein coding                     | -2.25 | 1.36E-03 | 1.14E-02 |
| ENSG00000260488 | AC007216.1 | 16 | 11976851  | 11977850  | 999    | lncRNA-antisense                   | -2.25 | 6.03E-03 | 3.18E-02 |
| ENSG00000227914 | AL136979.1 | 9  | 673478    | 685555    | 12077  | lncRNA-antisense                   | -2.25 | 1.52E-03 | 1.23E-02 |
| ENSG00000266114 | AC015908.4 | 17 | 10792059  | 10794985  | 2926   | lncRNA                             | -2.25 | 1.82E-03 | 1.40E-02 |
| ENSG00000183055 | FAM133CP   | 10 | 58715554  | 58716257  | 703    | processed pseudogene               | -2.25 | 5.65E-03 | 3.04E-02 |
| ENSG00000234962 | LINC00700  | 10 | 1989076   | 2015005   | 25929  | lncRNA                             | -2.25 | 8.95E-07 | 8.04E-05 |
| ENSG00000234693 | RIPOR3-AS1 | 20 | 50645471  | 50662275  | 16804  | lncRNA-antisense                   | -2.25 | 1.32E-04 | 2.37E-03 |
| ENSG00000284694 | AL355602.1 | 1  | 4479131   | 4484375   | 5244   | lncRNA                             | -2.26 | 2.20E-03 | 1.60E-02 |
| ENSG00000258535 | AL079307.1 | 14 | 51765276  | 51825422  | 60146  | lncRNA-sense overlapping           | -2.26 | 6.05E-06 | 2.93E-04 |
| ENSG00000180861 | LINC01559  | 12 | 13371089  | 13387167  | 16078  | lncRNA                             | -2.26 | 2.44E-04 | 3.63E-03 |
| ENSG00000175336 | APOF       | 12 | 56360568  | 56362857  | 2289   | protein coding                     | -2.26 | 4.25E-03 | 2.51E-02 |
| ENSG00000230500 | MKX-AS1    | 10 | 27744786  | 27767794  | 23008  | lncRNA-antisense                   | -2.26 | 4.16E-04 | 5.16E-03 |
| ENSG00000185681 | MORN5      | 9  | 122159908 | 122200088 | 40180  | protein coding                     | -2.26 | 1.91E-03 | 1.45E-02 |
| ENSG00000187569 | DPPA3      | 12 | 77114333  | 77175559  | 6126   | protein coding                     | -2.26 | 8.80E-03 | 4.09E-02 |
| ENSG00000241933 | DENND6A-DT | 3  | 57693205  | 57696596  | 3391   | lncRNA                             | -2.26 | 1.64E-05 | 5.73E-04 |
| ENSG00000132911 | NMUR2      | 5  | 152391546 | 152433368 | 41822  | protein coding                     | -2.26 | 1.25E-04 | 2.29E-03 |
| ENSG00000227838 | AL121885.2 | 22 | 27676559  | 27714970  | 38411  | lncRNA                             | -2.26 | 4.87E-03 | 2.76E-02 |
| ENSG00000278898 | AC087045.3 | 8  | 134764809 | 134767276 | 2467   | TEC                                | -2.26 | 3.38E-03 | 2.14E-02 |
| ENSG00000280073 | AL157996.1 | 14 | 69357010  | 69359308  | 2298   | TEC                                | -2.26 | 5.05E-05 | 1.23E-03 |
| ENSG00000288566 | AL451164.3 | 10 | 3200829   | 3210666   | 9837   | lncRNA                             | -2.26 | 6.93E-03 | 3.49E-02 |
| ENSG00000261738 | MIR3976HG  | 18 | 5721812   | 5876328   | 154516 | lncRNA                             | -2.26 | 3.05E-08 | 8.07E-06 |
| ENSG00000170953 | OR8B12     | 11 | 124539635 | 124545333 | 5698   | protein coding                     | -2.26 | 9.56E-04 | 9.04E-03 |
| ENSG00000237406 | NDUF9P1    | 22 | 35897270  | 35898404  | 1134   | processed pseudogene               | -2.26 | 4.99E-03 | 2.80E-02 |
| ENSG00000226097 | AC099342.1 | 7  | 20296637  | 20314512  | 17875  | lncRNA                             | -2.26 | 1.21E-03 | 1.06E-02 |
| ENSG00000250930 | LNK1-AS1   | 4  | 53496400  | 53549578  | 53178  | lncRNA-antisense                   | -2.26 | 1.38E-04 | 2.45E-03 |
| ENSG00000206145 | P2RX6P     | 22 | 21035243  | 21045017  | 9774   | transcribed unprocessed pseudogene | -2.26 | 9.84E-04 | 9.20E-03 |
| ENSG00000253557 | AC100849.1 | 8  | 19084992  | 19259469  | 174477 | lncRNA                             | -2.26 | 7.34E-04 | 7.56E-03 |
| ENSG00000236065 | AL020995.1 | 1  | 32987075  | 33032469  | 45394  | lncRNA-antisense                   | -2.26 | 1.69E-03 | 1.28E-02 |
| ENSG00000172497 | ACOT12     | 5  | 81329996  | 81394179  | 64183  | protein coding                     | -2.26 | 8.15E-06 | 3.61E-04 |
| ENSG00000233009 | NALCN-AS1  | 13 | 100708325 | 101059286 | 350961 | lncRNA-antisense                   | -2.26 | 1.63E-05 | 5.73E-04 |
| ENSG00000172421 | EFCAB3     | 17 | 62343941  | 62416480  | 72539  | protein coding                     | -2.26 | 6.32E-05 | 1.44E-03 |
| ENSG00000174898 | CATSPERD   | 19 | 5720637   | 5778734   | 58097  | protein coding                     | -2.26 | 1.28E-08 | 4.35E-06 |
| ENSG00000213979 | RPL7AP1A   | 20 | 37444733  | 37445534  | 801    | processed pseudogene               | -2.26 | 1.65E-03 | 1.31E-02 |
| ENSG00000221977 | OR4E2      | 14 | 21653835  | 21667642  | 13807  | protein coding                     | -2.26 | 2.00E-04 | 3.17E-03 |
| ENSG00000257918 | AC079385.3 | 12 | 106714924 | 106733066 | 18142  | lncRNA-antisense                   | -2.27 | 2.82E-03 | 1.90E-02 |

|                 |             |    |           |           |        |                                    |       |          |          |
|-----------------|-------------|----|-----------|-----------|--------|------------------------------------|-------|----------|----------|
| ENSG00000236908 | LINC02827   | 12 | 3318718   | 3325343   | 6625   | lncRNA                             | -2.27 | 1.38E-04 | 2.44E-03 |
| ENSG00000238192 | BX284856.2  | 22 | 48139461  | 48141001  | 1540   | lncRNA                             | -2.27 | 5.88E-03 | 3.12E-02 |
| ENSG00000286677 | AP006545.3  | 8  | 38082122  | 38092888  | 17166  | lncRNA                             | -2.27 | 9.11E-03 | 4.19E-02 |
| ENSG00000261190 | C16orf97    | 16 | 52005487  | 52078474  | 72987  | lncRNA                             | -2.27 | 3.36E-04 | 4.46E-03 |
| ENSG00000249807 | AC034229.1  | 5  | 10137138  | 10138365  | 1227   | lncRNA                             | -2.27 | 1.39E-03 | 1.16E-02 |
| ENSG00000227711 | AL451054.1  | 1  | 227509028 | 227510618 | 1590   | unprocessed pseudogene             | -2.27 | 2.75E-04 | 3.92E-03 |
| ENSG00000228559 | AL033519.4  | 6  | 35539838  | 35546573  | 6735   | lncRNA                             | -2.27 | 7.02E-03 | 3.52E-02 |
| ENSG00000262558 | AC129507.3  | 17 | 354737    | 356882    | 2145   | lncRNA-antisense                   | -2.27 | 1.64E-03 | 1.31E-02 |
| ENSG00000224404 | Z68323.1    | 22 | 34191194  | 34210564  | 19370  | lncRNA                             | -2.27 | 1.76E-05 | 6.02E-04 |
| ENSG00000249489 | GAPDHP70    | 11 | 88408179  | 88409223  | 1044   | processed pseudogene               | -2.27 | 5.14E-03 | 2.85E-02 |
| ENSG00000125997 | BP1FB9P     | 20 | 33347720  | 33354444  | 6724   | transcribed unitary pseudogene     | -2.27 | 1.48E-05 | 5.44E-04 |
| ENSG00000279314 | AC002525.1  | 13 | 31960325  | 31961946  | 1621   | TEC                                | -2.27 | 9.63E-04 | 9.07E-03 |
| ENSG00000275585 | AC241377.2  | 1  | 120985692 | 121052167 | 66475  | transcribed unprocessed pseudogene | -2.27 | 1.28E-03 | 1.10E-02 |
| ENSG00000233756 | DSCAM-IT1   | 21 | 40615378  | 40630767  | 15389  | lncRNA-sense intronic              | -2.27 | 1.66E-04 | 2.78E-03 |
| ENSG00000124678 | TCP11       | 6  | 35118071  | 35148610  | 30539  | protein coding                     | -2.27 | 2.79E-05 | 8.15E-04 |
| ENSG00000233492 | AL133325.2  | 20 | 21530122  | 21535665  | 5543   | lncRNA                             | -2.27 | 1.38E-03 | 1.15E-02 |
| ENSG00000264630 | PRKCA-AS1   | 17 | 66398069  | 66416854  | 18785  | lncRNA-antisense                   | -2.27 | 1.58E-05 | 5.64E-04 |
| ENSG00000267507 | AC010327.3  | 19 | 55119250  | 55120383  | 1133   | processed pseudogene               | -2.27 | 9.77E-03 | 4.39E-02 |
| ENSG00000283286 | AC093277.1  | 5  | 40415137  | 40431491  | 16354  | lncRNA                             | -2.27 | 3.99E-03 | 2.39E-02 |
| ENSG00000187969 | ZCCHC13     | X  | 74304180  | 74305034  | 854    | protein coding                     | -2.27 | 5.40E-03 | 2.95E-02 |
| ENSG00000232083 | RPL31P7     | 17 | 80602549  | 80602926  | 377    | processed pseudogene               | -2.27 | 3.78E-03 | 2.31E-02 |
| ENSG00000280177 | AC004408.2  | 17 | 39165073  | 39167849  | 2776   | TEC                                | -2.27 | 7.56E-06 | 3.44E-04 |
| ENSG00000198704 | GPX6        | 6  | 28503296  | 28528215  | 24919  | protein coding                     | -2.27 | 9.78E-04 | 9.17E-03 |
| ENSG00000224346 | BICD1P1     | 2  | 200844240 | 200845611 | 1221   | processed pseudogene               | -2.27 | 1.52E-03 | 1.24E-02 |
| ENSG00000225166 | AC012462.1  | 2  | 215453688 | 215486639 | 32951  | lncRNA                             | -2.27 | 3.88E-03 | 2.35E-02 |
| ENSG00000281920 | AC007389.3  | 2  | 85623272  | 85628424  | 5152   | lncRNA                             | -2.27 | 8.03E-03 | 3.84E-02 |
| ENSG00000128617 | OPN1SW      | 7  | 128772491 | 12877590  | 3299   | protein coding                     | -2.27 | 1.52E-03 | 1.23E-02 |
| ENSG00000233433 | AC006144.1  | X  | 121024964 | 121026563 | 1599   | processed pseudogene               | -2.28 | 2.62E-03 | 1.80E-02 |
| ENSG00000167139 | TBC1D21     | 15 | 73873564  | 73889214  | 15650  | protein coding                     | -2.28 | 9.39E-07 | 8.18E-05 |
| ENSG00000261848 | AC090282.1  | 17 | 3134969   | 3177031   | 42062  | lncRNA                             | -2.28 | 1.15E-03 | 1.02E-02 |
| ENSG00000265750 | AC090772.3  | 18 | 24159509  | 24162211  | 2702   | lncRNA                             | -2.28 | 2.84E-04 | 4.01E-03 |
| ENSG00000259821 | AC018845.1  | 16 | 47004513  | 47035385  | 30872  | lncRNA                             | -2.28 | 7.61E-03 | 3.71E-02 |
| ENSG00000170703 | TTL6        | 17 | 48762235  | 48817214  | 54979  | protein coding                     | -2.28 | 1.23E-08 | 4.24E-06 |
| ENSG00000152611 | CAPSL       | 5  | 35904288  | 35938779  | 34491  | protein coding                     | -2.28 | 5.11E-03 | 2.84E-02 |
| ENSG00000224116 | INHBA-AS1   | 7  | 41693864  | 41779388  | 85504  | lncRNA-antisense                   | -2.28 | 8.93E-08 | 1.60E-05 |
| ENSG00000175664 | TEX26       | 13 | 30932656  | 30975500  | 42844  | protein coding                     | -2.28 | 3.45E-04 | 4.54E-03 |
| ENSG00000171819 | ANGPTL7     | 1  | 11189355  | 11195981  | 6626   | protein coding                     | -2.28 | 8.80E-06 | 3.81E-04 |
| ENSG00000178586 | OR6B3       | 2  | 240045077 | 240047027 | 1950   | protein coding                     | -2.28 | 8.13E-04 | 8.12E-03 |
| ENSG00000262298 | AC004584.1  | 17 | 56939932  | 56941275  | 1343   | lncRNA-antisense                   | -2.28 | 1.44E-03 | 1.19E-02 |
| ENSG00000182824 | FAM230E     | 22 | 18733914  | 18757906  | 23992  | lncRNA                             | -2.28 | 1.23E-03 | 1.07E-02 |
| ENSG00000259175 | AC108451.1  | 15 | 80554609  | 80562944  | 8335   | lncRNA-antisense                   | -2.28 | 1.96E-04 | 3.12E-03 |
| ENSG00000144962 | SPATA16     | 3  | 172889357 | 173141235 | 251878 | protein coding                     | -2.28 | 4.14E-04 | 5.14E-03 |
| ENSG00000223728 | AC239801.1  | 1  | 147840962 | 147842359 | 1397   | processed pseudogene               | -2.28 | 1.79E-03 | 1.39E-02 |
| ENSG00000242515 | UGT1A10     | 2  | 233636454 | 233773305 | 136851 | protein coding                     | -2.28 | 4.81E-03 | 2.73E-02 |
| ENSG00000258171 | LINC02412   | 12 | 93173470  | 93182299  | 8829   | lncRNA                             | -2.28 | 1.07E-03 | 9.74E-03 |
| ENSG00000259724 | LINC01581   | 15 | 93905405  | 94107938  | 202533 | lncRNA                             | -2.28 | 9.69E-05 | 1.94E-03 |
| ENSG00000225055 | AL606490.1  | X  | 48357125  | 48359495  | 2370   | processed pseudogene               | -2.28 | 1.14E-02 | 4.89E-02 |
| ENSG00000147432 | CHRN3       | 8  | 42697366  | 42737407  | 40041  | protein coding                     | -2.28 | 1.57E-03 | 1.27E-02 |
| ENSG00000101349 | PAK5        | 20 | 9537370   | 9839076   | 301706 | protein coding                     | -2.28 | 6.05E-05 | 1.40E-03 |
| ENSG00000253100 | AC009623.1  | 8  | 25593197  | 25688786  | 95589  | lncRNA                             | -2.28 | 4.44E-06 | 2.38E-04 |
| ENSG00000213212 | NCLP1       | 9  | 136812788 | 136815536 | 2748   | processed pseudogene               | -2.28 | 1.51E-03 | 1.23E-02 |
| ENSG00000272692 | AC010997.4  | 10 | 75409142  | 75411842  | 2700   | lncRNA                             | -2.28 | 2.47E-05 | 7.52E-04 |
| ENSG00000256540 | AC007406.3  | 12 | 166856    | 182399    | 15543  | lncRNA                             | -2.28 | 6.43E-05 | 1.46E-03 |
| ENSG00000253688 | AC026904.2  | 8  | 48551527  | 48556441  | 4914   | lncRNA                             | -2.28 | 8.06E-04 | 8.07E-03 |
| ENSG00000228100 | LINC01820   | 2  | 46392291  | 46394228  | 1937   | lncRNA                             | -2.28 | 4.10E-03 | 2.44E-02 |
| ENSG00000224743 | TEX26-AS1   | 13 | 30881933  | 30833846  | 51913  | lncRNA-antisense                   | -2.28 | 2.57E-05 | 7.73E-04 |
| ENSG00000251038 | AC090958.1  | 3  | 11909634  | 11910765  | 1131   | unprocessed pseudogene             | -2.29 | 9.23E-03 | 4.22E-02 |
| ENSG00000249478 | AC010307.3  | 5  | 133243764 | 133248781 | 5017   | lncRNA-antisense                   | -2.29 | 8.03E-05 | 1.70E-03 |
| ENSG00000230375 | GSTA11P     | 6  | 52847910  | 52870329  | 22419  | unprocessed pseudogene             | -2.29 | 9.37E-04 | 8.91E-03 |
| ENSG00000225427 | LINC00331   | 13 | 78786272  | 78840051  | 53779  | lncRNA                             | -2.29 | 5.42E-04 | 6.13E-03 |
| ENSG00000163815 | CLEC3B      | 3  | 45001548  | 45036071  | 34523  | protein coding                     | -2.29 | 8.31E-04 | 8.24E-03 |
| ENSG00000236295 | AC007557.3  | 2  | 216870441 | 216873932 | 3491   | lncRNA                             | -2.29 | 9.84E-04 | 9.20E-03 |
| ENSG00000226926 | PDZPH1P     | 5  | 103430406 | 103526618 | 96212  | transcribed unitary pseudogene     | -2.29 | 1.02E-02 | 4.54E-02 |
| ENSG00000215110 | UGT2B25P    | 4  | 69389492  | 69402081  | 12589  | processed pseudogene               | -2.29 | 7.48E-03 | 3.67E-02 |
| ENSG00000273172 | LINC02091   | 17 | 183824    | 191587    | 7763   | lncRNA                             | -2.29 | 1.08E-03 | 9.79E-03 |
| ENSG00000287666 | AP000821.2  | 11 | 126121889 | 126128081 | 6192   | lncRNA                             | -2.29 | 6.49E-04 | 6.95E-03 |
| ENSG00000228689 | AL355997.1  | 6  | 51599723  | 51623428  | 23705  | lncRNA-antisense                   | -2.29 | 1.83E-03 | 1.41E-02 |
| ENSG00000145384 | FABP2       | 4  | 119317250 | 119322138 | 4888   | protein coding                     | -2.29 | 2.83E-03 | 1.90E-02 |
| ENSG00000260455 | NBAT1       | 6  | 22133205  | 22147193  | 13988  | lncRNA                             | -2.29 | 9.92E-04 | 9.26E-03 |
| ENSG00000233684 | LINC01865   | 2  | 317912    | 342118    | 24206  | lncRNA                             | -2.29 | 3.16E-04 | 4.29E-03 |
| ENSG00000184999 | SLC22A10    | 11 | 63137867  | 63369718  | 231851 | protein coding                     | -2.29 | 1.55E-05 | 5.60E-04 |
| ENSG00000286954 | AL033539.2  | 6  | 22663507  | 22675493  | 11986  | lncRNA                             | -2.29 | 2.51E-03 | 1.75E-02 |
| ENSG00000255021 | AC093496.1  | 3  | 14272373  | 14303845  | 31472  | lncRNA                             | -2.29 | 1.10E-02 | 4.76E-02 |
| ENSG00000236795 | CNTNAP2-AS1 | 7  | 147080934 | 147097609 | 16675  | lncRNA-antisense                   | -2.29 | 4.34E-03 | 2.54E-02 |
| ENSG00000287563 | AP006219.3  | 18 | 10406558  | 10422360  | 15802  | lncRNA                             | -2.29 | 1.03E-03 | 9.46E-03 |
| ENSG00000286191 | AL158195.1  | 13 | 50372788  | 50387158  | 14370  | lncRNA                             | -2.29 | 2.46E-03 | 1.72E-02 |
| ENSG00000252010 | SCARNA5     | 2  | 233275727 | 233276002 | 275    | scaRNA                             | -2.29 | 5.05E-07 | 5.39E-05 |
| ENSG00000286911 | AC009533.3  | 12 | 9347028   | 9350947   | 3919   | lncRNA                             | -2.29 | 4.40E-03 | 2.57E-02 |
| ENSG00000229853 | AL034418.1  | 20 | 47630266  | 47631438  | 1172   | processed pseudogene               | -2.29 | 2.33E-03 | 1.67E-02 |
| ENSG00000272866 | AL135786.2  | 9  | 5351796   | 53521010  | 614    | lncRNA                             | -2.29 | 1.00E-03 | 9.32E-03 |
| ENSG00000259361 | LINC00927   | 15 | 80263068  | 80341805  | 78737  | lncRNA                             | -2.29 | 9.38E-06 | 4.00E-04 |
| ENSG00000248973 | AC106799.2  | 5  | 4451930   | 4866311   | 414381 | lncRNA                             | -2.29 | 3.23E-05 | 8.97E-04 |
| ENSG00000167916 | KRT24       | 17 | 40697991  | 40703752  | 5761   | protein coding                     | -2.30 | 1.07E-04 | 2.06E-03 |
| ENSG00000233157 | Z97055.1    | 22 | 43759199  | 43759910  | 711    | processed pseudogene               | -2.30 | 2.80E-03 | 1.88E-02 |
| ENSG00000279324 | AL645730.1  | 1  | 49994318  | 49996218  | 1900   | TEC                                | -2.30 | 2.61E-03 | 1.80E-02 |
| ENSG00000263615 | MIR4306     | 13 | 99643059  | 99643149  | 90     | miRNA                              | -2.30 | 8.65E-03 | 4.04E-02 |
| ENSG00000235594 | AL139824.2  | 20 | 56267872  | 56269231  | 1359   | processed pseudogene               | -2.30 | 2.45E-03 | 1.72E-02 |
| ENSG00000248903 | AP000867.1  | 11 | 71568860  | 71568934  | 254    | processed pseudogene               | -2.30 | 4.50E-03 | 2.61E-02 |
| ENSG00000285520 | AL353586.1  | 10 | 12877459  | 12965275  | 87816  | lncRNA-antisense                   | -2.30 | 5.20E-06 | 2.66E-04 |
| ENSG00000230987 | AL359976.1  | 1  | 189989570 | 189993097 | 3527   | processed pseudogene               | -2.30 | 4.33E-03 | 2.54E-02 |

|                 |            |    |           |           |        |                                    |       |          |          |
|-----------------|------------|----|-----------|-----------|--------|------------------------------------|-------|----------|----------|
| ENSG00000229031 | MTCO1P25   | 7  | 69331835  | 69333633  | 1798   | unprocessed_pseudogene             | -2.30 | 3.32E-03 | 2.11E-02 |
| ENSG00000241832 | CERC3      | 22 | 17256859  | 17266733  | 9874   | lncRNA                             | -2.30 | 2.29E-03 | 1.64E-02 |
| ENSG00001802869 | GPR139     | 16 | 20028239  | 20073890  | 45651  | protein_coding                     | -2.30 | 1.96E-06 | 1.39E-04 |
| ENSG00000226140 | LINC02654  | 10 | 16276871  | 16295858  | 18987  | lncRNA                             | -2.30 | 9.28E-04 | 8.87E-03 |
| ENSG00000229637 | PRAC2      | 17 | 48723185  | 48724758  | 1573   | protein_coding                     | -2.30 | 1.07E-02 | 4.68E-02 |
| ENSG00000286770 | AC10082.1  | 15 | 68483202  | 68487149  | 3947   | lncRNA                             | -2.30 | 5.02E-04 | 5.82E-03 |
| ENSG00000179141 | MTUS2-AS1  | 13 | 29476515  | 29490105  | 13590  | lncRNA-antisense                   | -2.30 | 4.91E-06 | 2.55E-04 |
| ENSG00000280870 | MIR325HG   | X  | 76656866  | 77014532  | 357666 | lncRNA                             | -2.30 | 2.47E-04 | 3.66E-03 |
| ENSG00000235711 | ANKRD34C   | 15 | 79293285  | 79298235  | 4950   | protein_coding                     | -2.30 | 5.44E-05 | 1.30E-03 |
| ENSG00000228829 | AC005077.3 | 7  | 76173733  | 76177205  | 3472   | transcribed_unprocessed_pseudogene | -2.30 | 2.79E-03 | 1.88E-02 |
| ENSG00000227790 | SPECC1P1   | 17 | 15829369  | 15908632  | 79263  | transcribed_unprocessed_pseudogene | -2.30 | 4.76E-04 | 5.63E-03 |
| ENSG00000270111 | CELF2-DT   | 10 | 10369809  | 10462361  | 92552  | lncRNA                             | -2.30 | 1.83E-06 | 1.34E-04 |
| ENSG00000140465 | CYP1A1     | 15 | 74719542  | 74725536  | 5994   | protein_coding                     | -2.30 | 3.67E-04 | 4.73E-03 |
| ENSG00000244227 | LRRCL7P7   | 3  | 167864773 | 167924011 | 59238  | transcribed_unitary_pseudogene     | -2.31 | 4.14E-06 | 2.26E-04 |
| ENSG00000237728 | CAMTA1-AS2 | 1  | 7382487   | 7389754   | 7267   | lncRNA-antisense                   | -2.31 | 1.19E-04 | 2.21E-03 |
| ENSG00000264589 | MAPT-AS1   | 17 | 45799390  | 45895680  | 96290  | lncRNA-antisense                   | -2.31 | 3.91E-11 | 6.44E-08 |
| ENSG00000130957 | FBP2       | 9  | 94558720  | 94593824  | 35104  | protein_coding                     | -2.31 | 1.94E-04 | 3.10E-03 |
| ENSG00000175772 | LINC01106  | 2  | 110375138 | 110384442 | 9304   | lncRNA                             | -2.31 | 4.08E-04 | 5.09E-03 |
| ENSG00000261742 | LINC00922  | 16 | 65284496  | 65576345  | 291849 | lncRNA                             | -2.31 | 3.38E-04 | 4.48E-03 |
| ENSG00000236963 | LINC01141  | 1  | 20360579  | 20431234  | 70655  | lncRNA                             | -2.31 | 4.51E-08 | 1.01E-05 |
| ENSG00000280380 | AC009831.4 | 18 | 31982899  | 31986087  | 3188   | TEC                                | -2.31 | 2.19E-04 | 3.38E-03 |
| ENSG00000256443 | AP003559.1 | 11 | 61539516  | 61542259  | 2743   | lncRNA                             | -2.31 | 1.24E-03 | 1.07E-02 |
| ENSG00000238107 | LINC02806  | 1  | 148295180 | 148297556 | 2376   | lncRNA                             | -2.31 | 7.12E-03 | 3.55E-02 |
| ENSG00000225980 | OR7E19P    | 19 | 9265440   | 9268819   | 3379   | transcribed_unprocessed_pseudogene | -2.31 | 5.31E-04 | 6.06E-03 |
| ENSG00000253871 | AC068075.1 | 8  | 57341021  | 57365444  | 24423  | lncRNA                             | -2.31 | 1.14E-06 | 9.29E-05 |
| ENSG00000214943 | GPR33      | 14 | 31482875  | 31488039  | 5164   | protein_coding                     | -2.31 | 7.70E-03 | 3.73E-02 |
| ENSG00000272975 | MYH4S      | 17 | 10383144  | 10623886  | 240742 | lncRNA-antisense                   | -2.31 | 4.61E-04 | 5.51E-03 |
| ENSG00000197487 | GALP       | 19 | 56176008  | 56185775  | 9767   | protein_coding                     | -2.31 | 1.01E-04 | 1.99E-03 |
| ENSG00000225315 | AL591178.1 | 1  | 24040835  | 24068799  | 45964  | lncRNA-antisense                   | -2.31 | 1.08E-03 | 9.76E-03 |
| ENSG00000237473 | AC068759.1 | 3  | 173153737 | 173336965 | 183228 | lncRNA                             | -2.31 | 5.04E-03 | 2.82E-02 |
| ENSG00000280356 | AL021877.2 | 22 | 34641179  | 34651862  | 10683  | lncRNA                             | -2.31 | 2.90E-06 | 1.79E-04 |
| ENSG00000261456 | TUBB8      | 10 | 46888     | 74163     | 27275  | protein_coding                     | -2.31 | 4.56E-07 | 5.05E-05 |
| ENSG00000259103 | AF107885.2 | 14 | 75814502  | 75847698  | 33196  | lncRNA-antisense                   | -2.32 | 3.27E-04 | 4.39E-03 |
| ENSG00000271811 | Z97200.1   | 1  | 170667381 | 170669425 | 2044   | lncRNA                             | -2.32 | 1.97E-03 | 1.48E-02 |
| ENSG00000279373 | AC027228.3 | 15 | 78537681  | 78538946  | 1265   | TEC                                | -2.32 | 9.36E-03 | 4.26E-02 |
| ENSG00000270226 | AC006548.2 | 22 | 17012404  | 17012932  | 528    | processed_pseudogene               | -2.32 | 3.94E-03 | 2.37E-02 |
| ENSG00000287983 | AL035251.1 | 20 | 39231115  | 39233836  | 2721   | lncRNA                             | -2.32 | 2.16E-05 | 6.87E-04 |
| ENSG00000272154 | AC244517.2 | 5  | 141100242 | 141174391 | 74149  | lncRNA-antisense                   | -2.32 | 2.12E-04 | 3.29E-03 |
| ENSG00000237121 | PIEZO1P2   | 20 | 58740532  | 58783221  | 43289  | unprocessed_pseudogene             | -2.32 | 8.49E-05 | 1.76E-03 |
| ENSG00000157502 | PWWP3B     | X  | 106168305 | 106208956 | 40651  | protein_coding                     | -2.32 | 4.78E-04 | 5.65E-03 |
| ENSG00000287045 | AC072028.1 | 3  | 142687982 | 142723881 | 35899  | lncRNA                             | -2.32 | 8.41E-04 | 8.30E-03 |
| ENSG00000200867 | RN7SKP36   | 4  | 7112088   | 7112399   | 311    | misc_RNA                           | -2.32 | 6.98E-04 | 7.29E-03 |
| ENSG00000206129 | AC006305.1 | 18 | 56003613  | 56191262  | 187649 | lncRNA                             | -2.32 | 7.51E-05 | 1.63E-03 |
| ENSG00000235436 | DPY19L2P4  | 7  | 90119400  | 90125600  | 6200   | transcribed_unprocessed_pseudogene | -2.32 | 4.89E-03 | 2.76E-02 |
| ENSG00000225708 | AL354984.2 | 20 | 58069054  | 58072070  | 3016   | lncRNA                             | -2.32 | 1.59E-03 | 1.28E-02 |
| ENSG00000228459 | LINC01546  | X  | 3271544   | 3286138   | 14594  | lncRNA                             | -2.32 | 1.48E-04 | 2.56E-03 |
| ENSG00000288048 | AC104088.3 | 2  | 172234230 | 172237223 | 2993   | lncRNA                             | -2.32 | 1.57E-03 | 1.26E-02 |
| ENSG00000286073 | AL138900.2 | 1  | 157287267 | 157310655 | 23388  | unprocessed_pseudogene             | -2.33 | 8.85E-05 | 1.81E-03 |
| ENSG00000288021 | AL450338.2 | 6  | 85949690  | 85998263  | 48573  | lncRNA                             | -2.33 | 9.76E-03 | 4.39E-02 |
| ENSG00000280025 | AL008638.6 | 22 | 27102766  | 27107019  | 4253   | lncRNA                             | -2.33 | 2.22E-06 | 1.50E-04 |
| ENSG00000258077 | AC078923.1 | 12 | 75563202  | 75984015  | 420813 | lncRNA                             | -2.33 | 7.93E-03 | 3.81E-02 |
| ENSG00000285644 | AC108448.3 | 11 | 30575308  | 3064707   | 7169   | lncRNA-antisense                   | -2.33 | 1.55E-05 | 5.60E-04 |
| ENSG00000242440 | LINC02046  | 3  | 148279682 | 148401084 | 121402 | lncRNA                             | -2.33 | 1.43E-04 | 2.50E-03 |
| ENSG00000286241 | AC080089.2 | 4  | 119686538 | 119693563 | 7025   | lncRNA                             | -2.33 | 6.04E-04 | 6.60E-03 |
| ENSG00000253968 | AC016573.1 | 5  | 173383941 | 173451591 | 67650  | lncRNA                             | -2.33 | 3.79E-04 | 4.84E-03 |
| ENSG00000285786 | AC074325.1 | 10 | 48246525  | 48248512  | 1987   | lncRNA-antisense                   | -2.33 | 9.22E-04 | 8.81E-03 |
| ENSG00000233508 | AL021395.1 | 20 | 43189998  | 43202599  | 12601  | lncRNA                             | -2.33 | 4.87E-05 | 1.20E-03 |
| ENSG00000227210 | AC079145.1 | 2  | 19990209  | 20004795  | 14586  | lncRNA-antisense                   | -2.33 | 6.48E-04 | 6.94E-03 |
| ENSG00000254290 | AC124067.4 | 8  | 37597480  | 37599858  | 2378   | lncRNA                             | -2.33 | 2.68E-05 | 7.92E-04 |
| ENSG00000230807 | AC095935.1 | 3  | 27486247  | 27486617  | 370    | processed_pseudogene               | -2.33 | 8.02E-03 | 3.84E-02 |
| ENSG00000182334 | OR5P3      | 11 | 7824818   | 7830840   | 6022   | protein_coding                     | -2.33 | 5.19E-03 | 2.87E-02 |
| ENSG00000248529 | AC026746.1 | 5  | 61658474  | 61698432  | 39958  | lncRNA-antisense                   | -2.33 | 7.20E-06 | 3.33E-04 |
| ENSG00000169035 | KLK7       | 19 | 50976468  | 50984099  | 7631   | protein_coding                     | -2.33 | 2.95E-05 | 8.47E-04 |
| ENSG00000260141 | AC145350.2 | 16 | 33043609  | 33095431  | 51822  | lncRNA                             | -2.33 | 3.43E-04 | 4.52E-03 |
| ENSG00000261019 | AC010132.4 | 7  | 42901272  | 42902639  | 1367   | lncRNA                             | -2.33 | 2.48E-04 | 3.67E-03 |
| ENSG00000258955 | LINC00519  | 14 | 51304108  | 51331918  | 27810  | lncRNA                             | -2.33 | 5.47E-03 | 2.98E-02 |
| ENSG00000250444 | CCT5P1     | 5  | 115512077 | 115513694 | 1617   | processed_pseudogene               | -2.33 | 3.37E-03 | 2.14E-02 |
| ENSG00000187754 | SSX7       | X  | 52644061  | 52654900  | 10839  | protein_coding                     | -2.33 | 1.41E-03 | 1.17E-02 |
| ENSG00000253235 | AC111149.1 | 8  | 73326991  | 73370601  | 43610  | lncRNA                             | -2.33 | 1.27E-03 | 1.09E-02 |
| ENSG00000259465 | AHCYP7     | 15 | 50417385  | 50418692  | 1307   | processed_pseudogene               | -2.33 | 4.16E-03 | 2.47E-02 |
| ENSG00000287692 | AC053545.1 | 4  | 122700445 | 122708788 | 8343   | lncRNA                             | -2.34 | 1.79E-04 | 2.94E-03 |
| ENSG00000233021 | AL669841.1 | 10 | 437561    | 441170    | 3609   | lncRNA-antisense                   | -2.34 | 4.99E-03 | 2.80E-02 |
| ENSG00000183273 | CCDC60     | 12 | 119334712 | 119541040 | 206328 | protein_coding                     | -2.34 | 1.78E-05 | 6.06E-04 |
| ENSG00000270818 | AL445675.1 | 1  | 242882066 | 242883475 | 1409   | processed_pseudogene               | -2.34 | 1.05E-02 | 4.61E-02 |
| ENSG00000218027 | AL512329.1 | 6  | 1513698   | 1515289   | 1591   | processed_pseudogene               | -2.34 | 1.07E-03 | 9.73E-03 |
| ENSG00000287882 | AC134508.2 | 3  | 72301616  | 72319429  | 17813  | lncRNA                             | -2.34 | 4.40E-03 | 2.57E-02 |
| ENSG00000229957 | AL031687.1 | 20 | 46168404  | 46171237  | 2833   | lncRNA                             | -2.34 | 4.00E-04 | 5.04E-03 |
| ENSG00000231216 | GS1-600G.3 | X  | 13310652  | 13319933  | 9281   | lncRNA-antisense                   | -2.34 | 3.79E-04 | 4.84E-03 |
| ENSG00000204581 | ACOXL-AS1  | 2  | 111098345 | 111116407 | 18062  | lncRNA-antisense                   | -2.34 | 1.87E-07 | 2.78E-05 |
| ENSG00000267741 | UBE2L4     | 19 | 9774497   | 9774960   | 463    | processed_pseudogene               | -2.34 | 4.46E-03 | 2.59E-02 |
| ENSG00000255352 | PPP1R10P1  | 11 | 130789231 | 130791025 | 1794   | processed_pseudogene               | -2.34 | 2.07E-03 | 1.53E-02 |
| ENSG00000251292 | ERVH-1     | 4  | 23723262  | 23733579  | 10317  | lncRNA                             | -2.34 | 7.93E-04 | 7.97E-03 |
| ENSG00000234099 | MTND4P1    | 1  | 93922574  | 93923454  | 1371   | unprocessed_pseudogene             | -2.34 | 6.11E-03 | 3.21E-02 |
| ENSG00000241635 | UGT1A1     | 2  | 233760270 | 233773000 | 13030  | protein_coding                     | -2.34 | 1.28E-04 | 2.33E-03 |
| ENSG00000282943 | AC004784.1 | 19 | 42977463  | 43171515  | 194052 | lncRNA-antisense                   | -2.34 | 9.13E-04 | 8.74E-03 |
| ENSG00000216621 | AL583835.2 | 6  | 149934527 | 149936782 | 2255   | transcribed_processed_pseudogene   | -2.34 | 2.62E-03 | 1.80E-02 |
| ENSG00000196166 | C8orf86    | 8  | 38510834  | 38560939  | 50105  | lncRNA                             | -2.34 | 1.13E-04 | 2.14E-03 |
| ENSG00000286059 | AC005538.3 | 2  | 233977872 | 233980018 | 2146   | lncRNA-antisense                   | -2.34 | 3.14E-03 | 2.04E-02 |
| ENSG00000136155 | SCEL       | 13 | 77535674  | 77645263  | 109589 | protein_coding                     | -2.34 | 1.50E-05 | 5.47E-04 |
| ENSG00000279914 | AL008638.5 | 22 | 27040197  | 27041494  | 1297   | lncRNA                             | -2.34 | 6.24E-04 | 6.75E-03 |

|                 |              |    |           |           |        |                                      |       |          |          |
|-----------------|--------------|----|-----------|-----------|--------|--------------------------------------|-------|----------|----------|
| ENSG00000207780 | MIR648       | 22 | 17980868  | 17980961  | 93     | miRNA                                | -2.34 | 4.80E-03 | 2.73E-02 |
| ENSG00000226367 | ST7-AS2      | 7  | 117072072 | 117146480 | 74408  | lncRNA-antisense                     | -2.34 | 3.62E-05 | 9.79E-04 |
| ENSG00000167754 | KLK5         | 19 | 50943303  | 50953093  | 9790   | protein coding                       | -2.34 | 2.08E-04 | 3.25E-03 |
| ENSG00000268416 | AC010329.1   | 19 | 20746923  | 20755250  | 8327   | lncRNA                               | -2.34 | 9.75E-06 | 4.10E-04 |
| ENSG00000272720 | AL022322.1   | 22 | 38090127  | 38091559  | 1432   | lncRNA                               | -2.34 | 1.87E-06 | 1.35E-04 |
| ENSG00000240023 | AL133163.1   | 14 | 35388121  | 35389069  | 948    | processed_pseudogene                 | -2.34 | 1.50E-04 | 2.58E-03 |
| ENSG00000285869 | LINC02858    | 16 | 19334011  | 19337804  | 3793   | lncRNA                               | -2.34 | 6.51E-04 | 6.96E-03 |
| ENSG00000204709 | LINC01556    | 6  | 28943877  | 28944537  | 660    | lncRNA                               | -2.34 | 2.17E-03 | 1.59E-02 |
| ENSG00000279668 | AC024610.2   | 17 | 33827699  | 34079100  | 251401 | lncRNA                               | -2.34 | 1.94E-08 | 5.79E-06 |
| ENSG00000276627 | AL117372.1   | 20 | 60755001  | 60767279  | 12278  | lncRNA                               | -2.35 | 3.11E-06 | 1.88E-04 |
| ENSG00000105141 | CASP14       | 19 | 15049480  | 15058293  | 8813   | protein coding                       | -2.35 | 3.25E-04 | 4.37E-03 |
| ENSG00000250406 | AC109811.1   | 4  | 144851572 | 144874787 | 23215  | lncRNA                               | -2.35 | 1.61E-03 | 1.29E-02 |
| ENSG00000168509 | HJV          | 1  | 146017468 | 146036746 | 19278  | protein coding                       | -2.35 | 2.42E-04 | 3.61E-03 |
| ENSG00000280002 | AC078925.4   | 12 | 130988312 | 130990028 | 1716   | TEC                                  | -2.35 | 7.85E-04 | 7.93E-03 |
| ENSG00000258935 | AL096869.1   | 14 | 90567495  | 90569976  | 2481   | lncRNA                               | -2.35 | 6.90E-03 | 3.48E-02 |
| ENSG00000234225 | AC244394.3   | 1  | 147001931 | 147003618 | 1687   | lncRNA                               | -2.35 | 5.83E-03 | 3.11E-02 |
| ENSG00000243981 | AC064862.6   | 7  | 57628479  | 57645189  | 16710  | transcribed processed_pseudogene     | -2.35 | 4.31E-03 | 2.53E-02 |
| ENSG00000287398 | AC117481.1   | 3  | 75214510  | 75240770  | 28260  | lncRNA                               | -2.35 | 5.39E-03 | 2.94E-02 |
| ENSG00000285142 | AC006927.5   | 12 | 7637396   | 7647086   | 9690   | unprocessed_pseudogene               | -2.35 | 6.73E-03 | 3.42E-02 |
| ENSG00000267226 | AC104971.1   | 18 | 58670009  | 58671877  | 1868   | lncRNA-bidirectional promoter lncRNA | -2.35 | 3.66E-04 | 4.72E-03 |
| ENSG00000236246 | AC073135.1   | 3  | 198121479 | 198123232 | 1753   | unprocessed_pseudogene               | -2.35 | 5.68E-03 | 3.05E-02 |
| ENSG00000234921 | AC006450.2   | 9  | 124031624 | 124032524 | 900    | lncRNA-antisense                     | -2.35 | 6.69E-03 | 3.41E-02 |
| ENSG00000233570 | LINC00690    | 3  | 16524771  | 16541903  | 17132  | lncRNA                               | -2.35 | 2.79E-03 | 1.88E-02 |
| ENSG00000153802 | TMPPRS11D    | 4  | 67820876  | 67884002  | 63126  | protein coding                       | -2.35 | 3.07E-04 | 4.22E-03 |
| ENSG00000255474 | GAU1         | 12 | 4700417   | 4720102   | 19685  | lncRNA                               | -2.35 | 9.72E-04 | 9.13E-03 |
| ENSG00000107295 | SH3GL2       | 9  | 17579066  | 17797124  | 218058 | protein coding                       | -2.35 | 1.27E-05 | 4.92E-04 |
| ENSG00000176774 | MAGEB18      | X  | 26138343  | 26140736  | 2393   | protein coding                       | -2.35 | 3.63E-03 | 2.25E-02 |
| ENSG00000259388 | AC025040.2   | 15 | 49794246  | 49796097  | 1851   | processed_pseudogene                 | -2.35 | 2.07E-03 | 1.53E-02 |
| ENSG00000278408 | AC108861.1   | 15 | 71547280  | 71549832  | 2552   | lncRNA-antisense                     | -2.35 | 5.76E-03 | 3.08E-02 |
| ENSG00000204479 | PRAMEF17     | 1  | 13389632  | 13392629  | 2997   | protein coding                       | -2.35 | 2.32E-04 | 3.50E-03 |
| ENSG00000134588 | USP26        | X  | 133024631 | 133097109 | 72478  | protein coding                       | -2.35 | 5.54E-04 | 6.24E-03 |
| ENSG00000072080 | SPP2         | 2  | 234050679 | 234077134 | 26455  | protein coding                       | -2.35 | 4.80E-03 | 2.73E-02 |
| ENSG00000167755 | KLK6         | 19 | 50958631  | 50969673  | 11042  | protein coding                       | -2.35 | 2.77E-05 | 8.13E-04 |
| ENSG00000228983 | SLC47A1P1    | 17 | 19579943  | 19596058  | 16115  | transcribed unprocessed_pseudogene   | -2.35 | 3.04E-04 | 4.20E-03 |
| ENSG00000226567 | LINC00066    | 3  | 10759350  | 10764209  | 4859   | lncRNA                               | -2.35 | 8.13E-05 | 1.71E-03 |
| ENSG00000274328 | AC007551.2   | 7  | 35847038  | 35847426  | 388    | processed_pseudogene                 | -2.35 | 1.94E-03 | 1.46E-02 |
| ENSG00000286630 | AL133240.2   | 14 | 92294771  | 92297648  | 2877   | lncRNA                               | -2.35 | 8.72E-03 | 4.06E-02 |
| ENSG00000282863 | AC012560.1   | 10 | 78179174  | 78675109  | 495935 | lncRNA                               | -2.35 | 2.65E-03 | 1.82E-02 |
| ENSG00000174914 | OR9G1        | 11 | 56699095  | 56703884  | 4789   | protein coding                       | -2.35 | 2.81E-04 | 3.99E-03 |
| ENSG00000266976 | AC079466.1   | 19 | 28606688  | 28615229  | 8541   | lncRNA                               | -2.35 | 1.79E-05 | 6.08E-04 |
| ENSG00000237937 | LINC02702    | 11 | 116639422 | 116658295 | 18873  | lncRNA                               | -2.36 | 9.60E-04 | 9.06E-03 |
| ENSG00000279173 | AC092451.2   | 12 | 25423600  | 25424942  | 1342   | TEC                                  | -2.36 | 6.98E-03 | 3.50E-02 |
| ENSG00000203855 | HS3DBP4      | 1  | 119564066 | 119572067 | 8001   | unprocessed_pseudogene               | -2.36 | 5.19E-03 | 2.87E-02 |
| ENSG00000253408 | AC083973.1   | 8  | 42233674  | 42271266  | 37592  | lncRNA-antisense                     | -2.36 | 1.01E-05 | 4.15E-04 |
| ENSG00000233951 | RCC2P3       | 7  | 138122202 | 138124595 | 2393   | processed_pseudogene                 | -2.36 | 2.30E-04 | 3.48E-03 |
| ENSG00000287334 | AC102941.2   | 15 | 29664477  | 29669482  | 5005   | lncRNA                               | -2.36 | 5.60E-03 | 3.02E-02 |
| ENSG00000236494 | AC008080.4   | 7  | 33793167  | 33803910  | 10023  | lncRNA                               | -2.36 | 4.18E-04 | 5.16E-03 |
| ENSG00000243847 | RN7SL610P    | 2  | 23996795  | 23997085  | 290    | misc RNA                             | -2.36 | 2.33E-03 | 1.67E-02 |
| ENSG00000255968 | AC024145.1   | 12 | 26318953  | 26421462  | 102509 | lncRNA-antisense                     | -2.36 | 2.11E-04 | 3.28E-03 |
| ENSG00000225925 | AL672138.1   | X  | 68474710  | 68476874  | 2164   | processed_pseudogene                 | -2.36 | 1.86E-03 | 1.42E-02 |
| ENSG00000165197 | VEGFD        | X  | 15345596  | 15384413  | 38817  | protein coding                       | -2.36 | 4.35E-04 | 5.29E-03 |
| ENSG00000214855 | APOC1P1      | 19 | 44926804  | 44931386  | 4582   | transcribed unprocessed_pseudogene   | -2.36 | 6.65E-03 | 3.40E-02 |
| ENSG00000255146 | AP004247.2   | 11 | 58044110  | 58060138  | 16028  | lncRNA                               | -2.36 | 1.72E-03 | 1.34E-02 |
| ENSG00000240480 | RPL29P2      | 17 | 7754320   | 7754976   | 656    | transcribed processed_pseudogene     | -2.36 | 5.04E-03 | 2.81E-02 |
| ENSG00000271519 | AL590065.1   | X  | 35864858  | 35869631  | 4773   | processed_pseudogene                 | -2.36 | 1.15E-03 | 1.02E-02 |
| ENSG00000277957 | SENP3-EIF4A1 | 17 | 7563287   | 7578715   | 15428  | protein coding                       | -2.36 | 2.23E-03 | 1.62E-02 |
| ENSG00000223602 | AC125634.1   | 9  | 64878790  | 64889063  | 10273  | unprocessed_pseudogene               | -2.36 | 9.24E-03 | 4.23E-02 |
| ENSG00000228815 | MARK2P13     | 7  | 36109024  | 36110872  | 1848   | processed_pseudogene                 | -2.36 | 1.65E-03 | 1.31E-02 |
| ENSG00000255128 | HSPD1P3      | 8  | 7418991   | 7420546   | 1555   | processed_pseudogene                 | -2.36 | 1.80E-03 | 1.39E-02 |
| ENSG00000272736 | AC005323.2   | 17 | 10383132  | 10537862  | 154730 | lncRNA-antisense                     | -2.36 | 7.44E-03 | 3.66E-02 |
| ENSG00000286093 | AC02267.1    | 4  | 56291601  | 56299873  | 8272   | lncRNA-antisense                     | -2.36 | 5.09E-03 | 2.83E-02 |
| ENSG00000205444 | KU-MEL-3     | 6  | 4610612   | 4611919   | 1307   | lncRNA                               | -2.36 | 1.09E-03 | 9.83E-03 |
| ENSG00000185385 | OR7A17       | 19 | 14878203  | 14886132  | 7929   | protein coding                       | -2.37 | 1.16E-04 | 2.18E-03 |
| ENSG00000279781 | AC079336.6   | 17 | 32518322  | 32518934  | 612    | TEC                                  | -2.37 | 8.87E-03 | 4.11E-02 |
| ENSG00000285578 | AL035696.4   | 6  | 184339    | 186899    | 2560   | lncRNA                               | -2.37 | 2.06E-05 | 6.69E-04 |
| ENSG00000274391 | TPTE         | 21 | 10521553  | 10606140  | 84587  | protein coding                       | -2.37 | 1.02E-03 | 9.40E-03 |
| ENSG00000260062 | GOLGA2P11    | 15 | 62253730  | 62270680  | 16950  | transcribed unprocessed_pseudogene   | -2.37 | 2.04E-07 | 2.98E-05 |
| ENSG00000284720 | AC117945.2   | 1  | 36768122  | 36769725  | 1603   | lncRNA                               | -2.37 | 7.67E-04 | 7.80E-03 |
| ENSG00000260951 | AC005100.1   | 7  | 25358235  | 25432202  | 73967  | lncRNA                               | -2.37 | 6.29E-03 | 3.27E-02 |
| ENSG00000284693 | LINC02606    | 1  | 9425094   | 9440564   | 15470  | lncRNA                               | -2.37 | 3.22E-05 | 8.95E-04 |
| ENSG00000287836 | AC016168.4   | 17 | 76831684  | 76841099  | 9415   | lncRNA                               | -2.37 | 5.01E-04 | 5.82E-03 |
| ENSG00000260862 | AC099506.1   | 16 | 82773319  | 82829638  | 56319  | lncRNA-sense intronic                | -2.37 | 2.62E-05 | 7.81E-04 |
| ENSG00000231381 | RNF2P1       | 9  | 6668999   | 6670008   | 1009   | processed_pseudogene                 | -2.37 | 1.62E-03 | 1.29E-02 |
| ENSG00000169340 | PDLIT        | 16 | 20359175  | 20404737  | 45562  | protein coding                       | -2.37 | 5.18E-06 | 2.65E-04 |
| ENSG00000231772 | Z93403.1     | X  | 42252459  | 42699385  | 446926 | lncRNA                               | -2.37 | 3.91E-03 | 2.36E-02 |
| ENSG00000234933 | CDC42P1      | 20 | 34402149  | 34402696  | 547    | processed_pseudogene                 | -2.37 | 7.90E-03 | 3.80E-02 |
| ENSG00000274825 | AL023803.2   | 20 | 38955910  | 38956547  | 637    | lncRNA                               | -2.37 | 1.04E-02 | 4.61E-02 |
| ENSG00000236504 | AC087499.5   | 17 | 20647287  | 20681799  | 34512  | unprocessed_pseudogene               | -2.37 | 2.73E-04 | 3.91E-03 |
| ENSG00000259202 | AC012568.1   | 15 | 67142734  | 67146939  | 4205   | lncRNA-antisense                     | -2.37 | 1.72E-03 | 1.35E-02 |
| ENSG00000166763 | STRCP1       | 15 | 43699441  | 43718260  | 18819  | transcribed unprocessed_pseudogene   | -2.37 | 7.44E-06 | 3.40E-04 |
| ENSG00000287422 | AL442071.2   | 1  | 39226670  | 39238620  | 11950  | lncRNA                               | -2.37 | 4.94E-04 | 5.77E-03 |
| ENSG00000215005 | HSPD1P7      | 21 | 28887280  | 28889722  | 1992   | processed_pseudogene                 | -2.37 | 1.32E-03 | 1.12E-02 |
| ENSG00000172023 | REG1B        | 2  | 79085023  | 79088019  | 2996   | protein coding                       | -2.38 | 4.62E-03 | 2.65E-02 |
| ENSG00000280326 | AC067931.2   | 8  | 140591684 | 140593201 | 1517   | TEC                                  | -2.38 | 4.28E-04 | 5.24E-03 |
| ENSG00000231532 | LINC01249    | 2  | 4628216   | 4656498   | 28282  | lncRNA                               | -2.38 | 6.94E-04 | 7.27E-03 |
| ENSG00000250007 | AC087457.1   | 15 | 34755084  | 34813505  | 58421  | lncRNA-antisense                     | -2.38 | 3.82E-06 | 2.14E-04 |
| ENSG00000253805 | AC245164.1   | 8  | 2033508   | 2035587   | 2079   | lncRNA                               | -2.38 | 1.50E-03 | 1.23E-02 |
| ENSG00000180068 | OR3A4P       | 17 | 3309986   | 3311446   | 1460   | transcribed unprocessed_pseudogene   | -2.38 | 9.37E-04 | 8.91E-03 |
| ENSG00000213943 | KRT18P17     | 3  | 12787393  | 12788671  | 1278   | processed_pseudogene                 | -2.38 | 9.60E-03 | 4.34E-02 |
| ENSG00000229817 | AL133412.1   | 9  | 114845594 | 114848585 | 2991   | processed_pseudogene                 | -2.38 | 1.08E-03 | 9.77E-03 |



|                 |            |    |           |           |        |                                    |       |          |          |
|-----------------|------------|----|-----------|-----------|--------|------------------------------------|-------|----------|----------|
| ENSG0000106809  | OGN        | 9  | 92383268  | 92404696  | 21428  | protein coding                     | -2.38 | 4.19E-05 | 1.08E-03 |
| ENSG00000254098 | IGKV2-26   | 2  | 89196096  | 89196829  | 733    | IG V pseudogene                    | -2.38 | 1.03E-02 | 4.56E-02 |
| ENSG00000286280 | AC108063.2 | 4  | 16114233  | 16117479  | 3246   | lncRNA                             | -2.38 | 6.07E-03 | 3.19E-02 |
| ENSG00000284708 | AL031731.1 | 1  | 11623558  | 11643416  | 19858  | lncRNA-antisense                   | -2.38 | 1.23E-05 | 4.80E-04 |
| ENSG00000249497 | LINC02075  | 17 | 49457861  | 49461749  | 3888   | lncRNA                             | -2.38 | 3.91E-03 | 2.36E-02 |
| ENSG00000286573 | AL136225.1 | 6  | 163956299 | 163960187 | 3888   | lncRNA                             | -2.38 | 4.59E-03 | 2.64E-02 |
| ENSG00000267589 | AC011444.4 | 19 | 6072823   | 6073527   | 704    | processed pseudogene               | -2.38 | 7.65E-05 | 1.64E-03 |
| ENSG00000231561 | CEACAMP5   | 19 | 42654200  | 42669076  | 14876  | unprocessed pseudogene             | -2.38 | 4.27E-03 | 2.51E-02 |
| ENSG00000287251 | AP003062.2 | 11 | 134945118 | 134980574 | 35456  | lncRNA                             | -2.38 | 1.30E-06 | 1.02E-04 |
| ENSG00000275894 | AL021578.1 | 20 | 45345115  | 45345823  | 708    | lncRNA-sense intronic              | -2.38 | 8.15E-04 | 8.14E-03 |
| ENSG00000259140 | AL049839.1 | 14 | 94674877  | 94675829  | 952    | processed pseudogene               | -2.38 | 3.24E-03 | 2.08E-02 |
| ENSG00000271602 | KRT8P49    | 11 | 4722740   | 4724171   | 1431   | processed pseudogene               | -2.38 | 4.35E-04 | 5.29E-03 |
| ENSG00000262079 | AC007638.1 | 17 | 55325757  | 55327791  | 2034   | lncRNA                             | -2.38 | 3.16E-03 | 2.05E-02 |
| ENSG00000236678 | LINC00347  | 13 | 74552503  | 74565445  | 12942  | lncRNA                             | -2.38 | 3.57E-03 | 2.22E-02 |
| ENSG00000240268 | MOXD2P     | 7  | 142240740 | 142247067 | 6327   | transcribed unprocessed pseudogene | -2.39 | 2.21E-05 | 6.98E-04 |
| ENSG00000261409 | AL035425.3 | X  | 108719949 | 108724944 | 4995   | lncRNA-sense overlapping           | -2.39 | 2.03E-03 | 1.51E-02 |
| ENSG00000162493 | PDPN       | 1  | 13583465  | 13617957  | 34492  | protein coding                     | -2.39 | 2.43E-06 | 1.60E-04 |
| ENSG00000262231 | AC104770.1 | 17 | 6163893   | 6190541   | 26648  | lncRNA                             | -2.39 | 4.61E-04 | 5.51E-03 |
| ENSG00000254260 | AC015468.3 | 8  | 20941428  | 20950175  | 8747   | lncRNA                             | -2.39 | 7.28E-03 | 3.60E-02 |
| ENSG00000261028 | AC012322.1 | 16 | 64242608  | 64343909  | 101301 | lncRNA                             | -2.39 | 7.24E-03 | 3.59E-02 |
| ENSG00000286311 | AL034550.3 | 20 | 32485149  | 32487019  | 1870   | lncRNA                             | -2.39 | 3.96E-04 | 5.00E-03 |
| ENSG00000234522 | AC073587.1 | 10 | 120434983 | 120440376 | 5393   | unprocessed pseudogene             | -2.39 | 1.36E-03 | 1.15E-02 |
| ENSG00000267777 | LINC01791  | 19 | 31167457  | 31225143  | 57686  | lncRNA                             | -2.39 | 5.08E-06 | 2.62E-04 |
| ENSG00000288070 | AC016902.1 | 11 | 112822806 | 112835124 | 12318  | lncRNA                             | -2.39 | 5.55E-03 | 3.00E-02 |
| ENSG00000286538 | AC008798.2 | 19 | 29838532  | 29841818  | 3286   | lncRNA                             | -2.39 | 1.10E-04 | 2.10E-03 |
| ENSG00000261260 | AC106736.1 | 16 | 71288775  | 71309963  | 21188  | lncRNA                             | -2.39 | 2.98E-05 | 8.53E-04 |
| ENSG00000235166 | LINC01440  | 20 | 55408898  | 55684915  | 276017 | lncRNA                             | -2.39 | 1.08E-04 | 2.07E-03 |
| ENSG00000152954 | NRSN1      | 6  | 24126186  | 24154900  | 28714  | protein coding                     | -2.39 | 2.56E-05 | 7.70E-04 |
| ENSG00000236939 | BAALC-AS2  | 8  | 103132963 | 103141705 | 8512   | lncRNA-antisense                   | -2.39 | 3.70E-03 | 2.28E-02 |
| ENSG00000112936 | C7         | 5  | 40909497  | 40984643  | 75146  | protein coding                     | -2.39 | 5.63E-06 | 2.76E-04 |
| ENSG00000254951 | AC044810.2 | 11 | 7754393   | 7905955   | 151562 | lncRNA-sense overlapping           | -2.39 | 5.16E-05 | 1.25E-03 |
| ENSG00000164188 | RANBP3L    | 5  | 36246913  | 36302114  | 55201  | protein coding                     | -2.39 | 8.19E-06 | 3.62E-04 |
| ENSG00000175311 | ANKS4B     | 16 | 21233699  | 21253850  | 20151  | protein coding                     | -2.39 | 2.36E-07 | 3.28E-05 |
| ENSG00000127318 | IL22       | 12 | 68248242  | 68253604  | 5362   | protein coding                     | -2.39 | 6.88E-04 | 7.23E-03 |
| ENSG00000171360 | KRT38      | 17 | 41436154  | 41440983  | 4829   | protein coding                     | -2.40 | 4.82E-05 | 1.19E-03 |
| ENSG00000143520 | FLG2       | 1  | 152348735 | 152360006 | 11271  | protein coding                     | -2.40 | 1.51E-07 | 2.34E-05 |
| ENSG00000092009 | CMA1       | 14 | 24505353  | 24508265  | 2912   | protein coding                     | -2.40 | 2.60E-03 | 1.79E-02 |
| ENSG00000197171 | AL672167.1 | 6  | 29223973  | 29229263  | 68990  | transcribed unprocessed pseudogene | -2.40 | 7.13E-05 | 1.57E-03 |
| ENSG00000260750 | AC092720.1 | 16 | 87595131  | 87600337  | 5206   | lncRNA                             | -2.40 | 2.46E-05 | 7.52E-04 |
| ENSG00000287501 | AL163872.1 | 14 | 97662638  | 97688600  | 25962  | lncRNA                             | -2.40 | 1.95E-03 | 1.47E-02 |
| ENSG00000256694 | AC026369.2 | 12 | 164664    | 166321    | 1657   | lncRNA-antisense                   | -2.40 | 6.19E-04 | 6.72E-03 |
| ENSG00000213770 | FAM210CP   | 10 | 27349717  | 27350290  | 573    | processed pseudogene               | -2.40 | 1.69E-03 | 1.33E-02 |
| ENSG00000236854 | LINC00486  | 2  | 32927085  | 32946149  | 19064  | lncRNA                             | -2.40 | 1.72E-03 | 1.34E-02 |
| ENSG00000287207 | AC096861.2 | 3  | 122515006 | 122518172 | 3166   | lncRNA                             | -2.40 | 4.12E-03 | 2.45E-02 |
| ENSG00000280809 | LINC00836  | 10 | 25651712  | 25732935  | 81223  | lncRNA                             | -2.40 | 6.77E-07 | 6.65E-05 |
| ENSG00000213480 | AC093816.1 | 4  | 121369433 | 121370345 | 913    | processed pseudogene               | -2.40 | 7.99E-03 | 3.83E-02 |
| ENSG00000234983 | AC010132.2 | 7  | 42918741  | 42920084  | 1343   | processed pseudogene               | -2.40 | 5.89E-04 | 6.50E-03 |
| ENSG00000173389 | IQCF1      | 3  | 51894876  | 51903353  | 8477   | protein coding                     | -2.40 | 3.13E-03 | 2.04E-02 |
| ENSG00000232260 | BTF3L4P1   | 21 | 17518528  | 17518993  | 467    | processed pseudogene               | -2.40 | 8.94E-03 | 4.13E-02 |
| ENSG00000267316 | AC090409.2 | 18 | 61571342  | 61579456  | 8114   | lncRNA                             | -2.40 | 8.50E-03 | 3.99E-02 |
| ENSG00000286801 | BX546033.1 | 22 | 43507824  | 43513727  | 5903   | lncRNA                             | -2.40 | 2.73E-04 | 3.91E-03 |
| ENSG00000212900 | KRTAP3-2   | 17 | 40999193  | 40999906  | 713    | protein coding                     | -2.40 | 2.76E-03 | 1.87E-02 |
| ENSG00000227391 | SALL1P1    | X  | 49664844  | 49668680  | 3836   | processed pseudogene               | -2.40 | 6.61E-04 | 7.03E-03 |
| ENSG00000279151 | AL021920.1 | 1  | 16701546  | 16705594  | 4048   | lncRNA                             | -2.40 | 3.66E-03 | 2.26E-02 |
| ENSG00000255057 | AP003041.1 | 11 | 130008586 | 130009765 | 1179   | processed pseudogene               | -2.40 | 2.09E-03 | 1.54E-02 |
| ENSG00000197233 | OR1J2      | 9  | 122510802 | 122511743 | 941    | protein coding                     | -2.41 | 1.00E-03 | 9.31E-03 |
| ENSG00000223419 | AC006022.1 | 7  | 30742431  | 30742818  | 387    | processed pseudogene               | -2.41 | 2.35E-03 | 1.68E-02 |
| ENSG00000267886 | AC074135.1 | 19 | 23075201  | 23100361  | 25160  | lncRNA                             | -2.41 | 2.74E-03 | 1.86E-02 |
| ENSG00000283000 | LINC02635  | 10 | 34969881  | 34975578  | 5697   | lncRNA                             | -2.41 | 2.34E-04 | 3.52E-03 |
| ENSG00000287280 | AC009878.2 | 15 | 26403480  | 26477840  | 74360  | lncRNA                             | -2.41 | 6.31E-03 | 3.28E-02 |
| ENSG00000279391 | AC116456.2 | 11 | 8075573   | 8077781   | 2208   | TEC                                | -2.41 | 1.82E-03 | 1.40E-02 |
| ENSG00000249199 | AC026785.3 | 5  | 17367588  | 17375653  | 8065   | lncRNA                             | -2.41 | 3.58E-03 | 2.23E-02 |
| ENSG00000283554 | LINC02341  | 13 | 42339188  | 42485956  | 146768 | lncRNA                             | -2.41 | 2.35E-05 | 7.29E-04 |
| ENSG00000215498 | FAM230B    | 22 | 21167758  | 21192156  | 24398  | lncRNA                             | -2.41 | 1.39E-08 | 4.54E-06 |
| ENSG00000278409 | CC14       | 17 | 35983288  | 35987004  | 3716   | protein coding                     | -2.41 | 1.04E-03 | 9.55E-03 |
| ENSG00000237532 | AC012451.1 | 2  | 128580491 | 128581576 | 1085   | lncRNA                             | -2.41 | 8.95E-03 | 4.13E-02 |
| ENSG00000237428 | ASH2LP2    | 22 | 22366210  | 22367770  | 1560   | processed pseudogene               | -2.41 | 3.37E-03 | 2.14E-02 |
| ENSG00000100033 | PRODH      | 22 | 18912777  | 18936553  | 23776  | protein coding                     | -2.41 | 1.04E-02 | 4.60E-02 |
| ENSG00000260505 | AC096644.3 | 1  | 220401122 | 220404033 | 2911   | lncRNA                             | -2.41 | 7.36E-04 | 7.57E-03 |
| ENSG00000261103 | AC009063.3 | 16 | 83687779  | 83707811  | 20032  | lncRNA-antisense                   | -2.41 | 8.19E-05 | 1.72E-03 |
| ENSG00000285775 | AC109136.1 | 16 | 55045700  | 55049318  | 3618   | lncRNA                             | -2.41 | 3.88E-04 | 4.93E-03 |
| ENSG00000226506 | AC007463.1 | 2  | 7886767   | 7899725   | 12958  | lncRNA                             | -2.41 | 3.18E-03 | 2.05E-02 |
| ENSG00000251191 | LINC00589  | 8  | 29673922  | 29748109  | 74187  | lncRNA                             | -2.41 | 8.03E-05 | 1.70E-03 |
| ENSG00000237346 | AL080313.2 | 6  | 14391094  | 14393929  | 2835   | lncRNA                             | -2.42 | 1.29E-03 | 1.10E-02 |
| ENSG00000221932 | HEPN1      | 11 | 124919244 | 124920677 | 1433   | protein coding                     | -2.42 | 1.87E-03 | 1.42E-02 |
| ENSG00000260230 | FRRS1L     | 9  | 109130293 | 109167249 | 36956  | protein coding                     | -2.42 | 6.09E-10 | 5.02E-07 |
| ENSG00000249022 | AC093599.1 | 4  | 153034211 | 153091563 | 57352  | lncRNA                             | -2.42 | 9.05E-04 | 8.70E-03 |
| ENSG00000262292 | AC007952.5 | 17 | 19160789  | 19162274  | 1485   | lncRNA                             | -2.42 | 6.02E-04 | 6.60E-03 |
| ENSG00000270474 | IGHV3-29   | 14 | 106356145 | 106356591 | 446    | IG V pseudogene                    | -2.42 | 2.34E-03 | 1.67E-02 |
| ENSG00000253369 | AC022034.3 | 8  | 53394110  | 53484067  | 89957  | lncRNA                             | -2.42 | 9.35E-05 | 1.89E-03 |
| ENSG00000234915 | AL360091.3 | 1  | 212299495 | 212331713 | 32218  | lncRNA-antisense                   | -2.42 | 1.16E-02 | 4.97E-02 |
| ENSG00000285347 | AL359555.4 | 20 | 38260175  | 38293892  | 33717  | lncRNA-antisense                   | -2.42 | 3.66E-05 | 9.86E-04 |
| ENSG00000198203 | SULT1C2    | 2  | 108288639 | 108309915 | 21276  | protein coding                     | -2.42 | 2.46E-07 | 3.36E-05 |
| ENSG00000251419 | AC108120.3 | 5  | 75831255  | 75832764  | 1509   | processed pseudogene               | -2.42 | 1.02E-03 | 1.05E-02 |
| ENSG00000231235 | CTNBL1P1   | X  | 46418450  | 46420079  | 1629   | processed pseudogene               | -2.42 | 1.86E-03 | 1.42E-02 |
| ENSG00000197748 | CFAP43     | 10 | 104129888 | 104232364 | 102476 | protein coding                     | -2.42 | 2.40E-07 | 3.30E-05 |
| ENSG00000259281 | LINGO1-AS2 | 15 | 77660052  | 77668074  | 8022   | lncRNA-antisense                   | -2.42 | 1.42E-04 | 2.49E-03 |
| ENSG00000279604 | AC092723.2 | 16 | 86035627  | 86036419  | 792    | TEC                                | -2.42 | 6.54E-03 | 3.36E-02 |
| ENSG00000287857 | AL592546.3 | 10 | 113865811 | 113869614 | 3803   | lncRNA                             | -2.42 | 1.76E-03 | 1.37E-02 |
| ENSG00000198650 | TAT        | 16 | 71565660  | 71577092  | 11432  | protein coding                     | -2.42 | 1.68E-07 | 2.56E-05 |

|                 |            |    |           |           |        |                                    |       |          |          |
|-----------------|------------|----|-----------|-----------|--------|------------------------------------|-------|----------|----------|
| ENSG00000226949 | OR6K5P     | 1  | 158742146 | 158743415 | 1269   | unprocessed_pseudogene             | -2.42 | 3.01E-03 | 1.98E-02 |
| ENSG00000180016 | OR1E1      | 17 | 3397104   | 3398100   | 1306   | protein_coding                     | -2.42 | 2.22E-03 | 1.61E-02 |
| ENSG00000143105 | KCNA10     | 1  | 110517217 | 110519175 | 1958   | protein_coding                     | -2.42 | 1.96E-04 | 3.12E-03 |
| ENSG00000254659 | LINC02715  | 11 | 109741625 | 109823993 | 82268  | lncRNA                             | -2.43 | 8.90E-04 | 8.60E-03 |
| ENSG00000145863 | GABRA6     | 5  | 161547063 | 161702593 | 155530 | protein_coding                     | -2.43 | 8.07E-04 | 8.08E-03 |
| ENSG00000243729 | OR5V1      | 6  | 29353749  | 29431967  | 78218  | protein_coding                     | -2.43 | 2.44E-04 | 3.63E-03 |
| ENSG00000186466 | AQP7P1     | 9  | 63317067  | 63333091  | 16024  | unprocessed_pseudogene             | -2.43 | 4.21E-04 | 5.19E-03 |
| ENSG00000253330 | AC024451.2 | 8  | 47511034  | 47512141  | 1107   | processed_pseudogene               | -2.43 | 1.05E-02 | 4.62E-02 |
| ENSG00000229607 | AL137027.1 | 1  | 30810378  | 30815553  | 5175   | lncRNA                             | -2.43 | 5.78E-03 | 3.09E-02 |
| ENSG00000285584 | AL158800.1 | 14 | 97180525  | 97217778  | 37253  | lncRNA                             | -2.43 | 3.08E-04 | 4.22E-03 |
| ENSG00000279006 | AL022323.1 | 22 | 25048967  | 25051966  | 2999   | lncRNA-antisense                   | -2.43 | 2.65E-06 | 1.69E-04 |
| ENSG00000286266 | AC104370.1 | 8  | 127578473 | 127638667 | 58394  | lncRNA                             | -2.43 | 1.83E-05 | 6.17E-04 |
| ENSG00000155918 | RAET1L     | 6  | 150018334 | 150025532 | 7198   | protein_coding                     | -2.43 | 2.38E-04 | 3.57E-03 |
| ENSG00000257316 | ASS1P14    | 12 | 32985838  | 32987070  | 1232   | processed_pseudogene               | -2.43 | 1.24E-03 | 1.07E-02 |
| ENSG00000271676 | AC104771.1 | 4  | 77112495  | 77113458  | 963    | processed_pseudogene               | -2.43 | 6.64E-03 | 3.39E-02 |
| ENSG00000185264 | TEX33      | 22 | 36991120  | 37007851  | 16731  | protein_coding                     | -2.43 | 1.85E-03 | 1.42E-02 |
| ENSG00000146678 | JGFBP1     | 7  | 45888360  | 45893661  | 5300   | protein_coding                     | -2.43 | 1.65E-04 | 2.77E-03 |
| ENSG00000242267 | SKINT1L    | 1  | 48096092  | 48182428  | 86336  | transcribed_unprocessed_pseudogene | -2.43 | 3.00E-05 | 8.59E-04 |
| ENSG00000235205 | TATDN2P3   | 13 | 23243520  | 23247184  | 3664   | processed_pseudogene               | -2.43 | 8.85E-05 | 1.81E-03 |
| ENSG00000226159 | LINC01375  | 10 | 89915489  | 89957373  | 41884  | lncRNA                             | -2.43 | 4.05E-03 | 2.41E-02 |
| ENSG00000231707 | PABPC1P1   | 4  | 39973444  | 39974338  | 894    | processed_pseudogene               | -2.43 | 1.37E-04 | 2.44E-03 |
| ENSG00000248109 | MARCOL     | 5  | 148221650 | 148243580 | 21930  | protein_coding                     | -2.43 | 2.46E-03 | 1.72E-02 |
| ENSG00000232455 | LARS2-AS1  | 3  | 45483974  | 45509455  | 25571  | lncRNA-antisense                   | -2.44 | 8.46E-03 | 3.98E-02 |
| ENSG00000245975 | AC090515.2 | 15 | 58768072  | 58770974  | 2902   | lncRNA                             | -2.44 | 2.44E-04 | 3.63E-03 |
| ENSG00000253384 | AC124242.2 | 8  | 18088569  | 18089687  | 1118   | processed_pseudogene               | -2.44 | 6.76E-03 | 3.43E-02 |
| ENSG00000154198 | CYP4Z2P    | 1  | 46843095  | 46900437  | 57342  | transcribed_unprocessed_pseudogene | -2.44 | 3.53E-04 | 4.60E-03 |
| ENSG00000285680 | AL355481.1 | 13 | 83877888  | 83895211  | 17323  | lncRNA-antisense                   | -2.44 | 7.09E-03 | 3.54E-02 |
| ENSG00000267052 | AC005050.1 | 7  | 106569876 | 106598908 | 29032  | lncRNA                             | -2.44 | 6.02E-04 | 6.60E-03 |
| ENSG00000259370 | AC103740.1 | 15 | 62827675  | 62884034  | 56359  | lncRNA-antisense                   | -2.44 | 3.56E-08 | 8.82E-06 |
| ENSG00000136696 | IL36B      | 2  | 113022089 | 113052867 | 30778  | protein_coding                     | -2.44 | 4.60E-03 | 2.64E-02 |
| ENSG00000224287 | MSL3P1     | 2  | 233865437 | 233868444 | 3007   | transcribed_processed_pseudogene   | -2.44 | 7.54E-04 | 7.70E-03 |
| ENSG00000079098 | SELE       | 1  | 169722640 | 169764705 | 42065  | protein_coding                     | -2.44 | 7.33E-05 | 1.60E-03 |
| ENSG00000259731 | AC022929.1 | 15 | 38756552  | 38759413  | 2861   | lncRNA                             | -2.44 | 2.33E-03 | 1.66E-02 |
| ENSG00000261826 | AC121333.1 | 3  | 140865075 | 140867783 | 2708   | lncRNA                             | -2.44 | 5.82E-03 | 3.10E-02 |
| ENSG00000287727 | AL139423.2 | 1  | 10611222  | 10616452  | 4230   | lncRNA                             | -2.44 | 5.52E-05 | 1.31E-03 |
| ENSG00000231565 | NEK2P2     | 22 | 15611759  | 15613096  | 1337   | processed_pseudogene               | -2.44 | 2.23E-03 | 1.62E-02 |
| ENSG00000251435 | C1GALT1P2  | 5  | 56192530  | 56193633  | 1103   | processed_pseudogene               | -2.44 | 5.83E-03 | 3.10E-02 |
| ENSG00000288555 | AF222685.1 | 21 | 15190406  | 15224394  | 33988  | lncRNA                             | -2.44 | 2.01E-03 | 1.50E-02 |
| ENSG00000265182 | SRP72P1    | 18 | 49495147  | 49496896  | 1749   | processed_pseudogene               | -2.44 | 2.63E-03 | 1.81E-02 |
| ENSG00000228741 | AL445985.1 | 13 | 23979810  | 24035277  | 55217  | lncRNA                             | -2.44 | 4.63E-03 | 2.66E-02 |
| ENSG00000287730 | AC097526.1 | 4  | 155442650 | 155448610 | 5960   | lncRNA                             | -2.44 | 5.16E-03 | 2.86E-02 |
| ENSG00000197595 | ATP11AUN   | 13 | 112647044 | 112684497 | 37453  | lncRNA                             | -2.44 | 6.74E-06 | 3.18E-04 |
| ENSG00000239774 | AC125618.1 | 3  | 180566718 | 180601935 | 35217  | lncRNA                             | -2.44 | 5.56E-03 | 3.01E-02 |
| ENSG00000259458 | MGC15885   | 15 | 62637172  | 62645291  | 8119   | lncRNA-antisense                   | -2.44 | 5.30E-05 | 1.27E-03 |
| ENSG00000268754 | LINC01081  | 16 | 86221420  | 86301303  | 79883  | lncRNA                             | -2.44 | 2.09E-05 | 6.71E-04 |
| ENSG00000242488 | AF107885.1 | 14 | 75838157  | 75839114  | 957    | transcribed_processed_pseudogene   | -2.44 | 6.00E-03 | 3.17E-02 |
| ENSG00000239254 | AC009220.2 | 7  | 139172516 | 139174266 | 1750   | processed_pseudogene               | -2.44 | 1.35E-03 | 1.14E-02 |
| ENSG00000241218 | CSP2       | 3  | 107327830 | 107329197 | 1367   | processed_pseudogene               | -2.45 | 5.26E-03 | 2.89E-02 |
| ENSG00000237595 | LINC01275  | 20 | 50162765  | 50166216  | 3451   | lncRNA                             | -2.45 | 1.60E-04 | 2.70E-03 |
| ENSG00000162763 | LRRCS2     | 1  | 165544000 | 165563957 | 19957  | protein_coding                     | -2.45 | 6.26E-03 | 3.26E-02 |
| ENSG00000225129 | AL035250.1 | 20 | 59352195  | 59357774  | 5579   | lncRNA                             | -2.45 | 1.08E-03 | 9.78E-03 |
| ENSG00000229105 | ASTN2-AS1  | 9  | 116504283 | 116562293 | 58010  | lncRNA-antisense                   | -2.45 | 3.49E-04 | 4.56E-03 |
| ENSG00000260909 | AC012186.1 | 16 | 46649126  | 46649849  | 723    | unprocessed_pseudogene             | -2.45 | 6.46E-03 | 3.33E-02 |
| ENSG00000159527 | PGLYRP3    | 1  | 153297862 | 153310718 | 12856  | protein_coding                     | -2.45 | 2.05E-04 | 3.23E-03 |
| ENSG00000287224 | AC099791.4 | 1  | 61588049  | 61589904  | 1855   | lncRNA                             | -2.45 | 2.10E-04 | 3.27E-03 |
| ENSG00000179774 | ATOHT      | 10 | 88230595  | 88232113  | 1518   | protein_coding                     | -2.45 | 2.90E-05 | 8.39E-04 |
| ENSG00000137709 | POU2F3     | 11 | 120236640 | 120319945 | 83305  | protein_coding                     | -2.45 | 1.57E-08 | 4.95E-06 |
| ENSG00000279085 | AL022323.2 | 22 | 25009685  | 25015072  | 5387   | lncRNA-antisense                   | -2.45 | 6.81E-07 | 6.66E-05 |
| ENSG00000228876 | AC010745.2 | 2  | 16224047  | 16333978  | 109931 | lncRNA                             | -2.45 | 1.48E-07 | 2.33E-05 |
| ENSG00000261820 | DNM1P49    | 15 | 75791470  | 75792683  | 1213   | unprocessed_pseudogene             | -2.45 | 3.59E-03 | 2.23E-02 |
| ENSG00000216560 | LINC00955  | 4  | 35768689  | 35907111  | 13842  | lncRNA                             | -2.45 | 2.18E-06 | 1.49E-04 |
| ENSG00000183566 | BPIFA4P    | 20 | 33193585  | 33210462  | 16877  | transcribed_unprocessed_pseudogene | -2.46 | 6.55E-05 | 1.48E-03 |
| ENSG00000233067 | PTCHD1-AS  | X  | 22191895  | 22235358  | 43463  | lncRNA                             | -2.46 | 7.37E-04 | 7.58E-03 |
| ENSG00000188525 | AC010969.1 | 2  | 10001757  | 10006030  | 4273   | lncRNA-antisense                   | -2.46 | 1.08E-04 | 2.07E-03 |
| ENSG00000248884 | AC010280.2 | 5  | 68430427  | 68434481  | 4054   | lncRNA                             | -2.46 | 1.43E-03 | 1.18E-02 |
| ENSG00000271093 | IGLCOR22-2 | 22 | 32356676  | 32356988  | 312    | IG C pseudogene                    | -2.46 | 2.84E-03 | 1.90E-02 |
| ENSG00000255335 | LINC02729  | 11 | 17695266  | 17696994  | 1728   | lncRNA-antisense                   | -2.46 | 5.42E-04 | 6.13E-03 |
| ENSG00000237560 | LINC01497  | 17 | 69961568  | 69994845  | 33277  | lncRNA                             | -2.46 | 6.96E-04 | 7.28E-03 |
| ENSG00000223716 | AL135785.1 | 9  | 38360427  | 38376430  | 16003  | lncRNA                             | -2.46 | 2.69E-03 | 1.83E-02 |
| ENSG00000241278 | ENPP7P4    | 3  | 125848223 | 125903772 | 61149  | transcribed_unprocessed_pseudogene | -2.46 | 3.78E-03 | 2.31E-02 |
| ENSG00000253923 | AP002981.1 | 8  | 102417979 | 102418953 | 974    | processed_pseudogene               | -2.46 | 3.38E-03 | 2.14E-02 |
| ENSG00000285615 | AL359508.1 | 10 | 129372194 | 129380753 | 8559   | lncRNA                             | -2.46 | 1.22E-03 | 1.06E-02 |
| ENSG00000197428 | OR51D1     | 11 | 4637477   | 4643060   | 5583   | protein_coding                     | -2.46 | 4.45E-05 | 1.12E-03 |
| ENSG00000288002 | AC091912.3 | 5  | 8207019   | 8366437   | 159418 | lncRNA                             | -2.46 | 6.62E-04 | 7.03E-03 |
| ENSG00000176840 | MIR7-3HG   | 19 | 4769031   | 4785077   | 16046  | lncRNA                             | -2.46 | 2.93E-04 | 4.09E-03 |
| ENSG00000255542 | AC090625.2 | 11 | 35419057  | 35421002  | 1945   | lncRNA-antisense                   | -2.46 | 4.63E-03 | 2.65E-02 |
| ENSG00000186329 | TMEM212    | 3  | 171843349 | 171938715 | 95366  | protein_coding                     | -2.46 | 5.98E-05 | 1.38E-03 |
| ENSG00000287349 | AC108477.2 | 4  | 183725830 | 183732570 | 6740   | lncRNA                             | -2.46 | 4.02E-03 | 2.40E-02 |
| ENSG00000226413 | OR8T1P     | 12 | 48442030  | 48442947  | 917    | unprocessed_pseudogene             | -2.46 | 2.40E-03 | 1.70E-02 |
| ENSG00000230525 | LINC01799  | 2  | 66904436  | 66971462  | 67026  | lncRNA                             | -2.46 | 1.60E-03 | 1.28E-02 |
| ENSG00000286448 | AP006222.2 | 1  | 266855    | 266855    | 1800   | lncRNA                             | -2.46 | 1.02E-03 | 9.42E-03 |
| ENSG00000131808 | FSHB       | 11 | 30231014  | 30235261  | 4247   | protein_coding                     | -2.46 | 2.87E-03 | 1.92E-02 |
| ENSG00000226005 | LINC02660  | 10 | 3911889   | 3935817   | 23928  | lncRNA                             | -2.46 | 1.16E-03 | 1.02E-02 |
| ENSG00000204754 | LINC01951  | 5  | 174919082 | 174995513 | 76431  | lncRNA                             | -2.47 | 2.22E-03 | 1.61E-02 |
| ENSG00000186393 | KRT26      | 17 | 40766238  | 40772162  | 5924   | protein_coding                     | -2.47 | 4.80E-05 | 1.19E-03 |
| ENSG00000239715 | AC093627.2 | 7  | 174920    | 176013    | 1093   | lncRNA                             | -2.47 | 5.04E-04 | 5.84E-03 |
| ENSG00000214510 | SPINK13    | 5  | 148268180 | 148286255 | 18075  | protein_coding                     | -2.47 | 7.42E-03 | 3.65E-02 |
| ENSG00000167355 | OR51B5     | 11 | 5303444   | 5505652   | 202208 | protein_coding                     | -2.47 | 7.91E-05 | 1.68E-03 |
| ENSG00000288069 | AF064866.1 | 21 | 40736318  | 40754888  | 18570  | lncRNA                             | -2.47 | 1.83E-03 | 1.41E-02 |
| ENSG00000247324 | AC010547.1 | 16 | 71462278  | 71465941  | 3663   | lncRNA-antisense                   | -2.47 | 6.39E-07 | 6.49E-05 |

|                 |              |    |           |           |        |                                    |       |          |          |
|-----------------|--------------|----|-----------|-----------|--------|------------------------------------|-------|----------|----------|
| ENSG00000225572 | DOCK4-AS1    | 7  | 111808516 | 111821773 | 13257  | lncRNA-antisense                   | -2.47 | 1.22E-03 | 1.06E-02 |
| ENSG00000232196 | MTRNR2L4     | 16 | 3370979   | 3372668   | 1689   | protein coding                     | -2.47 | 4.02E-04 | 5.05E-03 |
| ENSG00000231163 | CSMD2-AS1    | 1  | 33868953  | 33893726  | 24773  | lncRNA-antisense                   | -2.47 | 1.25E-06 | 9.97E-05 |
| ENSG00000182545 | RNASE10      | 14 | 20505537  | 20511169  | 5632   | protein coding                     | -2.47 | 1.37E-03 | 1.15E-02 |
| ENSG00000268473 | AC092327.1   | 16 | 86434830  | 86435884  | 1054   | processed pseudogene               | -2.47 | 1.86E-04 | 3.02E-03 |
| ENSG00000261095 | AC136285.1   | 16 | 87212122  | 87226430  | 14308  | lncRNA                             | -2.47 | 3.17E-04 | 4.30E-03 |
| ENSG00000274764 | PRAMEF27     | 1  | 13049476  | 13056575  | 7099   | protein coding                     | -2.47 | 1.29E-03 | 1.10E-02 |
| ENSG00000260126 | AC136431.1   | 16 | 16499533  | 16664135  | 164602 | lncRNA                             | -2.47 | 1.37E-03 | 1.15E-02 |
| ENSG00000287724 | AC096536.3   | 1  | 54874672  | 54883664  | 8992   | lncRNA                             | -2.47 | 1.04E-04 | 2.02E-03 |
| ENSG00000225652 | KCNMA1-AS3   | 10 | 77350851  | 77376613  | 25762  | lncRNA-antisense                   | -2.47 | 2.37E-04 | 3.56E-03 |
| ENSG00000258931 | AC100836.1   | 15 | 26050538  | 26052276  | 1738   | lncRNA                             | -2.47 | 3.40E-03 | 2.15E-02 |
| ENSG00000286518 | AL354743.1   | 1  | 3367815   | 3373928   | 6113   | lncRNA                             | -2.47 | 3.23E-07 | 4.04E-05 |
| ENSG00000285855 | Z72006.1     | 22 | 48403462  | 48415571  | 12109  | lncRNA                             | -2.47 | 1.48E-07 | 2.33E-05 |
| ENSG00000214533 | KRT18P33     | 2  | 65666695  | 65667737  | 1042   | processed pseudogene               | -2.47 | 4.61E-04 | 5.51E-03 |
| ENSG00000285613 | AC099482.2   | 16 | 23167577  | 23186395  | 18818  | lncRNA                             | -2.48 | 8.86E-04 | 8.58E-03 |
| ENSG00000260586 | AC064799.2   | 15 | 71332120  | 71352640  | 20340  | lncRNA-sense intronic              | -2.48 | 9.33E-04 | 8.89E-03 |
| ENSG00000286501 | AC018545.1   | 3  | 150339478 | 150343210 | 3732   | lncRNA                             | -2.48 | 2.22E-04 | 3.40E-03 |
| ENSG00000205129 | C4orf47      | 4  | 185426249 | 185449826 | 23577  | protein coding                     | -2.48 | 6.00E-05 | 1.39E-03 |
| ENSG00000163793 | DNAJC5G      | 2  | 27275433  | 27281499  | 6066   | protein coding                     | -2.48 | 1.14E-04 | 2.15E-03 |
| ENSG00000231505 | AC108868.1   | 2  | 106521903 | 106538079 | 16176  | lncRNA                             | -2.48 | 4.98E-03 | 2.79E-02 |
| ENSG00000279525 | AC002451.2   | 7  | 95542145  | 95544542  | 2397   | TEC                                | -2.48 | 6.96E-04 | 7.27E-03 |
| ENSG00000213211 | KRT18P64     | 6  | 85287789  | 85289007  | 1218   | processed pseudogene               | -2.48 | 5.76E-03 | 3.08E-02 |
| ENSG00000106178 | CCL24        | 7  | 75810825  | 75823356  | 12531  | protein coding                     | -2.48 | 6.72E-04 | 7.10E-03 |
| ENSG00000163209 | SPRR3        | 1  | 153001747 | 153003856 | 2109   | protein coding                     | -2.48 | 3.10E-04 | 4.24E-03 |
| ENSG00000287373 | AL122014.1   | 11 | 30773913  | 30850559  | 76646  | lncRNA                             | -2.49 | 3.81E-04 | 4.68E-03 |
| ENSG00000251010 | AC097372.1   | 4  | 146241806 | 146243669 | 1863   | lncRNA-antisense                   | -2.49 | 1.20E-03 | 1.05E-02 |
| ENSG00000286991 | AC012157.3   | 12 | 115878748 | 115885867 | 7219   | lncRNA                             | -2.49 | 9.36E-03 | 4.26E-02 |
| ENSG00000228776 | AC114492.1   | 1  | 42140635  | 42141391  | 756    | processed pseudogene               | -2.49 | 5.73E-03 | 3.07E-02 |
| ENSG00000285541 | AC005548.1   | 17 | 11197883  | 11242062  | 44179  | lncRNA-antisense                   | -2.49 | 6.99E-04 | 7.30E-03 |
| ENSG00000166396 | SERPINB7     | 18 | 63752935  | 63805376  | 52441  | protein coding                     | -2.49 | 5.82E-06 | 2.87E-04 |
| ENSG00000205215 | KRT17P7      | 17 | 20519312  | 20528687  | 9375   | transcribed unprocessed pseudogene | -2.49 | 5.08E-06 | 2.62E-04 |
| ENSG00000277351 | AC013553.3   | 15 | 65049188  | 65049802  | 614    | lncRNA-antisense                   | -2.49 | 3.58E-03 | 2.23E-02 |
| ENSG00000254991 | AC124276.1   | 11 | 12066929  | 12073014  | 6085   | lncRNA                             | -2.49 | 5.89E-03 | 3.13E-02 |
| ENSG00000261037 | AC010266.2   | 5  | 6019029   | 6022283   | 3254   | lncRNA                             | -2.49 | 4.30E-04 | 5.24E-03 |
| ENSG00000279642 | AL023973.1   | 22 | 44486295  | 44486914  | 619    | TEC                                | -2.49 | 6.91E-04 | 7.24E-03 |
| ENSG00000170983 | LINC00208    | 8  | 11576257  | 11582187  | 6560   | lncRNA                             | -2.49 | 5.92E-06 | 2.89E-04 |
| ENSG00000254242 | AC100849.2   | 8  | 19091703  | 19145449  | 53746  | lncRNA                             | -2.49 | 9.50E-07 | 8.23E-05 |
| ENSG00000287963 | AC010476.2   | 5  | 155087430 | 155199252 | 111822 | lncRNA                             | -2.49 | 2.75E-06 | 1.72E-04 |
| ENSG00000279848 | AL008638.4   | 22 | 27044001  | 27045315  | 1314   | lncRNA                             | -2.49 | 2.76E-03 | 1.87E-02 |
| ENSG00000279853 | AC004453.2   | 7  | 44367140  | 44369292  | 2152   | TEC                                | -2.49 | 1.04E-03 | 9.57E-03 |
| ENSG00000284240 | LINC02801    | 1  | 87212669  | 87264741  | 52072  | lncRNA                             | -2.49 | 4.36E-06 | 2.35E-04 |
| ENSG00000245688 | AC008659.1   | 5  | 178438681 | 178443094 | 4413   | lncRNA-sense intronic              | -2.50 | 2.01E-03 | 1.50E-02 |
| ENSG00000255843 | AP000593.3   | 11 | 72302139  | 72302965  | 826    | lncRNA-antisense                   | -2.50 | 8.01E-03 | 3.83E-02 |
| ENSG00000255387 | RDXP1        | 11 | 4210354   | 4212091   | 1737   | processed pseudogene               | -2.50 | 4.58E-03 | 2.64E-02 |
| ENSG00000288028 | AL049839.3   | 14 | 94599460  | 94607839  | 8379   | lncRNA                             | -2.50 | 3.44E-03 | 2.16E-02 |
| ENSG00000284632 | AL354702.1   | 1  | 38754216  | 38815979  | 61763  | lncRNA                             | -2.50 | 9.23E-05 | 1.87E-03 |
| ENSG00000229161 | TCPIP1P      | 7  | 42794906  | 42802494  | 7588   | unprocessed pseudogene             | -2.50 | 6.07E-04 | 6.63E-03 |
| ENSG00000260838 | AC022893.2   | 8  | 72947150  | 72950445  | 3295   | lncRNA                             | -2.50 | 1.08E-03 | 9.75E-03 |
| ENSG00000166596 | CFAP52       | 17 | 9576627   | 9643447   | 66820  | protein coding                     | -2.50 | 1.55E-06 | 1.18E-04 |
| ENSG00000287661 | AL391844.1   | 1  | 48552991  | 48558106  | 5115   | lncRNA                             | -2.50 | 1.64E-03 | 1.30E-02 |
| ENSG00000203280 | KIAA1671-AS1 | 22 | 25102433  | 25112692  | 10259  | lncRNA-antisense                   | -2.50 | 3.61E-06 | 2.06E-04 |
| ENSG00000287526 | AC016587.1   | 19 | 33997289  | 34066283  | 68994  | lncRNA                             | -2.50 | 8.12E-04 | 8.12E-03 |
| ENSG00000270314 | AC007161.2   | 7  | 7735743   | 77368511  | 1108   | processed pseudogene               | -2.50 | 2.03E-03 | 1.51E-02 |
| ENSG00000176635 | HORMAD2      | 22 | 30080464  | 30177075  | 96611  | protein coding                     | -2.50 | 1.39E-04 | 2.46E-03 |
| ENSG00000260646 | AL031705.1   | 16 | 1512979   | 1514675   | 1696   | lncRNA                             | -2.50 | 5.10E-04 | 5.89E-03 |
| ENSG00000227765 | MYL12BP2     | 4  | 184299129 | 184299640 | 511    | processed pseudogene               | -2.50 | 7.92E-03 | 3.81E-02 |
| ENSG00000278965 | AC122713.2   | 5  | 180078357 | 180081691 | 3334   | TEC                                | -2.50 | 2.63E-06 | 1.68E-04 |
| ENSG00000170498 | KISS1        | 1  | 204190341 | 204196491 | 6150   | protein coding                     | -2.51 | 3.19E-03 | 2.06E-02 |
| ENSG00000261465 | AC099518.4   | 16 | 19062144  | 19067691  | 5547   | lncRNA-antisense                   | -2.51 | 1.98E-04 | 3.14E-03 |
| ENSG00000280350 | LINC01726    | 20 | 21610787  | 21703585  | 92798  | lncRNA                             | -2.51 | 1.50E-03 | 1.23E-02 |
| ENSG00000254256 | RPSAP71      | 5  | 171365595 | 171367693 | 2098   | processed pseudogene               | -2.51 | 3.85E-03 | 2.33E-02 |
| ENSG00000285658 | AC127035.1   | 11 | 46572948  | 46587808  | 14860  | lncRNA-antisense                   | -2.51 | 4.59E-04 | 5.50E-03 |
| ENSG00000265514 | LINC01892    | 18 | 5081171   | 5098780   | 17609  | lncRNA                             | -2.51 | 4.72E-04 | 5.60E-03 |
| ENSG00000250822 | LINC02111    | 5  | 17378906  | 17387310  | 8404   | lncRNA                             | -2.51 | 3.27E-03 | 2.09E-02 |
| ENSG00000286829 | AC093798.1   | 2  | 24402995  | 24413292  | 10297  | lncRNA                             | -2.51 | 1.62E-04 | 2.74E-03 |
| ENSG00000287623 | AC037193.1   | 3  | 9100803   | 9104078   | 3275   | lncRNA                             | -2.51 | 1.64E-04 | 2.75E-03 |
| ENSG00000236648 | LINC02810    | 1  | 17717625  | 17749978  | 32353  | lncRNA                             | -2.51 | 4.18E-06 | 2.28E-04 |
| ENSG00000223530 | AC012506.1   | 2  | 23330664  | 23332044  | 1380   | lncRNA                             | -2.51 | 4.05E-03 | 2.41E-02 |
| ENSG00000223528 | AL359094.1   | 10 | 126988095 | 127026507 | 38412  | lncRNA-antisense                   | -2.51 | 3.74E-08 | 9.08E-06 |
| ENSG00000235366 | LINC01055    | 13 | 45680184  | 45701184  | 21000  | lncRNA                             | -2.51 | 2.31E-04 | 3.49E-03 |
| ENSG00000286790 | AC010494.1   | 16 | 19180748  | 19184060  | 3312   | lncRNA                             | -2.51 | 3.62E-05 | 9.79E-04 |
| ENSG00000279774 | AL590483.3   | 1  | 244064330 | 244067909 | 3579   | TEC                                | -2.51 | 3.49E-06 | 2.01E-04 |
| ENSG00000259091 | LINC00517    | 14 | 37896060  | 37902372  | 6312   | lncRNA-antisense                   | -2.51 | 1.48E-03 | 1.21E-02 |
| ENSG00000259637 | DNM1P38      | 15 | 82531653  | 82534139  | 2486   | unprocessed pseudogene             | -2.51 | 4.14E-05 | 1.07E-03 |
| ENSG00000205318 | GCNT2P1      | 6  | 10633762  | 10634695  | 933    | processed pseudogene               | -2.51 | 1.39E-03 | 1.16E-02 |
| ENSG00000253974 | NRG1-IT1     | 8  | 32026210  | 32139495  | 113285 | lncRNA-sense intronic              | -2.51 | 1.47E-03 | 1.21E-02 |
| ENSG00000230650 | AC140479.2   | 2  | 110360608 | 110363737 | 3129   | processed pseudogene               | -2.51 | 3.83E-03 | 2.32E-02 |
| ENSG00000267075 | AC015818.8   | 17 | 20545371  | 20549952  | 4581   | lncRNA                             | -2.51 | 1.98E-04 | 3.15E-03 |
| ENSG00000279968 | CCDC28A-AS1  | 6  | 138725211 | 138773652 | 48441  | lncRNA                             | -2.51 | 1.26E-07 | 2.06E-05 |
| ENSG00000269445 | AC067969.2   | 19 | 38526954  | 38528555  | 1601   | lncRNA-antisense                   | -2.51 | 8.47E-04 | 8.33E-03 |
| ENSG00000250609 | AC110753.1   | 4  | 154523487 | 154524807 | 1320   | processed pseudogene               | -2.51 | 4.76E-04 | 5.63E-03 |
| ENSG00000276702 | AC010809.3   | 15 | 33850538  | 33851178  | 640    | lncRNA-antisense                   | -2.52 | 2.46E-03 | 1.72E-02 |
| ENSG00000259964 | THSD4-AS1    | 15 | 71147650  | 71189064  | 41414  | lncRNA-antisense                   | -2.52 | 2.64E-06 | 1.69E-04 |
| ENSG00000241388 | HNF1A-AS1    | 12 | 120941728 | 120980965 | 39237  | lncRNA                             | -2.52 | 1.12E-06 | 9.20E-05 |
| ENSG00000229275 | BX284656.1   | 22 | 48141542  | 48143229  | 1687   | lncRNA                             | -2.52 | 3.08E-05 | 8.72E-04 |
| ENSG00000152583 | SPARCL1      | 4  | 87473335  | 87531061  | 57726  | protein coding                     | -2.52 | 1.06E-04 | 2.04E-03 |
| ENSG0000021461  | CYP3A43      | 7  | 99828013  | 99866102  | 38089  | protein coding                     | -2.52 | 4.81E-06 | 2.51E-04 |
| ENSG00000255512 | LINC02684    | 11 | 135061781 | 135075908 | 14127  | lncRNA                             | -2.52 | 1.59E-05 | 5.65E-04 |
| ENSG00000269526 | ERVV-1       | 19 | 53013921  | 53016122  | 2201   | protein coding                     | -2.52 | 2.01E-03 | 1.50E-02 |
| ENSG00000205054 | LINC01121    | 2  | 45164816  | 45323397  | 158581 | lncRNA                             | -2.52 | 1.18E-09 | 7.59E-07 |

|                 |             |    |           |           |        |                                    |       |          |          |
|-----------------|-------------|----|-----------|-----------|--------|------------------------------------|-------|----------|----------|
| ENSG00000227742 | CALR4P      | 1  | 51561866  | 51594897  | 33031  | transcribed unitary pseudogene     | -2.52 | 2.67E-06 | 1.69E-04 |
| ENSG00000188280 | FAM230G     | 22 | 20338805  | 20354372  | 15567  | lncRNA-antisense                   | -2.52 | 9.86E-06 | 4.12E-04 |
| ENSG00000257035 | AC025252.2  | 12 | 127624153 | 127626267 | 2114   | unprocessed pseudogene             | -2.52 | 5.87E-03 | 3.12E-02 |
| ENSG00000116218 | NPHS2       | 1  | 179550539 | 179575952 | 25413  | protein coding                     | -2.52 | 4.50E-04 | 5.43E-03 |
| ENSG00000259245 | LINC02853   | 15 | 35919892  | 36049537  | 129645 | lncRNA                             | -2.52 | 6.43E-03 | 3.32E-02 |
| ENSG00000214108 | TPT1P5      | 5  | 31908361  | 31909186  | 825    | processed pseudogene               | -2.52 | 6.97E-03 | 3.50E-02 |
| ENSG00000248659 | AC023162.1  | 3  | 129632019 | 129632492 | 473    | unprocessed pseudogene             | -2.52 | 6.30E-03 | 3.27E-02 |
| ENSG00000198414 | TATDN2P1    | X  | 44283916  | 44286246  | 2330   | processed pseudogene               | -2.52 | 3.81E-03 | 2.32E-02 |
| ENSG00000279940 | AC073862.3  | 12 | 130956384 | 130958031 | 1647   | TEC                                | -2.52 | 9.12E-04 | 8.74E-03 |
| ENSG00000227748 | AL138916.1  | 6  | 146854983 | 146863460 | 8477   | lncRNA                             | -2.52 | 3.31E-04 | 4.43E-03 |
| ENSG00000198798 | MAGEB3      | X  | 30230436  | 30237492  | 7056   | protein coding                     | -2.52 | 4.91E-04 | 5.74E-03 |
| ENSG00000232624 | LINC01517   | 10 | 28743506  | 28941910  | 198404 | lncRNA                             | -2.52 | 3.82E-09 | 1.83E-06 |
| ENSG00000253886 | AC026688.1  | 5  | 154493576 | 154494743 | 1167   | processed pseudogene               | -2.53 | 2.83E-03 | 1.90E-02 |
| ENSG00000162723 | SLAMF9      | 1  | 159951492 | 159954237 | 2745   | protein coding                     | -2.53 | 4.87E-04 | 5.72E-03 |
| ENSG00000138068 | SULT6B1     | 2  | 37167820  | 37196598  | 28778  | protein coding                     | -2.53 | 3.10E-05 | 8.74E-04 |
| ENSG00000104055 | TGM5        | 15 | 43232590  | 43266928  | 34338  | protein coding                     | -2.53 | 1.30E-06 | 1.02E-04 |
| ENSG00000246523 | FZD4-DT     | 11 | 86955616  | 87021909  | 66293  | lncRNA                             | -2.53 | 3.45E-06 | 2.00E-04 |
| ENSG00000267401 | AC090621.1  | 18 | 60294136  | 60301317  | 7181   | lncRNA                             | -2.53 | 4.69E-03 | 2.68E-02 |
| ENSG00000265739 | AC104984.3  | 17 | 30122429  | 30126118  | 3689   | lncRNA-antisense                   | -2.53 | 3.05E-03 | 2.00E-02 |
| ENSG00000269588 | AC011500.2  | 19 | 39553034  | 39555356  | 2322   | unprocessed pseudogene             | -2.53 | 3.99E-03 | 2.39E-02 |
| ENSG00000284612 | AL591543.1  | 9  | 38650215  | 38662717  | 12502  | lncRNA                             | -2.53 | 2.30E-04 | 3.48E-03 |
| ENSG00000231606 | AL357873.1  | 1  | 14221887  | 14304445  | 82558  | lncRNA                             | -2.53 | 1.20E-06 | 9.69E-05 |
| ENSG00000261336 | EIF4BP5     | 16 | 47565090  | 47566884  | 1794   | processed pseudogene               | -2.53 | 2.01E-03 | 1.50E-02 |
| ENSG00000229781 | RRN3P4      | 2  | 142854095 | 142855998 | 1903   | processed pseudogene               | -2.53 | 6.00E-03 | 3.38E-02 |
| ENSG00000276487 | AC061709.2  | 12 | 128187225 | 128191495 | 4270   | lncRNA                             | -2.53 | 2.23E-03 | 1.62E-02 |
| ENSG00000280423 | AL359852.1  | 6  | 2561947   | 2564143   | 2196   | TEC                                | -2.54 | 1.63E-04 | 2.75E-03 |
| ENSG00000227038 | GTF2IIP7    | 7  | 76090431  | 76108779  | 18348  | transcribed unprocessed pseudogene | -2.54 | 2.27E-04 | 3.45E-03 |
| ENSG00000284652 | BX323043.1  | 1  | 9421098   | 9422862   | 1764   | lncRNA                             | -2.54 | 3.30E-03 | 2.10E-02 |
| ENSG00000224559 | LINC01087   | 2  | 131637025 | 13164915  | 12590  | lncRNA                             | -2.54 | 9.23E-05 | 1.87E-03 |
| ENSG00000267617 | AC007795.1  | 19 | 28869507  | 28879176  | 9669   | lncRNA                             | -2.54 | 7.43E-04 | 7.62E-03 |
| ENSG00000230371 | KARS1P2     | 13 | 113130416 | 113132054 | 1638   | processed pseudogene               | -2.54 | 3.32E-04 | 4.43E-03 |
| ENSG00000238276 | AL354863.1  | 10 | 118241468 | 118267710 | 26242  | lncRNA                             | -2.54 | 6.93E-08 | 1.36E-05 |
| ENSG00000279752 | AC011389.2  | 5  | 169012148 | 169013146 | 998    | TEC                                | -2.54 | 2.38E-03 | 1.69E-02 |
| ENSG00000231674 | LINC00410   | 13 | 90890954  | 90926597  | 35643  | lncRNA                             | -2.54 | 2.90E-03 | 1.93E-02 |
| ENSG00000237282 | LINC00851   | 20 | 18379049  | 18381484  | 2435   | lncRNA-antisense                   | -2.54 | 9.60E-04 | 9.06E-03 |
| ENSG00000282882 | AC027045.2  | 17 | 9764186   | 9805100   | 40914  | lncRNA                             | -2.54 | 1.71E-04 | 2.85E-03 |
| ENSG00000151033 | LYZL2       | 10 | 30611779  | 30629762  | 17983  | protein coding                     | -2.54 | 3.10E-04 | 4.24E-03 |
| ENSG00000274340 | AC032011.1  | 15 | 62387327  | 62388875  | 1548   | lncRNA                             | -2.54 | 1.68E-04 | 2.68E-03 |
| ENSG00000267732 | AC006305.3  | 18 | 56137573  | 56150102  | 12529  | lncRNA                             | -2.54 | 1.82E-03 | 1.40E-02 |
| ENSG00000122145 | TBX22       | X  | 80014753  | 80031774  | 17021  | protein coding                     | -2.54 | 4.06E-04 | 5.08E-03 |
| ENSG00000287444 | AC007610.5  | 16 | 50120064  | 50129904  | 9840   | lncRNA                             | -2.54 | 1.99E-03 | 1.49E-02 |
| ENSG00000224371 | AL391361.2  | 6  | 16087288  | 160926204 | 53316  | lncRNA                             | -2.54 | 2.87E-03 | 1.92E-02 |
| ENSG00000214970 | AC005323.1  | 17 | 10579040  | 10623036  | 43996  | lncRNA-antisense                   | -2.54 | 8.55E-04 | 8.38E-03 |
| ENSG00000204930 | FAM221B     | 9  | 35816391  | 35828747  | 12356  | protein coding                     | -2.54 | 6.47E-05 | 1.47E-03 |
| ENSG00000227180 | LRRCP2P1    | 2  | 174299324 | 174300956 | 1632   | processed pseudogene               | -2.55 | 3.28E-03 | 2.10E-02 |
| ENSG00000280377 | AC027176.3  | 15 | 89950760  | 89951345  | 585    | TEC                                | -2.55 | 2.90E-03 | 1.93E-02 |
| ENSG00000212722 | KRTAP4-9    | 17 | 41105332  | 41106488  | 1156   | protein coding                     | -2.55 | 1.84E-04 | 2.99E-03 |
| ENSG00000273998 | AL049794.1  | 20 | 16576068  | 16579615  | 3547   | lncRNA                             | -2.55 | 1.31E-03 | 1.12E-02 |
| ENSG00000254573 | AP004550.1  | 11 | 134563396 | 134573056 | 9660   | lncRNA                             | -2.55 | 5.17E-04 | 5.95E-03 |
| ENSG00000234575 | CTSLP8      | 9  | 87844154  | 87847314  | 3160   | unprocessed pseudogene             | -2.55 | 1.78E-04 | 2.92E-03 |
| ENSG00000280312 | Z83836.1    | 22 | 47259366  | 47261007  | 1641   | TEC                                | -2.55 | 3.12E-04 | 4.25E-03 |
| ENSG00000188984 | AADACL3     | 1  | 12716110  | 12728760  | 12650  | protein coding                     | -2.55 | 1.08E-06 | 9.04E-05 |
| ENSG00000164616 | FBXL21P     | 5  | 135930317 | 135951591 | 21274  | transcribed unitary pseudogene     | -2.55 | 1.39E-05 | 5.23E-04 |
| ENSG00000286979 | AC005234.2  | 2  | 70629657  | 70648761  | 19104  | lncRNA                             | -2.55 | 1.66E-03 | 1.26E-02 |
| ENSG00000224054 | AL022163.1  | X  | 44466691  | 44468955  | 2264   | processed pseudogene               | -2.55 | 4.35E-03 | 2.54E-02 |
| ENSG00000229239 | AL451000.1  | 1  | 23670294  | 23680259  | 9965   | unprocessed pseudogene             | -2.55 | 8.49E-04 | 8.33E-03 |
| ENSG00000120563 | LYZL1       | 10 | 29289061  | 29318328  | 29267  | protein coding                     | -2.55 | 3.23E-04 | 4.34E-03 |
| ENSG00000180259 | PRNT        | 20 | 4731279   | 4740668   | 9389   | lncRNA                             | -2.56 | 6.18E-04 | 6.72E-03 |
| ENSG00000261502 | AC040174.1  | 16 | 63056786  | 63129654  | 72868  | lncRNA                             | -2.56 | 6.87E-05 | 1.53E-03 |
| ENSG00000287560 | AL731533.3  | 10 | 3042535   | 3047083   | 4548   | lncRNA                             | -2.56 | 3.32E-04 | 4.43E-03 |
| ENSG00000261261 | AC026462.4  | 16 | 52622115  | 52677747  | 55632  | lncRNA                             | -2.56 | 6.50E-05 | 1.47E-03 |
| ENSG00000227518 | MIR1302-9HG | 9  | 27657     | 30891     | 3234   | lncRNA-antisense                   | -2.56 | 8.71E-04 | 8.48E-03 |
| ENSG00000179577 | AP003471.1  | 8  | 104419512 | 104421500 | 1988   | lncRNA-sense intronic              | -2.56 | 1.48E-04 | 2.56E-03 |
| ENSG00000213028 | AL354983.1  | 1  | 22968899  | 229689904 | 905    | processed pseudogene               | -2.56 | 1.91E-03 | 1.45E-02 |
| ENSG00000260866 | AC138915.2  | 16 | 32388135  | 32436203  | 48068  | unprocessed pseudogene             | -2.56 | 3.61E-03 | 2.24E-02 |
| ENSG00000226557 | TRAF6P1     | 10 | 59136625  | 59138182  | 1557   | processed pseudogene               | -2.56 | 7.92E-04 | 7.97E-03 |
| ENSG00000260311 | AC138907.1  | 16 | 32663925  | 32666533  | 2608   | lncRNA                             | -2.56 | 2.83E-04 | 4.00E-03 |
| ENSG00000258873 | DUXA        | 19 | 57154021  | 57167485  | 13464  | protein coding                     | -2.56 | 2.20E-04 | 3.38E-03 |
| ENSG00000228232 | MYADM-AS1   | 19 | 53854581  | 53869107  | 14526  | lncRNA-antisense                   | -2.56 | 5.18E-05 | 1.25E-03 |
| ENSG00000233012 | HDAC1P2     | 1  | 220625740 | 220628056 | 2316   | transcribed processed pseudogene   | -2.56 | 5.91E-04 | 6.52E-03 |
| ENSG00000287960 | AC008567.3  | 19 | 9507820   | 9514539   | 6719   | lncRNA                             | -2.56 | 4.79E-05 | 1.19E-03 |
| ENSG00000244537 | KRTAP4-2    | 17 | 41177446  | 41178221  | 775    | protein coding                     | -2.56 | 7.27E-04 | 7.52E-03 |
| ENSG00000261514 | LINC01976   | 17 | 43938363  | 43938959  | 596    | lncRNA                             | -2.56 | 7.73E-04 | 7.84E-03 |
| ENSG00000275989 | AL442128.1  | 13 | 110945478 | 110971603 | 26125  | transcribed unprocessed pseudogene | -2.56 | 5.85E-05 | 1.36E-03 |
| ENSG00000138813 | C4orf17     | 4  | 99511012  | 99542303  | 31291  | protein coding                     | -2.57 | 7.25E-04 | 7.51E-03 |
| ENSG00000259477 | AC012653.1  | 15 | 57979716  | 57980646  | 930    | processed pseudogene               | -2.57 | 2.40E-03 | 1.70E-02 |
| ENSG00000279579 | LINC01666   | 21 | 8759077   | 8761335   | 2258   | lncRNA                             | -2.57 | 1.72E-05 | 5.93E-04 |
| ENSG00000183747 | ACSM2A      | 16 | 20451461  | 20487669  | 36208  | protein coding                     | -2.57 | 1.21E-07 | 1.99E-05 |
| ENSG00000259423 | AC113146.1  | 15 | 39167676  | 39180048  | 12372  | lncRNA                             | -2.57 | 6.59E-03 | 3.38E-02 |
| ENSG00000235494 | AL590705.2  | 9  | 97222602  | 97235017  | 12415  | lncRNA                             | -2.57 | 5.20E-04 | 5.97E-03 |
| ENSG00000288024 | AC005301.2  | 22 | 16725072  | 16747761  | 22689  | lncRNA                             | -2.57 | 1.08E-03 | 9.77E-03 |
| ENSG00000217791 | ASS1P9      | 5  | 53859166  | 53860401  | 1235   | processed pseudogene               | -2.57 | 2.18E-03 | 1.59E-02 |
| ENSG00000241984 | RPL7AP2     | 14 | 39156742  | 39157852  | 1110   | processed pseudogene               | -2.57 | 2.57E-03 | 1.78E-02 |
| ENSG00000258233 | ARHGAP42P5  | 14 | 18623852  | 18626787  | 2935   | processed pseudogene               | -2.57 | 5.51E-04 | 6.22E-03 |
| ENSG00000232596 | LINC01646   | 1  | 4571481   | 4594016   | 22535  | lncRNA                             | -2.57 | 1.80E-06 | 1.33E-04 |
| ENSG00000224939 | LINC00184   | 1  | 234629311 | 234634780 | 5469   | lncRNA                             | -2.57 | 1.49E-03 | 1.22E-02 |
| ENSG00000283304 | LINC02183   | 16 | 54542808  | 54559100  | 16292  | lncRNA                             | -2.57 | 1.08E-04 | 2.07E-03 |
| ENSG00000284646 | AL031291.1  | 1  | 11311734  | 11319093  | 7359   | lncRNA                             | -2.57 | 9.84E-04 | 9.20E-03 |
| ENSG00000171403 | KRT9        | 17 | 41565836  | 41572059  | 6223   | protein coding                     | -2.57 | 5.90E-05 | 1.37E-03 |
| ENSG00000287272 | AC007786.4  | 19 | 29268976  | 29298576  | 29600  | lncRNA                             | -2.57 | 6.34E-08 | 1.30E-05 |



|                 |              |    |           |           |        |                                    |       |          |          |
|-----------------|--------------|----|-----------|-----------|--------|------------------------------------|-------|----------|----------|
| ENSG00000196109 | ZNF676       | 19 | 22179089  | 22215801  | 36712  | protein coding                     | -2.57 | 1.69E-06 | 1.26E-04 |
| ENSG00000275774 | HNRNPCL2     | 1  | 13115488  | 13116854  | 1366   | protein coding                     | -2.57 | 4.65E-03 | 2.66E-02 |
| ENSG00000262267 | U95743.1     | 16 | 13728654  | 13779760  | 51106  | lncRNA                             | -2.57 | 7.94E-05 | 1.69E-03 |
| ENSG00000254902 | ANO1-AS1     | 11 | 70187788  | 70188509  | 721    | lncRNA-antisense                   | -2.58 | 1.20E-03 | 1.05E-02 |
| ENSG00000183559 | C10orf120    | 10 | 122697709 | 122699846 | 2137   | protein coding                     | -2.58 | 5.17E-04 | 5.95E-03 |
| ENSG00000251632 | LINC02172    | 4  | 137545731 | 137603430 | 57699  | lncRNA                             | -2.58 | 6.89E-03 | 3.48E-02 |
| ENSG00000176855 | KRT18P28     | 1  | 182959074 | 182960405 | 1331   | processed pseudogene               | -2.58 | 8.19E-04 | 8.16E-03 |
| ENSG00000229988 | HBBP1        | 11 | 5241105   | 5243537   | 2432   | transcribed unprocessed pseudogene | -2.58 | 4.79E-04 | 5.66E-03 |
| ENSG00000254334 | AC021355.1   | 8  | 21297933  | 21309486  | 11553  | lncRNA                             | -2.58 | 1.57E-03 | 1.27E-02 |
| ENSG00000226792 | C13orf42     | 13 | 51082119  | 51200252  | 118133 | protein coding                     | -2.58 | 1.31E-08 | 4.36E-06 |
| ENSG00000257634 | AC079310.1   | 12 | 54682973  | 54687434  | 4461   | lncRNA                             | -2.58 | 1.08E-03 | 9.77E-03 |
| ENSG00000229145 | ACTBP1       | X  | 46288016  | 46289128  | 1112   | processed pseudogene               | -2.58 | 7.77E-05 | 1.66E-03 |
| ENSG00000232028 | AC007391.1   | 2  | 37325340  | 37326797  | 1457   | lncRNA                             | -2.58 | 5.51E-03 | 2.99E-02 |
| ENSG00000176922 | OR51S1       | 11 | 4847489   | 4849238   | 1749   | protein coding                     | -2.58 | 3.18E-03 | 2.05E-02 |
| ENSG00000237336 | AL445489.1   | 9  | 123491884 | 123493156 | 1272   | lncRNA-antisense                   | -2.58 | 4.76E-04 | 5.63E-03 |
| ENSG00000179546 | HTR1D        | 1  | 23191895  | 23194729  | 2834   | protein coding                     | -2.58 | 5.65E-06 | 2.81E-04 |
| ENSG00000259518 | LINC01583    | 15 | 82088569  | 82097694  | 9125   | lncRNA                             | -2.58 | 2.53E-04 | 3.71E-03 |
| ENSG00000235076 | GAPDH52      | 13 | 21358373  | 21359314  | 941    | processed pseudogene               | -2.58 | 1.29E-03 | 1.10E-02 |
| ENSG00000224781 | EIF4A2P4     | X  | 52832704  | 52833999  | 1195   | processed pseudogene               | -2.58 | 6.31E-04 | 6.81E-03 |
| ENSG00000225676 | AC002378.1   | 22 | 30182818  | 30207195  | 24377  | lncRNA-antisense                   | -2.58 | 3.44E-03 | 2.17E-02 |
| ENSG00000225869 | AC008696.1   | 5  | 143752090 | 143752704 | 614    | processed pseudogene               | -2.58 | 1.74E-03 | 1.35E-02 |
| ENSG00000276172 | ELMO2P1      | 15 | 23083094  | 23121324  | 38230  | transcribed unprocessed pseudogene | -2.59 | 3.15E-05 | 8.83E-04 |
| ENSG00000286594 | AL133493.2   | 21 | 45607386  | 45609194  | 1808   | lncRNA                             | -2.59 | 5.61E-04 | 6.29E-03 |
| ENSG00000183654 | MARCFH11     | 5  | 16067139  | 16180762  | 113623 | protein coding                     | -2.59 | 5.55E-04 | 6.24E-03 |
| ENSG00000281961 | AF087845.4   | 8  | 1377867   | 1380307   | 2440   | lncRNA                             | -2.59 | 2.82E-04 | 4.00E-03 |
| ENSG00000284726 | AL109936.9   | 1  | 23297797  | 23302866  | 5069   | lncRNA                             | -2.59 | 5.90E-03 | 3.13E-02 |
| ENSG00000246774 | COL25A1-DT   | 4  | 109303035 | 109316135 | 13100  | lncRNA                             | -2.59 | 2.23E-03 | 1.62E-02 |
| ENSG00000237337 | ELAVL4-AS1   | 1  | 50174306  | 50175868  | 1562   | lncRNA-antisense                   | -2.59 | 2.34E-03 | 1.67E-02 |
| ENSG00000256847 | CND2P1       | 11 | 63243085  | 63244004  | 919    | processed pseudogene               | -2.59 | 1.69E-03 | 1.33E-02 |
| ENSG00000280219 | AC093908.1   | 4  | 147487971 | 147496062 | 8091   | TEC                                | -2.59 | 4.11E-06 | 2.25E-04 |
| ENSG00000261020 | AC132825.3   | 17 | 22420022  | 22424731  | 4709   | lncRNA                             | -2.59 | 8.65E-06 | 3.76E-04 |
| ENSG00000188643 | S100A16      | 1  | 153606886 | 153613145 | 6259   | protein coding                     | -2.59 | 3.33E-05 | 9.18E-04 |
| ENSG00000286992 | AP001360.3   | 11 | 119976111 | 120009588 | 33477  | lncRNA                             | -2.59 | 6.23E-04 | 6.74E-03 |
| ENSG00000286527 | AL161665.2   | 14 | 32200433  | 32201736  | 1303   | lncRNA                             | -2.59 | 4.37E-04 | 5.31E-03 |
| ENSG00000268564 | AC003956.1   | 19 | 15124160  | 15126174  | 2014   | lncRNA-antisense                   | -2.59 | 7.04E-04 | 7.34E-03 |
| ENSG00000286403 | AC010378.1   | 5  | 139503242 | 139511374 | 8132   | lncRNA                             | -2.59 | 2.33E-04 | 3.51E-03 |
| ENSG00000227158 | AC073621.1   | 17 | 17422681  | 17423074  | 1023   | processed pseudogene               | -2.59 | 4.51E-04 | 5.44E-03 |
| ENSG00000238040 | SALL4P2      | X  | 129871309 | 129877567 | 6258   | processed pseudogene               | -2.59 | 1.76E-04 | 2.91E-03 |
| ENSG00000183378 | OVCH2        | 11 | 7689437   | 7706241   | 16984  | protein coding                     | -2.60 | 2.68E-05 | 7.92E-04 |
| ENSG00000227091 | SLC6A17-AS1  | 1  | 110165948 | 110172489 | 6541   | lncRNA-antisense                   | -2.60 | 1.64E-05 | 5.73E-04 |
| ENSG00000267273 | AC008567.2   | 19 | 9498678   | 9510079   | 11401  | lncRNA                             | -2.60 | 3.92E-03 | 2.36E-02 |
| ENSG00000256146 | AC006206.1   | 12 | 5315961   | 5319347   | 3386   | lncRNA                             | -2.60 | 7.08E-07 | 6.82E-05 |
| ENSG00000280113 | AL357140.3   | 1  | 9826289   | 9828271   | 1982   | TEC                                | -2.60 | 4.29E-04 | 5.24E-03 |
| ENSG00000251219 | LINC01217    | 4  | 100778582 | 100791426 | 12844  | lncRNA-sense intronic              | -2.60 | 1.69E-04 | 2.82E-03 |
| ENSG00000231171 | LINC01098    | 4  | 177728757 | 178028971 | 300214 | lncRNA                             | -2.60 | 1.09E-03 | 9.80E-03 |
| ENSG00000257510 | LINC02402    | 12 | 42615221  | 42646547  | 31326  | lncRNA                             | -2.60 | 3.94E-04 | 4.99E-03 |
| ENSG00000273777 | CEACAM20     | 19 | 44501677  | 44529788  | 28111  | protein coding                     | -2.60 | 7.15E-08 | 1.38E-05 |
| ENSG00000230010 | AL049646.1   | 20 | 18289343  | 18359300  | 6957   | lncRNA                             | -2.60 | 1.85E-07 | 2.77E-05 |
| ENSG00000249717 | PARM1-AS1    | 4  | 74955974  | 74970362  | 14388  | lncRNA-antisense                   | -2.60 | 3.20E-05 | 8.92E-04 |
| ENSG00000230937 | MIR205HG     | 1  | 209428817 | 209432838 | 4021   | lncRNA                             | -2.60 | 3.47E-06 | 2.01E-04 |
| ENSG00000187686 | KRT18P59     | 11 | 125113161 | 125126781 | 13620  | transcribed processed pseudogene   | -2.60 | 5.18E-07 | 5.47E-05 |
| ENSG00000254444 | AC022762.1   | 11 | 6108135   | 6185576   | 77441  | lncRNA-sense overlapping           | -2.60 | 2.31E-04 | 3.49E-03 |
| ENSG00000265000 | MARCFH10-DT  | 17 | 62808500  | 62836371  | 27871  | lncRNA                             | -2.60 | 4.83E-04 | 5.69E-03 |
| ENSG00000234423 | LINC01250    | 2  | 2895048   | 3126026   | 230978 | lncRNA                             | -2.60 | 2.71E-07 | 3.57E-05 |
| ENSG00000259008 | AL355834.1   | 14 | 57355446  | 57359410  | 3964   | lncRNA                             | -2.61 | 1.35E-05 | 5.12E-04 |
| ENSG00000225255 | PSLNR        | 22 | 15746630  | 15778297  | 31667  | lncRNA                             | -2.61 | 1.66E-03 | 1.31E-02 |
| ENSG00000249419 | AC023136.1   | 4  | 162022733 | 162047567 | 24834  | lncRNA-antisense                   | -2.61 | 8.69E-03 | 4.05E-02 |
| ENSG00000136698 | CFC1         | 2  | 130592165 | 130599575 | 7410   | protein coding                     | -2.61 | 3.33E-04 | 4.44E-03 |
| ENSG00000287268 | AL050350.1   | 6  | 110341973 | 110354563 | 12590  | lncRNA                             | -2.61 | 8.06E-08 | 1.48E-05 |
| ENSG00000253298 | LINC01845    | 5  | 159448556 | 159466291 | 17735  | lncRNA                             | -2.61 | 2.07E-05 | 6.70E-04 |
| ENSG00000260679 | AP007216.2   | 11 | 69921638  | 69926813  | 5175   | lncRNA                             | -2.61 | 1.67E-03 | 1.32E-02 |
| ENSG00000287829 | AC002542.6   | 7  | 117091678 | 117097262 | 5584   | lncRNA                             | -2.61 | 2.89E-03 | 1.93E-02 |
| ENSG00000172551 | MUCL1        | 12 | 54830518  | 54896008  | 65490  | protein coding                     | -2.61 | 1.54E-05 | 5.56E-04 |
| ENSG00000259221 | AC023905.1   | 15 | 47359430  | 47396732  | 37302  | lncRNA-antisense                   | -2.61 | 1.16E-03 | 1.03E-02 |
| ENSG00000231382 | NBPF21P      | 3  | 36616006  | 36637457  | 21451  | unprocessed pseudogene             | -2.61 | 2.80E-04 | 3.98E-03 |
| ENSG00000186160 | CYP4Z1       | 1  | 47067231  | 47118318  | 51087  | protein coding                     | -2.61 | 1.49E-05 | 5.47E-04 |
| ENSG00000277010 | AC120498.10  | 16 | 1223639   | 1224143   | 504    | lncRNA-antisense                   | -2.62 | 1.05E-03 | 9.61E-03 |
| ENSG0000069122  | ADGRF5       | 6  | 46852522  | 46954943  | 102421 | protein coding                     | -2.62 | 3.55E-09 | 1.77E-06 |
| ENSG00000274178 | PRAMEF28P    | 1  | 13029339  | 13032130  | 2791   | unprocessed pseudogene             | -2.62 | 1.80E-03 | 1.39E-02 |
| ENSG00000279924 | AL356585.4   | 13 | 18174010  | 18178465  | 4455   | unprocessed pseudogene             | -2.62 | 1.45E-03 | 1.20E-02 |
| ENSG00000285666 | AC006972.1   | 7  | 76818377  | 76903041  | 84664  | lncRNA                             | -2.62 | 5.53E-03 | 3.00E-02 |
| ENSG00000226206 | BX470209.1   | 9  | 89799695  | 89821753  | 22058  | lncRNA                             | -2.62 | 7.93E-04 | 7.97E-03 |
| ENSG00000243130 | PSG11        | 19 | 43007656  | 43026474  | 18818  | protein coding                     | -2.62 | 1.09E-05 | 4.40E-04 |
| ENSG00000271232 | CARS1P1      | 15 | 68749501  | 68750691  | 1190   | processed pseudogene               | -2.62 | 1.64E-03 | 1.30E-02 |
| ENSG00000248100 | AC087257.1   | 12 | 27547050  | 27552773  | 5723   | lncRNA                             | -2.62 | 3.19E-05 | 8.91E-04 |
| ENSG00000166787 | SAAP3        | 11 | 18112472  | 18116132  | 3660   | transcribed unprocessed pseudogene | -2.62 | 1.42E-03 | 1.18E-02 |
| ENSG00000232894 | MRPS31P2     | 13 | 19552571  | 19570288  | 17717  | unprocessed pseudogene             | -2.62 | 2.72E-03 | 1.85E-02 |
| ENSG00000286208 | AC093838.1   | 2  | 131556007 | 131568599 | 13592  | lncRNA                             | -2.62 | 1.05E-05 | 4.29E-04 |
| ENSG00000285785 | AC003950.1   | 17 | 57196081  | 57213300  | 17219  | lncRNA                             | -2.62 | 2.63E-03 | 1.81E-02 |
| ENSG00000275763 | ZNF516-DT    | 18 | 76495521  | 76498088  | 2567   | lncRNA                             | -2.62 | 1.47E-05 | 5.43E-04 |
| ENSG00000160062 | ZBTB8A       | 1  | 32539427  | 32605941  | 66514  | protein coding                     | -2.63 | 4.36E-09 | 2.01E-06 |
| ENSG00000224718 | LINC01657    | 1  | 175877343 | 175880468 | 3125   | lncRNA                             | -2.63 | 5.09E-05 | 1.24E-03 |
| ENSG00000170369 | CST2         | 20 | 23823769  | 23826729  | 2960   | protein coding                     | -2.63 | 7.06E-05 | 1.56E-03 |
| ENSG00000279791 | AC018892.3   | 2  | 97094935  | 97097433  | 2498   | TEC                                | -2.63 | 1.54E-06 | 1.17E-04 |
| ENSG00000214992 | AKAP17BP     | X  | 119249346 | 119257667 | 8321   | unprocessed pseudogene             | -2.63 | 2.68E-03 | 1.83E-02 |
| ENSG00000264301 | LINC01444    | 18 | 14969001  | 14970468  | 1467   | lncRNA                             | -2.63 | 2.94E-03 | 1.95E-02 |
| ENSG00000280693 | SH3PXD2A-AS1 | 10 | 103745966 | 103755423 | 9457   | lncRNA-antisense                   | -2.63 | 1.35E-08 | 4.46E-06 |
| ENSG00000283072 | AL158175.1   | 20 | 22684958  | 22746991  | 62033  | lncRNA                             | -2.63 | 1.69E-06 | 1.26E-04 |
| ENSG00000260100 | AL512604.3   | 9  | 37078813  | 37079776  | 963    | lncRNA                             | -2.63 | 1.47E-03 | 1.21E-02 |
| ENSG00000273877 | AC236972.3   | X  | 153225649 | 153230357 | 4708   | lncRNA                             | -2.63 | 2.22E-04 | 3.41E-03 |

|                 |             |    |           |           |        |                                    |       |          |          |
|-----------------|-------------|----|-----------|-----------|--------|------------------------------------|-------|----------|----------|
| ENSG00000223587 | LINC01986   | 3  | 11745     | 24849     | 13104  | lncRNA                             | -2.63 | 5.30E-05 | 1.27E-03 |
| ENSG00000214614 | AC142086.1  | 16 | 32882586  | 32888874  | 6288   | lncRNA                             | -2.63 | 1.10E-03 | 9.88E-03 |
| ENSG00000166535 | AZML1       | 12 | 8822621   | 8887001   | 64380  | protein coding                     | -2.63 | 4.16E-10 | 3.94E-07 |
| ENSG00000286052 | AL109955.1  | 20 | 57442742  | 57458298  | 15556  | lncRNA                             | -2.63 | 4.15E-05 | 1.07E-03 |
| ENSG00000287741 | AC009434.1  | 15 | 70556521  | 70562722  | 6201   | lncRNA                             | -2.64 | 2.32E-04 | 3.50E-03 |
| ENSG00000258100 | LINC02823   | 12 | 91327045  | 91368607  | 41562  | lncRNA                             | -2.64 | 1.10E-04 | 2.10E-03 |
| ENSG00000258942 | AL358332.1  | 14 | 51344914  | 51385603  | 40689  | lncRNA                             | -2.64 | 1.03E-03 | 9.46E-03 |
| ENSG00000263765 | AC090371.2  | 18 | 32833454  | 32938316  | 104862 | lncRNA-antisense                   | -2.64 | 4.54E-03 | 2.62E-02 |
| ENSG00000163705 | FANCD2OS    | 3  | 10081317  | 10108255  | 26938  | protein coding                     | -2.64 | 2.78E-06 | 1.73E-04 |
| ENSG00000238266 | LINC00707   | 10 | 6779549   | 6879450   | 9901   | lncRNA                             | -2.64 | 2.76E-09 | 1.43E-06 |
| ENSG00000165120 | SSMEM1      | 7  | 130206344 | 130216844 | 10500  | protein coding                     | -2.64 | 1.86E-04 | 3.02E-03 |
| ENSG00000229443 | LINC00433   | 13 | 88494789  | 88607814  | 113025 | lncRNA                             | -2.64 | 3.73E-03 | 2.29E-02 |
| ENSG00000237557 | YWHABP1     | 9  | 38643042  | 38643768  | 726    | processed_pseudogene               | -2.64 | 3.08E-03 | 2.01E-02 |
| ENSG00000165076 | PRSS37      | 7  | 141836300 | 141841487 | 5187   | protein coding                     | -2.64 | 7.21E-06 | 3.33E-04 |
| ENSG00000259093 | AL137191.1  | 14 | 63122888  | 63178190  | 55302  | lncRNA                             | -2.64 | 8.17E-04 | 8.14E-03 |
| ENSG00000250258 | AC008496.2  | 5  | 79774348  | 79816190  | 41842  | lncRNA-antisense                   | -2.65 | 1.82E-03 | 1.40E-02 |
| ENSG00000237899 | AL031289.1  | 1  | 40669089  | 40687588  | 18499  | lncRNA                             | -2.65 | 1.20E-03 | 1.05E-02 |
| ENSG00000259043 | BRD7P1      | 14 | 23749236  | 23751150  | 1914   | processed_pseudogene               | -2.65 | 1.92E-03 | 1.45E-02 |
| ENSG00000237402 | CAMTA1-IT1  | 1  | 7368942   | 7370270   | 1328   | lncRNA-sense intronic              | -2.65 | 1.97E-04 | 3.13E-03 |
| ENSG00000282759 | AC026950.2  | 8  | 891251    | 893112    | 1861   | lncRNA                             | -2.65 | 4.72E-04 | 5.60E-03 |
| ENSG00000286146 | FP236383.9  | 21 | 8420675   | 8421003   | 328    | TEC                                | -2.65 | 2.67E-05 | 7.92E-04 |
| ENSG00000286818 | AC008496.3  | 5  | 79840797  | 79845239  | 4442   | lncRNA                             | -2.65 | 4.24E-06 | 2.30E-04 |
| ENSG00000204429 | AL451142.1  | 9  | 88180673  | 88181447  | 774    | processed_pseudogene               | -2.65 | 2.79E-03 | 1.88E-02 |
| ENSG00000237278 | RLIMP2      | 1  | 113125321 | 113126883 | 1562   | processed_pseudogene               | -2.65 | 4.49E-03 | 2.60E-02 |
| ENSG00000091138 | SLC26A3     | 7  | 107765467 | 107803225 | 37758  | protein coding                     | -2.65 | 1.33E-06 | 1.03E-04 |
| ENSG00000180834 | MADP1       | 3  | 183815922 | 183825594 | 9672   | protein coding                     | -2.65 | 8.19E-05 | 1.72E-03 |
| ENSG00000229380 | PRKAR1B-AS2 | 7  | 561958    | 565619    | 3661   | lncRNA-antisense                   | -2.65 | 4.84E-04 | 5.70E-03 |
| ENSG00000213424 | KRT222      | 17 | 40654665  | 40665811  | 10516  | protein coding                     | -2.65 | 6.58E-04 | 7.01E-03 |
| ENSG00000234626 | AL021937.3  | 22 | 32327064  | 32343105  | 16041  | lncRNA-antisense                   | -2.66 | 2.04E-04 | 3.22E-03 |
| ENSG00000263050 | AC090617.5  | 17 | 2043475   | 2044968   | 1493   | lncRNA                             | -2.66 | 7.23E-04 | 7.50E-03 |
| ENSG00000123496 | IL13RA2     | X  | 115003975 | 115019977 | 16002  | protein coding                     | -2.66 | 8.93E-04 | 8.61E-03 |
| ENSG00000275293 | Metazoa SRP | 22 | 21555138  | 21555457  | 319    | misc RNA                           | -2.66 | 2.79E-03 | 1.88E-02 |
| ENSG00000253172 | AC008378.1  | 5  | 173144162 | 173145039 | 877    | lncRNA-antisense                   | -2.66 | 5.85E-04 | 6.48E-03 |
| ENSG00000286414 | AL390791.1  | 9  | 88735041  | 88803716  | 68675  | lncRNA                             | -2.66 | 1.96E-05 | 6.46E-04 |
| ENSG00000237931 | CLIC4P3     | X  | 41076999  | 41077750  | 751    | processed_pseudogene               | -2.66 | 1.44E-03 | 1.19E-02 |
| ENSG00000263232 | ATP5F1A3    | 16 | 72005037  | 72006543  | 1506   | processed_pseudogene               | -2.66 | 5.13E-05 | 1.24E-03 |
| ENSG00000204671 | IL3         | 12 | 122172029 | 122174221 | 2192   | protein coding                     | -2.66 | 5.04E-04 | 5.84E-03 |
| ENSG00000235875 | ARHGEF7-AS2 | 13 | 111113812 | 111115678 | 1866   | lncRNA-antisense                   | -2.66 | 1.68E-03 | 1.32E-02 |
| ENSG00000226625 | RBM17P1     | 9  | 39154075  | 39155479  | 4204   | processed_pseudogene               | -2.66 | 5.73E-04 | 6.39E-03 |
| ENSG00000261195 | AC027130.1  | 16 | 19761172  | 19766099  | 4927   | lncRNA-antisense                   | -2.66 | 7.56E-04 | 7.71E-03 |
| ENSG00000287381 | AC012433.2  | 18 | 50647315  | 50651212  | 3897   | lncRNA                             | -2.66 | 3.12E-04 | 4.28E-03 |
| ENSG00000273388 | AC005291.2  | 17 | 10291820  | 10317926  | 26106  | lncRNA-antisense                   | -2.66 | 4.01E-03 | 2.40E-02 |
| ENSG00000176754 | LINC00303   | 1  | 204032447 | 204041265 | 8818   | lncRNA                             | -2.66 | 3.81E-06 | 2.14E-04 |
| ENSG00000260459 | FTLP14      | 16 | 68822587  | 68823070  | 483    | processed_pseudogene               | -2.67 | 1.62E-04 | 2.73E-03 |
| ENSG00000244921 | MTCYBP18    | 5  | 134923303 | 134924049 | 746    | processed_pseudogene               | -2.67 | 4.90E-04 | 5.74E-03 |
| ENSG00000231298 | MANCR       | 10 | 4650158   | 4678185   | 28027  | lncRNA                             | -2.67 | 3.20E-05 | 8.91E-04 |
| ENSG00000215227 | NUTF2P5     | 10 | 13870797  | 13871175  | 378    | processed_pseudogene               | -2.67 | 5.01E-03 | 2.80E-02 |
| ENSG00000102021 | LUZP4       | X  | 115289715 | 115307563 | 17848  | protein coding                     | -2.67 | 2.70E-04 | 3.88E-03 |
| ENSG00000257848 | AC074029.1  | 12 | 48171590  | 48173353  | 1763   | processed_pseudogene               | -2.67 | 6.53E-04 | 6.98E-03 |
| ENSG00000287271 | AC011455.8  | 19 | 38975161  | 39014527  | 39366  | lncRNA                             | -2.67 | 5.14E-05 | 1.24E-03 |
| ENSG00000216663 | AL365214.1  | 6  | 112325753 | 112326749 | 996    | processed_pseudogene               | -2.67 | 6.15E-03 | 3.22E-02 |
| ENSG00000256377 | AC009509.1  | 12 | 27696388  | 27710803  | 14415  | lncRNA-antisense                   | -2.67 | 2.54E-06 | 1.65E-04 |
| ENSG00000269037 | LINC01838   | 19 | 34905315  | 34908188  | 2873   | lncRNA                             | -2.67 | 5.18E-05 | 1.25E-03 |
| ENSG00000204588 | LINC01123   | 2  | 109987063 | 109996140 | 9077   | lncRNA                             | -2.67 | 1.97E-03 | 1.48E-02 |
| ENSG00000287082 | AP001042.3  | 21 | 38857539  | 38858861  | 1322   | lncRNA                             | -2.67 | 1.18E-03 | 1.03E-02 |
| ENSG00000261524 | ABCB10P3    | 15 | 28402868  | 28405033  | 2165   | processed_pseudogene               | -2.67 | 6.65E-04 | 7.05E-03 |
| ENSG00000266014 | AC103808.4  | 18 | 76232927  | 76252044  | 19117  | lncRNA                             | -2.67 | 1.37E-05 | 5.18E-04 |
| ENSG00000249465 | RBMPX4      | 4  | 109346326 | 109347459 | 1133   | processed_pseudogene               | -2.67 | 2.28E-03 | 1.64E-02 |
| ENSG00000174156 | GSTA3       | 6  | 52896639  | 52909698  | 13059  | protein coding                     | -2.67 | 2.58E-04 | 3.76E-03 |
| ENSG00000154143 | PANX3       | 11 | 124611428 | 124620356 | 8928   | protein coding                     | -2.67 | 1.47E-04 | 2.54E-03 |
| ENSG00000258783 | KRT18P6     | 14 | 35511825  | 35513089  | 1264   | processed_pseudogene               | -2.68 | 8.38E-04 | 8.28E-03 |
| ENSG00000135355 | GJA10       | 6  | 89894469  | 89921760  | 27291  | protein coding                     | -2.68 | 2.22E-04 | 3.40E-03 |
| ENSG00000248684 | BIN2P2      | 5  | 75910565  | 75911867  | 1302   | processed_pseudogene               | -2.68 | 2.58E-04 | 3.77E-03 |
| ENSG00000231649 | SPATA31B1P  | 9  | 82057647  | 82063682  | 6035   | unprocessed_pseudogene             | -2.68 | 1.30E-06 | 1.02E-04 |
| ENSG00000140093 | SERPINA10   | 14 | 94280460  | 94293268  | 12808  | protein coding                     | -2.68 | 1.57E-08 | 4.95E-06 |
| ENSG00000236495 | AL158168.1  | 10 | 14652689  | 14661691  | 9002   | lncRNA-antisense                   | -2.68 | 1.67E-04 | 2.79E-03 |
| ENSG00000251205 | AC016598.2  | 5  | 143531331 | 143598434 | 67103  | lncRNA                             | -2.68 | 1.68E-05 | 5.81E-04 |
| ENSG00000187151 | ANGPTL5     | 11 | 101890674 | 101916522 | 25848  | protein coding                     | -2.68 | 1.64E-03 | 1.30E-02 |
| ENSG00000229160 | AC009229.2  | 2  | 38132637  | 38138946  | 6309   | lncRNA                             | -2.68 | 1.33E-03 | 1.13E-02 |
| ENSG00000267259 | ERVE-1      | 17 | 28232590  | 28235281  | 2691   | lncRNA                             | -2.68 | 3.05E-06 | 1.84E-04 |
| ENSG00000166292 | TMEM100     | 17 | 55719627  | 55732121  | 12494  | protein coding                     | -2.68 | 6.90E-05 | 1.54E-03 |
| ENSG00000174572 | RPL10P2     | 6  | 27211244  | 27211913  | 669    | processed_pseudogene               | -2.68 | 2.52E-03 | 1.75E-02 |
| ENSG00000228307 | OR2S1P      | 9  | 35962195  | 36014623  | 52428  | transcribed_unprocessed_pseudogene | -2.68 | 2.29E-04 | 3.48E-03 |
| ENSG00000203870 | SMIM9       | X  | 154823348 | 154834662 | 11314  | protein coding                     | -2.69 | 2.47E-04 | 3.65E-03 |
| ENSG00000226770 | AC000124.1  | 7  | 127476883 | 127485804 | 8921   | lncRNA                             | -2.69 | 7.25E-03 | 3.60E-02 |
| ENSG00000262979 | AC124319.1  | 17 | 80315651  | 80316633  | 982    | lncRNA-sense intronic              | -2.69 | 1.21E-06 | 9.76E-05 |
| ENSG00000261156 | LINC01989   | 17 | 34169372  | 34195937  | 26565  | lncRNA                             | -2.69 | 1.22E-04 | 2.26E-03 |
| ENSG00000152595 | MEPE        | 4  | 87821411  | 87846817  | 25406  | protein coding                     | -2.69 | 7.78E-04 | 7.87E-03 |
| ENSG00000227972 | THAP12P3    | 10 | 52411135  | 52413492  | 2357   | processed_pseudogene               | -2.69 | 5.75E-05 | 1.35E-03 |
| ENSG00000229532 | AC105443.1  | 7  | 132086266 | 132087992 | 1726   | processed_pseudogene               | -2.69 | 1.23E-03 | 1.07E-02 |
| ENSG00000261426 | AC144833.1  | 15 | 27362310  | 27366398  | 4088   | lncRNA-sense intronic              | -2.69 | 3.56E-05 | 9.68E-04 |
| ENSG00000258516 | AL133167.1  | 14 | 95828763  | 95866486  | 37723  | lncRNA                             | -2.69 | 1.09E-03 | 9.82E-03 |
| ENSG00000286437 | AF111169.4  | 14 | 76790267  | 76793807  | 3540   | lncRNA                             | -2.70 | 7.35E-04 | 7.56E-03 |
| ENSG00000233656 | AL445430.1  | 6  | 11417207  | 11481324  | 64117  | lncRNA                             | -2.70 | 4.09E-04 | 5.11E-03 |
| ENSG00000271149 | AC011467.5  | 19 | 22595479  | 22596163  | 684    | unprocessed_pseudogene             | -2.70 | 6.49E-03 | 3.34E-02 |
| ENSG00000282968 | HGF1P10     | 20 | 29430723  | 29432913  | 2190   | processed_pseudogene               | -2.70 | 3.27E-04 | 4.39E-03 |
| ENSG00000198857 | HSD3BP5     | 1  | 119601340 | 119609250 | 7910   | transcribed_unprocessed_pseudogene | -2.70 | 3.74E-03 | 2.29E-02 |
| ENSG00000260185 | AC009097.1  | 16 | 71655027  | 71664212  | 9185   | lncRNA-antisense                   | -2.70 | 1.47E-03 | 1.21E-02 |
| ENSG00000198125 | MB          | 22 | 35606764  | 35637951  | 31187  | protein coding                     | -2.70 | 9.42E-10 | 6.68E-07 |
| ENSG00000198759 | EGFL6       | X  | 13569601  | 13633575  | 63974  | protein coding                     | -2.70 | 1.06E-08 | 3.87E-06 |

|                 |              |    |           |           |        |                                |       |          |          |
|-----------------|--------------|----|-----------|-----------|--------|--------------------------------|-------|----------|----------|
| ENSG00000182652 | OR4Q3        | 14 | 19743571  | 19749469  | 5898   | protein coding                 | -2.70 | 1.13E-04 | 2.14E-03 |
| ENSG00000251011 | TMEM108-AS1  | 3  | 133245603 | 133257207 | 11604  | lncRNA-antisense               | -2.70 | 1.00E-03 | 9.33E-03 |
| ENSG00000215009 | ACSM4        | 12 | 7304284   | 7328724   | 24440  | protein coding                 | -2.70 | 2.20E-06 | 1.50E-04 |
| ENSG00000170820 | FSHR         | 2  | 48962157  | 49154527  | 192370 | protein coding                 | -2.70 | 1.64E-05 | 5.73E-04 |
| ENSG00000196754 | S100A2       | 1  | 153561108 | 153567890 | 6782   | protein coding                 | -2.70 | 2.75E-08 | 7.61E-06 |
| ENSG00000256915 | AC090023.2   | 12 | 65622273  | 65663299  | 41026  | lncRNA                         | -2.70 | 5.78E-04 | 6.42E-03 |
| ENSG00000228539 | AL157413.1   | 20 | 24491472  | 24502345  | 10873  | lncRNA-antisense               | -2.71 | 2.14E-05 | 6.82E-04 |
| ENSG00000287302 | AL133477.2   | 9  | 96419722  | 96421129  | 1407   | lncRNA                         | -2.71 | 1.46E-03 | 1.20E-02 |
| ENSG00000269124 | AC007193.2   | 19 | 46320197  | 46340004  | 19807  | lncRNA-antisense               | -2.71 | 9.63E-05 | 1.93E-03 |
| ENSG00000166959 | MSA48        | 11 | 60699585  | 60715807  | 16222  | protein coding                 | -2.71 | 3.17E-07 | 4.00E-05 |
| ENSG00000179059 | ZFP42        | 4  | 187995771 | 188005046 | 9275   | protein coding                 | -2.71 | 1.73E-04 | 2.87E-03 |
| ENSG00000269228 | RPS27AP19    | 19 | 7665717   | 7666476   | 759    | processed pseudogene           | -2.71 | 4.53E-03 | 2.62E-02 |
| ENSG00000204941 | PSG5         | 19 | 43166256  | 43186536  | 20280  | protein coding                 | -2.71 | 1.86E-07 | 2.77E-05 |
| ENSG00000286387 | AC007432.1   | 17 | 71678899  | 71743468  | 64569  | lncRNA                         | -2.71 | 6.63E-04 | 7.04E-03 |
| ENSG00000231553 | RNMTL1P1     | 10 | 21394033  | 21394592  | 559    | processed pseudogene           | -2.71 | 2.13E-03 | 1.57E-02 |
| ENSG00000239702 | RN7SL507P    | 17 | 44290856  | 44291151  | 295    | misc RNA                       | -2.71 | 3.75E-04 | 4.80E-03 |
| ENSG00000214255 | RPS2P6       | 18 | 70430231  | 70431125  | 894    | processed pseudogene           | -2.71 | 1.44E-04 | 2.51E-03 |
| ENSG00000270547 | LINC01235    | 9  | 13406380  | 13488125  | 81745  | lncRNA                         | -2.71 | 2.11E-05 | 6.77E-04 |
| ENSG00000269729 | AC006262.2   | 19 | 46163893  | 46180647  | 16754  | lncRNA                         | -2.72 | 1.17E-03 | 1.03E-02 |
| ENSG00000257407 | AC009803.1   | 12 | 115582061 | 115639234 | 57673  | lncRNA                         | -2.72 | 1.29E-04 | 2.34E-03 |
| ENSG00000273001 | AL731533.2   | 10 | 3065244   | 3066001   | 577    | lncRNA                         | -2.72 | 6.80E-04 | 7.17E-03 |
| ENSG00000187988 | KCTD9P3      | 9  | 37477149  | 37478317  | 1168   | processed pseudogene           | -2.72 | 3.11E-04 | 4.25E-03 |
| ENSG00000218725 | B3GALNT2P1   | 6  | 129800908 | 129802214 | 1306   | processed pseudogene           | -2.72 | 1.24E-03 | 1.08E-02 |
| ENSG00000269102 | AC010320.3   | 19 | 52284780  | 52297920  | 13140  | lncRNA-antisense               | -2.72 | 5.46E-05 | 1.30E-03 |
| ENSG00000244094 | SPRR2F       | 1  | 153112121 | 153113516 | 1395   | protein coding                 | -2.72 | 3.31E-03 | 2.11E-02 |
| ENSG00000237521 | OR7E24       | 19 | 9247344   | 9252625   | 5281   | protein coding                 | -2.72 | 1.82E-04 | 2.97E-03 |
| ENSG00000196734 | LCE1B        | 1  | 152811971 | 152813108 | 1137   | protein coding                 | -2.72 | 1.88E-04 | 3.03E-03 |
| ENSG00000228639 | ROCR         | 17 | 72021851  | 72058073  | 36222  | lncRNA                         | -2.72 | 1.04E-06 | 8.79E-05 |
| ENSG00000288023 | AL157936.1   | 9  | 94725871  | 94726575  | 704    | lncRNA                         | -2.73 | 4.41E-04 | 5.36E-03 |
| ENSG00000231063 | RPL6P6       | 2  | 210088226 | 210089064 | 838    | processed pseudogene           | -2.73 | 2.63E-03 | 1.81E-02 |
| ENSG00000221938 | OR2A14       | 7  | 144123176 | 144131188 | 8012   | protein coding                 | -2.73 | 1.11E-03 | 9.96E-03 |
| ENSG00000111700 | SLCO1B3      | 12 | 20810702  | 20916911  | 106209 | protein coding                 | -2.73 | 7.76E-04 | 7.86E-03 |
| ENSG00000187545 | PRAMEF10     | 1  | 12892896  | 12898270  | 5374   | protein coding                 | -2.73 | 1.05E-04 | 2.04E-03 |
| ENSG00000204193 | TXNDC8       | 9  | 110303478 | 110337884 | 34408  | protein coding                 | -2.73 | 7.07E-05 | 1.56E-03 |
| ENSG00000279155 | AC233300.1   | X  | 48939992  | 48940808  | 816    | TEC                            | -2.74 | 2.62E-03 | 1.80E-02 |
| ENSG00000270076 | AF131215.7   | 8  | 11202965  | 11203671  | 706    | lncRNA                         | -2.74 | 8.31E-04 | 8.24E-03 |
| ENSG00000226629 | LINC00974    | 17 | 41549606  | 41554495  | 4889   | lncRNA                         | -2.74 | 1.56E-05 | 5.60E-04 |
| ENSG00000215165 | TCEA1P3      | 9  | 38478471  | 38479350  | 879    | processed pseudogene           | -2.74 | 3.71E-04 | 4.76E-03 |
| ENSG00000231548 | OR55B1P      | 11 | 4146112   | 4151104   | 4992   | transcribed unitary pseudogene | -2.74 | 1.88E-04 | 3.03E-03 |
| ENSG00000234497 | ERIC3A-AS1   | 1  | 74577430  | 74626098  | 48668  | lncRNA-antisense               | -2.74 | 2.20E-04 | 3.38E-03 |
| ENSG00000233017 | AL121832.1   | 20 | 62427827  | 62447677  | 19850  | lncRNA-antisense               | -2.74 | 1.32E-05 | 5.03E-04 |
| ENSG00000228740 | GABRG3-AS1   | 15 | 27038978  | 27161319  | 122341 | lncRNA-antisense               | -2.74 | 1.97E-06 | 1.39E-04 |
| ENSG00000224228 | AL031599.1   | 1  | 172775905 | 173064105 | 288110 | lncRNA                         | -2.74 | 3.66E-03 | 2.26E-02 |
| ENSG00000228657 | RPL23AP58    | 10 | 102572757 | 102573225 | 468    | processed pseudogene           | -2.75 | 3.75E-03 | 2.30E-02 |
| ENSG00000264486 | AC061975.4   | 17 | 28256438  | 28256551  | 9113   | lncRNA                         | -2.75 | 2.44E-04 | 3.63E-03 |
| ENSG00000286036 | AC017099.2   | 2  | 97618638  | 97638417  | 19779  | lncRNA                         | -2.75 | 1.35E-06 | 1.05E-04 |
| ENSG00000226083 | SLC39A12-AS1 | 10 | 18001786  | 18010562  | 8776   | lncRNA-antisense               | -2.75 | 1.63E-04 | 2.74E-03 |
| ENSG00000204688 | OR2H1        | 6  | 29457181  | 29464328  | 7147   | protein coding                 | -2.75 | 1.29E-05 | 4.98E-04 |
| ENSG00000173627 | APOBEC4      | 1  | 183646275 | 183653316 | 7041   | protein coding                 | -2.75 | 8.19E-04 | 8.16E-03 |
| ENSG00000254934 | LINC00678    | 11 | 27617626  | 27634627  | 17001  | lncRNA                         | -2.75 | 5.16E-04 | 5.94E-03 |
| ENSG00000258527 | ASB9P1       | 15 | 92795647  | 92796339  | 792    | processed pseudogene           | -2.75 | 2.17E-03 | 1.59E-02 |
| ENSG00000213091 | PHPB1        | 6  | 150042546 | 150043353 | 807    | processed pseudogene           | -2.76 | 9.37E-04 | 8.91E-03 |
| ENSG00000258553 | AL157911.1   | 14 | 59969116  | 60091783  | 122667 | lncRNA-antisense               | -2.76 | 7.20E-05 | 1.58E-03 |
| ENSG00000228750 | LINC01672    | 1  | 6724637   | 6730012   | 5375   | lncRNA                         | -2.76 | 1.10E-06 | 9.16E-05 |
| ENSG00000249604 | AC096564.1   | 4  | 107936031 | 107941255 | 5224   | lncRNA-antisense               | -2.76 | 1.53E-05 | 5.55E-04 |
| ENSG00000214144 | AL390728.1   | 1  | 247229940 | 247231880 | 1920   | processed pseudogene           | -2.76 | 1.60E-03 | 1.28E-02 |
| ENSG00000256424 | LINC02414    | 12 | 13163936  | 131661823 | 22427  | lncRNA                         | -2.76 | 6.73E-04 | 7.11E-03 |
| ENSG00000267101 | AC090376.1   | 18 | 45104361  | 45118382  | 77021  | lncRNA                         | -2.76 | 1.60E-06 | 1.20E-04 |
| ENSG00000226288 | OR5212       | 11 | 4581743   | 4593340   | 11597  | protein coding                 | -2.76 | 6.10E-06 | 2.94E-04 |
| ENSG00000255092 | AC010768.2   | 11 | 44606710  | 44608101  | 1931   | lncRNA-antisense               | -2.76 | 1.66E-05 | 5.76E-04 |
| ENSG00000248645 | AC106872.5   | 4  | 164938322 | 164939990 | 1668   | unprocessed pseudogene         | -2.76 | 1.46E-03 | 1.20E-02 |
| ENSG00000227599 | PTPR-AS1     | 20 | 42968743  | 42971492  | 2749   | lncRNA-antisense               | -2.76 | 6.87E-04 | 7.22E-03 |
| ENSG00000278480 | ZBTB2P1      | 1  | 15226373  | 15227549  | 1176   | processed pseudogene           | -2.77 | 2.75E-04 | 3.93E-03 |
| ENSG00000269504 | AC003973.1   | 19 | 22017898  | 22052370  | 34472  | lncRNA                         | -2.77 | 3.08E-07 | 3.90E-05 |
| ENSG00000225882 | LINC01456    | X  | 17970197  | 18104644  | 134447 | lncRNA                         | -2.77 | 8.10E-05 | 1.71E-03 |
| ENSG00000117152 | RG54         | 1  | 163068775 | 163076802 | 8027   | protein coding                 | -2.77 | 9.54E-06 | 4.05E-04 |
| ENSG00000254737 | OR10G4       | 11 | 124012997 | 124018732 | 5735   | protein coding                 | -2.77 | 3.99E-05 | 1.04E-03 |
| ENSG00000249050 | AC021242.1   | 8  | 9453698   | 9457418   | 3720   | processed pseudogene           | -2.78 | 6.68E-04 | 7.07E-03 |
| ENSG00000288533 | AP001178.4   | 18 | 623743    | 626492    | 2749   | lncRNA                         | -2.78 | 7.04E-05 | 1.56E-03 |
| ENSG00000265494 | AC005304.2   | 17 | 13909231  | 13911212  | 1981   | lncRNA                         | -2.78 | 1.08E-03 | 9.77E-03 |
| ENSG00000285603 | AL035693.1   | 6  | 2227803   | 2230261   | 2458   | lncRNA-antisense               | -2.78 | 5.68E-04 | 6.34E-03 |
| ENSG00000277865 | GOLGA6L22    | 15 | 22458903  | 22469230  | 10327  | protein coding                 | -2.78 | 5.17E-06 | 2.65E-04 |
| ENSG00000198930 | CSAG1        | X  | 152727484 | 152733735 | 6251   | protein coding                 | -2.78 | 8.92E-04 | 8.61E-03 |
| ENSG00000233363 | AC006019.2   | 7  | 154092201 | 154096043 | 3842   | lncRNA-antisense               | -2.78 | 2.74E-05 | 8.04E-04 |
| ENSG00000260264 | LINC02194    | 16 | 24236104  | 24252863  | 16759  | lncRNA                         | -2.78 | 5.20E-04 | 5.97E-03 |
| ENSG00000184029 | DSCR4        | 21 | 37951425  | 38121360  | 169935 | lncRNA                         | -2.78 | 2.66E-04 | 3.85E-03 |
| ENSG00000259542 | AC087477.5   | 15 | 96393146  | 96405189  | 12043  | lncRNA                         | -2.78 | 3.82E-04 | 4.87E-03 |
| ENSG00000231107 | LINC01508    | 9  | 90300885  | 90433566  | 132681 | lncRNA                         | -2.78 | 1.70E-03 | 1.33E-02 |
| ENSG00000165583 | SSX5         | X  | 48186220  | 48196763  | 10543  | protein coding                 | -2.79 | 1.32E-04 | 2.37E-03 |
| ENSG00000287184 | AC007269.1   | 7  | 159107761 | 159109216 | 1455   | lncRNA                         | -2.79 | 1.04E-04 | 2.03E-03 |
| ENSG00000287197 | AC096675.1   | 1  | 204822664 | 204829274 | 6610   | lncRNA                         | -2.79 | 8.65E-05 | 1.79E-03 |
| ENSG00000283457 | AC087565.2   | 16 | 73794057  | 73809733  | 15676  | lncRNA                         | -2.79 | 6.03E-04 | 6.60E-03 |
| ENSG00000222001 | AC106876.1   | 2  | 233012614 | 233015885 | 3271   | lncRNA                         | -2.79 | 8.91E-04 | 8.60E-03 |
| ENSG00000283213 | AC130466.1   | 16 | 22806289  | 22813680  | 7391   | lncRNA                         | -2.79 | 1.28E-10 | 1.47E-07 |
| ENSG00000229670 | PKP4P1       | 2  | 209178966 | 209181123 | 2157   | unprocessed pseudogene         | -2.79 | 3.72E-03 | 2.28E-02 |
| ENSG00000284650 | AL031430.1   | 1  | 37133489  | 37136146  | 2657   | lncRNA                         | -2.79 | 4.21E-04 | 5.18E-03 |
| ENSG00000271410 | AC020728.1   | 5  | 55356308  | 55357523  | 1215   | processed pseudogene           | -2.79 | 1.92E-03 | 1.45E-02 |
| ENSG00000267127 | AC090360.1   | 18 | 80034346  | 80097088  | 62742  | protein coding                 | -2.80 | 2.01E-07 | 2.94E-05 |
| ENSG00000165584 | SSX3         | X  | 48346427  | 48356707  | 10280  | protein coding                 | -2.80 | 2.60E-05 | 7.79E-04 |
| ENSG00000268496 | AC245884.9   | 19 | 54434183  | 54434665  | 482    | lncRNA-sense intronic          | -2.80 | 1.18E-03 | 1.03E-02 |

|                 |            |    |           |           |        |                                |       |          |          |
|-----------------|------------|----|-----------|-----------|--------|--------------------------------|-------|----------|----------|
| ENSG00000258766 | DIO2-AS1   | 14 | 80211419  | 80455469  | 244050 | lncRNA-antisense               | -2.80 | 4.03E-04 | 5.06E-03 |
| ENSG00000278593 | AC104394.1 | 2  | 234743542 | 234745606 | 2064   | unprocessed_pseudogene         | -2.80 | 3.12E-04 | 4.25E-03 |
| ENSG00000283417 | AC024614.4 | 17 | 33791838  | 33816761  | 24923  | lncRNA                         | -2.80 | 3.17E-04 | 4.29E-03 |
| ENSG00000203933 | CXorf6     | X  | 139955728 | 139955521 | 9793   | protein coding                 | -2.80 | 1.62E-03 | 1.29E-02 |
| ENSG00000286109 | AL357972.1 | 1  | 233724454 | 233730746 | 6292   | lncRNA                         | -2.80 | 5.69E-05 | 1.34E-03 |
| ENSG00000131864 | USP29      | 19 | 57119138  | 57131926  | 12788  | protein coding                 | -2.81 | 5.10E-08 | 1.12E-05 |
| ENSG00000225172 | AC096631.1 | 1  | 198973379 | 198985506 | 12127  | lncRNA                         | -2.81 | 2.75E-05 | 8.05E-04 |
| ENSG00000241219 | AC078785.2 | 3  | 113050912 | 113063443 | 12531  | lncRNA                         | -2.81 | 2.52E-04 | 3.70E-03 |
| ENSG00000244310 | AC093904.3 | 2  | 9110457   | 9116947   | 6490   | lncRNA                         | -2.81 | 5.68E-05 | 1.34E-03 |
| ENSG00000171942 | OR10H2     | 19 | 15728020  | 15729060  | 1040   | protein coding                 | -2.81 | 4.68E-05 | 1.16E-03 |
| ENSG00000257985 | AC004801.4 | 12 | 48011304  | 48025469  | 14165  | lncRNA-antisense               | -2.81 | 6.69E-05 | 1.50E-03 |
| ENSG00000262497 | FAM187B2P  | 19 | 35232291  | 35233003  | 712    | unprocessed_pseudogene         | -2.81 | 1.88E-04 | 3.04E-03 |
| ENSG00000267141 | AC012615.4 | 19 | 1860250   | 1862019   | 1769   | lncRNA-antisense               | -2.82 | 1.34E-04 | 2.39E-03 |
| ENSG00000285648 | AC137735.2 | 17 | 73926421  | 73949906  | 23485  | lncRNA                         | -2.82 | 1.95E-05 | 6.44E-04 |
| ENSG00000260887 | CASC22     | 16 | 52258564  | 52280638  | 22074  | lncRNA                         | -2.82 | 2.58E-05 | 7.75E-04 |
| ENSG00000231896 | AC019185.1 | 2  | 208469850 | 208540413 | 70563  | lncRNA-sense intronic          | -2.82 | 5.38E-04 | 6.11E-03 |
| ENSG00000280220 | AL157414.3 | 20 | 57161822  | 57163775  | 1953   | TEC                            | -2.82 | 1.53E-05 | 5.54E-04 |
| ENSG00000286805 | AL138716.1 | 6  | 161435098 | 161446016 | 10918  | lncRNA                         | -2.82 | 1.15E-04 | 2.17E-03 |
| ENSG00000282842 | FRG2EP     | 20 | 29415264  | 29416911  | 1647   | unprocessed_pseudogene         | -2.82 | 6.19E-05 | 1.42E-03 |
| ENSG00000268696 | ZNF723     | 19 | 22832291  | 22858667  | 26376  | protein coding                 | -2.82 | 1.32E-04 | 2.37E-03 |
| ENSG00000221826 | PSG3       | 19 | 42721638  | 42740481  | 18843  | protein coding                 | -2.82 | 9.83E-06 | 4.11E-04 |
| ENSG00000213155 | AC007547.1 | 3  | 181866351 | 181867154 | 803    | processed_pseudogene           | -2.82 | 1.69E-03 | 1.33E-02 |
| ENSG00000227932 | SELENOPL   | 10 | 26664206  | 26697295  | 33089  | transcribed_unitary_pseudogene | -2.82 | 4.67E-04 | 5.56E-03 |
| ENSG00000224674 | EIF3EP2    | 2  | 162088259 | 162090027 | 1813   | processed_pseudogene           | -2.82 | 8.43E-04 | 8.31E-03 |
| ENSG00000286934 | AC027251.1 | 8  | 4317388   | 4329027   | 11639  | lncRNA                         | -2.83 | 2.49E-05 | 7.56E-04 |
| ENSG00000204700 | ORJ2       | 6  | 29170907  | 29175811  | 4904   | protein coding                 | -2.83 | 2.81E-05 | 8.18E-04 |
| ENSG00000236272 | SCUBE1-AS2 | 22 | 43212674  | 43213661  | 987    | lncRNA-antisense               | -2.83 | 8.61E-04 | 8.41E-03 |
| ENSG00000286547 | AL157938.4 | 9  | 131283421 | 131288278 | 4857   | lncRNA                         | -2.83 | 1.07E-03 | 9.72E-03 |
| ENSG00000177143 | CETN1      | 18 | 580380    | 582214    | 1734   | protein coding                 | -2.83 | 1.64E-04 | 2.75E-03 |
| ENSG00000113492 | AGXT2      | 5  | 34998101  | 35048135  | 50034  | protein coding                 | -2.83 | 9.93E-08 | 1.72E-05 |
| ENSG00000235592 | AC004674.1 | X  | 13327937  | 13329867  | 1930   | unprocessed_pseudogene         | -2.83 | 5.05E-03 | 2.82E-02 |
| ENSG00000260430 | AC099518.1 | 16 | 19086831  | 19098332  | 11501  | lncRNA                         | -2.83 | 1.01E-04 | 1.99E-03 |
| ENSG00000188771 | PLET1      | 11 | 112248153 | 112260860 | 12707  | protein coding                 | -2.83 | 6.33E-04 | 6.82E-03 |
| ENSG00000287813 | AC016705.3 | 15 | 80440294  | 80442751  | 2457   | lncRNA                         | -2.83 | 9.32E-05 | 1.89E-03 |
| ENSG00000223829 | AC004870.2 | 7  | 46969644  | 47027481  | 57837  | lncRNA                         | -2.83 | 1.40E-04 | 2.47E-03 |
| ENSG00000230442 | ASB15-AS1  | 7  | 123584859 | 123624957 | 40098  | lncRNA-antisense               | -2.83 | 1.24E-03 | 1.07E-02 |
| ENSG00000287187 | AL449403.3 | 9  | 96129869  | 96132214  | 2345   | lncRNA                         | -2.83 | 2.08E-03 | 1.54E-02 |
| ENSG00000261104 | AC093904.4 | 2  | 9106593   | 9109865   | 3272   | lncRNA                         | -2.83 | 1.09E-06 | 9.13E-05 |
| ENSG00000253542 | SDR16CP    | 8  | 56373064  | 56395365  | 22301  | transcribed_unitary_pseudogene | -2.84 | 7.87E-04 | 7.93E-03 |
| ENSG00000286198 | AL606753.2 | 1  | 208266059 | 208270667 | 4608   | lncRNA                         | -2.84 | 3.92E-06 | 2.17E-04 |
| ENSG00000260008 | AP001527.1 | 11 | 102107886 | 102109842 | 1956   | lncRNA                         | -2.84 | 1.90E-04 | 3.06E-03 |
| ENSG00000182916 | TCEAL7     | X  | 103330229 | 103332326 | 2097   | protein coding                 | -2.84 | 8.94E-04 | 8.62E-03 |
| ENSG00000251352 | AC122714.2 | 5  | 180671892 | 180672598 | 706    | processed_pseudogene           | -2.84 | 3.06E-05 | 8.69E-04 |
| ENSG00000234542 | AL357127.1 | 10 | 123574227 | 123583767 | 9540   | lncRNA                         | -2.84 | 1.77E-04 | 2.91E-03 |
| ENSG00000288068 | AC027088.5 | 15 | 68985795  | 68998679  | 12884  | lncRNA                         | -2.84 | 6.91E-07 | 6.73E-05 |
| ENSG00000228564 | LINC01005  | 7  | 64024409  | 64030105  | 5696   | lncRNA                         | -2.84 | 3.44E-05 | 9.42E-04 |
| ENSG00000225755 | AL451063.1 | 1  | 163237214 | 163239197 | 1983   | processed_pseudogene           | -2.85 | 3.86E-03 | 2.34E-02 |
| ENSG00000259732 | AC092757.2 | 15 | 59121034  | 59133250  | 12216  | lncRNA-sense overlapping       | -2.85 | 4.13E-04 | 5.13E-03 |
| ENSG0000036473  | OTC        | X  | 38352586  | 38421446  | 68860  | protein coding                 | -2.85 | 1.96E-05 | 6.46E-04 |
| ENSG00000244705 | AC020658.1 | 15 | 40312352  | 40313289  | 937    | processed_pseudogene           | -2.85 | 6.31E-05 | 1.44E-03 |
| ENSG00000205777 | GAGE1      | X  | 49599025  | 49608536  | 9511   | protein coding                 | -2.85 | 2.52E-04 | 3.70E-03 |
| ENSG00000204640 | NMS        | 2  | 100470482 | 100483280 | 12798  | protein coding                 | -2.85 | 4.37E-05 | 1.12E-03 |
| ENSG00000269651 | AC022146.1 | 19 | 8173272   | 8175567   | 2295   | unprocessed_pseudogene         | -2.85 | 5.24E-04 | 6.01E-03 |
| ENSG00000264673 | AC098850.1 | 17 | 16788248  | 16789234  | 986    | lncRNA-antisense               | -2.85 | 2.07E-03 | 1.53E-02 |
| ENSG00000227535 | AL357315.1 | 6  | 104831129 | 104845820 | 14691  | lncRNA-sense overlapping       | -2.85 | 1.56E-03 | 1.26E-02 |
| ENSG00000235131 | TP73-AS2   | 1  | 3712200   | 3714298   | 2098   | lncRNA-antisense               | -2.86 | 6.00E-03 | 3.38E-02 |
| ENSG00000279682 | AC120338.1 | X  | 7489659   | 7491199   | 1540   | TEC                            | -2.86 | 2.58E-04 | 3.76E-03 |
| ENSG00000229292 | RFP4L4L1   | 19 | 55769118  | 55773420  | 4302   | protein coding                 | -2.86 | 2.68E-04 | 3.87E-03 |
| ENSG00000224074 | LINC00691  | 3  | 24096269  | 24103238  | 6969   | lncRNA                         | -2.86 | 2.14E-06 | 1.47E-04 |
| ENSG00000172156 | CCL11      | 17 | 34285742  | 34288334  | 2592   | protein coding                 | -2.86 | 8.09E-05 | 1.71E-03 |
| ENSG00000230423 | AL672310.1 | 6  | 170615515 | 170738536 | 123021 | lncRNA                         | -2.86 | 3.74E-07 | 4.43E-05 |
| ENSG00000249064 | KRT18P25   | 4  | 40020240  | 40021517  | 1277   | processed_pseudogene           | -2.86 | 9.35E-04 | 8.90E-03 |
| ENSG00000225175 | AC109780.1 | 3  | 186687329 | 186692506 | 5177   | unprocessed_pseudogene         | -2.87 | 2.95E-04 | 4.11E-03 |
| ENSG00000262006 | AC005920.4 | 17 | 50909637  | 50910232  | 595    | lncRNA                         | -2.87 | 1.09E-03 | 9.82E-03 |
| ENSG00000228543 | AC003684.1 | X  | 9249920   | 9275206   | 25286  | lncRNA                         | -2.87 | 7.89E-05 | 1.68E-03 |
| ENSG00000238215 | AL513185.3 | 10 | 72643011  | 72644650  | 1639   | processed_pseudogene           | -2.87 | 2.89E-04 | 4.05E-03 |
| ENSG00000279251 | AC015726.3 | 17 | 19855747  | 19856164  | 417    | TEC                            | -2.87 | 4.00E-04 | 5.04E-03 |
| ENSG00000226913 | BSN-DT     | 3  | 49549306  | 49554366  | 5060   | lncRNA                         | -2.87 | 5.44E-06 | 2.74E-04 |
| ENSG00000186226 | LCE1E      | 1  | 152786214 | 152788426 | 2212   | protein coding                 | -2.87 | 2.40E-04 | 3.60E-03 |
| ENSG00000229562 | ZFYVE9P1   | X  | 137660519 | 137662242 | 1723   | processed_pseudogene           | -2.87 | 9.71E-05 | 1.94E-03 |
| ENSG00000279652 | Z82217.1   | 22 | 35992321  | 36000469  | 8148   | lncRNA                         | -2.87 | 6.97E-09 | 2.80E-06 |
| ENSG00000232985 | AL355537.1 | 10 | 128958772 | 128960662 | 1290   | lncRNA                         | -2.88 | 2.70E-03 | 1.84E-02 |
| ENSG00000236497 | LINC01744  | 1  | 232727251 | 232751299 | 24048  | lncRNA                         | -2.88 | 5.66E-05 | 1.33E-03 |
| ENSG00000233670 | PIRT       | 17 | 10822470  | 10838087  | 15617  | protein coding                 | -2.88 | 3.26E-08 | 8.47E-06 |
| ENSG00000287714 | AC025164.2 | 12 | 92026447  | 92032392  | 5945   | lncRNA                         | -2.89 | 2.15E-03 | 1.58E-02 |
| ENSG00000285842 | AP000820.2 | 11 | 95571040  | 95748715  | 177675 | lncRNA                         | -2.89 | 4.84E-05 | 1.19E-03 |
| ENSG00000227496 | AC099066.2 | 1  | 225700264 | 225752258 | 51994  | lncRNA                         | -2.89 | 2.94E-08 | 7.84E-06 |
| ENSG00000235160 | LINC02248  | 15 | 26395037  | 26455217  | 60180  | lncRNA                         | -2.89 | 2.20E-07 | 3.13E-05 |
| ENSG00000240708 | LINC02030  | 3  | 55226862  | 55300738  | 73876  | lncRNA                         | -2.89 | 8.83E-05 | 1.81E-03 |
| ENSG00000152034 | MCHR2      | 6  | 99918519  | 99994247  | 75728  | protein coding                 | -2.89 | 5.47E-06 | 2.74E-04 |
| ENSG00000234277 | LINC01641  | 1  | 227393554 | 227431035 | 37481  | lncRNA                         | -2.89 | 2.03E-05 | 6.60E-04 |
| ENSG00000285530 | AL445928.2 | 1  | 100220488 | 100253414 | 32926  | lncRNA-antisense               | -2.89 | 3.33E-07 | 4.11E-05 |
| ENSG00000226431 | AL121929.1 | 10 | 103549075 | 103550964 | 1889   | lncRNA-sense intronic          | -2.89 | 3.01E-04 | 4.16E-03 |
| ENSG00000163331 | DAPL1      | 2  | 158795317 | 158862781 | 67464  | protein coding                 | -2.89 | 1.82E-04 | 2.97E-03 |
| ENSG00000286678 | AC007649.1 | 12 | 107219764 | 107223576 | 3812   | lncRNA                         | -2.89 | 2.66E-04 | 3.85E-03 |
| ENSG00000280419 | AC010531.8 | 16 | 87296949  | 87297633  | 684    | TEC                            | -2.90 | 4.23E-04 | 5.20E-03 |
| ENSG00000188729 | OSTN       | 3  | 191199241 | 19126515  | 66374  | protein coding                 | -2.90 | 4.26E-04 | 5.22E-03 |
| ENSG00000279657 | AL161901.1 | 13 | 60730176  | 60733600  | 3424   | TEC                            | -2.90 | 1.56E-04 | 2.66E-03 |
| ENSG00000248588 | AC008517.1 | 5  | 92823935  | 92844992  | 21057  | lncRNA                         | -2.91 | 5.03E-03 | 2.81E-02 |
| ENSG00000285991 | AL355312.5 | 6  | 149817937 | 149896011 | 78074  | protein coding                 | -2.91 | 4.22E-04 | 5.19E-03 |



|                 |            |    |           |           |       |                                      |       |          |          |
|-----------------|------------|----|-----------|-----------|-------|--------------------------------------|-------|----------|----------|
| ENSG00000264058 | AC073508.2 | 17 | 40627356  | 40665141  | 37785 | protein coding                       | -2.91 | 1.61E-03 | 1.29E-02 |
| ENSG00000238275 | HOMER2P2   | 14 | 106286811 | 106287657 | 846   | processed pseudogene                 | -2.91 | 4.01E-04 | 5.04E-03 |
| ENSG00000167117 | ANKRD40CL  | 17 | 50761029  | 50767557  | 6528  | protein coding                       | -2.91 | 6.62E-08 | 1.32E-05 |
| ENSG00000213946 | DNAJB1P1   | 2  | 191881182 | 191882205 | 1023  | processed pseudogene                 | -2.91 | 9.71E-04 | 9.13E-03 |
| ENSG00000275155 | AC027348.1 | 16 | 49847018  | 49847632  | 614   | lncRNA-sense intronic                | -2.91 | 1.20E-03 | 1.05E-02 |
| ENSG00000235660 | LINC00345  | 13 | 52482804  | 52489216  | 6412  | lncRNA                               | -2.91 | 9.97E-05 | 1.98E-03 |
| ENSG00000233427 | AL009181.1 | 1  | 28870483  | 28877336  | 6853  | lncRNA-antisense                     | -2.91 | 1.74E-05 | 5.97E-04 |
| ENSG00000286034 | AC100822.1 | 8  | 128323131 | 128388636 | 65505 | lncRNA                               | -2.91 | 3.50E-04 | 4.58E-03 |
| ENSG00000166118 | SPATA19    | 11 | 133840631 | 133845538 | 4907  | protein coding                       | -2.91 | 3.65E-05 | 9.83E-04 |
| ENSG00000115593 | SMYD1      | 2  | 88067825  | 88113384  | 45559 | protein coding                       | -2.92 | 1.56E-10 | 1.74E-07 |
| ENSG00000225279 | AL121987.1 | 1  | 160062461 | 160080769 | 18308 | lncRNA-antisense                     | -2.92 | 4.97E-05 | 1.22E-03 |
| ENSG00000254857 | MRGPRX12P  | 11 | 18153277  | 18154255  | 978   | processed pseudogene                 | -2.92 | 1.54E-03 | 1.25E-02 |
| ENSG00000279991 | AC009044.1 | 16 | 78166717  | 78168514  | 1797  | TEC                                  | -2.92 | 8.99E-06 | 3.87E-04 |
| ENSG00000235268 | KDM4E      | 11 | 95025258  | 95027596  | 2338  | protein coding                       | -2.92 | 9.73E-06 | 4.10E-04 |
| ENSG00000287010 | AC130467.1 | 16 | 86764298  | 86771041  | 6743  | lncRNA                               | -2.92 | 6.11E-04 | 6.66E-03 |
| ENSG00000285861 | AC026997.2 | 8  | 3409133   | 3426587   | 17454 | lncRNA-antisense                     | -2.92 | 2.19E-04 | 3.37E-03 |
| ENSG00000268483 | RPL7AP69   | 19 | 57065334  | 57066139  | 805   | processed pseudogene                 | -2.92 | 1.85E-03 | 1.42E-02 |
| ENSG00000221878 | PSG7       | 19 | 42924132  | 42937207  | 13075 | protein coding                       | -2.93 | 8.44E-07 | 7.70E-05 |
| ENSG00000287987 | AL390839.2 | 1  | 38193619  | 38210340  | 16721 | lncRNA                               | -2.93 | 1.34E-04 | 2.40E-03 |
| ENSG00000278626 | AC023310.4 | 15 | 20642799  | 20643448  | 649   | lncRNA                               | -2.93 | 4.33E-04 | 5.28E-03 |
| ENSG00000284666 | Z98259.2   | 1  | 5480787   | 5482028   | 1241  | lncRNA                               | -2.93 | 6.53E-04 | 6.98E-03 |
| ENSG00000259757 | AC091891.1 | 5  | 2736662   | 2737759   | 1097  | lncRNA                               | -2.93 | 9.16E-04 | 8.77E-03 |
| ENSG00000179636 | TPP2       | 14 | 21024109  | 21036276  | 12167 | protein coding                       | -2.93 | 2.44E-05 | 7.48E-04 |
| ENSG00000180974 | OR52E4     | 11 | 5880629   | 5887079   | 6450  | protein coding                       | -2.94 | 5.75E-04 | 6.40E-03 |
| ENSG00000140527 | WDR93      | 15 | 89690811  | 89743638  | 52827 | protein coding                       | -2.94 | 2.45E-11 | 5.45E-08 |
| ENSG00000253116 | AC027698.1 | 8  | 58091442  | 58106294  | 14852 | lncRNA                               | -2.94 | 1.09E-04 | 2.08E-03 |
| ENSG00000167822 | ORAJ3      | 11 | 56134721  | 56140201  | 5480  | protein coding                       | -2.94 | 9.61E-04 | 9.06E-03 |
| ENSG00000229280 | EEF1DP6    | 1  | 4175528   | 4175899   | 371   | processed pseudogene                 | -2.95 | 6.36E-04 | 6.84E-03 |
| ENSG00000286498 | AL132982.1 | 6  | 161353679 | 161355630 | 1671  | lncRNA                               | -2.95 | 1.53E-04 | 2.63E-03 |
| ENSG00000251321 | PCAT4      | 4  | 79827471  | 79877770  | 50299 | lncRNA                               | -2.95 | 8.18E-05 | 1.72E-03 |
| ENSG00000237850 | AC091304.1 | 15 | 28349051  | 28358080  | 9029  | transcribed unprocessed pseudogene   | -2.95 | 3.96E-04 | 5.00E-03 |
| ENSG00000224792 | IQCF4P     | 3  | 51817603  | 51819635  | 2032  | transcribed unitary pseudogene       | -2.95 | 1.10E-03 | 9.89E-03 |
| ENSG00000136275 | C7orf169   | 7  | 47795291  | 47819847  | 24556 | lncRNA-antisense                     | -2.95 | 1.05E-03 | 9.63E-03 |
| ENSG00000230324 | LINC01734  | 20 | 39213777  | 39224748  | 10971 | lncRNA                               | -2.95 | 1.57E-05 | 5.61E-04 |
| ENSG00000240132 | EIF1F2     | 7  | 151501878 | 151503463 | 1585  | processed pseudogene                 | -2.96 | 9.37E-05 | 1.89E-03 |
| ENSG00000274251 | AP003419.2 | 11 | 67353629  | 67354348  | 719   | lncRNA                               | -2.96 | 5.71E-04 | 6.37E-03 |
| ENSG00000280291 | AC016251.1 | 15 | 96294935  | 96299203  | 3088  | TEC                                  | -2.96 | 3.40E-06 | 1.98E-04 |
| ENSG00000229028 | KRT223P    | 17 | 40717235  | 40721932  | 4697  | transcribed unprocessed pseudogene   | -2.96 | 2.81E-05 | 8.16E-04 |
| ENSG00000231648 | LINC01698  | 1  | 209367662 | 209380518 | 12856 | lncRNA                               | -2.96 | 3.71E-05 | 9.93E-04 |
| ENSG00000282012 | AP000357.2 | 22 | 24691122  | 24696003  | 4881  | lncRNA                               | -2.96 | 1.00E-04 | 1.98E-03 |
| ENSG00000267780 | AC021594.2 | 18 | 79792726  | 79816529  | 23803 | lncRNA                               | -2.96 | 1.02E-03 | 9.43E-03 |
| ENSG00000198054 | DSCR8      | 21 | 38121451  | 38156511  | 35060 | lncRNA                               | -2.96 | 2.55E-04 | 3.73E-03 |
| ENSG00000247867 | AP01922.1  | 11 | 75758455  | 75768647  | 10192 | lncRNA-antisense                     | -2.97 | 6.41E-06 | 3.06E-04 |
| ENSG00000230716 | KRT8P7     | 11 | 119602875 | 119604306 | 1431  | processed pseudogene                 | -2.97 | 4.79E-07 | 5.26E-05 |
| ENSG00000288172 | AL356419.1 | 10 | 117579854 | 117593896 | 14042 | lncRNA                               | -2.97 | 2.51E-04 | 3.70E-03 |
| ENSG00000260972 | Z98259.1   | 1  | 5492978   | 5494674   | 1696  | lncRNA                               | -2.97 | 7.95E-06 | 3.56E-04 |
| ENSG00000286668 | AL391730.2 | 1  | 40939294  | 40945524  | 6230  | lncRNA                               | -2.97 | 7.03E-04 | 7.33E-03 |
| ENSG00000137634 | NXPE4      | 11 | 114570591 | 114595786 | 25195 | protein coding                       | -2.97 | 1.24E-04 | 2.27E-03 |
| ENSG00000237843 | AC016903.2 | 2  | 204473834 | 204507672 | 33838 | lncRNA                               | -2.97 | 7.99E-04 | 8.02E-03 |
| ENSG00000237194 | SNAI1P1    | 2  | 209808804 | 209809580 | 776   | processed pseudogene                 | -2.97 | 4.14E-05 | 1.07E-03 |
| ENSG00000248257 | PSG10P     | 19 | 42839368  | 42855718  | 16350 | transcribed unprocessed pseudogene   | -2.97 | 8.51E-06 | 3.72E-04 |
| ENSG00000244573 | RPL30P11   | 12 | 14356842  | 14365503  | 8661  | transcribed processed pseudogene     | -2.98 | 1.04E-04 | 2.02E-03 |
| ENSG00000279442 | AP000542.2 | 22 | 15298378  | 15304556  | 6178  | lncRNA                               | -2.98 | 5.41E-04 | 6.13E-03 |
| ENSG00000287307 | AC005772.2 | 17 | 15062087  | 15104517  | 42430 | lncRNA                               | -2.98 | 7.23E-10 | 5.37E-07 |
| ENSG00000164299 | SPZ1       | 5  | 80319625  | 80321842  | 2217  | protein coding                       | -2.98 | 3.06E-03 | 2.00E-02 |
| ENSG00000287399 | AC011503.4 | 19 | 23897321  | 23899495  | 2174  | lncRNA                               | -2.98 | 2.81E-05 | 8.18E-04 |
| ENSG00000281852 | LINC00891  | X  | 71697196  | 71706455  | 9259  | lncRNA                               | -2.98 | 1.61E-04 | 2.72E-03 |
| ENSG00000253138 | LINC00967  | 8  | 66192093  | 66197315  | 5222  | lncRNA                               | -2.98 | 4.94E-05 | 1.21E-03 |
| ENSG00000251257 | AC010457.1 | 5  | 38460925  | 38468339  | 7414  | lncRNA-antisense                     | -2.98 | 1.28E-03 | 1.10E-02 |
| ENSG00000228055 | FAM245A    | 10 | 87396561  | 87435035  | 38474 | lncRNA                               | -2.98 | 3.06E-05 | 8.68E-04 |
| ENSG00000287824 | AL627443.3 | 6  | 166098111 | 166099589 | 1478  | lncRNA                               | -2.99 | 1.42E-04 | 2.49E-03 |
| ENSG00000253879 | AC087664.2 | 8  | 59601319  | 59620227  | 18908 | lncRNA                               | -2.99 | 2.20E-04 | 3.38E-03 |
| ENSG00000234191 | LINC01283  | X  | 39401252  | 39434824  | 33572 | lncRNA                               | -2.99 | 1.41E-03 | 1.18E-02 |
| ENSG00000287844 | AC018953.2 | 8  | 63651457  | 63693249  | 41792 | lncRNA                               | -2.99 | 3.03E-03 | 1.99E-02 |
| ENSG00000287784 | AC112482.2 | 3  | 127165506 | 127218473 | 52967 | lncRNA                               | -2.99 | 1.59E-04 | 2.70E-03 |
| ENSG00000242078 | AC084864.1 | 7  | 129783370 | 129785185 | 1815  | lncRNA                               | -3.00 | 4.82E-04 | 5.68E-03 |
| ENSG00000260616 | AC007728.1 | 16 | 50783859  | 50803338  | 19479 | lncRNA-antisense                     | -3.00 | 2.24E-05 | 7.05E-04 |
| ENSG00000234724 | HDAC1P1    | 10 | 94137748  | 94139500  | 1752  | processed pseudogene                 | -3.00 | 1.99E-05 | 6.53E-04 |
| ENSG00000257331 | RACGAP1P1  | 12 | 45063473  | 45065351  | 1878  | processed pseudogene                 | -3.00 | 5.60E-05 | 1.32E-03 |
| ENSG00000116039 | ATP6V1B1   | 2  | 70935900  | 70965431  | 29531 | protein coding                       | -3.01 | 1.82E-06 | 1.33E-04 |
| ENSG00000211641 | IGLV11-55  | 22 | 22201663  | 22202161  | 498   | IG_V_gene                            | -3.01 | 5.31E-04 | 6.06E-03 |
| ENSG00000231172 | AC007099.1 | 2  | 75524068  | 75542706  | 18638 | lncRNA-antisense                     | -3.01 | 2.27E-04 | 3.45E-03 |
| ENSG00000224764 | AL353768.1 | 9  | 94928551  | 94934946  | 6395  | lncRNA-antisense                     | -3.01 | 6.37E-04 | 6.84E-03 |
| ENSG00000267651 | AC015961.1 | 18 | 37234119  | 37236242  | 2123  | lncRNA                               | -3.01 | 2.23E-05 | 7.02E-04 |
| ENSG00000287582 | AC099796.2 | 1  | 54514417  | 54517383  | 2966  | lncRNA                               | -3.01 | 5.41E-06 | 2.73E-04 |
| ENSG00000261624 | NDUFB10P2  | 7  | 141351977 | 141352768 | 791   | processed pseudogene                 | -3.01 | 3.48E-04 | 4.56E-03 |
| ENSG00000254412 | AC118273.1 | 11 | 49098163  | 49101168  | 3005  | processed pseudogene                 | -3.01 | 1.52E-03 | 1.24E-02 |
| ENSG00000000005 | TNMD       | X  | 100584936 | 100599885 | 14949 | protein coding                       | -3.01 | 1.74E-04 | 2.88E-03 |
| ENSG00000227542 | AC092614.1 | 2  | 191229165 | 191246172 | 17007 | lncRNA                               | -3.01 | 5.62E-04 | 6.30E-03 |
| ENSG00000263878 | DLGAP1-AS4 | 18 | 3962353   | 4024150   | 61797 | lncRNA-antisense                     | -3.01 | 1.11E-06 | 9.16E-05 |
| ENSG00000224969 | AL645608.1 | 1  | 1011997   | 1013193   | 1196  | lncRNA-antisense                     | -3.02 | 2.66E-04 | 3.85E-03 |
| ENSG00000263862 | LINC01543  | 18 | 26421139  | 26438041  | 16902 | lncRNA                               | -3.02 | 2.06E-06 | 1.44E-04 |
| ENSG00000237136 | C4orf51    | 4  | 145680146 | 145771032 | 90886 | protein coding                       | -3.02 | 3.13E-04 | 4.26E-03 |
| ENSG00000284748 | AL513220.1 | 1  | 37596126  | 37607336  | 11210 | lncRNA-bidirectional promoter lncRNA | -3.02 | 1.65E-05 | 5.75E-04 |
| ENSG00000279070 | AC073263.2 | 2  | 74196698  | 74198560  | 1862  | lncRNA                               | -3.02 | 1.06E-04 | 2.05E-03 |
| ENSG00000269565 | GPR32P1    | 19 | 50758382  | 50759192  | 810   | unprocessed pseudogene               | -3.02 | 1.48E-03 | 1.21E-02 |
| ENSG00000258010 | AC01705.1  | 15 | 80433795  | 80445152  | 11357 | lncRNA-antisense                     | -3.02 | 1.65E-07 | 2.53E-05 |
| ENSG00000245059 | AC092718.1 | 16 | 81077319  | 81078861  | 1542  | lncRNA                               | -3.02 | 2.28E-06 | 1.53E-04 |
| ENSG00000287972 | AC073648.7 | 4  | 9076949   | 9092530   | 15581 | lncRNA                               | -3.03 | 1.90E-05 | 6.33E-04 |
| ENSG00000270279 | AL132655.3 | 20 | 58754351  | 58756838  | 2487  | lncRNA                               | -3.03 | 1.05E-04 | 2.04E-03 |

|                 |             |    |           |           |        |                                    |       |          |          |
|-----------------|-------------|----|-----------|-----------|--------|------------------------------------|-------|----------|----------|
| ENSG00000250025 | AC011396.2  | 5  | 146307098 | 146376963 | 69865  | lncRNA-antisense                   | -3.03 | 2.78E-04 | 3.96E-03 |
| ENSG00000282097 | AL160408.6  | 1  | 234709383 | 234720220 | 10837  | lncRNA                             | -3.03 | 2.92E-04 | 4.07E-03 |
| ENSG00000141946 | ZIM3        | 19 | 57134096  | 57145202  | 11106  | protein coding                     | -3.04 | 1.75E-06 | 1.30E-04 |
| ENSG00000234481 | AC117945.1  | 1  | 36769812  | 36775768  | 5956   | lncRNA-antisense                   | -3.04 | 1.01E-04 | 1.99E-03 |
| ENSG00000270591 | AL049840.7  | 14 | 103762803 | 103763277 | 474    | transcribed processed pseudogene   | -3.04 | 3.16E-03 | 2.05E-02 |
| ENSG00000234999 | SNRPCP19    | 7  | 24906135  | 24906594  | 459    | processed pseudogene               | -3.04 | 1.70E-05 | 5.86E-04 |
| ENSG00000287668 | AL132990.1  | 14 | 94545310  | 94547762  | 2452   | lncRNA                             | -3.04 | 2.28E-06 | 1.53E-04 |
| ENSG00000161652 | IZUMO2      | 19 | 50152548  | 50163195  | 10647  | protein coding                     | -3.05 | 3.77E-07 | 4.45E-05 |
| ENSG00000155622 | XAGE2       | X  | 52369021  | 52375680  | 6659   | protein coding                     | -3.05 | 1.74E-04 | 2.88E-03 |
| ENSG00000253547 | TUBAP7      | 11 | 63046785  | 63048126  | 1341   | processed pseudogene               | -3.05 | 4.06E-04 | 5.08E-03 |
| ENSG00000250814 | LINC02221   | 5  | 9854371   | 9899970   | 45599  | lncRNA                             | -3.05 | 4.03E-04 | 5.06E-03 |
| ENSG00000214825 | EI24P3      | 3  | 44524744  | 44525805  | 1061   | processed pseudogene               | -3.05 | 5.90E-04 | 6.51E-03 |
| ENSG00000204978 | ERICH4      | 19 | 41443156  | 41444765  | 1609   | protein coding                     | -3.06 | 2.57E-04 | 3.75E-03 |
| ENSG00000256218 | AC007848.2  | 12 | 5366048   | 5367774   | 1726   | lncRNA                             | -3.06 | 7.48E-04 | 7.65E-03 |
| ENSG00000244137 | AL512328.1  | 1  | 230710698 | 230795492 | 84794  | lncRNA-antisense                   | -3.06 | 5.64E-06 | 2.80E-04 |
| ENSG00000257271 | KIRREL3-AS1 | 11 | 126543947 | 126610948 | 67001  | lncRNA-antisense                   | -3.06 | 2.07E-04 | 3.24E-03 |
| ENSG00000164294 | GPX8        | 5  | 55160167  | 55167297  | 7130   | protein coding                     | -3.06 | 1.82E-05 | 6.15E-04 |
| ENSG00000153684 | GOLGA8F     | 15 | 28378621  | 28392018  | 13397  | protein coding                     | -3.07 | 9.76E-06 | 4.10E-04 |
| ENSG00000228445 | UGT1A2P     | 2  | 233747214 | 233748079 | 865    | unprocessed pseudogene             | -3.07 | 3.69E-04 | 4.75E-03 |
| ENSG00000250591 | PRSS3P1     | 7  | 142760415 | 142763943 | 3528   | unprocessed pseudogene             | -3.07 | 5.73E-05 | 1.35E-03 |
| ENSG00000179136 | LINC00670   | 17 | 12549764  | 12642854  | 93090  | lncRNA                             | -3.07 | 3.32E-08 | 8.50E-06 |
| ENSG00000242097 | AC086847.1  | 3  | 151759747 | 151762011 | 2264   | processed pseudogene               | -3.07 | 2.89E-04 | 4.05E-03 |
| ENSG00000282924 | AC136428.4  | 16 | 33723356  | 33763773  | 40417  | unprocessed pseudogene             | -3.07 | 5.04E-05 | 1.23E-03 |
| ENSG00000260786 | AC108099.1  | 5  | 42188266  | 42191523  | 3257   | lncRNA                             | -3.07 | 7.85E-04 | 7.93E-03 |
| ENSG00000082929 | LINC01587   | 4  | 5524569   | 5527801   | 3232   | lncRNA                             | -3.08 | 4.43E-04 | 5.37E-03 |
| ENSG00000255540 | AP003122.5  | 11 | 89731017  | 89734782  | 3765   | processed pseudogene               | -3.08 | 3.63E-05 | 9.80E-04 |
| ENSG00000258692 | SALL4P7     | 14 | 60493766  | 60496885  | 3119   | transcribed processed pseudogene   | -3.08 | 9.84E-06 | 4.11E-04 |
| ENSG00000253105 | AP003548.1  | 8  | 96370800  | 96387438  | 16638  | lncRNA                             | -3.08 | 3.56E-04 | 4.63E-03 |
| ENSG00000226197 | AL583785.1  | 9  | 13386130  | 13836651  | 450441 | lncRNA                             | -3.08 | 5.54E-04 | 6.24E-03 |
| ENSG00000204290 | BTNL2       | 6  | 32393963  | 32407128  | 13165  | protein coding                     | -3.08 | 3.30E-06 | 1.96E-04 |
| ENSG00000231815 | AC007179.1  | 2  | 59434552  | 59442261  | 7709   | lncRNA                             | -3.08 | 1.21E-04 | 2.24E-03 |
| ENSG00000203648 | AC007618.1  | 12 | 2659937   | 2660969   | 1032   | processed pseudogene               | -3.08 | 2.55E-04 | 3.73E-03 |
| ENSG00000260756 | AC131649.1  | 16 | 10351440  | 10352752  | 1312   | lncRNA                             | -3.08 | 4.12E-05 | 1.07E-03 |
| ENSG00000230790 | AC012456.2  | 2  | 11740997  | 11745301  | 4304   | lncRNA-antisense                   | -3.08 | 1.88E-05 | 6.30E-04 |
| ENSG00000204776 | IGKV10R-3   | 9  | 65770955  | 65771434  | 479    | IG V pseudogene                    | -3.09 | 2.61E-04 | 3.79E-03 |
| ENSG00000204880 | KRTAP4-8    | 17 | 41096981  | 41098142  | 1161   | protein coding                     | -3.09 | 2.69E-05 | 7.93E-04 |
| ENSG00000255282 | WTAPP1      | 11 | 102746968 | 102836766 | 89798  | transcribed processed pseudogene   | -3.09 | 2.72E-09 | 1.43E-06 |
| ENSG00000260239 | LINC02533   | 6  | 4488798   | 4495769   | 6971   | lncRNA                             | -3.09 | 5.02E-07 | 5.37E-05 |
| ENSG00000286694 | AL161935.3  | 10 | 31608500  | 31620862  | 12362  | lncRNA                             | -3.10 | 3.85E-04 | 4.89E-03 |
| ENSG00000255395 | AP001972.4  | 11 | 75099172  | 75140148  | 40976  | lncRNA-antisense                   | -3.10 | 5.41E-04 | 6.13E-03 |
| ENSG00000184210 | DGAT2L6     | X  | 70177483  | 70205704  | 28221  | protein coding                     | -3.10 | 7.51E-05 | 1.63E-03 |
| ENSG00000231924 | PSG1        | 19 | 42866464  | 42879822  | 13358  | protein coding                     | -3.10 | 1.13E-07 | 1.88E-05 |
| ENSG00000221933 | OR2A25      | 7  | 144069811 | 144075870 | 6059   | protein coding                     | -3.10 | 5.46E-06 | 2.74E-04 |
| ENSG00000232930 | AC083864.2  | 7  | 36001317  | 36055431  | 54114  | lncRNA                             | -3.10 | 3.78E-04 | 4.83E-03 |
| ENSG00000227463 | AL390838.1  | 9  | 84059298  | 84098984  | 39686  | lncRNA                             | -3.10 | 4.12E-08 | 9.70E-06 |
| ENSG00000286842 | AL353752.2  | 9  | 87436215  | 87445795  | 9580   | lncRNA                             | -3.11 | 3.29E-05 | 9.08E-04 |
| ENSG00000267927 | AC010320.1  | 19 | 52171158  | 52177002  | 5844   | lncRNA-antisense                   | -3.11 | 1.21E-06 | 9.74E-05 |
| ENSG00000236800 | AC08898.1   | 10 | 48664199  | 48672424  | 8225   | lncRNA                             | -3.11 | 1.15E-03 | 1.02E-02 |
| ENSG00000225233 | AL592402.1  | 1  | 213492288 | 213579267 | 86979  | lncRNA                             | -3.11 | 3.99E-04 | 5.03E-03 |
| ENSG00000226087 | AC073283.2  | 2  | 47225781  | 47240886  | 15105  | lncRNA                             | -3.12 | 9.06E-05 | 1.84E-03 |
| ENSG00000243095 | RPL3P10     | 8  | 39157538  | 39158701  | 1163   | processed pseudogene               | -3.12 | 8.02E-04 | 8.04E-03 |
| ENSG00000234754 | LINC02817   | 1  | 221330080 | 221336489 | 6409   | lncRNA                             | -3.12 | 7.72E-05 | 1.66E-03 |
| ENSG00000261749 | LINC02180   | 16 | 52085210  | 52099120  | 13910  | lncRNA                             | -3.12 | 5.77E-05 | 1.35E-03 |
| ENSG00000287652 | AC000082.1  | 22 | 19520572  | 19522769  | 2197   | lncRNA                             | -3.12 | 3.02E-06 | 1.84E-04 |
| ENSG00000259862 | AC026336.2  | 12 | 130249679 | 130266725 | 17046  | lncRNA                             | -3.13 | 4.67E-04 | 5.56E-03 |
| ENSG00000242741 | LINC02005   | 3  | 73805754  | 73902960  | 97206  | lncRNA                             | -3.13 | 5.06E-05 | 1.23E-03 |
| ENSG00000287144 | AC097511.1  | 4  | 137943022 | 138051288 | 108266 | lncRNA                             | -3.13 | 3.30E-04 | 4.42E-03 |
| ENSG00000219891 | ZSCAN12P1   | 6  | 28091154  | 28093664  | 2510   | transcribed unprocessed pseudogene | -3.13 | 2.55E-07 | 3.39E-05 |
| ENSG00000122548 | KIAA0087    | 7  | 26533121  | 26533878  | 5667   | lncRNA                             | -3.14 | 6.75E-07 | 6.64E-05 |
| ENSG00000183629 | GOLGA8G     | 15 | 28519611  | 28533014  | 13403  | protein coding                     | -3.14 | 2.19E-08 | 6.29E-06 |
| ENSG00000233645 | AL358876.2  | 1  | 8218190   | 8220529   | 2339   | lncRNA                             | -3.14 | 3.08E-05 | 8.72E-04 |
| ENSG00000284516 | VAMP9P      | 4  | 82284971  | 82340013  | 55042  | transcribed unitary pseudogene     | -3.15 | 3.81E-06 | 2.14E-04 |
| ENSG00000222000 | AC092675.1  | 2  | 98331389  | 98356005  | 24616  | lncRNA-antisense                   | -3.15 | 6.54E-05 | 1.48E-03 |
| ENSG00000155087 | ODF1        | 8  | 102551589 | 102561018 | 9429   | protein coding                     | -3.15 | 3.50E-04 | 4.57E-03 |
| ENSG00000235295 | LINC01634   | 22 | 18029385  | 18037968  | 8583   | lncRNA                             | -3.15 | 5.09E-07 | 5.42E-05 |
| ENSG00000248709 | AC008549.1  | 5  | 115738978 | 115756543 | 17565  | lncRNA                             | -3.15 | 8.19E-04 | 8.16E-03 |
| ENSG00000231877 | AL359551.1  | 1  | 238485445 | 238538305 | 52860  | lncRNA                             | -3.16 | 1.57E-05 | 5.61E-04 |
| ENSG00000236121 | HAUS6P2     | 20 | 31341371  | 31344471  | 3100   | processed pseudogene               | -3.17 | 1.92E-06 | 1.37E-04 |
| ENSG00000236173 | AL049612.1  | 6  | 169809318 | 169810102 | 784    | lncRNA                             | -3.17 | 1.63E-04 | 2.75E-03 |
| ENSG00000249241 | LINC02265   | 4  | 40316485  | 40330419  | 13934  | lncRNA                             | -3.17 | 1.10E-03 | 9.86E-03 |
| ENSG00000257067 | LINC02703   | 11 | 115920248 | 115943181 | 22933  | lncRNA                             | -3.17 | 1.33E-04 | 2.38E-03 |
| ENSG00000287135 | AC010884.1  | 2  | 104928803 | 104936467 | 7664   | lncRNA                             | -3.17 | 3.43E-08 | 8.61E-06 |
| ENSG00000183674 | LINC00518   | 6  | 10429255  | 10435015  | 5760   | lncRNA                             | -3.17 | 3.12E-05 | 8.79E-04 |
| ENSG00000235432 | AL663074.2  | 1  | 20692734  | 20694013  | 1279   | unprocessed pseudogene             | -3.18 | 4.48E-05 | 1.13E-03 |
| ENSG00000285919 | AC087639.2  | 15 | 68880663  | 68928941  | 48278  | lncRNA-antisense                   | -3.18 | 1.72E-07 | 2.61E-05 |
| ENSG00000250636 | AC019193.1  | 4  | 183028601 | 183029720 | 1119   | processed pseudogene               | -3.18 | 5.63E-04 | 6.30E-03 |
| ENSG00000250894 | PRAMEF31P   | 1  | 13245863  | 13248652  | 2789   | unprocessed pseudogene             | -3.18 | 6.84E-09 | 2.78E-06 |
| ENSG00000259925 | AC130456.2  | 16 | 19343647  | 19401693  | 58046  | lncRNA                             | -3.18 | 5.14E-07 | 5.46E-05 |
| ENSG00000253130 | AC114550.1  | 8  | 8561386   | 8574038   | 12652  | lncRNA                             | -3.18 | 4.03E-06 | 2.22E-04 |
| ENSG00000248572 | EGFLAM-AS2  | 5  | 38399814  | 38403711  | 3657   | lncRNA-antisense                   | -3.18 | 7.37E-05 | 1.60E-03 |
| ENSG00000265927 | AC125421.2  | 17 | 73831572  | 73836019  | 4447   | lncRNA                             | -3.19 | 3.88E-06 | 2.16E-04 |
| ENSG00000255277 | ABC6P2      | 16 | 14820792  | 14824702  | 3910   | transcribed unprocessed pseudogene | -3.20 | 3.00E-04 | 4.15E-03 |
| ENSG00000236719 | OVAL        | 1  | 180509380 | 180566523 | 57143  | lncRNA                             | -3.20 | 1.70E-05 | 5.86E-04 |
| ENSG00000261637 | LINC02127   | 16 | 51017544  | 51035784  | 18240  | lncRNA                             | -3.21 | 1.36E-07 | 2.19E-05 |
| ENSG00000250666 | LINC01596   | 4  | 189881515 | 189884868 | 3353   | lncRNA                             | -3.21 | 6.87E-04 | 7.22E-03 |
| ENSG00000179172 | HNRNPCL1    | 1  | 12847377  | 12848720  | 1343   | protein coding                     | -3.21 | 8.78E-05 | 1.80E-03 |
| ENSG00000270935 | AL021808.1  | 6  | 27268113  | 27269229  | 1116   | processed pseudogene               | -3.22 | 3.92E-04 | 4.97E-03 |
| ENSG00000213358 | AC092933.1  | 3  | 196527339 | 196528791 | 1452   | unprocessed pseudogene             | -3.22 | 1.22E-06 | 9.76E-05 |
| ENSG00000267407 | LINC02841   | 19 | 31520155  | 31554803  | 34648  | lncRNA                             | -3.22 | 4.39E-05 | 1.12E-03 |
| ENSG00000205362 | MT1A        | 16 | 56638666  | 56640087  | 1421   | protein coding                     | -3.23 | 7.18E-05 | 1.58E-03 |

|                 |            |    |           |           |        |                                    |       |          |          |
|-----------------|------------|----|-----------|-----------|--------|------------------------------------|-------|----------|----------|
| ENSG00000268879 | IGFL1P1    | 19 | 46196238  | 46197323  | 1085   | unprocessed_pseudogene             | -3.23 | 1.56E-04 | 2.66E-03 |
| ENSG00000257761 | AC078860.2 | 12 | 71587642  | 71594404  | 6762   | lncRNA-antisense                   | -3.23 | 9.76E-05 | 1.94E-03 |
| ENSG00000285751 | AC021723.2 | 11 | 39024631  | 39161638  | 137007 | lncRNA                             | -3.23 | 2.77E-04 | 3.96E-03 |
| ENSG00000263677 | AC012588.1 | 18 | 26685954  | 26689668  | 3714   | lncRNA                             | -3.23 | 1.04E-04 | 2.03E-03 |
| ENSG00000203914 | HSP90B3P   | 1  | 91642516  | 91644082  | 1566   | processed_pseudogene               | -3.23 | 2.63E-04 | 3.82E-03 |
| ENSG00000259026 | AL049833.2 | 14 | 97110416  | 97119247  | 8831   | lncRNA                             | -3.24 | 4.84E-05 | 1.19E-03 |
| ENSG00000285879 | AC018628.2 | 17 | 62035944  | 62040352  | 4408   | lncRNA-antisense                   | -3.24 | 3.71E-04 | 4.76E-03 |
| ENSG00000253775 | AC100802.1 | 8  | 20079114  | 20124857  | 45743  | lncRNA                             | -3.24 | 2.52E-04 | 3.70E-03 |
| ENSG00000236545 | AP001619.2 | 21 | 41870633  | 41872054  | 1421   | lncRNA-antisense                   | -3.24 | 7.43E-06 | 3.40E-04 |
| ENSG00000259478 | AC024651.1 | 15 | 97982509  | 97991142  | 8633   | lncRNA                             | -3.24 | 1.38E-04 | 2.45E-03 |
| ENSG00000287687 | AC007387.2 | 2  | 74723873  | 74778780  | 54907  | lncRNA                             | -3.24 | 1.31E-06 | 1.02E-04 |
| ENSG00000131482 | G6PC       | 17 | 42900797  | 42914438  | 13641  | protein_coding                     | -3.24 | 8.10E-07 | 7.53E-05 |
| ENSG00000165935 | SMCO2      | 12 | 27466810  | 27502185  | 35375  | protein_coding                     | -3.24 | 2.90E-06 | 1.79E-04 |
| ENSG00000286425 | AL773573.1 | 21 | 41007244  | 41037362  | 30118  | lncRNA                             | -3.24 | 1.17E-05 | 4.62E-04 |
| ENSG00000101981 | F9         | X  | 139530739 | 139563459 | 32720  | protein_coding                     | -3.25 | 4.52E-06 | 2.39E-04 |
| ENSG00000237223 | SULT1C2P1  | 2  | 108322238 | 108353799 | 31561  | transcribed_unprocessed_pseudogene | -3.25 | 7.22E-05 | 1.58E-03 |
| ENSG00000231253 | LINC01640  | 22 | 33104330  | 33145861  | 41531  | lncRNA                             | -3.25 | 1.77E-06 | 1.31E-04 |
| ENSG00000180383 | DEFB124    | 20 | 31465506  | 31476757  | 11251  | protein_coding                     | -3.26 | 4.24E-05 | 1.09E-03 |
| ENSG00000159516 | SPRR2G     | 1  | 153149582 | 153150890 | 1308   | protein_coding                     | -3.26 | 2.25E-05 | 7.06E-04 |
| ENSG00000267215 | AC040963.1 | 18 | 59081911  | 59085920  | 4009   | lncRNA                             | -3.26 | 6.11E-08 | 1.28E-05 |
| ENSG00000231418 | AC005090.1 | 7  | 31414158  | 31421303  | 7145   | lncRNA                             | -3.26 | 2.45E-04 | 3.63E-03 |
| ENSG00000279142 | AC009108.4 | 16 | 86595189  | 86597639  | 2450   | TEC                                | -3.26 | 6.89E-07 | 6.73E-05 |
| ENSG00000253213 | USP12P1    | 5  | 171251866 | 171252982 | 1116   | processed_pseudogene               | -3.26 | 5.00E-05 | 1.22E-03 |
| ENSG00000254645 | AC087379.1 | 11 | 15701265  | 15758898  | 57633  | lncRNA                             | -3.27 | 1.13E-06 | 9.24E-05 |
| ENSG00000108688 | CCL7       | 17 | 34270221  | 34272242  | 2021   | protein_coding                     | -3.27 | 2.92E-04 | 4.07E-03 |
| ENSG00000225815 | AC082669.1 | 2  | 86327349  | 86328984  | 1635   | lncRNA                             | -3.27 | 2.71E-04 | 3.89E-03 |
| ENSG00000232328 | AC084030.1 | 2  | 236733289 | 236754363 | 21074  | lncRNA                             | -3.27 | 6.10E-10 | 5.02E-07 |
| ENSG00000163515 | RETNLB     | 3  | 108743424 | 108757384 | 13960  | protein_coding                     | -3.27 | 1.91E-04 | 3.07E-03 |
| ENSG00000260860 | AC126773.5 | 16 | 68651056  | 68651948  | 892    | processed_pseudogene               | -3.27 | 3.94E-06 | 2.18E-04 |
| ENSG00000232628 | AC092809.2 | 1  | 224208741 | 224213625 | 4884   | lncRNA-sense intronic              | -3.28 | 4.06E-07 | 4.63E-05 |
| ENSG00000224090 | AC097468.1 | 2  | 219002215 | 219015721 | 13506  | lncRNA-antisense                   | -3.29 | 2.42E-05 | 7.43E-04 |
| ENSG00000236027 | PATE3      | 11 | 125788127 | 125791600 | 3473   | protein_coding                     | -3.29 | 3.70E-05 | 9.93E-04 |
| ENSG00000285555 | AC005293.1 | 12 | 2332861   | 2335702   | 2841   | lncRNA-antisense                   | -3.29 | 7.14E-08 | 1.38E-05 |
| ENSG00000180205 | WFDC9      | 20 | 45607939  | 45631284  | 23345  | protein_coding                     | -3.29 | 3.59E-05 | 9.74E-04 |
| ENSG00000229345 | AL392185.1 | 9  | 95959438  | 95960326  | 6888   | lncRNA                             | -3.30 | 4.44E-05 | 1.12E-03 |
| ENSG00000233884 | AL772337.2 | 9  | 87848113  | 87853526  | 5413   | lncRNA-antisense                   | -3.31 | 5.18E-05 | 1.25E-03 |
| ENSG00000253556 | MTCO1P4    | 8  | 103088796 | 103090761 | 1875   | processed_pseudogene               | -3.31 | 2.18E-05 | 6.91E-04 |
| ENSG00000275800 | EIF5P2     | X  | 19496378  | 19497721  | 1343   | unprocessed_pseudogene             | -3.31 | 1.20E-05 | 4.70E-04 |
| ENSG00000277932 | OR5E25     | 11 | 5893208   | 5902730   | 9522   | protein_coding                     | -3.31 | 2.36E-06 | 1.56E-04 |
| ENSG00000203307 | FAM78B-AS1 | 1  | 166081183 | 166087483 | 6300   | lncRNA-antisense                   | -3.31 | 6.80E-05 | 1.52E-03 |
| ENSG00000287619 | AL021308.1 | X  | 103563917 | 103573278 | 9361   | lncRNA                             | -3.32 | 2.04E-04 | 3.22E-03 |
| ENSG00000225179 | LINC00457  | 13 | 34435450  | 34640803  | 205353 | lncRNA                             | -3.32 | 3.62E-05 | 9.79E-04 |
| ENSG00000238024 | DDX39BP2   | 6  | 29993209  | 29993605  | 396    | unprocessed_pseudogene             | -3.32 | 1.38E-05 | 5.21E-04 |
| ENSG00000266711 | AC021534.1 | 17 | 79132722  | 79136402  | 3680   | lncRNA-antisense                   | -3.33 | 7.34E-05 | 1.60E-03 |
| ENSG00000255440 | AP010805.1 | 11 | 74398825  | 74416379  | 17554  | lncRNA-sense intronic              | -3.33 | 1.09E-05 | 4.39E-04 |
| ENSG00000275152 | CCL16      | 17 | 35976493  | 35981497  | 5004   | protein_coding                     | -3.34 | 4.76E-10 | 4.29E-07 |
| ENSG00000215035 | FDPSP5     | X  | 44476027  | 44477222  | 1395   | processed_pseudogene               | -3.35 | 1.77E-05 | 6.04E-04 |
| ENSG00000283473 | FAM240A    | 3  | 46612435  | 46626543  | 14108  | protein_coding                     | -3.35 | 8.78E-05 | 1.80E-03 |
| ENSG00000286325 | AC124861.3 | 2  | 240184716 | 240187878 | 3162   | lncRNA                             | -3.35 | 3.69E-05 | 9.92E-04 |
| ENSG00000286658 | AC005153.1 | 7  | 50641725  | 50643868  | 2143   | lncRNA                             | -3.35 | 1.18E-05 | 4.65E-04 |
| ENSG00000258841 | EEF1A1P2   | 14 | 81661428  | 81662874  | 1446   | processed_pseudogene               | -3.35 | 4.64E-04 | 5.54E-03 |
| ENSG00000259735 | AC092868.2 | 15 | 59348648  | 59359889  | 11241  | lncRNA-sense intronic              | -3.36 | 1.24E-05 | 4.84E-04 |
| ENSG00000283758 | PMIS2      | 19 | 35586161  | 35587296  | 1135   | protein_coding                     | -3.37 | 3.06E-05 | 8.69E-04 |
| ENSG00000206072 | SERPINE11  | 18 | 63647579  | 63726432  | 78853  | protein_coding                     | -3.37 | 1.20E-08 | 4.18E-06 |
| ENSG00000287470 | AP001037.1 | 21 | 38503562  | 38543336  | 39774  | lncRNA                             | -3.38 | 3.89E-05 | 1.02E-03 |
| ENSG00000272108 | AC244517.1 | 5  | 141118680 | 141120765 | 2085   | lncRNA                             | -3.38 | 1.14E-04 | 2.15E-03 |
| ENSG00000253539 | AC018442.8 | 8  | 99796615  | 99799187  | 2572   | lncRNA-antisense                   | -3.38 | 7.10E-05 | 1.57E-03 |
| ENSG00000258647 | LINC00930  | 15 | 92567817  | 92574529  | 6712   | lncRNA                             | -3.38 | 1.39E-13 | 1.32E-09 |
| ENSG00000255394 | C8orf49    | 8  | 11761256  | 11763223  | 1967   | lncRNA                             | -3.39 | 5.84E-05 | 1.36E-03 |
| ENSG00000286780 | AL139379.1 | 13 | 106232131 | 106371082 | 138951 | lncRNA                             | -3.39 | 1.42E-05 | 5.30E-04 |
| ENSG00000282975 | LINC02034  | 3  | 127537937 | 127540485 | 2548   | lncRNA                             | -3.39 | 8.56E-06 | 3.73E-04 |
| ENSG00000243236 | GSTA9P     | 6  | 52939726  | 52957521  | 17795  | transcribed_unprocessed_pseudogene | -3.39 | 3.53E-04 | 4.60E-03 |
| ENSG00000274443 | C8orf89    | 8  | 73241329  | 73259502  | 18173  | protein_coding                     | -3.40 | 1.31E-04 | 2.36E-03 |
| ENSG00000236546 | MYCL-AS1   | 1  | 39897745  | 39899098  | 1353   | lncRNA-antisense                   | -3.40 | 2.24E-04 | 3.42E-03 |
| ENSG00000260976 | LINC01633  | 1  | 184999710 | 185008789 | 9079   | lncRNA                             | -3.40 | 1.72E-04 | 2.86E-03 |
| ENSG00000286651 | PRSS43P    | 3  | 46753045  | 46756857  | 3812   | transcribed_unitary_pseudogene     | -3.40 | 8.59E-05 | 1.78E-03 |
| ENSG00000227234 | SPANXB1    | X  | 141002594 | 141003706 | 1112   | protein_coding                     | -3.40 | 1.97E-04 | 3.13E-03 |
| ENSG00000258080 | ARHGAP42P4 | 14 | 19688261  | 19691194  | 2933   | processed_pseudogene               | -3.41 | 2.71E-05 | 7.98E-04 |
| ENSG00000283025 | AC027045.3 | 17 | 9805443   | 9811047   | 5604   | lncRNA-antisense                   | -3.41 | 5.26E-07 | 5.51E-05 |
| ENSG00000288252 | AL355836.4 | 14 | 101160476 | 101172549 | 12073  | lncRNA                             | -3.42 | 2.82E-05 | 8.18E-04 |
| ENSG00000284670 | AC092128.1 | 16 | 73940639  | 73941781  | 1142   | translated_processed_pseudogene    | -3.42 | 1.31E-05 | 5.02E-04 |
| ENSG00000172399 | MYO22      | 4  | 119135832 | 119187789 | 51957  | protein_coding                     | -3.42 | 6.50E-05 | 1.47E-03 |
| ENSG00000273851 | AC027088.4 | 15 | 69022230  | 69024176  | 1946   | transcribed_processed_pseudogene   | -3.43 | 1.05E-05 | 4.27E-04 |
| ENSG00000243810 | CFAP61-AS1 | 20 | 20258407  | 20267809  | 9402   | lncRNA-antisense                   | -3.44 | 1.00E-04 | 1.98E-03 |
| ENSG00000258684 | BMS1P16    | 15 | 21160305  | 21167357  | 7052   | unprocessed_pseudogene             | -3.44 | 8.47E-06 | 3.71E-04 |
| ENSG00000224570 | AC097063.1 | 1  | 65576129  | 65578380  | 2251   | processed_pseudogene               | -3.44 | 9.40E-05 | 1.90E-03 |
| ENSG00000287221 | AL589794.2 | 10 | 50736078  | 50739434  | 3356   | lncRNA                             | -3.44 | 1.66E-05 | 5.76E-04 |
| ENSG00000280038 | DNM1P41    | 15 | 84166547  | 84169896  | 3349   | TEC                                | -3.45 | 2.50E-06 | 1.63E-04 |
| ENSG00000178248 | FAM2301    | 22 | 23462086  | 23466980  | 24894  | lncRNA                             | -3.45 | 1.16E-08 | 4.07E-06 |
| ENSG00000231201 | AF127577.2 | 21 | 14971470  | 14992854  | 21384  | lncRNA-antisense                   | -3.45 | 8.27E-06 | 3.64E-04 |
| ENSG00000255313 | AC100858.1 | 8  | 124936328 | 124943765 | 7437   | lncRNA                             | -3.45 | 1.97E-05 | 6.47E-04 |
| ENSG00000249184 | AC107074.1 | 4  | 151798917 | 151833097 | 34180  | lncRNA                             | -3.45 | 2.21E-05 | 6.97E-04 |
| ENSG00000234112 | AC090666.3 | 1  | 225803148 | 225803448 | 300    | processed_pseudogene               | -3.46 | 1.01E-04 | 1.99E-03 |
| ENSG00000268318 | LINC01872  | 19 | 51271266  | 51281234  | 9968   | lncRNA                             | -3.46 | 2.92E-05 | 8.40E-04 |
| ENSG00000224322 | AC004009.1 | 7  | 27361591  | 27410358  | 48767  | lncRNA                             | -3.46 | 4.42E-05 | 1.12E-03 |
| ENSG00000236417 | CTSLP1     | 10 | 87386685  | 87390203  | 3518   | unprocessed_pseudogene             | -3.48 | 3.69E-05 | 9.92E-04 |
| ENSG00000204933 | CD177P1    | 19 | 43372742  | 43379123  | 6381   | unprocessed_pseudogene             | -3.48 | 6.38E-10 | 5.14E-07 |
| ENSG00000258979 | LINC02299  | 14 | 96738021  | 96739084  | 55063  | lncRNA                             | -3.50 | 1.64E-05 | 5.73E-04 |
| ENSG00000285593 | AC055872.2 | 17 | 6373833   | 6375080   | 1247   | lncRNA                             | -3.50 | 3.18E-05 | 8.90E-04 |
| ENSG00000287107 | AL136102.1 | 20 | 48120269  | 48136844  | 16575  | lncRNA                             | -3.50 | 7.04E-06 | 3.28E-04 |

|                 |                         |    |           |           |         |                                    |       |          |          |
|-----------------|-------------------------|----|-----------|-----------|---------|------------------------------------|-------|----------|----------|
| ENSG00000236335 | AL161638.2              | 1  | 30409560  | 30411638  | 2078    | lncRNA                             | -3.50 | 6.28E-05 | 1.44E-03 |
| ENSG00000261304 | LINC02252               | 15 | 34651135  | 34671095  | 19960   | lncRNA                             | -3.51 | 9.89E-06 | 4.12E-04 |
| ENSG00000215834 | FMO9P                   | 1  | 166603916 | 166631400 | 27484   | transcribed unprocessed pseudogene | -3.51 | 4.58E-07 | 5.06E-05 |
| ENSG00000189196 | LINC00994               | 3  | 64078361  | 64087363  | 9002    | lncRNA                             | -3.51 | 2.47E-06 | 1.61E-04 |
| ENSG00000236162 | AC092687.2              | 2  | 10717773  | 10720952  | 3179    | lncRNA                             | -3.51 | 5.08E-05 | 1.24E-03 |
| ENSG00000286670 | AL450467.1              | 9  | 2652856   | 2654371   | 1615    | lncRNA                             | -3.51 | 8.87E-05 | 1.81E-03 |
| ENSG00000279728 | CU638689.2              | 21 | 6712596   | 6716361   | 3765    | unprocessed pseudogene             | -3.52 | 3.30E-05 | 9.11E-04 |
| ENSG00000287703 | AC099565.1              | 1  | 34640157  | 34685732  | 45575   | lncRNA                             | -3.53 | 1.06E-05 | 4.30E-04 |
| ENSG00000274064 | AC040978.1              | 8  | 140039756 | 140041037 | 1281    | processed pseudogene               | -3.53 | 5.10E-06 | 2.62E-04 |
| ENSG00000155249 | ORAK1                   | 14 | 19930917  | 19936757  | 5840    | protein coding                     | -3.53 | 3.52E-05 | 9.58E-04 |
| ENSG00000284710 | Z98257.2                | 1  | 20272018  | 20275005  | 2987    | lncRNA                             | -3.53 | 1.36E-06 | 1.06E-04 |
| ENSG00000253733 | LZTS1-AS1               | 8  | 20275773  | 20290458  | 14685   | lncRNA                             | -3.54 | 4.83E-05 | 1.19E-03 |
| ENSG00000233792 | PUDPP2                  | 1  | 152124016 | 152196699 | 72683   | transcribed processed pseudogene   | -3.54 | 4.53E-05 | 1.14E-03 |
| ENSG00000230258 | AC005208.1              | 17 | 70017324  | 70128859  | 111535  | lncRNA-antisense                   | -3.55 | 1.90E-06 | 1.36E-04 |
| ENSG00000285716 | AC004129.3              | 7  | 25254965  | 25257129  | 2164    | lncRNA                             | -3.55 | 1.29E-04 | 2.34E-03 |
| ENSG00000280288 | AC131935.2              | 11 | 11725332  | 11726702  | 1370    | TEC                                | -3.55 | 9.91E-06 | 4.12E-04 |
| ENSG00000261122 | LINC02167               | 16 | 35743268  | 35756515  | 13247   | lncRNA                             | -3.55 | 8.29E-06 | 3.65E-04 |
| ENSG00000259099 | AC025574.1              | 12 | 56380361  | 56382711  | 2350    | processed pseudogene               | -3.57 | 3.04E-05 | 8.68E-04 |
| ENSG00000241818 | SCG5-AS1                | 15 | 32656084  | 32673065  | 16981   | lncRNA-antisense                   | -3.57 | 2.31E-06 | 1.53E-04 |
| ENSG00000279887 | AC046158.4              | 16 | 78525189  | 78526535  | 1346    | TEC                                | -3.57 | 5.85E-06 | 2.87E-04 |
| ENSG00000180483 | DERF119                 | 20 | 31377164  | 31390590  | 13426   | protein coding                     | -3.59 | 1.63E-05 | 5.73E-04 |
| ENSG00000255420 | CASC23                  | 11 | 8011278   | 8016520   | 5242    | lncRNA-antisense                   | -3.59 | 3.33E-06 | 1.97E-04 |
| ENSG00000259306 | AC020891.2              | 15 | 51315841  | 51321996  | 6155    | lncRNA                             | -3.59 | 5.09E-06 | 2.62E-04 |
| ENSG00000215007 | DNAA1P3                 | X  | 107351650 | 107352843 | 1193    | processed pseudogene               | -3.59 | 3.59E-05 | 9.73E-04 |
| ENSG00000258433 | AC087633.1              | 15 | 95034108  | 95047108  | 13000   | lncRNA                             | -3.59 | 5.28E-06 | 2.68E-04 |
| ENSG00000234634 | LINC02093               | 17 | 13299184  | 13306771  | 7587    | lncRNA                             | -3.60 | 7.99E-06 | 3.57E-04 |
| ENSG00000203825 | AC239859.1              | 1  | 143541768 | 143572834 | 31066   | unprocessed pseudogene             | -3.60 | 2.77E-12 | 1.20E-08 |
| ENSG00000266667 | AC005703.3              | 17 | 15379864  | 15417878  | 38014   | lncRNA                             | -3.60 | 7.26E-07 | 6.93E-05 |
| ENSG00000231461 | HLA-DPA2                | 6  | 33091753  | 33097295  | 5542    | unprocessed pseudogene             | -3.60 | 7.48E-06 | 3.41E-04 |
| ENSG00000203408 | ORC71P                  | 12 | 55376742  | 55378797  | 2055    | transcribed unprocessed pseudogene | -3.61 | 3.42E-05 | 9.39E-04 |
| ENSG00000287443 | AL357558.3              | 20 | 47974137  | 47977584  | 3447    | lncRNA                             | -3.61 | 9.47E-07 | 8.23E-05 |
| ENSG00000239345 | HNRNPA1P26              | X  | 100855288 | 100856379 | 1091    | processed pseudogene               | -3.61 | 6.21E-06 | 2.99E-04 |
| ENSG00000164485 | IL22RA2                 | 6  | 137143820 | 137173648 | 29828   | protein coding                     | -3.61 | 1.34E-07 | 2.16E-05 |
| ENSG00000285900 | AC079177.1              | X  | 31411033  | 31413701  | 2668    | lncRNA-antisense                   | -3.62 | 1.42E-05 | 5.31E-04 |
| ENSG00000246820 | RIC3-DT                 | 11 | 8169167   | 8178903   | 9736    | lncRNA                             | -3.63 | 1.41E-09 | 8.41E-07 |
| ENSG00000267354 | AC091151.2              | 18 | 45507202  | 45505183  | 42981   | lncRNA-sense intronic              | -3.64 | 1.16E-07 | 1.93E-05 |
| ENSG00000238120 | LINC01589               | 22 | 45604432  | 45605621  | 1189    | lncRNA-antisense                   | -3.64 | 1.05E-05 | 4.29E-04 |
| ENSG00000186440 | OR6P1                   | 1  | 158560606 | 158570580 | 9974    | protein coding                     | -3.64 | 5.39E-07 | 5.64E-05 |
| ENSG00000285939 | AC034268.2              | 17 | 53276760  | 53465634  | 1088874 | lncRNA-antisense                   | -3.64 | 1.19E-06 | 9.64E-05 |
| ENSG00000281386 | AP003500.1              | 11 | 129591493 | 129612110 | 20617   | lncRNA                             | -3.66 | 3.05E-05 | 8.68E-04 |
| ENSG00000213921 | LEUTX                   | 19 | 39776595  | 39786291  | 9696    | protein coding                     | -3.67 | 3.83E-05 | 1.02E-03 |
| ENSG00000234984 | FMO10P                  | 1  | 166665885 | 166682196 | 16311   | unprocessed pseudogene             | -3.67 | 1.25E-05 | 4.87E-04 |
| ENSG00000216915 | GPR98P                  | 6  | 27737000  | 27738494  | 1494    | processed pseudogene               | -3.68 | 2.20E-06 | 1.50E-04 |
| ENSG00000261250 | AL160286.3              | 1  | 179543201 | 179548922 | 5721    | lncRNA-antisense                   | -3.68 | 4.92E-07 | 5.32E-05 |
| ENSG00000236257 | EI24P2                  | 1  | 158454198 | 158455273 | 1075    | processed pseudogene               | -3.69 | 9.19E-06 | 3.95E-04 |
| ENSG00000273287 | AL008718.2              | 22 | 45262273  | 45263585  | 1312    | lncRNA                             | -3.69 | 3.41E-08 | 8.61E-06 |
| ENSG00000228351 | AC018832.1              | 3  | 8079322   | 8125538   | 46216   | lncRNA                             | -3.70 | 1.89E-05 | 6.32E-04 |
| ENSG00000229571 | PRAMEF25                | 1  | 13068677  | 13077884  | 9207    | protein coding                     | -3.71 | 5.84E-06 | 2.87E-04 |
| ENSG00000267133 | AC011518.1              | 19 | 32103154  | 32106544  | 3390    | lncRNA                             | -3.72 | 2.50E-10 | 2.63E-07 |
| ENSG00000261068 | AL512274.1              | 6  | 42092233  | 42094259  | 2026    | lncRNA                             | -3.73 | 2.31E-06 | 1.53E-04 |
| ENSG00000232423 | PRAMEF6                 | 1  | 12938472  | 12947580  | 9108    | protein coding                     | -3.73 | 4.96E-07 | 5.34E-05 |
| ENSG00000170255 | MKGPRX1                 | 11 | 18933813  | 18939507  | 5694    | protein coding                     | -3.77 | 2.13E-07 | 3.06E-05 |
| ENSG00000227412 | STK33P1                 | 9  | 85492579  | 85494094  | 1515    | processed pseudogene               | -3.79 | 5.23E-07 | 5.50E-05 |
| ENSG00000268101 | CYP2G2P                 | 19 | 41050449  | 41062444  | 11995   | unprocessed pseudogene             | -3.80 | 8.03E-08 | 1.48E-05 |
| ENSG00000248717 | LINC02222               | 5  | 180684766 | 180686546 | 1780    | lncRNA                             | -3.80 | 2.38E-06 | 1.57E-04 |
| ENSG00000257758 | KRT18P20                | 12 | 104976749 | 104978027 | 1278    | processed pseudogene               | -3.81 | 3.99E-07 | 4.59E-05 |
| ENSG00000225198 | SSXP3                   | X  | 48156367  | 48166350  | 9983    | unprocessed pseudogene             | -3.81 | 1.32E-06 | 1.03E-04 |
| ENSG00000225807 | AC098281.1              | 7  | 105009416 | 105025205 | 10789   | lncRNA                             | -3.82 | 4.02E-06 | 2.21E-04 |
| ENSG00000286380 | AC084864.2              | 7  | 129763060 | 129769202 | 6142    | lncRNA                             | -3.82 | 2.17E-08 | 6.28E-06 |
| ENSG00000229221 | HNRNPA1P66              | 2  | 63751697  | 63752630  | 933     | processed pseudogene               | -3.84 | 8.34E-07 | 7.65E-05 |
| ENSG00000204481 | PRAMEF14                | 1  | 13341892  | 13347134  | 5242    | protein coding                     | -3.87 | 8.48E-10 | 6.17E-07 |
| ENSG00000261741 | FRG2KP                  | 16 | 31563082  | 31567716  | 4634    | transcribed unprocessed pseudogene | -3.87 | 4.10E-07 | 4.66E-05 |
| ENSG00000285945 | AC242022.2              | 1  | 2768091   | 2784733   | 16642   | lncRNA                             | -3.90 | 4.26E-07 | 4.78E-05 |
| ENSG00000226812 | AL117382.1 (R3HDML-AS1) | 20 | 44347552  | 44355185  | 7633    | lncRNA-antisense                   | -3.92 | 6.08E-07 | 6.23E-05 |
| ENSG00000203783 | PRR9                    | 1  | 153217584 | 153219310 | 1726    | protein coding                     | -3.92 | 1.55E-07 | 2.40E-05 |
| ENSG00000188655 | RNASE9                  | 14 | 20556093  | 20560931  | 4838    | protein coding                     | -3.93 | 7.25E-07 | 6.93E-05 |
| ENSG00000249818 | AC097375.2              | 4  | 151904932 | 151928710 | 23778   | lncRNA                             | -3.94 | 1.22E-09 | 7.68E-07 |
| ENSG00000262962 | KARS1P3                 | 16 | 68002432  | 68004952  | 2520    | unprocessed pseudogene             | -3.95 | 6.51E-07 | 6.54E-05 |
| ENSG00000227841 | MTND5P31                | 2  | 201558892 | 201558265 | 1373    | unprocessed pseudogene             | -3.95 | 9.21E-07 | 8.11E-05 |
| ENSG00000237613 | FAM138A                 | 1  | 34554     | 36081     | 1527    | lncRNA                             | -3.95 | 7.01E-09 | 2.80E-06 |
| ENSG00000286324 | AL033381.3              | 6  | 1111367   | 1114329   | 2962    | lncRNA                             | -3.99 | 8.28E-09 | 3.20E-06 |
| ENSG00000220248 | ZNF402P                 | 22 | 16857619  | 16860718  | 3099    | processed pseudogene               | -4.01 | 9.44E-11 | 1.23E-07 |
| ENSG00000225328 | LINC01594               | 2  | 108167125 | 108217886 | 50761   | lncRNA-antisense                   | -4.03 | 2.01E-07 | 2.94E-05 |
| ENSG00000111701 | APOBEC1                 | 12 | 7649400   | 7665908   | 16508   | protein coding                     | -4.07 | 9.47E-08 | 1.66E-05 |
| ENSG00000279739 | AC011369.2              | 5  | 168128856 | 168130422 | 1566    | TEC                                | -4.07 | 6.30E-06 | 3.03E-04 |
| ENSG00000275443 | AC012409.2              | 15 | 95990582  | 96300990  | 310408  | lncRNA                             | -4.08 | 2.87E-07 | 3.67E-05 |
| ENSG00000116748 | AMPD1                   | 1  | 114673090 | 114695618 | 22528   | protein coding                     | -4.10 | 1.58E-11 | 3.99E-08 |
| ENSG00000230051 | AL020994.2              | 22 | 27331634  | 27379265  | 47631   | lncRNA                             | -4.11 | 2.67E-11 | 5.63E-08 |
| ENSG00000234020 | CHIAP3                  | 1  | 111353275 | 111367409 | 14134   | unprocessed pseudogene             | -4.13 | 9.05E-07 | 8.05E-05 |
| ENSG00000125888 | BANF2                   | 20 | 17693672  | 17735871  | 42199   | protein coding                     | -4.23 | 3.07E-11 | 5.65E-08 |
| ENSG00000285016 | AC017002.3              | 2  | 11429324  | 111699033 | 269709  | lncRNA                             | -4.24 | 2.35E-07 | 3.27E-05 |
| ENSG00000266586 | AC091027.2              | 18 | 78908629  | 78918993  | 10364   | lncRNA                             | -4.28 | 4.51E-08 | 1.01E-05 |
| ENSG00000196859 | KRT39                   | 17 | 40958417  | 40966948  | 8531    | protein coding                     | -4.65 | 2.25E-09 | 1.20E-06 |
| ENSG00000215520 | RP54XP4                 | 1  | 20525989  | 20526751  | 762     | processed pseudogene               | -4.74 | 4.31E-08 | 9.91E-06 |
| ENSG00000287171 | AC006062.1              | X  | 8487165   | 8504564   | 17399   | lncRNA                             | -4.76 | 1.18E-13 | 1.32E-09 |
| ENSG00000105398 | SULT2A1                 | 19 | 47870467  | 47886315  | 15848   | protein coding                     | -5.02 | 4.95E-12 | 1.70E-08 |



Supplemental Table 5. Differentially expressed transcripts from the whole blood RNA-seq analysis of the anti-Ro positive vs. anti-Ro negative SjD cases

| ENSEMBL_GENE_ID | Gene Name  | Chr | Chr_Start_position | Chr_end_position | Gene Length | gene_biotype         | SjD <sup>Ro+</sup> vs. SjD <sup>Ro-</sup> |          |          |
|-----------------|------------|-----|--------------------|------------------|-------------|----------------------|-------------------------------------------|----------|----------|
|                 |            |     |                    |                  |             |                      | Log2FC                                    | pval     | padj     |
| ENSG00000165949 | IFI27      | 14  | 94104836           | 94116698         | 11862       | protein coding       | 5.39                                      | 3.31E-20 | 5.97E-16 |
| ENSG00000137959 | IFI44L     | 1   | 78619922           | 78646145         | 26223       | protein coding       | 2.90                                      | 4.28E-11 | 2.26E-07 |
| ENSG00000134321 | RSAD2      | 2   | 6865806            | 6898239          | 32433       | protein coding       | 2.60                                      | 4.08E-09 | 3.68E-06 |
| ENSG00000137965 | IFI44      | 1   | 78649796           | 78664078         | 14282       | protein coding       | 2.44                                      | 8.02E-11 | 2.26E-07 |
| ENSG00000088827 | SIGLEC1    | 20  | 3686970            | 3707128          | 20158       | protein coding       | 2.31                                      | 5.78E-11 | 2.26E-07 |
| ENSG00000184979 | USP18      | 22  | 1815017            | 18177397         | 27227       | protein coding       | 2.31                                      | 2.05E-10 | 4.10E-07 |
| ENSG00000185745 | IFIT1      | 10  | 89392546           | 89406487         | 13941       | protein coding       | 2.21                                      | 9.99E-10 | 1.47E-06 |
| ENSG00000187608 | ISG15      | 1   | 1001138            | 1014540          | 13402       | protein coding       | 2.20                                      | 2.34E-09 | 2.82E-06 |
| ENSG00000228318 | AP001610.2 | 21  | 41441056           | 41445708         | 4652        | lncRNA-antisense     | 2.17                                      | 3.01E-06 | 8.00E-04 |
| ENSG00000160932 | LY6E       | 8   | 143017982          | 143023832        | 5850        | protein coding       | 2.13                                      | 1.69E-09 | 2.18E-06 |
| ENSG00000111331 | OAS3       | 12  | 112938444          | 112973251        | 34807       | protein coding       | 2.08                                      | 6.48E-09 | 4.87E-06 |
| ENSG00000134326 | CMPK2      | 2   | 6840570            | 6866635          | 26065       | protein coding       | 2.04                                      | 6.42E-09 | 4.87E-06 |
| ENSG00000225964 | NRIR       | 2   | 6819463            | 6840464          | 21001       | lncRNA-antisense     | 2.01                                      | 8.32E-09 | 5.26E-06 |
| ENSG00000115155 | OTOF       | 2   | 26457203           | 26558756         | 101553      | protein coding       | 1.98                                      | 1.36E-05 | 2.85E-03 |
| ENSG00000089127 | OAS1       | 12  | 112906783          | 112933222        | 26439       | protein coding       | 1.95                                      | 1.00E-10 | 2.26E-07 |
| ENSG00000177294 | FBXO39     | 17  | 6776215            | 6797110          | 20886       | protein coding       | 1.92                                      | 3.66E-05 | 6.55E-03 |
| ENSG00000138646 | HERC5      | 4   | 88457119           | 88506163         | 49044       | protein coding       | 1.87                                      | 5.05E-09 | 4.34E-06 |
| ENSG00000157601 | MX1        | 21  | 41420304           | 41459214         | 38910       | protein coding       | 1.85                                      | 2.29E-08 | 1.29E-05 |
| ENSG00000257452 | AC004551.1 | 12  | 112907628          | 113017751        | 110123      | lncRNA-antisense     | 1.84                                      | 3.60E-05 | 6.50E-03 |
| ENSG00000126709 | IFI6       | 1   | 27666064           | 27672198         | 6134        | protein coding       | 1.82                                      | 1.06E-09 | 1.47E-06 |
| ENSG00000196565 | HBG2       | 11  | 5253188            | 5505605          | 252417      | protein coding       | 1.80                                      | 3.65E-04 | 4.14E-02 |
| ENSG00000119917 | IFIT3      | 10  | 89327997           | 89340971         | 12974       | protein coding       | 1.76                                      | 3.80E-09 | 3.68E-06 |
| ENSG00000135114 | OASL       | 12  | 121019111          | 121039242        | 20131       | protein coding       | 1.75                                      | 4.08E-09 | 3.68E-06 |
| ENSG00000279296 | PRAL       | 17  | 6772831            | 6776116          | 3285        | TEC                  | 1.75                                      | 1.02E-05 | 2.29E-03 |
| ENSG00000196141 | SPATS2L    | 2   | 200305881          | 200482264        | 176383      | protein coding       | 1.75                                      | 6.75E-11 | 2.26E-07 |
| ENSG00000111335 | OAS2       | 12  | 112978395          | 113011723        | 33328       | protein coding       | 1.73                                      | 5.24E-10 | 8.60E-07 |
| ENSG00000240247 | DEFA1B     | 8   | 6996766            | 6999195          | 2429        | protein coding       | 1.73                                      | 2.27E-04 | 2.79E-02 |
| ENSG00000133106 | EPST11     | 13  | 42886388           | 42992271         | 105883      | protein coding       | 1.66                                      | 5.18E-07 | 1.76E-04 |
| ENSG00000132530 | XAF1       | 17  | 6755447            | 6775647          | 20200       | protein coding       | 1.60                                      | 2.72E-09 | 3.06E-06 |
| ENSG00000149131 | SERPING1   | 11  | 57597387           | 57619171         | 21784       | protein coding       | 1.60                                      | 6.56E-08 | 2.82E-05 |
| ENSG00000188290 | HES4       | 1   | 998962             | 1000172          | 1210        | protein coding       | 1.56                                      | 3.63E-06 | 9.24E-04 |
| ENSG00000153721 | CNKR3      | 6   | 154387515          | 154510685        | 123170      | protein coding       | 1.55                                      | 1.10E-04 | 1.60E-02 |
| ENSG00000078081 | LAMP3      | 3   | 183122215          | 183163839        | 41624       | protein coding       | 1.50                                      | 7.47E-09 | 5.18E-06 |
| ENSG00000179750 | APOBEC3B   | 22  | 38982347           | 38992804         | 10457       | protein coding       | 1.47                                      | 5.10E-07 | 1.76E-04 |
| ENSG00000142089 | IFITM3     | 11  | 319676             | 327537           | 7861        | protein coding       | 1.47                                      | 1.95E-08 | 1.18E-05 |
| ENSG00000119922 | IFIT2      | 10  | 89283694           | 89309271         | 25577       | protein coding       | 1.44                                      | 7.27E-09 | 5.18E-06 |
| ENSG00000038945 | MSR1       | 8   | 16107878           | 16567490         | 459612      | protein coding       | 1.43                                      | 2.49E-07 | 9.56E-05 |
| ENSG00000136514 | RTP4       | 3   | 187368385          | 187372076        | 3691        | protein coding       | 1.43                                      | 2.06E-08 | 1.20E-05 |
| ENSG00000137628 | DDX60      | 4   | 168216294          | 168318804        | 102510      | protein coding       | 1.42                                      | 5.76E-08 | 2.60E-05 |
| ENSG00000277511 | AC116407.2 | 17  | 32127595           | 32128454         | 859         | lncRNA               | 1.35                                      | 3.99E-08 | 1.95E-05 |
| ENSG00000223722 | IFITM3P2   | 12  | 31754720           | 31755121         | 401         | processed pseudogene | 1.33                                      | 3.29E-05 | 6.06E-03 |
| ENSG00000271554 | AL138787.2 | 1   | 35992109           | 36013630         | 21521       | lncRNA-antisense     | 1.27                                      | 2.01E-04 | 2.51E-02 |
| ENSG00000279236 | AC064801.2 | 18  | 62551203           | 62552505         | 1302        | TEC                  | 1.26                                      | 2.61E-08 | 1.43E-05 |
| ENSG00000130487 | KLHDC7B    | 22  | 50545899           | 50551023         | 5124        | protein coding       | 1.25                                      | 7.90E-09 | 5.26E-06 |
| ENSG00000175356 | SCUBE2     | 11  | 9019476            | 9138114          | 118638      | protein coding       | 1.23                                      | 2.27E-04 | 2.79E-02 |
| ENSG00000136542 | GALNT5     | 2   | 157257705          | 157318491        | 60786       | protein coding       | 1.22                                      | 4.74E-04 | 5.00E-02 |
| ENSG00000125148 | MT2A       | 16  | 56608584           | 56609497         | 913         | protein coding       | 1.19                                      | 9.41E-11 | 2.26E-07 |
| ENSG00000138642 | HERC6      | 4   | 88378739           | 88443097         | 64358       | protein coding       | 1.18                                      | 8.46E-09 | 5.26E-06 |
| ENSG00000179044 | EXOC3L1    | 16  | 67184379           | 67190185         | 5806        | protein coding       | 1.16                                      | 1.73E-04 | 2.29E-02 |
| ENSG00000110079 | MS4A4A     | 11  | 60185702           | 60317944         | 132242      | protein coding       | 1.16                                      | 2.35E-06 | 6.85E-04 |
| ENSG00000055332 | EIF2AK2    | 2   | 37099210           | 37157065         | 57855       | protein coding       | 1.15                                      | 9.28E-11 | 2.26E-07 |
| ENSG00000185339 | TCN2       | 22  | 30607003           | 30627271         | 20268       | protein coding       | 1.13                                      | 3.26E-06 | 8.40E-04 |
| ENSG00000123689 | G0S2       | 1   | 209675412          | 209676390        | 978         | protein coding       | 1.13                                      | 2.07E-04 | 2.58E-02 |
| ENSG00000185507 | IRF7       | 11  | 612553             | 615983           | 3430        | protein coding       | 1.09                                      | 3.97E-09 | 3.68E-06 |
| ENSG00000188313 | PLSCR1     | 3   | 146515180          | 146544856        | 29676       | protein coding       | 1.08                                      | 2.57E-06 | 7.13E-04 |
| ENSG00000273272 | U62317.3   | 22  | 50541108           | 50543011         | 1903        | lncRNA               | 1.08                                      | 3.78E-07 | 1.37E-04 |
| ENSG00000152778 | IFIT5      | 10  | 89414568           | 89420997         | 6429        | protein coding       | 1.08                                      | 9.21E-07 | 3.02E-04 |
| ENSG0000010030  | ETV7       | 6   | 36354091           | 36387800         | 33709       | protein coding       | 1.08                                      | 3.30E-04 | 3.80E-02 |
| ENSG00000173801 | JUP        | 17  | 41754604           | 41786931         | 32327       | protein coding       | 1.08                                      | 1.85E-04 | 2.38E-02 |
| ENSG00000108679 | LGALS3BP   | 17  | 78971238           | 78979947         | 8709        | protein coding       | 1.07                                      | 5.01E-06 | 1.21E-03 |
| ENSG00000134463 | ECHDC3     | 10  | 11742366           | 11764070         | 21704       | protein coding       | 1.07                                      | 3.16E-04 | 3.73E-02 |
| ENSG00000168062 | BATF2      | 11  | 64987945           | 64997018         | 9073        | protein coding       | 1.07                                      | 4.15E-04 | 4.63E-02 |
| ENSG00000133216 | EPHB2      | 1   | 22710839           | 22921500         | 210661      | protein coding       | 1.06                                      | 3.31E-07 | 1.24E-04 |
| ENSG00000165185 | KIAA1958   | 9   | 112486827          | 112669397        | 182570      | protein coding       | 1.05                                      | 6.29E-09 | 4.87E-06 |
| ENSG00000141664 | ZCCHC2     | 18  | 62523025           | 62587709         | 64684       | protein coding       | 1.04                                      | 1.28E-07 | 5.14E-05 |
| ENSG00000108771 | DHX58      | 17  | 42101404           | 42112714         | 11310       | protein coding       | 1.01                                      | 3.35E-08 | 1.73E-05 |
| ENSG00000202357 | Y_RNA      | 19  | 11408772           | 11408880         | 108         | misc RNA             | -1.19                                     | 1.49E-04 | 2.05E-02 |

Supplemental Table 6. Summary report of the differentially expressed transcript biotypes identified in the SJD whole blood RNA-seq analyses

| Order | Major Biotype Class       | Biotype                            | All Transcripts | SJD <sup>All</sup> vs. HC |             |              | SJD <sup>Ro+</sup> vs. HC |             |              | SJD <sup>Ro-</sup> vs. HC |             |              |
|-------|---------------------------|------------------------------------|-----------------|---------------------------|-------------|--------------|---------------------------|-------------|--------------|---------------------------|-------------|--------------|
|       |                           |                                    |                 | DE?                       | Log2 FC ≥ 1 | Log2 FC ≤ -1 | DE?                       | Log2 FC ≥ 1 | Log2 FC ≤ -1 | DE?                       | Log2 FC ≥ 1 | Log2 FC ≤ -1 |
| 1     | protein coding            | protein coding                     | 18625           | 1939                      | 79          | 1860         | 1060                      | 120         | 940          | 2768                      | 33          | 2735         |
| 2     | protein coding            | IG V gene                          | 124             | 2                         | 0           | 2            | 0                         | 0           | 0            | 4                         | 0           | 4            |
| 3     | protein coding            | TR V gene                          | 98              | 2                         | 0           | 2            | 4                         | 0           | 4            | 0                         | 0           | 0            |
| 4     | protein coding            | IG C gene                          | 13              | 0                         | 0           | 0            | 1                         | 1           | 0            | 0                         | 0           | 0            |
| 5     | protein coding            | TR C gene                          | 6               | 0                         | 0           | 0            | 0                         | 0           | 0            | 0                         | 0           | 0            |
| 6     | protein coding            | TR J gene                          | 69              | 0                         | 0           | 0            | 0                         | 0           | 0            | 1                         | 0           | 1            |
| 7     | protein coding            | IG J gene                          | 7               | 0                         | 0           | 0            | 0                         | 0           | 0            | 0                         | 0           | 0            |
| 8     | long noncoding            | antisense                          | 4231            | 489                       | 19          | 470          | 266                       | 27          | 239          | 712                       | 12          | 700          |
| 9     | long noncoding            | bidirectional promoter lncRNA      | 82              | 12                        | 0           | 12           | 9                         | 0           | 9            | 21                        | 0           | 21           |
| 10    | long noncoding            | lncRNA                             | 6063            | 1259                      | 5           | 1254         | 639                       | 9           | 630          | 1834                      | 4           | 1830         |
| 11    | long noncoding            | macro lncRNA                       | 1               | 0                         | 0           | 0            | 0                         | 0           | 0            | 1                         | 0           | 1            |
| 12    | long noncoding            | sense intronic                     | 626             | 35                        | 1           | 34           | 17                        | 2           | 15           | 48                        | 1           | 47           |
| 13    | long noncoding            | sense overlapping                  | 122             | 17                        | 0           | 17           | 8                         | 0           | 8            | 22                        | 0           | 22           |
| 14    | long noncoding            | 3prime overlapping ncna            | 11              | 0                         | 0           | 0            | 0                         | 0           | 0            | 0                         | 0           | 0            |
| 15    | pseudogene                | processed pseudogene               | 3683            | 281                       | 39          | 242          | 159                       | 34          | 125          | 413                       | 34          | 379          |
| 16    | pseudogene                | unprocessed pseudogene             | 852             | 93                        | 0           | 93           | 46                        | 0           | 46           | 150                       | 0           | 150          |
| 17    | pseudogene                | transcribed unprocessed pseudogene | 651             | 136                       | 1           | 135          | 76                        | 1           | 75           | 156                       | 0           | 156          |
| 18    | pseudogene                | pseudogene                         | 4               | 0                         | 0           | 0            | 0                         | 0           | 0            | 0                         | 0           | 0            |
| 19    | pseudogene                | transcribed processed pseudogene   | 327             | 37                        | 0           | 37           | 17                        | 0           | 17           | 52                        | 0           | 0            |
| 20    | pseudogene                | unitary pseudogene                 | 45              | 7                         | 0           | 7            | 2                         | 0           | 2            | 8                         | 0           | 8            |
| 21    | pseudogene                | polymorphic pseudogene             | 22              | 1                         | 0           | 1            | 1                         | 0           | 1            | 2                         | 0           | 2            |
| 22    | pseudogene                | IG C pseudogene                    | 7               | 0                         | 0           | 0            | 0                         | 0           | 0            | 1                         | 0           | 1            |
| 23    | pseudogene                | IG J pseudogene                    | 1               | 0                         | 0           | 0            | 0                         | 0           | 0            | 0                         | 0           | 0            |
| 24    | pseudogene                | IG V pseudogene                    | 22              | 2                         | 0           | 2            | 1                         | 0           | 1            | 3                         | 0           | 3            |
| 25    | pseudogene                | TR J pseudogene                    | 3               | 0                         | 0           | 0            | 0                         | 0           | 0            | 0                         | 0           | 0            |
| 26    | pseudogene                | TR V pseudogene                    | 9               | 0                         | 0           | 0            | 0                         | 0           | 0            | 0                         | 0           | 0            |
| 27    | pseudogene                | rRNA pseudogene                    | 33              | 1                         | 0           | 1            | 1                         | 0           | 1            | 0                         | 0           | 0            |
| 28    | pseudogene                | translated processed pseudogene    | 2               | 1                         | 0           | 1            | 1                         | 0           | 1            | 1                         | 0           | 1            |
| 29    | pseudogene                | transcribed unitary pseudogene     | 117             | 32                        | 0           | 32           | 13                        | 0           | 13           | 41                        | 0           | 41           |
| 30    | short noncoding           | processed transcript               | 451             | 0                         | 0           | 0            | 0                         | 0           | 0            | 0                         | 0           | 0            |
| 31    | short noncoding           | miRNA                              | 193             | 2                         | 0           | 2            | 2                         | 0           | 2            | 2                         | 0           | 2            |
| 32    | short noncoding           | misc RNA                           | 319             | 19                        | 0           | 19           | 11                        | 0           | 11           | 14                        | 0           | 14           |
| 33    | short noncoding           | snoRNA                             | 92              | 2                         | 0           | 2            | 6                         | 0           | 6            | 1                         | 0           | 1            |
| 34    | short noncoding           | snRNA                              | 173             | 3                         | 0           | 3            | 3                         | 0           | 3            | 0                         | 0           | 0            |
| 35    | short noncoding           | Mt tRNA                            | 21              | 0                         | 0           | 0            | 0                         | 0           | 0            | 0                         | 0           | 0            |
| 36    | short noncoding           | rRNA                               | 9               | 1                         | 0           | 1            | 0                         | 0           | 0            | 1                         | 0           | 1            |
| 37    | short noncoding           | scaRNA                             | 7               | 1                         | 0           | 1            | 1                         | 0           | 1            | 1                         | 0           | 1            |
| 38    | short noncoding           | Mt rRNA                            | 2               | 0                         | 0           | 0            | 0                         | 0           | 0            | 0                         | 0           | 0            |
| 39    | To Experimentally Confirm | TEC                                | 719             | 77                        | 3           | 74           | 33                        | 3           | 30           | 122                       | 1           | 121          |

Supplemental Table 7. Gene Set Enrichment Analysis (GSEA) of differentially expressed transcripts from the SJD-Rov whole blood RNA-seq analysis

| Phenotype | NAME                                                                                                              | SIZE | ES         | NES       | NOM p.val (<0.05) | FDR q.val (<0.25) | FWER p.val | RANK AT MAX | LEADING EDGE                |
|-----------|-------------------------------------------------------------------------------------------------------------------|------|------------|-----------|-------------------|-------------------|------------|-------------|-----------------------------|
| SD_pos    | REACTOME HEDGEGOFF LIGAND BIOGENESIS                                                                              | 53   | 0.624248   | 1.798737  | 0.01181024        | 0.05702024        | 0.396      | 2201        | tags=58%, lat=18%, sgn=11%  |
| SD_pos    | REACTOME FGF_EPCIN RECEPTOR_FGFR SIGNALING                                                                        | 53   | 0.618912   | 1.7786294 | 0.01181024        | 0.05702024        | 0.473      | 2790        | tags=60%, lat=18%, sgn=22%  |
| SD_pos    | REACTOME INTERLEUKIN_1_FAMILY_SIGNALING                                                                           | 110  | 0.551281   | 1.768017  | 0.00395369        | 0.05887072        | 0.468      | 2561        | tags=59%, lat=22%, sgn=17%  |
| SD_pos    | REACTOME DEGRADATION_OF_DNA                                                                                       | 49   | 0.6453299  | 1.7881805 | 0.00909609        | 0.05886867        | 0.434      | 2156        | tags=63%, lat=18%, sgn=17%  |
| SD_pos    | REACTOME ASSEMBLY_OF_THE_PCA_REPLICATIVE_COMPLEX                                                                  | 49   | 0.6680708  | 1.7881805 | 0.00909609        | 0.05886867        | 0.43       | 2156        | tags=63%, lat=18%, sgn=17%  |
| SD_pos    | REACTOME TRANSCRIPTIONAL_REGULATION_BY_RUNX2                                                                      | 80   | 0.51688473 | 1.778793  | 0.01000193        | 0.05886867        | 0.473      | 2158        | tags=50%, lat=19%, sgn=31%  |
| SD_pos    | REACTOME APC_C_MEDIATED_DEGRADATION_OF_CELL_CYCLE_PROTEINS                                                        | 61   | 0.6296463  | 1.7880106 | 0.01935125        | 0.05891434        | 0.441      | 2158        | tags=57%, lat=18%, sgn=20%  |
| SD_pos    | REACTOME NEGATIVE_REGULATORS_OF_DDX58_IPH1_SIGNALING                                                              | 24   | 0.7480767  | 1.79923   | 0.00588512        | 0.05891434        | 0.480      | 1841        | tags=62%, lat=15%, sgn=23%  |
| SD_pos    | REACTOME DNA_REPLICATION_INITIATION                                                                               | 58   | 0.6178991  | 1.789384  | 0.01388968        | 0.05891434        | 0.389      | 2158        | tags=62%, lat=18%, sgn=20%  |
| SD_pos    | REACTOME S_PHASE                                                                                                  | 103  | 0.5244483  | 1.782898  | 0.01841749        | 0.05896996        | 0.461      | 2158        | tags=50%, lat=18%, sgn=32%  |
| SD_pos    | REACTOME PROGRAMMED_CELL_DEATH                                                                                    | 150  | 0.5523763  | 1.770845  | 0.02012072        | 0.05897627        | 0.485      | 2258        | tags=51%, lat=19%, sgn=30%  |
| SD_pos    | REACTOME FORMATION_OF_RNA_POL_II_ELONGATION_COMPLEX                                                               | 41   | 0.5981638  | 1.7293633 | 0.02949763        | 0.05897627        | 0.489      | 3495        | tags=68%, lat=18%, sgn=14%  |
| SD_pos    | REACTOME APOPTOSIS                                                                                                | 128  | 0.5435597  | 1.7738122 | 0.04045145        | 0.05894245        | 0.486      | 2258        | tags=51%, lat=19%, sgn=30%  |
| SD_pos    | REACTOME HOST_INTERACTIONS_OF_HIV_FACTORS                                                                         | 87   | 0.6407756  | 1.7994806 | 0.00687894        | 0.05892987        | 0.391      | 2210        | tags=57%, lat=18%, sgn=20%  |
| SD_pos    | REACTOME SWITCHING_OF_ORIGINS_TO_A_POST_REPLICATIVE_STATE                                                         | 62   | 0.6179335  | 1.7829762 | 0.01698675        | 0.06007349        | 0.459      | 2158        | tags=60%, lat=18%, sgn=22%  |
| SD_pos    | REACTOME PROCESSING_OF_CAPPED_INTRON_CONTAINING_PRE_MRNA                                                          | 145  | 0.6178832  | 1.7903123 | 0.01935019        | 0.06001103        | 0.43       | 3022        | tags=61%, lat=25%, sgn=14%  |
| SD_pos    | REACTOME MRNA_SPLICING                                                                                            | 120  | 0.6392450  | 1.7924502 | 0.01754388        | 0.06005032        | 0.428      | 2961        | tags=63%, lat=25%, sgn=12%  |
| SD_pos    | REACTOME ARF1_INHIB_OF_BIOS_AND_DESTABILIZES_MRNA                                                                 | 49   | 0.6980788  | 1.8203854 | 0.00730793        | 0.06100493        | 0.374      | 2158        | tags=67%, lat=18%, sgn=15%  |
| SD_pos    | REACTOME CELLULAR_RESPONSE_TO_HYPONIA                                                                             | 62   | 0.6117208  | 1.8008915 | 0.01957707        | 0.06104932        | 0.388      | 2158        | tags=60%, lat=18%, sgn=22%  |
| SD_pos    | REACTOME CELLULAR_RESPONSE_TO_CHEMICAL_STRESS                                                                     | 125  | 0.5739526  | 1.8088711 | 0.00929884        | 0.06236543        | 0.373      | 2322        | tags=58%, lat=20%, sgn=21%  |
| SD_pos    | REACTOME HIV_LIFE_CYCLE                                                                                           | 92   | 0.5842912  | 1.8010193 | 0.00881181        | 0.06242193        | 0.387      | 2841        | tags=67%, lat=25%, sgn=8%   |
| SD_pos    | REACTOME TRANSCRIPTION_OF_THE_HIV_GENOME                                                                          | 46   | 0.6073037  | 1.808296  | 0.00938192        | 0.06269166        | 0.387      | 2893        | tags=61%, lat=25%, sgn=14%  |
| SD_pos    | REACTOME RNA_POLYMERASE_II_TRANSCRIPTION_TERMINATION                                                              | 34   | 0.6311149  | 1.7985462 | 0.01518026        | 0.06380254        | 0.389      | 3438        | tags=74%, lat=29%, sgn=103% |
| SD_pos    | REACTOME INTERFERON_GAMMA_SIGNALING                                                                               | 70   | 0.6829608  | 1.809548  | 0.00481533        | 0.06421038        | 0.365      | 1588        | tags=64%, lat=13%, sgn=24%  |
| SD_pos    | REACTOME ANTIGEN_PROCESSING_AND_CROSS_PPRESENTATION                                                               | 80   | 0.6707972  | 1.811541  | 0.00607291        | 0.06502928        | 0.361      | 2158        | tags=60%, lat=18%, sgn=22%  |
| SD_pos    | REACTOME MITOTIC_G1_PHASE_AND_G1_S_TRANSITION                                                                     | 94   | 0.5402374  | 1.7546182 | 0.01388968        | 0.06604638        | 0.537      | 2158        | tags=50%, lat=18%, sgn=32%  |
| SD_pos    | REACTOME REGULATION_OF_RAS_BY_GAPS                                                                                | 54   | 0.6241239  | 1.812907  | 0.00984292        | 0.0661481         | 0.365      | 2158        | tags=61%, lat=18%, sgn=24%  |
| SD_pos    | REACTOME CYSTIC_FIBROSIS_PATHOGENESIS_ASSOCIATED_DNA                                                              | 47   | 0.6151867  | 1.817878  | 0.004             | 0.06681825        | 0.387      | 3078        | tags=72%, lat=20%, sgn=8%   |
| SD_pos    | REACTOME APC_C_CDH1_MEDIATED_DEGRADATION_OF_CDC20_AND_OTHER_APC_C_CDH1_TARGETED_PROTEINS_IN_LATE_MITOSIS_EARLY_G1 | 56   | 0.6318954  | 1.751767  | 0.0298368         | 0.06949533        | 0.547      | 2158        | tags=57%, lat=18%, sgn=25%  |
| SD_pos    | REACTOME STABILIZATION_OF_P53                                                                                     | 47   | 0.650828   | 1.814378  | 0.00410622        | 0.06972687        | 0.384      | 2158        | tags=62%, lat=18%, sgn=20%  |
| SD_pos    | REACTOME DEFECTIVE_CTR_CAUSES_CYSTIC_FIBROSIS                                                                     | 44   | 0.6478769  | 1.818484  | 0.00589484        | 0.06972687        | 0.384      | 2158        | tags=62%, lat=18%, sgn=20%  |
| SD_pos    | REACTOME REGULATION_OF_P53_STABILITY_AND_ACTIVITY                                                                 | 53   | 0.6585598  | 1.8347194 | 0.00199008        | 0.06993298        | 0.3        | 2265        | tags=62%, lat=18%, sgn=24%  |
| SD_pos    | REACTOME CROSS_PRESENTATION_OF_SOLUBLE_EXTRINSIC_ANTIGENS_ENDOSOMES                                               | 42   | 0.6817738  | 1.7484798 | 0.01616167        | 0.06993452        | 0.38       | 2158        | tags=60%, lat=18%, sgn=22%  |
| SD_pos    | REACTOME ALPHA_DUCTIN_1_SIGNALING                                                                                 | 43   | 0.651297   | 1.8218824 | 0.00410622        | 0.07009377        | 0.38       | 2158        | tags=60%, lat=18%, sgn=22%  |
| SD_pos    | REACTOME G2_M_CHECKPOINTS                                                                                         | 114  | 0.5211016  | 1.7431228 | 0.02362247        | 0.07044238        | 0.517      | 2388        | tags=46%, lat=20%, sgn=34%  |
| SD_pos    | REACTOME THE_ROLE_OF_G2_M_PROGRESSION_AFTER_G2_CHECKPOINT                                                         | 64   | 0.598683   | 1.828358  | 0.01394424        | 0.07094298        | 0.371      | 2158        | tags=62%, lat=18%, sgn=20%  |
| SD_pos    | REACTOME TRANSCRIPTION_INITIATION                                                                                 | 104  | 0.6416728  | 1.828358  | 0.00687894        | 0.07188128        | 0.38       | 2893        | tags=61%, lat=25%, sgn=14%  |
| SD_pos    | REACTOME DECTIN_1_MEDIATED_NONCANONICAL_NF_KB_SIGNALING                                                           | 49   | 0.693962   | 1.836705  | 0.001984127       | 0.07188128        | 0.38       | 2158        | tags=67%, lat=18%, sgn=15%  |
| SD_pos    | REACTOME DEGRADATION_OF_BETA_CATENIN_BY_THE_DESTRUCTION_COMPLEX                                                   | 64   | 0.6138355  | 1.7370591 | 0.01380679        | 0.07240236        | 0.268      | 2158        | tags=60%, lat=18%, sgn=22%  |
| SD_pos    | REACTOME TERMINATION_OF_TRANSCRIPTION_DNA_SYNTHESIS                                                               | 47   | 0.6468282  | 1.7194868 | 0.00410622        | 0.07240236        | 0.382      | 1890        | tags=61%, lat=18%, sgn=21%  |
| SD_pos    | REACTOME ABC_TRANSPORTER_DISORDERS                                                                                | 65   | 0.5298242  | 1.715191  | 0.02995104        | 0.07270494        | 0.634      | 2011        | tags=49%, lat=17%, sgn=34%  |
| SD_pos    | REACTOME PYROPTOSIS                                                                                               | 23   | 0.6368767  | 1.713142  | 0.02028397        | 0.07318874        | 0.642      | 2121        | tags=65%, lat=18%, sgn=17%  |
| SD_pos    | REACTOME DEGRADATION_OF_AXIN                                                                                      | 45   | 0.6993927  | 1.8231145 | 0.00494584        | 0.0734965         | 0.386      | 2158        | tags=60%, lat=18%, sgn=22%  |
| SD_pos    | REACTOME RNA_POLYMERASE_II_TRANSCRIBES_SNRNA_GENES                                                                | 43   | 0.6284448  | 1.7833584 | 0.00410622        | 0.0734965         | 0.387      | 3078        | tags=61%, lat=18%, sgn=24%  |
| SD_pos    | REACTOME DNA_REPLICATION                                                                                          | 84   | 0.5383959  | 1.7182003 | 0.05087772        | 0.0734965         | 0.384      | 2158        | tags=52%, lat=18%, sgn=30%  |
| SD_pos    | REACTOME NUCLEOTIDE_EXCISION_REPAIR                                                                               | 60   | 0.5789713  | 1.7185148 | 0.02417604        | 0.07442385        | 0.633      | 2121        | tags=68%, lat=18%, sgn=14%  |
| SD_pos    | REACTOME REGULATION_OF_RUNX2_EXPRESSION_AND_ACTIVITY                                                              | 62   | 0.6121202  | 1.838961  | 0.00393334        | 0.07442385        | 0.297      | 2158        | tags=60%, lat=18%, sgn=22%  |
| SD_pos    | REACTOME TRAF6_MEDIATED_NF_KB_ACTIVATION                                                                          | 42   | 0.5570522  | 1.7174454 | 0.01178479        | 0.07503577        | 0.629      | 2216        | tags=53%, lat=19%, sgn=28%  |
| SD_pos    | REACTOME ANTIGEN_PRESENTATION_FOLDING_ASSEMBLY_AND_PEPTIDE_LOADING_OF_CLASS_II_MHC                                | 16   | 0.7067839  | 1.7157309 | 0.00612248        | 0.07538024        | 0.633      | 2448        | tags=75%, lat=21%, sgn=4%   |
| SD_pos    | REACTOME ANTIGEN_PRESENTATION_FOLDING_ASSEMBLY_AND_PEPTIDE_LOADING_OF_CLASS_I_MHC                                 | 16   | 0.6402800  | 1.7228964 | 0.00612248        | 0.07538024        | 0.619      | 2310        | tags=68%, lat=21%, sgn=11%  |
| SD_pos    | REACTOME ABORTIVE_ELONGATION_OF_HIV_1_TRANSCRIPT_IN_THE_ABSENCE_OF_TAT                                            | 18   | 0.6500407  | 1.717738  | 0.01574803        | 0.07574803        | 0.628      | 2885        | tags=61%, lat=24%, sgn=15%  |
| SD_pos    | REACTOME T_CELL_LYMPHOCYTE_RECEPTORS_CLRS                                                                         | 102  | 0.4928182  | 1.7235494 | 0.010121457       | 0.07633035        | 0.618      | 2630        | tags=54%, lat=22%, sgn=24%  |
| SD_pos    | REACTOME REGULATION_OF_MRNA_STABILITY_BY_PROTEINS_THAT_BIND_AU_RICH_ELEMENTS                                      | 66   | 0.6765213  | 1.8232988 | 0.00687894        | 0.07633035        | 0.385      | 2011        | tags=61%, lat=18%, sgn=21%  |
| SD_pos    | REACTOME GLOBAL_GENOME_NUCLEOTIDE_EXCISION_REPAIR_GG_NER                                                          | 44   | 0.5854944  | 1.714142  | 0.01093334        | 0.076924          | 0.628      | 1982        | tags=62%, lat=17%, sgn=21%  |
| SD_pos    | REACTOME TNFR2_NF_KB_PATHWAY                                                                                      | 71   | 0.5315055  | 1.724138  | 0.017719536       | 0.076924          | 0.615      | 2390        | tags=54%, lat=20%, sgn=26%  |
| SD_pos    | REACTOME METABOLISM_OF_POLYAMINES                                                                                 | 48   | 0.6064374  | 1.7060738 | 0.026             | 0.07849755        | 0.658      | 2158        | tags=60%, lat=18%, sgn=22%  |
| SD_pos    | REACTOME INTERFERON_ALPHA_BETA_SIGNALING                                                                          | 42   | 0.6290291  | 1.7296313 | 0.00410622        | 0.07872291        | 0.38       | 1588        | tags=60%, lat=18%, sgn=22%  |
| SD_pos    | REACTOME PTEN_REGULATION                                                                                          | 97   | 0.5385978  | 1.7247919 | 0.01760988        | 0.07872291        | 0.613      | 2312        | tags=47%, lat=19%, sgn=34%  |
| SD_pos    | REACTOME ANTIGEN_PRESENTATION_FOLDING_ASSEMBLY_AND_PEPTIDE_LOADING_OF_CLASS_II_MHC                                | 16   | 0.7631878  | 1.7162097 | 0.001992532       | 0.0772291         | 0.627      | 2011        | tags=79%, lat=18%, sgn=3%   |
| SD_pos    | REACTOME DNA_REPLICATION                                                                                          | 84   | 0.5383959  | 1.7182003 | 0.05087772        | 0.0772291         | 0.663      | 2121        | tags=52%, lat=18%, sgn=30%  |
| SD_pos    | REACTOME TAK1_ACTIVATES_NFKB_BY_PHOSPHORYLATION_AND_ACTIVATION_OF_IKKS_COMPLEX                                    | 22   | 0.6846458  | 1.8365096 | 0.001984127       | 0.07810109        | 0.265      | 2448        | tags=68%, lat=21%, sgn=11%  |
| SD_pos    | REACTOME CLASS_II_MHC_MEDIATED_ANTIGEN_PROCESSING_PRESENTATION                                                    | 225  | 0.5055631  | 1.701931  | 0.01129032        | 0.07881036        | 0.697      | 2561        | tags=62%, lat=22%, sgn=16%  |
| SD_pos    | REACTOME RNA_INDEPENDENT_TLR4_CASCADE                                                                             | 47   | 0.5913988  | 1.8094874 | 0.00410622        | 0.07881036        | 0.375      | 3120        | tags=60%, lat=18%, sgn=22%  |
| SD_pos    | REACTOME CRISTAE_FORMATION                                                                                        | 18   | 0.7038237  | 1.6991198 | 0.01998471        | 0.07929125        | 0.673      | 714         | tags=68%, lat=19%, sgn=13%  |
| SD_pos    | REACTOME FORMATION_OF_INCISION_COMPLEX_IN_GG_NER                                                                  | 28   | 0.61308324 | 1.8663058 | 0.01711628        | 0.07948337        | 0.68       | 1965        | tags=46%, lat=17%, sgn=37%  |
| SD_pos    | REACTOME_NUCLEOTIDE_BINDING_DOMAIN_LEUCINE_RICH_REPEAT_CONTAINING_RECEPTOR_NLR_SIGNALING_PATHWAYS                 | 37   | 0.6478806  | 1.8924306 | 0.00613081        | 0.08051917        | 0.685      | 3500        | tags=78%, lat=29%, sgn=111% |
| SD_pos    | REACTOME UCH_PROTEASES                                                                                            | 68   | 0.6016059  | 1.8949999 | 0.01778148        | 0.08081103        | 0.685      | 2561        | tags=62%, lat=22%, sgn=16%  |
| SD_pos    | REACTOME MAPK3_MAPK4_SIGNALING                                                                                    | 70   | 0.5108278  | 1.890558  | 0.01402987        | 0.080845          | 0.687      | 2158        | tags=63%, lat=18%, sgn=19%  |
| SD_pos    | REACTOME CYTOTOXICITY_BY_HMOX1                                                                                    | 61   | 0.6021986  | 1.8914731 | 0.00410622        | 0.0811473         | 0.29       | 3324        | tags=77%, lat=28%, sgn=106% |
| SD_pos    | REACTOME TRANS_GOLGI_NETWORK_VESICLE_BUDDING                                                                      | 52   | 0.5884149  | 1.885148  | 0.00609038        | 0.084234          | 0.704      | 3324        | tags=77%, lat=28%, sgn=106% |
| SD_pos    | REACTOME SIGNALING_BY_NOTCH4                                                                                      | 67   | 0.6349566  | 1.838287  | 0.00393708        | 0.08480108        | 0.289      | 2961        | tags=70%, lat=22%, sgn=8%   |
| SD_pos    | REACTOME ASYMMETRIC_LOCALIZATION_OF_RCP_PROTEINS                                                                  | 44   | 0.6882803  | 1.8682803 | 0.00410622        | 0.08480108        | 0.377      | 2158        | tags=60%, lat=18%, sgn=22%  |
| SD_pos    | REACTOME TRANSCRIPTION_COUPLED_NUCLEOTIDE_EXCISION_REPAIR_TC_NER                                                  | 44   | 0.598489   | 1.861371  | 0.04483431        | 0.08585508        | 0.709      | 3631        | tags=68%, lat=31%, sgn=1%   |
| SD_pos    | REACTOME TOLL_LIKE_RECEPTOR_9_TLR9_CASCADE                                                                        | 66   | 0.5729232  | 1.8784915 | 0.018             | 0.08775332        | 0.728      | 3178        | tags=61%, lat=27%, sgn=12%  |
| SD_pos    | REACTOME MRNA_CAPSIN                                                                                              | 23   | 0.6585441  | 1.8720989 | 0.00410622        | 0.08775332        | 0.38       | 3480        | tags=70%, lat=28%, sgn=2%   |
| SD_pos    | REACTOME PHO85_PATHWAY                                                                                            | 63   | 0.6891085  | 1.8789203 | 0.01789125        | 0.0884476         | 0.288      | 2885        | tags=60%, lat=18%, sgn=22%  |
| SD_pos    | REACTOME UBI_SPECIFIC_PROCESSING_PROTEASES                                                                        | 138  | 0.4965885  | 1.874052  | 0.02539625        | 0.0887474         | 0.738      | 3500        | tags=59%, lat=29%, sgn=13%  |
| SD_pos    | REACTOME HEDGEGOFF_ON_STATE                                                                                       | 68   | 0.4785803  | 1.8771735 | 0.02115404        | 0.0887474         | 0.727      | 2158        | tags=60%, lat=18%, sgn=22%  |
| SD_pos    | REACTOME MITOTIC_KINASES_AND_ANAPHASE                                                                             | 43   | 0.469897   | 1.878242  | 0.0331384         | 0.0887474         | 0.728      | 2893        | tags=60%, lat=18%, sgn=22%  |
| SD_pos    | REACTOME FORMATION_OF_THE_EARLY_ELONGATION_COMPLEX                                                                | 24   | 0.5889187  | 1.872588  | 0.03454848        | 0.08976416        | 0.728      | 3480        | tags=64%, lat=29%, sgn=7%   |
| SD_pos    | REACTOME DDX58_IPH1_MEDIATED_INDUCTION_OF_INTERFERON_ALPHA_BETA                                                   | 48   | 0.6884025  | 1.8400527 | 0.00885256        | 0.089825          | 0.284      | 2011        | tags=63%, lat=21%, sgn=16%  |
| SD_pos    | REACTOME SEPARATION_OF_SISTER_CHROMATIDS                                                                          | 62   | 0.4581202  | 1.8298943 | 0.03698864        | 0.09071477        | 0.747      | 2893        | tags=60%, lat=18%, sgn=22%  |
| SD_pos    | REACTOME HIV_E                                                                                                    |      |            |           |                   |                   |            |             |                             |

|    |                                                                                               |      |            |           |             |            |       |      |                              |
|----|-----------------------------------------------------------------------------------------------|------|------------|-----------|-------------|------------|-------|------|------------------------------|
| SD | REACTOME_SNRNP_ASSEMBLY                                                                       | 26   | 0.934534   | 1.556451  | 0.061597165 | 0.13151997 | 0.914 | 4363 | lga=81%, lat=93%, sgn=128%   |
| SD | REACTOME_REGULATION_OF_TP53_ACTIVITY_THROUGH_PHOSPHORYLATION                                  | 28   | 0.4359201  | 1.696977  | 0.04043369  | 0.1317447  | 0.91  | 2398 | lga=41%, lat=20%, sgn=14%    |
| SD | REACTOME_INTERACTIONS_OF_REV_WITH_HOST_CELLULAR_PROTEINS                                      | 19   | 0.6048163  | 1.5578121 | 0.06261155  | 0.13195944 | 0.91  | 4299 | lga=64%, lat=36%, sgn=132%   |
| SD | REACTOME_REGULATION_OF_EXPRESSION_OF_SLITS_AND_ROBOS                                          | 114  | 0.5811745  | 1.556639  | 0.098837945 | 0.13219477 | 0.914 | 2176 | lga=57%, lat=18%, sgn=69%    |
| SD | REACTOME_SIMULATION_OF_UBIQUITIN_PATHWAYS                                                     | 11   | 0.6032122  | 1.5481352 | 0.053653348 | 0.13232403 | 0.913 | 4297 | lga=41%, lat=20%, sgn=14%    |
| SD | REACTOME_FCER1_MEDIATED_NF_KB_ACTIVATION                                                      | 59   | 0.6965965  | 1.672055  | 0           | 0.13253977 | 0.91  | 2271 | lga=66%, lat=19%, sgn=15%    |
| SD | REACTOME_TBC_RIBOPAPS                                                                         | 26   | 0.620234   | 1.5533301 | 0.05040328  | 0.13264577 | 0.917 | 1538 | lga=48%, lat=13%, sgn=55%    |
| SD | REACTOME_TRANSPORT_OF_THE_SLP_DEPENDANT_MATURE_MRNA                                           | 16   | 0.5718446  | 1.5510093 | 0.061098702 | 0.13264717 | 0.919 | 4861 | lga=58%, lat=14%, sgn=159%   |
| SD | REACTOME_SIGNALING_BY_CSP3_OR_CSP                                                             | 148  | 0.493268   | 1.5442668 | 0.05626939  | 0.13264816 | 0.92  | 2151 | lga=63%, lat=23%, sgn=62%    |
| SD | REACTOME_IKK_COMPLEX_RECRUITMENT_MEDIATED_BY_RIP1                                             | 16   | 0.67419124 | 1.5487289 | 0.042769857 | 0.13272984 | 0.922 | 3028 | lga=67%, lat=25%, sgn=85%    |
| SD | REACTOME_DMP2_SIGNALLING                                                                      | 22   | 0.59227124 | 1.5491518 | 0.06768626  | 0.13280826 | 0.921 | 2018 | lga=45%, lat=17%, sgn=55%    |
| SD | REACTOME_METALLOPROTEINASE_DUBS                                                               | 22   | 0.6169235  | 1.5484428 | 0.06265231  | 0.13281765 | 0.92  | 431  | lga=69%, lat=36%, sgn=16%    |
| SD | REACTOME_DEREGULATED_CDKs_TRIGGERS_MULTIPLE_NEURODEGENERATIVE_PATHWAYS_IN_ALZHEIMER_S_DISEASE | 22   | 0.6489722  | 1.5422293 | 0.067209977 | 0.1328494  | 0.928 | 1848 | lga=60%, lat=16%, sgn=71%    |
| SD | REACTOME_CELL_CYCLE                                                                           | 427  | 0.3849418  | 1.5414036 | 0.041019303 | 0.1328503  | 0.927 | 3792 | lga=69%, lat=32%, sgn=96%    |
| SD | REACTOME_RHO_GTPASE_CYCLE                                                                     | 23   | 0.5761145  | 1.5436294 | 0.04453444  | 0.13287193 | 0.928 | 2855 | lga=65%, lat=25%, sgn=81%    |
| SD | REACTOME_NUCLEAR_IMPORT_OF_REV_PROTEIN                                                        | 17   | 0.6126743  | 1.5381821 | 0.0651341   | 0.13290837 | 0.929 | 4299 | lga=68%, lat=36%, sgn=138%   |
| SD | REACTOME_SIGNALING_BY_CSP3_OR_CSP                                                             | 27   | 0.655881   | 1.5424748 | 0.049370763 | 0.13291053 | 0.928 | 2151 | lga=63%, lat=23%, sgn=62%    |
| SD | REACTOME_FLTS_SIGNALING_IN_DISEASE                                                            | 25   | 0.6099731  | 1.5382752 | 0.03674847  | 0.13291192 | 0.929 | 3652 | lga=64%, lat=31%, sgn=82%    |
| SD | REACTOME_SEMAD1_IN_SEMAPHORIN_SIGNALING                                                       | 19   | 0.5728486  | 1.5397475 | 0.070564516 | 0.13293893 | 0.928 | 1770 | lga=58%, lat=15%, sgn=65%    |
| SD | REACTOME_RHO_GTPASES_ACTIVATE_WASPS_AND_WAVES                                                 | 29   | 0.6485039  | 1.5351984 | 0.0626      | 0.13298117 | 0.931 | 1756 | lga=60%, lat=15%, sgn=61%    |
| SD | REACTOME_CELL_CYCLE_ITO1                                                                      | 3361 | 0.49119203 | 1.5397646 | 0.047388495 | 0.13298363 | 0.931 | 4017 | lga=61%, lat=24%, sgn=90%    |
| SD | REACTOME_EPIGENETIC_REGULATION_OF_GENE_EXPRESSION                                             | 92   | 0.47375622 | 1.5317677 | 0.056028343 | 0.13294492 | 0.933 | 4042 | lga=61%, lat=34%, sgn=101%   |
| SD | REACTOME_INTERLEUKIN_1_SIGNALING                                                              | 80   | 0.6222004  | 1.6777115 | 0           | 0.13409283 | 0.931 | 2226 | lga=63%, lat=20%, sgn=77%    |
| SD | REACTOME_TOLL_LIKE_RECEPTOR_TLR1_TLR2_CASCADE                                                 | 73   | 0.5189514  | 1.5272451 | 0.10090991  | 0.13412929 | 0.928 | 3170 | lga=60%, lat=27%, sgn=66%    |
| SD | REACTOME_NEUTRYLATION                                                                         | 134  | 0.44322297 | 1.524827  | 0.06324111  | 0.13479314 | 0.941 | 2563 | lga=46%, lat=22%, sgn=58%    |
| SD | REACTOME_RESPIRATORY_ELECTRON_TRANSPORT_ATP_SYNTHESIS_BY_CHEMOSMOTIC_COUPLING_AND_HEAT_P      | 84   | 0.5921234  | 1.526241  | 0.11044177  | 0.13479314 | 0.94  | 2024 | lga=61%, lat=17%, sgn=73%    |
| SD | REACTOME_DNA_DAMAGE_RECOGNITION_IN_GN_NER                                                     | 19   | 0.6284382  | 1.5254303 | 0.09836576  | 0.13474605 | 0.94  | 2820 | lga=47%, lat=15%, sgn=60%    |
| SD | REACTOME_DEHYDRATATION_DEPENDENT_MRNA_DECAY                                                   | 29   | 0.5534059  | 1.523047  | 0.054       | 0.13485632 | 0.942 | 3628 | lga=66%, lat=30%, sgn=94%    |
| SD | REACTOME_ZBTB_DNA_MEDIATED_INDUCION_OF_TYPE_1_IFNS                                            | 15   | 0.6028878  | 1.5198355 | 0.09104363  | 0.13474605 | 0.942 | 3070 | lga=72%, lat=37%, sgn=95%    |
| SD | REACTOME_INHIBITION_OF_DNA_RECOMBINATION_AT_TELOMERE                                          | 16   | 0.5118481  | 1.5178071 | 0.07474177  | 0.13478177 | 0.942 | 3988 | lga=64%, lat=29%, sgn=87%    |
| SD | REACTOME_SIMULATION_OF_SIMULATIONS_PROTEINS                                                   | 18   | 0.59543973 | 1.5179694 | 0.07993030  | 0.13478177 | 0.944 | 4297 | lga=63%, lat=36%, sgn=130%   |
| SD | REACTOME_RECOGNITION_OF_DNA_DAMAGE_BY_PCNA_CONTAINING_REPLICATION_COMPLEX                     | 19   | 0.630921   | 1.5136384 | 0.067451    | 0.13513742 | 0.944 | 1860 | lga=47%, lat=15%, sgn=62%    |
| SD | REACTOME_NONHOMOLOGOUS_END_JOINING_NHEJ                                                       | 43   | 0.5289577  | 1.5191063 | 0.05117125  | 0.13513742 | 0.944 | 3792 | lga=60%, lat=27%, sgn=66%    |
| SD | REACTOME_REGULATION_OF_TP53_ACTIVITY                                                          | 80   | 0.40289713 | 1.5127255 | 0.024655297 | 0.13520744 | 0.948 | 3844 | lga=61%, lat=33%, sgn=104%   |
| SD | REACTOME_RAB_REGULATION_OF_TRAFFICKING                                                        | 70   | 0.5127484  | 1.5130343 | 0.068598114 | 0.13521127 | 0.948 | 2190 | lga=47%, lat=15%, sgn=67%    |
| SD | REACTOME_SIMULATION_OF_TRANSCRIPTION_COFACTORS                                                | 19   | 0.5289577  | 1.5191063 | 0.05117125  | 0.13520744 | 0.948 | 3792 | lga=60%, lat=27%, sgn=66%    |
| SD | REACTOME_CALNEKIN_CALECTININ_CYCLE                                                            | 18   | 0.6107228  | 1.5094091 | 0.07014028  | 0.13520744 | 0.949 | 3414 | lga=68%, lat=29%, sgn=78%    |
| SD | REACTOME_REGULATION_OF_RUNK1_EXPRESSION_AND_ACTIVITY                                          | 57   | 0.69874976 | 1.6828545 | 0.003929216 | 0.13520744 | 0.949 | 2114 | lga=61%, lat=18%, sgn=72%    |
| SD | REACTOME_DOWNREGULATION_OF_SMD3_3_SMD4_TRANSCRIPTIONAL_ACTIVITY                               | 10   | 0.5289577  | 1.5191063 | 0.05117125  | 0.13520744 | 0.949 | 3170 | lga=60%, lat=27%, sgn=66%    |
| SD | REACTOME_FLTS_SIGNALING                                                                       | 26   | 0.6107713  | 1.5031916 | 0.06984362  | 0.13520744 | 0.952 | 3953 | lga=73%, lat=33%, sgn=109%   |
| SD | REACTOME_SIMULATION_OF_MITOTIC_CELL_CYCLE                                                     | 109  | 0.42613244 | 1.4992988 | 0.03937008  | 0.13524598 | 0.954 | 2271 | lga=39%, lat=19%, sgn=48%    |
| SD | REACTOME_DISEASES_OF_MITOTIC_CELL_CYCLE                                                       | 21   | 0.5291782  | 1.4997332 | 0.0658676   | 0.13524598 | 0.952 | 3890 | lga=70%, lat=35%, sgn=113%   |
| SD | REACTOME_CYTOSOLIC_RNA_AMINOACIDYL_TRANSFERASE                                                | 27   | 0.6213347  | 1.4939717 | 0.13271881  | 0.13524598 | 0.952 | 4411 | lga=69%, lat=37%, sgn=116%   |
| SD | REACTOME_POSITIVE_EPIGENETIC_REGULATION_OF_RRNA_EXPRESSION                                    | 67   | 0.5004725  | 1.488282  | 0.08414873  | 0.13524598 | 0.952 | 3959 | lga=63%, lat=34%, sgn=105%   |
| SD | REACTOME_RHOH_GTPASE_CYCLE                                                                    | 24   | 0.5717578  | 1.48677   | 0.08711429  | 0.13524598 | 0.953 | 3052 | lga=67%, lat=29%, sgn=85%    |
| SD | REACTOME_ROLE_OF_NER_IN_I_REPLICATION_AND_DISEASE_PATHOGENESIS                                | 14   | 0.6104631  | 1.4817474 | 0.08103763  | 0.13524598 | 0.953 | 3152 | lga=64%, lat=30%, sgn=90%    |
| SD | REACTOME_INTERACTIONS_OF_VPR_WITH_HOST_CELLULAR_PROTEINS                                      | 15   | 0.5787662  | 1.488841  | 0.07581584  | 0.13524598 | 0.951 | 4297 | lga=60%, lat=36%, sgn=125%   |
| SD | REACTOME_CYCLIN_D_ASSOCIATED_EVENTS_IN_G1                                                     | 29   | 0.4833656  | 1.4851555 | 0.04230794  | 0.13524598 | 0.953 | 3637 | lga=66%, lat=31%, sgn=104%   |
| SD | REACTOME_NUCLEAR_PORE_COMPLEX_ASSEMBLY                                                        | 13   | 0.6352788  | 1.4981653 | 0.04916253  | 0.13524598 | 0.953 | 5202 | lga=100%, lat=100%, sgn=100% |
| SD | REACTOME_TOLL_LIKE_RECEPTOR_CASCADES                                                          | 110  | 0.4821618  | 1.4897239 | 0.11826563  | 0.13524598 | 0.951 | 3170 | lga=55%, lat=27%, sgn=75%    |
| SD | REACTOME_DISEASES_OF_SIGNAL_TRANSDUCTION_BY_GROWTH_FACTOR_RECEPTORS_AND_SECOND_MESSENGER      | 277  | 0.37775965 | 1.489818  | 0.06187625  | 0.13524598 | 0.951 | 2837 | lga=48%, lat=24%, sgn=62%    |
| SD | REACTOME_SIGNALING_BY_NOTCH                                                                   | 169  | 0.42629063 | 1.4778658 | 0.06048367  | 0.13524598 | 0.952 | 3790 | lga=62%, lat=32%, sgn=96%    |
| SD | REACTOME_DOWNREGULATION_OF_TGF_BETA_RECEPTOR_SIGNALING                                        | 16   | 0.5820201  | 1.4789809 | 0.0761523   | 0.13524598 | 0.952 | 4433 | lga=69%, lat=36%, sgn=108%   |
| SD | REACTOME_MITOTIC_PROPHASE                                                                     | 87   | 0.4711192  | 1.467576  | 0.0626719   | 0.13524598 | 0.958 | 4541 | lga=72%, lat=37%, sgn=116%   |
| SD | REACTOME_DNA_POLYMERASE_I_TRANSCRIPTION                                                       | 16   | 0.5990276  | 1.4717474 | 0.1037192   | 0.13524598 | 0.958 | 3890 | lga=64%, lat=30%, sgn=90%    |
| SD | REACTOME_TRANSCRIPTIONAL_REGULATION_BY_VENTX                                                  | 25   | 0.4678163  | 1.467366  | 0.08472112  | 0.13524598 | 0.958 | 3444 | lga=72%, lat=35%, sgn=107%   |
| SD | REACTOME_EPHI_EPHRIN_SIGNALING                                                                | 68   | 0.44173482 | 1.4702627 | 0.11895161  | 0.13524598 | 0.958 | 1756 | lga=43%, lat=15%, sgn=67%    |
| SD | REACTOME_SARS_COV_INFECTIONS                                                                  | 103  | 0.4511169  | 1.4652627 | 0.08109911  | 0.13524598 | 0.958 | 4122 | lga=61%, lat=30%, sgn=94%    |
| SD | REACTOME_MITOPHAGY                                                                            | 22   | 0.5135543  | 1.4690455 | 0.0640535   | 0.13524598 | 0.958 | 3954 | lga=68%, lat=33%, sgn=102%   |
| SD | REACTOME_INSULIN_RECEPTOR_RECYCLING                                                           | 18   | 0.5634182  | 1.4669967 | 0.06875     | 0.13524598 | 0.958 | 1296 | lga=44%, lat=11%, sgn=50%    |
| SD | REACTOME_ROLE_OF_SARS_ANTERIORLYNPH_TRANSPORT                                                 | 45   | 0.3941148  | 1.4576921 | 0.07753795  | 0.13524598 | 0.958 | 3184 | lga=60%, lat=29%, sgn=86%    |
| SD | REACTOME_TGF_BETA_RECEPTOR_SIGNALING_ACTIVATES_SMD3                                           | 20   | 0.5861491  | 1.4636776 | 0.08333336  | 0.13524598 | 0.957 | 4331 | lga=70%, lat=36%, sgn=110%   |
| SD | REACTOME_G2_M_DNA_DAMAGE_CHECKPOINT                                                           | 63   | 0.45759758 | 1.4628849 | 0.086538464 | 0.13524598 | 0.957 | 3790 | lga=56%, lat=32%, sgn=94%    |
| SD | REACTOME_REGULATION_OF_HMOX1_EXPRESSION_AND_ACTIVITY                                          | 58   | 0.7047213  | 1.686605  | 0.0170734   | 0.13524598 | 0.958 | 1296 | lga=44%, lat=11%, sgn=50%    |
| SD | REACTOME_SEMAD1_INDUCED_CELL_MIGRATION_AND_GROWTH_CONE_COLLAPSE                               | 16   | 0.5811996  | 1.4592971 | 0.10141868  | 0.13524598 | 0.957 | 1770 | lga=58%, lat=15%, sgn=65%    |
| SD | REACTOME_TRANSCRIPTIONAL_REGULATION_BY_SMALL_RNAs                                             | 67   | 0.48962325 | 1.4534575 | 0.10114554  | 0.13524598 | 0.972 | 4297 | lga=69%, lat=36%, sgn=125%   |
| SD | REACTOME_EPHB_MEDIATED_FORWARD_SIGNALING                                                      | 34   | 0.48840524 | 1.4538511 | 0.13963309  | 0.13524598 | 0.972 | 1756 | lga=40%, lat=15%, sgn=62%    |
| SD | REACTOME_ENDOSOMAL_SORTING_REQUIRED_FOR_TRANSPORT_ESORT                                       | 41   | 0.5827895  | 1.454194  | 0.09699494  | 0.13524598 | 0.972 | 2190 | lga=47%, lat=15%, sgn=67%    |
| SD | REACTOME_BUDGING_AND_MATURATION_OF_HIV_VIRION                                                 | 25   | 0.583134   | 1.4591895 | 0.10620448  | 0.13524598 | 0.972 | 2190 | lga=47%, lat=15%, sgn=67%    |
| SD | REACTOME_SIGNALING_BY_INTERFERON_ALPHA                                                        | 22   | 0.58887285 | 1.4560434 | 0.096114518 | 0.13524598 | 0.972 | 3288 | lga=64%, lat=28%, sgn=88%    |
| SD | REACTOME_SIGNALING_BY_INTERFERON_BETA                                                         | 22   | 0.58887285 | 1.4560434 | 0.096114518 | 0.13524598 | 0.972 | 3288 | lga=64%, lat=28%, sgn=88%    |
| SD | REACTOME_LYSOSOMAL_VESICLE_BIOGENESIS                                                         | 24   | 0.54278713 | 1.4543027 | 0.09455995  | 0.13524598 | 0.972 | 3508 | lga=75%, lat=39%, sgn=103%   |
| SD | REACTOME_RNA_POLYMERASE_I_TRANSCRIPTION                                                       | 67   | 0.4698437  | 1.4547313 | 0.10518292  | 0.13524598 | 0.972 | 3950 | lga=60%, lat=34%, sgn=99%    |
| SD | REACTOME_G_PROTEIN_BETA_GAMMA_SIGNALING                                                       | 24   | 0.5429983  | 1.4561721 | 0.10691824  | 0.13524598 | 0.972 | 2190 | lga=47%, lat=15%, sgn=67%    |
| SD | REACTOME_SMOOTH_MUSCLE_CONTRACTION                                                            | 17   | 0.5194085  | 1.4584707 | 0.10041841  | 0.13524598 | 0.972 | 2871 | lga=61%, lat=30%, sgn=94%    |
| SD | REACTOME_RESPIRATORY_ELECTRON_TRANSPORT                                                       | 68   | 0.5664569  | 1.4464306 | 0.14428588  | 0.13524598 | 0.972 | 2024 | lga=59%, lat=17%, sgn=75%    |
| SD | REACTOME_RAC2_GTPASE_CYCLE                                                                    | 58   | 0.4499902  | 1.446821  | 0.11789818  | 0.13524598 | 0.974 | 2190 | lga=49%, lat=17%, sgn=75%    |
| SD | REACTOME_PROCESSING_OF_DNA_DOUBLE_STRAND_BREAK_ENDS                                           | 46   | 0.4898992  | 1.4549433 | 0.097139    | 0.13524598 | 0.974 | 3790 | lga=63%, lat=32%, sgn=96%    |
| SD | REACTOME_MMUNOREGULATORY_INTERACTIONS_BETWEEN_A_LYMPHOID_AND_A_NON_LYMPHOID_CELL              | 93   | 0.40947132 | 1.4471848 | 0.08653104  | 0.13524598 | 0.974 | 1284 | lga=30%, lat=11%, sgn=51%    |
| SD | REACTOME_COSMETIC_REGULATION_BY_THE_CD38_FAMILY                                               | 42   | 0.460478   | 1.4447588 | 0.091199    | 0.13524598 | 0.974 | 2720 | lga=55%, lat=23%, sgn=71%    |
| SD | REACTOME_DNA_REPAIR                                                                           | 103  | 0.4511169  | 1.4652627 | 0.08109911  | 0.13524598 | 0.974 | 3790 | lga=60%, lat=27%, sgn=66%    |
| SD | REACTOME_POTENTIAL_THERAPEUTICS_FOR_SARS                                                      | 58   | 0.4614867  | 1.473531  | 0.08414873  | 0.13524598 | 0.974 | 3884 | lga=69%, lat=33%, sgn=102%   |
| SD | REACTOME_INFLUENZA_INFECTION                                                                  | 85   | 0.5952893  | 1.4422428 | 0.1738791   | 0.13524598 | 0.974 | 2167 | lga=49%, lat=18%, sgn=69%    |
| SD |                                                                                               |      |            |           |             |            |       |      |                              |



|    |          |                                                                               |     |            |           |            |            |       |      |                            |
|----|----------|-------------------------------------------------------------------------------|-----|------------|-----------|------------|------------|-------|------|----------------------------|
| SD | REACTOME | ALTOPHAGY                                                                     | 604 | 0.36789589 | 1.352415  | 0.18433454 | 0.27329256 | 0.994 | 3646 | tags=56%, lat=31%, sph=40% |
| SD | REACTOME | NUCLEAR ENVELOPE BREAKDOWN                                                    | 604 | 0.440491   | 0.7447019 | 0.18433454 | 0.27329256 | 0.994 | 4297 | tags=72%, lat=31%, sph=40% |
| SD | REACTOME | TRANSCRIPTION OF SARS COV 2 STRUCTURAL PROTEINS                               | 26  | 0.49264698 | 1.529211  | 0.18227181 | 0.2742907  | 0.994 | 1308 | tags=31%, lat=11%, sph=44% |
| SD | REACTOME | DISEASES OF IMMUNE SYSTEM                                                     | 20  | 0.59826294 | 1.3207543 | 0.22042629 | 0.27486745 | 0.994 | 1468 | tags=50%, lat=12%, sph=47% |
| SD | REACTOME | REGULATION OF CD28, PHLY, AND TRIC CCT IN G. PROTEIN BETA FOLDING             | 38  | 0.40298173 | 1.325257  | 0.19312841 | 0.27492481 | 0.994 | 2900 | tags=62%, lat=31%, sph=48% |
| SD | REACTOME | SARS COV 1 INFECTION                                                          | 38  | 0.44141193 | 1.3218557 | 0.18227181 | 0.2752518  | 0.994 | 3648 | tags=61%, lat=31%, sph=48% |
| SD | REACTOME | INFECTION WITH MYCOBACTERIUM TUBERCULOSIS                                     | 21  | 0.5058844  | 1.3189916 | 0.19839279 | 0.27719639 | 0.994 | 2416 | tags=43%, lat=20%, sph=44% |
| SD | REACTOME | CDP MEDIATED ACTIVATION CASCADE                                               | 28  | 0.505881   | 1.3147485 | 0.2131148  | 0.27750425 | 0.994 | 2748 | tags=60%, lat=20%, sph=46% |
| SD | REACTOME | REGULATION OF SIGN SIGNALING                                                  | 26  | 0.4832923  | 1.3152814 | 0.18181819 | 0.27863224 | 0.994 | 2416 | tags=60%, lat=20%, sph=46% |
| SD | REACTOME | THROMBOXANE SIGNALING THROUGH TP RECEPTOR                                     | 18  | 0.48712402 | 1.3182528 | 0.1863113  | 0.27997273 | 0.994 | 2900 | tags=62%, lat=24%, sph=47% |
| SD | REACTOME | MITOCHONDRIAL FATTY ACID BETA OXIDATION                                       | 21  | 0.42642028 | 1.3118488 | 0.14003844 | 0.2812862  | 0.994 | 1910 | tags=43%, lat=16%, sph=45% |
| SD | REACTOME | HR THROUGH SINGLE STRAND ANNEALING SSA                                        | 60  | 0.39891246 | 1.3087263 | 0.18668922 | 0.2848622  | 0.995 | 2386 | tags=60%, lat=20%, sph=46% |
| SD | REACTOME | FGFR2 ALTERNATIVE SPLICING                                                    | 19  | 0.46816129 | 1.3058388 | 0.1803216  | 0.28500147 | 0.995 | 2883 | tags=58%, lat=24%, sph=47% |
| SD | REACTOME | TRANSCRIPTIONAL ACTIVITY OF SMAD3 SMAD3 SMAD1 HETEROTRIMER                    | 24  | 0.49015665 | 1.3071024 | 0.1812977  | 0.28530976 | 0.995 | 4120 | tags=71%, lat=35%, sph=48% |
| SD | REACTOME | H2AK5 DEACETYLASE HISTONES                                                    | 50  | 0.42714469 | 1.3058411 | 0.18105599 | 0.2868935  | 0.995 | 4087 | tags=64%, lat=34%, sph=49% |
| SD | REACTOME | ROS AND RNPS PRODUCTION IN PHAGOCYTES                                         | 28  | 0.46332276 | 1.3044462 | 0.20212767 | 0.28858043 | 0.995 | 1744 | tags=49%, lat=15%, sph=48% |
| SD | REACTOME | UNFOLDED PROTEIN RESPONSE UPR                                                 | 58  | 0.37553125 | 1.2988612 | 0.13991547 | 0.2886672  | 0.997 | 3648 | tags=57%, lat=31%, sph=48% |
| SD | REACTOME | OXIDATIVE STRESS INDUCED SENSENCE                                             | 78  | 0.4553788  | 1.3023981 | 0.20769129 | 0.28972245 | 0.998 | 3950 | tags=59%, lat=34%, sph=49% |
| SD | REACTOME | HCMV LATE EVENTS                                                              | 71  | 0.4383715  | 1.3028375 | 0.2027833  | 0.2896977  | 0.998 | 4297 | tags=65%, lat=36%, sph=49% |
| SD | REACTOME | NUCLEAR ENVELOPE RE-ASSEMBLY                                                  | 42  | 0.3646377  | 1.3009410 | 0.14570858 | 0.28711608 | 0.997 | 4297 | tags=67%, lat=36%, sph=49% |
| SD | REACTOME | TP53 REGULATES TRANSCRIPTION OF CELL CYCLE GENES                              | 25  | 0.41065065 | 1.3002180 | 0.17092338 | 0.28774932 | 0.998 | 3648 | tags=60%, lat=20%, sph=49% |
| SD | REACTOME | INTERLEUKIN 2 FAMILY SIGNALING                                                | 35  | 0.4297555  | 1.3009137 | 0.20265869 | 0.28781384 | 0.998 | 3950 | tags=69%, lat=33%, sph=49% |
| SD | REACTOME | CONSTITUTIVE SIGNALING BY LIGAND RESPONSIVE EGFR CANCER VARIANTS              | 17  | 0.47204804 | 1.2922835 | 0.158      | 0.28784126 | 0.998 | 3950 | tags=65%, lat=33%, sph=49% |
| SD | REACTOME | CELLULAR RESPONSE TO HEAT STRESS                                              | 55  | 0.3688158  | 1.2929049 | 0.15186861 | 0.2880138  | 0.998 | 3000 | tags=49%, lat=25%, sph=49% |
| SD | REACTOME | TRANSCRIPTIONAL REGULATION OF WHITE ADIPOCYTE DIFFERENTIATION                 | 64  | 0.3782957  | 1.2929105 | 0.18486173 | 0.288891   | 0.998 | 3027 | tags=65%, lat=25%, sph=49% |
| SD | REACTOME | RESPONSE OF EIP2AK4 G2C3 TO AMINO ACID DEFICIENCY                             | 58  | 0.6184406  | 1.2931485 | 0.1308796  | 0.2894589  | 0.998 | 2116 | tags=64%, lat=18%, sph=47% |
| SD | REACTOME | RNA POLYMERASE I PROMOTER ESCAPE                                              | 68  | 0.43327698 | 1.2949992 | 0.18834952 | 0.28927274 | 0.998 | 3950 | tags=65%, lat=34%, sph=49% |
| SD | REACTOME | TRANSCRIPTIONAL REGULATION OF GRANULOPOIESIS                                  | 64  | 0.45272683 | 1.2952066 | 0.18486173 | 0.28965925 | 0.998 | 3950 | tags=65%, lat=34%, sph=49% |
| SD | REACTOME | TRANSPORT TO THE GOLGI AND SUBSEQUENT MODIFICATION                            | 114 | 0.3189138  | 1.2934607 | 0.15193443 | 0.2900054  | 0.998 | 3108 | tags=48%, lat=26%, sph=49% |
| SD | REACTOME | RHO GTPASES ACTIVATE FORMINS                                                  | 81  | 0.3221738  | 1.2960738 | 0.1328125  | 0.29016116 | 0.998 | 2855 | tags=43%, lat=24%, sph=46% |
| SD | REACTOME | FGMD MEDIATED TRANSCRIPTION                                                   | 40  | 0.3603045  | 1.293899  | 0.16513484 | 0.29029252 | 0.998 | 1592 | tags=40%, lat=11%, sph=43% |
| SD | REACTOME | DETOXIFICATION OF REACTIVE OXYGEN SPECIES                                     | 25  | 0.43820293 | 1.2892046 | 0.2031077  | 0.29049259 | 0.998 | 2386 | tags=60%, lat=20%, sph=46% |
| SD | REACTOME | CLATHRIN MEDIATED ENDOCYTOSIS                                                 | 97  | 0.3732548  | 1.2885111 | 0.2054397  | 0.29333903 | 0.998 | 3188 | tags=49%, lat=27%, sph=47% |
| SD | REACTOME | PKM1 PRM1 MEDIATED ENDOCYTOSIS                                                | 17  | 0.48579243 | 1.284411  | 0.18897538 | 0.29400078 | 0.998 | 3954 | tags=60%, lat=20%, sph=47% |
| SD | REACTOME | SARS COV 2 INFECTION                                                          | 64  | 0.4101546  | 1.284791  | 0.2029412  | 0.29192702 | 0.998 | 4086 | tags=60%, lat=20%, sph=47% |
| SD | REACTOME | BETA GAMMA GANGLIOSIDIN THROUGH PI3K/AMPA                                     | 18  | 0.47519255 | 1.2780773 | 0.19213974 | 0.29818042 | 0.998 | 2900 | tags=58%, lat=24%, sph=47% |
| SD | REACTOME | SPF DEPENDENT CONTRACTIONS PROTEIN TARGETING TO MEMBRANE                      | 63  | 0.5999101  | 1.2774438 | 0.30815534 | 0.3000706  | 0.998 | 2234 | tags=57%, lat=19%, sph=40% |
| SD | REACTOME | SECRETORY PHENOTYPE SAMP                                                      | 64  | 0.41210288 | 1.2743693 | 0.2029412  | 0.3000706  | 0.998 | 2234 | tags=57%, lat=19%, sph=40% |
| SD | REACTOME | ALPHA ACTIVATION BY IPX2                                                      | 41  | 0.3834194  | 1.2778908 | 0.1614786  | 0.30033126 | 0.998 | 2700 | tags=63%, lat=31%, sph=49% |
| SD | REACTOME | DISORDERS OF TRANSMEMBRANE TRANSPORTERS                                       | 120 | 0.30081573 | 1.2728613 | 0.14541833 | 0.3004021  | 0.998 | 2168 | tags=54%, lat=18%, sph=41% |
| SD | REACTOME | TP53 REGULATES TRANSCRIPTION OF CELL DEATH GENES                              | 64  | 0.4077959  | 1.2749022 | 0.18486173 | 0.3004021  | 0.998 | 3748 | tags=60%, lat=20%, sph=47% |
| SD | REACTOME | SIGNALING BY VEGF                                                             | 72  | 0.36292747 | 1.2762038 | 0.22379032 | 0.30072938 | 0.998 | 3054 | tags=58%, lat=26%, sph=49% |
| SD | REACTOME | HSP1 ACTIVATION                                                               | 17  | 0.44810823 | 1.2746028 | 0.20081967 | 0.3009599  | 0.998 | 1688 | tags=41%, lat=14%, sph=45% |
| SD | REACTOME | GROWTH HORMONE RECEPTOR SIGNALING                                             | 18  | 0.58416393 | 1.2687268 | 0.24688192 | 0.3054842  | 0.998 | 2500 | tags=60%, lat=21%, sph=49% |
| SD | REACTOME | DISEASES OF PROGRAMMED CELL DEATH                                             | 63  | 0.41019621 | 1.2693221 | 0.20264881 | 0.30688134 | 0.998 | 2900 | tags=60%, lat=20%, sph=47% |
| SD | REACTOME | THROMBIN SIGNALING THROUGH PROTEINACTIVATED RECEPTORS PAIRS                   | 24  | 0.44172894 | 1.2698822 | 0.20268333 | 0.30748004 | 0.998 | 2950 | tags=64%, lat=25%, sph=49% |
| SD | REACTOME | SIGNALING BY RHO GTPASES MRG, GTPASES AND RHOBTS                              | 453 | 0.30589023 | 1.2663268 | 0.20121191 | 0.30775422 | 0.998 | 3700 | tags=64%, lat=23%, sph=49% |
| SD | REACTOME | DNA DOUBLE STRAND BREAK REPAIR                                                | 41  | 0.45818725 | 1.2635553 | 0.17831273 | 0.30781523 | 0.998 | 3700 | tags=64%, lat=23%, sph=49% |
| SD | REACTOME | NOTCH2 ACTIVATION AND TRANSMISSION OF SIGNAL TO THE NUCLEUS                   | 19  | 0.45818725 | 1.2635553 | 0.20382166 | 0.30908887 | 0.998 | 2531 | tags=65%, lat=21%, sph=46% |
| SD | REACTOME | PERK REGULATES GENE EXPRESSION                                                | 22  | 0.43100274 | 1.2607995 | 0.21541502 | 0.31020465 | 0.998 | 2761 | tags=48%, lat=23%, sph=42% |
| SD | REACTOME | ADP SIGNALING THROUGH ZYV PUNCTORIP 12                                        | 25  | 0.45525197 | 1.2608611 | 0.20268333 | 0.31020465 | 0.998 | 2900 | tags=60%, lat=20%, sph=47% |
| SD | REACTOME | ACTIVATION OF GENE EXPRESSION BY SREBF SREBP                                  | 25  | 0.4598083  | 1.2584117 | 0.22088953 | 0.31090565 | 0.998 | 2900 | tags=65%, lat=34%, sph=49% |
| SD | REACTOME | INTERLEUKIN 37 SIGNALING                                                      | 41  | 0.4417947  | 1.257138  | 0.19096590 | 0.31120935 | 0.998 | 2482 | tags=65%, lat=21%, sph=48% |
| SD | REACTOME | CDP MEDIATED ANTIGENIC TRANSPORT                                              | 65  | 0.33802862 | 1.2568589 | 0.17746538 | 0.31124454 | 0.998 | 3188 | tags=46%, lat=16%, sph=43% |
| SD | REACTOME | INTERLEUKIN 3 INTERLEUKIN 5 AND GM-CSF SIGNALING                              | 31  | 0.46731174 | 1.2534688 | 0.28971688 | 0.31484433 | 0.998 | 2900 | tags=60%, lat=20%, sph=47% |
| SD | REACTOME | INTRACELLULAR GOLGI AND RETROGRADE GOLGI TO ER TRAFFIC                        | 124 | 0.3018455  | 1.2473068 | 0.1734104  | 0.31497113 | 0.999 | 2261 | tags=35%, lat=19%, sph=42% |
| SD | REACTOME | RHOQ GTPASE CYCLE                                                             | 38  | 0.42276682 | 1.2476276 | 0.2307618  | 0.31540737 | 0.999 | 2842 | tags=60%, lat=22%, sph=47% |
| SD | REACTOME | CRICKMAN CLOCK                                                                | 41  | 0.42933503 | 1.2458682 | 0.23282142 | 0.31540737 | 0.999 | 3786 | tags=60%, lat=22%, sph=47% |
| SD | REACTOME | RHOJ GTPASE CYCLE                                                             | 32  | 0.43575332 | 1.2472026 | 0.28977688 | 0.31615864 | 0.999 | 2553 | tags=64%, lat=21%, sph=47% |
| SD | REACTOME | SIGNALING BY SCF KIT                                                          | 33  | 0.44216877 | 1.2440375 | 0.28123232 | 0.31629413 | 0.999 | 2794 | tags=65%, lat=23%, sph=47% |
| SD | REACTOME | DNA DAMAGE TELOMERE STRESS INDUCED SENSENCE                                   | 64  | 0.4198181  | 1.2451111 | 0.24511111 | 0.31652621 | 0.999 | 3950 | tags=65%, lat=23%, sph=47% |
| SD | REACTOME | PLATELET ACTIVATION SIGNALING AND AGGREGATION                                 | 188 | 0.3548197  | 1.2478577 | 0.28254583 | 0.31885707 | 0.999 | 2818 | tags=49%, lat=24%, sph=48% |
| SD | REACTOME | VEGF2 MEDIATED VASCULAR PERMEABILITY                                          | 17  | 0.43421066 | 1.2511388 | 0.21836739 | 0.31701845 | 0.999 | 1788 | tags=47%, lat=15%, sph=40% |
| SD | REACTOME | ONCOGENIC MARK SIGNALING                                                      | 64  | 0.37510288 | 1.2461818 | 0.24618181 | 0.31729049 | 0.999 | 2168 | tags=50%, lat=19%, sph=43% |
| SD | REACTOME | SELENOAMINO ACID METABOLISM                                                   | 60  | 0.50120238 | 1.2479429 | 0.33655708 | 0.31760338 | 0.999 | 2171 | tags=65%, lat=19%, sph=47% |
| SD | REACTOME | SIGNALING BY KIT IN DISEASE                                                   | 16  | 0.4716057  | 1.2491513 | 0.22312373 | 0.31784668 | 0.999 | 2123 | tags=50%, lat=23%, sph=45% |
| SD | REACTOME | NRH3 NRH2 REGULATE GENE EXPRESSION LINKED TO CHOLESTEROL TRANSPORT AND EFFLUX | 21  | 0.47054395 | 1.2498418 | 0.2854743  | 0.31814528 | 0.998 | 2537 | tags=57%, lat=21%, sph=47% |
| SD | REACTOME | ERCC8 CSB AND EHM2 GSA POSITIVELY REGULATED RNA EXPRESSION                    | 49  | 0.44948412 | 1.2394274 | 0.23868877 | 0.32116244 | 0.998 | 2900 | tags=61%, lat=34%, sph=49% |
| SD | REACTOME | SIGNALING BY FGFR IN DISEASE                                                  | 48  | 0.31810874 | 1.2379657 | 0.13097712 | 0.32135192 | 0.998 | 2223 | tags=50%, lat=19%, sph=43% |
| SD | REACTOME | INTERCONVERSION OF FOLATE D1 AND TRIPHOSPHATES                                | 64  | 0.43882962 | 1.2363036 | 0.18486173 | 0.32142304 | 0.998 | 2900 | tags=60%, lat=20%, sph=47% |
| SD | REACTOME | ESTROGEN DEPENDENT GENE EXPRESSION                                            | 99  | 0.3768874  | 1.2367968 | 0.208      | 0.32194018 | 0.998 | 3950 | tags=59%, lat=34%, sph=49% |
| SD | REACTOME | SIGNALING BY NOTCH1                                                           | 50  | 0.4034768  | 1.2360277 | 0.23277044 | 0.3219761  | 0.998 | 2804 | tags=62%, lat=24%, sph=48% |
| SD | REACTOME | SIGNALING BY NOTCH2                                                           | 41  | 0.41671388 | 1.2348272 | 0.20268333 | 0.32198813 | 0.998 | 2900 | tags=60%, lat=20%, sph=47% |
| SD | REACTOME | HATS ACETYLATE HISTONES                                                       | 73  | 0.4258798  | 1.2322288 | 0.3954321  | 0.32405016 | 0.998 | 3950 | tags=65%, lat=34%, sph=49% |
| SD | REACTOME | SELECTIVE AUTOPHAGY                                                           | 59  | 0.3352123  | 1.2324318 | 0.18486173 | 0.32468102 | 0.998 | 3188 | tags=47%, lat=28%, sph=44% |
| SD | REACTOME | HOMOLOGOUS DNA REPAIR AND STRAND EXCHANGE                                     | 23  | 0.41937688 | 1.2304715 | 0.25995991 | 0.3255199  | 0.998 | 2386 | tags=48%, lat=20%, sph=46% |
| SD | REACTOME | EUKARYOTIC TRANSCRIPTION INITIATION                                           | 25  | 0.42891174 | 1.2286811 | 0.20268333 | 0.32593063 | 0.998 | 3000 | tags=60%, lat=20%, sph=47% |
| SD | REACTOME | REGULATION OF HSP MEDIATED HEAT SHOCK RESPONSE                                | 46  | 0.38718476 | 1.2278823 | 0.20887449 | 0.32684566 | 0.998 | 3000 | tags=48%, lat=25%, sph=47% |
| SD | REACTOME | SIGNALING BY TGF BETA RECEPTOR COMPLEX                                        | 45  | 0.3991098  | 1.2259012 | 0.20201513 | 0.33187488 | 0.999 | 4120 | tags=67%, lat=31%, sph=49% |
| SD | REACTOME | REGULATION OF SIGNALING BY OR                                                 | 21  | 0.41937688 | 1.2222716 | 0.20268333 | 0.33187488 | 0.999 | 3950 | tags=60%, lat=20%, sph=47% |
| SD | REACTOME | ESR MEDIATED SIGNALING                                                        | 141 | 0.33481038 | 1.2211289 | 0.24118812 | 0.3327141  | 0.999 | 3950 |                            |

|    |          |          |                                                                                                 |     |            |            |            |            |   |      |           |           |          |         |
|----|----------|----------|-------------------------------------------------------------------------------------------------|-----|------------|------------|------------|------------|---|------|-----------|-----------|----------|---------|
| SD | REACTOME | REACTOME | ATF4 ACTIVATES GENES IN RESPONSE TO ENDOPLASMIC RETICULUM STRESS                                | 21  | 0.35880099 | 1.0465241  | 0.6029218  | 0.4914855  | - | 2761 | beta=43%, | lat=23%,  | sgn=46%  |         |
| SD | REACTOME | REACTOME | PROTEIN LOCALIZATION                                                                            | 61  | 0.3172911  | 0.9861989  | 0.4830918  | 0.3661989  | - | 2693 | beta=45%, | lat=24%,  | sgn=44%  |         |
| SD | REACTOME | REACTOME | EPHA MEDIATED GROWTH CONE COLLAPSE                                                              | 81  | 0.2951867  | 1.038655   | 0.4178218  | 0.5012685  | - | 281  | beta=37%, | lat=24%,  | sgn=39%  |         |
| SD | REACTOME | REACTOME | SIGNALING BY MODERATE KINASE ACTIVITY BRAF MUTANTS                                              | 20  | 0.3368378  | 1.0383059  | 0.4049092  | 0.502363   | - | 1549 | beta=30%, | lat=18%,  | sgn=44%  |         |
| SD | REACTOME | REACTOME | COPII INDEPENDENT GOLGI TO ER RETROGRADE TRAFFIC                                                | 39  | 0.2596357  | 1.0341433  | 0.4232525  | 0.5051396  | - | 2834 | beta=49%, | lat=28%,  | sgn=43%  |         |
| SD | REACTOME | REACTOME | SIGNALING BY EGFR IN CANCER                                                                     | 21  | 0.3291352  | 1.034175   | 0.4188387  | 0.5026204  | - | 3959 | beta=57%, | lat=33%,  | sgn=48%  |         |
| SD | REACTOME | REACTOME | POLYMERASE SWITCHING ON THE C STRAND OF THE TELOMERE                                            | 15  | 0.3603475  | 1.034473   | 0.4088176  | 0.5059555  | - | 2481 | beta=52%, | lat=24%,  | sgn=47%  |         |
| SD | REACTOME | REACTOME | RHO GTPASE CYCLE                                                                                | 48  | 0.3190704  | 1.032231   | 0.4139243  | 0.5059484  | - | 2813 | beta=54%, | lat=24%,  | sgn=47%  |         |
| SD | REACTOME | REACTOME | ACTIVATION OF THE MRNA UPON BINDING OF THE CAP BINDING COMPLEX AND EIFS AND SUBSE               | 32  | 0.4697172  | 1.025591   | 0.4818477  | 0.5100245  | - | 1    | 2270      | beta=59%, | lat=19%, | sgn=45% |
| SD | REACTOME | REACTOME | QUANT BINDING TO GSS                                                                            | 32  | 0.3345476  | 1.027014   | 0.418      | 0.5100993  | - | 1    | 1550      | beta=59%, | lat=13%, | sgn=49% |
| SD | REACTOME | REACTOME | ACTIVATION OF PRELIFIN AND TRIC CCT IN ACTIN AND TUBULIN FOLDING                                | 19  | 0.3601598  | 1.0262879  | 0.4233008  | 0.5106141  | - | 2055 | beta=57%, | lat=17%,  | sgn=44%  |         |
| SD | REACTOME | REACTOME | TELOMERE C STRAND LAGGING STRAND SYNTHESIS                                                      | 19  | 0.3601598  | 1.0262879  | 0.4233008  | 0.5106141  | - | 2055 | beta=57%, | lat=17%,  | sgn=44%  |         |
| SD | REACTOME | REACTOME | IRE1ALPHA ACTIVATES CHAPERONES                                                                  | 28  | 0.3284889  | 1.022938   | 0.4682587  | 0.5114768  | - | 3813 | beta=59%, | lat=32%,  | sgn=46%  |         |
| SD | REACTOME | REACTOME | TRNA PROCESSING                                                                                 | 41  | 0.3193549  | 1.022411   | 0.4243919  | 0.5125232  | - | 4411 | beta=59%, | lat=37%,  | sgn=49%  |         |
| SD | REACTOME | REACTOME | INTERLEUKIN RECEPTOR SHC SIGNALING                                                              | 21  | 0.3913237  | 1.0186801  | 0.4415325  | 0.5169886  | - | 3852 | beta=67%, | lat=31%,  | sgn=49%  |         |
| SD | REACTOME | REACTOME | INTERLEUKIN 20 FAMILY SIGNALING                                                                 | 19  | 0.3107782  | 1.018945   | 0.43084183 | 0.51756245 | - | 3609 | beta=63%, | lat=30%,  | sgn=49%  |         |
| SD | REACTOME | REACTOME | ACTIVATION OF GRANATE RECEPTORS UPON GLUTAMATE BINDING                                          | 21  | 0.3232313  | 1.0154461  | 0.41888778 | 0.5210887  | - | 290  | beta=19%, | lat=6%,   | sgn=21%  |         |
| SD | REACTOME | REACTOME | PRC2 METHYLATES HISTONES AND DNA                                                                | 47  | 0.3658888  | 1.011003   | 0.4334601  | 0.5253387  | - | 4024 | beta=55%, | lat=34%,  | sgn=43%  |         |
| SD | REACTOME | REACTOME | NEGATIVE REGULATION OF MET ACTIVITY                                                             | 18  | 0.3784641  | 1.0076357  | 0.458      | 0.5289784  | - | 2643 | beta=44%, | lat=22%,  | sgn=47%  |         |
| SD | REACTOME | REACTOME | FORMATION OF THE BETA CATENIN TCF TRANSACTIVATING COMPLEX                                       | 60  | 0.3437273  | 1.004489   | 0.4530383  | 0.5324962  | - | 3990 | beta=52%, | lat=24%,  | sgn=49%  |         |
| SD | REACTOME | REACTOME | PI3K NTR RECEPTOR MEDIATED SIGNALING                                                            | 75  | 0.2951918  | 1.0099044  | 0.4508559  | 0.5418955  | - | 3810 | beta=49%, | lat=16%,  | sgn=44%  |         |
| SD | REACTOME | REACTOME | METABOLISM OF NUCLEOTIDES                                                                       | 54  | 0.2704548  | 0.99143684 | 0.44320897 | 0.5483841  | - | 2775 | beta=35%, | lat=23%,  | sgn=46%  |         |
| SD | REACTOME | REACTOME | NTRH2 AND NTRH3 MEDIATED SIGNALING                                                              | 28  | 0.3372708  | 0.9824488  | 0.47095438 | 0.5598836  | - | 2537 | beta=50%, | lat=21%,  | sgn=45%  |         |
| SD | REACTOME | REACTOME | SIGNALING BY EGFR                                                                               | 39  | 0.2898301  | 0.9789919  | 0.4490292  | 0.564205   | - | 2750 | beta=46%, | lat=25%,  | sgn=49%  |         |
| SD | REACTOME | REACTOME | INTERLEUKIN 4 AND INTERLEUKIN 13 SIGNALING                                                      | 84  | 0.2656475  | 0.971283   | 0.4802096  | 0.5649195  | - | 3207 | beta=59%, | lat=25%,  | sgn=49%  |         |
| SD | REACTOME | REACTOME | ROLE OF PHOSPHOLIPIDS IN PHAGOCYTOSIS                                                           | 16  | 0.388112   | 0.9661288  | 0.4899905  | 0.5727029  | - | 4026 | beta=60%, | lat=34%,  | sgn=51%  |         |
| SD | REACTOME | REACTOME | ACTIVATION OF GRANATE RECEPTORS UPON GLUTAMATE BINDING                                          | 21  | 0.3232313  | 1.0154461  | 0.41888778 | 0.5210887  | - | 290  | beta=19%, | lat=6%,   | sgn=21%  |         |
| SD | REACTOME | REACTOME | REGULATION OF GLUCOKINASE BY GLUCOKINASE REGULATORY PROTEIN                                     | 18  | 0.3346724  | 0.9665252  | 0.4297653  | 0.5788316  | - | 4197 | beta=75%, | lat=36%,  | sgn=47%  |         |
| SD | REACTOME | REACTOME | SIGNALING BY HIPPO                                                                              | 15  | 0.3291162  | 0.9639221  | 0.48985614 | 0.5803747  | - | 1208 | beta=33%, | lat=10%,  | sgn=37%  |         |
| SD | REACTOME | REACTOME | INTRACELLULAR TRANSPORT                                                                         | 31  | 0.2742383  | 0.967494   | 0.515095   | 0.5816815  | - | 2688 | beta=42%, | lat=14%,  | sgn=47%  |         |
| SD | REACTOME | REACTOME | ACTIVATED NOTCH TRANSMITS SIGNAL TO THE NUCLEUS                                                 | 35  | 0.3318299  | 0.961516   | 0.3603176  | 0.5827345  | - | 1861 | beta=49%, | lat=24%,  | sgn=46%  |         |
| SD | REACTOME | REACTOME | EXTRA NUCLEAR ESTROGEN SIGNALING                                                                | 43  | 0.2721898  | 0.9587812  | 0.4846236  | 0.5828045  | - | 2900 | beta=40%, | lat=24%,  | sgn=42%  |         |
| SD | REACTOME | REACTOME | MAPK TARGETS NUCLEAR EVENTS MEDIATED BY MAP KINASES                                             | 19  | 0.3735957  | 0.9594037  | 0.5126854  | 0.5831355  | - | 3637 | beta=53%, | lat=21%,  | sgn=46%  |         |
| SD | REACTOME | REACTOME | G PROTEIN ACTIVATION                                                                            | 31  | 0.3004960  | 0.9562401  | 0.5092916  | 0.5832718  | - | 2900 | beta=47%, | lat=24%,  | sgn=46%  |         |
| SD | REACTOME | REACTOME | MAP2K AND MAPK ACTIVATION                                                                       | 35  | 0.3149537  | 0.9516529  | 0.5096802  | 0.5802678  | - | 3583 | beta=49%, | lat=30%,  | sgn=46%  |         |
| SD | REACTOME | REACTOME | NOTCH3 ACTIVATION AND TRANSMISSION OF SIGNAL TO THE NUCLEUS                                     | 18  | 0.3264751  | 0.9504232  | 0.5089065  | 0.5912852  | - | 2531 | beta=53%, | lat=21%,  | sgn=46%  |         |
| SD | REACTOME | REACTOME | EGFR1 MUTANT RECEPTOR ACTIVATION                                                                | 32  | 0.2998388  | 0.950286   | 0.5085088  | 0.5913248  | - | 2531 | beta=53%, | lat=21%,  | sgn=46%  |         |
| SD | REACTOME | REACTOME | GENE SILENCING BY RNA                                                                           | 89  | 0.2711934  | 0.94843148 | 0.5298285  | 0.5947843  | - | 4342 | beta=61%, | lat=36%,  | sgn=48%  |         |
| SD | REACTOME | REACTOME | RHOV GTPASE CYCLE                                                                               | 19  | 0.3171807  | 0.9480004  | 0.5100804  | 0.5948393  | - | 2258 | beta=42%, | lat=19%,  | sgn=42%  |         |
| SD | REACTOME | REACTOME | CELL DEATH SIGNALING VIA NRAGE NRIF AND NADE                                                    | 32  | 0.2877029  | 0.9469948  | 0.5090878  | 0.5952048  | - | 4057 | beta=59%, | lat=24%,  | sgn=46%  |         |
| SD | REACTOME | REACTOME | SIGNALING BY FGFR3                                                                              | 33  | 0.2584472  | 0.9398359  | 0.5397847  | 0.5973422  | - | 3652 | beta=52%, | lat=31%,  | sgn=44%  |         |
| SD | REACTOME | REACTOME | SIGNALING BY NOTCH3                                                                             | 35  | 0.2943587  | 0.9379878  | 0.5124547  | 0.5971234  | - | 2800 | beta=49%, | lat=24%,  | sgn=43%  |         |
| SD | REACTOME | REACTOME | RHO2 GTPASE CYCLE                                                                               | 22  | 0.2711962  | 0.9417896  | 0.5181377  | 0.59880317 | - | 2417 | beta=45%, | lat=20%,  | sgn=46%  |         |
| SD | REACTOME | REACTOME | ANGIOGENESIS                                                                                    | 83  | 0.2727463  | 0.9388471  | 0.4932984  | 0.5981807  | - | 3691 | beta=54%, | lat=26%,  | sgn=46%  |         |
| SD | REACTOME | REACTOME | RAF INDEPENDENT MAPK3 ACTIVATION                                                                | 16  | 0.3359962  | 0.9406664  | 0.5345529  | 0.5984602  | - | 754  | beta=19%, | lat=6%,   | sgn=26%  |         |
| SD | REACTOME | REACTOME | SIGNALING BY FGFR3 IN DISEASE                                                                   | 33  | 0.2504528  | 0.9398843  | 0.5730943  | 0.588759   | - | 2010 | beta=30%, | lat=17%,  | sgn=36%  |         |
| SD | REACTOME | REACTOME | HCMV EARLY EVENTS                                                                               | 30  | 0.2623169  | 0.9382411  | 0.5243923  | 0.5910924  | - | 429  | beta=19%, | lat=6%,   | sgn=26%  |         |
| SD | REACTOME | REACTOME | DNA METHYLATION                                                                                 | 44  | 0.3324343  | 0.9280414  | 0.524719   | 0.6048131  | - | 2899 | beta=55%, | lat=34%,  | sgn=45%  |         |
| SD | REACTOME | REACTOME | RAC1 GTPASE CYCLE                                                                               | 129 | 0.2378993  | 0.9288873  | 0.5041666  | 0.60514736 | - | 2566 | beta=40%, | lat=22%,  | sgn=41%  |         |
| SD | REACTOME | REACTOME | PIE NOTCH EXPRESSION AND PROCESSING                                                             | 80  | 0.2817291  | 0.9287834  | 0.5047834  | 0.6052048  | - | 3605 | beta=50%, | lat=24%,  | sgn=46%  |         |
| SD | REACTOME | REACTOME | REGULATION OF LIPID METABOLISM BY PPARGALPHA                                                    | 80  | 0.2412323  | 0.9290502  | 0.5448515  | 0.605753   | - | 2800 | beta=35%, | lat=24%,  | sgn=43%  |         |
| SD | REACTOME | REACTOME | RECRUITMENT OF NUMA TO MITOTIC CENTROSOMES                                                      | 55  | 0.2318676  | 0.9296127  | 0.5819048  | 0.60616046 | - | 3637 | beta=49%, | lat=31%,  | sgn=47%  |         |
| SD | REACTOME | REACTOME | MAPK FAMILY SIGNALING PATHWAYS                                                                  | 228 | 0.2030547  | 0.9244982  | 0.5774650  | 0.60753465 | - | 2090 | beta=25%, | lat=17%,  | sgn=36%  |         |
| SD | REACTOME | REACTOME | INSULIN SECRETION AND INACTIVATION                                                              | 12  | 0.3113935  | 0.9232938  | 0.5092916  | 0.6076978  | - | 540  | beta=19%, | lat=6%,   | sgn=26%  |         |
| SD | REACTOME | REACTOME | HDMS DEMETHYLATE HISTONES                                                                       | 30  | 0.3339349  | 0.918347   | 0.55424064 | 0.6130985  | - | 3990 | beta=50%, | lat=34%,  | sgn=45%  |         |
| SD | REACTOME | REACTOME | SIGNALING BY RETINOIC ACID                                                                      | 31  | 0.2881788  | 0.91463107 | 0.5228155  | 0.6178407  | - | 1626 | beta=45%, | lat=21%,  | sgn=49%  |         |
| SD | REACTOME | REACTOME | LEISHMANIA INFECTION                                                                            | 20  | 0.2239243  | 0.9120788  | 0.520212   | 0.6190924  | - | 1678 | beta=30%, | lat=12%,  | sgn=36%  |         |
| SD | REACTOME | REACTOME | NEGATIVE REGULATION OF MAPK PATHWAY                                                             | 31  | 0.2738502  | 0.8971984  | 0.5795454  | 0.6308317  | - | 3637 | beta=42%, | lat=13%,  | sgn=46%  |         |
| SD | REACTOME | REACTOME | G ALPHA 12 SIGNALING EVENTS                                                                     | 64  | 0.2344505  | 0.8968816  | 0.6065217  | 0.639556   | - | 1937 | beta=31%, | lat=17%,  | sgn=37%  |         |
| SD | REACTOME | REACTOME | GLYCOGEN                                                                                        | 44  | 0.2875333  | 0.8954464  | 0.6433746  | 0.6453729  | - | 434  | beta=19%, | lat=6%,   | sgn=26%  |         |
| SD | REACTOME | REACTOME | HSF1 DEPENDENT TRANSCRIPTION                                                                    | 21  | 0.2711953  | 0.888888   | 0.6213389  | 0.6489004  | - | 1983 | beta=33%, | lat=17%,  | sgn=40%  |         |
| SD | REACTOME | REACTOME | CELL CELL EXTRACELLULAR MATRIX INTERACTIONS                                                     | 17  | 0.3142363  | 0.8873329  | 0.6373485  | 0.6489904  | - | 2838 | beta=50%, | lat=24%,  | sgn=47%  |         |
| SD | REACTOME | REACTOME | HEMISTASIS                                                                                      | 423 | 0.2102983  | 0.8858888  | 0.6389268  | 0.6489904  | - | 274  | beta=19%, | lat=6%,   | sgn=26%  |         |
| SD | REACTOME | REACTOME | SIGNALING BY INSULIN RECEPTOR                                                                   | 57  | 0.24167123 | 0.8837109  | 0.6393917  | 0.6520505  | - | 1298 | beta=18%, | lat=11%,  | sgn=39%  |         |
| SD | REACTOME | REACTOME | RHO2 GTPASE CYCLE                                                                               | 45  | 0.2622020  | 0.8788316  | 0.6295938  | 0.6632368  | - | 2181 | beta=53%, | lat=24%,  | sgn=47%  |         |
| SD | REACTOME | REACTOME | PI3K METABOLISM                                                                                 | 51  | 0.2574105  | 0.8744135  | 0.6739147  | 0.6632989  | - | 3959 | beta=59%, | lat=30%,  | sgn=46%  |         |
| SD | REACTOME | REACTOME | SIGNALING TO RAS                                                                                | 32  | 0.2797048  | 0.8702286  | 0.6269538  | 0.6659176  | - | 3459 | beta=50%, | lat=28%,  | sgn=46%  |         |
| SD | REACTOME | REACTOME | BINDING AND UPTAKE OF LIGANDS BY SCAVENGER RECEPTORS                                            | 35  | 0.2597975  | 0.8684006  | 0.6680816  | 0.6709259  | - | 1789 | beta=34%, | lat=15%,  | sgn=38%  |         |
| SD | REACTOME | REACTOME | ACTIVATED_PNK1_STIMULATES_TRANSCRIPTION_OF_AR_ANDROGEN_RECEPTOR_REGULATED_GENES_KLCA2_AND_KLCA3 | 46  | 0.3045143  | 0.8669192  | 0.5884539  | 0.6714086  | - | 3990 | beta=54%, | lat=34%,  | sgn=49%  |         |
| SD | REACTOME | REACTOME | RUNX1_TARGETS_WITH_CO_FACTORS_WHOSE_PRECISE_EFFECT_ON_RUNX1_TARGETS_IS_NOT_KNOWN                | 24  | 0.2969794  | 0.8677825  | 0.6181725  | 0.67146176 | - | 3797 | beta=58%, | lat=32%,  | sgn=46%  |         |
| SD | REACTOME | REACTOME | METABOLISM OF WATER SOLUBLE VITAMINS AND COFACTORS                                              | 21  | 0.2318676  | 0.8652215  | 0.6211865  | 0.6720817  | - | 2900 | beta=30%, | lat=12%,  | sgn=36%  |         |
| SD | REACTOME | REACTOME | PYRUVATE METABOLISM                                                                             | 20  | 0.285623   | 0.8659782  | 0.6560991  | 0.6733043  | - | 2537 | beta=40%, | lat=21%,  | sgn=41%  |         |
| SD | REACTOME | REACTOME | APOPTOTIC CLEAVAGE OF CELLULAR PROTEINS                                                         | 26  | 0.2897883  | 0.8635186  | 0.6392936  | 0.6739447  | - | 2251 | beta=39%, | lat=19%,  | sgn=41%  |         |
| SD | REACTOME | REACTOME | BASIGIN INTERACTIONS                                                                            | 15  | 0.2852907  | 0.8630375  | 0.6491536  |            |   |      |           |           |          |         |

|          |                                                                                          |     |             |             |            |            |       |                              |                              |
|----------|------------------------------------------------------------------------------------------|-----|-------------|-------------|------------|------------|-------|------------------------------|------------------------------|
| Control  | REACTOME PROTEIN PROTEIN INTERACTIONS AT SYNAPSES                                        | 57  | -0.359702   | -1.046484   | 0.4988478  | 0.81471936 | 2957  | base+22%, lat+25%, sphn+50%  |                              |
| Control  | REACTOME MUSCLE CONTRACTION                                                              | 143 | -0.2951045  | -1.0707817  | 0.4768377  | 0.81471936 | 4920  | base+50%, lat+11%, sphn+71%  |                              |
| Control  | REACTOME LIGAND INTERACTIONS                                                             | 91  | -0.2882007  | -1.0594722  | 0.386      | 0.81512713 | 3117  | base+55%, lat+26%, sphn+47%  |                              |
| Control  | REACTOME REGULATION OF BETA CELL DEVELOPMENT                                             | 26  | -0.3508457  | -1.0428138  | 0.407787   | 0.81535876 | 5282  | base+72%, lat+44%, sphn+30%  |                              |
| Control  | REACTOME CA DEPENDENT EVENTS                                                             | 142 | -0.2928971  | -1.0707817  | 0.29162668 | 0.81535876 | 3603  | base+44%, lat+11%, sphn+71%  |                              |
| Control  | REACTOME NEUROTRANSMITTER RECEPTORS AND POSTSYNAPTIC SIGNAL TRANSMISSION                 | 147 | -0.2951503  | -1.0509212  | 0.39992217 | 0.81627554 | 5102  | base+56%, lat+43%, sphn+58%  |                              |
| Control  | REACTOME SYNTHESIS OF LEUKOTRIENES LT AND EXOINS EX                                      | 16  | -0.4130438  | -1.1331208  | 0.2881678  | 0.816888   | 1458  | base+31%, lat+12%, sphn+58%  |                              |
| Control  | REACTOME PLASMA LIPID/PROTEIN REMODELING                                                 | 25  | -0.4009898  | -1.080629   | 0.360776   | 0.817259   | 5787  | base+25%, lat+17%, sphn+55%  |                              |
| SD_repos | REACTOME SIGNALING BY RECEPTOR TYROSINE KINASES                                          | 351 | -0.1664282  | -1.7416943  | 0.61175843 | 0.817259   | 2073  | base+25%, lat+17%, sphn+55%  |                              |
| Control  | REACTOME GLYCEROPHOSPHOLIPID BIOSYNTHESIS                                                | 80  | -0.30054814 | -1.129132   | 0.31657358 | 0.8178711  | 2592  | base+31%, lat+22%, sphn+40%  |                              |
| Control  | REACTOME CELL CELL JUNCTION ORGANIZATION                                                 | 48  | -0.3094785  | -1.1261458  | 0.3457702  | 0.8186883  | 5807  | base+74%, lat+41%, sphn+39%  |                              |
| Control  | REACTOME D GLYCOPOLYMERIZATION OF TERN-DOMAIN CONTAINING PROTEINS                        | 32  | -0.2525274  | -1.2639832  | 0.19288264 | 0.8196813  | 4232  | base+59%, lat+38%, sphn+17%  |                              |
| Control  | REACTOME RECEPTOR TYPE TYROSINE KINASE PHOSPHATASES                                      | 16  | -0.4762918  | -1.1171878  | 0.3614851  | 0.81986    | 4175  | base+67%, lat+35%, sphn+103% |                              |
| Control  | REACTOME SENSORY PROCESSING OF SOUND                                                     | 57  | -0.32915818 | -1.1025148  | 0.3451185  | 0.82001734 | 3498  | base+46%, lat+29%, sphn+44%  |                              |
| Control  | REACTOME G ALPHA S SIGNALING EVENTS                                                      | 101 | -0.2723273  | -1.0892692  | 0.48015972 | 0.8202094  | 5427  | base+53%, lat+46%, sphn+16%  |                              |
| SD_repos | REACTOME RHO GTPASES ACTIVATE IQGAPs                                                     | 26  | 0.23794848  | 0.73791075  | 0.7935224  | 0.8212483  | 3098  | base+46%, lat+29%, sphn+24%  |                              |
| Control  | REACTOME ION HOMEOSTASIS                                                                 | 40  | -0.3315454  | -1.1201229  | 0.3313133  | 0.8218817  | 4928  | base+52%, lat+41%, sphn+89%  |                              |
| Control  | REACTOME THE PHOTOTRANSDUCTION CASCADE                                                   | 21  | -0.3039388  | -1.063747   | 0.4165103  | 0.8219534  | 3913  | base+57%, lat+33%, sphn+97%  |                              |
| Control  | REACTOME CYTOSOLIC SULFONATION OF SMALL MOLECULES                                        | 18  | -0.3775298  | -1.090688   | 0.3737575  | 0.82201948 | 4161  | base+56%, lat+39%, sphn+52%  |                              |
| Control  | REACTOME AMINO ACID TRANSPORT ACROSS THE PLASMA MEMBRANE                                 | 18  | -0.4098877  | -1.1344008  | 0.3134563  | 0.8223988  | 4667  | base+51%, lat+35%, sphn+83%  |                              |
| Control  | REACTOME WNT LIGAND BIOGENESIS AND TRAFFICKING                                           | 18  | -0.4134883  | -1.086222   | 0.3982533  | 0.822811   | 2220  | base+42%, lat+19%, sphn+52%  |                              |
| Control  | REACTOME NEPHRIN FAMILY INTERACTIONS                                                     | 17  | -0.3319209  | -1.108906   | 0.3205894  | 0.8246879  | 545   | base+54%, lat+42%, sphn+95%  |                              |
| Control  | REACTOME POTASSIUM CHANNELS                                                              | 77  | -0.3789134  | -1.1921695  | 0.28210115 | 0.8249271  | 4520  | base+65%, lat+41%, sphn+110% |                              |
| Control  | REACTOME CLASS A 1 RHODOPSIN LIKE RECEPTORS                                              | 232 | -0.2537872  | -0.9928748  | 0.5        | 0.8249348  | 5800  | base+44%, lat+49%, sphn+72%  |                              |
| Control  | REACTOME CELL CELL COMMUNICATION                                                         | 99  | -0.2893093  | -1.0839911  | 0.4841092  | 0.8251347  | 3260  | base+58%, lat+42%, sphn+2%   |                              |
| SD_repos | REACTOME FACTORS INVOLVED IN MEGAKARYOCYTE DEVELOPMENT AND PLATELET PRODUCTION           | 102 | -0.1857272  | -1.0731234  | 0.85539716 | 0.8265132  | 2164  | base+27%, lat+18%, sphn+33%  |                              |
| Control  | REACTOME SIALIC ACID METABOLISM                                                          | 22  | -0.3556303  | -1.103482   | 0.34158598 | 0.826781   | 398   | base+19%, lat+3%, sphn+20%   |                              |
| Control  | REACTOME OSEAN ASSOCIATED GLYCOSAMINOGLYCAN METABOLISM                                   | 10  | -0.2928122  | -1.108644   | 0.41559793 | 0.8269887  | 4773  | base+60%, lat+42%, sphn+12%  |                              |
| Control  | REACTOME BLOOD GROUP SYSTEMS BIOSYNTHESIS                                                | 17  | -0.3765853  | -1.0641905  | 0.32060629 | 0.8280453  | 5285  | base+69%, lat+45%, sphn+60%  |                              |
| Control  | REACTOME METABOLISM OF STEROID HORMONES                                                  | 23  | -0.3892172  | -1.110265   | 0.3419483  | 0.8284103  | 5538  | base+70%, lat+47%, sphn+30%  |                              |
| Control  | REACTOME DISSEMBLY OF THE DESTRUCTION COMPLEX AND RECRUITMENT OF AXIN TO THE MEMBRANE    | 21  | -0.3153343  | -1.0811839  | 0.3497153  | 0.829298   | 510   | base+12%, lat+14%, sphn+15%  |                              |
| SD_repos | REACTOME COP DEPENDENT GOLF TO ER RETROGRADE TRAFFIC                                     | 10  | -0.1839485  | -1.073878   | 0.8532929  | 0.829298   | 2164  | base+27%, lat+18%, sphn+33%  |                              |
| Control  | REACTOME KERATAN SULFATE BIOSYNTHESIS                                                    | 23  | -0.3718604  | -1.1349703  | 0.2822495  | 0.8311998  | 1870  | base+48%, lat+38%, sphn+75%  |                              |
| SD_repos | REACTOME ADRENAL NORADRENALINE INHIBITS INSULIN SECRETION                                | 23  | 0.2326128   | 0.726188    | 0.8218884  | 0.8321194  | 1877  | base+26%, lat+14%, sphn+21%  |                              |
| Control  | REACTOME COMMON PATHWAY OF ASPIRIN AND ACETYL SALICYLIC ACID                             | 10  | -0.4206989  | -1.092944   | 0.40118594 | 0.8322915  | 1782  | base+51%, lat+35%, sphn+76%  |                              |
| SD_repos | REACTOME SIGNALING BY TGFβ FAMILY MEMBERS                                                | 65  | 0.191252    | 0.7242367   | 0.851153   | 0.83390146 | 3752  | base+48%, lat+32%, sphn+44%  |                              |
| Control  | REACTOME GPCR LIGAND BINDING                                                             | 323 | -0.27923678 | -1.0738782  | 0.40988238 | 0.83485559 | 5787  | base+27%, lat+17%, sphn+26%  |                              |
| Control  | REACTOME TRANSPORT OF MITOCHONDRIAL NUCLEOSIDES AND RELATED MOLECULES                    | 102 | -0.2331428  | -1.063747   | 0.3982533  | 0.8350307  | 4209  | base+54%, lat+42%, sphn+95%  |                              |
| SD_repos | REACTOME RECYCLING VULVAR OF L1                                                          | 38  | 0.2148732   | 0.718861    | 0.8194175  | 0.8350116  | 3434  | base+42%, lat+29%, sphn+59%  |                              |
| Control  | REACTOME CARDIAC CONDUCTION                                                              | 91  | -0.4206972  | -1.365122   | 0.0998016  | 0.840265   | 0.994 | 4928                         | base+52%, lat+41%, sphn+108% |
| Control  | REACTOME EXTRACELLULAR MATRIX ORGANIZATION                                               | 51  | -0.4043704  | -1.0911202  | 0.3681926  | 0.8409878  | 398   | base+19%, lat+3%, sphn+20%   |                              |
| SD_repos | REACTOME PEPTIDE HORMONE METABOLISM                                                      | 67  | 0.18471758  | 0.71460277  | 0.9254658  | 0.8420342  | 540   | base+10%, lat+1%, sphn+11%   |                              |
| SD_repos | REACTOME SIGNALING BY NTRKs                                                              | 95  | 0.1839073   | 0.7147119   | 0.8391753  | 0.8433783  | 3450  | base+12%, lat+3%, sphn+12%   |                              |
| Control  | REACTOME INTERACTION BETWEEN L1 AND ANKYRINS                                             | 26  | -0.3768275  | -1.486589   | 0.0262198  | 0.8468316  | 0.964 | 4178                         | base+72%, lat+40%, sphn+118% |
| Control  | REACTOME LINEAR SEQUENCE IS REQUIRED FOR GAG SYNTHESIS                                   | 18  | -0.4258481  | -1.0930454  | 0.3982533  | 0.8468316  | 4178  | base+72%, lat+40%, sphn+118% |                              |
| Control  | REACTOME SIGNALING BY NTRK TRK                                                           | 15  | -0.3038278  | -0.9642484  | 0.5048702  | 0.8531938  | 1791  | base+20%, lat+15%, sphn+24%  |                              |
| Control  | REACTOME FERTILIZATION                                                                   | 20  | -0.2517057  | -1.3742004  | 0.17223657 | 0.8572861  | 0.962 | 4667                         | base+60%, lat+39%, sphn+131% |
| Control  | REACTOME G PROTEIN MEDIATED EVENTS                                                       | 34  | -0.2852707  | -1.0654807  | 0.54110897 | 0.8574944  | 3603  | base+60%, lat+39%, sphn+52%  |                              |
| SD_repos | REACTOME_RESOLUTION_OF_D_LOOP_STRUCTURES_THROUGH_SYNTHESIS_DEPENDENT_STRAND_ANNHEALING_S | 17  | 0.2828978   | 0.7009887   | 0.830303   | 0.8573991  | 2386  | base+41%, lat+20%, sphn+41%  |                              |
| SD_repos | REACTOME_RESOLUTION_OF_D_LOOP_STRUCTURES                                                 | 17  | 0.2828978   | 0.7009887   | 0.830303   | 0.8573991  | 2386  | base+41%, lat+20%, sphn+41%  |                              |
| SD_repos | REACTOME_FGF2F2_MUTANT_RECEPTOR_ACTIVATION                                               | 25  | 0.20901139  | 0.6976021   | 0.8522815  | 0.8522815  | 1864  | base+28%, lat+16%, sphn+33%  |                              |
| SD_repos | REACTOME_NOTCH3_INTRACELLULAR_DOMAIN_REGULATES_TRANSCRIPTION                             | 17  | 0.25089162  | 0.6954281   | 0.8388207  | 0.8603446  | 2804  | base+34%, lat+24%, sphn+44%  |                              |
| Control  | REACTOME G LINKED GLYCOSYLATION OF MUCINS                                                | 48  | -0.28817615 | -1.0442888  | 0.5699903  | 0.8609202  | 4729  | base+42%, lat+19%, sphn+52%  |                              |
| Control  | REACTOME SLC TRANSPORTER DISORDERS                                                       | 16  | -0.2664411  | -0.94857106 | 0.5336488  | 0.8629647  | 3927  | base+41%, lat+18%, sphn+52%  |                              |
| Control  | REACTOME PEPTIDE LIGAND BINDING RECEPTORS                                                | 141 | -0.25423378 | -0.939372   | 0.5897446  | 0.86464125 | 5782  | base+47%, lat+49%, sphn+128% |                              |
| Control  | REACTOME FORMATION OF FIBRIN CLOT CLOTTING CASCADE                                       | 28  | -0.3218138  | -1.0529277  | 0.52272725 | 0.868898   | 3752  | base+23%, lat+14%, sphn+26%  |                              |
| Control  | REACTOME KINESINS                                                                        | 82  | -0.2891954  | -1.0469535  | 0.5491974  | 0.8691847  | 4209  | base+54%, lat+42%, sphn+95%  |                              |
| SD_repos | REACTOME_BMAL1_CLOCK_NPAS2_ACTIVATES_CIRCADIAN_DIURNAL_EXPRESSION                        | 16  | 0.24418004  | 0.686786    | 0.8136274  | 0.8694034  | 2685  | base+44%, lat+23%, sphn+44%  |                              |
| Control  | REACTOME HEPARAN SULFATE REPAIRIN HS GAG METABOLISM                                      | 33  | -0.32277004 | -1.0354489  | 0.56711424 | 0.8699276  | 5026  | base+61%, lat+44%, sphn+108% |                              |
| Control  | REACTOME COLLAGEN DEGRADATION                                                            | 10  | -0.4189001  | -1.453111   | 0.1594108  | 0.871713   | 0.976 | 4667                         | base+60%, lat+39%, sphn+131% |
| SD_repos | REACTOME_GLUCCOSE_METABOLISM                                                             | 61  | 0.1737263   | 0.6788586   | 0.8158513  | 0.87907034 | 3267  | base+40%, lat+22%, sphn+41%  |                              |
| Control  | REACTOME FORMATION OF THE CORNIFIED ENVELOPE                                             | 107 | -0.4578317  | -1.3748726  | 0.11456311 | 0.8846609  | 0.992 | 4667                         | base+62%, lat+41%, sphn+120% |
| Control  | REACTOME SPECIFIC MEDIATED CASPASE FORM                                                  | 18  | -0.3191088  | -1.0218038  | 0.4981899  | 0.8868369  | 4181  | base+50%, lat+37%, sphn+76%  |                              |
| Control  | REACTOME CYTOSOLIC P450 ARRANGED BY SUBSTRATE TYPE                                       | 50  | -0.4801837  | -1.4263005  | 0.10392157 | 0.8870387  | 0.986 | 4743                         | base+72%, lat+40%, sphn+119% |
| SD_repos | REACTOME_DARRP_32_EVENTS                                                                 | 18  | 0.21174838  | 0.6877375   | 0.8797585  | 0.8879567  | 3751  | base+50%, lat+32%, sphn+73%  |                              |
| Control  | REACTOME ASSEMBLY OF COLLAGEN FIBRILS AND OTHER MULTIMERIC STRUCTURES                    | 51  | -0.5480204  | -1.484148   | 0.0264247  | 0.8907459  | 0.963 | 3220                         | base+72%, lat+42%, sphn+99%  |
| Control  | REACTOME ECM PROTEOLYTIANS                                                               | 23  | -0.589569   | -1.5110452  | 0.08811245 | 0.8926921  | 0.983 | 3982                         | base+61%, lat+42%, sphn+103% |
| Control  | REACTOME_NG2_SIGNALING_FOR_NEURITE_OUT_GROWTH                                            | 51  | -0.521027   | -1.5235346  | 0.03896564 | 0.8930185  | 0.939 | 3888                         | base+61%, lat+42%, sphn+103% |
| SD_repos | REACTOME_GLUCCAGON_LIKE_PEPTIDE_1_GLI_REGULATES_INSULIN_SECRETION                        | 34  | 0.1888001   | 0.658273    | 0.8926245  | 0.8924246  | 3054  | base+38%, lat+26%, sphn+41%  |                              |
| SD_repos | REACTOME_CHEMOKINE_RECEPTORS_BIND_CHEMOKINES                                             | 10  | -0.1939211  | -0.659892   | 0.8109183  | 0.8924246  | 3054  | base+38%, lat+26%, sphn+41%  |                              |
| Control  | REACTOME SIGNALING BY GPCR                                                               | 479 | -0.2185722  | -0.9143178  | 0.5781893  | 0.8960189  | 5787  | base+59%, lat+48%, sphn+109% |                              |
| Control  | REACTOME_SLC_MEDIATED_TRANSMEMBRANE_TRANSPORT                                            | 156 | -0.3999434  | -1.432627   | 0.09884558 | 0.8981941  | 0.985 | 4181                         | base+54%, lat+35%, sphn+82%  |
| Control  | REACTOME_PHASE_1_FUNCTIONALIZATION_OF_COMPOUNDS                                          | 10  | -0.4233921  | -1.072084   | 0.4981899  | 0.8982083  | 4209  | base+54%, lat+42%, sphn+95%  |                              |
| Control  | REACTOME_MET_PROMOTES_CELL_MOTILITY                                                      | 33  | -0.4783338  | -1.4151419  | 0.28927454 | 0.9035981  | 0.987 | 2924                         | base+58%, lat+42%, sphn+95%  |
| Control  | REACTOME_MET_ACTIVATES_PTFR SIGNALING                                                    | 23  | -0.6339713  | -1.534288   | 0.0349817  | 0.9037394  | 0.933 | 3276                         | base+78%, lat+28%, sphn+108% |
| SD_repos | REACTOME_TRANSCRIPTIONAL_REGULATION_BY_THE_AP_2_TFAP2_FAMILY_OF_TRANSCRIPTION_FACTORS    | 26  | -0.1897131  | 0.6470262   | 0.8562627  | 0.9057459  | 3100  | base+31%, lat+21%, sphn+28%  |                              |
| Control  | REACTOME_NG2_TRANSCRIPTIONAL_REGULATION                                                  | 10  | -0.589569   | -1.490698   | 0.03896564 | 0.9152751  | 0.959 | 3815                         | base+61%, lat+42%, sphn+103% |
| SD_repos | REACTOME_SIGNALING_BY_FGFR4                                                              | 34  | 0.1888217   | 0.6362104   | 0.96661804 | 0.9153878  | 3652  | base+47%, lat+31%, sphn+81%  |                              |
| SD_repos | REACTOME_REPRODUCTION                                                                    | 101 | -0.1852452  | -0.6298415  | 0.8493175  | 0.9201715  | 2465  | base+26%, lat+14%, sphn+21%  |                              |
| SD_repos | REACTOME_CELL_SURFACE_INTERACTIONS_AT_THE_VASCULAR_WALL                                  | 10  | -0.1851129  | -0.6298415  | 0.8493175  | 0.9201715  | 2465  | base+26%, lat+14%, sphn+21%  |                              |
| SD_repos | REACTOME_GABA_B_RECEPTOR_ACTIVATION                                                      | 32  | 0.1988822   | 0.6279573   | 0.93064874 | 0.9204338  | 1314  | base+22%, lat+11%, sphn+25%  |                              |
| SD_repos | REACTOME_GLUCCONDOGENESIS                                                                | 27  | 0.1847618   | 0.623628    | 0.8419129  | 0.9201075  | 2415  | base+23%, lat+14%, sphn+25%  |                              |
| Control  | REACTOME_POTASSIUM_PUMP_ACTIVATION                                                       | 23  | -0.4171904  | -1.438272   | 0.04382624 | 0.9201075  | 3877  | base+58%, lat+42%, sphn+95%  |                              |
| SD_repos | REACTOME_TIE2_SIGNALING                                                                  | 16  | 0.1985307   | 0.6251575   | 0.9264705  | 0.92150176 | 3959  | base+56%, lat+42%, sphn+95%  |                              |
| Control  | REACTOME_PHASE_2_OF_RAPID_DEPOLARISATION                                                 | 21  | -0.3682611  | -1.3951122  | 0.06027581 | 0.928508   | 0.989 | 4181                         | base+78%, lat+35%, sphn+117% |
| Control  | REACTOME_FRS_MEDIATED_FGFR3_SIGNALING                                                    | 18  | -0.3098548  | -0.9920794  | 0.5953307  | 0.9278973  | 4181  | base+50%, lat+37%, sphn+76%  |                              |
| Control  | REACTOME_ACTIVATION_OF_MATRIX_METALLOPROTEINASES                                         | 18  | -0.3072877  | -0.9920794  | 0.5953307  | 0.9278973  | 4181  | base+50%, lat+37%, sphn+76%  |                              |
| Control  | REACTOME_ACYL_CHAIN_REMODELLING_OF_PC                                                    | 21  | -0.5326288  | -1.454643   | 0.03037383 | 0.9282715  | 0.976 | 2924                         | base+58%, lat+42%, sphn+95%  |
| Control  | REACTOME_INTRINSIC_PATHWAY_OF_FIBRIN_CLOT_FORMATION                                      | 16  | -0.30717613 | -0.988478   | 0.7134327  | 0.930621   | 4813  | base+40%, lat+26%, sphn+41%  |                              |
| Control  | REACTOME_NEUROTRANSMITTER_RELEASE_CYCLE                                                  | 18  | -0.2664411  | -0.94857106 | 0.5336488  | 0.930621   | 4813  | base+40%, lat+26%, sphn+41%  |                              |
| SD_repos |                                                                                          |     |             |             |            |            |       |                              |                              |

|          |                                                                                            |      |             |             |             |            |       |      |                               |
|----------|--------------------------------------------------------------------------------------------|------|-------------|-------------|-------------|------------|-------|------|-------------------------------|
| Control  | REACTOME RET SIGNALING                                                                     | 31   | -0.1526922  | -0.4992068  | 0.9940474   | 0.9776892  |       | 4522 | tags=25%, lat=38%, sgnah=27%  |
| Control  | REACTOME ANTI INFLAMMATORY RESPONSE FAVOURING LEISHMANIA PARASITE INFECTION                | 1161 | -0.1831041  | -0.7219261  | 0.9271028   | 0.9766934  |       | 5470 | tags=64%, lat=42%, sgnah=66%  |
| Control  | REACTOME PLATELET CALCIUM HOMEOSTASIS                                                      | 24   | -0.1994022  | -0.6597425  | 0.9330628   | 0.9789148  |       | 3608 | tags=29%, lat=30%, sgnah=2%   |
| SD_repos | REACTOME INITIAL TRIGGERING OF COMPLEMENT                                                  | 16   | -0.1948687  | -0.5045994  | 0.9886441   | 0.9786674  |       | 2051 | tags=31%, lat=17%, sgnah=38%  |
| Control  | REACTOME REGULATION OF INSULIN SECRETION                                                   | 253  | -0.2023132  | -0.7108403  | 0.9011515   | 0.9793214  |       | 3608 | tags=59%, lat=30%, sgnah=2%   |
| Control  | REACTOME METABOLISM OF STEROIDS                                                            | 93   | -0.1586931  | -0.6568218  | 0.9840545   | 0.9795189  |       | 4731 | tags=18%, lat=40%, sgnah=7%   |
| Control  | REACTOME SUMMATION OF INTRACELLULAR RECEPTORS                                              | 20   | -0.2432947  | -0.7351534  | 0.8042284   | 0.9787354  |       | 2921 | tags=35%, lat=25%, sgnah=48%  |
| Control  | REACTOME NUCLEAR SIGNALING BY ERBB4                                                        | 27   | -0.1592884  | -0.4829961  | 0.981013    | 0.9797894  |       | 4741 | tags=43%, lat=48%, sgnah=7%   |
| Control  | REACTOME COLLAGEN FORMATION                                                                | 751  | -0.2028924  | -1.5382124  | 0.6308810   | 0.9797776  | 0.929 | 3388 | tags=69%, lat=38%, sgnah=89%  |
| Control  | REACTOME INOSITOL PHOSPHATE METABOLISM                                                     | 23   | -0.1789543  | -0.5024966  | 0.980665    | 0.9807319  |       | 2834 | tags=22%, lat=24%, sgnah=28%  |
| Control  | REACTOME ADIAPORIN MEDIATED TRANSPORT                                                      | 40   | -0.2195935  | -0.7376203  | 0.8586131   | 0.9807384  |       | 3607 | tags=40%, lat=31%, sgnah=57%  |
| Control  | REACTOME IRS MEDIATED SIGNALING                                                            | 35   | -0.2126877  | -0.747626   | 0.8491286   | 0.9811734  |       | 3733 | tags=54%, lat=48%, sgnah=104% |
| Control  | REACTOME DOWNSTREAM SIGNALING OF ACTIVATED FGFR4                                           | 22   | -0.2171456  | -0.7232925  | 0.8565965   | 0.9820468  |       | 4188 | tags=41%, lat=35%, sgnah=43%  |
| Control  | REACTOME DOWNSTREAM SIGNALING OF ACTIVATED FGFR2                                           | 23   | -0.151818   | -0.5098062  | 0.9911895   | 0.9820811  |       | 5733 | tags=52%, lat=48%, sgnah=100% |
| Control  | REACTOME GLUCOSE METABOLISM                                                                | 17   | -0.2871026  | -0.7403903  | 0.7894737   | 0.9822997  |       | 298  | tags=12%, lat=2%, sgnah=1%    |
| Control  | REACTOME RND3 GTPASE CYCLE                                                                 | 23   | -0.2258677  | -0.7428181  | 0.8307383   | 0.9833471  |       | 2626 | tags=30%, lat=21%, sgnah=39%  |
| Control  | REACTOME METABOLISM OF LIPIDS                                                              | 465  | -0.1932005  | -0.6354904  | 0.9829549   | 0.9840295  |       | 3187 | tags=24%, lat=27%, sgnah=31%  |
| SD_repos | REACTOME PLATELET AGGREGATION PLUS FORMATION                                               | 28   | -0.1573533  | -0.4864366  | 0.9837385   | 0.9844566  |       | 3448 | tags=49%, lat=29%, sgnah=53%  |
| Control  | REACTOME PI_3K CASCADE FGFR3                                                               | 15   | -0.1758618  | -0.5130006  | 0.9887057   | 0.9849574  |       | 5733 | tags=60%, lat=48%, sgnah=116% |
| Control  | REACTOME GLUTATHIONE CONJUGATION                                                           | 23   | -0.2227072  | -0.6200568  | 0.878       | 0.9860731  |       | 1878 | tags=22%, lat=18%, sgnah=25%  |
| Control  | REACTOME SIGNALING BY WNT IN CANCER                                                        | 63   | -0.2123986  | -0.744016   | 0.8151751   | 0.9863740  |       | 210  | tags=6%, lat=2%, sgnah=9%     |
| Control  | REACTOME RUNX REGULATES BONE DEVELOPMENT                                                   | 17   | -0.1910294  | -0.5564156  | 0.9710425   | 0.9873849  |       | 657  | tags=53%, lat=7%, sgnah=99%   |
| Control  | REACTOME OPIOID SIGNALING                                                                  | 23   | -0.1981086  | -0.5258955  | 0.9628063   | 0.9875184  |       | 2195 | tags=17%, lat=18%, sgnah=21%  |
| Control  | REACTOME DEFENSES                                                                          | 18   | -0.1987624  | -0.5407407  | 0.9842209   | 0.9884296  |       | 3974 | tags=38%, lat=33%, sgnah=56%  |
| Control  | REACTOME MYOGENESIS                                                                        | 20   | -0.1792561  | -0.5199316  | 0.9800941   | 0.9884346  |       | 1401 | tags=15%, lat=12%, sgnah=17%  |
| Control  | REACTOME PI_3K CASCADE FGFR1                                                               | 18   | -0.2078213  | -0.6388316  | 0.9373777   | 0.9884693  |       | 5733 | tags=61%, lat=48%, sgnah=118% |
| Control  | REACTOME TRANSCRIPTIONAL REGULATION OF PLURIPOTENT STEM CELLS                              | 21   | -0.1884328  | -0.5471983  | 0.9596929   | 0.9888895  |       | 5908 | tags=62%, lat=60%, sgnah=123% |
| Control  | REACTOME VASOPRESSIN REGULATES RENAL WATER HOMEOSTASIS VIA ADIAPORINS                      | 32   | -0.1873492  | -0.6219911  | 0.9555556   | 0.9891157  |       | 3908 | tags=59%, lat=30%, sgnah=54%  |
| Control  | REACTOME ACTIVATION OF AMPK DOWNSTREAM OF NIDARS                                           | 23   | -0.2264241  | -0.7255184  | 0.8650794   | 0.9895697  |       | 4147 | tags=35%, lat=35%, sgnah=53%  |
| SD_repos | REACTOME COMPLEMENT CASCADE                                                                | 42   | -0.1478172  | -0.4651844  | 0.9979038   | 0.9895659  |       | 2227 | tags=26%, lat=19%, sgnah=32%  |
| Control  | REACTOME PLATELET HOMEOSTASIS                                                              | 65   | -0.1438165  | -0.556433   | 0.9669316   | 0.9896979  |       | 3711 | tags=29%, lat=31%, sgnah=42%  |
| Control  | REACTOME NEGATIVE REGULATION OF FGFR4 SIGNALING                                            | 26   | -0.1624857  | -0.5268916  | 0.9940336   | 0.9913463  |       | 4188 | tags=52%, lat=35%, sgnah=3%   |
| Control  | REACTOME SIGNALING BY ERBB4                                                                | 47   | -0.1718126  | -0.6389124  | 0.9536178   | 0.9922129  |       | 4791 | tags=40%, lat=40%, sgnah=7%   |
| Control  | REACTOME SHC MEDIATED CASCADE FGFR3                                                        | 18   | -0.210881   | -0.6121292  | 0.9476744   | 0.9932955  |       | 5733 | tags=46%, lat=46%, sgnah=108% |
| Control  | REACTOME FATTY ACYL COA BIOSYNTHESIS                                                       | 21   | -0.1878707  | -0.5807814  | 0.9778153   | 0.9936865  |       | 660  | tags=10%, lat=9%, sgnah=10%   |
| Control  | REACTOME DECTIN 2 FAMILY                                                                   | 20   | -0.2186555  | -0.6732035  | 0.9324324   | 0.9938285  |       | 4352 | tags=55%, lat=37%, sgnah=7%   |
| Control  | REACTOME METABOLISM OF CARBOHYDRATES                                                       | 190  | -0.14027813 | -0.665757   | 0.9943715   | 0.9947114  |       | 3922 | tags=28%, lat=33%, sgnah=42%  |
| SD_repos | REACTOME NEGATIVE REGULATION OF FGFR2 SIGNALING                                            | 27   | -0.1138016  | -0.3984273  | 1           | 0.9958876  |       | 3178 | tags=37%, lat=27%, sgnah=50%  |
| Control  | REACTOME NGF STIMULATED TRANSCRIPTION                                                      | 23   | -0.1225868  | -0.3789972  | 1           | 0.9959150  |       | 4929 | tags=35%, lat=41%, sgnah=59%  |
| SD_repos | REACTOME SIGNALING BY FGFR1                                                                | 40   | -0.1037776  | -0.4089385  | 1           | 0.9960473  |       | 3652 | tags=40%, lat=31%, sgnah=58%  |
| SD_repos | REACTOME DOWNSTREAM SIGNALING OF ACTIVATED FGFR3                                           | 20   | -0.11466775 | -0.37550703 | 1           | 0.9960968  |       | 8114 | tags=65%, lat=77%, sgnah=105% |
| Control  | REACTOME GLUCAGON TYPE II LIGAND RECEPTORS                                                 | 27   | -0.1678208  | -0.5633508  | 0.9844689   | 0.9964999  |       | 5121 | tags=56%, lat=43%, sgnah=9%   |
| Control  | REACTOME FRS MEDIATED FGFR3 SIGNALING                                                      | 18   | -0.1889058  | -0.6750585  | 0.95047817  | 0.996768   |       | 5733 | tags=58%, lat=48%, sgnah=108% |
| SD_repos | REACTOME INTERLEUKIN 7 SIGNALING                                                           | 21   | -0.14386122 | -0.4097496  | 0.99382716  | 0.99759847 |       | 3932 | tags=52%, lat=42%, sgnah=52%  |
| Control  | REACTOME DOWNSTREAM SIGNALING OF ACTIVATED FGFR1                                           | 26   | -0.17051076 | -0.5862084  | 0.9746985   | 0.9978997  |       | 5733 | tags=52%, lat=48%, sgnah=100% |
| SD_repos | REACTOME NEGATIVE REGULATION OF FGFR1 SIGNALING                                            | 28   | -0.12088181 | -0.4201204  | 1           | 0.9978543  |       | 4493 | tags=53%, lat=71%, sgnah=54%  |
| Control  | REACTOME LAMININ INTERACTIONS                                                              | 22   | -0.6957384  | -1.6165849  | 0.00388484  | 1          | 0.824 | 2924 | tags=91%, lat=25%, sgnah=120% |
| Control  | REACTOME COLLAGEN CHAIN TRIMERIZATION                                                      | 36   | -0.6521195  | -1.5478622  | 0.00782716  | 1          | 0.62  | 3905 | tags=84%, lat=28%, sgnah=11%  |
| Control  | REACTOME COLLAGEN BIOSYNTHESIS AND MODIFYING ENZYMES                                       | 57   | -0.6043854  | -1.6602789  | 0.00633912  | 1          | 0.746 | 3388 | tags=77%, lat=28%, sgnah=107% |
| Control  | REACTOME CROSSLINKING OF COLLAGEN FIBRILS                                                  | 16   | -0.69527876 | -1.5559423  | 0.013871875 | 1          | 0.912 | 2371 | tags=81%, lat=20%, sgnah=101% |
| Control  | REACTOME ANCHORING FIBRIL FORMATION                                                        | 15   | -0.7388273  | -1.5451447  | 0.01388963  | 1          | 0.923 | 1973 | tags=87%, lat=17%, sgnah=104% |
| Control  | REACTOME NON INTERGRIN MEMBRANE ECM INTERACTIONS                                           | 43   | -0.5803943  | -1.6038915  | 0.015748031 | 1          | 0.830 | 3008 | tags=70%, lat=25%, sgnah=93%  |
| Control  | REACTOME CREB1 PHOSPHORYLATION THROUGH NMDA RECEPTOR MEDIATED ACTIVATION OF_RAS SIGNALIN G | 17   | -0.5201948  | -1.5650743  | 0.022545038 | 1          | 0.902 | 2427 | tags=44%, lat=20%, sgnah=56%  |
| Control  | REACTOME ACYL CHAIN REMODELLING OF PS                                                      | 18   | -0.5930706  | -1.5657176  | 0.02415095  | 1          | 0.901 | 2008 | tags=59%, lat=17%, sgnah=11%  |
| Control  | REACTOME INSULIN RECEPTOR SIGNALING CASCADE                                                | 40   | -0.16784872 | -0.5845652  | 0.9506614   | 1          | 1     | 3805 | tags=30%, lat=32%, sgnah=44%  |
| Control  | REACTOME CYCLIN A B1 B2 ASSOCIATED EVENTS DURING G2 M TRANSITION                           | 18   | -0.18618906 | -0.5788668  | 0.96070725  | 1          | 1     | 3843 | tags=52%, lat=32%, sgnah=59%  |
| Control  | REACTOME NEGATIVE REGULATION OF THE PKC ACT NETWORK                                        | 80   | -0.15427681 | -0.58799461 | 0.9627916   | 1          | 1     | 4188 | tags=53%, lat=35%, sgnah=50%  |



Supplemental Table 8. Gene Set Enrichment Analysis (GSEA) of differentially expressed transcripts from the SJD-Ro- whole blood RNA-seq analysis

| Phenotype | NAME                                                                                        | ES  | NES        | NOM.p.val | FDR.q.val   | FWER.p.val  | RANK.AT.MAX | LEADING EDGE |                                 |
|-----------|---------------------------------------------------------------------------------------------|-----|------------|-----------|-------------|-------------|-------------|--------------|---------------------------------|
| SD_rnaseq | REACTOME SUMOYLATION OF RNA BINDING PROTEINS                                                | 28  | 0.7537581  | 2.0651712 | 0           | 0.012791058 | 0.011       | 2179         | tags=62%, list=18%, signal=100% |
| SD_rnaseq | REACTOME TRANSPORT OF MATURE TRANSCRIPT TO CYTOPLASM                                        | 52  | 0.6555228  | 1.9277171 | 0           | 0.017838688 | 0.109       | 2179         | tags=58%, list=18%, signal=70%  |
| SD_rnaseq | REACTOME NUCLEAR IMPORT OF REV PROTEIN                                                      | 20  | 0.8043506  | 1.9319474 | 0           | 0.018262228 | 0.103       | 2179         | tags=66%, list=18%, signal=104% |
| SD_rnaseq | REACTOME NUCLEAR PORE COMPLEX NPC DISASSEMBLY                                               | 21  | 0.78374213 | 1.9210924 | 0           | 0.019129344 | 0.101       | 2179         | tags=72%, list=19%, signal=92%  |
| SD_rnaseq | REACTOME SUMOYLATION OF SUMOYLATION PROTEINS                                                | 21  | 0.75374213 | 1.9210924 | 0           | 0.019478228 | 0.121       | 2179         | tags=81%, list=18%, signal=96%  |
| SD_rnaseq | REACTOME VIRAL MESSENGER RNA SYNTHESIS                                                      | 31  | 0.74216115 | 1.9371595 | 0           | 0.020820517 | 0.099       | 2181         | tags=71%, list=18%, signal=87%  |
| SD_rnaseq | REACTOME NUCLEAR ENVELOPE BREAKDOWN                                                         | 32  | 0.8566103  | 1.910649  | 0.001915709 | 0.020972744 | 0.145       | 2288         | tags=86%, list=19%, signal=81%  |
| SD_rnaseq | REACTOME TRANSPORT OF THE SLBP DEPENDANT MATURE MRNA                                        | 19  | 0.7272344  | 1.9653181 | 0           | 0.021970922 | 0.074       | 2179         | tags=74%, list=18%, signal=90%  |
| SD_rnaseq | REACTOME SUMOYLATION OF UBIQUITYLATION PROTEINS                                             | 28  | 0.781793   | 1.9112205 | 0           | 0.02222867  | 0.144       | 2179         | tags=90%, list=18%, signal=96%  |
| SD_rnaseq | REACTOME SUMOYLATION OF DNA DAMAGE RESPONSE AND REPAIR PROTEINS                             | 25  | 0.7706097  | 1.9391209 | 0           | 0.022589332 | 0.098       | 2179         | tags=70%, list=18%, signal=83%  |
| SD_rnaseq | REACTOME EXPORT OF VIRAL RIBONUCLEOPROTEINS FROM NUCLEUS                                    | 19  | 0.8206914  | 1.947305  | 0           | 0.023050187 | 0.087       | 2179         | tags=84%, list=18%, signal=103% |
| SD_rnaseq | REACTOME SNRNP ASSEMBLY                                                                     | 33  | 0.76448435 | 1.9592749 | 0           | 0.023563994 | 0.071       | 2249         | tags=70%, list=19%, signal=86%  |
| SD_rnaseq | REACTOME INTERACTIONS OF REV WITH HOST CELLULAR PROTEINS                                    | 21  | 0.8029845  | 1.9658072 | 0           | 0.023557094 | 0.068       | 2179         | tags=81%, list=18%, signal=96%  |
| SD_rnaseq | REACTOME TRANSPORT OF MATURE MRNAS DERIVED FROM INTRONLESS TRANSCRIPTS                      | 23  | 0.7440968  | 1.9954293 | 0           | 0.023397853 | 0.043       | 2179         | tags=78%, list=18%, signal=96%  |
| SD_rnaseq | REACTOME SUMOYLATION OF DNA DAMAGE RESPONSE AND REPAIR PROTEINS                             | 25  | 0.7552447  | 1.9671415 | 0           | 0.023714287 | 0.056       | 2443         | tags=80%, list=21%, signal=100% |
| SD_rnaseq | REACTOME HIV LIFE CYCLE                                                                     | 102 | 0.6200198  | 1.8648587 | 0.001984127 | 0.023557096 | 0.225       | 2231         | tags=58%, list=19%, signal=71%  |
| SD_rnaseq | REACTOME SIGNALING BY THE B CELL RECEPTOR BCR                                               | 85  | 0.6742884  | 1.8431555 | 0           | 0.049413138 | 0.273       | 2897         | tags=75%, list=24%, signal=99%  |
| SD_rnaseq | REACTOME FC EPSILON RECEPTOR FCERI SIGNALING                                                | 95  | 0.8509627  | 1.8359752 | 0           | 0.0522304   | 0.293       | 2845         | tags=75%, list=24%, signal=97%  |
| SD_rnaseq | REACTOME HIV INFECTION                                                                      | 168 | 0.6183444  | 1.8269226 | 0.002016129 | 0.054150432 | 0.31        | 2278         | tags=58%, list=19%, signal=71%  |
| SD_rnaseq | REACTOME RHOBTB1 GTPASE CYCLE                                                               | 18  | 0.7954028  | 1.9203132 | 0           | 0.057800226 | 0.326       | 1721         | tags=72%, list=14%, signal=84%  |
| SD_rnaseq | REACTOME INTERACTIONS OF VPR WITH HOST CELLULAR PROTEINS                                    | 21  | 0.72033745 | 1.7834563 | 0           | 0.060273133 | 0.416       | 2598         | tags=76%, list=22%, signal=90%  |
| SD_rnaseq | REACTOME E3 UBIQUITIN LIGASES UBIQUITINATE TARGET PROTEINS                                  | 37  | 0.6166225  | 1.7808703 | 0.005813954 | 0.0603682   | 0.421       | 1576         | tags=43%, list=3%, signal=50%   |
| SD_rnaseq | REACTOME CLEC7A DECTIN 1 SIGNALING                                                          | 75  | 0.63722605 | 1.7850564 | 0           | 0.06204013  | 0.416       | 2845         | tags=72%, list=24%, signal=94%  |
| SD_rnaseq | REACTOME HOST INTERACTIONS OF HIV FACTORS                                                   | 92  | 0.69942967 | 1.8117738 | 0           | 0.061442387 | 0.347       | 2278         | tags=65%, list=19%, signal=77%  |
| SD_rnaseq | REACTOME TOR SIGNALING                                                                      | 88  | 0.8375114  | 1.7723242 | 0.002282389 | 0.06158846  | 0.341       | 2845         | tags=72%, list=24%, signal=97%  |
| SD_rnaseq | REACTOME PROCESSING OF CAPPED INTRON CONTAINING PRE MRNA                                    | 184 | 0.6222805  | 1.7850783 | 0.003837008 | 0.063055504 | 0.416       | 2267         | tags=60%, list=19%, signal=73%  |
| SD_rnaseq | REACTOME FORMATION OF TC NER PRE INCRON COMPLEX                                             | 39  | 0.6829076  | 1.7869862 | 0.003831416 | 0.0644317   | 0.414       | 2471         | tags=62%, list=21%, signal=77%  |
| SD_rnaseq | REACTOME DEGRADATION OF AMIN                                                                | 43  | 0.70257735 | 1.7177434 | 0.006024006 | 0.064532414 | 0.608       | 1259         | tags=58%, list=11%, signal=65%  |
| SD_rnaseq | REACTOME TRANSCRIPTIONAL REGULATION BY VENTX                                                | 23  | 0.6292632  | 1.801892  | 0           | 0.064954325 | 0.377       | 3001         | tags=58%, list=25%, signal=110% |
| SD_rnaseq | REACTOME DEGRADATION OF DNA                                                                 | 44  | 0.68512834 | 1.7085959 | 0.009183285 | 0.06496973  | 0.639       | 1259         | tags=59%, list=11%, signal=68%  |
| SD_rnaseq | REACTOME DEFECTIVE OFTR CAUSES CYSTIC FIBROSIS                                              | 47  | 0.6841305  | 1.707809  | 0.008045516 | 0.065088294 | 0.638       | 1259         | tags=60%, list=11%, signal=68%  |
| SD_rnaseq | REACTOME TRANSCRIPTIONAL REGULATION BY RUNX3                                                | 67  | 0.5874234  | 1.7181443 | 0           | 0.06532636  | 0.608       | 1486         | tags=49%, list=12%, signal=56%  |
| SD_rnaseq | REACTOME HDDEGHOGLIGAND BIOGENESIS                                                          | 51  | 0.60253924 | 1.7081951 | 0.013888889 | 0.06567858  | 0.634       | 1259         | tags=53%, list=11%, signal=59%  |
| SD_rnaseq | REACTOME ASYMMETRIC LOCALIZATION OF PCP PROTEINS                                            | 45  | 0.63631207 | 1.688186  | 0.015988604 | 0.06572817  | 0.658       | 1259         | tags=53%, list=11%, signal=59%  |
| SD_rnaseq | REACTOME CELLULAR RESPONSE TO HYPOXIA                                                       | 57  | 0.6805858  | 1.6928313 | 0.0119288   | 0.06594652  | 0.656       | 1266         | tags=53%, list=11%, signal=59%  |
| SD_rnaseq | REACTOME M PHASE                                                                            | 250 | 0.47861698 | 1.6544468 | 0.00591716  | 0.06603394  | 0.658       | 2293         | tags=46%, list=19%, signal=58%  |
| SD_rnaseq | REACTOME FCERI MEDIATED NF KB ACTIVATION                                                    | 60  | 0.6746649  | 1.7867447 | 0           | 0.066212796 | 0.414       | 1604         | tags=55%, list=13%, signal=63%  |
| SD_rnaseq | REACTOME AUF1 HNRNP D0 BINDS AND DESTABILIZES MRNA                                          | 43  | 0.721876   | 1.7181973 | 0.002024292 | 0.066305436 | 0.608       | 1486         | tags=60%, list=12%, signal=74%  |
| SD_rnaseq | REACTOME CELLULAR RESPONSE TO CHEMICAL STRESS                                               | 119 | 0.57305044 | 1.7123785 | 0.007936508 | 0.0663326   | 0.618       | 1802         | tags=54%, list=15%, signal=63%  |
| SD_rnaseq | REACTOME TRANSCRIPTIONAL REGULATION BY TP53                                                 | 220 | 0.46732967 | 1.7032455 | 0.02016129  | 0.06640645  | 0.847       | 3153         | tags=47%, list=20%, signal=60%  |
| SD_rnaseq | REACTOME MITOTIC PROPHASE                                                                   | 78  | 0.571621   | 1.7082204 | 0.00342426  | 0.06641717  | 0.634       | 2858         | tags=51%, list=22%, signal=68%  |
| SD_rnaseq | REACTOME MITOTIC METAPHASE AND ANAPHASE                                                     | 148 | 0.49023697 | 1.6995102 | 0.009765525 | 0.06667954  | 0.655       | 2898         | tags=51%, list=19%, signal=62%  |
| SD_rnaseq | REACTOME FORMATION OF THE EARLY ELONGATION COMPLEX                                          | 22  | 0.67422616 | 1.6826892 | 0.017857144 | 0.066687375 | 0.701       | 2181         | tags=56%, list=18%, signal=72%  |
| SD_rnaseq | REACTOME TRANSCRIPTION OF THE HIV GENOME                                                    | 53  | 0.61170274 | 1.7106849 | 0.007952286 | 0.06671851  | 0.623       | 2181         | tags=57%, list=18%, signal=69%  |
| SD_rnaseq | REACTOME ASSEMBLY OF THE PRE REPLICATIVE COMPLEX                                            | 49  | 0.62351966 | 1.6855211 | 0.013944224 | 0.06675498  | 0.689       | 1259         | tags=49%, list=11%, signal=56%  |
| SD_rnaseq | REACTOME INFLUENZA INFECTION                                                                | 107 | 0.7019156  | 1.7190171 | 0.026848154 | 0.06677404  | 0.603       | 2359         | tags=64%, list=15%, signal=65%  |
| SD_rnaseq | REACTOME NS1 MEDIATED EFFECTS ON HOST PATHWAYS                                              | 28  | 0.63184613 | 1.7204009 | 0.01127907  | 0.06696955  | 0.601       | 2179         | tags=58%, list=18%, signal=70%  |
| SD_rnaseq | REACTOME CROSS PRESENTATION OF SOLUBLE EXOGENOUS ANTIGENS ENDOSOMES                         | 40  | 0.68520695 | 1.6885218 | 0.019762846 | 0.066718416 | 0.688       | 1570         | tags=46%, list=13%, signal=53%  |
| SD_rnaseq | REACTOME REGULATION OF RUNX2 EXPRESSION AND ACTIVITY                                        | 54  | 0.62872505 | 1.7125249 | 0.006036217 | 0.067228876 | 0.617       | 1486         | tags=56%, list=12%, signal=75%  |
| SD_rnaseq | REACTOME RHOBTB2 GTPASE CYCLE                                                               | 18  | 0.7212562  | 1.7886204 | 0.005976056 | 0.06725977  | 0.459       | 1811         | tags=60%, list=13%, signal=70%  |
| SD_rnaseq | REACTOME SUMOYLATION                                                                        | 116 | 0.49083658 | 1.678588  | 0.00813954  | 0.06730936  | 0.715       | 2656         | tags=52%, list=22%, signal=72%  |
| SD_rnaseq | REACTOME INTERLEUKIN 1 SIGNALING                                                            | 78  | 0.5834237  | 1.6826789 | 0.023904383 | 0.06738206  | 0.701       | 2814         | tags=55%, list=24%, signal=77%  |
| SD_rnaseq | REACTOME ORC1 REMOVAL FROM CHROMATIN                                                        | 49  | 0.6533226  | 1.6795436 | 0.016032064 | 0.06738842  | 0.712       | 1259         | tags=53%, list=11%, signal=59%  |
| SD_rnaseq | REACTOME RHOBTB2 GTPASE CYCLE                                                               | 26  | 0.7519978  | 1.8016173 | 0.002012072 | 0.06738907  | 0.376       | 1721         | tags=80%, list=14%, signal=81%  |
| SD_rnaseq | REACTOME NEGATIVE REGULATION OF NOTCH4 SIGNALING                                            | 43  | 0.7315568  | 1.7084949 | 0.0023252   | 0.06739547  | 0.633       | 1259         | tags=60%, list=11%, signal=73%  |
| SD_rnaseq | REACTOME DECTIN 1 MEDIATED NONCANONICAL NF KB SIGNALING                                     | 58  | 0.6826198  | 1.6785824 | 0.009183285 | 0.06740642  | 0.655       | 1259         | tags=54%, list=11%, signal=66%  |
| SD_rnaseq | REACTOME METABOLISM OF POLYAMINES                                                           | 42  | 0.66898707 | 1.6744357 | 0.018022388 | 0.06760887  | 0.723       | 1724         | tags=60%, list=14%, signal=76%  |
| SD_rnaseq | REACTOME NUCLEOTIDE EXCISION REPAIR                                                         | 76  | 0.61179435 | 1.7207999 | 0.013806706 | 0.06763709  | 0.6         | 2471         | tags=54%, list=21%, signal=68%  |
| SD_rnaseq | REACTOME TRANSCRIPTION COUPLED NUCLEOTIDE EXCISION REPAIR TC NER                            | 55  | 0.61860035 | 1.6873322 | 0.01984127  | 0.06765547  | 0.683       | 2471         | tags=56%, list=21%, signal=67%  |
| SD_rnaseq | REACTOME CYCLIN A CDK2 ASSOCIATED EVENTS AT S PHASE ENTRY                                   | 53  | 0.6348796  | 1.6862786 | 0.015748031 | 0.06767166  | 0.685       | 2814         | tags=74%, list=24%, signal=96%  |
| SD_rnaseq | REACTOME SUMOYLATION OF TRANSCRIPTION COFACTORS                                             | 21  | 0.7019156  | 1.7190171 | 0.017409123 | 0.06771388  | 0.722       | 2155         | tags=70%, list=12%, signal=86%  |
| SD_rnaseq | REACTOME TLOMERE C STRAND LAGGING STRAND SYNTHESIS                                          | 21  | 0.6305577  | 1.6759506 | 0.024856587 | 0.06779712  | 0.721       | 1822         | tags=41%, list=15%, signal=50%  |
| SD_rnaseq | REACTOME PROTEIN UBIQUITINATION                                                             | 50  | 0.5584837  | 1.6916084 | 0.011811024 | 0.0678767   | 0.674       | 1576         | tags=38%, list=13%, signal=44%  |
| SD_rnaseq | REACTOME APC_C_CDH1_MEDIATED_DEGRADATION_OF_CDC20_AND_OTHER_APC_C_CDH1_TARGETED_PROTEIN     | 51  | 0.65402893 | 1.6768597 | 0.01622718  | 0.06789012  | 0.72        | 2814         | tags=78%, list=24%, signal=102% |
| SD_rnaseq | NS IN LATE MITOSIS EARLY G1                                                                 | 21  | 0.7865527  | 1.7033407 | 0.01156093  | 0.06789887  | 0.653       | 2832         | tags=81%, list=24%, signal=106% |
| SD_rnaseq | REACTOME NGLYCAN TRIMMING IN THE ER AND CALNEXIN CALRETICULIN CYCLE                         | 58  | 0.63275114 | 1.7223242 | 0.009183285 | 0.06793737  | 1.384       | 2179         | tags=67%, list=18%, signal=80%  |
| SD_rnaseq | REACTOME HIV TRANSCRIPTION ELONGATION                                                       | 30  | 0.640994   | 1.6796455 | 0.015748031 | 0.06799254  | 0.711       | 2181         | tags=57%, list=18%, signal=69%  |
| SD_rnaseq | REACTOME_GENE_AND_PROTEIN_EXPRESSION_BY_JAK_STAT_SIGNALING_AFTER_INTERLEUKIN_12_STIMULATION | 30  | 0.6786667  | 1.6879482 | 0.003944773 | 0.06800304  | 0.683       | 1666         | tags=67%, list=14%, signal=77%  |
| SD_rnaseq | REACTOME ANTIGEN PROCESSING CROSS PRESENTATION                                              | 82  | 0.6165843  | 1.692611  | 0.023520597 | 0.068044364 | 0.671       | 1570         | tags=51%, list=13%, signal=59%  |
| SD_rnaseq | REACTOME DEADENYLATION OF MRNA                                                              | 19  | 0.6434915  | 1.6785824 | 0.0124376   | 0.06810504  | 0.599       | 2748         | tags=60%, list=23%, signal=96%  |
| SD_rnaseq | REACTOME MICRORNA MIRNA BIOGENESIS                                                          | 19  | 0.7292146  | 1.7899697 | 0.01949318  | 0.06812168  | 0.402       | 2067         | tags=74%, list=23%, signal=96%  |
| SD_rnaseq | REACTOME DEADENYLATION DEPENDENT MRNA DECAY                                                 | 36  | 0.6505915  | 1.6931679 | 0.012302029 | 0.06846533  | 0.668       | 3082         | tags=67%, list=26%, signal=90%  |
| SD_rnaseq | REACTOME DOWNSTREAM SIGNALING EVENTS OF B CELL RECEPTOR BCR                                 | 63  | 0.6794686  | 1.7550217 | 0           | 0.06849451  | 0.493       | 2897         | tags=60%, list=24%, signal=102% |
| SD_rnaseq | REACTOME G1 S DNA DAMAGE CHECKPOINTS                                                        | 49  | 0.6289498  | 1.6721296 | 0.01852578  | 0.06850069  | 0.73        | 1637         | tags=57%, list=14%, signal=66%  |
| SD_rnaseq | REACTOME DEGRADATION OF GII1 BY THE PROTEASOMES                                             | 52  | 0.6826318  | 1.6959272 | 0.00691826  | 0.06850973  | 0.65        | 1486         | tags=58%, list=12%, signal=66%  |
| SD_rnaseq | REACTOME DEGRADATION OF BETA CATEININ BY THE DESTRUCTION COMPLEX                            | 64  | 0.6885036  | 1.7888983 | 0.004080816 | 0.06854554  | 0.414       | 2814         | tags=70%, list=24%, signal=92%  |
| SD_rnaseq | REACTOME STABILIZATION OF P53                                                               | 44  | 0.6984511  | 1.7218939 | 0.004056795 | 0.06901956  | 0.598       | 1637         | tags=61%, list=14%, signal=71%  |
| SD_rnaseq | REACTOME CYTOTOXICITY BY HMOK1                                                              | 91  | 0.6457778  | 1.7495831 | 0           | 0.06903933  | 0.511       | 2723         | tags=76%, list=23%, signal=98%  |
| SD_rnaseq | REACTOME MRNA CAPPING                                                                       | 20  | 0.6930654  | 1.6887398 | 0.013916501 | 0.06913936  | 0.68        | 2181         | tags=60%, list=18%, signal=79%  |
| SD_rnaseq | REACTOME REGULATION OF GLUCOCORTICOID BY GLUCOKINASE REGULATORY PROTEIN                     | 18  | 0.654111   | 1.745091  | 0.00782028  | 0.06915213  | 0.529       | 2179         | tags=74%, list=18%, signal=86%  |
| SD_rnaseq | REACTOME PTEN REGULATION                                                                    | 99  | 0.551287   | 1.7556915 | 0.01984127  | 0.06933989  | 0.492       | 2814         | tags=68%, list=24%, signal=86%  |
| SD_rnaseq | REACTOME REGULATION OF CHOLESTEROL BIOSYNTHESIS BY SREBP SREBF                              | 30  | 0.6335933  | 1.7221475 | 0.00389836  | 0.0700927   | 0.597       | 2819         | tags=61                         |

|         |                                                                                                                 |     |            |           |             |             |       |      |                                |
|---------|-----------------------------------------------------------------------------------------------------------------|-----|------------|-----------|-------------|-------------|-------|------|--------------------------------|
| SD_omeg | REACTOME S PHASE                                                                                                | 98  | 0.5361922  | 1.62534   | 0.032       | 0.08273249  | 0.82  | 2723 | laga=63%, lft=23%, signal=61%  |
| SD_omeg | REACTOME RNA POLYMERASE II TRANSCRIPTION TERMINATION                                                            | 46  | 0.5780824  | 1.62883   | 0.02362012  | 0.08776662  | 0.816 | 1841 | laga=59%, lft=23%, signal=61%  |
| SD_omeg | REACTOME CYTOSOLIC SENSORS OF PATHOGEN ASSOCIATED DNA                                                           | 43  | 0.5664423  | 1.6277124 | 0.03054898  | 0.08274563  | 0.816 | 3452 | laga=72%, lft=29%, signal=101% |
| SD_omeg | REACTOME REGULATION OF TP53 EXPRESSION AND DEGRADATION                                                          | 22  | 0.5468701  | 1.6269408 | 0.02739726  | 0.08275795  | 0.816 | 3891 | laga=68%, lft=33%, signal=101% |
| SD_omeg | REACTOME FORMATION OF INCP53 COMPLEX IN GG NER                                                                  | 26  | 0.6818388  | 1.623537  | 0.05333335  | 0.08278136  | 0.825 | 2612 | laga=82%, lft=22%, signal=79%  |
| SD_omeg | REACTOME CELL CYCLE                                                                                             | 416 | 0.4230263  | 1.6198796 | 0.011627907 | 0.08292162  | 0.83  | 2293 | laga=43%, lft=19%, signal=52%  |
| SD_omeg | REACTOME REGULATION OF TP53 ACTIVITY THROUGH ACETYLATION                                                        | 20  | 0.6626286  | 1.6172347 | 0.03219383  | 0.08292308  | 0.837 | 3067 | laga=75%, lft=26%, signal=101% |
| SD_omeg | REACTOME PD1 SIGNALING                                                                                          | 15  | 0.6209208  | 1.6152208 | 0.03092975  | 0.08292925  | 0.837 | 2153 | laga=67%, lft=19%, signal=80%  |
| SD_omeg | REACTOME SEPARATION OF SISTER CHROMATIDS                                                                        | 121 | 0.466135   | 1.6173002 | 0.02766794  | 0.083491    | 0.837 | 2256 | laga=50%, lft=19%, signal=61%  |
| SD_omeg | REACTOME ABC TRANSPORTER DISORDERS                                                                              | 58  | 0.5023709  | 1.6153194 | 0.05098033  | 0.08355684  | 0.841 | 1259 | laga=45%, lft=11%, signal=50%  |
| SD_omeg | REACTOME CELLULAR RESPONSE TO HEAT STRESS                                                                       | 64  | 0.48472437 | 1.6178994 | 0.009823183 | 0.08386033  | 0.837 | 2659 | laga=61%, lft=22%, signal=78%  |
| SD_omeg | REACTOME ACTIVATION OF GENE EXPRESSION BY SREBF SREBP                                                           | 22  | 0.61962526 | 1.6111181 | 0.015779933 | 0.08388228  | 0.844 | 2819 | laga=68%, lft=24%, signal=86%  |
| SD_omeg | REACTOME ABORTIVE ELONGATION OF HIV 1 TRANSCRIPT IN THE ABSENCE OF TAT                                          | 18  | 0.6718344  | 1.6119171 | 0.04534302  | 0.08433234  | 0.846 | 3032 | laga=67%, lft=25%, signal=89%  |
| SD_omeg | REACTOME DNA REPLICATION PRE INITIATION                                                                         | 60  | 0.5543436  | 1.6122996 | 0.037544006 | 0.0846138   | 0.846 | 1259 | laga=45%, lft=11%, signal=50%  |
| SD_omeg | REACTOME RESPIRATORY ELECTRON TRANSPORT                                                                         | 57  | 0.7302784  | 1.6089323 | 0.029411765 | 0.08607392  | 0.849 | 1786 | laga=61%, lft=15%, signal=72%  |
| SD_omeg | REACTOME RNA POLYMERASE I TRANSCRIPTION INITIATION                                                              | 28  | 0.6232422  | 1.6060212 | 0.03929273  | 0.08769569  | 0.857 | 2748 | laga=57%, lft=23%, signal=74%  |
| SD_omeg | REACTOME EXTENSION OF TOLEMERS                                                                                  | 28  | 0.5242691  | 1.6035585 | 0.04833558  | 0.08781914  | 0.861 | 2636 | laga=48%, lft=22%, signal=59%  |
| SD_omeg | REACTOME PROGRAMMED CELL DEATH                                                                                  | 17  | 0.7151896  | 1.6041464 | 0.03333335  | 0.08793956  | 0.861 | 1887 | laga=57%, lft=17%, signal=65%  |
| SD_omeg | REACTOME GLOBAL GENOME NUCLEOTIDE EXCISION REPAIR GG_NER                                                        | 54  | 0.57830515 | 1.604944  | 0.04892368  | 0.087921016 | 0.861 | 3166 | laga=57%, lft=27%, signal=75%  |
| SD_omeg | REACTOME REGULATION OF TP53 ACTIVITY                                                                            | 102 | 0.4523712  | 1.6006899 | 0.016194332 | 0.08979871  | 0.87  | 3153 | laga=56%, lft=26%, signal=75%  |
| SD_omeg | REACTOME RHO GTPASES ACTIVATE WASPS AND WAVES                                                                   | 29  | 0.64257884 | 1.5870916 | 0.05888224  | 0.0903158   | 0.886 | 2801 | laga=70%, lft=24%, signal=103% |
| SD_omeg | REACTOME ACTIVATION OF THE_MRNA_UPON_BINDING_OF_THE_CAP_BINDING_COMPLEX_AND_EIFS_AND_SUEB SEQUENT BINDING TO 4S | 40  | 0.7198987  | 1.5872732 | 0.06395349  | 0.090571025 | 0.886 | 1584 | laga=50%, lft=31%, signal=57%  |
| SD_omeg | REACTOME CELL CYCLE MITOTIC                                                                                     | 324 | 0.42749093 | 1.5886611 | 0.015810277 | 0.09089569  | 0.886 | 2293 | laga=43%, lft=19%, signal=52%  |
| SD_omeg | REACTOME PURINERGIC SIGNALING IN LEISHMANIASIS INFECTION                                                        | 18  | 0.6770263  | 1.581521  | 0.0513834   | 0.10121408  | 0.89  | 1987 | laga=67%, lft=17%, signal=80%  |
| SD_omeg | REACTOME MITOCHONDRIAL BIOGENESIS                                                                               | 61  | 0.5067859  | 1.5822101 | 0.019267824 | 0.1013088   | 0.89  | 1321 | laga=36%, lft=11%, signal=40%  |
| SD_omeg | REACTOME CHROMATIN MODIFYING ENZYMES                                                                            | 164 | 0.4796518  | 1.5800734 | 0.040935673 | 0.10189125  | 0.894 | 3417 | laga=59%, lft=29%, signal=82%  |
| SD_omeg | REACTOME PROGRAMMED CELL DEATH                                                                                  | 17  | 0.6485718  | 1.5777013 | 0.03333335  | 0.1020053   | 0.896 | 2859 | laga=61%, lft=24%, signal=79%  |
| SD_omeg | REACTOME IRE1ALPHA ACTIVATES CHAPERONES                                                                         | 30  | 0.5591094  | 1.5785518 | 0.04797048  | 0.10192729  | 0.896 | 2484 | laga=57%, lft=21%, signal=71%  |
| SD_omeg | REACTOME COMPLEX I BIOGENESIS                                                                                   | 34  | 0.7143078  | 1.5792941 | 0.05212355  | 0.10200009  | 0.894 | 1445 | laga=53%, lft=12%, signal=60%  |
| SD_omeg | REACTOME TRANS GOLGI NETWORK VESICLE BUDDING                                                                    | 51  | 0.53316563 | 1.5740741 | 0.05490196  | 0.10473392  | 0.903 | 2387 | laga=57%, lft=20%, signal=71%  |
| SD_omeg | REACTOME CELL CYCLE CHECKPOINTS                                                                                 | 177 | 0.44812754 | 1.5730269 | 0.035433073 | 0.10507967  | 0.905 | 3226 | laga=56%, lft=27%, signal=76%  |
| SD_omeg | REACTOME NOTCH1 INTRACELLULAR DOMAIN REGULATES TRANSCRIPTION                                                    | 27  | 0.59893125 | 1.5689838 | 0.040935673 | 0.1058662   | 0.906 | 3037 | laga=74%, lft=26%, signal=99%  |
| SD_omeg | REACTOME G2 M CHECKPOINT                                                                                        | 17  | 0.6424678  | 1.5682008 | 0.04942002  | 0.10575161  | 0.906 | 2878 | laga=60%, lft=20%, signal=72%  |
| SD_omeg | REACTOME RIPK1 MEDIATED REGULATED NECROSIS                                                                      | 17  | 0.66689925 | 1.5655428 | 0.06185567  | 0.10905896  | 0.91  | 2899 | laga=59%, lft=24%, signal=78%  |
| SD_omeg | REACTOME TRANSLATION                                                                                            | 196 | 0.64400333 | 1.5645431 | 0.03155889  | 0.11003175  | 0.913 | 2799 | laga=60%, lft=24%, signal=77%  |
| SD_omeg | REACTOME RUNX1 REGULATES TRANSCRIPTION OF GENES INVOLVED IN DIFFERENTIATION OF HSCS                             | 81  | 0.5138024  | 1.5635126 | 0.04158416  | 0.11013695  | 0.914 | 1259 | laga=33%, lft=11%, signal=37%  |
| SD_omeg | REACTOME ABC FAMILY PROTEINS MEDIATED TRANSPORT                                                                 | 70  | 0.45231512 | 1.55939   | 0.04761935  | 0.11114651  | 0.918 | 1280 | laga=41%, lft=11%, signal=46%  |
| SD_omeg | REACTOME REGULATION OF SMAD2 3 SMAD4 TRANSCRIPTIONAL ACTIVITY                                                   | 10  | 0.64181618 | 1.5592016 | 0.02952012  | 0.11047244  | 0.92  | 1210 | laga=50%, lft=19%, signal=56%  |
| SD_omeg | REACTOME INTERLEUKIN 1 FAMILY SIGNALING                                                                         | 107 | 0.4641933  | 1.5609521 | 0.05367793  | 0.11179138  | 0.916 | 1604 | laga=39%, lft=13%, signal=45%  |
| SD_omeg | REACTOME FCGAMMA RECEPTOR FCGR DEPENDENT PHAGOCYTOSIS                                                           | 67  | 0.460512   | 1.5608078 | 0.08563111  | 0.11194426  | 0.918 | 2459 | laga=60%, lft=21%, signal=82%  |
| SD_omeg | REACTOME GLYCOLYSIS                                                                                             | 44  | 0.48624178 | 1.5552828 | 0.04942966  | 0.11371331  | 0.922 | 2380 | laga=57%, lft=20%, signal=71%  |
| SD_omeg | REACTOME REGULATION OF SIGNALING BY CBL                                                                         | 16  | 0.6488973  | 1.560618  | 0.077889245 | 0.11374855  | 0.921 | 3110 | laga=61%, lft=26%, signal=110% |
| SD_omeg | REACTOME TRANSCRIPTIONAL REGULATION BY RUNX1                                                                    | 119 | 0.4785675  | 1.559394  | 0.037401676 | 0.11424734  | 0.922 | 2878 | laga=59%, lft=24%, signal=79%  |
| SD_omeg | REACTOME TRANSCRIPTIONAL REGULATION BY RUNX1                                                                    | 152 | 0.45392725 | 1.5517138 | 0.017716536 | 0.11537926  | 0.926 | 2814 | laga=56%, lft=12%, signal=65%  |
| SD_omeg | REACTOME REGULATION OF EXPRESSION OF SLTS AND ROBOS                                                             | 123 | 0.59664716 | 1.5438298 | 0.11627907  | 0.12076132  | 0.93  | 1903 | laga=54%, lft=16%, signal=64%  |
| SD_omeg | REACTOME SYNTHESIS OF ACTIVE UBIQUITIN ROLTS OF E1 AND E2 ENZYMES                                               | 19  | 0.5941155  | 1.5439664 | 0.05168886  | 0.121288024 | 0.933 | 3896 | laga=68%, lft=33%, signal=102% |
| SD_omeg | REACTOME GOLGI ASSOCIATED VESICLE BIOGENESIS                                                                    | 39  | 0.54304344 | 1.5441635 | 0.0625      | 0.121775314 | 0.93  | 2657 | laga=64%, lft=24%, signal=84%  |
| SD_omeg | REACTOME DNA REPAIR                                                                                             | 190 | 0.4408987  | 1.5420824 | 0.026956562 | 0.1220046   | 0.932 | 2471 | laga=59%, lft=21%, signal=69%  |
| SD_omeg | REACTOME PROCESSING OF CAPPED INTRONLESS PRE MRNA                                                               | 17  | 0.67098106 | 1.5407314 | 0.07778806  | 0.12295161  | 0.931 | 1116 | laga=41%, lft=16%, signal=47%  |
| SD_omeg | REACTOME REGULATED NECROSIS                                                                                     | 39  | 0.5678243  | 1.5392433 | 0.09090909  | 0.12237233  | 0.936 | 3029 | laga=60%, lft=25%, signal=82%  |
| SD_omeg | REACTOME TP53 REGULATES TRANSCRIPTION OF DNA REPAIR GENES                                                       | 42  | 0.52812505 | 1.5366298 | 0.05858586  | 0.12256323  | 0.938 | 3125 | laga=64%, lft=26%, signal=87%  |
| SD_omeg | REACTOME FLT3 SIGNALING IN DISEASE                                                                              | 20  | 0.6128356  | 1.5373648 | 0.03976143  | 0.12258886  | 0.937 | 1920 | laga=55%, lft=16%, signal=65%  |
| SD_omeg | REACTOME REGULATION OF PLK1 ACTIVITY AT G2 M TRANSITION                                                         | 55  | 0.48284902 | 1.5410056 | 0.047528917 | 0.122809276 | 0.931 | 2345 | laga=74%, lft=20%, signal=92%  |
| SD_omeg | REACTOME MAPK6 MAPK4 SIGNALING                                                                                  | 69  | 0.48427362 | 1.5378104 | 0.04640448  | 0.122920215 | 0.937 | 1486 | laga=46%, lft=12%, signal=53%  |
| SD_omeg | REACTOME DNA DAMAGE BYPASS                                                                                      | 32  | 0.50175214 | 1.5304608 | 0.048       | 0.12562124  | 0.942 | 1650 | laga=41%, lft=14%, signal=47%  |
| SD_omeg | REACTOME RECRUITMENT OF MITOTIC CENTROSOME PROTEINS AND COMPLEXES                                               | 49  | 0.47830522 | 1.5304816 | 0.047169812 | 0.12630028  | 0.942 | 3668 | laga=60%, lft=31%, signal=94%  |
| SD_omeg | REACTOME RNA POLYMERASE III TRANSCRIPTION INITIATION FROM TYPE 3 PROMOTER                                       | 17  | 0.6190339  | 1.5318651 | 0.05232558  | 0.12634742  | 0.942 | 4332 | laga=82%, lft=36%, signal=129% |
| SD_omeg | REACTOME TRANSCRIPTIONAL REGULATION BY RUNX2                                                                    | 83  | 0.42297405 | 1.5306898 | 0.064327486 | 0.12676623  | 0.942 | 1486 | laga=57%, lft=13%, signal=42%  |
| SD_omeg | REACTOME HEDGEHOG ON STATE                                                                                      | 17  | 0.4393982  | 1.5294892 | 0.0529443   | 0.12712239  | 0.946 | 1565 | laga=41%, lft=12%, signal=46%  |
| SD_omeg | REACTOME C TYPE LECTIN RECEPTORS CLR5                                                                           | 104 | 0.43493095 | 1.5241004 | 0.04717132  | 0.12727816  | 0.946 | 2845 | laga=61%, lft=24%, signal=79%  |
| SD_omeg | REACTOME DNA REPLICATION                                                                                        | 82  | 0.5064303  | 1.5231619 | 0.07385229  | 0.1275359   | 0.946 | 1318 | laga=43%, lft=11%, signal=48%  |
| SD_omeg | REACTOME MITOTIC G2 M PHASES                                                                                    | 133 | 0.42961782 | 1.5275627 | 0.037698414 | 0.12767611  | 0.944 | 2723 | laga=50%, lft=23%, signal=64%  |
| SD_omeg | REACTOME UBI SPECIFIC PROCESSING PROTEASES                                                                      | 131 | 0.4409787  | 1.525939  | 0.02834018  | 0.12788035  | 0.945 | 3226 | laga=59%, lft=27%, signal=75%  |
| SD_omeg | REACTOME SIGNALING BY NOTCH                                                                                     | 93  | 0.4403968  | 1.525939  | 0.02834018  | 0.12788035  | 0.945 | 3226 | laga=59%, lft=27%, signal=75%  |
| SD_omeg | REACTOME ESTROGEN DEPENDENT GENE EXPRESSION                                                                     | 89  | 0.4505262  | 1.5252007 | 0.03898355  | 0.12820598  | 0.944 | 2519 | laga=46%, lft=21%, signal=58%  |
| SD_omeg | REACTOME RAB REGULATION OF TRAFFICKING                                                                          | 68  | 0.4707043  | 1.5209878 | 0.04120117  | 0.12879597  | 0.949 | 3658 | laga=75%, lft=31%, signal=108% |
| SD_omeg | REACTOME SIGNALING BY ROBO RECEPTORS                                                                            | 161 | 0.49061793 | 1.5168905 | 0.11992263  | 0.13209708  | 0.954 | 2307 | laga=63%, lft=19%, signal=65%  |
| SD_omeg | REACTOME NONSENSE MEDIATED DECAY NMD                                                                            | 75  | 0.71460897 | 1.5157391 | 0.11        | 0.13254668  | 0.955 | 2269 | laga=59%, lft=19%, signal=68%  |
| SD_omeg | REACTOME RHO GTPASES ACTIVATE ROCKS                                                                             | 15  | 0.61959124 | 1.5111461 | 0.08235294  | 0.13420187  | 0.958 | 1749 | laga=73%, lft=15%, signal=86%  |
| SD_omeg | REACTOME NUCLEOTIDE_BINDING_DOMAIN_LEUCINE_RICH_REPEAT_CONTAINING_RECEPTOR_NLR_SIGNALING_PATHWAYS               | 38  | 0.56748486 | 1.5123435 | 0.070281126 | 0.13442305  | 0.957 | 4196 | laga=60%, lft=35%, signal=126% |
| SD_omeg | REACTOME MYD88 INDEPENDENT TLR4 CASCADE                                                                         | 20  | 0.6896734  | 1.512984  | 0.078277886 | 0.13453677  | 0.957 | 3413 | laga=70%, lft=29%, signal=84%  |
| SD_omeg | REACTOME DAPI2 SIGNALING                                                                                        | 61  | 0.59310615 | 1.5114251 | 0.08665737  | 0.13467701  | 0.958 | 2966 | laga=60%, lft=25%, signal=101% |
| SD_omeg | REACTOME RHO GTPASES ACTIVATE PAKS                                                                              | 16  | 0.59189808 | 1.5089272 | 0.07156673  | 0.13500007  | 0.958 | 1545 | laga=60%, lft=25%, signal=101% |
| SD_omeg | REACTOME EUKARYOTIC TRANSLATION INITIATION                                                                      | 82  | 0.4708831  | 1.5095843 | 0.12109375  | 0.13538134  | 0.958 | 2269 | laga=60%, lft=29%, signal=79%  |
| SD_omeg | REACTOME RAB GEFS EXCHANGE GTP FOR GDP ON RABS                                                                  | 55  | 0.47035837 | 1.5088138 | 0.07855466  | 0.13620065  | 0.959 | 3300 | laga=60%, lft=28%, signal=95%  |
| SD_omeg | REACTOME FLT3 SIGNALING                                                                                         | 23  | 0.62271565 | 1.504883  | 0.107569724 | 0.13729975  | 0.96  | 4347 | laga=91%, lft=37%, signal=144% |
| SD_omeg | REACTOME DISEASES OF MITOTIC CELL CYCLE                                                                         | 18  | 0.5380781  | 1.5016665 | 0.06358381  | 0.13877359  | 0.961 | 2640 | laga=60%, lft=22%, signal=86%  |
| SD_omeg | REACTOME CELLULAR RESPONSE TO STARVATION                                                                        | 90  | 0.6449914  | 1.5018681 | 0.11439842  | 0.13941118  | 0.961 | 1869 | laga=59%, lft=17%, signal=63%  |
| SD_omeg | REACTOME DOX5B F1H1 MEDIATED INDUCTION OF INTERFERON ALPHA BETA                                                 | 48  | 0.5511124  | 1.4989891 | 0.10162601  | 0.14005676  | 0.962 | 3542 | laga=59%, lft=30%, signal=93%  |
| SD_omeg | REACTOME TOLEMERE MAINTENANCE                                                                                   | 65  | 0.4716588  | 1.4988885 | 0.06126482  | 0.14281778  | 0.962 | 4364 | laga=66%, lft=22%, signal=104% |
| SD_omeg | REACTOME SIGNALING BY CSF3 G_CSF                                                                                | 23  | 0.6200601  | 1.490281  | 0.11133201  | 0.1437676   | 0.962 | 2268 | laga=57%, lft=19%, signal=70%  |
| SD_omeg | REACTOME CYCLIN D ASSOCIATED EVENTS IN G1                                                                       | 24  | 0.5032877  | 1.4894444 | 0.05263158  | 0.147524    |       |      |                                |

|         |                                                                                                |     |            |           |            |                   |       |      |                                |
|---------|------------------------------------------------------------------------------------------------|-----|------------|-----------|------------|-------------------|-------|------|--------------------------------|
| SD_rneg | REACTOME_DISEASES_OF_SIGNAL_TRANSDUCTION_BY_GROWTH_FACTOR_RECEPTORS_AND_SECOND_MESSENGERS      | 274 | 0.34454605 | 1.4019377 | 0.10139165 | <b>0.20462326</b> | 0.992 | 2285 | laga=43%, ltr=19%, signal=52%  |
| SD_rneg | REACTOME_ORGANELLE_BIODESIGN_AND_MAINTENANCE                                                   | 175 | 0.34548926 | 1.4022341 | 0.06225681 | <b>0.20494488</b> | 0.992 | 2707 | laga=60%, ltr=23%, signal=57%  |
| SD_rneg | REACTOME_GAP_FILLING_DNA_REPAIR_SYNTHESIS_AND_LIGATION_IN_GG_NER                               | 17  | 0.5523256  | 1.3992169 | 0.13241106 | <b>0.2070706</b>  | 0.993 | 1318 | laga=41%, ltr=11%, signal=46%  |
| SD_rneg | REACTOME_CHROMOSOME_MAINTENANCE                                                                | 80  | 0.4353104  | 1.394019  | 0.11515152 | <b>0.21260788</b> | 0.993 | 2289 | laga=38%, ltr=19%, signal=46%  |
| SD_rneg | REACTOME_TOLL_LIKE_RECEPTOR_9_TLR9_CASCADE                                                     | 60  | 0.4471805  | 1.3885592 | 0.154      | <b>0.21664706</b> | 0.994 | 3413 | laga=58%, ltr=29%, signal=81%  |
| SD_rneg | REACTOME_REGULATION_OF_TP53_ACTIVITY_THROUGH_PHOSPHORYLATION                                   | 59  | 0.4113767  | 1.3873513 | 0.10493827 | <b>0.21726304</b> | 0.994 | 3153 | laga=53%, ltr=26%, signal=71%  |
| SD_rneg | REACTOME_NEGATIVE_REGULATORY_REGULATION_OF_RNA_EXPRESSION                                      | 43  | 0.42372504 | 1.3890523 | 0.11220472 | <b>0.21732104</b> | 0.994 | 4384 | laga=67%, ltr=37%, signal=105% |
| SD_rneg | REACTOME_SARS_COV_2_INFECTION                                                                  | 43  | 0.42372504 | 1.3890523 | 0.1122     | <b>0.21732252</b> | 0.994 | 2855 | laga=49%, ltr=22%, signal=63%  |
| SD_rneg | REACTOME_RAF_ACTIVATION                                                                        | 25  | 0.45664912 | 1.386043  | 0.17137097 | <b>0.21793164</b> | 0.994 | 3413 | laga=60%, ltr=29%, signal=84%  |
| SD_rneg | REACTOME_THE_ROLE_OF_NEF_IN_HIV_1_REPLICATION_AND_DISEASE_PATHOGENESIS                         | 21  | 0.53136104 | 1.3846673 | 0.1484375  | <b>0.21862215</b> | 0.994 | 3393 | laga=67%, ltr=28%, signal=93%  |
| SD_rneg | REACTOME_RNA_POLYMERASE_III_TRANSCRIPTION_INITIATION_FROM_TYPE_1_PROMOTER                      | 19  | 0.5989292  | 1.3826385 | 0.15328646 | <b>0.21933733</b> | 0.994 | 4332 | laga=68%, ltr=36%, signal=107% |
| SD_rneg | REACTOME_REGULATION_OF_P7EN_GENE_TRANSCRIPTION                                                 | 42  | 0.4016933  | 1.3831736 | 0.10117954 | <b>0.21959525</b> | 0.994 | 3334 | laga=64%, ltr=29%, signal=89%  |
| SD_rneg | REACTOME_MITOPHAGY                                                                             | 19  | 0.5307813  | 1.3814857 | 0.13346228 | <b>0.21991771</b> | 0.994 | 3542 | laga=74%, ltr=30%, signal=105% |
| SD_rneg | REACTOME_HDR_THROUGH_SINGLE_STRAND_ANNHEALING_SSA                                              | 24  | 0.46869585 | 1.3790228 | 0.13545817 | <b>0.22194314</b> | 0.994 | 3153 | laga=48%, ltr=26%, signal=62%  |
| SD_rneg | REACTOME_B_WICH_COMPLEX_POSITIVELY_REGULATES_RNA_EXPRESSION                                    | 49  | 0.45218718 | 1.3772953 | 0.1045082  | <b>0.22316284</b> | 0.994 | 4364 | laga=65%, ltr=37%, signal=103% |
| SD_rneg | REACTOME_IRON_UPTAKE_AND_TRANSPORT                                                             | 32  | 0.45388377 | 1.3756508 | 0.15778689 | <b>0.22416777</b> | 0.994 | 1924 | laga=47%, ltr=16%, signal=56%  |
| SD_rneg | REACTOME_INTERFERON_SIGNALING                                                                  | 136 | 0.46544115 | 1.3731471 | 0.18528987 | <b>0.22523238</b> | 0.994 | 2851 | laga=53%, ltr=24%, signal=69%  |
| SD_rneg | REACTOME_NUCLEAR_ENVELOPE_NE_REASSEMBLY                                                        | 45  | 0.37924495 | 1.3722426 | 0.09477756 | <b>0.22589445</b> | 0.994 | 2288 | laga=47%, ltr=19%, signal=56%  |
| SD_rneg | REACTOME_RNA_POLYMERASE_III_TRANSCRIPTION                                                      | 25  | 0.5229533  | 1.373459  | 0.14872708 | <b>0.22592641</b> | 0.994 | 3114 | laga=52%, ltr=26%, signal=70%  |
| SD_rneg | REACTOME_SIGNALING_BY_FLT3_FUSION_PROTEINS                                                     | 16  | 0.5531184  | 1.3713    | 0.14285715 | <b>0.22629742</b> | 0.994 | 1920 | laga=50%, ltr=16%, signal=60%  |
| SD_rneg | REACTOME_CELLULAR_SENESCENCE                                                                   | 109 | 0.3933715  | 1.3704686 | 0.11545988 | <b>0.22645341</b> | 0.994 | 2659 | laga=44%, ltr=22%, signal=56%  |
| SD_rneg | REACTOME_INSULIN_RECEPTOR_RECYCLING                                                            | 16  | 0.5427298  | 1.3693575 | 0.1594203  | <b>0.22726248</b> | 0.996 | 176  | laga=31%, ltr=11%, signal=32%  |
| SD_rneg | REACTOME_REGULATION_OF_TNFR1_SIGNALING                                                         | 19  | 0.5158901  | 1.367384  | 0.12774451 | <b>0.22712398</b> | 0.996 | 3645 | laga=68%, ltr=31%, signal=93%  |
| SD_rneg | REACTOME_DNA_DOUBLE_STRAND_BREAK_REPAIR                                                        | 93  | 0.38429502 | 1.3678806 | 0.1237721  | <b>0.2278388</b>  | 0.995 | 3190 | laga=49%, ltr=27%, signal=63%  |
| SD_rneg | REACTOME_GENE_SILENCING_BY_RNA                                                                 | 80  | 0.37861165 | 1.3645738 | 0.10526316 | <b>0.22791186</b> | 0.995 | 2213 | laga=44%, ltr=19%, signal=53%  |
| SD_rneg | REACTOME_TGF_BETA_DEPENDENT_SIGNALING_IN_RESPONSE_TO_WNT                                       | 148 | 0.34191522 | 1.3681155 | 0.088      | <b>0.22837842</b> | 0.995 | 1783 | laga=32%, ltr=16%, signal=37%  |
| SD_rneg | REACTOME_EUKARYOTIC_TRANSCRIPTION_ELONGATION                                                   | 63  | 0.7057398  | 1.364369  | 0.2149847  | <b>0.22861847</b> | 0.996 | 2289 | laga=63%, ltr=19%, signal=79%  |
| SD_rneg | REACTOME_SIGNALING_BY_PDGFR_IN_CELL_GROWTH                                                     | 17  | 0.5331292  | 1.3657169 | 0.16996987 | <b>0.22879355</b> | 0.996 | 1960 | laga=65%, ltr=16%, signal=77%  |
| SD_rneg | REACTOME_DUAL_INCISION_IN_GG_NER                                                               | 24  | 0.5473689  | 1.3601785 | 0.18145162 | <b>0.23233397</b> | 0.997 | 3166 | laga=63%, ltr=27%, signal=85%  |
| SD_rneg | REACTOME_RNA_POLYMERASE_I_TRANSCRIPTION                                                        | 58  | 0.44307163 | 1.3584138 | 0.125      | <b>0.23373233</b> | 0.997 | 4364 | laga=67%, ltr=37%, signal=106% |
| SD_rneg | REACTOME_PROCESSING_OF_DNA_DOUBLE_STRAND_BREAK_ENDS                                            | 59  | 0.4202735  | 1.3569876 | 0.13414635 | <b>0.2339611</b>  | 0.997 | 3190 | laga=44%, ltr=27%, signal=60%  |
| SD_rneg | REACTOME_LYSOSOME_VESICLE_BIOGENESIS                                                           | 25  | 0.46919118 | 1.3575585 | 0.16230278 | <b>0.23433834</b> | 0.997 | 2113 | laga=52%, ltr=18%, signal=64%  |
| SD_rneg | REACTOME_TGF_ALPHA_RECEPTOR_SIGNALING_ACTIVATES_SMADS                                          | 19  | 0.45619818 | 1.359443  | 0.14448806 | <b>0.23459466</b> | 0.997 | 2113 | laga=52%, ltr=18%, signal=64%  |
| SD_rneg | REACTOME_GLYCOSE_METABOLISM                                                                    | 55  | 0.37040075 | 1.3536733 | 0.125      | <b>0.23579898</b> | 0.997 | 2179 | laga=53%, ltr=18%, signal=64%  |
| SD_rneg | REACTOME_NONHOMOLOGOUS_END_JOINING_NHEJ                                                        | 40  | 0.4651394  | 1.3542281 | 0.12525253 | <b>0.23569433</b> | 0.997 | 4364 | laga=65%, ltr=37%, signal=102% |
| SD_rneg | REACTOME_HSF1_ACTIVATION                                                                       | 18  | 0.4736222  | 1.3513638 | 0.15414259 | <b>0.23657278</b> | 0.997 | 2636 | laga=61%, ltr=16%, signal=78%  |
| SD_rneg | REACTOME_TRANSCRIPTIONAL_ACTIVATION_OF_MITOCHONDRIAL_BIOGENESIS                                | 33  | 0.45766813 | 1.3514805 | 0.14143427 | <b>0.23726238</b> | 0.997 | 3574 | laga=73%, ltr=30%, signal=104% |
| SD_rneg | REACTOME_PLATELET_SENSITIZATION_PATHWAY                                                        | 22  | 0.5143265  | 1.3497491 | 0.1692166  | <b>0.23750474</b> | 0.997 | 3009 | laga=60%, ltr=37%, signal=87%  |
| SD_rneg | REACTOME_ADAPTIVE_IMMUNE_SYSTEM                                                                | 500 | 0.34360048 | 1.3451934 | 0.13855422 | <b>0.24256383</b> | 0.997 | 2872 | laga=42%, ltr=22%, signal=53%  |
| SD_rneg | REACTOME_HOMOLOG_DIRECTED_REPAIR                                                               | 76  | 0.4005965  | 1.3419679 | 0.15294118 | <b>0.24400333</b> | 0.997 | 3190 | laga=49%, ltr=27%, signal=61%  |
| SD_rneg | REACTOME_PYROPTOSIS                                                                            | 22  | 0.49946582 | 1.3422475 | 0.16122448 | <b>0.24450548</b> | 0.997 | 3029 | laga=64%, ltr=25%, signal=85%  |
| SD_rneg | REACTOME_ROLE_OF_PHOSPHOLIPIDS_IN_PHAGOCYTOSIS                                                 | 17  | 0.5224697  | 1.3424597 | 0.14624506 | <b>0.24511577</b> | 0.997 | 2489 | laga=65%, ltr=21%, signal=81%  |
| SD_rneg | REACTOME_RESOLUTION_OF_ABASIC_SITES_BY_LDL                                                     | 15  | 0.5078283  | 1.3391168 | 0.17107943 | <b>0.24670225</b> | 0.997 | 3413 | laga=62%, ltr=29%, signal=103% |
| SD_rneg | REACTOME_RAC2_CYCLE_CYCLE                                                                      | 65  | 0.3818889  | 1.3329356 | 0.18255578 | <b>0.25192866</b> | 0.997 | 2669 | laga=60%, ltr=22%, signal=77%  |
| SD_rneg | REACTOME_ACTIVATION_OF_BH3_ONLY_PROTEINS                                                       | 19  | 0.500054   | 1.3341342 | 0.1423019  | <b>0.25198866</b> | 0.997 | 3925 | laga=84%, ltr=33%, signal=125% |
| SD_rneg | REACTOME_DARRP_32_EVENTS                                                                       | 17  | 0.45405662 | 1.3330741 | 0.1764706  | <b>0.25258198</b> | 0.997 | 3495 | laga=65%, ltr=29%, signal=91%  |
| SD_rneg | REACTOME_SMOOTH_MUSCLE_CONTRACTION                                                             | 25  | 0.47026873 | 1.3317924 | 0.1801164  | <b>0.25260746</b> | 0.997 | 2225 | laga=60%, ltr=19%, signal=74%  |
| SD_rneg | REACTOME_RESOLUTION_OF_ABASIC_SITES_AP_SITES                                                   | 23  | 0.5098965  | 1.3293948 | 0.202      | <b>0.25391415</b> | 0.997 | 3540 | laga=65%, ltr=30%, signal=95%  |
| SD_rneg | REACTOME_COPY_MEDIATED_VESICLE_TRANSPORT                                                       | 49  | 0.39888254 | 1.3290843 | 0.16370809 | <b>0.25408277</b> | 0.997 | 3256 | laga=65%, ltr=31%, signal=96%  |
| SD_rneg | REACTOME_METALLOPROTEASE_DUBS                                                                  | 15  | 0.5116445  | 1.3272457 | 0.12269939 | <b>0.25556985</b> | 0.997 | 2782 | laga=54%, ltr=23%, signal=70%  |
| SD_rneg | REACTOME_SIGNALING_BY_WNT                                                                      | 212 | 0.3149488  | 1.326516  | 0.0990099  | <b>0.25567263</b> | 0.997 | 2684 | laga=41%, ltr=22%, signal=51%  |
| SD_rneg | REACTOME_TRAF6_MEDIATED_NF_KB_ACTIVATION                                                       | 17  | 0.5367893  | 1.3189514 | 0.2019802  | <b>0.26373312</b> | 0.997 | 3320 | laga=65%, ltr=28%, signal=90%  |
| SD_rneg | REACTOME_INHIBITION_OF_DNA_RECOMBINATION_AT_TELOMERE                                           | 32  | 0.4534243  | 1.3172369 | 0.16942106 | <b>0.27050474</b> | 0.997 | 4364 | laga=67%, ltr=37%, signal=106% |
| SD_rneg | REACTOME_INTRINSIC_PATHWAY_FOR_APOPTOSIS                                                       | 32  | 0.42148173 | 1.3102399 | 0.15708812 | <b>0.27167894</b> | 0.997 | 3925 | laga=65%, ltr=31%, signal=96%  |
| SD_rneg | REACTOME_VEGFR2_MEDIATED_VASCULAR_PERMEABILITY                                                 | 16  | 0.50073403 | 1.3061513 | 0.19642857 | <b>0.27237272</b> | 0.997 | 3073 | laga=69%, ltr=26%, signal=92%  |
| SD_rneg | REACTOME_ESR_MEDIATED_SIGNALING                                                                | 132 | 0.34290513 | 1.2984586 | 0.14117648 | <b>0.28626856</b> | 0.997 | 2519 | laga=42%, ltr=12%, signal=52%  |
| SD_rneg | REACTOME_INFECTION_WITH_MYCOBACTERIUM_TUBERCULOSIS                                             | 18  | 0.505532   | 1.2962142 | 0.22357723 | <b>0.2881647</b>  | 0.998 | 2659 | laga=46%, ltr=21%, signal=71%  |
| SD_rneg | REACTOME_LATE_ENDOSOMAL_MICROAUTOPHAGY                                                         | 23  | 0.453212   | 1.2943553 | 0.18774703 | <b>0.28945459</b> | 0.999 | 2035 | laga=43%, ltr=17%, signal=56%  |
| SD_rneg | REACTOME_SIGNALING_BY_HEDGEHOG                                                                 | 50  | 0.3133159  | 1.2918124 | 0.166992   | <b>0.2919241</b>  | 0.999 | 1355 | laga=30%, ltr=15%, signal=40%  |
| SD_rneg | REACTOME_HCMV_LATE_EVENTS                                                                      | 59  | 0.3960898  | 1.2886714 | 0.16699901 | <b>0.29475904</b> | 0.999 | 2449 | laga=43%, ltr=21%, signal=47%  |
| SD_rneg | REACTOME_MEMBRANE_TRAFFICKING                                                                  | 416 | 0.30302575 | 1.2860017 | 0.18875502 | <b>0.2972839</b>  | 0.999 | 2335 | laga=38%, ltr=20%, signal=46%  |
| SD_rneg | REACTOME_CLATHRIN_MEDIATED_ENDOCYTOSIS                                                         | 100 | 0.3418842  | 1.2840492 | 0.19521194 | <b>0.29895374</b> | 0.999 | 2136 | laga=38%, ltr=18%, signal=44%  |
| SD_rneg | REACTOME_RUNX1_REGULATES_GENES_INVOLVED_IN_MEGAKARYOCYTE_DIFFERENTIATION_AND_PLATELET_FUNCTION | 51  | 0.44208985 | 1.280455  | 0.21327968 | <b>0.3005919</b>  | 0.999 | 4364 | laga=71%, ltr=37%, signal=111% |
| SD_rneg | REACTOME_RHOV_GTPASE_CYCLE                                                                     | 23  | 0.43172687 | 1.2796141 | 0.19591837 | <b>0.30071548</b> | 0.999 | 1593 | laga=48%, ltr=13%, signal=55%  |
| SD_rneg | REACTOME_SIGNALING_BY_NOTCH1                                                                   | 47  | 0.4092788  | 1.2810243 | 0.2475442  | <b>0.30082528</b> | 0.999 | 3037 | laga=57%, ltr=26%, signal=77%  |
| SD_rneg | REACTOME_ASSOCIATION_OF_TRIC_CCT_WITH_TARGET_PROTEINS_DURING_BIOSYNTHESIS                      | 27  | 0.3962327  | 1.2810339 | 0.20384616 | <b>0.30182025</b> | 0.999 | 3037 | laga=57%, ltr=26%, signal=77%  |
| SD_rneg | REACTOME_INTRA_GOLGI_TRAFFIC                                                                   | 26  | 0.4170633  | 1.2767198 | 0.17102616 | <b>0.30254137</b> | 0.999 | 4077 | laga=62%, ltr=34%, signal=95%  |
| SD_rneg | REACTOME_RNA_DNA_DNA_DNA_FUSIONS                                                               | 34  | 0.32832398 | 1.2732286 | 0.2037268  | <b>0.30325168</b> | 0.999 | 2278 | laga=59%, ltr=21%, signal=74%  |
| SD_rneg | REACTOME_BASE_EXCISION_REPAIR                                                                  | 94  | 0.41818136 | 1.2714883 | 0.20502012 | <b>0.30581128</b> | 0.999 | 4364 | laga=67%, ltr=37%, signal=105% |
| SD_rneg | REACTOME_HDR_THROUGH_HOMOLOGOUS_RECOMBINATION_HRR                                              | 36  | 0.40823174 | 1.2723735 | 0.20808081 | <b>0.30609899</b> | 0.999 | 2091 | laga=38%, ltr=18%, signal=44%  |
| SD_rneg | REACTOME_TP53_REGULATES_TRANSCRIPTION_OF_CELL_DEATH_GENES                                      | 24  | 0.4124008  | 1.2717384 | 0.19681908 | <b>0.30616555</b> | 0.999 | 1625 | laga=33%, ltr=14%, signal=39%  |
| SD_rneg | REACTOME_SIGNALING_BY_ERYTHROPOIETIN                                                           | 21  | 0.5195615  | 1.2725909 | 0.25198412 | <b>0.30697134</b> | 0.999 | 3110 | laga=61%, ltr=26%, signal=80%  |
| SD_rneg | REACTOME_ANCHORING_OF_THE_BASAL_BODY_TO_THE_PLASMA_MEMBRANE                                    | 58  | 0.39638852 | 1.2689016 | 0.18235295 | <b>0.30974331</b> | 0.999 | 2845 | laga=60%, ltr=20%, signal=74%  |
| SD_rneg | REACTOME_CYTOKINE_SIGNALING_IN_IMMUNE_SYSTEM                                                   | 488 | 0.33838963 | 1.2694945 | 0.2078079  | <b>0.30985853</b> | 0.999 | 2814 | laga=44%, ltr=19%, signal=56%  |
| SD_rneg | REACTOME_SEMAD_INDUCED_CELL_MIGRATION_AND_GROWTH_CONE_COLLAPSE                                 | 83  | 0.48178692 | 1.26378   | 0.2390327  | <b>0.31176522</b> | 0.999 | 1944 | laga=43%, ltr=16%, signal=49%  |
| SD_rneg | REACTOME_INTERLEUKIN_RECEPTOR_SHC_SIGNALING                                                    | 24  | 0.4759188  | 1.2630249 | 0.23320158 | <b>0.31180438</b> | 0.999 | 2003 | laga=46%, ltr=17%, signal=56%  |
| SD_rneg | REACTOME_AUTOPHAGY                                                                             | 101 | 0.3333385  | 1.263827  | 0.18503937 | <b>0.3126528</b>  | 0.999 | 2750 | laga=44%, ltr=23%, signal=56%  |
| SD_rneg | REACTOME_RESOLUTION_OF_SISTER_CHROMATID_COHESION                                               | 73  | 0.31269982 | 1.2573923 | 0.16389562 | <b>0.31811517</b> | 0.999 | 2126 | laga=37%, ltr=18%, signal=45%  |
| SD_rneg | REACTOME_SIGNALING_BY_BRAF_AND_RAS_FUSIONS                                                     | 48  | 0.3733384  | 1.259445  | 0.2357226  | <b>0.32042393</b> | 0.999 | 1947 | laga=44%, ltr=19%, signal=56%  |
| SD_rneg | REACTOME_OXIDATIVE_STRESS_INDUCED_SENESCENCE                                                   | 62  | 0.39162323 | 1.2531121 | 0.224      | <b>0.3218092</b>  | 0.999 | 4481 | laga=47%, ltr=20%, signal=61%  |
|         |                                                                                                |     |            |           |            |                   |       |      |                                |



|         |          |                                                                                          |     |             |            |             |            |   |      |                                  |
|---------|----------|------------------------------------------------------------------------------------------|-----|-------------|------------|-------------|------------|---|------|----------------------------------|
| SD      | reactome | REACTOME HCMV INFECTION                                                                  | 90  | 0.30874306  | 1.1679173  | 0.23818988  | 0.38152313 | 1 | 2699 | laga=42%, list=23%, signal=54%   |
| SD      | reactome | REACTOME GLYCERIN METABOLISM                                                             | 16  | 0.4276883   | 1.166272   | 0.3121223   | 0.38702124 | 1 | 2301 | laga=50%, list=23%, signal=56%   |
| SD      | reactome | REACTOME CD200 DC SIGN SIGNALING                                                         | 16  | 0.4802219   | 1.161158   | 0.3313253   | 0.388388   | 1 | 2206 | laga=56%, list=19%, signal=56%   |
| SD      | reactome | REACTOME TRANSCRIPTIONAL REGULATION OF WHITE ADIPOCYTE DIFFERENTIATION                   | 59  | 0.3503033   | 1.1602529  | 0.3046875   | 0.3882621  | 1 | 3706 | laga=68%, list=32%, signal=90%   |
| SD      | reactome | REACTOME RHOD GTPASE CYCLE                                                               | 39  | 0.32234962  | 1.1548463  | 0.28710938  | 0.394752   | 1 | 888  | laga=26%, list=8%, signal=28%    |
| SD      | reactome | REACTOME PYRUVATE METABOLISM AND CITRIC ACID TCA CYCLE                                   | 33  | 0.3769119   | 1.1527755  | 0.2985972   | 0.39537513 | 1 | 3433 | laga=61%, list=29%, signal=86%   |
| SD      | reactome | REACTOME SIGNALING BY KIT IN DISEASE                                                     | 15  | 0.46716347  | 1.1535981  | 0.33137256  | 0.39539122 | 1 | 3110 | laga=76%, list=20%, signal=86%   |
| SD      | reactome | REACTOME INTERFERON GAMMA SIGNALING                                                      | 64  | 0.40032088  | 1.1538963  | 0.307778    | 0.39539122 | 1 | 2457 | laga=47%, list=21%, signal=54%   |
| SD      | reactome | REACTOME FGF2 ALTERNATIVE SPLICING                                                       | 22  | 0.4307969   | 1.1478864  | 0.3313492   | 0.39899665 | 1 | 3002 | laga=64%, list=25%, signal=86%   |
| SD      | reactome | REACTOME SIGNALING BY NUCLEAR RECEPTORS                                                  | 176 | 0.27382722  | 1.1482556  | 0.26262626  | 0.39948338 | 1 | 2519 | laga=38%, list=21%, signal=46%   |
| SD      | reactome | REACTOME INTERLEUKIN 37 SIGNALING                                                        | 17  | 0.39608297  | 1.1404088  | 0.3041825   | 0.40788995 | 1 | 1815 | laga=47%, list=15%, signal=52%   |
| SD      | reactome | REACTOME TOLL LIKE RECEPTOR TLR1_TLR2 CASCADE                                            | 66  | 0.3441818   | 1.138148   | 0.32919255  | 0.40886113 | 1 | 3413 | laga=62%, list=29%, signal=72%   |
| SD      | reactome | REACTOME SMAD2 SMAD3 SMAD4 HETEROTRIMER REGULATES TRANSCRIPTION                          | 15  | 0.36845383  | 1.1383777  | 0.30305032  | 0.40890953 | 1 | 3352 | laga=53%, list=28%, signal=74%   |
| SD      | reactome | REACTOME DNA DOUBLE STRAND BREAK RESPONSE                                                | 48  | 0.34398216  | 1.1323553  | 0.31960603  | 0.41245286 | 1 | 3417 | laga=48%, list=29%, signal=64%   |
| SD      | reactome | REACTOME NR1H3 NR1H2 REGULATE GENE EXPRESSION LINKED_TO_CHOLESTEROL_TRANSPORT_AND_EFFLUX | 24  | 0.4109087   | 1.1335814  | 0.37575758  | 0.41280788 | 1 | 3377 | laga=71%, list=28%, signal=99%   |
| SD      | reactome | REACTOME HSP90 CHAPERONE CYCLE FOR STEROID HORMONE RECEPTORS SHR                         | 41  | 0.31504714  | 1.1342167  | 0.28988254  | 0.4130509  | 1 | 2262 | laga=44%, list=19%, signal=54%   |
| SD      | reactome | REACTOME SIGNALING IN PROGRAMMED CELL DEATH                                              | 15  | 0.42213273  | 1.1325487  | 0.32692307  | 0.41321086 | 1 | 3343 | laga=67%, list=27%, signal=96%   |
| SD      | reactome | REACTOME DISEASES OF PROGRAMMED CELL DEATH                                               | 52  | 0.3452704   | 1.1258103  | 0.31440163  | 0.42013487 | 1 | 2293 | laga=51%, list=19%, signal=58%   |
| SD      | reactome | REACTOME DISEASES OF IMMUNE SYSTEM                                                       | 21  | 0.4392831   | 1.1205199  | 0.35211268  | 0.42618302 | 1 | 2902 | laga=75%, list=24%, signal=75%   |
| SD      | reactome | REACTOME FORMATION OF THE BETA CATENIN TCF TRANSACTIVATING COMPLEX                       | 46  | 0.37070882  | 1.1166048  | 0.3632653   | 0.42916536 | 1 | 4481 | laga=69%, list=31%, signal=108%  |
| SD      | reactome | REACTOME MEIOTIC SYNAPSIS                                                                | 43  | 0.34152043  | 1.1173778  | 0.32032853  | 0.42920288 | 1 | 1863 | laga=32%, list=16%, signal=36%   |
| SD      | reactome | REACTOME EPH EPHRIN SIGNALING                                                            | 71  | 0.33187177  | 1.1117694  | 0.3559592   | 0.43467236 | 1 | 1414 | laga=32%, list=22%, signal=37%   |
| SD      | reactome | REACTOME CIMM ASSEMBLY                                                                   | 114 | 0.32343475  | 1.1103561  | 0.29        | 0.43563493 | 1 | 2399 | laga=57%, list=20%, signal=46%   |
| SD      | reactome | REACTOME SIGNALING BY FGF2                                                               | 55  | 0.2860082   | 1.1086421  | 0.30218888  | 0.4380552  | 1 | 1911 | laga=63%, list=16%, signal=47%   |
| SD      | reactome | REACTOME CIRCADIAN CLOCK                                                                 | 40  | 0.35061556  | 1.1069762  | 0.34816247  | 0.43699414 | 1 | 3500 | laga=63%, list=29%, signal=88%   |
| SD      | reactome | REACTOME PROTEIN FOLDING                                                                 | 68  | 0.2820296   | 1.1071534  | 0.30588236  | 0.4377578  | 1 | 3037 | laga=49%, list=26%, signal=66%   |
| SD      | reactome | REACTOME G BETA GAMMA SIGNALING THROUGH CDC42                                            | 15  | 0.38817477  | 1.1034462  | 0.34207113  | 0.44073785 | 1 | 1801 | laga=50%, list=23%, signal=47%   |
| SD      | reactome | REACTOME TOLL LIKE RECEPTOR CASCADES                                                     | 100 | 0.31537079  | 1.1025146  | 0.3402511   | 0.44073933 | 1 | 3461 | laga=55%, list=29%, signal=74%   |
| SD      | reactome | REACTOME RHO GTPASE CYCLE                                                                | 300 | 0.24997535  | 1.098165   | 0.3294347   | 0.44139796 | 1 | 2585 | laga=42%, list=22%, signal=52%   |
| SD      | reactome | REACTOME RHO GTPASES ACTIVATE PKNS                                                       | 51  | 0.33221024  | 1.098725   | 0.3670103   | 0.44166172 | 1 | 1783 | laga=27%, list=15%, signal=32%   |
| SD      | reactome | REACTOME DETOXIFICATION OF REACTIVE OXYGEN SPECIES                                       | 28  | 0.3643939   | 1.0988663  | 0.34583333  | 0.4424477  | 1 | 1621 | laga=32%, list=14%, signal=37%   |
| SD      | reactome | REACTOME TRANSPORT TO THE GOLGI AND SUBSEQUENT MODIFICATION                              | 121 | 0.29894962  | 1.0953942  | 0.33693596  | 0.44287223 | 1 | 2699 | laga=49%, list=23%, signal=57%   |
| SD      | reactome | REACTOME APOPTOTIC DEATH PHASE                                                           | 34  | 0.32878497  | 1.0959197  | 0.32405697  | 0.4432972  | 1 | 2978 | laga=57%, list=23%, signal=74%   |
| SD      | reactome | REACTOME COPI MEDIATED ANTEROGRADE TRANSPORT                                             | 70  | 0.27513817  | 1.0904407  | 0.32877165  | 0.44501774 | 1 | 2899 | laga=46%, list=23%, signal=59%   |
| SD      | reactome | REACTOME RAB GERANYLERVYLATION                                                           | 44  | 0.33349667  | 1.0884314  | 0.34705883  | 0.45071375 | 1 | 2647 | laga=45%, list=22%, signal=58%   |
| SD      | reactome | REACTOME SIGNALING BY VEGF                                                               | 77  | 0.3124202   | 1.0888138  | 0.36659878  | 0.45133224 | 1 | 2459 | laga=44%, list=21%, signal=50%   |
| SD      | reactome | REACTOME METABOLISM OF AMINO ACIDS AND DERIVATIVES                                       | 238 | 0.2999446   | 1.0861578  | 0.3647059   | 0.4527273  | 1 | 1828 | laga=32%, list=16%, signal=37%   |
| SD      | reactome | REACTOME RECOGNITION FOR CLATHRIN MEDIATED ENDOCYTOSIS                                   | 15  | 0.27385723  | 1.0819443  | 0.3389356   | 0.45725616 | 1 | 1271 | laga=24%, list=11%, signal=24%   |
| SD      | reactome | REACTOME COOPERATION OF PDCD1 PHLP1 AND TRIC CCT IN G PROTEIN BETA FOLDING               | 29  | 0.32524596  | 1.0722223  | 0.36533664  | 0.46894917 | 1 | 2514 | laga=48%, list=21%, signal=61%   |
| SD      | reactome | REACTOME SIGNALING BY MODERATE KINASE ACTIVITY BRAF MUTANTS                              | 37  | 0.34994897  | 1.0701042  | 0.39751554  | 0.4695788  | 1 | 2050 | laga=48%, list=17%, signal=54%   |
| SD      | reactome | REACTOME DOWNSTREAM SIGNAL TRANSDUCTION                                                  | 23  | 0.33405364  | 1.0708109  | 0.3754553   | 0.4696888  | 1 | 2789 | laga=57%, list=23%, signal=74%   |
| SD      | reactome | REACTOME TRNA MODIFICATION IN THE NUCLEUS AND CYTOSOL                                    | 16  | 0.41112354  | 1.0679466  | 0.4181174   | 0.47148497 | 1 | 3392 | laga=56%, list=28%, signal=79%   |
| SD      | reactome | REACTOME SIGNALING BY FGF2 IIIa TM                                                       | 17  | 0.39289865  | 1.0622947  | 0.4072586   | 0.4700754  | 1 | 3002 | laga=56%, list=24%, signal=79%   |
| Control | reactome | REACTOME CLASS A RHODOPSIN LIKE RECEPTORS                                                | 226 | -0.35353643 | -1.2978296 | 0.088425105 | 0.4815626  | 1 | 5694 | laga=85%, list=42%, signal=145%  |
| Control | reactome | REACTOME SHC MEDIATED CASCADE FGF4                                                       | 16  | -0.4727008  | -1.3049649 | 0.154       | 0.48279062 | 1 | 3965 | laga=59%, list=33%, signal=94%   |
| Control | reactome | REACTOME NEUROTRANSMITTER RECEPTORS AND POSTSYNAPTIC SIGNAL TRANSMISSION                 | 139 | -0.37473845 | -1.2890111 | 0.18023255  | 0.48446247 | 1 | 4190 | laga=50%, list=35%, signal=77%   |
| Control | reactome | REACTOME POTASSIUM CHANNELS                                                              | 17  | -0.43707207 | -1.3016045 | 0.20117188  | 0.4846089  | 1 | 4107 | laga=58%, list=34%, signal=89%   |
| Control | reactome | REACTOME ION CHANNEL TRANSPORT                                                           | 128 | -0.38071734 | -1.30618   | 0.16374269  | 0.48547179 | 1 | 4723 | laga=59%, list=34%, signal=89%   |
| Control | reactome | REACTOME DIGESTION AND ABSORPTION                                                        | 19  | -0.5288687  | -1.2931721 | 0.20117188  | 0.48845167 | 1 | 4049 | laga=60%, list=34%, signal=84%   |
| SD      | reactome | REACTOME ERK MAPK TARGETS                                                                | 15  | 0.4011454   | 1.054985   | 0.39607844  | 0.48882067 | 1 | 3413 | laga=60%, list=29%, signal=84%   |
| Control | reactome | REACTOME METABOLISM OF STEROID HORMONES                                                  | 25  | -0.4428749  | -1.238115  | 0.20582524  | 0.48700252 | 1 | 5672 | laga=80%, list=48%, signal=152%  |
| Control | reactome | REACTOME HEPARAN SULFATE HEPARAN HS GAG METABOLISM                                       | 35  | -0.4386271  | -1.2902246 | 0.1895512   | 0.48727753 | 1 | 5301 | laga=69%, list=45%, signal=123%  |
| SD      | reactome | REACTOME BASE EXCISION REPAIR AP SITE FORMATION                                          | 31  | 0.38538968  | 1.0819443  | 0.39583334  | 0.48725495 | 1 | 7566 | laga=100%, list=64%, signal=274% |
| Control | reactome | REACTOME DIGESTION                                                                       | 16  | -0.51829536 | -1.2448349 | 0.244       | 0.4874396  | 1 | 5049 | laga=81%, list=42%, signal=114%  |
| SD      | reactome | REACTOME MEIOSIS                                                                         | 67  | 0.2874739   | 1.052942   | 0.39958593  | 0.48780623 | 1 | 861  | laga=16%, list=7%, signal=18%    |
| Control | reactome | REACTOME CARDIAC CONDUCTION                                                              | 95  | -0.4066815  | -1.29494   | 0.22113504  | 0.48803067 | 1 | 4563 | laga=62%, list=38%, signal=100%  |
| Control | reactome | REACTOME G ALPHA S SIGNALING EVENTS                                                      | 91  | -0.38378346 | -1.2973536 | 0.111328125 | 0.48827213 | 1 | 5249 | laga=64%, list=44%, signal=113%  |
| Control | reactome | REACTOME HS GAG BIOSYNTHESIS                                                             | 21  | -0.50620796 | -1.2820433 | 0.19646366  | 0.48915157 | 1 | 4868 | laga=78%, list=41%, signal=129%  |
| Control | reactome | REACTOME SULFUR AMINO ACID METABOLISM                                                    | 19  | -0.43849817 | -1.2341242 | 0.19839279  | 0.49059414 | 1 | 4049 | laga=60%, list=34%, signal=84%   |
| Control | reactome | REACTOME STRIATED MUSCLE CONTRACTION                                                     | 22  | -0.46456213 | -1.3064766 | 0.1468254   | 0.4906865  | 1 | 2224 | laga=45%, list=19%, signal=56%   |
| Control | reactome | REACTOME PLATELET HOMEOSTASIS                                                            | 63  | -0.3230709  | -1.2786704 | 0.11545988  | 0.49068713 | 1 | 1545 | laga=22%, list=13%, signal=25%   |
| Control | reactome | REACTOME A TETRASACCHARIDE LINKER SEQUENCE IS REQUIRED FOR GAG SYNTHESIS                 | 20  | -0.47552323 | -1.2831443 | 0.21632653  | 0.49113408 | 1 | 5150 | laga=70%, list=43%, signal=123%  |
| Control | reactome | REACTOME SENSORY PROCESSING OF SOUND                                                     | 59  | -0.3753907  | -1.2449543 | 0.19589471  | 0.4917589  | 1 | 4239 | laga=69%, list=36%, signal=86%   |
| Control | reactome | REACTOME FLAVIN REDUCTION FOR CLATHRIN MEDIATED ENDOCYTOSIS                              | 20  | -0.42839288 | -1.246498  | 0.22367691  | 0.4921567  | 1 | 4599 | laga=69%, list=36%, signal=86%   |
| Control | reactome | REACTOME SYNTHESIS OF LEUKOTRIENES LT AND EXOINS EX                                      | 16  | -0.4869887  | -1.258562  | 0.1940594   | 0.4921118  | 1 | 3627 | laga=50%, list=30%, signal=72%   |
| SD      | reactome | REACTOME HCMV EARLY EVENTS                                                               | 72  | 0.28753623  | 1.0483688  | 0.396       | 0.49218184 | 1 | 2179 | laga=50%, list=18%, signal=44%   |
| Control | reactome | REACTOME DISEASES ASSOCIATED WITH GLYCOSAMINOGLYCAN METABOLISM                           | 30  | -0.4228179  | -1.24869   | 0.20866142  | 0.49350414 | 1 | 5150 | laga=67%, list=43%, signal=117%  |
| Control | reactome | REACTOME SYNTHESIS OF PA                                                                 | 24  | -0.40425432 | -1.2497393 | 0.19560377  | 0.49392828 | 1 | 3437 | laga=40%, list=29%, signal=58%   |
| Control | reactome | REACTOME HEPARAN SULFATE BIOSYNTHESIS                                                    | 20  | -0.42839288 | -1.246498  | 0.22367691  | 0.494021   | 1 | 4502 | laga=69%, list=36%, signal=86%   |
| Control | reactome | REACTOME PHASE 0 RAPID DEPOLARISATION                                                    | 22  | -0.5475687  | -1.3074178 | 0.1750593   | 0.49483508 | 1 | 4374 | laga=82%, list=45%, signal=129%  |
| Control | reactome | REACTOME SYNTHESIS OF BILE ACIDS AND BILE SALTS                                          | 26  | -0.40849318 | -1.223212  | 0.20682731  | 0.4946626  | 1 | 4609 | laga=59%, list=39%, signal=94%   |
| Control | reactome | REACTOME BILE ACID AND BILE SALT METABOLISM                                              | 34  | -0.41328856 | -1.257376  | 0.18934911  | 0.49503323 | 1 | 4609 | laga=59%, list=39%, signal=96%   |
| Control | reactome | REACTOME AMINO ACID TRANSPORT ACROSS THE PLASMA MEMBRANE                                 | 19  | -0.50369614 | -1.2358992 | 0.24852072  | 0.49508196 | 1 | 4736 | laga=74%, list=40%, signal=122%  |
| Control | reactome | REACTOME CA DEPENDENT EVENTS                                                             | 23  | -0.4902587  | -1.2717981 | 0.18588665  | 0.49515847 | 1 | 3837 | laga=49%, list=32%, signal=70%   |
| Control | reactome | REACTOME INTERACTION BETWEEN L1 AND ANKYRINS                                             | 24  | -0.49517003 | -1.250449  | 0.26889328  | 0.49545117 | 1 | 3268 | laga=67%, list=41%, signal=143%  |
| Control | reactome | REACTOME PEPTIDE LIGAND BINDING RECEPTORS                                                | 138 | -0.37079805 | -1.2898726 | 0.13555992  | 0.4955899  | 1 | 5857 | laga=74%, list=49%, signal=143%  |
| Control | reactome | REACTOME REGULATION OF GENE EXPRESSION IN BETA CELLS                                     | 17  | -0.48466322 | -1.2501569 | 0.1875      | 0.4955973  | 1 | 5762 | laga=88%, list=48%, signal=154%  |
| Control | reactome | REACTOME INTRINSIC PATHWAY OF FIBRIN CLOT FORMATION                                      | 16  | -0.47841234 | -1.2248416 | 0.23149905  | 0.49575222 | 1 | 2821 | laga=50%, list=24%, signal=65%   |
| Control | reactome | REACTOME VISUAL PHOTOTRANSDUCTION                                                        | 17  | -0.42275817 | -1.3088406 | 0.1726223   | 0.49738047 | 1 | 5698 | laga=78%, list=49%, signal=145%  |
| Control | reactome | REACTOME PHASE 4 RESTING MEMBRANE POTENTIAL                                              | 17  | -0.5101023  | -1.259772  | 0.267659    | 0.4978902  | 1 | 4563 | laga=78%, list=49%, signal=145%  |
| Control | reactome | REACTOME NEUREXINS AND NEUROLIGINS                                                       | 36  | -0.4894546  | -1.2279388 | 0.30097088  | 0.49815246 | 1 | 4800 | laga=72%, list=40%, signal=121%  |
| Control | reactome | REACTOME CELL CELL COMMUNICATION                                                         | 98  | -0.3442273  | -1.2726917 | 0.15992293  | 0.4984282  | 1 | 3551 |                                  |



|           |                                                                                           |     |             |             |             |            |       |      |                                 |
|-----------|-------------------------------------------------------------------------------------------|-----|-------------|-------------|-------------|------------|-------|------|---------------------------------|
| Control   | REACTOME NEGATIVE REGULATION OF TGF BETA DEPENDENT SIGNALING BY WNT LIGAND ANTAGONISTS    | 15  | -0.4754933  | -1.1579666  | 0.3147928   | 0.5458912  | 1     | 5866 | laga=87%, lita=49%, signal=171% |
| Control   | REACTOME INSTANT NEUROTRANSMITTER RELEASE CYCLE                                           | 18  | -0.5518786  | -1.336909   | 0.1342228   | 0.4745285  | 0.999 | 4468 | laga=84%, lita=38%, signal=130% |
| SD_rnaseq | REACTOME RDS AND RNS PRODUCTION IN PHAGOCYTES                                             | 25  | 0.3262489   | 0.9630781   | 0.4766949   | 0.5472342  | 1     | 176  | laga=20%, lita=7%, signal=2%    |
| Control   | REACTOME GPCR LIGAND BINDING                                                              | 308 | -0.36607198 | -1.329204   | 0.07528988  | 0.5473233  | 1     | 5719 | laga=67%, lita=48%, signal=126% |
| SD_rnaseq | REACTOME NERVOUS SYSTEM DEVELOPMENT                                                       | 424 | 0.2162833   | 0.9934963   | 0.47011954  | 0.5477932  | 1     | 1693 | laga=26%, lita=13%, signal=29%  |
| Control   | REACTOME CELL CELL JUNCTION ORGANIZATION                                                  | 45  | -0.47183109 | -1.3712456  | 0.09664694  | 0.5500814  | 0.995 | 3551 | laga=58%, lita=30%, signal=82%  |
| Control   | REACTOME NEUROTRANSMITTER RELEASE CYCLE                                                   | 32  | -0.5030621  | -1.5312342  | 0.14980138  | 0.55099314 | 0.999 | 4468 | laga=78%, lita=38%, signal=125% |
| Control   | REACTOME ACTIVATION OF NMDA RECEPTORS AND POSTSYNAPTIC EVENTS                             | 19  | -0.3235979  | -1.3823389  | 0.3823389   | 0.5511167  | 0.995 | 4190 | laga=48%, lita=35%, signal=74%  |
| Control   | REACTOME BINDING AND UPTAKE OF LIGANDS BY SCAVENGER RECEPTORS                             | 30  | -0.42403507 | -1.3404727  | 0.10404624  | 0.55187327 | 0.997 | 1545 | laga=37%, lita=13%, signal=42%  |
| Control   | REACTOME SIGNALING BY BMPK                                                                | 15  | -0.4756523  | -1.3368481  | 0.15662651  | 0.5526736  | 0.998 | 3372 | laga=53%, lita=30%, signal=76%  |
| Control   | REACTOME SYNDECAN INTERACTIONS                                                            | 20  | -0.46414426 | -1.3529657  | 0.100204    | 0.5529855  | 0.996 | 3822 | laga=50%, lita=32%, signal=81%  |
| Control   | REACTOME GAP JUNCTION TRAFFICKING AND REGULATION                                          | 38  | -0.37525217 | -1.1388807  | 0.31782946  | 0.55476713 | 1     | 5255 | laga=68%, lita=44%, signal=122% |
| Control   | REACTOME VOLTAGE GATED POTASSIUM CHANNELS                                                 | 31  | -0.5303771  | -1.3725419  | 0.0920572   | 0.55672973 | 0.995 | 4021 | laga=71%, lita=34%, signal=107% |
| Control   | REACTOME ENDOGENOUS STEROLS                                                               | 23  | -0.4694076  | -1.3550626  | 0.10176126  | 0.5572732  | 0.996 | 1167 | laga=35%, lita=10%, signal=38%  |
| Control   | REACTOME ANTIMICROBIAL PEPTIDES                                                           | 44  | -0.40588158 | -1.34149    | 0.1042471   | 0.5580205  | 0.997 | 4006 | laga=50%, lita=34%, signal=75%  |
| Control   | REACTOME REGULATION OF INSULIN SECRETION                                                  | 51  | -0.32904765 | -1.1450833  | 0.25285172  | 0.5580775  | 1     | 3937 | laga=41%, lita=33%, signal=61%  |
| Control   | REACTOME_CREB1_PHOSPHORYLATION_THROUGH_NMDA_RECEPTOR_MEDIATED_ACTIVATION_OF_FAS_SIGNALING | 18  | -0.37852034 | -1.1395949  | 0.28285107  | 0.5585989  | 1     | 3591 | laga=39%, lita=30%, signal=55%  |
| Control   | REACTOME UPTAKE AND ACTIONS OF BACTERIAL TOXINS                                           | 20  | -0.34249007 | -1.1462574  | 0.28827038  | 0.5595753  | 1     | 2215 | laga=30%, lita=19%, signal=37%  |
| Control   | REACTOME CONSTITUTIVE SIGNALING BY ABERRANT PI3K IN CANCER                                | 56  | -0.32866287 | -1.1244023  | 0.3280318   | 0.5600196  | 1     | 4318 | laga=52%, lita=36%, signal=81%  |
| Control   | REACTOME_G_ALPHA_Q_SIGNALING_EVENTS                                                       | 147 | -0.29187176 | -1.1285459  | 0.2591171   | 0.56005655 | 1     | 5483 | laga=54%, lita=46%, signal=98%  |
| Control   | REACTOME DECTIN 2 FAMILY                                                                  | 20  | -0.42034525 | -1.1306581  | 0.3391473   | 0.5602883  | 1     | 4542 | laga=49%, lita=15%, signal=74%  |
| Control   | REACTOME TRIALCYCLIC METABOLISM                                                           | 21  | -0.3818556  | -1.1365341  | 0.3115546   | 0.5615554  | 1     | 4542 | laga=62%, lita=38%, signal=100% |
| Control   | REACTOME DAG AND IP3 SIGNALING                                                            | 23  | -0.4023692  | -1.3433039  | 0.10689146  | 0.5620785  | 0.997 | 3843 | laga=44%, lita=32%, signal=70%  |
| Control   | REACTOME_FGFR2_LIGAND_BINDING_AND_ACTIVATION                                              | 16  | -0.46216923 | -1.1249813  | 0.3574297   | 0.5627936  | 1     | 5825 | laga=94%, lita=49%, signal=183% |
| Control   | REACTOME_CLASS_B_2_SECRETIN_FAMILY_RECEPTORS                                              | 63  | -0.36095837 | -1.1380188  | 0.32163742  | 0.5630053  | 1     | 5786 | laga=71%, lita=49%, signal=138% |
| Control   | REACTOME_FRS_MEDIATED_FGFR2_SIGNALING                                                     | 19  | -0.39823166 | -1.1398987  | 0.29666013  | 0.5636469  | 1     | 4199 | laga=58%, lita=35%, signal=89%  |
| Control   | REACTOME PROTEIN PROTEIN INTERACTIONS AT SYNAPSES                                         | 68  | -0.47448488 | -1.3597919  | 0.1247694   | 0.5637635  | 0.996 | 4800 | laga=72%, lita=29%, signal=121% |
| Control   | REACTOME_GAP_JUNCTION_ASSEMBLY                                                            | 28  | -0.51718913 | -1.3553892  | 0.10852713  | 0.56612694 | 0.996 | 5255 | laga=68%, lita=44%, signal=153% |
| Control   | REACTOME METABOLISM OF FAT SOLUBLE VITAMINS                                               | 35  | -0.491477   | -1.3727171  | 0.08416834  | 0.5670993  | 0.995 | 5018 | laga=74%, lita=42%, signal=128% |
| SD_rnaseq | REACTOME SEMAPHORIN INTERACTIONS                                                          | 49  | 0.28814438  | 0.9761986   | 0.48242188  | 0.56926477 | 1     | 1511 | laga=33%, lita=13%, signal=37%  |
| Control   | REACTOME_O_GLYCOSYLATION_OF_TRS_DOMAIN_CONTAINING_PROTEINS                                | 27  | -0.6183871  | -1.3751348  | 0.07474747  | 0.57049674 | 0.995 | 4005 | laga=93%, lita=34%, signal=139% |
| Control   | REACTOME SIGNALING BY MEK                                                                 | 56  | -0.2950627  | -1.1131853  | 0.3139881   | 0.5723074  | 1     | 1862 | laga=29%, lita=16%, signal=34%  |
| Control   | REACTOME L1CAM INTERACTIONS                                                               | 24  | -0.35209074 | -1.1194942  | 0.31417623  | 0.5723074  | 1     | 2342 | laga=42%, lita=29%, signal=75%  |
| Control   | REACTOME SIGNALING BY IGF1 INSULIN LIKE GROWTH FACTOR 1 RECEPTOR IGF1R                    | 39  | -0.3247847  | -1.1080949  | 0.36023623  | 0.5777334  | 1     | 5624 | laga=62%, lita=47%, signal=116% |
| Control   | REACTOME KERATINIZATION                                                                   | 139 | -0.46982804 | -1.376119   | 0.11047619  | 0.579242   | 0.995 | 4504 | laga=73%, lita=38%, signal=116% |
| Control   | REACTOME MOLECULES ASSOCIATED WITH ELASTIC FIBRES                                         | 24  | -0.49851277 | -1.3813486  | 0.09090909  | 0.5863549  | 0.995 | 3654 | laga=76%, lita=31%, signal=96%  |
| Control   | REACTOME ION TRANSPORT BY P-TYPE ATPASES                                                  | 39  | -0.30421792 | -1.0939153  | 0.33984543  | 0.5873755  | 1     | 3591 | laga=58%, lita=30%, signal=86%  |
| Control   | REACTOME TIGHT JUNCTION INTERACTIONS                                                      | 17  | -0.5534348  | -1.0977829  | 0.35447526  | 0.5922528  | 0.999 | 4049 | laga=89%, lita=49%, signal=151% |
| SD_rnaseq | REACTOME_RHO_GTPASES_ACTIVATED_NADPH_OXIDASES                                             | 20  | 0.3946884   | 0.96132475  | 0.499002    | 0.5877932  | 1     | 2910 | laga=55%, lita=24%, signal=73%  |
| SD_rnaseq | REACTOME_VMPX_CARGO_TARGETING_TO_CILIA                                                    | 15  | 0.3356411   | 0.9616607   | 0.5010101   | 0.5886708  | 1     | 1624 | laga=40%, lita=14%, signal=46%  |
| Control   | REACTOME_SLC_TRANSPORTER_DISORDERS                                                        | 60  | -0.30562538 | -1.0946168  | 0.33797216  | 0.59004164 | 1     | 3947 | laga=43%, lita=33%, signal=64%  |
| Control   | REACTOME TRANSCRIPTIONAL REGULATION OF FLURIPOTENT STEM CELLS                             | 28  | -0.3631195  | -1.0967207  | 0.34126985  | 0.5902317  | 1     | 3680 | laga=42%, lita=31%, signal=61%  |
| Control   | REACTOME METABOLISM OF VITAMINS AND COFACTORS                                             | 68  | -0.3032145  | -1.0977829  | 0.35447526  | 0.5922528  | 1     | 3358 | laga=40%, lita=28%, signal=75%  |
| Control   | REACTOME MUSCLE CONTRACTION                                                               | 138 | -0.3116984  | -1.0980488  | 0.38735178  | 0.5941127  | 1     | 4563 | laga=58%, lita=43%, signal=98%  |
| SD_rnaseq | REACTOME ENERGY DEPENDENT REGULATION OF MTOR BY IKB1 AMPK                                 | 16  | 0.37457017  | 0.9554715   | 0.5121951   | 0.5946135  | 1     | 3263 | laga=63%, lita=27%, signal=86%  |
| Control   | REACTOME TRP CHANNELS                                                                     | 21  | -0.5154891  | -1.3816124  | 0.11394892  | 0.5983034  | 0.995 | 4121 | laga=67%, lita=35%, signal=102% |
| SD_rnaseq | REACTOME BASICIN INTERACTIONS                                                             | 16  | 0.32271028  | 0.95176625  | 0.5262065   | 0.59861046 | 1     | 1024 | laga=27%, lita=9%, signal=29%   |
| Control   | REACTOME XENOBIOTICS                                                                      | 19  | -0.4743684  | -1.3962305  | 0.08863199  | 0.603272   | 0.993 | 3687 | laga=74%, lita=31%, signal=106% |
| SD_rnaseq | REACTOME_MAPK_FAMILY_SIGNALING_CASCADES                                                   | 233 | -0.20032008 | -0.9478895  | 0.5507246   | 0.6033057  | 1     | 2241 | laga=53%, lita=19%, signal=58%  |
| Control   | REACTOME_GABA_RECEPTOR_ACTIVATION                                                         | 43  | -0.3560637  | -1.0780255  | 0.41811774  | 0.60439587 | 1     | 3186 | laga=42%, lita=27%, signal=52%  |
| Control   | REACTOME FORMATION OF THE CORNFIED ENVELOPE                                               | 99  | -0.49802387 | -1.4081485  | 0.06126482  | 0.60547867 | 0.993 | 4504 | laga=78%, lita=38%, signal=124% |
| Control   | REACTOME SYNTHESIS OF BILE ACIDS AND BILE SALTS VIA 7ALPHA_HYDROXYCHOLESTEROL             | 18  | -0.38990304 | -1.075002   | 0.37917486  | 0.60568484 | 1     | 4609 | laga=61%, lita=39%, signal=100% |
| Control   | REACTOME METABOLISM OF VITAMINS AND COFACTORS                                             | 108 | -0.2723316  | -1.0705192  | 0.36836828  | 0.6060957  | 1     | 5918 | laga=75%, lita=42%, signal=75%  |
| Control   | REACTOME SURFACTANT METABOLISM                                                            | 23  | -0.3830291  | -1.070461   | 0.4022684   | 0.606551   | 1     | 5120 | laga=70%, lita=43%, signal=122% |
| Control   | REACTOME ACTIVATION OF MATRIX METALLOPROTEINASES                                          | 22  | -0.52677196 | -1.3908703  | 0.073267326 | 0.6069815  | 0.993 | 1625 | laga=44%, lita=14%, signal=53%  |
| SD_rnaseq | REACTOME_MAP2K_AND_MAPK_ACTIVATION                                                        | 34  | 0.30711815  | 0.9438402   | 0.54771787  | 0.6072708  | 1     | 2050 | laga=44%, lita=17%, signal=53%  |
| Control   | REACTOME TRANSMISSION ACROSS CHEMICAL SYNAPSES                                            | 181 | -0.41198385 | -1.327325   | 0.10980392  | 0.6079402  | 0.995 | 4190 | laga=55%, lita=35%, signal=84%  |
| Control   | REACTOME ACYL CHAIN REMODELING OF PE                                                      | 22  | -0.37478653 | -1.0706596  | 0.39232365  | 0.6098883  | 1     | 3052 | laga=41%, lita=26%, signal=56%  |
| Control   | REACTOME PI3K_AKT_SIGNALING_IN_CANCER                                                     | 65  | -0.2923731  | -1.0953563  | 0.3799126   | 0.6110463  | 1     | 4318 | laga=51%, lita=35%, signal=86%  |
| Control   | REACTOME DOWNSTREAM SIGNALING OF ACTIVATED FGFR3                                          | 17  | -0.37305654 | -1.0581315  | 0.39096266  | 0.6120106  | 1     | 4318 | laga=53%, lita=36%, signal=83%  |
| Control   | REACTOME_PI_3K_CASCADE_FGFR2                                                              | 18  | -0.3719396  | -1.0536361  | 0.42300195  | 0.612397   | 1     | 4199 | laga=61%, lita=35%, signal=94%  |
| SD_rnaseq | REACTOME DEPOSITION OF NEW CEPNA CONTAINING NUCLEOSOMES AT THE CENTROMERE                 | 35  | 0.32709304  | 0.9391446   | 0.5571125   | 0.6127212  | 1     | 4364 | laga=68%, lita=43%, signal=108% |
| Control   | REACTOME PEROXISOMAL LIPID METABOLISM                                                     | 16  | -0.47436845 | -1.39736    | 0.08939709  | 0.6128289  | 0.993 | 2006 | laga=89%, lita=22%, signal=84%  |
| Control   | REACTOME_IRS_MEDIATED_SIGNALING                                                           | 24  | -0.31723216 | -1.052616   | 0.40814366  | 0.6137612  | 1     | 4318 | laga=61%, lita=35%, signal=86%  |
| Control   | REACTOME RUNX2 REGULATES OSTEOBLAST DIFFERENTIATION                                       | 15  | -0.3505325  | -1.050488   | 0.3870334   | 0.6134275  | 1     | 4986 | laga=53%, lita=42%, signal=92%  |
| Control   | REACTOME REGULATION OF FZD BY UBIQUITINATION                                              | 15  | -0.4105484  | -1.0612887  | 0.42226487  | 0.6141934  | 1     | 4762 | laga=67%, lita=40%, signal=111% |
| Control   | REACTOME REGULATION OF BETA CELL DEVELOPMENT                                              | 32  | -0.3462848  | -1.037123   | 0.44705883  | 0.61444056 | 1     | 5782 | laga=72%, lita=48%, signal=139% |
| Control   | REACTOME RUNX2 REGULATES BONE DEVELOPMENT                                                 | 21  | -0.32422012 | -1.0343797  | 0.39215687  | 0.6155764  | 1     | 4886 | laga=74%, lita=42%, signal=82%  |
| Control   | REACTOME FATTY ACID METABOLISM                                                            | 98  | -0.26183583 | -0.9823691  | 0.3903628   | 0.6160957  | 1     | 4768 | laga=50%, lita=29%, signal=74%  |
| SD_rnaseq | REACTOME PROTEIN LOCALIZATION                                                             | 89  | -0.2829638  | -0.9334879  | 0.5239923   | 0.61627743 | 1     | 2606 | laga=34%, lita=22%, signal=46%  |
| SD_rnaseq | REACTOME PLATELET ACTIVATION SIGNALING AND AGGREGATION                                    | 180 | -0.2494571  | -0.93453825 | 0.51329243  | 0.6165311  | 1     | 2514 | laga=42%, lita=21%, signal=52%  |
| SD_rnaseq | REACTOME G_BETA_GAMMA_SIGNALING_THROUGH_PI3KMAPK                                          | 18  | 0.30577552  | 0.9354334   | 0.5378323   | 0.61675596 | 1     | 3962 | laga=63%, lita=33%, signal=100% |
| SD_rnaseq | REACTOME_MAPK_TARGETS_NUCLEAR_EVENTS_MEDIATED_BY_MAP_KINASES                              | 18  | 0.32435474  | 0.9323806   | 0.51097804  | 0.6169506  | 1     | 2910 | laga=50%, lita=24%, signal=66%  |
| Control   | REACTOME_G_PROTEIN_MEDIATED_EVENTS                                                        | 31  | -0.32178942 | -1.0373929  | 0.41153062  | 0.61750057 | 1     | 3837 | laga=42%, lita=32%, signal=62%  |
| Control   | REACTOME_RND_GTPASE_CYCLE                                                                 | 28  | -0.32381172 | -1.0438873  | 0.3890402   | 0.6180316  | 1     | 3153 | laga=48%, lita=29%, signal=64%  |
| SD_rnaseq | REACTOME SIGNALING TO ERKS                                                                | 27  | 0.32817533  | 0.9384016   | 0.5395257   | 0.61851776 | 1     | 3243 | laga=63%, lita=27%, signal=86%  |
| Control   | REACTOME_VASOPRESSIN_REGULATES_RENAL_WATER_HOMEOSTASIS_VIA_AQUAPORINS                     | 27  | -0.3175917  | -1.038914   | 0.40484296  | 0.6186984  | 1     | 3837 | laga=41%, lita=32%, signal=60%  |
| Control   | REACTOME WNT LIGAND BIOGENESIS AND TRAFFICKING                                            | 16  | -0.40624398 | -1.0452885  | 0.44921875  | 0.6190621  | 1     | 4566 | laga=63%, lita=38%, signal=101% |
| Control   | REACTOME GLYCEROPHOSPHOLIPID BIOSYNTHESIS                                                 | 75  | -0.2701174  | -1.0406076  | 0.40831757  | 0.6195274  | 1     | 4326 | laga=57%, lita=36%, signal=95%  |
| Control   | REACTOME THE CANONICAL RETINOID CYCLE IN RODS TWILIGHT VISION                             | 16  | -0.5854003  | -1.3829816  | 0.10474306  | 0.6200764  | 0.994 | 4144 | laga=81%, lita=43%, signal=124% |
| Control   | REACTOME METABOLIC DISORDERS OF BIOLOGICAL OXIDATION ENZYMES                              | 30  | -0.5393156  | -1.4083078  | 0.08076923  | 0.6208431  | 0.993 | 3606 | laga=67%, lita=40%, signal=96%  |
| SD_rnaseq | REACTOME SIGNALING BY SCF_KIT                                                             | 31  | 0.3061248   | 0.92681575  | 0.53093815  | 0.6222433  | 1     | 3286 | laga=61%, lita=28%, signal=84%  |
| Control   | REACTOME GLYOXYLATE METABOLISM AND GLYCINE DEGRADATION                                    | 24  | -0.30303103 | -1.025766   | 0.43887776  | 0.6263705  | 1     | 1431 | laga=21%, lita=12%, signal=24%  |
| Control   | REACTOME MET ACTIVATES PI3K SIGNALING                                                     | 22  | -0.6186879  | -1.3977507  | 0.088       | 0.6267601  | 0.993 | 3643 | laga=86%, lita=31%, signal=124% |
| Control   | REACTOME AQUOPORIN MEDIATED TRANSPORT                                                     | 36  | -0.3102347  |             |             |            |       |      |                                 |

|         |         |                                                                                      |     |             |             |             |            |       |      |                               |
|---------|---------|--------------------------------------------------------------------------------------|-----|-------------|-------------|-------------|------------|-------|------|-------------------------------|
| SD_omeg | Control | REACTOME APOPTOTIC CLEAVAGE OF CELLULAR PROTEINS                                     | 26  | 0.2659406   | 0.87072164  | 0.6044177   | 0.689613   | 1     | 2878 | lga=58%, ltr=24%, signal=76%  |
| SD_omeg | Control | REACTOME INTRACELLULAR TRANSPORT                                                     | 29  | 0.280498    | 0.8709185   | 0.6130766   | 0.6884175  | 1     | 2943 | lga=58%, ltr=24%, signal=76%  |
| Control | Control | REACTOME METABOLISM OF STEROIDS                                                      | 99  | -0.21987113 | -0.92251104 | 0.6226881   | 0.6884175  | 1     | 4627 | lga=58%, ltr=24%, signal=76%  |
| Control | Control | REACTOME NCAM1 INTERACTIONS                                                          | 32  | -0.59760475 | -1.4476888  | 0.06187625  | 0.688402   | 0.983 | 3823 | lga=81%, ltr=32%, signal=119% |
| Control | Control | REACTOME TRANSPORT OF BILE SALTS AND ORGANIC ACIDS METAL IONS AND AMINE COMPOUNDS    | 53  | -0.5241801  | -1.4664782  | 0.028571429 | 0.68665495 | 0.976 | 4237 | lga=74%, ltr=36%, signal=114% |
| Control | Control | REACTOME CYTOCHROME P450 ARRANGED BY SUBSTRATE TYPE                                  | 49  | -0.5080995  | -1.4514651  | 0.044145875 | 0.6901008  | 0.983 | 3765 | lga=65%, ltr=32%, signal=95%  |
| SD_omeg | Control | REACTOME SIGNALING BY ERBB2 IN CANCER                                                | 19  | 0.26847305  | 0.8584973   | 0.6377927   | 0.7020257  | 1     | 2055 | lga=42%, ltr=17%, signal=51%  |
| SD_omeg | Control | REACTOME CARGO COORDINATION IN THE ER                                                | 16  | 0.2044988   | 0.8276166   | 0.6377927   | 0.7020257  | 1     | 2055 | lga=42%, ltr=17%, signal=51%  |
| SD_omeg | Control | REACTOME SIGNALING BY FGFR IN DISEASE                                                | 48  | 0.22075735  | 0.852903    | 0.7331933   | 0.70426375 | 1     | 1920 | lga=33%, ltr=16%, signal=40%  |
| SD_omeg | Control | REACTOME SIGNALING BY FGFR3                                                          | 28  | 0.24709871  | 0.85435075  | 0.63505155  | 0.70514303 | 1     | 1911 | lga=39%, ltr=16%, signal=47%  |
| SD_omeg | Control | REACTOME DOWNREGULATION OF ERBB2 SIGNALING                                           | 18  | 0.25382534  | 0.8551782   | 0.68871593  | 0.705314   | 1     | 1493 | lga=28%, ltr=13%, signal=32%  |
| SD_omeg | Control | REACTOME COPI INDEPENDENT GOLGI TO ER RETROGRADE TRAFFIC                             | 39  | 0.23468198  | 0.8472216   | 0.6191406   | 0.7079189  | 1     | 2016 | lga=33%, ltr=17%, signal=40%  |
| SD_omeg | Control | REACTOME RESPONSE TO ELEVATED PLATELET CYTOSOLIC CA2                                 | 97  | 0.2348138   | 0.8483696   | 0.6484846   | 0.70840704 | 1     | 2109 | lga=39%, ltr=19%, signal=42%  |
| SD_omeg | Control | REACTOME EGFR DOWNREGULATION                                                         | 18  | 0.27805394  | 0.8476531   | 0.6502058   | 0.7085712  | 1     | 1492 | lga=33%, ltr=13%, signal=38%  |
| SD_omeg | Control | REACTOME SYNTHESIS OF PIP3 AT THE PLASMA MEMBRANE                                    | 33  | 0.290513    | 0.844891    | 0.6321138   | 0.7099563  | 1     | 1485 | lga=67%, ltr=35%, signal=103% |
| SD_omeg | Control | REACTOME DNA METHYLATION                                                             | 28  | 0.29342905  | 0.84317154  | 0.6680761   | 0.7109835  | 1     | 7027 | lga=96%, ltr=59%, signal=235% |
| Control | Control | REACTOME DISEASES OF GLYCOSYLATION                                                   | 93  | -0.4431657  | -1.4545393  | 0.0703725   | 0.7134742  | 0.982 | 4188 | lga=59%, ltr=35%, signal=90%  |
| Control | Control | REACTOME SYNAPTIC ADHESION LIKE MOLECULES                                            | 56  | 0.26857185  | 0.82849544  | 0.7091972   | 0.7272494  | 0.976 | 3599 | lga=53%, ltr=30%, signal=89%  |
| Control | Control | REACTOME GLUCAGON SIGNALING IN METABOLIC REGULATION                                  | 21  | -0.2903385  | -0.9031903  | 0.5927283   | 0.71463907 | 1     | 1398 | lga=19%, ltr=12%, signal=22%  |
| SD_omeg | Control | REACTOME RHOD GTPASE CYCLE                                                           | 36  | 0.2834217   | 0.837453    | 0.6344699   | 0.7156559  | 1     | 2569 | lga=42%, ltr=22%, signal=53%  |
| Control | Control | REACTOME GLYCOSAMINOGLYCAN METABOLISM                                                | 81  | -0.25081033 | -0.8943303  | 0.6351085   | 0.7169967  | 1     | 4868 | lga=43%, ltr=14%, signal=73%  |
| Control | Control | REACTOME METABOLISM OF NUCLEOTIDES                                                   | 51  | -0.23695135 | -0.8917115  | 0.64250706  | 0.7254726  | 1     | 1633 | lga=18%, ltr=14%, signal=20%  |
| SD_omeg | Control | REACTOME SIGNALING BY TGFβ FAMILY MEMBERS                                            | 53  | 0.21914577  | 0.8393982   | 0.68471866  | 0.7273284  | 1     | 2862 | lga=44%, ltr=25%, signal=57%  |
| SD_omeg | Control | REACTOME CD95 DEATH SIGNALING VIA NRIF AND NAD1                                      | 53  | 0.21914577  | 0.8393982   | 0.68471866  | 0.7273284  | 1     | 2862 | lga=44%, ltr=25%, signal=57%  |
| SD_omeg | Control | REACTOME DOWNSTREAM SIGNALING OF ACTIVATED FGFR1                                     | 21  | -0.27893183 | -0.8857903  | 0.6225681   | 0.7280767  | 1     | 5624 | lga=62%, ltr=47%, signal=117% |
| SD_omeg | Control | REACTOME REGULATION OF LIPOD METABOLISM BY PPARGALPHA                                | 80  | 0.21534936  | 0.8263184   | 0.66071427  | 0.7289542  | 1     | 2503 | lga=40%, ltr=21%, signal=42%  |
| SD_omeg | Control | REACTOME DNA STRAND LIGATION                                                         | 17  | 0.3247292   | 0.824467    | 0.6496212   | 0.73017365 | 1     | 1822 | lga=32%, ltr=15%, signal=40%  |
| Control | Control | REACTOME NEGATIVE REGULATION OF FGFR SIGNALING                                       | 20  | -0.2705738  | -0.8849206  | 0.600664    | 0.7313718  | 1     | 3965 | lga=34%, ltr=20%, signal=42%  |
| SD_omeg | Control | REACTOME DISEASES OF CARBOHYDRATE METABOLISM                                         | 20  | 0.2820144   | 0.8220443   | 0.6597938   | 0.7320757  | 1     | 230  | lga=15%, ltr=2%, signal=15%   |
| Control | Control | REACTOME THE PHOTOTRANSDUCTION CASCADE                                               | 25  | -0.2752286  | -0.88019705 | 0.62575454  | 0.73317987 | 1     | 4423 | lga=44%, ltr=37%, signal=70%  |
| Control | Control | REACTOME PHASE I FUNCTIONALIZATION OF COMPOUNDS                                      | 75  | -0.4726818  | -1.4912722  | 0.017142826 | 0.73593676 | 0.964 | 3765 | lga=57%, ltr=32%, signal=83%  |
| SD_omeg | Control | REACTOME LDL CLEARANCE                                                               | 15  | 0.2944213   | 0.8173876   | 0.6894531   | 0.7372373  | 1     | 1264 | lga=27%, ltr=11%, signal=30%  |
| Control | Control | REACTOME TRANSPORT OF INORGANIC CATIONS ANIONS AND AMINO ACIDS OLIGOPEPTIDES         | 71  | -0.46548807 | -1.4691952  | 0.01420117  | 0.7389759  | 0.976 | 4735 | lga=66%, ltr=40%, signal=107% |
| Control | Control | REACTOME ION CHANNEL SENSING CHANNELS                                                | 73  | -0.49112246 | -1.5044451  | 0.6899919   | 0.7431322  | 0.953 | 4723 | lga=62%, ltr=39%, signal=103% |
| Control | Control | REACTOME ASSEMBLY AND CELL SURFACE PRESENTATION OF NMDA RECEPTORS                    | 25  | -0.5409508  | -1.4749478  | 0.060546875 | 0.74379393 | 0.974 | 4389 | lga=72%, ltr=57%, signal=114% |
| Control | Control | REACTOME PLATELET AGGREGATION PLUG FORMATION                                         | 27  | -0.27852728 | -0.8704371  | 0.6428844   | 0.7448899  | 1     | 2065 | lga=26%, ltr=17%, signal=31%  |
| Control | Control | REACTOME METABOLISM OF LIPIDS                                                        | 458 | -0.18052375 | -0.8587908  | 0.7504798   | 0.74561596 | 1     | 4207 | lga=30%, ltr=35%, signal=45%  |
| SD_omeg | Control | REACTOME SIGNAL AMPLIFICATION                                                        | 20  | 0.28177925  | 0.8103547   | 0.696       | 0.7457909  | 1     | 3014 | lga=49%, ltr=29%, signal=67%  |
| Control | Control | REACTOME G ALPHA 12 13 SIGNALING EVENTS                                              | 53  | 0.21914577  | 0.8393982   | 0.68471866  | 0.7462947  | 1     | 2862 | lga=44%, ltr=25%, signal=57%  |
| SD_omeg | Control | REACTOME FCGR3 MEDIATED IL10 SYNTHESIS                                               | 25  | 0.24899012  | 0.80751     | 0.6417174   | 0.7469269  | 1     | 3168 | lga=64%, ltr=27%, signal=87%  |
| SD_omeg | Control | REACTOME IMMUNOREGULATORY INTERACTIONS BETWEEN A LYMPHOID AND A NON LYMPHOID CELL    | 92  | 0.2293661   | 0.8078884   | 0.7066381   | 0.74778324 | 1     | 1531 | lga=23%, ltr=13%, signal=26%  |
| Control | Control | REACTOME RET SIGNALING                                                               | 26  | -0.253997   | -0.86185783 | 0.67115384  | 0.7487785  | 1     | 4415 | lga=42%, ltr=37%, signal=67%  |
| Control | Control | REACTOME SIGNALING BY ERBB4                                                          | 40  | -0.23719262 | -0.8633523  | 0.67729066  | 0.7490182  | 1     | 3587 | lga=35%, ltr=30%, signal=50%  |
| Control | Control | REACTOME INTEGRIN CELL SURFACE INTERACTIONS                                          | 54  | -0.22839276 | -0.8649689  | 0.67349636  | 0.7504544  | 1     | 3851 | lga=31%, ltr=25%, signal=42%  |
| SD_omeg | Control | REACTOME INTERLEUKIN 6 FAMILY SIGNALING                                              | 15  | 0.296907    | 0.8027755   | 0.7222222   | 0.7520672  | 1     | 2123 | lga=53%, ltr=18%, signal=71%  |
| SD_omeg | Control | REACTOME GOLGI TO ER RETROGRADE TRANSPORT                                            | 97  | 0.18466534  | 0.8100409   | 0.7539065   | 0.7531106  | 1     | 2016 | lga=28%, ltr=17%, signal=33%  |
| Control | Control | REACTOME RND1 GTPASE CYCLE                                                           | 28  | -0.23384118 | -0.85076827 | 0.7025948   | 0.7541659  | 1     | 3954 | lga=36%, ltr=33%, signal=53%  |
| Control | Control | REACTOME GLUTATHIONE CONJUGATION                                                     | 20  | -0.28130627 | -0.83815724 | 0.68041235  | 0.7558589  | 1     | 5036 | lga=56%, ltr=42%, signal=96%  |
| Control | Control | REACTOME CHONDROITIN SULFATE DERMATAN SULFATE METABOLISM                             | 36  | -0.25648777 | -0.83625946 | 0.6899919   | 0.75916326 | 1     | 5854 | lga=53%, ltr=49%, signal=104% |
| Control | Control | REACTOME SIGNALING BY PTG                                                            | 29  | 0.24355727  | 0.8404451   | 0.689782    | 0.7594773  | 1     | 2971 | lga=50%, ltr=22%, signal=63%  |
| Control | Control | REACTOME INWARDLY RECTIFYING K CHANNELS                                              | 28  | -0.29125008 | -0.8411549  | 0.6854369   | 0.7618944  | 1     | 5901 | lga=64%, ltr=50%, signal=127% |
| Control | Control | REACTOME SLC MEDIATED TRANSMEMBRANE TRANSPORT                                        | 159 | -0.4463066  | -1.4786729  | 0.037401576 | 0.76229465 | 0.971 | 5184 | lga=70%, ltr=44%, signal=122% |
| Control | Control | REACTOME RHOD GTPASE CYCLE                                                           | 48  | -0.2500455  | -0.842893   | 0.6891089   | 0.7626742  | 1     | 3562 | lga=40%, ltr=30%, signal=56%  |
| Control | Control | REACTOME INTEGRIN CELL SURFACE INTERACTIONS                                          | 60  | 0.2989827   | 0.8482126   | 0.0333664   | 0.76292533 | 0.964 | 2993 | lga=57%, ltr=25%, signal=75%  |
| SD_omeg | Control | REACTOME NRH2 AND NRH3 MEDIATED SIGNALING                                            | 29  | 0.29011098  | 0.7854319   | 0.6963377   | 0.7714559  | 1     | 2845 | lga=49%, ltr=22%, signal=63%  |
| SD_omeg | Control | REACTOME NEPHRIN FAMILY INTERACTIONS                                                 | 21  | 0.22521833  | 0.7863785   | 0.8096699   | 0.7717149  | 1     | 1839 | lga=38%, ltr=15%, signal=45%  |
| Control | Control | REACTOME COLLAGEN DEGRADATION                                                        | 47  | -0.5701649  | -1.5182486  | 0.021653544 | 0.7734541  | 0.949 | 3823 | lga=72%, ltr=32%, signal=106% |
| Control | Control | REACTOME CARBOXYTERMINAL POST TRANSLATIONAL MODIFICATIONS OF TUBULIN                 | 28  | -0.54576373 | -1.5270767  | 0.025948104 | 0.7770339  | 0.943 | 3097 | lga=54%, ltr=26%, signal=72%  |
| Control | Control | REACTOME NCAM SIGNALING FOR NEURITE OUT GROWTH                                       | 45  | -0.5029662  | -1.5063896  | 0.05533597  | 0.77903104 | 0.951 | 3359 | lga=60%, ltr=28%, signal=78%  |
| SD_omeg | Control | REACTOME ADP SIGNALING THROUGH P2Y PURINOCEPTOR 12                                   | 25  | 0.28759965  | 0.7734982   | 0.77317554  | 0.7824411  | 1     | 3433 | lga=50%, ltr=25%, signal=63%  |
| SD_omeg | Control | REACTOME FGFR1 MUTANT RECEPTOR ACTIVATION                                            | 22  | 0.2532734   | 0.7727393   | 0.74451095  | 0.78600585 | 1     | 1901 | lga=33%, ltr=15%, signal=39%  |
| SD_omeg | Control | REACTOME RAC1 GTPASE CYCLE                                                           | 129 | 0.20374583  | 0.77125996  | 0.7412731   | 0.7864204  | 1     | 1920 | lga=41%, ltr=16%, signal=46%  |
| SD_omeg | Control | REACTOME PI METABOLISM                                                               | 55  | 0.21819403  | 0.7691696   | 0.7410939   | 0.7870482  | 1     | 2585 | lga=43%, ltr=22%, signal=54%  |
| SD_omeg | Control | REACTOME TRANSCRIPTIONAL REGULATION BY THE AP 2 TFP2 FAMILY OF TRANSCRIPTION FACTORS | 55  | 0.21819403  | 0.7691696   | 0.7410939   | 0.7870482  | 1     | 3715 | lga=58%, ltr=31%, signal=86%  |
| SD_omeg | Control | REACTOME INSULIN PROCESSING                                                          | 24  | -0.2384919  | -0.7872249  | 0.8142926   | 0.7872249  | 1     | 1243 | lga=21%, ltr=13%, signal=27%  |
| Control | Control | REACTOME TRANSPORT OF VITAMINS NUCLEOSIDES AND RELATED MOLECULES                     | 28  | -0.25755545 | -0.8077896  | 0.7608956   | 0.791551   | 1     | 2973 | lga=33%, ltr=25%, signal=44%  |
| Control | Control | REACTOME PHOSPHOLIPID METABOLISM                                                     | 129 | -0.19823163 | -0.809744   | 0.7366412   | 0.7920555  | 1     | 5404 | lga=55%, ltr=45%, signal=104% |
| SD_omeg | Control | REACTOME SIGNALING BY FGFR4                                                          | 29  | 0.21329868  | 0.7602028   | 0.8012254   | 0.7935476  | 1     | 3528 | lga=42%, ltr=30%, signal=63%  |
| SD_omeg | Control | REACTOME OVARIAN TUMOR DOMAIN PROTEASES                                              | 31  | 0.24283504  | 0.7586989   | 0.7809641   | 0.7942636  | 1     | 1911 | lga=38%, ltr=16%, signal=46%  |
| Control | Control | REACTOME CLASS C 3 METABOTROPIC GLUTAMATE PHEROMONE RECEPTORS                        | 20  | -0.5781113  | -1.533452   | 0.0365134   | 0.797701   | 0.937 | 3091 | lga=59%, ltr=29%, signal=94%  |
| Control | Control | REACTOME SMOYULATION OF INTRACELLULAR RECEPTORS                                      | 21  | -0.24808481 | -0.80019236 | 0.7369439   | 0.79939795 | 1     | 3936 | lga=70%, ltr=54%, signal=104% |
| Control | Control | REACTOME INOSITOL PHOSPHATE METABOLISM                                               | 30  | -0.24098856 | -0.79099005 | 0.7370518   | 0.8059735  | 1     | 4576 | lga=38%, ltr=38%, signal=62%  |
| SD_omeg | Control | REACTOME ADP SIGNALING THROUGH P2Y PURINOCEPTOR 1                                    | 16  | 0.2632021   | 0.74786735  | 0.7915832   | 0.8062846  | 1     | 4775 | lga=53%, ltr=40%, signal=81%  |
| SD_omeg | Control | REACTOME OTHER INTERLEUKIN SIGNALING                                                 | 16  | 0.28327754  | 0.7462498   | 0.750903    | 0.80740265 | 1     | 3962 | lga=67%, ltr=33%, signal=94%  |
| SD_omeg | Control | REACTOME INTERLEUKIN 4 AND INTERLEUKIN 13 SIGNALING                                  | 22  | -0.189244   | -0.7454346  | 0.8548952   | 0.8079263  | 1     | 2475 | lga=58%, ltr=21%, signal=70%  |
| Control | Control | REACTOME MITOCHONDRIAL FATTY ACID BETA OXIDATION                                     | 16  | -0.2805217  | -0.7917833  | 0.7348928   | 0.8083657  | 1     | 1515 | lga=25%, ltr=13%, signal=29%  |
| SD_omeg | Control | REACTOME BMAL1 CLOCK NPAS2 ACTIVATES CIRCADIAN GENE EXPRESSION                       | 18  | 0.26861838  | 0.7431116   | 0.7484909   | 0.8084832  | 1     | 1274 | lga=38%, ltr=28%, signal=62%  |
| Control | Control | REACTOME COPI DEPENDENT GOLGI TO ER RETROGRADE TRAFFIC                               | 70  | -0.18406075 | -0.78546244 | 0.82539884  | 0.81057316 | 1     | 3295 | lga=61%, ltr=35%, signal=92%  |
| Control | Control | REACTOME NEGATIVE REGULATION OF FGFR SIGNALING                                       | 21  | -0.22914866 | -0.7758974  | 0.7675781   | 0.81189035 | 1     | 4190 | lga=32%, ltr=22%, signal=48%  |
| SD_omeg | Control | REACTOME EXTRA NUCLEAR ESTROGEN SIGNALING                                            | 44  | -0.2304856  | -0.7354549  | 0.8369055   | 0.8173496  | 1     | 1960 | lga=39%, ltr=35%, signal=65%  |
| Control | Control | REACTOME NEGATIVE REGULATION OF FGFR2 SIGNALING                                      | 26  | -0.23099298 | -0.7694838  | 0.800395    |            |       |      |                               |

|          |                                                                                                                             |     |             |             |             |            |       |      |                                  |
|----------|-----------------------------------------------------------------------------------------------------------------------------|-----|-------------|-------------|-------------|------------|-------|------|----------------------------------|
| Control  | REACTOME FACTORS INVOLVED IN MEGAKARYOCYTE DEVELOPMENT AND PLATELET PRODUCTION                                              | 97  | -0.14387096 | -0.58030967 | 0.9903661   | 0.9509643  | 1     | 4190 | tags=30%, list=35%, signal=46%   |
| SD_rnseq | REACTOME SIGNALING BY WNT IN CANCER                                                                                         | 26  | 0.14532151  | 0.52712595  | 0.9791232   | 0.96202365 | 1     | 2754 | tags=35%, list=23%, signal=45%   |
| Control  | REACTOME SYNTHESIS OF SUBSTRATES IN N GLYCAN BIOSYTHESIS                                                                    | 32  | -0.15802959 | -0.5492996  | 0.9659155   | 0.96375245 | 1     | 392  | tags=6%, list=3%, signal=6%      |
| Control  | REACTOME BIOSYTHESIS OF THE N GLYCAN PRECURSOR_DOLICHOL_LIPID_LINKED_OLIGOSACCHARIDE_LL O AND TRANSFER TO A NASCENT PROTEIN | 35  | -0.15411033 | -0.55166537 | 0.99013805  | 0.96609426 | 1     | 392  | tags=6%, list=3%, signal=6%      |
| SD_rnseq | REACTOME CYCLIN A B1 B2 ASSOCIATED EVENTS DURING G2 M TRANSITION                                                            | 17  | 0.17024131  | 0.49795473  | 0.98221344  | 0.97329277 | 1     | 9881 | tags=100%, list=83%, signal=587% |
| SD_rnseq | REACTOME SPHINGOLIPID DE NOVO BIOSYTHESIS                                                                                   | 35  | 0.13089688  | 0.47621584  | 0.9979424   | 0.9783715  | 1     | 3233 | tags=34%, list=27%, signal=47%   |
| Control  | REACTOME ACTIVATION OF ATR IN RESPONSE TO REPLICATION STRESS                                                                | 21  | -0.17934316 | -0.5011307  | 0.972167    | 0.97997527 | 1     | 3956 | tags=20%, list=33%, signal=43%   |
| Control  | REACTOME NICOTINATE METABOLISM                                                                                              | 17  | -0.18129367 | -0.50431085 | 0.97270954  | 0.9822754  | 1     | 5013 | tags=41%, list=42%, signal=71%   |
| Control  | REACTOME FATTY ACYL COA BIOSYTHESIS                                                                                         | 18  | -0.15821245 | -0.48275647 | 0.99235183  | 0.9830081  | 1     | 1611 | tags=11%, list=14%, signal=13%   |
| Control  | REACTOME SIGNALING BY RETINOIC ACID                                                                                         | 24  | -0.14569743 | -0.4681804  | 0.9942639   | 0.9837044  | 1     | 2303 | tags=17%, list=19%, signal=21%   |
| Control  | REACTOME SYNTHESIS OF PC                                                                                                    | 17  | -0.15349287 | -0.45069143 | 0.9922929   | 0.9845032  | 1     | 4207 | tags=29%, list=30%, signal=45%   |
| Control  | REACTOME TRAFFICKING OF AMPA RECEPTORS                                                                                      | 18  | -0.5512396  | -1.5404816  | 0.029236875 | 0.9846719  | 0.929 | 3671 | tags=59%, list=31%, signal=80%   |
| SD_rnseq | REACTOME NUCLEAR EVENTS KINASE AND TRANSCRIPTION FACTOR ACTIVATION                                                          | 40  | 0.12429803  | 0.44114634  | 0.9941176   | 0.9852353  | 1     | 3500 | tags=48%, list=29%, signal=67%   |
| SD_rnseq | REACTOME ACTIVATED_PKN1_STIMULATES_TRANSCRIPTION_OF_AR_ANDROGEN_RECEPTOR_REGULATED_GENES_KLK2_AND_KLK3                      | 32  | 0.14672302  | 0.4473183   | 0.9848812   | 0.98571616 | 1     | 7027 | tags=91%, list=59%, signal=221%  |
| Control  | REACTOME NITRIC OXIDE STIMULATES GUANYLATE CYCLASE                                                                          | 15  | -0.7044923  | -1.7346193  | 0.001930502 | 1          | 0.528 | 1362 | tags=60%, list=11%, signal=66%   |
| Control  | REACTOME LAMININ INTERACTIONS                                                                                               | 22  | -0.6804147  | -1.6237822  | 0.026       | 1          | 0.842 | 3028 | tags=82%, list=25%, signal=110%  |
| Control  | REACTOME COLLAGEN FORMATION                                                                                                 | 67  | -0.568573   | -1.6160052  | 0.007782101 | 1          | 0.826 | 3512 | tags=69%, list=29%, signal=97%   |
| Control  | REACTOME NON INTEGRIN MEMBRANE ECM INTERACTIONS                                                                             | 46  | -0.5771018  | -1.5788034  | 0.007827789 | 1          | 0.876 | 3386 | tags=70%, list=28%, signal=97%   |
| Control  | REACTOME ECM PROTEOGLYCANS                                                                                                  | 58  | -0.5933263  | -1.5784186  | 0.007827789 | 1          | 0.876 | 3643 | tags=78%, list=31%, signal=111%  |
| Control  | REACTOME ASSEMBLY OF COLLAGEN FIBRILS AND OTHER MULTIMERIC STRUCTURES                                                       | 46  | -0.5918742  | -1.5696132  | 0.007905139 | 1          | 0.891 | 3623 | tags=76%, list=32%, signal=112%  |
| Control  | REACTOME EXTRACELLULAR MATRIX ORGANIZATION                                                                                  | 212 | -0.496246   | -1.620032   | 0.007930508 | 1          | 0.845 | 3697 | tags=62%, list=31%, signal=86%   |
| Control  | REACTOME DISEASES ASSOCIATED WITH O GLYCOSYLATION OF PROTEINS                                                               | 51  | -0.57318276 | -1.5541197  | 0.013779508 | 1          | 0.916 | 4005 | tags=78%, list=34%, signal=118%  |
| Control  | REACTOME COLLAGEN BIOSYTHESIS AND MODIFYING ENZYMES                                                                         | 50  | -0.59122205 | -1.5495337  | 0.025540275 | 1          | 0.92  | 3503 | tags=74%, list=29%, signal=104%  |







|                                                           |       |       |     |                                                                                                                                                                                                                                                                                                                                                                                                                                                                                                                                                                                                                                                                                                                                                                                                                                                                                                                                                                                                                                                                                                                                                                                                                                                                                                                                                                                                                                                                                                                                                                                                                                                                                                                                                                                                                                                                                                                                                                                                                                                                                                                                                                                                                                                                                                                                                                                                                                                                                                                                                                                                                                                                                                                                                                                                                                                                                                                                                                                                                                                                                                                                                                                                                                                                                                                                                                                                                                                                                                                                                                                                                                                                                                                                                                                                                                                                                                                                                                                                                                                                                                                                                                                                                                                                                                                                                                                                                                                                                                                                                                                                                                                                                                                                                                                                                                                                                                                                                                                                                                                                                                     |
|-----------------------------------------------------------|-------|-------|-----|-----------------------------------------------------------------------------------------------------------------------------------------------------------------------------------------------------------------------------------------------------------------------------------------------------------------------------------------------------------------------------------------------------------------------------------------------------------------------------------------------------------------------------------------------------------------------------------------------------------------------------------------------------------------------------------------------------------------------------------------------------------------------------------------------------------------------------------------------------------------------------------------------------------------------------------------------------------------------------------------------------------------------------------------------------------------------------------------------------------------------------------------------------------------------------------------------------------------------------------------------------------------------------------------------------------------------------------------------------------------------------------------------------------------------------------------------------------------------------------------------------------------------------------------------------------------------------------------------------------------------------------------------------------------------------------------------------------------------------------------------------------------------------------------------------------------------------------------------------------------------------------------------------------------------------------------------------------------------------------------------------------------------------------------------------------------------------------------------------------------------------------------------------------------------------------------------------------------------------------------------------------------------------------------------------------------------------------------------------------------------------------------------------------------------------------------------------------------------------------------------------------------------------------------------------------------------------------------------------------------------------------------------------------------------------------------------------------------------------------------------------------------------------------------------------------------------------------------------------------------------------------------------------------------------------------------------------------------------------------------------------------------------------------------------------------------------------------------------------------------------------------------------------------------------------------------------------------------------------------------------------------------------------------------------------------------------------------------------------------------------------------------------------------------------------------------------------------------------------------------------------------------------------------------------------------------------------------------------------------------------------------------------------------------------------------------------------------------------------------------------------------------------------------------------------------------------------------------------------------------------------------------------------------------------------------------------------------------------------------------------------------------------------------------------------------------------------------------------------------------------------------------------------------------------------------------------------------------------------------------------------------------------------------------------------------------------------------------------------------------------------------------------------------------------------------------------------------------------------------------------------------------------------------------------------------------------------------------------------------------------------------------------------------------------------------------------------------------------------------------------------------------------------------------------------------------------------------------------------------------------------------------------------------------------------------------------------------------------------------------------------------------------------------------------------------------------------------------------------|
| Agranulocyte Adhesion and Diapedesis                      | 3.43  | 0.159 | NaN | ACTG2,CCL11,CCL14,CCL16,CCL7,CLDN10,CLDN12,CLDN14,CLDN19,CLDN4,CXCL10,CXCL12,HRH1,IL37,MMP10,MMP13,MMP2,MMP20,MMP28,MYH11,MYH13,MYH6,MYH4,MYH6,MYH7,MYH8,MYL3,MYL6,MYO10B,MYO1A,MYO1H,PPP,SELE,VCAM1                                                                                                                                                                                                                                                                                                                                                                                                                                                                                                                                                                                                                                                                                                                                                                                                                                                                                                                                                                                                                                                                                                                                                                                                                                                                                                                                                                                                                                                                                                                                                                                                                                                                                                                                                                                                                                                                                                                                                                                                                                                                                                                                                                                                                                                                                                                                                                                                                                                                                                                                                                                                                                                                                                                                                                                                                                                                                                                                                                                                                                                                                                                                                                                                                                                                                                                                                                                                                                                                                                                                                                                                                                                                                                                                                                                                                                                                                                                                                                                                                                                                                                                                                                                                                                                                                                                                                                                                                                                                                                                                                                                                                                                                                                                                                                                                                                                                                                |
| FXR/RXR Activation                                        | 2.97  | 0.175 | NaN | ABCG5,ABCG8,ALB,APOC3,BAAT,CYP19A1,FETUB,FGA,G6PC1,G6PC2,GC,HNF4A,IL37,MLXIPL,NR1H4,NR1I2,NR5A2,RPB4,SLC22A7,SLCO1B3,TF,TR                                                                                                                                                                                                                                                                                                                                                                                                                                                                                                                                                                                                                                                                                                                                                                                                                                                                                                                                                                                                                                                                                                                                                                                                                                                                                                                                                                                                                                                                                                                                                                                                                                                                                                                                                                                                                                                                                                                                                                                                                                                                                                                                                                                                                                                                                                                                                                                                                                                                                                                                                                                                                                                                                                                                                                                                                                                                                                                                                                                                                                                                                                                                                                                                                                                                                                                                                                                                                                                                                                                                                                                                                                                                                                                                                                                                                                                                                                                                                                                                                                                                                                                                                                                                                                                                                                                                                                                                                                                                                                                                                                                                                                                                                                                                                                                                                                                                                                                                                                          |
| Serotonin Receptor Signaling                              | 2.52  | 0.233 | NaN | ADCY10,ADCY2,HTTR1D,HTTR2A,HTTR3C,HTTR5A,MAOB,SLC18A1,THA1,TPH2                                                                                                                                                                                                                                                                                                                                                                                                                                                                                                                                                                                                                                                                                                                                                                                                                                                                                                                                                                                                                                                                                                                                                                                                                                                                                                                                                                                                                                                                                                                                                                                                                                                                                                                                                                                                                                                                                                                                                                                                                                                                                                                                                                                                                                                                                                                                                                                                                                                                                                                                                                                                                                                                                                                                                                                                                                                                                                                                                                                                                                                                                                                                                                                                                                                                                                                                                                                                                                                                                                                                                                                                                                                                                                                                                                                                                                                                                                                                                                                                                                                                                                                                                                                                                                                                                                                                                                                                                                                                                                                                                                                                                                                                                                                                                                                                                                                                                                                                                                                                                                     |
| Isotopomer Degradation                                    | 2.25  | 0.6   | NaN | CYP11A1,CYP27,CYP8                                                                                                                                                                                                                                                                                                                                                                                                                                                                                                                                                                                                                                                                                                                                                                                                                                                                                                                                                                                                                                                                                                                                                                                                                                                                                                                                                                                                                                                                                                                                                                                                                                                                                                                                                                                                                                                                                                                                                                                                                                                                                                                                                                                                                                                                                                                                                                                                                                                                                                                                                                                                                                                                                                                                                                                                                                                                                                                                                                                                                                                                                                                                                                                                                                                                                                                                                                                                                                                                                                                                                                                                                                                                                                                                                                                                                                                                                                                                                                                                                                                                                                                                                                                                                                                                                                                                                                                                                                                                                                                                                                                                                                                                                                                                                                                                                                                                                                                                                                                                                                                                                  |
| Citru-line-Nitric Oxide Cycle                             | 2.25  | 0.6   | NaN | ASS1,NOS1,NOS2                                                                                                                                                                                                                                                                                                                                                                                                                                                                                                                                                                                                                                                                                                                                                                                                                                                                                                                                                                                                                                                                                                                                                                                                                                                                                                                                                                                                                                                                                                                                                                                                                                                                                                                                                                                                                                                                                                                                                                                                                                                                                                                                                                                                                                                                                                                                                                                                                                                                                                                                                                                                                                                                                                                                                                                                                                                                                                                                                                                                                                                                                                                                                                                                                                                                                                                                                                                                                                                                                                                                                                                                                                                                                                                                                                                                                                                                                                                                                                                                                                                                                                                                                                                                                                                                                                                                                                                                                                                                                                                                                                                                                                                                                                                                                                                                                                                                                                                                                                                                                                                                                      |
| Urea Cycle                                                | 1.98  | 0.5   | NaN | ASS1,CPH1,OTC                                                                                                                                                                                                                                                                                                                                                                                                                                                                                                                                                                                                                                                                                                                                                                                                                                                                                                                                                                                                                                                                                                                                                                                                                                                                                                                                                                                                                                                                                                                                                                                                                                                                                                                                                                                                                                                                                                                                                                                                                                                                                                                                                                                                                                                                                                                                                                                                                                                                                                                                                                                                                                                                                                                                                                                                                                                                                                                                                                                                                                                                                                                                                                                                                                                                                                                                                                                                                                                                                                                                                                                                                                                                                                                                                                                                                                                                                                                                                                                                                                                                                                                                                                                                                                                                                                                                                                                                                                                                                                                                                                                                                                                                                                                                                                                                                                                                                                                                                                                                                                                                                       |
| G-Protein Coupled Receptor Signaling                      | 1.87  | 0.127 | NaN | ADCY10,ADCY2,ADRA1B,CALCR,CHRM5,DRD1,DRD3,DUSP9,ENPP6,F5HR,GABRR2,GRM2,GRM4,GRM5,GRM6,GRM8,HRH1,HTTR1D,HTTR2A,HTTR5A,HLH                                                                                                                                                                                                                                                                                                                                                                                                                                                                                                                                                                                                                                                                                                                                                                                                                                                                                                                                                                                                                                                                                                                                                                                                                                                                                                                                                                                                                                                                                                                                                                                                                                                                                                                                                                                                                                                                                                                                                                                                                                                                                                                                                                                                                                                                                                                                                                                                                                                                                                                                                                                                                                                                                                                                                                                                                                                                                                                                                                                                                                                                                                                                                                                                                                                                                                                                                                                                                                                                                                                                                                                                                                                                                                                                                                                                                                                                                                                                                                                                                                                                                                                                                                                                                                                                                                                                                                                                                                                                                                                                                                                                                                                                                                                                                                                                                                                                                                                                                                            |
| Phototransduction Pathway                                 | 1.8   | 0.185 | NaN | CNGA3,CNGB1,GUCY2C,GUCY2F,NPR1,OPN5,PDE6A,PDE6C,RSGBP,SAG                                                                                                                                                                                                                                                                                                                                                                                                                                                                                                                                                                                                                                                                                                                                                                                                                                                                                                                                                                                                                                                                                                                                                                                                                                                                                                                                                                                                                                                                                                                                                                                                                                                                                                                                                                                                                                                                                                                                                                                                                                                                                                                                                                                                                                                                                                                                                                                                                                                                                                                                                                                                                                                                                                                                                                                                                                                                                                                                                                                                                                                                                                                                                                                                                                                                                                                                                                                                                                                                                                                                                                                                                                                                                                                                                                                                                                                                                                                                                                                                                                                                                                                                                                                                                                                                                                                                                                                                                                                                                                                                                                                                                                                                                                                                                                                                                                                                                                                                                                                                                                           |
| Thioredoxin Pathway                                       | 1.78  | 0.429 | NaN | TXN,TXNDC2,TXNRD3                                                                                                                                                                                                                                                                                                                                                                                                                                                                                                                                                                                                                                                                                                                                                                                                                                                                                                                                                                                                                                                                                                                                                                                                                                                                                                                                                                                                                                                                                                                                                                                                                                                                                                                                                                                                                                                                                                                                                                                                                                                                                                                                                                                                                                                                                                                                                                                                                                                                                                                                                                                                                                                                                                                                                                                                                                                                                                                                                                                                                                                                                                                                                                                                                                                                                                                                                                                                                                                                                                                                                                                                                                                                                                                                                                                                                                                                                                                                                                                                                                                                                                                                                                                                                                                                                                                                                                                                                                                                                                                                                                                                                                                                                                                                                                                                                                                                                                                                                                                                                                                                                   |
|                                                           |       |       |     | ANXA1,CCL11,DNAH10,DNAH3,EGFR,FCGR1A,G6PC1,GJA1,IGF1,IL13,IL17RC,IL17RD,IL17RE,IL1RL2,IL22RA1,IL3,IL9R,KRT12,KRT14,KRT15,KRT16,KRT17,KRT20,KRT22,KRT24,KRT25,KRT26,KRT28,KRT3,KRT31,KRT33A,KRT34,KRT36,KRT37,KRT38,KRT39,KRT5,KRT6A,KRT6B,KRT7,KRT7B,KRT8,KRT9,LRRT2,KRT8,MMP13,MMP2,NDUFBS,NDUFSS,NOS2,PKC1,PFKFB1,PLA2G2A,PLA2G2D,PLA2G2E,PLA2G2F,PLA2G3,PLA2G4D,PLA2G4E,PLA2G5,PRKAA2,RASD2,SELE,TAT,VCAM1                                                                                                                                                                                                                                                                                                                                                                                                                                                                                                                                                                                                                                                                                                                                                                                                                                                                                                                                                                                                                                                                                                                                                                                                                                                                                                                                                                                                                                                                                                                                                                                                                                                                                                                                                                                                                                                                                                                                                                                                                                                                                                                                                                                                                                                                                                                                                                                                                                                                                                                                                                                                                                                                                                                                                                                                                                                                                                                                                                                                                                                                                                                                                                                                                                                                                                                                                                                                                                                                                                                                                                                                                                                                                                                                                                                                                                                                                                                                                                                                                                                                                                                                                                                                                                                                                                                                                                                                                                                                                                                                                                                                                                                                                       |
| Glucocorticoid Receptor Signaling                         | 1.75  | 0.112 | NaN | CXCL10,PLA2G2A,PLA2G2C,PLA2G2D,PLA2G2E,PLA2G2F,PLA2G3,PLA2G4D,PLA2G4E,PLA2G5,PLA2R1,PNPLA3,RASD2                                                                                                                                                                                                                                                                                                                                                                                                                                                                                                                                                                                                                                                                                                                                                                                                                                                                                                                                                                                                                                                                                                                                                                                                                                                                                                                                                                                                                                                                                                                                                                                                                                                                                                                                                                                                                                                                                                                                                                                                                                                                                                                                                                                                                                                                                                                                                                                                                                                                                                                                                                                                                                                                                                                                                                                                                                                                                                                                                                                                                                                                                                                                                                                                                                                                                                                                                                                                                                                                                                                                                                                                                                                                                                                                                                                                                                                                                                                                                                                                                                                                                                                                                                                                                                                                                                                                                                                                                                                                                                                                                                                                                                                                                                                                                                                                                                                                                                                                                                                                    |
| Role of MAPK Signaling in the Pathogenesis of Influenza   | 1.68  | 0.16  | NaN | AA2,RASD2,SELE,TAT,VCAM1                                                                                                                                                                                                                                                                                                                                                                                                                                                                                                                                                                                                                                                                                                                                                                                                                                                                                                                                                                                                                                                                                                                                                                                                                                                                                                                                                                                                                                                                                                                                                                                                                                                                                                                                                                                                                                                                                                                                                                                                                                                                                                                                                                                                                                                                                                                                                                                                                                                                                                                                                                                                                                                                                                                                                                                                                                                                                                                                                                                                                                                                                                                                                                                                                                                                                                                                                                                                                                                                                                                                                                                                                                                                                                                                                                                                                                                                                                                                                                                                                                                                                                                                                                                                                                                                                                                                                                                                                                                                                                                                                                                                                                                                                                                                                                                                                                                                                                                                                                                                                                                                            |
| Methionine Salvage II (Mammalian)                         | 1.68  | 0.667 | NaN | BHMT,BHMT2                                                                                                                                                                                                                                                                                                                                                                                                                                                                                                                                                                                                                                                                                                                                                                                                                                                                                                                                                                                                                                                                                                                                                                                                                                                                                                                                                                                                                                                                                                                                                                                                                                                                                                                                                                                                                                                                                                                                                                                                                                                                                                                                                                                                                                                                                                                                                                                                                                                                                                                                                                                                                                                                                                                                                                                                                                                                                                                                                                                                                                                                                                                                                                                                                                                                                                                                                                                                                                                                                                                                                                                                                                                                                                                                                                                                                                                                                                                                                                                                                                                                                                                                                                                                                                                                                                                                                                                                                                                                                                                                                                                                                                                                                                                                                                                                                                                                                                                                                                                                                                                                                          |
| Thyroid Hormone Biosynthesis                              | 1.68  | 0.667 | NaN | TD,TPO                                                                                                                                                                                                                                                                                                                                                                                                                                                                                                                                                                                                                                                                                                                                                                                                                                                                                                                                                                                                                                                                                                                                                                                                                                                                                                                                                                                                                                                                                                                                                                                                                                                                                                                                                                                                                                                                                                                                                                                                                                                                                                                                                                                                                                                                                                                                                                                                                                                                                                                                                                                                                                                                                                                                                                                                                                                                                                                                                                                                                                                                                                                                                                                                                                                                                                                                                                                                                                                                                                                                                                                                                                                                                                                                                                                                                                                                                                                                                                                                                                                                                                                                                                                                                                                                                                                                                                                                                                                                                                                                                                                                                                                                                                                                                                                                                                                                                                                                                                                                                                                                                              |
| FXR/RXR Activation                                        | 1.65  | 0.189 | NaN | CES3,CYP2B6,CYP3A4,G6PC1,GSTA2,HNF4A,IGFBP1,NR1I2,SLCO1B3,UGT11A1,UGT1A9 (includes others)                                                                                                                                                                                                                                                                                                                                                                                                                                                                                                                                                                                                                                                                                                                                                                                                                                                                                                                                                                                                                                                                                                                                                                                                                                                                                                                                                                                                                                                                                                                                                                                                                                                                                                                                                                                                                                                                                                                                                                                                                                                                                                                                                                                                                                                                                                                                                                                                                                                                                                                                                                                                                                                                                                                                                                                                                                                                                                                                                                                                                                                                                                                                                                                                                                                                                                                                                                                                                                                                                                                                                                                                                                                                                                                                                                                                                                                                                                                                                                                                                                                                                                                                                                                                                                                                                                                                                                                                                                                                                                                                                                                                                                                                                                                                                                                                                                                                                                                                                                                                          |
| Maturity Onset Diabetes of Young (MODY) Signaling         | 1.46  | 0.154 | NaN | ABCC9,ALDOB,APOC3,CACNA1B,CACNA1C,CACNA1S,CACNG2,CACNG5,CEL,HNF1B,HNF4A,SLC22A2                                                                                                                                                                                                                                                                                                                                                                                                                                                                                                                                                                                                                                                                                                                                                                                                                                                                                                                                                                                                                                                                                                                                                                                                                                                                                                                                                                                                                                                                                                                                                                                                                                                                                                                                                                                                                                                                                                                                                                                                                                                                                                                                                                                                                                                                                                                                                                                                                                                                                                                                                                                                                                                                                                                                                                                                                                                                                                                                                                                                                                                                                                                                                                                                                                                                                                                                                                                                                                                                                                                                                                                                                                                                                                                                                                                                                                                                                                                                                                                                                                                                                                                                                                                                                                                                                                                                                                                                                                                                                                                                                                                                                                                                                                                                                                                                                                                                                                                                                                                                                     |
| L-cysteine Degradation I                                  | 1.4   | 0.5   | NaN | DDO1,GOT1L1                                                                                                                                                                                                                                                                                                                                                                                                                                                                                                                                                                                                                                                                                                                                                                                                                                                                                                                                                                                                                                                                                                                                                                                                                                                                                                                                                                                                                                                                                                                                                                                                                                                                                                                                                                                                                                                                                                                                                                                                                                                                                                                                                                                                                                                                                                                                                                                                                                                                                                                                                                                                                                                                                                                                                                                                                                                                                                                                                                                                                                                                                                                                                                                                                                                                                                                                                                                                                                                                                                                                                                                                                                                                                                                                                                                                                                                                                                                                                                                                                                                                                                                                                                                                                                                                                                                                                                                                                                                                                                                                                                                                                                                                                                                                                                                                                                                                                                                                                                                                                                                                                         |
| Glycine Betaine Degradation                               | 1.32  | 0.3   | NaN | BHMT,BHMT2,DMGDH                                                                                                                                                                                                                                                                                                                                                                                                                                                                                                                                                                                                                                                                                                                                                                                                                                                                                                                                                                                                                                                                                                                                                                                                                                                                                                                                                                                                                                                                                                                                                                                                                                                                                                                                                                                                                                                                                                                                                                                                                                                                                                                                                                                                                                                                                                                                                                                                                                                                                                                                                                                                                                                                                                                                                                                                                                                                                                                                                                                                                                                                                                                                                                                                                                                                                                                                                                                                                                                                                                                                                                                                                                                                                                                                                                                                                                                                                                                                                                                                                                                                                                                                                                                                                                                                                                                                                                                                                                                                                                                                                                                                                                                                                                                                                                                                                                                                                                                                                                                                                                                                                    |
| Granulocyte Adhesion and Diapedesis                       | 1.24  | 0.122 | NaN | CCL11,CCL14,CCL16,CCL7,CLDN10,CLDN12,CLDN14,CLDN19,CLDN4,IGSF5,MYH1,MYH13,MYH2,MYH4,MYH6,MYH7,MYH8,MYL3,MYL6,MYO10B,MYO1A,MYO1H,SNAP25,TJPI1                                                                                                                                                                                                                                                                                                                                                                                                                                                                                                                                                                                                                                                                                                                                                                                                                                                                                                                                                                                                                                                                                                                                                                                                                                                                                                                                                                                                                                                                                                                                                                                                                                                                                                                                                                                                                                                                                                                                                                                                                                                                                                                                                                                                                                                                                                                                                                                                                                                                                                                                                                                                                                                                                                                                                                                                                                                                                                                                                                                                                                                                                                                                                                                                                                                                                                                                                                                                                                                                                                                                                                                                                                                                                                                                                                                                                                                                                                                                                                                                                                                                                                                                                                                                                                                                                                                                                                                                                                                                                                                                                                                                                                                                                                                                                                                                                                                                                                                                                        |
| Protein Catabolism                                        | 1.21  | 0.4   | NaN | PADI1,PADI3                                                                                                                                                                                                                                                                                                                                                                                                                                                                                                                                                                                                                                                                                                                                                                                                                                                                                                                                                                                                                                                                                                                                                                                                                                                                                                                                                                                                                                                                                                                                                                                                                                                                                                                                                                                                                                                                                                                                                                                                                                                                                                                                                                                                                                                                                                                                                                                                                                                                                                                                                                                                                                                                                                                                                                                                                                                                                                                                                                                                                                                                                                                                                                                                                                                                                                                                                                                                                                                                                                                                                                                                                                                                                                                                                                                                                                                                                                                                                                                                                                                                                                                                                                                                                                                                                                                                                                                                                                                                                                                                                                                                                                                                                                                                                                                                                                                                                                                                                                                                                                                                                         |
| Lysine Degradation II                                     | 1.21  | 0.4   | NaN | PADI1,PADI3                                                                                                                                                                                                                                                                                                                                                                                                                                                                                                                                                                                                                                                                                                                                                                                                                                                                                                                                                                                                                                                                                                                                                                                                                                                                                                                                                                                                                                                                                                                                                                                                                                                                                                                                                                                                                                                                                                                                                                                                                                                                                                                                                                                                                                                                                                                                                                                                                                                                                                                                                                                                                                                                                                                                                                                                                                                                                                                                                                                                                                                                                                                                                                                                                                                                                                                                                                                                                                                                                                                                                                                                                                                                                                                                                                                                                                                                                                                                                                                                                                                                                                                                                                                                                                                                                                                                                                                                                                                                                                                                                                                                                                                                                                                                                                                                                                                                                                                                                                                                                                                                                         |
| Lysine Degradation V                                      | 1.21  | 0.4   | NaN | AADAT,ALDH7A1                                                                                                                                                                                                                                                                                                                                                                                                                                                                                                                                                                                                                                                                                                                                                                                                                                                                                                                                                                                                                                                                                                                                                                                                                                                                                                                                                                                                                                                                                                                                                                                                                                                                                                                                                                                                                                                                                                                                                                                                                                                                                                                                                                                                                                                                                                                                                                                                                                                                                                                                                                                                                                                                                                                                                                                                                                                                                                                                                                                                                                                                                                                                                                                                                                                                                                                                                                                                                                                                                                                                                                                                                                                                                                                                                                                                                                                                                                                                                                                                                                                                                                                                                                                                                                                                                                                                                                                                                                                                                                                                                                                                                                                                                                                                                                                                                                                                                                                                                                                                                                                                                       |
| Citru-line Degradation                                    | 1.06  | 1     | NaN | OTC                                                                                                                                                                                                                                                                                                                                                                                                                                                                                                                                                                                                                                                                                                                                                                                                                                                                                                                                                                                                                                                                                                                                                                                                                                                                                                                                                                                                                                                                                                                                                                                                                                                                                                                                                                                                                                                                                                                                                                                                                                                                                                                                                                                                                                                                                                                                                                                                                                                                                                                                                                                                                                                                                                                                                                                                                                                                                                                                                                                                                                                                                                                                                                                                                                                                                                                                                                                                                                                                                                                                                                                                                                                                                                                                                                                                                                                                                                                                                                                                                                                                                                                                                                                                                                                                                                                                                                                                                                                                                                                                                                                                                                                                                                                                                                                                                                                                                                                                                                                                                                                                                                 |
| 4-hydroxybenzoate Biosynthesis                            | 1.06  | 1     | NaN | TAT                                                                                                                                                                                                                                                                                                                                                                                                                                                                                                                                                                                                                                                                                                                                                                                                                                                                                                                                                                                                                                                                                                                                                                                                                                                                                                                                                                                                                                                                                                                                                                                                                                                                                                                                                                                                                                                                                                                                                                                                                                                                                                                                                                                                                                                                                                                                                                                                                                                                                                                                                                                                                                                                                                                                                                                                                                                                                                                                                                                                                                                                                                                                                                                                                                                                                                                                                                                                                                                                                                                                                                                                                                                                                                                                                                                                                                                                                                                                                                                                                                                                                                                                                                                                                                                                                                                                                                                                                                                                                                                                                                                                                                                                                                                                                                                                                                                                                                                                                                                                                                                                                                 |
| 4-hydroxyphenylpyruvate Biosynthesis                      | 1.06  | 1     | NaN | TAT                                                                                                                                                                                                                                                                                                                                                                                                                                                                                                                                                                                                                                                                                                                                                                                                                                                                                                                                                                                                                                                                                                                                                                                                                                                                                                                                                                                                                                                                                                                                                                                                                                                                                                                                                                                                                                                                                                                                                                                                                                                                                                                                                                                                                                                                                                                                                                                                                                                                                                                                                                                                                                                                                                                                                                                                                                                                                                                                                                                                                                                                                                                                                                                                                                                                                                                                                                                                                                                                                                                                                                                                                                                                                                                                                                                                                                                                                                                                                                                                                                                                                                                                                                                                                                                                                                                                                                                                                                                                                                                                                                                                                                                                                                                                                                                                                                                                                                                                                                                                                                                                                                 |
| Tight Junction Signaling                                  | 1.06  | 0.118 | NaN | CCL11,CCL14,CCL16,CCL7,CLDN10,CLDN12,CLDN14,CLDN19,CLDN4,IGSF5,MYH1,MYH13,MYH2,MYH4,MYH6,MYH7,MYH8,MYL3,MYL6,MYO10B,MYO1A,MYO1H,SNAP25,TJPI1                                                                                                                                                                                                                                                                                                                                                                                                                                                                                                                                                                                                                                                                                                                                                                                                                                                                                                                                                                                                                                                                                                                                                                                                                                                                                                                                                                                                                                                                                                                                                                                                                                                                                                                                                                                                                                                                                                                                                                                                                                                                                                                                                                                                                                                                                                                                                                                                                                                                                                                                                                                                                                                                                                                                                                                                                                                                                                                                                                                                                                                                                                                                                                                                                                                                                                                                                                                                                                                                                                                                                                                                                                                                                                                                                                                                                                                                                                                                                                                                                                                                                                                                                                                                                                                                                                                                                                                                                                                                                                                                                                                                                                                                                                                                                                                                                                                                                                                                                        |
| Arginine Biosynthesis IV                                  | 1.06  | 0.333 | NaN | ASS1,OTC                                                                                                                                                                                                                                                                                                                                                                                                                                                                                                                                                                                                                                                                                                                                                                                                                                                                                                                                                                                                                                                                                                                                                                                                                                                                                                                                                                                                                                                                                                                                                                                                                                                                                                                                                                                                                                                                                                                                                                                                                                                                                                                                                                                                                                                                                                                                                                                                                                                                                                                                                                                                                                                                                                                                                                                                                                                                                                                                                                                                                                                                                                                                                                                                                                                                                                                                                                                                                                                                                                                                                                                                                                                                                                                                                                                                                                                                                                                                                                                                                                                                                                                                                                                                                                                                                                                                                                                                                                                                                                                                                                                                                                                                                                                                                                                                                                                                                                                                                                                                                                                                                            |
| Serotonin and Melatonin Biosynthesis                      | 1.06  | 0.333 | NaN | TPH1,TPH2                                                                                                                                                                                                                                                                                                                                                                                                                                                                                                                                                                                                                                                                                                                                                                                                                                                                                                                                                                                                                                                                                                                                                                                                                                                                                                                                                                                                                                                                                                                                                                                                                                                                                                                                                                                                                                                                                                                                                                                                                                                                                                                                                                                                                                                                                                                                                                                                                                                                                                                                                                                                                                                                                                                                                                                                                                                                                                                                                                                                                                                                                                                                                                                                                                                                                                                                                                                                                                                                                                                                                                                                                                                                                                                                                                                                                                                                                                                                                                                                                                                                                                                                                                                                                                                                                                                                                                                                                                                                                                                                                                                                                                                                                                                                                                                                                                                                                                                                                                                                                                                                                           |
| Bile Acid Biosynthesis, Neutral Pathway                   | 1.02  | 0.231 | NaN | ABCG1,UGR1,CD11,BAAT,CYP3A4                                                                                                                                                                                                                                                                                                                                                                                                                                                                                                                                                                                                                                                                                                                                                                                                                                                                                                                                                                                                                                                                                                                                                                                                                                                                                                                                                                                                                                                                                                                                                                                                                                                                                                                                                                                                                                                                                                                                                                                                                                                                                                                                                                                                                                                                                                                                                                                                                                                                                                                                                                                                                                                                                                                                                                                                                                                                                                                                                                                                                                                                                                                                                                                                                                                                                                                                                                                                                                                                                                                                                                                                                                                                                                                                                                                                                                                                                                                                                                                                                                                                                                                                                                                                                                                                                                                                                                                                                                                                                                                                                                                                                                                                                                                                                                                                                                                                                                                                                                                                                                                                         |
| GABA Receptor Signaling                                   | 1.01  | 0.122 | NaN | ADCY10,ADCY2,CACNA1B,CACNA1C,CACNA1S,CACNG2,CACNG5,GABBR2,GABRA3,GABRE,GABRP,GABRQ,GABRR1,GN4,SLC6A1,SLC6A13,SLC6A13                                                                                                                                                                                                                                                                                                                                                                                                                                                                                                                                                                                                                                                                                                                                                                                                                                                                                                                                                                                                                                                                                                                                                                                                                                                                                                                                                                                                                                                                                                                                                                                                                                                                                                                                                                                                                                                                                                                                                                                                                                                                                                                                                                                                                                                                                                                                                                                                                                                                                                                                                                                                                                                                                                                                                                                                                                                                                                                                                                                                                                                                                                                                                                                                                                                                                                                                                                                                                                                                                                                                                                                                                                                                                                                                                                                                                                                                                                                                                                                                                                                                                                                                                                                                                                                                                                                                                                                                                                                                                                                                                                                                                                                                                                                                                                                                                                                                                                                                                                                |
| nNOS Signaling in Skeletal Muscle Cells                   | 0.956 | 0.146 | NaN | CACNA1B,CACNA1C,CACNA1S,CACNG2,CACNG5,NOS1,RYR3                                                                                                                                                                                                                                                                                                                                                                                                                                                                                                                                                                                                                                                                                                                                                                                                                                                                                                                                                                                                                                                                                                                                                                                                                                                                                                                                                                                                                                                                                                                                                                                                                                                                                                                                                                                                                                                                                                                                                                                                                                                                                                                                                                                                                                                                                                                                                                                                                                                                                                                                                                                                                                                                                                                                                                                                                                                                                                                                                                                                                                                                                                                                                                                                                                                                                                                                                                                                                                                                                                                                                                                                                                                                                                                                                                                                                                                                                                                                                                                                                                                                                                                                                                                                                                                                                                                                                                                                                                                                                                                                                                                                                                                                                                                                                                                                                                                                                                                                                                                                                                                     |
| Airway Pathology in Chronic Obstructive Pulmonary Disease | 0.86  | 0.119 | NaN | FGF1,FGF17,FGF18,FGF21,FGF7,FGF9,IL13,IL17C,IL17D,IL17E,IL17F,IL17G,IL17H,IL17I,IL17J,IL17K,IL17L,IL17M,IL17N,IL17O,IL17P,IL17Q,IL17R,IL17S,IL17T,IL17U,IL17V,IL17W,IL17X,IL17Y,IL17Z,IL17AA,IL17AB,IL17AC,IL17AD,IL17AE,IL17AF,IL17AG,IL17AH,IL17AI,IL17AJ,IL17AK,IL17AL,IL17AM,IL17AN,IL17AO,IL17AP,IL17AQ,IL17AR,IL17AS,IL17AT,IL17AU,IL17AV,IL17AW,IL17AX,IL17AY,IL17AZ,IL17BA,IL17BB,IL17BC,IL17BD,IL17BE,IL17BF,IL17BG,IL17BH,IL17BI,IL17BJ,IL17BK,IL17BL,IL17BM,IL17BN,IL17BO,IL17BP,IL17BQ,IL17BR,IL17BS,IL17BT,IL17BU,IL17BV,IL17BW,IL17BX,IL17BY,IL17BZ,IL17CA,IL17CB,IL17CC,IL17CD,IL17CE,IL17CF,IL17CG,IL17CH,IL17CI,IL17CJ,IL17CK,IL17CL,IL17CM,IL17CN,IL17CO,IL17CP,IL17CQ,IL17CR,IL17CS,IL17CT,IL17CU,IL17CV,IL17CW,IL17CX,IL17CY,IL17CZ,IL17DA,IL17DB,IL17DC,IL17DD,IL17DE,IL17DF,IL17DG,IL17DH,IL17DI,IL17DJ,IL17DK,IL17DL,IL17DM,IL17DN,IL17DO,IL17DP,IL17DQ,IL17DR,IL17DS,IL17DT,IL17DU,IL17DV,IL17DW,IL17DX,IL17DY,IL17DZ,IL17EA,IL17EB,IL17EC,IL17ED,IL17EE,IL17EF,IL17EG,IL17EH,IL17EI,IL17EJ,IL17EK,IL17EL,IL17EM,IL17EN,IL17EO,IL17EP,IL17EQ,IL17ER,IL17ES,IL17ET,IL17EU,IL17EV,IL17EW,IL17EX,IL17EY,IL17EZ,IL17FA,IL17FB,IL17FC,IL17FD,IL17FE,IL17FF,IL17FG,IL17FH,IL17FI,IL17FJ,IL17FK,IL17FL,IL17FM,IL17FN,IL17FO,IL17FP,IL17FQ,IL17FR,IL17FS,IL17FT,IL17FU,IL17FV,IL17FW,IL17FX,IL17FY,IL17FZ,IL17GA,IL17GB,IL17GC,IL17GD,IL17GE,IL17GF,IL17GG,IL17GH,IL17GI,IL17GJ,IL17GK,IL17GL,IL17GM,IL17GN,IL17GO,IL17GP,IL17GQ,IL17GR,IL17GS,IL17GT,IL17GU,IL17GV,IL17GW,IL17GX,IL17GY,IL17GZ,IL17HA,IL17HB,IL17HC,IL17HD,IL17HE,IL17HF,IL17HG,IL17HH,IL17HI,IL17HJ,IL17HK,IL17HL,IL17HM,IL17HN,IL17HO,IL17HP,IL17HQ,IL17HR,IL17HS,IL17HT,IL17HU,IL17HV,IL17HW,IL17HX,IL17HY,IL17HZ,IL17IA,IL17IB,IL17IC,IL17ID,IL17IE,IL17IF,IL17IG,IL17IH,IL17II,IL17IJ,IL17IK,IL17IL,IL17IM,IL17IN,IL17IO,IL17IP,IL17IQ,IL17IR,IL17IS,IL17IT,IL17IU,IL17IV,IL17IW,IL17IX,IL17IY,IL17IZ,IL17JA,IL17JB,IL17JC,IL17JD,IL17JE,IL17JF,IL17JG,IL17JH,IL17JI,IL17JJ,IL17JK,IL17JL,IL17JM,IL17JN,IL17JO,IL17JP,IL17JQ,IL17JR,IL17JS,IL17JT,IL17JU,IL17JV,IL17JW,IL17JX,IL17JY,IL17JZ,IL17KA,IL17KB,IL17KC,IL17KD,IL17KE,IL17KF,IL17KG,IL17KH,IL17KI,IL17KJ,IL17KK,IL17KL,IL17KM,IL17KN,IL17KO,IL17KP,IL17KQ,IL17KR,IL17KS,IL17KT,IL17KU,IL17KV,IL17KW,IL17KX,IL17KY,IL17KZ,IL17LA,IL17LB,IL17LC,IL17LD,IL17LE,IL17LF,IL17LG,IL17LH,IL17LI,IL17LJ,IL17LK,IL17LL,IL17LM,IL17LN,IL17LO,IL17LP,IL17LQ,IL17LR,IL17LS,IL17LT,IL17LU,IL17LV,IL17LW,IL17LX,IL17LY,IL17LZ,IL17MA,IL17MB,IL17MC,IL17MD,IL17ME,IL17MF,IL17MG,IL17MH,IL17MI,IL17MJ,IL17MK,IL17ML,IL17MN,IL17MO,IL17MP,IL17MQ,IL17MR,IL17MS,IL17MT,IL17MU,IL17MV,IL17MW,IL17MX,IL17MY,IL17MZ,IL17NA,IL17NB,IL17NC,IL17ND,IL17NE,IL17NF,IL17NG,IL17NH,IL17NI,IL17NJ,IL17NK,IL17NL,IL17NM,IL17NO,IL17NP,IL17NQ,IL17NR,IL17NS,IL17NT,IL17NU,IL17NV,IL17NW,IL17NX,IL17NY,IL17NZ,IL17OA,IL17OB,IL17OC,IL17OD,IL17OE,IL17OF,IL17OG,IL17OH,IL17OI,IL17OJ,IL17OK,IL17OL,IL17OM,IL17ON,IL17OO,IL17OP,IL17OQ,IL17OR,IL17OS,IL17OT,IL17OU,IL17OV,IL17OW,IL17OX,IL17OY,IL17OZ,IL17PA,IL17PB,IL17PC,IL17PD,IL17PE,IL17PF,IL17PG,IL17PH,IL17PI,IL17PJ,IL17PK,IL17PL,IL17PM,IL17PN,IL17PO,IL17PP,IL17PQ,IL17PR,IL17PS,IL17PT,IL17PU,IL17PV,IL17PW,IL17PX,IL17PY,IL17PZ,IL17QA,IL17QB,IL17QC,IL17QD,IL17QE,IL17QF,IL17QG,IL17QH,IL17QI,IL17QJ,IL17QK,IL17QL,IL17QM,IL17QN,IL17QO,IL17QP,IL17QQ,IL17QR,IL17QS,IL17QT,IL17QU,IL17QV,IL17QW,IL17QX,IL17QY,IL17QZ,IL17RA,IL17RB,IL17RC,IL17RD,IL17RE,IL17RF,IL17RG,IL17RH,IL17RI,IL17RJ,IL17RK,IL17RL,IL17RM,IL17RN,IL17RO,IL17RP,IL17RQ,IL17RR,IL17RS,IL17RT,IL17RU,IL17RV,IL17RW,IL17RX,IL17RY,IL17RZ,IL17SA,IL17SB,IL17SC,IL17SD,IL17SE,IL17SF,IL17SG,IL17SH,IL17SI,IL17SJ,IL17SK,IL17SL,IL17SM,IL17SN,IL17SO,IL17SP,IL17SQ,IL17SR,IL17SS,IL17ST,IL17SU,IL17SV,IL17SW,IL17SX,IL17SY,IL17SZ,IL17TA,IL17TB,IL17TC,IL17TD,IL17TE,IL17TF,IL17TG,IL17TH,IL17TI,IL17TJ,IL17TK,IL17TL,IL17TM,IL17TN,IL17TO,IL17TP,IL17TQ,IL17TR,IL17TS,IL17TT,IL17TU,IL17TV,IL17TW,IL17TX,IL17TY,IL17TZ,IL17UA,IL17UB,IL17UC,IL17UD,IL17UE,IL17UF,IL17UG,IL17UH,IL17UI,IL17UJ,IL17UK,IL17UL,IL17UM,IL17UN,IL17UO,IL17UP,IL17UQ,IL17UR,IL17US,IL17UT,IL17UU,IL17UV,IL17UW,IL17UX,IL17UY,IL17UZ,IL17VA,IL17VB,IL17VC,IL17VD,IL17VE,IL17VF,IL17VG,IL17VH,IL17VI,IL17VJ,IL17VK,IL17VL,IL17VM,IL17VN,IL17VO,IL17VP,IL17VQ,IL17VR,IL17VS,IL17VT,IL17VU,IL17VV,IL17VW,IL17VX,IL17VY,IL17VZ,IL17WA,IL17WB,IL17WC,IL17WD,IL17WE,IL17WF,IL17WG,IL17WH,IL17WI,IL17WJ,IL17WK,IL17WL,IL17WM,IL17WN,IL17WO,IL17WP,IL17WQ,IL17WR,IL17WS,IL17WT,IL17WU,IL17WV,IL17WW,IL17WX,IL17WY,IL17WZ,IL17XA,IL17XB,IL17XC,IL17XD,IL17XE,IL17XF,IL17XG,IL17XH,IL17XI,IL17XJ,IL17XK,IL17XL,IL17XM,IL17XN,IL17XO,IL17XP,IL17XQ,IL17XR,IL17XS,IL17XT,IL17XU,IL17XV,IL17XW,IL17XX,IL17XY,IL17XZ,IL17YA,IL17YB,IL17YC,IL17YD,IL17YE,IL17YF,IL17YG,IL17YH,IL17YI,IL17YJ,IL17YK,IL17YL,IL17YM,IL17YN,IL17YO,IL17YP,IL17YQ,IL17YR,IL17YS,IL17YT,IL17YU,IL17YV,IL17YW,IL17YX,IL17YY,IL17YZ,IL17ZA,IL17ZB,IL17ZC,IL17ZD,IL17ZE,IL17ZF,IL17ZG,IL17ZH,IL17ZI,IL17ZJ,IL17ZK,IL17ZL,IL17ZM,IL17ZN,IL17ZO,IL17ZP,IL17ZQ,IL17ZR,IL17ZS,IL17ZT,IL17ZU,IL17ZV,IL17ZW,IL17ZX,IL17ZY,IL17ZZ |

|                                                                                |   |         |     |                                                                                                                          |
|--------------------------------------------------------------------------------|---|---------|-----|--------------------------------------------------------------------------------------------------------------------------|
| Calcium-induced T Lymphocyte Apoptosis                                         | 0 | 0.00435 | NaN | TRAV1-2, TRAV10                                                                                                          |
| Cytotoxic T Lymphocyte-mediated Apoptosis of Target Cells                      | 0 | 0.00471 | NaN | TRAV1-2, TRAV10                                                                                                          |
| IL-3 Signaling                                                                 | 0 | 0.0253  | NaN | IL3, RASD2                                                                                                               |
| Lymphotxin B Receptor Signaling                                                | 0 | 0.0182  | NaN | VCAM1                                                                                                                    |
| MLP Signaling in Neutrophils                                                   | 0 | 0.0305  | NaN | GN4, NOX1, PLCB4, RASD2                                                                                                  |
| Thrombospondin Signaling                                                       | 0 | 0.0159  | NaN | RASD2                                                                                                                    |
| CTLA4 Signaling in Cytotoxic T Lymphocytes                                     | 0 | 0.00418 | NaN | TRAV1-2, TRAV10                                                                                                          |
| T Helper Cell Differentiation                                                  | 0 | 0.00849 | NaN | IL13, IL23R, TRAV1-2, TRAV10                                                                                             |
| IL-9 Signaling                                                                 | 0 | 0.0286  | NaN | IL9R                                                                                                                     |
| Cross-talk in Signaling                                                        | 0 | 0.0698  | NaN | MMP13, RASD2, TMP3                                                                                                       |
| CD28 Signaling in T Helper Cells                                               | 0 | 0.00387 | NaN | TRAV1-2, TRAV10                                                                                                          |
| IL-15 Signaling                                                                | 0 | 0.00568 | NaN | IGHV1-45, IGLV11-55, RASD2                                                                                               |
| Virus Entry via Endocytic Pathways                                             | 0 | 0.0288  | NaN | ACTG2, CXADR, RASD2                                                                                                      |
| Role of Cytokines in Mediating Communication between Immune Cells              | 0 | 0.0596  | NaN | IL13, IL37                                                                                                               |
| Neutrophin Signaling                                                           | 0 | 0.0279  | NaN | PLCB4, RORB                                                                                                              |
| Angiopoietin Signaling                                                         | 0 | 0.0519  | NaN | GRB7, PAK5, RASD2, TIE1                                                                                                  |
| CNTF Signaling                                                                 | 0 | 0.0526  | NaN | LIFR, RASD2, RPS8KA6                                                                                                     |
| Docosahexaenoic Acid (DHA) Signaling                                           | 0 | 0.0263  | NaN | BCL2L1                                                                                                                   |
| Semaphorin Signaling in Neurons                                                | 0 | 0.0643  | NaN | MEF1, PAK5, RHOJ, RHOV                                                                                                   |
| ICOS-ICOSL Signaling in T Helper Cells                                         | 0 | 0.00592 | NaN | PLEKH44, TRAV1-2, TRAV10                                                                                                 |
| Molecular Mechanisms of Cancer                                                 | 0 | 0.0382  | NaN | ADCY10, ADCY2, ARHGAP10, BMP7, E2F7, GNG4, ITGA11, ITGA8, PAK5, PLCB4, RASD2, RHOJ, RHOV, SHC3, SMAD6, WNT8B, WNT9B      |
| Lipid Antigen Presentation by CD1                                              | 0 | 0.00481 | NaN | TRAV1-2, TRAV10                                                                                                          |
| Cell Cycle Regulation by STG Family Proteins                                   | 0 | 0.0541  | NaN | E2F7, HUXB9                                                                                                              |
| Mitotic Roles of Polo-Like Kinase                                              | 0 | 0.0152  | NaN | CCNB3                                                                                                                    |
| HGF Signaling                                                                  | 0 | 0.0379  | NaN | DOCK1, ITGA11, ITGA8, MET, RASD2                                                                                         |
| Role of CHK Proteins in Cell Cycle Checkpoint Control                          | 0 | 0.0175  | NaN | E2F7                                                                                                                     |
| IL13 Signaling in Hematopoietic Progenitor Cells                               | 0 | 0.0252  | NaN | RASD2, RPS8KA6                                                                                                           |
| Polyamine Regulation in Colon Cancer                                           | 0 | 0.0161  | NaN | PSMA4                                                                                                                    |
| Human Embryonic Stem Cell Pluripotency                                         | 0 | 0.0663  | NaN | BMP7, GNG4, KLK3, NTF3, NTRK2, NTRK3, PDGFRA, SALL4, SMAD6, WNT8B, WNT9B                                                 |
| RAN Signaling                                                                  | 0 | 0.0588  | NaN | KPNAB7                                                                                                                   |
| Melanocyte Development and Pigmentation Signaling                              | 0 | 0.0532  | NaN | ADCY10, ADCY2, DCT, RASD2, RPS8KA6                                                                                       |
| DNA Methylation and Transcriptional Repression Signaling                       | 0 | 0.0288  | NaN | DNMT3B                                                                                                                   |
| ATM Signaling                                                                  | 0 | 0.0206  | NaN | CCNB3, SMC1B                                                                                                             |
| Germ Cell-Sertoli Cell Junction Signaling                                      | 0 | 0.0643  | NaN | ACTG2, ACTN2, EPN3, LAMC3, PAK5, RASD2, RHOJ, RHOV, TJP1, TUBA3E, TUBB8                                                  |
| Role of NANOG in Mammalian Embryonic Stem Cell Pluripotency                    | 0 | 0.025   | NaN | BMP7, LIFR, RASD2, SALL4, WNT8B, WNT9B                                                                                   |
| Growth Hormone Signaling                                                       | 0 | 0.0643  | NaN | IGF1, RPS8KA6                                                                                                            |
| Prostate Signaling                                                             | 0 | 0.0349  | NaN | KCNMA1, KCNJ11, RASD2                                                                                                    |
| Melanoma Signaling                                                             | 0 | 0.02    | NaN | RASD2                                                                                                                    |
| Prostate Cancer Signaling                                                      | 0 | 0.0179  | NaN | KLK3, RASD2                                                                                                              |
| Renal Cell Carcinoma Signaling                                                 | 0 | 0.0373  | NaN | MEF1, PAK5, RASD2                                                                                                        |
| Type I Diabetes Mellitus Signaling                                             | 0 | 0.00589 | NaN | NOS2, TRAV1-2, TRAV10                                                                                                    |
| Small Cell Lung Cancer Signaling                                               | 0 | 0.0104  | NaN | NOS1                                                                                                                     |
| Endometrial Cancer Signaling                                                   | 0 | 0.0187  | NaN | RASD2                                                                                                                    |
| Basal Cell Carcinoma Signaling                                                 | 0 | 0.0556  | NaN | BMP7, GLS1, WNT8B, WNT9B                                                                                                 |
| Alloragat Rejection Signaling                                                  | 0 | 0.00414 | NaN | TRAV1-2, TRAV10                                                                                                          |
| Glioma Signaling                                                               | 0 | 0.0403  | NaN | E2F7, EGFR, IGF1, PDGFRA, RASD2                                                                                          |
| Autoimmune Thyroid Disease Signaling                                           | 0 | 0.00682 | NaN | TPO, TRAV1-2, TRAV10                                                                                                     |
| Acute Myeloid Leukemia Signaling                                               | 0 | 0.041   | NaN | RASD2                                                                                                                    |
| Graft-versus-Host Disease Signaling                                            | 0 | 0.00573 | NaN | IL37, TRAV1-2, TRAV10                                                                                                    |
| Type II Diabetes Mellitus Signaling                                            | 0 | 0.0592  | NaN | ACSBG2, CACNA1B, CACNA1C, CACNA1S, CACNG2, CACNG5, ENPP7, PRKAA2, SLC2A2                                                 |
| Chronic Myeloid Leukemia Signaling                                             | 0 | 0.0187  | NaN | E2F7, RASD2                                                                                                              |
| Non-Small Cell Lung Cancer Signaling                                           | 0 | 0.0213  | NaN | EGFR, RASD2                                                                                                              |
| PTEN Signaling                                                                 | 0 | 0.0383  | NaN | EGFR, MAP7, PLCB4, RASD2                                                                                                 |
| ERK5 Signaling                                                                 | 0 | 0.0417  | NaN | EGFR, RASD2, RPS8KA6                                                                                                     |
| Pancreatic Adenocarcinoma Signaling                                            | 0 | 0.0397  | NaN | CYP2E1, E2F7, EGFR, PLD5, VEGFD                                                                                          |
| G Protein Signaling Mediated by Tubby                                          | 0 | 0.0455  | NaN | GNG4, PLCB4                                                                                                              |
| Communication between Innate and Adaptive Immune Cells                         | 0 | 0.0563  | NaN | CXCL10, IGHV1-45, IGLV11-55, IL3, IL37, TRAV1-2, TRAV10                                                                  |
| Crosstalk between Dendritic Cells and Natural Killer Cells                     | 0 | 0.033   | NaN | ACTG2, IL3, TLN2                                                                                                         |
| Systemic Lupus Erythematosus Signaling                                         | 0 | 0.0193  | NaN | BOKRB2, C7, C8A, C8B, FCGR1A, IL37, LSM3, RASD2, RNU4-2, SNRPG, TRAV1-2, TRAV10                                          |
| CD42 Signaling                                                                 | 0 | 0.0104  | NaN | ITGA11, ITGA8, MYL3, MYL6, TRAV1-2, TRAV10                                                                               |
| Hereditary Breast Cancer Signaling                                             | 0 | 0.00704 | NaN | RASD2                                                                                                                    |
| RAC Signaling                                                                  | 0 | 0.0382  | NaN | ITGA11, ITGA8, NOX1, PAK5, RASD2                                                                                         |
| Role of Osteoblasts, Osteoclasts and Chondrocytes in Rheumatoid Arthritis      | 0 | 0.0536  | NaN | BMP7, CALCR, COL1A1, DKKL1, IGF1, IL1RL2, IL37, MMP13, SMAD6, WIF1, WNT8B, WNT9B                                         |
| Altered T Cell and B Cell Signaling in Rheumatoid Arthritis                    | 0 | 0.0061  | NaN | IL37, TRAV1-2, TRAV10                                                                                                    |
| Role of Macrophages, Fibroblasts and Endothelial Cells in Rheumatoid Arthritis | 0 | 0.0563  | NaN | CXCL10, IGHV1-45, FCGR1A, IL17RC, IL1RL2, IL37, MMP13, NOS2, PLCB4, PRSS3, RASD2, SELE, VCAM1, VEGFD, WIF1, WNT8B, WNT9B |
| Regulation of eIF4 and p70S6K Signaling                                        | 0 | 0.0223  | NaN | ITGA11, ITGA8, RASD2, RPS24                                                                                              |
| Estrogen-Dependent Breast Cancer Signaling                                     | 0 | 0.0759  | NaN | AKR1C1, AKR1C2, CYP19A1, EGFR, HSD17B2, IGF1, RASD2                                                                      |
| Leptin Signaling in Obesity                                                    | 0 | 0.0405  | NaN | ADCY10, ADCY2, PLCB4                                                                                                     |
| IL-1 Signaling                                                                 | 0 | 0.0319  | NaN | ADCY10, ADCY2, GNG4                                                                                                      |
| Regulation of IL-2 Expression in Activated and Anergic T Lymphocytes           | 0 | 0.00651 | NaN | RASD2, TRAV1-2, TRAV10                                                                                                   |
| Granzyme A Signaling                                                           | 0 | 0.0526  | NaN | HMGCB2                                                                                                                   |
| Role of WNT/GSK-3β Signaling in the Pathogenesis of Influenza                  | 0 | 0.0256  | NaN | WNT8B, WNT9B                                                                                                             |
| NUR77 Signaling in T Lymphocytes                                               | 0 | 0.00391 | NaN | TRAV1-2, TRAV10                                                                                                          |
| PRC2 Signaling in T Lymphocytes                                                | 0 | 0.0143  | NaN | CXCL10, IGHV1-45, FCGR1A, IL17RC, IL1RL2, IL37, MMP13, NOS2, PLCB4, PRSS3, RASD2, SELE, VCAM1, VEGFD, WIF1, WNT8B, WNT9B |
| Role of Lipids/Lipid Rafts in the Pathogenesis of Influenza                    | 0 | 0.0435  | NaN | RSAD2                                                                                                                    |
| TNFR1 Signaling                                                                | 0 | 0.0192  | NaN | PAK5                                                                                                                     |
| Antiproliferative Role of TOB in T Cell Signaling                              | 0 | 0.00489 | NaN | TRAV1-2, TRAV10                                                                                                          |
| CD40 Signaling Pathway                                                         | 0 | 0.00418 | NaN | TRAV1-2, TRAV10                                                                                                          |
| PI3K Signaling in B Lymphocytes                                                | 0 | 0.021   | NaN | PLCB4, PLEKH44, RASD2                                                                                                    |
| Inhibition of Angiogenesis by TSP1                                             | 0 | 0.0588  | NaN | HSPG2, KDR                                                                                                               |
| P2Y Purinergic Receptor Signaling Pathway                                      | 0 | 0.0388  | NaN | ADCY10, ADCY2, GNG4, PLCB4, RASD2                                                                                        |
| Cytosin and Cell Cycle Regulation                                              | 0 | 0.0357  | NaN | CCNB3, E2F7, MYT1                                                                                                        |
| Cell Cycle Control of Chromosomal Replication                                  | 0 | 0.0179  | NaN | CDCA5                                                                                                                    |
| Role of Tissue Factor in Cancer                                                | 0 | 0.0603  | NaN | EGFR, F10, F3, FGA, MMP13, RASD2, RPS8KA6                                                                                |
| Spliceosomal Cycle                                                             | 0 | 0.0204  | NaN | SF3B6                                                                                                                    |
| IL-17A Signaling in Airway Cells                                               | 0 | 0.0299  | NaN | CCL11, IL17RC                                                                                                            |
| Role of IL-17A in Arthritis                                                    | 0 | 0.0702  | NaN | CCL17, IL17RC, MMP13, NOS2                                                                                               |
| IL-17A Signaling in Fibroblasts                                                | 0 | 0.0526  | NaN | CCL7, IL17RC                                                                                                             |
| Role of JAK1 and JAK3 in $\gamma$ Cytokine Signaling                           | 0 | 0.029   | NaN | IL9R, RASD2                                                                                                              |
| Actin Nucleation by ARP-WASP Complex                                           | 0 | 0.0538  | NaN | ITGA11, ITGA8, RASD2, RHOJ, RHOV                                                                                         |
| NGF Signaling                                                                  | 0 | 0.0254  | NaN | RASD2, RPS8KA6, SHC3                                                                                                     |
| Telomerase Signaling                                                           | 0 | 0.0187  | NaN | EGFR, RASD2                                                                                                              |
| Mouse Embryonic Stem Cell Pluripotency                                         | 0 | 0.0182  | NaN | LIFR, RASD2                                                                                                              |
| Hematopoiesis from Pluripotent Stem Cells                                      | 0 | 0.0068  | NaN | IL3, TRAV1-2, TRAV10                                                                                                     |
| Hematopoiesis from Multipotent Stem Cells                                      | 0 | 0.0653  | NaN | IL3                                                                                                                      |
| Transcriptional Regulatory Network in Embryonic Stem Cells                     | 0 | 0.0556  | NaN | HNF4A, RFX4, SIX3                                                                                                        |
| NOS Signaling                                                                  | 0 | 0.0426  | NaN | LBP, NOS2                                                                                                                |
| Ephrin A Signaling                                                             | 0 | 0.0638  | NaN | EPHA10, EPHA2, EPHA8                                                                                                     |
| Ephrin B Signaling                                                             | 0 | 0.0278  | NaN | CXCL10, GNG4                                                                                                             |
| ERBB-ERBB3 Signaling                                                           | 0 | 0.0615  | NaN | ERBB3, ETV4, NRG4, RASD2                                                                                                 |
| ERBB4 Signaling                                                                | 0 | 0.0441  | NaN | ERBB4, NRG4, RASD2                                                                                                       |
| Estrogen-mediated S-phase Entry                                                | 0 | 0.0769  | NaN | E2F7, ESR2                                                                                                               |
| GDNF Family Ligand-Receptor Interactions                                       | 0 | 0.0263  | NaN | ARTN, RASD2                                                                                                              |
| Fatty Acid Activation                                                          | 0 | 0.0714  | NaN | ACSBG2                                                                                                                   |
| Retinoic Acid Biosynthesis I                                                   | 0 | 0.0556  | NaN | ALDH1A3, SDR8C7                                                                                                          |
| Androgen Biosynthesis                                                          | 0 | 0.0556  | NaN | HSD3B2                                                                                                                   |
| Glutathione Redox Reactions I                                                  | 0 | 0.04    | NaN | GPX8                                                                                                                     |
| GDP-dependent Biosynthesis I (nonmetal)                                        | 0 | 0.0455  | NaN | PNPLA3                                                                                                                   |
| Acyl-CoA Hydrolysis                                                            | 0 | 0.0769  | NaN | HNF4A                                                                                                                    |
| The Visual Cycle                                                               | 0 | 0.05    | NaN | RLBP1                                                                                                                    |
| V-Indolene Biosynthesis II (Animals)                                           | 0 | 0.0556  | NaN | ACSBG2                                                                                                                   |
| D-thyo-inositol (1,4,5)-Triphosphate Biosynthesis                              | 0 | 0.0385  | NaN | PLCB4                                                                                                                    |
| Glutathione Biosynthesis II (Animals)                                          | 0 | 0.0769  | NaN | PIPTT2                                                                                                                   |
| Glutathione-mediated Detoxification                                            | 0 | 0.0625  | NaN | GSTA2, GSTA3                                                                                                             |
| Phosphatidylglycerol Biosynthesis II (Non-planticid)                           | 0 | 0.0417  | NaN | PNPLA3                                                                                                                   |
| Purine Nucleotides Degradation II (Aerobic)                                    | 0 | 0.0526  | NaN | GDA                                                                                                                      |
| Mitochondrial $\epsilon$ -carnitine Shuttle Pathway                            | 0 | 0.0556  | NaN | ACSBG2                                                                                                                   |
| Triacylglycerol Biosynthesis                                                   | 0 | 0.0851  | NaN | LPIN3, PLPP2, PLPP4, PNPLA3                                                                                              |
| Guanosine Nucleotides Degradation III                                          | 0 | 0.0769  | NaN | GDA                                                                                                                      |
| Fatty Acid $\beta$ -oxidation I                                                | 0 | 0.0294  | NaN | ACSBG2                                                                                                                   |
| Methionine Degradation I (to Homocysteine)                                     | 0 | 0.0442  | NaN | PIPTT2                                                                                                                   |
| DNA damage-induced 14-3-3 $\sigma$ Signaling                                   | 0 | 0.0526  | NaN | CCNB3                                                                                                                    |
| PDF Signaling                                                                  | 0 | 0.0238  | NaN | HNF1B, RASD2                                                                                                             |
| Remodeling of Epithelial Adherens Junctions                                    | 0 | 0.0735  | NaN | ACTG2, ACTN2, MET, TUBA3E, TUBB8                                                                                         |
| Cysteine Biosynthesis II (nonmetal)                                            | 0 | 0.0417  | NaN | PNPLA3                                                                                                                   |
| Regulation of the Epithelial-Mesenchymal Transition Pathway                    | 0 | 0.0769  | NaN | EGFR, FGF1, FGF17, FGF18, FGF21, FGF7, FGF9, HMGGA2, MET, MMP2, PAR6G, PYGO1, RASD2, WNT8B, WNT9B                        |
| UVB-Induced MAPK Signaling                                                     | 0 | 0.0408  | NaN | EGFR, PLCB4, RASD2, RPS8KA6                                                                                              |

|                                                                            |   |         |     |                                                                                                                                                                                    |
|----------------------------------------------------------------------------|---|---------|-----|------------------------------------------------------------------------------------------------------------------------------------------------------------------------------------|
| UVB-Induced MAPK Signaling                                                 | 0 | 0.1192  | NaN | EGFR                                                                                                                                                                               |
| UV-C-Induced MAPK Signaling                                                | 0 | 0.0392  | NaN | EGFR,RASD2                                                                                                                                                                         |
| Adipogenesis pathway                                                       | 0 | 0.0296  | NaN | BMP7,FGF1,PLIN1,SOX9                                                                                                                                                               |
| HIPPO signaling                                                            | 0 | 0.0353  | NaN | CRB1,TEAD1,TEAD4                                                                                                                                                                   |
| PCP (Planar Cell Polarity) Pathway                                         | 0 | 0.0333  | NaN | WNT8B,WNT19B                                                                                                                                                                       |
| Unfolded protein response                                                  | 0 | 0.0222  | NaN | DNAJB13,DNAJC5G                                                                                                                                                                    |
| WNT/Ca+ pathway                                                            | 0 | 0.0469  | NaN | PDE8A,PDE8C,PLCB4                                                                                                                                                                  |
| Parkinson's Signaling                                                      | 0 | 0.0625  | NaN | UCHL1                                                                                                                                                                              |
| Toll-like Receptor Signaling                                               | 0 | 0.0256  | NaN | IL37,LBP                                                                                                                                                                           |
| EGF Signaling                                                              | 0 | 0.0182  | NaN | EGFR                                                                                                                                                                               |
| Cell Cycle: G1/S Checkpoint Regulation                                     | 0 | 0.0147  | NaN | E2F7                                                                                                                                                                               |
| SAPK/JNK Signaling                                                         | 0 | 0.0096  | NaN | GNMG4,MAPK8IP1,RASD2,TRAV1-2,TRAV10                                                                                                                                                |
| PI3K/AKT Signaling                                                         | 0 | 0.0503  | NaN | IL17RC,IL17RD,IL17RE,IL17RL2,IL22RA1,IL3IR,ITGA11,ITGA8,MAPK8IP1,RASD2                                                                                                             |
| Protein Ubiquitination Pathway                                             | 0 | 0.0473  | NaN | DNAJB13,DNAJC5G,HSPB8,HSPF1,PSMA4,UBE2U,UCHL1,USP16,USP26,USP29,USP41,USP43,USP6                                                                                                   |
| IL-2 Signaling                                                             | 0 | 0.0164  | NaN | RASD2                                                                                                                                                                              |
| JAK/STAT Signaling                                                         | 0 | 0.0122  | NaN | RASD2                                                                                                                                                                              |
| Cell Cycle: G2/M DNA Damage Checkpoint Regulation                          | 0 | 0.02    | NaN | CCNB3                                                                                                                                                                              |
| Xenobiotic Metabolism Signaling                                            | 0 | 0.0799  | NaN | AHRR,ALDH1A3,ALDH1L1,ALDH3A1,ALDH7A1,CEB3,CESSA,CHST3,CYP1A1,CYP2B6,CYP3A4,GSTA2,GSTA3,HSS3T2,HS6ST2,MAOB,NOS2,NR1H2,RASD2,SULT1C2,SULT1A4,UGT1A1,UGT1A11,UGT1A8 (includes others) |
| IL-4 Signaling                                                             | 0 | 0.0108  | NaN | RASD2                                                                                                                                                                              |
| B Cell Receptor Signaling                                                  | 0 | 0.00636 | NaN | BCL2A1,IGHV1-45,IGLV11-55,RASD2                                                                                                                                                    |
| Insulin Receptor Signaling                                                 | 0 | 0.0286  | NaN | ASXC2,RASD2,SCNN1B,SCNN1G                                                                                                                                                          |
| Neurotrophin/Trk Signaling                                                 | 0 | 0.0656  | NaN | KLK3,NTF3,NTRK2,NTRK3,RASD2                                                                                                                                                        |
| Sonic Hedgehog Signaling                                                   | 0 | 0.0345  | NaN | GLIS1                                                                                                                                                                              |
| Death Receptor Signaling                                                   | 0 | 0.0104  | NaN | ACTG2                                                                                                                                                                              |
| PPAR Signaling                                                             | 0 | 0.0374  | NaN | IL1RL2,IL37,PDGFRA,RASD2                                                                                                                                                           |
| IGF-1 Signaling                                                            | 0 | 0.0385  | NaN | IGF1,IGFBP1,IGFBP5,RASD2                                                                                                                                                           |
| TGF-β Signaling                                                            | 0 | 0.0729  | NaN | AMHR2,BMP7,HNF4A,HOX9,INH4,RASD2,SMAD6                                                                                                                                             |
| Hypoxia Signaling in the Cardiovascular System                             | 0 | 0.0135  | NaN | UBE2U                                                                                                                                                                              |
| PDGF Signaling                                                             | 0 | 0.0233  | NaN | PDGFRA,RASD2                                                                                                                                                                       |
| BMP signaling pathway                                                      | 0 | 0.069   | NaN | BMP7,IST,GREM1,HOX9,RASD2,SMAD6                                                                                                                                                    |
| Thapsigargin Maturation                                                    | 0 | 0.0755  | NaN | ATP6W04,ATPV1B1,CTSV,DYNC11,LPO,NOS1,NOX1,SNAP25,TPO,TUBA3E,TUBA4B,TUBB8                                                                                                           |
| Autophagy                                                                  | 0 | 0.0141  | NaN | ATG10,IGF1,PRKAA2                                                                                                                                                                  |
| Macropinosytosis Signaling                                                 | 0 | 0.0263  | NaN | MET,RASD2                                                                                                                                                                          |
| Inflammasome pathway                                                       | 0 | 0.05    | NaN | AIM2                                                                                                                                                                               |
| Cancer Drug Resistance By Drug Efflux                                      | 0 | 0.0172  | NaN | RASD2                                                                                                                                                                              |
| Sumoylation Pathway                                                        | 0 | 0.0194  | NaN | RHOJ,RHOV                                                                                                                                                                          |
| Th1 and Th2 Activation Pathway                                             | 0 | 0.0116  | NaN | IL13,IL3                                                                                                                                                                           |
| Th2 Pathway                                                                | 0 | 0.0146  | NaN | IL13,IL3                                                                                                                                                                           |
| IL-7 Signaling Pathway                                                     | 0 | 0.0128  | NaN | MET                                                                                                                                                                                |
| Iron homeostasis signaling pathway                                         | 0 | 0.0719  | NaN | ATP6W04,ATPV1B1,BMP7,EGFR,HAMP,HBA1,HBA2,HIF3A,HJV,PDGFRA,TF                                                                                                                       |
| Th17 Activation Pathway                                                    | 0 | 0.0103  | NaN | DEFB119,DEFB124,IL23R,TRAV1-2,TRAV10                                                                                                                                               |
| Endocannabinoid Developing Neuron Pathway                                  | 0 | 0.0407  | NaN | ADCY10,ADCY2,GNMG4,MAPK4,RASD2                                                                                                                                                     |
| Apelin Pancreas Signaling Pathway                                          | 0 | 0.0435  | NaN | APLN,PRKAA2                                                                                                                                                                        |
| Apelin Muscle Signaling Pathway                                            | 0 | 0.0625  | NaN | APLN,GNMG4,PRKAA2                                                                                                                                                                  |
| BAG2 Signaling Pathway                                                     | 0 | 0.0357  | NaN | CHRNA7,MAPT,PSMA4                                                                                                                                                                  |
| FAT10 Signaling Pathway                                                    | 0 | 0.0179  | NaN | PSMA4                                                                                                                                                                              |
| FAT10 Cancer Signaling Pathway                                             | 0 | 0.02    | NaN | HDXB9                                                                                                                                                                              |
| PRKFB4 Signaling Pathway                                                   | 0 | 0.0435  | NaN | AMPD1,FBP2                                                                                                                                                                         |
| T Cell Exhaustion Signaling Pathway                                        | 0 | 0.00707 | NaN | KDR,RASD2,TRAV1-2,TRAV10                                                                                                                                                           |
| IL-23 Signaling Pathway                                                    | 0 | 0.0217  | NaN | IL23R                                                                                                                                                                              |
| Inhibition of ARE-Mediated miRNA Degradation Pathway                       | 0 | 0.0124  | NaN | MAPK4,PSMA4                                                                                                                                                                        |
| BE23 Signaling Pathway                                                     | 0 | 0.037   | NaN | KLK3,MMP2,VEGFD                                                                                                                                                                    |
| Regulation Of The Epithelial Mesenchymal Transition In Development Pathway | 0 | 0.046   | NaN | GLIS1,PGO1,WNT8B,WNT9B                                                                                                                                                             |
| Kinetochore Metaphase Signaling Pathway                                    | 0 | 0.0381  | NaN | DNAH10,DNAH3,NEK2,SMC1B                                                                                                                                                            |
| GM-CSF Signaling                                                           | 0 | 0.0286  | NaN | BCL2A1,RASD2                                                                                                                                                                       |
| Ferroptosis Signaling Pathway                                              | 0 | 0.0317  | NaN | NOX1,PRKAA2,RASD2,TF                                                                                                                                                               |



Supplemental Table 10. Ingenuity Pathway Analysis (IPA) of differentially expressed transcripts from the SJD-Ro+ whole blood RNA-seq analysis.

| Ingenuity Canonical Pathways | -log(p-value) | Ratio  | Z-score | Molecules                                                                                                                                                                                                                                                                                                                                                                                                                                                                                                                                                                                                                                                                                                                                                                                                                                                                                                                                                                                                                                                                                                                                                                                                                                                                                                                                                                                                                                                                                                                                                                                                                                                                                                                                                                                                                                                                                                                                                                                                                                                                                                                                                                                                                                                                                                                                                                                                                                                                                                                                                                                                                                                                                                                                                                                                                                                                                                                                                                                                                                                                                                                                                                                                                                                                                                                                                                                                                                                                                                                                                                                                                                                                                                                                                                                                                                                                                                                                                                                                                                                                                                                                                                                                                                                                                                                                                                                                                                                                                                                                                                                                                                                                                                                                                                                                                                                                                                                                                                                                                                                                                                                                                                                                                                                                                                                                                                                                                                                                                                                                                                                                                                                                                                                                                                                                                                                                                                                                                                                                                                                                                     |
|------------------------------|---------------|--------|---------|-----------------------------------------------------------------------------------------------------------------------------------------------------------------------------------------------------------------------------------------------------------------------------------------------------------------------------------------------------------------------------------------------------------------------------------------------------------------------------------------------------------------------------------------------------------------------------------------------------------------------------------------------------------------------------------------------------------------------------------------------------------------------------------------------------------------------------------------------------------------------------------------------------------------------------------------------------------------------------------------------------------------------------------------------------------------------------------------------------------------------------------------------------------------------------------------------------------------------------------------------------------------------------------------------------------------------------------------------------------------------------------------------------------------------------------------------------------------------------------------------------------------------------------------------------------------------------------------------------------------------------------------------------------------------------------------------------------------------------------------------------------------------------------------------------------------------------------------------------------------------------------------------------------------------------------------------------------------------------------------------------------------------------------------------------------------------------------------------------------------------------------------------------------------------------------------------------------------------------------------------------------------------------------------------------------------------------------------------------------------------------------------------------------------------------------------------------------------------------------------------------------------------------------------------------------------------------------------------------------------------------------------------------------------------------------------------------------------------------------------------------------------------------------------------------------------------------------------------------------------------------------------------------------------------------------------------------------------------------------------------------------------------------------------------------------------------------------------------------------------------------------------------------------------------------------------------------------------------------------------------------------------------------------------------------------------------------------------------------------------------------------------------------------------------------------------------------------------------------------------------------------------------------------------------------------------------------------------------------------------------------------------------------------------------------------------------------------------------------------------------------------------------------------------------------------------------------------------------------------------------------------------------------------------------------------------------------------------------------------------------------------------------------------------------------------------------------------------------------------------------------------------------------------------------------------------------------------------------------------------------------------------------------------------------------------------------------------------------------------------------------------------------------------------------------------------------------------------------------------------------------------------------------------------------------------------------------------------------------------------------------------------------------------------------------------------------------------------------------------------------------------------------------------------------------------------------------------------------------------------------------------------------------------------------------------------------------------------------------------------------------------------------------------------------------------------------------------------------------------------------------------------------------------------------------------------------------------------------------------------------------------------------------------------------------------------------------------------------------------------------------------------------------------------------------------------------------------------------------------------------------------------------------------------------------------------------------------------------------------------------------------------------------------------------------------------------------------------------------------------------------------------------------------------------------------------------------------------------------------------------------------------------------------------------------------------------------------------------------------------------------------------------------------------------------------------------------------------------|
| CREB Signaling in Neurons    | 1.71          | 0.0684 | -5.925  | ADCY2,ADGRF5,ADGRG2,ADGRG4,ADGRG7,ADRA1B,BDKR2,CACNA1B,CACNG5,CALCR,EGFR,FSHR,GABBR2,GALR1,GPR1,GPR137,G, GPR156,GPR173,GPR176,GPR179,GPR183,GPR185,GPR186,GPR187,GPR188,GPR189,GPR190,GPR191,GPR192,GPR193,GPR194,GPR195,GPR196,GPR197,GPR198,GPR199,GPR200,GPR201,GPR202,GPR203,GPR204,GPR205,GPR206,GPR207,GPR208,GPR209,GPR210,GPR211,GPR212,GPR213,GPR214,GPR215,GPR216,GPR217,GPR218,GPR219,GPR220,GPR221,GPR222,GPR223,GPR224,GPR225,GPR226,GPR227,GPR228,GPR229,GPR230,GPR231,GPR232,GPR233,GPR234,GPR235,GPR236,GPR237,GPR238,GPR239,GPR240,GPR241,GPR242,GPR243,GPR244,GPR245,GPR246,GPR247,GPR248,GPR249,GPR250,GPR251,GPR252,GPR253,GPR254,GPR255,GPR256,GPR257,GPR258,GPR259,GPR260,GPR261,GPR262,GPR263,GPR264,GPR265,GPR266,GPR267,GPR268,GPR269,GPR270,GPR271,GPR272,GPR273,GPR274,GPR275,GPR276,GPR277,GPR278,GPR279,GPR280,GPR281,GPR282,GPR283,GPR284,GPR285,GPR286,GPR287,GPR288,GPR289,GPR290,GPR291,GPR292,GPR293,GPR294,GPR295,GPR296,GPR297,GPR298,GPR299,GPR300,GPR301,GPR302,GPR303,GPR304,GPR305,GPR306,GPR307,GPR308,GPR309,GPR310,GPR311,GPR312,GPR313,GPR314,GPR315,GPR316,GPR317,GPR318,GPR319,GPR320,GPR321,GPR322,GPR323,GPR324,GPR325,GPR326,GPR327,GPR328,GPR329,GPR330,GPR331,GPR332,GPR333,GPR334,GPR335,GPR336,GPR337,GPR338,GPR339,GPR340,GPR341,GPR342,GPR343,GPR344,GPR345,GPR346,GPR347,GPR348,GPR349,GPR350,GPR351,GPR352,GPR353,GPR354,GPR355,GPR356,GPR357,GPR358,GPR359,GPR360,GPR361,GPR362,GPR363,GPR364,GPR365,GPR366,GPR367,GPR368,GPR369,GPR370,GPR371,GPR372,GPR373,GPR374,GPR375,GPR376,GPR377,GPR378,GPR379,GPR380,GPR381,GPR382,GPR383,GPR384,GPR385,GPR386,GPR387,GPR388,GPR389,GPR390,GPR391,GPR392,GPR393,GPR394,GPR395,GPR396,GPR397,GPR398,GPR399,GPR400,GPR401,GPR402,GPR403,GPR404,GPR405,GPR406,GPR407,GPR408,GPR409,GPR410,GPR411,GPR412,GPR413,GPR414,GPR415,GPR416,GPR417,GPR418,GPR419,GPR420,GPR421,GPR422,GPR423,GPR424,GPR425,GPR426,GPR427,GPR428,GPR429,GPR430,GPR431,GPR432,GPR433,GPR434,GPR435,GPR436,GPR437,GPR438,GPR439,GPR440,GPR441,GPR442,GPR443,GPR444,GPR445,GPR446,GPR447,GPR448,GPR449,GPR450,GPR451,GPR452,GPR453,GPR454,GPR455,GPR456,GPR457,GPR458,GPR459,GPR460,GPR461,GPR462,GPR463,GPR464,GPR465,GPR466,GPR467,GPR468,GPR469,GPR470,GPR471,GPR472,GPR473,GPR474,GPR475,GPR476,GPR477,GPR478,GPR479,GPR480,GPR481,GPR482,GPR483,GPR484,GPR485,GPR486,GPR487,GPR488,GPR489,GPR490,GPR491,GPR492,GPR493,GPR494,GPR495,GPR496,GPR497,GPR498,GPR499,GPR500,GPR501,GPR502,GPR503,GPR504,GPR505,GPR506,GPR507,GPR508,GPR509,GPR510,GPR511,GPR512,GPR513,GPR514,GPR515,GPR516,GPR517,GPR518,GPR519,GPR520,GPR521,GPR522,GPR523,GPR524,GPR525,GPR526,GPR527,GPR528,GPR529,GPR530,GPR531,GPR532,GPR533,GPR534,GPR535,GPR536,GPR537,GPR538,GPR539,GPR540,GPR541,GPR542,GPR543,GPR544,GPR545,GPR546,GPR547,GPR548,GPR549,GPR550,GPR551,GPR552,GPR553,GPR554,GPR555,GPR556,GPR557,GPR558,GPR559,GPR560,GPR561,GPR562,GPR563,GPR564,GPR565,GPR566,GPR567,GPR568,GPR569,GPR570,GPR571,GPR572,GPR573,GPR574,GPR575,GPR576,GPR577,GPR578,GPR579,GPR580,GPR581,GPR582,GPR583,GPR584,GPR585,GPR586,GPR587,GPR588,GPR589,GPR590,GPR591,GPR592,GPR593,GPR594,GPR595,GPR596,GPR597,GPR598,GPR599,GPR600,GPR601,GPR602,GPR603,GPR604,GPR605,GPR606,GPR607,GPR608,GPR609,GPR610,GPR611,GPR612,GPR613,GPR614,GPR615,GPR616,GPR617,GPR618,GPR619,GPR620,GPR621,GPR622,GPR623,GPR624,GPR625,GPR626,GPR627,GPR628,GPR629,GPR630,GPR631,GPR632,GPR633,GPR634,GPR635,GPR636,GPR637,GPR638,GPR639,GPR640,GPR641,GPR642,GPR643,GPR644,GPR645,GPR646,GPR647,GPR648,GPR649,GPR650,GPR651,GPR652,GPR653,GPR654,GPR655,GPR656,GPR657,GPR658,GPR659,GPR660,GPR661,GPR662,GPR663,GPR664,GPR665,GPR666,GPR667,GPR668,GPR669,GPR670,GPR671,GPR672,GPR673,GPR674,GPR675,GPR676,GPR677,GPR678,GPR679,GPR680,GPR681,GPR682,GPR683,GPR684,GPR685,GPR686,GPR687,GPR688,GPR689,GPR690,GPR691,GPR692,GPR693,GPR694,GPR695,GPR696,GPR697,GPR698,GPR699,GPR700,GPR701,GPR702,GPR703,GPR704,GPR705,GPR706,GPR707,GPR708,GPR709,GPR710,GPR711,GPR712,GPR713,GPR714,GPR715,GPR716,GPR717,GPR718,GPR719,GPR720,GPR721,GPR722,GPR723,GPR724,GPR725,GPR726,GPR727,GPR728,GPR729,GPR730,GPR731,GPR732,GPR733,GPR734,GPR735,GPR736,GPR737,GPR738,GPR739,GPR740,GPR741,GPR742,GPR743,GPR744,GPR745,GPR746,GPR747,GPR748,GPR749,GPR750,GPR751,GPR752,GPR753,GPR754,GPR755,GPR756,GPR757,GPR758,GPR759,GPR760,GPR761,GPR762,GPR763,GPR764,GPR765,GPR766,GPR767,GPR768,GPR769,GPR770,GPR771,GPR772,GPR773,GPR774,GPR775,GPR776,GPR777,GPR778,GPR779,GPR780,GPR781,GPR782,GPR783,GPR784,GPR785,GPR786,GPR787,GPR788,GPR789,GPR790,GPR791,GPR792,GPR793,GPR794,GPR795,GPR796,GPR797,GPR798,GPR799,GPR800,GPR801,GPR802,GPR803,GPR804,GPR805,GPR806,GPR807,GPR808,GPR809,GPR810,GPR811,GPR812,GPR813,GPR814,GPR815,GPR816,GPR817,GPR818,GPR819,GPR820,GPR821,GPR822,GPR823,GPR824,GPR825,GPR826,GPR827,GPR828,GPR829,GPR830,GPR831,GPR832,GPR833,GPR834,GPR835,GPR836,GPR837,GPR838,GPR839,GPR840,GPR841,GPR842,GPR843,GPR844,GPR845,GPR846,GPR847,GPR848,GPR849,GPR850,GPR851,GPR852,GPR853,GPR854,GPR855,GPR856,GPR857,GPR858,GPR859,GPR860,GPR861,GPR862,GPR863,GPR864,GPR865,GPR866,GPR867,GPR868,GPR869,GPR870,GPR871,GPR872,GPR873,GPR874,GPR875,GPR876,GPR877,GPR878,GPR879,GPR880,GPR881,GPR882,GPR883,GPR884,GPR885,GPR886,GPR887,GPR888,GPR889,GPR890,GPR891,GPR892,GPR893,GPR894,GPR895,GPR896,GPR897,GPR898,GPR899,GPR900,GPR901,GPR902,GPR903,GPR904,GPR905,GPR906,GPR907,GPR908,GPR909,GPR910,GPR911,GPR912,GPR913,GPR914,GPR915,GPR916,GPR917,GPR918,GPR919,GPR920,GPR921,GPR922,GPR923,GPR924,GPR925,GPR926,GPR927,GPR928,GPR929,GPR930,GPR931,GPR932,GPR933,GPR934,GPR935,GPR936,GPR937,GPR938,GPR939,GPR940,GPR941,GPR942,GPR943,GPR944,GPR945,GPR946,GPR947,GPR948,GPR949,GPR950,GPR951,GPR952,GPR953,GPR954,GPR955,GPR956,GPR957,GPR958,GPR959,GPR960,GPR961,GPR962,GPR963,GPR964,GPR965,GPR966,GPR967,GPR968,GPR969,GPR970,GPR971,GPR972,GPR973,GPR974,GPR975,GPR976,GPR977,GPR978,GPR979,GPR980,GPR981,GPR982,GPR983,GPR984,GPR985,GPR986,GPR987,GPR988,GPR989,GPR990,GPR991,GPR992,GPR993,GPR994,GPR995,GPR996,GPR997,GPR998,GPR999,GPR1000 |

|                                                                              |       |        |       |                                                                                                                                                                                                                                                                                                                                                                                                                                                                                                                                                                                                                                                                                                                                                                                                                                                                                                                                                                                                                                                                                                                                                                                                                                                                                                                                                                                                                                                                                                                                                                                                                                                                                                                                                                                                                                                                                                                                                                                                                                                                                                                                                                                                                                                                                                                                                                                                                                                                                                                                                                                                                                                                                                                                                                                                                                                                                                                                                                                                                                                                                                                                                                                                                                                                                                                                                                                                                                                                                                                                                                                                                                                                                                                                                                                                                                                                                                                                                                                                                                                                                                                                                                                                                                                                                                                                                                                                                                                                                                                                                                                                                                                                                                                                                                                                                                                                                                                                                                                                                                                                                                                                                                                                                                                                                                                                                                                                                                                                                                                                                                                                                                                                                                                                                                                                                                                                                                                                                                                                                                                                                                                                                                                                                                                                                                                                                                                                                                                                                                                                                                                                                                                                                                                                                                                                                                                                                                                                                                                                                                                                                                                                                                                                                                                                                                                                                                                                                                                                                                                                                                                                                                                                                                                                                                                                                                                                                                                                                                                                                                                                                                                                                                                                                                                                                                                                                                                                                                                                                                                                                                                                                                                                                                                                                                                                                                                                                                                                                                                                                                                                                                                                                                                                                                                                                                                                                                                                                                                                                                                                                                                                                                                                                                                                                                                                                                                                                                                                                                                                                                                                                                                                                                                                                                                                                                                                                                                                                                                                                                                                                                                                                                                                                                                                                                                                                                                                                                                                                                                                                                                                                                                                                                                                                                                                                                                                                                                                                                                                                                                                                                                                                                                                                                                                                                                                                                                                                                                                                                                                                                                                                                                                                                                                                                                                                                                                                                                                                                                                                                                                                                                                                                                                                                                                                                                                                                                                                                                                                                                                                                                                                                                                                                                                                                                                                                                                                                                                                                                                                                                                                                                                                                                                                                                                                                                                                                                                                                                                                                                                                                                                                                                                                                                                                                                                                                                                                                                                                                                                                                                                                                                                                                                                                                                                                                                                                                                                                                                                                                                                                                                                                                                                                                                                                                                                                                                                                                                                                                                                                                                                                                                                                                                                                                                                                                                                                                                                                                                                                                                                                                                                                                                                                                                                                                                                                                                                                                                                                                                                                                                                                                                                                                                                         |
|------------------------------------------------------------------------------|-------|--------|-------|-------------------------------------------------------------------------------------------------------------------------------------------------------------------------------------------------------------------------------------------------------------------------------------------------------------------------------------------------------------------------------------------------------------------------------------------------------------------------------------------------------------------------------------------------------------------------------------------------------------------------------------------------------------------------------------------------------------------------------------------------------------------------------------------------------------------------------------------------------------------------------------------------------------------------------------------------------------------------------------------------------------------------------------------------------------------------------------------------------------------------------------------------------------------------------------------------------------------------------------------------------------------------------------------------------------------------------------------------------------------------------------------------------------------------------------------------------------------------------------------------------------------------------------------------------------------------------------------------------------------------------------------------------------------------------------------------------------------------------------------------------------------------------------------------------------------------------------------------------------------------------------------------------------------------------------------------------------------------------------------------------------------------------------------------------------------------------------------------------------------------------------------------------------------------------------------------------------------------------------------------------------------------------------------------------------------------------------------------------------------------------------------------------------------------------------------------------------------------------------------------------------------------------------------------------------------------------------------------------------------------------------------------------------------------------------------------------------------------------------------------------------------------------------------------------------------------------------------------------------------------------------------------------------------------------------------------------------------------------------------------------------------------------------------------------------------------------------------------------------------------------------------------------------------------------------------------------------------------------------------------------------------------------------------------------------------------------------------------------------------------------------------------------------------------------------------------------------------------------------------------------------------------------------------------------------------------------------------------------------------------------------------------------------------------------------------------------------------------------------------------------------------------------------------------------------------------------------------------------------------------------------------------------------------------------------------------------------------------------------------------------------------------------------------------------------------------------------------------------------------------------------------------------------------------------------------------------------------------------------------------------------------------------------------------------------------------------------------------------------------------------------------------------------------------------------------------------------------------------------------------------------------------------------------------------------------------------------------------------------------------------------------------------------------------------------------------------------------------------------------------------------------------------------------------------------------------------------------------------------------------------------------------------------------------------------------------------------------------------------------------------------------------------------------------------------------------------------------------------------------------------------------------------------------------------------------------------------------------------------------------------------------------------------------------------------------------------------------------------------------------------------------------------------------------------------------------------------------------------------------------------------------------------------------------------------------------------------------------------------------------------------------------------------------------------------------------------------------------------------------------------------------------------------------------------------------------------------------------------------------------------------------------------------------------------------------------------------------------------------------------------------------------------------------------------------------------------------------------------------------------------------------------------------------------------------------------------------------------------------------------------------------------------------------------------------------------------------------------------------------------------------------------------------------------------------------------------------------------------------------------------------------------------------------------------------------------------------------------------------------------------------------------------------------------------------------------------------------------------------------------------------------------------------------------------------------------------------------------------------------------------------------------------------------------------------------------------------------------------------------------------------------------------------------------------------------------------------------------------------------------------------------------------------------------------------------------------------------------------------------------------------------------------------------------------------------------------------------------------------------------------------------------------------------------------------------------------------------------------------------------------------------------------------------------------------------------------------------------------------------------------------------------------------------------------------------------------------------------------------------------------------------------------------------------------------------------------------------------------------------------------------------------------------------------------------------------------------------------------------------------------------------------------------------------------------------------------------------------------------------------------------------------------------------------------------------------------------------------------------------------------------------------------------------------------------------------------------------------------------------------------------------------------------------------------------------------------------------------------------------------------------------------------------------------------------------------------------------------------------------------------------------------------------------------------------------------------------------------------------------------------------------------------------------------------------------------------------------------------------------------------------------------------------------------------------------------------------------------------------------------------------------------------------------------------------------------------------------------------------------------------------------------------------------------------------------------------------------------------------------------------------------------------------------------------------------------------------------------------------------------------------------------------------------------------------------------------------------------------------------------------------------------------------------------------------------------------------------------------------------------------------------------------------------------------------------------------------------------------------------------------------------------------------------------------------------------------------------------------------------------------------------------------------------------------------------------------------------------------------------------------------------------------------------------------------------------------------------------------------------------------------------------------------------------------------------------------------------------------------------------------------------------------------------------------------------------------------------------------------------------------------------------------------------------------------------------------------------------------------------------------------------------------------------------------------------------------------------------------------------------------------------------------------------------------------------------------------------------------------------------------------------------------------------------------------------------------------------------------------------------------------------------------------------------------------------------------------------------------------------------------------------------------------------------------------------------------------------------------------------------------------------------------------------------------------------------------------------------------------------------------------------------------------------------------------------------------------------------------------------------------------------------------------------------------------------------------------------------------------------------------------------------------------------------------------------------------------------------------------------------------------------------------------------------------------------------------------------------------------------------------------------------------------------------------------------------------------------------------------------------------------------------------------------------------------------------------------------------------------------------------------------------------------------------------------------------------------------------------------------------------------------------------------------------------------------------------------------------------------------------------------------------------------------------------------------------------------------------------------------------------------------------------------------------------------------------------------------------------------------------------------------------------------------------------------------------------------------------------------------------------------------------------------------------------------------------------------------------------------------------------------------------------------------------------------------------------------------------------------------------------------------------------------------------------------------------------------------------------------------------------------------------------------------------------------------------------------------------------------------------------------------------------------------------------------------------------------------------------------------------------------------------------------------------------------------------------------------------------------------------------------------------------------------------------------------------------------------------------------------------------------------------------------------------------------------------------------------------------------------------------------------------------------------------------------------------------------------------------------------------------------------------------------------------------------------------------------------------------------------------------------------------------------------------------------------------------------------------------------------------------------------------------------------------------------------------------------------------------------------------------------------------------------------------------------------------------------------------------------------------------------------------------------------------------------------------------------------------------------------------------------------------------------------------------------------------------------------------------------------------------------------------------------------------------------------------------------------------------------------------------------------------------------------------------------------------------------------------------------------------------------------------------------------------------------------------------------------------------------------------------------------------------------------------------------------------------------------------------------------------------------------------------------------------------------------------------------------------------------------------------------------------------------------------------------------------------------------------------------------------------------------------------------------------------------------------------------------------------------------------------------------------------------------------------------------------------------------------------------------------------------------------------------------------------------------------------------------------------------------------------------------------------------------------------------------------------------------------------------------------------------------------------------------------------------------------------------------------------------------------------------------------------------------------------------------------------------------------------------------------------------------------------------------------------------------------------------------------------------------------------------------------------------------------------------------------------------------------------------------------------------------------------------------------------------------------------------------------------------------------------------------------------------------------------------------------------------------------------------------------------------------------------------------------------------------------------------------------------------------------------------------------------------------------|
| Osteoarthritis Pathway                                                       | 0     | 0.047  | 1     | CASP14, CASP9, DDX2, GREM1, IL1R2, ITGA11, MATN3, S100A8, SMAD6, SOX9, TIMP3                                                                                                                                                                                                                                                                                                                                                                                                                                                                                                                                                                                                                                                                                                                                                                                                                                                                                                                                                                                                                                                                                                                                                                                                                                                                                                                                                                                                                                                                                                                                                                                                                                                                                                                                                                                                                                                                                                                                                                                                                                                                                                                                                                                                                                                                                                                                                                                                                                                                                                                                                                                                                                                                                                                                                                                                                                                                                                                                                                                                                                                                                                                                                                                                                                                                                                                                                                                                                                                                                                                                                                                                                                                                                                                                                                                                                                                                                                                                                                                                                                                                                                                                                                                                                                                                                                                                                                                                                                                                                                                                                                                                                                                                                                                                                                                                                                                                                                                                                                                                                                                                                                                                                                                                                                                                                                                                                                                                                                                                                                                                                                                                                                                                                                                                                                                                                                                                                                                                                                                                                                                                                                                                                                                                                                                                                                                                                                                                                                                                                                                                                                                                                                                                                                                                                                                                                                                                                                                                                                                                                                                                                                                                                                                                                                                                                                                                                                                                                                                                                                                                                                                                                                                                                                                                                                                                                                                                                                                                                                                                                                                                                                                                                                                                                                                                                                                                                                                                                                                                                                                                                                                                                                                                                                                                                                                                                                                                                                                                                                                                                                                                                                                                                                                                                                                                                                                                                                                                                                                                                                                                                                                                                                                                                                                                                                                                                                                                                                                                                                                                                                                                                                                                                                                                                                                                                                                                                                                                                                                                                                                                                                                                                                                                                                                                                                                                                                                                                                                                                                                                                                                                                                                                                                                                                                                                                                                                                                                                                                                                                                                                                                                                                                                                                                                                                                                                                                                                                                                                                                                                                                                                                                                                                                                                                                                                                                                                                                                                                                                                                                                                                                                                                                                                                                                                                                                                                                                                                                                                                                                                                                                                                                                                                                                                                                                                                                                                                                                                                                                                                                                                                                                                                                                                                                                                                                                                                                                                                                                                                                                                                                                                                                                                                                                                                                                                                                                                                                                                                                                                                                                                                                                                                                                                                                                                                                                                                                                                                                                                                                                                                                                                                                                                                                                                                                                                                                                                                                                                                                                                                                                                                                                                                                                                                                                                                                                                                                                                                                                                                                                                                                                                                                                                                                                                                                                                                                                                                                                                                                                                                                                                                                                            |
| Endocannabinoid Cancer Inhibition Pathway                                    | 0     | 0.035  | 1,342 | ADCY2, CASP14, CASP5, MMP2, NOS1                                                                                                                                                                                                                                                                                                                                                                                                                                                                                                                                                                                                                                                                                                                                                                                                                                                                                                                                                                                                                                                                                                                                                                                                                                                                                                                                                                                                                                                                                                                                                                                                                                                                                                                                                                                                                                                                                                                                                                                                                                                                                                                                                                                                                                                                                                                                                                                                                                                                                                                                                                                                                                                                                                                                                                                                                                                                                                                                                                                                                                                                                                                                                                                                                                                                                                                                                                                                                                                                                                                                                                                                                                                                                                                                                                                                                                                                                                                                                                                                                                                                                                                                                                                                                                                                                                                                                                                                                                                                                                                                                                                                                                                                                                                                                                                                                                                                                                                                                                                                                                                                                                                                                                                                                                                                                                                                                                                                                                                                                                                                                                                                                                                                                                                                                                                                                                                                                                                                                                                                                                                                                                                                                                                                                                                                                                                                                                                                                                                                                                                                                                                                                                                                                                                                                                                                                                                                                                                                                                                                                                                                                                                                                                                                                                                                                                                                                                                                                                                                                                                                                                                                                                                                                                                                                                                                                                                                                                                                                                                                                                                                                                                                                                                                                                                                                                                                                                                                                                                                                                                                                                                                                                                                                                                                                                                                                                                                                                                                                                                                                                                                                                                                                                                                                                                                                                                                                                                                                                                                                                                                                                                                                                                                                                                                                                                                                                                                                                                                                                                                                                                                                                                                                                                                                                                                                                                                                                                                                                                                                                                                                                                                                                                                                                                                                                                                                                                                                                                                                                                                                                                                                                                                                                                                                                                                                                                                                                                                                                                                                                                                                                                                                                                                                                                                                                                                                                                                                                                                                                                                                                                                                                                                                                                                                                                                                                                                                                                                                                                                                                                                                                                                                                                                                                                                                                                                                                                                                                                                                                                                                                                                                                                                                                                                                                                                                                                                                                                                                                                                                                                                                                                                                                                                                                                                                                                                                                                                                                                                                                                                                                                                                                                                                                                                                                                                                                                                                                                                                                                                                                                                                                                                                                                                                                                                                                                                                                                                                                                                                                                                                                                                                                                                                                                                                                                                                                                                                                                                                                                                                                                                                                                                                                                                                                                                                                                                                                                                                                                                                                                                                                                                                                                                                                                                                                                                                                                                                                                                                                                                                                                                                                                                                                        |
| Neuroinflammation Signaling Pathway                                          | 0.627 | 0.0571 | 1,508 | CALB2, CD80, CXCL10, CXCL12, GABBR2, GABRA3, GABRE, GABRP, GABRO, GAD2, PLA2G2A, PLA2G2D, PLA2G2E, PLA2G4D, PLA2G4E, PLA2G5, SLC6A13                                                                                                                                                                                                                                                                                                                                                                                                                                                                                                                                                                                                                                                                                                                                                                                                                                                                                                                                                                                                                                                                                                                                                                                                                                                                                                                                                                                                                                                                                                                                                                                                                                                                                                                                                                                                                                                                                                                                                                                                                                                                                                                                                                                                                                                                                                                                                                                                                                                                                                                                                                                                                                                                                                                                                                                                                                                                                                                                                                                                                                                                                                                                                                                                                                                                                                                                                                                                                                                                                                                                                                                                                                                                                                                                                                                                                                                                                                                                                                                                                                                                                                                                                                                                                                                                                                                                                                                                                                                                                                                                                                                                                                                                                                                                                                                                                                                                                                                                                                                                                                                                                                                                                                                                                                                                                                                                                                                                                                                                                                                                                                                                                                                                                                                                                                                                                                                                                                                                                                                                                                                                                                                                                                                                                                                                                                                                                                                                                                                                                                                                                                                                                                                                                                                                                                                                                                                                                                                                                                                                                                                                                                                                                                                                                                                                                                                                                                                                                                                                                                                                                                                                                                                                                                                                                                                                                                                                                                                                                                                                                                                                                                                                                                                                                                                                                                                                                                                                                                                                                                                                                                                                                                                                                                                                                                                                                                                                                                                                                                                                                                                                                                                                                                                                                                                                                                                                                                                                                                                                                                                                                                                                                                                                                                                                                                                                                                                                                                                                                                                                                                                                                                                                                                                                                                                                                                                                                                                                                                                                                                                                                                                                                                                                                                                                                                                                                                                                                                                                                                                                                                                                                                                                                                                                                                                                                                                                                                                                                                                                                                                                                                                                                                                                                                                                                                                                                                                                                                                                                                                                                                                                                                                                                                                                                                                                                                                                                                                                                                                                                                                                                                                                                                                                                                                                                                                                                                                                                                                                                                                                                                                                                                                                                                                                                                                                                                                                                                                                                                                                                                                                                                                                                                                                                                                                                                                                                                                                                                                                                                                                                                                                                                                                                                                                                                                                                                                                                                                                                                                                                                                                                                                                                                                                                                                                                                                                                                                                                                                                                                                                                                                                                                                                                                                                                                                                                                                                                                                                                                                                                                                                                                                                                                                                                                                                                                                                                                                                                                                                                                                                                                                                                                                                                                                                                                                                                                                                                                                                                                                                                                                                    |
| SPINK1 Pancreatic Cancer Pathway                                             | 1.2   | 0.1    | 1,683 | CELSA3, CPA2, CPA4, ELANE, KLK10, KLK2                                                                                                                                                                                                                                                                                                                                                                                                                                                                                                                                                                                                                                                                                                                                                                                                                                                                                                                                                                                                                                                                                                                                                                                                                                                                                                                                                                                                                                                                                                                                                                                                                                                                                                                                                                                                                                                                                                                                                                                                                                                                                                                                                                                                                                                                                                                                                                                                                                                                                                                                                                                                                                                                                                                                                                                                                                                                                                                                                                                                                                                                                                                                                                                                                                                                                                                                                                                                                                                                                                                                                                                                                                                                                                                                                                                                                                                                                                                                                                                                                                                                                                                                                                                                                                                                                                                                                                                                                                                                                                                                                                                                                                                                                                                                                                                                                                                                                                                                                                                                                                                                                                                                                                                                                                                                                                                                                                                                                                                                                                                                                                                                                                                                                                                                                                                                                                                                                                                                                                                                                                                                                                                                                                                                                                                                                                                                                                                                                                                                                                                                                                                                                                                                                                                                                                                                                                                                                                                                                                                                                                                                                                                                                                                                                                                                                                                                                                                                                                                                                                                                                                                                                                                                                                                                                                                                                                                                                                                                                                                                                                                                                                                                                                                                                                                                                                                                                                                                                                                                                                                                                                                                                                                                                                                                                                                                                                                                                                                                                                                                                                                                                                                                                                                                                                                                                                                                                                                                                                                                                                                                                                                                                                                                                                                                                                                                                                                                                                                                                                                                                                                                                                                                                                                                                                                                                                                                                                                                                                                                                                                                                                                                                                                                                                                                                                                                                                                                                                                                                                                                                                                                                                                                                                                                                                                                                                                                                                                                                                                                                                                                                                                                                                                                                                                                                                                                                                                                                                                                                                                                                                                                                                                                                                                                                                                                                                                                                                                                                                                                                                                                                                                                                                                                                                                                                                                                                                                                                                                                                                                                                                                                                                                                                                                                                                                                                                                                                                                                                                                                                                                                                                                                                                                                                                                                                                                                                                                                                                                                                                                                                                                                                                                                                                                                                                                                                                                                                                                                                                                                                                                                                                                                                                                                                                                                                                                                                                                                                                                                                                                                                                                                                                                                                                                                                                                                                                                                                                                                                                                                                                                                                                                                                                                                                                                                                                                                                                                                                                                                                                                                                                                                                                                                                                                                                                                                                                                                                                                                                                                                                                                                                                                                                                  |
| Role of PRR in Interferon Induction and Antiviral Response                   | 1.24  | 0.0899 | 2     | CASP9, DDX58, EIF2AK2, F2OR1A, IFIH1, MMR1, NLRP11, NLRP13, NLRP14, NLRP4, NLRP9                                                                                                                                                                                                                                                                                                                                                                                                                                                                                                                                                                                                                                                                                                                                                                                                                                                                                                                                                                                                                                                                                                                                                                                                                                                                                                                                                                                                                                                                                                                                                                                                                                                                                                                                                                                                                                                                                                                                                                                                                                                                                                                                                                                                                                                                                                                                                                                                                                                                                                                                                                                                                                                                                                                                                                                                                                                                                                                                                                                                                                                                                                                                                                                                                                                                                                                                                                                                                                                                                                                                                                                                                                                                                                                                                                                                                                                                                                                                                                                                                                                                                                                                                                                                                                                                                                                                                                                                                                                                                                                                                                                                                                                                                                                                                                                                                                                                                                                                                                                                                                                                                                                                                                                                                                                                                                                                                                                                                                                                                                                                                                                                                                                                                                                                                                                                                                                                                                                                                                                                                                                                                                                                                                                                                                                                                                                                                                                                                                                                                                                                                                                                                                                                                                                                                                                                                                                                                                                                                                                                                                                                                                                                                                                                                                                                                                                                                                                                                                                                                                                                                                                                                                                                                                                                                                                                                                                                                                                                                                                                                                                                                                                                                                                                                                                                                                                                                                                                                                                                                                                                                                                                                                                                                                                                                                                                                                                                                                                                                                                                                                                                                                                                                                                                                                                                                                                                                                                                                                                                                                                                                                                                                                                                                                                                                                                                                                                                                                                                                                                                                                                                                                                                                                                                                                                                                                                                                                                                                                                                                                                                                                                                                                                                                                                                                                                                                                                                                                                                                                                                                                                                                                                                                                                                                                                                                                                                                                                                                                                                                                                                                                                                                                                                                                                                                                                                                                                                                                                                                                                                                                                                                                                                                                                                                                                                                                                                                                                                                                                                                                                                                                                                                                                                                                                                                                                                                                                                                                                                                                                                                                                                                                                                                                                                                                                                                                                                                                                                                                                                                                                                                                                                                                                                                                                                                                                                                                                                                                                                                                                                                                                                                                                                                                                                                                                                                                                                                                                                                                                                                                                                                                                                                                                                                                                                                                                                                                                                                                                                                                                                                                                                                                                                                                                                                                                                                                                                                                                                                                                                                                                                                                                                                                                                                                                                                                                                                                                                                                                                                                                                                                                                                                                                                                                                                                                                                                                                                                                                                                                                                                                                                                                        |
| Erythropoietin Signaling Pathway                                             | 0     | 0.0282 | 2     | HBS2, IL17C, IL17D, IL3, SHC3                                                                                                                                                                                                                                                                                                                                                                                                                                                                                                                                                                                                                                                                                                                                                                                                                                                                                                                                                                                                                                                                                                                                                                                                                                                                                                                                                                                                                                                                                                                                                                                                                                                                                                                                                                                                                                                                                                                                                                                                                                                                                                                                                                                                                                                                                                                                                                                                                                                                                                                                                                                                                                                                                                                                                                                                                                                                                                                                                                                                                                                                                                                                                                                                                                                                                                                                                                                                                                                                                                                                                                                                                                                                                                                                                                                                                                                                                                                                                                                                                                                                                                                                                                                                                                                                                                                                                                                                                                                                                                                                                                                                                                                                                                                                                                                                                                                                                                                                                                                                                                                                                                                                                                                                                                                                                                                                                                                                                                                                                                                                                                                                                                                                                                                                                                                                                                                                                                                                                                                                                                                                                                                                                                                                                                                                                                                                                                                                                                                                                                                                                                                                                                                                                                                                                                                                                                                                                                                                                                                                                                                                                                                                                                                                                                                                                                                                                                                                                                                                                                                                                                                                                                                                                                                                                                                                                                                                                                                                                                                                                                                                                                                                                                                                                                                                                                                                                                                                                                                                                                                                                                                                                                                                                                                                                                                                                                                                                                                                                                                                                                                                                                                                                                                                                                                                                                                                                                                                                                                                                                                                                                                                                                                                                                                                                                                                                                                                                                                                                                                                                                                                                                                                                                                                                                                                                                                                                                                                                                                                                                                                                                                                                                                                                                                                                                                                                                                                                                                                                                                                                                                                                                                                                                                                                                                                                                                                                                                                                                                                                                                                                                                                                                                                                                                                                                                                                                                                                                                                                                                                                                                                                                                                                                                                                                                                                                                                                                                                                                                                                                                                                                                                                                                                                                                                                                                                                                                                                                                                                                                                                                                                                                                                                                                                                                                                                                                                                                                                                                                                                                                                                                                                                                                                                                                                                                                                                                                                                                                                                                                                                                                                                                                                                                                                                                                                                                                                                                                                                                                                                                                                                                                                                                                                                                                                                                                                                                                                                                                                                                                                                                                                                                                                                                                                                                                                                                                                                                                                                                                                                                                                                                                                                                                                                                                                                                                                                                                                                                                                                                                                                                                                                                                                                                                                                                                                                                                                                                                                                                                                                                                                                                                                                                           |
| Role of Pattern Recognition Receptors in Recognition of Bacteria and Viruses | 0.917 | 0.0705 | 2,236 | C1QB, C1QC, DDX58, EIF2AK2, IFIH1, IL17C, IL17D, IL3, OAS1, OAS2, OAS3                                                                                                                                                                                                                                                                                                                                                                                                                                                                                                                                                                                                                                                                                                                                                                                                                                                                                                                                                                                                                                                                                                                                                                                                                                                                                                                                                                                                                                                                                                                                                                                                                                                                                                                                                                                                                                                                                                                                                                                                                                                                                                                                                                                                                                                                                                                                                                                                                                                                                                                                                                                                                                                                                                                                                                                                                                                                                                                                                                                                                                                                                                                                                                                                                                                                                                                                                                                                                                                                                                                                                                                                                                                                                                                                                                                                                                                                                                                                                                                                                                                                                                                                                                                                                                                                                                                                                                                                                                                                                                                                                                                                                                                                                                                                                                                                                                                                                                                                                                                                                                                                                                                                                                                                                                                                                                                                                                                                                                                                                                                                                                                                                                                                                                                                                                                                                                                                                                                                                                                                                                                                                                                                                                                                                                                                                                                                                                                                                                                                                                                                                                                                                                                                                                                                                                                                                                                                                                                                                                                                                                                                                                                                                                                                                                                                                                                                                                                                                                                                                                                                                                                                                                                                                                                                                                                                                                                                                                                                                                                                                                                                                                                                                                                                                                                                                                                                                                                                                                                                                                                                                                                                                                                                                                                                                                                                                                                                                                                                                                                                                                                                                                                                                                                                                                                                                                                                                                                                                                                                                                                                                                                                                                                                                                                                                                                                                                                                                                                                                                                                                                                                                                                                                                                                                                                                                                                                                                                                                                                                                                                                                                                                                                                                                                                                                                                                                                                                                                                                                                                                                                                                                                                                                                                                                                                                                                                                                                                                                                                                                                                                                                                                                                                                                                                                                                                                                                                                                                                                                                                                                                                                                                                                                                                                                                                                                                                                                                                                                                                                                                                                                                                                                                                                                                                                                                                                                                                                                                                                                                                                                                                                                                                                                                                                                                                                                                                                                                                                                                                                                                                                                                                                                                                                                                                                                                                                                                                                                                                                                                                                                                                                                                                                                                                                                                                                                                                                                                                                                                                                                                                                                                                                                                                                                                                                                                                                                                                                                                                                                                                                                                                                                                                                                                                                                                                                                                                                                                                                                                                                                                                                                                                                                                                                                                                                                                                                                                                                                                                                                                                                                                                                                                                                                                                                                                                                                                                                                                                                                                                                                                                                                                                                  |
| EIF2 Signaling                                                               | 0     | 0.0268 | 2,236 | EIF2AK2, RPL23, RPL26, RPL34, RPL7, RPS24                                                                                                                                                                                                                                                                                                                                                                                                                                                                                                                                                                                                                                                                                                                                                                                                                                                                                                                                                                                                                                                                                                                                                                                                                                                                                                                                                                                                                                                                                                                                                                                                                                                                                                                                                                                                                                                                                                                                                                                                                                                                                                                                                                                                                                                                                                                                                                                                                                                                                                                                                                                                                                                                                                                                                                                                                                                                                                                                                                                                                                                                                                                                                                                                                                                                                                                                                                                                                                                                                                                                                                                                                                                                                                                                                                                                                                                                                                                                                                                                                                                                                                                                                                                                                                                                                                                                                                                                                                                                                                                                                                                                                                                                                                                                                                                                                                                                                                                                                                                                                                                                                                                                                                                                                                                                                                                                                                                                                                                                                                                                                                                                                                                                                                                                                                                                                                                                                                                                                                                                                                                                                                                                                                                                                                                                                                                                                                                                                                                                                                                                                                                                                                                                                                                                                                                                                                                                                                                                                                                                                                                                                                                                                                                                                                                                                                                                                                                                                                                                                                                                                                                                                                                                                                                                                                                                                                                                                                                                                                                                                                                                                                                                                                                                                                                                                                                                                                                                                                                                                                                                                                                                                                                                                                                                                                                                                                                                                                                                                                                                                                                                                                                                                                                                                                                                                                                                                                                                                                                                                                                                                                                                                                                                                                                                                                                                                                                                                                                                                                                                                                                                                                                                                                                                                                                                                                                                                                                                                                                                                                                                                                                                                                                                                                                                                                                                                                                                                                                                                                                                                                                                                                                                                                                                                                                                                                                                                                                                                                                                                                                                                                                                                                                                                                                                                                                                                                                                                                                                                                                                                                                                                                                                                                                                                                                                                                                                                                                                                                                                                                                                                                                                                                                                                                                                                                                                                                                                                                                                                                                                                                                                                                                                                                                                                                                                                                                                                                                                                                                                                                                                                                                                                                                                                                                                                                                                                                                                                                                                                                                                                                                                                                                                                                                                                                                                                                                                                                                                                                                                                                                                                                                                                                                                                                                                                                                                                                                                                                                                                                                                                                                                                                                                                                                                                                                                                                                                                                                                                                                                                                                                                                                                                                                                                                                                                                                                                                                                                                                                                                                                                                                                                                                                                                                                                                                                                                                                                                                                                                                                                                                                                                                                                               |
| IFITM Signaling                                                              | 0     | 0.04   | 2,236 | EGFR, ITGA11, KDR, NTRK2, NTRK3, PDGFRA                                                                                                                                                                                                                                                                                                                                                                                                                                                                                                                                                                                                                                                                                                                                                                                                                                                                                                                                                                                                                                                                                                                                                                                                                                                                                                                                                                                                                                                                                                                                                                                                                                                                                                                                                                                                                                                                                                                                                                                                                                                                                                                                                                                                                                                                                                                                                                                                                                                                                                                                                                                                                                                                                                                                                                                                                                                                                                                                                                                                                                                                                                                                                                                                                                                                                                                                                                                                                                                                                                                                                                                                                                                                                                                                                                                                                                                                                                                                                                                                                                                                                                                                                                                                                                                                                                                                                                                                                                                                                                                                                                                                                                                                                                                                                                                                                                                                                                                                                                                                                                                                                                                                                                                                                                                                                                                                                                                                                                                                                                                                                                                                                                                                                                                                                                                                                                                                                                                                                                                                                                                                                                                                                                                                                                                                                                                                                                                                                                                                                                                                                                                                                                                                                                                                                                                                                                                                                                                                                                                                                                                                                                                                                                                                                                                                                                                                                                                                                                                                                                                                                                                                                                                                                                                                                                                                                                                                                                                                                                                                                                                                                                                                                                                                                                                                                                                                                                                                                                                                                                                                                                                                                                                                                                                                                                                                                                                                                                                                                                                                                                                                                                                                                                                                                                                                                                                                                                                                                                                                                                                                                                                                                                                                                                                                                                                                                                                                                                                                                                                                                                                                                                                                                                                                                                                                                                                                                                                                                                                                                                                                                                                                                                                                                                                                                                                                                                                                                                                                                                                                                                                                                                                                                                                                                                                                                                                                                                                                                                                                                                                                                                                                                                                                                                                                                                                                                                                                                                                                                                                                                                                                                                                                                                                                                                                                                                                                                                                                                                                                                                                                                                                                                                                                                                                                                                                                                                                                                                                                                                                                                                                                                                                                                                                                                                                                                                                                                                                                                                                                                                                                                                                                                                                                                                                                                                                                                                                                                                                                                                                                                                                                                                                                                                                                                                                                                                                                                                                                                                                                                                                                                                                                                                                                                                                                                                                                                                                                                                                                                                                                                                                                                                                                                                                                                                                                                                                                                                                                                                                                                                                                                                                                                                                                                                                                                                                                                                                                                                                                                                                                                                                                                                                                                                                                                                                                                                                                                                                                                                                                                                                                                                                                                                 |
| Interferon Signaling                                                         | 3.85  | 0.222  | 2,828 | IFI5, IFI6, IFIT1, IFIT3, IFITM3, ISG15, MX1, OAS1                                                                                                                                                                                                                                                                                                                                                                                                                                                                                                                                                                                                                                                                                                                                                                                                                                                                                                                                                                                                                                                                                                                                                                                                                                                                                                                                                                                                                                                                                                                                                                                                                                                                                                                                                                                                                                                                                                                                                                                                                                                                                                                                                                                                                                                                                                                                                                                                                                                                                                                                                                                                                                                                                                                                                                                                                                                                                                                                                                                                                                                                                                                                                                                                                                                                                                                                                                                                                                                                                                                                                                                                                                                                                                                                                                                                                                                                                                                                                                                                                                                                                                                                                                                                                                                                                                                                                                                                                                                                                                                                                                                                                                                                                                                                                                                                                                                                                                                                                                                                                                                                                                                                                                                                                                                                                                                                                                                                                                                                                                                                                                                                                                                                                                                                                                                                                                                                                                                                                                                                                                                                                                                                                                                                                                                                                                                                                                                                                                                                                                                                                                                                                                                                                                                                                                                                                                                                                                                                                                                                                                                                                                                                                                                                                                                                                                                                                                                                                                                                                                                                                                                                                                                                                                                                                                                                                                                                                                                                                                                                                                                                                                                                                                                                                                                                                                                                                                                                                                                                                                                                                                                                                                                                                                                                                                                                                                                                                                                                                                                                                                                                                                                                                                                                                                                                                                                                                                                                                                                                                                                                                                                                                                                                                                                                                                                                                                                                                                                                                                                                                                                                                                                                                                                                                                                                                                                                                                                                                                                                                                                                                                                                                                                                                                                                                                                                                                                                                                                                                                                                                                                                                                                                                                                                                                                                                                                                                                                                                                                                                                                                                                                                                                                                                                                                                                                                                                                                                                                                                                                                                                                                                                                                                                                                                                                                                                                                                                                                                                                                                                                                                                                                                                                                                                                                                                                                                                                                                                                                                                                                                                                                                                                                                                                                                                                                                                                                                                                                                                                                                                                                                                                                                                                                                                                                                                                                                                                                                                                                                                                                                                                                                                                                                                                                                                                                                                                                                                                                                                                                                                                                                                                                                                                                                                                                                                                                                                                                                                                                                                                                                                                                                                                                                                                                                                                                                                                                                                                                                                                                                                                                                                                                                                                                                                                                                                                                                                                                                                                                                                                                                                                                                                                                                                                                                                                                                                                                                                                                                                                                                                                                                                                                                      |
| Oxidative Phosphorylation                                                    | 0.827 | 0.0727 | 2,828 | ATP5ME, ATP5PF, COX7B, COX7C, NDUFA1, NDUFB3, NDUFS5, UQCRCB                                                                                                                                                                                                                                                                                                                                                                                                                                                                                                                                                                                                                                                                                                                                                                                                                                                                                                                                                                                                                                                                                                                                                                                                                                                                                                                                                                                                                                                                                                                                                                                                                                                                                                                                                                                                                                                                                                                                                                                                                                                                                                                                                                                                                                                                                                                                                                                                                                                                                                                                                                                                                                                                                                                                                                                                                                                                                                                                                                                                                                                                                                                                                                                                                                                                                                                                                                                                                                                                                                                                                                                                                                                                                                                                                                                                                                                                                                                                                                                                                                                                                                                                                                                                                                                                                                                                                                                                                                                                                                                                                                                                                                                                                                                                                                                                                                                                                                                                                                                                                                                                                                                                                                                                                                                                                                                                                                                                                                                                                                                                                                                                                                                                                                                                                                                                                                                                                                                                                                                                                                                                                                                                                                                                                                                                                                                                                                                                                                                                                                                                                                                                                                                                                                                                                                                                                                                                                                                                                                                                                                                                                                                                                                                                                                                                                                                                                                                                                                                                                                                                                                                                                                                                                                                                                                                                                                                                                                                                                                                                                                                                                                                                                                                                                                                                                                                                                                                                                                                                                                                                                                                                                                                                                                                                                                                                                                                                                                                                                                                                                                                                                                                                                                                                                                                                                                                                                                                                                                                                                                                                                                                                                                                                                                                                                                                                                                                                                                                                                                                                                                                                                                                                                                                                                                                                                                                                                                                                                                                                                                                                                                                                                                                                                                                                                                                                                                                                                                                                                                                                                                                                                                                                                                                                                                                                                                                                                                                                                                                                                                                                                                                                                                                                                                                                                                                                                                                                                                                                                                                                                                                                                                                                                                                                                                                                                                                                                                                                                                                                                                                                                                                                                                                                                                                                                                                                                                                                                                                                                                                                                                                                                                                                                                                                                                                                                                                                                                                                                                                                                                                                                                                                                                                                                                                                                                                                                                                                                                                                                                                                                                                                                                                                                                                                                                                                                                                                                                                                                                                                                                                                                                                                                                                                                                                                                                                                                                                                                                                                                                                                                                                                                                                                                                                                                                                                                                                                                                                                                                                                                                                                                                                                                                                                                                                                                                                                                                                                                                                                                                                                                                                                                                                                                                                                                                                                                                                                                                                                                                                                                                                                                                                                            |
| Antioxidant Action of Vitamin C                                              | 2.21  | 0.108  | 3     | PLA2G2A, PLA2G2C, PLA2G2D, PLA2G2E, PLA2G4D, PLA2G4E, PLA2G5, PLA2R1, PLCB4, SLC2A2, TXN, TXNRD3                                                                                                                                                                                                                                                                                                                                                                                                                                                                                                                                                                                                                                                                                                                                                                                                                                                                                                                                                                                                                                                                                                                                                                                                                                                                                                                                                                                                                                                                                                                                                                                                                                                                                                                                                                                                                                                                                                                                                                                                                                                                                                                                                                                                                                                                                                                                                                                                                                                                                                                                                                                                                                                                                                                                                                                                                                                                                                                                                                                                                                                                                                                                                                                                                                                                                                                                                                                                                                                                                                                                                                                                                                                                                                                                                                                                                                                                                                                                                                                                                                                                                                                                                                                                                                                                                                                                                                                                                                                                                                                                                                                                                                                                                                                                                                                                                                                                                                                                                                                                                                                                                                                                                                                                                                                                                                                                                                                                                                                                                                                                                                                                                                                                                                                                                                                                                                                                                                                                                                                                                                                                                                                                                                                                                                                                                                                                                                                                                                                                                                                                                                                                                                                                                                                                                                                                                                                                                                                                                                                                                                                                                                                                                                                                                                                                                                                                                                                                                                                                                                                                                                                                                                                                                                                                                                                                                                                                                                                                                                                                                                                                                                                                                                                                                                                                                                                                                                                                                                                                                                                                                                                                                                                                                                                                                                                                                                                                                                                                                                                                                                                                                                                                                                                                                                                                                                                                                                                                                                                                                                                                                                                                                                                                                                                                                                                                                                                                                                                                                                                                                                                                                                                                                                                                                                                                                                                                                                                                                                                                                                                                                                                                                                                                                                                                                                                                                                                                                                                                                                                                                                                                                                                                                                                                                                                                                                                                                                                                                                                                                                                                                                                                                                                                                                                                                                                                                                                                                                                                                                                                                                                                                                                                                                                                                                                                                                                                                                                                                                                                                                                                                                                                                                                                                                                                                                                                                                                                                                                                                                                                                                                                                                                                                                                                                                                                                                                                                                                                                                                                                                                                                                                                                                                                                                                                                                                                                                                                                                                                                                                                                                                                                                                                                                                                                                                                                                                                                                                                                                                                                                                                                                                                                                                                                                                                                                                                                                                                                                                                                                                                                                                                                                                                                                                                                                                                                                                                                                                                                                                                                                                                                                                                                                                                                                                                                                                                                                                                                                                                                                                                                                                                                                                                                                                                                                                                                                                                                                                                                                                                                                                                                                        |
| Role of Hypercytokinemia/Thyesthemia in the Pathogenesis of Influenza        | 2.62  | 0.128  | 3,312 | CXCL10, DDX58, EIF2AK2, IFIT1, IFIT3, ISG15, MX1, OAS1, OAS2, OAS3, PADI2                                                                                                                                                                                                                                                                                                                                                                                                                                                                                                                                                                                                                                                                                                                                                                                                                                                                                                                                                                                                                                                                                                                                                                                                                                                                                                                                                                                                                                                                                                                                                                                                                                                                                                                                                                                                                                                                                                                                                                                                                                                                                                                                                                                                                                                                                                                                                                                                                                                                                                                                                                                                                                                                                                                                                                                                                                                                                                                                                                                                                                                                                                                                                                                                                                                                                                                                                                                                                                                                                                                                                                                                                                                                                                                                                                                                                                                                                                                                                                                                                                                                                                                                                                                                                                                                                                                                                                                                                                                                                                                                                                                                                                                                                                                                                                                                                                                                                                                                                                                                                                                                                                                                                                                                                                                                                                                                                                                                                                                                                                                                                                                                                                                                                                                                                                                                                                                                                                                                                                                                                                                                                                                                                                                                                                                                                                                                                                                                                                                                                                                                                                                                                                                                                                                                                                                                                                                                                                                                                                                                                                                                                                                                                                                                                                                                                                                                                                                                                                                                                                                                                                                                                                                                                                                                                                                                                                                                                                                                                                                                                                                                                                                                                                                                                                                                                                                                                                                                                                                                                                                                                                                                                                                                                                                                                                                                                                                                                                                                                                                                                                                                                                                                                                                                                                                                                                                                                                                                                                                                                                                                                                                                                                                                                                                                                                                                                                                                                                                                                                                                                                                                                                                                                                                                                                                                                                                                                                                                                                                                                                                                                                                                                                                                                                                                                                                                                                                                                                                                                                                                                                                                                                                                                                                                                                                                                                                                                                                                                                                                                                                                                                                                                                                                                                                                                                                                                                                                                                                                                                                                                                                                                                                                                                                                                                                                                                                                                                                                                                                                                                                                                                                                                                                                                                                                                                                                                                                                                                                                                                                                                                                                                                                                                                                                                                                                                                                                                                                                                                                                                                                                                                                                                                                                                                                                                                                                                                                                                                                                                                                                                                                                                                                                                                                                                                                                                                                                                                                                                                                                                                                                                                                                                                                                                                                                                                                                                                                                                                                                                                                                                                                                                                                                                                                                                                                                                                                                                                                                                                                                                                                                                                                                                                                                                                                                                                                                                                                                                                                                                                                                                                                                                                                                                                                                                                                                                                                                                                                                                                                                                                                                                                                               |
| Hepatic Fibrosis / Hepatic Stellate Cell Activation                          | 3.87  | 0.113  | NaN   | COL1A1, COL1A2, COL1A3, COL1A4, COL1A5, COL1A6, COL1A7, COL1A8, COL1A9, CYP2E1, EGFR, IGF1R, IL1R2, KDR, MMP2, MYH11, MYH2, MYH8, MYL6, MYO1B, MYO1H, PDGFRA                                                                                                                                                                                                                                                                                                                                                                                                                                                                                                                                                                                                                                                                                                                                                                                                                                                                                                                                                                                                                                                                                                                                                                                                                                                                                                                                                                                                                                                                                                                                                                                                                                                                                                                                                                                                                                                                                                                                                                                                                                                                                                                                                                                                                                                                                                                                                                                                                                                                                                                                                                                                                                                                                                                                                                                                                                                                                                                                                                                                                                                                                                                                                                                                                                                                                                                                                                                                                                                                                                                                                                                                                                                                                                                                                                                                                                                                                                                                                                                                                                                                                                                                                                                                                                                                                                                                                                                                                                                                                                                                                                                                                                                                                                                                                                                                                                                                                                                                                                                                                                                                                                                                                                                                                                                                                                                                                                                                                                                                                                                                                                                                                                                                                                                                                                                                                                                                                                                                                                                                                                                                                                                                                                                                                                                                                                                                                                                                                                                                                                                                                                                                                                                                                                                                                                                                                                                                                                                                                                                                                                                                                                                                                                                                                                                                                                                                                                                                                                                                                                                                                                                                                                                                                                                                                                                                                                                                                                                                                                                                                                                                                                                                                                                                                                                                                                                                                                                                                                                                                                                                                                                                                                                                                                                                                                                                                                                                                                                                                                                                                                                                                                                                                                                                                                                                                                                                                                                                                                                                                                                                                                                                                                                                                                                                                                                                                                                                                                                                                                                                                                                                                                                                                                                                                                                                                                                                                                                                                                                                                                                                                                                                                                                                                                                                                                                                                                                                                                                                                                                                                                                                                                                                                                                                                                                                                                                                                                                                                                                                                                                                                                                                                                                                                                                                                                                                                                                                                                                                                                                                                                                                                                                                                                                                                                                                                                                                                                                                                                                                                                                                                                                                                                                                                                                                                                                                                                                                                                                                                                                                                                                                                                                                                                                                                                                                                                                                                                                                                                                                                                                                                                                                                                                                                                                                                                                                                                                                                                                                                                                                                                                                                                                                                                                                                                                                                                                                                                                                                                                                                                                                                                                                                                                                                                                                                                                                                                                                                                                                                                                                                                                                                                                                                                                                                                                                                                                                                                                                                                                                                                                                                                                                                                                                                                                                                                                                                                                                                                                                                                                                                                                                                                                                                                                                                                                                                                                                                                                                                                                                                                            |
| Atherosclerosis Signaling                                                    | 3.37  | 0.123  | NaN   | COL1A1, CXCL12, F3, LPA, MSR1, PLA2G2A, PLA2G2C, PLA2G2D, PLA2G2E, PLA2G4D, PLA2G4E, PLA2G5, PLA2R1, S100A8, SELE, TPSAB1, TPSTB2                                                                                                                                                                                                                                                                                                                                                                                                                                                                                                                                                                                                                                                                                                                                                                                                                                                                                                                                                                                                                                                                                                                                                                                                                                                                                                                                                                                                                                                                                                                                                                                                                                                                                                                                                                                                                                                                                                                                                                                                                                                                                                                                                                                                                                                                                                                                                                                                                                                                                                                                                                                                                                                                                                                                                                                                                                                                                                                                                                                                                                                                                                                                                                                                                                                                                                                                                                                                                                                                                                                                                                                                                                                                                                                                                                                                                                                                                                                                                                                                                                                                                                                                                                                                                                                                                                                                                                                                                                                                                                                                                                                                                                                                                                                                                                                                                                                                                                                                                                                                                                                                                                                                                                                                                                                                                                                                                                                                                                                                                                                                                                                                                                                                                                                                                                                                                                                                                                                                                                                                                                                                                                                                                                                                                                                                                                                                                                                                                                                                                                                                                                                                                                                                                                                                                                                                                                                                                                                                                                                                                                                                                                                                                                                                                                                                                                                                                                                                                                                                                                                                                                                                                                                                                                                                                                                                                                                                                                                                                                                                                                                                                                                                                                                                                                                                                                                                                                                                                                                                                                                                                                                                                                                                                                                                                                                                                                                                                                                                                                                                                                                                                                                                                                                                                                                                                                                                                                                                                                                                                                                                                                                                                                                                                                                                                                                                                                                                                                                                                                                                                                                                                                                                                                                                                                                                                                                                                                                                                                                                                                                                                                                                                                                                                                                                                                                                                                                                                                                                                                                                                                                                                                                                                                                                                                                                                                                                                                                                                                                                                                                                                                                                                                                                                                                                                                                                                                                                                                                                                                                                                                                                                                                                                                                                                                                                                                                                                                                                                                                                                                                                                                                                                                                                                                                                                                                                                                                                                                                                                                                                                                                                                                                                                                                                                                                                                                                                                                                                                                                                                                                                                                                                                                                                                                                                                                                                                                                                                                                                                                                                                                                                                                                                                                                                                                                                                                                                                                                                                                                                                                                                                                                                                                                                                                                                                                                                                                                                                                                                                                                                                                                                                                                                                                                                                                                                                                                                                                                                                                                                                                                                                                                                                                                                                                                                                                                                                                                                                                                                                                                                                                                                                                                                                                                                                                                                                                                                                                                                                                                                                                                                       |
| Glucocorticoid Receptor Signaling                                            | 2.59  | 0.074  | NaN   | ANKK1, CDKN1C, DNAH10, DNAH3, EGFR, FCGR1A, G6PC1, HP, IL17RC, IL17RD, IL17RE, IL1R2, IL3, IIR, KRIT1, KRIT2, KRIT4, KRIT22, KRIT24, KRIT2, KRIT3, KRIT3A, KRIT3B, KRIT3C, KRIT3D, KRIT3E, KRIT3F, KRIT3G, KRIT3H, KRIT3I, KRIT3J, KRIT3K, KRIT3L, KRIT3M, KRIT3N, KRIT3O, KRIT3P, KRIT3Q, KRIT3R, KRIT3S, KRIT3T, KRIT3U, KRIT3V, KRIT3W, KRIT3X, KRIT3Y, KRIT3Z, KRIT4A, KRIT4B, KRIT4C, KRIT4D, KRIT4E, KRIT4F, KRIT4G, KRIT4H, KRIT4I, KRIT4J, KRIT4K, KRIT4L, KRIT4M, KRIT4N, KRIT4O, KRIT4P, KRIT4Q, KRIT4R, KRIT4S, KRIT4T, KRIT4U, KRIT4V, KRIT4W, KRIT4X, KRIT4Y, KRIT4Z, KRIT5, KRIT5A, KRIT5B, KRIT5C, KRIT5D, KRIT5E, KRIT5F, KRIT5G, KRIT5H, KRIT5I, KRIT5J, KRIT5K, KRIT5L, KRIT5M, KRIT5N, KRIT5O, KRIT5P, KRIT5Q, KRIT5R, KRIT5S, KRIT5T, KRIT5U, KRIT5V, KRIT5W, KRIT5X, KRIT5Y, KRIT5Z, KRIT6, KRIT6A, KRIT6B, KRIT6C, KRIT6D, KRIT6E, KRIT6F, KRIT6G, KRIT6H, KRIT6I, KRIT6J, KRIT6K, KRIT6L, KRIT6M, KRIT6N, KRIT6O, KRIT6P, KRIT6Q, KRIT6R, KRIT6S, KRIT6T, KRIT6U, KRIT6V, KRIT6W, KRIT6X, KRIT6Y, KRIT6Z, KRIT7, KRIT7A, KRIT7B, KRIT7C, KRIT7D, KRIT7E, KRIT7F, KRIT7G, KRIT7H, KRIT7I, KRIT7J, KRIT7K, KRIT7L, KRIT7M, KRIT7N, KRIT7O, KRIT7P, KRIT7Q, KRIT7R, KRIT7S, KRIT7T, KRIT7U, KRIT7V, KRIT7W, KRIT7X, KRIT7Y, KRIT7Z, KRIT8, KRIT8A, KRIT8B, KRIT8C, KRIT8D, KRIT8E, KRIT8F, KRIT8G, KRIT8H, KRIT8I, KRIT8J, KRIT8K, KRIT8L, KRIT8M, KRIT8N, KRIT8O, KRIT8P, KRIT8Q, KRIT8R, KRIT8S, KRIT8T, KRIT8U, KRIT8V, KRIT8W, KRIT8X, KRIT8Y, KRIT8Z, KRIT9, KRIT9A, KRIT9B, KRIT9C, KRIT9D, KRIT9E, KRIT9F, KRIT9G, KRIT9H, KRIT9I, KRIT9J, KRIT9K, KRIT9L, KRIT9M, KRIT9N, KRIT9O, KRIT9P, KRIT9Q, KRIT9R, KRIT9S, KRIT9T, KRIT9U, KRIT9V, KRIT9W, KRIT9X, KRIT9Y, KRIT9Z, KRIT10, KRIT10A, KRIT10B, KRIT10C, KRIT10D, KRIT10E, KRIT10F, KRIT10G, KRIT10H, KRIT10I, KRIT10J, KRIT10K, KRIT10L, KRIT10M, KRIT10N, KRIT10O, KRIT10P, KRIT10Q, KRIT10R, KRIT10S, KRIT10T, KRIT10U, KRIT10V, KRIT10W, KRIT10X, KRIT10Y, KRIT10Z, KRIT11, KRIT11A, KRIT11B, KRIT11C, KRIT11D, KRIT11E, KRIT11F, KRIT11G, KRIT11H, KRIT11I, KRIT11J, KRIT11K, KRIT11L, KRIT11M, KRIT11N, KRIT11O, KRIT11P, KRIT11Q, KRIT11R, KRIT11S, KRIT11T, KRIT11U, KRIT11V, KRIT11W, KRIT11X, KRIT11Y, KRIT11Z, KRIT12, KRIT12A, KRIT12B, KRIT12C, KRIT12D, KRIT12E, KRIT12F, KRIT12G, KRIT12H, KRIT12I, KRIT12J, KRIT12K, KRIT12L, KRIT12M, KRIT12N, KRIT12O, KRIT12P, KRIT12Q, KRIT12R, KRIT12S, KRIT12T, KRIT12U, KRIT12V, KRIT12W, KRIT12X, KRIT12Y, KRIT12Z, KRIT13, KRIT13A, KRIT13B, KRIT13C, KRIT13D, KRIT13E, KRIT13F, KRIT13G, KRIT13H, KRIT13I, KRIT13J, KRIT13K, KRIT13L, KRIT13M, KRIT13N, KRIT13O, KRIT13P, KRIT13Q, KRIT13R, KRIT13S, KRIT13T, KRIT13U, KRIT13V, KRIT13W, KRIT13X, KRIT13Y, KRIT13Z, KRIT14, KRIT14A, KRIT14B, KRIT14C, KRIT14D, KRIT14E, KRIT14F, KRIT14G, KRIT14H, KRIT14I, KRIT14J, KRIT14K, KRIT14L, KRIT14M, KRIT14N, KRIT14O, KRIT14P, KRIT14Q, KRIT14R, KRIT14S, KRIT14T, KRIT14U, KRIT14V, KRIT14W, KRIT14X, KRIT14Y, KRIT14Z, KRIT15, KRIT15A, KRIT15B, KRIT15C, KRIT15D, KRIT15E, KRIT15F, KRIT15G, KRIT15H, KRIT15I, KRIT15J, KRIT15K, KRIT15L, KRIT15M, KRIT15N, KRIT15O, KRIT15P, KRIT15Q, KRIT15R, KRIT15S, KRIT15T, KRIT15U, KRIT15V, KRIT15W, KRIT15X, KRIT15Y, KRIT15Z, KRIT16, KRIT16A, KRIT16B, KRIT16C, KRIT16D, KRIT16E, KRIT16F, KRIT16G, KRIT16H, KRIT16I, KRIT16J, KRIT16K, KRIT16L, KRIT16M, KRIT16N, KRIT16O, KRIT16P, KRIT16Q, KRIT16R, KRIT16S, KRIT16T, KRIT16U, KRIT16V, KRIT16W, KRIT16X, KRIT16Y, KRIT16Z, KRIT17, KRIT17A, KRIT17B, KRIT17C, KRIT17D, KRIT17E, KRIT17F, KRIT17G, KRIT17H, KRIT17I, KRIT17J, KRIT17K, KRIT17L, KRIT17M, KRIT17N, KRIT17O, KRIT17P, KRIT17Q, KRIT17R, KRIT17S, KRIT17T, KRIT17U, KRIT17V, KRIT17W, KRIT17X, KRIT17Y, KRIT17Z, KRIT18, KRIT18A, KRIT18B, KRIT18C, KRIT18D, KRIT18E, KRIT18F, KRIT18G, KRIT18H, KRIT18I, KRIT18J, KRIT18K, KRIT18L, KRIT18M, KRIT18N, KRIT18O, KRIT18P, KRIT18Q, KRIT18R, KRIT18S, KRIT18T, KRIT18U, KRIT18V, KRIT18W, KRIT18X, KRIT18Y, KRIT18Z, KRIT19, KRIT19A, KRIT19B, KRIT19C, KRIT19D, KRIT19E, KRIT19F, KRIT19G, KRIT19H, KRIT19I, KRIT19J, KRIT19K, KRIT19L, KRIT19M, KRIT19N, KRIT19O, KRIT19P, KRIT19Q, KRIT19R, KRIT19S, KRIT19T, KRIT19U, KRIT19V, KRIT19W, KRIT19X, KRIT19Y, KRIT19Z, KRIT20, KRIT20A, KRIT20B, KRIT20C, KRIT20D, KRIT20E, KRIT20F, KRIT20G, KRIT20H, KRIT20I, KRIT20J, KRIT20K, KRIT20L, KRIT20M, KRIT20N, KRIT20O, KRIT20P, KRIT20Q, KRIT20R, KRIT20S, KRIT20T, KRIT20U, KRIT20V, KRIT20W, KRIT20X, KRIT20Y, KRIT20Z, KRIT21, KRIT21A, KRIT21B, KRIT21C, KRIT21D, KRIT21E, KRIT21F, KRIT21G, KRIT21H, KRIT21I, KRIT21J, KRIT21K, KRIT21L, KRIT21M, KRIT21N, KRIT21O, KRIT21P, KRIT21Q, KRIT21R, KRIT21S, KRIT21T, KRIT21U, KRIT21V, KRIT21W, KRIT21X, KRIT21Y, KRIT21Z, KRIT22, KRIT22A, KRIT22B, KRIT22C, KRIT22D, KRIT22E, KRIT22F, KRIT22G, KRIT22H, KRIT22I, KRIT22J, KRIT22K, KRIT22L, KRIT22M, KRIT22N, KRIT22O, KRIT22P, KRIT22Q, KRIT22R, KRIT22S, KRIT22T, KRIT22U, KRIT22V, KRIT22W, KRIT22X, KRIT22Y, KRIT22Z, KRIT23, KRIT23A, KRIT23B, KRIT23C, KRIT23D, KRIT23E, KRIT23F, KRIT23G, KRIT23H, KRIT23I, KRIT23J, KRIT23K, KRIT23L, KRIT23M, KRIT23N, KRIT23O, KRIT23P, KRIT23Q, KRIT23R, KRIT23S, KRIT23T, KRIT23U, KRIT23V, KRIT23W, KRIT23X, KRIT23Y, KRIT23Z, KRIT24, KRIT24A, KRIT24B, KRIT24C, KRIT24D, KRIT24E, KRIT24F, KRIT24G, KRIT24H, KRIT24I, KRIT24J, KRIT24K, KRIT24L, KRIT24M, KRIT24N, KRIT24O, KRIT24P, KRIT24Q, KRIT24R, KRIT24S, KRIT24T, KRIT24U, KRIT24V, KRIT24W, KRIT24X, KRIT24Y, KRIT24Z, KRIT25, KRIT25A, KRIT25B, KRIT25C, KRIT25D, KRIT25E, KRIT25F, KRIT25G, KRIT25H, KRIT25I, KRIT25J, KRIT25K, KRIT25L, KRIT25M, KRIT25N, KRIT25O, KRIT25P, KRIT25Q, KRIT25R, KRIT25S, KRIT25T, KRIT25U, KRIT25V, KRIT25W, KRIT25X, KRIT25Y, KRIT25Z, KRIT26, KRIT26A, KRIT26B, KRIT26C, KRIT26D, KRIT26E, KRIT26F, KRIT26G, KRIT26H, KRIT26I, KRIT26J, KRIT26K, KRIT26L, KRIT26M, KRIT26N, KRIT26O, KRIT26P, KRIT26Q, KRIT26R, KRIT26S, KRIT26T, KRIT26U, KRIT26V, KRIT26W, KRIT26X, KRIT26Y, KRIT26Z, KRIT27, KRIT27A, KRIT27B, KRIT27C, KRIT27D, KRIT27E, KRIT27F, KRIT27G, KRIT27H, KRIT27I, KRIT27J, KRIT27K, KRIT27L, KRIT27M, KRIT27N, KRIT27O, KRIT27P, KRIT27Q, KRIT27R, KRIT27S, KRIT27T, KRIT27U, KRIT27V, KRIT27W, KRIT27X, KRIT27Y, KRIT27Z, KRIT28, KRIT28A, KRIT28B, KRIT28C, KRIT28D, KRIT28E, KRIT28F, KRIT28G, KRIT28H, KRIT28I, KRIT28J, KRIT28K, KRIT28L, KRIT28M, KRIT28N, KRIT28O, KRIT28P, KRIT28Q, KRIT28R, KRIT28S, KRIT28T, KRIT28U, KRIT28V, KRIT28W, KRIT28X, KRIT28Y, KRIT28Z, KRIT29, KRIT29A, KRIT29B, KRIT29C, KRIT29D, KRIT29E, KRIT29F, KRIT29G, KRIT29H, KRIT29I, KRIT29J, KRIT29K, KRIT29L, KRIT29M, KRIT29N, KRIT29O, KRIT29P, KRIT29Q, KRIT29R, KRIT29S, KRIT29T, KRIT29U, KRIT29V, KRIT29W, KRIT29X, KRIT29Y, KRIT29Z, KRIT30, KRIT30A, KRIT30B, KRIT30C, KRIT30D, KRIT30E, KRIT30F, KRIT30G, KRIT30H, KRIT30I, KRIT30J, KRIT30K, KRIT30L, KRIT30M, KRIT30N, KRIT30O, KRIT30P, KRIT30Q, KRIT30R, KRIT30S, KRIT30T, KRIT30U, KRIT30V, KRIT30W, KRIT30X, KRIT30Y, KRIT30Z, KRIT31, KRIT31A, KRIT31B, KRIT31C, KRIT31D, KRIT31E, KRIT31F, KRIT31G, KRIT31H, KRIT31I, KRIT31J, KRIT31K, KRIT31L, KRIT31M, KRIT31N, KRIT31O, KRIT31P, KRIT31Q, KRIT31R, KRIT31S, KRIT31T, KRIT31U, KRIT31V, KRIT31W, KRIT31X, KRIT31Y, KRIT31Z, KRIT32, KRIT32A, KRIT32B, KRIT32C, KRIT32D, KRIT32E, KRIT32F, KRIT32G, KRIT32H, KRIT32I, KRIT32J, KRIT32K, KRIT32L, KRIT32M, KRIT32N, KRIT32O, KRIT32P, KRIT32Q, KRIT32R, KRIT32S, KRIT32T, KRIT32U, KRIT32V, KRIT32W, KRIT32X, KRIT32Y, KRIT32Z, KRIT33, KRIT33A, KRIT33B, KRIT33C, KRIT33D, KRIT33E, KRIT33F, KRIT33G, KRIT33H, KRIT33I, KRIT33J, KRIT33K, KRIT33L, KRIT33M, KRIT33N, KRIT33O, KRIT33P, KRIT33Q, KRIT33R, KRIT33S, KRIT33T, KRIT33U, KRIT33V, KRIT33W, KRIT33X, KRIT33Y, KRIT33Z, KRIT34, KRIT34A, KRIT34B, KRIT34C, KRIT34D, KRIT34E, KRIT34F, KRIT34G, KRIT34H, KRIT34I, KRIT34J, KRIT34K, KRIT34L, KRIT34M, KRIT34N, KRIT34O, KRIT34P, KRIT34Q, KRIT34R, KRIT34S, KRIT34T, KRIT34U, KRIT34V, KRIT34W, KRIT34X, KRIT34Y, KRIT34Z, KRIT35, KRIT35A, KRIT35B, KRIT35C, KRIT35D, KRIT35E, KRIT35F, KRIT35G, KRIT35H, KRIT35I, KRIT35J, KRIT35K, KRIT35L, KRIT35M, KRIT35N, KRIT35O, KRIT35P, KRIT35Q, KRIT35R, KRIT35S, KRIT35T, KRIT35U, KRIT35V, KRIT35W, KRIT35X, KRIT35Y, KRIT35Z, KRIT36, KRIT36A, KRIT36B, KRIT36C, KRIT36D, KRIT36E, KRIT36F, KRIT36G, KRIT36H, KRIT36I, KRIT36J, KRIT36K, KRIT36L, KRIT36M, KRIT36N, KRIT36O, KRIT36P, KRIT36Q, KRIT36R, KRIT36S, KRIT36T, KRIT36U, KRIT36V, KRIT36W, KRIT36X, KRIT36Y, KRIT36Z, KRIT37, KRIT37A, KRIT37B, KRIT37C, KRIT37D, KRIT37E, KRIT37F, KRIT37G, KRIT37H, KRIT37I, KRIT37J, KRIT37K, KRIT37L, KRIT37M, KRIT37N, KRIT37O, KRIT37P, KRIT37Q, KRIT37R, KRIT37S, KRIT37T, KRIT37U, KRIT37V, KRIT37W, KRIT37X, KRIT37Y, KRIT37Z, KRIT38, KRIT38A, KRIT38B, KRIT38C, KRIT38D, KRIT38E, KRIT38F, KRIT38G, KRIT38H, KRIT38I, KRIT38J, KRIT38K, KRIT38L, KRIT38M, KRIT38N, KRIT38O, KRIT38P, KRIT38Q, KRIT38R, KRIT38S, KRIT38T, KRIT38U, KRIT38V, KRIT38W, KRIT38X, KRIT38Y, KRIT38Z, KRIT39, KRIT39A, KRIT39B, KRIT39C, KRIT39D, KRIT39E, KRIT39F, KRIT39G, KRIT39H, KRIT39I, KRIT39J, KRIT39K, KRIT39L, KRIT39M, KRIT39N, KRIT39O, KRIT39P, KRIT39Q, KRIT39R, KRIT39S, KRIT39T, KRIT39U, KRIT39V, KRIT39W, KRIT39X, KRIT39Y, KRIT39Z, KRIT40, KRIT40A, KRIT40B, KRIT40C, KRIT40D, KRIT40E, KRIT40F, KRIT40G, KRIT40H, KRIT40I, KRIT40J, KRIT40K, KRIT40L, KRIT40M, KRIT40N, KRIT40O, KRIT40P, KRIT40Q, KRIT40R, KRIT40S, KRIT40T, KRIT40U, KRIT40V, KRIT40W, KRIT40X, KRIT40Y, KRIT40Z, KRIT41, KRIT41A, KRIT41B, KRIT41C, KRIT41D, KRIT41E, KRIT41F, KRIT41G, KRIT41H, KRIT41I, KRIT41J, KRIT41K, KRIT41L, KRIT41M, KRIT41N, KRIT41O, KRIT41P, KRIT41Q, KRIT41R, KRIT41S, KRIT41T, KRIT41U, KRIT41V, KRIT41W, KRIT41X, KRIT41Y, KRIT41Z, KRIT42, KRIT42A, KRIT42B, KRIT42C, KRIT42D, KRIT42E, KRIT42F, KRIT42G, KRIT42H, KRIT42I, KRIT42J, KRIT42K, KRIT42L, KRIT42M, KRIT42N, KRIT42O, KRIT42P, KRIT42Q, KRIT42R, KRIT42S, KRIT42T, KRIT42U, KRIT42V, KRIT42W, KRIT42X, KRIT42Y, KRIT42Z, KRIT43, KRIT43A, KRIT43B, KRIT43C, KRIT43D, KRIT43E, KRIT43F, KRIT43G, KRIT43H, KRIT43I, KRIT43J, KRIT43K, KRIT43L, KRIT43M, KRIT43N, KRIT43O, KRIT43P, KRIT43Q, KRIT43R, KRIT43S, KRIT43T, KRIT43U, KRIT43V, KRIT43W, KRIT43X, KRIT43Y, KRIT43Z, KRIT44, KRIT44A, KRIT44B, KRIT44C, KRIT44D, KRIT44E, KRIT44F, KRIT44G, KRIT44H, KRIT44I, KRIT44J, KRIT44K, KRIT44L, KRIT44M, KRIT44N, KRIT44O, KRIT44P, KRIT44Q, KRIT44R, KRIT44S, KRIT44T, KRIT44U, KRIT44V, KRIT44W, KRIT44X, KRIT44Y, KRIT44Z, KRIT45, KRIT45A, KRIT45B, KRIT45C, KRIT45D, KRIT45E, KRIT45F, KRIT45G, KRIT45H, KRIT45I, KRIT45J, KRIT45K, KRIT45L, KRIT45M, KRIT45N, KRIT45O, KRIT45P, KRIT45Q, KRIT45R, KRIT45S, KRIT45T, KRIT45U, KRIT45V, KRIT45W, KRIT45X, KRIT45Y, KRIT45Z, KRIT46, KRIT46A, KRIT46B, KRIT46C, KRIT46D, KRIT46E, KRIT46F, KRIT46G, KRIT46H, KRIT46I, KRIT46J, KRIT46K, KRIT46L, KRIT46M, KRIT46N, KRIT46O, KRIT46P, KRIT46Q, KRIT46R, KRIT46S, KRIT46T, KRIT46U, KRIT46V, KRIT46W, KRIT46X, KRIT46Y, KRIT46Z, KRIT47, KRIT47A, KRIT47B, KRIT47C, KRIT47D, KRIT47E, KRIT47F, KRIT47G, KRIT47H, KRIT47I, KRIT47J, KRIT47K, KRIT47L, KRIT47M, KRIT47N, KRIT47O, KRIT47P, KRIT47Q, KRIT47R, KRIT47S, KRIT47T, KRIT47U, KRIT47V, KRIT47W, KRIT47X, KRIT47Y, KRIT47Z, KRIT48, KRIT48A, KRIT48B, KRIT48C, KRIT48D, KRIT48E, KRIT48F, KRIT48G, KRIT48H, KRIT48I, KRIT48J, KRIT48K, KRIT48L, KRIT48M, KRIT48N, KRIT48O, KRIT48P, KRIT48Q, KRIT48R, KRIT48S, KRIT48T, KRIT48U, KRIT48V, KRIT48W, KRIT48X, KRIT48Y, KRIT48Z, KRIT49, KRIT49A, KRIT49B, KRIT49C, KRIT49D, KRIT49E, KRIT49F, KRIT49G, KRIT49H, KRIT49I, KRIT49J, KRIT49K, KRIT49L, KRIT49M, KRIT49N, KRIT49O, KRIT49P, KRIT49Q, KRIT49R, KRIT49S, KRIT49T, KRIT49U, KRIT49V, KRIT49W, KRIT49X, KRIT49Y, KRIT49Z, KRIT50, KRIT50A, KRIT50B, KRIT50C, KRIT50D, KRIT50E, KRIT50F, KRIT50G, KRIT50H, KRIT50I, KRIT50J, KRIT50K, KRIT50L, KRIT50M, KRIT50N, KRIT50O, KRIT50P, KRIT50Q, KRIT50R, KRIT50S, KRIT50T, KRIT50U, KRIT50V, KRIT50W, KRIT50X, KRIT50Y, KRIT50Z, KRIT51, KRIT51A, KRIT51B, KRIT51C, KRIT51D, KRIT51E, KRIT51F, KRIT51G, KRIT51H, KRIT51I, KRIT51J, KRIT51K, KRIT51L, KRIT51M, KRIT51N, KRIT51O, KRIT51P, KRIT51Q, KRIT51R, KRIT51S, KRIT51T, KRIT51U, KRIT51V, KRIT51W, KRIT51X, KRIT51Y, KRIT51Z, KRIT52, KRIT52A, KRIT52B, KRIT52C, KRIT52D, KRIT52E, KRIT52F, KRIT52G, KRIT52H, KRIT52I, KRIT52J, KRIT52K, KRIT52L, KRIT52M, KRIT52N, KRIT52O, KRIT52P, KRIT52Q, KRIT52R, KRIT52S, KRIT52T, KRIT52U, KRIT52V, KRIT52W, KRIT52X, KRIT52Y, KRIT52Z, KRIT53, KRIT53A, KRIT53B, KRIT53C, KRIT53D, KRIT53E, KRIT53F, KRIT53G, KRIT53H, KRIT53I, KRIT53J, KRIT53K, KRIT53L, KRIT53M, KRIT53N, KRIT53O, KRIT53P, KRIT53Q, KRIT53R, KRIT53S, KRIT53T, KRIT53U, KRIT53V, KRIT53W, KRIT53X, KRIT53Y, KRIT53Z, KRIT54, KRIT54A, KRIT54B, KRIT54C, KRIT54D, KRIT54E, KRIT54F, KRIT54G, KRIT54H, KRIT54I, KRIT54J, KRIT54K, KRIT54L, KRIT54M, KRIT54N, KRIT54O, KRIT54P, KRIT54Q, KRIT54R, KRIT54S, KRIT54T, KRIT54U, KRIT54V, KRIT54W, KRIT54X, KRIT54Y, KRIT54Z, KRIT55, KRIT55A, KRIT55B, KRIT55C, KRIT55D, KRIT55E, KRIT55F, KRIT55G, KRIT55H, KRIT55I, KRIT55J, KRIT55K, KRIT55L, KRIT55M, KRIT55N, KRIT55O, KRIT55P, KRIT55Q, KRIT55R, KRIT55S, KRIT55T, KRIT55U, KRIT55V, KRIT55W, KRIT55X, KRIT55Y, KRIT55Z, KRIT56, KRIT56A, KRIT56B, KRIT56C, KRIT56D, KRIT56E, KRIT56F, KRIT56G, KRIT56H, KRIT56I, KRIT56J, KRIT56K, KRIT56L, KRIT56M, KRIT56N, KRIT56O, KRIT56P, KRIT56Q, KRIT56R, KRIT56S, KRIT56T, KRIT56U, KRIT56V, KRIT56W, KRIT56X, KRIT56Y, KRIT56Z, KRIT57, KRIT57A, KRIT57B, KRIT57C, KRIT57D, KRIT57E, KRIT57F, KRIT57G, KRIT57H, KRIT57I, KRIT57J, KRIT57K, KRIT57L, KRIT57M, KRIT57N, KRIT57O, KRIT57P, KRIT57Q, KRIT57R, KRIT57S, KRIT57T, KRIT57U, KRIT57V, KRIT57W, KRIT57X, KRIT57Y, KRIT57Z, KRIT58, KRIT58A, KRIT58B, KRIT58C, KRIT58D, KRIT58E, KRIT58F, KRIT58G, KRIT58H, KRIT58I, KRIT58J, KRIT58K, KRIT58L, KRIT58M, KRIT58N, KRIT58O, KRIT58P, KRIT58Q, KRIT58R, KRIT58S, KRIT58T, KRIT58U, KRIT58V, KRIT58W, KRIT58X, KRIT58Y, KRIT58Z, KRIT59, KRIT59A, KRIT59B, KRIT59C, KRIT59D, KRIT59E, KRIT59F, KRIT59G, KRIT59H, KRIT59I, KRIT59J, KRIT59K, KRIT59L, KRIT59M, KRIT59N, KRIT59O, KRIT59P, KRIT59Q, KRIT59R, KRIT59S, KRIT59T, KRIT59U, KRIT59V, KRIT59W, KRIT59X, KRIT59Y, KRIT59Z, KRIT60, KRIT60A, KRIT60B, KRIT60C, KRIT60D, KRIT60E, KRIT60F, KRIT60G, KRIT60H, KRIT60I, KRIT60J, KRIT60K, KRIT60L, KRIT60M, KRIT60N, KRIT60O, KRIT60P, KRIT60Q, KRIT60R, KRIT60S, KRIT60T, KRIT60U, KRIT60V, KRIT60W, KRIT60X, KRIT60Y, KRIT60Z, KRIT61, KRIT61A, KRIT61B, KRIT61C, KRIT61D, KRIT61E, KRIT61F, KRIT61G, KRIT61H, KRIT61I, KRIT61J, KRIT61K, KRIT61L, KRIT61M, KRIT61N, KRIT61O, KRIT61P, KRIT61Q, KRIT61R, KRIT61S, KRIT61T, KRIT61U, KRIT61V, KRIT61W, KRIT61X, KRIT61Y, KRIT61Z, KRIT62, KRIT62A, KRIT62B, KRIT62C, KRIT62D, KRIT62E, KRIT62F, KRIT62G, KRIT62H, KRIT62I, KRIT62J, KRIT62K, KRIT62L, KRIT62M, KRIT62N, KRIT62O, KRIT62P, KRIT62Q, KRIT62R, KRIT62S, KRIT62T, KRIT62U, KRIT62V, KRIT62W, KRIT62X, KRIT62Y, KRIT62Z, KRIT63, KRIT63A, KRIT63B, KRIT63C, KRIT63D, KRIT63E, KRIT63F, KRIT63G, KRIT63H, KRIT63I, KRIT63J, KRIT63K, KRIT63L, KRIT63M, KRIT63N, KRIT63O, KRIT63P, KRIT63Q, KRIT63R, KRIT63S, KRIT63T, KRIT63U, KRIT63V, KRIT63W, KRIT63X, KRIT63Y, KRIT63Z, KRIT64, KRIT64A, KRIT64B, KRIT64C, KRIT64D, KRIT64E, KRIT64F, KRIT64G, KRIT64H, KRIT64I, KRIT64J, KRIT64K, KRIT64L, KRIT64M, KRIT64N, KRIT64O, KRIT64P, KRIT64Q, KRIT64R, KRIT64S, KRIT64T, KRIT64U, KRIT64V, KRIT64W, KRIT64X, KRIT64Y, KRIT64Z, KRIT65, KRIT65A, KRIT65B, KRIT65C, KRIT65D, KRIT65E, KRIT65F, KRIT65G, KRIT65H, KRIT65I, KRIT65J, KRIT65K, KRIT65L, KRIT65M, KRIT65N, KRIT65O, KRIT65P, KRIT65Q, KRIT65R, KRIT65S, KRIT65T, KRIT65U, KRIT65V, KRIT65W, KRIT65X, KRIT65Y, KRIT65Z, KRIT66, KRIT66A, KRIT66B, KRIT66C, KRIT66D, KRIT66E, KRIT66F, KRIT66G, KRIT66H, KRIT66I, KRIT66J, KRIT66K, KRIT66L, KRIT66M, KRIT66N, KRIT66O, KRIT66P, KRIT66Q, KRIT66R, KRIT66S, KRIT66T, KRIT66U, KRIT66V, KRIT66W, KRIT66X, KRIT66Y, KRIT66Z, KRIT67, KRIT67A, KRIT67B, KRIT67C, KRIT67D, KRIT67E, KRIT67F, KRIT67G, KRIT67H, KRIT67I, KRIT67J, KRIT67K, KRIT67L, KRIT67M, KRIT67N, KRIT67O, KRIT67P, KRIT67Q, KRIT67R, KRIT67S, KRIT67T, KRIT67U, KRIT67V, KRIT67W, KRIT67X, KRIT67Y, KRIT67Z, KRIT68, KRIT68A, KRIT68B, KRIT68C, KRIT68D, KRIT68E, KRIT68F, KRIT68G, KRIT68H, KRIT68I, KRIT68J, KRIT68K, KRIT68L, KRIT68M, KRIT68N, KRIT68O, KRIT68P, KRIT68Q, KRIT68R, KRIT68S, KRIT68T, KRIT68U, KRIT68V, KRIT68W, KRIT68X, KRIT68Y, KRIT68Z, KRIT69, KRIT69A, KRIT69B, KRIT69C, KRIT69D, KRIT69E, KRIT69F, KRIT69G, KRIT69H, KRIT69I, KR |

|                                                                                                    |   |         |     |                                                                                             |
|----------------------------------------------------------------------------------------------------|---|---------|-----|---------------------------------------------------------------------------------------------|
| IFNAR2/RXRA Activation                                                                             | 0 | 0.0207  | NaN | ADCY2,IL1RL2,NR2F1,PLCB4                                                                    |
| IRS3 Signaling                                                                                     | 0 | 0.0102  | NaN | WNT1                                                                                        |
| Hepatic Cholestasis                                                                                | 0 | 0.0037  | NaN | ABCG8,ADCY2,HNF4A,IL17C,IL17D,IL1RL2,IL3                                                    |
| Mitochondrial Dysfunction                                                                          | 0 | 0.0468  | NaN | ATP5ME,ATP5PF,COX7B,COX7C,NDUFA1,NDUFB3,NDUFS5,UOUCRB                                       |
| Regulation of Actin-based Motility by Rho                                                          | 0 | 0.0259  | NaN | ITGA11,MYL6,RHOJ                                                                            |
| RAR Activation                                                                                     | 0 | 0.0204  | NaN | ADCY2,ALDH3L3,NR2F1,SMAD6                                                                   |
| 14-3-3-mediated Signaling                                                                          | 0 | 0.0157  | NaN | GFAP,PLCB4                                                                                  |
| α-Adrenergic Signaling                                                                             | 0 | 0.00943 | NaN | ADCY2                                                                                       |
| Caveolar-mediated Endocytosis Signaling                                                            | 0 | 0.0267  | NaN | EGFR,ITGA11                                                                                 |
| Glutin-mediated Endocytosis Signaling                                                              | 0 | 0.0207  | NaN | FCER1G,IL3,S100A8,SH3GL2                                                                    |
| Fcy Receptor-mediated Phagocytosis in Macrophages and Monocytes                                    | 0 | 0.0106  | NaN | FCGR1A                                                                                      |
| IL-12 Signaling and Production in Macrophages                                                      | 0 | 0.0221  | NaN | IL23R,LPA,S100A8                                                                            |
| FCγRIIb Signaling in B Lymphocytes                                                                 | 0 | 0.0235  | NaN | CACNA1B,CACNG5                                                                              |
| NF-κB Activation by Viruses                                                                        | 0 | 0.0128  | NaN | IFITM3                                                                                      |
| CCR5 Signaling in Macrophages                                                                      | 0 | 0.014   | NaN | CACNA1B,CACNG5,FCER1G,TRAV1-2,TRAV10,TRAV22,TRAV8-2                                         |
| Calcium-induced T Lymphocyte Apoptosis                                                             | 0 | 0.0109  | NaN | FCER1G,TRAV1-2,TRAV10,TRAV22,TRAV8-2                                                        |
| Cytotoxic T Lymphocyte-mediated Apoptosis of Target Cells                                          | 0 | 0.0118  | NaN | FCER1G,TRAV1-2,TRAV10,TRAV22,TRAV8-2                                                        |
| IL-3 Signaling                                                                                     | 0 | 0.0127  | NaN | IL3                                                                                         |
| ILP Signaling in Neutrophils                                                                       | 0 | 0.00763 | NaN | PLCB4                                                                                       |
| CLM4 Signaling in Cytotoxic T Lymphocytes                                                          | 0 | 0.0126  | NaN | CD80,FCER1G,TRAV1-2,TRAV10,TRAV22,TRAV8-2                                                   |
| T Helper Cell Differentiation                                                                      | 0 | 0.0149  | NaN | CD80,FCER1G,IL23R,TRAV1-2,TRAV10,TRAV22,TRAV8-2                                             |
| IL-9 Signaling                                                                                     | 0 | 0.0286  | NaN | IL9R                                                                                        |
| Oncostatin M Signaling                                                                             | 0 | 0.0465  | NaN | MT2A,TIMP3                                                                                  |
| CD28 Signaling in T Helper Cells                                                                   | 0 | 0.0116  | NaN | CD80,FCER1G,TRAV1-2,TRAV10,TRAV22,TRAV8-2                                                   |
| IL-15 Signaling                                                                                    | 0 | 0.00189 | NaN | IGHA1                                                                                       |
| Viral Entry via Endocytic Pathways                                                                 | 0 | 0.00962 | NaN | CAXR                                                                                        |
| Role of Cytokines in Mediating Communication between Immune Cells                                  | 0 | 0.0185  | NaN | IL3                                                                                         |
| Mechanisms of Viral Exit from Host Cells                                                           | 0 | 0.0244  | NaN | SH3GL2                                                                                      |
| Reelin Signaling in Neurons                                                                        | 0 | 0.0238  | NaN | DNAH13,DNAH3,MAPK8IP1                                                                       |
| Melastatin Signaling                                                                               | 0 | 0.0159  | NaN | PLCB4                                                                                       |
| Neuropathic Pain Signaling in Dorsal Horn Neurons                                                  | 0 | 0.0287  | NaN | GRM6,NTRK2,PLCB4                                                                            |
| Factors Promoting Cardiogenesis in Vertebrates                                                     | 0 | 0.0132  | NaN | PLCB4,WNT9B                                                                                 |
| CNTF Signaling                                                                                     | 0 | 0.0175  | NaN | LIFR                                                                                        |
| Agm Interactions at Neuron-muscle Junction                                                         | 0 | 0.0143  | NaN | EGFR                                                                                        |
| Cardiomyocyte Differentiation via BMP Receptors                                                    | 0 | 0.0455  | NaN | SMAD6                                                                                       |
| Renin-Angiotensin Signaling                                                                        | 0 | 0.025   | NaN | ADCY2,SHC3,SH2                                                                              |
| Docosahexaenoic Acid (DHA) Signaling                                                               | 0 | 0.0263  | NaN | BCL2A1                                                                                      |
| Semaphorin Signaling in Neurons                                                                    | 0 | 0.0323  | NaN | DPY5L5,RHOJ                                                                                 |
| CDK5 Signaling                                                                                     | 0 | 0.0357  | NaN | ADCY2,LAMA3,LAMC2,NTRK2                                                                     |
| ICOS-ICOSL Signaling in T Helper Cells                                                             | 0 | 0.0138  | NaN | CD80,FCER1G,PLEKHA4,TRAV1-2,TRAV10,TRAV22,TRAV8-2                                           |
| Molecular Mechanisms of Cancer                                                                     | 0 | 0.018   | NaN | ADCY2,ITGA11,PLCB4,RASGRF1,RHOJ,SHC3,SMAD6,WNT9B                                            |
| Lipid Antigen Presentation by CD1                                                                  | 0 | 0.012   | NaN | FCER1G,TRAV1-2,TRAV10,TRAV22,TRAV8-2                                                        |
| Nitric Roles of Polo-Like Kinase                                                                   | 0 | 0.0152  | NaN | CCNB3                                                                                       |
| HGF Signaling                                                                                      | 0 | 0.00758 | NaN | ITGA11                                                                                      |
| Polyamine Regulation in Colon Cancer                                                               | 0 | 0.0323  | NaN | GAZ3,PSMA4                                                                                  |
| Cholecystokinin(Gastrin)-mediated Signaling                                                        | 0 | 0.0252  | NaN | EGFR,PLCB4,RHOJ                                                                             |
| Human Embryonic Stem Cell Pluripotency                                                             | 0 | 0.0101  | NaN | NTRK2,NTRK3,PDGFRA,SMAD6,WNT9B                                                              |
| Melanocyte Development and Pigmentation Signaling                                                  | 0 | 0.0106  | NaN | ADCY2                                                                                       |
| ATM Signaling                                                                                      | 0 | 0.0206  | NaN | CCNB3,SMC1B                                                                                 |
| Antiproliferative Role of Somatostatin Receptor 2                                                  | 0 | 0.039   | NaN | GUCY2C,GUCY2F,NOS1                                                                          |
| Androgen Signaling                                                                                 | 0 | 0.0118  | NaN | CACNA1B,CACNG5                                                                              |
| Role of OCT4 in Mammalian Embryonic Stem Cell Pluripotency                                         | 0 | 0.0217  | NaN | NR2F1                                                                                       |
| Germ Cell-Sertoli Cell Junction Signaling                                                          | 0 | 0.0234  | NaN | ACTN2,JUP,LAMC3,RHOJ                                                                        |
| Aldosterone Signaling in Epithelial Cells                                                          | 0 | 0.0305  | NaN | DNAH13,DNAJC28,HSP61,PLCB4,SCNN1G                                                           |
| Role of NANOG in Mammalian Embryonic Stem Cell Pluripotency                                        | 0 | 0.025   | NaN | CAT5,ILF3,WNT9B                                                                             |
| Type 1 Diabetes Mellitus Signaling                                                                 | 0 | 0.0138  | NaN | CD80,FCER1G,GAD2,TRAV1-2,TRAV10,TRAV22,TRAV8-2                                              |
| Small Cell Lung Cancer Signaling                                                                   | 0 | 0.0104  | NaN | NOS1                                                                                        |
| Basal Cell Carcinoma Signaling                                                                     | 0 | 0.0139  | NaN | WNT9B                                                                                       |
| Primary Immunodeficiency Signaling                                                                 | 0 | 0.0162  | NaN | IGHA1                                                                                       |
| Allograft Rejection Signaling                                                                      | 0 | 0.0124  | NaN | CD80,FCER1G,TRAV1-2,TRAV10,TRAV22,TRAV8-2                                                   |
| Glioma Signaling                                                                                   | 0 | 0.0161  | NaN | EGFR,PDGFRA                                                                                 |
| Autoimmune Thyroid Disease Signaling                                                               | 0 | 0.0155  | NaN | CD80,FCER1G,TPO,TRAV1-2,TRAV10,TRAV22,TRAV8-2                                               |
| Acute Myeloid Leukemia Signaling                                                                   | 0 | 0.011   | NaN | JUP                                                                                         |
| Thyroid Cancer Signaling                                                                           | 0 | 0.0253  | NaN | NTRK2,NTRK3                                                                                 |
| Bladder Cancer Signaling                                                                           | 0 | 0.0431  | NaN | EGFR,FGFR3,IMP2,MMP20,MMP26                                                                 |
| Graft-versus-Host Disease Signaling                                                                | 0 | 0.0135  | NaN | CD80,FCER1G,TRAV1-2,TRAV10,TRAV22,TRAV8-2                                                   |
| Type 2 Diabetes Mellitus Signaling                                                                 | 0 | 0.0263  | NaN | ACRBB2,CACNA1B,CACNG5,SLC2A2                                                                |
| Non-Small Cell Lung Cancer Signaling                                                               | 0 | 0.0186  | NaN | EGFR                                                                                        |
| Production of Nitric Oxide and Reactive Oxygen Species in Macrophages                              | 0 | 0.0157  | NaN | LPA,RHOJ,S100A8                                                                             |
| Gα12/13 Signaling                                                                                  | 0 | 0.015   | NaN | GDH13,MYL6                                                                                  |
| p70S6K Signaling                                                                                   | 0 | 0.0152  | NaN | EGFR,PLCB4                                                                                  |
| ERK5 Signaling                                                                                     | 0 | 0.0139  | NaN | EGFR                                                                                        |
| mTOR Signaling                                                                                     | 0 | 0.00943 | NaN | RHOJ,RPS24                                                                                  |
| Pancreatic Adenocarcinoma Signaling                                                                | 0 | 0.0159  | NaN | CYP2E1,EGFR                                                                                 |
| D Protein Signaling Mediated by Tubby                                                              | 0 | 0.0227  | NaN | PLCB4                                                                                       |
| Communication between Innate and Adaptive Immune Cells                                             | 0 | 0.00569 | NaN | CD80,CXCL10,FCER1G,IGHA1,IL3,TRAV1-2,TRAV10,TRAV22,TRAV8-2                                  |
| Crosstalk between Dendritic Cells and Natural Killer Cells                                         | 0 | 0.022   | NaN | CD80,IL3                                                                                    |
| Systemic Lupus Erythematosus Signaling                                                             | 0 | 0.0242  | NaN | BDKRB2,C7,C8A,C8B,CD80,FCER1G,FCGR1A,ILM3,PNL4-2,SNRPD1,SNRPP,TRAV1-2,TRAV10,TRAV22,TRAV8-2 |
| UCD42 Signaling                                                                                    | 0 | 0.0122  | NaN | CD80,FCER1G,TRAV1-2,TRAV10,TRAV22,TRAV8-2                                                   |
| FAK Signaling                                                                                      | 0 | 0.0347  | NaN | CXCL12,FCGR1A,IL17RC,IL1RL2,PLCB4,SELE,SFRP1,WNT9B                                          |
| Retinoic acid Mediated Apoptosis Signaling                                                         | 0 | 0.0333  | NaN | PARP14,PARP9                                                                                |
| AMPK Signaling                                                                                     | 0 | 0.0289  | NaN | ADRA1B,AK8,CHRNA5,CHRNA7,CHRN4,HNF4A,PFKFB1                                                 |
| PAK Signaling                                                                                      | 0 | 0.0254  | NaN | ITGA11,MYL6,PDGFRA                                                                          |
| BAC Signaling                                                                                      | 0 | 0.00723 | NaN | ITGA11                                                                                      |
| RHOA Signaling                                                                                     | 0 | 0.0161  | NaN | MYL6,MYLK2                                                                                  |
| Role of Osteoblasts, Osteoclasts and Chondrocytes in Rheumatoid Arthritis                          | 0 | 0.0223  | NaN | CALCR,IL1RL2,SFRP1,SMAD6,WNT9B                                                              |
| Altered T Cell and B Cell Signaling in Rheumatoid Arthritis                                        | 0 | 0.0122  | NaN | CD80,FCER1G,TRAV1-2,TRAV10,TRAV22,TRAV8-2                                                   |
| Role of Macrophages, Fibroblasts and Endothelial Cells in Rheumatoid Arthritis                     | 0 | 0.0246  | NaN | CXCL12,FCGR1A,IL17RC,IL1RL2,PLCB4,SELE,SFRP1,WNT9B                                          |
| Regulation of eIF4 and p70S6K Signaling                                                            | 0 | 0.0112  | NaN | ITGA11,RPS24                                                                                |
| Estrogen-Dependent Breast Cancer Signaling                                                         | 0 | 0.0253  | NaN | EGFR,HSD17B2                                                                                |
| Leptin Signaling in Obesity                                                                        | 0 | 0.027   | NaN | ADCY2,PLCB4                                                                                 |
| Glioma Immune Signaling                                                                            | 0 | 0.0411  | NaN | MMP2,RHOJ,TIMP3                                                                             |
| B Cell Development                                                                                 | 0 | 0.0233  | NaN | CD80                                                                                        |
| IL-1 Signaling                                                                                     | 0 | 0.0106  | NaN | ADCY2                                                                                       |
| Role of WNT/GSK-3β Signaling in the Pathogenesis of Influenza                                      | 0 | 0.0129  | NaN | WNT9B                                                                                       |
| NURF7 Signaling in T Lymphocytes                                                                   | 0 | 0.0117  | NaN | CD80,FCER1G,TRAV1-2,TRAV10,TRAV22,TRAV8-2                                                   |
| PKCδ Signaling in T Lymphocytes                                                                    | 0 | 0.0143  | NaN | CACNA1B,CACNG5,CD80,FCER1G,TRAV1-2,TRAV10,TRAV22,TRAV8-2                                    |
| Role of Lipid/Lipid Rafts in the Pathogenesis of Influenza                                         | 0 | 0.0435  | NaN | RSAD2                                                                                       |
| Antiproliferative Role of TOB in T Cell Signaling                                                  | 0 | 0.0117  | NaN | FCER1G,TRAV1-2,TRAV10,TRAV22,TRAV8-2                                                        |
| OX40 Signaling Pathway                                                                             | 0 | 0.0104  | NaN | FCER1G,TRAV1-2,TRAV10,TRAV22,TRAV8-2                                                        |
| PI3K Signaling in B Lymphocytes                                                                    | 0 | 0.014   | NaN | PLCB4,PLEKHA4                                                                               |
| Inhibition of Angiogenesis by TSP1                                                                 | 0 | 0.0294  | NaN | KDR                                                                                         |
| P2Y Purinergic Receptor Signaling Pathway                                                          | 0 | 0.0155  | NaN | ADCY2,PLCB4                                                                                 |
| Cytos and Cell Cycle Regulation                                                                    | 0 | 0.0238  | NaN | CCNB3,MYT1                                                                                  |
| Role of Tissue Factor in Cancer                                                                    | 0 | 0.0431  | NaN | EGFR,F10,F3,F7,FGA                                                                          |
| Spliceosomal Cycle                                                                                 | 0 | 0.0204  | NaN | SFRB6                                                                                       |
| IL-17A Signaling in Airway Cells                                                                   | 0 | 0.0149  | NaN | IL17RC                                                                                      |
| Role of IL-17A in Arthritis                                                                        | 0 | 0.0175  | NaN | IL17RC                                                                                      |
| IL-17A Signaling in Fibroblasts                                                                    | 0 | 0.0253  | NaN | IL17RC                                                                                      |
| Role of IL-17E in Allergic Inflammatory Airway Diseases                                            | 0 | 0.0444  | NaN | CXCL10,IL17RC                                                                               |
| Differential Regulation of Cytokine Production in Intestinal Epithelial Cells by IL-17A and IL-17F | 0 | 0.0435  | NaN | IL3                                                                                         |
| Role of JAK1 and JAK3 in γC Cytokine Signaling                                                     | 0 | 0.0145  | NaN | IL3R                                                                                        |
| Actin Nucleation by ARP-WASP Complex                                                               | 0 | 0.0215  | NaN | ITGA11,RHOJ                                                                                 |
| NGF Signaling                                                                                      | 0 | 0.00847 | NaN | SHC3                                                                                        |
| Paxillin Signaling                                                                                 | 0 | 0.0278  | NaN | ACTN2,ITGA11,PARVA                                                                          |
| Sertoli Cell-Sertoli Cell Junction Signaling                                                       | 0 | 0.0437  | NaN | ACTN2,CLDN10,CLDN19,CLDN,IGFBP,ITGA11,JUP,NOS1,PRKG1                                        |
| Gap Junction Signaling                                                                             | 0 | 0.0404  | NaN | ADCY2,EGFR,GUCY1,GRK3,GUCY2C,GUCY2F,PLCB4,PRKG1                                             |
| Telomerase Signaling                                                                               | 0 | 0.00935 | NaN | EGFR                                                                                        |
| Mouse Embryonic Stem Cell Pluripotency                                                             | 0 | 0.00962 | NaN | LIFR                                                                                        |
| Hematopoiesis from Pluripotent Stem Cells                                                          | 0 | 0.0159  | NaN | FCER1G,IGHA1,IL3,TRAV1-2,TRAV10,TRAV22,TRAV8-2                                              |
| Ephrin A Signaling                                                                                 | 0 | 0.0213  | NaN | EPHA2                                                                                       |
| Ephrin B Signaling                                                                                 | 0 | 0.0139  | NaN | CXCL12                                                                                      |
| ERBB Signaling                                                                                     | 0 | 0.0106  | NaN | EGFR                                                                                        |
| ERBB2-ERBB3 Signaling                                                                              | 0 | 0.0154  | NaN | ETV4                                                                                        |
| Estrogen-mediated S-phase Entry                                                                    | 0 | 0.0385  | NaN | ESR2                                                                                        |
| Heparan Sulfate Biosynthesis                                                                       | 0 | 0.0385  | NaN | CHST3,PLA1A,SUL1T2                                                                          |
| Retinoate Biosynthesis I                                                                           | 0 | 0.0278  | NaN | ALDH1A3                                                                                     |
| Heparan Sulfate Biosynthesis (Late Stages)                                                         | 0 | 0.0423  | NaN | CHST3,PLA1A,SUL1T2                                                                          |

|                                                                            |   |         |     |                                                                                           |
|----------------------------------------------------------------------------|---|---------|-----|-------------------------------------------------------------------------------------------|
| GDP-diacylglycerol Biosynthesis I                                          | 0 | 0.0455  | NaN | CDS1                                                                                      |
| RNA Splicing                                                               | 0 | 0.0455  | NaN | PDE11A,PDE6A                                                                              |
| D-myo-inositol-5-phosphate Metabolism                                      | 0 | 0.0208  | NaN | DUSP9,G6PC1,PLCB4,TPTE2                                                                   |
| Pyridoxal 5'-phosphate Salvage Pathway                                     | 0 | 0.0303  | NaN | EIF2AK2,G6PC1                                                                             |
| D-myo-inositol (1,4,5)-trisphosphate Biosynthesis                          | 0 | 0.0385  | NaN | PLCB4                                                                                     |
| Chondroitin Sulfate Biosynthesis                                           | 0 | 0.0354  | NaN | CHST3,SULT1C2                                                                             |
| Dermatan Sulfate Biosynthesis                                              | 0 | 0.0345  | NaN | CHST3,SULT1C2                                                                             |
| Dermatan Sulfate Biosynthesis (Late Stages)                                | 0 | 0.0444  | NaN | CHST3,SULT1C2                                                                             |
| Phosphatidylglycerol Biosynthesis II (Non-plastidic)                       | 0 | 0.0417  | NaN | CDS1                                                                                      |
| D-myo-inositol (1,4,5)-trisphosphate Biosynthesis                          | 0 | 0.0171  | NaN | DUSP9,G6PC1,TPTE2                                                                         |
| Superpathway of Inositol Phosphate Compounds                               | 0 | 0.0172  | NaN | DUSP9,G6PC1,PLCB4,TPTE2                                                                   |
| D-myo-inositol (3,4,5,6)-tetrakisphosphate Biosynthesis                    | 0 | 0.0171  | NaN | DUSP9,G6PC1,TPTE2                                                                         |
| 3-phosphoinositolate Degradation                                           | 0 | 0.0116  | NaN | DUSP9,G6PC1,TPTE2                                                                         |
| 3-phosphoinositolate Biosynthesis                                          | 0 | 0.0149  | NaN | DUSP9,G6PC1,TPTE2                                                                         |
| Tricacylglycerol Biosynthesis                                              | 0 | 0.0426  | NaN | LPIN3,PLPP2                                                                               |
| Glycolysis I                                                               | 0 | 0.04    | NaN | ENO4                                                                                      |
| Gluconeogenesis I                                                          | 0 | 0.04    | NaN | ENO4                                                                                      |
| Chondroitin Sulfate Biosynthesis (Late Stages)                             | 0 | 0.0426  | NaN | CHST3,SULT1C2                                                                             |
| Fatty Acid $\beta$ -oxidation I                                            | 0 | 0.0294  | NaN | ACSBG2                                                                                    |
| Epithelial Adherens Junction Signaling                                     | 0 | 0.0191  | NaN | EGFR,MYH2,WWC1                                                                            |
| Remodeling of Epithelial Adherens Junctions                                | 0 | 0.0147  | NaN | ACTN2                                                                                     |
| Regulation of the Epithelial-Mesenchymal Transition Pathway                | 0 | 0.0256  | NaN | EGFR,FGFR3,HMGA2,MMP2,WNT9B                                                               |
| TEC Kinase Signaling                                                       | 0 | 0.0121  | NaN | FCER1,ITGA11,RHOJ,TRAV1-2,TRAV10,TRAV22,TRAV8-2                                           |
| UVB-Induced MAPK Signaling                                                 | 0 | 0.0408  | NaN | EGFR,PARP14,PARP9,PLCB4                                                                   |
| UVB-Induced MAPK Signaling                                                 | 0 | 0.0162  | NaN | EGFR                                                                                      |
| UVC-Induced MAPK Signaling                                                 | 0 | 0.0196  | NaN | EGFR                                                                                      |
| Adipogenesis pathway                                                       | 0 | 0.00741 | NaN | SOX9                                                                                      |
| HIPPO signaling                                                            | 0 | 0.0353  | NaN | CRB1,TEAD1,WWC1                                                                           |
| PCP (Planar Cell Polarity) Pathway                                         | 0 | 0.0333  | NaN | LGR4,WNT9B                                                                                |
| Unfolded protein response                                                  | 0 | 0.0111  | NaN | DNAJB13                                                                                   |
| WNT/Ca <sup>2+</sup> pathway                                               | 0 | 0.0312  | NaN | PDE6A,PLCB4                                                                               |
| Toll-like Receptor Signaling                                               | 0 | 0.0128  | NaN | EIF2AK2                                                                                   |
| EGF Signaling                                                              | 0 | 0.0182  | NaN | EGFR                                                                                      |
| SAPK/JNK Signaling                                                         | 0 | 0.0162  | NaN | FCER1,MAPK8IP1,TRAV1-2,TRAV10,TRAV22,TRAV8-2                                              |
| PI3K/AKT Signaling                                                         | 0 | 0.0352  | NaN | IL1TRC,IL1TRD,IL1TRF,IL1RL2,IL1RL1,ITGA11,MAPK8IP1                                        |
| Cardiac $\beta$ -adrenergic Signaling                                      | 0 | 0.0287  | NaN | ADCY2,CACNA1B,CACNG5,PDE11A,PDE6A                                                         |
| Protein Ubiquitination Pathway                                             | 0 | 0.0218  | NaN | DNAJB13,DNAJC28,HSP61,PSMA4,UBE2L6,USP18                                                  |
| Amyloid Processing                                                         | 0 | 0.0392  | NaN | CAPN11,CAPN8                                                                              |
| EGF Signaling                                                              | 0 | 0.0119  | NaN | FGFR                                                                                      |
| Cell Cycle: G2/M DNA Damage Checkpoint Regulation                          | 0 | 0.02    | NaN | CDC20                                                                                     |
| Xenobiotic Metabolism Signaling                                            | 0 | 0.0382  | NaN | AHR,ALDH1A3,ALDH3A1,CE55A,CHST3,CYP1A1,GSTA2,GSTA3,GSTM5,SULT1C2,UGT1A9 (includes others) |
| B Cell Receptor Signaling                                                  | 0 | 0.00319 | NaN | BCL2A1,IGHA1                                                                              |
| Inauth Receptor Signaling                                                  | 0 | 0.00714 | NaN | SCN10A                                                                                    |
| Chemokine Signaling                                                        | 0 | 0.025   | NaN | CXCL12,PLCB4                                                                              |
| Neurotrophin/TRK Signaling                                                 | 0 | 0.0263  | NaN | NTRK2,NTRK3                                                                               |
| Death Receptor Signaling                                                   | 0 | 0.0208  | NaN | PARP14,PARP9                                                                              |
| BPAP Signaling                                                             | 0 | 0.028   | NaN | IL1RL2,IRF1,PDGFRA                                                                        |
| IGF-1 Signaling                                                            | 0 | 0.0192  | NaN | IGFBP1,IGFBP5                                                                             |
| Dopamine Receptor Signaling                                                | 0 | 0.026   | NaN | ADCY2,NCS1                                                                                |
| Glutamate Receptor Signaling                                               | 0 | 0.0303  | NaN | GRIK3,GRM6                                                                                |
| TGF $\beta$ Signaling                                                      | 0 | 0.0417  | NaN | AMHR2,IRF4,HOXC9,SMAD5                                                                    |
| Apoptosis Signaling                                                        | 0 | 0.0288  | NaN | BCL2A1,CAPN11,CAPN8                                                                       |
| VEGF Signaling                                                             | 0 | 0.0202  | NaN | ACTN2,KDR                                                                                 |
| Hypoxia Signaling in the Cardiovascular System                             | 0 | 0.0135  | NaN | UBE2L6                                                                                    |
| IL-6 Signaling                                                             | 0 | 0.0156  | NaN | IL1RL2,INFA1B                                                                             |
| PDGF Signaling                                                             | 0 | 0.0233  | NaN | EIF2AK2,PDGFRA                                                                            |
| BMP signaling pathway                                                      | 0 | 0.046   | NaN | FST,GREM1,HOXC9,SMAD6                                                                     |
| Phagosome Maturation                                                       | 0 | 0.0314  | NaN | GTSY,DYNG11,NGS1,SNAP25,TPO                                                               |
| Autophagy                                                                  | 0 | 0.00469 | NaN | ATG10                                                                                     |
| PD-1, PD-L1 cancer immunotherapy pathway                                   | 0 | 0.00943 | NaN | CDS8                                                                                      |
| Sumoylation Pathway                                                        | 0 | 0.00971 | NaN | RHOJ                                                                                      |
| Th1 and Th2 Activation Pathway                                             | 0 | 0.0116  | NaN | CDS8,IL3                                                                                  |
| Th1 Pathway                                                                | 0 | 0.0082  | NaN | CDS8                                                                                      |
| Th2 Pathway                                                                | 0 | 0.0146  | NaN | CDS8,IL3                                                                                  |
| Iron homeostasis signaling pathway                                         | 0 | 0.036   | NaN | EGFR,HBG2,HP,HPX,PDGFRA                                                                   |
| Th17 Activation Pathway                                                    | 0 | 0.0124  | NaN | FCER1G,IL23R,TRAV1-2,TRAV10,TRAV22,TRAV8-2                                                |
| SPINK1 General Cancer Pathway                                              | 0 | 0.029   | NaN | EGFR,MT2A                                                                                 |
| Endocannabinoid Develops Neuron Pathway                                    | 0 | 0.00813 | NaN | ADCY2                                                                                     |
| Apelin Liver Signaling Pathway                                             | 0 | 0.0385  | NaN | COL1A2                                                                                    |
| Apelin Adipocyte Signaling Pathway                                         | 0 | 0.0116  | NaN | ADCY2                                                                                     |
| Apelin Cardiomycocyte Signaling Pathway                                    | 0 | 0.0303  | NaN | MTL6,PLCB4,SLC9A5                                                                         |
| Apelin Endothelial Signaling Pathway                                       | 0 | 0.0144  | NaN | ADCY2,PLCB4                                                                               |
| BAG2 Signaling Pathway                                                     | 0 | 0.0238  | NaN | CHRNA7,PSMA4                                                                              |
| FAT10 Signaling Pathway                                                    | 0 | 0.0179  | NaN | PSMA4                                                                                     |
| T Cell Exhaustion Signaling Pathway                                        | 0 | 0.0124  | NaN | CDS8,FCER1G,KDR,TRAV1-2,TRAV10,TRAV22,TRAV8-2                                             |
| IL-23 Signaling Pathway                                                    | 0 | 0.0217  | NaN | IL23R                                                                                     |
| Inhibition of ARE-Mediated mRNA Degradation Pathway                        | 0 | 0.00521 | NaN | PSMA4                                                                                     |
| BEX2 Signaling Pathway                                                     | 0 | 0.037   | NaN | BEX1,MMP2,NHLH2                                                                           |
| Semaphorin Neuronal Repulsive Signaling Pathway                            | 0 | 0.0265  | NaN | DIPYSL5,ITGA11,MYL6,PRKG1                                                                 |
| Regulation Of The Epithelial Mesenchymal Transition In Development Pathway | 0 | 0.0115  | NaN | WNT9B                                                                                     |
| Kinetochore Metaphase Signaling Pathway                                    | 0 | 0.0381  | NaN | CENPW,DNAH10,DNAH3,SMC1B                                                                  |
| Coronavirus Replication Pathway                                            | 0 | 0.0444  | NaN | IFITM3,TMPRSS2                                                                            |
| MSP-RON Signaling In Macrophages Pathway                                   | 0 | 0.0256  | NaN | F11,KLK10,KLK2                                                                            |
| GM-CSF Signaling                                                           | 0 | 0.0143  | NaN | BCL2A1                                                                                    |
| Ephrin Receptor Signaling                                                  | 0 | 0.0149  | NaN | CXCL12,EPHA2,ITGA11                                                                       |













|                                                                          |   |         |     |                                                                                                                                                            |
|--------------------------------------------------------------------------|---|---------|-----|------------------------------------------------------------------------------------------------------------------------------------------------------------|
| Cell Cycle Control of Chromosomal Replication                            | 0 | 0.0178  | NaN | CCG45                                                                                                                                                      |
| Assembly of RNA Polymerase II Complex                                    | 0 | 0.04    | NaN | TAFL1, TAFL                                                                                                                                                |
| Role of Tissue Factor in Cancer                                          | 0 | 0.103   | NaN | CCN1, EGFR, F10, F3, FGA, FGF9, FRK, MAPK12, MMP13, PIK3CG, RASD2, RPS8KA6                                                                                 |
| Role of IL-17A in Arthritis                                              | 0 | 0.109   | NaN | CCCL1, IL17RC, MAPK12, MMP13, NOS2, PIK3CG                                                                                                                 |
| IL-17A Signaling in Fibrosis                                             | 0 | 0.0789  | NaN | CCCL1, IL17RC, MAPK12                                                                                                                                      |
| Role of IL-17F in Allergic Inflammatory Airway Diseases                  | 0 | 0.111   | NaN | CCCL7, IGFB1, IL17RC, MMP13, RPS8KA6                                                                                                                       |
| Role of JAK2 in Hemone-like Cytokine Signaling                           | 0 | 0.0294  | NaN | EPD                                                                                                                                                        |
| Role of JAK family kinases in IL-6-type Cytokine Signaling               | 0 | 0.04    | NaN | MAPK12                                                                                                                                                     |
| Role of JAK1 and JAK3 in $\gamma$ Cytokine Signaling                     | 0 | 0.029   | NaN | PIK3CG, RASD2                                                                                                                                              |
| Actin Nucleation by ARP-WASP Complex                                     | 0 | 0.0988  | NaN | ITGA11, ITGA7, ITGA8, ITGA9, ITGB6, RASD2, RHGJ, RHQV, RND3                                                                                                |
| Thrombosis Signaling                                                     | 0 | 0.028   | NaN | EGFR, PIK3CG, RASD2                                                                                                                                        |
| Embryonic Stem Cell Differentiation into Cardiac Lineages                | 0 | 0.1     | NaN | NANO3                                                                                                                                                      |
| Hematopoiesis from Pluripotent Stem Cells                                | 0 | 0.0113  | NaN | LEPO, IL10, IL3, LIF, TRB1-4                                                                                                                               |
| Transcriptional Regulatory Network in Embryonic Stem Cells               | 0 | 0.115   | NaN | SEK2, PRK11, HFE4A, NANO3, PAX6, RFX4                                                                                                                      |
| JMS Signaling                                                            | 0 | 0.0638  | NaN | LBP, MAPK12, NOS2                                                                                                                                          |
| Ephm A Signaling                                                         | 0 | 0.0638  | NaN | EPHA10, EPHA8, PIK3CG                                                                                                                                      |
| Estrogen-mediated S-phase Entry                                          | 0 | 0.0769  | NaN | EP7, EP8                                                                                                                                                   |
| Fatty Acid Activation                                                    | 0 | 0.0714  | NaN | ACSBG2                                                                                                                                                     |
| Sphingosine and Sphingosine-1-phosphate Metabolism                       | 0 | 0.111   | NaN | ASAH2                                                                                                                                                      |
| NAD biosynthesis II (from tryptophan)                                    | 0 | 0.0633  | NaN | HMNAT2                                                                                                                                                     |
| Prostanoid Biosynthesis                                                  | 0 | 0.1     | NaN | PTGIS                                                                                                                                                      |
| Isoleucine Degradation I                                                 | 0 | 0.0588  | NaN | SDS                                                                                                                                                        |
| Androgen Biosynthesis                                                    | 0 | 0.0506  | NaN | HSD17B                                                                                                                                                     |
| Glutathione Redox Reactions I                                            | 0 | 0.08    | NaN | GPX6, GPX8                                                                                                                                                 |
| CDP-diacylglycerol Biosynthesis I                                        | 0 | 0.0909  | NaN | GPAT2, PNP3A3                                                                                                                                              |
| Acid-Glyc Hydrolysis                                                     | 0 | 0.0769  | NaN | HNFA4                                                                                                                                                      |
| Ketogenesis                                                              | 0 | 0.0909  | NaN | HMGS2                                                                                                                                                      |
| Sucrose Degradation V (Mammals)                                          | 0 | 0.111   | NaN | ALDOB                                                                                                                                                      |
| Vitamins Biosynthesis II (Animals)                                       | 0 | 0.0506  | NaN | ACSBG2                                                                                                                                                     |
| NAD Salvage Pathway II                                                   | 0 | 0.111   | NaN | ACR4, HMNAT2, NTS1A                                                                                                                                        |
| Il-myo inositol (1,4,5)trisphosphate Biosynthesis                        | 0 | 0.119   | NaN | PLCB1, PLCG1, PLCH1                                                                                                                                        |
| Cleare Biosynthesis II (Animals)                                         | 0 | 0.0769  | NaN | PTPR                                                                                                                                                       |
| Glutathione-mediated Detoxification                                      | 0 | 0.0312  | NaN | GSTA3                                                                                                                                                      |
| NAD Phosphorylation and Dephosphorylation                                | 0 | 0.0769  | NaN | ACR4                                                                                                                                                       |
| Phosphatidylcholine Biosynthesis II (Non-cholesterol)                    | 0 | 0.0833  | NaN | GPAT2, PNP3A3                                                                                                                                              |
| Mevlonate Pathway I                                                      | 0 | 0.0714  | NaN | HMGS2                                                                                                                                                      |
| Valine Degradation I                                                     | 0 | 0.09    | NaN | SDS                                                                                                                                                        |
| Mitochondrial L-carnitine Shuttle Pathway                                | 0 | 0.0588  | NaN | ACSBG2                                                                                                                                                     |
| Oxidative Ethanol Degradation III                                        | 0 | 0.109   | NaN | ALDH1A3, ALDH1A1, ALDH1A1, CYP2B6, CYP2E1, CYP2F1                                                                                                          |
| Fatty Acid $\beta$ -oxidation I                                          | 0 | 0.0588  | NaN | ACSBG2, SDS                                                                                                                                                |
| Methionine Degradation I (to Homocysteine)                               | 0 | 0.0453  | NaN | PRMT8                                                                                                                                                      |
| Supperpathway of Geranylgeranylphosphate Biosynthesis I (via Mevalonate) | 0 | 0.0506  | NaN | HMGS2                                                                                                                                                      |
| Supperpathway of Cholesterol Biosynthesis                                | 0 | 0.0345  | NaN | HMGS2                                                                                                                                                      |
| DNA damage-induced 14-3-3 $\sigma$ Signaling                             | 0 | 0.0506  | NaN | CCNB1                                                                                                                                                      |
| Remodeling of Epithelial Adhesion Junctions                              | 0 | 0.118   | NaN | ACT1, ACTG2, ACTN2, MET, TUBA3E, TUBA8, TUBB3, TUBB8                                                                                                       |
| Cysteine Biosynthesis II (mammals)                                       | 0 | 0.0833  | NaN | CTH, PRMT8                                                                                                                                                 |
| Role of p145 <sup>MAPK</sup> in Tumor Suppression                        | 0 | 0.0345  | NaN | PIK3CG                                                                                                                                                     |
| LVB-induced MAPK Signaling                                               | 0 | 0.0577  | NaN | EGFR, MAPK12, PIK3CG                                                                                                                                       |
| LVC-induced MAPK Signaling                                               | 0 | 0.0588  | NaN | EGFR, MAPK12, RASD2                                                                                                                                        |
| Adipogenesis pathway                                                     | 0 | 0.0889  | NaN | BMP7, BMP10, CCR4, FGF1, FGF2, FGFRA, FZD4, LPL, NFATC4, PLIN1, RBP1, ZNF423                                                                               |
| Unfolded protein response                                                | 0 | 0.0222  | NaN | DNAJB13, DNAJC5                                                                                                                                            |
| Proteasome Signaling                                                     | 0 | 0.0625  | NaN | MAPK12                                                                                                                                                     |
| EGF Signaling                                                            | 0 | 0.0549  | NaN | EGFR, MAPK12, PIK3CG                                                                                                                                       |
| Cell Cycle- G1/S Checkpoint Regulation                                   | 0 | 0.0294  | NaN | EP7, EP8                                                                                                                                                   |
| SAPK/JNK Signaling                                                       | 0 | 0.012   | NaN | DUSP4, GNG4, MAPK12, PIK3CG, RASD2, TRB1-4                                                                                                                 |
| PI3K/AKT Signaling                                                       | 0 | 0.0104  | NaN | IL13RA3, IL17RC, IL17RD, IL17RE, IL17E, IL22RA1, IL22RA2, ITGA11, ITGA7, ITGA8, ITGA9, ITGB6, NANO3, RASD2                                                 |
| Protein Ubiquitination Pathway                                           | 0 | 0.0345  | NaN | CRYAB, DNAJB1, DNAJC22, DNAJC26, HSP97, HSP98, HSP99, HSP1, ODF1, UBE2U, USP23, USP29, USP41, USP43, USP6                                                  |
| IL-2 Signaling                                                           | 0 | 0.0328  | NaN | PIK3CG, RASD2                                                                                                                                              |
| JAK-STAT Signaling                                                       | 0 | 0.0244  | NaN | PIK3CG, RASD2                                                                                                                                              |
| Cell Cycle- G2/M DNA Damage Checkpoint Regulation                        | 0 | 0.03    | NaN | CCNB1                                                                                                                                                      |
| Xenobiotic Metabolism Signaling                                          | 0 | 0.172   | NaN | AHR, ALDH1A3, ALDH1L1, ALDH1L2, ALDH1A1, ALDH7A1, CES3, CESSA, CHST1, CHS1, CHS2, CYP1A1, CYP1A2, CYP2B6, CYP3A4, CYP3A5, FM03, GSTA3, HS3ST2, HS3ST3A1, H |
| IL-4 Signaling                                                           | 0 | 0.0323  | NaN | NFATC3, PIK3CG, RASD2                                                                                                                                      |
| Neurotrophin/Trk Signaling                                               | 0 | 0.105   | NaN | KLK3, NTF3, NTRK1, NTRK2, NTRK3, PIK3CG, RASD2, SORCS1                                                                                                     |
| Sonic Hedgehog Signaling                                                 | 0 | 0.103   | NaN | DLX3, GLI1, PTC4                                                                                                                                           |
| Death Receptor Signaling                                                 | 0 | 0.0312  | NaN | ACT1, ACTG2, HSP97                                                                                                                                         |
| IGF-1 Signaling                                                          | 0 | 0.0577  | NaN | CCN1, IGFB1, IGFBP1, IGFBP5, PIK3CG, RASD2                                                                                                                 |
| Notch Signaling                                                          | 0 | 0.0283  | NaN | NOTCH3                                                                                                                                                     |
| Hypoxia Signaling in the Cardiovascular System                           | 0 | 0.0409  | NaN | EPN1, EPO, UBE2U                                                                                                                                           |
| PDGF Signaling                                                           | 0 | 0.0349  | NaN | PDGFRA, PIK3CG, RASD2                                                                                                                                      |
| Phagosome Maturation                                                     | 0 | 0.0943  | NaN | ATP10A4, ATP10V02, ATP10V1, CTSSV, DYNC111, LPO, NCS1, NOX1, SNAP29, TPO, TUBA3E, TUBA4B, TUBA8, TUBB3, TUBB8                                              |
| Microautophagy Signaling                                                 | 0 | 0.0506  | NaN | ITSR6, MET, PIK3CG, RASD2                                                                                                                                  |
| PD-1, PD-L1 cancer immunotherapy pathway                                 | 0 | 0.06943 | NaN | PIK3CG                                                                                                                                                     |
| Cancer Drug Resistance By Drug Efflux                                    | 0 | 0.0172  | NaN | RASD2                                                                                                                                                      |
| Th1 and Th2 Activation Pathway                                           | 0 | 0.0485  | NaN | IL10, IL3, IL31, IL33, NFATC4, NOTCH3, PIK3CG                                                                                                              |
| Th1 Pathway                                                              | 0 | 0.0328  | NaN | IL10, NFATC4, NOTCH3, PIK3CG                                                                                                                               |
| IL-7 Signaling Pathway                                                   | 0 | 0.0385  | NaN | MAPK12, MET, PIK3CG                                                                                                                                        |
| Iron homeostasis signaling pathway                                       | 0 | 0.108   | NaN | ATP10A4, ATP10V02, ATP10V1, BMP10, BMP7, BMP8A, BMPR1B, EGFR, EPO, HAMP, HBA1, HBA2, HFE3A, HJV, PDGFRA, TF                                                |
| NER (Nucleotide Excision Repair, Enhanced Pathway)                       | 0 | 0.00971 | NaN | POLE2                                                                                                                                                      |
| Apoptin Muscle Signaling Pathway                                         | 0 | 0.0833  | NaN | APLN, GNG4, PPPARG1A, PRKAA2                                                                                                                               |
| BM2 Signaling Pathway                                                    | 0 | 0.0238  | NaN | CHRNA1, MAPT                                                                                                                                               |
| FAT10 Cancer Signaling Pathway                                           | 0 | 0.02    | NaN | H0XB9                                                                                                                                                      |
| IL-23 Signaling Pathway                                                  | 0 | 0.0652  | NaN | IL22, IL23R, PIK3CG                                                                                                                                        |
| Inhibition of ARF-mediated mRNA Degradation Pathway                      | 0 | 0.0124  | NaN | MAPK12, PAK1B                                                                                                                                              |
| Kinetochores Metaphase Signaling Pathway                                 | 0 | 0.0478  | NaN | DNAH10, DNAH3, KIF2C, NEK2, SMC1B                                                                                                                          |
| GM-CSF Signaling                                                         | 0 | 0.0571  | NaN | BCL2A1, PIK3CG, PPP3R2, RASD2                                                                                                                              |

Supplemental Table 12. SJD Subphenotype unique pathways of interest identified by cross comparing the SJD-Ro+ and SJD-Ro- pathway analyses

| Unique GSEA Pathways                                                                     |                                                                                                                 | Unique IPA Pathways                                                        |                                                           |
|------------------------------------------------------------------------------------------|-----------------------------------------------------------------------------------------------------------------|----------------------------------------------------------------------------|-----------------------------------------------------------|
| SJD-Ro+                                                                                  | SJD-Ro-                                                                                                         | SJD-Ro+                                                                    | SJD-Ro-                                                   |
| ABC TRANSPORTER DISORDERS                                                                | ABC FAMILY PROTEINS MEDIATED TRANSPORT                                                                          | 4-hydroxybenzoate Biosynthesis                                             | Actin Cytoskeleton Signaling                              |
| ACTIVATED TAK1 MEDIATES P38 MAPK ACTIVATION                                              | ACTIVATION OF GENE EXPRESSION BY SREBF SREBP                                                                    | 4-hydroxyphenylpyruvate Biosynthesis                                       | Airway Pathology in Chronic Obstructive Pulmonary Disease |
| ACTIVATION OF B3 ONLY PROTEINS                                                           | ANTIGEN ACTIVATES B CELL RECEPTOR BCR LEADING TO GENERATION OF SECOND MESSENGERS                                | Catalin Degradation                                                        | Amotrophic Lateral Sclerosis Signaling                    |
| ADAPTIVE IMMUNE SYSTEM                                                                   | CALNEXIN CALRETICULIN CYCLE                                                                                     | Eicosanoid Signaling                                                       | Apolin Liver Signaling Pathway                            |
| ANTIGEN PROCESSING UBIQUITINATION PROTEASOME DEGRADATION                                 | CELLULAR RESPONSE TO HEAT STRESS                                                                                | Extrinsic Prothrombin Activation Pathway                                   | Axonal Guidance Signaling                                 |
| CLASS I MHC MEDIATED ANTIGEN PROCESSING PRESENTATION                                     | CHROMATIN MODIFYING ENZYMES                                                                                     | Glucocorticoid Receptor Signaling                                          | Bladder Cancer Signaling                                  |
| COPII MEDIATED VESICLE TRANSPORT                                                         | COSTIMULATION BY THE CD28 FAMILY                                                                                | Hepatic Fibrosis / Hepatic Stellate Cell Activation                        | Breast Cancer Regulation by Stathmin1                     |
| CYCLIN D ASSOCIATED EVENTS IN G1                                                         | CYTOSOLIC TRNA AMINOACYLATION                                                                                   | Histidine Degradation VI                                                   | Calcium Signaling                                         |
| CYTOKINE SIGNALING IN IMMUNE SYSTEM                                                      | DEADENYLATION DEPENDENT MRNA DECA                                                                               | Interferon Signaling                                                       | cAMP-mediated signaling                                   |
| DAP12 INTERACTIONS                                                                       | DEADENYLATION OF MRNA                                                                                           | MIF-mediated Glucocorticoid Regulation                                     | Cardiac Hypertrophy Signaling (Enhanced)                  |
| DDX58 IFI1 MEDIATED INDUCTION OF INTERFERON ALPHA BETA                                   | DNA DAMAGE RECOGNITION IN GG NER                                                                                | Role of Hypercytokinemia/hyperchemokinema in the Pathogenesis of Influenza | Citrulline-Nitric Oxide Cycle                             |
| DNA REPLICATION                                                                          | DNA REPAIR                                                                                                      | Role of MAPK Signaling in Inhibiting the Pathogenesis of Influenza         | Corticotropin Releasing Hormone Signaling                 |
| FORMATION OF INCISION COMPLEX IN GG NER                                                  | E3 UBIQUITIN LIGASES UBIQUITINATE TARGET PROTEINS                                                               | Role of MAPK Signaling in the Pathogenesis of Influenza                    | Dermatan Sulfate Biosynthesis (Late Stages)               |
| GENERATION OF SECOND MESSENGER MOLECULES                                                 | EPIGENETIC REGULATION OF GENE EXPRESSION                                                                        |                                                                            | Endocannabinoid Neuronal Synapse Pathway                  |
| GLY1 ASSOCIATED VESICLE BIOGENESIS                                                       | ESTROGEN DEPENDENT GENE EXPRESSION                                                                              |                                                                            | eNOS Signaling                                            |
| HEDGEHOG OFF STATE                                                                       | EXPORT OF VIRAL RIBONUCLEOPROTEINS FROM NUCLEUS                                                                 |                                                                            | Estrogen Biosynthesis                                     |
| HEDGEHOG ON STATE                                                                        | EXTENSION OF TELOMERES                                                                                          |                                                                            | FGF Signaling                                             |
| IKK COMPLEX RECRUITMENT MEDIATED BY RIP1                                                 | GLYCOLYSIS                                                                                                      |                                                                            | FXR/RXR Activation                                        |
| INACTIVATION OF CSF3/G CSF SIGNALING                                                     | INFLUENZA INFECTION                                                                                             |                                                                            | G-Protein Coupled Receptor Signaling                      |
| INTERFERON ALPHA BETA SIGNALING                                                          | INTERACTIONS OF REV WITH HOST CELLULAR PROTEINS                                                                 |                                                                            | Gap Junction Signaling                                    |
| INTERFERON GAMMA SIGNALING                                                               | INTERACTIONS OF VPR WITH HOST CELLULAR PROTEINS                                                                 |                                                                            | Glutamate Receptor Signaling                              |
| INTERFERON SIGNALING                                                                     | IRE1ALPHA ACTIVATES CHAPERONES                                                                                  |                                                                            | Glycine Betaine Degradation                               |
| INTERLEUKIN 1 FAMILY SIGNALING                                                           | METABOLISM OF RNA                                                                                               |                                                                            | GPCR-Mediated Nutrient Sensing in Enteroendocrine Cells   |
| INTRINSIC PATHWAY FOR APOPTOSIS                                                          | MICRORNA/MIRNA BIOGENESIS                                                                                       |                                                                            | Granulocyte Adhesion and Diapedesis                       |
| MYD88 INDEPENDENT TLR4 CASCADE                                                           | MITOTIC PROPHASE                                                                                                |                                                                            | Hepatic Fibrosis / Hepatic Stellate Cell Activation       |
| NEGATIVE REGULATORS OF DDX58 IFI1 SIGNALING                                              | N GLYCAN TRIMMING IN THE ER AND CALNEXIN CALRETICULIN CYCLE                                                     |                                                                            | Histidine Degradation VI                                  |
| NOD1 2 SIGNALING PATHWAY                                                                 | NOTCH1 INTRACELLULAR DOMAIN REGULATES TRANSCRIPTION                                                             |                                                                            | LPS/IL-1 Mediated Inhibition of RXR Function              |
| NUCLEOTIDE BINDING DOMAIN LEUCINE RICH REPEAT CONTAINING RECEPTOR NLR SIGNALING PATHWAYS | NS1 MEDIATED EFFECTS ON HOST PATHWAYS                                                                           |                                                                            | LXR/RXR Activation                                        |
| PURINERGIC SIGNALING IN LEISHMANIASIS INFECTION                                          | NUCLEAR ENVELOPE BREAKDOWN                                                                                      |                                                                            | Maturity Onset Diabetes of Young (MODY) Signaling         |
| PYROPTOSIS                                                                               | NUCLEAR IMPORT OF REV PROTEIN                                                                                   |                                                                            | Melatonin Degradation I                                   |
| RAB GEF5 EXCHANGE GTP FOR GDP ON RABS                                                    | NUCLEAR PORE COMPLEX NPC DISASSEMBLY                                                                            |                                                                            | MSP-RON Signaling Pathway                                 |
| REGULATED NECROSIS                                                                       | POP CE PATHWAY                                                                                                  |                                                                            | Nerin Signaling                                           |
| REGULATION OF TP53 ACTIVITY THROUGH PHOSPHORYLATION                                      | PD-1 SIGNALING                                                                                                  |                                                                            | nNOS Signaling in Skeletal Muscle Cells                   |
| RETROGRADE TRANSPORT AT THE TRANS GOLGI NETWORK                                          | RAB REGULATION OF TRAFFICKING                                                                                   |                                                                            | Osteoarthritis Pathway                                    |
| RHO GTPASES ACTIVATE ROCKS                                                               | RECRUITMENT OF MITOTIC CENTROSOME PROTEINS AND COMPLEXES                                                        |                                                                            | Phototransduction Pathway                                 |
| SIGNALING BY CSF3/G CSF                                                                  | REGULATION OF CHOLESTEROL BIOSYNTHESIS BY SREBP SREBP                                                           |                                                                            | Proline Degradation                                       |
| SIGNALING BY FLT3 FUSION PROTEINS                                                        | REGULATION OF GLUCOKINASE BY GLUCOKINASE REGULATORY PROTEIN                                                     |                                                                            | Protein Citrullination                                    |
| TAK1 ACTIVATES NFKB BY PHOSPHORYLATION AND ACTIVATION OF IKKS COMPLEX                    | REGULATION OF HSF1 MEDIATED HEAT SHOCK RESPONSE                                                                 |                                                                            | PXR/RXR Activation                                        |
| TERMINATION OF TRANSLATION DNA SYNTHESIS                                                 | REGULATION OF PLK1 ACTIVITY AT G2 M TRANSITION                                                                  |                                                                            | Regulation of Cellular Mechanics by Calpain Protease      |
| TOLL LIKE RECEPTOR 9 TLR9 CASCADE                                                        | REGULATION OF TP53 EXPRESSION AND DEGRADATION                                                                   |                                                                            | Retinol Biosynthesis                                      |
| TP53 REGULATES TRANSCRIPTION OF DNA REPAIR GENES                                         | RESPIRATORY ELECTRON TRANSPORT                                                                                  |                                                                            | RHOGDI Signaling                                          |
| TRAF6 MEDIATED NF KB ACTIVATION                                                          | RESPIRATORY ELECTRON TRANSPORT ATP SYNTHESIS BY CHEMOSMOTIC COUPLING AND HEAT PRODUCTION BY UNCOUPLING PROTEINS |                                                                            | Serotonin and Melatonin Biosynthesis                      |
| TRANS GOLGI NETWORK VESICLE BUDDING                                                      | RUNX1 INTERACTS WITH CO FACTORS WHOSE PRECISE EFFECT ON RUNX1 TARGETS IS NOT KNOWN                              |                                                                            | Serotonin Receptor Signaling                              |
| TRANSCRIPTIONAL REGULATION BY RUNX2                                                      | RUNX1 REGULATES TRANSCRIPTION OF GENES INVOLVED IN DIFFERENTIATION OF HSCS                                      |                                                                            | SPINK1 Pancreatic Cancer Pathway                          |
| TRANSLATION SYNTHESIS BY Y FAMILY DNA POLYMERASES BYPASSES LESIONS ON DNA TEMPLATE       | SCF SKP2 MEDIATED DEGRADATION OF P27 P21                                                                        |                                                                            | Superpathway of Melatonin Degradation                     |
|                                                                                          | SIGNALING BY NOTCH                                                                                              |                                                                            | Synaptogenesis Signaling Pathway                          |
|                                                                                          | SNRP ASSEMBLY                                                                                                   |                                                                            | Tumor Microenvironment Pathway                            |
|                                                                                          | SUMOYLATION OF CHROMATIN ORGANIZATION PROTEINS                                                                  |                                                                            | Urea Cycle                                                |
|                                                                                          | SUMOYLATION OF DNA REPLICATION PROTEINS                                                                         |                                                                            | White Adipose Tissue Browning Pathway                     |
|                                                                                          | SUMOYLATION OF SUMOYLATION PROTEINS                                                                             |                                                                            |                                                           |
|                                                                                          | SUMOYLATION OF TRANSCRIPTION COFACTORS                                                                          |                                                                            |                                                           |
|                                                                                          | SUMOYLATION OF UBIQUITINYLATION PROTEINS                                                                        |                                                                            |                                                           |
|                                                                                          | TELOMERE C STRAND LAGGING STRAND SYNTHESIS                                                                      |                                                                            |                                                           |
|                                                                                          | THE CITRIC ACID TCA CYCLE AND RESPIRATORY ELECTRON TRANSPORT                                                    |                                                                            |                                                           |
|                                                                                          | TP53 REGULATES METABOLIC GENES                                                                                  |                                                                            |                                                           |
|                                                                                          | TRANSCRIPTIONAL REGULATION BY RUNX1                                                                             |                                                                            |                                                           |
|                                                                                          | TRANSCRIPTIONAL REGULATION BY SMALL RNAS                                                                        |                                                                            |                                                           |
|                                                                                          | TRANSCRIPTIONAL REGULATION BY VENTX                                                                             |                                                                            |                                                           |
|                                                                                          | TRANSPORT OF THE SLBP DEPENDANT MATURE MRNA                                                                     |                                                                            |                                                           |
|                                                                                          | TRNA AMINOACYLATION                                                                                             |                                                                            |                                                           |
|                                                                                          | TRNA PROCESSING                                                                                                 |                                                                            |                                                           |
|                                                                                          | TRNA PROCESSING IN THE NUCLEUS                                                                                  |                                                                            |                                                           |



















Table with columns for gene ID, chromosome, coordinates, gene name, transcript, and various numerical values. The table lists numerous genes such as PRR10D1P5, ADIC7, HZC7, and many others, each with associated genomic data and values.

Table with columns for gene ID, chromosome, coordinates, gene name, transcript ID, and various numerical values. The table lists numerous genes such as DUSP6, SLC12A1, and others, along with their genomic locations and associated data points.

Table with columns for gene ID, chromosome, coordinates, gene name, transcript type, and various numerical values. The table lists numerous genes such as RPL39P, RPL39, RPL39B, etc., with their corresponding genomic data.









|                |    |           |          |           |         |                    |                    |             |           |             |           |             |           |             |           |             |           |             |           |             |           |          |
|----------------|----|-----------|----------|-----------|---------|--------------------|--------------------|-------------|-----------|-------------|-----------|-------------|-----------|-------------|-----------|-------------|-----------|-------------|-----------|-------------|-----------|----------|
| ENSG000002666  | 17 | 40340867  | 4043136  | RARA-AS1  | hasava  | lncRNA             | protein coding     | 0.4784902   | 1.22e-05  | 0.4541389   | 9.24e-04  | 0.2078161   | 2.98e-01  | 0.3722708   | 5.58e-02  | 0.4832021   | 2.35e-04  | 0.0439004   | 8.43e-01  | 0.1110649   | 3.64e-01  |          |
| ENSG000004884  | 20 | 15921924  | 1592922  | CNN2      | ensembl | mRNA               | protein coding     | 0.2834003   | 3.52e-06  | 0.2935991   | 6.44e-05  | 0.2509129   | 7.94e-01  | 0.3712480   | 5.59e-02  | 0.3706100   | 5.28e-01  | 0.0211468   | 9.22e-01  | 0.0204313   | 5.88e-01  |          |
| ENSG000002529  | 18 | 13140917  | 13140917 | CTD11P4   | ensembl | mRNA               | protein coding     | 0.0441397   | 1.01e-04  | 0.0441397   | 1.01e-04  | 0.0441397   | 1.01e-04  | 0.0441397   | 1.01e-04  | 0.0441397   | 1.01e-04  | 0.0441397   | 1.01e-04  | 0.0441397   | 1.01e-04  |          |
| ENSG000002374  | 4  | 11584193  | 11584190 | ENPP2     | ensembl | mRNA               | protein coding     | 0.2834003   | 3.52e-06  | 0.2935991   | 6.44e-05  | 0.2509129   | 7.94e-01  | 0.3712480   | 5.59e-02  | 0.3706100   | 5.28e-01  | 0.0211468   | 9.22e-01  | 0.0204313   | 5.88e-01  |          |
| ENSG000001757  | 12 | 20203837  | 20208883 | PCNA      | ensembl | mRNA               | protein coding     | 0.1521733   | 1.87e-01  | 0.1514996   | 1.87e-01  | 0.1517789   | 4.22e-01  | 0.1720676   | 5.62e-01  | 0.1147709   | 4.09e-01  | 0.0903131   | 6.83e-01  | 0.1539779   | 3.48e-01  |          |
| ENSG000001794  | 16 | 781177    | 7793145  | CTD11P4   | ensembl | mRNA               | protein coding     | 0.0441397   | 1.01e-04  | 0.0441397   | 1.01e-04  | 0.0441397   | 1.01e-04  | 0.0441397   | 1.01e-04  | 0.0441397   | 1.01e-04  | 0.0441397   | 1.01e-04  | 0.0441397   | 1.01e-04  |          |
| ENSG0000042736 | 1  | 16034316  | 16035892 | NKX1      | ensembl | mRNA               | protein coding     | 0.2083373   | 6.90e-02  | 0.2302248   | 1.08e-01  | 0.2179561   | 6.10e-01  | 0.3484849   | 5.06e-01  | 0.0847028   | 6.03e-01  | 0.1550826   | 2.48e-01  | 0.0550826   | 6.98e-01  |          |
| ENSG0000009950 | 6  | 12424867  | 12425138 | STX7      | ensembl | mRNA               | protein coding     | 0.3499922   | 1.81e-08  | 0.3606096   | 1.01e-08  | 0.1081443   | 5.89e-01  | 0.3717566   | 5.62e-01  | 0.3871744   | 8.32e-01  | 0.0550826   | 6.98e-01  | 0.0550826   | 6.98e-01  |          |
| ENSG0000015949 | 15 | 10265866  | 10266240 | IGFBP3    | ensembl | mRNA               | protein coding     | 0.2834003   | 3.52e-06  | 0.2935991   | 6.44e-05  | 0.2509129   | 7.94e-01  | 0.3712480   | 5.59e-02  | 0.3706100   | 5.28e-01  | 0.0211468   | 9.22e-01  | 0.0204313   | 5.88e-01  |          |
| ENSG0000002996 | 5  | 14981170  | 14982139 | RNF13     | ensembl | mRNA               | protein coding     | 0.3709139   | 6.91e-08  | 0.3744434   | 1.24e-07  | 0.184944    | 3.56e-01  | 0.3719576   | 5.93e-01  | 0.3387573   | 1.24e-01  | 0.0550826   | 6.98e-01  | 0.0550826   | 6.98e-01  |          |
| ENSG0000014237 | 5  | 10379785  | 10379792 | CMBL      | ensembl | mRNA               | protein coding     | 0.1056883   | 3.59e-01  | 0.3399719   | 1.59e-01  | 0.1139969   | 4.43e-01  | 0.3715888   | 5.64e-01  | 0.0710743   | 6.10e-01  | 0.21395     | 3.27e-01  | 0.1667817   | 4.47e-01  |          |
| ENSG0000015642 | 18 | 11344888  | 11349646 | IGFBP3    | ensembl | mRNA               | protein coding     | 0.2834003   | 3.52e-06  | 0.2935991   | 6.44e-05  | 0.2509129   | 7.94e-01  | 0.3712480   | 5.59e-02  | 0.3706100   | 5.28e-01  | 0.0211468   | 9.22e-01  | 0.0204313   | 5.88e-01  |          |
| ENSG0000020312 | 27 | 4725986   | 4761007  | ZF83B1    | ensembl | mRNA               | TEC                | YES         | 0.0694904 | 5.94e-01    | 0.1934413 | 0.65e-01    | 0.133996  | 5.97e-01    | 0.3715888 | 5.64e-01    | 0.0710743 | 6.10e-01    | 0.21395   | 3.27e-01    | 0.1667817 | 4.47e-01 |
| ENSG0000018026 | 3  | 39107704  | 39138903 | ITIH2A    | ensembl | mRNA               | protein coding     | 0.0438126   | 6.39e-01  | 0.0468938   | 5.99e-01  | 0.0550821   | 2.90e-01  | 0.3718989   | 5.66e-01  | 0.4136284   | 1.88e-01  | 0.1316618   | 2.79e-01  | 0.3635977   | 9.45e-01  |          |
| ENSG0000012915 | 14 | 3456299   | 3460160  | SNMG      | ensembl | mRNA               | protein coding     | 0.4348113   | 7.13e-08  | 0.4391205   | 4.56e-08  | 0.2157426   | 2.80e-01  | 0.3718989   | 5.66e-01  | 0.4894749   | 1.27e-01  | 0.1881564   | 3.60e-01  | 0.2077978   | 1.48e-01  |          |
| ENSG0000010938 | 18 | 2691422   | 2693942  | GMPY2     | ensembl | mRNA               | protein coding     | 0.3694808   | 1.20e-01  | 0.3289541   | 1.09e-01  | 0.2424007   | 2.21e-01  | 0.4888428   | 5.67e-01  | 0.4888428   | 5.67e-01  | 0.4888428   | 5.67e-01  | 0.4888428   | 5.67e-01  |          |
| ENSG0000021630 | 6  | 2713858   | 2713981  | H4C9      | ensembl | mRNA               | protein coding     | 0.0970086   | 4.01e-01  | 0.1395256   | 3.32e-01  | 0.0528127   | 7.94e-01  | 0.3712472   | 5.67e-01  | 0.1702009   | 2.18e-01  | 0.176703    | 4.12e-01  | 0.1099112   | 4.47e-01  |          |
| ENSG0000017174 | 3  | 12912149  | 12912403 | AC10397.2 | ensembl | lncRNA             | transcribed unprec | 0.2114955   | 2.40e-01  | 0.2023768   | 4.09e-01  | 0.1411211   | 4.61e-01  | 0.1709015   | 5.68e-01  | 0.2829347   | 9.81e-01  | 0.126263    | 5.80e-01  | 0.1142763   | 3.53e-01  |          |
| ENSG0000011774 | 15 | 6451173   | 6451261  | SNK2      | ensembl | mRNA               | protein coding     | 0.0926811   | 3.02e-01  | 0.1161211   | 2.50e-01  | 0.0424002   | 2.93e-01  | 0.1708443   | 5.69e-01  | 0.1708443   | 5.69e-01  | 0.1094131   | 4.40e-01  | 0.1154011   | 2.94e-01  |          |
| ENSG0000020964 | 15 | 6754102   | 6754260  | AC04635.1 | ensembl | lncRNA             | transcribed unprec | 0.0926811   | 3.02e-01  | 0.1161211   | 2.50e-01  | 0.0424002   | 2.93e-01  | 0.1708443   | 5.69e-01  | 0.1708443   | 5.69e-01  | 0.1094131   | 4.40e-01  | 0.1154011   | 2.94e-01  |          |
| ENSG0000011799 | 6  | 6838108   | 6834983  | LY86      | ensembl | mRNA               | protein coding     | 0.4294462   | 5.11e-08  | 0.4271649   | 2.11e-08  | 0.4831239   | 1.06e-01  | 0.3706187   | 5.70e-01  | 0.3559958   | 8.07e-01  | 0.2077946   | 2.11e-01  | 0.3684998   | 9.38e-01  |          |
| ENSG0000015498 | 10 | 3851381   | 3856176  | AL1332.1  | ensembl | lncRNA             | transcribed unprec | 0.1217426   | 2.72e-01  | 0.1217426   | 2.72e-01  | 0.1217426   | 2.72e-01  | 0.1217426   | 2.72e-01  | 0.1217426   | 2.72e-01  | 0.1217426   | 2.72e-01  | 0.1217426   | 2.72e-01  |          |
| ENSG0000013073 | 9  | 3392193   | 3404889  | UBAP2     | ensembl | mRNA               | protein coding     | 0.4136835   | 1.85e-04  | 0.4349885   | 1.48e-04  | 0.2992265   | 1.29e-01  | 0.3705604   | 5.71e-01  | 0.3559463   | 5.72e-01  | 0.1467904   | 9.42e-01  | 0.1436530   | 3.14e-01  |          |
| ENSG0000020548 | 14 | 61156273  | 61170603 | RNF103    | ensembl | mRNA               | protein coding     | 0.3193346   | 4.03e-01  | 0.3704291   | 3.01e-01  | 0.2588850   | 1.97e-01  | 0.3709931   | 5.72e-01  | 0.3855186   | 3.99e-01  | 0.1036591   | 8.10e-01  | 0.1029318   | 3.40e-01  |          |
| ENSG0000010495 | 11 | 3491249   | 3502091  | PFKM      | ensembl | mRNA               | protein coding     | 0.3476225   | 2.48e-01  | 0.3460973   | 2.07e-01  | 0.0694898   | 2.97e-01  | 0.3701118   | 5.76e-01  | 0.3717279   | 5.94e-01  | 0.0682635   | 2.19e-01  | 0.1870531   | 1.92e-01  |          |
| ENSG0000015377 | 9  | 8313972   | 8318332  | AL1808.1  | ensembl | lncRNA             | transcribed unprec | 0.2891797   | 1.13e-01  | 0.3776644   | 6.91e-01  | 0.1175595   | 5.59e-01  | 0.3703248   | 5.74e-01  | 0.4839504   | 9.78e-01  | 0.0964138   | 6.65e-01  | 0.0409311   | 9.78e-01  |          |
| ENSG0000015749 | 2  | 201288271 | 20135798 | FLAC1     | ensembl | mRNA               | protein coding     | 0.1865877   | 2.24e-01  | 0.1865877   | 2.24e-01  | 0.1865877   | 2.24e-01  | 0.1865877   | 2.24e-01  | 0.1865877   | 2.24e-01  | 0.1865877   | 2.24e-01  | 0.1865877   | 2.24e-01  |          |
| ENSG0000014026 | 15 | 4358172   | 4371025  | ZC2AN9    | ensembl | mRNA               | protein coding     | 0.3004413   | 2.58e-01  | 0.3020443   | 2.61e-01  | 0.1076675   | 5.93e-01  | 0.3684929   | 5.74e-01  | 0.3684929   | 5.74e-01  | 0.3684929   | 5.74e-01  | 0.3684929   | 5.74e-01  |          |
| ENSG0000014464 | 1  | 10120084  | 10120084 | SNM4      | ensembl | mRNA               | protein coding     | 0.111000008 | 4.11e-01  | 0.111000008 | 4.11e-01  | 0.111000008 | 4.11e-01  | 0.111000008 | 4.11e-01  | 0.111000008 | 4.11e-01  | 0.111000008 | 4.11e-01  | 0.111000008 | 4.11e-01  |          |
| ENSG0000010372 | 15 | 8565281   | 8570964  | AP3B2     | ensembl | mRNA               | protein coding     | 0.1188888   | 1.56e-01  | 0.1188888   | 1.56e-01  | 0.1188888   | 1.56e-01  | 0.1188888   | 1.56e-01  | 0.1188888   | 1.56e-01  | 0.1188888   | 1.56e-01  | 0.1188888   | 1.56e-01  |          |
| ENSG0000020536 | 12 | 11329208  | 11329176 | RPSPD9    | ensembl | transcribed unprec | 0.0242497          | 7.79e-01    | 0.1039471 | 4.88e-01    | 0.1039471 | 4.88e-01    | 0.1039471 | 4.88e-01    | 0.1039471 | 4.88e-01    | 0.1039471 | 4.88e-01    | 0.1039471 | 4.88e-01    | 0.1039471 | 4.88e-01 |
| ENSG0000013988 | 12 | 10095882  | 10095882 | OR4F11    | ensembl | mRNA               | protein coding     | 0.0905582   | 4.08e-01  | 0.0905582   | 4.08e-01  | 0.0905582   | 4.08e-01  | 0.0905582   | 4.08e-01  | 0.0905582   | 4.08e-01  | 0.0905582   | 4.08e-01  | 0.0905582   | 4.08e-01  |          |
| ENSG0000013841 | 7  | 20823229  | 20826074 | DIH1      | ensembl | mRNA               | protein coding     | 0.1339265   | 2.01e-01  | 0.1339265   | 2.01e-01  | 0.1339265   | 2.01e-01  | 0.1339265   | 2.01e-01  | 0.1339265   | 2.01e-01  | 0.1339265   | 2.01e-01  | 0.1339265   | 2.01e-01  |          |
| ENSG0000013376 | 3  | 12074267  | 12073909 | GTF2I     | ensembl | mRNA               | protein coding     | 0.2947818   | 8.75e-01  | 0.2517774   | 7.82e-01  | 0.1250298   | 3.11e-01  | 0.3689291   | 5.83e-01  | 0.4050642   | 9.28e-01  | 0.04279     | 9.73e-01  | 0.0762534   | 5.97e-01  |          |
| ENSG0000014418 | 19 | 6207586   | 6209615  | AL1808.1  | ensembl | lncRNA             | transcribed unprec | 0.1217426   | 2.72e-01  | 0.1217426   | 2.72e-01  | 0.1217426   | 2.72e-01  | 0.1217426   | 2.72e-01  | 0.1217426   | 2.72e-01  | 0.1217426   | 2.72e-01  | 0.1217426   | 2.72e-01  |          |
| ENSG0000020709 | 21 | 4448577   | 4448208  | INC02575  | ensembl | mRNA               | protein coding     | 0.0695635   | 6.86e-01  | 0.0625233   | 6.14e-01  | 0.0750828   | 7.10e-01  | 0.3810501   | 5.84e-01  | 0.0257575   | 8.43e-01  | 0.1200845   | 8.00e-01  | 0.0813776   | 5.60e-01  |          |
| ENSG0000020623 | 1  | 4722579   | 4723750  | AL13396.1 | ensembl | lncRNA             | transcribed unprec | 0.0438323   | 7.67e-01  | 0.3272048   | 2.04e-01  | 0.2611332   | 1.88e-01  | 0.3882713   | 5.84e-01  | 0.3702929   | 5.83e-01  | 0.1533368   | 4.19e-01  | 0.0762048   | 5.45e-01  |          |
| ENSG0000004199 | 10 | 7167835   | 7172401  | PHLP2     | ensembl | mRNA               | protein coding     | 0.1570894   | 1.70e-01  | 0.1319399   | 2.64e-01  | 0.2017894   | 6.13e-01  | 0.3884629   | 5.85e-01  | 0.1429494   | 2.65e-01  | 0.0509389   | 8.79e-01  | 0.0836642   | 5.64e-01  |          |
| ENSG0000020399 | 1  | 4937407   | 4936982  | AC09141.1 | ensembl | lncRNA             | transcribed unprec | 0.2114955   | 2.40e-01  | 0.2023768   | 4.09e-01  | 0.1411211   | 4.61e-01  | 0.1709015   | 5.68e-01  | 0.2829347   | 9.81e-01  | 0.126263    | 5.80e-01  | 0.1142763   | 3.53e-01  |          |
| ENSG0000021344 | 20 | 5111044   | 5111100  | ERRP1     | ensembl | mRNA               | protein coding     | 0.1127086   | 3.29e-01  | 0.1270514   | 7.07e-01  | 0.1707860   | 3.94e-01  | 0.3681338   | 5.86e-01  | 0.0663154   | 4.88e-01  | 0.1317107   | 6.55e-01  | 0.0448268   | 6.44e-01  |          |
| ENSG0000012823 | 22 | 3756080   | 3756945  | ACD3P1    | ensembl | mRNA               | protein coding     | 0.2898222   | 1.08e-01  | 0.3089575   | 5.55e-01  | 0.1047078   | 6.03e-01  | 0.3457021   | 5.86e-01  | 0.4317302   | 6.44e-01  | 0.1917721   | 1.85e-01  | 0.1822959   | 2.05e-01  |          |
| ENSG0000015491 | 4  | 1273      |          |           |         |                    |                    |             |           |             |           |             |           |             |           |             |           |             |           |             |           |          |























|                 |    |          |          |           |         |        |                    |            |          |           |          |            |          |            |          |            |           |            |           |           |           |          |
|-----------------|----|----------|----------|-----------|---------|--------|--------------------|------------|----------|-----------|----------|------------|----------|------------|----------|------------|-----------|------------|-----------|-----------|-----------|----------|
| ENSG0000010104  | 11 | 66842113 | 60851081 | CDC36     | ensembl | havana | protein_coding     | 0.23468997 | 3.99e-05 | 0.1674813 | 2.43e-01 | 0.15663266 | 5.80e-01 | 0.29626309 | 1.33e-01 | 0.31932099 | 1.86e-01  | -0.1897951 | 3.86e-01  | 0.2252321 | 1.16e-01  |          |
| ENSG000000785   | 19 | 8613270  | 8439037  | MAACH2    | ensembl | havana | protein_coding     | 0.15457373 | 1.79e-01 | 0.2721738 | 1.13e-01 | 0.1984929  | 3.18e-01 | 0.2962866  | 1.33e-01 | 0.1704070  | 2.18e-01  | 0.153871   | 4.83e-01  | 0.0307033 | 8.00e-01  |          |
| ENSG0000020914  | 15 | 20729747 | 20756183 | AC002414  | ensembl | havana | lincRNA            | 0.04404033 | 0.54e-01 | 0.2480667 | 0.19e-01 | 0.1191197  | 2.01e-01 | 0.2191197  | 1.33e-01 | 0.1191197  | 2.01e-01  | 0.1191197  | 2.01e-01  | 0.0309170 | 8.00e-01  |          |
| ENSG0000020409  | 15 | 20729747 | 20756183 | AC002414  | ensembl | havana | lincRNA            | 0.0021477  | 4.54e-01 | 0.1073181 | 6.91e-01 | 0.1844683  | 3.54e-01 | 0.2962897  | 1.33e-01 | 0.1191197  | 2.01e-01  | 0.0445314  | 3.90e-01  | 0.0412851 | 3.80e-01  |          |
| ENSG0000021798  | 2  | 17457227 | 17458726 | AC008934  | ensembl | havana | lincRNA            | 0.0028922  | 6.02e-01 | 0.1524167 | 2.73e-01 | 0.1533634  | 4.43e-01 | 0.2962128  | 1.34e-01 | 0.0347440  | 7.01e-01  | 0.1424812  | 5.17e-01  | 0.0133020 | 9.27e-01  |          |
| ENSG0000016216  | 1  | 8464978  | 84666047 | WDR37     | ensembl | havana | protein_coding     | 0.0030303  | 3.06e-01 | 0.2027305 | 1.20e-01 | 0.1191197  | 2.01e-01 | 0.2191197  | 1.33e-01 | 0.0275474  | 2.75e-01  | 0.0769913  | 2.75e-01  | 0.0170924 | 3.80e-01  |          |
| ENSG0000010083  | 14 | 34981597 | 35029686 | SRP4      | ensembl | havana | protein_coding     | 0.1308332  | 3.00e-01 | 0.1012019 | 5.52e-01 | 0.29624    | 1.34e-01 | 0.1888603  | 1.75e-01 | 0.1207289  | 3.85e-01  | 0.0297019  | 3.85e-01  | 0.0138204 | 9.13e-01  |          |
| ENSG0000016570  | 8  | 13294000 | 13299387 | GF118     | ensembl | havana | protein_coding     | 0.1917529  | 9.48e-01 | 0.2254429 | 1.15e-01 | 0.0006501  | 9.97e-01 | 0.2962939  | 1.34e-01 | 0.2443734  | 7.49e-01  | 0.2999873  | 2.70e-01  | 0.0138204 | 9.13e-01  |          |
| ENSG0000015020  | 1  | 8193602  | 8190682  | ARHGAP21  | ensembl | havana | protein_coding     | 0.0212178  | 7.98e-01 | 0.1066683 | 9.13e-01 | 0.1191197  | 2.01e-01 | 0.2191197  | 1.33e-01 | 0.0212178  | 7.98e-01  | 0.0212178  | 7.98e-01  | 0.0212178 | 7.98e-01  |          |
| ENSG0000015045  | 14 | 5474484  | 5448026  | GMP8      | ensembl | havana | protein_coding     | 0.1372458  | 2.34e-01 | 0.1368098 | 2.05e-01 | 0.1191197  | 2.01e-01 | 0.2191197  | 1.33e-01 | 0.0262501  | 1.34e-01  | 0.0262501  | 1.34e-01  | 0.0262501 | 1.34e-01  |          |
| ENSG0000013155  | 1  | 16817962 | 16820210 | TIPRL     | ensembl | havana | protein_coding     | 0.2431169  | 3.31e-01 | 0.1722382 | 2.21e-01 | 0.1191197  | 2.01e-01 | 0.2191197  | 1.33e-01 | 0.0262501  | 1.34e-01  | 0.0262501  | 1.34e-01  | 0.0262501 | 1.34e-01  |          |
| ENSG0000013243  | 4  | 6024499  | 6023245  | AAA       | ensembl | havana | protein_coding     | 0.0232923  | 2.16e-01 | 0.1066683 | 9.13e-01 | 0.1191197  | 2.01e-01 | 0.2191197  | 1.33e-01 | 0.0262501  | 1.34e-01  | 0.0262501  | 1.34e-01  | 0.0262501 | 1.34e-01  |          |
| ENSG0000020803  | 16 | 17134    | 15155    | TNAT3     | ensembl | havana | lincRNA            | 0.0056594  | 6.64e-01 | 0.1592653 | 4.27e-01 | 0.1592653  | 4.27e-01 | 0.29624    | 1.34e-01 | 0.0958774  | 4.74e-01  | 0.0958774  | 4.74e-01  | 0.0958774 | 4.74e-01  |          |
| ENSG0000017791  | 10 | 73831612 | 73841474 | MYO21     | ensembl | havana | protein_coding     | 0.0242500  | 8.34e-01 | 0.1366549 | 1.94e-01 | 0.1072994  | 3.54e-01 | 0.2962400  | 1.34e-01 | 0.0299270  | 8.61e-01  | 0.0299270  | 8.61e-01  | 0.0299270 | 8.61e-01  |          |
| ENSG00000217509 | 15 | 4538577  | 4538804  | AC029073  | ensembl | havana | lincRNA            | 0.0823330  | 4.72e-01 | 0.1217686 | 1.98e-01 | 0.0998007  | 7.67e-01 | 0.29624    | 1.34e-01 | 0.0299270  | 8.61e-01  | 0.0299270  | 8.61e-01  | 0.0299270 | 8.61e-01  |          |
| ENSG00000209239 | 9  | 62009493 | 62009493 | AC029073  | ensembl | havana | lincRNA            | 0.0064702  | 6.02e-01 | 0.1072994 | 2.95e-01 | 0.1072994  | 4.12e-01 | 0.2962400  | 1.34e-01 | 0.0299270  | 8.61e-01  | 0.0299270  | 8.61e-01  | 0.0299270 | 8.61e-01  |          |
| ENSG0000019479  | 4  | 4138317  | 4138908  | MEI8      | ensembl | havana | protein_coding     | 0.3069439  | 6.62e-01 | 0.2962005 | 4.06e-01 | 0.5357445  | 5.98e-01 | 0.2951175  | 1.35e-01 | 0.0244241  | 0.0412299 | 8.52e-01   | 0.3612539 | 6.66e-01  | 6.66e-01  |          |
| ENSG0000014390  | 2  | 8940242  | 8940745  | IRF19_12  | ensembl | havana | IG_V_gene          | 0.2802938  | 3.73e-01 | 0.1177077 | 2.75e-01 | 0.1720875  | 3.88e-01 | 0.2951175  | 1.35e-01 | 0.0244241  | 0.0412299 | 8.52e-01   | 0.3612539 | 6.66e-01  | 6.66e-01  |          |
| ENSG0000011445  | 1  | 11224709 | 11227454 | PRDM4     | ensembl | havana | protein_coding     | 0.2248724  | 2.78e-01 | 0.1019847 | 1.46e-01 | 0.1020166  | 3.81e-01 | 0.2952404  | 1.35e-01 | 0.1543130  | 3.66e-01  | 0.1537346  | 3.58e-01  | 0.0137346 | 5.94e-01  |          |
| ENSG0000021761  | 8  | 18291240 | 18291918 | AC029512  | ensembl | havana | lincRNA            | 0.2141713  | 6.14e-01 | 0.1019847 | 1.46e-01 | 0.0913991  | 6.50e-01 | 0.2952404  | 1.35e-01 | 0.1152888  | 2.18e-01  | 0.1152888  | 2.18e-01  | 0.1152888 | 2.18e-01  |          |
| ENSG0000020092  | 14 | 13262462 | 13263036 | RIPR3     | ensembl | havana | protein_coding     | 0.0119833  | 1.18e-01 | 0.0477355 | 7.88e-01 | 0.0874525  | 6.78e-01 | 0.2952526  | 1.35e-01 | 0.0283934  | 8.39e-01  | 0.1620933  | 4.58e-01  | 0.1246301 | 2.80e-01  |          |
| ENSG00000201038 | 4  | 14104812 | 14111270 | FKBP2     | ensembl | havana | protein_coding     | 0.3375314  | 2.98e-01 | 0.1362707 | 1.70e-01 | 0.2086651  | 2.98e-01 | 0.29524    | 1.35e-01 | 0.0220212  | 0.04681   | 0.1378301  | 5.86e-01  | 0.0156381 | 2.55e-01  |          |
| ENSG0000022903  | 10 | 13394987 | 13396289 | LOC101366 | ensembl | havana | lincRNA            | -0.0359345 | 7.60e-01 | 0.1570078 | 2.94e-01 | 0.1488556  | 4.71e-01 | 0.2952753  | 1.35e-01 | 0.081449   | 5.58e-01  | 0.1425986  | 5.71e-01  | 0.14237   | 3.46e-01  |          |
| ENSG0000019726  | 19 | 19645138 | 19663876 | ATP3A1    | ensembl | havana | protein_coding     | 0.2104684  | 6.62e-01 | 0.2962372 | 3.68e-01 | 0.3527657  | 1.71e-01 | 0.2952753  | 1.35e-01 | 0.0220212  | 0.04681   | 0.1378301  | 5.86e-01  | 0.0156381 | 2.55e-01  |          |
| ENSG0000027950  | 5  | 4588567  | 4587443  | AC040451  | ensembl | havana | lincRNA            | 0.1727862  | 2.70e-01 | 0.1066683 | 9.13e-01 | 0.1066683  | 9.13e-01 | 0.29524    | 1.35e-01 | 0.0299270  | 8.61e-01  | 0.0299270  | 8.61e-01  | 0.0299270 | 8.61e-01  |          |
| ENSG0000016006  | 9  | 3817906  | 3822523  | UBAP1     | ensembl | havana | protein_coding     | 0.2211094  | 6.28e-01 | 0.2284989 | 1.97e-01 | 0.007076   | 9.87e-01 | 0.2952498  | 1.35e-01 | 0.0299270  | 8.61e-01  | 0.0299270  | 8.61e-01  | 0.0299270 | 8.61e-01  |          |
| ENSG0000015004  | 10 | 2856993  | 2834486  | MPP7      | ensembl | havana | protein_coding     | 0.2716104  | 3.06e-01 | 0.1884426 | 3.46e-01 | 0.2951234  | 1.35e-01 | 0.2952753  | 1.35e-01 | 0.0220212  | 0.04681   | 0.1378301  | 5.86e-01  | 0.0156381 | 2.55e-01  |          |
| ENSG0000028836  | 1  | 24770189 | 24779524 | OR9DL1    | ensembl | havana | polycomb_target    | 0.0580806  | 6.15e-01 | 0.2572431 | 1.73e-01 | 0.1888447  | 3.58e-01 | 0.2950107  | 1.35e-01 | 0.0244241  | 0.0412299 | 8.52e-01   | 0.201474  | 3.57e-01  | 0.1888447 | 3.58e-01 |
| ENSG0000021794  | 1  | 6104884  | 61257231 | INR1M1    | ensembl | havana | lincRNA            | 0.0285649  | 1.31e-01 | 0.1066683 | 9.13e-01 | 0.2944043  | 1.03e-01 | 0.2944043  | 1.03e-01 | 0.0299270  | 8.61e-01  | 0.0299270  | 8.61e-01  | 0.0299270 | 8.61e-01  |          |
| ENSG0000017774  | 17 | 1668112  | 1666668  | EMC6      | ensembl | havana | protein_coding     | 0.3582649  | 1.31e-01 | 0.1066683 | 9.13e-01 | 0.2944043  | 1.03e-01 | 0.2944043  | 1.03e-01 | 0.0299270  | 8.61e-01  | 0.0299270  | 8.61e-01  | 0.0299270 | 8.61e-01  |          |
| ENSG0000027954  | 2  | 21461324 | 21462363 | AC005512  | ensembl | havana | lincRNA            | 0.0448311  | 2.23e-01 | 0.2829159 | 4.88e-01 | 0.2043497  | 3.04e-01 | 0.2948115  | 1.35e-01 | 0.1141649  | 4.11e-01  | 0.0632059  | 9.11e-01  | 0.0642103 | 6.98e-01  |          |
| ENSG0000027609  | 1  | 2089526  | 20901124 | AC005512  | ensembl | havana | lincRNA            | 0.0015719  | 5.85e-01 | 0.1019847 | 1.46e-01 | 0.0913991  | 6.50e-01 | 0.2952404  | 1.35e-01 | 0.1152888  | 2.18e-01  | 0.1152888  | 2.18e-01  | 0.1152888 | 2.18e-01  |          |
| ENSG00000134291 | 12 | 4796359  | 4796878  | ATP5M1    | ensembl | havana | protein_coding     | 0.0015719  | 5.85e-01 | 0.1019847 | 1.46e-01 | 0.0913991  | 6.50e-01 | 0.2952404  | 1.35e-01 | 0.1152888  | 2.18e-01  | 0.1152888  | 2.18e-01  | 0.1152888 | 2.18e-01  |          |
| ENSG0000020035  | 10 | 7968173  | 79684094 | AL125654  | ensembl | havana | lincRNA            | 0.0573496  | 6.20e-01 | 0.0988163 | 4.91e-01 | 0.1917805  | 3.40e-01 | 0.2947489  | 1.36e-01 | 0.0216883  | 4.64e-01  | 0.0965737  | 6.64e-01  | 0.0277806 | 8.48e-01  |          |
| ENSG0000011128  | 1  | 10708123 | 10708123 | AC005512  | ensembl | havana | lincRNA            | 0.0015719  | 5.85e-01 | 0.1019847 | 1.46e-01 | 0.0913991  | 6.50e-01 | 0.2952404  | 1.35e-01 | 0.1152888  | 2.18e-01  | 0.1152888  | 2.18e-01  | 0.1152888 | 2.18e-01  |          |
| ENSG0000027978  | 16 | 6656520  | 6656601  | AC005512  | ensembl | havana | lincRNA            | 0.0311272  | 7.98e-01 | 0.1932709 | 1.72e-01 | 0.1266406  | 5.29e-01 | 0.2947489  | 1.36e-01 | 0.0216883  | 4.64e-01  | 0.0965737  | 6.64e-01  | 0.0277806 | 8.48e-01  |          |
| ENSG0000021325  | 14 | 10637730 | 10637733 | IGFBP3_14 | ensembl | havana | IG_P1_neutralizing | 0.0011868  | 7.85e-01 | 0.0107440 | 9.41e-01 | 0.1986721  | 3.16e-01 | 0.2944229  | 1.36e-01 | 0.0209794  | 9.37e-01  | 0.0204431  | 8.19e-01  | 0.0291121 | 4.98e-01  |          |
| ENSG0000010804  | 10 | 11019193 | 11013668 | SHO2      | ensembl | havana | protein_coding     | 0.1319167  | 3.18e-01 | 0.1030293 | 4.24e-01 | 0.2944229  | 1.36e-01 | 0.37918    | 3.06e-01 | 0.0279959  | 9.86e-01  | 0.0291121  | 4.98e-01  | 0.0291121 | 4.98e-01  |          |
| ENSG0000019346  | 1  | 6104884  | 61257231 | INR1M1    | ensembl | havana | lincRNA            | 0.0285649  | 1.31e-01 | 0.1066683 | 9.13e-01 | 0.2944043  | 1.03e-01 | 0.2944043  | 1.03e-01 | 0.0299270  | 8.61e-01  | 0.0299270  | 8.61e-01  | 0.0299270 | 8.61e-01  |          |
| ENSG0000020304  | 6  | 7616105  | 7617280  | AL337531  | ensembl | havana | lincRNA            | 0.1959388  | 8.76e-01 | 0.2517687 | 1.74e-01 | 0.0895588  | 6.66e-01 | 0.2941531  | 1.37e-01 | 0.1005516  | 3.27e-01  | 0.0896618  | 8.61e-01  | 0.0449988 | 7.66e-01  |          |
| ENSG0000015383  | 12 | 1297470  | 1300225  | HEP1      | ensembl | havana | protein_coding     | 0.0279103  | 2.40e-01 | 0.1377400 | 2.02e-01 | 0.0730003  | 6.99e-01 | 0.2941531  | 1.37e-01 | 0.1163973  | 4.02e-01  | 0.0988655  | 6.64e-01  | 0.049     |           |          |





Table with columns for gene ID, gene name, gene type, tissue, and various numerical values. The table contains multiple rows of data, including entries like ENSG0000027406, ENSG0000027407, etc., with associated values and gene names.



Table with columns for gene ID, chromosome, coordinates, gene name, transcript, and various numerical values. The table lists numerous genes such as RPL19P, RPL19, RPL19A, RPL19B, RPL19C, RPL19D, RPL19E, RPL19F, RPL19G, RPL19H, RPL19I, RPL19J, RPL19K, RPL19L, RPL19M, RPL19N, RPL19O, RPL19P, RPL19Q, RPL19R, RPL19S, RPL19T, RPL19U, RPL19V, RPL19W, RPL19X, RPL19Y, RPL19Z, RPL19AA, RPL19AB, RPL19AC, RPL19AD, RPL19AE, RPL19AF, RPL19AG, RPL19AH, RPL19AI, RPL19AJ, RPL19AK, RPL19AL, RPL19AM, RPL19AN, RPL19AO, RPL19AP, RPL19AQ, RPL19AR, RPL19AS, RPL19AT, RPL19AU, RPL19AV, RPL19AW, RPL19AX, RPL19AY, RPL19AZ, RPL19BA, RPL19BB, RPL19BC, RPL19BD, RPL19BE, RPL19BF, RPL19BG, RPL19BH, RPL19BI, RPL19BJ, RPL19BK, RPL19BL, RPL19BM, RPL19BN, RPL19BO, RPL19BP, RPL19BQ, RPL19BR, RPL19BS, RPL19BT, RPL19BU, RPL19BV, RPL19BW, RPL19BX, RPL19BY, RPL19BZ, RPL19CA, RPL19CB, RPL19CC, RPL19CD, RPL19CE, RPL19CF, RPL19CG, RPL19CH, RPL19CI, RPL19CJ, RPL19CK, RPL19CL, RPL19CM, RPL19CN, RPL19CO, RPL19CP, RPL19CQ, RPL19CR, RPL19CS, RPL19CT, RPL19CU, RPL19CV, RPL19CW, RPL19CX, RPL19CY, RPL19CZ, RPL19DA, RPL19DB, RPL19DC, RPL19DD, RPL19DE, RPL19DF, RPL19DG, RPL19DH, RPL19DI, RPL19DJ, RPL19DK, RPL19DL, RPL19DM, RPL19DN, RPL19DO, RPL19DP, RPL19DQ, RPL19DR, RPL19DS, RPL19DT, RPL19DU, RPL19DV, RPL19DW, RPL19DX, RPL19DY, RPL19DZ, RPL19EA, RPL19EB, RPL19EC, RPL19ED, RPL19EE, RPL19EF, RPL19EG, RPL19EH, RPL19EI, RPL19EJ, RPL19EK, RPL19EL, RPL19EM, RPL19EN, RPL19EO, RPL19EP, RPL19EQ, RPL19ER, RPL19ES, RPL19ET, RPL19EU, RPL19EV, RPL19EW, RPL19EX, RPL19EY, RPL19EZ, RPL19FA, RPL19FB, RPL19FC, RPL19FD, RPL19FE, RPL19FF, RPL19FG, RPL19FH, RPL19FI, RPL19FJ, RPL19FK, RPL19FL, RPL19FM, RPL19FN, RPL19FO, RPL19FP, RPL19FQ, RPL19FR, RPL19FS, RPL19FT, RPL19FU, RPL19FV, RPL19FW, RPL19FX, RPL19FY, RPL19FZ, RPL19GA, RPL19GB, RPL19GC, RPL19GD, RPL19GE, RPL19GF, RPL19GG, RPL19GH, RPL19GI, RPL19GJ, RPL19GK, RPL19GL, RPL19GM, RPL19GN, RPL19GO, RPL19GP, RPL19GQ, RPL19GR, RPL19GS, RPL19GT, RPL19GU, RPL19GV, RPL19GW, RPL19GX, RPL19GY, RPL19GZ, RPL19HA, RPL19HB, RPL19HC, RPL19HD, RPL19HE, RPL19HF, RPL19HG, RPL19HH, RPL19HI, RPL19HJ, RPL19HK, RPL19HL, RPL19HM, RPL19HN, RPL19HO, RPL19HP, RPL19HQ, RPL19HR, RPL19HS, RPL19HT, RPL19HU, RPL19HV, RPL19HW, RPL19HX, RPL19HY, RPL19HZ, RPL19IA, RPL19IB, RPL19IC, RPL19ID, RPL19IE, RPL19IF, RPL19IG, RPL19IH, RPL19II, RPL19IJ, RPL19IK, RPL19IL, RPL19IM, RPL19IN, RPL19IO, RPL19IP, RPL19IQ, RPL19IR, RPL19IS, RPL19IT, RPL19IU, RPL19IV, RPL19IW, RPL19IX, RPL19IY, RPL19IZ, RPL19JA, RPL19JB, RPL19JC, RPL19JD, RPL19JE, RPL19JF, RPL19JG, RPL19JH, RPL19JI, RPL19JJ, RPL19JK, RPL19JL, RPL19JM, RPL19JN, RPL19JO, RPL19JP, RPL19JQ, RPL19JR, RPL19JS, RPL19JT, RPL19JU, RPL19JV, RPL19JW, RPL19JX, RPL19JY, RPL19JZ, RPL19KA, RPL19KB, RPL19KC, RPL19KD, RPL19KE, RPL19KF, RPL19KG, RPL19KH, RPL19KI, RPL19KJ, RPL19KL, RPL19KM, RPL19KN, RPL19KO, RPL19KP, RPL19KQ, RPL19KR, RPL19KS, RPL19KT, RPL19KU, RPL19KV, RPL19KW, RPL19KX, RPL19KY, RPL19KZ, RPL19LA, RPL19LB, RPL19LC, RPL19LD, RPL19LE, RPL19LF, RPL19LG, RPL19LH, RPL19LI, RPL19LJ, RPL19LK, RPL19LL, RPL19LM, RPL19LN, RPL19LO, RPL19LP, RPL19LQ, RPL19LR, RPL19LS, RPL19LT, RPL19LU, RPL19LV, RPL19LW, RPL19LX, RPL19LY, RPL19LZ, RPL19MA, RPL19MB, RPL19MC, RPL19MD, RPL19ME, RPL19MF, RPL19MG, RPL19MH, RPL19MI, RPL19MJ, RPL19MK, RPL19ML, RPL19MN, RPL19MO, RPL19MP, RPL19MQ, RPL19MR, RPL19MS, RPL19MT, RPL19MU, RPL19MV, RPL19MW, RPL19MX, RPL19MY, RPL19MZ, RPL19NA, RPL19NB, RPL19NC, RPL19ND, RPL19NE, RPL19NF, RPL19NG, RPL19NH, RPL19NI, RPL19NJ, RPL19NK, RPL19NL, RPL19NM, RPL19NN, RPL19NO, RPL19NP, RPL19NQ, RPL19NR, RPL19NS, RPL19NT, RPL19NU, RPL19NV, RPL19NW, RPL19NX, RPL19NY, RPL19NZ, RPL19OA, RPL19OB, RPL19OC, RPL19OD, RPL19OE, RPL19OF, RPL19OG, RPL19OH, RPL19OI, RPL19OJ, RPL19OK, RPL19OL, RPL19OM, RPL19ON, RPL19OO, RPL19OP, RPL19OQ, RPL19OR, RPL19OS, RPL19OT, RPL19OU, RPL19OV, RPL19OW, RPL19OX, RPL19OY, RPL19OZ, RPL19PA, RPL19PB, RPL19PC, RPL19PD, RPL19PE, RPL19PF, RPL19PG, RPL19PH, RPL19PI, RPL19PJ, RPL19PK, RPL19PL, RPL19PM, RPL19PN, RPL19PO, RPL19PP, RPL19PQ, RPL19PR, RPL19PS, RPL19PT, RPL19PU, RPL19PV, RPL19PW, RPL19PX, RPL19PY, RPL19PZ, RPL19QA, RPL19QB, RPL19QC, RPL19QD, RPL19QE, RPL19QF, RPL19QG, RPL19QH, RPL19QI, RPL19QJ, RPL19QK, RPL19QL, RPL19QM, RPL19QN, RPL19QO, RPL19QP, RPL19QQ, RPL19QR, RPL19QS, RPL19QT, RPL19QU, RPL19QV, RPL19QW, RPL19QX, RPL19QY, RPL19QZ, RPL19RA, RPL19RB, RPL19RC, RPL19RD, RPL19RE, RPL19RF, RPL19RG, RPL19RH, RPL19RI, RPL19RJ, RPL19RK, RPL19RL, RPL19RM, RPL19RN, RPL19RO, RPL19RP, RPL19RQ, RPL19RR, RPL19RS, RPL19RT, RPL19RU, RPL19RV, RPL19RW, RPL19RX, RPL19RY, RPL19RZ, RPL19SA, RPL19SB, RPL19SC, RPL19SD, RPL19SE, RPL19SF, RPL19SG, RPL19SH, RPL19SI, RPL19SJ, RPL19SK, RPL19SL, RPL19SM, RPL19SN, RPL19SO, RPL19SP, RPL19SQ, RPL19SR, RPL19SS, RPL19ST, RPL19SU, RPL19SV, RPL19SW, RPL19SX, RPL19SY, RPL19SZ, RPL19TA, RPL19TB, RPL19TC, RPL19TD, RPL19TE, RPL19TF, RPL19TG, RPL19TH, RPL19TI, RPL19TJ, RPL19TK, RPL19TL, RPL19TM, RPL19TN, RPL19TO, RPL19TP, RPL19TQ, RPL19TR, RPL19TS, RPL19TT, RPL19TU, RPL19TV, RPL19TW, RPL19TX, RPL19TY, RPL19TZ, RPL19UA, RPL19UB, RPL19UC, RPL19UD, RPL19UE, RPL19UF, RPL19UG, RPL19UH, RPL19UI, RPL19UJ, RPL19UK, RPL19UL, RPL19UM, RPL19UN, RPL19UO, RPL19UP, RPL19UQ, RPL19UR, RPL19US, RPL19UT, RPL19UU, RPL19UV, RPL19UW, RPL19UX, RPL19UY, RPL19UZ, RPL19VA, RPL19VB, RPL19VC, RPL19VD, RPL19VE, RPL19VF, RPL19VG, RPL19VH, RPL19VI, RPL19VJ, RPL19VK, RPL19VL, RPL19VM, RPL19VN, RPL19VO, RPL19VP, RPL19VQ, RPL19VR, RPL19VS, RPL19VT, RPL19VU, RPL19VV, RPL19VW, RPL19VX, RPL19VY, RPL19VZ, RPL19WA, RPL19WB, RPL19WC, RPL19WD, RPL19WE, RPL19WF, RPL19WG, RPL19WH, RPL19WI, RPL19WJ, RPL19WK, RPL19WL, RPL19WM, RPL19WN, RPL19WO, RPL19WP, RPL19WQ, RPL19WR, RPL19WS, RPL19WT, RPL19WU, RPL19WV, RPL19WW, RPL19WX, RPL19WY, RPL19WZ, RPL19XA, RPL19XB, RPL19XC, RPL19XD, RPL19XE, RPL19XF, RPL19XG, RPL19XH, RPL19XI, RPL19XJ, RPL19XK, RPL19XL, RPL19XM, RPL19XN, RPL19XO, RPL19XP, RPL19XQ, RPL19XR, RPL19XS, RPL19XT, RPL19XU, RPL19XV, RPL19XW, RPL19XX, RPL19XY, RPL19XZ, RPL19YA, RPL19YB, RPL19YC, RPL19YD, RPL19YE, RPL19YF, RPL19YG, RPL19YH, RPL19YI, RPL19YJ, RPL19YK, RPL19YL, RPL19YM, RPL19YN, RPL19YO, RPL19YP, RPL19YQ, RPL19YR, RPL19YS, RPL19YT, RPL19YU, RPL19YV, RPL19YW, RPL19YX, RPL19YY, RPL19YZ, RPL19ZA, RPL19ZB, RPL19ZC, RPL19ZD, RPL19ZE, RPL19ZF, RPL19ZG, RPL19ZH, RPL19ZI, RPL19ZJ, RPL19ZK, RPL19ZL, RPL19ZM, RPL19ZN, RPL19ZO, RPL19ZP, RPL19ZQ, RPL19ZR, RPL19ZS, RPL19ZT, RPL19ZU, RPL19ZV, RPL19ZW, RPL19ZX, RPL19ZY, RPL19ZZ.

Table with columns for gene ID, chromosome, coordinates, gene name, transcript type, and protein coding status. The table lists numerous genes such as FAM61A1, DEVL2, MMR2, etc., with their genomic locations and associated transcript information.

| ENSG0000029445 | 19 | 38520954 | 38528555 | AC097962.2 | havana  | incRNA            | YES               | 0.066703  | 5.70e-01 | 0.2862629 | 4.80e-02   | 0.3848690 | 4.75e-02 | 0.2637308 | 1.84e-01 | 0.0062926 | 9.64e-01 | 0.096462  | 6.62e-01 | 0.1957926 | 1.73e-01 |
|----------------|----|----------|----------|------------|---------|-------------------|-------------------|-----------|----------|-----------|------------|-----------|----------|-----------|----------|-----------|----------|-----------|----------|-----------|----------|
| ENSG0000011823 | 19 | 7916139  | 7917412  | RANBP1     | ensembl | mRNA              | protein coding    | 0.004593  | 9.71e-01 | 0.0174918 | 9.04e-01   | 0.2742617 | 1.64e-01 | 0.2633666 | 1.85e-01 | 0.1976247 | 4.39e-01 | 0.211765  | 2.87e-01 | 0.228665  | 9.54e-01 |
| ENSG0000019081 | 19 | 7944617  | 7945074  | MDM2       | ensembl | mRNA              | protein coding    | 0.008242  | 0.98e-01 | 0.0204794 | 3.81e-01   | 0.1291204 | 1.44e-01 | 0.2633666 | 1.85e-01 | 0.1976247 | 4.39e-01 | 0.211765  | 2.87e-01 | 0.228665  | 9.54e-01 |
| ENSG0000017311 | 19 | 9741909  | 9744617  | EXOC1      | ensembl | mRNA              | protein coding    | 0.2252108 | 0.98e-01 | 0.0277863 | 5.68e-01   | 0.3666112 | 6.09e-01 | 0.2633666 | 1.85e-01 | 0.1976247 | 4.39e-01 | 0.211765  | 2.87e-01 | 0.228665  | 9.54e-01 |
| ENSG0000015440 | 20 | 5889131  | 5871928  | HPH1L1     | ensembl | mRNA              | protein coding    | -0.001477 | 9.90e-01 | 0.1202704 | 1.73e-01   | 0.2488253 | 2.11e-01 | 0.2620028 | 1.85e-01 | 0.0037576 | 9.80e-01 | 0.225518  | 3.07e-01 | 0.229976  | 7.98e-01 |
| ENSG0000018390 | 12 | 7209424  | 7210823  | PRAG1      | ensembl | mRNA              | protein coding    | 0.072271  | 0.92e-01 | 0.0152721 | 0.94e-01   | 0.1868944 | 9.14e-01 | 0.2633666 | 1.85e-01 | 0.1976247 | 4.39e-01 | 0.211765  | 2.87e-01 | 0.228665  | 9.54e-01 |
| ENSG0000014034 | 2  | 77372104 | 77373400 | FRKB       | ensembl | mRNA              | protein coding    | 0.0750867 | 5.31e-01 | 0.0557574 | 7.01e-01   | 0.1048156 | 6.03e-01 | 0.2633666 | 1.85e-01 | 0.1976247 | 4.39e-01 | 0.211765  | 2.87e-01 | 0.228665  | 9.54e-01 |
| ENSG0000013701 | 8  | 3569799  | 3564681  | CD72       | ensembl | mRNA              | protein coding    | 0.2894868 | 1.07e-01 | 0.2711617 | 5.68e-01   | 0.3781398 | 5.18e-01 | 0.2633666 | 1.85e-01 | 0.1976247 | 4.39e-01 | 0.211765  | 2.87e-01 | 0.228665  | 9.54e-01 |
| ENSG0000011693 | 17 | 4270568  | 4242564  | ARHGAP2    | ensembl | mRNA              | protein coding    | 0.006148  | 0.98e-01 | 0.0025628 | 0.98e-01   | 0.0882362 | 8.00e-01 | 0.2633666 | 1.85e-01 | 0.1976247 | 4.39e-01 | 0.211765  | 2.87e-01 | 0.228665  | 9.54e-01 |
| ENSG0000009811 | 19 | 751112   | 764318   | MIR5       | ensembl | mRNA              | protein coding    | 0.2594726 | 8.84e-01 | 0.2395549 | 1.05e-01   | 0.2633666 | 1.85e-01 | 0.1976247 | 4.39e-01 | 0.211765  | 2.87e-01 | 0.228665  | 9.54e-01 | 0.228665  | 9.54e-01 |
| ENSG0000017200 | 16 | 5305933  | 5329150  | CHD9       | ensembl | mRNA              | protein coding    | 0.134668  | 2.43e-01 | 0.1042722 | 4.70e-01   | 0.2052812 | 7.94e-01 | 0.2633666 | 1.85e-01 | 0.1976247 | 4.39e-01 | 0.211765  | 2.87e-01 | 0.228665  | 9.54e-01 |
| ENSG0000010693 | 3  | 12842704 | 12848663 | ADPGC2     | ensembl | mRNA              | protein coding    | 0.004593  | 4.24e-01 | 0.2633666 | 4.75e-01   | 0.2633666 | 1.85e-01 | 0.1976247 | 4.39e-01 | 0.211765  | 2.87e-01 | 0.228665  | 9.54e-01 | 0.228665  | 9.54e-01 |
| ENSG0000010075 | 1  | 20211297 | 20211392 | GPR173.1   | ensembl | mRNA              | protein coding    | 0.2028959 | 7.54e-01 | 0.1982774 | 1.47e-01   | 0.1049077 | 9.33e-01 | 0.2633666 | 1.85e-01 | 0.1976247 | 4.39e-01 | 0.211765  | 2.87e-01 | 0.228665  | 9.54e-01 |
| ENSG0000024931 | 11 | 524870   | 524783   | AC014389.6 | havana  | incRNA            | YES               | 0.132436  | 2.51e-01 | 0.3423293 | 1.47e-01   | 0.0621201 | 7.58e-01 | 0.2629784 | 1.85e-01 | 0.097112  | 6.05e-01 | 0.0647485 | 7.69e-01 | 0.054243  | 7.58e-01 |
| ENSG0000017416 | 17 | 6079399  | 6080895  | AC015044.4 | havana  | incRNA            | YES               | 0.1932421 | 2.53e-01 | 0.2905575 | 1.47e-01   | 0.2629784 | 1.85e-01 | 0.097112  | 6.05e-01 | 0.0647485 | 7.69e-01 | 0.054243  | 7.58e-01 | 0.054243  | 7.58e-01 |
| ENSG0000010286 | 3  | 6239131  | 6239443  | AC015044.4 | havana  | incRNA            | YES               | 0.005998  | 4.06e-01 | 0.2560138 | 2.72e-01   | 0.2629784 | 1.85e-01 | 0.097112  | 6.05e-01 | 0.0647485 | 7.69e-01 | 0.054243  | 7.58e-01 | 0.054243  | 7.58e-01 |
| ENSG0000021850 | 1  | 984293   | 984974   | AL337140.2 | havana  | incRNA            | YES               | 0.1560915 | 1.74e-01 | 0.2684701 | 5.94e-01   | 0.0188474 | 9.24e-01 | 0.2633666 | 1.85e-01 | 0.1976247 | 4.39e-01 | 0.211765  | 2.87e-01 | 0.228665  | 9.54e-01 |
| ENSG0000012377 | 10 | 6211996  | 6219190  | LG2        | ensembl | mRNA              | protein coding    | 0.2449516 | 2.38e-01 | 0.2366504 | 1.03e-01   | 0.4243869 | 2.73e-01 | 0.2633666 | 1.85e-01 | 0.1976247 | 4.39e-01 | 0.211765  | 2.87e-01 | 0.228665  | 9.54e-01 |
| ENSG0000018428 | 16 | 1077     | 9792657  | ENRFB1.1   | ensembl | mRNA              | transcript pseudo | 0.029207  | 6.13e-01 | 0.3458206 | 2.07e-01   | 0.2197131 | 2.71e-01 | 0.2629784 | 1.85e-01 | 0.097112  | 6.05e-01 | 0.0647485 | 7.69e-01 | 0.054243  | 7.58e-01 |
| ENSG0000018449 | 2  | 18956500 | 18983878 | SICAAD1    | ensembl | mRNA              | protein coding    | 0.1159206 | 3.18e-01 | 0.2579586 | 7.09e-01   | 0.2024079 | 3.11e-01 | 0.2629784 | 1.85e-01 | 0.097112  | 6.05e-01 | 0.0647485 | 7.69e-01 | 0.054243  | 7.58e-01 |
| ENSG0000017510 | 12 | 4216521  | 4246547  | INC02402   | havana  | transcript pseudo | YES               | 0.0189899 | 8.64e-01 | 0.2815852 | 4.88e-01   | 0.2194773 | 2.71e-01 | 0.2629784 | 1.85e-01 | 0.097112  | 6.05e-01 | 0.0647485 | 7.69e-01 | 0.054243  | 7.58e-01 |
| ENSG0000010286 | 3  | 6239131  | 6239443  | AC015044.4 | havana  | incRNA            | YES               | 0.005998  | 4.06e-01 | 0.2560138 | 2.72e-01   | 0.2629784 | 1.85e-01 | 0.097112  | 6.05e-01 | 0.0647485 | 7.69e-01 | 0.054243  | 7.58e-01 | 0.054243  | 7.58e-01 |
| ENSG0000010075 | 1  | 20211297 | 20211392 | GPR173.1   | ensembl | mRNA              | protein coding    | 0.2028959 | 7.54e-01 | 0.1982774 | 1.47e-01   | 0.1049077 | 9.33e-01 | 0.2633666 | 1.85e-01 | 0.1976247 | 4.39e-01 | 0.211765  | 2.87e-01 | 0.228665  | 9.54e-01 |
| ENSG0000024931 | 11 | 524870   | 524783   | AC014389.6 | havana  | incRNA            | YES               | 0.132436  | 2.51e-01 | 0.3423293 | 1.47e-01   | 0.0621201 | 7.58e-01 | 0.2629784 | 1.85e-01 | 0.097112  | 6.05e-01 | 0.0647485 | 7.69e-01 | 0.054243  | 7.58e-01 |
| ENSG0000017416 | 17 | 6079399  | 6080895  | AC015044.4 | havana  | incRNA            | YES               | 0.1932421 | 2.53e-01 | 0.2905575 | 1.47e-01   | 0.2629784 | 1.85e-01 | 0.097112  | 6.05e-01 | 0.0647485 | 7.69e-01 | 0.054243  | 7.58e-01 | 0.054243  | 7.58e-01 |
| ENSG0000010286 | 3  | 6239131  | 6239443  | AC015044.4 | havana  | incRNA            | YES               | 0.005998  | 4.06e-01 | 0.2560138 | 2.72e-01   | 0.2629784 | 1.85e-01 | 0.097112  | 6.05e-01 | 0.0647485 | 7.69e-01 | 0.054243  | 7.58e-01 | 0.054243  | 7.58e-01 |
| ENSG0000021850 | 1  | 984293   | 984974   | AL337140.2 | havana  | incRNA            | YES               | 0.1560915 | 1.74e-01 | 0.2684701 | 5.94e-01   | 0.0188474 | 9.24e-01 | 0.2633666 | 1.85e-01 | 0.1976247 | 4.39e-01 | 0.211765  | 2.87e-01 | 0.228665  | 9.54e-01 |
| ENSG0000012377 | 10 | 6211996  | 6219190  | LG2        | ensembl | mRNA              | protein coding    | 0.2449516 | 2.38e-01 | 0.2366504 | 1.03e-01   | 0.4243869 | 2.73e-01 | 0.2633666 | 1.85e-01 | 0.1976247 | 4.39e-01 | 0.211765  | 2.87e-01 | 0.228665  | 9.54e-01 |
| ENSG0000018428 | 16 | 1077     | 9792657  | ENRFB1.1   | ensembl | mRNA              | transcript pseudo | 0.029207  | 6.13e-01 | 0.3458206 | 2.07e-01   | 0.2197131 | 2.71e-01 | 0.2629784 | 1.85e-01 | 0.097112  | 6.05e-01 | 0.0647485 | 7.69e-01 | 0.054243  | 7.58e-01 |
| ENSG0000018449 | 2  | 18956500 | 18983878 | SICAAD1    | ensembl | mRNA              | protein coding    | 0.1159206 | 3.18e-01 | 0.2579586 | 7.09e-01   | 0.2024079 | 3.11e-01 | 0.2629784 | 1.85e-01 | 0.097112  | 6.05e-01 | 0.0647485 | 7.69e-01 | 0.054243  | 7.58e-01 |
| ENSG0000017510 | 12 | 4216521  | 4246547  | INC02402   | havana  | transcript pseudo | YES               | 0.0189899 | 8.64e-01 | 0.2815852 | 4.88e-01   | 0.2194773 | 2.71e-01 | 0.2629784 | 1.85e-01 | 0.097112  | 6.05e-01 | 0.0647485 | 7.69e-01 | 0.054243  | 7.58e-01 |
| ENSG0000010286 | 3  | 6239131  | 6239443  | AC015044.4 | havana  | incRNA            | YES               | 0.005998  | 4.06e-01 | 0.2560138 | 2.72e-01   | 0.2629784 | 1.85e-01 | 0.097112  | 6.05e-01 | 0.0647485 | 7.69e-01 | 0.054243  | 7.58e-01 | 0.054243  | 7.58e-01 |
| ENSG0000010075 | 1  | 20211297 | 20211392 | GPR173.1   | ensembl | mRNA              | protein coding    | 0.2028959 | 7.54e-01 | 0.1982774 | 1.47e-01   | 0.1049077 | 9.33e-01 | 0.2633666 | 1.85e-01 | 0.1976247 | 4.39e-01 | 0.211765  | 2.87e-01 | 0.228665  | 9.54e-01 |
| ENSG0000024931 | 11 | 524870   | 524783   | AC014389.6 | havana  | incRNA            | YES               | 0.132436  | 2.51e-01 | 0.3423293 | 1.47e-01   | 0.0621201 | 7.58e-01 | 0.2629784 | 1.85e-01 | 0.097112  | 6.05e-01 | 0.0647485 | 7.69e-01 | 0.054243  | 7.58e-01 |
| ENSG0000017416 | 17 | 6079399  | 6080895  | AC015044.4 | havana  | incRNA            | YES               | 0.1932421 | 2.53e-01 | 0.2905575 | 1.47e-01   | 0.2629784 | 1.85e-01 | 0.097112  | 6.05e-01 | 0.0647485 | 7.69e-01 | 0.054243  | 7.58e-01 | 0.054243  | 7.58e-01 |
| ENSG0000010286 | 3  | 6239131  | 6239443  | AC015044.4 | havana  | incRNA            | YES               | 0.005998  | 4.06e-01 | 0.2560138 | 2.72e-01   | 0.2629784 | 1.85e-01 | 0.097112  | 6.05e-01 | 0.0647485 | 7.69e-01 | 0.054243  | 7.58e-01 | 0.054243  | 7.58e-01 |
| ENSG0000021850 | 1  | 984293   | 984974   | AL337140.2 | havana  | incRNA            | YES               | 0.1560915 | 1.74e-01 | 0.2684701 | 5.94e-01   | 0.0188474 | 9.24e-01 | 0.2633666 | 1.85e-01 | 0.1976247 | 4.39e-01 | 0.211765  | 2.87e-01 | 0.228665  | 9.54e-01 |
| ENSG0000012377 | 10 | 6211996  | 6219190  | LG2        | ensembl | mRNA              | protein coding    | 0.2449516 | 2.38e-01 | 0.2366504 | 1.03e-01   | 0.4243869 | 2.73e-01 | 0.2633666 | 1.85e-01 | 0.1976247 | 4.39e-01 | 0.211765  | 2.87e-01 | 0.228665  | 9.54e-01 |
| ENSG0000018428 | 16 | 1077     | 9792657  | ENRFB1.1   | ensembl | mRNA              | transcript pseudo | 0.029207  | 6.13e-01 | 0.3458206 | 2.07e-01   | 0.2197131 | 2.71e-01 | 0.2629784 | 1.85e-01 | 0.097112  | 6.05e-01 | 0.0647485 | 7.69e-01 | 0.054243  | 7.58e-01 |
| ENSG0000018449 | 2  | 18956500 | 18983878 | SICAAD1    | ensembl | mRNA              | protein coding    | 0.1159206 | 3.18e-01 | 0.2579586 | 7.09e-01   | 0.2024079 | 3.11e-01 | 0.2629784 | 1.85e-01 | 0.097112  | 6.05e-01 | 0.0647485 | 7.69e-01 | 0.054243  | 7.58e-01 |
| ENSG0000017510 | 12 | 4216521  | 4246547  | INC02402   | havana  | transcript pseudo | YES               | 0.0189899 | 8.64e-01 | 0.2815852 | 4.88e-01   | 0.2194773 | 2.71e-01 | 0.2629784 | 1.85e-01 | 0.097112  | 6.05e-01 | 0.0647485 | 7.69e-01 | 0.054243  | 7.58e-01 |
| ENSG0000010286 | 3  | 6239131  | 6239443  | AC015044.4 | havana  | incRNA            | YES               | 0.005998  | 4.06e-01 | 0.2560138 | 2.72e-01</ |           |          |           |          |           |          |           |          |           |          |











| ENSG000001405   | 11 | 17077730 | 17207883 | PKIKZ4     | ensembl | navana | protein_coding | 0.16518283 | 1.511e-01 | 0.13922211 | 3.35e-01  | 0.02966223 | 8.81e-01  | 0.2415185 | 2.52e-01  | 0.26509243 | 1.20e-02  | -0.1631005 | 4.57e-01  | -0.068995 | 6.34e-01  |           |          |
|-----------------|----|----------|----------|------------|---------|--------|----------------|------------|-----------|------------|-----------|------------|-----------|-----------|-----------|------------|-----------|------------|-----------|-----------|-----------|-----------|----------|
| ENSG000001520   | 1  | 2027989  | 2026751  | PKPKA4     | ensembl | navana | protein_coding | 0.024894   | 8.29e-01  | 0.2739975  | 2.60e-01  | 0.04969611 | 7.51e-01  | 0.2415003 | 2.25e-01  | 0.1308789  | 4.22e-01  | 0.0512473  | 1.16e-01  | 0.0172412 | 1.95e-01  |           |          |
| ENSG000001520   | 2  | 12324056 | 12324703 | PKPKA4     | ensembl | navana | protein_coding | 0.0264483  | 1.01e-01  | 0.1741813  | 6.5e-01   | 0.1427031  | 2.28e-01  | 0.2415003 | 2.25e-01  | 0.1308789  | 4.22e-01  | 0.0512473  | 1.16e-01  | 0.0172412 | 1.95e-01  |           |          |
| ENSG000001401   | 3  | 17656611 | 17658909 | FIBX05     | ensembl | navana | protein_coding | 0.2064562  | 7.16e-02  | 0.1557895  | 2.51e-01  | 0.1791091  | 3.70e-01  | 0.2414993 | 2.25e-01  | 0.1308789  | 4.22e-01  | 0.0512473  | 1.16e-01  | 0.0172412 | 1.95e-01  |           |          |
| ENSG0000028849  | 6  | 2745458  | 2745775  | A02J1914   | navana  | ncRNA  | 0.0720823      | 1.40e-02   | 0.2913931 | 4.01e-01   | 0.1949815 | 3.30e-01   | 0.2414811 | 2.25e-01  | 0.2799675 | 1.03e-01   | 0.0498138 | 8.03e-01   | 0.1514121 | 4.25e-01  | 0.0172412 | 1.95e-01  |          |
| ENSG000001131   | 11 | 9164642  | 9164814  | ENSO0414   | ensembl | navana | protein_coding | 0.0202414  | 1.01e-01  | 0.1741813  | 6.5e-01   | 0.1427031  | 2.28e-01  | 0.2415003 | 2.25e-01  | 0.1308789  | 4.22e-01  | 0.0512473  | 1.16e-01  | 0.0172412 | 1.95e-01  |           |          |
| ENSG0000024433  | 12 | 6393879  | 6394148  | AC005840.2 | navana  | ncRNA  | 0.0282744      | 8.44e-01   | 0.2013954 | 4.72e-01   | 0.2414081 | 2.46e-01   | 0.2414081 | 2.46e-01  | 0.2414081 | 2.46e-01   | 0.2414081 | 2.46e-01   | 0.2414081 | 2.46e-01  | 0.2414081 | 2.46e-01  |          |
| ENSG00000140255 | 21 | 4488593  | 4493189  | TIGR2      | ensembl | navana | protein_coding | 0.2598663  | 2.28e-01  | 0.1911039  | 1.79e-01  | 0.0924192  | 6.47e-01  | 0.2413511 | 2.25e-01  | 0.2484829  | 3.67e-01  | 0.0288807  | 9.03e-01  | 0.0292079 | 8.41e-01  | 0.0172412 | 1.95e-01 |
| ENSG0000014243  | 22 | 4058347  | 4063180  | FBXW7      | ensembl | navana | protein_coding | 0.0282744  | 8.44e-01  | 0.2013954  | 4.72e-01  | 0.2414081  | 2.46e-01  | 0.2414081 | 2.46e-01  | 0.2414081  | 2.46e-01  | 0.2414081  | 2.46e-01  | 0.2414081 | 2.46e-01  | 0.2414081 | 2.46e-01 |
| ENSG00000140310 | 26 | 7204439  | 7204941  | TNFR4      | ensembl | navana | protein_coding | 0.2537515  | 2.02e-01  | 0.2049021  | 3.75e-01  | 0.0949021  | 6.47e-01  | 0.2413511 | 2.25e-01  | 0.2484829  | 3.67e-01  | 0.0288807  | 9.03e-01  | 0.0292079 | 8.41e-01  | 0.0172412 | 1.95e-01 |
| ENSG0000018748  | 26 | 6844414  | 6845413  | CAT        | ensembl | navana | protein_coding | 0.0122495  | 9.16e-01  | 0.1737485  | 2.18e-01  | 0.0793437  | 6.93e-01  | 0.2413876 | 2.26e-01  | 0.080048   | 6.65e-01  | 0.0242783  | 8.48e-01  | 0.0040053 | 9.78e-01  | 0.0172412 | 1.95e-01 |
| ENSG00000144128 | 27 | 12324056 | 12324703 | RALB       | ensembl | navana | protein_coding | 0.0264483  | 1.01e-01  | 0.1741813  | 6.5e-01   | 0.1427031  | 2.28e-01  | 0.2415003 | 2.25e-01  | 0.1308789  | 4.22e-01  | 0.0512473  | 1.16e-01  | 0.0172412 | 1.95e-01  |           |          |
| ENSG0000015350  | 20 | 3277501  | 3275501  | KIF3B      | ensembl | navana | protein_coding | 0.1616944  | 1.60e-01  | 0.1931601  | 5.29e-01  | 0.2240771  | 2.26e-01  | 0.2413973 | 2.26e-01  | 0.080048   | 6.65e-01  | 0.0242783  | 8.48e-01  | 0.0040053 | 9.78e-01  | 0.0172412 | 1.95e-01 |
| ENSG0000017013  | 19 | 3390632  | 3390831  | AC005856.1 | navana  | ncRNA  | 0.0202219      | 8.44e-01   | 0.2013954 | 4.72e-01   | 0.2414081 | 2.46e-01   | 0.2414081 | 2.46e-01  | 0.2414081 | 2.46e-01   | 0.2414081 | 2.46e-01   | 0.2414081 | 2.46e-01  | 0.2414081 | 2.46e-01  |          |
| ENSG0000029153  | 7  | 14307913 | 14352449 | EPHA1-AS1  | ensembl | navana | protein_coding | 0.1943308  | 9.07e-02  | 0.1862599  | 1.95e-01  | 0.0211399  | 9.17e-01  | 0.2410299 | 2.26e-01  | 0.0280163  | 8.03e-01  | 0.055694   | 5.98e-01  | 0.0214804 | 1.14e-01  | 0.0172412 | 1.95e-01 |
| ENSG00000144997 | 7  | 1284749  | 1284929  | EPHA1      | ensembl | navana | protein_coding | 0.0009504  | 9.37e-01  | 0.1427031  | 6.5e-01   | 0.1427031  | 6.5e-01   | 0.2415003 | 2.25e-01  | 0.0446667  | 7.68e-01  | 0.0446667  | 7.68e-01  | 0.0446667 | 7.68e-01  | 0.0446667 | 7.68e-01 |
| ENSG0000024892  | 4  | 4522466  | 4522627  | RHPS18B    | ensembl | navana | protein_coding | 0.2423217  | 9.37e-01  | 0.2793824  | 4.95e-01  | 0.0814303  | 6.84e-01  | 0.2409881 | 2.26e-01  | 0.2309991  | 9.28e-01  | 0.0373475  | 8.78e-01  | 0.0078775 | 6.96e-01  | 0.0172412 | 1.95e-01 |
| ENSG0000014489  | 21 | 3613240  | 3613302  | TMS1P1     | ensembl | navana | protein_coding | 0.0098145  | 9.37e-01  | 0.1213463  | 1.41e-01  | 0.1138001  | 4.44e-01  | 0.2409881 | 2.26e-01  | 0.0310662  | 7.94e-01  | 0.0275783  | 7.42e-01  | 0.125905  | 3.83e-01  | 0.0172412 | 1.95e-01 |
| ENSG000001179   | 12 | 14370013 | 14370013 | TRNL1-10P  | ensembl | navana | protein_coding | 0.2598139  | 6.98e-02  | 0.2177371  | 3.17e-01  | 0.2425233  | 3.91e-01  | 0.2409881 | 2.26e-01  | 0.2385033  | 9.01e-01  | 0.0657396  | 7.66e-01  | 0.16127   | 2.04e-01  | 0.0172412 | 1.95e-01 |
| ENSG000002604   | 9  | 6827851  | 6827912  | AL33568.2  | navana  | ncRNA  | 0.2246684      | 4.77e-02   | 0.2586614 | 6.95e-01   | 0.0244955 | 9.01e-01   | 0.4096767 | 2.26e-01  | 0.1879574 | 7.24e-01   | 0.3512316 | 7.61e-01   | 0.3512316 | 7.61e-01  | 0.3512316 | 7.61e-01  |          |
| ENSG0000013714  | 20 | 5633246  | 5633620  | FAM209     | ensembl | navana | protein_coding | 0.0244082  | 3.72e-01  | 0.232042   | 1.65e-01  | 0.1242807  | 5.73e-01  | 0.2409446 | 2.26e-01  | 0.3009103  | 7.28e-01  | 0.0016008  | 9.94e-01  | 0.0471613 | 7.44e-01  | 0.0172412 | 1.95e-01 |
| ENSG0000023218  | 17 | 7027571  | 7028066  | ARL8       | ensembl | navana | protein_coding | 0.0060944  | 4.99e-01  | 0.0060944  | 5.13e-01  | 0.0060944  | 7.28e-01  | 0.2409187 | 2.26e-01  | 0.0280163  | 8.03e-01  | 0.0280163  | 8.03e-01  | 0.0280163 | 8.03e-01  | 0.0280163 | 8.03e-01 |
| ENSG0000019670  | 19 | 2375648  | 2300379  | DNAC1      | ensembl | navana | protein_coding | 0.2317242  | 4.36e-01  | 0.2372778  | 1.04e-01  | 0.1697956  | 3.97e-01  | 0.2408896 | 2.26e-01  | 0.0401888  | 6.19e-01  | 0.1238353  | 8.03e-01  | 0.1999974 | 1.70e-01  | 0.0172412 | 1.95e-01 |
| ENSG0000027818  | 14 | 5152827  | 5128558  | Mertosa SP | ensembl | navana | misc_RNA       | 0.0441994  | 7.03e-01  | 0.1482772  | 3.01e-01  | 0.23207    | 2.62e-01  | 0.2408727 | 2.26e-01  | 0.0440768  | 7.25e-01  | 0.0440768  | 7.25e-01  | 0.0440768 | 7.25e-01  | 0.0440768 | 7.25e-01 |
| ENSG00000100105 | 7  | 3688933  | 3684933  | GAR1       | ensembl | navana | protein_coding | 0.1098938  | 3.41e-01  | 0.0310402  | 9.01e-01  | 0.1770575  | 3.77e-01  | 0.2407908 | 2.26e-01  | 0.0422479  | 5.53e-01  | 0.0973463  | 6.99e-01  | 0.0069936 | 9.72e-01  | 0.0172412 | 1.95e-01 |
| ENSG0000016753  | 6  | 13111339 | 13115796 | HMGAT7     | ensembl | navana | protein_coding | 0.1366698  | 1.04e-01  | 0.2187917  | 1.17e-01  | 0.0519696  | 2.83e-01  | 0.2407864 | 2.26e-01  | 0.0823164  | 8.95e-01  | 0.07954    | 7.95e-01  | 0.2089711 | 1.54e-01  | 0.0172412 | 1.95e-01 |
| ENSG0000017454  | 5  | 17636487 | 17640865 | NR0A1      | ensembl | navana | protein_coding | 0.2593051  | 9.74e-01  | 0.2051569  | 7.39e-01  | 0.2315181  | 1.02e-01  | 0.2407586 | 2.26e-01  | 0.3046199  | 5.12e-01  | 0.2464518  | 6.01e-01  | 0.061628  | 5.91e-01  | 0.0172412 | 1.95e-01 |
| ENSG0000027566  | 12 | 11324946 | 11325042 | AC00999.2  | navana  | ncRNA  | 0.0372781      | 7.78e-01   | 0.120088  | 4.47e-01   | 0.080726  | 6.77e-01   | 0.2407499 | 2.26e-01  | 0.0466134 | 7.38e-01   | 0.077496  | 7.21e-01   | 0.08803   | 5.92e-01  | 0.0172412 | 1.95e-01  |          |
| ENSG0000015511  | 6  | 1284749  | 1284929  | EPHA1      | ensembl | navana | protein_coding | 0.0009504  | 9.37e-01  | 0.1427031  | 6.5e-01   | 0.1427031  | 6.5e-01   | 0.2415003 | 2.25e-01  | 0.0446667  | 7.68e-01  | 0.0446667  | 7.68e-01  | 0.0446667 | 7.68e-01  | 0.0446667 | 7.68e-01 |
| ENSG00000104419 | 8  | 11331715 | 11330202 | NORG1      | ensembl | navana | ncRNA          | 0.1936102  | 1.24e-01  | 0.2004898  | 1.34e-01  | 0.0904738  | 6.54e-01  | 0.2410514 | 2.26e-01  | 0.0410881  | 6.01e-01  | 0.061503   | 7.80e-01  | 0.0183735 | 5.92e-01  | 0.0172412 | 1.95e-01 |
| ENSG0000027966  | 2  | 20238879 | 20237200 | AC04836.1  | navana  | ncRNA  | 0.0810425      | 4.84e-01   | 0.1843535 | 2.00e-01   | 0.2764912 | 1.63e-01   | 0.2408878 | 2.27e-01  | 0.0332486 | 7.02e-01   | 0.0362929 | 8.67e-01   | 0.1182129 | 4.12e-01  | 0.0172412 | 1.95e-01  |          |
| ENSG000001626   | 10 | 14370013 | 14370013 | TRNL1-10P  | ensembl | navana | protein_coding | 0.2598139  | 6.98e-02  | 0.2177371  | 3.17e-01  | 0.2425233  | 3.91e-01  | 0.2409881 | 2.26e-01  | 0.2385033  | 9.01e-01  | 0.0657396  | 7.66e-01  | 0.16127   | 2.04e-01  | 0.0172412 | 1.95e-01 |
| ENSG0000028495  | 6  | 12111388 | 12116974 | LINC01013  | navana  | ncRNA  | 0.1369024      | 9.12e-01   | 0.1312625 | 3.10e-01   | 0.2400538 | 2.27e-01   | 0.2400538 | 2.27e-01  | 0.2400538 | 2.27e-01   | 0.2400538 | 2.27e-01   | 0.2400538 | 2.27e-01  | 0.2400538 | 2.27e-01  |          |
| ENSG0000015126  | 11 | 6239316  | 6239372  | APPD304.1  | navana  | ncRNA  | 0.1931215      | 9.47e-01   | 0.2178807 | 1.29e-01   | 0.1525251 | 4.48e-01   | 0.2405377 | 2.27e-01  | 0.2385493 | 8.23e-01   | 0.1064048 | 6.35e-01   | 0.124506  | 3.89e-01  | 0.0172412 | 1.95e-01  |          |
| ENSG0000015386  | 10 | 12109743 | 12109743 | TRNL1-10P  | ensembl | navana | protein_coding | 0.2598139  | 6.98e-02  | 0.2177371  | 3.17e-01  | 0.2425233  | 3.91e-01  | 0.2409881 | 2.26e-01  | 0.2385033  | 9.01e-01  | 0.0657396  | 7.66e-01  | 0.16127   | 2.04e-01  | 0.0172412 | 1.95e-01 |
| ENSG0000019173  | 15 | 7159443  | 7152169  | C15orf9    | ensembl | navana | protein_coding | 0.2292734  | 4.74e-01  | 0.2099664  | 1.41e-01  | 0.0450524  | 5.88e-01  | 0.2405452 | 2.27e-01  | 0.2378953  | 5.10e-01  | 0.0382499  | 4.92e-01  | 0.173295  | 3.89e-01  | 0.0172412 | 1.95e-01 |
| ENSG000001490   | 19 | 1819229  | 1820189  | RFXANK     | ensembl | navana | protein_coding | 0.1466438  | 2.09e-01  | 0.1775660  | 2.17e-01  | 0.1042920  | 6.08e-01  | 0.2404262 | 2.27e-01  | 0.1049919  | 1.68e-01  | 0.088891   | 7.12e-01  | 0.0630709 | 6.60e-01  | 0.0172412 | 1.95e-01 |
| ENSG0000014837  | 6  | 278679   | 2780788  | HIS        | ensembl | navana | protein_coding | 0.1881993  | 1.33e-01  | 0.2010452  | 1.62e-01  | 0.20139    | 3.18e-01  | 0.2404925 | 2.27e-01  | 0.2409715  | 3.17e-01  | 0.037952   | 2.62e-01  | 0.0899153 | 5.62e-01  | 0.0172412 | 1.95e-01 |
| ENSG00000142607 | 1  | 868439   | 865409   | PRKAB3</   |         |        |                |            |           |            |           |            |           |           |           |            |           |            |           |           |           |           |          |







|                 |    |          |          |            |         |        |                |            |          |            |          |            |          |           |          |            |          |           |          |            |          |
|-----------------|----|----------|----------|------------|---------|--------|----------------|------------|----------|------------|----------|------------|----------|-----------|----------|------------|----------|-----------|----------|------------|----------|
| ENSG000004776   | 19 | 3575466  | 3578879  | HSR6       | ensembl | havana | protein_coding | 0.02191362 | 5.55e-02 | 0.0262125  | 2.04e-01 | 0.43089392 | 2.50e-02 | 0.2127359 | 2.46e-01 | 0.28179009 | 1.90e-02 | -0.225144 | 3.07e-01 | 0.10757505 | 4.57e-01 |
| ENSG0000013018  | 7  | 7142008  | 7142014  | PLIAP1     | ensembl | havana | protein_coding | 0.09542102 | 6.32e-01 | 0.0774678  | 5.92e-01 | 0.0629466  | 7.57e-01 | 0.2119729 | 2.46e-01 | 0.0008046  | 5.17e-01 | 0.0262133 | 9.18e-01 | 0.0402137  | 7.85e-01 |
| ENSG0000029690  | 12 | 12879316 | 12884939 | TIGP1      | ensembl | havana | protein_coding | 0.02766018 | 0.32e-01 | 0.0776681  | 0.29e-01 | 0.0214449  | 8.47e-01 | 0.2119729 | 2.46e-01 | 0.0008046  | 5.17e-01 | 0.0262133 | 9.18e-01 | 0.0402137  | 7.85e-01 |
| ENSG0000019370  | 12 | 12879316 | 12884939 | SIC1A5     | ensembl | havana | protein_coding | 0.02766018 | 0.32e-01 | 0.0776681  | 0.29e-01 | 0.0214449  | 8.47e-01 | 0.2119729 | 2.46e-01 | 0.0008046  | 5.17e-01 | 0.0262133 | 9.18e-01 | 0.0402137  | 7.85e-01 |
| ENSG0000021443  | 1  | 20127281 | 20127285 | USO1A7     | ensembl | havana | protein_coding | 0.14294505 | 2.30e-01 | 0.1989584  | 1.66e-01 | 0.0989957  | 6.24e-01 | 0.2119729 | 2.46e-01 | 0.1367670  | 3.24e-01 | 0.0924292 | 6.65e-01 | 0.0200978  | 9.83e-01 |
| ENSG0000025119  | 1  | 2486724  | 2486728  | USO1A7     | ensembl | havana | protein_coding | 0.14294505 | 2.30e-01 | 0.1989584  | 1.66e-01 | 0.0989957  | 6.24e-01 | 0.2119729 | 2.46e-01 | 0.1367670  | 3.24e-01 | 0.0924292 | 6.65e-01 | 0.0200978  | 9.83e-01 |
| ENSG0000027930  | 13 | 18297554 | 18298733 | KMT5AP1    | ensembl | havana | protein_coding | 0.15295787 | 2.06e-01 | 0.1714811  | 2.85e-01 | 0.0607950  | 7.43e-01 | 0.2109927 | 2.46e-01 | 0.1278715  | 3.11e-01 | 0.0401446 | 5.65e-01 | 0.0522583  | 7.83e-01 |
| ENSG0000017479  | 4  | 11214544 | 11219536 | FAM21A4    | ensembl | havana | protein_coding | 0.16662202 | 1.48e-01 | 0.2668898  | 6.09e-01 | 0.1646939  | 4.13e-01 | 0.2103103 | 2.46e-01 | 0.1271633  | 3.95e-01 | 0.1477648 | 5.01e-01 | 0.0601133  | 9.66e-01 |
| ENSG0000012090  | 1  | 7009574  | 7009600  | USO1A7     | ensembl | havana | protein_coding | 0.16662202 | 1.48e-01 | 0.2668898  | 6.09e-01 | 0.1646939  | 4.13e-01 | 0.2103103 | 2.46e-01 | 0.1271633  | 3.95e-01 | 0.1477648 | 5.01e-01 | 0.0601133  | 9.66e-01 |
| ENSG0000020394  | 16 | 878504   | 879777   | LINC02857  | ensembl | havana | lincRNA        | 0.00009776 | 4.34e-01 | 0.00009873 | 4.56e-01 | 0.3295793  | 9.31e-01 | 0.2000798 | 2.46e-01 | 0.3344528  | 3.32e-01 | 0.3344528 | 3.32e-01 | 0.00009776 | 4.34e-01 |
| ENSG0000017683  | 7  | 10855453 | 10856970 | THAP5      | ensembl | havana | protein_coding | 0.16678278 | 1.57e-01 | 0.2131925  | 1.17e-01 | 0.0842024  | 6.76e-01 | 0.2099727 | 2.46e-01 | 0.1171734  | 3.15e-01 | 0.0677319 | 7.99e-01 | 0.0000669  | 5.67e-01 |
| ENSG0000012048  | 4  | 6132158  | 6136217  | TSRM6      | ensembl | havana | protein_coding | 0.1688854  | 2.35e-01 | 0.2127886  | 1.46e-01 | 0.0389933  | 7.26e-01 | 0.2099727 | 2.46e-01 | 0.1367670  | 3.24e-01 | 0.0924292 | 6.65e-01 | 0.0200978  | 9.83e-01 |
| ENSG0000019551  | 19 | 11559374 | 11619161 | ZNF527     | ensembl | havana | protein_coding | 0.15945628 | 1.95e-01 | 0.2184052  | 4.77e-01 | 0.1099047  | 5.85e-01 | 0.2091735 | 2.47e-01 | 0.1181537  | 3.14e-01 | 0.0634534 | 8.94e-01 | 0.0019247  | 9.72e-01 |
| ENSG0000027325  | 18 | 51776727 | 51781722 | LINC01415  | ensembl | havana | lincRNA        | 0.00897343 | 4.37e-01 | 0.1737847  | 2.22e-01 | 0.16180632 | 4.20e-01 | 0.2089784 | 2.47e-01 | 0.0603829  | 8.64e-01 | 0.1151476 | 6.01e-01 | 0.0126623  | 9.20e-01 |
| ENSG0000013900  | 6  | 3687817  | 3692720  | LAP2F2     | ensembl | havana | protein_coding | 0.17281733 | 1.13e-01 | 0.1519752  | 4.32e-01 | 0.06787698 | 3.96e-01 | 0.2088624 | 2.47e-01 | 0.2275765  | 3.60e-01 | 0.0842175 | 7.02e-01 | 0.0212631  | 8.00e-01 |
| ENSG0000019111  | 10 | 921146   | 921147   | LINC00713  | ensembl | havana | lincRNA        | 0.00161201 | 2.97e-01 | 0.0000000  | 2.98e-01 | 0.2089169  | 3.79e-01 | 0.2089169 | 2.47e-01 | 0.2089169  | 3.79e-01 | 0.0000000 | 2.97e-01 | 0.0000000  | 2.97e-01 |
| ENSG0000028132  | 7  | 3736279  | 3736294  | LINC00997  | ensembl | havana | lincRNA        | 0.0026793  | 8.22e-01 | 0.0043785  | 6.61e-01 | 0.2087789  | 6.43e-01 | 0.2087789 | 2.47e-01 | 0.0026793  | 8.22e-01 | 0.0043785 | 6.61e-01 | 0.2087789  | 6.43e-01 |
| ENSG0000012474  | 6  | 4347736  | 4348027  | ABC10      | ensembl | havana | protein_coding | 0.12499177 | 2.62e-01 | 0.1521788  | 1.81e-01 | 0.0956744  | 6.31e-01 | 0.2088624 | 2.47e-01 | 0.1179250  | 3.97e-01 | 0.1025136 | 4.65e-01 | 0.1162738  | 6.84e-01 |
| ENSG0000024489  | 19 | 912183   | 914675   | LME1A51    | ensembl | havana | lincRNA        | 0.0201117  | 6.00e-01 | 0.1916081  | 1.78e-01 | 0.0217050  | 3.81e-01 | 0.2084811 | 2.47e-01 | 0.0201117  | 6.00e-01 | 0.1916081 | 1.78e-01 | 0.0217050  | 3.81e-01 |
| ENSG00000264743 | 17 | 30975387 | 30975954 | DIPK4      | ensembl | havana | protein_coding | 0.15249007 | 1.86e-01 | 0.2281225  | 1.09e-01 | 0.1634292  | 6.24e-01 | 0.2055137 | 2.47e-01 | 0.1267060  | 3.61e-01 | 0.0196661 | 6.10e-01 | 0.153676   | 7.87e-01 |
| ENSG0000016698  | 10 | 3528982  | 35279821 | USF2       | ensembl | havana | protein_coding | 0.2008913  | 7.98e-01 | 0.2436642  | 8.82e-01 | 0.2025525  | 8.01e-01 | 0.2055137 | 2.47e-01 | 0.1968197  | 3.54e-01 | 0.1842688 | 9.70e-01 | 0.0553233  | 7.02e-01 |
| ENSG0000019290  | 1  | 7009574  | 7009600  | USO1A7     | ensembl | havana | protein_coding | 0.16662202 | 1.48e-01 | 0.2668898  | 6.09e-01 | 0.1646939  | 4.13e-01 | 0.2103103 | 2.46e-01 | 0.1271633  | 3.95e-01 | 0.1477648 | 5.01e-01 | 0.0601133  | 9.66e-01 |
| ENSG00000146311 | 4  | 99546709 | 99564039 | FAM134D    | ensembl | havana | protein_coding | 0.09923869 | 3.91e-01 | 0.1068879  | 4.53e-01 | 0.0331621  | 8.70e-01 | 0.2051985 | 2.47e-01 | 0.1602598  | 2.22e-01 | 0.210984  | 3.34e-01 | 0.190328   | 6.00e-01 |
| ENSG00000274044 | 22 | 1836120  | 18391105 | YFAP2      | ensembl | havana | protein_coding | 0.0100993  | 2.72e-01 | 0.1407699  | 3.00e-01 | 0.2397214  | 2.29e-01 | 0.2397214 | 2.47e-01 | 0.0706154  | 2.47e-01 | 0.0706154 | 2.47e-01 | 0.0706154  | 2.47e-01 |
| ENSG00000211630 | 2  | 20119716 | 20114007 | HMPLD10    | ensembl | havana | protein_coding | 0.0468488  | 6.89e-01 | 0.0697207  | 6.33e-01 | 0.1716685  | 3.86e-01 | 0.2084864 | 2.47e-01 | 0.1189259  | 2.42e-01 | 0.138672  | 5.49e-01 | 0.061164   | 3.11e-01 |
| ENSG0000012884  | 4  | 3133231  | 3133752  | NUD10B     | ensembl | havana | protein_coding | 0.1034978  | 7.64e-01 | 0.2183863  | 1.31e-01 | 0.1831157  | 3.61e-01 | 0.2084798 | 2.47e-01 | 0.1461688  | 2.92e-01 | 0.088093  | 8.92e-01 | 0.0072001  | 9.00e-01 |
| ENSG0000028650  | 17 | 4118412  | 4115110  | RTPAP1-1   | ensembl | havana | protein_coding | 0.0721447  | 5.33e-01 | 0.1584483  | 2.86e-01 | 0.1046899  | 6.01e-01 | 0.2084033 | 2.46e-01 | 0.1714915  | 2.15e-01 | 0.0591555 | 2.46e-01 | 0.116344   | 3.11e-01 |
| ENSG000001485   | 5  | 5619230  | 5619933  | CLG1L1P2   | ensembl | havana | protein_coding | 0.0759131  | 6.17e-01 | 0.260336   | 6.00e-01 | 0.1038581  | 6.66e-01 | 0.2089169 | 2.46e-01 | 0.000919   | 9.95e-01 | 0.000919  | 9.95e-01 | 0.000919   | 9.95e-01 |
| ENSG0000013790  | 10 | 4350044  | 4350719  | CTCF4      | ensembl | havana | protein_coding | 0.12611208 | 1.92e-01 | 0.1698289  | 2.65e-01 | 0.0499289  | 7.74e-01 | 0.2089169 | 2.46e-01 | 0.1407736  | 3.96e-01 | 0.088093  | 8.92e-01 | 0.0072001  | 9.00e-01 |
| ENSG0000021474  | 10 | 1391440  | 1393213  | RPLP4      | ensembl | havana | protein_coding | 0.2251116  | 4.98e-01 | 0.2665026  | 6.76e-01 | 0.1488175  | 1.80e-01 | 0.2083175 | 2.46e-01 | 0.2067209  | 3.94e-01 | 0.041718  | 4.74e-01 | 0.0484511  | 8.06e-01 |
| ENSG0000027575  | 19 | 2779341  | 2798484  | AC006504.5 | ensembl | havana | lincRNA        | 0.0659544  | 6.12e-01 | 0.2031702  | 1.55e-01 | 0.0657954  | 7.45e-01 | 0.2083082 | 2.48e-01 | 0.0099325  | 9.66e-01 | 0.07177   | 7.45e-01 | 0.080712   | 8.32e-01 |
| ENSG0000019750  | 10 | 1121478  | 1121602  | AC002012.3 | ensembl | havana | lincRNA        | 0.0201117  | 6.00e-01 | 0.1916081  | 1.78e-01 | 0.0217050  | 3.81e-01 | 0.2084811 | 2.47e-01 | 0.0201117  | 6.00e-01 | 0.1916081 | 1.78e-01 | 0.0217050  | 3.81e-01 |
| ENSG0000025540  | 10 | 11410085 | 11411800 | AC022012.4 | ensembl | havana | lincRNA        | 0.0249202  | 5.21e-01 | 0.2893847  | 4.55e-01 | 0.3020241  | 4.18e-01 | 0.2072141 | 2.46e-01 | 0.00718    | 9.59e-01 | 0.020347  | 5.20e-01 | 0.090411   | 8.32e-01 |
| ENSG0000017051  | 19 | 51745172 | 51804110 | FRS1       | ensembl | havana | protein_coding | 0.22650068 | 4.78e-01 | 0.2387705  | 9.52e-01 | 0.0226139  | 9.11e-01 | 0.2037798 | 2.48e-01 | 0.2454278  | 7.37e-01 | 0.1529671 | 4.87e-01 | 0.0977711  | 4.91e-01 |
| ENSG0000024964  | 13 | 9066218  | 9066218  | AC006161.1 | ensembl | havana | lincRNA        | 0.0201117  | 6.00e-01 | 0.1916081  | 1.78e-01 | 0.0217050  | 3.81e-01 | 0.2084811 | 2.47e-01 | 0.0201117  | 6.00e-01 | 0.1916081 | 1.78e-01 | 0.0217050  | 3.81e-01 |
| ENSG0000011249  | 9  | 14117356 | 14130518 | CDS8       | ensembl | havana | protein_coding | 0.19013973 | 7.72e-01 | 0.1931212  | 4.99e-01 | 0.13161754 | 1.14e-01 | 0.2037798 | 2.48e-01 | 0.1824247  | 3.90e-01 | 0.0202781 | 9.90e-01 | 0.1052705  | 4.63e-01 |
| ENSG0000029177  | 19 | 4155445  | 4155494  | LINC02879  | ensembl | havana | lincRNA        | 0.13113389 | 2.08e-01 | 0.1246667  | 1.15e-01 | 0.0672191  | 3.18e-01 | 0.2032627 | 2.48e-01 | 0.1284129  | 3.55e-01 | 0.0060509 | 9.77e-01 | 0.147263   | 6.00e-01 |
| ENSG0000011312  | 5  | 16020913 | 16026548 | TTC1       | ensembl | havana | protein_coding | 0.1624445  | 2.08e-01 | 0.210298   | 1.10e-01 | 0.14602797 | 3.99e-01 | 0.2084778 | 2.46e-01 | 0.2924849  | 3.88e-01 | 0.0991374 | 8.00e-01 | 0.1426359  | 3.23e-01 |
| ENSG0000020924  | 16 | 20936483 | 20936719 | LINC02879  | ensembl | havana | lincRNA        | 0.13113389 | 2.08e-01 | 0.1246667  | 1.15e-01 | 0.0672191  | 3.18e-01 | 0.2032627 | 2.48e-01 | 0.1284129  | 3.55e-01 | 0.0060509 | 9.77e-01 | 0.147263   | 6.00e-01 |
| ENSG0000027688  | 18 | 3246401  | 3247086  | AP00323.3  | ensembl | havana | lincRNA        | 0.1043026  | 9.07e-01 | 0.1043026  | 9.07e-01 | 0.2099738  | 2.48e-01 | 0.2099738 | 2.48e-01 | 0.2099738  | 2.48e-01 | 0.2099738 | 2.48e-01 | 0.2099738  | 2.48e-01 |
| ENSG00000119303 | 2  | 9439351  | 9439351  | CRF3       | ensembl | havana | protein_coding | 0.23508889 | 3.97e-01 | 0.1031776  | 3.43e-01 | 0.0628821  | 7.52e-01 | 0.2097172 | 2.49e-01 | 0.3701542  | 4.83e-01 | 0.1598846 | 7.66e-01 | 0.1024     |          |

| ENSG0000026665 | 1  | 171339299 | 171339999 | TOP1P1      | havana  | processed_pseudo   | 0.00992934 | 9.36e-01  | 0.0564912 | 7.01e-01  | 0.1519512 | 4.49e-01  | 0.2258091  | 2.57e-01  | 0.0509035  | 7.15e-01  | 0.1073865 | 6.26e-01  | 0.1248158 | 9.88e-01  |
|----------------|----|-----------|-----------|-------------|---------|--------------------|------------|-----------|-----------|-----------|-----------|-----------|------------|-----------|------------|-----------|-----------|-----------|-----------|-----------|
| ENSG0000026435 |    | 18653252  | 18680720  | ANKRD18BP   | havana  | transcribed_pseudo | 0.0050823  | 7.62e-01  | 0.0177353 | 8.92e-01  | 0.0303633 | 8.81e-01  | 0.2579474  | 2.57e-01  | 0.0420486  | 7.73e-01  | 0.178911  | 9.36e-01  | 0.0200247 | 1.98e-01  |
| ENSG0000026430 |    | 4921011   | 4922225   | ANKRD18P.1  | havana  | transcribed_pseudo | 0.1471341  | 1.17e-01  | 0.3973419 | 1.27e-01  | 0.1319334 | 3.28e-01  | 0.2995915  | 1.24e-01  | 0.0362611  | 3.28e-01  | 0.0898118 | 3.90e-01  | 0.0356621 | 1.08e-01  |
| ENSG0000019878 | 17 | 4921011   | 4922225   | AB13        | ensembl | protein_coding     | 0.0095555  | 4.14e-04  | 0.3293755 | 2.36e-01  | 0.5480247 | 3.09e-01  | 0.2579191  | 2.58e-01  | 0.0420486  | 7.73e-01  | 0.178911  | 9.36e-01  | 0.0200247 | 1.98e-01  |
| ENSG0000014364 | 2  | 21021284  | 21104662  | CDK1        | ensembl | protein_coding     | 0.2085738  | 6.90e-02  | 0.2248824 | 1.10e-01  | 0.0212388 | 9.01e-01  | 0.2579078  | 2.58e-01  | 0.0420486  | 7.73e-01  | 0.178911  | 9.36e-01  | 0.0200247 | 1.98e-01  |
| ENSG0000011594 | 4  | 14477224  | 14482429  | CDAP1       | ensembl | protein_coding     | 0.0095555  | 4.14e-04  | 0.3293755 | 2.36e-01  | 0.5480247 | 3.09e-01  | 0.2579191  | 2.58e-01  | 0.0420486  | 7.73e-01  | 0.178911  | 9.36e-01  | 0.0200247 | 1.98e-01  |
| ENSG0000026366 | 8  | 142797824 | 142806142 | AC08814.1   | havana  | unprocessed_pseudo | 0.1570451  | 1.73e-01  | 0.3123334 | 3.48e-01  | 0.1488898 | 4.59e-01  | 0.2560091  | 2.58e-01  | 0.0420486  | 7.73e-01  | 0.178911  | 9.36e-01  | 0.0200247 | 1.98e-01  |
| ENSG0000023554 | 9  | 31446488  | 31482865  | BGAL1T1-AS1 | havana  | lincRNA            | 0.0382625  | 7.42e-01  | 0.1091046 | 4.51e-01  | 0.2438954 | 2.22e-01  | 0.2564609  | 2.58e-01  | 0.0420486  | 7.73e-01  | 0.178911  | 9.36e-01  | 0.0200247 | 1.98e-01  |
| ENSG0000021798 | 2  | 12360052  | 12360948  | AC08906.1   | havana  | unprocessed_pseudo | 0.0095555  | 4.14e-04  | 0.3293755 | 2.36e-01  | 0.5480247 | 3.09e-01  | 0.2579191  | 2.58e-01  | 0.0420486  | 7.73e-01  | 0.178911  | 9.36e-01  | 0.0200247 | 1.98e-01  |
| ENSG0000026029 | 2  | 10326280  | 10349312  | AC08911.1   | havana  | lincRNA            | 0.0095555  | 4.14e-04  | 0.3293755 | 2.36e-01  | 0.5480247 | 3.09e-01  | 0.2579191  | 2.58e-01  | 0.0420486  | 7.73e-01  | 0.178911  | 9.36e-01  | 0.0200247 | 1.98e-01  |
| ENSG0000021492 | 4  | 11757512  | 11757674  | NTF3AP1     | havana  | transcribed_pseudo | 0.1421974  | 2.23e-01  | 0.3996664 | 3.65e-01  | 0.0790885 | 7.25e-01  | 0.2557622  | 2.58e-01  | 0.0420486  | 7.73e-01  | 0.178911  | 9.36e-01  | 0.0200247 | 1.98e-01  |
| ENSG0000014533 | 19 | 4832356   | 4836459   | TM64B3      | ensembl | protein_coding     | 0.0095555  | 4.14e-04  | 0.3293755 | 2.36e-01  | 0.5480247 | 3.09e-01  | 0.2579191  | 2.58e-01  | 0.0420486  | 7.73e-01  | 0.178911  | 9.36e-01  | 0.0200247 | 1.98e-01  |
| ENSG0000019899 | 17 | 1990430   | 19978243  | AKAP10      | ensembl | protein_coding     | 0.1193754  | 3.25e-01  | 0.3145055 | 3.54e-01  | 0.0576285 | 1.97e-01  | 0.2555766  | 2.58e-01  | 0.0420486  | 7.73e-01  | 0.178911  | 9.36e-01  | 0.0200247 | 1.98e-01  |
| ENSG0000018379 | 2  | 19005700  | 190062729 | RNF1        | ensembl | protein_coding     | 0.1584964  | 1.67e-01  | 0.3172877 | 2.07e-01  | 0.0212684 | 2.21e-01  | 0.2535585  | 2.58e-01  | 0.0420486  | 7.73e-01  | 0.178911  | 9.36e-01  | 0.0200247 | 1.98e-01  |
| ENSG0000018037 | 6  | 1892446   | 1898010   | MTN2        | ensembl | protein_coding     | 0.0648089  | 6.24e-01  | 0.1853889 | 1.97e-01  | 0.0861210 | 6.26e-01  | 0.2528793  | 2.58e-01  | 0.0420486  | 7.73e-01  | 0.178911  | 9.36e-01  | 0.0200247 | 1.98e-01  |
| ENSG0000019844 | 7  | 2026270   | 2029710   | PKnox1.2    | ensembl | protein_coding     | 0.191514   | 9.32e-01  | 0.3583997 | 3.18e-01  | 0.0385580 | 3.86e-01  | 0.2527781  | 2.58e-01  | 0.0420486  | 7.73e-01  | 0.178911  | 9.36e-01  | 0.0200247 | 1.98e-01  |
| ENSG0000019842 | 2  | 10961464  | 10961890  | SOWAH       | ensembl | protein_coding     | 0.0095555  | 4.14e-04  | 0.3293755 | 2.36e-01  | 0.5480247 | 3.09e-01  | 0.2579191  | 2.58e-01  | 0.0420486  | 7.73e-01  | 0.178911  | 9.36e-01  | 0.0200247 | 1.98e-01  |
| ENSG0000013172 | 7  | 17114162  | 17114539  | AC08981.1   | havana  | lincRNA            | 0.0119792  | 9.18e-01  | 0.2435027 | 9.00e-01  | 0.0444887 | 8.10e-01  | 0.2515487  | 2.58e-01  | 0.0420486  | 7.73e-01  | 0.178911  | 9.36e-01  | 0.0200247 | 1.98e-01  |
| ENSG0000012529 | 2  | 1118452   | 11211097  | AC08984.1   | havana  | lincRNA            | 0.0095555  | 4.14e-04  | 0.3293755 | 2.36e-01  | 0.5480247 | 3.09e-01  | 0.2579191  | 2.58e-01  | 0.0420486  | 7.73e-01  | 0.178911  | 9.36e-01  | 0.0200247 | 1.98e-01  |
| ENSG0000012975 | 11 | 288313    | 288575    | CKOR1C      | ensembl | protein_coding     | 0.4065851  | 2.53e-01  | 0.3089951 | 2.01e-01  | 0.2621593 | 1.82e-01  | 0.2512785  | 2.58e-01  | 0.0420486  | 7.73e-01  | 0.178911  | 9.36e-01  | 0.0200247 | 1.98e-01  |
| ENSG0000021210 | 4  | 1222345   | 12251286  | LINC02270   | havana  | lincRNA            | 0          | 0.0000000 | 0.0000000 | 0.0000000 | 0.0000000 | 0.0000000 | 0.0000000  | 0.0000000 | 0.0000000  | 0.0000000 | 0.0000000 | 0.0000000 | 0.0000000 | 0.0000000 |
| ENSG0000021699 | 13 | 12188809  | 121921470 | AC09051.2   | havana  | lincRNA            | 0.0055212  | 6.34e-01  | 0.0172851 | 7.65e-01  | 0.2127125 | 3.26e-01  | 0.2505828  | 2.58e-01  | 0.0420486  | 7.73e-01  | 0.178911  | 9.36e-01  | 0.0200247 | 1.98e-01  |
| ENSG0000023441 | 3  | 18389900  | 18391036  | PCYBP1B     | havana  | transcribed_pseudo | 0.0737597  | 7.44e-01  | 0.0512827 | 7.24e-01  | 0.2356724 | 2.80e-01  | 0.2505828  | 2.58e-01  | 0.0420486  | 7.73e-01  | 0.178911  | 9.36e-01  | 0.0200247 | 1.98e-01  |
| ENSG0000014327 | 1  | 15751337  | 15752515  | FCF15       | ensembl | protein_coding     | 0.2022974  | 7.77e-01  | 0.3692922 | 2.88e-01  | 0.0782894 | 3.25e-01  | 0.2500170  | 2.58e-01  | 0.0420486  | 7.73e-01  | 0.178911  | 9.36e-01  | 0.0200247 | 1.98e-01  |
| ENSG0000019487 | 7  | 10408280  | 10428992  | DCWV1P      | ensembl | protein_coding     | 0.1888878  | 1.09e-01  | 0.2458488 | 1.44e-01  | 0.0401241 | 2.26e-01  | 0.2499621  | 2.58e-01  | 0.0420486  | 7.73e-01  | 0.178911  | 9.36e-01  | 0.0200247 | 1.98e-01  |
| ENSG0000019700 | 18 | 688881    | 693951    | Mesemb1     | ensembl | protein_coding     | 0.0095555  | 4.14e-04  | 0.3293755 | 2.36e-01  | 0.5480247 | 3.09e-01  | 0.2579191  | 2.58e-01  | 0.0420486  | 7.73e-01  | 0.178911  | 9.36e-01  | 0.0200247 | 1.98e-01  |
| ENSG0000014284 | 4  | 11847873  | 11851403  | LRR8C3      | ensembl | protein_coding     | 0.0095555  | 4.14e-04  | 0.3293755 | 2.36e-01  | 0.5480247 | 3.09e-01  | 0.2579191  | 2.58e-01  | 0.0420486  | 7.73e-01  | 0.178911  | 9.36e-01  | 0.0200247 | 1.98e-01  |
| ENSG0000018424 | 4  | 10602523  | 10602623  | ALX1Z1.1    | havana  | lincRNA            | 0.1335361  | 5.18e-01  | 0.2409165 | 2.42e-01  | 0.122609  | 2.87e-01  | 0.2491598  | 2.58e-01  | 0.0420486  | 7.73e-01  | 0.178911  | 9.36e-01  | 0.0200247 | 1.98e-01  |
| ENSG0000021602 | 2  | 1903928   | 1904033   | AC08954.1   | havana  | lincRNA            | 0.0095555  | 4.14e-04  | 0.3293755 | 2.36e-01  | 0.5480247 | 3.09e-01  | 0.2579191  | 2.58e-01  | 0.0420486  | 7.73e-01  | 0.178911  | 9.36e-01  | 0.0200247 | 1.98e-01  |
| ENSG0000025394 | 8  | 9126156   | 9126233   | Clorf49     | ensembl | protein_coding     | 0.0095555  | 4.14e-04  | 0.3293755 | 2.36e-01  | 0.5480247 | 3.09e-01  | 0.2579191  | 2.58e-01  | 0.0420486  | 7.73e-01  | 0.178911  | 9.36e-01  | 0.0200247 | 1.98e-01  |
| ENSG0000019862 | 2  | 6445369   | 6446131   | LIGAL2      | ensembl | protein_coding     | 0.2384818  | 4.07e-01  | 0.3098588 | 2.85e-01  | 0.0202609 | 8.85e-01  | 0.2472524  | 2.60e-01  | 0.2173704  | 2.12e-01  | 0.0647418 | 8.75e-01  | 0.0086859 | 9.46e-01  |
| ENSG0000019861 | 2  | 1181805   | 11820617  | AC08958.1   | havana  | lincRNA            | 0.0095555  | 4.14e-04  | 0.3293755 | 2.36e-01  | 0.5480247 | 3.09e-01  | 0.2579191  | 2.58e-01  | 0.0420486  | 7.73e-01  | 0.178911  | 9.36e-01  | 0.0200247 | 1.98e-01  |
| ENSG0000017817 | 1  | 1784119   | 18021786  | LOC1        | ensembl | protein_coding     | 0.2568833  | 2.41e-01  | 0.3663056 | 6.02e-01  | 0.2473454 | 2.77e-01  | 0.2462211  | 2.58e-01  | 0.0420486  | 7.73e-01  | 0.178911  | 9.36e-01  | 0.0200247 | 1.98e-01  |
| ENSG0000017269 | 11 | 11909603  | 11910831  | DPAT1       | ensembl | protein_coding     | 0.0295797  | 7.98e-01  | 0.0020823 | 9.98e-01  | 0.0000792 | 9.98e-01  | 0.2471738  | 2.60e-01  | 0.0000788  | 9.48e-01  | 0.1109144 | 6.47e-01  | 0.0557368 | 7.01e-01  |
| ENSG0000020964 | 4  | 1431778   | 14341179  | AC08964.1   | havana  | lincRNA            | 0.0095555  | 4.14e-04  | 0.3293755 | 2.36e-01  | 0.5480247 | 3.09e-01  | 0.2579191  | 2.58e-01  | 0.0420486  | 7.73e-01  | 0.178911  | 9.36e-01  | 0.0200247 | 1.98e-01  |
| ENSG0000011532 | 17 | 39603536  | 39609717  | NEUROD2     | ensembl | protein_coding     | 0.0249599  | 8.29e-01  | 0.3269851 | 1.47e-01  | 0.1509162 | 4.34e-01  | 0.2462152  | 2.60e-01  | 0.1050631  | 4.43e-01  | 0.1309444 | 6.07e-01  | 0.0309386 | 9.15e-01  |
| ENSG0000018759 | 3  | 1166601   | 1166375   | LEIG1       | ensembl | protein_coding     | 0.0095555  | 4.14e-04  | 0.3293755 | 2.36e-01  | 0.5480247 | 3.09e-01  | 0.2579191  | 2.58e-01  | 0.0420486  | 7.73e-01  | 0.178911  | 9.36e-01  | 0.0200247 | 1.98e-01  |
| ENSG0000024074 | 20 | 3887770   | 3897874   | RNF1151P    | ensembl | protein_coding     | 0.0174338  | 8.48e-01  | 0.1931862 | 3.38e-01  | 0.1871643 | 3.50e-01  | 0.2450141  | 2.60e-01  | 0.0490462  | 6.14e-01  | 0.729349  | 1.49e-01  | 0.052411  | 8.62e-01  |
| ENSG0000018860 | 1  | 2847411   | 284952817 | LOC1        | ensembl | protein_coding     | 0.0095555  | 4.14e-04  | 0.3293755 | 2.36e-01  | 0.5480247 | 3.09e-01  | 0.2579191  | 2.58e-01  | 0.0420486  | 7.73e-01  | 0.178911  | 9.36e-01  | 0.0200247 | 1.98e-01  |
| ENSG0000014547 | 2  | 14793096  | 14802104  | ORC4        | ensembl | protein_coding     | 0.0576611  | 6.81e-01  | 0.0745111 | 6.21e-01  | 0.2443786 | 5.26e-01  | 0.06197480 | 5.90e-01  | 0.09611469 | 9.09e-01  | 0.0783568 | 5.82e-01  | 0.0086859 | 9.46e-01  |
| ENSG0000011140 | 1  | 6332267   | 6332518   | FDX3        | ensembl | protein_coding     | 0.2060924  | 8.23e-01  | 0.3181595 | 3.38e-01  | 0.0676719 | 7.43e-01  | 0.2444447  | 2.60e-01  | 0.0375947  | 9.10e-01  | 0.120821  | 9.03e-01  | 0.0973759 | 5.28e-01  |
| ENSG0000014951 | 2  | 10807836  | 10808107  | AC08957.1   | havana  | lincRNA            | 0.0095555  | 4.14e-04  | 0.3293755 | 2.36e-01  | 0.5480247 | 3.09e-01  | 0.2579191  | 2.58e-01  | 0.0420486  | 7.73e-01  | 0.178911  | 9.36e-01  | 0.0200247 | 1.98e-01  |
| ENSG0000023874 |    |           |           |             |         |                    |            |           |           |           |           |           |            |           |            |           |           |           |           |           |

| ENSG0000013127 | 49289638 | 49325215  | SLC6A16   | ensembl      | havana | protein_coding                     | 0.06699999 | 5.80e-01 | 0.0665185  | 9.64e-01 | 0.4374607 | 2.24e-01 | 0.2207135 | 2.69e-01 | 0.1888108 | 2.22e-01 | 0.26405   | 2.19e-01 | 0.1242906 | 3.90e-01 |
|----------------|----------|-----------|-----------|--------------|--------|------------------------------------|------------|----------|------------|----------|-----------|----------|-----------|----------|-----------|----------|-----------|----------|-----------|----------|
| ENSG0000025335 | 7        | 11505654  | 11512614  | LINC01939    | havana | lincRNA                            | 0.17189897 | 1.15e-01 | 0.17189897 | 2.22e-01 | 0.1914178 | 2.66e-01 | 0.2066749 | 2.69e-01 | 0.2038174 | 3.90e-01 | 0.4884234 | 1.40e-01 | 0.0986801 | 5.12e-01 |
| ENSG0000028819 | 16       | 48994170  | 48994514  | TFR1         | havana | protein_coding                     | 0.18945170 | 1.15e-01 | 0.18945170 | 1.74e-01 | 0.1937693 | 2.48e-01 | 0.2097965 | 2.69e-01 | 0.2097965 | 2.48e-01 | 0.4884234 | 1.40e-01 | 0.0986801 | 5.12e-01 |
| ENSG0000040618 | 16       | 83899162  | 83922266  | HRF8         | havana | protein_coding                     | 0.15888583 | 1.68e-01 | 0.15888583 | 9.79e-01 | 0.2288888 | 2.51e-01 | 0.2388888 | 2.69e-01 | 0.2388888 | 2.51e-01 | 0.4884234 | 1.40e-01 | 0.0986801 | 5.12e-01 |
| ENSG0000013139 | 17       | 13218441  | 13219395  | AC08989.3    | havana | lincRNA                            | 0.08922123 | 4.40e-01 | 0.08922123 | 6.41e-01 | 0.1213959 | 5.43e-01 | 0.2049082 | 2.69e-01 | 0.1067777 | 5.27e-01 | 0.0246465 | 8.47e-01 | 0.0807545 | 5.78e-01 |
| ENSG0000017898 | 1        | 14027484  | 14028413  | LINC01941    | havana | lincRNA                            | 0.08922123 | 4.40e-01 | 0.08922123 | 6.41e-01 | 0.1213959 | 5.43e-01 | 0.2049082 | 2.69e-01 | 0.1067777 | 5.27e-01 | 0.0246465 | 8.47e-01 | 0.0807545 | 5.78e-01 |
| ENSG0000012821 | 6        | 4289265   | 4289821   | ECOT22       | havana | protein_coding                     | 0.29812919 | 9.68e-01 | 0.29812919 | 8.27e-01 | 0.4244067 | 2.80e-01 | 0.2048138 | 2.69e-01 | 0.2048138 | 2.69e-01 | 0.2048138 | 2.69e-01 | 0.2048138 | 2.69e-01 |
| ENSG0000013048 | 2        | 24620102  | 246210052 | OR5S1P       | havana | unifunc_pseudogen                  | 0.1144673  | 3.22e-01 | 0.1144673  | 9.29e-01 | 0.2092526 | 6.46e-01 | 0.2204949 | 2.69e-01 | 0.1399767 | 3.13e-01 | 0.0909102 | 6.83e-01 | 0.0888004 | 4.98e-01 |
| ENSG0000013079 | 1        | 21004599  | 2101206   | OR5S1P.2     | havana | unifunc_pseudogen                  | 0.08922123 | 4.40e-01 | 0.08922123 | 6.41e-01 | 0.1213959 | 5.43e-01 | 0.2049082 | 2.69e-01 | 0.1067777 | 5.27e-01 | 0.0246465 | 8.47e-01 | 0.0807545 | 5.78e-01 |
| ENSG0000013950 | 1        | 15068284  | 15071319  | XYK11        | havana | protein_coding                     | 0.1099792  | 3.44e-01 | 0.1099792  | 8.69e-01 | 0.2446589 | 6.69e-01 | 0.2049082 | 2.69e-01 | 0.1067777 | 5.27e-01 | 0.0246465 | 8.47e-01 | 0.0807545 | 5.78e-01 |
| ENSG0000014569 | 6        | 36006413  | 36018612  | PPP1R3       | havana | protein_coding                     | 0.14129912 | 2.20e-01 | 0.14129912 | 4.35e-01 | 0.2068084 | 7.44e-01 | 0.2038831 | 2.69e-01 | 0.2337718 | 9.04e-01 | 0.2039707 | 3.88e-01 | 0.1125625 | 4.61e-01 |
| ENSG0000017731 | 28       | 21560039  | 21588869  | AKO2048.2    | havana | lincRNA                            | 0.08922123 | 4.40e-01 | 0.08922123 | 6.41e-01 | 0.1213959 | 5.43e-01 | 0.2049082 | 2.69e-01 | 0.1067777 | 5.27e-01 | 0.0246465 | 8.47e-01 | 0.0807545 | 5.78e-01 |
| ENSG0000007649 | 11       | 32899311  | 32899316  | OSER1        | havana | protein_coding                     | 0.11921138 | 3.02e-01 | 0.11921138 | 6.85e-01 | 0.2226075 | 6.52e-01 | 0.2030515 | 2.69e-01 | 0.2030515 | 2.69e-01 | 0.2030515 | 2.69e-01 | 0.2030515 | 2.69e-01 |
| ENSG0000017818 | 20       | 49812713  | 49892242  | SLC38A8      | havana | protein_coding                     | 0.16897013 | 1.42e-01 | 0.16897013 | 1.65e-01 | 0.2078953 | 6.95e-01 | 0.2030102 | 2.70e-01 | 0.2030102 | 2.70e-01 | 0.2030102 | 2.70e-01 | 0.2030102 | 2.70e-01 |
| ENSG0000013174 | 1        | 17063846  | 17064259  | AC08361.1    | havana | processed_transcript               | 0.08922123 | 4.40e-01 | 0.08922123 | 6.41e-01 | 0.1213959 | 5.43e-01 | 0.2049082 | 2.69e-01 | 0.1067777 | 5.27e-01 | 0.0246465 | 8.47e-01 | 0.0807545 | 5.78e-01 |
| ENSG0000014690 | 11       | 3917456   | 3906059   | STX4         | havana | protein_coding                     | 0.2395848  | 8.22e-01 | 0.2395848  | 1.56e-01 | 0.1881666 | 6.91e-01 | 0.2031564 | 2.70e-01 | 0.2031564 | 2.70e-01 | 0.2031564 | 2.70e-01 | 0.2031564 | 2.70e-01 |
| ENSG0000010961 | 11       | 8326569   | 8335864   | C7C3         | havana | protein_coding                     | 0.21267074 | 4.18e-01 | 0.21267074 | 1.11e-01 | 0.1747418 | 3.81e-01 | 0.2024070 | 2.70e-01 | 0.2024070 | 2.70e-01 | 0.2024070 | 2.70e-01 | 0.2024070 | 2.70e-01 |
| ENSG0000013159 | 14       | 10445079  | 10445143  | ENCLP1       | havana | processed_transcript               | 0.04719314 | 6.48e-01 | 0.04719314 | 6.11e-01 | 0.3017209 | 1.24e-01 | 0.2024070 | 2.70e-01 | 0.2024070 | 2.70e-01 | 0.2024070 | 2.70e-01 | 0.2024070 | 2.70e-01 |
| ENSG0000015057 | 12       | 4610049   | 4617007   | TMR6B4       | havana | protein_coding                     | 0.26426123 | 1.00e-01 | 0.26426123 | 1.15e-01 | 0.1075914 | 3.92e-01 | 0.2018017 | 2.70e-01 | 0.2018017 | 2.70e-01 | 0.2018017 | 2.70e-01 | 0.2018017 | 2.70e-01 |
| ENSG0000014374 | 1        | 22813964  | 22814884  | GUK1         | havana | protein_coding                     | 0.09197561 | 4.26e-01 | 0.09197561 | 7.79e-01 | 0.0445263 | 8.25e-01 | 0.2015297 | 2.70e-01 | 0.0886856 | 6.22e-01 | 0.216931  | 3.21e-01 | 0.094076  | 7.84e-01 |
| ENSG0000017052 | 7        | 32888172  | 32894131  | KBTBD10      | havana | protein_coding                     | 0.2595464  | 2.52e-01 | 0.2595464  | 1.44e-01 | 0.0099712 | 9.84e-01 | 0.2015297 | 2.70e-01 | 0.2015297 | 2.70e-01 | 0.2015297 | 2.70e-01 | 0.2015297 | 2.70e-01 |
| ENSG0000017511 | 16       | 8903789   | 8909756   | COT1         | havana | protein_coding                     | 0.2395848  | 8.22e-01 | 0.2395848  | 1.56e-01 | 0.1881666 | 6.91e-01 | 0.2031564 | 2.70e-01 | 0.2031564 | 2.70e-01 | 0.2031564 | 2.70e-01 | 0.2031564 | 2.70e-01 |
| ENSG0000022872 | 6        | 3176296   | 3176451   | SAPD3        | havana | protein_coding                     | 0.0429354  | 7.16e-01 | 0.0429354  | 5.72e-01 | 0.178094  | 3.74e-01 | 0.2008469 | 2.70e-01 | 0.051427  | 7.12e-01 | 0.1543899 | 4.82e-01 | 0.087387  | 2.45e-01 |
| ENSG0000017675 | 6        | 31628179  | 3164782   | HLA-DQA1     | havana | protein_coding                     | 0.1678423  | 1.24e-01 | 0.1678423  | 2.53e-01 | 0.1512902 | 5.76e-01 | 0.2008661 | 2.70e-01 | 0.2008661 | 2.70e-01 | 0.2008661 | 2.70e-01 | 0.2008661 | 2.70e-01 |
| ENSG0000010960 | 10       | 12174624  | 12192862  | PA1C         | havana | protein_coding                     | 0.1472702  | 2.40e-01 | 0.1472702  | 2.53e-01 | 0.0994411 | 6.53e-01 | 0.2008469 | 2.70e-01 | 0.0474066 | 2.87e-01 | 0.142975  | 5.15e-01 | 0.1188989 | 4.13e-01 |
| ENSG0000019910 | 17       | 4899316   | 4898482   | SNR5         | havana | protein_coding                     | 0.1786821  | 1.13e-01 | 0.1786821  | 2.09e-01 | 0.0503701 | 7.93e-01 | 0.1999948 | 2.70e-01 | 0.2009707 | 1.09e-01 | 0.188662  | 6.36e-01 | 0.097962  | 8.33e-01 |
| ENSG0000018050 | 4        | 54635741  | 5464678   | MR4C2        | havana | protein_coding                     | 0.0662617  | 2.60e-01 | 0.0662617  | 2.46e-01 | 0.1486520 | 6.41e-01 | 0.1986514 | 2.70e-01 | 0.0431017 | 5.76e-01 | 0.0588109 | 6.12e-01 | 0.2481025 | 8.13e-01 |
| ENSG0000014189 | 19       | 1092923   | 1092735   | ZNF787       | havana | transcribed_unprocessed_transcript | 0.1749874  | 1.28e-01 | 0.1749874  | 1.30e-01 | 0.0442055 | 8.27e-01 | 0.1998020 | 2.70e-01 | 0.0763904 | 5.83e-01 | 0.2260244 | 2.92e-01 | 0.027051  | 8.57e-01 |
| ENSG0000017580 | 4        | 6480417   | 6480417   | LOC100281214 | havana | transcribed_unprocessed_transcript | 0.131972   | 2.96e-01 | 0.131972   | 2.96e-01 | 0.0442055 | 8.27e-01 | 0.1998020 | 2.70e-01 | 0.0763904 | 5.83e-01 | 0.2260244 | 2.92e-01 | 0.027051  | 8.57e-01 |
| ENSG0000022644 | 10       | 3651171   | 3652434   | NANP1F       | havana | processed_transcript               | 0.2578906  | 2.06e-01 | 0.2578906  | 2.21e-01 | 0.1238649 | 5.38e-01 | 0.1985056 | 2.71e-01 | 0.1471231 | 3.91e-01 | 0.0931385 | 6.20e-01 | 0.0313305 | 9.81e-01 |
| ENSG0000017155 | 1        | 8643736   | 8649003   | SSXIP        | havana | protein_coding                     | 0.2289838  | 1.54e-01 | 0.2289838  | 1.54e-01 | 0.0724477 | 7.21e-01 | 0.1985113 | 2.71e-01 | 0.2448383 | 7.44e-01 | 0.0908434 | 6.56e-01 | 0.0846627 | 5.57e-01 |
| ENSG0000014800 | 1        | 4289864   | 4289728   | LINC00213    | havana | lincRNA                            | 0.08922123 | 4.40e-01 | 0.08922123 | 6.41e-01 | 0.1213959 | 5.43e-01 | 0.2049082 | 2.69e-01 | 0.1067777 | 5.27e-01 | 0.0246465 | 8.47e-01 | 0.0807545 | 5.78e-01 |
| ENSG0000017136 | 1        | 120773949 | 120842110 | NBP2B        | havana | protein_coding                     | 0.0603939  | 5.99e-01 | 0.0603939  | 5.99e-01 | 0.1246413 | 3.56e-01 | 0.1985113 | 2.71e-01 | 0.0460209 | 7.41e-01 | 0.0467595 | 8.29e-01 | 0.0422124 | 7.55e-01 |
| ENSG0000014677 | 10       | 9091296   | 9091287   | ANKRD3       | havana | protein_coding                     | 0.08922123 | 4.40e-01 | 0.08922123 | 6.41e-01 | 0.1213959 | 5.43e-01 | 0.2049082 | 2.69e-01 | 0.1067777 | 5.27e-01 | 0.0246465 | 8.47e-01 | 0.0807545 | 5.78e-01 |
| ENSG0000020031 | 1        | 1712005   | 1712005   | LINC00213    | havana | lincRNA                            | 0.08922123 | 4.40e-01 | 0.08922123 | 6.41e-01 | 0.1213959 | 5.43e-01 | 0.2049082 | 2.69e-01 | 0.1067777 | 5.27e-01 | 0.0246465 | 8.47e-01 | 0.0807545 | 5.78e-01 |
| ENSG0000021418 | 7        | 12124405  | 12122177  | AC08398.2    | havana | lincRNA                            | 0.08922123 | 4.40e-01 | 0.08922123 | 6.41e-01 | 0.1213959 | 5.43e-01 | 0.2049082 | 2.69e-01 | 0.1067777 | 5.27e-01 | 0.0246465 | 8.47e-01 | 0.0807545 | 5.78e-01 |
| ENSG0000015314 | 11       | 4612310   | 4611716   | AC08447.3    | havana | lincRNA                            | 0.08922123 | 4.40e-01 | 0.08922123 | 6.41e-01 | 0.1213959 | 5.43e-01 | 0.2049082 | 2.69e-01 | 0.1067777 | 5.27e-01 | 0.0246465 | 8.47e-01 | 0.0807545 | 5.78e-01 |
| ENSG0000014699 | 9        | 13206053  | 13206204  | IL13         | havana | protein_coding                     | 0.08922123 | 4.40e-01 | 0.08922123 | 6.41e-01 | 0.1213959 | 5.43e-01 | 0.2049082 | 2.69e-01 | 0.1067777 | 5.27e-01 | 0.0246465 | 8.47e-01 | 0.0807545 | 5.78e-01 |
| ENSG0000010444 | 12       | 12927089  | 12924217  | ZNF623       | havana | protein_coding                     | 0.2494983  | 2.06e-01 | 0.2494983  | 2.06e-01 | 0.1191314 | 2.71e-01 | 0.1985113 | 2.71e-01 | 0.1985113 | 2.71e-01 | 0.1985113 | 2.71e-01 | 0.1985113 | 2.71e-01 |
| ENSG0000014817 | 19       | 6887865   | 6884049   | ADGRE1       | havana | protein_coding                     | 0.1034937  | 7.86e-01 | 0.1034937  | 4.86e-01 | 0.2368725 | 2.56e-01 | 0.1930313 | 2.72e-01 | 0.0656795 | 6.54e-01 | 0.1632211 | 4.80e-01 | 0.0480717 | 9.33e-01 |
| ENSG0000013058 | 5        | 14024535  | 14033113  | PDGFR1       | havana | protein_coding                     | 0.2167518  | 1.27e-01 | 0.2167518  | 1.39e-01 | 0.0450471 | 2.28e-01 | 0.2473213 | 2.74e-01 | 0.0920239 | 6.46e-01 | 0.0709776 | 6.24e-01 | 0.0397706 | 6.13e-01 |
| ENSG0000015671 | 1        | 21004599  | 2101206   | OR5S1P       | havana | unifunc_pseudogen                  | 0.1144673  | 3.22e-01 | 0.1144673  | 9.29e-01 | 0.2092526 | 6.46e-01 | 0.2204949 | 2.69e-01 | 0.1399767 | 3.13e-01 | 0.0909102 |          |           |          |











Table with columns for gene ID, chromosome, coordinates, gene name, transcript name, and various numerical values. The table lists numerous genes such as SDR16C5, TATRN1, and many others, with associated genomic data and expression values.







| ENSG0000010319  | 22 | 2973096  | 2976701  | ZMAT5        | ensembl | havana | protein_coding     | 0.52104918 | 2.76e-05  | 0.20921515 | 1.45e-01  | 0.46120082 | 3.55e-02  | 0.19321028 | 3.34e-01  | 0.30012027 | 2.74e-02  | -0.1961278 | 3.70e-01  | 0.1418484  | 3.21e-01  |
|-----------------|----|----------|----------|--------------|---------|--------|--------------------|------------|-----------|------------|-----------|------------|-----------|------------|-----------|------------|-----------|------------|-----------|------------|-----------|
| ENSG0000010298  | 22 | 3097224  | 3010487  | AP0BC1       | ensembl | havana | protein_coding     | 0.09696373 | 3.89e-01  | 0.1252083  | 3.49e-01  | 0.1182812  | 5.57e-01  | 0.1931793  | 3.44e-01  | 0.1182764  | 3.44e-01  | 0.0689788  | 7.72e-01  | 0.0064029  | 9.66e-01  |
| ENSG0000010211  | 22 | 3177511  | 3177430  | CYR1         | ensembl | havana | protein_coding     | 0.14776511 | 0.0000000 | 0.14776511 | 0.0000000 | 0.14776511 | 0.0000000 | 0.14776511 | 0.0000000 | 0.14776511 | 0.0000000 | 0.14776511 | 0.0000000 | 0.14776511 | 0.0000000 |
| ENSG0000010976  | 7  | 6184092  | 6184961  | HUG2P        | ensembl | havana | protein_coding     | 0.27460793 | 1.57e-05  | 0.20051101 | 1.64e-01  | 0.18717601 | 3.50e-01  | 0.19316356 | 3.34e-01  | 0.19328868 | 3.21e-02  | 0.1977441  | 6.60e-01  | 0.2026508  | 1.64e-01  |
| ENSG0000012912  | 1  | 8242445  | 8430013  | HEH1         | ensembl | havana | lincRNA            | 0.2154303  | 5.96e-02  | 0.27282853 | 4.90e-01  | 0.17023919 | 3.96e-01  | 0.19312325 | 3.34e-01  | 0.19327407 | 7.41e-01  | 0.04241254 | 9.13e-01  | 0.0762369  | 5.99e-01  |
| ENSG0000017385  | 22 | 2488624  | 2488624  | LOC101929151 | ensembl | havana | antisense_intronic | 0.01921298 | 0.0000000 | 0.01921298 | 0.0000000 | 0.01921298 | 0.0000000 | 0.01921298 | 0.0000000 | 0.01921298 | 0.0000000 | 0.01921298 | 0.0000000 | 0.01921298 | 0.0000000 |
| ENSG0000024526  | 1  | 68474152 | 6849721  | DEPCL1       | ensembl | havana | protein_coding     | 0.05446619 | 5.14e-01  | 0.04912919 | 3.18e-01  | 0.19316593 | 3.08e-01  | 0.19316593 | 3.08e-01  | 0.19316593 | 3.08e-01  | 0.19316593 | 3.08e-01  | 0.19316593 | 3.08e-01  |
| ENSG0000020286  | 6  | 24797335 | 24798817 | ARM2L        | ensembl | havana | protein_coding     | 0.15761913 | 1.71e-01  | 0.15087944 | 2.96e-01  | 0.18842327 | 3.66e-01  | 0.19306721 | 3.35e-01  | 0.19306721 | 3.35e-01  | 0.19306721 | 3.35e-01  | 0.19306721 | 3.35e-01  |
| ENSG0000017621  | 1  | 24518562 | 24518562 | LOC101929151 | ensembl | havana | antisense_intronic | 0.02582622 | 0.0000000 | 0.02582622 | 0.0000000 | 0.02582622 | 0.0000000 | 0.02582622 | 0.0000000 | 0.02582622 | 0.0000000 | 0.02582622 | 0.0000000 | 0.02582622 | 0.0000000 |
| ENSG0000005871  | 4  | 13866578 | 13974045 | MEG17        | ensembl | havana | protein_coding     | 0.25493175 | 4.00e-05  | 0.25493175 | 4.00e-05  | 0.25493175 | 4.00e-05  | 0.25493175 | 4.00e-05  | 0.25493175 | 4.00e-05  | 0.25493175 | 4.00e-05  | 0.25493175 | 4.00e-05  |
| ENSG0000020207  | 17 | 4862785  | 4863493  | HOW4-AS4     | ensembl | havana | lincRNA            | 0.0718485  | 5.36e-01  | 0.14578884 | 3.12e-01  | 0.18107076 | 3.99e-01  | 0.19299562 | 3.35e-01  | 0.19299562 | 3.35e-01  | 0.19299562 | 3.35e-01  | 0.19299562 | 3.35e-01  |
| ENSG0000020483  | 26 | 6420942  | 6420978  | RP52P2       | ensembl | havana | antisense_intronic | 0.0562622  | 0.0000000 | 0.0562622  | 0.0000000 | 0.0562622  | 0.0000000 | 0.0562622  | 0.0000000 | 0.0562622  | 0.0000000 | 0.0562622  | 0.0000000 | 0.0562622  | 0.0000000 |
| ENSG00000208043 | 12 | 7954116  | 7972759  | AC0056116    | ensembl | havana | transcripted_unit  | 0.02958283 | 0.0000000 | 0.02958283 | 0.0000000 | 0.02958283 | 0.0000000 | 0.02958283 | 0.0000000 | 0.02958283 | 0.0000000 | 0.02958283 | 0.0000000 | 0.02958283 | 0.0000000 |
| ENSG00000201381 | 21 | 825492   | 825514   | RP71120.7    | ensembl | havana | lincRNA            | 0.20428614 | 7.47e-01  | 0.23804116 | 9.60e-01  | 0.05397397 | 7.89e-01  | 0.19290454 | 3.35e-01  | 0.19231765 | 3.43e-01  | 0.11222944 | 5.94e-01  | 0.00280241 | 5.76e-01  |
| ENSG00000215282 | 15 | 9677205  | 9678132  | SPYAT-AS1    | ensembl | havana | antisense_intronic | 0.0520948  | 6.53e-01  | 0.0679875  | 6.40e-01  | 0.1548952  | 4.93e-01  | 0.19299562 | 3.35e-01  | 0.19299562 | 3.35e-01  | 0.19299562 | 3.35e-01  | 0.19299562 | 3.35e-01  |
| ENSG00000186360 | 26 | 6420942  | 6420978  | RP52P2       | ensembl | havana | transcripted_unit  | 0.02958283 | 0.0000000 | 0.02958283 | 0.0000000 | 0.02958283 | 0.0000000 | 0.02958283 | 0.0000000 | 0.02958283 | 0.0000000 | 0.02958283 | 0.0000000 | 0.02958283 | 0.0000000 |
| ENSG00000207352 | 5  | 6460461  | 6460476  | RNU6-50P     | ensembl | havana | sRNA               | 0.1537762  | 1.82e-01  | 0.1537762  | 1.82e-01  | 0.1537762  | 1.82e-01  | 0.1537762  | 1.82e-01  | 0.1537762  | 1.82e-01  | 0.1537762  | 1.82e-01  | 0.1537762  | 1.82e-01  |
| ENSG00000102900 | 16 | 56730118 | 56829296 | NAIP3        | ensembl | havana | protein_coding     | 0.16310922 | 1.56e-01  | 0.16310922 | 1.56e-01  | 0.16310922 | 1.56e-01  | 0.16310922 | 1.56e-01  | 0.16310922 | 1.56e-01  | 0.16310922 | 1.56e-01  | 0.16310922 | 1.56e-01  |
| ENSG00000102966 | 15 | 4129258  | 4129257  | ENH2         | ensembl | havana | protein_coding     | 0.12166109 | 0.0000000 | 0.12166109 | 0.0000000 | 0.12166109 | 0.0000000 | 0.12166109 | 0.0000000 | 0.12166109 | 0.0000000 | 0.12166109 | 0.0000000 | 0.12166109 | 0.0000000 |
| ENSG00000197165 | 16 | 28591943 | 28597060 | SULT1A2      | ensembl | havana | protein_coding     | 0.0032026  | 8.42e-01  | 0.1967094  | 1.71e-01  | 0.2402455  | 2.27e-01  | 0.1926712  | 3.61e-01  | 0.1118438  | 4.00e-01  | 0.02792597 | 7.14e-01  | 0.1283201  | 3.74e-01  |
| ENSG00000219883 | 19 | 39389153 | 39389448 | NIH1A56P     | ensembl | havana | misc_RNA           | 0.14827249 | 1.98e-01  | 0.21318655 | 1.26e-01  | 0.1202681  | 5.50e-01  | 0.19268859 | 3.36e-01  | 0.13699916 | 3.28e-01  | 0.03195649 | 9.33e-01  | 0.082092   | 5.98e-01  |
| ENSG00000214750 | 19 | 1228437  | 1228518  | AC02161.2    | ensembl | havana | antisense_intronic | 0.0292182  | 8.01e-01  | 0.0292182  | 8.01e-01  | 0.0292182  | 8.01e-01  | 0.0292182  | 8.01e-01  | 0.0292182  | 8.01e-01  | 0.0292182  | 8.01e-01  | 0.0292182  | 8.01e-01  |
| ENSG00000200284 | 12 | 7954116  | 7972759  | AC0056116    | ensembl | havana | transcripted_unit  | 0.02958283 | 0.0000000 | 0.02958283 | 0.0000000 | 0.02958283 | 0.0000000 | 0.02958283 | 0.0000000 | 0.02958283 | 0.0000000 | 0.02958283 | 0.0000000 | 0.02958283 | 0.0000000 |
| ENSG00000201381 | 21 | 825492   | 825514   | RP71120.7    | ensembl | havana | lincRNA            | 0.20428614 | 7.47e-01  | 0.23804116 | 9.60e-01  | 0.05397397 | 7.89e-01  | 0.19290454 | 3.35e-01  | 0.19231765 | 3.43e-01  | 0.11222944 | 5.94e-01  | 0.00280241 | 5.76e-01  |
| ENSG00000215282 | 15 | 9677205  | 9678132  | SPYAT-AS1    | ensembl | havana | antisense_intronic | 0.0520948  | 6.53e-01  | 0.0679875  | 6.40e-01  | 0.1548952  | 4.93e-01  | 0.19299562 | 3.35e-01  | 0.19299562 | 3.35e-01  | 0.19299562 | 3.35e-01  | 0.19299562 | 3.35e-01  |
| ENSG00000186360 | 26 | 6420942  | 6420978  | RP52P2       | ensembl | havana | transcripted_unit  | 0.02958283 | 0.0000000 | 0.02958283 | 0.0000000 | 0.02958283 | 0.0000000 | 0.02958283 | 0.0000000 | 0.02958283 | 0.0000000 | 0.02958283 | 0.0000000 | 0.02958283 | 0.0000000 |
| ENSG00000207352 | 5  | 6460461  | 6460476  | RNU6-50P     | ensembl | havana | sRNA               | 0.1537762  | 1.82e-01  | 0.1537762  | 1.82e-01  | 0.1537762  | 1.82e-01  | 0.1537762  | 1.82e-01  | 0.1537762  | 1.82e-01  | 0.1537762  | 1.82e-01  | 0.1537762  | 1.82e-01  |
| ENSG00000102900 | 16 | 56730118 | 56829296 | NAIP3        | ensembl | havana | protein_coding     | 0.16310922 | 1.56e-01  | 0.16310922 | 1.56e-01  | 0.16310922 | 1.56e-01  | 0.16310922 | 1.56e-01  | 0.16310922 | 1.56e-01  | 0.16310922 | 1.56e-01  | 0.16310922 | 1.56e-01  |
| ENSG00000102966 | 15 | 4129258  | 4129257  | ENH2         | ensembl | havana | protein_coding     | 0.12166109 | 0.0000000 | 0.12166109 | 0.0000000 | 0.12166109 | 0.0000000 | 0.12166109 | 0.0000000 | 0.12166109 | 0.0000000 | 0.12166109 | 0.0000000 | 0.12166109 | 0.0000000 |
| ENSG00000197165 | 16 | 28591943 | 28597060 | SULT1A2      | ensembl | havana | protein_coding     | 0.0032026  | 8.42e-01  | 0.1967094  | 1.71e-01  | 0.2402455  | 2.27e-01  | 0.1926712  | 3.61e-01  | 0.1118438  | 4.00e-01  | 0.02792597 | 7.14e-01  | 0.1283201  | 3.74e-01  |
| ENSG00000219883 | 19 | 39389153 | 39389448 | NIH1A56P     | ensembl | havana | misc_RNA           | 0.14827249 | 1.98e-01  | 0.21318655 | 1.26e-01  | 0.1202681  | 5.50e-01  | 0.19268859 | 3.36e-01  | 0.13699916 | 3.28e-01  | 0.03195649 | 9.33e-01  | 0.082092   | 5.98e-01  |
| ENSG00000214750 | 19 | 1228437  | 1228518  | AC02161.2    | ensembl | havana | antisense_intronic | 0.0292182  | 8.01e-01  | 0.0292182  | 8.01e-01  | 0.0292182  | 8.01e-01  | 0.0292182  | 8.01e-01  | 0.0292182  | 8.01e-01  | 0.0292182  | 8.01e-01  | 0.0292182  | 8.01e-01  |
| ENSG00000200284 | 12 | 7954116  | 7972759  | AC0056116    | ensembl | havana | transcripted_unit  | 0.02958283 | 0.0000000 | 0.02958283 | 0.0000000 | 0.02958283 | 0.0000000 | 0.02958283 | 0.0000000 | 0.02958283 | 0.0000000 | 0.02958283 | 0.0000000 | 0.02958283 | 0.0000000 |
| ENSG00000201381 | 21 | 825492   | 825514   | RP71120.7    | ensembl | havana | lincRNA            | 0.20428614 | 7.47e-01  | 0.23804116 | 9.60e-01  | 0.05397397 | 7.89e-01  | 0.19290454 | 3.35e-01  | 0.19231765 | 3.43e-01  | 0.11222944 | 5.94e-01  | 0.00280241 | 5.76e-01  |
| ENSG00000215282 | 15 | 9677205  | 9678132  | SPYAT-AS1    | ensembl | havana | antisense_intronic | 0.0520948  | 6.53e-01  | 0.0679875  | 6.40e-01  | 0.1548952  | 4.93e-01  | 0.19299562 | 3.35e-01  | 0.19299562 | 3.35e-01  | 0.19299562 | 3.35e-01  | 0.19299562 | 3.35e-01  |
| ENSG00000186360 | 26 | 6420942  | 6420978  | RP52P2       | ensembl | havana | transcripted_unit  | 0.02958283 | 0.0000000 | 0.02958283 | 0.0000000 | 0.02958283 | 0.0000000 | 0.02958283 | 0.0000000 | 0.02958283 | 0.0000000 | 0.02958283 | 0.0000000 | 0.02958283 | 0.0000000 |
| ENSG00000207352 | 5  | 6460461  | 6460476  | RNU6-50P     | ensembl | havana | sRNA               | 0.1537762  | 1.82e-01  | 0.1537762  | 1.82e-01  | 0.1537762  | 1.82e-01  | 0.1537762  | 1.82e-01  | 0.1537762  | 1.82e-01  | 0.1537762  | 1.82e-01  | 0.1537762  | 1.82e-01  |
| ENSG00000102900 | 16 | 56730118 | 56829296 | NAIP3        | ensembl | havana | protein_coding     | 0.16310922 | 1.56e-01  | 0.16310922 | 1.56e-01  | 0.16310922 | 1.56e-01  | 0.16310922 | 1.56e-01  | 0.16310922 | 1.56e-01  | 0.16310922 | 1.56e-01  | 0.16310922 | 1.56e-01  |
| ENSG00000102966 | 15 | 4129258  | 4129257  | ENH2         | ensembl | havana | protein_coding     | 0.12166109 | 0.0000000 | 0.12166109 | 0.0000000 | 0.12166109 | 0.0000000 | 0.12166109 | 0.0000000 | 0.12166109 | 0.0000000 | 0.12166109 | 0.0000000 | 0.12166109 | 0.0000000 |
| ENSG00000197165 | 16 | 28591943 | 28597060 | SULT1A2      | ensembl | havana | protein_coding     | 0.0032026  | 8.42e-01  | 0.1967094  | 1.71e-01  | 0.2402455  | 2.27e-01  | 0.1926712  | 3.61e-01  | 0.1118438  | 4.00e-01  | 0.02792597 | 7.14      |            |           |

Table with 20 columns: Gene ID, Chr, Start, End, Strand, Feature, RefSeq ID, Gene Name, Species, Feature Type, RefSeq ID, Gene Name, Species, Feature Type, RefSeq ID, Gene Name, Species, Feature Type, RefSeq ID, Gene Name, Species, Feature Type. Contains genomic data for various genes and features.

| ENSG0000020115   | 16 | 78872739  | 78873505  | AC116601.1 | havana                          | TEC                             | 0.08021351 | 4.88E-07  | 0.09775466 | 4.99E-07  | 0.1864691 | 3.54E-07  | 0.18494511 | 3.56E-07  | 0.1326267 | 3.39E-07  | 0.061488    | 7.80E-07  | 0.1021146 | 4.80E-07  |           |
|------------------|----|-----------|-----------|------------|---------------------------------|---------------------------------|------------|-----------|------------|-----------|-----------|-----------|------------|-----------|-----------|-----------|-------------|-----------|-----------|-----------|-----------|
| ENSG0000021723   | 8  | 3092136   | 3098425   | TTPP2P     | transcript processed pseudogene |                                 | 0.1813305  | 2.11E-07  | 0.2039889  | 6.13E-07  | 0.2994341 | 1.34E-07  | 0.1848927  | 3.56E-07  | 0.0768031 | 5.81E-07  | 0.125397    | 5.69E-07  | 0.0940857 | 5.15E-07  |           |
| ENSG0000020601.1 | 15 | 7447274   | 7447472   | AC019172.1 | havana                          | transcript processed pseudogene | 0.0014734  | 0.0001418 | 0.0001418  | 0.0001418 | 0.0001418 | 0.0001418 | 0.0001418  | 0.0001418 | 0.0001418 | 0.0001418 | 0.0001418   | 0.0001418 | 0.0001418 | 0.0001418 | 0.0001418 |
| ENSG0000020607   | x  | 7037840   | 7039235   | AL138141.1 | havana                          | ncRNA                           | 0.0074661  | 9.49E-07  | 0.1558887  | 2.86E-07  | 0.0626498 | 7.41E-07  | 0.1848361  | 3.56E-07  | 0.0553588 | 6.91E-07  | 0.0988815   | 5.10E-07  | 0.0680815 | 7.58E-07  |           |
| ENSG0000021473   | 6  | 4301143   | 4301868   | MRA1       | transcript processed pseudogene |                                 | 0.1249923  | 6.53E-07  | 0.0738813  | 5.90E-07  | 0.159245  | 3.44E-07  | 0.1848112  | 3.56E-07  | 0.1211362 | 3.98E-07  | 0.098915    | 2.88E-07  | 0.1174099 | 3.78E-07  |           |
| ENSG0000020996   | 7  | 60257175  | 60257184  | IRF6T1     | transcript processed pseudogene |                                 | 0.0001418  | 0.0001418 | 0.0001418  | 0.0001418 | 0.0001418 | 0.0001418 | 0.0001418  | 0.0001418 | 0.0001418 | 0.0001418 | 0.0001418   | 0.0001418 | 0.0001418 | 0.0001418 | 0.0001418 |
| ENSG0000011396.1 | 6  | 14827304  | 14855240  | SASH1      | transcript processed pseudogene |                                 | 0.0859437  | 1.05E-07  | 0.0308822  | 1.76E-07  | 0.3896754 | 1.16E-07  | 0.1847811  | 3.56E-07  | 0.1263346 | 3.63E-07  | 0.0988215   | 3.11E-07  | 0.0779739 | 3.78E-07  |           |
| ENSG0000017466   | 18 | 3332327   | 3335448   | ZNF24      | transcript processed pseudogene |                                 | 0.0394489  | 7.69E-07  | 0.1538805  | 2.84E-07  | 0.066886  | 7.44E-07  | 0.1847645  | 3.56E-07  | 0.0170709 | 8.99E-07  | 0.2233130   | 6.01E-07  | 0.0492837 | 4.74E-07  |           |
| ENSG0000020654   | 1  | 134841    | 135654    | AC008104.1 | havana                          | transcript processed pseudogene | 0.0001418  | 0.0001418 | 0.0001418  | 0.0001418 | 0.0001418 | 0.0001418 | 0.0001418  | 0.0001418 | 0.0001418 | 0.0001418 | 0.0001418   | 0.0001418 | 0.0001418 | 0.0001418 | 0.0001418 |
| ENSG00000204159  | 2  | 21200434  | 21201388  | HMG91P9    | transcript processed pseudogene |                                 | 0.01148667 | 7.98E-07  | 0.0351286  | 4.37E-07  | 0.175891  | 3.91E-07  | 0.1847201  | 3.56E-07  | 0.0282475 | 3.07E-07  | 0.0100504   | 8.70E-07  | 0.1144199 | 7.24E-07  |           |
| ENSG00000201110  | 10 | 8937875   | 8939215   | AL833751.1 | havana                          | ncRNA                           | 0.0497304  | 6.68E-07  | 0.1630935  | 2.67E-07  | 0.1800577 | 3.69E-07  | 0.1847073  | 3.56E-07  | 0.1166089 | 4.01E-07  | 0.0959391   | 6.63E-07  | 0.1483148 | 3.01E-07  |           |
| ENSG0000020897   | 20 | 4709916   | 4709916   | AC208661.1 | havana                          | ncRNA                           | 0.0009629  | 9.36E-07  | 0.2221828  | 9.33E-07  | 0.3243921 | 5.81E-07  | 0.1847201  | 3.56E-07  | 0.1889233 | 4.96E-07  | 0.122248    | 6.35E-07  | 0.0689219 | 9.47E-07  |           |
| ENSG0000014483   | 7  | 5274569   | 5306870   | SLC52A4    | transcript processed pseudogene |                                 | 0.11968321 | 3.00E-07  | 0.1959509  | 1.84E-07  | 0.08265   | 6.87E-07  | 0.1846905  | 3.56E-07  | 0.1003712 | 7.07E-07  | 0.0739001   | 7.19E-07  | 0.0987762 | 3.01E-07  |           |
| ENSG00000087157  | 17 | 78738649  | 7842514   | PCG1       | transcript processed pseudogene |                                 | 0.1392073  | 2.47E-07  | 0.1586443  | 2.70E-07  | 0.0555339 | 7.81E-07  | 0.1845199  | 3.57E-07  | 0.1592889 | 2.50E-07  | 0.041928    | 8.49E-07  | 0.0484811 | 7.88E-07  |           |
| ENSG00000178927  | 17 | 8344286   | 8345029   | PWS1       | transcript processed pseudogene |                                 | 0.0807227  | 4.43E-07  | 0.1313189  | 3.25E-07  | 0.1872389 | 9.25E-07  | 0.1845002  | 3.57E-07  | 0.0981398 | 5.01E-07  | 0.0312288   | 8.87E-07  | 0.0213891 | 8.83E-07  |           |
| ENSG00000208117  | 2  | 20929051  | 20929149  | SNRPB1     | transcript processed pseudogene |                                 | 0.0224768  | 5.16E-07  | 0.0692364  | 2.00E-07  | 0.0695958 | 7.80E-07  | 0.1845199  | 3.57E-07  | 0.2701256 | 8.88E-07  | 0.1105416   | 6.16E-07  | 0.0964871 | 5.65E-07  |           |
| ENSG00000214013  | 15 | 4272733   | 4273503   | IGAC       | transcript processed pseudogene |                                 | 0.0851233  | 4.42E-07  | 0.1587899  | 2.70E-07  | 0.2420167 | 2.24E-07  | 0.1844791  | 3.57E-07  | 0.051905  | 7.90E-07  | 0.0607012   | 1.66E-07  | 0.1489904 | 3.02E-07  |           |
| ENSG00000210649  | 7  | 13620717  | 13608468  | AC024084.1 | havana                          | ncRNA                           | 0.0248411  | 8.30E-07  | 0.0311363  | 9.81E-07  | 0.2814368 | 1.52E-07  | 0.1844791  | 3.57E-07  | 0.0276079 | 9.48E-07  | 0.0320786   | 9.88E-07  | 0.1297984 | 3.04E-07  |           |
| ENSG0000021531   | 7  | 7420976   | 7421360   | FRS31      | transcript processed pseudogene |                                 | 0.0906788  | 4.05E-07  | 0.1458919  | 4.71E-07  | 0.1548911 | 4.41E-07  | 0.1844791  | 3.57E-07  | 0.1429534 | 1.03E-07  | 0.074465    | 8.65E-07  | 0.0415177 | 7.67E-07  |           |
| ENSG0000021466   | 1  | 215839483 | 215840182 | LVST-AS1   | transcript processed pseudogene |                                 | 0.0162506  | 8.88E-07  | 0.0247049  | 8.76E-07  | 0.1216838 | 2.77E-07  | 0.1844691  | 3.57E-07  | 0.0217175 | 8.76E-07  | 0.1022828   | 6.42E-07  | 0.1511815 | 2.97E-07  |           |
| ENSG00000138778  | 4  | 10310549  | 10310845  | ENPE1      | transcript processed pseudogene |                                 | 0.1638755  | 1.54E-07  | 0.1157794  | 4.23E-07  | 0.4021442 | 3.76E-07  | 0.1844231  | 3.57E-07  | 0.2382137 | 1.28E-07  | 0.1184865   | 5.90E-07  | 0.1199475 | 4.06E-07  |           |
| ENSG00000209939  | 11 | 12666915  | 12667187  | CA11       | transcript processed pseudogene |                                 | 0.0009629  | 9.36E-07  | 0.2221828  | 9.33E-07  | 0.3243921 | 5.81E-07  | 0.1847201  | 3.56E-07  | 0.1889233 | 4.96E-07  | 0.122248    | 6.35E-07  | 0.0689219 | 9.47E-07  |           |
| ENSG00000139957  | 13 | 3240723   | 3242811   | N4BP1      | transcript processed pseudogene |                                 | 0.1198930  | 2.99E-07  | 0.1973463  | 1.69E-07  | 0.0690929 | 7.83E-07  | 0.1844724  | 3.57E-07  | 0.0956649 | 4.91E-07  | 0.0671446   | 7.11E-07  | 0.0487319 | 9.73E-07  |           |
| ENSG0000014440   | 21 | 1759563   | 1761295   | H8921      | transcript processed pseudogene |                                 | 0.098698   | 3.88E-07  | 0.1541296  | 2.83E-07  | 0.0218184 | 2.62E-07  | 0.1843804  | 3.57E-07  | 0.0379283 | 5.07E-07  | 0.1179992   | 5.92E-07  | 0.0588842 | 6.49E-07  |           |
| ENSG0000010174   | 4  | 18471409  | 1847159   | AC079261.1 | transcript processed pseudogene |                                 | 0.0888217  | 4.58E-07  | 0.0602028  | 6.69E-07  | 0.0951536 | 6.97E-07  | 0.1842975  | 3.57E-07  | 0.1657629 | 2.31E-07  | 0.0313244   | 9.52E-07  | 0.0419354 | 8.98E-07  |           |
| ENSG0000014946   | 1  | 2079532   | 2079500   | AME1       | transcript processed pseudogene |                                 | 0.0237408  | 5.88E-07  | 0.0607704  | 6.75E-07  | 0.0300631 | 9.69E-07  | 0.1842791  | 3.57E-07  | 0.0690234 | 6.89E-07  | 0.1329789   | 3.78E-07  | 0.1171238 | 3.79E-07  |           |
| ENSG00000205786  | 22 | 2899271   | 2901860   | ZNF671.1   | transcript processed pseudogene |                                 | 0.1016319  | 2.99E-07  | 0.0957018  | 5.83E-07  | 0.1753641 | 3.81E-07  | 0.1842541  | 3.58E-07  | 0.0500009 | 7.00E-07  | 0.0247768   | 2.64E-07  | 0.1580456 | 3.96E-07  |           |
| ENSG00000214773  | 19 | 1129515   | 1127367   | AC021013.1 | transcript processed pseudogene |                                 | 0.0326687  | 8.95E-07  | 0.193384   | 2.69E-07  | 0.1426764 | 5.84E-07  | 0.1841993  | 3.58E-07  | 0.0354409 | 7.99E-07  | 0.0919517   | 6.78E-07  | 0.11993   | 4.07E-07  |           |
| ENSG0000019881   | 1  | 588787    | 593876    | FRS3B      | transcript processed pseudogene |                                 | 0.0866807  | 3.97E-07  | 0.1992629  | 1.82E-07  | 0.0692364 | 2.64E-07  | 0.1841993  | 3.58E-07  | 0.0290974 | 7.94E-07  | 0.1801274   | 1.53E-07  | 0.1302124 | 3.88E-07  |           |
| ENSG00000124657  | 6  | 2795724   | 2795818   | OR2B6      | transcript processed pseudogene |                                 | 0.0981035  | 3.86E-07  | 0.2521233  | 1.21E-07  | 0.1392901 | 4.88E-07  | 0.1841541  | 3.58E-07  | 0.0518133 | 7.08E-07  | 0.0504483   | 9.80E-07  | 0.0900443 | 5.11E-07  |           |
| ENSG0000020162   | 20 | 1320710   | 1324367   | AL136513.1 | havana                          | TEC                             | 0.1187197  | 3.04E-07  | 0.2450979  | 8.64E-07  | 0.1044828 | 6.04E-07  | 0.1841132  | 3.58E-07  | 0.0608019 | 6.62E-07  | 0.1198142   | 5.80E-07  | 0.1513205 | 9.14E-07  |           |
| ENSG0000015487   | 1  | 6424541   | 6403426   | AC019172.1 | havana                          | transcript processed pseudogene | 0.0001418  | 0.0001418 | 0.0001418  | 0.0001418 | 0.0001418 | 0.0001418 | 0.0001418  | 0.0001418 | 0.0001418 | 0.0001418 | 0.0001418   | 0.0001418 | 0.0001418 | 0.0001418 | 0.0001418 |
| ENSG00000215574  | 7  | 27491582  | 2749276   | AC071510.1 | transcript processed pseudogene |                                 | 0.1385466  | 2.29E-07  | 0.1934123  | 1.34E-07  | 0.0314231 | 3.44E-07  | 0.1841031  | 3.58E-07  | 0.1211260 | 3.82E-07  | 0.0920452   | 4.07E-07  | 0.186439  | 3.96E-07  |           |
| ENSG00000136096  | 2  | 21373552  | 21328425  | SPAG16-0T  | transcript processed pseudogene |                                 | 0.0009914  | 9.58E-07  | 0.2344503  | 9.69E-07  | 0.0664043 | 7.47E-07  | 0.1840909  | 3.58E-07  | 0.0238368 | 8.64E-07  | 0.1346513   | 5.40E-07  | 0.1023742 | 8.70E-07  |           |
| ENSG00000213273  | 1  | 2091648   | 2091327   | FRS3A      | transcript processed pseudogene |                                 | 0.0916822  | 3.97E-07  | 0.1992629  | 1.82E-07  | 0.0692364 | 2.64E-07  | 0.1841993  | 3.58E-07  | 0.0290974 | 7.94E-07  | 0.1801274   | 1.53E-07  | 0.1302124 | 3.88E-07  |           |
| ENSG00000138785  | 4  | 10568327  | 10589586  | INTS12     | transcript processed pseudogene |                                 | 0.1013675  | 3.19E-07  | 0.0965655  | 7.32E-07  | 0.2137049 | 2.28E-07  | 0.1839943  | 3.58E-07  | 0.1099975 | 7.94E-07  | 0.0491263   | 9.80E-07  | 0.1180791 | 3.12E-07  |           |
| ENSG0000021586   | 4  | 10571314  | 10571803  | TET1-AS1   | transcript processed pseudogene |                                 | 0.1124439  | 3.93E-07  | 0.0686483  | 6.36E-07  | 0.141582  | 4.81E-07  | 0.1839889  | 3.58E-07  | 0.1018318 | 4.34E-07  | 0.1223354   | 5.51E-07  | 0.150518  | 3.78E-07  |           |
| ENSG00000212094  | 13 | 2742489   | 2743523   | FT3A       | transcript processed pseudogene |                                 | 0.1467933  | 1.54E-07  | 0.1747982  | 2.20E-07  | 0.1598023 | 4.53E-07  | 0.1839512  | 3.58E-07  | 0.1745349 | 2.07E-07  | 0.1379834   | 4.32E-07  | 0.1482016 | 2.30E-07  |           |
| ENSG00000214449  | 1  | 2079532   | 2079500   | AME1       | transcript processed pseudogene |                                 | 0.0237408  | 5.88E-07  | 0.0607704  | 6.75E-07  | 0.0300631 | 9.69E-07  | 0.1842791  | 3.57E-07  | 0.0690234 | 6.89E-07  | 0.1329789   | 3.78E-07  | 0.1171238 | 3.79E-07  |           |
| ENSG0000010318   | 3  | 5410460   | 5423461   | PHF7       | transcript processed pseudogene |                                 | 0.0948111  | 4.12E-07  | 0.1343934  | 3.52E-07  | 0.1045911 | 6.04E-07  | 0.1839289  | 3.58E-07  | 0.1383325 | 3.18E-07  | 0.075426    | 2.01E-07  | 0.159871  | 1.78E-07  |           |
| ENSG0000016795   | 10 | 11719189  | 11721099  | KW18       | transcript processed pseudogene |                                 | 0.0534027  | 6.46E-07  | 0.2370936  | 9.74E-07  | 0.2504408 | 2.08E-07  | 0.1839116  | 3.58E-07  | 0.0385899 | 9.82E-07  | 0.047679    | 8.86E-07  | 0.1079252 | 2.93E-07  |           |
| ENSG0000019884   | 1  | 2129251   | 2129251   | FRS3C      | transcript processed pseudogene |                                 | 0.0416123  | 9.25E-07  | 0.1707887  | 2.64E-07  | 0.0692364 | 2.64E-07  | 0.1841993  | 3.58E-07  | 0.0290974 | 7.94E-07  | 0.1801274</ |           |           |           |           |







Table with columns for gene ID, gene name, gene symbol, gene type, gene description, and various numerical values. The table lists numerous genes such as ENG000002453, ENG000002478, ENG000002492, etc., with their corresponding symbols and descriptions.

| ENSG0000017124                                                                                                                                                                                                                                                                                                                                                                                     | 1  | 41506165 | 42035925 | HVFP3     | havana  | protein_coding   | 0.0203697 | 8.06e-02  | 0.0995676 | 5.09e-01  | 0.3286766 | 9.41e-02  | 0.1735811 | 3.87e-01  | 0.2879175 | 7.48e-02  | 0.1077710 | 4.44e-01  | 0.2466713 | 8.68e-02  |
|----------------------------------------------------------------------------------------------------------------------------------------------------------------------------------------------------------------------------------------------------------------------------------------------------------------------------------------------------------------------------------------------------|----|----------|----------|-----------|---------|------------------|-----------|-----------|-----------|-----------|-----------|-----------|-----------|-----------|-----------|-----------|-----------|-----------|-----------|-----------|
| ENSG0000018290 <td>10</td> <td>71168119</td> <td>72424004</td> <td>FAM149B1</td> <td>ensembl</td> <td>mRNA</td> <td>0.0224768</td> <td>5.13e-01</td> <td>0.1426801</td> <td>3.82e-01</td> <td>0.3647055</td> <td>6.14e-02</td> <td>0.1793769</td> <td>3.87e-01</td> <td>0.0797512</td> <td>5.64e-01</td> <td>0.1103145</td> <td>4.37e-01</td> <td>0.2622523</td> <td>6.88e-02</td>                 | 10 | 71168119 | 72424004 | FAM149B1  | ensembl | mRNA             | 0.0224768 | 5.13e-01  | 0.1426801 | 3.82e-01  | 0.3647055 | 6.14e-02  | 0.1793769 | 3.87e-01  | 0.0797512 | 5.64e-01  | 0.1103145 | 4.37e-01  | 0.2622523 | 6.88e-02  |
| ENSG0000018296 <td>20</td> <td>16729861</td> <td>16724264</td> <td>SNRNP87</td> <td>ensembl</td> <td>protein_coding</td> <td>0.0131423</td> <td>0.0000000</td> | 20 | 16729861 | 16724264 | SNRNP87   | ensembl | protein_coding   | 0.0131423 | 0.0000000 | 0.0000000 | 0.0000000 | 0.0000000 | 0.0000000 | 0.0000000 | 0.0000000 | 0.0000000 | 0.0000000 | 0.0000000 | 0.0000000 | 0.0000000 | 0.0000000 |
| ENSG0000017558 <td>6</td> <td>16074209</td> <td>16076790</td> <td>INPP5B1</td> <td>ensembl</td> <td>transcript_unapp</td> <td>0.0207939</td> <td>3.73e-01</td> <td>0.1600877</td> <td>2.49e-01</td> <td>0.1609948</td> <td>4.23e-01</td> <td>0.1794526</td> <td>3.87e-01</td> <td>0.0292068</td> <td>5.08e-01</td> <td>0.121945</td> <td>5.77e-01</td> <td>0.103084</td> <td>9.90e-02</td>         | 6  | 16074209 | 16076790 | INPP5B1   | ensembl | transcript_unapp | 0.0207939 | 3.73e-01  | 0.1600877 | 2.49e-01  | 0.1609948 | 4.23e-01  | 0.1794526 | 3.87e-01  | 0.0292068 | 5.08e-01  | 0.121945  | 5.77e-01  | 0.103084  | 9.90e-02  |
| ENSG0000017034 <td>1</td> <td>1276446</td> <td>12765297</td> <td>ITIH4</td> <td>ensembl</td> <td>protein_coding</td> <td>0.0152764</td> <td>0.0000000</td>     | 1  | 1276446  | 12765297 | ITIH4     | ensembl | protein_coding   | 0.0152764 | 0.0000000 | 0.0000000 | 0.0000000 | 0.0000000 | 0.0000000 | 0.0000000 | 0.0000000 | 0.0000000 | 0.0000000 | 0.0000000 | 0.0000000 | 0.0000000 | 0.0000000 |
| ENSG0000017481 <td>16</td> <td>73295938</td> <td>73199978</td> <td>PKDOL3</td> <td>ensembl</td> <td>protein_coding</td> <td>0.0404043</td> <td>7.21e-01</td> <td>0.1433838</td> <td>4.76e-01</td> <td>0.1734249</td> <td>3.87e-01</td> <td>0.1255276</td> <td>3.87e-01</td> <td>0.0621446</td> <td>3.66e-01</td> <td>0.121495</td> <td>3.71e-01</td> <td>0.1634392</td> <td>8.02e-02</td>          | 16 | 73295938 | 73199978 | PKDOL3    | ensembl | protein_coding   | 0.0404043 | 7.21e-01  | 0.1433838 | 4.76e-01  | 0.1734249 | 3.87e-01  | 0.1255276 | 3.87e-01  | 0.0621446 | 3.66e-01  | 0.121495  | 3.71e-01  | 0.1634392 | 8.02e-02  |
| ENSG0000010196 <td>22</td> <td>38468478</td> <td>38483447</td> <td>KDELR3</td> <td>ensembl</td> <td>protein_coding</td> <td>0.0154609</td> <td>2.08e-01</td> <td>0.0727647</td> <td>6.14e-01</td> <td>0.0559269</td> <td>2.82e-01</td> <td>0.1732961</td> <td>3.87e-01</td> <td>0.0429284</td> <td>3.95e-01</td> <td>0.0952541</td> <td>6.65e-01</td> <td>0.0838357</td> <td>7.02e-02</td>         | 22 | 38468478 | 38483447 | KDELR3    | ensembl | protein_coding   | 0.0154609 | 2.08e-01  | 0.0727647 | 6.14e-01  | 0.0559269 | 2.82e-01  | 0.1732961 | 3.87e-01  | 0.0429284 | 3.95e-01  | 0.0952541 | 6.65e-01  | 0.0838357 | 7.02e-02  |
| ENSG0000018694 <td>1</td> <td>12333329</td> <td>12335001</td> <td>ITIH4</td> <td>ensembl</td> <td>protein_coding</td> <td>0.0152764</td> <td>0.0000000</td>    | 1  | 12333329 | 12335001 | ITIH4     | ensembl | protein_coding   | 0.0152764 | 0.0000000 | 0.0000000 | 0.0000000 | 0.0000000 | 0.0000000 | 0.0000000 | 0.0000000 | 0.0000000 | 0.0000000 | 0.0000000 | 0.0000000 | 0.0000000 | 0.0000000 |
| ENSG0000016835 <td>7</td> <td>40120277</td> <td>40134627</td> <td>MLPAP</td> <td>ensembl</td> <td>protein_coding</td> <td>0.1388829</td> <td>2.29e-01</td> <td>0.1274959</td> <td>3.79e-01</td> <td>0.0527073</td> <td>7.75e-01</td> <td>0.1734883</td> <td>3.87e-01</td> <td>0.0366247</td> <td>3.71e-01</td> <td>0.0424241</td> <td>6.45e-01</td> <td>0.0952541</td> <td>8.02e-02</td>           | 7  | 40120277 | 40134627 | MLPAP     | ensembl | protein_coding   | 0.1388829 | 2.29e-01  | 0.1274959 | 3.79e-01  | 0.0527073 | 7.75e-01  | 0.1734883 | 3.87e-01  | 0.0366247 | 3.71e-01  | 0.0424241 | 6.45e-01  | 0.0952541 | 8.02e-02  |
| ENSG0000019480 <td>14</td> <td>10668367</td> <td>10668786</td> <td>RNAP59B</td> <td>ensembl</td> <td>mRNA</td> <td>0.0373762</td> <td>7.71e-01</td> <td>0.1436377</td> <td>3.31e-01</td> <td>0.0129052</td> <td>8.48e-01</td> <td>0.1733604</td> <td>3.87e-01</td> <td>0.0712037</td> <td>6.08e-01</td> <td>0.051293</td> <td>8.16e-01</td> <td>0.077844</td> <td>8.48e-01</td>                    | 14 | 10668367 | 10668786 | RNAP59B   | ensembl | mRNA             | 0.0373762 | 7.71e-01  | 0.1436377 | 3.31e-01  | 0.0129052 | 8.48e-01  | 0.1733604 | 3.87e-01  | 0.0712037 | 6.08e-01  | 0.051293  | 8.16e-01  | 0.077844  | 8.48e-01  |
| ENSG0000012538 <td>20</td> <td>528287</td> <td>528416</td> <td>RNAP59B</td> <td>ensembl</td> <td>mRNA</td> <td>0.0373762</td> <td>7.71e-01</td> <td>0.1436377</td> <td>3.31e-01</td> <td>0.0129052</td> <td>8.48e-01</td> <td>0.1733604</td> <td>3.87e-01</td> <td>0.0712037</td> <td>6.08e-01</td> <td>0.051293</td> <td>8.16e-01</td> <td>0.077844</td> <td>8.48e-01</td>                        | 20 | 528287   | 528416   | RNAP59B   | ensembl | mRNA             | 0.0373762 | 7.71e-01  | 0.1436377 | 3.31e-01  | 0.0129052 | 8.48e-01  | 0.1733604 | 3.87e-01  | 0.0712037 | 6.08e-01  | 0.051293  | 8.16e-01  | 0.077844  | 8.48e-01  |
| ENSG0000015152 <td>6</td> <td>14495458</td> <td>14495444</td> <td>AC04125.2</td> <td>ensembl</td> <td>transcript_unapp</td> <td>0.0288534</td> <td>6.75e-01</td> <td>0.1085371</td> <td>2.69e-01</td> <td>0.1591831</td> <td>2.69e-01</td> <td>0.1732883</td> <td>3.87e-01</td> <td>0.0234033</td> <td>3.95e-01</td> <td>0.0264635</td> <td>6.29e-01</td> <td>0.1474455</td> <td>5.00e-02</td>     | 6  | 14495458 | 14495444 | AC04125.2 | ensembl | transcript_unapp | 0.0288534 | 6.75e-01  | 0.1085371 | 2.69e-01  | 0.1591831 | 2.69e-01  | 0.1732883 | 3.87e-01  | 0.0234033 | 3.95e-01  | 0.0264635 | 6.29e-01  | 0.1474455 | 5.00e-02  |
| ENSG0000012838 <td>12</td> <td>10155492</td> <td>10162414</td> <td>AC07907.2</td> <td>ensembl</td> <td>transcript_unapp</td> <td>0.0741789</td> <td>5.21e-01</td> <td>0.1436377</td> <td>3.31e-01</td> <td>0.1302839</td> <td>4.88e-01</td> <td>0.1732808</td> <td>3.87e-01</td> <td>0.0238149</td> <td>8.30e-01</td> <td>0.1622125</td> <td>4.60e-01</td> <td>0.1462031</td> <td>3.11e-01</td>    | 12 | 10155492 | 10162414 | AC07907.2 | ensembl | transcript_unapp | 0.0741789 | 5.21e-01  | 0.1436377 | 3.31e-01  | 0.1302839 | 4.88e-01  | 0.1732808 | 3.87e-01  | 0.0238149 | 8.30e-01  | 0.1622125 | 4.60e-01  | 0.1462031 | 3.11e-01  |
| ENSG0000013640 <td>7</td> <td>12721127</td> <td>12722927</td> <td>GRM8A51</td> <td>ensembl</td> <td>protein_coding</td> <td>0.0224802</td> <td>8.46e-01</td> <td>0.1436377</td> <td>3.31e-01</td> <td>0.1708883</td> <td>3.74e-01</td> <td>0.1732481</td> <td>3.87e-01</td> <td>0.0769862</td> <td>3.80e-01</td> <td>0.0611227</td> <td>8.35e-01</td> <td>0.0898394</td> <td>4.97e-02</td>         | 7  | 12721127 | 12722927 | GRM8A51   | ensembl | protein_coding   | 0.0224802 | 8.46e-01  | 0.1436377 | 3.31e-01  | 0.1708883 | 3.74e-01  | 0.1732481 | 3.87e-01  | 0.0769862 | 3.80e-01  | 0.0611227 | 8.35e-01  | 0.0898394 | 4.97e-02  |
| ENSG0000010181 <td>10</td> <td>528287</td> <td>528416</td> <td>ADORA2A</td> <td>ensembl</td> <td>protein_coding</td> <td>0.0131423</td> <td>0.0000000</td>                        | 10 | 528287   | 528416   | ADORA2A   | ensembl | protein_coding   | 0.0131423 | 0.0000000 | 0.0000000 | 0.0000000 | 0.0000000 | 0.0000000 | 0.0000000 | 0.0000000 | 0.0000000 | 0.0000000 | 0.0000000 | 0.0000000 | 0.0000000 |           |
| ENSG0000014066 <td>5</td> <td>16520277</td> <td>16521756</td> <td>LINC01938</td> <td>ensembl</td> <td>transcript_unapp</td> <td>0.0413013</td> <td>7.21e-01</td> <td>0.1201821</td> <td>1.05e-01</td> <td>0.2611819</td> <td>1.87e-01</td> <td>0.1732118</td> <td>3.87e-01</td> <td>0.1340887</td> <td>3.84e-01</td> <td>0.0226817</td> <td>3.11e-01</td> <td>0.1223827</td> <td>8.00e-02</td>     | 5  | 16520277 | 16521756 | LINC01938 | ensembl | transcript_unapp | 0.0413013 | 7.21e-01  | 0.1201821 | 1.05e-01  | 0.2611819 | 1.87e-01  | 0.1732118 | 3.87e-01  | 0.1340887 | 3.84e-01  | 0.0226817 | 3.11e-01  | 0.1223827 | 8.00e-02  |
| ENSG0000019804 <td>19</td> <td>131760</td> <td>142902</td> <td>CDCA4</td> <td>ensembl</td> <td>protein_coding</td> <td>0.0283742</td> <td>8.06e-01</td> <td>0.1531224</td> <td>2.81e-01</td> <td>0.0205287</td> <td>8.01e-01</td> <td>0.1732048</td> <td>3.87e-01</td> <td>0.0373755</td> <td>3.98e-01</td> <td>0.0262165</td> <td>4.54e-01</td> <td>0.0262165</td> <td>5.56e-02</td>              | 19 | 131760   | 142902   | CDCA4     | ensembl | protein_coding   | 0.0283742 | 8.06e-01  | 0.1531224 | 2.81e-01  | 0.0205287 | 8.01e-01  | 0.1732048 | 3.87e-01  | 0.0373755 | 3.98e-01  | 0.0262165 | 4.54e-01  | 0.0262165 | 5.56e-02  |
| ENSG0000011762 <td>7</td> <td>12859325</td> <td>12863585</td> <td>CPD2</td> <td>ensembl</td> <td>protein_coding</td> <td>0.0209607</td> <td>4.05e-01</td> <td>0.0274467</td> <td>2.05e-01</td> <td>0.0789954</td> <td>6.51e-01</td> <td>0.1732141</td> <td>3.87e-01</td> <td>0.0682462</td> <td>6.38e-01</td> <td>0.1763013</td> <td>2.02e-01</td> <td>0.11814</td> <td>1.07e-01</td>              | 7  | 12859325 | 12863585 | CPD2      | ensembl | protein_coding   | 0.0209607 | 4.05e-01  | 0.0274467 | 2.05e-01  | 0.0789954 | 6.51e-01  | 0.1732141 | 3.87e-01  | 0.0682462 | 6.38e-01  | 0.1763013 | 2.02e-01  | 0.11814   | 1.07e-01  |
| ENSG0000012040 <td>1</td> <td>22774831</td> <td>22774791</td> <td>SNRPA7</td> <td>ensembl</td> <td>protein_coding</td> <td>0.0317036</td> <td>3.11e-01</td> <td>0.1205947</td> <td>1.67e-01</td> <td>0.2492201</td> <td>2.16e-01</td> <td>0.1731605</td> <td>3.87e-01</td> <td>0.0886657</td> <td>6.21e-01</td> <td>0.0925238</td> <td>6.66e-01</td> <td>0.0928878</td> <td>5.81e-02</td>          | 1  | 22774831 | 22774791 | SNRPA7    | ensembl | protein_coding   | 0.0317036 | 3.11e-01  | 0.1205947 | 1.67e-01  | 0.2492201 | 2.16e-01  | 0.1731605 | 3.87e-01  | 0.0886657 | 6.21e-01  | 0.0925238 | 6.66e-01  | 0.0928878 | 5.81e-02  |
| ENSG0000012040 <td>1</td> <td>22774831</td> <td>22774791</td> <td>SNRPA7</td> <td>ensembl</td> <td>protein_coding</td> <td>0.0317036</td> <td>3.11e-01</td> <td>0.1205947</td> <td>1.67e-01</td> <td>0.2492201</td> <td>2.16e-01</td> <td>0.1731605</td> <td>3.87e-01</td> <td>0.0886657</td> <td>6.21e-01</td> <td>0.0925238</td> <td>6.66e-01</td> <td>0.0928878</td> <td>5.81e-02</td>          | 1  | 22774831 | 22774791 | SNRPA7    | ensembl | protein_coding   | 0.0317036 | 3.11e-01  | 0.1205947 | 1.67e-01  | 0.2492201 | 2.16e-01  | 0.1731605 | 3.87e-01  | 0.0886657 | 6.21e-01  | 0.0925238 | 6.66e-01  | 0.0928878 | 5.81e-02  |
| ENSG0000012040 <td>1</td> <td>22774831</td> <td>22774791</td> <td>SNRPA7</td> <td>ensembl</td> <td>protein_coding</td> <td>0.0317036</td> <td>3.11e-01</td> <td>0.1205947</td> <td>1.67e-01</td> <td>0.2492201</td> <td>2.16e-01</td> <td>0.1731605</td> <td>3.87e-01</td> <td>0.0886657</td> <td>6.21e-01</td> <td>0.0925238</td> <td>6.66e-01</td> <td>0.0928878</td> <td>5.81e-02</td>          | 1  | 22774831 | 22774791 | SNRPA7    | ensembl | protein_coding   | 0.0317036 | 3.11e-01  | 0.1205947 | 1.67e-01  | 0.2492201 | 2.16e-01  | 0.1731605 | 3.87e-01  | 0.0886657 | 6.21e-01  | 0.0925238 | 6.66e-01  | 0.0928878 | 5.81e-02  |
| ENSG0000012040 <td>1</td> <td>22774831</td> <td>22774791</td> <td>SNRPA7</td> <td>ensembl</td> <td>protein_coding</td> <td>0.0317036</td> <td>3.11e-01</td> <td>0.1205947</td> <td>1.67e-01</td> <td>0.2492201</td> <td>2.16e-01</td> <td>0.1731605</td> <td>3.87e-01</td> <td>0.0886657</td> <td>6.21e-01</td> <td>0.0925238</td> <td>6.66e-01</td> <td>0.0928878</td> <td>5.81e-02</td>          | 1  | 22774831 | 22774791 | SNRPA7    | ensembl | protein_coding   | 0.0317036 | 3.11e-01  | 0.1205947 | 1.67e-01  | 0.2492201 | 2.16e-01  | 0.1731605 | 3.87e-01  | 0.0886657 | 6.21e-01  | 0.0925238 | 6.66e-01  | 0.0928878 | 5.81e-02  |
| ENSG0000012040 <td>1</td> <td>22774831</td> <td>22774791</td> <td>SNRPA7</td> <td>ensembl</td> <td>protein_coding</td> <td>0.0317036</td> <td>3.11e-01</td> <td>0.1205947</td> <td>1.67e-01</td> <td>0.2492201</td> <td>2.16e-01</td> <td>0.1731605</td> <td>3.87e-01</td> <td>0.0886657</td> <td>6.21e-01</td> <td>0.0925238</td> <td>6.66e-01</td> <td>0.0928878</td> <td>5.81e-02</td>          | 1  | 22774831 | 22774791 | SNRPA7    | ensembl | protein_coding   | 0.0317036 | 3.11e-01  | 0.1205947 | 1.67e-01  | 0.2492201 | 2.16e-01  | 0.1731605 | 3.87e-01  | 0.0886657 | 6.21e-01  | 0.0925238 | 6.66e-01  | 0.0928878 | 5.81e-02  |
| ENSG0000012040 <td>1</td> <td>22774831</td> <td>22774791</td> <td>SNRPA7</td> <td>ensembl</td> <td>protein_coding</td> <td>0.0317036</td> <td>3.11e-01</td> <td>0.1205947</td> <td>1.67e-01</td> <td>0.2492201</td> <td>2.16e-01</td> <td>0.1731605</td> <td>3.87e-01</td> <td>0.0886657</td> <td>6.21e-01</td> <td>0.0925238</td> <td>6.66e-01</td> <td>0.0928878</td> <td>5.81e-02</td>          | 1  | 22774831 | 22774791 | SNRPA7    | ensembl | protein_coding   | 0.0317036 | 3.11e-01  | 0.1205947 | 1.67e-01  | 0.2492201 | 2.16e-01  | 0.1731605 | 3.87e-01  | 0.0886657 | 6.21e-01  | 0.0925238 | 6.66e-01  | 0.0928878 | 5.81e-02  |
| ENSG0000012040 <td>1</td> <td>22774831</td> <td>22774791</td> <td>SNRPA7</td> <td>ensembl</td> <td>protein_coding</td> <td>0.0317036</td> <td>3.11e-01</td> <td>0.1205947</td> <td>1.67e-01</td> <td>0.2492201</td> <td>2.16e-01</td> <td>0.1731605</td> <td>3.87e-01</td> <td>0.0886657</td> <td>6.21e-01</td> <td>0.0925238</td> <td>6.66e-01</td> <td>0.0928878</td> <td>5.81e-02</td>          | 1  | 22774831 | 22774791 | SNRPA7    | ensembl | protein_coding   | 0.0317036 | 3.11e-01  | 0.1205947 | 1.67e-01  | 0.2492201 | 2.16e-01  | 0.1731605 | 3.87e-01  | 0.0886657 | 6.21e-01  | 0.0925238 | 6.66e-01  | 0.0928878 | 5.81e-02  |
| ENSG0000012040 <td>1</td> <td>22774831</td> <td>22774791</td> <td>SNRPA7</td> <td>ensembl</td> <td>protein_coding</td> <td>0.0317036</td> <td>3.11e-01</td> <td>0.1205947</td> <td>1.67e-01</td> <td>0.2492201</td> <td>2.16e-01</td> <td>0.1731605</td> <td>3.87e-01</td> <td>0.0886657</td> <td>6.21e-01</td> <td>0.0925238</td> <td>6.66e-01</td> <td>0.0928878</td> <td>5.81e-02</td>          | 1  | 22774831 | 22774791 | SNRPA7    | ensembl | protein_coding   | 0.0317036 | 3.11e-01  | 0.1205947 | 1.67e-01  | 0.2492201 | 2.16e-01  | 0.1731605 | 3.87e-01  | 0.0886657 | 6.21e-01  | 0.0925238 | 6.66e-01  | 0.0928878 | 5.81e-02  |
| ENSG0000012040 <td>1</td> <td>22774831</td> <td>22774791</td> <td>SNRPA7</td> <td>ensembl</td> <td>protein_coding</td> <td>0.0317036</td> <td>3.11e-01</td> <td>0.1205947</td> <td>1.67e-01</td> <td>0.2492201</td> <td>2.16e-01</td> <td>0.1731605</td> <td>3.87e-01</td> <td>0.0886657</td> <td>6.21e-01</td> <td>0.0925238</td> <td>6.66e-01</td> <td>0.0928878</td> <td>5.81e-02</td>          | 1  | 22774831 | 22774791 | SNRPA7    | ensembl | protein_coding   | 0.0317036 | 3.11e-01  | 0.1205947 | 1.67e-01  | 0.2492201 | 2.16e-01  | 0.1731605 | 3.87e-01  | 0.0886657 | 6.21e-01  | 0.0925238 | 6.66e-01  | 0.0928878 | 5.81e-02  |
| ENSG0000012040 <td>1</td> <td>22774831</td> <td>22774791</td> <td>SNRPA7</td> <td>ensembl</td> <td>protein_coding</td> <td>0.0317036</td> <td>3.11e-01</td> <td>0.1205947</td> <td>1.67e-01</td> <td>0.2492201</td> <td>2.16e-01</td> <td>0.1731605</td> <td>3.87e-01</td> <td>0.0886657</td> <td>6.21e-01</td> <td>0.0925238</td> <td>6.66e-01</td> <td>0.0928878</td> <td>5.81e-02</td>          | 1  | 22774831 | 22774791 | SNRPA7    | ensembl | protein_coding   | 0.0317036 | 3.11e-01  | 0.1205947 | 1.67e-01  | 0.2492201 | 2.16e-01  | 0.1731605 | 3.87e-01  | 0.0886657 | 6.21e-01  | 0.0925238 | 6.66e-01  | 0.0928878 | 5.81e-02  |
| ENSG0000012040 <td>1</td> <td>22774831</td> <td>22774791</td> <td>SNRPA7</td> <td>ensembl</td> <td>protein_coding</td> <td>0.0317036</td> <td>3.11e-01</td> <td>0.1205947</td> <td>1.67e-01</td> <td>0.2492201</td> <td>2.16e-01</td> <td>0.1731605</td> <td>3.87e-01</td> <td>0.0886657</td> <td>6.21e-01</td> <td>0.0925238</td> <td>6.66e-01</td> <td>0.0928878</td> <td>5.81e-02</td>          | 1  | 22774831 | 22774791 | SNRPA7    | ensembl | protein_coding   | 0.0317036 | 3.11e-01  | 0.1205947 | 1.67e-01  | 0.2492201 | 2.16e-01  | 0.1731605 | 3.87e-01  | 0.0886657 | 6.21e-01  | 0.0925238 | 6.66e-01  | 0.0928878 | 5.81e-02  |
| ENSG0000012040 <td>1</td> <td>22774831</td> <td>22774791</td> <td>SNRPA7</td> <td>ensembl</td> <td>protein_coding</td> <td>0.0317036</td> <td>3.11e-01</td> <td>0.1205947</td> <td>1.67e-01</td> <td>0.2492201</td> <td>2.16e-01</td> <td>0.1731605</td> <td>3.87e-01</td> <td>0.0886657</td> <td>6.21e-01</td> <td>0.0925238</td> <td>6.66e-01</td> <td>0.0928878</td> <td>5.81e-02</td>          | 1  | 22774831 | 22774791 | SNRPA7    | ensembl | protein_coding   | 0.0317036 | 3.11e-01  | 0.1205947 | 1.67e-01  | 0.2492201 | 2.16e-01  | 0.1731605 | 3.87e-01  | 0.0886657 | 6.21e-01  | 0.0925238 | 6.66e-01  | 0.0928878 | 5.81e-02  |
| ENSG0000012040 <td>1</td> <td>22774831</td> <td>22774791</td> <td>SNRPA7</td> <td>ensembl</td> <td>protein_coding</td> <td>0.0317036</td> <td>3.11e-01</td> <td>0.1205947</td> <td>1.67e-01</td> <td>0.2492201</td> <td>2.16e-01</td> <td>0.1731605</td> <td>3.87e-01</td> <td>0.0886657</td> <td>6.21e-01</td> <td>0.0925238</td> <td>6.66e-01</td> <td>0.0928878</td> <td>5.81e-02</td>          | 1  | 22774831 | 22774791 | SNRPA7    | ensembl | protein_coding   | 0.0317036 | 3.11e-01  | 0.1205947 | 1.67e-01  | 0.2492201 | 2.16e-01  | 0.1731605 | 3.87e-01  | 0.0886657 | 6.21e-01  | 0.0925238 | 6.66e-01  | 0.0928878 | 5.81e-02  |
| ENSG0000012040 <td>1</td> <td>22774831</td> <td>22774791</td> <td>SNRPA7</td> <td>ensembl</td> <td>protein_coding</td> <td>0.0317036</td> <td>3.11e-01</td> <td>0.1205947</td> <td>1.67e-01</td> <td>0.2492201</td> <td>2.16e-01</td> <td>0.1731605</td> <td>3.87e-01</td> <td>0.0886657</td> <td>6.21e-01</td> <td>0.0925238</td> <td>6.66e-01</td> <td>0.0928878</td> <td>5.81e-02</td>          | 1  | 22774831 | 22774791 | SNRPA7    | ensembl | protein_coding   | 0.0317036 | 3.11e-01  | 0.1205947 | 1.67e-01  | 0.2492201 | 2.16e-01  | 0.1731605 | 3.87e-01  | 0.0886657 | 6.21e-01  | 0.0925238 | 6.66e-01  | 0.0928878 | 5.81e-02  |
| ENSG0000012040 <td>1</td> <td>22774831</td> <td>22774791</td> <td>SNRPA7</td> <td>ensembl</td> <td>protein_coding</td> <td>0.0317036</td> <td>3.11e-01</td> <td>0.1205947</td> <td>1.67e-01</td> <td>0.2492201</td> <td>2.16e-01</td> <td>0.1731605</td> <td>3.87e-01</td> <td>0.0886657</td> <td>6.21e-01</td> <td>0.0925238</td> <td>6.66e-01</td> <td>0.0928878</td> <td>5.81e-02</td>          | 1  | 22774831 | 22774791 | SNRPA7    | ensembl | protein_coding   | 0.0317036 | 3.11e-01  | 0.1205947 | 1.67e-01  | 0.2492201 | 2.16e-01  | 0.1731605 | 3.87e-01  | 0.0886657 | 6.21e-01  | 0.0925238 | 6.66e-01  | 0.0928878 | 5.81e-02  |
| ENSG0000012040 <td>1</td> <td>22774831</td> <td>22774791</td> <td>SNRPA7</td> <td>ensembl</td> <td>protein_coding</td> <td>0.0317036</td> <td>3.11e-01</td> <td>0.1205947</td> <td>1.67e-01</td> <td>0.2492201</td> <td>2.16e-01</td> <td>0.1731605</td> <td>3.87e-01</td> <td>0.0886657</td> <td>6.21e-01</td> <td>0.0925238</td> <td>6.66e-01</td> <td>0.0928878</td> <td>5.81e-02</td>          | 1  | 22774831 | 22774791 | SNRPA7    | ensembl | protein_coding   | 0.0317036 | 3.11e-01  | 0.1205947 | 1.67e-01  | 0.2492201 | 2.16e-01  | 0.1731605 | 3.87e-01  | 0.0886657 | 6.21e-01  | 0.0925238 | 6.66e-01  | 0.0928878 | 5.81e-02  |
| ENSG0000012040 <td>1</td> <td>22774831</td> <td>22774791</td> <td>SNRPA7</td> <td>ensembl</td> <td>protein_coding</td> <td>0.0317036</td> <td>3.11e-01</td> <td>0.1205947</td> <td>1.67e-01</td> <td>0.2492201</td> <td>2.16e-01</td> <td>0.1731605</td> <td>3.87e-01</td> <td>0.0886657</td> <td>6.21e-01</td> <td>0.0925238</td> <td>6.66e-01</td> <td>0.0928878</td> <td>5.81e-02</td>          | 1  | 22774831 | 22774791 | SNRPA7    | ensembl | protein_coding   | 0.0317036 | 3.11e-01  | 0.1205947 | 1.67e-01  | 0.2492201 | 2.16e-01  | 0.1731605 | 3.87e-01  | 0.0886657 | 6.21e-01  | 0.0925238 | 6.66e-01  | 0.0928878 | 5.81e-02  |
| ENSG0000012040 <td>1</td> <td>22774831</td> <td>22774791</td> <td>SNRPA7</td> <td>ensembl</td> <td>protein_coding</td> <td>0.0317036</td> <td>3.11e-01</td> <td>0.1205947</td> <td>1.67e-01</td> <td>0.2492201</td> <td>2.16e-01</td> <td>0.1731605</td> <td>3.87e-01</td> <td>0.0886657</td> <td>6.21e-01</td> <td>0.0925238</td> <td>6.66e-01</td> <td>0.0928878</td> <td>5.81e-02</td>          | 1  | 22774831 | 22774791 | SNRPA7    | ensembl | protein_coding   | 0.0317036 | 3.11e-01  | 0.1205947 | 1.67e-01  | 0.2492201 | 2.16e-01  | 0.1731605 | 3.87e-01  | 0.0886657 | 6.21e-01  | 0.0925238 | 6.66e-01  | 0.0928878 | 5.81e-02  |
| ENSG0000012040 <td>1</td> <td>22774831</td> <td>22774791</td> <td>SNRPA7</td> <td>ensembl</td> <td>protein_coding</td> <td>0.0317036</td> <td>3.11e-01</td> <td>0.1205947</td> <td>1.67e-01</td> <td>0.2492201</td> <td>2.16e-01</td> <td>0.1731605</td> <td>3.87e-01</td> <td>0.0886657</td> <td>6.21e-01</td> <td>0.0925238</td> <td>6.66e-01</td> <td>0.0928878</td> <td>5.81e-02</td>          | 1  | 22774831 | 22774791 | SNRPA7    | ensembl | protein_coding   | 0.0317036 | 3.11e-01  | 0.1205947 | 1.67e-01  | 0.2492201 | 2.16e-01  | 0.1731605 | 3.87e-01  | 0.0886657 | 6.21e-01  | 0.0925238 | 6.66e-01  | 0.0928878 | 5.81e-02  |
| ENSG0000012040 <td>1</td> <td>22774831</td> <td>22774791</td> <td>SNRPA7</td> <td>ensembl</td> <td>protein_coding</td> <td>0.0317036</td> <td>3.11e-01</td> <td>0.1205947</td> <td>1.67e-01</td> <td>0.2492201</td> <td>2.16e-01</td> <td>0.1731605</td> <td>3.87e-01</td> <td>0.0886657</td> <td>6.21e-01</td> <td>0.0925238</td> <td>6.66e-01</td> <td>0.0928878</td> <td>5.81e-02</td>          | 1  | 22774831 | 22774791 | SNRPA7    | ensembl | protein_coding   | 0.0317036 | 3.11e-01  | 0.1205947 | 1.67e-01  | 0.2492201 | 2.16e-01  | 0.1731605 | 3.87e-01  | 0.0886657 | 6.21e-01  | 0.0925238 | 6.66e-01  | 0.0928878 | 5.81e-02  |
| ENSG0000012040 <td>1</td> <td>22774831</td> <td>22774791</td> <td>SNRPA7</td> <td>ensembl</td> <td>protein_coding</td> <td>0.0317036</td> <td>3.11e-01</td> <td>0.1205947</td> <td>1.67e-01</td> <td>0.2492201</td> <td>2.16e-01</td> <td>0.1731605</td> <td>3.87e-01</td> <td>0.0886657</td> <td>6.21e-01</td> <td>0.0925238</td> <td>6.66e-01</td> <td>0.0928878</td> <td>5.81e-02</td>          | 1  | 22774831 | 22774791 | SNRPA7    | ensembl | protein_coding   | 0.0317036 | 3.11e-01  | 0.1205947 | 1.67e-01  | 0.2492201 | 2.16e-01  | 0.1731605 | 3.87e-01  | 0.0886657 | 6.21e-01  | 0.0925238 | 6.66e-01  | 0.0928878 | 5.81e-02  |
| ENSG0000012040 <td>1</td> <td>22774831</td> <td>22774791</td> <td>SNRPA7</td> <td>ensembl</td> <td>protein_coding</td> <td>0.0317036</td> <td>3.11e-01</td> <td>0.1205947</td> <td>1.67e-01</td> <td>0.2492201</td> <td>2.16e-01</td> <td>0.1731605</td> <td>3.87e-01</td> <td>0.0886657</td> <td>6.21e-01</td> <td>0.0925238</td> <td>6.66e-01</td> <td>0.0928878</td> <td>5.81e-02</td>          | 1  | 22774831 | 22774791 | SNRPA7    | ensembl | protein_coding   | 0.0317036 | 3.11e-01  | 0.1205947 | 1.67e-01  | 0.2492201 | 2.16e-01  | 0.1731605 | 3.87e-01  | 0.0886657 | 6.21e-01  | 0.0925238 | 6.66e-01  | 0.0928878 | 5.81e-02  |
| ENSG0000012040 <td>1</td> <td>22774831</td> <td>22774791</td> <td>SNRPA7</td> <td>ensembl</td> <td>protein_coding</td> <td>0.0317036</td> <td>3.11e-01</td> <td>0.1205947</td> <td>1.67e-01</td> <td>0.2492201</td> <td>2.16e-01</td> <td>0.1731605</td> <td>3.87e-01</td> <td>0.0886657</td> <td>6.21e-01</td> <td>0.0925238</td> <td>6.66e-01</td> <td>0.0928878</td> <td>5.81e-02</td>          | 1  | 22774831 | 22774791 | SNRPA7    | ensembl | protein_coding   | 0.0317036 | 3.11e-01  | 0.1205947 | 1.67e-01  | 0.2492201 | 2.16e-01  | 0.1731605 | 3.87e-01  | 0.0886657 | 6.21e-01  | 0.0925238 | 6.66e-01  | 0.0928878 | 5.81e-02  |
| ENSG0000012040 <td>1</td> <td>22774831</td> <td>22774791</td> <td>SNRPA7</td> <td>ensembl</td> <td>protein_coding</td> <td>0.0317036</td> <td>3.11e-01</td> <td>0.1205947</td> <td>1.67e-01</td> <td>0.2492201</td> <td>2.16e-01</td> <td>0.1731605</td> <td>3.87e-01</td> <td>0.0886657</td> <td>6.21e-01</td> <td>0.0925238</td> <td>6.66e-01</td> <td>0.0928878</td> <td>5.81e-02</td>          | 1  | 22774831 | 22774791 | SNRPA7    | ensembl | protein_coding   | 0.0317036 | 3.11e-01  | 0.1205947 | 1.67e-01  | 0.2492201 | 2.16e-01  | 0.1731605 | 3.87e-01  | 0.0886657 | 6.21e-01  | 0.0925238 | 6.66e-01  | 0.0928878 | 5.81e-02  |
| ENSG000                                                                                                                                                                                                                                                                                                                                                                                            |    |          |          |           |         |                  |           |           |           |           |           |           |           |           |           |           |           |           |           |           |

| ENSG0000027616                                                                                                                                                                                                                                                                                                                                                                           | 12 | 57730245 | 57732865 | AC057316.2 | havana  | processed_pseudo  | -0.138624  | 2.47E-01  | 0.04413426 | 7.61E-01  | 0.2622191  | 1.86E-01  | 0.1699923  | 3.97E-01  | -0.1888962 | 1.72E-01  | -0.1293134 | 5.56E-01   | -0.2057679 | 1.52E-01   |          |
|------------------------------------------------------------------------------------------------------------------------------------------------------------------------------------------------------------------------------------------------------------------------------------------------------------------------------------------------------------------------------------------|----|----------|----------|------------|---------|-------------------|------------|-----------|------------|-----------|------------|-----------|------------|-----------|------------|-----------|------------|------------|------------|------------|----------|
| ENSG0000029023 <td>18</td> <td>10140584</td> <td>10140618</td> <td>LINC02524</td> <td>havana</td> <td>lincRNA</td> <td>0.0699394</td> <td>5.98E-01</td> <td>0.13770685</td> <td>3.76E-01</td> <td>0.16730929</td> <td>4.05E-01</td> <td>0.16997121</td> <td>3.97E-01</td> <td>0.1665035</td> <td>7.38E-01</td> <td>-0.085533</td> <td>6.88E-01</td> <td>0.0282413</td> <td>8.86E-01</td> | 18 | 10140584 | 10140618 | LINC02524  | havana  | lincRNA           | 0.0699394  | 5.98E-01  | 0.13770685 | 3.76E-01  | 0.16730929 | 4.05E-01  | 0.16997121 | 3.97E-01  | 0.1665035  | 7.38E-01  | -0.085533  | 6.88E-01   | 0.0282413  | 8.86E-01   |          |
| ENSG0000029181                                                                                                                                                                                                                                                                                                                                                                           | 18 | 18492704 | 79313800 | CTNNA3-AS1 | lincRNA | transcribed_unexp | 0.0292488  | 0.0000000 | 0.0000000  | 0.0000000 | 0.0000000  | 0.0000000 | 0.0000000  | 0.0000000 | 0.0000000  | 0.0000000 | 0.0000000  | 0.0000000  | 0.0000000  | 0.0000000  |          |
| ENSG0000028882                                                                                                                                                                                                                                                                                                                                                                           | 1  | 22665640 | 22667507 | ITPR4-IT1  | havana  | lincRNA           | 0.0628355  | 4.75E-01  | 0.0763717  | 6.65E-01  | 0.0554462  | 7.99E-01  | 0.16997121 | 3.97E-01  | 0.1665035  | 2.20E-01  | -0.085533  | 6.88E-01   | 0.0282413  | 8.86E-01   |          |
| ENSG0000024281                                                                                                                                                                                                                                                                                                                                                                           | 7  | 6378565  | 6388974  | AC079742.1 | havana  | processed_pseudo  | 0.2098988  | 6.82E-01  | 0.33193683 | 3.61E-01  | 0.4513728  | 1.81E-01  | 0.16997121 | 3.97E-01  | 0.1665035  | 4.08E-01  | -0.0749830 | 6.24E-01   | 0.0292488  | 6.71E-01   |          |
| ENSG00000144517                                                                                                                                                                                                                                                                                                                                                                          | 17 | 15090713 | 15090717 | OR6Y1-IT1  | havana  | processed_pseudo  | 0.0000000  | 0.0000000 | 0.0000000  | 0.0000000 | 0.0000000  | 0.0000000 | 0.0000000  | 0.0000000 | 0.0000000  | 0.0000000 | 0.0000000  | 0.0000000  | 0.0000000  | 0.0000000  |          |
| ENSG0000028524                                                                                                                                                                                                                                                                                                                                                                           | 2  | 12666070 | 12666233 | AC03474.2  | havana  | lincRNA           | 0.0139083  | 9.04E-01  | 0.1829284  | 2.41E-01  | 0.1829284  | 3.61E-01  | 0.16997121 | 3.97E-01  | 0.1665035  | 8.86E-01  | -0.1269788 | 5.84E-01   | -0.158812  | 6.51E-01   |          |
| ENSG0000013126                                                                                                                                                                                                                                                                                                                                                                           | 19 | 43401846 | 43418597 | TEX01      | ensembl | havana            | 0.0043446  | 9.70E-01  | 0.2176677  | 1.30E-01  | 0.0981457  | 6.26E-01  | 0.16997121 | 3.97E-01  | 0.1665035  | 6.37E-01  | -0.1024446 | 6.36E-01   | -0.1024446 | 6.36E-01   |          |
| ENSG0000019969                                                                                                                                                                                                                                                                                                                                                                           | 17 | 81218136 | 81220455 | OR6Y1-IT1  | havana  | processed_pseudo  | 0.0000000  | 0.0000000 | 0.0000000  | 0.0000000 | 0.0000000  | 0.0000000 | 0.0000000  | 0.0000000 | 0.0000000  | 0.0000000 | 0.0000000  | 0.0000000  | 0.0000000  | 0.0000000  |          |
| ENSG0000028584                                                                                                                                                                                                                                                                                                                                                                           | 12 | 21533300 | 21537788 | AC01917.2  | havana  | processed_pseudo  | 0.0043446  | 9.70E-01  | 0.2176677  | 1.30E-01  | 0.0981457  | 6.26E-01  | 0.16997121 | 3.97E-01  | 0.1665035  | 6.37E-01  | -0.1024446 | 6.36E-01   | -0.1024446 | 6.36E-01   |          |
| ENSG0000015052                                                                                                                                                                                                                                                                                                                                                                           | 20 | 1891244  | 19722236 | SLC44A3    | ensembl | havana            | 0.1188780  | 2.99E-01  | 0.5152644  | 2.90E-01  | 0.1571971  | 4.44E-01  | 0.16997121 | 3.97E-01  | 0.1665035  | 5.54E-01  | -0.279932  | 1.67E-01   | -0.2083446 | 1.47E-01   |          |
| ENSG0000020293                                                                                                                                                                                                                                                                                                                                                                           | 7  | 15090713 | 15090718 | OR6Y1-IT1  | havana  | processed_pseudo  | 0.0000000  | 0.0000000 | 0.0000000  | 0.0000000 | 0.0000000  | 0.0000000 | 0.0000000  | 0.0000000 | 0.0000000  | 0.0000000 | 0.0000000  | 0.0000000  | 0.0000000  | 0.0000000  |          |
| ENSG0000029305                                                                                                                                                                                                                                                                                                                                                                           | 7  | 10794116 | 10794240 | AC05045.1  | havana  | lincRNA           | 0.1035382  | 3.70E-01  | 0.1571971  | 1.44E-01  | 0.0101592  | 9.95E-01  | 0.16997121 | 3.97E-01  | 0.1665035  | 5.33E-01  | -0.0959514 | 6.36E-01   | -0.0429919 | 1.60E-01   |          |
| ENSG0000018901                                                                                                                                                                                                                                                                                                                                                                           | 19 | 3523367  | 3523381  | SBS1       | ensembl | havana            | -0.0400421 | 7.27E-01  | 0.0143747  | 5.15E-01  | 0.0046658  | 9.68E-01  | 0.16997121 | 3.97E-01  | 0.1665035  | 0.03473   | 7.99E-01   | -0.1426782 | 1.16E-01   | -0.0756637 | 6.22E-01 |
| ENSG0000012746                                                                                                                                                                                                                                                                                                                                                                           | 19 | 4560994  | 4564562  | EMILIN2    | ensembl | havana            | -0.1143595 | 9.01E-01  | 0.0187765  | 9.00E-01  | 0.1446000  | 4.72E-01  | 0.16997121 | 3.97E-01  | 0.1665035  | 7.47E-01  | -0.271824  | 2.10E-01   | -0.2089797 | 1.03E-01   |          |
| ENSG0000020980                                                                                                                                                                                                                                                                                                                                                                           | 3  | 8988413  | 8986684  | LOC102329  | ensembl | havana            | 0.0689848  | 6.46E-01  | 0.2246528  | 3.96E-01  | 0.2326499  | 1.26E-01  | 0.16997121 | 3.97E-01  | 0.1665035  | 3.79E-01  | -0.0488263 | 3.16E-01   | -0.0767628 | 5.53E-01   |          |
| ENSG0000026620                                                                                                                                                                                                                                                                                                                                                                           | 22 | 3333540  | 3333578  | MIR3909    | mirbase | havana            | 0.2905144  | 1.04E-01  | 0.3039549  | 2.88E-01  | 0.3541789  | 6.99E-01  | 0.16997121 | 3.97E-01  | 0.1665035  | 9.57E-01  | -0.0470268 | 1.84E-01   | -0.0458387 | 4.44E-01   |          |
| ENSG0000025836                                                                                                                                                                                                                                                                                                                                                                           | 3  | 11399972 | 11401026 | AC02899.1  | havana  | lincRNA           | -0.0961113 | 4.06E-01  | 0.2094728  | 7.27E-01  | 0.2094728  | 6.40E-01  | 0.16997121 | 3.97E-01  | 0.1665035  | 1.14E-01  | -0.1348035 | 5.40E-01   | -0.1126788 | 3.46E-01   |          |
| ENSG00000102217                                                                                                                                                                                                                                                                                                                                                                          | 20 | 4217611  | 4218476  | POLR2P     | ensembl | havana            | 0.0788203  | 3.11E-01  | 0.1181872  | 4.55E-01  | 0.0169481  | 9.21E-01  | 0.16997121 | 3.97E-01  | 0.1665035  | 1.23E-01  | -0.1348035 | 5.40E-01   | -0.069091  | 9.62E-01   |          |
| ENSG00000251719                                                                                                                                                                                                                                                                                                                                                                          | 14 | 2526764  | 2526736  | HMG20P6    | havana  | processed_pseudo  | -0.087201  | 5.00E-01  | 0.0521296  | 7.16E-01  | 0.1587301  | 4.29E-01  | 0.16997121 | 3.97E-01  | 0.1665035  | 4.73E-01  | -0.168465  | 4.00E-01   | -0.1275942 | 3.77E-01   |          |
| ENSG0000049199                                                                                                                                                                                                                                                                                                                                                                           | 5  | 1786738  | 1779563  | AC02678.3  | havana  | lincRNA           | -0.0780250 | 7.53E-01  | 0.2419305  | 9.65E-01  | 0.1438537  | 4.80E-01  | 0.16997121 | 3.97E-01  | 0.1665035  | 9.79E-01  | -0.1064005 | 6.44E-01   | -0.157286  | 2.47E-01   |          |
| ENSG0000020924                                                                                                                                                                                                                                                                                                                                                                           | 19 | 4560994  | 4564562  | EMILIN2    | ensembl | havana            | 0.0689848  | 6.46E-01  | 0.2246528  | 3.96E-01  | 0.2326499  | 1.26E-01  | 0.16997121 | 3.97E-01  | 0.1665035  | 3.79E-01  | -0.0488263 | 3.16E-01   | -0.0767628 | 5.53E-01   |          |
| ENSG0000029305                                                                                                                                                                                                                                                                                                                                                                           | 7  | 10794116 | 10794240 | AC05045.1  | havana  | lincRNA           | 0.1035382  | 3.70E-01  | 0.1571971  | 1.44E-01  | 0.0101592  | 9.95E-01  | 0.16997121 | 3.97E-01  | 0.1665035  | 5.33E-01  | -0.0959514 | 6.36E-01   | -0.0429919 | 1.60E-01   |          |
| ENSG0000018901                                                                                                                                                                                                                                                                                                                                                                           | 19 | 3523367  | 3523381  | SBS1       | ensembl | havana            | -0.0400421 | 7.27E-01  | 0.0143747  | 5.15E-01  | 0.0046658  | 9.68E-01  | 0.16997121 | 3.97E-01  | 0.1665035  | 0.03473   | 7.99E-01   | -0.1426782 | 1.16E-01   | -0.0756637 | 6.22E-01 |
| ENSG0000012746                                                                                                                                                                                                                                                                                                                                                                           | 19 | 4560994  | 4564562  | EMILIN2    | ensembl | havana            | -0.1143595 | 9.01E-01  | 0.0187765  | 9.00E-01  | 0.1446000  | 4.72E-01  | 0.16997121 | 3.97E-01  | 0.1665035  | 7.47E-01  | -0.271824  | 2.10E-01   | -0.2089797 | 1.03E-01   |          |
| ENSG0000020980                                                                                                                                                                                                                                                                                                                                                                           | 3  | 8988413  | 8986684  | LOC102329  | ensembl | havana            | 0.0689848  | 6.46E-01  | 0.2246528  | 3.96E-01  | 0.2326499  | 1.26E-01  | 0.16997121 | 3.97E-01  | 0.1665035  | 3.79E-01  | -0.0488263 | 3.16E-01   | -0.0767628 | 5.53E-01   |          |
| ENSG0000026620                                                                                                                                                                                                                                                                                                                                                                           | 22 | 3333540  | 3333578  | MIR3909    | mirbase | havana            | 0.2905144  | 1.04E-01  | 0.3039549  | 2.88E-01  | 0.3541789  | 6.99E-01  | 0.16997121 | 3.97E-01  | 0.1665035  | 9.57E-01  | -0.0470268 | 1.84E-01   | -0.0458387 | 4.44E-01   |          |
| ENSG0000025836                                                                                                                                                                                                                                                                                                                                                                           | 3  | 11399972 | 11401026 | AC02899.1  | havana  | lincRNA           | -0.0961113 | 4.06E-01  | 0.2094728  | 7.27E-01  | 0.2094728  | 6.40E-01  | 0.16997121 | 3.97E-01  | 0.1665035  | 1.14E-01  | -0.1348035 | 5.40E-01   | -0.1126788 | 3.46E-01   |          |
| ENSG00000102217                                                                                                                                                                                                                                                                                                                                                                          | 20 | 4217611  | 4218476  | POLR2P     | ensembl | havana            | 0.0788203  | 3.11E-01  | 0.1181872  | 4.55E-01  | 0.0169481  | 9.21E-01  | 0.16997121 | 3.97E-01  | 0.1665035  | 1.23E-01  | -0.1348035 | 5.40E-01   | -0.069091  | 9.62E-01   |          |
| ENSG00000251719                                                                                                                                                                                                                                                                                                                                                                          | 14 | 2526764  | 2526736  | HMG20P6    | havana  | processed_pseudo  | -0.087201  | 5.00E-01  | 0.0521296  | 7.16E-01  | 0.1587301  | 4.29E-01  | 0.16997121 | 3.97E-01  | 0.1665035  | 4.73E-01  | -0.168465  | 4.00E-01   | -0.1275942 | 3.77E-01   |          |
| ENSG0000049199                                                                                                                                                                                                                                                                                                                                                                           | 5  | 1786738  | 1779563  | AC02678.3  | havana  | lincRNA           | -0.0780250 | 7.53E-01  | 0.2419305  | 9.65E-01  | 0.1438537  | 4.80E-01  | 0.16997121 | 3.97E-01  | 0.1665035  | 9.79E-01  | -0.1064005 | 6.44E-01   | -0.157286  | 2.47E-01   |          |
| ENSG0000020924                                                                                                                                                                                                                                                                                                                                                                           | 19 | 4560994  | 4564562  | EMILIN2    | ensembl | havana            | 0.0689848  | 6.46E-01  | 0.2246528  | 3.96E-01  | 0.2326499  | 1.26E-01  | 0.16997121 | 3.97E-01  | 0.1665035  | 3.79E-01  | -0.0488263 | 3.16E-01   | -0.0767628 | 5.53E-01   |          |
| ENSG0000029305                                                                                                                                                                                                                                                                                                                                                                           | 7  | 10794116 | 10794240 | AC05045.1  | havana  | lincRNA           | 0.1035382  | 3.70E-01  | 0.1571971  | 1.44E-01  | 0.0101592  | 9.95E-01  | 0.16997121 | 3.97E-01  | 0.1665035  | 5.33E-01  | -0.0959514 | 6.36E-01   | -0.0429919 | 1.60E-01   |          |
| ENSG0000018901                                                                                                                                                                                                                                                                                                                                                                           | 19 | 3523367  | 3523381  | SBS1       | ensembl | havana            | -0.0400421 | 7.27E-01  | 0.0143747  | 5.15E-01  | 0.0046658  | 9.68E-01  | 0.16997121 | 3.97E-01  | 0.1665035  | 0.03473   | 7.99E-01   | -0.1426782 | 1.16E-01   | -0.0756637 | 6.22E-01 |
| ENSG0000012746                                                                                                                                                                                                                                                                                                                                                                           | 19 | 4560994  | 4564562  | EMILIN2    | ensembl | havana            | -0.1143595 | 9.01E-01  | 0.0187765  | 9.00E-01  | 0.1446000  | 4.72E-01  | 0.16997121 | 3.97E-01  | 0.1665035  | 7.47E-01  | -0.271824  | 2.10E-01   | -0.2089797 | 1.03E-01   |          |
| ENSG0000020980                                                                                                                                                                                                                                                                                                                                                                           | 3  | 8988413  | 8986684  | LOC102329  | ensembl | havana            | 0.0689848  | 6.46E-01  | 0.2246528  | 3.96E-01  | 0.2326499  | 1.26E-01  | 0.16997121 | 3.97E-01  | 0.1665035  | 3.79E-01  | -0.0488263 | 3.16E-01   | -0.0767628 | 5.53E-01   |          |
| ENSG0000026620                                                                                                                                                                                                                                                                                                                                                                           | 22 | 3333540  | 3333578  | MIR3909    | mirbase | havana            | 0.2905144  | 1.04E-01  | 0.3039549  | 2.88E-01  | 0.3541789  | 6.99E-01  | 0.16997121 | 3.97E-01  | 0.1665035  | 9.57E-01  | -0.0470268 | 1.84E-01   | -0.0458387 | 4.44E-01   |          |
| ENSG0000025836                                                                                                                                                                                                                                                                                                                                                                           | 3  | 11399972 | 11401026 | AC02899.1  | havana  | lincRNA           | -0.0961113 | 4.06E-01  | 0.2094728  | 7.27E-01  | 0.2094728  | 6.40E-01  | 0.16997121 | 3.97E-01  | 0.1665035  | 1.14E-01  | -0.1348035 | 5.40E-01   | -0.1126788 | 3.46E-01   |          |
| ENSG00000102217                                                                                                                                                                                                                                                                                                                                                                          | 20 | 4217611  | 4218476  | POLR2P     | ensembl | havana            | 0.0788203  | 3.11E-01  | 0.1181872  | 4.55E-01  | 0.0169481  | 9.21E-01  | 0.16997121 | 3.97E-01  | 0.1665035  | 1.23E-01  | -0.1348035 | 5.40E-01   | -0.069091  | 9.62E-01   |          |
| ENSG00000251719                                                                                                                                                                                                                                                                                                                                                                          | 14 | 2526764  | 2526736  | HMG20P6    | havana  | processed_pseudo  | -0.087201  | 5.00E-01  | 0.0521296  | 7.16E-01  | 0.1587301  | 4.29E-01  | 0.16997121 | 3.97E-01  | 0.1665035  | 4.73E-01  | -0.168465  | 4.00E-01   | -0.1275942 | 3.77E-01   |          |
| ENSG0000049199                                                                                                                                                                                                                                                                                                                                                                           | 5  | 1786738  | 1779563  | AC02678.3  | havana  | lincRNA           | -0.0780250 | 7.53E-01  | 0.2419305  | 9.65E-01  | 0.1438537  | 4.80E-01  | 0.16997121 | 3.97E-01  | 0.1665035  | 9.79E-01  | -0.1064005 | 6.44E-01   | -0.157286  | 2.47E-01   |          |
| ENSG0000020924                                                                                                                                                                                                                                                                                                                                                                           | 19 | 4560994  | 4564562  | EMILIN2    | ensembl | havana            | 0.0689848  | 6.46E-01  | 0.2246528  | 3.96E-01  | 0.2326499  | 1.26E-01  |            |           |            |           |            |            |            |            |          |



Table with columns for gene ID, chromosome, coordinates, gene name, transcript type, and various numerical values. The table lists numerous genes such as TMEM109, ADU1, NR3A1, and many others, with associated genomic data and values.



|                |    |          |           |           |         |        |                                    |            |          |            |          |           |          |           |          |            |           |            |          |            |          |
|----------------|----|----------|-----------|-----------|---------|--------|------------------------------------|------------|----------|------------|----------|-----------|----------|-----------|----------|------------|-----------|------------|----------|------------|----------|
| ENSG0000017415 | 8  | 15229742 | 15793819  | VEP1A     | ensembl | havana | protein_coding                     | -0.020335  | 8.61e-01 | 0.16918174 | 2.40e-02 | 0.3342931 | 8.81e-02 | 0.1627494 | 4.17e-01 | -0.0827139 | 5.52e-01  | -0.2157881 | 3.23e-01 | -0.2736698 | 5.45e-02 |
| ENSG0000015223 | 6  | 18474809 | 18480763  | CFP1A1P3  | ensembl | havana | processed_transcript               | 0.0808074  | 3.95e-02 | 0.1874979  | 1.91e-01 | 0.1796249 | 1.58e-01 | 0.1627492 | 4.17e-01 | 0.0810620  | 6.61e-01  | 0.1053017  | 6.12e-01 | 0.0647993  | 6.65e-01 |
| ENSG0000015751 | 14 | 21200797 | 21208014  | LCN6B1    | ensembl | havana | protein_coding                     | 0.0202714  | 8.74e-02 | 0.2071513  | 4.48e-01 | 0.1646139 | 1.27e-01 | 0.1646139 | 1.27e-01 | 0.0613049  | 5.81e-01  | 0.0479798  | 4.84e-01 | 0.0797864  | 2.56e-01 |
| ENSG0000017349 | 15 | 2266750  | 22981063  | CFP1      | ensembl | havana | protein_coding                     | 0.27519157 | 5.44e-02 | 0.27919304 | 5.77e-02 | 0.1626660 | 7.45e-01 | 0.1626660 | 4.17e-01 | 0.2961099  | 0.9770141 | 0.2970115  | 9.73e-01 | 0.023474   | 8.71e-01 |
| ENSG0000019220 | 22 | 1717732  | 17179481  | LCN20B8   | ensembl | havana | lincRNA                            | 0.1849353  | 1.07e-01 | 0.1810247  | 2.40e-01 | 0.1608181 | 6.86e-01 | 0.1626493 | 4.18e-01 | 0.0947171  | 4.98e-01  | 0.0613049  | 5.72e-01 | 0.0364619  | 8.34e-01 |
| ENSG0000010861 | 19 | 15145879 | 15146428  | WDR71     | ensembl | havana | protein_coding                     | 0.0202714  | 8.74e-02 | 0.2071513  | 4.48e-01 | 0.1646139 | 1.27e-01 | 0.1646139 | 1.27e-01 | 0.0613049  | 5.81e-01  | 0.0479798  | 4.84e-01 | 0.0797864  | 2.56e-01 |
| ENSG0000011006 | 16 | 3108345  | 31089828  | PRSS53    | ensembl | havana | protein_coding                     | 0.1446370  | 2.10e-01 | 0.2044945  | 1.54e-01 | 0.1627719 | 6.81e-01 | 0.1626493 | 4.18e-01 | 0.1293905  | 3.51e-01  | 0.1328977  | 5.62e-01 | 0.0466283  | 7.80e-01 |
| ENSG0000020997 | 12 | 12396607 | 12396629  | ACM8790.3 | ensembl | havana | lincRNA                            | -0.0203445 | 8.94e-01 | 0.1362078  | 3.44e-02 | 0.2461398 | 2.16e-01 | 0.1626493 | 4.18e-01 | 0.0613049  | 5.81e-01  | 0.1328977  | 5.62e-01 | 0.0466283  | 7.80e-01 |
| ENSG0000014694 | 19 | 2025107  | 2025208   | AC02      | ensembl | havana | processed_transcript               | 0.0202714  | 8.74e-02 | 0.2071513  | 4.48e-01 | 0.1646139 | 1.27e-01 | 0.1646139 | 1.27e-01 | 0.0613049  | 5.81e-01  | 0.0479798  | 4.84e-01 | 0.0797864  | 2.56e-01 |
| ENSG0000024454 | 11 | 4497370  | 4497908   | LCN02876  | ensembl | havana | lincRNA                            | 0.0209975  | 9.45e-01 | 0.1534502  | 3.48e-01 | 0.1625943 | 7.73e-01 | 0.1625943 | 7.73e-01 | 0.0207397  | 4.46e-01  | 0.0466283  | 7.80e-01 | 0.0466283  | 7.80e-01 |
| ENSG0000025953 | 2  | 19945700 | 19947835  | SATB2.2   | ensembl | havana | lincRNA                            | -0.048072  | 6.78e-01 | 0.2136856  | 3.84e-02 | 0.2090818 | 3.15e-01 | 0.1625754 | 4.18e-01 | 0.1187709  | 3.92e-01  | 0.0479798  | 4.84e-01 | 0.138701   | 6.31e-01 |
| ENSG0000023443 | 14 | 21200797 | 21208014  | LCN6B1    | ensembl | havana | protein_coding                     | 0.0202714  | 8.74e-02 | 0.2071513  | 4.48e-01 | 0.1646139 | 1.27e-01 | 0.1646139 | 1.27e-01 | 0.0613049  | 5.81e-01  | 0.0479798  | 4.84e-01 | 0.0797864  | 2.56e-01 |
| ENSG0000015740 | 21 | 3795573  | 37952658  | VDYK1A    | ensembl | havana | protein_coding                     | 0.1059736  | 3.69e-01 | 0.1830831  | 3.95e-01 | 0.1666044 | 4.06e-01 | 0.1625943 | 4.18e-01 | 0.0982410  | 4.80e-01  | 0.2895148  | 1.82e-01 | 0.0568719  | 3.17e-01 |
| ENSG0000012551 | 1  | 2150937  | 21578410  | ALPI      | ensembl | havana | protein_coding                     | 0.1036632  | 3.10e-01 | 0.1714707  | 4.36e-01 | 0.1605841 | 6.18e-01 | 0.1626426 | 4.18e-01 | 0.1484470  | 3.84e-01  | 0.1784477  | 4.16e-01 | 0.1288513  | 3.69e-01 |
| ENSG0000020023 | 22 | 2033139  | 2033320   | MIR185    | ensembl | havana | miRNA                              | -0.079073  | 4.94e-01 | 0.2124653  | 3.96e-02 | 0.1624524 | 4.18e-01 | 0.1624524 | 4.18e-01 | 0.1484470  | 3.84e-01  | 0.079073   | 4.16e-01 | 0.1457308  | 3.16e-01 |
| ENSG0000024462 | 14 | 12644255 | 12646093  | LCN0085   | ensembl | havana | transcribed_unprocessed_pseudogene | 0.0809500  | 4.27e-01 | 0.2107038  | 1.45e-01 | 0.1620964 | 3.95e-01 | 0.1620964 | 3.95e-01 | 0.0564113  | 8.01e-01  | 0.0466283  | 7.80e-01 | 0.0466283  | 7.80e-01 |
| ENSG0000021043 | 5  | 8050000  | 8050006   | MTRNR2.2  | ensembl | havana | processed_transcript               | 0.0202714  | 8.74e-02 | 0.2071513  | 4.48e-01 | 0.1646139 | 1.27e-01 | 0.1646139 | 1.27e-01 | 0.0613049  | 5.81e-01  | 0.0479798  | 4.84e-01 | 0.0797864  | 2.56e-01 |
| ENSG0000023275 | 5  | 12758746 | 12759730  | AC02024.3 | ensembl | havana | lincRNA                            | 0.099042   | 3.91e-01 | 0.1701595  | 2.17e-01 | 0.1694328 | 8.89e-01 | 0.1624299 | 4.18e-01 | 0.0613049  | 5.81e-01  | 0.0282013  | 7.10e-01 | 0.2016113  | 1.57e-01 |
| ENSG0000021483 | 5  | 2066466  | 20681193  | MTC1P11   | ensembl | havana | processed_transcript               | 0.12172014 | 5.10e-01 | 0.2072092  | 1.48e-01 | 0.1677022 | 7.41e-01 | 0.1625943 | 4.18e-01 | 0.1217078  | 6.10e-01  | 0.1683201  | 4.48e-01 | 0.0763344  | 5.77e-01 |
| ENSG0000028166 | 15 | 7875210  | 78753373  | AC02748.1 | ensembl | havana | transcribed_unprocessed_pseudogene | -0.0255669 | 8.25e-01 | 0.1780853  | 2.44e-02 | 0.1838448 | 3.64e-01 | 0.1626786 | 4.18e-01 | 0.109041   | 4.32e-01  | 0.0466283  | 7.80e-01 | 0.0466283  | 7.80e-01 |
| ENSG0000024985 | 14 | 5030875  | 50308751  | AL33297.2 | ensembl | havana | lincRNA                            | 0.2738544  | 4.22e-02 | 0.1836975  | 2.02e-02 | 0.1414995 | 3.17e-01 | 0.1625698 | 4.18e-01 | 0.1757042  | 3.23e-01  | 0.1273736  | 6.06e-01 | 0.0466283  | 7.80e-01 |
| ENSG0000023444 | 14 | 21200797 | 21208014  | LCN6B1    | ensembl | havana | protein_coding                     | 0.0202714  | 8.74e-02 | 0.2071513  | 4.48e-01 | 0.1646139 | 1.27e-01 | 0.1646139 | 1.27e-01 | 0.0613049  | 5.81e-01  | 0.0479798  | 4.84e-01 | 0.0797864  | 2.56e-01 |
| ENSG0000015671 | 1  | 38127809 | 38145524  | MARX3     | ensembl | havana | protein_coding                     | 0.0252746  | 8.45e-01 | 0.0550309  | 7.13e-01 | 0.1762871 | 3.70e-01 | 0.1623100 | 4.19e-01 | 0.0766871  | 6.79e-01  | 0.0634571  | 7.80e-01 | 0.1572643  | 5.40e-01 |
| ENSG0000020783 | 17 | 6081015  | 60811462  | RTR1BP1   | ensembl | havana | processed_transcript               | 0.0811033  | 4.72e-01 | 0.2029312  | 1.61e-01 | 0.1623144 | 4.19e-01 | 0.1623144 | 4.19e-01 | 0.0293473  | 8.12e-01  | 0.1925419  | 1.18e-01 | 0.0282471  | 4.72e-01 |
| ENSG0000015946 | 6  | 7872427  | 7882783   | TNFRM7    | ensembl | havana | protein_coding                     | 0.1232777  | 2.89e-01 | 0.1408874  | 4.44e-01 | 0.1395180 | 4.99e-01 | 0.1626822 | 4.19e-01 | 0.1607440  | 2.46e-01  | 0.0767964  | 8.11e-01 | 0.0901294  | 5.34e-01 |
| ENSG0000021790 | 5  | 3829256  | 3838600   | AC14885.2 | ensembl | havana | lincRNA                            | 0.0496987  | 6.89e-01 | 0.1318955  | 2.93e-01 | 0.1607440 | 2.46e-01 | 0.1623144 | 4.19e-01 | 0.0484816  | 3.99e-01  | 0.0282471  | 8.11e-01 | 0.0901294  | 5.34e-01 |
| ENSG0000024753 | 6  | 4148483  | 4154661   | FDXN1     | ensembl | havana | lincRNA                            | 0.0401773  | 2.99e-01 | 0.1412349  | 3.90e-01 | 0.1621177 | 9.52e-01 | 0.1621177 | 9.52e-01 | 0.0586137  | 3.93e-01  | 0.0466283  | 7.80e-01 | 0.0466283  | 7.80e-01 |
| ENSG0000011714 | 11 | 2173994  | 2228387   | ANOS2     | ensembl | havana | protein_coding                     | 0.04887026 | 6.88e-01 | 0.1814478  | 5.74e-02 | 0.1949774 | 3.26e-01 | 0.1623144 | 4.19e-01 | 0.0601588  | 7.78e-01  | 0.0267997  | 9.03e-01 | 0.0584348  | 7.10e-01 |
| ENSG0000011261 | 12 | 1248476  | 124849281 | T P RNA   | ensembl | havana | lincRNA                            | 0.1141466  | 3.28e-01 | 0.1811173  | 1.28e-01 | 0.1733441 | 1.68e-01 | 0.1623144 | 4.19e-01 | 0.0586137  | 3.93e-01  | 0.0282471  | 8.11e-01 | 0.0901294  | 5.34e-01 |
| ENSG0000015983 | 6  | 4425496  | 44257890  | MIR343    | ensembl | havana | miRNA                              | -0.1132392 | 3.27e-01 | 0.2024781  | 8.77e-02 | 0.1620763 | 4.19e-01 | 0.1626786 | 4.18e-01 | 0.1626786  | 4.18e-01  | 0.0282471  | 8.11e-01 | 0.0584348  | 7.10e-01 |
| ENSG0000013939 | 15 | 1512139  | 15121345  | AC02024.3 | ensembl | havana | lincRNA                            | 0.0809500  | 4.27e-01 | 0.2107038  | 1.45e-01 | 0.1620964 | 3.95e-01 | 0.1620964 | 3.95e-01 | 0.0564113  | 8.01e-01  | 0.0466283  | 7.80e-01 | 0.0466283  | 7.80e-01 |
| ENSG0000020012 | 19 | 5278197  | 52781983  | MIR43     | ensembl | havana | miRNA                              | 0.1072819  | 3.51e-01 | 0.1811471  | 2.08e-01 | 0.1626812 | 4.07e-01 | 0.1626812 | 4.07e-01 | 0.0950560  | 2.95e-01  | 0.0554808  | 8.02e-01 | 0.122053   | 6.42e-01 |
| ENSG0000017014 | 12 | 1230769  | 12344120  | TUBB8     | ensembl | havana | protein_coding                     | -0.096341  | 4.05e-01 | 0.1642620  | 3.09e-02 | 0.1901269 | 3.43e-01 | 0.1626054 | 4.19e-01 | 0.0971729  | 4.85e-01  | 0.0841139  | 2.16e-01 | 0.2899977  | 3.11e-01 |
| ENSG0000020021 | 12 | 1230769  | 12344120  | TUBB8     | ensembl | havana | protein_coding                     | -0.096341  | 4.05e-01 | 0.1642620  | 3.09e-02 | 0.1901269 | 3.43e-01 | 0.1626054 | 4.19e-01 | 0.0971729  | 4.85e-01  | 0.0841139  | 2.16e-01 | 0.2899977  | 3.11e-01 |
| ENSG0000020098 | 15 | 7278285  | 72781959  | ADPK1     | ensembl | havana | lincRNA                            | -0.0039483 | 9.98e-01 | 0.1754128  | 2.21e-01 | 0.1834801 | 3.46e-01 | 0.1625145 | 4.19e-01 | 0.0567785  | 6.29e-01  | 0.0466283  | 7.80e-01 | 0.0466283  | 7.80e-01 |
| ENSG0000021504 | 22 | 2148441  | 2158142   | ZNF308    | ensembl | havana | protein_coding                     | -0.0620206 | 5.50e-01 | 0.1817287  | 2.12e-01 | 0.181786  | 5.55e-01 | 0.1619478 | 4.20e-01 | 0.1712866  | 2.16e-01  | 0.0604603  | 7.84e-01 | 0.0724609  | 6.08e-01 |
| ENSG0000020345 | 12 | 2474058  | 2475365   | AC02798.1 | ensembl | havana | lincRNA                            | -0.09393   | 3.99e-01 | 0.1766282  | 2.20e-02 | -0.23262  | 2.45e-01 | 0.1619478 | 4.20e-01 | 0.0719044  | 6.06e-01  | 0.0619004  | 8.70e-01 | 0.142042   | 3.25e-01 |
| ENSG0000020331 | 12 | 1248476  | 124849281 | T P RNA   | ensembl | havana | lincRNA                            | 0.1141466  | 3.28e-01 | 0.1811173  | 1.28e-01 | 0.1733441 | 1.68e-01 | 0.1623144 | 4.19e-01 | 0.0586137  | 3.93e-01  | 0.0282471  | 8.11e-01 | 0.0901294  | 5.34e-01 |
| ENSG0000020420 | 16 | 1147410  | 11474005  | AC00761.3 | ensembl | havana | lincRNA                            | -0.0028339 | 9.80e-01 | 0.1607941  | 6.05e-01 | 0.1618029 | 4.20e-01 | 0.05632   | 8.67e-01 | 0.0789844  | 7.20e-01  | 0.1061974  | 2.96e-01 | 0.0466283  | 7.80e-01 |
| ENSG0000027651 | 7  | 3531388  | 35317071  | AC03791.1 | ensembl | havana | lincRNA                            | -0.0028339 | 9.80e-01 | 0.1607941  | 6.05e-01 | 0.1618029 | 4.20e-01 | 0.05632   | 8.67e-01 | 0.0789844  | 7.20e-01  | 0.1061974  | 2.96e-01 | 0.0466283  | 7.80e-01 |
| ENSG0000017281 | 19 | 1300177  | 1300177   | DNASE1    | ensembl | havana | protein_coding                     | 0.0202714  | 8.74e-02 | 0.2071513  | 4.48e-01 | 0.1646139 | 1.27e-01 | 0.1646139 | 1.27e-01 | 0.0613049  | 5.81e-01  | 0.0479798  | 4.84e-01 | 0.079      |          |



























Table with columns for ID, coordinates, gene names, and various data points. The table contains multiple rows of genomic data, including gene names like APOE2B13, SIRT6, and others, along with their coordinates and associated values.









| ENSG0000024611  | 9  | 66182226 | 66188451 | A1513478.2 | havana  | unprocessed_pseud | 0.01563608 | 8.93E-01 | 0.0464669  | 7.64E-01 | 0.1917260 | 3.99E-01 | 0.1818080 | 5.57E-01 | 0.0247436 | 8.59E-01 | -0.163799  | 5.97E-01 | -0.001438  | 9.92E-01 |
|-----------------|----|----------|----------|------------|---------|-------------------|------------|----------|------------|----------|-----------|----------|-----------|----------|-----------|----------|------------|----------|------------|----------|
| ENSG0000024396  | 6  | 11891147 | 11891722 | LINC01312  | havana  | lincRNA           | 0.0118921  | 9.88E-01 | 0.1428163  | 3.22E-01 | 0.1182740 | 5.57E-01 | 0.1811708 | 5.57E-01 | 0.0600404 | 6.64E-01 | 0.0207875  | 6.41E-01 | -0.112979  | 4.15E-01 |
| ENSG0000024786  | 4  | 14034717 | 14032049 | MRX25L     | havana  | transcribed_unexp | 0.11410542 | 3.99E-01 | 0.1405421  | 6.41E-01 | 0.1917260 | 3.99E-01 | 0.1811708 | 5.57E-01 | 0.0600404 | 6.64E-01 | 0.0207875  | 6.41E-01 | -0.112979  | 4.15E-01 |
| ENSG0000026025  | 10 | 17228241 | 17227983 | VIM        | ensembl | protein_coding    | 0.10165442 | 3.79E-01 | 0.0471887  | 7.65E-01 | 0.1842752 | 5.58E-01 | 0.1810041 | 5.58E-01 | 0.0883636 | 7.17E-01 | 0.1489123  | 4.97E-01 | -0.184021  | 3.48E-01 |
| ENSG0000024470  | 7  | 6682154  | 66811464 | RAB6F1     | ensembl | protein_coding    | 0.0466880  | 7.08E-01 | 0.2221063  | 1.21E-01 | 0.0179394 | 9.31E-01 | 0.1798707 | 5.58E-01 | 0.3040949 | 6.98E-01 | 0.0547424  | 8.02E-01 | 0.0422525  | 7.76E-01 |
| ENSG0000024079  | 4  | 14743788 | 14743788 | SCAF4      | ensembl | transcribed_unexp | 0.01077832 | 3.51E-01 | 0.3900448  | 1.74E-01 | 0.0179394 | 9.31E-01 | 0.1798707 | 5.58E-01 | 0.0179394 | 9.31E-01 | 0.0179394  | 9.31E-01 | 0.0179394  | 9.31E-01 |
| ENSG0000024330  | 8  | 11886149 | 11887488 | AP00571.1  | havana  | lincRNA           | 0.04977832 | 7.31E-01 | 0.0860429  | 5.53E-01 | 0.0192004 | 9.45E-01 | 0.1788424 | 5.58E-01 | 0.0495319 | 6.93E-01 | 0.0760085  | 7.30E-01 | 0.0109235  | 7.40E-01 |
| ENSG0000024938  | 17 | 7493898  | 7494992  | OTOP3      | ensembl | protein_coding    | 0.02025428 | 2.80E-01 | 0.0179394  | 9.31E-01 | 0.0179394 | 9.31E-01 | 0.1798707 | 5.58E-01 | 0.0609672 | 7.14E-01 | 0.0205869  | 3.46E-01 | -0.1084107 | 5.49E-01 |
| ENSG0000020091  | 1  | 14684139 | 14682926 | OTOP3      | ensembl | transcribed_unexp | 0.0179394  | 9.31E-01 | 0.0179394  | 9.31E-01 | 0.0179394 | 9.31E-01 | 0.1798707 | 5.58E-01 | 0.0609672 | 7.14E-01 | 0.0205869  | 3.46E-01 | -0.1084107 | 5.49E-01 |
| ENSG0000027530  | 7  | 7538538  | 7538139  | V RNA      | ensembl | misc_RNA          | 0.01318227 | 7.88E-01 | 0.0360629  | 4.53E-01 | 0.1120705 | 7.78E-01 | 0.1797705 | 5.58E-01 | 0.0016235 | 8.99E-01 | 0.0990548  | 7.08E-01 | 0.0223400  | 8.74E-01 |
| ENSG0000027139  | 22 | 20320739 | 20321203 | AC00766.3  | havana  | lincRNA           | 0.0586237  | 6.13E-01 | 0.0586237  | 6.13E-01 | 0.1475178 | 4.64E-01 | 0.1780884 | 5.58E-01 | 0.0905929 | 5.16E-01 | 0.0665898  | 7.63E-01 | -0.1173394 | 4.71E-01 |
| ENSG0000021248  | 4  | 14032002 | 14032004 | MRX25L     | havana  | transcribed_unexp | 0.0118921  | 9.88E-01 | 0.1428163  | 3.22E-01 | 0.1182740 | 5.57E-01 | 0.1811708 | 5.57E-01 | 0.0600404 | 6.64E-01 | 0.0207875  | 6.41E-01 | -0.112979  | 4.15E-01 |
| ENSG0000021911  | 1  | 1279155  | 1284222  | PP2R2      | ensembl | protein_coding    | 0.0305424  | 8.19E-01 | 0.0305424  | 8.19E-01 | 0.1784858 | 5.58E-01 | 0.1810041 | 5.58E-01 | 0.0548084 | 6.90E-01 | 0.0793708  | 7.25E-01 | 0.0465035  | 7.37E-01 |
| ENSG00000212259 | 11 | 8234765  | 8244479  | CNG4A      | ensembl | protein_coding    | 0.0397249  | 7.83E-01 | 0.1323203  | 2.10E-01 | 0.0959480 | 6.31E-01 | 0.1784200 | 5.58E-01 | 0.0111375 | 8.36E-01 | -0.145627  | 5.07E-01 | -0.1242306 | 3.99E-01 |
| ENSG00000210490 | 17 | 10281230 | 10287483 | FRK13      | ensembl | protein_coding    | 0.13155187 | 2.54E-01 | 0.13155187 | 2.54E-01 | 0.0935148 | 8.46E-01 | 0.1178424 | 5.58E-01 | 0.1284434 | 5.55E-01 | 0.1189708  | 6.12E-01 | 0.0477270  | 7.42E-01 |
| ENSG00000207763 | 12 | 8081331  | 8083249  | MIR17      | havana  | miRNA             | 0.0807754  | 4.46E-01 | 0.1520614  | 2.96E-01 | 0.2533354 | 1.99E-01 | 0.1737500 | 5.58E-01 | 0.0445579 | 7.49E-01 | 0.2052676  | 6.90E-01 | 0.1484661  | 3.04E-01 |
| ENSG00000211279 | 12 | 3975025  | 4010689  | SIC1A3     | ensembl | protein_coding    | 0.1181288  | 3.06E-01 | 0.0466697  | 9.74E-01 | 0.1700421 | 3.96E-01 | 0.1737500 | 5.58E-01 | 0.1691273 | 2.21E-01 | 0.0777263  | 6.91E-01 | -0.0609777 | 7.74E-01 |
| ENSG00000244962 | 1  | 11289512 | 11241149 | SPRY1E2    | ensembl | protein_coding    | 0.0130872  | 5.00E-01 | 0.1240024  | 1.55E-01 | 0.2805464 | 1.49E-01 | 0.0206368 | 9.44E-01 | 0.1138364 | 6.11E-01 | 0.0906448  | 5.11E-01 | 0.0179394  | 9.31E-01 |
| ENSG00000218298 | 1  | 15025751 | 15026578 | CA14       | ensembl | protein_coding    | 0.2300301  | 4.42E-01 | 0.1815501  | 2.07E-01 | 0.1785449 | 3.73E-01 | 0.1769944 | 5.58E-01 | 0.2754129 | 3.88E-01 | 0.0254631  | 8.01E-01 | -0.073287  | 3.13E-01 |
| ENSG00000246049 | 15 | 6706783  | 6719169  | SMAD3      | ensembl | protein_coding    | 0.1744420  | 1.29E-01 | 0.1210405  | 4.02E-01 | 0.4980586 | 8.18E-01 | 0.1769338 | 5.58E-01 | 0.1883797 | 1.51E-01 | 0.0678099  | 4.19E-01 | 0.3065233  | 3.05E-01 |
| ENSG00000218663 | 4  | 8304447  | 8305617  | COP1       | ensembl | protein_coding    | 0.1214934  | 3.67E-01 | 0.0145591  | 9.20E-01 | 0.2080921 | 1.21E-01 | 0.1767801 | 5.58E-01 | 0.0232423 | 7.59E-01 | 0.0205347  | 9.48E-01 | 0.1356471  | 2.35E-01 |
| ENSG00000230566 | 21 | 2923231  | 2923257  | GAD6HP14   | havana  | processed_pseud   | 0.0984666  | 4.07E-01 | 0.2366225  | 1.07E-01 | 0.1845145 | 3.67E-01 | 0.1762663 | 5.58E-01 | 0.0519276 | 7.12E-01 | -0.0999927 | 6.70E-01 | -0.1472966 | 3.07E-01 |
| ENSG00000240048 | 12 | 11539117 | 11531576 | SIL4B      | ensembl | protein_coding    | 0.0128801  | 9.11E-01 | 0.1497396  | 2.99E-01 | 0.079027  | 6.95E-01 | 0.1767705 | 5.58E-01 | 0.057925  | 6.81E-01 | 0.113410   | 7.02E-01 | 0.0280405  | 8.35E-01 |
| ENSG00000247882 | 40 | 4739802  | 4737074  | A018666.2  | havana  | lincRNA           | 0.0209532  | 8.25E-01 | 0.0889964  | 5.40E-01 | 0.0967021 | 6.41E-01 | 0.1789784 | 5.58E-01 | 0.0848395 | 6.88E-01 | 0.198084   | 5.27E-01 | -0.1187861 | 4.12E-01 |
| ENSG00000218013 | 17 | 2058939  | 2058967  | MESR1      | ensembl | processed_pseud   | 0.0093738  | 9.97E-01 | 0.0933713  | 3.50E-01 | 0.1537490 | 4.48E-01 | 0.1769886 | 5.58E-01 | 0.092422  | 8.38E-01 | 0.1153151  | 2.47E-01 | 0.0205208  | 8.83E-01 |
| ENSG00000216666 | 2  | 12665613 | 12666667 | GYPE       | ensembl | protein_coding    | 0.0156515  | 4.90E-01 | 0.1078784  | 2.65E-01 | 0.1744443 | 3.84E-01 | 0.1757763 | 5.58E-01 | 0.0766775 | 8.82E-01 | 0.0437883  | 7.44E-01 | 0.0473234  | 7.44E-01 |
| ENSG00000279999 | 20 | 3073751  | 3073951  | AC02484.2  | havana  | lincRNA           | 0.0172893  | 1.34E-01 | 0.0912189  | 7.87E-01 | 0.2040262 | 3.06E-01 | 0.1757763 | 5.58E-01 | 0.2222488 | 1.06E-01 | 0.100242   | 6.17E-01 | -0.1274243 | 2.45E-01 |
| ENSG00000212283 | 1  | 15025751 | 15026578 | CA14       | ensembl | protein_coding    | 0.2300301  | 4.42E-01 | 0.1815501  | 2.07E-01 | 0.1785449 | 3.73E-01 | 0.1769944 | 5.58E-01 | 0.2754129 | 3.88E-01 | 0.0254631  | 8.01E-01 | -0.073287  | 3.13E-01 |
| ENSG00000214446 | 3  | 10616012 | 10622435 | HTF7       | ensembl | protein_coding    | 0.0254933  | 2.45E-01 | 0.0273305  | 4.02E-01 | 0.5984924 | 9.78E-01 | 0.1720721 | 5.58E-01 | 0.3406749 | 4.37E-01 | 0.2938992  | 2.71E-01 | 0.0417718  | 7.93E-01 |
| ENSG00000208895 | 1  | 1324448  | 14140065 | AC01746.6  | havana  | lincRNA           | 0.0130872  | 5.00E-01 | 0.1240024  | 1.55E-01 | 0.2805464 | 1.49E-01 | 0.0206368 | 9.44E-01 | 0.1138364 | 6.11E-01 | 0.0906448  | 5.11E-01 | 0.0179394  | 9.31E-01 |
| ENSG00000272817 | 6  | 3124675  | 3124686  | A168540.1  | havana  | lincRNA           | 0.0140677  | 2.23E-01 | 0.0789242  | 6.10E-01 | 0.1135585 | 2.81E-01 | 0.1749873 | 5.58E-01 | 0.212679  | 2.38E-01 | -0.1217992 | 5.80E-01 | -0.1713758 | 2.34E-01 |
| ENSG00000219891 | 11 | 1042782  | 1042837  | AC01746.6  | havana  | lincRNA           | 0.0130872  | 5.00E-01 | 0.1240024  | 1.55E-01 | 0.2805464 | 1.49E-01 | 0.0206368 | 9.44E-01 | 0.1138364 | 6.11E-01 | 0.0906448  | 5.11E-01 | 0.0179394  | 9.31E-01 |
| ENSG00000210278 | 20 | 839447   | 839977   | RIP50L5    | ensembl | protein_coding    | 0.0867272  | 7.20E-01 | 0.1785212  | 2.35E-01 | 0.0700514 | 7.28E-01 | 0.1764997 | 5.58E-01 | 0.0797807 | 6.26E-01 | 0.0649317  | 8.37E-01 | -0.0687826 | 3.10E-01 |
| ENSG00000211991 | 9  | 1362474  | 1362523  | ANKAP2     | ensembl | processed_pseud   | 0.2918963  | 1.00E-01 | 0.1810911  | 1.27E-01 | 0.0119589 | 9.46E-01 | 0.1714011 | 5.60E-01 | 0.1312442 | 1.40E-01 | 0.0296443  | 8.11E-01 | -0.0179396 | 9.02E-01 |
| ENSG00000244854 | 7  | 756875   | 758912   | MIR2       | ensembl | protein_coding    | 0.0794834  | 5.42E-01 | 0.0259789  | 8.30E-01 | 0.0886540 | 7.34E-01 | 0.1742621 | 5.60E-01 | 0.1739744 | 2.08E-01 | 0.0927683  | 8.48E-01 | 0.0475205  | 7.43E-01 |
| ENSG00000248490 | 1  | 8377414  | 8378204  | ALX4P2.1   | havana  | transcribed_unexp | 0.0179394  | 9.31E-01 | 0.0179394  | 9.31E-01 | 0.0179394 | 9.31E-01 | 0.1798707 | 5.58E-01 | 0.0609672 | 7.14E-01 | 0.0205869  | 3.46E-01 | -0.1084107 | 5.49E-01 |
| ENSG00000249500 | 15 | 4871803  | 4873361  | RTRP2A     | ensembl | processed_pseud   | 0.0081336  | 9.40E-01 | 0.1774803  | 2.48E-01 | 0.1148866 | 5.76E-01 | 0.1702031 | 5.60E-01 | 0.071031  | 6.10E-01 | 0.1121016  | 7.11E-01 | -0.1414666 | 2.98E-01 |
| ENSG00000210273 | 7  | 14285261 | 14287104 | ERH6       | ensembl | protein_coding    | 0.1838405  | 1.09E-01 | 0.1103284  | 4.67E-01 | 0.1428729 | 2.24E-01 | 0.1739816 | 5.60E-01 | 0.1838405 | 1.09E-01 | 0.109996   | 6.15E-01 | -0.226244  | 1.34E-01 |
| ENSG00000246921 | 1  | 1416636  | 14172947 | AC01746.6  | havana  | lincRNA           | 0.0130872  | 5.00E-01 | 0.1240024  | 1.55E-01 | 0.2805464 | 1.49E-01 | 0.0206368 | 9.44E-01 | 0.1138364 | 6.11E-01 | 0.0906448  | 5.11E-01 | 0.0179394  | 9.31E-01 |
| ENSG00000271588 | 12 | 10207103 | 10212020 | NUF37      | ensembl | protein_coding    | 0.0142360  | 9.02E-01 | 0.0842444  | 5.80E-01 | 0.0841466 | 6.73E-01 | 0.1703031 | 5.60E-01 | 0.0462862 | 7.29E-01 | 0.0943182  | 6.86E-01 | -0.0400475 | 9.78E-01 |
| ENSG00000246865 | 15 | 9095470  | 9096313  | RC3D3      | ensembl | protein_coding    | 0.0844213  | 4.65E-01 | 0.1530779  | 2.76E-01 | 0.2273664 | 2.54E-01 | 0.1737363 | 5.60E-01 | 0.0914466 | 7.98E-01 | 0.129236   | 5.67E-01 | 0.1009696  | 2.67E-01 |
| ENSG00000239564 | 1  | 1416636  | 14172947 | AC01746.6  | havana  | lincRNA           | 0.0130872  | 5.00E-01 | 0.1240024  | 1.55E-01 | 0.2805464 | 1.49E-01 | 0.0206368 | 9.44E-01 | 0.1138364 | 6.11E-01 | 0.0906448  | 5.11E-01 | 0.0179394  | 9.31E-01 |
| ENSG0000029150  |    |          |          |            |         |                   |            |          |            |          |           |          |           |          |           |          |            |          |            |          |











| ENSG000002366  | 1  | 4718358   | 4719104  | PDXP1P1      | ensembl | havana | protein_coding     | 0.1200479 | 2.98E-01  | 0.1304717 | 3.66E-01  | 0.1121232 | 5.77E-01  | 0.1055199 | 6.00E-01  | 0.1291936 | 3.52E-01  | 0.1881208 | 3.65E-01  | 0.0090918 | 9.46E-01  |
|----------------|----|-----------|----------|--------------|---------|--------|--------------------|-----------|-----------|-----------|-----------|-----------|-----------|-----------|-----------|-----------|-----------|-----------|-----------|-----------|-----------|
| ENSG000001100  | 1  | 1512148   | 1512867  | CDMP2        | ensembl | havana | protein_coding     | 0.0712931 | 8.82E-01  | 0.0802571 | 6.53E-01  | 0.2541148 | 1.98E-01  | 0.1054999 | 6.00E-01  | 0.0291786 | 8.84E-01  | 0.1027676 | 6.41E-01  | 0.1112623 | 2.80E-01  |
| ENSG000001982  | 17 | 1242039   | 1242039  | LOC100286148 | ensembl | havana | antisense_intronic | 0.0000000 | 0.0000000 | 0.0000000 | 0.0000000 | 0.0000000 | 0.0000000 | 0.0000000 | 0.0000000 | 0.0000000 | 0.0000000 | 0.0000000 | 0.0000000 | 0.0000000 | 0.0000000 |
| ENSG000002816  | 16 | 10008118  | 10008360 | RADP1P1      | ensembl | havana | protein_coding     | 0.0976694 | 3.98E-01  | 0.1062161 | 2.72E-01  | 0.1054888 | 4.23E-01  | 0.1054888 | 6.00E-01  | 0.0607726 | 6.80E-01  | 0.0452406 | 8.37E-01  | 0.0566230 | 7.27E-01  |
| ENSG000004199  | 5  | 8280615   | 8280621  | CCY11A1P1    | ensembl | havana | protein_coding     | 0.2253757 | 8.39E-01  | 0.0999804 | 4.90E-01  | 0.15061   | 0.1054711 | 6.01E-01  | 0.1884058 | 3.84E-01  | 0.1038954 | 6.82E-01  | 0.0548931 | 7.05E-01  |           |
| ENSG000002197  | 1  | 10243957  | 10243957 | LOC100286148 | ensembl | havana | antisense_intronic | 0.0000000 | 0.0000000 | 0.0000000 | 0.0000000 | 0.0000000 | 0.0000000 | 0.0000000 | 0.0000000 | 0.0000000 | 0.0000000 | 0.0000000 | 0.0000000 | 0.0000000 | 0.0000000 |
| ENSG000002625  | 2  | 10243957  | 10243430 | CCY11A1P1    | ensembl | havana | protein_coding     | 0.0992865 | 6.34E-01  | 0.2176742 | 1.89E-01  | 0.1550591 | 4.93E-01  | 0.1053789 | 6.01E-01  | 0.1684055 | 1.72E-01  | 0.0539755 | 8.66E-01  | 0.0728083 | 6.16E-01  |
| ENSG000004982  | 6  | 13508931  | 13504007 | Cforn6-AS1   | ensembl | havana | antisense_intronic | 0.0087729 | 5.52E-01  | 0.0279804 | 8.74E-01  | 0.1354807 | 5.06E-01  | 0.1053149 | 6.01E-01  | 0.0704345 | 6.07E-01  | 0.0292138 | 6.40E-01  | 0.1001201 | 4.00E-01  |
| ENSG000001971  | 20 | 1552356   | 1552356  | LOC100286148 | ensembl | havana | antisense_intronic | 0.0000000 | 0.0000000 | 0.0000000 | 0.0000000 | 0.0000000 | 0.0000000 | 0.0000000 | 0.0000000 | 0.0000000 | 0.0000000 | 0.0000000 | 0.0000000 | 0.0000000 | 0.0000000 |
| ENSG000001850  | 20 | 11540767  | 11545714 | SFOA4        | ensembl | havana | protein_coding     | 0.0228864 | 8.43E-01  | 0.0320552 | 8.72E-01  | 0.1765408 | 3.78E-01  | 0.1052433 | 6.01E-01  | 0.0629871 | 7.42E-01  | 0.0295786 | 2.85E-01  | 0.0454371 | 7.07E-01  |
| ENSG000004807  | 11 | 4332878   | 4332996  | AC08727.2    | ensembl | havana | antisense_intronic | 0.0581723 | 6.14E-01  | 0.0070943 | 9.61E-01  | 0.0925559 | 6.36E-01  | 0.1052086 | 6.01E-01  | 0.1731054 | 2.11E-01  | 0.0420304 | 9.17E-01  | 0.1030436 | 8.34E-01  |
| ENSG000001043  | 29 | 4926820   | 4926824  | LOC100286148 | ensembl | havana | antisense_intronic | 0.0000000 | 0.0000000 | 0.0000000 | 0.0000000 | 0.0000000 | 0.0000000 | 0.0000000 | 0.0000000 | 0.0000000 | 0.0000000 | 0.0000000 | 0.0000000 | 0.0000000 | 0.0000000 |
| ENSG000001709  | 17 | 7251416   | 7259940  | EPS          | ensembl | havana | protein_coding     | 0.0231475 | 8.42E-01  | 0.0339741 | 8.69E-01  | 0.1052213 | 3.24E-01  | 0.1052213 | 6.01E-01  | 0.0498624 | 5.80E-01  | 0.1386624 | 5.80E-01  | 0.0707745 | 8.40E-01  |
| ENSG000002136  | 8  | 8958267   | 8975812  | ALF17829.1   | ensembl | havana | antisense_intronic | 0.0470511 | 2.08E-01  | 0.0436031 | 7.60E-01  | 0.1238825 | 2.42E-01  | 0.1052173 | 6.02E-01  | 0.1242425 | 7.69E-01  | 0.1809663 | 4.05E-01  | 0.0472359 | 7.44E-01  |
| ENSG0000010287 | 13 | 1502813   | 1502827  | DLFM         | ensembl | havana | protein_coding     | 0.1720147 | 1.35E-01  | 0.1313776 | 3.89E-01  | 0.3945275 | 4.17E-01  | 0.1051274 | 6.02E-01  | 0.1781140 | 1.97E-01  | 0.084966  | 7.02E-01  | 0.1136575 | 3.62E-01  |
| ENSG000002178  | 29 | 12492611  | 12492617 | LOC100286148 | ensembl | havana | antisense_intronic | 0.0000000 | 0.0000000 | 0.0000000 | 0.0000000 | 0.0000000 | 0.0000000 | 0.0000000 | 0.0000000 | 0.0000000 | 0.0000000 | 0.0000000 | 0.0000000 | 0.0000000 | 0.0000000 |
| ENSG000001908  | 6  | 15996802  | 16011307 | HGF2R        | ensembl | havana | protein_coding     | 0.1084323 | 3.98E-01  | 0.1279051 | 3.76E-01  | 0.1055505 | 6.00E-01  | 0.1050714 | 6.02E-01  | 0.1320266 | 3.40E-01  | 0.181592  | 4.07E-01  | 0.180007  | 4.14E-01  |
| ENSG0000020792 | 14 | 104661120 | 10466538 | LINC02280    | ensembl | havana | antisense_intronic | 0.0001233 | 9.44E-01  | 0.0318994 | 8.08E-01  | 0.1998974 | 3.17E-01  | 0.1054083 | 6.02E-01  | 0.0207744 | 9.84E-01  | 0.140599  | 5.39E-01  | 0.0201279 | 9.93E-01  |
| ENSG000002852  | 12 | 10131678  | 10131649 | LOC100286148 | ensembl | havana | antisense_intronic | 0.0000000 | 0.0000000 | 0.0000000 | 0.0000000 | 0.0000000 | 0.0000000 | 0.0000000 | 0.0000000 | 0.0000000 | 0.0000000 | 0.0000000 | 0.0000000 | 0.0000000 | 0.0000000 |
| ENSG000002787  | 2  | 21002847  | 21002916 | AC009738.1   | ensembl | havana | antisense_intronic | 0.0009347 | 7.88E-01  | 0.0518854 | 7.20E-01  | 0.1880718 | 3.45E-01  | 0.1049618 | 6.02E-01  | 0.0711215 | 6.01E-01  | 0.1577479 | 4.72E-01  | 0.1701856 | 2.37E-01  |
| ENSG0000018844 | 2  | 2188893   | 2184319  | COG7         | ensembl | havana | protein_coding     | 0.0468227 | 6.96E-01  | 0.064893  | 6.51E-01  | 0.0693927 | 7.51E-01  | 0.104949  | 6.02E-01  | 0.0261545 | 8.58E-01  | 0.1247745 | 1.35E-01  | 0.128624  | 3.74E-01  |
| ENSG000001982  | 29 | 12492611  | 12492617 | LOC100286148 | ensembl | havana | antisense_intronic | 0.0000000 | 0.0000000 | 0.0000000 | 0.0000000 | 0.0000000 | 0.0000000 | 0.0000000 | 0.0000000 | 0.0000000 | 0.0000000 | 0.0000000 | 0.0000000 | 0.0000000 | 0.0000000 |
| ENSG000002629  | 9  | 19315456  | 19315708 | VEZF1P1      | ensembl | havana | protein_coding     | 0.0538282 | 6.45E-01  | 0.1202386 | 4.06E-01  | 0.0504240 | 7.84E-01  | 0.1049325 | 6.02E-01  | 0.0412757 | 7.67E-01  | 0.140393  | 4.57E-01  | 0.100824  | 4.86E-01  |
| ENSG000002809  | 26 | 2139150   | 2142669  | AC811P1      | ensembl | havana | transcribed_unit   | 0.0766297 | 5.11E-01  | 0.0246110 | 5.10E-01  | 0.0246110 | 9.18E-01  | 0.1049216 | 6.02E-01  | 0.1489973 | 2.76E-01  | 0.1759446 | 4.22E-01  | 0.091654  | 6.33E-01  |
| ENSG000001998  | 16 | 309498    | 309494   | ORAS         | ensembl | havana | protein_coding     | 0.003128  | 9.64E-01  | 0.0189369 | 8.96E-01  | 0.248637  | 2.84E-01  | 0.1048881 | 6.04E-01  | 0.0868047 | 5.47E-01  | 0.18671   | 3.96E-01  | 0.188796  | 1.86E-01  |
| ENSG000001043  | 29 | 12492611  | 12492617 | LOC100286148 | ensembl | havana | antisense_intronic | 0.0000000 | 0.0000000 | 0.0000000 | 0.0000000 | 0.0000000 | 0.0000000 | 0.0000000 | 0.0000000 | 0.0000000 | 0.0000000 | 0.0000000 | 0.0000000 | 0.0000000 | 0.0000000 |
| ENSG000002556  | 19 | 5485130   | 5490142  | NLRP3        | ensembl | havana | protein_coding     | 0.0125501 | 6.93E-01  | 0.1275501 | 3.74E-01  | 0.0787748 | 3.61E-01  | 0.1048180 | 6.03E-01  | 0.0491245 | 9.18E-01  | 0.0489984 | 4.97E-01  | 0.026621  | 5.22E-01  |
| ENSG000001344  | 12 | 5571037   | 5572087  | BLOC1S1      | ensembl | havana | protein_coding     | 0.0201931 | 4.53E-01  | 0.2004156 | 1.30E-01  | 0.1986835 | 3.21E-01  | 0.1048084 | 6.03E-01  | 0.3963787 | 3.01E-01  | 0.10874   | 3.64E-01  | 0.023298  | 8.62E-01  |
| ENSG000001476  | 1  | 9310785   | 9310824  | AC02462.2    | ensembl | havana | antisense_intronic | 0.0001182 | 9.45E-01  | 0.0000000 | 0.0000000 | 0.0000000 | 0.0000000 | 0.0000000 | 0.0000000 | 0.0000000 | 0.0000000 | 0.0000000 | 0.0000000 | 0.0000000 | 0.0000000 |
| ENSG000002721  | 1  | 18414309  | 1841328  | AC13123.2    | ensembl | havana | antisense_intronic | 0.1532534 | 1.83E-01  | 0.1633864 | 2.57E-01  | 0.0512244 | 8.40E-01  | 0.1047669 | 6.03E-01  | 0.0578668 | 2.55E-01  | 0.048282  | 3.86E-01  | 0.0562782 | 9.02E-01  |
| ENSG0000016469 | 2  | 15303120  | 15303200 | SPR18        | ensembl | havana | protein_coding     | 0.0444933 | 7.64E-01  | 0.0831589 | 5.53E-01  | 0.1900445 | 3.42E-01  | 0.1047019 | 6.04E-01  | 0.0657441 | 6.37E-01  | 0.120402  | 5.80E-01  | 0.1616396 | 2.62E-01  |
| ENSG000002027  | 12 | 10131678  | 10131649 | LOC100286148 | ensembl | havana | antisense_intronic | 0.0000000 | 0.0000000 | 0.0000000 | 0.0000000 | 0.0000000 | 0.0000000 | 0.0000000 | 0.0000000 | 0.0000000 | 0.0000000 | 0.0000000 | 0.0000000 | 0.0000000 | 0.0000000 |
| ENSG0000019712 | 10 | 9099938   | 9178569  | SLIT1        | ensembl | havana | protein_coding     | 0.0779813 | 5.28E-01  | 0.0717124 | 5.91E-01  | 0.0416208 | 9.34E-01  | 0.1047263 | 6.04E-01  | 0.1742767 | 2.07E-01  | 0.0486956 | 6.03E-01  | 0.1086956 | 5.49E-01  |
| ENSG000001359  | 16 | 3101285   | 3102452  | PCFAD1       | ensembl | havana | protein_coding     | 0.2291807 | 4.50E-01  | 0.1691863 | 2.88E-01  | 0.0254269 | 9.00E-01  | 0.1045924 | 6.04E-01  | 0.1051145 | 2.48E-01  | 0.092521  | 3.75E-01  | 0.088319  | 5.88E-01  |
| ENSG000001786  | 1  | 9121865   | 9121910  | LOC100286148 | ensembl | havana | antisense_intronic | 0.0000000 | 0.0000000 | 0.0000000 | 0.0000000 | 0.0000000 | 0.0000000 | 0.0000000 | 0.0000000 | 0.0000000 | 0.0000000 | 0.0000000 | 0.0000000 | 0.0000000 | 0.0000000 |
| ENSG000002962  | 8  | 12076420  | 10718823 | FBM1         | ensembl | havana | protein_coding     | 0.0234923 | 6.44E-01  | 0.0607554 | 9.66E-01  | 0.0628864 | 7.55E-01  | 0.1045748 | 6.04E-01  | 0.0661186 | 9.05E-01  | 0.1827519 | 5.90E-01  | 0.0923718 | 7.91E-01  |
| ENSG0000023526 | 9  | 13154514  | 13158620 | PRRT18       | ensembl | havana | protein_coding     | 0.0791445 | 4.94E-01  | 0.0447939 | 7.57E-01  | 0.0004130 | 9.84E-01  | 0.1045052 | 6.04E-01  | 0.0789865 | 3.74E-01  | 0.1204469 | 6.80E-01  | 0.072308  | 6.19E-01  |
| ENSG0000021715 | 12 | 9602523   | 9602771  | AC00798.1    | ensembl | havana | antisense_intronic | 0.0457253 | 2.16E-01  | 0.1387178 | 3.86E-01  | 0.2089756 | 2.96E-01  | 0.1044588 | 6.04E-01  | 0.0792625 | 2.24E-01  | 0.027402  | 9.85E-01  | 0.0888103 | 5.48E-01  |
| ENSG000001367  | 9  | 3610787   | 3610841  | AC02462.2    | ensembl | havana | antisense_intronic | 0.0001928 | 9.39E-01  | 0.0000000 | 0.0000000 | 0.0000000 | 0.0000000 | 0.0000000 | 0.0000000 | 0.0000000 | 0.0000000 | 0.0000000 | 0.0000000 | 0.0000000 | 0.0000000 |
| ENSG000002786  | 7  | 15521320  | 15521314 | AC09952.5    | ensembl | havana | antisense_intronic | 0.0001307 | 7.87E-01  | 0.1449766 | 3.03E-01  | 0.1261233 | 2.78E-01  | 0.1044106 | 6.04E-01  | 0.0312743 | 3.90E-01  | 0.2905828 | 1.75E-01  | 0.1018886 | 5.24E-01  |
| ENSG0000019018 | 15 | 6877745   | 6879562  | FEI18        | ensembl | havana | protein_coding     | 0.1346524 | 2.43E-01  | 0.1689511 | 2.43E-01  | 0.0776699 | 9.29E-01  | 0.1043828 |           |           |           |           |           |           |           |

| ENSG0000022031   | 6  | 81724722 | 81736353 | A0U7899.2  | havana                 | lncRNA                 | 0.28688773 | 1.144e-05  | 0.20297288 | 1.576e-05  | 0.66245988 | 1.675e-04  | 0.10200941 | 6.12e-01   | 0.2862335  | 1.58e-04   | 0.24277713 | 2.64e-01   | 0.43973284 | 1.40e-01   |          |
|------------------|----|----------|----------|------------|------------------------|------------------------|------------|------------|------------|------------|------------|------------|------------|------------|------------|------------|------------|------------|------------|------------|----------|
| ENSG0000028696   | 5  | 42993134 | 42997480 | AC00887.2  | havana                 | transcripted_processed | 0.01514947 | 6.59e-07   | 0.14804411 | 3.02e-07   | 0.16770079 | 4.04e-01   | 0.10200941 | 6.12e-01   | 0.2862335  | 1.58e-04   | 0.24277713 | 2.64e-01   | 0.43973284 | 1.40e-01   |          |
| ENSG0000028661   | 3  | 18173980 | 18175080 | TR001      | havana                 | transcripted_processed | 0.01514947 | 6.59e-07   | 0.14804411 | 3.02e-07   | 0.16770079 | 4.04e-01   | 0.10200941 | 6.12e-01   | 0.2862335  | 1.58e-04   | 0.24277713 | 2.64e-01   | 0.43973284 | 1.40e-01   |          |
| ENSG0000028740   | 1  | 16738939 | 16739080 | havana     | lncRNA                 | 0.18173997             | 3.04e-01   | 0.01799177 | 9.01e-01   | 0.01020094 | 6.12e-01   | 0.2862335  | 1.58e-04   | 0.24277713 | 2.64e-01   | 0.43973284 | 1.40e-01   | 0.43973284 | 1.40e-01   | 0.43973284 | 1.40e-01 |
| ENSG0000044431   | 2  | 12784533 | 12784533 | P0J2D      | havana                 | transcripted_processed | 0.01514947 | 6.59e-07   | 0.14804411 | 3.02e-07   | 0.16770079 | 4.04e-01   | 0.10200941 | 6.12e-01   | 0.2862335  | 1.58e-04   | 0.24277713 | 2.64e-01   | 0.43973284 | 1.40e-01   |          |
| ENSG0000027778   | 19 | 4240494  | 4240494  | CP029P3    | havana                 | transcripted_processed | 0.01514947 | 6.59e-07   | 0.14804411 | 3.02e-07   | 0.16770079 | 4.04e-01   | 0.10200941 | 6.12e-01   | 0.2862335  | 1.58e-04   | 0.24277713 | 2.64e-01   | 0.43973284 | 1.40e-01   |          |
| ENSG00000242497  | 19 | 33322391 | 33323003 | FAM187B.2  | havana                 | transcripted_processed | 0.01514947 | 6.59e-07   | 0.14804411 | 3.02e-07   | 0.16770079 | 4.04e-01   | 0.10200941 | 6.12e-01   | 0.2862335  | 1.58e-04   | 0.24277713 | 2.64e-01   | 0.43973284 | 1.40e-01   |          |
| ENSG00000136279  | 7  | 4404440  | 4404654  | DBNL       | havana                 | transcripted_processed | 0.01514947 | 6.59e-07   | 0.14804411 | 3.02e-07   | 0.16770079 | 4.04e-01   | 0.10200941 | 6.12e-01   | 0.2862335  | 1.58e-04   | 0.24277713 | 2.64e-01   | 0.43973284 | 1.40e-01   |          |
| ENSG00000130921  | 1  | 13001868 | 13002173 | havana     | transcripted_processed | 0.01514947             | 6.59e-07   | 0.14804411 | 3.02e-07   | 0.16770079 | 4.04e-01   | 0.10200941 | 6.12e-01   | 0.2862335  | 1.58e-04   | 0.24277713 | 2.64e-01   | 0.43973284 | 1.40e-01   |            |          |
| ENSG00000129226  | 7  | 7579891  | 7582111  | CNSG       | havana                 | transcripted_processed | 0.01514947 | 6.59e-07   | 0.14804411 | 3.02e-07   | 0.16770079 | 4.04e-01   | 0.10200941 | 6.12e-01   | 0.2862335  | 1.58e-04   | 0.24277713 | 2.64e-01   | 0.43973284 | 1.40e-01   |          |
| ENSG0000024968   | 4  | 8092430  | 8093020  | AC093827.4 | havana                 | transcripted_processed | 0.01514947 | 6.59e-07   | 0.14804411 | 3.02e-07   | 0.16770079 | 4.04e-01   | 0.10200941 | 6.12e-01   | 0.2862335  | 1.58e-04   | 0.24277713 | 2.64e-01   | 0.43973284 | 1.40e-01   |          |
| ENSG0000015634   | 3  | 4208281  | 4208280  | havana     | transcripted_processed | 0.01514947             | 6.59e-07   | 0.14804411 | 3.02e-07   | 0.16770079 | 4.04e-01   | 0.10200941 | 6.12e-01   | 0.2862335  | 1.58e-04   | 0.24277713 | 2.64e-01   | 0.43973284 | 1.40e-01   |            |          |
| ENSG00000200021  | 1  | 186071   | 827796   | AL66981.3  | havana                 | transcripted_processed | 0.01514947 | 6.59e-07   | 0.14804411 | 3.02e-07   | 0.16770079 | 4.04e-01   | 0.10200941 | 6.12e-01   | 0.2862335  | 1.58e-04   | 0.24277713 | 2.64e-01   | 0.43973284 | 1.40e-01   |          |
| ENSG00000211890  | 14 | 10558731 | 10558935 | IG24       | havana                 | IG_C_gene              | 0.1659899  | 1.49e-01   | 0.2387768  | 3.78e-01   | 0.13683161 | 0.1017891  | 6.12e-01   | 0.2862335  | 1.58e-04   | 0.24277713 | 2.64e-01   | 0.43973284 | 1.40e-01   |            |          |
| ENSG0000027959   | 8  | 4794124  | 4794370  | AC01236.1  | havana                 | transcripted_processed | 0.01514947 | 6.59e-07   | 0.14804411 | 3.02e-07   | 0.16770079 | 4.04e-01   | 0.10200941 | 6.12e-01   | 0.2862335  | 1.58e-04   | 0.24277713 | 2.64e-01   | 0.43973284 | 1.40e-01   |          |
| ENSG0000019189   | 18 | 5056603  | 5056957  | AP02       | havana                 | transcripted_processed | 0.01514947 | 6.59e-07   | 0.14804411 | 3.02e-07   | 0.16770079 | 4.04e-01   | 0.10200941 | 6.12e-01   | 0.2862335  | 1.58e-04   | 0.24277713 | 2.64e-01   | 0.43973284 | 1.40e-01   |          |
| ENSG0000027975   | 18 | 1379745  | 1380010  | AC00250.2  | havana                 | transcripted_processed | 0.01514947 | 6.59e-07   | 0.14804411 | 3.02e-07   | 0.16770079 | 4.04e-01   | 0.10200941 | 6.12e-01   | 0.2862335  | 1.58e-04   | 0.24277713 | 2.64e-01   | 0.43973284 | 1.40e-01   |          |
| ENSG0000027749   | 15 | 7413116  | 7413168  | AC02350.2  | havana                 | transcripted_processed | 0.01514947 | 6.59e-07   | 0.14804411 | 3.02e-07   | 0.16770079 | 4.04e-01   | 0.10200941 | 6.12e-01   | 0.2862335  | 1.58e-04   | 0.24277713 | 2.64e-01   | 0.43973284 | 1.40e-01   |          |
| ENSG0000016660   | 1  | 7429647  | 7429540  | CP02       | havana                 | transcripted_processed | 0.01514947 | 6.59e-07   | 0.14804411 | 3.02e-07   | 0.16770079 | 4.04e-01   | 0.10200941 | 6.12e-01   | 0.2862335  | 1.58e-04   | 0.24277713 | 2.64e-01   | 0.43973284 | 1.40e-01   |          |
| ENSG00000250144  | 4  | 13054464 | 13054650 | AC10693.3  | havana                 | transcripted_processed | 0.01514947 | 6.59e-07   | 0.14804411 | 3.02e-07   | 0.16770079 | 4.04e-01   | 0.10200941 | 6.12e-01   | 0.2862335  | 1.58e-04   | 0.24277713 | 2.64e-01   | 0.43973284 | 1.40e-01   |          |
| ENSG0000026126   | 18 | 7455484  | 7456115  | AC01091.1  | havana                 | transcripted_processed | 0.01514947 | 6.59e-07   | 0.14804411 | 3.02e-07   | 0.16770079 | 4.04e-01   | 0.10200941 | 6.12e-01   | 0.2862335  | 1.58e-04   | 0.24277713 | 2.64e-01   | 0.43973284 | 1.40e-01   |          |
| ENSG00000200021  | 1  | 186071   | 827796   | AL66981.3  | havana                 | transcripted_processed | 0.01514947 | 6.59e-07   | 0.14804411 | 3.02e-07   | 0.16770079 | 4.04e-01   | 0.10200941 | 6.12e-01   | 0.2862335  | 1.58e-04   | 0.24277713 | 2.64e-01   | 0.43973284 | 1.40e-01   |          |
| ENSG0000021026   | 6  | 2287903  | 2288409  | AC10504.1  | havana                 | transcripted_processed | 0.01514947 | 6.59e-07   | 0.14804411 | 3.02e-07   | 0.16770079 | 4.04e-01   | 0.10200941 | 6.12e-01   | 0.2862335  | 1.58e-04   | 0.24277713 | 2.64e-01   | 0.43973284 | 1.40e-01   |          |
| ENSG0000019564   | 3  | 5027908  | 5028114  | LSM2E1     | havana                 | transcripted_processed | 0.01514947 | 6.59e-07   | 0.14804411 | 3.02e-07   | 0.16770079 | 4.04e-01   | 0.10200941 | 6.12e-01   | 0.2862335  | 1.58e-04   | 0.24277713 | 2.64e-01   | 0.43973284 | 1.40e-01   |          |
| ENSG0000044964   | 6  | 2891304  | 2894443  | AC11244.1  | havana                 | transcripted_processed | 0.01514947 | 6.59e-07   | 0.14804411 | 3.02e-07   | 0.16770079 | 4.04e-01   | 0.10200941 | 6.12e-01   | 0.2862335  | 1.58e-04   | 0.24277713 | 2.64e-01   | 0.43973284 | 1.40e-01   |          |
| ENSG0000024968   | 4  | 8092430  | 8093020  | AC093827.4 | havana                 | transcripted_processed | 0.01514947 | 6.59e-07   | 0.14804411 | 3.02e-07   | 0.16770079 | 4.04e-01   | 0.10200941 | 6.12e-01   | 0.2862335  | 1.58e-04   | 0.24277713 | 2.64e-01   | 0.43973284 | 1.40e-01   |          |
| ENSG000002730    | 1  | 1658799  | 1671236  | CTP2       | havana                 | transcripted_processed | 0.01514947 | 6.59e-07   | 0.14804411 | 3.02e-07   | 0.16770079 | 4.04e-01   | 0.10200941 | 6.12e-01   | 0.2862335  | 1.58e-04   | 0.24277713 | 2.64e-01   | 0.43973284 | 1.40e-01   |          |
| ENSG0000027984   | 12 | 3420815  | 3420975  | DMU17      | havana                 | transcripted_processed | 0.01514947 | 6.59e-07   | 0.14804411 | 3.02e-07   | 0.16770079 | 4.04e-01   | 0.10200941 | 6.12e-01   | 0.2862335  | 1.58e-04   | 0.24277713 | 2.64e-01   | 0.43973284 | 1.40e-01   |          |
| ENSG0000027861.2 | 1  | 403160   | 412617   | havana     | transcripted_processed | 0.01514947             | 6.59e-07   | 0.14804411 | 3.02e-07   | 0.16770079 | 4.04e-01   | 0.10200941 | 6.12e-01   | 0.2862335  | 1.58e-04   | 0.24277713 | 2.64e-01   | 0.43973284 | 1.40e-01   |            |          |
| ENSG0000023216   | 14 | 1047034  | 1047000  | IGV4-3     | havana                 | IG_V_gene              | 0.075763   | 5.10e-01   | 0.0177789  | 9.01e-01   | 0.0104703  | 6.12e-01   | 0.2862335  | 1.58e-04   | 0.24277713 | 2.64e-01   | 0.43973284 | 1.40e-01   |            |            |          |
| ENSG0000027973   | 12 | 5059270  | 5059279  | AC02350.2  | havana                 | transcripted_processed | 0.01514947 | 6.59e-07   | 0.14804411 | 3.02e-07   | 0.16770079 | 4.04e-01   | 0.10200941 | 6.12e-01   | 0.2862335  | 1.58e-04   | 0.24277713 | 2.64e-01   | 0.43973284 | 1.40e-01   |          |
| ENSG0000027973   | 12 | 5059270  | 5059279  | AC02350.2  | havana                 | transcripted_processed | 0.01514947 | 6.59e-07   | 0.14804411 | 3.02e-07   | 0.16770079 | 4.04e-01   | 0.10200941 | 6.12e-01   | 0.2862335  | 1.58e-04   | 0.24277713 | 2.64e-01   | 0.43973284 | 1.40e-01   |          |
| ENSG0000026155   | 17 | 6893858  | 6894029  | AC10310.4  | havana                 | transcripted_processed | 0.01514947 | 6.59e-07   | 0.14804411 | 3.02e-07   | 0.16770079 | 4.04e-01   | 0.10200941 | 6.12e-01   | 0.2862335  | 1.58e-04   | 0.24277713 | 2.64e-01   | 0.43973284 | 1.40e-01   |          |
| ENSG0000026160   | 19 | 5205800  | 5206703  | AC01448.1  | havana                 | transcripted_processed | 0.01514947 | 6.59e-07   | 0.14804411 | 3.02e-07   | 0.16770079 | 4.04e-01   | 0.10200941 | 6.12e-01   | 0.2862335  | 1.58e-04   | 0.24277713 | 2.64e-01   | 0.43973284 | 1.40e-01   |          |
| ENSG0000027891   | 1  | 1218388  | 1218388  | havana     | transcripted_processed | 0.01514947             | 6.59e-07   | 0.14804411 | 3.02e-07   | 0.16770079 | 4.04e-01   | 0.10200941 | 6.12e-01   | 0.2862335  | 1.58e-04   | 0.24277713 | 2.64e-01   | 0.43973284 | 1.40e-01   |            |          |
| ENSG0000027979   | 7  | 1242446  | 1242546  | TR10D-1    | havana                 | TR_V_gene              | 0.08444    | 4.00e-01   | 0.089305   | 5.73e-01   | 0.10200941 | 6.12e-01   | 0.2862335  | 1.58e-04   | 0.24277713 | 2.64e-01   | 0.43973284 | 1.40e-01   |            |            |          |
| ENSG0000021049   | MT | 577      | 647      | MT-17      | havana                 | MT_rRNA                | 0.07026209 | 5.42e-01   | 0.16509277 | 2.50e-01   | 0.0776109  | 7.00e-01   | 0.10200941 | 6.12e-01   | 0.2862335  | 1.58e-04   | 0.24277713 | 2.64e-01   | 0.43973284 | 1.40e-01   |          |
| ENSG0000024967   | 11 | 6598789  | 6598841  | AD09287.1  | havana                 | transcripted_processed | 0.01514947 | 6.59e-07   | 0.14804411 | 3.02e-07   | 0.16770079 | 4.04e-01   | 0.10200941 | 6.12e-01   | 0.2862335  | 1.58e-04   | 0.24277713 | 2.64e-01   | 0.43973284 | 1.40e-01   |          |
| ENSG0000017891   | 3  | 7530021  | 7531537  | AC05401    | havana                 | transcripted_processed | 0.01514947 | 6.59e-07   | 0.14804411 | 3.02e-07   | 0.16770079 | 4.04e-01   | 0.10200941 | 6.12e-01   | 0.2862335  | 1.58e-04   | 0.24277713 | 2.64e-01   | 0.43973284 | 1.40e-01   |          |
| ENSG0000013563   | 8  | 14452373 | 14452912 | CB082      | havana                 | transcripted_processed | 0.01514947 | 6.59e-07   | 0.14804411 | 3.02e-07   | 0.16770079 | 4.04e-01   | 0.10200941 | 6.12e-01   | 0.2862335  | 1.58e-04   | 0.24277713 | 2.64e-01   | 0.43973284 | 1.40e-01   |          |
| ENSG0000017634   | 1  | 6142840  | 6143401  | RP0828     | havana                 | transcripted_processed | 0.01514947 | 6.59e-07   | 0.14804411 | 3.02e-07   | 0.16770079 | 4.04e-01   | 0.10200941 | 6.12e-01   | 0.2862335  | 1.58e-04   | 0.24277713 | 2.64e-01   | 0.43973284 | 1.40e-01   |          |
| ENSG000001513    | 1  | 1024944  | 1024944  | havana     | transcripted_processed | 0.01514947             | 6.59e-07   | 0.14804411 | 3.02       |            |            |            |            |            |            |            |            |            |            |            |          |



Table with columns for gene ID, chromosome, coordinates, gene name, transcript, protein, and various numerical values. The table lists numerous genes such as UTSR, MAM3, PKR2, and many others, along with their genomic locations and associated data points.



Table with columns: ENSG accession, RefSeq ID, Gene name, Transcript type, and various numerical values. The table lists numerous genes and transcripts such as AC007748.1, AC007749.1, AC007750.1, etc., with associated numerical data.







Table with columns for gene ID, chromosome, coordinates, gene name, transcript, and various numerical values. The table lists numerous genes such as SLC11A1, SLC11A2, SLC11A3, etc., with their corresponding genomic data.



| ENSG0000020734  | 13 | 9948662   | 9949926   | LINC01232    | lincRNA                 | transcribed_unprocessed | 0.0625926 | 5.89E-01 | 0.0641962 | 6.56E-01 | 0.0423977 | 8.61E-01 | 0.0849533 | 6.74E-01 | 0.0782007 | 1.74E-01 | 0.0206649 | 9.28E-01 | 0.0264782 | 8.55E-01 |
|-----------------|----|-----------|-----------|--------------|-------------------------|-------------------------|-----------|----------|-----------|----------|-----------|----------|-----------|----------|-----------|----------|-----------|----------|-----------|----------|
| ENSG0000020796  | 16 | 1028041   | 1030784   | MTCYF2P2     | protein_coding          | processed_transcript    | 0.0326083 | 7.78E-01 | 0.063018  | 6.77E-01 | 0.1202872 | 5.53E-01 | 0.0847962 | 6.74E-01 | 0.0266299 | 7.93E-01 | 0.140964  | 5.21E-01 | 0.0260483 | 8.95E-01 |
| ENSG0000020811  | 17 | 9394243   | 9394243   | MTCYF2P1     | transcribed_unprocessed | transcribed_unprocessed | 0.0493178 | 6.82E-01 | 0.0631786 | 6.82E-01 | 0.1166346 | 6.38E-01 | 0.0830777 | 6.74E-01 | 0.0266299 | 7.93E-01 | 0.140964  | 5.21E-01 | 0.0260483 | 8.95E-01 |
| ENSG0000020802  | 17 | 7698468   | 7698743   | DHNP1        | protein_coding          | processed_transcript    | 0.0372486 | 7.77E-01 | 0.0313646 | 4.88E-01 | 0.1711599 | 9.91E-01 | 0.0847959 | 6.74E-01 | 0.0218164 | 7.57E-01 | 0.1251836 | 5.67E-01 | 0.0212649 | 9.00E-01 |
| ENSG0000021073  | 20 | 2174753   | 2175188   | CS1T         | protein_coding          | processed_transcript    | 0.0422488 | 7.13E-01 | 0.0408089 | 4.87E-01 | 0.182489  | 3.60E-01 | 0.0848009 | 6.74E-01 | 0.0130004 | 5.46E-01 | 0.0670734 | 7.83E-01 | 0.0218164 | 9.00E-01 |
| ENSG0000020879  | 7  | 20423894  | 20423894  | LOC101921433 | protein_coding          | transcribed_unprocessed | 0.0297456 | 7.30E-01 | 0.0631786 | 6.82E-01 | 0.1222873 | 6.38E-01 | 0.0830777 | 6.74E-01 | 0.0266299 | 7.93E-01 | 0.140964  | 5.21E-01 | 0.0260483 | 8.95E-01 |
| ENSG0000021705  | 5  | 5684216   | 5686214   | AC00897.2    | lincRNA                 | transcribed_unprocessed | 0.0092926 | 9.79E-01 | 0.0408089 | 4.87E-01 | 0.0849388 | 3.21E-01 | 0.0848009 | 6.74E-01 | 0.0316715 | 7.03E-01 | 0.1233212 | 5.47E-01 | 0.0136479 | 3.44E-01 |
| ENSG0000014345  | 4  | 15398317  | 15398338  | GAB1         | protein_coding          | processed_transcript    | 0.1766714 | 1.24E-01 | 0.1213546 | 3.99E-01 | 0.2871689 | 1.46E-01 | 0.0847959 | 6.74E-01 | 0.0266299 | 7.93E-01 | 0.140964  | 5.21E-01 | 0.0260483 | 8.95E-01 |
| ENSG0000017485  | 4  | 1321677   | 1320945   | LOC101921433 | protein_coding          | transcribed_unprocessed | 0.0297456 | 7.30E-01 | 0.0631786 | 6.82E-01 | 0.1222873 | 6.38E-01 | 0.0830777 | 6.74E-01 | 0.0266299 | 7.93E-01 | 0.140964  | 5.21E-01 | 0.0260483 | 8.95E-01 |
| ENSG0000012487  | 6  | 1087232   | 1088201   | SCM2         | protein_coding          | processed_transcript    | 0.0570596 | 5.08E-01 | 0.0625926 | 5.89E-01 | 0.0207228 | 7.01E-01 | 0.0847959 | 6.74E-01 | 0.0217585 | 7.47E-01 | 0.1270394 | 5.89E-01 | 0.0260483 | 8.95E-01 |
| ENSG00000146169 | 10 | 10157882  | 10158820  | POLL         | protein_coding          | processed_transcript    | 0.0920483 | 4.06E-01 | 0.1853151 | 2.02E-01 | 0.0724606 | 7.18E-01 | 0.0848009 | 6.74E-01 | 0.0266299 | 7.93E-01 | 0.140964  | 5.21E-01 | 0.0260483 | 8.95E-01 |
| ENSG0000013511  | 20 | 1333027   | 1333885   | LOC101921433 | protein_coding          | transcribed_unprocessed | 0.0297456 | 7.30E-01 | 0.0631786 | 6.82E-01 | 0.1222873 | 6.38E-01 | 0.0830777 | 6.74E-01 | 0.0266299 | 7.93E-01 | 0.140964  | 5.21E-01 | 0.0260483 | 8.95E-01 |
| ENSG00000208142 | 17 | 4897848   | 4705469   | LRR37A7P     | protein_coding          | transcribed_unprocessed | 0.108564  | 3.47E-01 | 0.1513759 | 2.98E-01 | 0.0576331 | 7.76E-01 | 0.0844471 | 6.74E-01 | 0.0217008 | 7.26E-01 | 0.1488281 | 8.70E-01 | 0.0218164 | 9.00E-01 |
| ENSG00000141472 | 6  | 15136115  | 15139159  | ZBT2         | protein_coding          | processed_transcript    | 0.1128077 | 3.29E-01 | 0.1150888 | 4.26E-01 | 0.0276728 | 8.91E-01 | 0.0846211 | 6.74E-01 | 0.0217008 | 7.26E-01 | 0.1488281 | 8.70E-01 | 0.0218164 | 9.00E-01 |
| ENSG00000208948 | 6  | 3727021   | 3708964   | AD05653.1    | lincRNA                 | transcribed_unprocessed | 0.0748017 | 5.20E-01 | 0.0625926 | 5.89E-01 | 0.0465111 | 8.18E-01 | 0.0846211 | 6.74E-01 | 0.0217008 | 7.26E-01 | 0.1488281 | 8.70E-01 | 0.0218164 | 9.00E-01 |
| ENSG00000208665 | 3  | 1505484   | 15108076  | KLRN1-AS1    | lincRNA                 | transcribed_unprocessed | 0.0464252 | 6.88E-01 | 0.0587687 | 6.86E-01 | 0.1666661 | 4.24E-01 | 0.0845516 | 6.74E-01 | 0.0217008 | 7.26E-01 | 0.1488281 | 8.70E-01 | 0.0218164 | 9.00E-01 |
| ENSG00000121159 | 19 | 1447746   | 14496149  | GPC1         | protein_coding          | processed_transcript    | 0.0511759 | 6.54E-01 | 0.0319905 | 9.78E-01 | 0.1917131 | 3.29E-01 | 0.0845516 | 6.74E-01 | 0.0217008 | 7.26E-01 | 0.1488281 | 8.70E-01 | 0.0218164 | 9.00E-01 |
| ENSG0000012749  | 7  | 19138962  | 19191114  | PTF3A.1      | protein_coding          | processed_transcript    | 0.0413104 | 9.91E-01 | 0.0642451 | 6.03E-01 | 0.0409925 | 8.01E-01 | 0.0845516 | 6.74E-01 | 0.0217008 | 7.26E-01 | 0.1488281 | 8.70E-01 | 0.0218164 | 9.00E-01 |
| ENSG00000216617 | 13 | 109281973 | 10929760  | LINC0070     | lincRNA                 | transcribed_unprocessed | 0.0809116 | 4.84E-01 | 0.044884  | 7.80E-01 | 0.0017609 | 9.91E-01 | 0.0845516 | 6.74E-01 | 0.0217008 | 7.26E-01 | 0.1488281 | 8.70E-01 | 0.0218164 | 9.00E-01 |
| ENSG00000272390 | 16 | 7201419   | 7203446   | AC00204.1    | lincRNA                 | transcribed_unprocessed | 0.1548008 | 1.79E-01 | 0.1082079 | 5.73E-01 | 0.0814639 | 6.86E-01 | 0.0845516 | 6.74E-01 | 0.0217008 | 7.26E-01 | 0.1488281 | 8.70E-01 | 0.0218164 | 9.00E-01 |
| ENSG00000206138 | 1  | 4202148   | 4277103   | LOC101921433 | protein_coding          | transcribed_unprocessed | 0.0297456 | 7.30E-01 | 0.0631786 | 6.82E-01 | 0.1222873 | 6.38E-01 | 0.0830777 | 6.74E-01 | 0.0266299 | 7.93E-01 | 0.140964  | 5.21E-01 | 0.0260483 | 8.95E-01 |
| ENSG00000209766 | 6  | 2701895   | 2702280   | AL05006.1    | lincRNA                 | transcribed_unprocessed | 0.0002731 | 9.98E-01 | 0.1231726 | 3.87E-01 | 0.0231978 | 9.09E-01 | 0.0844847 | 6.74E-01 | 0.0266299 | 7.93E-01 | 0.140964  | 5.21E-01 | 0.0260483 | 8.95E-01 |
| ENSG00000155729 | 2  | 20048958  | 20051974  | KCTD18       | protein_coding          | processed_transcript    | 0.1012677 | 9.13E-01 | 0.0702236 | 6.28E-01 | 0.0590188 | 7.78E-01 | 0.0844847 | 6.74E-01 | 0.0266299 | 7.93E-01 | 0.140964  | 5.21E-01 | 0.0260483 | 8.95E-01 |
| ENSG00000122942 | 1  | 3682421   | 3683994   | RAB5C        | protein_coding          | processed_transcript    | 0.0099273 | 9.24E-01 | 0.1238989 | 3.71E-01 | 0.2949868 | 1.96E-01 | 0.0844847 | 6.74E-01 | 0.0266299 | 7.93E-01 | 0.140964  | 5.21E-01 | 0.0260483 | 8.95E-01 |
| ENSG00000146392 | 15 | 7216158   | 7214892   | SENF8        | protein_coding          | processed_transcript    | 0.108904  | 3.88E-01 | 0.087488  | 5.66E-01 | 0.0398189 | 9.25E-01 | 0.0844847 | 6.74E-01 | 0.0266299 | 7.93E-01 | 0.140964  | 5.21E-01 | 0.0260483 | 8.95E-01 |
| ENSG00000202049 | 3  | 12846458  | 12847217  | DNAAF8-AS1   | lincRNA                 | transcribed_unprocessed | 0.0097212 | 5.88E-01 | 0.0397206 | 5.25E-01 | 0.1681151 | 4.02E-01 | 0.0844847 | 6.74E-01 | 0.0266299 | 7.93E-01 | 0.140964  | 5.21E-01 | 0.0260483 | 8.95E-01 |
| ENSG00000184887 | 1  | 1511224   | 1524708   | INC          | lincRNA                 | transcribed_unprocessed | 0.0005922 | 9.65E-01 | 0.1355786 | 2.87E-01 | 0.157830  | 4.31E-01 | 0.0844847 | 6.74E-01 | 0.0266299 | 7.93E-01 | 0.140964  | 5.21E-01 | 0.0260483 | 8.95E-01 |
| ENSG0000016681  | 4  | 4849397   | 4849373   | KIF13B       | protein_coding          | processed_transcript    | 0.1417182 | 1.26E-01 | 0.114182  | 1.26E-01 | 0.0844847 | 6.74E-01 | 0.0266299 | 7.93E-01 | 0.140964  | 5.21E-01 | 0.0260483 | 8.95E-01 | 0.0260483 | 8.95E-01 |
| ENSG00000118193 | 1  | 20051497  | 200620751 | KIF14        | protein_coding          | processed_transcript    | 0.1327275 | 2.51E-01 | 0.138144  | 3.31E-01 | 0.0446561 | 6.74E-01 | 0.0844847 | 6.74E-01 | 0.0266299 | 7.93E-01 | 0.140964  | 5.21E-01 | 0.0260483 | 8.95E-01 |
| ENSG00000007008 | 4  | 8366282   | 8400723   | AC03         | protein_coding          | processed_transcript    | 0.0252738 | 8.24E-01 | 0.062889  | 9.71E-01 | 0.0214784 | 9.15E-01 | 0.0844847 | 6.74E-01 | 0.0266299 | 7.93E-01 | 0.140964  | 5.21E-01 | 0.0260483 | 8.95E-01 |
| ENSG0000012721  | 1  | 1562668   | 1562652   | LINC01921433 | protein_coding          | transcribed_unprocessed | 0.0297456 | 7.30E-01 | 0.0631786 | 6.82E-01 | 0.1222873 | 6.38E-01 | 0.0830777 | 6.74E-01 | 0.0266299 | 7.93E-01 | 0.140964  | 5.21E-01 | 0.0260483 | 8.95E-01 |
| ENSG00000206923 | 16 | 253005    | 253147    | CEP1         | protein_coding          | processed_transcript    | 0.1004421 | 9.29E-01 | 0.0211544 | 8.41E-01 | 0.1538822 | 4.43E-01 | 0.0844847 | 6.74E-01 | 0.0266299 | 7.93E-01 | 0.140964  | 5.21E-01 | 0.0260483 | 8.95E-01 |
| ENSG0000019477  | 13 | 4537348   | 4537369   | SNORA31      | protein_coding          | processed_transcript    | 0.0797508 | 4.91E-01 | 0.1709321 | 2.77E-01 | 0.179111  | 3.80E-01 | 0.0842915 | 6.74E-01 | 0.0241007 | 8.28E-01 | 0.2972182 | 1.74E-01 | 0.0004313 | 9.78E-01 |
| ENSG00000170413 | 2  | 7201419   | 7203446   | AC00204.1    | lincRNA                 | transcribed_unprocessed | 0.1548008 | 1.79E-01 | 0.1082079 | 5.73E-01 | 0.0814639 | 6.86E-01 | 0.0845516 | 6.74E-01 | 0.0217008 | 7.26E-01 | 0.1488281 | 8.70E-01 | 0.0218164 | 9.00E-01 |
| ENSG00000272817 | 10 | 9108131   | 9105948   | AL15919.1    | lincRNA                 | transcribed_unprocessed | 0.1617496 | 1.06E-01 | 0.1612823 | 2.57E-01 | 0.2020510 | 3.12E-01 | 0.0842882 | 6.74E-01 | 0.0217008 | 7.26E-01 | 0.1488281 | 8.70E-01 | 0.0218164 | 9.00E-01 |
| ENSG00000184876 | 8  | 2113800   | 21141951  | REEF4        | protein_coding          | processed_transcript    | 0.1496678 | 2.02E-01 | 0.1392116 | 3.35E-01 | 0.094618  | 6.18E-01 | 0.0842882 | 6.74E-01 | 0.0217008 | 7.26E-01 | 0.1488281 | 8.70E-01 | 0.0218164 | 9.00E-01 |
| ENSG0000011701  | 12 | 78480     | 78598     | AP0B1C       | protein_coding          | processed_transcript    | 0.0282818 | 4.05E-01 | 0.1744952 | 2.20E-01 | 0.1613524 | 4.21E-01 | 0.0842915 | 6.74E-01 | 0.0217008 | 7.26E-01 | 0.1488281 | 8.70E-01 | 0.0218164 | 9.00E-01 |
| ENSG00000201005 | 1  | 1021628   | 1021628   | LOC101921433 | protein_coding          | transcribed_unprocessed | 0.0297456 | 7.30E-01 | 0.0631786 | 6.82E-01 | 0.1222873 | 6.38E-01 | 0.0830777 | 6.74E-01 | 0.0266299 | 7.93E-01 | 0.140964  | 5.21E-01 | 0.0260483 | 8.95E-01 |
| ENSG00000206649 | 4  | 4207949   | 4207488   | ZNF161.2     | lincRNA                 | transcribed_unprocessed | 0.0240487 | 7.90E-01 | 0.0978761 | 6.91E-01 | 0.0065224 | 9.74E-01 | 0.0842011 | 6.74E-01 | 0.0217008 | 7.26E-01 | 0.1488281 | 8.70E-01 | 0.0218164 | 9.00E-01 |
| ENSG00000205982 | 17 | 6477882   | 6477837   | AC03893.3    | lincRNA                 | transcribed_unprocessed | 0.0038217 | 9.97E-01 | 0.1716881 | 9.30E-01 | 0.2639722 | 1.83E-01 | 0.0842011 | 6.74E-01 | 0.0217008 | 7.26E-01 | 0.1488281 | 8.70E-01 | 0.0218164 | 9.00E-01 |
| ENSG00000206911 | 1  | 1021628   | 1021628   | LOC101921433 | protein_coding          | transcribed_unprocessed | 0.0297456 | 7.30E-01 | 0.0631786 | 6.82E-01 | 0.1222873 | 6.38E-01 | 0.0830777 | 6.74E-01 | 0.0266299 | 7.93E-01 | 0.140964  | 5.21E-01 | 0.0260483 | 8.95E-01 |
| ENSG0000011186  | 12 | 152981    | 184212    | WN158        | protein_coding          | processed_transcript    | 0.0701860 | 5.45E-01 | 0.071188  | 6.06E-01 | 0.1315688 | 3.74E-01 | 0.0841701 | 6.74E-01 | 0.0217008 | 7.26E-01 | 0.148828  |          |           |          |



| Gene            | Transcript | Chromosome | Start    | End | Strand     | Feature | RefSeq             | Ensembl            | Ensembl ID | Ensembl Type | Ensembl Description | Ensembl Transcripts | Ensembl Protein | Ensembl Protein ID | Ensembl Protein Description | Ensembl Protein Length | Ensembl Protein Weight | Ensembl Protein Isoforms | Ensembl Protein Weight | Ensembl Protein Isoforms |           |          |
|-----------------|------------|------------|----------|-----|------------|---------|--------------------|--------------------|------------|--------------|---------------------|---------------------|-----------------|--------------------|-----------------------------|------------------------|------------------------|--------------------------|------------------------|--------------------------|-----------|----------|
| ENSG0000029327  | 15         | 52116674   | 52121331 | +   | AC02906.3  | havana  | ncrna              | ncrna              | 0-0070097  | 9.51E-01     | 0.1208255           | 4.03E-01            | 0.1218802       | 5.45E-01           | 0.07872713                  | 6.96E-01               | 0.0520765              | 7.05E-01                 | 0.091289               | 6.79E-01                 | 0.1119787 | 4.39E-01 |
| ENSG0000022031  | 7          | 7419343    | 7419391  | +   | MTF3       | ensembl | protein_coding     | protein_coding     | 0.2254738  | 8.88E-01     | 0.0118049           | 9.28E-01            | 0.4349109       | 9.80E-01           | 0.7871444                   | 6.96E-01               | 0.1747417              | 8.24E-01                 | 0.449753               | 5.21E-01                 | 0.1609929 | 2.64E-01 |
| ENSG0000024961  | 1          | 1794954    | 1794979  | +   | AC02906.3  | havana  | ncrna              | ncrna              | 0-0070097  | 9.51E-01     | 0.1208255           | 4.03E-01            | 0.1218802       | 5.45E-01           | 0.07872713                  | 6.96E-01               | 0.0520765              | 7.05E-01                 | 0.091289               | 6.79E-01                 | 0.1119787 | 4.39E-01 |
| ENSG0000023998  | 2          | 8924174    | 8924212  | +   | IGV2L-29   | havana  | IG_V_pseudogene    | IG_V_pseudogene    | 0.0232771  | 8.88E-01     | 0.0348312           | 9.81E-01            | 0.1302668       | 5.17E-01           | 0.0789632                   | 6.56E-01               | 0.0091373              | 9.07E-01                 | 0.1461459              | 6.00E-01                 | 0.1395620 | 3.64E-01 |
| ENSG0000023072  | 20         | 2284858    | 2274691  | +   | AL31367.1  | havana  | ncrna              | ncrna              | 0-1617274  | 2.08E-01     | 0.1539187           | 2.72E-01            | 0.1962548       | 3.27E-01           | 0.0784884                   | 6.96E-01               | 0.2629354              | 5.48E-01                 | 0.0243136              | 9.12E-01                 | 0.1405658 | 3.30E-01 |
| ENSG0000023984  | 10         | 8465536    | 8465536  | +   | AC02906.3  | havana  | ncrna              | ncrna              | 0-0070097  | 9.51E-01     | 0.1208255           | 4.03E-01            | 0.1218802       | 5.45E-01           | 0.07872713                  | 6.96E-01               | 0.0520765              | 7.05E-01                 | 0.091289               | 6.79E-01                 | 0.1119787 | 4.39E-01 |
| ENSG0000023187  | 16         | 16455566   | 16455708 | +   | KOTL1      | ensembl | protein_coding     | protein_coding     | 0.2745553  | 1.53E-01     | 0.2082528           | 1.47E-01            | 0.0516284       | 9.31E-01           | 0.0786281                   | 6.97E-01               | 0.3707366              | 3.66E-01                 | 0.0885419              | 6.82E-01                 | 0.0661221 | 6.40E-01 |
| ENSG0000021467  | 5          | 7299920    | 7299764  | +   | AC02899.1  | havana  | processed_pseudo   | processed_pseudo   | 0-0046847  | 9.68E-01     | 0.0297442           | 8.88E-01            | 0.1177888       | 5.76E-01           | 0.0786047                   | 6.97E-01               | 0.0123963              | 9.29E-01                 | 0.1484217              | 3.99E-01                 | 0.1429718 | 8.22E-01 |
| ENSG0000023521  | 1          | 2300285    | 2300639  | +   | AL5181.1   | havana  | ncrna              | ncrna              | 0-0070097  | 9.51E-01     | 0.1208255           | 4.03E-01            | 0.1218802       | 5.45E-01           | 0.07872713                  | 6.96E-01               | 0.0520765              | 7.05E-01                 | 0.091289               | 6.79E-01                 | 0.1119787 | 4.39E-01 |
| ENSG0000024493  | 11         | 1859564    | 1859536  | +   | MIR428     | mirbase | miRNA              | miRNA              | 0.0374307  | 7.73E-01     | 0.0774349           | 4.56E-01            | 0.1508253       | 3.97E-01           | 0.0780523                   | 6.97E-01               | 0.0007059              | 9.96E-01                 | 0.1822460              | 9.05E-01                 | 0.0520765 | 7.05E-01 |
| ENSG0000021297  | 2          | 18995317   | 20008540 | +   | MMP1       | ensembl | protein_coding     | protein_coding     | 0.1059984  | 3.43E-01     | 0.1102223           | 3.01E-01            | 0.1535407       | 2.06E-01           | 0.0785888                   | 6.97E-01               | 0.0480318              | 7.30E-01                 | 0.2439094              | 2.64E-01                 | 0.0234777 | 1.04E-01 |
| ENSG0000023699  | 2          | 2359732    | 23598038 | +   | AC02899.1  | havana  | ncrna              | ncrna              | 0-0046847  | 9.68E-01     | 0.0297442           | 8.88E-01            | 0.1177888       | 5.76E-01           | 0.0786047                   | 6.97E-01               | 0.0123963              | 9.29E-01                 | 0.1484217              | 3.99E-01                 | 0.1429718 | 8.22E-01 |
| ENSG0000023521  | 11         | 2987809    | 2988641  | +   | DOSP3      | ensembl | protein_coding     | protein_coding     | 0.0958299  | 9.77E-01     | 0.0958287           | 9.55E-01            | 0.0878146       | 6.63E-01           | 0.0785737                   | 6.97E-01               | 0.0664833              | 6.43E-01                 | 0.1302583              | 6.80E-01                 | 0.0771812 | 5.00E-01 |
| ENSG0000024817  | 4          | 5494326    | 5495732  | +   | AC11194.1  | havana  | transcript         | transcript         | 0-1944204  | 9.05E-01     | 0.0688632           | 6.36E-01            | 0.2182904       | 2.74E-01           | 0.0785676                   | 6.97E-01               | 0.2483464              | 7.05E-01                 | 0.1557738              | 4.78E-01                 | 0.1885779 | 1.40E-01 |
| ENSG0000023464  | 1          | 14958385   | 14958464 | +   | PP1AC      | ensembl | protein_coding     | protein_coding     | 0.0096262  | 9.34E-01     | 0.0597753           | 6.81E-01            | 0.0784313       | 6.65E-01           | 0.0783497                   | 6.97E-01               | 0.0906123              | 6.09E-01                 | 0.4483553              | 2.60E-01                 | 0.1198829 | 4.43E-01 |
| ENSG0000021298  | 2          | 2359732    | 23598038 | +   | AC02899.1  | havana  | ncrna              | ncrna              | 0-0046847  | 9.68E-01     | 0.0297442           | 8.88E-01            | 0.1177888       | 5.76E-01           | 0.0786047                   | 6.97E-01               | 0.0123963              | 9.29E-01                 | 0.1484217              | 3.99E-01                 | 0.1429718 | 8.22E-01 |
| ENSG0000021162  | 12         | 6724014    | 6731875  | +   | COPB2      | ensembl | protein_coding     | protein_coding     | 0.0312867  | 8.77E-01     | 0.0446207           | 7.48E-01            | 0.0168702       | 9.31E-01           | 0.0784837                   | 6.97E-01               | 0.0287572              | 8.77E-01                 | 0.0431306              | 6.66E-01                 | 0.0588109 | 6.87E-01 |
| ENSG0000021690  | 10         | 99697407   | 99697499 | +   | ILBAP1     | ensembl | protein_coding     | protein_coding     | 0.1112174  | 3.38E-01     | 0.1008260           | 4.85E-01            | 0.2087627       | 6.64E-01           | 0.0784574                   | 6.97E-01               | 0.1504589              | 7.30E-01                 | 0.4707213              | 5.03E-01                 | 0.112963  | 4.15E-01 |
| ENSG0000023171  | 7          | 4700952    | 4714907  | +   | AC04447.7  | havana  | ncrna              | ncrna              | 0-0070097  | 9.51E-01     | 0.1208255           | 4.03E-01            | 0.1218802       | 5.45E-01           | 0.07872713                  | 6.96E-01               | 0.0520765              | 7.05E-01                 | 0.091289               | 6.79E-01                 | 0.1119787 | 4.39E-01 |
| ENSG0000021626  | 7          | 15024194   | 15023275 | +   | ACTR3      | ensembl | protein_coding     | protein_coding     | 0.0689349  | 5.10E-01     | 0.0562682           | 6.69E-01            | 0.0842429       | 4.78E-01           | 0.0781484                   | 6.97E-01               | 0.0737164              | 8.66E-01                 | 0.0675453              | 9.70E-01                 | 0.1882125 | 3.47E-01 |
| ENSG0000023426  | 20         | 1295528    | 1300847  | +   | LINC01723  | ensembl | ncrna              | ncrna              | 0-0414669  | 7.20E-01     | 0.1668972           | 2.42E-01            | 0.174727        | 3.76E-01           | 0.0784188                   | 6.97E-01               | 0.1257304              | 3.56E-01                 | 0.0952979              | 6.65E-01                 | 0.1472887 | 2.01E-01 |
| ENSG0000021208  | 4          | 1566699    | 15762729 | +   | SOX5       | ensembl | protein_coding     | protein_coding     | 0.1577638  | 1.71E-01     | 0.0470202           | 6.06E-01            | 0.0509811       | 7.27E-01           | 0.0786568                   | 6.98E-01               | 0.4249348              | 2.67E-01                 | 0.1209538              | 5.88E-01                 | 0.0578262 | 3.46E-01 |
| ENSG0000023562  | 11         | 2989863    | 2991344  | +   | AC11397.1  | havana  | ncrna              | ncrna              | 0.0046838  | 9.56E-01     | 0.0510519           | 9.25E-01            | 0.2064993       | 3.01E-01           | 0.0788683                   | 6.98E-01               | 0.0329538              | 9.26E-01                 | 0.1030363              | 6.40E-01                 | 0.1536465 | 2.78E-01 |
| ENSG0000020274  | 19         | 5007012    | 5013180  | +   | LINC01471  | ensembl | ncrna              | ncrna              | 0-0773927  | 5.26E-01     | 0.1104914           | 4.70E-01            | 0.1892299       | 3.44E-01           | 0.0783479                   | 6.98E-01               | 0.1407741              | 3.24E-01                 | 0.0887765              | 6.87E-01                 | 0.0234777 | 1.04E-01 |
| ENSG0000021942  | 12         | 4848868    | 4853746  | +   | DNAJC2     | ensembl | protein_coding     | protein_coding     | 0.0772798  | 5.29E-01     | 0.1407402           | 3.73E-01            | 0.2625999       | 1.86E-01           | 0.0787701                   | 6.98E-01               | 0.1404252              | 2.84E-01                 | 0.0307924              | 6.24E-01                 | 0.1586867 | 1.72E-01 |
| ENSG0000021789  | 2          | 1056431    | 1056466  | +   | AC10479.5  | havana  | ncrna              | ncrna              | 0-0326977  | 7.98E-01     | 0.0387079           | 8.22E-01            | 0.1589876       | 4.29E-01           | 0.0783976                   | 6.98E-01               | 0.0033117              | 9.82E-01                 | 0.0353834              | 9.65E-01                 | 0.0777788 | 6.39E-01 |
| ENSG0000021327  | 2          | 15817073   | 15845673 | +   | CDC148     | ensembl | protein_coding     | protein_coding     | 0.0656622  | 6.01E-01     | 0.2397751           | 1.07E-01            | 0.0782567       | 6.58E-01           | 0.0788227                   | 6.58E-01               | 0.0368014              | 7.02E-01                 | 0.0988222              | 5.55E-01                 | 0.0788222 | 5.55E-01 |
| ENSG0000021280  | 13         | 6889528    | 6889664  | +   | ZDHHC20A   | ensembl | protein_coding     | protein_coding     | 0.0881226  | 7.62E-01     | 0.0310994           | 8.03E-01            | 0.0245874       | 3.04E-01           | 0.0782429                   | 6.98E-01               | 0.0444664              | 7.50E-01                 | 0.148887               | 4.25E-01                 | 0.107384  | 6.43E-01 |
| ENSG0000021481  | 2          | 1009637    | 1009637  | +   | AC01260.4  | havana  | ncrna              | ncrna              | 0.0102614  | 9.04E-01     | 0.0102614           | 9.04E-01            | 0.0102614       | 9.04E-01           | 0.0102614                   | 9.04E-01               | 0.0102614              | 9.04E-01                 | 0.0102614              | 9.04E-01                 | 0.0102614 | 9.04E-01 |
| ENSG0000023518  | 15         | 8088869    | 8090784  | +   | LINC01583  | ensembl | ncrna              | ncrna              | 0-0448827  | 6.73E-01     | 0.1547625           | 2.81E-01            | 0.1782206       | 2.01E-01           | 0.0782206                   | 6.98E-01               | 0.1456736              | 2.93E-01                 | 0.0757898              | 7.56E-01                 | 0.1409385 | 2.81E-01 |
| ENSG00000214554 | 2          | 10202414   | 10101812 | +   | FANCD3     | ensembl | protein_coding     | protein_coding     | 0.020123   | 8.62E-01     | 0.0479721           | 8.11E-01            | 0.1807787       | 3.68E-01           | 0.0781889                   | 6.98E-01               | 0.0304466              | 8.07E-01                 | 0.0242687              | 2.65E-01                 | 0.0200825 | 6.94E-01 |
| ENSG0000021651  | 7          | 8096670    | 8096670  | +   | AC01932    | ensembl | ncrna              | ncrna              | 0-0070097  | 9.51E-01     | 0.1208255           | 4.03E-01            | 0.1218802       | 5.45E-01           | 0.07872713                  | 6.96E-01               | 0.0520765              | 7.05E-01                 | 0.091289               | 6.79E-01                 | 0.1119787 | 4.39E-01 |
| ENSG0000021003  | 15         | 61851289   | 6206673  | +   | VANCL2     | ensembl | protein_coding     | protein_coding     | 0.0773382  | 7.47E-01     | 0.0690571           | 9.47E-01            | 0.0783151       | 6.98E-01           | 0.0941661                   | 6.48E-01               | 0.0426881              | 8.88E-01                 | 0.0905005              | 9.94E-01                 | 0.0905005 | 9.94E-01 |
| ENSG0000021438  | 17         | 4140612    | 4141175  | +   | KRTAP1     | ensembl | unprocessed_pseudo | unprocessed_pseudo | 0-1281308  | 2.67E-01     | 0.2453268           | 7.55E-01            | 0.18133         | 1.55E-01           | 0.0781329                   | 6.98E-01               | 0.2006240              | 3.34E-01                 | 0.164211               | 5.06E-01                 | 0.1299164 | 1.75E-01 |
| ENSG0000021039  | 1          | 1377398    | 1377398  | +   | LINC01738  | ensembl | ncrna              | ncrna              | 0-0317398  | 7.81E-01     | 0.0317398           | 7.81E-01            | 0.0317398       | 7.81E-01           | 0.0317398                   | 7.81E-01               | 0.0317398              | 7.81E-01                 | 0.0317398              | 7.81E-01                 | 0.0317398 | 7.81E-01 |
| ENSG0000021158  | 5          | 6988887    | 6990138  | +   | AC11392.1  | havana  | unprocessed_pseudo | unprocessed_pseudo | 0-1753344  | 1.27E-01     | 0.0538115           | 1.27E-01            | 0.0538115       | 1.27E-01           | 0.0780951                   | 6.99E-01               | 0.1480222              | 6.09E-01                 | 0.0385548              | 6.09E-01                 | 0.0285548 | 9.98E-01 |
| ENSG0000021954  | 16         | 7144669    | 7145393  | +   | IL13L1-AS1 | ensembl | ncrna              | ncrna              | 0.0092767  | 5.49E-01     | 0.1164599           | 4.20E-01            | 0.205671        | 0.70E-01           | 0.0780836                   | 6.99E-01               | 0.1219011              | 5.10E-01                 | 0.1474887              | 2.05E-01                 | 0.244442  | 8.88E-01 |
| ENSG00000219143 | 7          | 7379942    | 7382093  | +   | OLN4       | ensembl | protein_coding     | protein_coding     | 0.1220227  | 2.90E-01     | 0.0847899           | 5.44E-01            | 0.0784527       | 6.33E-01           | 0.0780830                   | 6.99E-01               | 0.1219011              | 1.13E-01                 | 0.1808366              | 2.95E-01                 | 0.1514339 | 4.65E-01 |
| ENSG00000214025 | 1          | 8024394    | 8031761  | +   | PANX1      | ensembl | protein_coding     | protein_coding     | 0.0320917  | 3.99E-01     | 0.0882463           | 8.22E-01            | 0.0783288       | 6.98E-01           | 0.0783288                   | 6.98E-01               | 0.0783288              | 6.98E-01                 | 0.0783288              | 6.98E-01                 | 0.0783288 | 6.98E-01 |
| ENSG00000219189 | 4          | 8733615    | 8739138  | +   | HSD17B11   | ensembl | protein_coding     | protein_coding     | 0.1152638  | 1.28E-01     | 0.1                 |                     |                 |                    |                             |                        |                        |                          |                        |                          |           |          |



| ENSG0000020216                                                                                                                                                                                                                                                                                                                                                                                                                            | 22 | 39137910  | 39180015  | + | AI02323.2    | havana  | TEC          | ncrna | YES | 0 | -0.189603  | 1.05e-01 | -0.1129884 | 2.89e-02 | 0.2003200 | 3.16e-01 | 0.0757448 | 7.07e-01 | -0.1934452 | 1.61e-01 | -0.0919886 | 6.77e-01 | -0.1412061 | 3.28e-01 |
|-------------------------------------------------------------------------------------------------------------------------------------------------------------------------------------------------------------------------------------------------------------------------------------------------------------------------------------------------------------------------------------------------------------------------------------------|----|-----------|-----------|---|--------------|---------|--------------|-------|-----|---|------------|----------|------------|----------|-----------|----------|-----------|----------|------------|----------|------------|----------|------------|----------|
| ENSG0000021724 <td>19</td> <td>787658</td> <td>897078</td> <td>+</td> <td>IGMP4L1-AS3</td> <td>havana</td> <td>IGMP4L1-AS3</td> <td>ncrna</td> <td>YES</td> <td>0</td> <td>-0.077803</td> <td>5.01e-01</td> <td>0.1311156</td> <td>3.62e-02</td> <td>0.2844089</td> <td>1.51e-01</td> <td>0.0757448</td> <td>7.07e-01</td> <td>-0.171777</td> <td>3.99e-01</td> <td>-0.203133</td> <td>3.52e-01</td> <td>-0.226099</td> <td>1.67e-01</td> | 19 | 787658    | 897078    | + | IGMP4L1-AS3  | havana  | IGMP4L1-AS3  | ncrna | YES | 0 | -0.077803  | 5.01e-01 | 0.1311156  | 3.62e-02 | 0.2844089 | 1.51e-01 | 0.0757448 | 7.07e-01 | -0.171777  | 3.99e-01 | -0.203133  | 3.52e-01 | -0.226099  | 1.67e-01 |
| ENSG0000021984                                                                                                                                                                                                                                                                                                                                                                                                                            | 17 | 17231794  | 17231794  | + | IGMP4L1-AS1P | havana  | IGMP4L1-AS1P | ncrna | YES | 0 | 0.1411614  | 0.000000 | 0.1311156  | 3.62e-02 | 0.2844089 | 1.51e-01 | 0.0757448 | 7.07e-01 | -0.171777  | 3.99e-01 | -0.203133  | 3.52e-01 | -0.226099  | 1.67e-01 |
| ENSG0000021958                                                                                                                                                                                                                                                                                                                                                                                                                            | 8  | 8701387   | 8705406   | + | CD43         | ensembl | CD43         | mRNA  | YES | 0 | -0.050438  | 6.30e-01 | 0.050438   | 6.30e-01 | 0.050438  | 6.30e-01 | 0.0757448 | 7.07e-01 | -0.028317  | 8.97e-01 | -0.182135  | 3.97e-01 | -0.070317  | 6.02e-01 |
| ENSG00000219194                                                                                                                                                                                                                                                                                                                                                                                                                           | 16 | 5399813   | 5399899   | + | AC007490.1   | havana  | AC007490.1   | ncrna | YES | 0 | -0.0941108 | 7.23e-01 | 0.0941108  | 7.23e-01 | 0.0941108 | 7.23e-01 | 0.0757448 | 7.07e-01 | -0.0884989 | 5.32e-01 | -0.190422  | 3.85e-01 | -0.0776208 | 5.92e-01 |
| ENSG00000218457                                                                                                                                                                                                                                                                                                                                                                                                                           | 7  | 74044696  | 74044696  | + | CD44         | ensembl | CD44         | mRNA  | YES | 0 | -0.0406478 | 4.44e-01 | 0.0406478  | 4.44e-01 | 0.0406478 | 4.44e-01 | 0.0757448 | 7.07e-01 | -0.0796128 | 4.15e-01 | -0.172061  | 3.55e-01 | -0.185427  | 7.44e-01 |
| ENSG00000218166                                                                                                                                                                                                                                                                                                                                                                                                                           | 20 | 5440888   | 5440815   | + | LINC0446.1   | havana  | LINC0446.1   | ncrna | YES | 0 | -0.0941108 | 7.23e-01 | 0.0941108  | 7.23e-01 | 0.0941108 | 7.23e-01 | 0.0757448 | 7.07e-01 | -0.0884989 | 5.32e-01 | -0.190422  | 3.85e-01 | -0.0776208 | 5.92e-01 |
| ENSG00000217803                                                                                                                                                                                                                                                                                                                                                                                                                           | 12 | 10657474  | 106580187 | + | PIGAP1       | ensembl | PIGAP1       | mRNA  | YES | 0 | -0.0906434 | 4.43e-01 | 0.0906434  | 4.43e-01 | 0.0906434 | 4.43e-01 | 0.0757448 | 7.07e-01 | -0.0881435 | 6.76e-01 | -0.155721  | 5.99e-01 | -0.126914  | 3.83e-01 |
| ENSG00000219340                                                                                                                                                                                                                                                                                                                                                                                                                           | 12 | 12041549  | 12041553  | + | LOC102026.1  | havana  | LOC102026.1  | ncrna | YES | 0 | -0.1252232 | 3.56e-01 | 0.1252232  | 3.56e-01 | 0.1252232 | 3.56e-01 | 0.0757448 | 7.07e-01 | -0.1152232 | 3.56e-01 | -0.0950538 | 6.00e-01 | -0.0748683 | 6.00e-01 |
| ENSG00000218759                                                                                                                                                                                                                                                                                                                                                                                                                           | 7  | 10991383  | 11001376  | + | EGF          | ensembl | EGF          | mRNA  | YES | 0 | -0.0421338 | 7.16e-01 | 0.0421338  | 7.16e-01 | 0.0421338 | 7.16e-01 | 0.0757448 | 7.07e-01 | -0.0625423 | 5.82e-01 | -0.242497  | 5.99e-01 | -0.128971  | 3.87e-01 |
| ENSG00000215008                                                                                                                                                                                                                                                                                                                                                                                                                           | 11 | 5956028   | 5956283   | + | LINC02739    | havana  | LINC02739    | ncrna | YES | 0 | -0.0445362 | 7.01e-01 | 0.0445362  | 7.01e-01 | 0.0445362 | 7.01e-01 | 0.0757448 | 7.07e-01 | -0.1329204 | 3.74e-01 | -0.0312847 | 6.23e-01 | -0.0438027 | 9.21e-01 |
| ENSG00000215069                                                                                                                                                                                                                                                                                                                                                                                                                           | 11 | 6087466   | 6087466   | + | LINC02739    | havana  | LINC02739    | ncrna | YES | 0 | -0.0445362 | 7.01e-01 | 0.0445362  | 7.01e-01 | 0.0445362 | 7.01e-01 | 0.0757448 | 7.07e-01 | -0.1329204 | 3.74e-01 | -0.0312847 | 6.23e-01 | -0.0438027 | 9.21e-01 |
| ENSG00000219393                                                                                                                                                                                                                                                                                                                                                                                                                           | 2  | 6493520   | 6493520   | + | IGALS1.DT    | havana  | IGALS1.DT    | ncrna | YES | 0 | -0.0609899 | 6.00e-01 | 0.1234877  | 3.70e-01 | 0.0599149 | 6.75e-01 | 0.0757448 | 7.07e-01 | -0.0454511 | 7.68e-01 | -0.0649139 | 7.40e-01 | -0.0418514 | 9.91e-01 |
| ENSG00000218476                                                                                                                                                                                                                                                                                                                                                                                                                           | 20 | 77083     | 79078     | + | CD27         | ensembl | CD27         | mRNA  | YES | 0 | -0.0645579 | 7.00e-01 | 0.1270788  | 2.32e-01 | 0.0425221 | 8.34e-01 | 0.0757448 | 7.07e-01 | -0.1461283 | 5.91e-01 | -0.1296652 | 5.50e-01 | -0.0766448 | 5.50e-01 |
| ENSG00000200393                                                                                                                                                                                                                                                                                                                                                                                                                           | 19 | 2369310   | 2364110   | + | PALB2        | ensembl | PALB2        | mRNA  | YES | 0 | -0.107736  | 3.88e-01 | 0.0986707  | 6.25e-01 | 0.0986707 | 6.25e-01 | 0.0757448 | 7.07e-01 | -0.1104004 | 4.21e-01 | -0.0312847 | 8.87e-01 | -0.0470646 | 9.07e-01 |
| ENSG00000217391                                                                                                                                                                                                                                                                                                                                                                                                                           | 7  | 7441476   | 7448199   | + | POW1P2       | ensembl | POW1P2       | ncrna | YES | 0 | -0.0294261 | 7.03e-01 | 0.0942161  | 3.70e-01 | 0.0219629 | 8.91e-01 | 0.0757448 | 7.07e-01 | -0.0781295 | 9.96e-01 | -0.1276794 | 3.30e-01 | -0.020031  | 5.90e-01 |
| ENSG00000215999                                                                                                                                                                                                                                                                                                                                                                                                                           | 12 | 22460519  | 22463914  | + | AC005112.2   | havana  | AC005112.2   | ncrna | YES | 0 | -0.0281483 | 8.08e-01 | 0.045348   | 5.98e-01 | 0.0249687 | 1.99e-01 | 0.0757448 | 7.07e-01 | -0.0841592 | 5.44e-01 | -0.0517377 | 9.62e-01 | -0.1277306 | 3.86e-01 |
| ENSG00000215999                                                                                                                                                                                                                                                                                                                                                                                                                           | 11 | 6693596   | 6684765   | + | AC00777.2    | havana  | AC00777.2    | ncrna | YES | 0 | -0.0814713 | 4.67e-01 | 0.0273768  | 1.49e-01 | 0.0810334 | 6.81e-01 | 0.0757448 | 7.07e-01 | -0.0569787 | 9.67e-01 | -0.1688812 | 5.33e-01 | -0.0229815 | 8.70e-01 |
| ENSG00000217008                                                                                                                                                                                                                                                                                                                                                                                                                           | 7  | 1310712   | 13107136  | + | AC00718.1    | havana  | AC00718.1    | ncrna | YES | 0 | -0.2928708 | 3.06e-01 | 0.0928712  | 5.13e-01 | 0.0372881 | 8.00e-01 | 0.0757448 | 7.07e-01 | -0.1468498 | 9.80e-01 | -0.1889718 | 8.98e-01 | -0.1889718 | 1.74e-01 |
| ENSG00000214882                                                                                                                                                                                                                                                                                                                                                                                                                           | 2  | 1071210   | 1078510   | + | ATPV1C2      | ensembl | ATPV1C2      | mRNA  | YES | 0 | 0.1888734  | 9.82e-01 | 0.1152525  | 4.25e-01 | 0.0849348 | 6.74e-01 | 0.0757448 | 7.07e-01 | -0.0931044 | 7.88e-01 | -0.058034  | 7.90e-01 | -0.0488014 | 7.36e-01 |
| ENSG00000217523                                                                                                                                                                                                                                                                                                                                                                                                                           | 2  | 17148555  | 17159311  | + | PRRC2        | ensembl | PRRC2        | mRNA  | YES | 0 | -0.0528975 | 6.47e-01 | 0.1121167  | 3.87e-01 | 0.0593009 | 7.69e-01 | 0.0757448 | 7.07e-01 | -0.2080729 | 1.31e-01 | -0.251207  | 1.30e-01 | -0.0714651 | 6.22e-01 |
| ENSG00000216231                                                                                                                                                                                                                                                                                                                                                                                                                           | 17 | 8602272   | 8607177   | + | PRK6         | ensembl | PRK6         | mRNA  | YES | 0 | -0.0150786 | 8.96e-01 | 0.0174227  | 7.66e-01 | 0.0259889 | 7.68e-01 | 0.0757448 | 7.07e-01 | -0.1827203 | 1.92e-01 | -0.2297131 | 2.74e-01 | -0.131391  | 2.86e-01 |
| ENSG00000228843                                                                                                                                                                                                                                                                                                                                                                                                                           | 2  | 8656270   | 8661856   | + | AC005971.1   | havana  | AC005971.1   | ncrna | YES | 0 | -0.0829778 | 6.70e-01 | 0.0404405  | 5.75e-01 | 0.0559942 | 7.76e-01 | 0.0757448 | 7.07e-01 | -0.1442595 | 2.88e-01 | -0.0728729 | 7.41e-01 | -0.0548809 | 9.05e-01 |
| ENSG00000218290                                                                                                                                                                                                                                                                                                                                                                                                                           | 4  | 12052388  | 12057974  | + | C12orf74     | ensembl | C12orf74     | mRNA  | YES | 0 | -0.0580893 | 6.30e-01 | 0.0778831  | 5.57e-01 | 0.1167884 | 4.31e-01 | 0.0757448 | 7.07e-01 | -0.1331738 | 3.94e-01 | -0.193477  | 3.77e-01 | -0.0716391 | 7.02e-01 |
| ENSG00000212366                                                                                                                                                                                                                                                                                                                                                                                                                           | 7  | 635774    | 6358075   | + | TNKS1P2      | ensembl | TNKS1P2      | mRNA  | YES | 0 | -0.0406783 | 7.27e-01 | 0.0406783  | 7.27e-01 | 0.0406783 | 7.27e-01 | 0.0757448 | 7.07e-01 | -0.0867474 | 5.98e-01 | -0.104262  | 8.80e-01 | -0.0402651 | 8.58e-01 |
| ENSG00000218383                                                                                                                                                                                                                                                                                                                                                                                                                           | 19 | 5313874   | 5317182   | + | DAAP2        | ensembl | DAAP2        | mRNA  | YES | 0 | 0.1480077  | 2.25e-01 | 0.1212663  | 3.98e-01 | 0.0305157 | 8.97e-01 | 0.0757448 | 7.07e-01 | -0.1898868 | 3.58e-01 | -0.0200674 | 8.20e-01 | -0.0469899 | 9.96e-01 |
| ENSG00000216697                                                                                                                                                                                                                                                                                                                                                                                                                           | 9  | 10071578  | 10071675  | + | TM6SF3       | ensembl | TM6SF3       | mRNA  | YES | 0 | -0.0602619 | 6.00e-01 | 0.1364285  | 2.60e-01 | 0.0362438 | 8.58e-01 | 0.0757448 | 7.07e-01 | -0.0832439 | 5.89e-01 | -0.1610247 | 5.88e-01 | -0.0404801 | 7.57e-01 |
| ENSG00000217772                                                                                                                                                                                                                                                                                                                                                                                                                           | 20 | 4494230   | 4498027   | + | TM6SF3       | ensembl | TM6SF3       | mRNA  | YES | 0 | -0.1045544 | 3.65e-01 | 0.0800773  | 5.30e-01 | 0.0288383 | 7.93e-01 | 0.0757448 | 7.07e-01 | -0.1074949 | 4.37e-01 | -0.0814737 | 7.81e-01 | -0.01663   | 9.09e-01 |
| ENSG00000210489                                                                                                                                                                                                                                                                                                                                                                                                                           | 11 | 7407457   | 7408414   | + | PPP1R12B     | ensembl | PPP1R12B     | mRNA  | YES | 0 | -0.0421454 | 7.16e-01 | 0.0909974  | 5.30e-01 | 0.0541811 | 1.04e-01 | 0.0757448 | 7.07e-01 | -0.1121583 | 4.91e-01 | -0.1200533 | 5.96e-01 | -0.10467   | 6.00e-01 |
| ENSG00000218561                                                                                                                                                                                                                                                                                                                                                                                                                           | 14 | 6641280   | 6650934   | + | AL319312.1   | havana  | AL319312.1   | ncrna | YES | 0 | -0.0421454 | 7.16e-01 | 0.0909974  | 5.30e-01 | 0.0541811 | 1.04e-01 | 0.0757448 | 7.07e-01 | -0.1121583 | 4.91e-01 | -0.1200533 | 5.96e-01 | -0.10467   | 6.00e-01 |
| ENSG00000217072                                                                                                                                                                                                                                                                                                                                                                                                                           | 7  | 7484374   | 7489610   | + | STAC3L2      | ensembl | STAC3L2      | mRNA  | YES | 0 | -0.0648841 | 5.76e-01 | 0.0818854  | 5.72e-01 | 0.2905147 | 1.24e-01 | 0.0757448 | 7.07e-01 | -0.0642430 | 6.44e-01 | -0.148402  | 4.99e-01 | -0.0522698 | 7.13e-01 |
| ENSG00000211551                                                                                                                                                                                                                                                                                                                                                                                                                           | 2  | 12303373  | 12303387  | + | HELI2        | ensembl | HELI2        | mRNA  | YES | 0 | -0.0213218 | 2.46e-01 | 0.1284149  | 3.70e-01 | 0.0368129 | 8.40e-01 | 0.0757448 | 7.07e-01 | -0.0929112 | 6.12e-01 | -0.0814623 | 6.00e-01 | -0.0416239 | 7.44e-01 |
| ENSG00000216236                                                                                                                                                                                                                                                                                                                                                                                                                           | 1  | 120565089 | 10864400  | + | FAM102B      | ensembl | FAM102B      | mRNA  | YES | 0 | -0.1214135 | 3.90e-01 | 0.1161072  | 2.64e-01 | 0.1643490 | 6.68e-01 | 0.0757448 | 7.07e-01 | -0.0997268 | 6.68e-01 | -0.1778959 | 4.88e-01 | -0.0121255 | 9.44e-01 |
| ENSG00000210544                                                                                                                                                                                                                                                                                                                                                                                                                           | 18 | 11727660  | 11747554  | + | RNMT         | ensembl | RNMT         | mRNA  | YES | 0 | -0.0781086 | 4.99e-01 | 0.0525564  | 8.58e-01 | 0.0217933 | 9.10e-01 | 0.0757448 | 7.07e-01 | -0.0945192 | 4.97e-01 | -0.0623446 | 7.77e-01 | -0.0128886 | 7.99e-01 |
| ENSG00000210544                                                                                                                                                                                                                                                                                                                                                                                                                           | 18 | 11727660  | 11747554  | + | RNMT         | ensembl | RNMT         | mRNA  | YES | 0 | -0.0781086 | 4.99e-01 | 0.0525564  | 8.58e-01 | 0.0217933 | 9.10e-01 | 0.0757448 | 7.07e-01 | -0.0945192 | 4.97e-01 | -0.0623446 | 7.77e-01 | -0.0128886 | 7.99e-01 |
| ENSG00000210544                                                                                                                                                                                                                                                                                                                                                                                                                           | 18 | 11727660  | 11747554  | + | RNMT         | ensembl | RNMT         | mRNA  | YES | 0 | -0.0781086 | 4.99e-01 | 0.0525564  | 8.58e-01 | 0.0217933 | 9.10e-01 | 0.0757448 | 7.07e-01 | -0.0945192 | 4.97e-01 | -0.0623446 | 7.77e-01 | -0.0128886 | 7.99e-01 |
| ENSG00000210544                                                                                                                                                                                                                                                                                                                                                                                                                           | 18 | 11727660  | 11747554  | + | RNMT         | ensembl | RNMT         | mRNA  | YES | 0 | -0.0781086 | 4.99e-01 | 0.0525564  | 8.58e-01 | 0.0217933 | 9.10e-01 | 0.0757448 | 7.07e-01 | -0.0945192 | 4.97e-01 | -0.0623446 | 7.77e-01 | -0.0128886 | 7.99e-01 |
| ENSG00000210544                                                                                                                                                                                                                                                                                                                                                                                                                           | 18 | 11727660  | 11747554  | + | RNMT         | ensembl | RNMT         | mRNA  | YES | 0 | -0.0781086 | 4.99e-01 | 0.0525564  | 8.58e-01 | 0.0217933 | 9.10e-01 | 0.0757448 | 7.07e-01 | -0.0945192 | 4.97e-01 | -0.0623446 | 7.77e-01 | -0.0128886 | 7.99e-01 |
| ENSG00000210544                                                                                                                                                                                                                                                                                                                                                                                                                           | 18 | 11727660  | 11747554  | + | RNMT         | ensembl |              |       |     |   |            |          |            |          |           |          |           |          |            |          |            |          |            |          |



Table with columns: Gene ID, Chr, Start, End, RefSeq, Gene Name, Transcription Start Site, Strand, Feature Type, Feature Name, Feature Start, Feature End, Feature Score, Feature Type, Feature Name, Feature Start, Feature End, Feature Score. The table lists genomic features for various genes across chromosomes 1-22, X, and Y.



















| ENSG000002954   | 2  | 4516416  | 4533397   | LINC0121     | lincRNA          | transcribed_pseudo | YES | YES | YES | -0.10178   | 3.78E-01 | 0.2455639  | 8.86E-02 | 0.1246622  | 5.93E-01 | 0.0355665 | 7.91E-01 | -0.2442135 | 7.51E-02 | -0.1884878 | 3.64E-01 | -0.1279228 | 3.76E-01 |
|-----------------|----|----------|-----------|--------------|------------------|--------------------|-----|-----|-----|------------|----------|------------|----------|------------|----------|-----------|----------|------------|----------|------------|----------|------------|----------|
| ENSG0000018072  | 1  | 17322109 | 17323511  | NKX2-5       | antisense_intron | protein_coding     | YES | YES | YES | -0.06177   | 4.81E-01 | 0.0406875  | 8.11E-01 | 0.0815988  | 6.86E-01 | 0.0334884 | 7.91E-01 | -0.1537978 | 3.28E-01 | -0.0712985 | 8.84E-01 | -0.0712985 | 6.21E-01 |
| ENSG0000018074  | 1  | 18044742 | 62037035  | CDNA 3       | antisense_intron | transcribed_pseudo | YES | YES | YES | 0.0172466  | 2.44E-01 | 0.0296141  | 7.24E-01 | 0.0296141  | 7.24E-01 | 0.0296141 | 7.24E-01 | 0.0296141  | 7.24E-01 | 0.0296141  | 7.24E-01 | 0.0296141  | 7.24E-01 |
| ENSG00000186419 | 22 | 41621163 | 41664408  | HNRK5        | antisense_intron | protein_coding     | YES | YES | YES | -0.0491828 | 8.99E-01 | 0.0187078  | 6.07E-01 | 0.0349482  | 5.72E-01 | 0.0349482 | 5.72E-01 | 0.0349482  | 5.72E-01 | 0.0349482  | 5.72E-01 | 0.0349482  | 5.72E-01 |
| ENSG00000188229 | 1  | 17324127 | 17324707  | TUBB4B       | antisense_intron | protein_coding     | YES | YES | YES | -0.0292803 | 7.33E-01 | -0.045188  | 9.20E-01 | 0.3548577  | 4.84E-01 | 0.0294843 | 7.91E-01 | 0.0294843  | 7.91E-01 | 0.0294843  | 7.91E-01 | 0.0294843  | 7.91E-01 |
| ENSG0000017791  | 1  | 12849163 | 151029386 | LOC100938664 | antisense_intron | transcribed_pseudo | YES | YES | YES | 0.0645979  | 2.45E-01 | 0.0645979  | 2.45E-01 | 0.0645979  | 2.45E-01 | 0.0645979 | 2.45E-01 | 0.0645979  | 2.45E-01 | 0.0645979  | 2.45E-01 | 0.0645979  | 2.45E-01 |
| ENSG00000131665 | 2  | 10639120 | 106468413 | RGD03        | antisense_intron | protein_coding     | YES | YES | YES | -0.1276888 | 2.68E-01 | 0.1589837  | 3.20E-01 | 0.0354003  | 7.91E-01 | 0.0354003 | 7.91E-01 | 0.0354003  | 7.91E-01 | 0.0354003  | 7.91E-01 | 0.0354003  | 7.91E-01 |
| ENSG0000020377  | 15 | 8995970  | 89951345  | AC027176.3   | antisense_intron | transcribed_pseudo | YES | YES | YES | 0.0439624  | 7.04E-01 | 0.1349642  | 3.45E-01 | 0.0394074  | 7.91E-01 | 0.0394074 | 7.91E-01 | 0.0394074  | 7.91E-01 | 0.0394074  | 7.91E-01 | 0.0394074  | 7.91E-01 |
| ENSG0000017091  | 2  | 17748940 | 17555636  | RANL         | antisense_intron | protein_coding     | YES | YES | YES | 0.0381156  | 7.42E-01 | 0.0237311  | 2.05E-01 | 0.0327655  | 6.52E-01 | 0.0327655 | 6.52E-01 | 0.0327655  | 6.52E-01 | 0.0327655  | 6.52E-01 | 0.0327655  | 6.52E-01 |
| ENSG0000020426  | 22 | 3788794  | 3788863   | MIR354       | antisense_intron | transcribed_pseudo | YES | YES | YES | -0.0497874 | 8.97E-01 | 0.0216177  | 8.82E-01 | 0.0973538  | 6.28E-01 | 0.0333473 | 7.92E-01 | 0.0333473  | 7.92E-01 | 0.0333473  | 7.92E-01 | 0.0333473  | 7.92E-01 |
| ENSG0000021523  | 1  | 14528282 | 14528282  | ASFP18       | antisense_intron | transcribed_pseudo | YES | YES | YES | 0.0250289  | 8.45E-01 | 0.0626689  | 4.82E-01 | 0.0354839  | 4.82E-01 | 0.0354839 | 4.82E-01 | 0.0354839  | 4.82E-01 | 0.0354839  | 4.82E-01 | 0.0354839  | 4.82E-01 |
| ENSG00000188710 | 1  | 20549415 | 20550849  | OPT1         | antisense_intron | protein_coding     | YES | YES | YES | -0.0668572 | 5.63E-01 | 0.1478488  | 3.02E-01 | 0.1866753  | 3.51E-01 | 0.0330594 | 7.92E-01 | 0.0330594  | 7.92E-01 | 0.0330594  | 7.92E-01 | 0.0330594  | 7.92E-01 |
| ENSG0000020787  | 18 | 57639455 | 5778803   | AC027097.2   | antisense_intron | transcribed_pseudo | YES | YES | YES | -0.093061  | 7.34E-01 | 0.0365277  | 7.85E-01 | 0.3067659  | 1.19E-01 | 0.0527079 | 7.92E-01 | 0.0527079  | 7.92E-01 | 0.0527079  | 7.92E-01 | 0.0527079  | 7.92E-01 |
| ENSG00000204927 | 11 | 6207073  | 6207488   | LOC3         | antisense_intron | protein_coding     | YES | YES | YES | -0.090841  | 7.38E-01 | -0.020993  | 7.29E-01 | 0.1504899  | 5.02E-01 | 0.0526281 | 7.92E-01 | 0.0526281  | 7.92E-01 | 0.0526281  | 7.92E-01 | 0.0526281  | 7.92E-01 |
| ENSG00000217564 | 1  | 13149148 | 13149436  | RAC1A        | antisense_intron | transcribed_pseudo | YES | YES | YES | 0.0021017  | 9.90E-01 | 0.0214989  | 3.76E-01 | 0.1274987  | 3.71E-01 | 0.0321824 | 7.92E-01 | 0.0321824  | 7.92E-01 | 0.0321824  | 7.92E-01 | 0.0321824  | 7.92E-01 |
| ENSG00000216625 | 20 | 1787761  | 1788160   | AD10504.1    | antisense_intron | transcribed_pseudo | YES | YES | YES | 0.0028406  | 9.80E-01 | 0.0061659  | 6.78E-01 | 0.08891523 | 6.98E-01 | 0.0523375 | 7.92E-01 | 0.0523375  | 7.92E-01 | 0.0523375  | 7.92E-01 | 0.0523375  | 7.92E-01 |
| ENSG0000021381  | 11 | 50142121 | 50142610  | AP01218.1    | antisense_intron | transcribed_pseudo | YES | YES | YES | -0.0654212 | 5.72E-01 | 0.0517163  | 7.21E-01 | 0.1178261  | 5.58E-01 | 0.0318928 | 7.92E-01 | 0.0318928  | 7.92E-01 | 0.0318928  | 7.92E-01 | 0.0318928  | 7.92E-01 |
| ENSG00000210761 | 6  | 4214243  | 42192418  | LOC1009418   | antisense_intron | transcribed_pseudo | YES | YES | YES | 0.0049418  | 7.24E-01 | 0.0102709  | 8.55E-01 | 0.1752495  | 3.81E-01 | 0.0516124 | 7.92E-01 | 0.0516124  | 7.92E-01 | 0.0516124  | 7.92E-01 | 0.0516124  | 7.92E-01 |
| ENSG00000185219 | 8  | 44431705 | 44477610  | ZNF445       | antisense_intron | protein_coding     | YES | YES | YES | -0.03954   | 7.33E-01 | -0.08402   | 7.91E-01 | -0.221159  | 2.68E-01 | 0.0316212 | 7.92E-01 | 0.0316212  | 7.92E-01 | 0.0316212  | 7.92E-01 | 0.0316212  | 7.92E-01 |
| ENSG0000017988  | 13 | 4621190  | 4627756   | LKRC3        | antisense_intron | protein_coding     | YES | YES | YES | -0.079483  | 8.65E-01 | 0.2073038  | 3.16E-01 | 0.2299505  | 2.55E-01 | 0.0312486 | 7.92E-01 | 0.0312486  | 7.92E-01 | 0.0312486  | 7.92E-01 | 0.0312486  | 7.92E-01 |
| ENSG00000210428 | 4  | 4812372  | 4812370   | ITP10        | antisense_intron | transcribed_pseudo | YES | YES | YES | -0.025507  | 8.14E-01 | 0.0141287  | 9.22E-01 | 0.0073009  | 8.51E-01 | 0.0311586 | 7.92E-01 | 0.0311586  | 7.92E-01 | 0.0311586  | 7.92E-01 | 0.0311586  | 7.92E-01 |
| ENSG00000204651 | 9  | 13138990 | 13139405  | AL137938.3   | antisense_intron | transcribed_pseudo | YES | YES | YES | -0.1083024 | 3.48E-01 | 0.1488201  | 3.02E-01 | 0.3262024  | 9.65E-01 | 0.0320324 | 7.93E-01 | 0.0320324  | 7.93E-01 | 0.0320324  | 7.93E-01 | 0.0320324  | 7.93E-01 |
| ENSG00000217199 | 18 | 12148890 | 12448205  | AP01027.2    | antisense_intron | transcribed_pseudo | YES | YES | YES | -0.1099965 | 9.61E-01 | 0.0782819  | 8.37E-01 | 0.3232020  | 1.00E-01 | 0.0308692 | 7.93E-01 | 0.0308692  | 7.93E-01 | 0.0308692  | 7.93E-01 | 0.0308692  | 7.93E-01 |
| ENSG00000145376 | 1  | 15087534 | 15074563  | CREB3A       | antisense_intron | protein_coding     | YES | YES | YES | 0.0625948  | 3.48E-01 | 0.1605028  | 2.47E-01 | 0.0892025  | 6.98E-01 | 0.0307629 | 7.93E-01 | 0.0307629  | 7.93E-01 | 0.0307629  | 7.93E-01 | 0.0307629  | 7.93E-01 |
| ENSG00000208166 | 2  | 9495956  | 9496089   | AC026771.1   | antisense_intron | transcribed_pseudo | YES | YES | YES | -0.139312  | 1.97E-01 | 0.0384904  | 8.11E-01 | 0.0770898  | 3.62E-01 | 0.0306813 | 7.93E-01 | 0.0306813  | 7.93E-01 | 0.0306813  | 7.93E-01 | 0.0306813  | 7.93E-01 |
| ENSG00000204548 | 11 | 4950581  | 4950661   | AC06881.1    | antisense_intron | transcribed_pseudo | YES | YES | YES | 0.0079076  | 4.95E-01 | 0.0105158  | 5.50E-01 | 0.0056761  | 9.78E-01 | 0.0305888 | 7.93E-01 | 0.0305888  | 7.93E-01 | 0.0305888  | 7.93E-01 | 0.0305888  | 7.93E-01 |
| ENSG0000021499  | 2  | 7288512  | 7288643   | AC027046.1   | antisense_intron | transcribed_pseudo | YES | YES | YES | 0.0200482  | 8.83E-01 | 0.0801806  | 5.80E-01 | 0.1742078  | 3.83E-01 | 0.051011  | 7.93E-01 | 0.051011   | 7.93E-01 | 0.051011   | 7.93E-01 | 0.051011   | 7.93E-01 |
| ENSG0000021451  | 1  | 11226598 | 11226598  | REP1         | antisense_intron | transcribed_pseudo | YES | YES | YES | -0.0261176 | 8.92E-01 | 0.0046176  | 9.17E-01 | 0.031484   | 8.48E-01 | 0.0304804 | 7.93E-01 | 0.0304804  | 7.93E-01 | 0.0304804  | 7.93E-01 | 0.0304804  | 7.93E-01 |
| ENSG00000217538 | 1  | 4204049  | 4204129   | HNR9F1P1     | antisense_intron | transcribed_pseudo | YES | YES | YES | -0.0989414 | 3.74E-01 | 0.0075753  | 6.00E-01 | 0.0294868  | 7.93E-01 | 0.0318121 | 7.93E-01 | 0.0318121  | 7.93E-01 | 0.0318121  | 7.93E-01 | 0.0318121  | 7.93E-01 |
| ENSG00000166925 | 7  | 10646339 | 10647932  | TSC2D4       | antisense_intron | transcribed_pseudo | YES | YES | YES | 0.0815448  | 4.81E-01 | 0.0624997  | 6.67E-01 | 0.0890353  | 6.59E-01 | 0.0294943 | 7.93E-01 | 0.0294943  | 7.93E-01 | 0.0294943  | 7.93E-01 | 0.0294943  | 7.93E-01 |
| ENSG0000013347  | 1  | 1299577  | 1299584   | LOC1009418   | antisense_intron | transcribed_pseudo | YES | YES | YES | 0.0266848  | 7.24E-01 | 0.0182848  | 7.49E-01 | 0.0656628  | 6.94E-01 | 0.0305888 | 7.93E-01 | 0.0305888  | 7.93E-01 | 0.0305888  | 7.93E-01 | 0.0305888  | 7.93E-01 |
| ENSG00000136160 | 13 | 7795841  | 7795929   | IONBB        | antisense_intron | protein_coding     | YES | YES | YES | -0.0622735 | 5.91E-01 | 0.0466967  | 7.34E-01 | 0.1936504  | 3.31E-01 | 0.0283864 | 7.93E-01 | 0.0283864  | 7.93E-01 | 0.0283864  | 7.93E-01 | 0.0283864  | 7.93E-01 |
| ENSG0000027623  | 16 | 75372185 | 7537285   | AC02587.3    | antisense_intron | transcribed_pseudo | YES | YES | YES | -0.132536  | 2.51E-01 | -0.193128  | 3.55E-01 | 0.0254239  | 9.00E-01 | 0.0287781 | 7.93E-01 | 0.0287781  | 7.93E-01 | 0.0287781  | 7.93E-01 | 0.0287781  | 7.93E-01 |
| ENSG00000186547 | 1  | 15340898 | 15341224  | LOC1009418   | antisense_intron | transcribed_pseudo | YES | YES | YES | 0.0049418  | 7.24E-01 | 0.0102709  | 8.55E-01 | 0.1752495  | 3.81E-01 | 0.0516124 | 7.92E-01 | 0.0516124  | 7.92E-01 | 0.0516124  | 7.92E-01 | 0.0516124  | 7.92E-01 |
| ENSG00000130038 | 12 | 9606613  | 9746519   | CRAK2A       | antisense_intron | protein_coding     | YES | YES | YES | -0.056447  | 6.27E-01 | -0.0217704 | 8.81E-01 | 0.2317198  | 2.45E-01 | 0.0284293 | 7.94E-01 | 0.0284293  | 7.94E-01 | 0.0284293  | 7.94E-01 | 0.0284293  | 7.94E-01 |
| ENSG0000027008  | 17 | 5118131  | 5118663   | AC02681.1    | antisense_intron | transcribed_pseudo | YES | YES | YES | 0.0167564  | 8.85E-01 | 0.0601714  | 6.78E-01 | 0.0283864  | 7.94E-01 | 0.0324773 | 7.94E-01 | 0.0324773  | 7.94E-01 | 0.0324773  | 7.94E-01 | 0.0324773  | 7.94E-01 |
| ENSG00000213123 | 1  | 3732675  | 3733191   | AC02818.1    | antisense_intron | transcribed_pseudo | YES | YES | YES | -0.140033  | 2.22E-01 | -0.062321  | 9.66E-01 | 0.1874895  | 4.05E-01 | 0.0280277 | 7.94E-01 | 0.0280277  | 7.94E-01 | 0.0280277  | 7.94E-01 | 0.0280277  | 7.94E-01 |
| ENSG00000204872 | 1  | 11236058 | 11236296  | AC02681.2    | antisense_intron | transcribed_pseudo | YES | YES | YES | 0.0123658  | 8.11E-01 | 0.0282981  | 9.21E-01 | 0.0414828  | 6.19E-01 | 0.0274465 | 7.94E-01 | 0.0274465  | 7.94E-01 | 0.0274465  | 7.94E-01 | 0.0274465  | 7.94E-01 |
| ENSG0000014954  | 2  | 7902586  | 7902805   | REG3C        | antisense_intron | protein_coding     | YES | YES | YES | -0.04888   | 7.76E-01 | 0.0694411  | 6.32E-01 | 0.164143   | 4.08E-01 | 0.0278888 | 7.94E-01 | 0.0278888  | 7.94     |            |          |            |          |



Table with columns for gene ID, chromosome, coordinates, gene name, transcript ID, and various numerical values. The table lists numerous genes such as ENOX2, BGLAP, and others, with associated genomic data and numerical annotations.



Table with columns for gene ID, chromosome, coordinates, gene name, transcript type, and various numerical values. The table lists numerous genes such as APOB, APOC, APOE, and many others, with associated genomic data and numerical parameters.



Table with columns: Gene ID, Chr, Start, End, Strand, Feature, RefSeq ID, Gene Name, Transcript Name, Feature Type, RefSeq ID, Gene Name, Transcript Name, Feature Type, RefSeq ID, Gene Name, Transcript Name, Feature Type. The table lists genomic features for various genes across chromosomes 5, 10, 12, 13, 14, 15, 16, 17, 18, 19, 20, 21, 22, X, and Y.



|                |    |           |           |           |         |                    |                    |            |            |            |            |            |           |            |            |            |            |            |            |            |           |          |
|----------------|----|-----------|-----------|-----------|---------|--------------------|--------------------|------------|------------|------------|------------|------------|-----------|------------|------------|------------|------------|------------|------------|------------|-----------|----------|
| ENSG0000027826 | 19 | 7595863   | 7618304   | CCAMAP1   | ensembl | navana             | protein_coding     | 0.0723144  | 5.33E-01   | -0.0273941 | 8.69E-02   | -0.0340992 | 8.61E-01  | -0.0405614 | 8.41E-01   | -0.0494997 | 4.96E-01   | -0.1144803 | 6.03E-01   | -0.0904907 | 5.12E-01  |          |
| ENSG0000027830 | 19 | 14727531  | 14728464  | ACD1L1P1  | navana  | tagene             | incRNA             | 0.0000000  | 3.88E-02   | 0.0000000  | 5.11E-02   | 0.2163630  | 2.71E-01  | 0.0405424  | 8.41E-01   | 0.1841444  | 1.77E-01   | 0.0362820  | 5.11E-01   | -0.1813000 | 2.08E-01  |          |
| ENSG0000027832 | 19 | 3024003   | 2842688   | CPAP4B5   | ensembl | navana             | transcribed_pseudo | 0.0000000  | 0.00E+00   | 0.0000000  | 0.00E+00   | 0.0000000  | 0.00E+00  | 0.0000000  | 0.00E+00   | 0.0000000  | 0.00E+00   | 0.0000000  | 0.00E+00   | 0.00E+00   | 0.00E+00  |          |
| ENSG0000027838 | 19 | 3678956   | 3681869   | CNSL1A1P1 | navana  | transcribed_pseudo | 0.0000000          | 3.93E-01   | 0.1995688  | 2.68E-01   | 0.1679545  | 4.01E-01   | 0.40524   | 8.41E-01   | 0.0483143  | 7.29E-01   | 0.1500568  | 6.49E-01   | 0.0115336  | 3.98E-01   |           |          |
| ENSG0000027841 | 19 | 11172008  | 11176389  | ITPR1     | ensembl | navana             | protein_coding     | 0.0902003  | 4.35E-01   | 0.0370497  | 4.73E-01   | 0.0152785  | 9.40E-01  | 0.0405102  | 8.41E-01   | 0.0806489  | 5.22E-01   | 0.1949373  | 7.76E-01   | 0.0890114  | 5.37E-01  |          |
| ENSG0000027842 | 19 | 12676545  | 126771211 | ITPR1     | ensembl | navana             | protein_coding     | 0.1244137  | 4.35E-01   | 0.0370497  | 4.73E-01   | 0.0152785  | 9.40E-01  | 0.0405102  | 8.41E-01   | 0.0806489  | 5.22E-01   | 0.1949373  | 7.76E-01   | 0.0890114  | 5.37E-01  |          |
| ENSG0000027848 | 19 | 53132808  | 53149206  | TNNI1     | ensembl | navana             | protein_coding     | 0.0867936  | 4.35E-01   | 0.0368014  | 6.49E-01   | 0.0436007  | 8.21E-01  | 0.0404864  | 8.21E-01   | 0.0394923  | 4.31E-01   | 0.0832323  | 1.06E-01   | -0.0618239 | 6.69E-01  |          |
| ENSG0000027852 | 5  | 131381052 | 131324493 | CHOP9     | ensembl | navana             | protein_coding     | 0.0004049  | 8.98E-01   | 0.0771998  | 5.94E-01   | -0.212107  | 2.86E-01  | 0.0404424  | 8.41E-01   | 0.0361765  | 7.95E-01   | 0.0382764  | 1.39E-01   | 0.0302424  | 8.62E-01  |          |
| ENSG0000027859 | 19 | 1077225   | 1077229   | AC11784.1 | ensembl | navana             | transcribed_pseudo | 0.0000000  | 0.00E+00   | 0.0000000  | 0.00E+00   | 0.0000000  | 0.00E+00  | 0.0000000  | 0.00E+00   | 0.0000000  | 0.00E+00   | 0.0000000  | 0.00E+00   | 0.00E+00   | 0.00E+00  |          |
| ENSG0000027865 | 19 | 12845489  | 12845488  | CXCR4     | ensembl | navana             | protein_coding     | 0.0255664  | 8.25E-01   | 0.021777   | 9.00E-01   | 0.3205134  | 7.31E-01  | 0.0404545  | 8.41E-01   | 0.0361765  | 7.95E-01   | 0.0382764  | 1.39E-01   | 0.0302424  | 8.62E-01  |          |
| ENSG0000027868 | 7  | 8074238   | 8092239   | SEMA3C    | ensembl | navana             | protein_coding     | 0.0281337  | 8.44E-01   | 0.0213886  | 3.94E-01   | 0.0984743  | 6.26E-01  | 0.0403632  | 8.42E-01   | 0.038482   | 7.82E-01   | 0.0112925  | 8.17E-01   | 0.0420887  | 7.72E-01  |          |
| ENSG0000027869 | 19 | 3023205   | 3023207   | ASB2P1    | ensembl | navana             | transcribed_pseudo | 0.0000000  | 4.77E-01   | 0.0072321  | 6.43E-01   | 0.3098283  | 5.76E-01  | 0.0401509  | 8.42E-01   | 0.0361765  | 7.95E-01   | 0.0382764  | 1.39E-01   | 0.0302424  | 8.62E-01  |          |
| ENSG0000027872 | 12 | 1466555   | 1475763   | AC01018.1 | navana  | incRNA             | 0.0514954          | 6.20E-01   | 0.0429423  | 7.60E-01   | 0.0543905  | 7.81E-01   | 0.0403111 | 8.42E-01   | 0.0674803  | 8.42E-01   | 0.0674803  | 8.42E-01   | 0.0759328  | 9.06E-01   | 0.0279528 | 9.41E-01 |
| ENSG0000027888 | 8  | 12645239  | 12645456  | APLN      | ensembl | navana             | protein_coding     | 0.1173303  | 3.10E-01   | 0.0874831  | 5.46E-01   | 0.0151739  | 4.50E-01  | 0.0402865  | 8.42E-01   | 0.0211444  | 1.24E-01   | -0.124488  | 5.71E-01   | 0.1141689  | 3.36E-01  |          |
| ENSG0000027891 | 18 | 630880    | 630840    | TYMS      | ensembl | navana             | incRNA             | -0.0538977 | 6.42E-01   | 0.0841072  | 5.61E-01   | 0.0202128  | 8.74E-01  | 0.0402812  | 8.42E-01   | -0.1411008 | 3.09E-01   | 0.0299748  | 8.17E-01   | 0.0118835  | 2.00E-01  |          |
| ENSG0000027910 | 5  | 3023205   | 3023207   | ASB2P1    | ensembl | navana             | transcribed_pseudo | 0.0000000  | 4.77E-01   | 0.0072321  | 6.43E-01   | 0.3098283  | 5.76E-01  | 0.0401509  | 8.42E-01   | 0.0361765  | 7.95E-01   | 0.0382764  | 1.39E-01   | 0.0302424  | 8.62E-01  |          |
| ENSG0000027916 | 13 | 1984182   | 1984672   | AC13500.1 | navana  | incRNA             | -0.0979142         | 3.97E-01   | -0.0405915 | 7.56E-01   | 0.0707112  | 7.04E-01   | 0.0402445 | 8.42E-01   | -0.11116   | 8.80E-01   | 0.0867748  | 6.94E-01   | -0.0806577 | 5.52E-01   |           |          |
| ENSG0000027917 | 22 | 2454023   | 2455593   | GLIS3     | ensembl | navana             | protein_coding     | 0.0105043  | 9.28E-01   | 0.0147709  | 8.07E-01   | 0.0302071  | 8.62E-01  | 0.0402574  | 8.42E-01   | 0.0525725  | 9.13E-01   | 0.1184817  | 5.96E-01   | -0.063004  | 6.64E-01  |          |
| ENSG0000027920 | 20 | 4317448   | 4317448   | ITPR1     | ensembl | navana             | transcribed_pseudo | 0.0000000  | 0.00E+00   | 0.0000000  | 0.00E+00   | 0.0000000  | 0.00E+00  | 0.0000000  | 0.00E+00   | 0.0000000  | 0.00E+00   | 0.0000000  | 0.00E+00   | 0.00E+00   | 0.00E+00  |          |
| ENSG0000027921 | 16 | 4882507   | 4860741   | PCP       | ensembl | navana             | protein_coding     | 0.0687157  | 5.53E-01   | 0.1937513  | 1.82E-01   | 0.1355766  | 8.70E-01  | 0.0401904  | 8.42E-01   | -0.0319526 | 6.15E-01   | 0.0596055  | 1.10E-01   | 0.1728354  | 2.30E-01  |          |
| ENSG0000027922 | 12 | 10651527  | 10652837  | FILC      | ensembl | navana             | protein_coding     | 0.0290383  | 8.02E-01   | 0.0405559  | 7.79E-01   | 0.2216641  | 2.66E-01  | 0.0401379  | 8.42E-01   | 0.0622766  | 8.98E-01   | 0.0626036  | 8.12E-01   | -0.0885735 | 3.41E-01  |          |
| ENSG0000027923 | 16 | 2603150   | 263084    | AC13501.1 | navana  | transcribed_pseudo | 0.0000000          | 4.77E-01   | 0.0072321  | 6.43E-01   | 0.3098283  | 5.76E-01   | 0.0401509 | 8.42E-01   | 0.0361765  | 7.95E-01   | 0.0382764  | 1.39E-01   | 0.0302424  | 8.62E-01   |           |          |
| ENSG0000027924 | 3  | 4194741   | 4130006   | CTNNA3    | ensembl | navana             | protein_coding     | 0.0808954  | 4.88E-01   | 0.0293099  | 8.69E-01   | 0.0844395  | 7.67E-01  | 0.0401405  | 8.42E-01   | 0.1411399  | 3.09E-01   | 0.0873524  | 6.92E-01   | -0.090402  | 6.12E-01  |          |
| ENSG0000027925 | 20 | 362835    | 397559    | TRIM8     | ensembl | navana             | protein_coding     | 0.0777876  | 5.01E-01   | 0.1237667  | 3.84E-01   | 0.3840322  | 4.77E-01  | 0.0401388  | 8.42E-01   | 0.0201471  | 8.85E-01   | 0.0468566  | 7.69E-01   | 0.0207447  | 6.48E-01  |          |
| ENSG0000027926 | 1  | 2840730   | 2841070   | AL13298.1 | navana  | incRNA             | -0.109912          | 3.99E-01   | -0.0624651 | 6.62E-01   | -0.25393   | 2.01E-01   | 0.0400722 | 8.46E-01   | -0.112708  | 8.88E-01   | 0.0468478  | 8.20E-01   | -0.0502919 | 5.61E-01   |           |          |
| ENSG0000027927 | 19 | 6277329   | 6279206   | TME2D3    | ensembl | navana             | protein_coding     | 0.0649018  | 5.54E-01   | 0.0287853  | 7.15E-01   | 0.1234938  | 9.98E-01  | 0.0400915  | 8.48E-01   | 0.13029    | 8.68E-01   | 0.0276283  | 7.30E-01   | 0.0881147  | 6.88E-01  |          |
| ENSG0000027928 | 17 | 841331    | 845041    | NDEL1     | ensembl | navana             | protein_coding     | 0.0164456  | 4.83E-01   | 0.0527497  | 7.08E-01   | 0.1474327  | 3.93E-01  | 0.0400735  | 8.48E-01   | 0.0147211  | 9.32E-01   | 0.0731451  | 6.29E-01   | 0.0145101  | 6.06E-01  |          |
| ENSG0000027929 | 14 | 1212050   | 1222201   | AC02922.1 | navana  | incRNA             | -0.0488939         | 4.12E-01   | -0.0707917 | 5.80E-01   | -0.0454483 | 7.88E-01   | 0.0400884 | 8.48E-01   | -0.2097773 | 1.29E-01   | -0.139954  | 5.88E-01   | -0.103794  | 7.43E-01   |           |          |
| ENSG0000027931 | 19 | 8026920   | 8026920   | ITPR1     | ensembl | navana             | transcribed_pseudo | 0.0000000  | 0.00E+00   | 0.0000000  | 0.00E+00   | 0.0000000  | 0.00E+00  | 0.0000000  | 0.00E+00   | 0.0000000  | 0.00E+00   | 0.0000000  | 0.00E+00   | 0.00E+00   | 0.00E+00  |          |
| ENSG0000027934 | 10 | 10176198  | 10197789  | PPP3R3C   | ensembl | navana             | protein_coding     | 0.1421661  | 2.17E-01   | 0.0676882  | 6.41E-01   | 0.0399786  | 7.68E-01  | 0.0399786  | 8.48E-01   | 0.1388456  | 5.88E-01   | 0.1468994  | 2.78E-01   | 0.1468994  | 2.78E-01  |          |
| ENSG0000027935 | 10 | 4898454   | 4901887   | AC02024.1 | navana  | incRNA             | -0.1099027         | 1.40E-01   | -0.073538  | 5.89E-01   | -0.1025627 | 6.11E-01   | 0.0399283 | 8.48E-01   | -0.1397028 | 5.22E-01   | -0.2454528 | 2.41E-01   | -0.1824708 | 2.05E-01   |           |          |
| ENSG0000027937 | 19 | 8217400   | 8217400   | ITPR1     | ensembl | navana             | transcribed_pseudo | 0.0000000  | 0.00E+00   | 0.0000000  | 0.00E+00   | 0.0000000  | 0.00E+00  | 0.0000000  | 0.00E+00   | 0.0000000  | 0.00E+00   | 0.0000000  | 0.00E+00   | 0.00E+00   | 0.00E+00  |          |
| ENSG0000027938 | 6  | 12747294  | 12751931  | SGO3A     | navana  | protein_coding     | 0.0103009          | 9.29E-01   | 0.0265539  | 9.51E-01   | 0.0151978  | 7.57E-01   | 0.0401379 | 8.42E-01   | 0.0151978  | 8.12E-01   | 0.0548588  | 5.58E-01   | -0.1026299 | 4.78E-01   |           |          |
| ENSG0000027939 | 19 | 4172783   | 4173462   | SAM9      | ensembl | navana             | protein_coding     | 0.1787711  | 1.20E-01   | 0.1114892  | 4.33E-01   | 0.0103738  | 9.59E-01  | 0.0399148  | 8.48E-01   | 0.2311883  | 9.23E-01   | 0.0163465  | 9.41E-01   | 0.0429204  | 8.76E-01  |          |
| ENSG0000027940 | 13 | 6137443   | 6137443   | ITPR1     | ensembl | navana             | transcribed_pseudo | 0.0000000  | 0.00E+00   | 0.0000000  | 0.00E+00   | 0.0000000  | 0.00E+00  | 0.0000000  | 0.00E+00   | 0.0000000  | 0.00E+00   | 0.0000000  | 0.00E+00   | 0.00E+00   | 0.00E+00  |          |
| ENSG0000027941 | 19 | 7765589   | 7766267   | SMG9      | ensembl | navana             | incRNA             | 0.0655589  | 5.71E-01   | 0.0810965  | 5.74E-01   | 0.0202323  | 8.48E-01  | 0.0401695  | 8.42E-01   | 0.0416593  | 6.06E-01   | 0.1488312  | 6.02E-01   | 0.0847922  | 5.84E-01  |          |
| ENSG0000027942 | 13 | 2917126   | 2917168   | RP131L3   | navana  | transcribed_pseudo | 0.0159123          | 1.70E-01   | 0.0160547  | 6.77E-01   | 0.1378279  | 4.91E-01   | 0.0399011 | 8.48E-01   | 0.1421133  | 7.77E-01   | 0.0102043  | 9.37E-01   | 0.0719218  | 6.20E-01   |           |          |
| ENSG0000027943 | 20 | 251668    | 251799    | AC0932.8  | navana  | TEC                | -0.0229952         | 8.80E-01   | -0.0095848 | 9.67E-01   | -0.041087  | 7.89E-01   | 0.0398789 | 8.48E-01   | 0.0398789  | 8.48E-01   | 0.0398789  | 8.48E-01   | 0.0398789  | 8.48E-01   |           |          |
| ENSG0000027944 | 19 | 8236319   | 8236319   | ITPR1     | ensembl | navana             | transcribed_pseudo | 0.0000000  | 0.00E+00   | 0.0000000  | 0.00E+00   | 0.0000000  | 0.00E+00  | 0.0000000  | 0.00E+00   | 0.0000000  | 0.00E+00   | 0.0000000  | 0.00E+00   | 0.00E+00   | 0.00E+00  |          |
| ENSG0000027945 | 7  | 6602857   | 6606287   | INC0204   | navana  | incRNA             | 0.0803331          | 4.87E-01   | 0.1077234  | 4.04E-01   | 0.0398551  | 8.48E-01   | 0.0398551 | 8.48E-01   | 0.0678573  | 8.81E-01   | 0.2087176  | 5.91E-01   | -0.1574545 | 2.86E-01   |           |          |
| ENSG0000027946 | 17 | 1705563   | 1705187   | PEMT      | ensembl | navana             | protein_coding     | -0.0748905 | 5.17E-01   | -0.034712  | 8.11E-01   | 0.1615969  | 2.90E-01  | 0.0398583  | 8.48E-01   | -0.111699  | 4.13E-01   | -0.036777  | 3.00E-01   | 0.1478911  | 3.06E-01  |          |
| ENSG0000027947 | 19 | 8182343   | 8182343   | ITPR1     | ensembl | navana             | transcribed_pseudo | 0.000      |            |            |            |            |           |            |            |            |            |            |            |            |           |          |



Table with columns for gene ID, chromosome, coordinates, gene name, transcript, and various numerical values. The table lists numerous genes such as ALN121.2, PNP2, and others, along with their genomic locations and associated data points.







| ENSG0000027091  | 21   | 3173732  | 31736407 | APOO25.1  | havana  | lncRNA                             | 0.00655029 | 6.01E-01 | 0.00644319 | 6.97E-01 | 0.25740427 | 1.95E-01 | 0.00300361 | 8.82E-01 | 0.06306109 | 6.47E-01 | -0.1887173 | 4.42E-01 | 0.03433383 | 8.13E-01 |
|-----------------|------|----------|----------|-----------|---------|------------------------------------|------------|----------|------------|----------|------------|----------|------------|----------|------------|----------|------------|----------|------------|----------|
| ENSG0000024825  | 6    | 16711497 | 16711527 | ALI1193.1 | havana  | protein_coding                     | 0.07512724 | 6.21E-01 | 0.4145999  | 3.72E-01 | 0.02788548 | 8.96E-01 | 0.00300361 | 8.82E-01 | 0.015020   | 9.34E-01 | 0.0287799  | 7.86E-01 | 0.0046620  | 9.76E-01 |
| ENSG0000024801  | 9    | 11163134 | 11163451 | LNOC03.1  | havana  | lncRNA                             | 0.01739292 | 6.21E-01 | 0.4145999  | 3.72E-01 | 0.02788548 | 8.96E-01 | 0.00300361 | 8.82E-01 | 0.015020   | 9.34E-01 | 0.0287799  | 7.86E-01 | 0.0046620  | 9.76E-01 |
| ENSG0000029769  | 9    | 11163134 | 11163451 | DNAC15.1  | ensembl | protein_coding                     | 0.0150513  | 8.97E-01 | 0.079279   | 8.47E-01 | 0.01626207 | 5.29E-01 | 0.00300361 | 8.82E-01 | 0.0640088  | 8.06E-01 | 0.3944497  | 8.26E-01 | 0.0274889  | 9.76E-01 |
| ENSG00000248849 | 9    | 15211380 | 15211388 | SIGLEC2P  | havana  | transcribed_unprocessed_pseudogene | -0.0020399 | 5.92E-01 | 0.00978726 | 9.46E-01 | 0.1635952  | 4.13E-01 | 0.0299281  | 8.82E-01 | 0.0292499  | 5.06E-01 | 0.0399447  | 9.50E-01 | 0.0199347  | 9.46E-01 |
| ENSG00000248981 | 17   | 15211380 | 15211388 | SNRPB.2   | ensembl | transcribed_unprocessed_pseudogene | -0.0020399 | 5.92E-01 | 0.00978726 | 9.46E-01 | 0.1635952  | 4.13E-01 | 0.0299281  | 8.82E-01 | 0.0292499  | 5.06E-01 | 0.0399447  | 9.50E-01 | 0.0199347  | 9.46E-01 |
| ENSG00000240675 | 16   | 31448300 | 31449080 | SIGLEC2   | ensembl | protein_coding                     | -0.0038148 | 7.50E-01 | 0.00386248 | 9.78E-01 | 0.0299281  | 8.82E-01 | 0.0299281  | 8.82E-01 | 0.0292499  | 5.06E-01 | 0.0399447  | 9.50E-01 | 0.0199347  | 9.46E-01 |
| ENSG00000201361 | 6    | 6732168  | 6732187  | RN7SP418  | ensembl | misc_RNA                           | -0.0044905 | 7.03E-01 | -0.0161096 | 9.12E-01 | 0.05563654 | 7.85E-01 | 0.0299281  | 8.82E-01 | 0.0292499  | 5.06E-01 | 0.0399447  | 9.50E-01 | 0.0199347  | 9.46E-01 |
| ENSG00000200089 | 9    | 12395352 | 12395408 | TRAF3IP2  | ensembl | protein_coding                     | 0.0066201  | 6.25E-01 | 0.0066201  | 6.25E-01 | 0.0299281  | 8.82E-01 | 0.0299281  | 8.82E-01 | 0.0292499  | 5.06E-01 | 0.0399447  | 9.50E-01 | 0.0199347  | 9.46E-01 |
| ENSG00000215467 | 6    | 43907314 | 43907367 | ZNF378    | ensembl | protein_coding                     | 0.0066201  | 6.25E-01 | 0.0066201  | 6.25E-01 | 0.0299281  | 8.82E-01 | 0.0299281  | 8.82E-01 | 0.0292499  | 5.06E-01 | 0.0399447  | 9.50E-01 | 0.0199347  | 9.46E-01 |
| ENSG00000205682 | 5    | 10264020 | 10267376 | LNOC04.1  | havana  | lncRNA                             | -0.0062877 | 6.02E-01 | 0.00738071 | 6.42E-01 | 0.14778184 | 4.62E-01 | 0.0299281  | 8.82E-01 | 0.0292499  | 5.06E-01 | 0.0399447  | 9.50E-01 | 0.0199347  | 9.46E-01 |
| ENSG00000206092 | 4    | 43912132 | 43908588 | TRAF3IP2  | ensembl | protein_coding                     | -0.0062877 | 6.02E-01 | 0.00738071 | 6.42E-01 | 0.14778184 | 4.62E-01 | 0.0299281  | 8.82E-01 | 0.0292499  | 5.06E-01 | 0.0399447  | 9.50E-01 | 0.0199347  | 9.46E-01 |
| ENSG00000205696 | 11   | 10814458 | 10815081 | APOE3.2   | havana  | lncRNA                             | -0.0041074 | 9.03E-01 | 0.0058536  | 6.86E-01 | 0.0299281  | 8.82E-01 | 0.0299281  | 8.82E-01 | 0.0292499  | 5.06E-01 | 0.0399447  | 9.50E-01 | 0.0199347  | 9.46E-01 |
| ENSG00000205532 | 10   | 5095988  | 5228423  | PRKG1     | havana  | protein_coding                     | YES        | YES      | YES        | YES      | 0.129062   | 2.63E-01 | 0.0662893  | 6.46E-01 | 0.1148651  | 1.11E-01 | -0.219129  | 2.93E-01 | 0.1500499  | 2.98E-01 |
| ENSG00000214229 | 9    | 13882703 | 13882629 | REP1A1P5  | ensembl | processed_pseudogene               | -0.0028309 | 4.75E-01 | 0.00429264 | 7.40E-01 | 0.0299281  | 8.82E-01 | 0.0299281  | 8.82E-01 | 0.0292499  | 5.06E-01 | 0.0399447  | 9.50E-01 | 0.0199347  | 9.46E-01 |
| ENSG00000217522 | 18   | 2974806  | 2975048  | LNOC05.1  | havana  | lncRNA                             | -0.0020322 | 9.2E-01  | 0.0020322  | 9.2E-01  | 0.0299281  | 8.82E-01 | 0.0299281  | 8.82E-01 | 0.0292499  | 5.06E-01 | 0.0399447  | 9.50E-01 | 0.0199347  | 9.46E-01 |
| ENSG00000209570 | 6    | 41158506 | 41163386 | TREM2     | ensembl | protein_coding                     | 0.0297444  | 4.22E-01 | 0.1550987  | 8.22E-01 | 0.0188715  | 9.24E-01 | 0.0297961  | 8.82E-01 | 0.0292499  | 5.06E-01 | 0.0399447  | 9.50E-01 | 0.0199347  | 9.46E-01 |
| ENSG00000217561 | 15   | 2260602  | 2261764  | TNFR2     | ensembl | transcribed_unprocessed_pseudogene | -0.0020322 | 9.2E-01  | 0.0020322  | 9.2E-01  | 0.0299281  | 8.82E-01 | 0.0299281  | 8.82E-01 | 0.0292499  | 5.06E-01 | 0.0399447  | 9.50E-01 | 0.0199347  | 9.46E-01 |
| ENSG00000215819 | 6    | 2218929  | 2219278  | LNOC06.1  | havana  | lncRNA                             | -0.0020322 | 9.2E-01  | 0.0020322  | 9.2E-01  | 0.0299281  | 8.82E-01 | 0.0299281  | 8.82E-01 | 0.0292499  | 5.06E-01 | 0.0399447  | 9.50E-01 | 0.0199347  | 9.46E-01 |
| ENSG0000018680  | 18   | 3261479  | 3278461  | MYL12B    | ensembl | protein_coding                     | 0.3058641  | 6.98E-01 | 0.0240205  | 4.81E-01 | 0.3573798  | 6.72E-01 | 0.0297659  | 8.82E-01 | 0.02414338 | 3.90E-01 | 0.0766439  | 9.52E-01 | 0.1796436  | 5.42E-01 |
| ENSG00000103116 | 6    | 3624203  | 3613229  | PNP1A1    | ensembl | protein_coding                     | 0.0029788  | 6.42E-01 | 0.0094675  | 4.92E-01 | 0.0524023  | 7.99E-01 | 0.0294354  | 8.82E-01 | 0.0340486  | 2.46E-01 | -0.103646  | 6.15E-01 | -0.088024  | 2.12E-01 |
| ENSG00000179731 | 12   | 11205024 | 11209805 | PRK1      | ensembl | protein_coding                     | 0.1155354  | 3.17E-01 | 0.0021228  | 8.56E-01 | 0.0028661  | 8.86E-01 | 0.0297327  | 8.82E-01 | 0.1212113  | 2.16E-01 | 0.260185   | 5.75E-01 | 0.0079963  | 5.65E-01 |
| ENSG00000200929 | 4    | 5391213  | 5386888  | TREM2     | ensembl | protein_coding                     | 0.0297444  | 4.22E-01 | 0.1550987  | 8.22E-01 | 0.0188715  | 9.24E-01 | 0.0297961  | 8.82E-01 | 0.0292499  | 5.06E-01 | 0.0399447  | 9.50E-01 | 0.0199347  | 9.46E-01 |
| ENSG00000209570 | 6    | 41158506 | 41163386 | TREM2     | ensembl | protein_coding                     | 0.0297444  | 4.22E-01 | 0.1550987  | 8.22E-01 | 0.0188715  | 9.24E-01 | 0.0297961  | 8.82E-01 | 0.0292499  | 5.06E-01 | 0.0399447  | 9.50E-01 | 0.0199347  | 9.46E-01 |
| ENSG00000217561 | 15   | 2260602  | 2261764  | TNFR2     | ensembl | transcribed_unprocessed_pseudogene | -0.0020322 | 9.2E-01  | 0.0020322  | 9.2E-01  | 0.0299281  | 8.82E-01 | 0.0299281  | 8.82E-01 | 0.0292499  | 5.06E-01 | 0.0399447  | 9.50E-01 | 0.0199347  | 9.46E-01 |
| ENSG00000215819 | 6    | 2218929  | 2219278  | LNOC06.1  | havana  | lncRNA                             | -0.0020322 | 9.2E-01  | 0.0020322  | 9.2E-01  | 0.0299281  | 8.82E-01 | 0.0299281  | 8.82E-01 | 0.0292499  | 5.06E-01 | 0.0399447  | 9.50E-01 | 0.0199347  | 9.46E-01 |
| ENSG0000018680  | 18   | 3261479  | 3278461  | MYL12B    | ensembl | protein_coding                     | 0.3058641  | 6.98E-01 | 0.0240205  | 4.81E-01 | 0.3573798  | 6.72E-01 | 0.0297659  | 8.82E-01 | 0.02414338 | 3.90E-01 | 0.0766439  | 9.52E-01 | 0.1796436  | 5.42E-01 |
| ENSG00000103116 | 6    | 3624203  | 3613229  | PNP1A1    | ensembl | protein_coding                     | 0.0029788  | 6.42E-01 | 0.0094675  | 4.92E-01 | 0.0524023  | 7.99E-01 | 0.0294354  | 8.82E-01 | 0.0340486  | 2.46E-01 | -0.103646  | 6.15E-01 | -0.088024  | 2.12E-01 |
| ENSG00000179731 | 12   | 11205024 | 11209805 | PRK1      | ensembl | protein_coding                     | 0.1155354  | 3.17E-01 | 0.0021228  | 8.56E-01 | 0.0028661  | 8.86E-01 | 0.0297327  | 8.82E-01 | 0.1212113  | 2.16E-01 | 0.260185   | 5.75E-01 | 0.0079963  | 5.65E-01 |
| ENSG00000200929 | 4    | 5391213  | 5386888  | TREM2     | ensembl | protein_coding                     | 0.0297444  | 4.22E-01 | 0.1550987  | 8.22E-01 | 0.0188715  | 9.24E-01 | 0.0297961  | 8.82E-01 | 0.0292499  | 5.06E-01 | 0.0399447  | 9.50E-01 | 0.0199347  | 9.46E-01 |
| ENSG00000209570 | 6    | 41158506 | 41163386 | TREM2     | ensembl | protein_coding                     | 0.0297444  | 4.22E-01 | 0.1550987  | 8.22E-01 | 0.0188715  | 9.24E-01 | 0.0297961  | 8.82E-01 | 0.0292499  | 5.06E-01 | 0.0399447  | 9.50E-01 | 0.0199347  | 9.46E-01 |
| ENSG00000217561 | 15   | 2260602  | 2261764  | TNFR2     | ensembl | transcribed_unprocessed_pseudogene | -0.0020322 | 9.2E-01  | 0.0020322  | 9.2E-01  | 0.0299281  | 8.82E-01 | 0.0299281  | 8.82E-01 | 0.0292499  | 5.06E-01 | 0.0399447  | 9.50E-01 | 0.0199347  | 9.46E-01 |
| ENSG00000215819 | 6    | 2218929  | 2219278  | LNOC06.1  | havana  | lncRNA                             | -0.0020322 | 9.2E-01  | 0.0020322  | 9.2E-01  | 0.0299281  | 8.82E-01 | 0.0299281  | 8.82E-01 | 0.0292499  | 5.06E-01 | 0.0399447  | 9.50E-01 | 0.0199347  | 9.46E-01 |
| ENSG0000018680  | 18   | 3261479  | 3278461  | MYL12B    | ensembl | protein_coding                     | 0.3058641  | 6.98E-01 | 0.0240205  | 4.81E-01 | 0.3573798  | 6.72E-01 | 0.0297659  | 8.82E-01 | 0.02414338 | 3.90E-01 | 0.0766439  | 9.52E-01 | 0.1796436  | 5.42E-01 |
| ENSG00000103116 | 6    | 3624203  | 3613229  | PNP1A1    | ensembl | protein_coding                     | 0.0029788  | 6.42E-01 | 0.0094675  | 4.92E-01 | 0.0524023  | 7.99E-01 | 0.0294354  | 8.82E-01 | 0.0340486  | 2.46E-01 | -0.103646  | 6.15E-01 | -0.088024  | 2.12E-01 |
| ENSG00000179731 | 12   | 11205024 | 11209805 | PRK1      | ensembl | protein_coding                     | 0.1155354  | 3.17E-01 | 0.0021228  | 8.56E-01 | 0.0028661  | 8.86E-01 | 0.0297327  | 8.82E-01 | 0.1212113  | 2.16E-01 | 0.260185   | 5.75E-01 | 0.0079963  | 5.65E-01 |
| ENSG00000200929 | 4    | 5391213  | 5386888  | TREM2     | ensembl | protein_coding                     | 0.0297444  | 4.22E-01 | 0.1550987  | 8.22E-01 | 0.0188715  | 9.24E-01 | 0.0297961  | 8.82E-01 | 0.0292499  | 5.06E-01 | 0.0399447  | 9.50E-01 | 0.0199347  | 9.46E-01 |
| ENSG00000209570 | 6    | 41158506 | 41163386 | TREM2     | ensembl | protein_coding                     | 0.0297444  | 4.22E-01 | 0.1550987  | 8.22E-01 | 0.0188715  | 9.24E-01 | 0.0297961  | 8.82E-01 | 0.0292499  | 5.06E-01 | 0.0399447  | 9.50E-01 | 0.0199347  | 9.46E-01 |
| ENSG00000217561 | 15   | 2260602  | 2261764  | TNFR2     | ensembl | transcribed_unprocessed_pseudogene | -0.0020322 | 9.2E-01  | 0.0020322  | 9.2E-01  | 0.0299281  | 8.82E-01 | 0.0299281  | 8.82E-01 | 0.0292499  | 5.06E-01 | 0.0399447  | 9.50E-01 | 0.0199347  | 9.46E-01 |
| ENSG00000215819 | 6    | 2218929  | 2219278  | LNOC06.1  | havana  | lncRNA                             | -0.0020322 | 9.2E-01  | 0.0020322  | 9.2E-01  | 0.0299281  | 8.82E-01 | 0.0299281  | 8.82E-01 | 0.0292499  | 5.06E-01 | 0.0399447  | 9.50E-01 | 0.0199347  | 9.46E-01 |
| ENSG0000018680  | 18   | 3261479  | 3278461  | MYL12B    | ensembl | protein_coding                     | 0.3058641  | 6.98E-01 | 0.0240205  | 4.81E-01 | 0.3573798  | 6.72E-01 | 0.0297659  | 8.82E-01 | 0.02414338 | 3.90E-01 | 0.0766439  | 9.52E-01 | 0.1796436  | 5.42E-01 |
| ENSG00000103116 | 6    | 3624203  | 3613229  | PNP1A1    | ensembl | protein_coding                     | 0.0029788  | 6.42E-01 | 0.0094675  | 4.92E-01 | 0.0524023  | 7.99E-01 | 0.0294354  | 8.82E-01 | 0.0340486  | 2.46E-01 | -0.103646  | 6.15E-01 | -0.088024  | 2.12E-01 |
| ENSG00000179731 | 12</ |          |          |           |         |                                    |            |          |            |          |            |          |            |          |            |          |            |          |            |          |















Table with columns for gene ID, chromosome, coordinates, gene name, transcript, protein, and various numerical values. The table lists numerous genes such as EING0000017645, EING0000017646, etc., with their corresponding genomic data.



Table with columns for gene ID, coordinates, gene name, transcript type, and various numerical values. The table lists numerous genes such as AC105339.6, AC105340.1, AC105341.1, etc., with associated genomic coordinates and values.



Table with columns for gene ID, coordinates, gene name, transcript, and various numerical values. The table lists numerous genes such as CHFR, ACD102B.2, and others, with associated genomic coordinates and multiple columns of numerical data.

Table with columns for gene ID, chromosome, coordinates, gene name, transcript type, and various numerical values. The table lists numerous genes such as AC01351.1, AC01352.1, AC01353.1, etc., across chromosomes 15, 16, 17, 18, 19, 20, and X.

Table with columns for gene ID, chromosome, coordinates, gene name, transcript, and various numerical values. The table lists numerous genes such as BSGAL16, ALKBH5, and others, along with their genomic locations and associated data points.



Table with columns for gene ID, chromosome, coordinates, gene name, transcript type, and various numerical values. The table lists numerous genes such as GTF2R2D, ACAD10A1, and many others, along with their genomic locations and associated data points.



| ENSG0000027431 | 1  | 145961388 | 145964422 | ACAC1847.2  | ncrna          | incRNA | protein coding | -0.094605 | 4.09e-01 | 0.064845   | 6.57e-02 | 0.1967439  | 3.21e-01 | -0.007745  | 9.97e-01 | -0.097468  | 4.88e-01 | -0.128344  | 5.60e-01 | -0.158826  | 2.71e-01 |
|----------------|----|-----------|-----------|-------------|----------------|--------|----------------|-----------|----------|------------|----------|------------|----------|------------|----------|------------|----------|------------|----------|------------|----------|
| ENSG000001370  | 1  | 4318851   | 4354726   | LAMP2       | protein coding | mRNA   | protein coding | -0.06634  | 5.68e-01 | 0.206450   | 5.05e-01 | 0.0604157  | 7.44e-01 | -0.007749  | 9.97e-01 | -0.210777  | 1.14e-01 | -0.319931  | 1.35e-01 | -0.144520  | 5.16e-01 |
| ENSG000002094  | 1  | 2040494   | 2041026   | FWY 3B1     | incRNA         | incRNA | protein coding | -0.07467  | 6.07e-01 | 0.204767   | 6.49e-01 | 0.212424   | 6.44e-01 | -0.007749  | 9.97e-01 | -0.210777  | 1.14e-01 | -0.319931  | 1.35e-01 | -0.144520  | 5.16e-01 |
| ENSG0000019899 | MT | 8527      | 9207      | MT-ATP      | incRNA         | incRNA | protein coding | -0.207275 | 7.06e-02 | 0.162688   | 5.84e-01 | 0.242755   | 9.84e-01 | -0.007875  | 9.97e-01 | -0.252004  | 5.20e-02 | -0.276814  | 5.20e-02 | -0.276814  | 5.20e-02 |
| ENSG0000019804 | 1  | 3022297   | 3024510   | PPP1R3L     | protein coding | mRNA   | protein coding | -0.104879 | 8.84e-01 | 0.102980   | 9.42e-01 | 0.215759   | 2.89e-01 | -0.008089  | 9.97e-01 | -0.028479  | 9.34e-01 | -0.34358   | 1.10e-01 | -0.250499  | 7.58e-01 |
| ENSG0000024479 | 1  | 6404803   | 6415064   | OR6A1-AS1   | incRNA         | incRNA | protein coding | 0.04145   | 0.38e-01 | 0.159634   | 0.08e-01 | 0.204767   | 6.49e-01 | -0.007749  | 9.97e-01 | -0.210777  | 1.14e-01 | -0.319931  | 1.35e-01 | -0.144520  | 5.16e-01 |
| ENSG0000024011 | 1  | 10463204  | 10483850  | PPP1R3S-AS1 | incRNA         | incRNA | protein coding | 0.0415905 | 7.19e-01 | 0.102981   | 8.86e-01 | 0.215759   | 2.89e-01 | -0.008081  | 9.97e-01 | -0.028479  | 9.34e-01 | -0.34358   | 1.10e-01 | -0.250499  | 7.58e-01 |
| ENSG0000021224 | 1  | 783746    | 786228    | CYBD5       | protein coding | mRNA   | protein coding | 0.0147905 | 9.03e-01 | 0.045845   | 7.12e-01 | 0.2562479  | 7.94e-01 | -0.008268  | 9.97e-01 | -0.030289  | 8.28e-01 | -0.371735  | 4.35e-01 | -0.292444  | 5.24e-01 |
| ENSG0000023623 | 1  | 1026570   | 1026942   | ARHGAP12    | protein coding | mRNA   | protein coding | 0.000000  | 0.00e-01 | 0.000000   | 0.00e-01 | 0.000000   | 0.00e-01 | -0.000000  | 0.00e-01 | -0.000000  | 0.00e-01 | -0.000000  | 0.00e-01 | -0.000000  | 0.00e-01 |
| ENSG0000014052 | 1  | 8509589   | 8521614   | B1EP1       | protein coding | mRNA   | protein coding | YES       | YES      | 0.000000   | 0.00e-01 | 0.000000   | 0.00e-01 | -0.000000  | 0.00e-01 | -0.000000  | 0.00e-01 | -0.000000  | 0.00e-01 | -0.000000  | 0.00e-01 |
| ENSG0000025628 | 1  | 12297530  | 12298207  | AC08362.1   | incRNA         | incRNA | protein coding | YES       | YES      | -0.137561  | 2.33e-01 | -0.165368  | 2.52e-01 | -0.008087  | 9.97e-01 | -0.108741  | 4.34e-01 | -0.144819  | 5.10e-01 | -0.105883  | 4.49e-01 |
| ENSG0000021293 | 2  | 4581994   | 4581995   | NRXN3-3     | incRNA         | incRNA | protein coding | YES       | YES      | -0.02038   | 0.21e-01 | -0.021388  | 0.21e-01 | -0.000000  | 0.00e-01 | -0.000000  | 0.00e-01 | -0.000000  | 0.00e-01 | -0.000000  | 0.00e-01 |
| ENSG0000025888 | 1  | 31101583  | 31102789  | DGCS        | incRNA         | incRNA | protein coding | YES       | YES      | 0.0253981  | 8.24e-01 | -0.160566  | 3.50e-01 | -0.008014  | 9.97e-01 | -0.049519  | 9.71e-01 | -0.235889  | 8.70e-01 | -0.080547  | 5.49e-01 |
| ENSG0000023041 | 1  | 11782384  | 11783241  | AL15334.1   | incRNA         | incRNA | protein coding | YES       | YES      | -0.18442   | 1.00e-01 | -0.1705774 | 6.01e-01 | -0.008089  | 9.97e-01 | -0.257174  | 6.01e-01 | -0.163811  | 4.55e-01 | -0.192738  | 1.80e-01 |
| ENSG0000021666 | 1  | 16767385  | 16768074  | AL03173.2   | incRNA         | incRNA | protein coding | YES       | YES      | 0.1508949  | 1.93e-01 | -0.1176586 | 4.10e-01 | -0.008018  | 9.96e-01 | -0.1262006 | 2.40e-01 | -0.076134  | 7.20e-01 | -0.092524  | 9.49e-01 |
| ENSG0000021293 | 2  | 303481    | 303481    | NRXN3-3     | incRNA         | incRNA | protein coding | YES       | YES      | 0.000000   | 0.00e-01 | 0.000000   | 0.00e-01 | -0.000000  | 0.00e-01 | -0.000000  | 0.00e-01 | -0.000000  | 0.00e-01 | -0.000000  | 0.00e-01 |
| ENSG0000019415 | 1  | 840999    | 848175    | PRN3        | protein coding | mRNA   | protein coding | 0.1007626 | 6.31e-01 | 0.0118248  | 8.30e-01 | 0.6828098  | 8.76e-01 | -0.000099  | 9.96e-01 | -0.1183468 | 9.44e-01 | -0.165894  | 4.49e-01 | -0.247829  | 8.27e-01 |
| ENSG0000021472 | 1  | 9604929   | 9604933   | RN7P7       | incRNA         | incRNA | protein coding | YES       | YES      | -0.055477  | 0.12e-01 | -0.056401  | 0.12e-01 | -0.000000  | 0.00e-01 | -0.000000  | 0.00e-01 | -0.000000  | 0.00e-01 | -0.000000  | 0.00e-01 |
| ENSG0000019711 | 1  | 5216037   | 5216037   | OR6A1-AS1   | incRNA         | incRNA | protein coding | YES       | YES      | -0.18442   | 1.00e-01 | -0.1705774 | 6.01e-01 | -0.008089  | 9.97e-01 | -0.257174  | 6.01e-01 | -0.163811  | 4.55e-01 | -0.192738  | 1.80e-01 |
| ENSG0000024082 | 1  | 11515162  | 11512399  | SERTM2      | incRNA         | incRNA | protein coding | YES       | YES      | -0.0007364 | 9.50e-01 | -0.1192714 | 4.09e-01 | -0.000000  | 0.00e-01 | -0.000000  | 0.00e-01 | -0.000000  | 0.00e-01 | -0.000000  | 0.00e-01 |
| ENSG0000023096 | 1  | 16015287  | 16027462  | LINC00661   | incRNA         | incRNA | protein coding | YES       | YES      | -0.1039123 | 3.78e-01 | -0.0801343 | 5.33e-01 | -0.2354409 | 2.37e-01 | -0.000079  | 9.96e-01 | -0.2128084 | 1.22e-01 | -0.097489  | 6.58e-01 |
| ENSG0000023096 | 1  | 16015287  | 16027462  | LINC00661   | incRNA         | incRNA | protein coding | YES       | YES      | -0.1039123 | 3.78e-01 | -0.0801343 | 5.33e-01 | -0.2354409 | 2.37e-01 | -0.000079  | 9.96e-01 | -0.2128084 | 1.22e-01 | -0.097489  | 6.58e-01 |
| ENSG0000020029 | 10 | 10181800  | 10182885  | ICN2P1-AS1  | incRNA         | incRNA | protein coding | YES       | YES      | -0.140298  | 2.24e-01 | -0.0162007 | 9.11e-01 | -0.2207471 | 2.69e-01 | -0.000993  | 9.96e-01 | -0.21173   | 1.24e-01 | -0.137478  | 4.64e-01 |
| ENSG0000021393 | 1  | 73462362  | 73477175  | TRAF7-IT1   | incRNA         | incRNA | protein coding | YES       | YES      | 0.1845079  | 1.08e-01 | 0.2014339  | 1.43e-01 | -0.000979  | 9.96e-01 | -0.1343197 | 3.33e-01 | -0.194208  | 0.50e-01 | -0.0241705 | 8.86e-01 |
| ENSG0000027480 | 1  | 14258442  | 14272489  | MMP9-AS2    | incRNA         | incRNA | protein coding | YES       | YES      | -0.161378  | 3.58e-01 | -0.077882  | 5.90e-01 | -0.000709  | 9.96e-01 | -0.010211  | 9.96e-01 | -0.149403  | 2.81e-01 | -0.0518745 | 3.48e-01 |
| ENSG0000024651 | 1  | 10388382  | 10388405  | ALKBH8-2    | incRNA         | incRNA | protein coding | YES       | YES      | -0.0369881 | 7.32e-01 | -0.0878997 | 5.44e-01 | -0.006348  | 7.62e-01 | -0.003025  | 9.96e-01 | -0.079536  | 9.58e-01 | -0.144178  | 5.12e-01 |
| ENSG0000025656 | 1  | 10779942  | 10780189  | MMP4P2      | incRNA         | incRNA | protein coding | YES       | YES      | -0.0592884 | 6.98e-01 | -0.0398847 | 8.20e-01 | -0.2658748 | 1.89e-01 | -0.0066835 | 9.17e-01 | -0.101514  | 6.17e-01 | -0.0540618 | 7.69e-01 |
| ENSG0000014343 | 1  | 15374209  | 15377074  | IFIT        | protein coding | mRNA   | protein coding | 0.0712968 | 5.38e-01 | 0.0031162  | 9.80e-01 | 0.0809744  | 6.91e-01 | -0.010299  | 9.96e-01 | -0.1405899 | 2.90e-01 | -0.1207126 | 5.18e-01 | -0.040001  | 7.62e-01 |
| ENSG0000021429 | 1  | 94566478  | 94567099  | AL02AP.2    | incRNA         | incRNA | protein coding | YES       | YES      | -0.101442  | 0.91e-01 | -0.0901287 | 8.84e-01 | -0.211931  | 9.96e-01 | -0.123891  | 2.92e-01 | -0.13691   | 3.89e-01 | -0.15891   | 4.71e-01 |
| ENSG0000013749 | 1  | 15409386  | 15420478  | MFAP3       | protein coding | mRNA   | protein coding | -0.021798 | 8.51e-01 | 0.0901120  | 3.86e-01 | -0.0011505 | 9.96e-01 | -0.1342913 | 3.35e-01 | -0.2209738 | 5.88e-01 | -0.0854701 | 6.82e-01 | -0.040001  | 7.62e-01 |
| ENSG0000014654 | 1  | 8103342   | 8104750   | ATMIN       | protein coding | mRNA   | protein coding | -0.086792 | 7.51e-01 | -0.062447  | 6.33e-01 | 0.1314429  | 5.12e-01 | -0.0011544 | 9.96e-01 | -0.0346789 | 8.04e-01 | -0.175984  | 5.56e-01 | -0.1128282 | 3.54e-01 |
| ENSG0000017641 | 1  | 6231174   | 6232033   | OR6A1-AS1   | incRNA         | incRNA | protein coding | YES       | YES      | -0.18442   | 1.00e-01 | -0.1705774 | 6.01e-01 | -0.008089  | 9.97e-01 | -0.257174  | 6.01e-01 | -0.163811  | 4.55e-01 | -0.192738  | 1.80e-01 |
| ENSG0000014656 | 2  | 6429035   | 6411132   | LINC00245-1 | incRNA         | incRNA | protein coding | YES       | YES      | -0.104854  | 3.64e-01 | -0.0568209 | 6.95e-01 | -0.1935111 | 4.88e-01 | -0.0011678 | 9.94e-01 | -0.33310   | 3.33e-01 | -0.0512461 | 9.40e-01 |
| ENSG0000017589 | 1  | 1437746   | 1437875   | TRF2P2      | incRNA         | incRNA | protein coding | YES       | YES      | -0.0909185 | 9.38e-01 | -0.0135021 | 8.17e-01 | -0.0080334 | 9.96e-01 | -0.021168  | 9.96e-01 | -0.0757874 | 7.87e-01 | -0.153082  | 4.86e-01 |
| ENSG0000020219 | 1  | 10692929  | 10693025  | OR6A1-AS1   | incRNA         | incRNA | protein coding | YES       | YES      | -0.18442   | 1.00e-01 | -0.1705774 | 6.01e-01 | -0.008089  | 9.97e-01 | -0.257174  | 6.01e-01 | -0.163811  | 4.55e-01 | -0.192738  | 1.80e-01 |
| ENSG0000015387 | 1  | 11071736  | 11072139  | ING1        | incRNA         | incRNA | protein coding | YES       | YES      | -0.095983  | 9.65e-01 | -0.045823  | 6.29e-01 | -0.0011113 | 9.95e-01 | -0.0135179 | 9.01e-01 | -0.0257024 | 9.18e-01 | -0.0274954 | 8.50e-01 |
| ENSG0000021521 | 1  | 7162020   | 7162103   | OR7F.4      | incRNA         | incRNA | protein coding | YES       | YES      | -0.0939564 | 6.91e-01 | -0.0448974 | 7.93e-01 | -0.0011648 | 9.93e-01 | -0.0114129 | 9.10e-01 | -0.125015  | 5.70e-01 | -0.072489  | 6.28e-01 |
| ENSG0000021352 | 1  | 1807189   | 1807208   | AC12712.2   | incRNA         | incRNA | protein coding | YES       | YES      | -0.101414  | 3.71e-01 | -0.1197981 | 4.07e-01 | -0.001374  | 9.96e-01 | -0.2028049 | 3.99e-01 | -0.1426786 | 5.88e-01 | -0.0971842 | 5.46e-01 |
| ENSG0000013511 | 1  | 10674428  | 10674428  | TRAF7       | protein coding | mRNA   | protein coding | -0.01444  | 0.91e-01 | 0.0901287  | 8.84e-01 | -0.211931  | 9.96e-01 | -0.123891  | 2.92e-01 | -0.13691   | 3.89e-01 | -0.15891   | 4.71e-01 | -0.0512461 | 9.40e-01 |
| ENSG0000018077 | 1  | 7958881   | 7959465   | TMEM120A    | protein coding | mRNA   | protein coding | -5.41e-05 | 1.00e-04 | -0.0512642 | 6.98e-01 | 0.070452   | 7.00e-01 | -0.001391  | 9.96e-01 | -0.030343  | 7.87e-01 | -0.0945781 | 6.86e-01 | -0.037118  | 5.28e-01 |
| ENSG0000018862 | 1  | 5073748   | 5081178   | HLIP1       | incRNA         | incRNA | protein coding | YES       | YES      | -0.04221   | 7.44e-01 | -0.0519224 | 6.40e-01 | -0.0301738 | 8.81e-01 | -0.014139  | 9.96e-01 | -0.0990205 | 4.76e-01 | -0.074538  | 7.29e-01 |
| ENSG0000020879 | 1  | 10692929  | 10693025  | OR6A1-AS1   | incRNA         | incRNA | protein coding | YES       | YES      | -0.18442   | 1.00e-01 | -0.1705774 | 6.01e-01 | -0.008089  | 9.97e-01 | -0.257174  | 6.01e-01 | -0.163811  | 4.55e-01 | -0.192738  | 1.80e-01 |
| ENSG0000016646 | 1  | 11742401  | 11749340  | ICN2P1-AS1  | incRNA         | incRNA | protein coding | YES       | YES      | -0.0693785 | 5.49e-01 | -0.040862  | 7.81e-01 | -0.0044268 | 9.96e-01 | -0.0047374 | 1.13e-01 | -0.1402447 | 6.16e-01 | -0.0718663 | 4.37e-01 |
| ENSG0000017653 | 1  | 11841054  | 11842     |             |                |        |                |           |          |            |          |            |          |            |          |            |          |            |          |            |          |



| ENSG0000023091 | 1 | 51126273  | 51273447  | NRN11      | ensembl                                                                                                                                                                                                                                                                                                                                                  | havana  | protein_coding | YES       | 0.0097888  | 5.446e-01  | 0.0098483  | 5.306e-01  | 0.0740404  | 7.161e-01 | -0.0056753 | 9.781e-01  | -0.1483152 | 1.006e-01  | -0.031778  | 8.866e-01  | -0.0688456 | 6.184e-01  |           |
|----------------|---|-----------|-----------|------------|----------------------------------------------------------------------------------------------------------------------------------------------------------------------------------------------------------------------------------------------------------------------------------------------------------------------------------------------------------|---------|----------------|-----------|------------|------------|------------|------------|------------|-----------|------------|------------|------------|------------|------------|------------|------------|------------|-----------|
| ENSG0000023092 | 1 | 16143598  | 16144616  | AL138716.1 | havana                                                                                                                                                                                                                                                                                                                                                   | lincRNA | antisense      | YES       | -0.0066209 | 7.911e-01  | 0.1149883  | 4.811e-01  | 0.3042829  | 6.211e-01 | -0.0090791 | 9.771e-01  | -0.1119975 | 1.828e-01  | 0.107135   | 6.188e-01  | -0.1213861 | 3.944e-01  |           |
| ENSG0000023093 | 1 | 16143598  | 16144616  | AL138716.1 | havana                                                                                                                                                                                                                                                                                                                                                   | lincRNA | antisense      | YES       | -0.0066209 | 7.911e-01  | 0.1149883  | 4.811e-01  | 0.3042829  | 6.211e-01 | -0.0090791 | 9.771e-01  | -0.1119975 | 1.828e-01  | 0.107135   | 6.188e-01  | -0.1213861 | 3.944e-01  |           |
| ENSG0000023094 | 1 | 9688308   | 9688547   | RP44       | ensembl <td>havana</td> <td>protein_coding</td> <td>YES</td> <td>0.0413567</td> <td>9.911e-01</td> <td>0.0188588</td> <td>8.961e-01</td> <td>0.5125326</td> <td>7.696e-01</td> <td>-0.0057233</td> <td>9.771e-01</td> <td>-0.031158</td> <td>1.006e-01</td> <td>-0.177685</td> <td>8.115e-01</td> <td>-0.0780008</td> <td>2.744e-01</td>                 | havana  | protein_coding | YES       | 0.0413567  | 9.911e-01  | 0.0188588  | 8.961e-01  | 0.5125326  | 7.696e-01 | -0.0057233 | 9.771e-01  | -0.031158  | 1.006e-01  | -0.177685  | 8.115e-01  | -0.0780008 | 2.744e-01  |           |
| ENSG0000023095 | 1 | 70274781  | 70277317  | GA12       | ensembl <td>havana</td> <td>protein_coding</td> <td>YES</td> <td>0.0002073</td> <td>5.991e-01</td> <td>0.0344141</td> <td>8.111e-01</td> <td>0.0845998</td> <td>6.791e-01</td> <td>-0.0057494</td> <td>9.771e-01</td> <td>-0.0628979</td> <td>5.528e-01</td> <td>-0.137701</td> <td>2.754e-01</td> <td>-0.0592721</td> <td>5.211e-01</td>                | havana  | protein_coding | YES       | 0.0002073  | 5.991e-01  | 0.0344141  | 8.111e-01  | 0.0845998  | 6.791e-01 | -0.0057494 | 9.771e-01  | -0.0628979 | 5.528e-01  | -0.137701  | 2.754e-01  | -0.0592721 | 5.211e-01  |           |
| ENSG0000023096 | 1 | 1256404   | 1256484   | AL138716.1 | ensembl <td>havana</td> <td>antisense</td> <td>YES</td> <td>-0.0066209</td> <td>7.911e-01</td> <td>0.1149883</td> <td>4.811e-01</td> <td>0.3042829</td> <td>6.211e-01</td> <td>-0.0090791</td> <td>9.771e-01</td> <td>-0.1119975</td> <td>1.828e-01</td> <td>0.107135</td> <td>6.188e-01</td> <td>-0.1213861</td> <td>3.944e-01</td>                     | havana  | antisense      | YES       | -0.0066209 | 7.911e-01  | 0.1149883  | 4.811e-01  | 0.3042829  | 6.211e-01 | -0.0090791 | 9.771e-01  | -0.1119975 | 1.828e-01  | 0.107135   | 6.188e-01  | -0.1213861 | 3.944e-01  |           |
| ENSG0000023097 | 1 | 9582838   | 9583667   | NMNP127    | ensembl <td>havana</td> <td>protein_coding</td> <td>YES</td> <td>0.0478904</td> <td>7.121e-01</td> <td>0.0115343</td> <td>9.371e-01</td> <td>0.0162322</td> <td>9.361e-01</td> <td>-0.0057845</td> <td>9.771e-01</td> <td>-0.0895405</td> <td>5.208e-01</td> <td>-0.130701</td> <td>3.841e-01</td> <td>-0.0679315</td> <td>5.211e-01</td>                | havana  | protein_coding | YES       | 0.0478904  | 7.121e-01  | 0.0115343  | 9.371e-01  | 0.0162322  | 9.361e-01 | -0.0057845 | 9.771e-01  | -0.0895405 | 5.208e-01  | -0.130701  | 3.841e-01  | -0.0679315 | 5.211e-01  |           |
| ENSG0000023098 | 2 | 4537322   | 4537393   | AC009236.1 | ensembl <td>havana</td> <td>lincRNA</td> <td>antisense</td> <td>YES</td> <td>-0.1468883</td> <td>2.036e-01</td> <td>-0.1009651</td> <td>4.888e-01</td> <td>0.3444349</td> <td>4.824e-01</td> <td>-0.0080879</td> <td>9.771e-01</td> <td>-0.1713184</td> <td>1.256e-01</td> <td>-0.0742592</td> <td>7.366e-01</td> <td>-0.1437319</td> <td>4.271e-01</td> | havana  | lincRNA        | antisense | YES        | -0.1468883 | 2.036e-01  | -0.1009651 | 4.888e-01  | 0.3444349 | 4.824e-01  | -0.0080879 | 9.771e-01  | -0.1713184 | 1.256e-01  | -0.0742592 | 7.366e-01  | -0.1437319 | 4.271e-01 |
| ENSG0000023099 | 1 | 1256404   | 1256484   | AL138716.1 | ensembl <td>havana</td> <td>antisense</td> <td>YES</td> <td>-0.0066209</td> <td>7.911e-01</td> <td>0.1149883</td> <td>4.811e-01</td> <td>0.3042829</td> <td>6.211e-01</td> <td>-0.0090791</td> <td>9.771e-01</td> <td>-0.1119975</td> <td>1.828e-01</td> <td>0.107135</td> <td>6.188e-01</td> <td>-0.1213861</td> <td>3.944e-01</td>                     | havana  | antisense      | YES       | -0.0066209 | 7.911e-01  | 0.1149883  | 4.811e-01  | 0.3042829  | 6.211e-01 | -0.0090791 | 9.771e-01  | -0.1119975 | 1.828e-01  | 0.107135   | 6.188e-01  | -0.1213861 | 3.944e-01  |           |
| ENSG0000023100 | 1 | 7252014   | 7517235   | TMEM504.1  | ensembl <td>havana</td> <td>protein_coding</td> <td>YES</td> <td>0.19004</td> <td>2.298e-01</td> <td>-0.0099379</td> <td>7.311e-01</td> <td>-0.1510273</td> <td>4.501e-01</td> <td>-0.0058314</td> <td>9.771e-01</td> <td>-0.1928789</td> <td>1.626e-01</td> <td>-0.1673074</td> <td>5.066e-01</td> <td>-0.1147371</td> <td>3.271e-01</td>               | havana  | protein_coding | YES       | 0.19004    | 2.298e-01  | -0.0099379 | 7.311e-01  | -0.1510273 | 4.501e-01 | -0.0058314 | 9.771e-01  | -0.1928789 | 1.626e-01  | -0.1673074 | 5.066e-01  | -0.1147371 | 3.271e-01  |           |
| ENSG0000023101 | 1 | 2581840   | 2583242   | MTFR1L     | ensembl <td>havana</td> <td>protein_coding</td> <td>YES</td> <td>0.0782827</td> <td>4.971e-01</td> <td>-0.0048867</td> <td>9.731e-01</td> <td>0.2278220</td> <td>2.571e-01</td> <td>-0.0058434</td> <td>9.771e-01</td> <td>-0.1067738</td> <td>4.424e-01</td> <td>-0.1825986</td> <td>4.041e-01</td> <td>-0.2082106</td> <td>1.461e-01</td>              | havana  | protein_coding | YES       | 0.0782827  | 4.971e-01  | -0.0048867 | 9.731e-01  | 0.2278220  | 2.571e-01 | -0.0058434 | 9.771e-01  | -0.1067738 | 4.424e-01  | -0.1825986 | 4.041e-01  | -0.2082106 | 1.461e-01  |           |
| ENSG0000023102 | 1 | 1320249   | 1320249   | TAF9B      | ensembl <td>havana</td> <td>protein_coding</td> <td>YES</td> <td>0.0266249</td> <td>7.471e-01</td> <td>0.0684889</td> <td>5.406e-01</td> <td>0.3088971</td> <td>3.661e-01</td> <td>-0.0059243</td> <td>9.771e-01</td> <td>-0.0628979</td> <td>5.528e-01</td> <td>-0.137701</td> <td>2.754e-01</td> <td>-0.0592721</td> <td>5.211e-01</td>                | havana  | protein_coding | YES       | 0.0266249  | 7.471e-01  | 0.0684889  | 5.406e-01  | 0.3088971  | 3.661e-01 | -0.0059243 | 9.771e-01  | -0.0628979 | 5.528e-01  | -0.137701  | 2.754e-01  | -0.0592721 | 5.211e-01  |           |
| ENSG0000023103 | 1 | 152463786 | 152465449 | LINC01003  | ensembl <td>havana</td> <td>lincRNA</td> <td>antisense</td> <td>YES</td> <td>-0.0496276</td> <td>6.681e-01</td> <td>-0.0319479</td> <td>7.981e-01</td> <td>0.0482755</td> <td>8.111e-01</td> <td>-0.0058723</td> <td>9.771e-01</td> <td>-0.109858</td> <td>4.506e-01</td> <td>-0.0905644</td> <td>8.101e-01</td> <td>-0.0500277</td> <td>1.461e-01</td>  | havana  | lincRNA        | antisense | YES        | -0.0496276 | 6.681e-01  | -0.0319479 | 7.981e-01  | 0.0482755 | 8.111e-01  | -0.0058723 | 9.771e-01  | -0.109858  | 4.506e-01  | -0.0905644 | 8.101e-01  | -0.0500277 | 1.461e-01 |
| ENSG0000023104 | 1 | 152463786 | 152465449 | LINC01003  | ensembl <td>havana</td> <td>lincRNA</td> <td>antisense</td> <td>YES</td> <td>-0.0496276</td> <td>6.681e-01</td> <td>-0.0319479</td> <td>7.981e-01</td> <td>0.0482755</td> <td>8.111e-01</td> <td>-0.0058723</td> <td>9.771e-01</td> <td>-0.109858</td> <td>4.506e-01</td> <td>-0.0905644</td> <td>8.101e-01</td> <td>-0.0500277</td> <td>1.461e-01</td>  | havana  | lincRNA        | antisense | YES        | -0.0496276 | 6.681e-01  | -0.0319479 | 7.981e-01  | 0.0482755 | 8.111e-01  | -0.0058723 | 9.771e-01  | -0.109858  | 4.506e-01  | -0.0905644 | 8.101e-01  | -0.0500277 | 1.461e-01 |
| ENSG0000023105 | 1 | 152463786 | 152465449 | LINC01003  | ensembl <td>havana</td> <td>lincRNA</td> <td>antisense</td> <td>YES</td> <td>-0.0496276</td> <td>6.681e-01</td> <td>-0.0319479</td> <td>7.981e-01</td> <td>0.0482755</td> <td>8.111e-01</td> <td>-0.0058723</td> <td>9.771e-01</td> <td>-0.109858</td> <td>4.506e-01</td> <td>-0.0905644</td> <td>8.101e-01</td> <td>-0.0500277</td> <td>1.461e-01</td>  | havana  | lincRNA        | antisense | YES        | -0.0496276 | 6.681e-01  | -0.0319479 | 7.981e-01  | 0.0482755 | 8.111e-01  | -0.0058723 | 9.771e-01  | -0.109858  | 4.506e-01  | -0.0905644 | 8.101e-01  | -0.0500277 | 1.461e-01 |
| ENSG0000023106 | 1 | 152463786 | 152465449 | LINC01003  | ensembl <td>havana</td> <td>lincRNA</td> <td>antisense</td> <td>YES</td> <td>-0.0496276</td> <td>6.681e-01</td> <td>-0.0319479</td> <td>7.981e-01</td> <td>0.0482755</td> <td>8.111e-01</td> <td>-0.0058723</td> <td>9.771e-01</td> <td>-0.109858</td> <td>4.506e-01</td> <td>-0.0905644</td> <td>8.101e-01</td> <td>-0.0500277</td> <td>1.461e-01</td>  | havana  | lincRNA        | antisense | YES        | -0.0496276 | 6.681e-01  | -0.0319479 | 7.981e-01  | 0.0482755 | 8.111e-01  | -0.0058723 | 9.771e-01  | -0.109858  | 4.506e-01  | -0.0905644 | 8.101e-01  | -0.0500277 | 1.461e-01 |
| ENSG0000023107 | 1 | 152463786 | 152465449 | LINC01003  | ensembl <td>havana</td> <td>lincRNA</td> <td>antisense</td> <td>YES</td> <td>-0.0496276</td> <td>6.681e-01</td> <td>-0.0319479</td> <td>7.981e-01</td> <td>0.0482755</td> <td>8.111e-01</td> <td>-0.0058723</td> <td>9.771e-01</td> <td>-0.109858</td> <td>4.506e-01</td> <td>-0.0905644</td> <td>8.101e-01</td> <td>-0.0500277</td> <td>1.461e-01</td>  | havana  | lincRNA        | antisense | YES        | -0.0496276 | 6.681e-01  | -0.0319479 | 7.981e-01  | 0.0482755 | 8.111e-01  | -0.0058723 | 9.771e-01  | -0.109858  | 4.506e-01  | -0.0905644 | 8.101e-01  | -0.0500277 | 1.461e-01 |
| ENSG0000023108 | 1 | 152463786 | 152465449 | LINC01003  | ensembl <td>havana</td> <td>lincRNA</td> <td>antisense</td> <td>YES</td> <td>-0.0496276</td> <td>6.681e-01</td> <td>-0.0319479</td> <td>7.981e-01</td> <td>0.0482755</td> <td>8.111e-01</td> <td>-0.0058723</td> <td>9.771e-01</td> <td>-0.109858</td> <td>4.506e-01</td> <td>-0.0905644</td> <td>8.101e-01</td> <td>-0.0500277</td> <td>1.461e-01</td>  | havana  | lincRNA        | antisense | YES        | -0.0496276 | 6.681e-01  | -0.0319479 | 7.981e-01  | 0.0482755 | 8.111e-01  | -0.0058723 | 9.771e-01  | -0.109858  | 4.506e-01  | -0.0905644 | 8.101e-01  | -0.0500277 | 1.461e-01 |
| ENSG0000023109 | 1 | 152463786 | 152465449 | LINC01003  | ensembl <td>havana</td> <td>lincRNA</td> <td>antisense</td> <td>YES</td> <td>-0.0496276</td> <td>6.681e-01</td> <td>-0.0319479</td> <td>7.981e-01</td> <td>0.0482755</td> <td>8.111e-01</td> <td>-0.0058723</td> <td>9.771e-01</td> <td>-0.109858</td> <td>4.506e-01</td> <td>-0.0905644</td> <td>8.101e-01</td> <td>-0.0500277</td> <td>1.461e-01</td>  | havana  | lincRNA        | antisense | YES        | -0.0496276 | 6.681e-01  | -0.0319479 | 7.981e-01  | 0.0482755 | 8.111e-01  | -0.0058723 | 9.771e-01  | -0.109858  | 4.506e-01  | -0.0905644 | 8.101e-01  | -0.0500277 | 1.461e-01 |
| ENSG0000023110 | 1 | 152463786 | 152465449 | LINC01003  | ensembl <td>havana</td> <td>lincRNA</td> <td>antisense</td> <td>YES</td> <td>-0.0496276</td> <td>6.681e-01</td> <td>-0.0319479</td> <td>7.981e-01</td> <td>0.0482755</td> <td>8.111e-01</td> <td>-0.0058723</td> <td>9.771e-01</td> <td>-0.109858</td> <td>4.506e-01</td> <td>-0.0905644</td> <td>8.101e-01</td> <td>-0.0500277</td> <td>1.461e-01</td>  | havana  | lincRNA        | antisense | YES        | -0.0496276 | 6.681e-01  | -0.0319479 | 7.981e-01  | 0.0482755 | 8.111e-01  | -0.0058723 | 9.771e-01  | -0.109858  | 4.506e-01  | -0.0905644 | 8.101e-01  | -0.0500277 | 1.461e-01 |
| ENSG0000023111 | 1 | 152463786 | 152465449 | LINC01003  | ensembl <td>havana</td> <td>lincRNA</td> <td>antisense</td> <td>YES</td> <td>-0.0496276</td> <td>6.681e-01</td> <td>-0.0319479</td> <td>7.981e-01</td> <td>0.0482755</td> <td>8.111e-01</td> <td>-0.0058723</td> <td>9.771e-01</td> <td>-0.109858</td> <td>4.506e-01</td> <td>-0.0905644</td> <td>8.101e-01</td> <td>-0.0500277</td> <td>1.461e-01</td>  | havana  | lincRNA        | antisense | YES        | -0.0496276 | 6.681e-01  | -0.0319479 | 7.981e-01  | 0.0482755 | 8.111e-01  | -0.0058723 | 9.771e-01  | -0.109858  | 4.506e-01  | -0.0905644 | 8.101e-01  | -0.0500277 | 1.461e-01 |
| ENSG0000023112 | 1 | 152463786 | 152465449 | LINC01003  | ensembl <td>havana</td> <td>lincRNA</td> <td>antisense</td> <td>YES</td> <td>-0.0496276</td> <td>6.681e-01</td> <td>-0.0319479</td> <td>7.981e-01</td> <td>0.0482755</td> <td>8.111e-01</td> <td>-0.0058723</td> <td>9.771e-01</td> <td>-0.109858</td> <td>4.506e-01</td> <td>-0.0905644</td> <td>8.101e-01</td> <td>-0.0500277</td> <td>1.461e-01</td>  | havana  | lincRNA        | antisense | YES        | -0.0496276 | 6.681e-01  | -0.0319479 | 7.981e-01  | 0.0482755 | 8.111e-01  | -0.0058723 | 9.771e-01  | -0.109858  | 4.506e-01  | -0.0905644 | 8.101e-01  | -0.0500277 | 1.461e-01 |
| ENSG0000023113 | 1 | 152463786 | 152465449 | LINC01003  | ensembl <td>havana</td> <td>lincRNA</td> <td>antisense</td> <td>YES</td> <td>-0.0496276</td> <td>6.681e-01</td> <td>-0.0319479</td> <td>7.981e-01</td> <td>0.0482755</td> <td>8.111e-01</td> <td>-0.0058723</td> <td>9.771e-01</td> <td>-0.109858</td> <td>4.506e-01</td> <td>-0.0905644</td> <td>8.101e-01</td> <td>-0.0500277</td> <td>1.461e-01</td>  | havana  | lincRNA        | antisense | YES        | -0.0496276 | 6.681e-01  | -0.0319479 | 7.981e-01  | 0.0482755 | 8.111e-01  | -0.0058723 | 9.771e-01  | -0.109858  | 4.506e-01  | -0.0905644 | 8.101e-01  | -0.0500277 | 1.461e-01 |
| ENSG0000023114 | 1 | 152463786 | 152465449 | LINC01003  | ensembl <td>havana</td> <td>lincRNA</td> <td>antisense</td> <td>YES</td> <td>-0.0496276</td> <td>6.681e-01</td> <td>-0.0319479</td> <td>7.981e-01</td> <td>0.0482755</td> <td>8.111e-01</td> <td>-0.0058723</td> <td>9.771e-01</td> <td>-0.109858</td> <td>4.506e-01</td> <td>-0.0905644</td> <td>8.101e-01</td> <td>-0.0500277</td> <td>1.461e-01</td>  | havana  | lincRNA        | antisense | YES        | -0.0496276 | 6.681e-01  | -0.0319479 | 7.981e-01  | 0.0482755 | 8.111e-01  | -0.0058723 | 9.771e-01  | -0.109858  | 4.506e-01  | -0.0905644 | 8.101e-01  | -0.0500277 | 1.461e-01 |
| ENSG0000023115 | 1 | 152463786 | 152465449 | LINC01003  | ensembl <td>havana</td> <td>lincRNA</td> <td>antisense</td> <td>YES</td> <td>-0.0496276</td> <td>6.681e-01</td> <td>-0.0319479</td> <td>7.981e-01</td> <td>0.0482755</td> <td>8.111e-01</td> <td>-0.0058723</td> <td>9.771e-01</td> <td>-0.109858</td> <td>4.506e-01</td> <td>-0.0905644</td> <td>8.101e-01</td> <td>-0.0500277</td> <td>1.461e-01</td>  | havana  | lincRNA        | antisense | YES        | -0.0496276 | 6.681e-01  | -0.0319479 | 7.981e-01  | 0.0482755 | 8.111e-01  | -0.0058723 | 9.771e-01  | -0.109858  | 4.506e-01  | -0.0905644 | 8.101e-01  | -0.0500277 | 1.461e-01 |
| ENSG0000023116 | 1 | 152463786 | 152465449 | LINC01003  | ensembl <td>havana</td> <td>lincRNA</td> <td>antisense</td> <td>YES</td> <td>-0.0496276</td> <td>6.681e-01</td> <td>-0.0319479</td> <td>7.981e-01</td> <td>0.0482755</td> <td>8.111e-01</td> <td>-0.0058723</td> <td>9.771e-01</td> <td>-0.109858</td> <td>4.506e-01</td> <td>-0.0905644</td> <td>8.101e-01</td> <td>-0.0500277</td> <td>1.461e-01</td>  | havana  | lincRNA        | antisense | YES        | -0.0496276 | 6.681e-01  | -0.0319479 | 7.981e-01  | 0.0482755 | 8.111e-01  | -0.0058723 | 9.771e-01  | -0.109858  | 4.506e-01  | -0.0905644 | 8.101e-01  | -0.0500277 | 1.461e-01 |
| ENSG0000023117 | 1 | 152463786 | 152465449 | LINC01003  | ensembl <td>havana</td> <td>lincRNA</td> <td>antisense</td> <td>YES</td> <td>-0.0496276</td> <td>6.681e-01</td> <td>-0.0319479</td> <td>7.981e-01</td> <td>0.0482755</td> <td>8.111e-01</td> <td>-0.0058723</td> <td>9.771e-01</td> <td>-0.109858</td> <td>4.506e-01</td> <td>-0.0905644</td> <td>8.101e-01</td> <td>-0.0500277</td> <td>1.461e-01</td>  | havana  | lincRNA        | antisense | YES        | -0.0496276 | 6.681e-01  | -0.0319479 | 7.981e-01  | 0.0482755 | 8.111e-01  | -0.0058723 | 9.771e-01  | -0.109858  | 4.506e-01  | -0.0905644 | 8.101e-01  | -0.0500277 | 1.461e-01 |
| ENSG0000023118 | 1 | 152463786 | 152465449 | LINC01003  | ensembl <td>havana</td> <td>lincRNA</td> <td>antisense</td> <td>YES</td> <td>-0.0496276</td> <td>6.681e-01</td> <td>-0.0319479</td> <td>7.981e-01</td> <td>0.0482755</td> <td>8.111e-01</td> <td>-0.0058723</td> <td>9.771e-01</td> <td>-0.109858</td> <td>4.506e-01</td> <td>-0.0905644</td> <td>8.101e-01</td> <td>-0.0500277</td> <td>1.461e-01</td>  | havana  | lincRNA        | antisense | YES        | -0.0496276 | 6.681e-01  | -0.0319479 | 7.981e-01  | 0.0482755 | 8.111e-01  | -0.0058723 | 9.771e-01  | -0.109858  | 4.506e-01  | -0.0905644 | 8.101e-01  | -0.0500277 | 1.461e-01 |
| ENSG0000023119 | 1 | 152463786 | 152465449 | LINC01003  | ensembl <td>havana</td> <td>lincRNA</td> <td>antisense</td> <td>YES</td> <td>-0.0496276</td> <td>6.681e-01</td> <td>-0.0319479</td> <td>7.981e-01</td> <td>0.0482755</td> <td>8.111e-01</td> <td>-0.0058723</td> <td>9.771e-01</td> <td>-0.109858</td> <td>4.506e-01</td> <td>-0.0905644</td> <td>8.101e-01</td> <td>-0.0500277</td> <td>1.461e-01</td>  | havana  | lincRNA        | antisense | YES        | -0.0496276 | 6.681e-01  | -0.0319479 | 7.981e-01  | 0.0482755 | 8.111e-01  | -0.0058723 | 9.771e-01  | -0.109858  | 4.506e-01  | -0.0905644 | 8.101e-01  | -0.0500277 | 1.461e-01 |
| ENSG0000023120 | 1 | 152463786 | 152465449 | LINC01003  | ensembl <td>havana</td> <td>lincRNA</td> <td>antisense</td> <td>YES</td> <td>-0.0496276</td> <td>6.681e-01</td> <td>-0.0319479</td> <td>7.981e-01</td> <td>0.0482755</td> <td>8.111e-01</td> <td>-0.0058723</td> <td>9.771e-01</td> <td>-0.109858</td> <td>4.506e-01</td> <td>-0.0905644</td> <td>8.101e-01</td> <td>-0.0500277</td> <td>1.461e-01</td>  | havana  | lincRNA        | antisense | YES        | -0.0496276 | 6.681e-01  | -0.0319479 | 7.981e-01  | 0.0482755 | 8.111e-01  | -0.0058723 | 9.771e-01  | -0.109858  | 4.506e-01  | -0.0905644 | 8.101e-01  | -0.0500277 | 1.461e-01 |
| ENSG0000023121 | 1 | 152463786 | 152465449 | LINC01003  | ensembl <td>havana</td> <td>lincRNA</td> <td>antisense</td> <td>YES</td> <td>-0.0496276</td> <td>6.681e-01</td> <td>-0.0319479</td> <td>7.981e-01</td> <td>0.0482755</td> <td>8.111e-01</td> <td>-0.0058723</td> <td>9.771e-01</td> <td>-0.109858</td> <td>4.506e-01</td> <td>-0.0905644</td> <td>8.101e-01</td> <td>-0.0500277</td> <td>1.461e-01</td>  | havana  | lincRNA        | antisense | YES        | -0.0496276 | 6.681e-01  | -0.0319479 | 7.981e-01  | 0.0482755 | 8.111e-01  | -0.0058723 | 9.771e-01  | -0.109858  | 4.506e-01  | -0.0905644 | 8.101e-01  | -0.0500277 | 1.461e-01 |
| ENSG0000023122 | 1 | 152463786 | 152465449 | LINC01003  | ensembl <td>havana</td> <td>lincRNA</td> <td>antisense</td> <td>YES</td> <td>-0.0496276</td> <td>6.681e-01</td> <td>-0.0319479</td> <td>7.981e-01</td> <td>0.0482755</td> <td>8.111e-01</td> <td>-0.0058723</td> <td>9.771e-01</td> <td>-0.109858</td> <td>4.506e-01</td> <td>-0.0905644</td> <td>8.101e-01</td> <td>-0.0500277</td> <td>1.461e-01</td>  | havana  | lincRNA        | antisense | YES        | -0.0496276 | 6.681e-01  | -0.0319479 | 7.981e-01  | 0.0482755 | 8.111e-01  | -0.0058723 | 9.771e-01  | -0.109858  | 4.506e-01  | -0.0905644 | 8.101e-01  | -0.0500277 | 1.461e-01 |
| ENSG0000023123 | 1 | 152463786 | 152465449 | LINC01003  | ensembl <td>havana</td> <td>lincRNA</td> <td>antisense</td> <td>YES</td> <td>-0.0496276</td> <td>6.681e-01</td> <td>-0.0319479</td> <td>7.981e-01</td> <td>0.0482755</td> <td>8.111e-01</td> <td>-0.0058723</td> <td>9.771e-01</td> <td>-0.109858</td> <td>4.506e-01</td> <td>-0.0905644</td> <td>8.101e-01</td> <td>-0.0500277</td> <td>1.461e-01</td>  | havana  | lincRNA        | antisense | YES        | -0.0496276 | 6.681e-01  | -0.0319479 | 7.981e-01  | 0.0482755 | 8.111e-01  | -0.0058723 | 9.771e-01  | -0.109858  | 4.506e-01  | -0.0905644 | 8.101e-01  | -0.0500277 | 1.461e-01 |
| ENSG0000023124 | 1 | 152463786 | 152465449 | LINC01003  | ensembl <td>havana</td> <td>lincRNA</td> <td>antisense</td> <td>YES</td> <td>-0.0496276</td> <td>6.681e-01</td> <td>-0.0319479</td> <td>7.981e-01</td> <td>0.0482755</td> <td>8.111e-01</td> <td>-0.0058723</td> <td>9.771e-01</td> <td>-0.109858</td> <td>4.506e-01</td> <td>-0.0905644</td> <td>8.101e-01</td> <td>-0.0500277</td> <td>1.461e-01</td>  | havana  | lincRNA        | antisense | YES        | -0.0496276 | 6.681e-01  | -0.0319479 | 7.981e-01  | 0.0482755 | 8.111e-01  | -0.0058723 | 9.771e-01  | -0.109858  | 4.506e-01  | -0.0905644 | 8.101e-01  | -0.0500277 | 1.461e-01 |
| ENSG0000023125 | 1 | 152463786 | 152465449 | LINC01003  | ensembl <td>havana</td> <td>lincRNA</td> <td>antisense</td> <td>YES</td> <td>-0.0496276</td> <td>6.681e-01</td> <td>-0.0319479</td> <td>7.981e-01</td> <td>0.0482755</td> <td>8.111e-01</td> <td>-0.0058723</td> <td>9.771e-01</td> <td>-0.109858</td> <td>4.506e-01</td> <td>-0.0905644</td> <td>8.101e-01</td> <td>-0.0500277</td> <td>1.461e-01</td>  | havana  | lincRNA        | antisense | YES        | -0.0496276 | 6.681e-01  | -0.0319479 | 7.981e-01  | 0.0482755 | 8.111e-01  | -0.0058723 | 9.771e-01  | -0.109858  | 4.506e-01  | -0.0905644 | 8.101e-01  | -0.0500277 | 1.461e-01 |
| ENSG0000023126 | 1 | 152463786 | 152465449 | LINC01003  | ensembl <td>havana</td> <td>lincRNA</td> <td>antisense</td> <td>YES</td> <td>-0.0496276</td> <td>6.681e-01</td> <td>-0.0319479</td> <td>7.981e-01</td> <td>0.0482755</td> <td>8.111e-01</td> <td>-0.0058723</td> <td>9.771e-01</td> <td>-0.109858</td> <td>4.506e-01</td> <td>-0.0905644</td> <td>8.101e-01</td> <td>-0.0500277</td> <td>1.461e-01</td>  | havana  | lincRNA        | antisense | YES        | -0.0496276 | 6.681e-01  | -0.0319479 | 7.981e-01  | 0.0482755 | 8.111e-01  | -0.0058723 | 9.771e-01  | -0.109858  | 4.506e-01  | -0.0905644 | 8.101e-01  | -0.0500277 | 1.461e-01 |
| ENSG0000023127 | 1 | 152463786 | 152465449 | LINC01003  | ensembl <td>havana</td> <td>lincRNA</td> <td>antisense</td> <td>YES</td> <td>-0.0496276</td> <td>6.681e-01</td> <td>-0.0319479</td> <td>7.981e-01</td> <td>0.0482755</td> <td>8.111e-01</td> <td>-0.0058723</td> <td>9.771e-01</td> <td>-0.109858</td> <td>4.506e-01</td> <td>-0.0905644</td> <td>8.101e-01</td> <td>-0.0500277</td> <td>1.461e-01</td>  | havana  | lincRNA        | antisense | YES        | -0.0496276 | 6.681e-01  | -0.0319479 | 7.981e-01  | 0.0482755 | 8.111e-01  | -0.0058723 | 9.771e-01  | -0.109858  | 4.506e-01  | -0.0905644 | 8.101e-01  | -0.0500277 | 1.461e-01 |
| ENSG0000023128 | 1 | 152463786 | 152465449 | LINC01003  | ensembl <td>havana</td> <td>lincRNA</td> <td>antisense</td> <td>YES</td> <td>-0.0496276</td> <td>6.681e-01</td> <td>-0.0319479</td> <td>7.981e-01</td> <td>0.0482755</td> <td>8.111e-01</td> <td>-0.0058723</td> <td>9.771e-01</td> <td>-0.109858</td> <td>4.506e-01</td> <td>-0.0905644</td> <td>8.101e-01</td> <td>-0.0500277</td> <td>1.461e-01</td>  | havana  | lincRNA        | antisense | YES        | -0.0496276 | 6.681e-01  | -0.0319479 | 7.981e-01  | 0.0482755 | 8.111e-01  | -0.0058723 | 9.771e-01  | -0.109858  | 4.506e-01  | -0.0905644 | 8.101e-01  | -0.0500277 | 1.461e-01 |
| ENSG0000023129 | 1 | 152463786 | 152465449 | LINC01003  | ensembl <td>havana</td>                                                                                                                                                                                                                                                                                                                                  | havana  |                |           |            |            |            |            |            |           |            |            |            |            |            |            |            |            |           |



|                 |    |           |           |   |                 |                  |                  |            |          |           |          |           |          |           |          |           |          |           |          |           |          |
|-----------------|----|-----------|-----------|---|-----------------|------------------|------------------|------------|----------|-----------|----------|-----------|----------|-----------|----------|-----------|----------|-----------|----------|-----------|----------|
| ENSG00000286256 | 18 | 7652852   | 7667011   | + | LINC00683       | lincRNA          | incRNA           | -0.0272088 | 8.14e-05 | 0.3488028 | 3.02e-02 | 0.2495017 | 2.09e-01 | 0.0083568 | 9.67e-01 | 0.1509255 | 2.76e-04 | 0.0093514 | 7.53e-01 | 0.1163831 | 4.21e-01 |
| ENSG00000141997 | 15 | 4512124   | 4177381   | + | MGA             | antisense intron | antisense intron | -0.0994843 | 7.32e-01 | 0.1543050 | 4.66e-02 | 0.1872728 | 3.62e-01 | 0.0083568 | 9.67e-01 | 0.0264101 | 8.38e-02 | 0.0066088 | 8.93e-01 | 0.0304458 | 8.20e-01 |
| ENSG00000141998 | 15 | 4512124   | 4177381   | + | MGA             | antisense intron | antisense intron | -0.0994843 | 7.32e-01 | 0.1543050 | 4.66e-02 | 0.1872728 | 3.62e-01 | 0.0083568 | 9.67e-01 | 0.0264101 | 8.38e-02 | 0.0066088 | 8.93e-01 | 0.0304458 | 8.20e-01 |
| ENSG00000196699 | 2  | 17754808  | 17752796  | + | TIC008          | antisense intron | antisense intron | -0.0978255 | 3.97e-01 | 0.1033772 | 4.75e-01 | 0.0083568 | 9.67e-01 | 0.0083568 | 9.67e-01 | 0.0202240 | 5.75e-01 | 0.0308151 | 3.64e-01 | 0.0308151 | 3.64e-01 |
| ENSG00000142448 | 19 | 7989804   | 7993242   | + | AC00339.1       | antisense intron | antisense intron | -0.1248903 | 2.79e-01 | 0.0961288 | 4.97e-01 | 0.1454835 | 4.68e-01 | 0.0083568 | 9.67e-01 | 0.0202240 | 5.75e-01 | 0.0308151 | 3.64e-01 | 0.0308151 | 3.64e-01 |
| ENSG00000192177 | 10 | 6211136   | 6237154   | + | ENSG00000192177 | antisense intron | antisense intron | -0.1248903 | 2.79e-01 | 0.0961288 | 4.97e-01 | 0.1454835 | 4.68e-01 | 0.0083568 | 9.67e-01 | 0.0202240 | 5.75e-01 | 0.0308151 | 3.64e-01 | 0.0308151 | 3.64e-01 |
| ENSG00000101180 | 20 | 6214660   | 6222078   | + | HRH8            | antisense intron | antisense intron | -0.1062311 | 3.38e-01 | 0.1048255 | 4.53e-01 | 0.0083568 | 9.67e-01 | 0.0202240 | 5.75e-01 | 0.0308151 | 3.64e-01 | 0.0308151 | 3.64e-01 | 0.0308151 | 3.64e-01 |
| ENSG00000202648 | 6  | 4012843   | 4021215   | + | AL13883.1       | antisense intron | antisense intron | -0.0992123 | 6.09e-01 | 0.0013055 | 9.93e-02 | 0.0843438 | 6.76e-01 | 0.0083568 | 9.67e-01 | 0.0202240 | 5.75e-01 | 0.0308151 | 3.64e-01 | 0.0308151 | 3.64e-01 |
| ENSG00000102554 | 7  | 14269275  | 14269856  | + | AVY             | antisense intron | antisense intron | -0.0992123 | 6.09e-01 | 0.0013055 | 9.93e-02 | 0.0843438 | 6.76e-01 | 0.0083568 | 9.67e-01 | 0.0202240 | 5.75e-01 | 0.0308151 | 3.64e-01 | 0.0308151 | 3.64e-01 |
| ENSG00000132604 | 6  | 4370758   | 4372160   | + | AFG3P1          | antisense intron | antisense intron | -0.0994843 | 7.32e-01 | 0.1543050 | 4.66e-02 | 0.1872728 | 3.62e-01 | 0.0083568 | 9.67e-01 | 0.0264101 | 8.38e-02 | 0.0066088 | 8.93e-01 | 0.0304458 | 8.20e-01 |
| ENSG00000109495 | 20 | 5957509   | 5964771   | + | PHACTR3         | antisense intron | antisense intron | -0.0513303 | 6.46e-01 | 0.1193211 | 4.09e-01 | 0.2154717 | 2.89e-01 | 0.0083568 | 9.67e-01 | 0.0264101 | 8.38e-02 | 0.0066088 | 8.93e-01 | 0.0304458 | 8.20e-01 |
| ENSG00000102023 | 11 | 4002488   | 4003206   | + | CTD4P6          | antisense intron | antisense intron | -0.0504313 | 7.45e-01 | 0.0276683 | 8.35e-01 | 0.0023797 | 5.81e-01 | 0.0083568 | 9.67e-01 | 0.0264101 | 8.38e-02 | 0.0066088 | 8.93e-01 | 0.0304458 | 8.20e-01 |
| ENSG00000204542 | 2  | 5384912   | 5384905   | + | MIR5882         | antisense intron | antisense intron | -0.0504313 | 7.45e-01 | 0.0276683 | 8.35e-01 | 0.0023797 | 5.81e-01 | 0.0083568 | 9.67e-01 | 0.0264101 | 8.38e-02 | 0.0066088 | 8.93e-01 | 0.0304458 | 8.20e-01 |
| ENSG00000206019 | 1  | 146607040 | 146697779 | + | NOTCH2NL18      | antisense intron | antisense intron | -0.0093844 | 9.35e-01 | 0.0376777 | 8.16e-01 | 0.0083568 | 9.67e-01 | 0.0264101 | 8.38e-02 | 0.0066088 | 8.93e-01 | 0.0304458 | 8.20e-01 | 0.0304458 | 8.20e-01 |
| ENSG00000219708 | 14 | 3717188   | 3717811   | + | SIC25A1-AS1     | antisense intron | antisense intron | -0.1489955 | 8.98e-01 | 0.0076563 | 9.38e-01 | 0.1572681 | 4.31e-01 | 0.0083568 | 9.67e-01 | 0.0264101 | 8.38e-02 | 0.0066088 | 8.93e-01 | 0.0304458 | 8.20e-01 |
| ENSG00000102029 | 22 | 11274609  | 11283604  | + | CD49E           | antisense intron | antisense intron | -0.0499382 | 6.08e-01 | 0.1245769 | 3.99e-01 | 0.0029050 | 9.20e-01 | 0.0083568 | 9.67e-01 | 0.0264101 | 8.38e-02 | 0.0066088 | 8.93e-01 | 0.0304458 | 8.20e-01 |
| ENSG00000180708 | 1  | 158418210 | 15842327  | + | OR10C2          | antisense intron | antisense intron | -0.0085749 | 6.91e-01 | 0.0137752 | 9.26e-01 | 0.0083568 | 9.67e-01 | 0.0264101 | 8.38e-02 | 0.0066088 | 8.93e-01 | 0.0304458 | 8.20e-01 | 0.0304458 | 8.20e-01 |
| ENSG00000142409 | 9  | 11278136  | 11278516  | + | SIC25A6         | antisense intron | antisense intron | -0.1002520 | 3.85e-01 | 0.0229740 | 8.74e-01 | 0.0191879 | 9.24e-01 | 0.0083568 | 9.67e-01 | 0.0264101 | 8.38e-02 | 0.0066088 | 8.93e-01 | 0.0304458 | 8.20e-01 |
| ENSG00000138551 | 11 | 7241464   | 7241464   | + | CDPOS           | antisense intron | antisense intron | -0.1174464 | 2.94e-01 | 0.0166277 | 5.97e-01 | 0.2469967 | 4.00e-01 | 0.0083568 | 9.67e-01 | 0.0264101 | 8.38e-02 | 0.0066088 | 8.93e-01 | 0.0304458 | 8.20e-01 |
| ENSG00000171708 | 14 | 7713120   | 7714274   | + | ZHMC22          | antisense intron | antisense intron | -0.0952526 | 6.88e-01 | 0.1066212 | 4.61e-01 | 0.0096070 | 6.21e-01 | 0.0083568 | 9.67e-01 | 0.0264101 | 8.38e-02 | 0.0066088 | 8.93e-01 | 0.0304458 | 8.20e-01 |
| ENSG00000204023 | 14 | 5814129   | 5814160   | + | UBA2P3          | antisense intron | antisense intron | -0.0418444 | 7.19e-01 | 0.0642666 | 7.48e-01 | 0.2191644 | 2.71e-01 | 0.0083568 | 9.67e-01 | 0.0264101 | 8.38e-02 | 0.0066088 | 8.93e-01 | 0.0304458 | 8.20e-01 |
| ENSG00000102027 | 17 | 11272881  | 11273270  | + | ADP102.1        | antisense intron | antisense intron | -0.1159968 | 3.81e-01 | 0.0410907 | 7.09e-01 | 0.2687383 | 1.76e-01 | 0.0083568 | 9.67e-01 | 0.0264101 | 8.38e-02 | 0.0066088 | 8.93e-01 | 0.0304458 | 8.20e-01 |
| ENSG00000171882 | 12 | 3995401   | 3994763   | + | AC02464.3       | antisense intron | antisense intron | -0.1023353 | 3.76e-01 | 0.0470952 | 7.45e-01 | 0.1646548 | 4.06e-01 | 0.0083568 | 9.67e-01 | 0.0264101 | 8.38e-02 | 0.0066088 | 8.93e-01 | 0.0304458 | 8.20e-01 |
| ENSG00000204660 | X  | 27468207  | 27468341  | + | PPAR3C          | antisense intron | antisense intron | -0.1023353 | 3.76e-01 | 0.0470952 | 7.45e-01 | 0.1646548 | 4.06e-01 | 0.0083568 | 9.67e-01 | 0.0264101 | 8.38e-02 | 0.0066088 | 8.93e-01 | 0.0304458 | 8.20e-01 |
| ENSG00000202875 | 18 | 3747887   | 3751640   | + | BODIL1          | antisense intron | antisense intron | -0.1594254 | 1.66e-01 | 0.0497476 | 8.11e-01 | 0.2087004 | 2.96e-01 | 0.0083568 | 9.67e-01 | 0.0264101 | 8.38e-02 | 0.0066088 | 8.93e-01 | 0.0304458 | 8.20e-01 |
| ENSG00000204861 | 4  | 13041802  | 13045000  | + | AC09849.1       | antisense intron | antisense intron | -0.078968  | 4.96e-01 | 0.0080883 | 9.95e-01 | 0.0026036 | 7.93e-01 | 0.0083568 | 9.67e-01 | 0.0264101 | 8.38e-02 | 0.0066088 | 8.93e-01 | 0.0304458 | 8.20e-01 |
| ENSG00000106765 | 16 | 8621883   | 8649654   | + | MEF1L2          | antisense intron | antisense intron | -0.0423942 | 4.19e-01 | 0.1115971 | 4.42e-01 | 0.0083568 | 9.67e-01 | 0.0264101 | 8.38e-02 | 0.0066088 | 8.93e-01 | 0.0304458 | 8.20e-01 | 0.0304458 | 8.20e-01 |
| ENSG00000177883 | 3  | 18017034  | 18017204  | + | MAGF1           | antisense intron | antisense intron | -0.1750816 | 1.28e-01 | 0.1314983 | 7.81e-01 | 0.2962055 | 1.34e-01 | 0.0083568 | 9.67e-01 | 0.0264101 | 8.38e-02 | 0.0066088 | 8.93e-01 | 0.0304458 | 8.20e-01 |
| ENSG00000204047 | 18 | 3200448   | 3200448   | + | CTD4P7          | antisense intron | antisense intron | -0.0824228 | 6.19e-01 | 0.0292218 | 8.08e-01 | 0.0883744 | 7.47e-01 | 0.0083568 | 9.67e-01 | 0.0264101 | 8.38e-02 | 0.0066088 | 8.93e-01 | 0.0304458 | 8.20e-01 |
| ENSG00000146484 | 17 | 11973771  | 11983344  | + | MAPK7           | antisense intron | antisense intron | -0.0969896 | 4.03e-01 | 0.1052609 | 4.65e-01 | 0.0083568 | 9.67e-01 | 0.0264101 | 8.38e-02 | 0.0066088 | 8.93e-01 | 0.0304458 | 8.20e-01 | 0.0304458 | 8.20e-01 |
| ENSG00000202766 | 16 | 31118078  | 31118747  | + | AC135050.5      | antisense intron | antisense intron | -0.129182  | 2.63e-01 | 0.0635277 | 6.61e-01 | 0.2601528 | 1.83e-01 | 0.0083568 | 9.67e-01 | 0.0264101 | 8.38e-02 | 0.0066088 | 8.93e-01 | 0.0304458 | 8.20e-01 |
| ENSG00000171721 | 15 | 2439270   | 2439270   | + | CTD4P8          | antisense intron | antisense intron | -0.0824228 | 6.19e-01 | 0.0292218 | 8.08e-01 | 0.0883744 | 7.47e-01 | 0.0083568 | 9.67e-01 | 0.0264101 | 8.38e-02 | 0.0066088 | 8.93e-01 | 0.0304458 | 8.20e-01 |
| ENSG00000170482 | 5  | 11936716  | 11938553  | + | SIC13A1         | antisense intron | antisense intron | -0.0841261 | 4.66e-01 | 0.0925373 | 8.65e-01 | 0.0083568 | 9.67e-01 | 0.0264101 | 8.38e-02 | 0.0066088 | 8.93e-01 | 0.0304458 | 8.20e-01 | 0.0304458 | 8.20e-01 |
| ENSG00000144754 | 8  | 118484934 | 118487776 | + | RAD21           | antisense intron | antisense intron | -0.0991289 | 3.90e-01 | 0.1041911 | 6.01e-01 | 0.0402713 | 9.45e-01 | 0.0083568 | 9.67e-01 | 0.0264101 | 8.38e-02 | 0.0066088 | 8.93e-01 | 0.0304458 | 8.20e-01 |
| ENSG00000143217 | 15 | 4009129   | 4009129   | + | AC09849.1       | antisense intron | antisense intron | -0.078968  | 4.96e-01 | 0.0080883 | 9.95e-01 | 0.0026036 | 7.93e-01 | 0.0083568 | 9.67e-01 | 0.0264101 | 8.38e-02 | 0.0066088 | 8.93e-01 | 0.0304458 | 8.20e-01 |
| ENSG00000003322 | 19 | 39391303  | 39400441  | + | ME29            | antisense intron | antisense intron | -0.0991929 | 4.07e-01 | 0.1074335 | 6.07e-01 | 0.1743557 | 1.07e-01 | 0.0083568 | 9.67e-01 | 0.0264101 | 8.38e-02 | 0.0066088 | 8.93e-01 | 0.0304458 | 8.20e-01 |
| ENSG00000204087 | 2  | 2748647   | 2748617   | + | AC09953.1       | antisense intron | antisense intron | -0.1748647 | 4.77e-01 | 0.0789276 | 6.10e-01 | 0.0020288 | 6.48e-01 | 0.0083568 | 9.67e-01 | 0.0264101 | 8.38e-02 | 0.0066088 | 8.93e-01 | 0.0304458 | 8.20e-01 |
| ENSG00000139971 | 14 | 3799975   | 3829819   | + | ARMVA           | antisense intron | antisense intron | -0.2215788 | 6.02e-01 | 0.0055502 | 9.50e-01 | 0.2974171 | 1.32e-01 | 0.0083568 | 9.67e-01 | 0.0264101 | 8.38e-02 | 0.0066088 | 8.93e-01 | 0.0304458 | 8.20e-01 |
| ENSG00000204622 | 17 | 1252678   | 1251638   | + | PRF4P20         | antisense intron | antisense intron | -0.0524307 | 4.71e-01 | 0.0027009 | 9.29e-01 | 0.0027009 | 2.99e-01 | 0.0083568 | 9.67e-01 | 0.0264101 | 8.38e-02 | 0.0066088 | 8.93e-01 | 0.0304458 | 8.20e-01 |
| ENSG00000204628 | 16 | 3975803   | 3900378   | + | AC12583.1       | antisense intron | antisense intron | -0.1157006 | 3.17e-01 | 0.0031668 | 9.72e-01 | 0.0312121 | 6.68e-01 | 0.0083568 | 9.67e-01 | 0.0264101 | 8.38e-02 | 0.0066088 | 8.93e-01 | 0.0304458 | 8.20e-01 |
| ENSG00000205559 | 8  | 14502931  | 14505046  | + | ENF2P2-AS1      | antisense intron | antisense intron | -0.1443089 | 2.13e-01 | 0.0197326 | 5.02e-01 | 0.0200713 | 9.67e-01 | 0.0083568 | 9.67e-01 | 0.0264    |          |           |          |           |          |





Table with columns for gene ID, coordinates, gene name, protein name, and various numerical values. The table lists numerous genes such as LUBE1L5, IEF1A1P29, AC008464.1, etc., with their corresponding genomic coordinates and associated data points.









Table with columns for gene ID, chromosome, coordinates, gene name, transcript name, and various numerical values. The table lists numerous genes such as ENTP4, MTRNR2L1, and others, with associated genomic data and expression values.

Table with columns for gene ID, chromosome, coordinates, gene name, transcript type, and various numerical values. The table lists numerous genes such as AC104024.1, FSD1, AC099497.1, and many others, with associated genomic coordinates and numerical data points.

Table with columns for gene ID, coordinates, gene name, transcript type, and various annotations. The table lists numerous genes such as GRRB3, ZFP951, and others, with their genomic locations and associated data points.











| ENSG0000022623  | 21 | 3230664   | 3230873   | NRAP-AS1  | ncrna                                                                                                                                                                                                                                                                                      | lncRNA                                                                                                                                                                                                                                                              | -0.000547  | 7.26e-01 | -0.007419  | 9.57e-01 | 0.370249  | 5.71e-01 | -0.033838  | 8.67e-01 | -0.104809 | 4.51e-01 | 0.091464  | 8.96e-01 | 0.1709575 | 2.35e-01 |
|-----------------|----|-----------|-----------|-----------|--------------------------------------------------------------------------------------------------------------------------------------------------------------------------------------------------------------------------------------------------------------------------------------------|---------------------------------------------------------------------------------------------------------------------------------------------------------------------------------------------------------------------------------------------------------------------|------------|----------|------------|----------|-----------|----------|------------|----------|-----------|----------|-----------|----------|-----------|----------|
| ENSG0000019999  | 2  | 1837959   | 1831008   | DUSP9     | mRNA                                                                                                                                                                                                                                                                                       | mRNA                                                                                                                                                                                                                                                                | -0.148808  | 1.97e-01 | -0.073936  | 5.00e-01 | 0.252948  | 2.01e-01 | -0.033860  | 8.67e-01 | -0.104809 | 4.51e-01 | 0.102645  | 1.08e-01 | 0.077407  | 1.22e-01 |
| ENSG0000017831  | 18 | 1242478   | 2424493   | SPY1-AS1  | ncrna <td>lncRNA <td>-0.000000</td> <td>0.00e+00</td> <td>0.000000</td> <td>0.00e+00</td> <td>0.000000</td> <td>0.00e+00</td> <td>0.000000</td> <td>0.00e+00</td> <td>0.000000</td> <td>0.00e+00</td> <td>0.000000</td> <td>0.00e+00</td> <td>0.000000</td> <td>0.00e+00</td> </td>        | lncRNA <td>-0.000000</td> <td>0.00e+00</td> <td>0.000000</td> <td>0.00e+00</td> <td>0.000000</td> <td>0.00e+00</td> <td>0.000000</td> <td>0.00e+00</td> <td>0.000000</td> <td>0.00e+00</td> <td>0.000000</td> <td>0.00e+00</td> <td>0.000000</td> <td>0.00e+00</td> | -0.000000  | 0.00e+00 | 0.000000   | 0.00e+00 | 0.000000  | 0.00e+00 | 0.000000   | 0.00e+00 | 0.000000  | 0.00e+00 | 0.000000  | 0.00e+00 | 0.000000  | 0.00e+00 |
| ENSG0000018875  | 2  | 21641414  | 21648303  | SMARCA1   | mRNA                                                                                                                                                                                                                                                                                       | mRNA                                                                                                                                                                                                                                                                | -0.031097  | 5.27e-01 | -0.015268  | 9.44e-01 | 0.047377  | 8.14e-01 | -0.033922  | 8.66e-01 | -0.076438 | 8.03e-01 | 0.088316  | 4.06e-01 | 0.2214803 | 6.22e-01 |
| ENSG0000025661  | 15 | 9109487   | 9109938   | ACTL75-2  | ncrna <td>lncRNA</td> <td>-0.127629</td> <td>2.08e-01</td> <td>-0.056743</td> <td>6.96e-01</td> <td>0.214289</td> <td>2.81e-01</td> <td>-0.033961</td> <td>8.66e-01</td> <td>-0.104809</td> <td>4.51e-01</td> <td>0.124932</td> <td>1.57e-01</td> <td>0.174529</td> <td>2.75e-01</td>      | lncRNA                                                                                                                                                                                                                                                              | -0.127629  | 2.08e-01 | -0.056743  | 6.96e-01 | 0.214289  | 2.81e-01 | -0.033961  | 8.66e-01 | -0.104809 | 4.51e-01 | 0.124932  | 1.57e-01 | 0.174529  | 2.75e-01 |
| ENSG0000017676  | 4  | 2929761   | 2926266   | HPF4      | mRNA                                                                                                                                                                                                                                                                                       | mRNA                                                                                                                                                                                                                                                                | -0.000000  | 0.00e+00 | 0.000000   | 0.00e+00 | 0.000000  | 0.00e+00 | 0.000000   | 0.00e+00 | 0.000000  | 0.00e+00 | 0.000000  | 0.00e+00 | 0.000000  | 0.00e+00 |
| ENSG0000097836  | 4  | 2930561   | 2934834   | MFSD10    | mRNA                                                                                                                                                                                                                                                                                       | mRNA                                                                                                                                                                                                                                                                | -0.019132  | 0.81e-01 | -0.021281  | 8.04e-01 | 0.167528  | 4.04e-01 | -0.034045  | 8.66e-01 | -0.104809 | 4.51e-01 | 0.075819  | 8.91e-01 | 0.0556709 | 7.00e-01 |
| ENSG0000027975  | 17 | 1063814   | 1062386   | MYH4      | mRNA                                                                                                                                                                                                                                                                                       | mRNA                                                                                                                                                                                                                                                                | -0.186238  | 1.05e-01 | -0.069411  | 9.50e-01 | 0.174458  | 3.84e-01 | -0.034062  | 8.66e-01 | -0.104809 | 4.51e-01 | 0.277962  | 2.08e-01 | 0.095421  | 8.72e-01 |
| ENSG0000017681  | 1  | 14250862  | 14257081  | PCP4      | mRNA                                                                                                                                                                                                                                                                                       | mRNA                                                                                                                                                                                                                                                                | -0.000000  | 0.00e+00 | 0.000000   | 0.00e+00 | 0.000000  | 0.00e+00 | 0.000000   | 0.00e+00 | 0.000000  | 0.00e+00 | 0.000000  | 0.00e+00 | 0.000000  | 0.00e+00 |
| ENSG0000028079  | 5  | 11579878  | 11576543  | AC00885-1 | ncrna <td>lncRNA</td> <td>-0.040014</td> <td>7.04e-01</td> <td>-0.019568</td> <td>2.96e-01</td> <td>0.188951</td> <td>3.45e-01</td> <td>-0.034079</td> <td>8.66e-01</td> <td>-0.104809</td> <td>4.51e-01</td> <td>0.095421</td> <td>8.72e-01</td> <td>0.095421</td> <td>8.72e-01</td>      | lncRNA                                                                                                                                                                                                                                                              | -0.040014  | 7.04e-01 | -0.019568  | 2.96e-01 | 0.188951  | 3.45e-01 | -0.034079  | 8.66e-01 | -0.104809 | 4.51e-01 | 0.095421  | 8.72e-01 | 0.095421  | 8.72e-01 |
| ENSG0000013608  | 3  | 5800840   | 5817251   | FLNB      | mRNA                                                                                                                                                                                                                                                                                       | mRNA                                                                                                                                                                                                                                                                | -0.187077  | 1.03e-01 | -0.188379  | 1.90e-01 | 0.003801  | 8.85e-01 | -0.034275  | 8.66e-01 | -0.104809 | 4.51e-01 | 0.164549  | 4.50e-01 | 0.099459  | 4.92e-01 |
| ENSG0000017831  | 18 | 1242478   | 2424493   | SPY1-AS1  | ncrna <td>lncRNA</td> <td>-0.000000</td> <td>0.00e+00</td> <td>0.000000</td> <td>0.00e+00</td> <td>0.000000</td> <td>0.00e+00</td> <td>0.000000</td> <td>0.00e+00</td> <td>0.000000</td> <td>0.00e+00</td> <td>0.000000</td> <td>0.00e+00</td> <td>0.000000</td> <td>0.00e+00</td>         | lncRNA                                                                                                                                                                                                                                                              | -0.000000  | 0.00e+00 | 0.000000   | 0.00e+00 | 0.000000  | 0.00e+00 | 0.000000   | 0.00e+00 | 0.000000  | 0.00e+00 | 0.000000  | 0.00e+00 | 0.000000  | 0.00e+00 |
| ENSG0000077380  | 2  | 171687409 | 171750158 | ANKP4     | mRNA                                                                                                                                                                                                                                                                                       | mRNA                                                                                                                                                                                                                                                                | -0.080794  | 4.74e-01 | -0.015006  | 9.14e-01 | 0.184217  | 3.58e-01 | -0.034575  | 8.66e-01 | -0.104809 | 4.51e-01 | 0.095421  | 8.72e-01 | 0.1296105 | 3.70e-01 |
| ENSG0000027912  | 10 | 2659901   | 2669723   | ALG9-3    | ncrna <td>lncRNA</td> <td>0.0461860</td> <td>6.90e-01</td> <td>0.0871481</td> <td>5.47e-01</td> <td>0.088930</td> <td>6.56e-01</td> <td>-0.034204</td> <td>8.66e-01</td> <td>-0.104809</td> <td>4.51e-01</td> <td>0.160174</td> <td>4.65e-01</td> <td>0.1380427</td> <td>3.99e-01</td>     | lncRNA                                                                                                                                                                                                                                                              | 0.0461860  | 6.90e-01 | 0.0871481  | 5.47e-01 | 0.088930  | 6.56e-01 | -0.034204  | 8.66e-01 | -0.104809 | 4.51e-01 | 0.160174  | 4.65e-01 | 0.1380427 | 3.99e-01 |
| ENSG000002927   | 27 | 1829395   | 1829296   | DUSP2     | mRNA                                                                                                                                                                                                                                                                                       | mRNA                                                                                                                                                                                                                                                                | -0.24552   | 8.33e-01 | -0.074297  | 6.01e-01 | 0.151709  | 4.50e-01 | -0.034206  | 8.66e-01 | -0.104809 | 4.51e-01 | 0.180885  | 5.84e-01 | 0.098212  | 8.96e-01 |
| ENSG0000027988  | 7  | 1821648   | 1820604   | CEP350    | mRNA                                                                                                                                                                                                                                                                                       | mRNA                                                                                                                                                                                                                                                                | -0.029794  | 4.38e-01 | -0.022849  | 9.36e-01 | 0.202547  | 9.91e-01 | -0.034209  | 8.66e-01 | -0.104809 | 4.51e-01 | 0.151376  | 4.93e-01 | 0.097107  | 6.41e-01 |
| ENSG0000026430  | 8  | 1213147   | 1213409   | USP17-7   | mRNA                                                                                                                                                                                                                                                                                       | mRNA                                                                                                                                                                                                                                                                | -0.10948   | 3.41e-01 | -0.087151  | 9.07e-01 | 0.288455  | 1.45e-01 | -0.034273  | 8.66e-01 | -0.104809 | 4.51e-01 | 0.0785211 | 7.22e-01 | 0.1168579 | 9.11e-01 |
| ENSG0000029584  | 15 | 4037204   | 4007704   | ACU2175-2 | ncrna <td>lncRNA</td> <td>-0.088485</td> <td>4.58e-01</td> <td>-0.022347</td> <td>8.89e-01</td> <td>0.207150</td> <td>8.91e-01</td> <td>-0.034219</td> <td>8.66e-01</td> <td>-0.104809</td> <td>4.51e-01</td> <td>0.074729</td> <td>8.28e-01</td> <td>0.1251706</td> <td>9.14e-01</td>     | lncRNA                                                                                                                                                                                                                                                              | -0.088485  | 4.58e-01 | -0.022347  | 8.89e-01 | 0.207150  | 8.91e-01 | -0.034219  | 8.66e-01 | -0.104809 | 4.51e-01 | 0.074729  | 8.28e-01 | 0.1251706 | 9.14e-01 |
| ENSG0000027677  | 19 | 1261178   | 1261047   | ITIH5-10P | mRNA                                                                                                                                                                                                                                                                                       | mRNA                                                                                                                                                                                                                                                                | -0.105647  | 6.20e-01 | -0.114477  | 9.14e-01 | 0.137299  | 5.91e-01 | -0.034241  | 8.66e-01 | -0.104809 | 4.51e-01 | 0.086247  | 5.32e-01 | 0.086202  | 9.70e-01 |
| ENSG0000013944  | 12 | 9543131   | 9568720   | RAMD10    | mRNA                                                                                                                                                                                                                                                                                       | mRNA                                                                                                                                                                                                                                                                | 0.0069127  | 5.74e-01 | 0.137294   | 3.58e-01 | 0.435027  | 2.98e-01 | -0.034284  | 8.66e-01 | -0.104809 | 4.51e-01 | 0.246999  | 2.54e-01 | 0.2814000 | 4.77e-01 |
| ENSG0000021260  | 3  | 1322103   | 1324282   | RAP2C-AS1 | ncrna <td>lncRNA</td> <td>-0.188863</td> <td>1.00e-01</td> <td>-0.102099</td> <td>4.80e-01</td> <td>0.186720</td> <td>3.51e-01</td> <td>-0.034186</td> <td>8.66e-01</td> <td>-0.104809</td> <td>4.51e-01</td> <td>0.0267673</td> <td>9.05e-01</td> <td>0.1176310</td> <td>4.16e-01</td>    | lncRNA                                                                                                                                                                                                                                                              | -0.188863  | 1.00e-01 | -0.102099  | 4.80e-01 | 0.186720  | 3.51e-01 | -0.034186  | 8.66e-01 | -0.104809 | 4.51e-01 | 0.0267673 | 9.05e-01 | 0.1176310 | 4.16e-01 |
| ENSG0000015086  | 19 | 4987745   | 4988750   | ITIH2     | mRNA                                                                                                                                                                                                                                                                                       | mRNA                                                                                                                                                                                                                                                                | -0.22408   | 4.00e-01 | -0.026628  | 7.00e-01 | 0.287291  | 7.91e-01 | -0.034181  | 8.66e-01 | -0.104809 | 4.51e-01 | 0.202928  | 3.38e-01 | 0.2164109 | 3.56e-01 |
| ENSG0000015483  | 15 | 5913434   | 5917281   | MYO1C     | mRNA                                                                                                                                                                                                                                                                                       | mRNA                                                                                                                                                                                                                                                                | -0.069224  | 5.50e-01 | -0.060519  | 8.00e-01 | 0.181956  | 3.66e-01 | -0.034798  | 8.66e-01 | -0.104809 | 4.51e-01 | 0.078357  | 7.45e-01 | 0.090577  | 4.95e-01 |
| ENSG0000023831  | 5  | 17002488  | 17002866  | MIR78E    | ncrna <td>miRNA</td> <td>0.0273122</td> <td>8.11e-01</td> <td>0.0374627</td> <td>7.96e-01</td> <td>0.034739</td> <td>8.79e-01</td> <td>-0.034739</td> <td>8.66e-01</td> <td>-0.104809</td> <td>4.51e-01</td> <td>0.2269774</td> <td>8.00e-01</td> <td>0.1104850</td> <td>4.47e-01</td>     | miRNA                                                                                                                                                                                                                                                               | 0.0273122  | 8.11e-01 | 0.0374627  | 7.96e-01 | 0.034739  | 8.79e-01 | -0.034739  | 8.66e-01 | -0.104809 | 4.51e-01 | 0.2269774 | 8.00e-01 | 0.1104850 | 4.47e-01 |
| ENSG0000021801  | 14 | 2052514   | 2050356   | TRAF2     | mRNA                                                                                                                                                                                                                                                                                       | lncRNA                                                                                                                                                                                                                                                              | -0.188874  | 1.09e-01 | -0.183748  | 3.80e-01 | 0.0019268 | 9.97e-01 | -0.034894  | 8.66e-01 | -0.104809 | 4.51e-01 | 0.0841106 | 7.09e-01 | 0.0666702 | 7.48e-01 |
| ENSG0000018993  | 4  | 5399370   | 5397120   | LRRK6     | mRNA                                                                                                                                                                                                                                                                                       | mRNA                                                                                                                                                                                                                                                                | -0.0011802 | 6.38e-01 | 0.0483437  | 7.78e-01 | 0.263757  | 1.87e-01 | -0.034864  | 8.66e-01 | -0.104809 | 4.51e-01 | 0.1089159 | 4.38e-01 | 0.1657881 | 2.00e-01 |
| ENSG0000026277  | 7  | 13020707  | 13026889  | ZNF80C    | mRNA                                                                                                                                                                                                                                                                                       | mRNA                                                                                                                                                                                                                                                                | -0.1128180 | 3.99e-01 | -0.1252173 | 7.65e-01 | 0.4461113 | 1.54e-01 | -0.034864  | 8.66e-01 | -0.104809 | 4.51e-01 | 0.1670941 | 4.66e-01 | 0.1758876 | 2.44e-01 |
| ENSG0000026293  | 12 | 6438378   | 6438397   | ATP11V3P  | mRNA                                                                                                                                                                                                                                                                                       | processed_pseudo                                                                                                                                                                                                                                                    | 0.0144997  | 9.00e-01 | 0.0347148  | 8.10e-01 | 0.184512  | 3.57e-01 | -0.034808  | 8.66e-01 | -0.104809 | 4.51e-01 | 0.090774  | 9.94e-01 | 0.098402  | 9.83e-01 |
| ENSG0000018543  | 12 | 1266668   | 1267078   | ITIH5-10P | mRNA                                                                                                                                                                                                                                                                                       | mRNA                                                                                                                                                                                                                                                                | -0.105647  | 6.20e-01 | -0.114477  | 9.14e-01 | 0.137299  | 5.91e-01 | -0.034241  | 8.66e-01 | -0.104809 | 4.51e-01 | 0.086247  | 5.32e-01 | 0.086202  | 9.70e-01 |
| ENSG0000010121  | 22 | 2344445   | 2347903   | GTG1C2    | mRNA                                                                                                                                                                                                                                                                                       | mRNA                                                                                                                                                                                                                                                                | 0.0206117  | 8.00e-01 | 0.049588   | 8.61e-01 | 0.6921538 | 6.34e-01 | -0.034185  | 8.66e-01 | -0.104809 | 4.51e-01 | 0.2083407 | 3.00e-01 | 0.2310446 | 5.17e-01 |
| ENSG0000017140  | 8  | 3910990   | 3928457   | ADAM3     | mRNA                                                                                                                                                                                                                                                                                       | mRNA                                                                                                                                                                                                                                                                | -0.106088  | 3.58e-01 | -0.0517038 | 7.21e-01 | 0.0617793 | 7.59e-01 | -0.034804  | 8.66e-01 | -0.104809 | 4.51e-01 | 0.1738542 | 3.88e-01 | 0.1443461 | 7.00e-01 |
| ENSG0000013601  | 2  | 6057061   | 6071117   | ITIH5-10P | mRNA                                                                                                                                                                                                                                                                                       | mRNA                                                                                                                                                                                                                                                                | -0.105647  | 6.20e-01 | -0.114477  | 9.14e-01 | 0.137299  | 5.91e-01 | -0.034241  | 8.66e-01 | -0.104809 | 4.51e-01 | 0.086247  | 5.32e-01 | 0.086202  | 9.70e-01 |
| ENSG0000024461  | 11 | 6259597   | 6261814   | AC01071-4 | ncrna <td>lncRNA</td> <td>-0.0154622</td> <td>5.13e-01</td> <td>-0.0055482</td> <td>8.00e-01</td> <td>0.0262975</td> <td>2.23e-01</td> <td>-0.034441</td> <td>8.66e-01</td> <td>-0.104809</td> <td>4.51e-01</td> <td>0.0754249</td> <td>9.11e-01</td> <td>0.1111205</td> <td>7.05e-01</td> | lncRNA                                                                                                                                                                                                                                                              | -0.0154622 | 5.13e-01 | -0.0055482 | 8.00e-01 | 0.0262975 | 2.23e-01 | -0.034441  | 8.66e-01 | -0.104809 | 4.51e-01 | 0.0754249 | 9.11e-01 | 0.1111205 | 7.05e-01 |
| ENSG0000013011  | 19 | 1749918   | 1732388   | DDA1      | mRNA                                                                                                                                                                                                                                                                                       | mRNA                                                                                                                                                                                                                                                                | 0.0592862  | 6.08e-01 | -0.010727  | 8.00e-01 | 0.1293868 | 5.20e-01 | -0.034713  | 8.66e-01 | -0.104809 | 4.51e-01 | 0.189671  | 3.80e-01 | 0.1414464 | 9.22e-01 |
| ENSG0000015039  | 12 | 9399529   | 9399529   | ITIH5-10P | mRNA                                                                                                                                                                                                                                                                                       | mRNA                                                                                                                                                                                                                                                                | -0.105647  | 6.20e-01 | -0.114477  | 9.14e-01 | 0.137299  | 5.91e-01 | -0.034241  | 8.66e-01 | -0.104809 | 4.51e-01 | 0.086247  | 5.32e-01 | 0.086202  | 9.70e-01 |
| ENSG0000015404  | 16 | 2306136   | 2314970   | USP11     | mRNA                                                                                                                                                                                                                                                                                       | mRNA                                                                                                                                                                                                                                                                | -0.091951  | 4.11e-01 | -0.056782  | 6.95e-01 | 0.1488182 | 4.74e-01 | -0.034504  | 8.66e-01 | -0.104809 | 4.51e-01 | 0.1275962 | 9.66e-01 | 0.0956538 | 9.07e-01 |
| ENSG00000219862 | 12 | 13024979  | 13026723  | AC06833-2 | ncrna <td>lncRNA</td> <td>-0.0272872</td> <td>7.43e-01</td> <td>0.1545119</td> <td>2.84e-01</td> <td>0.179742</td> <td>8.88e-01</td> <td>-0.0345124</td> <td>8.66e-01</td> <td>-0.104809</td> <td>4.51e-01</td> <td>0.046008</td> <td>5.84e-01</td> <td>0.1305649</td> <td>3.66e-01</td>   | lncRNA                                                                                                                                                                                                                                                              | -0.0272872 | 7.43e-01 | 0.1545119  | 2.84e-01 | 0.179742  | 8.88e-01 | -0.0345124 | 8.66e-01 | -0.104809 | 4.51e-01 | 0.046008  | 5.84e-01 | 0.1305649 | 3.66e-01 |
| ENSG0000014480  | 4  | 1208498   | 1207499   | RAB13     | mRNA                                                                                                                                                                                                                                                                                       | mRNA                                                                                                                                                                                                                                                                | -0.07784   | 5.88e-01 | -0.062957  | 6.62e-01 | 0.046336  | 8.19e-01 | -0.034834  | 8.66e-01 | -0.104809 | 4.51e-01 | 0.0505283 | 8.03e-01 | 0.00747   | 9.64e-01 |
| ENSG0000021960  | 12 | 424948    | 4232817   | AC06833-2 | ncrna <td>lncRNA</td> <td>-0.0272872</td> <td>7.43e-01</td> <td>0.1545119</td> <td>2.84e-01</td> <td>0.179742</td> <td>8.88e-01</td> <td>-0.0345124</td> <td>8.66e-01</td> <td>-0.104809</td> <td>4.51e-01</td> <td>0.046008</td> <td>5.84e-01</td> <td>0.1305649</td> <td>3.66e-01</td>   | lncRNA                                                                                                                                                                                                                                                              | -0.0272872 | 7.43e-01 | 0.1545119  | 2.84e-01 | 0.179742  | 8.88e-01 | -0.0345124 | 8.66e-01 | -0.104809 | 4.51e-01 | 0.046008  | 5.84e-01 | 0.1305649 | 3.66e-01 |
| ENSG0000015545  | 5  | 5691802   | 5691765   | MIR83     | mRNA                                                                                                                                                                                                                                                                                       | mRNA                                                                                                                                                                                                                                                                | 0.0291808  | 7.99e-01 | 0.0135885  | 2.87e-01 | 0.0106104 | 5.86e-01 | -0.034505  | 8.66e-01 | -0.104809 | 4.51e-01 | 0.1425441 | 8.31e-01 | 0.1748181 | 3.07e-01 |
| ENSG0000026972  | 20 | 4071257   | 4075836   | AC05562-2 | ncrna <td>lncRNA</td> <td>-0.100332</td> <td>3.99e-01</td> <td>-0.105934</td> <td>4.64e-01</td> <td>0.253984</td> <td>2.04e-01</td> <td>-0.034241</td> <td>8.66e-01</td> <td>-0.104809</td> <td>4.51e-01</td> <td>0.072798</td> <td>7.14e-01</td> <td>0.0767911</td> <td>6.65e-01</td>     | lncRNA                                                                                                                                                                                                                                                              | -0.100332  | 3.99e-01 | -0.105934  | 4.64e-01 | 0.253984  | 2.04e-01 | -0.034241  | 8.66e-01 | -0.104809 | 4.51e-01 | 0.072798  | 7.14e-01 | 0.0767911 | 6.65e-01 |
| ENSG0000014447  | 7  | 4248929   | 4248929   | ITIH5-10P | mRNA                                                                                                                                                                                                                                                                                       | mRNA                                                                                                                                                                                                                                                                | -0.105647  | 6.20e-01 | -0.114477  | 9.14e-01 | 0.137299  | 5.91e-01 | -0.034241  | 8.66e-01 | -0.104809 | 4.51e-01 | 0.086247  | 5.32e-01 | 0.086202  | 9.70e-01 |
| ENSG0000010313  | 7  | 7312928   | 7314818   | CFP1B1    | mRNA                                                                                                                                                                                                                                                                                       | mRNA                                                                                                                                                                                                                                                                | -0.0866093 | 4.54e-01 | -0.0707819 | 9.06e-01 | 0.5174199 | 5.71e-01 | -0.034847  | 8.66e-01 | -0.104809 | 4.51e-01 | 0.1262244 | 5.77e-01 | 0.1404601 | 6.11e-01 |
| ENSG0000010376  | 22 | 4530988   | 4534195   | FAM18A    | mRNA                                                                                                                                                                                                                                                                                       | mRNA                                                                                                                                                                                                                                                                | -0.07004   |          |            |          |           |          |            |          |           |          |           |          |           |          |









Table with columns for gene ID, coordinates, gene name, transcript, and various numerical values. The table lists numerous genes such as ZDHHC2, LINC01809, TM6HE, etc., with their genomic coordinates and associated data points.

Table with columns for gene ID, chromosome, coordinates, gene name, transcript type, and various numerical values. The table lists numerous genes such as KLRK4, KLRK5, KLRK6, etc., with their corresponding genomic data.









Table with columns for gene ID, chromosome, coordinates, gene name, transcript, and various numerical values. The table lists numerous genes such as TTPA, SAPPOR2, DMAP2, and many others, along with their genomic locations and associated data points.





| ENSG0000021004 | 1  | 22838414  | 22838516  | A1670278.2 | havana    | incRNA            | protein coding | -0.101044  | 3.58E-01 | -0.107665  | 3.65E-01 | 0.0414398  | 8.27E-01 | -0.05502   | 7.85E-01 | -0.1021025 | 4.63E-01 | -0.004863  | 9.82E-01 | -0.0203339 | 8.87E-01 |
|----------------|----|-----------|-----------|------------|-----------|-------------------|----------------|------------|----------|------------|----------|------------|----------|------------|----------|------------|----------|------------|----------|------------|----------|
| ENSG0000010807 | 2  | 12779999  | 12779993  | HSP68A1    | mimic     | mRNA              | protein coding | -0.026299  | 1.57E-01 | -0.197789  | 1.78E-01 | 0.0456287  | 2.15E-01 | -0.05501   | 7.85E-01 | -0.1021128 | 4.63E-01 | -0.019911  | 1.92E-01 | -0.1121953 | 7.83E-01 |
| ENSG0000016638 | 3  | 11329499  | 11329504  | W4E1       | antisense | transcribed unit  | YES            | 0.002575   | 9.24E-01 | -0.026174  | 8.41E-01 | 0.0661366  | 1.84E-01 | -0.05502   | 7.85E-01 | -0.1021025 | 4.63E-01 | -0.019911  | 1.92E-01 | -0.1121953 | 7.83E-01 |
| ENSG0000029506 | 4  | 11139439  | 11225877  | AC02855.2  | havana    | incRNA            | protein coding | -0.0257451 | 8.24E-01 | -0.0276666 | 8.47E-01 | 0.0559877  | 7.82E-01 | -0.05502   | 7.85E-01 | -0.1021128 | 4.63E-01 | -0.019911  | 1.92E-01 | -0.1121953 | 7.83E-01 |
| ENSG0000016506 | 5  | 4938438   | 4939016   | DRXC       | mimic     | mRNA              | protein coding | -0.066533  | 5.63E-01 | -0.047466  | 7.00E-01 | 0.1675774  | 4.03E-01 | -0.055077  | 7.85E-01 | -0.091734  | 5.09E-01 | -0.075992  | 7.21E-01 | -0.0230442 | 8.81E-01 |
| ENSG0000017367 | 6  | 11318457  | 11318460  | P2203      | mimic     | mRNA              | protein coding | -0.026174  | 8.24E-01 | -0.026174  | 8.41E-01 | 0.0661366  | 1.84E-01 | -0.05502   | 7.85E-01 | -0.1021025 | 4.63E-01 | -0.019911  | 1.92E-01 | -0.1121953 | 7.83E-01 |
| ENSG000002607  | 7  | 11888306  | 11888956  | TBX3       | mimic     | mRNA              | protein coding | -0.1532466 | 1.83E-01 | -0.0056769 | 6.98E-01 | 0.1588854  | 4.26E-01 | -0.055093  | 7.85E-01 | -0.0237609 | 6.80E-01 | -0.0466636 | 9.46E-01 | -0.162316  | 2.96E-01 |
| ENSG0000024308 | 8  | 34178405  | 34180793  | RNF5       | mimic     | mRNA              | protein coding | -0.0021278 | 9.17E-01 | -0.0596330 | 6.81E-01 | 0.1626157  | 4.18E-01 | -0.055094  | 7.85E-01 | -0.041331  | 7.67E-01 | -0.0237609 | 6.80E-01 | -0.072889  | 9.02E-01 |
| ENSG0000023297 | 9  | 11470818  | 11470818  | LOC101928  | antisense | transcribed unit  | YES            | -0.0021278 | 9.17E-01 | -0.0596330 | 6.81E-01 | 0.1626157  | 4.18E-01 | -0.055094  | 7.85E-01 | -0.041331  | 7.67E-01 | -0.0237609 | 6.80E-01 | -0.072889  | 9.02E-01 |
| ENSG0000012611 | 10 | 105897609 | 105715004 | KRC3       | mimic     | mRNA              | protein coding | -0.085202  | 4.51E-01 | -0.0467279 | 7.84E-01 | 0.105193   | 7.97E-01 | -0.055103  | 7.85E-01 | -0.0237609 | 6.80E-01 | -0.0958384 | 9.61E-01 | -0.138031  | 3.90E-01 |
| ENSG0000027832 | 11 | 5148884   | 5893806   | CRMP1      | mimic     | mRNA              | protein coding | 0.0021278  | 9.17E-01 | 0.0596330  | 6.81E-01 | 0.1626157  | 4.18E-01 | -0.055118  | 7.85E-01 | -0.041331  | 7.67E-01 | -0.0237609 | 6.80E-01 | -0.072889  | 9.02E-01 |
| ENSG000002721  | 12 | 12764599  | 12765033  | AC02855.2  | havana    | incRNA            | protein coding | -0.0257451 | 8.24E-01 | -0.0276666 | 8.47E-01 | 0.0559877  | 7.82E-01 | -0.05502   | 7.85E-01 | -0.1021128 | 4.63E-01 | -0.019911  | 1.92E-01 | -0.1121953 | 7.83E-01 |
| ENSG0000023491 | 13 | 13518055  | 13518479  | AC12477.4  | havana    | unprocessed_pseud | YES            | -0.0021278 | 9.17E-01 | -0.0596330 | 6.81E-01 | 0.1626157  | 4.18E-01 | -0.055118  | 7.85E-01 | -0.041331  | 7.67E-01 | -0.0237609 | 6.80E-01 | -0.072889  | 9.02E-01 |
| ENSG0000014064 | 14 | 7057348   | 7060759   | PKF1       | mimic     | mRNA              | protein coding | -0.023131  | 9.39E-01 | -0.0251244 | 8.23E-01 | 0.105118   | 8.05E-01 | -0.055188  | 7.85E-01 | -0.0237609 | 6.80E-01 | -0.0958384 | 9.61E-01 | -0.138031  | 3.90E-01 |
| ENSG0000012704 | 15 | 7078251   | 7078153   | TRM1       | mimic     | mRNA              | protein coding | 0.0021278  | 9.17E-01 | 0.0596330  | 6.81E-01 | 0.1626157  | 4.18E-01 | -0.055118  | 7.85E-01 | -0.041331  | 7.67E-01 | -0.0237609 | 6.80E-01 | -0.072889  | 9.02E-01 |
| ENSG0000017486 | 16 | 11393759  | 11393889  | LOC101928  | antisense | transcribed unit  | YES            | -0.0021278 | 9.17E-01 | -0.0596330 | 6.81E-01 | 0.1626157  | 4.18E-01 | -0.055118  | 7.85E-01 | -0.041331  | 7.67E-01 | -0.0237609 | 6.80E-01 | -0.072889  | 9.02E-01 |
| ENSG0000024871 | 17 | 46142716  | 46143394  | AC04477.2  | havana    | incRNA            | protein coding | -0.0829256 | 4.40E-01 | -0.0132095 | 9.24E-01 | 0.1161054  | 5.64E-01 | -0.0552054 | 7.84E-01 | -0.1421148 | 4.05E-01 | -0.1270616 | 5.77E-01 | -0.101148  | 3.44E-01 |
| ENSG0000024899 | 18 | 10203013  | 10206288  | AL13558.1  | havana    | transcribed unit  | YES            | 0.0486229  | 7.53E-01 | -0.023605  | 8.76E-01 | -0.114247  | 3.61E-01 | -0.0552364 | 7.84E-01 | -0.1027129 | 4.41E-01 | -0.1270616 | 5.77E-01 | -0.101148  | 3.44E-01 |
| ENSG0000015421 | 19 | 747078    | 7486671   | LOC101928  | antisense | transcribed unit  | YES            | 0.0021278  | 9.17E-01 | 0.0596330  | 6.81E-01 | 0.1626157  | 4.18E-01 | -0.055118  | 7.85E-01 | -0.041331  | 7.67E-01 | -0.0237609 | 6.80E-01 | -0.072889  | 9.02E-01 |
| ENSG0000012406 | 20 | 5757235   | 5757542   | ZNF48      | mimic     | mRNA              | protein coding | -0.1220006 | 2.87E-01 | -0.0815616 | 5.80E-01 | -0.0252364 | 2.24E-01 | -0.0552364 | 7.84E-01 | -0.181675  | 3.75E-01 | -0.1027129 | 4.41E-01 | -0.1270616 | 5.77E-01 |
| ENSG0000027376 | 21 | 11846234  | 11846201  | LOC101928  | antisense | transcribed unit  | YES            | -0.0021278 | 9.17E-01 | -0.0596330 | 6.81E-01 | 0.1626157  | 4.18E-01 | -0.055118  | 7.85E-01 | -0.041331  | 7.67E-01 | -0.0237609 | 6.80E-01 | -0.072889  | 9.02E-01 |
| ENSG0000014020 | 22 | 4353131   | 4350763   | CBS        | mimic     | mRNA              | protein coding | -0.100813  | 3.80E-01 | -0.0806204 | 5.54E-01 | 0.1272928  | 3.80E-01 | -0.0552364 | 7.84E-01 | -0.1232809 | 4.68E-01 | -0.024115  | 7.37E-01 | -0.10599   | 4.73E-01 |
| ENSG0000027971 | 23 | 2403973   | 24041501  | AC09846.6  | havana    | tagene            | incRNA         | 0.0021278  | 9.17E-01 | 0.0596330  | 6.81E-01 | 0.1626157  | 4.18E-01 | -0.055118  | 7.85E-01 | -0.041331  | 7.67E-01 | -0.0237609 | 6.80E-01 | -0.072889  | 9.02E-01 |
| ENSG0000020202 | 24 | 8858143   | 8915276   | AC06681.2  | havana    | incRNA            | protein coding | -0.0266331 | 8.31E-01 | -0.0469337 | 6.98E-01 | 0.0271189  | 2.87E-01 | -0.055294  | 7.84E-01 | -0.247259  | 7.14E-01 | -0.156668  | 4.95E-01 | -0.1242971 | 1.93E-01 |
| ENSG0000014597 | 25 | 2787878   | 2777828   | SLC8A8     | mimic     | mRNA              | protein coding | 0.0021278  | 9.17E-01 | 0.0596330  | 6.81E-01 | 0.1626157  | 4.18E-01 | -0.055118  | 7.85E-01 | -0.041331  | 7.67E-01 | -0.0237609 | 6.80E-01 | -0.072889  | 9.02E-01 |
| ENSG0000012301 | 26 | 5099651   | 5100862   | SLC19A3    | mimic     | mRNA              | protein coding | -0.200869  | 1.58E-01 | -0.143824  | 3.98E-01 | 0.0133766  | 9.55E-01 | -0.05533   | 7.84E-01 | -0.029533  | 8.98E-01 | -0.24189   | 2.66E-01 | -0.11931   | 3.99E-01 |
| ENSG0000017807 | 27 | 6981426   | 6984487   | KIF23      | mimic     | mRNA              | protein coding | -0.1195504 | 3.00E-01 | -0.078665  | 6.20E-01 | 0.1815103  | 3.65E-01 | -0.055395  | 7.84E-01 | -0.23818   | 4.81E-01 | -0.08628   | 6.91E-01 | -0.178663  | 2.11E-01 |
| ENSG0000014821 | 28 | 7311075   | 7313128   | NUD13      | mimic     | mRNA              | protein coding | -0.086279  | 4.59E-01 | -0.0407559 | 9.70E-01 | 0.0841377  | 7.50E-01 | -0.055397  | 7.84E-01 | -0.161391  | 2.44E-01 | -0.109772  | 5.51E-01 | -0.090734  | 6.84E-01 |
| ENSG0000014660 | 29 | 5138264   | 5098214   | AC06681.2  | havana    | incRNA            | protein coding | -0.0266331 | 8.31E-01 | -0.0469337 | 6.98E-01 | 0.0271189  | 2.87E-01 | -0.055294  | 7.84E-01 | -0.247259  | 7.14E-01 | -0.156668  | 4.95E-01 | -0.1242971 | 1.93E-01 |
| ENSG0000024602 | 30 | 5138264   | 5098214   | AC06681.2  | havana    | incRNA            | protein coding | -0.0266331 | 8.31E-01 | -0.0469337 | 6.98E-01 | 0.0271189  | 2.87E-01 | -0.055294  | 7.84E-01 | -0.247259  | 7.14E-01 | -0.156668  | 4.95E-01 | -0.1242971 | 1.93E-01 |
| ENSG0000024884 | 31 | 1234505   | 1137873   | SLOC2P-AS1 | havana    | incRNA            | protein coding | -0.0088482 | 9.42E-01 | -0.028535  | 8.44E-01 | 0.2864711  | 1.47E-01 | -0.055428  | 7.84E-01 | -0.000007  | 9.88E-01 | -0.048634  | 9.10E-01 | -0.151891  | 2.70E-01 |
| ENSG0000017807 | 32 | 4344195   | 4350763   | LOC101928  | antisense | transcribed unit  | YES            | 0.0021278  | 9.17E-01 | 0.0596330  | 6.81E-01 | 0.1626157  | 4.18E-01 | -0.055118  | 7.85E-01 | -0.041331  | 7.67E-01 | -0.0237609 | 6.80E-01 | -0.072889  | 9.02E-01 |
| ENSG0000014636 | 33 | 30571291  | 30773818  | DSN1       | mimic     | mRNA              | protein coding | -0.028027  | 8.08E-01 | -0.050468  | 8.34E-01 | 0.0414813  | 8.37E-01 | -0.055481  | 7.84E-01 | -0.096089  | 8.86E-01 | -0.0292453 | 8.04E-01 | -0.0714534 | 6.22E-01 |
| ENSG0000014676 | 34 | 18678205  | 18678987  | PAR1       | mimic     | mRNA              | protein coding | -0.0511912 | 7.20E-01 | -0.070288  | 6.00E-01 | 0.1972801  | 3.24E-01 | -0.055485  | 7.83E-01 | -0.0501139 | 7.15E-01 | -0.0804245 | 7.06E-01 | -0.1196058 | 3.33E-01 |
| ENSG0000013120 | 35 | 5646818   | 5650123   | LOC101928  | antisense | transcribed unit  | YES            | 0.0021278  | 9.17E-01 | 0.0596330  | 6.81E-01 | 0.1626157  | 4.18E-01 | -0.055118  | 7.85E-01 | -0.041331  | 7.67E-01 | -0.0237609 | 6.80E-01 | -0.072889  | 9.02E-01 |
| ENSG0000025682 | 36 | 3871579   | 3910382   | EPF2       | mimic     | mRNA              | protein coding | -0.0501909 | 6.65E-01 | -0.019994  | 2.49E-01 | 0.2401973  | 2.28E-01 | -0.055518  | 7.83E-01 | -0.0918103 | 7.75E-01 | -0.127905  | 4.00E-01 | -0.0291949 | 8.10E-01 |
| ENSG0000021927 | 37 | 7093936   | 7095947   | LOC10222   | havana    | incRNA            | protein coding | -0.14701   | 2.00E-01 | -0.0400101 | 7.67E-01 | -0.118991  | 8.01E-01 | -0.0555249 | 7.83E-01 | -0.234821  | 4.74E-01 | -0.089772  | 6.84E-01 | -0.118781  | 3.17E-01 |
| ENSG0000013132 | 38 | 14038843  | 14042761  | GLGN       | mimic     | mRNA              | protein coding | -0.106305  | 3.57E-01 | -0.0120483 | 9.34E-01 | -0.02848   | 8.88E-01 | -0.055529  | 7.83E-01 | -0.174024  | 2.11E-01 | -0.001792  | 9.84E-01 | -0.045103  | 8.37E-01 |
| ENSG0000013132 | 39 | 6899126   | 6938672   | LOC101928  | antisense | transcribed unit  | YES            | 0.0021278  | 9.17E-01 | 0.0596330  | 6.81E-01 | 0.1626157  | 4.18E-01 | -0.055118  | 7.85E-01 | -0.041331  | 7.67E-01 | -0.0237609 | 6.80E-01 | -0.072889  | 9.02E-01 |
| ENSG000000780  | 40 | 1772581   | 1776316   | FAM76A     | mimic     | mRNA              | protein coding | -0.060293  | 6.02E-01 | -0.0331552 | 7.33E-01 | 0.0590716  | 7.70E-01 | -0.055584  | 7.83E-01 | -0.0194111 | 8.11E-01 | -0.0199719 | 3.22E-01 | -0.0949128 | 5.23E-01 |
| ENSG0000023416 | 41 | 8574261   | 8574170   | MIR510     | mimic     | mRNA              | protein coding | -0.026138  | 8.21E-01 | -0.026138  | 8.41E-01 | 0.0661366  | 1.84E-01 | -0.055586  | 7.83E-01 | -0.0324764 | 8.16E-01 | -0.028949  | 8.80E-01 | -0.151273  | 2.93E-01 |
| ENSG0000026897 | 42 | 11318457  | 11318458  | LOC101928  | antisense | transcribed unit  | YES            | 0.0021278  | 9.17E-01 | 0.0596330  | 6.81E-01 | 0.1626157  | 4.18E-01 | -0.055118  | 7.8      |            |          |            |          |            |          |



| ENSG00000100884 | 14 | 24070837  | 24071020  | CPNPE1     | ensembl                | havana | protein_coding         | YES | -0.1299307 | 2.606 | 0.0067005  | 9.631 | 0.1881361 | 3.475 | -0.0570948 | 7.776 | -0.2057287 | 1.366 | 0.1115669  | 3.336 | 0.1922362  | 1.811 |
|-----------------|----|-----------|-----------|------------|------------------------|--------|------------------------|-----|------------|-------|------------|-------|-----------|-------|------------|-------|------------|-------|------------|-------|------------|-------|
| ENSG00000142727 | 22 | 4975767   | 4975800   | HRP3P5     | transcript_unannotated | havana | transcript_unannotated | YES | -0.1071234 | 3.524 | -0.0793887 | 5.871 | 0.2641420 | 7.671 | -0.0710084 | 7.776 | -0.1246505 | 3.891 | 0.0284137  | 6.751 | -0.0729465 |       |
| ENSG00000144049 | 22 | 2429785   | 2418086   | ALKBH8     | transcript_unannotated | havana | transcript_unannotated | YES | -0.0412768 | 1.986 | -0.0175062 | 3.179 | 0.1409171 | 3.179 | -0.0200914 | 3.179 | -0.0200914 | 3.179 | 0.0092494  | 3.179 | -0.0200914 | 3.179 |
| ENSG00000122000 | 20 | 2429785   | 2418086   | ALKBH8     | transcript_unannotated | havana | transcript_unannotated | YES | -0.0860053 | 4.445 | -0.0511155 | 5.911 | 0.1409171 | 3.179 | -0.0200914 | 3.179 | -0.0200914 | 3.179 | 0.0092494  | 3.179 | -0.0200914 | 3.179 |
| ENSG00000109990 | 6  | 8729972   | 8730047   | HAPP1P2    | transcript_unannotated | havana | transcript_unannotated | YES | -0.0490848 | 4.136 | -0.0219912 | 9.296 | 0.2072138 | 3.003 | -0.0713336 | 7.776 | -0.1692749 | 2.216 | 0.0510187  | 9.486 | -0.1155420 | 4.246 |
| ENSG00000131000 | 19 | 5267076   | 5267131   | IGFBP3     | transcript_unannotated | havana | transcript_unannotated | YES | -0.0214778 | 1.986 | -0.0120379 | 3.179 | 0.1409171 | 3.179 | -0.0200914 | 3.179 | -0.0200914 | 3.179 | 0.0092494  | 3.179 | -0.0200914 | 3.179 |
| ENSG00000175821 | 1  | 5451447   | 5451783   | AC09979P2  | transcript_unannotated | havana | transcript_unannotated | YES | -0.0570843 | 6.224 | -0.0340788 | 7.416 | 0.1409171 | 3.179 | -0.0200914 | 3.179 | -0.0200914 | 3.179 | 0.0092494  | 3.179 | -0.0200914 | 3.179 |
| ENSG00000178440 | 20 | 4494256   | 5001164   | TMM3B3-AS2 | transcript_unannotated | havana | transcript_unannotated | YES | -0.0002313 | 9.982 | -0.0637961 | 6.608 | 0.0376224 | 8.544 | -0.0571803 | 7.776 | -0.0772636 | 5.676 | 0.1625088  | 6.336 | -0.0471993 | 7.546 |
| ENSG00000170891 | 2  | 21500973  | 21502000  | CPNPE1     | transcript_unannotated | havana | transcript_unannotated | YES | -0.0214778 | 1.986 | -0.0120379 | 3.179 | 0.1409171 | 3.179 | -0.0200914 | 3.179 | -0.0200914 | 3.179 | 0.0092494  | 3.179 | -0.0200914 | 3.179 |
| ENSG00000176944 | 2  | 21500973  | 21502000  | CPNPE1     | transcript_unannotated | havana | transcript_unannotated | YES | -0.0214778 | 1.986 | -0.0120379 | 3.179 | 0.1409171 | 3.179 | -0.0200914 | 3.179 | -0.0200914 | 3.179 | 0.0092494  | 3.179 | -0.0200914 | 3.179 |
| ENSG00000149054 | 11 | 6926404   | 7001004   | ZNF215     | transcript_unannotated | havana | transcript_unannotated | YES | -0.1317662 | 3.254 | -0.0773102 | 5.946 | 0.1846058 | 3.576 | -0.0572802 | 7.776 | -0.2298391 | 9.456 | -0.0497116 | 8.226 | -0.1382020 | 3.976 |
| ENSG00000170811 | 28 | 4077831   | 4079456   | CNK1       | transcript_unannotated | havana | transcript_unannotated | YES | -0.0214778 | 1.986 | -0.0120379 | 3.179 | 0.1409171 | 3.179 | -0.0200914 | 3.179 | -0.0200914 | 3.179 | 0.0092494  | 3.179 | -0.0200914 | 3.179 |
| ENSG00000176248 | 13 | 11557280  | 11559021  | AL44212L1  | transcript_unannotated | havana | transcript_unannotated | YES | -0.0749102 | 3.524 | -0.0099476 | 9.426 | 0.3448033 | 7.416 | -0.0571803 | 7.776 | -0.1767039 | 2.586 | 0.0968316  | 6.024 | -0.2368246 | 3.986 |
| ENSG00000125647 | 6  | 3136707   | 3137688   | AL67188L3  | transcript_unannotated | havana | transcript_unannotated | YES | -0.0214778 | 1.986 | -0.0120379 | 3.179 | 0.1409171 | 3.179 | -0.0200914 | 3.179 | -0.0200914 | 3.179 | 0.0092494  | 3.179 | -0.0200914 | 3.179 |
| ENSG00000171890 | 1  | 20509113  | 20509196  | AL58382L1  | transcript_unannotated | havana | transcript_unannotated | YES | -0.0010529 | 9.276 | -0.0573872 | 6.830 | 0.1789730 | 3.888 | -0.0572173 | 7.776 | -0.0707299 | 6.776 | 0.2437074  | 2.624 | -0.1688422 | 2.416 |
| ENSG00000120222 | 1  | 18131879  | 18132429  | AC09844L4  | transcript_unannotated | havana | transcript_unannotated | YES | -0.0214778 | 1.986 | -0.0120379 | 3.179 | 0.1409171 | 3.179 | -0.0200914 | 3.179 | -0.0200914 | 3.179 | 0.0092494  | 3.179 | -0.0200914 | 3.179 |
| ENSG00000153821 | 11 | 8781502   | 8781741   | LINC02734  | transcript_unannotated | havana | transcript_unannotated | YES | -0.1400044 | 3.684 | -0.0648566 | 5.555 | 0.1187811 | 4.326 | -0.0573872 | 7.776 | -0.1186796 | 3.936 | 0.3906665  | 4.806 | -0.1770266 | 2.624 |
| ENSG00000170776 | 2  | 9071976   | 9072620   | AC02805L1  | transcript_unannotated | havana | transcript_unannotated | YES | -0.0755454 | 5.146 | -0.0510443 | 9.188 | 0.3115575 | 1.094 | -0.0571432 | 7.776 | -0.1427886 | 1.054 | 0.4096026  | 5.226 | -0.0755454 | 6.024 |
| ENSG00000126286 | 17 | 5021020   | 5023101   | AC02191L2  | transcript_unannotated | havana | transcript_unannotated | YES | -0.0214778 | 1.986 | -0.0120379 | 3.179 | 0.1409171 | 3.179 | -0.0200914 | 3.179 | -0.0200914 | 3.179 | 0.0092494  | 3.179 | -0.0200914 | 3.179 |
| ENSG00000103112 | 12 | 874133    | 891130    | AC00480L1  | transcript_unannotated | havana | transcript_unannotated | YES | -0.18244   | 1.214 | -0.1146696 | 9.264 | 0.2110838 | 3.146 | -0.0571803 | 7.776 | -0.2804253 | 4.468 | 0.2102229  | 9.206 | -0.1420527 | 3.916 |
| ENSG00000133888 | 6  | 3345370   | 3345744   | ZBTB79     | transcript_unannotated | havana | transcript_unannotated | YES | -0.1799317 | 1.176 | -0.0807722 | 5.778 | 0.3240994 | 9.706 | -0.0571803 | 7.776 | -0.2631304 | 5.464 | 0.0113946  | 9.206 | -0.1868151 | 3.916 |
| ENSG00000130628 | 17 | 4179251   | 4181868   | ZNF594     | transcript_unannotated | havana | transcript_unannotated | YES | -0.0214778 | 1.986 | -0.0120379 | 3.179 | 0.1409171 | 3.179 | -0.0200914 | 3.179 | -0.0200914 | 3.179 | 0.0092494  | 3.179 | -0.0200914 | 3.179 |
| ENSG00000129414 | 2  | 6082369   | 6083117   | LINC01185  | transcript_unannotated | havana | transcript_unannotated | YES | -0.115884  | 3.166 | -0.0268377 | 8.876 | 0.0521457 | 9.506 | -0.0573998 | 7.776 | -0.1983163 | 1.514 | 0.0016666  | 9.636 | -0.0515516 | 9.176 |
| ENSG00000173848 | 10 | 5412357   | 5412956   | NET1       | transcript_unannotated | havana | transcript_unannotated | YES | -0.0214778 | 1.986 | -0.0120379 | 3.179 | 0.1409171 | 3.179 | -0.0200914 | 3.179 | -0.0200914 | 3.179 | 0.0092494  | 3.179 | -0.0200914 | 3.179 |
| ENSG00000105714 | 3  | 3911578   | 3911869   | AC04561L2  | transcript_unannotated | havana | transcript_unannotated | YES | -0.1124462 | 3.306 | -0.0478868 | 3.126 | 0.0404702 | 7.064 | -0.0574493 | 7.776 | -0.0868433 | 2.226 | 0.0737375  | 7.286 | -0.0718977 | 9.024 |
| ENSG00000120460 | 8  | 12006188  | 12013193  | AC07918L4  | transcript_unannotated | havana | transcript_unannotated | YES | -0.1124462 | 3.306 | -0.0478868 | 3.126 | 0.0404702 | 7.064 | -0.0574493 | 7.776 | -0.0868433 | 2.226 | 0.0737375  | 7.286 | -0.0718977 | 9.024 |
| ENSG00000145429 | 9  | 4188014   | 4212910   | CNTNAP8    | transcript_unannotated | havana | transcript_unannotated | YES | -0.0214778 | 1.986 | -0.0120379 | 3.179 | 0.1409171 | 3.179 | -0.0200914 | 3.179 | -0.0200914 | 3.179 | 0.0092494  | 3.179 | -0.0200914 | 3.179 |
| ENSG00000109953 | 7  | 10046520  | 10046420  | C7orf61    | transcript_unannotated | havana | transcript_unannotated | YES | -0.0079256 | 9.456 | -0.0174877 | 7.806 | 0.3840723 | 6.186 | -0.0574641 | 7.776 | -0.0199881 | 8.886 | 0.1027454  | 6.286 | -0.1504927 | 2.986 |
| ENSG00000158819 | 1  | 4079796   | 4080624   | ZNF790     | transcript_unannotated | havana | transcript_unannotated | YES | -0.0214778 | 1.986 | -0.0120379 | 3.179 | 0.1409171 | 3.179 | -0.0200914 | 3.179 | -0.0200914 | 3.179 | 0.0092494  | 3.179 | -0.0200914 | 3.179 |
| ENSG0000016554  | 8  | 8003445   | 8003123   | P30D2      | transcript_unannotated | havana | transcript_unannotated | YES | -0.1009744 | 3.824 | -0.0470641 | 6.096 | 0.0307131 | 3.796 | -0.0571432 | 7.776 | -0.1399644 | 3.186 | 0.1095972  | 6.106 | -0.0516688 | 7.776 |
| ENSG0000016430  | 17 | 1750405   | 1751266   | AC00556L6  | transcript_unannotated | havana | transcript_unannotated | YES | -0.0214778 | 1.986 | -0.0120379 | 3.179 | 0.1409171 | 3.179 | -0.0200914 | 3.179 | -0.0200914 | 3.179 | 0.0092494  | 3.179 | -0.0200914 | 3.179 |
| ENSG0000013734  | 17 | 1732442   | 1732637   | BNP3       | transcript_unannotated | havana | transcript_unannotated | YES | -0.0214778 | 1.986 | -0.0120379 | 3.179 | 0.1409171 | 3.179 | -0.0200914 | 3.179 | -0.0200914 | 3.179 | 0.0092494  | 3.179 | -0.0200914 | 3.179 |
| ENSG00000183763 | 27 | 2868743   | 2874222   | CHEK2      | transcript_unannotated | havana | transcript_unannotated | YES | -0.1190312 | 3.024 | -0.0631125 | 6.012 | 0.2036411 | 3.086 | -0.0573239 | 7.776 | -0.1511269 | 2.746 | 0.2351036  | 6.206 | -0.1509734 | 5.064 |
| ENSG0000011241  | 16 | 4657819   | 4662179   | SHTK1P     | transcript_unannotated | havana | transcript_unannotated | YES | -0.0083864 | 3.556 | -0.0248651 | 8.646 | 0.2071238 | 7.986 | -0.0573744 | 7.776 | -0.2014731 | 1.446 | 0.1544805  | 4.826 | -0.1152974 | 4.086 |
| ENSG00000121117 | 17 | 12466740  | 12466740  | HR23FB-IT1 | transcript_unannotated | havana | transcript_unannotated | YES | -0.0214778 | 1.986 | -0.0120379 | 3.179 | 0.1409171 | 3.179 | -0.0200914 | 3.179 | -0.0200914 | 3.179 | 0.0092494  | 3.179 | -0.0200914 | 3.179 |
| ENSG00000118358 | 6  | 149999019 | 150005157 | RHAI1P     | transcript_unannotated | havana | transcript_unannotated | YES | -0.0083864 | 3.556 | -0.0248651 | 8.646 | 0.2071238 | 7.986 | -0.0573744 | 7.776 | -0.2014731 | 1.446 | 0.1544805  | 4.826 | -0.1152974 | 4.086 |
| ENSG00000144619 | 17 | 1835602   | 1837670   | KRR2       | transcript_unannotated | havana | transcript_unannotated | YES | -0.1878665 | 1.426 | -0.0762317 | 5.996 | 0.0240620 | 2.908 | -0.0572903 | 7.776 | -0.2331120 | 8.976 | 0.1026933  | 3.786 | -0.0918168 | 5.886 |
| ENSG00000139451 | 14 | 2059340   | 2070720   | EGGA       | transcript_unannotated | havana | transcript_unannotated | YES | -0.1908971 | 9.676 | -0.0574493 | 6.926 | 0.2534919 | 2.024 | -0.0571432 | 7.776 | -0.2404808 | 5.246 | 0.2404808  | 4.826 | -0.1917811 | 1.626 |
| ENSG00000123821 | 13 | 13066843  | 13067423  | C7orf61    | transcript_unannotated | havana | transcript_unannotated | YES | -0.0214778 | 1.986 | -0.0120379 | 3.179 | 0.1409171 | 3.179 | -0.0200914 | 3.179 | -0.0200914 | 3.179 | 0.0092494  | 3.179 | -0.0200914 | 3.179 |
| ENSG00000148792 | 11 | 6512183   | 6512173   | MIR449     | transcript_unannotated | havana | transcript_unannotated | YES | -0.1958917 | 1.666 | -0.1443125 | 3.176 | 0.1176789 | 5.586 | -0.0576889 | 7.776 | -0.1691029 | 2.126 | 0.0789782  | 9.736 | -0.0865678 | 5.546 |
| ENSG00000111118 | 1  | 11577058  | 11577058  | HP24       | transcript_unannotated | havana | transcript_unannotated | YES | -0.0597423 | 6.086 | -0.0318657 | 9.926 | 0.1495956 | 4.586 | -0.0571173 | 7.776 | -0.0919109 | 4.746 | 0.1120566  | 6.116 | -0.1379523 | 4.086 |
| ENSG00000132861 | 17 | 4205670   | 4206766   | AC09844L4  | transcript_unannotated | havana | transcript_unannotated | YES | -0.0214778 | 1.986 | -0.0120379 | 3.179 | 0.1409171 | 3.179 | -0.0200914 | 3.179 | -0.0200914 | 3.179 | 0.0092494  | 3.179 | -0.0200914 | 3.179 |
| ENSG00000121811 | 6  | 149999019 | 15000     |            |                        |        |                        |     |            |       |            |       |           |       |            |       |            |       |            |       |            |       |

| ENSG0000028011  | 10 | 6239353  | 6237366  | AC04597.1 | havana  | tagene     | incRNA         | -0.120868 | 2.95e-01 | -0.079811 | 6.80e-01 | -0.0883   | 6.61e-01 | -0.059253 | 7.69e-01 | -0.167679 | 2.26e-01 | -0.088417 | 6.88e-01 | -0.09607  | 5.04e-01 |           |          |
|-----------------|----|----------|----------|-----------|---------|------------|----------------|-----------|----------|-----------|----------|-----------|----------|-----------|----------|-----------|----------|-----------|----------|-----------|----------|-----------|----------|
| ENSG000001785   | 4  | 9847037  | 9848311  | TPSN5     | ensembl | transcript | protein coding | -0.025942 | 8.21e-01 | -0.043399 | 9.30e-01 | -0.040293 | 8.41e-01 | -0.059274 | 7.69e-01 | -0.037246 | 7.98e-01 | -0.11985  | 5.48e-01 | -0.02777  | 5.68e-01 |           |          |
| ENSG000002996   | 17 | 8760185  | 8761368  | MAGL4     | ensembl | transcript | protein coding | -0.131798 | 1.94e-01 | -0.073788 | 7.74e-01 | -0.262029 | 7.61e-01 | -0.059274 | 7.69e-01 | -0.037246 | 7.98e-01 | -0.081643 | 6.48e-01 | -0.02777  | 5.68e-01 |           |          |
| ENSG00000144118 | 16 | 8760185  | 8761368  | TPSN5     | ensembl | transcript | protein coding | -0.149949 | 1.94e-01 | -0.073788 | 7.74e-01 | -0.262029 | 7.61e-01 | -0.059274 | 7.69e-01 | -0.037246 | 7.98e-01 | -0.081643 | 6.48e-01 | -0.02777  | 5.68e-01 |           |          |
| ENSG0000019134  | 6  | 2829297  | 2829298  | NAIP1     | ensembl | transcript | protein coding | -0.008023 | 7.42e-01 | -0.042079 | 9.21e-01 | -0.22165  | 2.61e-01 | -0.059293 | 7.69e-01 | -0.047079 | 8.00e-01 | -0.042079 | 7.77e-01 | -0.145207 | 3.14e-01 |           |          |
| ENSG0000014892  | 7  | 8760185  | 8761368  | TPSN5     | ensembl | transcript | protein coding | -0.008023 | 7.42e-01 | -0.042079 | 9.21e-01 | -0.22165  | 2.61e-01 | -0.059293 | 7.69e-01 | -0.047079 | 8.00e-01 | -0.042079 | 7.77e-01 | -0.145207 | 3.14e-01 |           |          |
| ENSG0000015065  | 10 | 4765426  | 4765601  | DUSP8P1   | ensembl | transcript | protein coding | -0.003649 | 9.86e-01 | -0.004948 | 9.73e-01 | -0.147976 | 3.00e-01 | -0.059751 | 7.69e-01 | -0.040769 | 7.80e-01 | -0.04721  | 8.11e-01 | -0.032436 | 1.04e-01 |           |          |
| ENSG0000025594  | 20 | 5426782  | 5426923  | AL13882.2 | ensembl | transcript | protein coding | -0.248003 | 2.97e-01 | -0.12744  | 3.79e-01 | -0.171195 | 3.91e-01 | -0.059388 | 7.69e-01 | -0.043184 | 3.11e-01 | -0.075608 | 9.32e-01 | -0.138808 | 3.36e-01 |           |          |
| ENSG0000013920  | 7  | 1816496  | 1816987  | TRAF3M1   | ensembl | transcript | protein coding | -0.142879 | 2.15e-01 | -0.113804 | 3.59e-01 | -0.178883 | 2.88e-01 | -0.059424 | 7.69e-01 | -0.048237 | 3.24e-01 | -0.075608 | 9.32e-01 | -0.138808 | 3.36e-01 |           |          |
| ENSG0000014282  | 1  | 1582873  | 1582877  | KAT7A3    | ensembl | transcript | protein coding | -0.07052  | 5.44e-01 | -0.040589 | 9.12e-01 | -0.120927 | 5.51e-01 | -0.054238 | 7.69e-01 | -0.055246 | 7.62e-01 | -0.006782 | 9.75e-01 | -0.043111 | 7.65e-01 |           |          |
| ENSG0000016323  | 17 | 8022738  | 8023075  | CEP350    | ensembl | transcript | protein coding | -0.148089 | 2.12e-01 | -0.073508 | 9.46e-01 | -0.132488 | 5.48e-01 | -0.059428 | 7.69e-01 | -0.032768 | 8.27e-01 | -0.123248 | 5.46e-01 | -0.102024 | 3.66e-01 |           |          |
| ENSG0000016339  | 6  | 11956560 | 11957640 | YFAP6L1   | ensembl | transcript | tagene         | YES       | YES      | -0.059293 | 1.74e-01 | -0.051233 | 9.93e-01 | -0.141254 | 4.82e-01 | -0.059428 | 7.69e-01 | -0.044536 | 9.00e-01 | -0.031894 | 9.10e-01 | -0.103564 | 7.64e-01 |
| ENSG0000017403  | 17 | 4155636  | 4157209  | KRT9      | ensembl | transcript | protein coding | YES       | YES      | -0.140248 | 2.22e-01 | -0.049508 | 7.52e-01 | -0.080468 | 6.89e-01 | -0.059458 | 7.69e-01 | -0.233884 | 6.89e-01 | -0.12401  | 7.30e-01 | -0.082689 | 5.37e-01 |
| ENSG0000027419  | 7  | 14985400 | 14986429 | AC04807.1 | ensembl | transcript | incRNA         | -0.102788 | 3.74e-01 | -0.095344 | 7.81e-01 | -0.045403 | 8.18e-01 | -0.059444 | 7.69e-01 | -0.171903 | 2.14e-01 | -0.075792 | 9.73e-01 | -0.020412 | 8.55e-01 |           |          |
| ENSG0000016332  | 17 | 4022738  | 4023075  | CEP350    | ensembl | transcript | protein coding | YES       | YES      | -0.148089 | 2.12e-01 | -0.073508 | 9.46e-01 | -0.132488 | 5.48e-01 | -0.059428 | 7.69e-01 | -0.032768 | 8.27e-01 | -0.123248 | 5.46e-01 | -0.102024 | 3.66e-01 |
| ENSG0000016332  | 10 | 2349458  | 2344280  | OTUD1     | ensembl | transcript | protein coding | -0.149597 | 1.94e-01 | -0.072293 | 6.93e-01 | -0.137993 | 1.04e-01 | -0.059516 | 7.69e-01 | -0.197449 | 1.52e-01 | -0.081484 | 7.12e-01 | -0.240807 | 1.16e-01 | -0.140207 | 1.16e-01 |
| ENSG0000017025  | 19 | 5795847  | 5794734  | CTCFB1    | ensembl | transcript | protein coding | -0.084544 | 4.65e-01 | -0.080943 | 5.39e-01 | -0.175247 | 3.92e-01 | -0.059245 | 7.69e-01 | -0.078252 | 7.47e-01 | -0.059569 | 7.87e-01 | -0.10212  | 4.80e-01 | -0.10212  | 4.80e-01 |
| ENSG0000016919  | 7  | 2134787  | 2134715  | AC00274.1 | ensembl | transcript | incRNA         | -0.041979 | 7.17e-01 | -0.00203  | 9.11e-01 | -0.19862  | 3.84e-01 | -0.059258 | 7.69e-01 | -0.042956 | 7.49e-01 | -0.059677 | 8.17e-01 | -0.05174  | 2.74e-01 | -0.05174  | 2.74e-01 |
| ENSG0000017189  | 7  | 1779061  | 1794501  | SNX3      | ensembl | transcript | protein coding | -0.057184 | 2.70e-01 | -0.048239 | 6.55e-01 | -0.274771 | 1.66e-01 | -0.059258 | 7.69e-01 | -0.141186 | 6.80e-01 | -0.046043 | 7.32e-01 | -0.143445 | 2.94e-01 | -0.046043 | 2.94e-01 |
| ENSG0000017885  | 11 | 82614    | 81391    | CRACK2    | ensembl | transcript | protein coding | -0.070455 | 5.43e-01 | -0.071449 | 6.22e-01 | -0.200778 | 2.96e-01 | -0.059254 | 7.69e-01 | -0.088497 | 5.42e-01 | -0.17186  | 4.79e-01 | -0.031075 | 7.65e-01 | -0.031075 | 7.65e-01 |
| ENSG0000013070  | 18 | 178205   | 181276   | ATP8B1    | ensembl | transcript | protein coding | -0.1128   | 3.29e-01 | -0.085138 | 5.56e-01 | -0.118678 | 4.26e-01 | -0.059509 | 7.69e-01 | -0.127283 | 1.59e-01 | -0.118023 | 5.92e-01 | -0.118023 | 5.92e-01 | -0.118023 | 5.92e-01 |
| ENSG0000029756  | 4  | 3817328  | 3819355  | EXOSC6M1  | ensembl | transcript | incRNA         | -0.056573 | 6.93e-01 | -0.074327 | 6.08e-01 | -0.006367 | 9.74e-01 | -0.059606 | 7.69e-01 | -0.032663 | 8.37e-01 | -0.039563 | 7.48e-01 | -0.049527 | 8.10e-01 | -0.049527 | 8.10e-01 |
| ENSG00000106338 | 7  | 15033317 | 15034162 | BARR2E2   | ensembl | transcript | protein coding | -0.159635 | 8.82e-01 | -0.114721 | 2.07e-01 | -0.087847 | 6.63e-01 | -0.059263 | 7.69e-01 | -0.205465 | 1.35e-01 | -0.076581 | 5.15e-01 | -0.155131 | 8.20e-01 | -0.155131 | 8.20e-01 |
| ENSG0000021245  | 6  | 4458474  | 4459545  | LAPK4-AS1 | ensembl | transcript | incRNA         | -0.049527 | 6.94e-01 | -0.091282 | 5.89e-01 | -0.027190 | 9.18e-01 | -0.059628 | 7.69e-01 | -0.127272 | 3.59e-01 | -0.079642 | 7.94e-01 | -0.071498 | 9.04e-01 | -0.071498 | 9.04e-01 |
| ENSG0000027815  | 9  | 3974854  | 3981097  | GUBB      | ensembl | transcript | incRNA         | -0.007381 | 9.90e-01 | -0.054604 | 6.91e-01 | -0.086610 | 8.58e-01 | -0.059649 | 7.69e-01 | -0.062671 | 2.98e-01 | -0.067432 | 7.65e-01 | -0.067432 | 7.65e-01 | -0.067432 | 7.65e-01 |
| ENSG0000017524  | 22 | 4626761  | 4629488  | ITIC8     | ensembl | transcript | protein coding | -0.007744 | 9.74e-01 | -0.023444 | 8.72e-01 | -0.093630 | 6.42e-01 | -0.059669 | 7.69e-01 | -0.036765 | 8.98e-01 | -0.036765 | 8.98e-01 | -0.036765 | 8.98e-01 | -0.036765 | 8.98e-01 |
| ENSG0000016996  | 1  | 2378784  | 2378952  | PNP2      | ensembl | transcript | protein coding | -0.144388 | 2.13e-01 | -0.10788  | 4.00e-01 | -0.124408 | 5.36e-01 | -0.059878 | 7.67e-01 | -0.129235 | 1.83e-01 | -0.128484 | 5.78e-01 | -0.026017 | 9.41e-01 | -0.026017 | 9.41e-01 |
| ENSG0000029846  | 1  | 1032444  | 1032107  | RPL7      | ensembl | transcript | protein coding | -0.013107 | 9.14e-01 | -0.013107 | 9.14e-01 | -0.013107 | 9.14e-01 | -0.013107 | 9.14e-01 | -0.013107 | 9.14e-01 | -0.013107 | 9.14e-01 | -0.013107 | 9.14e-01 | -0.013107 | 9.14e-01 |
| ENSG00000143400 | 8  | 8011151  | 8010548  | SERINC3   | ensembl | transcript | protein coding | -0.197458 | 8.51e-01 | -0.164745 | 3.00e-01 | -0.060468 | 9.81e-01 | -0.058911 | 7.67e-01 | -0.241203 | 7.88e-01 | -0.22895  | 8.66e-01 | -0.227306 | 7.06e-01 | -0.227306 | 7.06e-01 |
| ENSG0000017698  | 11 | 499451   | 500536   | OR5L11    | ensembl | transcript | protein coding | YES       | YES      | -0.079293 | 7.00e-01 | -0.031349 | 8.29e-01 | -0.174965 | 3.81e-01 | -0.059662 | 7.67e-01 | -0.110769 | 2.44e-01 | -0.151562 | 4.80e-01 | -0.151562 | 4.80e-01 |
| ENSG0000014263  | 6  | 6042268  | 6044818  | AC02363.1 | ensembl | transcript | tagene         | YES       | YES      | -0.059293 | 1.74e-01 | -0.051233 | 9.93e-01 | -0.141254 | 4.82e-01 | -0.059428 | 7.69e-01 | -0.044536 | 9.00e-01 | -0.031894 | 9.10e-01 | -0.103564 | 7.64e-01 |
| ENSG0000015840  | 2  | 12011007 | 12012428 | AC02363.2 | ensembl | transcript | incRNA         | -0.043076 | 7.09e-01 | -0.159055 | 4.89e-01 | -0.059712 | 7.67e-01 | -0.034105 | 8.05e-01 | -0.058502 | 6.98e-01 | -0.058502 | 6.98e-01 | -0.058502 | 6.98e-01 | -0.058502 | 6.98e-01 |
| ENSG0000021900  | 2  | 4639219  | 4639228  | LINC0128  | ensembl | transcript | incRNA         | -0.113699 | 3.75e-01 | -0.024557 | 9.86e-01 | -0.009448 | 8.61e-01 | -0.059723 | 7.67e-01 | -0.187224 | 1.74e-01 | -0.124978 | 5.70e-01 | -0.066799 | 7.49e-01 | -0.066799 | 7.49e-01 |
| ENSG0000027827  | 13 | 1383507  | 1383507  | ITIC8     | ensembl | transcript | protein coding | -0.149597 | 1.94e-01 | -0.072293 | 6.93e-01 | -0.137993 | 1.04e-01 | -0.059516 | 7.69e-01 | -0.197449 | 1.52e-01 | -0.081484 | 7.12e-01 | -0.240807 | 1.16e-01 | -0.140207 | 1.16e-01 |
| ENSG0000029236  | 17 | 6628319  | 6640456  | AC04706.3 | ensembl | transcript | incRNA         | -0.137258 | 2.34e-01 | -0.020615 | 2.96e-01 | -0.059755 | 7.67e-01 | -0.127254 | 2.74e-01 | -0.209272 | 7.67e-01 | -0.209272 | 7.67e-01 | -0.209272 | 7.67e-01 | -0.209272 | 7.67e-01 |
| ENSG0000013943  | 12 | 9158528  | 9159328  | SNRPB     | ensembl | transcript | protein coding | -0.037049 | 5.05e-01 | -0.116182 | 3.81e-01 | -0.088888 | 6.74e-01 | -0.059738 | 7.67e-01 | -0.047239 | 7.31e-01 | -0.140036 | 3.26e-01 | -0.022832 | 8.75e-01 | -0.022832 | 8.75e-01 |
| ENSG0000017903  | 7  | 8783568  | 8787640  | SLC25A4   | ensembl | transcript | protein coding | -0.103776 | 1.84e-01 | -0.079840 | 5.00e-01 | -0.059492 | 7.68e-01 | -0.059749 | 7.67e-01 | -0.209483 | 1.30e-01 | -0.079783 | 7.21e-01 | -0.079783 | 7.21e-01 | -0.079783 | 7.21e-01 |
| ENSG0000018986  | 1  | 7449713  | 7449717  | RPL9      | ensembl | transcript | protein coding | YES       | YES      | -0.049724 | 9.49e-01 | -0.049724 | 9.49e-01 | -0.049724 | 9.49e-01 | -0.049724 | 9.49e-01 | -0.049724 | 9.49e-01 | -0.049724 | 9.49e-01 | -0.049724 | 9.49e-01 |
| ENSG0000013529  | 2  | 2350571  | 2350576  | AGAP1P1   | ensembl | transcript | incRNA         | -0.113731 | 3.25e-01 | -0.040365 | 3.00e-01 | -0.008168 | 9.97e-01 | -0.059473 | 7.67e-01 | -0.095473 | 4.92e-01 | -0.134068 | 6.00e-01 | -0.071388 | 2.44e-01 | -0.071388 | 2.44e-01 |
| ENSG0000020225  | 16 | 5638889  | 5637928  | ZNF429    | ensembl | transcript | unprocessed    | -0.140273 | 1.54e-01 | -0.040279 | 7.69e-01 | -0.200819 | 2.97e-01 | -0.059779 | 7.67e-01 | -0.251569 | 6.68e-01 | -0.132078 | 5.42e-01 | -0.179138 | 2.18e-01 | -0.179138 | 2.18e-01 |





| Gene ID        | Gene Name    | Accession | Chromosome | Start    | End      | Strand | Transcript   | Protein          | RefSeq           | Ensembl  | UniProt | NCBI   | EMBL   | GenBank | CCDS   | RefSeq    | Ensembl  | UniProt   | NCBI     | EMBL      | GenBank  | CCDS      |          |           |          |           |          |           |          |
|----------------|--------------|-----------|------------|----------|----------|--------|--------------|------------------|------------------|----------|---------|--------|--------|---------|--------|-----------|----------|-----------|----------|-----------|----------|-----------|----------|-----------|----------|-----------|----------|-----------|----------|
| ENSG0000027285 | LOC101928128 | 31232129  | 3          | 31232128 | 31232178 | +      | HNRNPA1P2    | hnRNA            | processed_pseudo |          |         |        |        |         |        | -0.044433 | 7.01E-01 | -0.007561 | 9.58E-01 | 0.147883  | 4.61E-01 | -0.063161 | 7.54E-01 | -0.007894 | 5.28E-01 | -0.070196 | 7.50E-01 | 0.050209  | 7.30E-01 |
| ENSG0000024209 | LOC101928129 | 12345678  | 12         | 12345678 | 12345678 | +      | SNRPB        | protein_coding   | SNRPB            | SNRPB    | P09876  | U00001 | U00001 | U00001  | U00001 | 0.002273  | 8.81E-02 | -0.114270 | 4.41E-01 | 0.114270  | 4.41E-01 | -0.063161 | 7.54E-01 | -0.072289 | 6.08E-01 | -0.253147 | 2.79E-01 | -0.147209 | 2.74E-01 |
| ENSG0000025041 | LOC101928130 | 960399    | 1          | 960399   | 960420   | +      | LOC101928130 | processed_pseudo |                  |          |         |        |        |         |        | -0.000000 | 0.00E+00 | -0.000000 | 0.00E+00 | -0.000000 | 0.00E+00 | -0.000000 | 0.00E+00 | -0.000000 | 0.00E+00 | -0.000000 | 0.00E+00 | -0.000000 | 0.00E+00 |
| ENSG0000022557 | LOC101928131 | 3361359   | 3          | 3361359  | 3361749  | +      | HERPUD2      | protein_coding   | HERPUD2          | HERPUD2  | P12345  | U00001 | U00001 | U00001  | U00001 | 0.007617  | 5.07E-01 | -0.065812 | 7.50E-01 | 0.065812  | 7.50E-01 | -0.063161 | 7.54E-01 | -0.074635 | 2.90E-01 | -0.165147 | 0.51E-01 | -0.073874 | 2.74E-01 |
| ENSG0000013920 | LOC101928132 | 4865311   | 12         | 4865311  | 4868278  | +      | STX16L1      | protein_coding   | STX16L1          | STX16L1  | P67890  | U00001 | U00001 | U00001  | U00001 | 0.008412  | 4.71E-01 | -0.001944 | 6.09E-01 | 0.076570  | 7.95E-01 | -0.063209 | 7.53E-01 | -0.072766 | 3.34E-01 | -0.089924 | 4.90E-01 | 0.009924  | 4.90E-01 |
| ENSG0000025050 | LOC101928133 | 12345678  | 12         | 12345678 | 12345678 | +      | LOC101928133 | processed_pseudo |                  |          |         |        |        |         |        | -0.000000 | 0.00E+00 | -0.000000 | 0.00E+00 | -0.000000 | 0.00E+00 | -0.000000 | 0.00E+00 | -0.000000 | 0.00E+00 | -0.000000 | 0.00E+00 | -0.000000 | 0.00E+00 |
| ENSG0000067074 | LOC101928134 | 7445339   | 7          | 7445339  | 7460205  | +      | GTJ10L1      | protein_coding   | GTJ10L1          | GTJ10L1  | P12345  | U00001 | U00001 | U00001  | U00001 | 0.001217  | 2.86E-01 | -0.029289 | 9.88E-01 | 0.130324  | 5.02E-01 | -0.063274 | 7.53E-01 | -0.072375 | 1.01E-01 | -0.152814 | 2.84E-01 | 0.001217  | 2.86E-01 |
| ENSG0000013706 | LOC101928135 | 7692114   | 7          | 7692114  | 7692778  | +      | IMP1         | protein_coding   | IMP1             | IMP1     | P67890  | U00001 | U00001 | U00001  | U00001 | 0.002563  | 8.25E-01 | -0.018397 | 8.98E-01 | 0.2061234 | 3.16E-01 | -0.063275 | 7.53E-01 | -0.072029 | 9.41E-01 | -0.188701 | 3.99E-01 | -0.021203 | 8.73E-01 |
| ENSG0000013921 | LOC101928136 | 12345678  | 12         | 12345678 | 12345678 | +      | LOC101928136 | processed_pseudo |                  |          |         |        |        |         |        | -0.000000 | 0.00E+00 | -0.000000 | 0.00E+00 | -0.000000 | 0.00E+00 | -0.000000 | 0.00E+00 | -0.000000 | 0.00E+00 | -0.000000 | 0.00E+00 | -0.000000 | 0.00E+00 |
| ENSG0000013365 | LOC101928137 | 14799808  | 14         | 14799808 | 14799808 | +      | DPY3L3       | protein_coding   | DPY3L3           | DPY3L3   | P12345  | U00001 | U00001 | U00001  | U00001 | 0.011968  | 2.91E-01 | -0.058839 | 5.58E-01 | 0.258415  | 1.93E-01 | -0.063281 | 7.53E-01 | -0.071851 | 1.96E-01 | -0.105884 | 3.25E-01 | 0.015884  | 3.25E-01 |
| ENSG0000013760 | LOC101928138 | 17984380  | 17         | 17984380 | 17993365 | +      | FGF1         | protein_coding   | FGF1             | FGF1     | P67890  | U00001 | U00001 | U00001  | U00001 | 0.013075  | 2.56E-01 | -0.076629 | 5.97E-01 | 0.158717  | 4.44E-01 | -0.063589 | 7.53E-01 | -0.073490 | 8.84E-01 | -0.152426 | 4.82E-01 | -0.143134 | 3.21E-01 |
| ENSG0000023973 | LOC101928139 | 12345678  | 12         | 12345678 | 12345678 | +      | LOC101928139 | processed_pseudo |                  |          |         |        |        |         |        | -0.000000 | 0.00E+00 | -0.000000 | 0.00E+00 | -0.000000 | 0.00E+00 | -0.000000 | 0.00E+00 | -0.000000 | 0.00E+00 | -0.000000 | 0.00E+00 | -0.000000 | 0.00E+00 |
| ENSG0000025772 | LOC101928140 | 10254751  | 10         | 10254751 | 10257847 | +      | LINC02401    | lincRNA          | lincRNA          | YES      | YES     | YES    | YES    | YES     | YES    | -0.006461 | 1.05E-01 | -0.064471 | 7.94E-01 | 0.186045  | 1.94E-01 | -0.063573 | 7.53E-01 | -0.075113 | 6.01E-01 | -0.242575 | 0.57E-01 | -0.223124 | 3.12E-01 |
| ENSG0000013406 | LOC101928141 | 5813329   | 5          | 5813329  | 5813362  | +      | ZNF74        | protein_coding   | ZNF74            | ZNF74    | P12345  | U00001 | U00001 | U00001  | U00001 | 0.156076  | 1.75E-01 | -0.112472 | 1.81E-01 | 0.1507749 | 3.47E-01 | -0.063652 | 7.52E-01 | -0.074210 | 3.78E-01 | -0.094788 | 6.77E-01 | 0.044786  | 7.20E-01 |
| ENSG0000017968 | LOC101928142 | 2904139   | 2          | 2904139  | 2904140  | +      | Metazoan SRP | misc_RNA         | misc_RNA         |          |         |        |        |         |        | -0.117372 | 1.71E-01 | -0.113413 | 4.41E-01 | 0.114938  | 5.68E-01 | -0.063663 | 7.52E-01 | -0.072019 | 1.35E-01 | -0.070705 | 2.21E-01 | -0.037492 | 8.73E-01 |
| ENSG0000012981 | LOC101928143 | 6780021   | 6          | 6780021  | 6780042  | +      | LINC0039     | lincRNA          | lincRNA          |          |         |        |        |         |        | 0.006612  | 5.96E-01 | -0.007868 | 8.48E-01 | 0.017664  | 2.84E-01 | -0.063693 | 7.53E-01 | -0.075113 | 2.88E-01 | -0.092628 | 3.97E-01 | 0.006612  | 5.96E-01 |
| ENSG0000024432 | LOC101928144 | 12878174  | 12         | 12878174 | 12878448 | +      | RN716L8P     | protein_coding   | RN716L8P         | RN716L8P | P12345  | U00001 | U00001 | U00001  | U00001 | 0.003449  | 7.74E-01 | -0.113958 | 4.84E-01 | 0.080259  | 6.59E-01 | -0.063711 | 7.52E-01 | -0.072158 | 9.24E-01 | -0.011249 | 9.18E-01 | 0.003449  | 7.74E-01 |
| ENSG0000018635 | LOC101928145 | 7248500   | 7          | 7248500  | 7279159  | +      | ARAF1        | protein_coding   | ARAF1            | ARAF1    | P67890  | U00001 | U00001 | U00001  | U00001 | 0.0073814 | 9.49E-01 | -0.080652 | 9.52E-01 | 0.294457  | 6.21E-01 | -0.063720 | 7.52E-01 | -0.072830 | 8.94E-01 | -0.126778 | 5.64E-01 | -0.104420 | 7.79E-01 |
| ENSG0000025075 | LOC101928146 | 12345678  | 12         | 12345678 | 12345678 | +      | LOC101928146 | processed_pseudo |                  |          |         |        |        |         |        | -0.000000 | 0.00E+00 | -0.000000 | 0.00E+00 | -0.000000 | 0.00E+00 | -0.000000 | 0.00E+00 | -0.000000 | 0.00E+00 | -0.000000 | 0.00E+00 | -0.000000 | 0.00E+00 |
| ENSG0000025853 | LOC101928147 | 5846641   | 5          | 5846641  | 5918247  | +      | LINC01502    | lincRNA          | lincRNA          | YES      | YES     | YES    | YES    | YES     | YES    | -0.146897 | 2.02E-01 | -0.041506 | 4.04E-01 | 0.063764  | 7.75E-01 | -0.063770 | 7.52E-01 | -0.074100 | 3.81E-01 | -0.089771 | 7.52E-01 | -0.088723 | 5.42E-01 |
| ENSG0000025663 | LOC101928148 | 16492094  | 16         | 16492094 | 16493407 | +      | LINC02580    | lincRNA          | lincRNA          |          |         |        |        |         |        | -0.001792 | 3.80E-01 | -0.013704 | 9.14E-01 | 0.0257177 | 9.06E-01 | -0.063797 | 7.52E-01 | -0.072099 | 1.41E-01 | -0.087975 | 6.90E-01 | 0.025238  | 6.62E-01 |
| ENSG0000027473 | LOC101928149 | 3368780   | 3          | 3368780  | 3369250  | +      | LOC08781.1   | lincRNA          | lincRNA          |          |         |        |        |         |        | -0.002333 | 8.27E-01 | -0.001692 | 9.81E-01 | 0.051211  | 8.00E-01 | -0.063773 | 7.52E-01 | -0.072024 | 1.65E-01 | -0.022941 | 9.17E-01 | 0.018138  | 7.66E-01 |
| ENSG0000025772 | LOC101928150 | 10254751  | 10         | 10254751 | 10257847 | +      | LINC02401    | lincRNA          | lincRNA          | YES      | YES     | YES    | YES    | YES     | YES    | -0.006461 | 1.05E-01 | -0.064471 | 7.94E-01 | 0.186045  | 1.94E-01 | -0.063573 | 7.53E-01 | -0.075113 | 6.01E-01 | -0.242575 | 0.57E-01 | -0.223124 | 3.12E-01 |
| ENSG0000013406 | LOC101928151 | 5813329   | 5          | 5813329  | 5813362  | +      | ZNF74        | protein_coding   | ZNF74            | ZNF74    | P12345  | U00001 | U00001 | U00001  | U00001 | 0.156076  | 1.75E-01 | -0.112472 | 1.81E-01 | 0.1507749 | 3.47E-01 | -0.063652 | 7.52E-01 | -0.074210 | 3.78E-01 | -0.094788 | 6.77E-01 | 0.044786  | 7.20E-01 |
| ENSG0000017968 | LOC101928152 | 2904139   | 2          | 2904139  | 2904140  | +      | Metazoan SRP | misc_RNA         | misc_RNA         |          |         |        |        |         |        | -0.117372 | 1.71E-01 | -0.113413 | 4.41E-01 | 0.114938  | 5.68E-01 | -0.063663 | 7.52E-01 | -0.072019 | 1.35E-01 | -0.070705 | 2.21E-01 | -0.037492 | 8.73E-01 |
| ENSG0000012981 | LOC101928153 | 6780021   | 6          | 6780021  | 6780042  | +      | LINC0039     | lincRNA          | lincRNA          |          |         |        |        |         |        | 0.006612  | 5.96E-01 | -0.007868 | 8.48E-01 | 0.017664  | 2.84E-01 | -0.063693 | 7.53E-01 | -0.075113 | 2.88E-01 | -0.092628 | 3.97E-01 | 0.006612  | 5.96E-01 |
| ENSG0000024432 | LOC101928154 | 12878174  | 12         | 12878174 | 12878448 | +      | RN716L8P     | protein_coding   | RN716L8P         | RN716L8P | P12345  | U00001 | U00001 | U00001  | U00001 | 0.003449  | 7.74E-01 | -0.113958 | 4.84E-01 | 0.080259  | 6.59E-01 | -0.063711 | 7.52E-01 | -0.072158 | 9.24E-01 | -0.011249 | 9.18E-01 | 0.003449  | 7.74E-01 |
| ENSG0000018635 | LOC101928155 | 7248500   | 7          | 7248500  | 7279159  | +      | ARAF1        | protein_coding   | ARAF1            | ARAF1    | P67890  | U00001 | U00001 | U00001  | U00001 | 0.0073814 | 9.49E-01 | -0.080652 | 9.52E-01 | 0.294457  | 6.21E-01 | -0.063720 | 7.52E-01 | -0.072830 | 8.94E-01 | -0.126778 | 5.64E-01 | -0.104420 | 7.79E-01 |
| ENSG0000025075 | LOC101928156 | 12345678  | 12         | 12345678 | 12345678 | +      | LOC101928156 | processed_pseudo |                  |          |         |        |        |         |        | -0.000000 | 0.00E+00 | -0.000000 | 0.00E+00 | -0.000000 | 0.00E+00 | -0.000000 | 0.00E+00 | -0.000000 | 0.00E+00 | -0.000000 | 0.00E+00 | -0.000000 | 0.00E+00 |
| ENSG0000025853 | LOC101928157 | 5846641   | 5          | 5846641  | 5918247  | +      | LINC01502    | lincRNA          | lincRNA          | YES      | YES     | YES    | YES    | YES     | YES    | -0.146897 | 2.02E-01 | -0.041506 | 4.04E-01 | 0.063764  | 7.75E-01 | -0.063770 | 7.52E-01 | -0.074100 | 3.81E-01 | -0.089771 | 7.52E-01 | -0.088723 | 5.42E-01 |
| ENSG0000025663 | LOC101928158 | 16492094  | 16         | 16492094 | 16493407 | +      | LINC02580    | lincRNA          | lincRNA          |          |         |        |        |         |        | -0.001792 | 3.80E-01 | -0.013704 | 9.14E-01 | 0.0257177 | 9.06E-01 | -0.063797 | 7.52E-01 | -0.072099 | 1.41E-01 | -0.087975 | 6.90E-01 | 0.025238  | 6.62E-01 |
| ENSG0000027473 | LOC101928159 | 3368780   | 3          | 3368780  | 3369250  | +      | LOC08781.1   | lincRNA          | lincRNA          |          |         |        |        |         |        | -0.002333 | 8.27E-01 | -0.001692 | 9.81E-01 | 0.051211  | 8.00E-01 | -0.063773 | 7.52E-01 | -0.072024 | 1.65E-01 | -0.022941 | 9.17E-01 | 0.018138  | 7.66E-01 |
| ENSG0000025772 | LOC101928160 | 10254751  | 10         | 10254751 | 10257847 | +      | LINC02401    | lincRNA          | lincRNA          | YES      | YES     | YES    | YES    | YES     | YES    | -0.006461 | 1.05E-01 | -0.064471 | 7.94E-01 | 0.186     |          |           |          |           |          |           |          |           |          |





| ENSG0000027672  | 13 | 20070250  | 20071236  | KRRP1L     | havana  | processed_pseudo   | YES | YES | -0.259825  | 2.25e-04 | -0.2147741 | 1.34e-01 | 0.1504502  | 4.37e-01 | -0.0679987 | 7.36e-01 | -0.1340706 | 2.05e-01 | -0.1072182 | 6.26e-01 | -0.1400208 | 3.32e-01 |
|-----------------|----|-----------|-----------|------------|---------|--------------------|-----|-----|------------|----------|------------|----------|------------|----------|------------|----------|------------|----------|------------|----------|------------|----------|
| ENSG0000046900  | 4  | 996800    | 9961166   | ARPC2D26.1 | havana  | mRNA               |     |     | -0.156248  | 8.82e-02 | -0.087895  | 5.68e-01 | 0.2617613  | 1.87e-01 | 0.0600031  | 7.36e-01 | 0.2809696  | 9.86e-01 | 0.0714114  | 7.66e-01 | -0.1079004 | 2.44e-01 |
| ENSG0000011191  | 4  | 10545310  | 9945112   | AC0244.11  | havana  | mRNA               |     |     | -0.103841  | 2.58e-01 | -0.0197769 | 7.70e-01 | 0.1881373  | 7.94e-01 | 0.0600031  | 7.36e-01 | 0.1110541  | 6.35e-01 | 0.1110541  | 6.35e-01 | 0.0524489  | 7.68e-01 |
| ENSG0000014895  | 11 | 12506302  | 12509616  | SIC12.2    | ensembl | mRNA               |     |     | -0.103841  | 2.58e-01 | -0.0197769 | 7.70e-01 | 0.1881373  | 7.94e-01 | 0.0600031  | 7.36e-01 | 0.1110541  | 6.35e-01 | 0.1110541  | 6.35e-01 | 0.0524489  | 7.68e-01 |
| ENSG0000017448  | 11 | 1309171   | 13102943  | TOP1L3     | ensembl | mRNA               |     |     | -0.107608  | 1.62e-01 | -0.0318143 | 1.56e-01 | 0.1539511  | 4.43e-01 | 0.0600031  | 7.36e-01 | 0.1312449  | 3.87e-01 | 0.0600031  | 7.36e-01 | 0.0808992  | 5.78e-01 |
| ENSG0000016972  | 7  | 12306004  | 12944048  | LOC101928  | ensembl | mRNA               |     |     | -0.085642  | 6.12e-01 | -0.0084643 | 5.96e-01 | 0.1506854  | 1.57e-01 | 0.0600031  | 7.36e-01 | 0.1312449  | 3.87e-01 | 0.0600031  | 7.36e-01 | 0.0808992  | 5.78e-01 |
| ENSG0000013544  | 12 | 113056709 | 113098028 | ITP1L3     | ensembl | mRNA               |     |     | -0.085642  | 6.12e-01 | -0.0084643 | 5.96e-01 | 0.1506854  | 1.57e-01 | 0.0600031  | 7.36e-01 | 0.1312449  | 3.87e-01 | 0.0600031  | 7.36e-01 | 0.0808992  | 5.78e-01 |
| ENSG0000012887  | 6  | 13118435  | 13118484  | AL117222.1 | havana  | processed_pseudo   |     |     | -0.175134  | 1.28e-01 | -0.0948644 | 5.12e-01 | 0.1857475  | 3.54e-01 | 0.0600031  | 7.36e-01 | 0.2239457  | 1.04e-01 | -0.1438768 | 5.14e-01 | -0.1601561 | 5.92e-01 |
| ENSG0000017021  | 2  | 2322299   | 23202863  | LOC121214  | ensembl | transcribed_unappr | YES | YES | -0.123248  | 4.45e-01 | -0.0024643 | 5.89e-01 | 0.1521770  | 2.88e-01 | 0.0600031  | 7.36e-01 | 0.1312449  | 3.87e-01 | 0.0600031  | 7.36e-01 | 0.0808992  | 5.78e-01 |
| ENSG0000012486  | 19 | 1523519   | 15323245  | BRD4       | ensembl | mRNA               |     |     | -0.050009  | 9.65e-01 | -0.015009  | 6.88e-01 | 0.0512829  | 7.94e-01 | 0.0600031  | 7.36e-01 | 0.0554023  | 7.99e-01 | 0.0554023  | 7.99e-01 | 0.0054401  | 9.28e-01 |
| ENSG0000013888  | 6  | 27173814  | 27210783  | AC019011.1 | havana  | transcribed_unappr |     |     | -0.162452  | 1.58e-01 | -0.1196548 | 4.08e-01 | 0.1500004  | 4.49e-01 | 0.0600031  | 7.36e-01 | 0.1972444  | 1.53e-01 | -0.0981707 | 6.56e-01 | -0.1317815 | 3.62e-01 |
| ENSG0000013204  | 2  | 7032356   | 7032356   | LOC121214  | ensembl | transcribed_unappr | YES | YES | -0.123248  | 4.45e-01 | -0.0024643 | 5.89e-01 | 0.1521770  | 2.88e-01 | 0.0600031  | 7.36e-01 | 0.1312449  | 3.87e-01 | 0.0600031  | 7.36e-01 | 0.0808992  | 5.78e-01 |
| ENSG0000017543  | 15 | 5698812   | 5698812   | AC019011.1 | havana  | mRNA               |     |     | -0.09832   | 0.82e-01 | -0.219033  | 1.21e-01 | 0.1557171  | 4.47e-01 | 0.0600031  | 7.36e-01 | 0.1921054  | 5.07e-01 | -0.1292104 | 5.57e-01 | -0.134344  | 3.62e-01 |
| ENSG00000126670 | 9  | 2652856   | 2654371   | AL040611.1 | havana  | transcribed_unappr | YES | YES | -0.0202964 | 8.61e-01 | -0.0145977 | 4.83e-01 | 0.09291314 | 6.22e-01 | 0.0600031  | 7.36e-01 | 0.1312449  | 3.87e-01 | 0.0600031  | 7.36e-01 | 0.0808992  | 5.78e-01 |
| ENSG0000012483  | 20 | 3543329   | 3543450   | GDPS-AS1   | havana  | mRNA               |     |     | -0.107802  | 3.54e-01 | -0.0200027 | 7.30e-01 | 0.120883   | 3.15e-01 | 0.0600031  | 7.36e-01 | 0.1074981  | 5.34e-01 | -0.0648895 | 7.69e-01 | -0.1510975 | 2.93e-01 |
| ENSG0000012494  | 2  | 149266171 | 14927012  | ZNF783     | ensembl | mRNA               |     |     | -0.124308  | 3.17e-01 | -0.0012466 | 9.91e-01 | 0.0600031  | 7.36e-01 | 0.124308   | 3.17e-01 | 0.0600031  | 7.36e-01 | 0.124308   | 3.17e-01 | 0.0600031  | 7.36e-01 |
| ENSG0000017055  | 12 | 12044864  | 12044864  | TRAP1      | ensembl | mRNA               |     |     | -0.0549935 | 6.44e-01 | -0.0248134 | 6.61e-01 | 0.0800711  | 6.62e-01 | 0.0600031  | 7.36e-01 | 0.1021935  | 8.17e-01 | 0.1252045  | 1.13e-01 | 0.1393420  | 3.34e-01 |
| ENSG0000013544  | 16 | 19555240  | 19706793  | VPS15      | ensembl | mRNA               |     |     | -0.0781073 | 4.98e-01 | -0.023049  | 8.74e-01 | 0.1271372  | 3.71e-01 | 0.0600031  | 7.36e-01 | 0.1271372  | 3.71e-01 | 0.1271372  | 3.71e-01 | 0.0600031  | 7.36e-01 |
| ENSG0000012483  | 2  | 7032356   | 7032356   | LOC121214  | ensembl | transcribed_unappr | YES | YES | -0.123248  | 4.45e-01 | -0.0024643 | 5.89e-01 | 0.1521770  | 2.88e-01 | 0.0600031  | 7.36e-01 | 0.1312449  | 3.87e-01 | 0.0600031  | 7.36e-01 | 0.0808992  | 5.78e-01 |
| ENSG0000018713  | 1  | 34792999  | 3479574   | GLI4       | ensembl | mRNA               |     |     | -0.0872326 | 4.51e-01 | -0.0456427 | 6.66e-01 | 0.0600031  | 7.36e-01 | 0.145688   | 2.98e-01 | 0.0600031  | 7.36e-01 | 0.0600031  | 7.36e-01 | 0.0600031  | 7.36e-01 |
| ENSG0000013520  | 3  | 1549125   | 15638422  | FBLN2      | ensembl | mRNA               |     |     | -0.1991652 | 8.25e-02 | -0.081542  | 5.61e-01 | 0.1016438  | 9.46e-01 | 0.0600031  | 7.36e-01 | 0.194588   | 9.06e-01 | 0.1035461  | 7.06e-01 | -0.0279989 | 8.56e-01 |
| ENSG0000012483  | 2  | 7032356   | 7032356   | LOC121214  | ensembl | transcribed_unappr | YES | YES | -0.123248  | 4.45e-01 | -0.0024643 | 5.89e-01 | 0.1521770  | 2.88e-01 | 0.0600031  | 7.36e-01 | 0.1312449  | 3.87e-01 | 0.0600031  | 7.36e-01 | 0.0808992  | 5.78e-01 |
| ENSG0000013888  | 6  | 27173814  | 27210783  | AC019011.1 | havana  | transcribed_unappr |     |     | -0.162452  | 1.58e-01 | -0.1196548 | 4.08e-01 | 0.1500004  | 4.49e-01 | 0.0600031  | 7.36e-01 | 0.1972444  | 1.53e-01 | -0.0981707 | 6.56e-01 | -0.1317815 | 3.62e-01 |
| ENSG0000017543  | 15 | 5698812   | 5698812   | AC019011.1 | havana  | mRNA               |     |     | -0.09832   | 0.82e-01 | -0.219033  | 1.21e-01 | 0.1557171  | 4.47e-01 | 0.0600031  | 7.36e-01 | 0.1921054  | 5.07e-01 | -0.1292104 | 5.57e-01 | -0.134344  | 3.62e-01 |
| ENSG00000126670 | 9  | 2652856   | 2654371   | AL040611.1 | havana  | transcribed_unappr | YES | YES | -0.0202964 | 8.61e-01 | -0.0145977 | 4.83e-01 | 0.09291314 | 6.22e-01 | 0.0600031  | 7.36e-01 | 0.1312449  | 3.87e-01 | 0.0600031  | 7.36e-01 | 0.0808992  | 5.78e-01 |
| ENSG0000012483  | 20 | 3543329   | 3543450   | GDPS-AS1   | havana  | mRNA               |     |     | -0.107802  | 3.54e-01 | -0.0200027 | 7.30e-01 | 0.120883   | 3.15e-01 | 0.0600031  | 7.36e-01 | 0.1074981  | 5.34e-01 | -0.0648895 | 7.69e-01 | -0.1510975 | 2.93e-01 |
| ENSG0000012494  | 2  | 149266171 | 14927012  | ZNF783     | ensembl | mRNA               |     |     | -0.124308  | 3.17e-01 | -0.0012466 | 9.91e-01 | 0.0600031  | 7.36e-01 | 0.124308   | 3.17e-01 | 0.0600031  | 7.36e-01 | 0.124308   | 3.17e-01 | 0.0600031  | 7.36e-01 |
| ENSG0000017055  | 12 | 12044864  | 12044864  | TRAP1      | ensembl | mRNA               |     |     | -0.0549935 | 6.44e-01 | -0.0248134 | 6.61e-01 | 0.0800711  | 6.62e-01 | 0.0600031  | 7.36e-01 | 0.1021935  | 8.17e-01 | 0.1252045  | 1.13e-01 | 0.1393420  | 3.34e-01 |
| ENSG0000013544  | 16 | 19555240  | 19706793  | VPS15      | ensembl | mRNA               |     |     | -0.0781073 | 4.98e-01 | -0.023049  | 8.74e-01 | 0.1271372  | 3.71e-01 | 0.0600031  | 7.36e-01 | 0.1271372  | 3.71e-01 | 0.1271372  | 3.71e-01 | 0.0600031  | 7.36e-01 |
| ENSG0000012483  | 2  | 7032356   | 7032356   | LOC121214  | ensembl | transcribed_unappr | YES | YES | -0.123248  | 4.45e-01 | -0.0024643 | 5.89e-01 | 0.1521770  | 2.88e-01 | 0.0600031  | 7.36e-01 | 0.1312449  | 3.87e-01 | 0.0600031  | 7.36e-01 | 0.0808992  | 5.78e-01 |
| ENSG0000018713  | 1  | 34792999  | 3479574   | GLI4       | ensembl | mRNA               |     |     | -0.0872326 | 4.51e-01 | -0.0456427 | 6.66e-01 | 0.0600031  | 7.36e-01 | 0.145688   | 2.98e-01 | 0.0600031  | 7.36e-01 | 0.0600031  | 7.36e-01 | 0.0600031  | 7.36e-01 |
| ENSG0000013520  | 3  | 1549125   | 15638422  | FBLN2      | ensembl | mRNA               |     |     | -0.1991652 | 8.25e-02 | -0.081542  | 5.61e-01 | 0.1016438  | 9.46e-01 | 0.0600031  | 7.36e-01 | 0.194588   | 9.06e-01 | 0.1035461  | 7.06e-01 | -0.0279989 | 8.56e-01 |
| ENSG0000012483  | 2  | 7032356   | 7032356   | LOC121214  | ensembl | transcribed_unappr | YES | YES | -0.123248  | 4.45e-01 | -0.0024643 | 5.89e-01 | 0.1521770  | 2.88e-01 | 0.0600031  | 7.36e-01 | 0.1312449  | 3.87e-01 | 0.0600031  | 7.36e-01 | 0.0808992  | 5.78e-01 |
| ENSG0000013888  | 6  | 27173814  | 27210783  | AC019011.1 | havana  | transcribed_unappr |     |     | -0.162452  | 1.58e-01 | -0.1196548 | 4.08e-01 | 0.1500004  | 4.49e-01 | 0.0600031  | 7.36e-01 | 0.1972444  | 1.53e-01 | -0.0981707 | 6.56e-01 | -0.1317815 | 3.62e-01 |
| ENSG0000017543  | 15 | 5698812   | 5698812   | AC019011.1 | havana  | mRNA               |     |     | -0.09832   | 0.82e-01 | -0.219033  | 1.21e-01 | 0.1557171  | 4.47e-01 | 0.0600031  | 7.36e-01 | 0.1921054  | 5.07e-01 | -0.1292104 | 5.57e-01 | -0.134344  | 3.62e-01 |
| ENSG00000126670 | 9  | 2652856   | 2654371   | AL040611.1 | havana  | transcribed_unappr | YES | YES | -0.0202964 | 8.61e-01 | -0.0145977 | 4.83e-01 | 0.09291314 | 6.22e-01 | 0.0600031  | 7.36e-01 | 0.1312449  | 3.87e-01 | 0.0600031  | 7.36e-01 | 0.0808992  | 5.78e-01 |
| ENSG0000012483  | 20 | 3543329   | 3543450   | GDPS-AS1   | havana  | mRNA               |     |     | -0.107802  | 3.54e-01 | -0.0200027 | 7.30e-01 | 0.120883   | 3.15e-01 | 0.0600031  | 7.36e-01 | 0.1074981  | 5.34e-01 | -0.0648895 | 7.69e-01 | -0.1510975 | 2.93e-01 |
| ENSG0000012494  | 2  | 149266171 | 14927012  | ZNF783     | ensembl | mRNA               |     |     | -0.124308  | 3.17e-01 | -0.0012466 | 9.91e-01 | 0.0600031  | 7.36e-01 | 0.124308   | 3.17e-01 | 0.0600031  | 7.36e-01 | 0.124308   | 3.17e-01 | 0.0600031  | 7.36e-01 |
| ENSG0000017055  | 12 | 12044864  | 12044864  | TRAP1      | ensembl | mRNA               |     |     | -0.0549935 | 6.44e-01 | -0.0248134 | 6.61e-01 | 0.0800711  | 6.62e-01 | 0.0600031  | 7.36e-01 | 0.1021935  | 8.17e-01 | 0.1252045  | 1.13e-01 | 0.1393420  | 3.34e-01 |
| ENSG0000013544  | 16 | 19555240  | 19706793  | VPS15      | ensembl | mRNA               |     |     | -0.0781073 | 4.98e-01 | -0.023049  | 8.74e-01 | 0.1271372  | 3.71e-01 | 0.0600031  | 7.36e-01 | 0.1271372  | 3.71e-01 | 0.1271372  | 3.71e-01 | 0.0600031  | 7.36e-01 |
| ENSG0000012483  | 2  | 7032356   | 7032356   | LOC121214  | ensembl | transcribed_unappr | YES | YES | -0.123248  | 4.45e-01 | -0.0024643 | 5.89e-01 | 0.1521770  | 2.88e-01 | 0.0600     |          |            |          |            |          |            |          |

|                 |    |          |          |            |            |                         |            |          |            |          |            |          |           |          |           |          |           |          |           |          |
|-----------------|----|----------|----------|------------|------------|-------------------------|------------|----------|------------|----------|------------|----------|-----------|----------|-----------|----------|-----------|----------|-----------|----------|
| ENSG0000013632  | 14 | 36516192 | 36521149 | NKX2-1     | transcript | protein_coding          | -0.150328  | 1.92e-01 | -0.121167  | 4.88e-01 | -0.139129  | 4.89e-01 | -0.070623 | 7.27e-01 | -0.176508 | 2.02e-01 | -0.151244 | 4.90e-01 | -0.169757 | 2.99e-01 |
| ENSG0000024660  | 9  | 8947237  | 8947202  | ALDH3L2.1  | transcript | protein_coding          | 0.049574   | 5.98e-01 | 0.0291114  | 8.99e-01 | 0.0672349  | 7.99e-01 | 0.070623  | 7.27e-01 | 0.0529729 | 8.00e-01 | 0.168904  | 5.95e-01 | 0.097862  | 5.88e-01 |
| ENSG0000024775  | 7  | 4409162  | 9718447  | PKNOX4     | transcript | protein_coding          | 0.049574   | 5.98e-01 | 0.0291114  | 8.99e-01 | 0.0672349  | 7.99e-01 | 0.070623  | 7.27e-01 | 0.0529729 | 8.00e-01 | 0.168904  | 5.95e-01 | 0.097862  | 5.88e-01 |
| ENSG0000024666  | 6  | 4649252  | 4646612  | ALDH5B1.1  | transcript | lincRNA                 | YES        | YES      | YES        | YES      | YES        | YES      | YES       | YES      | YES       | YES      | YES       | YES      | YES       | YES      |
| ENSG0000011319  | 9  | 18633441 | 18634702 | DYX5       | transcript | protein_coding          | -0.240208  | 4.00e-01 | -0.344326  | 1.01e-01 | -0.021689  | 9.11e-01 | 0.070991  | 7.26e-01 | 0.226607  | 8.49e-01 | 0.125279  | 5.69e-01 | 0.050818  | 7.00e-01 |
| ENSG0000011791  | 1  | 1488966  | 3489524  | FAM67B     | transcript | protein_coding          | -0.042418  | 3.26e-01 | -0.054118  | 3.42e-01 | -0.024418  | 3.42e-01 | 0.070991  | 7.26e-01 | 0.168904  | 5.95e-01 | 0.097862  | 5.88e-01 | 0.125279  | 5.69e-01 |
| ENSG0000014864  | 4  | 5264488  | 5270632  | GLT1D1     | transcript | protein_coding          | -0.005828  | 9.68e-01 | -0.044577  | 7.95e-01 | 0.0246831  | 9.01e-01 | 0.070623  | 7.26e-01 | 0.043248  | 5.96e-01 | 0.251584  | 2.47e-01 | -0.121225 | 4.00e-01 |
| ENSG0000027466  | 10 | 12962388 | 12962464 | ALX3SS1.1  | transcript | lincRNA                 | YES        | YES      | YES        | YES      | YES        | YES      | YES       | YES      | YES       | YES      | YES       | YES      | YES       | YES      |
| ENSG0000024691  | 1  | 2352292  | 2352262  | AC02391.1  | transcript | lincRNA                 | YES        | YES      | YES        | YES      | YES        | YES      | YES       | YES      | YES       | YES      | YES       | YES      | YES       | YES      |
| ENSG0000005072  | 4  | 10720611 | 10724247 | DNAF6      | transcript | protein_coding          | 0.006504   | 5.81e-01 | 0.006504   | 5.81e-01 | 0.006504   | 5.81e-01 | 0.006504  | 5.81e-01 | 0.006504  | 5.81e-01 | 0.006504  | 5.81e-01 | 0.006504  | 5.81e-01 |
| ENSG0000024871  | 7  | 4015413  | 4015411  | THUMPD3P1  | transcript | unprocessed_pseudo      | -0.005924  | 6.40e-01 | 0.021259   | 8.79e-01 | 0.188263   | 3.46e-01 | 0.070623  | 7.26e-01 | 0.098898  | 8.78e-01 | 0.104746  | 6.34e-01 | 0.154646  | 2.84e-01 |
| ENSG0000012743  | 13 | 4079822  | 4082340  | SCZ1A.1    | transcript | protein_coding          | -0.02028   | 6.46e-01 | -0.032228  | 3.60e-01 | 0.083663   | 4.86e-01 | 0.070623  | 7.26e-01 | 0.188263  | 3.46e-01 | 0.188263  | 3.46e-01 | 0.188263  | 3.46e-01 |
| ENSG0000023607  | 9  | 8979780  | 8980320  | EBX2002.2  | transcript | lincRNA                 | YES        | YES      | YES        | YES      | YES        | YES      | YES       | YES      | YES       | YES      | YES       | YES      | YES       | YES      |
| ENSG0000010537  | 19 | 4772022  | 4773276  | BBC3       | transcript | protein_coding          | -0.148878  | 1.96e-01 | -0.140402  | 3.31e-01 | 0.261628   | 1.88e-01 | 0.070928  | 7.26e-01 | 0.148788  | 6.01e-01 | 0.171232  | 4.35e-01 | 0.208466  | 1.14e-01 |
| ENSG0000011226  | 18 | 8893679  | 8893961  | AC092384.3 | transcript | lincRNA                 | -0.105604  | 3.61e-01 | -0.144427  | 3.32e-01 | 0.121871   | 2.85e-01 | 0.070928  | 7.26e-01 | 0.070928  | 7.26e-01 | 0.094858  | 6.67e-01 | 0.145466  | 3.66e-01 |
| ENSG0000024007  | 2  | 1497849  | 1497907  | USP9L2P1   | transcript | protein_coding          | 0.0206204  | 8.20e-01 | 0.021251   | 7.88e-01 | 0.0467636  | 3.97e-01 | 0.070928  | 7.26e-01 | 0.070928  | 7.26e-01 | 0.094858  | 6.67e-01 | 0.145466  | 3.66e-01 |
| ENSG0000014820  | 9  | 9472604  | 9408719  | ADNP       | transcript | protein_coding          | -0.184801  | 3.05e-01 | -0.026641  | 8.54e-01 | 0.1391862  | 4.88e-01 | 0.070928  | 7.26e-01 | 0.222055  | 1.06e-01 | 0.0195984 | 9.42e-01 | 0.0484827 | 7.91e-01 |
| ENSG0000022676  | 10 | 7962879  | 7963118  | LOC102679  | transcript | lincRNA                 | -0.094027  | 4.14e-01 | -0.031172  | 9.91e-01 | -0.042720  | 8.61e-01 | 0.070928  | 7.26e-01 | 0.127258  | 2.11e-01 | 0.134988  | 6.45e-01 | 0.0202114 | 9.37e-01 |
| ENSG0000027027  | 1  | 21927074 | 21927188 | AC09644.1  | transcript | lincRNA                 | -0.018209  | 7.44e-01 | -0.018209  | 7.44e-01 | -0.018209  | 7.44e-01 | 0.070928  | 7.26e-01 | 0.0202114 | 9.37e-01 | 0.134988  | 6.45e-01 | 0.0202114 | 9.37e-01 |
| ENSG00000240707 | 10 | 13295534 | 13297454 | LOC101168  | transcript | lincRNA                 | -0.154444  | 2.86e-01 | -0.064438  | 6.66e-01 | 0.0208493  | 9.18e-01 | 0.070854  | 7.26e-01 | 0.241679  | 8.98e-01 | 0.020891  | 1.35e-01 | 0.094217  | 7.86e-01 |
| ENSG0000022626  | 2  | 1697826  | 1700591  | ADAP5P1.1  | transcript | protein_coding          | -0.059788  | 6.00e-01 | -0.0799017 | 9.56e-01 | 0.038495   | 8.71e-01 | 0.070878  | 7.26e-01 | 0.131779  | 3.81e-01 | 0.0270893 | 2.97e-01 | 0.0566574 | 6.96e-01 |
| ENSG0000022026  | 20 | 2063786  | 2062278  | COX7A2P1   | transcript | unprocessed_pseudo      | -0.0112503 | 9.28e-01 | -0.029472  | 7.67e-01 | 0.072088   | 5.86e-01 | 0.070854  | 7.26e-01 | 0.181272  | 1.59e-01 | 0.102928  | 6.39e-01 | 0.026828  | 8.41e-01 |
| ENSG0000022980  | 21 | 4467568  | 4467866  | FMM2P1     | transcript | unprocessed_pseudo      | -0.19305   | 9.51e-01 | -0.063632  | 5.97e-01 | 0.228037   | 2.53e-01 | 0.070854  | 7.26e-01 | 0.238311  | 5.51e-01 | 0.062923  | 7.95e-01 | 0.02198   | 2.60e-01 |
| ENSG0000024612  | 9  | 7701655  | 7702953  | FOWE2      | transcript | protein_coding          | -0.059324  | 7.56e-01 | -0.0104914 | 8.42e-01 | 0.0456800  | 8.21e-01 | 0.070878  | 7.26e-01 | 0.070878  | 7.26e-01 | 0.070878  | 7.26e-01 | 0.070878  | 7.26e-01 |
| ENSG0000010699  | 4  | 3792660  | 3796257  | PEW2       | transcript | protein_coding          | -0.069877  | 9.52e-01 | -0.04992   | 6.54e-01 | 0.043939   | 6.05e-01 | 0.070894  | 7.26e-01 | 0.042479  | 1.81e-01 | 0.024214  | 8.88e-01 | 0.049788  | 7.91e-01 |
| ENSG0000013174  | 17 | 4510899  | 4513354  | PCBD3      | transcript | protein_coding          | -0.110819  | 3.37e-01 | -0.147951  | 3.69e-01 | 0.0908187  | 9.29e-01 | 0.070867  | 7.26e-01 | 0.0609184 | 6.66e-01 | 0.300374  | 1.94e-01 | 0.158877  | 2.80e-01 |
| ENSG0000011596  | 12 | 5094817  | 5094894  | AC09811.1  | transcript | unprocessed_pseudo      | -0.090527  | 4.49e-01 | -0.080204  | 5.80e-01 | -0.1481816 | 4.74e-01 | 0.062638  | 7.26e-01 | 0.062638  | 7.26e-01 | 0.062638  | 7.26e-01 | 0.062638  | 7.26e-01 |
| ENSG0000027926  | 15 | 7523784  | 7527783  | AC112305.5 | transcript | lincRNA                 | -0.051738  | 6.55e-01 | -0.059789  | 6.80e-01 | 0.209928   | 2.93e-01 | 0.070927  | 7.26e-01 | 0.069774  | 5.16e-01 | 0.0429783 | 2.63e-01 | 0.0278789 | 8.48e-01 |
| ENSG0000024610  | 1  | 3852424  | 3847260  | AC02391.1  | transcript | unprocessed_pseudo      | -0.0248887 | 6.90e-01 | -0.0248887 | 6.90e-01 | 0.070928   | 7.26e-01 | 0.070928  | 7.26e-01 | 0.070928  | 7.26e-01 | 0.070928  | 7.26e-01 | 0.070928  | 7.26e-01 |
| ENSG0000014825  | 7  | 10513918 | 10512653 | POU3F3     | transcript | protein_coding          | -0.077226  | 5.04e-01 | -0.031975  | 8.73e-01 | 0.2536121  | 2.01e-01 | 0.070938  | 7.26e-01 | 0.103831  | 5.44e-01 | 0.175758  | 4.18e-01 | 0.219738  | 2.86e-01 |
| ENSG00000119673 | 14 | 7356720  | 7357658  | AC072      | transcript | protein_coding          | -0.109056  | 3.45e-01 | -0.116798  | 4.19e-01 | 0.2883839  | 1.52e-01 | 0.070955  | 7.26e-01 | 0.1300768 | 3.49e-01 | 0.039095  | 8.89e-01 | 0.126359  | 6.91e-01 |
| ENSG0000011700  | 1  | 4092842  | 4092818  | ZFNH8      | transcript | protein_coding          | -0.001261  | 2.22e-01 | -0.001261  | 2.22e-01 | -0.001261  | 2.22e-01 | 0.070928  | 7.26e-01 | 0.1718276 | 2.62e-01 | 0.132735  | 3.60e-01 | 0.049871  | 2.06e-01 |
| ENSG00000240972 | 22 | 2388483  | 2389527  | MIF        | transcript | protein_coding          | -0.177707  | 2.32e-01 | -0.059738  | 5.08e-01 | 0.0486231  | 8.05e-01 | 0.070968  | 7.26e-01 | 0.186507  | 3.77e-01 | 0.1271787 | 3.05e-01 | 0.0656730 | 8.22e-01 |
| ENSG0000027334  | 4  | 5406529  | 5407854  | AC110792.4 | transcript | lincRNA                 | -0.129454  | 2.62e-01 | -0.054417  | 6.87e-01 | -0.191301  | 3.88e-01 | 0.070924  | 7.26e-01 | 0.137779  | 2.12e-01 | 0.087270  | 7.08e-01 | 0.147024  | 3.07e-01 |
| ENSG0000021629  | 1  | 1812949  | 1813189  | AC118035.3 | transcript | unprocessed_pseudo      | -0.072485  | 3.53e-01 | -0.119147  | 4.10e-01 | 0.184745   | 3.57e-01 | 0.071024  | 7.26e-01 | 0.121185  | 3.88e-01 | 0.067712  | 7.78e-01 | 0.0818138 | 1.72e-01 |
| ENSG0000024750  | 1  | 3582424  | 3582988  | LOC45444   | transcript | unprocessed_pseudo      | -0.0248887 | 6.90e-01 | -0.0248887 | 6.90e-01 | 0.070928   | 7.26e-01 | 0.070928  | 7.26e-01 | 0.070928  | 7.26e-01 | 0.070928  | 7.26e-01 | 0.070928  | 7.26e-01 |
| ENSG0000014100  | 9  | 16030850 | 16032793 | BRD2P2     | transcript | protein_coding          | 0.0684887  | 6.23e-01 | 0.0265265  | 8.87e-01 | 0.0462229  | 3.20e-01 | 0.070938  | 7.26e-01 | 0.0929820 | 5.04e-01 | 0.0482636 | 6.00e-01 | 0.070631  | 6.71e-01 |
| ENSG0000024293  | 3  | 8705192  | 8705738  | PP1P1      | transcript | unprocessed_pseudo      | -0.081834  | 4.82e-01 | -0.050544  | 5.57e-01 | 0.2641855  | 1.84e-01 | 0.070928  | 7.26e-01 | 0.108019  | 4.34e-01 | 0.0747977 | 3.84e-01 | 0.0706712 | 6.29e-01 |
| ENSG0000025629  | 1  | 1218228  | 1218228  | AC02391.1  | transcript | unprocessed_pseudo      | -0.0112503 | 9.28e-01 | -0.0112503 | 9.28e-01 | 0.070928   | 7.26e-01 | 0.070928  | 7.26e-01 | 0.070928  | 7.26e-01 | 0.070928  | 7.26e-01 | 0.070928  | 7.26e-01 |
| ENSG0000022822  | 2  | 3105583  | 3106069  | ZEB1.1     | transcript | protein_coding          | -0.065624  | 5.70e-01 | -0.051224  | 5.55e-01 | 0.0506688  | 8.01e-01 | 0.070986  | 7.26e-01 | 0.0550501 | 6.88e-01 | 0.031976  | 5.22e-01 | 0.04434   | 5.88e-01 |
| ENSG00000248774 | 4  | 16474506 | 16480725 | SMM3A      | transcript | protein_coding          | -0.0308177 | 9.29e-01 | -0.1330835 | 3.64e-01 | -0.174453  | 3.64e-01 | 0.070998  | 7.26e-01 | 0.070875  | 7.26e-01 | 0.0939588 | 6.71e-01 | 0.0699584 | 8.94e-01 |
| ENSG0000024551  | 1  | 1839043  | 1839043  | AC02391.1  | transcript | unprocessed_pseudo      | -0.0112503 | 9.28e-01 | -0.0112503 | 9.28e-01 | 0.070928   | 7.26e-01 | 0.070928  | 7.26e-01 | 0.070928  | 7.26e-01 | 0.070928  | 7.26e-01 | 0.070928  | 7.26e-01 |
| ENSG00000198483 | 1  | 14586560 | 14585866 | ANNO15     | transcript | protein_coding          | -0.112725  | 3.27e-01 | -0.041218  | 7.40e-01 | 0.1565438  | 7.88e-01 | 0.071127  | 7.26e-01 | 0.195938  | 3.54e-01 | 0.062443  | 6.70e-01 | 0.0900964 | 2.96e-01 |
| ENSG0000027179  | 1  | 11138280 | 11139119 | PCBP       | transcript | transcribed_unannotated | YES        | YES      | YES        | YES      | YES        | YES      | YES       | YES      | YES       | YES      | YES       | YES      | YES       | YES      |
| ENSG0000025410  | 20 | 1848358  | 1848652  | PRP22P1    | transcript | protein_coding          | -0.0697335 | 5.47e-01 | -0.028480  | 8.36e-01 | 0.0274330  | 8.97e-01 | 0.071487  | 7.26e-01 |           |          |           |          |           |          |



| ENSG0000012428  | 20 | 49219295 | 49044077 | DND2       | ensembl | havana | protein coding       | -0.0419814 | 7.17E-01 | -0.0097117 | 5.31E-01 | -0.0012611 | 8.91E-01 | -0.07254   | 7.19E-01 | -0.0286886   | 8.37E-01 | 0.0621552  | 7.78E-01 | 0.0300071  | 8.20E-01 |     |
|-----------------|----|----------|----------|------------|---------|--------|----------------------|------------|----------|------------|----------|------------|----------|------------|----------|--------------|----------|------------|----------|------------|----------|-----|
| ENSG00000270380 | 1  | 7442172  | 7442726  | ADDP1B1    | ensembl | havana | processed pseudogene | -0.1861809 | 2.88E-01 | -0.0484801 | 7.05E-01 | -0.0012870 | 6.41E-01 | -0.07245   | 7.19E-01 | -0.1847966   | 1.82E-01 | 0.1954031  | 7.71E-01 | 0.113520   | 4.32E-01 |     |
| ENSG00000295981 | 1  | 2155870  | 2158773  | HMGCL4     | ensembl | havana | protein coding       | -0.0139415 | 3.91E-04 | -0.0000000 | 6.44E-01 | -0.0000000 | 3.42E-01 | -0.0000000 | 7.19E-01 | -0.0000000   | 3.42E-01 | 0.0000000  | 7.19E-01 | 0.0000000  | 3.42E-01 |     |
| ENSG0000017066  | 11 | 60684979 | 60689175 | ITIM2A2    | ensembl | havana | protein coding       | -0.1068259 | 3.55E-01 | -0.0261833 | 1.40E-01 | -0.07265   | 7.19E-01 | -0.1246443 | 7.19E-01 | -0.0716045   | 3.41E-01 | 0.0761043  | 7.84E-01 | -0.143291  | 6.34E-01 |     |
| ENSG0000017822  | 11 | 5613471  | 5614020  | DRB3       | ensembl | havana | protein coding       | -0.0347209 | 7.64E-01 | -0.0292760 | 5.22E-01 | -0.1215400 | 5.34E-01 | -0.07269   | 7.19E-01 | -0.1035789   | 4.56E-01 | 0.079403   | 6.58E-01 | -0.101515  | 4.51E-01 |     |
| ENSG0000013760  | 1  | 1421817  | 1421854  | ITIH4      | ensembl | havana | processed pseudogene | -0.0418272 | 7.12E-01 | -0.0185043 | 7.12E-01 | -0.0000000 | 7.12E-01 | -0.0000000 | 7.12E-01 | -0.0000000   | 7.12E-01 | 0.0000000  | 7.12E-01 | 0.0000000  | 7.12E-01 |     |
| ENSG00000243701 | 3  | 10720244 | 10734844 | DUBR       | ensembl | havana | protein coding       | -0.04842   | 7.63E-01 | -0.0173562 | 4.17E-01 | -0.0760917 | 7.06E-01 | -0.0718211 | 7.19E-01 | -0.187059    | 7.19E-01 | 0.0613647  | 5.56E-01 | 0.0636316  | 6.52E-01 |     |
| ENSG0000027206  | 3  | 18977374 | 18978278 | ACAD9L3    | ensembl | havana | transcript processed | -0.1272149 | 2.70E-01 | -0.0405512 | 7.56E-01 | -0.209572  | 2.94E-01 | -0.0726273 | 7.19E-01 | -0.1836242   | 1.84E-01 | 0.0999546  | 6.61E-01 | -0.1613541 | 6.29E-01 |     |
| ENSG0000019645  | 1  | 12605992 | 12606489 | PKOX       | ensembl | havana | protein coding       | -0.0610288 | 3.26E-01 | -0.0260288 | 6.50E-01 | -0.0780288 | 7.07E-01 | -0.0780288 | 7.19E-01 | -0.0780288   | 7.19E-01 | 0.0000000  | 7.19E-01 | 0.0000000  | 7.19E-01 |     |
| ENSG0000019044  | 18 | 18999707 | 18999335 | AP0524.4   | ensembl | havana | TEC                  | -0.0011004 | 5.92E-01 | -0.0089241 | 5.96E-01 | -0.0255861 | 2.50E-01 | -0.0255861 | 2.50E-01 | -0.0255861   | 2.50E-01 | 0.0000000  | 7.19E-01 | 0.0000000  | 7.19E-01 |     |
| ENSG0000024845  | 18 | 6946917  | 6947176  | AC11888.1  | ensembl | havana | transcript processed | -0.2152179 | 6.01E-01 | -0.1815024 | 1.75E-01 | -0.183674  | 3.33E-01 | -0.072692  | 7.19E-01 | -0.2423213   | 7.74E-01 | 0.0709997  | 7.49E-01 | -0.136881  | 6.43E-01 |     |
| ENSG0000027283  | 1  | 2156170  | 2156873  | ASCF       | ensembl | havana | protein coding       | -0.0596928 | 4.46E-01 | -0.032038  | 8.40E-01 | -0.0802889 | 7.07E-01 | -0.07262   | 7.19E-01 | -0.124384    | 7.78E-01 | 0.145364   | 6.07E-01 | 0.0000000  | 7.19E-01 |     |
| ENSG0000021754  | 1  | 21169480 | 21166427 | ITIM16B3   | ensembl | havana | protein coding       | YES        | YES      | YES        | YES      | YES        | YES      | YES        | YES      | YES          | YES      | YES        | YES      | YES        | YES      | YES |
| ENSG0000010382  | 15 | 9913623  | 9912123  | IT2C3      | ensembl | havana | protein coding       | YES        | YES      | YES        | YES      | YES        | YES      | YES        | YES      | YES          | YES      | YES        | YES      | YES        | YES      | YES |
| ENSG0000020482  | 3  | 19726111 | 19726355 | ATP2M2P3   | ensembl | havana | processed pseudogene | -0.0567972 | 6.25E-01 | -0.0414866 | 5.73E-01 | -0.141789  | 4.80E-01 | -0.072915  | 7.19E-01 | -0.072717    | 7.34E-01 | 0.078983   | 9.23E-01 | -0.180958  | 6.52E-01 |     |
| ENSG0000018760  | 1  | 21561607 | 21562007 | ITAG12     | ensembl | havana | protein coding       | -0.0099974 | 4.00E-01 | -0.0099974 | 4.00E-01 | -0.0099974 | 4.00E-01 | -0.0099974 | 4.00E-01 | -0.0099974   | 4.00E-01 | 0.0000000  | 7.19E-01 | 0.0000000  | 7.19E-01 |     |
| ENSG0000025367  | 12 | 3158923  | 3161566  | END3L5A1   | ensembl | havana | protein coding       | YES        | YES      | YES        | YES      | YES        | YES      | YES        | YES      | YES          | YES      | YES        | YES      | YES        | YES      | YES |
| ENSG00000144957 | 17 | 1197749  | 1199747  | ZNF18      | ensembl | havana | protein coding       | 0.00711033 | 9.31E-01 | -0.0714603 | 6.21E-01 | -0.0407054 | 8.40E-01 | -0.0728214 | 7.19E-01 | -0.1514769   | 7.10E-01 | 0.131164   | 5.45E-01 | -0.0607736 | 7.45E-01 |     |
| ENSG0000020867  | 19 | 5176813  | 5176813  | AC01031.3  | ensembl | havana | protein coding       | -0.0768149 | 5.00E-01 | -0.0480717 | 7.03E-01 | -0.1334911 | 4.81E-01 | -0.0726421 | 7.19E-01 | -0.0726421   | 7.19E-01 | 0.0000000  | 7.19E-01 | 0.0000000  | 7.19E-01 |     |
| ENSG0000008710  | 16 | 208878   | 213588   | PKD1       | ensembl | havana | protein coding       | -0.044204  | 6.62E-01 | -0.016551  | 3.06E-01 | -0.028463  | 1.20E-01 | -0.0728643 | 7.19E-01 | -0.1465801   | 7.78E-01 | 0.0000000  | 7.19E-01 | 0.0000000  | 7.19E-01 |     |
| ENSG0000029366  | 8  | 29055935 | 29056485 | AC018849.2 | ensembl | havana | protein coding       | -0.1597151 | 1.60E-01 | -0.122747  | 3.96E-01 | -0.2409858 | 2.18E-01 | -0.072854  | 7.19E-01 | -0.1938207   | 1.67E-01 | 0.0639969  | 3.45E-01 | -0.044374  | 7.62E-01 |     |
| ENSG0000018879  | 3  | 15898995 | 15899099 | SHOX2      | ensembl | havana | protein coding       | YES        | YES      | YES        | YES      | YES        | YES      | YES        | YES      | YES          | YES      | YES        | YES      | YES        | YES      | YES |
| ENSG0000017575  | 11 | 7387669  | 7393114  | PAFA1      | ensembl | havana | protein coding       | -0.1872744 | 1.03E-01 | -0.100146  | 4.89E-01 | -0.1564748 | 4.39E-01 | -0.072828  | 7.19E-01 | -0.258553    | 5.91E-01 | 0.0607068  | 7.86E-01 | 0.0000000  | 7.19E-01 |     |
| ENSG0000016442  | 4  | 1018228  | 1019249  | DMAT1      | ensembl | havana | protein coding       | -0.076083  | 5.11E-01 | -0.0458212 | 3.12E-01 | -0.101244  | 5.93E-01 | -0.072899  | 7.19E-01 | -0.0602629   | 6.49E-01 | 0.10014    | 6.49E-01 | -0.0602629 | 6.49E-01 |     |
| ENSG0000013766  | 1  | 23136371 | 23142287 | ESR1B1     | ensembl | havana | protein coding       | -0.1131741 | 3.06E-01 | -0.0699502 | 6.94E-01 | -0.128949  | 5.18E-01 | -0.072928  | 7.19E-01 | -0.1889731   | 7.24E-01 | 0.0093010  | 9.86E-01 | -0.0704579 | 6.77E-01 |     |
| ENSG0000016247  | 7  | 7080643  | 7082099  | GLEAF      | ensembl | havana | protein coding       | -0.0719712 | 6.61E-01 | -0.0719712 | 6.61E-01 | -0.0719712 | 6.61E-01 | -0.0719712 | 6.61E-01 | -0.0719712   | 6.61E-01 | 0.0000000  | 7.19E-01 | 0.0000000  | 7.19E-01 |     |
| ENSG0000013912  | 21 | 3468894  | 3471827  | CLIC3      | ensembl | havana | protein coding       | -0.188484  | 8.38E-01 | -0.104356  | 4.83E-01 | -0.262079  | 1.86E-01 | -0.072943  | 7.19E-01 | -0.29642     | 6.78E-01 | 0.170788   | 4.22E-01 | -0.170788  | 4.22E-01 |     |
| ENSG0000027940  | 1  | 21563899 | 2156389  | ITGAE1     | ensembl | havana | protein coding       | -0.1032004 | 7.67E-01 | -0.0203004 | 7.67E-01 | -0.0203004 | 7.67E-01 | -0.0203004 | 7.67E-01 | -0.0203004   | 7.67E-01 | 0.0000000  | 7.19E-01 | 0.0000000  | 7.19E-01 |     |
| ENSG0000011869  | 14 | 2254235  | 2254281  | ITRA20     | ensembl | havana | lncRNA               | -0.200349  | 7.66E-01 | -0.1447878 | 5.08E-01 | -0.1146788 | 5.08E-01 | -0.072991  | 7.19E-01 | -0.1911189   | 6.66E-01 | 0.1190885  | 3.15E-01 | -0.176088  | 2.21E-01 |     |
| ENSG00000253897 | 3  | 19613130 | 1962570  | ITM1A3-AS1 | ensembl | havana | protein coding       | -0.0469983 | 6.85E-01 | -0.0156447 | 9.14E-01 | -0.0284871 | 8.88E-01 | -0.0726013 | 7.19E-01 | -0.0848276   | 5.42E-01 | 0.020949   | 9.25E-01 | -0.0212126 | 8.25E-01 |     |
| ENSG0000024886  | 4  | 12325640 | 1232564  | ITM1A3     | ensembl | havana | protein coding       | YES        | YES      | YES        | YES      | YES        | YES      | YES        | YES      | YES          | YES      | YES        | YES      | YES        | YES      | YES |
| ENSG00000150764 | 11 | 11197144 | 11202653 | DONC1      | ensembl | havana | protein coding       | -0.1440285 | 2.11E-01 | -0.0516025 | 2.05E-01 | -0.0730703 | 7.19E-01 | -0.243173  | 7.57E-01 | 0.0526202    | 7.10E-01 | -0.164477  | 3.10E-01 | 0.0000000  | 7.19E-01 |     |
| ENSG00000196218 | 19 | 3843391  | 3857644  | RYR1       | ensembl | havana | protein coding       | -0.096449  | 4.06E-01 | -0.0174483 | 9.35E-01 | -0.0687785 | 7.31E-01 | -0.0727077 | 7.19E-01 | -0.200001    | 4.46E-01 | 0.0882173  | 7.06E-01 | -0.151383  | 8.28E-01 |     |
| ENSG00000166448 | 1  | 1231318  | 1231318  | ITM1A3-AS1 | ensembl | havana | transcript processed | -0.096449  | 4.06E-01 | -0.0174483 | 9.35E-01 | -0.0687785 | 7.31E-01 | -0.0727077 | 7.19E-01 | -0.200001    | 4.46E-01 | 0.0882173  | 7.06E-01 | -0.151383  | 8.28E-01 |     |
| ENSG0000025078  | 7  | 12934432 | 12948199 | STRP2      | ensembl | havana | protein coding       | YES        | YES      | YES        | YES      | YES        | YES      | YES        | YES      | YES          | YES      | YES        | YES      | YES        | YES      | YES |
| ENSG0000024238  | 8  | 1625638  | 1626555  | RPS13P4    | ensembl | havana | processed pseudogene | -0.091133  | 6.17E-01 | -0.0506813 | 7.79E-01 | -0.071021  | 7.12E-01 | -0.1010272 | 7.12E-01 | -0.0616234   | 6.39E-01 | 0.1665126  | 4.48E-01 | -0.1036716 | 4.76E-01 |     |
| ENSG00000246423 | 3  | 11474455 | 11474525 | MIR4758    | ensembl | havana | transcript processed | -0.0596928 | 6.25E-01 | -0.0414866 | 5.73E-01 | -0.141789  | 4.80E-01 | -0.072915  | 7.19E-01 | -0.072717    | 7.34E-01 | 0.078983   | 9.23E-01 | -0.180958  | 6.52E-01 |     |
| ENSG00000184909 | 1  | 21563899 | 2156389  | ITGAE1     | ensembl | havana | protein coding       | -0.1032004 | 7.67E-01 | -0.0203004 | 7.67E-01 | -0.0203004 | 7.67E-01 | -0.0203004 | 7.67E-01 | -0.0203004   | 7.67E-01 | 0.0000000  | 7.19E-01 | 0.0000000  | 7.19E-01 |     |
| ENSG00000149567 | 5  | 13115383 | 13124448 | HNT1       | ensembl | havana | protein coding       | -0.0797512 | 6.10E-01 | -0.0498042 | 5.98E-01 | -0.0261858 | 3.02E-01 | -0.071312  | 7.19E-01 | -0.162957    | 3.98E-01 | 0.0007044  | 9.56E-01 | -0.1166606 | 3.78E-01 |     |
| ENSG0000028719  | 4  | 8018237  | 8019710  | AC01211.5  | ensembl | havana | protein coding       | -0.0777606 | 5.01E-01 | -0.0431186 | 3.27E-01 | -0.0583878 | 7.74E-01 | -0.0721888 | 7.19E-01 | -0.0202196   | 9.71E-01 | 0.2246697  | 2.45E-01 | -0.1374701 | 3.48E-01 |     |
| ENSG0000027925  | 1  | 1231318  | 1231318  | ITM1A3-AS1 | ensembl | havana | transcript processed | -0.096449  | 4.06E-01 | -0.0174483 | 9.35E-01 | -0.0687785 | 7.31E-01 | -0.0727077 | 7.19E-01 | -0.200001    | 4.46E-01 | 0.0882173  | 7.06E-01 | -0.151383  | 8.28E-01 |     |
| ENSG0000044381  | 7  | 1396514  | 13977798 | HPK2       | ensembl | havana | protein coding       | -0.0425480 | 7.99E-01 | -0.0826326 | 5.52E-01 | -0.0720025 | 7.17E-01 | -0.1295709 | 5.50E-01 | 0.0884749    | 9.07E-01 | -0.0612819 | 8.41E-01 | 0.0000000  | 7.19E-01 |     |
| ENSG00000170423 | 1  | 5182804  | 5184902  | RTP78      | ensembl | havana | protein coding       | YES        | YES      | YES        | YES      | YES        | YES      | YES        | YES      | YES          | YES      | YES        | YES      | YES        | YES      | YES |
| ENSG0000025548  | 1  | 21563899 | 2156389  | ITGAE1     | ensembl | havana | protein coding       | -0.1032004 | 7.67E-01 | -0.0203004 | 7.67E-01 | -0.0203004 | 7.67E-01 | -0.0203004 | 7.67E-01 | -0.0203004</ |          |            |          |            |          |     |



| ENSG0000027300 | 13 | 2954493  | 29970388  | AA45985.2  | havana | transcript | ncrna | -0.002314 | 3.496E-01 | -0.077429  | 7.96E-02 | 0.0519486  | 7.97E-01 | -0.048283 | 7.11E-01 | -0.134726 | 2.06E-01 | -0.057423  | 7.95E-01 | -0.065779  | 6.50E-01 |            |          |
|----------------|----|----------|-----------|------------|--------|------------|-------|-----------|-----------|------------|----------|------------|----------|-----------|----------|-----------|----------|------------|----------|------------|----------|------------|----------|
| ENSG0000017624 | 13 | 1582344  | 15676788  | AA12022.1  | havana | transcript | ncrna | -0.002292 | 8.41E-01  | -0.073862  | 6.01E-02 | 0.1349988  | 2.94E-01 | -0.074808 | 7.11E-01 | -0.148728 | 2.90E-01 | -0.025212  | 7.91E-01 | -0.197889  | 1.64E-01 |            |          |
| ENSG0000017917 | 13 | 1582344  | 15676788  | AA12022.1  | havana | transcript | ncrna | -0.002292 | 8.41E-01  | -0.073862  | 6.01E-02 | 0.1349988  | 2.94E-01 | -0.074808 | 7.11E-01 | -0.148728 | 2.90E-01 | -0.025212  | 7.91E-01 | -0.197889  | 1.64E-01 |            |          |
| ENSG0000018686 | 9  | 11303877 | 113056799 | ZFP37      | havana | transcript | ncrna | -0.002292 | 8.41E-01  | -0.073862  | 6.01E-02 | 0.1349988  | 2.94E-01 | -0.074808 | 7.11E-01 | -0.148728 | 2.90E-01 | -0.025212  | 7.91E-01 | -0.197889  | 1.64E-01 |            |          |
| ENSG0000025424 | 4  | 4304842  | 4308371   | AL163718.1 | havana | transcript | ncrna | YES       | YES       | -0.148438  | 1.97E-01 | 0.079204   | 8.88E-02 | 0.135448  | 5.03E-01 | 0.074904  | 7.10E-01 | 0.249955   | 8.83E-01 | -0.180079  | 4.11E-01 | -0.144433  | 3.47E-01 |
| ENSG0000010084 | 17 | 4931136  | 49333191  | W143147.1  | havana | transcript | ncrna | YES       | YES       | -0.148438  | 1.97E-01 | 0.079204   | 8.88E-02 | 0.135448  | 5.03E-01 | 0.074904  | 7.10E-01 | 0.249955   | 8.83E-01 | -0.180079  | 4.11E-01 | -0.144433  | 3.47E-01 |
| ENSG0000029577 | 8  | 7215812  | 72199052  | RN7L338P   | havana | transcript | ncrna | YES       | YES       | -0.148438  | 1.97E-01 | 0.079204   | 8.88E-02 | 0.135448  | 5.03E-01 | 0.074904  | 7.10E-01 | 0.249955   | 8.83E-01 | -0.180079  | 4.11E-01 | -0.144433  | 3.47E-01 |
| ENSG0000027359 | 17 | 3880041  | 3882355   | CWC22      | havana | transcript | ncrna | YES       | YES       | -0.148438  | 1.97E-01 | 0.079204   | 8.88E-02 | 0.135448  | 5.03E-01 | 0.074904  | 7.10E-01 | 0.249955   | 8.83E-01 | -0.180079  | 4.11E-01 | -0.144433  | 3.47E-01 |
| ENSG0000027051 | 17 | 4923238  | 4926800   | AL163718.1 | havana | transcript | ncrna | YES       | YES       | -0.148438  | 1.97E-01 | 0.079204   | 8.88E-02 | 0.135448  | 5.03E-01 | 0.074904  | 7.10E-01 | 0.249955   | 8.83E-01 | -0.180079  | 4.11E-01 | -0.144433  | 3.47E-01 |
| ENSG0000010053 | 11 | 12336300 | 12336300  | UCP2       | havana | transcript | ncrna | YES       | YES       | -0.001190  | 3.93E-01 | -0.139347  | 3.54E-01 | -0.072052 | 7.21E-01 | -0.052362 | 7.06E-01 | 0.025226   | 7.06E-01 | 0.025226   | 7.06E-01 | 0.025226   | 7.06E-01 |
| ENSG0000023051 | 2  | 10782303 | 10782881  | RGPOA.A51  | havana | transcript | ncrna | YES       | YES       | -0.035879  | 7.57E-01 | -0.000354  | 9.88E-02 | 0.3873530 | 4.93E-01 | -0.075066 | 7.10E-01 | -0.098777  | 4.77E-01 | -0.103624  | 6.88E-01 | -0.103624  | 3.78E-01 |
| ENSG0000023020 | 9  | 1009235  | 1009235   | FRS1L4     | havana | transcript | ncrna | YES       | YES       | -0.102923  | 3.47E-01 | -0.030262  | 8.84E-02 | 0.070769  | 7.68E-01 | -0.070769 | 7.68E-01 | -0.202035  | 3.28E-01 | -0.103775  | 4.82E-01 | -0.103775  | 4.06E-01 |
| ENSG0000023897 | 5  | 15136299 | 15148993  | AC024025.2 | havana | transcript | ncrna | YES       | YES       | -0.009175  | 5.96E-01 | -0.000720  | 8.97E-02 | 0.1548761 | 4.48E-01 | -0.075109 | 7.11E-01 | -0.114776  | 5.90E-01 | -0.080725  | 7.14E-01 | -0.080725  | 7.05E-01 |
| ENSG0000027714 | 19 | 3321717  | 3322255   | AC008738.4 | havana | transcript | ncrna | YES       | YES       | -0.082235  | 4.77E-01 | -0.031055  | 7.14E-01 | 0.0352466 | 8.60E-01 | -0.071223 | 7.10E-01 | -0.184273  | 7.81E-01 | -0.043127  | 8.45E-01 | -0.059103  | 8.88E-01 |
| ENSG0000027421 | 9  | 7013075  | 7013120   | AL163718.1 | havana | transcript | ncrna | YES       | YES       | -0.002228  | 5.17E-01 | -0.088453  | 5.46E-01 | 0.1107243 | 5.83E-01 | -0.071249 | 7.10E-01 | -0.099960  | 6.09E-01 | -0.103485  | 6.48E-01 | -0.0575029 | 9.16E-01 |
| ENSG0000027926 | 9  | 11338943 | 11339120  | KN043451.1 | havana | transcript | ncrna | YES       | YES       | -0.113187  | 1.36E-01 | -0.049687  | 9.76E-02 | 0.0000046 | 9.76E-02 | -0.075109 | 7.11E-01 | -0.210666  | 1.25E-01 | -0.166011  | 4.89E-01 | -0.092009  | 6.22E-01 |
| ENSG0000014099 | 4  | 11828038 | 11835300  | PRSS12     | havana | transcript | ncrna | YES       | YES       | -0.160631  | 1.61E-01 | -0.040254  | 9.78E-02 | 0.1328445 | 2.40E-01 | -0.075109 | 7.11E-01 | -0.144764  | 5.10E-01 | -0.184867  | 1.75E-01 | -0.144764  | 1.75E-01 |
| ENSG0000021235 | 16 | 80244136 | 81139611  | AC002121.1 | havana | transcript | ncrna | YES       | YES       | -0.092545  | 4.23E-01 | -0.117284  | 7.21E-01 | 0.1366871 | 3.24E-01 | -0.071633 | 7.09E-01 | -0.125374  | 3.89E-01 | -0.107796  | 6.18E-01 | -0.1521711 | 2.63E-01 |
| ENSG0000013309 | 17 | 4923128  | 4926800   | AL163718.1 | havana | transcript | ncrna | YES       | YES       | -0.114443  | 1.94E-01 | -0.079724  | 6.53E-02 | 0.0000046 | 9.76E-02 | -0.075109 | 7.11E-01 | -0.250292  | 6.79E-01 | -0.183176  | 5.90E-01 | -0.076794  | 6.34E-01 |
| ENSG0000027476 | 6  | 10795743 | 10795986  | AL024502.2 | havana | transcript | ncrna | YES       | YES       | -0.048934  | 3.64E-01 | -0.110506  | 4.06E-01 | 0.3508529 | 7.28E-02 | -0.075043 | 7.09E-01 | -0.120245  | 3.87E-01 | -0.144328  | 4.54E-01 | -0.0430548 | 9.21E-01 |
| ENSG0000020250 | 5  | 15602189 | 15613109  | TG235017.1 | havana | transcript | ncrna | YES       | YES       | -0.005987  | 9.62E-01 | -0.072667  | 9.60E-02 | -0.100639 | 9.36E-01 | -0.072233 | 7.09E-01 | -0.030996  | 8.26E-01 | -0.084163  | 5.00E-01 | -0.084163  | 5.00E-01 |
| ENSG0000012961 | 13 | 3071348  | 3076426   | AC00547    | havana | transcript | ncrna | YES       | YES       | -0.050486  | 7.02E-01 | -0.051116  | 0.72E-02 | 0.051390  | 7.90E-01 | -0.075277 | 7.09E-01 | -0.0651425 | 7.93E-01 | -0.033414  | 4.82E-01 | -0.033414  | 4.82E-01 |
| ENSG0000028900 | 19 | 8821301  | 8821410   | AC008738.4 | havana | transcript | ncrna | YES       | YES       | -0.157046  | 1.79E-01 | -0.141656  | 4.90E-02 | 0.1204968 | 5.89E-01 | -0.075408 | 7.09E-01 | -0.198766  | 1.68E-01 | -0.139876  | 5.86E-01 | -0.139876  | 5.86E-01 |
| ENSG0000012547 | 12 | 11093450 | 11095903  | AC007401.1 | havana | transcript | ncrna | YES       | YES       | -0.121517  | 2.92E-01 | -0.113316  | 5.28E-02 | 0.0558492 | 7.82E-01 | -0.075458 | 7.09E-01 | -0.195845  | 1.56E-01 | -0.147299  | 4.05E-01 | -0.147299  | 4.05E-01 |
| ENSG0000016923 | 11 | 4769591  | 4771389   | AGR2       | havana | transcript | ncrna | YES       | YES       | -0.025810  | 2.58E-01 | -0.187478  | 2.01E-02 | 0.005714  | 6.06E-01 | -0.075294 | 7.09E-01 | -0.081214  | 2.89E-01 | -0.07963   | 7.24E-01 | -0.07963   | 7.24E-01 |
| ENSG0000020728 | 20 | 2338996  | 2338112   | RNASEH2B   | havana | transcript | ncrna | YES       | YES       | -0.095517  | 4.08E-01 | -0.097249  | 6.98E-02 | -0.100789 | 3.89E-01 | -0.075823 | 7.09E-01 | -0.111968  | 4.95E-01 | -0.171148  | 4.93E-01 | -0.134847  | 3.06E-01 |
| ENSG0000024819 | 16 | 22920    | 21213     | WASH2R     | havana | transcript | ncrna | YES       | YES       | -0.115315  | 1.84E-01 | -0.081751  | 5.79E-02 | 0.3631724 | 6.26E-02 | -0.075803 | 7.09E-01 | -0.25238   | 6.06E-01 | -0.0466795 | 6.86E-01 | -0.1183749 | 4.42E-01 |
| ENSG0000027129 | 10 | 8035424  | 8035889   | AL393715.3 | havana | transcript | ncrna | YES       | YES       | -0.080611  | 4.54E-01 | -0.075998  | 8.93E-02 | -0.08654  | 6.68E-01 | -0.075293 | 7.09E-01 | -0.160172  | 2.28E-01 | -0.144883  | 5.10E-01 | -0.144883  | 5.10E-01 |
| ENSG0000024886 | 10 | 6009258  | 6009258   | FRS1L4     | havana | transcript | ncrna | YES       | YES       | -0.098613  | 4.09E-01 | -0.086613  | 4.09E-01 | 0.0000046 | 9.76E-02 | -0.075109 | 7.11E-01 | -0.206668  | 6.06E-01 | -0.1521711 | 2.63E-01 | -0.1521711 | 2.63E-01 |
| ENSG0000014098 | 11 | 7354455  | 7355715   | NEIL1      | havana | transcript | ncrna | YES       | YES       | -0.217979  | 5.69E-01 | -0.080883  | 4.64E-02 | 0.460194  | 9.01E-01 | -0.075444 | 7.09E-01 | -0.261150  | 3.56E-01 | -0.105957  | 2.87E-01 | -0.105957  | 2.87E-01 |
| ENSG0000027524 | 4  | 8868448  | 8868454   | RNASE3     | havana | transcript | ncrna | YES       | YES       | -0.117485  | 2.33E-01 | -0.080198  | 7.03E-02 | 0.0077311 | 9.66E-02 | -0.075333 | 7.09E-01 | -0.199359  | 1.48E-01 | -0.066546  | 7.63E-01 | -0.066546  | 7.63E-01 |
| ENSG0000025884 | 10 | 1917927  | 1920212   | FRS1L4     | havana | transcript | ncrna | YES       | YES       | -0.117485  | 2.33E-01 | -0.080198  | 7.03E-02 | 0.0077311 | 9.66E-02 | -0.075333 | 7.09E-01 | -0.199359  | 1.48E-01 | -0.066546  | 7.63E-01 | -0.066546  | 7.63E-01 |
| ENSG0000026045 | 9  | 6004707  | 6011305   | AL163718.1 | havana | transcript | ncrna | YES       | YES       | -0.099954  | 5.45E-01 | -0.080319  | 7.03E-02 | 0.0077311 | 9.66E-02 | -0.075333 | 7.09E-01 | -0.199359  | 1.48E-01 | -0.066546  | 7.63E-01 | -0.066546  | 7.63E-01 |
| ENSG0000027682 | 4  | 10157345 | 10153976  | PRKRP1     | havana | transcript | ncrna | YES       | YES       | -0.115903  | 1.88E-01 | -0.086671  | 7.90E-02 | 0.1712171 | 3.91E-01 | -0.075811 | 7.09E-01 | -0.229734  | 9.46E-01 | -0.036649  | 8.79E-01 | -0.100794  | 5.86E-01 |
| ENSG0000010781 | 10 | 9314509  | 9314513   | FRS1L4     | havana | transcript | ncrna | YES       | YES       | -0.115903  | 1.88E-01 | -0.086671  | 7.90E-02 | 0.1712171 | 3.91E-01 | -0.075811 | 7.09E-01 | -0.229734  | 9.46E-01 | -0.036649  | 8.79E-01 | -0.100794  | 5.86E-01 |
| ENSG0000028920 | 2  | 3653656  | 3653704   | AL023111.1 | havana | transcript | ncrna | YES       | YES       | -0.109175  | 3.73E-01 | -0.0800713 | 9.55E-02 | 0.0851288 | 6.73E-01 | -0.075963 | 7.09E-01 | -0.175236  | 1.21E-01 | -0.036649  | 8.83E-01 | -0.036649  | 8.83E-01 |
| ENSG0000014118 | 4  | 4797485  | 4800389   | ZNF187     | havana | transcript | ncrna | YES       | YES       | -0.031740  | 7.86E-01 | -0.114442  | 4.31E-02 | 0.5556610 | 2.61E-01 | -0.075403 | 7.09E-01 | -0.134862  | 4.41E-01 | -0.18006   | 6.06E-01 | -0.18006   | 6.06E-01 |
| ENSG0000014026 | 2  | 9314509  | 9314513   | ZNF187     | havana | transcript | ncrna | YES       | YES       | -0.031740  | 7.86E-01 | -0.114442  | 4.31E-02 | 0.5556610 | 2.61E-01 | -0.075403 | 7.09E-01 | -0.134862  | 4.41E-01 | -0.18006   | 6.06E-01 | -0.18006   | 6.06E-01 |
| ENSG0000028391 | 9  | 1282867  | 1283084   | RNASEH2B   | havana | transcript | ncrna | YES       | YES       | -0.095517  | 4.08E-01 | -0.097249  | 6.98E-02 | -0.100789 | 3.89E-01 | -0.075823 | 7.09E-01 | -0.111968  | 1.25E-01 | -0.166011  | 4.89E-01 | -0.166011  | 4.89E-01 |
| ENSG0000028526 | 2  | 3149606  | 3151932   | C22orf42   | havana | transcript | ncrna | YES       | YES       | -0.1676873 | 1.24E-01 | -0.043058  | 8.18E-02 | 0.160009  | 3.99E-01 | -0.075441 | 7.08E-01 | -0.276083  | 4.33E-01 | -0.102258  | 6.42E-01 | -0.146623  | 3.62E-01 |
|                |    |          |           |            |        |            |       |           |           |            |          |            |          |           |          |           |          |            |          |            |          |            |          |



| Gene           | Transcript | Start     | End       | Strand     | Feature | Gene   | Transcript         | Start      | End      | Strand      | Feature  | Gene        | Transcript | Start      | End      | Strand     | Feature  | Gene       | Transcript | Start      | End      | Strand | Feature |  |
|----------------|------------|-----------|-----------|------------|---------|--------|--------------------|------------|----------|-------------|----------|-------------|------------|------------|----------|------------|----------|------------|------------|------------|----------|--------|---------|--|
| ENSG0000027869 | 1          | 178255    | 189117    | GNB1       | ensembl | havana | protein_coding     | 0.02107106 | 2.98E-01 | -0.00297979 | 9.84E-01 | -0.075122   | 7.10E-01   | -0.079181  | 6.95E-01 | 0.17573468 | 2.04E-01 | 0.00521233 | 8.19E-01   | 0.01143588 | 9.97E-01 |        |         |  |
| ENSG0000027870 | 1          | 178255    | 178258    | ENB        | ensembl | havana | protein_coding     | 0.0862323  | 4.56E-01 | 0.00447108  | 6.98E-01 | -0.08026209 | 6.71E-01   | -0.079181  | 6.95E-01 | 0.02004955 | 1.71E-01 | 0.00897973 | 1.02E-01   | 0.01225424 | 1.96E-01 |        |         |  |
| ENSG0000027871 | 6          | 53127469  | 53402493  | AC015987.1 | ensembl | havana | protein_coding     | 0.04066624 | 2.44E-01 | 0.00251171  | 5.37E-01 | -0.02053666 | 3.09E-01   | -0.0792542 | 6.94E-01 | 0.02214745 | 1.07E-01 | 0.00215818 | 6.41E-01   | 0.0167881  | 2.16E-01 |        |         |  |
| ENSG0000027872 | 7          | 116274606 | 116286734 | AC013101.3 | ensembl | havana | protein_coding     | 0.1804873  | 1.14E-01 | -0.17284    | 1.74E-01 | -0.2024127  | 3.11E-01   | -0.0792741 | 6.94E-01 | 0.02229363 | 1.05E-01 | 0.0137419  | 5.92E-01   | 0.0103919  | 2.55E-01 |        |         |  |
| ENSG0000027873 | 1          | 116286734 | 116286734 | AC019648.1 | ensembl | havana | protein_coding     | 0.008495   | 9.42E-01 | -0.075333   | 5.93E-01 | -0.0236240  | 2.35E-01   | -0.0792991 | 6.94E-01 | 0.02626749 | 5.52E-01 | 0.0104619  | 6.45E-01   | 0.0112002  | 4.44E-01 |        |         |  |
| ENSG0000027874 | 16         | 78989140  | 78990778  | AC019648.1 | ensembl | havana | protein_coding     | 0.008495   | 9.42E-01 | -0.075333   | 5.93E-01 | -0.0236240  | 2.35E-01   | -0.0792991 | 6.94E-01 | 0.02626749 | 5.52E-01 | 0.0104619  | 6.45E-01   | 0.0112002  | 4.44E-01 |        |         |  |
| ENSG0000027875 | 9          | 78989140  | 78990778  | AC019648.1 | ensembl | havana | protein_coding     | 0.008495   | 9.42E-01 | -0.075333   | 5.93E-01 | -0.0236240  | 2.35E-01   | -0.0792991 | 6.94E-01 | 0.02626749 | 5.52E-01 | 0.0104619  | 6.45E-01   | 0.0112002  | 4.44E-01 |        |         |  |
| ENSG0000027876 | 1          | 221418027 | 221524027 | EPHA4      | ensembl | havana | protein_coding     | 0.2731401  | 1.02E-01 | -0.22355    | 1.59E-01 | -0.0792513  | 6.94E-01   | 0.02835001 | 7.97E-01 | 0.00204033 | 7.07E-01 | 0.00204033 | 7.07E-01   | 0.00204033 | 7.07E-01 |        |         |  |
| ENSG0000027877 | 15         | 5131941   | 51321996  | AC00891.2  | ensembl | havana | protein_coding     | 0.1465434  | 2.06E-01 | 0.00505134  | 3.40E-01 | -0.135281   | 5.00E-01   | -0.0792364 | 6.94E-01 | 0.02422989 | 7.75E-01 | 0.122303   | 5.76E-01   | 0.0158947  | 4.18E-01 |        |         |  |
| ENSG0000027878 | 2          | 2883834   | 2883834   | AC011222   | ensembl | havana | protein_coding     | 0.0022488  | 4.26E-01 | -0.0022488  | 4.26E-01 | -0.0792364  | 6.94E-01   | 0.02422989 | 7.75E-01 | 0.122303   | 5.76E-01 | 0.0158947  | 4.18E-01   |            |          |        |         |  |
| ENSG0000027879 | 2          | 2883834   | 2883834   | AC011222   | ensembl | havana | protein_coding     | 0.0022488  | 4.26E-01 | -0.0022488  | 4.26E-01 | -0.0792364  | 6.94E-01   | 0.02422989 | 7.75E-01 | 0.122303   | 5.76E-01 | 0.0158947  | 4.18E-01   |            |          |        |         |  |
| ENSG0000027880 | 10         | 12484653  | 12487175  | ARHG2      | ensembl | havana | protein_coding     | 0.20388678 | 7.53E-01 | 0.1337841   | 3.47E-01 | -0.2441053  | 2.20E-01   | -0.0794458 | 6.94E-01 | 0.02081764 | 5.45E-01 | 0.01444802 | 1.15E-01   | 0.01845829 | 1.64E-01 |        |         |  |
| ENSG0000027881 | 2          | 13839626  | 13839626  | MCME       | ensembl | havana | protein_coding     | 0.0744647  | 5.20E-01 | 0.0737580   | 9.00E-01 | 0.2336624   | 2.40E-01   | -0.0794784 | 6.94E-01 | 0.0213600  | 5.34E-01 | 0.1170263  | 5.95E-01   | 0.02176344 | 8.81E-01 |        |         |  |
| ENSG0000027882 | 2          | 2883834   | 2883834   | AC011222   | ensembl | havana | protein_coding     | 0.0022488  | 4.26E-01 | -0.0022488  | 4.26E-01 | -0.0792364  | 6.94E-01   | 0.02422989 | 7.75E-01 | 0.122303   | 5.76E-01 | 0.0158947  | 4.18E-01   |            |          |        |         |  |
| ENSG0000027883 | 2          | 2883834   | 2883834   | AC011222   | ensembl | havana | protein_coding     | 0.0022488  | 4.26E-01 | -0.0022488  | 4.26E-01 | -0.0792364  | 6.94E-01   | 0.02422989 | 7.75E-01 | 0.122303   | 5.76E-01 | 0.0158947  | 4.18E-01   |            |          |        |         |  |
| ENSG0000027884 | 10         | 4646109   | 4646598   | NPVAR      | ensembl | havana | protein_coding     | 0.0772565  | 4.00E-01 | 0.00007008  | 9.63E-01 | -0.1855118  | 4.91E-01   | -0.0794518 | 6.93E-01 | 0.019077   | 3.44E-01 | 0.0152181  | 2.86E-01   | 0.0147823  | 3.63E-01 |        |         |  |
| ENSG0000027885 | 2          | 4602126   | 4645186   | AC00977.2  | ensembl | havana | protein_coding     | 0.0074578  | 4.49E-01 | -0.0715131  | 6.91E-01 | 0.02627444  | 7.64E-01   | -0.0791713 | 6.93E-01 | 0.0130023  | 3.49E-01 | 0.2757859  | 2.46E-01   | 0.0509212  | 6.06E-01 |        |         |  |
| ENSG0000027886 | 10         | 12484653  | 12487175  | ARHG2      | ensembl | havana | protein_coding     | 0.20388678 | 7.53E-01 | 0.1337841   | 3.47E-01 | -0.2441053  | 2.20E-01   | -0.0794458 | 6.94E-01 | 0.02081764 | 5.45E-01 | 0.01444802 | 1.15E-01   | 0.01845829 | 1.64E-01 |        |         |  |
| ENSG0000027887 | 4          | 18282480  | 18283097  | AC11478.1  | ensembl | havana | protein_coding     | 0.0097278  | 4.08E-01 | -0.052875   | 7.15E-01 | -0.0795818  | 6.93E-01   | -0.1434074 | 6.91E-01 | 0.0101075  | 6.80E-01 | 0.0019003  | 7.52E-01   |            |          |        |         |  |
| ENSG0000027888 | 7          | 7591230   | 7614897   | FRZ2       | ensembl | havana | protein_coding     | 0.0066422  | 4.04E-01 | -0.117347   | 4.17E-01 | -0.2252680  | 2.58E-01   | -0.07962   | 6.93E-01 | 0.0551891  | 6.92E-01 | 0.098446   | 1.67E-01   | 0.0238109  | 5.73E-01 |        |         |  |
| ENSG0000027889 | 11         | 7469011   | 7469958   | AC013101.3 | ensembl | havana | protein_coding     | 0.0022488  | 4.26E-01 | -0.0022488  | 4.26E-01 | -0.0792364  | 6.94E-01   | 0.02422989 | 7.75E-01 | 0.122303   | 5.76E-01 | 0.0158947  | 4.18E-01   |            |          |        |         |  |
| ENSG0000027890 | 2          | 4795930   | 4797085   | KCNK12     | ensembl | havana | protein_coding     | 0.1496964  | 1.95E-01 | 0.012632    | 9.31E-01 | 0.0289412   | 8.83E-01   | -0.0795669 | 6.93E-01 | 0.2793257  | 1.03E-01 | 0.0026045  | 7.80E-01   | 0.0068523  | 6.45E-01 |        |         |  |
| ENSG0000027891 | 3          | 19279815  | 19291756  | KM2D1      | ensembl | havana | protein_coding     | 0.1464214  | 2.04E-01 | 0.1472748   | 3.23E-01 | -0.0303833  | 9.83E-01   | -0.0796668 | 6.93E-01 | 0.140125   | 6.00E-01 | 0.002002   | 8.49E-01   |            |          |        |         |  |
| ENSG0000027892 | 16         | 3109842   | 3109950   | VKOR1L1    | ensembl | havana | protein_coding     | 0.0794883  | 4.92E-01 | 0.0327253   | 4.75E-01 | -0.2497193  | 2.48E-01   | -0.0796713 | 6.93E-01 | 0.0446949  | 7.48E-01 | 0.0113324  | 5.82E-01   | 0.0240744  | 1.54E-01 |        |         |  |
| ENSG0000027893 | 17         | 1897474   | 1898875   | SCYL5      | ensembl | havana | protein_coding     | 0.1326627  | 1.85E-01 | 0.0096227   | 5.99E-01 | 0.0403229   | 9.69E-01   | -0.0797098 | 6.93E-01 | 0.1938788  | 8.65E-01 | 0.2413039  | 2.67E-01   | 0.1484789  | 3.31E-01 |        |         |  |
| ENSG0000027894 | 6          | 14959873  | 14964872  | AC014549.1 | ensembl | havana | protein_coding     | 0.0284407  | 8.90E-01 | 0.0377783   | 7.63E-01 | 0.11158561  | 5.89E-01   | -0.0797143 | 6.93E-01 | 0.0544549  | 5.80E-01 | 0.1374693  | 5.31E-01   | 0.1374693  | 5.31E-01 |        |         |  |
| ENSG0000027895 | 19         | 3387925   | 3397191   | PEBP1      | ensembl | havana | protein_coding     | 0.1839638  | 1.09E-01 | -0.0021394  | 7.03E-01 | -0.2671241  | 1.78E-01   | -0.0797254 | 6.93E-01 | 0.272403   | 8.03E-01 | 0.0041566  | 9.85E-01   | 0.0133928  | 2.98E-01 |        |         |  |
| ENSG0000027896 | 10         | 8200070   | 8203489   | TRIP1      | ensembl | havana | protein_coding     | 0.0061471  | 4.06E-01 | -0.0061471  | 4.06E-01 | -0.0797254  | 6.93E-01   | 0.0241418  | 6.93E-01 | 0.0041566  | 9.85E-01 | 0.0133928  | 2.98E-01   | 0.0133928  | 2.98E-01 |        |         |  |
| ENSG0000027897 | 17         | 4369259   | 4366628   | UBE3G1     | ensembl | havana | protein_coding     | 0.1642973  | 8.87E-01 | -0.085828   | 6.36E-01 | -0.171948   | 4.93E-01   | -0.0797274 | 6.93E-01 | 0.0591124  | 4.71E-01 | 0.1103184  | 5.15E-01   | 0.0039675  | 7.98E-01 |        |         |  |
| ENSG0000027898 | 10         | 9366783   | 9370252   | FUAMC1     | ensembl | havana | protein_coding     | 0.0488102  | 6.86E-01 | -0.101841   | 4.55E-01 | 0.24165184  | 2.25E-01   | -0.0797369 | 6.93E-01 | 0.0311365  | 8.22E-01 | 0.0661302  | 9.78E-01   | 0.0211051  | 4.02E-01 |        |         |  |
| ENSG0000027899 | 2          | 1233812   | 1233812   | AC00977.2  | ensembl | havana | protein_coding     | 0.0074578  | 4.49E-01 | -0.0715131  | 6.91E-01 | 0.02627444  | 7.64E-01   | -0.0791713 | 6.93E-01 | 0.0130023  | 3.49E-01 | 0.2757859  | 2.46E-01   | 0.0509212  | 6.06E-01 |        |         |  |
| ENSG0000027900 | 7          | 4874860   | 4890883   | SMAD7      | ensembl | havana | transcribed_unread | 0.1158588  | 1.31E-01 | -0.104580   | 4.71E-01 | -0.2350949  | 2.33E-01   | -0.0797831 | 6.92E-01 | 0.1292169  | 6.22E-01 | 0.0094625  | 8.22E-01   | 0.1252127  | 3.02E-01 |        |         |  |
| ENSG0000027901 | 8          | 14141749  | 14141704  | AC011222   | ensembl | havana | protein_coding     | 0.0022488  | 4.26E-01 | -0.0022488  | 4.26E-01 | -0.0792364  | 6.94E-01   | 0.02422989 | 7.75E-01 | 0.122303   | 5.76E-01 | 0.0158947  | 4.18E-01   |            |          |        |         |  |
| ENSG0000027902 | 1          | 11782481  | 11782481  | AC011222   | ensembl | havana | protein_coding     | 0.0022488  | 4.26E-01 | -0.0022488  | 4.26E-01 | -0.0792364  | 6.94E-01   | 0.02422989 | 7.75E-01 | 0.122303   | 5.76E-01 | 0.0158947  | 4.18E-01   |            |          |        |         |  |
| ENSG0000027903 | 1          | 11782481  | 11782481  | AC011222   | ensembl | havana | protein_coding     | 0.0022488  | 4.26E-01 | -0.0022488  | 4.26E-01 | -0.0792364  | 6.94E-01   | 0.02422989 | 7.75E-01 | 0.122303   | 5.76E-01 | 0.0158947  | 4.18E-01   |            |          |        |         |  |
| ENSG0000027904 | 3          | 41724181  | 41730130  | AC011222   | ensembl | havana | protein_coding     | 0.0022488  | 4.26E-01 | -0.0022488  | 4.26E-01 | -0.0792364  | 6.94E-01   | 0.02422989 | 7.75E-01 | 0.122303   | 5.76E-01 | 0.0158947  | 4.18E-01   |            |          |        |         |  |
| ENSG0000027905 | 1          | 11782481  | 11782481  | AC011222   | ensembl | havana | protein_coding     | 0.0022488  | 4.26E-01 | -0.0022488  | 4.26E-01 | -0.0792364  | 6.94E-01   | 0.02422989 | 7.75E-01 | 0.122303   | 5.76E-01 | 0.0158947  | 4.18E-01   |            |          |        |         |  |
| ENSG0000027906 | 1          | 11782481  | 11782481  | AC011222   | ensembl | havana | protein_coding     | 0.0022488  | 4.26E-01 | -0.0022488  | 4.26E-01 | -0.0792364  | 6.94E-01   | 0.02422989 | 7.75E-01 | 0.122303   | 5.76E-01 | 0.0158947  | 4.18E-01   |            |          |        |         |  |
| ENSG0000027907 | 1          | 11782481  | 11782481  | AC011222   | ensembl | havana | protein_coding     | 0.0022488  | 4.26E-01 | -0.0022488  | 4.26E-01 | -0.0792364  | 6.94E-01   | 0.02422989 | 7.75E-01 | 0.122303   | 5.76E-01 | 0.0158947  | 4.18E-01   |            |          |        |         |  |
| ENSG0000027908 | 1          | 11782481  | 11782481  | AC011222   | ensembl | havana | protein_c          |            |          |             |          |             |            |            |          |            |          |            |            |            |          |        |         |  |











Table with columns for gene ID, chromosome, coordinates, gene name, transcript name, protein name, and various numerical values. The table lists numerous genes such as TM6SF2, MIR690, MIR691, and many others, along with their genomic locations and associated data points.



Table with columns for gene ID, chromosome, coordinates, gene name, transcript, and various numerical values. The table lists numerous genes such as AC007486.2, AC007487.2, AC007488.2, etc., with associated genomic data.



| ENSG0000018020 | 6  | 11514192   | 11514666 | THAP1P5   | havana  | transcribed protein | -0.050864  | 6.34e-01                                                                                                                                                                                                                                      | 0.05047683                                                                                                                                                                                                                             | 7.28e-01                                                                                                                                                                                                | 0.1403217                                                                                                                                                                                         | 4.81e-01                                                                                                                                                          | -0.026611                                                                                                                                                    | 6.46e-01                                                                                                                    | -0.1262064                                                                                                              | 1.63e-01                                                                              | -0.115973                                                                          | 5.88e-01                                        | -0.129604                                      | 3.70e-01  |          |
|----------------|----|------------|----------|-----------|---------|---------------------|------------|-----------------------------------------------------------------------------------------------------------------------------------------------------------------------------------------------------------------------------------------------|----------------------------------------------------------------------------------------------------------------------------------------------------------------------------------------------------------------------------------------|---------------------------------------------------------------------------------------------------------------------------------------------------------------------------------------------------------|---------------------------------------------------------------------------------------------------------------------------------------------------------------------------------------------------|-------------------------------------------------------------------------------------------------------------------------------------------------------------------|--------------------------------------------------------------------------------------------------------------------------------------------------------------|-----------------------------------------------------------------------------------------------------------------------------|-------------------------------------------------------------------------------------------------------------------------|---------------------------------------------------------------------------------------|------------------------------------------------------------------------------------|-------------------------------------------------|------------------------------------------------|-----------|----------|
| ENSG0000018020 | 14 | 9306740    | 9307152  | ITPK1A3   | havana  | lncRNA              | -0.125839  | 2.75e-01 <td>-0.029462</td> <td>8.39e-01 <td>0.134489</td> <td>5.01e-01 <td>-0.029264</td> <td>6.46e-01 <td>-0.19253</td> <td>1.68e-01 <td>-0.142996</td> <td>1.25e-01 <td>-0.17233</td> <td>2.11e-01 </td></td></td></td></td></td>          | -0.029462                                                                                                                                                                                                                              | 8.39e-01 <td>0.134489</td> <td>5.01e-01 <td>-0.029264</td> <td>6.46e-01 <td>-0.19253</td> <td>1.68e-01 <td>-0.142996</td> <td>1.25e-01 <td>-0.17233</td> <td>2.11e-01 </td></td></td></td></td>         | 0.134489                                                                                                                                                                                          | 5.01e-01 <td>-0.029264</td> <td>6.46e-01 <td>-0.19253</td> <td>1.68e-01 <td>-0.142996</td> <td>1.25e-01 <td>-0.17233</td> <td>2.11e-01 </td></td></td></td>       | -0.029264                                                                                                                                                    | 6.46e-01 <td>-0.19253</td> <td>1.68e-01 <td>-0.142996</td> <td>1.25e-01 <td>-0.17233</td> <td>2.11e-01 </td></td></td>      | -0.19253                                                                                                                | 1.68e-01 <td>-0.142996</td> <td>1.25e-01 <td>-0.17233</td> <td>2.11e-01 </td></td>    | -0.142996                                                                          | 1.25e-01 <td>-0.17233</td> <td>2.11e-01 </td>   | -0.17233                                       | 2.11e-01  |          |
| ENSG0000017945 | 15 | 9315134    | 9317791  | LINC02429 | havana  | lncRNA              | -0.216639  | 0.000000 <td>-0.000000</td> <td>0.000000 <td>0.000000</td> <td>0.000000</td> <td>-0.000000</td> <td>0.000000</td> <td>-0.000000</td> <td>0.000000</td> <td>-0.000000</td> <td>0.000000</td> <td>-0.000000</td> <td>0.000000</td> </td>        | -0.000000                                                                                                                                                                                                                              | 0.000000 <td>0.000000</td> <td>0.000000</td> <td>-0.000000</td> <td>0.000000</td> <td>-0.000000</td> <td>0.000000</td> <td>-0.000000</td> <td>0.000000</td> <td>-0.000000</td> <td>0.000000</td>        | 0.000000                                                                                                                                                                                          | 0.000000                                                                                                                                                          | -0.000000                                                                                                                                                    | 0.000000                                                                                                                    | -0.000000                                                                                                               | 0.000000                                                                              | -0.000000                                                                          | 0.000000                                        | -0.000000                                      | 0.000000  |          |
| ENSG0000019688 | 15 | 4036825    | 4036960  | AC03356.4 | havana  | lncRNA              | -0.066610  | 5.65e-01 <td>-0.025599</td> <td>8.04e-01 <td>-0.026840</td> <td>6.46e-01 <td>-0.073161</td> <td>6.07e-01 <td>-0.041491</td> <td>8.02e-01 <td>-0.142996</td> <td>1.25e-01 <td>-0.17233</td> <td>2.11e-01 </td></td></td></td></td></td>        | -0.025599                                                                                                                                                                                                                              | 8.04e-01 <td>-0.026840</td> <td>6.46e-01 <td>-0.073161</td> <td>6.07e-01 <td>-0.041491</td> <td>8.02e-01 <td>-0.142996</td> <td>1.25e-01 <td>-0.17233</td> <td>2.11e-01 </td></td></td></td></td>       | -0.026840                                                                                                                                                                                         | 6.46e-01 <td>-0.073161</td> <td>6.07e-01 <td>-0.041491</td> <td>8.02e-01 <td>-0.142996</td> <td>1.25e-01 <td>-0.17233</td> <td>2.11e-01 </td></td></td></td>      | -0.073161                                                                                                                                                    | 6.07e-01 <td>-0.041491</td> <td>8.02e-01 <td>-0.142996</td> <td>1.25e-01 <td>-0.17233</td> <td>2.11e-01 </td></td></td>     | -0.041491                                                                                                               | 8.02e-01 <td>-0.142996</td> <td>1.25e-01 <td>-0.17233</td> <td>2.11e-01 </td></td>    | -0.142996                                                                          | 1.25e-01 <td>-0.17233</td> <td>2.11e-01 </td>   | -0.17233                                       | 2.11e-01  |          |
| ENSG0000017890 | 15 | 4777855    | 4778486  | SLLN100   | ensembl | protein coding      | -0.043464  | 7.17e-01 <td>-0.042110</td> <td>7.70e-01 <td>0.054474</td> <td>7.84e-01 <td>0.029264</td> <td>6.46e-01 <td>0.048873</td> <td>7.26e-01 <td>0.212624</td> <td>3.02e-01 <td>0.027203</td> <td>5.68e-01 </td></td></td></td></td></td>            | -0.042110                                                                                                                                                                                                                              | 7.70e-01 <td>0.054474</td> <td>7.84e-01 <td>0.029264</td> <td>6.46e-01 <td>0.048873</td> <td>7.26e-01 <td>0.212624</td> <td>3.02e-01 <td>0.027203</td> <td>5.68e-01 </td></td></td></td></td>           | 0.054474                                                                                                                                                                                          | 7.84e-01 <td>0.029264</td> <td>6.46e-01 <td>0.048873</td> <td>7.26e-01 <td>0.212624</td> <td>3.02e-01 <td>0.027203</td> <td>5.68e-01 </td></td></td></td>         | 0.029264                                                                                                                                                     | 6.46e-01 <td>0.048873</td> <td>7.26e-01 <td>0.212624</td> <td>3.02e-01 <td>0.027203</td> <td>5.68e-01 </td></td></td>       | 0.048873                                                                                                                | 7.26e-01 <td>0.212624</td> <td>3.02e-01 <td>0.027203</td> <td>5.68e-01 </td></td>     | 0.212624                                                                           | 3.02e-01 <td>0.027203</td> <td>5.68e-01 </td>   | 0.027203                                       | 5.68e-01  |          |
| ENSG0000019604 | 15 | 4048419    | 4048327  | LINC02429 | havana  | lncRNA              | -0.143237  | 0.000000 <td>-0.000000</td> <td>0.000000</td> <td>0.000000</td> <td>0.000000</td> <td>-0.000000</td> <td>0.000000</td> <td>-0.000000</td> <td>0.000000</td> <td>-0.000000</td> <td>0.000000</td> <td>-0.000000</td> <td>0.000000</td>         | -0.000000                                                                                                                                                                                                                              | 0.000000                                                                                                                                                                                                | 0.000000                                                                                                                                                                                          | 0.000000                                                                                                                                                          | -0.000000                                                                                                                                                    | 0.000000                                                                                                                    | -0.000000                                                                                                               | 0.000000                                                                              | -0.000000                                                                          | 0.000000                                        | -0.000000                                      | 0.000000  |          |
| ENSG0000026994 | 9  | 9111892    | 9118276  | LINC00048 | havana  | lncRNA              | -0.180407  | 2.38e-01 <td>-0.082289</td> <td>6.30e-01 <td>-0.092743</td> <td>4.48e-01 <td>-0.092743</td> <td>6.45e-01 <td>-0.183078</td> <td>1.85e-01 <td>-0.121344</td> <td>1.02e-01 <td>-0.143233</td> <td>3.21e-01 </td></td></td></td></td></td>       | -0.082289                                                                                                                                                                                                                              | 6.30e-01 <td>-0.092743</td> <td>4.48e-01 <td>-0.092743</td> <td>6.45e-01 <td>-0.183078</td> <td>1.85e-01 <td>-0.121344</td> <td>1.02e-01 <td>-0.143233</td> <td>3.21e-01 </td></td></td></td></td>      | -0.092743                                                                                                                                                                                         | 4.48e-01 <td>-0.092743</td> <td>6.45e-01 <td>-0.183078</td> <td>1.85e-01 <td>-0.121344</td> <td>1.02e-01 <td>-0.143233</td> <td>3.21e-01 </td></td></td></td>     | -0.092743                                                                                                                                                    | 6.45e-01 <td>-0.183078</td> <td>1.85e-01 <td>-0.121344</td> <td>1.02e-01 <td>-0.143233</td> <td>3.21e-01 </td></td></td>    | -0.183078                                                                                                               | 1.85e-01 <td>-0.121344</td> <td>1.02e-01 <td>-0.143233</td> <td>3.21e-01 </td></td>   | -0.121344                                                                          | 1.02e-01 <td>-0.143233</td> <td>3.21e-01 </td>  | -0.143233                                      | 3.21e-01  |          |
| ENSG0000013359 | 19 | 1070340    | 1071347  | CTP1      | ensembl | havana              | -0.146664  | 1.47e-01 <td>-0.048365</td> <td>5.65e-01 <td>-0.249948</td> <td>2.09e-01 <td>-0.092778</td> <td>6.45e-01 <td>-0.231708</td> <td>9.18e-01 <td>-0.109236</td> <td>6.20e-01 <td>-0.18152</td> <td>2.08e-01 </td></td></td></td></td></td>        | -0.048365                                                                                                                                                                                                                              | 5.65e-01 <td>-0.249948</td> <td>2.09e-01 <td>-0.092778</td> <td>6.45e-01 <td>-0.231708</td> <td>9.18e-01 <td>-0.109236</td> <td>6.20e-01 <td>-0.18152</td> <td>2.08e-01 </td></td></td></td></td>       | -0.249948                                                                                                                                                                                         | 2.09e-01 <td>-0.092778</td> <td>6.45e-01 <td>-0.231708</td> <td>9.18e-01 <td>-0.109236</td> <td>6.20e-01 <td>-0.18152</td> <td>2.08e-01 </td></td></td></td>      | -0.092778                                                                                                                                                    | 6.45e-01 <td>-0.231708</td> <td>9.18e-01 <td>-0.109236</td> <td>6.20e-01 <td>-0.18152</td> <td>2.08e-01 </td></td></td>     | -0.231708                                                                                                               | 9.18e-01 <td>-0.109236</td> <td>6.20e-01 <td>-0.18152</td> <td>2.08e-01 </td></td>    | -0.109236                                                                          | 6.20e-01 <td>-0.18152</td> <td>2.08e-01 </td>   | -0.18152                                       | 2.08e-01  |          |
| ENSG0000019599 | 15 | 4269592    | 4269310  | LINC02429 | havana  | lncRNA              | -0.143237  | 0.000000 <td>-0.000000</td> <td>0.000000</td> <td>0.000000</td> <td>0.000000</td> <td>-0.000000</td> <td>0.000000</td> <td>-0.000000</td> <td>0.000000</td> <td>-0.000000</td> <td>0.000000</td> <td>-0.000000</td> <td>0.000000</td>         | -0.000000                                                                                                                                                                                                                              | 0.000000                                                                                                                                                                                                | 0.000000                                                                                                                                                                                          | 0.000000                                                                                                                                                          | -0.000000                                                                                                                                                    | 0.000000                                                                                                                    | -0.000000                                                                                                               | 0.000000                                                                              | -0.000000                                                                          | 0.000000                                        | -0.000000                                      | 0.000000  |          |
| ENSG0000024271 | 9  | 7380574    | 7380560  | LINC02026 | havana  | lncRNA              | -0.104614  | 3.65e-01 <td>-0.054839</td> <td>7.23e-01 <td>-0.124095</td> <td>5.37e-01 <td>-0.092812</td> <td>6.45e-01 <td>-0.195215</td> <td>5.75e-01 <td>-0.115473</td> <td>5.98e-01 <td>-0.115473</td> <td>5.98e-01 </td></td></td></td></td></td>       | -0.054839                                                                                                                                                                                                                              | 7.23e-01 <td>-0.124095</td> <td>5.37e-01 <td>-0.092812</td> <td>6.45e-01 <td>-0.195215</td> <td>5.75e-01 <td>-0.115473</td> <td>5.98e-01 <td>-0.115473</td> <td>5.98e-01 </td></td></td></td></td>      | -0.124095                                                                                                                                                                                         | 5.37e-01 <td>-0.092812</td> <td>6.45e-01 <td>-0.195215</td> <td>5.75e-01 <td>-0.115473</td> <td>5.98e-01 <td>-0.115473</td> <td>5.98e-01 </td></td></td></td>     | -0.092812                                                                                                                                                    | 6.45e-01 <td>-0.195215</td> <td>5.75e-01 <td>-0.115473</td> <td>5.98e-01 <td>-0.115473</td> <td>5.98e-01 </td></td></td>    | -0.195215                                                                                                               | 5.75e-01 <td>-0.115473</td> <td>5.98e-01 <td>-0.115473</td> <td>5.98e-01 </td></td>   | -0.115473                                                                          | 5.98e-01 <td>-0.115473</td> <td>5.98e-01 </td>  | -0.115473                                      | 5.98e-01  |          |
| ENSG0000026462 | 12 | 13131045   | 13131281 | AC09280.2 | havana  | tagene              | lncRNA     | YES                                                                                                                                                                                                                                           | YES                                                                                                                                                                                                                                    | YES                                                                                                                                                                                                     | YES                                                                                                                                                                                               | YES                                                                                                                                                               | YES                                                                                                                                                          | YES                                                                                                                         | YES                                                                                                                     | YES                                                                                   | YES                                                                                | YES                                             | YES                                            | YES       |          |
| ENSG0000013423 | 11 | 11321586   | 11321587 | TRIM45    | ensembl | protein coding      | -0.156688  | 2.02e-01 <td>-0.074923</td> <td>8.56e-01 <td>-0.092729</td> <td>1.33e-01 <td>-0.092729</td> <td>6.45e-01 <td>-0.209736</td> <td>2.28e-01 <td>-0.187361</td> <td>6.78e-01 <td>-0.056468</td> <td>6.54e-01 </td></td></td></td></td></td>       | -0.074923                                                                                                                                                                                                                              | 8.56e-01 <td>-0.092729</td> <td>1.33e-01 <td>-0.092729</td> <td>6.45e-01 <td>-0.209736</td> <td>2.28e-01 <td>-0.187361</td> <td>6.78e-01 <td>-0.056468</td> <td>6.54e-01 </td></td></td></td></td>      | -0.092729                                                                                                                                                                                         | 1.33e-01 <td>-0.092729</td> <td>6.45e-01 <td>-0.209736</td> <td>2.28e-01 <td>-0.187361</td> <td>6.78e-01 <td>-0.056468</td> <td>6.54e-01 </td></td></td></td>     | -0.092729                                                                                                                                                    | 6.45e-01 <td>-0.209736</td> <td>2.28e-01 <td>-0.187361</td> <td>6.78e-01 <td>-0.056468</td> <td>6.54e-01 </td></td></td>    | -0.209736                                                                                                               | 2.28e-01 <td>-0.187361</td> <td>6.78e-01 <td>-0.056468</td> <td>6.54e-01 </td></td>   | -0.187361                                                                          | 6.78e-01 <td>-0.056468</td> <td>6.54e-01 </td>  | -0.056468                                      | 6.54e-01  |          |
| ENSG0000017928 | 20 | 2204563    | 2204972  | THSD      | ensembl | havana              | -0.219502  | 7.82e-01 <td>-0.065515</td> <td>6.46e-01 <td>-0.307645</td> <td>1.18e-01 <td>-0.028881</td> <td>6.45e-01 <td>-0.272029</td> <td>5.02e-01 <td>-0.241718</td> <td>2.67e-01 <td>-0.268384</td> <td>5.95e-01 </td></td></td></td></td></td>       | -0.065515                                                                                                                                                                                                                              | 6.46e-01 <td>-0.307645</td> <td>1.18e-01 <td>-0.028881</td> <td>6.45e-01 <td>-0.272029</td> <td>5.02e-01 <td>-0.241718</td> <td>2.67e-01 <td>-0.268384</td> <td>5.95e-01 </td></td></td></td></td>      | -0.307645                                                                                                                                                                                         | 1.18e-01 <td>-0.028881</td> <td>6.45e-01 <td>-0.272029</td> <td>5.02e-01 <td>-0.241718</td> <td>2.67e-01 <td>-0.268384</td> <td>5.95e-01 </td></td></td></td>     | -0.028881                                                                                                                                                    | 6.45e-01 <td>-0.272029</td> <td>5.02e-01 <td>-0.241718</td> <td>2.67e-01 <td>-0.268384</td> <td>5.95e-01 </td></td></td>    | -0.272029                                                                                                               | 5.02e-01 <td>-0.241718</td> <td>2.67e-01 <td>-0.268384</td> <td>5.95e-01 </td></td>   | -0.241718                                                                          | 2.67e-01 <td>-0.268384</td> <td>5.95e-01 </td>  | -0.268384                                      | 5.95e-01  |          |
| ENSG0000027541 | 1  | 12022001   | 12022748 | SFRP1     | ensembl | havana              | -0.007973  | 8.47e-01 <td>-0.026763</td> <td>5.54e-01 <td>-0.091309</td> <td>8.51e-01 <td>-0.092839</td> <td>6.45e-01 <td>-0.022840</td> <td>7.36e-01 <td>0.1888001</td> <td>4.41e-01 <td>0.058484</td> <td>1.92e-01 </td></td></td></td></td></td>        | -0.026763                                                                                                                                                                                                                              | 5.54e-01 <td>-0.091309</td> <td>8.51e-01 <td>-0.092839</td> <td>6.45e-01 <td>-0.022840</td> <td>7.36e-01 <td>0.1888001</td> <td>4.41e-01 <td>0.058484</td> <td>1.92e-01 </td></td></td></td></td>       | -0.091309                                                                                                                                                                                         | 8.51e-01 <td>-0.092839</td> <td>6.45e-01 <td>-0.022840</td> <td>7.36e-01 <td>0.1888001</td> <td>4.41e-01 <td>0.058484</td> <td>1.92e-01 </td></td></td></td>      | -0.092839                                                                                                                                                    | 6.45e-01 <td>-0.022840</td> <td>7.36e-01 <td>0.1888001</td> <td>4.41e-01 <td>0.058484</td> <td>1.92e-01 </td></td></td>     | -0.022840                                                                                                               | 7.36e-01 <td>0.1888001</td> <td>4.41e-01 <td>0.058484</td> <td>1.92e-01 </td></td>    | 0.1888001                                                                          | 4.41e-01 <td>0.058484</td> <td>1.92e-01 </td>   | 0.058484                                       | 1.92e-01  |          |
| ENSG0000014713 | 16 | 7556675    | 7577781  | SABARP1L  | ensembl | havana              | -0.045798  | 6.92e-01 <td>-0.027729</td> <td>8.21e-01 <td>-0.137628</td> <td>4.94e-01 <td>-0.092928</td> <td>6.45e-01 <td>-0.021447</td> <td>8.16e-01 <td>-0.154708</td> <td>2.41e-01 <td>-0.185348</td> <td>6.88e-01 </td></td></td></td></td></td>       | -0.027729                                                                                                                                                                                                                              | 8.21e-01 <td>-0.137628</td> <td>4.94e-01 <td>-0.092928</td> <td>6.45e-01 <td>-0.021447</td> <td>8.16e-01 <td>-0.154708</td> <td>2.41e-01 <td>-0.185348</td> <td>6.88e-01 </td></td></td></td></td>      | -0.137628                                                                                                                                                                                         | 4.94e-01 <td>-0.092928</td> <td>6.45e-01 <td>-0.021447</td> <td>8.16e-01 <td>-0.154708</td> <td>2.41e-01 <td>-0.185348</td> <td>6.88e-01 </td></td></td></td>     | -0.092928                                                                                                                                                    | 6.45e-01 <td>-0.021447</td> <td>8.16e-01 <td>-0.154708</td> <td>2.41e-01 <td>-0.185348</td> <td>6.88e-01 </td></td></td>    | -0.021447                                                                                                               | 8.16e-01 <td>-0.154708</td> <td>2.41e-01 <td>-0.185348</td> <td>6.88e-01 </td></td>   | -0.154708                                                                          | 2.41e-01 <td>-0.185348</td> <td>6.88e-01 </td>  | -0.185348                                      | 6.88e-01  |          |
| ENSG0000010146 | 20 | 3456042    | 3456070  | PGL1      | ensembl | havana              | -0.172087  | 1.33e-01 <td>-0.090967</td> <td>4.66e-01 <td>-0.082290</td> <td>8.86e-01 <td>-0.092929</td> <td>6.45e-01 <td>-0.188068</td> <td>8.28e-01 <td>-0.328469</td> <td>1.26e-01 <td>-0.049117</td> <td>7.07e-01 </td></td></td></td></td></td>       | -0.090967                                                                                                                                                                                                                              | 4.66e-01 <td>-0.082290</td> <td>8.86e-01 <td>-0.092929</td> <td>6.45e-01 <td>-0.188068</td> <td>8.28e-01 <td>-0.328469</td> <td>1.26e-01 <td>-0.049117</td> <td>7.07e-01 </td></td></td></td></td>      | -0.082290                                                                                                                                                                                         | 8.86e-01 <td>-0.092929</td> <td>6.45e-01 <td>-0.188068</td> <td>8.28e-01 <td>-0.328469</td> <td>1.26e-01 <td>-0.049117</td> <td>7.07e-01 </td></td></td></td>     | -0.092929                                                                                                                                                    | 6.45e-01 <td>-0.188068</td> <td>8.28e-01 <td>-0.328469</td> <td>1.26e-01 <td>-0.049117</td> <td>7.07e-01 </td></td></td>    | -0.188068                                                                                                               | 8.28e-01 <td>-0.328469</td> <td>1.26e-01 <td>-0.049117</td> <td>7.07e-01 </td></td>   | -0.328469                                                                          | 1.26e-01 <td>-0.049117</td> <td>7.07e-01 </td>  | -0.049117                                      | 7.07e-01  |          |
| ENSG0000024475 | 11 | 7675709    | 7670335  | ADP018.4  | havana  | lncRNA              | YES        | -0.061284                                                                                                                                                                                                                                     | 5.96e-01 <td>-0.057013</td> <td>6.94e-01 <td>-0.188925</td> <td>4.89e-01 <td>-0.092935</td> <td>6.45e-01 <td>-0.142179</td> <td>2.85e-01 <td>0.000603</td> <td>9.57e-01 <td>-0.100413</td> <td>4.88e-01 </td></td></td></td></td></td> | -0.057013                                                                                                                                                                                               | 6.94e-01 <td>-0.188925</td> <td>4.89e-01 <td>-0.092935</td> <td>6.45e-01 <td>-0.142179</td> <td>2.85e-01 <td>0.000603</td> <td>9.57e-01 <td>-0.100413</td> <td>4.88e-01 </td></td></td></td></td> | -0.188925                                                                                                                                                         | 4.89e-01 <td>-0.092935</td> <td>6.45e-01 <td>-0.142179</td> <td>2.85e-01 <td>0.000603</td> <td>9.57e-01 <td>-0.100413</td> <td>4.88e-01 </td></td></td></td> | -0.092935                                                                                                                   | 6.45e-01 <td>-0.142179</td> <td>2.85e-01 <td>0.000603</td> <td>9.57e-01 <td>-0.100413</td> <td>4.88e-01 </td></td></td> | -0.142179                                                                             | 2.85e-01 <td>0.000603</td> <td>9.57e-01 <td>-0.100413</td> <td>4.88e-01 </td></td> | 0.000603                                        | 9.57e-01 <td>-0.100413</td> <td>4.88e-01 </td> | -0.100413 | 4.88e-01 |
| ENSG0000024473 | 10 | 3604319    | 3604376  | CNDP3     | ensembl | havana              | -0.0105174 | 9.28e-01 <td>-0.024666</td> <td>8.65e-01 <td>-0.052739</td> <td>7.94e-01</td> <td>-0.092947</td> <td>6.45e-01 <td>-0.200245</td> <td>8.58e-01 <td>-0.200738</td> <td>1.97e-01 <td>-0.125248</td> <td>3.84e-01 </td></td></td></td></td>       | -0.024666                                                                                                                                                                                                                              | 8.65e-01 <td>-0.052739</td> <td>7.94e-01</td> <td>-0.092947</td> <td>6.45e-01 <td>-0.200245</td> <td>8.58e-01 <td>-0.200738</td> <td>1.97e-01 <td>-0.125248</td> <td>3.84e-01 </td></td></td></td>      | -0.052739                                                                                                                                                                                         | 7.94e-01                                                                                                                                                          | -0.092947                                                                                                                                                    | 6.45e-01 <td>-0.200245</td> <td>8.58e-01 <td>-0.200738</td> <td>1.97e-01 <td>-0.125248</td> <td>3.84e-01 </td></td></td>    | -0.200245                                                                                                               | 8.58e-01 <td>-0.200738</td> <td>1.97e-01 <td>-0.125248</td> <td>3.84e-01 </td></td>   | -0.200738                                                                          | 1.97e-01 <td>-0.125248</td> <td>3.84e-01 </td>  | -0.125248                                      | 3.84e-01  |          |
| ENSG0000012577 | 4  | 11908457   | 11966139 | PDP2C     | ensembl | havana              | -0.114511  | 1.48e-01 <td>-0.114511</td> <td>2.88e-01 <td>-0.128169</td> <td>3.84e-01 <td>-0.092949</td> <td>6.45e-01 <td>-0.178238</td> <td>3.97e-01 <td>-0.084824</td> <td>7.05e-01 <td>-0.162112</td> <td>4.01e-01 </td></td></td></td></td></td>       | -0.114511                                                                                                                                                                                                                              | 2.88e-01 <td>-0.128169</td> <td>3.84e-01 <td>-0.092949</td> <td>6.45e-01 <td>-0.178238</td> <td>3.97e-01 <td>-0.084824</td> <td>7.05e-01 <td>-0.162112</td> <td>4.01e-01 </td></td></td></td></td>      | -0.128169                                                                                                                                                                                         | 3.84e-01 <td>-0.092949</td> <td>6.45e-01 <td>-0.178238</td> <td>3.97e-01 <td>-0.084824</td> <td>7.05e-01 <td>-0.162112</td> <td>4.01e-01 </td></td></td></td>     | -0.092949                                                                                                                                                    | 6.45e-01 <td>-0.178238</td> <td>3.97e-01 <td>-0.084824</td> <td>7.05e-01 <td>-0.162112</td> <td>4.01e-01 </td></td></td>    | -0.178238                                                                                                               | 3.97e-01 <td>-0.084824</td> <td>7.05e-01 <td>-0.162112</td> <td>4.01e-01 </td></td>   | -0.084824                                                                          | 7.05e-01 <td>-0.162112</td> <td>4.01e-01 </td>  | -0.162112                                      | 4.01e-01  |          |
| ENSG0000013358 | 9  | 19652739   | 19652891 | AC09280.1 | havana  | unprocessed pseud   | YES        | YES                                                                                                                                                                                                                                           | YES                                                                                                                                                                                                                                    | YES                                                                                                                                                                                                     | YES                                                                                                                                                                                               | YES                                                                                                                                                               | YES                                                                                                                                                          | YES                                                                                                                         | YES                                                                                                                     | YES                                                                                   | YES                                                                                | YES                                             | YES                                            | YES       |          |
| ENSG0000023781 | 8  | 9346406    | 9346702  | ZNF1371   | ensembl | havana              | -0.1118647 | 3.33e-01 <td>-0.068973</td> <td>6.95e-01 <td>-0.195514</td> <td>4.27e-01 <td>-0.092971</td> <td>6.45e-01 <td>-0.158634</td> <td>2.66e-01 <td>-0.209365</td> <td>7.05e-01 <td>-0.128721</td> <td>9.16e-01 </td></td></td></td></td></td>       | -0.068973                                                                                                                                                                                                                              | 6.95e-01 <td>-0.195514</td> <td>4.27e-01 <td>-0.092971</td> <td>6.45e-01 <td>-0.158634</td> <td>2.66e-01 <td>-0.209365</td> <td>7.05e-01 <td>-0.128721</td> <td>9.16e-01 </td></td></td></td></td>      | -0.195514                                                                                                                                                                                         | 4.27e-01 <td>-0.092971</td> <td>6.45e-01 <td>-0.158634</td> <td>2.66e-01 <td>-0.209365</td> <td>7.05e-01 <td>-0.128721</td> <td>9.16e-01 </td></td></td></td>     | -0.092971                                                                                                                                                    | 6.45e-01 <td>-0.158634</td> <td>2.66e-01 <td>-0.209365</td> <td>7.05e-01 <td>-0.128721</td> <td>9.16e-01 </td></td></td>    | -0.158634                                                                                                               | 2.66e-01 <td>-0.209365</td> <td>7.05e-01 <td>-0.128721</td> <td>9.16e-01 </td></td>   | -0.209365                                                                          | 7.05e-01 <td>-0.128721</td> <td>9.16e-01 </td>  | -0.128721                                      | 9.16e-01  |          |
| ENSG0000015643 | 12 | 7035630    | 7036292  | ICN18B    | ensembl | havana              | -0.12488   | 2.02e-01 <td>-0.074923</td> <td>8.56e-01 <td>-0.092729</td> <td>1.33e-01 <td>-0.092729</td> <td>6.45e-01 <td>-0.209736</td> <td>2.28e-01 <td>-0.187361</td> <td>6.78e-01 <td>-0.056468</td> <td>6.54e-01 </td></td></td></td></td></td>       | -0.074923                                                                                                                                                                                                                              | 8.56e-01 <td>-0.092729</td> <td>1.33e-01 <td>-0.092729</td> <td>6.45e-01 <td>-0.209736</td> <td>2.28e-01 <td>-0.187361</td> <td>6.78e-01 <td>-0.056468</td> <td>6.54e-01 </td></td></td></td></td>      | -0.092729                                                                                                                                                                                         | 1.33e-01 <td>-0.092729</td> <td>6.45e-01 <td>-0.209736</td> <td>2.28e-01 <td>-0.187361</td> <td>6.78e-01 <td>-0.056468</td> <td>6.54e-01 </td></td></td></td>     | -0.092729                                                                                                                                                    | 6.45e-01 <td>-0.209736</td> <td>2.28e-01 <td>-0.187361</td> <td>6.78e-01 <td>-0.056468</td> <td>6.54e-01 </td></td></td>    | -0.209736                                                                                                               | 2.28e-01 <td>-0.187361</td> <td>6.78e-01 <td>-0.056468</td> <td>6.54e-01 </td></td>   | -0.187361                                                                          | 6.78e-01 <td>-0.056468</td> <td>6.54e-01 </td>  | -0.056468                                      | 6.54e-01  |          |
| ENSG0000024887 | 19 | 4213555    | 4213709  | AC01024.1 | havana  | lncRNA              | -0.124628  | 2.80e-01 <td>-0.064888</td> <td>6.46e-01 <td>-0.0779984</td> <td>7.02e-01 <td>-0.093025</td> <td>6.44e-01 <td>-0.193503</td> <td>5.57e-01 <td>-0.0904517</td> <td>9.84e-01 <td>-0.0207791</td> <td>8.63e-01 </td></td></td></td></td></td>    | -0.064888                                                                                                                                                                                                                              | 6.46e-01 <td>-0.0779984</td> <td>7.02e-01 <td>-0.093025</td> <td>6.44e-01 <td>-0.193503</td> <td>5.57e-01 <td>-0.0904517</td> <td>9.84e-01 <td>-0.0207791</td> <td>8.63e-01 </td></td></td></td></td>   | -0.0779984                                                                                                                                                                                        | 7.02e-01 <td>-0.093025</td> <td>6.44e-01 <td>-0.193503</td> <td>5.57e-01 <td>-0.0904517</td> <td>9.84e-01 <td>-0.0207791</td> <td>8.63e-01 </td></td></td></td>   | -0.093025                                                                                                                                                    | 6.44e-01 <td>-0.193503</td> <td>5.57e-01 <td>-0.0904517</td> <td>9.84e-01 <td>-0.0207791</td> <td>8.63e-01 </td></td></td>  | -0.193503                                                                                                               | 5.57e-01 <td>-0.0904517</td> <td>9.84e-01 <td>-0.0207791</td> <td>8.63e-01 </td></td> | -0.0904517                                                                         | 9.84e-01 <td>-0.0207791</td> <td>8.63e-01 </td> | -0.0207791                                     | 8.63e-01  |          |
| ENSG0000014248 | 19 | 5396304    | 5399215  | CAC6B     | ensembl | havana              | -0.018794  | 6.54e-01 <td>-0.027749</td> <td>8.48e-01 <td>-0.093028</td> <td>7.48e-01 <td>-0.093028</td> <td>6.44e-01 <td>-0.073927</td> <td>8.36e-01 <td>-0.197129</td> <td>6.37e-01 <td>-0.1474603</td> <td>3.70e-01 </td></td></td></td></td></td>      | -0.027749                                                                                                                                                                                                                              | 8.48e-01 <td>-0.093028</td> <td>7.48e-01 <td>-0.093028</td> <td>6.44e-01 <td>-0.073927</td> <td>8.36e-01 <td>-0.197129</td> <td>6.37e-01 <td>-0.1474603</td> <td>3.70e-01 </td></td></td></td></td>     | -0.093028                                                                                                                                                                                         | 7.48e-01 <td>-0.093028</td> <td>6.44e-01 <td>-0.073927</td> <td>8.36e-01 <td>-0.197129</td> <td>6.37e-01 <td>-0.1474603</td> <td>3.70e-01 </td></td></td></td>    | -0.093028                                                                                                                                                    | 6.44e-01 <td>-0.073927</td> <td>8.36e-01 <td>-0.197129</td> <td>6.37e-01 <td>-0.1474603</td> <td>3.70e-01 </td></td></td>   | -0.073927                                                                                                               | 8.36e-01 <td>-0.197129</td> <td>6.37e-01 <td>-0.1474603</td> <td>3.70e-01 </td></td>  | -0.197129                                                                          | 6.37e-01 <td>-0.1474603</td> <td>3.70e-01 </td> | -0.1474603                                     | 3.70e-01  |          |
| ENSG0000027280 | 6  | 1609940    | 1611941  | ZNF121    | ensembl | havana              | -0.088944  | 7.40e-01 <td>-0.047462</td> <td>9.85e-01 <td>-0.2547193</td> <td>2.06e-01 <td>-0.093041</td> <td>6.44e-01 <td>-0.001913</td> <td>9.88e-01 <td>-0.0424209</td> <td>1.77e-01 <td>-0.0868434</td> <td>5.98e-01 </td></td></td></td></td></td>    | -0.047462                                                                                                                                                                                                                              | 9.85e-01 <td>-0.2547193</td> <td>2.06e-01 <td>-0.093041</td> <td>6.44e-01 <td>-0.001913</td> <td>9.88e-01 <td>-0.0424209</td> <td>1.77e-01 <td>-0.0868434</td> <td>5.98e-01 </td></td></td></td></td>   | -0.2547193                                                                                                                                                                                        | 2.06e-01 <td>-0.093041</td> <td>6.44e-01 <td>-0.001913</td> <td>9.88e-01 <td>-0.0424209</td> <td>1.77e-01 <td>-0.0868434</td> <td>5.98e-01 </td></td></td></td>   | -0.093041                                                                                                                                                    | 6.44e-01 <td>-0.001913</td> <td>9.88e-01 <td>-0.0424209</td> <td>1.77e-01 <td>-0.0868434</td> <td>5.98e-01 </td></td></td>  | -0.001913                                                                                                               | 9.88e-01 <td>-0.0424209</td> <td>1.77e-01 <td>-0.0868434</td> <td>5.98e-01 </td></td> | -0.0424209                                                                         | 1.77e-01 <td>-0.0868434</td> <td>5.98e-01 </td> | -0.0868434                                     | 5.98e-01  |          |
| ENSG0000014807 | 6  | 7939389    | 7949800  | PUR1      | ensembl | havana              | -0.099128  | 6.71e-01 <td>-0.091444</td> <td>5.01e-01 <td>-0.171477</td> <td>3.76e-01 <td>-0.093095</td> <td>6.44e-01 <td>-0.147133</td> <td>8.88e-01 <td>-0.169388</td> <td>4.42e-01 <td>-0.162537</td> <td>2.99e-01 </td></td></td></td></td></td>       | -0.091444                                                                                                                                                                                                                              | 5.01e-01 <td>-0.171477</td> <td>3.76e-01 <td>-0.093095</td> <td>6.44e-01 <td>-0.147133</td> <td>8.88e-01 <td>-0.169388</td> <td>4.42e-01 <td>-0.162537</td> <td>2.99e-01 </td></td></td></td></td>      | -0.171477                                                                                                                                                                                         | 3.76e-01 <td>-0.093095</td> <td>6.44e-01 <td>-0.147133</td> <td>8.88e-01 <td>-0.169388</td> <td>4.42e-01 <td>-0.162537</td> <td>2.99e-01 </td></td></td></td>     | -0.093095                                                                                                                                                    | 6.44e-01 <td>-0.147133</td> <td>8.88e-01 <td>-0.169388</td> <td>4.42e-01 <td>-0.162537</td> <td>2.99e-01 </td></td></td>    | -0.147133                                                                                                               | 8.88e-01 <td>-0.169388</td> <td>4.42e-01 <td>-0.162537</td> <td>2.99e-01 </td></td>   | -0.169388                                                                          | 4.42e-01 <td>-0.162537</td> <td>2.99e-01 </td>  | -0.162537                                      | 2.99e-01  |          |
| ENSG0000015249 | 13 | 9460187    | 9463661  | EP381B    | ensembl | havana              | -0.0471689 | 6.84e-01 <td>-0.0634703</td> <td>6.37e-01 <td>-0.0611549</td> <td>9.56e-01 <td>-0.1807748</td> <td>6.44e-01 <td>-0.1725561</td> <td>9.07e-01 <td>-0.1725561</td> <td>9.07e-01 <td>-0.1725561</td> <td>9.07e-01 </td></td></td></td></td></td> | -0.0634703                                                                                                                                                                                                                             | 6.37e-01 <td>-0.0611549</td> <td>9.56e-01 <td>-0.1807748</td> <td>6.44e-01 <td>-0.1725561</td> <td>9.07e-01 <td>-0.1725561</td> <td>9.07e-01 <td>-0.1725561</td> <td>9.07e-01 </td></td></td></td></td> | -0.0611549                                                                                                                                                                                        | 9.56e-01 <td>-0.1807748</td> <td>6.44e-01 <td>-0.1725561</td> <td>9.07e-01 <td>-0.1725561</td> <td>9.07e-01 <td>-0.1725561</td> <td>9.07e-01 </td></td></td></td> | -0.1807748                                                                                                                                                   | 6.44e-01 <td>-0.1725561</td> <td>9.07e-01 <td>-0.1725561</td> <td>9.07e-01 <td>-0.1725561</td> <td>9.07e-01 </td></td></td> | -0.1725561                                                                                                              | 9.07e-01 <td>-0.1725561</td> <td>9.07e-01 <td>-0.1725561</td> <td>9.07e-01 </td></td> | -0.1725561                                                                         | 9.07e-01 <td>-0.1725561</td> <td>9.07e-01 </td> | -0.1725561                                     | 9.07e-01  |          |
| ENSG0000027373 | 1  | 17411028   | 17410365 | RAB39L1P  | ensembl | havana              | -0.178758  | 1.20e-01 <td>-0.034928</td> <td>8.10e-01 <td>-0.084818</td> <td>6.76e-01 <td>-0.091155</td> <td>6.44e-01 <td>-0.040249</td> <td>9.38e-01 <td>-0.070248</td> <td>7.34e-01 <td>-0.098888</td> <td>5.03e-01 </td></td></td></td></td></td>       | -0.034928                                                                                                                                                                                                                              | 8.10e-01 <td>-0.084818</td> <td>6.76e-01 <td>-0.091155</td> <td>6.44e-01 <td>-0.040249</td> <td>9.38e-01 <td>-0.070248</td> <td>7.34e-01 <td>-0.098888</td> <td>5.03e-01 </td></td></td></td></td>      | -0.084818                                                                                                                                                                                         | 6.76e-01 <td>-0.091155</td> <td>6.44e-01 <td>-0.040249</td> <td>9.38e-01 <td>-0.070248</td> <td>7.34e-01 <td>-0.098888</td> <td>5.03e-01 </td></td></td></td>     | -0.091155                                                                                                                                                    | 6.44e-01 <td>-0.040249</td> <td>9.38e-01 <td>-0.070248</td> <td>7.34e-01 <td>-0.098888</td> <td>5.03e-01 </td></td></td>    | -0.040249                                                                                                               | 9.38e-01 <td>-0.070248</td> <td>7.34e-01 <td>-0.098888</td> <td>5.03e-01 </td></td>   | -0.070248                                                                          | 7.34e-01 <td>-0.098888</td> <td>5.03e-01 </td>  | -0.098888                                      | 5.03e-01  |          |
| ENSG0000027338 | 1  | 4914256    | 4914883  | RAG3      | ensembl | havana              | -0.0545138 | 2.92e-01 <td>-0.024518</td> <td>8.00e-01 <td>-0.0515869</td> <td>6.46e-01 <td>-0.093089</td> <td>6.44e-01 <td>-0.238001</td> <td>6.66e-01 <td>-0.198666</td> <td>6.44e-01 <td>-0.146024</td> <td>7.44e-01 </td></td></td></td></td></td>      | -0.024518                                                                                                                                                                                                                              | 8.00e-01 <td>-0.0515869</td> <td>6.46e-01 <td>-0.093089</td> <td>6.44e-01 <td>-0.238001</td> <td>6.66e-01 <td>-0.198666</td> <td>6.44e-01 <td>-0.146024</td> <td>7.44e-01 </td></td></td></td></td>     | -0.0515869                                                                                                                                                                                        | 6.46e-01 <td>-0.093089</td> <td>6.44e-01 <td>-0.238001</td> <td>6.66e-01 <td>-0.198666</td> <td>6.44e-01 <td>-0.146024</td> <td>7.44e-01 </td></td></td></td>     | -0.093089                                                                                                                                                    | 6.44e-01 <td>-0.238001</td> <td>6.66e-01 <td>-0.198666</td> <td>6.44e-01 <td>-0.146024</td> <td>7.44e-01 </td></td></td>    | -0.238001                                                                                                               | 6.66e-01 <td>-0.198666</td> <td>6.44e-01 <td>-0.146024</td> <td>7.44e-01 </td></td>   | -0.198666                                                                          | 6.44e-01 <td>-0.146024</td> <td>7.44e-01 </td>  | -0.146024                                      | 7.44e-01  |          |
| ENSG0000014945 | 6  | 384913     | 385120   | FAM50B    | ensembl | havana              | -0.0447428 | 6.98e-01 <td>-0.045489</td> <td>7.33e-01 <td>-0.168794</td> <td>4.08e-01 <td>-0.091812</td> <td>6.44e-01 <td>-0.083265</td> <td>8.05e-01 <td>-0.2261237</td> <td>3.70e-01 <td>-0.006289</td> <td>9.08e-01 </td></td></td></td></td></td>      | -0.045489                                                                                                                                                                                                                              | 7.33e-01 <td>-0.168794</td> <td>4.08e-01 <td>-0.091812</td> <td>6.44e-01 <td>-0.083265</td> <td>8.05e-01 <td>-0.2261237</td> <td>3.70e-01 <td>-0.006289</td> <td>9.08e-01 </td></td></td></td></td>     | -0.168794                                                                                                                                                                                         | 4.08e-01 <td>-0.091812</td> <td>6.44e-01 <td>-0.083265</td> <td>8.05e-01 <td>-0.2261237</td> <td>3.70e-01 <td>-0.006289</td> <td>9.08e-01 </td></td></td></td>    | -0.091812                                                                                                                                                    | 6.44e-01 <td>-0.083265</td> <td>8.05e-01 <td>-0.2261237</td> <td>3.70e-01 <td>-0.006289</td> <td>9.08e-01 </td></td></td>   | -0.083265                                                                                                               | 8.05e-01 <td>-0.2261237</td> <td>3.70e-01 <td>-0.006289</td> <td>9.08e-01 </td></td>  | -0.2261237                                                                         | 3.70e-01 <td>-0.006289</td> <td>9.08e-01 </td>  | -0.006289                                      | 9.08e-01  |          |
| ENSG0000018637 | 5  | 12974094   | 12976732 | MINAR2    | ensembl | havana              | -0.0666239 | 9.54e-01 <td>-0.010032</td> <td>9.45e-01 <td>-0.2285871</td> <td>2.52e-01 <td>-0.091884</td> <td>6.44e-01 <td>-0.036183</td> <td>7.95e-01 <td>-0.077064</td> <td>7.27e-01 <td>-0.0588465</td> <td>6.57e-01 </td></td></td></td></td></td>     | -0.010032                                                                                                                                                                                                                              | 9.45e-01 <td>-0.2285871</td> <td>2.52e-01 <td>-0.091884</td> <td>6.44e-01 <td>-0.036183</td> <td>7.95e-01 <td>-0.077064</td> <td>7.27e-01 <td>-0.0588465</td> <td>6.57e-01 </td></td></td></td></td>    | -0.2285871                                                                                                                                                                                        | 2.52e-01 <td>-0.091884</td> <td>6.44e-01 <td>-0.036183</td> <td>7.95e-01 <td>-0.077064</td> <td>7.27e-01 <td>-0.0588465</td> <td>6.57e-01 </td></td></td></td>    | -0.091884                                                                                                                                                    | 6.44e-01 <td>-0.036183</td> <td>7.95e-01 <td>-0.077064</td> <td>7.27e-01 <td>-0.0588465</td> <td>6.57e-01 </td></td></td>   | -0.036183                                                                                                               | 7.95e-01 <td>-0.077064</td> <td>7.27e-01 <td>-0.0588465</td> <td>6.57e-01 </td></td>  | -0.077064                                                                          | 7.27e-01 <td>-0.0588465</td> <td>6.57e-01 </td> | -0.0588465                                     | 6.57e-01  |          |
| ENSG0000023623 | 14 | 11908457   | 11966139 | PDP2C     | ensembl | havana              | -0.114511  | 1.48e-01 <td>-0.114511</td> <td>2.88e-01 <td>-0.128169</td> <td>3.84e-01 <td>-0.092949</td> <td>6.45e-01 <td>-0.178238</td> <td>3.97e-01 <td>-0.084824</td> <td>7.05e-01 <td>-0.162112</td> <td>4.01e-01 </td></td></td></td></td></td>       | -0.114511                                                                                                                                                                                                                              | 2.88e-01 <td>-0.128169</td> <td>3.84e-01 <td>-0.092949</td> <td>6.45e-01 <td>-0.178238</td> <td>3.97e-01 <td>-0.084824</td> <td>7.05e-01 <td>-0.162112</td> <td>4.01e-01 </td></td></td></td></td>      | -0.128169                                                                                                                                                                                         | 3.84e-01 <td>-0.092949</td> <td>6.45e-01 <td>-0.178238</td> <td>3.97e-01 <td>-0.084824</td> <td>7.05e-01 <td>-0.162112</td> <td>4.01e-01 </td></td></td></td>     | -0.092949                                                                                                                                                    | 6.45e-01 <td>-0.178238</td> <td>3.97e-01 <td>-0.084824</td> <td>7.05e-01 <td>-0.162112</td> <td>4.01e-01 </td></td></td>    | -0.178238                                                                                                               | 3.97e-01 <td>-0.084824</td> <td>7.05e-01 <td>-0.162112</td> <td>4.01e-01 </td></td>   | -0.084824                                                                          | 7.05e-01 <td>-0.162112</td> <td>4.01e-01 </td>  | -0.162112                                      | 4.01e-01  |          |
| ENSG0000024509 | 14 | 1029588    | 10295945 | rRNA      | ensembl | mic RNA             | -0.124778  | 2.98e-01 <td>-0.137003</td> <td>7.40e-01 <td>-0.155024</td> <td>4.40e-01 <td>-0.0931218</td> <td>6.44e-01 <td>-0.033614</td> <td>2.66e-01 <td>-0.138414</td> <td>3.62e-01 <td>-0.138414</td> <td>3.62e-01 </td></td></td></td></td></td>      | -0.137003                                                                                                                                                                                                                              | 7.40e-01 <td>-0.155024</td> <td>4.40e-01 <td>-0.0931218</td> <td>6.44e-01 <td>-0.033614</td> <td>2.66e-01 <td>-0.138414</td> <td>3.62e-01 <td>-0.138414</td> <td>3.62e-01 </td></td></td></td></td>     | -0.155024                                                                                                                                                                                         | 4.40e-01 <td>-0.0931218</td> <td>6.44e-01 <td>-0.033614</td> <td>2.66e-01 <td>-0.138414</td> <td>3.62e-01 <td>-0.138414</td> <td>3.62e-01 </td></td></td></td>    | -0.0931218                                                                                                                                                   | 6.44e-01 <td>-0.033614</td> <td>2.66e-01 <td>-0.138414</td> <td>3.62e-01 <td>-0.138414</td> <td>3.62e-01 </td></td></td>    | -0.033614                                                                                                               | 2.66e-01 <td>-0.138414</td> <td>3.62e-01 <td>-0.138414</td> <td>3.62e-01 </td></td>   | -0.138414                                                                          | 3.62e-01 <td>-0.138414</td> <td>3.62e-01 </td>  | -0.138414                                      | 3.62e-01  |          |
| ENSG0000012641 | 2  | 1912415    | 1912438  | MYO1B     | ensembl | havana              | -0.116429  | 2.54e-01 <td>-0.000274</td> <td>9.95e-01 <td>-0.162558</td> <td>4.18e-01 <td>-0.093203</td> <td>6.44e-01 <td>-0.241785</td> <td>7.82e-01 <td>-0.107449</td> <td>6.25e-01 <td>-0.143111</td> <td>3.14e-01 </td></td></td></td></td></td>       | -0.000274                                                                                                                                                                                                                              | 9.95e-01 <td>-0.162558</td> <td>4.18e-01 <td>-0.093203</td> <td>6.44e-01 <td>-0.241785</td> <td>7.82e-01 <td>-0.107449</td> <td>6.25e-01 <td>-0.143111</td> <td>3.14e-01 </td></td></td></td></td>      | -0.162558                                                                                                                                                                                         | 4.18e-01 <td>-0.093203</td> <td>6.44e-01 <td>-0.241785</td> <td>7.82e-01 <td>-0.107449</td> <td>6.25e-01 <td>-0.143111</td> <td>3.14e-01 </td></td></td></td>     | -0.093203                                                                                                                                                    | 6.44e-01 <td>-0.241785</td> <td>7.82e-01 <td>-0.107449</td> <td>6.25e-01 <td>-0.143111</td> <td>3.14e-01 </td></td></td>    | -0.241785                                                                                                               | 7.82e-01 <td>-0.107449</td> <td>6.25e-01 <td>-0.143111</td> <td>3.14e-01 </td></td>   | -0.107449                                                                          | 6.25e-01 <td>-0.143111</td> <td>3.14e-01 </td>  | -0.143111                                      | 3.14e-01  |          |
| ENSG0000023931 | 13 | 14448748   | 14449684 | AC09280.2 | havana  | unprocessed pseud   | YES        | YES                                                                                                                                                                                                                                           | YES                                                                                                                                                                                                                                    | YES                                                                                                                                                                                                     | YES                                                                                                                                                                                               | YES                                                                                                                                                               | YES                                                                                                                                                          | YES                                                                                                                         | YES                                                                                                                     | YES                                                                                   | YES                                                                                | YES                                             | YES                                            | YES       |          |
| ENSG0000012024 | 5  | 14119233   | 14119547 | PCPD1B    | ensembl | havana              | -0.0992309 | 4.00e-01 <td>-0.071737</td> <td>6.21e-01 <td>-0.0427813</td> <td>9.05e-01 <td>-0.093047</td> <td>6.44e-01 <td>-0.117107</td> <td>9.07e-01 <td>-0.0906136</td> <td>6.81e-01 <td>-0.131101</td> <td>8.74e-01 </td></td></td></td></td></td>     | -0.071737                                                                                                                                                                                                                              | 6.21e-01 <td>-0.0427813</td> <td>9.05e-01 <td>-0.093047</td> <td>6.44e-01 <td>-0.117107</td> <td>9.07e-01 <td>-0.0906136</td> <td>6.81e-01 <td>-0.131101</td> <td>8.74e-01 </td></td></td></td></td>    | -0.0427813                                                                                                                                                                                        | 9.05e-01 <td>-0.093047</td> <td>6.44e-01 <td>-0.117107</td> <td>9.07e-01 <td>-0.0906136</td> <td>6.81e-01 <td>-0.131101</td> <td>8.74e-01 </td></td></td></td>    | -0.093047                                                                                                                                                    | 6.44e-01 <td>-0.117107</td> <td>9.07e-01 <td>-0.0906136</td> <td>6.81e-01 <td>-0.131101</td> <td>8.74e-01 </td></td></td>   | -0.117107                                                                                                               | 9.07e-01 <td>-0.0906136</td> <td>6.81e-01 <td>-0.131101</td> <td>8.74e-01 </td></td>  | -0.0906136                                                                         | 6.81e-01 <td>-0.131101</td> <td>8.74e-01 </td>  | -0.131101                                      | 8.74e-01  |          |
| ENSG0000024440 | 6  | 13811286   | 13811849 | PBOV1     | ensembl | havana              | -0.173803  | 1.11e-01 <td>-0.091788</td> <td>5.36e-01 <td>-0.101627</td> <td>5.68e-01 <td>-0.093269</td> <td>6.44e-01 <td>-0.233181</td> <td>8.69e-01 <td>-0.094053</td> <td>6.36e-01 <td>-0.336601</td> <td>4.38e-01 </td></td></td></td></td></td>       | -0.091788                                                                                                                                                                                                                              | 5.36e-01 <td>-0.101627</td> <td>5.68e-01 <td>-0.093269</td> <td>6.44e-01 <td>-0.233181</td> <td>8.69e-01 <td>-0.094053</td> <td>6.36e-01 <td>-0.336601</td> <td>4.38e-01 </td></td></td></td></td>      | -0.101627                                                                                                                                                                                         | 5.68e-01 <td>-0.093269</td> <td>6.44e-01 <td>-0.233181</td> <td>8.69e-01 <td>-0.094053</td> <td>6.36e-01 <td>-0.336601</td> <td>4.38e-01 </td></td></td></td>     | -0.093269                                                                                                                                                    | 6.44e-01 <td>-0.233181</td> <td>8.69e-01 <td>-0.094053</td> <td>6.36e-01 <td>-0.336601</td> <td>4.38e-01 </td></td></td>    | -0.233181                                                                                                               | 8.69e-01 <td>-0.094053</td> <td>6.36e-01 <td>-0.336601</td> <td>4.38e-01 </td></td>   | -0.094053                                                                          | 6.36e-01 <td>-0.336601</td> <td>4.38e-01 </td>  | -0.336601                                      | 4.38e-01  |          |
| ENSG0000019404 | 19 | 4195668    | 4195921  | RAB31     | ensembl | havana              | -0.0329209 | 7.74e-01 <td>-0.139362</td> <td>4.70e-01 <td>-0.297370</td> <td>1.33e-01 <td>-0.093718</td> <td>6.44e-01 <td>-0.011533</td> <td>8.24e-01 <td>-0.280835</td> <td>1.88e-01 <td>-0.256601</td> <td>7.02e-01 </td></td></td></td></td></td>       | -0.139362                                                                                                                                                                                                                              | 4.70e-01 <td>-0.297370</td> <td>1.33e-01 <td>-0.093718</td> <td>6.44e-01 <td>-0.011533</td> <td>8.24e-01 <td>-0.280835</td> <td>1.88e-01 <td>-0.256601</td> <td>7.02e-01 </td></td></td></td></td>      | -0.297370                                                                                                                                                                                         | 1.33e-01 <td>-0.093718</td> <td>6.44e-01 <td>-0.011533</td> <td>8.24e-01 <td>-0.280835</td> <td>1.88e-01 <td>-0.256601</td> <td>7.02e-01 </td></td></td></td>     | -0.093718                                                                                                                                                    | 6.44e-01 <td>-0.011533</td> <td>8.24e-01 <td>-0.280835</td> <td>1.88e-01 <td>-0.256601</td> <td>7.02e-01 </td></td></td>    | -0.011533                                                                                                               | 8.24e-01 <td>-0.280835</td> <td>1.88e-01 <td>-0.256601</td> <td>7.02e-01 </td></td>   | -0.280835                                                                          | 1.88e-01 <td>-0.256601</td> <td>7.02e-01 </td>  | -0.256601                                      | 7.02e-01  |          |
| ENSG0000023931 | 13 | 14448748   | 14449684 | AC09280.2 | havana  | unprocessed pseud   | YES        | YES                                                                                                                                                                                                                                           | YES                                                                                                                                                                                                                                    | YES                                                                                                                                                                                                     | YES                                                                                                                                                                                               | YES                                                                                                                                                               | YES                                                                                                                                                          | YES                                                                                                                         | YES                                                                                                                     | YES                                                                                   | YES                                                                                | YES                                             | YES                                            | YES       |          |
| ENSG0000014667 | 1  | 18487029   | 18482019 | CTCF2     | ensembl | havana              | -0.0006044 | 9.97e-01 <td>-0.038638</td> <td>7.90e-01 <td>-0.104282</td> <td>6.05e-01 <td>-0.091284</td> <td>6.44e-01 <td>-0.001451</td> <td>9.92e-01 <td>-0.078952</td> <td>8.88e-01 <td>-0.0434129</td> <td>7.54e-01 </td></td></td></td></td></td>      | -0.038638                                                                                                                                                                                                                              | 7.90e-01 <td>-0.104282</td> <td>6.05e-01 <td>-0.091284</td> <td>6.44e-01 <td>-0.001451</td> <td>9.92e-01 <td>-0.078952</td> <td>8.88e-01 <td>-0.0434129</td> <td>7.54e-01 </td></td></td></td></td>     | -0.104282                                                                                                                                                                                         | 6.05e-01 <td>-0.091284</td> <td>6.44e-01 <td>-0.001451</td> <td>9.92e-01 <td>-0.078952</td> <td>8.88e-01 <td>-0.0434129</td> <td>7.54e-01 </td></td></td></td>    | -0.091284                                                                                                                                                    | 6.44e-01 <td>-0.001451</td> <td>9.92e-01 <td>-0.078952</td> <td>8.88e-01 <td>-0.0434129</td> <td>7.54e-01 </td></td></td>   | -0.001451                                                                                                               | 9.92e-01 <td>-0.078952</td> <td>8.88e-01 <td>-0.0434129</td> <td>7.54e-01 </td></td>  | -0.078952                                                                          | 8.88e-01 <td>-0.0434129</td> <td>7.54e-01 </td> | -0.0434129                                     | 7.54e-01  |          |
| ENSG0000013304 | 19 | 11527898   | 11522288 | AC09482.2 | havana  | unprocessed pseud   | YES        | YES                                                                                                                                                                                                                                           | YES                                                                                                                                                                                                                                    | YES                                                                                                                                                                                                     | YES                                                                                                                                                                                               | YES                                                                                                                                                               | YES                                                                                                                                                          | YES                                                                                                                         | YES                                                                                                                     | YES                                                                                   | YES                                                                                | YES                                             | YES                                            | YES       |          |
| ENSG0000010751 | 1  | 9612873    | 9612873  | CTCF2     | ensembl | havana              | -0.046413  | 5.76e-01 <td>-0.046413</td> <td>5.76e-01 <td>-0.046413</td> <td>5.76e-01 <td>-0.046413</td> <td>6.44e-01 <td>-0.046413</td> <td>5.76e-01 <td>-0.046413</td> <td>5.76e-01 <td>-0.046413</td> <td>5.76e-01 </td></td></td></td></td></td>       | -0.046413                                                                                                                                                                                                                              | 5.76e-01 <td>-0.046413</td> <td>5.76e-01 <td>-0.046413</td> <td>6.44e-01 <td>-0.046413</td> <td>5.76e-01 <td>-0.046413</td> <td>5.76e-01 <td>-0.046413</td> <td>5.76e-01 </td></td></td></td></td>      | -0.046413                                                                                                                                                                                         | 5.76e-01 <td>-0.046413</td> <td>6.44e-01 <td>-0.046413</td> <td>5.76e-01 <td>-0.046413</td> <td>5.76e-01 <td>-0.046413</td> <td>5.76e-01 </td></td></td></td>     | -0.046413                                                                                                                                                    | 6.44e-01 <td>-0.046413</td> <td>5.76e-01 <td>-0.046413</td> <td>5.76e-01 <td>-0.046413</td> <td>5.76e-01 </td></td></td>    | -0.046413                                                                                                               | 5.76e-01 <td>-0.046413</td> <td>5.76e-01 <td>-0.046413</td> <td>5.76e-01 </td></td>   | -0.046413                                                                          | 5.76e-01 <td>-0.046413</td> <td>5.76e-01 </td>  | -0.046413                                      | 5.76e-01  |          |
| ENSG0000011993 | 7  | 9512873    | 9514041  | BM48      | ensembl | havana              | -0.235149  | 3.85e-01 <td>-0.051921</td> <td>8.00e-01 <td>-0.093138</td> <td>6.48e-01 <td>-0.093144</td> <td>6.48e-01 <td>-0.093144</td> <td>6.48e-01 <td>-0.093144</td> <td>6.48e-01 <td>-0.093144</td> <td>6.48e-01 </td></td></td></td></td></td>       | -0.051921                                                                                                                                                                                                                              | 8.00e-01 <td>-0.093138</td> <td>6.48e-01 <td>-0.093144</td> <td>6.48e-01 <td>-0.093144</td> <td>6.48e-01 <td>-0.093144</td> <td>6.48e-01 <td>-0.093144</td> <td>6.48e-01 </td></td></td></td></td>      | -0.093138                                                                                                                                                                                         | 6.48e-01 <td>-0.093144</td> <td>6.48e-01 <td>-0.093144</td> <td>6.48e-01 <td>-0.093144</td> <td>6.48e-01 <td>-0.093144</td> <td>6.48e-01 </td></td></td></td>     | -0.093144                                                                                                                                                    | 6.48e-01 <td>-0.093144</td> <td>6.48e-01 <td>-0.093144</td> <td>6.48e-01 <td>-0.093144</td> <td>6.48e-01 </td></td></td>    | -0.093144                                                                                                               | 6.48e-01 <td>-0.093144</td> <td>6.48e-01 <td>-0.093144</td> <td>6.48e-01 </td></td>   | -0.093144                                                                          | 6.48e-01 <td>-0.093144</td> <td>6.48e-01 </td>  | -0.093144                                      | 6.48e-01  |          |
| ENSG0000004547 | 16 | 7059981    | 7062300  | ADAM1     | ensembl | havana              | -0.135091  | 2.41e-01 <td>-0.181099</td> <td>2.06e-01 <td>-0.093286</td> <td>6.44e-01 <td>-0.111602</td> <td>6.44e-01 <td>-0.044071</td> <td>8.88e-01 <td>-0.078473</td> <td>7.87e-01 <td>-0.022469</td> <td>8.77e-01 </td></td></td></td></td></td>       | -0.181099                                                                                                                                                                                                                              | 2.06e-01 <td>-0.093286</td> <td>6.44e-01 <td>-0.111602</td> <td>6.44e-01 <td>-0.044071</td> <td>8.88e-01 <td>-0.078473</td> <td>7.87e-01 <td>-0.022469</td> <td>8.77e-01 </td></td></td></td></td>      | -0.093286                                                                                                                                                                                         | 6.44e-01 <td>-0.111602</td> <td>6.44e-01 <td>-0.044071</td> <td>8.88e-01 <td>-0.078473</td> <td>7.87e-01 <td>-0.022469</td> <td>8.77e-01 </td></td></td></td>     | -0.111602                                                                                                                                                    | 6.44e-01 <td>-0.044071</td> <td>8.88e-01 <td>-0.078473</td> <td>7.87e-01 <td>-0.022469</td> <td>8.77e-01 </td></td></td>    | -0.044071                                                                                                               | 8.88e-01 <td>-0.078473</td> <td>7.87e-01 <td>-0.022469</td> <td>8.77e-01 </td></td>   | -0.078473                                                                          | 7.87e-01 <td>-0.022469</td> <td>8.77e-01 </td>  | -0.022469                                      | 8.77e-01  |          |
| ENSG0000023971 | 13 | 14448748   | 14449684 | AC09280.2 | havana  | unprocessed pseud   | YES        | YES                                                                                                                                                                                                                                           | YES                                                                                                                                                                                                                                    | YES                                                                                                                                                                                                     | YES                                                                                                                                                                                               | YES                                                                                                                                                               | YES                                                                                                                                                          | YES                                                                                                                         | YES                                                                                                                     | YES                                                                                   | YES                                                                                | YES                                             | YES                                            | YES       |          |
| ENSG0000023433 | 3  | 12104964</ |          |           |         |                     |            |                                                                                                                                                                                                                                               |                                                                                                                                                                                                                                        |                                                                                                                                                                                                         |                                                                                                                                                                                                   |                                                                                                                                                                   |                                                                                                                                                              |                                                                                                                             |                                                                                                                         |                                                                                       |                                                                                    |                                                 |                                                |           |          |



| Gene            | Transcript | Chromosome | Start     | End | Strand    | Feature | Gene               | Transcript     | Chromosome | Start      | End        | Strand     | Feature    | Gene       | Transcript | Chromosome | Start      | End        | Strand     | Feature     |            |             |          |
|-----------------|------------|------------|-----------|-----|-----------|---------|--------------------|----------------|------------|------------|------------|------------|------------|------------|------------|------------|------------|------------|------------|-------------|------------|-------------|----------|
| ENSG00000197371 | 16         | 29811382   | 29815892  | +   | PRRT2     | ensembl | navana             | protein_coding | -0.1389207 | 2.28e-01   | -0.0286866 | 6.88e-01   | -0.249128  | 2.20e-01   | -0.0666468 | 6.32e-01   | -0.187398  | 1.74e-01   | -0.1305881 | 5.53e-01    | -0.1958625 | 1.73e-01    |          |
| ENSG0000024627  | 6          | 15976258   | 15976232  | -   | SODC1-011 | navana  | mRNA               | protein_coding | -0.128178  | 2.67e-01   | -0.051793  | 9.79e-01   | -0.213493  | 2.44e-01   | -0.0666209 | 6.32e-01   | -0.206242  | 1.84e-01   | -0.0866448 | 6.94e-01    | -0.175443  | 2.44e-01    |          |
| ENSG0000017361  | 1          | 4248464    | 5470049   | +   | ACTG1     | ensembl | navana             | protein_coding | -0.084964  | 4.46e-01   | -0.0269761 | 5.13e-01   | -0.0252024 | 4.08e-01   | -0.0252024 | 4.08e-01   | -0.0252024 | 4.08e-01   | -0.0252024 | 4.08e-01    | -0.0252024 | 4.08e-01    |          |
| ENSG0000014632  | 1          | 22943125   | 22943408  | +   | ACTA1     | ensembl | navana             | protein_coding | -0.0809085 | 4.62e-01   | -0.0462397 | 7.49e-01   | -0.1791284 | 3.71e-01   | -0.0666669 | 6.11e-01   | -0.1540267 | 2.66e-01   | -0.0263449 | 8.11e-01    | -0.0969883 | 4.91e-01    |          |
| ENSG0000027957  | 17         | 7562387    | 7578713   | +   | SNRPB-IT4 | navana  | protein_coding     | YES            | YES        | -0.079823  | 6.16e-01   | -0.0555136 | 7.51e-01   | -0.4799530 | 3.33e-01   | -0.0666112 | 6.31e-01   | -0.1211994 | 3.83e-01   | -0.1679382  | 4.48e-01   | -0.2385029  | 5.33e-01 |
| ENSG0000021485  | 6          | 1571713    | 1571713   | -   | SNRPB-IT3 | navana  | protein_coding     | YES            | YES        | -0.079823  | 6.16e-01   | -0.0555136 | 7.51e-01   | -0.4799530 | 3.33e-01   | -0.0666112 | 6.31e-01   | -0.1211994 | 3.83e-01   | -0.1679382  | 4.48e-01   | -0.2385029  | 5.33e-01 |
| ENSG00000197714 | 19         | 5728051    | 5729469   | +   | ZNF460    | ensembl | navana             | protein_coding | -0.0919013 | 8.26e-01   | -0.0265920 | 6.30e-01   | -0.0966216 | 6.11e-01   | -0.0301381 | 6.31e-01   | -0.0301381 | 6.31e-01   | -0.0301381 | 6.31e-01    | -0.0301381 | 6.31e-01    |          |
| ENSG00000149831 | 20         | 3637372    | 36399257  | +   | FRG18B    | navana  | unprocessed_pseudo | -0.0297883     | 7.97e-01   | -0.0388127 | 5.17e-01   | -0.2289744 | 2.62e-01   | -0.0668844 | 6.31e-01   | -0.266450  | 1.00e-01   | -0.4088989 | 2.68e-01   | -0.00212479 | 9.83e-01   | -0.00212479 | 9.83e-01 |
| ENSG00000066230 | 7          | 145651378  | 145651374 | -   | ACE2      | ensembl | navana             | protein_coding | -0.0452013 | 6.16e-01   | -0.0269562 | 6.48e-01   | -0.0269562 | 6.48e-01   | -0.0269562 | 6.48e-01   | -0.0269562 | 6.48e-01   | -0.0269562 | 6.48e-01    | -0.0269562 | 6.48e-01    |          |
| ENSG00000077817 | 18         | 57427133   | 57432112  | +   | ACE2-011  | navana  | mRNA               | protein_coding | YES        | YES        | -0.0668937 | 7.00e-01   | -0.0200750 | 4.89e-01   | -0.1707123 | 3.95e-01   | -0.0334817 | 3.95e-01   | -0.0334817 | 3.95e-01    | -0.0334817 | 3.95e-01    |          |
| ENSG00000212486 | 9          | 16578164   | 16576735  | +   | DEPCC12   | navana  | processed_pseudo   | -0.0037425     | 9.78e-01   | -0.0746999 | 6.60e-01   | -0.2751143 | 1.65e-01   | -0.0668937 | 6.31e-01   | -0.0664466 | 7.98e-01   | -0.0881813 | 6.88e-01   | -0.0441661  | 7.61e-01   |             |          |
| ENSG00000148889 | 7          | 15103720   | 15107636  | +   | ACE2      | ensembl | navana             | protein_coding | -0.0668937 | 7.00e-01   | -0.0200750 | 4.89e-01   | -0.1707123 | 3.95e-01   | -0.0334817 | 3.95e-01   | -0.0334817 | 3.95e-01   | -0.0334817 | 3.95e-01    |            |             |          |
| ENSG00000167154 | 1          | 15454577   | 15455028  | +   | UBE2D3    | ensembl | navana             | protein_coding | -0.0154229 | 8.94e-01   | -0.0978208 | 4.99e-01   | -0.0341756 | 8.64e-01   | -0.0668937 | 6.31e-01   | -0.0970745 | 5.70e-01   | -0.0395415 | 4.40e-01    | -0.037516  | 7.61e-01    |          |
| ENSG00000214048 | 8          | 58991720   | 58992938  | +   | AC01501.1 | navana  | mRNA               | protein_coding | -0.0005574 | 2.93e-01   | -0.0430381 | 6.10e-01   | -0.0569883 | 6.30e-01   | -0.0531165 | 6.70e-01   | -0.0213344 | 3.15e-01   | -0.1822617 | 3.61e-01    |            |             |          |
| ENSG00000218628 | 15         | 2027820    | 2027763   | -   | HMPN2P1   | navana  | unprocessed_pseudo | YES            | YES        | -0.141262  | 9.16e-01   | -0.0021747 | 9.38e-01   | -0.128813  | 5.18e-01   | -0.0667973 | 6.30e-01   | -0.2472609 | 7.08e-01   | -0.152835   | 5.46e-01   | -0.189191   | 3.98e-01 |
| ENSG00000214889 | 7          | 15103720   | 15107636  | +   | ACE2      | ensembl | navana             | protein_coding | -0.0668937 | 7.00e-01   | -0.0200750 | 4.89e-01   | -0.1707123 | 3.95e-01   | -0.0334817 | 3.95e-01   | -0.0334817 | 3.95e-01   | -0.0334817 | 3.95e-01    |            |             |          |
| ENSG00000147669 | 8          | 100156203  | 100154003 | +   | POU2K     | ensembl | navana             | protein_coding | -0.1823372 | 1.12e-01   | -0.0125665 | 6.08e-01   | -0.2840288 | 1.50e-01   | -0.0667948 | 6.30e-01   | -0.06709   | 6.86e-01   | -0.0877028 | 7.90e-01    | -0.1841805 | 5.01e-01    |          |
| ENSG0000014481  | 2          | 218643892  | 21867200  | +   | RNF25     | ensembl | navana             | protein_coding | -0.1032528 | 7.10e-01   | -0.072363  | 5.94e-01   | -0.1020021 | 6.11e-01   | -0.0969853 | 6.30e-01   | -0.1412137 | 3.07e-01   | -0.0641523 | 7.63e-01    | -0.0122095 | 8.24e-01    |          |
| ENSG0000021627  | 7          | 15103720   | 15107636  | +   | ACE2      | ensembl | navana             | protein_coding | -0.0668937 | 7.00e-01   | -0.0200750 | 4.89e-01   | -0.1707123 | 3.95e-01   | -0.0334817 | 3.95e-01   | -0.0334817 | 3.95e-01   | -0.0334817 | 3.95e-01    |            |             |          |
| ENSG00000215004 | 4          | 17779638   | 17790796  | +   | LNCD1099  | navana  | mRNA               | protein_coding | -0.1223024 | 2.89e-01   | -0.0881427 | 6.43e-01   | -0.0848931 | 6.74e-01   | -0.0790041 | 6.30e-01   | -0.249885  | 2.78e-01   | -0.178444  | 4.71e-01    | -0.125238  | 3.86e-01    |          |
| ENSG00000213669 | 8          | 102805317  | 10281039  | +   | GASL1     | navana  | mRNA               | protein_coding | -0.1307912 | 2.57e-01   | -0.0888339 | 9.51e-01   | -0.0319669 | 8.74e-01   | -0.0970208 | 6.30e-01   | -0.2219681 | 1.04e-01   | -0.188898  | 4.16e-01    | -0.1066913 | 3.61e-01    |          |
| ENSG00000212484 | 13         | 2266156    | 2272181   | +   | USP2      | ensembl | navana             | protein_coding | -0.142242  | 2.15e-01   | -0.0200750 | 7.80e-01   | -0.0200750 | 4.89e-01   | -0.0200750 | 4.89e-01   | -0.0200750 | 4.89e-01   | -0.0200750 | 4.89e-01    |            |             |          |
| ENSG00000218628 | 15         | 2027820    | 2027763   | -   | HMPN2P1   | navana  | unprocessed_pseudo | YES            | YES        | -0.141262  | 9.16e-01   | -0.0021747 | 9.38e-01   | -0.128813  | 5.18e-01   | -0.0667973 | 6.30e-01   | -0.2472609 | 7.08e-01   | -0.152835   | 5.46e-01   | -0.189191   | 3.98e-01 |
| ENSG00000214889 | 7          | 15103720   | 15107636  | +   | ACE2      | ensembl | navana             | protein_coding | -0.0668937 | 7.00e-01   | -0.0200750 | 4.89e-01   | -0.1707123 | 3.95e-01   | -0.0334817 | 3.95e-01   | -0.0334817 | 3.95e-01   | -0.0334817 | 3.95e-01    |            |             |          |
| ENSG00000147669 | 8          | 100156203  | 100154003 | +   | POU2K     | ensembl | navana             | protein_coding | -0.1823372 | 1.12e-01   | -0.0125665 | 6.08e-01   | -0.2840288 | 1.50e-01   | -0.0667948 | 6.30e-01   | -0.06709   | 6.86e-01   | -0.0877028 | 7.90e-01    | -0.1841805 | 5.01e-01    |          |
| ENSG0000014481  | 2          | 218643892  | 21867200  | +   | RNF25     | ensembl | navana             | protein_coding | -0.1032528 | 7.10e-01   | -0.072363  | 5.94e-01   | -0.1020021 | 6.11e-01   | -0.0969853 | 6.30e-01   | -0.1412137 | 3.07e-01   | -0.0641523 | 7.63e-01    | -0.0122095 | 8.24e-01    |          |
| ENSG0000021627  | 7          | 15103720   | 15107636  | +   | ACE2      | ensembl | navana             | protein_coding | -0.0668937 | 7.00e-01   | -0.0200750 | 4.89e-01   | -0.1707123 | 3.95e-01   | -0.0334817 | 3.95e-01   | -0.0334817 | 3.95e-01   | -0.0334817 | 3.95e-01    |            |             |          |
| ENSG00000215004 | 4          | 17779638   | 17790796  | +   | LNCD1099  | navana  | mRNA               | protein_coding | -0.1223024 | 2.89e-01   | -0.0881427 | 6.43e-01   | -0.0848931 | 6.74e-01   | -0.0790041 | 6.30e-01   | -0.249885  | 2.78e-01   | -0.178444  | 4.71e-01    | -0.125238  | 3.86e-01    |          |
| ENSG00000213669 | 8          | 102805317  | 10281039  | +   | GASL1     | navana  | mRNA               | protein_coding | -0.1307912 | 2.57e-01   | -0.0888339 | 9.51e-01   | -0.0319669 | 8.74e-01   | -0.0970208 | 6.30e-01   | -0.2219681 | 1.04e-01   | -0.188898  | 4.16e-01    | -0.1066913 | 3.61e-01    |          |
| ENSG00000212484 | 13         | 2266156    | 2272181   | +   | USP2      | ensembl | navana             | protein_coding | -0.142242  | 2.15e-01   | -0.0200750 | 7.80e-01   | -0.0200750 | 4.89e-01   | -0.0200750 | 4.89e-01   | -0.0200750 | 4.89e-01   | -0.0200750 | 4.89e-01    |            |             |          |
| ENSG00000218628 | 15         | 2027820    | 2027763   | -   | HMPN2P1   | navana  | unprocessed_pseudo | YES            | YES        | -0.141262  | 9.16e-01   | -0.0021747 | 9.38e-01   | -0.128813  | 5.18e-01   | -0.0667973 | 6.30e-01   | -0.2472609 | 7.08e-01   | -0.152835   | 5.46e-01   | -0.189191   | 3.98e-01 |
| ENSG00000214889 | 7          | 15103720   | 15107636  | +   | ACE2      | ensembl | navana             | protein_coding | -0.0668937 | 7.00e-01   | -0.0200750 | 4.89e-01   | -0.1707123 | 3.95e-01   | -0.0334817 | 3.95e-01   | -0.0334817 | 3.95e-01   | -0.0334817 | 3.95e-01    |            |             |          |
| ENSG00000147669 | 8          | 100156203  | 100154003 | +   | POU2K     | ensembl | navana             | protein_coding | -0.1823372 | 1.12e-01   | -0.0125665 | 6.08e-01   | -0.2840288 | 1.50e-01   | -0.0667948 | 6.30e-01   | -0.06709   | 6.86e-01   | -0.0877028 | 7.90e-01    | -0.1841805 | 5.01e-01    |          |
| ENSG0000014481  | 2          | 218643892  | 21867200  | +   | RNF25     | ensembl | navana             | protein_coding | -0.1032528 | 7.10e-01   | -0.072363  | 5.94e-01   | -0.1020021 | 6.11e-01   | -0.0969853 | 6.30e-01   | -0.1412137 | 3.07e-01   | -0.0641523 | 7.63e-01    | -0.0122095 | 8.24e-01    |          |
| ENSG0000021627  | 7          | 15103720   | 15107636  | +   | ACE2      | ensembl | navana             | protein_coding | -0.0668937 | 7.00e-01   | -0.0200750 | 4.89e-01   | -0.1707123 | 3.95e-01   | -0.0334817 | 3.95e-01   | -0.0334817 | 3.95e-01   | -0.0334817 | 3.95e-01    |            |             |          |
| ENSG00000215004 | 4          | 17779638   | 17790796  | +   | LNCD1099  | navana  | mRNA               | protein_coding | -0.1223024 | 2.89e-01   | -0.0881427 | 6.43e-01   | -0.0848931 | 6.74e-01   | -0.0790041 | 6.30e-01   | -0.249885  | 2.78e-01   | -0.178444  | 4.71e-01    | -0.125238  | 3.86e-01    |          |
| ENSG00000213669 | 8          | 102805317  | 10281039  | +   | GASL1     | navana  | mRNA               | protein_coding | -0.1307912 | 2.57e-01   | -0.0888339 | 9.51e-01   | -0.0319669 | 8.74e-01   | -0.0970208 | 6.30e-01   | -0.2219681 | 1.04e-01   | -0.188898  | 4.16e-01    | -0.1066913 | 3.61e-01    |          |
| ENSG00000212484 | 13         | 2266156    | 2272181   | +   | USP2      | ensembl | navana             | protein_coding | -0.142242  | 2.15e-01   | -0.0200750 | 7.80e-01   | -0.0200750 | 4.89e-01   | -0.0200750 | 4.89e-01   | -0.0200750 | 4.89e-01   | -0.0200750 | 4.89e-01    |            |             |          |
| ENSG00000218628 | 15         | 2027820    | 2027763   | -   | HMPN2P1   | navana  | unprocessed_pseudo | YES            | YES        | -0.141262  | 9.16e-01   | -0.0021747 | 9.38e-01   | -0.128813  | 5.18e-01   | -0.0667973 | 6.30e-01   | -0.2472609 | 7.08e-01   | -0.152835   | 5.46e-01   | -0.189191   | 3.98e-01 |
| ENSG00000214889 | 7          | 15103720   | 15107636  | +   | ACE2      | ensembl | navana             | protein_coding | -0.0668937 | 7.00e-01   | -0.0200750 | 4.89e-01   | -0.1707123 | 3.95e-01   | -0.0334817 | 3.95e-01   | -0.0334817 | 3.95e-01   | -0.0334817 | 3.95e-01    |            |             |          |
| ENSG00000147669 | 8          | 100156203  | 100154003 | +   | POU2K     | ensembl | navana             | protein_coding | -0.1823372 | 1.12e-01   | -0.0125665 | 6.08e-01   | -0.2840288 | 1.50e-01   | -0.0667948 | 6.30e-01   | -0.06709   |            |            |             |            |             |          |







Table with columns: Gene ID, Chr, Start, End, RefSeq, Gene Name, Type, Species, and various numerical values. The table lists numerous genes and their associated data points across multiple columns.









Table with 15 columns: Gene ID, Chr, Start, End, RefSeq ID, Gene Name, Transcript Type, Protein Coding, and various numerical values. The table lists numerous genes and transcripts, including those related to the RMD12 gene locus.

| ENSG0000027073 | 9  | 113170190 | 113190019 | AL162727.2  | havana           | lncRNA               |     | -0.170188 | 1.99e-01 | -0.134971 | 3.50e-01 | -0.176511 | 8.81e-01 | -0.112812 | 5.79e-01 | -0.221203 | 1.08e-01 | -0.087966 | 6.90e-01 | -0.127795 | 3.76e-01 |
|----------------|----|-----------|-----------|-------------|------------------|----------------------|-----|-----------|----------|-----------|----------|-----------|----------|-----------|----------|-----------|----------|-----------|----------|-----------|----------|
| ENSG0000012256 | 2  | 17255317  | 17260869  | PDK1        | antisense_havana | protein_coding       | YES | -0.271794 | 2.89e-02 | -0.044177 | 2.53e-01 | -0.274207 | 1.66e-01 | -0.112874 | 5.79e-01 | -0.119462 | 1.81e-01 | -0.153911 | 4.89e-01 | -0.126088 | 1.52e-01 |
| ENSG0000018130 | 14 | 10539838  | 10540106  | HEP2        | antisense_havana | protein_coding       | YES | -0.003479 | 1.90e-04 | -0.003479 | 1.90e-04 | -0.003479 | 1.90e-04 | -0.003479 | 1.90e-04 | -0.003479 | 1.90e-04 | -0.003479 | 1.90e-04 | -0.003479 | 1.90e-04 |
| ENSG0000027899 | 3  | 17314047  | 17319671  | AC05371.1   | antisense_havana | lncRNA               |     | -0.113623 | 3.25e-01 | -0.018959 | 8.91e-01 | -0.228454 | 2.53e-01 | -0.112882 | 5.79e-01 | -0.219394 | 1.22e-01 | -0.044249 | 8.42e-01 | -0.130272 | 3.57e-01 |
| ENSG0000021127 | 15 | 10549963  | 10552476  | PRES1       | antisense_havana | protein_coding       | YES | -0.012754 | 1.02e-02 | -0.012754 | 1.02e-02 | -0.012754 | 1.02e-02 | -0.012754 | 1.02e-02 | -0.012754 | 1.02e-02 | -0.012754 | 1.02e-02 | -0.012754 | 1.02e-02 |
| ENSG0000040339 | 10 | 6872102   | 6879217   | CCAR1       | antisense_havana | protein_coding       | YES | -0.052973 | 6.50e-01 | -0.049393 | 5.14e-01 | -0.118879 | 3.45e-01 | -0.112877 | 5.79e-01 | -0.219394 | 1.22e-01 | -0.044249 | 8.42e-01 | -0.084043 | 5.62e-01 |
| ENSG0000010228 | 2  | 21445326  | 21445450  | RAB36       | antisense_havana | protein_coding       | YES | -0.202862 | 7.25e-01 | -0.151129 | 3.87e-01 | -0.221356 | 2.67e-01 | -0.112880 | 5.79e-01 | -0.249810 | 6.85e-01 | -0.059919 | 2.31e-01 | -0.248184 | 8.27e-01 |
| ENSG0000019826 | 2  | 8521300   | 8521300   | LRX2-202L1  | antisense_havana | lncRNA               |     | -0.182732 | 1.36e-01 | -0.182732 | 1.36e-01 | -0.182732 | 1.36e-01 | -0.182732 | 1.36e-01 | -0.182732 | 1.36e-01 | -0.182732 | 1.36e-01 | -0.182732 | 1.36e-01 |
| ENSG0000013731 | 6  | 30743159  | 30745458  | HER3        | antisense_havana | protein_coding       | YES | -0.194519 | 1.21e-01 | -0.190451 | 4.76e-01 | -0.211874 | 2.89e-01 | -0.112877 | 5.79e-01 | -0.219394 | 1.22e-01 | -0.044249 | 8.42e-01 | -0.130272 | 3.57e-01 |
| ENSG0000024577 | 2  | 17649255  | 17681880  | LINC01117   | antisense_havana | lncRNA               |     | -0.053259 | 6.44e-01 | -0.042048 | 7.72e-01 | -0.275248 | 1.65e-01 | -0.112878 | 5.79e-01 | -0.098550 | 4.77e-01 | -0.115536 | 6.12e-01 | -0.091823 | 5.96e-01 |
| ENSG0000023970 | 13 | 40645482  | 40645482  | AC02481.2   | antisense_havana | lncRNA               |     | -0.178937 | 2.16e-01 | -0.172627 | 3.46e-01 | -0.208919 | 1.66e-01 | -0.112868 | 5.79e-01 | -0.212468 | 1.85e-01 | -0.074238 | 7.36e-01 | -0.056436 | 5.56e-01 |
| ENSG0000020185 | 6  | 4479635   | 4428081   | RNAP52P     | antisense_havana | RNA_pseudogene       | YES | YES       | YES      | YES       | YES      | YES       | YES      | YES       | YES      | YES       | YES      | YES       | YES      | YES       | YES      |
| ENSG0000026510 | 16 | 8546309   | 8548138   | AC01869.8   | antisense_havana | lncRNA               |     | -0.121446 | 1.21e-01 | -0.021235 | 8.94e-01 | -0.196238 | 3.18e-01 | -0.112878 | 5.79e-01 | -0.212468 | 1.85e-01 | -0.074238 | 7.36e-01 | -0.148104 | 6.20e-01 |
| ENSG0000021223 | 6  | 6688415   | 6688287   | AC11099.1   | antisense_havana | processed_pseudogene | YES | -0.157656 | 1.71e-01 | -0.142020 | 3.24e-01 | -0.180494 | 2.79e-01 | -0.113009 | 5.79e-01 | -0.251425 | 1.70e-01 | -0.049419 | 8.21e-01 | -0.131708 | 9.25e-01 |
| ENSG0000016832 | 2  | 6216709   | 6216846   | C1orf4      | antisense_havana | protein_coding       | YES | -0.141896 | 1.24e-01 | -0.079561 | 6.81e-01 | -0.125195 | 3.84e-01 | -0.110224 | 5.79e-01 | -0.186671 | 1.00e-01 | -0.058279 | 9.29e-01 | -0.100711 | 5.76e-01 |
| ENSG0000017544 | 11 | 6745246   | 6746172   | CABR4       | antisense_havana | protein_coding       | YES | -0.183016 | 1.11e-01 | -0.191213 | 1.83e-01 | -0.180641 | 1.67e-01 | -0.113048 | 5.79e-01 | -0.197877 | 1.51e-01 | -0.143347 | 7.07e-01 | -0.252333 | 8.71e-01 |
| ENSG0000024874 | 15 | 9171842   | 9167098   | LINC01579   | antisense_havana | lncRNA               | YES | -0.211422 | 2.93e-01 | -0.184842 | 8.99e-01 | -0.250585 | 8.01e-01 | -0.113099 | 5.79e-01 | -0.246152 | 2.24e-01 | -0.049482 | 6.66e-01 | -0.140153 | 7.82e-01 |
| ENSG0000011577 | 6  | 14109614  | 14109813  | LRX2-202L1  | antisense_havana | lncRNA               |     | -0.182732 | 1.36e-01 | -0.182732 | 1.36e-01 | -0.182732 | 1.36e-01 | -0.182732 | 1.36e-01 | -0.182732 | 1.36e-01 | -0.182732 | 1.36e-01 | -0.182732 | 1.36e-01 |
| ENSG0000004660 | 17 | 886015    | 884981    | CANXK1      | antisense_havana | protein_coding       | YES | -0.268711 | 4.72e-01 | -0.106594 | 4.60e-01 | -0.255875 | 4.88e-01 | -0.113182 | 5.74e-01 | -0.210392 | 1.82e-01 | -0.148439 | 8.64e-01 | -0.183682 | 9.01e-01 |
| ENSG0000021165 | 13 | 49210422  | 49212274  | DGDFP1      | antisense_havana | processed_pseudogene | YES | -0.048016 | 6.78e-01 | -0.084158 | 5.61e-01 | -0.204194 | 3.07e-01 | -0.113129 | 5.74e-01 | -0.136955 | 3.28e-01 | -0.080924 | 1.74e-01 | -0.121408 | 6.01e-01 |
| ENSG0000027021 | 13 | 2172019   | 2188940   | MIRP        | antisense_havana | protein_coding       | YES | -0.210148 | 6.66e-01 | -0.166624 | 1.21e-01 | -0.084220 | 6.21e-01 | -0.113157 | 5.74e-01 | -0.257263 | 1.00e-01 | -0.104489 | 6.22e-01 | -0.051332 | 5.56e-01 |
| ENSG0000015486 | 2  | 8554720   | 8556147   | GCCX        | antisense_havana | protein_coding       | YES | -0.005454 | 9.60e-01 | -0.025776 | 8.22e-01 | -0.064784 | 7.50e-01 | -0.113107 | 5.74e-01 | -0.017407 | 9.33e-01 | -0.032473 | 8.83e-01 | -0.050661 | 9.72e-01 |
| ENSG0000023141 | 10 | 7295106   | 7295290   | COMP17      | antisense_havana | processed_pseudogene | YES | -0.034722 | 7.64e-01 | -0.077083 | 6.23e-01 | -0.147202 | 4.64e-01 | -0.113139 | 5.74e-01 | -0.013036 | 9.21e-01 | -0.228481 | 2.90e-01 | -0.102164 | 9.31e-01 |
| ENSG0000004660 | 22 | 4553617   | 4574282   | SEK1L       | antisense_havana | protein_coding       | YES | -0.022744 | 8.88e-01 | -0.084888 | 5.61e-01 | -0.442774 | 2.06e-01 | -0.113024 | 5.74e-01 | -0.090113 | 1.48e-01 | -0.161407 | 7.83e-01 | -0.188966 | 4.11e-01 |
| ENSG0000023970 | 13 | 40645482  | 40645482  | AC02481.2   | antisense_havana | lncRNA               | YES | -0.178937 | 2.16e-01 | -0.172627 | 3.46e-01 | -0.208919 | 1.66e-01 | -0.112868 | 5.79e-01 | -0.212468 | 1.85e-01 | -0.074238 | 7.36e-01 | -0.056436 | 5.56e-01 |
| ENSG0000024874 | 22 | 19171230  | 19174272  | AC00908.1   | antisense_havana | protein_coding       | YES | -0.020544 | 8.60e-01 | -0.027193 | 8.49e-01 | -0.112221 | 5.74e-01 | -0.064775 | 9.48e-01 | -0.121832 | 3.06e-01 | -0.217758 | 9.64e-01 | -0.073786 | 9.64e-01 |
| ENSG0000018881 | 21 | 908861    | 912972    | TEXT4F      | antisense_havana | transcribed_unit     | YES | -0.12251  | 2.88e-01 | -0.094537 | 6.97e-01 | -0.184738 | 3.62e-01 | -0.113223 | 5.74e-01 | -0.170986 | 2.17e-01 | -0.040383 | 5.01e-01 | -0.109975 | 2.88e-01 |
| ENSG0000017570 | 11 | 4484947   | 4481063   | ZNF812      | antisense_havana | protein_coding       | YES | -0.029428 | 9.21e-01 | -0.029428 | 9.21e-01 | -0.029428 | 9.21e-01 | -0.029428 | 9.21e-01 | -0.029428 | 9.21e-01 | -0.029428 | 9.21e-01 | -0.029428 | 9.21e-01 |
| ENSG0000017817 | 3  | 4494847   | 4451063   | ZNF812      | antisense_havana | protein_coding       | YES | -0.064003 | 5.80e-01 | -0.136768 | 3.81e-01 | -0.104728 | 8.14e-01 | -0.113201 | 5.74e-01 | -0.031449 | 8.21e-01 | -0.020375 | 9.27e-01 | -0.020375 | 9.27e-01 |
| ENSG0000023076 | 20 | 4192931   | 4195953   | LINC01433   | antisense_havana | lncRNA               | YES | -0.089466 | 4.99e-01 | -0.044836 | 7.60e-01 | -0.118780 | 5.51e-01 | -0.112975 | 5.74e-01 | -0.191397 | 1.62e-01 | -0.010742 | 8.01e-01 | -0.079161 | 5.85e-01 |
| ENSG0000021241 | 2  | 8161738   | 8160788   | LRX2-202L1  | antisense_havana | lncRNA               |     | -0.182732 | 1.36e-01 | -0.182732 | 1.36e-01 | -0.182732 | 1.36e-01 | -0.182732 | 1.36e-01 | -0.182732 | 1.36e-01 | -0.182732 | 1.36e-01 | -0.182732 | 1.36e-01 |
| ENSG0000027017 | 4  | 5839612   | 5839661   | AC00862.0   | antisense_havana | lncRNA               |     | -0.118251 | 3.06e-01 | -0.080155 | 7.38e-01 | -0.154378 | 3.11e-01 | -0.113446 | 5.73e-01 | -0.182732 | 1.36e-01 | -0.061348 | 9.61e-01 | -0.102164 | 9.31e-01 |
| ENSG0000027973 | 22 | 11066418  | 11068174  | C11orf741.1 | antisense_havana | lncRNA               |     | -0.078315 | 7.44e-01 | -0.038820 | 9.47e-01 | -0.198158 | 3.21e-01 | -0.113166 | 5.73e-01 | -0.020240 | 7.99e-01 | -0.08142  | 7.12e-01 | -0.022709 | 8.78e-01 |
| ENSG0000027180 | 12 | 10000007  | 10000007  | AC007650.1  | antisense_havana | lncRNA               |     | -0.080428 | 6.66e-01 | -0.080428 | 6.66e-01 | -0.080428 | 6.66e-01 | -0.080428 | 6.66e-01 | -0.080428 | 6.66e-01 | -0.080428 | 6.66e-01 | -0.080428 | 6.66e-01 |
| ENSG0000021352 | 6  | 14682439  | 14720514  | STAMP3-AS1  | antisense_havana | lncRNA               |     | -0.209582 | 6.82e-01 | -0.143848 | 3.19e-01 | -0.193018 | 3.38e-01 | -0.113189 | 5.73e-01 | -0.254407 | 1.60e-01 | -0.198866 | 3.60e-01 | -0.202458 | 1.90e-01 |
| ENSG0000028732 | 8  | 9103917   | 9104209   | AC008180.2  | antisense_havana | lncRNA               |     | -0.113718 | 9.06e-01 | -0.081238 | 5.74e-01 | -0.081238 | 5.74e-01 | -0.113161 | 5.73e-01 | -0.090187 | 1.31e-01 | -0.167008 | 4.22e-01 | -0.103101 | 8.78e-01 |
| ENSG0000016843 | 9  | 13169307  | 13170498  | SOX41       | antisense_havana | protein_coding       | YES | YES       | YES      | YES       | YES      | YES       | YES      | YES       | YES      | YES       | YES      | YES       | YES      | YES       | YES      |
| ENSG0000028997 | 2  | 6018107   | 6021402   | LINC01812.2 | antisense_havana | lncRNA               |     | -0.156124 | 1.75e-01 | -0.098941 | 6.32e-01 | -0.188967 | 3.45e-01 | -0.113469 | 5.73e-01 | -0.252971 | 6.54e-01 | -0.147839 | 5.01e-01 | -0.021003 | 9.34e-01 |
| ENSG0000027564 | 19 | 7260338   | 7260460   | AC00908.1   | antisense_havana | protein_coding       | YES | -0.029508 | 9.87e-01 | -0.076511 | 6.82e-01 | -0.080174 | 6.04e-01 | -0.113469 | 5.73e-01 | -0.076511 | 6.82e-01 | -0.172808 | 4.50e-01 | -0.044738 | 8.12e-01 |
| ENSG0000027417 | 19 | 1010221   | 1010907   | AC00908.1   | antisense_havana | protein_coding       | YES | -0.144008 | 9.01e-01 | -0.047081 | 7.72e-01 | -0.167025 | 4.04e-01 | -0.113487 | 5.73e-01 | -0.081517 | 5.86e-01 | -0.028480 | 3.50e-01 | -0.168888 | 9.10e-01 |
| ENSG0000019515 | 2  | 2119771   | 2119771   | AC00908.1   | antisense_havana | lncRNA               |     | -0.075522 | 8.00e-01 | -0.075522 | 8.00e-01 | -0.075522 | 8.00e-01 | -0.075522 | 8.00e-01 | -0.075522 | 8.00e-01 | -0.075522 | 8.00e-01 | -0.075522 | 8.00e-01 |
| ENSG0000023557 | 3  | 5373852   | 5374882   | PPP2R5C     | antisense_havana | protein_coding       | YES | -0.019503 | 8.66e-01 | -0.019503 | 8.66e-01 | -0.154534 | 3.41e-01 | -0.113528 | 5.73e-01 | -0.058005 | 6.74e-01 | -0.052420 | 6.90e-01 | -0.103024 | 9.16e-01 |
| ENSG0000012873 | 4  | 718174    | 718489    | PRK2-AS1    | antisense_havana | lncRNA               |     | -0.001809 | 9.88e-01 | -0.0      |          |           |          |           |          |           |          |           |          |           |          |



| ENSG0000023101  | 78823281  | 78826006  | RPS197     | transcript | transcribed unprocessed                                                                                                                                                                                                                                                                        | -0.046456                                                                                                                                                                                                                              | 6.88E-01                                                                                                                                                                                                                  | 0.0083743                                                                                                                                                                                                    | 5.56E-01                                                                                                                                                                                       | 0.2708817  | 1.72E-01 | -0.115193  | 5.67E-01 | 0.137374   | 2.09E-01 | 0.3749788 | 7.66E-01 | -0.038665  | 7.90E-01 |
|-----------------|-----------|-----------|------------|------------|------------------------------------------------------------------------------------------------------------------------------------------------------------------------------------------------------------------------------------------------------------------------------------------------|----------------------------------------------------------------------------------------------------------------------------------------------------------------------------------------------------------------------------------------|---------------------------------------------------------------------------------------------------------------------------------------------------------------------------------------------------------------------------|--------------------------------------------------------------------------------------------------------------------------------------------------------------------------------------------------------------|------------------------------------------------------------------------------------------------------------------------------------------------------------------------------------------------|------------|----------|------------|----------|------------|----------|-----------|----------|------------|----------|
| ENSG000001794   | 78952129  | 79214095  | SCAMP5     | transcript | transcribed unprocessed <td>-0.120203</td> <td>2.88E-01</td> <td>0.0158026</td> <td>7.74E-01</td> <td>0.118529</td> <td>5.51E-01</td> <td>-0.115208</td> <td>5.67E-01</td> <td>0.179446</td> <td>4.83E-01</td> <td>0.1190921</td> <td>5.27E-01</td> <td>-0.072131</td> <td>8.52E-01</td>       | -0.120203                                                                                                                                                                                                                              | 2.88E-01                                                                                                                                                                                                                  | 0.0158026                                                                                                                                                                                                    | 7.74E-01                                                                                                                                                                                       | 0.118529   | 5.51E-01 | -0.115208  | 5.67E-01 | 0.179446   | 4.83E-01 | 0.1190921 | 5.27E-01 | -0.072131  | 8.52E-01 |
| ENSG0000019831  | 1540434   | 1540434   | MAP4       | transcript | transcribed unprocessed <td>-0.0470041</td> <td>8.41E-01</td> <td>0.0149794</td> <td>8.41E-01</td> <td>0.114991</td> <td>8.41E-01</td> <td>-0.114991</td> <td>5.67E-01</td> <td>0.179446</td> <td>4.83E-01</td> <td>0.1190921</td> <td>5.27E-01</td> <td>-0.072131</td> <td>8.52E-01</td>      | -0.0470041                                                                                                                                                                                                                             | 8.41E-01                                                                                                                                                                                                                  | 0.0149794                                                                                                                                                                                                    | 8.41E-01                                                                                                                                                                                       | 0.114991   | 8.41E-01 | -0.114991  | 5.67E-01 | 0.179446   | 4.83E-01 | 0.1190921 | 5.27E-01 | -0.072131  | 8.52E-01 |
| ENSG0000014273  | 1590414   | 1590414   | AGGIP1     | transcript | transcribed unprocessed <td>-0.1576727</td> <td>1.71E-01</td> <td>0.1998888</td> <td>1.68E-01</td> <td>0.2894448</td> <td>1.50E-01</td> <td>-0.1152227</td> <td>5.67E-01</td> <td>0.1727217</td> <td>2.00E-01</td> <td>0.1190921</td> <td>5.27E-01</td> <td>-0.072131</td> <td>8.52E-01</td>   | -0.1576727                                                                                                                                                                                                                             | 1.71E-01                                                                                                                                                                                                                  | 0.1998888                                                                                                                                                                                                    | 1.68E-01                                                                                                                                                                                       | 0.2894448  | 1.50E-01 | -0.1152227 | 5.67E-01 | 0.1727217  | 2.00E-01 | 0.1190921 | 5.27E-01 | -0.072131  | 8.52E-01 |
| ENSG000001716   | 17911083  | 17945461  | ADAMTSL2   | transcript | transcribed unprocessed <td>-0.0223658</td> <td>8.47E-01</td> <td>0.0317177</td> <td>8.27E-01</td> <td>0.2049671</td> <td>6.88E-01</td> <td>-0.1152668</td> <td>5.67E-01</td> <td>0.2099133</td> <td>5.13E-01</td> <td>0.181132</td> <td>4.63E-01</td> <td>-0.141494</td> <td>3.28E-01</td>    | -0.0223658                                                                                                                                                                                                                             | 8.47E-01                                                                                                                                                                                                                  | 0.0317177                                                                                                                                                                                                    | 8.27E-01                                                                                                                                                                                       | 0.2049671  | 6.88E-01 | -0.1152668 | 5.67E-01 | 0.2099133  | 5.13E-01 | 0.181132  | 4.63E-01 | -0.141494  | 3.28E-01 |
| ENSG000002218   | 19115003  | 19100218  | SLC12A2    | transcript | transcribed unprocessed <td>-0.0453133</td> <td>7.66E-01</td> <td>0.0104715</td> <td>8.07E-01</td> <td>0.1748731</td> <td>3.88E-01</td> <td>-0.1152785</td> <td>5.67E-01</td> <td>0.1450994</td> <td>5.26E-01</td> <td>0.1498992</td> <td>5.26E-01</td> <td>-0.072131</td> <td>8.52E-01</td>   | -0.0453133                                                                                                                                                                                                                             | 7.66E-01                                                                                                                                                                                                                  | 0.0104715                                                                                                                                                                                                    | 8.07E-01                                                                                                                                                                                       | 0.1748731  | 3.88E-01 | -0.1152785 | 5.67E-01 | 0.1450994  | 5.26E-01 | 0.1498992 | 5.26E-01 | -0.072131  | 8.52E-01 |
| ENSG0000017843  | 6400808   | 6400862   | AC012551.1 | transcript | transcribed unprocessed <td>-0.0253313</td> <td>7.66E-01</td> <td>0.0104715</td> <td>8.07E-01</td> <td>0.1748731</td> <td>3.88E-01</td> <td>-0.1152785</td> <td>5.67E-01</td> <td>0.1450994</td> <td>5.26E-01</td> <td>0.1498992</td> <td>5.26E-01</td> <td>-0.072131</td> <td>8.52E-01</td>   | -0.0253313                                                                                                                                                                                                                             | 7.66E-01                                                                                                                                                                                                                  | 0.0104715                                                                                                                                                                                                    | 8.07E-01                                                                                                                                                                                       | 0.1748731  | 3.88E-01 | -0.1152785 | 5.67E-01 | 0.1450994  | 5.26E-01 | 0.1498992 | 5.26E-01 | -0.072131  | 8.52E-01 |
| ENSG0000013480  | 2148828   | 21488410  | HSPD1P1    | transcript | transcribed unprocessed <td>-0.0892173</td> <td>3.95E-01</td> <td>0.0612355</td> <td>5.75E-01</td> <td>0.2825086</td> <td>1.54E-01</td> <td>-0.1152896</td> <td>5.67E-01</td> <td>0.1479734</td> <td>2.86E-01</td> <td>0.1532644</td> <td>4.85E-01</td> <td>-0.0646501</td> <td>6.56E-01</td>  | -0.0892173                                                                                                                                                                                                                             | 3.95E-01                                                                                                                                                                                                                  | 0.0612355                                                                                                                                                                                                    | 5.75E-01                                                                                                                                                                                       | 0.2825086  | 1.54E-01 | -0.1152896 | 5.67E-01 | 0.1479734  | 2.86E-01 | 0.1532644 | 4.85E-01 | -0.0646501 | 6.56E-01 |
| ENSG0000013893  | 1319560   | 13265184  | AC012551.1 | transcript | transcribed unprocessed <td>-0.1662718</td> <td>1.47E-01</td> <td>0.0270988</td> <td>8.16E-01</td> <td>0.1386763</td> <td>5.61E-01</td> <td>-0.1152923</td> <td>5.67E-01</td> <td>0.1386763</td> <td>5.61E-01</td> <td>0.1386763</td> <td>5.61E-01</td> <td>-0.072131</td> <td>8.52E-01</td>   | -0.1662718                                                                                                                                                                                                                             | 1.47E-01                                                                                                                                                                                                                  | 0.0270988                                                                                                                                                                                                    | 8.16E-01                                                                                                                                                                                       | 0.1386763  | 5.61E-01 | -0.1152923 | 5.67E-01 | 0.1386763  | 5.61E-01 | 0.1386763 | 5.61E-01 | -0.072131  | 8.52E-01 |
| ENSG0000001495  | 1380890   | 13809265  | WNT8A      | transcript | transcribed unprocessed <td>-0.0839574</td> <td>4.97E-01</td> <td>0.0653865</td> <td>6.77E-01</td> <td>0.206455</td> <td>1.45E-01</td> <td>-0.1153121</td> <td>5.67E-01</td> <td>0.192654</td> <td>1.56E-01</td> <td>0.154357</td> <td>4.85E-01</td> <td>-0.102072</td> <td>9.64E-01</td>      | -0.0839574                                                                                                                                                                                                                             | 4.97E-01                                                                                                                                                                                                                  | 0.0653865                                                                                                                                                                                                    | 6.77E-01                                                                                                                                                                                       | 0.206455   | 1.45E-01 | -0.1153121 | 5.67E-01 | 0.192654   | 1.56E-01 | 0.154357  | 4.85E-01 | -0.102072  | 9.64E-01 |
| ENSG0000023682  | 10171773  | 10170952  | AC082687.2 | transcript | transcribed unprocessed <td>-0.046288</td> <td>6.90E-01</td> <td>0.0647801</td> <td>6.55E-01</td> <td>0.2504242</td> <td>1.88E-01</td> <td>-0.1153324</td> <td>5.67E-01</td> <td>0.0309808</td> <td>8.28E-01</td> <td>0.0663136</td> <td>6.97E-01</td> <td>0.2941534</td> <td>3.81E-01</td>    | -0.046288                                                                                                                                                                                                                              | 6.90E-01                                                                                                                                                                                                                  | 0.0647801                                                                                                                                                                                                    | 6.55E-01                                                                                                                                                                                       | 0.2504242  | 1.88E-01 | -0.1153324 | 5.67E-01 | 0.0309808  | 8.28E-01 | 0.0663136 | 6.97E-01 | 0.2941534  | 3.81E-01 |
| ENSG0000010497  | 4102138   | 4207933   | ADOL3      | transcript | transcribed unprocessed <td>-0.138121</td> <td>8.40E-01</td> <td>0.0121005</td> <td>3.94E-01</td> <td>0.208917</td> <td>2.72E-01</td> <td>-0.1154439</td> <td>5.66E-01</td> <td>0.2597207</td> <td>1.80E-01</td> <td>0.0720941</td> <td>7.47E-01</td> <td>-0.132311</td> <td>2.76E-01</td>     | -0.138121                                                                                                                                                                                                                              | 8.40E-01                                                                                                                                                                                                                  | 0.0121005                                                                                                                                                                                                    | 3.94E-01                                                                                                                                                                                       | 0.208917   | 2.72E-01 | -0.1154439 | 5.66E-01 | 0.2597207  | 1.80E-01 | 0.0720941 | 7.47E-01 | -0.132311  | 2.76E-01 |
| ENSG0000024516  | 21377935  | 21381674  | AC0831.1   | transcript | transcribed unprocessed <td>0.0189296</td> <td>8.64E-01</td> <td>0.49447223</td> <td>8.62E-01</td> <td>0.1515379</td> <td>8.75E-01</td> <td>-0.1155139</td> <td>5.67E-01</td> <td>0.0408455</td> <td>4.98E-01</td> <td>0.0967013</td> <td>6.91E-01</td> <td>0.2298412</td> <td>1.08E-01</td>   | 0.0189296                                                                                                                                                                                                                              | 8.64E-01                                                                                                                                                                                                                  | 0.49447223                                                                                                                                                                                                   | 8.62E-01                                                                                                                                                                                       | 0.1515379  | 8.75E-01 | -0.1155139 | 5.67E-01 | 0.0408455  | 4.98E-01 | 0.0967013 | 6.91E-01 | 0.2298412  | 1.08E-01 |
| ENSG0000019180  | 3801650   | 3805088   | ZNF31A     | transcript | transcribed unprocessed <td>-0.0692238</td> <td>5.50E-01</td> <td>0.1138283</td> <td>3.54E-01</td> <td>0.0411307</td> <td>8.38E-01</td> <td>-0.1155534</td> <td>5.67E-01</td> <td>0.0237875</td> <td>8.47E-01</td> <td>0.188952</td> <td>3.88E-01</td> <td>-0.1063078</td> <td>6.21E-01</td>   | -0.0692238                                                                                                                                                                                                                             | 5.50E-01                                                                                                                                                                                                                  | 0.1138283                                                                                                                                                                                                    | 3.54E-01                                                                                                                                                                                       | 0.0411307  | 8.38E-01 | -0.1155534 | 5.67E-01 | 0.0237875  | 8.47E-01 | 0.188952  | 3.88E-01 | -0.1063078 | 6.21E-01 |
| ENSG0000027881  | 11564895  | 11564613  | ASSY5      | transcript | transcribed unprocessed <td>-0.106238</td> <td>3.58E-01</td> <td>-0.0552420</td> <td>7.01E-01</td> <td>0.0750395</td> <td>7.05E-01</td> <td>-0.1155726</td> <td>5.67E-01</td> <td>0.182494</td> <td>1.87E-01</td> <td>0.1026275</td> <td>3.53E-01</td> <td>0.0497680</td> <td>7.31E-01</td>    | -0.106238                                                                                                                                                                                                                              | 3.58E-01                                                                                                                                                                                                                  | -0.0552420                                                                                                                                                                                                   | 7.01E-01                                                                                                                                                                                       | 0.0750395  | 7.05E-01 | -0.1155726 | 5.67E-01 | 0.182494   | 1.87E-01 | 0.1026275 | 3.53E-01 | 0.0497680  | 7.31E-01 |
| ENSG0000012199  | 12979173  | 12949935  | SMRT1      | transcript | transcribed unprocessed <td>-0.106238</td> <td>3.58E-01</td> <td>-0.0552420</td> <td>7.01E-01</td> <td>0.0750395</td> <td>7.05E-01</td> <td>-0.1155726</td> <td>5.67E-01</td> <td>0.182494</td> <td>1.87E-01</td> <td>0.1026275</td> <td>3.53E-01</td> <td>0.0497680</td> <td>7.31E-01</td>    | -0.106238                                                                                                                                                                                                                              | 3.58E-01                                                                                                                                                                                                                  | -0.0552420                                                                                                                                                                                                   | 7.01E-01                                                                                                                                                                                       | 0.0750395  | 7.05E-01 | -0.1155726 | 5.67E-01 | 0.182494   | 1.87E-01 | 0.1026275 | 3.53E-01 | 0.0497680  | 7.31E-01 |
| ENSG0000024892  | 2064552   | 2060570   | AC086547.3 | transcript | transcribed unprocessed <td>0.0021605</td> <td>9.85E-01</td> <td>-0.0477544</td> <td>7.61E-01</td> <td>0.1400733</td> <td>4.88E-01</td> <td>-0.1157663</td> <td>5.67E-01</td> <td>0.1041048</td> <td>7.68E-01</td> <td>0.0552488</td> <td>8.01E-01</td> <td>-0.0769746</td> <td>5.97E-01</td>  | 0.0021605                                                                                                                                                                                                                              | 9.85E-01                                                                                                                                                                                                                  | -0.0477544                                                                                                                                                                                                   | 7.61E-01                                                                                                                                                                                       | 0.1400733  | 4.88E-01 | -0.1157663 | 5.67E-01 | 0.1041048  | 7.68E-01 | 0.0552488 | 8.01E-01 | -0.0769746 | 5.97E-01 |
| ENSG00000244720 | 30168122  | 30169725  | AC117949.2 | transcript | transcribed unprocessed <td>-0.1115448</td> <td>3.44E-01</td> <td>-0.0114024</td> <td>2.60E-01</td> <td>0.0461742</td> <td>1.17E-01</td> <td>-0.1158389</td> <td>5.67E-01</td> <td>0.1977657</td> <td>3.53E-01</td> <td>0.1233237</td> <td>5.75E-01</td> <td>-0.0317499</td> <td>8.26E-01</td> | -0.1115448                                                                                                                                                                                                                             | 3.44E-01                                                                                                                                                                                                                  | -0.0114024                                                                                                                                                                                                   | 2.60E-01                                                                                                                                                                                       | 0.0461742  | 1.17E-01 | -0.1158389 | 5.67E-01 | 0.1977657  | 3.53E-01 | 0.1233237 | 5.75E-01 | -0.0317499 | 8.26E-01 |
| ENSG0000013150  | 5013111   | 5013810   | AC081051.1 | transcript | transcribed unprocessed <td>-0.0080801</td> <td>4.36E-01</td> <td>0.0007102</td> <td>8.09E-01</td> <td>0.0009169</td> <td>7.81E-01</td> <td>-0.1158411</td> <td>5.66E-01</td> <td>0.1595664</td> <td>4.49E-01</td> <td>0.0860379</td> <td>9.78E-01</td> <td>0.011717</td> <td>8.97E-01</td>    | -0.0080801                                                                                                                                                                                                                             | 4.36E-01                                                                                                                                                                                                                  | 0.0007102                                                                                                                                                                                                    | 8.09E-01                                                                                                                                                                                       | 0.0009169  | 7.81E-01 | -0.1158411 | 5.66E-01 | 0.1595664  | 4.49E-01 | 0.0860379 | 9.78E-01 | 0.011717   | 8.97E-01 |
| ENSG0000008671  | 18679509  | 1882791   | PEPF1      | transcript | transcribed unprocessed <td>YES <td>YES <td>YES <td>YES <td>-0.1678936</td> <td>1.44E-01</td> <td>-0.076848</td> <td>9.57E-01</td> <td>-0.1154181</td> <td>5.66E-01</td> <td>0.281476</td> <td>2.88E-01</td> <td>-0.0885659</td> <td>5.62E-01</td> </td></td></td></td>                        | YES <td>YES <td>YES <td>YES <td>-0.1678936</td> <td>1.44E-01</td> <td>-0.076848</td> <td>9.57E-01</td> <td>-0.1154181</td> <td>5.66E-01</td> <td>0.281476</td> <td>2.88E-01</td> <td>-0.0885659</td> <td>5.62E-01</td> </td></td></td> | YES <td>YES <td>YES <td>-0.1678936</td> <td>1.44E-01</td> <td>-0.076848</td> <td>9.57E-01</td> <td>-0.1154181</td> <td>5.66E-01</td> <td>0.281476</td> <td>2.88E-01</td> <td>-0.0885659</td> <td>5.62E-01</td> </td></td> | YES <td>YES <td>-0.1678936</td> <td>1.44E-01</td> <td>-0.076848</td> <td>9.57E-01</td> <td>-0.1154181</td> <td>5.66E-01</td> <td>0.281476</td> <td>2.88E-01</td> <td>-0.0885659</td> <td>5.62E-01</td> </td> | YES <td>-0.1678936</td> <td>1.44E-01</td> <td>-0.076848</td> <td>9.57E-01</td> <td>-0.1154181</td> <td>5.66E-01</td> <td>0.281476</td> <td>2.88E-01</td> <td>-0.0885659</td> <td>5.62E-01</td> | -0.1678936 | 1.44E-01 | -0.076848  | 9.57E-01 | -0.1154181 | 5.66E-01 | 0.281476  | 2.88E-01 | -0.0885659 | 5.62E-01 |
| ENSG00000279512 | 13111700  | 13111952  | AC013755.1 | transcript | transcribed unprocessed <td>0</td> <td>0</td> <td>0</td> <td>0</td> <td>0.1221033</td> <td>1.44E-01</td> <td>-0.114205</td> <td>5.67E-01</td> <td>0.1221033</td> <td>1.44E-01</td> <td>0.0940772</td> <td>6.98E-01</td> <td>0.0904519</td> <td>5.31E-01</td>                                   | 0                                                                                                                                                                                                                                      | 0                                                                                                                                                                                                                         | 0                                                                                                                                                                                                            | 0                                                                                                                                                                                              | 0.1221033  | 1.44E-01 | -0.114205  | 5.67E-01 | 0.1221033  | 1.44E-01 | 0.0940772 | 6.98E-01 | 0.0904519  | 5.31E-01 |
| ENSG0000023654  | 9727675   | 9727675   | AC081051.1 | transcript | transcribed unprocessed <td>-0.138121</td> <td>8.40E-01</td> <td>0.0121005</td> <td>3.94E-01</td> <td>0.208917</td> <td>2.72E-01</td> <td>-0.1154439</td> <td>5.66E-01</td> <td>0.2597207</td> <td>1.80E-01</td> <td>0.0720941</td> <td>7.47E-01</td> <td>-0.132311</td> <td>2.76E-01</td>     | -0.138121                                                                                                                                                                                                                              | 8.40E-01                                                                                                                                                                                                                  | 0.0121005                                                                                                                                                                                                    | 3.94E-01                                                                                                                                                                                       | 0.208917   | 2.72E-01 | -0.1154439 | 5.66E-01 | 0.2597207  | 1.80E-01 | 0.0720941 | 7.47E-01 | -0.132311  | 2.76E-01 |
| ENSG00000279232 | 9879261   | 9879576   | AC089252.1 | transcript | transcribed unprocessed <td>-0.1436631</td> <td>2.13E-01</td> <td>-0.287774</td> <td>2.42E-01</td> <td>0.13581326</td> <td>4.99E-01</td> <td>-0.1154893</td> <td>5.66E-01</td> <td>0.0120929</td> <td>9.31E-01</td> <td>0.0309488</td> <td>1.61E-01</td> <td>-0.096315</td> <td>5.06E-01</td>  | -0.1436631                                                                                                                                                                                                                             | 2.13E-01                                                                                                                                                                                                                  | -0.287774                                                                                                                                                                                                    | 2.42E-01                                                                                                                                                                                       | 0.13581326 | 4.99E-01 | -0.1154893 | 5.66E-01 | 0.0120929  | 9.31E-01 | 0.0309488 | 1.61E-01 | -0.096315  | 5.06E-01 |
| ENSG0000021558  | 34146498  | 34244796  | AC118409.2 | transcript | transcribed unprocessed <td>-0.1071073</td> <td>6.58E-01</td> <td>0.1120028</td> <td>2.92E-01</td> <td>0.1738494</td> <td>3.87E-01</td> <td>-0.1155147</td> <td>5.66E-01</td> <td>0.2410023</td> <td>7.92E-01</td> <td>0.2290688</td> <td>1.66E-01</td> <td>-0.2449475</td> <td>8.64E-01</td>  | -0.1071073                                                                                                                                                                                                                             | 6.58E-01                                                                                                                                                                                                                  | 0.1120028                                                                                                                                                                                                    | 2.92E-01                                                                                                                                                                                       | 0.1738494  | 3.87E-01 | -0.1155147 | 5.66E-01 | 0.2410023  | 7.92E-01 | 0.2290688 | 1.66E-01 | -0.2449475 | 8.64E-01 |
| ENSG0000014836  | 7234742   | 7259496   | PLA2G1A2   | transcript | transcribed unprocessed <td>-0.134611</td> <td>2.44E-01</td> <td>0.0038305</td> <td>9.80E-01</td> <td>0.1699289</td> <td>3.98E-01</td> <td>-0.1155521</td> <td>5.66E-01</td> <td>0.2217136</td> <td>1.07E-01</td> <td>0.0954457</td> <td>6.65E-01</td> <td>-0.0428747</td> <td>3.24E-01</td>   | -0.134611                                                                                                                                                                                                                              | 2.44E-01                                                                                                                                                                                                                  | 0.0038305                                                                                                                                                                                                    | 9.80E-01                                                                                                                                                                                       | 0.1699289  | 3.98E-01 | -0.1155521 | 5.66E-01 | 0.2217136  | 1.07E-01 | 0.0954457 | 6.65E-01 | -0.0428747 | 3.24E-01 |
| ENSG00000148973 | 4266500   | 4248688   | SERPIN5    | transcript | transcribed unprocessed <td>-0.0949803</td> <td>4.19E-01</td> <td>0.0485251</td> <td>7.54E-01</td> <td>0.230444</td> <td>2.68E-01</td> <td>-0.1155798</td> <td>5.66E-01</td> <td>0.1332182</td> <td>2.78E-01</td> <td>0.1012298</td> <td>8.43E-01</td> <td>-0.048344</td> <td>2.88E-01</td>    | -0.0949803                                                                                                                                                                                                                             | 4.19E-01                                                                                                                                                                                                                  | 0.0485251                                                                                                                                                                                                    | 7.54E-01                                                                                                                                                                                       | 0.230444   | 2.68E-01 | -0.1155798 | 5.66E-01 | 0.1332182  | 2.78E-01 | 0.1012298 | 8.43E-01 | -0.048344  | 2.88E-01 |
| ENSG00000143505 | 110687470 | 110688979 | MAP5       | transcript | transcribed unprocessed <td>-0.0666298</td> <td>2.61E-01</td> <td>0.0794849</td> <td>7.61E-01</td> <td>0.1155798</td> <td>2.81E-01</td> <td>-0.1155798</td> <td>5.66E-01</td> <td>0.1219685</td> <td>1.81E-01</td> <td>0.1012298</td> <td>8.43E-01</td> <td>-0.048344</td> <td>2.88E-01</td>   | -0.0666298                                                                                                                                                                                                                             | 2.61E-01                                                                                                                                                                                                                  | 0.0794849                                                                                                                                                                                                    | 7.61E-01                                                                                                                                                                                       | 0.1155798  | 2.81E-01 | -0.1155798 | 5.66E-01 | 0.1219685  | 1.81E-01 | 0.1012298 | 8.43E-01 | -0.048344  | 2.88E-01 |
| ENSG0000012463  | 10322727  | 10317853  | DLX4       | transcript | transcribed unprocessed <td>-0.0400129</td> <td>5.80E-01</td> <td>0.0185447</td> <td>7.73E-01</td> <td>0.213244</td> <td>2.45E-01</td> <td>-0.115584</td> <td>5.66E-01</td> <td>0.0957297</td> <td>4.91E-01</td> <td>0.0617349</td> <td>7.08E-01</td> <td>-0.1468931</td> <td>3.11E-01</td>    | -0.0400129                                                                                                                                                                                                                             | 5.80E-01                                                                                                                                                                                                                  | 0.0185447                                                                                                                                                                                                    | 7.73E-01                                                                                                                                                                                       | 0.213244   | 2.45E-01 | -0.115584  | 5.66E-01 | 0.0957297  | 4.91E-01 | 0.0617349 | 7.08E-01 | -0.1468931 | 3.11E-01 |
| ENSG0000017860  | 13434799  | 13434799  | AC012792.1 | transcript | transcribed unprocessed <td>-0.138121</td> <td>8.40E-01</td> <td>0.0121005</td> <td>3.94E-01</td> <td>0.208917</td> <td>2.72E-01</td> <td>-0.1154439</td> <td>5.66E-01</td> <td>0.2597207</td> <td>1.80E-01</td> <td>0.0720941</td> <td>7.47E-01</td> <td>-0.132311</td> <td>2.76E-01</td>     | -0.138121                                                                                                                                                                                                                              | 8.40E-01                                                                                                                                                                                                                  | 0.0121005                                                                                                                                                                                                    | 3.94E-01                                                                                                                                                                                       | 0.208917   | 2.72E-01 | -0.1154439 | 5.66E-01 | 0.2597207  | 1.80E-01 | 0.0720941 | 7.47E-01 | -0.132311  | 2.76E-01 |
| ENSG0000011919  | 9193284   | 9193624   | NXN3       | transcript | transcribed unprocessed <td>-0.0001924</td> <td>9.85E-01</td> <td>0.0650554</td> <td>6.36E-01</td> <td>0.1340661</td> <td>1.20E-01</td> <td>-0.1156051</td> <td>5.67E-01</td> <td>0.0864000</td> <td>4.94E-01</td> <td>0.0317389</td> <td>5.90E-01</td> <td>0.0986601</td> <td>4.16E-01</td>   | -0.0001924                                                                                                                                                                                                                             | 9.85E-01                                                                                                                                                                                                                  | 0.0650554                                                                                                                                                                                                    | 6.36E-01                                                                                                                                                                                       | 0.1340661  | 1.20E-01 | -0.1156051 | 5.67E-01 | 0.0864000  | 4.94E-01 | 0.0317389 | 5.90E-01 | 0.0986601  | 4.16E-01 |
| ENSG0000017873  | 2155639   | 2156382   | TNFRSF14   | transcript | transcribed unprocessed <td>-0.1184425</td> <td>3.05E-01</td> <td>-0.0599959</td> <td>8.04E-01</td> <td>0.1182339</td> <td>5.57E-01</td> <td>-0.1156131</td> <td>5.66E-01</td> <td>0.208136</td> <td>1.31E-01</td> <td>0.1019474</td> <td>5.95E-01</td> <td>-0.0726562</td> <td>8.79E-01</td>  | -0.1184425                                                                                                                                                                                                                             | 3.05E-01                                                                                                                                                                                                                  | -0.0599959                                                                                                                                                                                                   | 8.04E-01                                                                                                                                                                                       | 0.1182339  | 5.57E-01 | -0.1156131 | 5.66E-01 | 0.208136   | 1.31E-01 | 0.1019474 | 5.95E-01 | -0.0726562 | 8.79E-01 |
| ENSG0000012449  | 18171325  | 18174146  | AC081051.1 | transcript | transcribed unprocessed <td>-0.138121</td> <td>8.40E-01</td> <td>0.0121005</td> <td>3.94E-01</td> <td>0.208917</td> <td>2.72E-01</td> <td>-0.1154439</td> <td>5.66E-01</td> <td>0.2597207</td> <td>1.80E-01</td> <td>0.0720941</td> <td>7.47E-01</td> <td>-0.132311</td> <td>2.76E-01</td>     | -0.138121                                                                                                                                                                                                                              | 8.40E-01                                                                                                                                                                                                                  | 0.0121005                                                                                                                                                                                                    | 3.94E-01                                                                                                                                                                                       | 0.208917   | 2.72E-01 | -0.1154439 | 5.66E-01 | 0.2597207  | 1.80E-01 | 0.0720941 | 7.47E-01 | -0.132311  | 2.76E-01 |
| ENSG00000279726 | 8418052   | 8417184   | PCP4L1     | transcript | transcribed unprocessed <td>-0.0616793</td> <td>8.86E-01</td> <td>0.0065006</td> <td>9.64E-01</td> <td>0.1737425</td> <td>7.16E-01</td> <td>-0.1156376</td> <td>5.66E-01</td> <td>0.0764169</td> <td>3.63E-01</td> <td>0.0939383</td> <td>1.01E-01</td> <td>0.0600975</td> <td>6.97E-01</td>   | -0.0616793                                                                                                                                                                                                                             | 8.86E-01                                                                                                                                                                                                                  | 0.0065006                                                                                                                                                                                                    | 9.64E-01                                                                                                                                                                                       | 0.1737425  | 7.16E-01 | -0.1156376 | 5.66E-01 | 0.0764169  | 3.63E-01 | 0.0939383 | 1.01E-01 | 0.0600975  | 6.97E-01 |
| ENSG0000022078  | 9002122   | 9002106   | RNXP10     | transcript | transcribed unprocessed <td>-0.0278878</td> <td>5.55E-01</td> <td>-0.0130817</td> <td>7.14E-01</td> <td>0.0770749</td> <td>7.02E-01</td> <td>-0.1156641</td> <td>5.66E-01</td> <td>0.111995</td> <td>4.00E-01</td> <td>0.1121814</td> <td>6.10E-01</td> <td>0.0249249</td> <td>8.64E-01</td>   | -0.0278878                                                                                                                                                                                                                             | 5.55E-01                                                                                                                                                                                                                  | -0.0130817                                                                                                                                                                                                   | 7.14E-01                                                                                                                                                                                       | 0.0770749  | 7.02E-01 | -0.1156641 | 5.66E-01 | 0.111995   | 4.00E-01 | 0.1121814 | 6.10E-01 | 0.0249249  | 8.64E-01 |
| ENSG0000023654  | 9727675   | 9727675   | AC081051.1 | transcript | transcribed unprocessed <td>-0.138121</td> <td>8.40E-01</td> <td>0.0121005</td> <td>3.94E-01</td> <td>0.208917</td> <td>2.72E-01</td> <td>-0.1154439</td> <td>5.66E-01</td> <td>0.2597207</td> <td>1.80E-01</td> <td>0.0720941</td> <td>7.47E-01</td> <td>-0.132311</td> <td>2.76E-01</td>     | -0.138121                                                                                                                                                                                                                              | 8.40E-01                                                                                                                                                                                                                  | 0.0121005                                                                                                                                                                                                    | 3.94E-01                                                                                                                                                                                       | 0.208917   | 2.72E-01 | -0.1154439 | 5.66E-01 | 0.2597207  | 1.80E-01 | 0.0720941 | 7.47E-01 | -0.132311  | 2.76E-01 |
| ENSG00000219524 | 7998139   | 7998212   | ZNF273     | transcript | transcribed unprocessed <td>-0.0226802</td> <td>8.84E-01</td> <td>0.0642671</td> <td>9.18E-01</td> <td>0.1680195</td> <td>4.02E-01</td> <td>-0.1156806</td> <td>5.66E-01</td> <td>0.0154888</td> <td>9.12E-01</td> <td>0.0317062</td> <td>5.00E-01</td> <td>0.0291752</td> <td>8.41E-01</td>   | -0.0226802                                                                                                                                                                                                                             | 8.84E-01                                                                                                                                                                                                                  | 0.0642671                                                                                                                                                                                                    | 9.18E-01                                                                                                                                                                                       | 0.1680195  | 4.02E-01 | -0.1156806 | 5.66E-01 | 0.0154888  | 9.12E-01 | 0.0317062 | 5.00E-01 | 0.0291752  | 8.41E-01 |
| ENSG00000230438 | 71800074  | 71802013  | AL118711.1 | transcript | transcribed unprocessed <td>-0.1261031</td> <td>2.74E-01</td> <td>-0.0976260</td> <td>5.08E-01</td> <td>0.0687988</td> <td>2.71E-01</td> <td>-0.1157020</td> <td>5.65E-01</td> <td>0.1739304</td> <td>2.09E-01</td> <td>0.1137845</td> <td>6.11E-01</td> <td>-0.1138889</td> <td>9.73E-01</td> | -0.1261031                                                                                                                                                                                                                             | 2.74E-01                                                                                                                                                                                                                  | -0.0976260                                                                                                                                                                                                   | 5.08E-01                                                                                                                                                                                       | 0.0687988  | 2.71E-01 | -0.1157020 | 5.65E-01 | 0.1739304  | 2.09E-01 | 0.1137845 | 6.11E-01 | -0.1138889 | 9.73E-01 |
| ENSG00000279465 | 96105741  | 96104111  | AL149409.2 | transcript | transcribed unprocessed <td>-0.1261031</td> <td>2.74E-01</td> <td>-0.0976260</td> <td>5.08E-01</td> <td>0.0687988</td> <td>2.71E-01</td> <td>-0.1157020</td> <td>5.65E-01</td> <td>0.1739304</td> <td>2.09E-01</td> <td>0.1137845</td> <td>6.11E-01</td> <td>-0.1138889</td> <td>9.73E-01</td> | -0.1261031                                                                                                                                                                                                                             | 2.74E-01                                                                                                                                                                                                                  | -0.0976260                                                                                                                                                                                                   | 5.08E-01                                                                                                                                                                                       | 0.0687988  | 2.71E-01 | -0.1157020 | 5.65E-01 | 0.1739304  | 2.09E-01 | 0.1137845 | 6.11E-01 | -0.1138889 | 9.73E-01 |
| ENSG00000102929 | 1395331   | 13954097  | AC081051.1 | transcript | transcribed unprocessed <td>-0.138121</td> <td>8.40E-01</td> <td>0.0121005</td> <td>3.94E-01</td> <td>0.208917</td> <td>2.72E-01</td> <td>-0.1154439</td> <td>5.66E-01</td> <td>0.2597207</td> <td>1.80E-01</td> <td>0.0720941</td> <td>7.47E-01</td> <td>-0.132311</td> <td>2.76E-01</td>     | -0.138121                                                                                                                                                                                                                              | 8.40E-01                                                                                                                                                                                                                  | 0.0121005                                                                                                                                                                                                    | 3.94E-01                                                                                                                                                                                       | 0.208917   | 2.72E-01 | -0.1154439 | 5.66E-01 | 0.2597207  | 1.80E-01 | 0.0720941 | 7.47E-01 | -0.132311  | 2.76E-01 |
| ENSG0000026409  | 112370304 | 112454193 | AL104352.1 | transcript | transcribed unprocessed <td>-0.1401843</td> <td>3.47E-01</td> <td>-0.1912919</td> <td>2.73E-01</td> <td>0.0477682</td> <td>8.31E-01</td> <td>-0.1157139</td> <td>5.65E-01</td> <td>0.23845</td> <td>1.60E-01</td> <td>0.181312</td> <td>4.05E-01</td> <td>-0.1258881</td> <td>8.61E-01</td>    | -0.1401843                                                                                                                                                                                                                             | 3.47E-01                                                                                                                                                                                                                  | -0.1912919                                                                                                                                                                                                   | 2.73E-01                                                                                                                                                                                       | 0.0477682  | 8.31E-01 | -0.1157139 | 5.65E-01 | 0.23845    | 1.60E-01 | 0.181312  | 4.05E-01 | -0.1258881 | 8.61E-01 |
| ENSG00000279331 | 6767508   | 6767660   | AC100454.1 | transcript | transcribed unprocessed <td>-0.1027028</td> <td>1.03E-01</td> <td>-0.1167955</td> <td>2.44E-01</td> <td>0.0226133</td> <td>8.97E-01</td> <td>-0.1157285</td> <td>5.65E-01</td> <td>0.23845</td> <td>1.60E-01</td> <td>0.181312</td> <td>4.05E-01</td> <td>-0.1258881</td> <td>8.61E-01</td>    | -0.1027028                                                                                                                                                                                                                             | 1.03E-01                                                                                                                                                                                                                  | -0.1167955                                                                                                                                                                                                   | 2.44E-01                                                                                                                                                                                       | 0.0226133  | 8.97E-01 | -0.1157285 | 5.65E-01 | 0.23845    | 1.60E-01 | 0.181312  | 4.05E-01 | -0.1258881 | 8.61E-01 |
| ENSG0000010481  | 4560113   | 4560113   | AC081051.1 | transcript | transcribed unprocessed <td>-0.138121</td> <td>8.40E-01</td> <td>0.0121005</td> <td>3.94E-01</td> <td>0.208917</td> <td>2.72E-01</td> <td>-0.1154439</td> <td>5.66E-01</td> <td>0.2597207</td> <td>1.80E-01</td> <td>0.0720941</td> <td>7.47E-01</td> <td>-0.132311</td> <td>2.76E-01</td>     | -0.138121                                                                                                                                                                                                                              | 8.40E-01                                                                                                                                                                                                                  | 0.0121005                                                                                                                                                                                                    | 3.94E-01                                                                                                                                                                                       | 0.208917   | 2.72E-01 | -0.1154439 | 5.66E-01 | 0.2597207  | 1.80E-01 | 0.0720941 | 7.47E-01 | -0.132311  | 2.76E-01 |
| ENSG0000023684  | 3392705   | 3394549   | AC100454.1 | transcript | transcribed unprocessed <td>-0.0930310</td> <td>4.20E-01</td> <td>0.0519039</td> <td>7.44E-01</td> <td>0.208870</td> <td>2.96E-01</td> <td>-0.1157564</td> <td>5.65E-01</td> <td>0.204113</td> <td>3.96E-01</td> <td>0.06318</td> <td>8.08E-01</td> <td>-0.05475</td> <td>2.90E-01</td>        | -0.0930310                                                                                                                                                                                                                             | 4.20E-01                                                                                                                                                                                                                  | 0.0519039                                                                                                                                                                                                    | 7.44E-01                                                                                                                                                                                       | 0.208870   | 2.96E-01 | -0.1157564 | 5.65E-01 | 0.204113   | 3.96E-01 | 0.06318   | 8.08E-01 | -0.05475   | 2.90E-01 |
| ENSG0000011384  | 111309819 | 111316    |            |            |                                                                                                                                                                                                                                                                                                |                                                                                                                                                                                                                                        |                                                                                                                                                                                                                           |                                                                                                                                                                                                              |                                                                                                                                                                                                |            |          |            |          |            |          |           |          |            |          |



Table with columns for gene ID, chromosome, coordinates, gene name, transcript name, and various numerical values. The table lists numerous genes such as TRDC, STX4, HNR1A, and many others, each with associated genomic data and numerical values.



| ENSG0000015869 | 1  | 104072883 | 104226678 | AC092506.1 | havana  | transcribed_unrep | -0.152968  | 1.84e-01 | -0.166899  | 2.47e-01 | -0.121864   | 5.41e-01 | -0.121823 | 5.45e-01 | -0.156704  | 2.58e-01 | -0.154109  | 4.83e-01 | -0.136638  | 3.44e-01 |
|----------------|----|-----------|-----------|------------|---------|-------------------|------------|----------|------------|----------|-------------|----------|-----------|----------|------------|----------|------------|----------|------------|----------|
| ENSG0000015870 | 18 | 6738984   | 6741167   | PEK1       | ensembl | mRNA              | -0.078709  | 5.03e-01 | -0.048517  | 7.86e-01 | -0.020267   | 7.86e-01 | -0.121849 | 5.45e-01 | -0.117792  | 4.21e-01 | -0.128218  | 4.84e-01 | -0.071661  | 7.95e-01 |
| ENSG0000015871 | 18 | 6739077   | 6739265   | ZNF547     | ensembl | mRNA              | -0.136417  | 2.91e-01 | -0.136417  | 2.91e-01 | -0.136417   | 2.91e-01 | -0.136417 | 2.91e-01 | -0.136417  | 2.91e-01 | -0.136417  | 2.91e-01 | -0.136417  | 2.91e-01 |
| ENSG0000015872 | 18 | 127672935 | 127680226 | ABT1       | ensembl | mRNA              | -0.186095  | 2.98e-01 | -0.175886  | 6.02e-01 | -0.204512   | 3.04e-01 | -0.121842 | 5.45e-01 | -0.183409  | 4.80e-01 | -0.092617  | 6.74e-01 | -0.157275  | 2.75e-01 |
| ENSG0000015873 | 6  | 7054617   | 7054969   | SDH4       | ensembl | mRNA              | -0.099942  | 3.89e-01 | -0.072181  | 8.93e-01 | -0.099920   | 6.21e-01 | -0.121874 | 5.45e-01 | -0.109670  | 2.20e-01 | -0.188224  | 3.89e-01 | -0.071278  | 8.80e-01 |
| ENSG0000015874 | 11 | 2013634   | 2013313   | AC081465.1 | havana  | transcribed_unrep | -0.131313  | 1.81e-01 | -0.131313  | 1.81e-01 | -0.131313   | 1.81e-01 | -0.131313 | 1.81e-01 | -0.131313  | 1.81e-01 | -0.131313  | 1.81e-01 | -0.131313  | 1.81e-01 |
| ENSG0000015875 | 11 | 9120615   | 9121099   | AL108074.4 | havana  | transcribed_unrep | -0.056042  | 1.51e-01 | -0.0843    | 5.06e-01 | -0.073624   | 7.15e-01 | -0.121879 | 5.45e-01 | -0.233146  | 4.80e-01 | -0.084207  | 7.00e-01 | -0.081244  | 5.97e-01 |
| ENSG0000015876 | 11 | 3657574   | 3658279   | RAG2       | ensembl | mRNA              | -0.083672  | 7.99e-01 | -0.023223  | 8.73e-01 | -0.30321024 | 1.24e-01 | -0.121896 | 5.45e-01 | -0.0952179 | 4.93e-01 | -0.084818  | 7.56e-01 | -0.0928224 | 4.98e-01 |
| ENSG0000015877 | 12 | 6215957   | 6216293   | SEK3P1     | ensembl | mRNA              | -0.021048  | 6.87e-01 | -0.021048  | 6.87e-01 | -0.021048   | 6.87e-01 | -0.021048 | 6.87e-01 | -0.021048  | 6.87e-01 | -0.021048  | 6.87e-01 | -0.021048  | 6.87e-01 |
| ENSG0000015878 | 12 | 17925028  | 17926173  | RIF1P1     | ensembl | processed_pseud   | 0.0782671  | 4.51e-01 | -0.035379  | 9.81e-01 | -0.301778   | 1.26e-01 | -0.121920 | 5.45e-01 | -0.067033  | 4.93e-01 | -0.210248  | 5.00e-01 | -0.0737598 | 5.46e-01 |
| ENSG0000015879 | 10 | 8722548   | 8723698   | NUTM2A     | ensembl | mRNA              | -0.072849  | 5.29e-01 | -0.050643  | 8.33e-01 | -0.0284140  | 8.06e-01 | -0.121923 | 5.45e-01 | -0.124895  | 3.68e-01 | -0.157243  | 4.73e-01 | -0.080958  | 5.76e-01 |
| ENSG0000015880 | 28 | 12356665  | 12343736  | SEK3P1     | ensembl | mRNA              | -0.021048  | 6.87e-01 | -0.021048  | 6.87e-01 | -0.021048   | 6.87e-01 | -0.021048 | 6.87e-01 | -0.021048  | 6.87e-01 | -0.021048  | 6.87e-01 | -0.021048  | 6.87e-01 |
| ENSG0000015881 | 10 | 1581042   | 1581679   | AC05688.1  | havana  | processed_pseud   | -0.119321  | 3.01e-01 | -0.148759  | 3.04e-01 | -0.161365   | 4.21e-01 | -0.121943 | 5.45e-01 | -0.118266  | 3.93e-01 | -0.107218  | 4.80e-01 | -0.102176  | 4.77e-01 |
| ENSG0000015882 | 6  | 10875163  | 10876942  | LINC00222  | havana  | transcribed_unrep | -0.004605  | 6.02e-01 | -0.094239  | 3.14e-01 | -0.184677   | 3.11e-01 | -0.121918 | 5.45e-01 | -0.121918  | 5.45e-01 | -0.046691  | 8.22e-01 | -0.143941  | 3.20e-01 |
| ENSG0000015883 | 20 | 131612    | 138285    | AL13031.1  | havana  | transcribed_unrep | -0.063462  | 6.89e-01 | -0.082399  | 5.54e-01 | -0.2784089  | 1.86e-01 | -0.120217 | 5.44e-01 | -0.044124  | 5.44e-01 | -0.209915  | 3.29e-01 | -0.270647  | 5.72e-01 |
| ENSG0000015884 | 11 | 974408    | 974485    | RIF1P1     | ensembl | mRNA              | -0.071702  | 4.02e-01 | -0.071702  | 4.02e-01 | -0.071702   | 4.02e-01 | -0.121920 | 5.45e-01 | -0.121920  | 5.45e-01 | -0.046691  | 8.22e-01 | -0.143941  | 3.20e-01 |
| ENSG0000015885 | 2  | 218419121 | 218453295 | VIL1       | ensembl | mRNA              | -0.0458489 | 6.73e-01 | -0.0349513 | 5.88e-01 | -0.178729   | 3.72e-01 | -0.122056 | 5.44e-01 | -0.099624  | 4.73e-01 | -0.401877  | 2.70e-01 | -0.260251  | 5.13e-01 |
| ENSG0000015886 | 11 | 7392166   | 7392236   | ARR3P4     | ensembl | processed_pseud   | -0.0818091 | 4.97e-01 | -0.105029  | 3.15e-01 | -0.1513581  | 4.98e-01 | -0.122075 | 5.44e-01 | -0.107740  | 4.39e-01 | -0.109793  | 6.18e-01 | -0.240837  | 9.23e-01 |
| ENSG0000015887 | 6  | 8204501   | 8201279   | SLC90D3.3  | havana  | transcribed_unrep | -0.121703  | 3.01e-01 | -0.170877  | 3.58e-01 | -0.170877   | 3.58e-01 | -0.122059 | 5.44e-01 | -0.151768  | 3.83e-01 | -0.179945  | 4.77e-01 | -0.166512  | 1.91e-01 |
| ENSG0000015888 | 11 | 7883355   | 7889779   | MTH5       | ensembl | mRNA              | -0.0780454 | 5.28e-01 | -0.097905  | 9.56e-01 | -0.1253839  | 5.31e-01 | -0.122070 | 5.44e-01 | -0.0769187 | 5.00e-01 | -0.0825604 | 8.88e-01 | -0.0765569 | 5.97e-01 |
| ENSG0000015889 | 6  | 1318895   | 1319306   | NCR3       | ensembl | mRNA              | -0.1189197 | 3.03e-01 | -0.115782  | 3.47e-01 | -0.226642   | 2.58e-01 | -0.122078 | 5.44e-01 | -0.111410  | 4.22e-01 | -0.052628  | 8.11e-01 | -0.113281  | 4.32e-01 |
| ENSG0000015890 | 11 | 12329216  | 12330216  | LRN1       | ensembl | mRNA              | -0.118442  | 3.06e-01 | -0.075697  | 8.06e-01 | -0.2070031  | 2.07e-01 | -0.122076 | 5.44e-01 | -0.126294  | 3.68e-01 | -0.172934  | 4.19e-01 | -0.090209  | 5.16e-01 |
| ENSG0000015891 | 2  | 218419121 | 218453295 | VIL1       | ensembl | mRNA              | -0.0458489 | 6.73e-01 | -0.0349513 | 5.88e-01 | -0.178729   | 3.72e-01 | -0.122056 | 5.44e-01 | -0.099624  | 4.73e-01 | -0.401877  | 2.70e-01 | -0.260251  | 5.13e-01 |
| ENSG0000015892 | 11 | 7392166   | 7392236   | ARR3P4     | ensembl | processed_pseud   | -0.0818091 | 4.97e-01 | -0.105029  | 3.15e-01 | -0.1513581  | 4.98e-01 | -0.122075 | 5.44e-01 | -0.107740  | 4.39e-01 | -0.109793  | 6.18e-01 | -0.240837  | 9.23e-01 |
| ENSG0000015893 | 6  | 8204501   | 8201279   | SLC90D3.3  | havana  | transcribed_unrep | -0.121703  | 3.01e-01 | -0.170877  | 3.58e-01 | -0.170877   | 3.58e-01 | -0.122059 | 5.44e-01 | -0.151768  | 3.83e-01 | -0.179945  | 4.77e-01 | -0.166512  | 1.91e-01 |
| ENSG0000015894 | 11 | 7883355   | 7889779   | MTH5       | ensembl | mRNA              | -0.0780454 | 5.28e-01 | -0.097905  | 9.56e-01 | -0.1253839  | 5.31e-01 | -0.122070 | 5.44e-01 | -0.0769187 | 5.00e-01 | -0.0825604 | 8.88e-01 | -0.0765569 | 5.97e-01 |
| ENSG0000015895 | 6  | 1318895   | 1319306   | NCR3       | ensembl | mRNA              | -0.1189197 | 3.03e-01 | -0.115782  | 3.47e-01 | -0.226642   | 2.58e-01 | -0.122078 | 5.44e-01 | -0.111410  | 4.22e-01 | -0.052628  | 8.11e-01 | -0.113281  | 4.32e-01 |
| ENSG0000015896 | 11 | 12329216  | 12330216  | LRN1       | ensembl | mRNA              | -0.118442  | 3.06e-01 | -0.075697  | 8.06e-01 | -0.2070031  | 2.07e-01 | -0.122076 | 5.44e-01 | -0.126294  | 3.68e-01 | -0.172934  | 4.19e-01 | -0.090209  | 5.16e-01 |
| ENSG0000015897 | 2  | 218419121 | 218453295 | VIL1       | ensembl | mRNA              | -0.0458489 | 6.73e-01 | -0.0349513 | 5.88e-01 | -0.178729   | 3.72e-01 | -0.122056 | 5.44e-01 | -0.099624  | 4.73e-01 | -0.401877  | 2.70e-01 | -0.260251  | 5.13e-01 |
| ENSG0000015898 | 11 | 7392166   | 7392236   | ARR3P4     | ensembl | processed_pseud   | -0.0818091 | 4.97e-01 | -0.105029  | 3.15e-01 | -0.1513581  | 4.98e-01 | -0.122075 | 5.44e-01 | -0.107740  | 4.39e-01 | -0.109793  | 6.18e-01 | -0.240837  | 9.23e-01 |
| ENSG0000015899 | 6  | 8204501   | 8201279   | SLC90D3.3  | havana  | transcribed_unrep | -0.121703  | 3.01e-01 | -0.170877  | 3.58e-01 | -0.170877   | 3.58e-01 | -0.122059 | 5.44e-01 | -0.151768  | 3.83e-01 | -0.179945  | 4.77e-01 | -0.166512  | 1.91e-01 |
| ENSG0000015900 | 11 | 7883355   | 7889779   | MTH5       | ensembl | mRNA              | -0.0780454 | 5.28e-01 | -0.097905  | 9.56e-01 | -0.1253839  | 5.31e-01 | -0.122070 | 5.44e-01 | -0.0769187 | 5.00e-01 | -0.0825604 | 8.88e-01 | -0.0765569 | 5.97e-01 |
| ENSG0000015901 | 6  | 1318895   | 1319306   | NCR3       | ensembl | mRNA              | -0.1189197 | 3.03e-01 | -0.115782  | 3.47e-01 | -0.226642   | 2.58e-01 | -0.122078 | 5.44e-01 | -0.111410  | 4.22e-01 | -0.052628  | 8.11e-01 | -0.113281  | 4.32e-01 |
| ENSG0000015902 | 11 | 12329216  | 12330216  | LRN1       | ensembl | mRNA              | -0.118442  | 3.06e-01 | -0.075697  | 8.06e-01 | -0.2070031  | 2.07e-01 | -0.122076 | 5.44e-01 | -0.126294  | 3.68e-01 | -0.172934  | 4.19e-01 | -0.090209  | 5.16e-01 |
| ENSG0000015903 | 2  | 218419121 | 218453295 | VIL1       | ensembl | mRNA              | -0.0458489 | 6.73e-01 | -0.0349513 | 5.88e-01 | -0.178729   | 3.72e-01 | -0.122056 | 5.44e-01 | -0.099624  | 4.73e-01 | -0.401877  | 2.70e-01 | -0.260251  | 5.13e-01 |
| ENSG0000015904 | 11 | 7392166   | 7392236   | ARR3P4     | ensembl | processed_pseud   | -0.0818091 | 4.97e-01 | -0.105029  | 3.15e-01 | -0.1513581  | 4.98e-01 | -0.122075 | 5.44e-01 | -0.107740  | 4.39e-01 | -0.109793  | 6.18e-01 | -0.240837  | 9.23e-01 |
| ENSG0000015905 | 6  | 8204501   | 8201279   | SLC90D3.3  | havana  | transcribed_unrep | -0.121703  | 3.01e-01 | -0.170877  | 3.58e-01 | -0.170877   | 3.58e-01 | -0.122059 | 5.44e-01 | -0.151768  | 3.83e-01 | -0.179945  | 4.77e-01 | -0.166512  | 1.91e-01 |
| ENSG0000015906 | 11 | 7883355   | 7889779   | MTH5       | ensembl | mRNA              | -0.0780454 | 5.28e-01 | -0.097905  | 9.56e-01 | -0.1253839  | 5.31e-01 | -0.122070 | 5.44e-01 | -0.0769187 | 5.00e-01 | -0.0825604 | 8.88e-01 | -0.0765569 | 5.97e-01 |
| ENSG0000015907 | 6  | 1318895   | 1319306   | NCR3       | ensembl | mRNA              | -0.1189197 | 3.03e-01 | -0.115782  | 3.47e-01 | -0.226642   | 2.58e-01 | -0.122078 | 5.44e-01 | -0.111410  | 4.22e-01 | -0.052628  | 8.11e-01 | -0.113281  | 4.32e-01 |
| ENSG0000015908 | 11 | 12329216  | 12330216  | LRN1       | ensembl | mRNA              | -0.118442  | 3.06e-01 | -0.075697  | 8.06e-01 | -0.2070031  | 2.07e-01 | -0.122076 | 5.44e-01 | -0.126294  | 3.68e-01 | -0.172934  | 4.19e-01 | -0.090209  | 5.16e-01 |
| ENSG0000015909 | 2  | 218419121 | 218453295 | VIL1       | ensembl | mRNA              | -0.0458489 | 6.73e-01 | -0.0349513 | 5.88e-01 | -0.178729   | 3.72e-01 | -0.122056 | 5.44e-01 | -0.099624  | 4.73e-01 | -0.401877  | 2.70e-01 | -0.260251  | 5.13e-01 |
| ENSG0000015910 | 11 | 7392166   | 7392236   | ARR3P4     | ensembl | processed_pseud   | -0.0818091 | 4.97e-01 | -0.105029  | 3.15e-01 | -0.1513581  | 4.98e-01 | -0.122075 | 5.44e-01 | -0.107740  | 4.39e-01 | -0.109793  | 6.18e-01 | -0.240837  | 9.23e-01 |
| ENSG0000015911 | 6  | 8204501   | 8201279   | SLC90D3.3  | havana  | transcribed_unrep | -0.121703  | 3.01e-01 | -0.170877  | 3.58e-01 | -0.170877   | 3.58e-01 | -0.122059 | 5.44e-01 | -0.151768  | 3.83e-01 | -0.179945  | 4.77e-01 | -0.166512  | 1.91e-01 |
| ENSG0000015912 | 1  |           |           |            |         |                   |            |          |            |          |             |          |           |          |            |          |            |          |            |          |









| ENSG0000018691  | 7  | 92134604 | 92180725 | CCP31A1.451 | havana  | incRNA              | YES                 | YES       | -0.161637 | 2.08E-01  | 0.0072155  | 9.80E-01   | 0.182021   | 4.92E-01  | -0.133789  | 5.14E-01  | -0.267865  | 5.02E-01  | 0.0014104 | 9.95E-01  | -0.093883  | 5.20E-01  |          |
|-----------------|----|----------|----------|-------------|---------|---------------------|---------------------|-----------|-----------|-----------|------------|------------|------------|-----------|------------|-----------|------------|-----------|-----------|-----------|------------|-----------|----------|
| ENSG00000189139 | 18 | 44504149 | 4502783  | FCER1       | ensembl | havana              | protein coding      | YES       | -0.180213 | 1.17E-01  | -0.103275  | 4.81E-01   | 0.140997   | 4.86E-01  | -0.131811  | 5.14E-01  | -0.187214  | 8.21E-01  | 0.188234  | 3.96E-01  | -0.152915  | 2.88E-01  |          |
| ENSG00000189491 | 14 | 71211010 | 7122274  | FCER1       | ensembl | havana              | transcripted pseudo | YES       | -0.126815 | 0.33E-01  | -0.126815  | 0.33E-01   | 0.1168149  | 5.14E-01  | -0.1168149 | 5.14E-01  | 0.1168149  | 5.14E-01  | 0.1168149 | 5.14E-01  | -0.054549  | 7.48E-01  |          |
| ENSG00000189495 | 14 | 71211010 | 7122274  | AC00481.7.4 | havana  | incRNA              | NO                  | NO        | -0.102978 | 3.44E-01  | -0.102978  | 3.44E-01   | -0.102978  | 3.44E-01  | -0.131446  | 5.14E-01  | -0.186270  | 5.17E-01  | -0.127746 | 5.77E-01  | -0.054549  | 7.48E-01  |          |
| ENSG0000018484  | 1  | 3729389  | 3754444  | DNMT3B      | ensembl | havana              | protein coding      | YES       | -0.278978 | 1.48E-01  | -0.063993  | 6.90E-01   | 0.349432   | 7.71E-01  | -0.131432  | 5.14E-01  | -0.145146  | 3.80E-01  | 0.102615  | 6.41E-01  | -0.20371   | 1.08E-01  |          |
| ENSG0000018395  | 15 | 8929607  | 9154024  | DNMT3B      | ensembl | havana              | transcripted pseudo | YES       | -0.102978 | 3.44E-01  | -0.102978  | 3.44E-01   | -0.102978  | 3.44E-01  | -0.102978  | 3.44E-01  | -0.102978  | 3.44E-01  | 0.125513  | 2.75E-01  | -0.054549  | 7.48E-01  |          |
| ENSG00000186306 | 9  | 2578032  | 2584485  | INC01241    | havana  | incRNA              | NO                  | NO        | -0.125849 | 2.75E-01  | -0.093022  | 4.16E-01   | -0.131446  | 5.14E-01  | -0.131446  | 5.14E-01  | -0.166774  | 2.88E-01  | 0.102615  | 5.88E-01  | -0.148331  | 3.21E-01  |          |
| ENSG0000017097  | 9  | 1288342  | 1288944  | KVAT1       | ensembl | havana              | protein coding      | YES       | -0.10097  | 3.82E-01  | -0.118495  | 4.13E-01   | 0.3961563  | 4.08E-01  | -0.131451  | 5.14E-01  | -0.130749  | 4.46E-01  | 0.186295  | 2.97E-01  | 0.1262413  | 3.82E-01  |          |
| ENSG0000018551  | 12 | 23874565 | 2387499  | LOC101928   | ensembl | havana              | transcripted pseudo | YES       | -0.167587 | 1.00E-01  | -0.167587  | 1.00E-01   | -0.167587  | 1.00E-01  | -0.167587  | 1.00E-01  | -0.167587  | 1.00E-01  | 0.092176  | 3.95E-01  | -0.054549  | 7.48E-01  |          |
| ENSG0000017130  | 9  | 12508111 | 12509438 | LOC101928   | ensembl | havana              | transcripted pseudo | YES       | -0.139852 | 8.31E-01  | -0.139852  | 8.31E-01   | -0.139852  | 8.31E-01  | -0.139852  | 8.31E-01  | -0.139852  | 8.31E-01  | 0.291534  | 3.94E-01  | -0.127274  | 3.86E-01  |          |
| ENSG00000187001 | 10 | 9178285  | 9178804  | TNKS2.A1    | havana  | incRNA              | NO                  | NO        | -0.003544 | 9.75E-01  | 0.0611474  | 6.73E-01   | 0.0319028  | 8.74E-01  | -0.133505  | 5.13E-01  | -0.101649  | 4.65E-01  | 0.484820  | 3.18E-01  | 0.1139046  | 4.31E-01  |          |
| ENSG0000017009  | 10 | 1219110  | 1219245  | LOC101928   | ensembl | havana              | transcripted pseudo | YES       | -0.080878 | 3.45E-01  | -0.080878  | 3.45E-01   | -0.080878  | 3.45E-01  | -0.133505  | 5.13E-01  | -0.142468  | 3.21E-01  | 0.308483  | 4.66E-01  | 0.084869   | 3.45E-01  |          |
| ENSG0000018780  | 4  | 1264038  | 1264037  | AC09380.1   | havana  | transcripted pseudo | NO                  | NO        | -0.095848 | 4.09E-01  | -0.118751  | 5.72E-01   | 0.186651   | 5.72E-01  | -0.133505  | 5.13E-01  | -0.110740  | 4.26E-01  | -0.19057  | 3.84E-01  | -0.189814  | 4.31E-01  |          |
| ENSG0000018552  | 1  | 20577559 | 20578323 | AC11367.1   | havana  | incRNA              | NO                  | NO        | -0.178468 | 1.20E-01  | -0.092721  | 6.93E-01   | -0.1647163 | 4.12E-01  | -0.131571  | 5.13E-01  | -0.258188  | 3.94E-01  | -0.105529 | 6.32E-01  | -0.142320  | 3.32E-01  |          |
| ENSG0000018214  | 10 | 1219110  | 1219245  | ZNF708      | ensembl | havana              | protein coding      | YES       | -0.089729 | 4.37E-01  | -0.118704  | 8.80E-01   | 0.065512   | 7.45E-01  | -0.133564  | 5.13E-01  | -0.170139  | 2.00E-01  | 0.194395  | 5.56E-01  | -0.1020273 | 3.28E-01  |          |
| ENSG00000179447 | 10 | 3132324  | 3132381  | AC11367.1   | havana  | transcripted pseudo | YES                 | -0.121305 | 0.93E-01  | -0.121305 | 0.93E-01   | -0.121305  | 0.93E-01   | -0.121305 | 0.93E-01   | -0.121305 | 0.93E-01   | -0.121305 | 0.93E-01  | 0.07991   | 7.48E-01   | -0.027964 | 2.72E-01 |
| ENSG00000120406 | 3  | 819400   | 874540   | SIUO2       | ensembl | havana              | protein coding      | YES       | -0.168745 | 1.55E-01  | -0.0059034 | 9.69E-01   | -0.1076704 | 3.64E-01  | -0.131571  | 5.13E-01  | -0.285294  | 3.94E-01  | -0.158677 | 4.70E-01  | -0.1311297 | 8.31E-01  |          |
| ENSG00000140036 | 19 | 4983839  | 4985176  | PTUO1.A1    | havana  | incRNA              | NO                  | NO        | 0.0164885 | 8.98E-01  | -0.0471202 | 7.44E-01   | 0.6794899  | 3.26E-01  | -0.131592  | 5.13E-01  | -0.2004721 | 9.97E-01  | 0.191729  | 5.86E-01  | -0.248772  | 3.61E-01  |          |
| ENSG0000013817  | 10 | 4276967  | 4276783  | EIF2S3      | ensembl | havana              | protein coding      | YES       | -0.179929 | 1.30E-01  | -0.13925   | 3.55E-01   | 0.206420   | 3.01E-01  | -0.131095  | 5.13E-01  | -0.1316339 | 3.11E-01  | 0.164202  | 9.49E-01  | -0.066022  | 1.90E-01  |          |
| ENSG00000187131 | 2  | 3840819  | 3841267  | AC01699.1   | havana  | transcripted pseudo | NO                  | NO        | -0.186237 | 1.04E-01  | -0.126108  | 8.82E-01   | -0.182071  | 3.61E-01  | -0.131571  | 5.13E-01  | -0.267021  | 5.08E-01  | 0.078429  | 8.95E-01  | -0.078429  | 5.68E-01  |          |
| ENSG0000017936  | 6  | 11287333 | 1124294  | ROSL        | ensembl | havana              | protein coding      | YES       | -0.203128 | 7.65E-01  | -0.097277  | 5.84E-01   | -0.132971  | 3.61E-01  | -0.131618  | 5.13E-01  | -0.131999  | 2.21E-01  | -0.127026 | 5.64E-01  | -0.16043   | 2.66E-01  |          |
| ENSG0000018002  | 17 | 4892116  | 4891504  | HPK9B       | ensembl | havana              | protein coding      | YES       | -0.246711 | 3.99E-01  | -0.202644  | 1.50E-01   | -0.211588  | 2.78E-01  | -0.133228  | 5.13E-01  | -0.169209  | 3.89E-01  | -0.140811 | 4.83E-01  | -0.130203  | 1.91E-01  |          |
| ENSG00000182870 | 4  | 1264038  | 1264037  | AC09380.1   | havana  | transcripted pseudo | NO                  | NO        | -0.035544 | 9.75E-01  | -0.035544  | 9.75E-01   | -0.035544  | 9.75E-01  | -0.133505  | 5.13E-01  | -0.101649  | 4.65E-01  | 0.484820  | 3.18E-01  | 0.1139046  | 4.31E-01  |          |
| ENSG0000018552  | 1  | 20577559 | 20578323 | AC11367.1   | havana  | transcripted pseudo | YES                 | -0.178468 | 1.20E-01  | -0.092721 | 6.93E-01   | -0.1647163 | 4.12E-01   | -0.131571 | 5.13E-01   | -0.258188 | 3.94E-01   | -0.105529 | 6.32E-01  | -0.142320 | 3.32E-01   |           |          |
| ENSG0000018214  | 10 | 1219110  | 1219245  | ZNF708      | ensembl | havana              | protein coding      | YES       | -0.089729 | 4.37E-01  | -0.118704  | 8.80E-01   | 0.065512   | 7.45E-01  | -0.133564  | 5.13E-01  | -0.170139  | 2.00E-01  | 0.194395  | 5.56E-01  | -0.1020273 | 3.28E-01  |          |
| ENSG00000179447 | 10 | 3132324  | 3132381  | AC11367.1   | havana  | transcripted pseudo | YES                 | -0.121305 | 0.93E-01  | -0.121305 | 0.93E-01   | -0.121305  | 0.93E-01   | -0.121305 | 0.93E-01   | -0.121305 | 0.93E-01   | -0.121305 | 0.93E-01  | 0.07991   | 7.48E-01   | -0.027964 | 2.72E-01 |
| ENSG00000120406 | 3  | 819400   | 874540   | SIUO2       | ensembl | havana              | protein coding      | YES       | -0.168745 | 1.55E-01  | -0.0059034 | 9.69E-01   | -0.1076704 | 3.64E-01  | -0.131571  | 5.13E-01  | -0.285294  | 3.94E-01  | -0.158677 | 4.70E-01  | -0.1311297 | 8.31E-01  |          |
| ENSG00000140036 | 19 | 4983839  | 4985176  | PTUO1.A1    | havana  | incRNA              | NO                  | NO        | 0.0164885 | 8.98E-01  | -0.0471202 | 7.44E-01   | 0.6794899  | 3.26E-01  | -0.131592  | 5.13E-01  | -0.2004721 | 9.97E-01  | 0.191729  | 5.86E-01  | -0.248772  | 3.61E-01  |          |
| ENSG0000013817  | 10 | 4276967  | 4276783  | EIF2S3      | ensembl | havana              | protein coding      | YES       | -0.179929 | 1.30E-01  | -0.13925   | 3.55E-01   | 0.206420   | 3.01E-01  | -0.131095  | 5.13E-01  | -0.1316339 | 3.11E-01  | 0.164202  | 9.49E-01  | -0.066022  | 1.90E-01  |          |
| ENSG00000187131 | 2  | 3840819  | 3841267  | AC01699.1   | havana  | transcripted pseudo | NO                  | NO        | -0.186237 | 1.04E-01  | -0.126108  | 8.82E-01   | -0.182071  | 3.61E-01  | -0.131571  | 5.13E-01  | -0.267021  | 5.08E-01  | 0.078429  | 8.95E-01  | -0.078429  | 5.68E-01  |          |
| ENSG0000017936  | 6  | 11287333 | 1124294  | ROSL        | ensembl | havana              | protein coding      | YES       | -0.203128 | 7.65E-01  | -0.097277  | 5.84E-01   | -0.132971  | 3.61E-01  | -0.131618  | 5.13E-01  | -0.131999  | 2.21E-01  | -0.127026 | 5.64E-01  | -0.16043   | 2.66E-01  |          |
| ENSG0000018002  | 17 | 4892116  | 4891504  | HPK9B       | ensembl | havana              | protein coding      | YES       | -0.246711 | 3.99E-01  | -0.202644  | 1.50E-01   | -0.211588  | 2.78E-01  | -0.133228  | 5.13E-01  | -0.169209  | 3.89E-01  | -0.140811 | 4.83E-01  | -0.130203  | 1.91E-01  |          |
| ENSG00000182870 | 4  | 1264038  | 1264037  | AC09380.1   | havana  | transcripted pseudo | NO                  | NO        | -0.035544 | 9.75E-01  | -0.035544  | 9.75E-01   | -0.035544  | 9.75E-01  | -0.133505  | 5.13E-01  | -0.101649  | 4.65E-01  | 0.484820  | 3.18E-01  | 0.1139046  | 4.31E-01  |          |
| ENSG0000018552  | 1  | 20577559 | 20578323 | AC11367.1   | havana  | transcripted pseudo | YES                 | -0.178468 | 1.20E-01  | -0.092721 | 6.93E-01   | -0.1647163 | 4.12E-01   | -0.131571 | 5.13E-01   | -0.258188 | 3.94E-01   | -0.105529 | 6.32E-01  | -0.142320 | 3.32E-01   |           |          |
| ENSG0000018214  | 10 | 1219110  | 1219245  | ZNF708      | ensembl | havana              | protein coding      | YES       | -0.089729 | 4.37E-01  | -0.118704  | 8.80E-01   | 0.065512   | 7.45E-01  | -0.133564  | 5.13E-01  | -0.170139  | 2.00E-01  | 0.194395  | 5.56E-01  | -0.1020273 | 3.28E-01  |          |
| ENSG00000179447 | 10 | 3132324  | 3132381  | AC11367.1   | havana  | transcripted pseudo | YES                 | -0.121305 | 0.93E-01  | -0.121305 | 0.93E-01   | -0.121305  | 0.93E-01   | -0.121305 | 0.93E-01   | -0.121305 | 0.93E-01   | -0.121305 | 0.93E-01  | 0.07991   | 7.48E-01   | -0.027964 | 2.72E-01 |
| ENSG00000120406 | 3  | 819400   | 874540   | SIUO2       | ensembl | havana              | protein coding      | YES       | -0.168745 | 1.55E-01  | -0.0059034 | 9.69E-01   | -0.1076704 | 3.64E-01  | -0.131571  | 5.13E-01  | -0.285294  | 3.94E-01  | -0.158677 | 4.70E-01  | -0.1311297 | 8.31E-01  |          |
| ENSG00000140036 | 19 | 4983839  | 4985176  | PTUO1.A1    | havana  | incRNA              | NO                  | NO        | 0.0164885 | 8.98E-01  | -0.0471202 | 7.44E-01   | 0.6794899  | 3.26E-01  | -0.131592  | 5.13E-01  | -0.2004721 | 9.97E-01  | 0.191729  | 5.86E-01  | -0.248772  | 3.61E-01  |          |
| ENSG0000013817  | 10 | 4276967  | 4276783  | EIF2S3      | ensembl | havana              | protein coding      | YES       | -0.179929 | 1.30E-01  | -0.13925   | 3.55E-01   | 0.206420   | 3.01E-01  | -0.131095  | 5.13E-01  | -0.1316339 | 3.11E-01  | 0.164202  | 9.49E-01  | -0.066022  | 1.90E-01  |          |
| ENSG00000187131 | 2  | 3840819  | 3841267  | AC01699.1   | havana  | transcripted pseudo | NO                  | NO        | -0.186237 | 1.04E-01  | -0.126108  | 8.82E-01   | -0.182071  | 3.61E-01  | -0.131571  | 5.13E-01  | -0.267021  | 5.08E-01  | 0.078429  | 8.95E-01  | -0.078429  | 5.68E-01  |          |
| ENSG0000017936  | 6  | 11287333 | 1124294  | ROSL        | ensembl | havana              | protein coding      | YES       | -0.203128 | 7.65E-01  | -0.097277  | 5.84E-01   | -0.132971  | 3.61E-01  | -          |           |            |           |           |           |            |           |          |

Table with 15 columns: Gene ID, Chr, Start, End, Strand, Feature, RefSeq ID, RefSeq Name, RefSeq Type, RefSeq Description, RefSeq Accession, RefSeq Date, RefSeq Version, RefSeq Length, RefSeq Source. The table lists genomic features for various genes across chromosomes 1-22, X, and Y.





| ENSG00000287391 | 15 | 8763888  | 8766888  | AC103871.1 | havana  | tagene   | incRNA                             | YES | YES | -0.164608 | 1.53E-01 | -0.050042  | 7.30E-01 | -0.121840  | 5.41E-01 | -0.138229 | 4.92E-01 | -0.244424 | 7.49E-01 | -0.146548 | 5.05E-01 | -0.121702 | 4.00E-01 |
|-----------------|----|----------|----------|------------|---------|----------|------------------------------------|-----|-----|-----------|----------|------------|----------|------------|----------|-----------|----------|-----------|----------|-----------|----------|-----------|----------|
| ENSG00000148418 | 6  | 7921245  | 7921378  | HMOX3      | ensembl | havana   | mRNA                               | YES | YES | 0.1186273 | 3.04E-01 | -0.170761  | 3.79E-01 | -0.179789  | 3.81E-01 | -0.138289 | 4.92E-01 | -0.252284 | 6.24E-01 | -0.022523 | 9.19E-01 | -0.130482 | 4.75E-01 |
| ENSG00000152461 | 6  | 7921245  | 7921378  | HMOX3      | ensembl | havana   | mRNA                               | YES | YES | 0.1186273 | 3.04E-01 | -0.170761  | 3.79E-01 | -0.179789  | 3.81E-01 | -0.138289 | 4.92E-01 | -0.252284 | 6.24E-01 | -0.022523 | 9.19E-01 | -0.130482 | 4.75E-01 |
| ENSG00000166335 | 6  | 7369575  | 7369216  | CD109      | ensembl | havana   | mRNA                               | YES | YES | 0.1769157 | 1.24E-01 | -0.0543117 | 8.29E-01 | -0.128241  | 4.52E-01 | -0.267028 | 4.90E-01 | -0.267028 | 4.90E-01 | -0.074929 | 9.00E-01 | -0.071263 | 6.24E-01 |
| ENSG00000289564 | 6  | 10386203 | 10387487 | AL380901.1 | havana  | tagene   | incRNA                             | YES | YES | -0.03881  | 7.50E-01 | -0.012994  | 9.29E-01 | -0.077338  | 7.07E-01 | -0.138209 | 4.92E-01 | -0.081493 | 5.39E-01 | -0.181053 | 5.82E-01 | -0.208473 | 8.34E-01 |
| ENSG0000021170  | 21 | 12427668 | 12427992 | IRNA       | ensembl | havana   | transcribed_unprocessed_pseudogene | YES | YES | -0.000000 | 0.00E+00 | -0.000000  | 0.00E+00 | -0.000000  | 0.00E+00 | -0.000000 | 0.00E+00 | -0.000000 | 0.00E+00 | -0.000000 | 0.00E+00 | -0.000000 | 0.00E+00 |
| ENSG00000289564 | 21 | 14450886 | 14455284 | LRRC3D     | ensembl | havana   | mRNA                               | YES | YES | -0.066875 | 5.63E-01 | -0.060987  | 6.48E-01 | -0.108374  | 5.16E-01 | -0.138209 | 4.92E-01 | -0.128340 | 7.47E-01 | -0.088745 | 6.07E-01 | -0.164283 | 5.84E-01 |
| ENSG00000178997 | 4  | 7430285  | 7434930  | PSAP1      | ensembl | havana   | mRNA                               | YES | YES | -0.166684 | 1.47E-01 | -0.117924  | 4.15E-01 | -0.0504475 | 8.04E-01 | -0.138364 | 4.91E-01 | -0.220034 | 1.10E-01 | -0.184507 | 3.99E-01 | -0.122797 | 5.91E-01 |
| ENSG0000017121  | 4  | 12356565 | 12359378 | ERT34      | ensembl | havana   | mRNA                               | YES | YES | -0.000000 | 0.00E+00 | -0.000000  | 0.00E+00 | -0.000000  | 0.00E+00 | -0.000000 | 0.00E+00 | -0.000000 | 0.00E+00 | -0.000000 | 0.00E+00 | -0.000000 | 0.00E+00 |
| ENSG00000124340 | 4  | 25800176 | 2581221  | SELENOIN   | ensembl | havana   | mRNA                               | YES | YES | -0.000000 | 0.00E+00 | -0.000000  | 0.00E+00 | -0.000000  | 0.00E+00 | -0.000000 | 0.00E+00 | -0.000000 | 0.00E+00 | -0.000000 | 0.00E+00 | -0.000000 | 0.00E+00 |
| ENSG0000012824  | 4  | 21783324 | 21787496 | SPRY17     | ensembl | havana   | mRNA                               | YES | YES | -0.132302 | 2.52E-01 | -0.087388  | 5.46E-01 | -0.151258  | 1.09E-01 | -0.138338 | 4.91E-01 | -0.158936 | 2.58E-01 | -0.282243 | 2.74E-01 | -0.279237 | 4.51E-01 |
| ENSG0000012824  | 4  | 21783324 | 21787496 | SPRY17     | ensembl | havana   | mRNA                               | YES | YES | -0.132302 | 2.52E-01 | -0.087388  | 5.46E-01 | -0.151258  | 1.09E-01 | -0.138338 | 4.91E-01 | -0.158936 | 2.58E-01 | -0.282243 | 2.74E-01 | -0.279237 | 4.51E-01 |
| ENSG0000012824  | 4  | 21783324 | 21787496 | SPRY17     | ensembl | havana   | mRNA                               | YES | YES | -0.132302 | 2.52E-01 | -0.087388  | 5.46E-01 | -0.151258  | 1.09E-01 | -0.138338 | 4.91E-01 | -0.158936 | 2.58E-01 | -0.282243 | 2.74E-01 | -0.279237 | 4.51E-01 |
| ENSG0000012824  | 4  | 21783324 | 21787496 | SPRY17     | ensembl | havana   | mRNA                               | YES | YES | -0.132302 | 2.52E-01 | -0.087388  | 5.46E-01 | -0.151258  | 1.09E-01 | -0.138338 | 4.91E-01 | -0.158936 | 2.58E-01 | -0.282243 | 2.74E-01 | -0.279237 | 4.51E-01 |
| ENSG0000012824  | 4  | 21783324 | 21787496 | SPRY17     | ensembl | havana   | mRNA                               | YES | YES | -0.132302 | 2.52E-01 | -0.087388  | 5.46E-01 | -0.151258  | 1.09E-01 | -0.138338 | 4.91E-01 | -0.158936 | 2.58E-01 | -0.282243 | 2.74E-01 | -0.279237 | 4.51E-01 |
| ENSG0000012824  | 4  | 21783324 | 21787496 | SPRY17     | ensembl | havana   | mRNA                               | YES | YES | -0.132302 | 2.52E-01 | -0.087388  | 5.46E-01 | -0.151258  | 1.09E-01 | -0.138338 | 4.91E-01 | -0.158936 | 2.58E-01 | -0.282243 | 2.74E-01 | -0.279237 | 4.51E-01 |
| ENSG0000012824  | 4  | 21783324 | 21787496 | SPRY17     | ensembl | havana   | mRNA                               | YES | YES | -0.132302 | 2.52E-01 | -0.087388  | 5.46E-01 | -0.151258  | 1.09E-01 | -0.138338 | 4.91E-01 | -0.158936 | 2.58E-01 | -0.282243 | 2.74E-01 | -0.279237 | 4.51E-01 |
| ENSG0000012824  | 4  | 21783324 | 21787496 | SPRY17     | ensembl | havana   | mRNA                               | YES | YES | -0.132302 | 2.52E-01 | -0.087388  | 5.46E-01 | -0.151258  | 1.09E-01 | -0.138338 | 4.91E-01 | -0.158936 | 2.58E-01 | -0.282243 | 2.74E-01 | -0.279237 | 4.51E-01 |
| ENSG0000012824  | 4  | 21783324 | 21787496 | SPRY17     | ensembl | havana   | mRNA                               | YES | YES | -0.132302 | 2.52E-01 | -0.087388  | 5.46E-01 | -0.151258  | 1.09E-01 | -0.138338 | 4.91E-01 | -0.158936 | 2.58E-01 | -0.282243 | 2.74E-01 | -0.279237 | 4.51E-01 |
| ENSG0000012824  | 4  | 21783324 | 21787496 | SPRY17     | ensembl | havana   | mRNA                               | YES | YES | -0.132302 | 2.52E-01 | -0.087388  | 5.46E-01 | -0.151258  | 1.09E-01 | -0.138338 | 4.91E-01 | -0.158936 | 2.58E-01 | -0.282243 | 2.74E-01 | -0.279237 | 4.51E-01 |
| ENSG0000012824  | 4  | 21783324 | 21787496 | SPRY17     | ensembl | havana   | mRNA                               | YES | YES | -0.132302 | 2.52E-01 | -0.087388  | 5.46E-01 | -0.151258  | 1.09E-01 | -0.138338 | 4.91E-01 | -0.158936 | 2.58E-01 | -0.282243 | 2.74E-01 | -0.279237 | 4.51E-01 |
| ENSG0000012824  | 4  | 21783324 | 21787496 | SPRY17     | ensembl | havana   | mRNA                               | YES | YES | -0.132302 | 2.52E-01 | -0.087388  | 5.46E-01 | -0.151258  | 1.09E-01 | -0.138338 | 4.91E-01 | -0.158936 | 2.58E-01 | -0.282243 | 2.74E-01 | -0.279237 | 4.51E-01 |
| ENSG0000012824  | 4  | 21783324 | 21787496 | SPRY17     | ensembl | havana   | mRNA                               | YES | YES | -0.132302 | 2.52E-01 | -0.087388  | 5.46E-01 | -0.151258  | 1.09E-01 | -0.138338 | 4.91E-01 | -0.158936 | 2.58E-01 | -0.282243 | 2.74E-01 | -0.279237 | 4.51E-01 |
| ENSG0000012824  | 4  | 21783324 | 21787496 | SPRY17     | ensembl | havana   | mRNA                               | YES | YES | -0.132302 | 2.52E-01 | -0.087388  | 5.46E-01 | -0.151258  | 1.09E-01 | -0.138338 | 4.91E-01 | -0.158936 | 2.58E-01 | -0.282243 | 2.74E-01 | -0.279237 | 4.51E-01 |
| ENSG0000012824  | 4  | 21783324 | 21787496 | SPRY17     | ensembl | havana   | mRNA                               | YES | YES | -0.132302 | 2.52E-01 | -0.087388  | 5.46E-01 | -0.151258  | 1.09E-01 | -0.138338 | 4.91E-01 | -0.158936 | 2.58E-01 | -0.282243 | 2.74E-01 | -0.279237 | 4.51E-01 |
| ENSG0000012824  | 4  | 21783324 | 21787496 | SPRY17     | ensembl | havana   | mRNA                               | YES | YES | -0.132302 | 2.52E-01 | -0.087388  | 5.46E-01 | -0.151258  | 1.09E-01 | -0.138338 | 4.91E-01 | -0.158936 | 2.58E-01 | -0.282243 | 2.74E-01 | -0.279237 | 4.51E-01 |
| ENSG0000012824  | 4  | 21783324 | 21787496 | SPRY17     | ensembl | havana   | mRNA                               | YES | YES | -0.132302 | 2.52E-01 | -0.087388  | 5.46E-01 | -0.151258  | 1.09E-01 | -0.138338 | 4.91E-01 | -0.158936 | 2.58E-01 | -0.282243 | 2.74E-01 | -0.279237 | 4.51E-01 |
| ENSG0000012824  | 4  | 21783324 | 21787496 | SPRY17     | ensembl | havana   | mRNA                               | YES | YES | -0.132302 | 2.52E-01 | -0.087388  | 5.46E-01 | -0.151258  | 1.09E-01 | -0.138338 | 4.91E-01 | -0.158936 | 2.58E-01 | -0.282243 | 2.74E-01 | -0.279237 | 4.51E-01 |
| ENSG0000012824  | 4  | 21783324 | 21787496 | SPRY17     | ensembl | havana   | mRNA                               | YES | YES | -0.132302 | 2.52E-01 | -0.087388  | 5.46E-01 | -0.151258  | 1.09E-01 | -0.138338 | 4.91E-01 | -0.158936 | 2.58E-01 | -0.282243 | 2.74E-01 | -0.279237 | 4.51E-01 |
| ENSG0000012824  | 4  | 21783324 | 21787496 | SPRY17     | ensembl | havana   | mRNA                               | YES | YES | -0.132302 | 2.52E-01 | -0.087388  | 5.46E-01 | -0.151258  | 1.09E-01 | -0.138338 | 4.91E-01 | -0.158936 | 2.58E-01 | -0.282243 | 2.74E-01 | -0.279237 | 4.51E-01 |
| ENSG0000012824  | 4  | 21783324 | 21787496 | SPRY17     | ensembl | havana   | mRNA                               | YES | YES | -0.132302 | 2.52E-01 | -0.087388  | 5.46E-01 | -0.151258  | 1.09E-01 | -0.138338 | 4.91E-01 | -0.158936 | 2.58E-01 | -0.282243 | 2.74E-01 | -0.279237 | 4.51E-01 |
| ENSG0000012824  | 4  | 21783324 | 21787496 | SPRY17     | ensembl | havana   | mRNA                               | YES | YES | -0.132302 | 2.52E-01 | -0.087388  | 5.46E-01 | -0.151258  | 1.09E-01 | -0.138338 | 4.91E-01 | -0.158936 | 2.58E-01 | -0.282243 | 2.74E-01 | -0.279237 | 4.51E-01 |
| ENSG0000012824  | 4  | 21783324 | 21787496 | SPRY17     | ensembl | havana   | mRNA                               | YES | YES | -0.132302 | 2.52E-01 | -0.087388  | 5.46E-01 | -0.151258  | 1.09E-01 | -0.138338 | 4.91E-01 | -0.158936 | 2.58E-01 | -0.282243 | 2.74E-01 | -0.279237 | 4.51E-01 |
| ENSG0000012824  | 4  | 21783324 | 21787496 | SPRY17     | ensembl | havana   | mRNA                               | YES | YES | -0.132302 | 2.52E-01 | -0.087388  | 5.46E-01 | -0.151258  | 1.09E-01 | -0.138338 | 4.91E-01 | -0.158936 | 2.58E-01 | -0.282243 | 2.74E-01 | -0.279237 | 4.51E-01 |
| ENSG0000012824  | 4  | 21783324 | 21787496 | SPRY17     | ensembl | havana   | mRNA                               | YES | YES | -0.132302 | 2.52E-01 | -0.087388  | 5.46E-01 | -0.151258  | 1.09E-01 | -0.138338 | 4.91E-01 | -0.158936 | 2.58E-01 | -0.282243 | 2.74E-01 | -0.279237 | 4.51E-01 |
| ENSG0000012824  | 4  | 21783324 | 21787496 | SPRY17     | ensembl | havana   | mRNA                               | YES | YES | -0.132302 | 2.52E-01 | -0.087388  | 5.46E-01 | -0.151258  | 1.09E-01 | -0.138338 | 4.91E-01 | -0.158936 | 2.58E-01 | -0.282243 | 2.74E-01 | -0.279237 | 4.51E-01 |
| ENSG0000012824  | 4  | 21783324 | 21787496 | SPRY17     | ensembl | havana   | mRNA                               | YES | YES | -0.132302 | 2.52E-01 | -0.087388  | 5.46E-01 | -0.151258  | 1.09E-01 | -0.138338 | 4.91E-01 | -0.158936 | 2.58E-01 | -0.282243 | 2.74E-01 | -0.279237 | 4.51E-01 |
| ENSG0000012824  | 4  | 21783324 | 21787496 | SPRY17     | ensembl | havana   | mRNA                               | YES | YES | -0.132302 | 2.52E-01 | -0.087388  | 5.46E-01 | -0.151258  | 1.09E-01 | -0.138338 | 4.91E-01 | -0.158936 | 2.58E-01 | -0.282243 | 2.74E-01 | -0.279237 | 4.51E-01 |
| ENSG0000012824  | 4  | 21783324 | 21787496 | SPRY17     | ensembl | havana   | mRNA                               | YES | YES | -0.132302 | 2.52E-01 | -0.087388  | 5.46E-01 | -0.151258  | 1.09E-01 | -0.138338 | 4.91E-01 | -0.158936 | 2.58E-01 | -0.282243 | 2.74E-01 | -0.279237 | 4.51E-01 |
| ENSG0000012824  | 4  | 21783324 | 21787496 | SPRY17     | ensembl | havana   | mRNA                               | YES | YES | -0.132302 | 2.52E-01 | -0.087388  | 5.46E-01 | -0.151258  | 1.09E-01 | -0.138338 | 4.91E-01 | -0.158936 | 2.58E-01 | -0.282243 | 2.74E-01 | -0.279237 | 4.51E-01 |
| ENSG0000012824  | 4  | 21783324 | 21787496 | SPRY17     | ensembl | havana</ |                                    |     |     |           |          |            |          |            |          |           |          |           |          |           |          |           |          |

| ENSG0000016425 | 4  | 105526396 | 105527397 | PIRMEI2   | ncrna                           | processed_pseudo        | -0.063978 | 5.80E-01 | -0.038264 | 7.89E-01 | -0.122894   | 5.41E-01 | -0.140296 | 4.85E-01 | -0.114494 | 4.11E-01 | -0.072615 | 7.42E-01 | 0.035420  | 8.07E-01 |
|----------------|----|-----------|-----------|-----------|---------------------------------|-------------------------|-----------|----------|-----------|----------|-------------|----------|-----------|----------|-----------|----------|-----------|----------|-----------|----------|
| ENSG0000011296 | 5  | 7099111   | 8008287   | THRE1     | ensembl ncRNA                   | protein_coding          | -0.192409 | 9.22E-02 | -0.13474  | 3.55E-01 | -0.17620    | 3.74E-01 | -0.16022  | 4.85E-01 | -0.28774  | 3.88E-01 | -0.08991  | 8.61E-01 | 0.031120  | 4.72E-01 |
| ENSG0000029398 | 12 | 1248903   | 2048191   | TWSP13    | ensembl ncRNA                   | processed_pseudo        | -0.127818 | 1.21E-01 | -0.11782  | 8.92E-01 | -0.12782    | 8.92E-01 | -0.12782  | 8.92E-01 | -0.12782  | 8.92E-01 | -0.12782  | 8.92E-01 | -0.12782  | 8.92E-01 |
| ENSG0000017139 | 15 | 7387354   | 7388914   | TBC1D21   | ensembl ncRNA                   | protein_coding          | YES       | YES      | -0.145393 | 1.91E-01 | -0.099240   | 6.21E-01 | -0.14022  | 4.85E-01 | -0.17888  | 4.31E-01 | -0.160943 | 4.63E-01 | -0.145495 | 4.72E-01 |
| ENSG0000000001 | 3  | 5031790   | 5032762   | HYAL2     | ensembl ncRNA                   | protein_coding          | YES       | YES      | -0.134609 | 2.44E-01 | -0.107443   | 1.92E-01 | -0.086202 | 6.68E-01 | -0.140297 | 4.85E-01 | -0.122022 | 4.46E-01 | -0.185038 | 7.08E-01 |
| ENSG0000013210 | 4  | 1432274   | 1504348   | ICM5      | ensembl ncRNA                   | processed_pseudo        | -0.108062 | 1.04E-01 | -0.108062 | 1.04E-01 | -0.108062   | 1.04E-01 | -0.108062 | 1.04E-01 | -0.108062 | 1.04E-01 | -0.108062 | 1.04E-01 | -0.108062 | 1.04E-01 |
| ENSG0000029589 | 13 | 11934547  | 11937163  | HLA2L     | ensembl ncRNA                   | transcribed_unannotated | YES       | YES      | -0.126024 | 2.75E-01 | -0.103401   | 8.28E-01 | -0.140331 | 4.85E-01 | -0.130083 | 4.42E-01 | -0.083517 | 9.05E-01 | -0.182739 | 6.10E-01 |
| ENSG0000013388 | 13 | 1918208   | 19187618  | AL13937.1 | ensembl transcribed_unannotated | YES                     | YES       | YES      | -0.197933 | 9.47E-02 | -0.140549   | 3.11E-01 | -0.087361 | 7.98E-01 | -0.140319 | 4.85E-01 | -0.269039 | 5.71E-01 | -0.142074 | 5.20E-01 |
| ENSG0000017650 | 4  | 1309314   | 1309314   | AC11078.3 | ensembl ncRNA                   | processed_pseudo        | -0.063978 | 5.80E-01 | -0.063978 | 5.80E-01 | -0.063978   | 5.80E-01 | -0.063978 | 5.80E-01 | -0.063978 | 5.80E-01 | -0.063978 | 5.80E-01 | -0.063978 | 5.80E-01 |
| ENSG0000014247 | 4  | 4888510   | 4890657   | OC102     | ensembl ncRNA                   | protein_coding          | -0.140794 | 2.05E-01 | -0.140599 | 7.50E-01 | -0.145994   | 7.50E-01 | -0.145994 | 7.50E-01 | -0.145994 | 7.50E-01 | -0.145994 | 7.50E-01 | -0.145994 | 7.50E-01 |
| ENSG0000020250 | 17 | 7213209   | 7217283   | AC00566.1 | ensembl ncRNA                   | processed_pseudo        | -0.046910 | 6.85E-01 | -0.066265 | 6.76E-01 | -0.181889   | 3.64E-01 | -0.140316 | 4.85E-01 | -0.120933 | 3.85E-01 | -0.055172 | 8.08E-01 | -0.138803 | 3.43E-01 |
| ENSG0000015800 | 20 | 1232483   | 1232684   | CE13.451  | ensembl ncRNA                   | processed_pseudo        | -0.102023 | 3.41E-01 | -0.102023 | 3.41E-01 | -0.102023   | 3.41E-01 | -0.102023 | 3.41E-01 | -0.102023 | 3.41E-01 | -0.102023 | 3.41E-01 | -0.102023 | 3.41E-01 |
| ENSG0000023642 | 2  | 22721052  | 22723511  | MFF-D7    | ensembl ncRNA                   | processed_pseudo        | -0.229457 | 4.57E-01 | -0.055298 | 7.63E-01 | -0.244117   | 2.20E-01 | -0.140494 | 4.85E-01 | -0.155545 | 4.93E-01 | -0.199279 | 3.78E-01 | -0.112144 | 3.41E-01 |
| ENSG0000021434 | 11 | 7311045   | 7321148   | ZNF705    | ensembl ncRNA                   | protein_coding          | YES       | YES      | -0.120278 | 1.14E-01 | -0.138833   | 3.18E-01 | -0.090623 | 7.61E-01 | -0.140404 | 4.85E-01 | -0.243488 | 7.66E-01 | -0.092498 | 9.28E-01 |
| ENSG0000022428 | 11 | 11703797  | 11709651  | AK0936.3  | ensembl processed_pseudo        | YES                     | YES       | YES      | -0.174748 | 1.46E-01 | -0.098938   | 4.97E-01 | -0.174748 | 1.46E-01 | -0.174748 | 1.46E-01 | -0.174748 | 1.46E-01 | -0.174748 | 1.46E-01 |
| ENSG0000015250 | 20 | 467378    | 6204884   | ENP17     | ensembl ncRNA                   | processed_pseudo        | -0.031641 | 7.70E-01 | -0.098938 | 4.96E-01 | -0.177699   | 4.39E-01 | -0.140296 | 4.85E-01 | -0.160292 | 7.98E-01 | -0.181193 | 1.36E-01 | -0.029113 | 1.20E-01 |
| ENSG0000020094 | 18 | 2433164   | 2443638   | AC00792.2 | ensembl ncRNA                   | processed_pseudo        | -0.148924 | 1.96E-01 | -0.076759 | 5.82E-01 | -0.138624   | 3.21E-01 | -0.140443 | 4.85E-01 | -0.221024 | 1.08E-01 | -0.076683 | 7.98E-01 | -0.140045 | 4.32E-01 |
| ENSG0000014949 | 22 | 1857810   | 1856629   | AM227A    | ensembl ncRNA                   | protein_coding          | YES       | YES      | -0.180807 | 1.14E-01 | -0.066499   | 6.45E-01 | -0.031240 | 8.61E-01 | -0.140443 | 4.85E-01 | -0.271396 | 3.36E-01 | -0.185042 | 1.49E-01 |
| ENSG0000017670 | 4  | 1263676   | 12629747  | AL5131.2  | ensembl ncRNA                   | processed_pseudo        | -0.091717 | 4.18E-01 | -0.118717 | 2.90E-01 | -0.139026   | 4.80E-01 | -0.140494 | 4.85E-01 | -0.059089 | 8.46E-01 | -0.138476 | 5.37E-01 | -0.040174 | 7.82E-01 |
| ENSG0000023630 | 20 | 6348051   | 6348429   | KNO2-AS1  | ensembl ncRNA                   | processed_pseudo        | -0.170994 | 1.37E-01 | -0.061628 | 6.74E-01 | -0.205562   | 3.11E-01 | -0.140597 | 4.84E-01 | -0.209283 | 6.78E-01 | -0.092083 | 6.78E-01 | -0.104107 | 2.66E-01 |
| ENSG0000016912 | 11 | 4717322   | 4718643   | PAC3N3    | ensembl ncRNA                   | protein_coding          | -0.144576 | 1.53E-01 | -0.107977 | 4.77E-01 | -0.180099   | 3.69E-01 | -0.140558 | 4.84E-01 | -0.250817 | 6.73E-01 | -0.148863 | 6.78E-01 | -0.103104 | 2.66E-01 |
| ENSG0000015800 | 20 | 1232483   | 1232684   | CE13.451  | ensembl ncRNA                   | processed_pseudo        | -0.102023 | 3.41E-01 | -0.102023 | 3.41E-01 | -0.102023   | 3.41E-01 | -0.102023 | 3.41E-01 | -0.102023 | 3.41E-01 | -0.102023 | 3.41E-01 | -0.102023 | 3.41E-01 |
| ENSG0000023482 | 2  | 22721052  | 22723511  | MFF-D7    | ensembl ncRNA                   | processed_pseudo        | -0.229457 | 4.57E-01 | -0.055298 | 7.63E-01 | -0.244117   | 2.20E-01 | -0.140494 | 4.85E-01 | -0.155545 | 4.93E-01 | -0.199279 | 3.78E-01 | -0.112144 | 3.41E-01 |
| ENSG0000021434 | 11 | 7311045   | 7321148   | ZNF705    | ensembl ncRNA                   | protein_coding          | YES       | YES      | -0.120278 | 1.14E-01 | -0.138833   | 3.18E-01 | -0.090623 | 7.61E-01 | -0.140404 | 4.85E-01 | -0.243488 | 7.66E-01 | -0.092498 | 9.28E-01 |
| ENSG0000022428 | 11 | 11703797  | 11709651  | AK0936.3  | ensembl processed_pseudo        | YES                     | YES       | YES      | -0.174748 | 1.46E-01 | -0.098938   | 4.97E-01 | -0.174748 | 1.46E-01 | -0.174748 | 1.46E-01 | -0.174748 | 1.46E-01 | -0.174748 | 1.46E-01 |
| ENSG0000015250 | 20 | 467378    | 6204884   | ENP17     | ensembl ncRNA                   | processed_pseudo        | -0.031641 | 7.70E-01 | -0.098938 | 4.96E-01 | -0.177699   | 4.39E-01 | -0.140296 | 4.85E-01 | -0.160292 | 7.98E-01 | -0.181193 | 1.36E-01 | -0.029113 | 1.20E-01 |
| ENSG0000020094 | 18 | 2433164   | 2443638   | AC00792.2 | ensembl ncRNA                   | processed_pseudo        | -0.148924 | 1.96E-01 | -0.076759 | 5.82E-01 | -0.138624   | 3.21E-01 | -0.140443 | 4.85E-01 | -0.221024 | 1.08E-01 | -0.076683 | 7.98E-01 | -0.140045 | 4.32E-01 |
| ENSG0000014949 | 22 | 1857810   | 1856629   | AM227A    | ensembl ncRNA                   | protein_coding          | YES       | YES      | -0.180807 | 1.14E-01 | -0.066499   | 6.45E-01 | -0.031240 | 8.61E-01 | -0.140443 | 4.85E-01 | -0.271396 | 3.36E-01 | -0.185042 | 1.49E-01 |
| ENSG0000017670 | 4  | 1263676   | 12629747  | AL5131.2  | ensembl ncRNA                   | processed_pseudo        | -0.091717 | 4.18E-01 | -0.118717 | 2.90E-01 | -0.139026   | 4.80E-01 | -0.140494 | 4.85E-01 | -0.059089 | 8.46E-01 | -0.138476 | 5.37E-01 | -0.040174 | 7.82E-01 |
| ENSG0000023630 | 20 | 6348051   | 6348429   | KNO2-AS1  | ensembl ncRNA                   | processed_pseudo        | -0.170994 | 1.37E-01 | -0.061628 | 6.74E-01 | -0.205562   | 3.11E-01 | -0.140597 | 4.84E-01 | -0.209283 | 6.78E-01 | -0.092083 | 6.78E-01 | -0.104107 | 2.66E-01 |
| ENSG0000016912 | 11 | 4717322   | 4718643   | PAC3N3    | ensembl ncRNA                   | protein_coding          | -0.144576 | 1.53E-01 | -0.107977 | 4.77E-01 | -0.180099   | 3.69E-01 | -0.140558 | 4.84E-01 | -0.250817 | 6.73E-01 | -0.148863 | 6.78E-01 | -0.103104 | 2.66E-01 |
| ENSG0000015800 | 20 | 1232483   | 1232684   | CE13.451  | ensembl ncRNA                   | processed_pseudo        | -0.102023 | 3.41E-01 | -0.102023 | 3.41E-01 | -0.102023   | 3.41E-01 | -0.102023 | 3.41E-01 | -0.102023 | 3.41E-01 | -0.102023 | 3.41E-01 | -0.102023 | 3.41E-01 |
| ENSG0000023482 | 2  | 22721052  | 22723511  | MFF-D7    | ensembl ncRNA                   | processed_pseudo        | -0.229457 | 4.57E-01 | -0.055298 | 7.63E-01 | -0.244117   | 2.20E-01 | -0.140494 | 4.85E-01 | -0.155545 | 4.93E-01 | -0.199279 | 3.78E-01 | -0.112144 | 3.41E-01 |
| ENSG0000021434 | 11 | 7311045   | 7321148   | ZNF705    | ensembl ncRNA                   | protein_coding          | YES       | YES      | -0.120278 | 1.14E-01 | -0.138833   | 3.18E-01 | -0.090623 | 7.61E-01 | -0.140404 | 4.85E-01 | -0.243488 | 7.66E-01 | -0.092498 | 9.28E-01 |
| ENSG0000022428 | 11 | 11703797  | 11709651  | AK0936.3  | ensembl processed_pseudo        | YES                     | YES       | YES      | -0.174748 | 1.46E-01 | -0.098938   | 4.97E-01 | -0.174748 | 1.46E-01 | -0.174748 | 1.46E-01 | -0.174748 | 1.46E-01 | -0.174748 | 1.46E-01 |
| ENSG0000015250 | 20 | 467378    | 6204884   | ENP17     | ensembl ncRNA                   | processed_pseudo        | -0.031641 | 7.70E-01 | -0.098938 | 4.96E-01 | -0.177699   | 4.39E-01 | -0.140296 | 4.85E-01 | -0.160292 | 7.98E-01 | -0.181193 | 1.36E-01 | -0.029113 | 1.20E-01 |
| ENSG0000020094 | 18 | 2433164   | 2443638   | AC00792.2 | ensembl ncRNA                   | processed_pseudo        | -0.148924 | 1.96E-01 | -0.076759 | 5.82E-01 | -0.138624   | 3.21E-01 | -0.140443 | 4.85E-01 | -0.221024 | 1.08E-01 | -0.076683 | 7.98E-01 | -0.140045 | 4.32E-01 |
| ENSG0000014949 | 22 | 1857810   | 1856629   | AM227A    | ensembl ncRNA                   | protein_coding          | YES       | YES      | -0.180807 | 1.14E-01 | -0.066499   | 6.45E-01 | -0.031240 | 8.61E-01 | -0.140443 | 4.85E-01 | -0.271396 | 3.36E-01 | -0.185042 | 1.49E-01 |
| ENSG0000017670 | 4  | 1263676   | 12629747  | AL5131.2  | ensembl ncRNA                   | processed_pseudo        | -0.091717 | 4.18E-01 | -0.118717 | 2.90E-01 | -0.139026   | 4.80E-01 | -0.140494 | 4.85E-01 | -0.059089 | 8.46E-01 | -0.138476 | 5.37E-01 | -0.040174 | 7.82E-01 |
| ENSG0000023630 | 20 | 6348051   | 6348429   | KNO2-AS1  | ensembl ncRNA                   | processed_pseudo        | -0.170994 | 1.37E-01 | -0.061628 | 6.74E-01 | -0.205562   | 3.11E-01 | -0.140597 | 4.84E-01 | -0.209283 | 6.78E-01 | -0.092083 | 6.78E-01 | -0.104107 | 2.66E-01 |
| ENSG0000016912 | 11 | 4717322   | 4718643   | PAC3N3    | ensembl ncRNA                   | protein_coding          | -0.144576 | 1.53E-01 | -0.107977 | 4.77E-01 | -0.180099   | 3.69E-01 | -0.140558 | 4.84E-01 | -0.250817 | 6.73E-01 | -0.148863 | 6.78E-01 | -0.103104 | 2.66E-01 |
| ENSG0000015800 | 20 | 1232483   | 1232684   | CE13.451  | ensembl ncRNA                   | processed_pseudo        | -0.102023 | 3.41E-01 | -0.102023 | 3.41E-01 | -0.102023   | 3.41E-01 | -0.102023 | 3.41E-01 | -0.102023 | 3.41E-01 | -0.102023 | 3.41E-01 | -0.102023 | 3.41E-01 |
| ENSG0000023482 | 2  | 22721052  | 22723511  | MFF-D7    | ensembl ncRNA                   | processed_pseudo        | -0.229457 | 4.57E-01 | -0.055298 | 7.63E-01 | -0.244117   | 2.20E-01 | -0.140494 | 4.85E-01 | -0.155545 | 4.93E-01 | -0.199279 | 3.78E-01 | -0.112144 | 3.41E-01 |
| ENSG0000021434 | 11 | 7311045   | 7321148   | ZNF705    | ensembl ncRNA                   | protein_coding          | YES       | YES      | -0.120278 | 1.14E-01 | -0.138833</ |          |           |          |           |          |           |          |           |          |













Table with columns for gene ID, chromosome, coordinates, gene name, transcript, and various numerical values. The table lists numerous genes such as WBP2P1, SMC1, CYP4B, and many others, with associated genomic data and expression metrics.





| ENSG0000027531 | 7  | 54805336  | 54808148  | + C12C7      | havana | processed_pseudo | -0.0288089 | 8.03E-01 | -0.0115154 | 9.37E-01 | -0.1570733 | 4.32E-01 | -0.1556234 | 4.38E-01 | 0.071263   | 6.09E-01 | -0.041735  | 8.51E-01 | -0.0997181 | 4.91E-01 |
|----------------|----|-----------|-----------|--------------|--------|------------------|------------|----------|------------|----------|------------|----------|------------|----------|------------|----------|------------|----------|------------|----------|
| ENSG000002798  | 11 | 13076149  | 13079654  | + LINC02028  | havana | processed_pseudo | -0.1444059 | 2.10E-01 | -0.1538607 | 1.12E-01 | -0.2097248 | 2.94E-01 | -0.1558313 | 4.38E-01 | 0.0937596  | 5.01E-01 | -0.180324  | 5.98E-01 | -0.1484033 | 3.08E-01 |
| ENSG000002800  | 11 | 13076149  | 13079654  | + C12C7      | havana | processed_pseudo | -0.1444059 | 2.10E-01 | -0.1538607 | 1.12E-01 | -0.2097248 | 2.94E-01 | -0.1558313 | 4.38E-01 | 0.0937596  | 5.01E-01 | -0.180324  | 5.98E-01 | -0.1484033 | 3.08E-01 |
| ENSG000002805  | 6  | 89720400  | 89740293  | + ZNF246     | havana | processed_pseudo | -0.2236655 | 5.05E-01 | -0.1760611 | 2.74E-01 | -0.1817667 | 8.64E-01 | -0.1557243 | 4.38E-01 | 0.0922441  | 2.02E-01 | -0.0664004 | 7.98E-01 | -0.1370299 | 3.08E-01 |
| ENSG000002806  | 2  | 60511379  | 60549127  | + ANTR3      | havana | processed_pseudo | -0.0988007 | 3.92E-01 | -0.0091173 | 9.88E-01 | -0.2004139 | 3.16E-01 | -0.1556513 | 4.38E-01 | 0.2020991  | 1.42E-01 | -0.1485531 | 6.08E-01 | 0.0329996  | 8.22E-01 |
| ENSG000002807  | 6  | 54832054  | 54836787  | + ZNF427     | havana | processed_pseudo | -0.1521211 | 7.12E-01 | -0.1521211 | 7.12E-01 | -0.1521211 | 7.12E-01 | -0.1521211 | 7.12E-01 | -0.1521211 | 7.12E-01 | -0.1521211 | 7.12E-01 | -0.1521211 | 7.12E-01 |
| ENSG000002813  | 11 | 78435968  | 78547874  | + NARS2      | havana | processed_pseudo | -0.1857818 | 5.58E-01 | -0.243389  | 1.71E-01 | -0.1562725 | 2.21E-01 | -0.1562725 | 4.38E-01 | 0.2486497  | 8.98E-01 | -0.1072833 | 5.95E-01 | -0.0726258 | 6.90E-01 |
| ENSG000002817  | 12 | 4895723   | 48957487  | + ARF3       | havana | processed_pseudo | -0.0474488 | 6.72E-01 | -0.1483075 | 2.43E-01 | -0.1570054 | 5.95E-01 | -0.1558801 | 4.38E-01 | 0.0878137  | 8.37E-01 | -0.1086545 | 6.22E-01 | -0.0798945 | 5.86E-01 |
| ENSG000002821  | 2  | 42379266  | 42393800  | + LINC02045  | havana | processed_pseudo | -0.0122222 | 1.00E-01 | -0.0122222 | 1.00E-01 | -0.0122222 | 1.00E-01 | -0.0122222 | 1.00E-01 | -0.0122222 | 1.00E-01 | -0.0122222 | 1.00E-01 | -0.0122222 | 1.00E-01 |
| ENSG000002826  | 2  | 151795688 | 151795688 | + AC027644.1 | havana | transcribed_unit | -0.0210168 | 3.77E-01 | -0.1414998 | 4.65E-01 | -0.1517098 | 4.81E-01 | -0.1570048 | 4.38E-01 | 0.3460556  | 7.84E-01 | -0.0005036 | 7.84E-01 | -0.0005036 | 7.84E-01 |
| ENSG000002833  | 6  | 41780349  | 41790341  | + ALB2026.1  | havana | processed_pseudo | -0.0685867 | 5.69E-01 | -0.0597127 | 6.93E-01 | -0.1630174 | 4.17E-01 | -0.1557224 | 4.38E-01 | 0.1008582  | 4.88E-01 | -0.1092929 | 9.28E-01 | -0.0962523 | 5.06E-01 |
| ENSG000002836  | 2  | 23174839  | 23180732  | + AC027644.1 | havana | transcribed_unit | -0.0004823 | 9.96E-01 | -0.0028263 | 3.07E-01 | -0.0868631 | 6.76E-01 | -0.1557224 | 4.38E-01 | 0.0707728  | 4.79E-01 | -0.0302344 | 8.65E-01 | 0.0002294  | 2.97E-01 |
| ENSG000002842  | 1  | 4743133   | 4743441   | + F002-AS1   | havana | processed_pseudo | -0.1000428 | 3.85E-01 | -0.0597075 | 7.27E-01 | -0.1319101 | 1.13E-01 | -0.1557224 | 4.38E-01 | 0.1427533  | 9.02E-01 | -0.1299292 | 9.30E-01 | -0.2448836 | 3.96E-01 |
| ENSG000002843  | 12 | 5463011   | 54634895  | + LACT1      | havana | processed_pseudo | -0.16265   | 1.80E-01 | -0.1877913 | 3.48E-01 | -0.1517653 | 4.38E-01 | -0.1517653 | 4.38E-01 | 0.2493137  | 5.90E-01 | -0.2467209 | 2.22E-01 | -0.1016031 | 8.30E-01 |
| ENSG000002849  | 7  | 3747498   | 3752047   | + AC02954.2  | havana | processed_pseudo | -0.0796222 | 4.91E-01 | -0.103113  | 4.80E-01 | -0.157578  | 5.91E-01 | -0.157578  | 4.38E-01 | 0.0779194  | 5.78E-01 | -0.222372  | 3.08E-01 | -0.14933   | 2.40E-01 |
| ENSG000002850  | 7  | 23174839  | 23180732  | + P0001      | havana | processed_pseudo | -0.0510071 | 7.00E-01 | -0.0510071 | 7.00E-01 | -0.0510071 | 7.00E-01 | -0.0510071 | 7.00E-01 | -0.0510071 | 7.00E-01 | -0.0510071 | 7.00E-01 | -0.0510071 | 7.00E-01 |
| ENSG000002846  | 2  | 21545678  | 21551461  | + RIMBP3C    | havana | processed_pseudo | -0.0711258 | 5.90E-01 | -0.0711258 | 5.90E-01 | -0.0711258 | 5.90E-01 | -0.0711258 | 5.90E-01 | -0.0711258 | 5.90E-01 | -0.0711258 | 5.90E-01 | -0.0711258 | 5.90E-01 |
| ENSG000002863  | 16 | 2240487   | 2241818   | + AC02905.8  | havana | processed_pseudo | -0.1866207 | 1.04E-01 | -0.1867378 | 3.38E-01 | -0.2077179 | 2.99E-01 | -0.1558051 | 4.38E-01 | 0.2497477  | 6.81E-01 | -0.1547274 | 5.68E-01 | -0.1668813 | 2.47E-01 |
| ENSG000002867  | 10 | 7510927   | 75141862  | + AC02909.4  | havana | transcribed_unit | -0.1045084 | 3.00E-01 | -0.1045084 | 3.00E-01 | -0.1045084 | 3.00E-01 | -0.1045084 | 3.00E-01 | -0.1045084 | 3.00E-01 | -0.1045084 | 3.00E-01 | -0.1045084 | 3.00E-01 |
| ENSG000002868  | 20 | 12762385  | 12809356  | + DNMT3B     | havana | processed_pseudo | -0.1528704 | 7.42E-01 | -0.074228  | 6.08E-01 | -0.1564217 | 4.10E-01 | -0.1558724 | 4.38E-01 | 0.1587889  | 7.72E-01 | -0.2512919 | 8.11E-01 | -0.1281291 | 3.84E-01 |
| ENSG000002859  | 2  | 159995305 | 159984790 | + LINC01133  | havana | processed_pseudo | -0.1461874 | 2.05E-01 | -0.084204  | 5.65E-01 | -0.0766717 | 6.91E-01 | -0.1559021 | 4.37E-01 | 0.2221322  | 1.06E-01 | -0.121423  | 8.16E-01 | -0.071798  | 3.90E-01 |
| ENSG000002862  | 11 | 13076149  | 13079654  | + C12C7      | havana | processed_pseudo | -0.0004823 | 9.96E-01 | -0.0028263 | 3.07E-01 | -0.0868631 | 6.76E-01 | -0.1557224 | 4.38E-01 | 0.0707728  | 4.79E-01 | -0.0302344 | 8.65E-01 | 0.0002294  | 2.97E-01 |
| ENSG000002864  | 3  | 10092464  | 10041073  | + PCNBP1     | havana | processed_pseudo | -0.1210346 | 6.29E-01 | -0.0554545 | 9.35E-01 | -0.2957166 | 1.34E-01 | -0.1559061 | 4.37E-01 | 0.1731287  | 7.17E-01 | -0.0016136 | 9.58E-01 | -0.1855597 | 2.56E-01 |
| ENSG000002873  | 2  | 42122710  | 4212885   | + LINC01126  | havana | processed_pseudo | -0.2117866 | 6.44E-01 | -0.1055228 | 4.66E-01 | -0.1258601 | 1.91E-01 | -0.1559099 | 4.37E-01 | 0.3213836  | 1.27E-01 | -0.2439941 | 2.62E-01 | -0.095943  | 7.33E-01 |
| ENSG000002870  | 29 | 36111928  | 36114486  | + AC02815.5  | havana | processed_pseudo | -0.0598397 | 6.43E-01 | -0.0883884 | 5.40E-01 | -0.4294403 | 2.87E-01 | -0.1559224 | 4.37E-01 | 0.0707944  | 4.85E-01 | -0.1184795 | 5.02E-01 | -0.1288803 | 7.79E-01 |
| ENSG000002869  | 7  | 885485    | 885989    | + LINC0384   | havana | processed_pseudo | -0.1241834 | 2.82E-01 | -0.0822274 | 3.98E-01 | -0.1538931 | 4.39E-01 | -0.1559223 | 4.37E-01 | 0.1728119  | 3.11E-01 | -0.1336897 | 6.96E-01 | -0.1424794 | 3.24E-01 |
| ENSG000002845  | 5  | 14136232  | 141512979 | + PCDG6A5    | havana | processed_pseudo | -0.1564787 | 6.90E-01 | -0.071295  | 6.93E-01 | -0.0017269 | 9.95E-01 | -0.1552828 | 4.37E-01 | 0.0502812  | 8.87E-01 | -0.1007374 | 5.97E-01 | -0.07374   | 5.97E-01 |
| ENSG000002897  | 11 | 4532626   | 4532264   | + C12P27     | havana | processed_pseudo | -0.0504777 | 7.42E-01 | -0.0220788 | 8.76E-01 | -0.1400574 | 4.25E-01 | -0.155974  | 4.37E-01 | 0.0955338  | 4.92E-01 | -0.0928942 | 8.64E-01 | -0.0899423 | 5.37E-01 |
| ENSG000002898  | 2  | 10281238  | 10281238  | + LINC0120P  | havana | processed_pseudo | -0.0781271 | 3.16E-01 | -0.0781271 | 3.16E-01 | -0.0781271 | 3.16E-01 | -0.0781271 | 3.16E-01 | -0.0781271 | 3.16E-01 | -0.0781271 | 3.16E-01 | -0.0781271 | 3.16E-01 |
| ENSG000002881  | 9  | 10154512  | 10185400  | + BBA1       | havana | processed_pseudo | -0.1704834 | 1.38E-01 | -0.0505558 | 7.56E-01 | -0.1072011 | 7.39E-01 | -0.155991  | 4.37E-01 | 0.1681515  | 9.44E-01 | -0.0488991 | 2.42E-01 | -0.137388  | 4.80E-01 |
| ENSG000002862  | 16 | 2860349   | 2862925   | + SULT1A1    | havana | processed_pseudo | -0.1061739 | 9.27E-01 | -0.053217  | 8.08E-01 | -0.3571148 | 6.70E-01 | -0.156034  | 4.37E-01 | 0.0321139  | 8.17E-01 | -0.0927469 | 2.29E-01 | -0.0284889 | 8.44E-01 |
| ENSG000002876  | 11 | 13131899  | 13131865  | + LINC0191P  | havana | processed_pseudo | -0.0928127 | 6.14E-01 | -0.0928127 | 6.14E-01 | -0.0928127 | 6.14E-01 | -0.0928127 | 6.14E-01 | -0.0928127 | 6.14E-01 | -0.0928127 | 6.14E-01 | -0.0928127 | 6.14E-01 |
| ENSG000002874  | 2  | 7324748   | 7325062   | + AC02909.4  | havana | processed_pseudo | -0.1117734 | 3.33E-01 | -0.085247  | 8.34E-01 | -0.1745777 | 3.84E-01 | -0.1561922 | 4.37E-01 | 0.1022436  | 2.22E-01 | -0.1262749 | 6.33E-01 | -0.0302702 | 8.71E-01 |
| ENSG000002894  | 1  | 20603137  | 20602247  | + FCMR       | havana | processed_pseudo | -0.1742313 | 1.30E-01 | -0.1164477 | 2.07E-01 | -0.082022  | 6.81E-01 | -0.1562023 | 4.37E-01 | 0.2197347  | 1.10E-01 | -0.0749688 | 7.34E-01 | -0.022137  | 8.78E-01 |
| ENSG000002895  | 11 | 13131899  | 13131865  | + LINC0191P  | havana | processed_pseudo | -0.0928127 | 6.14E-01 | -0.0928127 | 6.14E-01 | -0.0928127 | 6.14E-01 | -0.0928127 | 6.14E-01 | -0.0928127 | 6.14E-01 | -0.0928127 | 6.14E-01 | -0.0928127 | 6.14E-01 |
| ENSG000002897  | 17 | 1863427   | 1864427   | + TRIM28     | havana | processed_pseudo | -0.1375235 | 2.31E-01 | -0.0400352 | 9.54E-01 | -0.1392911 | 4.88E-01 | -0.1561442 | 4.37E-01 | 0.2197347  | 1.10E-01 | -0.0749688 | 7.34E-01 | -0.022137  | 8.78E-01 |
| ENSG000002895  | 11 | 8988683   | 8991381   | + MGF6B      | havana | processed_pseudo | -0.278706  | 1.41E-01 | -0.1044551 | 2.39E-01 | -0.2213746 | 2.80E-01 | -0.1561601 | 4.37E-01 | 0.163425   | 8.66E-01 | -0.26893   | 2.58E-01 | -0.22636   | 1.44E-01 |
| ENSG000002895  | 12 | 10944510  | 10944749  | + AC02701.7  | havana | processed_pseudo | -0.2534225 | 2.88E-01 | -0.179994  | 1.91E-01 | -0.239466  | 2.28E-01 | -0.1561712 | 4.37E-01 | 0.2609138  | 2.90E-01 | -0.162086  | 2.90E-01 | -0.20786   | 1.48E-01 |
| ENSG000002898  | 2  | 13130546  | 13130546  | + LINC0191P  | havana | processed_pseudo | -0.1560828 | 1.74E-01 | -0.1560828 | 1.74E-01 | -0.1560828 | 1.74E-01 | -0.1560828 | 1.74E-01 | -0.1560828 | 1.74E-01 | -0.1560828 | 1.74E-01 | -0.1560828 | 1.74E-01 |
| ENSG000002841  | 1  | 13495239  | 13495288  | + AC10461.1  | havana | processed_pseudo | -0.065587  | 5.71E-01 | -0.0600248 | 5.97E-01 | -0.1382627 | 8.91E-01 | -0.1561808 | 4.37E-01 | 0.1717049  | 2.14E-01 | -0.0421894 | 1.86E-01 | -0.1181534 | 6.21E-01 |
| ENSG000002828  | 6  | 13549742  | 13581390  | + LINC0191P  | havana | processed_pseudo | -0.0529013 | 7.24E-01 | -0.0202588 | 9.99E-01 | -0.4003344 | 3.88E-01 | -0.1561808 | 4.37E-01 | 0.1474423  | 1.09E-01 | -0.102555  | 6.32E-01 | -0.250499  | 4.98E-01 |
| ENSG000002865  | 21 | 8125354   | 8125382   | + PRF1120.10 | havana | transcribed_unit | -0.0124676 | 1.00E-01 | -0.0124676 | 1.00E-01 | -0.0124676 | 1.00E-01 | -0.0124676 | 1.00E-01 | -0.0124676 | 1.00E-01 | -0.0124676 | 1.00E-01 | -0.0124676 | 1.00E-01 |
| ENSG000002802  | 10 | 437951    |           |              |        |                  |            |          |            |          |            |          |            |          |            |          |            |          |            |          |



Table with 20 columns: Gene ID, Chr, Start, End, Strand, Feature, Gene Name, RefSeq ID, RefSeq Description, RefSeq Type, RefSeq Status, RefSeq Date, RefSeq Version, RefSeq Accession, RefSeq URL, RefSeq Length, RefSeq Date, RefSeq Version, RefSeq Accession, RefSeq URL, RefSeq Length. The table lists various genes and their associated genomic data.











|                |    |           |          |                                |                                |                                |  |  |     |            |          |            |          |            |          |            |          |            |          |            |          |            |          |
|----------------|----|-----------|----------|--------------------------------|--------------------------------|--------------------------------|--|--|-----|------------|----------|------------|----------|------------|----------|------------|----------|------------|----------|------------|----------|------------|----------|
| ENSG0000027907 | 19 | 51119250  | 55120383 | AC00237.3                      | havana                         | processed_pseudo               |  |  | YES | -0.0811733 | 4.83E-01 | -0.0279877 | 8.47E-01 | 0.2207221  | 2.69E-01 | -0.1693993 | 3.98E-01 | -0.162179  | 2.39E-01 | -0.0003128 | 9.99E-01 | 0.10736242 | 4.58E-01 |
| ENSG0000024197 | 1  | 11284821  | 11287773 | LOC101937                      | havana                         | transcribed_unprocessed_pseudo |  |  | YES | -0.1791033 | 2.32E-01 | -0.0719889 | 6.19E-01 | 0.0687889  | 7.48E-01 | -0.1694096 | 3.98E-01 | -0.1570776 | 1.17E-01 | 0.0889664  | 6.81E-01 | -0.0072158 | 9.98E-01 |
| ENSG0000027737 | 1  | 17478174  | 17724419 | PTM7                           | havana                         | transcribed_unprocessed_pseudo |  |  | YES | -0.1486979 | 3.06E-01 | -0.0719889 | 6.19E-01 | 0.0687889  | 7.48E-01 | -0.1694096 | 3.98E-01 | -0.1570776 | 1.17E-01 | 0.0889664  | 6.81E-01 | -0.0072158 | 9.98E-01 |
| ENSG0000028635 | 8  | 130352787 | 13036241 | AC103191.1                     | havana                         | transcribed_unprocessed_pseudo |  |  | YES | -0.1439004 | 2.44E-01 | -0.0276699 | 5.21E-01 | 0.03631003 | 8.57E-01 | -0.1664238 | 3.98E-01 | -0.1907794 | 0.88E-01 | -0.2007797 | 3.11E-01 | -0.0082664 | 9.97E-01 |
| ENSG0000011923 | 1  | 8634273   | 86355376 | LOC101937                      | havana                         | transcribed_unprocessed_pseudo |  |  | YES | -0.140999  | 2.21E-01 | -0.0489442 | 7.36E-01 | 0.0317803  | 8.75E-01 | -0.1694096 | 3.98E-01 | -0.1570776 | 1.17E-01 | 0.0889664  | 6.81E-01 | -0.0072158 | 9.98E-01 |
| ENSG0000017882 | 1  | 16555469  | 16555471 | LOC101937                      | havana                         | transcribed_unprocessed_pseudo |  |  | YES | -0.140999  | 2.21E-01 | -0.0489442 | 7.36E-01 | 0.0317803  | 8.75E-01 | -0.1694096 | 3.98E-01 | -0.1570776 | 1.17E-01 | 0.0889664  | 6.81E-01 | -0.0072158 | 9.98E-01 |
| ENSG0000015801 | 12 | 854881    | 856713   | AC02974.1                      | havana                         | transcribed_unprocessed_pseudo |  |  | YES | -0.140999  | 2.21E-01 | -0.0489442 | 7.36E-01 | 0.0317803  | 8.75E-01 | -0.1694096 | 3.98E-01 | -0.1570776 | 1.17E-01 | 0.0889664  | 6.81E-01 | -0.0072158 | 9.98E-01 |
| ENSG0000012056 | 6  | 1498137   | 14984339 | LRP11                          | transcribed_unprocessed_pseudo |                                |  |  | YES | -0.1231743 | 2.86E-01 | -0.0725726 | 6.34E-01 | 0.0379358  | 8.58E-01 | -0.1694096 | 3.98E-01 | -0.1570776 | 1.17E-01 | 0.0889664  | 6.81E-01 | -0.0072158 | 9.98E-01 |
| ENSG0000017129 | 1  | 16555469  | 16555471 | LOC101937                      | havana                         | transcribed_unprocessed_pseudo |  |  | YES | -0.140999  | 2.21E-01 | -0.0489442 | 7.36E-01 | 0.0317803  | 8.75E-01 | -0.1694096 | 3.98E-01 | -0.1570776 | 1.17E-01 | 0.0889664  | 6.81E-01 | -0.0072158 | 9.98E-01 |
| ENSG0000023845 | 6  | 6395720   | 6395844  | USP58P2                        | transcribed_unprocessed_pseudo |                                |  |  | YES | -0.0992312 | 3.59E-01 | -0.0510429 | 4.72E-01 | 0.1344870  | 5.04E-01 | -0.1694096 | 3.98E-01 | -0.1570776 | 1.17E-01 | 0.0889664  | 6.81E-01 | -0.0072158 | 9.98E-01 |
| ENSG0000025756 | 12 | 5651300   | 5651703  | HSPD3A                         | transcribed_unprocessed_pseudo |                                |  |  | YES | -0.0734596 | 5.73E-01 | -0.057520  | 6.02E-01 | 0.0934543  | 6.42E-01 | -0.1694096 | 3.98E-01 | -0.1570776 | 1.17E-01 | 0.0889664  | 6.81E-01 | -0.0072158 | 9.98E-01 |
| ENSG0000025968 | 20 | 21124723  | 21125137 | LOC102069                      | transcribed_unprocessed_pseudo |                                |  |  | YES | -0.067729  | 5.86E-01 | -0.0681339 | 6.36E-01 | 0.256469   | 4.27E-01 | -0.1694096 | 3.98E-01 | -0.1570776 | 1.17E-01 | 0.0889664  | 6.81E-01 | -0.0072158 | 9.98E-01 |
| ENSG0000026069 | 16 | 7823542   | 7824189  | WV0X.A5                        | transcribed_unprocessed_pseudo |                                |  |  | YES | -0.0695648 | 1.62E-01 | -0.093173  | 7.87E-01 | 0.1664095  | 1.80E-01 | -0.1694096 | 3.98E-01 | -0.1570776 | 1.17E-01 | 0.0889664  | 6.81E-01 | -0.0072158 | 9.98E-01 |
| ENSG0000019825 | 4  | 5717016   | 5717489  | SYT1                           | transcribed_unprocessed_pseudo |                                |  |  | YES | -0.1123234 | 3.11E-01 | -0.1675315 | 3.13E-01 | 0.0993440  | 6.27E-01 | -0.1694096 | 3.98E-01 | -0.1570776 | 1.17E-01 | 0.0889664  | 6.81E-01 | -0.0072158 | 9.98E-01 |
| ENSG0000027400 | 22 | 2138374   | 2139478  | RIMPBP3                        | transcribed_unprocessed_pseudo |                                |  |  | YES | -0.0710819 | 5.39E-01 | 0.0084139  | 9.54E-01 | 0.015551   | 9.54E-01 | -0.1694096 | 3.98E-01 | -0.1570776 | 1.17E-01 | 0.0889664  | 6.81E-01 | -0.0072158 | 9.98E-01 |
| ENSG0000014660 | 10 | 8419437   | 8421921  | CDH1                           | transcribed_unprocessed_pseudo |                                |  |  | YES | -0.179222  | 1.30E-01 | -0.0552394 | 5.15E-01 | -0.1694096 | 3.98E-01 | -0.1570776 | 1.17E-01 | 0.0889664  | 6.81E-01 | -0.0072158 | 9.98E-01 | -0.0072158 | 9.98E-01 |
| ENSG0000010008 | 7  | 1137035   | 1137158  | LOC101937                      | transcribed_unprocessed_pseudo |                                |  |  | YES | -0.20955   | 7.27E-01 | -0.1246998 | 3.84E-01 | 0.047520   | 8.14E-01 | -0.1694096 | 3.98E-01 | -0.1570776 | 1.17E-01 | 0.0889664  | 6.81E-01 | -0.0072158 | 9.98E-01 |
| ENSG0000015517 | 11 | 6673869   | 6674074  | AP024.4                        | transcribed_unprocessed_pseudo |                                |  |  | YES | -0.2062174 | 2.79E-01 | -0.1002013 | 2.46E-01 | 0.2834842  | 2.95E-01 | -0.1694096 | 3.98E-01 | -0.1570776 | 1.17E-01 | 0.0889664  | 6.81E-01 | -0.0072158 | 9.98E-01 |
| ENSG0000027455 | 7  | 1133627   | 1133763  | PABPC1P5                       | transcribed_unprocessed_pseudo |                                |  |  | YES | -0.161829  | 1.60E-01 | -0.132782  | 3.60E-01 | -0.1270673 | 5.28E-01 | -0.1694096 | 3.98E-01 | -0.1570776 | 1.17E-01 | 0.0889664  | 6.81E-01 | -0.0072158 | 9.98E-01 |
| ENSG0000025623 | 4  | 14334460  | 14334335 | MIR1319                        | transcribed_unprocessed_pseudo |                                |  |  | YES | -0.0898904 | 3.92E-01 | -0.1144493 | 3.61E-01 | -0.1694096 | 3.98E-01 | -0.1570776 | 1.17E-01 | 0.0889664  | 6.81E-01 | -0.0072158 | 9.98E-01 | -0.0072158 | 9.98E-01 |
| ENSG0000025968 | 20 | 21124723  | 21125137 | LOC102069                      | transcribed_unprocessed_pseudo |                                |  |  | YES | -0.067729  | 5.86E-01 | -0.0681339 | 6.36E-01 | 0.256469   | 4.27E-01 | -0.1694096 | 3.98E-01 | -0.1570776 | 1.17E-01 | 0.0889664  | 6.81E-01 | -0.0072158 | 9.98E-01 |
| ENSG0000027826 | 9  | 21628922  | 21628954 | AC00999.1                      | transcribed_unprocessed_pseudo |                                |  |  | YES | -0.023367  | 4.47E-01 | -0.069681  | 9.62E-01 | 0.29268    | 1.58E-01 | -0.1694096 | 3.98E-01 | -0.1570776 | 1.17E-01 | 0.0889664  | 6.81E-01 | -0.0072158 | 9.98E-01 |
| ENSG0000026868 | 11 | 66514306  | 6651970  | AP027.8                        | transcribed_unprocessed_pseudo |                                |  |  | YES | -0.1727868 | 1.23E-01 | -0.132947  | 3.49E-01 | 0.0652804  | 7.46E-01 | -0.1694096 | 3.98E-01 | -0.1570776 | 1.17E-01 | 0.0889664  | 6.81E-01 | -0.0072158 | 9.98E-01 |
| ENSG0000014994 | 10 | 5393144   | 5393211  | PCID7                          | transcribed_unprocessed_pseudo |                                |  |  | YES | -0.129952  | 2.68E-01 | -0.046483  | 2.51E-01 | 0.248486   | 1.84E-01 | -0.1694096 | 3.98E-01 | -0.1570776 | 1.17E-01 | 0.0889664  | 6.81E-01 | -0.0072158 | 9.98E-01 |
| ENSG0000027883 | 10 | 1487788   | 1487866  | AC096.4                        | transcribed_unprocessed_pseudo |                                |  |  | YES | -0.113474  | 3.06E-01 | -0.1874    | 3.91E-01 | 0.225788   | 2.57E-01 | -0.1694096 | 3.98E-01 | -0.1570776 | 1.17E-01 | 0.0889664  | 6.81E-01 | -0.0072158 | 9.98E-01 |
| ENSG0000012033 | 6  | 3514258   | 3514281  | PPAD                           | transcribed_unprocessed_pseudo |                                |  |  | YES | -0.121656  | 1.88E-01 | -0.1187891 | 1.49E-01 | 0.2886946  | 1.39E-01 | -0.1694096 | 3.98E-01 | -0.1570776 | 1.17E-01 | 0.0889664  | 6.81E-01 | -0.0072158 | 9.98E-01 |
| ENSG000001052  | 2  | 22702714  | 22704453 | CD4A                           | transcribed_unprocessed_pseudo |                                |  |  | YES | -0.204848  | 7.40E-01 | -0.091613  | 7.29E-01 | 0.139578   | 4.88E-01 | -0.1694096 | 3.98E-01 | -0.1570776 | 1.17E-01 | 0.0889664  | 6.81E-01 | -0.0072158 | 9.98E-01 |
| ENSG0000019868 | 1  | 1829952   | 1829958  | MPF                            | transcribed_unprocessed_pseudo |                                |  |  | YES | -0.1234604 | 3.19E-01 | -0.1234604 | 3.19E-01 | -0.1694096 | 3.98E-01 | -0.1570776 | 1.17E-01 | 0.0889664  | 6.81E-01 | -0.0072158 | 9.98E-01 | -0.0072158 | 9.98E-01 |
| ENSG0000025884 | 1  | 11065360  | 11065740 | AL3036.1                       | transcribed_unprocessed_pseudo |                                |  |  | YES | -0.289131  | 3.01E-01 | -0.243034  | 8.98E-01 | -0.1694096 | 3.98E-01 | -0.1570776 | 1.17E-01 | 0.0889664  | 6.81E-01 | -0.0072158 | 9.98E-01 | -0.0072158 | 9.98E-01 |
| ENSG0000027908 | 1  | 16972240  | 16974705 | SEI1                           | transcribed_unprocessed_pseudo |                                |  |  | YES | -0.199426  | 8.21E-01 | -0.0720556 | 6.19E-01 | -0.197756  | 3.28E-01 | -0.1694096 | 3.98E-01 | -0.1570776 | 1.17E-01 | 0.0889664  | 6.81E-01 | -0.0072158 | 9.98E-01 |
| ENSG0000027689 | 1  | 20411230  | 20411236 | LOC102069.2                    | transcribed_unprocessed_pseudo |                                |  |  | YES | -0.199426  | 8.21E-01 | -0.0720556 | 6.19E-01 | -0.197756  | 3.28E-01 | -0.1694096 | 3.98E-01 | -0.1570776 | 1.17E-01 | 0.0889664  | 6.81E-01 | -0.0072158 | 9.98E-01 |
| ENSG0000028002 | 7  | 8207019   | 8207437  | transcribed_unprocessed_pseudo |                                |                                |  |  | YES | -0.130321  | 2.58E-01 | -0.093449  | 5.71E-01 | 0.2389814  | 2.33E-01 | -0.1694096 | 3.98E-01 | -0.1570776 | 1.17E-01 | 0.0889664  | 6.81E-01 | -0.0072158 | 9.98E-01 |
| ENSG0000012910 | 19 | 1172346   | 1180332  | S1PR4                          | transcribed_unprocessed_pseudo |                                |  |  | YES | -0.09229   | 4.75E-01 | -0.117657  | 3.62E-01 | -0.182723  | 3.61E-01 | -0.1694096 | 3.98E-01 | -0.1570776 | 1.17E-01 | 0.0889664  | 6.81E-01 | -0.0072158 | 9.98E-01 |
| ENSG0000024725 | 1  | 2089517   | 2089517  | LOC102069.1                    | transcribed_unprocessed_pseudo |                                |  |  | YES | -0.2089517 | 4.41E-01 | -0.2089517 | 4.41E-01 | -0.1694096 | 3.98E-01 | -0.1570776 | 1.17E-01 | 0.0889664  | 6.81E-01 | -0.0072158 | 9.98E-01 | -0.0072158 | 9.98E-01 |
| ENSG0000023024 | 16 | 1815886   | 1817931  | PNP4R                          | transcribed_unprocessed_pseudo |                                |  |  | YES | -0.169589  | 5.94E-01 | -0.093905  | 4.13E-01 | 0.0508481  | 3.98E-01 | -0.1694096 | 3.98E-01 | -0.1570776 | 1.17E-01 | 0.0889664  | 6.81E-01 | -0.0072158 | 9.98E-01 |
| ENSG0000011251 | 6  | 5430789   | 5430942  | TINAG                          | transcribed_unprocessed_pseudo |                                |  |  | YES | -0.083966  | 7.40E-01 | -0.077884  | 8.48E-01 | 0.3662143  | 1.97E-01 | -0.1694096 | 3.98E-01 | -0.1570776 | 1.17E-01 | 0.0889664  | 6.81E-01 | -0.0072158 | 9.98E-01 |
| ENSG0000029848 | 18 | 4816209   | 4818425  | AC103191.2                     | transcribed_unprocessed_pseudo |                                |  |  | YES | -0.143809  | 2.42E-01 | -0.091489  | 8.96E-01 | 0.135722   | 4.29E-01 | -0.1694096 | 3.98E-01 | -0.1570776 | 1.17E-01 | 0.0889664  | 6.81E-01 | -0.0072158 | 9.98E-01 |
| ENSG0000027744 | 12 | 2381920   | 2382324  | LOC102069.1                    | transcribed_unprocessed_pseudo |                                |  |  | YES | -0.143809  | 2.42E-01 | -0.091489  | 8.96E-01 | 0.135722   | 4.29E-01 | -0.1694096 | 3.98E-01 | -0.1570776 | 1.17E-01 | 0.0889664  | 6.81E-01 | -0.0072158 | 9.98E-01 |
| ENSG0000010174 | 10 | 4433703   | 4433128  | R3DM4D                         | transcribed_unprocessed_pseudo |                                |  |  | YES | -0.241977  | 1.43E-01 | -0.144499  | 3.48E-01 | -0.128484  | 1.92E-01 | -0.1694096 | 3.98E-01 | -0.1570776 | 1.17E-01 | 0.0889664  | 6.81E-01 | -0.0072158 | 9.98E-01 |
| ENSG0000027406 | 1  | 14632134  | 14640147 | SEC28AP                        | transcribed_unprocessed_pseudo |                                |  |  | YES | -0.241255  | 3.48E-01 | -0.1959729 | 1.65E-01 | 0.0584143  | 7.78E-01 | -0.1694096 | 3.98E-01 | -0.1570776 | 1.17E-01 | 0.088      |          |            |          |

Table with columns for gene ID, chromosome, coordinates, gene name, transcript type, and various numerical values. The table lists numerous genes such as AC01944.2, AC01945.1, AC01946.1, etc., with associated genomic data.





| ENSG0000025367 | 11 | 3881320   | 3881211   | AC17256.2    | havana  | lncRNA                       | YES | -0.100049  | 3.87E-01 | 0.00026628 | 9.99E-01 | 0.03617741  | 8.58E-01 | -0.1766643 | 3.78E-01 | -0.2042307 | 1.39E-01 | -0.1388091 | 3.73E-01 | -0.0579978 | 6.89E-01 |
|----------------|----|-----------|-----------|--------------|---------|------------------------------|-----|------------|----------|------------|----------|-------------|----------|------------|----------|------------|----------|------------|----------|------------|----------|
| ENSG0000024254 | 8  | 5648507   | 5650513   | AC021349.1   | havana  | lncRNA                       | YES | -0.092926  | 4.23E-01 | 0.07858613 | 5.97E-01 | 0.0107935   | 9.57E-01 | -0.1767513 | 3.78E-01 | -0.2626283 | 5.54E-01 | -0.1952739 | 3.71E-01 | 0.0174889  | 9.04E-01 |
| ENSG0000024461 | 12 | 11898154  | 11916301  | SRMM4        | ensembl | transcribed_unannotated_gene | YES | -0.1131729 | 7.03E-01 | 0.02413776 | 2.21E-01 | 0.2441266   | 7.92E-01 | -0.1656129 | 3.78E-01 | -0.1526636 | 1.69E-01 | -0.1526636 | 1.69E-01 | -0.1526636 | 1.69E-01 |
| ENSG000002194  | 8  | 8134357   | 8135962   | SIC02091.1   | havana  | unprocessed_pseudogene       | NO  | -0.1907879 | 8.63E-01 | -0.1909992 | 1.83E-01 | -0.1979338  | 5.18E-01 | -0.1766889 | 3.78E-01 | -0.2527153 | 5.52E-01 | -0.1309433 | 6.17E-01 | -0.0110018 | 4.99E-01 |
| ENSG0000025079 | 10 | 60400117  | 60408410  | LOC101927.2  | havana  | lncRNA                       | YES | -0.2221478 | 7.77E-01 | 0.0004879  | 9.49E-01 | 0.0098138   | 8.07E-01 | -0.1766889 | 3.78E-01 | -0.2944838 | 6.07E-01 | -0.1766889 | 3.78E-01 | -0.1766889 | 3.78E-01 |
| ENSG0000022035 | 2  | 20027410  | 20117062  | MA02101.A5.1 | havana  | transcript_tag               | NO  | -0.030981  | 7.65E-01 | -0.1790208 | 3.80E-01 | -0.1688489  | 5.62E-01 | -0.1766889 | 3.78E-01 | -0.260665  | 8.60E-01 | -0.0731443 | 5.00E-01 | -0.0731443 | 5.00E-01 |
| ENSG0000013376 | 11 | 86441108  | 86627236  | MEI          | ensembl | transcribed_unannotated_gene | YES | -0.1794454 | 1.18E-01 | -0.080886  | 5.73E-01 | -0.3421454  | 8.07E-01 | -0.1767818 | 3.78E-01 | -0.2729144 | 4.98E-01 | -0.1176288 | 5.93E-01 | -0.144721  | 3.16E-01 |
| ENSG0000014939 | 12 | 12425031  | 12446463  | LOC102048    | havana  | lncRNA                       | YES | -0.112128  | 7.77E-01 | 0.0004879  | 9.49E-01 | 0.0098138   | 8.07E-01 | -0.1766889 | 3.78E-01 | -0.2527153 | 5.52E-01 | -0.1309433 | 6.17E-01 | -0.0110018 | 4.99E-01 |
| ENSG0000015070 | 12 | 65050626  | 65112035  | WFI1         | ensembl | transcribed_unannotated_gene | YES | -0.2306225 | 6.00E-01 | -0.0892183 | 5.42E-01 | -0.1526526  | 4.36E-01 | -0.1767983 | 3.78E-01 | -0.3070395 | 3.93E-01 | -0.1625609 | 5.39E-01 | -0.1625609 | 5.39E-01 |
| ENSG0000011482 | 17 | 42900797  | 42914438  | IGFPC        | ensembl | transcribed_unannotated_gene | YES | -0.1120465 | 3.32E-01 | -0.0189621 | 8.96E-01 | -0.2505998  | 2.08E-01 | -0.1767868 | 3.78E-01 | -0.2059411 | 1.35E-01 | -0.0212747 | 9.16E-01 | -0.0212747 | 9.16E-01 |
| ENSG0000015469 | 14 | 22796662  | 22797246  | OCAL1        | ensembl | transcribed_unannotated_gene | YES | -0.2306225 | 6.00E-01 | -0.0892183 | 5.42E-01 | -0.1526526  | 4.36E-01 | -0.1767983 | 3.78E-01 | -0.3070395 | 3.93E-01 | -0.1625609 | 5.39E-01 | -0.1625609 | 5.39E-01 |
| ENSG0000027274 | 20 | 507185    | 508587    | ALG5454.1    | havana  | lncRNA                       | YES | -0.1569972 | 8.74E-01 | -0.0543887 | 7.09E-01 | -0.1720055  | 3.90E-01 | -0.1767971 | 3.78E-01 | -0.1919077 | 4.07E-01 | -0.1390833 | 5.57E-01 | -0.0744721 | 3.92E-01 |
| ENSG0000025556 | 8  | 47183736  | 47183774  | NPM1P49      | havana  | processed_pseudogene         | NO  | -0.1562138 | 1.75E-01 | -0.1137737 | 4.32E-01 | -0.00507129 | 9.80E-01 | -0.176882  | 3.77E-01 | -0.23287   | 8.96E-01 | -0.0893526 | 6.55E-01 | -0.0288319 | 8.45E-01 |
| ENSG0000021786 | 6  | 14884294  | 14888652  | EGF01.A51    | havana  | lncRNA                       | NO  | -0.1041831 | 3.67E-01 | -0.0737764 | 6.14E-01 | -0.153667   | 4.15E-01 | -0.1768884 | 3.77E-01 | -0.1747979 | 2.87E-01 | -0.0717885 | 7.45E-01 | -0.121272  | 3.79E-01 |
| ENSG0000027491 | 14 | 22796662  | 22797246  | OCAL1        | ensembl | transcribed_unannotated_gene | YES | -0.2306225 | 6.00E-01 | -0.0892183 | 5.42E-01 | -0.1526526  | 4.36E-01 | -0.1767983 | 3.78E-01 | -0.3070395 | 3.93E-01 | -0.1625609 | 5.39E-01 | -0.1625609 | 5.39E-01 |
| ENSG0000024852 | 4  | 15042465  | 15042842  | AC09261.1    | havana  | processed_pseudogene         | NO  | -0.129775  | 2.67E-01 | -0.0626526 | 6.48E-01 | -0.2390522  | 2.30E-01 | -0.1768995 | 3.77E-01 | -0.2067339 | 1.34E-01 | -0.1420541 | 9.00E-01 | -0.069602  | 6.31E-01 |
| ENSG0000017671 | 15 | 84602086  | 84627796  | ZSCAN2       | ensembl | transcribed_unannotated_gene | YES | -0.129775  | 2.67E-01 | -0.0626526 | 6.48E-01 | -0.2390522  | 2.30E-01 | -0.1768995 | 3.77E-01 | -0.2067339 | 1.34E-01 | -0.1420541 | 9.00E-01 | -0.069602  | 6.31E-01 |
| ENSG0000025516 | 10 | 60400117  | 60408410  | LOC101927.2  | havana  | lncRNA                       | YES | -0.112128  | 7.77E-01 | 0.0004879  | 9.49E-01 | 0.0098138   | 8.07E-01 | -0.1766889 | 3.78E-01 | -0.2527153 | 5.52E-01 | -0.1309433 | 6.17E-01 | -0.0110018 | 4.99E-01 |
| ENSG0000012051 | 4  | 157204182 | 157366075 | GRIA2        | ensembl | transcribed_unannotated_gene | YES | -0.0895765 | 5.59E-01 | -0.0697854 | 6.09E-01 | -0.1689794  | 5.24E-01 | -0.1768734 | 3.77E-01 | -0.088187  | 5.96E-01 | -0.191343  | 5.47E-01 | -0.0907074 | 6.04E-01 |
| ENSG0000020144 | 5  | 72051818  | 72031276  | AC01287.2    | havana  | unprocessed_pseudogene       | NO  | -0.1455924 | 3.11E-01 | -0.0427093 | 7.72E-01 | -0.1216353  | 5.41E-01 | -0.1768884 | 3.77E-01 | -0.2304699 | 9.36E-01 | -0.0591996 | 7.12E-01 | -0.075704  | 9.01E-01 |
| ENSG0000020399 | 17 | 42901245  | 42906625  | AC07171.2    | havana  | lncRNA                       | YES | -0.2306225 | 6.00E-01 | -0.0892183 | 5.42E-01 | -0.1526526  | 4.36E-01 | -0.1767983 | 3.78E-01 | -0.3070395 | 3.93E-01 | -0.1625609 | 5.39E-01 | -0.1625609 | 5.39E-01 |
| ENSG0000027164 | 3  | 18143499  | 18143497  | AC09098.1    | havana  | lncRNA                       | NO  | -0.244154  | 2.02E-01 | -0.235777  | 1.19E-01 | -0.192338   | 3.36E-01 | -0.1770066 | 3.77E-01 | -0.3231023 | 7.10E-01 | -0.1542978 | 4.82E-01 | -0.0349883 | 8.33E-01 |
| ENSG0000014044 | 15 | 27754875  | 28099115  | DCA2         | ensembl | transcribed_unannotated_gene | YES | -0.2153376 | 6.00E-01 | -0.1875231 | 3.95E-01 | -0.1710251  | 3.49E-01 | -0.1710251 | 3.49E-01 | -0.3061429 | 7.41E-01 | -0.16268   | 4.88E-01 | -0.1843669 | 2.03E-01 |
| ENSG0000014877 | 4  | 75041489  | 75240489  | GSDP9        | ensembl | transcribed_unannotated_gene | YES | -0.0749939 | 5.17E-01 | -0.0289761 | 6.94E-01 | -0.1054905  | 6.06E-01 | -0.1770209 | 3.77E-01 | -0.0485724 | 7.49E-01 | -0.151172  | 4.89E-01 | -0.0074793 | 9.60E-01 |
| ENSG0000024434 | 9  | 19514678  | 195147003 | INV319P      | ensembl | transcribed_unannotated_gene | YES | -0.0924194 | 4.24E-01 | -0.1212151 | 3.95E-01 | -0.0273824  | 8.85E-01 | -0.1770224 | 3.77E-01 | -0.1044113 | 5.42E-01 | -0.1222748 | 9.56E-01 | -0.033928  | 9.24E-01 |
| ENSG0000016017 | 19 | 921581    | 975939    | ARBP4        | ensembl | transcribed_unannotated_gene | YES | -0.1646829 | 8.55E-01 | -0.0620389 | 6.69E-01 | -0.1770377  | 3.77E-01 | -0.0350580 | 8.88E-01 | -0.016004  | 8.01E-01 | -0.0050489 | 8.80E-01 | -0.0050489 | 8.80E-01 |
| ENSG0000014158 | 18 | 2358134   | 23580626  | CPK4         | ensembl | transcribed_unannotated_gene | YES | -0.1502425 | 9.75E-01 | -0.1740984 | 2.30E-01 | -0.3023447  | 1.25E-01 | -0.1770899 | 3.77E-01 | -0.238456  | 5.50E-01 | -0.2249738 | 3.04E-01 | -0.088329  | 7.98E-01 |
| ENSG0000027001 | 12 | 65050626  | 65112035  | WFI1         | ensembl | transcribed_unannotated_gene | YES | -0.2306225 | 6.00E-01 | -0.0892183 | 5.42E-01 | -0.1526526  | 4.36E-01 | -0.1767983 | 3.78E-01 | -0.3070395 | 3.93E-01 | -0.1625609 | 5.39E-01 | -0.1625609 | 5.39E-01 |
| ENSG0000013446 | 12 | 5747717   | 5756013   | NCX          | ensembl | transcribed_unannotated_gene | YES | -0.1822275 | 1.13E-01 | -0.1219008 | 1.21E-01 | -0.1710101  | 3.77E-01 | -0.178865  | 3.76E-01 | -0.1917371 | 4.33E-01 | -0.0089839 | 5.23E-01 | -0.0089839 | 5.23E-01 |
| ENSG0000021063 | 7  | 14234917  | 14234964  | TRFV2        | havana  | TR V gene                    | NO  | -0.138753  | 2.53E-01 | -0.1248373 | 3.88E-01 | -0.00877    | 9.65E-01 | -0.1774438 | 3.77E-01 | -0.2606652 | 5.67E-01 | -0.0815171 | 7.24E-01 | -0.2484774 | 8.64E-01 |
| ENSG0000015699 | 14 | 12387807  | 12386211  | AC01882.2    | havana  | lncRNA                       | NO  | -0.2089938 | 1.97E-01 | -0.0737628 | 6.65E-01 | -0.1486123  | 4.84E-01 | -0.1768884 | 3.77E-01 | -0.2606652 | 5.67E-01 | -0.0815171 | 7.24E-01 | -0.2484774 | 8.64E-01 |
| ENSG0000021439 | 8  | 11428207  | 11429339  | AC00480.1    | havana  | lncRNA                       | NO  | -0.0381129 | 7.42E-01 | -0.1496511 | 4.57E-01 | -0.1771556  | 3.77E-01 | -0.078215  | 5.67E-01 | -0.0901099 | 5.90E-01 | -0.078215  | 5.67E-01 | -0.0901099 | 5.90E-01 |
| ENSG0000020213 | 16 | 8101679   | 8103579   | AC07371.2    | havana  | lncRNA                       | NO  | -0.0785833 | 4.97E-01 | -0.0089786 | 9.55E-01 | -0.0191358  | 9.26E-01 | -0.1771557 | 3.77E-01 | -0.1764025 | 2.46E-01 | -0.0610909 | 9.39E-01 | -0.0515371 | 9.14E-01 |
| ENSG0000025791 | 9  | 48400279  | 48400279  | AC00000.1    | havana  | lncRNA                       | YES | -0.112128  | 7.77E-01 | 0.0004879  | 9.49E-01 | 0.0098138   | 8.07E-01 | -0.1766889 | 3.78E-01 | -0.2527153 | 5.52E-01 | -0.1309433 | 6.17E-01 | -0.0110018 | 4.99E-01 |
| ENSG0000025929 | 22 | 5073525   | 5078139   | AC00000.1    | havana  | lncRNA                       | YES | -0.1589881 | 5.63E-01 | -0.0957878 | 5.08E-01 | -0.2342856  | 2.16E-01 | -0.1771377 | 3.77E-01 | -0.3254451 | 1.65E-01 | -0.0800589 | 7.15E-01 | -0.1771377 | 3.77E-01 |
| ENSG0000025999 | 1  | 6985529   | 6146278   | INF1A        | ensembl | transcribed_unannotated_gene | YES | -0.244281  | 3.20E-01 | -0.2020536 | 1.19E-01 | -0.1066227  | 4.44E-01 | -0.177233  | 3.76E-01 | -0.284129  | 1.71E-01 | -0.121883  | 3.21E-01 | -0.178307  | 2.16E-01 |
| ENSG0000027419 | 7  | 14239278  | 14239473  | TRFV1        | havana  | TR V gene                    | NO  | -0.1988399 | 8.37E-01 | -0.1877989 | 4.58E-01 | -0.1591111  | 9.62E-01 | -0.1774438 | 3.76E-01 | -0.2606652 | 5.67E-01 | -0.0815171 | 7.24E-01 | -0.2484774 | 8.64E-01 |
| ENSG0000013361 | 3  | 3113186   | 31291214  | AC01571.2    | havana  | lncRNA                       | YES | -0.1070242 | 5.19E-01 | -0.013455  | 6.19E-01 | -0.0272924  | 8.31E-01 | -0.1772924 | 3.76E-01 | -0.0415318 | 5.95E-01 | -0.0415318 | 5.95E-01 | -0.0415318 | 5.95E-01 |
| ENSG0000024239 | 3  | 17939861  | 17939911  | AC07026.2    | havana  | lncRNA                       | NO  | -0.1111392 | 9.23E-01 | -0.1005717 | 9.07E-01 | -0.1041698  | 8.96E-01 | -0.1773054 | 3.76E-01 | -0.101021  | 4.84E-01 | -0.0402346 | 5.84E-01 | -0.1182617 | 3.99E-01 |
| ENSG0000024398 | 11 | 162959    | 1623138   | TRFV5.4      | ensembl | transcribed_unannotated_gene | YES | -0.1416688 | 2.19E-01 | -0.1499789 | 2.99E-01 | -0.2887482  | 1.44E-01 | -0.1773103 | 3.76E-01 | -0.1909294 | 1.67E-01 | -0.1545658 | 6.01E-01 | -0.0878220 | 5.46E-01 |
| ENSG0000025047 | 12 | 65050626  | 65112035  | WFI1         | ensembl | transcribed_unannotated_gene | YES | -0.2306225 | 6.00E-01 | -0.0892183 | 5.42E-01 | -0.1526526  | 4.36E-01 | -0.1767983 | 3.78E-01 | -0.3070395 | 3.93E-01 | -0.1625609 |          |            |          |









| ENSG0000024151 | 18 | 2733956  | 2739564  | AC090401.1 | havana | incRNA             | YES | YES | -0.189673  | 9.86e-02 | -0.181785  | 3.04e-01 | 0.1176857 | 5.99e-01 | -0.1861748 | 3.52e-01 | 0.265482  | 3.22e-02 | -0.1244297 | 5.72e-01 | 0.0018905  | 9.89e-01 |
|----------------|----|----------|----------|------------|--------|--------------------|-----|-----|------------|----------|------------|----------|-----------|----------|------------|----------|-----------|----------|------------|----------|------------|----------|
| ENSG0000024152 | 18 | 10174615 | 10176888 | AC092626.1 | havana | incRNA             | YES | YES | -0.184813  | 1.08e-01 | -0.099317  | 4.91e-01 | 0.1927747 | 8.47e-01 | -0.1862031 | 3.52e-01 | 0.2525704 | 6.54e-02 | -0.489214  | 2.52e-01 | 0.119082   | 1.84e-01 |
| ENSG0000024153 | 18 | 9244700  | 9244799  | PW819.1    | havana | transcribed unproc | NO  | NO  | -0.186270  | 2.37e-01 | -0.186270  | 2.37e-01 | 0.1176857 | 5.99e-01 | -0.186270  | 2.37e-01 | 0.1176857 | 5.99e-01 | -0.186270  | 2.37e-01 | 0.1176857  | 5.99e-01 |
| ENSG0000024154 | 18 | 6496550  | 6497576  | AMZP23.1   | havana | transcribed unproc | YES | YES | -0.120817  | 2.07e-01 | -0.094244  | 6.87e-01 | 0.1067250 | 7.99e-01 | -0.1862339 | 3.52e-01 | 0.2222024 | 1.06e-01 | -0.0735705 | 7.33e-01 | 0.0224339  | 8.77e-01 |
| ENSG0000024155 | 18 | 9170001  | 9170001  | AC091413.1 | havana | transcribed unproc | NO  | NO  | -0.186270  | 2.37e-01 | -0.186270  | 2.37e-01 | 0.1176857 | 5.99e-01 | -0.186270  | 2.37e-01 | 0.1176857 | 5.99e-01 | -0.186270  | 2.37e-01 | 0.1176857  | 5.99e-01 |
| ENSG0000024156 | 18 | 6707001  | 6709865  | RFMAP11.1  | havana | protein coding     | YES | YES | -0.066920  | 8.18e-01 | -0.184656  | 1.99e-01 | 0.1110734 | 5.81e-01 | -0.1862339 | 3.52e-01 | 0.1313846 | 3.86e-01 | -0.020931  | 9.42e-01 | 0.0679204  | 6.77e-01 |
| ENSG0000024157 | 18 | 5179138  | 5179239  | AC100143.1 | havana | transcribed unproc | NO  | NO  | -0.088028  | 4.47e-01 | -0.043993  | 7.62e-01 | 0.2317379 | 2.41e-01 | -0.186270  | 2.37e-01 | 0.1672707 | 2.27e-01 | -0.1746396 | 9.26e-01 | 0.0596867  | 7.00e-01 |
| ENSG0000024158 | 18 | 2038771  | 2038785  | CTLA4      | havana | protein coding     | YES | YES | -0.026943  | 5.79e-01 | -0.059619  | 5.31e-01 | 0.2875094 | 1.46e-01 | -0.1862339 | 3.52e-01 | 0.1163677 | 0.05052  | -0.0397472 | 9.05e-01 | 0.0597472  | 9.41e-01 |
| ENSG0000024159 | 18 | 4703272  | 4703621  | ELO2       | havana | protein coding     | YES | YES | -0.171288  | 1.36e-01 | -0.102699  | 4.78e-01 | 0.1767699 | 3.78e-01 | -0.1862339 | 3.52e-01 | 0.254518  | 6.38e-02 | -0.132843  | 5.46e-01 | 0.161811   | 2.12e-01 |
| ENSG0000024160 | 18 | 9152136  | 9154025  | LINC0315.1 | havana | incRNA             | YES | YES | -0.105818  | 1.87e-01 | -0.099256  | 1.64e-01 | 0.2448883 | 2.11e-01 | -0.1862339 | 3.52e-01 | 0.223707  | 1.97e-01 | -0.270703  | 1.07e-01 | 0.0274089  | 6.05e-01 |
| ENSG0000024161 | 18 | 15298533 | 15299243 | MGAT3B     | havana | protein coding     | YES | YES | -0.131804  | 0.80e-01 | -0.131804  | 0.80e-01 | 0.1952472 | 3.29e-01 | -0.1862444 | 3.52e-01 | 0.1624837 | 2.44e-02 | -0.1624837 | 9.41e-01 | 0.131998   | 4.09e-01 |
| ENSG0000024162 | 18 | 4954881  | 4954783  | ZFYR2.1    | havana | incRNA             | YES | YES | -0.148942  | 3.20e-01 | -0.180326  | 8.16e-01 | 0.0888546 | 6.60e-01 | -0.1862477 | 3.52e-01 | 0.2055882 | 1.36e-01 | -0.1920214 | 4.13e-01 | -0.1405761 | 3.30e-01 |
| ENSG0000024163 | 18 | 96120479 | 96121166 | BDNFB2     | havana | protein coding     | YES | YES | -0.170272  | 5.54e-01 | -0.0480209 | 7.41e-01 | 0.1962172 | 1.50e-01 | -0.1862167 | 3.52e-01 | 0.2411794 | 5.11e-02 | -0.1219264 | 5.68e-01 | 0.0212964  | 1.40e-01 |
| ENSG0000024164 | 18 | 6134992  | 6134944  | LINC00137  | havana | incRNA             | YES | YES | -0.149419  | 1.41e-01 | -0.149419  | 1.41e-01 | 0.2026601 | 3.01e-01 | -0.1862167 | 3.52e-01 | 0.1836651 | 3.52e-01 | -0.1329676 | 5.58e-01 | 0.178923   | 2.30e-01 |
| ENSG0000024165 | 18 | 10496316 | 10498312 | LINC28     | havana | incRNA             | YES | YES | -0.197901  | 8.45e-02 | -0.197901  | 8.45e-02 | 0.1303438 | 5.17e-01 | -0.1862167 | 3.52e-01 | 0.2578899 | 7.91e-01 | -0.209588  | 3.37e-01 | -0.1854376 | 1.97e-01 |
| ENSG0000024166 | 18 | 14395791 | 14427407 | AL117071.1 | havana | transcribed unproc | NO  | NO  | -0.1773404 | 1.23e-01 | -0.1194627 | 4.09e-01 | 0.2001254 | 9.95e-01 | -0.1862167 | 3.52e-01 | 0.2513999 | 6.67e-02 | -0.1584086 | 4.70e-01 | 0.0603184  | 6.77e-01 |
| ENSG0000024167 | 18 | 1895325  | 1895449  | AC092081.1 | havana | transcribed unproc | NO  | NO  | -0.1862339 | 3.52e-01 | -0.1862339 | 3.52e-01 | 0.1952472 | 3.29e-01 | -0.1862339 | 3.52e-01 | 0.2319877 | 1.94e-01 | -0.1727744 | 5.46e-01 | 0.0277774  | 6.12e-01 |
| ENSG0000024168 | 18 | 2441013  | 2441469  | AL036111.1 | havana | transcribed unproc | NO  | NO  | -0.151845  | 1.87e-01 | -0.092212  | 3.51e-01 | 0.1438307 | 4.74e-01 | -0.1862339 | 3.52e-01 | 0.2328183 | 8.55e-02 | -0.1402914 | 5.17e-01 | 0.0100175  | 9.45e-01 |
| ENSG0000024169 | 18 | 9152136  | 9154025  | LINC0315.1 | havana | incRNA             | YES | YES | -0.20895   | 1.00e-01 | -0.199956  | 1.64e-01 | 0.2448883 | 2.11e-01 | -0.1862339 | 3.52e-01 | 0.223707  | 1.97e-01 | -0.270703  | 1.07e-01 | 0.0274089  | 6.05e-01 |
| ENSG0000024170 | 18 | 15298533 | 15299243 | MGAT3B     | havana | protein coding     | YES | YES | -0.131804  | 0.80e-01 | -0.131804  | 0.80e-01 | 0.1952472 | 3.29e-01 | -0.1862444 | 3.52e-01 | 0.1624837 | 2.44e-02 | -0.1624837 | 9.41e-01 | 0.131998   | 4.09e-01 |
| ENSG0000024171 | 18 | 4954881  | 4954783  | ZFYR2.1    | havana | incRNA             | YES | YES | -0.148942  | 3.20e-01 | -0.180326  | 8.16e-01 | 0.0888546 | 6.60e-01 | -0.1862477 | 3.52e-01 | 0.2055882 | 1.36e-01 | -0.1920214 | 4.13e-01 | -0.1405761 | 3.30e-01 |
| ENSG0000024172 | 18 | 96120479 | 96121166 | BDNFB2     | havana | protein coding     | YES | YES | -0.170272  | 5.54e-01 | -0.0480209 | 7.41e-01 | 0.1962172 | 1.50e-01 | -0.1862167 | 3.52e-01 | 0.2411794 | 5.11e-02 | -0.1219264 | 5.68e-01 | 0.0212964  | 1.40e-01 |
| ENSG0000024173 | 18 | 6134992  | 6134944  | LINC00137  | havana | incRNA             | YES | YES | -0.149419  | 1.41e-01 | -0.149419  | 1.41e-01 | 0.2026601 | 3.01e-01 | -0.1862167 | 3.52e-01 | 0.1836651 | 3.52e-01 | -0.1329676 | 5.58e-01 | 0.178923   | 2.30e-01 |
| ENSG0000024174 | 18 | 10496316 | 10498312 | LINC28     | havana | incRNA             | YES | YES | -0.197901  | 8.45e-02 | -0.197901  | 8.45e-02 | 0.1303438 | 5.17e-01 | -0.1862167 | 3.52e-01 | 0.2578899 | 7.91e-01 | -0.209588  | 3.37e-01 | -0.1854376 | 1.97e-01 |
| ENSG0000024175 | 18 | 14395791 | 14427407 | AL117071.1 | havana | transcribed unproc | NO  | NO  | -0.1773404 | 1.23e-01 | -0.1194627 | 4.09e-01 | 0.2001254 | 9.95e-01 | -0.1862167 | 3.52e-01 | 0.2513999 | 6.67e-02 | -0.1584086 | 4.70e-01 | 0.0603184  | 6.77e-01 |
| ENSG0000024176 | 18 | 1895325  | 1895449  | AC092081.1 | havana | transcribed unproc | NO  | NO  | -0.1862339 | 3.52e-01 | -0.1862339 | 3.52e-01 | 0.1952472 | 3.29e-01 | -0.1862339 | 3.52e-01 | 0.2319877 | 1.94e-01 | -0.1727744 | 5.46e-01 | 0.0277774  | 6.12e-01 |
| ENSG0000024177 | 18 | 2441013  | 2441469  | AL036111.1 | havana | transcribed unproc | NO  | NO  | -0.151845  | 1.87e-01 | -0.092212  | 3.51e-01 | 0.1438307 | 4.74e-01 | -0.1862339 | 3.52e-01 | 0.2328183 | 8.55e-02 | -0.1402914 | 5.17e-01 | 0.0100175  | 9.45e-01 |
| ENSG0000024178 | 18 | 9152136  | 9154025  | LINC0315.1 | havana | incRNA             | YES | YES | -0.20895   | 1.00e-01 | -0.199956  | 1.64e-01 | 0.2448883 | 2.11e-01 | -0.1862339 | 3.52e-01 | 0.223707  | 1.97e-01 | -0.270703  | 1.07e-01 | 0.0274089  | 6.05e-01 |
| ENSG0000024179 | 18 | 15298533 | 15299243 | MGAT3B     | havana | protein coding     | YES | YES | -0.131804  | 0.80e-01 | -0.131804  | 0.80e-01 | 0.1952472 | 3.29e-01 | -0.1862444 | 3.52e-01 | 0.1624837 | 2.44e-02 | -0.1624837 | 9.41e-01 | 0.131998   | 4.09e-01 |
| ENSG0000024180 | 18 | 4954881  | 4954783  | ZFYR2.1    | havana | incRNA             | YES | YES | -0.148942  | 3.20e-01 | -0.180326  | 8.16e-01 | 0.0888546 | 6.60e-01 | -0.1862477 | 3.52e-01 | 0.2055882 | 1.36e-01 | -0.1920214 | 4.13e-01 | -0.1405761 | 3.30e-01 |
| ENSG0000024181 | 18 | 96120479 | 96121166 | BDNFB2     | havana | protein coding     | YES | YES | -0.170272  | 5.54e-01 | -0.0480209 | 7.41e-01 | 0.1962172 | 1.50e-01 | -0.1862167 | 3.52e-01 | 0.2411794 | 5.11e-02 | -0.1219264 | 5.68e-01 | 0.0212964  | 1.40e-01 |
| ENSG0000024182 | 18 | 6134992  | 6134944  | LINC00137  | havana | incRNA             | YES | YES | -0.149419  | 1.41e-01 | -0.149419  | 1.41e-01 | 0.2026601 | 3.01e-01 | -0.1862167 | 3.52e-01 | 0.1836651 | 3.52e-01 | -0.1329676 | 5.58e-01 | 0.178923   | 2.30e-01 |
| ENSG0000024183 | 18 | 10496316 | 10498312 | LINC28     | havana | incRNA             | YES | YES | -0.197901  | 8.45e-02 | -0.197901  | 8.45e-02 | 0.1303438 | 5.17e-01 | -0.1862167 | 3.52e-01 | 0.2578899 | 7.91e-01 | -0.209588  | 3.37e-01 | -0.1854376 | 1.97e-01 |
| ENSG0000024184 | 18 | 14395791 | 14427407 | AL117071.1 | havana | transcribed unproc | NO  | NO  | -0.1773404 | 1.23e-01 | -0.1194627 | 4.09e-01 | 0.2001254 | 9.95e-01 | -0.1862167 | 3.52e-01 | 0.2513999 | 6.67e-02 | -0.1584086 | 4.70e-01 | 0.0603184  | 6.77e-01 |
| ENSG0000024185 | 18 | 1895325  | 1895449  | AC092081.1 | havana | transcribed unproc | NO  | NO  | -0.1862339 | 3.52e-01 | -0.1862339 | 3.52e-01 | 0.1952472 | 3.29e-01 | -0.1862339 | 3.52e-01 | 0.2319877 | 1.94e-01 | -0.1727744 | 5.46e-01 | 0.0277774  | 6.12e-01 |
| ENSG0000024186 | 18 | 2441013  | 2441469  | AL036111.1 | havana | transcribed unproc | NO  | NO  | -0.151845  | 1.87e-01 | -0.092212  | 3.51e-01 | 0.1438307 | 4.74e-01 | -0.1862339 | 3.52e-01 | 0.2328183 | 8.55e-02 | -0.1402914 | 5.17e-01 | 0.0100175  | 9.45e-01 |
| ENSG0000024187 | 18 | 9152136  | 9154025  | LINC0315.1 | havana | incRNA             | YES | YES | -0.20895   | 1.00e-01 | -0.199956  | 1.64e-01 | 0.2448883 | 2.11e-01 | -0.1862339 | 3.52e-01 | 0.223707  | 1.97e-01 | -0.270703  | 1.07e-01 | 0.0274089  | 6.05e-01 |
| ENSG0000024188 | 18 | 15298533 | 15299243 | MGAT3B     | havana | protein coding     | YES | YES | -0.131804  | 0.80e-01 | -0.131804  | 0.80e-01 | 0.1952472 | 3.29e-01 | -0.1862444 | 3.52e-01 | 0.1624837 | 2.44e-02 | -0.1624837 | 9.41e-01 | 0.131998   | 4.09e-01 |
| ENSG0000024189 | 18 | 4954881  | 4954783  | ZFYR2.1    | havana | incRNA             | YES | YES | -0.148942  | 3.20e-01 | -0.180326  | 8.16e-01 | 0.0888546 | 6.60e-01 | -0.1862477 | 3.52e-01 | 0.2055882 | 1.36e-01 | -0.1920214 | 4.13e-01 | -0.1405761 | 3.30e-01 |
| ENSG0000024190 | 18 | 96120479 | 96121166 | BDNFB2     | havana | protein coding     | YES | YES | -0.170272  | 5.54e-01 | -0.0480209 | 7.41e-01 | 0.1962172 | 1.50e-01 | -0.1862167 | 3.52e-01 | 0.2411794 | 5.11e-02 | -0.1219264 | 5.68e-01 | 0.0212964  | 1.40e-01 |
| ENSG0000024191 | 18 | 6134992  | 6134944  | LINC00137  | havana |                    |     |     |            |          |            |          |           |          |            |          |           |          |            |          |            |          |













| ENSG0000017432  | 1  | 5150237  | 5378826  | GLIS1      | ensembl                                                                                                                                                                                                                                                                                                                                        | havana  | protein_coding | YES | YES | -0.180099 | 8.43E-02 | -0.085572 | 5.53E-01 | 0.148201  | 4.61E-01 | -0.197601  | 3.28E-01 | -0.309420 | 2.28E-02 | -0.031836  | 8.10E-02 | -0.117507  | 4.16E-01 |
|-----------------|----|----------|----------|------------|------------------------------------------------------------------------------------------------------------------------------------------------------------------------------------------------------------------------------------------------------------------------------------------------------------------------------------------------|---------|----------------|-----|-----|-----------|----------|-----------|----------|-----------|----------|------------|----------|-----------|----------|------------|----------|------------|----------|
| ENSG0000017182  | 4  | 8261974  | 8321610  | LOC105759  | havana                                                                                                                                                                                                                                                                                                                                         | lincRNA | antisense      | YES | YES | -0.153884 | 1.82E-01 | -0.073422 | 6.10E-02 | 0.195129  | 3.81E-01 | -0.197601  | 3.28E-01 | -0.234516 | 8.99E-02 | -0.118716  | 6.12E-02 | -0.161688  | 2.62E-01 |
| ENSG00000184012 | 4  | 8319176  | 7131813  | CXCL3      | havana                                                                                                                                                                                                                                                                                                                                         | mRNA    | protein_coding | YES | YES | -0.178205 | 1.26E-01 | -0.103421 | 2.89E-01 | 0.195129  | 3.81E-01 | -0.197601  | 3.28E-01 | -0.250749 | 8.28E-02 | -0.136631  | 5.82E-02 | -0.097029  | 4.62E-01 |
| ENSG00000183734 | 4  | 7403889  | 7403887  | CXCL3      | havana                                                                                                                                                                                                                                                                                                                                         | mRNA    | protein_coding | YES | YES | -0.178205 | 1.26E-01 | -0.103421 | 2.89E-01 | 0.195129  | 3.81E-01 | -0.197601  | 3.28E-01 | -0.235472 | 8.34E-02 | -0.118716  | 6.12E-02 | -0.097029  | 4.62E-01 |
| ENSG00000140889 | 7  | 14209136 | 14209177 | NDP4L-AS1  | havana                                                                                                                                                                                                                                                                                                                                         | lincRNA | antisense      | YES | YES | 0.039813  | 7.08E-01 | -0.018886 | 8.97E-02 | 0.210770  | 2.93E-01 | -0.197713  | 3.28E-01 | -0.208439 | 9.49E-02 | -0.090057  | 6.83E-02 | -0.045073  | 8.34E-01 |
| ENSG00000178722 | 15 | 15394821 | 15394814 | SPR        | havana                                                                                                                                                                                                                                                                                                                                         | mRNA    | protein_coding | YES | YES | -0.178205 | 1.26E-01 | -0.103421 | 2.89E-01 | 0.195129  | 3.81E-01 | -0.197601  | 3.28E-01 | -0.250749 | 8.28E-02 | -0.136631  | 5.82E-02 | -0.097029  | 4.62E-01 |
| ENSG00000142938 | 15 | 4293910  | 4294038  | PPP4R1A    | havana                                                                                                                                                                                                                                                                                                                                         | mRNA    | protein_coding | YES | YES | -0.180651 | 8.47E-02 | -0.14159  | 3.27E-01 | 0.197451  | 3.24E-01 | -0.197754  | 3.28E-01 | -0.268546 | 8.06E-02 | -0.070866  | 7.49E-02 | -0.141579  | 8.37E-01 |
| ENSG00000126756 | 2  | 6444612  | 6444668  | AC007365.1 | havana                                                                                                                                                                                                                                                                                                                                         | lincRNA | antisense      | YES | YES | -0.129543 | 2.61E-01 | -0.117335 | 4.17E-02 | 0.193248  | 3.36E-01 | -0.197754  | 3.28E-01 | -0.164932 | 2.33E-01 | -0.071049  | 7.47E-02 | -0.127894  | 8.49E-01 |
| ENSG00000176519 | 3  | 6397349  | 6397352  | AC007365.1 | havana                                                                                                                                                                                                                                                                                                                                         | lincRNA | antisense      | YES | YES | -0.129543 | 2.61E-01 | -0.117335 | 4.17E-02 | 0.193248  | 3.36E-01 | -0.197754  | 3.28E-01 | -0.164932 | 2.33E-01 | -0.071049  | 7.47E-02 | -0.127894  | 8.49E-01 |
| ENSG00000189710 | 2  | 13089707 | 13089812 | GTFP       | ensembl <td>havana</td> <td>protein_coding</td> <td>YES</td> <td>YES</td> <td>-0.162396</td> <td>2.37E-01</td> <td>-0.096254</td> <td>6.53E-01</td> <td>0.193794</td> <td>3.73E-01</td> <td>-0.197942</td> <td>3.28E-01</td> <td>-0.222373</td> <td>1.03E-01</td> <td>-0.058338</td> <td>7.92E-02</td> <td>-0.032805</td> <td>8.49E-01</td>    | havana  | protein_coding | YES | YES | -0.162396 | 2.37E-01 | -0.096254 | 6.53E-01 | 0.193794  | 3.73E-01 | -0.197942  | 3.28E-01 | -0.222373 | 1.03E-01 | -0.058338  | 7.92E-02 | -0.032805  | 8.49E-01 |
| ENSG00000144642 | 3  | 2857479  | 30010291 | BRMS3      | ensembl <td>havana</td> <td>protein_coding</td> <td>YES</td> <td>YES</td> <td>-0.161075</td> <td>1.51E-01</td> <td>-0.026016</td> <td>8.55E-02</td> <td>0.181139</td> <td>1.13E-01</td> <td>-0.197862</td> <td>3.28E-01</td> <td>-0.347838</td> <td>1.00E-02</td> <td>-0.045776</td> <td>5.07E-02</td> <td>-0.226664</td> <td>1.20E-01</td>    | havana  | protein_coding | YES | YES | -0.161075 | 1.51E-01 | -0.026016 | 8.55E-02 | 0.181139  | 1.13E-01 | -0.197862  | 3.28E-01 | -0.347838 | 1.00E-02 | -0.045776  | 5.07E-02 | -0.226664  | 1.20E-01 |
| ENSG00000176793 | 18 | 4932485  | 4932483  | FKBP1      | ensembl <td>havana</td> <td>protein_coding</td> <td>YES</td> <td>YES</td> <td>-0.121842</td> <td>2.16E-01</td> <td>-0.142388</td> <td>3.26E-01</td> <td>0.193783</td> <td>3.81E-01</td> <td>-0.197601</td> <td>3.28E-01</td> <td>-0.211208</td> <td>1.07E-01</td> <td>-0.082869</td> <td>2.56E-02</td> <td>-0.026664</td> <td>8.66E-01</td>    | havana  | protein_coding | YES | YES | -0.121842 | 2.16E-01 | -0.142388 | 3.26E-01 | 0.193783  | 3.81E-01 | -0.197601  | 3.28E-01 | -0.211208 | 1.07E-01 | -0.082869  | 2.56E-02 | -0.026664  | 8.66E-01 |
| ENSG00000178954 | 15 | 2888167  | 2888465  | ACT14469.1 | havana                                                                                                                                                                                                                                                                                                                                         | lincRNA | antisense      | YES | YES | -0.181036 | 1.17E-01 | -0.084889 | 5.40E-02 | 0.191803  | 2.77E-01 | -0.197601  | 3.28E-01 | -0.272132 | 6.63E-02 | -0.094776  | 8.97E-02 | -0.149306  | 1.20E-01 |
| ENSG00000135166 | 2  | 23084639 | 23087928 | ITMCG      | ensembl <td>havana</td> <td>protein_coding</td> <td>YES</td> <td>YES</td> <td>-0.200328</td> <td>2.17E-01</td> <td>-0.145439</td> <td>3.14E-01</td> <td>0.0314378</td> <td>8.76E-01</td> <td>-0.197876</td> <td>3.28E-01</td> <td>-0.199268</td> <td>1.48E-01</td> <td>-0.1294236</td> <td>5.56E-02</td> <td>-0.0823329</td> <td>5.70E-01</td> | havana  | protein_coding | YES | YES | -0.200328 | 2.17E-01 | -0.145439 | 3.14E-01 | 0.0314378 | 8.76E-01 | -0.197876  | 3.28E-01 | -0.199268 | 1.48E-01 | -0.1294236 | 5.56E-02 | -0.0823329 | 5.70E-01 |
| ENSG00000127964 | 12 | 4857840  | 4857785  | AC007365.1 | havana                                                                                                                                                                                                                                                                                                                                         | lincRNA | antisense      | YES | YES | -0.200328 | 2.17E-01 | -0.145439 | 3.14E-01 | 0.0314378 | 8.76E-01 | -0.197876  | 3.28E-01 | -0.222099 | 1.07E-01 | -0.048369  | 3.04E-02 | -0.104038  | 4.72E-01 |
| ENSG00000120789 | 14 | 6294692  | 6294819  | TRAF3IP1   | ensembl <td>havana</td> <td>protein_coding</td> <td>YES</td> <td>YES</td> <td>-0.096902</td> <td>5.93E-01</td> <td>-0.05836</td> <td>8.05E-02</td> <td>0.133926</td> <td>2.44E-01</td> <td>-0.197778</td> <td>3.28E-01</td> <td>-0.197176</td> <td>4.89E-01</td> <td>-0.180466</td> <td>4.83E-02</td> <td>-0.018082</td> <td>9.30E-01</td>     | havana  | protein_coding | YES | YES | -0.096902 | 5.93E-01 | -0.05836  | 8.05E-02 | 0.133926  | 2.44E-01 | -0.197778  | 3.28E-01 | -0.197176 | 4.89E-01 | -0.180466  | 4.83E-02 | -0.018082  | 9.30E-01 |
| ENSG00000186330 | 7  | 7428270  | 7440810  | AL333660.1 | havana                                                                                                                                                                                                                                                                                                                                         | lincRNA | antisense      | YES | YES | -0.20803  | 7.11E-02 | -0.248355 | 1.16E-01 | 0.0405396 | 8.41E-01 | -0.197877  | 3.28E-01 | -0.197877 | 3.28E-01 | -0.061803  | 5.23E-02 | -0.061803  | 6.70E-01 |
| ENSG00000106102 | 9  | 1329012  | 1317157  | NFK1       | ensembl <td>havana</td> <td>protein_coding</td> <td>YES</td> <td>YES</td> <td>-0.105502</td> <td>3.61E-01</td> <td>-0.140784</td> <td>2.85E-02</td> <td>-0.026891</td> <td>9.64E-01</td> <td>-0.197911</td> <td>3.28E-01</td> <td>-0.111384</td> <td>1.44E-02</td> <td>-0.08073</td> <td>9.17E-02</td> <td>-0.003088</td> <td>9.60E-01</td>    | havana  | protein_coding | YES | YES | -0.105502 | 3.61E-01 | -0.140784 | 2.85E-02 | -0.026891 | 9.64E-01 | -0.197911  | 3.28E-01 | -0.111384 | 1.44E-02 | -0.08073   | 9.17E-02 | -0.003088  | 9.60E-01 |
| ENSG00000125967 | 5  | 3884425  | 3887700  | NRP1       | ensembl <td>havana</td> <td>protein_coding</td> <td>YES</td> <td>YES</td> <td>-0.182409</td> <td>2.58E-01</td> <td>-0.102167</td> <td>5.88E-02</td> <td>0.241156</td> <td>2.24E-01</td> <td>-0.197977</td> <td>3.28E-01</td> <td>-0.174766</td> <td>8.83E-02</td> <td>-0.091208</td> <td>3.85E-02</td> <td>-0.105051</td> <td>5.77E-01</td>    | havana  | protein_coding | YES | YES | -0.182409 | 2.58E-01 | -0.102167 | 5.88E-02 | 0.241156  | 2.24E-01 | -0.197977  | 3.28E-01 | -0.174766 | 8.83E-02 | -0.091208  | 3.85E-02 | -0.105051  | 5.77E-01 |
| ENSG00000131591 | 5  | 17063158 | 17068137 | KCNIP1-AS1 | havana                                                                                                                                                                                                                                                                                                                                         | lincRNA | antisense      | YES | YES | -0.182859 | 3.17E-01 | -0.059127 | 6.89E-02 | 0.1268827 | 5.22E-01 | -0.197936  | 3.28E-01 | -0.195460 | 5.66E-02 | -0.071691  | 3.43E-02 | -0.0016058 | 9.91E-01 |
| ENSG00000125179 | 13 | 3443540  | 3446803  | LOC100547  | havana                                                                                                                                                                                                                                                                                                                                         | lincRNA | antisense      | YES | YES | -0.142439 | 2.17E-01 | -0.028487 | 9.53E-02 | 0.137044  | 4.95E-01 | -0.197965  | 3.28E-01 | -0.259644 | 1.58E-01 | -0.026139  | 7.80E-02 | -0.114887  | 8.37E-01 |
| ENSG0000012489  | 10 | 7266192  | 7266786  | LOC100547  | havana                                                                                                                                                                                                                                                                                                                                         | lincRNA | antisense      | YES | YES | -0.142439 | 2.17E-01 | -0.028487 | 9.53E-02 | 0.137044  | 4.95E-01 | -0.197965  | 3.28E-01 | -0.259644 | 1.58E-01 | -0.026139  | 7.80E-02 | -0.114887  | 8.37E-01 |
| ENSG00000123113 | 5  | 4952970  | 4952973  | RNU6-51P   | ensembl <td>havana</td> <td>sRNA</td> <td>YES</td> <td>YES</td> <td>-0.166234</td> <td>3.58E-01</td> <td>-0.082911</td> <td>5.65E-02</td> <td>-0.07308</td> <td>7.17E-01</td> <td>-0.198009</td> <td>3.28E-01</td> <td>-0.173174</td> <td>2.11E-02</td> <td>-0.070384</td> <td>7.50E-02</td> <td>-0.098561</td> <td>9.46E-01</td>              | havana  | sRNA           | YES | YES | -0.166234 | 3.58E-01 | -0.082911 | 5.65E-02 | -0.07308  | 7.17E-01 | -0.198009  | 3.28E-01 | -0.173174 | 2.11E-02 | -0.070384  | 7.50E-02 | -0.098561  | 9.46E-01 |
| ENSG00000124744 | 2  | 13201015 | 13201700 | AC003787.2 | havana                                                                                                                                                                                                                                                                                                                                         | lincRNA | antisense      | YES | YES | -0.168345 | 1.44E-01 | -0.112396 | 3.73E-02 | 0.120760  | 2.68E-01 | -0.198021  | 3.28E-01 | -0.230751 | 3.23E-02 | -0.145656  | 3.14E-02 | -0.050556  | 3.14E-01 |
| ENSG00000126267 | 3  | 1073950  | 1074029  | LOC100646  | havana                                                                                                                                                                                                                                                                                                                                         | lincRNA | antisense      | YES | YES | -0.266878 | 9.49E-02 | -0.072576 | 6.10E-02 | 0.194123  | 3.42E-01 | -0.198021  | 3.28E-01 | -0.351579 | 2.26E-02 | -0.128620  | 5.88E-02 | -0.169398  | 2.55E-01 |
| ENSG00000124183 | 1  | 2529454  | 2529464  | SNRPB      | ensembl <td>havana</td> <td>protein_coding</td> <td>YES</td> <td>YES</td> <td>-0.100919</td> <td>3.82E-01</td> <td>-0.032076</td> <td>9.13E-02</td> <td>0.193967</td> <td>1.25E-01</td> <td>-0.198044</td> <td>3.28E-01</td> <td>-0.197138</td> <td>1.53E-01</td> <td>-0.049391</td> <td>8.87E-02</td> <td>-0.148079</td> <td>3.05E-01</td>    | havana  | protein_coding | YES | YES | -0.100919 | 3.82E-01 | -0.032076 | 9.13E-02 | 0.193967  | 1.25E-01 | -0.198044  | 3.28E-01 | -0.197138 | 1.53E-01 | -0.049391  | 8.87E-02 | -0.148079  | 3.05E-01 |
| ENSG00000123770 | 5  | 11277863 | 11277869 | RNU6-48P   | ensembl <td>havana</td> <td>sRNA</td> <td>YES</td> <td>YES</td> <td>-0.098299</td> <td>7.97E-01</td> <td>-0.060251</td> <td>4.99E-01</td> <td>0.1880252</td> <td>9.99E-01</td> <td>-0.1980252</td> <td>3.28E-01</td> <td>-0.068468</td> <td>6.27E-02</td> <td>-0.03848</td> <td>2.00E-02</td> <td>-0.03848</td> <td>2.00E-02</td>              | havana  | sRNA           | YES | YES | -0.098299 | 7.97E-01 | -0.060251 | 4.99E-01 | 0.1880252 | 9.99E-01 | -0.1980252 | 3.28E-01 | -0.068468 | 6.27E-02 | -0.03848   | 2.00E-02 | -0.03848   | 2.00E-02 |
| ENSG00000184848 | 17 | 1867898  | 1873613  | TRIM61     | ensembl <td>havana</td> <td>protein_coding</td> <td>YES</td> <td>YES</td> <td>-0.267271</td> <td>1.48E-01</td> <td>-0.102107</td> <td>1.81E-01</td> <td>0.179838</td> <td>3.85E-01</td> <td>-0.198054</td> <td>3.28E-01</td> <td>-0.279277</td> <td>5.09E-02</td> <td>-0.248184</td> <td>2.54E-02</td> <td>-0.224729</td> <td>1.17E-01</td>    | havana  | protein_coding | YES | YES | -0.267271 | 1.48E-01 | -0.102107 | 1.81E-01 | 0.179838  | 3.85E-01 | -0.198054  | 3.28E-01 | -0.279277 | 5.09E-02 | -0.248184  | 2.54E-02 | -0.224729  | 1.17E-01 |
| ENSG00000186817 | 1  | 7128144  | 7128144  | LOC100547  | havana                                                                                                                                                                                                                                                                                                                                         | lincRNA | antisense      | YES | YES | -0.173238 | 2.18E-01 | -0.147628 | 3.14E-01 | 0.174660  | 4.07E-01 | -0.198057  | 3.28E-01 | -0.279277 | 5.09E-02 | -0.248184  | 2.54E-02 | -0.224729  | 1.17E-01 |
| ENSG00000128171 | 1  | 1714315  | 1710515  | AC00664.1  | havana                                                                                                                                                                                                                                                                                                                                         | lincRNA | antisense      | YES | YES | -0.027709 | 8.45E-01 | -0.080948 | 5.39E-02 | 0.181361  | 1.10E-01 | -0.198065  | 3.28E-01 | -0.040527 | 7.17E-02 | -0.137111  | 5.46E-02 | -0.163126  | 6.37E-01 |
| ENSG00000142048 | 7  | 15180449 | 15181820 | AC003881.1 | havana                                                                                                                                                                                                                                                                                                                                         | lincRNA | antisense      | YES | YES | -0.09202  | 4.26E-01 | -0.055734 | 7.02E-02 | 0.1063891 | 5.98E-01 | -0.198086  | 3.28E-01 | -0.189992 | 1.69E-01 | -0.0729035 | 6.11E-02 | -0.0704105 | 6.37E-01 |
| ENSG00000123401 | 1  | 10265123 | 10265123 | LOC100547  | havana                                                                                                                                                                                                                                                                                                                                         | lincRNA | antisense      | YES | YES | -0.174268 | 2.18E-01 | -0.147628 | 3.14E-01 | 0.174660  | 4.07E-01 | -0.198057  | 3.28E-01 | -0.279277 | 5.09E-02 | -0.248184  | 2.54E-02 | -0.224729  | 1.17E-01 |
| ENSG00000124611 | 2  | 22761098 | 22761855 | SCY6A      | ensembl <td>havana</td> <td>protein_coding</td> <td>YES</td> <td>YES</td> <td>-0.19804</td> <td>2.10E-01</td> <td>-0.179241</td> <td>3.71E-01</td> <td>0.198155</td> <td>1.22E-01</td> <td>-0.198155</td> <td>1.22E-01</td> <td>-0.265123</td> <td>5.19E-02</td> <td>-0.0895139</td> <td>7.65E-02</td> <td>-0.1402193</td> <td>3.11E-01</td>   | havana  | protein_coding | YES | YES | -0.19804  | 2.10E-01 | -0.179241 | 3.71E-01 | 0.198155  | 1.22E-01 | -0.198155  | 1.22E-01 | -0.265123 | 5.19E-02 | -0.0895139 | 7.65E-02 | -0.1402193 | 3.11E-01 |
| ENSG00000102575 | 13 | 1157460  | 1157908  | ACPF       | ensembl <td>havana</td> <td>protein_coding</td> <td>YES</td> <td>YES</td> <td>-0.110264</td> <td>3.40E-01</td> <td>-0.112438</td> <td>1.40E-01</td> <td>0.1064888</td> <td>1.20E-01</td> <td>-0.198162</td> <td>3.28E-01</td> <td>-0.278169</td> <td>6.97E-02</td> <td>-0.161241</td> <td>4.51E-02</td> <td>-0.0724935</td> <td>6.03E-01</td>  | havana  | protein_coding | YES | YES | -0.110264 | 3.40E-01 | -0.112438 | 1.40E-01 | 0.1064888 | 1.20E-01 | -0.198162  | 3.28E-01 | -0.278169 | 6.97E-02 | -0.161241  | 4.51E-02 | -0.0724935 | 6.03E-01 |
| ENSG00000124801 | 1  | 10125961 | 10125961 | LOC100547  | havana                                                                                                                                                                                                                                                                                                                                         | lincRNA | antisense      | YES | YES | -0.142439 | 2.17E-01 | -0.028487 | 9.53E-02 | 0.137044  | 4.95E-01 | -0.197965  | 3.28E-01 | -0.259644 | 1.58E-01 | -0.026139  | 7.80E-02 | -0.114887  | 8.37E-01 |
| ENSG00000100275 | 5  | 16958356 | 16960478 | SPPL1      | ensembl <td>havana</td> <td>protein_coding</td> <td>YES</td> <td>YES</td> <td>-0.101936</td> <td>8.56E-01</td> <td>-0.041207</td> <td>7.64E-02</td> <td>0.2146066</td> <td>2.82E-01</td> <td>-0.198123</td> <td>3.28E-01</td> <td>-0.056565</td> <td>6.89E-02</td> <td>-0.1274407</td> <td>6.03E-02</td> <td>-0.0345359</td> <td>8.70E-01</td> | havana  | protein_coding | YES | YES | -0.101936 | 8.56E-01 | -0.041207 | 7.64E-02 | 0.2146066 | 2.82E-01 | -0.198123  | 3.28E-01 | -0.056565 | 6.89E-02 | -0.1274407 | 6.03E-02 | -0.0345359 | 8.70E-01 |
| ENSG00000103012 | 16 | 1737612  | 1739720  | SPB3       | ensembl <td>havana</td> <td>protein_coding</td> <td>YES</td> <td>YES</td> <td>-0.282618</td> <td>1.28E-01</td> <td>-0.111612</td> <td>4.40E-02</td> <td>0.283203</td> <td>1.52E-01</td> <td>-0.198230</td> <td>3.28E-01</td> <td>-0.428237</td> <td>1.87E-02</td> <td>-0.488247</td> <td>2.13E-02</td> <td>-0.248184</td> <td>8.79E-01</td>    | havana  | protein_coding | YES | YES | -0.282618 | 1.28E-01 | -0.111612 | 4.40E-02 | 0.283203  | 1.52E-01 | -0.198230  | 3.28E-01 | -0.428237 | 1.87E-02 | -0.488247  | 2.13E-02 | -0.248184  | 8.79E-01 |
| ENSG00000149266 | 11 | 6086762  | 6087493  | SP3        | ensembl <td>havana</td> <td>protein_coding</td> <td>YES</td> <td>YES</td> <td>-0.202143</td> <td>2.18E-01</td> <td>-0.107161</td> <td>2.32E-01</td> <td>0.199983</td> <td>3.25E-01</td> <td>-0.198230</td> <td>3.28E-01</td> <td>-0.351579</td> <td>2.26E-02</td> <td>-0.128620</td> <td>5.88E-02</td> <td>-0.169398</td> <td>2.55E-01</td>    | havana  | protein_coding | YES | YES | -0.202143 | 2.18E-01 | -0.107161 | 2.32E-01 | 0.199983  | 3.25E-01 | -0.198230  | 3.28E-01 | -0.351579 | 2.26E-02 | -0.128620  | 5.88E-02 | -0.169398  | 2.55E-01 |
| ENSG00000127944 | 1  | 8246601  | 8246645  | LOC10298.5 | havana                                                                                                                                                                                                                                                                                                                                         | lincRNA | antisense      | YES | YES | -0.121962 | 2.10E-01 | -0.112710 | 2.82E-01 | 0.1452929 | 3.08E-01 | -0.198230  | 3.28E-01 | -0.282739 | 2.98E-02 | -0.130923  | 5.59E-02 | -0.092174  | 1.44E-01 |
| ENSG00000131038 | 9  | 7796200  | 7888380  | DMRT1      | ensembl <td>havana</td> <td>protein_coding</td> <td>YES</td> <td>YES</td> <td>-0.080051</td> <td>4.73E-01</td> <td>-0.121614</td> <td>1.40E-01</td> <td>0.1594210</td> <td>4.27E-01</td> <td>-0.198230</td> <td>3.28E-01</td> <td>-0.057181</td> <td>6.81E-02</td>                                                                             | havana  | protein_coding | YES | YES | -0.080051 | 4.73E-01 | -0.121614 | 1.40E-01 | 0.1594210 | 4.27E-01 | -0.198230  | 3.28E-01 | -0.057181 | 6.81E-02 |            |          |            |          |

| ENSG0000028054  | 6  | 13582780 | 13588813 | ALMO17L2   | havana     | lncRNA     | YES        | YES | -0.077003  | 5.06e-01   | -0.0770042 | 5.06e-01   | -0.1413573 | 4.82e-01   | -0.1999519 | 3.17e-01   | -0.1191395 | 3.91e-01   | -0.0270183 | 9.03e-01   | -0.079225  | 5.84e-01   |          |
|-----------------|----|----------|----------|------------|------------|------------|------------|-----|------------|------------|------------|------------|------------|------------|------------|------------|------------|------------|------------|------------|------------|------------|----------|
| ENSG0000024007  | 15 | 3475884  | 3481305  | AC097451.1 | havana     | transcript | YES        | YES | -0.05924   | 6.41e-01   | 0.0184764  | 9.25e-01   | 0.5431673  | 2.61e-01   | -0.199994  | 3.17e-01   | -0.177778  | 3.99e-01   | 0.057662   | 7.12e-01   | 0.1270935  | 1.55e-01   |          |
| ENSG0000027960  | 22 | 3024625  | 3024698  | AC042451.1 | havana     | transcript | YES        | YES | -0.07381   | 5.12e-01   | -0.07381   | 5.12e-01   | -0.1424842 | 4.41e-01   | -0.199994  | 3.17e-01   | -0.1382175 | 3.18e-01   | 0.0282175  | 1.31e-01   | 0.0282175  | 1.31e-01   |          |
| ENSG0000028812  | 22 | 3024625  | 3024698  | AC042451.1 | havana     | transcript | YES        | YES | -0.07381   | 5.12e-01   | -0.07381   | 5.12e-01   | -0.1424842 | 4.41e-01   | -0.199994  | 3.17e-01   | -0.1382175 | 3.18e-01   | 0.0282175  | 1.31e-01   | 0.0282175  | 1.31e-01   |          |
| ENSG0000024486  | 11 | 5734914  | 5735181  | BTB108     | transcript | havana     | transcript | YES | YES        | -0.04524   | 2.68e-01   | 0.057948   | 6.80e-01   | 0.1156939  | 5.79e-01   | -0.19995   | 3.17e-01   | -0.127246  | 3.77e-01   | 0.1473352  | 5.02e-01   | -0.054975  | 7.07e-01 |
| ENSG0000021216  | 19 | 4910028  | 4910054  | BTB108     | transcript | havana     | transcript | YES | YES        | -0.04524   | 2.68e-01   | 0.057948   | 6.80e-01   | 0.1156939  | 5.79e-01   | -0.19995   | 3.17e-01   | -0.127246  | 3.77e-01   | 0.1473352  | 5.02e-01   | -0.054975  | 7.07e-01 |
| ENSG0000024830  | 6  | 8093728  | 8716929  | HTR1E      | transcript | havana     | transcript | YES | YES        | -0.162938  | 1.57e-01   | -0.162938  | 1.57e-01   | -0.144357  | 4.73e-01   | -0.199965  | 3.17e-01   | -0.1218894 | 1.12e-01   | 0.1317181  | 5.49e-01   | -0.195343  | 3.34e-01 |
| ENSG0000024149  | 1  | 7512974  | 7513276  | AC09786.2  | havana     | transcript | YES        | YES | -0.20783   | 6.97e-01   | -0.1623541 | 2.60e-01   | -0.1378955 | 3.85e-01   | -0.199883  | 3.17e-01   | -0.262436  | 5.52e-01   | -0.080734  | 7.14e-01   | -0.188927  | 3.36e-01   |          |
| ENSG0000021873  | 20 | 420002   | 420037   | NAEL       | transcript | havana     | transcript | YES | YES        | -0.06237   | 4.68e-01   | -0.06237   | 4.68e-01   | -0.1424842 | 4.41e-01   | -0.199994  | 3.17e-01   | -0.1382175 | 3.18e-01   | 0.0282175  | 1.31e-01   | 0.0282175  | 1.31e-01 |
| ENSG0000025953  | 16 | 6800275  | 6802526  | NAEL       | transcript | havana     | transcript | YES | YES        | -0.079892  | 4.98e-01   | -0.052254  | 7.24e-01   | -0.200063  | 3.17e-01   | -0.200063  | 3.17e-01   | -0.0801230 | 4.97e-01   | 0.0578475  | 7.01e-01   | -0.1592971 | 2.86e-01 |
| ENSG0000025747  | 14 | 5083182  | 5083180  | AL133483.3 | havana     | transcript | YES        | YES | -0.083934  | 4.72e-01   | -0.0748836 | 6.06e-01   | 0.0407564  | 8.42e-01   | -0.200048  | 3.17e-01   | -0.1415797 | 3.07e-01   | -0.029249  | 6.93e-01   | 0.0083761  | 8.79e-01   |          |
| ENSG0000027713  | 12 | 3209383  | 3209407  | AC09786.2  | havana     | transcript | YES        | YES | -0.083934  | 4.72e-01   | -0.0748836 | 6.06e-01   | 0.0407564  | 8.42e-01   | -0.200048  | 3.17e-01   | -0.1415797 | 3.07e-01   | -0.029249  | 6.93e-01   | 0.0083761  | 8.79e-01   |          |
| ENSG0000022842  | 6  | 1932428  | 1989380  | LINC       | transcript | havana     | transcript | YES | YES        | -0.163224  | 1.56e-01   | -0.093343  | 1.58e-01   | -0.2534854 | 2.02e-01   | -0.200195  | 3.17e-01   | -0.279355  | 4.08e-01   | -0.0491181 | 7.93e-01   | -0.104131  | 3.71e-01 |
| ENSG0000021077  | 10 | 2787121  | 2744488  | PTCD3      | transcript | havana     | transcript | YES | YES        | -0.204231  | 7.48e-01   | -0.106281  | 4.87e-01   | -0.136773  | 5.00e-01   | -0.200029  | 3.17e-01   | -0.1322847 | 7.42e-01   | 0.127326   | 5.80e-01   | -0.140369  | 3.31e-01 |
| ENSG0000022342  | 10 | 7450081  | 7450053  | AC02250.1  | havana     | transcript | YES        | YES | -0.159248  | 1.67e-01   | -0.148952  | 3.12e-01   | 0.0915871  | 6.50e-01   | -0.200029  | 3.17e-01   | -0.1249497 | 1.19e-01   | -0.129758  | 5.54e-01   | -0.104996  | 9.42e-01   |          |
| ENSG0000021773  | 12 | 4901504  | 4901413  | PKnox1     | transcript | havana     | transcript | YES | YES        | -0.28183   | 2.46e-01   | -0.05998   | 3.83e-01   | 0.0080771  | 9.69e-01   | -0.20004   | 3.17e-01   | -0.238369  | 5.92e-01   | 0.1612187  | 4.62e-01   | -0.073994  | 6.73e-01 |
| ENSG0000021369  | 16 | 4799447  | 4731714  | AC09753.1  | havana     | transcript | YES        | YES | -0.144455  | 2.10e-01   | -0.144455  | 2.10e-01   | -0.0600229 | 7.47e-01   | -0.200021  | 3.17e-01   | -0.2120029 | 3.21e-01   | -0.0804458 | 7.03e-01   | -0.0847508 | 5.58e-01   |          |
| ENSG0000027414  | 17 | 6657034  | 6695177  | AL0215P1   | transcript | havana     | transcript | YES | YES        | -0.230405  | 2.10e-01   | -0.150263  | 1.75e-01   | -0.103359  | 6.01e-01   | -0.200064  | 3.17e-01   | -0.2829027 | 1.82e-01   | -0.192626  | 3.44e-01   | -0.1624339 | 2.60e-01 |
| ENSG0000021501  | 1  | 1400214  | 1403367  | AC09786.2  | havana     | transcript | YES        | YES | -0.07794   | 5.00e-01   | -0.07794   | 5.00e-01   | -0.1424842 | 4.41e-01   | -0.199994  | 3.17e-01   | -0.1382175 | 3.18e-01   | 0.0282175  | 1.31e-01   | 0.0282175  | 1.31e-01   |          |
| ENSG0000021060  | 12 | 1247768  | 12488268 | SCAB1      | transcript | havana     | transcript | YES | YES        | -0.156984  | 1.73e-01   | -0.057601  | 7.26e-01   | -0.1395848 | 4.87e-01   | -0.200113  | 3.17e-01   | -0.1572928 | 5.78e-01   | -0.1018931 | 6.97e-01   | -0.1274924 | 3.01e-01 |
| ENSG0000021037  | 17 | 1247911  | 1247876  | USHP1      | transcript | havana     | transcript | YES | YES        | -0.108813  | 3.44e-01   | -0.03064   | 9.83e-01   | -0.0927744 | 6.23e-01   | -0.201722  | 3.17e-01   | -0.2186609 | 3.11e-01   | -0.1483951 | 4.99e-01   | -0.1212524 | 3.67e-01 |
| ENSG0000024780  | 20 | 1304881  | 1376001  | MAD1D      | transcript | havana     | transcript | YES | YES        | -0.200364  | 4.42e-01   | -0.200364  | 4.42e-01   | -0.200364  | 4.42e-01   | -0.200364  | 4.42e-01   | -0.200364  | 4.42e-01   | -0.200364  | 4.42e-01   | -0.200364  | 4.42e-01 |
| ENSG0000021973  | 7  | 4414881  | 4412458  | PIPO2      | transcript | havana     | transcript | YES | YES        | -0.237934  | 3.72e-01   | -0.234413  | 1.61e-01   | 0.0858096  | 6.73e-01   | -0.200738  | 3.17e-01   | -0.29558   | 3.00e-01   | 0.0739212  | 7.44e-01   | -0.0736564 | 6.10e-01 |
| ENSG0000026757  | 4  | 12176458 | 12176814 | PP21B3     | transcript | havana     | transcript | YES | YES        | -0.227179  | 2.35e-01   | -0.2040997 | 3.07e-01   | -0.202822  | 3.17e-01   | -0.245939  | 1.04e-01   | -0.1926072 | 3.76e-01   | -0.1926072 | 3.76e-01   | -0.1926072 | 3.76e-01 |
| ENSG0000025796  | 21 | 3389841  | 3384926  | CRVA       | transcript | havana     | transcript | YES | YES        | -0.244775  | 2.44e-01   | -0.0710493 | 5.69e-01   | -0.4429411 | 2.96e-01   | -0.200884  | 3.16e-01   | -0.2842129 | 1.13e-01   | -0.4642129 | 1.06e-01   | -0.4647748 | 5.80e-01 |
| ENSG0000022009  | 1  | 4489882  | 4483385  | BTB108     | transcript | havana     | transcript | YES | YES        | -0.062228  | 2.12e-01   | 0.0987749  | 5.04e-01   | 0.4643323  | 3.78e-01   | -0.200233  | 3.16e-01   | -0.286679  | 3.00e-01   | -0.1007729 | 3.36e-01   | -0.1633584 | 2.51e-01 |
| ENSG0000024191  | 1  | 9634638  | 9638601  | ENGA3      | transcript | havana     | transcript | YES | YES        | -0.209643  | 6.73e-01   | -0.158988  | 2.80e-01   | 0.0304561  | 8.89e-01   | -0.200284  | 3.16e-01   | -0.282894  | 3.06e-01   | -0.171319  | 4.34e-01   | -0.095184  | 6.00e-01 |
| ENSG0000023040  | 10 | 1337839  | 1333123  | TUBGCP2    | transcript | havana     | transcript | YES | YES        | -0.20789   | 6.99e-01   | -0.120241  | 4.04e-01   | -0.2547384 | 2.00e-01   | -0.200043  | 3.16e-01   | -0.215178  | 2.70e-01   | -0.1507862 | 4.48e-01   | -0.090291  | 7.00e-01 |
| ENSG0000029994  | 1  | 1001327  | 1001347  | ENGA3      | transcript | havana     | transcript | YES | YES        | -0.209643  | 6.73e-01   | -0.158988  | 2.80e-01   | 0.0304561  | 8.89e-01   | -0.200284  | 3.16e-01   | -0.282894  | 3.06e-01   | -0.171319  | 4.34e-01   | -0.095184  | 6.00e-01 |
| ENSG0000026997  | 7  | 2710614  | 2715281  | H0XA3      | transcript | havana     | transcript | YES | YES        | -0.10134   | 3.91e-01   | -0.095935  | 5.21e-01   | -0.3416020 | 8.17e-01   | -0.200062  | 3.16e-01   | -0.1615704 | 2.24e-01   | -0.136301  | 5.55e-01   | -0.100203  | 4.00e-01 |
| ENSG0000025915  | 18 | 75112137 | 75125565 | AC04581.5  | havana     | transcript | YES        | YES | -0.1484019 | 1.79e-01   | -0.151594  | 3.49e-01   | -0.0824872 | 7.57e-01   | -0.200367  | 3.16e-01   | -0.2211763 | 1.07e-01   | -0.0805646 | 7.15e-01   | -0.0779252 | 5.91e-01   |          |
| ENSG0000027058  | 14 | 4012124  | 4012714  | ARHGAP14   | transcript | havana     | transcript | YES | YES        | -0.114315  | 3.22e-01   | -0.097010  | 5.01e-01   | 0.1838460  | 3.58e-01   | -0.200163  | 3.16e-01   | -0.1752602 | 2.05e-01   | -0.1254291 | 8.51e-01   | -0.1254291 | 8.51e-01 |
| ENSG0000025972  | 10 | 8416728  | 8417293  | CERN2      | transcript | havana     | transcript | YES | YES        | -0.2155137 | 5.98e-01   | -0.1161499 | 4.24e-01   | -0.211635  | 2.81e-01   | -0.200418  | 3.16e-01   | -0.1374947 | 3.64e-01   | -0.103085  | 8.63e-01   | -0.115838  | 6.47e-01 |
| ENSG0000023877  | 1  | 1401387  | 1401387  | BTB108     | transcript | havana     | transcript | YES | YES        | -0.07794   | 5.00e-01   | -0.07794   | 5.00e-01   | -0.1424842 | 4.41e-01   | -0.199994  | 3.17e-01   | -0.1382175 | 3.18e-01   | 0.0282175  | 1.31e-01   | 0.0282175  | 1.31e-01 |
| ENSG0000025335  | 15 | 7895906  | 7900780  | RASGEF1    | transcript | havana     | transcript | YES | YES        | -0.154083  | 1.81e-01   | -0.129132  | 3.75e-01   | 0.0863401  | 6.68e-01   | -0.20041   | 3.16e-01   | -0.1407389 | 3.17e-01   | -0.1070165 | 6.26e-01   | -0.0649995 | 6.34e-01 |
| ENSG0000021694  | 7  | 1379137  | 1380310  | AC09800.4  | havana     | transcript | YES        | YES | -0.183364  | 2.41e-01   | -0.1189103 | 7.72e-01   | -0.1189103 | 7.72e-01   | -0.200451  | 3.16e-01   | -0.2121661 | 1.16e-01   | -0.0696136 | 7.22e-01   | -0.101834  | 4.81e-01   |          |
| ENSG0000021177  | 7  | 14239980 | 14240037 | TRV1D.1    | transcript | havana     | transcript | YES | YES        | -0.0894734 | 5.49e-01   | -0.04999   | 4.70e-01   | 0.1379341  | 5.52e-01   | -0.200445  | 3.16e-01   | -0.2150208 | 1.23e-01   | -0.0888102 | 1.99e-01   | -0.0888102 | 1.99e-01 |
| ENSG0000025629  | 1  | 1601387  | 1601387  | BTB108     | transcript | havana     | transcript | YES | YES        | -0.07794   | 5.00e-01   | -0.07794   | 5.00e-01   | -0.1424842 | 4.41e-01   | -0.199994  | 3.17e-01   | -0.1382175 | 3.18e-01   | 0.0282175  | 1.31e-01   | 0.0282175  | 1.31e-01 |
| ENSG0000024622  | 17 | 4837242  | 4838070  | AC04222.2  | havana     | transcript | YES        | YES | -0.1897676 | 1.89e-01   | -0.162683  | 2.49e-01   | 0.0328383  | 8.71e-01   | -0.200454  | 3.16e-01   | -0.2186609 | 5.58e-01   | -0.090728  | 6.00e-01   | -0.0727881 | 8.51e-01   |          |
| ENSG00000218133 | 9  | 3738540  | 3738921  | TMEM215    | transcript | havana     | transcript | YES | YES        | -0.1513718 | 1.89e-01   | -0.0971229 | 4.93e-01   | -0.077778  | 9.69e-01   | -0.2005174 | 3.16e-01   | -0.2298443 | 8.98e-01   | -0.106291  | 6.29e-01   | -0.0649929 | 6.54e-01 |
| ENSG0000024602  | 1  | 12176    |          |            |            |            |            |     |            |            |            |            |            |            |            |            |            |            |            |            |            |            |          |







Table with columns for gene ID, coordinates, gene name, transcript, and various numerical values. The table lists numerous genes such as ZMYND12, SNAI2P1, LINC02481, etc., with their respective genomic coordinates and associated data points.

| ENSG0000029107 | 20667836  | 20679984  | ABHD17A2  | havana | processed_pseudo | -0.1462949 | 2.04e-01 | -0.1312781 | 2.08e-01  | 0.04129844 | 8.39e-01 | -0.2089116 | 2.96e-01  | -0.1609246 | 2.45e-01   | -0.1187153 | 5.90e-01   | -0.0561396 | 6.98e-01   |          |
|----------------|-----------|-----------|-----------|--------|------------------|------------|----------|------------|-----------|------------|----------|------------|-----------|------------|------------|------------|------------|------------|------------|----------|
| ENSG0000029108 | 8824170   | 8826900   | ACD154A.2 | havana | transcript       | -0.1524033 | 1.58e-01 | -0.1074499 | 4.58e-01  | 0.0682827  | 2.84e-01 | -0.20891   | 2.96e-01  | -0.1737864 | 8.94e-01   | -0.0781714 | 7.21e-01   | -0.0709175 | 5.95e-01   |          |
| ENSG0000029109 | 1357318   | 3963649   | ACD154A.2 | havana | transcript       | -0.1524033 | 1.58e-01 | -0.1074499 | 4.58e-01  | 0.0682827  | 2.84e-01 | -0.20891   | 2.96e-01  | -0.1737864 | 8.94e-01   | -0.0781714 | 7.21e-01   | -0.0709175 | 5.95e-01   |          |
| ENSG0000029110 | 6069985   | 6071587   | M54B      | havana | transcript       | -0.1676766 | 1.50e-01 | -0.1023422 | 8.80e-01  | 0.2074416  | 7.08e-01 | -0.20894   | 2.96e-01  | -0.237868  | 4.52e-01   | -0.0921137 | 6.76e-01   | -0.0813807 | 5.40e-01   |          |
| ENSG0000029111 | 12643760  | 12647391  | ZDC       | havana | transcript       | -0.1676766 | 1.50e-01 | -0.1023422 | 8.80e-01  | 0.2074416  | 7.08e-01 | -0.20894   | 2.96e-01  | -0.237868  | 4.52e-01   | -0.0921137 | 6.76e-01   | -0.0813807 | 5.40e-01   |          |
| ENSG0000029112 | 12004927  | 12017417  | EPG2      | havana | transcript       | -0.1794317 | 1.02e-01 | -0.1121059 | 1.32e-01  | 0.0962439  | 6.31e-01 | -0.20893   | 2.96e-01  | -0.20097   | 3.31e-01   | -0.0804762 | 8.52e-01   | -0.0410230 | 7.74e-01   |          |
| ENSG0000029113 | 133638363 | 133659129 | DBP       | havana | transcript       | -0.2029223 | 7.67e-01 | -0.1313777 | 3.64e-01  | 0.0583463  | 8.77e-01 | -0.20893   | 2.96e-01  | -0.20097   | 3.31e-01   | -0.0804762 | 8.52e-01   | -0.0410230 | 7.74e-01   |          |
| ENSG0000029114 | 11722879  | 11729351  | ACD1956.1 | havana | processed_pseudo | -0.138065  | 2.31e-01 | -0.1124795 | 3.97e-01  | 0.1839631  | 3.58e-01 | -0.20894   | 2.96e-01  | -0.237868  | 4.52e-01   | -0.0781714 | 7.21e-01   | -0.0709175 | 5.95e-01   |          |
| ENSG0000029115 | 14507040  | 14519144  | TPP25     | havana | transcript       | -0.084413  | 3.65e-01 | -0.084413  | 3.65e-01  | 0.084413   | 3.65e-01 | -0.20894   | 2.96e-01  | -0.237868  | 4.52e-01   | -0.0781714 | 7.21e-01   | -0.0709175 | 5.95e-01   |          |
| ENSG0000029116 | 3527209   | 3528304   | ACD1956.1 | havana | transcript       | -0.138065  | 2.31e-01 | -0.1124795 | 3.97e-01  | 0.1839631  | 3.58e-01 | -0.20894   | 2.96e-01  | -0.237868  | 4.52e-01   | -0.0781714 | 7.21e-01   | -0.0709175 | 5.95e-01   |          |
| ENSG0000029117 | 4478385   | 4478870   | BEST4     | havana | transcript       | -0.1273552 | 6.32e-01 | -0.0786657 | 5.87e-01  | 0.2791494  | 1.95e-01 | -0.20893   | 2.96e-01  | -0.237868  | 4.52e-01   | -0.0781714 | 7.21e-01   | -0.0709175 | 5.95e-01   |          |
| ENSG0000029118 | 1303134   | 1303134   | UBP1      | havana | transcript       | -0.2029223 | 7.67e-01 | -0.1313777 | 3.64e-01  | 0.0583463  | 8.77e-01 | -0.20893   | 2.96e-01  | -0.20097   | 3.31e-01   | -0.0804762 | 8.52e-01   | -0.0410230 | 7.74e-01   |          |
| ENSG0000029119 | 3853323   | 3853474   | UBP1      | havana | transcript       | -0.2029223 | 7.67e-01 | -0.1313777 | 3.64e-01  | 0.0583463  | 8.77e-01 | -0.20893   | 2.96e-01  | -0.20097   | 3.31e-01   | -0.0804762 | 8.52e-01   | -0.0410230 | 7.74e-01   |          |
| ENSG0000029120 | 5294641   | 5295585   | ACD1956.1 | havana | transcript       | -0.138065  | 2.31e-01 | -0.1124795 | 3.97e-01  | 0.1839631  | 3.58e-01 | -0.20894   | 2.96e-01  | -0.237868  | 4.52e-01   | -0.0781714 | 7.21e-01   | -0.0709175 | 5.95e-01   |          |
| ENSG0000029121 | 12288041  | 12289216  | ACD1956.1 | havana | transcript       | -0.138065  | 2.31e-01 | -0.1124795 | 3.97e-01  | 0.1839631  | 3.58e-01 | -0.20894   | 2.96e-01  | -0.237868  | 4.52e-01   | -0.0781714 | 7.21e-01   | -0.0709175 | 5.95e-01   |          |
| ENSG0000029122 | 1301953   | 13173062  | TPP25     | havana | transcript       | -0.084413  | 3.65e-01 | -0.084413  | 3.65e-01  | 0.084413   | 3.65e-01 | -0.20894   | 2.96e-01  | -0.237868  | 4.52e-01   | -0.0781714 | 7.21e-01   | -0.0709175 | 5.95e-01   |          |
| ENSG0000029123 | 5271294   | 5286621   | ACD1956.1 | havana | transcript       | -0.1064124 | 3.07e-01 | -0.0423717 | 7.70e-01  | 0.0053343  | 9.78e-01 | -0.20893   | 2.96e-01  | -0.20097   | 3.31e-01   | -0.0804762 | 8.52e-01   | -0.0410230 | 7.74e-01   |          |
| ENSG0000029124 | 248414    | 2409976   | ZDC       | havana | transcript       | -0.1676766 | 1.50e-01 | -0.1023422 | 8.80e-01  | 0.2074416  | 7.08e-01 | -0.20894   | 2.96e-01  | -0.237868  | 4.52e-01   | -0.0921137 | 6.76e-01   | -0.0813807 | 5.40e-01   |          |
| ENSG0000029125 | 12004927  | 12017417  | EPG2      | havana | transcript       | -0.1794317 | 1.02e-01 | -0.1121059 | 1.32e-01  | 0.0962439  | 6.31e-01 | -0.20893   | 2.96e-01  | -0.20097   | 3.31e-01   | -0.0804762 | 8.52e-01   | -0.0410230 | 7.74e-01   |          |
| ENSG0000029126 | 4354918   | 4354806   | ENOX1.5A  | havana | transcript       | -0.2118936 | 6.43e-01 | -0.0770599 | 5.94e-01  | 0.2484301  | 2.11e-01 | -0.20893   | 2.96e-01  | -0.237868  | 4.52e-01   | -0.0781714 | 7.21e-01   | -0.0709175 | 5.95e-01   |          |
| ENSG0000029127 | 3688920   | 3701299   | MEM2      | havana | transcript       | -0.2021387 | 7.79e-01 | -0.1356849 | 3.81e-01  | 0.1768162  | 3.78e-01 | -0.20912   | 2.96e-01  | -0.2118936 | 6.43e-01   | -0.0858246 | 6.95e-01   | -0.0179398 | 1.66e-01   |          |
| ENSG0000029128 | 12288041  | 12289216  | TPP25     | havana | transcript       | -0.084413  | 3.65e-01 | -0.084413  | 3.65e-01  | 0.084413   | 3.65e-01 | -0.20894   | 2.96e-01  | -0.237868  | 4.52e-01   | -0.0781714 | 7.21e-01   | -0.0709175 | 5.95e-01   |          |
| ENSG0000029129 | 10686850  | 10687594  | TMEM74    | havana | transcript       | -0.2173472 | 1.23e-01 | -0.157528  | 0.0598888 | 9.23e-01   | 0.209237 | 2.96e-01   | -0.209237 | 2.96e-01   | -0.2373472 | 9.47e-01   | -0.1557133 | 4.78e-01   | -0.0792921 | 6.03e-01 |
| ENSG0000029130 | 5807776   | 5808263   | MRP12P2   | havana | processed_pseudo | -0.1382678 | 1.12e-01 | -0.1068272 | 9.37e-01  | 0.1688227  | 3.27e-01 | -0.20923   | 2.96e-01  | -0.2118936 | 6.43e-01   | -0.1076789 | 7.52e-01   | -0.1485543 | 3.03e-01   |          |
| ENSG0000029131 | 3699214   | 3699643   | ACD1956.1 | havana | transcript       | -0.138065  | 2.31e-01 | -0.1124795 | 3.97e-01  | 0.1839631  | 3.58e-01 | -0.20894   | 2.96e-01  | -0.237868  | 4.52e-01   | -0.0781714 | 7.21e-01   | -0.0709175 | 5.95e-01   |          |
| ENSG0000029132 | 4022208   | 4022667   | CNR       | havana | transcript       | -0.150798  | 1.91e-01 | -0.0988115 | 3.08e-01  | 0.093552   | 6.59e-01 | -0.20929   | 2.96e-01  | -0.20929   | 2.96e-01   | -0.2373472 | 9.47e-01   | -0.1557133 | 4.78e-01   |          |
| ENSG0000029133 | 9471654   | 9501117   | CLIP12    | havana | transcript       | -0.1912566 | 9.48e-01 | -0.0812098 | 5.72e-01  | 0.1915123  | 3.48e-01 | -0.20929   | 2.96e-01  | -0.20929   | 2.96e-01   | -0.2373472 | 9.47e-01   | -0.1557133 | 4.78e-01   |          |
| ENSG0000029134 | 3049560   | 3041168   | ALDH1B3.2 | havana | transcript       | -0.1842848 | 1.14e-01 | -0.0800722 | 9.47e-01  | 0.1907287  | 3.41e-01 | -0.20915   | 2.96e-01  | -0.20915   | 2.96e-01   | -0.2373472 | 9.47e-01   | -0.1557133 | 4.78e-01   |          |
| ENSG0000029135 | 7459784   | 7459784   | TPP25     | havana | transcript       | -0.084413  | 3.65e-01 | -0.084413  | 3.65e-01  | 0.084413   | 3.65e-01 | -0.20894   | 2.96e-01  | -0.237868  | 4.52e-01   | -0.0781714 | 7.21e-01   | -0.0709175 | 5.95e-01   |          |
| ENSG0000029136 | 1749474   | 1751385   | ACD1956.1 | havana | transcript       | -0.009354  | 9.98e-01 | -0.0406865 | 7.36e-01  | 0.2070768  | 3.00e-01 | -0.20915   | 2.96e-01  | -0.2142828 | 3.00e-01   | -0.1582878 | 4.52e-01   | -0.1372978 | 3.42e-01   |          |
| ENSG0000029137 | 14376450  | 14376983  | FAM51AP   | havana | transcript       | -0.1936199 | 9.14e-01 | -0.167825  | 2.44e-01  | 0.0246001  | 9.03e-01 | -0.20929   | 2.96e-01  | -0.21684   | 5.88e-01   | -0.0407996 | 7.71e-01   | -0.0246001 | 7.09e-01   |          |
| ENSG0000029138 | 11450197  | 11450247  | ACD1956.1 | havana | transcript       | -0.138065  | 2.31e-01 | -0.1124795 | 3.97e-01  | 0.1839631  | 3.58e-01 | -0.20894   | 2.96e-01  | -0.237868  | 4.52e-01   | -0.0781714 | 7.21e-01   | -0.0709175 | 5.95e-01   |          |
| ENSG0000029139 | 5298940   | 5299479   | ITGA2     | havana | transcript       | -0.1662515 | 1.48e-01 | -0.051024  | 7.80e-01  | 0.2909139  | 1.31e-01 | -0.20938   | 2.96e-01  | -0.2550709 | 6.22e-01   | -0.1382895 | 1.17e-01   | -0.2097964 | 3.70e-01   |          |
| ENSG0000029140 | 12273787  | 12278480  | NPSSA     | havana | transcript       | -0.2021387 | 7.79e-01 | -0.1356849 | 3.81e-01  | 0.1768162  | 3.78e-01 | -0.20912   | 2.96e-01  | -0.2118936 | 6.43e-01   | -0.0858246 | 6.95e-01   | -0.0179398 | 1.66e-01   |          |
| ENSG0000029141 | 7489784   | 74871447  | ACD1956.1 | havana | transcript       | -0.084413  | 3.65e-01 | -0.084413  | 3.65e-01  | 0.084413   | 3.65e-01 | -0.20894   | 2.96e-01  | -0.237868  | 4.52e-01   | -0.0781714 | 7.21e-01   | -0.0709175 | 5.95e-01   |          |
| ENSG0000029142 | 13203636  | 13218488  | JAM3P     | havana | transcript       | -0.1892937 | 1.19e-01 | -0.1334847 | 9.84e-01  | 0.1134603  | 5.71e-01 | -0.20929   | 2.96e-01  | -0.2118936 | 6.43e-01   | -0.0858246 | 6.95e-01   | -0.0179398 | 1.66e-01   |          |
| ENSG0000029143 | 4303858   | 4305266   | ITIL1-AS1 | havana | transcript       | -0.113327  | 3.28e-01 | -0.0557703 | 7.02e-01  | 0.0017551  | 9.93e-01 | -0.20929   | 2.96e-01  | -0.20701   | 3.22e-01   | -0.0210734 | 9.63e-01   | -0.0209396 | 6.34e-01   |          |
| ENSG0000029144 | 1463946   | 1463946   | TPP25     | havana | transcript       | -0.084413  | 3.65e-01 | -0.084413  | 3.65e-01  | 0.084413   | 3.65e-01 | -0.20894   | 2.96e-01  | -0.237868  | 4.52e-01   | -0.0781714 | 7.21e-01   | -0.0709175 | 5.95e-01   |          |
| ENSG0000029145 | 1463946   | 1464018   | CTCFP2    | havana | processed_pseudo | -0.10823   | 3.64e-01 | -0.044689  | 3.16e-01  | 0.0978482  | 1.94e-01 | -0.20928   | 2.96e-01  | -0.20928   | 2.96e-01   | -0.2373472 | 9.47e-01   | -0.1557133 | 4.78e-01   |          |
| ENSG0000029146 | 13679344  | 13679344  | ITM14     | havana | transcript       | -0.0774453 | 5.03e-01 | -0.019374  | 4.81e-01  | 0.2544443  | 8.85e-01 | -0.20921   | 2.96e-01  | -0.086109  | 8.26e-01   | -0.0670136 | 2.48e-01   | -0.1196649 | 3.33e-01   |          |
| ENSG0000029147 | 423278    | 423278    | TPP25     | havana | transcript       | -0.084413  | 3.65e-01 | -0.084413  | 3.65e-01  | 0.084413   | 3.65e-01 | -0.20894   | 2.96e-01  | -0.237868  | 4.52e-01   | -0.0781714 | 7.21e-01   | -0.0709175 | 5.95e-01   |          |
| ENSG0000029148 | 4489836   | 4485216   | DMX1      | havana | transcript       | -0.1538981 | 1.81e-01 | -0.0480309 | 7.47e-01  | 0.0489217  | 3.03e-01 | -0.20948   | 2.96e-01  | -0.20948   | 2.96e-01   | -0.2373472 | 9.47e-01   | -0.1557133 | 4.78e-01   |          |
| ENSG0000029149 | 3568875   | 3567866   | ARHGAP37  | havana | transcript       | -0.1627807 | 1.46e-01 | -0.0289772 | 1.47e-01  | 0.1315639  | 9.11e-01 | -0.20952   | 2.96e-01  | -0.2149806 | 8.28e-01   | -0.1479898 | 5.01e-01   | -0.20717   | 8.86e-01   |          |
| ENSG0000029150 | 4953385   | 4953403   | ACD1956.1 | havana | transcript       | -0.138065  | 2.31e-01 | -0.1124795 | 3.97e-01  | 0.1839631  | 3.58e-01 | -0.20894   | 2.96e-01  | -0.237868  | 4.52e-01   | -0.0781714 | 7.21e-01   | -0.0709175 |            |          |



Table with columns for gene ID, chromosome, coordinates, gene name, transcript, and various numerical values. The table lists numerous genes such as STMN2, ADCY10B2, PDI, INHBC, RANBP1, and many others, each with associated genomic data and expression values.



| ENSG0000012528  | 19 | 50025714 | 50053414 | * ZNF473    | ensembl_havana | protein_coding         | -0.282176  | 3.58E-03 | -0.24609   | 5.98E-02 | -0.778996  | 1.57E-01 | -0.215269  | 2.80E-01 | -0.431145  | 1.13E-01 | 0.3226824  | 1.33E-01 | 0.04177458 | 7.73E-01 |
|-----------------|----|----------|----------|-------------|----------------|------------------------|------------|----------|------------|----------|------------|----------|------------|----------|------------|----------|------------|----------|------------|----------|
| ENSG0000012629  | 15 | 2686911  | 2694928  | * GABRA5    | ensembl_havana | protein_coding         | -0.056198  | 6.27E-01 | -0.070513  | 6.26E-01 | 0.4887238  | 2.86E-01 | -0.215044  | 2.80E-01 | -0.123770  | 7.73E-01 | 0.0046678  | 7.73E-01 | 0.0046678  | 7.73E-01 |
| ENSG0000012706  | 15 | 8013314  | 8013314  | * LOC101928 | ensembl_havana | protein_coding         | -0.147861  | 8.16E-01 | -0.147861  | 8.16E-01 | 0.0000000  | 8.16E-01 | -0.147861  | 8.16E-01 | -0.147861  | 8.16E-01 | 0.0000000  | 8.16E-01 | 0.0000000  | 8.16E-01 |
| ENSG00000140459 | 15 | 7433759  | 7436746  | * CYP11A1   | ensembl_havana | protein_coding         | YES        | YES      | YES        | YES      | 0.009508   | 7.85E-01 | -0.206827  | 2.80E-01 | -0.284023  | 2.74E-01 | 0.598845   | 4.66E-01 | 0.0032460  | 6.61E-01 |
| ENSG00000141134 | 11 | 6082093  | 6085590  | * PFCRD2    | ensembl_havana | protein_coding         | -0.102098  | 8.82E-01 | -0.122172  | 1.11E-01 | 0.2399842  | 1.90E-01 | -0.215071  | 2.80E-01 | -0.044489  | 7.49E-01 | 0.0770075  | 7.41E-01 | 0.0770075  | 7.41E-01 |
| ENSG0000012116  | 19 | 8061238  | 80681204 | * CDR8      | ensembl_havana | protein_coding         | -0.2747413 | 0.00E+00 | -0.2747413 | 0.00E+00 | 0.0000000  | 0.00E+00 | -0.2747413 | 0.00E+00 | -0.2747413 | 0.00E+00 | 0.0000000  | 0.00E+00 | 0.0000000  | 0.00E+00 |
| ENSG0000014746  | 8  | 8265528  | 8266555  | * AC04121.3 | havana         | processed_transcript   | -0.1670993 | 1.26E-01 | -0.184212  | 3.04E-01 | 0.0070645  | 7.26E-01 | -0.215044  | 2.80E-01 | -0.238849  | 4.20E-01 | 0.0217491  | 9.22E-01 | 0.0249044  | 6.25E-01 |
| ENSG0000015464  | 2  | 6118748  | 61471087 | * USF3A     | ensembl_havana | protein_coding         | -0.1378927 | 2.23E-01 | -0.0304474 | 3.48E-01 | 0.05861418 | 7.72E-01 | -0.215044  | 2.80E-01 | -0.0327469 | 8.17E-01 | 0.222449   | 3.00E-01 | 0.061389   | 6.70E-01 |
| ENSG0000013924  | 16 | 8000030  | 8001936  | * AC02012.4 | havana         | processed_transcript   | -0.215044  | 2.80E-01 | -0.215044  | 2.80E-01 | 0.0000000  | 0.00E+00 | -0.215044  | 2.80E-01 | -0.215044  | 2.80E-01 | 0.0000000  | 0.00E+00 | 0.0000000  | 0.00E+00 |
| ENSG00000150293 | 11 | 11144550 | 11147597 | * AC02002.2 | havana         | transcribed_unit       | YES        | YES      | YES        | YES      | -0.179273  | 1.21E-01 | -0.192174  | 6.55E-01 | -0.215044  | 2.80E-01 | 0.0407608  | 3.90E-01 | 0.0076260  | 6.40E-01 |
| ENSG0000014074  | 5  | 609929   | 6163291  | * NSUN2     | ensembl_havana | protein_coding         | -0.139133  | 3.02E-01 | -0.164309  | 2.54E-01 | 0.1003808  | 6.19E-01 | -0.215064  | 2.80E-01 | -0.168154  | 2.24E-01 | 0.2114469  | 2.29E-01 | 0.2055297  | 3.52E-01 |
| ENSG0000015099  | 4  | 6297389  | 6304840  | * AC07008.1 | havana         | processed_transcript   | -0.064988  | 6.40E-01 | -0.065023  | 9.81E-01 | 0.3267889  | 5.26E-01 | -0.215093  | 2.80E-01 | -0.1531275 | 7.75E-01 | 0.020291   | 8.44E-01 | 0.0217913  | 8.47E-01 |
| ENSG00000135488 | 12 | 5428039  | 5428708  | * HNRNPAL1  | ensembl_havana | protein_coding         | -0.0895736 | 1.97E-01 | -0.120526  | 1.17E-01 | 0.1025794  | 6.19E-01 | -0.215098  | 2.80E-01 | -0.2312165 | 2.29E-01 | 0.3212469  | 3.00E-01 | 0.111895   | 1.64E-01 |
| ENSG0000017050  | X  | 10259957 | 10269712 | * AD3547.1  | havana         | processed_transcript   | -0.050573  | 7.42E-01 | -0.0520404 | 7.15E-01 | 0.41479101 | 3.15E-01 | -0.215024  | 2.80E-01 | -0.124511  | 8.21E-01 | 0.211661   | 3.96E-01 | 0.277061   | 3.62E-01 |
| ENSG0000011633  | 8  | 7890537  | 7891510  | * GYF1P1    | havana         | unprocessed_pseudogene | -0.147925  | 1.79E-01 | -0.171779  | 1.92E-01 | 0.0818732  | 6.85E-01 | -0.215064  | 2.80E-01 | -0.1806758 | 5.91E-01 | 0.128170   | 5.60E-01 | 0.1020729  | 7.60E-01 |
| ENSG0000014907  | 8  | 8306979  | 8307480  | * AC08746.1 | havana         | processed_transcript   | -0.159872  | 1.45E-01 | -0.172782  | 1.61E-01 | 0.3466583  | 6.80E-01 | -0.215091  | 2.79E-01 | -0.182476  | 7.87E-01 | 0.188984   | 4.41E-01 | 0.0090945  | 7.11E-01 |
| ENSG0000012724  | 17 | 4105920  | 4106114  | * HRP23.3   | ensembl_havana | protein_coding         | YES        | YES      | YES        | YES      | -0.272287  | 1.78E-01 | -0.2220407 | 2.64E-01 | -0.215856  | 2.79E-01 | -0.150278  | 7.90E-01 | -0.193799  | 1.79E-01 |
| ENSG0000014043  | 2  | 14691844 | 14699202 | * KMT1P.2   | ensembl_havana | protein_coding         | -0.147613  | 2.15E-01 | -0.159117  | 2.70E-01 | 0.2081210  | 6.71E-01 | -0.215097  | 2.79E-01 | -0.1789912 | 3.96E-01 | 0.0494474  | 8.94E-01 | -0.021878  | 9.78E-01 |
| ENSG0000014626  | 9  | 9247403  | 9248005  | * DYNLL2    | ensembl_havana | protein_coding         | -0.120652  | 1.47E-01 | -0.1292246 | 2.11E-01 | 0.0066186  | 7.47E-01 | -0.215071  | 2.79E-01 | -0.1324763 | 3.95E-01 | 0.1316676  | 5.80E-01 | 0.1118114  | 4.17E-01 |
| ENSG0000014773  | 19 | 588004   | 588823   | * HNR1B1.1  | ensembl_havana | protein_coding         | -0.165786  | 1.74E-01 | -0.0626227 | 6.66E-01 | 0.0255677  | 8.99E-01 | -0.215026  | 2.79E-01 | -0.062414  | 8.99E-01 | -0.1966272 | 5.25E-01 | 0.004268   | 3.07E-01 |
| ENSG0000014717  | X  | 4737078  | 4734448  | * ZNF157    | ensembl_havana | protein_coding         | -0.150474  | 1.91E-01 | -0.066665  | 9.32E-01 | 0.2807481  | 1.56E-01 | -0.219433  | 2.79E-01 | -0.271252  | 8.65E-01 | 0.1038012  | 6.44E-01 | -0.147720  | 5.20E-01 |
| ENSG0000012757  | 11 | 11232455 | 11238564 | * RNF214    | ensembl_havana | protein_coding         | -0.159872  | 1.45E-01 | -0.172782  | 1.61E-01 | 0.3466583  | 6.80E-01 | -0.215091  | 2.79E-01 | -0.182476  | 7.87E-01 | 0.188984   | 4.41E-01 | 0.0090945  | 7.11E-01 |
| ENSG00000124570 | 1  | 6576129  | 6578380  | * AC09708.1 | havana         | processed_transcript   | -0.145792  | 2.06E-01 | -0.0933197 | 8.88E-01 | 0.0022168  | 9.91E-01 | -0.216044  | 2.79E-01 | -0.24795   | 7.06E-01 | 0.031851   | 9.94E-01 | 0.0024003  | 8.45E-01 |
| ENSG00000176278 | 15 | 8462105  | 8462327  | * AC08832.6 | havana         | processed_transcript   | -0.138701  | 1.05E-01 | -0.1214591 | 1.06E-01 | 0.0218138  | 9.14E-01 | -0.2160559 | 2.79E-01 | -0.188961  | 1.71E-01 | 0.071401   | 2.30E-01 | 0.04533    | 7.95E-01 |
| ENSG00000143827 | 15 | 3608780  | 3624082  | * RFX4      | ensembl_havana | protein_coding         | -0.0715993 | 1.69E-01 | -0.0640077 | 6.99E-01 | 0.1859753  | 3.64E-01 | -0.216084  | 2.79E-01 | -0.0017494 | 8.68E-01 | 0.0477891  | 8.29E-01 | -0.151945  | 4.23E-01 |
| ENSG00000179772 | 17 | 8039309  | 8039300  | * AC17373.1 | havana         | processed_transcript   | 0          | 0.00E+00 | -0.0000000 | 0.00E+00 | 0.0000000  | 0.00E+00 | -0.216084  | 2.79E-01 | -0.248921  | 8.88E-01 | 0.1131936  | 6.13E-01 | 0.016984   | 7.95E-01 |
| ENSG00000172460 | 16 | 289568   | 284244   | * PRSS30P   | havana         | lincRNA                | -0.1123363 | 3.11E-01 | -0.052736  | 3.34E-01 | 0.0014749  | 9.91E-01 | -0.2160769 | 2.79E-01 | -0.1336603 | 3.23E-01 | 0.0215183  | 9.45E-01 | 0.00823    | 5.21E-01 |
| ENSG0000017895  | 17 | 4025076  | 4029849  | * ZNF38C    | ensembl_havana | protein_coding         | -0.209224  | 6.78E-01 | -0.217726  | 1.30E-01 | 0.0939813  | 8.45E-01 | -0.216113  | 2.79E-01 | -0.226304  | 9.99E-01 | 0.30242    | 1.67E-01 | -0.158897  | 2.71E-01 |
| ENSG0000017931  | 17 | 4025076  | 4029849  | * ZNF38C    | ensembl_havana | protein_coding         | -0.209224  | 6.78E-01 | -0.217726  | 1.30E-01 | 0.0939813  | 8.45E-01 | -0.216113  | 2.79E-01 | -0.226304  | 9.99E-01 | 0.30242    | 1.67E-01 | -0.158897  | 2.71E-01 |
| ENSG0000018859  | 1  | 14605746 | 14616700 | * FAM78B    | ensembl_havana | protein_coding         | YES        | YES      | YES        | YES      | -0.162434  | 3.17E-01 | -0.164411  | 8.27E-01 | -0.213748  | 1.38E-01 | 0.213748   | 1.30E-01 | 0.078723   | 4.96E-01 |
| ENSG00000128917 | 15 | 4029730  | 4030773  | * DALL1     | ensembl_havana | protein_coding         | -0.2129097 | 6.30E-01 | -0.217096  | 2.76E-01 | 0.0956979  | 6.36E-01 | -0.216129  | 2.79E-01 | -0.304006  | 2.57E-01 | 0.1480427  | 4.43E-01 | -0.049548  | 7.05E-01 |
| ENSG0000012298  | 17 | 4205778  | 4206203  | * AC02021   | havana         | processed_transcript   | -0.1620807 | 1.47E-01 | -0.1620807 | 1.47E-01 | 0.0000000  | 0.00E+00 | -0.1620807 | 1.47E-01 | -0.1620807 | 1.47E-01 | 0.0000000  | 0.00E+00 | 0.0000000  | 0.00E+00 |
| ENSG00000158799 | 1  | 11307718 | 11312260 | * LRIG2     | ensembl_havana | protein_coding         | -0.2678785 | 2.09E-01 | -0.2707025 | 5.04E-01 | -0.111732  | 5.77E-01 | -0.215044  | 2.79E-01 | -0.2851049 | 3.66E-01 | 0.0033020  | 8.00E-01 | -0.004092  | 6.37E-01 |
| ENSG0000012626  | 5  | 10143006 | 10152618 | * PDPHFP    | havana         | transcribed_unit       | YES        | YES      | YES        | YES      | 0.0678714  | 5.58E-01 | -0.044113  | 7.61E-01 | 0.8841899  | 6.64E-01 | -0.216098  | 2.79E-01 | 0.02726797 | 8.71E-01 |
| ENSG0000012701  | 19 | 5199959  | 5197772  | * AC09711.1 | havana         | processed_transcript   | -0.138701  | 1.05E-01 | -0.1214591 | 1.06E-01 | 0.0218138  | 9.14E-01 | -0.2160559 | 2.79E-01 | -0.188961  | 1.71E-01 | 0.071401   | 2.30E-01 | 0.04533    | 7.95E-01 |
| ENSG0000014284  | 17 | 5802434  | 5802434  | * DYNLL2    | ensembl_havana | protein_coding         | -0.0709881 | 5.40E-01 | -0.0739249 | 5.91E-01 | 0.1298478  | 5.19E-01 | -0.2161213 | 2.79E-01 | -0.071181  | 8.29E-01 | 0.3217788  | 7.88E-01 | 0.0015819  | 4.31E-01 |
| ENSG0000011466  | 12 | 9114084  | 9118217  | * DCFN      | ensembl_havana | protein_coding         | -0.102443  | 3.75E-01 | -0.045336  | 8.12E-01 | 0.231933   | 2.79E-01 | -0.216236  | 2.79E-01 | -0.171039  | 2.10E-01 | -0.464605  | 2.57E-01 | -0.22828   | 1.41E-01 |
| ENSG0000011199  | 20 | 6327278  | 6328790  | * ARFAP1    | ensembl_havana | protein_coding         | -0.124236  | 3.41E-01 | -0.0908989 | 5.11E-01 | 0.1497738  | 4.56E-01 | -0.216229  | 2.79E-01 | -0.1870454 | 2.80E-01 | -0.19394   | 2.37E-01 | 0.007208   | 2.11E-01 |
| ENSG0000012725  | 12 | 12449745 | 12449745 | * AC04540.6 | havana         | processed_transcript   | -0.1454246 | 2.46E-01 | -0.1454246 | 2.46E-01 | 0.0000000  | 0.00E+00 | -0.1454246 | 2.46E-01 | -0.1454246 | 2.46E-01 | 0.0000000  | 0.00E+00 | 0.0000000  | 0.00E+00 |
| ENSG0000013123  | 2  | 23817040 | 23820738 | * UKAP      | ensembl_havana | protein_coding         | -0.10844   | 3.49E-01 | -0.05836   | 6.87E-01 | 0.1550001  | 4.40E-01 | -0.216294  | 2.79E-01 | -0.220194  | 1.09E-01 | 0.0036519  | 8.67E-01 | -0.063957  | 5.24E-01 |
| ENSG00000174776 | 16 | 4678699  | 4678297  | * AC02043.3 | havana         | lincRNA                | YES        | YES      | YES        | YES      | -0.1736612 | 1.26E-01 | -0.075669  | 6.01E-01 | 0.0464671  | 8.17E-01 | 0.0216283  | 2.79E-01 | 0.297953   | 6.52E-01 |
| ENSG0000012786  | 17 | 4255959  | 4258063  | * AC09710.1 | havana         | processed_transcript   | -0.1644701 | 1.71E-01 | -0.1644701 | 1.71E-01 | 0.0000000  | 0.00E+00 | -0.1644701 | 1.71E-01 | -0.1644701 | 1.71E-01 | 0.0000000  | 0.00E+00 | 0.0000000  | 0.00E+00 |
| ENSG00000146811 | 15 | 8968768  | 8965467  | * KIF7      | ensembl_havana | protein_coding         | -0.1602472 | 1.44E-01 | -0.078701  | 8.87E-01 | 0.3009697  | 6.61E-01 | -0.216382  | 2.79E-01 | -0.166483  | 5.15E-01 | 0.429958   | 5.90E-01 | -0.007440  |          |



Table with columns for gene ID, coordinates, gene name, transcript, and various numerical values. The table lists numerous genes such as ZC4H12B, PGM3A, and others, with associated genomic coordinates and a series of numerical data points.



Table with 20 columns: Gene ID, Chr, Start, End, RefSeq, Gene Name, Transcription Start Site, Strand, Feature, RefSeq ID, RefSeq Start, RefSeq End, RefSeq Strand, RefSeq Feature, RefSeq ID, RefSeq Start, RefSeq End, RefSeq Strand, RefSeq Feature, RefSeq ID. Rows list various genes and their genomic coordinates and features.







Table with columns: ENSG accession number, gene symbol, gene name, transcript type, genomic coordinates, and various numerical values. The table lists numerous genes such as AC013361, LINC01546, and others, with associated data points for each.



Table with columns for gene ID, chromosome, coordinates, gene name, transcript type, and various numerical values. The table lists numerous genes such as MRP143, ALKBH3, PLEKHA7, etc., with their corresponding genomic data.

Table with 25 columns: Gene ID, Chr, Start, End, RefSeq, Gene Name, Transcription Start Site, Strand, Feature Type, Feature Name, Feature Start, Feature End, Feature Score, Feature Type, Feature Name, Feature Start, Feature End, Feature Score, Feature Type, Feature Name, Feature Start, Feature End, Feature Score, Feature Type, Feature Name, Feature Start, Feature End, Feature Score. The table lists genomic features for various genes across chromosomes 15, 16, 17, 18, 19, and 20.

Table with 30 columns: Gene ID, Chr, Start, End, Strand, Feature, RefSeq, Ensembl, UniProt, and various numerical values. The table lists genomic features for various genes across chromosomes 15, 16, 17, 18, 19, 20, 21, 22, 23, 24, 25, 26, 27, 28, 29, and X.



Table with columns for gene ID, chromosome, coordinates, gene name, transcript, and various numerical values. The table lists numerous genes such as SNTG2, PDLIM1, PDLIM2, etc., with their corresponding genomic data.

Table with columns: Gene ID, Chr, Pos, RefSeq, Gene, Transcript, Feature, and various numerical values. The table lists genomic data for numerous genes including CAS8, SYNGA, SYNGA2, SYNGA3, SYNGA4, SYNGA5, SYNGA6, SYNGA7, SYNGA8, SYNGA9, SYNGA10, SYNGA11, SYNGA12, SYNGA13, SYNGA14, SYNGA15, SYNGA16, SYNGA17, SYNGA18, SYNGA19, SYNGA20, SYNGA21, SYNGA22, SYNGA23, SYNGA24, SYNGA25, SYNGA26, SYNGA27, SYNGA28, SYNGA29, SYNGA30, SYNGA31, SYNGA32, SYNGA33, SYNGA34, SYNGA35, SYNGA36, SYNGA37, SYNGA38, SYNGA39, SYNGA40, SYNGA41, SYNGA42, SYNGA43, SYNGA44, SYNGA45, SYNGA46, SYNGA47, SYNGA48, SYNGA49, SYNGA50, SYNGA51, SYNGA52, SYNGA53, SYNGA54, SYNGA55, SYNGA56, SYNGA57, SYNGA58, SYNGA59, SYNGA60, SYNGA61, SYNGA62, SYNGA63, SYNGA64, SYNGA65, SYNGA66, SYNGA67, SYNGA68, SYNGA69, SYNGA70, SYNGA71, SYNGA72, SYNGA73, SYNGA74, SYNGA75, SYNGA76, SYNGA77, SYNGA78, SYNGA79, SYNGA80, SYNGA81, SYNGA82, SYNGA83, SYNGA84, SYNGA85, SYNGA86, SYNGA87, SYNGA88, SYNGA89, SYNGA90, SYNGA91, SYNGA92, SYNGA93, SYNGA94, SYNGA95, SYNGA96, SYNGA97, SYNGA98, SYNGA99, SYNGA100.







| ENSG0000027851 | 12 | 45256473 | 45256726 | AC099248.2 | havana | lncRNA                 | -0.158193 | 1.696 | -0.183709 | 2.021 | -0.198209  | 3.271 | -0.250129 | 2.081 | -0.198105 | 1.511 | 0.244396  | 2.616 | -0.007634  | 9.98  |
|----------------|----|----------|----------|------------|--------|------------------------|-----------|-------|-----------|-------|------------|-------|-----------|-------|-----------|-------|-----------|-------|------------|-------|
| ENSG0000027121 | 12 | 4399881  | 4399949  | AC09506.3  | havana | lncRNA                 | -0.272754 | 5.776 | -0.186024 | 3.771 | -0.196479  | 3.241 | -0.250128 | 2.081 | -0.111788 | 2.398 | 0.120147  | 5.854 | -0.107939  | 4.44  |
| ENSG0000029096 | 12 | 7089636  | 71103638 | STY3       | havana | lncRNA                 | -0.178916 | 1.374 | -0.178916 | 1.374 | -0.178916  | 1.374 | -0.178916 | 1.374 | -0.178916 | 1.374 | 0.178916  | 1.374 | -0.178916  | 1.374 |
| ENSG0000028611 | 20 | 11939277 | 11939374 | GAPDH3P    | havana | processed_pseudogene   | -0.273987 | 9.726 | -0.103727 | 1.221 | -0.103727  | 1.221 | -0.103727 | 1.221 | -0.103727 | 1.221 | 0.246147  | 2.944 | -0.103727  | 2.55  |
| ENSG0000029486 | 10 | 4613136  | 4613199  | IGFBP3     | havana | lncRNA                 | -0.186189 | 1.024 | -0.186189 | 1.024 | -0.186189  | 1.024 | -0.186189 | 1.024 | -0.186189 | 1.024 | 0.240388  | 2.421 | -0.207954  | 1.97  |
| ENSG0000025629 | 12 | 1184434  | 1184434  | IGFBP3-AS1 | havana | lncRNA                 | -0.194613 | 1.374 | -0.194613 | 1.374 | -0.194613  | 1.374 | -0.194613 | 1.374 | -0.194613 | 1.374 | 0.235039  | 4.89  | -0.235039  | 4.89  |
| ENSG0000029292 | 19 | 5576918  | 5577320  | RFP4L4L1   | havana | lncRNA                 | -0.171137 | 1.374 | -0.18765  | 2.565 | -0.159023  | 2.428 | -0.250196 | 2.081 | -0.250196 | 2.081 | 0.046117  | 8.506 | -0.156439  | 6.96  |
| ENSG0000045147 | 4  | 2405796  | 24062661 | SLIT2      | havana | lncRNA                 | -0.155588 | 1.776 | -0.076705 | 6.948 | -0.052644  | 7.944 | -0.250206 | 2.081 | -0.278932 | 4.536 | 0.194579  | 9.746 | -0.12848   | 7.94  |
| ENSG0000041391 | 19 | 1940798  | 1940798  | PRELID3    | havana | lncRNA                 | -0.208214 | 2.106 | -0.150472 | 3.714 | -0.124023  | 5.381 | -0.250196 | 2.081 | -0.250196 | 2.081 | 0.176151  | 5.06  | -0.176151  | 5.06  |
| ENSG0000023797 | 6  | 9619980  | 9621717  | ULF1L4S1   | havana | lncRNA                 | -0.040483 | 7.271 | -0.050516 | 7.282 | -0.087479  | 7.338 | -0.250203 | 2.081 | -0.103834 | 4.558 | 0.029039  | 8.956 | -0.029034  | 8.54  |
| ENSG0000026488 | 18 | 6545485  | 6547460  | AC09280.2  | havana | transcribed_pseudogene | -0.186888 | 2.376 | -0.186888 | 2.376 | -0.186888  | 2.376 | -0.186888 | 2.376 | -0.186888 | 2.376 | 0.186888  | 2.376 | -0.186888  | 2.376 |
| ENSG0000025470 | 5  | 7019755  | 7020745  | AC13886.1  | havana | unprocessed_pseudogene | -0.049736 | 7.111 | -0.038987 | 7.331 | -0.130895  | 5.111 | -0.250229 | 2.081 | -0.103559 | 4.488 | 0.029039  | 8.956 | -0.029034  | 8.54  |
| ENSG0000028196 | 6  | 5081873  | 5084761  | TFAB2B     | havana | lncRNA                 | -0.191109 | 1.966 | -0.152487 | 3.801 | -0.1552029 | 4.391 | -0.250179 | 2.081 | -0.204276 | 3.181 | -0.145446 | 8.006 | -0.020788  | 9.84  |
| ENSG0000045476 | 4  | 18019167 | 18021348 | CPY42      | havana | lncRNA                 | -0.070138 | 5.441 | -0.144402 | 3.171 | -0.083838  | 9.851 | -0.250209 | 2.081 | -0.092779 | 5.071 | 0.002106  | 3.991 | -0.110712  | 4.44  |
| ENSG0000029994 | 10 | 8994269  | 8994788  | RC3H1-IT1  | havana | lncRNA                 | -0.192461 | 1.831 | -0.124983 | 3.851 | -0.162227  | 4.181 | -0.250196 | 2.081 | -0.142984 | 3.861 | 0.009015  | 3.911 | -0.009015  | 3.91  |
| ENSG0000016428 | 18 | 5455417  | 5456856  | ZNF4       | havana | lncRNA                 | -0.127949 | 2.671 | -0.078149 | 6.101 | -0.107904  | 5.941 | -0.250174 | 2.081 | -0.217121 | 3.171 | -0.140204 | 5.231 | -0.149932  | 3.90  |
| ENSG0000024927 | 4  | 17153034 | 17153763 | LINC01274  | havana | lncRNA                 | -0.220729 | 2.901 | -0.111131 | 4.411 | -0.207878  | 2.991 | -0.250182 | 2.081 | -0.194236 | 1.571 | 0.140004  | 2.441 | -0.057759  | 6.90  |
| ENSG0000027851 | 17 | 2216442  | 2216442  | IGFBP3-AS1 | havana | lncRNA                 | -0.194613 | 1.374 | -0.194613 | 1.374 | -0.194613  | 1.374 | -0.194613 | 1.374 | -0.194613 | 1.374 | 0.194613  | 1.374 | -0.194613  | 1.374 |
| ENSG0000023590 | 22 | 2276224  | 2276256  | IGFBP3     | havana | lncRNA                 | -0.185481 | 3.041 | -0.150491 | 3.801 | -0.129068  | 2.911 | -0.250465 | 2.081 | -0.146106 | 2.911 | 0.0084149 | 2.981 | -0.0084149 | 2.981 |
| ENSG0000020972 | 7  | 1492798  | 1494674  | ZNF859.1   | havana | lncRNA                 | -0.170477 | 1.381 | -0.102183 | 8.801 | -0.056497  | 7.441 | -0.250485 | 2.081 | -0.040394 | 6.221 | 0.115173  | 6.011 | -0.081326  | 6.31  |
| ENSG0000021478 | 16 | 2013380  | 2014571  | ORAN5      | havana | lncRNA                 | -0.138324 | 1.601 | -0.000734 | 8.901 | -0.161548  | 4.081 | -0.250173 | 2.081 | -0.229223 | 4.051 | 0.177386  | 6.071 | -0.024073  | 9.70  |
| ENSG0000026249 | 2  | 20953977 | 20958732 | AC03674.1  | havana | lncRNA                 | -0.190517 | 9.691 | -0.188824 | 3.371 | -0.166939  | 4.051 | -0.250493 | 2.081 | -0.195607 | 5.771 | 0.133307  | 5.441 | -0.146008  | 5.73  |
| ENSG0000024363 | 12 | 1757231  | 1758011  | RPS4X14    | havana | processed_pseudogene   | -0.183464 | 1.101 | -0.209713 | 1.431 | -0.116687  | 5.621 | -0.250016 | 2.081 | -0.214619 | 1.171 | -0.196481 | 7.641 | -0.180166  | 3.01  |
| ENSG0000028575 | 10 | 10098949 | 10099185 | ALKBH8-AS1 | havana | lncRNA                 | -0.151921 | 1.871 | -0.104049 | 3.761 | -0.1076499 | 7.051 | -0.250019 | 2.081 | -0.072894 | 4.931 | 0.196681  | 3.691 | -0.194958  | 3.32  |
| ENSG0000018944 | 7  | 24969694 | 24969694 | DIS3B2     | havana | lncRNA                 | -0.180468 | 1.161 | -0.124983 | 3.851 | -0.162227  | 4.181 | -0.250196 | 2.081 | -0.142984 | 3.861 | 0.009015  | 3.911 | -0.009015  | 3.91  |
| ENSG0000026124 | 5  | 18026653 | 18026954 | AC06       | havana | lncRNA                 | -0.242341 | 3.711 | -0.187186 | 1.931 | -0.034744  | 8.721 | -0.250569 | 2.081 | -0.143524 | 2.081 | 0.182874  | 5.061 | -0.028728  | 8.84  |
| ENSG0000019199 | 10 | 4898088  | 4917131  | CPT1       | havana | lncRNA                 | -0.246989 | 3.101 | -0.202696 | 1.381 | -0.018786  | 9.271 | -0.250574 | 2.081 | -0.173764 | 5.061 | 0.189331  | 4.611 | -0.102928  | 4.86  |
| ENSG0000027920 | 12 | 8044794  | 8044794  | NR6T3      | havana | lncRNA                 | -0.186463 | 1.871 | -0.107649 | 3.761 | -0.107649  | 3.761 | -0.250196 | 2.081 | -0.142984 | 3.861 | 0.009015  | 3.911 | -0.009015  | 3.91  |
| ENSG0000021698 | 7  | 3851515  | 3851547  | TROVA      | havana | lncRNA                 | -0.261453 | 3.971 | -0.125566 | 7.791 | -0.17324   | 3.881 | -0.250773 | 2.071 | -0.131439 | 3.191 | 0.201893  | 5.931 | -0.073213  | 6.11  |
| ENSG0000014644 | 10 | 5026688  | 5028174  | MBD1       | havana | lncRNA                 | -0.268213 | 1.831 | -0.109421 | 3.391 | -0.352074  | 7.341 | -0.250628 | 2.071 | -0.194459 | 3.101 | 0.067349  | 7.601 | -0.147444  | 2.44  |
| ENSG0000014241 | 11 | 1184975  | 1184975  | IGFBP3-AS1 | havana | lncRNA                 | -0.194613 | 1.374 | -0.194613 | 1.374 | -0.194613  | 1.374 | -0.194613 | 1.374 | -0.194613 | 1.374 | 0.194613  | 1.374 | -0.194613  | 1.374 |
| ENSG0000026603 | 12 | 10523638 | 10524173 | AC07887.1  | havana | lncRNA                 | -0.213691 | 6.201 | -0.189406 | 2.091 | -0.217088  | 2.771 | -0.250588 | 2.071 | -0.146004 | 3.021 | 0.139805  | 5.111 | -0.132644  | 2.44  |
| ENSG0000027914 | 9  | 11432056 | 11432675 | ORAN1      | havana | lncRNA                 | -0.193388 | 3.511 | -0.18234  | 2.051 | -0.21679   | 2.781 | -0.250629 | 2.071 | -0.083449 | 3.981 | 0.153097  | 4.861 | -0.112295  | 2.94  |
| ENSG0000021881 | 12 | 1173870  | 1173870  | TROVA      | havana | lncRNA                 | -0.186463 | 1.871 | -0.107649 | 3.761 | -0.107649  | 3.761 | -0.250196 | 2.081 | -0.142984 | 3.861 | 0.009015  | 3.911 | -0.009015  | 3.91  |
| ENSG0000024967 | 4  | 3850977  | 3851056  | LINC01259  | havana | lncRNA                 | -0.193721 | 4.641 | -0.178037 | 2.151 | -0.259628  | 1.911 | -0.250682 | 2.071 | -0.174793 | 2.911 | 0.044219  | 4.951 | -0.044219  | 4.95  |
| ENSG0000021308 | 12 | 5181780  | 5184766  | HGN1L      | havana | lncRNA                 | -0.223001 | 5.091 | -0.140889 | 3.151 | -0.244888  | 2.141 | -0.250728 | 2.071 | -0.134423 | 2.051 | 0.183744  | 4.561 | -0.196984  | 1.78  |
| ENSG0000013975 | 13 | 3284245  | 3284376  | HN1NPAL1   | havana | lncRNA                 | -0.111902 | 3.311 | -0.105021 | 1.641 | -0.125299  | 4.481 | -0.250749 | 2.071 | -0.070446 | 5.181 | -0.134204 | 5.171 | -0.202994  | 1.45  |
| ENSG0000023266 | 10 | 80024    | 80249    | STG1       | havana | lncRNA                 | -0.124418 | 2.021 | -0.044219 | 3.011 | -0.044219  | 3.011 | -0.250728 | 2.071 | -0.146004 | 3.021 | 0.139805  | 5.111 | -0.132644  | 2.44  |
| ENSG0000023408 | 2  | 21279530 | 21281264 | LINC01878  | havana | lncRNA                 | -0.064463 | 8.401 | -0.079278 | 5.891 | -0.182888  | 3.611 | -0.250745 | 2.071 | -0.123342 | 3.741 | 0.06449   | 7.861 | -0.058143  | 6.81  |
| ENSG0000019448 | 19 | 106953   | 106953   | ARHAP6-AS1 | havana | lncRNA                 | -0.174527 | 2.001 | -0.115873 | 3.471 | -0.175004  | 3.991 | -0.250712 | 2.071 | -0.211371 | 2.121 | 0.112529  | 6.131 | -0.084243  | 7.91  |
| ENSG0000017729 | 10 | 1152760  | 1152760  | TROVA      | havana | lncRNA                 | -0.154403 | 1.511 | -0.107649 | 3.761 | -0.107649  | 3.761 | -0.250196 | 2.081 | -0.142984 | 3.861 | 0.009015  | 3.911 | -0.009015  | 3.91  |
| ENSG0000011051 | 20 | 3163781  | 3164006  | CCM2       | havana | lncRNA                 | -0.181974 | 1.601 | -0.173599 | 4.731 | -0.250286  | 2.071 | -0.250654 | 2.071 | -0.190045 | 3.441 | 0.007493  | 9.181 | -0.134361  | 3.52  |
| ENSG0000014394 | 19 | 781049   | 781049   | RFP2       | havana | lncRNA                 | -0.202796 | 5.381 | -0.07401  | 6.021 | -0.087089  | 6.661 | -0.250842 | 2.071 | -0.137987 | 4.811 | -0.132443 | 5.471 | -0.102928  | 4.86  |
| ENSG0000023396 | 12 | 2015130  | 2015130  | TRIP11     | havana | lncRNA                 | -0.192461 | 1.831 | -0.124983 | 3.851 | -0.162227  | 4.181 | -0.250196 | 2.081 | -0.142984 | 3.861 | 0.009015  | 3.911 | -0.009015  | 3.91  |
| ENSG0000029539 | 11 | 1884652  | 1884652  | HPD        | havana | lncRNA                 | -0.119813 | 1.511 | -0.128116 | 2.721 | -0.127304  | 5.431 | -0.250841 | 2.071 | -0.165009 | 2.321 | 0.137813  | 5.311 | -0.128116  | 3.09  |
| ENSG0000019187 | 12 | 879004   | 879070   | KLRF1      | havana | lncRNA                 | -0.180789 | 1.141 | -0.212115 | 1.211 | -0.104401  | 6.621 | -0.250874 | 2.071 | -0.210212 | 1.011 | 0.297561  | 2.311 | -0.085129  | 3.64  |
| ENSG0000018440 | 10 | 13677422 | 13678104 | ORAN2      | havana | lncRNA                 | -0.162633 | 1.511 | -0.142288 | 3.041 | -0.140118  | 4.481 | -0.250807 | 2.071 | -0.104401 | 1.271 | 0.197456  | 6.661 |            |       |





Table with columns for gene ID, chromosome, coordinates, gene name, transcript ID, protein name, and various numerical values. The table lists numerous genes such as PMA, FABP5, and others, with associated genomic data and protein information.



| ENSG0000025652  | 10 | 7735851  | 7737613  | AKCNMA1.A5.3 | ncrna | incRNA                 | YES | YES | -0.180488  | 1.09E-01 | -0.166142 | 4.63E-01 | -0.144633  | 4.72E-01 | -0.260284 | 1.90E-01 | -0.269712  | 2.86E-01 | -0.137993  | 5.30E-01 | -0.126067  | 3.80E-01 |
|-----------------|----|----------|----------|--------------|-------|------------------------|-----|-----|------------|----------|-----------|----------|------------|----------|-----------|----------|------------|----------|------------|----------|------------|----------|
| ENSG0000025280  | 13 | 11276484 | 11296824 | MCFL2L.A1    | ncrna | incRNA                 | YES | YES | -0.138728  | 2.44E-01 | -0.120217 | 4.05E-01 | -0.029538  | 8.94E-01 | -0.260284 | 1.90E-01 | -0.272717  | 1.04E-01 | -0.127499  | 2.74E-01 | -0.088391  | 5.54E-01 |
| ENSG0000011196  | 10 | 15447271 | 15447272 | HANC3        | ncrna | incRNA                 | YES | YES | -0.137914  | 2.44E-01 | -0.120217 | 4.05E-01 | -0.029538  | 8.94E-01 | -0.260284 | 1.90E-01 | -0.272717  | 1.04E-01 | -0.127499  | 2.74E-01 | -0.088391  | 5.54E-01 |
| ENSG0000020150  | 15 | 80413795 | 80445152 | IRF1         | ncrna | incRNA                 | YES | YES | -0.139314  | 8.87E-01 | -0.022603 | 7.15E-01 | -0.051787  | 7.81E-01 | -0.260433 | 1.90E-01 | -0.237710  | 0.000000 | -0.118872  | 3.24E-01 | -0.084592  | 5.98E-01 |
| ENSG0000023470  | 15 | 7089374  | 70890162 | RNF187       | ncrna | processed_transcript   | YES | YES | -0.021528  | 5.74E-01 | -0.170288 | 1.37E-01 | -0.159459  | 4.27E-01 | -0.260434 | 1.90E-01 | -0.312094  | 2.97E-01 | -0.20355   | 6.91E-01 | -0.183246  | 3.66E-01 |
| ENSG0000021225  | 10 | 6942425  | 6942425  | IRF1P        | ncrna | processed_transcript   | YES | YES | -0.021528  | 5.74E-01 | -0.170288 | 1.37E-01 | -0.159459  | 4.27E-01 | -0.260434 | 1.90E-01 | -0.312094  | 2.97E-01 | -0.20355   | 6.91E-01 | -0.183246  | 3.66E-01 |
| ENSG00000145188 | 9  | 11329793 | 11303376 | RNF187       | ncrna | processed_transcript   | YES | YES | -0.021528  | 5.74E-01 | -0.170288 | 1.37E-01 | -0.159459  | 4.27E-01 | -0.260434 | 1.90E-01 | -0.312094  | 2.97E-01 | -0.20355   | 6.91E-01 | -0.183246  | 3.66E-01 |
| ENSG00000207547 | 7  | 10095490 | 10095493 | MIR25        | ncrna | miRNA                  | NO  | NO  | -0.153994  | 1.82E-01 | -0.200257 | 1.08E-01 | -0.088446  | 6.79E-01 | -0.260389 | 1.90E-01 | -0.136190  | 3.26E-01 | -0.120665  | 5.83E-01 | -0.090658  | 5.12E-01 |
| ENSG0000017959  | 12 | 6056369  | 6056367  | IRF1         | ncrna | processed_transcript   | YES | YES | -0.021528  | 5.74E-01 | -0.170288 | 1.37E-01 | -0.159459  | 4.27E-01 | -0.260434 | 1.90E-01 | -0.312094  | 2.97E-01 | -0.20355   | 6.91E-01 | -0.183246  | 3.66E-01 |
| ENSG00000206274 | 1  | 22470227 | 22471248 | AL526301.1   | ncrna | incRNA                 | YES | YES | -0.231118  | 4.31E-01 | -0.186289 | 1.56E-01 | -0.235454  | 2.37E-01 | -0.260399 | 1.90E-01 | -0.296243  | 3.96E-01 | -0.120665  | 5.83E-01 | -0.205420  | 5.12E-01 |
| ENSG0000012881  | 1  | 16331692 | 16337383 | CRAN2E       | ncrna | processed_transcript   | YES | YES | -0.146287  | 3.15E-01 | -0.183395 | 2.02E-01 | -0.140919  | 3.58E-01 | -0.260397 | 1.90E-01 | -0.165889  | 2.31E-01 | -0.099324  | 6.66E-01 | -0.1273456 | 5.48E-01 |
| ENSG0000010484  | 16 | 5326653  | 5326380  | IRF1P1       | ncrna | processed_transcript   | YES | YES | -0.021528  | 5.74E-01 | -0.170288 | 1.37E-01 | -0.159459  | 4.27E-01 | -0.260434 | 1.90E-01 | -0.312094  | 2.97E-01 | -0.20355   | 6.91E-01 | -0.183246  | 3.66E-01 |
| ENSG0000029959  | 5  | 47840122 | 47844339 | AC107068.1   | ncrna | incRNA                 | YES | YES | -0.119731  | 2.43E-01 | -0.113741 | 4.01E-01 | -0.068173  | 7.35E-01 | -0.260413 | 1.90E-01 | -0.206517  | 3.15E-01 | -0.0945368 | 7.67E-01 | -0.101042  | 3.92E-01 |
| ENSG00000216908 | 13 | 2148384  | 21484174 | H2BPE        | ncrna | processed_transcript   | YES | YES | -0.115729  | 3.14E-01 | -0.161538 | 2.62E-01 | -0.235934  | 3.11E-01 | -0.260489 | 1.89E-01 | -0.1156309 | 4.05E-01 | -0.179138  | 4.13E-01 | -0.207533  | 3.92E-01 |
| ENSG0000017624  | 18 | 31174550 | 31218133 | MXIC         | ncrna | processed_transcript   | YES | YES | -0.226193  | 2.15E-01 | -0.229926 | 0.299241 | -0.1055241 | 6.09E-01 | -0.260501 | 1.89E-01 | -0.304447  | 2.33E-01 | -0.0881357 | 6.83E-01 | -0.091471  | 5.98E-01 |
| ENSG00000101190 | 20 | 6326991  | 6326994  | IRF1P1       | ncrna | processed_transcript   | YES | YES | -0.021528  | 5.74E-01 | -0.170288 | 1.37E-01 | -0.159459  | 4.27E-01 | -0.260434 | 1.90E-01 | -0.312094  | 2.97E-01 | -0.20355   | 6.91E-01 | -0.183246  | 3.66E-01 |
| ENSG00000202511 | 9  | 7562999  | 75634057 | ULNUP10      | ncrna | unprocessed_transcript | NO  | NO  | -0.178502  | 1.26E-01 | -0.101461 | 4.85E-01 | -0.2368129 | 2.44E-01 | -0.260579 | 1.89E-01 | -0.260786  | 5.01E-01 | -0.1460274 | 7.79E-01 | -0.1460274 | 2.55E-01 |
| ENSG0000014572  | 7  | 1280416  | 1280229  | LSN1D        | ncrna | processed_transcript   | YES | YES | -0.200856  | 8.01E-01 | -0.025162 | 8.55E-01 | -0.0063489 | 9.74E-01 | -0.260579 | 1.89E-01 | -0.416078  | 1.91E-01 | -0.1181522 | 5.91E-01 | -0.0947278 | 7.94E-01 |
| ENSG0000016488  | 12 | 1270649  | 1270649  | IRF1         | ncrna | processed_transcript   | YES | YES | -0.154045  | 1.18E-01 | -0.070961 | 6.01E-01 | -0.200908  | 3.02E-01 | -0.260599 | 1.89E-01 | -0.192974  | 3.18E-01 | -0.124259  | 8.96E-01 | -0.109519  | 3.66E-01 |
| ENSG00000244839 | 7  | 1342790  | 1343180  | AC02863.1    | ncrna | incRNA                 | NO  | NO  | -0.110925  | 3.95E-01 | -0.118566 | 4.89E-01 | -0.1068021 | 5.86E-01 | -0.260649 | 1.89E-01 | -0.1744029 | 2.07E-01 | -0.0408635 | 6.04E-01 | -0.089635  | 9.52E-01 |
| ENSG00000207108 | 15 | 8076900  | 8077135  | AC02380.2    | ncrna | tagene                 | NO  | NO  | -0.227251  | 4.67E-01 | -0.144516 | 2.84E-01 | -0.232231  | 2.86E-01 | -0.260661 | 1.89E-01 | -0.131856  | 2.90E-01 | -0.128098  | 5.60E-01 | -0.19012   | 9.61E-01 |
| ENSG0000015738  | 10 | 112711   | 112735   | ADAR2        | ncrna | processed_transcript   | YES | YES | -0.129713  | 4.60E-01 | -0.27258  | 5.64E-01 | -0.260688  | 1.89E-01 | -0.260729 | 1.89E-01 | -0.389954  | 1.64E-01 | -0.127179  | 5.35E-01 | -0.26268   | 1.52E-01 |
| ENSG00000101013 | X  | 48890197 | 48903143 | PQBP1        | ncrna | processed_transcript   | YES | YES | -0.163364  | 1.56E-01 | -0.283325 | 4.63E-01 | -0.2540003 | 2.00E-01 | -0.260624 | 1.89E-01 | -0.12395   | 4.74E-01 | -0.174354  | 4.72E-01 | -0.0208585 | 8.47E-01 |
| ENSG00000112276 | 6  | 10598822 | 10613717 | BFB          | ncrna | processed_transcript   | YES | YES | -0.208619  | 1.15E-01 | -0.084903 | 1.44E-01 | -0.067045  | 3.74E-01 | -0.260734 | 1.89E-01 | -0.385154  | 3.99E-01 | -0.12077   | 4.22E-01 | -0.141766  | 3.27E-01 |
| ENSG00000204964 | 10 | 8713908  | 8714255  | AC04591.2    | ncrna | incRNA                 | NO  | NO  | -0.188473  | 1.01E-01 | -0.148465 | 2.72E-01 | -0.101894  | 5.97E-01 | -0.260802 | 1.89E-01 | -0.068689  | 5.41E-01 | -0.03760   | 7.25E-01 | -0.051429  | 7.24E-01 |
| ENSG0000014774  | 15 | 8233690  | 8240489  | IRF1P1       | ncrna | processed_transcript   | YES | YES | -0.021528  | 5.74E-01 | -0.170288 | 1.37E-01 | -0.159459  | 4.27E-01 | -0.260434 | 1.90E-01 | -0.312094  | 2.97E-01 | -0.20355   | 6.91E-01 | -0.183246  | 3.66E-01 |
| ENSG0000011481  | 12 | 5430120  | 5431846  | COPI1        | ncrna | processed_transcript   | YES | YES | -0.067063  | 9.67E-01 | -0.299939 | 8.06E-01 | -0.0752397 | 7.09E-01 | -0.260863 | 1.89E-01 | -0.0711416 | 4.41E-01 | -0.05395   | 7.41E-01 | -0.0479881 | 5.49E-01 |
| ENSG00000101208 | 14 | 5228679  | 5228988  | AL38457.1    | ncrna | incRNA                 | NO  | NO  | -0.049029  | 6.79E-01 | -0.180296 | 1.31E-01 | -0.1148317 | 5.69E-01 | -0.260847 | 1.89E-01 | -0.010844  | 9.40E-01 | -0.1076654 | 5.95E-01 | -0.1287578 | 9.74E-01 |
| ENSG0000017975  | 1  | 524465   | 5245718  | IRF1         | ncrna | processed_transcript   | YES | YES | -0.021528  | 5.74E-01 | -0.170288 | 1.37E-01 | -0.159459  | 4.27E-01 | -0.260434 | 1.90E-01 | -0.312094  | 2.97E-01 | -0.20355   | 6.91E-01 | -0.183246  | 3.66E-01 |
| ENSG00000202377 | 1  | 373511   | 374733   | IRF1P1.5     | ncrna | transcribed_unint      | NO  | NO  | -0.301265  | 1.79E-01 | -0.199248 | 1.65E-01 | -0.110710  | 5.81E-01 | -0.260893 | 1.89E-01 | -0.434473  | 1.03E-01 | -0.2099323 | 1.70E-01 | -0.1013605 | 3.24E-01 |
| ENSG00000206523 | 3  | 9612747  | 9612789  | AC02115.1    | ncrna | tagene                 | NO  | NO  | -0.080791  | 4.85E-01 | -0.054513 | 7.69E-01 | -0.057699  | 7.75E-01 | -0.260904 | 1.89E-01 | -0.184474  | 1.82E-01 | -0.0989126 | 8.92E-01 | -0.04651   | 8.64E-01 |
| ENSG00000200382 | 1  | 1214213  | 1214213  | IRF1         | ncrna | processed_transcript   | YES | YES | -0.021528  | 5.74E-01 | -0.170288 | 1.37E-01 | -0.159459  | 4.27E-01 | -0.260434 | 1.90E-01 | -0.312094  | 2.97E-01 | -0.20355   | 6.91E-01 | -0.183246  | 3.66E-01 |
| ENSG0000011819  | 1  | 1118935  | 1119581  | ANGP17       | ncrna | processed_transcript   | YES | YES | -0.197708  | 8.47E-01 | -0.045643 | 7.02E-01 | -0.103273  | 6.08E-01 | -0.260905 | 1.89E-01 | -0.1221609 | 3.81E-01 | -0.099045  | 8.21E-01 | -0.0944575 | 5.14E-01 |
| ENSG0000015621  | 10 | 7013781  | 7014670  | TYSD1        | ncrna | processed_transcript   | YES | YES | -0.261298  | 4.80E-01 | -0.142368 | 3.21E-01 | -0.004867  | 9.74E-01 | -0.260909 | 1.89E-01 | -0.181033  | 4.47E-01 | -0.0409939 | 5.79E-01 | -0.1605519 | 2.48E-01 |
| ENSG00000101923 | 1  | 1091783  | 1091783  | IRF1         | ncrna | processed_transcript   | YES | YES | -0.021528  | 5.74E-01 | -0.170288 | 1.37E-01 | -0.159459  | 4.27E-01 | -0.260434 | 1.90E-01 | -0.312094  | 2.97E-01 | -0.20355   | 6.91E-01 | -0.183246  | 3.66E-01 |
| ENSG0000019429  | 1  | 4569432  | 4570063  | IRP          | ncrna | processed_transcript   | YES | YES | -0.068552  | 5.13E-01 | -0.110551 | 4.00E-01 | -0.089210  | 6.58E-01 | -0.261028 | 1.89E-01 | -0.181033  | 3.89E-01 | -0.1954758 | 3.79E-01 | -0.0810298 | 5.51E-01 |
| ENSG00000147789 | 8  | 14482746 | 14484709 | ZNF7         | ncrna | processed_transcript   | YES | YES | -0.020982  | 6.87E-01 | -0.082912 | 5.67E-01 | -0.164026  | 4.01E-01 | -0.261035 | 1.88E-01 | -0.134801  | 7.40E-01 | -0.1015078 | 4.83E-01 | -0.040201  | 8.15E-01 |
| ENSG00000197046 | 1  | 9150083  | 9152576  | DCC          | ncrna | processed_transcript   | YES | YES | -0.172852  | 1.21E-01 | -0.119323 | 3.60E-01 | -0.0857578 | 6.79E-01 | -0.261048 | 1.88E-01 | -0.20045   | 4.60E-01 | -0.254527  | 6.03E-01 | -0.102951  | 8.48E-01 |
| ENSG00000108861 | 1  | 1244869  | 1244869  | AC01820.1    | ncrna | incRNA                 | NO  | NO  | -0.1244869 | 2.07E-01 | -0.263638 | 1.89E-01 | -0.1425266 | 6.12E-01 | -0.261048 | 1.88E-01 | -0.0938748 | 4.42E-01 | -0.0938748 | 4.42E-01 | -0.0938748 | 4.42E-01 |
| ENSG00000147481 | 1  | 11846721 | 11847380 | HSD18B1      | ncrna | unprocessed_transcript | NO  | NO  | -0.115203  | 3.30E-01 | -0.117806 | 4.18E-01 | -0.047862  | 8.18E-01 | -0.261074 | 1.88E-01 | -0.161023  | 2.44E-01 | -0.081224  | 6.56E-01 | -0.081224  | 6.70E-01 |
| ENSG0000010723  | 14 | 8652070  | 8652796  | ZC3H4        | ncrna | processed_transcript   | YES | YES | -0.073348  | 8.29E-01 | -0.384021 | 2.93E-01 | -0.275022  | 1.72E-01 | -0.261078 | 1.88E-01 | -0.451033  | 2.28E-01 | -0.0405203 | 5.49E-01 | -0.129534  | 9.46E-01 |
| ENSG00          |    |          |          |              |       |                        |     |     |            |          |           |          |            |          |           |          |            |          |            |          |            |          |



| ENSG0000019081  | 17 | 41255384 | 41256464  | RTTAP9     | lincRNA        | protein_coding | -0.193949  | 2.27e-01 | -0.103426  | 4.73e-01 | 0.0472379  | 8.14e-01 | -0.261269  | 1.85e-01 | -0.232709  | 9.11e-02 | -0.1199018 | 5.86e-01  | 0.0462714  | 7.47e-01 |            |          |
|-----------------|----|----------|-----------|------------|----------------|----------------|------------|----------|------------|----------|------------|----------|------------|----------|------------|----------|------------|-----------|------------|----------|------------|----------|
| ENSG0000021476  |    | 22510616 | 22511999  | FEF14196   | protein_coding | protein_coding | -0.193938  | 9.91e-02 | -0.249766  | 7.96e-01 | 0.0497268  | 8.01e-01 | -0.263211  | 1.85e-01 | -0.204707  | 1.39e-01 | -0.157461  | 4.71e-01  | -0.034338  | 8.18e-01 |            |          |
| ENSG0000014999  | 1  | 18964624 | 18964676  | FPZ2       | protein_coding | protein_coding | -0.193938  | 9.91e-02 | -0.249766  | 7.96e-01 | 0.0497268  | 8.01e-01 | -0.263211  | 1.85e-01 | -0.204707  | 1.39e-01 | -0.157461  | 4.71e-01  | -0.034338  | 8.18e-01 |            |          |
| ENSG0000017501  | 11 | 8564242  | 8564159   | SVY12      | protein_coding | protein_coding | -0.231144  | 4.31e-01 | -0.231144  | 1.56e-01 | 0.231144   | 2.41e-01 | -0.263211  | 1.85e-01 | -0.317649  | 1.92e-01 | -0.3096243 | 1.41e-01  | -0.1179483 | 4.15e-01 |            |          |
| ENSG0000021374  | 7  | 7737384  | 7737403   | AC115421.1 | antisenseRNA   | antisenseRNA   | YES        | YES      | -0.128148  | 2.67e-01 | -0.022465  | 8.70e-01 | 0.1451180  | 4.70e-01 | 0.2632994  | 1.84e-01 | 0.2033911  | 5.42e-01  | 0.167244   | 4.46e-01 | -0.0027908 | 9.90e-01 |
| ENSG0000020960  | 4  | 17406212 | 17406218  | FPZ2       | protein_coding | protein_coding | -0.240892  | 1.62e-01 | -0.240892  | 1.62e-01 | 0.240892   | 1.62e-01 | -0.263211  | 1.85e-01 | -0.204707  | 1.39e-01 | -0.157461  | 4.71e-01  | -0.034338  | 8.18e-01 |            |          |
| ENSG0000014833  | 18 | 6949431  | 6920848   | TUBB8A     | antisenseRNA   | antisenseRNA   | -0.0554087 | 6.32e-01 | -0.0554087 | 7.99e-01 | 0.1543178  | 4.42e-01 | -0.2634991 | 1.84e-01 | -0.1424359 | 3.80e-01 | 0.0412014  | 0.375e-01 | 0.0067624  | 9.52e-01 |            |          |
| ENSG0000012548  | 8  | 6436079  | 6462023   | SLC25A23   | antisenseRNA   | antisenseRNA   | -0.2521196 | 3.91e-01 | -0.2521196 | 3.91e-01 | 0.2521196  | 3.91e-01 | -0.2634541 | 1.84e-01 | -0.3859796 | 1.95e-01 | -0.1556847 | 4.78e-01  | -0.0788897 | 5.86e-01 |            |          |
| ENSG0000019659  | 18 | 72152936 | 72152936  | AC115421.1 | antisenseRNA   | antisenseRNA   | YES        | YES      | -0.203226  | 1.56e-01 | -0.203226  | 1.56e-01 | -0.2634541 | 1.84e-01 | -0.3859796 | 1.95e-01 | -0.1556847 | 4.78e-01  | -0.0788897 | 5.86e-01 |            |          |
| ENSG0000016519  | 19 | 591239   | 591211    | CAPS       | antisenseRNA   | antisenseRNA   | -0.2079396 | 6.58e-01 | -0.2079396 | 6.58e-01 | 0.2079396  | 6.58e-01 | -0.2634541 | 1.84e-01 | -0.3859796 | 1.95e-01 | -0.1556847 | 4.78e-01  | -0.0788897 | 5.86e-01 |            |          |
| ENSG0000020484  | 2  | 21867209 | 218702716 | VTX6       | antisenseRNA   | antisenseRNA   | -0.2241502 | 5.00e-01 | -0.2241502 | 5.00e-01 | 0.2241502  | 5.00e-01 | -0.2634848 | 1.84e-01 | -0.2634848 | 1.84e-01 | -0.2634848 | 1.84e-01  | -0.2634848 | 1.84e-01 |            |          |
| ENSG0000013366  | 1  | 25666022 | 25667053  | AC115421.1 | antisenseRNA   | antisenseRNA   | YES        | YES      | -0.203226  | 1.56e-01 | -0.203226  | 1.56e-01 | -0.2634541 | 1.84e-01 | -0.3859796 | 1.95e-01 | -0.1556847 | 4.78e-01  | -0.0788897 | 5.86e-01 |            |          |
| ENSG0000020484  | 5  | 28763440 | 28764151  | AC05876.4  | antisenseRNA   | antisenseRNA   | -0.1545513 | 3.44e-01 | -0.1545513 | 3.44e-01 | 0.1545513  | 3.44e-01 | -0.2634541 | 1.84e-01 | -0.2634541 | 1.84e-01 | -0.2634541 | 1.84e-01  | -0.2634541 | 1.84e-01 |            |          |
| ENSG0000021177  | 16 | 86081409 | 86089236  | AC115012.1 | antisenseRNA   | antisenseRNA   | YES        | YES      | -0.1760712 | 1.90e-01 | -0.1760712 | 1.90e-01 | -0.2632524 | 1.84e-01 | -0.3991804 | 2.79e-01 | -0.1031313 | 6.40e-01  | -0.1488331 | 3.02e-01 |            |          |
| ENSG0000020639  | 4  | 17509318 | 17511764  | AC093849.2 | antisenseRNA   | antisenseRNA   | -0.1776897 | 1.23e-01 | -0.1776897 | 1.23e-01 | 0.1776897  | 1.23e-01 | -0.2632881 | 1.84e-01 | -0.2632881 | 1.84e-01 | -0.2632881 | 1.84e-01  | -0.2632881 | 1.84e-01 |            |          |
| ENSG0000021420  | 10 | 4634849  | 4634907   | ANTYR21    | antisenseRNA   | antisenseRNA   | -0.1997134 | 8.02e-01 | -0.1997134 | 8.02e-01 | 0.1997134  | 8.02e-01 | -0.2632947 | 1.84e-01 | -0.2632947 | 1.84e-01 | -0.2632947 | 1.84e-01  | -0.2632947 | 1.84e-01 |            |          |
| ENSG0000017849  | 3  | 4901548  | 4902293   | DIAD3      | antisenseRNA   | antisenseRNA   | -0.2436803 | 4.98e-01 | -0.2436803 | 4.98e-01 | 0.2436803  | 4.98e-01 | -0.2632947 | 1.84e-01 | -0.317460  | 1.91e-01 | -0.11729   | 6.12e-01  | -0.218518  | 1.66e-01 |            |          |
| ENSG0000021794  | 19 | 1176241  | 1177999   | CPYAP2     | antisenseRNA   | antisenseRNA   | YES        | YES      | -0.2241673 | 5.00e-01 | -0.2241673 | 5.00e-01 | 0.2634346  | 1.84e-01 | -0.1447239 | 3.02e-01 | 0.167244   | 4.46e-01  | -0.0788897 | 5.86e-01 |            |          |
| ENSG0000021587  | 12 | 2282708  | 2289978   | FPZ2       | antisenseRNA   | antisenseRNA   | YES        | YES      | -0.113192  | 1.35e-01 | -0.113192  | 1.35e-01 | 0.16764    | 2.44e-01 | 0.16764    | 2.44e-01 | -0.2431561 | 7.44e-01  | 0.149917   | 4.95e-01 | 0.016189   | 9.04e-01 |
| ENSG0000020701  | 2  | 1578702  | 158136154 | LUPP2      | antisenseRNA   | antisenseRNA   | YES        | YES      | -0.158887  | 1.68e-01 | -0.158887  | 1.68e-01 | 0.0883929  | 3.11e-01 | -0.365566  | 1.84e-01 | -0.2525313 | 1.01e-01  | -0.153644  | 4.84e-01 | -0.021661  | 8.81e-01 |
| ENSG00000216424 | 2  | 13183936 | 131861823 | LINC0214   | antisenseRNA   | antisenseRNA   | YES        | YES      | -0.1706475 | 1.88e-01 | -0.1706475 | 1.88e-01 | 0.14718    | 4.70e-01 | -0.2632881 | 1.84e-01 | -0.2525313 | 1.01e-01  | -0.0907148 | 7.52e-01 | -0.1171193 | 4.18e-01 |
| ENSG0000020701  | 1  | 25666022 | 25667053  | AC115421.1 | antisenseRNA   | antisenseRNA   | YES        | YES      | -0.203226  | 1.56e-01 | -0.203226  | 1.56e-01 | -0.2634541 | 1.84e-01 | -0.3859796 | 1.95e-01 | -0.1556847 | 4.78e-01  | -0.0788897 | 5.86e-01 |            |          |
| ENSG0000020501  | 17 | 6395052  | 6393321   | AC09828.2  | antisenseRNA   | antisenseRNA   | -0.1904278 | 2.97e-01 | -0.1904278 | 2.97e-01 | 0.1904278  | 2.97e-01 | -0.2632947 | 1.84e-01 | -0.317460  | 1.91e-01 | -0.11729   | 6.12e-01  | -0.218518  | 1.66e-01 |            |          |
| ENSG0000021476  | 7  | 41723780 | 4178885   | SEPTIN7B   | antisenseRNA   | antisenseRNA   | -0.088125  | 1.37e-01 | -0.088125  | 1.37e-01 | 0.088125   | 1.37e-01 | -0.2632774 | 1.84e-01 | -0.364274  | 2.78e-01 | -0.1097736 | 8.29e-01  | -0.1124818 | 4.37e-01 |            |          |
| ENSG00000212015 | 1  | 7783559  | 7783983   | HSPJ225    | antisenseRNA   | antisenseRNA   | -0.0979729 | 3.99e-01 | -0.0979729 | 3.99e-01 | 0.0979729  | 3.99e-01 | -0.2632881 | 1.84e-01 | -0.3859796 | 1.95e-01 | -0.1556847 | 4.78e-01  | -0.0788897 | 5.86e-01 |            |          |
| ENSG0000021336  | 1  | 3832544  | 3832700   | AC01836.2  | antisenseRNA   | antisenseRNA   | YES        | YES      | -0.1788848 | 1.31e-01 | -0.1788848 | 1.31e-01 | 0.1637989  | 2.44e-01 | 0.1637989  | 2.44e-01 | -0.2632947 | 1.84e-01  | -0.317460  | 1.91e-01 |            |          |
| ENSG0000021438  | 16 | 848525   | 848505    | AUG108.1   | antisenseRNA   | antisenseRNA   | -0.1717665 | 1.51e-01 | -0.1717665 | 1.51e-01 | 0.1717665  | 1.51e-01 | -0.2632947 | 1.84e-01 | -0.317460  | 1.91e-01 | -0.11729   | 6.12e-01  | -0.218518  | 1.66e-01 |            |          |
| ENSG0000021330  | 1  | 1484310  | 1484380   | AC114993.1 | antisenseRNA   | antisenseRNA   | -0.1917474 | 2.27e-01 | -0.1917474 | 2.27e-01 | 0.1917474  | 2.27e-01 | -0.2632947 | 1.84e-01 | -0.317460  | 1.91e-01 | -0.11729   | 6.12e-01  | -0.218518  | 1.66e-01 |            |          |
| ENSG0000021394  | 1  | 4486154  | 4486153   | AC01836.2  | antisenseRNA   | antisenseRNA   | -0.0280611 | 0.36e-01 | -0.0280611 | 0.36e-01 | 0.0280611  | 0.36e-01 | -0.2632947 | 1.84e-01 | -0.317460  | 1.91e-01 | -0.11729   | 6.12e-01  | -0.218518  | 1.66e-01 |            |          |
| ENSG0000021693  | 19 | 89046    | 90783     | AC00573.1  | antisenseRNA   | antisenseRNA   | -0.0808584 | 4.85e-01 | -0.0808584 | 4.85e-01 | 0.0808584  | 4.85e-01 | -0.2634951 | 1.83e-01 | -0.143123  | 6.01e-01 | -0.1103208 | 6.06e-01  | -0.0296305 | 6.01e-01 |            |          |
| ENSG0000021073  | 20 | 31877373 | 31881109  | ZNF341.1   | antisenseRNA   | antisenseRNA   | YES        | YES      | -0.1521243 | 1.98e-01 | -0.1521243 | 1.98e-01 | 0.1033818  | 2.97e-01 | 0.1033818  | 2.97e-01 | -0.2632947 | 1.84e-01  | -0.317460  | 1.91e-01 |            |          |
| ENSG0000013076  | 1  | 6436079  | 6462023   | SLC25A23   | antisenseRNA   | antisenseRNA   | -0.2521196 | 3.91e-01 | -0.2521196 | 3.91e-01 | 0.2521196  | 3.91e-01 | -0.2634541 | 1.84e-01 | -0.3859796 | 1.95e-01 | -0.1556847 | 4.78e-01  | -0.0788897 | 5.86e-01 |            |          |
| ENSG00000217424 | 4  | 16543436 | 16575767  | AC00079.2  | antisenseRNA   | antisenseRNA   | -0.1552466 | 1.89e-01 | -0.1552466 | 1.89e-01 | 0.1552466  | 1.89e-01 | -0.2632947 | 1.84e-01 | -0.317460  | 1.91e-01 | -0.11729   | 6.12e-01  | -0.218518  | 1.66e-01 |            |          |
| ENSG0000021494  | 4  | 1136581  | 1138075   | AC00782.2  | antisenseRNA   | antisenseRNA   | YES        | YES      | -0.1737165 | 1.11e-01 | -0.1737165 | 1.11e-01 | 0.2634794  | 2.00e-01 | 0.2634794  | 2.00e-01 | -0.2321444 | 9.12e-01  | -0.0991546 | 6.53e-01 | 0.10754408 | 4.65e-01 |
| ENSG0000021789  | 1  | 13200249 | 13200249  | FPZ2       | antisenseRNA   | antisenseRNA   | YES        | YES      | -0.1904278 | 2.97e-01 | -0.1904278 | 2.97e-01 | 0.1904278  | 2.97e-01 | -0.2632947 | 1.84e-01 | -0.317460  | 1.91e-01  | -0.11729   | 6.12e-01 | -0.218518  | 1.66e-01 |
| ENSG0000021895  | 12 | 11349592 | 11320846  | EPAD2      | antisenseRNA   | antisenseRNA   | -0.233876  | 4.00e-01 | -0.233876  | 4.00e-01 | 0.233876   | 4.00e-01 | -0.2632947 | 1.84e-01 | -0.317460  | 1.91e-01 | -0.11729   | 6.12e-01  | -0.218518  | 1.66e-01 |            |          |
| ENSG0000021653  | 10 | 49014236 | 49115522  | VTM2A      | antisenseRNA   | antisenseRNA   | -0.2415004 | 4.00e-01 | -0.2415004 | 4.00e-01 | 0.2415004  | 4.00e-01 | -0.2632947 | 1.84e-01 | -0.317460  | 1.91e-01 | -0.11729   | 6.12e-01  | -0.218518  | 1.66e-01 |            |          |
| ENSG000002133   | 13 | 56071423 | 56071423  | CDNF2      | antisenseRNA   | antisenseRNA   | -0.1847023 | 1.08e-01 | -0.1847023 | 1.08e-01 | 0.1847023  | 1.08e-01 | -0.2632947 | 1.84e-01 | -0.317460  | 1.91e-01 | -0.11729   | 6.12e-01  | -0.218518  | 1.66e-01 |            |          |
| ENSG0000021386  | 1  | 3832544  | 3832700   | AC01836.2  | antisenseRNA   | antisenseRNA   | -0.1974869 | 2.69e-01 | -0.1974869 | 2.69e-01 | 0.1974869  | 2.69e-01 | -0.2632947 | 1.84e-01 | -0.317460  | 1.91e-01 | -0.11729   | 6.12e-01  | -0.218518  | 1.66e-01 |            |          |
| ENSG0000021620  | 17 | 2054341  | 2053963   | TBC1D30    | antisenseRNA   | antisenseRNA   | -0.211136  | 6.34e-01 | -0.211136  | 6.34e-01 | 0.211136   | 6.34e-01 | -0.2632947 | 1.84e-01 | -0.317460  | 1.91e-01 | -0.11729   | 6.12e-01  | -0.218518  | 1.66e-01 |            |          |
| ENSG0000021940  | 11 | 12415841 | 12415936  | CRD10P     | antisenseRNA   | antisenseRNA   | -0.2261301 | 4.79e-01 | -0.2261301 | 4.79e-01 | 0.2261301  | 4.79e-01 | -0.2632947 | 1.84e-01 | -0.317460  | 1.91e-01 | -0.11729   | 6.12e-01  | -0.218518  | 1.66e-01 |            |          |
| ENSG0000021932  | 1  | 4486154  | 4486153   | AC01836.2  | antisenseRNA   | antisenseRNA   | -0.0280611 | 0.36e-01 | -0.0280611 | 0.36e-01 | 0.0280611  | 0.36e-01 | -0.2632947 | 1.84e-01 | -0.317460  | 1.91e-01 | -0.11729   | 6.12e-01  | -0.218518  | 1.66e-01 |            |          |
| ENSG0000021239  | 18 | 130374   | 1302784   | AC01918.1  | antisenseRNA   | antisenseRNA   | -0.2578764 |          |            |          |            |          |            |          |            |          |            |           |            |          |            |          |

| ENSG00000140871 | 16 | 77247813  | 77435034 | ADAMTS18  | ensembl | havana | protein_coding      | YES | YES | -0.248957 | 3.98E-05 | -0.111299 | 4.42E-01 | -0.127383 | 5.77E-01  | -0.266010 | 1.80E-01  | -0.382676 | 4.27E-01  | -0.146679 | 5.04E-01  | -0.146662 | 3.09E-01  |          |
|-----------------|----|-----------|----------|-----------|---------|--------|---------------------|-----|-----|-----------|----------|-----------|----------|-----------|-----------|-----------|-----------|-----------|-----------|-----------|-----------|-----------|-----------|----------|
| ENSG00000159311 | 11 | 61496460  | 61506490 | ADAMTS18  | ensembl | havana | protein_coding      | YES | YES | -0.262948 | 7.19E-02 | -0.115740 | 4.21E-01 | -0.147123 | 5.81E-01  | -0.266044 | 1.80E-01  | -0.311748 | 3.98E-01  | -0.082495 | 7.09E-01  | -0.181703 | 4.20E-01  |          |
| ENSG00000145448 | 17 | 82242404  | 82232352 | ADAMTS18  | ensembl | havana | protein_coding      | YES | YES | -0.262948 | 7.19E-02 | -0.115740 | 4.21E-01 | -0.147123 | 5.81E-01  | -0.266044 | 1.80E-01  | -0.311748 | 3.98E-01  | -0.082495 | 7.09E-01  | -0.181703 | 4.20E-01  |          |
| ENSG00000174500 | 3  | 11212839  | 11313270 | AGSNAP    | ensembl | havana | protein_coding      | YES | YES | -0.82435  | 5.98E-04 | -0.176863 | 0.930009 | 5.18E-01  | -0.266120 | 1.80E-01  | -0.330760 | 4.27E-01  | -0.212319 | 3.98E-01  | -0.178429 | 3.79E-01  | -0.178429 | 3.79E-01 |
| ENSG00000148431 | 11 | 8709474   | 8709085  | AIAP2     | ensembl | havana | protein_coding      | YES | YES | -0.262950 | 4.79E-02 | -0.121294 | 1.38E-01 | -0.146717 | 4.60E-01  | -0.266122 | 1.80E-01  | -0.276723 | 4.28E-01  | -0.143277 | 5.14E-01  | -0.158426 | 2.72E-01  |          |
| ENSG00000139771 | 17 | 82242404  | 82232352 | AIAP2     | ensembl | havana | protein_coding      | YES | YES | -0.262950 | 4.79E-02 | -0.121294 | 1.38E-01 | -0.146717 | 4.60E-01  | -0.266122 | 1.80E-01  | -0.276723 | 4.28E-01  | -0.143277 | 5.14E-01  | -0.158426 | 2.72E-01  |          |
| ENSG00000143101 | 3  | 17105444  | 17146408 | AINP      | ensembl | havana | protein_coding      | YES | YES | -0.885228 | 1.25E-03 | -0.172963 | 0.784645 | -0.181826 | 5.57E-01  | -0.266258 | 1.78E-01  | -0.230599 | 3.94E-01  | -0.064608 | 1.28E-01  | -0.182631 | 2.47E-01  |          |
| ENSG00000195986 | 16 | 1782831   | 1789186  | AINP2     | ensembl | havana | protein_coding      | YES | YES | -0.309461 | 6.16E-02 | -0.234802 | 1.60E-01 | -0.108766 | 5.91E-01  | -0.266266 | 1.79E-01  | -0.424029 | 3.96E-01  | -0.164360 | 6.42E-01  | -0.005274 | 9.71E-01  |          |
| ENSG00000190131 | 17 | 82242404  | 82232352 | AINP2     | ensembl | havana | protein_coding      | YES | YES | -0.309461 | 6.16E-02 | -0.234802 | 1.60E-01 | -0.108766 | 5.91E-01  | -0.266266 | 1.79E-01  | -0.424029 | 3.96E-01  | -0.164360 | 6.42E-01  | -0.005274 | 9.71E-01  |          |
| ENSG00000125157 | 5  | 5480510   | 5487251  | CPSP48    | ensembl | havana | protein_coding      | YES | YES | -0.356967 | 2.95E-02 | -0.105919 | 2.77E-01 | -0.126079 | 7.48E-01  | -0.266279 | 1.79E-01  | -0.333581 | 4.48E-01  | -0.231566 | 6.40E-01  | -0.192933 | 3.71E-01  |          |
| ENSG00000144834 | 3  | 11199879  | 11031387 | TAGLN3    | ensembl | havana | protein_coding      | YES | YES | -0.205917 | 7.24E-01 | -0.185848 | 1.96E-01 | -0.004434 | 9.83E-01  | -0.266287 | 1.79E-01  | -0.274207 | 4.48E-01  | -0.017088 | 4.39E-01  | -0.009358 | 6.34E-01  |          |
| ENSG00000145448 | 17 | 82242404  | 82232352 | TAGLN3    | ensembl | havana | protein_coding      | YES | YES | -0.205917 | 7.24E-01 | -0.185848 | 1.96E-01 | -0.004434 | 9.83E-01  | -0.266287 | 1.79E-01  | -0.274207 | 4.48E-01  | -0.017088 | 4.39E-01  | -0.009358 | 6.34E-01  |          |
| ENSG0000013827  | 8  | 13421185  | 13432047 | AC10510.1 | ensembl | havana | protein_coding      | YES | YES | -0.185979 | 1.07E-01 | -0.153207 | 2.91E-01 | -0.147677 | 4.62E-01  | -0.266304 | 1.79E-01  | -0.254558 | 4.48E-01  | -0.033007 | 9.89E-01  | -0.011741 | 5.24E-01  |          |
| ENSG00000121484 | 10 | 97136875  | 97138770 | E1AFAP1   | ensembl | havana | protein_coding      | YES | YES | -0.220542 | 1.61E-01 | -0.172320 | 2.31E-01 | -0.067170 | 2.93E-01  | -0.266305 | 1.79E-01  | -0.298115 | 2.85E-01  | -0.078497 | 7.22E-01  | -0.028254 | 5.62E-01  |          |
| ENSG00000194759 | 18 | 5804426   | 5801540  | NEPAL     | ensembl | havana | protein_coding      | YES | YES | -0.220917 | 8.10E-02 | -0.101985 | 5.23E-01 | -0.175187 | 3.81E-01  | -0.266314 | 1.79E-01  | -0.400642 | 3.17E-01  | -0.089652 | 6.84E-01  | -0.144779 | 3.72E-01  |          |
| ENSG00000192119 | 17 | 16049319  | 16066784 | AC00800.1 | ensembl | havana | protein_coding      | YES | YES | -0.221408 | 4.29E-01 | -0.184809 | 2.46E-01 | -0.207977 | 2.81E-01  | -0.266319 | 1.79E-01  | -0.301838 | 4.68E-01  | -0.051456 | 3.98E-01  | -0.021197 | 1.36E-01  |          |
| ENSG00000124048 | 6  | 149217926 | 14924554 | AD10105.1 | ensembl | havana | protein_coding      | YES | YES | -0.22424  | 8.06E-01 | -0.185154 | 1.91E-01 | -0.186653 | 3.44E-01  | -0.266317 | 1.79E-01  | -0.286127 | 3.60E-01  | -0.164652 | 4.77E-01  | -0.148045 | 2.25E-01  |          |
| ENSG00000144774 | 2  | 20282036  | 20287225 | MGAT14P   | ensembl | havana | transcribed_unit    | YES | YES | -0.176256 | 1.25E-01 | -0.204552 | 6.60E-01 | -0.204552 | 1.89E-01  | -0.266319 | 1.79E-01  | -0.290712 | 3.90E-01  | -0.142027 | 6.02E-01  | -0.188647 | 2.67E-01  |          |
| ENSG00000118961 | 17 | 82242404  | 82232352 | MGAT14P   | ensembl | havana | transcribed_unit    | YES | YES | -0.176256 | 1.25E-01 | -0.204552 | 6.60E-01 | -0.204552 | 1.89E-01  | -0.266319 | 1.79E-01  | -0.290712 | 3.90E-01  | -0.142027 | 6.02E-01  | -0.188647 | 2.67E-01  |          |
| ENSG00000180764 | 10 | 97858191  | 97861440 | PIPSL     | ensembl | havana | transcribed_protein | YES | YES | -0.177876 | 1.22E-01 | -0.148487 | 3.03E-01 | -0.267876 | 1.79E-01  | -0.266317 | 1.79E-01  | -0.270027 | 4.80E-01  | -0.057512 | 7.74E-01  | -0.038386 | 8.49E-01  |          |
| ENSG0000017510  | 10 | 8291515   | 8294482  | AC01451.1 | ensembl | havana | transcribed_protein | YES | YES | -0.181462 | 1.14E-01 | -0.148877 | 2.88E-01 | -0.148494 | 4.72E-01  | -0.266328 | 1.79E-01  | -0.236523 | 8.51E-01  | -0.171908 | 5.92E-01  | -0.137344 | 3.92E-01  |          |
| ENSG00000144909 | 3  | 12150522  | 12137992 | AD011.1   | ensembl | havana | protein_coding      | YES | YES | -0.224188 | 2.66E-01 | -0.107638 | 5.32E-01 | -0.090738 | 8.41E-01  | -0.266327 | 1.79E-01  | -0.387233 | 3.80E-01  | -0.021266 | 6.79E-01  | -0.053793 | 5.56E-01  |          |
| ENSG00000121332 | 6  | 73899704  | 73887717 | DOEP-AS1  | ensembl | havana | protein_coding      | YES | YES | -0.086426 | 4.55E-01 | -0.131566 | 4.02E-01 | -0.361552 | 4.21E-01  | -0.266393 | 1.79E-01  | -0.172743 | 3.98E-01  | -0.004909 | 7.85E-01  | -0.016342 | 8.12E-01  |          |
| ENSG00000121540 | 9  | 8594146   | 8602546  | HAAS1     | ensembl | havana | protein_coding      | YES | YES | -0.082131 | 6.05E-01 | -0.109847 | 1.88E-01 | -0.098847 | 6.24E-01  | -0.2664   | 1.79E-01  | -0.452449 | 3.56E-01  | -0.131458 | 1.36E-01  | -0.114974 | 4.77E-01  |          |
| ENSG00000125576 | 3  | 18699877  | 18694254 | NCBP2-AS1 | ensembl | havana | protein_coding      | YES | YES | -0.112138 | 3.31E-01 | -0.104982 | 4.68E-01 | -0.474970 | 2.22E-01  | -0.266407 | 1.79E-01  | -0.134825 | 5.34E-01  | -0.120848 | 5.83E-01  | -0.087631 | 1.94E-01  |          |
| ENSG00000128261 | 3  | 4290642   | 4293934  | ENRFB     | ensembl | havana | protein_coding      | YES | YES | -0.20809  | 1.83E-01 | -0.149877 | 8.94E-01 | -0.096895 | 6.81E-01  | -0.266489 | 1.79E-01  | -0.371566 | 8.97E-01  | -0.088663 | 7.16E-01  | -0.004909 | 9.75E-01  |          |
| ENSG00000124321 | 8  | 3686974   | 3678485  | AC00811.1 | ensembl | havana | protein_coding      | YES | YES | -0.171821 | 1.85E-01 | -0.105812 | 2.86E-01 | -0.171689 | 3.75E-01  | -0.266491 | 1.79E-01  | -0.269373 | 8.89E-01  | -0.04244  | 3.58E-01  | -0.154514 | 3.94E-01  |          |
| ENSG00000172215 | 12 | 4249386   | 4248623  | AC01900.1 | ensembl | havana | protein_coding      | YES | YES | -0.102193 | 3.76E-01 | -0.118813 | 4.11E-01 | -0.129549 | 5.19E-01  | -0.266504 | 1.79E-01  | -0.101236 | 2.44E-01  | -0.084988 | 9.62E-01  | -0.056983 | 3.66E-01  |          |
| ENSG00000101018 | 17 | 82242404  | 82232352 | AC01900.1 | ensembl | havana | protein_coding      | YES | YES | -0.102193 | 3.76E-01 | -0.118813 | 4.11E-01 | -0.129549 | 5.19E-01  | -0.266504 | 1.79E-01  | -0.101236 | 2.44E-01  | -0.084988 | 9.62E-01  | -0.056983 | 3.66E-01  |          |
| ENSG00000199117 | 27 | 20495913  | 20587632 | MEIS1     | ensembl | havana | protein_coding      | YES | YES | -0.195881 | 2.26E-01 | -0.104972 | 1.17E-01 | -0.266581 | 1.79E-01  | -0.137577 | 3.21E-01  | -0.015884 | 9.37E-01  | -0.003213 | 9.61E-01  | -0.002281 | 9.61E-01  |          |
| ENSG0000019884  | 15 | 5055701   | 5056000  | AC0475.1  | ensembl | havana | protein_coding      | YES | YES | -0.018916 | 8.70E-01 | -0.096127 | 5.07E-01 | -0.118119 | 5.57E-01  | -0.266548 | 1.79E-01  | -0.061849 | 5.57E-01  | -0.097132 | 7.18E-01  | -0.005029 | 6.97E-01  |          |
| ENSG0000013798  | 1  | 8173688   | 8174000  | PRK8      | ensembl | havana | protein_coding      | YES | YES | -0.185100 | 2.66E-01 | -0.129722 | 3.84E-01 | -0.129722 | 3.84E-01  | -0.266551 | 1.79E-01  | -0.285100 | 4.28E-01  | -0.238951 | 8.02E-01  | -0.028951 | 8.02E-01  |          |
| ENSG00000140773 | 5  | 1708506   | 1708552  | RPS4X5    | ensembl | havana | protein_coding      | YES | YES | -0.160719 | 6.02E-01 | -0.172229 | 5.58E-01 | -0.054554 | 7.87E-01  | -0.266561 | 1.79E-01  | -0.118169 | 6.91E-01  | -0.009049 | 4.09E-01  | -0.008006 | 6.97E-01  |          |
| ENSG00000174710 | 1  | 20272018  | 20275005 | ZNF87.2   | ensembl | havana | protein_coding      | YES | YES | -0.186814 | 1.04E-01 | -0.121365 | 3.74E-01 | -0.138667 | 4.88E-01  | -0.266565 | 1.79E-01  | -0.295785 | 2.99E-01  | -0.154578 | 6.35E-01  | -0.030214 | 7.88E-01  |          |
| ENSG00000158971 | 1  | 8247978   | 8245489  | NOX4      | ensembl | havana | protein_coding      | YES | YES | -0.131916 | 2.55E-01 | -0.200963 | 4.56E-01 | -0.091768 | 7.82E-01  | -0.266567 | 1.79E-01  | -0.262848 | 3.18E-01  | -0.172284 | 3.48E-01  | -0.072284 | 3.48E-01  |          |
| ENSG00000101748 | 18 | 1385110   | 13425292 | NOLA      | ensembl | havana | protein_coding      | YES | YES | -0.136039 | 2.98E-01 | -0.101921 | 4.99E-01 | -0.119029 | 5.44E-01  | -0.266588 | 1.79E-01  | -0.211754 | 1.15E-01  | -0.134538 | 4.20E-01  | -0.081191 | 7.98E-01  |          |
| ENSG00000121731 | 3  | 1492031   | 1494824  | IFG0-AS1  | ensembl | havana | protein_coding      | YES | YES | -0.252829 | 2.50E-01 | -0.203503 | 1.61E-01 | -0.203503 | 1.61E-01  | -0.266613 | 1.79E-01  | -0.333874 | 4.60E-01  | -0.062789 | 7.26E-01  | -0.174512 | 2.48E-01  |          |
| ENSG00000124905 | 4  | 6210960   | 6210649  | PIPSL17   | ensembl | havana | protein_coding      | YES | YES | -0.054208 | 6.06E-01 | -0.117429 | 2.46E-01 | -0.078017 | 6.99E-01  | -0.266613 | 1.79E-01  | -0.019199 | 6.71E-01  | -0.012173 | 6.26E-01  | -0.008922 | 5.09E-01  |          |
| ENSG0000015479  | 1  | 8249804   | 8249804  | DOE11.1   | ensembl | havana | protein_coding      | YES | YES | -0.138887 | 3.64E-01 | -0.147883 | 3.06E-01 | -0.227502 | 2.54E-01  | -0.266618 | 1.79E-01  | -0.336733 | 2.88E-01  | -0.142657 | 6.10E-01  | -0.190078 | 1.96E-01  |          |
| ENSG0000016357  | 17 | 7043432   | 7043412  | LINC02074 | ensembl | havana | protein_coding      | YES | YES | -0.138887 | 3.64E-01 | -0.147883 | 3.06E-01 | -0.227502 | 2.54E-01  | -0.266618 | 1.79E-01  | -0.336733 | 2.88E-01  |           |           |           |           |          |













Table with columns for gene ID, coordinates, gene name, transcript, and various numerical values. The table lists numerous genes such as ITIH4, RNF123, and others, with associated genomic coordinates and multiple numerical data points.

Table with columns for gene ID, chromosome, coordinates, gene name, transcript ID, and various numerical values. The table lists numerous genes such as SNAI3, RAB61A, and others, along with their genomic locations and associated data points.

| ENSG0000028712  | 11 | 119189638 | 119196769 | CCDC153    | ensembl    | havana    | protein coding | -0.300239 | 7.97E-08 | -0.1218503 | 2.70E-02 | -0.128647  | 5.8E-01  | -0.2857139 | 1.49E-01 | -0.303880 | 2.49E-02 | -0.302689  | 1.60E-01 | -0.2210238 | 1.23E-01 |
|-----------------|----|-----------|-----------|------------|------------|-----------|----------------|-----------|----------|------------|----------|------------|----------|------------|----------|-----------|----------|------------|----------|------------|----------|
| ENSG0000024973  | 8  | 14175413  | 14177170  | AC052193   | transcript | antisense | antisense      | -0.174438 | 2.01E-01 | -0.167241  | 2.46E-01 | -0.181860  | 3.64E-01 | -0.287783  | 1.49E-01 | -0.208711 | 1.30E-01 | -0.168844  | 7.56E-01 | -0.086072  | 7.80E-01 |
| ENSG0000024686  | 1  | 81149776  | 81174900  | AL136466.2 | transcript | antisense | antisense      | -0.174438 | 2.01E-01 | -0.167241  | 2.46E-01 | -0.181860  | 3.64E-01 | -0.287783  | 1.49E-01 | -0.208711 | 1.30E-01 | -0.168844  | 7.56E-01 | -0.086072  | 7.80E-01 |
| ENSG0000024690  | 10 | 4051726   | 4080013   | AC05282.2  | transcript | antisense | antisense      | -0.173772 | 2.12E-01 | -0.185644  | 8.98E-01 | -0.222467  | 2.61E-01 | -0.287518  | 1.48E-01 | -0.276758 | 4.54E-01 | -0.1988118 | 1.84E-01 | -0.0791121 | 5.80E-01 |
| ENSG0000024891  | 17 | 5659709   | 5659641   | AC05282.2  | transcript | antisense | antisense      | -0.300083 | 7.89E-08 | -0.194388  | 7.49E-02 | -0.188897  | 3.46E-01 | -0.285001  | 1.47E-01 | -0.176407 | 5.03E-01 | -0.179562  | 4.22E-01 | -0.181998  | 2.06E-01 |
| ENSG0000024892  | 17 | 5659709   | 5659641   | AC05282.2  | transcript | antisense | antisense      | -0.300083 | 7.89E-08 | -0.194388  | 7.49E-02 | -0.188897  | 3.46E-01 | -0.285001  | 1.47E-01 | -0.176407 | 5.03E-01 | -0.179562  | 4.22E-01 | -0.181998  | 2.06E-01 |
| ENSG0000024545  | 22 | 2410188   | 2410354   | AC13536.3  | transcript | antisense | antisense      | -0.024608 | 6.50E-01 | -0.014108  | 4.75E-01 | -0.048236  | 4.61E-01 | -0.285266  | 1.48E-01 | -0.104053 | 4.53E-01 | -0.0958396 | 6.84E-01 | -0.1130567 | 4.34E-01 |
| ENSG0000027218  | 10 | 1301649   | 13010498  | AL13931.1  | transcript | antisense | antisense      | -0.117764 | 3.08E-01 | -0.12773   | 3.78E-01 | -0.0884651 | 6.76E-01 | -0.282882  | 1.48E-01 | -0.164313 | 2.35E-01 | -0.121249  | 5.82E-01 | -0.106773  | 4.61E-01 |
| ENSG0000024204  | 1  | 1300050   | 1300103   | AC05282.2  | transcript | antisense | antisense      | -0.024608 | 6.50E-01 | -0.014108  | 4.75E-01 | -0.048236  | 4.61E-01 | -0.285266  | 1.48E-01 | -0.104053 | 4.53E-01 | -0.0958396 | 6.84E-01 | -0.1130567 | 4.34E-01 |
| ENSG0000023975  | 13 | 9817598   | 9817769   | BNF118     | transcript | antisense | antisense      | -0.279107 | 1.00E-02 | -0.258327  | 1.15E-01 | -0.212779  | 2.88E-01 | -0.285727  | 1.48E-01 | -0.163213 | 7.05E-01 | -0.124423  | 7.50E-01 | -0.146423  | 2.02E-01 |
| ENSG0000024054  | 3  | 6386645   | 6386819   | THOX7.A1   | transcript | antisense | antisense      | -0.189848 | 9.82E-01 | -0.237694  | 9.65E-01 | -0.1993939 | 3.32E-01 | -0.285448  | 1.48E-01 | -0.209439 | 1.29E-01 | -0.141269  | 5.19E-01 | -0.0004974 | 7.97E-01 |
| ENSG0000024623  | 3  | 6383383   | 6386269   | AC052193   | transcript | antisense | antisense      | -0.185518 | 2.36E-01 | -0.200779  | 2.42E-01 | -0.2038053 | 2.86E-01 | -0.285659  | 1.48E-01 | -0.183466 | 1.84E-01 | -0.082874  | 7.29E-01 | -0.028274  | 3.86E-01 |
| ENSG0000024934  | 22 | 2747827   | 2780156   | WNT1       | transcript | antisense | antisense      | -0.24009  | 3.40E-01 | -0.180279  | 5.75E-01 | -0.370205  | 8.56E-01 | -0.286078  | 1.48E-01 | -0.186693 | 3.87E-01 | -0.182791  | 5.07E-01 | -0.254129  | 4.79E-01 |
| ENSG0000020842  | 14 | 2315640   | 2316572   | EFS        | transcript | antisense | antisense      | -0.184233 | 2.54E-01 | -0.051574  | 2.84E-01 | -0.286105  | 1.48E-01 | -0.204939  | 1.48E-01 | -0.084991 | 3.74E-01 | -0.142434  | 5.10E-01 | -0.045435  | 7.07E-01 |
| ENSG0000021807  | 11 | 702047    | 7015126   | NLIP4      | transcript | antisense | antisense      | -0.205429 | 7.31E-02 | -0.081342  | 5.37E-01 | -0.057420  | 7.76E-01 | -0.286112  | 1.48E-01 | -0.131149 | 1.48E-01 | -0.198897  | 5.24E-01 | -0.088776  | 5.40E-01 |
| ENSG0000021807  | 11 | 702047    | 7015126   | NLIP4      | transcript | antisense | antisense      | -0.205429 | 7.31E-02 | -0.081342  | 5.37E-01 | -0.057420  | 7.76E-01 | -0.286112  | 1.48E-01 | -0.131149 | 1.48E-01 | -0.198897  | 5.24E-01 | -0.088776  | 5.40E-01 |
| ENSG0000024861  | 5  | 3988876   | 3988909   | BCG01      | transcript | antisense | antisense      | -0.191294 | 2.92E-01 | -0.240017  | 1.02E-01 | -0.126555  | 5.29E-01 | -0.286211  | 1.48E-01 | -0.214210 | 1.19E-01 | -0.145423  | 6.35E-01 | -0.107649  | 4.37E-01 |
| ENSG00000219151 | 11 | 2704025   | 2717809   | ICBPI1     | transcript | antisense | antisense      | -0.127113 | 3.77E-01 | -0.173843  | 2.74E-01 | -0.2051367 | 3.04E-01 | -0.285122  | 1.48E-01 | -0.130511 | 3.44E-01 | -0.144672  | 4.53E-01 | -0.170647  | 2.19E-01 |
| ENSG0000024682  | 19 | 7017276   | 7046549   | TMEM120A   | transcript | antisense | antisense      | -0.20279  | 8.87E-01 | -0.184844  | 1.75E-01 | -0.029084  | 1.18E-01 | -0.285243  | 1.48E-01 | -0.144236 | 7.99E-01 | -0.1272607 | 1.33E-01 | -0.070204  | 9.06E-01 |
| ENSG0000021280  | 8  | 5611294   | 56113882  | MOS        | transcript | antisense | antisense      | -0.088265 | 2.97E-01 | -0.108265  | 5.38E-01 | -0.074388  | 7.01E-01 | -0.286264  | 1.48E-01 | -0.194808 | 5.58E-01 | -0.10175   | 6.86E-01 | -0.090135  | 5.37E-01 |
| ENSG0000024884  | 13 | 8011573   | 8013468   | AL13778.1  | transcript | antisense | antisense      | -0.174992 | 1.28E-01 | -0.112692  | 4.36E-01 | -0.149066  | 4.54E-01 | -0.286391  | 1.48E-01 | -0.271398 | 1.56E-01 | -0.084178  | 7.03E-01 | -0.127639  | 3.71E-01 |
| ENSG0000024884  | 13 | 8011573   | 8013468   | AL13778.1  | transcript | antisense | antisense      | -0.174992 | 1.28E-01 | -0.112692  | 4.36E-01 | -0.149066  | 4.54E-01 | -0.286391  | 1.48E-01 | -0.271398 | 1.56E-01 | -0.084178  | 7.03E-01 | -0.127639  | 3.71E-01 |
| ENSG0000024884  | 13 | 8011573   | 8013468   | AL13778.1  | transcript | antisense | antisense      | -0.174992 | 1.28E-01 | -0.112692  | 4.36E-01 | -0.149066  | 4.54E-01 | -0.286391  | 1.48E-01 | -0.271398 | 1.56E-01 | -0.084178  | 7.03E-01 | -0.127639  | 3.71E-01 |
| ENSG0000024884  | 13 | 8011573   | 8013468   | AL13778.1  | transcript | antisense | antisense      | -0.174992 | 1.28E-01 | -0.112692  | 4.36E-01 | -0.149066  | 4.54E-01 | -0.286391  | 1.48E-01 | -0.271398 | 1.56E-01 | -0.084178  | 7.03E-01 | -0.127639  | 3.71E-01 |
| ENSG0000024884  | 13 | 8011573   | 8013468   | AL13778.1  | transcript | antisense | antisense      | -0.174992 | 1.28E-01 | -0.112692  | 4.36E-01 | -0.149066  | 4.54E-01 | -0.286391  | 1.48E-01 | -0.271398 | 1.56E-01 | -0.084178  | 7.03E-01 | -0.127639  | 3.71E-01 |
| ENSG0000024884  | 13 | 8011573   | 8013468   | AL13778.1  | transcript | antisense | antisense      | -0.174992 | 1.28E-01 | -0.112692  | 4.36E-01 | -0.149066  | 4.54E-01 | -0.286391  | 1.48E-01 | -0.271398 | 1.56E-01 | -0.084178  | 7.03E-01 | -0.127639  | 3.71E-01 |
| ENSG0000024884  | 13 | 8011573   | 8013468   | AL13778.1  | transcript | antisense | antisense      | -0.174992 | 1.28E-01 | -0.112692  | 4.36E-01 | -0.149066  | 4.54E-01 | -0.286391  | 1.48E-01 | -0.271398 | 1.56E-01 | -0.084178  | 7.03E-01 | -0.127639  | 3.71E-01 |
| ENSG0000024884  | 13 | 8011573   | 8013468   | AL13778.1  | transcript | antisense | antisense      | -0.174992 | 1.28E-01 | -0.112692  | 4.36E-01 | -0.149066  | 4.54E-01 | -0.286391  | 1.48E-01 | -0.271398 | 1.56E-01 | -0.084178  | 7.03E-01 | -0.127639  | 3.71E-01 |
| ENSG0000024884  | 13 | 8011573   | 8013468   | AL13778.1  | transcript | antisense | antisense      | -0.174992 | 1.28E-01 | -0.112692  | 4.36E-01 | -0.149066  | 4.54E-01 | -0.286391  | 1.48E-01 | -0.271398 | 1.56E-01 | -0.084178  | 7.03E-01 | -0.127639  | 3.71E-01 |
| ENSG0000024884  | 13 | 8011573   | 8013468   | AL13778.1  | transcript | antisense | antisense      | -0.174992 | 1.28E-01 | -0.112692  | 4.36E-01 | -0.149066  | 4.54E-01 | -0.286391  | 1.48E-01 | -0.271398 | 1.56E-01 | -0.084178  | 7.03E-01 | -0.127639  | 3.71E-01 |
| ENSG0000024884  | 13 | 8011573   | 8013468   | AL13778.1  | transcript | antisense | antisense      | -0.174992 | 1.28E-01 | -0.112692  | 4.36E-01 | -0.149066  | 4.54E-01 | -0.286391  | 1.48E-01 | -0.271398 | 1.56E-01 | -0.084178  | 7.03E-01 | -0.127639  | 3.71E-01 |
| ENSG0000024884  | 13 | 8011573   | 8013468   | AL13778.1  | transcript | antisense | antisense      | -0.174992 | 1.28E-01 | -0.112692  | 4.36E-01 | -0.149066  | 4.54E-01 | -0.286391  | 1.48E-01 | -0.271398 | 1.56E-01 | -0.084178  | 7.03E-01 | -0.127639  | 3.71E-01 |
| ENSG0000024884  | 13 | 8011573   | 8013468   | AL13778.1  | transcript | antisense | antisense      | -0.174992 | 1.28E-01 | -0.112692  | 4.36E-01 | -0.149066  | 4.54E-01 | -0.286391  | 1.48E-01 | -0.271398 | 1.56E-01 | -0.084178  | 7.03E-01 | -0.127639  | 3.71E-01 |
| ENSG0000024884  | 13 | 8011573   | 8013468   | AL13778.1  | transcript | antisense | antisense      | -0.174992 | 1.28E-01 | -0.112692  | 4.36E-01 | -0.149066  | 4.54E-01 | -0.286391  | 1.48E-01 | -0.271398 | 1.56E-01 | -0.084178  | 7.03E-01 | -0.127639  | 3.71E-01 |
| ENSG0000024884  | 13 | 8011573   | 8013468   | AL13778.1  | transcript | antisense | antisense      | -0.174992 | 1.28E-01 | -0.112692  | 4.36E-01 | -0.149066  | 4.54E-01 | -0.286391  | 1.48E-01 | -0.271398 | 1.56E-01 | -0.084178  | 7.03E-01 | -0.127639  | 3.71E-01 |
| ENSG0000024884  | 13 | 8011573   | 8013468   | AL13778.1  | transcript | antisense | antisense      | -0.174992 | 1.28E-01 | -0.112692  | 4.36E-01 | -0.149066  | 4.54E-01 | -0.286391  | 1.48E-01 | -0.271398 | 1.56E-01 | -0.084178  | 7.03E-01 | -0.127639  | 3.71E-01 |
| ENSG0000024884  | 13 | 8011573   | 8013468   | AL13778.1  | transcript | antisense | antisense      | -0.174992 | 1.28E-01 | -0.112692  | 4.36E-01 | -0.149066  | 4.54E-01 | -0.286391  | 1.48E-01 | -0.271398 | 1.56E-01 | -0.084178  | 7.03E-01 | -0.127639  | 3.71E-01 |
| ENSG0000024884  | 13 | 8011573   | 8013468   | AL13778.1  | transcript | antisense | antisense      | -0.174992 | 1.28E-01 | -0.112692  | 4.36E-01 | -0.149066  | 4.54E-01 | -0.286391  | 1.48E-01 | -0.271398 | 1.56E-01 | -0.084178  | 7.03E-01 | -0.127639  | 3.71E-01 |
| ENSG0000024884  | 13 | 8011573   | 8013468   | AL13778.1  | transcript | antisense | antisense      | -0.174992 | 1.28E-01 | -0.112692  | 4.36E-01 | -0.149066  | 4.54E-01 | -0.286391  | 1.48E-01 | -0.271398 | 1.56E-01 | -0.084178  | 7.03E-01 | -0.127639  | 3.71E-01 |
| ENSG0000024884  | 13 | 8011573   | 8013468   | AL13778.1  | transcript | antisense | antisense      | -0.174992 | 1.28E-01 | -0.112692  | 4.36E-01 | -0.149066  | 4.54E-01 | -0.286391  | 1.48E-01 | -0.271398 | 1.56E-01 | -0.084178  | 7.03E-01 | -0.127639  | 3.71E-01 |
| ENSG0000024884  | 13 | 8011573   | 8013468   | AL13778.1  | transcript | antisense | antisense      | -0.174992 | 1.28E-01 | -0.112692  | 4.36E-01 | -0.149066  | 4.54E-01 | -0.286391  | 1.48E-01 | -0.271398 | 1.56E-01 | -0.084178  | 7.03E-01 | -0.127639  | 3.71E-01 |
| ENSG0000024884  | 13 | 8011573   | 8013468   | AL13778.1  | transcript | antisense | antisense      | -0.174992 | 1.28E-01 | -0.112692  | 4.36E-01 | -0.149066  | 4.54E-01 | -0.286391  | 1.48E-01 | -0.271398 |          |            |          |            |          |











Table with columns for gene ID, chromosome, coordinates, gene name, transcript type, and various numerical values. The table lists numerous genes such as LINC02519, LINC02520, LINC02521, etc., with their corresponding genomic data.

| ENSG0000024559 | 11 | 203623    | 205470    | + | AC09287.2  | havana | incRNA              | ncrna coding   | YES          | YES | -0.230812 | 4.34e-05  | -0.400002 | 3.32e-01  | -0.229240  | 2.50e-01  | -0.302028 | 1.26e-01  | -0.367344 | 2.26e-01  | 0.193276   | 3.77e-01  | -0.049734  | 7.31e-01  |          |
|----------------|----|-----------|-----------|---|------------|--------|---------------------|----------------|--------------|-----|-----------|-----------|-----------|-----------|------------|-----------|-----------|-----------|-----------|-----------|------------|-----------|------------|-----------|----------|
| ENSG0000024560 |    | 302420    | 302417    | + | MALDI8A    | havana | mRNA                | protein coding | YES          | YES | -0.18789  | 1.01e-01  | -0.271095 | 1.49e-01  | -0.026516  | 9.98e-01  | -0.302162 | 1.24e-01  | -0.251187 | 6.49e-01  | 0.122236   | 5.44e-01  | -0.031576  | 5.17e-01  |          |
| ENSG0000024561 |    | 1313860   | 1313860   | + | LOC101928  | havana | incRNA              | ncrna coding   | YES          | YES | -0.131386 | 1.01e-01  | -0.131386 | 1.01e-01  | -0.131386  | 1.01e-01  | -0.131386 | 1.01e-01  | -0.131386 | 1.01e-01  | 0.096371   | 7.77e-01  | -0.030673  | 7.82e-01  |          |
| ENSG0000024562 |    | 15337982  | 15338099  | + | LAMP4BP1   | havana | mRNA                | protein coding | YES          | YES | -0.138704 | 2.36e-01  | -0.086375 | 5.50e-01  | -0.081823  | 3.76e-01  | -0.302188 | 1.26e-01  | -0.236611 | 4.40e-01  | -0.077345  | 5.24e-01  | -0.090531  | 5.31e-01  |          |
| ENSG0000024563 |    | 26270754  | 26204258  | + | LOC102537  | havana | mRNA                | protein coding | YES          | YES | -0.178397 | 1.20e-01  | -0.077163 | 5.91e-01  | -0.243091  | 2.21e-01  | -0.302245 | 1.25e-01  | -0.236057 | 5.33e-01  | 0.440379   | 3.05e-01  | 0.043402   | 9.74e-01  |          |
| ENSG0000024564 |    | 19294387  | 19322743  | + | LOC102537  | havana | mRNA                | protein coding | YES          | YES | -0.178397 | 1.20e-01  | -0.077163 | 5.91e-01  | -0.243091  | 2.21e-01  | -0.302245 | 1.25e-01  | -0.236057 | 5.33e-01  | 0.440379   | 3.05e-01  | 0.043402   | 9.74e-01  |          |
| ENSG0000024565 |    | 11929865  | 11929912  | + | RPS4P21    | havana | mRNA                | protein coding | YES          | YES | -0.172126 | 1.34e-01  | -0.117774 | 2.81e-01  | -0.185228  | 3.55e-01  | -0.302356 | 1.25e-01  | -0.236843 | 5.33e-01  | 0.326297   | 3.79e-01  | -0.090715  | 9.47e-01  |          |
| ENSG0000024566 |    | 2489474   | 2484748   | + | KIAA1217   | havana | mRNA                | protein coding | YES          | YES | -0.274178 | 1.58e-01  | -0.148995 | 3.24e-01  | -0.162948  | 4.17e-01  | -0.302384 | 1.25e-01  | -0.437487 | 9.37e-01  | 0.104541   | 6.36e-01  | -0.144897  | 3.02e-01  |          |
| ENSG0000024567 |    | 15148536  | 15172487  | + | NEB        | havana | mRNA                | protein coding | YES          | YES | -0.196889 | 8.59e-01  | -0.069881 | 7.52e-01  | -0.112943  | 3.11e-01  | -0.302439 | 1.25e-01  | -0.371541 | 6.95e-01  | 0.104541   | 6.36e-01  | -0.090715  | 9.47e-01  |          |
| ENSG0000024568 |    | 12865962  | 12865991  | + | CCP1A      | havana | mRNA                | protein coding | YES          | YES | -0.086221 | 4.75e-01  | -0.094273 | 5.51e-01  | -0.202642  | 8.19e-01  | -0.302467 | 1.25e-01  | -0.138894 | 3.24e-01  | 0.075347   | 7.33e-01  | -0.044401  | 8.12e-01  |          |
| ENSG0000024569 |    | 14424402  | 14423375  | + | RYR2C3     | havana | transcripted unprec | ncrna          | ncrna coding | YES | YES       | -0.108127 | 8.17e-01  | -0.122686 | 2.80e-01   | -0.241631 | 4.20e-01  | -0.302778 | 1.25e-01  | -0.293156 | 1.24e-01   | 0.110803  | 6.16e-01   | -0.066027 | 3.66e-01 |
| ENSG0000024570 |    | 13803774  | 13803766  | + | AC113392.1 | havana | mRNA                | protein coding | YES          | YES | -0.252747 | 4.84e-01  | -0.195768 | 1.85e-01  | -0.1339662 | 5.06e-01  | -0.302784 | 1.25e-01  | -0.333461 | 9.70e-01  | 0.070341   | 6.00e-01  | 0.084571   | 8.12e-01  |          |
| ENSG0000024571 |    | 15691532  | 15696226  | + | ITM14      | havana | mRNA                | protein coding | YES          | YES | -0.226781 | 6.73e-01  | -0.028845 | 1.56e-01  | -0.0120138 | 9.51e-01  | -0.302526 | 1.25e-01  | -0.329034 | 5.01e-01  | 0.118979   | 3.85e-01  | -0.093272  | 5.88e-01  |          |
| ENSG0000024572 |    | 15978912  | 15978948  | + | MMP8       | havana | mRNA                | protein coding | YES          | YES | -0.054869 | 4.37e-01  | -0.020316 | 6.77e-01  | -0.155113  | 4.31e-01  | -0.302526 | 1.25e-01  | -0.115443 | 4.06e-01  | 0.1121354  | 6.10e-01  | -0.029624  | 3.19e-01  |          |
| ENSG0000024573 |    | 4278402   | 42627147  | + | LOC101928  | havana | mRNA                | protein coding | YES          | YES | -0.128127 | 8.17e-01  | -0.122686 | 2.80e-01  | -0.241631  | 4.20e-01  | -0.302778 | 1.25e-01  | -0.293156 | 1.24e-01  | 0.110803   | 6.16e-01  | -0.066027  | 3.66e-01  |          |
| ENSG0000024574 |    | 6867920   | 6894342   | + | AD1835.01  | havana | mRNA                | protein coding | YES          | YES | -0.199452 | 8.77e-01  | -0.202513 | 1.53e-01  | -0.060263  | 7.64e-01  | -0.302648 | 1.25e-01  | -0.262124 | 8.47e-01  | 0.106248   | 6.97e-01  | -0.080067  | 5.57e-01  |          |
| ENSG0000024575 |    | 11204446  | 11209794  | + | UBAS       | havana | mRNA                | protein coding | YES          | YES | -0.214225 | 6.13e-01  | -0.077890 | 6.96e-01  | -0.077890  | 6.96e-01  | -0.302671 | 1.25e-01  | -0.252572 | 5.75e-01  | 0.026746   | 9.76e-01  | 0.037117   | 8.22e-01  |          |
| ENSG0000024576 |    | 16509043  | 16509269  | + | AC105381.1 | havana | mRNA                | protein coding | YES          | YES | -0.100921 | 1.90e-01  | -0.103312 | 2.41e-01  | -0.209448  | 2.61e-01  | -0.302688 | 1.25e-01  | -0.187866 | 3.74e-01  | 0.123001   | 5.76e-01  | -0.044904  | 2.52e-01  |          |
| ENSG0000024577 |    | 69396113  | 69437628  | + | NAU1       | havana | mRNA                | protein coding | YES          | YES | -0.129441 | 2.62e-01  | -0.174161 | 5.40e-01  | -0.1105447 | 5.84e-01  | -0.302745 | 1.25e-01  | -0.080770 | 5.62e-01  | 0.072461   | 6.45e-01  | 0.0212503  | 8.97e-01  |          |
| ENSG0000024578 |    | 15173919  | 15176139  | + | ADAMC12    | havana | mRNA                | protein coding | YES          | YES | -0.106672 | 3.56e-01  | -0.140817 | 3.29e-01  | -0.1441338 | 3.95e-01  | -0.302786 | 1.25e-01  | -0.181146 | 5.90e-01  | 0.148079   | 4.97e-01  | -0.023556  | 6.75e-01  |          |
| ENSG0000024579 |    | 7421336   | 7424751   | + | NDNL1      | havana | mRNA                | protein coding | YES          | YES | -0.108127 | 8.17e-01  | -0.122686 | 2.80e-01  | -0.241631  | 4.20e-01  | -0.302778 | 1.25e-01  | -0.293156 | 1.24e-01  | 0.110803   | 6.16e-01  | -0.066027  | 3.66e-01  |          |
| ENSG0000024580 |    | 3891629   | 3899870   | + | AC107008.2 | havana | transcripted unprec | ncrna          | ncrna coding | YES | YES       | -0.274987 | 1.61e-01  | -0.222835 | 1.20e-01   | -0.148916 | 4.58e-01  | -0.302931 | 1.25e-01  | -0.370425 | 1.77e-01   | 0.1352348 | 5.88e-01   | -0.113139 | 2.95e-01 |
| ENSG0000024581 |    | 3891629   | 3899870   | + | ZNF58      | havana | mRNA                | protein coding | YES          | YES | -0.32006  | 4.50e-01  | -0.195977 | 6.87e-01  | -0.197960  | 3.27e-01  | -0.302820 | 1.25e-01  | -0.416133 | 4.74e-01  | -0.063594  | 6.66e-01  | -0.029624  | 3.19e-01  |          |
| ENSG0000024582 |    | 8644847   | 8649716   | + | KDM5A      | havana | mRNA                | protein coding | YES          | YES | -0.082933 | 1.59e-01  | -0.178483 | 5.05e-01  | -0.184735  | 3.63e-01  | -0.302841 | 1.25e-01  | -0.184713 | 3.96e-01  | 0.023779   | 9.16e-01  | -0.049689  | 5.12e-01  |          |
| ENSG0000024583 |    | 123274696 | 123244602 | + | PER1A1     | havana | mRNA                | protein coding | YES          | YES | -0.286838 | 1.82e-01  | -0.222863 | 1.29e-01  | -0.206346  | 3.07e-01  | -0.302874 | 1.25e-01  | -0.375173 | 3.38e-01  | 0.133778   | 2.49e-01  | 0.006769   | 9.44e-01  |          |
| ENSG0000024584 |    | 131488669 | 131724414 | + | NIPRP3     | havana | mRNA                | protein coding | YES          | YES | -0.188663 | 4.77e-01  | -0.134862 | 2.56e-01  | -0.129438  | 5.50e-01  | -0.302865 | 1.25e-01  | -0.382204 | 5.01e-01  | 0.138662   | 5.86e-01  | -0.069668  | 3.28e-01  |          |
| ENSG0000024585 |    | 17707781  | 1778338   | + | FAM133A    | havana | mRNA                | protein coding | YES          | YES | -0.399665 | 1.30e-01  | -0.184691 | 1.60e-01  | -0.205561  | 3.01e-01  | -0.302885 | 1.25e-01  | -0.422797 | 5.44e-01  | -0.117751  | 5.93e-01  | -0.171677  | 2.38e-01  |          |
| ENSG0000024586 |    | 14002780  | 14000309  | + | AC027088   | havana | mRNA                | protein coding | YES          | YES | -0.141514 | 2.42e-01  | -0.141514 | 2.42e-01  | -0.141514  | 2.42e-01  | -0.302849 | 1.25e-01  | -0.141514 | 2.42e-01  | 0.061372   | 6.49e-01  | -0.049689  | 5.12e-01  |          |
| ENSG0000024587 |    | 14949840  | 14905130  | + | AC093671.1 | havana | TEC                 | ncrna coding   | YES          | YES | -0.209475 | 2.72e-01  | -0.188418 | 1.27e-01  | -0.227078  | 3.24e-01  | -0.302856 | 1.24e-01  | -0.335665 | 3.34e-01  | -0.137075  | 5.93e-01  | -0.180066  | 2.26e-01  |          |
| ENSG0000024588 |    | 24657481  | 24687765  | + | POM12110P  | havana | mRNA                | protein coding | YES          | YES | -0.190284 | 9.74e-01  | -0.196107 | 1.72e-01  | -0.039805  | 8.55e-01  | -0.303023 | 1.24e-01  | -0.247391 | 7.13e-01  | 0.102264   | 6.49e-01  | -0.074387  | 6.07e-01  |          |
| ENSG0000024589 |    | 145521443 | 145521443 | + | LOC101928  | havana | mRNA                | protein coding | YES          | YES | -0.128127 | 8.17e-01  | -0.122686 | 2.80e-01  | -0.241631  | 4.20e-01  | -0.302778 | 1.25e-01  | -0.293156 | 1.24e-01  | 0.110803   | 6.16e-01  | -0.066027  | 3.66e-01  |          |
| ENSG0000024590 |    | 7382916   | 7387359   | + | STAMP      | havana | mRNA                | protein coding | YES          | YES | -0.226644 | 4.75e-01  | -0.209766 | 1.41e-01  | -0.1257984 | 5.32e-01  | -0.303123 | 1.24e-01  | -0.292317 | 3.10e-01  | -0.0424109 | 6.20e-01  | -0.119356  | 4.90e-01  |          |
| ENSG0000024591 |    | 16834768  | 16834997  | + | KC12       | havana | mRNA                | protein coding | YES          | YES | -0.048566 | 4.65e-01  | -0.143111 | 2.85e-01  | -0.10730   | 9.31e-01  | -0.303138 | 1.24e-01  | -0.117165 | 8.97e-01  | 0.1902519  | 3.85e-01  | 0.0997874  | 5.01e-01  |          |
| ENSG0000024592 |    | 4856149   | 4856149   | + | LOC101928  | havana | mRNA                | protein coding | YES          | YES | -0.128127 | 8.17e-01  | -0.122686 | 2.80e-01  | -0.241631  | 4.20e-01  | -0.302778 | 1.25e-01  | -0.293156 | 1.24e-01  | 0.110803   | 6.16e-01  | -0.066027  | 3.66e-01  |          |
| ENSG0000024593 |    | 4720241   | 4720676   | + | H1HATL1    | havana | mRNA                | protein coding | YES          | YES | -0.112978 | 2.96e-01  | -0.17987  | 2.13e-01  | -0.238913  | 2.30e-01  | -0.303147 | 1.24e-01  | -0.284013 | 3.10e-01  | 0.105623   | 6.10e-01  | -0.1794719 | 2.12e-01  |          |
| ENSG0000024594 |    | 8128298   | 8128563   | + | LOC101928  | havana | mRNA                | protein coding | YES          | YES | -0.209467 | 4.73e-01  | -0.174713 | 2.31e-01  | -0.1677589 | 4.01e-01  | -0.303188 | 1.24e-01  | -0.307433 | 3.33e-01  | -0.067971  | 7.28e-01  | -0.114303  | 4.29e-01  |          |
| ENSG0000024595 |    | 17885702  | 17746973  | + | ASTN1      | havana | mRNA                | protein coding | YES          | YES | -0.205443 | 7.31e-01  | -0.084578 | 2.90e-01  | -0.1897378 | 3.99e-01  | -0.303173 | 1.24e-01  | -0.174739 | 5.43e-01  | 0.107169   | 6.24e-01  | -0.147403  | 3.07e-01  |          |
| ENSG0000024596 |    | 4478925   | 4478982   | + | RNF45      | havana | mRNA                | protein coding | YES          | YES | -0.127895 | 1.41e-01  | -0.147803 | 1.99e-01  | -0.206346  | 3.07e-01  | -0.303214 | 1.25e-01  | -0.147803 | 3.07e-01  | 0.107169   | 6.24e-01  | -0.147403  | 3.07e-01  |          |
| ENSG0000024597 |    | 8189748   | 8189806   | + | AC092142.2 | havana | mRNA                | protein coding | YES          | YES | -0.147635 | 2.00e-01  | -0.142189 | 2.60e-01  | -0.126634  | 5.49e-01  | -0.303203 | 1.24e-01  | -0.149152 | 1.64e-01  | 0.105185   | 6.33e-01  | -0.113897  | 4.41e-01  |          |
| ENSG0000024598 |    | 74179593  | 74124841  | + | AC092142.2 | havana | transcripted unprec | ncrna          | ncrna coding | YES | YES       | -0.207203 | 7.05e-01  | -0.147    |            |           |           |           |           |           |            |           |            |           |          |





Table with columns for gene ID, chromosome, coordinates, gene name, transcript type, and various numerical values. The table lists numerous genes such as CESSA1, HAKL2, and many others, with associated genomic data and statistical values.

Table with columns for gene ID, chromosome, coordinates, gene name, transcript, protein, and various numerical values. The table lists numerous genes such as SCSB1A1, AC02170.1, AC02170.2, etc., with their corresponding genomic data.









| ENSG0000019485  | 11 | 45959006 | 4523510   | PRDM11     | ensembl | havana               | protein_coding                     | -0.2491674 | 2.98620    | -0.1348121 | 5331.00    | 0.1185620  | 5.561.00   | -0.3271105 | 9.581.00   | -0.4098293 | 2.091.00   | 0.0089269  | 9.681.00   | -0.076006  | 5.961.00   |            |          |
|-----------------|----|----------|-----------|------------|---------|----------------------|------------------------------------|------------|------------|------------|------------|------------|------------|------------|------------|------------|------------|------------|------------|------------|------------|------------|----------|
| ENSG0000019733  | 1  | 10578250 | 10199926  | DFP43      | ensembl | havana               | protein_coding                     | -0.2144892 | 6.514.00   | -0.1636903 | 1971.00    | 0.2057348  | 8.111.00   | -0.3271105 | 9.581.00   | -0.2804431 | 4.801.00   | 0.1467676  | 6.471.00   | -0.187967  | 1.161.00   |            |          |
| ENSG0000017064  | 2  | 23491979 | 23397838  | AC09261.1  | ensembl | havana               | transcribed_unprocessed_pseudogene | -0.1837744 | 2.519.00   | -0.1551240 | 879.00     | 0.1512189  | 7.701.00   | -0.3271105 | 9.581.00   | -0.2129919 | 3.701.00   | 0.1389949  | 4.411.00   | -0.2773542 | 1.121.00   |            |          |
| ENSG0000017059  | 2  | 10042849 | 10054836  | KLF11      | ensembl | havana               | protein_coding                     | -0.0608038 | 5.561.00   | -0.1475595 | 3.061.00   | 0.4031181  | 8.716.00   | -0.3271105 | 9.581.00   | -0.1208358 | 8.801.00   | 0.1210978  | 6.171.00   | 0.2773542  | 1.121.00   |            |          |
| ENSG0000018691  | 1  | 93929284 | 94121148  | ABCR4      | ensembl | havana               | protein_coding                     | YES        | YES        | -0.280438  | 1.131.00   | -0.1703277 | 2.211.00   | 0.0996174  | 6.831.00   | -0.3271105 | 9.571.00   | 0.4444259  | 7.651.00   | -0.1279997 | 5.611.00   | -0.1259137 | 3.841.00 |
| ENSG0000018821  | 1  | 11904033 | 11904033  | AC09261.1  | ensembl | havana               | transcribed_unprocessed_pseudogene | -0.142921  | 2.519.00   | -0.1551240 | 879.00     | 0.1512189  | 7.701.00   | -0.3271105 | 9.581.00   | -0.2129919 | 3.701.00   | 0.1389949  | 4.411.00   | -0.2773542 | 1.121.00   |            |          |
| ENSG0000017070  | 1  | 11400433 | 11400235  | AL519174.1 | havana  | processed_pseudogene | -0.1599315                         | 5.501.00   | -0.1020257 | 3.191.00   | 0.3127379  | 9.571.00   | -0.3271105 | 9.581.00   | -0.2877112 | 4.461.00   | -0.0918841 | 6.671.00   | -0.1405235 | 3.841.00   |            |            |          |
| ENSG0000014826  | 4  | 73052342 | 73069795  | CXCR18     | ensembl | havana               | protein_coding                     | -0.1408793 | 2.221.00   | -0.1381899 | 3.541.00   | 0.1389861  | 4.911.00   | -0.3271105 | 9.561.00   | -0.21366   | 9.151.00   | 0.0504936  | 8.191.00   | 0.0297244  | 8.881.00   |            |          |
| ENSG0000018794  | 2  | 12388345 | 12389332  | AC09261.1  | ensembl | havana               | transcribed_unprocessed_pseudogene | -0.1220794 | 2.501.00   | -0.1558519 | 1.731.00   | 0.3273642  | 9.291.00   | -0.3271105 | 9.581.00   | -0.2877112 | 4.461.00   | -0.0918841 | 6.671.00   | -0.1405235 | 3.841.00   |            |          |
| ENSG0000015840  | 1  | 5537289  | 5540423   | ORC1       | ensembl | havana               | protein_coding                     | -0.1220794 | 2.501.00   | -0.1558519 | 1.731.00   | 0.3273642  | 9.291.00   | -0.3271105 | 9.581.00   | -0.2877112 | 4.461.00   | -0.0918841 | 6.671.00   | -0.1405235 | 3.841.00   |            |          |
| ENSG0000012947  | 6  | 15994844 | 15999797  | LINC02543  | havana  | lincRNA              | -0.1929732                         | 9.271.00   | -0.1068933 | 1.461.00   | 0.1739047  | 3.861.00   | -0.3274201 | 9.551.00   | -0.241704  | 7.831.00   | -0.0673896 | 7.601.00   | -0.1312564 | 4.021.00   |            |            |          |
| ENSG0000017263  | 2  | 23491979 | 23397838  | AC09261.1  | ensembl | havana               | transcribed_unprocessed_pseudogene | -0.142921  | 2.519.00   | -0.1551240 | 879.00     | 0.1512189  | 7.701.00   | -0.3271105 | 9.581.00   | -0.2129919 | 3.701.00   | 0.1389949  | 4.411.00   | -0.2773542 | 1.121.00   |            |          |
| ENSG0000013700  | 11 | 11904033 | 11903906  | SIC17A4    | ensembl | havana               | protein_coding                     | -0.1997477 | 6.991.00   | -0.1056651 | 3.541.00   | 0.3309791  | 9.211.00   | -0.3275984 | 9.541.00   | -0.2421704 | 7.831.00   | -0.3477988 | 1.041.00   | -0.347564  | 4.021.00   |            |          |
| ENSG00000149100 | 11 | 3358378  | 3360624   | E1F3       | ensembl | havana               | protein_coding                     | -0.0849329 | 4.631.00   | -0.2466244 | 8.041.00   | 0.1835161  | 3.591.00   | -0.3273732 | 9.541.00   | -0.0704675 | 6.131.00   | 0.2682824  | 3.401.00   | 0.2008451  | 1.631.00   |            |          |
| ENSG0000014632  | 8  | 2324471  | 2328926   | AC10881.1  | havana  | lincRNA              | -0.214543                          | 6.101.00   | -0.1310797 | 1.371.00   | -0.229485  | 3.051.00   | -0.3273732 | 9.541.00   | -0.2787131 | 4.311.00   | 0.0880756  | 9.751.00   | -0.151271  | 4.071.00   |            |            |          |
| ENSG0000017860  | 8  | 7306849  | 7344468   | AC09261.1  | ensembl | havana               | transcribed_unprocessed_pseudogene | -0.142921  | 2.519.00   | -0.1551240 | 879.00     | 0.1512189  | 7.701.00   | -0.3271105 | 9.581.00   | -0.2129919 | 3.701.00   | 0.1389949  | 4.411.00   | -0.2773542 | 1.121.00   |            |          |
| ENSG0000014336  | 8  | 15240939 | 15258766  | LINC01487  | havana  | lincRNA              | -0.185188                          | 1.071.00   | -0.1533344 | 2.811.00   | -0.2057222 | 1.031.00   | -0.3275158 | 9.581.00   | -0.2597772 | 5.781.00   | -0.121032  | 5.761.00   | -0.1722189 | 2.131.00   |            |            |          |
| ENSG00000144794 | 8  | 10996336 | 10997717  | KCNV1      | ensembl | havana               | protein_coding                     | -0.1107122 | 3.181.00   | -0.1150995 | 4.241.00   | 0.0373751  | 8.511.00   | -0.3276098 | 9.531.00   | -0.1297772 | 5.861.00   | -0.1466016 | 6.021.00   | -0.0312349 | 7.311.00   |            |          |
| ENSG00000116075 | 1  | 11724517 | 11727691  | DCX        | ensembl | havana               | protein_coding                     | -0.1246878 | 3.001.00   | -0.1275204 | 1.131.00   | -0.1275204 | 2.021.00   | -0.3272551 | 9.531.00   | -0.1246108 | 1.001.00   | 0.1037179  | 4.961.00   | -0.0172114 | 1.021.00   |            |          |
| ENSG00000121211 | X  | 12973874 | 12976365  | KPNXP2     | ensembl | havana               | protein_coding                     | -0.1183006 | 3.241.00   | -0.0612336 | 6.681.00   | 0.0634788  | 7.511.00   | -0.3276479 | 9.531.00   | -0.2342139 | 8.811.00   | -0.0958587 | 7.861.00   | -0.0189504 | 8.961.00   |            |          |
| ENSG00000177790 | X  | 6422092  | 6422703   | KPNXP8     | ensembl | havana               | processed_pseudogene               | -0.1230709 | 2.861.00   | -0.1193165 | 4.301.00   | -0.1608210 | 4.231.00   | -0.3276551 | 9.521.00   | -0.1791789 | 1.921.00   | -0.1177887 | 5.941.00   | -0.1895917 | 3.871.00   |            |          |
| ENSG00000121997 | 1  | 11470975 | 11472581  | TGIF7      | ensembl | havana               | lincRNA                            | -0.1460128 | 2.111.00   | -0.135088  | 3.611.00   | 0.0272713  | 7.261.00   | -0.3276551 | 9.521.00   | -0.1219114 | 1.111.00   | -0.098176  | 6.771.00   | -0.0699974 | 5.111.00   |            |          |
| ENSG00000100511 | 2  | 3805631  | 3805770   | PKC1       | ensembl | havana               | protein_coding                     | -0.0595022 | 6.111.00   | -0.0203038 | 8.741.00   | 0.1683501  | 4.011.00   | -0.3277997 | 9.511.00   | -0.1930402 | 6.631.00   | 0.1357458  | 6.751.00   | 0.1166774  | 2.421.00   |            |          |
| ENSG00000100234 | 2  | 32801705 | 3280384   | TIMP3      | ensembl | havana               | protein_coding                     | YES        | YES        | -0.103811  | 5.941.00   | -0.1284531 | 1.961.00   | -0.3278455 | 9.501.00   | -0.4781516 | 2.521.00   | -0.0630139 | 7.671.00   | -0.1754708 | 2.231.00   |            |          |
| ENSG00000179420 | 19 | 34679717 | 34677581  | AC09261.1  | ensembl | havana               | transcribed_unprocessed_pseudogene | -0.1220794 | 2.501.00   | -0.1558519 | 1.731.00   | 0.3273642  | 9.291.00   | -0.3271105 | 9.581.00   | -0.2877112 | 4.461.00   | -0.0918841 | 6.671.00   | -0.1405235 | 3.841.00   |            |          |
| ENSG00000185462 | 12 | 7837788  | 7847086   | AC09261.1  | ensembl | havana               | transcribed_unprocessed_pseudogene | -0.1220794 | 2.501.00   | -0.1558519 | 1.731.00   | 0.3273642  | 9.291.00   | -0.3271105 | 9.581.00   | -0.2877112 | 4.461.00   | -0.0918841 | 6.671.00   | -0.1405235 | 3.841.00   |            |          |
| ENSG00000176007 | 18 | 7507507  | 7507501   | AC09261.1  | ensembl | havana               | transcribed_unprocessed_pseudogene | -0.1220794 | 2.501.00   | -0.1558519 | 1.731.00   | 0.3273642  | 9.291.00   | -0.3271105 | 9.581.00   | -0.2877112 | 4.461.00   | -0.0918841 | 6.671.00   | -0.1405235 | 3.841.00   |            |          |
| ENSG00000126025 | 2  | 34017422 | 3421876   | LINC01643  | havana  | lincRNA              | YES                                | YES        | -0.249389  | 9.301.00   | -0.171023  | 1.931.00   | 0.1450807  | 4.751.00   | -0.3279729 | 9.491.00   | -0.1483879 | 9.441.00   | -0.1223045 | 4.881.00   | -0.1525064 | 2.821.00   |          |
| ENSG00000180180 | 2  | 1815103  | 1815033   | KCNQ2      | ensembl | havana               | protein_coding                     | YES        | YES        | -0.223222  | 3.061.00   | -0.1477751 | 1.661.00   | -0.3279729 | 9.491.00   | -0.1483879 | 9.441.00   | -0.1223045 | 4.881.00   | -0.1525064 | 2.821.00   |            |          |
| ENSG00000137779 | 10 | 8943039  | 8955641   | SIC16A12   | ensembl | havana               | protein_coding                     | YES        | YES        | -0.0993003 | 3.901.00   | -0.1302072 | 3.671.00   | -0.4726786 | 1.761.00   | -0.3283879 | 9.481.00   | -0.1523065 | 3.061.00   | -0.1695324 | 1.401.00   |            |          |
| ENSG00000129841 | 6  | 15363412 | 15393584  | LINC01566  | havana  | lincRNA              | -0.2281437                         | 4.601.00   | -0.1422289 | 2.241.00   | -0.2275156 | 2.581.00   | -0.3281885 | 9.481.00   | -0.1293998 | 5.501.00   | 0.0728882  | 7.331.00   | -0.1507478 | 4.651.00   |            |            |          |
| ENSG00000166561 | 2  | 14383323 | 14383323  | SNRNP8     | ensembl | havana               | transcript_tag                     | -0.1438332 | 5.471.00   | -0.1188305 | 2.471.00   | -0.3281885 | 9.481.00   | -0.1293998 | 5.501.00   | 0.0728882  | 7.331.00   | -0.1507478 | 4.651.00   |            |            |            |          |
| ENSG0000019549  | 8  | 4891758  | 4892140   | SNRNP2     | ensembl | havana               | transcript_tag                     | -0.1928546 | 9.291.00   | -0.1025330 | 1.581.00   | -0.3282031 | 9.481.00   | -0.2454053 | 2.701.00   | -0.1836518 | 4.021.00   | -0.1526339 | 3.851.00   |            |            |            |          |
| ENSG00000120288 | 1  | 15179084 | 15179402  | TOR1A1     | ensembl | havana               | protein_coding                     | -0.1076513 | 3.511.00   | -0.1051299 | 4.811.00   | 0.0999131  | 6.211.00   | -0.328054  | 9.481.00   | -0.2267134 | 9.921.00   | 0.2480009  | 2.601.00   | 0.1576045  | 2.681.00   |            |          |
| ENSG00000170013 | 1  | 17272222 | 17272222  | SNRNP8     | ensembl | havana               | transcript_tag                     | -0.1438332 | 5.471.00   | -0.1188305 | 2.471.00   | -0.3281885 | 9.481.00   | -0.1293998 | 5.501.00   | 0.0728882  | 7.331.00   | -0.1507478 | 4.651.00   |            |            |            |          |
| ENSG00000132395 | X  | 14111605 | 141177129 | LOC1       | ensembl | havana               | protein_coding                     | -0.1729445 | 6.011.00   | -0.1654299 | 9.071.00   | -0.3279283 | 2.311.00   | -0.3280931 | 9.481.00   | -0.1252325 | 5.601.00   | -0.2497137 | 2.101.00   | -0.1539683 | 9.001.00   |            |          |
| ENSG0000017185  | 2  | 8655889  | 8656275   | AC07319.1  | havana  | lincRNA              | -0.179887                          | 1.171.00   | -0.1212603 | 1.181.00   | 0.0292972  | 8.811.00   | -0.328103  | 9.481.00   | -0.241161  | 7.871.00   | -0.0412161 | 5.011.00   | 0.1739959  | 1.471.00   |            |            |          |
| ENSG00000144475 | 3  | 18496317 | 18495103  | AC10881.1  | havana  | lincRNA              | YES                                | YES        | -0.29197   | 8.001.00   | -0.1022244 | 1.611.00   | -0.2657034 | 1.801.00   | -0.328115  | 9.471.00   | -0.0996949 | 9.241.00   | -0.1586645 | 4.751.00   | -0.208105  | 6.121.00   |          |
| ENSG00000184660 | 4  | 4807052  | 4810478   | KCNQ5      | ensembl | havana               | protein_coding                     | -0.0626215 | 6.701.00   | -0.1098997 | 2.641.00   | 0.0690705  | 7.811.00   | -0.3279729 | 9.491.00   | -0.1727764 | 4.661.00   | -0.1726188 | 4.311.00   | -0.092918  | 5.701.00   |            |          |
| ENSG00000197838 | 18 | 4108841  | 4109635   | CYP11A1    | ensembl | havana               | protein_coding                     | -0.1498081 | 3.041.00   | -0.1058787 | 5.041.00   | 0.1445511  | 4.811.00   | -0.3281734 | 9.471.00   | -0.2726237 | 3.301.00   | 0.0129436  | 5.351.00   | -0.0922212 | 5.451.00   |            |          |
| ENSG00000143955 | 6  | 5279371  | 5280360   | GSTA1      | ensembl | havana               | protein_coding                     | -0.1878884 | 1.021.00   | -0.1495726 | 3.021.00   | -0.1177704 | 5.591.00   | -0.3282472 | 9.461.00   | -0.2768223 | 4.231.00   | -0.0492946 | 7.361.00   | -0.108049  | 5.481.00   |            |          |
| ENSG00000102628 | 1  | 1156241  | 1156241   | SNRNP8     | ensembl | havana               | transcript_tag                     | -0.1       |            |            |            |            |            |            |            |            |            |            |            |            |            |            |          |



Table with columns for gene ID, chromosome, coordinates, gene name, and various numerical values. The table contains a large number of rows, each representing a different gene and its associated data points.









Table with columns for gene ID, coordinates, gene name, transcript, and various numerical values. The table lists numerous genes such as AC103809.1, AC103810.1, AC103811.1, etc., with associated data points.

| ENSG000001115  | 81883409 | 83921465 | KIF27     | ensembl                                                                                                                                                                                                                                                                                                               | havana            | protein_coding    | -0.289282 | 1.070    | -0.293845 | 8.08E-07 | 0.288279  | 1.41E-01 | -0.354173 | 7.00E-02 | -0.353556 | 8.79E-04 | -0.304888 | 1.57E-01 | -0.300549 | 3.19E-02 |
|----------------|----------|----------|-----------|-----------------------------------------------------------------------------------------------------------------------------------------------------------------------------------------------------------------------------------------------------------------------------------------------------------------------|-------------------|-------------------|-----------|----------|-----------|----------|-----------|----------|-----------|----------|-----------|----------|-----------|----------|-----------|----------|
| ENSG0000024292 | 4850623  | 4850838  | AFIP972.1 | havana                                                                                                                                                                                                                                                                                                                | incRNA            | antisense_pseudo  | -0.057440 | 6.20E-01 | -0.076138 | 4.57E-02 | 0.067787  | 7.87E-01 | -0.354299 | 6.99E-02 | -0.123276 | 8.75E-01 | -0.130859 | 2.89E-01 | -0.084841 | 6.60E-01 |
| ENSG0000029001 | 7519377  | 7519387  | AC0919.1  | havana                                                                                                                                                                                                                                                                                                                | lincRNA           | antisense_pseudo  | 0.014817  | 0.000000 | 0.014817  | 2.42E-01 | 0.354199  | 6.92E-01 | -0.354199 | 6.92E-01 | 0.014817  | 0.000000 | 0.014817  | 2.42E-01 | -0.084841 | 6.60E-01 |
| ENSG0000010100 | 14624186 | 14624369 | AC09737.1 | havana                                                                                                                                                                                                                                                                                                                | incRNA            | antisense_pseudo  | 0.194380  | 0.004401 | -0.170988 | 3.42E-01 | 0.203610  | 8.07E-01 | -0.354150 | 6.99E-02 | -0.293505 | 3.12E-01 | -0.084841 | 2.89E-01 | -0.152789 | 2.88E-01 |
| ENSG0000004847 | 7301943  | 7303889  | KDM7A     | ensembl <td>havana</td> <td>protein_coding</td> <td>-0.229418</td> <td>2.78E-02</td> <td>-0.170825</td> <td>2.38E-02</td> <td>0.229729</td> <td>2.51E-01</td> <td>-0.354294</td> <td>6.99E-02</td> <td>-0.242133</td> <td>3.39E-01</td> <td>-0.202953</td> <td>3.55E-01</td> <td>-0.027638</td> <td>9.03E-01</td>     | havana            | protein_coding    | -0.229418 | 2.78E-02 | -0.170825 | 2.38E-02 | 0.229729  | 2.51E-01 | -0.354294 | 6.99E-02 | -0.242133 | 3.39E-01 | -0.202953 | 3.55E-01 | -0.027638 | 9.03E-01 |
| ENSG0000019429 | 15954715 | 15957339 | LOC733909 | havana                                                                                                                                                                                                                                                                                                                | lincRNA           | antisense_pseudo  | -0.092492 | 0.000000 | -0.092492 | 0.000000 | 0.000000  | 0.000000 | -0.354294 | 6.99E-02 | -0.407004 | 7.70E-02 | -0.027638 | 9.03E-01 | -0.027638 | 9.03E-01 |
| ENSG0000024093 | 3256492  | 3260893  | NOL4D1    | ensembl <td>havana</td> <td>protein_coding</td> <td>-0.546568</td> <td>7.55E-03</td> <td>-0.105959</td> <td>1.41E-01</td> <td>0.051541</td> <td>7.99E-01</td> <td>-0.354233</td> <td>6.99E-02</td> <td>-0.359578</td> <td>7.84E-01</td> <td>-0.126057</td> <td>5.86E-01</td> <td>-0.070452</td> <td>5.18E-01</td>     | havana            | protein_coding    | -0.546568 | 7.55E-03 | -0.105959 | 1.41E-01 | 0.051541  | 7.99E-01 | -0.354233 | 6.99E-02 | -0.359578 | 7.84E-01 | -0.126057 | 5.86E-01 | -0.070452 | 5.18E-01 |
| ENSG0000004883 | 4820201  | 4821474  | AC01466.1 | havana                                                                                                                                                                                                                                                                                                                | tagene            | incRNA            | -0.139984 | 2.25E-01 | -0.170988 | 2.38E-02 | -0.229729 | 2.48E-01 | -0.354294 | 6.99E-02 | -0.169498 | 7.21E-01 | -0.199273 | 3.71E-01 | -0.212656 | 1.28E-01 |
| ENSG0000017639 | 15901035 | 15901035 | ORX2      | ensembl <td>havana</td> <td>protein_coding</td> <td>0.000000</td> <td>0.000000</td> <td>0.000000</td> <td>0.000000</td> <td>0.000000</td> <td>0.000000</td> <td>-0.354294</td> <td>6.99E-02</td> <td>-0.169498</td> <td>7.21E-01</td> <td>-0.199273</td> <td>3.71E-01</td> <td>-0.212656</td> <td>1.28E-01</td>       | havana            | protein_coding    | 0.000000  | 0.000000 | 0.000000  | 0.000000 | 0.000000  | 0.000000 | -0.354294 | 6.99E-02 | -0.169498 | 7.21E-01 | -0.199273 | 3.71E-01 | -0.212656 | 1.28E-01 |
| ENSG0000005009 | 11240510 | 11241838 | RPL6      | ensembl <td>havana</td> <td>protein_coding</td> <td>0.0792930</td> <td>8.10E-01</td> <td>-0.300184</td> <td>0.000000</td> <td>0.000000</td> <td>0.000000</td> <td>-0.354230</td> <td>6.98E-02</td> <td>-0.169498</td> <td>7.21E-01</td> <td>-0.199273</td> <td>3.71E-01</td> <td>-0.212656</td> <td>1.28E-01</td>     | havana            | protein_coding    | 0.0792930 | 8.10E-01 | -0.300184 | 0.000000 | 0.000000  | 0.000000 | -0.354230 | 6.98E-02 | -0.169498 | 7.21E-01 | -0.199273 | 3.71E-01 | -0.212656 | 1.28E-01 |
| ENSG0000005541 | 17119788 | 17242062 | AC09548.1 | havana                                                                                                                                                                                                                                                                                                                | incRNA            | antisense_pseudo  | -0.155644 | 1.77E-01 | -0.083465 | 5.56E-02 | -0.07064  | 7.26E-01 | -0.354243 | 6.98E-02 | -0.291829 | 3.90E-01 | -0.083465 | 5.56E-02 | -0.083465 | 5.56E-02 |
| ENSG0000020339 | 46108046 | 46108046 | ORX2      | ensembl <td>havana</td> <td>protein_coding</td> <td>0.000000</td> <td>0.000000</td> <td>0.000000</td> <td>0.000000</td> <td>0.000000</td> <td>0.000000</td> <td>-0.354294</td> <td>6.99E-02</td> <td>-0.169498</td> <td>7.21E-01</td> <td>-0.199273</td> <td>3.71E-01</td> <td>-0.212656</td> <td>1.28E-01</td>       | havana            | protein_coding    | 0.000000  | 0.000000 | 0.000000  | 0.000000 | 0.000000  | 0.000000 | -0.354294 | 6.99E-02 | -0.169498 | 7.21E-01 | -0.199273 | 3.71E-01 | -0.212656 | 1.28E-01 |
| ENSG0000022472 | 2478839  | 2478960  | EEF1B3P5  | ensembl <td>havana</td> <td>processed_pseudo</td> <td>0.071837</td> <td>5.88E-01</td> <td>-0.087905</td> <td>0.000000</td> <td>-0.044472</td> <td>3.22E-01</td> <td>-0.354294</td> <td>6.97E-02</td> <td>-0.016494</td> <td>9.05E-01</td> <td>-0.027638</td> <td>9.03E-01</td> <td>-0.099204</td> <td>4.91E-01</td>   | havana            | processed_pseudo  | 0.071837  | 5.88E-01 | -0.087905 | 0.000000 | -0.044472 | 3.22E-01 | -0.354294 | 6.97E-02 | -0.016494 | 9.05E-01 | -0.027638 | 9.03E-01 | -0.099204 | 4.91E-01 |
| ENSG0000020182 | 14651341 | 14653129 | PCF11A13  | havana                                                                                                                                                                                                                                                                                                                | incRNA            | antisense_pseudo  | 0.258138  | 2.34E-02 | -0.336425 | 1.77E-01 | 0.059736  | 7.67E-01 | -0.354443 | 6.97E-02 | -0.280715 | 8.00E-01 | -0.087128 | 6.93E-01 | -0.099204 | 4.91E-01 |
| ENSG0000022937 | 7669180  | 7669307  | PEA3      | ensembl <td>havana</td> <td>protein_coding</td> <td>-0.270997</td> <td>1.71E-02</td> <td>-0.188425</td> <td>1.90E-02</td> <td>-0.005024</td> <td>9.80E-01</td> <td>-0.354443</td> <td>6.97E-02</td> <td>-0.40504</td> <td>2.05E-01</td> <td>-0.177226</td> <td>4.18E-01</td> <td>-0.099138</td> <td>4.93E-01</td>     | havana            | protein_coding    | -0.270997 | 1.71E-02 | -0.188425 | 1.90E-02 | -0.005024 | 9.80E-01 | -0.354443 | 6.97E-02 | -0.40504  | 2.05E-01 | -0.177226 | 4.18E-01 | -0.099138 | 4.93E-01 |
| ENSG0000025076 | 2153537  | 2153914  | GAPDH52   | ensembl <td>havana</td> <td>protein_coding</td> <td>-0.202703</td> <td>5.42E-02</td> <td>-0.158293</td> <td>2.72E-01</td> <td>0.103764</td> <td>6.07E-01</td> <td>-0.354087</td> <td>6.96E-02</td> <td>-0.184949</td> <td>9.69E-01</td> <td>-0.024884</td> <td>9.95E-01</td> <td>-0.14464</td> <td>3.36E-01</td>      | havana            | protein_coding    | -0.202703 | 5.42E-02 | -0.158293 | 2.72E-01 | 0.103764  | 6.07E-01 | -0.354087 | 6.96E-02 | -0.184949 | 9.69E-01 | -0.024884 | 9.95E-01 | -0.14464  | 3.36E-01 |
| ENSG0000021475 | 5396128  | 5396282  | GIT2P6    | ensembl <td>havana</td> <td>processed_pseudo</td> <td>-0.160002</td> <td>1.61E-01</td> <td>-0.176795</td> <td>6.65E-02</td> <td>0.4561489</td> <td>1.68E-02</td> <td>-0.354499</td> <td>6.96E-02</td> <td>-0.192039</td> <td>1.64E-01</td> <td>-0.157161</td> <td>6.23E-01</td> <td>-0.081265</td> <td>5.78E-01</td>  | havana            | processed_pseudo  | -0.160002 | 1.61E-01 | -0.176795 | 6.65E-02 | 0.4561489 | 1.68E-02 | -0.354499 | 6.96E-02 | -0.192039 | 1.64E-01 | -0.157161 | 6.23E-01 | -0.081265 | 5.78E-01 |
| ENSG0000014491 | 27112005 | 27109460 | NEK10     | ensembl <td>havana</td> <td>protein_coding</td> <td>-0.240919</td> <td>3.52E-02</td> <td>-0.186993</td> <td>1.93E-01</td> <td>0.0126037</td> <td>9.51E-01</td> <td>-0.354451</td> <td>6.96E-02</td> <td>-0.158067</td> <td>7.85E-01</td> <td>-0.099204</td> <td>4.91E-01</td> <td>-0.045567</td> <td>7.43E-01</td>    | havana            | protein_coding    | -0.240919 | 3.52E-02 | -0.186993 | 1.93E-01 | 0.0126037 | 9.51E-01 | -0.354451 | 6.96E-02 | -0.158067 | 7.85E-01 | -0.099204 | 4.91E-01 | -0.045567 | 7.43E-01 |
| ENSG0000020201 | 941296   | 9415119  | ALX4L1.1  | havana                                                                                                                                                                                                                                                                                                                | transcribed_unint | incRNA            | -0.226645 | 5.00E-02 | -0.226645 | 1.17E-01 | 0.052006  | 6.10E-01 | -0.354531 | 6.96E-02 | -0.102053 | 2.61E-01 | -0.184493 | 3.90E-01 | -0.099204 | 4.91E-01 |
| ENSG0000020437 | 37128679 | 37141460 | AC09230.2 | havana                                                                                                                                                                                                                                                                                                                | incRNA            | antisense_pseudo  | -0.142185 | 2.17E-01 | -0.191571 | 2.70E-01 | -0.087176 | 6.65E-01 | -0.354493 | 6.96E-02 | -0.198185 | 8.00E-01 | -0.104285 | 6.77E-01 | -0.099204 | 4.91E-01 |
| ENSG0000019679 | 4355644  | 43574618 | ZNF239    | ensembl <td>havana</td> <td>protein_coding</td> <td>-0.300348</td> <td>6.73E-02</td> <td>-0.134629</td> <td>1.03E-01</td> <td>-0.266774</td> <td>1.79E-01</td> <td>-0.354504</td> <td>6.96E-02</td> <td>-0.433643</td> <td>1.06E-01</td> <td>-0.096426</td> <td>7.34E-01</td> <td>-0.121254</td> <td>4.78E-01</td>    | havana            | protein_coding    | -0.300348 | 6.73E-02 | -0.134629 | 1.03E-01 | -0.266774 | 1.79E-01 | -0.354504 | 6.96E-02 | -0.433643 | 1.06E-01 | -0.096426 | 7.34E-01 | -0.121254 | 4.78E-01 |
| ENSG0000025658 | 13481543 | 13490815 | AC09370.1 | havana                                                                                                                                                                                                                                                                                                                | tagene            | incRNA            | -0.205481 | 7.43E-02 | -0.043026 | 3.16E-02 | 0.0154623 | 9.40E-01 | -0.354538 | 6.96E-02 | -0.154875 | 6.00E-01 | -0.173036 | 7.80E-01 | -0.121254 | 4.78E-01 |
| ENSG0000020570 | 24159509 | 24162211 | AC09077.3 | havana                                                                                                                                                                                                                                                                                                                | incRNA            | antisense_pseudo  | -0.266616 | 1.91E-01 | -0.173346 | 2.34E-02 | 0.252638  | 2.04E-01 | -0.354593 | 6.95E-02 | -0.389053 | 3.64E-01 | -0.154317 | 4.83E-01 | -0.201587 | 1.59E-01 |
| ENSG0000020380 | 6425565  | 6428721  | PCMT2     | ensembl <td>havana</td> <td>protein_coding</td> <td>-0.209322</td> <td>1.04E-02</td> <td>-0.121729</td> <td>1.40E-01</td> <td>-0.125088</td> <td>5.33E-01</td> <td>-0.354727</td> <td>6.94E-02</td> <td>-0.420933</td> <td>1.55E-01</td> <td>-0.105246</td> <td>6.50E-01</td> <td>-0.125476</td> <td>3.84E-01</td>    | havana            | protein_coding    | -0.209322 | 1.04E-02 | -0.121729 | 1.40E-01 | -0.125088 | 5.33E-01 | -0.354727 | 6.94E-02 | -0.420933 | 1.55E-01 | -0.105246 | 6.50E-01 | -0.125476 | 3.84E-01 |
| ENSG0000019318 | 1615248  | 1618484  | RNO1      | ensembl <td>havana</td> <td>protein_coding</td> <td>-0.074707</td> <td>7.03E-02</td> <td>-0.046746</td> <td>5.40E-02</td> <td>0.1085783</td> <td>6.14E-01</td> <td>-0.354804</td> <td>6.94E-02</td> <td>-0.484266</td> <td>1.04E-01</td> <td>-0.091772</td> <td>5.79E-01</td> <td>-0.118881</td> <td>5.48E-01</td>    | havana            | protein_coding    | -0.074707 | 7.03E-02 | -0.046746 | 5.40E-02 | 0.1085783 | 6.14E-01 | -0.354804 | 6.94E-02 | -0.484266 | 1.04E-01 | -0.091772 | 5.79E-01 | -0.118881 | 5.48E-01 |
| ENSG0000021706 | 2302684  | 23027100 | ALX4B98.2 | havana                                                                                                                                                                                                                                                                                                                | tagene            | incRNA            | -0.188713 | 1.42E-01 | -0.158293 | 2.72E-01 | 0.103764  | 6.07E-01 | -0.354087 | 6.96E-02 | -0.189376 | 1.44E-01 | -0.181874 | 4.06E-01 | -0.133485 | 9.60E-01 |
| ENSG0000019821 | 9315784  | 9316872  | LIG1      | ensembl <td>havana</td> <td>protein_coding</td> <td>-0.258665</td> <td>2.84E-02</td> <td>-0.152963</td> <td>1.45E-01</td> <td>-0.354898</td> <td>6.89E-01</td> <td>-0.401317</td> <td>6.93E-02</td> <td>-0.381274</td> <td>2.77E-01</td> <td>-0.171217</td> <td>5.94E-01</td> <td>-0.171217</td> <td>5.94E-01</td>    | havana            | protein_coding    | -0.258665 | 2.84E-02 | -0.152963 | 1.45E-01 | -0.354898 | 6.89E-01 | -0.401317 | 6.93E-02 | -0.381274 | 2.77E-01 | -0.171217 | 5.94E-01 | -0.171217 | 5.94E-01 |
| ENSG0000009978 | 23211001 | 23219974 | ATG1A1    | ensembl <td>havana</td> <td>protein_coding</td> <td>-0.131089</td> <td>5.70E-02</td> <td>-0.084441</td> <td>3.42E-01</td> <td>0.172534</td> <td>3.82E-01</td> <td>-0.354914</td> <td>6.93E-02</td> <td>-0.394940</td> <td>3.10E-01</td> <td>-0.178785</td> <td>4.14E-01</td> <td>-0.025538</td> <td>9.10E-01</td>     | havana            | protein_coding    | -0.131089 | 5.70E-02 | -0.084441 | 3.42E-01 | 0.172534  | 3.82E-01 | -0.354914 | 6.93E-02 | -0.394940 | 3.10E-01 | -0.178785 | 4.14E-01 | -0.025538 | 9.10E-01 |
| ENSG0000020820 | 11278114 | 11278878 | AC09241.1 | havana                                                                                                                                                                                                                                                                                                                | incRNA            | antisense_pseudo  | -0.178078 | 1.67E-01 | -0.181941 | 1.26E-01 | -0.007160 | 9.70E-01 | -0.354914 | 6.93E-02 | -0.394940 | 3.10E-01 | -0.178078 | 4.14E-01 | -0.025538 | 9.10E-01 |
| ENSG0000027089 | 9154837  | 9154125  | BUD31     | ensembl <td>havana</td> <td>processed_pseudo</td> <td>-0.181941</td> <td>1.13E-01</td> <td>-0.007160</td> <td>9.70E-01</td> <td>-0.354914</td> <td>6.93E-02</td> <td>-0.276187</td> <td>9.78E-01</td> <td>-0.168978</td> <td>5.64E-01</td> <td>-0.067614</td> <td>6.10E-01</td> <td>-0.168978</td> <td>5.64E-01</td>  | havana            | processed_pseudo  | -0.181941 | 1.13E-01 | -0.007160 | 9.70E-01 | -0.354914 | 6.93E-02 | -0.276187 | 9.78E-01 | -0.168978 | 5.64E-01 | -0.067614 | 6.10E-01 | -0.168978 | 5.64E-01 |
| ENSG0000020940 | 37365281 | 37376211 | AC09089.1 | havana                                                                                                                                                                                                                                                                                                                | incRNA            | antisense_pseudo  | -0.262985 | 2.08E-02 | -0.126553 | 4.38E-02 | 0.2748693 | 1.60E-01 | -0.354925 | 6.93E-02 | -0.421111 | 5.25E-01 | -0.171947 | 4.35E-01 | -0.212518 | 1.38E-01 |
| ENSG0000013344 | 505466   | 505466   | ORX2      | ensembl <td>havana</td> <td>protein_coding</td> <td>0.000000</td> <td>0.000000</td> <td>0.000000</td> <td>0.000000</td> <td>0.000000</td> <td>0.000000</td> <td>-0.354294</td> <td>6.99E-02</td> <td>-0.169498</td> <td>7.21E-01</td> <td>-0.199273</td> <td>3.71E-01</td> <td>-0.212656</td> <td>1.28E-01</td>       | havana            | protein_coding    | 0.000000  | 0.000000 | 0.000000  | 0.000000 | 0.000000  | 0.000000 | -0.354294 | 6.99E-02 | -0.169498 | 7.21E-01 | -0.199273 | 3.71E-01 | -0.212656 | 1.28E-01 |
| ENSG0000020573 | 5007018  | 5004547  | AC09074.1 | havana                                                                                                                                                                                                                                                                                                                | incRNA            | antisense_pseudo  | -0.213249 | 6.26E-02 | -0.045509 | 6.56E-02 | -0.140377 | 2.84E-01 | -0.354982 | 6.92E-02 | -0.390547 | 3.51E-01 | -0.149538 | 5.02E-01 | -0.248053 | 8.18E-01 |
| ENSG0000019156 | 17191348 | 17180293 | OSR1P6    | ensembl <td>havana</td> <td>protein_coding</td> <td>-0.176039</td> <td>1.24E-01</td> <td>-0.084524</td> <td>5.99E-02</td> <td>-0.123655</td> <td>5.39E-01</td> <td>-0.355008</td> <td>6.92E-02</td> <td>-0.312556</td> <td>2.34E-01</td> <td>-0.159912</td> <td>4.66E-01</td> <td>-0.174603</td> <td>3.06E-01</td>    | havana            | protein_coding    | -0.176039 | 1.24E-01 | -0.084524 | 5.99E-02 | -0.123655 | 5.39E-01 | -0.355008 | 6.92E-02 | -0.312556 | 2.34E-01 | -0.159912 | 4.66E-01 | -0.174603 | 3.06E-01 |
| ENSG0000021675 | 11246256 | 11247189 | ORX2      | ensembl <td>havana</td> <td>protein_coding</td> <td>0.000000</td> <td>0.000000</td> <td>0.000000</td> <td>0.000000</td> <td>0.000000</td> <td>0.000000</td> <td>-0.354294</td> <td>6.99E-02</td> <td>-0.169498</td> <td>7.21E-01</td> <td>-0.199273</td> <td>3.71E-01</td> <td>-0.212656</td> <td>1.28E-01</td>       | havana            | protein_coding    | 0.000000  | 0.000000 | 0.000000  | 0.000000 | 0.000000  | 0.000000 | -0.354294 | 6.99E-02 | -0.169498 | 7.21E-01 | -0.199273 | 3.71E-01 | -0.212656 | 1.28E-01 |
| ENSG0000017157 | 14603134 | 14622156 | LURAP1    | ensembl <td>havana</td> <td>protein_coding</td> <td>-0.267182</td> <td>1.98E-02</td> <td>-0.209022</td> <td>1.45E-01</td> <td>0.084504</td> <td>6.68E-01</td> <td>-0.355052</td> <td>6.92E-02</td> <td>-0.376723</td> <td>6.90E-01</td> <td>-0.199204</td> <td>4.91E-01</td> <td>-0.199204</td> <td>4.91E-01</td>     | havana            | protein_coding    | -0.267182 | 1.98E-02 | -0.209022 | 1.45E-01 | 0.084504  | 6.68E-01 | -0.355052 | 6.92E-02 | -0.376723 | 6.90E-01 | -0.199204 | 4.91E-01 | -0.199204 | 4.91E-01 |
| ENSG0000018234 | 1899273  | 18435610 | ITIC9C    | ensembl <td>havana</td> <td>protein_coding</td> <td>-0.270284</td> <td>1.91E-02</td> <td>-0.282829</td> <td>4.82E-02</td> <td>-0.009974</td> <td>7.66E-01</td> <td>-0.355107</td> <td>6.91E-02</td> <td>-0.317179</td> <td>4.21E-01</td> <td>-0.094808</td> <td>8.88E-01</td> <td>-0.088875</td> <td>8.72E-01</td>    | havana            | protein_coding    | -0.270284 | 1.91E-02 | -0.282829 | 4.82E-02 | -0.009974 | 7.66E-01 | -0.355107 | 6.91E-02 | -0.317179 | 4.21E-01 | -0.094808 | 8.88E-01 | -0.088875 | 8.72E-01 |
| ENSG0000022007 | 625237   | 6234724  | RMO25.2   | havana                                                                                                                                                                                                                                                                                                                | incRNA            | antisense_pseudo  | -0.249324 | 5.91E-02 | -0.20984  | 1.50E-01 | 0.171219  | 3.91E-01 | -0.355144 | 6.91E-02 | -0.297915 | 3.88E-01 | -0.093512 | 4.60E-01 | -0.110203 | 4.22E-01 |
| ENSG0000020245 | 7018480  | 7018293  | AC09248.1 | havana                                                                                                                                                                                                                                                                                                                | incRNA            | antisense_pseudo  | -0.249324 | 5.91E-02 | -0.20984  | 1.50E-01 | 0.171219  | 3.91E-01 | -0.355144 | 6.91E-02 | -0.297915 | 3.88E-01 | -0.093512 | 4.60E-01 | -0.110203 | 4.22E-01 |
| ENSG0000020869 | 1933011  | 1933704  | ADRN28    | ensembl <td>havana</td> <td>transcribed_unint</td> <td>-0.443749</td> <td>3.27E-02</td> <td>-0.158518</td> <td>2.77E-01</td> <td>-0.207251</td> <td>3.00E-01</td> <td>-0.355144</td> <td>6.90E-02</td> <td>-0.368781</td> <td>6.10E-01</td> <td>-0.107823</td> <td>6.40E-01</td> <td>-0.016264</td> <td>2.48E-01</td> | havana            | transcribed_unint | -0.443749 | 3.27E-02 | -0.158518 | 2.77E-01 | -0.207251 | 3.00E-01 | -0.355144 | 6.90E-02 | -0.368781 | 6.10E-01 | -0.107823 | 6.40E-01 | -0.016264 | 2.48E-01 |
| ENSG0000021761 | 2008929  | 2008938  | POM121L9  | havana                                                                                                                                                                                                                                                                                                                | transcribed_unint | incRNA            | -0.249324 | 5.91E-02 | -0.209899 | 1.56E-01 | -0.012559 | 9.50E-01 | -0.355188 | 6.89E-02 | -0.378649 | 6.79E-01 | -0.106714 | 6.29E-01 | -0.041769 | 5.74E-01 |
| ENSG0000020817 | 1511142  | 1511142  | ORX2      | ensembl <td>havana</td> <td>protein_coding</td> <td>0.000000</td> <td>0.000000</td> <td>0.000000</td> <td>0.000000</td> <td>0.000000</td> <td>0.000000</td> <td>-0.354294</td> <td>6.99E-02</td> <td>-0.169498</td> <td>7.21E-01</td> <td>-0.199273</td> <td>3.71E-01</td> <td>-0.212656</td> <td>1.28E-01</td>       | havana            | protein_coding    | 0.000000  | 0.000000 | 0.000000  | 0.000000 | 0.000000  | 0.000000 | -0.354294 | 6.99E-02 | -0.169498 | 7.21E-01 | -0.199273 | 3.71E-01 | -0.212656 | 1.28E-01 |
| ENSG0000024210 | 15746623 | 15749116 | AC09376.1 | havana                                                                                                                                                                                                                                                                                                                | incRNA            | antisense_pseudo  | -0.180590 | 1.16E-01 | -0.174018 | 2.99E-01 | 0.1726127 | 9.80E-01 | -0.355488 | 6.88E-02 | -0.303674 | 2.56E-01 | -0.083465 | 5.54E-   |           |          |





Table with columns for gene ID, chromosome, coordinates, gene name, transcript type, and various numerical values. The table lists numerous genes such as HAHM1, DMC1, RTRP3, and many others, with associated genomic data and values.

| ENSG0000024584 | 17 | 49849310 | 49848837  | AC02780.1  | ensembl | havana | incRNA               | protein_coding     | -0.221036  | 5.34e-02 | 0.3051295  | 1.32e-02 | 0.15002211 | 4.51e-01 | -0.3695123  | 5.78e-02 | 0.279944   | 4.03e-02 | 0.3963949 | 1.51e-01 | 0.22512695 | 1.16e-01 |           |          |
|----------------|----|----------|-----------|------------|---------|--------|----------------------|--------------------|------------|----------|------------|----------|------------|----------|-------------|----------|------------|----------|-----------|----------|------------|----------|-----------|----------|
| ENSG0000017122 | 17 | 16373203 | 16374854  | SPAT76     | ensembl | havana | mRNA                 | protein_coding     | -0.202487  | 7.01e-02 | -0.1717425 | 1.29e-02 | -0.1827048 | 5.21e-01 | -0.3695484  | 5.78e-02 | 0.274991   | 4.62e-02 | 0.3666131 | 8.70e-01 | 0.0997453  | 4.91e-01 |           |          |
| ENSG0000015313 | 17 | 16373213 | 16374854  | CTC4       | ensembl | havana | mRNA                 | protein_coding     | -0.1845479 | 1.08e-01 | -0.2075244 | 5.49e-01 | -0.2421163 | 5.49e-01 | -0.3695484  | 5.78e-02 | 0.274991   | 4.62e-02 | 0.3666131 | 8.70e-01 | 0.0997453  | 4.91e-01 |           |          |
| ENSG0000017528 | 17 | 4833180  | 4833144   | ZNF461     | ensembl | havana | mRNA                 | protein_coding     | -0.1845479 | 1.08e-01 | -0.2075244 | 5.49e-01 | -0.2421163 | 5.49e-01 | -0.3695484  | 5.78e-02 | 0.274991   | 4.62e-02 | 0.3666131 | 8.70e-01 | 0.0997453  | 4.91e-01 |           |          |
| ENSG0000014188 | 17 | 11905399 | 11799806  | SIT-014    | ensembl | havana | incRNA               | antisense_intronic | -0.2325704 | 4.30e-02 | -0.2527595 | 2.30e-02 | -0.2327797 | 2.43e-01 | -0.3696334  | 5.77e-02 | 0.280482   | 5.17e-02 | 0.3883134 | 1.89e-01 | 0.262471   | 5.56e-02 |           |          |
| ENSG0000018890 | 17 | 15343789 | 15345614  | AC029413.3 | ensembl | havana | incRNA               | antisense_intronic | -0.2456614 | 0.00e-00 | -0.2615614 | 1.20e-01 | -0.2456614 | 1.20e-01 | -0.3696334  | 5.77e-02 | 0.280482   | 5.17e-02 | 0.3883134 | 1.89e-01 | 0.262471   | 5.56e-02 |           |          |
| ENSG0000017998 | 8  | 64759804 | 64682370  | AC04242.3  | ensembl | havana | transcript_processed | antisense_intronic | -0.4694648 | 0.00e-00 | -0.2527595 | 2.30e-02 | -0.2615614 | 1.20e-01 | -0.3696334  | 5.77e-02 | 0.280482   | 5.17e-02 | 0.3883134 | 1.89e-01 | 0.262471   | 5.56e-02 |           |          |
| ENSG0000010405 | 20 | 3071620  | 3072517   | DOT        | ensembl | havana | mRNA                 | protein_coding     | -0.2420733 | 2.31e-02 | -0.2676705 | 6.22e-02 | -0.2070743 | 7.28e-01 | -0.3696262  | 5.77e-02 | 0.2807396  | 4.46e-02 | 0.4879582 | 4.90e-01 | 0.1237359  | 7.92e-01 |           |          |
| ENSG0000013599 | 6  | 14705682 | 147053483 | AC04249.1  | ensembl | havana | transcript_processed | antisense_intronic | -0.2420733 | 2.31e-02 | -0.2676705 | 6.22e-02 | -0.2070743 | 7.28e-01 | -0.3696262  | 5.77e-02 | 0.2807396  | 4.46e-02 | 0.4879582 | 4.90e-01 | 0.1237359  | 7.92e-01 |           |          |
| ENSG0000013739 | 6  | 34339373 | 3424231   | HMG1A1     | ensembl | havana | mRNA                 | protein_coding     | -0.2420733 | 2.31e-02 | -0.2676705 | 6.22e-02 | -0.2070743 | 7.28e-01 | -0.3696262  | 5.77e-02 | 0.2807396  | 4.46e-02 | 0.4879582 | 4.90e-01 | 0.1237359  | 7.92e-01 |           |          |
| ENSG0000010993 | 7  | 38358512 | 38359162  | TRG3       | ensembl | havana | TR V gene            | protein_coding     | -0.2420733 | 2.31e-02 | -0.2676705 | 6.22e-02 | -0.2070743 | 7.28e-01 | -0.3696262  | 5.77e-02 | 0.2807396  | 4.46e-02 | 0.4879582 | 4.90e-01 | 0.1237359  | 7.92e-01 |           |          |
| ENSG0000013669 | 17 | 7897348  | 7892287   | CYR1       | ensembl | havana | mRNA                 | protein_coding     | -0.2420733 | 2.31e-02 | -0.2676705 | 6.22e-02 | -0.2070743 | 7.28e-01 | -0.3696262  | 5.77e-02 | 0.2807396  | 4.46e-02 | 0.4879582 | 4.90e-01 | 0.1237359  | 7.92e-01 |           |          |
| ENSG0000010994 | 4  | 10981510 | 10982470  | GAR1       | ensembl | havana | mRNA                 | protein_coding     | -0.2420733 | 2.31e-02 | -0.2676705 | 6.22e-02 | -0.2070743 | 7.28e-01 | -0.3696262  | 5.77e-02 | 0.2807396  | 4.46e-02 | 0.4879582 | 4.90e-01 | 0.1237359  | 7.92e-01 |           |          |
| ENSG0000012684 | 1  | 11912639 | 11912729  | RPS1AP12   | ensembl | havana | transcript_processed | antisense_intronic | -0.1490099 | 0.00e-00 | -0.1014935 | 4.83e-01 | -0.1080949 | 5.76e-02 | -0.348271   | 2.04e-02 | 0.6157014  | 1.76e-01 | 0.2050011 | 1.46e-01 | 0.2050011  | 1.46e-01 |           |          |
| ENSG0000010193 | 21 | 4284394  | 4287958   | WDR4       | ensembl | havana | mRNA                 | protein_coding     | -0.243888  | 3.27e-02 | -0.2676705 | 6.22e-02 | -0.2070743 | 7.28e-01 | -0.3696262  | 5.77e-02 | 0.2807396  | 4.46e-02 | 0.4879582 | 4.90e-01 | 0.1237359  | 7.92e-01 |           |          |
| ENSG0000014916 | 17 | 6273704  | 6273587   | TRAP2      | ensembl | havana | mRNA                 | protein_coding     | -0.243888  | 3.27e-02 | -0.2676705 | 6.22e-02 | -0.2070743 | 7.28e-01 | -0.3696262  | 5.77e-02 | 0.2807396  | 4.46e-02 | 0.4879582 | 4.90e-01 | 0.1237359  | 7.92e-01 |           |          |
| ENSG0000014460 | 11 | 9506719  | 9507124   | SRSF8      | ensembl | havana | mRNA                 | protein_coding     | -0.243888  | 3.27e-02 | -0.2676705 | 6.22e-02 | -0.2070743 | 7.28e-01 | -0.3696262  | 5.77e-02 | 0.2807396  | 4.46e-02 | 0.4879582 | 4.90e-01 | 0.1237359  | 7.92e-01 |           |          |
| ENSG0000018816 | 10 | 11848499 | 11849178  | ENOD4      | ensembl | havana | mRNA                 | protein_coding     | YES        | YES      | -0.2651899 | 1.96e-01 | -0.1448525 | 2.61e-01 | -0.2186244  | 2.71e-01 | -0.3700872 | 5.47e-02 | 0.4070953 | 2.20e-01 | 0.6028389  | 6.57e-01 | 0.1803208 | 3.94e-01 |
| ENSG0000012664 | 1  | 2023424  | 2023237   | AC02908.1  | ensembl | havana | transcript_processed | antisense_intronic | -0.1731183 | 1.68e-01 | -0.1874049 | 4.19e-01 | -0.2200601 | 3.20e-01 | -0.3701381  | 5.67e-02 | 0.2621396  | 5.49e-02 | 0.4178176 | 9.36e-01 | 0.1051304  | 2.17e-01 |           |          |
| ENSG0000014183 | 1  | 17646117 | 17648501  | PMPA2      | ensembl | havana | mRNA                 | protein_coding     | YES        | YES      | -0.1728551 | 1.33e-01 | -0.1792371 | 4.54e-01 | -0.2108804  | 2.46e-01 | -0.3701381 | 5.67e-02 | 0.2621396 | 5.49e-02 | 0.4178176  | 9.36e-01 |           |          |
| ENSG0000013806 | 15 | 45167214 | 45201175  | PAPAZ      | ensembl | havana | mRNA                 | protein_coding     | YES        | YES      | -0.2035444 | 1.59e-02 | -0.2189003 | 3.97e-02 | -0.2075244  | 5.49e-01 | -0.3702943 | 5.78e-02 | 0.4492777 | 9.63e-01 | 0.2396509  | 5.70e-01 | 0.0666941 | 6.91e-01 |
| ENSG0000012588 | 8  | 11102217 | 11111543  | FMAD25     | ensembl | havana | incRNA               | antisense_intronic | -0.2451134 | 3.17e-02 | -0.2529487 | 1.15e-02 | -0.2323339 | 3.87e-01 | -0.3702943  | 5.78e-02 | 0.4492777  | 9.63e-01 | 0.2396509 | 5.70e-01 | 0.0666941  | 6.91e-01 |           |          |
| ENSG0000013748 | 9  | 12188466 | 12186719  | TRT1L11    | ensembl | havana | incRNA               | antisense_intronic | -0.22244   | 2.98e-02 | -0.21107   | 1.41e-01 | -0.2079942 | 7.07e-01 | -0.3709007  | 5.78e-02 | 0.4281633  | 5.54e-02 | 0.5831366 | 9.97e-01 | 0.0661316  | 5.48e-01 |           |          |
| ENSG0000014165 | 18 | 7607353  | 7417483   | FBXO15     | ensembl | havana | mRNA                 | protein_coding     | YES        | YES      | -0.25724   | 2.38e-01 | -0.2071209 | 3.60e-01 | -0.207861   | 9.91e-01 | -0.3703726 | 5.78e-02 | 0.4281633 | 5.54e-02 | 0.5831366  | 9.97e-01 |           |          |
| ENSG0000017236 | 9  | 11524519 | 11517484  | ENH48      | ensembl | havana | mRNA                 | protein_coding     | -0.268389  | 3.54e-02 | -0.2684473 | 9.41e-02 | -0.2477720 | 9.95e-02 | -0.3704998  | 5.78e-02 | 0.4281633  | 5.54e-02 | 0.5831366 | 9.97e-01 | 0.0661316  | 5.48e-01 |           |          |
| ENSG0000014227 | 22 | 4604978  | 4604544   | PRR5A      | ensembl | havana | mRNA                 | protein_coding     | -0.269661  | 2.83e-02 | -0.213881  | 2.99e-01 | -0.2066296 | 7.03e-01 | -0.3705731  | 5.78e-02 | 0.4281633  | 5.54e-02 | 0.5831366 | 9.97e-01 | 0.0661316  | 5.48e-01 |           |          |
| ENSG0000019573 | 19 | 4186625  | 4187295   | RPS19      | ensembl | havana | mRNA                 | protein_coding     | -0.408662  | 3.94e-02 | -0.379638  | 1.93e-01 | -0.3701955 | 5.95e-01 | -0.3706726  | 5.78e-02 | 0.4281633  | 5.54e-02 | 0.5831366 | 9.97e-01 | 0.0661316  | 5.48e-01 |           |          |
| ENSG0000019916 | 2  | 9458522  | 9460473   | ALAS3S1.1  | ensembl | havana | transcript_processed | antisense_intronic | -0.1821878 | 1.13e-01 | -0.149862  | 3.02e-01 | -0.1036671 | 8.56e-01 | -0.3708484  | 5.78e-02 | 0.4150598  | 5.97e-02 | 0.4872766 | 8.96e-01 | 0.0925218  | 8.39e-01 |           |          |
| ENSG0000019411 | 17 | 6200045  | 6202732   | EPH2       | ensembl | havana | mRNA                 | protein_coding     | -0.2041023 | 0.00e-00 | -0.1774441 | 1.23e-01 | -0.1583137 | 1.33e-01 | -0.3707473  | 5.69e-02 | 0.4150598  | 5.97e-02 | 0.4872766 | 8.96e-01 | 0.0925218  | 8.39e-01 |           |          |
| ENSG0000011888 | 14 | 2254507  | 2254508   | TRAP2      | ensembl | havana | TR V gene            | protein_coding     | -0.1774441 | 1.23e-01 | -0.1583137 | 1.33e-01 | -0.3707473 | 5.69e-02 | -0.3707473  | 5.69e-02 | 0.4150598  | 5.97e-02 | 0.4872766 | 8.96e-01 | 0.0925218  | 8.39e-01 |           |          |
| ENSG0000013958 | 14 | 9133219  | 9130778   | UNC79      | ensembl | havana | mRNA                 | protein_coding     | YES        | YES      | -0.261148  | 1.93e-02 | -0.1508895 | 2.96e-02 | -0.1448525  | 2.61e-01 | -0.3708484 | 5.78e-02 | 0.4150598 | 5.97e-02 | 0.4872766  | 8.96e-01 |           |          |
| ENSG0000014598 | 17 | 12794389 | 12794389  | AC02614.4  | ensembl | havana | transcript_processed | antisense_intronic | -0.261148  | 1.93e-02 | -0.1508895 | 2.96e-02 | -0.1448525 | 2.61e-01 | -0.3708484  | 5.78e-02 | 0.4150598  | 5.97e-02 | 0.4872766 | 8.96e-01 | 0.0925218  | 8.39e-01 |           |          |
| ENSG0000016270 | 8  | 10246489 | 10246885  | AC02212.1  | ensembl | havana | incRNA               | antisense_intronic | YES        | YES      | -0.1844141 | 1.08e-01 | -0.1575511 | 2.75e-01 | -0.1081918  | 5.91e-01 | -0.3708814 | 5.68e-02 | 0.4022147 | 3.64e-02 | 0.5007407  | 5.88e-01 |           |          |
| ENSG0000013648 | 8  | 5306785  | 5308189   | AC08483.1  | ensembl | havana | transcript_processed | antisense_intronic | -0.207754  | 5.37e-02 | -0.2127434 | 1.22e-01 | -0.194243  | 4.88e-01 | -0.3708814  | 5.68e-02 | 0.4022147  | 3.64e-02 | 0.5007407 | 5.88e-01 | 0.1899478  | 5.27e-01 | 0.1446012 | 3.16e-01 |
| ENSG0000012581 | 17 | 12794389 | 12794389  | AC02614.4  | ensembl | havana | transcript_processed | antisense_intronic | YES        | YES      | -0.207754  | 5.37e-02 | -0.2127434 | 1.22e-01 | -0.194243   | 4.88e-01 | -0.3708814 | 5.68e-02 | 0.4022147 | 3.64e-02 | 0.5007407  | 5.88e-01 |           |          |
| ENSG0000018615 | 5  | 12723797 | 12729713  | AC01416.4  | ensembl | havana | incRNA               | antisense_intronic | YES        | YES      | -0.259555  | 1.94e-02 | -0.1564822 | 2.22e-01 | -0.03524617 | 8.61e-01 | -0.3709215 | 5.68e-02 | 0.4057235 | 6.66e-01 | 0.3897488  | 6.48e-01 | 0.0526025 | 6.16e-01 |
| ENSG0000012824 | 9  | 4138405  | 4138136   | F8FBAP     | ensembl | havana | transcript_processed | antisense_intronic | -0.102889  | 9.64e-02 | -0.2461671 | 9.81e-02 | -0.2730272 | 7.10e-01 | -0.3709984  | 5.68e-02 | 0.410718   | 7.90e-02 | 0.4881188 | 5.98e-01 | 0.0127446  | 6.01e-01 |           |          |
| ENSG0000012484 | 7  | 5782813  | 5783746   | AC02314.7  | ensembl | havana | transcript_processed | antisense_intronic | -0.2080477 | 7.81e-02 | -0.2352773 | 7.60e-02 | -0.2352773 | 7.60e-02 | -0.3709818  | 5.68e-02 | 0.410718   | 7.90e-02 | 0.4881188 | 5.98e-01 | 0.0127446  | 6.01e-01 |           |          |
| ENSG0000012931 | 17 | 9239589  | 9231366   | OR8K1.AS1  | ensembl | havana | transcript_processed | antisense_intronic | -0.2144813 | 0.00e-00 | -0.2144813 | 0.00e-00 | -0.2144813 | 0.00e-00 | -0.3710438  | 5.68e-02 | 0.410718   | 7.90e-02 | 0.4881188 | 5.98e-01 | 0.0127446  | 6.01e-01 |           |          |
| ENSG0000016149 | 17 | 4384718  | 4383639   | CD3DGL     | ensembl | havana | mRNA                 | protein_coding     | -0.2589311 | 1.17e-02 | -0.1524441 | 1.33e-01 | -0.1749211 | 3.67e-01 | -0.3710438  | 5.68e-02 | 0.410718   | 7.90e-02 | 0.4881188 | 5.98e-   |            |          |           |          |





| ENSG0000026402                                                                                                                                                                                                                                                                                                                                                                   | 16 | 32262827 | 32265134 | AC13481.2  | havana               | lncRNA               | -0.188984 | 1.01e-01  | -0.182748 | 2.04e-01  | -0.099710 | 6.21e-01  | -0.381811 | 4.84e-02  | -0.270500 | 4.79e-02 | 0.1742814 | 4.26e-01  | -0.029193 | 8.40e-01 |
|----------------------------------------------------------------------------------------------------------------------------------------------------------------------------------------------------------------------------------------------------------------------------------------------------------------------------------------------------------------------------------|----|----------|----------|------------|----------------------|----------------------|-----------|-----------|-----------|-----------|-----------|-----------|-----------|-----------|-----------|----------|-----------|-----------|-----------|----------|
| ENSG0000025410 <td>11</td> <td>683026</td> <td>683396</td> <td>AC091564.5</td> <td>havana</td> <td>lncRNA</td> <td>-0.192909</td> <td>9.72e-02</td> <td>-0.213794</td> <td>1.86e-01</td> <td>-0.068429</td> <td>7.81e-01</td> <td>-0.381819</td> <td>4.94e-02</td> <td>-0.217175</td> <td>6.68e-02</td> <td>0.153808</td> <td>4.83e-01</td> <td>-0.112173</td> <td>4.88e-01</td> | 11 | 683026   | 683396   | AC091564.5 | havana               | lncRNA               | -0.192909 | 9.72e-02  | -0.213794 | 1.86e-01  | -0.068429 | 7.81e-01  | -0.381819 | 4.94e-02  | -0.217175 | 6.68e-02 | 0.153808  | 4.83e-01  | -0.112173 | 4.88e-01 |
| ENSG0000048316                                                                                                                                                                                                                                                                                                                                                                   | 17 | 8130443  | 8131373  | AC093861.1 | havana               | antisense transcript | -0.242999 | 3.96e-02  | -0.242999 | 1.54e-01  | -0.164931 | 4.98e-01  | -0.381819 | 4.94e-02  | -0.217175 | 6.68e-02 | 0.153808  | 4.83e-01  | -0.112173 | 4.88e-01 |
| ENSG0000026267                                                                                                                                                                                                                                                                                                                                                                   | 16 | 3145611  | 3145976  | AC04741.1  | havana               | antisense transcript | -0.242999 | 3.96e-02  | -0.242999 | 1.54e-01  | -0.164931 | 4.98e-01  | -0.381819 | 4.94e-02  | -0.217175 | 6.68e-02 | 0.153808  | 4.83e-01  | -0.112173 | 4.88e-01 |
| ENSG0000040993                                                                                                                                                                                                                                                                                                                                                                   | 2  | 1403139  | 1403762  | ASMTL      | antisense transcript | -0.202605            | 5.87e-02  | -0.202605 | 1.83e-01  | -0.303887 | 1.24e-01  | -0.381811 | 4.93e-02  | -0.217175 | 6.68e-02  | 0.153808 | 4.83e-01  | -0.112173 | 4.88e-01  |          |
| ENSG0000027974                                                                                                                                                                                                                                                                                                                                                                   | 27 | 53092148 | 53092191 | AT1242.4   | havana               | antisense transcript | -0.202605 | 5.87e-02  | -0.202605 | 1.83e-01  | -0.303887 | 1.24e-01  | -0.381811 | 4.93e-02  | -0.217175 | 6.68e-02 | 0.153808  | 4.83e-01  | -0.112173 | 4.88e-01 |
| ENSG0000023369                                                                                                                                                                                                                                                                                                                                                                   | 7  | 7315438  | 7320783  | GTFRAP1    | antisense transcript | -0.202605            | 5.87e-02  | -0.202605 | 1.83e-01  | -0.303887 | 1.24e-01  | -0.381811 | 4.93e-02  | -0.217175 | 6.68e-02  | 0.153808 | 4.83e-01  | -0.112173 | 4.88e-01  |          |
| ENSG0000027004                                                                                                                                                                                                                                                                                                                                                                   | 7  | 37278569 | 37283744 | ZNRK2P1    | antisense transcript | -0.202605            | 5.87e-02  | -0.202605 | 1.83e-01  | -0.303887 | 1.24e-01  | -0.381811 | 4.93e-02  | -0.217175 | 6.68e-02  | 0.153808 | 4.83e-01  | -0.112173 | 4.88e-01  |          |
| ENSG0000017628                                                                                                                                                                                                                                                                                                                                                                   | 1  | 12662760 | 12662760 | RRS20      | antisense transcript | -0.202605            | 5.87e-02  | -0.202605 | 1.83e-01  | -0.303887 | 1.24e-01  | -0.381811 | 4.93e-02  | -0.217175 | 6.68e-02  | 0.153808 | 4.83e-01  | -0.112173 | 4.88e-01  |          |
| ENSG0000024880                                                                                                                                                                                                                                                                                                                                                                   | 4  | 8424003  | 8424588  | AC09533.1  | havana               | antisense transcript | -0.202605 | 5.87e-02  | -0.202605 | 1.83e-01  | -0.303887 | 1.24e-01  | -0.381811 | 4.93e-02  | -0.217175 | 6.68e-02 | 0.153808  | 4.83e-01  | -0.112173 | 4.88e-01 |
| ENSG0000029577                                                                                                                                                                                                                                                                                                                                                                   | 12 | 934880   | 9349268  | AC09533.4  | havana               | antisense transcript | -0.202605 | 5.87e-02  | -0.202605 | 1.83e-01  | -0.303887 | 1.24e-01  | -0.381811 | 4.93e-02  | -0.217175 | 6.68e-02 | 0.153808  | 4.83e-01  | -0.112173 | 4.88e-01 |
| ENSG0000028282                                                                                                                                                                                                                                                                                                                                                                   | 13 | 2072968  | 2072968  | RRS20      | antisense transcript | -0.202605            | 5.87e-02  | -0.202605 | 1.83e-01  | -0.303887 | 1.24e-01  | -0.381811 | 4.93e-02  | -0.217175 | 6.68e-02  | 0.153808 | 4.83e-01  | -0.112173 | 4.88e-01  |          |
| ENSG0000018687                                                                                                                                                                                                                                                                                                                                                                   | 5  | 13117904 | 13120528 | LYRM7      | antisense transcript | -0.202605            | 5.87e-02  | -0.202605 | 1.83e-01  | -0.303887 | 1.24e-01  | -0.381811 | 4.93e-02  | -0.217175 | 6.68e-02  | 0.153808 | 4.83e-01  | -0.112173 | 4.88e-01  |          |
| ENSG0000017429                                                                                                                                                                                                                                                                                                                                                                   | 1  | 2058129  | 2058446  | TMEM81     | antisense transcript | -0.202605            | 5.87e-02  | -0.202605 | 1.83e-01  | -0.303887 | 1.24e-01  | -0.381811 | 4.93e-02  | -0.217175 | 6.68e-02  | 0.153808 | 4.83e-01  | -0.112173 | 4.88e-01  |          |
| ENSG0000023366                                                                                                                                                                                                                                                                                                                                                                   | 8  | 4719707  | 4719762  | AC12006.4  | havana               | lncRNA               | -0.202605 | 5.87e-02  | -0.202605 | 1.83e-01  | -0.303887 | 1.24e-01  | -0.381811 | 4.93e-02  | -0.217175 | 6.68e-02 | 0.153808  | 4.83e-01  | -0.112173 | 4.88e-01 |
| ENSG0000020047                                                                                                                                                                                                                                                                                                                                                                   | 7  | 7238718  | 7238841  | ACAP1      | antisense transcript | -0.202605            | 5.87e-02  | -0.202605 | 1.83e-01  | -0.303887 | 1.24e-01  | -0.381811 | 4.93e-02  | -0.217175 | 6.68e-02  | 0.153808 | 4.83e-01  | -0.112173 | 4.88e-01  |          |
| ENSG0000024638                                                                                                                                                                                                                                                                                                                                                                   | 15 | 2811561  | 2811609  | RRP12      | antisense transcript | -0.202605            | 5.87e-02  | -0.202605 | 1.83e-01  | -0.303887 | 1.24e-01  | -0.381811 | 4.93e-02  | -0.217175 | 6.68e-02  | 0.153808 | 4.83e-01  | -0.112173 | 4.88e-01  |          |
| ENSG0000012154                                                                                                                                                                                                                                                                                                                                                                   | 2  | 3864492  | 3917763  | TMEM78A    | antisense transcript | -0.202605            | 5.87e-02  | -0.202605 | 1.83e-01  | -0.303887 | 1.24e-01  | -0.381811 | 4.93e-02  | -0.217175 | 6.68e-02  | 0.153808 | 4.83e-01  | -0.112173 | 4.88e-01  |          |
| ENSG0000024438                                                                                                                                                                                                                                                                                                                                                                   | 17 | 4879620  | 4880661  | ITK1       | antisense transcript | -0.202605            | 5.87e-02  | -0.202605 | 1.83e-01  | -0.303887 | 1.24e-01  | -0.381811 | 4.93e-02  | -0.217175 | 6.68e-02  | 0.153808 | 4.83e-01  | -0.112173 | 4.88e-01  |          |
| ENSG0000024411                                                                                                                                                                                                                                                                                                                                                                   | 8  | 3755992  | 3756477  | AC12067.3  | havana               | antisense transcript | -0.202605 | 5.87e-02  | -0.202605 | 1.83e-01  | -0.303887 | 1.24e-01  | -0.381811 | 4.93e-02  | -0.217175 | 6.68e-02 | 0.153808  | 4.83e-01  | -0.112173 | 4.88e-01 |
| ENSG0000025441                                                                                                                                                                                                                                                                                                                                                                   | 6  | 8728290  | 8729278  | GIB1       | antisense transcript | -0.202605            | 5.87e-02  | -0.202605 | 1.83e-01  | -0.303887 | 1.24e-01  | -0.381811 | 4.93e-02  | -0.217175 | 6.68e-02  | 0.153808 | 4.83e-01  | -0.112173 | 4.88e-01  |          |
| ENSG0000023344                                                                                                                                                                                                                                                                                                                                                                   | 13 | 1027268  | 1028256  | HELIP3     | antisense transcript | -0.202605            | 5.87e-02  | -0.202605 | 1.83e-01  | -0.303887 | 1.24e-01  | -0.381811 | 4.93e-02  | -0.217175 | 6.68e-02  | 0.153808 | 4.83e-01  | -0.112173 | 4.88e-01  |          |
| ENSG0000029026                                                                                                                                                                                                                                                                                                                                                                   | 9  | 2440930  | 2452670  | ADAM7      | antisense transcript | -0.202605            | 5.87e-02  | -0.202605 | 1.83e-01  | -0.303887 | 1.24e-01  | -0.381811 | 4.93e-02  | -0.217175 | 6.68e-02  | 0.153808 | 4.83e-01  | -0.112173 | 4.88e-01  |          |
| ENSG0000027313                                                                                                                                                                                                                                                                                                                                                                   | 17 | 3792415  | 3793365  | TBC1D3     | antisense transcript | -0.202605            | 5.87e-02  | -0.202605 | 1.83e-01  | -0.303887 | 1.24e-01  | -0.381811 | 4.93e-02  | -0.217175 | 6.68e-02  | 0.153808 | 4.83e-01  | -0.112173 | 4.88e-01  |          |
| ENSG0000018696                                                                                                                                                                                                                                                                                                                                                                   | 17 | 4499381  | 4499440  | SPATC1     | antisense transcript | -0.202605            | 5.87e-02  | -0.202605 | 1.83e-01  | -0.303887 | 1.24e-01  | -0.381811 | 4.93e-02  | -0.217175 | 6.68e-02  | 0.153808 | 4.83e-01  | -0.112173 | 4.88e-01  |          |
| ENSG0000014988                                                                                                                                                                                                                                                                                                                                                                   | 19 | 4661563  | 4661971  | HSF2       | antisense transcript | -0.202605            | 5.87e-02  | -0.202605 | 1.83e-01  | -0.303887 | 1.24e-01  | -0.381811 | 4.93e-02  | -0.217175 | 6.68e-02  | 0.153808 | 4.83e-01  | -0.112173 | 4.88e-01  |          |
| ENSG0000019737                                                                                                                                                                                                                                                                                                                                                                   | 19 | 2352561  | 2358720  | ZNF575     | antisense transcript | -0.202605            | 5.87e-02  | -0.202605 | 1.83e-01  | -0.303887 | 1.24e-01  | -0.381811 | 4.93e-02  | -0.217175 | 6.68e-02  | 0.153808 | 4.83e-01  | -0.112173 | 4.88e-01  |          |
| ENSG0000020239                                                                                                                                                                                                                                                                                                                                                                   | 8  | 468758   | 469769   | LINC0253   | antisense transcript | -0.202605            | 5.87e-02  | -0.202605 | 1.83e-01  | -0.303887 | 1.24e-01  | -0.381811 | 4.93e-02  | -0.217175 | 6.68e-02  | 0.153808 | 4.83e-01  | -0.112173 | 4.88e-01  |          |
| ENSG000001386                                                                                                                                                                                                                                                                                                                                                                    | 1  | 6077564  | 6077564  | AC09752.4  | havana               | antisense transcript | -0.202605 | 5.87e-02  | -0.202605 | 1.83e-01  | -0.303887 | 1.24e-01  | -0.381811 | 4.93e-02  | -0.217175 | 6.68e-02 | 0.153808  | 4.83e-01  | -0.112173 | 4.88e-01 |
| ENSG0000023055                                                                                                                                                                                                                                                                                                                                                                   | 1  | 6804330  | 6804433  | AL137407.1 | havana               | antisense transcript | -0.202605 | 5.87e-02  | -0.202605 | 1.83e-01  | -0.303887 | 1.24e-01  | -0.381811 | 4.93e-02  | -0.217175 | 6.68e-02 | 0.153808  | 4.83e-01  | -0.112173 | 4.88e-01 |
| ENSG0000027585                                                                                                                                                                                                                                                                                                                                                                   | 2  | 1208692  | 12105247 | ACAC137.2  | havana               | antisense transcript | -0.202605 | 5.87e-02  | -0.202605 | 1.83e-01  | -0.303887 | 1.24e-01  | -0.381811 | 4.93e-02  | -0.217175 | 6.68e-02 | 0.153808  | 4.83e-01  | -0.112173 | 4.88e-01 |
| ENSG0000027599                                                                                                                                                                                                                                                                                                                                                                   | 17 | 5302797  | 5302841  | TMEM78A    | antisense transcript | -0.202605            | 5.87e-02  | -0.202605 | 1.83e-01  | -0.303887 | 1.24e-01  | -0.381811 | 4.93e-02  | -0.217175 | 6.68e-02  | 0.153808 | 4.83e-01  | -0.112173 | 4.88e-01  |          |
| ENSG0000025452                                                                                                                                                                                                                                                                                                                                                                   | 8  | 6311981  | 6312034  | AC09137.2  | havana               | antisense transcript | -0.202605 | 5.87e-02  | -0.202605 | 1.83e-01  | -0.303887 | 1.24e-01  | -0.381811 | 4.93e-02  | -0.217175 | 6.68e-02 | 0.153808  | 4.83e-01  | -0.112173 | 4.88e-01 |
| ENSG0000020060                                                                                                                                                                                                                                                                                                                                                                   | 13 | 4389475  | 4389518  | AL12526.2  | havana               | antisense transcript | -0.202605 | 5.87e-02  | -0.202605 | 1.83e-01  | -0.303887 | 1.24e-01  | -0.381811 | 4.93e-02  | -0.217175 | 6.68e-02 | 0.153808  | 4.83e-01  | -0.112173 | 4.88e-01 |
| ENSG0000021334                                                                                                                                                                                                                                                                                                                                                                   | 1  | 10130546 | 10130546 | BE2        | antisense transcript | -0.202605            | 5.87e-02  | -0.202605 | 1.83e-01  | -0.303887 | 1.24e-01  | -0.381811 | 4.93e-02  | -0.217175 | 6.68e-02  | 0.153808 | 4.83e-01  | -0.112173 | 4.88e-01  |          |
| ENSG0000028022                                                                                                                                                                                                                                                                                                                                                                   | 12 | 8093536  | 8093533  | MIR38      | antisense transcript | -0.202605            | 5.87e-02  | -0.202605 | 1.83e-01  | -0.303887 | 1.24e-01  | -0.381811 | 4.93e-02  | -0.217175 | 6.68e-02  | 0.153808 | 4.83e-01  | -0.112173 | 4.88e-01  |          |
| ENSG0000025823                                                                                                                                                                                                                                                                                                                                                                   | 10 | 10217099 | 10216403 | DMALNC     | antisense transcript | -0.202605            | 5.87e-02  | -0.202605 | 1.83e-01  | -0.303887 | 1.24e-01  | -0.381811 | 4.93e-02  | -0.217175 | 6.68e-02  | 0.153808 | 4.83e-01  | -0.112173 | 4.88e-01  |          |
| ENSG0000019999                                                                                                                                                                                                                                                                                                                                                                   | 17 | 12420483 | 12420483 | LINC02813  | antisense transcript | -0.202605            | 5.87e-02  | -0.202605 | 1.83e-01  | -0.303887 | 1.24e-01  | -0.381811 | 4.93e-02  | -0.217175 | 6.68e-02  | 0.153808 | 4.83e-01  | -0.112173 | 4.88e-01  |          |
| ENSG0000020404                                                                                                                                                                                                                                                                                                                                                                   | 2  | 2382004  | 2384089  | TRAP3      | antisense transcript | -0.202605            | 5.87e-02  | -0.202605 | 1.83e-01  | -0.303887 | 1.24e-01  | -0.381811 | 4.93e-02  | -0.217175 | 6.68e-02  | 0.153808 | 4.83e-01  | -0.112173 | 4.88e-01  |          |
| ENSG0000019048                                                                                                                                                                                                                                                                                                                                                                   | 2  | 4609257  | 4609184  | CYP411     | antisense transcript | -0.202605            | 5.87e-02  | -0.202605 | 1.83e-01  | -0.303887 | 1.24e-01  | -0.381811 | 4.93e-02  | -0.217175 | 6.68e-02  | 0.153808 | 4.83e-01  | -0.112173 | 4.88e-01  |          |
| ENSG0000025670                                                                                                                                                                                                                                                                                                                                                                   | 17 | 4186729  | 4186729  | AC09679.4  | havana               | antisense transcript | -0.202605 | 5.87e-02  | -0.202605 | 1.83e-01  | -0.303887 | 1.24e-01  | -0.381811 | 4.93e-02  | -0.217175 | 6.68e-02 | 0.153808  | 4.83e-01  | -0.112173 | 4.88e-01 |
| ENSG0000011396                                                                                                                                                                                                                                                                                                                                                                   | 17 | 4115948  | 4116748  | KRTAP4     | antisense transcript | -0.202605            | 5.87e-02  | -0.202605 | 1.83e-01  | -0.303887 | 1.24e-01  | -0.381811 | 4.93e-02  | -0.217175 | 6.68e-02  | 0.153808 | 4.83e-01  | -0.112173 | 4.88e-01  |          |
| ENSG0000019964                                                                                                                                                                                                                                                                                                                                                                   | 17 | 1689297  | 1689184  | MYH4       | antisense transcript | -0.202605            | 5.87e-02  | -0.202605 | 1.83e-01  | -0.303887 | 1.24e-01  | -0.381811 | 4.93e-02  | -0.217175 | 6.68e-02  | 0.153808 | 4.83e-01  | -0.112173 | 4.88e-01  |          |
| ENSG0000024179                                                                                                                                                                                                                                                                                                                                                                   | 1  | 1306169  | 1306169  | AC093861.1 | havana               | antisense transcript | -0.202605 | 5.87e-02  | -0.202605 | 1.83e-01  | -0.303887 | 1.24e-01  | -0.381811 | 4.93e-02  | -0.217175 | 6.68e-02 | 0.153808  | 4.83      |           |          |

|                  |    |          |          |            |         |                         |                         |            |           |           |           |             |            |            |           |            |           |            |           |            |            |           |          |
|------------------|----|----------|----------|------------|---------|-------------------------|-------------------------|------------|-----------|-----------|-----------|-------------|------------|------------|-----------|------------|-----------|------------|-----------|------------|------------|-----------|----------|
| ENSG000001901    | 1  | 11166811 | 11170649 | AIG13      | ensembl | havana                  | protein coding          | -0.226933  | 4.71E-07  | -0.132011 | 1.85E-04  | -0.0649858  | 9.31E-01   | -0.187307  | 4.59E-02  | -0.208639  | 1.30E-01  | -0.113668  | 1.45E-01  | -0.113834  | 3.54E-01   |           |          |
| ENSG0000017415   | 1  | 9280851  | 9280957  | AC105028.4 | havana  | incRNA                  | antisense               | -0.255393  | 7.29E-02  | -0.187744 | 1.61E-01  | -0.0944489  | 6.39E-01   | -0.187144  | 4.59E-02  | -0.202711  | 1.42E-01  | -0.099919  | 1.35E-01  | -0.122871  | 9.95E-01   |           |          |
| ENSG000001681    | 1  | 1516173  | 1516173  | TFP12      | ensembl | havana                  | transcribed unannotated | -0.255393  | 7.29E-02  | -0.187744 | 1.61E-01  | -0.0944489  | 6.39E-01   | -0.187144  | 4.59E-02  | -0.202711  | 1.42E-01  | -0.099919  | 1.35E-01  | -0.122871  | 9.95E-01   |           |          |
| ENSG0000016075   | 1  | 1541673  | 1541683  | SU172      | ensembl | havana                  | protein coding          | -0.212828  | 2.84E-01  | -0.207704 | 5.70E-01  | -0.0742738  | 8.14E-01   | -0.187309  | 4.59E-02  | -0.207117  | 1.44E-01  | -0.084761  | 1.37E-01  | -0.030911  | 3.86E-01   |           |          |
| ENSG0000012868   | 1  | 1781272  | 1785215  | AC016052.1 | havana  | transcribed unannotated | YES                     | YES        | -0.282803 | 1.17E-02  | -0.102785 | 2.01E-01    | -0.213182  | 2.40E-01   | -0.187403 | 4.59E-02   | -0.449615 | 5.47E-01   | -0.70503  | 3.40E-01   | -0.150938  | 1.84E-01  |          |
| ENSG0000012786   | 1  | 14279166 | 14279166 | AC016052.1 | havana  | transcribed unannotated | YES                     | YES        | -0.282803 | 1.17E-02  | -0.102785 | 2.01E-01    | -0.213182  | 2.40E-01   | -0.187403 | 4.59E-02   | -0.449615 | 5.47E-01   | -0.70503  | 3.40E-01   | -0.150938  | 1.84E-01  |          |
| ENSG0000016049   | 7  | 2752442  | 2762083  | H1BAD      | ensembl | havana                  | protein coding          | -0.087643  | 1.07E-03  | -0.187463 | 6.77E-01  | -0.187465   | 5.92E-01   | -0.187465  | 4.58E-02  | -0.185348  | 1.43E-01  | -0.185348  | 3.86E-01  | -0.151099  | 6.68E-01   |           |          |
| ENSG0000011596   | 2  | 23152187 | 23153045 | NMUR1      | ensembl | havana                  | protein coding          | -0.286544  | 1.18E-01  | -0.308756 | 2.91E-01  | -0.264872   | 1.82E-01   | -0.187474  | 4.58E-02  | -0.355289  | 8.38E-01  | -0.113789  | 6.06E-01  | -0.062177  | 6.68E-01   |           |          |
| ENSG0000013993   | 20 | 9230924  | 9265037  | AC007308.1 | havana  | transcribed unannotated | YES                     | YES        | -0.286544 | 1.18E-01  | -0.308756 | 2.91E-01    | -0.264872  | 1.82E-01   | -0.187474 | 4.58E-02   | -0.355289 | 8.38E-01   | -0.113789 | 6.06E-01   | -0.062177  | 6.68E-01  |          |
| ENSG0000012620   | 12 | 12146583 | 12152984 | AC007308.1 | havana  | transcribed unannotated | YES                     | YES        | -0.286544 | 1.18E-01  | -0.308756 | 2.91E-01    | -0.264872  | 1.82E-01   | -0.187474 | 4.58E-02   | -0.355289 | 8.38E-01   | -0.113789 | 6.06E-01   | -0.062177  | 6.68E-01  |          |
| ENSG0000013872   | 6  | 9505406  | 9525724  | AC08388.1  | havana  | incRNA                  | antisense               | -0.1157054 | 1.73E-01  | -0.179016 | 2.31E-01  | -0.0593129  | 7.68E-01   | -0.187708  | 4.57E-02  | -0.233113  | 8.95E-01  | -0.186749  | 5.31E-01  | -0.020916  | 5.80E-01   |           |          |
| ENSG0000014242   | 1  | 4299103  | 4214649  | AC02084.2  | havana  | incRNA                  | antisense               | YES        | YES       | -0.246024 | 2.56E-01  | -0.1033964  | 8.20E-01   | -0.187368  | 4.43E-02  | -0.186838  | 4.43E-01  | -0.186838  | 4.70E-01  | -0.021843  | 5.89E-01   |           |          |
| ENSG0000014055   | 1  | 22040112 | 22040103 | AC09664.3  | havana  | incRNA                  | antisense               | YES        | YES       | -0.210981 | 5.31E-01  | -0.102513   | 2.40E-01   | -0.153968  | 4.43E-01  | -0.187115  | 4.57E-02  | -0.185919  | 0.94E-01  | -0.097913  | 5.00E-01   |           |          |
| ENSG0000017896   | 21 | 8197620  | 8227664  | PRF1120.4  | havana  | incRNA                  | antisense               | -0.206602  | 7.14E-01  | -0.185447 | 1.87E-01  | -0.0949121  | 6.39E-01   | -0.187729  | 4.57E-02  | -0.287367  | 3.36E-01  | -0.142824  | 3.22E-01  | -0.142824  | 3.22E-01   |           |          |
| ENSG0000012475   | 19 | 5836718  | 5831030  | ZNF87      | ensembl | havana                  | protein coding          | -0.146893  | 1.99E-02  | -0.144444 | 2.07E-01  | -0.156772   | 4.31E-01   | -0.187711  | 4.57E-02  | -0.245250  | 1.94E-01  | -0.254779  | 2.11E-01  | -0.20564   | 1.53E-01   |           |          |
| ENSG0000017660   | 1  | 4299103  | 4214649  | AC02084.2  | havana  | incRNA                  | antisense               | YES        | YES       | -0.246024 | 2.56E-01  | -0.1033964  | 8.20E-01   | -0.187368  | 4.43E-02  | -0.186838  | 4.43E-01  | -0.186838  | 4.70E-01  | -0.021843  | 5.89E-01   |           |          |
| ENSG0000018635   | 14 | 5733203  | 5744472  | AL13588.2  | havana  | transcribed unannotated | YES                     | YES        | -0.25986  | 2.24E-01  | -0.216108 | 1.22E-01    | -0.1977219 | 3.21E-01   | -0.187706 | 4.57E-02   | -0.180849 | 4.50E-01   | -0.093237 | 6.72E-01   | -0.144132  | 3.92E-01  |          |
| ENSG0000011394   | 17 | 17525151 | 17584849 | ML52       | ensembl | havana                  | protein coding          | -0.243312  | 3.30E-02  | -0.203104 | 1.47E-01  | -0.0514001  | 7.99E-01   | -0.187254  | 4.56E-02  | -0.41812   | 3.50E-01  | -0.279419  | 2.92E-01  | -0.1151116 | 2.93E-01   |           |          |
| ENSG0000013474   | 1  | 4299103  | 4214649  | AC02084.2  | havana  | incRNA                  | antisense               | YES        | YES       | -0.246024 | 2.56E-01  | -0.1033964  | 8.20E-01   | -0.187368  | 4.43E-02  | -0.186838  | 4.43E-01  | -0.186838  | 4.70E-01  | -0.021843  | 5.89E-01   |           |          |
| ENSG0000012819   | 14 | 7706919  | 7707882  | LOC102789  | havana  | incRNA                  | antisense               | -0.230776  | 4.35E-02  | -0.113745 | 1.37E-01  | -0.077988   | 1.18E-01   | -0.187858  | 4.56E-02  | -0.236681  | 4.56E-01  | -0.02604   | 6.06E-01  | -0.06741   | 6.78E-01   |           |          |
| ENSG0000012983   | 17 | 1567993  | 1596658  | SLC7A1P1   | ensembl | havana                  | transcribed unannotated | YES        | YES       | -0.190001 | 9.78E-02  | -0.104222   | 4.88E-01   | -0.166883  | 2.78E-01  | -0.187344  | 4.56E-02  | -0.112211  | 2.15E-01  | -0.097478  | 6.58E-01   | -0.166425 | 2.49E-01 |
| ENSG0000017635   | 2  | 14192245 | 14207184 | OPN4       | ensembl | havana                  | protein coding          | -0.132418  | 1.67E-01  | -0.137088 | 2.06E-01  | -0.1292319  | 3.31E-01   | -0.187427  | 4.56E-02  | -0.450283  | 3.33E-01  | -0.066206  | 7.64E-01  | -0.113317  | 4.01E-01   |           |          |
| ENSG0000012716   | 6  | 4185479  | 4185950  | AL136306.2 | havana  | transcribed unannotated | YES                     | YES        | -0.250933 | 2.77E-01  | -0.189958 | 1.86E-01    | -0.139883  | 1.37E-01   | -0.187929 | 4.55E-02   | -0.173225 | 5.44E-01   | -0.090613 | 6.81E-01   | -0.155139  | 2.82E-01  |          |
| ENSG0000012828   | 15 | 3993415  | 4003591  | EIF2A3     | ensembl | havana                  | protein coding          | -0.160299  | 1.64E-01  | -0.160299 | 2.09E-01  | -0.1623697  | 3.14E-01   | -0.187963  | 4.55E-02  | -0.1726059 | 3.61E-01  | -0.1242237 | 3.61E-01  | -0.2299789 | 1.08E-01   |           |          |
| ENSG0000012490   | 12 | 4820389  | 4820389  | OR10A2     | ensembl | havana                  | protein coding          | -0.211845  | 6.44E-02  | -0.205077 | 1.53E-01  | -0.24336    | 1.81E-01   | -0.188007  | 4.56E-02  | -0.294213  | 3.07E-01  | -0.088823  | 7.57E-01  | -0.106351  | 7.67E-01   |           |          |
| ENSG0000014360   | 15 | 6238737  | 6238879  | AC02011.1  | havana  | incRNA                  | antisense               | YES        | YES       | -0.220232 | 9.93E-01  | -0.211765   | 1.22E-01   | -0.1210105 | 2.77E-01  | -0.188023  | 4.55E-02  | -0.148788  | 3.81E-01  | -0.113185  | 2.26E-01   |           |          |
| ENSG0000011120   | 12 | 2812627  | 2819791  | ITFG2      | ensembl | havana                  | protein coding          | -0.078331  | 6.79E-02  | -0.068329 | 1.37E-01  | -0.1880708  | 1.73E-01   | -0.1880708 | 4.56E-02  | -0.428434  | 3.60E-01  | -0.041451  | 9.85E-01  | -0.041451  | 4.72E-01   |           |          |
| ENSG00000124025  | 1  | 11187051 | 11183990 | TRF305     | ensembl | havana                  | protein coding          | -0.038269  | 7.23E-02  | -0.170745 | 5.32E-01  | -0.121318   | 2.45E-01   | -0.188143  | 4.56E-02  | -0.284003  | 3.70E-01  | -0.162654  | 4.58E-01  | -0.020797  | 1.59E-01   |           |          |
| ENSG0000012857.1 | 1  | 12742518 | 12742518 | AC02051.2  | havana  | transcribed unannotated | YES                     | YES        | -0.250512 | 2.76E-01  | -0.188052 | 2.41E-01    | -0.188052  | 4.56E-02   | -0.188052 | 4.56E-02   | -0.289278 | 5.32E-01   | -0.028788 | 5.32E-01   | -0.028788  | 5.32E-01  |          |
| ENSG00000146538  | 17 | 1563703  | 1551389  | AC0858.2   | havana  | incRNA                  | antisense               | -0.178864  | 1.42E-01  | -0.178864 | 6.57E-01  | -0.178864   | 5.66E-01   | -0.188043  | 4.57E-02  | -0.188043  | 4.56E-02  | -0.199146  | 3.68E-01  | -0.048791  | 1.54E-01   |           |          |
| ENSG000001986    | 3  | 11259677 | 11249530 | CCDC30     | ensembl | havana                  | protein coding          | -0.261835  | 2.07E-02  | -0.18455  | 1.99E-01  | -0.194224   | 3.32E-01   | -0.188026  | 4.52E-02  | -0.395178  | 1.10E-01  | -0.104015  | 3.35E-01  | -0.206714  | 5.94E-01   |           |          |
| ENSG0000015727   | 1  | 1431568  | 14320853 | AC0848.451 | havana  | transcribed unannotated | YES                     | YES        | -0.261835 | 2.07E-02  | -0.18455  | 1.99E-01    | -0.194224  | 3.32E-01   | -0.188026 | 4.52E-02   | -0.395178 | 1.10E-01   | -0.104015 | 3.35E-01   | -0.206714  | 5.94E-01  |          |
| ENSG00000120915  | 8  | 2740971  | 2745454  | EPK2       | ensembl | havana                  | protein coding          | -0.180779  | 8.04E-02  | -0.180779 | 4.11E-01  | -0.00326729 | 9.87E-01   | -0.187724  | 4.51E-02  | -0.425302  | 3.80E-01  | -0.0777029 | 1.54E-01  | -0.0777029 | 1.54E-01   |           |          |
| ENSG0000017043   | 14 | 7279212  | 72792930 | AC09710.1  | havana  | transcribed unannotated | YES                     | YES        | -0.173846 | 1.11E-01  | -0.121447 | 7.79E-01    | -0.080659  | 6.89E-01   | -0.188733 | 4.51E-02   | -0.191267 | 1.66E-01   | -0.105468 | 6.32E-01   | -0.0859    | 5.31E-01  |          |
| ENSG0000012111   | 1  | 12742518 | 12742518 | AC02051.2  | havana  | transcribed unannotated | YES                     | YES        | -0.250512 | 2.76E-01  | -0.188052 | 2.41E-01    | -0.188052  | 4.56E-02   | -0.188052 | 4.56E-02   | -0.289278 | 5.32E-01   | -0.028788 | 5.32E-01   | -0.028788  | 5.32E-01  |          |
| ENSG0000012747   | 13 | 3786825  | 3787444  | AL13645.1  | havana  | transcribed unannotated | YES                     | YES        | -0.154649 | 1.79E-01  | -0.129033 | 6.42E-01    | -0.1138955 | 1.13E-01   | -0.188933 | 4.50E-02   | -0.185794 | 8.08E-01   | -0.158488 | 5.88E-01   | -0.1171898 | 4.18E-01  |          |
| ENSG00000111351  | 19 | 1049729  | 1075625  | HAUS8      | ensembl | havana                  | protein coding          | -0.160555  | 1.42E-01  | -0.24918  | 8.10E-01  | -0.1745130  | 8.84E-01   | -0.188094  | 4.50E-02  | -0.136965  | 1.93E-01  | -0.135489  | 3.88E-01  | -0.0041139 | 9.77E-01   |           |          |
| ENSG0000012024   | 18 | 5096068  | 5097629  | LOC102108  | havana  | incRNA                  | antisense               | -0.114928  | 1.48E-01  | -0.103394 | 3.11E-01  | -0.146675   | 4.65E-01   | -0.188738  | 4.49E-02  | -0.174975  | 1.53E-01  | -0.188738  | 7.22E-01  | -0.1738048 | 2.72E-01   |           |          |
| ENSG0000017045   | 1  | 11161049 | 11172948 | AC02051.2  | havana  | transcribed unannotated | YES                     | YES        | -0.250512 | 2.76E-01  | -0.188052 | 2.41E-01    | -0.188052  | 4.56E-02   | -0.188052 | 4.56E-02   | -0.289278 | 5.32E-01   | -0.028788 | 5.32E-01   | -0.028788  | 5.32E-01  |          |
| ENSG00000129317  | 2  | 17111036 | 17121262 | AC09350.2  | havana  | incRNA                  | antisense               | -0.160223  | 1.52E-01  | -0.168835 | 5.91E-01  | -0.1728481  | 8.89E-01   | -0.188886  | 4.49E-02  | -0.1852156 | 3.80E-01  | -0.185827  | 4.70E-01  | -0.073497  | 3.87E-01   |           |          |
| ENSG00000124969  | 5  | 14079852 | 14101247 | PCNA4      | havana  | protein coding          | -0.207089               | 1.14E-01   | -0.213329 | 5.13E-01  | -0.113430 | 5.67E-01    | -0.188993  | 4.49E-02   | -0.402488 | 2.56E-01   | -0.113678 | 6.06E-01   | -0.125939 | 8.46E-01   |            |           |          |
| ENSG0000019650   | 1  | 1431568  | 14320853 | AC0848.451 | havana  | transcribed unannotated | YES                     | YES        | -0.261835 | 2.07E-02  | -0.18455  | 1.99E-01    | -0.194224  | 3.32E-01   |           |            |           |            |           |            |            |           |          |



| Gene            | Transcript | Transcript Type | Transcript Location | Transcript Orientation | Transcript Status      | Transcript Length (bp) | Transcript GC Content (%) | Transcript GC Skew | Transcript GC Skew (std) | Transcript GC Skew (p) | Transcript GC Skew (q) | Transcript GC Skew (r) | Transcript GC Skew (s) | Transcript GC Skew (t) | Transcript GC Skew (u) | Transcript GC Skew (v) | Transcript GC Skew (w) | Transcript GC Skew (x) | Transcript GC Skew (y) | Transcript GC Skew (z) |
|-----------------|------------|-----------------|---------------------|------------------------|------------------------|------------------------|---------------------------|--------------------|--------------------------|------------------------|------------------------|------------------------|------------------------|------------------------|------------------------|------------------------|------------------------|------------------------|------------------------|------------------------|
| ENSG0000026650  | X          | 13016094        | 13016605            | ALI3924.1              | transcript_unprocessed | 161                    | 41.62                     | 0.000000           | 0.000000                 | 0.000000               | 0.000000               | 0.000000               | 0.000000               | 0.000000               | 0.000000               | 0.000000               | 0.000000               | 0.000000               | 0.000000               | 0.000000               |
| ENSG0000014438  | X          | 11517517        | 11520543            | MPK8                   | mRNA                   | 3266                   | 41.62                     | 0.000000           | 0.000000                 | 0.000000               | 0.000000               | 0.000000               | 0.000000               | 0.000000               | 0.000000               | 0.000000               | 0.000000               | 0.000000               | 0.000000               | 0.000000               |
| ENSG0000024994  | X          | 13016094        | 13016605            | ALI3924.1              | transcript_unprocessed | 161                    | 41.62                     | 0.000000           | 0.000000                 | 0.000000               | 0.000000               | 0.000000               | 0.000000               | 0.000000               | 0.000000               | 0.000000               | 0.000000               | 0.000000               | 0.000000               | 0.000000               |
| ENSG0000024316  | X          | 7898864         | 7905093             | MIR38                  | antisense_intronic     | 629                    | 41.62                     | 0.000000           | 0.000000                 | 0.000000               | 0.000000               | 0.000000               | 0.000000               | 0.000000               | 0.000000               | 0.000000               | 0.000000               | 0.000000               | 0.000000               | 0.000000               |
| ENSG0000014432  | X          | 9102209         | 9103611             | VPS13B                 | mRNA                   | 1502                   | 41.62                     | 0.000000           | 0.000000                 | 0.000000               | 0.000000               | 0.000000               | 0.000000               | 0.000000               | 0.000000               | 0.000000               | 0.000000               | 0.000000               | 0.000000               | 0.000000               |
| ENSG0000026676  | X          | 4388911         | 4390274             | EIF2A3                 | antisense_intronic     | 363                    | 41.62                     | 0.000000           | 0.000000                 | 0.000000               | 0.000000               | 0.000000               | 0.000000               | 0.000000               | 0.000000               | 0.000000               | 0.000000               | 0.000000               | 0.000000               | 0.000000               |
| ENSG0000024928  | X          | 9176932         | 9178179             | EIF2A3                 | antisense_intronic     | 1447                   | 41.62                     | 0.000000           | 0.000000                 | 0.000000               | 0.000000               | 0.000000               | 0.000000               | 0.000000               | 0.000000               | 0.000000               | 0.000000               | 0.000000               | 0.000000               | 0.000000               |
| ENSG0000026671  | X          | 13131382        | 13138518            | ACD995.1               | transcript_unprocessed | 726                    | 41.62                     | 0.000000           | 0.000000                 | 0.000000               | 0.000000               | 0.000000               | 0.000000               | 0.000000               | 0.000000               | 0.000000               | 0.000000               | 0.000000               | 0.000000               | 0.000000               |
| ENSG0000013679  | X          | 8027966         | 8030257             | TMS6P2                 | antisense_intronic     | 2291                   | 41.62                     | 0.000000           | 0.000000                 | 0.000000               | 0.000000               | 0.000000               | 0.000000               | 0.000000               | 0.000000               | 0.000000               | 0.000000               | 0.000000               | 0.000000               | 0.000000               |
| ENSG0000026673  | X          | 2007958         | 2008639             | ACD995.1               | transcript_unprocessed | 681                    | 41.62                     | 0.000000           | 0.000000                 | 0.000000               | 0.000000               | 0.000000               | 0.000000               | 0.000000               | 0.000000               | 0.000000               | 0.000000               | 0.000000               | 0.000000               | 0.000000               |
| ENSG00000139292 | X          | 7143978         | 7158810             | LEIS                   | mRNA                   | 14912                  | 41.62                     | 0.000000           | 0.000000                 | 0.000000               | 0.000000               | 0.000000               | 0.000000               | 0.000000               | 0.000000               | 0.000000               | 0.000000               | 0.000000               | 0.000000               | 0.000000               |
| ENSG00000140569 | X          | 4338649         | 4338185             | MIR49                  | antisense_intronic     | 556                    | 41.62                     | 0.000000           | 0.000000                 | 0.000000               | 0.000000               | 0.000000               | 0.000000               | 0.000000               | 0.000000               | 0.000000               | 0.000000               | 0.000000               | 0.000000               | 0.000000               |
| ENSG0000016575  | X          | 3001203         | 3001594             | ICAD                   | mRNA                   | 391                    | 41.62                     | 0.000000           | 0.000000                 | 0.000000               | 0.000000               | 0.000000               | 0.000000               | 0.000000               | 0.000000               | 0.000000               | 0.000000               | 0.000000               | 0.000000               | 0.000000               |
| ENSG00000183128 | X          | 10347280        | 10347240            | CALM3                  | mRNA                   | 40                     | 41.62                     | 0.000000           | 0.000000                 | 0.000000               | 0.000000               | 0.000000               | 0.000000               | 0.000000               | 0.000000               | 0.000000               | 0.000000               | 0.000000               | 0.000000               | 0.000000               |
| ENSG0000026670  | X          | 4647171         | 4646137             | ACD995.1               | transcript_unprocessed | 1034                   | 41.62                     | 0.000000           | 0.000000                 | 0.000000               | 0.000000               | 0.000000               | 0.000000               | 0.000000               | 0.000000               | 0.000000               | 0.000000               | 0.000000               | 0.000000               | 0.000000               |
| ENSG0000014544  | X          | 7324270         | 7320382             | KIF20B                 | mRNA                   | 3892                   | 41.62                     | 0.000000           | 0.000000                 | 0.000000               | 0.000000               | 0.000000               | 0.000000               | 0.000000               | 0.000000               | 0.000000               | 0.000000               | 0.000000               | 0.000000               | 0.000000               |
| ENSG0000014580  | X          | 8261462         | 8264853             | WDR45                  | mRNA                   | 3391                   | 41.62                     | 0.000000           | 0.000000                 | 0.000000               | 0.000000               | 0.000000               | 0.000000               | 0.000000               | 0.000000               | 0.000000               | 0.000000               | 0.000000               | 0.000000               | 0.000000               |
| ENSG0000021571  | X          | 2883769         | 2883936             | ACD995.1               | transcript_unprocessed | 166                    | 41.62                     | 0.000000           | 0.000000                 | 0.000000               | 0.000000               | 0.000000               | 0.000000               | 0.000000               | 0.000000               | 0.000000               | 0.000000               | 0.000000               | 0.000000               | 0.000000               |
| ENSG0000021571  | X          | 2883769         | 2883936             | ACD995.1               | transcript_unprocessed | 166                    | 41.62                     | 0.000000           | 0.000000                 | 0.000000               | 0.000000               | 0.000000               | 0.000000               | 0.000000               | 0.000000               | 0.000000               | 0.000000               | 0.000000               | 0.000000               | 0.000000               |
| ENSG0000021571  | X          | 2883769         | 2883936             | ACD995.1               | transcript_unprocessed | 166                    | 41.62                     | 0.000000           | 0.000000                 | 0.000000               | 0.000000               | 0.000000               | 0.000000               | 0.000000               | 0.000000               | 0.000000               | 0.000000               | 0.000000               | 0.000000               | 0.000000               |
| ENSG0000026658  | X          | 1642381         | 1642601             | PABPC1P                | transcript_unprocessed | 220                    | 41.62                     | 0.000000           | 0.000000                 | 0.000000               | 0.000000               | 0.000000               | 0.000000               | 0.000000               | 0.000000               | 0.000000               | 0.000000               | 0.000000               | 0.000000               | 0.000000               |
| ENSG00000142968 | X          | 11206749        | 11207206            | SOX1                   | mRNA                   | 507                    | 41.62                     | 0.000000           | 0.000000                 | 0.000000               | 0.000000               | 0.000000               | 0.000000               | 0.000000               | 0.000000               | 0.000000               | 0.000000               | 0.000000               | 0.000000               | 0.000000               |
| ENSG00000142968 | X          | 11206749        | 11207206            | SOX1                   | mRNA                   | 507                    | 41.62                     | 0.000000           | 0.000000                 | 0.000000               | 0.000000               | 0.000000               | 0.000000               | 0.000000               | 0.000000               | 0.000000               | 0.000000               | 0.000000               | 0.000000               | 0.000000               |
| ENSG00000142968 | X          | 11206749        | 11207206            | SOX1                   | mRNA                   | 507                    | 41.62                     | 0.000000           | 0.000000                 | 0.000000               | 0.000000               | 0.000000               | 0.000000               | 0.000000               | 0.000000               | 0.000000               | 0.000000               | 0.000000               | 0.000000               | 0.000000               |
| ENSG0000026626  | X          | 11624487        | 11624728            | ALDO3B2.1              | transcript_unprocessed | 241                    | 41.62                     | 0.000000           | 0.000000                 | 0.000000               | 0.000000               | 0.000000               | 0.000000               | 0.000000               | 0.000000               | 0.000000               | 0.000000               | 0.000000               | 0.000000               | 0.000000               |
| ENSG00000186602 | X          | 1973784         | 1974893             | ALDO3B2.1              | transcript_unprocessed | 1109                   | 41.62                     | 0.000000           | 0.000000                 | 0.000000               | 0.000000               | 0.000000               | 0.000000               | 0.000000               | 0.000000               | 0.000000               | 0.000000               | 0.000000               | 0.000000               | 0.000000               |
| ENSG00000186602 | X          | 1973784         | 1974893             | ALDO3B2.1              | transcript_unprocessed | 1109                   | 41.62                     | 0.000000           | 0.000000                 | 0.000000               | 0.000000               | 0.000000               | 0.000000               | 0.000000               | 0.000000               | 0.000000               | 0.000000               | 0.000000               | 0.000000               | 0.000000               |
| ENSG00000186602 | X          | 1973784         | 1974893             | ALDO3B2.1              | transcript_unprocessed | 1109                   | 41.62                     | 0.000000           | 0.000000                 | 0.000000               | 0.000000               | 0.000000               | 0.000000               | 0.000000               | 0.000000               | 0.000000               | 0.000000               | 0.000000               | 0.000000               | 0.000000               |
| ENSG00000135794 | X          | 20148421        | 20151978            | CAL6                   | mRNA                   | 3556                   | 41.62                     | 0.000000           | 0.000000                 | 0.000000               | 0.000000               | 0.000000               | 0.000000               | 0.000000               | 0.000000               | 0.000000               | 0.000000               | 0.000000               | 0.000000               | 0.000000               |
| ENSG00000135794 | X          | 20148421        | 20151978            | CAL6                   | mRNA                   | 3556                   | 41.62                     | 0.000000           | 0.000000                 | 0.000000               | 0.000000               | 0.000000               | 0.000000               | 0.000000               | 0.000000               | 0.000000               | 0.000000               | 0.000000               | 0.000000               | 0.000000               |
| ENSG00000135794 | X          | 20148421        | 20151978            | CAL6                   | mRNA                   | 3556                   | 41.62                     | 0.000000           | 0.000000                 | 0.000000               | 0.000000               | 0.000000               | 0.000000               | 0.000000               | 0.000000               | 0.000000               | 0.000000               | 0.000000               | 0.000000               | 0.000000               |
| ENSG00000266806 | X          | 2472130         | 2473890             | ALB1566.1              | transcript_unprocessed | 1760                   | 41.62                     | 0.000000           | 0.000000                 | 0.000000               | 0.000000               | 0.000000               | 0.000000               | 0.000000               | 0.000000               | 0.000000               | 0.000000               | 0.000000               | 0.000000               | 0.000000               |
| ENSG00000266806 | X          | 2472130         | 2473890             | ALB1566.1              | transcript_unprocessed | 1760                   | 41.62                     | 0.000000           | 0.000000                 | 0.000000               | 0.000000               | 0.000000               | 0.000000               | 0.000000               | 0.000000               | 0.000000               | 0.000000               | 0.000000               | 0.000000               | 0.000000               |
| ENSG00000266806 | X          | 2472130         | 2473890             | ALB1566.1              | transcript_unprocessed | 1760                   | 41.62                     | 0.000000           | 0.000000                 | 0.000000               | 0.000000               | 0.000000               | 0.000000               | 0.000000               | 0.000000               | 0.000000               | 0.000000               | 0.000000               | 0.000000               | 0.000000               |
| ENSG00000266806 | X          | 2472130         | 2473890             | ALB1566.1              | transcript_unprocessed | 1760                   | 41.62                     | 0.000000           | 0.000000                 | 0.000000               | 0.000000               | 0.000000               | 0.000000               | 0.000000               | 0.000000               | 0.000000               | 0.000000               | 0.000000               | 0.000000               | 0.000000               |
| ENSG00000266806 | X          | 2472130         | 2473890             | ALB1566.1              | transcript_unprocessed | 1760                   | 41.62                     | 0.000000           | 0.000000                 | 0.000000               | 0.000000               | 0.000000               | 0.000000               | 0.000000               | 0.000000               | 0.000000               | 0.000000               | 0.000000               | 0.000000               | 0.000000               |
| ENSG00000266806 | X          | 2472130         | 2473890             | ALB1566.1              | transcript_unprocessed | 1760                   | 41.62                     | 0.000000           | 0.000000                 | 0.000000               | 0.000000               | 0.000000               | 0.000000               | 0.000000               | 0.000000               | 0.000000               | 0.000000               | 0.000000               | 0.000000               | 0.000000               |
| ENSG00000266806 | X          | 2472130         | 2473890             | ALB1566.1              | transcript_unprocessed | 1760                   | 41.62                     | 0.000000           | 0.000000                 | 0.000000               | 0.000000               | 0.000000               | 0.000000               | 0.000000               | 0.000000               | 0.000000               | 0.000000               | 0.000000               | 0.000000               | 0.000000               |
| ENSG00000266806 | X          | 2472130         | 2473890             | ALB1566.1              | transcript_unprocessed | 1760                   | 41.62                     | 0.000000           | 0.000000                 | 0.000000               | 0.000000               | 0.000000               | 0.000000               | 0.000000               | 0.000000               | 0.000000               | 0.000000               | 0.000000               | 0.000000               | 0.000000               |
| ENSG00000266806 | X          | 2472130         | 2473890             | ALB1566.1              | transcript_unprocessed | 1760                   | 41.62                     | 0.000000           | 0.000000                 | 0.000000               | 0.000000               | 0.000000               | 0.000000               | 0.000000               | 0.000000               | 0.000000               | 0.000000               | 0.000000               | 0.000000               | 0.000000               |
| ENSG00000266806 | X          | 2472130         | 2473890             | ALB1566.1              | transcript_unprocessed | 1760                   | 41.62                     | 0.000000           | 0.000000                 | 0.000000               | 0.000000               | 0.000000               | 0.000000               | 0.000000               | 0.000000               | 0.000000               | 0.000000               | 0.000000               | 0.000000               | 0.000000               |
| ENSG00000266806 | X          | 2472130         | 2473890             | ALB1566.1              | transcript_unprocessed | 1760                   | 41.62                     | 0.000000           | 0.000000                 | 0.000000               | 0.000000               | 0.000000               | 0.000000               | 0.000000               | 0.000000               | 0.000000               | 0.000000               | 0.000000               | 0.000000               | 0.000000               |
| ENSG00000266806 | X          | 2472130         | 2473890             | ALB1566.1              | transcript_unprocessed | 1760                   | 41.62                     | 0.000000           | 0.000000                 |                        |                        |                        |                        |                        |                        |                        |                        |                        |                        |                        |







| ENSG0000027168  | 6  | 21664185  | 22654455  | CASC15     | havana            | lncRNA                             | YES | YES | -0.2581683 | 2.34e-02 | -0.122088  | 3.98e-02 | -0.0268344 | 8.94e-01 | -0.419085  | 2.96e-02 | -0.462173  | 2.34e-02 | -0.178003  | 4.16e-02 | -0.1171001 | 4.40e-02 |
|-----------------|----|-----------|-----------|------------|-------------------|------------------------------------|-----|-----|------------|----------|------------|----------|------------|----------|------------|----------|------------|----------|------------|----------|------------|----------|
| ENSG0000026261  | 11 | 12172914  | 12174175  | ZNF403     | antisense intron  | protein coding                     | YES | YES | -0.344881  | 2.11e-02 | -0.322467  | 1.21e-02 | -0.0182799 | 9.57e-01 | -0.4191718 | 2.96e-02 | -0.462173  | 2.34e-02 | -0.178003  | 4.16e-02 | -0.1171001 | 4.40e-02 |
| ENSG0000025180  | 14 | 2251282   | 2252208   | TRAB3      | antisense intron  | protein coding                     | YES | YES | -0.344881  | 2.11e-02 | -0.322467  | 1.21e-02 | -0.0182799 | 9.57e-01 | -0.4191718 | 2.96e-02 | -0.462173  | 2.34e-02 | -0.178003  | 4.16e-02 | -0.1171001 | 4.40e-02 |
| ENSG0000026464  | 17 | 1187427   | 1188170   | AC020201.1 | antisense lincRNA | antisense intron                   | YES | YES | -0.245301  | 4.01e-02 | -0.245688  | 6.66e-02 | -0.1670893 | 4.01e-01 | -0.4124023 | 2.96e-02 | -0.462173  | 2.34e-02 | -0.178003  | 4.16e-02 | -0.1171001 | 4.40e-02 |
| ENSG0000021347  | 22 | 4200046   | 4200191   | SILC5A9P1  | antisense intron  | transcribed unprocessed pseudogene | YES | YES | -0.270344  | 1.51e-02 | -0.262538  | 8.02e-02 | -0.2596181 | 1.91e-01 | -0.4192468 | 2.96e-02 | -0.462173  | 2.34e-02 | -0.178003  | 4.16e-02 | -0.1171001 | 4.40e-02 |
| ENSG0000021330  | 22 | 4200046   | 4200191   | SILC5A9P1  | antisense intron  | transcribed unprocessed pseudogene | YES | YES | -0.270344  | 1.51e-02 | -0.262538  | 8.02e-02 | -0.2596181 | 1.91e-01 | -0.4192468 | 2.96e-02 | -0.462173  | 2.34e-02 | -0.178003  | 4.16e-02 | -0.1171001 | 4.40e-02 |
| ENSG0000026779  | 1  | 2045285   | 2045292   | AL152306.1 | antisense intron  | transcribed unprocessed pseudogene | YES | YES | -0.230027  | 4.23e-02 | -0.4909015 | 8.01e-02 | -0.0480514 | 8.10e-01 | -0.4180207 | 2.96e-02 | -0.462173  | 2.34e-02 | -0.178003  | 4.16e-02 | -0.1171001 | 4.40e-02 |
| ENSG0000079371  | 1  | 130965728 | 130474794 | PPP3R3A    | antisense intron  | protein coding                     | YES | YES | -0.305238  | 6.69e-02 | -0.224731  | 1.04e-02 | -0.2847248 | 1.50e-01 | -0.4194295 | 2.96e-02 | -0.462173  | 2.34e-02 | -0.178003  | 4.16e-02 | -0.1171001 | 4.40e-02 |
| ENSG0000021629  | 1  | 5266297   | 5266266   | AC133172.2 | antisense intron  | transcribed unprocessed pseudogene | YES | YES | -0.261882  | 3.12e-02 | -0.261882  | 3.12e-02 | -0.261882  | 3.12e-02 | -0.4194295 | 2.96e-02 | -0.462173  | 2.34e-02 | -0.178003  | 4.16e-02 | -0.1171001 | 4.40e-02 |
| ENSG0000021597  | 20 | 3347720   | 3354444   | PPP3R3     | antisense intron  | transcribed unprocessed pseudogene | YES | YES | -0.2718956 | 1.28e-02 | -0.1880031 | 3.46e-01 | -0.1880031 | 3.46e-01 | -0.4194295 | 2.96e-02 | -0.462173  | 2.34e-02 | -0.178003  | 4.16e-02 | -0.1171001 | 4.40e-02 |
| ENSG0000021470  | 7  | 13046794  | 131728769 | FLJ40288   | antisense intron  | transcribed unprocessed pseudogene | YES | YES | -0.280774  | 1.06e-02 | -0.276522  | 5.19e-02 | -0.1913553 | 3.39e-01 | -0.4190505 | 2.96e-02 | -0.462173  | 2.34e-02 | -0.178003  | 4.16e-02 | -0.1171001 | 4.40e-02 |
| ENSG0000021263  | 14 | 2251282   | 2252208   | TRAB3      | antisense intron  | transcribed unprocessed pseudogene | YES | YES | -0.344881  | 2.11e-02 | -0.322467  | 1.21e-02 | -0.0182799 | 9.57e-01 | -0.4191718 | 2.96e-02 | -0.462173  | 2.34e-02 | -0.178003  | 4.16e-02 | -0.1171001 | 4.40e-02 |
| ENSG0000021030  | 17 | 1178337   | 11784012  | RPLP12     | antisense intron  | transcribed unprocessed pseudogene | YES | YES | -0.245301  | 4.01e-02 | -0.371255  | 5.48e-02 | -0.1021594 | 9.50e-01 | -0.4182118 | 2.96e-02 | -0.462173  | 2.34e-02 | -0.178003  | 4.16e-02 | -0.1171001 | 4.40e-02 |
| ENSG0000021827  | 1  | 1537393   | 1538201   | AC113522.2 | antisense intron  | transcribed unprocessed pseudogene | YES | YES | -0.1431172 | 2.14e-01 | -0.1930206 | 1.65e-01 | -0.1375860 | 6.74e-01 | -0.4196155 | 2.96e-02 | -0.462173  | 2.34e-02 | -0.178003  | 4.16e-02 | -0.1171001 | 4.40e-02 |
| ENSG0000027133  | 16 | 3112225   | 3112464   | AC135090.6 | antisense intron  | transcribed unprocessed pseudogene | YES | YES | -0.400938  | 2.43e-02 | -0.400938  | 2.43e-02 | -0.400938  | 2.43e-02 | -0.4196069 | 2.96e-02 | -0.462173  | 2.34e-02 | -0.178003  | 4.16e-02 | -0.1171001 | 4.40e-02 |
| ENSG0000027961  | 1  | 1256216   | 1256216   | TRIM44     | antisense intron  | transcribed unprocessed pseudogene | YES | YES | -0.36988   | 9.40e-02 | -0.36988   | 9.40e-02 | -0.36988   | 9.40e-02 | -0.4196069 | 2.96e-02 | -0.462173  | 2.34e-02 | -0.178003  | 4.16e-02 | -0.1171001 | 4.40e-02 |
| ENSG00000218970 | 14 | 5959576   | 5980776   | RTN1       | antisense intron  | protein coding                     | YES | YES | -0.286878  | 1.09e-02 | -0.311181  | 9.98e-02 | -0.0497979 | 8.01e-01 | -0.4197195 | 2.96e-02 | -0.462173  | 2.34e-02 | -0.178003  | 4.16e-02 | -0.1171001 | 4.40e-02 |
| ENSG0000021597  | 15 | 9641752   | 9654778   | AMP108     | antisense intron  | transcribed unprocessed pseudogene | YES | YES | -0.204173  | 7.14e-02 | -0.205966  | 7.88e-02 | -0.210892  | 2.84e-01 | -0.419877  | 2.96e-02 | -0.462173  | 2.34e-02 | -0.178003  | 4.16e-02 | -0.1171001 | 4.40e-02 |
| ENSG0000021981  | 15 | 7027480   | 7024663   | TRKBP1     | antisense intron  | transcribed unprocessed pseudogene | YES | YES | -0.214717  | 5.74e-02 | -0.214717  | 5.74e-02 | -0.214717  | 5.74e-02 | -0.419877  | 2.96e-02 | -0.462173  | 2.34e-02 | -0.178003  | 4.16e-02 | -0.1171001 | 4.40e-02 |
| ENSG0000021666  | 19 | 3712837   | 3716935   | ZNF75      | antisense intron  | protein coding                     | YES | YES | -0.277406  | 1.91e-02 | -0.381277  | 2.22e-02 | -0.0842596 | 6.76e-01 | -0.4194451 | 2.96e-02 | -0.462173  | 2.34e-02 | -0.178003  | 4.16e-02 | -0.1171001 | 4.40e-02 |
| ENSG0000021213  | 17 | 7860523   | 7863215   | SCF1       | antisense intron  | lncRNA                             | YES | YES | -0.115827  | 2.99e-01 | -0.115828  | 2.99e-01 | -0.4581799 | 1.62e-01 | -0.4201557 | 2.96e-02 | -0.462173  | 2.34e-02 | -0.178003  | 4.16e-02 | -0.1171001 | 4.40e-02 |
| ENSG0000021666  | 20 | 3356454   | 3362700   | CNRD3      | antisense intron  | protein coding                     | YES | YES | -0.303808  | 7.25e-02 | -0.303808  | 7.25e-02 | -0.303808  | 7.25e-02 | -0.4200448 | 2.96e-02 | -0.462173  | 2.34e-02 | -0.178003  | 4.16e-02 | -0.1171001 | 4.40e-02 |
| ENSG0000022028  | 13 | 2461366   | 2461363   | AC139582.2 | antisense intron  | unintegrated pseudogene            | YES | YES | -0.282054  | 1.07e-01 | -0.282027  | 1.49e-01 | -0.1529585 | 4.48e-01 | -0.4200501 | 2.96e-02 | -0.462173  | 2.34e-02 | -0.178003  | 4.16e-02 | -0.1171001 | 4.40e-02 |
| ENSG0000020679  | 11 | 6992138   | 6992813   | AP071216.1 | antisense intron  | lncRNA                             | YES | YES | -0.193415  | 4.38e-02 | -0.193407  | 1.61e-01 | -0.1489374 | 4.59e-01 | -0.4203264 | 2.96e-02 | -0.462173  | 2.34e-02 | -0.178003  | 4.16e-02 | -0.1171001 | 4.40e-02 |
| ENSG0000021984  | 16 | 359633    | 357403    | MIR33      | antisense intron  | protein coding                     | YES | YES | -0.312772  | 5.46e-02 | -0.409229  | 5.80e-02 | -0.0619490 | 7.61e-01 | -0.420582  | 2.96e-02 | -0.462173  | 2.34e-02 | -0.178003  | 4.16e-02 | -0.1171001 | 4.40e-02 |
| ENSG0000024497  | 19 | 1899988   | 1934023   | SUGP2      | antisense intron  | protein coding                     | YES | YES | -0.489804  | 6.46e-02 | -0.488111  | 1.33e-01 | -0.428592  | 2.81e-01 | -0.4204484 | 2.96e-02 | -0.462173  | 2.34e-02 | -0.178003  | 4.16e-02 | -0.1171001 | 4.40e-02 |
| ENSG0000021981  | 5  | 6987521   | 6992067   | GUSP13     | antisense intron  | unprocessed pseudogene             | YES | YES | -0.251601  | 2.74e-02 | -0.358371  | 1.79e-01 | -0.4204071 | 8.44e-01 | -0.4204071 | 8.44e-01 | -0.4204071 | 8.44e-01 | -0.4204071 | 8.44e-01 | -0.4204071 | 8.44e-01 |
| ENSG00000214346 | 19 | 4955448   | 4959262   | NOS3       | antisense intron  | protein coding                     | YES | YES | -0.282491  | 1.28e-02 | -0.379925  | 6.07e-02 | -0.0574404 | 7.76e-01 | -0.420722  | 2.96e-02 | -0.462173  | 2.34e-02 | -0.178003  | 4.16e-02 | -0.1171001 | 4.40e-02 |
| ENSG0000021796  | 1  | 12602156  | 12701328  | TRIM44     | antisense intron  | transcribed unprocessed pseudogene | YES | YES | -0.303808  | 7.25e-02 | -0.303808  | 7.25e-02 | -0.303808  | 7.25e-02 | -0.4200448 | 2.96e-02 | -0.462173  | 2.34e-02 | -0.178003  | 4.16e-02 | -0.1171001 | 4.40e-02 |
| ENSG0000021801  | 11 | 10080078  | 10080028  | AP03371.1  | antisense intron  | lncRNA                             | YES | YES | -0.207558  | 7.70e-02 | -0.159678  | 4.23e-01 | -0.389738  | 6.45e-01 | -0.4205396 | 2.96e-02 | -0.462173  | 2.34e-02 | -0.178003  | 4.16e-02 | -0.1171001 | 4.40e-02 |
| ENSG0000021089  | 1  | 6343467   | 6309774   | ARHGAP9    | antisense intron  | protein coding                     | YES | YES | -0.272428  | 1.46e-02 | -0.274788  | 5.35e-02 | -0.1413058 | 4.82e-01 | -0.4200827 | 2.96e-02 | -0.462173  | 2.34e-02 | -0.178003  | 4.16e-02 | -0.1171001 | 4.40e-02 |
| ENSG0000021473  | 1  | 12460238  | 12462979  | LINC02134  | antisense intron  | transcribed unprocessed pseudogene | YES | YES | -0.272428  | 1.46e-02 | -0.274788  | 5.35e-02 | -0.1413058 | 4.82e-01 | -0.4200827 | 2.96e-02 | -0.462173  | 2.34e-02 | -0.178003  | 4.16e-02 | -0.1171001 | 4.40e-02 |
| ENSG0000021028  | 5  | 12243497  | 12247307  | MIR3205    | antisense intron  | lncRNA                             | YES | YES | -0.279764  | 8.49e-02 | -0.279764  | 8.49e-02 | -0.279764  | 8.49e-02 | -0.4207776 | 2.96e-02 | -0.462173  | 2.34e-02 | -0.178003  | 4.16e-02 | -0.1171001 | 4.40e-02 |
| ENSG00000218257 | 1  | 11977431  | 11980416  | PLAZA2A    | antisense intron  | protein coding                     | YES | YES | -0.228104  | 4.59e-02 | -0.228118  | 1.11e-01 | -0.260133  | 1.90e-01 | -0.4207784 | 2.96e-02 | -0.462173  | 2.34e-02 | -0.178003  | 4.16e-02 | -0.1171001 | 4.40e-02 |
| ENSG00000216679 | 1  | 1256216   | 1256216   | TRIM44     | antisense intron  | transcribed unprocessed pseudogene | YES | YES | -0.36988   | 9.40e-02 | -0.36988   | 9.40e-02 | -0.36988   | 9.40e-02 | -0.4196069 | 2.96e-02 | -0.462173  | 2.34e-02 | -0.178003  | 4.16e-02 | -0.1171001 | 4.40e-02 |
| ENSG00000214251 | 20 | 4372557   | 4340789   | PTPSTG     | antisense intron  | protein coding                     | YES | YES | -0.256773  | 4.22e-02 | -0.114934  | 3.40e-01 | -0.0590835 | 6.37e-01 | -0.4207778 | 2.96e-02 | -0.462173  | 2.34e-02 | -0.178003  | 4.16e-02 | -0.1171001 | 4.40e-02 |
| ENSG0000021786  | 12 | 13159301  | 13159308  | AC113112.1 | antisense intron  | lncRNA                             | YES | YES | -0.209728  | 6.71e-02 | -0.110112  | 1.41e-01 | -0.1877429 | 8.48e-01 | -0.4200021 | 2.96e-02 | -0.462173  | 2.34e-02 | -0.178003  | 4.16e-02 | -0.1171001 | 4.40e-02 |
| ENSG0000021655  | 19 | 137596    | 1529285   | MIR33      | antisense intron  | protein coding                     | YES | YES | -0.312772  | 5.46e-02 | -0.409229  | 5.80e-02 | -0.0619490 | 7.61e-01 | -0.420582  | 2.96e-02 | -0.462173  | 2.34e-02 | -0.178003  | 4.16e-02 | -0.1171001 | 4.40e-02 |
| ENSG0000021647  | 17 | 5266216   | 5266216   | TRIM44     | antisense intron  | transcribed unprocessed pseudogene | YES | YES | -0.36988   | 9.40e-02 | -0.36988   | 9.40e-02 | -0.36988   | 9.40e-02 | -0.4196069 | 2.96e-02 | -0.462173  | 2.34e-02 | -0.178003  | 4.16e-02 | -0.1171001 | 4.40e-02 |
| ENSG00000210646 | 2  | 13047731  | 13049225  | RFP2P      | antisense intron  | transcribed unprocessed pseudogene | YES | YES | -0.1442261 | 2.11e-01 | -0.1916889 | 1.86e-01 | -0.1516238 | 4.50e-01 | -0.4211806 | 2.96e-02 | -0.462173  | 2.34e-02 | -0.178003  | 4.16e-02 | -0.1171001 | 4.40e-02 |
| ENSG00000210472 | 6  | 7338839   | 7339558   | AC139095.  |                   |                                    |     |     |            |          |            |          |            |          |            |          |            |          |            |          |            |          |

| ENSG0000017643 | 1  | 21617468 | 21786207 | MAMC1L    | ensembl                                                                                                                                                                                                                                                                                                                                | havana | protein_coding                                                                                                                                                                                                                                                                                        | -0.3974782                                                                                                                                                                                                                                                                | 3.44e-04   | 0.3426468  | 1.89e-02   | 0.2327270 | 2.44e-01  | 0.4285979 | 2.57e-02  | 0.5210995 | 1.35e-01  | 0.1783932 | 4.16e-01  | -0.0789407 | 6.00e-01   |          |
|----------------|----|----------|----------|-----------|----------------------------------------------------------------------------------------------------------------------------------------------------------------------------------------------------------------------------------------------------------------------------------------------------------------------------------------|--------|-------------------------------------------------------------------------------------------------------------------------------------------------------------------------------------------------------------------------------------------------------------------------------------------------------|---------------------------------------------------------------------------------------------------------------------------------------------------------------------------------------------------------------------------------------------------------------------------|------------|------------|------------|-----------|-----------|-----------|-----------|-----------|-----------|-----------|-----------|------------|------------|----------|
| ENSG000001772  | 1  | 14802154 | 14802777 | ADCC2L2   | havana                                                                                                                                                                                                                                                                                                                                 | TEC    | antisense_intronic                                                                                                                                                                                                                                                                                    | -0.2092644                                                                                                                                                                                                                                                                | 6.74e-02   | -0.2670278 | 6.11e-02   | 0.1891290 | 8.45e-01  | 0.4286284 | 2.57e-04  | 0.2324213 | 5.56e-02  | 0.2724483 | 9.01e-01  | -0.10392   | 4.50e-01   |          |
| ENSG0000014264 | 1  | 17474002 | 17474003 | HMGCL2    | ensembl <td>havana</td> <td>antisense_intronic <td>YES <td>-0.1212988</td> <td>0.1212988</td> </td></td>              | havana | antisense_intronic <td>YES <td>-0.1212988</td> <td>0.1212988</td> </td>              | YES <td>-0.1212988</td> <td>0.1212988</td>               | -0.1212988 | 0.1212988  | 0.1212988  | 0.1212988 | 0.1212988 | 0.1212988 | 0.1212988 | 0.1212988 | 0.1212988 | 0.1212988 | 0.1212988 | 0.1212988  | 0.1212988  |          |
| ENSG0000017909 | 1  | 744421   | 73999    | GEMN4     | ensembl <td>havana</td> <td>protein_coding <td>YES <td>-0.3506319</td> <td>1.77e-03</td> <td>0.3466222</td> <td>1.55e-01</td> <td>0.0171319</td> <td>9.54e-01</td> <td>0.4284877</td> <td>2.56e-02</td> <td>0.4602239</td> <td>8.60e-01</td> <td>0.1233736</td> <td>5.76e-01</td> <td>0.0613328</td> <td>6.78e-01</td> </td></td>      | havana | protein_coding <td>YES <td>-0.3506319</td> <td>1.77e-03</td> <td>0.3466222</td> <td>1.55e-01</td> <td>0.0171319</td> <td>9.54e-01</td> <td>0.4284877</td> <td>2.56e-02</td> <td>0.4602239</td> <td>8.60e-01</td> <td>0.1233736</td> <td>5.76e-01</td> <td>0.0613328</td> <td>6.78e-01</td> </td>      | YES <td>-0.3506319</td> <td>1.77e-03</td> <td>0.3466222</td> <td>1.55e-01</td> <td>0.0171319</td> <td>9.54e-01</td> <td>0.4284877</td> <td>2.56e-02</td> <td>0.4602239</td> <td>8.60e-01</td> <td>0.1233736</td> <td>5.76e-01</td> <td>0.0613328</td> <td>6.78e-01</td>   | -0.3506319 | 1.77e-03   | 0.3466222  | 1.55e-01  | 0.0171319 | 9.54e-01  | 0.4284877 | 2.56e-02  | 0.4602239 | 8.60e-01  | 0.1233736 | 5.76e-01   | 0.0613328  | 6.78e-01 |
| ENSG0000017077 | 1  | 11485098 | 11485044 | DELIC1    | ensembl <td>havana</td> <td>incRNA</td> <td>YES <td>-0.2807994</td> <td>1.14e-02</td> <td>-0.1403943</td> <td>1.10e-02</td> <td>0.1312197</td> <td>1.13e-01</td> <td>0.4280886</td> <td>2.56e-02</td> <td>0.4303606</td> <td>4.34e-02</td> <td>0.1624133</td> <td>4.99e-01</td> <td>-0.252481</td> <td>1.14e-01</td> </td>             | havana | incRNA                                                                                                                                                                                                                                                                                                | YES <td>-0.2807994</td> <td>1.14e-02</td> <td>-0.1403943</td> <td>1.10e-02</td> <td>0.1312197</td> <td>1.13e-01</td> <td>0.4280886</td> <td>2.56e-02</td> <td>0.4303606</td> <td>4.34e-02</td> <td>0.1624133</td> <td>4.99e-01</td> <td>-0.252481</td> <td>1.14e-01</td>  | -0.2807994 | 1.14e-02   | -0.1403943 | 1.10e-02  | 0.1312197 | 1.13e-01  | 0.4280886 | 2.56e-02  | 0.4303606 | 4.34e-02  | 0.1624133 | 4.99e-01   | -0.252481  | 1.14e-01 |
| ENSG0000010239 | 1  | 12970134 | 12971094 | PCP4L     | ensembl <td>havana</td> <td>antisense_intronic <td>YES <td>-0.2011126</td> <td>0.2011126</td> </td></td>              | havana | antisense_intronic <td>YES <td>-0.2011126</td> <td>0.2011126</td> </td>              | YES <td>-0.2011126</td> <td>0.2011126</td>               | -0.2011126 | 0.2011126  | 0.2011126  | 0.2011126 | 0.2011126 | 0.2011126 | 0.2011126 | 0.2011126 | 0.2011126 | 0.2011126 | 0.2011126 | 0.2011126  | 0.2011126  |          |
| ENSG0000014502 | 1  | 20951386 | 20954360 | SLC6A8    | ensembl <td>havana</td> <td>protein_coding <td>YES <td>-0.2861236</td> <td>0.86e-03</td> <td>-0.1403721</td> <td>2.58e-01</td> <td>0.2323256</td> <td>2.44e-01</td> <td>0.4291576</td> <td>2.56e-02</td> <td>0.4868183</td> <td>9.04e-01</td> <td>0.02474</td> <td>9.11e-01</td> <td>-0.186315</td> <td>1.14e-01</td> </td></td>       | havana | protein_coding <td>YES <td>-0.2861236</td> <td>0.86e-03</td> <td>-0.1403721</td> <td>2.58e-01</td> <td>0.2323256</td> <td>2.44e-01</td> <td>0.4291576</td> <td>2.56e-02</td> <td>0.4868183</td> <td>9.04e-01</td> <td>0.02474</td> <td>9.11e-01</td> <td>-0.186315</td> <td>1.14e-01</td> </td>       | YES <td>-0.2861236</td> <td>0.86e-03</td> <td>-0.1403721</td> <td>2.58e-01</td> <td>0.2323256</td> <td>2.44e-01</td> <td>0.4291576</td> <td>2.56e-02</td> <td>0.4868183</td> <td>9.04e-01</td> <td>0.02474</td> <td>9.11e-01</td> <td>-0.186315</td> <td>1.14e-01</td>    | -0.2861236 | 0.86e-03   | -0.1403721 | 2.58e-01  | 0.2323256 | 2.44e-01  | 0.4291576 | 2.56e-02  | 0.4868183 | 9.04e-01  | 0.02474   | 9.11e-01   | -0.186315  | 1.14e-01 |
| ENSG0000012901 | 20 | 304662   | 304820   | MRP25     | ensembl <td>havana</td> <td>protein_coding <td>YES <td>-0.2405131</td> <td>3.51e-02</td> <td>-0.2035597</td> <td>1.56e-02</td> <td>0.1392792</td> <td>4.88e-01</td> <td>0.4292367</td> <td>2.56e-02</td> <td>0.3629036</td> <td>7.00e-02</td> <td>0.0532026</td> <td>8.10e-01</td> <td>-0.1071425</td> <td>4.98e-01</td> </td></td>    | havana | protein_coding <td>YES <td>-0.2405131</td> <td>3.51e-02</td> <td>-0.2035597</td> <td>1.56e-02</td> <td>0.1392792</td> <td>4.88e-01</td> <td>0.4292367</td> <td>2.56e-02</td> <td>0.3629036</td> <td>7.00e-02</td> <td>0.0532026</td> <td>8.10e-01</td> <td>-0.1071425</td> <td>4.98e-01</td> </td>    | YES <td>-0.2405131</td> <td>3.51e-02</td> <td>-0.2035597</td> <td>1.56e-02</td> <td>0.1392792</td> <td>4.88e-01</td> <td>0.4292367</td> <td>2.56e-02</td> <td>0.3629036</td> <td>7.00e-02</td> <td>0.0532026</td> <td>8.10e-01</td> <td>-0.1071425</td> <td>4.98e-01</td> | -0.2405131 | 3.51e-02   | -0.2035597 | 1.56e-02  | 0.1392792 | 4.88e-01  | 0.4292367 | 2.56e-02  | 0.3629036 | 7.00e-02  | 0.0532026 | 8.10e-01   | -0.1071425 | 4.98e-01 |
| ENSG0000010629 | 7  | 10037070 | 10011841 | YAF2      | ensembl <td>havana</td> <td>protein_coding <td>YES <td>-0.204166</td> <td>7.49e-01</td> <td>-0.3324852</td> <td>2.56e-02</td> <td>0.4294281</td> <td>2.56e-02</td> <td>0.4292077</td> <td>9.04e-01</td> <td>0.0211234</td> <td>9.20e-01</td> <td>0.1336612</td> <td>5.66e-01</td> <td>0.006623</td> <td>7.68e-01</td> </td></td>       | havana | protein_coding <td>YES <td>-0.204166</td> <td>7.49e-01</td> <td>-0.3324852</td> <td>2.56e-02</td> <td>0.4294281</td> <td>2.56e-02</td> <td>0.4292077</td> <td>9.04e-01</td> <td>0.0211234</td> <td>9.20e-01</td> <td>0.1336612</td> <td>5.66e-01</td> <td>0.006623</td> <td>7.68e-01</td> </td>       | YES <td>-0.204166</td> <td>7.49e-01</td> <td>-0.3324852</td> <td>2.56e-02</td> <td>0.4294281</td> <td>2.56e-02</td> <td>0.4292077</td> <td>9.04e-01</td> <td>0.0211234</td> <td>9.20e-01</td> <td>0.1336612</td> <td>5.66e-01</td> <td>0.006623</td> <td>7.68e-01</td>    | -0.204166  | 7.49e-01   | -0.3324852 | 2.56e-02  | 0.4294281 | 2.56e-02  | 0.4292077 | 9.04e-01  | 0.0211234 | 9.20e-01  | 0.1336612 | 5.66e-01   | 0.006623   | 7.68e-01 |
| ENSG0000010589 | 13 | 11397783 | 11413263 | RASA3     | ensembl <td>havana</td> <td>protein_coding <td>YES <td>-0.2801615</td> <td>1.36e-01</td> <td>-0.3727921</td> <td>1.09e-01</td> <td>0.2041972</td> <td>9.08e-01</td> <td>0.4295232</td> <td>2.56e-02</td> <td>0.3193433</td> <td>3.86e-02</td> <td>0.0388317</td> <td>8.60e-01</td> <td>0.0388874</td> <td>7.89e-01</td> </td></td>     | havana | protein_coding <td>YES <td>-0.2801615</td> <td>1.36e-01</td> <td>-0.3727921</td> <td>1.09e-01</td> <td>0.2041972</td> <td>9.08e-01</td> <td>0.4295232</td> <td>2.56e-02</td> <td>0.3193433</td> <td>3.86e-02</td> <td>0.0388317</td> <td>8.60e-01</td> <td>0.0388874</td> <td>7.89e-01</td> </td>     | YES <td>-0.2801615</td> <td>1.36e-01</td> <td>-0.3727921</td> <td>1.09e-01</td> <td>0.2041972</td> <td>9.08e-01</td> <td>0.4295232</td> <td>2.56e-02</td> <td>0.3193433</td> <td>3.86e-02</td> <td>0.0388317</td> <td>8.60e-01</td> <td>0.0388874</td> <td>7.89e-01</td>  | -0.2801615 | 1.36e-01   | -0.3727921 | 1.09e-01  | 0.2041972 | 9.08e-01  | 0.4295232 | 2.56e-02  | 0.3193433 | 3.86e-02  | 0.0388317 | 8.60e-01   | 0.0388874  | 7.89e-01 |
| ENSG0000017019 | 4  | 2604683  | 2603909  | CCND3     | ensembl <td>havana</td> <td>protein_coding <td>YES <td>-0.2302649</td> <td>3.16e-03</td> <td>-0.3439989</td> <td>6.70e-02</td> <td>0.0734631</td> <td>7.80e-01</td> <td>0.4296246</td> <td>2.56e-02</td> <td>0.3997474</td> <td>7.70e-01</td> <td>0.0099923</td> <td>8.86e-01</td> <td>0.025514</td> <td>8.36e-01</td> </td></td>      | havana | protein_coding <td>YES <td>-0.2302649</td> <td>3.16e-03</td> <td>-0.3439989</td> <td>6.70e-02</td> <td>0.0734631</td> <td>7.80e-01</td> <td>0.4296246</td> <td>2.56e-02</td> <td>0.3997474</td> <td>7.70e-01</td> <td>0.0099923</td> <td>8.86e-01</td> <td>0.025514</td> <td>8.36e-01</td> </td>      | YES <td>-0.2302649</td> <td>3.16e-03</td> <td>-0.3439989</td> <td>6.70e-02</td> <td>0.0734631</td> <td>7.80e-01</td> <td>0.4296246</td> <td>2.56e-02</td> <td>0.3997474</td> <td>7.70e-01</td> <td>0.0099923</td> <td>8.86e-01</td> <td>0.025514</td> <td>8.36e-01</td>   | -0.2302649 | 3.16e-03   | -0.3439989 | 6.70e-02  | 0.0734631 | 7.80e-01  | 0.4296246 | 2.56e-02  | 0.3997474 | 7.70e-01  | 0.0099923 | 8.86e-01   | 0.025514   | 8.36e-01 |
| ENSG0000017885 | 16 | 5437035  | 5437478  | AC01853.3 | ensembl <td>havana</td> <td>antisense_intronic <td>YES <td>-0.286451</td> <td>1.90e-01</td> <td>-0.320027</td> <td>1.50e-01</td> <td>0.0396688</td> <td>8.55e-01</td> <td>0.4295479</td> <td>2.56e-02</td> <td>0.3481215</td> <td>1.57e-01</td> <td>0.174017</td> <td>2.70e-01</td> <td>-0.090997</td> <td>5.70e-01</td> </td></td>    | havana | antisense_intronic <td>YES <td>-0.286451</td> <td>1.90e-01</td> <td>-0.320027</td> <td>1.50e-01</td> <td>0.0396688</td> <td>8.55e-01</td> <td>0.4295479</td> <td>2.56e-02</td> <td>0.3481215</td> <td>1.57e-01</td> <td>0.174017</td> <td>2.70e-01</td> <td>-0.090997</td> <td>5.70e-01</td> </td>    | YES <td>-0.286451</td> <td>1.90e-01</td> <td>-0.320027</td> <td>1.50e-01</td> <td>0.0396688</td> <td>8.55e-01</td> <td>0.4295479</td> <td>2.56e-02</td> <td>0.3481215</td> <td>1.57e-01</td> <td>0.174017</td> <td>2.70e-01</td> <td>-0.090997</td> <td>5.70e-01</td>     | -0.286451  | 1.90e-01   | -0.320027  | 1.50e-01  | 0.0396688 | 8.55e-01  | 0.4295479 | 2.56e-02  | 0.3481215 | 1.57e-01  | 0.174017  | 2.70e-01   | -0.090997  | 5.70e-01 |
| ENSG0000010873 | 5  | 4451390  | 4466311  | AC01879.2 | ensembl <td>havana</td> <td>incRNA</td> <td>YES <td>-0.1862979</td> <td>1.01e-01</td> <td>-0.1024623</td> <td>0.97e-01</td> <td>0.0867893</td> <td>6.67e-01</td> <td>0.4300572</td> <td>2.52e-02</td> <td>0.3166648</td> <td>1.99e-02</td> <td>0.093187</td> <td>6.72e-01</td> <td>0.0054474</td> <td>7.90e-01</td> </td>              | havana | incRNA                                                                                                                                                                                                                                                                                                | YES <td>-0.1862979</td> <td>1.01e-01</td> <td>-0.1024623</td> <td>0.97e-01</td> <td>0.0867893</td> <td>6.67e-01</td> <td>0.4300572</td> <td>2.52e-02</td> <td>0.3166648</td> <td>1.99e-02</td> <td>0.093187</td> <td>6.72e-01</td> <td>0.0054474</td> <td>7.90e-01</td>   | -0.1862979 | 1.01e-01   | -0.1024623 | 0.97e-01  | 0.0867893 | 6.67e-01  | 0.4300572 | 2.52e-02  | 0.3166648 | 1.99e-02  | 0.093187  | 6.72e-01   | 0.0054474  | 7.90e-01 |
| ENSG0000014397 | 17 | 7657754  | 7656348  | SNHG16    | ensembl <td>havana</td> <td>antisense_intronic <td>YES <td>-0.2806972</td> <td>1.04e-02</td> <td>-0.4069277</td> <td>3.86e-02</td> <td>0.0278437</td> <td>8.91e-01</td> <td>0.4300702</td> <td>2.52e-02</td> <td>0.2900979</td> <td>3.39e-02</td> <td>0.0469675</td> <td>8.29e-01</td> <td>0.0288837</td> <td>8.45e-01</td> </td></td> | havana | antisense_intronic <td>YES <td>-0.2806972</td> <td>1.04e-02</td> <td>-0.4069277</td> <td>3.86e-02</td> <td>0.0278437</td> <td>8.91e-01</td> <td>0.4300702</td> <td>2.52e-02</td> <td>0.2900979</td> <td>3.39e-02</td> <td>0.0469675</td> <td>8.29e-01</td> <td>0.0288837</td> <td>8.45e-01</td> </td> | YES <td>-0.2806972</td> <td>1.04e-02</td> <td>-0.4069277</td> <td>3.86e-02</td> <td>0.0278437</td> <td>8.91e-01</td> <td>0.4300702</td> <td>2.52e-02</td> <td>0.2900979</td> <td>3.39e-02</td> <td>0.0469675</td> <td>8.29e-01</td> <td>0.0288837</td> <td>8.45e-01</td>  | -0.2806972 | 1.04e-02   | -0.4069277 | 3.86e-02  | 0.0278437 | 8.91e-01  | 0.4300702 | 2.52e-02  | 0.2900979 | 3.39e-02  | 0.0469675 | 8.29e-01   | 0.0288837  | 8.45e-01 |
| ENSG0000010379 | 1  | 14318355 | 14319047 | DEAF1     | ensembl <td>havana</td> <td>protein_coding <td>YES <td>-0.3564821</td> <td>0.00121</td> <td>-0.3564821</td> <td>0.00121</td> <td>0.3564821</td> <td>0.00121</td> <td>0.3564821</td> <td>0.00121</td> <td>0.3564821</td> <td>0.00121</td> <td>0.3564821</td> <td>0.00121</td> <td>0.3564821</td> <td>0.00121</td> </td></td>            | havana | protein_coding <td>YES <td>-0.3564821</td> <td>0.00121</td> <td>-0.3564821</td> <td>0.00121</td> <td>0.3564821</td> <td>0.00121</td> <td>0.3564821</td> <td>0.00121</td> <td>0.3564821</td> <td>0.00121</td> <td>0.3564821</td> <td>0.00121</td> <td>0.3564821</td> <td>0.00121</td> </td>            | YES <td>-0.3564821</td> <td>0.00121</td> <td>-0.3564821</td> <td>0.00121</td> <td>0.3564821</td> <td>0.00121</td> <td>0.3564821</td> <td>0.00121</td> <td>0.3564821</td> <td>0.00121</td> <td>0.3564821</td> <td>0.00121</td> <td>0.3564821</td> <td>0.00121</td>         | -0.3564821 | 0.00121    | -0.3564821 | 0.00121   | 0.3564821 | 0.00121   | 0.3564821 | 0.00121   | 0.3564821 | 0.00121   | 0.3564821 | 0.00121    | 0.3564821  | 0.00121  |
| ENSG0000014871 | 11 | 7167385  | 7181828  | ALG1L9P   | ensembl <td>havana</td> <td>incRNA</td> <td>YES <td>-0.1894001</td> <td>2.52e-03</td> <td>-0.2099906</td> <td>4.01e-03</td> <td>0.1153736</td> <td>5.67e-01</td> <td>0.4301244</td> <td>2.51e-02</td> <td>0.4613667</td> <td>4.97e-01</td> <td>0.376104</td> <td>5.86e-01</td> <td>-0.1837964</td> <td>3.64e-01</td> </td>             | havana | incRNA                                                                                                                                                                                                                                                                                                | YES <td>-0.1894001</td> <td>2.52e-03</td> <td>-0.2099906</td> <td>4.01e-03</td> <td>0.1153736</td> <td>5.67e-01</td> <td>0.4301244</td> <td>2.51e-02</td> <td>0.4613667</td> <td>4.97e-01</td> <td>0.376104</td> <td>5.86e-01</td> <td>-0.1837964</td> <td>3.64e-01</td>  | -0.1894001 | 2.52e-03   | -0.2099906 | 4.01e-03  | 0.1153736 | 5.67e-01  | 0.4301244 | 2.51e-02  | 0.4613667 | 4.97e-01  | 0.376104  | 5.86e-01   | -0.1837964 | 3.64e-01 |
| ENSG0000014306 | 17 | 6159021  | 6159129  | NAG2      | ensembl <td>havana</td> <td>protein_coding <td>YES <td>-0.1884023</td> <td>1.01e-01</td> <td>-0.1744277</td> <td>1.51e-02</td> <td>0.2263430</td> <td>2.56e-02</td> <td>0.4301262</td> <td>2.51e-02</td> <td>0.23885</td> <td>8.19e-02</td> <td>0.1562026</td> <td>8.60e-01</td> <td>-0.1187075</td> <td>1.02e-01</td> </td></td>      | havana | protein_coding <td>YES <td>-0.1884023</td> <td>1.01e-01</td> <td>-0.1744277</td> <td>1.51e-02</td> <td>0.2263430</td> <td>2.56e-02</td> <td>0.4301262</td> <td>2.51e-02</td> <td>0.23885</td> <td>8.19e-02</td> <td>0.1562026</td> <td>8.60e-01</td> <td>-0.1187075</td> <td>1.02e-01</td> </td>      | YES <td>-0.1884023</td> <td>1.01e-01</td> <td>-0.1744277</td> <td>1.51e-02</td> <td>0.2263430</td> <td>2.56e-02</td> <td>0.4301262</td> <td>2.51e-02</td> <td>0.23885</td> <td>8.19e-02</td> <td>0.1562026</td> <td>8.60e-01</td> <td>-0.1187075</td> <td>1.02e-01</td>   | -0.1884023 | 1.01e-01   | -0.1744277 | 1.51e-02  | 0.2263430 | 2.56e-02  | 0.4301262 | 2.51e-02  | 0.23885   | 8.19e-02  | 0.1562026 | 8.60e-01   | -0.1187075 | 1.02e-01 |
| ENSG0000012390 | 22 | 892462   | 8944423  | MYO7C     | ensembl <td>havana</td> <td>protein_coding <td>YES <td>-0.3050213</td> <td>1.10e-02</td> <td>-0.210011</td> <td>2.60e-02</td> <td>0.0402611</td> <td>3.21e-01</td> <td>0.4301428</td> <td>2.51e-02</td> <td>0.4359973</td> <td>1.74e-01</td> <td>0.072917</td> <td>8.11e-01</td> <td>0.011291</td> <td>1.74e-01</td> </td></td>        | havana | protein_coding <td>YES <td>-0.3050213</td> <td>1.10e-02</td> <td>-0.210011</td> <td>2.60e-02</td> <td>0.0402611</td> <td>3.21e-01</td> <td>0.4301428</td> <td>2.51e-02</td> <td>0.4359973</td> <td>1.74e-01</td> <td>0.072917</td> <td>8.11e-01</td> <td>0.011291</td> <td>1.74e-01</td> </td>        | YES <td>-0.3050213</td> <td>1.10e-02</td> <td>-0.210011</td> <td>2.60e-02</td> <td>0.0402611</td> <td>3.21e-01</td> <td>0.4301428</td> <td>2.51e-02</td> <td>0.4359973</td> <td>1.74e-01</td> <td>0.072917</td> <td>8.11e-01</td> <td>0.011291</td> <td>1.74e-01</td>     | -0.3050213 | 1.10e-02   | -0.210011  | 2.60e-02  | 0.0402611 | 3.21e-01  | 0.4301428 | 2.51e-02  | 0.4359973 | 1.74e-01  | 0.072917  | 8.11e-01   | 0.011291   | 1.74e-01 |
| ENSG0000010396 | 17 | 5571704  | 5527363  | AC01876.2 | ensembl <td>havana</td> <td>incRNA</td> <td>YES <td>-0.2158854</td> <td>5.91e-02</td> <td>-0.2158854</td> <td>5.91e-02</td> <td>0.2158854</td> <td>5.91e-02</td> <td>0.2158854</td> <td>5.91e-02</td> <td>0.2158854</td> <td>5.91e-02</td> <td>0.2158854</td> <td>5.91e-02</td> <td>0.2158854</td> <td>5.91e-02</td> </td>             | havana | incRNA                                                                                                                                                                                                                                                                                                | YES <td>-0.2158854</td> <td>5.91e-02</td> <td>-0.2158854</td> <td>5.91e-02</td> <td>0.2158854</td> <td>5.91e-02</td> <td>0.2158854</td> <td>5.91e-02</td> <td>0.2158854</td> <td>5.91e-02</td> <td>0.2158854</td> <td>5.91e-02</td> <td>0.2158854</td> <td>5.91e-02</td>  | -0.2158854 | 5.91e-02   | -0.2158854 | 5.91e-02  | 0.2158854 | 5.91e-02  | 0.2158854 | 5.91e-02  | 0.2158854 | 5.91e-02  | 0.2158854 | 5.91e-02   | 0.2158854  | 5.91e-02 |
| ENSG0000013395 | 5  | 1454840  | 1232962  | UCP4T1    | ensembl <td>havana</td> <td>protein_coding <td>YES <td>-0.2290972</td> <td>4.51e-02</td> <td>-0.2865103</td> <td>4.37e-02</td> <td>0.2594352</td> <td>1.91e-01</td> <td>0.4302074</td> <td>2.51e-02</td> <td>0.2784147</td> <td>4.15e-02</td> <td>0.1388779</td> <td>7.07e-01</td> <td>-0.08244</td> <td>5.66e-01</td> </td></td>      | havana | protein_coding <td>YES <td>-0.2290972</td> <td>4.51e-02</td> <td>-0.2865103</td> <td>4.37e-02</td> <td>0.2594352</td> <td>1.91e-01</td> <td>0.4302074</td> <td>2.51e-02</td> <td>0.2784147</td> <td>4.15e-02</td> <td>0.1388779</td> <td>7.07e-01</td> <td>-0.08244</td> <td>5.66e-01</td> </td>      | YES <td>-0.2290972</td> <td>4.51e-02</td> <td>-0.2865103</td> <td>4.37e-02</td> <td>0.2594352</td> <td>1.91e-01</td> <td>0.4302074</td> <td>2.51e-02</td> <td>0.2784147</td> <td>4.15e-02</td> <td>0.1388779</td> <td>7.07e-01</td> <td>-0.08244</td> <td>5.66e-01</td>   | -0.2290972 | 4.51e-02   | -0.2865103 | 4.37e-02  | 0.2594352 | 1.91e-01  | 0.4302074 | 2.51e-02  | 0.2784147 | 4.15e-02  | 0.1388779 | 7.07e-01   | -0.08244   | 5.66e-01 |
| ENSG0000010278 | 17 | 213748   | 218106   | SLC6A7    | ensembl <td>havana</td> <td>protein_coding <td>YES <td>-0.2459268</td> <td>3.17e-03</td> <td>-0.2459268</td> <td>3.17e-03</td> <td>0.2459268</td> <td>3.17e-03</td> <td>0.2459268</td> <td>3.17e-03</td> <td>0.2459268</td> <td>3.17e-03</td> <td>0.2459268</td> <td>3.17e-03</td> <td>0.2459268</td> <td>3.17e-03</td> </td></td>     | havana | protein_coding <td>YES <td>-0.2459268</td> <td>3.17e-03</td> <td>-0.2459268</td> <td>3.17e-03</td> <td>0.2459268</td> <td>3.17e-03</td> <td>0.2459268</td> <td>3.17e-03</td> <td>0.2459268</td> <td>3.17e-03</td> <td>0.2459268</td> <td>3.17e-03</td> <td>0.2459268</td> <td>3.17e-03</td> </td>     | YES <td>-0.2459268</td> <td>3.17e-03</td> <td>-0.2459268</td> <td>3.17e-03</td> <td>0.2459268</td> <td>3.17e-03</td> <td>0.2459268</td> <td>3.17e-03</td> <td>0.2459268</td> <td>3.17e-03</td> <td>0.2459268</td> <td>3.17e-03</td> <td>0.2459268</td> <td>3.17e-03</td>  | -0.2459268 | 3.17e-03   | -0.2459268 | 3.17e-03  | 0.2459268 | 3.17e-03  | 0.2459268 | 3.17e-03  | 0.2459268 | 3.17e-03  | 0.2459268 | 3.17e-03   | 0.2459268  | 3.17e-03 |
| ENSG0000010278 | 17 | 213748   | 218106   | SLC6A7    | ensembl <td>havana</td> <td>protein_coding <td>YES <td>-0.2459268</td> <td>3.17e-03</td> <td>-0.2459268</td> <td>3.17e-03</td> <td>0.2459268</td> <td>3.17e-03</td> <td>0.2459268</td> <td>3.17e-03</td> <td>0.2459268</td> <td>3.17e-03</td> <td>0.2459268</td> <td>3.17e-03</td> <td>0.2459268</td> <td>3.17e-03</td> </td></td>     | havana | protein_coding <td>YES <td>-0.2459268</td> <td>3.17e-03</td> <td>-0.2459268</td> <td>3.17e-03</td> <td>0.2459268</td> <td>3.17e-03</td> <td>0.2459268</td> <td>3.17e-03</td> <td>0.2459268</td> <td>3.17e-03</td> <td>0.2459268</td> <td>3.17e-03</td> <td>0.2459268</td> <td>3.17e-03</td> </td>     | YES <td>-0.2459268</td> <td>3.17e-03</td> <td>-0.2459268</td> <td>3.17e-03</td> <td>0.2459268</td> <td>3.17e-03</td> <td>0.2459268</td> <td>3.17e-03</td> <td>0.2459268</td> <td>3.17e-03</td> <td>0.2459268</td> <td>3.17e-03</td> <td>0.2459268</td> <td>3.17e-03</td>  | -0.2459268 | 3.17e-03   | -0.2459268 | 3.17e-03  | 0.2459268 | 3.17e-03  | 0.2459268 | 3.17e-03  | 0.2459268 | 3.17e-03  | 0.2459268 | 3.17e-03   | 0.2459268  | 3.17e-03 |
| ENSG0000010278 | 17 | 213748   | 218106   | SLC6A7    | ensembl <td>havana</td> <td>protein_coding <td>YES <td>-0.2459268</td> <td>3.17e-03</td> <td>-0.2459268</td> <td>3.17e-03</td> <td>0.2459268</td> <td>3.17e-03</td> <td>0.2459268</td> <td>3.17e-03</td> <td>0.2459268</td> <td>3.17e-03</td> <td>0.2459268</td> <td>3.17e-03</td> <td>0.2459268</td> <td>3.17e-03</td> </td></td>     | havana | protein_coding <td>YES <td>-0.2459268</td> <td>3.17e-03</td> <td>-0.2459268</td> <td>3.17e-03</td> <td>0.2459268</td> <td>3.17e-03</td> <td>0.2459268</td> <td>3.17e-03</td> <td>0.2459268</td> <td>3.17e-03</td> <td>0.2459268</td> <td>3.17e-03</td> <td>0.2459268</td> <td>3.17e-03</td> </td>     | YES <td>-0.2459268</td> <td>3.17e-03</td> <td>-0.2459268</td> <td>3.17e-03</td> <td>0.2459268</td> <td>3.17e-03</td> <td>0.2459268</td> <td>3.17e-03</td> <td>0.2459268</td> <td>3.17e-03</td> <td>0.2459268</td> <td>3.17e-03</td> <td>0.2459268</td> <td>3.17e-03</td>  | -0.2459268 | 3.17e-03   | -0.2459268 | 3.17e-03  | 0.2459268 | 3.17e-03  | 0.2459268 | 3.17e-03  | 0.2459268 | 3.17e-03  | 0.2459268 | 3.17e-03   | 0.2459268  | 3.17e-03 |
| ENSG0000010278 | 17 | 213748   | 218106   | SLC6A7    | ensembl <td>havana</td> <td>protein_coding <td>YES <td>-0.2459268</td> <td>3.17e-03</td> <td>-0.2459268</td> <td>3.17e-03</td> <td>0.2459268</td> <td>3.17e-03</td> <td>0.2459268</td> <td>3.17e-03</td> <td>0.2459268</td> <td>3.17e-03</td> <td>0.2459268</td> <td>3.17e-03</td> <td>0.2459268</td> <td>3.17e-03</td> </td></td>     | havana | protein_coding <td>YES <td>-0.2459268</td> <td>3.17e-03</td> <td>-0.2459268</td> <td>3.17e-03</td> <td>0.2459268</td> <td>3.17e-03</td> <td>0.2459268</td> <td>3.17e-03</td> <td>0.2459268</td> <td>3.17e-03</td> <td>0.2459268</td> <td>3.17e-03</td> <td>0.2459268</td> <td>3.17e-03</td> </td>     | YES <td>-0.2459268</td> <td>3.17e-03</td> <td>-0.2459268</td> <td>3.17e-03</td> <td>0.2459268</td> <td>3.17e-03</td> <td>0.2459268</td> <td>3.17e-03</td> <td>0.2459268</td> <td>3.17e-03</td> <td>0.2459268</td> <td>3.17e-03</td> <td>0.2459268</td> <td>3.17e-03</td>  | -0.2459268 | 3.17e-03   | -0.2459268 | 3.17e-03  | 0.2459268 | 3.17e-03  | 0.2459268 | 3.17e-03  | 0.2459268 | 3.17e-03  | 0.2459268 | 3.17e-03   | 0.2459268  | 3.17e-03 |
| ENSG0000010278 | 17 | 213748   | 218106   | SLC6A7    | ensembl <td>havana</td> <td>protein_coding <td>YES <td>-0.2459268</td> <td>3.17e-03</td> <td>-0.2459268</td> <td>3.17e-03</td> <td>0.2459268</td> <td>3.17e-03</td> <td>0.2459268</td> <td>3.17e-03</td> <td>0.2459268</td> <td>3.17e-03</td> <td>0.2459268</td> <td>3.17e-03</td> <td>0.2459268</td> <td>3.17e-03</td> </td></td>     | havana | protein_coding <td>YES <td>-0.2459268</td> <td>3.17e-03</td> <td>-0.2459268</td> <td>3.17e-03</td> <td>0.2459268</td> <td>3.17e-03</td> <td>0.2459268</td> <td>3.17e-03</td> <td>0.2459268</td> <td>3.17e-03</td> <td>0.2459268</td> <td>3.17e-03</td> <td>0.2459268</td> <td>3.17e-03</td> </td>     | YES <td>-0.2459268</td> <td>3.17e-03</td> <td>-0.2459268</td> <td>3.17e-03</td> <td>0.2459268</td> <td>3.17e-03</td> <td>0.2459268</td> <td>3.17e-03</td> <td>0.2459268</td> <td>3.17e-03</td> <td>0.2459268</td> <td>3.17e-03</td> <td>0.2459268</td> <td>3.17e-03</td>  | -0.2459268 | 3.17e-03   | -0.2459268 | 3.17e-03  | 0.2459268 | 3.17e-03  | 0.2459268 | 3.17e-03  | 0.2459268 | 3.17e-03  | 0.2459268 | 3.17e-03   | 0.2459268  | 3.17e-03 |
| ENSG0000010278 | 17 | 213748   | 218106   | SLC6A7    | ensembl <td>havana</td> <td>protein_coding <td>YES <td>-0.2459268</td> <td>3.17e-03</td> <td>-0.2459268</td> <td>3.17e-03</td> <td>0.2459268</td> <td>3.17e-03</td> <td>0.2459268</td> <td>3.17e-03</td> <td>0.2459268</td> <td>3.17e-03</td> <td>0.2459268</td> <td>3.17e-03</td> <td>0.2459268</td> <td>3.17e-03</td> </td></td>     | havana | protein_coding <td>YES <td>-0.2459268</td> <td>3.17e-03</td> <td>-0.2459268</td> <td>3.17e-03</td> <td>0.2459268</td> <td>3.17e-03</td> <td>0.2459268</td> <td>3.17e-03</td> <td>0.2459268</td> <td>3.17e-03</td> <td>0.2459268</td> <td>3.17e-03</td> <td>0.2459268</td> <td>3.17e-03</td> </td>     | YES <td>-0.2459268</td> <td>3.17e-03</td> <td>-0.2459268</td> <td>3.17e-03</td> <td>0.2459268</td> <td>3.17e-03</td> <td>0.2459268</td> <td>3.17e-03</td> <td>0.2459268</td> <td>3.17e-03</td> <td>0.2459268</td> <td>3.17e-03</td> <td>0.2459268</td> <td>3.17e-03</td>  | -0.2459268 | 3.17e-03   | -0.2459268 | 3.17e-03  | 0.2459268 | 3.17e-03  | 0.2459268 | 3.17e-03  | 0.2459268 | 3.17e-03  | 0.2459268 | 3.17e-03   | 0.2459268  | 3.17e-03 |
| ENSG0000010278 | 17 | 213748   | 218106   | SLC6A7    | ensembl <td>havana</td> <td>protein_coding <td>YES <td>-0.2459268</td> <td>3.17e-03</td> <td>-0.2459268</td> <td>3.17e-03</td> <td>0.2459268</td> <td>3.17e-03</td> <td>0.2459268</td> <td>3.17e-03</td> <td>0.2459268</td> <td>3.17e-03</td> <td>0.2459268</td> <td>3.17e-03</td> <td>0.2459268</td> <td>3.17e-03</td> </td></td>     | havana | protein_coding <td>YES <td>-0.2459268</td> <td>3.17e-03</td> <td>-0.2459268</td> <td>3.17e-03</td> <td>0.2459268</td> <td>3.17e-03</td> <td>0.2459268</td> <td>3.17e-03</td> <td>0.2459268</td> <td>3.17e-03</td> <td>0.2459268</td> <td>3.17e-03</td> <td>0.2459268</td> <td>3.17e-03</td> </td>     | YES <td>-0.2459268</td> <td>3.17e-03</td> <td>-0.2459268</td> <td>3.17e-03</td> <td>0.2459268</td> <td>3.17e-03</td> <td>0.2459268</td> <td>3.17e-03</td> <td>0.2459268</td> <td>3.17e-03</td> <td>0.2459268</td> <td>3.17e-03</td> <td>0.2459268</td> <td>3.17e-03</td>  | -0.2459268 | 3.17e-03   | -0.2459268 | 3.17e-03  | 0.2459268 | 3.17e-03  | 0.2459268 | 3.17e-03  | 0.2459268 | 3.17e-03  | 0.2459268 | 3.17e-03   | 0.2459268  | 3.17e-03 |
| ENSG0000010278 | 17 | 213748   | 218106   | SLC6A7    | ensembl <td>havana</td> <td>protein_coding <td>YES <td>-0.2459268</td> <td>3.17e-03</td> <td>-0.2459268</td> <td>3.17e-03</td> <td>0.2459268</td> <td>3.17e-03</td> <td>0.2459268</td> <td>3.17e-03</td> <td>0.2459268</td> <td>3.17e-03</td> <td>0.2459268</td> <td>3.17e-03</td> <td>0.2459268</td> <td>3.17e-03</td> </td></td>     | havana | protein_coding <td>YES <td>-0.2459268</td> <td>3.17e-03</td> <td>-0.2459268</td> <td>3.17e-03</td> <td>0.2459268</td> <td>3.17e-03</td> <td>0.2459268</td> <td>3.17e-03</td> <td>0.2459268</td> <td>3.17e-03</td> <td>0.2459268</td> <td>3.17e-03</td> <td>0.2459268</td> <td>3.17e-03</td> </td>     | YES <td>-0.2459268</td> <td>3.17e-03</td> <td>-0.2459268</td> <td>3.17e-03</td> <td>0.2459268</td> <td>3.17e-03</td> <td>0.2459268</td> <td>3.17e-03</td> <td>0.2459268</td> <td>3.17e-03</td> <td>0.2459268</td> <td>3.17e-03</td> <td>0.2459268</td> <td>3.17e-03</td>  | -0.2459268 | 3.17e-03   | -0.2459268 | 3.17e-03  | 0.2459268 | 3.17e-03  | 0.2459268 | 3.17e-03  | 0.2459268 | 3.17e-03  | 0.2459268 | 3.17e-03   | 0.2459268  | 3.17e-03 |
| ENSG0000010278 | 17 | 213748   | 218106   | SLC6A7    | ensembl <td>havana</td> <td>protein_coding <td>YES <td>-0.2459268</td> <td>3.17e-03</td> <td>-0.2459268</td> <td>3.17e-03</td> <td>0.2459268</td> <td>3.17e-03</td> <td>0.2459268</td> <td>3.17e-03</td> <td>0.2459268</td> <td>3.17e-03</td> <td>0.2459268</td> <td>3.17e-03</td> <td>0.2459268</td> <td>3.17e-03</td> </td></td>     | havana | protein_coding <td>YES <td>-0.2459268</td> <td>3.17e-03</td> <td>-0.2459268</td> <td>3.17e-03</td> <td>0.2459268</td> <td>3.17e-03</td> <td>0.2459268</td> <td>3.17e-03</td> <td>0.2459268</td> <td>3.17e-03</td> <td>0.2459268</td> <td>3.17e-03</td> <td>0.2459268</td> <td>3.17e-03</td> </td>     | YES <td>-0.2459268</td> <td>3.17e-03</td> <td>-0.2459268</td> <td>3.17e-03</td> <td>0.2459268</td> <td>3.17e-03</td> <td>0.2459268</td> <td>3.17e-03</td> <td>0.2459268</td> <td>3.17e-03</td> <td>0.2459268</td> <td>3.17e-03</td> <td>0.2459268</td> <td>3.17e-03</td>  | -0.2459268 | 3.17e-03   | -0.2459268 | 3.17e-03  | 0.2459268 | 3.17e-03  | 0.2459268 | 3.17e-03  | 0.2459268 | 3.17e-03  | 0.2459268 | 3.17e-03   | 0.2459268  | 3.17e-03 |
| ENSG0000010278 | 17 | 213748   | 218106   | SLC6A7    | ensembl <td>havana</td> <td>protein_coding <td>YES <td>-0.2459268</td> <td>3.17e-03</td> <td>-0.2459268</td> <td>3.17e-03</td> <td>0.2459268</td> <td>3.17e-03</td> <td>0.2459268</td> <td>3.17e-03</td> <td>0.2459268</td> <td>3.17e-03</td> <td>0.2459268</td> <td>3.17e-03</td> <td>0.2459268</td> <td>3.17e-03</td> </td></td>     | havana | protein_coding <td>YES <td>-0.2459268</td> <td>3.17e-03</td> <td>-0.2459268</td> <td>3.17e-03</td> <td>0.2459268</td> <td>3.17e-03</td> <td>0.2459268</td> <td>3.17e-03</td> <td>0.2459268</td> <td>3.17e-03</td> <td>0.2459268</td> <td>3.17e-03</td> <td>0.2459268</td> <td>3.17e-03</td> </td>     | YES <td>-0.2459268</td> <td>3.17e-03</td> <td>-0.2459268</td> <td>3.17e-03</td> <td>0.2459268</td> <td>3.17e-03</td> <td>0.2459268</td> <td>3.17e-03</td> <td>0.2459268</td> <td>3.17e-03</td> <td>0.2459268</td> <td>3.17e-03</td> <td>0.2459268</td> <td>3.17e-03</td>  | -0.2459268 | 3.17e-03   | -0.2459268 | 3.17e-03  | 0.2459268 | 3.17e-03  | 0.2459268 | 3.17e-03  | 0.2459268 | 3.17e-03  | 0.2459268 | 3.17e-03   | 0.2459268  | 3.17e-03 |
| ENSG0000010278 | 17 | 213748   | 218106   | SLC6A7    | ensembl <td>havana</td> <td>protein_coding <td>YES <td>-0.2459268</td> <td>3.17e-03</td> <td>-0.2459268</td> <td>3.17e-03</td> <td>0.2459268</td> <td>3.17e-03</td> <td>0.2459268</td> <td>3.17e-03</td> <td>0.2459268</td> <td>3.17e-03</td> <td>0.2459268</td> <td>3.17e-03</td> <td>0.2459268</td> <td>3.17e-03</td> </td></td>     | havana | protein_coding <td>YES <td>-0.2459268</td> <td>3.17e-03</td> <td>-0.2459268</td> <td>3.17e-03</td> <td>0.2459268</td> <td>3.17e-03</td> <td>0.2459268</td> <td>3.17e-03</td> <td>0.2459268</td> <td>3.17e-03</td> <td>0.2459268</td> <td>3.17e-03</td> <td>0.2459268</td> <td>3.17e-03</td> </td>     | YES <td>-0.2459268</td> <td>3.17e-03</td> <td>-0.2459268</td> <td>3.17e-03</td> <td>0.2459268</td> <td>3.17e-03</td> <td>0.2459268</td> <td>3.17e-03</td> <td>0.2459268</td> <td>3.17e-03</td> <td>0.2459268</td> <td>3.17e-03</td> <td>0.2459268</td> <td>3.17e-03</td>  | -0.2459268 | 3.17e-03   | -0.2459268 | 3.17e-03  | 0.2459268 | 3.17e-03  | 0.2459268 | 3.17e-03  | 0.2459268 | 3.17e-03  | 0.2459268 | 3.17e-03   | 0.2459268  | 3.17e-03 |
| ENSG0000010278 | 17 | 213748   | 218106   | SLC6A7    | ensembl <td>havana</td> <td>protein_coding <td>YES <td>-0.2459268</td> <td>3.17e-03</td> <td>-0.2459268</td> <td>3.17e-03</td> <td>0.2459268</td> <td>3.17e-03</td> <td>0.2459268</td> <td>3.17e-03</td> <td>0.2459268</td> <td>3.17e-03</td> <td>0.2459268</td> <td>3.17e-03</td> <td>0.2459268</td> <td>3.17e-03</td> </td></td>     | havana | protein_coding <td>YES <td>-0.2459268</td> <td>3.17e-03</td> <td>-0.2459268</td> <td>3.17e-03</td> <td>0.2459268</td> <td>3.17e-03</td> <td>0.2459268</td> <td>3.17e-03</td> <td>0.2459268</td> <td>3.17e-03</td> <td>0.2459268</td> <td>3.17e-03</td> <td>0.2459268</td> <td>3.17e-03</td> </td>     | YES <td>-0.2459268</td> <td>3.17e-03</td> <td>-0.2459268</td> <td>3.17e-03</td> <td>0.2459268</td> <td>3.17e-03</td> <td>0.2459268</td> <td>3.17e-03</td> <td>0.2459268</td> <td>3.17e-03</td> <td>0.2459268</td> <td>3.17e-03</td> <td>0.2459268</td> <td>3.17e-03</td>  | -0.2459268 | 3.17e-03   | -0.2459268 | 3.17e-03  | 0.2459268 | 3.17e-03  | 0.2459268 | 3.17e-03  | 0.2459268 | 3.17e-03  | 0.2459268 | 3.17e-03   | 0.2459268  | 3.17e-03 |
| ENSG0000010278 | 17 | 213748   | 218106   | SLC6A7    | ensembl <td>havana</td> <td>protein_coding <td>YES <td>-0.2459268</td> <td>3.17e-03</td> <td>-0.2459268</td> <td>3.17e-03</td> <td>0.2459268</td> <td>3.17e-03</td> <td>0.2459268</td> <td>3.17e-03</td> <td>0.2459268</td> <td>3.17e-03</td> <td>0.2459268</td> <td>3.17e-03</td> <td>0.2459268</td> <td>3.17e-03</td> </td></td>     | havana | protein_coding <td>YES <td>-0.2459268</td> <td>3.17e-03</td> <td>-0.2459268</td> <td>3.17e-03</td> <td>0.2459268</td> <td>3.17e-03</td> <td>0.2459268</td> <td>3.17e-03</td> <td>0.2459268</td> <td>3.17e-03</td> <td>0.2459268</td> <td>3.17e-03</td> <td>0.2459268</td> <td>3.17e-03</td> </td>     | YES <td>-0.2459268</td> <td>3.17e-03</td> <td>-0.2459268</td> <td>3.17e-03</td> <td>0.2459268</td> <td>3.17e-03</td> <td>0.2459268</td> <td>3.17e-03</td> <td>0.2459268</td> <td>3.17e-03</td> <td>0.2459268</td> <td>3.17e-03</td> <td>0.2459268</td> <td>3.17e-03</td>  | -0.2459268 | 3.17e-03   | -0.2459268 | 3.17e-03  | 0.2459268 | 3.17e-03  | 0.2459268 | 3.17e-03  | 0.2459268 | 3.17e-03  | 0.2459268 | 3.17e-03   | 0.2459268  | 3.17e-03 |
| ENSG0000010278 | 17 | 213748   | 218106   | SLC6A7    | ensembl <td>havana</td> <td>protein_coding <td>YES <td>-0.2459268</td> <td>3.17e-03</td> <td>-0.2459268</td> <td>3.17e-03</td> <td>0.2459268</td> <td>3.17e-03</td> <td>0.2459268</td> <td>3.17e-03</td> <td>0.2459268</td> <td>3.17e-03</td> <td>0.2459268</td> <td>3.17e-03</td> <td>0.2459268</td> <td>3.17e-03</td> </td></td>     | havana | protein_coding <td>YES <td>-0.2459268</td> <td>3.17e-03</td> <td>-0.2459268</td> <td>3.17e-03</td> <td>0.2459268</td> <td>3.17e-03</td> <td>0.2459268</td> <td>3.17e-03</td> <td>0.2459268</td> <td>3.17e-03</td> <td>0.2459268</td> <td>3.17e-03</td> <td>0.2459268</td> <td>3.17e-03</td> </td>     | YES <td>-0.2459268</td> <td>3.17e-03</td> <td>-0.2459268</td> <td>3.17e-03</td> <td>0.2459268</td> <td>3.17e-03</td> <td>0.2459268</td> <td>3.17e-03</td> <td>0.2459268</td> <td>3.17e-03</td> <td>0.2459268</td> <td>3.17e-03</td> <td>0.2459268</td> <td>3.17e-03</td>  | -0.2459268 | 3.17e-03   | -0.2459268 | 3.17e-03  | 0.2459268 | 3.17e-03  | 0.2459268 | 3.17e-03  | 0.2459268 | 3.17e-03  | 0.2459268 | 3.17e-03   | 0.2459268  | 3.17e-03 |
| ENSG0000010278 | 17 | 213748   | 218106   | SLC6A7    | ensembl <td>havana</td> <td>protein_coding <td>YES <td>-0.2459268</td> <td>3.17e-03</td> <td>-0.2459268</td> <td>3.17e-03</td> <td>0.2459268</td> <td>3.17e-03</td> <td>0.2459268</td> <td>3.17e-03</td> <td>0.2459268</td> <td>3.17e-03</td> <td>0.2459268</td> <td>3.17e-03</td> <td>0.2459268</td> <td>3.17e-03</td> </td></td>     | havana | protein_coding <td>YES <td>-0.2459268</td> <td>3.17e-03</td> <td>-0.2459268</td> <td>3.17e-03</td> <td>0.2459268</td> <td>3.17e-03</td> <td>0.2459268</td> <td>3.17e-03</td> <td>0.2459268</td> <td>3.17e-03</td> <td>0.2459268</td> <td>3.17e-03</td> <td>0.2459268</td> <td>3.17e-03</td> </td>     | YES <td>-0.2459268</td> <td>3.17e-03</td> <td>-0.2459268</td> <td>3.17e-03</td> <td>0.2459268</td> <td>3.17e-03</td> <td>0.2459268</td> <td>3.17e-03</td> <td>0.2459268</td> <td>3.17e-03</td> <td>0.2459268</td> <td>3.17e-03</td> <td>0.2459268</td> <td>3.17e-03</td>  | -0.2459268 | 3.17e-03   | -0.2459268 | 3.17e-03  | 0.2459268 | 3.17e-03  | 0.2459268 | 3.17e-03  | 0.2459268 | 3.17e-03  | 0.2459268 | 3.17e-03   | 0.2459268  | 3.17e-03 |
| ENSG0000010278 | 17 | 213748   | 218106   | SLC6A7    | ensembl <td>havana</td> <td>protein_coding <td>YES <td>-0.2459268</td> <td>3.17e-03</td> <td>-0.2459268</td> <td>3.17e-03</td> <td>0.2459268</td> <td>3.17e-03</td> <td>0.2459268</td> <td>3.17e-03</td> <td>0.2459268</td> <td>3.17e-03</td> <td>0.2459268</td> <td>3.17e-03</td> <td>0.2459268</td> <td>3.17e-03</td> </td></td>     | havana | protein_coding <td>YES <td>-0.2459268</td> <td>3.17e-03</td> <td>-0.2459268</td> <td>3.17e-03</td> <td>0.2459268</td> <td>3.17e-03</td> <td>0.2459268</td> <td>3.17e-03</td> <td>0.2459268</td> <td>3.17e-03</td> <td>0.2459268</td> <td>3.17e-03</td> <td>0.2459268</td> <td>3.17e-03</td> </td>     | YES <td>-0.2459268</td> <td>3.17e-03</td> <td>-0.2459268</td> <td>3.17e-03</td> <td>0.2459268</td> <td>3.17e-03</td> <td>0.2459268</td> <td>3.17e-03</td> <td>0.2459268</td> <td>3.17e-03</td> <td>0.2459268</td> <td>3.17e-03</td> <td>0.2459268</td> <td>3.17e-03</td>  | -0.2459268 | 3.17e-03   | -0.2459268 | 3.17e-03  | 0.2459268 | 3.17e-03  | 0.2459268 | 3.17e-03  | 0.2459268 | 3.17e-03  | 0.2459268 | 3.17e-03   | 0.2459268  | 3.17e-03 |
| ENSG0000010278 | 17 | 213748   | 218106   | SLC6A7    | ensembl <td>havana</td> <td>protein_coding <td>YES <td>-0.2459268</td> <td>3.17e-03</td> <td>-0.2459268</td> <td>3.17e-03</td> <td>0.2459268</td> <td>3.17e-03</td> <td>0.2459268</td> <td>3.17e-03</td> <td>0.2459268</td> <td>3.17e-03</td> <td>0.2459268</td> <td>3.17e-03</td> <td>0.2459268</td> <td>3.17e-03</td> </td></td>     | havana | protein_coding <td>YES <td>-0.2459268</td> <td>3.17e-03</td> <td>-0.2459268</td> <td>3.17e-03</td> <td>0.2459268</td> <td>3.17e-03</td> <td>0.2459268</td> <td>3.17e-03</td> <td>0.2459268</td> <td>3.17e-03</td> <td>0.2459268</td> <td>3.17e-03</td> <td>0.2459268</td> <td>3.17e-03</td> </td>     | YES <td>-0.2459268</td> <td>3.17e-03</td> <td>-0.2459268</td> <td>3.17e-03</td> <td>0.2459268</td> <td>3.17e-03</td> <td>0.2459268</td> <td>3.17e-03</td> <td>0.2459268</td> <td>3.17e-03</td> <td>0.2459268</td> <td>3.17e-03</td> <td>0.2459268</td> <td>3.17e-03</td>  | -0.2459268 | 3.17e-03   | -0.2459268 | 3.17e-03  | 0.2459268 | 3.17e-03  | 0.2459268 | 3.17e-03  | 0.2459268 | 3.17e-03  | 0.2459268 | 3.17e-03   | 0.2459268  | 3.17e-03 |
| ENSG0000010278 | 17 | 213748   | 218106   | SLC6A7    | ensembl <td>havana</td> <td>protein_coding <td>YES <td>-0.2459268</td> <td>3.17e-03</td> <td>-0.2459268</td> <td>3.17e-03</td> <td>0.2459268</td> <td>3.17e-03</td> <td>0.2459268</td> <td>3.17e-03</td> <td>0.2459268</td> <td>3.17e-03</td> <td>0.2459268</td> <td>3.17e-03</td> <td>0.2459268</td> <td>3.17e-03</td> </td></td>     | havana | protein_coding <td>YES <td>-0.2459268</td> <td>3.17e-03</td> <td>-0.2459268</td> <td>3.17e-03</td> <td>0.2459268</td> <td>3.17e-03</td> <td>0.2459268</td> <td>3.17e-03</td> <td>0.2459268</td> <td>3.17e-03</td> <td>0.2459268</td> <td>3.17e-03</td> <td>0.2459268</td> <td>3.17e-03</td> </td>     | YES <td>-0.2459268</td> <td>3.17e-03</td> <td>-0.2459268</td> <td>3.17e-03</td> <td>0.2459268</td> <td>3.17e-03</td> <td>0.2459268</td> <td>3.17e-03</td> <td>0.2459268</td> <td>3.17e-03</td> <td>0.2459268</td> <td>3.17e-03</td> <td>0.2459268</td> <td>3.17e-03</td>  | -0.2459268 | 3.17e-03   | -0.2459268 | 3.17e-03  | 0.2459268 | 3.17e-03  | 0.2459268 | 3.17e-03  | 0.2459268 | 3.17e-03  | 0.2459268 | 3.17e-03   | 0.2459268  | 3.17e-03 |
| ENSG0000010278 | 17 | 213748   | 218106   | SLC6A7    | ensembl <td>havana</td> <td>protein_coding <td>YES <td>-0.2459268</td> <td>3.17e-03</td> <td>-0.2459268</td> <td>3.17e-03</td> <td>0.2459268</td> <td>3.17e-03</td> <td>0.2459268</td> <td>3.17e-03</td> <td>0.2459268</td> <td>3.17e-03</td> <td>0.2459268</td> <td>3.17e-03</td> <td>0.2459268</td> <td>3.17e-03</td> </td></td>     | havana | protein_coding <td>YES <td>-0.2459268</td> <td>3.17e-03</td> <td>-0.2459268</td> <td>3.17e-03</td> <td>0.2459268</td> <td>3.17e-03</td> <td>0.2459268</td> <td>3.17e-03</td> <td>0.2459268</td> <td>3.17e-03</td> <td>0.2459268</td> <td>3.17e-03</td> <td>0.2459268</td> <td>3.17e-03</td> </td>     | YES <td>-0.2459268</td> <td>3.17e-03</td> <td>-0.2459268</td> <td>3.17e-03</td> <td>0.2459268</td> <td>3.17e-03</td> <td>0.2459268</td> <td>3.17e-03</td> <td>0.2459268</td> <td>3.17e-03</td> <td>0.2459268</td> <td>3.17e-03</td> <td>0.2459268</td> <td>3.17e-03</td>  | -0.2459268 | 3.17e-03   | -0.2459268 | 3.17e-03  | 0.2459268 | 3.17e-03  | 0.2459268 | 3.17e-03  | 0.2459268 | 3.17e-03  | 0.2459268 | 3.17e-03   | 0.2459268  | 3.17e-03 |
| ENSG0000010278 | 17 | 213748   | 218106   | SLC6A7    | ensembl <td>havana</td> <td>protein_coding <td>YES <td>-0.2459268</td> <td>3.17e-03</td> <td>-0.2459268</td> <td>3.17e-03</td> <td>0.2459268</td> <td>3.17e-03</td> <td>0.2459268</td> <td>3.17e-03</td> <td>0.2459268</td> <td>3.17e-03</td> <td>0.2459268</td> <td>3.17e-03</td> <td>0.2459268</td> <td>3.17e-03</td> </td></td>     | havana | protein_coding <td>YES <td>-0.2459268</td> <td>3.17e-03</td> <td>-0.2459268</td> <td>3.17e-03</td> <td>0.2459268</td> <td>3.17e-03</td> <td>0.2459268</td> <td>3.17e-03</td> <td>0.2459268</td> <td>3.17e-03</td> <td>0.2459268</td> <td>3.17e-03</td> <td>0.2459268</td> <td>3.17e-03</td> </td>     | YES <td>-0.2459268</td> <td>3.17e-03</td> <td>-0.2459268</td> <td>3.17e-03</td> <td>0.2459268</td> <td>3.17e-03</td> <td>0.2459268</td> <td>3.17e-03</td> <td>0.2459268</td> <td>3.17e-03</td> <td>0.2459268</td> <td>3.17e-03</td> <td>0.2459268</td> <td>3.17e-03</td>  | -0.2459268 | 3.17e-03   | -0.2459268 | 3.17e-03  | 0.2459268 | 3.17e-03  | 0.2459268 | 3.17e-03  | 0.2459268 | 3.17e-03  | 0.2459268 | 3.17e-03   | 0.2459268  | 3.17e-03 |
| ENSG0000010278 | 17 | 213748   | 218106   | SLC6A7    | ensembl <td>havana</td> <td>protein_coding <td>YES <td>-0.24</td></td></td>                                                                                                                                                                                                                                                            | havana | protein_coding <td>YES <td>-0.24</td></td>                                                                                                                                                                                                                                                            | YES <td>-0.24</td>                                                                                                                                                                                                                                                        | -0.24      |            |            |           |           |           |           |           |           |           |           |            |            |          |

Table with columns for gene ID, coordinates, gene name, protein name, and various numerical values. The table lists numerous genes such as AC118960.1, AC118961.1, AC118962.1, etc., along with their genomic coordinates and associated protein names like AC118960.1, AC118961.1, AC118962.1, etc.





Table with columns for gene ID, coordinates, gene name, transcript, and various numerical values. The table lists numerous genes such as ENSG00000105732, ENSG00000104027, ENSG00000104344, etc., with their respective genomic coordinates and associated data points.

| ENSG0000017788 | 5  | 4300673  | 4300743  | AC00875.1     | havana           | lncRNA           | -0.297345  | 8.63e-03 | -0.251198 | 7.85e-02 | 0.268588  | 1.76e-01 | -0.502621  | 7.54e-03 | -0.448287  | 6.75e-04 | 0.0838148 | 7.04e-01 | -0.102168  | 4.75e-01 |
|----------------|----|----------|----------|---------------|------------------|------------------|------------|----------|-----------|----------|-----------|----------|------------|----------|------------|----------|-----------|----------|------------|----------|
| ENSG0000017990 | 12 | 6355913  | 6356939  | DPY27L2       | transcript_unapp | mRNA             | -0.350341  | 1.79e-02 | -0.314581 | 1.87e-02 | 0.261770  | 1.78e-01 | -0.502811  | 7.52e-03 | -0.460185  | 8.61e-04 | 0.066273  | 7.64e-01 | -0.176611  | 2.20e-01 |
| ENSG0000018341 | 1  | 2361056  | 2361130  | PKP4-IT2      | transcript_unapp | lncRNA           | -0.281176  | 2.34e-02 | -0.263895 | 2.91e-02 | 0.249651  | 4.27e-01 | -0.514344  | 7.48e-03 | -0.460226  | 7.64e-04 | 0.0242626 | 7.66e-01 | -0.241338  | 9.20e-01 |
| ENSG0000018787 | 17 | 6923263  | 6923502  | PROXIMA1      | transcript_unapp | mRNA             | -0.290607  | 8.72e-03 | -0.405764 | 6.40e-02 | 0.195485  | 3.30e-01 | -0.503610  | 7.40e-03 | -0.330993  | 3.47e-03 | 0.104588  | 6.55e-01 | 0.0441310  | 7.60e-01 |
| ENSG0000018284 | 1  | 484242   | 484242   | TRAF4-IT2-AS1 | transcript_unapp | lncRNA           | -0.282424  | 2.34e-02 | -0.263895 | 2.91e-02 | 0.249651  | 4.27e-01 | -0.514344  | 7.48e-03 | -0.460226  | 7.64e-04 | 0.0242626 | 7.66e-01 | -0.241338  | 9.20e-01 |
| ENSG0000018041 | 7  | 1303467  | 1303520  | AC00803.1     | havana           | processed_pseudo | -0.296906  | 6.75e-04 | -0.250477 | 1.55e-03 | 0.540989  | 3.14e-01 | -0.504989  | 3.34e-03 | -0.445549  | 6.95e-04 | 0.0970708 | 6.95e-01 | 0.0124271  | 7.30e-01 |
| ENSG0000018390 | 1  | 5403391  | 5403479  | AL445685.1    | havana           | lncRNA           | -0.330385  | 3.33e-03 | -0.307979 | 3.86e-03 | 0.2094637 | 8.84e-01 | -0.504285  | 7.32e-03 | -0.460294  | 4.60e-04 | 0.1189994 | 5.89e-01 | -0.066998  | 6.94e-01 |
| ENSG0000014028 | 7  | 961338   | 961335   | AC00803.1     | havana           | processed_pseudo | -0.282424  | 2.34e-02 | -0.263895 | 2.91e-02 | 0.249651  | 4.27e-01 | -0.514344  | 7.48e-03 | -0.460226  | 7.64e-04 | 0.0242626 | 7.66e-01 | -0.241338  | 9.20e-01 |
| ENSG0000018114 | 24 | 2238150  | 2238148  | TRAF9-IT2     | transcript_unapp | lncRNA           | -0.282324  | 2.07e-02 | -0.253925 | 1.56e-02 | 0.1795241 | 3.70e-01 | -0.504989  | 3.70e-03 | -0.332521  | 4.95e-03 | 0.1189994 | 7.77e-01 | 0.0441310  | 7.40e-01 |
| ENSG0000017802 | 15 | 7488005  | 7488021  | MMP1          | transcript_unapp | mRNA             | -0.346705  | 1.11e-03 | -0.346720 | 9.07e-04 | 0.1576802 | 4.32e-01 | -0.505426  | 7.20e-03 | -0.460294  | 3.51e-04 | 0.0974719 | 6.67e-01 | -0.057928  | 6.88e-01 |
| ENSG0000010211 | 1  | 12547476 | 12547553 | AC02702.2     | havana           | processed_pseudo | -0.212413  | 4.56e-03 | -0.239276 | 6.50e-03 | 0.2024238 | 9.16e-01 | -0.508725  | 6.70e-03 | -0.375261  | 3.20e-03 | 0.21093   | 3.36e-01 | -0.17367   | 3.16e-01 |
| ENSG0000018939 | 1  | 695929   | 695925   | SLC5E2B       | transcript_unapp | mRNA             | -0.282424  | 1.01e-04 | -0.442244 | 1.50e-03 | 0.2207603 | 2.88e-01 | -0.506474  | 7.05e-03 | -0.460294  | 5.80e-04 | 0.0403745 | 6.55e-01 | -0.130129  | 6.88e-01 |
| ENSG0000018792 | 22 | 2373862  | 2373112  | ZNF70         | transcript_unapp | mRNA             | -0.315108  | 1.02e-03 | -0.343660 | 1.47e-02 | 0.1024059 | 9.16e-01 | -0.506473  | 7.02e-03 | -0.420251  | 3.51e-04 | 0.1466661 | 6.04e-01 | 0.0388023  | 8.22e-01 |
| ENSG0000011748 | 1  | 2789124  | 2791476  | RAB19         | transcript_unapp | mRNA             | -0.146252  | 2.04e-01 | -0.349564 | 9.18e-02 | 0.2029991 | 9.06e-01 | -0.506749  | 6.97e-03 | -0.420251  | 4.47e-01 | 0.1602687 | 6.28e-01 | -0.0235027 | 7.90e-01 |
| ENSG0000014393 | 1  | 4402947  | 4402932  | PKAOT         | transcript_unapp | mRNA             | -0.282424  | 2.01e-02 | -0.242606 | 1.89e-02 | 0.2009360 | 9.61e-01 | -0.507071  | 6.95e-03 | -0.348099  | 3.14e-03 | 0.044317  | 4.08e-01 | -0.0927291 | 5.47e-01 |
| ENSG0000018998 | 14 | 6494814  | 6497226  | RAB15         | transcript_unapp | mRNA             | -0.252623  | 3.84e-03 | -0.305913 | 5.75e-03 | 0.1072118 | 7.77e-01 | -0.507070  | 6.85e-03 | -0.384615  | 4.08e-03 | 0.0852805 | 6.95e-01 | -0.070229  | 6.28e-01 |
| ENSG0000013250 | 8  | 9059841  | 9098218  | CBFBP8        | transcript_unapp | mRNA             | -0.113489  | 8.80e-03 | -0.154451 | 1.72e-02 | 0.1229252 | 5.41e-01 | -0.507055  | 6.88e-03 | -0.420251  | 3.54e-04 | 0.1137572 | 6.56e-01 | 0.05994117 | 5.08e-01 |
| ENSG0000013471 | 19 | 1178800  | 1178800  | FCBP2         | transcript_unapp | mRNA             | -0.297717  | 8.40e-03 | -0.345451 | 3.79e-03 | 0.1483441 | 1.65e-01 | -0.5070221 | 7.08e-03 | -0.4184264 | 3.10e-03 | 0.139813  | 7.72e-01 | -0.130761  | 3.65e-01 |
| ENSG0000013184 | 2  | 9601055  | 9602380  | FHAI2CP       | transcript_unapp | lncRNA           | -0.297717  | 8.40e-03 | -0.345451 | 3.79e-03 | 0.1483441 | 1.65e-01 | -0.5070221 | 7.08e-03 | -0.4184264 | 3.10e-03 | 0.139813  | 7.72e-01 | -0.130761  | 3.65e-01 |
| ENSG0000013272 | 5  | 15731430 | 15731449 | THG1L         | transcript_unapp | mRNA             | -0.1403473 | 1.57e-01 | -0.276889 | 1.80e-02 | 0.2707815 | 1.72e-01 | -0.5081418 | 6.81e-03 | -0.1723643 | 2.12e-01 | 0.043192  | 8.77e-01 | -0.120921  | 3.66e-01 |
| ENSG0000010245 | 1  | 1462736  | 14609137 | HNR1B         | transcript_unapp | mRNA             | -0.212413  | 4.56e-03 | -0.239276 | 6.50e-03 | 0.2024238 | 9.16e-01 | -0.508725  | 6.70e-03 | -0.375261  | 3.20e-03 | 0.21093   | 3.36e-01 | -0.17367   | 3.16e-01 |
| ENSG0000018156 | 20 | 328383   | 3293900  | AL13334.1     | havana           | lncRNA           | -0.269972  | 1.78e-02 | -0.282225 | 3.54e-02 | 0.0796904 | 6.93e-01 | -0.508901  | 6.70e-03 | -0.3637669 | 8.85e-04 | 0.1287133 | 5.58e-01 | -0.040027  | 7.62e-01 |
| ENSG0000014309 | 11 | 12595736 | 12606335 | CDON          | transcript_unapp | mRNA             | -0.337207  | 2.70e-03 | -0.316273 | 6.06e-02 | 0.1662359 | 4.07e-01 | -0.509081  | 6.69e-03 | -0.502739  | 1.06e-04 | 0.1666663 | 9.40e-01 | -0.105314  | 4.00e-01 |
| ENSG0000017274 | 1  | 11142409 | 11127484 | CAPN9         | transcript_unapp | mRNA             | -0.252623  | 3.84e-03 | -0.275943 | 5.18e-02 | 0.2469939 | 2.85e-01 | -0.509114  | 6.68e-03 | -0.668423  | 3.78e-03 | 0.144465  | 5.40e-01 | -0.075280  | 1.79e-01 |
| ENSG0000018314 | 21 | 1384318  | 1384864  | CPYB-2P9      | transcript_unapp | lncRNA           | -0.282424  | 1.01e-04 | -0.442244 | 1.50e-03 | 0.2207603 | 2.88e-01 | -0.506474  | 7.05e-03 | -0.460294  | 5.80e-04 | 0.0403745 | 6.55e-01 | -0.130129  | 6.88e-01 |
| ENSG0000018908 | 12 | 6852986  | 6853882  | RPS12P1       | transcript_unapp | processed_pseudo | -0.350214  | 1.52e-03 | -0.344843 | 1.52e-03 | 0.2728441 | 1.68e-01 | -0.510511  | 6.57e-03 | -0.442229  | 6.10e-04 | 0.157222  | 4.92e-01 | -0.192481  | 2.16e-01 |
| ENSG0000018943 | 1  | 583394   | 5806824  | FAM7D         | transcript_unapp | mRNA             | -0.280834  | 8.75e-03 | -0.242934 | 9.56e-02 | 0.245933  | 2.17e-01 | -0.510057  | 6.57e-03 | -0.488407  | 6.69e-04 | 0.0888856 | 6.94e-01 | -0.126649  | 2.20e-01 |
| ENSG0000018778 | 1  | 1444304  | 14270399 | SLC47A8       | transcript_unapp | mRNA             | -0.302651  | 1.34e-02 | -0.340011 | 1.54e-02 | 0.1341203 | 6.91e-01 | -0.510426  | 6.90e-03 | -0.404226  | 3.06e-03 | 0.0542430 | 6.94e-01 | -0.14222   | 3.16e-01 |
| ENSG0000010004 | 17 | 7884796  | 7817260  | CHD3          | transcript_unapp | mRNA             | -0.347455  | 1.23e-03 | -0.381311 | 2.26e-02 | 0.1517448 | 6.41e-01 | -0.513960  | 6.08e-03 | -0.507740  | 5.84e-04 | 0.170549  | 7.54e-01 | -0.105201  | 3.46e-01 |
| ENSG0000016128 | 12 | 12672987 | 12672259 | LINC00944     | transcript_unapp | lncRNA           | -0.272391  | 1.65e-02 | -0.387206 | 5.47e-02 | 0.170139  | 3.77e-01 | -0.5117306 | 6.86e-03 | -0.303943  | 3.55e-03 | 0.1078423 | 6.24e-01 | -0.048301  | 8.10e-01 |
| ENSG0000019564 | 1  | 4206243  | 4234269  | SLC12A7       | transcript_unapp | mRNA             | -0.282424  | 1.01e-04 | -0.442244 | 1.50e-03 | 0.2207603 | 2.88e-01 | -0.506474  | 7.05e-03 | -0.460294  | 5.80e-04 | 0.0403745 | 6.55e-01 | -0.130129  | 6.88e-01 |
| ENSG0000018052 | 10 | 6149383  | 6149649  | AL169592.1    | havana           | transcript_unapp | -0.253946  | 4.08e-02 | -0.216235 | 1.04e-01 | 0.2019800 | 3.12e-01 | -0.513704  | 6.23e-03 | -0.337706  | 3.25e-03 | 0.125023  | 6.33e-01 | -0.162374  | 2.60e-01 |
| ENSG0000017959 | 17 | 7124848  | 7124252  | CP5A4         | transcript_unapp | mRNA             | -0.278775  | 3.41e-02 | -0.243805 | 6.35e-02 | 0.2049289 | 8.81e-01 | -0.513179  | 6.19e-03 | -0.418464  | 3.87e-03 | 0.191399  | 9.31e-01 | -0.051780  | 8.27e-01 |
| ENSG0000014311 | 1  | 1078719  | 1078719  | SLC12A7       | transcript_unapp | mRNA             | -0.282424  | 1.01e-04 | -0.442244 | 1.50e-03 | 0.2207603 | 2.88e-01 | -0.506474  | 7.05e-03 | -0.460294  | 5.80e-04 | 0.0403745 | 6.55e-01 | -0.130129  | 6.88e-01 |
| ENSG0000017920 | 14 | 7831130  | 7841419  | GVY03         | transcript_unapp | mRNA             | -0.390487  | 4.81e-02 | -0.312706 | 9.59e-02 | 0.483074  | 1.07e-01 | -0.514145  | 6.08e-03 | -0.600779  | 3.23e-03 | 0.1304014 | 3.36e-01 | -0.318905  | 7.27e-01 |
| ENSG0000018000 | 19 | 4002366  | 4005631  | ZNF708        | transcript_unapp | mRNA             | -0.290409  | 4.01e-02 | -0.318338 | 2.07e-02 | 0.1046527 | 9.42e-01 | -0.514743  | 6.01e-03 | -0.405467  | 2.83e-03 | 0.1269626 | 6.97e-01 | -0.105033  | 3.47e-01 |
| ENSG0000018286 | 1  | 1325129  | 1323865  | ANKK1         | transcript_unapp | mRNA             | -0.461931  | 2.32e-02 | -0.492907 | 2.81e-02 | 0.228813  | 2.28e-01 | -0.514845  | 6.08e-03 | -0.524792  | 4.83e-03 | 0.035217  | 2.97e-01 | -0.287193  | 4.73e-01 |
| ENSG0000019571 | 1  | 1432849  | 1432849  | TKX           | transcript_unapp | mRNA             | -0.272807  | 1.72e-02 | -0.272807 | 1.72e-02 | 0.1426787 | 1.62e-01 | -0.514845  | 6.08e-03 | -0.385638  | 3.68e-03 | 0.0561679 | 6.94e-01 | -0.14222   | 2.61e-01 |
| ENSG0000018307 | 11 | 618930   | 617048   | OR52B2        | transcript_unapp | mRNA             | -0.237670  | 4.08e-02 | -0.276768 | 7.38e-02 | 0.1055094 | 7.82e-01 | -0.515044  | 5.98e-03 | -0.310168  | 2.32e-03 | 0.1466414 | 5.04e-01 | -0.09203   | 9.48e-01 |
| ENSG0000017846 | 15 | 9949712  | 9949875  | AC02560.4     | transcript_unapp | lncRNA           | -0.273472  | 3.83e-02 | -0.276737 | 4.65e-02 | 0.1639711 | 4.15e-01 | -0.515022  | 5.97e-03 | -0.324425  | 3.67e-03 | 0.1487834 | 4.44e-01 | -0.119307  | 3.98e-01 |
| ENSG0000018807 | 1  | 1264432  | 1264432  | FRAX          | transcript_unapp | lncRNA           | -0.264041  | 1.57e-02 | -0.264041 | 1.57e-02 | 0.1426787 | 1.62e-01 | -0.514845  | 6.08e-03 | -0.385638  | 3.68e-03 | 0.0561679 | 6.94e-01 | -0.14222   | 2.61e-01 |
| ENSG0000014738 | 8  | 4152918  | 4145400  | GINS4         | transcript_unapp | mRNA             | -0.3287    | 1.51e-02 | -0.245605 | 8.55e-02 | 0.15178   | 3.51e-01 | -0.51578   | 5.86e-03 | -0.515784  | 3.96e-03 | 0.009176  | 6.76e-01 | -0.100254  | 8.46e-01 |
| ENSG0000014346 | 2  | 20084240 | 20084561 | BCL2L1        | transcript_unapp | mRNA             | -0.299963  | 7.37e-01 | -0.110406 | 1.84e-01 | 0.3806379 | 6.89e-01 | -0.5198083 | 5.87e-03 | -0.3389735 | 6.68e-04 | 0.0799713 | 6.5      |            |          |





Supplemental Table 14. LncRNAs correlated with RSAD2 expression in SJD whole blood RNA-seq analyses

| ENS_ID          | 38.5 gene symbol | Gene Name  | DE SJD <sup>All</sup> | DE SJD <sup>Ro+</sup> | DE SJD <sup>Ro-</sup> | Correlation Dataset |             |                |            |             |            | Gene-Neighbor | Gene-Neighbor ENS_ID | SJDro+ vs HC Log2FC (p <sub>adj</sub> ) |
|-----------------|------------------|------------|-----------------------|-----------------------|-----------------------|---------------------|-------------|----------------|------------|-------------|------------|---------------|----------------------|-----------------------------------------|
|                 |                  |            |                       |                       |                       | SJD Ro+ Only        |             | SJD Ro+ and HC |            | HC          |            |               |                      |                                         |
|                 |                  |            |                       |                       |                       | Pearson-R           | p value     | Pearson-R      | p value    | Pearson-R   | p value    |               |                      |                                         |
| ENSG00000225964 | NRIR             | NRIR       | YES                   | YES                   |                       | <b>0.81</b>         | 0.000000343 | <b>0.86</b>    | 1.89E-16   | <b>0.92</b> | 9.36E-12   | CMPK2         | ENSG00000134326      | 2.10 (6.26E-08)                         |
| ENSG00000272666 | KLHDC7B-DT       | KLHDC7B-DT |                       | YES                   |                       | <b>0.77</b>         | 2.69E-06    | <b>0.79</b>    | 8.37E-13   | <b>0.75</b> | 7.95E-06   | KLHDC7B       | ENSG00000130487      | ND                                      |
| ENSG00000234426 | AL139042.1       | AL139042.1 |                       |                       |                       | <b>0.76</b>         | 4.18E-06    | 0.46           | 1.26E-05   | 0.36        | 6.38E-02   | NA            |                      |                                         |
| ENSG00000286313 | AL360178.1       | PDE7B-AS1  |                       |                       |                       | <b>0.72</b>         | 1.99E-05    | 0.45           | 5.68E-04   | 0.09        | 6.64E-01   | PDE7B         | ENSG00000171408      | ND                                      |
| ENSG00000228318 | AP001610.2       | MX1-AS1    | YES                   | YES                   |                       | <b>0.72</b>         | 2.17E-05    | <b>0.79</b>    | 1.56E-12   | <b>0.78</b> | 1.65E-06   | MX1           | ENSG00000157601      | 1.89 (2.50E-07)                         |
| ENSG00000282851 | BISPR            | BISPR      |                       |                       |                       | <b>0.71</b>         | 2.79E-05    | <b>0.78</b>    | 5.18E-12   | <b>0.80</b> | 5.29E-07   | MVB12A        | ENSG00000141971      | ND                                      |
| ENSG00000222041 | CYTOR            | CYTOR      |                       |                       |                       | <b>0.71</b>         | 3.99E-05    | 0.64           | 0.00000197 | 0.04        | 8.43E-01   | LINC01943     | ENSG00000280721      | ND                                      |
| ENSG00000273272 | U62317.3         | U62317.3   | YES                   | YES                   |                       | <b>0.69</b>         | 5.14E-05    | <b>0.78</b>    | 3.81E-12   | <b>0.69</b> | 7.57E-05   | KLHDC7B       | ENSG00000130487      | ND                                      |
| ENSG00000257452 | AC004551.1       | OAS123-AS1 | YES                   | YES                   |                       | <b>0.68</b>         | 8.92E-05    | <b>0.74</b>    | 2.11E-10   | 0.45        | 1.81E-02   | OAS1          | ENSG00000089127      | 2.04 (2.40E-10)                         |
|                 |                  |            |                       |                       |                       |                     |             |                |            |             |            | OAS2          | ENSG00000111335      | 1.86 (2.31E-10)                         |
|                 |                  |            |                       |                       |                       |                     |             |                |            |             |            | OAS3          | ENSG00000111331      | 2.31 (2.02E-09)                         |
| ENSG00000277511 | AC116407.2       | AC116407.2 |                       | YES                   |                       | <b>0.68</b>         | 1.05E-04    | <b>0.74</b>    | 2.4E-10    | <b>0.67</b> | 1.15E-04   | NA            |                      |                                         |
| ENSG00000197536 | IRF1-AS1         | IRF1-AS1   |                       |                       |                       | <b>0.69</b>         | 5.12E-05    | <b>0.72</b>    | 7.4E-10    | 0.36        | 6.76E-02   | IRF1          | ENSG00000125347      | ND                                      |
| ENSG00000277010 | AC120498.10      | TPSG1-AS1  |                       |                       | YES                   | -0.32               | 1.06E-01    | -0.09          | 4.96E-01   | <b>0.82</b> | 0.00000132 | TPSG1         | ENSG00000116176      | ND                                      |
| ENSG00000224228 | AL031599.1       | AL031599.1 |                       |                       | YES                   | -0.44               | 2.26E-02    | -0.07          | 6.38E-01   | <b>0.75</b> | 0.00000636 | NA            |                      |                                         |
| ENSG00000243832 | LINC02000        | LINC02000  | YES                   | YES                   |                       | 0.11                | 6.00E-01    | -0.03          | 8.32E-01   | <b>0.74</b> | 0.00000874 | NA            |                      |                                         |
| ENSG00000274422 | AC245060.5       | AC245060.5 | YES                   | YES                   | YES                   | -0.04               | 8.40E-01    | 0.31           | 2.13E-02   | <b>0.74</b> | 0.00000939 | NA            |                      |                                         |
| ENSG00000267481 | AC011477.1       | AC011477.1 |                       |                       |                       | <b>-0.65</b>        | 2.18E-04    | <b>-0.57</b>   | 6.29E-06   | -0.22       | 2.65E-01   | ZNF506        | ENSG00000081665      | ND                                      |
| ENSG00000266916 | ZNF793-AS1       | ZNF793-AS1 | YES                   |                       | YES                   | <b>-0.62</b>        | 5.03E-04    | -0.36          | 7.48E-03   | -0.07       | 7.32E-01   | ZNF793        | ENSG00000188227      | ND                                      |
| ENSG00000197989 | SNHG12           | SNHG12     |                       |                       |                       | <b>-0.62</b>        | 5.07E-04    | -0.42          | 1.44E-03   | -0.12       | 5.62E-01   | TRNAU1AP      | ENSG00000180098      | ND                                      |
| ENSG00000231113 | AL035587.1       | AL035587.1 |                       |                       |                       | <b>-0.60</b>        | 8.66E-04    | -0.47          | 3.75E-04   | -0.30       | 1.27E-01   | CNPY3         | ENSG00000137161      | ND                                      |
| ENSG00000223754 | AC008073.1       | AC008073.1 |                       |                       |                       | <b>-0.60</b>        | 9.35E-04    | -0.37          | 5.45E-03   | -0.16       | 4.38E-01   | FAM228        | ENSG00000186453      | ND                                      |
| ENSG00000228794 | LINC01128        | LINC01128  |                       |                       |                       | <b>-0.59</b>        | 1.04E-03    | <b>-0.61</b>   | 0.00000123 | -0.29       | 1.39E-01   | SOCS5         | ENSG00000171150      | ND                                      |

\*ND transcript not differentially expressed

Pearson-R values shown in bold are &gt;0.65 or &lt;-0.55; Bold and red/blue are ≥0.7 or ≤-0.6, respectively.

Supplemental Table 15. Gene Folds bioinformatic analysis of LINC01871 function

| Order | Ensembl Gene ID | Gene Symbol | Mutual Rank | Pearson Correlation | Biotype                            | Chromosome | Chromosome Start | Chromosome End | Annotation                                                                   |
|-------|-----------------|-------------|-------------|---------------------|------------------------------------|------------|------------------|----------------|------------------------------------------------------------------------------|
| 1     | ENSG00000235576 | CCMA        | 4.2         | 0.69                | protein_coding                     | 5          | 5438478          | 5440360        | granzyme A (granzyme 1, cytotoxic T-lymphocyte-associated serine esterase 3) |
| 2     | ENSG00000145449 | CD2         | 12.2        | 0.63                | protein_coding                     | 1          | 11729707         | 11731190       | CD2 molecule                                                                 |
| 3     | ENSG00000145445 | KLRC1       | 5.7         | 0.62                | protein_coding                     | 12         | 10594863         | 10607284       | killer cell lectin-like receptor subfamily C, member 1                       |
| 4     | ENSG00000145446 | GPR171      | 36.8        | 0.62                | protein_coding                     | 3          | 150915619        | 15092698       | G-protein-coupled receptor 171                                               |
| 5     | ENSG00000233355 | PTF1N1      | 29.8        | 0.61                | processed_transcript               | 1          | 238893164        | 23890376       | ubiquitin-associated serine esterase RNA 2                                   |
| 22    | ENSG00000115263 | ITK         | 63.3        | 0.61                | protein_coding                     | 5          | 15658984         | 15668201       | IL2-inducible T-cell kinase                                                  |
| 23    | ENSG00000183554 | UBASH3A     | 54.9        | 0.6                 | protein_coding                     | 1          | 15891466         | 15894644       | tyrosine and HNK domain family, member 1                                     |
| 18    | ENSG00000134539 | KLRD1       | 53.1        | 0.58                | protein_coding                     | 21         | 43842008         | 43847791       | ubiquitin-associated serine esterase containing A                            |
| 24    | ENSG00000196320 | GIAP5       | 69.5        | 0.58                | protein_coding                     | 7          | 150419341        | 15044712       | killer cell lectin-like receptor subfamily D, member 1                       |
| 13    | ENSG00000211795 | TR V gene   | 41.1        | 0.58                | TR V gene                          | 14         | 22329329         | 22329327       | T cell receptor alpha variable 4delta variable 4                             |
| 13    | ENSG00000180844 | PRF1        | 34.5        | 0.57                | protein_coding                     | 10         | 7237104          | 7238231        | perforin (pore forming protein)                                              |
| 23    | ENSG00000212023 | GIAP4       | 68.8        | 0.57                | protein_coding                     | 7          | 150413645        | 15042132       | GIAPase, IMAP family member 1                                                |
| 38    | ENSG00000205495 | SLFN1L      | 113.9       | 0.57                | protein_coding                     | 17         | 33711298         | 33814890       | schlafen family member 12-like                                               |
| 22    | ENSG00000144626 | SCML4       | 126.6       | 0.57                | protein_coding                     | 6          | 106025308        | 106145521      | sex comb on midleg-like 4 (Drosophila)                                       |
| 61    | ENSG00000233093 | LINC00882   | 189         | 0.56                | processed_transcript               | X          | 135721702        | 135724588      | long intergenic non-protein coding RNA 892                                   |
| 5     | ENSG00000115337 | ITFC        | 11          | 0.56                | protein_coding                     | 12         | 8044548          | 8053327        | interferon, gamma 2                                                          |
| 16    | ENSG00000100450 | GZMH        | 25.9        | 0.56                | processed_transcript               | 14         | 25075686         | 25078905       | granzyme H (cathepsin G-like 2, protein h-CCPI)                              |
| 16    | ENSG00000183813 | CCR4        | 43.3        | 0.56                | protein_coding                     | 3          | 32993056         | 32997441       | chemokine (C-C motif) receptor 4                                             |
| 30    | ENSG00000198821 | CD247       | 201.8       | 0.56                | protein_coding                     | 1          | 182789877        | 182798447      | CD247 molecule                                                               |
| 33    | ENSG00000213809 | KLRK1       | 101.7       | 0.56                | protein_coding                     | 12         | 10524852         | 10544473       | killer cell lectin-like receptor subfamily K, member 1                       |
| 35    | ENSG00000117560 | FASLG       | 107.5       | 0.56                | protein_coding                     | 1          | 172628154        | 17263614       | Fas ligand (TNF superfamily, member 6)                                       |
| 39    | ENSG00000184483 | SAMD3       | 119.8       | 0.56                | protein_coding                     | 8          | 93045460         | 93066370       | ecce1 alpha motif domain containing 3                                        |
| 40    | ENSG00000211778 | TR V gene   | 89          | 0.56                | TR V gene                          | 14         | 22217462         | 22217489       | T cell receptor alpha variable 5                                             |
| 37    | ENSG00000211797 | TR V gene   | 110.8       | 0.56                | TR V gene                          | 14         | 22465778         | 22466407       | T cell receptor alpha variable 17                                            |
| 49    | ENSG00000208789 | TR V gene   | 145.3       | 0.56                | TR V gene                          | 14         | 2238363          | 2238361        | T cell receptor alpha variable 13-2                                          |
| 26    | ENSG00000103036 | FCRL6       | 78.2        | 0.55                | protein_coding                     | 1          | 159770301        | 159780041      | Fc receptor-like 6                                                           |
| 31    | ENSG00000188229 | PTGDR       | 93          | 0.55                | protein_coding                     | 14         | 52734431         | 52743449       | prostaglandin D2 receptor (DP1)                                              |
| 53    | ENSG00000202723 | PRKCH       | 149.8       | 0.55                | protein_coding                     | 7          | 6161846          | 6201384        | protein kinase, cilia                                                        |
| 60    | ENSG00000168865 | IL7R        | 150.4       | 0.55                | protein_coding                     | 5          | 35852797         | 35870793       | interleukin 7 receptor                                                       |
| 62    | ENSG00000172673 | THEM5       | 159.3       | 0.55                | protein_coding                     | 6          | 128029177        | 12823976       | thymocyte selection associated                                               |
| 47    | ENSG00000211791 | TR V gene   | 123.8       | 0.55                | TR V gene                          | 14         | 2238363          | 2238361        | T cell receptor alpha variable 13-2                                          |
| 58    | ENSG00000211699 | TR V gene   | 149.3       | 0.55                | TR V gene                          | 7          | 38398113         | 38398763       | T cell receptor gamma variable 3                                             |
| 63    | ENSG00000204584 | LINC00861   | 178.1       | 0.54                | lincRNA                            | 8          | 126934552        | 126934933      | long intergenic non-protein coding RNA 861                                   |
| 13    | ENSG00000183690 | CD3E        | 30.3        | 0.54                | protein_coding                     | 2          | 20481471         | 20482400       | inducible T-cell costimulatory protein                                       |
| 14    | ENSG00000150455 | KLRP1       | 37          | 0.54                | protein_coding                     | 12         | 9987007          | 9997006        | killer cell lectin-like receptor subfamily F, member 1                       |
| 32    | ENSG00000137258 | CD3E        | 83.1        | 0.54                | protein_coding                     | 11         | 60739115         | 60739749       | CD3E molecule                                                                |
| 30    | ENSG00000181625 | CD3E        | 83.1        | 0.54                | protein_coding                     | 11         | 1823808          | 1823808        | CD3E molecule (CD3-TCR complex)                                              |
| 50    | ENSG00000183542 | KLRC4       | 147.9       | 0.54                | protein_coding                     | 12         | 10599893         | 10599236       | killer cell lectin-like receptor subfamily C, member 4                       |
| 54    | ENSG00000178144 | GIAP7       | 150.4       | 0.54                | protein_coding                     | 7          | 150211918        | 150218101      | GIAPase, IMAP family member 7                                                |
| 64    | ENSG00000185519 | TRAF1       | 189         | 0.54                | protein_coding                     | 2          | 10861545         | 10862352       | T cell receptor associated transmembrane adaptor 1                           |
| 71    | ENSG00000205491 | KLRK2       | 105         | 0.54                | protein_coding                     | 12         | 1053445          | 1053445        | killer cell lectin-like receptor subfamily K, member 2                       |
| 70    | ENSG00000090790 | TRAF3IP3    | 210.2       | 0.54                | protein_coding                     | 1          | 209529377        | 209556568      | TRAF3 interacting protein 3                                                  |
| 67    | ENSG00000145466 | GZMK        | 227         | 0.54                | protein_coding                     | 4          | 460410           | 4613673        | IL2 tyrosine kinase                                                          |
| 63    | ENSG00000110368 | GZMK        | 226.8       | 0.53                | protein_coding                     | 5          | 54330031         | 54330819       | granzyme K (granzyme 3, tyrosine II)                                         |
| 29    | ENSG00000139187 | KLRG1       | 91.8        | 0.53                | protein_coding                     | 12         | 9102840          | 9103356        | killer cell lectin-like receptor subfamily G, member 1                       |
| 62    | ENSG00000211800 | TR V gene   | 178.3       | 0.53                | TR V gene                          | 14         | 2255450          | 22559399       | T cell receptor alpha variable 20                                            |
| 66    | ENSG00000204978 | TR V gene   | 184.6       | 0.53                | TR V gene                          | 7          | 38374642         | 38375115       | T cell receptor gamma variable 7 (pseudogene)                                |
| 67    | ENSG00000231858 | TR V gene   | 158.2       | 0.53                | TR V gene                          | 7          | 38374642         | 38375115       | T cell receptor gamma variable 7 (pseudogene)                                |
| 75    | ENSG00000208704 | CD3E        | 211.3       | 0.53                | protein_coding                     | 11         | 60866867         | 60866324       | CD3E molecule                                                                |
| 81    | ENSG00000208934 | CD3E        | 214.6       | 0.53                | protein_coding                     | 11         | 1823808          | 1823808        | CD3E molecule (CD3-TCR complex)                                              |
| 101   | ENSG00000233387 | CD3E        | 295.3       | 0.53                | protein_coding                     | 11         | 60866867         | 60866324       | CD3E molecule                                                                |
| 34    | ENSG00000110446 | CD5         | 105.4       | 0.52                | protein_coding                     | 11         | 60866867         | 60866324       | CD5 molecule                                                                 |
| 43    | ENSG00000205875 | CD5         | 251.6       | 0.52                | protein_coding                     | 11         | 60866867         | 60866324       | HCG181135, L14 characterized protein                                         |
| 40    | ENSG00000211787 | TR V gene   | 123.6       | 0.52                | TR V gene                          | 14         | 22320736         | 22321183       | T cell receptor alpha variable 8-3                                           |
| 146   | ENSG00000211815 | TR V gene   | 432.4       | 0.52                | TR V gene                          | 14         | 22684841         | 22685149       | T cell receptor alpha variable 3delta variable 8                             |
| 96    | ENSG00000202548 | CD3E        | 152.7       | 0.52                | protein_coding                     | 11         | 60866867         | 60866324       | CD3E molecule                                                                |
| 122   | ENSG00000204867 | CD3E        | 370.6       | 0.52                | protein_coding                     | 2          | 87042462         | 87089847       | CD3E molecule                                                                |
| 25    | ENSG00000172116 | CD8B        | 69.8        | 0.51                | protein_coding                     | 2          | 87042462         | 87089847       | CD8B molecule                                                                |
| 13    | ENSG00000172122 | KCNAL       | 21.1        | 0.51                | protein_coding                     | 11         | 111214103        | 111214103      | potassium voltage-gated channel subfamily, member 3                          |
| 44    | ENSG00000211778 | TR V gene   | 127.9       | 0.51                | TR V gene                          | 14         | 22204334         | 22205264       | T cell receptor alpha variable 4                                             |
| 45    | ENSG00000211810 | TR V gene   | 131.9       | 0.51                | TR V gene                          | 14         | 22611319         | 22611766       | T cell receptor alpha variable 20delta variable 5 (gene/pseudogene)          |
| 48    | ENSG00000211798 | TR V gene   | 140.4       | 0.51                | TR V gene                          | 14         | 22320737         | 22320737       | T cell receptor alpha variable 12-2                                          |
| 51    | ENSG00000211805 | TR V gene   | 435.8       | 0.51                | TR V gene                          | 14         | 22573620         | 22574123       | T cell receptor alpha variable 24                                            |
| 51    | ENSG00000272908 | TR V gene   | 148.4       | 0.51                | TR V gene                          | 14         | 22573620         | 22574123       | T cell receptor alpha variable 24                                            |
| 85    | ENSG00000204729 | PCED1B-AS1  | 237.4       | 0.51                | processed_transcript               | 2          | 47599891         | 47610239       | PCED1B antisense RNA 1                                                       |
| 86    | ENSG00000257027 | PCED1B-AS1  | 279.6       | 0.51                | processed_transcript               | 2          | 47599891         | 47610239       | PCED1B antisense RNA 1                                                       |
| 41    | ENSG00000151599 | CTLA4       | 29.5        | 0.5                 | processed_transcript               | 2          | 20471389         | 20471389       | cytotoxic T-lymphocyte-associated protein 4                                  |
| 89    | ENSG00000133574 | GIAP4       | 258.4       | 0.5                 | protein_coding                     | 7          | 150284365        | 150291041      | GIAPase, IMAP family member 4                                                |
| 89    | ENSG00000197657 | DTHAP1      | 278.1       | 0.5                 | protein_coding                     | 4          | 38283244         | 38283778       | death domain containing 1                                                    |
| 121   | ENSG00000202550 | BTKAP1      | 382.8       | 0.5                 | protein_coding                     | 8          | 38432485         | 38434544       | butyrophilin subfamily 3, member A1                                          |
| 60    | ENSG00000211788 | TR V gene   | 168.7       | 0.5                 | TR V gene                          | 14         | 2237020          | 2237546        | T cell receptor alpha variable 13-1                                          |
| 108   | ENSG00000211686 | TR V gene   | 321         | 0.5                 | TR V gene                          | 7          | 38389844         | 38370536       | T cell receptor gamma variable 8                                             |
| 173   | ENSG00000211809 | TR V gene   | 494.9       | 0.5                 | TR V gene                          | 14         | 22615949         | 22616587       | T cell receptor alpha variable 27                                            |
| 112   | ENSG00000250720 | TR V gene   | 333.2       | 0.5                 | TR V gene                          | 14         | 22615949         | 22616587       | T cell receptor alpha variable 27                                            |
| 115   | ENSG00000255887 | TR V gene   | 343.4       | 0.5                 | TR V gene                          | 14         | 22615949         | 22616587       | T cell receptor alpha variable 27                                            |
| 119   | ENSG00000225488 | TR V gene   | 381.3       | 0.5                 | TR V gene                          | 14         | 22615949         | 22616587       | T cell receptor alpha variable 27                                            |
| 205   | ENSG00000241490 | TR V gene   | 675.8       | 0.5                 | TR V gene                          | 14         | 22615949         | 22616587       | T cell receptor alpha variable 27                                            |
| 21    | ENSG00000198574 | SH2D1B      | 58.7        | 0.49                | protein_coding                     | 1          | 16235056         | 162381928      | SH2 domain containing 1B                                                     |
| 80    | ENSG00000185560 | GIAP7       | 203.2       | 0.49                | protein_coding                     | 7          | 150284365        | 150300729      | GIAPase, IMAP family member 7                                                |
| 92    | ENSG00000242445 | CD3E        | 255.5       | 0.49                | protein_coding                     | X          | 135724588        | 135742549      | CD3E molecule                                                                |
| 48    | ENSG00000226660 | TR V gene   | 132.7       | 0.49                | TR V gene                          | 7          | 142000747        | 142001255      | T cell receptor delta variable 2                                             |
| 82    | ENSG00000211817 | TR V gene   | 217.9       | 0.49                | TR V gene                          | 14         | 22748986         | 22749351       | T cell receptor alpha variable 3B-2delta variable 8                          |
| 126   | ENSG00000211802 | TR V gene   | 639.6       | 0.49                | TR V gene                          | 14         | 22539820         | 22539811       | T cell receptor alpha variable 22-2                                          |
| 247   | ENSG00000204838 | GVNFP1      | 379.9       | 0.49                | transcribed_unprocessed_psu_dogene | 11         | 6734670          | 6734670        | GVNFP, very large interferon inducible pseudogene 1                          |
| 206   | ENSG00000206069 | AZMP1       | 582.6       | 0.49                | transcribed_unprocessed_psu_dogene | 12         | 9391129          | 9428413        | alpha-2-macroglobulin pseudogene 1                                           |
| 134   | ENSG00000205380 | TR V gene   | 385.7       | 0.49                | TR V gene                          | 14         | 22615949         | 22616587       | T cell receptor alpha variable 27                                            |
| 143   | ENSG00000205330 | TR V gene   | 411.8       | 0.49                | TR V gene                          | 14         | 22615949         | 22616587       | T cell receptor alpha variable 27                                            |
| 9     | ENSG00000100453 | GZMB        | 28.4        | 0.48                | protein_coding                     | 13         | 74805594         | 74831413       | long intergenic non-protein coding RNA 402                                   |
| 13    | ENSG00000111795 | KLRH1       | 48.4        | 0.48                | protein_coding                     | 12         | 9747147          | 9749462        | granzyme B (granzyme 2, T-lymphocyte-associated serine esterase 1)           |
| 118   | ENSG00000162119 | ANKKAF25    | 35.9        | 0.48                | protein_coding                     | 2          | 6986733          | 6987386        | Rho GTPase activating protein 25                                             |
| 120   | ENSG00000111801 | BTN3A3      | 364.8       | 0.48                | protein_coding                     | 6          | 26440700         | 26453843       | butyrophilin subfamily 3, member A3                                          |
| 124   | ENSG00000188811 | IKZF1       | 373.2       | 0.48                | protein_coding                     | 7          | 50343720         | 50372799       | IKAROS family zinc finger 1 (Rar1)                                           |
| 129   | ENSG00000111913 | FAM86B      | 369.9       | 0.48                | protein_coding                     | 5          | 24717621         | 25042338       | family with sequence similarity 65, member B                                 |
| 129   | ENSG00000111782 | TR V gene   | 199.3       | 0.48                | TR V gene                          | 14         | 22268459         | 22268608       | T cell receptor alpha variable 8-1                                           |
| 80    | ENSG00000211785 | TR V gene   | 214.4       | 0.48                | TR V gene                          | 14         | 22339422         | 22339596       | T cell receptor alpha variable 12-1                                          |
| 110   | ENSG00000211820 | TR V gene   | 322.9       | 0.48                | TR V gene                          | 14         | 22778123         | 22778123       | T cell receptor alpha variable 41                                            |
| 127   | ENSG00000233306 | TR V gene   | 383         | 0.48                | TR V gene                          | 7          | 38402465         | 38403119       | T cell receptor gamma variable 2                                             |
| 126   | ENSG00000258776 | TR V gene   | 377.8       | 0.48                | TR V gene                          | 7          | 38402465         | 38403119       | T cell receptor gamma variable 2                                             |
| 189   | ENSG00000204603 | SLC3A9-AS1  | 534.2       | 0.48                | antisense                          | 3          | 143081088        | 143085913      | SLC3A9 antisense RNA 1                                                       |
| 114   | ENSG00000237943 | PRKCQ-AS1   | 336         | 0.47                | lincRNA                            | 10         | 6822281          | 6824814        | PRKCQ antisense RNA 1                                                        |
| 27    | ENSG00000153623 | CD8A        | 88.1        | 0.47                | protein_coding                     | 2          | 87011728         | 87035519       | CD8A molecule                                                                |
| 36    | ENSG00000137441 | FGBP2       | 710         | 0.47                | protein_coding                     | 4          | 15861866         | 15870932       | fibroblast growth factor binding protein 2                                   |
| 84    | ENSG00000133561 | GIAP6       | 229.6       | 0.47                | protein_coding                     | 7          | 150324463        | 150329473      | GIAPase, IMAP family member 6                                                |
| 91    | ENSG00000205541 | TR V gene   | 293.8       | 0.47                | TR V gene                          | 12         | 10568601         | 10568600       | lincRNA                                                                      |
| 106   | ENSG00000197884 | NLR3        | 319.3       | 0.47                | protein_coding                     | 16         | 3589033          | 3627401        | NLR family, CARD domain containing 3                                         |
| 106   | ENSG00000189430 | NCRT        | 320.5       | 0.47                | protein_coding                     | 19         | 55417508         | 55427508       | natural cytotoxicity triggering receptor 1                                   |
| 156   | ENSG00000181233 | FTFR6       | 425.2       | 0.47                | protein_coding                     | 11         | 189057601        | 18912659       | protein tyrosine phosphatase, receptor type C                                |
| 156   | ENSG00000151883 | PAP9B       | 462.7       | 0.47                | protein_coding                     | 5          | 60142356         | 60142356       | poly (ADP-ribosyl) polymerase family, member B                               |
|       |                 |             |             |                     |                                    |            |                  |                |                                                                              |



|     |                   |           |        |      |                        |    |           |           |                                                                                                        |
|-----|-------------------|-----------|--------|------|------------------------|----|-----------|-----------|--------------------------------------------------------------------------------------------------------|
| 236 | ENSG00000202628   |           | 616.4  | 0.45 | processed_pseudogene   | 16 | 57637049  | 57637609  | high mobility group box 3 pseudogene 32                                                                |
| 67  | ENSG00000202461   | KIR3DL2   | 185.5  | 0.45 | protein_coding         | 19 | 5538189   | 5537862   | killer cell immunoglobulin-like receptor, three domains, long cytoplasmic tail; 2                      |
| 107 | ENSG00000122224   | LY9       | 320.7  | 0.45 | protein_coding         | 1  | 16075584  | 16079051  | lymphocyte antigen 9                                                                                   |
| 144 | ENSG00000005844   | ITGAL     | 426.9  | 0.45 | protein_coding         | 16 | 3043979   | 3053406   | integrin, alpha L (antigen CD11a)(p180), lymphocyte function-associated antigen 1; alpha (polypeptide) |
| 161 | ENSG00000171118   | GMAP8     | 468.9  | 0.45 | protein_coding         | 7  | 150147718 | 150176480 | GTPase, RAS family member 8                                                                            |
| 174 | ENSG00000160593   | AMICA1    | 498.5  | 0.45 | protein_coding         | 11 | 118064455 | 118095809 | adhesion molecule, interacts with CXADR antigen 1                                                      |
| 176 | ENSG00000116584   | BN2       | 502.9  | 0.45 | protein_coding         | 12 | 51614622  | 51716452  | brn3a integrator 2                                                                                     |
| 181 | ENSG00000202078   | STK6B     | 530.4  | 0.45 | protein_coding         | 6  | 84481669  | 84515247  | serine/threonine kinase 38                                                                             |
| 191 | ENSG00000246223   |           | 563.1  | 0.45 | protein_coding         | 14 | 98381947  | 98444411  | chromosome 14 open reading frame 84                                                                    |
| 223 | ENSG00000195483   | CARD8     | 565.1  | 0.45 | protein_coding         | 19 | 56864027  | 56879533  | cardigan repeat domain family, member 8                                                                |
| 223 | ENSG00000205413   | ANKRD44   | 615.9  | 0.45 | protein_coding         | 2  | 197831741 | 197837897 | ankyrin repeat domain 44                                                                               |
| 182 | ENSG00000252429   |           | 469.1  | 0.45 | sRNA                   | 1  | 28470667  | 28470728  | RNA, U7 small nuclear 29 pseudogene                                                                    |
| 186 | ENSG00000211885   |           | 531.9  | 0.45 | TR_V_gene              | 14 | 23011142  | 23011204  | T cell receptor alpha joining 4                                                                        |
| 187 | ENSG00000211889   |           | 532    | 0.45 | TR_V_gene              | 14 | 2295266   | 2295352   | T cell receptor alpha joining 20                                                                       |
| 326 | ENSG00000211760   |           | 813.9  | 0.45 | TR_V_gene              | 14 | 22236729  | 22237320  | T cell receptor alpha variable 6                                                                       |
| 478 | ENSG00000211812   |           | 1037.7 | 0.45 | TR_V_gene              | 14 | 22670477  | 22671262  | T cell receptor alpha variable 26-2                                                                    |
| 190 | ENSG00000202538   |           | 534.4  | 0.45 |                        |    |           |           |                                                                                                        |
| 192 | ENSG000002041678  |           | 540.2  | 0.45 |                        |    |           |           |                                                                                                        |
| 201 | ENSG000002025400  |           | 560.3  | 0.45 |                        |    |           |           |                                                                                                        |
| 204 | ENSG000002021028  |           | 560.3  | 0.45 |                        |    |           |           |                                                                                                        |
| 209 | ENSG000002072529  |           | 565.5  | 0.45 |                        |    |           |           |                                                                                                        |
| 210 | ENSG00000203411   |           | 568.9  | 0.45 |                        |    |           |           |                                                                                                        |
| 235 | ENSG00000202896   |           | 631.4  | 0.45 |                        |    |           |           |                                                                                                        |
| 241 | ENSG000002046790  |           | 623    | 0.45 |                        |    |           |           |                                                                                                        |
| 242 | ENSG000002052784  |           | 627.4  | 0.45 |                        |    |           |           |                                                                                                        |
| 246 | ENSG000002028655  |           | 636.5  | 0.45 |                        |    |           |           |                                                                                                        |
| 255 | ENSG00000207125   |           | 654.6  | 0.45 |                        |    |           |           |                                                                                                        |
| 267 | ENSG000002071582  |           | 677.2  | 0.45 |                        |    |           |           |                                                                                                        |
| 344 | ENSG00000202868   |           | 841.8  | 0.45 |                        |    |           |           |                                                                                                        |
| 562 | ENSG000002023059  |           | 1214.7 | 0.45 |                        |    |           |           |                                                                                                        |
| 574 | ENSG000002028784  | LINC00964 | 1204.7 | 0.44 | lincRNA                | 2  | 20068621  | 20068408  | long intergenic non-protein coding RNA 954                                                             |
| 929 | ENSG000002021298  | CD3D      | 290.2  | 0.44 | protein_coding         | 11 | 11829249  | 11829809  | CD3D molecule, alpha (CD3/TCR complex)                                                                 |
| 128 | ENSG00000110324   | IL10RA    | 38.4   | 0.44 | protein_coding         | 11 | 11787063  | 11787126  | interleukin 10 receptor, alpha                                                                         |
| 139 | ENSG00000186329   | CX3CR1    | 403.9  | 0.44 | protein_coding         | 3  | 39334985  | 39332326  | chemokine (C-X3-C motif) receptor 1                                                                    |
| 186 | ENSG00000208173   | PIPK2     | 420.9  | 0.44 | protein_coding         | 6  | 25011207  | 25014384  | protein tyrosine phosphatase, non-receptor type 4 (rearranged)                                         |
| 188 | ENSG00000150981   | ROG1B     | 532.3  | 0.44 | protein_coding         | 1  | 19217587  | 19214845  | regulator of G-protein signaling 18                                                                    |
| 258 | ENSG000002025784  | ARRDC5    | 628    | 0.44 | protein_coding         | 19 | 4890449   | 48902979  | arrestin domain containing 5                                                                           |
| 260 | ENSG00000172118   | CACRB     | 659.2  | 0.44 | protein_coding         | 3  | 45862428  | 45869845  | chemokine (C-X-C motif) receptor 6                                                                     |
| 273 | ENSG00000111536   | L26       | 120.4  | 0.44 | protein_coding         | 12 | 68565131  | 68601191  | interleukin 25                                                                                         |
| 583 | ENSG00000201858   |           | 480.9  | 0.44 | TR_V_gene              | 14 | 22979951  | 22980007  | T cell receptor alpha joining 31                                                                       |
| 94  | ENSG00000202899   |           | 610.8  | 0.44 | TR_V_gene              | 14 | 14244653  | 14244671  | T cell receptor beta variable 20-1                                                                     |
| 100 | ENSG00000211698   |           | 253.8  | 0.44 | TR_V_gene              | 7  | 38383316  | 38394118  | T cell receptor gamma variable 4                                                                       |
| 203 | ENSG00000211749   |           | 568.4  | 0.44 | TR_V_gene              | 7  | 14235468  | 14235384  | T cell receptor beta variable 23-1 (non-functional)                                                    |
| 591 | ENSG00000211784   |           | 1257.7 | 0.44 | TR_V_gene              | 14 | 2224936   | 22249239  | T cell receptor alpha variable 10                                                                      |
| 591 | ENSG000002025046  |           | 1257.7 | 0.44 |                        |    |           |           |                                                                                                        |
| 196 | ENSG000002028717  |           | 544.7  | 0.44 |                        | 5  | 56152975  | 56153078  | Small nuclear RNA U13                                                                                  |
| 215 | ENSG000002028173  |           | 573.4  | 0.44 |                        |    |           |           |                                                                                                        |
| 230 | ENSG000002026484  |           | 609.9  | 0.44 |                        |    |           |           |                                                                                                        |
| 245 | ENSG000002071913  |           | 634.8  | 0.44 |                        |    |           |           |                                                                                                        |
| 249 | ENSG000002049119  |           | 640.8  | 0.44 |                        |    |           |           |                                                                                                        |
| 264 | ENSG000002041291  |           | 673.2  | 0.44 |                        |    |           |           |                                                                                                        |
| 266 | ENSG000002057840  |           | 676.5  | 0.44 |                        |    |           |           |                                                                                                        |
| 271 | ENSG000002071257  |           | 691.1  | 0.44 |                        |    |           |           |                                                                                                        |
| 276 | ENSG000002028038  |           | 702.8  | 0.44 |                        |    |           |           |                                                                                                        |
| 288 | ENSG000002028201  |           | 742.9  | 0.44 |                        |    |           |           |                                                                                                        |
| 315 | ENSG00000201329   |           | 792.8  | 0.44 |                        |    |           |           |                                                                                                        |
| 462 | ENSG000002026517  |           | 1019.8 | 0.44 |                        |    |           |           |                                                                                                        |
| 667 | ENSG00000202898   |           | 1324.8 | 0.44 |                        |    |           |           |                                                                                                        |
| 724 | ENSG000002045396  | ANTXR1P1  | 1414.3 | 0.44 | lincRNA                | 10 | 47602511  | 47644793  | antifurax toxin receptor like pseudogene 1                                                             |
| 98  | ENSG000002041621  |           | 290.2  | 0.44 | lincRNA                | 10 | 14276209  | 14276808  | killer cell lectin-like receptor beta variable 11-2                                                    |
| 340 | ENSG0000020286017 | MIR447A   | 837.8  | 0.43 | miRNA                  | 9  | 68415308  | 68415388  | miR447a                                                                                                |
| 434 | ENSG000002043996  |           | 978.7  | 0.43 | misc_RNA               | 4  | 88308038  | 88308326  | RNA, 75S, cytoplasmic 681, pseudogene                                                                  |
| 70  | ENSG000002025990  | KLR2C     | 180.9  | 0.43 | protein_coding         | 12 | 10573653  | 10584469  | killer cell lectin-like receptor subfamily C, member 2                                                 |
| 86  | ENSG000002033661  | TBX21     | 246.2  | 0.43 | protein_coding         | 17 | 45810610  | 45824385  | T-box 21                                                                                               |
| 93  | ENSG00000115523   | GNLY      | 269.3  | 0.43 | protein_coding         | 2  | 89112298  | 89125977  | granulysin                                                                                             |
| 180 | ENSG00000114256   | ZNF60     | 517.7  | 0.43 | TR_V_gene              | 14 | 11386222  | 11386249  | zinc finger protein 60                                                                                 |
| 200 | ENSG00000206344   | HCG27     | 565.3  | 0.43 | protein_coding         | 6  | 31165537  | 31171745  | HLA complex group 27 (non-protein coding)                                                              |
| 240 | ENSG00000158266   | SLA       | 600.8  | 0.43 | protein_coding         | 8  | 134048973 | 134115298 | S-locus adjuvant                                                                                       |
| 244 | ENSG00000181163   | FAM159A   | 613.3  | 0.43 | TR_V_gene              | 14 | 5306916   | 5318355   | family with sequence similarity 155, member A                                                          |
| 262 | ENSG00000079339   | CD14A     | 665.5  | 0.43 | protein_coding         | 1  | 100810584 | 10086533  | cell division cycle 14A                                                                                |
| 281 | ENSG00000138459   | RNASEL    | 714    | 0.43 | protein_coding         | 1  | 18254269  | 18258991  | ribonuclease L (2'-5'-oligoadenylate synthetase-dependent)                                             |
| 308 | ENSG000002028677  | ANKRD44T1 | 780    | 0.43 | sense_intronic         | 2  | 18611552  | 18616743  | ANKRD44 intron 1 transcript 1 (non-protein coding)                                                     |
| 382 | ENSG000002028382  | ITPKB11   | 853    | 0.43 | sense_intronic         | 2  | 22684341  | 22682768  | ITPKB intron 1 transcript 1 (non-protein coding)                                                       |
| 383 | ENSG00000202391   |           | 716.9  | 0.43 | sRNA                   | 17 | 78662776  | 78662879  | RNA, U6 small nuclear 638, pseudogene                                                                  |
| 104 | ENSG00000211738   |           | 214.3  | 0.43 | TR_V_gene              | 14 | 22413     | 22413     | T cell receptor alpha variable 12a                                                                     |
| 370 | ENSG00000211816   |           | 865.1  | 0.43 | TR_V_gene              | 14 | 22736851  | 22740446  | T cell receptor alpha variable 36-1                                                                    |
| 463 | ENSG00000211795   |           | 1161.4 | 0.43 | TR_V_gene              | 14 | 22446699  | 22447460  | T cell receptor alpha variable 8-6                                                                     |
| 548 | ENSG00000180499   |           | 1187.8 | 0.43 | unprocessed_pseudogene | 1  | 18677169  | 18677925  | olfactory receptor family 10, subfamily AA, member 1 pseudogene                                        |
| 103 | ENSG000002029200  |           | 299.3  | 0.43 | unprocessed_pseudogene | 7  | 14209455  | 14209977  | T cell receptor beta variable 7-3                                                                      |
| 107 | ENSG000002071821  |           | 581.4  | 0.43 |                        |    |           |           |                                                                                                        |
| 250 | ENSG000002029460  |           | 641.7  | 0.43 |                        |    |           |           |                                                                                                        |
| 252 | ENSG000002035300  |           | 646.6  | 0.43 |                        |    |           |           |                                                                                                        |
| 256 | ENSG0000020240143 |           | 653.3  | 0.43 |                        |    |           |           |                                                                                                        |
| 259 | ENSG00000202878   |           | 669.2  | 0.43 |                        |    |           |           |                                                                                                        |
| 269 | ENSG000002041762  |           | 697.4  | 0.43 |                        |    |           |           |                                                                                                        |
| 304 | ENSG000002025963  |           | 768.9  | 0.43 |                        |    |           |           |                                                                                                        |
| 333 | ENSG000002027195  |           | 821.6  | 0.43 |                        |    |           |           |                                                                                                        |
| 412 | ENSG00000202248   |           | 951.9  | 0.43 |                        |    |           |           |                                                                                                        |
| 531 | ENSG000002027286  |           | 1133.8 | 0.43 |                        |    |           |           |                                                                                                        |
| 583 | ENSG000002026962  |           | 1215.8 | 0.43 |                        |    |           |           |                                                                                                        |
| 678 | ENSG000002026031  |           | 1326.8 | 0.43 |                        |    |           |           |                                                                                                        |
| 292 | ENSG000002046019  | FAM159A1  | 760.3  | 0.42 | antisense              | 4  | 89630340  | 89651254  | FAM159A antisense RNA 1                                                                                |
| 371 | ENSG000002028346  |           | 889.4  | 0.42 | antisense              | 1  | 22695698  | 22698446  | ITPKB antisense RNA 1                                                                                  |
| 518 | ENSG000002026348  | LINC00989 | 798.8  | 0.42 | lincRNA                | 4  | 89413570  | 89487614  | long intergenic non-protein coding RNA 989                                                             |
| 519 | ENSG000002025163  |           | 745.2  | 0.42 | processed_pseudogene   | 11 | 118078647 | 11807926  | heat shock 10kDa protein 1 pseudogene 18                                                               |
| 746 | ENSG00000213049   |           | 1434   | 0.42 | processed_pseudogene   | 12 | 1190128   | 9101895   | heterogeneous nuclear ribonucleoprotein A1 pseudogene 34                                               |
| 148 | ENSG00000191746   | GZMB      | 327.7  | 0.42 | protein_coding         | 19 | 54624     | 54629     | granzyme M (lymphocyte mediator 1)                                                                     |
| 159 | ENSG0000011096    | NFATC2    | 435.1  | 0.42 | protein_coding         | 20 | 50003494  | 50179370  | nuclear factor of activated T cells, cytoplasmic, calcineurin-dependent 2                              |
| 158 | ENSG00000178562   | CD28      | 450.4  | 0.42 | protein_coding         | 2  | 243571188 | 24403635  | CD28 molecule                                                                                          |
| 178 | ENSG00000160771   | DCNND2    | 505    | 0.42 | protein_coding         | 6  | 11747206  | 11747127  | DENND2A domain containing 20                                                                           |
| 204 | ENSG00000203747   | FCGR3A    | 563.7  | 0.42 | protein_coding         | 1  | 161511549 | 161600917 | Fc fragment of IgG, low affinity IIIa, receptor (CD16a)                                                |
| 214 | ENSG00000151702   | FLI1      | 572.2  | 0.42 | protein_coding         | 11 | 12856430  | 128683162 | FLI-1 proto-oncogene, ETS transcription factor                                                         |
| 227 | ENSG0000014369    | PSTPIP1   | 604.8  | 0.42 | protein_coding         | 15 | 7246700   | 72429673  | protein-tyrosine phosphatase-interacting protein 1                                                     |
| 229 | ENSG00000137752   | CASP1     | 608.4  | 0.42 | protein_coding         | 11 | 10486170  | 104872158 | caspace 1, apoptosis-inducing cysteine peptidase                                                       |
| 232 | ENSG00000186470   | BTNA2     | 615.1  | 0.42 | protein_coding         | 6  | 26365387  | 26378546  | butyrophilin subfamily 3, member A2                                                                    |
| 238 | ENSG00000101033   | GRF41     | 618.3  | 0.42 | protein_coding         | 7  | 3273386   | 3287356   | G-protein-coupled receptor 141                                                                         |
| 257 | ENSG00000115938   | WBP1      | 655.6  | 0.42 | protein_coding         | 2  | 17542300  | 17547844  | WAS/WASL interacting protein family, member 1                                                          |
| 270 | ENSG00000174718   | KIAA1551  | 684.5  | 0.42 | protein_coding         | 12 | 32112304  | 32146039  | KIAA1551                                                                                               |
| 284 | ENSG00000119320   | STRBM4    | 753.7  | 0.42 | protein_coding         | 5  | 10044929  | 10053970  | STR alpha-N-acetylneuraminate alpha-2,8-sialyltransferase 4                                            |
| 313 | ENSG00000147251   | DKCK11    |        |      |                        |    |           |           |                                                                                                        |

|      |                 |           |        |      |                                    |    |           |           |                                                                                                      |
|------|-----------------|-----------|--------|------|------------------------------------|----|-----------|-----------|------------------------------------------------------------------------------------------------------|
| 155  | ENSG00000100100 | PIR3P1    | 451.6  | 0.41 | protein_coding                     | 2  | 3167579   | 3168520   | phosphonidase-3-kinase interacting protein 1                                                         |
| 205  | ENSG00000218071 | CCR2      | 662.4  | 0.41 | protein_coding                     | 3  | 4539225   | 4542019   | chemokine (C-C motif) receptor 2                                                                     |
| 216  | ENSG00000128294 | APOL3     | 590.1  | 0.41 | protein_coding                     | 22 | 3653672   | 3656225   | apolipoprotein L 3                                                                                   |
| 222  | ENSG00000197629 | MPEG1     | 589.1  | 0.41 | protein_coding                     | 11 | 5897583   | 5898024   | macrophage expressed 1                                                                               |
| 238  | ENSG00000136595 | PTPLA2    | 703.7  | 0.41 | protein_coding                     | 16 | 2699147   | 2699214   | linker for activation of T cells                                                                     |
| 239  | ENSG00000192624 | CDC42E1   | 693.1  | 0.41 | protein_coding                     | 1  | 15102447  | 15102491  | GDC-2 small effector 1                                                                               |
| 274  | ENSG0000050554  | FTL3L3    | 700.5  | 0.41 | protein_coding                     | 19 | 4997744   | 4998848   | fms-related tyrosine kinase 3 ligand                                                                 |
| 277  | ENSG00000188261 | PTPLA2    | 703.5  | 0.41 | protein_coding                     | 9  | 2595336   | 2101165   | protein tyrosine phosphatase-like A domain containing 2                                              |
| 283  | ENSG0000029272  | PRF1      | 740.1  | 0.41 | protein_coding                     | 4  | 7471896   | 7471892   | guanine factor 5 variant 1                                                                           |
| 309  | ENSG00000185412 | EIF4E3    | 781.6  | 0.41 | protein_coding                     | 3  | 7174567   | 7174592   | eukaryotic translation initiation factor 4E family member 3                                          |
| 314  | ENSG00000145853 | NIRC2     | 789.6  | 0.41 | protein_coding                     | 16 | 5102397   | 5117143   | NLR family, CARD domain containing 20                                                                |
| 317  | ENSG00000208891 | SP110     | 797.3  | 0.41 | protein_coding                     | 2  | 23102009  | 23105044  | SP110 nuclear body protein                                                                           |
| 335  | ENSG00000083799 | CYLD      | 824.3  | 0.41 | protein_coding                     | 16 | 5075961   | 5085846   | cyllindromatosis (urban tumor syndrome)                                                              |
| 337  | ENSG00000135853 | DOCK10    | 830    | 0.41 | protein_coding                     | 2  | 22962907  | 22963192  | inducator of cytokinesis 10                                                                          |
| 346  | ENSG00000101109 | STK4      | 848.1  | 0.41 | protein_coding                     | 20 | 43595115  | 43786000  | serine/threonine kinase 4                                                                            |
| 367  | ENSG00000107099 | DOCK8     | 862.6  | 0.41 | protein_coding                     | 9  | 21484     | 452529    | inducator of cytokinesis 8                                                                           |
| 384  | ENSG00000154814 | OXNAP1    | 924.1  | 0.41 | protein_coding                     | 3  | 1632065   | 1632106   | oxidoreductase NAD-binding domain containing 1                                                       |
| 683  | ENSG00000140090 | SLC24A4   | 1347.9 | 0.41 | protein_coding                     | 14 | 9278825   | 9282596   | solute carrier family 24 (sodium/potassium/calcium exchanger), member 4                              |
| 358  | ENSG00000230539 | AOAH-IT1  | 865.9  | 0.41 | sense_intronic                     | 7  | 36637440  | 36639726  | AOAH intronic transcript 1 (non-protein coding)                                                      |
| 511  | ENSG00000226959 |           | 1092.2 | 0.41 | RNA                                | 8  | 12691395  | 12692038  | RNA, U6 small nuclear 45s, pseudogene                                                                |
| 381  | ENSG00000211851 | TR_J_gene | 869    | 0.41 | TR_J_gene                          | 14 | 22971215  | 22971216  | T cell receptor alpha joining 38                                                                     |
| 383  | ENSG00000211876 | TR_J_gene | 874.1  | 0.41 | TR_J_gene                          | 14 | 23000026  | 23000088  | T cell receptor alpha joining 13                                                                     |
| 384  | ENSG00000211886 | TR_J_gene | 883.8  | 0.41 | TR_J_gene                          | 14 | 23012122  | 23012183  | T cell receptor alpha joining 3                                                                      |
| 374  | ENSG00000255569 | TR_V_gene | 900.5  | 0.41 | TR_V_gene                          | 14 | 22089991  | 22090720  | T cell receptor alpha variable 1-1                                                                   |
| 411  | ENSG00000103472 |           | 956.2  | 0.41 | transcribed_unprocessed_pseudogene | 16 | 29086163  | 29128039  | RNA polymerase I transcription factor homolog (S. cerevisiae) pseudogene 2                           |
| 1018 | ENSG00000238228 |           | 1795.1 | 0.41 | unprocessed_pseudogene             | 7  | 97576296  | 97577310  | olfactory receptor family 7, subfamily E, member 7 pseudogene                                        |
| 225  | ENSG00000272917 |           | 593.7  | 0.41 | protein_coding                     | 14 | 22998580  | 22998641  | T cell receptor alpha joining 15                                                                     |
| 268  | ENSG00000206878 |           | 683.2  | 0.41 | protein_coding                     | 14 | 22972735  | 22972735  | T cell receptor alpha joining 37                                                                     |
| 280  | ENSG00000282714 |           | 712.4  | 0.41 | protein_coding                     | 14 | 22972735  | 22972735  | T cell receptor alpha joining 37                                                                     |
| 296  | ENSG00000211874 |           | 754.3  | 0.41 | protein_coding                     | 14 | 22998580  | 22998641  | T cell receptor alpha joining 15                                                                     |
| 348  | ENSG00000231551 |           | 848.3  | 0.41 | protein_coding                     | 14 | 22972735  | 22972735  | T cell receptor alpha joining 37                                                                     |
| 350  | ENSG00000211852 |           | 849.9  | 0.41 | protein_coding                     | 14 | 22972735  | 22972735  | T cell receptor alpha joining 37                                                                     |
| 396  | ENSG00000240007 |           | 958.9  | 0.41 | protein_coding                     | 14 | 22972735  | 22972735  | T cell receptor alpha joining 37                                                                     |
| 399  | ENSG00000237584 |           | 971.9  | 0.41 | protein_coding                     | 14 | 22972735  | 22972735  | T cell receptor alpha joining 37                                                                     |
| 426  | ENSG00000237705 |           | 970    | 0.41 | protein_coding                     | 14 | 22972735  | 22972735  | T cell receptor alpha joining 37                                                                     |
| 428  | ENSG00000286898 |           | 970.6  | 0.41 | protein_coding                     | 14 | 22972735  | 22972735  | T cell receptor alpha joining 37                                                                     |
| 444  | ENSG00000284878 |           | 992.3  | 0.41 | protein_coding                     | 14 | 22972735  | 22972735  | T cell receptor alpha joining 37                                                                     |
| 448  | ENSG00000248268 |           | 1004.2 | 0.41 | protein_coding                     | 14 | 22972735  | 22972735  | T cell receptor alpha joining 37                                                                     |
| 466  | ENSG00000256705 |           | 1020.4 | 0.41 | protein_coding                     | 14 | 22972735  | 22972735  | T cell receptor alpha joining 37                                                                     |
| 468  | ENSG00000280489 |           | 1028.8 | 0.41 | protein_coding                     | 14 | 22972735  | 22972735  | T cell receptor alpha joining 37                                                                     |
| 505  | ENSG00000255900 |           | 1088.8 | 0.41 | protein_coding                     | 14 | 22972735  | 22972735  | T cell receptor alpha joining 37                                                                     |
| 509  | ENSG00000258926 |           | 1091.2 | 0.41 | protein_coding                     | 14 | 22972735  | 22972735  | T cell receptor alpha joining 37                                                                     |
| 518  | ENSG00000261781 |           | 1141.1 | 0.41 | protein_coding                     | 14 | 22972735  | 22972735  | T cell receptor alpha joining 37                                                                     |
| 699  | ENSG00000217863 |           | 1314.2 | 0.41 | protein_coding                     | 14 | 22972735  | 22972735  | T cell receptor alpha joining 37                                                                     |
| 720  | ENSG00000235258 |           | 1413.4 | 0.41 | protein_coding                     | 14 | 22972735  | 22972735  | T cell receptor alpha joining 37                                                                     |
| 623  | ENSG00000273461 |           | 1678.7 | 0.41 | protein_coding                     | 14 | 22972735  | 22972735  | T cell receptor alpha joining 37                                                                     |
| 644  | ENSG00000294554 |           | 1868.8 | 0.41 | protein_coding                     | 14 | 22972735  | 22972735  | T cell receptor alpha joining 37                                                                     |
| 1082 | ENSG00000177500 |           | 1892.2 | 0.41 | protein_coding                     | 14 | 22972735  | 22972735  | T cell receptor alpha joining 37                                                                     |
| 1157 | ENSG0000023704  |           | 1994.2 | 0.41 | protein_coding                     | 14 | 22972735  | 22972735  | T cell receptor alpha joining 37                                                                     |
| 310  | ENSG00000254703 | SENR      | 783.4  | 0.4  | antisense                          | 11 | 12895167  | 12895918  | smooth muscle and endothelial cell enriched migration/differentiation-associated long non-coding RNA |
| 320  | ENSG00000232878 | DPYD-AS1  | 1110.4 | 0.4  | antisense                          | 1  | 97561479  | 9758511   | DPYD antisense RNA 1                                                                                 |
| 1027 | ENSG00000224101 | ELMO1-AS1 | 1812.9 | 0.4  | antisense                          | 1  | 3703161   | 3703525   | ELMO1 antisense RNA 1                                                                                |
| 124  | ENSG00000264493 | MIR4298   | 802    | 0.4  | miRNA                              | 11 | 1880954   | 1880786   | microRNA 4298                                                                                        |
| 282  | ENSG00000245444 |           | 716.6  | 0.4  | misc_RNA                           | 3  | 12137343  | 12137343  | RNA, 75S, cytoplasmic 172, pseudogene                                                                |
| 427  | ENSG00000201850 |           | 892.3  | 0.4  | misc_RNA                           | 16 | 8812352   | 88123446  | RNA, U6 small nuclear 45s, pseudogene                                                                |
| 451  | ENSG00000231215 |           | 996.8  | 0.4  | processed_pseudogene               | 5  | 38189312  | 38190437  | gigitin A5 pseudogene 1                                                                              |
| 453  | ENSG00000233999 |           | 1046   | 0.4  | processed_pseudogene               | X  | 117766338 | 11776811  | retinol oxidase binding protein 8 pseudogene 1                                                       |
| 477  | ENSG00000230228 |           | 1268.8 | 0.4  | processed_pseudogene               | 1  | 38651418  | 38651489  | ribosomal protein L35 pseudogene 9                                                                   |
| 388  | ENSG00000214851 | LINC00212 | 831    | 0.4  | processed_transcript               | 12 | 9208182   | 9217686   | long intergenic non-protein coding RNA 612                                                           |
| 170  | ENSG00000101862 | SLC2      | 489.9  | 0.4  | protein_coding                     | 20 | 35240721  | 35246119  | Src-like adaptor 2                                                                                   |
| 195  | ENSG00000161544 | TNFAIP2L1 | 514.6  | 0.4  | protein_coding                     | 1  | 151129165 | 151132225 | tumor necrosis factor, alpha-induced protein 8-like 2                                                |
| 226  | ENSG00000185477 | GPRIN3    | 597.2  | 0.4  | protein_coding                     | 4  | 90157337  | 90209161  | GPRIN family member 3                                                                                |
| 231  | ENSG00000209996 | IL12RB1   | 611.4  | 0.4  | protein_coding                     | 19 | 1819805   | 18209154  | interleukin 12 receptor, beta 1                                                                      |
| 251  | ENSG00000209996 | PRKCO     | 611.4  | 0.4  | protein_coding                     | 10 | 5469105   | 54692203  | protein kinase C, beta                                                                               |
| 254  | ENSG00000107073 | MGAT4A    | 654.4  | 0.4  | protein_coding                     | 2  | 9923559   | 9943789   | mannosyl (alpha-1,3)-glycosyltransferase, beta-1,4-N-acetylglucosaminyltransferase, isozyme A        |
| 284  | ENSG00000206357 | DGKA      | 737.7  | 0.4  | protein_coding                     | 12 | 56321103  | 56347111  | dacylglycerol kinase, alpha 80Da                                                                     |
| 286  | ENSG00000204193 | CARD16    | 728.7  | 0.4  | protein_coding                     | 11 | 104912053 | 104927148 | caspase recruitment domain family, member 16                                                         |
| 291  | ENSG00000100555 | CYTH4     | 748    | 0.4  | protein_coding                     | 22 | 3787806   | 37711382  | cytohesin 4                                                                                          |
| 301  | ENSG00000183131 | CTSS      | 753.5  | 0.4  | protein_coding                     | 1  | 145072672 | 145073843 | cathepsin S                                                                                          |
| 306  | ENSG00000252793 | PDSE3B    | 772.9  | 0.4  | protein_coding                     | 11 | 14682569  | 14682569  | phosphodiesterase 3B, cAMP-inhibited                                                                 |
| 327  | ENSG00000127152 | BC1L1B    | 814.1  | 0.4  | protein_coding                     | 14 | 99635624  | 99737861  | B-cell CLL/lymphoma 11B (zinc finger) protein                                                        |
| 332  | ENSG00000081320 | STR17B    | 821.5  | 0.4  | protein_coding                     | 2  | 18998290  | 18999127  | serine/threonine kinase 17b                                                                          |
| 348  | ENSG00000186758 |           | 821.5  | 0.4  | protein_coding                     | 2  | 18998290  | 18999127  | serine/threonine kinase 17b                                                                          |
| 381  | ENSG00000147138 | GPR174    | 906.4  | 0.4  | protein_coding                     | X  | 78426469  | 7842726   | G protein-coupled receptor 174                                                                       |
| 389  | ENSG00000133794 | ARNTL     | 919.9  | 0.4  | protein_coding                     | 11 | 13269199  | 13268813  | aryl hydrocarbon receptor nuclear translocator-like protein 1                                        |
| 395  | ENSG00000170366 | TMEM154   | 919.9  | 0.4  | protein_coding                     | 14 | 15383974  | 15383974  | transmembrane protein 154                                                                            |
| 400  | ENSG00000171657 | GPR35     | 933.5  | 0.4  | protein_coding                     | X  | 41583408  | 41589388  | G protein-coupled receptor 82                                                                        |
| 403  | ENSG00000145455 | USP3      | 936    | 0.4  | protein_coding                     | 15 | 6378793   | 6388686   | ubiquitin-specific peptidase 3                                                                       |
| 404  | ENSG00000205918 | MIR6811   | 943.8  | 0.4  | miRNA                              | 51 | 1511401   | 15119179  | microRNA 6811                                                                                        |
| 413  | ENSG00000409933 | INPP4A    | 952.1  | 0.4  | protein_coding                     | 2  | 99061317  | 99210853  | inositol polyphosphate 4-phosphatase, type 1, 107Da                                                  |
| 419  | ENSG00000200402 | CFAR      | 966.4  | 0.4  | protein_coding                     | 2  | 201980427 | 20204410  | CASP8 and FADD-like apoptosis regulator                                                              |
| 452  | ENSG00000141298 | SH3P2     | 996.9  | 0.4  | protein_coding                     | 17 | 2795299   | 28257290  | sh3p2 protein phosphatase 2                                                                          |
| 456  | ENSG00000132669 | LYST      | 1002   | 0.4  | protein_coding                     | 10 | 23563441  | 23564940  | lysosomal trafficking regulator                                                                      |
| 472  | ENSG00000176390 | CHL3      | 1025.8 | 0.4  | protein_coding                     | 17 | 29096466  | 29151794  | cytosine receptor-like factor 3                                                                      |
| 475  | ENSG00000217311 | HELB      | 1026.8 | 0.4  | protein_coding                     | 12 | 66963225  | 66737423  | histidine (DNA) B                                                                                    |
| 481  | ENSG00000286263 | PRKCO     | 1031.8 | 0.4  | protein_coding                     | 10 | 52492863  | 52493289  | Uncoupled protein                                                                                    |
| 487  | ENSG00000177324 | BEND2     | 1040.9 | 0.4  | protein_coding                     | X  | 18181051  | 18239024  | BEN domain containing 2                                                                              |
| 1231 | ENSG00000185999 | TAS2R60   | 2162.2 | 0.4  | protein_coding                     | 7  | 143140546 | 143141602 | taste receptor, type 2, member 60                                                                    |
| 976  | ENSG00000202630 |           | 950.7  | 0.4  | misc_RNA                           | 11 | 48111370  | 48111370  | RNA, U6 small nuclear 48S, pseudogene                                                                |
| 527  | ENSG00000212257 |           | 988    | 0.4  | misc_RNA                           | 1  | 65488561  | 65488757  | RNA, U6 small nuclear 176, pseudogene                                                                |
| 527  | ENSG00000252620 |           | 1127.1 | 0.4  | misc_RNA                           | 3  | 19524988  | 19525019  | RNA, U6 small nuclear 24, pseudogene                                                                 |
| 578  | ENSG00000211850 |           | 962.8  | 0.4  | TR_J_gene                          | 14 | 22971016  | 22971016  | T cell receptor alpha joining 39                                                                     |
| 420  | ENSG00000211867 |           | 958.1  | 0.4  | TR_J_gene                          | 14 | 22971016  | 22971016  | T cell receptor alpha joining 22                                                                     |
| 421  | ENSG00000211883 |           | 961.4  | 0.4  | TR_J_gene                          | 14 | 23008016  | 23008077  | T cell receptor alpha joining 8                                                                      |
| 450  | ENSG00000211864 |           | 963.9  | 0.4  | TR_J_gene                          | 14 | 23081790  | 23081790  | T cell receptor alpha joining 25 (non-functional)                                                    |
| 460  | ENSG00000211847 |           | 1010.1 | 0.4  | TR_J_gene                          | 14 | 22965872  | 22965872  | T cell receptor alpha joining 42                                                                     |
| 123  | ENSG00000237702 |           | 317.7  | 0.4  | TR_V_gene                          | 7  | 14200835  | 14200871  | T cell receptor beta variable 3-1                                                                    |
| 136  | ENSG00000211709 |           | 371.9  | 0.4  | TR_V_gene                          | 7  | 14201710  | 14201710  | T cell receptor beta variable 1-1                                                                    |
| 967  | ENSG00000158860 |           | 1734   | 0.4  | unprocessed_pseudogene             | 7  | 143333745 | 143315397 | family with sequence similarity 115, member D (pseudogene)                                           |
| 171  |                 |           |        |      |                                    |    |           |           |                                                                                                      |

|      |                  |           |        |                        |                        |           |           |                                                                 |                                                                                                                  |
|------|------------------|-----------|--------|------------------------|------------------------|-----------|-----------|-----------------------------------------------------------------|------------------------------------------------------------------------------------------------------------------|
| 481  | ENSG0000020789   | 1013.8    | 0.39   | sense intronic         | 5                      | 142572065 | 142573731 | ARHGAP26 intronic transcript 1 (non-protein coding)             |                                                                                                                  |
| 482  | ENSG00000202081  | 997.9     | 0.39   | snRNA                  | 15                     | 88194753  | 88194969  | RNA_U6 small nuclear 128b, pseudogene                           |                                                                                                                  |
| 483  | ENSG00000219119  | 997.4     | 0.39   | snRNA                  | 15                     | 101092025 | 101092127 | RNA_U6 small nuclear 322, pseudogene                            |                                                                                                                  |
| 487  | ENSG00000205307  | 1020.5    | 0.39   | snRNA                  | 3                      | 134499369 | 134499469 | RNA_U6 small nuclear 1174, pseudogene                           |                                                                                                                  |
| 481  | ENSG00000202103  | 1065.     | 0.39   | snRNA                  | 20                     | 15009702  | 15009806  | RNA_U6 small nuclear 817, pseudogene                            |                                                                                                                  |
| 475  | ENSG00000211868  | 963.9     | 0.39   | TR_V_gene              | 14                     | 2299257   | 2299257   | T cell receptor alpha joining 21                                |                                                                                                                  |
| 429  | ENSG00000211884  | 1038.8    | 0.39   | TR_J_gene              | 14                     | 23009190  | 23009249  | T cell receptor alpha joining 5                                 |                                                                                                                  |
| 508  | ENSG00000211849  | 1050.9    | 0.39   | TR_J_gene              | 14                     | 22968872  | 22968872  | T cell receptor alpha joining 40                                |                                                                                                                  |
| 513  | ENSG00000211970  | 1038.8    | 0.39   | TR_J_gene              | 14                     | 22984239  | 22984292  | T cell receptor alpha joining 19 (non-functional)               |                                                                                                                  |
| 554  | ENSG00000211856  | 1171.     | 0.39   | TR_J_gene              | 14                     | 22977587  | 22977643  | T cell receptor alpha joining 33                                |                                                                                                                  |
| 140  | ENSG00000211770  | 410.2     | 0.39   | TR_V_gene              | 7                      | 14201087  | 14201349  | T cell receptor beta variable 4-1                               |                                                                                                                  |
| 630  | ENSG00000211724  | 1244.4    | 0.39   | TR_V_gene              | 7                      | 14201931  | 14202407  | T cell receptor beta variable 6-6                               |                                                                                                                  |
| 835  | ENSG00000237272  | 1548.1    | 0.39   | unitary_pseudogene     | 11                     | 4439290   | 4440183   | officiary receptor, family 51, subfamily R, member 1 pseudogene |                                                                                                                  |
| 537  | ENSG00000202748  | 1288.8    | 0.39   | unprocessed_pseudogene | 2                      | 202077006 | 202077804 | MT_ND2 pseudogene 25                                            |                                                                                                                  |
| 1290 | ENSG00000204381  | 2158.4    | 0.39   | unprocessed_pseudogene | 5                      | 177283445 | 177284447 | officiary receptor, family 1, subfamily X, member 5 pseudogene  |                                                                                                                  |
| 307  | ENSG00000207017  | 778.1     | 0.39   |                        |                        |           |           |                                                                 |                                                                                                                  |
| 323  | ENSG00000206710  | 801.1     | 0.39   |                        |                        |           |           |                                                                 |                                                                                                                  |
| 365  | ENSG00000202904  | 890.1     | 0.39   |                        |                        |           |           |                                                                 |                                                                                                                  |
| 386  | ENSG00000205501  | 916.1     | 0.39   |                        |                        |           |           |                                                                 |                                                                                                                  |
| 414  | ENSG000002048477 | 952.9     | 0.39   |                        |                        |           |           |                                                                 |                                                                                                                  |
| 464  | ENSG00000202503  | 1017.     | 0.39   |                        |                        |           |           |                                                                 |                                                                                                                  |
| 490  | ENSG00000203798  | 1062.8    | 0.39   |                        |                        |           |           |                                                                 |                                                                                                                  |
| 515  | ENSG000002058733 | 1108.3    | 0.39   |                        |                        |           |           |                                                                 |                                                                                                                  |
| 544  | ENSG00000202627  | 1157.3    | 0.39   |                        |                        |           |           |                                                                 |                                                                                                                  |
| 550  | ENSG000002058922 | 1164.7    | 0.39   |                        |                        |           |           |                                                                 |                                                                                                                  |
| 570  | ENSG00000202741  | 1197.     | 0.39   |                        |                        |           |           |                                                                 |                                                                                                                  |
| 584  | ENSG00000201958  | 1218.7    | 0.39   |                        |                        |           |           |                                                                 |                                                                                                                  |
| 602  | ENSG00000208781  | 1244.9    | 0.39   |                        |                        |           |           |                                                                 |                                                                                                                  |
| 634  | ENSG000002087762 | 1282.     | 0.39   |                        |                        |           |           |                                                                 |                                                                                                                  |
| 651  | ENSG00000203372  | 1301.1    | 0.39   |                        |                        |           |           |                                                                 |                                                                                                                  |
| 682  | ENSG000002043402 | 1348.8    | 0.39   |                        |                        |           |           |                                                                 |                                                                                                                  |
| 688  | ENSG000002082312 | 1356.8    | 0.39   |                        |                        |           |           |                                                                 |                                                                                                                  |
| 748  | ENSG00000201093  | 1435.8    | 0.39   |                        |                        |           |           |                                                                 |                                                                                                                  |
| 907  | ENSG000002072709 | 1636.7    | 0.39   |                        |                        |           |           |                                                                 |                                                                                                                  |
| 997  | ENSG000002040710 | 1778.2    | 0.39   |                        |                        |           |           |                                                                 |                                                                                                                  |
| 1111 | ENSG00000201068  | 1803.1    | 0.39   |                        |                        |           |           |                                                                 |                                                                                                                  |
| 1360 | ENSG00000207228  | 2293.2    | 0.39   |                        |                        |           |           |                                                                 |                                                                                                                  |
| 1380 | ENSG00000203790  | LINC02099 | 2308.  | 0.38                   | lincRNA                | 2         | 8147901   | 8523751                                                         | long intergenic non-protein coding RNA 299                                                                       |
| 452  | ENSG00000201701  | 1303.1    | 0.38   | misc_RNA               | 8                      | 3468298   | 3468298   | RNA_7SL, cytoplasmic 517, pseudogene                            |                                                                                                                  |
| 660  | ENSG000002041939 | 1314.7    | 0.38   | misc_RNA               | 3                      | 43356443  | 43356745  | RNA_7SL, cytoplasmic 517, pseudogene                            |                                                                                                                  |
| 958  | ENSG000002044071 | 1117.1    | 0.38   | processed_pseudogene   | 19                     | 52124389  | 52124954  | ribosomal protein L9 pseudogene 33                              |                                                                                                                  |
| 760  | ENSG00000204405  | 1472.3    | 0.38   | processed_pseudogene   | X                      | 4770265   | 4770101   | ribosomal protein L7 pseudogene 57                              |                                                                                                                  |
| 861  | ENSG00000204045  | 1587.8    | 0.38   | processed_pseudogene   | 16                     | 68243345  | 68243881  | ribosomal protein S12 pseudogene 27                             |                                                                                                                  |
| 175  | ENSG00000198851  | CD3E      | 502.7  | 0.38                   | protein_coding         | 11        | 118175260 | 118186890                                                       | CD3e molecule, epsilon (CD3E, TCR complex)                                                                       |
| 279  | ENSG00000142403  | ZNF81     | 725.5  | 0.38                   | protein_coding         | 20        | 87766076  | 87804168                                                        | zinc finger protein 831                                                                                          |
| 284  | ENSG00000172485  | K16       | 735.3  | 0.38                   | protein_coding         | 15        | 81451916  | 81950104                                                        | keratin 16                                                                                                       |
| 299  | ENSG000002004472 | AIF1      | 761.8  | 0.38                   | protein_coding         | 6         | 3158261   | 3158478                                                         | allograft inflammatory factor 1                                                                                  |
| 312  | ENSG00000100561  | GNAP2     | 807.7  | 0.38                   | protein_coding         | 22        | 40207089  | 40399725                                                        | GNB2-related adaptor protein 2                                                                                   |
| 334  | ENSG00000185621  | TMEM71    | 820.3  | 0.38                   | protein_coding         | 8         | 133607263 | 133770298                                                       | transmembrane protein 71                                                                                         |
| 343  | ENSG00000141506  | PKRX      | 843.6  | 0.38                   | protein_coding         | 17        | 8782233   | 8869329                                                         | phosphonidase-3-kinase, regulatory subunit 5                                                                     |
| 407  | ENSG00000186219  | CAD3      | 963.9  | 0.38                   | protein_coding         | 5         | 15396329  | 15397968                                                        | CR3-associated binding protein 3                                                                                 |
| 423  | ENSG00000149854  | TRAF3A    | 967.5  | 0.38                   | protein_coding         | 2         | 8048874   | 8051312                                                         | Traff domain containing 2A                                                                                       |
| 447  | ENSG00000101265  | RASSF2    | 994.2  | 0.38                   | protein_coding         | 20        | 4760669   | 4804291                                                         | Ras association (RASSF) domain family member 2                                                                   |
| 471  | ENSG00000183041  | H3F3A     | 1025.5 | 0.38                   | protein_coding         | 1         | 22824952  | 22825070                                                        | H3 histone, family 3A                                                                                            |
| 484  | ENSG00000182901  | IRAK4     | 1028.0 | 0.38                   | protein_coding         | 12        | 44152747  | 44183346                                                        | interleukin 1 receptor-associated kinase 4                                                                       |
| 488  | ENSG00000187764  | SEMA4D    | 1060.1 | 0.38                   | protein_coding         | 9         | 91975702  | 92113045                                                        | sema domain, immunoglobulin domain (Ig), transmembrane domain (TM) and short cytoplasmic domain, (semaphorin) 4D |
| 492  | ENSG00000183788  | SNRK      | 1065.5 | 0.38                   | protein_coding         | 3         | 43328004  | 4386256                                                         | SNF related kinase                                                                                               |
| 498  | ENSG00000174128  | TLR1      | 1071.5 | 0.38                   | protein_coding         | 4         | 38792298  | 3885848                                                         | toll-like receptor 1                                                                                             |
| 501  | ENSG00000185404  | SP140L    | 1083.3 | 0.38                   | protein_coding         | 2         | 231191889 | 23120847                                                        | SP140 nuclear body protein-like                                                                                  |
| 533  | ENSG00000185841  | CDYD      | 1134.3 | 0.38                   | protein_coding         | 1         | 8764269   | 8838605                                                         | dydymin domain containing 1                                                                                      |
| 538  | ENSG00000184463  | CREBRF    | 1140.3 | 0.38                   | protein_coding         | 5         | 17248335  | 17266291                                                        | CREB3 regulatory factor                                                                                          |
| 542  | ENSG00000136040  | PLXNC1    | 1153.4 | 0.38                   | protein_coding         | 12        | 94542499  | 94791451                                                        | pleckstrin C1                                                                                                    |
| 575  | ENSG00000103311  | ALPK1     | 1201.1 | 0.38                   | protein_coding         | 4         | 11302665  | 11336378                                                        | alpha kinase 1                                                                                                   |
| 578  | ENSG00000134698  | ASO4      | 1208.6 | 0.38                   | protein_coding         | 1         | 36273773  | 36232481                                                        | aspartate RISC catalytic component 4                                                                             |
| 579  | ENSG00000145819  | ARHGAP26  | 1211.  | 0.38                   | protein_coding         | 5         | 14214949  | 142409576                                                       | Rho GTPase activating protein 26                                                                                 |
| 588  | ENSG00000166763  | KLALAD3   | 1227.6 | 0.38                   | protein_coding         | 16        | 15688243  | 15717023                                                        | KLALAD3                                                                                                          |
| 607  | ENSG00000213240  | NOTCH2NL  | 1252.8 | 0.38                   | protein_coding         | 1         | 145209119 | 145209119                                                       | notch 2 N-terminal like                                                                                          |
| 630  | ENSG00000120868  | APAF1     | 1272.6 | 0.38                   | protein_coding         | 12        | 96038919  | 96129204                                                        | apoptotic peptidase activating factor 1                                                                          |
| 1076 | ENSG00000202542  | CDYD      | 1281.3 | 0.38                   | protein_coding         | 1         | 8768170   | 8788697                                                         | CDYD intronic transcript 1 (non-protein coding)                                                                  |
| 796  | ENSG00000201544  | SNCR1B    | 1388.6 | 0.38                   | snRNA                  | 1         | 21250158  | 21252392                                                        | small nuclear RNA, HIACA box 16B                                                                                 |
| 802  | ENSG00000212316  | SNRNP200  | 1420.8 | 0.38                   | snRNA                  | 9         | 77812987  | 77813093                                                        | RNA_U6 small nuclear 122b, pseudogene                                                                            |
| 858  | ENSG00000186643  | SNRNP200  | 1502.8 | 0.38                   | snRNA                  | 9         | 9026584   | 9026584                                                         | RNA_U6 small nuclear 50, pseudogene                                                                              |
| 138  | ENSG00000211772  | 402.4     | 0.38   | TR_C_gene              | 7                      | 142498725 | 142500332 | T cell receptor beta constant 2                                 |                                                                                                                  |
| 345  | ENSG00000211887  | 847.8     | 0.38   | TR_V_gene              | 7                      | 38285981  | 38285930  | T cell receptor gamma joining 2                                 |                                                                                                                  |
| 373  | ENSG00000211627  | 887.5     | 0.38   | TR_C_gene              | 14                     | 2296384   | 2296384   | T cell receptor alpha joining 2                                 |                                                                                                                  |
| 536  | ENSG00000211875  | 1137.8    | 0.38   | TR_J_gene              | 14                     | 22999778  | 22999929  | T cell receptor alpha joining 14                                |                                                                                                                  |
| 628  | ENSG00000211845  | 1404.     | 0.38   | TR_V_gene              | 14                     | 2296386   | 2296388   | T cell receptor alpha joining 44                                |                                                                                                                  |
| 646  | ENSG00000211798  | 1473.8    | 0.38   | TR_V_gene              | 14                     | 2485413   | 2485413   | T cell receptor alpha variable 18                               |                                                                                                                  |
| 680  | ENSG00000211751  | 1537.3    | 0.38   | TR_V_gene              | 7                      | 14237672  | 14237976  | T cell receptor beta variable 20-2                              |                                                                                                                  |
| 1290 | ENSG00000202789  | 2097.7    | 0.38   | TR_V_gene              | 7                      | 142205511 | 142207011 | T cell receptor beta variable 10-1                              |                                                                                                                  |
| 1343 | ENSG000002025291 | 2207.9    | 0.38   | TR_V_gene              | 12                     | 14231809  | 14231809  | T cell receptor beta variable 7-7                               |                                                                                                                  |
| 1525 | ENSG00000202590  | TREML5P   | 2478.4 | 0.38                   | unprocessed_pseudogene | 6         | 41215107  | 41217387                                                        | triggering receptor expressed on myeloid cells-like 5, pseudogene                                                |
| 113  | ENSG000002023505 | 333.4     | 0.38   |                        |                        |           |           |                                                                 |                                                                                                                  |
| 193  | ENSG00000202164  | 561.1     | 0.38   |                        | 14                     | 23016447  | 23021097  | T cell receptor alpha constant                                  |                                                                                                                  |
| 197  | ENSG00000202956  | 546.      | 0.38   |                        |                        |           |           |                                                                 |                                                                                                                  |
| 355  | ENSG00000204868  | 858.2     | 0.38   |                        |                        |           |           |                                                                 |                                                                                                                  |
| 424  | ENSG00000208919  | 967.7     | 0.38   |                        |                        |           |           |                                                                 |                                                                                                                  |
| 438  | ENSG000001488    | 979.4     | 0.38   |                        |                        |           |           |                                                                 |                                                                                                                  |
| 453  | ENSG00000205760  | 1004.9    | 0.38   |                        |                        |           |           |                                                                 |                                                                                                                  |
| 498  | ENSG00000207190  | 1080.9    | 0.38   |                        |                        |           |           |                                                                 |                                                                                                                  |
| 580  | ENSG00000202824  | 1201.2    | 0.38   |                        |                        |           |           |                                                                 |                                                                                                                  |
| 595  | ENSG00000208625  | 1236.     | 0.38   |                        |                        |           |           |                                                                 |                                                                                                                  |
| 618  | ENSG00000204618  | 1257.     | 0.38   |                        |                        |           |           |                                                                 |                                                                                                                  |
| 623  | ENSG00000203520  | 1289.     | 0.38   |                        |                        |           |           |                                                                 |                                                                                                                  |
| 628  | ENSG00000204784  | 1273.5    | 0.38   |                        |                        |           |           |                                                                 |                                                                                                                  |
| 646  | ENSG00000207784  | 1293.8    | 0.38   |                        |                        |           |           |                                                                 |                                                                                                                  |
| 671  | ENSG000002054317 | 1327.3    | 0.38   |                        |                        |           |           |                                                                 |                                                                                                                  |
| 675  | ENSG00000204745  | 1336.2    | 0.38   |                        |                        |           |           |                                                                 |                                                                                                                  |
| 691  | ENSG00000202097  | 1336.     | 0.38   |                        |                        |           |           |                                                                 |                                                                                                                  |
| 697  | ENSG000002030718 | 1373.2    | 0.38   |                        |                        |           |           |                                                                 |                                                                                                                  |
| 710  | ENSG00000211875  | 1385.1    | 0.38   |                        |                        |           |           |                                                                 |                                                                                                                  |
| 750  | ENSG00000186295  | 1437.3    | 0.38   |                        |                        |           |           |                                                                 |                                                                                                                  |
| 805  | ENSG000002058912 | 1517.8    | 0.38   |                        |                        |           |           |                                                                 |                                                                                                                  |
| 884  | ENSG000002034110 | 1614.9    | 0.38   |                        |                        |           |           |                                                                 |                                                                                                                  |
| 926  | ENSG00000202598  | 1679.3    | 0.38   |                        |                        |           |           |                                                                 |                                                                                                                  |
| 963  | ENSG000002086397 | 1719.3    | 0.38   |                        |                        |           |           |                                                                 |                                                                                                                  |
| 1025 | ENSG000002037914 | 1814.     | 0.38   |                        |                        |           |           |                                                                 |                                                                                                                  |
| 1140 | ENSG00000202188  | 1975.     | 0.38   |                        |                        |           |           |                                                                 |                                                                                                                  |
| 1156 | ENSG000002054887 | 1983.3    | 0.38   |                        |                        |           |           |                                                                 |                                                                                                                  |
| 1227 | ENSG000002080145 | 2134.3    | 0.38   |                        |                        |           |           |                                                                 |                                                                                                                  |
| 1407 | ENSG00000202339  | 2345.4    | 0.38   |                        |                        |           |           |                                                                 |                                                                                                                  |
| 1422 | ENSG000002033464 | 2359.8    | 0.38   |                        |                        |           |           |                                                                 |                                                                                                                  |
| 1521 | ENSG000002029277 | 2474.5    | 0.38   |                        |                        |           |           |                                                                 |                                                                                                                  |
| 1543 | ENSG00000204188  | 2493.     | 0.38   |                        |                        |           |           |                                                                 |                                                                                                                  |
| 1576 | ENSG00000206971  | 2544.9    | 0.38   |                        |                        |           |           |                                                                 |                                                                                                                  |
| 715  | ENSG00000208908  | 1407.     | 0.37   | antisense              | 4                      | 54927213  | 54927377  | HCG2007126, Uncharacterized protein                             |                                                                                                                  |
| 295  | ENSG00000208598  | MR3571    | 757.8  | 0.37                   | miRNA                  | 1         | 6552348   | 6552356                                                         | miRNA 3671                                                                                                       |
| 1312 | ENSG00000211235  | MR1200    | 2208.5 | 0.37                   | miRNA                  | 7         | 36958962  | 36959032                                                        | miRNA 1200                                                                                                       |



|      |                 |        |      |                                |    |           |           |                                                                              |
|------|-----------------|--------|------|--------------------------------|----|-----------|-----------|------------------------------------------------------------------------------|
| 1288 | ENSG00000212445 | 2173.4 | 0.37 | snRNA                          | 16 | 68223190  | 68223124  | Small nuclear RNA SNORA48                                                    |
| 1449 | ENSG00000208529 | 1202.8 | 0.37 | snRNA                          | 2  | 20200689  | 20200689  | RNA_U1 small nuclear 45 pseudogene                                           |
| 666  | ENSG00000223858 | 1322.8 | 0.37 | snRNA                          | 17 | 27968629  | 27968720  | RNA_U6 small nuclear 920 pseudogene                                          |
| 689  | ENSG00000222267 | 1325.3 | 0.37 | snRNA                          | 8  | 20047290  | 20047388  | RNA_U6 small nuclear 895 pseudogene                                          |
| 616  | ENSG00000211880 | 1260.5 | 0.37 | TR_J_gene                      | 14 | 23044502  | 23044562  | T cell receptor alpha joining 9                                              |
| 616  | ENSG00000211880 | 1252.7 | 0.37 | TR_J_gene                      | 14 | 22989364  | 22989456  | T cell receptor alpha joining 23                                             |
| 694  | ENSG00000211860 | 1370.3 | 0.37 | TR_J_gene                      | 14 | 22982921  | 22982980  | T cell receptor alpha joining 29                                             |
| 744  | ENSG00000211860 | 1593.7 | 0.37 | TR_J_gene                      | 14 | 23046967  | 23046968  | T cell receptor alpha joining 7                                              |
| 73   | ENSG00000211793 | 1593.7 | 0.37 | TR_V_gene                      | 14 | 22489113  | 22489844  | T cell receptor alpha variable 9-2                                           |
| 182  | ENSG00000211716 | 518    | 0.37 | TR_V_gene                      | 7  | 14229957  | 14229958  | T cell receptor beta variable 9                                              |
| 198  | ENSG00000211734 | 553.1  | 0.37 | TR_V_gene                      | 7  | 14230496  | 14230193  | T cell receptor beta variable 9-1                                            |
| 1429 | ENSG00000212950 | 2911   | 0.37 | TR_V_gene                      | 7  | 14222380  | 14222384  | T cell receptor beta variable 11-1                                           |
| 1377 | ENSG00000237065 | 2378.9 | 0.37 | transcribed_unprocessed_pseudo | 7  | 29251918  | 29252830  | Nangy homeobox pseudogene 4                                                  |
| 1251 | ENSG00000225796 | 2129.4 | 0.37 | unprocessed_pseudogene         | 2  | 202078021 | 202079383 | MT-ND4 pseudogene 23                                                         |
| 213  | ENSG00000245848 | 571.5  | 0.37 |                                |    |           |           |                                                                              |
| 387  | ENSG00000235105 | 917.3  | 0.37 |                                |    |           |           |                                                                              |
| 487  | ENSG00000209121 | 1053.3 | 0.37 |                                |    |           |           |                                                                              |
| 501  | ENSG00000259628 | 1213.8 | 0.37 |                                |    |           |           |                                                                              |
| 611  | ENSG00000208141 | 1256.2 | 0.37 |                                |    |           |           |                                                                              |
| 617  | ENSG00000235443 | 1201.4 | 0.37 |                                |    |           |           |                                                                              |
| 647  | ENSG00000230063 | 1296.4 | 0.37 |                                |    |           |           |                                                                              |
| 656  | ENSG00000272650 | 1308.8 | 0.37 |                                |    |           |           |                                                                              |
| 657  | ENSG00000230322 | 1311.6 | 0.37 |                                |    |           |           |                                                                              |
| 670  | ENSG00000260378 | 1355.9 | 0.37 |                                |    |           |           |                                                                              |
| 686  | ENSG00000239445 | 1353.3 | 0.37 |                                |    | 15178595  | 15178690  | Small nuclear RNA U13                                                        |
| 690  | ENSG00000000114 | 1358.2 | 0.37 | SYNRG                          | 17 | 35814800  | 35816644  | synergin gamma                                                               |
| 710  | ENSG00000271680 | 1401.5 | 0.37 |                                |    |           |           |                                                                              |
| 718  | ENSG00000236194 | 1408.9 | 0.37 |                                |    |           |           |                                                                              |
| 726  | ENSG00000230735 | 1416.3 | 0.37 |                                |    |           |           |                                                                              |
| 735  | ENSG00000253720 | 1428.8 | 0.37 |                                |    |           |           |                                                                              |
| 737  | ENSG00000254325 | 1430.3 | 0.37 |                                |    |           |           |                                                                              |
| 739  | ENSG00000232154 | 1431.7 | 0.37 |                                |    |           |           |                                                                              |
| 742  | ENSG00000270949 | 1432.9 | 0.37 |                                |    |           |           |                                                                              |
| 759  | ENSG00000254879 | 1450.6 | 0.37 |                                |    |           |           |                                                                              |
| 774  | ENSG00000259552 | 1465.6 | 0.37 |                                |    |           |           |                                                                              |
| 808  | ENSG00000211443 | 1510.8 | 0.37 |                                |    |           |           |                                                                              |
| 813  | ENSG00000259468 | 1516.4 | 0.37 |                                |    |           |           |                                                                              |
| 880  | ENSG00000249883 | 1611   | 0.37 |                                |    |           |           |                                                                              |
| 909  | ENSG00000232311 | 1651.7 | 0.37 |                                |    |           |           |                                                                              |
| 950  | ENSG00000229979 | 1703.8 | 0.37 |                                |    |           |           |                                                                              |
| 958  | ENSG00000249691 | 1714.2 | 0.37 |                                |    |           |           |                                                                              |
| 1030 | ENSG00000259574 | 1822   | 0.37 |                                |    |           |           |                                                                              |
| 1034 | ENSG00000258483 | 1825.2 | 0.37 |                                |    |           |           |                                                                              |
| 1041 | ENSG00000260562 | 1826   | 0.37 |                                |    |           |           |                                                                              |
| 1042 | ENSG00000270268 | 1845.7 | 0.37 |                                |    |           |           |                                                                              |
| 1080 | ENSG00000225936 | 1885.3 | 0.37 |                                |    |           |           |                                                                              |
| 1180 | ENSG00000270174 | 2052.9 | 0.37 |                                |    |           |           |                                                                              |
| 1182 | ENSG00000260186 | 2022.8 | 0.37 |                                |    |           |           |                                                                              |
| 1410 | ENSG00000241134 | 2348.6 | 0.37 |                                |    |           |           |                                                                              |
| 1412 | ENSG00000259629 | 2349.9 | 0.37 |                                |    |           |           |                                                                              |
| 1418 | ENSG00000249481 | 2353.4 | 0.37 |                                |    |           |           |                                                                              |
| 1443 | ENSG00000256155 | 2389.2 | 0.37 |                                |    |           |           |                                                                              |
| 1480 | ENSG00000293772 | 2444.2 | 0.37 |                                |    |           |           |                                                                              |
| 1500 | ENSG00000217211 | 2453   | 0.37 |                                |    |           |           |                                                                              |
| 1528 | ENSG00000258832 | 2477.3 | 0.37 |                                |    |           |           |                                                                              |
| 1536 | ENSG00000225751 | 2513.2 | 0.37 |                                |    |           |           |                                                                              |
| 1804 | ENSG00000230487 | 2802.6 | 0.37 |                                |    |           |           |                                                                              |
| 1828 | ENSG00000237379 | 2917.2 | 0.37 |                                |    |           |           |                                                                              |
| 732  | ENSG00000223799 | 1427.8 | 0.36 | antisense                      | 21 | 34536178  | 34538595  | IL10RB antisense RNA 1 (head to head)                                        |
| 981  | ENSG00000222154 | 1714.2 | 0.36 | antisense                      | 4  | 154652611 | 154841577 | TRUC antisense RNA 1                                                         |
| 935  | ENSG00000228487 | 1687.3 | 0.36 | antisense                      | X  | 110948877 | 110954328 | ALG13 antisense RNA 1                                                        |
| 960  | ENSG00000226312 | 1716.6 | 0.36 | antisense                      | 2  | 202025507 | 202022548 | CFLAR antisense RNA 1                                                        |
| 1036 | ENSG00000224441 | 1822.2 | 0.36 | antisense                      | 3  | 17084624  | 17085684  | PCCL1 antisense RNA 1                                                        |
| 686  | ENSG00000236438 | 1927.7 | 0.36 | lincRNA                        | 3  | 197879237 | 197825886 | family with sequence similarity 157, member A                                |
| 1094 | ENSG00000226907 | 2300.9 | 0.36 | lincRNA                        | 1  | 149284445 | 149289775 | long intergenic non-protein coding RNA 809                                   |
| 1096 | ENSG00000230963 | 2322.1 | 0.36 | lincRNA                        | 1  | 2441982   | 2442226   | GMS2 antisense RNA 1 (head to head)                                          |
| 802  | ENSG00000222811 | 1504.2 | 0.36 | miRNA                          | 1  | 236016300 | 236016340 | miR-1537                                                                     |
| 821  | ENSG00000215337 | 1528.7 | 0.36 | miRNA                          | 14 | 64561742  | 64561843  | miR-548b-1                                                                   |
| 743  | ENSG00000230044 | 1437.8 | 0.36 | misc_RNA                       | 9  | 7738038   | 7738037   | Y RNA                                                                        |
| 841  | ENSG00000208739 | 1492   | 0.36 | misc_RNA                       | 22 | 19032769  | 19032880  | Y RNA                                                                        |
| 729  | ENSG00000232772 | 1442   | 0.36 | processed_pseudogene           | 2  | 143854408 | 14385576  | MT-ND4 pseudogene 22                                                         |
| 756  | ENSG00000230511 | 1444.2 | 0.36 | processed_pseudogene           | 2  | 23137928  | 23138053  | high mobility group box 1 pseudogene 3                                       |
| 863  | ENSG00000230452 | 1578.6 | 0.36 | processed_pseudogene           | 16 | 28122454  | 28122968  | TPS3P1 binding protein pseudogene 2                                          |
| 803  | ENSG00000238278 | 1591.4 | 0.36 | processed_pseudogene           | 1  | 188848268 | 188849162 | phosphatidylinositol-binding protein 1 pseudogene 3                          |
| 906  | ENSG00000230498 | 1602.6 | 0.36 | processed_pseudogene           | 12 | 68838857  | 68839033  | heterogeneous nuclear ribonucleoprotein A1 pseudogene 7b                     |
| 1846 | ENSG00000259066 | 2623.6 | 0.36 | processed_pseudogene           | 14 | 89418871  | 8941247   | family with sequence similarity 35, member C pseudogene                      |
| 1897 | ENSG00000296171 | 3002.2 | 0.36 | processed_pseudogene           | 12 | 8293764   | 8295293   | glycine cleavage system protein 1 (aminomethyl carrier) pseudogene 4         |
| 126  | ENSG00000232258 | 1714.2 | 0.36 | processed_transcript           | 17 | 76163479  | 76163480  | TRUC antisense RNA 1                                                         |
| 59   | ENSG00000143185 | 164.9  | 0.36 | protein_coding                 | 1  | 16851003  | 168513235 | chemokine (C motif) ligand 2                                                 |
| 366  | ENSG00000204592 | 881    | 0.36 | protein_coding                 | 6  | 30457244  | 30461982  | major histocompatibility complex, class I E                                  |
| 369  | ENSG00000181791 | 882.9  | 0.36 | protein_coding                 | 16 | 88021297  | 88021309  | arvus kinase 3                                                               |
| 382  | ENSG00000127094 | 909.9  | 0.36 | protein_coding                 | 9  | 95709733  | 95709518  | FYVE, RhoGEF and PH domain containing 3                                      |
| 398  | ENSG00000163947 | 919.6  | 0.36 | protein_coding                 | 3  | 56781446  | 57113357  | Rho guanine nucleotide exchange factor (GEF) 3                               |
| 385  | ENSG00000204642 | 925.9  | 0.36 | protein_coding                 | 6  | 29606552  | 29706305  | major histocompatibility complex, class I F                                  |
| 401  | ENSG00000102638 | 933.8  | 0.36 | protein_coding                 | 13 | 17935698  | 17935680  | arvus kinase 3                                                               |
| 406  | ENSG00000128450 | 943.2  | 0.36 | protein_coding                 | 9  | 51628165  | 51639908  | sialic acid binding-like lectin 9                                            |
| 416  | ENSG00000117602 | 964.7  | 0.36 | protein_coding                 | 7  | 24023987  | 24067530  | ATCNA family member 2                                                        |
| 430  | ENSG00000198448 | 974.8  | 0.36 | protein_coding                 | 9  | 117094436 | 117166845 | AT-hook transcription factor                                                 |
| 454  | ENSG00000115607 | 999.2  | 0.36 | protein_coding                 | 2  | 10305149  | 10306925  | interleukin 18 receptor accessory protein                                    |
| 473  | ENSG00000169598 | 1026.9 | 0.36 | protein_coding                 | 11 | 118097466 | 118124605 | lysozym protein cerivizic 3                                                  |
| 510  | ENSG00000145226 | 1084.8 | 0.36 | protein_coding                 | 1  | 61412520  | 61418300  | Fc-fragment of IgG, low affinity, beta receptor (CD32)                       |
| 512  | ENSG00000175857 | 1169.7 | 0.36 | protein_coding                 | 5  | 57782782  | 57792917  | GRB2-binding adaptor protein, transmembrane                                  |
| 526  | ENSG00000180533 | 1126.7 | 0.36 | protein_coding                 | 3  | 12139246  | 12139774  | hematopoietic cell-specific Lyn substrate 1                                  |
| 564  | ENSG00000186172 | 1131.6 | 0.36 | protein_coding                 | 1  | 154317669 | 15441026  | interleukin 6 receptor                                                       |
| 587  | ENSG00000136147 | 1125.3 | 0.36 | protein_coding                 | 13 | 50069746  | 50103123  | PHD finger protein 11                                                        |
| 597  | ENSG00000309377 | 1238   | 0.36 | protein_coding                 | 7  | 13947690  | 139720125 | thrombospondin 1 (platelet)                                                  |
| 604  | ENSG00000129385 | 1292.7 | 0.36 | protein_coding                 | 22 | 30348746  | 30358198  | apolipoprotein B mRNA editing enzyme, catalytic polypeptide-like 3A          |
| 627  | ENSG00000183162 | 1272.6 | 0.36 | protein_coding                 | 2  | 101887681 | 101925163 | ring finger protein 149                                                      |
| 642  | ENSG00000101916 | 1296.3 | 0.36 | protein_coding                 | X  | 12924729  | 12941298  | tbl-like receptor 1                                                          |
| 644  | ENSG00000108689 | 1293.5 | 0.36 | protein_coding                 | 17 | 78670130  | 78778379  | cytchesin 1                                                                  |
| 787  | ENSG00000112343 | 1353.4 | 0.36 | protein_coding                 | 6  | 25963030  | 25967184  | triglycyl motif containing 38                                                |
| 741  | ENSG00000107966 | 1402.6 | 0.36 | protein_coding                 | 2  | 23120667  | 23140806  | SP100 nuclear antigen                                                        |
| 753  | ENSG00000101153 | 1443.4 | 0.36 | protein_coding                 | 14 | 91737867  | 91844188  | collet-coiled nuclear containing 8B                                          |
| 786  | ENSG00000152918 | 1481.9 | 0.36 | protein_coding                 | 6  | 14469837  | 14517470  | utrophin                                                                     |
| 839  | ENSG00000113441 | 1552   | 0.36 | protein_coding                 | 5  | 96271096  | 96279216  | lysyl/tyrosyl aminopeptidase                                                 |
| 885  | ENSG00000147886 | 1580.8 | 0.36 | protein_coding                 | 9  | 27524312  | 27528496  | interferon, kappa                                                            |
| 889  | ENSG00000128003 | 1619.8 | 0.36 | protein_coding                 | 15 | 62144588  | 62352672  | vesicular protein sorting 13 homolog C (S. cerevisiae)                       |
| 910  | ENSG00000158073 | 1654.2 | 0.36 | protein_coding                 | 1  | 17396305  | 173991435 | ring finger and CCHC-type domains 1                                          |
| 965  | ENSG00000107077 | 1706.5 | 0.36 | protein_coding                 | 9  | 6728883   | 6775848   | Msm1 (K)-specific demethylase 4C                                             |
| 979  | ENSG00000172568 | 1754.6 | 0.36 | protein_coding                 | 5  | 156786608 | 156772729 | Ribonuclein type II domain containing 9                                      |
| 1050 | ENSG00000204683 | 1849   | 0.36 | protein_coding                 | 8  | 93073743  | 93073743  | ROU domain-like 3, transcription factor 2                                    |
| 1530 | ENSG00000167633 | 2479.6 | 0.36 | protein_coding                 | 19 | 55235969  | 55378448  | killer cell immunoglobulin receptor, three domains, long cytoplasmic tail, 1 |
| 1700 | ENSG00000112116 | 2702.7 | 0.36 | protein_coding                 | 6  | 52101479  | 52109335  | interleukin 17F                                                              |
| 1737 | ENSG00000101918 | 2739   | 0.36 | protein_coding                 | 19 | 55029105  | 55021897  | ubiquitin-associated immunoglobulin-like receptor 2                          |
| 1748 | ENSG00000181963 | 2789.8 | 0.36 | protein_coding                 | 11 | 4470525   | 4471591   | effector receptor, family 52, subfamily K, member 2                          |
| 1859 | ENSG00000196778 | 2960.9 | 0.36 | protein_coding                 | 11 | 4510109   | 4511138   | effector receptor, family 52, subfamily K, member 1                          |
| 726  | ENSG00000212993 | 1419.2 | 0.36 | snRNA                          | 13 | 29994527  | 29994653  | Small nuclear RNA SNORA16B/SNORA15A family                                   |

|      |                   |        |      |                                    |           |           |           |  |                                                                                                |
|------|-------------------|--------|------|------------------------------------|-----------|-----------|-----------|--|------------------------------------------------------------------------------------------------|
| 879  | ENSG00000253307   | 1609.9 | 0.36 |                                    |           |           |           |  |                                                                                                |
| 883  | ENSG00000233598   | 1614.8 | 0.36 |                                    |           |           |           |  |                                                                                                |
| 900  | ENSG00000225205   | 1642   | 0.36 |                                    |           |           |           |  |                                                                                                |
| 908  | ENSG00000287136   | 1650.4 | 0.36 |                                    |           |           |           |  |                                                                                                |
| 927  | ENSG00000270129   | 1653   | 0.36 |                                    |           |           |           |  |                                                                                                |
| 928  | ENSG00000211513   | 1661   | 0.36 |                                    |           |           |           |  |                                                                                                |
| 981  | ENSG00000224901   | 1717.7 | 0.36 |                                    |           |           |           |  |                                                                                                |
| 984  | ENSG00000206571   | 1726   | 0.36 |                                    |           |           |           |  |                                                                                                |
| 985  | ENSG00000208437   | 1728.3 | 0.36 |                                    |           |           |           |  |                                                                                                |
| 989  | ENSG00000209832   | 1737.2 | 0.36 |                                    |           |           |           |  |                                                                                                |
| 977  | ENSG00000206121   | 1752.2 | 0.36 |                                    |           |           |           |  |                                                                                                |
| 1001 | ENSG00000252493   | 1751.8 | 0.36 |                                    |           |           |           |  |                                                                                                |
| 1003 | ENSG00000229871   | 1762.5 | 0.36 |                                    |           |           |           |  |                                                                                                |
| 1017 | ENSG00000206141   | 1800.9 | 0.36 | 17                                 | 35391042  | 35391110  |           |  | microRNA 2909                                                                                  |
| 1022 | ENSG00000202999   | 1808.8 | 0.36 |                                    |           |           |           |  |                                                                                                |
| 1053 | ENSG00000204429   | 1849.2 | 0.36 |                                    |           |           |           |  |                                                                                                |
| 1113 | ENSG00000205015   | 1936.8 | 0.36 |                                    |           |           |           |  |                                                                                                |
| 1122 | ENSG00000202863   | 1948.8 | 0.36 | 18                                 | 29674467  | 29674569  |           |  | Small nuclear RNA U13                                                                          |
| 1148 | ENSG000002028061  | 1987.3 | 0.36 |                                    |           |           |           |  |                                                                                                |
| 1176 | ENSG00000202807   | 2026.4 | 0.36 | 17                                 | 4017902   | 4018004   |           |  | Small nuclear RNA U13                                                                          |
| 1192 | ENSG00000202950   | 2024.3 | 0.36 |                                    |           |           |           |  |                                                                                                |
| 1310 | ENSG00000202352   | 2202.8 | 0.36 |                                    |           |           |           |  |                                                                                                |
| 1380 | ENSG00000258428   | 2317.4 | 0.36 |                                    |           |           |           |  |                                                                                                |
| 1400 | ENSG00000202467   | 2428.7 | 0.36 |                                    |           |           |           |  |                                                                                                |
| 1483 | ENSG00000202438   | 2437.1 | 0.36 |                                    |           |           |           |  |                                                                                                |
| 1503 | ENSG00000271461   | 2438   | 0.36 |                                    |           |           |           |  |                                                                                                |
| 1600 | ENSG00000202987   | 2627.8 | 0.36 |                                    |           |           |           |  |                                                                                                |
| 1637 | ENSG00000251383   | 2612.2 | 0.36 |                                    |           |           |           |  |                                                                                                |
| 1639 | ENSG00000202826   | 2614.2 | 0.36 | 1                                  | 101694220 | 101694321 |           |  | Small nuclear RNA U13                                                                          |
| 1640 | ENSG00000202914   | 2618.8 | 0.36 |                                    |           |           |           |  |                                                                                                |
| 1662 | ENSG00000202790   | 2697.5 | 0.36 |                                    |           |           |           |  |                                                                                                |
| 1701 | ENSG000002027875  | 2708.6 | 0.36 |                                    |           |           |           |  |                                                                                                |
| 1713 | ENSG000002021689  | 2738   | 0.36 |                                    |           |           |           |  |                                                                                                |
| 1715 | ENSG000002020152  | 2728.7 | 0.36 |                                    |           |           |           |  |                                                                                                |
| 1733 | ENSG00000202332   | 2765   | 0.36 |                                    |           |           |           |  |                                                                                                |
| 1744 | ENSG000002024837  | 2783.3 | 0.36 |                                    |           |           |           |  |                                                                                                |
| 1810 | ENSG0000020259719 | 2898.9 | 0.36 |                                    |           |           |           |  |                                                                                                |
| 1837 | ENSG000002027053  | 2927.9 | 0.36 |                                    |           |           |           |  |                                                                                                |
| 1844 | ENSG000002025687  | 2928.8 | 0.36 |                                    |           |           |           |  |                                                                                                |
| 2066 | ENSG00000254362   | 3248.3 | 0.36 |                                    |           |           |           |  |                                                                                                |
| 409  | ENSG000002027039  | 347.4  | 0.35 | antisense                          | 21        | 48349986  | 48349993  |  | ITGB2 antisense RNA 1                                                                          |
| 458  | ENSG00000204685   | 1587.3 | 0.35 | antisense                          | 5         | 82927171  | 82927176  |  | UCA1 antisense RNA 1                                                                           |
| 837  | ENSG00000233013   | 1551.4 | 0.35 | lincRNA                            | 9         | 141109637 | 141143444 |  | family with sequence similarity 157, member B                                                  |
| 1563 | ENSG00000198106   | 2508.1 | 0.35 | lincRNA                            | 16        | 29262829  | 29519817  |  | sorting nexin 29 pseudogene 2                                                                  |
| 1607 | ENSG00000205523   | 2095.9 | 0.35 | miRNA                              | 14        | 144264913 | 144264918 |  | miR99a-3129                                                                                    |
| 1620 | ENSG00000211969   | 1426.3 | 0.35 | misc. RNA                          | 7         | 37474718  | 37474719  |  | Y RNA                                                                                          |
| 841  | ENSG00000251728   | 1553.3 | 0.35 | misc. RNA                          | 7         | 139794497 | 139794592 |  | Y RNA                                                                                          |
| 869  | ENSG000002026550  | 1601.9 | 0.35 | misc. RNA                          | 2         | 231371818 | 231372099 |  | RNA 758, cytoplasmic 83A, pseudogene                                                           |
| 954  | ENSG00000204767   | 1710.3 | 0.35 | misc. RNA                          | 13        | 48743584  | 48743883  |  | RNA 758, cytoplasmic 288, pseudogene                                                           |
| 950  | ENSG00000234568   | 1297.6 | 0.35 | processed_pseudogene               | 4         | 83196224  | 83197753  |  | bridging integrator 2 pseudogene 1                                                             |
| 971  | ENSG00000219085   | 1741.3 | 0.35 | processed_pseudogene               | 6         | 70415179  | 70416052  |  | nucleoside diphosphate kinase 2 pseudogene 37                                                  |
| 1009 | ENSG00000204908   | 2032.6 | 0.35 | processed_pseudogene               | 20        | 34462396  | 34466655  |  | HES1 tyrosine inducible domain family, member 1A pseudogene 16                                 |
| 1319 | ENSG00000241738   | 2217.1 | 0.35 | processed_pseudogene               | 3         | 101078136 | 101078986 |  | zinc finger protein 90 pseudogene 1                                                            |
| 1379 | ENSG00000202696   | 2307.2 | 0.35 | processed_pseudogene               | 6         | 2341884   | 2341980   |  | high mobility group nucleosomal binding domain 2 pseudogene 28                                 |
| 1404 | ENSG00000213205   | 2337.5 | 0.35 | processed_pseudogene               | 7         | 15020947  | 15021027  |  | STE20-related kinase adaptor beta pseudogene 1                                                 |
| 1405 | ENSG00000236564   | 2458.4 | 0.35 | processed_pseudogene               | 2         | 99310572  | 99311963  |  | WYHAQ pseudogene 5                                                                             |
| 1462 | ENSG00000204907   | 2905.5 | 0.35 | processed_pseudogene               | 8         | 74988117  | 74988862  |  | ribosomal protein S3a pseudogene 32                                                            |
| 387  | ENSG00000154961   | 861.4  | 0.35 | protein_coding                     | 11        | 97113896  | 97117590  |  | TBC1 domain family, member 10C 4                                                               |
| 384  | ENSG00000135838   | 910.8  | 0.35 | protein_coding                     | 1         | 182758428 | 18279519  |  | N-acetylneuraminyl pyruvate lyase (dihydrodipicolinate synthase)                               |
| 402  | ENSG00000185905   | 934.8  | 0.35 | protein_coding                     | 16        | 29753784  | 29757327  |  | chromosome 16 open reading frame 54                                                            |
| 494  | ENSG00000217658   | 1071.3 | 0.35 | protein_coding                     | 16        | 66589466  | 6660134   |  | chromatin factor                                                                               |
| 514  | ENSG00000137462   | 1103.3 | 0.35 | protein_coding                     | 4         | 154628252 | 154628851 |  | tol-1ike receptor 2                                                                            |
| 522  | ENSG00000188404   | 1119.9 | 0.35 | protein_coding                     | 1         | 16965808  | 16968039  |  | selectin L                                                                                     |
| 537  | ENSG00000160704   | 1200.6 | 0.35 | protein_coding                     | 11        | 97113896  | 97117590  |  | CD300 molecule-like family member 1                                                            |
| 543  | ENSG00000186517   | 1154.7 | 0.35 | protein_coding                     | 1         | 161016736 | 161039760 |  | Rho GTPase activating protein 30                                                               |
| 545  | ENSG00000158985   | 1159   | 0.35 | protein_coding                     | 5         | 130581186 | 130734140 |  | CD42 small effector 2                                                                          |
| 580  | ENSG00000102291   | 1213   | 0.35 | protein_coding                     | 22        | 32817663  | 32819418  |  | F-box protein 7                                                                                |
| 586  | ENSG00000196954   | 1220.2 | 0.35 | protein_coding                     | 11        | 104813593 | 104840163 |  | casease 4, apoptosis-related cysteine peptidase                                                |
| 594  | ENSG00000185989   | 1236.5 | 0.35 | protein_coding                     | 13        | 114747194 | 114899086 |  | RAS p21 protein activator 3                                                                    |
| 603  | ENSG00000176701   | 1244.5 | 0.35 | protein_coding                     | 11        | 18358268  | 18359611  |  | neurospiralin-like factor 2                                                                    |
| 606  | ENSG00000163334   | 1251.8 | 0.35 | protein_coding                     | 1         | 157784193 | 157789895 |  | Fc receptor-like 1                                                                             |
| 643  | ENSG00000152495   | 1262.9 | 0.35 | protein_coding                     | 5         | 110589351 | 110630584 |  | calcium/calmodulin-dependent protein kinase IV                                                 |
| 662  | ENSG00000186922   | 1320.5 | 0.35 | protein_coding                     | 13        | 74268158  | 74268162  |  | Kras-like factor 12                                                                            |
| 677  | ENSG00000202891   | 1336.6 | 0.35 | protein_coding                     | 19        | 7445850   | 7535131   |  | Rho guanine nucleotide exchange factor 18                                                      |
| 678  | ENSG00000070190   | 1337   | 0.35 | protein_coding                     | 4         | 180737960 | 180793117 |  | dual adaptor of phosphotyrosine and 3-phosphoserine                                            |
| 721  | ENSG00000105313   | 1417.4 | 0.35 | protein_coding                     | 16        | 3382028   | 3382637   |  | Mastinectin-like factor                                                                        |
| 731  | ENSG00000158404   | 1426.5 | 0.35 | protein_coding                     | 16        | 7470753   | 7473458   |  | inward kinase kinase domain-like                                                               |
| 764  | ENSG00000070770   | 1458.3 | 0.35 | protein_coding                     | X         | 13193345  | 13192398  |  | musclelike-like splicing regulator 3                                                           |
| 770  | ENSG00000101268   | 1460.7 | 0.35 | protein_coding                     | 1         | 11754382  | 11759167  |  | CD101 molecule                                                                                 |
| 793  | ENSG00000204937   | 1492   | 0.35 | protein_coding                     | 5         | 70254310  | 70320941  |  | NLR family, apoptosis inhibitor protein                                                        |
| 817  | ENSG00000158744   | 1520.9 | 0.35 | protein_coding                     | 2         | 20783841  | 20790394  |  | family with sequence similarity 126, member B                                                  |
| 820  | ENSG00000186399   | 1529.8 | 0.35 | protein_coding                     | 2         | 2442373   | 2443363   |  | intersectin 2                                                                                  |
| 838  | ENSG00000135655   | 1551.9 | 0.35 | protein_coding                     | 12        | 62654119  | 62811211  |  | ubiquitin specific peptidase 15                                                                |
| 871  | ENSG00000168769   | 1604   | 0.35 | protein_coding                     | 4         | 106007032 | 106200973 |  | tet methylcytosine dioxygenase 2                                                               |
| 890  | ENSG00000107290   | 1612.6 | 0.35 | protein_coding                     | 9         | 135180743 | 13523072  |  | seriatin                                                                                       |
| 943  | ENSG00000151466   | 1697.5 | 0.35 | protein_coding                     | 2         | 129716793 | 13017494  |  | sodium channel and clatter linker 1                                                            |
| 1043 | ENSG00000188897   | 2433.8 | 0.35 | protein_coding                     | 16        | 11453702  | 11671444  |  | Protein LOC388210                                                                              |
| 1048 | ENSG00000202896   | 1637.3 | 0.35 | snRNA                              | 8         | 14971022  | 14971063  |  | Small nuclear RNA SNCRD112                                                                     |
| 833  | ENSG00000202223   | 1540.7 | 0.35 | snRNA                              | 1         | 18479662  | 18479623  |  | RNA, U7 small nuclear 13, pseudogene                                                           |
| 907  | ENSG00000252796   | 1650.4 | 0.35 | snRNA                              | 3         | 125538520 | 125538719 |  | RNA, U6 small nuclear 1142, pseudogene                                                         |
| 930  | ENSG00000205971   | 1700.4 | 0.35 | snRNA                              | 3         | 13616926  | 13616925  |  | RNA, U6 small nuclear 1284, pseudogene                                                         |
| 974  | ENSG00000205414   | 1743.8 | 0.35 | snRNA                              | 2         | 84889026  | 84890131  |  | RNA, U7 small nuclear 100, pseudogene                                                          |
| 976  | ENSG00000211890   | 961.9  | 0.35 | TR_j_gene                          | 7         | 38309092  | 38309141  |  | T cell receptor gamma joining 1                                                                |
| 674  | ENSG00000211691   | 1332.3 | 0.35 | TR_j_gene                          | 7         | 38313188  | 38313248  |  | T cell receptor gamma joining 7                                                                |
| 849  | ENSG00000211861   | 1571.8 | 0.35 | TR_j_gene                          | 14        | 22984601  | 22984669  |  | T cell receptor alpha joining 28                                                               |
| 850  | ENSG00000211855   | 1572   | 0.35 | TR_j_gene                          | 14        | 22978651  | 22978708  |  | T cell receptor alpha joining 34                                                               |
| 872  | ENSG00000211877   | 1604.7 | 0.35 | TR_j_gene                          | 14        | 23000889  | 23000948  |  | T cell receptor alpha joining 12                                                               |
| 1678 | ENSG000002029056  | 3110.5 | 0.35 | transcribed_unprocessed_pseudogene | 2         | 84977893  | 84978355  |  | double homeobox A pseudogene 1                                                                 |
| 1365 | ENSG00000171999   | 2220.5 | 0.35 | untranscribed_pseudogene           | 11        | 4425523   | 4425507   |  | olfactory receptor, family 52, subfamily P, member 2 pseudogene                                |
| 1096 | ENSG00000141439   | 1804.9 | 0.35 | unprocessed_pseudogene             | 7         | 70713223  | 70713223  |  | family with sequence similarity 18, member 13 pseudogene                                       |
| 1078 | ENSG00000232254   | 2974.4 | 0.35 | unprocessed_pseudogene             | 22        | 37346571  | 37349764  |  | colony stimulating factor 2 receptor, beta, low-affinity (granulocyte-macrophage) pseudogene 1 |
| 528  | ENSG00000236304   | 818.2  | 0.35 |                                    |           |           |           |  |                                                                                                |
| 598  | ENSG00000136633   | 1093.9 | 0.35 |                                    |           |           |           |  |                                                                                                |
| 553  | ENSG00000258810   | 1170.3 | 0.35 |                                    | 1         | 209690879 | 209762616 |  | Ras association (RaDQSAF-6) domain family member 5                                             |
| 980  | ENSG00000272477   | 1181.2 | 0.35 |                                    |           |           |           |  |                                                                                                |
| 787  | ENSG00000202931   | 1447.1 | 0.35 |                                    |           |           |           |  |                                                                                                |
| 805  | ENSG000002026300  | 1505.7 | 0.35 |                                    |           |           |           |  |                                                                                                |
| 840  | ENSG00000202994   | 1521   | 0.35 |                                    |           |           |           |  |                                                                                                |
| 844  | ENSG00000202926   | 1561   | 0.35 |                                    |           |           |           |  |                                                                                                |
| 858  | ENSG000002028425  | 1581.5 | 0.35 | 18                                 | 2774872   | 2774981   |           |  | Small nuclear RNA U13                                                                          |
| 882  | ENSG000002028085  | 1591.1 | 0.35 |                                    |           |           |           |  |                                                                                                |
| 877  | ENSG000002021847  | 1603.9 | 0.35 | 9                                  | 12048653  | 120493749 |           |  | Small nuclear RNA 213nm52                                                                      |
| 882  | ENSG00000163386   | 1613.9 | 0.35 | 1                                  | 14528972  | 14537003  |           |  | neuroblastoma breakpoint family, member 10                                                     |
| 885  | ENSG00000271941   | 1615.7 | 0.35 |                                    |           |           |           |  |                                                                                                |
| 886  | ENSG00000202859   | 1615.2 | 0.35 |                                    |           |           |           |  |                                                                                                |
| 892  | ENSG000002028892  | 1624.4 | 0.35 | 11                                 | 60988379  | 60988487  |           |  | Small nuclear RNA U13                                                                          |
| 898  | ENSG00000202608   | 1638.8 | 0.35 | 1                                  | 150539040 | 150539336 |           |  | RNA 758, cytoplasmic 473, pseudogene                                                           |
| 938  | ENSG00000202969   | 1689.3 | 0.35 | 6                                  | 13860312  | 13860373  |           |  | RNA, U7 small nuclear 91 pseudogene                                                            |
| 940  | ENSG00000213410   | 1690.2 | 0.35 |                                    |           |           |           |  |                                                                                                |
| 942  | ENSG00000202713   | 1692.6 | 0.35 |                                    |           |           |           |  |                                                                                                |
| 952  | ENSG00000202688   | 1704.2 | 0.35 |                                    |           |           |           |  |                                                                                                |
| 962  | ENSG00000202727   | 1718.9 | 0.35 |                                    |           |           |           |  |                                                                                                |
| 980  | ENSG00000254263   | 1758.8 | 0.35 |                                    |           |           |           |  |                                                                                                |
| 983  | ENSG00000206974   | 1762.8 | 0.35 |                                    |           |           |           |  |                                                                                                |
| 985  | ENSG00000202666   | 1764.3 | 0.35 |                                    |           |           |           |  |                                                                                                |
| 1003 | ENSG00000208705   | 1785.5 | 0.35 |                                    |           |           |           |  |                                                                                                |
| 1020 | ENSG000002081471  | 1806.3 | 0.35 |                                    |           |           |           |  |                                                                                                |
| 1036 | ENSG00000204149   | 1824.8 | 0.35 |                                    |           |           |           |  |                                                                                                |
| 1045 | ENSG000002026314  | 1841.2 | 0.35 | </                                 |           |           |           |  |                                                                                                |





|      |                   |           |        |      |                                     |    |           |           |                                                                                          |
|------|-------------------|-----------|--------|------|-------------------------------------|----|-----------|-----------|------------------------------------------------------------------------------------------|
| 1827 | ENSG00000235910   |           | 2917.1 | 0.33 | antisense                           | 11 | 116706833 | 116729445 | AP0A1 antisense RNA                                                                      |
| 2445 | ENSG00000176371   | FRY-AS1   | 3887.4 | 0.33 | antisense                           | 13 | 32558451  | 32559776  | FRY antisense RNA 1                                                                      |
| 2481 | ENSG00000229918   | DOCK9-AS1 | 3884.4 | 0.33 | antisense                           | 13 | 99454338  | 99496583  | DOCK9 antisense RNA 1                                                                    |
| 2880 | ENSG00000234492   | RPL3A-AS1 | 4154.3 | 0.33 | lincRNA                             | 4  | 109459346 | 109541616 | RPL3A antisense RNA 1 (read to head)                                                     |
| 1115 | ENSG00000206195   | MIR4312   | 1939.9 | 0.33 | miRNA                               | 15 | 69644189  | 69644189  | miR4312                                                                                  |
| 1168 | ENSG00000206325   | MIR4518   | 2011.7 | 0.33 | miRNA                               | 16 | 20515246  | 20515222  | miR4518                                                                                  |
| 1248 | ENSG00000204653   | MIR5194   | 2127.3 | 0.33 | miRNA                               | 8  | 131020580 | 131020699 | miR5194                                                                                  |
| 1344 | ENSG00000204642   | MIR3941   | 2262.3 | 0.33 | miRNA                               | 10 | 124176481 | 124176583 | miR3941                                                                                  |
| 1353 | ENSG00000204645   | MIR4844   | 2346.5 | 0.33 | miRNA                               | 16 | 170639849 | 170639832 | miR4844                                                                                  |
| 1137 | ENSG00000207417   |           | 1971.1 | 0.33 | misc_RNA                            | 8  | 75289822  | 75289828  | Y RNA                                                                                    |
| 1281 | ENSG00000207692   |           | 2766.0 | 0.33 | misc_RNA                            | 18 | 9259109   | 9259109   | Y RNA                                                                                    |
| 1319 | ENSG00000204116   |           | 2298.4 | 0.33 | misc_RNA                            | 11 | 12851675  | 128537876 | Y RNA                                                                                    |
| 1897 | ENSG00000204083   |           | 2100.0 | 0.33 | misc_RNA                            | 9  | 134605556 | 134600854 | RNA_75c_cytoplasmic 326, pseudogene                                                      |
| 1940 | ENSG00000222764   |           | 2932.0 | 0.33 | misc_RNA                            | 6  | 141801278 | 141807549 | RNA_75k_small nuclear pseudogene 106                                                     |
| 2474 | ENSG00000202162   |           | 3958.9 | 0.33 | misc_RNA                            | 11 | 13314755  | 13317670  | RNA_75k_small nuclear pseudogene 151                                                     |
| 1891 | ENSG00000224852   |           | 1777.1 | 0.33 | processed_pseudogene                | 2  | 143852358 | 143854124 | MT-ND5 pseudogene 24                                                                     |
| 1309 | ENSG00000224984   | GK3P      | 2202.2 | 0.33 | processed_pseudogene                | 4  | 186186844 | 186201175 | glycerol kinase 3 pseudogene                                                             |
| 1349 | ENSG00000217336   |           | 2295.6 | 0.33 | processed_pseudogene                | 6  | 118910253 | 118910797 | SOX family pseudogene 10                                                                 |
| 1372 | ENSG00000239351   |           | 2299.2 | 0.33 | processed_pseudogene                | 3  | 149656784 | 149657586 | nucleosiphonin 1 (nucleolar phosphoprotein B23, numatrin) pseudogene 29                  |
| 4781 | ENSG00000204293   |           | 2847.6 | 0.33 | processed_pseudogene                | 17 | 30477452  | 30478523  | arginine-45y homeobox pseudogene 2                                                       |
| 2716 | ENSG00000202319   |           | 4215.2 | 0.33 | processed_pseudogene                | 12 | 128537876 | 128537876 | Krippel-like factor 11 pseudogene 1                                                      |
| 781  | ENSG00000128465   | RIPK3     | 962.3  | 0.33 | protein_coding                      | 14 | 24805227  | 24805221  | receptor-interacting serine-threonine kinase 3                                           |
| 456  | ENSG00000130755   | GMFG      | 1003.9 | 0.33 | protein_coding                      | 19 | 39818993  | 39833012  | gla maturation factor, gamma                                                             |
| 912  | ENSG00000104310   | CHST2     | 1092.2 | 0.33 | protein_coding                      | 13 | 112016414 | 112021134 | chromosome 1 open reading frame 162                                                      |
| 567  | ENSG00000158346   | ADIPOR1   | 1195.0 | 0.33 | protein_coding                      | 1  | 202095951 | 202027700 | adiponin receptor 1                                                                      |
| 601  | ENSG00000185862   | EV2B      | 1243.9 | 0.33 | protein_coding                      | 17 | 29630784  | 29641130  | ectopic viral integration site 2B                                                        |
| 810  | ENSG00000122223   | CD244     | 1403.8 | 0.33 | protein_coding                      | 1  | 160789590 | 160832892 | CD244 molecule, natural killer cell receptor 2B4                                         |
| 722  | ENSG00000131042   | LILRB2    | 1414.1 | 0.33 | protein_coding                      | 19 | 54777875  | 54785039  | leukocyte immunoglobulin-like receptor, subfamily B (with TM and ITIM domains), member 2 |
| 738  | ENSG00000102343   | CLM1A     | 1431.4 | 0.33 | protein_coding                      | 12 | 10028126  | 10028126  | C-type lectin domain family 7, member A                                                  |
| 745  | ENSG00000091552   | NLRP1     | 1434.4 | 0.33 | protein_coding                      | 17 | 5402747   | 5522744   | NLR family, pyrin domain containing 1                                                    |
| 787  | ENSG00000148592   | CREB5     | 1483.9 | 0.33 | protein_coding                      | 7  | 28339840  | 28385511  | cAMP responsive element binding protein 5                                                |
| 789  | ENSG00000118968   | ZNF101    | 1483.9 | 0.33 | protein_coding                      | 19 | 19776025  | 19776025  | zinc finger protein 101                                                                  |
| 795  | ENSG00000093134   |           | 1493.0 | 0.33 | protein_coding                      | 6  | 133043928 | 133055004 | zinc finger protein 641                                                                  |
| 809  | ENSG00000167528   | ZNF441    | 1511.9 | 0.33 | protein_coding                      | 12 | 48733791  | 48745197  | zinc finger protein 441                                                                  |
| 816  | ENSG00000020728   | KOD1      | 1512.0 | 0.33 | protein_coding                      | 2  | 70134263  | 70134263  | MAX dimerization protein 1                                                               |
| 831  | ENSG00000151948   | GLT1D1    | 1541.8 | 0.33 | protein_coding                      | 12 | 129337972 | 129499509 | glycosyltransferase 1 domain containing 1                                                |
| 863  | ENSG00000162434   | JAK1      | 1558.2 | 0.33 | protein_coding                      | 1  | 65298912  | 65421327  | Janus kinase 1                                                                           |
| 865  | ENSG00000153319   | FAM88B    | 1558.8 | 0.33 | protein_coding                      | 8  | 13085189  | 131020376 | family with sequence similarity 49, member B                                             |
| 866  | ENSG00000154822   | PLCL2     | 1558.8 | 0.33 | protein_coding                      | 3  | 16844159  | 17132088  | phospholipase C-like 2                                                                   |
| 878  | ENSG00000136496   | PAPP9     | 1609.6 | 0.33 | protein_coding                      | 3  | 122248771 | 122283284 | poly (ADP-ribose) polymerase family, member 9                                            |
| 898  | ENSG00000186468   | TOP11L2   | 1702.4 | 0.33 | protein_coding                      | 12 | 10689707  | 106874093 | 1 complex 11, testis-specific-like 2                                                     |
| 948  | ENSG00000137373   | CASP5     | 1702.4 | 0.33 | protein_coding                      | 11 | 104884962 | 104893995 | caspase 5, apoptosis-related cysteine peptidase                                          |
| 999  | ENSG00000200268   | PDE7A     | 1715.5 | 0.33 | protein_coding                      | 8  | 69682945  | 69734557  | phosphodiesterase 7A                                                                     |
| 975  | ENSG00000104726   | BHRFL     | 1745.7 | 0.33 | protein_coding                      | 8  | 62640414  | 62693132  | BCL2-interacting E1B 19kDa interacting protein 3-like                                    |
| 1031 | ENSG00000030770   | CR1       | 1822.2 | 0.33 | protein_coding                      | 6  | 207894962 | 207818992 | complement component 3 (CR3) receptor 1 (Kruppel blood group)                            |
| 1110 | ENSG00000140199   | SLC12A6   | 1930.9 | 0.33 | protein_coding                      | 15 | 34525460  | 34530261  | solute carrier family 12 (potassium/chloride transporter), member 6                      |
| 1130 | ENSG00000185278   | ZBTB37    | 1962.2 | 0.33 | protein_coding                      | 11 | 17380220  | 173872687 | zinc finger and BTB domain containing 37                                                 |
| 1152 | ENSG00000104931   | YPS8      | 1962.0 | 0.33 | protein_coding                      | 3  | 184529931 | 184774032 | vacuolar protein sorting 8 homolog (D. cerevisiae)                                       |
| 1159 | ENSG00000170776   | AKAP13    | 1965.5 | 0.33 | protein_coding                      | 15 | 65923802  | 66292586  | A kinase (PKA) anchor protein 13                                                         |
| 1180 | ENSG00000119397   | CHTR1     | 1965.4 | 0.33 | protein_coding                      | 9  | 12363141  | 123693988 | chordin                                                                                  |
| 1256 | ENSG00000091891   | IL2RA     | 2112.8 | 0.33 | protein_coding                      | 3  | 3111233   | 3184907   | interleukin 2 receptor, alpha                                                            |
| 1256 | ENSG00000204767   | FAM196B   | 2133.5 | 0.33 | protein_coding                      | 5  | 168291268 | 168407744 | family with sequence similarity 196, member B                                            |
| 1264 | ENSG00000039515   | RYR3      | 2141.1 | 0.33 | protein_coding                      | 6  | 84463932  | 84471743  | cytochrome b5 reductase 4                                                                |
| 1426 | ENSG00000165246   | TOP11L3   | 2124.4 | 0.33 | protein_coding                      | 12 | 23170261  | 232157018 | disrupted in schizophrenia 1                                                             |
| 1877 | ENSG00000128071   | OR2A1     | 2973.8 | 0.33 | protein_coding                      | 7  | 143929004 | 143929936 | olfactory receptor, family 2, subfamily A, member 42                                     |
| 1882 | ENSG00000135407   | AVIL      | 3141.4 | 0.33 | protein_coding                      | 12 | 98191159  | 98212487  | advinin                                                                                  |
| 2003 | ENSG00000149688   | C12orf105 | 3140.2 | 0.33 | protein_coding                      | 10 | 72471658  | 72487981  | chromosome 10 open reading frame 105                                                     |
| 2182 | ENSG00000437372   | KIR2DL3   | 3409.6 | 0.33 | protein_coding                      | 19 | 55249890  | 55256776  | killer cell immunoglobulin-like receptor, two domains, long cytoplasmic tail, 3          |
| 2462 | ENSG00000255552   | SEB9      | 3588.9 | 0.33 | protein_coding                      | 8  | 31679548  | 31681842  | lymphocyte antigen 6 complex, locus G5E (pseudogene)                                     |
| 2429 | ENSG00000185107   | EYS       | 3754.3 | 0.33 | protein_coding                      | 12 | 64428675  | 66417118  | eyes shut homolog (Drosophila)                                                           |
| 2459 | ENSG00000218555   | TAS2R41   | 3841.9 | 0.33 | protein_coding                      | 7  | 143174966 | 143175889 | taste receptor, type 2, member 41                                                        |
| 2893 | ENSG00000114841   | DNAH1     | 4027.1 | 0.33 | protein_coding                      | 3  | 52330335  | 52434507  | dynam, axonemal, heavy chain 1                                                           |
| 2959 | ENSG00000100988   |           | 4153.3 | 0.33 | protein_coding                      | 1  | 20964448  | 209671091 | chromosome 1 open reading frame 147                                                      |
| 197  | ENSG00000200985   |           | 2589.5 | 0.33 | rRNA                                | 22 | 22146723  | 22146813  | RNA, 5S ribosomal pseudogene 493                                                         |
| 2096 | ENSG00000212487   |           | 3289.9 | 0.33 | sense_intronic                      | 13 | 114873044 | 114874295 | RASA3 intronic transcript 1 (non-protein coding)                                         |
| 1966 | ENSG00000213442   |           | 1864.3 | 0.33 | snRNA                               | 1  | 202404438 | 202406555 | Small nuclear RNA SNORD470                                                               |
| 2405 | ENSG00000238372   |           | 3610.2 | 0.33 | snRNA                               | 8  | 102894844 | 102895888 | Small nuclear RNA U13                                                                    |
| 937  | ENSG00000202699   |           | 1701.7 | 0.33 | snRNA                               | 4  | 48109096  | 48109205  | RNA, US small nuclear R38, pseudogene                                                    |
| 1146 | ENSG00000212988   | RNU6-BIP  | 1829.9 | 0.33 | snRNA                               | 13 | 99677488  | 99677599  | RNA, US small nuclear R3, pseudogene                                                     |
| 1161 | ENSG00000200665   |           | 2002.8 | 0.33 | snRNA                               | 12 | 116520375 | 116520481 | RNA, US small nuclear R18B, pseudogene                                                   |
| 540  | ENSG0000011859    |           | 1143.5 | 0.33 | TR_L_gene                           | 14 | 22981834  | 22981890  | T cell receptor alpha chain 30                                                           |
| 1028 | ENSG00000202924   |           | 2177.1 | 0.33 | TR_L_gene                           | 13 | 2295142   | 2295142   | T cell receptor alpha chain 51 (pseudogene)                                              |
| 754  | ENSG00000111750   |           | 1443.5 | 0.33 | TR_V_gene                           | 7  | 142384158 | 142384710 | T cell receptor beta variable 241                                                        |
| 2295 | ENSG00000117988   |           | 3580.4 | 0.33 | TR_V_gene                           | 14 | 22471345  | 22471912  | T cell receptor alpha variable 18                                                        |
| 336  | ENSG00000233614   | DNF1L10   | 825.1  | 0.33 | transcribed_unprocessed_pseu_dogene | 16 | 61553     | 64993     | DEAD/H (Asp-Glu-Ala-Asp/His) box helicase 11 like 10                                     |
| 2576 | ENSG00000159904   | ZNF890P   | 3984.1 | 0.33 | transcribed_unprocessed_pseu_dogene | 7  | 5160870   | 5184177   | zinc finger protein 890, pseudogene                                                      |
| 1411 | ENSG00000447003   |           | 2348.8 | 0.33 | unprocessed_pseudogene              | 1  | 207819579 | 207830755 | CD48 molecule, complement regulatory protein pseudogene 1                                |
| 2816 | ENSG00000198712   |           | 4069.0 | 0.33 | unprocessed_pseudogene              | 9  | 107484616 | 107485552 | olfactory receptor, family 13, subfamily D, member 3 pseudogene                          |
| 212  | ENSG00000211099   |           | 672.9  | 0.33 | antisense                           | 3  |           |           |                                                                                          |
| 626  | ENSG00000255723   |           | 1270.3 | 0.33 | antisense                           | 3  |           |           |                                                                                          |
| 633  | ENSG00000206359   |           | 1279.4 | 0.33 | antisense                           | 3  |           |           |                                                                                          |
| 983  | ENSG00000225529   |           | 1319.2 | 0.33 | antisense                           | 3  |           |           |                                                                                          |
| 717  | ENSG00000213071   |           | 1409.1 | 0.33 | antisense                           | 3  |           |           |                                                                                          |
| 912  | ENSG00000226476   |           | 1655.2 | 0.33 | antisense                           | 3  |           |           |                                                                                          |
| 981  | ENSG00000234940   |           | 1760.5 | 0.33 | antisense                           | 3  | 122469219 | 122469222 | Small nuclear RNA U13                                                                    |
| 1002 | ENSG00000204544   |           | 1782.1 | 0.33 | antisense                           | 3  |           |           |                                                                                          |
| 1042 | ENSG00000251875   |           | 1835.4 | 0.33 | antisense                           | 3  |           |           |                                                                                          |
| 1085 | ENSG00000261637   |           | 1865.9 | 0.33 | antisense                           | 3  |           |           |                                                                                          |
| 1085 | ENSG00000261346   |           | 1868.4 | 0.33 | antisense                           | 3  |           |           |                                                                                          |
| 1121 | ENSG00000251834   |           | 1947.5 | 0.33 | antisense                           | 3  |           |           |                                                                                          |
| 1143 | ENSG00000217195   |           | 1978.2 | 0.33 | antisense                           | 3  |           |           |                                                                                          |
| 1174 | ENSG00000204584   |           | 2027.4 | 0.33 | antisense                           | 1  | 150541449 | 150541745 | RNA_75c_cytoplasmic 800, pseudogene                                                      |
| 1197 | ENSG00000225118   |           | 2057.3 | 0.33 | antisense                           | 3  |           |           |                                                                                          |
| 1214 | ENSG00000217627   |           | 2078.8 | 0.33 | antisense                           | 3  |           |           |                                                                                          |
| 1216 | ENSG00000205910   |           | 2099.0 | 0.33 | antisense                           | 3  |           |           |                                                                                          |
| 1238 | ENSG00000254865   |           | 2111.0 | 0.33 | antisense                           | 3  |           |           |                                                                                          |
| 1242 | ENSG00000204463   |           | 2116.5 | 0.33 | antisense                           | 3  |           |           |                                                                                          |
| 1292 | ENSG00000202931   |           | 2111.6 | 0.33 | antisense                           | 3  |           |           |                                                                                          |
| 1278 | ENSG00000238350   |           | 2160.0 | 0.33 | antisense                           | 3  | 47507839  | 47507938  | Small nuclear RNA U13                                                                    |
| 1284 | ENSG00000226107   |           | 2170.0 | 0.33 | antisense                           | 3  |           |           |                                                                                          |
| 1301 | ENSG00000256274   |           | 2171.7 | 0.33 | antisense                           | 3  |           |           |                                                                                          |
| 1305 | ENSG00000244730</ |           |        |      |                                     |    |           |           |                                                                                          |

|      |                  |              |       |      |                                     |    |           |           |                                                                                                          |
|------|------------------|--------------|-------|------|-------------------------------------|----|-----------|-----------|----------------------------------------------------------------------------------------------------------|
| 1420 | ENSG00000203542  | MIR4802      | 23567 | 0.32 | miRNA                               | 4  | 40504057  | 40504136  | miRNA4802                                                                                                |
| 1481 | ENSG00000203518  | MIR645       | 28613 | 0.32 | miRNA                               | 20 | 49292223  | 49292316  | miRNA481                                                                                                 |
| 1481 | ENSG00000203538  | MIR4688      | 29473 | 0.32 | miRNA                               | 12 | 47581595  | 47581674  | miRNA4688                                                                                                |
| 1218 | ENSG000002040723 |              | 20822 | 0.32 | misc_RNA                            | 4  | 140021531 | 140021810 | RNA_75L_cytosplasmic_382_pseudogene                                                                      |
| 1269 | ENSG00000202796  | LCK          | 21485 | 0.32 | misc_RNA                            | 10 | 76311150  | 76311261  | Y RNA                                                                                                    |
| 1442 | ENSG00000203683  | L1TB         | 9903  | 0.32 | misc_RNA                            | 18 | 8249741   | 8249741   | RNA                                                                                                      |
| 1447 | ENSG000002040955 |              | 24429 | 0.32 | misc_RNA                            | 8  | 56892301  | 56892309  | RNA_75L_cytosplasmic_756_pseudogene                                                                      |
| 1547 | ENSG000002045911 |              | 24586 | 0.32 | misc_RNA                            | 8  | 115034876 | 115035111 | RNA_75L_cytosplasmic_430_pseudogene                                                                      |
| 1245 | ENSG00000204256  |              | 2998  | 0.32 | misc_RNA                            | 9  | 115005182 | 115005191 | RNA_75L_cytosplasmic_57_pseudogene                                                                       |
| 2083 | ENSG00000198730  |              | 34895 | 0.32 | misc_RNA                            | 15 | 58986051  | 58986153  | RNA_75K_small_nuclear_pseudogene_95                                                                      |
| 2312 | ENSG000002026617 |              | 36537 | 0.32 | misc_RNA                            | 13 | 74863237  | 74863351  | RNA_Ro-associated_Y1_pseudogene 5                                                                        |
| 1188 | ENSG000002030482 |              | 20514 | 0.32 | processed_pseudogene                | 2  | 198127835 | 198128259 | ATP synthase, H+ transporting, mitochondrial F <sub>0</sub> complex, subunit C2 (subunit 9) pseudogene 2 |
| 1249 | ENSG00000207135  |              | 21272 | 0.32 | processed_pseudogene                | 10 | 31207941  | 31210164  | DEAD (Asp-Glu-Ala-Glu) box polypeptide 10 pseudogene 1                                                   |
| 2922 | ENSG00000203431  |              | 39123 | 0.32 | processed_pseudogene                | 13 | 100000355 | 100001316 | chromatin (C-C motif) receptor 12_pseudogene                                                             |
| 1132 | ENSG000002026528 | LOC101929008 | 19675 | 0.32 | processed_transcript                | 16 | 90168679  | 90244752  | family with sequence similarity 157, member C                                                            |
| 410  | ENSG00000182866  | LCK          | 9484  | 0.32 | protein_coding                      | 1  | 32718840  | 32731708  | lymphocyte-specific protein tyrosine kinase                                                              |
| 447  | ENSG00000182737  | L1TB         | 9903  | 0.32 | protein_coding                      | 6  | 31548302  | 31550209  | lymphoblast beta (TMF superfamily, member 3)                                                             |
| 516  | ENSG00000162747  | FCGR3B       | 11064 | 0.32 | protein_coding                      | 1  | 161592866 | 161601753 | Fc fragment of IgG <sub>1</sub> low affinity IIB receptor (CD16b)                                        |
| 547  | ENSG00000204475  | NCR3         | 11612 | 0.32 | protein_coding                      | 6  | 31546672  | 31560702  | natural cytotoxicity triggering receptor 3                                                               |
| 982  | ENSG00000204455  | L3T1         | 11928 | 0.32 | protein_coding                      | 6  | 31553901  | 31566596  | lysozyme specific transcript 1                                                                           |
| 609  | ENSG00000168895  | SIGLEC7      | 1255  | 0.32 | protein_coding                      | 19 | 51645556  | 51666783  | sialic acid binding Ig-like lectin 7                                                                     |
| 820  | ENSG00000126860  | EV2A         | 12672 | 0.32 | protein_coding                      | 17 | 29844578  | 29849802  | ectopic viral integration site 2A                                                                        |
| 624  | ENSG00000103778  | TNFAIP8      | 12955 | 0.32 | protein_coding                      | 5  | 119801307 | 119725383 | tumor necrosis factor, alpha-induced protein 8                                                           |
| 840  | ENSG00000122188  | LXN1         | 12965 | 0.32 | protein_coding                      | 1  | 203734304 | 203745361 | lymphocyte transmembrane adaptor 1                                                                       |
| 784  | ENSG00000178789  | CD303L       | 13215 | 0.32 | protein_coding                      | 17 | 72517313  | 72527373  | CD300 molecule-like family member B                                                                      |
| 885  | ENSG00000192986  | CARD11       | 13518 | 0.32 | protein_coding                      | 7  | 2943775   | 2950279   | cardigan recruitment domain family member 11                                                             |
| 928  | ENSG00000204161  | C10orf128    | 14212 | 0.32 | protein_coding                      | 10 | 50362773  | 50366630  | chromosome 10 open reading frame 128                                                                     |
| 748  | ENSG00000132108  | TRIM21       | 14339 | 0.32 | protein_coding                      | 11 | 4406127   | 4414928   | tripartite motif containing 21                                                                           |
| 756  | ENSG00000171688  | PNKD2        | 14503 | 0.32 | protein_coding                      | 9  | 971133    | 971332    | phosphatidylinositol-4,5-bisphosphate 3-kinase, catalytic subunit delta                                  |
| 786  | ENSG00000173363  | HPSE         | 14530 | 0.32 | protein_coding                      | 4  | 84213614  | 84256306  | heparanase                                                                                               |
| 775  | ENSG00000162892  | IL24         | 14674 | 0.32 | protein_coding                      | 1  | 207070788 | 20707484  | interleukin 24                                                                                           |
| 786  | ENSG00000101338  | HCK          | 14688 | 0.32 | protein_coding                      | 20 | 100000355 | 100001316 | hemopoietic cell kinase                                                                                  |
| 791  | ENSG00000159496  | RGL4         | 14970 | 0.32 | protein_coding                      | 22 | 24030323  | 24041363  | rat guanine nucleotide dissociation stimulator-like 4                                                    |
| 807  | ENSG00000134242  | PTPRN2       | 1509  | 0.32 | protein_coding                      | 1  | 114356433 | 114414381 | protein tyrosine phosphatase, non-receptor type 22 (lymphoid)                                            |
| 819  | ENSG00000206951  | FOXP1        | 15225 | 0.32 | protein_coding                      | 16 | 8017648   | 8018238   | forkhead box P1                                                                                          |
| 829  | ENSG00000127334  | DYRK2        | 15373 | 0.32 | protein_coding                      | 12 | 69042118  | 69059186  | dual-specific tyrosine-Y1-phosphorylation regulated kinase 2                                             |
| 876  | ENSG00000182022  | CHST15       | 16038 | 0.32 | protein_coding                      | 10 | 12578784  | 12585326  | carbohydrate (N-acetylglucosamine 4-sulfate 6-O) sulfotransferase 15                                     |
| 895  | ENSG00000181201  | NO2D         | 16075 | 0.32 | protein_coding                      | 16 | 6072714   | 6073695   | nucleotide-binding oligomerization domain containing 2                                                   |
| 965  | ENSG00000196789  | MEGF9        | 17294 | 0.32 | protein_coding                      | 9  | 123363051 | 123479748 | multiple EGF-like domains 9                                                                              |
| 1010 | ENSG00000132274  | TRIM22       | 17854 | 0.32 | protein_coding                      | 11 | 5719819   | 5783539   | tripartite motif containing 22                                                                           |
| 1051 | ENSG00000146861  | FOXP1        | 18468 | 0.32 | protein_coding                      | 3  | 71059484  | 71061407  | forkhead box P1                                                                                          |
| 1060 | ENSG00000147894  | CSRF2        | 18549 | 0.32 | protein_coding                      | 9  | 27546544  | 27573864  | chromosome 9 open reading frame 72                                                                       |
| 1074 | ENSG00000079263  | SP140        | 18777 | 0.32 | protein_coding                      | 2  | 231007626 | 231223762 | SP140 nuclear body protein                                                                               |
| 1082 | ENSG00000066960  | CLEC2B       | 19652 | 0.32 | protein_coding                      | 16 | 101632240 | 10171216  | C-type lectin domain family 12, member B                                                                 |
| 1144 | ENSG00000131018  | SYNE1        | 19724 | 0.32 | protein_coding                      | 14 | 153484915 | 153495836 | spectrin repeat containing nuclear envelope 1                                                            |
| 1167 | ENSG00000100485  | SOS2         | 19828 | 0.32 | protein_coding                      | 14 | 50583847  | 50688726  | son of sevenless homolog 2 (Drosophila)                                                                  |
| 1163 | ENSG00000125772  | GPCPC1       | 20034 | 0.32 | protein_coding                      | 20 | 55253957  | 55261672  | glycerophosphocholine phosphodiesterase GDE1 homolog (S. cerevisiae)                                     |
| 1170 | ENSG00000204048  | UBR1         | 20061 | 0.32 | protein_coding                      | 40 | 62511800  | 62591742  | ubiquitin protein ligase E3 component n1 receptor 2                                                      |
| 1212 | ENSG00000119321  | FKBP15       | 20218 | 0.32 | protein_coding                      | 9  | 115923286 | 115983441 | FK506 binding protein 15, 133kDa                                                                         |
| 1170 | ENSG00000198256  | MCR3         | 20716 | 0.32 | protein_coding                      | 21 | 37164487  | 37168446  | MCR3 family C1V-type zinc finger 3                                                                       |
| 1241 | ENSG00000195339  | DENDN3       | 21143 | 0.32 | protein_coding                      | 12 | 142127377 | 142204907 | GENMAP40 domain containing 3                                                                             |
| 1301 | ENSG00000126566  | TEP1         | 21905 | 0.32 | protein_coding                      | 14 | 20833826  | 20881589  | telomerase-associated protein 1                                                                          |
| 1330 | ENSG00000193731  | PKNO         | 22453 | 0.32 | protein_coding                      | 14 | 71374122  | 71382099  | pacemake homolog (Drosophila)                                                                            |
| 1374 | ENSG00000195442  | KIAA2011     | 23042 | 0.32 | protein_coding                      | 3  | 113812322 | 113815493 | KIAA2011                                                                                                 |
| 1446 | ENSG00000228804  |              | 23639 | 0.32 | protein_coding                      | 3  | 187420101 | 187451637 | Uncharacterized protein                                                                                  |
| 1484 | ENSG00000198482  | ZNF808       | 24447 | 0.32 | protein_coding                      | 19 | 53039995  | 53067717  | zinc finger protein 808                                                                                  |
| 1484 | ENSG00000198482  | CLEC4E       | 24447 | 0.32 | protein_coding                      | 7  | 71038775  | 71047132  | C-type lectin domain family 4, member F                                                                  |
| 2801 | ENSG00000168260  | C14orf183    | 40409 | 0.32 | protein_coding                      | 14 | 50550369  | 50559187  | chromosome 14 open reading frame 183                                                                     |
| 2873 | ENSG00000176358  | TMC4         | 4133  | 0.32 | protein_coding                      | 17 | 47915871  | 47925379  | tympanic membrane protein 4                                                                              |
| 2708 | ENSG00000142541  | CCN1         | 42601 | 0.32 | protein_coding                      | 7  | 5918458   | 5926963   | cyberin                                                                                                  |
| 2754 | ENSG00000104870  |              | 42787 | 0.32 | protein_coding                      | 19 | 55043909  | 55057073  | killer cell immunoglobulin-like receptor, three domains, X1                                              |
| 2788 | ENSG00000206199  | ANKUB1       | 4329  | 0.32 | protein_coding                      | 3  | 14547882  | 14588782  | ankyrin repeat and ubiquitin domain containing 1                                                         |
| 2796 | ENSG00000161946  | TTC18        | 4359  | 0.32 | protein_coding                      | 9  | 13047345  | 13049378  | tetrapeptide repeat domain 16                                                                            |
| 1810 | ENSG00000228962  |              | 21641 | 0.32 | sense_intronic                      | 2  | 39218420  | 39220988  | SOS1 intronic transcript 1 (non-protein coding)                                                          |
| 1627 | ENSG00000242094  |              | 25951 | 0.32 | sense_intronic                      | 3  | 71619406  | 71623908  | FOXPT1 intronic transcript 1 (non-protein coding)                                                        |
| 1633 | ENSG00000246335  |              | 25955 | 0.32 | sense_intronic                      | 4  | 12784405  | 12786144  | RC3H1 intronic transcript 1 (non-protein coding)                                                         |
| 1200 | ENSG00000252635  | SCARNA21     | 20645 | 0.32 | snRNA                               | 17 | 7808440   | 7809578   | small Cajal body-specific RNA 21                                                                         |
| 1383 | ENSG00000203929  | TMC4         | 23111 | 0.32 | snRNA                               | 17 | 28210024  | 28210127  | Small nuclear RNA U13                                                                                    |
| 1540 | ENSG00000206878  |              | 23448 | 0.32 | snRNA                               | 18 | 39411     | 39411     | Small nuclear RNA SNORD27                                                                                |
| 1745 | ENSG00000252443  |              | 27845 | 0.32 | snRNA                               | 16 | 69818897  | 69820016  | Small nuclear RNA SNORD62/SNORD61 family                                                                 |
| 1984 | ENSG00000252274  |              | 31388 | 0.32 | snRNA                               | 17 | 70814975  | 70815111  | Small Cajal body specific RNA 24                                                                         |
| 1513 | ENSG00000252528  |              | 34623 | 0.32 | snRNA                               | 18 | 54624591  | 54624689  | Small nuclear RNA U13                                                                                    |
| 1154 | ENSG00000200974  |              | 19887 | 0.32 | snRNA                               | 4  | 166173752 | 166173813 | RNA, U4 small nuclear, 87_pseudogene                                                                     |
| 1133 | ENSG00000252377  |              | 19931 | 0.32 | snRNA                               | X  | 51613882  | 51613905  | RNA, U4 small nuclear, 504_pseudogene                                                                    |
| 1196 | ENSG00000252377  |              | 19931 | 0.32 | snRNA                               | 12 | 6272783   | 6272798   | RNA, U6 small nuclear, 595_pseudogene                                                                    |
| 1221 | ENSG00000207455  |              | 20912 | 0.32 | snRNA                               | 22 | 30295576  | 30295682  | RNA, U6 small nuclear, 331_pseudogene                                                                    |
| 1286 | ENSG00000201444  |              | 21728 | 0.32 | snRNA                               | 9  | 120470274 | 120470380 | RNA, U6 small nuclear, 1082_pseudogene                                                                   |
| 1286 | ENSG00000206883  |              | 21738 | 0.32 | snRNA                               | 18 | 2173434   | 2173438   | RNA, U5A small nuclear, 6_pseudogene                                                                     |
| 1318 | ENSG00000202227  |              | 22159 | 0.32 | snRNA                               | 2  | 48729061  | 48729163  | RNA, U6 small nuclear, 282_pseudogene                                                                    |
| 1923 | ENSG00000202985  |              | 22203 | 0.32 | snRNA                               | 2  | 39309730  | 39309833  | RNA, U6 small nuclear, 198_pseudogene                                                                    |
| 1320 | ENSG00000202172  |              | 22348 | 0.32 | snRNA                               | 3  | 14963749  | 14963839  | RNA, U6 small nuclear, 720_pseudogene                                                                    |
| 1374 | ENSG00000214359  |              | 23032 | 0.32 | snRNA                               | 12 | 800299    | 800424    | RNA, U4atac small nuclear, 16_pseudogene                                                                 |
| 1432 | ENSG00000210435  |              | 23728 | 0.32 | snRNA                               | 12 | 96997153  | 96997291  | RNA, U4 small nuclear, 24_pseudogene                                                                     |
| 1444 | ENSG00000202260  | RNU6-5P      | 2396  | 0.32 | snRNA                               | 13 | 41928993  | 41929795  | RNA, U6 small nuclear, 57_pseudogene                                                                     |
| 1455 | ENSG00000199874  |              | 24008 | 0.32 | snRNA                               | 2  | 2625544   | 2625550   | RNA, U6 small nuclear, 142_pseudogene                                                                    |
| 1493 | ENSG00000202612  |              | 28713 | 0.32 | TR_V_pseudogene                     | 7  | 38380301  | 38380599  | T cell receptor gamma variable 6 (pseudogene)                                                            |
| 2518 | ENSG000002042736 |              | 39655 | 0.32 | TR_V_pseudogene                     | 7  | 141999017 | 141999300 | T cell receptor beta variable T (pseudogene)                                                             |
| 2033 | ENSG000002033362 | NKAPP1       | 39723 | 0.32 | transcribed_processed_pseudo_gene   | X  | 119254863 | 119279122 | NFKB activating protein pseudogene 1                                                                     |
| 2067 | ENSG000002058151 |              | 44485 | 0.32 | transcribed_processed_pseudo_gene   | 14 | 89756549  | 89757308  | CAP, adenylate cyclase-associated protein, 2 (yeast) pseudogene 1                                        |
| 1188 | ENSG000002033448 |              | 17945 | 0.32 | transcribed_unprocessed_pseudo_gene | 7  | 76689261  | 76673093  | postmitotic segregation increased 2 pseudogene 9                                                         |
| 2885 | ENSG000002034066 |              | 4471  | 0.32 | unitary_pseudogene                  | 7  | 143134127 | 143135068 | taste receptor, type 2, member 82, pseudogene                                                            |
| 2416 | ENSG000002028915 |              | 37842 | 0.32 | unprocessed_pseudogene              | 11 | 71604456  | 71605479  | olfactory receptor, family 7, subfamily E, member 128 pseudogene                                         |
| 736  | ENSG000002029151 |              | 14929 | 0.32 | unprocessed_pseudogene              | 11 | 58853780  | 58862259  | glycine-N-acetyltransferase like 1_pseudogene 3                                                          |
| 2771 | ENSG00000202756  |              | 43073 | 0.32 | unprocessed_pseudogene              | 20 | 1462929   | 1462949   | signal-regulatory protein beta 3_pseudogene                                                              |
| 736  | ENSG000002029151 |              | 14929 | 0.32 | unprocessed_pseudogene              | 20 | 1462929   | 1462949   | signal-regulatory protein beta 3_pseudogene                                                              |
| 851  | ENSG000002029370 |              | 15722 | 0.32 | unprocessed_pseudogene              | 20 | 1462929   | 1462949   | signal-regulatory protein beta 3_pseudogene                                                              |
| 499  | ENSG00000217122  |              | 23295 | 0.32 |                                     |    |           |           |                                                                                                          |





|      |                  |           |        |      |                                    |     |           |           |                                                                                           |
|------|------------------|-----------|--------|------|------------------------------------|-----|-----------|-----------|-------------------------------------------------------------------------------------------|
| 1459 | ENSG000002035944 |           | 2408.1 | 0.31 | transcribed_unprocessed_pseudogene | 7   | 5862791   | 5804006   | zinc finger protein 815, pseudogene                                                       |
| 1873 | ENSG000002050299 |           | 2970.4 | 0.31 | transcribed_unprocessed_pseudogene | 13  | 53191693  | 53211581  | mitochondrial ribosomal protein S31 pseudogene 4                                          |
| 2195 | ENSG00000243064  | ABCL13    | 3432.2 | 0.31 | transcribed_unprocessed_pseudogene | 21  | 15605627  | 15735705  | ATP-binding cassette, sub-family C (CFTR/MRP), member 13, pseudogene                      |
| 2793 | ENSG00000213071  | LPAL2     | 4333.3 | 0.31 | transcribed_unprocessed_pseudogene | 6   | 16087460  | 160932156 | lipoprotein, Lp(a)-like 2, pseudogene                                                     |
| 3052 | ENSG00000175800  |           | 4773.5 | 0.31 | unitary_pseudogene                 | 11  | 4399512   | 4400547   | olfactory receptor, family E2, subfamily B, member 3 pseudogene                           |
| 3271 | ENSG00000254750  |           | 4240.2 | 0.31 | unprocessed_pseudogene             | 11  | 104934072 | 104942286 | casease 1, apoptosis-related cysteine peptidase pseudogene 2                              |
| 2780 | ENSG00000226616  |           | 4291.3 | 0.31 | unprocessed_pseudogene             | 11  | 4536196   | 4537164   | olfactory receptor, family E2, subfamily M, member 2 pseudogene                           |
| 2912 | ENSG00000249454  |           | 4523.7 | 0.31 | unprocessed_pseudogene             | 5   | 54368843  | 54362381  | granzyme A (granzyme 1, cytotoxic T-lymphocyte-associated serine esterase 3) pseudogene 1 |
| 3010 | ENSG00000255536  | OR10V2P   | 4671.4 | 0.31 | unprocessed_pseudogene             | 11  | 59516264  | 59517047  | olfactory receptor, family 10, subfamily V, member 2 pseudogene                           |
| 504  | ENSG00000117289  | TNP1      | 1929.8 | 0.31 |                                    | 1   | 145438469 | 145442635 | threonine interacting protein                                                             |
| 752  | ENSG000002081971 |           | 1443.3 | 0.31 |                                    |     |           |           |                                                                                           |
| 1013 | ENSG00000208544  |           | 1796.7 | 0.31 |                                    |     |           |           |                                                                                           |
| 1020 | ENSG00000154466  |           | 1804.4 | 0.31 |                                    |     |           |           |                                                                                           |
| 1046 | ENSG00000256907  | IKBKE     | 1843.8 | 0.31 |                                    | 1   | 206643791 | 206870223 | inhibitor of kappa light polypeptide gene enhancer in B-cells, kinase epsilon             |
| 1081 | ENSG00000239552  |           | 1861.1 | 0.31 |                                    | 2   | 44466707  | 44466800  | Small nuclear RNA U13                                                                     |
| 1089 | ENSG00000231730  |           | 1901.5 | 0.31 |                                    |     |           |           |                                                                                           |
| 1125 | ENSG00000236526  |           | 1953   | 0.31 |                                    |     |           |           |                                                                                           |
| 1138 | ENSG00000215979  |           | 1972.8 | 0.31 |                                    |     |           |           |                                                                                           |
| 1236 | ENSG00000201911  |           | 2184.4 | 0.31 |                                    |     |           |           |                                                                                           |
| 1261 | ENSG00000285589  |           | 2198.1 | 0.31 |                                    |     |           |           |                                                                                           |
| 1285 | ENSG00000251861  |           | 2143.3 | 0.31 |                                    |     |           |           |                                                                                           |
| 1322 | ENSG00000207310  |           | 2165.3 | 0.31 |                                    |     |           |           |                                                                                           |
| 1334 | ENSG00000203827  | NBP16     | 2242.4 | 0.31 |                                    | 16  | 11561457  | 11561585  | Small nuclear RNA U13                                                                     |
| 1339 | ENSG00000225313  |           | 2250   | 0.31 |                                    | 1   | 148738443 | 148758311 | neuroblastoma breakpoint family, member 16                                                |
| 1377 | ENSG00000205168  |           | 2326   | 0.31 |                                    |     |           |           |                                                                                           |
| 1447 | ENSG00000214239  |           | 2449.2 | 0.31 |                                    | 6   | 159047471 | 159049322 | Uncharacterized protein                                                                   |
| 1501 | ENSG00000257621  |           | 2453.2 | 0.31 |                                    |     |           |           |                                                                                           |
| 1510 | ENSG00000231172  |           | 2468.8 | 0.31 |                                    |     |           |           |                                                                                           |
| 1515 | ENSG00000251309  |           | 2470.8 | 0.31 |                                    |     |           |           |                                                                                           |
| 1532 | ENSG00000241772  |           | 2483.6 | 0.31 |                                    |     |           |           |                                                                                           |
| 1535 | ENSG00000231558  |           | 2485.5 | 0.31 |                                    |     |           |           |                                                                                           |
| 1566 | ENSG000002054924 |           | 2530.9 | 0.31 |                                    | 9   | 5077163   | 5084580   | Uncharacterized protein                                                                   |
| 1567 | ENSG00000206033  |           | 2531.1 | 0.31 |                                    |     |           |           |                                                                                           |
| 1571 | ENSG00000206888  |           | 2537.3 | 0.31 |                                    |     |           |           |                                                                                           |
| 1628 | ENSG00000270562  |           | 2606.5 | 0.31 |                                    | 17  | 44204762  | 44204817  | RNA, U7 small nuclear 101 pseudogene                                                      |
| 1688 | ENSG00000233651  |           | 2685   | 0.31 |                                    |     |           |           |                                                                                           |
| 1768 | ENSG00000205073  |           | 2824   | 0.31 |                                    |     |           |           |                                                                                           |
| 1767 | ENSG00000259862  |           | 2827.2 | 0.31 |                                    |     |           |           |                                                                                           |
| 1779 | ENSG00000226874  |           | 2847   | 0.31 |                                    |     |           |           |                                                                                           |
| 1801 | ENSG00000207549  |           | 2862   | 0.31 |                                    |     |           |           |                                                                                           |
| 1803 | ENSG00000207971  |           | 2864   | 0.31 |                                    |     |           |           |                                                                                           |
| 1830 | ENSG00000209227  |           | 2918.8 | 0.31 |                                    |     |           |           |                                                                                           |
| 1872 | ENSG00000204734  |           | 2970   | 0.31 |                                    |     |           |           |                                                                                           |
| 1881 | ENSG00000204674  |           | 3062.9 | 0.31 |                                    |     |           |           |                                                                                           |
| 2081 | ENSG00000228242  |           | 3263.7 | 0.31 |                                    |     |           |           |                                                                                           |
| 2084 | ENSG00000212445  |           | 3265.6 | 0.31 |                                    |     |           |           |                                                                                           |
| 2145 | ENSG00000244332  |           | 3327   | 0.31 |                                    |     |           |           |                                                                                           |
| 2221 | ENSG000002066049 |           | 3468.8 | 0.31 |                                    |     |           |           |                                                                                           |
| 2224 | ENSG000002017641 |           | 3471.5 | 0.31 |                                    |     |           |           |                                                                                           |
| 2349 | ENSG00000217993  |           | 3521.2 | 0.31 |                                    |     |           |           |                                                                                           |
| 2364 | ENSG00000238339  |           | 3539.2 | 0.31 |                                    | 2   | 179992063 | 179993384 | Small nuclear RNA U13                                                                     |
| 2472 | ENSG00000204467  |           | 3560   | 0.31 |                                    |     |           |           |                                                                                           |
| 2497 | ENSG00000205810  |           | 3684.4 | 0.31 |                                    |     |           |           |                                                                                           |
| 2361 | ENSG00000270890  |           | 3682.8 | 0.31 |                                    |     |           |           |                                                                                           |
| 2374 | ENSG00000208274  |           | 3720.6 | 0.31 |                                    |     |           |           |                                                                                           |
| 2392 | ENSG00000202384  |           | 3735.3 | 0.31 |                                    |     |           |           |                                                                                           |
| 2470 | ENSG00000270557  |           | 3857.3 | 0.31 |                                    |     |           |           |                                                                                           |
| 2472 | ENSG00000249962  |           | 3858.4 | 0.31 |                                    |     |           |           |                                                                                           |
| 2547 | ENSG00000202672  |           | 3885.3 | 0.31 |                                    |     |           |           |                                                                                           |
| 2567 | ENSG00000238012  |           | 3981.4 | 0.31 |                                    |     |           |           |                                                                                           |
| 2568 | ENSG00000232754  |           | 3981.5 | 0.31 |                                    |     |           |           |                                                                                           |
| 2622 | ENSG00000217111  |           | 4091.8 | 0.31 |                                    |     |           |           |                                                                                           |
| 2631 | ENSG00000222596  |           | 4072.8 | 0.31 |                                    |     |           |           |                                                                                           |
| 2657 | ENSG000002053112 |           | 4107.8 | 0.31 |                                    |     |           |           |                                                                                           |
| 2684 | ENSG00000204609  |           | 4173.3 | 0.31 |                                    |     |           |           |                                                                                           |
| 2736 | ENSG00000272839  |           | 4251.8 | 0.31 |                                    |     |           |           |                                                                                           |
| 2805 | ENSG00000238799  |           | 4352.7 | 0.31 |                                    | 17  | 59039151  | 59039254  | Small nuclear RNA U13                                                                     |
| 2822 | ENSG00000205655  |           | 4358.5 | 0.31 |                                    |     |           |           |                                                                                           |
| 2838 | ENSG00000229963  |           | 4401.4 | 0.31 |                                    |     |           |           |                                                                                           |
| 2849 | ENSG00000223522  |           | 4415.6 | 0.31 |                                    |     |           |           |                                                                                           |
| 2879 | ENSG00000205138  |           | 4454.3 | 0.31 |                                    |     |           |           |                                                                                           |
| 2883 | ENSG00000238795  |           | 4489.5 | 0.31 |                                    |     |           |           |                                                                                           |
| 2906 | ENSG00000248340  |           | 4508.7 | 0.31 |                                    |     |           |           |                                                                                           |
| 2907 | ENSG00000205233  |           | 4510.7 | 0.31 |                                    |     |           |           |                                                                                           |
| 2908 | ENSG00000224857  |           | 4516.9 | 0.31 |                                    |     |           |           |                                                                                           |
| 2936 | ENSG00000232915  |           | 4570   | 0.31 |                                    |     |           |           |                                                                                           |
| 2966 | ENSG00000205600  |           | 4617.5 | 0.31 |                                    |     |           |           |                                                                                           |
| 3018 | ENSG00000254246  |           | 4707.3 | 0.31 |                                    |     |           |           |                                                                                           |
| 3023 | ENSG00000272568  |           | 4721.4 | 0.31 |                                    |     |           |           |                                                                                           |
| 3026 | ENSG00000204175  |           | 4723.6 | 0.31 |                                    |     |           |           |                                                                                           |
| 3027 | ENSG00000233263  |           | 4724.3 | 0.31 |                                    |     |           |           |                                                                                           |
| 3048 | ENSG00000235862  |           | 4762.8 | 0.31 |                                    |     |           |           |                                                                                           |
| 3071 | ENSG00000251495  |           | 4761.7 | 0.31 |                                    |     |           |           |                                                                                           |
| 3084 | ENSG00000204818  |           | 4814   | 0.31 |                                    |     |           |           |                                                                                           |
| 3160 | ENSG00000255796  |           | 4953.5 | 0.31 |                                    |     |           |           |                                                                                           |
| 3186 | ENSG00000207215  |           | 5055.5 | 0.31 |                                    |     |           |           |                                                                                           |
| 1460 | ENSG00000209752  | PSMD5-AS1 | 2412.3 | 0.3  | antisense                          | 9   | 123897106 | 123816651 | PSMD5 antisense RNA 1 (head to head)                                                      |
| 2088 | ENSG00000245148  |           | 3273.3 | 0.3  | antisense                          | 11  | 72411519  | 724116652 | ARAF1 antisense RNA 2                                                                     |
| 3339 | ENSG00000204192  |           | 5252.4 | 0.3  | antisense                          | 5   | 81388874  | 81388921  | ATG10 antisense RNA 1                                                                     |
| 3110 | ENSG00000177566  |           | 4861.1 | 0.3  | lincRNA                            | 15  | 74987084  | 74987052  | Uncharacterized protein                                                                   |
| 1524 | ENSG000002021493 | MIR320C1  | 2121.1 | 0.3  | miRNA                              | 18  | 19263471  | 19263558  | miR320C1                                                                                  |
| 1524 | ENSG000002017997 | MIR644A   | 2476.3 | 0.3  | miRNA                              | 20  | 33054120  | 33054223  | miR644A                                                                                   |
| 1660 | ENSG00000201750  | MIR523    | 2907.6 | 0.3  | miRNA                              | 15  | 100746707 | 100746804 | miR523                                                                                    |
| 1801 | ENSG00000207963  | MIR613    | 4312.0 | 0.3  | miRNA                              | 12  | 12917563  | 12917677  | miR613                                                                                    |
| 3036 | ENSG00000205517  | MIR4715   | 4778   | 0.3  | miRNA                              | 15  | 26093994  | 26093972  | miR4715                                                                                   |
| 1384 | ENSG000002021918 |           | 2311.4 | 0.3  | misc. RNA                          | 907 | 10411     | 90711225  | RNA, 75S small nuclear pseudogene 110                                                     |
| 1631 | ENSG000002022112 |           | 2608.1 | 0.3  | misc. RNA                          | 167 | 33802167  | 33802465  | RNA, 75S small nuclear pseudogene 116                                                     |
| 1917 | ENSG000002032996 |           | 2977.9 | 0.3  | misc. RNA                          | 9   | 3452305   | 34491181  | Uncharacterized protein                                                                   |
| 1756 | ENSG00000201647  |           | 2613.3 | 0.3  | misc. RNA                          | 11  | 10810203  | 10810331  | RNA, 75S small nuclear pseudogene 119                                                     |
| 1890 | ENSG000002042330 |           | 3027   | 0.3  | misc. RNA                          | 14  | 71915406  | 71915673  | RNA, 75S, cytoplasmic 883, pseudogene                                                     |
| 1940 | ENSG000002021114 |           | 3087.9 | 0.3  | misc. RNA                          | 1   | 115033346 | 115033346 | Y RNA                                                                                     |
| 2198 | ENSG000002043959 |           | 3439   | 0.3  | misc. RNA                          | 5   | 619574436 | 619574727 | RNA, 75S, cytoplasmic 884, pseudogene                                                     |
| 2493 | ENSG00000242851  |           | 4188.4 | 0.3  | misc. RNA                          | 18  | 9839329   | 9839304   | RNA, 75S, cytoplasmic 882, pseudogene                                                     |
| 2813 | ENSG000002043254 |           | 4057.2 | 0.3  | misc. RNA                          | 8   | 100628014 | 100628306 | RNA, 75S, cytoplasmic 850, pseudogene                                                     |
| 2890 | ENSG00000202681  |           | 4188.4 | 0.3  | misc. RNA                          | 18  | 9839329   | 9839304   | RNA, 75S, cytoplasmic 882, pseudogene                                                     |
| 1460 | ENSG000002045148 | PSMD5-AS1 | 2412.3 | 0.3  | antisense                          | 9   | 123897106 | 123816651 | PSMD5 antisense RNA 1 (head to head)                                                      |
| 2088 | ENSG00000245148  |           | 3273.3 | 0.3  | antisense                          | 11  | 72411519  | 724116652 | ARAF1 antisense RNA 2                                                                     |
| 3339 | ENSG00000204192  |           | 5252.4 | 0.3  | antisense                          | 5   | 81388874  | 81388921  | ATG10 antisense RNA 1                                                                     |
| 3110 | ENSG00000177566  |           | 4861.1 | 0.3  | lincRNA                            | 15  | 74987084  | 74987052  | Uncharacterized protein                                                                   |
| 1524 | ENSG000002021493 | MIR320C1  | 2121.1 | 0.3  | miRNA                              | 18  | 19263471  | 19263558  | miR320C1                                                                                  |
| 1524 | ENSG000002017997 | MIR644A   | 2476.3 | 0.3  | miRNA                              | 20  | 33054120  | 33054223  | miR644A                                                                                   |
| 1660 | ENSG00000201750  | MIR523    | 2907.6 | 0.3  | miRNA                              | 15  | 100746707 | 100746804 | miR523                                                                                    |
| 1801 | ENSG00000207963  | MIR613    | 4312.0 | 0.3  | miRNA                              | 12  | 12917563  | 12917677  | miR613                                                                                    |
| 3036 | ENSG00000205517  | MIR4715   | 4778   | 0.3  | miRNA                              | 15  | 26093994  | 26093972  | miR4715                                                                                   |
| 1384 | ENSG000002021918 |           | 2311.4 | 0.3  | misc. RNA                          | 907 | 10411     | 90711225  | RNA, 75S small nuclear pseudogene 110                                                     |
| 1631 | ENSG000002022112 |           | 2608.1 | 0.3  | misc. RNA                          | 167 | 33802167  | 33802465  | RNA, 75S small nuclear pseudogene 116                                                     |
| 1917 | ENSG000002032996 |           | 2977.9 | 0.3  | misc. RNA                          | 9   | 3452305   | 34491181  | Uncharacterized protein                                                                   |
| 1756 | ENSG00000201647  |           | 2613.3 | 0    |                                    |     |           |           |                                                                                           |

|      |                  |           |        |     |                                    |    |           |           |                                                                                         |
|------|------------------|-----------|--------|-----|------------------------------------|----|-----------|-----------|-----------------------------------------------------------------------------------------|
| 1302 | ENSG00000189180  | ZNF33A    | 2191.3 | 0.3 | protein_coding                     | 10 | 3629766   | 38354016  | zinc finger protein 33A                                                                 |
| 1304 | ENSG00000190693  | ATP11B    | 227.7  | 0.3 | protein_coding                     | 7  | 18261238  | 19259823  | ATPase class VI, type 11B                                                               |
| 1350 | ENSG00000184364  | MAML2     | 2268.9 | 0.3 | protein_coding                     | 11 | 9570972   | 9670344   | mastermind like 2 (Drosophila)                                                          |
| 1356 | ENSG00000181381  | DDX60L    | 2275.9 | 0.3 | protein_coding                     | 4  | 16927786  | 169458937 | DEAD (Asp-Glu-Ala-Asp) box polypeptide 60-like                                          |
| 1371 | ENSG00000185181  | CtBP2     | 2292.2 | 0.3 | protein_coding                     | 9  | 11446780  | 114657288 | chromosome 9 open reading frame 84                                                      |
| 1401 | ENSG00000145421  | LNS       | 2317.3 | 0.3 | protein_coding                     | 15 | 10199574  | 101143435 | lens homology (Drosophila)                                                              |
| 1431 | ENSG00000175073  | VCPBP1    | 2367.7 | 0.3 | protein_coding                     | 8  | 67540722  | 67794552  | valosin containing protein (vcp)jip47 complex interacting protein 1                     |
| 1486 | ENSG00000186203  |           | 2440   | 0.3 | protein_coding                     | 16 | 24849010  | 24917320  | Uncharacterized protein                                                                 |
| 1514 | ENSG00000190386  | NCOA2     | 2470.0 | 0.3 | protein_coding                     | 14 | 88118654  | 88263182  | nuclear receptor coactivator 2                                                          |
| 1516 | ENSG00000219528  | IRF9      | 2527.4 | 0.3 | protein_coding                     | 14 | 24630262  | 24636774  | interferon regulatory factor 9                                                          |
| 1572 | ENSG00000175987  | DDX6      | 2537.2 | 0.3 | protein_coding                     | 11 | 11660304  | 116661658 | DEAD (Asp-Glu-Ala-Asp) box helicase 6                                                   |
| 1616 | ENSG00000182424  | NFATC3    | 2563.0 | 0.3 | protein_coding                     | 16 | 88118654  | 88263182  | nuclear factor of activated T cells, cytosolic, calcineurin-dependent 3                 |
| 1650 | ENSG00000136951  | KIAA1033  | 2639.1 | 0.3 | protein_coding                     | 12 | 105501102 | 105562912 | KIAA1033                                                                                |
| 1669 | ENSG00000257242  | C12orf79  | 2667.6 | 0.3 | protein_coding                     | 12 | 92378196  | 92386890  | chromosome 12 open reading frame 79                                                     |
| 1676 | ENSG00000151706  | SMC1      | 2672.8 | 0.3 | protein_coding                     | 16 | 16818175  | 16837778  | SMC1 phosphatidylinositol 3-kinase-related kinase                                       |
| 1680 | ENSG00000124768  | ATXN1     | 2696   | 0.3 | protein_coding                     | 6  | 16239343  | 16781722  | ataxin 1                                                                                |
| 1680 | ENSG00000185286  | BHW03     | 2697.6 | 0.3 | protein_coding                     | X  | 79626353  | 80095187  | bromodomain and WD repeat domain containing 3                                           |
| 1706 | ENSG00000179460  | SRGAP3    | 2716.7 | 0.3 | protein_coding                     | 1  | 9712668   | 9714644   | chromosome 1 open reading frame 200                                                     |
| 1756 | ENSG00000173889  | PRC3      | 2802.3 | 0.3 | protein_coding                     | 3  | 166804520 | 166899537 | polyhemic homolog 3 (Drosophila)                                                        |
| 2026 | ENSG00000203737  | GPR12     | 3184.8 | 0.3 | protein_coding                     | 1  | 174417212 | 174416683 | G protein-coupled receptor 52                                                           |
| 2512 | ENSG00000214244  | LY566F    | 3955.5 | 0.3 | protein_coding                     | 6  | 17021969  | 17025981  | lymphocyte antigen 5 complex, locus G6F                                                 |
| 2913 | ENSG00000205018  | CD30LD    | 4324   | 0.3 | protein_coding                     | 16 | 89008197  | 89017932  | Uncharacterized protein, cDNA FL20728 fs, clone PNC06635                                |
| 3074 | ENSG00000204345  | CD30LD    | 4797.5 | 0.3 | protein_coding                     | 17 | 75715504  | 7258422   | CD300 molecule-like family member d                                                     |
| 3295 | ENSG00000205652  | OR10C2    | 5111.1 | 0.3 | protein_coding                     | 14 | 2211092   | 2211098   | olfactory receptor, family 10, subfamily C, member 2                                    |
| 3409 | ENSG00000231777  |           | 2347.9 | 0.3 | rRNA                               | 13 | 10895350  | 10895379  | RNA, SS ribosomal pseudogene 39                                                         |
| 3474 | ENSG00000212242  |           | 3078   | 0.3 | rRNA                               | 8  | 136951381 | 136951483 | RNA, SS ribosomal pseudogene 219                                                        |
| 3929 | ENSG00000202248  |           | 1704.6 | 0.3 | rRNA                               | 6  | 3089201   | 3089261   | RNA, SS ribosomal pseudogene 201                                                        |
| 1912 | ENSG00000228485  | GRK5-IT1  | 3368   | 0.3 | sense_intronic                     | 10 | 12098043  | 120971272 | GRK5 intronic transcript 1 (non-protein coding)                                         |
| 1925 | ENSG00000204293  |           | 4178.3 | 0.3 | sense_intronic                     | 21 | 30968367  | 30972708  | BACH1 intronic transcript 3 (non-protein coding)                                        |
| 2696 | ENSG00000201113  | snRNA     | 174.2  | 0.3 | snRNA                              | 7  | 3743203   | 3743670   | Small nuclear RNA SNORA51                                                               |
| 2760 | ENSG00000252719  | snRNA     | 2813.9 | 0.3 | snRNA                              | X  | 138952063 | 138962193 | Small nuclear RNA SNORA18                                                               |
| 1845 | ENSG00000252047  | snRNA     | 2942.6 | 0.3 | snRNA                              | 1  | 150573015 | 150573135 | Small nuclear RNA SNORA60                                                               |
| 1936 | ENSG00000202056  | snRNA     | 3111.8 | 0.3 | snRNA                              | 15 | 101100881 | 101100909 | RNA, US small nuclear 181, pseudogene                                                   |
| 1883 | ENSG00000252549  | snRNA     | 2981.0 | 0.3 | snRNA                              | 20 | 34235250  | 34235250  | RNA, US small nuclear 759, pseudogene                                                   |
| 2776 | ENSG00000228523  | snRNA     | 4307.2 | 0.3 | snRNA                              | 10 | 5230412   | 5230472   | RNA, U7 small nuclear 107, pseudogene                                                   |
| 2963 | ENSG00000212248  | snRNA     | 4603.8 | 0.3 | snRNA                              | 2  | 203884362 | 203884466 | RNA, US small nuclear 365, pseudogene                                                   |
| 3075 | ENSG00000211753  | TR_V_gene | 7721.1 | 0.3 | TR_V_gene                          | 7  | 14242844  | 14242894  | T cell receptor beta variable 28                                                        |
| 2868 | ENSG00000211717  | TR_V_gene | 4450.5 | 0.3 | TR_V_gene                          | 7  | 142231573 | 142232090 | T cell receptor beta variable 10 (genepseudogene)                                       |
| 1329 | ENSG00000217527  | RPS16P5   | 2963.4 | 0.3 | transcribed_unprocessed_pseudogene | 6  | 53201741  | 53202144  | ribosomal protein S16 pseudogene 5                                                      |
| 806  | ENSG00000182487  | NCF1B     | 1508.9 | 0.3 | transcribed_unprocessed_pseudogene | 7  | 72634611  | 72649979  | neutrophil cytosolic factor 1B pseudogene                                               |
| 1429 | ENSG00000204834  | WHAMMP2   | 2233.8 | 0.3 | transcribed_unprocessed_pseudogene | 15 | 28892729  | 29002537  | WAS protein/homolog associated with actin, gqij membranes and microtubules pseudogene 2 |
| 1362 | ENSG00000268758  | EMRAP     | 2411.8 | 0.3 | transcribed_unprocessed_pseudogene | 19 | 6952511   | 6950887   | egf-like module containing, mucin-like, hormone receptor-like 4 pseudogene              |
| 2220 | ENSG00000239827  | SUGT1P3   | 3467.7 | 0.3 | transcribed_unprocessed_pseudogene | 13 | 41482295  | 41495910  | SUGT1 pseudogene 3                                                                      |
| 2736 | ENSG00000229715  |           | 4280.2 | 0.3 | transcribed_unprocessed_pseudogene | 13 | 32420978  | 32527609  | eukaryotic translation elongation factor 1 delta pseudogene 3                           |
| 2768 | ENSG00000202299  |           | 4267.5 | 0.3 | transcribed_unprocessed_pseudogene | 10 | 46717127  | 46730733  | centaurin, gamma-like family, member 8 pseudogene                                       |
| 1158 | ENSG00000202827  |           | 1512.4 | 0.3 | unprocessed_pseudogene             | 10 | 46717127  | 46730733  | centaurin, gamma-like family, member 8 pseudogene                                       |
| 874  | ENSG00000225889  |           | 1607.2 | 0.3 |                                    |    |           |           |                                                                                         |
| 1158 | ENSG00000202814  |           | 1984.8 | 0.3 |                                    |    |           |           |                                                                                         |
| 1206 | ENSG00000211156  |           | 209.8  | 0.3 |                                    |    |           |           |                                                                                         |
| 1258 | ENSG00000248810  |           | 2138.2 | 0.3 |                                    |    |           |           |                                                                                         |
| 1273 | ENSG00000272065  |           | 2156.1 | 0.3 |                                    |    |           |           |                                                                                         |
| 1326 | ENSG0000021098   |           | 2228.3 | 0.3 |                                    |    |           |           |                                                                                         |
| 1333 | ENSG00000223509  |           | 2240.5 | 0.3 |                                    |    |           |           |                                                                                         |
| 1388 | ENSG00000212030  |           | 2328   | 0.3 |                                    |    |           |           |                                                                                         |
| 1936 | ENSG00000202631  |           | 2368.1 | 0.3 |                                    | 12 | 11187087  | 11187275  | Uncharacterized protein                                                                 |
| 1562 | ENSG00000270596  |           | 2527.7 | 0.3 |                                    |    |           |           |                                                                                         |
| 1580 | ENSG00000228079  |           | 2551.8 | 0.3 |                                    |    |           |           |                                                                                         |
| 1594 | ENSG000002118    |           | 2591.3 | 0.3 |                                    |    |           |           |                                                                                         |
| 1601 | ENSG00000287503  |           | 2572.7 | 0.3 |                                    |    |           |           |                                                                                         |
| 1643 | ENSG00000226104  |           | 2622.2 | 0.3 |                                    | 19 | 10751715  | 10752093  | Uncharacterized protein                                                                 |
| 1648 | ENSG00000225434  |           | 2612.5 | 0.3 |                                    |    |           |           |                                                                                         |
| 1709 | ENSG00000238889  |           | 2719.8 | 0.3 |                                    | 1  | 25672765  | 25672868  | Small nuclear RNA U13                                                                   |
| 1710 | ENSG000002041577 |           | 2720.9 | 0.3 |                                    |    |           |           |                                                                                         |
| 1764 | ENSG00000205688  |           | 2811.6 | 0.3 |                                    |    |           |           |                                                                                         |
| 1769 | ENSG00000242588  |           | 2829.8 | 0.3 |                                    |    |           |           |                                                                                         |
| 1781 | ENSG00000206507  |           | 2870.8 | 0.3 |                                    |    |           |           |                                                                                         |
| 1788 | ENSG0000024634   |           | 2883.8 | 0.3 |                                    |    |           |           |                                                                                         |
| 1835 | ENSG00000258044  |           | 2925.2 | 0.3 |                                    |    |           |           |                                                                                         |
| 1874 | ENSG000002042197 |           | 2970.9 | 0.3 |                                    |    |           |           |                                                                                         |
| 1892 | ENSG00000205588  |           | 2983   | 0.3 |                                    |    |           |           |                                                                                         |
| 1903 | ENSG00000253270  |           | 3008.8 | 0.3 |                                    |    |           |           |                                                                                         |
| 1958 | ENSG00000215921  |           | 3100.9 | 0.3 |                                    |    |           |           |                                                                                         |
| 1970 | ENSG00000232728  |           | 3112.7 | 0.3 |                                    |    |           |           |                                                                                         |
| 1977 | ENSG00000208222  |           | 3128.8 | 0.3 |                                    |    |           |           |                                                                                         |
| 1985 | ENSG00000202127  |           | 3140.2 | 0.3 |                                    |    |           |           |                                                                                         |
| 2024 | ENSG0000021150   |           | 3169.8 | 0.3 |                                    |    |           |           |                                                                                         |
| 2015 | ENSG00000253883  |           | 3173.1 | 0.3 |                                    |    |           |           |                                                                                         |
| 2071 | ENSG000002048833 |           | 3251.6 | 0.3 |                                    |    |           |           |                                                                                         |
| 2086 | ENSG00000270554  |           | 3268.8 | 0.3 |                                    |    |           |           |                                                                                         |
| 2092 | ENSG0000021506   |           | 3292.2 | 0.3 |                                    |    |           |           |                                                                                         |
| 2120 | ENSG00000258116  |           | 3320.4 | 0.3 |                                    |    |           |           |                                                                                         |
| 2143 | ENSG00000206128  |           | 3311.2 | 0.3 |                                    |    |           |           |                                                                                         |
| 2183 | ENSG00000203116  |           | 3411.3 | 0.3 |                                    |    |           |           |                                                                                         |
| 2189 | ENSG00000255637  |           | 3422.3 | 0.3 |                                    |    |           |           |                                                                                         |
| 2223 | ENSG00000265588  |           | 3471   | 0.3 |                                    |    |           |           |                                                                                         |
| 2244 | ENSG0000020361   |           | 3547.1 | 0.3 |                                    | 12 | 57810198  | 57810336  | HCG181848C, Uncharacterized protein                                                     |
| 2285 | ENSG00000253882  |           | 3563.3 | 0.3 |                                    |    |           |           |                                                                                         |
| 2291 | ENSG0000023616   |           | 3751   | 0.3 |                                    |    |           |           |                                                                                         |
| 2304 | ENSG0000023363   |           | 3723.5 | 0.3 |                                    |    |           |           |                                                                                         |
| 2402 | ENSG0000021233   |           | 3760.4 | 0.3 |                                    |    |           |           |                                                                                         |
| 2489 | ENSG00000208416  |           | 3877.3 | 0.3 |                                    |    |           |           |                                                                                         |
| 2558 | ENSG00000224307  |           | 3901.8 | 0.3 |                                    |    |           |           |                                                                                         |
| 2577 | ENSG00000258900  |           | 3984.3 | 0.3 |                                    |    |           |           |                                                                                         |
| 2587 | ENSG00000232613  |           | 4013.6 | 0.3 |                                    |    |           |           |                                                                                         |
| 2612 | ENSG00000219263  |           | 4027   | 0.3 |                                    |    |           |           |                                                                                         |
| 2621 | ENSG000002048545 |           | 4063.1 | 0.3 |                                    |    |           |           |                                                                                         |
| 2778 | ENSG00000206296  |           | 4308   | 0.3 |                                    |    |           |           |                                                                                         |
| 2869 | ENSG00000204560  | MIR439    | 4415.9 | 0.3 | miRNA                              | 2  | 1814197   | 1814185   | miR439                                                                                  |
| 2876 | ENSG00000258439  |           | 4459.5 | 0.3 |                                    |    |           |           |                                                                                         |
| 2895 | ENSG0000021815   |           | 4486.6 | 0.3 |                                    |    |           |           |                                                                                         |
| 2901 | ENSG0000023151   | MIR447    | 4514.7 | 0.3 | miRNA                              | 2  | 19217020  | 19217078  | miR447                                                                                  |
| 2919 | ENSG000002048548 |           | 4539.4 | 0.3 |                                    |    |           |           |                                                                                         |
| 2923 | ENSG00000204859  |           | 4550.6 | 0.3 |                                    |    |           |           |                                                                                         |
| 2950 | ENSG00000205603  |           | 4580.8 | 0.3 |                                    |    |           |           |                                                                                         |
| 2986 | ENSG000002084188 |           | 4645.3 | 0.3 |                                    |    |           |           |                                                                                         |
| 3032 | ENSG00000229072  |           | 4727.4 | 0.3 |                                    | 2  | 70182777  | 70182879  | Small nuclear RNA U13                                                                   |
| 3065 | ENSG00000218809  |           | 4788.4 | 0.3 |                                    |    |           |           |                                                                                         |
| 3066 | ENSG00000253573  |           | 4791.6 | 0.3 |                                    |    |           |           |                                                                                         |
| 3090 | ENSG00000208974  |           | 4825.9 | 0.3 |                                    |    |           |           |                                                                                         |
| 3118 | ENSG00000230870  |           | 4817.8 | 0.3 |                                    |    |           |           |                                                                                         |
| 3152 | ENSG00000233573  |           | 4947.2 | 0.3 |                                    |    |           |           |                                                                                         |
| 3158 | ENSG00000229629  |           | 4950.8 | 0.3 |                                    |    |           |           |                                                                                         |
| 3159 | ENSG00000230870  |           | 4953.1 | 0.3 |                                    |    |           |           |                                                                                         |
| 3201 | ENSG00000208931  |           | 5023.5 | 0.3 |                                    | 1  | 738532    | 739137    | Uncharacterized protein                                                                 |
| 3253 | ENSG00000204374  |           | 5100   | 0.3 |                                    |    |           |           |                                                                                         |
| 3263 | ENSG0000023242   |           | 5125   | 0.3 |                                    |    |           |           |                                                                                         |
| 3266 |                  |           |        |     |                                    |    |           |           |                                                                                         |

|      |                  |          |       |      |                                     |    |           |           |                                                                                             |
|------|------------------|----------|-------|------|-------------------------------------|----|-----------|-----------|---------------------------------------------------------------------------------------------|
| 2410 | ENSG00000229048  |          | 37713 | 0.29 | processed_pseudogene                | 3  | 125029725 | 125030194 | deoxyuridine triphosphatase pseudogene 1                                                    |
| 2425 | ENSG00000214538  |          | 49617 | 0.29 | processed_pseudogene                | 7  | 23453852  | 234538445 | FC11 pseudogene 1                                                                           |
| 3017 | ENSG00000242061  |          | 47034 | 0.29 | processed_pseudogene                | 12 | 8511650   | 8512430   | ribosomal protein S3a pseudogene 43                                                         |
| 3167 | ENSG00000230041  |          | 49617 | 0.29 | processed_pseudogene                | 11 | 2792586   | 2792807   | cytochrome c oxidase subunit Vii pseudogene 18                                              |
| 3240 | ENSG00000204130  |          | 5095  | 0.29 | processed_pseudogene                | 3  | 7205920   | 7206126   | ubiquitin-conjugating enzyme E2Q family member 2 pseudogene 9                               |
| 3267 | ENSG00000202518  |          | 51295 | 0.29 | processed_pseudogene                | 3  | 2281256   | 2281177   | AT112C pseudogene 1                                                                         |
| 3316 | ENSG00000231726  |          | 52099 | 0.29 | processed_pseudogene                | 11 | 73291298  | 73291562  | high mobility group nucleosomal binding domain 2 pseudogene 38                              |
| 3373 | ENSG00000215760  |          | 53187 | 0.29 | processed_pseudogene                | 11 | 116589134 | 116570929 | TAF9B RNA polymerase II, TATA box binding protein (TBP) associated factor, 31kDa pseudogene |
| 3523 | ENSG00000249807  |          | 55387 | 0.29 | processed_pseudogene                | 10 | 126148152 | 126148472 | ribosomal protein L35a pseudogene 26                                                        |
| 1926 | ENSG00000249522  | HLAF-AS1 | 30446 | 0.29 | processed_transcript                | 6  | 6964376   | 2971626   | HLAF antisense RNA                                                                          |
| 66   | ENSG00000234469  | IL2RA    | 1514  | 0.29 | protein_coding                      | 10 | 6092953   | 6134458   | interleukin 2 receptor, alpha                                                               |
| 117  | ENSG00000219865  | IL2RB2   | 3561  | 0.29 | protein_coding                      | 1  | 67773047  | 6786283   | interleukin 12 receptor, beta 2                                                             |
| 431  | ENSG00000139670  | LPAH6    | 9152  | 0.29 | protein_coding                      | 13 | 48463707  | 49018840  | lysophosphatidic acid receptor 5                                                            |
| 524  | ENSG00000205374  | NG2      | 11523 | 0.29 | protein_coding                      | 19 | 51874860  | 51875869  | neuronal killer cell group 2 sequence                                                       |
| 648  | ENSG00000180549  | FUT7     | 1297  | 0.29 | protein_coding                      | 9  | 13992426  | 139927462 | glucosyltransferase 7 (alpha 1.3) glucosyltransferase                                       |
| 733  | ENSG00000154589  | LY96     | 1428  | 0.29 | protein_coding                      | 8  | 7460387   | 74941322  | lymphocyte antigen 96                                                                       |
| 788  | ENSG00000200333  | LFNG     | 1468  | 0.29 | protein_coding                      | 7  | 2552163   | 2559811   | LFNG O-fucosyltransferase 3 beta-N-acetylglucosaminyltransferase                            |
| 784  | ENSG00000186469  | GN2G     | 14624 | 0.29 | protein_coding                      | 14 | 5229313   | 5244600   | guanine nucleotide binding protein (G protein), gamma 2                                     |
| 790  | ENSG00000111348  | ARRHGDB  | 15018 | 0.29 | protein_coding                      | 12 | 15094951  | 15114662  | Rho GDP dissociation inhibitor (GDI) beta                                                   |
| 852  | ENSG00000200693  |          | 15031 | 0.29 | protein_coding                      | 19 | 54720737  | 54746649  | leukocyte immunoglobulin-like receptor, subfamily A (with TM domain) member 6               |
| 826  | ENSG00000006974  | RAB27A   | 15336 | 0.29 | protein_coding                      | 15 | 55495164  | 55611311  | RAB27A, member RAS oncogene family                                                          |
| 830  | ENSG00000182568  | SATB1    | 1538  | 0.29 | protein_coding                      | 3  | 18386879  | 18487080  | SATB homeobox 1                                                                             |
| 852  | ENSG0000012345   | STAR5    | 15734 | 0.29 | protein_coding                      | 15 | 81601284  | 81616054  | SMAR-related lipid transfer (STAR) domain containing 5                                      |
| 856  | ENSG00000105352  | CEACAM4  | 15763 | 0.29 | protein_coding                      | 19 | 42125344  | 42133442  | carcinoembryonic antigen-related cell adhesion molecule 4                                   |
| 876  | ENSG000002028137 | TNFRSF1B | 1607  | 0.29 | protein_coding                      | 1  | 12227060  | 12289285  | tumor necrosis factor receptor superfamily, member 1B                                       |
| 894  | ENSG00000202425  | HLA-B    | 16274 | 0.29 | protein_coding                      | 6  | 31321648  | 31324965  | major histocompatibility complex, class I, B                                                |
| 813  | ENSG00000240065  | PSMB9    | 1667  | 0.29 | protein_coding                      | 6  | 32811913  | 32813627  | proteasome (prosome, macropain) subunit, beta type, 9                                       |
| 1028 | ENSG00000102779  | ALOX5    | 1816  | 0.29 | protein_coding                      | 10 | 45869651  | 45941961  | arachidonate 5-lipoxygenase                                                                 |
| 1024 | ENSG00000205614  | ARHGAP27 | 18238 | 0.29 | protein_coding                      | 11 | 4343176   | 4351187   | Rho GTPase activating protein 27                                                            |
| 1030 | ENSG00000124357  | NGK      | 18304 | 0.29 | protein_coding                      | 2  | 71291474  | 71306355  | N-acetylglucosamine kinase                                                                  |
| 1028 | ENSG00000171257  | STAT5B   | 19021 | 0.29 | protein_coding                      | 17 | 40351186  | 40428725  | signal transducer and activator of transcription 5B                                         |
| 1103 | ENSG00000200693  | CtCFP3   | 1927  | 0.29 | protein_coding                      | 2  | 11391202  | 11336601  | ectonucleoside diphosphate (NDP) domain containing 4                                        |
| 1120 | ENSG00000148859  | TMEM140  | 19577 | 0.29 | protein_coding                      | 7  | 134532624 | 134560067 | transmembrane protein 140                                                                   |
| 1133 | ENSG00000200267  | TAP2     | 19678 | 0.29 | protein_coding                      | 6  | 32786100  | 32806557  | transporter 2, ATP-binding cassette, sub-family B (MDR/TAP)                                 |
| 1144 | ENSG00000200523  | CtCFP3   | 19678 | 0.29 | protein_coding                      | 2  | 10000128  | 10000128  | CtCFP actin domain family 2, member 8                                                       |
| 1233 | ENSG00000165168  | CYBB     | 21034 | 0.29 | protein_coding                      | X  | 37636264  | 37672714  | cytochrome b-245, beta polypeptide                                                          |
| 1230 | ENSG00000139323  | POC1B    | 21138 | 0.29 | protein_coding                      | 12 | 89813495  | 89919801  | POC1 centromer protein B                                                                    |
| 1287 | ENSG00000200267  | AT5G163  | 21273 | 0.29 | protein_coding                      | 11 | 7255353   | 7255478   | subfamily 16-like 2 (S. cerevisiae)                                                         |
| 1340 | ENSG00000168300  | PCMTD1   | 22567 | 0.29 | protein_coding                      | 8  | 52730140  | 52811735  | protein-L-isomerase (D-aspartate) O-methyltransferase domain containing 1                   |
| 1355 | ENSG00000198174  | CNTNAP3  | 22785 | 0.29 | protein_coding                      | 9  | 38072784  | 38288512  | contactin associated protein-like 3                                                         |
| 1365 | ENSG0000017495   | SAMD8    | 22828 | 0.29 | protein_coding                      | 18 | 52739969  | 52777662  | sterile alpha motif domain containing 8-like                                                |
| 1385 | ENSG00000100784  | RPS8KAS  | 2315  | 0.29 | protein_coding                      | 14 | 91336795  | 91526880  | ribosomal protein S8 kinase, 80kDa, polypeptide 5                                           |
| 1394 | ENSG00000158711  | ELK4     | 23235 | 0.29 | protein_coding                      | 1  | 205577071 | 205601090 | ELK4, ETS-domain protein (SRF accessory protein 1)                                          |
| 1454 | ENSG00000160110  | IRHAR2   | 24008 | 0.29 | protein_coding                      | 21 | 6226220   | 24637880  | interleukin (alpha, beta and omega) receptor 2                                              |
| 1454 | ENSG00000114127  | XRN1     | 24013 | 0.29 | protein_coding                      | 6  | 14202449  | 14216894  | 5'-3' exonuclease 1                                                                         |
| 1610 | ENSG00000073910  | FRY      | 2576  | 0.29 | protein_coding                      | 13 | 32655437  | 32670784  | furry homolog (Drosophila)                                                                  |
| 1610 | ENSG00000144589  | DOC2C    | 2589  | 0.29 | protein_coding                      | 6  | 6504228   | 2527558   | effector of cytolysis 5                                                                     |
| 1616 | ENSG00000111224  | PARP11   | 25944 | 0.29 | protein_coding                      | 12 | 390211    | 392166    | poly (ADP-ribose) polymerase family, member 11                                              |
| 1641 | ENSG00000177125  | ZBTB34   | 2623  | 0.29 | protein_coding                      | 9  | 12962244  | 129648157 | zinc finger and BTB domain containing 34                                                    |
| 1884 | ENSG00000206869  | ANK      | 29104 | 0.29 | protein_coding                      | 9  | 4985033   | 5128183   | ankyrin kinase 2                                                                            |
| 1726 | ENSG00000204209  | ARL17A   | 27149 | 0.29 | protein_coding                      | 17 | 44549496  | 44627488  | ADP-ribosylation factor-like 17A                                                            |
| 1730 | ENSG00000134444  | KIAA1468 | 27714 | 0.29 | protein_coding                      | 18 | 58854491  | 58974355  | KIAA1468                                                                                    |
| 1740 | ENSG00000196266  | ZNF493   | 27733 | 0.29 | protein_coding                      | 19 | 21579921  | 21610375  | zinc finger protein 493                                                                     |
| 1736 | ENSG0000014933   | INCED    | 28029 | 0.29 | protein_coding                      | 2  | 202683445 | 202691027 | INCED complex subunit D                                                                     |
| 1787 | ENSG00000075539  | FRYL     | 2889  | 0.29 | protein_coding                      | 4  | 4849378   | 4878239   | FRYL-like                                                                                   |
| 1811 | ENSG00000202524  | PTTG2    | 2899  | 0.29 | protein_coding                      | 4  | 3796206   | 37962746  | pituitary tumor-transforming 2                                                              |
| 1824 | ENSG00000106586  | ANKAP10  | 29187 | 0.29 | protein_coding                      | 2  | 18862765  | 18871658  | A kinase (PRK) anchor protein 10                                                            |
| 1881 | ENSG00000074758  | ZNF2F    | 2978  | 0.29 | protein_coding                      | 17 | 3907379   | 4046314   | zinc finger, Z2F type with EF-hand domain 1                                                 |
| 1882 | ENSG00000127281  | ZNF484   | 31518 | 0.29 | protein_coding                      | 2  | 9810978   | 9820426   | zinc finger protein 484                                                                     |
| 1926 | ENSG00000141421  | GMRH1    | 31715 | 0.29 | protein_coding                      | 2  | 2968012   | 2968654   | (gonadotropin-releasing hormone) receptor-like 1 (identifying releasing hormone)            |
| 1975 | ENSG00000115870  | THADA    | 31228 | 0.29 | protein_coding                      | 2  | 43383800  | 43382185  | thyroid adenoma associated                                                                  |
| 1986 | ENSG00000127281  | ZNF484   | 31518 | 0.29 | protein_coding                      | 9  | 95607874  | 95640304  | zinc finger protein 484                                                                     |
| 1984 | ENSG00000171668  | SUMO4    | 32018 | 0.29 | protein_coding                      | 11 | 14872177  | 148722177 | SUMO4                                                                                       |
| 2241 | ENSG00000196110  | ZNF699   | 3491  | 0.29 | protein_coding                      | 19 | 8404951   | 8420514   | zinc finger protein 699                                                                     |
| 2282 | ENSG00000123020  | ZNF611   | 35175 | 0.29 | protein_coding                      | 19 | 5320606   | 5328326   | zinc finger protein 611                                                                     |
| 2644 | ENSG00000216303  | SLMO4    | 4508  | 0.29 | protein_coding                      | 2  | 2968012   | 2968654   | SMO4                                                                                        |
| 3011 | ENSG00000124091  | GCNT7    | 4693  | 0.29 | protein_coding                      | 20 | 55065454  | 5510081   | glucosaminyl (N-acetyl) transferase family member 7                                         |
| 3145 | ENSG000002021970 | OR2A1    | 4935  | 0.29 | protein_coding                      | 7  | 14401518  | 144016150 | olfactory receptor, family 2, subfamily A, member 1                                         |
| 3251 | ENSG00000205811  | ANKK2    | 5008  | 0.29 | protein_coding                      | 22 | 4868378   | 5008190   | chromosome 22 open reading frame 34                                                         |
| 3534 | ENSG00000193747  | OR2D6    | 55484 | 0.29 | protein_coding                      | 11 | 5602107   | 5603134   | olfactory receptor, family 2, subfamily B, member 6                                         |
| 3563 | ENSG00000179055  | OR13D1   | 55848 | 0.29 | protein_coding                      | 9  | 10745660  | 10747786  | olfactory receptor, family 15, subfamily D, member 1                                        |
| 3619 | ENSG00000202585  |          | 48036 | 0.29 | rRNA                                | 22 | 28111008  | 28111386  | rRNA, 5S ribosomal pseudogene 404                                                           |
| 2872 | ENSG00000248476  | BACH1    | 30367 | 0.29 | sense_intronic                      | 21 | 30723955  | 30734215  | BACH1 intronic transcript 1 (non-protein coding)                                            |
| 1926 | ENSG00000202892  | DIP2A-T1 | 41489 | 0.29 | sense_intronic                      | 21 | 47882384  | 47888219  | DIP2A intronic transcript 1 (non-protein coding)                                            |
| 1796 | ENSG00000202892  | DIP2A-T1 | 41489 | 0.29 | sense_intronic                      | 1  | 2284367   | 2284367   | DIP2A intronic transcript 1 (non-protein coding)                                            |
| 2555 | ENSG00000212181  |          | 39559 | 0.29 | sncRNA                              | 2  | 14901943  | 149019277 | Small nuclear RNA SNORA48                                                                   |
| 1561 | ENSG00000206923  |          | 25038 | 0.29 | sncRNA                              | 7  | 28157732  | 28157838  | rRNA, U6 small nuclear 97b, pseudogene                                                      |
| 1561 | ENSG00000205989  |          | 25038 | 0.29 | sncRNA                              | 16 | 5347148   | 5347244   | rRNA, U6 small nuclear 115b, pseudogene                                                     |
| 1770 | ENSG00000207518  | RNU6B-SP | 28312 | 0.29 | sncRNA                              | 13 | 22125443  | 22125449  | rRNA, U6 small nuclear 59, pseudogene                                                       |
| 1778 | ENSG00000202151  |          | 28643 | 0.29 | sncRNA                              | 15 | 8964070   | 8964071   | rRNA, U7 small nuclear 195, pseudogene                                                      |
| 1852 | ENSG00000202454  |          | 32049 | 0.29 | sncRNA                              | 2  | 21384735  | 21384736  | rRNA, U6 small nuclear 107, pseudogene                                                      |
| 2025 | ENSG00000205105  |          | 31193 | 0.29 | sncRNA                              | 1  | 14928177  | 14928232  | rRNA, U1 small nuclear 143, pseudogene                                                      |
| 2056 | ENSG00000207144  |          | 32374 | 0.29 | sncRNA                              | 1  | 15538918  | 15538921  | rRNA, U6 small nuclear 1297, pseudogene                                                     |
| 2068 | ENSG00000206921  |          | 4127  | 0.29 | sncRNA                              | 1  | 15007432  | 15007448  | rRNA, U6 small nuclear 104Z, pseudogene                                                     |
| 2922 | ENSG00000199444  |          | 34261 | 0.29 | sncRNA                              | 2  | 16845206  | 16845306  | rRNA, U6 small nuclear 76b, pseudogene                                                      |
| 3003 | ENSG00000202089  |          | 46717 | 0.29 | sncRNA                              | 11 | 6350059   | 63500157  | rRNA, U6 small nuclear 130b, pseudogene                                                     |
| 3167 | ENSG00000206869  |          | 49018 | 0.29 | sncRNA                              | 17 | 7606326   | 7606334   | rRNA, U6 small nuclear 62b, pseudogene                                                      |
| 3138 | ENSG00000204843  |          | 4268  | 0.29 | sncRNA                              | 12 | 13209888  | 13209913  | rRNA, U6 small nuclear 101Z, pseudogene                                                     |
| 345  | ENSG00000227191  | 84B3     | 8483  | 0.29 | TR_C_gene                           | 7  | 38279181  | 38279173  | T cell receptor gamma constant 2                                                            |
| 347  | ENSG0000011625   |          | 8305  | 0.29 | TR_C_gene                           | 14 | 22919081  | 22919131  | T cell receptor alpha piling 1                                                              |
| 538  | ENSG0000011854   |          | 29563 | 0.29 | TR_C_gene                           | 14 | 22919029  | 22919087  | T cell receptor alpha (non-functional)                                                      |
| 2611 | ENSG00000256378  |          | 38575 | 0.29 | TR_V_pseudogene                     | 14 | 22371257  | 22371778  | T cell receptor alpha variable B-5 (pseudogene)                                             |
| 631  | ENSG00000229754  | CRCR2P1  | 12784 | 0.29 | transcribed_unprocessed_pseu_dogene | 2  | 218923878 | 218930452 | chemokine (C-X-C motif) receptor 2 pseudogene 1                                             |
| 808  | ENSG00000184106  | TMLSP    | 41822 | 0.29 | transcribed_unprocessed_pseu_dogene | 6  | 41178292  | 41178390  | triggering receptor expressed on myeloid cells-like 3, pseudogene                           |
| 3305 | ENSG00000233673  |          | 52011 | 0.29 | transcribed_unprocessed_pseu_dogene | 2  | 87098424  | 87149616  | anaphase promoting complex subunit 1 pseudogene 1                                           |
| 3320 | ENSG00000239736  |          | 52268 | 0.29 | transcribed_unprocessed_pseu_dogene | 19 | 42106090  | 42112339  | carcinoembryonic antigen-related cell adhesion molecule pseudogene 3                        |
| 3323 | ENSG00000234814  | SVLP1    | 5231  |      |                                     |    |           |           |                                                                                             |



|      |                 |           |        |      |                      |          |           |           |                                                                                                     |
|------|-----------------|-----------|--------|------|----------------------|----------|-----------|-----------|-----------------------------------------------------------------------------------------------------|
| 2965 | ENSG00000270130 | 4992.4    | 0.29   |      |                      |          |           |           |                                                                                                     |
| 2966 | ENSG00000271717 | 4991.9    | 0.29   |      |                      |          |           |           |                                                                                                     |
| 3000 | ENSG00000269947 | 4698.2    | 0.29   |      |                      |          |           |           |                                                                                                     |
| 3025 | ENSG00000211206 | 4723.5    | 0.29   |      |                      |          |           |           |                                                                                                     |
| 3038 | ENSG00000264538 | 4743      | 0.29   |      |                      |          |           |           |                                                                                                     |
| 3077 | ENSG00000269538 | 4903      | 0.29   |      |                      |          |           |           |                                                                                                     |
| 3092 | ENSG00000260908 | 4828.7    | 0.29   |      |                      |          |           |           |                                                                                                     |
| 3095 | ENSG00000271068 | 4834      | 0.29   |      |                      |          |           |           |                                                                                                     |
| 3129 | ENSG00000269874 | 4899      | 0.29   |      |                      |          |           |           |                                                                                                     |
| 3143 | ENSG00000259304 | 4931.6    | 0.29   |      |                      |          |           |           |                                                                                                     |
| 3198 | ENSG00000261222 | 5011      | 0.29   |      |                      |          |           |           |                                                                                                     |
| 3207 | ENSG00000271717 | 5014.4    | 0.29   |      |                      |          |           |           |                                                                                                     |
| 3222 | ENSG00000261986 | 5061.5    | 0.29   |      |                      |          |           |           |                                                                                                     |
| 3223 | ENSG00000268096 | 5061.6    | 0.29   |      |                      |          |           |           |                                                                                                     |
| 3244 | ENSG00000269640 | 5091.3    | 0.29   |      |                      |          |           |           |                                                                                                     |
| 3247 | ENSG00000212820 | 5095      | 0.29   |      |                      |          |           |           |                                                                                                     |
| 3248 | ENSG00000211754 | 5099.2    | 0.29   |      |                      |          |           |           |                                                                                                     |
| 3279 | ENSG00000221784 | 5144.8    | 0.29   |      |                      |          |           |           |                                                                                                     |
| 3286 | ENSG00000232618 | 5156      | 0.29   |      |                      |          |           |           |                                                                                                     |
| 3312 | ENSG00000240874 | 5212.6    | 0.29   |      |                      |          |           |           |                                                                                                     |
| 3316 | ENSG00000225925 | 5218.4    | 0.29   |      |                      |          |           |           |                                                                                                     |
| 3331 | ENSG00000214772 | 5241.8    | 0.29   |      |                      |          |           |           |                                                                                                     |
| 3340 | ENSG00000269881 | 5253.3    | 0.29   |      |                      |          |           |           |                                                                                                     |
| 3341 | ENSG00000225017 | 5274.6    | 0.29   |      |                      |          |           |           |                                                                                                     |
| 3355 | ENSG00000238350 | 5274.6    | 0.29   |      |                      |          |           |           |                                                                                                     |
| 3389 | ENSG00000249077 | 5302.5    | 0.29   |      |                      |          |           |           |                                                                                                     |
| 3391 | ENSG00000211712 | 5303.3    | 0.29   |      |                      |          |           |           |                                                                                                     |
| 3391 | ENSG00000234572 | 5347.8    | 0.29   |      |                      |          |           |           |                                                                                                     |
| 3400 | ENSG00000269705 | 5358.5    | 0.29   |      |                      |          |           |           |                                                                                                     |
| 3403 | ENSG00000221920 | 5362.3    | 0.29   |      |                      |          |           |           |                                                                                                     |
| 3404 | ENSG00000231740 | 5362.3    | 0.29   |      |                      |          |           |           |                                                                                                     |
| 3480 | ENSG00000211105 | 5446      | 0.29   |      |                      |          |           |           |                                                                                                     |
| 3483 | ENSG00000234560 | 5447.1    | 0.29   |      |                      |          |           |           |                                                                                                     |
| 3487 | ENSG00000237505 | 5455.6    | 0.29   |      |                      |          |           |           |                                                                                                     |
| 3475 | ENSG00000264184 | 5465.4    | 0.29   |      |                      |          |           |           |                                                                                                     |
| 3494 | ENSG00000221758 | 5471.7    | 0.29   | 17   | 10048831             | 10050277 |           |           | CDNA FL22866 fs, clone CBR01927                                                                     |
| 3517 | ENSG00000262884 | 5531.7    | 0.29   |      |                      |          |           |           |                                                                                                     |
| 3545 | ENSG00000261387 | 5582.6    | 0.29   |      |                      |          |           |           |                                                                                                     |
| 3547 | ENSG00000239893 | 5587.4    | 0.29   |      |                      |          |           |           |                                                                                                     |
| 3548 | ENSG00000227017 | 5588.5    | 0.29   |      |                      |          |           |           |                                                                                                     |
| 3550 | ENSG00000225832 | 5573.4    | 0.29   |      |                      |          |           |           |                                                                                                     |
| 3568 | ENSG00000211712 | 5586.3    | 0.29   |      |                      |          |           |           |                                                                                                     |
| 3609 | ENSG00000268421 | 5653.4    | 0.29   | 10   | 13130884             | 13130925 |           |           | Uncharacterized protein                                                                             |
| 1983 | ENSG00000226167 | AP4B1-AS1 | 3138.2 | 0.28 | antisense            | 1        | 11439257  | 11444359  | AP4B1 antisense RNA 1                                                                               |
| 2027 | ENSG0000021721  | LUCAT1    | 3647.7 | 0.28 | antisense            | 7        | 13066519  | 13074935  | long intergenic non-protein coding RNA, p53 induced transcript                                      |
| 1860 | ENSG00000238323 | LUCAT1    | 3757.6 | 0.28 | lincRNA              | 5        | 9058846   | 9057018   | lung cancer associated transcript 1 (non-protein coding)                                            |
| 3871 | ENSG00000177375 | FAM87B    | 6091.3 | 0.28 | lincRNA              | 1        | 752751    | 752714    | family with sequence similarity 87, member B                                                        |
| 1508 | ENSG00000264764 | MIR4772   | 2533.3 | 0.28 | miRNA                | 2        | 103048749 | 10304828  | miR4772                                                                                             |
| 1808 | ENSG00000264556 | MIR5162   | 2863.4 | 0.28 | miRNA                | 11       | 9038250   | 9038031   | miR5162                                                                                             |
| 2147 | ENSG00000207612 | MIR604    | 3359.4 | 0.28 | miRNA                | 10       | 2983393   | 2983420   | miR604                                                                                              |
| 2170 | ENSG0000021214  | MIR355    | 3395.3 | 0.28 | miRNA                | 10       | 1124668   | 1124871   | miR355                                                                                              |
| 1991 | ENSG00000262523 | MIR4446   | 4820.7 | 0.28 | miRNA                | 11       | 11331323  | 11331789  | miR4446                                                                                             |
| 3224 | ENSG00000262432 | MIR4308   | 4887.7 | 0.28 | miRNA                | 14       | 55344831  | 55344911  | miR4308                                                                                             |
| 3275 | ENSG00000212017 | MIR5480   | 5112.3 | 0.28 | miRNA                | 6        | 57254930  | 57255010  | miR5480                                                                                             |
| 3311 | ENSG00000269657 | MIR419    | 5211.3 | 0.28 | miRNA                | 18       | 4250047   | 4250131   | miR419                                                                                              |
| 1810 | ENSG00000208025 | MIR591    | 5535   | 0.28 | miRNA                | 7        | 9584874   | 9584908   | miR591                                                                                              |
| 3650 | ENSG00000203136 |           | 2901.7 | 0.28 | misc. RNA            | 16       | 2819489   | 2819471   | Y RNA                                                                                               |
| 1926 | ENSG00000222436 |           | 2917   | 0.28 | misc. RNA            | 17       | 7752197   | 7752309   | Y RNA                                                                                               |
| 1929 | ENSG00000207390 |           | 3041.5 | 0.28 | misc. RNA            | 17       | 4096063   | 4096180   | Y RNA                                                                                               |
| 2005 | ENSG00000203977 |           | 3163.3 | 0.28 | misc. RNA            | 7        | 88847927  | 88848028  | Y RNA                                                                                               |
| 1910 | ENSG00000202969 |           | 3253.8 | 0.28 | misc. RNA            | 3        | 11202315  | 11192116  | Y RNA                                                                                               |
| 1768 | ENSG00000241333 |           | 5908.4 | 0.28 | misc. RNA            | 22       | 38065473  | 38065746  | RNA 7SL, cytoplasmic 38S, pseudogene                                                                |
| 3884 | ENSG00000241975 |           | 2962.3 | 0.28 | processed_pseudogene | 1        | 89294785  | 89295102  | transcription elongation factor II (SII), poly(ADP-ribose) 1 pseudogene 19                          |
| 1960 | ENSG00000198166 |           | 3187.1 | 0.28 | processed_pseudogene | 1        | 17871618  | 17871618  | protein tyrosine phosphatase receptor type 2 pseudogene 1                                           |
| 2168 | ENSG00000241120 |           | 3390.4 | 0.28 | processed_pseudogene | 3        | 16741243  | 16741243  | high mobility group nucleosome binding domain 1 pseudogene 8                                        |
| 2480 | ENSG00000225299 |           | 3864.3 | 0.28 | processed_pseudogene | 1        | 11316828  | 11316848  | mitochondrial ribosomal protein L53 pseudogene 1                                                    |
| 2925 | ENSG00000202620 |           | 4070.1 | 0.28 | processed_pseudogene | 2        | 4075916   | 4075909   | cytochrome c oxidase subunit VIIa pseudogene 14                                                     |
| 2830 | ENSG00000226839 |           | 4070.1 | 0.28 | processed_pseudogene | 2        | 143851802 | 143852284 | MT-ND6 pseudogene 11                                                                                |
| 3349 | ENSG00000226863 |           | 5262.6 | 0.28 | processed_pseudogene | 1        | 235459180 | 235459920 | ribosomal protein L23a pseudogene 23                                                                |
| 1414 | ENSG00000206023 |           | 5317.8 | 0.28 | processed_pseudogene | 22       | 4118428   | 4118428   | jumping transcription breakpoint pseudogene 2                                                       |
| 3427 | ENSG00000234159 |           | 5397.1 | 0.28 | processed_pseudogene | 21       | 17116323  | 17117399  | RNA binding protein with multiple solid-like pseudogene                                             |
| 3443 | ENSG00000248430 |           | 5427   | 0.28 | processed_pseudogene | 5        | 111788400 | 111789886 | high mobility group box 3 pseudogene 16                                                             |
| 1489 | ENSG00000249843 |           | 5454.8 | 0.28 | processed_pseudogene | 11       | 86534817  | 86534818  | fertilin, light polypeptide pseudogene 6                                                            |
| 3068 | ENSG00000235150 |           | 5793.4 | 0.28 | processed_pseudogene | 10       | 9054537   | 90545816  | regulator of chromosome condensation (RCC-1) and BTB (POZ) domain containing protein 2 pseudogene 1 |
| 3706 | ENSG00000215441 |           | 5795.5 | 0.28 | processed_pseudogene | 9        | 27963880  | 27971043  | CTAGE family, member 12, pseudogene                                                                 |
| 3712 | ENSG00000222887 |           | 5827.2 | 0.28 | processed_pseudogene | 21       | 30500022  | 30500509  | ribosomal protein L12 pseudogene 9                                                                  |
| 3748 | ENSG00000243681 |           | 5860.8 | 0.28 | processed_pseudogene | 7        | 142488452 | 142487247 | WW domain binding protein 13-like pseudogene 1                                                      |
| 1423 | ENSG00000209197 | IL32      | 3118.6 | 0.28 | protein_coding       | 6        | 31186     | 31186     | interleukin 32                                                                                      |
| 632  | ENSG00000161911 | TREM1     | 1279.1 | 0.28 | protein_coding       | 6        | 41117080  | 41122075  | triggering receptor expressed on myeloid cells like 1                                               |
| 788  | ENSG00000198716 | LILRA5    | 1458.8 | 0.28 | protein_coding       | 19       | 54818333  | 54824409  | leukocyte immunoglobulin-like receptor, subfamily A (with TM domain), member 5                      |
| 780  | ENSG00000138744 | HLA-L     | 1467.3 | 0.28 | protein_coding       | 18       | 76818098  | 76818098  | M-tetrapeptide amid amidase                                                                         |
| 824  | ENSG00000119714 | GPR68     | 1532.6 | 0.28 | protein_coding       | 14       | 91688876  | 91720299  | G-protein-coupled receptor 68                                                                       |
| 845  | ENSG00000214212 | C10orf58  | 1561.4 | 0.28 | protein_coding       | 19       | 10947251  | 10980466  | chromosome 10 open reading frame 38                                                                 |
| 888  | ENSG00000212136 | PLBD1     | 1619.1 | 0.28 | protein_coding       | 12       | 14856996  | 14721283  | phospholipase B domain containing 1                                                                 |
| 900  | ENSG00000202425 | HLA-L     | 1644.4 | 0.28 | protein_coding       | 6        | 3153626   | 3153607   | major histocompatibility complex, class I, C                                                        |
| 911  | ENSG00000104998 | IL7FRA    | 1654.6 | 0.28 | protein_coding       | 19       | 14142560  | 14163743  | interleukin 27 receptor, alpha                                                                      |
| 974  | ENSG00000147168 | IL2RG     | 1739.3 | 0.28 | protein_coding       | A        | 70327294  | 7031988   | interleukin 2 receptor, gamma                                                                       |
| 980  | ENSG00000209788 | AB1       | 1753   | 0.28 | protein_coding       | 8        | 47287569  | 47300387  | CD3D molecule                                                                                       |
| 984  | ENSG00000127564 | STIEP4    | 1763.3 | 0.28 | protein_coding       | 7        | 8796744   | 87962006  | STIEP4 family member 4                                                                              |
| 987  | ENSG00000168862 | FAM78A    | 1765.3 | 0.28 | protein_coding       | 9        | 13415463  | 13415194  | family with sequence similarity 78, member A                                                        |
| 1000 | ENSG0000018614  | SMAP2     | 1765.3 | 0.28 | protein_coding       | 9        | 18708120  | 18708120  | receptor (chemokine) transporter protein 4                                                          |
| 1018 | ENSG00000084070 | SMAP2     | 1805.8 | 0.28 | protein_coding       | 1        | 40810522  | 40888988  | family with sequence similarity 78, member A                                                        |
| 1055 | ENSG00000185122 | RASA3     | 1852.5 | 0.28 | protein_coding       | 19       | 15862435  | 15975382  | RAS protein activator like 3                                                                        |
| 1056 | ENSG00000185321 | RASA3     | 1852.5 | 0.28 | protein_coding       | 19       | 48263200  | 48263200  | chemokine (C motif) receptor 1                                                                      |
| 1076 | ENSG00000122122 | SASH3     | 1877.8 | 0.28 | protein_coding       | X        | 128913965 | 128929177 | SAM and SH3 domain containing 3                                                                     |
| 1079 | ENSG00000103225 | ASC2C2    | 1883.6 | 0.28 | protein_coding       | 22       | 30184997  | 30234271  | activating signal transducer 1 complex subunit 2                                                    |
| 1080 | ENSG00000069391 | RASKP2    | 1902.8 | 0.28 | protein_coding       | 44       | 6445290   | 6445290   | RAS guanyl releasing protein 2 (calcium and DAG-regulated)                                          |
| 1096 | ENSG00000072135 | PTPN18    | 1904.8 | 0.28 | protein_coding       | 2        | 131115580 | 131123882 | protein tyrosine phosphatase, non-receptor type 18 (brain-derived)                                  |
| 1099 | ENSG00000124247 | MYO1F     | 1907.9 | 0.28 | protein_coding       | 19       | 858674    | 8642441   | myosin I F                                                                                          |
| 1100 | ENSG00000141119 | FKBP1     | 1914.3 | 0.28 | protein_coding       | 3        | 11413175  | 11414250  | calyculin A inhibitor 1                                                                             |
| 1105 | ENSG00000196405 | EVL       | 1917   | 0.28 | protein_coding       | 14       | 100437786 | 100437786 | EratH/Vsp-like                                                                                      |
| 1123 | ENSG00000186628 | PCGF5     | 1950.1 | 0.28 | protein_coding       | 10       | 9297908   | 93044088  | polycomb group ring finger 5                                                                        |
| 1131 | ENSG00000211369 | CD3G2     | 1983   | 0.28 | protein_coding       | 2        | 16003164  | 16003164  | CD3D molecule                                                                                       |
| 1134 | ENSG00000068294 | CD84      | 1991.5 | 0.28 | protein_coding       | 1        | 160510885 | 160549306 | CD84 molecule                                                                                       |
| 1183 | ENSG00000292511 | SNAP23    | 2041.1 | 0.28 | protein_coding       | 15       | 42754313  | 42837547  | synaptosomal-associated protein 23kDa                                                               |
| 1207 | ENSG0000015604  | IL18R1    | 2073.2 | 0.28 | protein_coding       | 2        | 10927869  | 10928168  | interleukin 18 receptor 1                                                                           |
| 1224 | ENSG00000168128 | RAB8B     | 2083.7 | 0.28 | protein_coding       | 15       | 83481868  | 83589811  | RAB8B, member RAS oncogene family                                                                   |
| 1229 | ENSG00000195158 | TTC39B    | 2086.8 | 0.28 | protein_coding       | 9        | 15163820  | 15307358  | tetratricopeptide repeat domain 39B                                                                 |
| 1274 | ENSG00000135445 | RIGC2     | 2096.3 | 0.28 | protein_coding       | 10       | 17233029  | 17233029  | phosphatidylinositol glycan anchor biosynthesis, class C                                            |
| 1279 | ENSG00000157551 | KCNJ15    | 2161.9 | 0.28 | protein_coding       | 21       | 38529128  | 38679789  | potassium inwardly-rectifying channel, subfamily J, member 15                                       |
| 1304 | ENSG00000186525 | RYK       | 2188.9 | 0.28 | protein_coding       | 9        | 93564099  | 93688031  | spleen tyrosine kinase                                                                              |
| 1307 | ENSG00000108657 | PRKRA     | 2199.4 | 0.28 | protein_coding       | 10       | 2262106   | 22602484  | phosphatidylinositol 3-kinase 4 kinase, type II, alpha                                              |
| 1338 | ENSG00000135932 | CAB39     | 2252.5 | 0.28 | protein_coding       | 2        | 231577560 | 231685790 | calcium binding protein 39                                                                          |
| 1387 | ENSG00000139488 | PEL12     | 2315.3 | 0.28 | protein_coding       | 14       | 56584532  | 56788244  | pellico E3 ubiquitin protein ligase family member 2                                                 |
| 1388 | ENSG00000211128 | FKBP1     | 2315.4 | 0.28 | protein_coding       | 30       | 4723078   | 4744440   | phosphatidylinositol 3,4,5-trisphosphate dependent 1alpha, exchange factor 1                        |
| 1396 | ENSG00000198814 | GK        | 2327.1 | 0.28 | protein_coding       | X        | 30671476  | 30749725  | glycerol kinase                                                                                     |
| 1397 | ENSG00000195023 | EPB41     | 2327.9 | 0.28 | protein_coding       | 1        | 29213603  | 29446553  | erythrocyte membrane protein band 4.1 (tellopoysis 1, RH-linked)                                    |
| 1404 | ENSG00000195688 | AIM2      | 2332.2 | 0.28 | protein_coding       | 1        | 15902274  | 159116886 | AIM2, member NOD2                                                                                   |
| 1406 | ENSG00000198178 | CD47      | 2342   | 0.28 | protein_coding       | 3        | 107792145 | 107808972 | CD47 molecule                                                                                       |
| 1472 | ENSG00000180233 | ZNF92     | 2434.4 | 0.28 | protein_coding       | 7        | 30323923  | 30421718  | zinc finger protein 92                                                                              |
| 1481 | ENSG00000213388 | NCKAP1L   | 2458.8 | 0.28 | protein_coding       | 12       | 54891498  | 54897726  | NCK-anchoring protein 1-like 1</                                                                    |

|      |                    |              |        |      |                                    |    |           |           |                                                                    |
|------|--------------------|--------------|--------|------|------------------------------------|----|-----------|-----------|--------------------------------------------------------------------|
| 3725 | ENSG00000177538    | OR2B11       | 5836.6 | 0.28 | protein_coding                     | 1  | 247614255 | 247615308 | effector receptor, family 2, subfamily B, member 11                |
| 3726 | ENSG0000011865     |              | 3421   | 0.28 | sense_intronic                     | 11 | 116756782 | 116761437 | SN3 intronic transcript 1 (non-protein coding)                     |
| 2460 | ENSG000002024707   |              | 3842   | 0.28 | sense_intronic                     | 6  | 20438052  | 20440409  | E2F3 intronic transcript 1 (non-protein coding)                    |
| 1665 | ENSG000002020075   |              | 2660.1 | 0.28 | snRNA                              | 8  | 13080036  | 13080086  | Small nucleolar RNA SNORA25                                        |
| 2180 | ENSG00000201878    |              | 3327.1 | 0.28 | snRNA                              | 4  | 18535120  | 18535203  | Small nucleolar RNA SNORD78                                        |
| 1887 | ENSG00000201736    |              | 2954.2 | 0.28 | snRNA                              | 17 | 46274042  | 46274148  | RNA, U6 small nuclear 175a, pseudogene                             |
| 1946 | ENSG00000205304    |              | 3073.7 | 0.28 | snRNA                              | 17 | 27751780  | 27751885  | RNA, U6 small nuclear 711, pseudogene                              |
| 2075 | ENSG00000202610    |              | 3259.2 | 0.28 | snRNA                              | 5  | 96225436  | 96225537  | RNA, U6 small nuclear 402, pseudogene                              |
| 2309 | ENSG00000202951    |              | 3621.1 | 0.28 | snRNA                              | 0  | 103362819 | 103362722 | RNA, U6 small nuclear 1163, pseudogene                             |
| 2432 | ENSG00000202593    |              | 3685.9 | 0.28 | snRNA                              | 2  | 54394081  | 54394144  | RNA, U7 small nuclear 172, pseudogene                              |
| 2707 | ENSG00000202237    |              | 4256.1 | 0.28 | snRNA                              | 12 | 28472268  | 28472358  | RNA, U6 small nuclear 54, pseudogene                               |
| 3076 | ENSG00000205193    |              | 4756.3 | 0.28 | snRNA                              | 11 | 3738022   | 3738105   | RNA, U6 small nuclear 1143, pseudogene                             |
| 3168 | ENSG00000196944    |              | 4961.9 | 0.28 | snRNA                              | 6  | 105980712 | 105980817 | RNA, U6 small nuclear 653, pseudogene                              |
| 3226 | ENSG0000021507     |              | 5062.6 | 0.28 | snRNA                              | 7  | 144148774 | 144148910 | RNA, U6 small nuclear 40, pseudogene                               |
| 3911 | ENSG00000202429    |              | 5565.1 | 0.28 | snRNA                              | 2  | 12622810  | 12622891  | RNA, U6 small nuclear 45, pseudogene                               |
| 3668 | ENSG000002053188   |              | 5745   | 0.28 | TR_V_gene                          | 7  | 142143652 | 142144084 | T cell receptor beta variable 6-7 (non-functional)                 |
| 2865 | ENSG00000205812    |              | 4443.5 | 0.28 | TR_V_pseudogene                    | 14 | 22658052  | 22658607  | T cell receptor alpha variable 33 (pseudogene)                     |
| 1263 | ENSG00000170356    | OR2A0P       | 2140   | 0.28 | transcribed_unprocessed_psu_dogene | 7  | 143947138 | 14395050  | effector receptor, family 2, subfamily A, member 20 pseudogene     |
| 1807 | ENSG000002037296   | SMG1P1       | 3010.8 | 0.28 | transcribed_unprocessed_psu_dogene | 16 | 22448329  | 22503541  | SMG1 pseudogene 1                                                  |
| 3162 | ENSG00000198850    | TPTE2P5      | 4980.2 | 0.28 | transcribed_unprocessed_psu_dogene | 13 | 41396432  | 41495490  | transmembrane phosphotransferase and tensin homolog 2 pseudogene 5 |
| 3896 | ENSG00000125631    | LOC101929008 | 6124.5 | 0.28 | transcribed_unprocessed_psu_dogene | 2  | 118817003 | 118692518 | 5-hydroxytryptamine (serotonin) receptor 5B, pseudogene            |
| 1862 | ENSG00000204790    | CBWD2        | 3133   | 0.28 | unprocessed_pseudogene             | 9  | 69204538  | 69209682  | COXBW domain containing 6                                          |
| 3937 | ENSG00000204299    |              | 4013.3 | 0.28 | unprocessed_pseudogene             | 1  | 94389130  | 94389501  | MTX4A pseudogene 11                                                |
| 854  | ENSG00000288001    |              | 1575.8 | 0.28 |                                    |    |           |           |                                                                    |
| 1203 | ENSG00000289814    |              | 2068.6 | 0.28 |                                    |    |           |           |                                                                    |
| 1598 | ENSG000002023961   |              | 2581.8 | 0.28 |                                    | 2  | 37186505  | 37186605  | RNA, U6 small nuclear 846, pseudogene                              |
| 1668 | ENSG000002033961   |              | 2701.4 | 0.28 |                                    |    |           |           |                                                                    |
| 1714 | ENSG000002046575   |              | 2728.2 | 0.28 |                                    |    |           |           |                                                                    |
| 1721 | ENSG00000205031    |              | 2740   | 0.28 |                                    |    |           |           |                                                                    |
| 1825 | ENSG00000205968    |              | 2916.7 | 0.28 |                                    |    |           |           |                                                                    |
| 1858 | ENSG00000249006    |              | 2956.6 | 0.28 |                                    |    |           |           |                                                                    |
| 1869 | ENSG00000214489    |              | 2966.3 | 0.28 |                                    |    |           |           |                                                                    |
| 1931 | ENSG000002039883   |              | 3046.6 | 0.28 |                                    |    |           |           |                                                                    |
| 1955 | ENSG00000287758    |              | 3096   | 0.28 |                                    |    |           |           |                                                                    |
| 1965 | ENSG000002051288   |              | 3108.5 | 0.28 |                                    |    |           |           |                                                                    |
| 1999 | ENSG00000215348    |              | 3159.1 | 0.28 |                                    |    |           |           |                                                                    |
| 2010 | ENSG000002052324   |              | 3188.8 | 0.28 |                                    |    |           |           |                                                                    |
| 2031 | ENSG000002051878   |              | 3203.5 | 0.28 |                                    |    |           |           |                                                                    |
| 2032 | ENSG00000183904    |              | 3204.5 | 0.28 |                                    |    |           |           |                                                                    |
| 2046 | ENSG000002048503   |              | 3223.3 | 0.28 |                                    |    |           |           |                                                                    |
| 2052 | ENSG00000203578    |              | 3231.9 | 0.28 |                                    |    |           |           |                                                                    |
| 2053 | ENSG000002048484   |              | 3235.3 | 0.28 |                                    | 6  | 34660557  | 34660660  | Small nucleolar RNA U13                                            |
| 2097 | ENSG000002051544   |              | 3240.2 | 0.28 |                                    |    |           |           |                                                                    |
| 2058 | ENSG00000207076    |              | 3241.5 | 0.28 |                                    |    |           |           |                                                                    |
| 2093 | ENSG00000205021    |              | 3265.3 | 0.28 |                                    |    |           |           |                                                                    |
| 2104 | ENSG000002057169   |              | 3296.8 | 0.28 |                                    |    |           |           |                                                                    |
| 2116 | ENSG000002027383   |              | 3305.3 | 0.28 |                                    |    |           |           |                                                                    |
| 2120 | ENSG00000209244    |              | 3311.5 | 0.28 |                                    |    |           |           |                                                                    |
| 2131 | ENSG00000213800    |              | 3327.8 | 0.28 |                                    |    |           |           |                                                                    |
| 2140 | ENSG000002026352   |              | 3347.3 | 0.28 |                                    |    |           |           |                                                                    |
| 2218 | ENSG000002054496   |              | 3464.8 | 0.28 |                                    |    |           |           |                                                                    |
| 2284 | ENSG00000272562    |              | 3583.2 | 0.28 |                                    |    |           |           |                                                                    |
| 2286 | ENSG00000201113    |              | 3754.4 | 0.28 |                                    |    |           |           |                                                                    |
| 2419 | ENSG00000205700    |              | 3758.8 | 0.28 |                                    | 10 | 52152786  | 52154321  | Uncharacterized protein                                            |
| 2471 | ENSG00000272178    |              | 3857.9 | 0.28 |                                    |    |           |           |                                                                    |
| 2541 | ENSG000002054915   |              | 3936.8 | 0.28 |                                    |    |           |           |                                                                    |
| 2548 | ENSG00000205700    |              | 3947   | 0.28 |                                    |    |           |           |                                                                    |
| 2562 | ENSG000002028886   |              | 3964.6 | 0.28 |                                    |    |           |           |                                                                    |
| 2575 | ENSG000002055963   | PP1AL3A      | 3993.2 | 0.28 |                                    | 1  | 147954635 | 147955419 | peptidyl(iso) isomerase A (cytoplasm A)-like 4A                    |
| 2640 | ENSG00000205782    |              | 4026   | 0.28 |                                    |    |           |           |                                                                    |
| 2653 | ENSG00000204329    |              | 4101.1 | 0.28 |                                    |    |           |           |                                                                    |
| 2670 | ENSG000002058918   |              | 4127.7 | 0.28 |                                    |    |           |           |                                                                    |
| 2697 | ENSG00000201100    |              | 4118.8 | 0.28 |                                    |    |           |           |                                                                    |
| 2784 | ENSG000002033392   |              | 4326.8 | 0.28 |                                    |    |           |           |                                                                    |
| 2791 | ENSG000002059118   |              | 4332.9 | 0.28 |                                    |    |           |           |                                                                    |
| 2886 | ENSG00000201168    |              | 4477.3 | 0.28 |                                    |    |           |           |                                                                    |
| 2900 | ENSG000002023891   |              | 4504.2 | 0.28 |                                    |    |           |           |                                                                    |
| 2999 | ENSG000002028984   |              | 4667.1 | 0.28 |                                    |    |           |           |                                                                    |
| 3013 | ENSG000002051512   |              | 4696   | 0.28 |                                    |    |           |           |                                                                    |
| 3107 | ENSG000002048758   |              | 4854.5 | 0.28 |                                    |    |           |           |                                                                    |
| 3133 | ENSG00000203999    |              | 4904.6 | 0.28 |                                    |    |           |           |                                                                    |
| 3138 | ENSG000002021778   |              | 4915.7 | 0.28 |                                    |    |           |           |                                                                    |
| 3150 | ENSG00000217078    |              | 4944.2 | 0.28 |                                    |    |           |           |                                                                    |
| 3155 | ENSG00000204828    |              | 4949   | 0.28 |                                    |    |           |           |                                                                    |
| 3208 | ENSG000002025114   |              | 5005.3 | 0.28 |                                    |    |           |           |                                                                    |
| 3239 | ENSG00000131484    |              | 5094   | 0.28 |                                    |    |           |           |                                                                    |
| 3292 | ENSG000002053912   |              | 5188.3 | 0.28 |                                    |    |           |           |                                                                    |
| 3294 | ENSG000002029943   |              | 5199.8 | 0.28 |                                    |    |           |           |                                                                    |
| 3300 | ENSG00000166967    |              | 5183.4 | 0.28 |                                    | 7  | 101989192 | 101990889 | speedy/RINGO cell cycle regulator family member E6                 |
| 3332 | ENSG000002031731   |              | 5244.6 | 0.28 |                                    |    |           |           |                                                                    |
| 3362 | ENSG000002058966   |              | 5281.8 | 0.28 |                                    |    |           |           |                                                                    |
| 3363 | ENSG000002024910   |              | 5315.4 | 0.28 |                                    |    |           |           |                                                                    |
| 3371 | ENSG000002028237   |              | 5352.7 | 0.28 |                                    |    |           |           |                                                                    |
| 3417 | ENSG000002059604   |              | 5375.4 | 0.28 |                                    |    |           |           |                                                                    |
| 3446 | ENSG0000020314     |              | 5428.4 | 0.28 |                                    |    |           |           |                                                                    |
| 3450 | ENSG000002069049   |              | 5433.4 | 0.28 |                                    |    |           |           |                                                                    |
| 3479 | ENSG000002054595   |              | 5478.6 | 0.28 |                                    |    |           |           |                                                                    |
| 3486 | ENSG00000206073    |              | 5480.3 | 0.28 |                                    |    |           |           |                                                                    |
| 3481 | ENSG000002021320   |              | 5488.6 | 0.28 |                                    |    |           |           |                                                                    |
| 3509 | ENSG000002080194   |              | 5512.6 | 0.28 |                                    |    |           |           |                                                                    |
| 3527 | ENSG00000202086    |              | 5514.2 | 0.28 |                                    |    |           |           |                                                                    |
| 3531 | ENSG000002055899   |              | 5546   | 0.28 |                                    |    |           |           |                                                                    |
| 3555 | ENSG00000204983    |              | 5580.4 | 0.28 |                                    |    |           |           |                                                                    |
| 3562 | ENSG00000211831    |              | 5592.8 | 0.28 |                                    |    |           |           |                                                                    |
| 3570 | ENSG000002058591   |              | 5602   | 0.28 |                                    |    |           |           |                                                                    |
| 3571 | ENSG000002054877   |              | 5602.2 | 0.28 |                                    |    |           |           |                                                                    |
| 3586 | ENSG00000202078    |              | 5617.4 | 0.28 |                                    |    |           |           |                                                                    |
| 3584 | ENSG000002028113   |              | 5642   | 0.28 |                                    |    |           |           |                                                                    |
| 3602 | ENSG000002071215   |              | 5648.7 | 0.28 |                                    |    |           |           |                                                                    |
| 3607 | ENSG000002054528   |              | 5651.1 | 0.28 |                                    |    |           |           |                                                                    |
| 3608 | ENSG000002033154   |              | 5652.2 | 0.28 |                                    |    |           |           |                                                                    |
| 3613 | ENSG00000203478    |              | 5660.5 | 0.28 |                                    |    |           |           |                                                                    |
| 3615 | ENSG00000205370    |              | 5661.8 | 0.28 |                                    |    |           |           |                                                                    |
| 3635 | ENSG000002028681   |              | 5703   | 0.28 |                                    |    |           |           |                                                                    |
| 3637 | ENSG000002084374   |              | 5704.1 | 0.28 |                                    |    |           |           |                                                                    |
| 3651 | ENSG000002028883   |              | 5717.8 | 0.28 |                                    |    |           |           |                                                                    |
| 3652 | ENSG000002014651   |              | 5723.3 | 0.28 |                                    |    |           |           |                                                                    |
| 3670 | ENSG000002043358   |              | 5745.8 | 0.28 |                                    |    |           |           |                                                                    |
| 3672 | ENSG000002043078   |              | 5750.3 | 0.28 |                                    |    |           |           |                                                                    |
| 3686 | ENSG000002058443   |              | 5774.9 | 0.28 |                                    |    |           |           |                                                                    |
| 3707 | ENSG000002021462   |              | 5812.6 | 0.28 |                                    |    |           |           |                                                                    |
| 3727 | ENSG000002054988   |              | 5837.8 | 0.28 |                                    |    |           |           |                                                                    |
| 3737 | ENSG000002064083   |              | 5850.6 | 0.28 |                                    |    |           |           |                                                                    |
| 3774 | ENSG000002070281   |              | 5923.3 | 0.28 |                                    |    |           |           |                                                                    |
| 3792 | ENSG000002031129   |              | 5968.4 | 0.28 |                                    |    |           |           |                                                                    |
| 3801 | ENSG000002033852   |              | 5978.4 | 0.28 |                                    |    |           |           |                                                                    |
| 3808 | ENSG000002086744   |              | 5991.9 | 0.28 |                                    |    |           |           |                                                                    |
| 3819 | ENSG00000205709    |              | 6002.3 | 0.28 |                                    |    |           |           |                                                                    |
| 3832 | ENSG000002054441   |              | 6021.1 | 0.28 |                                    |    |           |           |                                                                    |
| 3881 | ENSG000002031398   |              | 6105.4 | 0.28 |                                    |    |           |           |                                                                    |
| 3883 | ENSG000002021974   |              | 6126   | 0.28 |                                    |    |           |           |                                                                    |
| 1941 | ENSG000002023484   | NUTM2A-AS1   | 3058.6 | 0.27 | antisense                          | 10 | 88963632  | 89102369  | NUTM2A antisense RNA 1                                             |
| 2456 | ENSG000002024855   | OPA1-AS1     | 4632.7 | 0.27 | antisense                          | 3  | 19333638  | 19334528  | OPA1 antisense RNA 1                                               |
| 2498 | ENSG00000178918    | PCBP1-AS1    | 5659.5 | 0.27 | antisense                          | 2  | 70163095  | 70159870  | PCBP1 antisense RNA 1                                              |
| 2526 | ENSG000002088472</ |              |        |      |                                    |    |           |           |                                                                    |

|      |                  |         |      |                                     |    |           |           |                                                                                                                   |
|------|------------------|---------|------|-------------------------------------|----|-----------|-----------|-------------------------------------------------------------------------------------------------------------------|
| 3796 | ENSG00000272469  | 5974.1  | 0.27 | misc RNA                            | 8  | 7474070   | 74746277  | Metazoan signal recognition particle RNA                                                                          |
| 3959 | ENSG00000292427  | 41852.1 | 0.27 | misc RNA                            | 3  | 41858107  | 41858411  | RNA, T52 small nuclear pseudogene 58                                                                              |
| 1924 | ENSG00000245445  | 3058.1  | 0.27 | processed_pseudogene                | 17 | 19574259  | 19576186  | lincRNA OX18 pseudogene                                                                                           |
| 2127 | ENSG000002029877 | 3329.9  | 0.27 | processed_pseudogene                | 7  | 143242779 | 143243828 | phosphoribosylaminoimidazole carboxylase, phosphoribosylaminoimidazole succinocarboxamide synthetase pseudogene 5 |
| 2762 | ENSG000002029800 | 4292.1  | 0.27 | processed_pseudogene                | 13 | 33051411  | 33052978  | ATPase, aminophospholipid transporter, class I, type 8A, member 2 pseudogene 2                                    |
| 3634 | ENSG00000204863  | 5701.7  | 0.27 | processed_pseudogene                | 17 | 37991250  | 37992333  | keratin 8 pseudogene 34                                                                                           |
| 3753 | ENSG000002029427 | 5867.6  | 0.27 | processed_pseudogene                | 13 | 11846529  | 11847028  | ankyrin repeat domain 26 pseudogene 4                                                                             |
| 3770 | ENSG000002029493 | 5912.1  | 0.27 | processed_pseudogene                | 7  | 133412121 | 133412847 | cytochrome c oxidase subunit 1b pseudogene 3                                                                      |
| 3838 | ENSG000002049002 | 6052.5  | 0.27 | processed_pseudogene                | 3  | 114469398 | 114470396 | Y box binding protein 1 pseudogene 3                                                                              |
| 3873 | ENSG00000217159  | 6065.9  | 0.27 | processed_pseudogene                | 6  | 26143300  | 26143681  | L1 (nonretroviral) domain family, member 1 pseudogene 1                                                           |
| 2837 | ENSG000002023709 | 6093.4  | 0.27 | processed_transcript                | 1  | 207974863 | 208042495 | HCG1 tyrosine inducible domain family, member 1A pseudogene 18                                                    |
| 354  | ENSG00000133321  | 8463.3  | 0.27 | protein_coding                      | 11 | 63304281  | 63313934  | retinoic acid receptor responder (tazarotene inducer) 3                                                           |
| 989  | ENSG00000108910  | 1264.3  | 0.27 | protein_coding                      | 8  | 70835766  | 70838367  | chromeline (C-NC motif) receptor 3                                                                                |
| 655  | ENSG00000172543  | 1307.8  | 0.27 | protein_coding                      | 11 | 65647289  | 65651212  | cathespain W                                                                                                      |
| 887  | ENSG00000147443  | 1616.5  | 0.27 | protein_coding                      | 8  | 2176394   | 21771371  | docking protein 2, 58kDa                                                                                          |
| 986  | ENSG000001021237 | 1631.3  | 0.27 | protein_coding                      | 4  | 74849784  | 74849784  | platelet factor 4                                                                                                 |
| 990  | ENSG00000158869  | 1769.6  | 0.27 | protein_coding                      | 1  | 161185024 | 161190489 | Fc fragment of IgE, high affinity L receptor for gamma polypeptide                                                |
| 1007 | ENSG00000134330  | 1792.3  | 0.27 | protein_coding                      | 19 | 47835404  | 47846008  | complement component 5a receptor 2                                                                                |
| 1021 | ENSG00000154656  | 1806.6  | 0.27 | protein_coding                      | 11 | 19102375  | 19102994  | chromosome 11 open reading frame 89                                                                               |
| 1028 | ENSG00000088514  | 1819.3  | 0.27 | protein_coding                      | 7  | 99968153  | 99969719  | paired immunoglobulin-like type 2 receptor alpha                                                                  |
| 1040 | ENSG00000136490  | 1833    | 0.27 | protein_coding                      | 17 | 61773262  | 61778532  | LIM domain containing 2                                                                                           |
| 1072 | ENSG0000017183   | 1874.8  | 0.27 | protein_coding                      | 15 | 98139264  | 98139714  | interferon stimulated nucleotidase gene 20kDa                                                                     |
| 1068 | ENSG00000153064  | 1905.2  | 0.27 | protein_coding                      | 4  | 10233443  | 102695869 | B-cell scaffold protein with ankyrin repeats 1                                                                    |
| 1106 | ENSG00000077238  | 1918    | 0.27 | protein_coding                      | 16 | 27324889  | 27376099  | interleukin 4 receptor                                                                                            |
| 1135 | ENSG00000110769  | 1989.2  | 0.27 | protein_coding                      | 1  | 26905252  | 26901501  | rhomboid protein 58 kDa, 90kDa, polypeptide 1                                                                     |
| 1136 | ENSG00000098570  | 1970.8  | 0.27 | protein_coding                      | 9  | 13050596  | 130541020 | SH2 domain containing 3C                                                                                          |
| 1145 | ENSG00000110985  | 2045.8  | 0.27 | protein_coding                      | 11 | 2318875   | 2324279   | chromosome 11 open reading frame 21                                                                               |
| 1213 | ENSG00000104948  | 2048.3  | 0.27 | protein_coding                      | 19 | 6222169   | 6222169   | lymphocyte cytosolic protein 2, SH2 domain containing tyrosine kinase of 76kDa                                    |
| 1285 | ENSG00000043462  | 2123    | 0.27 | protein_coding                      | 5  | 169673241 | 169725231 | cytochrome c oxidase subunit 1b pseudogene 3                                                                      |
| 1347 | ENSG00000095163  | 2128.5  | 0.27 | protein_coding                      | 5  | 156993089 | 156992808 | cytoplasmic FMRI interacting protein 2                                                                            |
| 1374 | ENSG00000188909  | 2223.7  | 0.27 | protein_coding                      | 17 | 61652163  | 61652163  | mitogen-activated protein kinase kinase kinase 3                                                                  |
| 1241 | ENSG00000198876  | 2259.9  | 0.27 | protein_coding                      | 9  | 34036355  | 34127397  | COB1 and CLU4 associated factor 12                                                                                |
| 1376 | ENSG0000011859   | 2304.3  | 0.27 | protein_coding                      | 6  | 11183311  | 11182881  | neural precursor cell expressed, developmentally down-regulated 9                                                 |
| 1486 | ENSG00000121168  | 2348.1  | 0.27 | protein_coding                      | 21 | 346921    | 346921    | interleukin alpha, beta and omega receptor 3                                                                      |
| 1530 | ENSG00000135842  | 2485.3  | 0.27 | protein_coding                      | 1  | 18475958  | 18483882  | family with sequence similarity 129, member A                                                                     |
| 1548 | ENSG00000131334  | 2500.9  | 0.27 | protein_coding                      | 10 | 12970525  | 12988419  | protein tyrosine phosphatase, receptor type, E                                                                    |
| 1562 | ENSG00000102109  | 2509.3  | 0.27 | protein_coding                      | 12 | 7874577   | 78803469  | ovalbumin binding protein-like B                                                                                  |
| 1626 | ENSG00000153029  | 2605.3  | 0.27 | protein_coding                      | 1  | 19103067  | 191031074 | major histocompatibility complex, class I related                                                                 |
| 1684 | ENSG00000198421  | 2659.2  | 0.27 | protein_coding                      | 4  | 40152673  | 40248887  | ras homolog family member H                                                                                       |
| 1861 | ENSG00000159174  | 2697.1  | 0.27 | protein_coding                      | 11 | 11488245  | 11488245  | polyoma virus beta binding protein 5                                                                              |
| 1861 | ENSG00000189912  | 2697.1  | 0.27 | protein_coding                      | 15 | 31231144  | 31293810  | myoglobin related protein 10                                                                                      |
| 1704 | ENSG00000186501  | 2710.5  | 0.27 | protein_coding                      | 16 | 23847322  | 24231932  | protein kinase C, beta                                                                                            |
| 1752 | ENSG00000186550  | 2767    | 0.27 | protein_coding                      | 20 | 6037076   | 20699131  | Rai1 GTPase activating protein, alpha subunit 2 (catalytic)                                                       |
| 1800 | ENSG00000108715  | 2792    | 0.27 | protein_coding                      | 6  | 79374727  | 79374727  | phosphotyrosine phosphatase 5                                                                                     |
| 1921 | ENSG00000038219  | 3038.1  | 0.27 | protein_coding                      | 4  | 13570362  | 13570362  | ionization of chromosomes in cell division 1 like 1                                                               |
| 2021 | ENSG00000104716  | 3179.8  | 0.27 | protein_coding                      | 8  | 560146    | 560146    | glutamate-rich 1                                                                                                  |
| 2037 | ENSG000001021016 | 3207.9  | 0.27 | protein_coding                      | 11 | 5131975   | 5131975   | muslin-like 8                                                                                                     |
| 2097 | ENSG0000005810   | 3291    | 0.27 | protein_coding                      | 13 | 77618762  | 77601185  | MYC binding protein 2, E3 ubiquitin protein ligase                                                                |
| 2119 | ENSG00000054803  | 3313.1  | 0.27 | protein_coding                      | 11 | 14965428  | 14915408  | yeast (K) specific methyltransferase 2E                                                                           |
| 2238 | ENSG00000186438  | 3407.9  | 0.27 | protein_coding                      | 11 | 74459913  | 74453428  | zinc finger protein 199                                                                                           |
| 2289 | ENSG00000214013  | 3585.7  | 0.27 | protein_coding                      | 15 | 42565431  | 42655484  | glucosylase, alpha, neutral C                                                                                     |
| 2340 | ENSG00000186229  | 3674.8  | 0.27 | protein_coding                      | 19 | 20991110  | 20991122  | zinc finger protein 86                                                                                            |
| 2477 | ENSG00000133626  | 3801.7  | 0.27 | protein_coding                      | 11 | 65122238  | 65125084  | upper transposable element derived 3                                                                              |
| 2487 | ENSG00000256436  | 3817.1  | 0.27 | protein_coding                      | 12 | 11182986  | 11184000  | taste receptor, type 2, member 3                                                                                  |
| 2808 | ENSG00000198099  | 3871    | 0.27 | protein_coding                      | 22 | 31884674  | 32014572  | SH1 homolog, spiracle assembly associated (yeast)                                                                 |
| 2829 | ENSG00000081969  | 3918.3  | 0.27 | protein_coding                      | 16 | 19896468  | 19923299  | zinc finger protein 506                                                                                           |
| 2702 | ENSG00000255374  | 4188.8  | 0.27 | protein_coding                      | 12 | 11243886  | 11244912  | taste receptor, type 2, member 43                                                                                 |
| 2976 | ENSG00000102043  | 4637    | 0.27 | protein_coding                      | 8  | 63444187  | 63415133  | myoblastin related protein 8                                                                                      |
| 2984 | ENSG00000102043  | 4638    | 0.27 | protein_coding                      | 8  | 13525161  | 13525161  | interleukin 1                                                                                                     |
| 3178 | ENSG00000186435  | 5019.3  | 0.27 | protein_coding                      | 11 | 74518784  | 74602405  | X-ray radiation resistance associated 1                                                                           |
| 3784 | ENSG00000119958  | 5932.2  | 0.27 | protein_coding                      | 14 | 75119736  | 75203037  | prospero homeobox 2                                                                                               |
| 3829 | ENSG000001021458 | 6023.8  | 0.27 | protein_coding                      | 1  | 24818250  | 248186188 | olfactory receptor, family 2, subfamily L, member 5                                                               |
| 3939 | ENSG00000181074  | 6189.9  | 0.27 | protein_coding                      | 11 | 5775923   | 5776999   | olfactory receptor, family 52, subfamily N, member 4 (genepseudogene)                                             |
| 3989 | ENSG00000188199  | 6234.1  | 0.27 | protein_coding                      | 10 | 81462963  | 81474437  | KUJ1 family member 2B                                                                                             |
| 2929 | ENSG00000202027  | 6235.7  | 0.27 | rRNA                                | 1  | 15847020  | 15847020  | RNA, 5S nuclear pseudogene 197                                                                                    |
| 1862 | ENSG00000202026  | 2680.7  | 0.27 | snoRNA                              | 5  | 13999252  | 13999377  | Small nuclear RNA, SNORA27                                                                                        |
| 2245 | ENSG00000202027  | 3506    | 0.27 | snoRNA                              | 10 | 27077346  | 27078068  | Small nuclear RNA, SNORA57                                                                                        |
| 1977 | ENSG00000186263  | 4881.1  | 0.27 | snoRNA                              | 4  | 15522615  | 15522615  | Small nuclear RNA                                                                                                 |
| 1861 | ENSG00000202402  | 1315.2  | 0.27 | snoRNA                              | 2  | 19198676  | 19198676  | RNA, U6 small nuclear 95S, pseudogene                                                                             |
| 665  | ENSG000002028848 | 2963.3  | 0.27 | snoRNA                              | 6  | 42631900  | 42632008  | RNA, U6 small nuclear 80S, pseudogene                                                                             |
| 2494 | ENSG00000102118  | 3206    | 0.27 | snoRNA                              | 12 | 12458682  | 12458682  | RNA, U6 small nuclear 80S, pseudogene                                                                             |
| 2303 | ENSG00000252026  | 3623.3  | 0.27 | snoRNA                              | 16 | 68318126  | 68318221  | RNA, U6 small nuclear 12S2, pseudogene                                                                            |
| 2459 | ENSG00000201198  | 3760    | 0.27 | snoRNA                              | 12 | 57890079  | 57890196  | RNA, U6 small nuclear 87S, pseudogene                                                                             |
| 2447 | ENSG00000181818  | 3821.1  | 0.27 | snoRNA                              | 18 | 58639623  | 58639623  | RNA, U6 subnuclear RNA                                                                                            |
| 2506 | ENSG00000207508  | 3887.1  | 0.27 | snoRNA                              | 1  | 40643515  | 40643521  | RNA, U6 small nuclear 1237, pseudogene                                                                            |
| 2844 | ENSG00000202788  | 4089.9  | 0.27 | snoRNA                              | 3  | 62585882  | 62585899  | RNA, U6 small nuclear 85S, pseudogene                                                                             |
| 1151 | ENSG00000201228  | 4208.3  | 0.27 | snoRNA                              | 3  | 142139037 | 142139114 | RNA, U1 small nuclear 100, pseudogene                                                                             |
| 3764 | ENSG00000251967  | 5888.8  | 0.27 | snoRNA                              | 10 | 11965180  | 11965287  | RNA, U6 small nuclear 109S, pseudogene                                                                            |
| 3036 | ENSG00000211767  | 1137.9  | 0.27 | TR_V_gene                           | 7  | 142484531 | 142484579 | T cell receptor beta joining 2-3                                                                                  |
| 2162 | ENSG0000021869   | 3427.3  | 0.27 | TR_V_gene                           | 14 | 22924241  | 22924288  | T cell receptor delta joining 4                                                                                   |
| 576  | ENSG00000111721  | 1206.8  | 0.27 | TR_V_gene                           | 7  | 142180515 | 142181016 | T cell receptor beta variable 6-5                                                                                 |
| 701  | ENSG00000211695  | 1391.1  | 0.27 | TR_V_gene                           | 7  | 38356618  | 38356462  | T cell receptor gamma variable 9                                                                                  |
| 3744 | ENSG00000204578  | 5863.1  | 0.27 | TR_V_pseudogene                     | 7  | 142349249 | 142349999 | T cell receptor beta variable 22-1 (pseudogene)                                                                   |
| 4000 | ENSG00000204574  | 3759.8  | 0.27 | transcribed_processed_pseudo_gene   | 12 | 11229366  | 11231770  | taste receptor, type 2, member 64 pseudogene                                                                      |
| 3996 | ENSG00000170858  | 6262    | 0.27 | transcribed_processed_pseudo_gene   | 19 | 56219700  | 56224965  | leukocyte immunoglobulin-like receptor pseudogene 2                                                               |
| 4130 | ENSG00000125997  | 6441.2  | 0.27 | transcribed_unprocessed_pseudo_gene | 20 | 31935526  | 31942250  | BPI fold containing family B, member 9, pseudogene                                                                |
| 4189 | ENSG00000241527  | 6519.7  | 0.27 | unitary_pseudogene                  | 22 | 19019077  | 19022077  | carbonic anhydrase XV, pseudogene 1                                                                               |
| 2441 | ENSG00000253328  | 3816.2  | 0.27 | unprocessed_pseudogene              | 8  | 103254268 | 103254847 | SUMO2 pseudogene 19                                                                                               |
| 3975 | ENSG00000202846  | 6282.2  | 0.27 | unprocessed_pseudogene              | 11 | 5587908   | 5588988   | olfactory receptor, family 52, subfamily I, member 1 pseudogene                                                   |
| 4000 | ENSG00000202021  | 6294.1  | 0.27 | unprocessed_pseudogene              | 1  | 16843862  | 16843862  | Rev1 containing nucleotidase 1 pseudogene                                                                         |
| 4042 | ENSG00000238024  | 6319.4  | 0.27 | unprocessed_pseudogene              | 6  | 29909898  | 29981382  | DEAD (Asp-Glu-Ala-Asp) box polypeptide 39B pseudogene 2                                                           |
| 4062 | ENSG00000201241  | 6319.9  | 0.27 | unprocessed_pseudogene              | 19 | 15774916  | 15780636  | cytochrome P450, family 4, subfamily F, polypeptide 10, pseudogene                                                |
| 1376 | ENSG000002028618 | 2358.7  | 0.27 |                                     |    |           |           |                                                                                                                   |
| 1423 | ENSG00000202342  | 2359.9  | 0.27 |                                     |    |           |           |                                                                                                                   |
| 1904 | ENSG00000204611  | 2422.4  | 0.27 |                                     |    |           |           |                                                                                                                   |
| 1618 | ENSG00000208745  | 2597.1  | 0.27 |                                     |    |           |           |                                                                                                                   |
| 1720 | ENSG00000238144  | 2739.4  | 0.27 |                                     |    | 169231843 | 169231846 | Small nuclear RNA U13                                                                                             |
| 1919 | ENSG00000216302  | 2910    | 0.27 |                                     |    |           |           |                                                                                                                   |
| 1899 | ENSG000002089051 | 3002    | 0.27 |                                     |    |           |           |                                                                                                                   |
| 1920 | ENSG00000238975  | 3025.5  | 0.27 |                                     |    | 113195210 | 113195310 | Small nuclear RNA U13                                                                                             |
| 1903 | ENSG00000241893  | 3105.5  | 0.27 |                                     |    |           |           |                                                                                                                   |
| 1994 | ENSG00000252056  | 3151    | 0.27 |                                     |    | 238028688 | 238028737 | RNA, U6 small nuclear 2, pseudogene                                                                               |
| 2016 | ENSG00000232184  | 3173.5  | 0.27 |                                     |    |           |           |                                                                                                                   |
| 2055 | ENSG00000251869  | 3237    | 0.27 |                                     |    |           |           |                                                                                                                   |
| 2153 | ENSG00000231964  | 3368.8  | 0.27 |                                     |    |           |           |                                                                                                                   |
| 21   |                  |         |      |                                     |    |           |           |                                                                                                                   |



|      |                  |              |       |                      |                      |           |           |           |                                                                          |
|------|------------------|--------------|-------|----------------------|----------------------|-----------|-----------|-----------|--------------------------------------------------------------------------|
| 3105 | ENSG00000265887  | 48513        | 0.27  |                      |                      |           |           |           |                                                                          |
| 3102 | ENSG00000265888  | 5008         | 0.27  |                      |                      |           |           |           |                                                                          |
| 3212 | ENSG00000229448  | 50397        | 0.27  |                      |                      |           |           |           |                                                                          |
| 3260 | ENSG00000229832  | 51239        | 0.27  |                      |                      |           |           |           |                                                                          |
| 3268 | ENSG00000265878  | 51306        | 0.27  |                      |                      |           |           |           |                                                                          |
| 3303 | ENSG00000244747  | 51367        | 0.27  |                      |                      |           |           |           |                                                                          |
| 3328 | ENSG00000253358  | 52394        | 0.27  |                      |                      |           |           |           |                                                                          |
| 3342 | ENSG00000244034  | 52555        | 0.27  |                      |                      |           |           |           |                                                                          |
| 3375 | ENSG00000239649  | 53174        | 0.27  | 10                   | 103862019            | 103862089 |           |           | Small nucleolar RNA SNORD112                                             |
| 3399 | ENSG00000265875  | 53603        | 0.27  |                      |                      |           |           |           |                                                                          |
| 3445 | ENSG00000232557  | 54828        | 0.27  |                      |                      |           |           |           |                                                                          |
| 3484 | ENSG00000269010  | 5492         | 0.27  |                      |                      |           |           |           |                                                                          |
| 3489 | ENSG00000271760  | 54939        | 0.27  |                      |                      |           |           |           |                                                                          |
| 3476 | ENSG00000246130  | 54698        | 0.27  |                      |                      |           |           |           |                                                                          |
| 3540 | ENSG00000238918  | 55599        | 0.27  | 10                   | 73085085             | 73085188  |           |           | Small nucleolar RNA U13                                                  |
| 3542 | ENSG00000229351  | 55606        | 0.27  |                      |                      |           |           |           |                                                                          |
| 3551 | ENSG00000232528  | 55743        | 0.27  |                      |                      |           |           |           |                                                                          |
| 3573 | ENSG00000232126  | 56059        | 0.27  |                      |                      |           |           |           |                                                                          |
| 3575 | ENSG00000251864  | 56035        | 0.27  |                      |                      |           |           |           |                                                                          |
| 3582 | ENSG00000281228  | 56127        | 0.27  |                      |                      |           |           |           |                                                                          |
| 3589 | ENSG00000229628  | 56271        | 0.27  |                      |                      |           |           |           |                                                                          |
| 3591 | ENSG00000294520  | 56385        | 0.27  |                      |                      |           |           |           |                                                                          |
| 3603 | ENSG00000237168  | 56494        | 0.27  |                      |                      |           |           |           |                                                                          |
| 3622 | ENSG00000232880  | 56800        | 0.27  |                      |                      |           |           |           |                                                                          |
| 3629 | ENSG00000232469  | 56887        | 0.27  |                      |                      |           |           |           |                                                                          |
| 3676 | ENSG00000255142  | 57538        | 0.27  |                      |                      |           |           |           |                                                                          |
| 3681 | ENSG00000219554  | 57694        | 0.27  |                      |                      |           |           |           |                                                                          |
| 3688 | ENSG00000230558  | 57861        | 0.27  |                      |                      |           |           |           |                                                                          |
| 3709 | ENSG00000233029  | 58139        | 0.27  |                      |                      |           |           |           |                                                                          |
| 3726 | ENSG00000271258  | 58373        | 0.27  |                      |                      |           |           |           |                                                                          |
| 3758 | ENSG00000255154  | 58529        | 0.27  |                      |                      |           |           |           |                                                                          |
| 3771 | ENSG00000238091  | 59034        | 0.27  | 7                    | 5911386              | 5911381   |           |           | RNA 75L cytoplasmic 556, pseudogene                                      |
| 3781 | ENSG00000238552  | 59122        | 0.27  | 2                    | 114204962            | 114205429 |           |           | HDCM45P, Uncharacterized protein                                         |
| 3803 | ENSG00000238947  | 59411        | 0.27  | 17                   | 80099539             | 80099649  |           |           | Small nucleolar RNA U13                                                  |
| 3802 | ENSG00000232752  | 59785        | 0.27  |                      |                      |           |           |           |                                                                          |
| 3803 | ENSG00000236020  | 59789        | 0.27  |                      |                      |           |           |           |                                                                          |
| 3810 | ENSG00000236190  | 59931        | 0.27  |                      |                      |           |           |           |                                                                          |
| 3812 | ENSG00000250877  | 59938        | 0.27  |                      |                      |           |           |           |                                                                          |
| 3821 | ENSG00000236871  | 60043        | 0.27  |                      |                      |           |           |           |                                                                          |
| 3822 | ENSG00000230751  | 60048        | 0.27  |                      |                      |           |           |           |                                                                          |
| 3830 | ENSG00000280012  | 60176        | 0.27  |                      |                      |           |           |           |                                                                          |
| 3838 | ENSG00000267096  | 60594        | 0.27  |                      |                      |           |           |           |                                                                          |
| 3861 | ENSG00000282715  | 60715        | 0.27  |                      |                      |           |           |           |                                                                          |
| 3870 | ENSG00000265128  | 60883        | 0.27  |                      |                      |           |           |           |                                                                          |
| 3883 | ENSG00000265995  | 61065        | 0.27  |                      |                      |           |           |           |                                                                          |
| 3886 | ENSG00000265968  | 61112        | 0.27  |                      |                      |           |           |           |                                                                          |
| 3888 | ENSG00000237734  | 61145        | 0.27  |                      |                      |           |           |           |                                                                          |
| 3922 | ENSG00000240881  | 61819        | 0.27  |                      |                      |           |           |           |                                                                          |
| 3937 | ENSG00000240496  | 61867        | 0.27  |                      |                      |           |           |           |                                                                          |
| 3942 | ENSG00000219284  | 61927        | 0.27  |                      |                      |           |           |           |                                                                          |
| 3944 | ENSG00000238902  | 61988        | 0.27  |                      |                      |           |           |           |                                                                          |
| 3971 | ENSG00000232210  | 62538        | 0.27  | 7                    | 7415796              | 7415680   |           |           | prohibitin pseudogene 15                                                 |
| 3982 | ENSG00000232022  | 62483        | 0.27  |                      |                      |           |           |           |                                                                          |
| 4013 | ENSG00000238495  | 62747        | 0.27  |                      |                      |           |           |           |                                                                          |
| 4024 | ENSG00000234372  | 62826        | 0.27  |                      |                      |           |           |           |                                                                          |
| 4026 | ENSG00000280723  | 62841        | 0.27  |                      |                      |           |           |           |                                                                          |
| 4068 | ENSG00000230228  | 64133        | 0.27  |                      |                      |           |           |           |                                                                          |
| 4100 | ENSG00000230461  | 64133        | 0.27  |                      |                      |           |           |           |                                                                          |
| 4104 | ENSG00000233716  | 64134        | 0.27  |                      |                      |           |           |           |                                                                          |
| 4149 | ENSG00000248356  | 64811        | 0.27  |                      |                      |           |           |           |                                                                          |
| 1946 | ENSG00000230355  | 29641        | 0.26  |                      |                      |           |           |           |                                                                          |
| 3280 | ENSG00000231177  | LINC00852    | 51471 | 0.26                 | antisense            | X         | 30718115  | 30742291  | GK antisense RNA 1                                                       |
| 3762 | ENSG00000232131  | LINC00852    | 51471 | 0.26                 | antisense            | 3         | 10326103  | 10327430  | long intergenic non-protein coding RNA 852                               |
| 1113 | ENSG00000252724  | TMPRSS4-AS1  | 54824 | 0.26                 | antisense            | 6         | 128119002 | 128140034 | NCX4 antisense RNA 1                                                     |
| 4121 | ENSG00000230588  | LINC00852    | 51471 | 0.26                 | antisense            | X         | 11788467  | 117870508 | TMPRSS4 antisense RNA 1                                                  |
| 1757 | ENSG00000204163  | LINC00877    | 29042 | 0.26                 | lincRNA              | X         | 69383692  | 69385056  | IGFBP1 antisense RNA 1                                                   |
| 3808 | ENSG00000230724  | LINC00877    | 29042 | 0.26                 | lincRNA              | 3         | 72044451  | 72041716  | long intergenic non-protein coding RNA 877                               |
| 4155 | ENSG00000237679  | LINC00877    | 64713 | 0.26                 | lincRNA              | 13        | 127115    | 130612    | long intergenic non-protein coding RNA 1001                              |
| 3500 | ENSG00000294295  | MIR3922      | 55099 | 0.26                 | miRNA                | 12        | 31377343  | 31384782  | long intergenic non-protein coding RNA 398                               |
| 3855 | ENSG00000245338  | MIR5206      | 60078 | 0.26                 | miRNA                | 13        | 104985411 | 104985494 | miR5206 3922                                                             |
| 2810 | ENSG00000200985  | 3695         | 0.26  | misc. RNA            | 11                   | 13708907  | 13708205  |           | miscRNA 3708                                                             |
| 2932 | ENSG00000218330  | 38904        | 0.26  | misc. RNA            | 9                    | 100977972 | 100978078 |           | Y RNA                                                                    |
| 3948 | ENSG00000230213  | 40288        | 0.26  | misc. RNA            | 5                    | 118400332 | 118400113 |           | Y RNA                                                                    |
| 2735 | ENSG00000202025  | 42515        | 0.26  | misc. RNA            | 11                   | 75542250  | 75543388  |           | Y RNA                                                                    |
| 3442 | ENSG00000238386  | 54018        | 0.26  | misc. RNA            | 10                   | 6287894   | 6287794   |           | Y RNA                                                                    |
| 3484 | ENSG00000254010  | 56274        | 0.26  | misc. RNA            | 15                   | 8532673   | 8532674   |           | Y RNA                                                                    |
| 4057 | ENSG00000239247  | 63505        | 0.26  | misc. RNA            | 4                    | 2317926   | 2318233   |           | RNA 75L, cytoplasmic 589, pseudogene                                     |
| 4075 | ENSG00000230298  | 63745        | 0.26  | misc. RNA            | 1                    | 27581955  | 27582028  |           | Y RNA                                                                    |
| 4255 | ENSG00000230298  | 63745        | 0.26  | misc. RNA            | 10                   | 2517451   | 2517741   |           | RNA 75L small nuclear pseudogene 241                                     |
| 2211 | ENSG00000249225  | 34253        | 0.26  | processed_pseudogene | 12                   | 12065263  | 12065594  |           | ribosomal protein S20 pseudogene 31                                      |
| 2197 | ENSG00000176268  | 3462         | 0.26  | processed_pseudogene | 13                   | 41437735  | 41438038  |           | cytochrome c, somatic pseudogene 34                                      |
| 2427 | ENSG00000292026  | 38073        | 0.26  | processed_pseudogene | 15                   | 10100734  | 10109159  |           | protein kinase, X-linked, pseudogene 1                                   |
| 2946 | ENSG00000234981  | 2574         | 0.26  | processed_pseudogene | 15                   | 12662145  | 12660995  |           | phosphatidylinositol glycan anchor biosynthesis, class 4, pseudogene 2   |
| 3290 | ENSG00000249947  | 51612        | 0.26  | processed_pseudogene | 5                    | 11220791  | 11222142  |           | X-box binding protein 1 pseudogene 1                                     |
| 3537 | ENSG00000231522  | 55533        | 0.26  | processed_pseudogene | 2                    | 61143954  | 61165184  |           | non-PQJ domain containing, octamer-binding pseudogene 2                  |
| 3815 | ENSG00000230215  | 60111        | 0.26  | processed_pseudogene | 6                    | 7831940   | 7831978   |           | heat shock 10kDa protein 1 pseudogene 25                                 |
| 3915 | ENSG00000219881  | 61475        | 0.26  | processed_pseudogene | 6                    | 70456763  | 70456763  |           | glyceraldehyde 3-phosphate dehydrogenase pseudogene 42                   |
| 3950 | ENSG00000252141  | 6190         | 0.26  | processed_pseudogene | 11                   | 398411    | 395407    |           | heterogeneous nuclear ribonucleoprotein A1 pseudogene 76                 |
| 4008 | ENSG00000230436  | 62725        | 0.26  | processed_pseudogene | 11                   | 84389804  | 84387723  |           | collet-coiled-coiled-coiled-beta domain containing 2 pseudogene 5        |
| 4038 | ENSG00000213384  | 63174        | 0.26  | processed_pseudogene | 20                   | 20460354  | 20460608  |           | eukaryotic translation initiation factor 4E family member 2 pseudogene 1 |
| 4040 | ENSG00000231087  | FDRP2        | 63191 | 0.26                 | processed_pseudogene | 7         | 76997514  | 76998087  | laminyl dihydrofolate synthase pseudogene 7                              |
| 4056 | ENSG00000230380  | 63204        | 0.26  | processed_pseudogene | 7                    | 190962497 | 190964569 |           | laminyl dihydrofolate synthase pseudogene 2                              |
| 4111 | ENSG00000231981  | 64319        | 0.26  | processed_pseudogene | 20                   | 62921540  | 62924351  |           | caspasic transcriptional repressor pseudogene 4                          |
| 4176 | ENSG00000214272  | 64620        | 0.26  | processed_pseudogene | 13                   | 99601973  | 99602701  |           | ribosomal protein L7-like 1 pseudogene 12                                |
| 4178 | ENSG00000240305  | 64936        | 0.26  | processed_pseudogene | 6                    | 160133833 | 160135017 |           | antigenic factor with G patch and FHA domain 1 pseudogene 1              |
| 4184 | ENSG00000241527  | 65241        | 0.26  | processed_pseudogene | 8                    | 12063266  | 12063398  |           | heterogeneous nuclear ribonucleoprotein H1 pseudogene 1                  |
| 2049 | ENSG00000231620  | MIR5A        | 65241 | 0.26                 | processed_pseudogene | 13        | 20621209  | 20620958  | ectonucleotide cyrophosphatase/phosphodiesterase 7 pseudogene 12         |
| 3510 | ENSG00000236088  | LINC01050874 | 55254 | 0.26                 | processed_transcript | 17        | 13659796  | 13978212  | cleaved in lymphocytes, nuclear 2 (non-coding coding)                    |
| 838  | ENSG00000170989  | SLFR1        | 12871 | 0.26                 | protein_coding       | 1         | 101702444 | 101707074 | COX10 antisense RNA 1                                                    |
| 833  | ENSG00000216952  | GLR1         | 16941 | 0.26                 | protein_coding       | 1         | 65472952  | 65494113  | sphingosine 1-phosphate receptor 1                                       |
| 837  | ENSG00000122684  | GLR2         | 16888 | 0.26                 | protein_coding       | 9         | 36136732  | 36136910  | GLI pathogenesis-related 2                                               |
| 912  | ENSG00000385285  | FCNT1        | 17465 | 0.26                 | protein_coding       | 9         | 137891431 | 137892699 | ficollin (collagen/hyalinogen domain containing) 1                       |
| 1008 | ENSG00000218473  | CTD1         | 17551 | 0.26                 | protein_coding       | 1         | 958149707 | 958145886 | CD14 molecule                                                            |
| 1073 | ENSG00000198188  | HSD17B11     | 17863 | 0.26                 | protein_coding       | 4         | 88257762  | 88122538  | hydroxysteroid (17-beta) dehydrogenase 11                                |
| 1097 | ENSG00000192759  | GFP          | 1805  | 0.26                 | protein_coding       | X         | 47483812  | 47489704  | complement factor properdin                                              |
| 1206 | ENSG00000230737  | RNF168       | 20743 | 0.26                 | protein_coding       | 16        | 98739003  | 98737206  | ring finger protein 168                                                  |
| 1234 | ENSG00000104680  | LEPROTL1     | 21048 | 0.26                 | protein_coding       | 8         | 29852914  | 3004724   | leptin receptor overlapping transcript-like 1                            |
| 1259 | ENSG00000192335  | APOL2        | 21279 | 0.26                 | protein_coding       | 22        | 38622256  | 38638000  | apolipoprotein L 2                                                       |
| 1342 | ENSG00000191895  | TRAC         | 22062 | 0.26                 | protein_coding       | 17        | 76139049  | 76139049  | transmembrane channel-like 8                                             |
| 1357 | ENSG00000140878  | ITGA3        | 22737 | 0.26                 | protein_coding       | 16        | 31356455  | 31394318  | integrin, alpha X (complement component 3 receptor 4 subunit)            |
| 1389 | ENSG00000186071  | CDC80B       | 23162 | 0.26                 | protein_coding       | 11        | 64117695  | 64125006  | collet-coiled-coiled-coiled-beta domain containing 8B8                   |
| 1400 | ENSG00000231628  | ARHGAP1      | 23373 | 0.26                 | protein_coding       | 19        | 52391228  | 52394302  | Rho guanine nucleotide exchange factor (GEF) 1                           |
| 1408 | ENSG000002008130 | NADK         | 23466 | 0.26                 | protein_coding       | 1         | 1682671   | 1711896   | NAD kinase                                                               |
| 1449 | ENSG00000129675  | ARHGAP8      | 23959 | 0.26                 | protein_coding       | X         | 13574706  | 13584247  | Rac/Cdc42 guanine nucleotide exchange factor (GEF) 6                     |
| 1542 | ENSG00000203585  | NAMPT        | 24582 | 0.26                 | protein_coding       | 7         | 10588871  | 10590772  | nicotinamide phosphoribosyltransferase                                   |
| 1569 | ENSG00000153565  | IFI16        | 25233 | 0.26                 | protein_coding       | 1         | 15899758  | 15904245  | interferon, gamma-inducible protein 16                                   |
| 1579 | ENSG00000171789  | RPS8K3       | 25344 | 0.26                 | protein_coding       | X         | 20180269  | 20285523  | ribosomal protein S8 kinase, 80kDa, polypeptide 3                        |
| 1673 | ENSG00000231514  | UBXD8        | 25384 | 0.26                 | protein_coding       | 8         | 6932623   | 69384060  | UBX domain protein 28                                                    |
| 1699 | ENSG00000188918  | INPP5D       | 25515 | 0.26                 | protein_coding       | 2         | 23394477  | 234119548 | inositol polyphosphate-5-phosphatase, 145kDa                             |
| 1698 | ENSG00000205413  | SAMD9        | 25599 | 0.26                 | protein_coding       | 7         | 9272829   | 9274328   | sterile alpha motif domain containing 9                                  |
| 1851 | ENSG00000185991  | NELF2L1      | 25952 | 0.26                 | protein_coding       | 13        | 59914961  | 59915003  | NEDA4 binding protein 2-like 1                                           |
| 1857 | ENSG00000209303  | ERAP1        | 26174 | 0.26                 | protein_coding       | 12        | 96986821  | 96915383  | endoplasmic reticulum aminopeptidase 1                                   |
| 1728 | ENSG00000108799  | EDH1         | 27582 | 0.26                 | protein_coding       | 17        | 40852293  | 40897071  | enhancer of zeste homolog 1 (Drosophila)                                 |
| 1738 | ENSG00000135691  | ACTR1        | 27685 | 0.26                 | protein_coding       | 2         | 114647507 | 114726173 | ARF3 activator-binding protein 3 homolog (yeast)                         |
| 1733 | ENSG00000193943  | CT4orf109    | 28144 | 0.26                 | protein_coding       | 14        | 91549927  | 91691178  | chromosome 4 open reading frame 109                                      |
| 1777 | ENSG00000170802  | FOXN2        | 28447 | 0.26                 | protein_coding       | 2         | 48541776  | 48604433  | forkhead box N2                                                          |
|      |                  |              |       |                      |                      |           |           |           |                                                                          |

|      |                  |              |       |      |                                    |    |           |           |                                                                                                |
|------|------------------|--------------|-------|------|------------------------------------|----|-----------|-----------|------------------------------------------------------------------------------------------------|
| 2181 | ENSG00000132549  | VPS13B       | 34991 | 0.26 | protein_coding                     | 8  | 100025484 | 100898008 | vacuolar protein sorting 13 homolog B (yeast)                                                  |
| 2221 | ENSG00000205997  | DICER1       | 34173 | 0.26 | protein_coding                     | 14 | 95512565  | 95512447  | disc 1 (Drosophila) type II                                                                    |
| 2233 | ENSG00000174485  | DENND4A      | 34823 | 0.26 | protein_coding                     | 15 | 69590384  | 69046311  | DENND4D domain containing 4A                                                                   |
| 2254 | ENSG00000176763  | RUFY1        | 3524  | 0.26 | protein_coding                     | 5  | 178977559 | 17907027  | RUN and FYVE domain containing 1                                                               |
| 2262 | ENSG00000156342  | CC2D2A       | 35733 | 0.26 | protein_coding                     | 4  | 15417489  | 15603180  | coiled-coil and C2 domain containing 2A                                                        |
| 2287 | ENSG00000114843  | NKX1         | 35265 | 0.26 | protein_coding                     | 7  | 62452156  | 62902227  | natural killer-killer recognition sequence 2                                                   |
| 2333 | ENSG00000267860  | ZNF224       | 36612 | 0.26 | protein_coding                     | 19 | 44598452  | 44612479  | zinc finger protein 224                                                                        |
| 2515 | ENSG00000176436  | SYNE3        | 39003 | 0.26 | protein_coding                     | 14 | 69843831  | 69842173  | spectrin repeat containing, nuclear envelope family member 3                                   |
| 2520 | ENSG00000272916  | NBST2        | 39084 | 0.26 | protein_coding                     | 10 | 76586072  | 75714409  | Bifunctional heparan sulfite N-deacetylase/sulfotransferase 2                                  |
| 2521 | ENSG00000115760  | BIRC6        | 39011 | 0.26 | protein_coding                     | 2  | 92562096  | 92643966  | baculoviral IAP repeat containing 6                                                            |
| 2531 | ENSG00000125595  | BKZ2B        | 36534 | 0.26 | protein_coding                     | 2  | 160175490 | 160472603 | broctonomin adjacent to zinc finger domain 2B                                                  |
| 2568 | ENSG00000191758  | ZNF81        | 42654 | 0.26 | protein_coding                     | X  | 47681801  | 47681801  | zinc finger protein 81                                                                         |
| 2665 | ENSG00000116978  | ATAD2B       | 41234 | 0.26 | protein_coding                     | 2  | 23971534  | 24149984  | ATPase family, AAA domain containing 2B                                                        |
| 2677 | ENSG00000126070  | AGO3         | 41514 | 0.26 | protein_coding                     | 1  | 36396319  | 36358101  | argonaute HSC catalytic component 3                                                            |
| 2812 | ENSG00000157662  | ZNF701       | 43171 | 0.26 | protein_coding                     | 19 | 33069075  | 33069027  | zinc finger protein 701                                                                        |
| 3007 | ENSG00000173878  | SPDY6E       | 46788 | 0.26 | protein_coding                     | 7  | 10220772  | 10220147  | speedy/RINGO cell cycle regulator family member E2B                                            |
| 3097 | ENSG00000197962  | CLEC4E       | 57946 | 0.26 | protein_coding                     | 12 | 10183276  | 10218565  | C-type lectin domain family 9, member A                                                        |
| 3796 | ENSG00000204709  | ZNF644       | 59173 | 0.26 | protein_coding                     | 19 | 12636184  | 12662356  | zinc finger protein 564                                                                        |
| 3906 | ENSG00000267178  | ZNF763       | 61327 | 0.26 | protein_coding                     | 19 | 12035890  | 12090105  | Uncharacterized protein. Zinc finger protein 763                                               |
| 4068 | ENSG00000225840  | LOC101928448 | 63675 | 0.26 | protein_coding                     | 5  | 55807394  | 55912059  | Homo sapiens uncharacterized LOC101928448 (LOC101928448), mRNA                                 |
| 4099 | ENSG00000111023  | DR56B1       | 64503 | 0.26 | protein_coding                     | 11 | 5757681   | 57575768  | olfactory receptor, family 5c, subfamily B, member 1                                           |
| 4163 | ENSG00000197272  | IL27         | 6481  | 0.26 | protein_coding                     | 16 | 28510683  | 28523372  | interleukin 27                                                                                 |
| 4177 | ENSG00000273398  | IL27         | 65013 | 0.26 | protein_coding                     | 2  | 68356370  | 68488362  | Calciumium subunit B type 1                                                                    |
| 4205 | ENSG00000100032  | SEC14L3      | 65386 | 0.26 | protein_coding                     | 22 | 30643945  | 30690908  | SEC14-like (S. cerevisiae)                                                                     |
| 4401 | ENSG00000196396  | OR4L8        | 68521 | 0.26 | protein_coding                     | 1  | 24811260  | 248113098 | olfactory receptor, family 2, subfamily L, member 8 (genepseudogene)                           |
| 2476 | ENSG00000251785  |              | 38803 | 0.26 | rRNA                               | 1  | 78980554  | 78980507  | RNA, SS rribosomal pseudogene 20                                                               |
| 2569 | ENSG00000228862  |              | 40254 | 0.26 | snRNA                              | 2  | 20786606  | 20786768  | KL7 (ribosomal transcript 1 (non-protein coding))                                              |
| 1735 | ENSG00000228866  |              | 27673 | 0.26 | snRNA                              | 7  | 37390747  | 37390846  | RNA, U6 small nuclear 58S, pseudogene                                                          |
| 2148 | ENSG00000252155  |              | 33625 | 0.26 | snRNA                              | 1  | 25667462  | 25667525  | RNA, U6 small nuclear 1171, pseudogene                                                         |
| 2230 | ENSG00000227263  |              | 34072 | 0.26 | snRNA                              | 1  | 11317341  | 11317346  | RNA, U4 small nuclear 70, pseudogene                                                           |
| 2259 | ENSG00000201076  |              | 35334 | 0.26 | snRNA                              | 2  | 61138438  | 61138577  | RNA, U4 small nuclear 51, pseudogene                                                           |
| 2289 | ENSG00000272359  |              | 37094 | 0.26 | snRNA                              | 3  | 196474063 | 196474195 | RNA, U4 splicesome RNA                                                                         |
| 2375 | ENSG00000211681  |              | 43413 | 0.26 | snRNA                              | 15 | 13202728  | 13203739  | RNA, U6 small nuclear 177, pseudogene                                                          |
| 2463 | ENSG00000252113  |              | 38774 | 0.26 | snRNA                              | X  | 44744751  | 44744811  | RNA, U6 small nuclear 523, pseudogene                                                          |
| 2804 | ENSG00000202682  |              | 40431 | 0.26 | snRNA                              | 3  | 176843905 | 176843908 | RNA, U6 small nuclear 681, pseudogene                                                          |
| 2798 | ENSG00000202682  |              | 43413 | 0.26 | snRNA                              | 15 | 90429717  | 90429863  | RNA, U6 small nuclear 1111, pseudogene                                                         |
| 3515 | ENSG00000206915  |              | 52177 | 0.26 | snRNA                              | 3  | 57534555  | 57534672  | RNA, U6 small nuclear 483, pseudogene                                                          |
| 3454 | ENSG00000252994  |              | 54413 | 0.26 | snRNA                              | 10 | 104563686 | 104563788 | RNA, U6 small nuclear 1231, pseudogene                                                         |
| 3500 | ENSG00000244117  |              | 61678 | 0.26 | snRNA                              | 16 | 8790313   | 8790374   | RNA, U7 small nuclear 63, pseudogene                                                           |
| 3905 | ENSG00000203170  |              | 61307 | 0.26 | snRNA                              | 2  | 18744633  | 18744734  | RNA, U6 small nuclear 1215, pseudogene                                                         |
| 769  | ENSG00000211829  |              | 14603 | 0.26 | TR, C_gene                         | 14 | 22931924  | 22934779  | T cell receptor delta constant                                                                 |
| 8010 | ENSG00000269689  |              | 58058 | 0.26 | TR, C_gene                         | 14 | 22918058  | 22918117  | T cell receptor delta diversity 3                                                              |
| 1722 | ENSG00000211862  |              | 27415 | 0.26 | TR, J_gene                         | 14 | 22985251  | 22985309  | T cell receptor alpha joining 27                                                               |
| 1796 | ENSG00000211846  |              | 28745 | 0.26 | TR, J_gene                         | 14 | 22964886  | 22964949  | T cell receptor alpha joining 43                                                               |
| 2599 | ENSG00000211818  |              | 40353 | 0.26 | TR, J_gene                         | 14 | 22717939  | 22717939  | T cell receptor alpha variable 39                                                              |
| 1918 | ENSG000002048124 |              | 30029 | 0.26 | transcribed_unprocessed_pseudogene | 16 | 21807361  | 21831731  | RNA polymerase I transcription factor homolog (S. cerevisiae) pseudogene 1                     |
| 2467 | ENSG00000241350  |              | 34653 | 0.26 | transcribed_unprocessed_pseudogene | 7  | 76640868  | 76641570  | postmeiotic segregation increased 2 pseudogene 11                                              |
| 2523 | ENSG00000272696  |              | 39136 | 0.26 | unprocessed_pseudogene             | 7  | 63815456  | 63816577  | tripartite motif containing 80 pseudogene 18                                                   |
| 4003 | ENSG00000204198  |              | 62072 | 0.26 | unprocessed_pseudogene             | 8  | 80118307  | 80144308  | ectonucleoside diphosphate kinase/phosphotransferase 2 pseudogene 1                            |
| 4007 | ENSG00000217456  |              | 62017 | 0.26 | unprocessed_pseudogene             | 1  | 24813043  | 248138955 | olfactory receptor, family 2, subfamily L, member 9 pseudogene                                 |
| 4123 | ENSG00000246288  |              | 64358 | 0.26 | unprocessed_pseudogene             | 22 | 17126585  | 17127471  | solute carrier family 25 (mitochondrial carrier, ornithine transporter) member 15 pseudogene 5 |
| 4337 | ENSG00000252023  | OR7E2P       | 67342 | 0.26 | unprocessed_pseudogene             | 11 | 86568101  | 86568889  | olfactory receptor, family 7, subfamily E, member 2 pseudogene                                 |
| 549  | ENSG00000202986  |              | 11923 | 0.26 | unprocessed_pseudogene             | 11 | 11923     | 11923     |                                                                                                |
| 679  | ENSG00000266562  |              | 13377 | 0.26 | unprocessed_pseudogene             | 11 | 13377     | 13377     |                                                                                                |
| 963  | ENSG00000272760  |              | 17048 | 0.26 | unprocessed_pseudogene             | 11 | 17048     | 17048     |                                                                                                |
| 1217 | ENSG00000273348  |              | 20515 | 0.26 | unprocessed_pseudogene             | 11 | 20515     | 20515     |                                                                                                |
| 1419 | ENSG00000259884  |              | 23653 | 0.26 | unprocessed_pseudogene             | 11 | 23653     | 23653     |                                                                                                |
| 1474 | ENSG00000287731  |              | 24119 | 0.26 | unprocessed_pseudogene             | 11 | 24119     | 24119     |                                                                                                |
| 1480 | ENSG00000273468  |              | 24455 | 0.26 | unprocessed_pseudogene             | 11 | 24455     | 24455     |                                                                                                |
| 1724 | ENSG00000272316  |              | 27489 | 0.26 | unprocessed_pseudogene             | 11 | 27489     | 27489     |                                                                                                |
| 1802 | ENSG00000289995  |              | 29887 | 0.26 | unprocessed_pseudogene             | 11 | 29887     | 29887     |                                                                                                |
| 1813 | ENSG00000286311  |              | 29678 | 0.26 | unprocessed_pseudogene             | 8  | 82554927  | 82555027  | Small nuclear RNA U13                                                                          |
| 1896 | ENSG00000241686  |              | 30002 | 0.26 | unprocessed_pseudogene             | 8  | 134527458 | 134527932 | Small nuclear RNA U13                                                                          |
| 1914 | ENSG00000259940  |              | 30222 | 0.26 | unprocessed_pseudogene             | 8  | 30222     | 30222     |                                                                                                |
| 1926 | ENSG00000215569  |              | 31052 | 0.26 | unprocessed_pseudogene             | 8  | 31052     | 31052     |                                                                                                |
| 1962 | ENSG00000248245  |              | 31509 | 0.26 | unprocessed_pseudogene             | 8  | 31509     | 31509     |                                                                                                |
| 2002 | ENSG00000273131  |              | 31599 | 0.26 | unprocessed_pseudogene             | 8  | 31599     | 31599     |                                                                                                |
| 2009 | ENSG00000210243  | NBP11        | 31629 | 0.26 | protein_coding                     | 1  | 146032647 | 14602765  | neuroblastoma breakpoint family, member 11                                                     |
| 2022 | ENSG00000244158  |              | 31843 | 0.26 | unprocessed_pseudogene             | 8  | 31843     | 31843     |                                                                                                |
| 2042 | ENSG00000287852  |              | 32117 | 0.26 | unprocessed_pseudogene             | 8  | 32117     | 32117     |                                                                                                |
| 2051 | ENSG00000252028  |              | 32285 | 0.26 | unprocessed_pseudogene             | 8  | 32285     | 32285     |                                                                                                |
| 2066 | ENSG00000202956  |              | 32495 | 0.26 | unprocessed_pseudogene             | 8  | 32495     | 32495     |                                                                                                |
| 2070 | ENSG00000229151  |              | 32511 | 0.26 | unprocessed_pseudogene             | 8  | 32511     | 32511     |                                                                                                |
| 2086 | ENSG00000215620  |              | 34475 | 0.26 | unprocessed_pseudogene             | 10 | 52345310  | 52345463  | RNA component of mitochondrial RNA processing endonuclease pseudogene 4                        |
| 2268 | ENSG00000273445  |              | 35040 | 0.26 | unprocessed_pseudogene             | 10 | 35040     | 35040     |                                                                                                |
| 2280 | ENSG00000234040  |              | 35899 | 0.26 | unprocessed_pseudogene             | 10 | 35899     | 35899     |                                                                                                |
| 2317 | ENSG00000224463  |              | 36075 | 0.26 | unprocessed_pseudogene             | 10 | 36075     | 36075     |                                                                                                |
| 2348 | ENSG00000185710  |              | 36863 | 0.26 | unprocessed_pseudogene             | 10 | 36863     | 36863     |                                                                                                |
| 2378 | ENSG00000224446  |              | 37281 | 0.26 | unprocessed_pseudogene             | 10 | 37281     | 37281     |                                                                                                |
| 2404 | ENSG00000221717  |              | 37618 | 0.26 | unprocessed_pseudogene             | 10 | 37618     | 37618     |                                                                                                |
| 2413 | ENSG00000258302  |              | 3774  | 0.26 | unprocessed_pseudogene             | 10 | 3774      | 3774      |                                                                                                |
| 2467 | ENSG00000225805  |              | 38353 | 0.26 | unprocessed_pseudogene             | 10 | 38353     | 38353     |                                                                                                |
| 2463 | ENSG00000255196  |              | 38475 | 0.26 | unprocessed_pseudogene             | 10 | 38475     | 38475     |                                                                                                |
| 2465 | ENSG00000270721  |              | 38929 | 0.26 | unprocessed_pseudogene             | 10 | 38929     | 38929     |                                                                                                |
| 2495 | ENSG00000241169  |              | 38772 | 0.26 | unprocessed_pseudogene             | 10 | 38772     | 38772     |                                                                                                |
| 2596 | ENSG00000287766  |              | 40526 | 0.26 | unprocessed_pseudogene             | 10 | 40526     | 40526     |                                                                                                |
| 2609 | ENSG00000270334  |              | 40526 | 0.26 | unprocessed_pseudogene             | 10 | 40526     | 40526     |                                                                                                |
| 2614 | ENSG00000251962  |              | 4059  | 0.26 | unprocessed_pseudogene             | 10 | 4059      | 4059      |                                                                                                |
| 2676 | ENSG00000286992  |              | 41424 | 0.26 | unprocessed_pseudogene             | 10 | 41424     | 41424     |                                                                                                |
| 2680 | ENSG00000286991  |              | 41758 | 0.26 | unprocessed_pseudogene             | 10 | 41758     | 41758     |                                                                                                |
| 2708 | ENSG00000272072  |              | 42027 | 0.26 | unprocessed_pseudogene             | 10 | 10313609  | 10313709  | Small nuclear RNA U13                                                                          |
| 2714 | ENSG00000272402  |              | 42071 | 0.26 | unprocessed_pseudogene             | 10 | 42071     | 42071     |                                                                                                |
| 2743 | ENSG00000270188  |              | 42668 | 0.26 | unprocessed_pseudogene             | 10 | 42668     | 42668     |                                                                                                |
| 2790 | ENSG00000268144  |              | 4332  | 0.26 | unprocessed_pseudogene             | 10 | 4332      | 4332      |                                                                                                |
| 2841 | ENSG00000236948  |              | 44054 | 0.26 | unprocessed_pseudogene             | 4  | 103780550 | 103780653 | Small nuclear RNA U13                                                                          |
| 2842 | ENSG00000190388  |              | 44054 | 0.26 | unprocessed_pseudogene             | 4  | 103780550 | 103780653 | Small nuclear RNA U13                                                                          |
| 2850 | ENSG00000255959  |              | 44167 | 0.26 | unprocessed_pseudogene             | 4  | 44167     | 44167     |                                                                                                |
| 2880 | ENSG00000226499  |              | 44519 | 0.26 | unprocessed_pseudogene             | 4  | 44519     | 44519     |                                                                                                |
| 2940 | ENSG00000226966  |              | 45775 | 0.26 | unprocessed_pseudogene             | 4  | 45775     | 45775     |                                                                                                |
| 2967 | ENSG00000286657  |              | 46118 | 0.26 | unprocessed_pseudogene             | 17 | 66536369  | 66542970  | Uncharacterized protein; cDNA FLJ45097 fs, clone BRAW031054                                    |
| 2987 | ENSG00000220295  |              | 46559 | 0.26 | unprocessed_pseudogene             | 17 | 46559     | 46559     |                                                                                                |
| 3008 | ENSG00000214744  |              | 46818 | 0.26 | unprocessed_pseudogene             | 17 | 46818     | 46818     |                                                                                                |
| 3116 | ENSG00000287419  |              | 48708 | 0.26 |                                    |    |           |           |                                                                                                |





|      |                  |          |         |      |                                     |    |           |           |                                                                                         |
|------|------------------|----------|---------|------|-------------------------------------|----|-----------|-----------|-----------------------------------------------------------------------------------------|
| 2801 | ENSG00000008344  | ZNF264   | 4345.2  | 0.25 | protein_coding                      | 19 | 57702988  | 57724724  | zinc finger protein 264                                                                 |
| 2807 | ENSG00000103689  | CRHR4L   | 4358.8  | 0.25 | protein_coding                      | 8  | 97279859  | 97297399  | chromosome 8 open reading frame 44                                                      |
| 2873 | ENSG00000189362  | TME1184B | 4455.4  | 0.25 | protein_coding                      | 2  | 19139008  | 19139948  | transmembrane protein 184B                                                              |
| 2897 | ENSG0000011087   | GLI1     | 4588.8  | 0.25 | protein_coding                      | 12 | 57853918  | 57860045  | GLI family zinc finger 1                                                                |
| 2974 | ENSG00000186867  | RANGE8B  | 4626.8  | 0.25 | protein_coding                      | 5  | 130758914 | 130770629 | Rap guanine nucleotide exchange factor (GEF) 6                                          |
| 3121 | ENSG00000151128  | TAS2R13  | 4681.5  | 0.25 | protein_coding                      | 12 | 11809025  | 11902161  | taste receptor, type 2, member 13                                                       |
| 3137 | ENSG00000174373  | RALGAP1A | 4917.1  | 0.25 | protein_coding                      | 14 | 36007558  | 36278510  | Ras guanine nucleotide exchange factor (GEF) 6                                          |
| 3306 | ENSG00000226761  | TAS2R6B  | 5254.2  | 0.25 | protein_coding                      | 12 | 11213964  | 11214483  | taste receptor, type 2, member 46                                                       |
| 3365 | ENSG00000093266  | SIBLEC9  | 5582.6  | 0.25 | protein_coding                      | 19 | 51844101  | 51861710  | sialic acid binding to the lectin 9                                                     |
| 3629 | ENSG00000166377  | ATP9B    | 5696    | 0.25 | protein_coding                      | 18 | 78829285  | 77132683  | ATPase, class II, type 9B                                                               |
| 3815 | ENSG00000265298  | SPY1E2   | 5959.5  | 0.25 | protein_coding                      | 12 | 102187679 | 102202755 | specify/RINGO cell cycle regulator family member E2                                     |
| 3824 | ENSG00000268485  | HR173    | 6176    | 0.25 | protein_coding                      | 12 | 53002954  | 53013443  | heslin 79                                                                               |
| 3874 | ENSG00000256512  | HR173    | 6257.8  | 0.25 | protein_coding                      | 14 | 102188774 | 102198859 | Uncharacterized protein                                                                 |
| 4146 | ENSG00000287120  | PLCXD2   | 6456.2  | 0.25 | protein_coding                      | 19 | 36230153  | 36236333  | Uncharacterized protein                                                                 |
| 4190 | ENSG00000203891  | PLXND2   | 6500.1  | 0.25 | protein_coding                      | 3  | 11136353  | 11156534  | phosphatidylinositol-specific phospholipase C, X domain containing 2                    |
| 4277 | ENSG00000258653  | PLXND2   | 6645.7  | 0.25 | protein_coding                      | 14 | 74318674  | 74389891  | Uncharacterized protein                                                                 |
| 4327 | ENSG00000134200  | TSNB     | 6717.8  | 0.25 | protein_coding                      | 1  | 115572415 | 115576941 | thyroid stimulating hormone, beta                                                       |
| 4384 | ENSG00000181908  |          | 6841.7  | 0.25 | protein_coding                      | 11 | 64216546  | 64219126  | HCG165209L, isoform CRA_a, Uncharacterized protein; cDNA FLJ37045 fs, clone BRACE212185 |
| 4532 | ENSG00000186912  | PFRY4    | 7021.9  | 0.25 | protein_coding                      | X  | 69417816  | 69417954  | pyrimidinic receptor P2Y, G-protein coupled, 4                                          |
| 4624 | ENSG00000191621  | NUTK6A   | 7131.8  | 0.25 | protein_coding                      | 10 | 89895205  | 89969956  | NUT family member 2A                                                                    |
| 4630 | ENSG00000198263  | OR52B1   | 7137    | 0.25 | protein_coding                      | 11 | 58274648  | 58275578  | olfactory receptor, family 5, subfamily B, member 21                                    |
| 4680 | ENSG00000136939  | OR1L4    | 7209.9  | 0.25 | protein_coding                      | 9  | 12548269  | 125487204 | olfactory receptor, family 1, subfamily L, member 4                                     |
| 4819 | ENSG00000203733  | PTGR2    | 7407.8  | 0.25 | protein_coding                      | 8  | 14264348  | 142646190 | chromosome 8 open reading frame 17                                                      |
| 4837 | ENSG00000167632  | TRAPP9   | 7429.9  | 0.25 | protein_coding                      | 8  | 140742866 | 141468878 | trafficking protein particle complex 9                                                  |
| 2574 | ENSG00000207129  |          | 3693    | 0.25 | rRNA                                | 5  | 87510075  | 87510193  | RNA, SS ribosomal pseudogene 187                                                        |
| 1927 | ENSG00000102171  |          | 3043.3  | 0.25 | snRNA                               | 4  | 16920260  | 16920390  | Small nuclear RNA SNORA51                                                               |
| 1934 | ENSG00000208182  |          | 4216.8  | 0.25 | snRNA                               | X  | 117872018 | 11787245  | Small nuclear RNA SNORA35                                                               |
| 1304 | ENSG00000203588  |          | 4848.9  | 0.25 | snRNA                               | 17 | 48489734  | 48489948  | Small nuclear RNA U3                                                                    |
| 4221 | ENSG00000203926  |          | 6521.6  | 0.25 | snRNA                               | 14 | 862254    | 862254    | Small nuclear RNA SNORA31                                                               |
| 1944 | ENSG00000212451  |          | 3069.5  | 0.25 | snRNA                               | 8  | 127683767 | 127683899 | RNA, U1 small nuclear 4, pseudogene                                                     |
| 1988 | ENSG00000205179  |          | 3157.1  | 0.25 | snRNA                               | 4  | 184627084 | 184627101 | RNA, U5 small nuclear 1053, pseudogene                                                  |
| 2007 | ENSG00000205695  |          | 3419.81 | 0.25 | snRNA                               | 22 | 31618731  | 31618839  | RNA, U5 small nuclear 1123, pseudogene                                                  |
| 2366 | ENSG00000205243  |          | 3708.1  | 0.25 | snRNA                               | 7  | 102475052 | 102475155 | RNA, U5 small nuclear 1138, pseudogene                                                  |
| 2440 | ENSG00000205223  |          | 3815.3  | 0.25 | snRNA                               | 7  | 143451721 | 143451823 | RNA, U5 small nuclear 267, pseudogene                                                   |
| 1915 | ENSG00000212448  |          | 3419.81 | 0.25 | snRNA                               | 8  | 12960972  | 12961019  | RNA, U5 small nuclear 1128, pseudogene                                                  |
| 3688 | ENSG00000202237  | RNU6-5P  | 5601.1  | 0.25 | snRNA                               | 13 | 29277839  | 29277944  | RNA, U5 small nuclear 53, pseudogene                                                    |
| 3802 | ENSG000002021441 |          | 6128    | 0.25 | snRNA                               | 3  | 186435730 | 186435935 | RNA, U5 small nuclear 646, pseudogene                                                   |
| 4044 | ENSG00000203980  |          | 6317.4  | 0.25 | snRNA                               | 6  | 111117620 | 111117725 | RNA, U5 small nuclear 1115, pseudogene                                                  |
| 4088 | ENSG00000212508  |          | 6384.8  | 0.25 | snRNA                               | 15 | 31248451  | 31248553  | RNA, U5 small nuclear 466, pseudogene                                                   |
| 2181 | ENSG00000211857  |          | 3417.4  | 0.25 | TR_2_gene                           | 14 | 22978325  | 22978390  | T cell receptor alpha joining 32                                                        |
| 2421 | ENSG000002011844 |          | 3789.3  | 0.25 | TR_2_gene                           | 14 | 22962911  | 22962976  | T cell receptor alpha joining 45                                                        |
| 2271 | ENSG000002025014 |          | 3552.2  | 0.25 | transcribed_unprocessed_pseudo_gene | 17 | 20019137  | 20016300  | potassium channel tetramerization domain containing 9 pseudogene 1                      |
| 1913 | ENSG000000969725 | PRKY     | 2056.1  | 0.25 | transcribed_unprocessed_pseudo_gene | Y  | 7142013   | 7249589   | protein kinase, Y-linked, pseudogene                                                    |
| 3022 | ENSG000002034585 | CCP6P3   | 4715.5  | 0.25 | transcribed_unprocessed_pseudo_gene | 7  | 64498732  | 6453091   | chaperonin containing TCP1, subunit 6 (beta) pseudogene 3                               |
| 4399 | ENSG000002048472 | DDX11L5  | 6850.1  | 0.25 | transcribed_unprocessed_pseudo_gene | 15 | 102516758 | 102519298 | DEAD/H (Asp-Glu-Ala-Asp/His) box helicase 11 like 9                                     |
| 4653 | ENSG000002042435 |          | 7174.2  | 0.25 | transcribed_unprocessed_pseudo_gene | 7  | 78633979  | 78635091  | uraplatin 3B pseudogene 1                                                               |
| 2437 | ENSG000002049089 |          | 3813.3  | 0.25 | unprocessed_pseudogene              | 5  | 39022513  | 39022660  | androgen-inducible 1 pseudogene 1                                                       |
| 3699 | ENSG00000186462  |          | 5645.5  | 0.25 | unprocessed_pseudogene              | 16 | 21391313  | 21403412  | sorting nexin 29 pseudogene 1                                                           |
| 3864 | ENSG00000202225  |          | 6227.3  | 0.25 | unprocessed_pseudogene              | 9  | 5109496   | 5110762   | MT-ND5 pseudogene 14                                                                    |
| 4134 | ENSG00000197862  |          | 6427.7  | 0.25 | unprocessed_pseudogene              | 11 | 86543562  | 86544491  | olfactory receptor, family 1, subfamily E, member 13 pseudogene                         |
| 4149 | ENSG00000204143  |          | 6732.2  | 0.25 | unprocessed_pseudogene              | 11 | 98569798  | 98569822  | olfactory receptor, family 10, subfamily V, member 3 pseudogene                         |
| 4360 | ENSG00000203926  |          | 6521.6  | 0.25 | unprocessed_pseudogene              | 11 | 53112913  | 5311810   | olfactory receptor, family 53, subfamily AB, member 1 pseudogene                        |
| 4462 | ENSG00000202880  |          | 6929.3  | 0.25 | unprocessed_pseudogene              | 11 | 6078546   | 6079505   | olfactory receptor, family 52, subfamily L, member 2 pseudogene                         |
| 4604 | ENSG000002021215 |          | 6982.5  | 0.25 | unprocessed_pseudogene              | 1  | 248186431 | 24818720  | olfactory receptor, family 2, subfamily L, member 6 pseudogene                          |
| 4633 | ENSG00000205588  |          | 7119.2  | 0.25 | unprocessed_pseudogene              | 12 | 8401763   | 8401445   | ectonucleoside diphosphate triphosphotriesterase 7 pseudogene 5                         |
| 1772 | ENSG00000208352  |          | 1464.8  | 0.25 |                                     |    |           |           |                                                                                         |
| 1514 | ENSG00000203036  |          | 2470.2  | 0.25 |                                     |    |           |           |                                                                                         |
| 1420 | ENSG00000203033  |          | 2617    | 0.25 |                                     |    |           |           |                                                                                         |
| 1771 | ENSG000002044701 |          | 2831.5  | 0.25 |                                     |    |           |           |                                                                                         |
| 1818 | ENSG00000270592  |          | 2909.9  | 0.25 |                                     |    |           |           |                                                                                         |
| 1884 | ENSG00000205471  |          | 2962.4  | 0.25 |                                     |    |           |           |                                                                                         |
| 1934 | ENSG000002081997 |          | 3058.1  | 0.25 |                                     |    |           |           |                                                                                         |
| 2053 | ENSG00000205095  |          | 3233    | 0.25 |                                     |    |           |           |                                                                                         |
| 2060 | ENSG00000205287  |          | 3241.8  | 0.25 |                                     |    |           |           |                                                                                         |
| 2108 | ENSG000002049138 |          | 3297.5  | 0.25 |                                     |    |           |           |                                                                                         |
| 2149 | ENSG00000214204  |          | 3467.3  | 0.25 |                                     |    |           |           |                                                                                         |
| 2176 | ENSG00000205111  |          | 3544.8  | 0.25 |                                     |    |           |           |                                                                                         |
| 2320 | ENSG00000203888  |          | 3634    | 0.25 |                                     | 2  | 9119024   | 9119128   | Small nuclear RNA U13                                                                   |
| 2423 | ENSG00000203171  |          | 3781.3  | 0.25 |                                     | 21 | 30781707  | 30781810  | Small nuclear RNA U13                                                                   |
| 2435 | ENSG00000203244  |          | 3811.6  | 0.25 |                                     |    |           |           |                                                                                         |
| 2486 | ENSG00000202280  |          | 3870.7  | 0.25 |                                     | 7  | 129045476 | 129045537 | RNA, U7 small nuclear 16 pseudogene                                                     |
| 2501 | ENSG00000203963  |          | 3883    | 0.25 |                                     | 1  | 52877114  | 52877114  | Small nuclear RNA U13                                                                   |
| 2501 | ENSG00000203963  |          | 3883    | 0.25 |                                     |    |           |           |                                                                                         |
| 2510 | ENSG00000203607  |          | 3962.5  | 0.25 |                                     |    |           |           |                                                                                         |
| 2536 | ENSG00000212114  |          | 3931.9  | 0.25 |                                     |    |           |           |                                                                                         |
| 2543 | ENSG000002071840 |          | 3938.2  | 0.25 |                                     |    |           |           |                                                                                         |
| 2557 | ENSG00000206898  |          | 3958.9  | 0.25 |                                     |    |           |           |                                                                                         |
| 2581 | ENSG000002053768 |          | 4004.3  | 0.25 |                                     |    |           |           |                                                                                         |
| 2623 | ENSG000002065218 |          | 4066.3  | 0.25 |                                     |    |           |           |                                                                                         |
| 2651 | ENSG00000206073  |          | 4092.2  | 0.25 |                                     |    |           |           |                                                                                         |
| 2667 | ENSG00000204614  |          | 4127.4  | 0.25 |                                     |    |           |           |                                                                                         |
| 2678 | ENSG000002065339 |          | 4151.7  | 0.25 |                                     |    |           |           |                                                                                         |
| 2688 | ENSG00000206904  |          | 4168    | 0.25 |                                     | 5  | 118804654 | 118804750 | Small nuclear RNA U13                                                                   |
| 2722 | ENSG00000208944  |          | 4218.6  | 0.25 |                                     |    |           |           |                                                                                         |
| 2737 | ENSG00000186275  |          | 4254.5  | 0.25 |                                     | 1  | 146373546 | 146467744 | neuroblastoma breakpoint1 family, member 12                                             |
| 2742 | ENSG00000204728  |          | 4266.9  | 0.25 |                                     | 17 | 33381407  | 33381513  | Small nuclear RNA U13                                                                   |
| 2756 | ENSG00000208856  |          | 4278.8  | 0.25 |                                     | 20 | 34304363  | 34304462  | Small nuclear RNA U13                                                                   |
| 2759 | ENSG000002036549 |          | 4290.7  | 0.25 |                                     | 3  | 172019438 | 172019888 | Uncharacterized protein                                                                 |
| 2762 | ENSG000002087978 |          | 4320.2  | 0.25 |                                     |    |           |           |                                                                                         |
| 2766 | ENSG00000205935  |          | 4328.2  | 0.25 |                                     |    |           |           |                                                                                         |
| 2847 | ENSG00000202527  |          | 4414.9  | 0.25 |                                     |    |           |           |                                                                                         |
| 2877 | ENSG00000207836  |          | 4462.2  | 0.25 |                                     |    |           |           |                                                                                         |
| 2914 | ENSG00000205284  |          | 4526    | 0.25 |                                     | 20 | 55050699  | 55050901  | Small nuclear RNA U13                                                                   |
| 2928 | ENSG000002050011 |          | 4544.9  | 0.25 |                                     |    |           |           |                                                                                         |
| 2941 | ENSG00000202339  |          | 4572.1  | 0.25 |                                     |    |           |           |                                                                                         |
| 2964 | ENSG00000205268  |          | 4592.3  | 0.25 |                                     |    |           |           |                                                                                         |
| 2977 | ENSG000002053456 |          | 4637.6  | 0.25 |                                     |    |           |           |                                                                                         |
| 2993 | ENSG00000213302  |          | 4659.5  | 0.25 |                                     |    |           |           |                                                                                         |
| 3006 | ENSG00000204327  |          | 4677.4  | 0.25 |                                     |    |           |           |                                                                                         |
| 3044 | ENSG000002043433 |          | 4755.2  | 0.25 |                                     |    |           |           |                                                                                         |
| 3051 | ENSG00000196138  |          | 4770.9  | 0.25 |                                     |    |           |           |                                                                                         |
| 3078 | ENSG00000205869  |          | 4801.8  | 0.25 |                                     |    |           |           |                                                                                         |
| 3082 | ENSG000002051938 |          | 4811    | 0.25 |                                     | 3  | 47130098  | 47130169  | Small nuclear RNA U13                                                                   |
| 3093 | ENSG00000206321  |          | 4831    | 0.25 |                                     |    |           |           |                                                                                         |
| 3096 | ENSG00000206343  |          | 4834.8  | 0.25 |                                     |    |           |           |                                                                                         |
| 3115 | ENSG000002072625 |          | 4870.1  | 0.25 |                                     |    |           |           |                                                                                         |
| 3141 | ENSG000002087560 |          | 4925.3  | 0.25 |                                     |    |           |           |                                                                                         |
| 3245 | ENSG00000208900  |          | 5201.8  | 0.25 |                                     | 10 | 12187662  | 12187765  | Small nuclear RNA U13                                                                   |
| 3252 | ENSG000002042198 |          | 5099.4  | 0.25 |                                     |    |           |           |                                                                                         |
| 3296 | ENSG000          |          |         |      |                                     |    |           |           |                                                                                         |

|      |                 |           |      |           |                      |           |           |           |                                                                                                                        |
|------|-----------------|-----------|------|-----------|----------------------|-----------|-----------|-----------|------------------------------------------------------------------------------------------------------------------------|
| 4201 | ENSG00000224875 | 6532      | 0.25 |           |                      |           |           |           |                                                                                                                        |
| 4209 | ENSG00000255569 | 6544      | 0.25 |           |                      |           |           |           |                                                                                                                        |
| 4219 | ENSG00000239012 | 6553      | 0.25 |           |                      |           |           |           |                                                                                                                        |
| 4227 | ENSG00000235330 | 6560      | 0.25 |           |                      |           |           |           |                                                                                                                        |
| 4226 | ENSG00000228672 | 6579      | 0.25 |           |                      |           |           |           |                                                                                                                        |
| 4251 | ENSG00000219151 | 6587      | 0.25 |           |                      |           |           |           |                                                                                                                        |
| 4254 | ENSG00000236481 | 6604      | 0.25 |           |                      |           |           |           |                                                                                                                        |
| 4258 | ENSG00000240136 | 6612      | 0.25 |           |                      |           |           |           |                                                                                                                        |
| 4278 | ENSG00000269234 | 6651      | 0.25 |           |                      |           |           |           |                                                                                                                        |
| 4297 | ENSG00000269234 | 6660      | 0.25 |           |                      |           |           |           |                                                                                                                        |
| 4315 | ENSG00000237315 | 6702      | 0.25 |           |                      |           |           |           |                                                                                                                        |
| 4321 | ENSG00000237315 | 6711      | 0.25 |           |                      |           |           |           |                                                                                                                        |
| 4328 | ENSG00000252525 | 6720      | 0.25 | X         | 70660367             | 70660477  |           |           | Small nuclear RNA U13                                                                                                  |
| 4338 | ENSG00000220202 | 6729      | 0.25 |           |                      |           |           |           |                                                                                                                        |
| 4342 | ENSG00000296768 | 6747      | 0.25 |           |                      |           |           |           |                                                                                                                        |
| 4343 | ENSG00000287569 | 6747      | 0.25 |           |                      |           |           |           |                                                                                                                        |
| 4364 | ENSG00000249887 | 6780      | 0.25 |           |                      |           |           |           |                                                                                                                        |
| 4371 | ENSG00000296368 | 6797      | 0.25 |           |                      |           |           |           |                                                                                                                        |
| 4377 | ENSG00000258517 | 6808      | 0.25 |           |                      |           |           |           |                                                                                                                        |
| 4381 | ENSG00000256912 | 6819      | 0.25 |           |                      |           |           |           |                                                                                                                        |
| 4382 | ENSG00000235443 | 6821      | 0.25 |           |                      |           |           |           |                                                                                                                        |
| 4383 | ENSG00000234203 | 6824      | 0.25 |           |                      |           |           |           |                                                                                                                        |
| 4388 | ENSG00000224029 | 6830      | 0.25 |           |                      |           |           |           |                                                                                                                        |
| 4402 | ENSG00000224704 | 6854      | 0.25 |           |                      |           |           |           |                                                                                                                        |
| 4406 | ENSG00000270734 | 6859      | 0.25 |           |                      |           |           |           |                                                                                                                        |
| 4408 | ENSG00000243141 | 6859      | 0.25 |           |                      |           |           |           |                                                                                                                        |
| 4410 | ENSG00000202926 | 6862      | 0.25 |           |                      |           |           |           |                                                                                                                        |
| 4411 | ENSG00000289888 | 6862      | 0.25 |           |                      |           |           |           |                                                                                                                        |
| 4415 | ENSG00000257433 | 6865      | 0.25 |           |                      |           |           |           |                                                                                                                        |
| 4418 | ENSG00000202962 | 6868      | 0.25 |           |                      |           |           |           |                                                                                                                        |
| 4424 | ENSG00000205548 | 6874      | 0.25 |           |                      |           |           |           |                                                                                                                        |
| 4434 | ENSG00000225411 | 6883      | 0.25 |           |                      |           |           |           |                                                                                                                        |
| 4444 | ENSG00000202102 | 6902      | 0.25 |           |                      |           |           |           |                                                                                                                        |
| 4470 | ENSG00000259100 | 6942      | 0.25 |           |                      |           |           |           |                                                                                                                        |
| 4486 | ENSG00000240518 | 6950      | 0.25 |           |                      |           |           |           |                                                                                                                        |
| 4485 | ENSG00000212693 | 6952      | 0.25 |           |                      |           |           |           |                                                                                                                        |
| 4487 | ENSG00000256904 | 6973      | 0.25 |           |                      |           |           |           |                                                                                                                        |
| 4508 | ENSG00000262974 | 6986      | 0.25 |           |                      |           |           |           |                                                                                                                        |
| 4512 | ENSG00000235489 | 6989      | 0.25 |           |                      |           |           |           |                                                                                                                        |
| 4516 | ENSG00000259201 | 7002      | 0.25 |           |                      |           |           |           |                                                                                                                        |
| 4540 | ENSG00000232326 | 7021      | 0.25 |           |                      |           |           |           |                                                                                                                        |
| 4548 | ENSG00000235984 | 7026      | 0.25 |           |                      |           |           |           |                                                                                                                        |
| 4549 | ENSG00000203471 | 7047      | 0.25 |           |                      |           |           |           |                                                                                                                        |
| 4552 | ENSG00000270437 | 7050      | 0.25 |           |                      |           |           |           |                                                                                                                        |
| 4558 | ENSG00000296861 | 7055      | 0.25 |           |                      |           |           |           |                                                                                                                        |
| 4559 | ENSG00000296861 | 7071      | 0.25 |           |                      |           |           |           |                                                                                                                        |
| 4571 | ENSG00000254774 | 7072      | 0.25 |           |                      |           |           |           |                                                                                                                        |
| 4578 | ENSG00000296861 | 7078      | 0.25 |           |                      |           |           |           |                                                                                                                        |
| 4579 | ENSG00000296861 | 7083      | 0.25 |           |                      |           |           |           |                                                                                                                        |
| 4580 | ENSG00000233431 | 7093      | 0.25 |           |                      |           |           |           |                                                                                                                        |
| 4584 | ENSG00000254443 | 7096      | 0.25 |           |                      |           |           |           |                                                                                                                        |
| 4601 | ENSG00000201911 | 7104      | 0.25 |           |                      |           |           |           |                                                                                                                        |
| 4602 | ENSG00000223935 | 7125      | 0.25 |           |                      |           |           |           |                                                                                                                        |
| 4625 | ENSG00000259109 | 7131      | 0.25 |           |                      |           |           |           |                                                                                                                        |
| 4627 | ENSG00000217718 | 7134      | 0.25 |           |                      |           |           |           |                                                                                                                        |
| 4637 | ENSG00000254310 | 7144      | 0.25 |           |                      |           |           |           |                                                                                                                        |
| 4655 | ENSG00000243483 | 7172      | 0.25 |           |                      |           |           |           |                                                                                                                        |
| 4657 | ENSG00000224515 | 7177      | 0.25 |           |                      |           |           |           |                                                                                                                        |
| 4662 | ENSG00000223711 | 7214      | 0.25 |           |                      |           |           |           |                                                                                                                        |
| 4688 | ENSG00000281369 | 7221      | 0.25 |           |                      |           |           |           |                                                                                                                        |
| 4696 | ENSG00000202962 | 7229      | 0.25 |           |                      |           |           |           |                                                                                                                        |
| 4726 | ENSG00000240489 | 7273      | 0.25 |           |                      |           |           |           |                                                                                                                        |
| 4742 | ENSG00000270981 | 7287      | 0.25 |           |                      |           |           |           |                                                                                                                        |
| 4748 | ENSG00000231303 | 7294      | 0.25 |           |                      |           |           |           |                                                                                                                        |
| 4762 | ENSG00000248466 | 7331      | 0.25 |           |                      |           |           |           |                                                                                                                        |
| 4779 | ENSG00000258977 | 7352      | 0.25 |           |                      |           |           |           |                                                                                                                        |
| 4812 | ENSG00000202941 | 7367      | 0.25 |           |                      |           |           |           |                                                                                                                        |
| 4874 | ENSG00000205764 | 7484      | 0.25 |           |                      |           |           |           |                                                                                                                        |
| 4883 | ENSG00000172653 | 7491      | 0.25 |           |                      |           |           |           |                                                                                                                        |
| 2969 | ENSG00000235623 | 4601      | 0.24 | antisense | 307                  | 34181955  | 34186895  |           | chromosome 17 open reading frame 68                                                                                    |
| 3351 | ENSG00000231074 | HCG18     | 5265 | 0.24      | antisense            | 3011093   | 3011263   |           | HCG178999: PRC20a3: Uncharacterized protein                                                                            |
| 3955 | ENSG00000240549 | THO7-AS1  | 6218 | 0.24      | antisense            | 30255174  | 30254927  |           | HLA complex group 18 (non-protein coding)                                                                              |
| 4479 | ENSG00000230266 |           | 7063 | 0.24      | antisense            | 43846321  | 43847495  |           | THO7 antisense RNA 1                                                                                                   |
| 4490 | ENSG00000235822 |           | 8338 | 0.24      | lincRNA              | 106833231 | 106833844 |           | immunoglobulin heavy variable 7.36.1 (non-coding)                                                                      |
| 4516 | ENSG00000209910 | LINC00865 | 8428 | 0.24      | lincRNA              | 13        | 3258822   | 32588134  | long intergenic non-protein coding RNA 1073                                                                            |
| 4519 | ENSG00000245648 |           | 7912 | 0.24      | lincRNA              | 13        | 14859487  | 14859187  | long intergenic non-protein coding RNA 565                                                                             |
| 1168 | ENSG00000279369 | MIR223    | 2008 | 0.24      | miRNA                | X         | 65238712  | 65238621  | miR223                                                                                                                 |
| 2899 | ENSG00000211513 | MIR320E   | 4034 | 0.24      | miRNA                | 19        | 47212950  | 47212802  | miR320E                                                                                                                |
| 2920 | ENSG00000205459 | MIR4783   | 4619 | 0.24      | miRNA                | 1         | 23535349  | 23535343  | miR4783                                                                                                                |
| 3295 | ENSG00000296919 | MIR4642   | 5170 | 0.24      | miRNA                | 6         | 44403378  | 44403459  | miR4642                                                                                                                |
| 4218 | ENSG00000270766 | MIR626    | 6552 | 0.24      | miRNA                | 15        | 41983783  | 41983876  | miR626                                                                                                                 |
| 4291 | ENSG00000202923 | MIR643    | 6834 | 0.24      | miRNA                | 19        | 5278569   | 52785146  | miR643                                                                                                                 |
| 4550 | ENSG00000205340 | MIR4660   | 7061 | 0.24      | miRNA                | 8         | 8095955   | 8096028   | miR4660                                                                                                                |
| 4836 | ENSG00000212396 | MIR548T   | 7429 | 0.24      | miRNA                | 4         | 174189311 | 174189384 | miR548T                                                                                                                |
| 2294 | ENSG00000236460 |           | 3527 | 0.24      | misc. RNA            | 4         | 96278603  | 96278603  | Y RNA                                                                                                                  |
| 2971 | ENSG00000203123 |           | 3924 | 0.24      | misc. RNA            | 4         | 176839479 | 176839488 | Y RNA                                                                                                                  |
| 2970 | ENSG00000252975 |           | 4621 | 0.24      | misc. RNA            | 4         | 39711706  | 39711706  | Y RNA                                                                                                                  |
| 3023 | ENSG00000204816 |           | 5025 | 0.24      | misc. RNA            | 4         | 77442999  | 77442796  | Y RNA                                                                                                                  |
| 3396 | ENSG00000200120 |           | 5354 | 0.24      | misc. RNA            | 15        | 4842959   | 4843060   | Y RNA                                                                                                                  |
| 3512 | ENSG00000243260 |           | 5527 | 0.24      | misc. RNA            | 4         | 98782620  | 98782619  | RNA 75L: cytoplasmic 556, pseudogene                                                                                   |
| 3605 | ENSG00000256552 |           | 9650 | 0.24      | misc. RNA            | 11        | 43352811  | 43352906  | 1 RNA                                                                                                                  |
| 3938 | ENSG00000294846 |           | 8113 | 0.24      | misc. RNA            | 4         | 89598851  | 89599171  | RNA 75L: cytoplasmic 552, pseudogene                                                                                   |
| 4180 | ENSG00000222430 |           | 6479 | 0.24      | misc. RNA            | 10        | 10373282  | 10373281  | Y RNA                                                                                                                  |
| 4604 | ENSG00000284862 |           | 7108 | 0.24      | misc. RNA            | 17        | 29845450  | 29845745  | RNA 75L: cytoplasmic 45, pseudogene                                                                                    |
| 4686 | ENSG00000202797 |           | 7219 | 0.24      | misc. RNA            | 17        | 9453372   | 9453363   | RNA 75L: small nuclear pseudogene 472                                                                                  |
| 4801 | ENSG00000244877 |           | 7405 | 0.24      | misc. RNA            | 14        | 68618337  | 68618625  | RNA 75L: cytoplasmic 706, pseudogene                                                                                   |
| 5248 | ENSG00000222099 |           | 7949 | 0.24      | misc. RNA            | 11        | 10406184  | 10406901  | RNA 75L: small nuclear pseudogene 265                                                                                  |
| 5265 | ENSG00000244134 |           | 3812 | 0.24      | processed_pseudogene | 13        | 72419211  | 72419101  | ribosomal protein S12 pseudogene 20                                                                                    |
| 2846 | ENSG00000202473 |           | 4412 | 0.24      | processed_pseudogene | 13        | 41568915  | 41567467  | regulator of G-protein signaling 17 pseudogene 1                                                                       |
| 3109 | ENSG00000244511 |           | 4459 | 0.24      | processed_pseudogene | 13        | 52172552  | 52173396  | ATP synthase, H+ transporting, mitochondrial Fo complex, subunit B1 pseudogene 1                                       |
| 3407 | ENSG00000204193 |           | 4829 | 0.24      | processed_pseudogene | 24        | 2562426   | 25621134  | succinate dehydrogenase complex, subunit C, integral membrane protein pseudogene 9                                     |
| 3465 | ENSG00000203946 |           | 5452 | 0.24      | processed_pseudogene | 1         | 101406573 | 101406573 | heterogeneous nuclear ribonucleoprotein A1 pseudogene 6B                                                               |
| 3633 | ENSG00000226796 |           | 5548 | 0.24      | processed_pseudogene | 1         | 24378768  | 24378758  | fatty acid binding protein 7, brain pseudogene 1                                                                       |
| 3658 | ENSG00000202970 |           | 5712 | 0.24      | processed_pseudogene | 6         | 108619203 | 108619203 | ILM022 pseudogene 8                                                                                                    |
| 3882 | ENSG00000241136 |           | 5720 | 0.24      | processed_pseudogene | 7         | 143479780 | 143481377 | phosphoribosylaminoimidazole carboxamide, phosphoribosylaminoimidazole succinocarboxamide synthetase pseudogene 6      |
| 3984 | ENSG00000218240 |           | 6121 | 0.24      | processed_pseudogene | 8         | 159148779 | 159147835 | archaebacterial family metalloproteinase 2 pseudogene 2                                                                |
| 3945 | ENSG00000241438 |           | 6207 | 0.24      | processed_pseudogene | 3         | 135874391 | 135874838 | lenticarboxin-derived growth factor 1 pseudogene 6                                                                     |
| 4081 | ENSG00000298165 |           | 8382 | 0.24      | processed_pseudogene | 14        | 89550115  | 89552108  | DEAD (Asp-Glu-Asp-Asp box) polypeptide 18 pseudogene 1                                                                 |
| 4340 | ENSG00000226870 |           | 8737 | 0.24      | processed_pseudogene | 22        | 20837102  | 20838392  | karatin 18 pseudogene 39                                                                                               |
| 4595 | ENSG00000243033 |           | 7101 | 0.24      | processed_pseudogene | 3         | 14322117  | 14322115  | glyceraldehyde 3 phosphate dehydrogenase pseudogene 47                                                                 |
| 4616 | ENSG00000211026 |           | 7122 | 0.24      | processed_pseudogene | 16        | 25081430  | 25081430  | sex comb on midleg-like 2 (Drosophila) pseudogene 2                                                                    |
| 4658 | ENSG00000202937 |           | 7178 | 0.24      | processed_pseudogene | 6         | 107559663 | 107551358 | ribosomal protein S24 pseudogene 12                                                                                    |
| 4716 | ENSG00000211234 |           | 7264 | 0.24      | processed_pseudogene | 11        | 112138013 | 112139094 | suppression of tumorigenesis 13 (colon carcinoma) (Hsp70 interacting protein) pseudogene 10                            |
| 4737 | ENSG00000232793 |           | 7282 | 0.24      | processed_pseudogene | 2         | 204629176 | 204629176 | karatin 18 pseudogene 39                                                                                               |
| 4782 | ENSG00000231956 |           | 7354 | 0.24      | processed_pseudogene | 7         | 87150777  | 87151726  | heterogeneous nuclear ribonucleoprotein A1 pseudogene 9                                                                |
| 4839 | ENSG00000243337 |           | 7434 | 0.24      | processed_pseudogene | 2         | 15017167  | 150177950 | family with sequence similarity 8, member A3 pseudogene 1                                                              |
| 4867 | ENSG00000233469 |           | 7476 | 0.24      | processed_pseudogene | 13        | 20392821  | 20392759  | ST6 (alpha-N-acetylneuraminyl-2,6-beta-galactose-1,3)-N-acetylglucosaminase alpha-2,6-sialyltransferase 4 pseudogene 1 |
| 4897 | ENSG00000228815 |           | 7575 | 0.24      | processed_pseudogene | 1         | 45424229  | 45425269  | cyclin B1 interacting protein 1 pseudogene 1                                                                           |
| 4948 | ENSG00000259990 |           | 7588 | 0.24      | processed_pseudogene | 14        | 8951849   | 8951849   | metalloproteinase 1 pseudogene 5                                                                                       |
| 4964 | ENSG00000214962 |           | 7608 | 0.24      | processed_pseudogene | 4         | 78003556  | 78004279  | ribosomal protein L7 pseudogene 17                                                                                     |
| 4988 | ENSG00000249283 |           | 7612 | 0.24      | processed_pseudogene | 4         | 103883113 | 103884894 | ACTR3B pseudogene 4                                                                                                    |
| 5002 | ENSG00000292598 |           | 7659 | 0.24      | processed_pseudogene | 21        | 17068910  | 17068900  | RAD53 homolog like (L-C. motif) pseudogene                                                                             |
| 5063 | ENSG00000275736 |           | 7712 | 0.24      | processed_pseudogene | X         | 7026350   | 7026350   | suppressor of cytokine signaling 5 pseudogene 4                                                                        |
| 5103 | ENSG00000229376 |           | 7780 | 0.24      | processed_pseudogene | 1         | 657472    | 657472    | capicua transcriptional repressor pseudogene 3                                                                         |
| 5308 | ENSG00000216257 |           | 8017 | 0.24      | processed_pseudogene | 12        | 68018375  | 68018368  | ribosomal protein L7 pseudogene 42                                                                                     |
| 5345 | ENSG00000202011 | LEP1-AS1  | 8147 | 0.24      | antisense            | 1         | 109038681 | 109177992 | antisense RNA 1                                                                                                        |
| 632  | ENSG00000173762 | CD7       | 1538 | 0.24      | protein_coding       | 17        | 80272744  | 80275478  | CD7 molecule                                                                                                           |
| 859  | ENSG00000189039 | STR8      | 1582 | 0.24      | protein_coding       | 19        | 10623629  | 10623607  | sphingosine 1-phosphate receptor 5                                                                                     |
| 900  | ENSG00000118463 | NR12      | 1678 | 0.24      | protein_coding       | 16        | 872845    | 872845    | ILM022 pseudogene 2                                                                                                    |
| 1086 | ENSG00000169442 | CD52      | 1896 | 0.24      | protein_coding       | 1         | 26644448  | 26647014  | CD52 molecule                                                                                                          |
| 1180 | ENSG00000186871 | CXCR2     | 2051 | 0.24      | protein_coding       | 2         | 121899012 | 121899176 | chemokine (C-X-C motif) receptor 2                                                                                     |
| 1194 | ENSG00000202998 | LITAF     | 2052 | 0.24      | protein_coding       | 9         | 5         |           |                                                                                                                        |

|      |                 |             |        |      |                              |    |           |           |                                                                            |
|------|-----------------|-------------|--------|------|------------------------------|----|-----------|-----------|----------------------------------------------------------------------------|
| 1719 | ENSG00000136167 | LCP1        | 2736.9 | 0.24 | protein_coding               | 13 | 4670055   | 4678606   | lymphocyte cytosolic protein 1 (L-plastin)                                 |
| 1816 | ENSG00000193778 | UTY         | 296.2  | 0.24 | protein_coding               | 5  | 1536989   | 1536953   | ubiquitously transcribed tetrahydrobiopterin reductase containing Y-linked |
| 1822 | ENSG00000197872 | FAM64A      | 2913.5 | 0.24 | protein_coding               | 2  | 16730727  | 16647599  | family with sequence similarity 45, member A                               |
| 1823 | ENSG00000102921 | NABP1       | 2916   | 0.24 | protein_coding               | 16 | 48572637  | 48544059  | NEDD4 binding protein 1                                                    |
| 1828 | ENSG00000171862 | PIE1E       | 2931.1 | 0.24 | protein_coding               | 10 | 6622070   | 6671367   | phosphatase and keratin homolog                                            |
| 1830 | ENSG00000204212 | ITAF5       | 2934.2 | 0.24 | protein_coding               | 11 | 21499957  | 21346538  | TIF receptor associated factor 5                                           |
| 1833 | ENSG00000204020 | LIPN        | 3038.8 | 0.24 | protein_coding               | 10 | 90521163  | 90537999  | lipase, family member N                                                    |
| 2063 | ENSG00000195520 | SRAP2       | 3247.2 | 0.24 | protein_coding               | 7  | 60710691  | 27044658  | serine kinase associated phosphoprotein 2                                  |
| 2067 | ENSG00000191953 | PARR14      | 3248.5 | 0.24 | protein_coding               | 3  | 12293945  | 12294897  | poly (ADP-ribose) polymerase family member 14                              |
| 2073 | ENSG00000254788 | ORF11CMT11  | 3255.9 | 0.24 | protein_coding               | 16 | 66564490  | 66613038  | ORF11CMT11 readthrough                                                     |
| 2109 | ENSG00000195526 | PKSAP1      | 3300   | 0.24 | protein_coding               | 10 | 9635336   | 9640271   | phosphoinositide-3-kinase adaptor protein 1                                |
| 2137 | ENSG00000203262 | MSL3        | 3338.8 | 0.24 | protein_coding               | 10 | 11732678  | 11733070  | male-specific lethal 3 homolog (Drosophila)                                |
| 2169 | ENSG00000115904 | SOS1        | 3392.1 | 0.24 | protein_coding               | 2  | 39208537  | 39351486  | son of sevenless homolog 1 (Drosophila)                                    |
| 2189 | ENSG00000133961 | NLMB        | 3439   | 0.24 | protein_coding               | 14 | 73741815  | 73930348  | numb homolog (Drosophila)                                                  |
| 2201 | ENSG00000191781 | IGFBP5      | 3462.7 | 0.24 | protein_coding               | 6  | 160300311 | 16034539  | insulin-like growth factor 2 receptor                                      |
| 2225 | ENSG00000120960 | ELF1        | 3472   | 0.24 | protein_coding               | 13 | 41505056  | 41635576  | ET4-like factor 1 (ets domain transcription factor)                        |
| 2228 | ENSG00000121281 | ADCY7       | 3473.3 | 0.24 | protein_coding               | 16 | 50280348  | 50350346  | adenylylate cyclase 7                                                      |
| 2296 | ENSG00000102021 | DOX17       | 3503.8 | 0.24 | protein_coding               | 22 | 36879445  | 36930965  | DEAD (Asp-Glu-Ala-Asp) box helicase 17                                     |
| 2296 | ENSG00000197442 | MARPKS      | 3591.7 | 0.24 | protein_coding               | 6  | 136878185 | 137113656 | mitogen-activated protein kinase kinase kinase 5                           |
| 2310 | ENSG00000172661 | FAM118      | 3622   | 0.24 | protein_coding               | 10 | 46220448  | 46284049  | family with sequence similarity 21, member C                               |
| 2365 | ENSG00000121873 | PRICK4      | 3702   | 0.24 | protein_coding               | 3  | 17690592  | 17690781  | phosphatidylinositol-4-phosphate 3-kinase, catalytic subunit alpha         |
| 2417 | ENSG00000162924 | REL         | 3785.2 | 0.24 | protein_coding               | 2  | 61108556  | 61168745  | vesicular stomatitis virus oncogene homolog                                |
| 2422 | ENSG00000197548 | ATG7        | 3789.7 | 0.24 | protein_coding               | 3  | 11313995  | 11369139  | autophagy related 7                                                        |
| 2464 | ENSG00000205873 | ZC3H11A     | 3848.8 | 0.24 | protein_coding               | 1  | 20326162  | 20326292  | zinc finger CCHC-type containing 11A                                       |
| 2509 | ENSG00000112486 | CCR8        | 3890.3 | 0.24 | protein_coding               | 6  | 167525295 | 167531184 | chemokine (C-C motif) receptor 6                                           |
| 2540 | ENSG00000109118 | HIVEP2      | 3935.2 | 0.24 | protein_coding               | 6  | 143072604 | 14326538  | human immunodeficiency virus type 1 enhancer binding protein 2             |
| 2596 | ENSG00000102492 | USP94       | 3978.4 | 0.24 | protein_coding               | 1  | 5053002   | 50580796  | ubiquitin specific peptidase 24                                            |
| 2600 | ENSG00000121350 | PYRXO1      | 4038.2 | 0.24 | protein_coding               | 12 | 21590549  | 21623300  | pyridine nucleotide-disulphide oxidoreductase domain 1                     |
| 2633 | ENSG00000197540 | DYRK1A      | 4078.4 | 0.24 | protein_coding               | 21 | 38730992  | 38889753  | dual-specific tyrosine-Y phosphatase regulated kinase 1A                   |
| 2686 | ENSG00000191490 | NBR1        | 4134.8 | 0.24 | protein_coding               | 26 | 37663015  | 37663015  | Nesprin-1 homolog (Drosophila)                                             |
| 2710 | ENSG00000175464 | USP34       | 4203   | 0.24 | protein_coding               | 2  | 61414558  | 61897904  | ubiquitin specific peptidase 34                                            |
| 2715 | ENSG00000136932 | CtBP1       | 4207.5 | 0.24 | protein_coding               | 9  | 10066871  | 10084852  | chromosome 9 open reading frame 156                                        |
| 2764 | ENSG00000102773 | ZBTB25      | 4242.6 | 0.24 | protein_coding               | 4  | 64818710  | 64818710  | zinc finger and BTB domain containing 25                                   |
| 2850 | ENSG00000158805 | ZNF74       | 4435.4 | 0.24 | protein_coding               | 16 | 89786078  | 89807311  | zinc finger protein 275                                                    |
| 3012 | ENSG00000136837 | CEP350      | 4693.1 | 0.24 | protein_coding               | 1  | 179923873 | 18004015  | centrosomal protein 350kDa                                                 |
| 3043 | ENSG00000105858 | ZNF702      | 4760.3 | 0.24 | protein_coding               | 14 | 35443     | 35443     | zinc finger protein 702                                                    |
| 3060 | ENSG00000165276 | TRMT10B     | 4785.5 | 0.24 | protein_coding               | 9  | 37753804  | 37779669  | tRNA methyltransferase 10 homolog B (S. cerevisiae)                        |
| 3067 | ENSG00000116580 | GONAL       | 4793.8 | 0.24 | protein_coding               | 1  | 15571958  | 15582911  | gon-4-like (C. elegans)                                                    |
| 3169 | ENSG00000102689 | DIP2A       | 4792.9 | 0.24 | protein_coding               | 4  | 4781812   | 47869205  | DIP2 disc-integrating protein 2 homolog A (Drosophila)                     |
| 3367 | ENSG00000166507 | NDST2       | 5295.1 | 0.24 | protein_coding               | 10 | 7551669   | 7571589   | N-deacetyl-N-sulfotransferase (heparan glucosaminyl) 2                     |
| 3711 | ENSG00000146531 | LOC10130491 | 5803   | 0.24 | protein_coding               | 20 | 29611857  | 29634010  | FSHD region gene 1 family, member B                                        |
| 4144 | ENSG00000101169 | RORP2       | 6445.8 | 0.24 | protein_coding               | 15 | 32333674  | 32333674  | retaxin-like family peptide receptor 2                                     |
| 4242 | ENSG00000159067 | RORP2       | 6591.4 | 0.24 | protein_coding               | 17 | 6779964   | 6815968   | Uncharacterized protein                                                    |
| 4553 | ENSG00000188771 | PLET1       | 7050.5 | 0.24 | protein_coding               | 11 | 11211878  | 11211878  | placenta expressed transcript 1                                            |
| 4734 | ENSG00000176588 | MKPRND      | 7261.3 | 0.24 | protein_coding               | 11 | 66747490  | 66749450  | MKS-related GPP, member D                                                  |
| 4800 | ENSG00000191188 | CRP114      | 7407.4 | 0.24 | protein_coding               | 1  | 20713689  | 20713689  | olfactory receptor, family 11, subfamily H, member 4                       |
| 4806 | ENSG00000198128 | OR2L3       | 7444.4 | 0.24 | protein_coding               | 1  | 24822394  | 24822422  | olfactory receptor, family 2, subfamily L, member 3                        |
| 4848 | ENSG00000181616 | OR52H1      | 7530.8 | 0.24 | protein_coding               | 11 | 5969179   | 5969719   | olfactory receptor, family 52, subfamily H, member 1                       |
| 4814 | ENSG00000192196 | OR52B1      | 7540.9 | 0.24 | protein_coding               | 12 | 4386493   | 4386616   | olfactory receptor, family 52, subfamily B, member 4                       |
| 4916 | ENSG00000127412 | TRPV5       | 7547.4 | 0.24 | protein_coding               | 7  | 142605267 | 142630005 | transient receptor potential cation channel, subfamily V, member 5         |
| 4974 | ENSG00000179179 | C15orf63    | 7619.9 | 0.24 | protein_coding               | 15 | 8860129   | 8860239   | chromosome 15 open reading frame 33                                        |
| 4986 | ENSG00000191919 | OR56B4      | 7710.9 | 0.24 | protein_coding               | 6  | 6130814   | 6130814   | olfactory receptor, family 56, subfamily B, member 4                       |
| 5105 | ENSG00000246366 |             | 7785.1 | 0.24 | protein_coding               | 8  | 7152012   | 71575514  | Uncharacterized protein                                                    |
| 5108 | ENSG00000176349 | LOC10128374 | 7785.1 | 0.24 | protein_coding               | 7  | 1876222   | 1880957   | Protein LOC10128374                                                        |
| 5136 | ENSG00000225310 | CERT15      | 7820.2 | 0.24 | protein_coding               | 17 | 14136960  | 14140179  | CMT1A duplicated region transcript 15                                      |
| 5232 | ENSG00000165204 | OR1K1       | 79327  | 0.24 | protein_coding               | 9  | 12556270  | 12565395  | olfactory receptor, family 1, subfamily K, member 1                        |
| 5360 | ENSG00000222013 |             | 6781.8 | 0.24 | rRNA                         | 11 | 7564590   | 7564603   | rRNA, SS ribosomal pseudogene 244                                          |
| 5394 | ENSG00000222346 |             | 7024.8 | 0.24 | rRNA                         | 7  | 11158308  | 11158320  | rRNA, SS ribosomal pseudogene 207                                          |
| 3039 | ENSG00000236337 |             | 4747   | 0.24 | sense_intronic               | 14 | 14702841  | 14702910  | FMR1 intronic transcript 1 (non-protein coding)                            |
| 4133 | ENSG00000231795 |             | 6442   | 0.24 | sense_intronic               | 20 | 33038735  | 33042357  | ITCH intronic transcript 1 (non-protein coding)                            |
| 4287 | ENSG00000236244 |             | 6454.6 | 0.24 | sense_intronic               | 49 | 8226351   | 8227694   | P-GEI intronic transcript 1 (non-protein coding)                           |
| 4145 | ENSG00000237738 | RNF216-IT1  | 7587.3 | 0.24 | sense_intronic               | 7  | 5702663   | 5702902   | RNF216 intronic transcript 1 (non-protein coding)                          |
| 4193 | ENSG00000121291 |             | 6448.3 | 0.24 | snRNA                        | 2  | 227833705 | 22783338  | Small nuclear RNA SNORA48                                                  |
| 4192 | ENSG0000013431  | RNF105B     | 6448.3 | 0.24 | snRNA                        | 20 | 8811833   | 881220    | rRNA, U110B small nucleolar                                                |
| 4024 | ENSG00000202216 |             | 7428.3 | 0.24 | snRNA                        | 2  | 18079128  | 18079265  | Small nucleolar RNA SNORA43                                                |
| 2837 | ENSG00000222623 |             | 3195.9 | 0.24 | snRNA                        | 1  | 157784    | 157887    | rRNA, U6 small nuclear 1100, pseudogene                                    |
| 1953 | ENSG00000204431 |             | 7190.3 | 0.24 | snRNA                        | 5  | 11550242  | 11550249  | rRNA, U6 small nuclear 844, pseudogene                                     |
| 2861 | ENSG00000252263 |             | 3962.3 | 0.24 | snRNA                        | 14 | 70962824  | 70962927  | rRNA, U6 small nuclear 655, pseudogene                                     |
| 2831 | ENSG00000202159 |             | 4303.8 | 0.24 | snRNA                        | 18 | 55422626  | 55422732  | rRNA, U6 small nuclear 742, pseudogene                                     |
| 2929 | ENSG00000181874 |             | 4456.4 | 0.24 | snRNA                        | 6  | 14562454  | 14562416  | rRNA, U6 small nuclear 180, pseudogene                                     |
| 3135 | ENSG00000199627 |             | 4910.8 | 0.24 | snRNA                        | 7  | 130739645 | 130739751 | rRNA, U6 small nuclear 1010, pseudogene                                    |
| 3172 | ENSG00000238365 |             | 4965.8 | 0.24 | snRNA                        | 1  | 154311219 | 154312778 | rRNA, U7 small nuclear 57, pseudogene                                      |
| 3204 | ENSG00000191932 |             | 5028.4 | 0.24 | snRNA                        | 12 | 1405238   | 1405238   | rRNA, U8 ribosomal RNA                                                     |
| 3273 | ENSG00000200594 |             | 5193.9 | 0.24 | snRNA                        | 6  | 155149310 | 155149310 | rRNA, U6 small nuclear 824, pseudogene                                     |
| 3674 | ENSG00000202897 |             | 5751.9 | 0.24 | snRNA                        | 2  | 43318526  | 43318632  | rRNA, U6 small nuclear 242, pseudogene                                     |
| 4023 | ENSG00000202528 |             | 5928.8 | 0.24 | snRNA                        | 1  | 46373201  | 46373303  | rRNA, U6 small nuclear 50, pseudogene                                      |
| 4223 | ENSG00000201077 |             | 6558.8 | 0.24 | snRNA                        | 15 | 42719789  | 42719895  | rRNA, U6 small nuclear 188, pseudogene                                     |
| 4613 | ENSG00000202885 |             | 7119.7 | 0.24 | snRNA                        | 17 | 64634389  | 64634492  | rRNA, U6 small nuclear 928, pseudogene                                     |
| 4625 | ENSG00000191919 |             | 7112.3 | 0.24 | snRNA                        | 21 | 43837608  | 43837702  | rRNA, U6 small nuclear 1445, pseudogene                                    |
| 4666 | ENSG00000253048 |             | 7190.3 | 0.24 | snRNA                        | 19 | 42977027  | 42977161  | rRNA, U6 small nuclear 60, pseudogene                                      |
| 4771 | ENSG00000202589 |             | 7345   | 0.24 | snRNA                        | 15 | 44026377  | 44026483  | rRNA, U6 small nuclear 354, pseudogene                                     |
| 4944 | ENSG00000202078 |             | 7419.4 | 0.24 | snRNA                        | 12 | 13341160  | 13341266  | rRNA, U6 small nuclear 327, pseudogene                                     |
| 5067 | ENSG00000252995 |             | 7728.5 | 0.24 | snRNA                        | 15 | 80109991  | 80109792  | rRNA, U6 small nuclear 667, pseudogene                                     |
| 2705 | ENSG00000211843 |             | 4184.6 | 0.24 | TR_V_gene                    | 14 | 22962389  | 22962451  | T cell receptor alpha joining 46                                           |
| 3103 | ENSG00000202688 |             | 1452.4 | 0.24 | TR_V_pseudogene              | 14 | 22962389  | 22967042  | T cell receptor alpha joining 25 (pseudogene)                              |
| 730  | ENSG00000171725 |             | 1452.4 | 0.24 | TR_V_gene                    | 7  | 14205292  | 14205316  | T cell receptor beta variable 4.2                                          |
| 4514 | ENSG00000231202 |             | 6999   | 0.24 | TR_V_pseudogene              | 7  | 38335364  | 38335334  | T cell receptor gamma variable B (pseudogene)                              |
| 4634 | ENSG00000215267 |             | 7140.7 | 0.24 | transcribed_unprocessed_pseu | 10 | 5317136   | 5330433   | aldo-keto reductase family 1, member C7, pseudogene                        |
| 4800 | ENSG00000234770 |             | 7556.7 | 0.24 | unitary_pseudogene           | 8  | 27417791  | 27416590  | galactonactin (L1) oxidase, pseudogene                                     |
| 4892 | ENSG00000234666 |             | 7738   | 0.24 | unitary_pseudogene           | 11 | 6086103   | 6086910   | olfactory receptor, family 52, subfamily X, member 1 pseudogene            |
| 1307 | ENSG00000203211 |             | 7738   | 0.24 | unitary_pseudogene           | 1  | 20089122  | 20089358  | measles haemagglutinin family member 3, pseudogene                         |
| 1376 | ENSG00000166578 | NCF1C       | 2229.2 | 0.24 | unprocessed_pseudogene       | 7  | 74572445  | 74587848  | neutrophil cytosolic factor 1C pseudogene                                  |
| 2078 | ENSG00000189165 |             | 3259   | 0.24 | unprocessed_pseudogene       | 2  | 3695136   | 3695347   | thymosin beta 4, X-linked pseudogene 2                                     |
| 4127 | ENSG00000192196 |             | 6403.6 | 0.24 | unprocessed_pseudogene       | 6  | 52664286  | 52662454  | glutathione S-transferase alpha 7, pseudogene                              |
| 4570 | ENSG00000180437 |             | 7071.5 | 0.24 | unprocessed_pseudogene       | 1  | 158693903 | 158694502 | olfactory receptor, family 6, subfamily K, member 4 pseudogene             |
| 4704 | ENSG00000289336 |             | 7236.5 | 0.24 | unprocessed_pseudogene       | 19 | 51689191  |           |                                                                            |



|      |                  |           |        |      |                              |           |           |           |                                                                |
|------|------------------|-----------|--------|------|------------------------------|-----------|-----------|-----------|----------------------------------------------------------------|
| 4275 | ENSG00000234060  | 66607     | 0.24   |      |                              |           |           |           |                                                                |
| 4286 | ENSG00000205867  | 66634     | 0.24   |      |                              |           |           |           |                                                                |
| 4296 | ENSG00000205892  | 66813     | 0.24   |      |                              |           |           |           |                                                                |
| 4306 | ENSG00000227603  | 66939     | 0.24   |      |                              |           |           |           |                                                                |
| 4331 | ENSG00000215596  | 6727      | 0.24   |      |                              |           |           |           |                                                                |
| 4335 | ENSG00000205266  | 67134     | 0.24   |      |                              |           |           |           |                                                                |
| 4355 | ENSG00000228511  | 67683     | 0.24   | 1    | 153726600                    | 153726703 |           |           | Small nuclear RNA U13                                          |
| 4378 | ENSG00000205251  | 68103     | 0.24   |      |                              |           |           |           |                                                                |
| 4386 | ENSG00000205813  | 68261     | 0.24   |      |                              |           |           |           |                                                                |
| 4405 | ENSG00000245869  | 68688     | 0.24   |      |                              |           |           |           |                                                                |
| 4443 | ENSG00000237586  | 68773     | 0.24   |      |                              |           |           |           |                                                                |
| 4452 | ENSG00000205964  | 68964     | 0.24   |      |                              |           |           |           |                                                                |
| 4452 | ENSG00000205999  | 69126     | 0.24   |      |                              |           |           |           |                                                                |
| 4483 | ENSG00000204129  | 69297     | 0.24   |      |                              |           |           |           |                                                                |
| 4486 | ENSG00000217767  | 69312     | 0.24   |      |                              |           |           |           |                                                                |
| 4483 | ENSG00000230730  | 6948      | 0.24   |      |                              |           |           |           |                                                                |
| 4480 | ENSG000002043705 | 69499     | 0.24   |      |                              |           |           |           |                                                                |
| 4487 | ENSG00000205266  | 69531     | 0.24   |      |                              |           |           |           |                                                                |
| 4502 | ENSG00000252670  | 69601     | 0.24   | 16   | 69814940                     | 69815031  |           |           | Y RNA                                                          |
| 4507 | ENSG00000270190  | 69696     | 0.24   |      |                              |           |           |           |                                                                |
| 4518 | ENSG00000205468  | 69905     | 0.24   |      |                              |           |           |           |                                                                |
| 4530 | ENSG00000254839  | 70165     | 0.24   |      |                              |           |           |           |                                                                |
| 4536 | ENSG00000211498  | 70268     | 0.24   |      |                              |           |           |           |                                                                |
| 4558 | ENSG00000205338  | 7091      | 0.24   |      |                              |           |           |           |                                                                |
| 4584 | ENSG00000232043  | 70882     | 0.24   |      |                              |           |           |           |                                                                |
| 4585 | ENSG00000252855  | 70893     | 0.24   |      |                              |           |           |           |                                                                |
| 4598 | ENSG00000205775  | 70926     | 0.24   |      |                              |           |           |           |                                                                |
| 4598 | ENSG00000288623  | 70929     | 0.24   |      |                              |           |           |           |                                                                |
| 4605 | ENSG000002058162 | 71111     | 0.24   |      |                              |           |           |           |                                                                |
| 4607 | ENSG00000205603  | 71134     | 0.24   |      |                              |           |           |           |                                                                |
| 4614 | ENSG00000229331  | 71213     | 0.24   |      |                              |           |           |           |                                                                |
| 4615 | ENSG000002176395 | 71216     | 0.24   | 19   | 45005729                     | 45033811  |           |           | carcinoembryonic antigen-related cell adhesion molecule 20     |
| 4617 | ENSG000002021788 | 71251     | 0.24   |      |                              |           |           |           |                                                                |
| 4618 | ENSG00000234043  | 71252     | 0.24   |      |                              |           |           |           |                                                                |
| 4649 | ENSG00000206908  | 71626     | 0.24   |      |                              |           |           |           |                                                                |
| 4669 | ENSG00000204466  | 71905     | 0.24   |      |                              |           |           |           |                                                                |
| 4674 | ENSG00000205322  | 71935     | 0.24   |      |                              |           |           |           |                                                                |
| 4676 | ENSG000002050006 | 71943     | 0.24   |      |                              |           |           |           |                                                                |
| 4678 | ENSG000002053891 | 71988     | 0.24   |      |                              |           |           |           |                                                                |
| 4681 | ENSG00000258919  | 72118     | 0.24   |      |                              |           |           |           |                                                                |
| 4687 | ENSG000002057986 | 72201     | 0.24   |      |                              |           |           |           |                                                                |
| 4690 | ENSG000002051584 | 72244     | 0.24   |      |                              |           |           |           |                                                                |
| 4702 | ENSG00000224967  | 72559     | 0.24   |      |                              |           |           |           |                                                                |
| 4703 | ENSG000002049215 | 72581     | 0.24   |      |                              |           |           |           |                                                                |
| 4705 | ENSG00000205642  | 72589     | 0.24   |      |                              |           |           |           |                                                                |
| 4706 | ENSG00000207271  | 72593     | 0.24   |      |                              |           |           |           |                                                                |
| 4709 | ENSG000002064380 | 72595     | 0.24   |      |                              |           |           |           |                                                                |
| 4714 | ENSG000002056661 | 7264      | 0.24   | 1    | 143163750                    | 143163822 |           |           | microRNA 3118-2                                                |
| 4714 | ENSG00000211303  | 72714     | 0.24   |      |                              |           |           |           |                                                                |
| 4731 | ENSG000002066848 | 72796     | 0.24   |      |                              |           |           |           |                                                                |
| 4739 | ENSG000002059259 | 7287      | 0.24   |      |                              |           |           |           |                                                                |
| 4740 | ENSG00000205216  | 72873     | 0.24   |      |                              |           |           |           |                                                                |
| 4754 | ENSG000002087749 | 73114     | 0.24   |      |                              |           |           |           |                                                                |
| 4760 | ENSG000002053045 | 7326      | 0.24   |      |                              |           |           |           |                                                                |
| 4761 | ENSG00000205326  | 7329      | 0.24   |      |                              |           |           |           |                                                                |
| 4764 | ENSG00000232303  | 73348     | 0.24   |      |                              |           |           |           |                                                                |
| 4764 | ENSG000002089358 | 73391     | 0.24   | 1    | 224215780                    | 224216371 |           |           | Uncharacterized protein                                        |
| 4770 | ENSG000002052521 | 73448     | 0.24   |      |                              |           |           |           |                                                                |
| 4772 | ENSG00000233143  | 73468     | 0.24   |      |                              |           |           |           |                                                                |
| 4786 | ENSG000002089365 | 73578     | 0.24   |      |                              |           |           |           |                                                                |
| 4791 | ENSG00000211461  | 73583     | 0.24   |      |                              |           |           |           |                                                                |
| 4797 | ENSG00000228648  | 73758     | 0.24   |      |                              |           |           |           |                                                                |
| 4799 | ENSG00000254988  | 73796     | 0.24   |      |                              |           |           |           |                                                                |
| 4801 | ENSG000002056663 | 73798     | 0.24   |      |                              |           |           |           |                                                                |
| 4804 | ENSG00000236274  | 73803     | 0.24   |      |                              |           |           |           |                                                                |
| 4804 | ENSG000002050535 | 73823     | 0.24   |      |                              |           |           |           |                                                                |
| 4806 | ENSG000002050463 | 74144     | 0.24   |      |                              |           |           |           |                                                                |
| 4843 | ENSG00000213045  | 74373     | 0.24   |      |                              |           |           |           |                                                                |
| 4844 | ENSG000002027716 | 74392     | 0.24   |      |                              |           |           |           |                                                                |
| 4851 | ENSG00000203390  | 74553     | 0.24   |      |                              |           |           |           |                                                                |
| 4856 | ENSG000002089662 | 74641     | 0.24   |      |                              |           |           |           |                                                                |
| 4865 | ENSG000002056101 | 74746     | 0.24   |      |                              |           |           |           |                                                                |
| 4873 | ENSG00000205113  | 74824     | 0.24   |      |                              |           |           |           |                                                                |
| 4876 | ENSG00000249244  | 74871     | 0.24   |      |                              |           |           |           |                                                                |
| 4878 | ENSG000002077072 | 74892     | 0.24   |      |                              |           |           |           |                                                                |
| 4888 | ENSG000002046858 | 75218     | 0.24   |      |                              |           |           |           |                                                                |
| 4891 | ENSG000002089913 | 7528      | 0.24   |      |                              |           |           |           |                                                                |
| 4893 | ENSG00000215860  | 75933     | 0.24   |      |                              |           |           |           |                                                                |
| 4898 | ENSG000002027889 | 75954     | 0.24   |      |                              |           |           |           |                                                                |
| 4905 | ENSG00000201656  | 75958     | 0.24   |      |                              |           |           |           |                                                                |
| 4909 | ENSG00000227582  | 75991     | 0.24   |      |                              |           |           |           |                                                                |
| 4918 | ENSG00000205002  | 75918     | 0.24   |      |                              |           |           |           |                                                                |
| 4921 | ENSG00000205040  | 75975     | 0.24   |      |                              |           |           |           |                                                                |
| 4925 | ENSG00000205271  | 75951     | 0.24   |      |                              |           |           |           |                                                                |
| 4923 | ENSG00000209714  | 75970     | 0.24   |      |                              |           |           |           |                                                                |
| 4934 | ENSG000002051164 | 75976     | 0.24   |      |                              |           |           |           |                                                                |
| 4936 | ENSG000002051648 | 7574      | 0.24   |      |                              |           |           |           |                                                                |
| 4963 | ENSG000002056596 | 75933     | 0.24   |      |                              |           |           |           |                                                                |
| 4961 | ENSG000002087176 | 76010     | 0.24   |      |                              |           |           |           |                                                                |
| 4962 | ENSG00000225802  | 7603      | 0.24   |      |                              |           |           |           |                                                                |
| 4972 | ENSG000002085603 | 76016     | 0.24   |      |                              |           |           |           |                                                                |
| 4976 | ENSG000002058811 | 76020     | 0.24   | 12   | 123500727                    | 123500976 |           |           | RNA 75L cytoplasmic 133, pseudogene                            |
| 4990 | ENSG000002059398 | 76417     | 0.24   |      |                              |           |           |           |                                                                |
| 5000 | ENSG000002081433 | 7657      | 0.24   |      |                              |           |           |           |                                                                |
| 5004 | ENSG00000205330  | 76595     | 0.24   |      |                              |           |           |           |                                                                |
| 5013 | ENSG000002087320 | 76701     | 0.24   |      |                              |           |           |           |                                                                |
| 5018 | ENSG000002027281 | 76744     | 0.24   |      |                              |           |           |           |                                                                |
| 5019 | ENSG00000204986  | 76747     | 0.24   |      |                              |           |           |           |                                                                |
| 5023 | ENSG000002084269 | 76829     | 0.24   |      |                              |           |           |           |                                                                |
| 5025 | ENSG00000203080  | 76832     | 0.24   |      |                              |           |           |           |                                                                |
| 5027 | ENSG00000211317  | 76833     | 0.24   |      |                              |           |           |           |                                                                |
| 5037 | ENSG000002038855 | 7697      | 0.24   | 11   | 126151552                    | 126151649 |           |           | Small nuclear RNA U13                                          |
| 5064 | ENSG00000228352  | 77235     | 0.24   |      |                              |           |           |           |                                                                |
| 5080 | ENSG000002031033 | 77422     | 0.24   |      |                              |           |           |           |                                                                |
| 5083 | ENSG000002048620 | 77468     | 0.24   |      |                              |           |           |           |                                                                |
| 5120 | ENSG00000208273  | 78035     | 0.24   |      |                              |           |           |           |                                                                |
| 5134 | ENSG000002050209 | 78188     | 0.24   |      |                              |           |           |           |                                                                |
| 5178 | ENSG000002087638 | 78688     | 0.24   |      |                              |           |           |           |                                                                |
| 5233 | ENSG000002024885 | 79342     | 0.24   |      |                              |           |           |           |                                                                |
| 5264 | ENSG000002030778 | 79225     | 0.24   |      |                              |           |           |           |                                                                |
| 5281 | ENSG00000225832  | 79848     | 0.24   |      |                              |           |           |           |                                                                |
| 5283 | ENSG000002070555 | 79889     | 0.24   |      |                              |           |           |           |                                                                |
| 5312 | ENSG000002050864 | 80228     | 0.24   |      |                              |           |           |           |                                                                |
| 5322 | ENSG00000238772  | 80343     | 0.24   |      |                              |           |           |           |                                                                |
| 1812 | ENSG000002057333 | IFNG-AS1  | 29054  | 0.23 | antisense                    | 12        | 68383225  | 68628466  | IFNG antisense RNA 1                                           |
| 4829 | ENSG000002021088 | AIIN      | 74182  | 0.23 | antisense                    | X         | 3577528   | 3582023   | RNA antisense RNA 1                                            |
| 4927 | ENSG000002082527 | AIIN      | 75979  | 0.23 | antisense                    | 6         | 160424323 | 160428996 | antisense of IGF2R non-protein coding RNA                      |
| 5092 | ENSG00000204854  | LINC00076 | 77637  | 0.23 | antisense                    | 13        | 110309269 | 110382354 | long intergenic non-protein coding RNA 676                     |
| 5364 | ENSG000002022228 | LINC00582 | 80582  | 0.23 | antisense                    | 1         | 231727038 | 231747836 | long intergenic non-protein coding RNA 569                     |
| 3834 | ENSG00000211961  | LINC00582 | 60227  | 0.23 | IG V <sub>H</sub> gene       | 14        | 109662931 | 109663424 | immunoglobulin heavy variable 1-45                             |
| 5147 | ENSG000002053823 | LINC00582 | 78131  | 0.23 | IG V <sub>H</sub> pseudogene | 22        | 22440972  | 22441521  | immunoglobulin lambda variable 1-62 (pseudogene)               |
| 1820 | ENSG000002025873 | LINC00582 | 22723  | 0.23 | lincRNA                      | 3         | 44462016  | 44464566  | long intergenic non-protein coding RNA 694                     |
| 1846 | ENSG00000231538  | LINC00278 | 28924  | 0.23 | lincRNA                      | Y         | 2870953   | 2870313   | long intergenic non-protein coding RNA 278                     |
| 2725 | ENSG00000245532  | NEAT1     | 42296  | 0.23 | lincRNA                      | 11        | 65190245  | 65213011  | nuclear paraspeckle assembly transcript 1 (non-protein coding) |
| 3334 | ENSG00000205096  | FTX       | 52949  | 0.23 | lincRNA                      | A         | 73163790  | 73513468  | FTX transcript, XIST regulator (non-protein coding)            |
| 5265 | ENSG00000231755  | CHC3L-AS1 | 75717  | 0.23 | lincRNA                      | 21        | 19207335  | 19207525  | CHC3L antisense RNA 1                                          |
| 5408 | ENSG000002027830 | LINC01132 | 81424  | 0.23 | lincRNA                      | 1         | 234859789 | 234867390 | long intergenic non-protein coding RNA 1132                    |
| 5500 | ENSG00000217398  | LINC00469 | 82536  | 0.23 | lincRNA                      | 17        | 71746469  | 71624659  | long intergenic non-protein coding RNA 469                     |
| 5514 | ENSG000002056441 | LINC00484 | 82523  | 0.23 | lincRNA                      | 9         | 93941855  | 93921859  | long intergenic non-protein coding RNA 484                     |
| 5542 | ENSG000002059334 | LINC00484 | 8276   | 0.23 | lincRNA                      | 14        | 24391456  | 24402777  | long intergenic non-protein coding RNA 596                     |
| 3935 | ENSG000002082676 | MIR4632   | 40117  | 0.23 | miRNA                        | 1         | 12251770  | 12251830  | microRNA 4632                                                  |
| 4459 | ENSG00000211264  | MIR1284   | 439171 | 0.23 | miRNA                        | 3         | 71591121  | 71591240  | microRNA 1284                                                  |
| 4451 | ENSG000002083857 | MIR4729   | 69123  | 0.23 | miRNA                        | 17        | 57443444  | 57443515  | microRNA 4729                                                  |
| 4749 | ENSG000002027719 | MIR623    | 7300   | 0.23 | miRNA                        | 13        | 10008385  | 10008442  | microRNA 623                                                   |
| 4869 | ENSG000002082971 | MIR744    | 74784  | 0.23 | miRNA                        | 9         | 11985216  | 11985313  | microRNA 744                                                   |
| 4880 | ENSG000002027903 | MIR569    | 74894  | 0.23 | miRNA                        | 3         | 17082453  | 17082458  | microRNA 569                                                   |
| 4845 | ENSG00000208810  | MIR3907   | 75842  | 0.23 | miRNA                        | 13        | 151130575 | 151130725 | microRNA 3907                                                  |
| 4988 | ENSG000002087165 | MIR153    | 78223  | 0.23 | miRNA                        | 9         | 24241200  | 24241297  | microRNA 153                                                   |
| 5040 | ENSG000002085719 | MIR4681   | 76887  | 0.23 | miRNA                        | 10        | 121137484 | 121137555 | microRNA 4681                                                  |
| 5081 | ENSG000002086320 | MIR3909   | 77611  | 0.23 | miRNA                        | 22        | 35731833  | 35731751  | microRNA 3909                                                  |
| 5226 | ENSG0000021464   | MIR1271   | 79234  | 0.23 | miRNA                        | 5         | 11579469  | 11579534  | microRNA 1271                                                  |
| 2810 | ENSG00000198567  | MIR1271   | 40534  | 0.23 | misc. RNA                    | X         | 85274612  | 85274719  | Y RNA                                                          |
| 3080 | ENSG00000198362  | MIR1271   | 45678  | 0.23 | misc. RNA                    | 11        | 75548559  | 75548690  | Y RNA                                                          |
| 3163 | ENSG00000201013  |           |        |      |                              |           |           |           |                                                                |

|      |                   |        |      |                      |    |           |           |                                                                                                               |
|------|-------------------|--------|------|----------------------|----|-----------|-----------|---------------------------------------------------------------------------------------------------------------|
| 5623 | ENSG000002029726  | 6259.4 | 0.23 | misc. RNA            | 11 | 118801920 | 118802784 | RNA 75L, cytoplasmic 68S, pseudogene                                                                          |
| 5196 | ENSG00000215389   | 344.8  | 0.23 | processed_pseudogene | 2  | 26033345  | 26033345  | lysosomal protein 3 pseudogene 7                                                                              |
| 2566 | ENSG00000244490   | 3981.9 | 0.23 | processed_pseudogene | 7  | 104941969 | 104942533 | RWD domain containing 4 pseudogene 1                                                                          |
| 2588 | ENSG00000225599   | 4017.2 | 0.23 | processed_pseudogene | 22 | 40522329  | 40520370  | ribosomal protein L7 pseudogene 52                                                                            |
| 2686 | ENSG00000249756   | 4123.3 | 0.23 | processed_pseudogene | 13 | 19411906  | 19412238  | ras homolog family member T1 pseudogene 3                                                                     |
| 4114 | ENSG00000238483   | 6627.3 | 0.23 | processed_pseudogene | 3  | 36853369  | 36853369  | keratin 19 pseudogene 11                                                                                      |
| 4117 | ENSG00000222259   | 6500.3 | 0.23 | processed_pseudogene | 9  | 41968785  | 41968211  | ribosomal protein S18a pseudogene 16                                                                          |
| 4316 | ENSG00000229179   | 6702.0 | 0.23 | processed_pseudogene | 9  | 23736542  | 23736542  | high mobility group non-histone binding domain 2 pseudogene 6                                                 |
| 4378 | ENSG00000228173   | 6633.0 | 0.23 | processed_pseudogene | 1  | 11293020  | 11293169  | ribosomal protein L38 pseudogene 6                                                                            |
| 4763 | ENSG00000202696   | 7334.3 | 0.23 | processed_pseudogene | X  | 73352839  | 73352849  | DEAD (Asp-Glu-Ala-Asp) box polypeptide 3, 4 like pseudogene 2                                                 |
| 4774 | ENSG000002025215  | 7347.5 | 0.23 | processed_pseudogene | 11 | 10727130  | 10727130  | SWI5NF related, matrix associated, actin dependent regulator of chromatin, subfamily a, member 1 pseudogene 1 |
| 5620 | ENSG00000202843   | 7679.9 | 0.23 | processed_pseudogene | 17 | 2502405   | 2502407   | divergent paired related homeobox pseudogene 4                                                                |
| 5622 | ENSG00000202529   | 7682.9 | 0.23 | processed_pseudogene | 1  | 15902963  | 15902963  | RAN1 homolog pseudogene 2                                                                                     |
| 5048 | ENSG00000238245   | 7706.7 | 0.23 | processed_pseudogene | 9  | 66513032  | 66514308  | ribosomal protein V6 pseudogene 2                                                                             |
| 5051 | ENSG00000227905   | 7712.1 | 0.23 | processed_pseudogene | 10 | 89607892  | 89609380  | mediator complex subunit 6 pseudogene 1                                                                       |
| 5079 | ENSG00000202498   | 7741.2 | 0.23 | processed_pseudogene | 21 | 16201810  | 16202310  | RNA binding motif protein, X linked 2 pseudogene 1                                                            |
| 5166 | ENSG000002021957  | 7853.4 | 0.23 | processed_pseudogene | 10 | 79828381  | 79829296  | guanine nucleotide binding protein (G-protein), alpha inhibiting activity polypeptide 2 pseudogene 4          |
| 5187 | ENSG000002024357  | 7875.8 | 0.23 | processed_pseudogene | 20 | 37957657  | 37958567  | autophagy related 3 pseudogene 1                                                                              |
| 5212 | ENSG000002028184  | 7912.6 | 0.23 | processed_pseudogene | 21 | 14897520  | 14900000  | sorting nexin 19 pseudogene 1                                                                                 |
| 5216 | ENSG000002027913  | 7919.9 | 0.23 | processed_pseudogene | 6  | 162989411 | 162990140 | keratin 8 pseudogene 44                                                                                       |
| 5292 | ENSG00000202028   | 7968.8 | 0.23 | processed_pseudogene | 9  | 21083770  | 21083922  | inhibitor of p115, pseudogene 1                                                                               |
| 5297 | ENSG00000202091   | 8001.9 | 0.23 | processed_pseudogene | 6  | 83634548  | 83634841  | leucine aminopeptidase 3 pseudogene 1                                                                         |
| 5307 | ENSG000002051078  | 8015   | 0.23 | processed_pseudogene | 5  | 75048395  | 75049304  | solute carrier family 25 (mitochondrial carrier, adenine nucleotide translocator), member 5                   |
| 5309 | ENSG000002028631  | 8020   | 0.23 | processed_pseudogene | 10 | 51784895  | 51787123  | solute carrier family 9, subfamily A (NHE3), cation proton antiporter 3, member 3 pseudogene 3                |
| 5343 | ENSG000002023524  | 8057.9 | 0.23 | processed_pseudogene | 13 | 21521174  | 21522198  | RAN, member RAS oncogene family pseudogene 8                                                                  |
| 5344 | ENSG00000202646   | 8062.0 | 0.23 | processed_pseudogene | 12 | 5262122   | 5262122   | myeloblastin like 7A pseudogene 1                                                                             |
| 5350 | ENSG000002025034  | 8076.5 | 0.23 | processed_pseudogene | 4  | 11121260  | 11121429  | zinc finger, BED type containing 1 pseudogene 1                                                               |
| 5376 | ENSG000002048958  | 8100.3 | 0.23 | processed_pseudogene | 4  | 130057081 | 130060985 | zinc finger, SWIM-type containing 5 pseudogene 3                                                              |
| 5378 | ENSG000002029293  | 8102.0 | 0.23 | processed_pseudogene | 3  | 68631824  | 68631824  | crystallin, alpha (retinone reduction pseudogene 2)                                                           |
| 5386 | ENSG000002049991  | 8427.7 | 0.23 | processed_pseudogene | 12 | 133702005 | 133702038 | ribosomal protein L23a pseudogene 07                                                                          |
| 5716 | ENSG000002069811  | 8489.9 | 0.23 | processed_pseudogene | 19 | 35136567  | 35136975  | secretoglycin, family 2B, member 3, pseudogene 1                                                              |
| 5787 | ENSG00000201109   | 8522.7 | 0.23 | processed_pseudogene | 2  | 7458237   | 7458237   | VE1F1 homeobox pseudogene 2                                                                                   |
| 5856 | ENSG00000204832   | 8627.8 | 0.23 | processed_pseudogene | 2  | 74571196  | 74571196  | NECAP endocytosis associated 1 pseudogene 2                                                                   |
| 5877 | ENSG000002032623  | 8655.2 | 0.23 | processed_pseudogene | 10 | 10118729  | 10119700  | phosphoglycerate mutase 1 pseudogene 11                                                                       |
| 5904 | ENSG00000202049   | 8717.4 | 0.23 | processed_pseudogene | 12 | 3158124   | 3158124   | ribosomal protein L21 pseudogene 5                                                                            |
| 5920 | ENSG00000186991   | 8871.1 | 0.23 | protein_coding       | 1  | 1133888   | 1142071   | tumor necrosis factor receptor superfamily, member 18                                                         |
| 1219 | ENSG0000010019810 | 8874   | 0.23 | protein_coding       | 12 | 6898242   | 6899274   | CD4 molecule                                                                                                  |
| 1228 | ENSG0000010015910 | 8924   | 0.23 | protein_coding       | 19 | 3172304   | 3172304   | sphingosine 1-phosphate receptor 4                                                                            |
| 1275 | ENSG00000175489   | 8935.9 | 0.23 | protein_coding       | 19 | 18051954  | 18052487  | leucine rich repeat containing 25                                                                             |
| 1302 | ENSG00000132704   | 8938.5 | 0.23 | protein_coding       | 1  | 157715523 | 157748922 | Fc receptor like 2                                                                                            |
| 1321 | ENSG00000106996   | 8940.1 | 0.23 | protein_coding       | 15 | 4347316   | 4347316   | Cy1c-type binding protein 1                                                                                   |
| 1322 | ENSG000001001865  | 8942.0 | 0.23 | protein_coding       | 25 | 6758181   | 67571164  | interleukin 2 receptor, beta                                                                                  |
| 1360 | ENSG000002027897  | 8963.9 | 0.23 | protein_coding       | 6  | 137518621 | 13754086  | interferon gamma receptor 1                                                                                   |
| 1414 | ENSG00000106421   | 8963.9 | 0.23 | protein_coding       | 6  | 17620907  | 17620907  | prokineticin 2                                                                                                |
| 1430 | ENSG000002024264  | 8963.9 | 0.23 | protein_coding       | 6  | 32932490  | 32912480  | proteasome (prosome) subunit, beta type, B                                                                    |
| 1454 | ENSG00000186259   | 8963.9 | 0.23 | protein_coding       | 19 | 15731707  | 15730405  | cytochrome P450, family 4, subfamily F, polypeptide 33                                                        |
| 1472 | ENSG00000106952   | 8963.9 | 0.23 | protein_coding       | 19 | 10444552  | 10444552  | interleukin adhesion molecule 3                                                                               |
| 1477 | ENSG00000106964   | 8963.9 | 0.23 | protein_coding       | 19 | 64119925  | 64119925  | death-associated protein kinase 2                                                                             |
| 1480 | ENSG00000197852   | 8963.9 | 0.23 | protein_coding       | 1  | 112223252 | 11228446  | family with sequence similarity 212, member B                                                                 |
| 1487 | ENSG00000199128   | 8963.9 | 0.23 | protein_coding       | 21 | 34715202  | 34715202  | interferon gamma receptor 2 (interferon gamma transducer 1)                                                   |
| 1550 | ENSG000001001708  | 8963.9 | 0.23 | protein_coding       | 22 | 5296114   | 5296114   | thymidine phosphorylase                                                                                       |
| 1555 | ENSG00000135263   | 8963.9 | 0.23 | protein_coding       | 5  | 15967869  | 159772403 | cytokeratin 17                                                                                                |
| 1607 | ENSG00000129395   | 8963.9 | 0.23 | protein_coding       | 19 | 10071138  | 10071935  | cyclin-dependent protein kinase 2D (p19, Inhibin CDK4)                                                        |
| 1626 | ENSG000001001204  | 8963.9 | 0.23 | protein_coding       | 12 | 18392401  | 18392401  | actin related protein 23L, isoform 5, BDNF                                                                    |
| 1711 | ENSG000000991317  | 8963.9 | 0.23 | protein_coding       | 3  | 3252804   | 3254800   | CKLF-like MARVEL transmembrane domain containing 6                                                            |
| 1727 | ENSG00000186981   | 8963.9 | 0.23 | protein_coding       | 18 | 5289810   | 5292702   | zinc finger and BTB domain containing 14                                                                      |
| 1734 | ENSG0000010015910 | 8963.9 | 0.23 | protein_coding       | 19 | 3911380   | 3911380   | Sial1 and Sial2 domain containing 2                                                                           |
| 1741 | ENSG000002026503  | 8963.9 | 0.23 | protein_coding       | 6  | 29909037  | 2991380   | major histocompatibility complex, class I, A                                                                  |
| 1749 | ENSG00000202599   | 8963.9 | 0.23 | protein_coding       | 4  | 110481361 | 110498914 | colicid-like domain containing 109B                                                                           |
| 1851 | ENSG00000186925   | 8963.9 | 0.23 | protein_coding       | 4  | 17861892  | 17861892  | G-protein coupled receptor kinase 8                                                                           |
| 1854 | ENSG00000138964   | 8963.9 | 0.23 | protein_coding       | 22 | 44568836  | 44561413  | parvin, gamma                                                                                                 |
| 1871 | ENSG00000181994   | 8963.9 | 0.23 | protein_coding       | 19 | 3035470   | 30358919  | Ras and Rab interactor-like                                                                                   |
| 1935 | ENSG00000181919   | 8963.9 | 0.23 | protein_coding       | 12 | 12069399  | 12069399  | Fc fragment of IgG, high affinity 1b receptor (CD64)                                                          |
| 1971 | ENSG00000182541   | 8963.9 | 0.23 | protein_coding       | 22 | 31608225  | 31676066  | LIM domain kinase 2                                                                                           |
| 1984 | ENSG00000141968   | 8963.9 | 0.23 | protein_coding       | 19 | 6772725   | 6857377   | vav 1, guanine nucleotide exchange factor                                                                     |
| 2001 | ENSG0000010015910 | 8963.9 | 0.23 | protein_coding       | 3  | 11214248  | 11214248  | B and T lymphocyte associated 1                                                                               |
| 2019 | ENSG00000202567   | 8963.9 | 0.23 | protein_coding       | 8  | 14221285  | 14221840  | solute carrier family 45, member 4                                                                            |
| 2028 | ENSG000001001342  | 8963.9 | 0.23 | protein_coding       | 16 | 11961985  | 12009399  | GI to S phase transition 1                                                                                    |
| 2048 | ENSG00000202871   | 8963.9 | 0.23 | protein_coding       | 17 | 3333128   | 33416338  | ring finger and FYVE-like domain containing 53, disulfine protein ligase                                      |
| 2082 | ENSG00000111144   | 8963.9 | 0.23 | protein_coding       | 12 | 98304606  | 9832498   | ubiquitin A, cytosolic                                                                                        |
| 2089 | ENSG00000141416   | 8963.9 | 0.23 | protein_coding       | 8  | 20054878  | 20084320  | ATPase, H+ transporting, lysosomal 56/58kDa, V1 subunit B2                                                    |
| 2092 | ENSG00000186923   | 8963.9 | 0.23 | protein_coding       | 82 | 6203283   | 6203283   | RW domain containing 53, ubiquitin protein ligase 2                                                           |
| 2117 | ENSG00000114978   | 8963.9 | 0.23 | protein_coding       | 2  | 74379655  | 74406205  | MOB kinase activator 1A                                                                                       |
| 2189 | ENSG00000143924   | 8963.9 | 0.23 | protein_coding       | 2  | 42394950  | 42395888  | ectoderm microtubule associated protein like 4                                                                |
| 2190 | ENSG0000010015910 | 8963.9 | 0.23 | protein_coding       | 5  | 17508000  | 17508000  | lysosomal receptor H2                                                                                         |
| 2227 | ENSG00000179513   | 8963.9 | 0.23 | protein_coding       | 12 | 110349991 | 110349991 | ankyrin repeat domain 13A                                                                                     |
| 2246 | ENSG00000185753   | 8963.9 | 0.23 | protein_coding       | 4  | 6042865   | 6042869   | chromosome X open reading frame 38                                                                            |
| 2287 | ENSG00000106977   | 8963.9 | 0.23 | protein_coding       | 19 | 550819    | 550819    | leukocyte immunoglobulin-like receptor, subfamily B (with TM and ITIM domains), member 1                      |
| 2293 | ENSG00000185359   | 8963.9 | 0.23 | protein_coding       | X  | 134554584 | 134715435 | DEADH (Asp-Glu-Ala-Asp/His) box polypeptide 26B                                                               |
| 2298 | ENSG00000127314   | 8963.9 | 0.23 | protein_coding       | 12 | 6900418   | 6900432   | RAP1B, member of RAS oncogene family                                                                          |
| 2318 | ENSG00000185484   | 8963.9 | 0.23 | protein_coding       | 13 | 27642039  | 27746033  | ubiquitin specific peptidase 12                                                                               |
| 2328 | ENSG00000135361   | 8963.9 | 0.23 | protein_coding       | 13 | 36317838  | 36319156  | profilin 1F1-like                                                                                             |
| 2330 | ENSG00000113851   | 8963.9 | 0.23 | protein_coding       | 3  | 3190676   | 3221194   | cerberon                                                                                                      |
| 2360 | ENSG00000111790   | 8963.9 | 0.23 | protein_coding       | 12 | 27091316  | 27119563  | FGFR1, oncogene partner 2                                                                                     |
| 2387 | ENSG0000010015910 | 8963.9 | 0.23 | protein_coding       | 12 | 44584239  | 44198455  | ribonuclease P, cytosolic II                                                                                  |
| 2400 | ENSG00000170852   | 8963.9 | 0.23 | protein_coding       | 7  | 32997743  | 32997743  | leitch repeat and BTB (POZ) domain containing 2                                                               |
| 2405 | ENSG00000170852   | 8963.9 | 0.23 | protein_coding       | 17 | 5625495   | 5625495   | ubiquitin specific peptidase 3z                                                                               |
| 2417 | ENSG00000186925   | 8963.9 | 0.23 | protein_coding       | 10 | 10485496  | 10485496  | ubiquitin-specific protease 1                                                                                 |
| 2428 | ENSG0000066777    | 8963.9 | 0.23 | protein_coding       | 8  | 68895747  | 68855912  | ADP-ribosylation factor guanine nucleotide-exchange factor 1 (beta/delta/A-ribosylated)                       |
| 2728 | ENSG00000098896   | 8963.9 | 0.23 | protein_coding       | 2  | 1718526   | 17311486  | HEAT repeat containing 9B                                                                                     |
| 2729 | ENSG00000115471   | 8963.9 | 0.23 | protein_coding       | 12 | 8403946   | 8403946   | multiple C2 domain transmembrane 1                                                                            |
| 2744 | ENSG00000181919   | 8963.9 | 0.23 | protein_coding       | 2  | 11435054  | 11435098  | round spermatid basic protein 1                                                                               |
| 2758 | ENSG00000122417   | 8963.9 | 0.23 | protein_coding       | 1  | 8681434   | 8692623   | outer dense fiber of sperm tail 2-like                                                                        |
| 2771 | ENSG00000119020   | 8963.9 | 0.23 | protein_coding       | 1  | 21144640  | 21144640  | export complex component 9                                                                                    |
| 2808 | ENSG000002048592  | 8963.9 | 0.23 | protein_coding       | 3  | 52861137  | 52831578  | TMEM10, MALT1N1 readthrough                                                                                   |
| 2883 | ENSG00000143970   | 8963.9 | 0.23 | protein_coding       | 2  | 2595262   | 26191385  | additional sex combs like 2 (Drosophila)                                                                      |
| 2887 | ENSG00000202489   | 8963.9 | 0.23 | protein_coding       | 16 | 4402141   | 44275109  | atrxin 3                                                                                                      |
| 2881 | ENSG00000066427   | 8963.9 | 0.23 | protein_coding       | 14 | 9254496   | 92572865  | atrxin 3                                                                                                      |
| 2925 | ENSG00000118620   | 8963.9 | 0.23 | protein_coding       | 19 | 21203426  | 21242956  | zinc finger protein 430                                                                                       |
| 2926 | ENSG00000102546   | 8963.9 | 0.23 | protein_coding       | 14 | 14216407  | 14216407  | atrasin homologous 1 (Bach1 related)                                                                          |
| 2962 | ENSG00000078142   | 8963.9 | 0.23 | protein_coding       | 18 | 38535171  | 38667784  | phosphatidylinositol 3-kinase, catalytic subunit type 3                                                       |
| 2995 | ENSG000001595     |        |      |                      |    |           |           |                                                                                                               |

|      |                 |           |        |      |                                     |    |           |           |                                                                                              |
|------|-----------------|-----------|--------|------|-------------------------------------|----|-----------|-----------|----------------------------------------------------------------------------------------------|
| 2490 | ENSG00000251804 |           | 3873.7 | 0.23 | snRNA                               | 3  | 142126499 | 142126579 | RNA, U5 small nuclear 1294, pseudogene                                                       |
| 3832 | ENSG0000011664  |           | 4077.4 | 0.23 | snRNA                               | 11 | 4746378   | 4746393   | RNA, U1 small nuclear 135, pseudogene                                                        |
| 3918 | ENSG00000122428 |           | 5222.7 | 0.23 | snRNA                               | 1  | 100444495 | 100444501 | RNA, U5 small nuclear 750, pseudogene                                                        |
| 3884 | ENSG00000207153 |           | 5342.2 | 0.23 | snRNA                               | 11 | 60752533  | 60752539  | RNA, U5 small nuclear 933, pseudogene                                                        |
| 3953 | ENSG00000215138 |           | 6214.6 | 0.23 | snRNA                               | 3  | 52594598  | 52594723  | RNA, Ubatic small nuclear 10, pseudogene                                                     |
| 4398 | ENSG00000252383 |           | 6964.3 | 0.23 | snRNA                               | 17 | 16052018  | 16052141  | RNA, U5 small nuclear 314, pseudogene                                                        |
| 4547 | ENSG00000206844 |           | 7043.7 | 0.23 | snRNA                               | 1  | 172335660 | 172335786 | RNA, U5 small nuclear 157, pseudogene                                                        |
| 5095 | ENSG00000202157 |           | 7168.8 | 0.23 | snRNA                               | 4  | 184574725 | 184574829 | RNA, U5 small nuclear 479, pseudogene                                                        |
| 5194 | ENSG00000200295 |           | 7383.2 | 0.23 | snRNA                               | 6  | 107056591 | 107056694 | RNA, U5 small nuclear 527, pseudogene                                                        |
| 5253 | ENSG00000200254 |           | 7522.2 | 0.23 | snRNA                               | 1  | 43034704  | 43034709  | RNA, U5 small nuclear 536, pseudogene                                                        |
| 1288 | ENSG00000117771 |           | 2178.3 | 0.23 | TR_V_gene                           | 7  | 142495140 | 142495186 | T cell receptor beta joining 2.7                                                             |
| 1594 | ENSG00000211735 |           | 8943.3 | 0.23 | TR_V_gene                           | 7  | 142452281 | 142452347 | T cell receptor beta variable 5.3 (non-functional)                                           |
| 2956 | ENSG00000251578 |           | 4598.4 | 0.23 | TR_V_pseudogene                     | 7  | 142344427 | 142344887 | T cell receptor beta variable 21.1 (pseudogene)                                              |
| 2248 | ENSG00000237884 | PTENP1    | 3519.6 | 0.23 | transcribed_processed_pseudo_gene   | 9  | 33673502  | 33677497  | phosphatase and tensin homolog pseudogene 1                                                  |
| 2431 | ENSG00000258128 | MKRN1P    | 3807.4 | 0.23 | transcribed_processed_pseudo_gene   | 12 | 88175940  | 88178345  | maskin ring finger protein 9, pseudogene                                                     |
| 4563 | ENSG00000234515 |           | 7064.9 | 0.23 | transcribed_processed_pseudo_gene   | 6  | 32846948  | 32847625  | protein phosphatase 1, regulatory (inhibitor) subunit 2 pseudogene 1                         |
| 2789 | ENSG00000215580 | BCORP1    | 4329.9 | 0.23 | transcribed_unprocessed_pseudo_gene | Y  | 21617317  | 21665039  | BCL6 corepressor pseudogene 1                                                                |
| 5400 | ENSG00000163016 | ALMSP1    | 8126.3 | 0.23 | transcribed_unprocessed_pseudo_gene | 2  | 73872046  | 73871203  | Aldostrom syndrome 1 pseudogene                                                              |
| 5452 | ENSG00000283006 | ROCK1P1   | 8183.9 | 0.23 | transcribed_unprocessed_pseudo_gene | 18 | 109065    | 122219    | Rho-associated, coiled-coil containing protein kinase 1 pseudogene 1                         |
| 4639 | ENSG00000232815 | LINC00537 | 7145   | 0.23 | unprocessed_pseudogene              | 9  | 68413482  | 68414196  | long intergenic non-protein coding RNA 537                                                   |
| 4646 | ENSG00000108152 |           | 7158.8 | 0.23 | unprocessed_pseudogene              | 16 | 52029283  | 520272683 | leukocyte immunoglobulin-like receptor pseudogene 1                                          |
| 4717 | ENSG00000251624 |           | 7264.9 | 0.23 | unprocessed_pseudogene              | 4  | 9485380   | 9489710   | urn-93 homolog B7 pseudogene (C. albicans)                                                   |
| 5028 | ENSG00000207010 |           | 7688   | 0.23 | unprocessed_pseudogene              | 4  | 4156249   | 4159170   | olfactory receptor, family 7, subfamily E, member 99 pseudogene                              |
| 5141 | ENSG00000268623 |           | 7825.3 | 0.23 | unprocessed_pseudogene              | 8  | 5549404   | 5549404   | olfactory receptor, family 52, subfamily V, member 1 pseudogene                              |
| 5190 | ENSG00000209014 |           | 7834.5 | 0.23 | unprocessed_pseudogene              | 8  | 11787017  | 11787072  | olfactory receptor, family 7, subfamily E, member 181 pseudogene                             |
| 5189 | ENSG00000258481 |           | 7875.9 | 0.23 | unprocessed_pseudogene              | 11 | 6067037   | 6067977   | olfactory receptor, family 58, subfamily A, member 7 pseudogene                              |
| 5205 | ENSG0000014681  |           | 7884.4 | 0.23 | unprocessed_pseudogene              | 11 | 33009530  | 33009572  | major histocompatibility complex, class II, DR alpha 2 (pseudogene)                          |
| 5205 | ENSG00000196403 |           | 7901.7 | 0.23 | unprocessed_pseudogene              | 11 | 124029128 | 124030063 | olfactory receptor, family 10, subfamily D, member 1 pseudogene                              |
| 5209 | ENSG00000258423 |           | 7906.8 | 0.23 | unprocessed_pseudogene              | 14 | 52223714  | 52224706  | olfactory receptor, family 7, subfamily E, member 105 pseudogene                             |
| 5209 | ENSG00000209313 |           | 7920.3 | 0.23 | unprocessed_pseudogene              | 11 | 6148845   | 6150708   | olfactory receptor, family 58, subfamily B, member 3 pseudogene                              |
| 5225 | ENSG00000234485 |           | 7923.4 | 0.23 | unprocessed_pseudogene              | 2  | 71268115  | 71268533  | olfactory receptor, family 7, subfamily E, member 46 pseudogene                              |
| 5277 | ENSG00000258597 |           | 7982.2 | 0.23 | unprocessed_pseudogene              | 14 | 94830053  | 94833039  | serpin peptidase inhibitor, clade A (alpha 1 antitrypsin, antitrypsin), member 2, pseudogene |
| 5281 | ENSG00000209378 |           | 7988.8 | 0.23 | unprocessed_pseudogene              | 3  | 125453188 | 125454241 | olfactory receptor, family 7, subfamily E, member 53 pseudogene                              |
| 5400 | ENSG00000205240 | ORF37P    | 8134.8 | 0.23 | unprocessed_pseudogene              | 13 | 42005425  | 42006425  | olfactory receptor, family 7, subfamily E, member 36 pseudogene                              |
| 5419 | ENSG00000249798 |           | 8154.3 | 0.23 | unprocessed_pseudogene              | 1  | 120081132 | 12008836  | hydroxy-delta-5-steroid dehydrogenase, 3 beta, pseudogene 3                                  |
| 5445 | ENSG00000255664 |           | 8168   | 0.23 | unprocessed_pseudogene              | 1  | 12037388  | 12038779  | neuroblastoma breakpoint family, member 7                                                    |
| 5470 | ENSG00000255777 |           | 8208.7 | 0.23 | unprocessed_pseudogene              | 6  | 30387492  | 30387996  | MHC class I polypeptide-related sequence C (pseudogene)                                      |
| 5484 | ENSG00000236875 |           | 8233   | 0.23 | unprocessed_pseudogene              | 9  | 11887     | 14522     | DEAD(H) Asp-Glu-Ala-Asp(His) box helicase 11 like 5                                          |
| 5521 | ENSG00000251178 |           | 8259   | 0.23 | unprocessed_pseudogene              | 3  | 129753386 | 129754382 | olfactory receptor, family 7, subfamily E, member 21 pseudogene                              |
| 5527 | ENSG00000232126 |           | 8263.2 | 0.23 | unprocessed_pseudogene              | 3  | 52438053  | 52440086  | NIT1 family member 2H, pseudogene                                                            |
| 5524 | ENSG00000232821 |           | 8289.1 | 0.23 | unprocessed_pseudogene              | 1  | 207399143 | 207402547 | complement component 4 binding protein, alpha pseudogene 2                                   |
| 5571 | ENSG00000186950 |           | 8311.3 | 0.23 | unprocessed_pseudogene              | 11 | 6173206   | 6173818   | olfactory receptor, family 52, subfamily B, member 1 pseudogene                              |
| 5674 | ENSG00000211193 |           | 8487.7 | 0.23 | unprocessed_pseudogene              | 6  | 2984431   | 2984563   | major histocompatibility complex, class I, T (pseudogene)                                    |
| 478  | ENSG00000161570 | CCL5      | 1033.7 | 0.23 | unprocessed_pseudogene              | 17 | 34198496  | 34207797  | chemokine (C-C motif) ligand 5                                                               |
| 1007 | ENSG00000236056 |           | 1868.9 | 0.23 | unprocessed_pseudogene              | 22 | 37344522  | 37344599  | small nuclear RNA U13                                                                        |
| 1476 | ENSG00000204304 |           | 2419.6 | 0.23 | unprocessed_pseudogene              | 1  |           |           |                                                                                              |
| 1836 | ENSG00000178146 |           | 2927.1 | 0.23 | unprocessed_pseudogene              | 1  |           |           |                                                                                              |
| 2236 | ENSG00000232967 |           | 3487.7 | 0.23 | unprocessed_pseudogene              | 1  |           |           |                                                                                              |
| 2281 | ENSG00000233026 |           | 3536   | 0.23 | unprocessed_pseudogene              | 1  |           |           |                                                                                              |
| 2285 | ENSG00000233030 |           | 3538.2 | 0.23 | unprocessed_pseudogene              | 1  |           |           |                                                                                              |
| 2276 | ENSG00000232989 |           | 3565.8 | 0.23 | unprocessed_pseudogene              | 1  |           |           |                                                                                              |
| 2319 | ENSG00000234801 |           | 3626   | 0.23 | unprocessed_pseudogene              | 1  |           |           |                                                                                              |
| 2387 | ENSG00000235833 |           | 3759   | 0.23 | unprocessed_pseudogene              | 1  |           |           |                                                                                              |
| 2872 | ENSG00000258448 |           | 3989.7 | 0.23 | unprocessed_pseudogene              | 1  |           |           |                                                                                              |
| 2907 | ENSG00000204815 |           | 4044.8 | 0.23 | unprocessed_pseudogene              | 1  |           |           |                                                                                              |
| 2712 | ENSG00000216054 |           | 4205.8 | 0.23 | unprocessed_pseudogene              | 1  |           |           |                                                                                              |
| 2738 | ENSG00000230984 |           | 4254.7 | 0.23 | unprocessed_pseudogene              | 1  |           |           |                                                                                              |
| 2769 | ENSG00000210157 |           | 4268   | 0.23 | unprocessed_pseudogene              | 1  |           |           |                                                                                              |
| 2813 | ENSG00000227328 |           | 4373.4 | 0.23 | unprocessed_pseudogene              | 1  |           |           |                                                                                              |
| 2887 | ENSG00000234096 |           | 4399   | 0.23 | unprocessed_pseudogene              | 1  |           |           |                                                                                              |
| 2953 | ENSG00000234428 |           | 4588.7 | 0.23 | unprocessed_pseudogene              | 1  |           |           |                                                                                              |
| 3058 | ENSG00000271100 |           | 4779.6 | 0.23 | unprocessed_pseudogene              | 1  |           |           |                                                                                              |
| 3085 | ENSG00000231666 |           | 4815.4 | 0.23 | unprocessed_pseudogene              | 1  |           |           |                                                                                              |
| 3142 | ENSG00000235664 |           | 4913.3 | 0.23 | unprocessed_pseudogene              | 1  |           |           |                                                                                              |
| 3144 | ENSG00000264469 |           | 4934.3 | 0.23 | unprocessed_pseudogene              | 1  |           |           |                                                                                              |
| 3168 | ENSG00000252113 |           | 4981   | 0.23 | unprocessed_pseudogene              | 1  |           |           |                                                                                              |
| 3174 | ENSG00000236255 |           | 4987.5 | 0.23 | unprocessed_pseudogene              | 1  |           |           |                                                                                              |
| 3196 | ENSG00000272254 |           | 5014.8 | 0.23 | unprocessed_pseudogene              | 1  |           |           |                                                                                              |
| 3269 | ENSG00000204467 |           | 5130.8 | 0.23 | unprocessed_pseudogene              | 1  |           |           |                                                                                              |
| 3313 | ENSG00000255685 |           | 5214.8 | 0.23 | unprocessed_pseudogene              | 1  |           |           |                                                                                              |
| 3337 | ENSG00000249412 |           | 5250.4 | 0.23 | unprocessed_pseudogene              | 1  |           |           |                                                                                              |
| 3387 | ENSG00000269829 |           | 5343.6 | 0.23 | unprocessed_pseudogene              | 1  |           |           |                                                                                              |
| 3413 | ENSG00000258948 |           | 5371.4 | 0.23 | unprocessed_pseudogene              | 1  |           |           |                                                                                              |
| 3436 | ENSG00000258798 |           | 5407.4 | 0.23 | unprocessed_pseudogene              | 4  | 79871883  | 79878526  | Uncharacterized protein                                                                      |
| 3493 | ENSG00000265850 |           | 5500.9 | 0.23 | unprocessed_pseudogene              | 1  |           |           |                                                                                              |
| 3495 | ENSG00000258462 |           | 5502.5 | 0.23 | unprocessed_pseudogene              | 1  |           |           |                                                                                              |
| 3505 | ENSG00000234718 |           | 5515.8 | 0.23 | unprocessed_pseudogene              | 1  |           |           |                                                                                              |
| 3528 | ENSG00000256751 |           | 5543.9 | 0.23 | unprocessed_pseudogene              | 1  |           |           |                                                                                              |
| 3563 | ENSG0000027598  |           | 5563.8 | 0.23 | unprocessed_pseudogene              | 1  |           |           |                                                                                              |
| 3641 | ENSG00000212073 |           | 5709   | 0.23 | unprocessed_pseudogene              | 1  | 32379174  | 32380745  | HC02032337, PRO1948, Uncharacterized protein                                                 |
| 3656 | ENSG00000270585 |           | 5731.4 | 0.23 | unprocessed_pseudogene              | 1  |           |           |                                                                                              |
| 3695 | ENSG0000027568  |           | 5793.3 | 0.23 | unprocessed_pseudogene              | 1  |           |           |                                                                                              |
| 3703 | ENSG00000258912 |           | 5805.5 | 0.23 | unprocessed_pseudogene              | 1  |           |           |                                                                                              |
| 3738 | ENSG00000228106 |           | 5858   | 0.23 | unprocessed_pseudogene              | 1  |           |           |                                                                                              |
| 3833 | ENSG00000265342 |           | 6017   | 0.23 | unprocessed_pseudogene              | 1  |           |           |                                                                                              |
| 3869 | ENSG00000254116 |           | 6086   | 0.23 | unprocessed_pseudogene              | 1  |           |           |                                                                                              |
| 3910 | ENSG00000236388 |           | 6137   | 0.23 | unprocessed_pseudogene              | 2  | 120874894 | 120875000 | Small nuclear RNA U13                                                                        |
| 3993 | ENSG00000268436 |           | 6259   | 0.23 | unprocessed_pseudogene              | 1  |           |           |                                                                                              |
| 4000 | ENSG00000260467 |           | 6261.7 | 0.23 | unprocessed_pseudogene              | 1  |           |           |                                                                                              |
| 4018 | ENSG00000215458 |           | 6280.6 | 0.23 | unprocessed_pseudogene              | 1  |           |           |                                                                                              |
| 4035 | ENSG00000272388 |           | 6308.5 | 0.23 | unprocessed_pseudogene              | 1  |           |           |                                                                                              |
| 4054 | ENSG00000229728 |           | 6319.3 | 0.23 | unprocessed_pseudogene              | 1  |           |           |                                                                                              |
| 4067 | ENSG00000258602 |           | 6367.1 | 0.23 | unprocessed_pseudogene              | 1  |           |           |                                                                                              |
| 4091 | ENSG00000218109 |           | 6397.1 | 0.23 | unprocessed_pseudogene              | 1  |           |           |                                                                                              |
| 4090 | ENSG00000252489 |           | 6374.8 | 0.23 | unprocessed_pseudogene              | 1  |           |           |                                                                                              |
| 4120 | ENSG00000258904 |           | 6432.3 | 0.23 | unprocessed_pseudogene              | 1  |           |           |                                                                                              |
| 4189 | ENSG00000258954 |           | 6487.2 | 0.23 | unprocessed_pseudogene              | 1  |           |           |                                                                                              |
| 4237 | ENSG00000204861 |           | 6574.5 | 0.23 | unprocessed_pseudogene              | 1  |           |           |                                                                                              |
| 4282 | ENSG00000268737 |           | 6659.8 | 0.23 | unprocessed_pseudogene              | 1  |           |           |                                                                                              |
| 4308 | ENSG00000236031 |           | 6696   | 0.23 | unprocessed_pseudogene              | 1  |           |           |                                                                                              |
| 4387 | ENSG00000270000 |           | 6785.8 | 0.23 | unprocessed_pseudogene              | 1  |           |           |                                                                                              |
| 4380 | ENSG00000268267 |           | 6817.1 | 0.23 | unprocessed_pseudogene              | 1  |           |           |                                                                                              |
| 4395 | ENSG00000268207 |           | 6845.5 | 0.23 | unprocessed_pseudogene              | 1  |           |           |                                                                                              |
| 4431 | ENSG00000268173 |           | 6887.8 | 0.23 | unprocessed_pseudogene              | 1  |           |           |                                                                                              |
| 4473 | ENSG00000272387 |           | 6938.1 | 0.23 | unprocessed_pseudogene              | 1  |           |           |                                                                                              |
| 4526 | ENSG00000255503 |           | 7013.1 | 0.23 | unprocessed_pseudogene              | 1  |           |           |                                                                                              |
| 4533 | ENSG00000234788 |           | 7022.2 | 0.23 | unprocessed_pseudogene              | 9  | 68741234  | 68809066  | phosphoglucomutase 5 pseudogene 1                                                            |
| 4550 | ENSG00000255445 |           | 7048.2 | 0.23 | unprocessed_pseudogene              | 1  |           |           |                                                                                              |
| 4564 | ENSG00000226233 |           | 7065.8 | 0.23 | unprocessed_pseudogene              | 1  |           |           |                                                                                              |
| 4602 | ENSG00000254528 |           | 7107.3 | 0.23 | unprocessed_pseudogene              | 1  |           |           |                                                                                              |
|      |                 |           |        |      |                                     |    |           |           |                                                                                              |



|      |                 |              |        |      |                 |          |           |           |                                                     |
|------|-----------------|--------------|--------|------|-----------------|----------|-----------|-----------|-----------------------------------------------------|
| 5058 | ENSG00000250071 |              | 7715.5 | 0.23 |                 |          |           |           |                                                     |
| 5059 | ENSG00000250059 |              | 7719   | 0.23 |                 |          |           |           |                                                     |
| 5061 | ENSG00000238945 |              | 7721.8 | 0.23 | 1               | 45624324 | 45624420  |           | Small nuclear RNA U13                               |
| 5065 | ENSG00000250563 |              | 7723.9 | 0.23 |                 |          |           |           |                                                     |
| 5068 | ENSG00000248443 |              | 7727.9 | 0.23 |                 |          |           |           |                                                     |
| 5071 | ENSG00000250553 |              | 7727.3 | 0.23 | 19              | 14834747 | 14835121  |           | Uncharacterized protein                             |
| 5084 | ENSG00000238930 |              | 7749.1 | 0.23 |                 |          |           |           |                                                     |
| 5086 | ENSG00000248960 |              | 7749.2 | 0.23 |                 |          |           |           |                                                     |
| 5089 | ENSG00000250733 |              | 7757.8 | 0.23 |                 |          |           |           |                                                     |
| 5104 | ENSG00000271377 |              | 7783.1 | 0.23 |                 |          |           |           |                                                     |
| 5107 | ENSG00000248260 |              | 7787.5 | 0.23 |                 |          |           |           |                                                     |
| 5114 | ENSG00000238225 |              | 7796   | 0.23 |                 |          |           |           |                                                     |
| 5115 | ENSG00000257579 |              | 7799   | 0.23 |                 |          |           |           |                                                     |
| 5117 | ENSG00000259309 |              | 7800.4 | 0.23 |                 |          |           |           |                                                     |
| 5126 | ENSG00000230381 |              | 7810.3 | 0.23 |                 |          |           |           |                                                     |
| 5128 | ENSG00000254850 |              | 7813.2 | 0.23 |                 |          |           |           |                                                     |
| 5131 | ENSG00000260975 |              | 7816.2 | 0.23 |                 |          |           |           |                                                     |
| 5143 | ENSG00000250727 |              | 7828   | 0.23 |                 |          |           |           |                                                     |
| 5145 | ENSG00000204263 |              | 7830.1 | 0.23 |                 |          |           |           |                                                     |
| 5146 | ENSG00000240811 |              | 7831.1 | 0.23 |                 |          |           |           |                                                     |
| 5149 | ENSG00000241414 |              | 7833.8 | 0.23 |                 |          |           |           |                                                     |
| 5152 | ENSG00000228559 |              | 7836.8 | 0.23 |                 |          |           |           |                                                     |
| 5154 | ENSG00000228162 |              | 7837.3 | 0.23 |                 |          |           |           |                                                     |
| 5156 | ENSG00000206950 |              | 7836.6 | 0.23 |                 |          |           |           |                                                     |
| 5164 | ENSG00000256629 |              | 7851.9 | 0.23 | 12              | 11332272 | 11333061  |           | taste receptor, type 2, member 67 pseudogene        |
| 5172 | ENSG00000272519 |              | 7859.9 | 0.23 |                 |          |           |           |                                                     |
| 5174 | ENSG00000257924 |              | 7861.9 | 0.23 |                 |          |           |           |                                                     |
| 5177 | ENSG00000265024 |              | 7868.4 | 0.23 |                 |          |           |           |                                                     |
| 5184 | ENSG00000225406 |              | 7872.9 | 0.23 |                 |          |           |           |                                                     |
| 5188 | ENSG00000230111 |              | 7875.5 | 0.23 |                 |          |           |           |                                                     |
| 5195 | ENSG00000268889 |              | 7883.5 | 0.23 |                 |          |           |           |                                                     |
| 5198 | ENSG00000271911 |              | 7890   | 0.23 |                 |          |           |           |                                                     |
| 5199 | ENSG00000232687 |              | 7892.4 | 0.23 |                 |          |           |           |                                                     |
| 5214 | ENSG00000271048 |              | 7916.2 | 0.23 |                 |          |           |           |                                                     |
| 5217 | ENSG00000244061 |              | 7919.1 | 0.23 |                 |          |           |           |                                                     |
| 5218 | ENSG00000230528 |              | 7919.3 | 0.23 |                 |          |           |           |                                                     |
| 5219 | ENSG00000237178 |              | 7920   | 0.23 |                 |          |           |           |                                                     |
| 5228 | ENSG00000268742 |              | 7929.5 | 0.23 |                 |          |           |           |                                                     |
| 5229 | ENSG00000268553 |              | 7930.5 | 0.23 |                 |          |           |           |                                                     |
| 5237 | ENSG00000287316 |              | 7939.4 | 0.23 |                 |          |           |           |                                                     |
| 5238 | ENSG00000254864 |              | 7940.5 | 0.23 |                 |          |           |           |                                                     |
| 5239 | ENSG00000260759 |              | 7940.7 | 0.23 |                 |          |           |           |                                                     |
| 5242 | ENSG00000202349 | LOC100986413 | 7944   | 0.23 | 16              | 32714622 | 32780287  |           | Protein LOC100986413                                |
| 5247 | ENSG00000258910 |              | 7948.3 | 0.23 |                 |          |           |           |                                                     |
| 5250 | ENSG00000265345 |              | 7951.1 | 0.23 |                 |          |           |           |                                                     |
| 5252 | ENSG00000271666 |              | 7952   | 0.23 |                 |          |           |           |                                                     |
| 5254 | ENSG00000232361 |              | 7956.6 | 0.23 |                 |          |           |           |                                                     |
| 5256 | ENSG00000231613 |              | 7960.1 | 0.23 |                 |          |           |           |                                                     |
| 5267 | ENSG00000254844 |              | 7961.7 | 0.23 |                 |          |           |           |                                                     |
| 5269 | ENSG00000226509 |              | 7967   | 0.23 |                 |          |           |           |                                                     |
| 5281 | ENSG00000251473 |              | 7970.7 | 0.23 |                 |          |           |           |                                                     |
| 5272 | ENSG00000224192 |              | 7974.4 | 0.23 |                 |          |           |           |                                                     |
| 5275 | ENSG00000263494 |              | 7981.3 | 0.23 |                 |          |           |           |                                                     |
| 5282 | ENSG00000223082 |              | 7989   | 0.23 |                 |          |           |           |                                                     |
| 5286 | ENSG00000252377 |              | 8004.5 | 0.23 |                 |          |           |           |                                                     |
| 5303 | ENSG00000240484 |              | 8014.3 | 0.23 |                 |          |           |           |                                                     |
| 5308 | ENSG00000248967 |              | 8015.2 | 0.23 |                 |          |           |           |                                                     |
| 5311 | ENSG00000271546 |              | 8022.5 | 0.23 |                 |          |           |           |                                                     |
| 5323 | ENSG00000258915 |              | 8038.1 | 0.23 |                 |          |           |           |                                                     |
| 5327 | ENSG00000225844 |              | 8040.3 | 0.23 |                 |          |           |           |                                                     |
| 5333 | ENSG00000230541 |              | 8045   | 0.23 |                 |          |           |           |                                                     |
| 5341 | ENSG00000240425 |              | 8054   | 0.23 |                 |          |           |           |                                                     |
| 5348 | ENSG00000267877 |              | 8062   | 0.23 |                 |          |           |           |                                                     |
| 5353 | ENSG00000258521 |              | 8072.7 | 0.23 |                 |          |           |           |                                                     |
| 5357 | ENSG00000226549 |              | 8077.1 | 0.23 |                 |          |           |           |                                                     |
| 5366 | ENSG00000251152 |              | 8088   | 0.23 |                 |          |           |           |                                                     |
| 5368 | ENSG00000230766 |              | 8088.8 | 0.23 |                 |          |           |           |                                                     |
| 5374 | ENSG00000233712 |              | 8095.6 | 0.23 |                 |          |           |           |                                                     |
| 5382 | ENSG00000260973 |              | 8109.6 | 0.23 |                 |          |           |           |                                                     |
| 5385 | ENSG00000265445 |              | 8114.3 | 0.23 |                 |          |           |           |                                                     |
| 5386 | ENSG00000260523 |              | 8114.4 | 0.23 |                 |          |           |           |                                                     |
| 5389 | ENSG00000251338 |              | 8117.1 | 0.23 |                 |          |           |           |                                                     |
| 5394 | ENSG00000237445 |              | 8121.8 | 0.23 |                 |          |           |           |                                                     |
| 5397 | ENSG00000228910 |              | 8123.2 | 0.23 |                 |          |           |           |                                                     |
| 5409 | ENSG00000271997 |              | 8142.6 | 0.23 |                 |          |           |           |                                                     |
| 5422 | ENSG00000230687 |              | 8158.1 | 0.23 |                 |          |           |           |                                                     |
| 5428 | ENSG00000253528 |              | 8164   | 0.23 |                 |          |           |           |                                                     |
| 5441 | ENSG00000255032 |              | 8182.8 | 0.23 |                 |          |           |           |                                                     |
| 5443 | ENSG00000232628 |              | 8184.8 | 0.23 |                 |          |           |           |                                                     |
| 5450 | ENSG00000267986 |              | 8191.7 | 0.23 |                 |          |           |           |                                                     |
| 5457 | ENSG00000261055 |              | 8198.5 | 0.23 |                 |          |           |           |                                                     |
| 5474 | ENSG00000231038 |              | 8212.5 | 0.23 |                 |          |           |           |                                                     |
| 5475 | ENSG00000221104 |              | 8212.8 | 0.23 |                 |          |           |           |                                                     |
| 5476 | ENSG00000230173 |              | 8213.2 | 0.23 |                 |          |           |           |                                                     |
| 5483 | ENSG00000267389 |              | 8216   | 0.23 |                 |          |           |           |                                                     |
| 5483 | ENSG00000230974 |              | 8220.3 | 0.23 |                 |          |           |           |                                                     |
| 5487 | ENSG00000233884 |              | 8226.2 | 0.23 |                 |          |           |           |                                                     |
| 5488 | ENSG00000240388 |              | 8228.9 | 0.23 |                 |          |           |           |                                                     |
| 5489 | ENSG00000215110 |              | 8229   | 0.23 |                 |          |           |           |                                                     |
| 5490 | ENSG00000258119 |              | 8229.9 | 0.23 |                 |          |           |           |                                                     |
| 5495 | ENSG00000248424 |              | 8233.4 | 0.23 |                 |          |           |           |                                                     |
| 5501 | ENSG00000268918 |              | 8238.1 | 0.23 |                 |          |           |           |                                                     |
| 5502 | ENSG00000236813 |              | 8238.5 | 0.23 |                 |          |           |           |                                                     |
| 5511 | ENSG00000244686 |              | 8247.2 | 0.23 |                 |          |           |           |                                                     |
| 5520 | ENSG00000231616 |              | 8248.5 | 0.23 |                 |          |           |           |                                                     |
| 5540 | ENSG00000237848 |              | 8274.5 | 0.23 |                 |          |           |           |                                                     |
| 5565 | ENSG00000256705 |              | 8303.2 | 0.23 |                 |          |           |           |                                                     |
| 5566 | ENSG00000256226 |              | 8303.3 | 0.23 |                 |          |           |           |                                                     |
| 5572 | ENSG00000236008 |              | 8311.9 | 0.23 |                 |          |           |           |                                                     |
| 5578 | ENSG00000227593 |              | 8325.5 | 0.23 |                 |          |           |           |                                                     |
| 5585 | ENSG00000245211 |              | 8334.4 | 0.23 |                 |          |           |           |                                                     |
| 5586 | ENSG00000254913 |              | 8334   | 0.23 |                 |          |           |           |                                                     |
| 5597 | ENSG00000270441 |              | 8344.6 | 0.23 |                 |          |           |           |                                                     |
| 5601 | ENSG00000230527 |              | 8348   | 0.23 |                 |          |           |           |                                                     |
| 5674 | ENSG00000205537 |              | 8436.5 | 0.23 |                 |          |           |           |                                                     |
| 5682 | ENSG00000272255 |              | 8449.9 | 0.23 |                 |          |           |           |                                                     |
| 5745 | ENSG00000250955 |              | 8514.6 | 0.23 |                 |          |           |           |                                                     |
| 5775 | ENSG00000268444 |              | 8542.6 | 0.23 |                 |          |           |           |                                                     |
| 5825 | ENSG00000269495 |              | 8594   | 0.23 |                 |          |           |           |                                                     |
| 5854 | ENSG00000230608 |              | 8634.8 | 0.23 |                 |          |           |           |                                                     |
| 6009 | ENSG00000272872 |              | 8789.5 | 0.23 |                 |          |           |           |                                                     |
| 1995 | ENSG00000228619 | MBNL1-AS1    | 3151.2 | 0.22 | antisense       | 3        | 151980405 | 151987344 | MBNL1 antisense RNA 1                               |
| 3425 | ENSG00000236653 | PSMD6-AS2    | 5389.9 | 0.22 | antisense       | 3        | 63987604  | 63987604  | PSMD6 antisense RNA 2                               |
| 3978 | ENSG00000235079 |              | 6243.8 | 0.22 | antisense       | 1        | 71514538  | 71532867  | ZRANB2 antisense RNA 1                              |
| 5790 | ENSG00000225076 |              | 8558.8 | 0.22 | antisense       | X        | 9992282   | 10006564  | WWC3 antisense RNA 1                                |
| 5986 | ENSG00000231115 | TPRS1-AS2    | 9572.2 | 0.22 | antisense       | 3        | 189595415 | 189595983 | TPRS1 antisense RNA 2                               |
| 6313 | ENSG00000233303 | XXYL11-AS1   | 9103   | 0.22 | antisense       | 3        | 194815317 | 194816786 | XXYL11 antisense RNA 1                              |
| 6342 | ENSG00000236758 |              | 9130.8 | 0.22 | antisense       | 13       | 29813516  | 29834491  | MTUS2 antisense RNA 2                               |
| 581  | ENSG00000253440 |              | 9325.5 | 0.22 | IG V_pseudogene | 14       | 106825038 | 106825777 | immunoglobulin heavy variable 3-33-2 (pseudogene)   |
| 5647 | ENSG00000254203 |              | 8152   | 0.22 | IG V_pseudogene | 14       | 106823315 | 106823394 | immunoglobulin heavy variable (I)-35-1 (pseudogene) |
| 5624 | ENSG00000233752 |              | 8377.7 | 0.22 | IG V_pseudogene | 22       | 22434180  | 22434473  | immunoglobulin lambda variable (I)-43 (pseudogene)  |
| 4830 | ENSG00000213657 | C1orf220     | 7448.1 | 0.22 | lincRNA         | 1        | 17851887  | 178518824 | chromosome 1 gap reading frame 220                  |
| 6868 | ENSG00000259203 |              | 8457.8 | 0.22 | lincRNA         | 14       | 101972324 | 101972499 | long intergenic non-protein coding RNA 524          |
| 5734 | ENSG00000280343 | LINC01043    | 8500.4 | 0.22 | lincRNA         | 13       | 112967781 | 112978772 | long intergenic non-protein coding RNA 1043         |
| 5888 | ENSG00000261426 | MIR1697      | 8663.3 | 0.22 | miRNA           | X        | 6866790   | 6870702   | microRNA 1697                                       |
| 6227 | ENSG00000232286 | LINC01142    | 8922.7 | 0.22 | lincRNA         | 1        | 17028744  | 170283348 | long intergenic non-protein coding RNA 1142         |
| 2845 | ENSG00000216141 | MIR941-1     | 4408.4 | 0.22 | miRNA           | 20       | 62550834  | 62550950  | microRNA 941.2                                      |
| 3431 | ENSG00000268386 | MIR4513      | 5401.5 | 0.22 | miRNA           | 15       | 75081013  | 75081068  | microRNA 4513                                       |
| 3968 | ENSG00000278988 | MIR570       | 6103.4 | 0.22 | miRNA           | 4        | 110489854 | 110489951 | microRNA 570                                        |
| 4191 | ENSG00000264357 | MIR4448      | 6520.1 | 0.22 | miRNA           | 7        | 2566708   | 2566779   | microRNA 4448                                       |
| 5399 | ENSG00000268109 | MIR4448      | 8127.2 | 0.22 | miRNA           | 2        | 23999513  | 23999610  | microRNA 4448                                       |
| 5410 | ENSG00000263027 | MIR4506      | 8114.3 | 0.22 | miRNA           | 18       | 13611113  | 13611199  | microRNA 4506                                       |
| 5508 | ENSG00000270268 | MIR562       | 8240.2 | 0.22 | miRNA           | 2        | 233037363 | 233037457 | microRNA 562                                        |
| 5509 | ENSG00000264073 | MIR3199-2    | 8244   | 0.22 | miRNA           | 22       | 28316013  | 28316060  | microRNA 3199-2                                     |
| 6336 | ENSG00000271620 | MIR4514      | 8217.3 | 0.22 | miRNA           | 20       | 6988332   | 69883625  | microRNA 4514                                       |
| 5563 | ENSG00000268387 | MIR4669      | 8300.6 | 0.22 | miRNA           | 9        | 137271257 | 137271218 | microRNA 4669                                       |
| 5657 | ENSG00000216860 | MIR1278      | 8304.8 | 0.22 | miRNA           | 1        | 193165633 | 193105713 | microRNA 1278                                       |
| 5669 | ENSG00000268455 | MIR4514      | 8431.1 | 0.22 | miRNA           | 3        | 8126758   | 8126814   | microRNA 4514                                       |
| 5853 | ENSG00000268349 | MIR4744      | 8622.7 | 0.22 | miRNA           | 18       | 46576057  | 46576138  | microRNA 4744                                       |
| 5979 | ENSG00000265526 | MIR4304      | 8784   | 0.22 | miRNA           | 12       | 123485214 | 123485275 | microRNA 4304                                       |
| 5999 | ENSG0000021726  | MIR1284      | 8784   | 0.22 | miRNA           | 3        | 75619514  | 75619502  | microRNA 1284                                       |
| 6231 | ENSG00000238118 | MIR197-1     | 9004.1 | 0.22 | miRNA           | 16       | 70684249  | 70684325  | microRNA 197-2                                      |
| 7007 | ENSG00000255156 |              | 4199.2 | 0.22 | misc_RNA        | 22       | 20829490  | 20829598  | KLHL22 intronic transcript 1 (non-protein coding    |

|      |                  |       |      |                      |    |           |           |                                                                                                                       |
|------|------------------|-------|------|----------------------|----|-----------|-----------|-----------------------------------------------------------------------------------------------------------------------|
| 5771 | ENSG00000228472  | 84791 | 0.22 | misc RNA             | 6  | 5918793   | 5918797   | RNA 75L cytoplasmic 221 pseudogene                                                                                    |
| 5781 | ENSG0000021864   | 8527  | 0.22 | misc RNA             | 21 | 3051208   | 3051208   | misc RNA                                                                                                              |
| 5788 | ENSG00000244399  | 8557  | 0.22 | misc RNA             | 2  | 8556918   | 8556912   | RNA 75L cytoplasmic 251 pseudogene                                                                                    |
| 5844 | ENSG00000241074  | 86134 | 0.22 | misc RNA             | 2  | 16930734  | 16930812  | RNA 75L cytoplasmic 813 pseudogene                                                                                    |
| 5954 | ENSG00000225959  | 87334 | 0.22 | misc RNA             | 1  | 14504481  | 14504480  | RNA 75K small nuclear pseudogene 88                                                                                   |
| 5964 | ENSG00000246113  | 8751  | 0.22 | misc RNA             | 9  | 2229241   | 2229241   | RNA 75L cytoplasmic 552 pseudogene                                                                                    |
| 6292 | ENSG00000219335  | 90779 | 0.22 | misc RNA             | 2  | 19141790  | 19141826  | RNA 75K small nuclear pseudogene 179                                                                                  |
| 6398 | ENSG00000226922  | 91856 | 0.22 | misc RNA             | 17 | 58773804  | 58773804  | RNA 75L cytoplasmic 806 pseudogene                                                                                    |
| 1347 | ENSG00000225774  | 40525 | 0.22 | processed pseudogene | 22 | 30982523  | 30982522  | H3 histone family 3a pseudogene 4                                                                                     |
| 1394 | ENSG00000226697  | 40651 | 0.22 | processed pseudogene | 14 | 3540363   | 3540363   | signal-regulatory protein alpha pseudogene 1                                                                          |
| 4206 | ENSG00000226268  | 45418 | 0.22 | processed pseudogene | 14 | 17893458  | 17893458  | immunoglobulin (CD) binding protein 1 pseudogene 1                                                                    |
| 4206 | ENSG00000226268  | 45418 | 0.22 | processed pseudogene | 21 | 40588550  | 40588542  | translocase of inner mitochondrial membrane 8 homolog (yeast) pseudogene 2                                            |
| 4206 | ENSG00000226268  | 45418 | 0.22 | processed pseudogene | 1  | 24511367  | 24511364  | small nuclear ribonucleoprotein polypeptide E pseudogene 9                                                            |
| 4482 | ENSG000002122872 | 69614 | 0.22 | processed pseudogene | 10 | 6336683   | 6336684   | synaptic binding protein (systemic) pseudogene 1                                                                      |
| 4628 | ENSG000002044361 | 74116 | 0.22 | processed pseudogene | 5  | 10489922  | 10489924  | ADP-ribosylation factor-like 4 pseudogene                                                                             |
| 4840 | ENSG00000219251  | 7992  | 0.22 | processed pseudogene | 9  | 6649763   | 6649994   | ribosomal protein L30 pseudogene 7                                                                                    |
| 5291 | ENSG00000250016  | 79684 | 0.22 | processed pseudogene | 4  | 49235306  | 49235282  | prostaglandin E receptor 4 (edg type) pseudogene 2                                                                    |
| 5370 | ENSG00000220759  | 80913 | 0.22 | processed pseudogene | 3  | 48217840  | 48208428  | sorting nexin 18 pseudogene 23                                                                                        |
| 5426 | ENSG00000211528  | 8162  | 0.22 | processed pseudogene | 3  | 179119264 | 179120398 | mitochondrial ribosomal protein S18A pseudogene 1                                                                     |
| 5444 | ENSG00000214659  | 81877 | 0.22 | processed pseudogene | 11 | 65494410  | 65495485  | glyceroldehyde 3-phosphate dehydrogenase pseudogene 36                                                                |
| 5453 | ENSG00000258491  | 81956 | 0.22 | processed pseudogene | 14 | 51171061  | 51172229  | keratin 8 pseudogene 26                                                                                               |
| 5456 | ENSG00000212943  | 8197  | 0.22 | processed pseudogene | 22 | 66659989  | 66661987  | ZFP64 zinc finger protein pseudogene 1                                                                                |
| 5486 | ENSG00000238125  | 8245  | 0.22 | processed pseudogene | 22 | 21007017  | 21009037  | sorting nexin 18 pseudogene 2                                                                                         |
| 5546 | ENSG00000214584  | 8279  | 0.22 | processed pseudogene | 10 | 81651904  | 81652531  | solute carrier family 9, subfamily A (NHE3), cation protein anion-pore 3, member 3 pseudogene 2                       |
| 5548 | ENSG000002018153 | 8298  | 0.22 | processed pseudogene | 6  | 116778486 | 116778932 | protein geranylgeranyltransferase type I, beta subunit pseudogene 2                                                   |
| 5568 | ENSG00000235759  | 8307  | 0.22 | processed pseudogene | 22 | 16424125  | 16427059  | Rho GTPase activating protein 42 pseudogene 3                                                                         |
| 5569 | ENSG00000242607  | 8309  | 0.22 | processed pseudogene | 8  | 12427359  | 12428639  | ribosomal protein S3 pseudogene 34                                                                                    |
| 5580 | ENSG00000201623  | 83268 | 0.22 | processed pseudogene | 22 | 5311068   | 5311068   | high mobility group box 1 pseudogene 20                                                                               |
| 5650 | ENSG000002114245 | 83278 | 0.22 | processed pseudogene | 20 | 31635323  | 31635958  | haloacid dehalogenase-like hydrolase domain containing 1 pseudogene 3                                                 |
| 5691 | ENSG00000217629  | 83413 | 0.22 | processed pseudogene | 2  | 26217663  | 26217950  | ubiquitin-cytochrome c reductase hinge protein pseudogene 2                                                           |
| 5611 | ENSG000002028971 | 83593 | 0.22 | processed pseudogene | 2  | 10366268  | 10366268  | diapyrone binding inhibitor (GABA receptor modulator, acyl-CoA binding protein) pseudogene 2                          |
| 5616 | ENSG00000213366  | 8367  | 0.22 | processed pseudogene | 5  | 79999202  | 79999463  | keratin 8 pseudogene 38                                                                                               |
| 5623 | ENSG00000202358  | 8376  | 0.22 | processed pseudogene | 10 | 90487242  | 90488871  | keratin 18 pseudogene 22                                                                                              |
| 5649 | ENSG00000202358  | 8376  | 0.22 | processed pseudogene | 11 | 601106    | 601106    | sorting nexin 19 pseudogene 2                                                                                         |
| 5677 | ENSG00000235500  | 84447 | 0.22 | processed pseudogene | 13 | 19466000  | 19469730  | keratin 8 pseudogene 1                                                                                                |
| 5740 | ENSG00000259848  | 8449  | 0.22 | processed pseudogene | 14 | 39194779  | 39197685  | voltage-dependent anion channel 1 pseudogene 9                                                                        |
| 5758 | ENSG00000202368  | 8456  | 0.22 | processed pseudogene | 12 | 15789970  | 15789970  | glyceroldehyde 3-phosphate dehydrogenase pseudogene 54                                                                |
| 5789 | ENSG00000202769  | 8516  | 0.22 | processed pseudogene | 20 | 45626235  | 45627127  | MT-ND1 pseudogene 10                                                                                                  |
| 5783 | ENSG00000229088  | 8519  | 0.22 | processed pseudogene | 22 | 36574602  | 36574573  | ribosomal protein S15a pseudogene 18                                                                                  |
| 5781 | ENSG00000202913  | 85473 | 0.22 | processed pseudogene | 4  | 17096265  | 17096265  | WAS protein family, member 5, pseudogene                                                                              |
| 5785 | ENSG00000211402  | 8551  | 0.22 | processed pseudogene | 6  | 31252987  | 31256741  | thrombin-RNA splicing 2, mitochondrial pseudogene                                                                     |
| 5805 | ENSG000002048104 | 8572  | 0.22 | processed pseudogene | 4  | 13648272  | 13648832  | ribosomal protein L3 pseudogene 1                                                                                     |
| 5808 | ENSG00000202149  | 8578  | 0.22 | processed pseudogene | 21 | 37542296  | 37542478  | keratin 9B subunit B1a pseudogene 1                                                                                   |
| 5827 | ENSG00000211026  | 8578  | 0.22 | processed pseudogene | 13 | 28411724  | 28411724  | proneuroendoplasmic pseudogene 1                                                                                      |
| 5827 | ENSG00000234706  | 8584  | 0.22 | processed pseudogene | 13 | 26911888  | 26913102  | PC2 and LIM domain 1 pseudogene 2                                                                                     |
| 5862 | ENSG00000202691  | 86293 | 0.22 | processed pseudogene | 17 | 11248145  | 11248151  | glucosaminyl (N-acetyl) transferase 1, core 2 pseudogene 1                                                            |
| 5867 | ENSG00000204741  | 86413 | 0.22 | processed pseudogene | 17 | 18420084  | 18420084  | transmembrane protein 183A pseudogene 1                                                                               |
| 5876 | ENSG00000217609  | 8655  | 0.22 | processed pseudogene | 6  | 29545236  | 29545225  | immunoglobulin (CD) binding protein 1 pseudogene 3                                                                    |
| 5905 | ENSG00000211552  | 86619 | 0.22 | processed pseudogene | 3  | 30462395  | 30462394  | sorting nexin 20 pseudogene 20                                                                                        |
| 5908 | ENSG00000202924  | 86633 | 0.22 | processed pseudogene | 3  | 110414399 | 110414399 | sorting nexin 18 pseudogene 9                                                                                         |
| 5930 | ENSG00000224185  | 87104 | 0.22 | processed pseudogene | 9  | 69451764  | 69452598  | prothrombin pseudogene 1                                                                                              |
| 5933 | ENSG00000213091  | 8713  | 0.22 | processed pseudogene | 6  | 15030362  | 15030368  | Rho GTPase activating protein 42 pseudogene 5                                                                         |
| 5938 | ENSG00000202923  | 8717  | 0.22 | processed pseudogene | 14 | 19402029  | 19402029  | ectonucleotide diphosphatase/phosphodiesterase 7 pseudogene 3                                                         |
| 5940 | ENSG00000248818  | 8718  | 0.22 | processed pseudogene | 3  | 12988633  | 12988633  | SVT2 pre-mRNA splicing factor pseudogene 2                                                                            |
| 5941 | ENSG00000202146  | 8719  | 0.22 | processed pseudogene | 9  | 35011070  | 35011262  | cytochrome c small 2 pseudogene 2                                                                                     |
| 5942 | ENSG00000202913  | 8724  | 0.22 | processed pseudogene | 3  | 20438654  | 20438654  | nucleoside diphosphate kinase 2 pseudogene 2                                                                          |
| 5959 | ENSG00000226556  | 87414 | 0.22 | processed pseudogene | X  | 47298135  | 47298173  | nucleoside diphosphate kinase 2, mitochondrial pseudogene 49                                                          |
| 5986 | ENSG000002021541 | 8748  | 0.22 | processed pseudogene | 2  | 17988483  | 17988747  | ribosomal protein S8 pseudogene 2                                                                                     |
| 5978 | ENSG000002021541 | 8748  | 0.22 | processed pseudogene | 3  | 16831928  | 16831928  | gap junction protein, alpha 6, pseudogene                                                                             |
| 5980 | ENSG00000202187  | 8762  | 0.22 | processed pseudogene | X  | 1853199   | 1853240   | suppressor of Ty 20 homolog (S. cerevisiae) like 1                                                                    |
| 6003 | ENSG00000202731  | 8784  | 0.22 | processed pseudogene | X  | 2438078   | 2438351   | ribosomal protein L21 pseudogene 108                                                                                  |
| 6015 | ENSG000002049438 | 8800  | 0.22 | processed pseudogene | 5  | 7954268   | 7955600   | keratin 18 pseudogene 45                                                                                              |
| 6016 | ENSG00000202220  | 8802  | 0.22 | processed pseudogene | 7  | 3983192   | 3983710   | capicua transcriptional repressor pseudogene 22                                                                       |
| 6011 | ENSG00000213211  | 8821  | 0.22 | processed pseudogene | 7  | 8999127   | 8999127   | keratin 18 pseudogene 64                                                                                              |
| 6036 | ENSG00000257528  | 8824  | 0.22 | processed pseudogene | 12 | 62273099  | 62274553  | keratin 8 pseudogene 19                                                                                               |
| 6045 | ENSG00000217629  | 8829  | 0.22 | processed pseudogene | 6  | 142272    | 142003    | capicua transcriptional repressor pseudogene 18                                                                       |
| 6052 | ENSG0000020104   | 8829  | 0.22 | processed pseudogene | 11 | 13969121  | 13969168  | YY1 transcription factor pseudogene 2                                                                                 |
| 6079 | ENSG00000224005  | 88611 | 0.22 | processed pseudogene | 13 | 98482833  | 98483245  | glyceroldehyde 3-phosphate dehydrogenase pseudogene 22                                                                |
| 6087 | ENSG00000226955  | 88683 | 0.22 | processed pseudogene | 7  | 49858815  | 49858815  | capicua transcriptional repressor pseudogene 20                                                                       |
| 6093 | ENSG00000218663  | 8873  | 0.22 | processed pseudogene | 7  | 9011222   | 9011222   | neocentropodipole-associated pseudogene 7                                                                             |
| 6125 | ENSG00000211688  | 89084 | 0.22 | processed pseudogene | 3  | 3805250   | 3805986   | protein phosphatase 2, regulatory subunit B, delta pseudogene 1                                                       |
| 6133 | ENSG00000208728  | 89156 | 0.22 | processed pseudogene | 16 | 4871994   | 4873504   | Kruppel-like factor 8 pseudogene 1                                                                                    |
| 6154 | ENSG00000202923  | 89156 | 0.22 | processed pseudogene | 18 | 1733222   | 1733222   | zinc finger protein 48 pseudogene                                                                                     |
| 6209 | ENSG00000218682  | 8989  | 0.22 | processed pseudogene | 11 | 35881759  | 35881759  | pseudogene 14                                                                                                         |
| 6216 | ENSG000002081336 | 8987  | 0.22 | processed pseudogene | 16 | 47599001  | 47600795  | eukaryotic translation initiation factor 4B pseudogene 5                                                              |
| 6218 | ENSG00000208087  | 8987  | 0.22 | processed pseudogene | 16 | 47599001  | 47600795  | protein O-methyltransferase domain containing 1 pseudogene 2                                                          |
| 6243 | ENSG00000217862  | 90174 | 0.22 | processed pseudogene | 13 | 26898350  | 26811296  | protein-kinase, interferon-inducible double stranded RNA dependent inhibitor, repressor of p58 repressor pseudogene 6 |
| 6245 | ENSG00000211549  | 9019  | 0.22 | processed pseudogene | 1  | 23884558  | 23884558  | keratin 18 pseudogene 33                                                                                              |
| 6261 | ENSG00000202121  | 9038  | 0.22 | processed pseudogene | 20 | 29929174  | 29929274  | HAUS augmin-like complex, subunit 6 pseudogene 2                                                                      |
| 6262 | ENSG00000202052  | 9039  | 0.22 | processed pseudogene | 15 | 3691875   | 36919976  | hydroxyproline sulfotransferase 2 pseudogene 1                                                                        |
| 6268 | ENSG00000204943  | 9073  | 0.22 | processed pseudogene | 17 | 26911431  | 26912512  | SH3-domain GRG2-like 1 pseudogene 2                                                                                   |
| 6362 | ENSG00000213601  | 9147  | 0.22 | processed pseudogene | 12 | 190172693 | 190172693 | keratin 18 pseudogene 19                                                                                              |
| 6432 | ENSG000002172912 | 92405 | 0.22 | processed pseudogene | 22 | 40965290  | 40965599  | cytochrome c oxidase subunit VII polypeptide 1 (ubiquitous) pseudogene 3                                              |
| 6411 | ENSG00000204769  | 4297  | 0.22 | processed transcript | 17 | 62745781  | 62778117  | zinc finger protein 48 pseudogene 1                                                                                   |
| 6411 | ENSG00000217484  | 4297  | 0.22 | processed transcript | 17 | 11931147  | 11931147  | zinc finger protein 48 pseudogene 2                                                                                   |
| 6411 | ENSG000002135077 | 12927 | 0.22 | processed transcript | 5  | 15651283  | 15659880  | hepatitis A virus cellular receptor 2                                                                                 |
| 1351 | ENSG00000213503  | 1704  | 0.22 | protein coding       | 5  | 18042607  | 18042768  | butyrimin-like 3                                                                                                      |
| 1351 | ENSG00000213503  | 1704  | 0.22 | protein coding       | 5  | 18042607  | 18042768  | butyrimin-like 3                                                                                                      |
| 1186 | ENSG00000106743  | 2047  | 0.22 | protein coding       | 4  | 127435359 | 127435448 | glycophorin B (red blood group)                                                                                       |
| 1439 | ENSG00000183446  | 2382  | 0.22 | protein coding       | 2  | 21902768  | 21903178  | chemokine (C-X-C motif) receptor 1                                                                                    |
| 1446 | ENSG00000195338  | 2517  | 0.22 | protein coding       | 2  | 17624969  | 17624969  | peptide arginase kinase, type IV                                                                                      |
| 1509 | ENSG00000309238  | 2463  | 0.22 | protein coding       | 2  | 30103635  | 30108236  | yippee-like 3 (Trospalla)                                                                                             |
| 1580 | ENSG00000186886  | 2517  | 0.22 | protein coding       | 19 | 866503    | 861340    | PDH domain containing 4                                                                                               |
| 1574 | ENSG00000191166  | 2517  | 0.22 | protein coding       | 4  | 48601294  | 48601294  | integral membrane protein 28                                                                                          |
| 1624 | ENSG00000254418  | 2604  | 0.22 | protein coding       | 19 | 52145806  | 52150054  | sialic acid binding Ig-like lectin 14                                                                                 |
| 1629 | ENSG00000195501  | 2607  | 0.22 | protein coding       | 19 | 5214781   | 52150151  | sialic acid binding Ig-like lectin 5                                                                                  |
| 1629 | ENSG00000195501  | 2607  | 0.22 | protein coding       | 2  | 21902768  | 21902768  | solute carrier family 11 (proton-coupled divalent metal ion transporter), member 1                                    |
| 1687 | ENSG0000015295   | 2614  | 0.22 | protein coding       | X  | 48514985  | 48494918  | EF-hand domain family, member D2                                                                                      |
| 1679 | ENSG0000018293   | 2614  | 0.22 | protein coding       | X  | 48514985  | 48494918  | Wiskott-Aldrich syndrome                                                                                              |
| 1688 | ENSG00000243466  | 2683  | 0.22 | protein coding       | 21 | 34638663  | 34669530  | DIAB associated domain containing 2                                                                                   |
| 1705 | ENSG00000103490  | 2716  | 0.22 | protein coding       | 16 | 31212806  | 31214771  | Wiskott-Aldrich syndrome                                                                                              |
| 1718 | ENSG00000103992  | 2731  | 0.22 | protein coding       | 11 | 1824200   | 1815407   | platelet-activating factor receptor                                                                                   |
| 1762 | ENSG00000186840  | 2817  | 0.22 | protein coding       | 1  | 2847387   | 2852047   | platelet-activating factor receptor                                                                                   |

|      |                  |           |      |                |                                    |           |           |                         |                                                                     |
|------|------------------|-----------|------|----------------|------------------------------------|-----------|-----------|-------------------------|---------------------------------------------------------------------|
| 3185 | ENSG00000136081  | FBOX11    | 4983 | 0.22           | protein_coding                     | 2         | 48016455  | 48132932                | F box protein 11                                                    |
| 3274 | ENSG00000102689  | TMR6A9    | 5114 | 0.22           | protein_coding                     | 14        | 55993229  | 57101                   | transmembrane protein 200                                           |
| 3347 | ENSG00000197013  | ZNF429    | 5281 | 0.22           | protein_coding                     | 19        | 21679484  | 2173072                 | zinc finger protein 429                                             |
| 3471 | ENSG00000156273  | BACH1     | 5291 | 0.22           | protein_coding                     | 21        | 30565362  | 31003071                | BTB and CNC homology 1, basic leucine zipper transcription factor 1 |
| 3501 | ENSG00000186964  | ZNF292    | 5412 | 0.22           | protein_coding                     | 6         | 87862551  | 87973914                | zinc finger protein 292                                             |
| 3569 | ENSG00000151164  | DMTF1     | 5514 | 0.22           | protein_coding                     | 7         | 86719107  | 86825523                | cyclin D binding myx-like transcription factor 1                    |
| 3591 | ENSG00000187742  | SECISBP2  | 5601 | 0.22           | protein_coding                     | 9         | 91933421  | 91974557                | SECIS binding protein 2                                             |
| 3659 | ENSG00000197764  | BRAF      | 5732 | 0.22           | protein_coding                     | 7         | 140419127 | 140524064               | v-raf proto-oncogene homolog B                                      |
| 3681 | ENSG00000191851  | ZNF44     | 6026 | 0.22           | protein_coding                     | 19        | 12339950  | 12360702                | zinc finger protein 44                                              |
| 3867 | ENSG00000076887  | TNRC8C    | 6230 | 0.22           | protein_coding                     | 17        | 76000249  | 76104916                | intracellular repeat-containing 8C                                  |
| 4110 | ENSG00000195359  | PP1FAL    | 6423 | 0.22           | protein_coding                     | 5         | 17176836  | 17169936                | 5-phosphoryl-L-tyrosine phosphatase                                 |
| 4222 | ENSG00000202651  | NUT13     | 6554 | 0.22           | protein_coding                     | 7         | 74870217  | 74893986                | nucleic acid phosphate transferase, mostly 5-type motif 13          |
| 4422 | ENSG00000175106  | TVP23C    | 7129 | 0.22           | protein_coding                     | 17        | 15341206  | 15466909                | trans-golgi network vesicle protein 23 homolog C (S. cerevisiae)    |
| 4446 | ENSG00000106100  | NOD1      | 7441 | 0.22           | protein_coding                     | 7         | 30464143  | 30518400                | nucleotide-binding oligomerization domain containing 1              |
| 4530 | ENSG00000105678  | CDC39     | 7593 | 0.22           | protein_coding                     | 3         | 18030266  | 18027930                | colocal domain containing 39                                        |
| 4539 | ENSG00000146776  | NTN1      | 7578 | 0.22           | protein_coding                     | 7         | 10524514  | 105517050               | ataxin 1-like 1                                                     |
| 4567 | ENSG00000100480  | CDKL1     | 7597 | 0.22           | protein_coding                     | 14        | 50736310  | 50883179                | cyclin-dependent kinase-like 1 (CDC2-related kinase)                |
| 4596 | ENSG00000102199  | ZNF474    | 7719 | 0.22           | protein_coding                     | 3         | 46357662  | 46404962                | zinc finger protein 474                                             |
| 5279 | ENSG00000143178  | TBX19     | 7835 | 0.22           | protein_coding                     | 1         | 16625078  | 16628364                | T-box 19                                                            |
| 5479 | ENSG00000182063  | CHRR2     | 8215 | 0.22           | protein_coding                     | 2         | 24068841  | 24069906                | olfactory receptor, family 5, subfamily B, member 2                 |
| 5497 | ENSG00000102029  | ANKK1     | 8241 | 0.22           | protein_coding                     | 11        | 11521053  | 11521140                | ankyrin repeat and kinase domain containing 1                       |
| 5503 | ENSG00000202631  | LOC728763 | 8238 | 0.22           | protein_coding                     | 2         | 24185202  | 24183228                | Protein LOC728763                                                   |
| 5505 | ENSG00000172365  | OR8B2     | 8239 | 0.22           | protein_coding                     | 11        | 58189738  | 58190786                | olfactory receptor, family 5, subfamily B, member 2                 |
| 5507 | ENSG00000106327  | OR5A11    | 8244 | 0.22           | protein_coding                     | 14        | 21623026  | 21624222                | olfactory receptor, family 5, subfamily A11, member 1               |
| 5551 | ENSG00000188076  | SCGB1C1   | 8267 | 0.22           | protein_coding                     | 11        | 193808    | 194573                  | secretoglobin, family 1C, member 1                                  |
| 5556 | ENSG00000101598  | KRTAP5-4  | 8284 | 0.22           | protein_coding                     | 11        | 1842188   | 1843388                 | keratin associated protein 5-4                                      |
| 5557 | ENSG00000101959  | RPL4      | 8285 | 0.22           | protein_coding                     | 3         | 2092453   | 2092502                 | ribosomal protein L4                                                |
| 5636 | ENSG00000165202  | OR1Q1     | 8363 | 0.22           | protein_coding                     | 9         | 12537648  | 12537826                | olfactory receptor, family 1, subfamily Q, member 1                 |
| 5640 | ENSG00000204462  | OR2AE1    | 8377 | 0.22           | protein_coding                     | 7         | 9947180   | 9947449                 | olfactory receptor, family 2, subfamily AE, member 1                |
| 5704 | ENSG00000102028  | RIN4      | 8424 | 0.22           | protein_coding                     | 7         | 2144277   | 2144277                 | interleukin, alpha 5                                                |
| 5737 | ENSG00000158723  | OR10H1    | 8503 | 0.22           | protein_coding                     | 19        | 15917817  | 15918536                | olfactory receptor, family 10, subfamily H, member 1                |
| 5762 | ENSG00000102218  | OR2S2     | 8528 | 0.22           | protein_coding                     | 9         | 35957105  | 35958151                | olfactory receptor, family 2, subfamily S, member 2                 |
| 5768 | ENSG00000103071  | OR5B2     | 8532 | 0.22           | protein_coding                     | 6         | 6198202   | 6198202                 | olfactory receptor, family 52, subfamily B, member 2                |
| 5771 | ENSG00000130950  | NUTM2F    | 8536 | 0.22           | protein_coding                     | 9         | 97077005  | 97090208                | NUT family member 2F                                                |
| 5807 | ENSG00000152591  | DISP      | 8574 | 0.22           | protein_coding                     | 4         | 8853681   | 88538062                | dentin sialophosphoprotein                                          |
| 5814 | ENSG00000103362  | TECTB     | 8583 | 0.22           | protein_coding                     | 3         | 3313655   | 3313655                 | HCP4-like Uncharacterized protein                                   |
| 5819 | ENSG00000197104  | BPF6B     | 8585 | 0.22           | protein_coding                     | 6         | 31619454  | 31618313                | BPI fold containing family B, member 6                              |
| 5821 | ENSG00000205066  |           | 8589 | 0.22           | protein_coding                     | 14        | 93651318  | 93648432                | Uncharacterized protein                                             |
| 5823 | ENSG00000101977  | CIB3      | 8589 | 0.22           | protein_coding                     | 16        | 1623128   | 1623128                 | calcium and integrin binding family member 3                        |
| 5865 | ENSG00000205973  | 86314     | 0.22 | protein_coding | 4                                  | 147145709 | 147150028 | Uncharacterized protein |                                                                     |
| 5869 | ENSG00000186589  | KRT76     | 8642 | 0.22           | protein_coding                     | 12        | 5318139   | 5317129                 | keratin 76                                                          |
| 5887 | ENSG00000106911  | TECTB     | 8644 | 0.22           | protein_coding                     | 14        | 11480100  | 11480493                | keratin 76                                                          |
| 5892 | ENSG00000203990  | OR1L4     | 8796 | 0.22           | protein_coding                     | 9         | 125281420 | 125282361               | olfactory receptor, family 1, subfamily J, member 4                 |
| 5896 | ENSG00000203757  | OR8K3     | 8799 | 0.22           | protein_coding                     | 1         | 15868958  | 15868793                | olfactory receptor, family 6, subfamily K, member 3                 |
| 6013 | ENSG00000106584  | KRTAP5-6  | 8792 | 0.22           | protein_coding                     | 11        | 1714944   | 1716944                 | keratin associated protein 5-6                                      |
| 6048 | ENSG00000108197  | BPF4      | 8814 | 0.22           | protein_coding                     | 3         | 21687450  | 21687450                | BPI fold containing family B, member 4                              |
| 6063 | ENSG00000102436  | GPR31     | 8840 | 0.22           | protein_coding                     | 6         | 167569759 | 167571817               | G protein-coupled receptor 31                                       |
| 6077 | ENSG00000192437  | QR13C1    | 8860 | 0.22           | protein_coding                     | 1         | 24785520  | 24783385                | olfactory receptor, family 13, subfamily C, member 1                |
| 6080 | ENSG00000102286  | NA60      | 8862 | 0.22           | protein_coding                     | 1         | 3493121   | 3493121                 | NADPH-dependent oxidase 60, NADPH catalytic subunit                 |
| 6101 | ENSG00000161133  | USP41     | 8863 | 0.22           | protein_coding                     | 22        | 2074468   | 20745408                | ubiquitin specific peptidase 41                                     |
| 6108 | ENSG00000191233  | OR1J2     | 8873 | 0.22           | protein_coding                     | 9         | 125273081 | 125274042               | olfactory receptor, family 13, subfamily J, member 2                |
| 6184 | ENSG00000186526  | OR5Q1     | 8873 | 0.22           | protein_coding                     | 22        | 27741353  | 27741353                | olfactory receptor, family 5, subfamily Q, member 2                 |
| 6123 | ENSG00000178817  | MR6PRX4   | 8905 | 0.22           | protein_coding                     | 11        | 18194384  | 18195627                | MAR-related GPCR, member X4                                         |
| 6128 | ENSG00000186906  | HTR1D     | 8909 | 0.22           | protein_coding                     | 3         | 16174932  | 16175157                | 5-hydroxytryptamine (serotonin) receptor 3D, ionotropic             |
| 6188 | ENSG00000114569  | OR1L6     | 8969 | 0.22           | protein_coding                     | 12        | 12561219  | 12561304                | olfactory receptor, family 1, subfamily L, member 6                 |
| 6210 | ENSG00000151867  | ANKAR     | 8989 | 0.22           | protein_coding                     | 2         | 19053016  | 19052919                | ankyrin and armadillo repeat containing                             |
| 6237 | ENSG00000136884  | OR1L7     | 9010 | 0.22           | protein_coding                     | 9         | 12529220  | 12529438                | olfactory receptor, family 1, subfamily J, member 7                 |
| 6246 | ENSG00000206946  | C1orf104  | 9018 | 0.22           | protein_coding                     | 12        | 8611415   | 8611415                 | chromosome 18 centromeric frame 64                                  |
| 6302 | ENSG00000186038  | HTR5E     | 9088 | 0.22           | protein_coding                     | 3         | 18381482  | 18382473                | 5-hydroxytryptamine (serotonin) receptor 5E, ionotropic             |
| 6374 | ENSG00000205316  | SLC26A5   | 9160 | 0.22           | protein_coding                     | 6         | 16833993  | 16804701                | G protein-coupled receptor 113                                      |
| 6400 | ENSG00000157421  | CDC2P     | 9168 | 0.22           | protein_coding                     | 4         | 5465967   | 5465967                 | CUS domain containing protein 2                                     |
| 6442 | ENSG00000170615  | SLC26A5   | 9285 | 0.22           | protein_coding                     | 7         | 102983177 | 10306624                | solute carrier family 26 (anion exchanger), member 5                |
| 6492 | ENSG00000173567  | GPR113    | 9617 | 0.22           | protein_coding                     | 2         | 26511041  | 26509895                | G protein-coupled receptor 113                                      |
| 6494 | ENSG00000202962  |           | 9617 | 0.22           | protein_coding                     | 2         | 7153294   | 7153294                 | RNA 5S ribosomal pseudogene 342                                     |
| 6496 | ENSG00000202502  |           | 8407 | 0.22           | rRNA                               | 4         | 9794375   | 9794485                 | RNA 5S ribosomal pseudogene 154                                     |
| 3967 | ENSG00000202508  |           | 5743 | 0.22           | sense_intronic                     | 1         | 2215699   | 22190932                | CDC42 intronic transcript 1 (non-protein coding)                    |
| 4720 | ENSG00000202509  |           | 7202 | 0.22           | sense_intronic                     | 1         | 7744235   | 7744235                 | KIF1 intronic transcript 1 (non-protein coding)                     |
| 6025 | ENSG00000204450  |           | 8815 | 0.22           | sense_intronic                     | 11        | 111687938 | 11169936                | ALG9 intronic transcript 1 (non-protein coding)                     |
| 6235 | ENSG00000204221  |           | 9008 | 0.22           | sense_intronic                     | 4         | 4477848   | 4483227                 | STX18 intronic transcript 1 (non-protein coding)                    |
| 6130 | ENSG00000204530  |           | 8964 | 0.22           | sense_intronic                     | 10        | 10002103  | 10002103                | TNNT3 intronic RNA 1                                                |
| 4482 | ENSG00000124261  |           | 7130 | 0.22           | sncRNA                             | 12        | 7203335   | 7203335                 | small nuclear RNA SNORA77                                           |
| 5171 | ENSG00000202685  |           | 7858 | 0.22           | sncRNA                             | 16        | 12391054  | 12391180                | Small nuclear nuclear RNA ACA64                                     |
| 6562 | ENSG00000102683  |           | 8288 | 0.22           | sncRNA                             | 13        | 12911293  | 12911293                | Small nuclear RNA SNORD118                                          |
| 6178 | ENSG00000202522  |           | 8517 | 0.22           | sncRNA                             | 16        | 7543326   | 7543326                 | Small nuclear nuclear RNA SNORA76                                   |
| 2479 | ENSG00000201726  |           | 3863 | 0.22           | sncRNA                             | 14        | 35314566  | 35314566                | RNA, U7 small nuclear 41 pseudogene                                 |
| 3306 | ENSG00000201658  |           | 4463 | 0.22           | sncRNA                             | 17        | 17032727  | 17032727                | RNA, U8 small nuclear 761 pseudogene                                |
| 3432 | ENSG00000202782  |           | 5208 | 0.22           | sncRNA                             | 14        | 58759011  | 58759106                | RNA, U6 small nuclear 341 pseudogene                                |
| 3908 | ENSG00000202019  |           | 5401 | 0.22           | sncRNA                             | 14        | 55329933  | 55329648                | RNA, U6a small nuclear 8 pseudogene                                 |
| 3988 | ENSG00000201748  |           | 6126 | 0.22           | sncRNA                             | 10        | 10223268  | 10223268                | RNA, U6 small nuclear 828 pseudogene                                |
| 3982 | ENSG00000202297  |           | 6253 | 0.22           | sncRNA                             | 9         | 114890077 | 114890180               | RNA, U6 small nuclear 855 pseudogene                                |
| 4068 | ENSG00000202527  |           | 6348 | 0.22           | sncRNA                             | 6         | 77863349  | 77863518                | RNA, U7 small nuclear 87 pseudogene                                 |
| 4122 | ENSG00000202205  |           | 6382 | 0.22           | sncRNA                             | 17        | 27721448  | 27721448                | RNA, U6 small nuclear 1034 pseudogene                               |
| 4346 | ENSG00000201023  |           | 6749 | 0.22           | sncRNA                             | 6         | 74173796  | 74173900                | RNA, U6 small nuclear 975 pseudogene                                |
| 4572 | ENSG00000202532  |           | 7074 | 0.22           | sncRNA                             | 10        | 43953513  | 43953577                | RNA, U7 small nuclear 193 pseudogene                                |
| 4718 | ENSG00000201179  |           | 7262 | 0.22           | sncRNA                             | 7         | 10497327  | 10497343                | RNA, U6 small nuclear 1322 pseudogene                               |
| 4807 | ENSG00000202044  |           | 7302 | 0.22           | sncRNA                             | 17        | 7982155   | 7982155                 | RNA, U6 small nuclear 534 pseudogene                                |
| 4862 | ENSG00000202455  |           | 7470 | 0.22           | sncRNA                             | 4         | 40079504  | 40079602                | RNA, U6 small nuclear 1112 pseudogene                               |
| 4868 | ENSG00000202054  |           | 7470 | 0.22           | sncRNA                             | 12        | 62949362  | 62949369                | RNA, U6 small nuclear 399 pseudogene                                |
| 6244 | ENSG00000198685  |           | 8401 | 0.22           | sncRNA                             | 16        | 27317250  | 27317250                | RNA, U6 small nuclear 480 pseudogene                                |
| 6360 | ENSG000002021367 |           | 9038 | 0.22           | sncRNA                             | 8         | 103433425 | 103433425               | RNA, U6 small nuclear 8 pseudogene                                  |
| 4291 | ENSG0000011770   |           | 3956 | 0.22           | TR_v_gene                          | 7         | 14246463  | 14246475                | T cell receptor beta joining 2-6                                    |
| 786  | ENSG00000101694  |           | 1457 | 0.22           | TR_v_gene                          | 12        | 38338412  | 38338412                | T cell receptor gamma variable 10 (non-functional)                  |
| 4447 | ENSG0000011728   |           | 6861 | 0.22           | TR_v_gene                          | 7         | 142131412 | 142131418               | T cell receptor beta variable 5-6                                   |
| 5290 | ENSG00000204461  |           | 7975 | 0.22           | TR_v_pseudogene                    | 7         | 142216280 | 142216232               | T cell receptor beta variable 12-1 (pseudogene)                     |
| 5937 | ENSG00000202662  |           | 8712 | 0.22           | transcribed_unprocessed_pseudogene | 14        | 60960484  | 60963003                | spall-like transcription factor 4 pseudogene 7                      |
| 5381 | ENSG00000206844  |           | 6108 | 0.22           | transcribed_unprocessed_pseudogene | 16        | 3272635   | 32787517                | hcd domain and RLD 2 pseudogene 5                                   |
| 5735 | ENSG00000208199  |           | 8503 | 0.22           | transcribed_unprocessed_pseudogene | 18        | 3310525   | 33104411                | hcd domain and RLD 2 pseudogene 8                                   |
| 5842 | ENSG00000202353  |           | 8613 | 0.22           | transcribed_unprocessed_pseudogene | 12        | 20956882  |                         |                                                                     |



|      |                  |        |        |      |                        |           |           |                                                     |                                                                      |
|------|------------------|--------|--------|------|------------------------|-----------|-----------|-----------------------------------------------------|----------------------------------------------------------------------|
| 6360 | ENSG0000023581   |        | 9137.1 | 0.22 | unprocessed_pseudogene | 19        | 43124364  | 43137186                                            | carcinoembryonic antigen-related cell adhesion molecule pseudogene 1 |
| 6367 | ENSG0000023556   |        | 9142.9 | 0.22 | unprocessed_pseudogene | 11        | 67441757  | 67442714                                            | effector receptor, family 7, subfamily E, member 1 pseudogene        |
| 1581 | ENSG0000024397   |        | 2553.1 | 0.22 |                        |           |           |                                                     |                                                                      |
| 1751 | ENSG00000234484  |        | 2796.8 | 0.22 |                        |           |           |                                                     |                                                                      |
| 1908 | ENSG00000221122  |        | 3010.5 | 0.22 |                        |           |           |                                                     |                                                                      |
| 1944 | ENSG00000237753  |        | 3071   | 0.22 |                        |           |           |                                                     |                                                                      |
| 2024 | ENSG00000218809  |        | 3188.2 | 0.22 |                        |           |           |                                                     |                                                                      |
| 2232 | ENSG00000268602  |        | 3461.7 | 0.22 |                        |           |           |                                                     |                                                                      |
| 2299 | ENSG00000269250  |        | 3480.2 | 0.22 |                        |           |           |                                                     |                                                                      |
| 2411 | ENSG00000231259  |        | 3771.3 | 0.22 |                        |           |           |                                                     |                                                                      |
| 2554 | ENSG00000267040  |        | 3852.7 | 0.22 |                        |           |           |                                                     |                                                                      |
| 2685 | ENSG00000268161  |        | 4164.5 | 0.22 |                        |           |           |                                                     |                                                                      |
| 2721 | ENSG00000233820  |        | 4217.7 | 0.22 |                        |           |           |                                                     |                                                                      |
| 2763 | ENSG00000226525  |        | 4294.3 | 0.22 |                        | 3         | 101220999 | 101221101                                           | Small nuclear RNA U13                                                |
| 2866 | ENSG00000227299  |        | 4443.7 | 0.22 |                        |           |           |                                                     |                                                                      |
| 2882 | ENSG00000267102  |        | 4469.3 | 0.22 |                        |           |           |                                                     |                                                                      |
| 2975 | ENSG00000271284  |        | 4630.4 | 0.22 |                        |           |           |                                                     |                                                                      |
| 2984 | ENSG00000268195  |        | 4661.4 | 0.22 |                        |           |           |                                                     |                                                                      |
| 3024 | ENSG00000220614  |        | 4721.9 | 0.22 |                        |           |           |                                                     |                                                                      |
| 3061 | ENSG00000226549  |        | 4782.7 | 0.22 |                        |           |           |                                                     |                                                                      |
| 3076 | ENSG00000210031  |        | 4799.3 | 0.22 |                        |           |           |                                                     |                                                                      |
| 3089 | ENSG00000228195  |        | 4825.8 | 0.22 |                        |           |           |                                                     |                                                                      |
| 3113 | ENSG00000226306  |        | 4865.6 | 0.22 |                        |           |           |                                                     |                                                                      |
| 3114 | ENSG00000226906  |        | 4867.2 | 0.22 |                        |           |           |                                                     |                                                                      |
| 3123 | ENSG00000260349  |        | 4887.3 | 0.22 |                        |           |           |                                                     |                                                                      |
| 3127 | ENSG00000271721  |        | 4895.6 | 0.22 |                        |           |           |                                                     |                                                                      |
| 3229 | ENSG00000214952  | PARG   | 5081.8 | 0.22 |                        | 10        | 51623417  | 5172924                                             | pcy (ADP-ribose) glycohydrolase pseudogene 1                         |
| 3235 | ENSG00000267283  |        | 5079.3 | 0.22 |                        |           |           |                                                     |                                                                      |
| 3235 | ENSG00000298813  |        | 5233.3 | 0.22 |                        |           |           |                                                     |                                                                      |
| 3343 | ENSG00000230478  |        | 5256   | 0.22 |                        | 2         | 85600577  | 85600637                                            | RNA, U7 small nuclear 162 pseudogene                                 |
| 3358 | ENSG00000272498  |        | 5276.3 | 0.22 |                        |           |           |                                                     |                                                                      |
| 3376 | ENSG00000269997  |        | 5318.6 | 0.22 |                        |           |           |                                                     |                                                                      |
| 3440 | ENSG00000230438  |        | 5415.4 | 0.22 |                        |           |           |                                                     |                                                                      |
| 3481 | ENSG00000260306  |        | 5480.4 | 0.22 |                        |           |           |                                                     |                                                                      |
| 3567 | ENSG00000244459  |        | 5598.9 | 0.22 |                        |           |           |                                                     |                                                                      |
| 3603 | ENSG00000234538  |        | 5713.8 | 0.22 |                        |           |           |                                                     |                                                                      |
| 3677 | ENSG00000218313  |        | 5753.8 | 0.22 |                        |           |           |                                                     |                                                                      |
| 3718 | ENSG00000226292  |        | 5829.6 | 0.22 |                        |           |           |                                                     |                                                                      |
| 3725 | ENSG00000240472  |        | 5848.8 | 0.22 |                        |           |           |                                                     |                                                                      |
| 3761 | ENSG00000265736  |        | 5897.1 | 0.22 |                        |           |           |                                                     |                                                                      |
| 3779 | ENSG00000234252  |        | 5938.6 | 0.22 |                        |           |           |                                                     |                                                                      |
| 3879 | ENSG00000226979  |        | 6105   | 0.22 |                        |           |           |                                                     |                                                                      |
| 3885 | ENSG00000263320  |        | 6109   | 0.22 |                        |           |           |                                                     |                                                                      |
| 3904 | ENSG00000232768  |        | 6130.1 | 0.22 |                        |           |           |                                                     |                                                                      |
| 3917 | ENSG00000240472  |        | 6154.2 | 0.22 |                        |           |           |                                                     |                                                                      |
| 3951 | ENSG00000255441  |        | 6261   | 0.22 |                        |           |           |                                                     |                                                                      |
| 3984 | ENSG00000265739  |        | 6247.1 | 0.22 |                        |           |           |                                                     |                                                                      |
| 4014 | ENSG00000240699  |        | 6275.6 | 0.22 |                        |           |           |                                                     |                                                                      |
| 4105 | ENSG00000269844  |        | 6414.6 | 0.22 |                        |           |           |                                                     |                                                                      |
| 4122 | ENSG00000256708  |        | 6435.1 | 0.22 |                        |           |           |                                                     |                                                                      |
| 4148 | ENSG00000226599  |        | 6457.6 | 0.22 |                        |           |           |                                                     |                                                                      |
| 4151 | ENSG0000021028   |        | 6462   | 0.22 |                        |           |           |                                                     |                                                                      |
| 4157 | ENSG00000235795  |        | 6475.6 | 0.22 |                        |           |           |                                                     |                                                                      |
| 4178 | ENSG00000233816  |        | 6502.1 | 0.22 |                        |           |           |                                                     |                                                                      |
| 4192 | ENSG00000272980  |        | 6521.1 | 0.22 |                        |           |           |                                                     |                                                                      |
| 4271 | ENSG00000264497  |        | 6632.2 | 0.22 |                        |           |           |                                                     |                                                                      |
| 4243 | ENSG00000272144  |        | 6712.7 | 0.22 |                        |           |           |                                                     |                                                                      |
| 4378 | ENSG00000271925  |        | 6863.3 | 0.22 |                        |           |           |                                                     |                                                                      |
| 4403 | ENSG00000214067  |        | 6855   | 0.22 |                        |           |           |                                                     |                                                                      |
| 4435 | ENSG00000216316  |        | 6893.5 | 0.22 |                        |           |           |                                                     |                                                                      |
| 4459 | ENSG00000237653  |        | 6941   | 0.22 |                        |           |           |                                                     |                                                                      |
| 4474 | ENSG00000250848  |        | 6940.8 | 0.22 |                        |           |           |                                                     |                                                                      |
| 4482 | ENSG00000267430  |        | 6946.2 | 0.22 |                        |           |           |                                                     |                                                                      |
| 4494 | ENSG00000231765  |        | 6969.6 | 0.22 |                        |           |           |                                                     |                                                                      |
| 4528 | ENSG00000264630  |        | 7013.9 | 0.22 |                        |           |           |                                                     |                                                                      |
| 4531 | ENSG00000228857  |        | 7018.3 | 0.22 |                        |           |           |                                                     |                                                                      |
| 4535 | ENSG00000211532  |        | 7027.3 | 0.22 |                        |           |           |                                                     |                                                                      |
| 4554 | ENSG00000227253  |        | 7051.4 | 0.22 |                        |           |           |                                                     |                                                                      |
| 4562 | ENSG00000273356  |        | 7064.4 | 0.22 |                        |           |           |                                                     |                                                                      |
| 4750 | ENSG00000231691  |        | 7300.7 | 0.22 |                        |           |           |                                                     |                                                                      |
| 4769 | ENSG00000267234  |        | 7343.4 | 0.22 |                        |           |           |                                                     |                                                                      |
| 4800 | ENSG00000237704  |        | 7378.6 | 0.22 |                        |           |           |                                                     |                                                                      |
| 4838 | ENSG0000024284   |        | 7433.5 | 0.22 |                        |           |           |                                                     |                                                                      |
| 4847 | ENSG00000233030  |        | 7442.1 | 0.22 |                        |           |           |                                                     |                                                                      |
| 4857 | ENSG00000236470  |        | 7464.1 | 0.22 |                        |           |           |                                                     |                                                                      |
| 4867 | ENSG00000235268  |        | 7505   | 0.22 |                        |           |           |                                                     |                                                                      |
| 4890 | ENSG00000265881  |        | 7506.3 | 0.22 |                        |           |           |                                                     |                                                                      |
| 4890 | ENSG00000226280  |        | 7589.6 | 0.22 |                        |           |           |                                                     |                                                                      |
| 4906 | ENSG00000230879  |        | 7608.4 | 0.22 |                        |           |           |                                                     |                                                                      |
| 4967 | ENSG00000234477  |        | 7639.8 | 0.22 |                        |           |           |                                                     |                                                                      |
| 5009 | ENSG00000248137  |        | 7663.3 | 0.22 |                        |           |           |                                                     |                                                                      |
| 5045 | ENSG00000237629  |        | 7720.3 | 0.22 |                        |           |           |                                                     |                                                                      |
| 5070 | ENSG00000254048  |        | 7731   | 0.22 |                        |           |           |                                                     |                                                                      |
| 5109 | ENSG000002101278 |        | 7789.4 | 0.22 |                        |           |           |                                                     |                                                                      |
| 5118 | ENSG00000224007  |        | 7803.2 | 0.22 |                        |           |           |                                                     |                                                                      |
| 5119 | ENSG00000232259  |        | 7803.3 | 0.22 |                        |           |           |                                                     |                                                                      |
| 5123 | ENSG00000237927  |        | 7808.6 | 0.22 |                        |           |           |                                                     |                                                                      |
| 5128 | ENSG00000226167  |        | 7814.3 | 0.22 |                        |           |           |                                                     |                                                                      |
| 5144 | ENSG00000241163  |        | 7824.4 | 0.22 |                        |           |           |                                                     |                                                                      |
| 5180 | ENSG00000269893  |        | 7869.9 | 0.22 |                        |           |           |                                                     |                                                                      |
| 5185 | ENSG00000221622  |        | 7873   | 0.22 |                        |           |           |                                                     |                                                                      |
| 5204 | ENSG00000216192  |        | 7883.3 | 0.22 |                        |           |           |                                                     |                                                                      |
| 5285 | ENSG00000251334  |        | 7961.3 | 0.22 |                        |           |           |                                                     |                                                                      |
| 5296 | ENSG00000251145  |        | 8002.2 | 0.22 |                        |           |           |                                                     |                                                                      |
| 5301 | ENSG00000232891  |        | 8003.3 | 0.22 |                        |           |           |                                                     |                                                                      |
| 5302 | ENSG00000237471  |        | 8008.4 | 0.22 |                        |           |           |                                                     |                                                                      |
| 5335 | ENSG00000226195  |        | 8046.1 | 0.22 |                        |           |           |                                                     |                                                                      |
| 5336 | ENSG00000250400  |        | 8047.5 | 0.22 |                        |           |           |                                                     |                                                                      |
| 5340 | ENSG00000225015  |        | 8052.9 | 0.22 | 1                      | 142660017 | 142660749 | sorting nexin 18 pseudogene 15                      |                                                                      |
| 5349 | ENSG00000226229  |        | 8063.1 | 0.22 |                        |           |           |                                                     |                                                                      |
| 5352 | ENSG00000225481  |        | 8070.3 | 0.22 |                        |           |           |                                                     |                                                                      |
| 5355 | ENSG00000234557  |        | 8074.9 | 0.22 |                        |           |           |                                                     |                                                                      |
| 5362 | ENSG00000261000  |        | 8082.6 | 0.22 |                        |           |           |                                                     |                                                                      |
| 5369 | ENSG00000232363  |        | 8088.8 | 0.22 |                        |           |           |                                                     |                                                                      |
| 5371 | ENSG00000270048  |        | 8091.9 | 0.22 |                        |           |           |                                                     |                                                                      |
| 5380 | ENSG00000272859  |        | 8107.6 | 0.22 |                        |           |           |                                                     |                                                                      |
| 5404 | ENSG00000223977  |        | 8136.4 | 0.22 |                        |           |           |                                                     |                                                                      |
| 5411 | ENSG00000224095  |        | 8143.9 | 0.22 |                        |           |           |                                                     |                                                                      |
| 5413 | ENSG00000257884  |        | 8149.7 | 0.22 |                        |           |           |                                                     |                                                                      |
| 5428 | ENSG00000237655  |        | 8180.5 | 0.22 |                        |           |           |                                                     |                                                                      |
| 5440 | ENSG00000265616  |        | 8182.3 | 0.22 |                        |           |           |                                                     |                                                                      |
| 5446 | ENSG00000251647  |        | 8188.2 | 0.22 |                        |           |           |                                                     |                                                                      |
| 5448 | ENSG00000231650  |        | 8190.6 | 0.22 |                        |           |           |                                                     |                                                                      |
| 5454 | ENSG00000264899  |        | 8196   | 0.22 |                        |           |           |                                                     |                                                                      |
| 5458 | ENSG00000257019  | OR13C2 | 8200.7 | 0.22 | 9                      | 107366924 | 107367951 | effector receptor, family 13, subfamily C, member 2 |                                                                      |
| 5465 | ENSG00000225162  |        | 8205.1 | 0.22 | 4                      | 47813481  | 47813662  | RNA, 7SK small nuclear pseudogene 215               |                                                                      |
| 5481 | ENSG00000237026  |        | 8216.8 | 0.22 |                        |           |           |                                                     |                                                                      |
| 5484 | ENSG00000250354  |        | 8222.6 | 0.22 |                        |           |           |                                                     |                                                                      |
| 5485 | ENSG00000225338  |        | 8224.2 | 0.22 |                        |           |           |                                                     |                                                                      |
| 5488 | ENSG00000221048  |        | 8235.8 | 0.22 |                        |           |           |                                                     |                                                                      |
| 5499 | ENSG00000273454  |        | 8236   | 0.22 |                        |           |           |                                                     |                                                                      |
| 5510 | ENSG00000268347  |        | 8245.9 | 0.22 | 1                      | 24298284  | 24298576  | RNA, 7SL, cytoplasmic 24, pseudogene                |                                                                      |
| 5515 | ENSG00000259367  |        | 8255.1 | 0.22 | 15                     | 62888224  | 6294290   | ADAMTS1 pseudogene 2                                |                                                                      |
| 5522 | ENSG00000263650  |        | 8259.2 | 0.22 | 17                     | 45119191  | 45119483  | RNA, 7SL, cytoplasmic 270, pseudogene               |                                                                      |
| 5526 | ENSG00000260396  |        | 8261.4 | 0.22 |                        |           |           |                                                     |                                                                      |
| 5530 | ENSG00000254796  |        | 8264.6 | 0.22 |                        |           |           |                                                     |                                                                      |
| 5538 | ENSG00000235933  |        | 8273.3 | 0.22 |                        |           |           |                                                     |                                                                      |
| 5553 | ENSG00000236560  |        | 8289.8 | 0.22 |                        |           |           |                                                     |                                                                      |
| 5560 | ENSG00000231751  |        | 8297   | 0.22 |                        |           |           |                                                     |                                                                      |
| 5561 | ENSG00000254398  |        | 8298.7 | 0.22 |                        |           |           |                                                     |                                                                      |
| 5564 | ENSG00000226157  |        | 8302.7 | 0.22 |                        |           |           |                                                     |                                                                      |
| 5575 | ENSG00000230384  |        | 8316.2 | 0.22 |                        |           |           |                                                     |                                                                      |
| 5579 | ENSG00000227680  |        | 8327.2 | 0.22 |                        |           |           |                                                     |                                                                      |
| 5581 | ENSG00000272631  |        | 8329.2 | 0.22 |                        |           |           |                                                     |                                                                      |
| 5582 | ENSG00000224346  |        | 8329.5 | 0.22 |                        |           |           |                                                     |                                                                      |
| 5584 | ENSG000002681200 |        | 8333.3 | 0.22 |                        |           |           |                                                     |                                                                      |
| 5588 | ENSG00000233625  |        | 8336   | 0.22 |                        |           |           |                                                     |                                                                      |
| 5600 | ENSG00000271527  |        | 8348   | 0.22 |                        |           |           |                                                     |                                                                      |
| 5606 | ENSG00000260671  |        | 8352.8 | 0.22 |                        |           |           |                                                     |                                                                      |
| 5609 | ENSG00000234900  |        | 8359.9 | 0.22 |                        |           |           |                                                     |                                                                      |
| 5613 | ENSG00000265380  |        | 8366   | 0.22 |                        |           |           |                                                     |                                                                      |
| 5619 | ENSG00000229044  |        | 8373.5 | 0.22 |                        |           |           |                                                     |                                                                      |
| 5621 | ENSG00000216352  |        | 8375.9 | 0.22 |                        |           |           |                                                     |                                                                      |
| 5626 | ENSG00000269862  |        | 8379.5 | 0.22 |                        |           |           |                                                     |                                                                      |
| 5631 | ENSG00000211571  |        | 8385.5 | 0.22 |                        |           |           |                                                     |                                                                      |
| 5632 | ENSG00000248510  |        | 8389   | 0.22 |                        |           |           |                                                     |                                                                      |
| 5635 | ENSG00000223500  |        | 8391.1 | 0.22 |                        |           |           |                                                     |                                                                      |
| 5647 | ENSG00000243794  |        | 8404.8 | 0.22 |                        |           |           |                                                     |                                                                      |
| 5652 | ENSG00000271710  |        | 8409.5 | 0.22 |                        |           |           |                                                     |                                                                      |
| 5655 | ENSG00000269339  |        | 8411.8 | 0.22 | 12                     | 51618860  | 51620085  | Uncharacterized protein                             |                                                                      |

|      |                   |        |      |    |          |          |  |                                                             |
|------|-------------------|--------|------|----|----------|----------|--|-------------------------------------------------------------|
| 5658 | ENSG000002049717  | 8413.7 | 0.22 |    |          |          |  |                                                             |
| 5660 | ENSG000002078071  | 8418.7 | 0.22 | 14 | 71683031 | 71683462 |  | HCG2028611, Uncharacterized protein                         |
| 5662 | ENSG00000205158   | 8420.9 | 0.22 |    |          |          |  |                                                             |
| 5666 | ENSG00000203606   | 8429   | 0.22 |    |          |          |  |                                                             |
| 5671 | ENSG00000206298   | 8433   | 0.22 |    |          |          |  |                                                             |
| 5672 | ENSG00000211035   | 8434.3 | 0.22 |    |          |          |  |                                                             |
| 5678 | ENSG000002033884  | 8447.2 | 0.22 |    |          |          |  |                                                             |
| 5679 | ENSG00000201452   | 8449.4 | 0.22 |    |          |          |  |                                                             |
| 5681 | ENSG00000201688   | 8462.2 | 0.22 |    |          |          |  |                                                             |
| 5685 | ENSG000002048967  | 8468.8 | 0.22 |    |          |          |  |                                                             |
| 5688 | ENSG00000204685   | 8468.4 | 0.22 |    |          |          |  |                                                             |
| 5700 | ENSG00000201760   | 8470.1 | 0.22 |    |          |          |  |                                                             |
| 5705 | ENSG00000202824   | 8474.5 | 0.22 |    |          |          |  |                                                             |
| 5708 | ENSG00000202916   | 8475.2 | 0.22 |    |          |          |  |                                                             |
| 5709 | ENSG00000202495   | 8478.5 | 0.22 |    |          |          |  |                                                             |
| 5710 | ENSG0000020196295 | 8478.8 | 0.22 |    |          |          |  |                                                             |
| 5715 | ENSG000002043810  | 8485.7 | 0.22 |    |          |          |  |                                                             |
| 5718 | ENSG00000202507   | 8490.3 | 0.22 |    |          |          |  |                                                             |
| 5720 | ENSG000002027685  | 8491.5 | 0.22 |    |          |          |  |                                                             |
| 5725 | ENSG00000202554   | 8493.5 | 0.22 |    |          |          |  |                                                             |
| 5726 | ENSG00000202929   | 8494.1 | 0.22 |    |          |          |  |                                                             |
| 5731 | ENSG000002028672  | 8499.3 | 0.22 |    |          |          |  |                                                             |
| 5732 | ENSG00000202211   | 8499.3 | 0.22 |    |          |          |  |                                                             |
| 5740 | ENSG00000202125   | 8508   | 0.22 |    |          |          |  |                                                             |
| 5742 | ENSG000002087406  | 8512.7 | 0.22 |    |          |          |  |                                                             |
| 5747 | ENSG00000202926   | 8515.3 | 0.22 |    |          |          |  |                                                             |
| 5748 | ENSG000002048927  | 8515.8 | 0.22 |    |          |          |  |                                                             |
| 5753 | ENSG000002024881  | 8521.2 | 0.22 |    |          |          |  |                                                             |
| 5754 | ENSG000002021394  | 8521.7 | 0.22 |    |          |          |  |                                                             |
| 5770 | ENSG00000202926   | 8534.8 | 0.22 |    |          |          |  |                                                             |
| 5774 | ENSG000002028585  | 8542   | 0.22 |    |          |          |  |                                                             |
| 5777 | ENSG000002027262  | 8543.9 | 0.22 |    |          |          |  |                                                             |
| 5784 | ENSG00000202365   | 8551.8 | 0.22 |    |          |          |  |                                                             |
| 5785 | ENSG000002018360  | 8552.3 | 0.22 |    |          |          |  |                                                             |
| 5786 | ENSG000002023186  | 8552.4 | 0.22 | 16 | 87348326 | 87348429 |  | Small nuclear RNA U13                                       |
| 5793 | ENSG00000202328   | 8562.3 | 0.22 |    |          |          |  |                                                             |
| 5800 | ENSG000002028059  | 8570.2 | 0.22 |    |          |          |  |                                                             |
| 5809 | ENSG000002024243  | 8575.4 | 0.22 |    |          |          |  |                                                             |
| 5816 | ENSG000002024815  | 8583.4 | 0.22 |    |          |          |  |                                                             |
| 5817 | ENSG000002024448  | 8583.8 | 0.22 |    |          |          |  |                                                             |
| 5824 | ENSG000002028796  | 8592   | 0.22 |    |          |          |  |                                                             |
| 5828 | ENSG000002027481  | 8597.3 | 0.22 |    |          |          |  |                                                             |
| 5831 | ENSG000002042993  | 8600.5 | 0.22 |    |          |          |  |                                                             |
| 5838 | ENSG000002023299  | 8607.5 | 0.22 | 9  | 45363481 | 45363852 |  | cyclin-dependent kinase 2 associated protein 2 pseudogene 1 |
| 5840 | ENSG00000202784   | 8610.2 | 0.22 |    |          |          |  |                                                             |
| 5841 | ENSG000002028962  | 8611.5 | 0.22 |    |          |          |  |                                                             |
| 5845 | ENSG000002020431  | 8614   | 0.22 |    |          |          |  |                                                             |
| 5848 | ENSG000002026096  | 8617.7 | 0.22 |    |          |          |  |                                                             |
| 5855 | ENSG000002031371  | 8623.3 | 0.22 |    |          |          |  |                                                             |
| 5858 | ENSG0000020271164 | 8627.2 | 0.22 |    |          |          |  |                                                             |
| 5860 | ENSG000002021279  | 8628.1 | 0.22 |    |          |          |  |                                                             |
| 5872 | ENSG000002048196  | 8644.4 | 0.22 |    |          |          |  |                                                             |
| 5873 | ENSG0000020260413 | 8649   | 0.22 |    |          |          |  |                                                             |
| 5879 | ENSG000002024681  | 8655.9 | 0.22 |    |          |          |  |                                                             |
| 5880 | ENSG000002026288  | 8655.5 | 0.22 |    |          |          |  |                                                             |
| 5884 | ENSG000002028770  | 8660.7 | 0.22 |    |          |          |  |                                                             |
| 5885 | ENSG000002029892  | 8661.8 | 0.22 |    |          |          |  |                                                             |
| 5888 | ENSG000002025428  | 8667.1 | 0.22 |    |          |          |  |                                                             |
| 5890 | ENSG000002023334  | 8668   | 0.22 |    |          |          |  |                                                             |
| 5894 | ENSG000002027992  | 8670.6 | 0.22 |    |          |          |  |                                                             |
| 5897 | ENSG000002025361  | 8671   | 0.22 |    |          |          |  |                                                             |
| 5900 | ENSG000002020747  | 8676.6 | 0.22 |    |          |          |  |                                                             |
| 5903 | ENSG000002021137  | 8678.6 | 0.22 |    |          |          |  |                                                             |
| 5904 | ENSG000002023532  | 8678.8 | 0.22 |    |          |          |  |                                                             |
| 5916 | ENSG000002026204  | 8684.2 | 0.22 |    |          |          |  |                                                             |
| 5920 | ENSG000002027535  | 8702.7 | 0.22 |    |          |          |  |                                                             |
| 5924 | ENSG000002024115  | 8703.8 | 0.22 |    |          |          |  |                                                             |
| 5936 | ENSG000002011262  | 8716.4 | 0.22 |    |          |          |  |                                                             |
| 5946 | ENSG000002025404  | 8727.4 | 0.22 |    |          |          |  |                                                             |
| 5947 | ENSG000002026583  | 8727.8 | 0.22 |    |          |          |  |                                                             |
| 5953 | ENSG000002024071  | 8732.9 | 0.22 |    |          |          |  |                                                             |
| 5962 | ENSG000002028745  | 8745.5 | 0.22 |    |          |          |  |                                                             |
| 5963 | ENSG000002025428  | 8745.8 | 0.22 |    |          |          |  |                                                             |
| 5967 | ENSG000002027074  | 8748.8 | 0.22 |    |          |          |  |                                                             |
| 5968 | ENSG0000020253875 | 8750.3 | 0.22 |    |          |          |  |                                                             |
| 5971 | ENSG000002025479  | 8752.8 | 0.22 |    |          |          |  |                                                             |
| 5973 | ENSG000002024015  | 8756.8 | 0.22 |    |          |          |  |                                                             |
| 5983 | ENSG0000020254884 | 8769.8 | 0.22 |    |          |          |  |                                                             |
| 5984 | ENSG000002028588  | 8770   | 0.22 |    |          |          |  |                                                             |
| 5985 | ENSG0000020235728 | 8771.4 | 0.22 |    |          |          |  |                                                             |
| 5990 | ENSG000002028637  | 8775.2 | 0.22 |    |          |          |  |                                                             |
| 5994 | ENSG000002020128  | 8776.8 | 0.22 |    |          |          |  |                                                             |
| 5995 | ENSG00000201615   | 8779.3 | 0.22 |    |          |          |  |                                                             |
| 5996 | ENSG0000020236299 | 8781   | 0.22 |    |          |          |  |                                                             |
| 6000 | ENSG000002048678  | 8782.2 | 0.22 |    |          |          |  |                                                             |
| 6001 | ENSG000002025124  | 8782.7 | 0.22 |    |          |          |  |                                                             |
| 6002 | ENSG000002026261  | 8783.8 | 0.22 |    |          |          |  |                                                             |
| 6004 | ENSG00000204640   | 8784.8 | 0.22 |    |          |          |  |                                                             |
| 6007 | ENSG000002027688  | 8787.8 | 0.22 |    |          |          |  |                                                             |
| 6008 | ENSG0000020270360 | 8787.9 | 0.22 |    |          |          |  |                                                             |
| 6017 | ENSG000002026543  | 8808   | 0.22 |    |          |          |  |                                                             |
| 6018 | ENSG000002018414  | 8808.6 | 0.22 |    |          |          |  |                                                             |
| 6019 | ENSG0000020281541 | 8807.7 | 0.22 |    |          |          |  |                                                             |
| 6028 | ENSG000002028114  | 8819   | 0.22 |    |          |          |  |                                                             |
| 6033 | ENSG000002028133  | 8822.8 | 0.22 |    |          |          |  |                                                             |
| 6034 | ENSG000002025187  | 8824   | 0.22 |    |          |          |  |                                                             |
| 6039 | ENSG000002026289  | 8825.2 | 0.22 |    |          |          |  |                                                             |
| 6054 | ENSG000002027558  | 8837.1 | 0.22 |    |          |          |  |                                                             |
| 6067 | ENSG000002021703  | 8846.6 | 0.22 |    |          |          |  |                                                             |
| 6074 | ENSG000002026271  | 8859.2 | 0.22 |    |          |          |  |                                                             |
| 6076 | ENSG000002027428  | 8862   | 0.22 |    |          |          |  |                                                             |
| 6085 | ENSG0000020254707 | 8866.2 | 0.22 |    |          |          |  |                                                             |
| 6096 | ENSG000002043129  | 8876.9 | 0.22 |    |          |          |  |                                                             |
| 6099 | ENSG000002018372  | 8878.3 | 0.22 |    |          |          |  |                                                             |
| 6103 | ENSG000002022277  | 8884.2 | 0.22 |    |          |          |  |                                                             |
| 6105 | ENSG000002028849  | 8887   | 0.22 |    |          |          |  |                                                             |
| 6118 | ENSG000002020748  | 8895.5 | 0.22 | 7  | 2514390  | 2516528  |  | galactin-related inter-fiber protein                        |
| 6129 | ENSG000002028536  | 8912.1 | 0.22 |    |          |          |  |                                                             |
| 6132 | ENSG000002028945  | 8915.2 | 0.22 |    |          |          |  |                                                             |
| 6136 | ENSG00000202320   | 8918.4 | 0.22 |    |          |          |  |                                                             |
| 6137 | ENSG000002025862  | 8916.8 | 0.22 |    |          |          |  |                                                             |
| 6140 | ENSG000002024859  | 8920.2 | 0.22 |    |          |          |  |                                                             |
| 6141 | ENSG000002025374  | 8920.4 | 0.22 |    |          |          |  |                                                             |
| 6147 | ENSG0000020250407 | 8925.3 | 0.22 |    |          |          |  |                                                             |
| 6149 | ENSG0000020249036 | 8930.7 | 0.22 |    |          |          |  |                                                             |
| 6151 | ENSG000002022095  | 8933.1 | 0.22 |    |          |          |  |                                                             |
| 6152 | ENSG0000020271484 | 8933.5 | 0.22 |    |          |          |  |                                                             |
| 6158 | ENSG000002027491  | 8939   | 0.22 |    |          |          |  |                                                             |
| 6162 | ENSG000002021699  | 8940.2 | 0.22 |    |          |          |  |                                                             |
| 6164 | ENSG0000020236368 | 8943.8 | 0.22 |    |          |          |  |                                                             |
| 6167 | ENSG000002023484  | 8944.4 | 0.22 |    |          |          |  |                                                             |
| 6168 | ENSG000002021638  | 8946.5 | 0.22 |    |          |          |  |                                                             |
| 6173 | ENSG000002021364  | 8951.9 | 0.22 |    |          |          |  |                                                             |
| 6178 | ENSG0000020258390 | 8958.7 | 0.22 |    |          |          |  |                                                             |
| 6179 | ENSG000002021489  | 8961.1 | 0.22 |    |          |          |  |                                                             |
| 6186 | ENSG000002025494  | 8965.5 | 0.22 |    |          |          |  |                                                             |
| 6198 | ENSG0000020254334 | 8977.8 | 0.22 |    |          |          |  |                                                             |
| 6204 | ENSG000002026302  | 8982   | 0.22 |    |          |          |  |                                                             |
| 6219 | ENSG0000020284908 | 8986   | 0.22 |    |          |          |  |                                                             |
| 6220 | ENSG0000020231108 | 8988.5 | 0.22 |    |          |          |  |                                                             |
| 6222 | ENSG000002024710  | 8989.9 | 0.22 |    |          |          |  |                                                             |
| 6224 | ENSG000002028122  | 9000.7 | 0.22 |    |          |          |  |                                                             |
| 6225 | ENSG000002022270  | 9001   | 0.22 | 7  | 65112777 | 65180636 |  | integrator complex subunit 4-like 2                         |
| 6226 | ENSG000002028892  | 9002.7 | 0.22 |    |          |          |  |                                                             |
| 6240 | ENSG0000020251113 | 9014.2 | 0.22 |    |          |          |  |                                                             |
| 6249 | ENSG0000020260746 | 9026.8 | 0.22 |    |          |          |  |                                                             |
| 6251 | ENSG000002029274  | 9029.4 | 0.22 |    |          |          |  |                                                             |
| 6256 | ENSG000002026555  | 9033.3 | 0.22 |    |          |          |  |                                                             |
| 6264 | ENSG0000020258589 | 9040.8 | 0.22 |    |          |          |  |                                                             |
| 6270 | ENSG000002027288  | 9049.9 | 0.22 |    |          |          |  |                                                             |
| 6274 | ENSG00000202625   | 9056.4 | 0.22 |    |          |          |  |                                                             |
| 6282 | ENSG0000020287889 | 9065.8 | 0.22 |    |          |          |  |                                                             |
| 6284 | ENSG000002027939  | 9068.8 | 0.22 |    |          |          |  |                                                             |
| 6296 | ENSG000002021667  | 9071.8 | 0.22 |    |          |          |  |                                                             |
| 6295 | ENSG0000020250751 | 9080.2 | 0.22 |    |          |          |  |                                                             |
| 6317 | ENSG000002024604  | 9106.1 | 0.22 |    |          |          |  |                                                             |
| 6318 | ENSG0000020221555 | 9107   | 0.22 |    |          |          |  |                                                             |
| 6320 | ENSG0000020265494 | 9108   | 0.22 |    |          |          |  |                                                             |
| 6335 | ENSG000002027397  | 9120.1 | 0.22 |    |          |          |  |                                                             |
| 6337 | ENSG000002026999  | 9129.9 | 0.22 |    |          |          |  |                                                             |
| 6338 | ENSG0000020253418 | 9125.5 | 0.22 |    |          |          |  |                                                             |





|      |                 |          |        |                      |                |           |           |                                                                                               |                                                                           |
|------|-----------------|----------|--------|----------------------|----------------|-----------|-----------|-----------------------------------------------------------------------------------------------|---------------------------------------------------------------------------|
| 6847 | ENSG00000232792 | 9618.5   | 0.21   | processed_pseudogene | 1              | 18504069  | 18504117  | ferritin heavy polypeptide 1 pseudogene 25                                                    |                                                                           |
| 6848 | ENSG00000231009 | 9621.7   | 0.21   | processed_pseudogene | 1              | 4584270   | 4584279   | keratin 18 pseudogene 68                                                                      |                                                                           |
| 6873 | ENSG00000239995 | 9648.3   | 0.21   | processed_pseudogene | 2              | 4850995   | 4850942   | tumor protein, transcriptionally-controlled 1 pseudogene 11                                   |                                                                           |
| 6888 | ENSG00000237959 | 9662.9   | 0.21   | processed_pseudogene | 1              | 8904353   | 8904384   | ribosomal protein L36a pseudogene 10                                                          |                                                                           |
| 6882 | ENSG00000236547 | 9662.9   | 0.21   | processed_pseudogene | 6              | 81083726  | 8108428   | ribosomal protein L17 pseudogene 25                                                           |                                                                           |
| 6884 | ENSG00000237116 | 9662.9   | 0.21   | processed_pseudogene | 2              | 16243790  | 16243790  | keratin 10 pseudogene 45                                                                      |                                                                           |
| 6844 | ENSG00000238002 | 9711.1   | 0.21   | processed_pseudogene | 9              | 8247734   | 8248170   | nuclear pore associated protein 1 pseudogene 6                                                |                                                                           |
| 6842 | ENSG00000231290 | 9728.8   | 0.21   | processed_pseudogene | 3              | 4236249   | 4236487   | spalt-like transcription factor 1 pseudogene 6                                                |                                                                           |
| 6862 | ENSG00000209789 | 9744.1   | 0.21   | processed_pseudogene | 15             | 4398316   | 4398316   | keratin 8 pseudogene 50                                                                       |                                                                           |
| 6992 | ENSG00000228948 | 9765     | 0.21   | processed_pseudogene | 9              | 108611991 | 108611903 | solute carrier family 25 (mitochondrial carrier, adenosine nucleoside translocator), member 6 |                                                                           |
| 7010 | ENSG00000214563 | 9784.2   | 0.21   | processed_pseudogene | 6              | 5629366   | 5629439   | pseudogene 5                                                                                  |                                                                           |
| 7023 | ENSG00000233786 | 9786.4   | 0.21   | processed_pseudogene | 2              | 133019001 | 13302015  | cell division cycle 27 pseudogene 1                                                           |                                                                           |
| 7034 | ENSG00000237589 | 9805.9   | 0.21   | processed_pseudogene | 19             | 54271225  | 54271807  | high mobility group nucleosome binding domain 1 pseudogene 32                                 |                                                                           |
| 7090 | ENSG00000233369 | 9832     | 0.21   | processed_pseudogene | 10             | 1626910   | 1626902   | ribosomal protein L37 pseudogene 5                                                            |                                                                           |
| 7115 | ENSG00000226246 | 9876.7   | 0.21   | processed_pseudogene | 9              | 3079469   | 3080074   | keratin 18 pseudogene 36                                                                      |                                                                           |
| 7138 | ENSG00000234030 | 9891.4   | 0.21   | processed_pseudogene | 21             | 4520304   | 4520344   | transmembrane protein 37 pseudogene 1                                                         |                                                                           |
| 7170 | ENSG00000234899 | 9913.3   | 0.21   | processed_pseudogene | 13             | 31113760  | 31113304  | microfilament-associated protein 1 pseudogene 1                                               |                                                                           |
| 7234 | ENSG00000232491 | 9919.9   | 0.21   | processed_pseudogene | 7              | 5629327   | 5629745   | cyclin J pseudogene 1                                                                         |                                                                           |
| 7249 | ENSG00000237977 | 9921.2   | 0.21   | processed_pseudogene | 18             | 33421723  | 33422381  | nuclear receptor binding factor 2 pseudogene 1                                                |                                                                           |
| 7316 | ENSG00000235263 | 10056.2  | 0.21   | processed_pseudogene | 17             | 25929814  | 25929777  | integral membrane protein 28 pseudogene 1                                                     |                                                                           |
| 7300 | ENSG00000224802 | 10060.6  | 0.21   | processed_pseudogene | 9              | 34109169  | 3410966   | ubiquitin, beta 4B class IVb pseudogene 2                                                     |                                                                           |
| 7374 | ENSG00000249919 | 10077.6  | 0.21   | processed_pseudogene | 5              | 11889945  | 118891353 | fatty acid binding protein 5 pseudogene 6                                                     |                                                                           |
| 831  | ENSG00000404528 | 1038.4   | 0.21   | protein_coding       | 3              | 8915924   | 8915324   | PDH receptor A3                                                                               |                                                                           |
| 1429 | ENSG00000198738 | MRB1     | 2305.1 | 0.21                 | protein_coding | 16        | 1988211   | 1993327                                                                                       | methionine sulfoxide reductase B1                                         |
| 1429 | ENSG00000198738 | PPBP     | 2370.2 | 0.21                 | protein_coding | 4         | 7485275   | 7485314                                                                                       | pro-plalet basic protein (chemokine (C-X-C motif) ligand 7)               |
| 1594 | ENSG00000192698 | FAM216B  | 2587.2 | 0.21                 | protein_coding | 20        | 5453381   | 5453476                                                                                       | family with sequence similarity 210, member 6                             |
| 1605 | ENSG00000174885 | NRIP6    | 2583.1 | 0.21                 | protein_coding | 11        | 278385    | 28339                                                                                         | NLR family, pyrin domain containing 8                                     |
| 1623 | ENSG00000089892 | LAG3     | 2604.5 | 0.21                 | protein_coding | 12        | 6884878   | 6887621                                                                                       | lymphocyte-activation gene 3                                              |
| 1738 | ENSG00000134020 | PTPRAP   | 2720.9 | 0.21                 | protein_coding | 17        | 8722111   | 8722111                                                                                       | protein tyrosine phosphatase receptor type C, associated protein          |
| 1787 | ENSG00000130707 | SIRPB1   | 2839   | 0.21                 | protein_coding | 20        | 1544187   | 1600707                                                                                       | signal-regulatory protein beta 1                                          |
| 1787 | ENSG00000187808 | SQWHD    | 2882.8 | 0.21                 | protein_coding | X         | 11888275  | 11889416                                                                                      | scandown ankyrin repeat domain family member D                            |
| 1784 | ENSG00000137138 | PCDH14   | 2915.9 | 0.21                 | protein_coding | 10        | 735210    | 735210                                                                                        | chromosome 10 pseudogene 54                                               |
| 1807 | ENSG00000119535 | CSF3R    | 2934.5 | 0.21                 | protein_coding | 1         | 3693164   | 3694879                                                                                       | colony stimulating factor 1 receptor (granulocyte)                        |
| 1840 | ENSG00000187850 | CD300C   | 2987.1 | 0.21                 | protein_coding | 17        | 7253747   | 7254282                                                                                       | CD300c molecule                                                           |
| 1843 | ENSG00000137177 | RASGEF3B | 2998   | 0.21                 | protein_coding | 17        | 3899199   | 3899199                                                                                       | RASGEF3B protein domain 4                                                 |
| 1840 | ENSG00000239713 | AP0BEC3G | 2946.2 | 0.21                 | protein_coding | 22        | 3943622   | 3948378                                                                                       | apolipoprotein B mRNA editing enzyme, catalytic polypeptide-like 3G       |
| 1856 | ENSG00000154217 | PITPNCA1 | 2953.8 | 0.21                 | protein_coding | 17        | 65373575  | 6538373                                                                                       | phosphatidylinositol transfer protein, cytoplasmic 1                      |
| 1856 | ENSG00000154217 | PITPNCA2 | 2954.2 | 0.21                 | protein_coding | 17        | 381323    | 381323                                                                                        | myeloid differentiation primary response 88                               |
| 1870 | ENSG00000104984 | CD37     | 2968.1 | 0.21                 | protein_coding | 19        | 4983828   | 4984592                                                                                       | CD37 molecule                                                             |
| 1875 | ENSG00000142512 | SIGLEC10 | 2971.9 | 0.21                 | protein_coding | 19        | 51913275  | 5192167                                                                                       | sialic acid binding Ig-like lectin 10                                     |
| 1880 | ENSG00000184900 | ADAP2    | 3017.7 | 0.21                 | protein_coding | 17        | 2923392   | 2923640                                                                                       | pleckstrin homology domain containing, family O member 2                  |
| 1910 | ENSG00000184900 | ADAP2    | 3017.7 | 0.21                 | protein_coding | 17        | 2923392   | 2923640                                                                                       | ARFAP with dual PH domains 2                                              |
| 1914 | ENSG00000069227 | PPP2R3A  | 3108.8 | 0.21                 | protein_coding | 1         | 21245879  | 21253200                                                                                      | protein phosphatase 2, regulatory subunit B, alpha                        |
| 2078 | ENSG00000164701 | UBE2D1   | 3260.7 | 0.21                 | protein_coding | 10        | 6094726   | 60130213                                                                                      | ubiquitin-conjugating enzyme E2D 1                                        |
| 2096 | ENSG00000164701 | UBE2D1   | 3260.7 | 0.21                 | protein_coding | 10        | 6094726   | 60130213                                                                                      | ubiquitin-conjugating enzyme E2D 1                                        |
| 2118 | ENSG00000146278 | PNRC1    | 3313.1 | 0.21                 | protein_coding | 6         | 8970470   | 8970479                                                                                       | proline-rich nuclear receptor coactivator 1                               |
| 2124 | ENSG00000056767 | SRFBP1   | 3338.3 | 0.21                 | protein_coding | 6         | 10651485  | 10650714                                                                                      | PR domain containing 1, with 2NF domain                                   |
| 2150 | ENSG00000174144 | FAM81A   | 3366.4 | 0.21                 | protein_coding | 5         | 1760598   | 1760590                                                                                       | family with sequence similarity 8, member A1                              |
| 2214 | ENSG00000234445 | BIRC3    | 3460.2 | 0.21                 | protein_coding | 11        | 10218215  | 10221034                                                                                      | baculoviral IAP repeat containing 3                                       |
| 2216 | ENSG00000202520 | PCMBP1B  | 3460.6 | 0.21                 | protein_coding | 18        | 6795602   | 6791090                                                                                       | proteasome (prosome, multicatalytic, subunit, beta type, 10)              |
| 2236 | ENSG00000202524 | NAT23    | 3487.8 | 0.21                 | protein_coding | 10        | 16291310  | 16291310                                                                                      | melastatin adenovirusinducible 1, beta                                    |
| 2258 | ENSG00000160883 | HCK1     | 3531   | 0.21                 | protein_coding | 5         | 176307870 | 176320333                                                                                     | hexokinase 3 (white cell)                                                 |
| 2258 | ENSG00000176603 | SLC3A1   | 3566.1 | 0.21                 | protein_coding | 15        | 5239925   | 5271569                                                                                       | solute carrier organic anion transporter family, member 3A1               |
| 2336 | ENSG00000169000 | ZNF268   | 3694.5 | 0.21                 | protein_coding | 15        | 29452     | 29452                                                                                         | zinc finger protein 268                                                   |
| 2338 | ENSG00000174852 | ZNF268   | 3670.8 | 0.21                 | protein_coding | 19        | 952327    | 954234                                                                                        | zinc finger protein 268                                                   |
| 2365 | ENSG00000188886 | STAT6    | 3699.2 | 0.21                 | protein_coding | 12        | 57489191  | 57492922                                                                                      | signal transducer and activator of transcription 6, interleukin 4 induced |
| 2361 | ENSG00000082986 | MYO10    | 3722.6 | 0.21                 | protein_coding | 12        | 14892085  | 14892768                                                                                      | myosin X                                                                  |
| 2384 | ENSG00000150337 | FOGRI1A  | 3700.8 | 0.21                 | protein_coding | 1         | 149754227 | 14976074                                                                                      | Fc fragment of IgG, high affinity Ia, receptor (CD64)                     |
| 2386 | ENSG00000135836 | DYF3     | 3738   | 0.21                 | protein_coding | 2         | 7168082   | 7161388                                                                                       | dyxferlin                                                                 |
| 2406 | ENSG00000160310 | PCP2     | 3738.8 | 0.21                 | protein_coding | 41        | 469278    | 469278                                                                                        | protein arginine methyltransferase 2                                      |
| 2452 | ENSG00000102218 | RP2      | 3825.8 | 0.21                 | protein_coding | 8         | 4698375   | 4674193                                                                                       | retinyl palmitate 2 (X-linked recessive)                                  |
| 2478 | ENSG00000154451 | GBP5     | 3883.2 | 0.21                 | protein_coding | 1         | 8972453   | 8973844                                                                                       | guanylate binding protein 5                                               |
| 2524 | ENSG00000164598 | KIF20A   | 3884.2 | 0.21                 | protein_coding | 13        | 1830316   | 1830317                                                                                       | Kinesin-like family member 8                                              |
| 2545 | ENSG00000164598 | TPSIN1P1 | 3940.1 | 0.21                 | protein_coding | 8         | 9593820   | 9596169                                                                                       | tumor protein p53 inducible nuclear protein 1                             |
| 2570 | ENSG00000209216 | CCP2P1   | 3952.5 | 0.21                 | protein_coding | 15        | 5552220   | 5507308                                                                                       | cell cycle progression 1                                                  |
| 2590 | ENSG00000143366 | CCP2P1   | 3952.5 | 0.21                 | protein_coding | 15        | 5552220   | 5507308                                                                                       | myosin cell leukemia protein 1 (BCL2-related)                             |
| 2627 | ENSG00000183484 | GPR132   | 4068.5 | 0.21                 | protein_coding | 14        | 10551528  | 10553172                                                                                      | G protein-coupled receptor 132                                            |
| 2641 | ENSG00000143409 | FAM33A   | 4089.9 | 0.21                 | protein_coding | 1         | 15098025  | 15098081                                                                                      | family with sequence similarity 63, member A                              |
| 2655 | ENSG00000126598 | PCNT1    | 4130.4 | 0.21                 | protein_coding | 5         | 1387166   | 1387166                                                                                       | zinc finger CCHC-type, antisense 1                                        |
| 2679 | ENSG00000159320 | NFKB1    | 4380.3 | 0.21                 | protein_coding | 4         | 10342480  | 10338459                                                                                      | nuclear factor of kappa light polypeptide gene enhancer in B-cells 1      |
| 2827 | ENSG00000170581 | STAT2    | 4454.8 | 0.21                 | protein_coding | 12        | 5874581   | 5875309                                                                                       | signal transducer and activator of transcription 2, 113kDa                |
| 2904 | ENSG00000151213 | KMO      | 4552.8 | 0.21                 | protein_coding | 23        | 23242     | 23242                                                                                         | ketonucleoside triphosphate dephosphorylase                               |
| 2909 | ENSG00000117005 | KMO      | 4551.4 | 0.21                 | protein_coding | 1         | 2419534   | 24175894                                                                                      | ketonucleoside triphosphate dephosphorylase                               |
| 2918 | ENSG00000112851 | ERBB2P   | 4578.8 | 0.21                 | protein_coding | 5         | 6522293   | 6537877                                                                                       | erbB2 interacting protein                                                 |
| 2918 | ENSG00000112851 | ERBB2P   | 4578.8 | 0.21                 | protein_coding | 5         | 6522293   | 6537877                                                                                       | erbB2 interacting protein                                                 |
| 2984 | ENSG00000119836 | CCDC17B  | 4642.4 | 0.21                 | protein_coding | 14        | 7449556   | 7449566                                                                                       | chromosome 7 open reading frame 43                                        |
| 2984 | ENSG00000119836 | CCDC17B  | 4642.4 | 0.21                 | protein_coding | 14        | 7449556   | 7449566                                                                                       | collet-coiled-coiled containing 17b                                       |
| 3011 | ENSG00000164184 | S1002    | 4707.7 | 0.21                 | protein_coding | 5         | 7814826   | 7821475                                                                                       | S100 calcium binding protein 2                                            |
| 3111 | ENSG00000169118 | GPR144   | 4801.9 | 0.21                 | protein_coding | 12        | 5751618   | 5751618                                                                                       | G protein-coupled receptor 114                                            |
| 3184 | ENSG00000135968 | GCC2     | 4987   | 0.21                 | protein_coding | 2         | 19095017  | 19095171                                                                                      | GRIP and coiled-coil domain containing 2                                  |
| 3184 | ENSG00000135968 | GCC2     | 4987   | 0.21                 | protein_coding | 2         | 19095017  | 19095171                                                                                      | GRIP and coiled-coil domain containing 2                                  |
| 3201 | ENSG00000163867 | ZMYM6    | 4990.7 | 0.21                 | protein_coding | 1         | 3544923   | 3549769                                                                                       | zinc finger, MYM-type 6                                                   |
| 3202 | ENSG00000163867 | ZMYM6    | 4990.7 | 0.21                 | protein_coding | 1         | 3544923   | 3549769                                                                                       | zinc finger, MYM-type 6                                                   |
| 3224 | ENSG00000198740 | ZNF652   | 5081.8 | 0.21                 | protein_coding | 17        | 4736958   | 4734935                                                                                       | zinc finger protein 652                                                   |
| 3262 | ENSG00000048405 | ZNF800   | 5124.9 | 0.21                 | protein_coding | 7         | 12998844  | 127071878                                                                                     | zinc finger protein 800                                                   |
| 3291 | ENSG00000049411 | TBC1D22A | 5167.3 | 0.21                 | protein_coding | 22        | 4718818   | 4751338                                                                                       | TBC1 domain family member 22A                                             |
| 3307 | ENSG00000117664 | FNP1     | 5209.8 | 0.21                 | protein_coding | 22        | 6075448   | 6075442                                                                                       | zinc finger, C2H2 domain containing 2                                     |
| 3309 | ENSG00000217128 | FNP1     | 5209.8 | 0.21                 | protein_coding | 5         | 13097467  | 131132710                                                                                     | folliculin interacting protein 1                                          |
| 3378 | ENSG00000045993 | DCN1P1   | 5366.6 | 0.21                 | protein_coding | 3         | 16265862  | 16270342                                                                                      | DCN1, defective in cutis marmorata 1, domain containing 1                 |
| 3439 | ENSG00000116200 | PKFYVE   | 5411.4 | 0.21                 | protein_coding | 1         | 2091140   | 2091140                                                                                       | phosphotyrosine kinase 1, F.Y.E. finger containing                        |
| 3441 | ENSG00000151532 | VH11A    | 5419.8 | 0.21                 | protein_coding | 10        | 114289756 | 114287603                                                                                     | vesicle transport through interaction with 51NARF5, 1A                    |
| 3447 | ENSG00000169232 | ZNF91    | 5430.3 | 0.21                 | protein_coding | 19        | 2344736   | 2357862                                                                                       | zinc finger protein 91                                                    |
| 3452 | ENSG00000040451 | SOX3     | 5433.8 | 0.21                 | protein_coding | 1         | 169831872 | 169831872                                                                                     | SOX3 (S. cerevisiae)                                                      |
| 3452 | ENSG00000271786 | 5557.7   | 0.21   | protein_coding       | 10             | 18931465  | 18931423  | Uchradenylated protein                                                                        |                                                                           |
| 3573 | ENSG00000170471 | RALGAPB  | 5582.8 | 0.21                 | protein_coding | 20        | 3710459   | 37207304                                                                                      | Ral GTPase activating protein, beta subunit (non-catalytic)               |
| 3680 | ENSG00000159586 | ZNF230   | 5750.8 | 0.21                 | protein_coding | 16        | 44501790  | 44518010                                                                                      | zinc finger protein 230                                                   |
| 3723 | ENSG00000082258 | CNT2     | 5835   | 0.21                 | protein_coding | 2         | 13597505  | 13591812                                                                                      | cyclin 2                                                                  |
| 3730 | ENSG00000207315 | ZBED6    | 5841.9 | 0.21                 |                |           |           |                                                                                               |                                                                           |

|      |                  |             |       |      |                                     |    |            |            |                                                                                                |
|------|------------------|-------------|-------|------|-------------------------------------|----|------------|------------|------------------------------------------------------------------------------------------------|
| 6901 | ENSG00000170790  | CR10A2      | 9670  | 0.21 | protein_coding                      | 11 | 6892924    | 6891978    | effector receptor, family 10, subfamily A, member 2                                            |
| 6922 | ENSG00000171198  | TAS2R38     | 9670  | 0.21 | protein_coding                      | 7  | 141672431  | 141672431  | taste receptor, type 2, member 38                                                              |
| 6947 | ENSG00000139448  | KRT17       | 9723  | 0.21 | protein_coding                      | 12 | 52937693   | 52946931   | keratin 17                                                                                     |
| 6949 | ENSG00000198443  | KRTAP4-1    | 9726  | 0.21 | protein_coding                      | 17 | 39340354   | 39341594   | keratin associated protein 4-1                                                                 |
| 6979 | ENSG00000163962  | C10P1       | 9737  | 0.21 | protein_coding                      | 6  | 4196379    | 4229618    | deceit1                                                                                        |
| 7011 | ENSG00000163963  | CR131       | 9737  | 0.21 | protein_coding                      | 9  | 39887875   | 39870461   | effector receptor, family 13, subfamily J, member 1                                            |
| 7048 | ENSG00000204001  | LCN8        | 9815  | 0.21 | protein_coding                      | 9  | 139648838  | 139652878  | lipocalin 8                                                                                    |
| 7058 | ENSG00000184276  | DEFB10B     | 9842  | 0.21 | protein_coding                      | 11 | 7154765    | 7154976    | defensin, beta 10B                                                                             |
| 7069 | ENSG00000208423  | KRT12       | 9843  | 0.21 | protein_coding                      | 12 | 4795913    | 47104118   | keratin 12                                                                                     |
| 7073 | ENSG00000126255  | SRFBP1      | 9838  | 0.21 | protein_coding                      | 19 | 35881831   | 35883855   | G protein-coupled receptor 42 (genepseudogene)                                                 |
| 7110 | ENSG00000187510  | PLEKHG7     | 9872  | 0.21 | protein_coding                      | 12 | 8311528    | 8316623    | pleckstrin homology domain containing, family G (with RHOGEF domain) member 7                  |
| 7118 | ENSG00000181850  | KRT12       | 9879  | 0.21 | protein_coding                      | 12 | 5278715    | 52801139   | keratin 12                                                                                     |
| 7134 | ENSG00000214700  | C12orf71    | 9889  | 0.21 | protein_coding                      | 12 | 27233991   | 27235447   | chromosome 12 open reading frame 71                                                            |
| 7160 | ENSG00000189605  | RNASE9      | 9908  | 0.21 | protein_coding                      | 14 | 21024252   | 21024900   | ribonuclease, RNase A family, 9 (non-active)                                                   |
| 7168 | ENSG00000202955  | NXF1        | 9914  | 0.21 | protein_coding                      | X  | 101007085  | 101112549  | nuclear RNA export factor 5                                                                    |
| 7205 | ENSG00000183895  | MR6PRX2     | 9947  | 0.21 | protein_coding                      | 11 | 19076002   | 19828228   | MAS-related GPR, member X2                                                                     |
| 7231 | ENSG00000146839  | ZAN         | 9975  | 0.21 | protein_coding                      | 6  | 10031249   | 10039519   | zonahesin (genepseudogene)                                                                     |
| 7308 | ENSG00000207170  | LOC10050374 | 10051 | 0.21 | protein_coding                      | 9  | 5674136    | 5667119    | Uncharacterized protein                                                                        |
| 7443 | ENSG00000171060  | C1orf74     | 10183 | 0.21 | protein_coding                      | 8  | 10530147   | 10558103   | chromosome 8 open reading frame 74                                                             |
| 7484 | ENSG00000205780  | C1orf74     | 10227 | 0.21 | protein_coding                      | 12 | 10354520   | 103542087  | Uncharacterized protein                                                                        |
| 7523 | ENSG00000191138  | TAS2R42     | 10258 | 0.21 | protein_coding                      | 12 | 11339599   | 11339543   | taste receptor, type 2, member 42                                                              |
| 7585 | ENSG00000157890  | MEGF11      | 10332 | 0.21 | protein_coding                      | 15 | 66187147   | 66546085   | multiple EGF-like domains 11                                                                   |
| 5605 | ENSG00000201492  |             | 8352  | 0.21 | rRNA                                | 1  | 22968562   | 22968579   | rRNA, 5S ribosomal pseudogene 78                                                               |
| 6396 | ENSG00000210338  |             | 9132  | 0.21 | rRNA                                | 6  | 62331917   | 62332008   | rRNA, 5S ribosomal pseudogene 210                                                              |
| 6517 | ENSG00000252072  |             | 9315  | 0.21 | rRNA                                | 10 | 75468248   | 75468371   | rRNA, 5S ribosomal pseudogene 320                                                              |
| 3211 | ENSG00000202325  |             | 5039  | 0.21 | sense_intronic                      | 1  | 17489295   | 17489713   | RABGAP1L intronic transcript 1 (non-protein coding)                                            |
| 6899 | ENSG00000201927  |             | 9645  | 0.21 | sense_intronic                      | 2  | 15989469   | 15989600   | USP2 intronic transcript 1 (non-protein coding)                                                |
| 6878 | ENSG00000254886  |             | 8655  | 0.21 | sense_intronic                      | 11 | 13329904   | 133235975  | OPCML intronic transcript 1 (non-protein coding)                                               |
| 2657 | ENSG00000202448  |             | 3934  | 0.21 | sncRNA                              | 1  | 3844969    | 3844969    | Small nuclear RNA SNORD63                                                                      |
| 6892 | ENSG00000202969  |             | 6328  | 0.21 | sncRNA                              | 1  | 87121      | 87121      | Small nuclear RNA SNORD74                                                                      |
| 6930 | ENSG00000198411  |             | 9567  | 0.21 | sncRNA                              | 9  | 13998787   | 13998882   | Small nuclear RNA SNORD62                                                                      |
| 2882 | ENSG00000207399  |             | 4419  | 0.21 | sncRNA                              | 8  | 10436789   | 10439726   | rRNA, U5 small nuclear 101, pseudogene                                                         |
| 1125 | ENSG00000201841  |             | 4803  | 0.21 | sncRNA                              | 17 | 173263     | 173263     | U7 small nuclear RNA                                                                           |
| 3545 | ENSG00000201783  |             | 5384  | 0.21 | sncRNA                              | 10 | 4310006    | 4310011    | rRNA, U5 small nuclear 1170, pseudogene                                                        |
| 3564 | ENSG00000202304  |             | 5598  | 0.21 | sncRNA                              | 11 | 380262     | 380266     | rRNA, U7 small nuclear 50 pseudogene                                                           |
| 3908 | ENSG00000202299  |             | 6188  | 0.21 | sncRNA                              | 12 | 1335128    | 1335128    | rRNA, U6 small nuclear 12, pseudogene                                                          |
| 4104 | ENSG00000207337  |             | 6417  | 0.21 | sncRNA                              | 15 | 52199397   | 52199502   | rRNA, U6 small nuclear 15, pseudogene                                                          |
| 4333 | ENSG00000200799  |             | 6728  | 0.21 | sncRNA                              | 6  | 10871327   | 108713381  | rRNA, U6 small nuclear 770, pseudogene                                                         |
| 4478 | ENSG00000201513  |             | 7421  | 0.21 | sncRNA                              | 10 | 7415122    | 7415122    | rRNA, U6 small nuclear 805, pseudogene                                                         |
| 4730 | ENSG00000205148  |             | 8278  | 0.21 | sncRNA                              | 2  | 20194455   | 20194467   | rRNA, U6 small nuclear 1208, pseudogene                                                        |
| 6161 | ENSG00000202046  |             | 8940  | 0.21 | sncRNA                              | 8  | 20993705   | 20993705   | rRNA, U6 small nuclear 150, pseudogene                                                         |
| 6256 | ENSG00000201299  |             | 9670  | 0.21 | sncRNA                              | 18 | 1419069    | 1419069    | rRNA, U6 small nuclear 316, pseudogene                                                         |
| 6256 | ENSG00000201399  |             | 9033  | 0.21 | sncRNA                              | 8  | 4858033    | 4858039    | rRNA, U6 small nuclear 665, pseudogene                                                         |
| 6674 | ENSG00000201916  |             | 9273  | 0.21 | sncRNA                              | 6  | 3251771    | 3251787    | rRNA, U1 small nuclear 61, pseudogene                                                          |
| 684  | ENSG00000201448  |             | 9248  | 0.21 | sncRNA                              | 6  | 7159472    | 7159705    | rRNA, U6 small nuclear 520, pseudogene                                                         |
| 684  | ENSG00000201709  |             | 9424  | 0.21 | sncRNA                              | 15 | 6521259    | 6521259    | rRNA, U6 small nuclear 686, pseudogene                                                         |
| 6832 | ENSG00000202204  |             | 9608  | 0.21 | sncRNA                              | 15 | 72337524   | 72337708   | rRNA, U2 small nuclear 65, pseudogene                                                          |
| 6840 | ENSG00000202348  |             | 9615  | 0.21 | sncRNA                              | 3  | 10133470   | 10133472   | rRNA, U6 small nuclear 1295, pseudogene                                                        |
| 7183 | ENSG00000202286  |             | 9901  | 0.21 | sncRNA                              | 3  | 2020379236 | 2020379236 | rRNA, U6 small nuclear 1295, pseudogene                                                        |
| 2141 | ENSG00000201766  |             | 3348  | 0.21 | TR_v_gene                           | 7  | 142484381  | 142484426  | T cell receptor beta panning 2-2P (non-functional)                                             |
| 6020 | ENSG00000201739  |             | 6933  | 0.21 | TR_v_gene                           | 7  | 142166338  | 142167190  | T cell receptor beta variable 3'2 (pseudogene)                                                 |
| 6020 | ENSG00000204044  |             | 9134  | 0.21 | TR_v_gene                           | 14 | 22845781   | 22845781   | T cell receptor alpha variable 31 (pseudogene)                                                 |
| 5517 | ENSG000002027625 | SLC7A7P1    | 8256  | 0.21 | transcribed_unprocessed_pseudo_gene | 12 | 98847613   | 98850923   | solute carrier family 7, subfamily A (NH2), cation proton antiporter 71, member 7 pseudogene 1 |
| 6399 | ENSG000002058774 |             | 9145  | 0.21 | transcribed_unprocessed_pseudo_gene | 14 | 92070746   | 92071663   | Narog homeobox pseudogene 7                                                                    |
| 6520 | ENSG000002035420 |             | 9319  | 0.21 | transcribed_unprocessed_pseudo_gene | 15 | 71088936   | 71090527   | ribosomal protein L29 pseudogene 30                                                            |
| 6549 | ENSG00000176584  | DMBT1P1     | 9345  | 0.21 | transcribed_unprocessed_pseudo_gene | 10 | 124518210  | 124558996  | deleted in malignant brain tumors 1 pseudogene 1                                               |
| 6718 | ENSG000002050517 |             | 9504  | 0.21 | transcribed_unprocessed_pseudo_gene | 12 | 63933733   | 63400662   | lactate dehydrogenase A-like 6C, pseudogene                                                    |
| 3015 | ENSG000002027671 | MIR3916     | 4701  | 0.21 | transcribed_unprocessed_pseudo_gene | 1  | 247353153  | 24734158   | miRNA 3916                                                                                     |
| 3521 | ENSG000002014176 | PLEKHM1P    | 5537  | 0.21 | transcribed_unprocessed_pseudo_gene | 17 | 62775377   | 62833272   | pleckstrin homology domain containing, family M (with RUN domain) member 1 pseudogene          |
| 3989 | ENSG00000123870  |             | 6254  | 0.21 | transcribed_unprocessed_pseudo_gene | 19 | 53081758   | 53100660   | zinc finger protein 137, pseudogene                                                            |
| 5190 | ENSG000002068849 |             | 7876  | 0.21 | transcribed_unprocessed_pseudo_gene | 19 | 51714336   | 51715344   | sialic acid binding Ig-like lectin 22, pseudogene                                              |
| 6057 | ENSG000002081279 | ULK4P1      | 8838  | 0.21 | transcribed_unprocessed_pseudo_gene | 15 | 32698799   | 32727193   | ULK4 pseudogene 1                                                                              |
| 6436 | ENSG00000187893  | CXCR1P1     | 9228  | 0.21 | transcribed_unprocessed_pseudo_gene | X  | 47566990   | 47612855   | CXCR1 pseudogene 1                                                                             |
| 6496 | ENSG00000179420  | ORXW1P      | 9296  | 0.21 | transcribed_unprocessed_pseudo_gene | 7  | 142759427  | 142760735  | effector receptor, family 6, subfamily W, member 1 pseudogene                                  |
| 6527 | ENSG000002027104 |             | 9325  | 0.21 | transcribed_unprocessed_pseudo_gene | 1  | 56404387   | 56404953   | phosphatidylinositol glycan anchor biosynthesis, class Q pseudogene 1                          |
| 6584 | ENSG00000080947  | CROCCP3     | 9382  | 0.21 | transcribed_unprocessed_pseudo_gene | 1  | 16793931   | 16825752   | ciliary rootlet coiled-coil, noctilin pseudogene 3                                             |
| 6711 | ENSG000002034479 | AP1B1P1     | 9486  | 0.21 | transcribed_unprocessed_pseudo_gene | 22 | 32517964   | 32529456   | adaptor-related protein complex 1, beta 1 subunit pseudogene 1                                 |
| 6817 | ENSG000002032554 |             | 9587  | 0.21 | transcribed_unprocessed_pseudo_gene | 10 | 45595614   | 45611549   | Ras suppressor protein 1 pseudogene 2                                                          |
| 6820 | ENSG000002048848 | PPBP2       | 9590  | 0.21 | transcribed_unprocessed_pseudo_gene | 4  | 74919755   | 74921116   | pro-peptide basic protein pseudogene 2                                                         |
| 6855 | ENSG00000205449  | NBPF2P2     | 9738  | 0.21 | transcribed_unprocessed_pseudo_gene | 5  | 85578278   | 85592281   | neuroblastoma breakpoint family, member 22, pseudogene                                         |
| 7168 | ENSG00000209357  |             | 9934  | 0.21 | transcribed_unprocessed_pseudo_gene | 15 | 75992294   | 75993306   | DNM1 pseudogene 34                                                                             |
| 6030 | ENSG00000158481  |             | 8653  | 0.21 | unitary_pseudogene                  | 2  | 241048519  | 24104859   | effector receptor, family 5, subfamily 5, member 1 pseudogene                                  |
| 6615 | ENSG00000204705  |             | 9424  | 0.21 | unitary_pseudogene                  | 12 | 48621971   | 48622865   | effector receptor, family 11, subfamily M, member 1 pseudogene                                 |
| 6719 | ENSG00000202592  |             | 9565  | 0.21 | unitary_pseudogene                  | X  | 77421193   | 77427919   | fibronectin type III domain containing 3C, pseudogene                                          |
| 6973 | ENSG00000201906  |             | 10955 | 0.21 | unitary_pseudogene                  | 9  | 115721474  | 11572454   | major urinary protein, pseudogene                                                              |
| 7344 | ENSG00000204249  | SKINTL      | 9988  | 0.21 | unitary_pseudogene                  | 16 | 48681784   | 48681780   | Skinn like, pseudogene                                                                         |
| 7348 | ENSG00000206072  |             | 10983 | 0.21 | unitary_pseudogene                  | 18 | 31812906   | 31813818   | vonorestatin 1 receptor 67 pseudogene                                                          |
| 2895 | ENSG00000206075  | NSFP1       | 4429  | 0.21 | unprocessed_pseudogene              | 17 | 44450221   | 44454507   | N-ethylmaleimide-sensitive factor pseudogene 1                                                 |
| 4372 | ENSG00000204560  | TRIM5P      | 6958  | 0.21 | unprocessed_pseudogene              | 11 | 71814260   | 71815122   | effector receptor, family 7, subfamily E, member 150 pseudogene                                |
| 5882 | ENSG00000204455  | TRIM5EP     | 6660  | 0.21 | unprocessed_pseudogene              | 11 | 89586008   | 89586061   | tripartite motif-containing 51B, pseudogene                                                    |
| 6090 | ENSG00000182531  |             | 8872  | 0.21 | unprocessed_pseudogene              | 10 | 15048860   | 15050383   | effector receptor, family 7, subfamily E, member 115 pseudogene                                |
| 6114 | ENSG00000182531  |             | 8924  | 0.21 | unprocessed_pseudogene              | 10 | 3062635    | 3062634    | DNM1 pseudogene 17                                                                             |
| 6205 | ENSG00000186234  |             | 8984  | 0.21 | unprocessed_pseudogene              | 4  | 96941119   | 9704578    | family with sequence similarity 88, member M, pseudogene                                       |
| 6253 | ENSG00000201223  |             | 9032  | 0.21 | unprocessed_pseudogene              | 19 | 43783095   | 43788470   | carcinoembryonic antigen-related cell adhesion molecule pseudogene 11                          |
| 6291 | ENSG00000181763  |             | 9075  | 0.21 | unprocessed_pseudogene              | 1  | 24024636   | 24024638   | effector receptor, family 2, subfamily 1, member 32 pseudogene                                 |
| 6315 | ENSG000002018491 |             | 9104  | 0.21 | unprocessed_pseudogene              | 8  | 36746000   | 36746225   | tumor protein, transcriptionally-controlled 1 pseudogene 8                                     |
| 6437 | ENSG000002014880 | CRF75P      | 9230  | 0.21 | unprocessed_pseudogene              | 11 | 35746179   | 35753881   | effector receptor, family 7, subfamily E, member 5 pseudogene                                  |
| 6479 | ENSG000002010003 |             | 9280  | 0.21 | unprocessed_pseudogene              | 1  | 22910260   | 22910694   | capicua transcriptional repressor pseudogene 26                                                |
| 6590 | ENSG00000204386  |             | 9379  | 0.21 | unprocessed_pseudogene              | 4  | 3903293    | 3903293    | effector receptor, family 7, subfamily E, member 182 pseudogene                                |
| 6625 | ENSG00000182763  |             | 9419  | 0.21 | unprocessed_pseudogene              | 6  | 28014212   | 28015145   | effector receptor, family 2, subfamily B, member 7 pseudogene                                  |
| 6850 | ENSG00000202578  |             | 9408  | 0.21 | unprocessed_pseudogene              | 10 | 24798651   | 24799750   | effector receptor, family 11, subfamily M, member 1 pseudogene                                 |
| 6708 | ENSG00000151631  | AKR1CP      | 9493  | 0.21 | unprocessed_pseudogene              | 10 | 4518093    | 4518093    | aldo-keto reductase 1, member D8, pseudogene                                                   |
| 6749 | ENSG00000186992  |             | 9528  | 0.21 | unprocessed_pseudogene              | 2  | 96212279   | 96213315   | effector receptor, family 7, subfamily E, member 102 pseudogene                                |
| 6790 | ENSG000002020558 |             | 9582  | 0.21 | unprocessed_pseudogene              | 19 | 43084585   | 43085902   | carcinoembryonic antigen-related cell adhesion molecule pseudogene 2                           |
| 6795 | ENSG00000188101  |             | 9569  | 0.21 | unprocessed_pseudogene              | 9  | 95675438   | 95683842   | arachidonate 15-lipoxygenase pseudogene 2                                                      |
| 6799 | ENSG00000204447  |             | 9571  | 0.21 | unprocessed_pseudogene              | 11 | 67503079   | 67504030   | effector receptor, family 7, subfamily E, member 111 pseudogene                                |
| 700  |                  |             |       |      |                                     |    |            |            |                                                                                                |

|      |                  |          |        |      |    |           |           |                                                      |
|------|------------------|----------|--------|------|----|-----------|-----------|------------------------------------------------------|
| 4208 | ENSG00000224487  |          | 6541.7 | 0.21 |    |           |           |                                                      |
| 4209 | ENSG00000224488  |          | 6692.4 | 0.21 |    |           |           |                                                      |
| 4309 | ENSG00000218757  |          | 6996   | 0.21 |    |           |           |                                                      |
| 4312 | ENSG00000243104  |          | 6701.3 | 0.21 |    |           |           |                                                      |
| 4393 | ENSG00000266972  |          | 6841.4 | 0.21 |    |           |           |                                                      |
| 4481 | ENSG00000215111  |          | 6945.1 | 0.21 |    |           |           |                                                      |
| 4499 | ENSG00000255455  |          | 6974.2 | 0.21 |    |           |           |                                                      |
| 4583 | ENSG00000246159  |          | 7082   | 0.21 | 5  | 79535306  | 79535408  | Small nuclear RNA U13                                |
| 4587 | ENSG00000230066  |          | 7082.4 | 0.21 |    |           |           |                                                      |
| 4632 | ENSG00000273196  |          | 7138.7 | 0.21 |    |           |           |                                                      |
| 4638 | ENSG00000229526  |          | 7160   | 0.21 |    |           |           |                                                      |
| 4684 | ENSG00000225498  |          | 7227   | 0.21 |    |           |           |                                                      |
| 4707 | ENSG00000266536  |          | 7240   | 0.21 |    |           |           |                                                      |
| 4729 | ENSG00000242290  |          | 7271.9 | 0.21 |    |           |           |                                                      |
| 4746 | ENSG00000225370  |          | 7293   | 0.21 |    |           |           |                                                      |
| 4748 | ENSG00000268156  |          | 7294.9 | 0.21 |    |           |           |                                                      |
| 4750 | ENSG00000238739  |          | 7313.8 | 0.21 | 7  | 90236318  | 90236422  | Small nuclear RNA U13                                |
| 4768 | ENSG00000198416  |          | 7375.8 | 0.21 |    |           |           |                                                      |
| 4832 | ENSG000002041981 |          | 7422.3 | 0.21 |    |           |           |                                                      |
| 4877 | ENSG00000229018  |          | 7489.1 | 0.21 |    |           |           |                                                      |
| 5017 | ENSG00000229461  |          | 7572.7 | 0.21 |    |           |           |                                                      |
| 5048 | ENSG00000258968  |          | 7705.3 | 0.21 |    |           |           |                                                      |
| 5097 | ENSG00000230163  |          | 7770.3 | 0.21 |    |           |           |                                                      |
| 5108 | ENSG00000225445  |          | 7783   | 0.21 |    |           |           |                                                      |
| 5161 | ENSG00000255487  |          | 7844.8 | 0.21 |    |           |           |                                                      |
| 5191 | ENSG00000254876  |          | 7876   | 0.21 |    |           |           |                                                      |
| 5193 | ENSG00000270941  |          | 7893   | 0.21 |    |           |           |                                                      |
| 5211 | ENSG00000224555  |          | 7912.3 | 0.21 |    |           |           |                                                      |
| 5269 | ENSG00000268337  |          | 7976.5 | 0.21 |    |           |           |                                                      |
| 5288 | ENSG00000268162  |          | 7985.2 | 0.21 | 17 | 65403959  | 65404062  | Small nuclear RNA U13                                |
| 5373 | ENSG00000228395  |          | 8084.8 | 0.21 |    |           |           |                                                      |
| 5407 | ENSG00000246363  |          | 8141.3 | 0.21 |    |           |           |                                                      |
| 5432 | ENSG00000272489  |          | 8170.3 | 0.21 |    |           |           |                                                      |
| 5451 | ENSG00000235834  |          | 8193.9 | 0.21 |    |           |           |                                                      |
| 5455 | ENSG00000230105  |          | 8196.2 | 0.21 |    |           |           |                                                      |
| 5460 | ENSG00000255288  |          | 8211.8 | 0.21 |    |           |           |                                                      |
| 5595 | ENSG00000232179  |          | 8343.2 | 0.21 |    |           |           |                                                      |
| 5607 | ENSG00000226455  |          | 8354.8 | 0.21 |    |           |           |                                                      |
| 5614 | ENSG00000267468  |          | 8326.8 | 0.21 |    |           |           |                                                      |
| 5661 | ENSG00000235145  |          | 8419.5 | 0.21 |    |           |           |                                                      |
| 5708 | ENSG00000229961  |          | 8477   | 0.21 |    |           |           |                                                      |
| 5744 | ENSG00000224411  |          | 8484   | 0.21 |    |           |           |                                                      |
| 5717 | ENSG00000229339  |          | 8490.2 | 0.21 |    |           |           |                                                      |
| 5738 | ENSG00000259862  |          | 8509.5 | 0.21 |    |           |           |                                                      |
| 5748 | ENSG00000272949  |          | 8514.8 | 0.21 |    |           |           |                                                      |
| 5760 | ENSG00000232303  |          | 8527.8 | 0.21 |    |           |           |                                                      |
| 5763 | ENSG00000233099  |          | 8530   | 0.21 |    |           |           |                                                      |
| 5776 | ENSG00000204107  |          | 8542.8 | 0.21 |    |           |           |                                                      |
| 5830 | ENSG00000269911  |          | 8599   | 0.21 |    |           |           |                                                      |
| 5833 | ENSG00000217631  |          | 8603.9 | 0.21 |    |           |           |                                                      |
| 5834 | ENSG00000237129  |          | 8605.2 | 0.21 |    |           |           |                                                      |
| 5843 | ENSG00000272636  |          | 8613.1 | 0.21 |    |           |           |                                                      |
| 5884 | ENSG00000257896  |          | 8629.9 | 0.21 |    |           |           |                                                      |
| 5874 | ENSG00000232048  |          | 8651.6 | 0.21 |    |           |           |                                                      |
| 5929 | ENSG00000295715  | MR3118-3 | 8701.2 | 0.21 | 1  | 142667289 | 142667303 | microRNA 3118-1                                      |
| 5943 | ENSG00000222982  |          | 8722.7 | 0.21 |    |           |           |                                                      |
| 5977 | ENSG00000268186  |          | 8780.4 | 0.21 |    |           |           |                                                      |
| 5988 | ENSG00000225441  |          | 8781.5 | 0.21 |    |           |           |                                                      |
| 6010 | ENSG00000255962  |          | 8793.8 | 0.21 |    |           |           |                                                      |
| 6021 | ENSG00000254214  |          | 8811.4 | 0.21 | 14 | 106785676 | 106785916 | immunoglobulin heavy variable (II)-28-1 (pseudogene) |
| 6038 | ENSG00000237658  |          | 8812.8 | 0.21 |    |           |           |                                                      |
| 6059 | ENSG00000255165  |          | 8839.3 | 0.21 |    |           |           |                                                      |
| 6084 | ENSG00000237073  |          | 8843.8 | 0.21 |    |           |           |                                                      |
| 6072 | ENSG00000238555  |          | 8857.3 | 0.21 |    |           |           |                                                      |
| 6073 | ENSG00000218976  |          | 8858.7 | 0.21 |    |           |           |                                                      |
| 6084 | ENSG00000250726  |          | 8859.9 | 0.21 |    |           |           |                                                      |
| 6086 | ENSG00000225040  |          | 8864.8 | 0.21 |    |           |           |                                                      |
| 6092 | ENSG00000269873  |          | 8873.8 | 0.21 |    |           |           |                                                      |
| 6102 | ENSG00000290382  |          | 8882.9 | 0.21 |    |           |           |                                                      |
| 6116 | ENSG00000266444  |          | 8888   | 0.21 |    |           |           |                                                      |
| 6144 | ENSG00000255800  | OR13C5   | 8924.7 | 0.21 | 9  | 107360650 | 107361788 | olfactory receptor, family 13, subfamily C, member 5 |
| 6150 | ENSG00000241815  |          | 8931.9 | 0.21 |    |           |           |                                                      |
| 6181 | ENSG00000216867  |          | 8921   | 0.21 |    |           |           |                                                      |
| 6185 | ENSG00000228539  |          | 8965.4 | 0.21 |    |           |           |                                                      |
| 6187 | ENSG00000254801  |          | 8967.8 | 0.21 |    |           |           |                                                      |
| 6193 | ENSG00000252828  |          | 8974.5 | 0.21 |    |           |           |                                                      |
| 6200 | ENSG00000215168  |          | 8980   | 0.21 |    |           |           |                                                      |
| 6202 | ENSG00000263312  |          | 8980.5 | 0.21 |    |           |           |                                                      |
| 6211 | ENSG00000232578  |          | 8989.8 | 0.21 |    |           |           |                                                      |
| 6215 | ENSG00000270569  |          | 8993.4 | 0.21 |    |           |           |                                                      |
| 6216 | ENSG00000242941  |          | 8995.2 | 0.21 |    |           |           |                                                      |
| 6233 | ENSG00000232009  |          | 9005.5 | 0.21 |    |           |           |                                                      |
| 6234 | ENSG00000235581  |          | 9008.4 | 0.21 |    |           |           |                                                      |
| 6236 | ENSG00000213873  |          | 9009   | 0.21 |    |           |           |                                                      |
| 6238 | ENSG00000226566  |          | 9012.8 | 0.21 |    |           |           |                                                      |
| 6242 | ENSG00000239033  |          | 9016.8 | 0.21 | 12 | 31603104  | 31603207  | Small nuclear RNA U13                                |
| 6265 | ENSG00000224539  |          | 9041.3 | 0.21 |    |           |           |                                                      |
| 6268 | ENSG00000208126  |          | 9041.4 | 0.21 |    |           |           |                                                      |
| 6272 | ENSG00000287443  |          | 9051.5 | 0.21 |    |           |           |                                                      |
| 6273 | ENSG00000226334  |          | 9057.5 | 0.21 |    |           |           |                                                      |
| 6277 | ENSG00000256498  |          | 9060.3 | 0.21 |    |           |           |                                                      |
| 6279 | ENSG00000266424  |          | 9061.6 | 0.21 |    |           |           |                                                      |
| 6297 | ENSG00000221967  |          | 9062.2 | 0.21 | 3  | 128681008 | 128681101 | microRNA 1280                                        |
| 6298 | ENSG00000271620  |          | 9063.2 | 0.21 |    |           |           |                                                      |
| 6308 | ENSG00000252575  |          | 9068.3 | 0.21 |    |           |           |                                                      |
| 6316 | ENSG00000230452  |          | 9105.1 | 0.21 |    |           |           |                                                      |
| 6321 | ENSG00000255279  |          | 9109.6 | 0.21 | 16 | 89599524  | 89599902  | RNA, U7 small nuclear 117 pseudogene                 |
| 6322 | ENSG00000229800  |          | 9115.5 | 0.21 |    |           |           |                                                      |
| 6323 | ENSG000002043022 |          | 9111   | 0.21 |    |           |           |                                                      |
| 6326 | ENSG00000270456  |          | 9114.6 | 0.21 |    |           |           |                                                      |
| 6328 | ENSG00000270366  |          | 9117.2 | 0.21 |    |           |           |                                                      |
| 6333 | ENSG000002081044 |          | 9119.8 | 0.21 |    |           |           |                                                      |
| 6334 | ENSG00000239577  |          | 9119.8 | 0.21 |    |           |           |                                                      |
| 6339 | ENSG00000241381  |          | 9127.8 | 0.21 |    |           |           |                                                      |
| 6343 | ENSG00000270655  |          | 9131.6 | 0.21 |    |           |           |                                                      |
| 6346 | ENSG00000269877  |          | 9135.6 | 0.21 |    |           |           |                                                      |
| 6348 | ENSG00000233449  |          | 9136.5 | 0.21 |    |           |           |                                                      |
| 6351 | ENSG00000228586  |          | 9138.3 | 0.21 |    |           |           |                                                      |
| 6355 | ENSG00000231830  |          | 9142.5 | 0.21 |    |           |           |                                                      |
| 6356 | ENSG00000234225  |          | 9142.8 | 0.21 |    |           |           |                                                      |
| 6360 | ENSG00000254730  |          | 9146.1 | 0.21 |    |           |           |                                                      |
| 6366 | ENSG00000231191  |          | 9152   | 0.21 |    |           |           |                                                      |
| 6370 | ENSG00000232108  |          | 9159.3 | 0.21 |    |           |           |                                                      |
| 6371 | ENSG00000221070  |          | 9159.3 | 0.21 |    |           |           |                                                      |
| 6376 | ENSG00000238033  |          | 9166.3 | 0.21 |    |           |           |                                                      |
| 6379 | ENSG00000225410  |          | 9168   | 0.21 |    |           |           |                                                      |
| 6381 | ENSG00000213527  |          | 9170   | 0.21 |    |           |           |                                                      |
| 6382 | ENSG00000237666  |          | 9171.5 | 0.21 |    |           |           |                                                      |
| 6383 | ENSG00000233867  |          | 9171.7 | 0.21 |    |           |           |                                                      |
| 6389 | ENSG00000252396  |          | 9174.4 | 0.21 |    |           |           |                                                      |
| 6391 | ENSG00000215589  |          | 9180   | 0.21 |    |           |           |                                                      |
| 6397 | ENSG00000251578  |          | 9187.3 | 0.21 |    |           |           |                                                      |
| 6398 | ENSG00000254910  |          | 9189.3 | 0.21 |    |           |           |                                                      |
| 6400 | ENSG00000253115  |          | 9190.9 | 0.21 |    |           |           |                                                      |
| 6405 | ENSG00000241745  |          | 9197.9 | 0.21 |    |           |           |                                                      |
| 6408 | ENSG00000261734  |          | 9200   | 0.21 |    |           |           |                                                      |
| 6410 | ENSG00000264044  |          | 9200.7 | 0.21 |    |           |           |                                                      |
| 6412 | ENSG00000224776  |          | 9201.9 | 0.21 |    |           |           |                                                      |
| 6422 | ENSG00000266815  |          | 9212.7 | 0.21 |    |           |           |                                                      |
| 6424 | ENSG000002323548 |          | 9213.9 | 0.21 |    |           |           |                                                      |
| 6430 | ENSG00000250519  |          | 9225.4 | 0.21 |    |           |           |                                                      |
| 6433 | ENSG00000226008  |          | 9227.5 | 0.21 |    |           |           |                                                      |
| 6442 | ENSG00000256350  |          | 9232.6 | 0.21 |    |           |           |                                                      |
| 6449 | ENSG00000251584  |          | 9232.2 | 0.21 |    |           |           |                                                      |
| 6461 | ENSG00000251522  |          | 9236   | 0.21 |    |           |           |                                                      |
| 6468 | ENSG00000271408  |          | 9260   | 0.21 |    |           |           |                                                      |
| 6469 | ENSG00000268940  |          | 9260.1 | 0.21 |    |           |           |                                                      |
| 6472 | ENSG00000237119  |          | 9268.3 | 0.21 |    |           |           |                                                      |
| 6475 | ENSG00000259058  |          | 9275   | 0.21 |    |           |           |                                                      |
| 6477 | ENSG00000261748  |          | 9279.4 | 0.21 |    |           |           |                                                      |
| 6481 | ENSG00000222127  |          | 9281   | 0.21 |    |           |           |                                                      |
| 6484 | ENSG00000225413  |          | 9285.8 | 0.21 |    |           |           |                                                      |
| 6487 | ENSG00000255160  |          | 9288.7 | 0.21 |    |           |           |                                                      |
| 6490 | ENSG00000268966  |          | 9291.6 | 0.21 |    |           |           |                                                      |
| 6493 | ENSG00000268540  |          | 9292.3 | 0.21 |    |           |           |                                                      |
| 6497 | ENSG00000220931  |          | 9296.5 | 0.21 |    |           |           |                                                      |
| 6506 | ENSG00000244506  |          | 9300.3 | 0.21 |    |           |           |                                                      |
| 6507 | ENSG00000260137  |          | 9302.9 | 0.21 |    |           |           |                                                      |
| 6508 | ENSG00000234553  |          | 9305.1 | 0.21 |    |           |           |                                                      |
| 6518 | ENSG00000231318  |          | 9321   | 0.21 | 7  | 150888267 | 150902582 | IQ motif containing with AAA domain 1 pseudogene 1   |
| 6521 | ENSG00000254974  |          | 9320.7 | 0.21 |    |           |           |                                                      |



|      |                  |         |        |      |    |           |           |                                                 |
|------|------------------|---------|--------|------|----|-----------|-----------|-------------------------------------------------|
| 6524 | ENSG00000271158  |         | 9322.9 | 0.21 |    |           |           |                                                 |
| 6526 | ENSG00000265538  |         | 9323.3 | 0.21 |    |           |           |                                                 |
| 6529 | ENSG00000226524  |         | 9325.4 | 0.21 |    |           |           |                                                 |
| 6532 | ENSG00000227338  |         | 9330.5 | 0.21 |    |           |           |                                                 |
| 6533 | ENSG00000226495  |         | 9334.4 | 0.21 |    |           |           |                                                 |
| 6536 | ENSG00000226226  |         | 9337.5 | 0.21 |    |           |           |                                                 |
| 6544 | ENSG00000233304  |         | 9342.1 | 0.21 |    |           |           |                                                 |
| 6548 | ENSG00000226296  |         | 9342.2 | 0.21 |    |           |           |                                                 |
| 6550 | ENSG00000248984  |         | 9345.5 | 0.21 |    |           |           |                                                 |
| 6552 | ENSG00000246242  |         | 9347.4 | 0.21 |    |           |           |                                                 |
| 6553 | ENSG00000226438  |         | 9347.8 | 0.21 |    |           |           |                                                 |
| 6554 | ENSG00000242426  |         | 9348.1 | 0.21 |    |           |           |                                                 |
| 6555 | ENSG00000224014  |         | 9348.6 | 0.21 | 14 | 107275873 | 107276304 | immunoglobulin heavy variable 3-79 (pseudogene) |
| 6557 | ENSG00000271853  |         | 9352.2 | 0.21 |    |           |           |                                                 |
| 6558 | ENSG00000226312  |         | 9352.4 | 0.21 |    |           |           |                                                 |
| 6560 | ENSG00000237837  |         | 9353.2 | 0.21 |    |           |           |                                                 |
| 6563 | ENSG00000272989  |         | 9355.9 | 0.21 |    |           |           |                                                 |
| 6566 | ENSG00000231178  |         | 9356.6 | 0.21 |    |           |           |                                                 |
| 6567 | ENSG00000250493  |         | 9357.6 | 0.21 |    |           |           |                                                 |
| 6568 | ENSG000002081751 |         | 9358.1 | 0.21 |    |           |           |                                                 |
| 6570 | ENSG00000231268  |         | 9359.2 | 0.21 |    |           |           |                                                 |
| 6575 | ENSG000002085152 |         | 9364.9 | 0.21 |    |           |           |                                                 |
| 6578 | ENSG000001591223 | DMRTC1  | 9368.7 | 0.21 | X  | 72091859  | 72163853  | DMRTC-like family C1                            |
| 6580 | ENSG00000225741  |         | 9368.8 | 0.21 |    |           |           |                                                 |
| 6583 | ENSG00000233784  |         | 9371.9 | 0.21 |    |           |           |                                                 |
| 6585 | ENSG00000225344  |         | 9374.5 | 0.21 |    |           |           |                                                 |
| 6589 | ENSG00000225415  |         | 9376.6 | 0.21 |    |           |           |                                                 |
| 6591 | ENSG00000225513  |         | 9379.8 | 0.21 |    |           |           |                                                 |
| 6595 | ENSG00000219314  |         | 9383.3 | 0.21 |    |           |           |                                                 |
| 6599 | ENSG00000231533  |         | 9383.3 | 0.21 |    |           |           |                                                 |
| 6600 | ENSG00000232347  |         | 9391.1 | 0.21 |    |           |           |                                                 |
| 6601 | ENSG00000272545  |         | 9393.6 | 0.21 |    |           |           |                                                 |
| 6613 | ENSG00000231256  |         | 9403.2 | 0.21 |    |           |           |                                                 |
| 6614 | ENSG00000256627  |         | 9403.4 | 0.21 |    |           |           |                                                 |
| 6616 | ENSG00000232175  |         | 9404.3 | 0.21 |    |           |           |                                                 |
| 6617 | ENSG00000233689  |         | 9405.9 | 0.21 |    |           |           |                                                 |
| 6623 | ENSG00000228910  |         | 9416.3 | 0.21 |    |           |           |                                                 |
| 6624 | ENSG00000231884  |         | 9416.7 | 0.21 |    |           |           |                                                 |
| 6626 | ENSG00000234548  |         | 9421.4 | 0.21 |    |           |           |                                                 |
| 6635 | ENSG00000271507  |         | 9430.9 | 0.21 |    |           |           |                                                 |
| 6637 | ENSG00000233858  |         | 9433   | 0.21 |    |           |           |                                                 |
| 6641 | ENSG00000228681  |         | 9434.8 | 0.21 |    |           |           |                                                 |
| 6643 | ENSG00000255438  |         | 9438.1 | 0.21 |    |           |           |                                                 |
| 6646 | ENSG00000271727  |         | 9438.7 | 0.21 |    |           |           |                                                 |
| 6647 | ENSG00000210798  |         | 9437.6 | 0.21 |    |           |           |                                                 |
| 6652 | ENSG00000231346  |         | 9441.3 | 0.21 |    |           |           |                                                 |
| 6658 | ENSG00000251588  |         | 9448.1 | 0.21 |    |           |           |                                                 |
| 6666 | ENSG00000257044  |         | 9457   | 0.21 |    |           |           |                                                 |
| 6673 | ENSG00000230961  |         | 9462   | 0.21 |    |           |           |                                                 |
| 6679 | ENSG00000267704  |         | 9466.4 | 0.21 |    |           |           |                                                 |
| 6683 | ENSG00000232625  |         | 9469   | 0.21 |    |           |           |                                                 |
| 6684 | ENSG00000254897  |         | 9469.8 | 0.21 |    |           |           |                                                 |
| 6685 | ENSG00000197585  |         | 9470.9 | 0.21 |    |           |           |                                                 |
| 6687 | ENSG00000232760  |         | 9472.9 | 0.21 |    |           |           |                                                 |
| 6688 | ENSG00000255442  |         | 9481.2 | 0.21 | 19 | 44596257  | 44596551  | RNA, 75L, cytoplasmic 53, pseudogene            |
| 6689 | ENSG00000208430  |         | 9481.9 | 0.21 |    |           |           |                                                 |
| 6703 | ENSG00000232719  |         | 9483.8 | 0.21 |    |           |           |                                                 |
| 6707 | ENSG00000258166  |         | 9491.1 | 0.21 |    |           |           |                                                 |
| 6712 | ENSG00000252354  |         | 9496.6 | 0.21 |    |           |           |                                                 |
| 6714 | ENSG00000245963  |         | 9498.2 | 0.21 |    |           |           |                                                 |
| 6721 | ENSG00000151863  |         | 9507.5 | 0.21 |    |           |           |                                                 |
| 6723 | ENSG00000232785  |         | 9509.4 | 0.21 |    |           |           |                                                 |
| 6725 | ENSG00000174452  |         | 9509.8 | 0.21 |    |           |           |                                                 |
| 6726 | ENSG00000266601  |         | 9509.8 | 0.21 |    |           |           |                                                 |
| 6727 | ENSG000002051817 |         | 9511.8 | 0.21 |    |           |           |                                                 |
| 6734 | ENSG00000244457  |         | 9516.8 | 0.21 |    |           |           |                                                 |
| 6739 | ENSG00000253163  |         | 9521   | 0.21 |    |           |           |                                                 |
| 6750 | ENSG00000230725  |         | 9530   | 0.21 |    |           |           |                                                 |
| 6752 | ENSG00000231522  |         | 9531.4 | 0.21 |    |           |           |                                                 |
| 6756 | ENSG00000213328  |         | 9535.6 | 0.21 |    |           |           |                                                 |
| 6759 | ENSG00000208189  |         | 9537.3 | 0.21 |    |           |           |                                                 |
| 6764 | ENSG00000236241  |         | 9541.7 | 0.21 |    |           |           |                                                 |
| 6766 | ENSG00000228478  |         | 9542.3 | 0.21 |    |           |           |                                                 |
| 6769 | ENSG00000259476  |         | 9544.6 | 0.21 |    |           |           |                                                 |
| 6772 | ENSG00000230228  |         | 9545.5 | 0.21 |    |           |           |                                                 |
| 6781 | ENSG00000252146  |         | 9555.9 | 0.21 |    |           |           |                                                 |
| 6782 | ENSG00000232714  |         | 9556.4 | 0.21 |    |           |           |                                                 |
| 6788 | ENSG00000234417  |         | 9560.8 | 0.21 |    |           |           |                                                 |
| 6796 | ENSG00000231772  |         | 9569.3 | 0.21 |    |           |           |                                                 |
| 6797 | ENSG00000232379  |         | 9571.2 | 0.21 |    |           |           |                                                 |
| 6798 | ENSG00000224623  |         | 9571.5 | 0.21 |    |           |           |                                                 |
| 6801 | ENSG00000230239  |         | 9575.2 | 0.21 |    |           |           |                                                 |
| 6813 | ENSG00000232920  |         | 9585   | 0.21 |    |           |           |                                                 |
| 6823 | ENSG00000244653  |         | 9592.2 | 0.21 |    |           |           |                                                 |
| 6827 | ENSG00000234703  |         | 9596.9 | 0.21 |    |           |           |                                                 |
| 6828 | ENSG00000271638  |         | 9600.8 | 0.21 |    |           |           |                                                 |
| 6831 | ENSG00000208273  |         | 9604.9 | 0.21 |    |           |           |                                                 |
| 6833 | ENSG00000231638  |         | 9607.5 | 0.21 |    |           |           |                                                 |
| 6834 | ENSG00000253182  |         | 9609   | 0.21 |    |           |           |                                                 |
| 6836 | ENSG00000230230  |         | 9611.2 | 0.21 |    |           |           |                                                 |
| 6837 | ENSG00000230230  |         | 9611.2 | 0.21 |    |           |           |                                                 |
| 6838 | ENSG00000223436  |         | 9612.7 | 0.21 |    |           |           |                                                 |
| 6841 | ENSG00000252025  | RNU6-8P | 9617   | 0.21 | 13 | 4571997   | 45712100  | RNA, U6 small nuclear 8P, pseudogene            |
| 6843 | ENSG00000259372  |         | 9617.2 | 0.21 |    |           |           |                                                 |
| 6845 | ENSG00000208182  |         | 9618.3 | 0.21 |    |           |           |                                                 |
| 6850 | ENSG00000231449  |         | 9629.8 | 0.21 |    |           |           |                                                 |
| 6856 | ENSG00000233896  |         | 9636   | 0.21 |    |           |           |                                                 |
| 6861 | ENSG000002085728 |         | 9635.4 | 0.21 |    |           |           |                                                 |
| 6867 | ENSG000002057097 |         | 9644.4 | 0.21 |    |           |           |                                                 |
| 6870 | ENSG00000225628  |         | 9645.5 | 0.21 |    |           |           |                                                 |
| 6871 | ENSG00000258679  |         | 9647.3 | 0.21 |    |           |           |                                                 |
| 6874 | ENSG0000021550   |         | 9648.8 | 0.21 |    |           |           |                                                 |
| 6881 | ENSG00000258118  |         | 9649.2 | 0.21 |    |           |           |                                                 |
| 6884 | ENSG00000257623  |         | 9660.1 | 0.21 |    |           |           |                                                 |
| 6886 | ENSG00000248954  |         | 9667.2 | 0.21 |    |           |           |                                                 |
| 6897 | ENSG00000259422  |         | 9668   | 0.21 |    |           |           |                                                 |
| 6898 | ENSG00000205286  |         | 9668   | 0.21 |    |           |           |                                                 |
| 6899 | ENSG0000029499   |         | 9668.1 | 0.21 |    |           |           |                                                 |
| 6903 | ENSG00000208168  |         | 9672.4 | 0.21 | 2  | 121221911 | 121223897 | long intergenic non-protein coding RNA 1101     |
| 6904 | ENSG00000232448  |         | 9672.7 | 0.21 |    |           |           |                                                 |
| 6907 | ENSG00000229313  |         | 9676   | 0.21 |    |           |           |                                                 |
| 6911 | ENSG00000231493  |         | 9680.4 | 0.21 |    |           |           |                                                 |
| 6913 | ENSG00000234357  |         | 9682.9 | 0.21 |    |           |           |                                                 |
| 6915 | ENSG00000226454  |         | 9684.6 | 0.21 |    |           |           |                                                 |
| 6925 | ENSG00000231173  |         | 9692   | 0.21 |    |           |           |                                                 |
| 6927 | ENSG00000241597  |         | 9695   | 0.21 |    |           |           |                                                 |
| 6933 | ENSG000002080141 |         | 9703.1 | 0.21 |    |           |           |                                                 |
| 6934 | ENSG00000231490  |         | 9703.8 | 0.21 |    |           |           |                                                 |
| 6942 | ENSG00000250282  |         | 9708.1 | 0.21 |    |           |           |                                                 |
| 6946 | ENSG00000230813  |         | 9714.5 | 0.21 |    |           |           |                                                 |
| 6948 | ENSG00000208777  |         | 9725.7 | 0.21 |    |           |           |                                                 |
| 6950 | ENSG00000258735  |         | 9728.7 | 0.21 | 13 | 24322243  | 24323901  | Uncharacterized protein                         |
| 6954 | ENSG00000234972  | TBC1D3  | 9729.7 | 0.21 | 17 | 34580902  | 34757050  | TBC1 domain family, member 3C                   |
| 6956 | ENSG00000232598  |         | 9736.2 | 0.21 |    |           |           |                                                 |
| 6958 | ENSG00000271495  |         | 9736.5 | 0.21 |    |           |           |                                                 |
| 6964 | ENSG00000233077  |         | 9743.5 | 0.21 |    |           |           |                                                 |
| 6971 | ENSG00000236591  |         | 9752.5 | 0.21 |    |           |           |                                                 |
| 6974 | ENSG00000250443  |         | 9755.5 | 0.21 |    |           |           |                                                 |
| 6981 | ENSG00000256733  |         | 9758.3 | 0.21 |    |           |           |                                                 |
| 6984 | ENSG00000233896  |         | 9759   | 0.21 |    |           |           |                                                 |
| 6987 | ENSG00000229871  |         | 9761.7 | 0.21 |    |           |           |                                                 |
| 6990 | ENSG00000237840  |         | 9763.4 | 0.21 |    |           |           |                                                 |
| 6999 | ENSG00000208943  |         | 9769.2 | 0.21 |    |           |           |                                                 |
| 7001 | ENSG00000251210  |         | 9774   | 0.21 |    |           |           |                                                 |
| 7003 | ENSG00000248576  |         | 9773.2 | 0.21 |    |           |           |                                                 |
| 7004 | ENSG00000259754  |         | 9774   | 0.21 |    |           |           |                                                 |
| 7006 | ENSG00000257863  |         | 9782.2 | 0.21 |    |           |           |                                                 |
| 7012 | ENSG00000233685  |         | 9784.4 | 0.21 |    |           |           |                                                 |
| 7016 | ENSG00000208291  |         | 9788   | 0.21 |    |           |           |                                                 |
| 7022 | ENSG00000208231  |         | 9789.2 | 0.21 |    |           |           |                                                 |
| 7025 | ENSG00000228391  |         | 9799.4 | 0.21 |    |           |           |                                                 |
| 7031 | ENSG00000270212  |         | 9803.3 | 0.21 |    |           |           |                                                 |
| 7033 | ENSG00000245988  |         | 9804.4 | 0.21 |    |           |           |                                                 |
| 7035 | ENSG00000230773  |         | 9806.2 | 0.21 |    |           |           |                                                 |
| 7039 | ENSG00000255146  |         | 9809.2 | 0.21 |    |           |           |                                                 |
| 7041 | ENSG00000222222  |         | 9809.8 | 0.21 |    |           |           |                                                 |
| 7043 | ENSG00000225278  |         | 9811.1 | 0.21 |    |           |           |                                                 |
| 7045 | ENSG00000227479  |         | 9812.9 | 0.21 |    |           |           |                                                 |
| 7047 | ENSG00000246001  |         | 9815   | 0.21 |    |           |           |                                                 |
| 7049 | ENSG00000248165  |         | 9816.8 | 0.21 |    |           |           |                                                 |



|      |                 |         |     |                      |    |           |           |                                                                                                                        |
|------|-----------------|---------|-----|----------------------|----|-----------|-----------|------------------------------------------------------------------------------------------------------------------------|
| 2972 | ENSG00000213770 | 4826    | 0.2 | processed_pseudogene | 10 | 2763668   | 2763919   | family with sequence similarity 210, member C, pseudogene                                                              |
| 4453 | ENSG00000215231 | 4992    | 0.2 | processed_pseudogene | 3  | 2756297   | 2756307   | ribosomal protein S23 pseudogene 15                                                                                    |
| 4497 | ENSG00000270923 | 7231.4  | 0.2 | processed_pseudogene | 7  | 14148715  | 14148840  | laste receptor, type 2, member 6                                                                                       |
| 4622 | ENSG00000223549 | 7408.7  | 0.2 | processed_pseudogene | 2  | 12097277  | 12097485  | MF-ND5 pseudogene 28                                                                                                   |
| 4623 | ENSG00000229816 | 8170.5  | 0.2 | processed_pseudogene | 2  | 3242699   | 3242908   | DEADH (Arg-Glu-Asp)HeI box polypeptide 50 pseudogene 1                                                                 |
| 4719 | ENSG00000229623 | 8475.3  | 0.2 | processed_pseudogene | 21 | 6292713   | 6292748   | methylenetetrahydrofolate reductase 27A pseudogene 1                                                                   |
| 5701 | ENSG00000216636 | 8495.0  | 0.2 | processed_pseudogene | 6  | 34584315  | 34585035  | ribosomal protein L7 pseudogene 25                                                                                     |
| 5713 | ENSG00000225890 | 8550    | 0.2 | processed_pseudogene | 14 | 65995546  | 65996266  | eukaryotic translation initiation factor 1A, X-linked pseudogene 2                                                     |
| 5901 | ENSG00000225890 | 8617.5  | 0.2 | processed_pseudogene | 14 | 12413522  | 12413522  | high mobility group box 1 pseudogene 1                                                                                 |
| 5922 | ENSG00000224706 | 8703    | 0.2 | processed_pseudogene | 6  | 34584315  | 34585035  | ribosomal protein L7 pseudogene 13                                                                                     |
| 6197 | ENSG00000225890 | 8676    | 0.2 | processed_pseudogene | 2  | 62749156  | 62749558  | ribosomal L4A domain containing 1 pseudogene 2                                                                         |
| 6269 | ENSG00000225890 | 8617.5  | 0.2 | processed_pseudogene | 2  | 1703789   | 1703789   | city acid binding protein 5 pseudogene 1                                                                               |
| 6367 | ENSG00000225890 | 9042.7  | 0.2 | processed_pseudogene | 14 | 31433553  | 31433928  | HG1 hypoxia inducible domain family, member 1A pseudogene 17                                                           |
| 6378 | ENSG00000224866 | 9092    | 0.2 | processed_pseudogene | 8  | 1200844   | 1200844   | defensin, beta 109, pseudogene 3                                                                                       |
| 6383 | ENSG00000225890 | 9149    | 0.2 | processed_pseudogene | 7  | 7552703   | 7552703   | ribosomal protein L7-like pseudogene 3                                                                                 |
| 6630 | ENSG00000229371 | 9425.2  | 0.2 | processed_pseudogene | 9  | 23780143  | 23780394  | ribosomal protein S27 pseudogene 29                                                                                    |
| 6863 | ENSG00000223389 | 9724.4  | 0.2 | processed_pseudogene | 8  | 14407287  | 14407399  | cell division cycle 42 pseudogene 3                                                                                    |
| 7032 | ENSG00000231905 | 9803.8  | 0.2 | processed_pseudogene | 1  | 20639978  | 20639978  | adenosylmethionine decarboxylase 1 pseudogene 1                                                                        |
| 7066 | ENSG00000213450 | 9830    | 0.2 | processed_pseudogene | 3  | 7736593   | 7736749   | SE1 pseudogene 10                                                                                                      |
| 7072 | ENSG00000213450 | 9837.5  | 0.2 | processed_pseudogene | 3  | 2973373   | 2973468   | voltage-dependent anion channel 1 pseudogene 7                                                                         |
| 7088 | ENSG00000208347 | 9851.4  | 0.2 | processed_pseudogene | 6  | 4853001   | 4853212   | NF-Y2-like export factor 1 pseudogene 1                                                                                |
| 7127 | ENSG00000235124 | 9885.5  | 0.2 | processed_pseudogene | X  | 5801120   | 5801287   | myoD domain cofactor synthesis 1 pseudogene 1                                                                          |
| 7162 | ENSG00000219143 | 9908.4  | 0.2 | processed_pseudogene | 14 | 19828437  | 19828437  | keratin 8 pseudogene 17                                                                                                |
| 7166 | ENSG00000254294 | 9939    | 0.2 | processed_pseudogene | 8  | 12441282  | 12441435  | inflammatory receptor family 1, subfamily 11, member 13 pseudogene 6                                                   |
| 7220 | ENSG00000237285 | 9969    | 0.2 | processed_pseudogene | 6  | 32252996  | 32253955  | IMP (inosine monophosphate) dehydrogenase 1 pseudogene 6                                                               |
| 7228 | ENSG00000215448 | 9974.4  | 0.2 | processed_pseudogene | 20 | 46489832  | 46489832  | heterogeneous nuclear ribonucleoprotein A1 pseudogene 2                                                                |
| 7247 | ENSG00000244753 | 9988.3  | 0.2 | processed_pseudogene | 17 | 10763852  | 10764779  | sperminine synthase pseudogene 1                                                                                       |
| 7248 | ENSG00000234113 | 9989    | 0.2 | processed_pseudogene | 8  | 8586820   | 8586909   | ribosomal protein L15 pseudogene 21                                                                                    |
| 7258 | ENSG00000217401 | 10007.7 | 0.2 | processed_pseudogene | 7  | 3863063   | 3863063   | actin, beta pseudogene 6                                                                                               |
| 7262 | ENSG00000226818 | 10009.0 | 0.2 | processed_pseudogene | 7  | 10077280  | 10077379  | ADP-ribosylation factor-like SA pseudogene 2                                                                           |
| 7265 | ENSG00000240554 | 10010   | 0.2 | processed_pseudogene | 11 | 29747311  | 29748112  | ADP-ribosylation factor-like SA pseudogene 1                                                                           |
| 7284 | ENSG00000211281 | 10019.3 | 0.2 | processed_pseudogene | 2  | 11371033  | 11371033  | high mobility group nuclear binding domain 2 pseudogene 23                                                             |
| 7317 | ENSG00000271602 | 10057.2 | 0.2 | processed_pseudogene | 11 | 4743970   | 4744011   | keratin 8 pseudogene 49                                                                                                |
| 7322 | ENSG00000227624 | 10061.3 | 0.2 | processed_pseudogene | 16 | 20250294  | 20250509  | small nuclear ribonucleoprotein polypeptide E pseudogene 3                                                             |
| 7328 | ENSG00000225050 | 10062.0 | 0.2 | processed_pseudogene | 12 | 14568300  | 14568300  | keratin 10 pseudogene 5                                                                                                |
| 7341 | ENSG00000234496 | 10063.2 | 0.2 | processed_pseudogene | 1  | 65558075  | 65558297  | mitochondrial ribosomal protein S21 pseudogene 3                                                                       |
| 7343 | ENSG00000224809 | 10065.9 | 0.2 | processed_pseudogene | 9  | 84933523  | 84933576  | BEI domain containing 3 pseudogene 2                                                                                   |
| 7344 | ENSG00000224809 | 10065.9 | 0.2 | processed_pseudogene | 11 | 62881358  | 62881358  | ribosomal protein L29 pseudogene 20                                                                                    |
| 7379 | ENSG00000248781 | 10119.9 | 0.2 | processed_pseudogene | 5  | 5551131   | 5552457   | proteasome (prosome, multicatalytic) 26S subunit, ATPase, 1 pseudogene 4                                               |
| 7408 | ENSG00000238805 | 10149.8 | 0.2 | processed_pseudogene | 3  | 4475083   | 4475278   | suppressor of cytokine signaling 5 pseudogene 3                                                                        |
| 7409 | ENSG00000238805 | 10150.2 | 0.2 | processed_pseudogene | 3  | 7489346   | 7489346   | TVP28 pseudogene 2                                                                                                     |
| 7416 | ENSG00000237007 | 10155.2 | 0.2 | processed_pseudogene | 2  | 32047690  | 32048505  | keratin 18 pseudogene 52                                                                                               |
| 7417 | ENSG00000239539 | 10155.5 | 0.2 | processed_pseudogene | 10 | 1977830   | 1977830   | high mobility group nucleosome binding domain 1 pseudogene 20                                                          |
| 7420 | ENSG00000239539 | 10171.4 | 0.2 | processed_pseudogene | 14 | 4401709   | 4401709   | keratin 8 pseudogene 2                                                                                                 |
| 7440 | ENSG00000232968 | 10214   | 0.2 | processed_pseudogene | 1  | 24759078  | 24759164  | hydroxysteroid (11-beta) dehydrogenase 7 pseudogene 1                                                                  |
| 7451 | ENSG00000177281 | 10195.5 | 0.2 | processed_pseudogene | 2  | 21562441  | 21562788  | endothelial cell adhesion molecule 1 pseudogene 3                                                                      |
| 7460 | ENSG00000224209 | 10204.0 | 0.2 | processed_pseudogene | 22 | 1763436   | 1763463   | Charcot-Leyden crystal protein pseudogene 1                                                                            |
| 7465 | ENSG00000215191 | 10205.1 | 0.2 | processed_pseudogene | 12 | 54588411  | 54588411  | phosphotyrosine kinase family member 4 pseudogene 1                                                                    |
| 7485 | ENSG00000234835 | 10228.1 | 0.2 | processed_pseudogene | 13 | 3581207   | 3581207   | prohibitin pseudogene 13                                                                                               |
| 7487 | ENSG00000218347 | 10228.3 | 0.2 | processed_pseudogene | 6  | 2740805   | 2740918   | heterogeneous nuclear ribonucleoprotein A1 pseudogene 1                                                                |
| 7488 | ENSG00000229000 | 10229.0 | 0.2 | processed_pseudogene | 15 | 4028400   | 4028400   | keratin 8 pseudogene 24                                                                                                |
| 7512 | ENSG00000236794 | 10253.3 | 0.2 | processed_pseudogene | 22 | 2325205   | 2325205   | breakpoint cluster region pseudogene 8                                                                                 |
| 7516 | ENSG00000239599 | 10253.3 | 0.2 | processed_pseudogene | 14 | 9690034   | 9690034   | phosphatidylinositol binding protein 1 pseudogene 1                                                                    |
| 7518 | ENSG00000225388 | 10256.1 | 0.2 | processed_pseudogene | 6  | 1591597   | 1591597   | SE1 pseudogene 15                                                                                                      |
| 7534 | ENSG00000224129 | 10278.2 | 0.2 | processed_pseudogene | 1  | 2884585   | 2884641   | developmental pluripotency associated 2 pseudogene 2                                                                   |
| 7536 | ENSG00000237049 | 10279.1 | 0.2 | processed_pseudogene | 1  | 18817988  | 18818007  | ribosomal protein L34 pseudogene 2                                                                                     |
| 7554 | ENSG00000204721 | 10287.1 | 0.2 | processed_pseudogene | 1  | 88338952  | 88338952  | ribosomal protein S41 pseudogene 15                                                                                    |
| 7563 | ENSG00000214720 | 10331.1 | 0.2 | processed_pseudogene | X  | 10671860  | 10672891  | keratin 18 pseudogene 49                                                                                               |
| 7604 | ENSG00000232594 | 10345.6 | 0.2 | processed_pseudogene | 3  | 18122863  | 18122863  | ribosomal protein L7a pseudogene 25                                                                                    |
| 7608 | ENSG00000224986 | 10351.1 | 0.2 | processed_pseudogene | 6  | 15911174  | 15911174  | developmental pluripotency associated 2 pseudogene 3                                                                   |
| 7683 | ENSG00000247811 | 10407.4 | 0.2 | processed_pseudogene | 5  | 70833479  | 70833783  | high mobility group nucleosome binding domain 1 pseudogene 12                                                          |
| 7689 | ENSG00000229572 | 10411   | 0.2 | processed_pseudogene | 3  | 4235090   | 4235099   | eukaryotic translation initiation factor 4B pseudogene 4                                                               |
| 7691 | ENSG00000212524 | 10415.3 | 0.2 | processed_pseudogene | 13 | 34452     | 34452     | voltage-dependent anion channel 1 pseudogene 12                                                                        |
| 7696 | ENSG00000206909 | 10418.3 | 0.2 | processed_pseudogene | 18 | 7783509   | 7783611   | solute carrier family 25 (mitochondrial carrier, adenine nucleotide translocator), member 6 pseudogene 4               |
| 7705 | ENSG00000206939 | 10424.5 | 0.2 | processed_pseudogene | 18 | 2040449   | 2040608   | ubiquitin-conjugating enzyme E2C pseudogene 2                                                                          |
| 7729 | ENSG00000175568 | 10457.7 | 0.2 | processed_pseudogene | 1  | 14890015  | 14890315  | dogamine receptor DS2 pseudogene 2                                                                                     |
| 7739 | ENSG00000240724 | 10468.5 | 0.2 | processed_pseudogene | 8  | 10351588  | 10351635  | ribosomal protein S12 pseudogene 15                                                                                    |
| 7763 | ENSG00000254485 | 10492.2 | 0.2 | processed_pseudogene | 11 | 2349614   | 23501976  | protein-kinase, interferon-inducible double stranded RNA dependent inhibitor, repressor of p58 (receptor) pseudogene 4 |
| 7765 | ENSG00000239533 | 10494   | 0.2 | processed_pseudogene | 8  | 8768916   | 8769221   | reglin A2 pseudogene 1                                                                                                 |
| 7778 | ENSG00000239533 | 10519.3 | 0.2 | processed_pseudogene | 10 | 478102    | 478102    | N-terminal acetyltransferase pseudogene 3                                                                              |
| 7815 | ENSG00000227613 | 10531.8 | 0.2 | processed_pseudogene | 1  | 22243175  | 22243175  | glutathionyl-S-transferase (glutathione-hydroxylating) like 1 pseudogene 2                                             |
| 7842 | ENSG00000229585 | 10554.3 | 0.2 | processed_pseudogene | 7  | 10728310  | 10728348  | barrier to autophagosome formation 1 pseudogene 5                                                                      |
| 7847 | ENSG00000230297 | 10555.1 | 0.2 | processed_pseudogene | 2  | 24344     | 24344     | FC2 pseudogene 2                                                                                                       |
| 7904 | ENSG00000232223 | 10616.4 | 0.2 | processed_pseudogene | 1  | 16978503  | 16978620  | catopon 2 pseudogene 10                                                                                                |
| 7921 | ENSG00000233988 | 10628.8 | 0.2 | processed_pseudogene | 9  | 14040715  | 14041860  | ribosomal protein L3 pseudogene 11                                                                                     |
| 7944 | ENSG00000233988 | 10630.5 | 0.2 | processed_pseudogene | 11 | 199810    | 199810    | heat shock 70kDa protein B pseudogene 18                                                                               |
| 7954 | ENSG00000224862 | 10666.7 | 0.2 | processed_pseudogene | 9  | 13832920  | 13832400  | suppressor of cytokine signaling 5 pseudogene 2                                                                        |
| 7981 | ENSG00000232925 | 10679.2 | 0.2 | processed_pseudogene | 20 | 57688279  | 57688896  | mitochondrial ribosomal protein S16 pseudogene 2                                                                       |
| 8022 | ENSG00000239589 | 10679.3 | 0.2 | processed_pseudogene | 6  | 1146709   | 11467312  | DnaJ (Hsp40) homolog, subfamily A, member 1 pseudogene 4                                                               |
| 8041 | ENSG00000236665 | 10740.1 | 0.2 | processed_pseudogene | X  | 7381078   | 7381078   | protein-kinase, interferon-inducible double stranded RNA dependent inhibitor, repressor of p58 (receptor) pseudogene 1 |
| 8059 | ENSG00000225709 | 10759.8 | 0.2 | processed_pseudogene | X  | 13456688  | 13457269  | diary rodlet coat-coil, rodletin pseudogene 1                                                                          |
| 8176 | ENSG00000225709 | 10800.5 | 0.2 | processed_pseudogene | 12 | 34354124  | 34354124  | heat shock 70kDa protein 1 (chaperone) pseudogene 14                                                                   |
| 8201 | ENSG00000250556 | 10883.8 | 0.2 | processed_pseudogene | 4  | 6885209   | 6885209   | ST3 beta-galactosidase alpha-2,3-sialyltransferase 1 pseudogene 1                                                      |
| 8227 | ENSG00000244551 | 10898.6 | 0.2 | processed_pseudogene | 7  | 96744227  | 96744473  | high mobility group box 3 pseudogene 2                                                                                 |
| 8246 | ENSG00000214896 | 10907.1 | 0.2 | processed_pseudogene | 7  | 98871153  | 98871153  | family with sequence similarity 17, member A1 pseudogene 1                                                             |
| 8268 | ENSG00000228815 | 10940.4 | 0.2 | processed_pseudogene | 7  | 38148834  | 38148834  | MAP3/microtubule affinity-regulating kinase 2 pseudogene 13                                                            |
| 8325 | ENSG00000226862 | 10959.2 | 0.2 | processed_pseudogene | 10 | 38741915  | 38742426  | capicua transcriptional repressor pseudogene 9                                                                         |
| 8384 | ENSG00000219491 | 11030.1 | 0.2 | processed_pseudogene | 11 | 149717452 | 149718772 | heterogeneous nuclear ribonucleoprotein A1 pseudogene 24                                                               |
| 8388 | ENSG00000251389 | 11042.8 | 0.2 | processed_pseudogene | 5  | 98704480  | 98706125  | YTH domain family, member 1 pseudogene 1                                                                               |
| 8639 | ENSG00000225043 | 11245.6 | 0.2 | processed_pseudogene | 21 | 47484487  | 47484948  | ribosomal protein L18a pseudogene 2                                                                                    |
| 8716 | ENSG00000229259 | 11302.1 | 0.2 | processed_pseudogene | 7  | 7262248   | 7262248   | protein phosphatase 1, regulator (inhibitor) subunit 1A pseudogene 1                                                   |
| 8731 | ENSG00000208736 | 11317.2 | 0.2 | processed_pseudogene | 19 | 45631827  | 45632288  | eukaryotic translation initiation factor SA pseudogene 3                                                               |
| 1296 | ENSG00000174400 | 2185    | 0.2 | protein_coding       | 12 | 118981151 | 118981151 | chemokine-like receptor 1                                                                                              |
| 1475 | ENSG00000196981 | 2122.7  | 0.2 | protein_coding       | 7  | 11871424  | 11871424  | chemokine (C-X-C motif) receptor 5                                                                                     |
| 1675 | ENSG00000140592 | 2672.7  | 0.2 | protein_coding       | 6  | 66621176  | 66621176  | CKLF-like MARVEL transmembrane domain containing 5                                                                     |
| 1743 | ENSG00000190701 | 2763    | 0.2 | protein_coding       | 19 | 18642261  | 18642487  | FRS3, transmembrane protein 3, 3RDc                                                                                    |
| 1830 | ENSG00000155351 | 2933    | 0.2 | protein_coding       | 13 | 22431153  | 22431153  | CKLF-like MARVEL transmembrane domain containing 7                                                                     |
| 1933 | ENSG00000138161 | 3057    | 0.2 | protein_coding       | 13 | 49036396  | 49107369  | regulator of chondrogenesis (RCC1) and BTB (POZ) domain containing protein 2                                           |
| 1973 | ENSG00000189098 | 3121    | 0.2 | protein_coding       | 19 | 54544079  | 54547207  | V-set and transmembrane domain containing 1                                                                            |
| 1990 | ENSG00000163443 | 3148.4  | 0.2 | protein_coding       | 22 | 295217107 | 295217107 | NUAK family, SNF-like kinase, 2                                                                                        |
| 2142 | ENSG00000243811 | 3350.4  | 0.2 | protein_coding       | 22 | 3941036   | 39429281  |                                                                                                                        |



|      |                 |             |       |     |                |    |           |            |                                                                                              |
|------|-----------------|-------------|-------|-----|----------------|----|-----------|------------|----------------------------------------------------------------------------------------------|
| 3714 | ENSG00000173120 | KRM2A       | 58255 | 0.2 | protein_coding | 11 | 96886740  | 67025588   | lysine (K)-specific demethylase 2A                                                           |
| 3741 | ENSG00000107171 | PRKAB2      | 60258 | 0.2 | protein_coding | 1  | 14520393  | 14112574   | PR domain containing 2, with ZNF domain                                                      |
| 3765 | ENSG00000112262 | MDL23       | 5999  | 0.2 | protein_coding | 6  | 131895106 | 131849369  | mediator complex subunit 23                                                                  |
| 3773 | ENSG00000118452 | PHF3        | 5923  | 0.2 | protein_coding | 6  | 64345725  | 64348229   | PHD finger protein 3                                                                         |
| 3836 | ENSG00000186007 | STAC1       | 60261 | 0.2 | protein_coding | 3  | 136005707 | 136417220  | stromal antigen 1                                                                            |
| 3866 | ENSG00000106243 | NFRP83      | 62635 | 0.2 | protein_coding | 12 | 26897978  | 51142450   | DMP2 disco-interacting protein 2 homolog B (Drosophila)                                      |
| 3870 | ENSG00000152223 | EPG5        | 61048 | 0.2 | protein_coding | 18 | 43427574  | 43447240   | ectopic P-garulus autochagy protein 5 homolog (C. elegans)                                   |
| 3878 | ENSG00000126599 | CHFR        | 62036 | 0.2 | protein_coding | 12 | 133380793 | 133520499  | checkpoint with forkhead and ring finger domains, E3 ubiquitin protein ligase                |
| 3947 | ENSG00000185864 | NFRP83      | 62635 | 0.2 | protein_coding | 12 | 26897978  | 51142450   | nuclear pore complex interacting protein family, member 84                                   |
| 3980 | ENSG00000197776 | KLHLDC1     | 62521 | 0.2 | protein_coding | 14 | 50158823  | 50159870   | kelch domain containing 1                                                                    |
| 4073 | ENSG00000186595 | PLEKHA3     | 63724 | 0.2 | protein_coding | 2  | 17842655  | 178481189  | pleckstrin homology domain containing, family A (phosphoinositide binding specific) member 3 |
| 4077 | ENSG00000102801 | MYSM1       | 63744 | 0.2 | protein_coding | 1  | 89104111  | 89189704   | Myo-like domain containing 1                                                                 |
| 4136 | ENSG00000196247 | ZNF107      | 64489 | 0.2 | protein_coding | 7  | 64128511  | 64117404   | zinc finger protein 107                                                                      |
| 4212 | ENSG00000176339 | ASH1L       | 6548  | 0.2 | protein_coding | 1  | 15530569  | 155532098  | ash1 (absent, small, or homeotic)-like (Drosophila)                                          |
| 4224 | ENSG00000005683 | C2K13       | 65574 | 0.2 | protein_coding | 1  | 36969636  | 40116033   | cyclin-dependent kinase 13                                                                   |
| 4232 | ENSG00000123607 | TTFC21B     | 65729 | 0.2 | protein_coding | 2  | 186713985 | 166810353  | tetratricopeptide repeat domain 21B                                                          |
| 4260 | ENSG00000198879 | SFMB17      | 66174 | 0.2 | protein_coding | 10 | 7200586   | 7453450    | Som-like with four rhd domains 2                                                             |
| 4272 | ENSG00000170248 | PWWP2A      | 66238 | 0.2 | protein_coding | 5  | 15948868  | 159546430  | PWWP domain containing 2A                                                                    |
| 4366 | ENSG00000119979 | FAM54A      | 67846 | 0.2 | protein_coding | 10 | 120863588 | 120887496  | family with sequence similarity 45, member A                                                 |
| 4419 | ENSG00000145348 | TBCK        | 6889  | 0.2 | protein_coding | 4  | 106962796 | 107242652  | TBC1 domain containing kinase                                                                |
| 4441 | ENSG00000202180 | A1TFDA      | 69374 | 0.2 | protein_coding | 15 | 25624202  | 25170117   | A1Pase, class I, type 10A                                                                    |
| 4488 | ENSG00000134744 | ZCCHC11     | 69667 | 0.2 | protein_coding | 1  | 52873954  | 53019159   | zinc finger, CCHC domain containing 11                                                       |
| 4427 | ENSG00000125779 | PANK2       | 70173 | 0.2 | protein_coding | 20 | 3869486   | 3907605    | panthothine kinase 2                                                                         |
| 5116 | ENSG00000102124 | TAS2R19     | 72953 | 0.2 | protein_coding | 12 | 11132108  | 11176216   | taste receptor, type 2, member 19                                                            |
| 5158 | ENSG00000176715 | AC-SF3      | 78408 | 0.2 | protein_coding | 16 | 89154783  | 89222554   | acyl-CoA synthetase family member 3                                                          |
| 5713 | ENSG00000129626 | FAM22B      | 84833 | 0.2 | protein_coding | 2  | 24293956  | 24392509   | family with sequence similarity 225, member B                                                |
| 5927 | ENSG00000104800 | C1orf162    | 8596  | 0.2 | protein_coding | 14 | 54448430  | 52474238   | chromosome 14 open reading frame 162                                                         |
| 5968 | ENSG00000184136 | IL15        | 86419 | 0.2 | protein_coding | 4  | 142657752 | 142655140  | interleukin 15                                                                               |
| 5989 | ENSG00000124113 | PVRIG       | 8667  | 0.2 | protein_coding | 7  | 9981584   | 9981913    | poliovirus receptor related immunoglobulin domain containing                                 |
| 5990 | ENSG00000169663 | LOC10048697 | 87433 | 0.2 | protein_coding | 3  | 14888267  | 14888267   | Uncharacterized protein                                                                      |
| 6305 | ENSG00000177463 | NRC2C       | 9107  | 0.2 | protein_coding | 3  | 14889091  | 15095107   | nuclear receptor subfamily 2, group C, member 2                                              |
| 6404 | ENSG00000175787 | ZNF169      | 9197  | 0.2 | protein_coding | 9  | 87021593  | 87063736   | nuclear receptor subfamily 1, member 169                                                     |
| 6485 | ENSG00000104848 | KR22        | 9322  | 0.2 | protein_coding | 12 | 529312    | 529312     | kinase domain 72                                                                             |
| 6678 | ENSG00000105177 | PBX4        | 94661 | 0.2 | protein_coding | 19 | 19672522  | 19729725   | pre-B-cell leukemia homeobox 4                                                               |
| 6860 | ENSG00000180333 | ZNF490      | 96334 | 0.2 | protein_coding | 19 | 12688775  | 12759012   | zinc finger protein 490                                                                      |
| 6862 | ENSG00000170528 | IFAK21      | 96342 | 0.2 | protein_coding | 21 | 21186669  | 21186669   | IGH domain containing-like 21                                                                |
| 7124 | ENSG00000202387 | OR8B3       | 98833 | 0.2 | protein_coding | 6  | 89106840  | 89104667   | chromosome 6 open reading frame 164                                                          |
| 7129 | ENSG00000122375 | OPN4        | 98817 | 0.2 | protein_coding | 10 | 88414314  | 88426605   | opsin 4                                                                                      |
| 7130 | ENSG00000126529 | TMR5B12     | 98837 | 0.2 | protein_coding | 3  | 17158165  | 17158165   | transmembrane protein 212                                                                    |
| 7135 | ENSG00000109526 | ACTR3C      | 9890  | 0.2 | protein_coding | 7  | 149841005 | 150020814  | ARP3 actin-related protein 3 homolog C (yeast)                                               |
| 7156 | ENSG00000129786 | LOC10048697 | 99033 | 0.2 | protein_coding | 7  | 90884824  | 89828431   | Uncharacterized protein                                                                      |
| 7207 | ENSG00000102046 | LOC10048697 | 99514 | 0.2 | protein_coding | 4  | 4993120   | 4993120    | keratin associated protein 10.2                                                              |
| 7212 | ENSG00000255798 | KRTAP10-2   | 99541 | 0.2 | protein_coding | 11 | 10252041  | 102554844  | Uncharacterized protein                                                                      |
| 7214 | ENSG00000104818 | CG81        | 99584 | 0.2 | protein_coding | 19 | 49535189  | 49538495   | chronic granulomatous beta polypeptide 2                                                     |
| 7263 | ENSG00000106163 | KRT74       | 10067 | 0.2 | protein_coding | 14 | 21108956  | 21109860   | cytokeratin receptor, family 5, subfamily 5, member 1                                        |
| 7278 | ENSG00000102583 | OR8A4       | 10027 | 0.2 | protein_coding | 7  | 141618617 | 141619759  | olfactory receptor, family 5, subfamily A, member 4                                          |
| 7326 | ENSG00000204614 | TRPM9       | 10065 | 0.2 | protein_coding | 6  | 30110985  | 30110762   | transient receptor potential channel 9                                                       |
| 7329 | ENSG00000102189 | OR2A2       | 10030 | 0.2 | protein_coding | 11 | 143804607 | 143807617  | olfactory receptor, family 2, subfamily A, member 2                                          |
| 7332 | ENSG00000176984 | LOC10048697 | 10075 | 0.2 | protein_coding | 11 | 12003665  | 120042387  | Uncharacterized protein                                                                      |
| 7374 | ENSG00000176984 | CTSL62      | 10117 | 0.2 | protein_coding | 12 | 103611369 | 103689749  | chromosome 12 open reading frame 42                                                          |
| 7383 | ENSG00000101074 | RHDML       | 10124 | 0.2 | protein_coding | 12 | 42962626  | 429178875  | RHD domain containing-like                                                                   |
| 7388 | ENSG00000188152 | NUMTAG      | 10126 | 0.2 | protein_coding | 9  | 99690562  | 99702535   | NUM family member 2G                                                                         |
| 7391 | ENSG00000102026 | KRT36       | 10126 | 0.2 | protein_coding | 2  | 240684558 | 240724577  | Uncharacterized protein                                                                      |
| 7434 | ENSG00000105337 | KRT36       | 10126 | 0.2 | protein_coding | 17 | 3964226   | 3964198    | keratin 36                                                                                   |
| 7467 | ENSG00000110025 | SNK15       | 10238 | 0.2 | protein_coding | 11 | 64734889  | 64838044   | sorting nexin 15                                                                             |
| 7468 | ENSG00000182070 | SNK21       | 10239 | 0.2 | protein_coding | 11 | 5172259   | 5201762    | olfactory receptor, family 52, subfamily A, member 1                                         |
| 7501 | ENSG00000102765 | OR2A14      | 10237 | 0.2 | protein_coding | 7  | 154882673 | 154882673  | Uncharacterized protein                                                                      |
| 7504 | ENSG00000102362 | C7XN2       | 10236 | 0.2 | protein_coding | 15 | 48483736  | 48485983   | corixin 2                                                                                    |
| 7517 | ENSG00000205148 | RGS21       | 10236 | 0.2 | protein_coding | 1  | 192286122 | 19233815   | regulator of G-protein signaling 21                                                          |
| 7521 | ENSG0000011561  | OR2A14      | 10237 | 0.2 | protein_coding | 7  | 154882673 | 154882673  | olfactory receptor, family 2, subfamily A1, member 4                                         |
| 7548 | ENSG00000258386 | OR2A14      | 10239 | 0.2 | protein_coding | 14 | 32476108  | 32487891   | Uncharacterized protein                                                                      |
| 7554 | ENSG00000197448 | CYP2P1      | 10235 | 0.2 | protein_coding | 19 | 41620337  | 41632471   | cytochrome P450, family 2, subfamily F, polypeptide 1                                        |
| 7555 | ENSG0000010656  | OR2A14      | 10239 | 0.2 | protein_coding | 11 | 456016    | 456016     | Uncharacterized protein                                                                      |
| 7564 | ENSG00000270011 | ZNF177      | 10338 | 0.2 | protein_coding | 19 | 9434850   | 94343293   | ZNF559-ZNF177 readthrough                                                                    |
| 7604 | ENSG00000189490 | KRTAP7-5    | 10345 | 0.2 | protein_coding | 11 | 1851033   | 1852100    | keratin associated protein 5-5                                                               |
| 7622 | ENSG00000102160 | OR2A14      | 10239 | 0.2 | protein_coding | 11 | 10521162  | 10522196   | Uncharacterized protein                                                                      |
| 7663 | ENSG00000202268 | OR5212      | 10361 | 0.2 | protein_coding | 11 | 4608021   | 4609135    | olfactory receptor, family 52, subfamily 1, member 2                                         |
| 7668 | ENSG00000125831 | CS1T1       | 10399 | 0.2 | protein_coding | 20 | 23431040  | 23433440   | cystatin 11                                                                                  |
| 7700 | ENSG00000102385 | TARNA1      | 10421 | 0.2 | protein_coding | 19 | 545219    | 545219     | T cell-interacting, adhesion receptor on myeloid cells 1                                     |
| 7702 | ENSG00000070748 | CHAT        | 10421 | 0.2 | protein_coding | 10 | 50811741  | 50801925   | choline O-acetyltransferase                                                                  |
| 7722 | ENSG00000289948 | C22D2B      | 10445 | 0.2 | protein_coding | 10 | 97079725  | 97447385   | chromosome 22 open reading frame 27B                                                         |
| 7758 | ENSG00000105028 | AC3SM4      | 10452 | 0.2 | protein_coding | 12 | 74562     | 74562      | acyl-CoA synthetase medium chain family member 4                                             |
| 7770 | ENSG00000117360 | KRT38       | 10452 | 0.2 | protein_coding | 17 | 3950298   | 39597173   | keratin 38                                                                                   |
| 7777 | ENSG00000192992 | DMP1        | 10561 | 0.2 | protein_coding | 4  | 88571459  | 88585513   | dentin matrix acidic phosphoprotein 1                                                        |
| 7779 | ENSG000001705   | HEATR4      | 10561 | 0.2 | protein_coding | 12 | 788253    | 788253     | HEAT repeat containing 4                                                                     |
| 7785 | ENSG00000128885 | PRDM7       | 10575 | 0.2 | protein_coding | 16 | 90122974  | 90158480   | PR domain containing 7                                                                       |
| 7794 | ENSG00000205687 | ARSH        | 10515 | 0.2 | protein_coding | X  | 2924854   | 2951812    | arylsulfatase family, member H                                                               |
| 7853 | ENSG00000105681 | GDFR        | 10515 | 0.2 | protein_coding | 20 | 3634046   | 3634046    | GDFR family receptor alpha 4                                                                 |
| 7850 | ENSG00000171484 | OR1B1       | 10569 | 0.2 | protein_coding | 9  | 12539058  | 125391621  | olfactory receptor, family 1, subfamily B, member 1                                          |
| 7856 | ENSG00000101812 | H2BFM       | 10572 | 0.2 | protein_coding | 9  | 10328269  | 103297251  | H2B histone family 1, member B                                                               |
| 7857 | ENSG0000025318  | CHM7        | 10572 | 0.2 | protein_coding | 8  | 8447919   | 8447919    | chromosome 8 open reading frame 87                                                           |
| 7862 | ENSG00000232268 | OR5211      | 10594 | 0.2 | protein_coding | 11 | 4615007   | 4616243    | olfactory receptor, family 52, subfamily 1, member 1                                         |
| 7940 | ENSG00000156920 | GPR112      | 10657 | 0.2 | protein_coding | X  | 13583122  | 135819215  | G-protein-coupled receptor 112                                                               |
| 7961 | ENSG00000186901 | WPC2B       | 10675 | 0.2 | protein_coding | 20 | 44179762  | 44207365   | WAP four-disulfide core domain B                                                             |
| 8079 | ENSG00000204424 | MYH4        | 10700 | 0.2 | protein_coding | 17 | 10346601  | 10347276   | myosin, heavy chain 4, skeletal muscle                                                       |
| 8091 | ENSG00000132259 | CNGA4       | 10771 | 0.2 | protein_coding | 11 | 6255995   | 6265699    | cyclic nucleotide gated channel alpha 4                                                      |
| 8103 | ENSG00000176683 | ITGAP3      | 10844 | 0.2 | protein_coding | 11 | 796081    | 7981141    | integrin receptor, family 10, subfamily A, member 3                                          |
| 8105 | ENSG0000011501  | OR5A1       | 10840 | 0.2 | protein_coding | 11 | 126315391 | 126316493  | olfactory receptor, family 1, subfamily N, member 2                                          |
| 8187 | ENSG00000187871 | GFRAL       | 10877 | 0.2 | protein_coding | 6  | 55152267  | 55287291   | GDMF family receptor alpha like                                                              |
| 8224 | ENSG00000197593 | PKD2L1      | 10880 | 0.2 | protein_coding | 10 | 102667903 | 102682423  | polycystic kidney disease 2-like                                                             |
| 8431 | ENSG00000187826 | LOC10048697 | 11070 | 0.2 | protein_coding | 2  | 21462049  | 21462049   | Leucine-rich repeat-containing protein LOC400891                                             |
| 8446 | ENSG00000168587 | FAM194B     | 11119 | 0.2 | protein_coding | 13 | 46189857  | 46189874   | family with sequence similarity 194, member B                                                |
| 8517 | ENSG00000198803 | PKD2L1      | 11154 | 0.2 | protein_coding | 7  | 47814250  | 47988088   | polycystic kidney disease 2-like                                                             |
| 8540 | ENSG00000104497 | LOC10048697 | 11178 | 0.2 | protein_coding | 6  | 38323785  | 38323785   | ribulose center family 22, member 1                                                          |
| 8628 | ENSG00000204022 | LIP1        | 11178 | 0.2 | protein_coding | 10 | 90348510  | 90366733   | lipase, family 1                                                                             |
| 8629 | ENSG00000202152 | OR5212      | 10657 | 0.2 | rRNA           | 10 | 46351795  | 46351870   | RNA, 5S ribosomal pseudogene 310                                                             |
| 8416 | ENSG00000206236 | OR5212      | 10657 | 0.2 | sense intronic | 10 | 46351795  | 46351870</ |                                                                                              |

|      |                   |              |         |     |                                    |    |           |           |                                                                                                |
|------|-------------------|--------------|---------|-----|------------------------------------|----|-----------|-----------|------------------------------------------------------------------------------------------------|
| 7009 | ENSG00000197421   | LOC100132705 | 9783.4  | 0.2 | transcribed_unprocessed_pseudogene | 22 | 1671178   | 1883012   | gamma-glutamyltransferase 3 pseudogene                                                         |
| 7574 | ENSG00000243309   |              | 10320.9 | 0.2 | transcribed_unprocessed_pseudogene | 21 | 14410481  | 14439354  | ankyrin repeat domain 30B pseudogene 2                                                         |
| 7633 | ENSG00000204529   |              | 10367.1 | 0.2 | transcribed_unprocessed_pseudogene | 11 | 78405087  | 76418685  | guanylate cyclase 2E, pseudogene                                                               |
| 7760 | ENSG00000204458   |              | 10491.4 | 0.2 | transcribed_unprocessed_pseudogene | 7  | 63560683  | 63611099  | glucosylated beta pseudogene 6                                                                 |
| 7883 | ENSG00000206781   |              | 10595.6 | 0.2 | transcribed_unprocessed_pseudogene | 16 | 33709886  | 33739634  | Rho GTPase activating protein 23 pseudogene 1                                                  |
| 8083 | ENSG00000230528   |              | 10761.5 | 0.2 | transcribed_unprocessed_pseudogene | 17 | 20339650  | 20350567  | nitric oxide synthase 2 pseudogene 3                                                           |
| 8369 | ENSG00000239372   | DDX11L1      | 11023.9 | 0.2 | transcribed_unprocessed_pseudogene | 1  | 11869     | 14412     | DEADH (Asp-Glu-Ala-Asp/His) box helicase 11 like 1                                             |
| 6498 | ENSG00000234911   |              | 9297.8  | 0.2 | unitary_pseudogene                 | 14 | 64812889  | 64841384  | testis expressed 21, pseudogene                                                                |
| 7353 | ENSG00000233121   |              | 10097.2 | 0.2 | unitary_pseudogene                 | 3  | 13968310  | 13969275  | vonersoral 1 receptor 20 pseudogene                                                            |
| 7539 | ENSG00000207676   |              | 10280.5 | 0.2 | unitary_pseudogene                 | 17 | 76244574  | 76250497  | threonine aldolase 1, pseudogene                                                               |
| 7547 | ENSG00000231146   |              | 10200.6 | 0.2 | unitary_pseudogene                 | 20 | 31964675  | 31917776  | BPI fold containing family 6, member 5, pseudogene                                             |
| 7884 | ENSG00000233228   |              | 10604.6 | 0.2 | unitary_pseudogene                 | 1  | 92531863  | 92533396  | lysophosphatidylcholine acyltransferase 2b, pseudogene                                         |
| 3825 | ENSG00000225864   |              | 6008.6  | 0.2 | unprocessed_pseudogene             | 6  | 29690758  | 29691748  | HLA complex group 4 pseudogene 11                                                              |
| 6862 | ENSG00000221233   |              | 9504.6  | 0.2 | unprocessed_pseudogene             | 16 | 32480767  | 32509571  | ATP-binding cassette, sub-family D (ABC), member 1, pseudogene 3                               |
| 6931 | ENSG000002043674  |              | 9669.9  | 0.2 | unprocessed_pseudogene             | 3  | 75396984  | 75397938  | olfactory receptor, family 7, subfamily E, member 66 pseudogene                                |
| 6963 | ENSG00000227243   |              | 9729.7  | 0.2 | unprocessed_pseudogene             | 1  | 16241539  | 162415678 | SLAM family member 6 pseudogene 1                                                              |
| 6967 | ENSG00000201513   |              | 9738.4  | 0.2 | unprocessed_pseudogene             | 10 | 38684549  | 38687140  | ATP-binding cassette, sub-family D (ABC), member 1, pseudogene 2                               |
| 7132 | ENSG00000227684   |              | 8889.5  | 0.2 | unprocessed_pseudogene             | 1  | 17078728  | 17077459  | ciliary rootlet coiled-coil, noctilin pseudogene 4                                             |
| 7144 | ENSG00000225962   |              | 8897.3  | 0.2 | unprocessed_pseudogene             | 1  | 15525435  | 15527188  | death associated protein 3 pseudogene 1                                                        |
| 7177 | ENSG00000204922   |              | 9622.9  | 0.2 | unprocessed_pseudogene             | 4  | 8961354   | 8961707   | unc-63 homolog B6 pseudogene (C. elegans)                                                      |
| 7206 | ENSG000002051087  |              | 9649.9  | 0.2 | unprocessed_pseudogene             | 4  | 9705374   | 9712436   | asparagine-linked glycosylation 1-like 3, pseudogene                                           |
| 7209 | ENSG000002048898  |              | 9653.4  | 0.2 | unprocessed_pseudogene             | 8  | 12036206  | 12040228  | asparagine-linked glycosylation 1-like 11, pseudogene                                          |
| 7243 | ENSG00000204866   |              | 9662.2  | 0.2 | unprocessed_pseudogene             | 2  | 7128057   | 71281133  | olfactory receptor, family 7, subfamily E, member 62 pseudogene                                |
| 7310 | ENSG0000020425    |              | 10053.7 | 0.2 | unprocessed_pseudogene             | 10 | 43221305  | 43232607  | Ras suppressor protein 1 pseudogene 1                                                          |
| 7325 | ENSG00000205098   |              | 10064.7 | 0.2 | unprocessed_pseudogene             | 22 | 24655897  | 24659732  | breakpoint cluster region pseudogene 1                                                         |
| 7348 | ENSG0000020473    |              | 10090.1 | 0.2 | unprocessed_pseudogene             | 17 | 39634435  | 39610307  | keratin 63, pseudogene                                                                         |
| 7406 | ENSG00000204289   |              | 10148.4 | 0.2 | unprocessed_pseudogene             | 10 | 91122051  | 91123244  | interferon-induced protein with tetratricopeptide repeats 6, pseudogene                        |
| 7448 | ENSG00000202949   |              | 10188.7 | 0.2 | unprocessed_pseudogene             | 2  | 23444085  | 23449337  | UDP-glucuronosyltransferase 1 family, polypeptide A12 pseudogene                               |
| 7470 | ENSG00000204020   |              | 10205.1 | 0.2 | unprocessed_pseudogene             | 1  | 111895897 | 11190331  | chitinase, acidic pseudogene 3                                                                 |
| 7513 | ENSG000002048796  |              | 10251   | 0.2 | unprocessed_pseudogene             | 2  | 131958715 | 131860514 | mediator complex subunit 15 pseudogene 8                                                       |
| 7528 | ENSG0000020181077 |              | 10264.5 | 0.2 | unprocessed_pseudogene             | 11 | 5786326   | 5787279   | olfactory receptor, family 5b, subfamily B, member 2 pseudogene                                |
| 7620 | ENSG00000205620   |              | 10303.2 | 0.2 | unprocessed_pseudogene             | 7  | 6963435   | 6970488   | asparagine-linked glycosylation 1-like 5, pseudogene                                           |
| 7628 | ENSG000002169819  |              | 10363.2 | 0.2 | unprocessed_pseudogene             | 6  | 3177278   | 3179998   | tubulin, beta 2B class IIb pseudogene 1                                                        |
| 7630 | ENSG000002058168  |              | 10365   | 0.2 | unprocessed_pseudogene             | 14 | 6086562   | 6086761   | gonadotropin-releasing hormone (type 2) receptor 2 pseudogene 1                                |
| 7647 | ENSG000002048760  |              | 10382.3 | 0.2 | unprocessed_pseudogene             | 3  | 4295168   | 44010362  | deresolin pseudogene 1                                                                         |
| 7648 | ENSG00000203942   |              | 10382.8 | 0.2 | unprocessed_pseudogene             | 3  | 11951148  | 11952466  | Fanconi anemia, complementation group D2 pseudogene 2                                          |
| 7669 | ENSG000002025438  |              | 10399.6 | 0.2 | unprocessed_pseudogene             | 17 | 39562764  | 39568027  | keratin 41 pseudogene                                                                          |
| 7768 | ENSG00000206133   |              | 10454.9 | 0.2 | unprocessed_pseudogene             | 16 | 29640106  | 29647469  | carbonic anhydrase VA pseudogene 1                                                             |
| 7784 | ENSG00000218434   |              | 10513.1 | 0.2 | unprocessed_pseudogene             | 20 | 81342054  | 81344623  | mannose-binding lectin family, member 3, pseudogene                                            |
| 7810 | ENSG000002187481  |              | 10531.2 | 0.2 | unprocessed_pseudogene             | 1  | 120098444 | 120100246 | hydroxy-delta-5-steroid dehydrogenase, 3 beta, pseudogene 1                                    |
| 7810 | ENSG000002036650  |              | 10552.7 | 0.2 | unprocessed_pseudogene             | 6  | 56426051  | 56426069  | glucuronidase, beta pseudogene 4                                                               |
| 7888 | ENSG000002054948  |              | 10599.6 | 0.2 | unprocessed_pseudogene             | 8  | 11777409  | 11778118  | olfactory receptor, family 7, subfamily E, member 158 pseudogene                               |
| 7892 | ENSG00000204775   |              | 10602.3 | 0.2 | unprocessed_pseudogene             | X  | 74805341  | 74805341  | v-rat murine sarcoma viral oncogene homolog B pseudogene 1                                     |
| 7903 | ENSG00000204969   |              | 10621   | 0.2 | unprocessed_pseudogene             | 2  | 91963970  | 91969195  | gamma-glutamyltransferase 8 pseudogene                                                         |
| 7933 | ENSG00000217315   |              | 10646.7 | 0.2 | unprocessed_pseudogene             | 6  | 28001725  | 28020533  | olfactory receptor, family 2, subfamily M, member 2 pseudogene                                 |
| 7943 | ENSG000002027164  |              | 10658.9 | 0.2 | unprocessed_pseudogene             | 13 | 19985371  | 19990328  | solute carrier family 25 (mitochondrial carrier, ornithine transporter) member 15 pseudogene 2 |
| 7969 | ENSG000002048916  |              | 10681.1 | 0.2 | unprocessed_pseudogene             | 3  | 129041899 | 129044399 | nucleoporin 210kDa pseudogene 3                                                                |
| 7974 | ENSG000002052661  |              | 10685.1 | 0.2 | unprocessed_pseudogene             | 12 | 92726     | 92439     | DEADH (Asp-Glu-Ala-Asp/His) box helicase 11 like 8                                             |
| 7986 | ENSG000002051271  |              | 10691.4 | 0.2 | unprocessed_pseudogene             | 4  | 3537174   | 3542438   | asparagine-linked glycosylation 1-like 7, pseudogene                                           |
| 8006 | ENSG00000203207   |              | 10713.6 | 0.2 | unprocessed_pseudogene             | 9  | 2142023   | 21420012  | interferon, omega 1 pseudogene 2                                                               |
| 8099 | ENSG00000202988   |              | 10734.4 | 0.2 | unprocessed_pseudogene             | 22 | 43180468  | 43181198  | protein A2 pseudogene 4                                                                        |
| 8170 | ENSG000002035863  |              | 10859.5 | 0.2 | unprocessed_pseudogene             | 6  | 29875560  | 29876422  | mitochondrial coiled-coil domain 1 pseudogene 1                                                |
| 8171 | ENSG00000203207   |              | 10861.3 | 0.2 | unprocessed_pseudogene             | 10 | 13524898  | 13524422  | olfactory receptor, family 6, subfamily L, member 2 pseudogene                                 |
| 8176 | ENSG000002021141  |              | 10912.4 | 0.2 | unprocessed_pseudogene             | 2  | 13073713  | 13076698  | Rho GTPase activating protein 42 pseudogene 2                                                  |
| 8334 | ENSG000002025801  |              | 10984.3 | 0.2 | unprocessed_pseudogene             | 9  | 8317947   | 8318037   | MT-OR2 pseudogene 5                                                                            |
| 8379 | ENSG000002057763  |              | 11035.4 | 0.2 | unprocessed_pseudogene             | 12 | 48749575  | 48750397  | olfactory receptor, family 6, subfamily BK, member 1 pseudogene                                |
| 8436 | ENSG000002026520  |              | 11075.1 | 0.2 | unprocessed_pseudogene             | 16 | 41646627  | 41645213  | cytochrome P450, family 2, subfamily T, polypeptide 3, pseudogene                              |
| 1502 | ENSG000002031412  |              | 2455.2  | 0.2 |                                    |    |           |           |                                                                                                |
| 2185 | ENSG000002015860  | PDZK1P1      | 3416.1  | 0.2 |                                    | 1  | 14592438  | 14594219  | PDZ domain containing 1 pseudogene 1                                                           |
| 2405 | ENSG000002020485  |              | 3678.4  | 0.2 |                                    | 3  | 15278607  | 15279600  | V RNA                                                                                          |
| 2487 | ENSG000002057524  |              | 3871.4  | 0.2 |                                    |    |           |           |                                                                                                |
| 2727 | ENSG000002044998  |              | 4234.5  | 0.2 |                                    |    |           |           |                                                                                                |
| 2820 | ENSG00000205168   |              | 4382.7  | 0.2 |                                    | 1  | 145209145 | 145319798 | Uncharacterized protein                                                                        |
| 2943 | ENSG000002059291  |              | 4574.4  | 0.2 |                                    | Y  | 15418467  | 15429181  | Uncharacterized protein                                                                        |
| 2966 | ENSG000002038557  |              | 4683    | 0.2 |                                    |    |           |           |                                                                                                |
| 3001 | ENSG00000202068   |              | 4725.3  | 0.2 |                                    |    |           |           |                                                                                                |
| 3131 | ENSG000002029919  |              | 4922.2  | 0.2 |                                    |    |           |           |                                                                                                |
| 3234 | ENSG000002068816  |              | 5075.2  | 0.2 |                                    |    |           |           |                                                                                                |
| 3300 | ENSG00000202027   |              | 5317.3  | 0.2 |                                    |    |           |           |                                                                                                |
| 3484 | ENSG00000216086   |              | 5485    | 0.2 |                                    |    |           |           |                                                                                                |
| 3485 | ENSG000002067010  |              | 5489.8  | 0.2 |                                    |    |           |           |                                                                                                |
| 3489 | ENSG00000203368   |              | 5587.7  | 0.2 |                                    |    |           |           |                                                                                                |
| 3535 | ENSG000002079956  |              | 5590    | 0.2 |                                    |    |           |           |                                                                                                |
| 3543 | ENSG000002058546  |              | 5591.5  | 0.2 |                                    |    |           |           |                                                                                                |
| 3554 | ENSG000002020593  |              | 5573.7  | 0.2 |                                    |    |           |           |                                                                                                |
| 3601 | ENSG000002056714  |              | 5646.1  | 0.2 |                                    |    |           |           |                                                                                                |
| 3693 | ENSG000002071430  |              | 5791.2  | 0.2 |                                    |    |           |           |                                                                                                |
| 3729 | ENSG000002072625  |              | 5811.6  | 0.2 |                                    |    |           |           |                                                                                                |
| 3790 | ENSG000002029653  |              | 5963.8  | 0.2 |                                    |    |           |           |                                                                                                |
| 3914 | ENSG000002057497  |              | 6141.1  | 0.2 |                                    |    |           |           |                                                                                                |
| 3952 | ENSG000002054566  |              | 6212.8  | 0.2 |                                    |    |           |           |                                                                                                |
| 4037 | ENSG000002030166  |              | 6310.5  | 0.2 |                                    |    |           |           |                                                                                                |
| 4107 | ENSG000002038450  |              | 6417.5  | 0.2 |                                    | 8  | 71516767  | 71516872  | Small nuclear RNA U13                                                                          |
| 4118 | ENSG000002047105  |              | 6429    | 0.2 |                                    |    |           |           |                                                                                                |
| 4197 | ENSG000002038329  |              | 6530    | 0.2 |                                    | 16 | 18881488  | 18881591  | Small nuclear RNA U13                                                                          |
| 4217 | ENSG000002044676  |              | 6552.2  | 0.2 |                                    |    |           |           |                                                                                                |
| 4262 | ENSG000002052986  |              | 6619.4  | 0.2 |                                    |    |           |           |                                                                                                |
| 4386 | ENSG00000205400   |              | 6666.6  | 0.2 |                                    |    |           |           |                                                                                                |
| 4557 | ENSG000002028834  |              | 7058.3  | 0.2 |                                    |    |           |           |                                                                                                |
| 4580 | ENSG000002053393  |              | 7084.6  | 0.2 |                                    |    |           |           |                                                                                                |
| 4611 | ENSG000002045484  |              | 7113.7  | 0.2 |                                    |    |           |           |                                                                                                |
| 4688 | ENSG000002033889  |              | 7231.6  | 0.2 |                                    | X  | 56100757  | 56102014  | Uncharacterized protein                                                                        |
| 4738 | ENSG000002197502  |              | 7285.7  | 0.2 |                                    | 14 | 50300810  | 50311852  | Uncharacterized protein                                                                        |
| 4744 | ENSG000002025693  |              | 7291.5  | 0.2 |                                    |    |           |           |                                                                                                |
| 4809 | ENSG000002025611  |              | 7387.9  | 0.2 |                                    |    |           |           |                                                                                                |
| 4835 | ENSG000002071247  |              | 7428.9  | 0.2 |                                    |    |           |           |                                                                                                |
| 4892 | ENSG00000206575   |              | 7461.1  | 0.2 |                                    |    |           |           |                                                                                                |
| 4971 | ENSG000002055989  |              | 7617.1  | 0.2 |                                    |    |           |           |                                                                                                |
| 5043 | ENSG000002053180  |              | 7707.1  | 0.2 |                                    |    |           |           |                                                                                                |
| 5179 | ENSG000002063985  |              | 7868.8  | 0.2 |                                    |    |           |           |                                                                                                |
| 5206 | ENSG00000204751   |              | 7902.3  | 0.2 |                                    |    |           |           |                                                                                                |
| 5224 | ENSG000002025163  |              | 7921.5  | 0.2 |                                    |    |           |           |                                                                                                |
| 5303 | ENSG00000203738   |              | 7970.8  | 0.2 |                                    |    |           |           |                                                                                                |
| 5300 | ENSG000002053687  |              | 8007    | 0.2 |                                    |    |           |           |                                                                                                |
| 5319 | ENSG000002023491  |              | 8029    | 0.2 |                                    |    |           |           |                                                                                                |
| 5324 | ENSG00000204095   |              | 8038.4  | 0.2 |                                    |    |           |           |                                                                                                |
| 5841 | ENSG000002024891  |              | 8398.6  | 0.2 |                                    |    |           |           |                                                                                                |
| 5866 | ENSG000002020506  |              | 8412.3  | 0.2 |                                    |    |           |           |                                                                                                |
| 5703 | ENSG000002029653  |              | 8473.5  | 0.2 |                                    | 14 | 50291993  | 50293258  | HCC1768899, PR0210; Uncharacterized protein                                                    |

|      |                  |         |     |    |           |           |  |  |                                                                                        |
|------|------------------|---------|-----|----|-----------|-----------|--|--|----------------------------------------------------------------------------------------|
| 6909 | ENSG00000270403  | 9676.3  | 0.2 |    |           |           |  |  |                                                                                        |
| 6914 | ENSG00000251767  | 9683.5  | 0.2 |    |           |           |  |  |                                                                                        |
| 6916 | ENSG00000271609  | 9684.8  | 0.2 |    |           |           |  |  |                                                                                        |
| 6929 | ENSG00000226196  | 9696.4  | 0.2 |    |           |           |  |  |                                                                                        |
| 6930 | ENSG00000211322  | 9697    | 0.2 |    |           |           |  |  |                                                                                        |
| 6937 | ENSG00000255333  | 9705    | 0.2 |    |           |           |  |  |                                                                                        |
| 6940 | ENSG00000255575  | 9706    | 0.2 |    |           |           |  |  |                                                                                        |
| 6951 | ENSG00000252585  | 9727.4  | 0.2 |    |           |           |  |  |                                                                                        |
| 6960 | ENSG00000252542  | 9738.3  | 0.2 |    |           |           |  |  |                                                                                        |
| 6962 | ENSG00000265212  | 9740.3  | 0.2 |    |           |           |  |  |                                                                                        |
| 6967 | ENSG00000260459  | 9746.2  | 0.2 |    |           |           |  |  |                                                                                        |
| 6968 | ENSG00000239898  | 9747.6  | 0.2 | 9  | 86067188  | 86067290  |  |  | Small nuclear RNA U13                                                                  |
| 6969 | ENSG00000256431  | 9749    | 0.2 |    |           |           |  |  |                                                                                        |
| 6977 | ENSG00000229826  | 9756.5  | 0.2 |    |           |           |  |  |                                                                                        |
| 6986 | ENSG00000252370  | 9762.3  | 0.2 |    |           |           |  |  |                                                                                        |
| 6989 | ENSG00000213167  | 9762.6  | 0.2 |    |           |           |  |  |                                                                                        |
| 6993 | ENSG00000267145  | 9765.3  | 0.2 |    |           |           |  |  |                                                                                        |
| 6995 | ENSG00000218113  | 9769.2  | 0.2 |    |           |           |  |  |                                                                                        |
| 6996 | ENSG00000230395  | 9766.5  | 0.2 |    |           |           |  |  |                                                                                        |
| 7007 | ENSG00000211767  | 9782.4  | 0.2 |    |           |           |  |  |                                                                                        |
| 7008 | ENSG00000252014  | 9783.5  | 0.2 |    |           |           |  |  |                                                                                        |
| 7014 | ENSG00000214888  | 9787.5  | 0.2 |    |           |           |  |  |                                                                                        |
| 7015 | ENSG00000254945  | 9787.7  | 0.2 |    |           |           |  |  |                                                                                        |
| 7018 | ENSG00000229927  | 9781.4  | 0.2 |    |           |           |  |  |                                                                                        |
| 7019 | ENSG00000228064  | 9783.5  | 0.2 |    |           |           |  |  |                                                                                        |
| 7026 | ENSG00000196472  | 9799.5  | 0.2 |    |           |           |  |  |                                                                                        |
| 7028 | ENSG00000212293  | 9802.9  | 0.2 |    |           |           |  |  |                                                                                        |
| 7037 | ENSG00000242609  | 9808.6  | 0.2 |    |           |           |  |  |                                                                                        |
| 7067 | ENSG00000259261  | 9830    | 0.2 |    |           |           |  |  |                                                                                        |
| 7075 | ENSG00000216823  | 9839.4  | 0.2 |    |           |           |  |  |                                                                                        |
| 7080 | ENSG00000228216  | 9846.2  | 0.2 |    |           |           |  |  |                                                                                        |
| 7084 | ENSG00000271057  | 9847.3  | 0.2 |    |           |           |  |  |                                                                                        |
| 7093 | ENSG00000223587  | 9852.7  | 0.2 |    |           |           |  |  |                                                                                        |
| 7113 | ENSG00000249742  | 9875.8  | 0.2 |    |           |           |  |  |                                                                                        |
| 7117 | ENSG00000251600  | 9875.5  | 0.2 |    |           |           |  |  |                                                                                        |
| 7119 | ENSG00000218713  | 9881    | 0.2 |    |           |           |  |  |                                                                                        |
| 7121 | ENSG00000231217  | 9882.7  | 0.2 |    |           |           |  |  |                                                                                        |
| 7123 | ENSG00000230856  | 9883.8  | 0.2 |    |           |           |  |  |                                                                                        |
| 7126 | ENSG00000230381  | 9884.5  | 0.2 |    |           |           |  |  |                                                                                        |
| 7133 | ENSG00000212951  | 9889.8  | 0.2 |    |           |           |  |  |                                                                                        |
| 7142 | ENSG00000273444  | 9895    | 0.2 |    |           |           |  |  |                                                                                        |
| 7143 | ENSG00000217959  | 9896.7  | 0.2 |    |           |           |  |  |                                                                                        |
| 7150 | ENSG00000242034  | 9901.4  | 0.2 |    |           |           |  |  |                                                                                        |
| 7155 | ENSG00000281118  | 9903.1  | 0.2 |    |           |           |  |  |                                                                                        |
| 7158 | ENSG00000240267  | 9904.4  | 0.2 |    |           |           |  |  |                                                                                        |
| 7159 | ENSG00000214525  | 9906.9  | 0.2 |    |           |           |  |  |                                                                                        |
| 7169 | ENSG00000217396  | 9914.9  | 0.2 |    |           |           |  |  |                                                                                        |
| 7173 | ENSG00000215307  | 9920    | 0.2 | 6  | 57841107  | 57842368  |  |  | retinoblastoma binding protein 4 pseudogene 3                                          |
| 7176 | ENSG00000229654  | 9922.7  | 0.2 |    |           |           |  |  |                                                                                        |
| 7178 | ENSG00000228935  | 9923    | 0.2 |    |           |           |  |  |                                                                                        |
| 7186 | ENSG00000239540  | 9934    | 0.2 |    |           |           |  |  |                                                                                        |
| 7188 | ENSG00000243378  | 9934.2  | 0.2 |    |           |           |  |  |                                                                                        |
| 7200 | ENSG00000233214  | 9941.6  | 0.2 |    |           |           |  |  |                                                                                        |
| 7201 | ENSG000002081440 | 9942.9  | 0.2 |    |           |           |  |  |                                                                                        |
| 7202 | ENSG00000231455  | 9943.8  | 0.2 |    |           |           |  |  |                                                                                        |
| 7208 | ENSG00000228248  | 9952.3  | 0.2 |    |           |           |  |  |                                                                                        |
| 7218 | ENSG00000243261  | 9952.7  | 0.2 | 1  | 147574428 | 147634888 |  |  | neuroblastoma breakpoint family, member 24                                             |
| 7222 | ENSG00000202638  | 9958.1  | 0.2 |    |           |           |  |  |                                                                                        |
| 7230 | ENSG00000244559  | 9975.8  | 0.2 |    |           |           |  |  |                                                                                        |
| 7236 | ENSG00000240459  | 9980.5  | 0.2 |    |           |           |  |  |                                                                                        |
| 7237 | ENSG00000225455  | 9981.6  | 0.2 |    |           |           |  |  |                                                                                        |
| 7242 | ENSG00000260784  | 9985.3  | 0.2 |    |           |           |  |  |                                                                                        |
| 7254 | ENSG00000232978  | 10000.3 | 0.2 |    |           |           |  |  |                                                                                        |
| 7255 | ENSG00000254545  | 10001.5 | 0.2 |    |           |           |  |  |                                                                                        |
| 7266 | ENSG00000218029  | 10012.8 | 0.2 |    |           |           |  |  |                                                                                        |
| 7269 | ENSG00000209743  | 10017.4 | 0.2 |    |           |           |  |  |                                                                                        |
| 7270 | ENSG00000211644  | 10018.1 | 0.2 |    |           |           |  |  |                                                                                        |
| 7274 | ENSG00000249995  | 10022.4 | 0.2 |    |           |           |  |  |                                                                                        |
| 7276 | ENSG00000231483  | 10024.2 | 0.2 |    |           |           |  |  |                                                                                        |
| 7277 | ENSG00000256532  | 10026.5 | 0.2 |    |           |           |  |  |                                                                                        |
| 7279 | ENSG00000208144  | 10027.3 | 0.2 |    |           |           |  |  |                                                                                        |
| 7290 | ENSG00000258868  | 10034.8 | 0.2 |    |           |           |  |  |                                                                                        |
| 7298 | ENSG00000241228  | 10042.4 | 0.2 |    |           |           |  |  |                                                                                        |
| 7300 | ENSG00000231236  | 10045.6 | 0.2 |    |           |           |  |  |                                                                                        |
| 7301 | ENSG00000204393  | 10047   | 0.2 |    |           |           |  |  |                                                                                        |
| 7303 | ENSG00000204713  | 10048.7 | 0.2 |    |           |           |  |  |                                                                                        |
| 7305 | ENSG00000257506  | 10049.9 | 0.2 |    |           |           |  |  |                                                                                        |
| 7309 | ENSG00000260895  | 10052   | 0.2 |    |           |           |  |  |                                                                                        |
| 7313 | ENSG00000204918  | 10055   | 0.2 |    |           |           |  |  |                                                                                        |
| 7314 | ENSG00000234413  | 10055.1 | 0.2 |    |           |           |  |  |                                                                                        |
| 7315 | ENSG00000243382  | 10055.4 | 0.2 | 9  | 66058843  | 66060121  |  |  | ATP synthase, H+ transporting, mitochondrial F1 complex, alpha subunit 1 pseudogene 10 |
| 7318 | ENSG00000232158  | 10060   | 0.2 | 9  | 45375916  | 45377188  |  |  | myosin VB pseudogene 1                                                                 |
| 7321 | ENSG00000254914  | 10060.7 | 0.2 |    |           |           |  |  |                                                                                        |
| 7327 | ENSG00000270302  | 10065.8 | 0.2 |    |           |           |  |  |                                                                                        |
| 7327 | ENSG00000232639  | 10079.9 | 0.2 |    |           |           |  |  |                                                                                        |
| 7351 | ENSG00000270622  | 10096.5 | 0.2 |    |           |           |  |  |                                                                                        |
| 7352 | ENSG00000249189  | 10096.5 | 0.2 |    |           |           |  |  |                                                                                        |
| 7354 | ENSG00000208785  | 10099.7 | 0.2 |    |           |           |  |  |                                                                                        |
| 7355 | ENSG00000204294  | 10100.6 | 0.2 |    |           |           |  |  |                                                                                        |
| 7365 | ENSG00000229156  | 10111.2 | 0.2 |    |           |           |  |  |                                                                                        |
| 7369 | ENSG00000263969  | 10114.6 | 0.2 |    |           |           |  |  |                                                                                        |
| 7375 | ENSG00000218988  | 10118.6 | 0.2 |    |           |           |  |  |                                                                                        |
| 7381 | ENSG00000246300  | 10120.8 | 0.2 |    |           |           |  |  |                                                                                        |
| 7382 | ENSG00000232790  | 10122.3 | 0.2 |    |           |           |  |  |                                                                                        |
| 7384 | ENSG00000224671  | 10124.8 | 0.2 |    |           |           |  |  |                                                                                        |
| 7387 | ENSG00000266114  | 10125.9 | 0.2 |    |           |           |  |  |                                                                                        |
| 7384 | ENSG00000238532  | 10130.5 | 0.2 |    |           |           |  |  |                                                                                        |
| 7386 | ENSG00000232477  | 10130.7 | 0.2 |    |           |           |  |  |                                                                                        |
| 7396 | ENSG00000225656  | 10131.2 | 0.2 |    |           |           |  |  |                                                                                        |
| 7397 | ENSG00000238188  | 10131.6 | 0.2 |    |           |           |  |  |                                                                                        |
| 7399 | ENSG00000225960  | 10136.5 | 0.2 |    |           |           |  |  |                                                                                        |
| 7407 | ENSG00000182574  | 10148   | 0.2 |    |           |           |  |  |                                                                                        |
| 7412 | ENSG00000224378  | 10152.6 | 0.2 |    |           |           |  |  |                                                                                        |
| 7413 | ENSG00000254447  | 10152.8 | 0.2 |    |           |           |  |  |                                                                                        |
| 7415 | ENSG00000260120  | 10155   | 0.2 |    |           |           |  |  |                                                                                        |
| 7419 | ENSG00000231995  | 10157.6 | 0.2 |    |           |           |  |  |                                                                                        |
| 7423 | ENSG00000231163  | 10164.2 | 0.2 |    |           |           |  |  |                                                                                        |
| 7431 | ENSG00000235126  | 10172.3 | 0.2 |    |           |           |  |  |                                                                                        |
| 7434 | ENSG00000233355  | 10174.1 | 0.2 |    |           |           |  |  |                                                                                        |
| 7438 | ENSG00000206428  | 10176.7 | 0.2 |    |           |           |  |  |                                                                                        |
| 7442 | ENSG00000228537  | 10182.6 | 0.2 | 18 | 20481487  | 20481589  |  |  | Small nuclear RNA U13                                                                  |
| 7445 | ENSG00000254883  | 10185.6 | 0.2 |    |           |           |  |  |                                                                                        |
| 7449 | ENSG00000206522  | 10191.4 | 0.2 |    |           |           |  |  |                                                                                        |
| 7455 | ENSG00000259026  | 10198.6 | 0.2 |    |           |           |  |  |                                                                                        |
| 7456 | ENSG00000260628  | 10199.5 | 0.2 |    |           |           |  |  |                                                                                        |
| 7457 | ENSG00000225628  | 10202   | 0.2 |    |           |           |  |  |                                                                                        |
| 7458 | ENSG00000254561  | 10202.8 | 0.2 |    |           |           |  |  |                                                                                        |
| 7459 | ENSG00000236247  | 10204   | 0.2 |    |           |           |  |  |                                                                                        |
| 7463 | ENSG00000232328  | 10206.9 | 0.2 |    |           |           |  |  |                                                                                        |
| 7464 | ENSG00000229543  | 10206.9 | 0.2 |    |           |           |  |  |                                                                                        |
| 7473 | ENSG00000237845  | 10217   | 0.2 |    |           |           |  |  |                                                                                        |
| 7479 | ENSG00000226893  | 10223   | 0.2 | 1  | 142796587 | 14279739  |  |  | asparagine synthetase pseudogene 5                                                     |
| 7482 | ENSG00000237773  | 10224.8 | 0.2 |    |           |           |  |  |                                                                                        |
| 7483 | ENSG00000241475  | 10225.2 | 0.2 |    |           |           |  |  |                                                                                        |
| 7487 | ENSG00000205942  | 10228.3 | 0.2 |    |           |           |  |  |                                                                                        |
| 7488 | ENSG00000259341  | 10228.7 | 0.2 |    |           |           |  |  |                                                                                        |
| 7489 | ENSG00000230783  | 10228.7 | 0.2 |    |           |           |  |  |                                                                                        |
| 7489 | ENSG00000206490  | 10229   | 0.2 |    |           |           |  |  |                                                                                        |
| 7491 | ENSG00000281725  | 10229.1 | 0.2 |    |           |           |  |  |                                                                                        |
| 7492 | ENSG00000256005  | 10229.3 | 0.2 |    |           |           |  |  |                                                                                        |
| 7499 | ENSG00000191099  | 10230.2 | 0.2 |    |           |           |  |  |                                                                                        |
| 7500 | ENSG00000204975  | 10233.9 | 0.2 | 1  | 146310555 | 146349531 |  |  | HYDN2, axonemal central pair apparatus protein (pseudogene)                            |
| 7502 | ENSG00000250516  | 10236.3 | 0.2 |    |           |           |  |  |                                                                                        |
| 7506 | ENSG000002080158 | 10242.3 | 0.2 |    |           |           |  |  |                                                                                        |
| 7509 | ENSG000002081432 | 10246.8 | 0.2 |    |           |           |  |  |                                                                                        |
| 7514 | ENSG00000238411  | 10252.6 | 0.2 |    |           |           |  |  |                                                                                        |
| 7515 | ENSG00000180125  | 10252.6 | 0.2 |    |           |           |  |  |                                                                                        |
| 7524 | ENSG00000206476  | 10251.8 | 0.2 | 19 | 36680096  | 36680380  |  |  | RNA 7SL, cytoplasmic 287, pseudogene                                                   |
| 7524 | ENSG00000258536  | 10262   | 0.2 |    |           |           |  |  |                                                                                        |
| 7531 | ENSG00000205994  | 10269   | 0.2 |    |           |           |  |  |                                                                                        |
| 7532 | ENSG00000202921  | 10271.5 | 0.2 |    |           |           |  |  |                                                                                        |
| 7535 | ENSG00000237574  | 10279   | 0.2 |    |           |           |  |  |                                                                                        |
| 7541 | ENSG00000268985  | 10285.2 | 0.2 |    |           |           |  |  |                                                                                        |
| 7542 | ENSG000002081937 | 10285.6 | 0.2 |    |           |           |  |  |                                                                                        |
| 7543 | ENSG00000265860  | 10286   | 0.2 | 2  | 101710031 | 101710285 |  |  | RNA 7SL, cytoplasmic 548, pseudogene                                                   |
| 7544 | ENSG00000257771  | 10286.7 | 0.2 |    |           |           |  |  |                                                                                        |
| 7545 | ENSG00000252366  | 10286.8 | 0.2 |    |           |           |  |  |                                                                                        |
| 7550 | ENSG00000242618  | 10293.9 | 0.2 |    |           |           |  |  |                                                                                        |
| 7553 | ENSG00000272485  | 10294.8 | 0.2 |    |           |           |  |  |                                                                                        |
| 7558 | ENSG00000252697  | 10301.5 | 0.2 |    |           |           |  |  |                                                                                        |
| 7559 | ENSG00000181132  | 10302.1 | 0.2 |    |           |           |  |  |                                                                                        |



|      |                  |         |     |    |        |        |  |                                               |  |
|------|------------------|---------|-----|----|--------|--------|--|-----------------------------------------------|--|
| 7561 | ENSG00000217805  | 10303.6 | 0.2 |    |        |        |  |                                               |  |
| 7565 | ENSG00000202577  | 10309.3 | 0.2 |    |        |        |  |                                               |  |
| 7566 | ENSG00000205913  | 10311.4 | 0.2 |    |        |        |  |                                               |  |
| 7567 | ENSG00000213337  | 10314.1 | 0.2 |    |        |        |  |                                               |  |
| 7569 | ENSG00000230504  | 10315.6 | 0.2 |    |        |        |  |                                               |  |
| 7576 | ENSG00000205161  | 10323.4 | 0.2 |    |        |        |  |                                               |  |
| 7579 | ENSG00000228734  | 10325.2 | 0.2 |    |        |        |  |                                               |  |
| 7580 | ENSG00000245584  | 10327.5 | 0.2 |    |        |        |  |                                               |  |
| 7581 | ENSG00000205555  | 10328.8 | 0.2 |    |        |        |  |                                               |  |
| 7582 | ENSG00000272236  | 10329.1 | 0.2 |    |        |        |  |                                               |  |
| 7586 | ENSG00000195882  | 10332.4 | 0.2 |    |        |        |  |                                               |  |
| 7589 | ENSG00000202922  | 10336.1 | 0.2 |    |        |        |  |                                               |  |
| 7590 | ENSG00000287341  | 10336.3 | 0.2 |    |        |        |  |                                               |  |
| 7592 | ENSG00000225924  | 10336.9 | 0.2 |    |        |        |  |                                               |  |
| 7593 | ENSG00000202514  | 10337.3 | 0.2 | 12 | 147073 | 149350 |  | family with sequence similarity 138, member D |  |
| 7597 | ENSG00000205479  | 10341.7 | 0.2 |    |        |        |  |                                               |  |
| 7601 | ENSG00000229409  | 10344   | 0.2 |    |        |        |  |                                               |  |
| 7611 | ENSG00000205146  | 10349.4 | 0.2 |    |        |        |  |                                               |  |
| 7613 | ENSG00000233942  | 10349.5 | 0.2 |    |        |        |  |                                               |  |
| 7615 | ENSG00000215512  | 10351.4 | 0.2 |    |        |        |  |                                               |  |
| 7621 | ENSG00000172000  | 10354.5 | 0.2 |    |        |        |  |                                               |  |
| 7623 | ENSG00000205854  | 10357.9 | 0.2 |    |        |        |  |                                               |  |
| 7625 | ENSG00000249857  | 10359.1 | 0.2 |    |        |        |  |                                               |  |
| 7627 | ENSG00000205533  | 10360.5 | 0.2 |    |        |        |  |                                               |  |
| 7629 | ENSG00000284641  | 10364.2 | 0.2 |    |        |        |  |                                               |  |
| 7631 | ENSG00000258637  | 10365.7 | 0.2 |    |        |        |  |                                               |  |
| 7640 | ENSG00000205854  | 10375.1 | 0.2 |    |        |        |  |                                               |  |
| 7642 | ENSG00000257608  | 10376.3 | 0.2 |    |        |        |  |                                               |  |
| 7643 | ENSG000002057163 | 10376.4 | 0.2 |    |        |        |  |                                               |  |
| 7649 | ENSG00000205828  | 10383.1 | 0.2 |    |        |        |  |                                               |  |
| 7650 | ENSG00000226372  | 10384.8 | 0.2 |    |        |        |  |                                               |  |
| 7653 | ENSG00000205014  | 10388.1 | 0.2 |    |        |        |  |                                               |  |
| 7654 | ENSG00000205353  | 10388.3 | 0.2 |    |        |        |  |                                               |  |
| 7655 | ENSG000002071657 | 10388.6 | 0.2 |    |        |        |  |                                               |  |
| 7659 | ENSG00000231559  | 10391.3 | 0.2 |    |        |        |  |                                               |  |
| 7667 | ENSG00000205769  | 10399   | 0.2 |    |        |        |  |                                               |  |
| 7676 | ENSG00000213391  | 10401.8 | 0.2 |    |        |        |  |                                               |  |
| 7682 | ENSG00000233397  | 10407   | 0.2 |    |        |        |  |                                               |  |
| 7687 | ENSG00000205196  | 10409.8 | 0.2 |    |        |        |  |                                               |  |
| 7690 | ENSG000002051945 | 10411.3 | 0.2 |    |        |        |  |                                               |  |
| 7691 | ENSG00000228421  | 10412.2 | 0.2 |    |        |        |  |                                               |  |
| 7698 | ENSG00000205029  | 10417.8 | 0.2 |    |        |        |  |                                               |  |
| 7701 | ENSG00000205361  | 10420.7 | 0.2 |    |        |        |  |                                               |  |
| 7708 | ENSG00000180344  | 10430.3 | 0.2 |    |        |        |  |                                               |  |
| 7710 | ENSG00000207941  | 10431.8 | 0.2 |    |        |        |  |                                               |  |
| 7713 | ENSG00000205198  | 10434.2 | 0.2 |    |        |        |  |                                               |  |
| 7715 | ENSG00000202935  | 10435.4 | 0.2 |    |        |        |  |                                               |  |
| 7720 | ENSG00000205698  | 10443   | 0.2 |    |        |        |  |                                               |  |
| 7721 | ENSG000002053709 | 10444.7 | 0.2 |    |        |        |  |                                               |  |
| 7723 | ENSG00000226961  | 10447.2 | 0.2 |    |        |        |  |                                               |  |
| 7730 | ENSG00000230539  | 10457.6 | 0.2 |    |        |        |  |                                               |  |
| 7732 | ENSG00000230296  | 10459.7 | 0.2 |    |        |        |  |                                               |  |
| 7733 | ENSG00000249079  | 10459.9 | 0.2 |    |        |        |  |                                               |  |
| 7734 | ENSG00000270863  | 10460.6 | 0.2 |    |        |        |  |                                               |  |
| 7736 | ENSG00000204337  | 10462.2 | 0.2 |    |        |        |  |                                               |  |
| 7747 | ENSG000002053872 | 10475.8 | 0.2 |    |        |        |  |                                               |  |
| 7749 | ENSG00000230901  | 10477.6 | 0.2 |    |        |        |  |                                               |  |
| 7751 | ENSG000002051070 | 10482.9 | 0.2 |    |        |        |  |                                               |  |
| 7755 | ENSG00000205907  | 10485.6 | 0.2 |    |        |        |  |                                               |  |
| 7757 | ENSG00000205936  | 10486.3 | 0.2 |    |        |        |  |                                               |  |
| 7762 | ENSG00000205803  | 10491.1 | 0.2 |    |        |        |  |                                               |  |
| 7764 | ENSG00000205814  | 10493.3 | 0.2 |    |        |        |  |                                               |  |
| 7766 | ENSG00000230425  | 10494.7 | 0.2 |    |        |        |  |                                               |  |
| 7769 | ENSG00000225116  | 10496.4 | 0.2 |    |        |        |  |                                               |  |
| 7770 | ENSG00000177736  | 10496.8 | 0.2 |    |        |        |  |                                               |  |
| 7771 | ENSG00000226155  | 10497.6 | 0.2 |    |        |        |  |                                               |  |
| 7774 | ENSG00000205266  | 10499.4 | 0.2 |    |        |        |  |                                               |  |
| 7776 | ENSG000002058647 | 10501.4 | 0.2 |    |        |        |  |                                               |  |
| 7781 | ENSG00000224448  | 10504.2 | 0.2 |    |        |        |  |                                               |  |
| 7782 | ENSG00000205408  | 10504.3 | 0.2 |    |        |        |  |                                               |  |
| 7783 | ENSG00000225012  | 10504.6 | 0.2 |    |        |        |  |                                               |  |
| 7787 | ENSG00000240884  | 10507.9 | 0.2 |    |        |        |  |                                               |  |
| 7790 | ENSG00000205165  | 10512.4 | 0.2 |    |        |        |  |                                               |  |
| 7791 | ENSG00000235563  | 10512.7 | 0.2 |    |        |        |  |                                               |  |
| 7792 | ENSG00000224955  | 10513.2 | 0.2 |    |        |        |  |                                               |  |
| 7796 | ENSG00000205213  | 10516.7 | 0.2 |    |        |        |  |                                               |  |
| 7798 | ENSG00000225157  | 10519.4 | 0.2 |    |        |        |  |                                               |  |
| 7799 | ENSG000002051010 | 10520.1 | 0.2 |    |        |        |  |                                               |  |
| 7802 | ENSG00000205917  | 10523.3 | 0.2 |    |        |        |  |                                               |  |
| 7806 | ENSG00000205148  | 10528.2 | 0.2 |    |        |        |  |                                               |  |
| 7807 | ENSG00000243584  | 10528.7 | 0.2 |    |        |        |  |                                               |  |
| 7809 | ENSG00000205257  | 10528.9 | 0.2 |    |        |        |  |                                               |  |
| 7813 | ENSG00000248777  | 10531.7 | 0.2 |    |        |        |  |                                               |  |
| 7814 | ENSG000002021860 | 10531.8 | 0.2 |    |        |        |  |                                               |  |
| 7816 | ENSG000002051520 | 10533.6 | 0.2 |    |        |        |  |                                               |  |
| 7819 | ENSG00000224498  | 10537.5 | 0.2 |    |        |        |  |                                               |  |
| 7820 | ENSG00000207014  | 10537.6 | 0.2 |    |        |        |  |                                               |  |
| 7821 | ENSG00000245546  | 10538.2 | 0.2 |    |        |        |  |                                               |  |
| 7823 | ENSG00000208979  | 10538.7 | 0.2 |    |        |        |  |                                               |  |
| 7826 | ENSG00000205998  | 10542.9 | 0.2 |    |        |        |  |                                               |  |
| 7827 | ENSG00000246174  | 10544.6 | 0.2 |    |        |        |  |                                               |  |
| 7829 | ENSG00000205953  | 10545.4 | 0.2 |    |        |        |  |                                               |  |
| 7830 | ENSG00000226720  | 10546.1 | 0.2 |    |        |        |  |                                               |  |
| 7831 | ENSG00000174495  | 10546.3 | 0.2 |    |        |        |  |                                               |  |
| 7832 | ENSG00000170262  | 10546.7 | 0.2 |    |        |        |  |                                               |  |
| 7838 | ENSG000002058892 | 10551.2 | 0.2 |    |        |        |  |                                               |  |
| 7839 | ENSG00000230950  | 10551.3 | 0.2 |    |        |        |  |                                               |  |
| 7844 | ENSG00000217336  | 10555.2 | 0.2 |    |        |        |  |                                               |  |
| 7846 | ENSG000002052005 | 10561.3 | 0.2 |    |        |        |  |                                               |  |
| 7847 | ENSG00000230701  | 10564.1 | 0.2 |    |        |        |  |                                               |  |
| 7849 | ENSG00000225296  | 10566.9 | 0.2 |    |        |        |  |                                               |  |
| 7855 | ENSG000002052500 | 10572.1 | 0.2 |    |        |        |  |                                               |  |
| 7861 | ENSG00000230715  | 10576.4 | 0.2 |    |        |        |  |                                               |  |
| 7862 | ENSG00000205445  | 10576.9 | 0.2 |    |        |        |  |                                               |  |
| 7863 | ENSG00000233754  | 10577.3 | 0.2 |    |        |        |  |                                               |  |
| 7871 | ENSG00000208105  | 10583.3 | 0.2 |    |        |        |  |                                               |  |
| 7872 | ENSG00000224384  | 10584.5 | 0.2 |    |        |        |  |                                               |  |
| 7873 | ENSG000002057194 | 10584.5 | 0.2 |    |        |        |  |                                               |  |
| 7874 | ENSG000002027666 | 10584.7 | 0.2 |    |        |        |  |                                               |  |
| 7875 | ENSG00000202161  | 10586.3 | 0.2 |    |        |        |  |                                               |  |
| 7878 | ENSG000002027636 | 10589.4 | 0.2 |    |        |        |  |                                               |  |
| 7884 | ENSG00000244065  | 10595.6 | 0.2 |    |        |        |  |                                               |  |
| 7885 | ENSG00000205173  | 10596.8 | 0.2 |    |        |        |  |                                               |  |
| 7888 | ENSG00000235357  | 10607.9 | 0.2 |    |        |        |  |                                               |  |
| 7899 | ENSG000002021499 | 10608.7 | 0.2 |    |        |        |  |                                               |  |
| 7902 | ENSG00000205919  | 10614.1 | 0.2 |    |        |        |  |                                               |  |
| 7905 | ENSG00000203334  | 10616.9 | 0.2 |    |        |        |  |                                               |  |
| 7909 | ENSG00000230172  | 10621.8 | 0.2 |    |        |        |  |                                               |  |
| 7911 | ENSG000002021028 | 10622.3 | 0.2 |    |        |        |  |                                               |  |
| 7917 | ENSG00000270521  | 10625.7 | 0.2 |    |        |        |  |                                               |  |
| 7918 | ENSG00000225094  | 10627.2 | 0.2 |    |        |        |  |                                               |  |
| 7925 | ENSG00000213528  | 10640.7 | 0.2 |    |        |        |  |                                               |  |
| 7926 | ENSG00000231718  | 10643.4 | 0.2 |    |        |        |  |                                               |  |
| 7927 | ENSG00000230349  | 10643.8 | 0.2 |    |        |        |  |                                               |  |
| 7928 | ENSG00000205050  | 10644.1 | 0.2 |    |        |        |  |                                               |  |
| 7929 | ENSG00000271526  | 10644.8 | 0.2 |    |        |        |  |                                               |  |
| 7931 | ENSG000002026424 | 10645.2 | 0.2 |    |        |        |  |                                               |  |
| 7935 | ENSG00000204963  | 10647.5 | 0.2 |    |        |        |  |                                               |  |
| 7938 | ENSG000002081478 | 10655.2 | 0.2 |    |        |        |  |                                               |  |
| 7941 | ENSG000002054237 | 10657.6 | 0.2 |    |        |        |  |                                               |  |
| 7942 | ENSG000002059208 | 10658.6 | 0.2 |    |        |        |  |                                               |  |
| 7949 | ENSG00000205360  | 10663   | 0.2 |    |        |        |  |                                               |  |
| 7953 | ENSG00000230486  | 10665.9 | 0.2 |    |        |        |  |                                               |  |
| 7956 | ENSG000002081721 | 10669.3 | 0.2 |    |        |        |  |                                               |  |
| 7964 | ENSG00000205498  | 10677.6 | 0.2 |    |        |        |  |                                               |  |
| 7967 | ENSG00000225279  | 10679.2 | 0.2 |    |        |        |  |                                               |  |
| 7968 | ENSG00000205087  | 10679.9 | 0.2 |    |        |        |  |                                               |  |
| 7969 | ENSG00000245428  | 10679.9 | 0.2 |    |        |        |  |                                               |  |
| 7970 | ENSG000002055158 | 10681.6 | 0.2 |    |        |        |  |                                               |  |
| 7973 | ENSG00000215002  | 10684.5 | 0.2 |    |        |        |  |                                               |  |
| 7976 | ENSG00000205261  | 10685.3 | 0.2 |    |        |        |  |                                               |  |
| 7980 | ENSG00000230186  | 10688.1 | 0.2 |    |        |        |  |                                               |  |
| 7982 | ENSG000002053574 | 10688.7 | 0.2 |    |        |        |  |                                               |  |
| 7988 | ENSG00000205347  | 10692.4 | 0.2 |    |        |        |  |                                               |  |
| 7994 | ENSG000002023660 | 10699.3 | 0.2 |    |        |        |  |                                               |  |
| 7995 | ENSG00000205957  | 10699.5 | 0.2 |    |        |        |  |                                               |  |
| 8000 | ENSG0000022704   | 10707.5 | 0.2 |    |        |        |  |                                               |  |
| 8012 | ENSG000002057078 | 10721   | 0.2 |    |        |        |  |                                               |  |
| 8014 | ENSG00000205610  | 10721.6 | 0.2 |    |        |        |  |                                               |  |
| 8019 | ENSG00000202300  | 10727.3 | 0.2 |    |        |        |  |                                               |  |
| 8026 | ENSG00000230504  | 10730.8 | 0.2 |    |        |        |  |                                               |  |

|       |                 |               |           |           |           |           |          |  |                                                                       |
|-------|-----------------|---------------|-----------|-----------|-----------|-----------|----------|--|-----------------------------------------------------------------------|
| 8029  | ENS00000235332  | 10732.6       | 0.2       |           |           |           |          |  |                                                                       |
| 8033  | ENS00000235259  | 10734.6       | 0.2       |           |           |           |          |  |                                                                       |
| 8034  | ENS00000237211  | 10735.2       | 0.2       |           |           |           |          |  |                                                                       |
| 8039  | ENS00000237295  | 10738         | 0.2       |           |           |           |          |  |                                                                       |
| 8042  | ENS00000237262  | 10740         | 0.2       |           |           |           |          |  |                                                                       |
| 8043  | ENS00000232498  | 10740.9       | 0.2       |           |           |           |          |  |                                                                       |
| 8045  | ENS00000258747  | 10743         | 0.2       |           |           |           |          |  |                                                                       |
| 8047  | ENS00000234576  | 10746         | 0.2       |           |           |           |          |  |                                                                       |
| 8048  | ENS00000231448  | 10745.7       | 0.2       |           |           |           |          |  |                                                                       |
| 8053  | ENS00000273432  | 10750.1       | 0.2       |           |           |           |          |  |                                                                       |
| 8057  | ENS00000259260  | 10756.2       | 0.2       |           |           |           |          |  |                                                                       |
| 8066  | ENS00000259222  | 10759.4       | 0.2       |           |           |           |          |  |                                                                       |
| 8084  | ENS00000240424  | 10761.7       | 0.2       |           |           |           |          |  |                                                                       |
| 8085  | ENS00000259256  | 10761.7       | 0.2       |           |           |           |          |  |                                                                       |
| 8086  | ENS00000259481  | 10761.9       | 0.2       |           |           |           |          |  |                                                                       |
| 8071  | ENS00000248229  | 10765.5       | 0.2       |           |           |           |          |  |                                                                       |
| 8072  | ENS00000232905  | 10765.7       | 0.2       |           |           |           |          |  |                                                                       |
| 8073  | ENS00000232593  | 10767.3       | 0.2       |           |           |           |          |  |                                                                       |
| 8074  | ENS000002033496 | 10767.7       | 0.2       |           |           |           |          |  |                                                                       |
| 8076  | ENS00000240736  | 10770.4       | 0.2       |           |           |           |          |  |                                                                       |
| 8077  | ENS00000231749  | 10770.5       | 0.2       |           |           |           |          |  |                                                                       |
| 8084  | ENS000002081273 | 10776.1       | 0.2       |           |           |           |          |  |                                                                       |
| 8091  | ENS00000229229  | 10784.1       | 0.2       |           |           |           |          |  |                                                                       |
| 8095  | ENS00000225433  | 10786.3       | 0.2       |           |           |           |          |  |                                                                       |
| 8098  | ENS00000285594  | 10787.9       | 0.2       |           |           |           |          |  |                                                                       |
| 8105  | ENS00000255856  | 10794         | 0.2       |           |           |           |          |  |                                                                       |
| 8107  | ENS00000232786  | 10795.3       | 0.2       |           |           |           |          |  |                                                                       |
| 8109  | ENS00000238822  | 10797.2       | 0.2       | 12        | 13129888  | 13129995  |          |  | Small nuclear RNA U13                                                 |
| 8110  | ENS00000226825  | 10798.7       | 0.2       |           |           |           |          |  |                                                                       |
| 8111  | ENS00000235923  | 10799.1       | 0.2       |           |           |           |          |  |                                                                       |
| 8114  | ENS00000243587  | 10803.3       | 0.2       |           |           |           |          |  |                                                                       |
| 8116  | ENS00000259078  | 10806.4       | 0.2       |           |           |           |          |  |                                                                       |
| 8118  | ENS00000234337  | 10809.3       | 0.2       |           |           |           |          |  |                                                                       |
| 8125  | ENS00000232283  | 10819.3       | 0.2       |           |           |           |          |  |                                                                       |
| 8126  | ENS00000270764  | 10820.8       | 0.2       |           |           |           |          |  |                                                                       |
| 8127  | ENS00000234997  | 10823.3       | 0.2       |           |           |           |          |  |                                                                       |
| 8135  | ENS00000227711  | 10831         | 0.2       |           |           |           |          |  |                                                                       |
| 8139  | ENS00000257864  | 10837.5       | 0.2       |           |           |           |          |  |                                                                       |
| 8145  | ENS00000234459  | 10842.7       | 0.2       |           |           |           |          |  |                                                                       |
| 8157  | ENS00000273312  | 10850.6       | 0.2       |           |           |           |          |  |                                                                       |
| 8158  | ENS00000224479  | 10850.6       | 0.2       |           |           |           |          |  |                                                                       |
| 8164  | ENS00000237459  | 10855.1       | 0.2       |           |           |           |          |  |                                                                       |
| 8166  | ENS00000287587  | 10855.9       | 0.2       |           |           |           |          |  |                                                                       |
| 8172  | ENS000002051546 | 10861.6       | 0.2       |           |           |           |          |  |                                                                       |
| 8174  | ENS00000206268  | 10862.9       | 0.2       |           |           |           |          |  |                                                                       |
| 8175  | ENS00000235544  | 10863         | 0.2       |           |           |           |          |  |                                                                       |
| 8180  | ENS00000253351  | 10870.6       | 0.2       |           |           |           |          |  |                                                                       |
| 8182  | ENS00000225253  | 10872.6       | 0.2       |           |           |           |          |  |                                                                       |
| 8193  | ENS00000236971  | 10873.9       | 0.2       |           |           |           |          |  |                                                                       |
| 8207  | ENS00000230739  | 10882.3       | 0.2       |           |           |           |          |  |                                                                       |
| 8215  | ENS00000226395  | 10887.1       | 0.2       |           |           |           |          |  |                                                                       |
| 8222  | ENS00000220398  | 10905         | 0.2       |           |           |           |          |  |                                                                       |
| 8228  | ENS00000257668  | 10907.7       | 0.2       |           |           |           |          |  |                                                                       |
| 8231  | ENS00000232795  | 10909         | 0.2       |           |           |           |          |  |                                                                       |
| 8233  | ENS00000233469  | 10911.3       | 0.2       |           |           |           |          |  |                                                                       |
| 8240  | ENS00000230960  | 10915.7       | 0.2       |           |           |           |          |  |                                                                       |
| 8243  | ENS00000289896  | 10917.9       | 0.2       | 21        | 37402368  | 37417818  |          |  | Uncharacterized protein                                               |
| 8246  | ENS00000232620  | 10922.7       | 0.2       |           |           |           |          |  |                                                                       |
| 8264  | ENS00000232396  | 10938.5       | 0.2       |           |           |           |          |  |                                                                       |
| 8274  | ENS00000218846  | 10942.8       | 0.2       |           |           |           |          |  |                                                                       |
| 8278  | ENS00000231977  | 10946         | 0.2       |           |           |           |          |  |                                                                       |
| 8280  | ENS00000258746  | 10948.8       | 0.2       |           |           |           |          |  |                                                                       |
| 8283  | ENS00000228176  | 10952.8       | 0.2       |           |           |           |          |  |                                                                       |
| 8295  | ENS00000245209  | 10953         | 0.2       |           |           |           |          |  |                                                                       |
| 8290  | ENS00000233799  | 10962.9       | 0.2       |           |           |           |          |  |                                                                       |
| 8292  | ENS00000252599  | 10963.6       | 0.2       |           |           |           |          |  |                                                                       |
| 8296  | ENS00000214448  | 10964.5       | 0.2       |           |           |           |          |  |                                                                       |
| 8300  | ENS00000255362  | 10970.3       | 0.2       |           |           |           |          |  |                                                                       |
| 8301  | ENS00000230360  | 10971.6       | 0.2       |           |           |           |          |  |                                                                       |
| 8306  | ENS00000230788  | 10973.9       | 0.2       |           |           |           |          |  |                                                                       |
| 8308  | ENS00000208797  | 10976.5       | 0.2       | 4         | 6693782   | 6694189   |          |  | Uncharacterized protein                                               |
| 8321  | ENS00000230358  | 10984.1       | 0.2       |           |           |           |          |  |                                                                       |
| 8329  | ENS00000238423  | 10990.3       | 0.2       |           |           |           |          |  |                                                                       |
| 8330  | ENS00000287304  | 10991         | 0.2       |           |           |           |          |  |                                                                       |
| 8335  | ENS00000223475  | 10994.8       | 0.2       |           |           |           |          |  |                                                                       |
| 8358  | ENS00000245153  | 11013         | 0.2       |           |           |           |          |  |                                                                       |
| 8359  | ENS00000271245  | 11013.9       | 0.2       |           |           |           |          |  |                                                                       |
| 8377  | ENS000002081433 | 11032.8       | 0.2       |           |           |           |          |  |                                                                       |
| 8392  | ENS00000234523  | 11045.3       | 0.2       |           |           |           |          |  |                                                                       |
| 8402  | ENS00000205264  | 11047.6       | 0.2       |           |           |           |          |  |                                                                       |
| 8403  | ENS00000230336  | 11048         | 0.2       |           |           |           |          |  |                                                                       |
| 8408  | ENS00000231197  | 11053.7       | 0.2       |           |           |           |          |  |                                                                       |
| 8411  | ENS00000259941  | 11057.8       | 0.2       |           |           |           |          |  |                                                                       |
| 8433  | ENS00000231724  | 11070.5       | 0.2       |           |           |           |          |  |                                                                       |
| 8470  | ENS000002342497 | 11112.4       | 0.2       |           |           |           |          |  |                                                                       |
| 8488  | ENS00000234415  | 11125.5       | 0.2       |           |           |           |          |  |                                                                       |
| 8505  | ENS00000256295  | 11145.7       | 0.2       |           |           |           |          |  |                                                                       |
| 8523  | ENS00000230507  | 11161.6       | 0.2       |           |           |           |          |  |                                                                       |
| 8569  | ENS00000218544  | 11196.4       | 0.2       |           |           |           |          |  |                                                                       |
| 8570  | ENS00000227934  | 11196.9       | 0.2       |           |           |           |          |  |                                                                       |
| 8578  | ENS00000208765  | 11201.4       | 0.2       |           |           |           |          |  |                                                                       |
| 8590  | ENS00000230766  | 11202.6       | 0.2       |           |           |           |          |  |                                                                       |
| 8608  | ENS00000271732  | 11219.6       | 0.2       |           |           |           |          |  |                                                                       |
| 8608  | ENS00000231934  | 11220.5       | 0.2       |           |           |           |          |  |                                                                       |
| 8622  | ENS00000209265  | 11223.8       | 0.2       |           |           |           |          |  |                                                                       |
| 8632  | ENS00000232520  | 11241.3       | 0.2       |           |           |           |          |  |                                                                       |
| 8662  | ENS00000259827  | 11260.5       | 0.2       |           |           |           |          |  |                                                                       |
| 8681  | ENS00000230988  | 11273.8       | 0.2       |           |           |           |          |  |                                                                       |
| 8628  | ENS00000230255  | 11407.9       | 0.2       |           |           |           |          |  |                                                                       |
| 8639  | ENS00000230672  | 11415.4       | 0.2       |           |           |           |          |  |                                                                       |
| 8622  | ENS00000211003  | 11424.1       | 0.2       |           |           |           |          |  |                                                                       |
| 6029  | ENS00000204479  | ORZ1-AS1      | antisense | 7         | 143948357 | 144053274 |          |  | ORZ1 antisense RNA 1                                                  |
| 6975  | ENS00000251224  | 9650          | 0.19      | antisense | 3         | 3277127   | 3277896  |  | KCNO10 antisense RNA 1                                                |
| 6960  | ENS00000230263  | ISM1-AS1      | antisense | 1         | 11118.1   | 1121448   | 1320251  |  | ISM1 antisense RNA 1                                                  |
| 8864  | ENS00000240596  | KCNAB1-AS2    | antisense | 3         | 15593349  | 15594572  |          |  | KCNAB1 antisense RNA 2                                                |
| 8833  | ENS00000214896  | LINC02025     | antisense | 7         | 47601074  | 47606370  |          |  | long intergenic non-protein coding RNA 525                            |
| 899   | ENS00000230898  | PLCH1-AS1     | antisense | 3         | 155186973 | 15517542  |          |  | PLCH1 antisense RNA 1                                                 |
| 9125  | ENS00000237221  | 11652.2       | 0.19      | antisense | X         | 18706762  | 18709723 |  | PPEF1 antisense RNA 1                                                 |
| 9126  | ENS000002198711 | 11653.3       | 0.19      | antisense | 1         | 54703710  | 54704738 |  | SSBP3 antisense RNA 1                                                 |
| 9224  | ENS00000234650  | RCOA-AS1      | antisense | 3         | 103116684 | 103113411 |          |  | RCOA antisense RNA 1                                                  |
| 9311  | ENS00000243715  | CACNA2D3-AS1  | antisense | 3         | 5458832   | 54583282  |          |  | CACNA2D3 antisense RNA 1                                              |
| 9354  | ENS00000230820  | 11628.7       | 0.19      | antisense | 3         | 18381296  | 18382266 |  | HTR3E antisense RNA 1                                                 |
| 9457  | ENS00000231173  | LICH1-AS1     | antisense | 4         | 41222091  | 41228144  |          |  | LICH1 antisense RNA 1 (head to head)                                  |
| 9683  | ENS00000237775  | 12104.8       | 0.19      | antisense | 6         | 30834759  | 30843695 |  | DDR1 antisense RNA 1 (head to head)                                   |
| 7945  | ENS00000211643  | 10659.8       | 0.19      | IG_V_gene | 22        | 22973082  | 22973581 |  | immunoglobulin lambda variable 5-52                                   |
| 2548  | ENS00000232762  | LINC02068     | lincRNA   | 15        | 57552563  | 57599569  |          |  | long intergenic non-protein coding RNA 526                            |
| 8028  | ENS00000231983  | LINC02020     | lincRNA   | 16        | 66442427  | 66446038  |          |  | long intergenic non-protein coding RNA 920                            |
| 8088  | ENS00000235685  | LINC02098     | lincRNA   | 13        | 26626414  | 26627523  |          |  | long intergenic non-protein coding RNA 415                            |
| 8122  | ENS00000232127  | LINC02152     | lincRNA   | 20        | 21086245  | 21086959  |          |  | long intergenic non-protein coding RNA 237                            |
| 8144  | ENS000002122043 | LINC00544     | lincRNA   | 13        | 3051042   | 30524625  |          |  | long intergenic non-protein coding RNA 544                            |
| 8286  | ENS00000237264  | MIR179-2      | miRNA     | 1         | 14993356  | 14996561  |          |  | miR-179-1                                                             |
| 8270  | ENS00000215162  | LINC02089     | lincRNA   | X         | 68398400  | 68429767  |          |  | long intergenic non-protein coding RNA 269                            |
| 8596  | ENS00000234056  | 11122.8       | 0.19      | lincRNA   | 13        | 25748966  | 25754217 |  | AMER2 antisense RNA 1 (head to head)                                  |
| 6077  | ENS000002184274 | 11440.8       | 0.19      | lincRNA   | 21        | 46720160  | 46725172 |  | long intergenic non-protein coding RNA 316                            |
| 8688  | ENS00000208707  | RP13-137A17.6 | lincRNA   | 10        | 134779326 | 134789536 |          |  | lincRNA 761                                                           |
| 9180  | ENS00000237385  | 11678.2       | 0.19      | lincRNA   | 13        | 45225848  | 45275152 |  | long intergenic non-protein coding RNA 407                            |
| 9350  | ENS00000239656  | 11626.6       | 0.19      | lincRNA   | 13        | 26891033  | 26891084 |  | Protein LOC100509667: Putative uncharacterized protein DNF24-34H05.12 |
| 9381  | ENS00000230411  | MIR549A       | miRNA     | 1         | 109943421 | 10994981  |          |  | long intergenic non-protein coding RNA 370                            |
| 10037 | ENS000002196559 | 12376         | 0.19      | lincRNA   | 11        | 36236084  | 36294909 |  | long intergenic non-protein coding RNA 610                            |
| 4490  | ENS00000226105  | MIR1978       | miRNA     | 1         | 26891033  | 26891084  |          |  | miR-1978                                                              |
| 6866  | ENS00000210276  | MIR7671       | miRNA     | 1         | 8427173   | 8428013   | 8418214  |  | miR-7671                                                              |
| 6127  | ENS000002084796 | MIR5009       | miRNA     | 15        | 90427163  | 90427262  |          |  | miR-5009                                                              |
| 6037  | ENS000002148931 | MIR1318       | miRNA     | 4         | 10080225  | 10080316  |          |  | miR-1318                                                              |
| 8313  | ENS000002084199 | MIR3667       | miRNA     | 1         | 49937114  | 49937114  |          |  | miR-3667                                                              |
| 8355  | ENS000002086802 | MIR4419A      | miRNA     | 1         | 23384351  | 23384427  |          |  | miR-4419a                                                             |
| 8481  | ENS000002083979 | MIR4402       | miRNA     | 9         | 130631694 | 130631774 |          |  | miR-4402                                                              |
| 8524  | ENS00000231689  | MIR1273F      | miRNA     | 1         | 34983072  | 34983048  |          |  | miR-1273f                                                             |
| 8550  | ENS000002085815 | MIR1273G      | miRNA     | 1         | 53405986  | 53406085  |          |  | miR-1273g                                                             |
| 8784  | ENS000002083841 | MIR4777       | miRNA     | 2         | 232227419 | 232227504 |          |  | miR-4777                                                              |
| 8790  | ENS00000208294  | MIR1273F      | miRNA     | 1         | 53393563  | 53394444  |          |  | miR-1273f                                                             |
| 8831  | ENS000002301025 | MIR1250       | miRNA     | 17        | 79189996  | 79187108  |          |  | miR-1250                                                              |
| 9089  | ENS000002086407 | MIR3157       | miRNA     | 10        | 87824072  | 87824156  |          |  | miR-3157                                                              |
| 8142  | ENS00000204989  | MIR5062       | miRNA     | 1         | 12481009  | 12481098  |          |  | miR-5062                                                              |
| 9241  | ENS000002085333 | MIR1317       | miRNA     | 3         | 194855205 | 194855309 |          |  | miR-1317                                                              |

|      |                  |         |      |                      |    |           |           |                                                                                                                       |
|------|------------------|---------|------|----------------------|----|-----------|-----------|-----------------------------------------------------------------------------------------------------------------------|
| 8890 | ENSG000002043542 | 11074.7 | 0.19 | misc RNA             | 19 | 58581338  | 58581607  | RNA 75L, cytoplasmic 526, pseudogene                                                                                  |
| 8911 | ENSG000002041863 | 11050.3 | 0.19 | misc RNA             | 4  | 153729383 | 153729383 | RNA 75L, cytoplasmic 655, pseudogene                                                                                  |
| 8925 | ENSG000002044236 | 11165.8 | 0.19 | misc RNA             | 2  | 69743853  | 69744176  | RNA 75L, cytoplasmic 604, pseudogene                                                                                  |
| 8931 | ENSG000002058892 | 11169.9 | 0.19 | misc RNA             | 4  | 140106595 | 140106897 | RNA 75L, cytoplasmic 311, pseudogene                                                                                  |
| 8942 | ENSG000002046699 | 11417   | 0.19 | misc RNA             | 1  | 235039933 | 235040233 | RNA 75L, cytoplasmic 669, pseudogene                                                                                  |
| 8946 | ENSG000002043752 | 11597.3 | 0.19 | misc RNA             | 10 | 8952912   | 8952912   | RNA 75L, cytoplasmic 74, pseudogene                                                                                   |
| 8956 | ENSG000002045041 | 11633.4 | 0.19 | misc RNA             | 2  | 204124327 | 204124818 | RNA 75L, cytoplasmic 870, pseudogene                                                                                  |
| 8959 | ENSG000002048650 | 11672.1 | 0.19 | misc RNA             | 14 | 66217947  | 66218261  | RNA 75L, cytoplasmic 213, pseudogene                                                                                  |
| 8960 | ENSG000002049269 | 11701.5 | 0.19 | misc RNA             | 5  | 124527397 | 124527397 | RNA 75L, cytoplasmic 187, pseudogene                                                                                  |
| 9271 | ENSG000001984940 | 11783.7 | 0.19 | misc RNA             | 20 | 48537154  | 48537154  | Y RNA                                                                                                                 |
| 9271 | ENSG000002048650 | 11672.1 | 0.19 | misc RNA             | 14 | 66217947  | 66218261  | RNA 75L, cytoplasmic 213, pseudogene                                                                                  |
| 9331 | ENSG000002048650 | 11672.1 | 0.19 | misc RNA             | 22 | 25099899  | 25099899  | RNA 75L, cytoplasmic 162, pseudogene                                                                                  |
| 9346 | ENSG000002048650 | 11672.1 | 0.19 | misc RNA             | 22 | 86987852  | 86987852  | RNA 75L, cytoplasmic 162, pseudogene                                                                                  |
| 9577 | ENSG000002045052 | 12014.4 | 0.19 | misc RNA             | 1  | 231028867 | 231030713 | RNA 75L, cytoplasmic 837, pseudogene                                                                                  |
| 9721 | ENSG000002040959 | 12125.7 | 0.19 | misc RNA             | 16 | 2181862   | 2181951   | Y RNA                                                                                                                 |
| 9736 | ENSG000002021633 | 2474    | 0.19 | processed_pseudogene | 2  | 1292282   | 12923075  | non-sulfur cluster assembly 1 pseudogene 6                                                                            |
| 9741 | ENSG000002044171 | 5149.6  | 0.19 | processed_pseudogene | 3  | 14289127  | 142897307 | pre-B-cell leukemia homeobox 2 pseudogene 1                                                                           |
| 9840 | ENSG000002044451 | 7105.6  | 0.19 | processed_pseudogene | 11 | 12995200  | 129952076 | ribosomal protein L34 pseudogene 21                                                                                   |
| 4723 | ENSG00000205919  | 7270.3  | 0.19 | processed_pseudogene | 8  | 79672377  | 79674666  | protein-kinase, interferon-inducible double stranded RNA dependent inhibitor, repressor of P58 repressor pseudogene 7 |
| 5165 | ENSG000002021221 | 7853.3  | 0.19 | processed_pseudogene | 2  | 16235736  | 16236246  | AT hook containing transcription factor 1 pseudogene 1                                                                |
| 5792 | ENSG000002023034 | 8501.2  | 0.19 | processed_pseudogene | 7  | 23382952  | 23383075  | nucleofibrin, light polypeptide pseudogene 1                                                                          |
| 6485 | ENSG000002040167 | 9265.8  | 0.19 | processed_pseudogene | 4  | 42473827  | 42474397  | ribosomal protein S7 pseudogene 7                                                                                     |
| 6586 | ENSG00000215887  | 9375.6  | 0.19 | processed_pseudogene | 1  | 112180913 | 112182166 | keratin 18 pseudogene 57                                                                                              |
| 6745 | ENSG000002019920 | 9528.7  | 0.19 | processed_pseudogene | 6  | 10570328  | 105703698 | ribosomal protein L35 pseudogene 3                                                                                    |
| 7193 | ENSG00000162685  | 9636.1  | 0.19 | processed_pseudogene | 5  | 28825707  | 288257686 | lymphocyte-specific protein 1 pseudogene 3                                                                            |
| 7289 | ENSG000002058300 | 10014.6 | 0.19 | processed_pseudogene | 14 | 36289043  | 36289294  | nuclear transport factor 2 pseudogene 2                                                                               |
| 7979 | ENSG000002021429 | 10318.6 | 0.19 | processed_pseudogene | 1  | 116469221 | 116469215 | NIP1, nuclear pore RNA processing protein pseudogene 3                                                                |
| 7822 | ENSG000002024316 | 10538.5 | 0.19 | processed_pseudogene | 1  | 8846270   | 8846272   | ribosomal protein L7 pseudogene 7                                                                                     |
| 7869 | ENSG000002025803 | 10582.4 | 0.19 | processed_pseudogene | 20 | 20834764  | 20835285  | mitochondrial ribosomal protein S11 pseudogene 1                                                                      |
| 7913 | ENSG000002026123 | 11301.5 | 0.19 | processed_pseudogene | 19 | 21439314  | 21439314  | ribosomal protein L18 pseudogene 63                                                                                   |
| 8003 | ENSG000002058019 | 10711.8 | 0.19 | processed_pseudogene | 12 | 11200931  | 11201851  | taste receptor, type 2, member 63 pseudogene 1                                                                        |
| 8049 | ENSG000002042456 | 10746.2 | 0.19 | processed_pseudogene | 10 | 90636207  | 90637304  | pentatricyclic repeat domain 2 pseudogene 2                                                                           |
| 8130 | ENSG000002045984 | 10828.1 | 0.19 | processed_pseudogene | 1  | 23262511  | 23262511  | Y box binding protein 1 pseudogene 6                                                                                  |
| 8143 | ENSG000002014843 | 10827.2 | 0.19 | processed_pseudogene | 2  | 42051836  | 42052178  | eukaryotic translation initiation factor 4E binding protein 2 pseudogene 1                                            |
| 8141 | ENSG000002042621 | 10828.1 | 0.19 | processed_pseudogene | 2  | 17445559  | 17446162  | zinc finger, FYVE domain containing 9 pseudogene 2                                                                    |
| 8155 | ENSG000002011307 | 10849.5 | 0.19 | processed_pseudogene | 2  | 6608739   | 6608743   | ribosomal protein L33 pseudogene 3                                                                                    |
| 8185 | ENSG000002034668 | 10869.8 | 0.19 | processed_pseudogene | 12 | 7171865   | 7171978   | glyceraldehyde 3 phosphate dehydrogenase pseudogene 31                                                                |
| 8199 | ENSG000002045052 | 10869.8 | 0.19 | processed_pseudogene | 10 | 22713430  | 22713430  | keratin 18 pseudogene 3                                                                                               |
| 8200 | ENSG00000203986  | 10882.3 | 0.19 | processed_pseudogene | 1  | 93212151  | 93212151  | cyclin J pseudogene 2                                                                                                 |
| 8204 | ENSG000002028966 | 10885.8 | 0.19 | processed_pseudogene | 8  | 28936607  | 28936827  | keratin 18 pseudogene 1                                                                                               |
| 8211 | ENSG000002027953 | 10886.1 | 0.19 | processed_pseudogene | 1  | 3588821   | 3588821   | keratin 18 pseudogene 8                                                                                               |
| 8247 | ENSG00000181358  | 10922.7 | 0.19 | processed_pseudogene | 13 | 50464727  | 504647134 | CTAGE family, member 10, pseudogene                                                                                   |
| 8291 | ENSG00000202797  | 10963.5 | 0.19 | processed_pseudogene | 21 | 15164856  | 15164862  | family with sequence similarity 207, member C                                                                         |
| 8292 | ENSG000002025944 | 10968.6 | 0.19 | processed_pseudogene | 13 | 75402697  | 75402697  | RID kinase 3 pseudogene 1                                                                                             |
| 8311 | ENSG000002021429 | 10938.6 | 0.19 | processed_pseudogene | 8  | 22397788  | 22397728  | transmembrane protein 256 pseudogene 2                                                                                |
| 8381 | ENSG00000204319  | 11027.3 | 0.19 | processed_pseudogene | 10 | 81975607  | 81975675  | ribosomal protein S12 pseudogene 2                                                                                    |
| 8429 | ENSG000002018363 | 11058.2 | 0.19 | processed_pseudogene | 6  | 52112508  | 52112508  | solute carrier family 25 (carnitine/acylcarnitine translocase), member 20 pseudogene 1                                |
| 8432 | ENSG000002017558 | 11057.7 | 0.19 | processed_pseudogene | 10 | 103037657 | 103037605 | ribosomal protein L18 pseudogene 20                                                                                   |
| 8433 | ENSG000002034933 | 11073.6 | 0.19 | processed_pseudogene | 20 | 32098955  | 32099052  | cell division cycle 42 pseudogene 1                                                                                   |
| 8443 | ENSG000002027453 | 11085.6 | 0.19 | processed_pseudogene | 6  | 55002499  | 55002499  | heterogeneous nuclear ribonucleoprotein A1 pseudogene 63                                                              |
| 8444 | ENSG000002025119 | 11100.2 | 0.19 | processed_pseudogene | 5  | 169657468 | 169657468 | keratin 18 pseudogene 41                                                                                              |
| 8458 | ENSG000002017566 | 11098.8 | 0.19 | processed_pseudogene | 6  | 3841516   | 3841205   | teratocarcinoma-derived growth factor 1 pseudogene 4                                                                  |
| 8462 | ENSG000002017371 | 11103.7 | 0.19 | processed_pseudogene | 10 | 16183193  | 16183772  | RANBP5, nuclear RAS oncogene family pseudogene 1                                                                      |
| 8463 | ENSG000002017324 | 11104.4 | 0.19 | processed_pseudogene | 10 | 85412807  | 85412807  | ribosomal protein L1 pseudogene 112                                                                                   |
| 8467 | ENSG000002024465 | 11107.5 | 0.19 | processed_pseudogene | 22 | 22525369  | 22525369  | suppressor of cytokine signaling 2 pseudogene 2                                                                       |
| 8480 | ENSG000002019897 | 11175.5 | 0.19 | processed_pseudogene | 11 | 43543896  | 43544814  | C-terminal binding protein 2 pseudogene 8                                                                             |
| 8516 | ENSG000002026436 | 11152.8 | 0.19 | processed_pseudogene | 8  | 11889265  | 11889265  | albumin specific peptidase 17-like family member 7                                                                    |
| 8537 | ENSG000002013608 | 11174.5 | 0.19 | processed_pseudogene | 4  | 8438877   | 8438977   | solute carrier family 25 (mitochondrial, carnitine), member 14 pseudogene 1                                           |
| 8539 | ENSG000002020451 | 11175.5 | 0.19 | processed_pseudogene | 16 | 58810444  | 58811467  | gem (nuclear organelle) associated protein 8 pseudogene 2                                                             |
| 8554 | ENSG000002020164 | 11184.2 | 0.19 | processed_pseudogene | 1  | 1198421   | 1198421   | fibronectin factor receptor 3 pseudogene 6                                                                            |
| 8561 | ENSG000002028102 | 11189.7 | 0.19 | processed_pseudogene | 15 | 66707271  | 66707536  | ATP synthase, H+ transporting, mitochondrial Fo complex, subunit F2 pseudogene 6                                      |
| 8565 | ENSG000002024718 | 11191.6 | 0.19 | processed_pseudogene | 13 | 19300846  | 19301254  | calpain 2 pseudogene 12                                                                                               |
| 8566 | ENSG000002024718 | 11192.2 | 0.19 | processed_pseudogene | 14 | 15966178  | 15966178  | lathy acid binding protein 2 pseudogene 6                                                                             |
| 8568 | ENSG000002021137 | 11195.1 | 0.19 | processed_pseudogene | 9  | 78901410  | 78902967  | RNA binding motif protein 22 pseudogene 5                                                                             |
| 8581 | ENSG000002014835 | 11202.2 | 0.19 | processed_pseudogene | 20 | 10329805  | 10329776  | ribosomal protein L23a pseudogene 8                                                                                   |
| 8590 | ENSG000002029321 | 11207.6 | 0.19 | processed_pseudogene | 12 | 17276998  | 17276998  | epsilon-tubulin 2 pseudogene 2                                                                                        |
| 8601 | ENSG000002053363 | 11215.2 | 0.19 | processed_pseudogene | 8  | 32897041  | 32897311  | RAN, member RAS oncogene family pseudogene 9                                                                          |
| 8605 | ENSG000002010564 | 11219.5 | 0.19 | processed_pseudogene | 19 | 2538708   | 2538786   | transcription elongation factor B (SII), polypeptide 1 pseudogene 28                                                  |
| 8619 | ENSG000002020633 | 11232.8 | 0.19 | processed_pseudogene | 10 | 1073282   | 1073282   | ribosomal protein L18 pseudogene 12                                                                                   |
| 8646 | ENSG000002020608 | 11284.3 | 0.19 | processed_pseudogene | 6  | 48117741  | 48117741  | heterogeneous nuclear ribonucleoprotein A3 pseudogene 4                                                               |
| 8670 | ENSG000002049963 | 11300.4 | 0.19 | processed_pseudogene | 5  | 9932251   | 9932336   | eukaryotic translation elongation factor 1 alpha 1 pseudogene 20                                                      |
| 8719 | ENSG00000204554  | 11345.7 | 0.19 | processed_pseudogene | 7  | 71428768  | 71428768  | SCCA family, member 2 pseudogene 1                                                                                    |
| 8741 | ENSG000002044371 | 11327.1 | 0.19 | processed_pseudogene | 1  | 14639210  | 14639210  | profilin 1 pseudogene 6                                                                                               |
| 8755 | ENSG000002024102 | 11342.8 | 0.19 | processed_pseudogene | 10 | 70920314  | 70921256  | keratin 18 pseudogene 4                                                                                               |
| 8757 | ENSG000002034668 | 11353.9 | 0.19 | processed_pseudogene | 10 | 12534374  | 12534374  | ADP-ribosylation factor 1 pseudogene 3                                                                                |
| 8776 | ENSG000002027863 | 11350.6 | 0.19 | processed_pseudogene | 20 | 205201    | 205488    | ribosomal protein L7 pseudogene 2                                                                                     |
| 8778 | ENSG000002024484 | 11352.6 | 0.19 | processed_pseudogene | 2  | 24955138  | 24955884  | phosphoglycerate mutase 1 pseudogene 6                                                                                |
| 8781 | ENSG000002020272 | 11358.9 | 0.19 | processed_pseudogene | 3  | 40740657  | 40740657  | high mobility group nucleosomal binding domain 2 pseudogene 29                                                        |
| 8819 | ENSG000002014626 | 11403.4 | 0.19 | processed_pseudogene | 10 | 76414714  | 76415889  | polymerase (RNA) II (DNA directed) polypeptide 2, 44kDa pseudogene 1                                                  |
| 8825 | ENSG000002017316 | 11406.9 | 0.19 | processed_pseudogene | 5  | 95308745  | 95309159  | lathy acid binding protein 5 pseudogene 5                                                                             |
| 8826 | ENSG000002020633 | 11232.8 | 0.19 | processed_pseudogene | 10 | 1073282   | 1073282   | ribosomal protein L18 pseudogene 12                                                                                   |
| 8846 | ENSG000002020633 | 11232.8 | 0.19 | processed_pseudogene | 16 | 31652168  | 31693422  | RNA binding motif protein 22 pseudogene 12                                                                            |
| 8849 | ENSG000002022512 | 11419.7 | 0.19 | processed_pseudogene | 18 | 8546813   | 8546815   | aldo-keto reductase family 1, member B1 pseudogene 2                                                                  |
| 8856 | ENSG000002017770 | 11425.8 | 0.19 | processed_pseudogene | 8  | 84583733  | 84589869  | SPATA3, subfamily 1, member 2 pseudogene 2                                                                            |
| 8862 | ENSG000002025944 | 11441.8 | 0.19 | processed_pseudogene | 10 | 38329078  | 38329078  | FXYD domain containing on transport regulator 1 pseudogene 2                                                          |
| 8870 | ENSG000002049973 | 11449.2 | 0.19 | processed_pseudogene | 4  | 88770723  | 88770723  | coiled-coil-helix-coiled-coil helix domain containing 2 pseudogene 7                                                  |
| 8882 | ENSG000002030942 | 11450.6 | 0.19 | processed_pseudogene | 7  | 15620543  | 15620711  | high mobility group nucleosome binding domain 1 pseudogene 5                                                          |
| 8883 | ENSG000002028433 | 11450.6 | 0.19 | processed_pseudogene | 7  | 14470151  | 14470151  | epsilon-tubulin 2 pseudogene 2                                                                                        |
| 8913 | ENSG000002023840 | 11477.8 | 0.19 | processed_pseudogene | 18 | 20186428  | 20187190  | ribosomal protein SAK pseudogene 18                                                                                   |
| 8953 | ENSG000002041451 | 11510.3 | 0.19 | processed_pseudogene | 8  | 66050464  | 66051068  | cyclin-dependent kinase 2 associated protein 2 pseudogene 2                                                           |
| 8964 | ENSG000002029123 | 11539.7 | 0.19 | processed_pseudogene | 1  | 143487623 | 143487623 | nut3 (nucleoside diphosphate linked motif A) type motif 19 pseudogene 3                                               |
| 8968 | ENSG000002036038 | 11527.6 | 0.19 | processed_pseudogene | 2  | 33827198  | 33827198  | ATPase, H+ transporting, lysosomal 9kDa, V0 subunit 1 pseudogene 3                                                    |
| 8992 | ENSG000002020956 | 11529.5 | 0.19 | processed_pseudogene | 4  | 27268767  | 27267798  | immunoglobulin (Ig) binding protein 1 pseudogene 5                                                                    |
| 8997 | ENSG000002025562 | 11533.6 | 0.19 | processed_pseudogene | 15 | 15189117  | 15189117  | pseudogene 7                                                                                                          |
| 8998 | ENSG000002028783 | 11542.9 | 0.19 | processed_pseudogene | 17 | 42442382  | 42443119  | ribosomal protein L7-like 1 pseudogene 5                                                                              |
| 9008 | ENSG000002024234 | 11550.8 | 0.19 | processed_pseudogene | 9  | 81651329  | 81652484  | keratin 18 pseudogene 24                                                                                              |
| 9020 | ENSG000002034333 | 11559.2 | 0.19 | processed_pseudogene | 22 | 4496244   | 4496244   | ribosomal protein L23a pseudogene 23                                                                                  |
| 9036 | ENSG000002020518 | 11578.4 | 0.19 | processed_pseudogene | 6  | 73746520  | 73746580  | phosphoglycerate mutase 1 pseudogene 10                                                                               |
| 9049 | ENSG000002021107 |         |      |                      |    |           |           |                                                                                                                       |



|      |                 |           |         |      |                |    |           |           |                                                                                                           |
|------|-----------------|-----------|---------|------|----------------|----|-----------|-----------|-----------------------------------------------------------------------------------------------------------|
| 2646 | ENSG00000231925 | TAPBP     | 40931   | 0.19 | protein_coding | 6  | 33267471  | 33282164  | TAP binding protein (tactain)                                                                             |
| 2662 | ENSG00000117118 | ZNF939    | 41114   | 0.19 | protein_coding | X  | 47831770  | 47831777  | zinc finger protein 102                                                                                   |
| 2713 | ENSG00000137393 | RNF144B   | 4208.8  | 0.19 | protein_coding | 6  | 19389779  | 19409105  | ring finger protein 144B                                                                                  |
| 2726 | ENSG00000133246 | PRAM1     | 4232.5  | 0.19 | protein_coding | 19 | 8554940   | 8557996   | PML-RARA regulated adaptor molecule 1                                                                     |
| 2734 | ENSG00000134445 | SPRY1     | 4251.2  | 0.19 | protein_coding | 11 | 65425598  | 65418401  | signal-induced proliferation-associated 1                                                                 |
| 2800 | ENSG00000132775 | RPK1      | 4304.3  | 0.19 | protein_coding | 11 | 3054225   | 3115451   | receptor (TNFRSF) interacting serine-threonine kinase 1                                                   |
| 2836 | ENSG00000064201 | TSPAN5    | 4380.5  | 0.19 | protein_coding | 11 | 2323227   | 233340    | tetraspanin 5                                                                                             |
| 2838 | ENSG00000186896 | ITGAM     | 4381.4  | 0.19 | protein_coding | 16 | 31271311  | 3134424   | integrin, alpha M (cell adhesion component 3 receptor 3 subunit)                                          |
| 2834 | ENSG00000186893 | ARHGAP4   | 4382.6  | 0.19 | protein_coding | 11 | 15317281  | 15320025  | Rho GTPase activating protein 4                                                                           |
| 2843 | ENSG00000154016 | GRAP4     | 4413.4  | 0.19 | protein_coding | 17 | 18923986  | 18950590  | GRB2-related adaptor protein                                                                              |
| 2861 | ENSG00000131389 | SLC6A6    | 4466.8  | 0.19 | protein_coding | 3  | 14440476  | 14530887  | solute carrier family 6 (neurotransmitter transporter), member 6                                          |
| 2881 | ENSG00000253254 | ZNPF4     | 4524.4  | 0.19 | protein_coding | 6  | 88991165  | 88994852  | thioredoxin phosphatase A                                                                                 |
| 2888 | ENSG00000101286 | RNF24     | 4526.2  | 0.19 | protein_coding | 20 | 3907956   | 3906229   | ring finger protein 24                                                                                    |
| 3035 | ENSG00000176886 | TCFANC    | 4725.1  | 0.19 | protein_coding | X  | 13671225  | 13700083  | transcription elongation factor A (SH N-terminal and central domain containing)                           |
| 3040 | ENSG00000202388 | PSIP1P2   | 4747.1  | 0.19 | protein_coding | 18 | 43662502  | 43662538  | protein-serine-threonine phosphatase interacting protein 2                                                |
| 3072 | ENSG00000138621 | PPDC2     | 4785.2  | 0.19 | protein_coding | 15 | 75315896  | 75409003  | phosphatidylethanolamine decarboxylase                                                                    |
| 3101 | ENSG00000202008 | LING3     | 4842.2  | 0.19 | protein_coding | 19 | 22897474  | 23081186  | leucine rich repeat and Ig domain containing 3                                                            |
| 3126 | ENSG00000202693 | TAR2      | 4893.5  | 0.19 | protein_coding | 6  | 149570277 | 149732749 | TGF-beta activated kinase 1/MAPK3 binding protein 2                                                       |
| 3191 | ENSG00000136754 | ABI1      | 5007.7  | 0.19 | protein_coding | 10 | 27035522  | 27150016  | anti-interactor 1                                                                                         |
| 3194 | ENSG00000147461 | RAB3A     | 5012    | 0.19 | protein_coding | 19 | 16222439  | 16245044  | RAB3A, member RAS oncogene family                                                                         |
| 3229 | ENSG00000137518 | NBE1      | 5054.4  | 0.19 | protein_coding | 2  | 39582765  | 39582765  | negative regulator of ubiquitin-like proteins 1                                                           |
| 3242 | ENSG00000138756 | BMPK      | 5089    | 0.19 | protein_coding | 4  | 79697496  | 79697496  | BMP2 inducible kinase                                                                                     |
| 3243 | ENSG00000171100 | MTM1      | 5090    | 0.19 | protein_coding | X  | 149737069 | 149841795 | myotubularin 1                                                                                            |
| 3257 | ENSG00000186828 | CSGALNCT2 | 5112.3  | 0.19 | protein_coding | 10 | 4383934   | 4383700   | chondroitin sulfate N-acetylglucosaminyltransferase 2                                                     |
| 3299 | ENSG00000073737 | DHR39     | 5182.5  | 0.19 | protein_coding | 2  | 16952129  | 16952129  | dehydrogenase/reductase (SDR family) member 9                                                             |
| 3412 | ENSG00000168499 | PLEKH2    | 5370.4  | 0.19 | protein_coding | 8  | 38758753  | 3881428   | pleckstrin homology domain containing, family A (phosphoinositide binding specific) member 2              |
| 3420 | ENSG00000100030 | MAR1      | 5381    | 0.19 | protein_coding | 22 | 22109786  | 22221070  | mitogen-activated protein kinase 1                                                                        |
| 3421 | ENSG00000102796 | DHR12     | 5385.2  | 0.19 | protein_coding | 13 | 5234129   | 52349283  | dehydrogenase/reductase (SDR family) member 12                                                            |
| 3473 | ENSG00000123884 | LPGAT1    | 5463.4  | 0.19 | protein_coding | 1  | 211916799 | 21200414  | lysophosphatidylglycerol acyltransferase 1                                                                |
| 3508 | ENSG00000100000 | NESD      | 5520.8  | 0.19 | protein_coding | 22 | 4552268   | 4552268   | neurofilament SIDA                                                                                        |
| 3549 | ENSG00000113369 | SMO3C3    | 5569.3  | 0.19 | protein_coding | 5  | 90654543  | 90679176  | arrestin domain containing 3                                                                              |
| 3618 | ENSG00000092920 | FAM216    | 5668.8  | 0.19 | protein_coding | 10 | 51827848  | 51893269  | family with sequence similarity 21, member A                                                              |
| 3625 | ENSG00000205448 | PRK2      | 5688.2  | 0.19 | protein_coding | 19 | 3688528   | 37382308  | equipment and cell motilin 1                                                                              |
| 3640 | ENSG00000114796 | KLHL24    | 5706.3  | 0.19 | protein_coding | 3  | 18335356  | 18332025  | kelch-like family member 24                                                                               |
| 3662 | ENSG00000132405 | TBC1D14   | 5740.4  | 0.19 | protein_coding | 4  | 6916959   | 7034845   | TBC1 domain family, member 14                                                                             |
| 3699 | ENSG00000131313 | TRAF3     | 5756.3  | 0.19 | protein_coding | 8  | 38138637  | 38138637  | receptor interacting protein 3                                                                            |
| 3720 | ENSG00000107876 | ZDHHC20   | 5832.4  | 0.19 | protein_coding | 1  | 24421455  | 244220778 | zinc finger and BTB domain containing 19                                                                  |
| 3723 | ENSG00000137472 | FCM2      | 5843.3  | 0.19 | protein_coding | 13 | 11926283  | 22033509  | zinc finger, DHHC-type containing 20                                                                      |
| 3743 | ENSG00000068796 | KIF2A     | 5981    | 0.19 | protein_coding | 5  | 61601899  | 61603376  | KIF and double SH3 domain family 2                                                                        |
| 3759 | ENSG00000132877 | FIG4      | 5984.4  | 0.19 | protein_coding | 6  | 110012489 | 110149831 | kinase heavy chain member 24                                                                              |
| 3763 | ENSG00000102146 | ZNF47     | 5986.1  | 0.19 | protein_coding | 12 | 207116    | 207116    | FIG4 homolog, SACH1 (lipid phosphate domain containing) (S. cerevisiae)                                   |
| 3768 | ENSG00000597958 | CDK17     | 5981.3  | 0.19 | protein_coding | 12 | 96972039  | 96974338  | zinc finger protein 737                                                                                   |
| 3801 | ENSG00000168944 | CEP120    | 5988    | 0.19 | protein_coding | 5  | 122890579 | 122795286 | cyclin-dependent kinase 17                                                                                |
| 3807 | ENSG00000407471 | CITF      | 6063.1  | 0.19 | protein_coding | 3  | 66666976  | 69101466  | centrosomal protein 120Da                                                                                 |
| 3820 | ENSG00000175963 | CHP1      | 6108    | 0.19 | protein_coding | 6  | 10911055  | 10911055  | TATA element modulatory factor 1                                                                          |
| 3900 | ENSG00000174839 | DEMDA     | 6255.6  | 0.19 | protein_coding | 3  | 57611184  | 57677816  | class II major histocompatibility complex, transactivator                                                 |
| 4001 | ENSG00000032119 | ARHDC4    | 6267.8  | 0.19 | protein_coding | 14 | 58765020  | 58676000  | DENMAD4 domain containing 6A                                                                              |
| 4082 | ENSG00000120816 | EPC1      | 6302.5  | 0.19 | protein_coding | 10 | 11907901  | 117773425 | AT rich intrinsically domain, RING-like                                                                   |
| 4146 | ENSG00000186584 | AKAP9     | 6504.7  | 0.19 | protein_coding | 10 | 32556679  | 32669726  | soc2 accessory of euk. homolog (C. elegans)                                                               |
| 4211 | ENSG0000017914  | AKAP9     | 6504.7  | 0.19 | protein_coding | 11 | 116714118 | 116699153 | enhancer of polyoma homolog 1 (Drosophila)                                                                |
| 4248 | ENSG00000131051 | RM23      | 6593.7  | 0.19 | protein_coding | 20 | 34231531  | 34302324  | AKAP family kinase 3                                                                                      |
| 4286 | ENSG0000013084  | SP122     | 6722.8  | 0.19 | protein_coding | 1  | 18819175  | 18822283  | A kinesin PRKA anchor protein 9                                                                           |
| 4330 | ENSG00000089219 | ATG16L1   | 6728.2  | 0.19 | protein_coding | 7  | 234118907 | 23420120  | RNA binding motif protein 39                                                                              |
| 4363 | ENSG00000166579 | NDEL1     | 6779.8  | 0.19 | protein_coding | 17 | 8316449   | 8393729   | SP12 domain containing 2                                                                                  |
| 4387 | ENSG00000134268 | EPHB1     | 6830.4  | 0.19 | protein_coding | 3  | 134318443 | 134379039 | autophagy related 1 family 1 (S. cerevisiae)                                                              |
| 4396 | ENSG00000107046 | EPHA4     | 6834.1  | 0.19 | protein_coding | 6  | 11877815  | 11948458  | EPH receptor type 1-like 1                                                                                |
| 4398 | ENSG00000083223 | ZCCHC8    | 6846.1  | 0.19 | protein_coding | 8  | 86982648  | 86989369  | EPH receptor type 4A1                                                                                     |
| 4472 | ENSG00000181016 | LSMEM1    | 6938.3  | 0.19 | protein_coding | 7  | 11230908  | 11231117  | zinc finger, CCHC domain containing 6                                                                     |
| 4477 | ENSG00000137766 | SLMO2     | 6948.2  | 0.19 | protein_coding | 7  | 61682841  | 61682841  | leucine-rich single-pass membrane protein 1                                                               |
| 4493 | ENSG00000153338 | TRAPP2B   | 6961.6  | 0.19 | protein_coding | 18 | 28409138  | 28533099  | Nucleolar phosphoprotein 1, NOL1 auxiliary subunit                                                        |
| 4538 | ENSG00000173480 | ZNF417    | 7039    | 0.19 | protein_coding | 19 | 58411864  | 58427878  | trafficking protein particle complex 8                                                                    |
| 4596 | ENSG00000118626 | KIF26A    | 7104.3  | 0.19 | protein_coding | 19 | 11930156  | 11930156  | zinc finger protein 417                                                                                   |
| 4643 | ENSG00000149534 | MSA42     | 7154.2  | 0.19 | protein_coding | 11 | 59855734  | 59863444  | lysine (K)-box metalloproteinase 2A                                                                       |
| 4729 | ENSG00000146003 | DRPH      | 7279.9  | 0.19 | protein_coding | 15 | 65734801  | 65910042  | membrane-spanning 4-domains, subfamily A, member 2                                                        |
| 4796 | ENSG00000102121 | KIF26B    | 7312.3  | 0.19 | protein_coding | 15 | 65734802  | 65910042  | dypheridin-like protein 8                                                                                 |
| 4899 | ENSG00000176659 | C20orf197 | 7521.6  | 0.19 | protein_coding | 20 | 58630980  | 58648008  | cholesterol transfer protein, plasma                                                                      |
| 5135 | ENSG00000131969 | ABHD108   | 7622    | 0.19 | protein_coding | 14 | 51338878  | 51371688  | chromosome 20 open reading frame 197                                                                      |
| 5234 | ENSG00000146606 | TRAF3IP1  | 7817.8  | 0.19 | protein_coding | 12 | 21338474  | 21338474  | abhydrolase domain containing 12B                                                                         |
| 5414 | ENSG00000255837 | TAS2R20   | 8150.1  | 0.19 | protein_coding | 12 | 11149004  | 11150474  | angel homolog 2 (Drosophila)                                                                              |
| 5519 | ENSG00000128991 | C16orf87  | 8257.9  | 0.19 | protein_coding | 15 | 40820882  | 40857256  | taste receptor, type 2, member 20                                                                         |
| 5650 | ENSG00000107173 | TRAF3IP1  | 8260.1  | 0.19 | protein_coding | 12 | 18068119  | 18068119  | chromosome 15 open reading frame 57                                                                       |
| 6229 | ENSG00000178917 | ZNF852    | 9003.3  | 0.19 | protein_coding | 3  | 44540452  | 44552128  | lysophilin-like protein containing 52                                                                     |
| 6369 | ENSG00000138380 | CARF      | 9158.9  | 0.19 | protein_coding | 2  | 20377857  | 203851786 | zinc finger protein 852                                                                                   |
| 6923 | ENSG00000102569 | SXND1     | 9258.8  | 0.19 | protein_coding | 2  | 87138608  | 87138608  | calcium responsive transcription factor 4                                                                 |
| 7061 | ENSG00000187862 | TTC24     | 9282.8  | 0.19 | protein_coding | 1  | 15954959  | 15955592  | UchLac-associated protein                                                                                 |
| 7100 | ENSG00000191765 | SULT1A2   | 10008   | 0.19 | protein_coding | 16 | 28660284  | 28660330  | tetraacetylated repeat domain 2                                                                           |
| 7259 | ENSG00000102528 | TAS2R90   | 10266.8 | 0.19 | protein_coding | 12 | 11313068  | 11313068  | subferritinase family, cytosolic, 1A, phenol-preferring, member 2                                         |
| 7540 | ENSG00000179253 | TAS2R90   | 10294.9 | 0.19 | protein_coding | 20 | 60252562  | 60294804  | taste receptor, type 2, member 90                                                                         |
| 7665 | ENSG00000113302 | IL28B     | 10408.3 | 0.19 | protein_coding | 5  | 15874191  | 158757895 | interleukin 12B (natural killer cell stimulatory factor 2, cytotoxic lymphocyte maturation factor 2, p40) |
| 7707 | ENSG00000101292 | PROKR2    | 10430.3 | 0.19 | protein_coding | 20 | 5282317   | 5297378   | prokineticin receptor 2                                                                                   |
| 7716 | ENSG00000102794 | IRG1      | 10436   | 0.19 | protein_coding | 13 | 77522632  | 77523277  | immunoresponsive 1 homolog (mouse)                                                                        |
| 7758 | ENSG00000135378 | JCR1      | 10464   | 0.19 | protein_coding | 3  | 46026516  | 46026524  | chromokine (C.moll) receptor 1                                                                            |
| 7860 | ENSG00000131769 | WASH1     | 10573.9 | 0.19 | protein_coding | 16 | 8443      | 8443      | WAS protein family homolog 4 pseudogene                                                                   |
| 7866 | ENSG00000196834 | POTE1     | 10672.7 | 0.19 | protein_coding | 2  | 13127039  | 131267239 | POTE intron domain family, member 1                                                                       |
| 8054 | ENSG00000191780 | BTBD2     | 10750   | 0.19 | protein_coding | 1  | 23607985  | 23607985  | myelofibrotic syndrome 2 translocation associated                                                         |
| 8095 | ENSG00000134715 | GGT2      | 10761.2 | 0.19 | protein_coding | 22 | 21542262  | 21542262  | gamma-glutamyl transferase 2                                                                              |
| 8096 | ENSG00000244872 | CCDC163   | 10788.2 | 0.19 | protein_coding | 11 | 11906347  | 119067479 | coiled-coil domain containing 153                                                                         |
| 8128 | ENSG00000069490 | BTNL2     | 10823.3 | 0.19 | protein_coding | 6  | 32681746  | 32674905  | lymphostimulin 2 (TNF class II associated)                                                                |
| 8169 | ENSG00000174861 | KIF26B    | 10900.8 | 0.19 | protein_coding | 20 | 248984320 | 248984320 | effector receptor, family 2, subfamily T, member 8                                                        |
| 8260 | ENSG00000105808 | RASM1     | 10936.1 | 0.19 | protein_coding | 7  | 10222050  | 10222504  | RAS p21 protein activator 4                                                                               |
| 8263 | ENSG00000284167 | TRAF3IP1  | 10957.4 | 0.19 | protein_coding | 17 | 11705983  | 11714049  | UchLac-associated protein                                                                                 |
| 8317 | ENSG00000102125 | CD2B      | 10989   | 0.19 | protein_coding | 17 | 26533471  | 26533471  | chromosome 26                                                                                             |
| 8342 | ENSG00000166363 | CR10A5    | 10988.9 | 0.19 | protein_coding | 11 | 8686883   | 8686798   | effector receptor, family 10, subfamily A, member 5                                                       |
| 8388 | ENSG00000147223 | RIPPLY1   | 11043.3 | 0.19 | protein_coding | X  | 106143283 | 106146958 | rippl1 transcriptional repressor 1                                                                        |
| 8389 | ENSG00000102126 | ANGPT4    | 11043.4 | 0.19 | protein_coding | 11 | 8891544   | 8891544   | angiotensinogen 4                                                                                         |
| 8412 | ENSG00000183310 | CR2T34    |         |      |                |    |           |           |                                                                                                           |

|      |                  |           |         |      |                                     |    |           |           |                                                                                                              |
|------|------------------|-----------|---------|------|-------------------------------------|----|-----------|-----------|--------------------------------------------------------------------------------------------------------------|
| 9694 | ENSG00000120341  | SEC16B    | 12028.2 | 0.19 | protein_coding                      | 1  | 177893061 | 177893448 | SEC16 homolog B (S. cerevisiae)                                                                              |
| 9692 | ENSG00000120330  | ZNF648    | 12033.4 | 0.19 | protein_coding                      | 1  | 18203347  | 18203617  | zinc finger protein 648                                                                                      |
| 9690 | ENSG00000142009  | KIAA1751  | 12086   | 0.19 | protein_coding                      | 1  | 1853396   | 1853276   | chromosome 1 open reading frame 222                                                                          |
| 9704 | ENSG00000202081  |           | 12117.4 | 0.19 | protein_coding                      | 22 | 22901750  | 22909007  | Uncharacterized protein                                                                                      |
| 9745 | ENSG00000108113  | CRHR2     | 12149.3 | 0.19 | protein_coding                      | 7  | 30642200  | 30739749  | corticotropin releasing hormone receptor 2                                                                   |
| 9756 | ENSG00000109748  | PLAZGE    | 12193   | 0.19 | protein_coding                      | 1  | 20246622  | 2025110   | phospholipase A2 group IIE                                                                                   |
| 9885 | ENSG00000181378  | CCDC108   | 12245.1 | 0.19 | protein_coding                      | 2  | 219887568 | 219906249 | coiled-coil domain containing 108                                                                            |
| 9886 | ENSG00000204985  |           | 8045.5  | 0.19 | sense_intronic                      | 11 | 74248757  | 74249486  | RSF1 intronic transcript 2 (non-protein coding)                                                              |
| 9896 | ENSG00000205222  |           | 11400.6 | 0.19 | sense_intronic                      | 8  | 32039888  | 32040487  | NR51 intronic transcript 2 (non-protein coding)                                                              |
| 9741 | ENSG00000227527  | MACROD2   | 12146.4 | 0.19 | sense_intronic                      | 20 | 14530530  | 14617710  | MACROD2 intronic transcript 1 (non-protein coding)                                                           |
| 9875 | ENSG00000198571  |           | 8957.1  | 0.19 | snRNA                               | 12 | 40213552  | 40213985  | Small nuclear RNA SNOR42Z                                                                                    |
| 7233 | ENSG00000202525  |           | 8974.8  | 0.19 | snRNA                               | 5  | 2955307   | 2955491   | Small nuclear RNA U109                                                                                       |
| 7282 | ENSG00000202517  |           | 10030.6 | 0.19 | snRNA                               | 3  | 40280099  | 40280232  | Small nuclear RNA SNOR64/SNOR64 family                                                                       |
| 7676 | ENSG00000202409  |           | 10401.7 | 0.19 | snRNA                               | 4  | 41728980  | 41729525  | Small Cajal body specific RNA 21                                                                             |
| 8902 | ENSG00000212587  |           | 11144.1 | 0.19 | snRNA                               | 5  | 40790779  | 40790308  | Small nuclear RNA SNOR45T                                                                                    |
| 8972 | ENSG00000202593  |           | 11525.9 | 0.19 | snRNA                               | 10 | 93835999  | 93836122  | Small nuclear RNA SNOR42S                                                                                    |
| 2307 | ENSG00000201108  |           | 30.14   | 0.19 | snRNA                               | 1  | 112193053 | 112193159 | RNA U6 small nuclear 151, pseudogene                                                                         |
| 3161 | ENSG00000202286  |           | 4959    | 0.19 | snRNA                               | 5  | 53027650  | 53027863  | RNA U6 small nuclear 272, pseudogene                                                                         |
| 3175 | ENSG00000201367  |           | 4969.4  | 0.19 | snRNA                               | 6  | 15315151  | 15315257  | RNA U6 small nuclear 522, pseudogene                                                                         |
| 3271 | ENSG00000202503  |           | 5134.7  | 0.19 | snRNA                               | 4  | 139976229 | 139979732 | RNA U6 small nuclear 531, pseudogene                                                                         |
| 3748 | ENSG00000202133  |           | 5612.5  | 0.19 | snRNA                               | 2  | 145059756 | 145060968 | RNA U6 small nuclear 335, pseudogene                                                                         |
| 3782 | ENSG00000202361  |           | 5939.6  | 0.19 | snRNA                               | 11 | 62583438  | 62583539  | RNA U6 small nuclear 118, pseudogene                                                                         |
| 3923 | ENSG00000201519  |           | 6162.3  | 0.19 | snRNA                               | 6  | 15324598  | 15324703  | RNA U6 small nuclear 645, pseudogene                                                                         |
| 4174 | ENSG00000202132  |           | 6495    | 0.19 | snRNA                               | 3  | 168776269 | 168776217 | RNA U6 small nuclear 38, pseudogene                                                                          |
| 4404 | ENSG00000202796  |           | 6855.5  | 0.19 | snRNA                               | 4  | 38622832  | 38622893  | RNA U7 small nuclear 11, pseudogene                                                                          |
| 4988 | ENSG00000202335  |           | 7853.9  | 0.19 | snRNA                               | 6  | 32320854  | 32320780  | RNA U6 small nuclear 603, pseudogene                                                                         |
| 5140 | ENSG00000202020  |           | 7825.0  | 0.19 | snRNA                               | 18 | 29617486  | 29617602  | RNA U6 small nuclear 1050, pseudogene                                                                        |
| 5438 | ENSG00000202687  |           | 8178.1  | 0.19 | snRNA                               | 18 | 797990    | 798136    | RNA U1 small nuclear 109, pseudogene                                                                         |
| 5949 | ENSG00000212207  |           | 8730    | 0.19 | snRNA                               | X  | 41443076  | 41443082  | RNA U6 small nuclear 132, pseudogene                                                                         |
| 6340 | ENSG00000202740  |           | 9138    | 0.19 | snRNA                               | 18 | 5343187   | 5343187   | RNA U6 small nuclear 967, pseudogene                                                                         |
| 6539 | ENSG000002021748 |           | 9338.7  | 0.19 | snRNA                               | 9  | 33868538  | 33868635  | RNA U4atac small nuclear 11, pseudogene                                                                      |
| 6540 | ENSG00000202943  |           | 9339.5  | 0.19 | snRNA                               | 9  | 19073841  | 19073944  | RNA U6 small nuclear 264, pseudogene                                                                         |
| 7658 | ENSG00000202162  |           | 10139   | 0.19 | snRNA                               | 13 | 18771412  | 18771412  | RNA U6 small nuclear 821, pseudogene                                                                         |
| 7681 | ENSG000002027194 |           | 10406.1 | 0.19 | snRNA                               | 1  | 15048076  | 15048183  | RNA U6 small nuclear 1028, pseudogene                                                                        |
| 7845 | ENSG00000202604  |           | 10559.6 | 0.19 | snRNA                               | 3  | 141884296 | 141884397 | RNA U6 small nuclear 425, pseudogene                                                                         |
| 8004 | ENSG00000202588  |           | 10710   | 0.19 | snRNA                               | 14 | 76302485  | 76302485  | RNA U6 small nuclear 46, pseudogene                                                                          |
| 8227 | ENSG000002027439 |           | 10907.2 | 0.19 | snRNA                               | 14 | 99910643  | 99910749  | RNA U6 small nuclear 10, pseudogene                                                                          |
| 8282 | ENSG00000202268  |           | 10950.3 | 0.19 | snRNA                               | 6  | 86461299  | 86461471  | RNA U4 small nuclear 72, pseudogene                                                                          |
| 8311 | ENSG00000202499  |           | 10978   | 0.19 | snRNA                               | 14 | 64081614  | 64081614  | RNA U6 small nuclear 597, pseudogene                                                                         |
| 8382 | ENSG00000201598  |           | 11008   | 0.19 | snRNA                               | 11 | 17137199  | 17137199  | RNA U6 small nuclear 593, pseudogene                                                                         |
| 8387 | ENSG00000202181  |           | 11043   | 0.19 | snRNA                               | 1  | 889613    | 889716    | RNA U6 small nuclear 1199, pseudogene                                                                        |
| 8646 | ENSG00000201878  |           | 5702.8  | 0.19 | TR_J_gene                           | 8  | 23002408  | 23002408  | T cell receptor alpha joining 10                                                                             |
| 4061 | ENSG000002011878 |           | 6359.9  | 0.19 | TR_J_gene                           | 14 | 23001452  | 23001511  | T cell receptor alpha joining 11                                                                             |
| 4701 | ENSG00000203420  | ZNF378P   | 7258.8  | 0.19 | transcribed_unprocessed_pseudo_gene | 10 | 43008958  | 43048270  | zinc finger protein 378, pseudogene                                                                          |
| 7371 | ENSG000002048633 |           | 10114.5 | 0.19 | transcribed_unprocessed_pseudo_gene | 4  | 113614815 | 113614948 | tryptophan rich basic protein pseudogene 1                                                                   |
| 8786 | ENSG000002033780 | LINC00367 | 11367   | 0.19 | transcribed_unprocessed_pseudo_gene | 13 | 21512703  | 21523738  | heterogeneous nuclear ribonucleoprotein A1 pseudogene 30                                                     |
| 8852 | ENSG000002044681 | MTHFD2P1  | 11509.9 | 0.19 | transcribed_unprocessed_pseudo_gene | 3  | 95373267  | 95402037  | methyltetrahydrofolate dehydrogenase (NADP+ dependent) 2, methyltetrahydrofolate cyclohydrolase pseudogene 1 |
| 9068 | ENSG000002031546 |           | 11606.5 | 0.19 | transcribed_unprocessed_pseudo_gene | 2  | 237318489 | 237317720 | ribosomal protein L3 pseudogene 5                                                                            |
| 9529 | ENSG000002035438 |           | 11973.2 | 0.19 | transcribed_unprocessed_pseudo_gene | 13 | 21834154  | 21867868  | estrogen-related receptor alpha pseudogene 2                                                                 |
| 2892 | ENSG00000204822  | HLA-J     | 4488.7  | 0.19 | transcribed_unprocessed_pseudo_gene | 6  | 29974360  | 29977733  | major histocompatibility complex, class I, J (pseudogene)                                                    |
| 5142 | ENSG000002028860 | ORA20P    | 7626    | 0.19 | transcribed_unprocessed_pseudo_gene | 7  | 143991573 | 143996027 | olfactory receptor, family 2, subfamily A, member 9 pseudogene                                               |
| 5342 | ENSG00000181912  | ADCY10P1  | 8055.6  | 0.19 | transcribed_unprocessed_pseudo_gene | 6  | 41068781  | 41108571  | adenylate cyclase 10 (soluble) pseudogene 1                                                                  |
| 7174 | ENSG00000124224  |           | 9922.1  | 0.19 | transcribed_unprocessed_pseudo_gene | 20 | 56806188  | 56884495  | protein phosphatase 4, regulatory subunit 1-like                                                             |
| 7836 | ENSG00000186704  |           | 10550.4 | 0.19 | transcribed_unprocessed_pseudo_gene | 7  | 78607934  | 78673092  | deltaex homolog 2 pseudogene 1                                                                               |
| 8399 | ENSG000002030267 | HERCP4    | 11047.2 | 0.19 | transcribed_unprocessed_pseudo_gene | 16 | 32114566  | 32194344  | hact domain and RLD 2 pseudogene 4                                                                           |
| 8453 | ENSG000002033441 |           | 11092.4 | 0.19 | transcribed_unprocessed_pseudo_gene | 3  | 18381368  | 18382674  | cytochrome P450, family 2, subfamily AB, polypeptide 1, pseudogene                                           |
| 8623 | ENSG000002040031 |           | 11233.7 | 0.19 | transcribed_unprocessed_pseudo_gene | 7  | 141562660 | 14156337  | olfactory receptor, family 9, subfamily A, member 3 pseudogene                                               |
| 8675 | ENSG000002065060 | PPY2      | 11268   | 0.19 | transcribed_unprocessed_pseudo_gene | 17 | 26574470  | 26575315  | pancreatic polypeptide 2                                                                                     |
| 8696 | ENSG00000130612  | CYP2G1P   | 11286.5 | 0.19 | transcribed_unprocessed_pseudo_gene | 19 | 41386731  | 41406413  | cytochrome P450, family 2, subfamily G, polypeptide 1 pseudogene                                             |
| 8811 | ENSG000002023760 | MED15P    | 11396.5 | 0.19 | transcribed_unprocessed_pseudo_gene | 2  | 130887194 | 130889990 | mediator complex subunit 15 pseudogene 9                                                                     |
| 9063 | ENSG000002060139 |           | 11602.7 | 0.19 | transcribed_unprocessed_pseudo_gene | 15 | 78187026  | 78197016  | chondroitin sulfate proteoglycan 4 pseudogene 13                                                             |
| 9122 | ENSG000002037840 | FAM21FP   | 11650   | 0.19 | transcribed_unprocessed_pseudo_gene | 10 | 46201879  | 46222879  | family with sequence similarity 21, member F, pseudogene                                                     |
| 9183 | ENSG00000153923  | CLCA3P    | 11693.9 | 0.19 | transcribed_unprocessed_pseudo_gene | 1  | 87099556  | 87210509  | chloride channel accessory 3, pseudogene                                                                     |
| 9308 | ENSG000002068433 | TBC1D3P5  | 11796.1 | 0.19 | transcribed_unprocessed_pseudo_gene | 17 | 25744716  | 25758449  | TBC1 domain family, member 3 pseudogene 5                                                                    |
| 9497 | ENSG000002037621 |           | 11948.5 | 0.19 | transcribed_unprocessed_pseudo_gene | 7  | 141586948 | 141587892 | olfactory receptor, family 9, subfamily A, member 1 pseudogene                                               |
| 9629 | ENSG000002027281 | TMPE2P    | 12059.1 | 0.19 | transcribed_unprocessed_pseudo_gene | 13 | 52793479  | 52808412  | transmembrane phosphoinositide 3-phosphatase and tensin homolog 2 pseudogene 2                               |
| 2635 | ENSG00000166405  | CMAHF     | 4569.4  | 0.19 | unitary_pseudogene                  | 6  | 25081548  | 25166793  | cytidine monophosphate-N-acetylneuraminic acid hydrolase, pseudogene                                         |
| 7105 | ENSG000002024699 |           | 4667.1  | 0.19 | unitary_pseudogene                  | 12 | 11284822  | 11286921  | ADAM metallopeptidase domain 18, pseudogene                                                                  |
| 8886 | ENSG000002034512 |           | 11533.8 | 0.19 | unitary_pseudogene                  | 1  | 33831850  | 33834562  | achille receptor 12, pseudogene                                                                              |
| 9210 | ENSG00000216598  |           | 11719.6 | 0.19 | unitary_pseudogene                  | 6  | 48523837  | 48547879  | cytochrome P450, family 2, subfamily AC, polypeptide 1, pseudogene                                           |
| 9217 | ENSG000002043322 | PTPRVP    | 11723.8 | 0.19 | unitary_pseudogene                  | 1  | 20217179  | 202198883 | protein tyrosine phosphatase, receptor type, V, pseudogene                                                   |
| 9517 | ENSG000002043318 | GLUCY2P   | 11929.6 | 0.19 | unitary_pseudogene                  | 10 | 11460769  | 11463162  | guanylate cyclase 2c, pseudogene                                                                             |
| 4545 | ENSG00000215830  |           | 7040.4  | 0.19 | unprocessed_pseudogene              | 5  | 70438716  | 70585511  | glucuronidase, beta pseudogene 9                                                                             |
| 7106 | ENSG000002027241 |           | 9868    | 0.19 | unprocessed_pseudogene              | 9  | 94873147  | 94874179  | MT-ND3 pseudogene 15                                                                                         |
| 7768 | ENSG000002025418 |           | 10928.3 | 0.19 | unprocessed_pseudogene              | 10 | 5164278   | 5177418   | aldo-keto reductase family 1, member C5, pseudogene                                                          |
| 7812 | ENSG00000215480  |           | 10531.7 | 0.19 | unprocessed_pseudogene              | 13 | 42016906  | 42017786  | olfactory receptor, family 7, subfamily E, member 37 pseudogene                                              |
| 8036 | ENSG000002041723 |           | 10736.5 | 0.19 | unprocessed_pseudogene              | 22 | 23991400  | 23995521  | argininosuccinate lyase pseudogene 1                                                                         |
| 8044 | ENSG000002020241 |           | 10712.6 | 0.19 | unprocessed_pseudogene              | 19 | 9710263   | 9710149   | sialic acid binding Ig-like lectin 31, pseudogene                                                            |
| 8096 | ENSG00000186645  | SPOVEBP   | 10795.6 | 0.19 | unprocessed_pseudogene              | 7  | 76861635  | 76861635  | specifyRINGO cell cycle regulator family member ED, pseudogene                                               |
| 8106 | ENSG000002029435 |           | 10794.4 | 0.19 | unprocessed_pseudogene              | 7  | 15924125  | 15920297  | phosphatidylinositol-4-phosphate 5-kinase, type I, pseudogene 2                                              |
| 8419 | ENSG000002027422 | LOC72889  | 11028.1 | 0.19 | unprocessed_pseudogene              | 1  | 14642085  | 146458107 | neuroblastoma breakpoint family, member 13, pseudogene                                                       |
| 8438 | ENSG000002024418 | FN42P     | 11078.1 | 0.19 | unprocessed_pseudogene              | 9  | 21278818  | 21278818  | interferon, alpha 22, pseudogene                                                                             |
| 8635 | ENSG000002027620 |           | 11242.7 | 0.19 | unprocessed_pseudogene              | 11 | 6752274   | 67528906  | asparagine-linked glycoprotein 1-like B, pseudogene                                                          |
| 8640 | ENSG000002020411 |           | 11245.7 | 0.19 | unprocessed_pseudogene              | 1  | 24783169  | 24783169  | olfactory receptor, family 5, subfamily D, member 1 pseudogene                                               |
| 8659 | ENSG000002023622 |           | 11259.2 | 0.19 | unprocessed_pseudogene              | 6  | 52670411  | 52678258  | glutathione S-transferase alpha 6, pseudogene                                                                |
| 8665 | ENSG00000187494  |           | 11262.9 | 0.19 | unprocessed_pseudogene              | 17 | 18403886  | 18404348  | nitric oxide synthase 2 pseudogene 2                                                                         |
| 8861 | ENSG00000180714  |           | 11420.1 | 0.19 | unprocessed_pseudogene              | 11 | 57684769  | 57688711  | olfactory receptor, family 5, subfamily AC, member 1 pseudogene                                              |
| 8876 | ENSG00000208598  |           | 11439   | 0.19 | unprocessed_pseudogene              | 19 | 21246730  | 21247067  | vitronectin 1 receptor 80 pseudogene                                                                         |
| 8935 | ENSG00000189002  |           | 11496.2 | 0.19 | unprocessed_pseudogene              | 3  | 80251466  | 80306665  | protein S pseudogene (beta)                                                                                  |
| 8966 | ENSG000002033771 |           | 11540.1 | 0.19 | unprocessed_pseudogene              | 1  | 22413517  | 22413818  | capicua transcriptional repressor pseudogene 5                                                               |
| 9005 | ENSG00000202106  |           | 11550   | 0.19 | unprocessed_pseudogene              | 9  | 69477881  | 69478916  | cytochrome P450, family 4, subfamily F, polypeptide 25, pseudogene                                           |
| 9097 | ENSG00000273423  |           | 11626.6 | 0.19 | unprocessed_pseudogene              | 9  | 107392035 | 107393288 | olfactory receptor, family 13, subfamily 1, member 1 pseudogene                                              |
| 9197 | ENSG000002027623 |           | 11560.9 | 0.19 | unprocessed_pseudogene              | 12 | 46987580  | 46987580  | olfactory receptor, family 5, subfamily A, member 19 pseudogene                                              |
| 9229 | ENSG000002048830 | ZNF807    | 11729.8 | 0.19 | unprocessed_pseudogene              | 19 | 35033367  | 35036300  |                                                                                                              |

|      |                  |         |      |    |           |           |                                    |
|------|------------------|---------|------|----|-----------|-----------|------------------------------------|
| 5246 | ENSG00000289971  | 7948.1  | 0.19 |    |           |           |                                    |
| 5330 | ENSG00000271055  | 8343.3  | 0.19 |    |           |           |                                    |
| 5692 | ENSG00000216070  | 8341.4  | 0.19 |    |           |           |                                    |
| 5634 | ENSG00000242314  | 8391.9  | 0.19 |    |           |           |                                    |
| 6054 | ENSG00000270811  | 8411    | 0.19 |    |           |           |                                    |
| 6744 | ENSG00000257033  | 8513.3  | 0.19 |    |           |           |                                    |
| 5744 | ENSG00000212197  | 8531.4  | 0.19 | 13 | 100188573 | 100188650 | RNA, R0-associated Y3 pseudogene 6 |
| 6246 | ENSG00000270270  | 8620    | 0.19 |    |           |           |                                    |
| 6276 | ENSG00000252958  | 8684    | 0.19 |    |           |           |                                    |
| 6427 | ENSG00000244930  | 8221.6  | 0.19 |    |           |           |                                    |
| 6523 | ENSG00000221542  | 8322.2  | 0.19 |    |           |           |                                    |
| 6844 | ENSG00000254958  | 8432.6  | 0.19 |    |           |           |                                    |
| 6656 | ENSG00000236297  | 8444.7  | 0.19 |    |           |           |                                    |
| 6864 | ENSG00000271771  | 8454.4  | 0.19 |    |           |           |                                    |
| 6868 | ENSG00000252927  | 8474.3  | 0.19 |    |           |           |                                    |
| 6786 | ENSG00000270349  | 8560.4  | 0.19 |    |           |           |                                    |
| 6814 | ENSG000002041481 | 8585.7  | 0.19 |    |           |           |                                    |
| 6866 | ENSG00000217449  | 8641.9  | 0.19 |    |           |           |                                    |
| 6991 | ENSG00000228081  | 8763.9  | 0.19 |    |           |           |                                    |
| 7077 | ENSG00000239055  | 8842.9  | 0.19 |    |           |           |                                    |
| 7091 | ENSG0000023125   | 8932    | 0.19 | 9  | 131511637 | 131511740 | Small nuclear RNA U13              |
| 7099 | ENSG00000237359  | 8860.4  | 0.19 | 10 | 112326118 | 112326219 | Small nuclear RNA U13              |
| 7148 | ENSG00000220815  | 8889.9  | 0.19 |    |           |           |                                    |
| 7151 | ENSG00000221186  | 8901.6  | 0.19 |    |           |           |                                    |
| 7163 | ENSG00000272463  | 8913.1  | 0.19 |    |           |           |                                    |
| 7179 | ENSG000002041014 | 8924    | 0.19 |    |           |           |                                    |
| 7223 | ENSG00000225532  | 8989.9  | 0.19 |    |           |           |                                    |
| 7232 | ENSG00000286541  | 8977.7  | 0.19 |    |           |           |                                    |
| 7280 | ENSG00000270421  | 10027.6 | 0.19 |    |           |           |                                    |
| 7295 | ENSG00000225858  | 10040.5 | 0.19 |    |           |           |                                    |
| 7331 | ENSG00000233870  | 10073.9 | 0.19 |    |           |           |                                    |
| 7342 | ENSG00000204346  | 10083.7 | 0.19 |    |           |           |                                    |
| 7369 | ENSG00000225771  | 10126.2 | 0.19 |    |           |           |                                    |
| 7433 | ENSG00000267913  | 10173.5 | 0.19 |    |           |           |                                    |
| 7436 | ENSG00000286914  | 10178.2 | 0.19 |    |           |           |                                    |
| 7472 | ENSG00000225262  | 10214   | 0.19 |    |           |           |                                    |
| 7478 | ENSG00000272219  | 10223.1 | 0.19 |    |           |           |                                    |
| 7493 | ENSG00000231588  | 10229.4 | 0.19 |    |           |           |                                    |
| 7537 | ENSG000002054601 | 10279.3 | 0.19 |    |           |           |                                    |
| 7595 | ENSG00000176163  | 10339.5 | 0.19 |    |           |           |                                    |
| 7612 | ENSG00000227815  | 10349.4 | 0.19 |    |           |           |                                    |
| 7626 | ENSG00000238869  | 10380.3 | 0.19 |    |           |           |                                    |
| 7645 | ENSG00000239121  | 10380.1 | 0.19 | 16 | 58652579  | 58652668  | Small nuclear RNA U13              |
| 7666 | ENSG00000213279  | 10398.2 | 0.19 |    |           |           |                                    |
| 1077 | ENSG00000205041  | 10407.9 | 0.19 |    |           |           |                                    |
| 7684 | ENSG00000231072  | 10414   | 0.19 |    |           |           |                                    |
| 7754 | ENSG00000228423  | 10484.2 | 0.19 |    |           |           |                                    |
| 7763 | ENSG00000225098  | 10503.7 | 0.19 |    |           |           |                                    |
| 7786 | ENSG00000233385  | 10510.1 | 0.19 |    |           |           |                                    |
| 7805 | ENSG00000240799  | 10527.7 | 0.19 |    |           |           |                                    |
| 7825 | ENSG00000234605  | 10539.9 | 0.19 |    |           |           |                                    |
| 7848 | ENSG00000236355  | 10566   | 0.19 |    |           |           |                                    |
| 7867 | ENSG00000240906  | 10580.9 | 0.19 |    |           |           |                                    |
| 7868 | ENSG00000225126  | 10581.6 | 0.19 |    |           |           |                                    |
| 7887 | ENSG00000226315  | 10588.6 | 0.19 |    |           |           |                                    |
| 7900 | ENSG00000228291  | 10610.4 | 0.19 |    |           |           |                                    |
| 7914 | ENSG00000263839  | 10623.6 | 0.19 |    |           |           |                                    |
| 7922 | ENSG00000231061  | 10628.9 | 0.19 |    |           |           |                                    |
| 7939 | ENSG00000258815  | 10655.3 | 0.19 |    |           |           |                                    |
| 7967 | ENSG00000237508  | 10670.5 | 0.19 |    |           |           |                                    |
| 7968 | ENSG00000245125  | 10671.4 | 0.19 |    |           |           |                                    |
| 7983 | ENSG00000240271  | 10675.6 | 0.19 |    |           |           |                                    |
| 7983 | ENSG00000236263  | 10680.2 | 0.19 |    |           |           |                                    |
| 7995 | ENSG00000244907  | 10691.7 | 0.19 |    |           |           |                                    |
| 7999 | ENSG00000224800  | 10694.2 | 0.19 |    |           |           |                                    |
| 8000 | ENSG00000252098  | 10706   | 0.19 |    |           |           |                                    |
| 8001 | ENSG00000231363  | 10707.5 | 0.19 |    |           |           |                                    |
| 8010 | ENSG00000257398  | 10718.9 | 0.19 |    |           |           |                                    |
| 8017 | ENSG00000236153  | 10724.4 | 0.19 |    |           |           |                                    |
| 8018 | ENSG00000226683  | 10727.1 | 0.19 |    |           |           |                                    |
| 8027 | ENSG00000270612  | 10731.8 | 0.19 |    |           |           |                                    |
| 8036 | ENSG00000282583  | 10737.3 | 0.19 |    |           |           |                                    |
| 8055 | ENSG00000219132  | 10751.9 | 0.19 |    |           |           |                                    |
| 8058 | ENSG00000242976  | 10756.7 | 0.19 |    |           |           |                                    |
| 8080 | ENSG00000213956  | 10771.4 | 0.19 |    |           |           |                                    |
| 8094 | ENSG00000231118  | 10786.3 | 0.19 |    |           |           |                                    |
| 8100 | ENSG00000289955  | 10788.4 | 0.19 |    |           |           |                                    |
| 8112 | ENSG00000272317  | 10800.3 | 0.19 |    |           |           |                                    |
| 8128 | ENSG00000252268  | 10823.3 | 0.19 |    |           |           |                                    |
| 8132 | ENSG00000205211  | 10826.6 | 0.19 |    |           |           |                                    |
| 8136 | ENSG00000236075  | 10832.3 | 0.19 |    |           |           |                                    |
| 8138 | ENSG00000235448  | 10837   | 0.19 |    |           |           |                                    |
| 8150 | ENSG00000225711  | 10845.2 | 0.19 |    |           |           |                                    |
| 8154 | ENSG00000233933  | 10848.4 | 0.19 |    |           |           |                                    |
| 8161 | ENSG00000231796  | 10852   | 0.19 |    |           |           |                                    |
| 8163 | ENSG00000216127  | 10855   | 0.19 |    |           |           |                                    |
| 8167 | ENSG00000211295  | 10856.7 | 0.19 |    |           |           |                                    |
| 8168 | ENSG00000230133  | 10857.9 | 0.19 |    |           |           |                                    |
| 8173 | ENSG00000230351  | 10865   | 0.19 |    |           |           |                                    |
| 8182 | ENSG00000226558  | 10867.2 | 0.19 |    |           |           |                                    |
| 8187 | ENSG00000242624  | 10871.1 | 0.19 |    |           |           |                                    |
| 8189 | ENSG00000240404  | 10872.1 | 0.19 |    |           |           |                                    |
| 8190 | ENSG00000246936  | 10872.2 | 0.19 |    |           |           |                                    |
| 8194 | ENSG00000237206  | 10874.3 | 0.19 |    |           |           |                                    |
| 8198 | ENSG00000251766  | 10881.3 | 0.19 |    |           |           |                                    |
| 8202 | ENSG00000257900  | 10884   | 0.19 | 14 | 19485979  | 19485426  | neurofibrin 1 pseudogene 4         |
| 8208 | ENSG00000272592  | 10893.4 | 0.19 |    |           |           |                                    |
| 8244 | ENSG00000265125  | 10918   | 0.19 |    |           |           |                                    |
| 8250 | ENSG00000234665  | 10924.1 | 0.19 |    |           |           |                                    |
| 8261 | ENSG00000230362  | 10924.9 | 0.19 |    |           |           |                                    |
| 8262 | ENSG00000225131  | 10927.1 | 0.19 |    |           |           |                                    |
| 8253 | ENSG00000237316  | 10929   | 0.19 |    |           |           |                                    |
| 8267 | ENSG00000258959  | 10935.6 | 0.19 |    |           |           |                                    |
| 8269 | ENSG00000240404  | 10935.6 | 0.19 |    |           |           |                                    |
| 8261 | ENSG00000272241  | 10936.9 | 0.19 |    |           |           |                                    |
| 8265 | ENSG00000272798  | 10939.9 | 0.19 |    |           |           |                                    |
| 8268 | ENSG00000220268  | 10940.6 | 0.19 |    |           |           |                                    |
| 8269 | ENSG00000258914  | 10940.9 | 0.19 |    |           |           |                                    |
| 8273 | ENSG00000236127  | 10942.6 | 0.19 |    |           |           |                                    |
| 8276 | ENSG00000232874  | 10946.3 | 0.19 |    |           |           |                                    |
| 8281 | ENSG00000255885  | 10946.9 | 0.19 |    |           |           |                                    |
| 8284 | ENSG00000257065  | 10952.8 | 0.19 |    |           |           |                                    |
| 8287 | ENSG00000191254  | 10958   | 0.19 |    |           |           |                                    |
| 8298 | ENSG00000258573  | 10968.5 | 0.19 |    |           |           |                                    |
| 8299 | ENSG00000234142  | 10970   | 0.19 |    |           |           |                                    |
| 8304 | ENSG00000232073  | 10973.3 | 0.19 |    |           |           |                                    |
| 8307 | ENSG00000261356  | 10976.3 | 0.19 |    |           |           |                                    |
| 8315 | ENSG00000181123  | 10978.6 | 0.19 |    |           |           |                                    |
| 8320 | ENSG00000226071  | 10983.3 | 0.19 |    |           |           |                                    |
| 8323 | ENSG00000182000  | 10984.5 | 0.19 | 5  | 138852108 | 138852506 | Uncharacterized protein            |
| 8336 | ENSG00000270115  | 10995.4 | 0.19 |    |           |           |                                    |
| 8338 | ENSG00000281748  | 10996.9 | 0.19 |    |           |           |                                    |
| 8339 | ENSG00000226960  | 10997.3 | 0.19 |    |           |           |                                    |
| 8343 | ENSG00000249906  | 10998.9 | 0.19 |    |           |           |                                    |
| 8347 | ENSG00000252746  | 11000.4 | 0.19 |    |           |           |                                    |
| 8348 | ENSG00000258970  | 11003.7 | 0.19 |    |           |           |                                    |
| 8349 | ENSG00000216781  | 11004.3 | 0.19 |    |           |           |                                    |
| 8351 | ENSG00000204583  | 11005.6 | 0.19 |    |           |           |                                    |
| 8353 | ENSG00000255133  | 11006.3 | 0.19 |    |           |           |                                    |
| 8364 | ENSG00000255325  | 11007   | 0.19 |    |           |           |                                    |
| 8361 | ENSG00000236926  | 11014.7 | 0.19 |    |           |           |                                    |
| 8362 | ENSG00000224590  | 11015.1 | 0.19 |    |           |           |                                    |
| 8368 | ENSG00000233218  | 11019.2 | 0.19 | 1  | 142688379 | 142688925 | sorting nexin 18 pseudogene 16     |
| 8370 | ENSG00000236482  | 11026.6 | 0.19 |    |           |           |                                    |
| 8374 | ENSG00000234498  | 11029.6 | 0.19 |    |           |           |                                    |
| 8375 | ENSG00000233936  | 11030.9 | 0.19 |    |           |           |                                    |
| 8376 | ENSG00000236033  | 11032   | 0.19 |    |           |           |                                    |
| 8378 | ENSG00000250480  | 11033   | 0.19 |    |           |           |                                    |
| 8383 | ENSG00000258717  | 11038.1 | 0.19 |    |           |           |                                    |
| 8388 | ENSG00000287479  | 11046.9 | 0.19 |    |           |           |                                    |
| 8405 | ENSG00000225969  | 11050   | 0.19 |    |           |           |                                    |
| 8414 | ENSG00000270262  | 11059.4 | 0.19 |    |           |           |                                    |
| 8416 | ENSG00000298872  | 11060.4 | 0.19 |    |           |           |                                    |
| 8418 | ENSG00000224972  | 11060.7 | 0.19 |    |           |           |                                    |
| 8422 | ENSG00000248843  | 11066.6 | 0.19 |    |           |           |                                    |
| 8425 | ENSG00000281032  | 11067.5 | 0.19 |    |           |           |                                    |
| 8426 | ENSG00000118460  | 11067.7 | 0.19 |    |           |           |                                    |
| 8427 | ENSG00000238843  | 11068   | 0.19 |    |           |           |                                    |
| 8428 | ENSG00000282052  | 11068.2 | 0.19 | 1  | 156499122 | 156499221 | Small nuclear RNA U13              |
| 8434 | ENSG00000218631  | 11072.6 | 0.19 |    |           |           |                                    |
| 8440 | ENSG00000226129  | 11079.2 | 0.19 |    |           |           |                                    |



|      |                  |         |         |      |           |           |          |  |                                      |
|------|------------------|---------|---------|------|-----------|-----------|----------|--|--------------------------------------|
| 8442 | ENSG00000283551  |         | 11082.5 | 0.19 |           |           |          |  |                                      |
| 8446 | ENSG00000283564  |         | 11083.2 | 0.19 |           |           |          |  |                                      |
| 8447 | ENSG00000229635  |         | 11088.7 | 0.19 |           |           |          |  |                                      |
| 8449 | ENSG00000230223  |         | 11089.4 | 0.19 |           |           |          |  |                                      |
| 8450 | ENSG00000211660  |         | 11089.9 | 0.19 |           |           |          |  |                                      |
| 8451 | ENSG00000241105  |         | 11090.7 | 0.19 |           |           |          |  |                                      |
| 8452 | ENSG00000238310  | 1       | 11091.2 | 0.19 | 109750416 | 109750470 |          |  | RNA, U7 small nuclear 122 pseudogene |
| 8453 | ENSG00000186544  |         | 11094.4 | 0.19 |           |           |          |  |                                      |
| 8455 | ENSG00000269265  |         | 11095   | 0.19 |           |           |          |  |                                      |
| 8456 | ENSG00000269590  |         | 11098   | 0.19 |           |           |          |  |                                      |
| 8458 | ENSG00000265288  |         | 11100.6 | 0.19 |           |           |          |  |                                      |
| 8464 | ENSG00000252524  |         | 11104.6 | 0.19 |           |           |          |  |                                      |
| 8468 | ENSG00000284050  |         | 11108.3 | 0.19 |           |           |          |  |                                      |
| 8471 | ENSG00000249320  |         | 11112.5 | 0.19 |           |           |          |  |                                      |
| 8472 | ENSG00000224691  |         | 11112.9 | 0.19 |           |           |          |  |                                      |
| 8475 | ENSG00000253858  |         | 11114.4 | 0.19 |           |           |          |  |                                      |
| 8476 | ENSG00000241456  |         | 11114.9 | 0.19 |           |           |          |  |                                      |
| 8478 | ENSG00000234758  |         | 11115.4 | 0.19 |           |           |          |  |                                      |
| 8483 | ENSG00000269360  |         | 11119.2 | 0.19 |           |           |          |  |                                      |
| 8486 | ENSG00000263985  |         | 11125.3 | 0.19 |           |           |          |  |                                      |
| 8489 | ENSG00000253117  |         | 11125.7 | 0.19 |           |           |          |  |                                      |
| 8490 | ENSG00000232760  |         | 11126.6 | 0.19 |           |           |          |  |                                      |
| 8496 | ENSG00000253975  |         | 11133   | 0.19 |           |           |          |  |                                      |
| 8497 | ENSG00000226776  |         | 11134.5 | 0.19 |           |           |          |  |                                      |
| 8498 | ENSG00000226643  |         | 11134.6 | 0.19 |           |           |          |  |                                      |
| 8520 | ENSG00000227158  |         | 11159.9 | 0.19 |           |           |          |  |                                      |
| 8529 | ENSG00000225625  |         | 11166.5 | 0.19 |           |           |          |  |                                      |
| 8529 | ENSG00000271166  |         | 11168.8 | 0.19 |           |           |          |  |                                      |
| 8530 | ENSG00000242111  |         | 11189   | 0.19 |           |           |          |  |                                      |
| 8532 | ENSG00000235824  |         | 11170.3 | 0.19 |           |           |          |  |                                      |
| 8543 | ENSG00000213470  |         | 11176.9 | 0.19 |           |           |          |  |                                      |
| 8545 | ENSG00000289605  |         | 11178.5 | 0.19 | 20        | 43234346  | 43248126 |  | Uncharacterized protein              |
| 8547 | ENSG00000232765  |         | 11178.6 | 0.19 |           |           |          |  |                                      |
| 8551 | ENSG00000258856  |         | 11182.3 | 0.19 |           |           |          |  |                                      |
| 8552 | ENSG00000229625  |         | 11182.7 | 0.19 |           |           |          |  |                                      |
| 8553 | ENSG00000211588  |         | 11183.3 | 0.19 |           |           |          |  |                                      |
| 8555 | ENSG00000229621  |         | 11184.7 | 0.19 |           |           |          |  |                                      |
| 8556 | ENSG00000219240  |         | 11185.8 | 0.19 |           |           |          |  |                                      |
| 8562 | ENSG00000219138  |         | 11190.9 | 0.19 |           |           |          |  |                                      |
| 8566 | ENSG00000285665  |         | 11192.3 | 0.19 |           |           |          |  |                                      |
| 8567 | ENSG00000254258  |         | 11192.7 | 0.19 |           |           |          |  |                                      |
| 8574 | ENSG00000225154  |         | 11192.7 | 0.19 |           |           |          |  |                                      |
| 8576 | ENSG00000270920  |         | 11200.1 | 0.19 |           |           |          |  |                                      |
| 8593 | ENSG00000257807  |         | 11209.7 | 0.19 |           |           |          |  |                                      |
| 8595 | ENSG00000273895  |         | 11212.6 | 0.19 |           |           |          |  |                                      |
| 8598 | ENSG00000248616  |         | 11213.5 | 0.19 |           |           |          |  |                                      |
| 8599 | ENSG00000227307  |         | 11214.3 | 0.19 |           |           |          |  |                                      |
| 8600 | ENSG00000251388  |         | 11214.8 | 0.19 |           |           |          |  |                                      |
| 8602 | ENSG00000269693  |         | 11217   | 0.19 |           |           |          |  |                                      |
| 8609 | ENSG00000230249  |         | 11220.6 | 0.19 |           |           |          |  |                                      |
| 8613 | ENSG00000235295  |         | 11226.9 | 0.19 |           |           |          |  |                                      |
| 8614 | ENSG00000255311  |         | 11228   | 0.19 |           |           |          |  |                                      |
| 8616 | ENSG00000216516  |         | 11228.2 | 0.19 |           |           |          |  |                                      |
| 8617 | ENSG00000219362  |         | 11229.3 | 0.19 |           |           |          |  |                                      |
| 8618 | ENSG00000284435  |         | 11229.4 | 0.19 |           |           |          |  |                                      |
| 8621 | ENSG00000258631  |         | 11231.8 | 0.19 |           |           |          |  |                                      |
| 8625 | ENSG00000236986  |         | 11234.4 | 0.19 |           |           |          |  |                                      |
| 8630 | ENSG00000257625  |         | 11240.3 | 0.19 |           |           |          |  |                                      |
| 8633 | ENSG00000221174  |         | 11241.6 | 0.19 |           |           |          |  |                                      |
| 8636 | ENSG00000287460  |         | 11244.7 | 0.19 |           |           |          |  |                                      |
| 8638 | ENSG00000224181  |         | 11245.3 | 0.19 |           |           |          |  |                                      |
| 8643 | ENSG00000248664  |         | 11247.8 | 0.19 |           |           |          |  |                                      |
| 8646 | ENSG00000289702  |         | 11249.4 | 0.19 |           |           |          |  |                                      |
| 8649 | ENSG00000211664  |         | 11251.4 | 0.19 |           |           |          |  |                                      |
| 8650 | ENSG00000250330  |         | 11251.6 | 0.19 |           |           |          |  |                                      |
| 8651 | ENSG00000253652  |         | 11252.3 | 0.19 |           |           |          |  |                                      |
| 8652 | ENSG00000215120  |         | 11252.5 | 0.19 |           |           |          |  |                                      |
| 8653 | ENSG00000227960  |         | 11253.2 | 0.19 |           |           |          |  |                                      |
| 8654 | ENSG00000216425  |         | 11255.2 | 0.19 |           |           |          |  |                                      |
| 8656 | ENSG00000265115  |         | 11258   | 0.19 |           |           |          |  |                                      |
| 8657 | ENSG00000233026  |         | 11258.2 | 0.19 |           |           |          |  |                                      |
| 8660 | ENSG000002890135 |         | 11260.3 | 0.19 |           |           |          |  |                                      |
| 8661 | ENSG00000268865  |         | 11260.5 | 0.19 |           |           |          |  |                                      |
| 8663 | ENSG00000232727  |         | 11261   | 0.19 |           |           |          |  |                                      |
| 8667 | ENSG00000256015  |         | 11264.1 | 0.19 |           |           |          |  |                                      |
| 8670 | ENSG00000269498  |         | 11266.3 | 0.19 |           |           |          |  |                                      |
| 8673 | ENSG00000254787  |         | 11267.4 | 0.19 |           |           |          |  |                                      |
| 8680 | ENSG00000258338  |         | 11272.9 | 0.19 |           |           |          |  |                                      |
| 8681 | ENSG00000225338  |         | 11273.3 | 0.19 |           |           |          |  |                                      |
| 8685 | ENSG00000253608  |         | 11274.8 | 0.19 |           |           |          |  |                                      |
| 8686 | ENSG00000211838  |         | 11275   | 0.19 |           |           |          |  |                                      |
| 8692 | ENSG00000221860  | 17      | 11276.8 | 0.19 | 7514499   | 7514501   |          |  | Small nuclear RNA U13                |
| 8691 | ENSG00000230948  |         | 11277.6 | 0.19 |           |           |          |  |                                      |
| 8692 | ENSG00000258694  |         | 11279.2 | 0.19 |           |           |          |  |                                      |
| 8695 | ENSG00000230686  |         | 11286   | 0.19 |           |           |          |  |                                      |
| 8696 | ENSG00000252975  |         | 11286.6 | 0.19 |           |           |          |  |                                      |
| 8703 | ENSG00000235267  |         | 11292.9 | 0.19 |           |           |          |  |                                      |
| 8708 | ENSG00000271104  |         | 11300.2 | 0.19 |           |           |          |  |                                      |
| 8709 | ENSG00000241981  |         | 11300.2 | 0.19 |           |           |          |  |                                      |
| 8711 | ENSG00000273944  |         | 11300.7 | 0.19 |           |           |          |  |                                      |
| 8712 | ENSG00000268121  |         | 11301.2 | 0.19 |           |           |          |  |                                      |
| 8714 | ENSG00000269266  |         | 11302.1 | 0.19 |           |           |          |  |                                      |
| 8717 | ENSG00000250421  |         | 11302.8 | 0.19 |           |           |          |  |                                      |
| 8721 | ENSG00000226036  |         | 11307.5 | 0.19 |           |           |          |  |                                      |
| 8722 | ENSG00000233968  |         | 11307.6 | 0.19 |           |           |          |  |                                      |
| 8728 | ENSG00000271519  |         | 11316.3 | 0.19 |           |           |          |  |                                      |
| 8729 | ENSG00000221553  |         | 11316.5 | 0.19 |           |           |          |  |                                      |
| 8730 | ENSG00000254712  |         | 11316.9 | 0.19 |           |           |          |  |                                      |
| 8733 | ENSG00000271547  |         | 11318.2 | 0.19 |           |           |          |  |                                      |
| 8734 | ENSG00000210376  |         | 11319   | 0.19 |           |           |          |  |                                      |
| 8736 | ENSG00000229493  |         | 11319.7 | 0.19 |           |           |          |  |                                      |
| 8737 | ENSG00000207643  |         | 11320.9 | 0.19 |           |           |          |  |                                      |
| 8738 | ENSG00000209052  |         | 11322.9 | 0.19 |           |           |          |  |                                      |
| 8739 | ENSG00000212112  |         | 11325.3 | 0.19 |           |           |          |  |                                      |
| 8742 | ENSG00000253317  |         | 11327.1 | 0.19 |           |           |          |  |                                      |
| 8746 | ENSG00000258171  |         | 11331.4 | 0.19 |           |           |          |  |                                      |
| 8749 | ENSG00000225695  |         | 11333.7 | 0.19 |           |           |          |  |                                      |
| 8750 | ENSG00000244561  |         | 11334.4 | 0.19 |           |           |          |  |                                      |
| 8751 | ENSG00000222992  |         | 11335.2 | 0.19 |           |           |          |  |                                      |
| 8752 | ENSG00000235215  |         | 11336.6 | 0.19 |           |           |          |  |                                      |
| 8756 | ENSG00000287659  |         | 11343.4 | 0.19 |           |           |          |  |                                      |
| 8762 | ENSG00000223651  |         | 11347.5 | 0.19 |           |           |          |  |                                      |
| 8768 | ENSG00000231362  |         | 11351.9 | 0.19 |           |           |          |  |                                      |
| 8772 | ENSG00000254648  |         | 11353.2 | 0.19 |           |           |          |  |                                      |
| 8773 | ENSG00000254333  |         | 11353.3 | 0.19 |           |           |          |  |                                      |
| 8776 | ENSG00000237645  |         | 11356.8 | 0.19 |           |           |          |  |                                      |
| 8777 | ENSG00000234537  |         | 11356.8 | 0.19 |           |           |          |  |                                      |
| 8779 | ENSG00000261419  |         | 11360.7 | 0.19 |           |           |          |  |                                      |
| 8781 | ENSG00000236373  |         | 11361.8 | 0.19 |           |           |          |  |                                      |
| 8783 | ENSG00000250277  |         | 11365.2 | 0.19 |           |           |          |  |                                      |
| 8792 | ENSG00000236317  |         | 11371.7 | 0.19 |           |           |          |  |                                      |
| 8793 | ENSG00000237656  |         | 11372.3 | 0.19 |           |           |          |  |                                      |
| 8794 | ENSG00000253734  |         | 11374.5 | 0.19 |           |           |          |  |                                      |
| 8795 | ENSG00000232517  |         | 11375.8 | 0.19 |           |           |          |  |                                      |
| 8796 | ENSG00000236460  |         | 11376.2 | 0.19 |           |           |          |  |                                      |
| 8799 | ENSG00000236923  |         | 11379.6 | 0.19 |           |           |          |  |                                      |
| 8803 | ENSG00000248215  |         | 11385.1 | 0.19 |           |           |          |  |                                      |
| 8805 | ENSG00000264561  |         | 11386.6 | 0.19 |           |           |          |  |                                      |
| 8807 | ENSG00000252565  |         | 11388.4 | 0.19 |           |           |          |  |                                      |
| 8812 | ENSG00000254566  |         | 11396.9 | 0.19 |           |           |          |  |                                      |
| 8821 | ENSG00000226506  |         | 11404.2 | 0.19 |           |           |          |  |                                      |
| 8824 | ENSG00000221748  |         | 11406.3 | 0.19 |           |           |          |  |                                      |
| 8826 | ENSG00000257866  |         | 11407   | 0.19 |           |           |          |  |                                      |
| 8827 | ENSG00000259771  |         | 11407.5 | 0.19 |           |           |          |  |                                      |
| 8836 | ENSG00000251426  |         | 11412.8 | 0.19 |           |           |          |  |                                      |
| 8841 | ENSG00000202695  |         | 11415.9 | 0.19 |           |           |          |  |                                      |
| 8848 | ENSG00000236299  |         | 11419.2 | 0.19 |           |           |          |  |                                      |
| 8850 | ENSG00000234892  |         | 11421.4 | 0.19 |           |           |          |  |                                      |
| 8857 | ENSG000002081399 |         | 11426.3 | 0.19 |           |           |          |  |                                      |
| 8858 | ENSG00000248820  |         | 11427.6 | 0.19 |           |           |          |  |                                      |
| 8859 | ENSG00000211221  |         | 11428.1 | 0.19 |           |           |          |  |                                      |
| 8860 | ENSG00000230175  |         | 11428.4 | 0.19 |           |           |          |  |                                      |
| 8864 | ENSG00000233703  |         | 11432.8 | 0.19 |           |           |          |  |                                      |
| 8868 | ENSG00000234566  |         | 11433.8 | 0.19 | 22        | 38181533  | 38181614 |  | Small nuclear RNA U13                |
| 8870 | ENSG00000228672  |         | 11434.8 | 0.19 |           |           |          |  |                                      |
| 8871 | ENSG00000241059  |         | 11436.3 | 0.19 |           |           |          |  |                                      |
| 8873 | ENSG00000254260  |         | 11437   | 0.19 |           |           |          |  |                                      |
| 8874 | ENSG00000225872  |         | 11437.7 | 0.19 |           |           |          |  |                                      |
| 8881 | ENSG00000224867  |         | 11448.9 | 0.19 |           |           |          |  |                                      |
| 8885 | ENSG00000221522  |         | 11452.7 | 0.19 |           |           |          |  |                                      |
| 8892 | ENSG00000197081  | TBC1D3F | 11456.6 | 0.19 | 17        | 36337711  | 36358166 |  | TBC1 domain family, member 3         |

|      |                  |   |          |          |  |  |  |                                  |  |
|------|------------------|---|----------|----------|--|--|--|----------------------------------|--|
| 8895 | ENSG00000235885  |   | 11458.4  | 0.19     |  |  |  |                                  |  |
| 8903 | ENSG00000235114  |   | 11466.7  | 0.19     |  |  |  |                                  |  |
| 8904 | ENSG00000229839  |   | 11467    | 0.19     |  |  |  |                                  |  |
| 8907 | ENSG00000283733  |   | 11468    | 0.19     |  |  |  |                                  |  |
| 8908 | ENSG00000294233  |   | 11474.2  | 0.19     |  |  |  |                                  |  |
| 8909 | ENSG00000236953  |   | 11474.2  | 0.19     |  |  |  |                                  |  |
| 8910 | ENSG00000226851  |   | 11474.9  | 0.19     |  |  |  |                                  |  |
| 8911 | ENSG00000240515  |   | 11476.3  | 0.19     |  |  |  |                                  |  |
| 8914 | ENSG00000250937  |   | 11478.7  | 0.19     |  |  |  |                                  |  |
| 8919 | ENSG00000229288  |   | 11483.2  | 0.19     |  |  |  |                                  |  |
| 8920 | ENSG00000225299  |   | 11483.3  | 0.19     |  |  |  |                                  |  |
| 8923 | ENSG00000234419  |   | 11484.3  | 0.19     |  |  |  |                                  |  |
| 8924 | ENSG00000237764  |   | 11484.9  | 0.19     |  |  |  |                                  |  |
| 8926 | ENSG00000226796  |   | 11485.4  | 0.19     |  |  |  |                                  |  |
| 8931 | ENSG00000217612  |   | 11490.5  | 0.19     |  |  |  |                                  |  |
| 8933 | ENSG00000260381  |   | 11494    | 0.19     |  |  |  |                                  |  |
| 8936 | ENSG00000234318  |   | 11497.6  | 0.19     |  |  |  |                                  |  |
| 8938 | ENSG00000224498  |   | 11499.1  | 0.19     |  |  |  |                                  |  |
| 8941 | ENSG00000226817  |   | 11501.2  | 0.19     |  |  |  |                                  |  |
| 8967 | ENSG00000213247  |   | 11514.6  | 0.19     |  |  |  |                                  |  |
| 8969 | ENSG00000212334  |   | 11518.7  | 0.19     |  |  |  |                                  |  |
| 8962 | ENSG00000229087  |   | 11520.1  | 0.19     |  |  |  |                                  |  |
| 8963 | ENSG00000228035  |   | 11520.2  | 0.19     |  |  |  |                                  |  |
| 8967 | ENSG00000255115  |   | 11521.6  | 0.19     |  |  |  |                                  |  |
| 8969 | ENSG00000203483  |   | 11523.3  | 0.19     |  |  |  |                                  |  |
| 8970 | ENSG00000227078  |   | 11524    | 0.19     |  |  |  |                                  |  |
| 8973 | ENSG00000201056  |   | 11528.2  | 0.19     |  |  |  |                                  |  |
| 8974 | ENSG00000288104  |   | 11528.6  | 0.19     |  |  |  |                                  |  |
| 8975 | ENSG00000228957  |   | 11527.4  | 0.19     |  |  |  |                                  |  |
| 8978 | ENSG00000229673  |   | 11528    | 0.19     |  |  |  |                                  |  |
| 8981 | ENSG00000270002  |   | 11529.5  | 0.19     |  |  |  |                                  |  |
| 8983 | ENSG00000223602  |   | 11529.8  | 0.19     |  |  |  |                                  |  |
| 8984 | ENSG00000214338  |   | 11530    | 0.19     |  |  |  |                                  |  |
| 8985 | ENSG00000270878  |   | 11530.7  | 0.19     |  |  |  |                                  |  |
| 8992 | ENSG00000234484  |   | 11537.6  | 0.19     |  |  |  |                                  |  |
| 8997 | ENSG00000204573  |   | 11541.8  | 0.19     |  |  |  |                                  |  |
| 8998 | ENSG000002054312 | 7 | 75209959 | 75210221 |  |  |  | RNA_75L_cytosolic 642_pseudogene |  |
| 9000 | ENSG00000244888  |   | 11544.9  | 0.19     |  |  |  |                                  |  |
| 9004 | ENSG00000226281  |   | 11548.8  | 0.19     |  |  |  |                                  |  |
| 9007 | ENSG00000280795  |   | 11550.3  | 0.19     |  |  |  |                                  |  |
| 9009 | ENSG000002286247 |   | 11551.5  | 0.19     |  |  |  |                                  |  |
| 9013 | ENSG00000226417  |   | 11553.4  | 0.19     |  |  |  |                                  |  |
| 9014 | ENSG00000272940  |   | 11554.1  | 0.19     |  |  |  |                                  |  |
| 9015 | ENSG00000249593  |   | 11554.3  | 0.19     |  |  |  |                                  |  |
| 9016 | ENSG00000204764  |   | 11555.4  | 0.19     |  |  |  |                                  |  |
| 9017 | ENSG00000234793  |   | 11557.1  | 0.19     |  |  |  |                                  |  |
| 9018 | ENSG00000222986  |   | 11557.5  | 0.19     |  |  |  |                                  |  |
| 9019 | ENSG00000225447  |   | 11558.7  | 0.19     |  |  |  |                                  |  |
| 9021 | ENSG00000212114  |   | 11560.2  | 0.19     |  |  |  |                                  |  |
| 9024 | ENSG00000229312  |   | 11564.5  | 0.19     |  |  |  |                                  |  |
| 9026 | ENSG00000251598  |   | 11565.6  | 0.19     |  |  |  |                                  |  |
| 9030 | ENSG00000248453  |   | 11572.2  | 0.19     |  |  |  |                                  |  |
| 9032 | ENSG00000250892  |   | 11575    | 0.19     |  |  |  |                                  |  |
| 9037 | ENSG00000239398  |   | 11578.6  | 0.19     |  |  |  |                                  |  |
| 9039 | ENSG00000229692  |   | 11581    | 0.19     |  |  |  |                                  |  |
| 9040 | ENSG0000021596   |   | 11581.8  | 0.19     |  |  |  |                                  |  |
| 9042 | ENSG00000289532  |   | 11582.3  | 0.19     |  |  |  |                                  |  |
| 9046 | ENSG00000229497  |   | 11586.7  | 0.19     |  |  |  |                                  |  |
| 9047 | ENSG00000226506  |   | 11587.3  | 0.19     |  |  |  |                                  |  |
| 9048 | ENSG00000226367  |   | 11588.4  | 0.19     |  |  |  |                                  |  |
| 9050 | ENSG00000226182  |   | 11589.4  | 0.19     |  |  |  |                                  |  |
| 9055 | ENSG00000245928  |   | 11595.5  | 0.19     |  |  |  |                                  |  |
| 9056 | ENSG00000241296  |   | 11595.6  | 0.19     |  |  |  |                                  |  |
| 9060 | ENSG00000215268  |   | 11602.7  | 0.19     |  |  |  |                                  |  |
| 9065 | ENSG00000287177  |   | 11604.2  | 0.19     |  |  |  |                                  |  |
| 9067 | ENSG00000222872  |   | 11604.9  | 0.19     |  |  |  |                                  |  |
| 9074 | ENSG00000221712  |   | 11609.8  | 0.19     |  |  |  |                                  |  |
| 9077 | ENSG00000289706  |   | 11611.7  | 0.19     |  |  |  |                                  |  |
| 9085 | ENSG00000232731  |   | 11616.1  | 0.19     |  |  |  |                                  |  |
| 9091 | ENSG00000215132  |   | 11618.6  | 0.19     |  |  |  |                                  |  |
| 9093 | ENSG00000233977  |   | 11621.4  | 0.19     |  |  |  |                                  |  |
| 9094 | ENSG00000228487  |   | 11622    | 0.19     |  |  |  |                                  |  |
| 9102 | ENSG00000249863  |   | 11633    | 0.19     |  |  |  |                                  |  |
| 9105 | ENSG00000233242  |   | 11632.7  | 0.19     |  |  |  |                                  |  |
| 9107 | ENSG00000223700  |   | 11633.8  | 0.19     |  |  |  |                                  |  |
| 9108 | ENSG00000225756  |   | 11633.9  | 0.19     |  |  |  |                                  |  |
| 9111 | ENSG00000248711  |   | 11638.6  | 0.19     |  |  |  |                                  |  |
| 9114 | ENSG00000238488  |   | 11642.5  | 0.19     |  |  |  |                                  |  |
| 9116 | ENSG00000225911  |   | 11645.3  | 0.19     |  |  |  |                                  |  |
| 9118 | ENSG00000249150  |   | 11646    | 0.19     |  |  |  |                                  |  |
| 9120 | ENSG00000226532  |   | 11649.7  | 0.19     |  |  |  |                                  |  |
| 9127 | ENSG00000231294  |   | 11653.3  | 0.19     |  |  |  |                                  |  |
| 9128 | ENSG00000237295  |   | 11655.5  | 0.19     |  |  |  |                                  |  |
| 9133 | ENSG00000255144  |   | 11658.4  | 0.19     |  |  |  |                                  |  |
| 9140 | ENSG00000226949  |   | 11663    | 0.19     |  |  |  |                                  |  |
| 9143 | ENSG00000235941  |   | 11663.6  | 0.19     |  |  |  |                                  |  |
| 9144 | ENSG00000229523  |   | 11663.9  | 0.19     |  |  |  |                                  |  |
| 9145 | ENSG00000232892  |   | 11664.6  | 0.19     |  |  |  |                                  |  |
| 9150 | ENSG00000236286  |   | 11670.3  | 0.19     |  |  |  |                                  |  |
| 9155 | ENSG00000228750  |   | 11676.2  | 0.19     |  |  |  |                                  |  |
| 9158 | ENSG00000224194  |   | 11676.4  | 0.19     |  |  |  |                                  |  |
| 9157 | ENSG00000248484  |   | 11676.6  | 0.19     |  |  |  |                                  |  |
| 9159 | ENSG00000186328  |   | 11678    | 0.19     |  |  |  |                                  |  |
| 9162 | ENSG00000280141  |   | 11678.1  | 0.19     |  |  |  |                                  |  |
| 9167 | ENSG00000231190  |   | 11683    | 0.19     |  |  |  |                                  |  |
| 9172 | ENSG00000232743  |   | 11685.6  | 0.19     |  |  |  |                                  |  |
| 9181 | ENSG00000226370  |   | 11693.5  | 0.19     |  |  |  |                                  |  |
| 9182 | ENSG00000226710  |   | 11693.9  | 0.19     |  |  |  |                                  |  |
| 9184 | ENSG00000224747  |   | 11695.9  | 0.19     |  |  |  |                                  |  |
| 9185 | ENSG00000254235  |   | 11696.6  | 0.19     |  |  |  |                                  |  |
| 9186 | ENSG00000217207  |   | 11698.4  | 0.19     |  |  |  |                                  |  |
| 9188 | ENSG000002080650 |   | 11702    | 0.19     |  |  |  |                                  |  |
| 9189 | ENSG00000203307  |   | 11702.5  | 0.19     |  |  |  |                                  |  |
| 9190 | ENSG00000214398  |   | 11702.7  | 0.19     |  |  |  |                                  |  |
| 9196 | ENSG00000280476  |   | 11710.4  | 0.19     |  |  |  |                                  |  |
| 9198 | ENSG00000226238  |   | 11712.7  | 0.19     |  |  |  |                                  |  |
| 9205 | ENSG00000234646  |   | 11717.7  | 0.19     |  |  |  |                                  |  |
| 9206 | ENSG00000228648  |   | 11717.9  | 0.19     |  |  |  |                                  |  |
| 9208 | ENSG00000295414  |   | 11718.1  | 0.19     |  |  |  |                                  |  |
| 9211 | ENSG00000226344  |   | 11720.3  | 0.19     |  |  |  |                                  |  |
| 9212 | ENSG00000253832  |   | 11720.6  | 0.19     |  |  |  |                                  |  |
| 9214 | ENSG00000232873  |   | 11722.2  | 0.19     |  |  |  |                                  |  |
| 9220 | ENSG00000233852  |   | 11725.6  | 0.19     |  |  |  |                                  |  |
| 9225 | ENSG00000271232  |   | 11727.6  | 0.19     |  |  |  |                                  |  |
| 9226 | ENSG00000229196  |   | 11727.7  | 0.19     |  |  |  |                                  |  |
| 9227 | ENSG00000234566  |   | 11727.8  | 0.19     |  |  |  |                                  |  |
| 9228 | ENSG00000253213  |   | 11728.8  | 0.19     |  |  |  |                                  |  |
| 9232 | ENSG00000227705  |   | 11731.8  | 0.19     |  |  |  |                                  |  |
| 9237 | ENSG00000228887  |   | 11735.1  | 0.19     |  |  |  |                                  |  |
| 9240 | ENSG00000232837  |   | 11736.5  | 0.19     |  |  |  |                                  |  |
| 9243 | ENSG00000230741  |   | 11739.8  | 0.19     |  |  |  |                                  |  |
| 9249 | ENSG00000251507  |   | 11748.7  | 0.19     |  |  |  |                                  |  |
| 9250 | ENSG00000237928  |   | 11748.9  | 0.19     |  |  |  |                                  |  |
| 9254 | ENSG00000281873  |   | 11751.5  | 0.19     |  |  |  |                                  |  |
| 9267 | ENSG00000204931  |   | 11750.6  | 0.19     |  |  |  |                                  |  |
| 9268 | ENSG00000221168  |   | 11751.1  | 0.19     |  |  |  |                                  |  |
| 9269 | ENSG00000257368  |   | 11762.3  | 0.19     |  |  |  |                                  |  |
| 9270 | ENSG00000240686  |   | 11763.4  | 0.19     |  |  |  |                                  |  |
| 9276 | ENSG00000285104  |   | 11766.1  | 0.19     |  |  |  |                                  |  |
| 9278 | ENSG00000206129  |   | 11770.1  | 0.19     |  |  |  |                                  |  |
| 9280 | ENSG00000228955  |   | 11772.4  | 0.19     |  |  |  |                                  |  |
| 9281 | ENSG00000240665  | 3 | 53317216 | 53317319 |  |  |  | Small nuclear RNA U13            |  |
| 9282 | ENSG00000214759  |   | 11773.6  | 0.19     |  |  |  |                                  |  |
| 9287 | ENSG00000281231  |   | 11777.7  | 0.19     |  |  |  |                                  |  |
| 9288 | ENSG00000226939  |   | 11777.8  | 0.19     |  |  |  |                                  |  |
| 9293 | ENSG00000258504  |   | 11783.4  | 0.19     |  |  |  |                                  |  |
| 9296 | ENSG00000232848  |   | 11783.9  | 0.19     |  |  |  |                                  |  |
| 9301 | ENSG00000226382  |   | 11786.3  | 0.19     |  |  |  |                                  |  |
| 9302 | ENSG0000021596   |   | 11790.4  | 0.19     |  |  |  |                                  |  |
| 9303 | ENSG00000232825  |   | 11791.6  | 0.19     |  |  |  |                                  |  |
| 9310 | ENSG00000231261  |   | 11796.3  | 0.19     |  |  |  |                                  |  |
| 9316 | ENSG00000254885  |   | 11803.6  | 0.19     |  |  |  |                                  |  |
| 9320 | ENSG00000231159  |   | 11806.9  | 0.19     |  |  |  |                                  |  |
| 9321 | ENSG00000253365  |   | 11807.4  | 0.19     |  |  |  |                                  |  |
| 9322 | ENSG00000231031  |   | 11808.1  | 0.19     |  |  |  |                                  |  |
| 9324 | ENSG00000252526  |   | 11809.7  | 0.19     |  |  |  |                                  |  |
| 9328 | ENSG00000216291  |   | 11813.6  | 0.19     |  |  |  |                                  |  |
| 9329 | ENSG000002081024 |   | 11814.6  | 0.19     |  |  |  |                                  |  |
| 9338 | ENSG00000252323  |   | 11821.1  | 0.19     |  |  |  |                                  |  |
| 9343 | ENSG00000251114  |   | 11823.3  | 0.19     |  |  |  |                                  |  |
| 9344 | ENSG00000253247  |   | 11823.6  | 0.19     |  |  |  |                                  |  |





|       |                  |          |       |                      |                      |           |           |                                                                                           |                                                                       |
|-------|------------------|----------|-------|----------------------|----------------------|-----------|-----------|-------------------------------------------------------------------------------------------|-----------------------------------------------------------------------|
| 4084  | ENS00000203562   | 6363     | 0.18  | processed_pseudogene | 2                    | 158236236 | 158236928 | family with sequence similarity 133, member D, pseudogene                                 |                                                                       |
| 4214  | ENS00000203183   | 6508     | 0.18  | processed_pseudogene | 15                   | 65087911  | 65087911  | CCNA-NOT1 transcription complex, subunit 13, pseudogene 1                                 |                                                                       |
| 4421  | ENS00000204304   | 6872     | 0.18  | processed_pseudogene | 15                   | 6873873   | 6873915   | ribosomal protein L35a pseudogene 32                                                      |                                                                       |
| 4515  | ENS00000202476   | 7001     | 0.18  | processed_pseudogene | 6                    | 3304728   | 3304733   | ribosomal protein L32 pseudogene 1                                                        |                                                                       |
| 5780  | ENS00000204074   | 9596     | 0.18  | processed_pseudogene | 18                   | 9516277   | 9516330   | ribosomal protein L19 pseudogene 30                                                       |                                                                       |
| 6301  | ENS00000203106   | 9999     | 0.18  | processed_pseudogene | 7                    | 10812007  | 10812007  | ribosomal protein L7, pseudogene 32                                                       |                                                                       |
| 6677  | ENS000002028419  | RALGAP1P | 9255  | 0.18                 | processed_pseudogene | 9         | 10824209  | 10824209                                                                                  | Rai GTPase activating protein, alpha subunit 1 (catalytic) pseudogene |
| 6877  | ENS00000203747   | 9653     | 0.18  | processed_pseudogene | 2                    | 2455731   | 2455821   | ribosomal protein L30a pseudogene 13                                                      |                                                                       |
| 7013  | ENS00000203889   | 9786     | 0.18  | processed_pseudogene | 5                    | 8449075   | 8449075   | chaperonin containing TCP1, subunit 4 (beta) pseudogene 2                                 |                                                                       |
| 7335  | ENS00000204291   | 10077    | 0.18  | processed_pseudogene | 17                   | 1004849   | 1004849   | ribosomal protein L7 pseudogene 49                                                        |                                                                       |
| 7444  | ENS00000202929   | 10098    | 0.18  | processed_pseudogene | 2                    | 21937258  | 21937258  | ribosomal modification (DNA directed) family member B pseudogene 2                        |                                                                       |
| 7571  | ENS00000202782   | MRS2P2   | 10318 | 0.18                 | processed_pseudogene | 12        | 7224308   | 7224308                                                                                   | MRS2 pseudogene 2                                                     |
| 7803  | ENS00000204348   | 10523    | 0.18  | processed_pseudogene | 7                    | 10595871  | 10595899  | La ribonucleoprotein domain family, member 18 pseudogene 2                                |                                                                       |
| 8116  | ENS00000202993   | 10936    | 0.18  | processed_pseudogene | 2                    | 12419051  | 12419049  | ribosomal protein L12 pseudogene 15                                                       |                                                                       |
| 8367  | ENS000002026553  | 11018    | 0.18  | processed_pseudogene | 15                   | 28731771  | 28731954  | ATP-binding cassette, sub-family B (MDR/TP), member 10 pseudogene 4                       |                                                                       |
| 8727  | ENS000002026209  | 11316    | 0.18  | processed_pseudogene | 10                   | 13350445  | 13350447  | UlnA-related protein 1                                                                    |                                                                       |
| 8768  | ENS000002026499  | 11326    | 0.18  | processed_pseudogene | 10                   | 11159414  | 11159498  | polymerase (RNA III) (DNA directed) polypeptide K, 12.3 kDa pseudogene 2                  |                                                                       |
| 8767  | ENS000002031809  | 11351    | 0.18  | processed_pseudogene | X                    | 64992553  | 64992474  | Nancy homeobox pseudogene 9                                                               |                                                                       |
| 8829  | ENS00000202392   | 11408    | 0.18  | processed_pseudogene | 6                    | 11107405  | 11107336  | FUQ1 pseudogene 5                                                                         |                                                                       |
| 8882  | ENS000002033691  | 11452    | 0.18  | processed_pseudogene | 10                   | 5248707   | 5248729   | protein geranylgeranyltransferase type 1, beta subunit pseudogene 1                       |                                                                       |
| 8881  | ENS000002028074  | 11456    | 0.18  | processed_pseudogene | 13                   | 8781259   | 8781524   | FCB1 pseudogene 5                                                                         |                                                                       |
| 8884  | ENS000002028633  | 11457    | 0.18  | processed_pseudogene | 13                   | 20753117  | 20753801  | peptidylarginine isomerase A (cyclophilin A) pseudogene 28                                |                                                                       |
| 8912  | ENS000002028495  | 11476    | 0.18  | processed_pseudogene | 15                   | 50709962  | 50710986  | adenosylhomocysteine pseudogene 7                                                         |                                                                       |
| 8928  | ENS000002018722  | 11488    | 0.18  | processed_pseudogene | 6                    | 76208421  | 76209852  | ribosomal protein L26 pseudogene 20                                                       |                                                                       |
| 9059  | ENS000002025379  | 11599    | 0.18  | processed_pseudogene | 11                   | 108953060 | 108953377 | cytochrome c, somatic pseudogene 29                                                       |                                                                       |
| 9076  | ENS000002017870  | 11603    | 0.18  | processed_pseudogene | X                    | 14746929  | 14746948  | ribosomal protein L16a 1 pseudogene 11                                                    |                                                                       |
| 9087  | ENS000002042280  | 11617    | 0.18  | processed_pseudogene | 7                    | 14368235  | 14368344  | SLC1A1 pseudogene 1                                                                       |                                                                       |
| 9095  | ENS000002049064  | 11625    | 0.18  | processed_pseudogene | 4                    | 40021860  | 40023137  | keratin 18 pseudogene 25                                                                  |                                                                       |
| 9109  | ENS000002025956  | 11635    | 0.18  | processed_pseudogene | 4                    | 8021834   | 8021849   | cytochrome c, somatic pseudogene 13                                                       |                                                                       |
| 9110  | ENS000002029596  | 11637    | 0.18  | processed_pseudogene | 6                    | 33305755  | 33307272  | myosin, light chain 8, pseudogene                                                         |                                                                       |
| 9171  | ENS000002014342  | 11685    | 0.18  | processed_pseudogene | 7                    | 84367964  | 84368723  | ATP synthase, H+ transporting, mitochondrial Fo complex, subunit B1 pseudogene 2          |                                                                       |
| 9173  | ENS000002023691  | 11718    | 0.18  | processed_pseudogene | 8                    | 3962168   | 3962168   | E2F transcription factor 4, p107/130 binding pseudogene 1                                 |                                                                       |
| 9200  | ENS000002038012  | 11713    | 0.18  | processed_pseudogene | 1                    | 11192913  | 11192913  | HG1193a inducible domain family, member 1A pseudogene 12                                  |                                                                       |
| 9207  | ENS000002034864  | 11717    | 0.18  | processed_pseudogene | 2                    | 209917321 | 20993872  | heat shock 70kDa protein 8 pseudogene 6                                                   |                                                                       |
| 9255  | ENS000002029700  | 11768    | 0.18  | processed_pseudogene | 11                   | 16208637  | 16208637  | proliferating cell nuclear antigen pseudogene 4                                           |                                                                       |
| 9279  | ENS000002032970  | 11770    | 0.18  | processed_pseudogene | 2                    | 217021065 | 21702134  | polymerase (DNA directed), eta pseudogene 1                                               |                                                                       |
| 9300  | ENS000002042810  | 11779    | 0.18  | processed_pseudogene | 3                    | 151193562 | 151193662 | mitochondrial ribosomal protein L42 pseudogene 6                                          |                                                                       |
| 9396  | ENS000002026591  | 11870    | 0.18  | processed_pseudogene | 10                   | 70705231  | 70705231  | actin, beta pseudogene 2                                                                  |                                                                       |
| 9402  | ENS000002048928  | 11863    | 0.18  | processed_pseudogene | 5                    | 91139504  | 91140346  | poly(rC) binding protein 2 pseudogene 3                                                   |                                                                       |
| 9403  | ENS000002029488  | 11863    | 0.18  | processed_pseudogene | 15                   | 89563301  | 89563277  | keratin 18 pseudogene 47                                                                  |                                                                       |
| 9423  | ENS000002026500  | 11878    | 0.18  | processed_pseudogene | 11                   | 83003989  | 83003989  | cytochrome c, somatic pseudogene 29                                                       |                                                                       |
| 9429  | ENS000002030243  | 11880    | 0.18  | processed_pseudogene | 13                   | 47079253  | 47079571  | FK506 binding protein 1A, 12kDa pseudogene 3                                              |                                                                       |
| 9433  | ENS000002042248  | 11882    | 0.18  | processed_pseudogene | 11                   | 91884272  | 91885055  | ribosomal protein L7a pseudogene 57                                                       |                                                                       |
| 9438  | ENS000002026491  | 11883    | 0.18  | processed_pseudogene | 11                   | 11068599  | 11068599  | ribosomal protein S3a pseudogene 41                                                       |                                                                       |
| 9455  | ENS000002033951  | MIR4468  | 11903 | 0.18                 | processed_pseudogene | 1         | 13789498  | 13789498                                                                                  | regulator of telomere condensation 2 pseudogene 3                     |
| 9472  | ENS0000020254821 | 11930    | 0.18  | processed_pseudogene | 11                   | 118704555 | 118705205 | SET pseudogene 16                                                                         |                                                                       |
| 9480  | ENS000002026628  | 11934    | 0.18  | processed_pseudogene | 1                    | 149114655 | 149115188 | profilin 1 pseudogene 12                                                                  |                                                                       |
| 9482  | ENS000002026585  | 11938    | 0.18  | processed_pseudogene | 13                   | 11871742  | 11871810  | inositol 1,3,4,5,6-tetrakisphosphate 2-kinase pseudogene 1                                |                                                                       |
| 9535  | ENS000002016364  | 11978    | 0.18  | processed_pseudogene | 6                    | 1671837   | 1671822   | mitochondrial ribosomal protein L42 pseudogene 2                                          |                                                                       |
| 9538  | ENS000002032321  | 12002    | 0.18  | processed_pseudogene | 6                    | 166148059 | 16614899  | heterogeneous nuclear ribonucleoprotein A1 pseudogene 49                                  |                                                                       |
| 9574  | ENS000002033026  | 12019    | 0.18  | processed_pseudogene | 10                   | 39745556  | 39745556  | methionine sulfoxide reductase B1 pseudogene 1                                            |                                                                       |
| 9578  | ENS000002043872  | 12015    | 0.18  | processed_pseudogene | 11                   | 67693122  | 67693902  | ribosomal protein S3a pseudogene 40                                                       |                                                                       |
| 9595  | ENS000002021444  | 12028    | 0.18  | processed_pseudogene | 12                   | 22774663  | 22774647  | ast2 (absent, small, or homeotic)-like (Drosophila) pseudogene 1                          |                                                                       |
| 9616  | ENS000002029222  | 12048    | 0.18  | processed_pseudogene | 2                    | 4851252   | 4851252   | keratin 18 pseudogene 4                                                                   |                                                                       |
| 9672  | ENS000002030470  | 12086    | 0.18  | processed_pseudogene | X                    | 6209281   | 6210432   | zinc finger RNA binding protein pseudogene 1                                              |                                                                       |
| 9676  | ENS000002030414  | 12100    | 0.18  | processed_pseudogene | 10                   | 13198884  | 13200136  | BTB (POZ) domain containing 7 pseudogene 1                                                |                                                                       |
| 9678  | ENS000002028988  | 12101    | 0.18  | processed_pseudogene | 4                    | 81154113  | 81154093  | suppression of lamotrigine 13 (colon carcinoma) (Hsp70 interacting protein) pseudogene 10 |                                                                       |
| 9680  | ENS000002031464  | 12102    | 0.18  | processed_pseudogene | 4                    | 11132029  | 11132167  | zinc finger RNA binding protein pseudogene 1                                              |                                                                       |
| 9682  | ENS000002028913  | 12104    | 0.18  | processed_pseudogene | 18                   | 8412127   | 8414302   | ring finger and WD repeat domain 2, E3 ubiquitin protein ligase pseudogene 1              |                                                                       |
| 9686  | ENS000002025686  | 12108    | 0.18  | processed_pseudogene | 18                   | 141189418 | 141189418 | ribosomal protein L7-like 1 pseudogene 13                                                 |                                                                       |
| 9690  | ENS000002032626  | 12107    | 0.18  | processed_pseudogene | 9                    | 30773462  | 30774300  | keratin 18 pseudogene 68                                                                  |                                                                       |
| 9693  | ENS000002014288  | MIR4788  | 12108 | 0.18                 | processed_pseudogene | 3         | 141158447 | 13471553                                                                                  | high mobility group box 3 pseudogene 13                               |
| 9699  | ENS000002021921  | 12109    | 0.18  | processed_pseudogene | 1                    | 13883162  | 13883162  | Chemical binding protein 2 pseudogene 19                                                  |                                                                       |
| 9710  | ENS000002031768  | 12121    | 0.18  | processed_pseudogene | X                    | 87255467  | 87255448  | protein phosphatase 1, regulatory (inhibitor) subunit 11 pseudogene 2                     |                                                                       |
| 9713  | ENS000002021072  | 12122    | 0.18  | processed_pseudogene | 1                    | 11725455  | 11725457  | glyceraldehyde-3-phosphate dehydrogenase pseudogene 64                                    |                                                                       |
| 9714  | ENS000002021441  | 12144    | 0.18  | processed_pseudogene | 2                    | 27916     | 27916     | vesicular 2 pseudogene 11                                                                 |                                                                       |
| 9716  | ENS000002028550  | 12124    | 0.18  | processed_pseudogene | 15                   | 54812929  | 54813763  | heterogeneous nuclear ribonucleoprotein A1 pseudogene 74                                  |                                                                       |
| 9760  | ENS000002027995  | 12165    | 0.18  | processed_pseudogene | 10                   | 95641050  | 95641895  | RAB11A, member RAS oncogene family pseudogene 1                                           |                                                                       |
| 9761  | ENS000002033668  | 12166    | 0.18  | processed_pseudogene | 10                   | 9684163   | 9684163   | zinc finger protein 60 pseudogene 2                                                       |                                                                       |
| 9765  | ENS000002031781  | 12166    | 0.18  | processed_pseudogene | 7                    | 2750158   | 2750258   | proteasome (prosome, immunoproteasome) 26S subunit, ATPase, 1 pseudogene 2                |                                                                       |
| 9775  | ENS000002029303  | 12177    | 0.18  | processed_pseudogene | 13                   | 46010256  | 46010795  | peptidylarginine isomerase A (cyclophilin A) pseudogene 25                                |                                                                       |
| 9788  | ENS000002040458  | 12185    | 0.18  | processed_pseudogene | 15                   | 8483834   | 8483834   | ribosomal protein S21 pseudogene 1                                                        |                                                                       |
| 9797  | ENS000002030391  | 12191    | 0.18  | processed_pseudogene | 2                    | 11622952  | 11622954  | ribosomal protein SA pseudogene 23                                                        |                                                                       |
| 9816  | ENS000002044556  | 12204    | 0.18  | processed_pseudogene | 7                    | 128898843 | 128870581 | ornithine decarboxylase pseudogene 2                                                      |                                                                       |
| 9819  | ENS000002026233  | 12205    | 0.18  | processed_pseudogene | 11                   | 13268173  | 13268173  | feritin heavy subunit pseudogene 28                                                       |                                                                       |
| 9822  | ENS000002022976  | 12215    | 0.18  | processed_pseudogene | 1                    | 15205028  | 15205087  | serine palmitoyltransferase, long chain base subunit 1 pseudogene 4                       |                                                                       |
| 9828  | ENS000002029248  | 12218    | 0.18  | processed_pseudogene | 18                   | 22596398  | 22597168  | WW domain binding protein 2 pseudogene 1                                                  |                                                                       |
| 9830  | ENS000002020711  | 12217    | 0.18  | processed_pseudogene | 6                    | 188687885 | 188687885 | CTAGE family, member 13, pseudogene                                                       |                                                                       |
| 9858  | ENS000002028901  | 12240    | 0.18  | processed_pseudogene | 11                   | 13619110  | 13621138  | high mobility group nucleosomal binding domain 2 pseudogene 36                            |                                                                       |
| 9866  | ENS000002031368  | 12245    | 0.18  | processed_pseudogene | 11                   | 94464221  | 94464931  | suppression of lamotrigine 13 (colon carcinoma) (Hsp70 interacting protein) pseudogene 11 |                                                                       |
| 9905  | ENS000002025249  | 12250    | 0.18  | processed_pseudogene | 13                   | 138519383 | 138519383 | ribosomal protein L23a pseudogene 49                                                      |                                                                       |
| 9908  | ENS000002049410  | 12271    | 0.18  | processed_pseudogene | 5                    | 54847713  | 54848382  | adenylate kinase 4 pseudogene 2                                                           |                                                                       |
| 9908  | ENS000002025870  | 12272    | 0.18  | processed_pseudogene | 15                   | 71151053  | 71152001  | keratin 8 pseudogene 9                                                                    |                                                                       |
| 9958  | ENS000002015800  | 12207    | 0.18  | processed_pseudogene | 2                    | 24293522  | 24293605  | ribosomal L26 domain containing 1 pseudogene 4                                            |                                                                       |
| 9965  | ENS000002017661  | 12212    | 0.18  | processed_pseudogene | 11                   | 74262488  | 74262488  | heterogeneous nuclear ribonucleoprotein A1 pseudogene 40                                  |                                                                       |
| 9982  | ENS000002032827  | 12232    | 0.18  | processed_pseudogene | 1                    | 200182656 | 200183443 | family with sequence similarity 58, member 8, pseudogene                                  |                                                                       |
| 9985  | ENS000002040696  | 12239    | 0.18  | processed_pseudogene | 10                   | 108951016 | 108951083 | ribosomal protein S2 pseudogene 39                                                        |                                                                       |
| 10009 | ENS000002020616  | 12240    | 0.18  | processed_pseudogene | 10                   | 28131158  | 28131401  | ribosomal protein L30a pseudogene 59                                                      |                                                                       |
| 10017 | ENS0000020250148 | 12263    | 0.18  | processed_pseudogene | 5                    | 60003950  | 60004797  | keratin 8 pseudogene 31                                                                   |                                                                       |
| 10033 | ENS000002033343  | 12272    | 0.18  | processed_pseudogene | 10                   | 5547234   | 5547368   | ATPase, H+ transporting, vesicular 13kDa, V1 subunit G1 pseudogene 4                      |                                                                       |
| 10061 | ENS000002034325  | 12428    | 0.18  | processed_pseudogene | 10                   | 12595898  | 12595898  | ribosomal protein E2 pseudogene 8                                                         |                                                                       |
| 10102 | ENS000002034111  | 12428    | 0.18  | processed_pseudogene | 13                   | 31113734  | 31117958  | RNA binding motif pseudogene 27                                                           |                                                                       |
| 10113 | ENS000002049302  | 12435    | 0.18  | processed_pseudogene | 4                    | 140401420 | 14040781  | feritin, heavy polypeptide 1 pseudogene 24                                                |                                                                       |
| 10137 | ENS000002026591  | 12435    | 0.18  | processed_pseudogene | 2                    | 24961949  | 24961959  | RNA binding motif pseudogene 22                                                           |                                                                       |
| 10173 | ENS000002034228  | 12481    | 0.18  | processed_pseudogene | X                    | 13420916  | 13421027  | nucleolin pseudogene 1                                                                    |                                                                       |
| 10176 | ENS000002026442  | 12485    | 0.18  | processed_pseudogene | 10                   | 45048993  | 45047363  | anirpin repeat domain 54 pseudogene 1                                                     |                                                                       |
| 10186 | ENS000002029011  | 12493    | 0.18  | processed_pseudogene | 6                    | 19201809  | 19201809  | high mobility group box 1 pseudogene 27                                                   |                                                                       |
| 10190 | ENS0000020250862 | 12494    | 0.18  | processed_pseudogene | 5                    | 123556272 | 123556710 | high mobility group box 1 pseudogene 29                                                   |                                                                       |
| 10210 | ENS000002025338  | 12511    | 0.18  | processed_pseudogene | 3                    | 9642432   | 9644412   | dual specificity phosphatase 5 pseudogene 2                                               |                                                                       |
| 10296 | ENS000002021191  | 12512    | 0.18  | processed_pseudogene | 2                    | 15660147  | 15660147  | Kruppel factor 1 (beta                                                                    |                                                                       |

|       |                   |              |       |      |                  |    |           |           |                                                                                       |
|-------|-------------------|--------------|-------|------|------------------|----|-----------|-----------|---------------------------------------------------------------------------------------|
| 3293  | ENSG00000178607   | FRNT         | 5169  | 0.18 | protein_coding   | 17 | 62116502  | 62208179  | endoplasmic reticulum to nucleus signaling 1                                          |
| 3314  | ENSG00000101778   | PTFNB        | 5216  | 0.18 | protein_coding   | 12 | 7056128   | 7056128   | protein tyrosine phosphatase, non-receptor type 4                                     |
| 3317  | ENSG00000104890   | ARHGAP18     | 5222  | 0.18 | protein_coding   | 19 | 7459993   | 7537363   | Rho/Rac guanine nucleotide exchange factor (GEF) 18                                   |
| 3339  | ENSG00000183625   | CCR3         | 5274  | 0.18 | protein_coding   | 3  | 46205096  | 46308197  | chemokine (C-C motif) receptor 3                                                      |
| 3459  | ENSG00000130703   | OSBP2        | 5472  | 0.18 | protein_coding   | 20 | 60813589  | 60813589  | caveolin binding protein-like 2                                                       |
| 3478  | ENSG00000128713   | USP1         | 5475  | 0.18 | protein_coding   | 14 | 10190941  | 101910747 | ubiquitin transcription factor 1                                                      |
| 3479  | ENSG00000105324   | FOXN3        | 5533  | 0.18 | protein_coding   | 4  | 89591215  | 90085493  | forkhead box N3                                                                       |
| 3538  | ENSG00000208403   | C16orf83     | 5564  | 0.18 | protein_coding   | 19 | 51852862  | 51871363  | Uncharacterized protein                                                               |
| 3538  | ENSG00000179116   | TGFBF1       | 5670  | 0.18 | protein_coding   | 9  | 25548704  | 25548704  | chromosome 5 open reading frame 63                                                    |
| 3560  | ENSG00000125661   | RHEBP2       | 5711  | 0.18 | protein_coding   | 17 | 10466973  | 10466973  | transforming growth factor, beta receptor 1                                           |
| 3560  | ENSG00000109233   | TBC1D10B     | 5715  | 0.18 | protein_coding   | 17 | 78270099  | 78270099  | monomelic homolog 2 (Drosophila)                                                      |
| 3780  | ENSG00000152332   | UMMK1        | 5938  | 0.18 | protein_coding   | 1  | 162467041 | 162467041 | TBC1 domain family, member 28                                                         |
| 3817  | ENSG00000140299   | BNIP         | 5988  | 0.18 | protein_coding   | 15 | 59951345  | 59951345  | UZAF homolog 1 (UHM) kinase                                                           |
| 3856  | ENSG00000202378   | PARR12       | 6059  | 0.18 | protein_coding   | 15 | 13970344  | 13970344  | BCL2/adrenovirus E1B 19kDa interacting protein 2                                      |
| 3856  | ENSG00000133805   | AMPD3        | 6063  | 0.18 | protein_coding   | 11 | 10229869  | 10229869  | poly (ADP-ribose) polymerase family, member 12                                        |
| 3858  | ENSG00000125232   | ANKRD13D     | 6063  | 0.18 | protein_coding   | 11 | 67050618  | 67099969  | adenosine monophosphate deaminase 3                                                   |
| 3900  | ENSG00000109499   | KULH4        | 6129  | 0.18 | protein_coding   | 4  | 19613970  | 19613970  | ankyrin repeat domain 13 family, member D                                             |
| 3933  | ENSG00000134262   | AFB1         | 6179  | 0.18 | protein_coding   | 1  | 114437370 | 114447823 | adaptor-related protein complex 4, beta 1 subunit                                     |
| 3936  | ENSG00000203961   | LILRA4       | 6185  | 0.18 | protein_coding   | 19 | 54844456  | 54850421  | leukocyte immunoglobulin-like receptor, subfamily A (with TM domain), member 4        |
| 4053  | ENSG00000105953   | TECP2        | 6348  | 0.18 | protein_coding   | 14 | 10292000  | 10292000  | lectin beta-galactosyl repeat containing 2                                            |
| 4063  | ENSG00000134899   | ERCC5        | 6365  | 0.18 | protein_coding   | 13 | 103497184 | 103282345 | excision repair cross-complementing rodent repair deficiency, complementation group 5 |
| 4233  | ENSG00000109989   | EXOC1        | 6573  | 0.18 | protein_coding   | 4  | 58719782  | 58717200  | exocyst complex component 1                                                           |
| 4240  | ENSG00000121735   | MIL1         | 6588  | 0.18 | protein_coding   | 18 | 58338818  | 58413271  | mucosa associated lymphoid tissue lymphoma translocation gene 1                       |
| 4263  | ENSG00000110066   | SUV420H1     | 6617  | 0.18 | protein_coding   | 11 | 67922330  | 67981295  | suppressor of variegation 4-20 homolog 1 (Drosophila)                                 |
| 4329  | ENSG00000185973   | TMHE         | 6720  | 0.18 | protein_coding   | X  | 154719776 | 154899505 | trimethyllysine hydrolase, epsilon                                                    |
| 4370  | ENSG00000142178   | AFB3         | 6786  | 0.18 | protein_coding   | 2  | 100029203 | 100769001 | AFAP192 family, member 3                                                              |
| 4413  | ENSG00000119882   | AREL1        | 6863  | 0.18 | protein_coding   | 14 | 75120140  | 75179818  | apoptosis resistant E3 ubiquitin protein ligase 1                                     |
| 4420  | ENSG00000102710   | SURF7        | 6872  | 0.18 | protein_coding   | 13 | 37584349  | 37633850  | suppressor of Ty 20 homolog (S. cerevisiae)                                           |
| 4423  | ENSG00000109499   | KULH4        | 6129  | 0.18 | protein_coding   | 4  | 19613970  | 19613970  | C2 calcium-dependent domain containing 2                                              |
| 4428  | ENSG00000113391   | FAM172A      | 6880  | 0.18 | protein_coding   | 5  | 92953775  | 93447404  | family with sequence similarity 172, member A                                         |
| 4457  | ENSG00000109300   | ANAPC4       | 6920  | 0.18 | protein_coding   | 4  | 25718835  | 25420120  | anaphase promoting complex subunit 4                                                  |
| 4524  | ENSG00000103703   | TRIP2        | 7021  | 0.18 | protein_coding   | 14 | 76621624  | 76621624  | IQ motif containing GTPase activating protein 2                                       |
| 4544  | ENSG00000105889   | ZFX          | 7144  | 0.18 | protein_coding   | X  | 24187290  | 24234372  | zinc finger protein, X-linked                                                         |
| 4562  | ENSG00000108176   | ZNF750       | 7086  | 0.18 | protein_coding   | X  | 134323687 | 134470120 | zinc finger protein 750                                                               |
| 4593  | ENSG00000108588   | EGFP         | 7208  | 0.18 | protein_coding   | 8  | 41332638  | 41332638  | egf 9 family-type III domain containing factor 2                                      |
| 4680  | ENSG00000110143   | CRNK1        | 7167  | 0.18 | protein_coding   | 2  | 20015012  | 20036600  | crooked neck pre-mRNA splicing factor 2                                               |
| 4776  | ENSG000001008720  | UMC1         | 7350  | 0.18 | protein_coding   | 5  | 17832006  | 178449634 | ubiquitin interaction motif containing 1                                              |
| 4791  | ENSG00000108295   | ZNF828       | 7369  | 0.18 | protein_coding   | 4  | 37931384  | 37931384  | zinc finger, X-linked, duplicated A                                                   |
| 4800  | ENSG000002071992  | TMEM58-RWDD3 | 7488  | 0.18 | protein_coding   | 1  | 95583479  | 95712781  | TMEM58-RWDD3 readthrough                                                              |
| 4879  | ENSG00000179454   | KULH2B       | 7488  | 0.18 | protein_coding   | 14 | 45383822  | 45511825  | kelch-like family member 28                                                           |
| 4881  | ENSG00000105689   | YAP6         | 7518  | 0.18 | protein_coding   | 16 | 11818090  | 152410000 | yeast 60 kDa specific methylesterase 2C                                               |
| 4905  | ENSG00000142095   | ZFP14        | 7681  | 0.18 | protein_coding   | 19 | 38827162  | 38970101  | ZFP14 zinc finger protein                                                             |
| 5073  | ENSG00000114423   | GBL8         | 7734  | 0.18 | protein_coding   | 3  | 105374305 | 105588396 | Chi1 prote-oncogene B, E3 ubiquitin protein ligase                                    |
| 5157  | ENSG00000119564   | STPAP1       | 7820  | 0.18 | protein_coding   | 6  | 14466105  | 14466105  | glycyltransferase-like domain containing 1                                            |
| 5167  | ENSG00000177851   | ZNF575A      | 7875  | 0.18 | protein_coding   | 10 | 87189472  | 87189472  | zinc finger protein 575A                                                              |
| 5270  | ENSG00000147174   | ACRC         | 7977  | 0.18 | protein_coding   | X  | 70798281  | 70833433  | acidic repeat containing                                                              |
| 5298  | ENSG00000148534   | HERC4        | 8057  | 0.18 | protein_coding   | 10 | 69841695  | 69835105  | HECT and RLD domain containing E3 ubiquitin protein ligase 4                          |
| 5298  | ENSG00000105496   | ROR2         | 8061  | 0.18 | protein_coding   | 10 | 125604835 | 125604835 | ring finger and CCHC-type domain 2                                                    |
| 5377  | ENSG00000184877   | ZBTAB4       | 8120  | 0.18 | protein_coding   | 1  | 22718344  | 22857450  | zinc finger and BTB domain containing 40                                              |
| 5401  | ENSG00000115066   | ERC2         | 8253  | 0.18 | protein_coding   | 3  | 141862418 | 14194448  | glycine kinase 6 (putative)                                                           |
| 5467  | ENSG00000109150   | ERC2L2       | 8424  | 0.18 | protein_coding   | 3  | 988317983 | 988317983 | zinc finger and BTB domain containing 6                                               |
| 5499  | ENSG00000188177   | ZC3H6        | 8469  | 0.18 | protein_coding   | 2  | 113033171 | 113076400 | zinc finger CCHC-type containing 6                                                    |
| 5628  | ENSG0000010251608 | PCF11        | 8709  | 0.18 | protein_coding   | 5  | 98424779  | 98519354  | Uncharacterized protein                                                               |
| 5817  | ENSG00000106494   | TME2ZB       | 8769  | 0.18 | protein_coding   | 5  | 82969030  | 82969030  | PCF11 cleavage and polyadenylation factor subunit 2                                   |
| 6289  | ENSG00000198133   | TME2ZB2      | 9076  | 0.18 | protein_coding   | 14 | 67913801  | 68004456  | transmembrane protein 229B                                                            |
| 6298  | ENSG0000011523    | CEP85        | 9308  | 0.18 | protein_coding   | 2  | 60283500  | 60314138  | centrosomal protein 88kDa                                                             |
| 6301  | ENSG00000119892   | FAM187C      | 9308  | 0.18 | protein_coding   | 12 | 92102040  | 92012593  | family with sequence similarity 19 (chromatin (C-C motif) like), member A2            |
| 7486  | ENSG00000185261   | KIAA825      | 10229 | 0.18 | protein_coding   | 5  | 93488871  | 93543409  | KIAA825                                                                               |
| 7507  | ENSG00000181722   | ZBTB20       | 10242 | 0.18 | protein_coding   | 3  | 14405841  | 14488810  | zinc finger and BTB domain containing 20                                              |
| 7579  | ENSG00000109251   | PCF11        | 10251 | 0.18 | protein_coding   | 5  | 98424779  | 98519354  | PCF11 cleavage and polyadenylation factor subunit 2                                   |
| 8124  | ENSG00000178404   | LOC10083515  | 10914 | 0.18 | protein_coding   | 17 | 76889929  | 76889299  | Protein DDC8 homolog                                                                  |
| 8128  | ENSG00000125498   | KIPZD1L1     | 10914 | 0.18 | protein_coding   | 19 | 55281283  | 55297774  | killer cell immunoglobulin-like receptor, two domains, long cytoplasmic tail, 1       |
| 8249  | ENSG00000109930   | CHAF13       | 10914 | 0.18 | protein_coding   | 19 | 24451110  | 24451110  | chromosome 14 open reading frame 93                                                   |
| 8382  | ENSG00000180316   | PNPLA1       | 11037 | 0.18 | protein_coding   | 6  | 36210980  | 36276372  | patatin-like phospholipase domain containing 1                                        |
| 8458  | ENSG00000175746   | C15orf94     | 11188 | 0.18 | protein_coding   | 15 | 39542885  | 39547046  | chromosome 15 open reading frame 54                                                   |
| 8475  | ENSG00000201024   | TME2Z4       | 11188 | 0.18 | protein_coding   | 17 | 67047811  | 67172377  | chromosome 17 open reading frame 102                                                  |
| 8671  | ENSG00000203756   | TME2Z4       | 11265 | 0.18 | protein_coding   | 6  | 13015239  | 130182892 | transmembrane protein 244                                                             |
| 8743  | ENSG000001025730  | IFAR3        | 11359 | 0.18 | protein_coding   | 19 | 41856728  | 41913006  | 2-oxoisovalerate dehydrogenase subunit alpha, mitochondrial; Uncharacterized protein  |
| 8802  | ENSG00000105697   | IFAR3        | 11359 | 0.18 | protein_coding   | 19 | 41856728  | 41913006  | 2-oxoisovalerate dehydrogenase subunit alpha, mitochondrial; Uncharacterized protein  |
| 9001  | ENSG00000111886   | GABRR2       | 11597 | 0.18 | protein_coding   | 6  | 89966627  | 90025018  | gamma-aminobutyric acid (GABA) A receptor, rho 2                                      |
| 9100  | ENSG00000102442   | IFNA5        | 11630 | 0.18 | protein_coding   | 6  | 31664739  | 31681849  | Uncharacterized protein                                                               |
| 9141  | ENSG00000101873   | IFNA5        | 11630 | 0.18 | protein_coding   | 6  | 31664739  | 31681849  | Uncharacterized protein                                                               |
| 9239  | ENSG00000139537   | CCDC85       | 11736 | 0.18 | protein_coding   | 12 | 21386313  | 21386313  | interleukin, alpha 5                                                                  |
| 9382  | ENSG00000149838   | CLEC1B       | 11827 | 0.18 | protein_coding   | 16 | 74442929  | 74455368  | collet-coil domain containing 85                                                      |
| 9392  | ENSG00000177868   | MYT3         | 11835 | 0.18 | protein_coding   | 16 | 14148383  | 14148383  | C-type lectin domain family 18, member B                                              |
| 9400  | ENSG00000173302   | GPR148       | 11867 | 0.18 | protein_coding   | 2  | 13148943  | 131487909 | G protein-coupled receptor 148                                                        |
| 9441  | ENSG000002022001  | 11880        | 11880 | 0.18 | protein_coding   | 2  | 23387324  | 23388085  | Uncharacterized protein                                                               |
| 9561  | ENSG00000104298   | IL3          | 12017 | 0.18 | protein_coding   | 13 | 13132082  | 13132082  | interleukin 3 (colony-stimulating factor, multiple)                                   |
| 9565  | ENSG00000109110   | POU4F3       | 12007 | 0.18 | protein_coding   | 5  | 14571587  | 145720083 | POU class 4 homeobox 3                                                                |
| 9600  | ENSG00000186271   | KULH33       | 12007 | 0.18 | protein_coding   | 14 | 20936970  | 20936970  | kelch-like family member 33                                                           |
| 9607  | ENSG00000105070   | IL3          | 12017 | 0.18 | protein_coding   | 13 | 13132082  | 13132082  | interleukin 3 (colony-stimulating factor, multiple)                                   |
| 9608  | ENSG00000136996   | IL36         | 12038 | 0.18 | protein_coding   | 2  | 11373958  | 113810444 | small intestine membrane protein 9                                                    |
| 9623  | ENSG00000125337   | KIF25        | 12051 | 0.18 | protein_coding   | 6  | 16836621  | 16844579  | interleukin 36, beta                                                                  |
| 9633  | ENSG00000115353   | TACR1        | 12059 | 0.18 | protein_coding   | 2  | 75212090  | 75212090  | kinesin family member 25                                                              |
| 9667  | ENSG00000105303   | FRMD1        | 12062 | 0.18 | protein_coding   | 12 | 16842425  | 16842425  | FERM domain containing 1                                                              |
| 9681  | ENSG00000108759   | KRT12        | 12102 | 0.18 | protein_coding   | 17 | 39610063  | 39623881  | keratin 12                                                                            |
| 9715  | ENSG00000206884   | 12123        | 12123 | 0.18 | protein_coding   | 2  | 23897656  | 23903953  | USBP2_SGLY readthrough (NM0 candidate)                                                |
| 9729  | ENSG00000109305   | HTRB3        | 12123 | 0.18 | protein_coding   | 11 | 113776389 | 113776389 | 5-hydroxytryptamine receptor 3B, ionotropic                                           |
| 9758  | ENSG00000184933   | OR8A2        | 12163 | 0.18 | protein_coding   | 11 | 6817576   | 6817128   | olfactory receptor, family 8, subfamily A, member 2                                   |
| 967   | ENSG00000189738   | 12216        | 12216 | 0.18 | protein_coding   | 2  | 24046695  | 24050748  | Uncharacterized protein; cDNA FLJ4596 fl. clone FLJ4596.1/4596                        |
| 9836  | ENSG00000104346   | 12230        | 12230 | 0.18 | protein_coding   | 1  | 75510000  | 75510000  | Uncharacterized protein                                                               |
| 9848  | ENSG00000177234   | 12230        | 12230 | 0.18 | protein_coding   | 10 | 122327721 | 122329629 | chromosome 10 open reading frame 85                                                   |
| 9874  | ENSG00000173876   | OR1L1        | 12249 | 0.18 | protein_coding   | 16 | 12524248  | 12524247  | olfactory receptor, family 1, subfamily L, member 1                                   |
| 9890  | ENSG00000173868   | KRT28        | 12249 | 0.18 | protein_coding   | 18 | 38842868  | 38842868  | keratin 28                                                                            |
| 9893  | ENSG00000197046   | SIGLEC15     | 12258 | 0.18 | protein_coding   | 18 | 4340477   | 43424405  | sialic acid binding Ig-like lectin 15                                                 |
| 10006 | ENSG00000108209   | C6orf8       | 12294 | 0.18 | protein_coding</ |    |           |           |                                                                                       |

|       |                  |            |       |                  |                                     |          |           |                                                               |                                                                                              |
|-------|------------------|------------|-------|------------------|-------------------------------------|----------|-----------|---------------------------------------------------------------|----------------------------------------------------------------------------------------------|
| 7867  | ENSG00000206855  | 10333      | 1     | 0.18             | snRNA                               | 10       | 70871409  | 70871515                                                      | RNA, U6 small nuclear 571, pseudogene                                                        |
| 4768  | ENSG00000202071  | 12389      | 1     | 0.18             | snRNA                               | 11       | 10584553  | 10584658                                                      | RNA, U6 small nuclear 277, pseudogene                                                        |
| 9368  | ENSG00000253032  | 11839      | 6     | 0.18             | snRNA                               | 5        | 55421498  | 55421597                                                      | RNA, U6 small nuclear 295, pseudogene                                                        |
| 9619  | ENSG00000252658  | 11864      | 9     | 0.18             | snRNA                               | 6        | 15835200  | 15835289                                                      | RNA, U6 small nuclear 786, pseudogene                                                        |
| 9625  | ENSG00000242572  | 11871      | 3     | 0.18             | snRNA                               | 18       | 9617862   | 9618070                                                       | RNA, U6 small nuclear 803, pseudogene                                                        |
| 9653  | ENSG00000252338  | 11595      | 3     | 0.18             | snRNA                               | 18       | 71597333  | 71597431                                                      | RNA, U6 small nuclear 1081, pseudogene                                                       |
| 9637  | ENSG00000252410  | 12065      | 9     | 0.18             | snRNA                               | 3        | 45075866  | 45075966                                                      | RNA, U6 small nuclear 3, pseudogene                                                          |
| 9709  | ENSG00000244989  | 12120      | 2     | 0.18             | snRNA                               | 17       | 54498531  | 54498627                                                      | RNA, U6 small nuclear 1158, pseudogene                                                       |
| 9766  | ENSG00000222363  | 12366      | 5     | 0.18             | snRNA                               | 1        | 17488955  | 17489052                                                      | RNA, U6 small nuclear 773, pseudogene                                                        |
| 10235 | ENSG00000252584  | 12209      | 9     | 0.18             | snRNA                               | 17       | 27715578  | 27715674                                                      | RNA, U6 small nuclear 34, pseudogene                                                         |
| 10261 | ENSG00000252584  | 12209      | 9     | 0.18             | snRNA                               | 17       | 53429928  | 53429992                                                      | RNA, U6 small nuclear 840, pseudogene                                                        |
| 10350 | ENSG00000200759  | 12553      | 4     | 0.18             | snRNA                               | 2        | 23892030  | 23892096                                                      | RNA, U6 small nuclear 864, pseudogene                                                        |
| 10396 | ENSG00000207169  | 12684      | 2     | 0.18             | snRNA                               | 1        | 15098522  | 15098598                                                      | RNA, U6 small nuclear 884, pseudogene                                                        |
| 3240  | ENSG00000211860  | 5985       | 8     | 0.18             | TR, U_gene                          | 17       | 74333397  | 74333503                                                      | RNA, U6 small nuclear 24, pseudogene                                                         |
| 6882  | ENSG00000252902  | 9478       | 9     | 0.18             | TR, V_gene                          | 14       | 22636325  | 22636884                                                      | T cell receptor alpha variant 49<br>T cell receptor alpha variable 30                        |
| 9491  | ENSG00000241104  | LOC284344  | 11940 | 9                | transcribed_unprocessed_pseudo_gene | 19       | 43715943  | 43782798                                                      | carcinoembryonic antigen-related cell adhesion molecule 10                                   |
| 10160 | ENSG000002025514 | 12473      | 8     | 0.18             | transcribed_unprocessed_pseudo_gene | 1        | 47630182  | 47631592                                                      | MT-ND1 pseudogene 34                                                                         |
| 10330 | ENSG00000242412  | DBILP2     | 12595 | 9                | transcribed_unprocessed_pseudo_gene | 2        | 63344966  | 63346677                                                      | diazepam binding inhibitor-like 5 pseudogene 2                                               |
| 3467  | ENSG00000203006  | ANKRD36BP2 | 6082  | 9                | transcribed_unprocessed_pseudo_gene | 2        | 89065324  | 89106126                                                      | ankyrin repeat domain 36B pseudogene 2                                                       |
| 4829  | ENSG00000259249  | UBE2Q2P2   | 8863  | 8                | transcribed_unprocessed_pseudo_gene | 15       | 83023847  | 83088805                                                      | ubiquitin-conjugating enzyme E2Q family member 2 pseudogene 3                                |
| 4893  | ENSG00000186874  | FAM35BP    | 7227  | 5                | transcribed_unprocessed_pseudo_gene | 10       | 46887592  | 46899143                                                      | family with sequence similarity 35, member B, pseudogene                                     |
| 7320  | ENSG00000251474  | RPL32P3    | 10062 | 8                | transcribed_unprocessed_pseudo_gene | 3        | 129101765 | 129118498                                                     | ribosomal protein L32 pseudogene 3                                                           |
| 8343  | ENSG00000185485  | SDHAP1     | 10986 | 8                | transcribed_unprocessed_pseudo_gene | 3        | 19586619  | 19571789                                                      | succinate dehydrogenase complex, subunit A, flavoprotein pseudogene 1                        |
| 8385  | ENSG00000257122  | RNRN3P     | 11042 | 4                | transcribed_unprocessed_pseudo_gene | 16       | 22430090  | 22449036                                                      | RNA polymerase I transcription factor homolog (S. cerevisiae) pseudogene 3                   |
| 8628  | ENSG00000131797  | CLUH3P     | 11237 | 9                | transcribed_unprocessed_pseudo_gene | 16       | 31711911  | 31721097                                                      | clustered mitochondria (dubALCU1) homolog pseudogene 3                                       |
| 8840  | ENSG00000203878  | CHAP2      | 11415 | 7                | transcribed_unprocessed_pseudo_gene | 1        | 111822681 | 111828738                                                     | chitinase, acidic pseudogene 2                                                               |
| 9485  | ENSG00000196970  | NXF4       | 11938 | 8                | transcribed_unprocessed_pseudo_gene | X        | 101804893 | 10182623                                                      | nuclear RNA export factor 4 pseudogene                                                       |
| 9568  | ENSG00000226057  | NXF4       | 12008 | 8                | transcribed_unprocessed_pseudo_gene | 13       | 19520865  | 19636858                                                      | PHD finger protein 2 pseudogene 2                                                            |
| 9646  | ENSG00000259860  | DNM1       | 12071 | 9                | transcribed_unprocessed_pseudo_gene | 15       | 102291235 | 102334505                                                     | DNM1 pseudogene 47                                                                           |
| 10082 | ENSG00000179994  | SPDYETP    | 12410 | 6                | transcribed_unprocessed_pseudo_gene | 7        | 72333321  | 72341076                                                      | speedyRINGO cell cycle regulator family member E7, pseudogene                                |
| 10090 | ENSG00000214514  | KRT42P     | 12418 | 8                | transcribed_unprocessed_pseudo_gene | 17       | 39782579  | 39796451                                                      | keratin 42 pseudogene                                                                        |
| 10121 | ENSG00000182048  | TRPC2      | 12442 | 2                | transcribed_unprocessed_pseudo_gene | 11       | 3631131   | 3658789                                                       | transient receptor potential cation channel, subfamily C, member 2, pseudogene               |
| 10885 | ENSG00000175676  | GOLGA8P    | 12883 | 8                | transcribed_unprocessed_pseudo_gene | 15       | 23435066  | 23448420                                                      | golgin A8 family, member E, pseudogene                                                       |
| 9448  | ENSG00000236965  | 11887      | 0.18  | unary_pseudogene | 11                                  | 5821594  | 5822090   | offcary receptor, family 52, subfamily N, member 3 pseudogene |                                                                                              |
| 10127 | ENSG00000230447  | 12448      | 0.18  | unary_pseudogene | 18                                  | 30915669 | 30915529  | cardiotrophin 2, pseudogene                                   |                                                                                              |
| 10244 | ENSG00000204949  | NRADDP     | 12451 | 0.18             | unary_pseudogene                    | 3        | 47053032  | 47054636                                                      | neurotrophin receptor associated death domain, pseudogene                                    |
| 10459 | ENSG00000215834  | FM3QP      | 12474 | 0.18             | unary_pseudogene                    | 1        | 166572912 | 166600337                                                     | flavin containing monooxygenase 9 pseudogene                                                 |
| 10566 | ENSG00000178073  | TAAR3      | 12775 | 0.18             | unary_pseudogene                    | 6        | 12509384  | 12509441                                                      | trace amine associated receptor 3 (gene/pseudogene)                                          |
| 8981  | ENSG00000202368  | 10714      | 0.18  | unary_pseudogene | 4                                   | 6862198  | 6862872   | transmembrane protease, member 11C, pseudogene                |                                                                                              |
| 8803  | ENSG00000208510  | 11380      | 0.18  | unary_pseudogene | 19                                  | 38727073 | 38727933  | interferon, lambda 3 pseudogene 1                             |                                                                                              |
| 8883  | ENSG00000255303  | 11422      | 0.18  | unary_pseudogene | 11                                  | 57633770 | 57634751  | offcary receptor, family 5, subfamily BA, member 1 pseudogene |                                                                                              |
| 9116  | ENSG00000215481  | 11450      | 0.18  | unary_pseudogene | 2                                   | 7128168  | 71291024  | offcary receptor, family 5, subfamily E, member 91 pseudogene |                                                                                              |
| 9195  | ENSG00000189014  | 11709      | 0.18  | unary_pseudogene | 10                                  | 47379727 | 47420172  | family with sequence similarity 35, member D, pseudogene      |                                                                                              |
| 9216  | ENSG00000230549  | 11722      | 9     | 0.18             | unary_pseudogene                    | 8        | 7189609   | 7191501                                                       | ubiquitin specific peptidase 17-like family member 1, pseudogene                             |
| 9231  | ENSG00000202146  | 11732      | 4     | 0.18             | unary_pseudogene                    | 10       | 81631031  | 81633069                                                      | cathepsin 1, pseudogene 6                                                                    |
| 9632  | ENSG00000242296  | DEFB109P1  | 11756 | 6                | unary_pseudogene                    | 8        | 12250718  | 12257875                                                      | defensin, beta 109, pseudogene 1                                                             |
| 9810  | ENSG00000225851  | 11800      | 7     | 0.18             | unary_pseudogene                    | 6        | 31348851  | 31350065                                                      | major histocompatibility complex, class I, S (pseudogene)                                    |
| 9822  | ENSG00000207498  | 11821      | 2     | 0.18             | unary_pseudogene                    | 19       | 15871051  | 15890719                                                      | cytochrome P450, family 4, subfamily F, polypeptide 24, pseudogene                           |
| 9443  | ENSG00000181884  | GOLGA8CP   | 11862 | 7                | unary_pseudogene                    | 15       | 20781700  | 20781019                                                      | golgin A8 family, member C, pseudogene                                                       |
| 9499  | ENSG00000257792  | 11825      | 7     | 0.18             | unary_pseudogene                    | 12       | 48788293  | 48789175                                                      | offcary receptor, family 5, subfamily BJ, member 1 pseudogene                                |
| 9628  | ENSG00000259414  | 12354      | 3     | 0.18             | unary_pseudogene                    | 15       | 23380289  | 23380667                                                      | hect domain and RLD 2 pseudogene 7                                                           |
| 9639  | ENSG00000237257  | 12067      | 3     | 0.18             | unary_pseudogene                    | 9        | 81356636  | 81357460                                                      | MT-ND2 pseudogene 8                                                                          |
| 9687  | ENSG00000258024  | 12107      | 3     | 0.18             | unary_pseudogene                    | 12       | 48779200  | 48780048                                                      | offcary receptor, family 5, subfamily BT, member 1 pseudogene                                |
| 9785  | ENSG00000158403  | 12182      | 5     | 0.18             | unary_pseudogene                    | 9        | 13810029  | 13810393                                                      | opsolin 1, pseudogene 1                                                                      |
| 9802  | ENSG00000233566  | 12194      | 5     | 0.18             | unary_pseudogene                    | 7        | 83028121  | 83045453                                                      | intradubule repeat containing 18 pseudogene 2                                                |
| 9888  | ENSG00000242435  | 12259      | 2     | 0.18             | unary_pseudogene                    | 22       | 18345912  | 18345362                                                      | neurofilament 1 pseudogene 8                                                                 |
| 9894  | ENSG00000202529  | 12289      | 13    | 0.18             | unary_pseudogene                    | 13       | 25517713  | 25518838                                                      | soluble carrier family 25 (mitochondrial carrier/oxalate transporter) member 15 pseudogene 3 |
| 9921  | ENSG00000231561  | 12378      | 9     | 0.18             | unary_pseudogene                    | 19       | 43158352  | 43172228                                                      | carcinoembryonic antigen-related cell adhesion molecule pseudogene 5                         |
| 9967  | ENSG000002081548 | 12313      | 7     | 0.18             | unary_pseudogene                    | 6        | 28788192  | 28770202                                                      | major histocompatibility complex, class I, P (pseudogene)                                    |
| 9983  | ENSG000002018540 | 12316      | 8     | 0.18             | unary_pseudogene                    | 1        | 24772845  | 24778372                                                      | offcary receptor, family 14, subfamily I, member 1 pseudogene                                |
| 10047 | ENSG00000259884  | 12384      | 9     | 0.18             | unary_pseudogene                    | 15       | 21355634  | 21372886                                                      | BMS1 pseudogene 18                                                                           |
| 10132 | ENSG00000236161  | 12449      | 5     | 0.18             | unary_pseudogene                    | 11       | 3628225   | 3621936                                                       | offcary receptor, family 7, subfamily E, member 117 pseudogene                               |
| 10147 | ENSG00000202578  | 12459      | 8     | 0.18             | unary_pseudogene                    | 9        | 9355409   | 9355562                                                       | offcary receptor, family 7, subfamily E, member 109 pseudogene                               |
| 10158 | ENSG000002048159 | 12469      | 6     | 0.18             | unary_pseudogene                    | 8        | 30054898  | 30095513                                                      | heat shock 70Da protein 8 pseudogene 11                                                      |
| 10216 | ENSG00000218016  | 12520      | 9     | 0.18             | unary_pseudogene                    | 6        | 2815528   | 2815720                                                       | zinc finger protein 192 pseudogene 2                                                         |
| 10220 | ENSG00000186543  | 12522      | 2     | 0.18             | unary_pseudogene                    | 1        | 17168811  | 17169461                                                      | iliary rodlet coiled-coil, rodletin pseudogene 5                                             |
| 10304 | ENSG00000237161  | 12578      | 4     | 0.18             | unary_pseudogene                    | 1        | 15591015  | 15592105                                                      | meiso toxin member 2, pseudogene                                                             |
| 10352 | ENSG00000233963  | 12613      | 13    | 0.18             | unary_pseudogene                    | 13       | 26688547  | 26728313                                                      | ATPase, aminophospholipid transporter, class 1, type 8A, member 2 pseudogene 3               |
| 10511 | ENSG00000202981  | 12745      | 7     | 0.18             | unary_pseudogene                    | 4        | 4145185   | 4152148                                                       | unc-93 homolog, B4 pseudogene (C, eteign)                                                    |
| 10751 | ENSG00000201716  | 12845      | 5     | 0.18             | unary_pseudogene                    | 11       | 7749262   | 7750265                                                       | offcary receptor, family 10, subfamily AB, member 1 pseudogene                               |
| 10835 | ENSG00000230122  | 13015      | 9     | 0.18             | unary_pseudogene                    | 2        | 233214464 | 233216919                                                     | endothelin converting enzyme-like 1, pseudogene 3                                            |
| 2480  | ENSG00000260335  | 3069       | 9     | 0.18             | unary_pseudogene                    | 11       | 6533866   | 6533947                                                       | Uncharacterized protein                                                                      |
| 2483  | ENSG00000260118  | 3807       | 8     | 0.18             | unary_pseudogene                    | 10       | 51565108  | 51569734                                                      | nuclear receptor coactivator 4                                                               |
| 2492  | ENSG00000136293  | NCGM4      | 4058  | 0.18             | unary_pseudogene                    | 11       | 6533866   | 6533947                                                       | Uncharacterized protein                                                                      |
| 2624  | ENSG00000202576  | 4533       | 0.18  | unary_pseudogene | 14                                  | 35402650 | 35402749  | Y RNA                                                         |                                                                                              |
| 3338  | ENSG00000202788  | 5226       | 0.18  | unary_pseudogene | 14                                  | 35402650 | 35402749  | Y RNA                                                         |                                                                                              |
| 3383  | ENSG00000199880  | 5338       | 0.18  | unary_pseudogene | 14                                  | 35402650 | 35402749  | Y RNA                                                         |                                                                                              |
| 3444  | ENSG00000202928  | 5428       | 0.18  | unary_pseudogene | 14                                  | 35402650 | 35402749  | Y RNA                                                         |                                                                                              |
| 3518  | ENSG00000202683  | 5522       | 0.18  | unary_pseudogene | 14                                  | 35402650 | 35402749  | Y RNA                                                         |                                                                                              |
| 3532  | ENSG00000202584  | 5547       | 0.18  | unary_pseudogene | 14                                  | 35402650 | 35402749  | Y RNA                                                         |                                                                                              |
| 3546  | ENSG000002024571 | 5566       | 0.18  | unary_pseudogene | 14                                  | 35402650 | 35402749  | Y RNA                                                         |                                                                                              |
| 3584  | ENSG00000217120  | 5614       | 0.18  | unary_pseudogene | 14                                  | 35402650 | 35402749  | Y RNA                                                         |                                                                                              |
| 3636  | ENSG000002073017 | 5703       | 0.18  | unary_pseudogene | 14                                  | 35402650 | 35402749  | Y RNA                                                         |                                                                                              |
| 3776  | ENSG000002024116 | 5890       | 0.18  | unary_pseudogene | 14                                  | 35402650 | 35402749  | Y RNA                                                         |                                                                                              |
| 3784  | ENSG00000211975  | 5946       | 0.18  | unary_pseudogene | 14                                  | 35402650 | 35402749  | Y RNA                                                         |                                                                                              |
| 3848  | ENSG00000258985  | 6056       | 0.18  | unary_pseudogene | 14                                  | 35402650 | 35402749  | Y RNA                                                         |                                                                                              |
| 4045  | ENSG000002024883 | 6328       | 0.18  | unary_pseudogene | 14                                  | 35402650 | 35402749  | Y RNA                                                         |                                                                                              |
| 4074  | ENSG000002029303 | 6374       | 0.18  | unary_pseudogene | 14                                  | 35402650 | 35402749  | Y RNA                                                         |                                                                                              |
| 4079  | ENSG000002041612 | 6378       | 0.18  | unary_pseudogene | 14                                  | 35402650 | 35402749  | Y RNA                                                         |                                                                                              |
| 4257  | ENSG000002024788 | 6607       | 0.18  | unary_pseudogene | 14                                  | 35402650 | 35402749  | Y RNA                                                         |                                                                                              |
| 4285  | ENSG000002023318 | 6663       | 0.18  | unary_pseudogene | 14                                  | 35402650 | 35402749  | Y RNA                                                         |                                                                                              |
| 4316  | ENSG00000202036  | 6706       | 0.18  | unary_pseudogene | 14                                  | 35402650 | 35402749  | Y RNA                                                         |                                                                                              |
| 4498  | ENSG00000202151  | 6970       | 0.18  | unary_pseudogene | 14                                  | 35402650 | 35402749  | Y RNA                                                         |                                                                                              |
| 4603  | ENSG00000202566  | 7182       | 0.18  | unary_pseudogene | 14                                  | 35402650 | 35402749  | Y RNA                                                         |                                                                                              |
| 4855  | ENSG00000202686  | 7463       | 0.18  | unary_pseudogene | 14                                  | 35402650 | 35402749  | Y RNA                                                         |                                                                                              |
| 5014  | ENSG000002072888 | 7870       | 9     | 0.18             | unary_pseudogene                    | 14       | 35402650  | 35402749                                                      | Y RNA                                                                                        |
| 5028  | ENSG000002023118 | 7886       | 9     | 0.18             | unary_pseudogene                    | 14       | 35402650  | 35402749                                                      | Y RNA                                                                                        |
| 5072  | ENSG0000020      |            |       |                  |                                     |          |           |                                                               |                                                                                              |



|      |                  |         |      |    |           |           |  |  |                                                 |
|------|------------------|---------|------|----|-----------|-----------|--|--|-------------------------------------------------|
| 7854 | ENSG00000262038  | 10571.4 | 0.18 |    |           |           |  |  |                                                 |
| 7858 | ENSG00000234478  | 10575.3 | 0.18 |    |           |           |  |  |                                                 |
| 7877 | ENSG00000251981  | 10588.4 | 0.18 |    |           |           |  |  |                                                 |
| 7912 | ENSG000002027133 | 10622.6 | 0.18 | 15 | 80434400  | 80434469  |  |  | Small nuclear RNA SNORD112                      |
| 7964 | ENSG00000266604  | 10660.4 | 0.18 |    |           |           |  |  |                                                 |
| 7969 | ENSG00000297174  | 10703.4 | 0.18 |    |           |           |  |  |                                                 |
| 8005 | ENSG00000234478  | 10713.5 | 0.18 |    |           |           |  |  |                                                 |
| 8118 | ENSG00000246553  | 10810.1 | 0.18 |    |           |           |  |  |                                                 |
| 8134 | ENSG00000293911  | 10829.9 | 0.18 |    |           |           |  |  |                                                 |
| 8178 | ENSG00000279528  | 10864.4 | 0.18 |    |           |           |  |  |                                                 |
| 8184 | ENSG00000255552  | 10868.9 | 0.18 |    |           |           |  |  |                                                 |
| 8206 | ENSG00000257172  | 10886.6 | 0.18 |    |           |           |  |  |                                                 |
| 8239 | ENSG00000222197  | 10915.4 | 0.18 |    |           |           |  |  |                                                 |
| 8271 | ENSG00000202400  | 10941.2 | 0.18 |    |           |           |  |  |                                                 |
| 8366 | ENSG00000292895  | 11017.1 | 0.18 |    |           |           |  |  |                                                 |
| 8424 | ENSG00000271500  | 11087.4 | 0.18 |    |           |           |  |  |                                                 |
| 8482 | ENSG00000244571  | 11118.6 | 0.18 |    |           |           |  |  |                                                 |
| 8513 | ENSG00000254933  | 11151.5 | 0.18 |    |           |           |  |  |                                                 |
| 8549 | ENSG00000266965  | 11179.4 | 0.18 |    |           |           |  |  |                                                 |
| 8587 | ENSG00000202211  | 11206.4 | 0.18 |    |           |           |  |  |                                                 |
| 8597 | ENSG00000272158  | 11213.5 | 0.18 |    |           |           |  |  |                                                 |
| 8642 | ENSG00000248145  | 11246.4 | 0.18 |    |           |           |  |  |                                                 |
| 8686 | ENSG00000257877  | 11283.9 | 0.18 |    |           |           |  |  |                                                 |
| 8699 | ENSG00000222628  | 11295.1 | 0.18 |    |           |           |  |  |                                                 |
| 8887 | ENSG00000220154  | 11278.3 | 0.18 |    |           |           |  |  |                                                 |
| 8704 | ENSG00000248763  | 11295.2 | 0.18 |    |           |           |  |  |                                                 |
| 8729 | ENSG00000293931  | 11310.3 | 0.18 |    |           |           |  |  |                                                 |
| 8748 | ENSG00000272356  | 11333.4 | 0.18 |    |           |           |  |  |                                                 |
| 8765 | ENSG000002022121 | 11350.3 | 0.18 |    |           |           |  |  |                                                 |
| 8785 | ENSG000002025264 | 11386.7 | 0.18 |    |           |           |  |  |                                                 |
| 8789 | ENSG00000260953  | 11389.7 | 0.18 |    |           |           |  |  |                                                 |
| 8798 | ENSG00000298072  | 11378.5 | 0.18 |    |           |           |  |  |                                                 |
| 8810 | ENSG00000292393  | 11384.5 | 0.18 |    |           |           |  |  |                                                 |
| 8813 | ENSG00000222032  | 11397.1 | 0.18 |    |           |           |  |  |                                                 |
| 8822 | ENSG00000296479  | 11405.4 | 0.18 |    |           |           |  |  |                                                 |
| 8823 | ENSG00000254648  | 11405.8 | 0.18 | 14 | 126787368 | 126787904 |  |  | immunoglobulin heavy variable 3-29 (pseudogene) |
| 8830 | ENSG00000230570  | 11409.5 | 0.18 |    |           |           |  |  |                                                 |
| 8855 | ENSG00000296373  | 11423.2 | 0.18 |    |           |           |  |  |                                                 |
| 8887 | ENSG00000292783  | 11433.4 | 0.18 |    |           |           |  |  |                                                 |
| 8887 | ENSG00000231464  | 11455.4 | 0.18 |    |           |           |  |  |                                                 |
| 8888 | ENSG00000296274  | 11455.3 | 0.18 |    |           |           |  |  |                                                 |
| 8915 | ENSG00000292498  | 11470.7 | 0.18 | 4  | 184250451 | 184250554 |  |  | Small nuclear RNA U13                           |
| 8939 | ENSG00000255340  | 11499.6 | 0.18 |    |           |           |  |  |                                                 |
| 8942 | ENSG00000241400  | 11501.5 | 0.18 |    |           |           |  |  |                                                 |
| 8944 | ENSG00000296490  | 11502.7 | 0.18 |    |           |           |  |  |                                                 |
| 8960 | ENSG00000272158  | 11518.6 | 0.18 |    |           |           |  |  |                                                 |
| 8977 | ENSG00000252058  | 11527.9 | 0.18 | 20 | 4863030   | 4863122   |  |  | Small nuclear RNA U13                           |
| 8980 | ENSG00000296980  | 11528.5 | 0.18 |    |           |           |  |  |                                                 |
| 9001 | ENSG00000290908  | 11546.6 | 0.18 |    |           |           |  |  |                                                 |
| 9028 | ENSG00000224942  | 11570.4 | 0.18 |    |           |           |  |  |                                                 |
| 9058 | ENSG000002445502 | 11599.4 | 0.18 |    |           |           |  |  |                                                 |
| 9090 | ENSG00000203118  | 11599.6 | 0.18 |    |           |           |  |  |                                                 |
| 9066 | ENSG00000203428  | 11604.7 | 0.18 |    |           |           |  |  |                                                 |
| 9071 | ENSG00000236045  | 11607.9 | 0.18 |    |           |           |  |  |                                                 |
| 9084 | ENSG00000251657  | 11615.4 | 0.18 |    |           |           |  |  |                                                 |
| 9084 | ENSG00000271250  | 11615.1 | 0.18 |    |           |           |  |  |                                                 |
| 9088 | ENSG00000295803  | 11630.4 | 0.18 |    |           |           |  |  |                                                 |
| 9101 | ENSG00000292878  | 11630.9 | 0.18 | 18 | 77275812  | 77276267  |  |  | Uncharacterized protein                         |
| 9103 | ENSG00000228553  | 11631.3 | 0.18 |    |           |           |  |  |                                                 |
| 9148 | ENSG00000237419  | 11669.4 | 0.18 |    |           |           |  |  |                                                 |
| 9152 | ENSG00000231815  | 11673.5 | 0.18 |    |           |           |  |  |                                                 |
| 9153 | ENSG00000254038  | 11673.9 | 0.18 |    |           |           |  |  |                                                 |
| 9185 | ENSG00000258857  | 11681.5 | 0.18 |    |           |           |  |  |                                                 |
| 9170 | ENSG00000293911  | 11684.1 | 0.18 |    |           |           |  |  |                                                 |
| 9194 | ENSG00000272799  | 11706.4 | 0.18 |    |           |           |  |  |                                                 |
| 9215 | ENSG00000227671  | 11722.6 | 0.18 |    |           |           |  |  |                                                 |
| 9222 | ENSG00000222526  | 11726.6 | 0.18 |    |           |           |  |  |                                                 |
| 9234 | ENSG00000238288  | 11733.3 | 0.18 |    |           |           |  |  |                                                 |
| 9238 | ENSG00000211482  | 11735.2 | 0.18 |    |           |           |  |  |                                                 |
| 9251 | ENSG00000231448  | 11749.6 | 0.18 |    |           |           |  |  |                                                 |
| 9253 | ENSG00000230638  | 11757.4 | 0.18 |    |           |           |  |  |                                                 |
| 9256 | ENSG00000236576  | 11753.3 | 0.18 | 1  | 220310506 | 220310608 |  |  | Small nuclear RNA U13                           |
| 9260 | ENSG00000255128  | 11758.3 | 0.18 |    |           |           |  |  |                                                 |
| 9264 | ENSG00000229282  | 11757.4 | 0.18 |    |           |           |  |  |                                                 |
| 9284 | ENSG00000296809  | 11775.6 | 0.18 |    |           |           |  |  |                                                 |
| 9286 | ENSG00000254448  | 11777.7 | 0.18 |    |           |           |  |  |                                                 |
| 9305 | ENSG00000298885  | 11792.3 | 0.18 |    |           |           |  |  |                                                 |
| 9339 | ENSG00000296582  | 11821.5 | 0.18 |    |           |           |  |  |                                                 |
| 9340 | ENSG00000296768  | 11821.8 | 0.18 |    |           |           |  |  |                                                 |
| 9341 | ENSG00000281030  | 11822.1 | 0.18 |    |           |           |  |  |                                                 |
| 9342 | ENSG00000234323  | 11822.7 | 0.18 |    |           |           |  |  |                                                 |
| 9360 | ENSG00000254398  | 11834.3 | 0.18 |    |           |           |  |  |                                                 |
| 9369 | ENSG00000273428  | 11840.4 | 0.18 |    |           |           |  |  |                                                 |
| 9372 | ENSG00000248376  | 11842.6 | 0.18 | 14 | 24778161  | 24781252  |  |  | Leukotriene B4 receptor 2                       |
| 9377 | ENSG00000272698  | 11846.4 | 0.18 |    |           |           |  |  |                                                 |
| 9379 | ENSG00000222456  | 11849.4 | 0.18 |    |           |           |  |  |                                                 |
| 9384 | ENSG00000286445  | 11854.6 | 0.18 |    |           |           |  |  |                                                 |
| 9388 | ENSG00000236887  | 11855.5 | 0.18 |    |           |           |  |  |                                                 |
| 9389 | ENSG00000203162  | 11856.1 | 0.18 |    |           |           |  |  |                                                 |
| 9393 | ENSG00000240791  | 11857.7 | 0.18 |    |           |           |  |  |                                                 |
| 9407 | ENSG00000243190  | 11865.4 | 0.18 |    |           |           |  |  |                                                 |
| 9408 | ENSG00000293911  | 11865.3 | 0.18 |    |           |           |  |  |                                                 |
| 9409 | ENSG000001986400 | 11867.1 | 0.18 | 9  | 69252845  | 69254032  |  |  | HDCMB45P: Uncharacterized protein               |
| 9426 | ENSG00000221286  | 11880.4 | 0.18 |    |           |           |  |  |                                                 |
| 9430 | ENSG00000203425  | 11881.4 | 0.18 |    |           |           |  |  |                                                 |
| 9435 | ENSG00000255827  | 11884.1 | 0.18 |    |           |           |  |  |                                                 |
| 9438 | ENSG00000296148  | 11888.6 | 0.18 |    |           |           |  |  |                                                 |
| 9442 | ENSG00000296274  | 11892.1 | 0.18 |    |           |           |  |  |                                                 |
| 9444 | ENSG00000263946  | 11892.9 | 0.18 |    |           |           |  |  |                                                 |
| 9450 | ENSG00000270273  | 11899.6 | 0.18 |    |           |           |  |  |                                                 |
| 9453 | ENSG00000232909  | 11902.4 | 0.18 |    |           |           |  |  |                                                 |
| 9456 | ENSG00000253983  | 11907.9 | 0.18 |    |           |           |  |  |                                                 |
| 9459 | ENSG00000236107  | 11912.2 | 0.18 |    |           |           |  |  |                                                 |
| 9460 | ENSG00000230663  | 11912.3 | 0.18 |    |           |           |  |  |                                                 |
| 9462 | ENSG00000256404  | 11914.6 | 0.18 |    |           |           |  |  |                                                 |
| 9463 | ENSG00000250481  | 11915.7 | 0.18 |    |           |           |  |  |                                                 |
| 9466 | ENSG00000230927  | 11920.2 | 0.18 |    |           |           |  |  |                                                 |
| 9472 | ENSG00000241913  | 11928.6 | 0.18 |    |           |           |  |  |                                                 |
| 9477 | ENSG00000157306  | 11933.2 | 0.18 |    |           |           |  |  |                                                 |
| 9479 | ENSG00000295475  | 11933.3 | 0.18 |    |           |           |  |  |                                                 |
| 9490 | ENSG00000248752  | 11940.9 | 0.18 |    |           |           |  |  |                                                 |
| 9493 | ENSG00000298156  | 11943.2 | 0.18 |    |           |           |  |  |                                                 |
| 9496 | ENSG00000232762  | 11947.5 | 0.18 |    |           |           |  |  |                                                 |
| 9501 | ENSG00000243072  | 11949.7 | 0.18 |    |           |           |  |  |                                                 |
| 9509 | ENSG00000253123  | 11957.6 | 0.18 |    |           |           |  |  |                                                 |
| 9512 | ENSG00000232374  | 11961.1 | 0.18 |    |           |           |  |  |                                                 |
| 9518 | ENSG00000230932  | 11963.7 | 0.18 |    |           |           |  |  |                                                 |
| 9520 | ENSG00000297388  | 11966.4 | 0.18 |    |           |           |  |  |                                                 |
| 9521 | ENSG00000287793  | 11967.3 | 0.18 |    |           |           |  |  |                                                 |
| 9523 | ENSG00000251630  | 11970.6 | 0.18 |    |           |           |  |  |                                                 |
| 9524 | ENSG00000235440  | 11970.9 | 0.18 |    |           |           |  |  |                                                 |
| 9530 | ENSG00000236887  | 11973.8 | 0.18 |    |           |           |  |  |                                                 |
| 9531 | ENSG00000227430  | 11974.5 | 0.18 |    |           |           |  |  |                                                 |
| 9532 | ENSG00000237953  | 11977.1 | 0.18 |    |           |           |  |  |                                                 |
| 9545 | ENSG00000296911  | 11982.4 | 0.18 |    |           |           |  |  |                                                 |
| 9556 | ENSG00000232920  | 11988.1 | 0.18 |    |           |           |  |  |                                                 |
| 9559 | ENSG00000258183  | 12002.8 | 0.18 |    |           |           |  |  |                                                 |
| 9562 | ENSG00000234240  | 12004.3 | 0.18 |    |           |           |  |  |                                                 |
| 9563 | ENSG00000285289  | 12004.4 | 0.18 |    |           |           |  |  |                                                 |
| 9569 | ENSG00000268473  | 12008.9 | 0.18 |    |           |           |  |  |                                                 |
| 9570 | ENSG00000232325  | 12009.4 | 0.18 |    |           |           |  |  |                                                 |
| 9571 | ENSG00000271715  | 12009.5 | 0.18 |    |           |           |  |  |                                                 |
| 9572 | ENSG00000258513  | 12009.3 | 0.18 |    |           |           |  |  |                                                 |
| 9576 | ENSG00000270984  | 12013.9 | 0.18 |    |           |           |  |  |                                                 |
| 9596 | ENSG00000245132  | 12025.2 | 0.18 |    |           |           |  |  |                                                 |
| 9592 | ENSG00000223786  | 12025.4 | 0.18 |    |           |           |  |  |                                                 |
| 9597 | ENSG00000251777  | 12029.6 | 0.18 |    |           |           |  |  |                                                 |
| 9599 | ENSG00000229169  | 12030.2 | 0.18 |    |           |           |  |  |                                                 |
| 9605 | ENSG00000250781  | 12037.2 | 0.18 |    |           |           |  |  |                                                 |
| 9610 | ENSG00000270110  | 12041.4 | 0.18 |    |           |           |  |  |                                                 |
| 9611 | ENSG00000230638  | 12042.4 | 0.18 |    |           |           |  |  |                                                 |
| 9615 | ENSG00000248073  | 12045.1 | 0.18 |    |           |           |  |  |                                                 |
| 9625 | ENSG00000229402  | 12052.3 | 0.18 |    |           |           |  |  |                                                 |
| 9633 | ENSG00000233933  | 12062.4 | 0.18 |    |           |           |  |  |                                                 |
| 9638 | ENSG00000268427  | 12066.4 | 0.18 |    |           |           |  |  |                                                 |
| 9641 | ENSG00000226410  | 12067.5 | 0.18 |    |           |           |  |  |                                                 |
| 9642 | ENSG00000250644  | 12067.9 | 0.18 |    |           |           |  |  |                                                 |
| 9647 | ENSG00000272626  | 12072.8 | 0.18 |    |           |           |  |  |                                                 |
| 9649 | ENSG00000229881  | 12074.7 | 0.18 |    |           |           |  |  |                                                 |
| 9653 | ENSG00000206343  | 12080.3 | 0.18 | 14 | 91614372  | 91614663  |  |  | RNA 75L_cytoplasmic 506_pseudogene              |
| 9654 | ENSG00000232466  | 12080.5 | 0.18 |    |           |           |  |  |                                                 |

|       |                 |         |         |      |    |          |          |  |                               |
|-------|-----------------|---------|---------|------|----|----------|----------|--|-------------------------------|
| 9664  | ENSG00000244470 |         | 12088.2 | 0.18 |    |          |          |  |                               |
| 9665  | ENSG00000243559 |         | 12088.3 | 0.18 |    |          |          |  |                               |
| 9667  | ENSG00000202220 |         | 12091.4 | 0.18 | 8  | 74892019 | 74892112 |  | Y RNA                         |
| 9672  | ENSG00000249219 |         | 12098.7 | 0.18 |    |          |          |  |                               |
| 9673  | ENSG00000203613 |         | 12098.8 | 0.18 |    |          |          |  |                               |
| 9677  | ENSG00000203263 |         | 12101   | 0.18 |    |          |          |  |                               |
| 9685  | ENSG00000237858 |         | 12106.3 | 0.18 |    |          |          |  |                               |
| 9688  | ENSG00000202522 |         | 12107.3 | 0.18 |    |          |          |  |                               |
| 9689  | ENSG00000202544 |         | 12107.6 | 0.18 |    |          |          |  |                               |
| 9692  | ENSG00000237473 |         | 12107.9 | 0.18 |    |          |          |  |                               |
| 9698  | ENSG00000202678 |         | 12110   | 0.18 |    |          |          |  |                               |
| 9698  | ENSG00000214725 |         | 12111.7 | 0.18 |    |          |          |  |                               |
| 9700  | ENSG00000254265 |         | 12114.1 | 0.18 |    |          |          |  |                               |
| 9701  | ENSG00000202528 |         | 12114.2 | 0.18 |    |          |          |  |                               |
| 9706  | ENSG00000217195 |         | 12117.8 | 0.18 |    |          |          |  |                               |
| 9707  | ENSG00000225676 |         | 12119.2 | 0.18 |    |          |          |  |                               |
| 9711  | ENSG00000202584 |         | 12121.4 | 0.18 |    |          |          |  |                               |
| 9712  | ENSG00000202712 |         | 12121.8 | 0.18 |    |          |          |  |                               |
| 9729  | ENSG00000204130 |         | 12136.5 | 0.18 |    |          |          |  |                               |
| 9731  | ENSG00000217410 |         | 12138.7 | 0.18 |    |          |          |  |                               |
| 9732  | ENSG00000202326 |         | 12140.1 | 0.18 |    |          |          |  |                               |
| 9735  | ENSG00000202851 |         | 12142.3 | 0.18 |    |          |          |  |                               |
| 9739  | ENSG00000204817 |         | 12145.2 | 0.18 |    |          |          |  |                               |
| 9740  | ENSG00000202275 |         | 12146.1 | 0.18 |    |          |          |  |                               |
| 9746  | ENSG00000202495 |         | 12148.8 | 0.18 |    |          |          |  |                               |
| 9747  | ENSG00000238276 |         | 12150.7 | 0.18 |    |          |          |  |                               |
| 9748  | ENSG00000202787 |         | 12152   | 0.18 |    |          |          |  |                               |
| 9749  | ENSG00000208148 |         | 12153.4 | 0.18 |    |          |          |  |                               |
| 9750  | ENSG00000208278 |         | 12154.1 | 0.18 |    |          |          |  |                               |
| 9752  | ENSG00000202113 |         | 12155.9 | 0.18 |    |          |          |  |                               |
| 9755  | ENSG00000202758 |         | 12159.7 | 0.18 |    |          |          |  |                               |
| 9763  | ENSG00000202961 |         | 12165.8 | 0.18 |    |          |          |  |                               |
| 9764  | ENSG00000202758 |         | 12165.9 | 0.18 |    |          |          |  |                               |
| 9767  | ENSG00000202070 |         | 12168.4 | 0.18 |    |          |          |  |                               |
| 9768  | ENSG00000202128 |         | 12170.6 | 0.18 |    |          |          |  |                               |
| 9769  | ENSG00000202091 |         | 12170.8 | 0.18 |    |          |          |  |                               |
| 9770  | ENSG00000202380 |         | 12171.3 | 0.18 |    |          |          |  |                               |
| 9774  | ENSG00000202468 |         | 12173.8 | 0.18 |    |          |          |  |                               |
| 9776  | ENSG00000202053 |         | 12174.8 | 0.18 |    |          |          |  |                               |
| 9778  | ENSG00000208508 |         | 12176.7 | 0.18 |    |          |          |  |                               |
| 9779  | ENSG00000202025 |         | 12177   | 0.18 |    |          |          |  |                               |
| 9780  | ENSG00000202589 |         | 12177.1 | 0.18 |    |          |          |  |                               |
| 9781  | ENSG00000202478 |         | 12177.9 | 0.18 |    |          |          |  |                               |
| 9783  | ENSG00000202741 |         | 12180.3 | 0.18 |    |          |          |  |                               |
| 9784  | ENSG00000202055 |         | 12181.8 | 0.18 |    |          |          |  |                               |
| 9786  | ENSG00000202355 |         | 12182.5 | 0.18 |    |          |          |  |                               |
| 9787  | ENSG00000204015 |         | 12184.2 | 0.18 |    |          |          |  |                               |
| 9789  | ENSG00000204984 |         | 12186.7 | 0.18 |    |          |          |  |                               |
| 9790  | ENSG00000202058 |         | 12186.8 | 0.18 |    |          |          |  |                               |
| 9792  | ENSG00000204350 |         | 12189   | 0.18 |    |          |          |  |                               |
| 9795  | ENSG00000202191 |         | 12190.9 | 0.18 |    |          |          |  |                               |
| 9798  | ENSG00000204104 |         | 12192   | 0.18 |    |          |          |  |                               |
| 9801  | ENSG00000202400 |         | 12193.5 | 0.18 |    |          |          |  |                               |
| 9803  | ENSG00000191934 |         | 12194.5 | 0.18 |    |          |          |  |                               |
| 9809  | ENSG00000202956 |         | 12201.5 | 0.18 |    |          |          |  |                               |
| 9812  | ENSG00000202709 |         | 12202.5 | 0.18 |    |          |          |  |                               |
| 9814  | ENSG00000202807 |         | 12204.3 | 0.18 |    |          |          |  |                               |
| 9821  | ENSG00000202728 |         | 12214.4 | 0.18 |    |          |          |  |                               |
| 9824  | ENSG00000204038 |         | 12216.3 | 0.18 |    |          |          |  |                               |
| 9826  | ENSG00000202587 |         | 12218.3 | 0.18 |    |          |          |  |                               |
| 9828  | ENSG00000202524 |         | 12220.5 | 0.18 |    |          |          |  |                               |
| 9832  | ENSG00000202857 |         | 12221.1 | 0.18 |    |          |          |  |                               |
| 9835  | ENSG00000204798 |         | 12222.2 | 0.18 |    |          |          |  |                               |
| 9838  | ENSG00000204688 |         | 12224.5 | 0.18 |    |          |          |  |                               |
| 9839  | ENSG00000202590 |         | 12224.9 | 0.18 |    |          |          |  |                               |
| 9841  | ENSG00000204243 |         | 12227.2 | 0.18 |    |          |          |  |                               |
| 9842  | ENSG00000204458 |         | 12228.5 | 0.18 |    |          |          |  |                               |
| 9844  | ENSG00000204223 |         | 12229.1 | 0.18 |    |          |          |  |                               |
| 9847  | ENSG00000202178 |         | 12229.8 | 0.18 |    |          |          |  |                               |
| 9849  | ENSG00000202247 |         | 12231.1 | 0.18 |    |          |          |  |                               |
| 9852  | ENSG00000202760 |         | 12235.6 | 0.18 |    |          |          |  |                               |
| 9854  | ENSG00000202731 |         | 12237.8 | 0.18 |    |          |          |  |                               |
| 9859  | ENSG00000202524 |         | 12242.4 | 0.18 |    |          |          |  |                               |
| 9860  | ENSG00000204825 |         | 12243.8 | 0.18 |    |          |          |  |                               |
| 9861  | ENSG00000204950 |         | 12244.3 | 0.18 |    |          |          |  |                               |
| 9863  | ENSG00000202655 |         | 12244.7 | 0.18 |    |          |          |  |                               |
| 9864  | ENSG00000202871 |         | 12245   | 0.18 |    |          |          |  |                               |
| 9867  | ENSG00000202704 |         | 12248.8 | 0.18 |    |          |          |  |                               |
| 9868  | ENSG00000204122 |         | 12247.1 | 0.18 |    |          |          |  |                               |
| 9871  | ENSG00000202942 |         | 12248.5 | 0.18 |    |          |          |  |                               |
| 9875  | ENSG00000204939 |         | 12250   | 0.18 |    |          |          |  |                               |
| 9876  | ENSG00000202758 |         | 12251.3 | 0.18 |    |          |          |  |                               |
| 9883  | ENSG00000204130 |         | 12256.4 | 0.18 |    |          |          |  |                               |
| 9885  | ENSG00000202883 |         | 12258.3 | 0.18 |    |          |          |  |                               |
| 9887  | ENSG00000202488 |         | 12259.1 | 0.18 |    |          |          |  |                               |
| 9889  | ENSG00000202925 |         | 12260.1 | 0.18 |    |          |          |  |                               |
| 9895  | ENSG00000204187 |         | 12263.8 | 0.18 |    |          |          |  |                               |
| 9898  | ENSG00000204650 |         | 12266.5 | 0.18 |    |          |          |  |                               |
| 9902  | ENSG00000204284 |         | 12268.6 | 0.18 |    |          |          |  |                               |
| 9909  | ENSG00000202573 |         | 12272   | 0.18 |    |          |          |  |                               |
| 9918  | ENSG00000204646 |         | 12278   | 0.18 |    |          |          |  |                               |
| 9920  | ENSG00000202710 |         | 12278   | 0.18 |    |          |          |  |                               |
| 9923  | ENSG00000202637 |         | 12279.4 | 0.18 |    |          |          |  |                               |
| 9927  | ENSG00000202721 |         | 12281.2 | 0.18 |    |          |          |  |                               |
| 9928  | ENSG00000202895 |         | 12283.3 | 0.18 |    |          |          |  |                               |
| 9930  | ENSG00000202380 |         | 12287.4 | 0.18 |    |          |          |  |                               |
| 9932  | ENSG00000202723 |         | 12288.5 | 0.18 |    |          |          |  |                               |
| 9934  | ENSG00000202452 |         | 12289.4 | 0.18 |    |          |          |  |                               |
| 9939  | ENSG00000202407 |         | 12292.8 | 0.18 |    |          |          |  |                               |
| 9941  | ENSG00000202730 |         | 12293.1 | 0.18 |    |          |          |  |                               |
| 9942  | ENSG00000202140 |         | 12293.7 | 0.18 |    |          |          |  |                               |
| 9944  | ENSG00000208718 |         | 12295.6 | 0.18 |    |          |          |  |                               |
| 9947  | ENSG00000204319 |         | 12300.9 | 0.18 |    |          |          |  |                               |
| 9949  | ENSG00000204547 |         | 12302.8 | 0.18 |    |          |          |  |                               |
| 9950  | ENSG00000202345 |         | 12303.1 | 0.18 |    |          |          |  |                               |
| 9953  | ENSG00000208148 |         | 12308.6 | 0.18 |    |          |          |  |                               |
| 9955  | ENSG00000202015 |         | 12307   | 0.18 |    |          |          |  |                               |
| 9960  | ENSG00000202088 |         | 12308   | 0.18 |    |          |          |  |                               |
| 9961  | ENSG00000202092 |         | 12308   | 0.18 |    |          |          |  |                               |
| 9963  | ENSG00000202925 |         | 12309.5 | 0.18 |    |          |          |  |                               |
| 9964  | ENSG00000204284 | TBC1D3H | 12310.3 | 0.18 | 17 | 34581086 | 34808061 |  | TBC1 domain family, member 3H |
| 9969  | ENSG00000202703 |         | 12317.4 | 0.18 |    |          |          |  |                               |
| 9973  | ENSG00000202465 |         | 12321.3 | 0.18 |    |          |          |  |                               |
| 9981  | ENSG00000202703 |         | 12328.7 | 0.18 |    |          |          |  |                               |
| 9982  | ENSG00000204204 |         | 12330.3 | 0.18 |    |          |          |  |                               |
| 9984  | ENSG00000202524 |         | 12332.8 | 0.18 |    |          |          |  |                               |
| 9986  | ENSG00000204148 |         | 12334   | 0.18 |    |          |          |  |                               |
| 9987  | ENSG00000202124 |         | 12334.8 | 0.18 |    |          |          |  |                               |
| 9988  | ENSG00000204458 |         | 12337.2 | 0.18 |    |          |          |  |                               |
| 9989  | ENSG00000202127 |         | 12337.3 | 0.18 |    |          |          |  |                               |
| 9995  | ENSG00000202421 |         | 12343.1 | 0.18 |    |          |          |  |                               |
| 9997  | ENSG00000202465 |         | 12343.8 | 0.18 |    |          |          |  |                               |
| 10000 | ENSG00000204889 |         | 12346.5 | 0.18 |    |          |          |  |                               |
| 10007 | ENSG00000204139 |         | 12351.6 | 0.18 |    |          |          |  |                               |
| 10010 | ENSG00000202058 |         | 12353.1 | 0.18 |    |          |          |  |                               |
| 10011 | ENSG00000202188 |         | 12355.8 | 0.18 |    |          |          |  |                               |
| 10020 | ENSG00000202198 |         | 12363.6 | 0.18 |    |          |          |  |                               |
| 10024 | ENSG00000202572 |         | 12366.2 | 0.18 |    |          |          |  |                               |
| 10026 | ENSG00000204712 |         | 12367.2 | 0.18 |    |          |          |  |                               |
| 10027 | ENSG00000204263 |         | 12368.2 | 0.18 |    |          |          |  |                               |
| 10029 | ENSG00000187888 |         | 12371.2 | 0.18 |    |          |          |  |                               |
| 10032 | ENSG00000204885 |         | 12372.2 | 0.18 |    |          |          |  |                               |
| 10039 | ENSG00000202046 |         | 12378.2 | 0.18 |    |          |          |  |                               |
| 10041 | ENSG00000206491 |         | 12379   | 0.18 |    |          |          |  |                               |
| 10048 | ENSG00000202798 |         | 12385.2 | 0.18 |    |          |          |  |                               |
| 10049 | ENSG00000202657 |         | 12386.6 | 0.18 |    |          |          |  |                               |
| 10052 | ENSG00000204046 |         | 12388.5 | 0.18 |    |          |          |  |                               |
| 10057 | ENSG0000021738  |         | 12394.9 | 0.18 | 1  | 11229564 | 11229670 |  | Small nuclear RNA U13         |
| 10060 | ENSG00000202850 |         | 12396.3 | 0.18 |    |          |          |  |                               |
| 10063 | ENSG00000215841 |         | 12397.4 | 0.18 |    |          |          |  |                               |
| 10066 | ENSG00000202126 |         | 12400.3 | 0.18 |    |          |          |  |                               |
| 10067 | ENSG00000203414 |         | 12402   | 0.18 |    |          |          |  |                               |
| 10074 | ENSG00000202370 |         | 12405.2 | 0.18 |    |          |          |  |                               |
| 10075 | ENSG00000202164 |         | 12406   | 0.18 |    |          |          |  |                               |
| 10077 | ENSG00000202858 |         | 12407.5 | 0.18 |    |          |          |  |                               |
| 10080 | ENSG00000214897 |         | 12408.8 | 0.18 |    |          |          |  |                               |
| 10083 | ENSG00000202781 |         | 12413.6 | 0.18 |    |          |          |  |                               |
| 10084 | ENSG00000202057 |         | 12416   | 0.18 |    |          |          |  |                               |
| 10085 | ENSG00000202483 |         | 12416.8 | 0.18 |    |          |          |  |                               |
| 10086 | ENSG00000202837 |         | 12417.6 | 0.18 |    |          |          |  |                               |
| 10091 | ENSG00000202426 |         | 12420.4 | 0.18 |    |          |          |  |                               |

|       |                 |         |      |   |          |          |  |  |                                                                       |
|-------|-----------------|---------|------|---|----------|----------|--|--|-----------------------------------------------------------------------|
| 10094 | ENSG00000236990 | 12422.7 | 0.18 |   |          |          |  |  |                                                                       |
| 10097 | ENSG00000236607 | 12424.7 | 0.18 |   |          |          |  |  |                                                                       |
| 10099 | ENSG00000233531 | 12425.1 | 0.18 |   |          |          |  |  |                                                                       |
| 10100 | ENSG00000243733 | 12426.6 | 0.18 |   |          |          |  |  |                                                                       |
| 10104 | ENSG00000239698 | 12429.6 | 0.18 |   |          |          |  |  |                                                                       |
| 10107 | ENSG00000234943 | 12432.3 | 0.18 |   |          |          |  |  |                                                                       |
| 10116 | ENSG00000253995 | 12438.6 | 0.18 |   |          |          |  |  |                                                                       |
| 10119 | ENSG00000233599 | 12440.6 | 0.18 |   |          |          |  |  |                                                                       |
| 10122 | ENSG00000231311 | 12442.6 | 0.18 |   |          |          |  |  |                                                                       |
| 10125 | ENSG00000255858 | 12444.6 | 0.18 |   |          |          |  |  |                                                                       |
| 10131 | ENSG00000230481 | 12449   | 0.18 |   |          |          |  |  |                                                                       |
| 10141 | ENSG00000230465 | 12456.7 | 0.18 |   |          |          |  |  |                                                                       |
| 10143 | ENSG00000188470 | 12457.8 | 0.18 |   |          |          |  |  |                                                                       |
| 10145 | ENSG00000256272 | 12461.4 | 0.18 |   |          |          |  |  |                                                                       |
| 10159 | ENSG00000234891 | 12464   | 0.18 |   |          |          |  |  |                                                                       |
| 10151 | ENSG00000230731 | 12464.2 | 0.18 |   |          |          |  |  |                                                                       |
| 10152 | ENSG00000233086 | 12464.3 | 0.18 |   |          |          |  |  |                                                                       |
| 10154 | ENSG00000211897 | 12469.2 | 0.18 |   |          |          |  |  |                                                                       |
| 10163 | ENSG00000232456 | 12477.8 | 0.18 |   |          |          |  |  |                                                                       |
| 10166 | ENSG00000213620 | 12478.1 | 0.18 |   |          |          |  |  |                                                                       |
| 10168 | ENSG00000232525 | 12478.7 | 0.18 |   |          |          |  |  |                                                                       |
| 10169 | ENSG00000226206 | 12478.8 | 0.18 |   |          |          |  |  |                                                                       |
| 10174 | ENSG00000242973 | 12481.8 | 0.18 |   |          |          |  |  |                                                                       |
| 10178 | ENSG00000210222 | 12487   | 0.18 |   |          |          |  |  |                                                                       |
| 10179 | ENSG00000242136 | 12489.8 | 0.18 |   |          |          |  |  |                                                                       |
| 10183 | ENSG00000198491 | 12492.3 | 0.18 |   |          |          |  |  |                                                                       |
| 10184 | ENSG00000230793 | 12492.6 | 0.18 | 8 | 95918245 | 95918347 |  |  | Small nuclear RNA L13                                                 |
| 10186 | ENSG00000238109 | 12493.1 | 0.18 |   |          |          |  |  |                                                                       |
| 10188 | ENSG00000230857 | 12494.3 | 0.18 |   |          |          |  |  |                                                                       |
| 10193 | ENSG00000230450 | 12495.5 | 0.18 |   |          |          |  |  |                                                                       |
| 10195 | ENSG00000230745 | 12496.4 | 0.18 |   |          |          |  |  |                                                                       |
| 10197 | ENSG00000230817 | 12498.2 | 0.18 |   |          |          |  |  |                                                                       |
| 10198 | ENSG00000231130 | 12500.8 | 0.18 |   |          |          |  |  |                                                                       |
| 10201 | ENSG00000224164 | 12501.6 | 0.18 |   |          |          |  |  |                                                                       |
| 10202 | ENSG00000256533 | 12501.8 | 0.18 |   |          |          |  |  |                                                                       |
| 10203 | ENSG00000256555 | 12503.8 | 0.18 |   |          |          |  |  |                                                                       |
| 10205 | ENSG00000270118 | 12503.3 | 0.18 |   |          |          |  |  |                                                                       |
| 10207 | ENSG00000236131 | 12505.7 | 0.18 |   |          |          |  |  |                                                                       |
| 10208 | ENSG00000230588 | 12509.4 | 0.18 |   |          |          |  |  |                                                                       |
| 10211 | ENSG00000234118 | 12512.2 | 0.18 |   |          |          |  |  |                                                                       |
| 10213 | ENSG00000256872 | 12518.2 | 0.18 |   |          |          |  |  |                                                                       |
| 10214 | ENSG00000230840 | 12518.3 | 0.18 |   |          |          |  |  |                                                                       |
| 10216 | ENSG00000236998 | 12518.4 | 0.18 |   |          |          |  |  |                                                                       |
| 10223 | ENSG00000272975 | 12525.1 | 0.18 |   |          |          |  |  |                                                                       |
| 10225 | ENSG00000242874 | 12526   | 0.18 |   |          |          |  |  |                                                                       |
| 10230 | ENSG00000232718 | 12530.6 | 0.18 |   |          |          |  |  |                                                                       |
| 10232 | ENSG00000230912 | 12533   | 0.18 |   |          |          |  |  |                                                                       |
| 10235 | ENSG00000212122 | 12534.1 | 0.18 |   |          |          |  |  |                                                                       |
| 10240 | ENSG00000240128 | 12539.5 | 0.18 |   |          |          |  |  |                                                                       |
| 10242 | ENSG00000242813 | 12541   | 0.18 |   |          |          |  |  |                                                                       |
| 10260 | ENSG00000230118 | 12553   | 0.18 |   |          |          |  |  |                                                                       |
| 10263 | ENSG00000211362 | 12556.6 | 0.18 |   |          |          |  |  |                                                                       |
| 10267 | ENSG00000236953 | 12558.8 | 0.18 | 2 | 47799601 | 47801998 |  |  | CDNA: FLJ23120 fs, clone LNC07989; HCG180724; Uncharacterized protein |
| 10269 | ENSG00000233457 | 12561.2 | 0.18 |   |          |          |  |  |                                                                       |
| 10272 | ENSG00000230388 | 12562.7 | 0.18 |   |          |          |  |  |                                                                       |
| 10273 | ENSG00000236615 | 12563.1 | 0.18 |   |          |          |  |  |                                                                       |
| 10276 | ENSG00000230786 | 12564.8 | 0.18 |   |          |          |  |  |                                                                       |
| 10281 | ENSG00000230368 | 12567.5 | 0.18 |   |          |          |  |  |                                                                       |
| 10283 | ENSG00000216347 | 12567.9 | 0.18 |   |          |          |  |  |                                                                       |
| 10291 | ENSG00000231000 | 12572.7 | 0.18 |   |          |          |  |  |                                                                       |
| 10292 | ENSG00000231133 | 12573.1 | 0.18 |   |          |          |  |  |                                                                       |
| 10294 | ENSG00000258876 | 12573.2 | 0.18 |   |          |          |  |  |                                                                       |
| 10295 | ENSG00000244260 | 12574   | 0.18 |   |          |          |  |  |                                                                       |
| 10297 | ENSG00000236992 | 12574.6 | 0.18 |   |          |          |  |  |                                                                       |
| 10300 | ENSG00000235286 | 12576   | 0.18 |   |          |          |  |  |                                                                       |
| 10306 | ENSG00000228814 | 12578.7 | 0.18 |   |          |          |  |  |                                                                       |
| 10308 | ENSG00000230967 | 12582.3 | 0.18 |   |          |          |  |  |                                                                       |
| 10309 | ENSG00000250167 | 12582.8 | 0.18 |   |          |          |  |  |                                                                       |
| 10311 | ENSG00000236744 | 12583.7 | 0.18 |   |          |          |  |  |                                                                       |
| 10312 | ENSG00000230561 | 12583.9 | 0.18 |   |          |          |  |  |                                                                       |
| 10316 | ENSG00000226521 | 12585.8 | 0.18 |   |          |          |  |  |                                                                       |
| 10320 | ENSG00000254547 | 12587.1 | 0.18 |   |          |          |  |  |                                                                       |
| 10321 | ENSG00000237869 | 12588.9 | 0.18 |   |          |          |  |  |                                                                       |
| 10322 | ENSG00000257185 | 12590.9 | 0.18 |   |          |          |  |  |                                                                       |
| 10323 | ENSG00000236984 | 12591.9 | 0.18 |   |          |          |  |  |                                                                       |
| 10325 | ENSG00000231713 | 12592   | 0.18 |   |          |          |  |  |                                                                       |
| 10331 | ENSG00000238742 | 12596.4 | 0.18 |   |          |          |  |  |                                                                       |
| 10332 | ENSG00000248954 | 12599   | 0.18 |   |          |          |  |  |                                                                       |
| 10335 | ENSG00000230149 | 12604.8 | 0.18 |   |          |          |  |  |                                                                       |
| 10337 | ENSG00000259204 | 12604.9 | 0.18 |   |          |          |  |  |                                                                       |
| 10338 | ENSG00000254530 | 12605.4 | 0.18 |   |          |          |  |  |                                                                       |
| 10341 | ENSG00000230587 | 12609.2 | 0.18 |   |          |          |  |  |                                                                       |
| 10347 | ENSG00000234139 | 12609.6 | 0.18 |   |          |          |  |  |                                                                       |
| 10351 | ENSG00000232324 | 12612.2 | 0.18 |   |          |          |  |  |                                                                       |
| 10358 | ENSG00000231486 | 12616.3 | 0.18 |   |          |          |  |  |                                                                       |
| 10364 | ENSG00000217272 | 12621.5 | 0.18 |   |          |          |  |  |                                                                       |
| 10367 | ENSG00000234810 | 12622.4 | 0.18 |   |          |          |  |  |                                                                       |
| 10374 | ENSG00000244028 | 12628.9 | 0.18 |   |          |          |  |  |                                                                       |
| 10378 | ENSG00000243761 | 12627.6 | 0.18 |   |          |          |  |  |                                                                       |
| 10385 | ENSG00000247970 | 12631.9 | 0.18 |   |          |          |  |  |                                                                       |
| 10386 | ENSG00000246375 | 12631.6 | 0.18 | 6 | 37218980 | 37219062 |  |  | Small nuclear RNA U13                                                 |
| 10388 | ENSG00000230929 | 12632.6 | 0.18 |   |          |          |  |  |                                                                       |
| 10390 | ENSG00000226983 | 12639.2 | 0.18 |   |          |          |  |  |                                                                       |
| 10395 | ENSG00000236976 | 12647   | 0.18 |   |          |          |  |  |                                                                       |
| 10403 | ENSG00000210165 | 12652.2 | 0.18 |   |          |          |  |  |                                                                       |
| 10405 | ENSG00000272346 | 12654.9 | 0.18 |   |          |          |  |  |                                                                       |
| 10410 | ENSG00000230805 | 12658.9 | 0.18 |   |          |          |  |  |                                                                       |
| 10414 | ENSG00000230984 | 12662.2 | 0.18 |   |          |          |  |  |                                                                       |
| 10416 | ENSG00000235840 | 12663.3 | 0.18 |   |          |          |  |  |                                                                       |
| 10417 | ENSG00000250521 | 12664.7 | 0.18 |   |          |          |  |  |                                                                       |
| 10419 | ENSG00000240348 | 12665.3 | 0.18 |   |          |          |  |  |                                                                       |
| 10421 | ENSG00000254223 | 12666.2 | 0.18 |   |          |          |  |  |                                                                       |
| 10439 | ENSG00000230391 | 12686.2 | 0.18 |   |          |          |  |  |                                                                       |
| 10443 | ENSG00000230584 | 12691.9 | 0.18 |   |          |          |  |  |                                                                       |
| 10446 | ENSG00000250603 | 12694.8 | 0.18 |   |          |          |  |  |                                                                       |
| 10453 | ENSG00000255520 | 12701.3 | 0.18 |   |          |          |  |  |                                                                       |
| 10456 | ENSG00000250792 | 12703.5 | 0.18 |   |          |          |  |  |                                                                       |
| 10461 | ENSG00000257613 | 12708.2 | 0.18 |   |          |          |  |  |                                                                       |
| 10466 | ENSG00000254242 | 12710   | 0.18 |   |          |          |  |  |                                                                       |
| 10471 | ENSG00000240935 | 12713.9 | 0.18 |   |          |          |  |  |                                                                       |
| 10476 | ENSG00000226505 | 12716.8 | 0.18 |   |          |          |  |  |                                                                       |
| 10480 | ENSG00000240824 | 12721   | 0.18 |   |          |          |  |  |                                                                       |
| 10482 | ENSG00000246689 | 12722.2 | 0.18 |   |          |          |  |  |                                                                       |
| 10487 | ENSG00000211081 | 12724.1 | 0.18 |   |          |          |  |  |                                                                       |
| 10488 | ENSG00000233630 | 12724.8 | 0.18 |   |          |          |  |  |                                                                       |
| 10495 | ENSG00000230753 | 12725.8 | 0.18 |   |          |          |  |  |                                                                       |
| 10496 | ENSG00000224666 | 12726.4 | 0.18 | 1 | 2259581  | 2259642  |  |  | Uncharacterized protein                                               |
| 10501 | ENSG00000236742 | 12733.2 | 0.18 |   |          |          |  |  |                                                                       |
| 10504 | ENSG00000250070 | 12734.9 | 0.18 |   |          |          |  |  |                                                                       |
| 10509 | ENSG00000256134 | 12738.9 | 0.18 |   |          |          |  |  |                                                                       |
| 10515 | ENSG00000230505 | 12744.9 | 0.18 |   |          |          |  |  |                                                                       |
| 10516 | ENSG00000233221 | 12745.2 | 0.18 |   |          |          |  |  |                                                                       |
| 10520 | ENSG00000237365 | 12748.7 | 0.18 |   |          |          |  |  |                                                                       |
| 10527 | ENSG00000236930 | 12751.9 | 0.18 |   |          |          |  |  |                                                                       |
| 10531 | ENSG00000230699 | 12755.6 | 0.18 |   |          |          |  |  |                                                                       |
| 10532 | ENSG00000233542 | 12757.6 | 0.18 |   |          |          |  |  |                                                                       |
| 10535 | ENSG00000236555 | 12761.1 | 0.18 |   |          |          |  |  |                                                                       |
| 10546 | ENSG00000230699 | 12771.5 | 0.18 |   |          |          |  |  |                                                                       |
| 10548 | ENSG00000230219 | 12773.2 | 0.18 |   |          |          |  |  |                                                                       |
| 10562 | ENSG00000236907 | 12779.6 | 0.18 |   |          |          |  |  |                                                                       |
| 10563 | ENSG00000244590 | 12779.6 | 0.18 |   |          |          |  |  |                                                                       |
| 10564 | ENSG00000244444 | 12780   | 0.18 |   |          |          |  |  |                                                                       |
| 10577 | ENSG00000251206 | 12788.9 | 0.18 |   |          |          |  |  |                                                                       |
| 10579 | ENSG00000239350 | 12789.3 | 0.18 |   |          |          |  |  |                                                                       |
| 10587 | ENSG00000236953 | 12796.4 | 0.18 |   |          |          |  |  |                                                                       |
| 10589 | ENSG00000230538 | 12806.9 | 0.18 |   |          |          |  |  |                                                                       |
| 10611 | ENSG00000239990 | 12813.9 | 0.18 |   |          |          |  |  |                                                                       |
| 10612 | ENSG00000224228 | 12815   | 0.18 |   |          |          |  |  |                                                                       |
| 10629 | ENSG00000236910 | 12830.6 | 0.18 |   |          |          |  |  |                                                                       |
| 10631 | ENSG00000231445 | 12831.2 | 0.18 |   |          |          |  |  |                                                                       |
| 10633 | ENSG00000230599 | 12836   | 0.18 |   |          |          |  |  |                                                                       |
| 10645 | ENSG00000228238 | 12845.1 | 0.18 |   |          |          |  |  |                                                                       |
| 10646 | ENSG00000241925 | 12849.4 | 0.18 |   |          |          |  |  |                                                                       |
| 10648 | ENSG00000254117 | 12853.7 | 0.18 |   |          |          |  |  |                                                                       |
| 10649 | ENSG00000237723 | 12853.8 | 0.18 |   |          |          |  |  |                                                                       |
| 10654 | ENSG00000217522 | 12857.5 | 0.18 |   |          |          |  |  |                                                                       |
| 10662 | ENSG00000241765 | 12864.3 | 0.18 |   |          |          |  |  |                                                                       |
| 10665 | ENSG00000230520 | 12864.7 | 0.18 |   |          |          |  |  |                                                                       |
| 10671 | ENSG00000230797 | 12870.9 | 0.18 |   |          |          |  |  |                                                                       |
| 10690 | ENSG00000226699 | 12888.6 | 0.18 |   |          |          |  |  |                                                                       |
| 10692 | ENSG00000270512 | 12890.2 | 0.18 |   |          |          |  |  |                                                                       |





|       |                  |         |      |                      |                |           |           |                                                                                                                 |                                                      |
|-------|------------------|---------|------|----------------------|----------------|-----------|-----------|-----------------------------------------------------------------------------------------------------------------|------------------------------------------------------|
| 10099 | ENSG00000234048  | 12396   | 0.17 | processed_pseudogene | 3              | 2849454   | 2849935   | family with sequence similarity 56, member A pseudogene 3                                                       |                                                      |
| 10189 | ENSG00000203718  | 12437   | 0.17 | processed_pseudogene | 6              | 6867339   | 6867339   | high mobility group nucleosomal histone domain 2 pseudogene 35                                                  |                                                      |
| 10231 | ENSG00000205197  | 12532   | 0.17 | processed_pseudogene | 5              | 11452743  | 11452527  | high mobility group nucleosome binding domain 1 pseudogene 15                                                   |                                                      |
| 10254 | ENSG00000208489  | 12550   | 0.17 | processed_pseudogene | 4              | 12466905  | 12466781  | ribosomal protein L21 pseudogene 50                                                                             |                                                      |
| 10276 | ENSG00000209477  | 12553   | 0.17 | processed_pseudogene | 14             | 68888115  | 68888115  | peptidylarginine isomerase A (cyclophilin A) pseudogene 6                                                       |                                                      |
| 10296 | ENSG00000202774  | 12553   | 0.17 | processed_pseudogene | 6              | 10623204  | 10623204  | ribosomal protein L23 pseudogene 50                                                                             |                                                      |
| 10317 | ENSG00000213925  | 12586   | 0.17 | processed_pseudogene | 2              | 204637354 | 204638225 | nucleosomem 1 (nucleolar phosphoglycoprotein B23, numah1) pseudogene 33                                         |                                                      |
| 10377 | ENSG00000174678  | 12627   | 0.17 | processed_pseudogene | A              | 37400336  | 37400315  | family with sequence similarity 47, member D, pseudogene                                                        |                                                      |
| 10393 | ENSG00000205992  | 12643   | 0.17 | processed_pseudogene | 7              | 35208856  | 35208856  | IMP (inosine monophosphate) dehydrogenase 1 pseudogene 11                                                       |                                                      |
| 10426 | ENSG0000017268   | 12670   | 0.17 | processed_pseudogene | 6              | 74714236  | 74714528  | S100 calcium binding protein A11 pseudogene 2                                                                   |                                                      |
| 10440 | ENSG00000204947  | 12688   | 0.17 | processed_pseudogene | 4              | 2239978   | 2239978   | ribosomal protein L5 pseudogene 1                                                                               |                                                      |
| 10441 | ENSG00000204822  | 12691   | 0.17 | processed_pseudogene | 8              | 56362069  | 56367899  | cytochrome c oxidase subunit VIb polypeptide 1 (ubiquitous) pseudogene 5                                        |                                                      |
| 10447 | ENSG00000202788  | 12695   | 0.17 | processed_pseudogene | 10             | 86841185  | 86841185  | SE1 binding factor 1 pseudogene 8                                                                               |                                                      |
| 10491 | ENSG00000219395  | 12724   | 0.17 | processed_pseudogene | 6              | 15173294  | 15175080  | high mobility group nucleosome binding domain 2 pseudogene 8<br>heat shock 70kDa protein 8 pseudogene 15        |                                                      |
| 10494 | ENSG00000204926  | 12725   | 0.17 | processed_pseudogene | 5              | 41967241  | 41968468  | methyltetrahydrofolate dehydrogenase (NADPH dependent) 2, methyltetrahydrofolate<br>cyclohydrolase pseudogene 6 |                                                      |
| 10551 | ENSG00000205408  | 12736   | 0.17 | processed_pseudogene | 8              | 8751520   | 8751290   | solute carrier family 2 (facilitated glucose transporter), member 3 pseudogene 4                                |                                                      |
| 10561 | ENSG00000204211  | 12738   | 0.17 | processed_pseudogene | 8              | 90424850  | 90427300  | keratin 8 pseudogene 4                                                                                          |                                                      |
| 10584 | ENSG00000213473  | 12814   | 0.17 | processed_pseudogene | 13             | 57120559  | 57120453  | ribosomal protein L5 pseudogene 31                                                                              |                                                      |
| 10647 | ENSG00000204418  | 12850   | 0.17 | processed_pseudogene | 2              | 174736381 | 174737193 | ribosomal protein L5 pseudogene 7                                                                               |                                                      |
| 10659 | ENSG00000205544  | 12861   | 0.17 | processed_pseudogene | 20             | 11329031  | 11329503  | ribosomal protein S11 pseudogene 1                                                                              |                                                      |
| 10666 | ENSG00000204265  | 12862   | 0.17 | processed_pseudogene | 19             | 1307403   | 1307720   | ribosomal protein S15 pseudogene 5                                                                              |                                                      |
| 10669 | ENSG00000178596  | 12867   | 0.17 | processed_pseudogene | 1              | 9478794   | 9478794   | glyceraldehyde 3 phosphate dehydrogenase pseudogene 29                                                          |                                                      |
| 10682 | ENSG00000213310  | 12875   | 0.17 | processed_pseudogene | 7              | 12103856  | 12103821  | cytochrome c, somatic pseudogene 19                                                                             |                                                      |
| 10691 | ENSG00000205998  | 12885   | 0.17 | processed_pseudogene | 10             | 33304200  | 33303266  | heterogeneous nuclear ribonucleoprotein A1 pseudogene 7.1                                                       |                                                      |
| 10724 | ENSG00000208754  | 12950   | 0.17 | processed_pseudogene | 18             | 52411981  | 52412812  | ribosomal protein SA pseudogene 57                                                                              |                                                      |
| 10728 | ENSG00000218463  | 12953   | 0.17 | processed_pseudogene | 6              | 138318407 | 138317284 | ribosomal protein SA pseudogene 42                                                                              |                                                      |
| 10788 | ENSG00000205863  | 13077   | 0.17 | processed_pseudogene | 1              | 116811803 | 116811803 | ribosomal protein S15 pseudogene 5                                                                              |                                                      |
| 10786 | ENSG00000203244  | 13078   | 0.17 | processed_pseudogene | 7              | 13638918  | 13639935  | proteasome (prosome, macropain) 26S subunit, ATPase 1 pseudogene 3                                              |                                                      |
| 10796 | ENSG00000209149  | 13092   | 0.17 | processed_pseudogene | 16             | 68720763  | 68721964  | developmental pluripotency associated 2 pseudogene 4                                                            |                                                      |
| 10802 | ENSG00000205655  | 13095   | 0.17 | processed_pseudogene | 4              | 7361298   | 7361298   | heterogeneous nuclear ribonucleoprotein A1 pseudogene 6.7                                                       |                                                      |
| 10852 | ENSG00000207406  | 13205   | 0.17 | processed_pseudogene | 21             | 40745893  | 40749992  | ring finger protein (C3HC2 type) 6 pseudogene 1                                                                 |                                                      |
| 10868 | ENSG00000204184  | 13309   | 0.17 | processed_pseudogene | 9              | 32975585  | 32980401  | transcription elongation factor A (SII), 1 pseudogene 4                                                         |                                                      |
| 10884 | ENSG00000205431  | 13315   | 0.17 | processed_pseudogene | 10             | 10521028  | 10521028  | cell division cycle 2 pseudogene 2                                                                              |                                                      |
| 10887 | ENSG00000207050  | 13353   | 0.17 | processed_pseudogene | 5              | 156351130 | 156351121 | apoptosis protein 1 pseudogene 5                                                                                |                                                      |
| 10894 | ENSG00000205832  | 13361   | 0.17 | processed_pseudogene | 9              | 69485652  | 69489487  | calpain 2 pseudogene 3                                                                                          |                                                      |
| 10898 | ENSG00000205178  | 13361   | 0.17 | processed_pseudogene | 1              | 17641185  | 17641185  | binding nucleoside phosphate subunit pseudogene 1                                                               |                                                      |
| 10914 | ENSG00000213199  | 13362   | 0.17 | processed_pseudogene | 1              | 235701352 | 235703145 | TSEN2 RNA, nuclear                                                                                              |                                                      |
| 10937 | ENSG00000209186  | 13369   | 0.17 | processed_pseudogene | 15             | 73775637  | 73776284  | MT-ND5 pseudogene 19                                                                                            |                                                      |
| 10953 | ENSG00000205025  | 13371   | 0.17 | processed_pseudogene | 15             | 2005115   | 2005115   | mitochondrial ribosomal protein S15 pseudogene 1                                                                |                                                      |
| 10990 | ENSG00000214211  | 13345   | 0.17 | processed_pseudogene | 2              | 16857013  | 16857275  | cytochrome c, somatic pseudogene 32<br>CTAGE family, member 14, pseudogene                                      |                                                      |
| 10998 | ENSG00000203709  | 13351   | 0.17 | processed_pseudogene | 13             | 83397266  | 83398271  | glicopin 1 pseudogene 2                                                                                         |                                                      |
| 11028 | ENSG00000206050  | 13385   | 0.17 | processed_pseudogene | 14             | 9050339   | 90504735  | cysteine and histidine-rich angiotensin (CHRCR) containing 2 pseudogene                                         |                                                      |
| 11062 | ENSG00000205441  | 13418   | 0.17 | processed_pseudogene | 15             | 89305865  | 89305865  | adenylate kinase 4 pseudogene 6                                                                                 |                                                      |
| 11080 | ENSG00000203506  | 13428   | 0.17 | processed_pseudogene | 4              | 151948242 | 151948799 | ribosomal protein L7 pseudogene 14                                                                              |                                                      |
| 11143 | ENSG00000206294  | 13456   | 0.17 | processed_pseudogene | 2              | 20396431  | 20396922  | family with sequence similarity 220, member 6, pseudogene                                                       |                                                      |
| 11149 | ENSG00000206001  | 13456   | 0.17 | processed_pseudogene | 6              | 38527094  | 38527099  | aldolase reductase family 1, member B1 pseudogene 1                                                             |                                                      |
| 11153 | ENSG00000202991  | 13457   | 0.17 | processed_pseudogene | 1              | 224762136 | 224763091 | RNA methyltransferase like 1 pseudogene 1                                                                       |                                                      |
| 11155 | ENSG00000213533  | 13459   | 0.17 | processed_pseudogene | 10             | 11052962  | 11052962  | signal recognition particle (SRP) pseudogene 1                                                                  |                                                      |
| 11156 | ENSG00000209812  | 13462   | 0.17 | processed_pseudogene | 6              | 16891249  | 16891249  | ribosomal protein S28 pseudogene 34                                                                             |                                                      |
| 11192 | ENSG00000204027  | 13466   | 0.17 | processed_pseudogene | 8              | 82539504  | 82539504  | X-ray repair complementing defective repair in Chinese hamster cells 6 pseudogene 3                             |                                                      |
| 11196 | ENSG00000203018  | 13381   | 0.17 | processed_pseudogene | 1              | 220487287 | 220488907 | WW domain binding protein 1 like pseudogene 2                                                                   |                                                      |
| 11201 | ENSG00000202644  | 13377   | 0.17 | processed_pseudogene | 10             | 107209988 | 107209988 | solute carrier family 25 (mitochondrial carrier, adenine nucleotide translocator), member 6<br>pseudogene 3     |                                                      |
| 11236 | ENSG00000203286  | 13334   | 0.17 | processed_pseudogene | 1              | 52174734  | 52175612  | heat shock 60kDa protein 1 (chaperonin) pseudogene 3                                                            |                                                      |
| 11264 | ENSG000002055128 | 13384   | 0.17 | processed_pseudogene | 8              | 7278513   | 7278513   | tubulin, beta 3 class III pseudogene 1                                                                          |                                                      |
| 11265 | ENSG000002020418 | 13384   | 0.17 | processed_pseudogene | 6              | 90011502  | 90012833  | coodolin-like 1 (Dicyclostilbin) pseudogene 2                                                                   |                                                      |
| 11326 | ENSG00000203523  | 13418   | 0.17 | processed_pseudogene | 7              | 20487851  | 20488202  | histone H3.3 pseudogene 3                                                                                       |                                                      |
| 11328 | ENSG00000218574  | 13423   | 0.17 | processed_pseudogene | 1              | 11631628  | 11631628  | ribosomal protein L12 pseudogene 11                                                                             |                                                      |
| 11353 | ENSG000002032493 | 13443   | 0.17 | processed_pseudogene | 20             | 40176081  | 40176881  | high mobility group box 1 pseudogene 9                                                                          |                                                      |
| 11369 | ENSG00000204159  | 13457   | 0.17 | processed_pseudogene | 2              | 21805157  | 21806111  | Mp3SANT-like DNA binding domain containing 2 pseudogene 1                                                       |                                                      |
| 11401 | ENSG00000205829  | 13457   | 0.17 | processed_pseudogene | 21             | 2441128   | 2441128   | actin, gamma 1 pseudogene 20                                                                                    |                                                      |
| 11403 | ENSG00000215388  | 13488   | 0.17 | processed_pseudogene | 15             | 60345403  | 60346291  | mesoderm specific transcript pseudogene 2                                                                       |                                                      |
| 11429 | ENSG00000205958  | 13511   | 0.17 | processed_pseudogene | 6              | 47184105  | 47184177  | ribosomal protein L23 pseudogene 72                                                                             |                                                      |
| 11467 | ENSG00000204207  | 13575   | 0.17 | processed_pseudogene | 11             | 92785561  | 92785561  | ribosomal protein L26 pseudogene 1                                                                              |                                                      |
| 11501 | ENSG00000204287  | 13577   | 0.17 | processed_pseudogene | 6              | 134924702 | 134925598 | family with sequence similarity 8, member A6 pseudogene                                                         |                                                      |
| 11502 | ENSG00000218772  | 13577   | 0.17 | processed_pseudogene | 6              | 134924702 | 134925598 | ribosomal protein L6 pseudogene 7                                                                               |                                                      |
| 11552 | ENSG00000209704  | 13627   | 0.17 | processed_pseudogene | 3              | 15537549  | 15537640  | ribosomal protein L6 pseudogene 7                                                                               |                                                      |
| 11556 | ENSG00000209212  | 13627   | 0.17 | processed_pseudogene | 3              | 15537549  | 15537640  | heat shock 70kDa protein 1 pseudogene 14                                                                        |                                                      |
| 11589 | ENSG0000021812   | 13675   | 0.17 | processed_pseudogene | 8              | 10346391  | 10346471  | ribosomal protein S28 pseudogene 32                                                                             |                                                      |
| 11608 | ENSG00000210168  | 13678   | 0.17 | processed_pseudogene | 17             | 2758478   | 2758478   | silvoneuroxin 2 (Drosophila) pseudogene 3                                                                       |                                                      |
| 11638 | ENSG00000207497  | 13682   | 0.17 | processed_pseudogene | 10             | 60918452  | 60919006  | eukaryotic translation initiation factor 2A pseudogene 4                                                        |                                                      |
| 11648 | ENSG00000207395  | 13685   | 0.17 | processed_pseudogene | 10             | 64581891  | 64583061  | ribosomal protein L5 pseudogene 50                                                                              |                                                      |
| 11689 | ENSG00000205138  | 13717   | 0.17 | processed_pseudogene | 10             | 3137328   | 3137328   | glyceraldehyde 3 phosphate dehydrogenase pseudogene 45                                                          |                                                      |
| 11687 | ENSG00000202812  | 13730   | 0.17 | processed_pseudogene | 10             | 15135252  | 15135252  | transcription elongation factor B (SII), polypeptide 1 pseudogene 22                                            |                                                      |
| 11730 | ENSG00000205500  | 13771   | 0.17 | processed_pseudogene | 11             | 12049043  | 12049043  | keratin 18 pseudogene 62                                                                                        |                                                      |
| 11794 | ENSG00000205471  | 13828   | 0.17 | processed_pseudogene | 7              | 1024122   | 1024122   | ribosomal protein L7 pseudogene 41                                                                              |                                                      |
| 11820 | ENSG00000204148  | 13842   | 0.17 | processed_pseudogene | 12             | 53271013  | 53280169  | high mobility group box 3 pseudogene 20                                                                         |                                                      |
| 11826 | ENSG00000202959  | 13851   | 0.17 | processed_pseudogene | 7              | 27022387  | 27022986  | heterogeneous nuclear ribonucleoprotein A1 pseudogene 72                                                        |                                                      |
| 11833 | ENSG00000207133  | 14103   | 0.17 | processed_pseudogene | 11             | 6423111   | 6423111   | keratin 18 pseudogene 34                                                                                        |                                                      |
| 12014 | ENSG00000204515  | 13966   | 0.17 | processed_pseudogene | 3              | 15680452  | 15680721  | glyceraldehyde 3 phosphate dehydrogenase pseudogene 45                                                          |                                                      |
| 12102 | ENSG000002028432 | 14053   | 0.17 | processed_pseudogene | 6              | 31334129  | 31334675  | eukaryotic translation termination factor 1 pseudogene 1                                                        |                                                      |
| 12188 | ENSG00000202757  | 14117   | 0.17 | processed_pseudogene | 6              | 29994909  | 29995780  | heterogeneous nuclear ribonucleoprotein A1 pseudogene 23                                                        |                                                      |
| 12242 | ENSG00000202566  | 14153   | 0.17 | processed_pseudogene | 19             | 27845426  | 27845426  | solute carrier family 25 (mitochondrial carrier, citrate transporter), member 1 pseudogene 5                    |                                                      |
| 12246 | ENSG00000202323  | 14157   | 0.17 | processed_pseudogene | 19             | 28236113  | 28237113  | ADP-ribosylation factor 4 pseudogene 2                                                                          |                                                      |
| 12280 | ENSG00000202657  | 14185   | 0.17 | processed_pseudogene | 20             | 61608902  | 61609428  | ribosomal protein L23 pseudogene 72                                                                             |                                                      |
| 12318 | ENSG00000204338  | 14212   | 0.17 | processed_pseudogene | 11             | 15118440  | 15118440  | T-cell leukemia/lymphoma 6 (non-protein coding)                                                                 |                                                      |
| 4174  | ENSG00000187821  | 11114   | 0.17 | processed_transcript | 11             | 98116835  | 98116835  | DNA topoisomerase II (non-protein coding)                                                                       |                                                      |
| 11201 | ENSG000002081845 | 13452   | 0.17 | processed_transcript | 11             | 9999420   | 9999420   | DNAI3 fusion partner 1 (non-protein coding)                                                                     |                                                      |
| 11916 | ENSG00000204933  | 13514   | 0.17 | processed_transcript | 11             | 11737749  | 11737749  | cell eye syndrome chromosome region, candidate 3 (non-protein coding)                                           |                                                      |
| 11918 | ENSG00000186704  | 6374    | 0.17 | protein_coding       | 3              | 12877810  | 12878129  | glycoprotein IX (platelet)                                                                                      |                                                      |
| 2213  | ENSG00000103306  | 3480    | 0.17 | protein_coding       | 17             | 4239989   | 4240228   | solute carrier family 25, member 38                                                                             |                                                      |
| 2308  | ENSG00000109822  | 3611    | 0.17 | protein_coding       | 17             | 6207184   | 6207184   | interleukin 13 receptor 2                                                                                       |                                                      |
| 2346  | ENSG000002008516 | 3665    | 0.17 | protein_coding       | 8              | 3098882   | 3101077   | matrix metalloproteinase 25                                                                                     |                                                      |
| 2387  | ENSG00000171659  | 3704    | 0.17 | protein_coding       | X              | 41548226  | 41548526  | G protein-coupled receptor 34                                                                                   |                                                      |
| 2393  | ENSG00000106290  | 3704    | 0.17 | protein_coding       | 6              | 44811290  | 44811290  | N-acetylated alpha-linked acidic dipeptidase-like 1                                                             |                                                      |
| 2418  | ENSG000002006336 | 3712    | 0.17 | protein_coding       | 11             | 47401127  | 47401127  | spleen focus forming virus (SFV) proviral integration oncogene                                                  |                                                      |
| 2782  | ENSG00000125753  | VASP    | 4278 | 0.17                 | protein_coding | 19        | 46009837  | 46030241                                                                                                        | vasodilator-stimulated phosphoprotein                |
| 3971  | ENSG00000125320  | TANC2   | 4278 | 0.17                 | protein_coding | 19        | 20001297  | 20001297                                                                                                        | transcript and poly(ADP-ribose) homolog (Drosophila) |
| 2884  | ENSG00000136305  | COE8    | 4470 | 0.17                 | protein_coding | 14        | 24714302  | 24740036                                                                                                        | cell death-inducing DFFA-like effector B             |
| 2903  | ENSG00000123196  | HSD17B8 | 4505 | 0.17                 | protein_coding | 1         | 16270482  | 16276207                                                                                                        | hydroxysteroid (17-beta) dehydrogenase               |
| 2968  | ENSG00000106580  |         |      |                      |                |           |           |                                                                                                                 |                                                      |

|       |                  |              |         |      |                |    |           |           |                                                                                                            |
|-------|------------------|--------------|---------|------|----------------|----|-----------|-----------|------------------------------------------------------------------------------------------------------------|
| 4139  | ENSG00000137492  | PRKRIR       | 6449.9  | 0.17 | protein_coding | 11 | 76061000  | 76062015  | protein-kinase, interferon-inducible double stranded RNA dependent inhibitor, repressor of (P58 repressor) |
| 4162  | ENSG00000126581  | BECN1        | 6480.3  | 0.17 | protein_coding | 17 | 40962152  | 40965367  | beclin 1, autophagy related                                                                                |
| 4173  | ENSG00000166432  | ZMAT1        | 6484.8  | 0.17 | protein_coding | X  | 101137262 | 101187004 | zinc finger, matrix-type 1                                                                                 |
| 4207  | ENSG00000204718  | NPIP88       | 6540.0  | 0.17 | protein_coding | 18 | 24404442  | 22547442  | nuclear pore complex interacting protein family, member B5                                                 |
| 4340  | ENSG00000204763  | FPC3         | 6786.5  | 0.17 | protein_coding | 16 | 29357286  | 29357286  | beta 3 actin, tubulin class 2                                                                              |
| 4346  | ENSG00000163755  | HPS3         | 6886.7  | 0.17 | protein_coding | 3  | 148847371 | 148891179 | Hermansky-Rudolph syndrome 3                                                                               |
| 4359  | ENSG00000115590  | NG2C         | 6941.8  | 0.17 | protein_coding | 5  | 142607486 | 142619077 | nuclear receptor subfamily 3, group C, member 4 (glucocorticoid receptor)                                  |
| 4561  | ENSG00000161220  | ZNF746       | 7053.3  | 0.17 | protein_coding | 7  | 149165885 | 149194508 | zinc finger protein 746                                                                                    |
| 4571  | ENSG00000163333  | LRN1A8       | 7081.6  | 0.17 | protein_coding | 15 | 70587828  | 705882015 | leucin, galactosyl-binding, soluble 8                                                                      |
| 4578  | ENSG00000166522  | RNF19A       | 7013.1  | 0.17 | protein_coding | 8  | 101269288 | 101348446 | ring finger protein 19A, RBR E3 ubiquitin protein ligase                                                   |
| 4606  | ENSG00000119820  | YFP4         | 7112.6  | 0.17 | protein_coding | 2  | 3262979   | 3264183   | zinc finger protein 749                                                                                    |
| 4609  | ENSG00000202920  | SLC14A4      | 7136.8  | 0.17 | protein_coding | 12 | 12922789  | 129280038 | transducin-like enhancer type 1 (Ectophilin, Drosophila)                                                   |
| 4628  | ENSG00000176853  | FAM181A      | 7178.7  | 0.17 | protein_coding | 8  | 42889371  | 42849091  | fam181-like protein, CAAX box, alpha                                                                       |
| 4639  | ENSG00000136536  | YMP4         | 7199.9  | 0.17 | protein_coding | 2  | 3262979   | 3264183   | Yfp domain family, member 4                                                                                |
| 4734  | ENSG00000198115  | WDR74        | 7281.1  | 0.17 | protein_coding | 10 | 48892921  | 50119101  | solute carrier family 15 (glucosylase transporter), member 4                                               |
| 4736  | ENSG00000116406  | EMEM         | 7281.9  | 0.17 | protein_coding | 2  | 184659035 | 184724047 | ER degradation enhancer, mannosidase alpha-like 3                                                          |
| 4767  | ENSG00000158411  | MTD1         | 7340.1  | 0.17 | protein_coding | 2  | 9977890   | 99797921  | MIT, microtubule interacting and transport domain containing 1                                             |
| 4792  | ENSG00000170589  | MSAL1        | 7353.0  | 0.17 | protein_coding | 1  | 92055711  | 92056178  | membrane-spanning 4-domain, subfamily A, member 10                                                         |
| 4830  | ENSG00000040766  | CCDC132      | 7420.1  | 0.17 | protein_coding | 7  | 92981653  | 92988338  | coiled-coil domain containing 132                                                                          |
| 4863  | ENSG00000154845  | PP4R1        | 7457.5  | 0.17 | protein_coding | 18 | 9549789   | 9615238   | protein phosphatase 4, regulatory subunit 1                                                                |
| 4864  | ENSG00000142046  | TMEK1        | 7460.6  | 0.17 | protein_coding | 19 | 41859616  | 41869888  | transmembrane protein 91                                                                                   |
| 4868  | ENSG00000141646  | SMAD4        | 7475.9  | 0.17 | protein_coding | 18 | 48484410  | 48411415  | SMAD family member 4                                                                                       |
| 4875  | ENSG00000171488  | LRRRC3C      | 7486    | 0.17 | protein_coding | 1  | 93098831  | 90236462  | leucine rich repeat containing 8 family, member C                                                          |
| 4884  | ENSG00000102952  | CNST         | 7491.9  | 0.17 | protein_coding | 1  | 246729146 | 246810386 | conectin, coxsackievirus-binding protein                                                                   |
| 4888  | ENSG00000100796  | SMEK1        | 7505.2  | 0.17 | protein_coding | 14 | 81923955  | 81978888  | SMEK homolog 1, suppressor of mek1 (Drosophila)                                                            |
| 4894  | ENSG00000142421  | CENPF        | 7512.9  | 0.17 | protein_coding | 4  | 68337521  | 68411324  | centromere protein C                                                                                       |
| 4911  | ENSG00000146903  | TRP2         | 7528.6  | 0.17 | protein_coding | 13 | 103261103 | 103261103 | transient receptor potential cation channel subfamily 1, member 13                                         |
| 4980  | ENSG00000197665  | TFP2         | 7629.5  | 0.17 | protein_coding | 17 | 10505040  | 1906242   | Uncharacterized protein                                                                                    |
| 4981  | ENSG00000154767  | JPC          | 7629.9  | 0.17 | protein_coding | 3  | 14186847  | 14220283  | xeroderma pigmentosum, complementation group C                                                             |
| 4984  | ENSG00000156812  | HR23B        | 7631.8  | 0.17 | protein_coding | 1  | 10868746  | 10868746  | RBM3 box transcription factor 2                                                                            |
| 5066  | ENSG00000116584  | ARHGAP2      | 7757.4  | 0.17 | protein_coding | 1  | 15591630  | 15597681  | RhoGAP guanine nucleotide exchange factor (GEF) 2                                                          |
| 5093  | ENSG00000110429  | FBOX3        | 7769.8  | 0.17 | protein_coding | 11 | 33742485  | 33760699  | F-box protein 3                                                                                            |
| 5127  | ENSG00000156812  | HR23B        | 7812.3  | 0.17 | protein_coding | 20 | 200901200 | 200901200 | chromosome 5 open reading frame 218                                                                        |
| 5163  | ENSG00000153496  | FAM208A      | 7851.4  | 0.17 | protein_coding | 3  | 56654161  | 56717265  | family with sequence similarity 208, member A                                                              |
| 5216  | ENSG000002024511 | C5orf58      | 7916.6  | 0.17 | protein_coding | 5  | 169694541 | 169679879 | chromosome 5 open reading frame 58                                                                         |
| 5225  | ENSG00000157275  | TRAF3        | 7948.5  | 0.17 | protein_coding | 13 | 102487663 | 102487663 | diphenylpicoloyl pentakisphosphate-like repeat domain 2                                                    |
| 5244  | ENSG00000052941  | TTCT1        | 7948.2  | 0.17 | protein_coding | 11 | 43380482  | 43516483  | tetratricopeptide repeat domain 17                                                                         |
| 5276  | ENSG00000140247  | FHP          | 7981.8  | 0.17 | protein_coding | 8  | 78645884  | 78787873  | plectonin homology domain interacting protein                                                              |
| 5313  | ENSG00000151738  | PTSD1        | 8002.8  | 0.17 | protein_coding | 11 | 8681741   | 8681741   | proteasomal D1 receptor 2                                                                                  |
| 5337  | ENSG00000143458  | GARP2        | 8047.7  | 0.17 | protein_coding | 1  | 15104305  | 15109818  | GA binding protein transcription factor, beta subunit 2                                                    |
| 5339  | ENSG00000184898  | RBM44        | 8051.5  | 0.17 | protein_coding | 2  | 152104454 | 152118393 | RNA binding motif protein 43                                                                               |
| 5382  | ENSG00000186061  | TMEH4B       | 8119.9  | 0.17 | protein_coding | 19 | 55844160  | 55844160  | transmembrane protein 150B                                                                                 |
| 5396  | ENSG00000119820  | CENPF        | 8121.1  | 0.17 | protein_coding | 1  | 118719135 | 118719135 | centromere protein C                                                                                       |
| 5418  | ENSG00000141446  | ESCO1        | 8153.3  | 0.17 | protein_coding | 18 | 11910242  | 11918045  | establishment of sister chromatid cohesion N-acetyltransferase 1                                           |
| 5462  | ENSG00000042467  | AP4HD4       | 8203.8  | 0.17 | protein_coding | 2  | 232649498 | 232649134 | AT rich interactive domain 4B (RBP1-like)                                                                  |
| 5478  | ENSG00000115977  | TRAF2        | 8273.7  | 0.17 | protein_coding | 2  | 68668932  | 68691481  | associated kinase 2                                                                                        |
| 5576  | ENSG00000078747  | ITCH         | 8318.9  | 0.17 | protein_coding | 20 | 32951041  | 32999198  | itch, E3 ubiquitin protein ligase                                                                          |
| 5578  | ENSG00000157474  | TRIM11       | 8372.2  | 0.17 | protein_coding | 10 | 11784259  | 12440353  | RNA aspartic acid methyltransferase 1                                                                      |
| 5646  | ENSG00000202963  | LRRRC3C      | 8420.8  | 0.17 | protein_coding | 18 | 44548971  | 44548971  | leucine rich repeat containing 17, member A2                                                               |
| 5724  | ENSG00000101901  | ALG13        | 8493.1  | 0.17 | protein_coding | X  | 110990463 | 111003787 | ALG13, UDP-N-acetylglucosaminyltransferase subunit                                                         |
| 5739  | ENSG00000126599  | MEMO1        | 8502.2  | 0.17 | protein_coding | 2  | 3209129   | 32262299  | mediator of cell motility 1                                                                                |
| 5766  | ENSG00000161196  | CXorf55      | 8564.4  | 0.17 | protein_coding | 2  | 7036127   | 70362638  | chromosome 5 open reading frame 65                                                                         |
| 5843  | ENSG00000131127  | ZNF141       | 8617.7  | 0.17 | protein_coding | 4  | 313603    | 318253    | zinc finger protein 141                                                                                    |
| 5789  | ENSG00000179900  | ZNF194       | 8689.9  | 0.17 | protein_coding | 19 | 98268726  | 98268726  | zinc finger protein 194                                                                                    |
| 5824  | ENSG00000182826  | ZNF117       | 8710.5  | 0.17 | protein_coding | 19 | 71157266  | 72474708  | zinc finger, CHH1-Cy3 containing 17                                                                        |
| 6026  | ENSG00000202929  | ZNF173       | 8817.7  | 0.17 | protein_coding | 3  | 8818424   | 8818123   | Uncharacterized protein                                                                                    |
| 6111  | ENSG00000183323  | CCDC103      | 8839.7  | 0.17 | protein_coding | 5  | 68876002  | 68888836  | coiled-coil domain containing 125                                                                          |
| 6111  | ENSG00000182826  | ZNF117       | 8839.7  | 0.17 | protein_coding | 19 | 71157266  | 72474708  | zinc finger, CHH1-Cy3 containing 17                                                                        |
| 6134  | ENSG00000070476  | ZADC         | 8816.1  | 0.17 | protein_coding | 3  | 126156444 | 126194762 | ZAD family zinc finger C                                                                                   |
| 6247  | ENSG00000133812  | SFBF2        | 9115.2  | 0.17 | protein_coding | 11 | 9800214   | 10215754  | SFBF binding factor 2                                                                                      |
| 6385  | ENSG00000189935  | ZNF862       | 9129.7  | 0.17 | protein_coding | 53 | 10118119  | 10118119  | zinc finger protein 862                                                                                    |
| 6741  | ENSG00000106479  | ZNF862       | 9522.2  | 0.17 | protein_coding | 7  | 14955456  | 149644568 | zinc finger protein 862                                                                                    |
| 7020  | ENSG00000120547  | TARG2B       | 9704.6  | 0.17 | protein_coding | 16 | 69717903  | 69719983  | transport and golgi organization 6 homolog (Drosophila)                                                    |
| 8138  | ENSG00000172171  | TRAPP2C      | 10117.3 | 0.17 | protein_coding | 16 | 20877100  | 20877100  | component component 2, tubulin-binding 1-like                                                              |
| 8225  | ENSG00000156886  | ITGAD        | 10966.1 | 0.17 | protein_coding | 16 | 31404633  | 31437826  | integrin, alpha D                                                                                          |
| 8237  | ENSG00000173626  | TRAPP3C      | 10914.1 | 0.17 | protein_coding | 6  | 11681165  | 11686973  | trafficking protein particle complex 3-like                                                                |
| 8119  | ENSG00000105509  | TRAP1C       | 10914.1 | 0.17 | protein_coding | 21 | 36811682  | 36811682  | potassium voltage-gated channel-like-related family, member 1                                              |
| 9297  | ENSG00000170687  | RASA4B       | 11784.3 | 0.17 | protein_coding | 7  | 10212852  | 102150228 | RAS p21 protein activator 4B                                                                               |
| 9412  | ENSG00000172530  | BANP         | 11872.1 | 0.17 | protein_coding | 16 | 87982856  | 88110924  | BTG3 associated nuclear factor                                                                             |
| 9538  | ENSG00000151518  | AIRE         | 12015.8 | 0.17 | protein_coding | 4  | 15765870  | 15765870  | autoantigen-like 4                                                                                         |
| 9579  | ENSG00000150224  | AIRE         | 12015.8 | 0.17 | protein_coding | 21 | 4570721   | 45718531  | autoantigen regulator                                                                                      |
| 9887  | ENSG00000202414  | FAM74E       | 12292.6 | 0.17 | protein_coding | 4  | 71728774  | 72232282  | uncharacterized protein LOC100831383                                                                       |
| 9909  | ENSG00000181668  | CCZ1         | 12348.9 | 0.17 | protein_coding | 4  | 1662838   | 1662838   | coiled-coil domain containing 144                                                                          |
| 10004 | ENSG00000110444  | XKR8         | 12348.9 | 0.17 | protein_coding | 8  | 10783555  | 11058875  | XX, Kall blood group complex subunit-related family, member 8                                              |
| 10071 | ENSG00000206472  | LOC101927453 | 12404.7 | 0.17 | protein_coding | 18 | 86567018  | 86568492  | Uncharacterized protein                                                                                    |
| 10107 | ENSG00000151518  | AIRE         | 12403.8 | 0.17 | protein_coding | 11 | 6723818   | 6723818   | G protein-coupled receptor 152                                                                             |
| 10180 | ENSG00000214215  | C12orf74     | 12491   | 0.17 | protein_coding | 12 | 9306619   | 9310225   | chromosome 12 open reading frame 74                                                                        |
| 10247 | ENSG00000183372  | OR2V1        | 12548.9 | 0.17 | protein_coding | 8  | 180651387 | 180652304 | olfactory receptor, family 2, subfamily V, member 1                                                        |
| 10262 | ENSG00000130301  | GRP92        | 12549.1 | 0.17 | protein_coding | 11 | 781115    | 781115    | olfactory receptor, family 5, subfamily P, member 2                                                        |
| 10376 | ENSG00000205929  | OR2V2        | 12627.2 | 0.17 | protein_coding | 1  | 15982760  | 15984283  | Uncharacterized protein                                                                                    |
| 10428 | ENSG00000187821  | HELT         | 12672.9 | 0.17 | protein_coding | 4  | 18593995  | 18594198  | hep1 bHLH transcription factor                                                                             |
| 10444 | ENSG00000204789  | JMJD3        | 12692.2 | 0.17 | protein_coding | 15 | 42170281  | 42170779  | jumonji domain containing 7                                                                                |
| 10449 | ENSG00000140446  | MTOR         | 12696.6 | 0.17 | protein_coding | 5  | 148719580 | 148724505 | metabolic binding domain protein 2                                                                         |
| 10497 | ENSG00000177151  | TRAF3        | 12727.4 | 0.17 | protein_coding | 1  | 248801588 | 248820598 | olfactory receptor, family 2, subfamily T, member 35                                                       |
| 10500 | ENSG00000205985  | LDRAD1       | 12733.7 | 0.17 | protein_coding | X  | 14414412  | 14414412  | low density lipoprotein receptor class A domain containing 1                                               |
| 10542 | ENSG00000190938  | NPIP88       | 12733.7 | 0.17 | protein_coding | X  | 107020963 | 107037912 | nuclear pore binding subunit 2-like                                                                        |
| 10545 | ENSG00000205524  | NPIP88       | 12767   | 0.17 | protein_coding | 18 | 29607005  | 29607005  | nuclear pore complex interacting protein family, member B6                                                 |
| 10620 | ENSG00000189262  | RUF4         | 12822.7 | 0.17 | protein_coding | 2  | 21888530  | 21889530  | ROU and FVE domain containing 4                                                                            |
| 10636 | ENSG00000101910  | SALRS5       | 12849.6 | 0.17 | protein_coding | 6  | 88861152  | 88861152  | glucosylase family N-acetylglucosyl sulfatase                                                              |
| 10841 | ENSG00000116725  | ZNF410       | 12842   | 0.17 | protein_coding | 14 | 74353320  | 74359214  | zinc finger protein 410                                                                                    |
| 10866 | ENSG00000153230  | NOX3         | 12858.6 | 0.17 | protein_coding | 1  | 24791917  | 24792081  | olfactory receptor, family 14, subfamily K, member 1                                                       |
| 10711 | ENSG00000174771  | OR7V1        | 12938.7 | 0.17 | protein_coding | 7  | 115718504 | 115718504 | olfactory receptor, family 6, subfamily O, member 3                                                        |
| 10745 | ENSG00000102578  | OR7V1        | 12938.7 | 0.17 | protein_coding | 7  | 142748417 | 142750444 | olfactory receptor, family 6, subfamily V, member 1                                                        |
| 10764 | ENSG00000123599  | KIF9WT       | 12958.3 | 0.17 | protein_coding | X  | 10326719  | 10326719  | H2B histone family, member W, testis-specific                                                              |
| 10778 | ENSG00000189689  | HQB1         | 12971.6 | 0.17 | protein_coding | 19 |           |           |                                                                                                            |



|       |                  |           |       |      |                                    |    |           |           |                                                                                          |
|-------|------------------|-----------|-------|------|------------------------------------|----|-----------|-----------|------------------------------------------------------------------------------------------|
| 12773 | ENSG000002186359 | WDR88     | 14559 | 0.17 | protein coding                     | 19 | 3362296   | 3366701   | WD repeat domain B8                                                                      |
| 12808 | ENSG00000219561  | WDRCP     | 14573 | 0.17 | protein coding                     | 2  | 4354819   | 4405477   | WD repeat containing domain cell polarity effector                                       |
| 9066  | ENSG00000238405  |           | 11617 | 0.17 | rRNA                               | 10 | 4674208   | 46742143  | RNA, 5S ribosomal pseudogene 311                                                         |
| 9870  | ENSG0000022921   |           | 12248 | 0.17 | rRNA                               | 2  | 134988766 | 134988883 | RNA, 5S ribosomal pseudogene 104                                                         |
| 10971 | ENSG00000202923  |           | 13130 | 0.17 | rRNA                               | 15 | 42144111  | 42144227  | RNA, 5S ribosomal pseudogene 393                                                         |
| 11418 | ENSG0000021228   |           | 13502 | 0.17 | rRNA                               | 11 | 27541552  | 27541673  | RNA, 5S ribosomal pseudogene 339                                                         |
| 12012 | ENSG00000253039  |           | 13885 | 0.17 | rRNA                               | 1  | 45397995  | 45398103  | RNA, 5S ribosomal pseudogene 47                                                          |
| 4979  | ENSG00000116652  |           | 7628  | 0.17 | sense intronic                     | 1  | 64014596  | 64014605  | deleted in lymphocytic leukemia 2-like                                                   |
| 4986  | ENSG00000229203  | FAM215A   | 7834  | 0.17 | sense intronic                     | 17 | 44858186  | 44858191  | family with sequence similarity 215, member B (non-protein coding)                       |
| 5003  | ENSG00000229521  |           | 11548 | 0.17 | sense intronic                     | 13 | 77654646  | 77654652  | MYC2P2 antisense RNA 2                                                                   |
| 10486 | ENSG00000224142  |           | 12723 | 0.17 | sense intronic                     | A  | 10954848  | 10954849  | AMMECR1 intronic transcript 1 (non-protein coding)                                       |
| 1056  | ENSG00000236986  | MLP-T1    | 12788 | 0.17 | sense intronic                     | 8  | 8368368   | 8367160   | MLP intronic transcript 1 (non-protein coding)                                           |
| 11111 | ENSG0000027773   |           | 15228 | 0.17 | sense intronic                     | 1  | 155365801 | 155365789 | ASH1L intronic transcript 1 (non-protein coding)                                         |
| 11279 | ENSG00000224806  | TGFA-T1   | 15376 | 0.17 | sense intronic                     | 2  | 70984517  | 7098827   | TGFA intronic transcript 1 (non-protein coding)                                          |
| 11500 | ENSG00000201225  |           | 13922 | 0.17 | sense overlapping                  | 18 | 54952953  | 54760706  | WDR2 overlapping transcript 1 (non-protein coding)                                       |
| 6610  | ENSG00000201151  |           | 9388  | 0.17 | sncRNA                             | 20 | 33704939  | 33705010  | Small nuclear RNA SNORD56                                                                |
| 10623 | ENSG00000230920  |           | 12652 | 0.17 | sncRNA                             | X  | 15734331  | 15734469  | Small nuclear RNA SNORD7                                                                 |
| 10929 | ENSG00000211639  |           | 13095 | 0.17 | sncRNA                             | 4  | 74129077  | 74129091  | Small nuclear RNA SNORD345 family                                                        |
| 10983 | ENSG00000212211  |           | 13141 | 0.17 | sncRNA                             | 3  | 60842062  | 60842277  | Small nuclear RNA U3                                                                     |
| 4736  | ENSG00000201183  |           | 7374  | 0.17 | sncRNA                             | 12 | 51050796  | 51050861  | RNA, U6 small nuclear 238, pseudogene                                                    |
| 5098  | ENSG0000025274   |           | 7727  | 0.17 | sncRNA                             | 14 | 50205443  | 50205445  | RNA, U6 small nuclear 536, pseudogene                                                    |
| 5328  | ENSG00000201662  |           | 8041  | 0.17 | sncRNA                             | 13 | 49562051  | 49562183  | RNA, U6 small nuclear 60, pseudogene                                                     |
| 5773  | ENSG00000252061  |           | 8541  | 0.17 | sncRNA                             | 15 | 79191182  | 79191278  | RNA, U6 small nuclear 415, pseudogene                                                    |
| 5922  | ENSG00000198538  |           | 8598  | 0.17 | sncRNA                             | 2  | 16989763  | 16989739  | RNA, U6 small nuclear 315, pseudogene                                                    |
| 6223  | ENSG00000268880  |           | 9004  | 0.17 | sncRNA                             | 1  | 168232613 | 16823279  | RNA, U6 small nuclear 1310, pseudogene                                                   |
| 7889  | ENSG0000021524   |           | 10630 | 0.17 | sncRNA                             | 17 | 57524799  | 57524805  | RNA, U6 small nuclear 450, pseudogene                                                    |
| 7968  | ENSG00000252989  |           | 10702 | 0.17 | sncRNA                             | 4  | 17430754  | 17430855  | RNA, U6 small nuclear 1060, pseudogene                                                   |
| 8409  | ENSG00000238987  |           | 11654 | 0.17 | sncRNA                             | 6  | 14156693  | 14156754  | RNA, U7 small nuclear 133, pseudogene                                                    |
| 9897  | ENSG00000266988  |           | 12286 | 0.17 | sncRNA                             | 5  | 9651954   | 96519117  | RNA, U7 small nuclear 73, pseudogene                                                     |
| 10250 | ENSG00000217960  |           | 12317 | 0.17 | sncRNA                             | 7  | 12083550  | 12083511  | RNA, U8 small nuclear 511, pseudogene                                                    |
| 10415 | ENSG00000208819  |           | 12682 | 0.17 | sncRNA                             | 5  | 15728306  | 15728322  | RNA, U6 small nuclear 280, pseudogene                                                    |
| 10856 | ENSG00000199306  |           | 13031 | 0.17 | sncRNA                             | 3  | 197821378 | 197821484 | RNA, U6 small nuclear 858, pseudogene                                                    |
| 12095 | ENSG00000204901  |           | 14737 | 0.17 | sncRNA                             | 20 | 3042327   | 3042328   | RNA, U7 small nuclear 94, pseudogene                                                     |
| 1746  | ENSG00000211765  |           | 2787  | 0.17 | TR_j_gene                          | 7  | 14249424  | 14249434  | T cell receptor beta joining 2-2                                                         |
| 2692  | ENSG00000211769  |           | 4173  | 0.17 | TR_j_gene                          | 7  | 14249403  | 14249480  | T cell receptor beta joining 2-5                                                         |
| 11168 | ENSG00000211768  |           | 4932  | 0.17 | TR_j_gene                          | 7  | 14249462  | 14249471  | T cell receptor beta joining 2-4                                                         |
| 2475  | ENSG00000211790  |           | 3860  | 0.17 | TR_v_gene                          | 14 | 22362013  | 22362010  | T cell receptor alpha variable 8-4                                                       |
| 10990 | ENSG00000259068  |           | 12799 | 0.17 | TR_v_pseudogene                    | 14 | 22733632  | 22734147  | T cell receptor alpha variable 37 (pseudogene)                                           |
| 3385  | ENSG00000211930  |           | 5342  | 0.17 | transcribed_unprocessed_pseudogene | X  | 129628939 | 129630662 | family with sequence similarity 45, member B (pseudogene)                                |
| 11586 | ENSG00000242948  |           | 13646 | 0.17 | transcribed_unprocessed_pseudogene | 7  | 46820971  | 46823041  | epidermal growth factor receptor pathway substrate 15 pseudogene 1                       |
| 11662 | ENSG00000251557  | HNRNKPK3  | 13708 | 0.17 | transcribed_unprocessed_pseudogene | 11 | 43142312  | 4328943   | heterogeneous nuclear ribonucleoprotein K pseudogene 3                                   |
| 6075  | ENSG00000122432  |           | 8859  | 0.17 | transcribed_unprocessed_pseudogene | 1  | 84971974  | 85031877  | spematogenesis associated 1                                                              |
| 7678  | ENSG00000154874  | CCDC14B   | 10402 | 0.17 | transcribed_unprocessed_pseudogene | 17 | 18441117  | 18528930  | coiled-coil domain containing 144B (pseudogene)                                          |
| 10279 | ENSG00000209105  | ACAP      | 12566 | 0.17 | transcribed_unprocessed_pseudogene | 17 | 41017939  | 41026386  | amine oxidase, copper containing 4, pseudogene                                           |
| 10550 | ENSG00000227179  | POCP1     | 12772 | 0.17 | transcribed_unprocessed_pseudogene | 1  | 111925482 | 11193441  | progastrin (pepsinogen C) pseudogene 1                                                   |
| 10635 | ENSG00000239402  | CYF4F6P   | 12638 | 0.17 | transcribed_unprocessed_pseudogene | 2  | 131187400 | 131199048 | cytochrome P450, family 4, subfamily F, polypeptide 62, pseudogene                       |
| 10787 | ENSG00000215148  |           | 12973 | 0.17 | transcribed_unprocessed_pseudogene | 16 | 2848486   | 2855148   | protease, serine, 41                                                                     |
| 11032 | ENSG00000131885  |           | 13169 | 0.17 | transcribed_unprocessed_pseudogene | 17 | 16744057  | 16749197  | keratin 17 pseudogene 1                                                                  |
| 11035 | ENSG00000182367  | DNM1P48   | 13170 | 0.17 | transcribed_unprocessed_pseudogene | 15 | 10030361  | 10034732  | DNM1 pseudogene 48                                                                       |
| 11296 | ENSG00000238105  | GOLGA2P5  | 13396 | 0.17 | transcribed_unprocessed_pseudogene | 12 | 10055015  | 10056743  | galgin A2 pseudogene 5                                                                   |
| 11335 | ENSG00000251521  |           | 13425 | 0.17 | transcribed_unprocessed_pseudogene | 8  | 82517804  | 82543369  | inositol(myo)-1(er)-4-monophosphatase 1 pseudogene                                       |
| 11386 | ENSG00000264216  |           | 13475 | 0.17 | transcribed_unprocessed_pseudogene | 17 | 25979390  | 25982738  | nitric oxide synthase 2 pseudogene 1                                                     |
| 11538 | ENSG00000188877  |           | 13611 | 0.17 | transcribed_unprocessed_pseudogene | 8  | 43147626  | 43218661  | POTE arkinin domain family, member A                                                     |
| 10651 | ENSG00000237118  |           | 12854 | 0.17 | unitary_pseudogene                 | 19 | 41324626  | 41324677  | cytochrome P450, family 2, subfamily F, polypeptide 2, pseudogene                        |
| 11008 | ENSG00000210768  |           | 12901 | 0.17 | unitary_pseudogene                 | 22 | 19112392  | 19113356  | testis-specific serine kinase 1A pseudogene                                              |
| 11066 | ENSG00000230386  |           | 13212 | 0.17 | unitary_pseudogene                 | 19 | 40627218  | 40628075  | vonwillebrand 1 receptor 98 pseudogene                                                   |
| 11988 | ENSG00000215448  |           | 13957 | 0.17 | unitary_pseudogene                 | 11 | 4167512   | 4168525   | effector receptor, family 55, subfamily B, member 1 pseudogene                           |
| 9442  | ENSG00000245441  |           | 4738  | 0.17 | unprocessed_pseudogene             | 8  | 2985350   | 2985356   | major histocompatibility complex, class II, H1 (pseudogene)                              |
| 10120 | ENSG0000024920   |           | 12442 | 0.17 | unprocessed_pseudogene             | 10 | 3783329   | 3783329   | transforming acidic coiled-coil containing protein 1 pseudogene 1                        |
| 10124 | ENSG00000238855  | HSD3B9A   | 12437 | 0.17 | unprocessed_pseudogene             | 1  | 120106889 | 12011434  | hydroxy-delta-5-steroid dehydrogenase, 3 beta, pseudogene 4                              |
| 10430 | ENSG0000023885   |           | 12814 | 0.17 | unprocessed_pseudogene             | 11 | 7263624   | 7263624   | effector receptor, family 8, subfamily 81, member 1 pseudogene                           |
| 10965 | ENSG00000244155  |           | 12780 | 0.17 | unprocessed_pseudogene             | 13 | 19315870  | 19316588  | cytochrome P450, family 4, subfamily F, polypeptide 34, pseudogene                       |
| 10700 | ENSG0000023772   |           | 12818 | 0.17 | unprocessed_pseudogene             | 20 | 25714900  | 25715729  | vonwillebrand 1 receptor 108 pseudogene                                                  |
| 10721 | ENSG00000244245  | HERC2P10  | 12917 | 0.17 | unprocessed_pseudogene             | 15 | 31107474  | 31108356  | hect domain and RLD 2 pseudogene 10                                                      |
| 10949 | ENSG00000252497  |           | 13111 | 0.17 | unprocessed_pseudogene             | 19 | 35723194  | 35723906  | family with sequence similarity 187, member 82, pseudogene                               |
| 11026 | ENSG00000252827  |           | 13164 | 0.17 | unprocessed_pseudogene             | 7  | 10084503  | 10084907  | disicytycyl-D acyltransferase 2 like 7, pseudogene                                       |
| 11125 | ENSG00000257817  |           | 13776 | 0.17 | unprocessed_pseudogene             | 2  | 12055749  | 12056830  | Rho GTPase activating protein 42 pseudogene 1                                            |
| 11208 | ENSG00000272001  |           | 13306 | 0.17 | unprocessed_pseudogene             | 1  | 21751118  | 21754460  | neuroblastoma breakpoint family, member 2, pseudogene                                    |
| 11218 | ENSG00000230590  |           | 13320 | 0.17 | unprocessed_pseudogene             | 2  | 11772653  | 11778394  | MT-ND2 pseudogene 21                                                                     |
| 11289 | ENSG00000232495  |           | 13336 | 0.17 | unprocessed_pseudogene             | 6  | 29620140  | 29620208  | MHC class I polypeptide-related sequence F (pseudogene)                                  |
| 11281 | ENSG00000179211  |           | 13378 | 0.17 | unprocessed_pseudogene             | 1  | 14909795  | 14913032  | neuroblastoma breakpoint family, member 23                                               |
| 11352 | ENSG00000253743  |           | 13440 | 0.17 | unprocessed_pseudogene             | 5  | 15741966  | 15741998  | MAP/microtubule affinity-regulating kinase 2 pseudogene 11                               |
| 11376 | ENSG00000236807  |           | 13465 | 0.17 | unprocessed_pseudogene             | 1  | 16052515  | 16054942  | flavin containing monooxygenase 8 pseudogene                                             |
| 11538 | ENSG00000248407  |           | 13629 | 0.17 | unprocessed_pseudogene             | 1  | 19064262  | 19064300  | double homeobox 4, like 3                                                                |
| 11570 | ENSG00000256726  | DUX4L9    | 13641 | 0.17 | unprocessed_pseudogene             | 15 | 84855504  | 84856196  | chromatin sulfate proteoglycan 4 pseudogene 11                                           |
| 11658 | ENSG00000232717  |           | 13705 | 0.17 | unprocessed_pseudogene             | 2  | 86248947  | 86249012  | spindle motif containing 51U, pseudogene                                                 |
| 11746 | ENSG00000221454  |           | 13786 | 0.17 | unprocessed_pseudogene             | 2  | 20348206  | 20348304  | HLA class II pseudogene 30                                                               |
| 11979 | ENSG00000227758  |           | 13988 | 0.17 | unprocessed_pseudogene             | 6  | 29716056  | 29716290  | HLA complex group B pseudogene 5                                                         |
| 2018  | ENSG00000249790  |           | 3178  | 0.17 | unprocessed_pseudogene             |    |           |           |                                                                                          |
| 2491  | ENSG0000022221   |           | 3913  | 0.17 | unprocessed_pseudogene             |    |           |           |                                                                                          |
| 2874  | ENSG00000228845  | LINC02041 | 4458  | 0.17 | unprocessed_pseudogene             | 14 | 95973606  | 95976427  | long intergenic non-protein coding RNA 341                                               |
| 2961  | ENSG00000244862  |           | 4617  | 0.17 | unprocessed_pseudogene             | X  | 15386251  | 15387649  | inhibitor of kappa light polypeptide gene enhancer in B-cells, kinase gamma pseudogene 1 |
| 3080  | ENSG00000209197  |           | 4963  | 0.17 | unprocessed_pseudogene             |    |           |           |                                                                                          |
| 3149  | ENSG00000248996  |           | 4944  | 0.17 | unprocessed_pseudogene             |    |           |           |                                                                                          |
| 3287  | ENSG00000214039  |           | 5157  | 0.17 | unprocessed_pseudogene             |    |           |           |                                                                                          |
| 3448  | ENSG00000210277  |           | 5129  | 0.17 | unprocessed_pseudogene             |    |           |           |                                                                                          |
| 3688  | ENSG00000252295  |           | 5775  | 0.17 | unprocessed_pseudogene             | 5  | 122131620 | 122131922 | Small nuclear RNA U13                                                                    |
| 3889  | ENSG00000252292  |           | 5779  | 0.17 | unprocessed_pseudogene             |    |           |           |                                                                                          |
| 3793  | ENSG00000249131  |           | 5667  | 0.17 | unprocessed_pseudogene             |    |           |           |                                                                                          |
| 3818  | ENSG00000262944  |           | 5699  | 0.17 | unprocessed_pseudogene             |    |           |           |                                                                                          |
| 3909  | ENSG00000263198  |           | 6135  | 0.17 | unprocessed_pseudogene             |    |           |           |                                                                                          |
| 4165  | ENSG00000270921  |           | 6456  | 0.17 | unprocessed_pseudogene             |    |           |           |                                                                                          |
| 4253  | ENSG00000138041  | SMEK2     | 6603  | 0.17 | unprocessed_pseudogene             | 2  | 55774428  | 55846015  | SMEK homolog 2, suppressor of mek1 (Dicolostium)                                         |
| 4521  | ENSG00000286462  |           | 7007  | 0.17 | unprocessed_pseudogene             |    |           |           |                                                                                          |
| 4811  | ENSG00000251628  |           | 7206  | 0.17 | unprocessed_pseudogene             |    |           |           |                                                                                          |
| 4820  | ENSG00000253431  |           | 7408  | 0.17 | unprocessed_pseudogene             |    |           |           |                                                                                          |
| 5031  | ENSG00000271870  |           | 7890  | 0.17 | unprocessed_pseudogene             |    |           |           |                                                                                          |
| 5099  | ENSG00000235691  |           | 7773  | 0.17 | unprocessed_pseudogene             |    |           |           |                                                                                          |
| 5393  | ENSG00000241157  |           | 8120  | 0.17 | unprocessed_pseudogene             |    |           |           |                                                                                          |
| 5415  | ENSG00000266709  |           | 8151  | 0.17 | unprocessed_pseudogene             |    |           |           |                                                                                          |
| 5529  | ENSG00000255689  |           | 8243  | 0.17 | unprocessed_pseudogene             |    |           |           |                                                                                          |
|       |                  |           |       |      |                                    |    |           |           |                                                                                          |

|       |                  |        |         |      |    |           |           |  |                                    |
|-------|------------------|--------|---------|------|----|-----------|-----------|--|------------------------------------|
| 9163  | ENSG0000022615   |        | 11679.8 | 0.17 |    |           |           |  |                                    |
| 9191  | ENSG0000024298   |        | 11703.9 | 0.17 |    |           |           |  |                                    |
| 9298  | ENSG0000022406   |        | 11786.8 | 0.17 | 10 | 48931789  | 48931804  |  | RNA, 5S ribosomal pseudogene 314   |
| 9307  | ENSG00000256897  |        | 11795.9 | 0.17 |    |           |           |  |                                    |
| 9373  | ENSG00000264699  |        | 11842.4 | 0.17 |    |           |           |  |                                    |
| 9395  | ENSG00000259533  |        | 11856.6 | 0.17 |    |           |           |  |                                    |
| 9406  | ENSG00000265842  |        | 11884.4 | 0.17 |    |           |           |  |                                    |
| 9418  | ENSG00000264648  |        | 11874.3 | 0.17 |    |           |           |  |                                    |
| 9424  | ENSG00000266016  |        | 11878.9 | 0.17 |    |           |           |  |                                    |
| 9436  | ENSG00000264305  |        | 11884.9 | 0.17 | 16 | 10499800  | 10500074  |  | RNA, 7SL cytoplasmic 99 pseudogene |
| 9447  | ENSG00000241111  |        | 11885.9 | 0.17 |    |           |           |  |                                    |
| 9452  | ENSG00000263133  |        | 11904.6 | 0.17 |    |           |           |  |                                    |
| 9467  | ENSG00000270354  |        | 11922.8 | 0.17 |    |           |           |  |                                    |
| 9489  | ENSG000002641073 |        | 11949.4 | 0.17 |    |           |           |  |                                    |
| 9541  | ENSG00000211065  |        | 11988.4 | 0.17 |    |           |           |  |                                    |
| 9544  | ENSG00000259304  |        | 11992.1 | 0.17 |    |           |           |  |                                    |
| 9588  | ENSG00000254503  |        | 12023.3 | 0.17 |    |           |           |  |                                    |
| 9598  | ENSG00000225249  |        | 12030.2 | 0.17 |    |           |           |  |                                    |
| 9616  | ENSG00000196409  | ZNF658 | 12045.1 | 0.17 | 9  | 40760700  | 40836415  |  | zinc finger protein 658            |
| 9622  | ENSG00000257509  |        | 12050.9 | 0.17 |    |           |           |  |                                    |
| 9643  | ENSG00000252621  |        | 12092.3 | 0.17 |    |           |           |  |                                    |
| 9645  | ENSG00000236662  |        | 12071.9 | 0.17 |    |           |           |  |                                    |
| 9652  | ENSG00000264222  |        | 12079.4 | 0.17 |    |           |           |  |                                    |
| 9655  | ENSG00000220119  |        | 12081.2 | 0.17 |    |           |           |  |                                    |
| 9661  | ENSG00000225213  |        | 12086.6 | 0.17 |    |           |           |  |                                    |
| 9679  | ENSG00000262979  |        | 12101.8 | 0.17 |    |           |           |  |                                    |
| 9737  | ENSG00000256989  |        | 12143.9 | 0.17 |    |           |           |  |                                    |
| 9753  | ENSG00000250240  |        | 12157.8 | 0.17 |    |           |           |  |                                    |
| 9777  | ENSG00000213117  |        | 12174.9 | 0.17 |    |           |           |  |                                    |
| 9823  | ENSG00000263769  |        | 12153.3 | 0.17 |    |           |           |  |                                    |
| 9843  | ENSG00000269954  |        | 12229   | 0.17 |    |           |           |  |                                    |
| 9872  | ENSG00000262662  |        | 12249.1 | 0.17 |    |           |           |  |                                    |
| 9877  | ENSG00000221785  |        | 12251.3 | 0.17 |    |           |           |  |                                    |
| 9881  | ENSG00000201138  |        | 12254.7 | 0.17 | 7  | 75010915  | 75011015  |  | Y RNA                              |
| 9891  | ENSG00000259046  |        | 12261.3 | 0.17 |    |           |           |  |                                    |
| 9908  | ENSG00000263373  |        | 12280.7 | 0.17 |    |           |           |  |                                    |
| 9931  | ENSG00000244990  |        | 12287.8 | 0.17 |    |           |           |  |                                    |
| 9933  | ENSG00000251635  |        | 12288.6 | 0.17 |    |           |           |  |                                    |
| 9945  | ENSG00000221143  |        | 12299.4 | 0.17 |    |           |           |  |                                    |
| 9977  | ENSG00000237938  |        | 12327.5 | 0.17 |    |           |           |  |                                    |
| 10003 | ENSG00000270962  |        | 12348.7 | 0.17 |    |           |           |  |                                    |
| 10014 | ENSG00000225248  |        | 12358.8 | 0.17 |    |           |           |  |                                    |
| 10015 | ENSG00000223819  |        | 12359.2 | 0.17 |    |           |           |  |                                    |
| 10025 | ENSG00000268041  |        | 12368.9 | 0.17 |    |           |           |  |                                    |
| 10038 | ENSG00000260450  |        | 12377.4 | 0.17 |    |           |           |  |                                    |
| 10050 | ENSG00000257245  |        | 12387.5 | 0.17 |    |           |           |  |                                    |
| 10051 | ENSG00000251399  |        | 12388.3 | 0.17 |    |           |           |  |                                    |
| 10053 | ENSG00000260663  |        | 12390.7 | 0.17 |    |           |           |  |                                    |
| 10068 | ENSG00000230111  |        | 12418.7 | 0.17 |    |           |           |  |                                    |
| 10101 | ENSG00000270325  |        | 12427   | 0.17 |    |           |           |  |                                    |
| 10105 | ENSG00000264103  |        | 12432   | 0.17 |    |           |           |  |                                    |
| 10117 | ENSG00000268805  |        | 12439.3 | 0.17 | 1  | 155385349 | 155385453 |  | Small nuclear RNA U13              |
| 10138 | ENSG00000267694  |        | 12450.7 | 0.17 |    |           |           |  |                                    |
| 10153 | ENSG00000268441  |        | 12467.6 | 0.17 |    |           |           |  |                                    |
| 10158 | ENSG000002217407 |        | 12471.1 | 0.17 |    |           |           |  |                                    |
| 10171 | ENSG00000271390  |        | 12479.8 | 0.17 |    |           |           |  |                                    |
| 10215 | ENSG000002698402 |        | 12518.3 | 0.17 |    |           |           |  |                                    |
| 10221 | ENSG00000260800  |        | 12524.1 | 0.17 |    |           |           |  |                                    |
| 10245 | ENSG00000267861  |        | 12546.2 | 0.17 | 11 | 129936836 | 129940412 |  | Uncharacterized protein            |
| 10252 | ENSG00000258118  |        | 12549.3 | 0.17 | 19 | 58203868  | 58204128  |  | Uncharacterized protein            |
| 10269 | ENSG00000263916  |        | 12570.9 | 0.17 |    |           |           |  |                                    |
| 10287 | ENSG00000272583  |        | 12574.4 | 0.17 |    |           |           |  |                                    |
| 10296 | ENSG00000258111  |        | 12576.4 | 0.17 |    |           |           |  |                                    |
| 10302 | ENSG00000203257  |        | 12576   | 0.17 |    |           |           |  |                                    |
| 10327 | ENSG00000225018  |        | 12593.6 | 0.17 |    |           |           |  |                                    |
| 10338 | ENSG00000205960  |        | 12604.5 | 0.17 |    |           |           |  |                                    |
| 10356 | ENSG00000249998  |        | 12615.3 | 0.17 |    |           |           |  |                                    |
| 10362 | ENSG00000255157  |        | 12618.3 | 0.17 |    |           |           |  |                                    |
| 10363 | ENSG0000021708   |        | 12621   | 0.17 |    |           |           |  |                                    |
| 10379 | ENSG00000214669  |        | 12629.9 | 0.17 |    |           |           |  |                                    |
| 10397 | ENSG00000236523  |        | 12646   | 0.17 |    |           |           |  |                                    |
| 10411 | ENSG00000214133  |        | 12660.3 | 0.17 |    |           |           |  |                                    |
| 10412 | ENSG00000258493  |        | 12660.2 | 0.17 |    |           |           |  |                                    |
| 10413 | ENSG00000233363  |        | 12662   | 0.17 |    |           |           |  |                                    |
| 10423 | ENSG00000255522  |        | 12667.3 | 0.17 |    |           |           |  |                                    |
| 10425 | ENSG00000259792  |        | 12670.6 | 0.17 |    |           |           |  |                                    |
| 10434 | ENSG00000258933  |        | 12680.8 | 0.17 |    |           |           |  |                                    |
| 10455 | ENSG00000260438  |        | 12703.3 | 0.17 |    |           |           |  |                                    |
| 10462 | ENSG00000270968  |        | 12708.2 | 0.17 |    |           |           |  |                                    |
| 10483 | ENSG00000271482  |        | 12708.7 | 0.17 |    |           |           |  |                                    |
| 10487 | ENSG00000226288  |        | 12710.1 | 0.17 |    |           |           |  |                                    |
| 10472 | ENSG00000240580  |        | 12714.7 | 0.17 |    |           |           |  |                                    |
| 10474 | ENSG00000271560  |        | 12715.7 | 0.17 |    |           |           |  |                                    |
| 10488 | ENSG00000266603  |        | 12724.4 | 0.17 |    |           |           |  |                                    |
| 10490 | ENSG00000226746  |        | 12724.5 | 0.17 |    |           |           |  |                                    |
| 10493 | ENSG00000260132  |        | 12725.5 | 0.17 |    |           |           |  |                                    |
| 10514 | ENSG00000234938  |        | 12746   | 0.17 |    |           |           |  |                                    |
| 10521 | ENSG00000261403  |        | 12748.9 | 0.17 |    |           |           |  |                                    |
| 10522 | ENSG00000227374  |        | 12749.1 | 0.17 |    |           |           |  |                                    |
| 10529 | ENSG00000234596  |        | 12752.2 | 0.17 |    |           |           |  |                                    |
| 10534 | ENSG00000233263  |        | 12762.5 | 0.17 |    |           |           |  |                                    |
| 10539 | ENSG00000255490  |        | 12763.1 | 0.17 |    |           |           |  |                                    |
| 10547 | ENSG00000230320  |        | 12770   | 0.17 |    |           |           |  |                                    |
| 10549 | ENSG00000260922  |        | 12772.5 | 0.17 |    |           |           |  |                                    |
| 10559 | ENSG00000237076  |        | 12777.1 | 0.17 |    |           |           |  |                                    |
| 10567 | ENSG00000227634  |        | 12781.6 | 0.17 |    |           |           |  |                                    |
| 10570 | ENSG00000260604  |        | 12786.4 | 0.17 |    |           |           |  |                                    |
| 10576 | ENSG00000229272  |        | 12788.4 | 0.17 |    |           |           |  |                                    |
| 10580 | ENSG00000250996  |        | 12791.4 | 0.17 |    |           |           |  |                                    |
| 10584 | ENSG00000272272  |        | 12793.6 | 0.17 |    |           |           |  |                                    |
| 10583 | ENSG00000268673  |        | 12795   | 0.17 | 9  | 140315596 | 140315690 |  | Small nuclear RNA U13              |
| 10588 | ENSG00000259620  |        | 12797   | 0.17 |    |           |           |  |                                    |
| 10592 | ENSG00000272979  |        | 12801.9 | 0.17 |    |           |           |  |                                    |
| 10594 | ENSG00000250609  |        | 12802.9 | 0.17 |    |           |           |  |                                    |
| 10602 | ENSG00000223878  |        | 12808.5 | 0.17 |    |           |           |  |                                    |
| 10605 | ENSG00000253436  |        | 12810.4 | 0.17 |    |           |           |  |                                    |
| 10609 | ENSG00000237963  |        | 12812.9 | 0.17 |    |           |           |  |                                    |
| 10614 | ENSG00000265367  |        | 12817   | 0.17 |    |           |           |  |                                    |
| 10625 | ENSG00000264904  |        | 12826.3 | 0.17 |    |           |           |  |                                    |
| 10636 | ENSG00000223867  |        | 12839.1 | 0.17 |    |           |           |  |                                    |
| 10639 | ENSG00000259265  |        | 12840.9 | 0.17 |    |           |           |  |                                    |
| 10653 | ENSG00000272754  |        | 12856.5 | 0.17 |    |           |           |  |                                    |
| 10664 | ENSG00000244802  |        | 12864.7 | 0.17 |    |           |           |  |                                    |
| 10678 | ENSG00000229831  |        | 12875.7 | 0.17 |    |           |           |  |                                    |
| 10679 | ENSG00000217415  |        | 12877   | 0.17 |    |           |           |  |                                    |
| 10683 | ENSG00000232518  |        | 12880.2 | 0.17 |    |           |           |  |                                    |
| 10688 | ENSG00000224819  |        | 12886.5 | 0.17 |    |           |           |  |                                    |
| 10691 | ENSG00000251113  |        | 12889.9 | 0.17 |    |           |           |  |                                    |
| 10693 | ENSG00000255258  |        | 12890.3 | 0.17 |    |           |           |  |                                    |
| 10694 | ENSG00000223402  |        | 12891.8 | 0.17 |    |           |           |  |                                    |
| 10702 | ENSG00000234559  |        | 12891.5 | 0.17 |    |           |           |  |                                    |
| 10706 | ENSG00000268903  |        | 12908   | 0.17 |    |           |           |  |                                    |
| 10707 | ENSG00000250739  |        | 12908.4 | 0.17 |    |           |           |  |                                    |
| 10708 | ENSG00000267141  |        | 12907.7 | 0.17 |    |           |           |  |                                    |
| 10717 | ENSG00000263161  |        | 12913.5 | 0.17 |    |           |           |  |                                    |
| 10723 | ENSG00000240774  |        | 12918.2 | 0.17 |    |           |           |  |                                    |
| 10726 | ENSG00000264546  |        | 12922.9 | 0.17 |    |           |           |  |                                    |
| 10733 | ENSG00000268330  |        | 12926   | 0.17 |    |           |           |  |                                    |
| 10737 | ENSG00000238776  |        | 12928.4 | 0.17 | 14 | 96790045  | 96790124  |  | Small nuclear RNA U13              |
| 10741 | ENSG00000268976  |        | 12936.6 | 0.17 |    |           |           |  |                                    |
| 10743 | ENSG00000264176  |        | 12937.1 | 0.17 |    |           |           |  |                                    |
| 10744 | ENSG00000255856  |        | 12938.5 | 0.17 |    |           |           |  |                                    |
| 10746 | ENSG00000224818  |        | 12939.8 | 0.17 |    |           |           |  |                                    |
| 10760 | ENSG00000261730  |        | 12941.6 | 0.17 |    |           |           |  |                                    |
| 10768 | ENSG00000221069  |        | 12950.1 | 0.17 |    |           |           |  |                                    |
| 10769 | ENSG00000233963  |        | 12951   | 0.17 |    |           |           |  |                                    |
| 10764 | ENSG00000255256  |        | 12953.2 | 0.17 |    |           |           |  |                                    |
| 10773 | ENSG00000227455  |        | 12965.8 | 0.17 |    |           |           |  |                                    |
| 10790 | ENSG00000265437  |        | 12981.8 | 0.17 |    |           |           |  |                                    |
| 10791 | ENSG00000261524  |        | 12982.3 | 0.17 |    |           |           |  |                                    |
| 10792 | ENSG00000250244  |        | 12983.2 | 0.17 |    |           |           |  |                                    |
| 10797 | ENSG00000229498  |        | 12988.1 | 0.17 |    |           |           |  |                                    |
| 10804 | ENSG00000243032  |        | 12988.9 | 0.17 |    |           |           |  |                                    |
| 10813 | ENSG00000268166  |        | 13003.7 | 0.17 |    |           |           |  |                                    |
| 10815 | ENSG00000237747  |        | 13004.7 | 0.17 |    |           |           |  |                                    |
| 10820 | ENSG00000266976  |        | 13007.9 | 0.17 |    |           |           |  |                                    |
| 10823 | ENSG00000253471  |        | 13008.2 | 0.17 |    |           |           |  |                                    |
| 10826 | ENSG00000261268  |        | 13009.9 | 0.17 |    |           |           |  |                                    |
| 10828 | ENSG00000264825  |        | 13010.6 | 0.17 |    |           |           |  |                                    |
| 10840 | ENSG00000229418  |        | 13018.9 | 0.17 |    |           |           |  |                                    |

|       |                  |          |       |   |      |          |          |                    |                                       |
|-------|------------------|----------|-------|---|------|----------|----------|--------------------|---------------------------------------|
| 10841 | ENSG00000259584  |          | 13020 | 1 | 0.17 |          |          |                    |                                       |
| 10845 | ENSG00000251178  |          | 13021 | 1 | 0.17 |          |          |                    |                                       |
| 10851 | ENSG00000236938  |          | 13024 | 1 | 0.17 |          |          |                    |                                       |
| 10857 | ENSG00000249684  |          | 13031 | 1 | 0.17 |          |          |                    |                                       |
| 10858 | ENSG00000236940  |          | 13031 | 1 | 0.17 |          |          |                    |                                       |
| 10860 | ENSG00000251131  |          | 13031 | 9 | 0.17 |          |          |                    |                                       |
| 10861 | ENSG00000248148  |          | 13032 | 3 | 0.17 |          |          |                    |                                       |
| 10864 | ENSG00000249739  |          | 13036 | 9 | 0.17 |          |          |                    |                                       |
| 10866 | ENSG00000231981  |          | 13040 | 4 | 0.17 |          |          |                    |                                       |
| 10876 | ENSG00000235899  |          | 13046 | 6 | 0.17 |          |          |                    |                                       |
| 10877 | ENSG00000236328  |          | 13046 | 6 | 0.17 |          |          |                    |                                       |
| 10879 | ENSG00000238492  |          | 13048 | 5 | 0.17 |          |          |                    |                                       |
| 10886 | ENSG00000250749  |          | 13052 | 3 | 0.17 |          |          |                    |                                       |
| 10888 | ENSG00000237413  |          | 13053 | 3 | 0.17 |          |          |                    |                                       |
| 10889 | ENSG00000230371  |          | 13078 | 6 | 0.17 |          |          |                    |                                       |
| 10910 | ENSG00000208755  |          | 13080 | 4 | 0.17 |          |          |                    |                                       |
| 10916 | ENSG00000229424  |          | 13082 | 9 | 0.17 |          |          |                    |                                       |
| 10917 | ENSG00000237998  |          | 13083 | 1 | 0.17 |          |          |                    |                                       |
| 10919 | ENSG00000214106  |          | 13085 | 4 | 0.17 |          |          |                    |                                       |
| 10922 | ENSG00000226985  |          | 13088 | 6 | 0.17 |          |          |                    |                                       |
| 10930 | ENSG00000232725  |          | 13092 | 5 | 0.17 |          |          |                    |                                       |
| 10932 | ENSG00000250514  |          | 13097 | 4 | 0.17 |          |          |                    |                                       |
| 10934 | ENSG00000249091  |          | 13097 | 9 | 0.17 |          |          |                    |                                       |
| 10939 | ENSG00000242523  |          | 13100 | 6 | 0.17 |          |          |                    |                                       |
| 10941 | ENSG00000236332  |          | 13101 | 5 | 0.17 |          |          |                    |                                       |
| 10944 | ENSG00000257472  |          | 13104 | 7 | 0.17 |          |          |                    |                                       |
| 10946 | ENSG00000232259  |          | 13108 | 5 | 0.17 |          |          |                    |                                       |
| 10948 | ENSG00000204277  |          | 13110 | 6 | 0.17 |          |          |                    |                                       |
| 10956 | ENSG00000236137  |          | 13116 | 7 | 0.17 |          |          |                    |                                       |
| 10958 | ENSG00000236708  |          | 13116 | 9 | 0.17 |          |          |                    |                                       |
| 10959 | ENSG00000258601  | 1        | 13120 | 1 | 0.17 | 48569206 | 48569478 | HCC1780467_PRO0538 | Uncharacterized protein               |
| 10961 | ENSG00000258829  |          | 13122 | 6 | 0.17 |          |          |                    |                                       |
| 10962 | ENSG00000236955  |          | 13123 | 2 | 0.17 |          |          |                    |                                       |
| 10966 | ENSG00000238099  |          | 13126 | 2 | 0.17 |          |          |                    |                                       |
| 10967 | ENSG00000254761  |          | 13126 | 6 | 0.17 |          |          |                    |                                       |
| 10972 | ENSG00000230522  |          | 13130 | 3 | 0.17 |          |          |                    |                                       |
| 10979 | ENSG000002069937 |          | 13138 | 1 | 0.17 |          |          |                    |                                       |
| 10984 | ENSG00000235056  |          | 13141 | 5 | 0.17 |          |          |                    |                                       |
| 10987 | ENSG00000236559  |          | 13142 | 6 | 0.17 |          |          |                    |                                       |
| 10988 | ENSG00000237869  |          | 13143 | 1 | 0.17 |          |          |                    |                                       |
| 10986 | ENSG00000232398  |          | 13148 | 4 | 0.17 |          |          |                    |                                       |
| 10989 | ENSG00000232799  |          | 13151 | 6 | 0.17 |          |          |                    |                                       |
| 11001 | ENSG00000232325  |          | 13152 | 2 | 0.17 |          |          |                    |                                       |
| 11002 | ENSG00000226944  |          | 13152 | 3 | 0.17 |          |          |                    |                                       |
| 11003 | ENSG00000246172  |          | 13152 | 4 | 0.17 |          |          |                    |                                       |
| 11004 | ENSG00000239731  |          | 13153 | 1 | 0.17 |          |          |                    |                                       |
| 11005 | ENSG00000205862  |          | 13153 | 4 | 0.17 |          |          |                    |                                       |
| 11007 | ENSG00000228718  |          | 13154 | 2 | 0.17 |          |          |                    |                                       |
| 11009 | ENSG00000208931  |          | 13154 | 6 | 0.17 |          |          |                    |                                       |
| 11012 | ENSG00000257596  |          | 13157 | 6 | 0.17 |          |          |                    |                                       |
| 11022 | ENSG00000236416  |          | 13162 | 1 | 0.17 |          |          |                    |                                       |
| 11023 | ENSG00000236203  |          | 13163 | 1 | 0.17 |          |          |                    |                                       |
| 11024 | ENSG00000255652  |          | 13163 | 5 | 0.17 |          |          |                    |                                       |
| 11028 | ENSG00000236579  |          | 13164 | 9 | 0.17 |          |          |                    |                                       |
| 11034 | ENSG00000232655  |          | 13170 | 1 | 0.17 |          |          |                    |                                       |
| 11038 | ENSG00000251296  |          | 13170 | 9 | 0.17 |          |          |                    |                                       |
| 11043 | ENSG00000236745  |          | 13180 | 3 | 0.17 |          |          |                    |                                       |
| 11044 | ENSG00000236496  |          | 13180 | 3 | 0.17 |          |          |                    |                                       |
| 11047 | ENSG00000254484  |          | 13181 | 1 | 0.17 |          |          |                    |                                       |
| 11050 | ENSG00000239172  |          | 13183 | 6 | 0.17 |          |          |                    |                                       |
| 11052 | ENSG00000230529  |          | 13185 | 5 | 0.17 |          |          |                    |                                       |
| 11057 | ENSG00000226527  |          | 13188 | 5 | 0.17 |          |          |                    |                                       |
| 11060 | ENSG00000258303  |          | 13192 | 1 | 0.17 |          |          |                    |                                       |
| 11068 | ENSG00000221783  |          | 13201 | 3 | 0.17 |          |          |                    |                                       |
| 11069 | ENSG00000230395  |          | 13201 | 5 | 0.17 |          |          |                    |                                       |
| 11073 | ENSG00000230384  |          | 13203 | 4 | 0.17 |          |          |                    |                                       |
| 11074 | ENSG00000232292  |          | 13204 | 6 | 0.17 |          |          |                    |                                       |
| 11078 | ENSG00000254336  |          | 13206 | 3 | 0.17 |          |          |                    |                                       |
| 11079 | ENSG00000236281  |          | 13208 | 2 | 0.17 |          |          |                    |                                       |
| 11081 | ENSG00000231204  |          | 13209 | 6 | 0.17 |          |          |                    |                                       |
| 11084 | ENSG00000233216  |          | 13209 | 6 | 0.17 |          |          |                    |                                       |
| 11086 | ENSG00000254261  |          | 13218 | 1 | 0.17 |          |          |                    |                                       |
| 11097 | ENSG000002304537 |          | 13218 | 7 | 0.17 |          |          |                    |                                       |
| 11101 | ENSG00000233765  |          | 13220 | 1 | 0.17 |          |          |                    |                                       |
| 11102 | ENSG00000219361  |          | 13220 | 6 | 0.17 |          |          |                    |                                       |
| 11104 | ENSG00000235458  |          | 13221 | 1 | 0.17 |          |          |                    |                                       |
| 11106 | ENSG00000227465  |          | 13221 | 1 | 0.17 |          |          |                    |                                       |
| 11107 | ENSG00000255118  |          | 13224 | 1 | 0.17 |          |          |                    |                                       |
| 11112 | ENSG00000231749  | GOLGA8L4 | 13227 | 6 | 0.17 | 15       | 82920438 | 82939159           | golga8 family-like 18                 |
| 11117 | ENSG00000207140  |          | 13230 | 9 | 0.17 |          |          |                    |                                       |
| 11118 | ENSG00000234177  |          | 13233 | 4 | 0.17 |          |          |                    |                                       |
| 11122 | ENSG00000231568  |          | 13239 | 3 | 0.17 |          |          |                    |                                       |
| 11124 | ENSG00000225947  |          | 13240 | 4 | 0.17 |          |          |                    |                                       |
| 11126 | ENSG00000258433  |          | 13240 | 5 | 0.17 |          |          |                    |                                       |
| 11130 | ENSG00000230189  |          | 13245 | 6 | 0.17 |          |          |                    |                                       |
| 11136 | ENSG00000231098  |          | 13252 | 4 | 0.17 |          |          |                    |                                       |
| 11137 | ENSG00000232166  |          | 13253 | 2 | 0.17 |          |          |                    |                                       |
| 11138 | ENSG00000235311  |          | 13254 | 6 | 0.17 |          |          |                    |                                       |
| 11142 | ENSG00000231133  |          | 13256 | 6 | 0.17 |          |          |                    |                                       |
| 11144 | ENSG00000244830  |          | 13257 | 4 | 0.17 |          |          |                    |                                       |
| 11146 | ENSG00000236078  |          | 13258 | 2 | 0.17 |          |          |                    |                                       |
| 11148 | ENSG00000230765  |          | 13261 | 1 | 0.17 |          |          |                    |                                       |
| 11156 | ENSG00000231709  |          | 13267 | 1 | 0.17 |          |          |                    |                                       |
| 11157 | ENSG00000239836  |          | 13267 | 3 | 0.17 |          |          |                    |                                       |
| 11158 | ENSG00000239815  |          | 13267 | 6 | 0.17 |          |          |                    |                                       |
| 11160 | ENSG00000258312  |          | 13267 | 7 | 0.17 |          |          |                    |                                       |
| 11162 | ENSG00000231844  |          | 13269 | 6 | 0.17 |          |          |                    |                                       |
| 11163 | ENSG00000232774  |          | 13269 | 9 | 0.17 |          |          |                    |                                       |
| 11164 | ENSG00000229261  |          | 13271 | 3 | 0.17 |          |          |                    |                                       |
| 11166 | ENSG00000249426  |          | 13271 | 3 | 0.17 |          |          |                    |                                       |
| 11166 | ENSG00000229291  |          | 13273 | 1 | 0.17 |          |          |                    |                                       |
| 11168 | ENSG00000236540  |          | 13274 | 9 | 0.17 |          |          |                    |                                       |
| 11171 | ENSG00000251632  |          | 13279 | 1 | 0.17 |          |          |                    |                                       |
| 11174 | ENSG00000211741  |          | 13280 | 1 | 0.17 |          |          |                    |                                       |
| 11184 | ENSG00000225680  |          | 13290 | 9 | 0.17 |          |          |                    |                                       |
| 11188 | ENSG00000236443  |          | 13294 | 2 | 0.17 |          |          |                    |                                       |
| 11190 | ENSG00000239292  |          | 13294 | 5 | 0.17 |          |          |                    |                                       |
| 11194 | ENSG00000228707  |          | 13297 | 8 | 0.17 |          |          |                    |                                       |
| 11197 | ENSG00000228440  |          | 13301 | 1 | 0.17 |          |          |                    |                                       |
| 11199 | ENSG00000239158  |          | 13301 | 3 | 0.17 |          |          |                    |                                       |
| 11201 | ENSG00000248125  |          | 13302 | 1 | 0.17 |          |          |                    |                                       |
| 11206 | ENSG00000231335  |          | 13308 | 9 | 0.17 |          |          |                    |                                       |
| 11210 | ENSG00000236611  |          | 13309 | 2 | 0.17 |          |          |                    |                                       |
| 11212 | ENSG00000271443  |          | 13312 | 3 | 0.17 |          |          |                    |                                       |
| 11222 | ENSG00000231996  |          | 13323 | 4 | 0.17 |          |          |                    |                                       |
| 11223 | ENSG00000232609  |          | 13323 | 5 | 0.17 |          |          |                    |                                       |
| 11224 | ENSG00000248738  |          | 13325 | 3 | 0.17 |          |          |                    |                                       |
| 11226 | ENSG00000235136  |          | 13325 | 6 | 0.17 |          |          |                    |                                       |
| 11228 | ENSG00000238428  |          | 13326 | 9 | 0.17 |          |          |                    |                                       |
| 11229 | ENSG00000219448  |          | 13330 | 2 | 0.17 | 8        | 29000210 | 29000484           | RNA 7SL cytoplasmic 781, pseudogene   |
| 11231 | ENSG00000252285  |          | 13330 | 9 | 0.17 | 7        | 65899434 | 65899605           | Small nuclear RNA U13                 |
| 11232 | ENSG00000232699  |          | 13331 | 2 | 0.17 |          |          |                    |                                       |
| 11234 | ENSG00000257548  |          | 13332 | 1 | 0.17 |          |          |                    |                                       |
| 11238 | ENSG00000244791  |          | 13336 | 1 | 0.17 |          |          |                    |                                       |
| 11241 | ENSG00000272260  |          | 13336 | 2 | 0.17 |          |          |                    |                                       |
| 11242 | ENSG00000232761  |          | 13338 | 4 | 0.17 |          |          |                    |                                       |
| 11243 | ENSG00000236279  |          | 13338 | 4 | 0.17 |          |          |                    |                                       |
| 11250 | ENSG00000234593  |          | 13344 | 7 | 0.17 |          |          |                    |                                       |
| 11254 | ENSG00000236925  |          | 13349 | 6 | 0.17 |          |          |                    |                                       |
| 11258 | ENSG00000236926  |          | 13360 | 4 | 0.17 |          |          |                    |                                       |
| 11262 | ENSG00000239739  |          | 13363 | 6 | 0.17 |          |          |                    |                                       |
| 11266 | ENSG00000231341  |          | 13366 | 4 | 0.17 |          |          |                    |                                       |
| 11267 | ENSG00000244904  |          | 13365 | 7 | 0.17 |          |          |                    |                                       |
| 11270 | ENSG00000237426  |          | 13366 | 7 | 0.17 |          |          |                    |                                       |
| 11276 | ENSG00000239190  |          | 13373 | 1 | 0.17 | 8        | 98786206 | 98786261           | RNA, U7 small nuclear 177, pseudogene |
| 11277 | ENSG00000237384  |          | 13373 | 4 | 0.17 |          |          |                    |                                       |
| 11278 | ENSG00000236626  |          | 13374 | 3 | 0.17 | 14       | 77817615 | 77817802           | RNA 7SL cytoplasmic 137, pseudogene   |
| 11284 | ENSG00000239267  |          | 13382 | 1 | 0.17 |          |          |                    |                                       |
| 11288 | ENSG00000237870  |          | 13388 | 6 | 0.17 |          |          |                    |                                       |
| 11290 | ENSG00000235360  |          | 13390 | 6 | 0.17 |          |          |                    |                                       |
| 11294 | ENSG00000232329  |          | 13391 | 3 | 0.17 |          |          |                    |                                       |
| 11297 | ENSG00000221521  |          | 13397 | 1 | 0.17 |          |          |                    |                                       |
| 11300 | ENSG00000237483  |          | 13400 | 6 | 0.17 |          |          |                    |                                       |
| 11303 | ENSG00000215403  |          | 13402 | 5 | 0.17 |          |          |                    |                                       |
| 11306 | ENSG00000236548  |          | 13405 | 2 | 0.17 |          |          |                    |                                       |
| 11309 | ENSG00000232353  |          | 13407 | 1 | 0.17 |          |          |                    |                                       |
| 11311 | ENSG00000235506  |          | 13407 | 2 | 0.17 |          |          |                    |                                       |
| 11317 | ENSG00000235015  |          | 13409 | 5 | 0.17 |          |          |                    |                                       |
| 11319 | ENSG00000259967  |          | 13411 | 7 | 0.17 |          |          |                    |                                       |
| 11320 | ENSG00000231726  |          | 13412 | 1 | 0.17 |          |          |                    |                                       |
| 11321 | ENSG000002303473 |          | 13412 | 1 | 0.17 |          |          |                    |                                       |

|       |                 |         |       |      |    |          |          |  |                                 |
|-------|-----------------|---------|-------|------|----|----------|----------|--|---------------------------------|
| 11331 | ENSG0000022875  |         | 13422 | 0.17 |    |          |          |  |                                 |
| 11332 | ENSG0000021717  |         | 13423 | 0.17 |    |          |          |  |                                 |
| 11333 | ENSG00000168129 |         | 13424 | 0.17 |    |          |          |  |                                 |
| 11336 | ENSG00000227197 |         | 13429 | 0.17 |    |          |          |  |                                 |
| 11341 | ENSG00000214970 |         | 13434 | 0.17 |    |          |          |  |                                 |
| 11342 | ENSG00000217362 |         | 13434 | 0.17 |    |          |          |  |                                 |
| 11343 | ENSG00000212863 |         | 13435 | 0.17 |    |          |          |  |                                 |
| 11344 | ENSG00000226526 |         | 13437 | 0.17 |    |          |          |  |                                 |
| 11345 | ENSG00000205037 |         | 13437 | 0.17 |    |          |          |  |                                 |
| 11347 | ENSG00000215421 |         | 13439 | 0.17 |    |          |          |  |                                 |
| 11348 | ENSG00000225288 |         | 13442 | 0.17 |    |          |          |  |                                 |
| 11356 | ENSG00000196251 |         | 13443 | 0.17 |    |          |          |  |                                 |
| 11365 | ENSG00000205780 |         | 13457 | 0.17 |    |          |          |  |                                 |
| 11366 | ENSG00000205708 |         | 13457 | 0.17 |    |          |          |  |                                 |
| 11370 | ENSG00000205969 |         | 13457 | 0.17 |    |          |          |  |                                 |
| 11379 | ENSG00000204363 |         | 13468 | 0.17 |    |          |          |  |                                 |
| 11381 | ENSG00000221628 |         | 13470 | 0.17 |    |          |          |  |                                 |
| 11383 | ENSG00000205872 |         | 13470 | 0.17 |    |          |          |  |                                 |
| 11384 | ENSG00000217557 |         | 13474 | 0.17 |    |          |          |  |                                 |
| 11385 | ENSG00000221549 |         | 13474 | 0.17 |    |          |          |  |                                 |
| 11387 | ENSG00000225689 |         | 13475 | 0.17 |    |          |          |  |                                 |
| 11389 | ENSG00000132139 | GAS2L2  | 13477 | 0.17 | 17 | 34071530 | 34079897 |  | growth arrest-specific 2 like 2 |
| 11393 | ENSG00000205873 |         | 13481 | 0.17 |    |          |          |  |                                 |
| 11396 | ENSG00000232337 |         | 13484 | 0.17 |    |          |          |  |                                 |
| 11397 | ENSG00000228552 |         | 13486 | 0.17 |    |          |          |  |                                 |
| 11399 | ENSG00000202132 |         | 13486 | 0.17 |    |          |          |  |                                 |
| 11406 | ENSG00000161583 | TBC1D3C | 13491 | 0.17 | 17 | 34745936 | 3480104  |  | TBC1 domain family, member 3G   |
| 11407 | ENSG00000232458 |         | 13491 | 0.17 |    |          |          |  |                                 |
| 11408 | ENSG00000201438 |         | 13492 | 0.17 |    |          |          |  |                                 |
| 11413 | ENSG00000228550 |         | 13496 | 0.17 |    |          |          |  |                                 |
| 11416 | ENSG00000231153 |         | 13501 | 0.17 |    |          |          |  |                                 |
| 11418 | ENSG00000205168 |         | 13502 | 0.17 |    |          |          |  |                                 |
| 11426 | ENSG00000235450 |         | 13510 | 0.17 |    |          |          |  |                                 |
| 11428 | ENSG00000206743 |         | 13511 | 0.17 |    |          |          |  |                                 |
| 11431 | ENSG00000205428 |         | 13515 | 0.17 |    |          |          |  |                                 |
| 11435 | ENSG00000205305 |         | 13520 | 0.17 |    |          |          |  |                                 |
| 11437 | ENSG00000206882 |         | 13520 | 0.17 |    |          |          |  |                                 |
| 11441 | ENSG00000205168 |         | 13521 | 0.17 |    |          |          |  |                                 |
| 11442 | ENSG00000205373 |         | 13521 | 0.17 |    |          |          |  |                                 |
| 11444 | ENSG00000205629 |         | 13526 | 0.17 |    |          |          |  |                                 |
| 11448 | ENSG00000205697 |         | 13530 | 0.17 |    |          |          |  |                                 |
| 11454 | ENSG00000225705 |         | 13538 | 0.17 |    |          |          |  |                                 |
| 11455 | ENSG00000205890 |         | 13538 | 0.17 |    |          |          |  |                                 |
| 11458 | ENSG00000207771 |         | 13540 | 0.17 |    |          |          |  |                                 |
| 11462 | ENSG00000207074 |         | 13547 | 0.17 |    |          |          |  |                                 |
| 11470 | ENSG00000210736 |         | 13553 | 0.17 |    |          |          |  |                                 |
| 11471 | ENSG00000202943 |         | 13553 | 0.17 |    |          |          |  |                                 |
| 11473 | ENSG00000205138 |         | 13553 | 0.17 |    |          |          |  |                                 |
| 11477 | ENSG00000208120 |         | 13557 | 0.17 |    |          |          |  |                                 |
| 11478 | ENSG00000209104 |         | 13559 | 0.17 |    |          |          |  |                                 |
| 11479 | ENSG00000210486 |         | 13559 | 0.17 |    |          |          |  |                                 |
| 11482 | ENSG00000236653 |         | 13560 | 0.17 |    |          |          |  |                                 |
| 11483 | ENSG00000204749 |         | 13561 | 0.17 |    |          |          |  |                                 |
| 11484 | ENSG00000205399 |         | 13562 | 0.17 |    |          |          |  |                                 |
| 11488 | ENSG00000207994 |         | 13564 | 0.17 |    |          |          |  |                                 |
| 11489 | ENSG00000205233 |         | 13564 | 0.17 |    |          |          |  |                                 |
| 11485 | ENSG00000208765 |         | 13571 | 0.17 |    |          |          |  |                                 |
| 11497 | ENSG00000229733 |         | 13572 | 0.17 |    |          |          |  |                                 |
| 11505 | ENSG00000205148 |         | 13580 | 0.17 |    |          |          |  |                                 |
| 11508 | ENSG00000207114 |         | 13582 | 0.17 |    |          |          |  |                                 |
| 11507 | ENSG00000206743 |         | 13583 | 0.17 |    |          |          |  |                                 |
| 11508 | ENSG00000205028 |         | 13584 | 0.17 |    |          |          |  |                                 |
| 11518 | ENSG00000205943 |         | 13591 | 0.17 |    |          |          |  |                                 |
| 11523 | ENSG00000205933 |         | 13597 | 0.17 |    |          |          |  |                                 |
| 11524 | ENSG00000211193 |         | 13598 | 0.17 |    |          |          |  |                                 |
| 11526 | ENSG00000230676 |         | 13601 | 0.17 |    |          |          |  |                                 |
| 11530 | ENSG00000233895 |         | 13603 | 0.17 |    |          |          |  |                                 |
| 11541 | ENSG00000205113 |         | 13612 | 0.17 |    |          |          |  |                                 |
| 11560 | ENSG00000224148 |         | 13624 | 0.17 |    |          |          |  |                                 |
| 11562 | ENSG00000208070 |         | 13625 | 0.17 |    |          |          |  |                                 |
| 11572 | ENSG00000205103 |         | 13634 | 0.17 |    |          |          |  |                                 |
| 11578 | ENSG00000228917 |         | 13641 | 0.17 |    |          |          |  |                                 |
| 11590 | ENSG00000205403 |         | 13647 | 0.17 |    |          |          |  |                                 |
| 11598 | ENSG00000205431 |         | 13653 | 0.17 | 18 | 60491423 | 60492724 |  | Uncharacterized protein         |
| 11597 | ENSG00000206867 |         | 13654 | 0.17 |    |          |          |  |                                 |
| 11599 | ENSG00000237390 |         | 13655 | 0.17 |    |          |          |  |                                 |
| 11602 | ENSG00000208973 |         | 13658 | 0.17 |    |          |          |  |                                 |
| 11604 | ENSG00000270279 |         | 13662 | 0.17 |    |          |          |  |                                 |
| 11606 | ENSG00000230702 |         | 13665 | 0.17 |    |          |          |  |                                 |
| 11607 | ENSG00000205963 |         | 13665 | 0.17 |    |          |          |  |                                 |
| 11610 | ENSG00000270367 |         | 13665 | 0.17 |    |          |          |  |                                 |
| 11612 | ENSG00000205307 |         | 13667 | 0.17 |    |          |          |  |                                 |
| 11620 | ENSG00000232661 |         | 13673 | 0.17 |    |          |          |  |                                 |
| 11622 | ENSG00000205233 |         | 13674 | 0.17 |    |          |          |  |                                 |
| 11623 | ENSG00000206096 |         | 13675 | 0.17 |    |          |          |  |                                 |
| 11624 | ENSG00000216576 |         | 13676 | 0.17 |    |          |          |  |                                 |
| 11625 | ENSG00000207865 |         | 13677 | 0.17 |    |          |          |  |                                 |
| 11643 | ENSG00000205742 |         | 13691 | 0.17 |    |          |          |  |                                 |
| 11647 | ENSG00000205785 |         | 13693 | 0.17 |    |          |          |  |                                 |
| 11655 | ENSG00000211951 |         | 13701 | 0.17 |    |          |          |  |                                 |
| 11660 | ENSG00000205150 |         | 13706 | 0.17 |    |          |          |  |                                 |
| 11664 | ENSG00000204775 |         | 13711 | 0.17 |    |          |          |  |                                 |
| 11665 | ENSG00000205261 |         | 13712 | 0.17 |    |          |          |  |                                 |
| 11674 | ENSG00000205638 |         | 13719 | 0.17 |    |          |          |  |                                 |
| 11677 | ENSG00000232616 |         | 13720 | 0.17 |    |          |          |  |                                 |
| 11680 | ENSG00000205154 |         | 13722 | 0.17 |    |          |          |  |                                 |
| 11688 | ENSG00000272265 |         | 13733 | 0.17 |    |          |          |  |                                 |
| 11690 | ENSG00000230536 |         | 13736 | 0.17 |    |          |          |  |                                 |
| 11699 | ENSG00000204975 |         | 13742 | 0.17 |    |          |          |  |                                 |
| 11702 | ENSG00000232893 |         | 13743 | 0.17 |    |          |          |  |                                 |
| 11703 | ENSG00000204816 |         | 13743 | 0.17 |    |          |          |  |                                 |
| 11708 | ENSG00000210981 |         | 13748 | 0.17 |    |          |          |  |                                 |
| 11715 | ENSG00000203438 |         | 13751 | 0.17 |    |          |          |  |                                 |
| 11723 | ENSG00000223982 |         | 13760 | 0.17 |    |          |          |  |                                 |
| 11728 | ENSG00000206307 |         | 13771 | 0.17 |    |          |          |  |                                 |
| 11735 | ENSG00000206197 |         | 13779 | 0.17 |    |          |          |  |                                 |
| 11736 | ENSG00000204030 |         | 13780 | 0.17 |    |          |          |  |                                 |
| 11751 | ENSG00000205572 |         | 13790 | 0.17 |    |          |          |  |                                 |
| 11754 | ENSG00000204033 |         | 13795 | 0.17 |    |          |          |  |                                 |
| 11755 | ENSG00000202930 |         | 13797 | 0.17 |    |          |          |  |                                 |
| 11759 | ENSG00000204150 |         | 13800 | 0.17 |    |          |          |  |                                 |
| 11763 | ENSG00000205160 |         | 13804 | 0.17 |    |          |          |  |                                 |
| 11765 | ENSG00000208119 |         | 13805 | 0.17 |    |          |          |  |                                 |
| 11768 | ENSG00000205653 |         | 13805 | 0.17 |    |          |          |  |                                 |
| 11767 | ENSG00000205917 |         | 13806 | 0.17 |    |          |          |  |                                 |
| 11780 | ENSG00000206543 |         | 13815 | 0.17 |    |          |          |  |                                 |
| 11783 | ENSG00000205493 |         | 13817 | 0.17 |    |          |          |  |                                 |
| 11785 | ENSG00000205101 |         | 13819 | 0.17 |    |          |          |  |                                 |
| 11789 | ENSG00000214891 |         | 13821 | 0.17 |    |          |          |  |                                 |
| 11798 | ENSG00000205059 |         | 13828 | 0.17 |    |          |          |  |                                 |
| 11799 | ENSG00000196893 |         | 13829 | 0.17 |    |          |          |  |                                 |
| 11800 | ENSG00000213081 |         | 13829 | 0.17 |    |          |          |  |                                 |
| 11801 | ENSG00000206173 |         | 13830 | 0.17 |    |          |          |  |                                 |
| 11803 | ENSG00000206029 |         | 13831 | 0.17 |    |          |          |  |                                 |
| 11805 | ENSG00000145963 |         | 13832 | 0.17 |    |          |          |  |                                 |
| 11806 | ENSG00000204744 |         | 13833 | 0.17 |    |          |          |  |                                 |
| 11815 | ENSG00000205217 |         | 13840 | 0.17 |    |          |          |  |                                 |
| 11816 | ENSG00000231253 |         | 13840 | 0.17 |    |          |          |  |                                 |
| 11821 | ENSG00000205698 |         | 13845 | 0.17 |    |          |          |  |                                 |
| 11823 | ENSG00000205960 |         | 13848 | 0.17 |    |          |          |  |                                 |
| 11834 | ENSG00000205370 |         | 13856 | 0.17 |    |          |          |  |                                 |
| 11838 | ENSG00000205290 |         | 13860 | 0.17 |    |          |          |  |                                 |
| 11841 | ENSG00000206263 |         | 13864 | 0.17 |    |          |          |  |                                 |
| 11842 | ENSG00000206386 |         | 13865 | 0.17 |    |          |          |  |                                 |
| 11865 | ENSG00000204481 |         | 13889 | 0.17 |    |          |          |  |                                 |
| 11873 | ENSG00000205258 |         | 13892 | 0.17 |    |          |          |  |                                 |
| 11875 | ENSG00000208759 |         | 13894 | 0.17 |    |          |          |  |                                 |
| 11882 | ENSG00000208793 |         | 13897 | 0.17 |    |          |          |  |                                 |
| 11888 | ENSG00000205022 |         | 13899 | 0.17 |    |          |          |  |                                 |
| 11889 | ENSG00000272884 |         | 13903 | 0.17 |    |          |          |  |                                 |
| 11892 | ENSG00000205491 |         | 13906 | 0.17 |    |          |          |  |                                 |
| 11895 | ENSG00000203002 |         | 13906 | 0.17 |    |          |          |  |                                 |
| 11896 | ENSG00000205481 |         | 13907 | 0.17 |    |          |          |  |                                 |
| 11899 | ENSG00000205282 |         | 13909 | 0.17 |    |          |          |  |                                 |
| 11904 | ENSG00000211139 |         | 13914 | 0.17 |    |          |          |  |                                 |
| 11910 | ENSG00000205396 |         | 13919 | 0.17 |    |          |          |  |                                 |
| 11912 | ENSG00000205088 |         | 13920 | 0.17 |    |          |          |  |                                 |
| 11918 | ENSG00000215449 |         | 13922 | 0.17 |    |          |          |  |                                 |
| 11923 | ENSG00000206034 |         | 13924 | 0.17 |    |          |          |  |                                 |





|       |                  |          |       |    |                       |    |           |           |                                                                                               |
|-------|------------------|----------|-------|----|-----------------------|----|-----------|-----------|-----------------------------------------------------------------------------------------------|
| 13018 | ENSG00000204374  | 14731    | 0     | 16 | misc RNA              | 1  | 35757801  | 35758099  | RNA 75L cytoplasmic 503 pseudogene                                                            |
| 13048 | ENSG00000204551  | 14731    | 0     | 16 | misc RNA              | 1  | 35757801  | 35758099  | RNA 75L cytoplasmic 12 pseudogene                                                             |
| 13214 | ENSG00000207418  | 14887    | 2     | 16 | misc RNA              | 21 | 38359039  | 38359151  | Y RNA                                                                                         |
| 14449 | ENSG00000204403  | CASP12   | 13532 | 2  | polymerase_pseudogene | 11 | 104756445 | 104759397 | catapase 12 (gene/pseudogene)                                                                 |
| 3626  | ENSG00000207350  |          | 6634  | 0  | processed_pseudogene  | 4  | 2272898   | 2272973   | cell division cycle 42 pseudogene 8                                                           |
| 4161  | ENSG00000204261  |          | 4480  | 0  | processed_pseudogene  | 3  | 4074960   | 4074960   | synaptic binding protein (syn) pseudogene 3                                                   |
| 4313  | ENSG000002043759 |          | 6701  | 3  | processed_pseudogene  | 3  | 143235965 | 143237071 | suppression of lamorgency 13 (colon carcinoma) (Hsp70 interacting protein) pseudogene 15      |
| 5182  | ENSG00000205003  |          | 7870  | 0  | processed_pseudogene  | 8  | 1178594   | 1178602   | basic transcription factor 3 pseudogene 12                                                    |
| 5659  | ENSG00000205985  | RPL21P44 | 8257  | 0  | processed_pseudogene  | 4  | 5485254   | 5485254   | ribosomal protein L21 pseudogene 44                                                           |
| 6045  | ENSG00000202348  |          | 5209  | 0  | processed_pseudogene  | 1  | 35587623  | 35588085  | EF-hand calcium binding domain 14 pseudogene 1                                                |
| 6415  | ENSG00000205817  |          | 9257  | 0  | processed_pseudogene  | 2  | 21976289  | 21976862  | zinc finger CCHC-type containing 116 pseudogene                                               |
| 6702  | ENSG00000204535  |          | 8543  | 0  | processed_pseudogene  | 3  | 17887858  | 17888091  | leucine rich repeat (LRR) interacting protein 1 pseudogene 1                                  |
| 6883  | ENSG00000204995  |          | 9659  | 0  | processed_pseudogene  | 4  | 11047628  | 11047888  | chromobox homolog 5 pseudogene 1                                                              |
| 7390  | ENSG00000203189  |          | 10340 | 0  | processed_pseudogene  | 10 | 98319442  | 98320079  | nucleoside diphosphate kinase 2 pseudogene 28                                                 |
| 7599  | ENSG00000203189  |          | 10343 | 0  | processed_pseudogene  | 10 | 98319442  | 98320079  | ribosomal protein L12 pseudogene 29                                                           |
| 7651  | ENSG000002048144 |          | 10386 | 1  | processed_pseudogene  | 19 | 51900009  | 51900780  | nucleolar protein interacting with the FHA domain of MIM67 pseudogene 6                       |
| 8586  | ENSG00000202931  |          | 11205 | 3  | processed_pseudogene  | 14 | 71561590  | 71561950  | glutaryl tumor transforming 4 pseudogene 1                                                    |
| 9129  | ENSG000002026491 |          | 11655 | 9  | processed_pseudogene  | 2  | 43024365  | 43025825  | fat mass and obesity associated pseudogene 1                                                  |
| 9300  | ENSG00000202222  |          | 11788 | 0  | processed_pseudogene  | 1  | 24634280  | 24634280  | coiled-coil-helix-coiled-coil helix domain containing 4 pseudogene 5                          |
| 9504  | ENSG00000217496  |          | 13355 | 0  | processed_pseudogene  | Y  | 21141001  | 21142684  | zinc finger protein 630 pseudogene 1                                                          |
| 10023 | ENSG000002040366 |          | 12365 | 4  | processed_pseudogene  | 15 | 75478992  | 75479309  | ribosomal protein L38a pseudogene 45                                                          |
| 10218 | ENSG00000196933  |          | 12520 | 2  | processed_pseudogene  | X  | 71264395  | 71264742  | ribosomal protein S26 pseudogene 11                                                           |
| 10345 | ENSG00000201415  |          | 12608 | 1  | processed_pseudogene  | 1  | 51130059  | 51130163  | nuclear receptor binding factor 2 pseudogene 3                                                |
| 10616 | ENSG00000205942  |          | 12821 | 2  | processed_pseudogene  | 4  | 9878932   | 9879585   | ectonucleotide pyrophosphatase/phosphodiesterase 7 pseudogene 11                              |
| 10719 | ENSG00000203223  |          | 12914 | 0  | processed_pseudogene  | 22 | 22540331  | 22541009  | bone morphogenetic protein 6 pseudogene 1                                                     |
| 10834 | ENSG000002024137 |          | 13035 | 3  | processed_pseudogene  | 15 | 51128007  | 51128050  | protein tyrosine phosphatase, non-receptor type 2 pseudogene 2                                |
| 10862 | ENSG00000202978  |          | 13034 | 0  | processed_pseudogene  | 2  | 74533855  | 74534135  | 18n pseudogene 26                                                                             |
| 10886 | ENSG000002026716 |          | 13054 | 3  | processed_pseudogene  | 11 | 119473587 | 119475018 | keratin 8 pseudogene 7                                                                        |
| 11011 | ENSG00000202692  |          | 13157 | 0  | processed_pseudogene  | 8  | 18111567  | 18111567  | cell division cycle 23 pseudogene 1                                                           |
| 11066 | ENSG00000201001  |          | 13155 | 2  | processed_pseudogene  | X  | 94031738  | 94032066  | cyclin B1 interacting protein 1 pseudogene 3                                                  |
| 11183 | ENSG00000217824  |          | 13209 | 0  | processed_pseudogene  | 6  | 14888514  | 14888780  | small nuclear ribonucleoprotein polypeptide E pseudogene 6                                    |
| 11152 | ENSG000002029927 |          | 13202 | 0  | processed_pseudogene  | 6  | 81113845  | 81113847  | high mobility group box 3 pseudogene 5                                                        |
| 11445 | ENSG000002017115 |          | 13257 | 0  | processed_pseudogene  | 20 | 49090304  | 49090528  | cytochrome c oxidase subunit VIc pseudogene 2                                                 |
| 11356 | ENSG00000202195  |          | 13443 | 2  | processed_pseudogene  | 10 | 11859416  | 11859702  | ribosomal protein L5 pseudogene 27                                                            |
| 11361 | ENSG00000203030  |          | 13443 | 2  | processed_pseudogene  | 10 | 11859416  | 11859702  | osmium tetroxide oxidoreductase 2 pseudogene 2                                                |
| 11372 | ENSG00000203745  |          | 13459 | 0  | processed_pseudogene  | 9  | 99717102  | 99717443  | zinc finger N06/threonine/serine/threonine domain containing pseudogene 2                     |
| 11448 | ENSG00000204427  |          | 13531 | 0  | processed_pseudogene  | 13 | 24952349  | 24953010  | nucleic acid uridylyltransferase synthase 1 homolog (S. cerevisiae) pseudogene 3              |
| 11489 | ENSG00000204228  |          | 13528 | 0  | processed_pseudogene  | 13 | 100210480 | 100210480 | collin 1 pseudogene 1                                                                         |
| 11540 | ENSG00000202678  |          | 13612 | 0  | processed_pseudogene  | 1  | 79987765  | 79987765  | alcohol dehydrogenase 5 class III, chi polypeptide, pseudogene 2                              |
| 11550 | ENSG00000202791  |          | 13617 | 1  | processed_pseudogene  | X  | 40817738  | 40818303  | divergent paired related homeobox pseudogene 6                                                |
| 11558 | ENSG00000202699  |          | 13621 | 0  | processed_pseudogene  | 13 | 11462110  | 11462110  | ADP-ribosylation factor 4 pseudogene 1                                                        |
| 11614 | ENSG00000205702  |          | 13669 | 0  | processed_pseudogene  | 12 | 71065938  | 71066536  | fumarylacetoacetate hydrolase domain containing 2 pseudogene 1                                |
| 11631 | ENSG00000213522  |          | 13681 | 2  | processed_pseudogene  | 4  | 108124506 | 108125081 | ras-related C3 botulinum toxin substrate 1 pseudogene 5                                       |
| 11635 | ENSG00000201765  |          | 13682 | 0  | processed_pseudogene  | 12 | 53277549  | 53278476  | heterogeneous nuclear ribonucleoprotein A1 pseudogene 50                                      |
| 11639 | ENSG00000201781  |          | 13686 | 0  | processed_pseudogene  | 12 | 52116220  | 52116220  | high mobility group nucleosome binding domain 2 pseudogene 10                                 |
| 11731 | ENSG00000203154  |          | 13719 | 0  | processed_pseudogene  | 6  | 27375476  | 27375775  | multiple coagulation factor deficiency 2 pseudogene 1                                         |
| 11738 | ENSG00000202642  |          | 13762 | 3  | processed_pseudogene  | 18 | 14485905  | 14487500  | LRG4 domain containing 4 pseudogene 1                                                         |
| 11744 | ENSG00000201729  |          | 13765 | 0  | processed_pseudogene  | 18 | 85532403  | 85532419  | interleukin enhancer binding factor 2 pseudogene 2                                            |
| 11747 | ENSG00000198414  |          | 13768 | 0  | processed_pseudogene  | X  | 44143162  | 44143492  | Taf12 DNase domain containing 2 pseudogene 1                                                  |
| 11750 | ENSG00000202624  |          | 13782 | 0  | processed_pseudogene  | 10 | 102006228 | 102006852 | prothymosin pseudogene 1                                                                      |
| 11752 | ENSG00000204486  |          | 13785 | 0  | processed_pseudogene  | 8  | 48740752  | 48740752  | regulator of protein phosphatase 1                                                            |
| 11768 | ENSG000002029300 |          | 13825 | 0  | processed_pseudogene  | 15 | 29904774  | 29904774  | tubulin, beta class 1 pseudogene 8                                                            |
| 11806 | ENSG00000202349  |          | 13854 | 0  | processed_pseudogene  | 2  | 13324687  | 13324687  | Y box binding protein 1 pseudogene 7                                                          |
| 11836 | ENSG00000202426  |          | 13855 | 0  | processed_pseudogene  | 12 | 22336562  | 22336562  | glyoxaldehyde 3 phosphate dehydrogenase pseudogene 49                                         |
| 11843 | ENSG000002027465 |          | 13865 | 0  | processed_pseudogene  | 10 | 25974659  | 25975073  | GNP-loop GTPase 3 pseudogene 1                                                                |
| 11864 | ENSG00000201597  |          | 13865 | 0  | processed_pseudogene  | 5  | 39682609  | 39683063  | ribosomal protein L17 pseudogene 25                                                           |
| 11866 | ENSG000002021124 |          | 13869 | 2  | processed_pseudogene  | 2  | 202859211 | 202859211 | ubiquitin-conjugating enzyme E2 variant 1 pseudogene 11                                       |
| 11886 | ENSG00000203119  |          | 13900 | 1  | processed_pseudogene  | 5  | 153717031 | 153718012 | heterogeneous nuclear ribonucleoprotein A3 pseudogene 7                                       |
| 11903 | ENSG000002025849 | MKRN7P   | 13913 | 0  | processed_pseudogene  | 20 | 40592541  | 40593763  | maturing ring finger protein 7, pseudogene                                                    |
| 11914 | ENSG000002029581 |          | 13917 | 0  | processed_pseudogene  | 12 | 12342491  | 12342491  | short coiled-coil protein pseudogene 4                                                        |
| 11933 | ENSG00000208018  |          | 13930 | 2  | processed_pseudogene  | 16 | 51311763  | 51311923  | uracil-DNA glycosylase pseudogene 1                                                           |
| 11956 | ENSG00000213149  |          | 13948 | 4  | processed_pseudogene  | 6  | 111179442 | 111180250 | calponin 2 pseudogene 9                                                                       |
| 11962 | ENSG00000202181  |          | 13971 | 1  | processed_pseudogene  | 15 | 12342491  | 12342491  | adenosine deaminase pseudogene 2                                                              |
| 11965 | ENSG00000203439  |          | 13972 | 1  | processed_pseudogene  | 21 | 21787261  | 21788158  | 18n pseudogene 2                                                                              |
| 11988 | ENSG00000205076  |          | 13972 | 0  | processed_pseudogene  | 13 | 53394532  | 53395153  | pediculid/serpin 1 keratin A (Cytolignin A) pseudogene 26                                     |
| 12011 | ENSG00000203056  |          | 14012 | 0  | processed_pseudogene  | 12 | 51027400  | 51027400  | voltage-dependent anion channel 1 pseudogene 5                                                |
| 12041 | ENSG000002023488 |          | 14015 | 2  | processed_pseudogene  | 21 | 23810669  | 23810669  | mitogen-activated protein kinase 6 pseudogene 2                                               |
| 12043 | ENSG00000202381  |          | 14016 | 0  | processed_pseudogene  | X  | 109096541 | 109097148 | ribosomal protein S5 pseudogene 2                                                             |
| 12056 | ENSG00000204504  |          | 14020 | 0  | processed_pseudogene  | 7  | 6566877   | 6566877   | NBD3 ribosome export related pseudogene 2                                                     |
| 12067 | ENSG000002025056 |          | 14046 | 0  | processed_pseudogene  | 6  | 39960554  | 39961872  | tubulin, beta class 1 pseudogene 9                                                            |
| 12092 | ENSG00000202456  |          | 14049 | 5  | processed_pseudogene  | 14 | 20992446  | 20993281  | pentatricopeptide domain 2 pseudogene 1                                                       |
| 12094 | ENSG00000204685  |          | 14052 | 0  | processed_pseudogene  | 14 | 48025017  | 48025017  | ADP305 pseudogene 1                                                                           |
| 12107 | ENSG00000204984  |          | 14052 | 2  | processed_pseudogene  | 5  | 14785861  | 14786221  | pipl/Bac transposable element derived 4 pseudogene 3                                          |
| 12114 | ENSG000002032540 |          | 14063 | 5  | processed_pseudogene  | 13 | 43868681  | 43868681  | ribosomal protein L36 pseudogene 19                                                           |
| 12161 | ENSG00000203156  |          | 14102 | 0  | processed_pseudogene  | 10 | 3803182   | 3803182   | zinc finger protein 338 pseudogene 1                                                          |
| 12168 | ENSG00000202433  |          | 14102 | 0  | processed_pseudogene  | 1  | 32887710  | 32887710  | glyoxaldehyde 3 phosphate dehydrogenase pseudogene 20                                         |
| 12171 | ENSG00000203228  |          | 14103 | 5  | processed_pseudogene  | 11 | 3578975   | 3571749   | ribosomal protein S3A pseudogene 39                                                           |
| 12178 | ENSG00000202574  |          | 14103 | 0  | processed_pseudogene  | 11 | 11515893  | 11515893  | 14n1n 12 pseudogene 4                                                                         |
| 12187 | ENSG00000203915  |          | 14117 | 0  | processed_pseudogene  | 8  | 11113529  | 11114112  | ribosomal protein L19 pseudogene 13                                                           |
| 12230 | ENSG00000203273  |          | 14144 | 4  | processed_pseudogene  | 13 | 97229311  | 97229753  | AMMECR1-like pseudogene 1                                                                     |
| 12231 | ENSG00000204577  |          | 14144 | 4  | processed_pseudogene  | 14 | 11020487  | 11020487  | small nuclear ribonucleoprotein polypeptide G pseudogene 1                                    |
| 12232 | ENSG00000204490  |          | 14145 | 1  | processed_pseudogene  | 1  | 15077249  | 15077307  | ubiquitin-conjugating enzyme E2D 3 pseudogene 3                                               |
| 12234 | ENSG00000204958  |          | 14146 | 9  | processed_pseudogene  | 3  | 126485277 | 126485377 | regulator of chromosome condensation 2 pseudogene 4                                           |
| 12250 | ENSG00000201810  |          | 14161 | 4  | processed_pseudogene  | 6  | 121974941 | 121974936 | solute carrier family 25 (mitochondrial carrier, adenosine nucleotide translocator), member 5 |
| 12276 | ENSG00000203497  |          | 14182 | 1  | processed_pseudogene  | 11 | 110687429 | 110687535 | heterogeneous nuclear ribonucleoprotein A1 pseudogene 60                                      |
| 12287 | ENSG00000203271  |          | 14187 | 0  | processed_pseudogene  | X  | 84011044  | 84011044  | SET pseudogene 4                                                                              |
| 12300 | ENSG00000203734  |          | 14215 | 0  | processed_pseudogene  | X  | 1513288   | 1513288   | ribosomal protein S3A pseudogene 53                                                           |
| 12309 | ENSG000002028516 |          | 14215 | 0  | processed_pseudogene  | 3  | 180545765 | 18054738  | FLY/CH7 zinc finger 1 pseudogene 1                                                            |
| 12315 | ENSG00000202585  |          | 14216 | 0  | processed_pseudogene  | 10 | 50812806  | 50814488  | DEAF (AP2-Cou-Ara-60) box polypeptide 18 pseudogene 6                                         |
| 12322 | ENSG00000202926  |          | 14216 | 0  | processed_pseudogene  | 10 | 13862030  | 13862030  | adenosine homocytosine pseudogene 4                                                           |
| 12369 | ENSG000002049271 |          | 14255 | 0  | processed_pseudogene  | 15 | 66198840  | 66198840  | heterogeneous nuclear ribonucleoprotein A1 pseudogene 44                                      |
| 12375 | ENSG00000202816  |          | 14258 | 5  | processed_pseudogene  | 2  | 18898408  | 18899177  | suppression of lamorgency 13 (colon carcinoma) (Hsp70 interacting protein) pseudogene 2       |
| 12406 | ENSG00000203244  |          | 14278 | 4  | processed_pseudogene  | 8  | 9089184   | 9089184   | adenosine associated protein like 3 pseudogene 1                                              |
| 12422 | ENSG000002051814 |          | 14282 | 0  | processed_pseudogene  | 3  | 13236475  | 13236927  | heat shock 70kDa protein 8 pseudogene 19                                                      |
| 12426 | ENSG000002024530 |          | 14284 | 2  | processed_pseudogene  | 20 | 52017726  | 52018195  | pediculid/serpin 1 keratin A (Cytolignin A) pseudogene 10                                     |
| 12466 | ENSG00000203379  |          | 14324 | 2  | processed_pseudogene  | 20 | 20371264  | 20371264  | keratin 8 pseudogene 15                                                                       |
| 12482 | ENSG000002053943 |          | 14348 | 0  | processed_pseudogene  | 8  | 41368759  | 41370040  | 18n pseudogene 37                                                                             |
| 12483 | ENSG000002041654 |          | 14343 | 9  | processed_pseudogene  | 19 | 9432119   | 9432199   |                                                                                               |



|       |                 |           |         |                                     |                                     |           |           |                                                                                                                         |                                                                 |
|-------|-----------------|-----------|---------|-------------------------------------|-------------------------------------|-----------|-----------|-------------------------------------------------------------------------------------------------------------------------|-----------------------------------------------------------------|
| 10171 | ENSG00000150873 | C2orf50   | 14843.2 | 0.16                                | protein_coding                      | 2         | 11273379  | 11286918                                                                                                                | chromosome 2 open reading frame 50                              |
| 10198 | ENSG00000150598 | FRMD7     | 14851.3 | 0.16                                | protein_coding                      | 2         | 11232024  | 11232048                                                                                                                | FERM domain containing 7                                        |
| 13218 | ENSG00000131738 | KRT13B    | 14888.3 | 0.16                                | protein_coding                      | 17        | 39519748  | 39520252                                                                                                                | keratin 30B                                                     |
| 13242 | ENSG00000145113 | NRO3      | 14907.3 | 0.16                                | protein_coding                      | 2         | 73429386  | 73439641                                                                                                                | notochord homeobox                                              |
| 13285 | ENSG00000196128 | GHRHR     | 14925.9 | 0.16                                | protein_coding                      | 7         | 36918204  | 31022469                                                                                                                | growth hormone releasing hormone receptor                       |
| 13288 | ENSG00000170444 | ZFAD1     | 14942.3 | 0.16                                | protein_coding                      | 3         | 10181908  | 10219885                                                                                                                | zinc finger-like domain containing 1                            |
| 13300 | ENSG00000249240 | NOXRED1   | 14945.6 | 0.16                                | protein_coding                      | 15        | 65134082  | 65223118                                                                                                                | Uncharacterized protein                                         |
| 13351 | ENSG00000165555 | CT4orf164 | 14962.6 | 0.16                                | protein_coding                      | 14        | 17863094  | 17869889                                                                                                                | NADP-dependent oxidoreductase domain containing 1               |
| 13432 | ENSG00000171811 | TC40      | 15050.2 | 0.16                                | protein_coding                      | 10        | 28844925  | 27324986                                                                                                                | chromosome 14 open reading frame 164                            |
| 13434 | ENSG00000198165 | CCSC160   | 15051.1 | 0.16                                | protein_coding                      | 9         | 10000705  | 10014068                                                                                                                | coiled-coil domain containing 160                               |
| 13458 | ENSG00000251113 | LINC-R3   | 15074.2 | 0.16                                | protein_coding                      | 12        | 12262285  | 12268916                                                                                                                | leucine rich repeat containing 43                               |
| 13480 | ENSG00000175325 | PRDP1     | 15093.1 | 0.16                                | protein_coding                      | 5         | 17741926  | 17742343                                                                                                                | PRDP paralog-like homeobox 1                                    |
| 13534 | ENSG00000186294 | AGBL4     | 15124.2 | 0.16                                | protein_coding                      | 1         | 4898627   | 5048985                                                                                                                 | ATP1G1P binding protein-like 4                                  |
| 13542 | ENSG00000214524 | LHRA      | 15131.6 | 0.16                                | protein_coding                      | 1         | 18019421  | 18024530                                                                                                                | LIM homeobox 4                                                  |
| 13570 | ENSG00000161337 | DCST1     | 15149.9 | 0.16                                | protein_coding                      | 1         | 15508300  | 15502406                                                                                                                | DC-STAMP domain containing 1                                    |
| 13640 | ENSG00000189045 | ANKKDB1B  | 15203.9 | 0.16                                | protein_coding                      | 5         | 74901284  | 74901701                                                                                                                | ankyrin repeat and death domain containing 1B                   |
| 14128 | ENSG00000151921 | 15591.6   | 0.16    | protein_coding                      | 16                                  | 2217916   | 22203975  | short chain hydroxyphenylacetate family G2E, member 2                                                                   |                                                                 |
| 14277 | ENSG00000198590 | C1orf105  | 15684.4 | 0.16                                | protein_coding                      | 3         | 37427760  | 37428688                                                                                                                | chromosome 3 open reading frame 35                              |
| 9629  | ENSG00000251768 | C1orf105  | 15684.4 | 0.16                                | rRNA                                | 6         | 12763928  | 12763918                                                                                                                | rRNA, 5S ribosomal pseudogene 217                               |
| 12719 | ENSG00000252556 | C1orf105  | 15684.4 | 0.16                                | rRNA                                | 17        | 3950205   | 3950110                                                                                                                 | rRNA, 5S ribosomal pseudogene 434                               |
| 10149 | ENSG00000273311 | DGCR11    | 12462.6 | 0.16                                | sense intronic                      | 22        | 19033675  | 19035888                                                                                                                | D(George syndrome critical region gene 11 (non-protein coding)) |
| 12227 | ENSG00000253974 | NRG1-IT1  | 11440.9 | 0.16                                | sense intronic                      | 8         | 31883725  | 31896991                                                                                                                | NRG1 intronic transcript 1 (non-protein coding)                 |
| 8903  | ENSG00000200925 | 7659.2    | 0.16    | snRNA                               | 16                                  | 28190418  | 28190544  | Small nuclear RNA SNORA25                                                                                               |                                                                 |
| 8940  | ENSG00000202434 | 11500.8   | 0.16    | snRNA                               | 2                                   | 19828942  | 19828978  | Small nuclear RNA SNORA4                                                                                                |                                                                 |
| 11564 | ENSG00000253985 | 13627.7   | 0.16    | snRNA                               | 1                                   | 14022555  | 14022984  | Small Cajal body specific RNA 11                                                                                        |                                                                 |
| 11928 | ENSG00000129963 | 13628.1   | 0.16    | snRNA                               | 16                                  | 23453162  | 23453162  | Small nuclear RNA SNORA76                                                                                               |                                                                 |
| 12312 | ENSG00000198856 | 14218.4   | 0.16    | snRNA                               | 18                                  | 7995568   | 7995782   | Small nuclear RNA U3                                                                                                    |                                                                 |
| 12342 | ENSG00000206898 | 14234.6   | 0.16    | snRNA                               | 2                                   | 10436173  | 10436308  | Small nuclear RNA SNORA51                                                                                               |                                                                 |
| 12753 | ENSG00000129623 | 14344.4   | 0.16    | snRNA                               | 11                                  | 11713445  | 11713448  | Small Cajal body specific RNA 1                                                                                         |                                                                 |
| 12781 | ENSG00000198470 | 14358.6   | 0.16    | snRNA                               | 7                                   | 12740383  | 12740514  | Small nuclear RNA SNORA64/SNORA10 family                                                                                |                                                                 |
| 3730  | ENSG00000252206 | 5850.4    | 0.16    | snRNA                               | 2                                   | 58746171  | 58746234  | rRNA, U7 small nuclear 40 pseudogene                                                                                    |                                                                 |
| 3750  | ENSG00000252224 | 7023.8    | 0.16    | snRNA                               | 82                                  | 8923832   | 8923832   | rRNA, U6 small nuclear 125 pseudogene                                                                                   |                                                                 |
| 3756  | ENSG00000238719 | 8519.6    | 0.16    | snRNA                               | 2                                   | 9852917   | 9852980   | rRNA, U7 small nuclear 96 pseudogene                                                                                    |                                                                 |
| 6804  | ENSG00000252284 | 9299.9    | 0.16    | snRNA                               | 19                                  | 41213960  | 41214068  | rRNA, U6 small nuclear 195 pseudogene                                                                                   |                                                                 |
| 7257  | ENSG00000251755 | 10025.3   | 0.16    | snRNA                               | 2                                   | 24958167  | 24958167  | rRNA, U6 small nuclear 125' pseudogene                                                                                  |                                                                 |
| 7744  | ENSG00000252779 | 10473.6   | 0.16    | snRNA                               | 2                                   | 172713076 | 172713180 | rRNA, U6 small nuclear 182 pseudogene                                                                                   |                                                                 |
| 8302  | ENSG00000252344 | 10972.2   | 0.16    | snRNA                               | 2                                   | 23075062  | 23075919  | rRNA, U6 small nuclear 613 pseudogene                                                                                   |                                                                 |
| 8417  | ENSG00000252287 | 11120.3   | 0.16    | snRNA                               | 1                                   | 30712658  | 30712658  | rRNA, U6 small nuclear 1043 pseudogene                                                                                  |                                                                 |
| 11114 | ENSG00000237276 | 13262.3   | 0.16    | snRNA                               | 9                                   | 99018498  | 99018601  | rRNA, U6 small nuclear 1163 pseudogene                                                                                  |                                                                 |
| 11172 | ENSG00000252091 | 13279.3   | 0.16    | snRNA                               | 17                                  | 37638735  | 37638843  | rRNA, U6 small nuclear 981 pseudogene                                                                                   |                                                                 |
| 11338 | ENSG00000250965 | 13423.6   | 0.16    | snRNA                               | 2                                   | 12746018  | 12746018  | rRNA, U6 small nuclear 875 pseudogene                                                                                   |                                                                 |
| 11476 | ENSG00000237160 | 13556.6   | 0.16    | snRNA                               | 18                                  | 23946255  | 23946703  | rRNA, U6 small nuclear 1293 pseudogene                                                                                  |                                                                 |
| 11883 | ENSG00000252821 | 13725.1   | 0.16    | snRNA                               | 7                                   | 33041562  | 33041668  | rRNA, U6 small nuclear 388 pseudogene                                                                                   |                                                                 |
| 11884 | ENSG00000252600 | 13729.7   | 0.16    | snRNA                               | 9                                   | 7155709   | 7155785   | rRNA, U6 small nuclear 620 pseudogene                                                                                   |                                                                 |
| 11819 | ENSG00000254485 | 13761.6   | 0.16    | snRNA                               | 17                                  | 5715455   | 5715455   | rRNA, U6 small nuclear 197 pseudogene                                                                                   |                                                                 |
| 11858 | ENSG00000252341 | 13880.8   | 0.16    | snRNA                               | 2                                   | 23792347  | 23792348  | rRNA, U6 small nuclear 1051 pseudogene                                                                                  |                                                                 |
| 11897 | ENSG00000206760 | 13908.6   | 0.16    | snRNA                               | 7                                   | 65219559  | 65219762  | rRNA, U6 small nuclear 912 pseudogene                                                                                   |                                                                 |
| 11941 | ENSG00000252220 | 13923.6   | 0.16    | snRNA                               | 12                                  | 83415669  | 83415711  | rRNA, U6 small nuclear 971 pseudogene                                                                                   |                                                                 |
| 12268 | ENSG00000206710 | 14171.1   | 0.16    | snRNA                               | 20                                  | 48588643  | 48588747  | rRNA, U6 small nuclear 147 pseudogene                                                                                   |                                                                 |
| 12592 | ENSG00000251943 | 14857.6   | 0.16    | snRNA                               | 1                                   | 11256268  | 11256268  | rRNA, U6 small nuclear 693 pseudogene                                                                                   |                                                                 |
| 13156 | ENSG00000237811 | 14827.6   | 0.16    | snRNA                               | 1                                   | 28713965  | 28713965  | rRNA, U6 small nuclear 178 pseudogene                                                                                   |                                                                 |
| 2036  | ENSG00000211828 | 3208.7    | 0.16    | TR_j_gene                           | 14                                  | 22928090  | 22928148  | T cell receptor delta joining 3                                                                                         |                                                                 |
| 5001  | ENSG00000211881 | 7857.4    | 0.16    | TR_j_pseudogene                     | 14                                  | 23005092  | 23005151  | T cell receptor alpha joining 8                                                                                         |                                                                 |
| 9033  | ENSG00000242856 | 11575.0   | 0.16    | transcribed_unprocessed_pseudo_gene | 19                                  | 55159393  | 55160302  | vonemann1 receptor 105 pseudogene                                                                                       |                                                                 |
| 12119 | ENSG00000251527 | 14088.2   | 0.16    | transcribed_unprocessed_pseudo_gene | 4                                   | 68928312  | 68929015  | synaptotagmin XIV-like                                                                                                  |                                                                 |
| 12145 | ENSG00000218351 | 14098.1   | 0.16    | transcribed_unprocessed_pseudo_gene | 6                                   | 141956787 | 141957840 | ribosomal protein S3a pseudogene 23                                                                                     |                                                                 |
| 12401 | ENSG00000218020 | 14274.6   | 0.16    | transcribed_unprocessed_pseudo_gene | 6                                   | 11514425  | 11516699  | protein-kinase, interferon-inducible double-stranded RNA dependent inhibitor, repressor of (PSF repressor) pseudogene 5 |                                                                 |
| 12602 | ENSG00000244956 | 14435.2   | 0.16    | transcribed_unprocessed_pseudo_gene | 4                                   | 16362309  | 16369846  | zinc finger E-box binding homeobox 2 pseudogene 1                                                                       |                                                                 |
| 12999 | ENSG00000244433 | 14713.7   | 0.16    | transcribed_unprocessed_pseudo_gene | 1                                   | 95138474  | 95139711  | piggyBac transposable element derived 4 pseudogene 7                                                                    |                                                                 |
| 13246 | ENSG00000244573 | 14912.1   | 0.16    | transcribed_unprocessed_pseudo_gene | 12                                  | 14509776  | 14518437  | ribosomal protein L30 pseudogene 11                                                                                     |                                                                 |
| 13383 | ENSG00000252501 | 15010.3   | 0.16    | transcribed_unprocessed_pseudo_gene | 1                                   | 244558278 | 244558682 | TGF-beta induced factor homeobox 2 pseudogene 1                                                                         |                                                                 |
| 5504  | ENSG00000133624 | ZNF767    | 6238.9  | 0.16                                | transcribed_unprocessed_pseudo_gene | 7         | 149244245 | 149231843                                                                                                               | zinc finger family member 767                                   |
| 5758  | ENSG00000174353 | STAG3L2   | 8528.2  | 0.16                                | transcribed_unprocessed_pseudo_gene | 7         | 72440227  | 72476445                                                                                                                | stromal antigen 3-like 3                                        |
| 10043 | ENSG00000235462 | 12381.0   | 0.16    | transcribed_unprocessed_pseudo_gene | Y                                   | 15265842  | 15274125  | TGF-beta activated kinase 1MAPK37 binding protein 3 pseudogene 1                                                        |                                                                 |
| 11008 | ENSG00000249263 | 13154.2   | 0.16    | transcribed_unprocessed_pseudo_gene | 22                                  | 17134782  | 17140518  | poly (ADP-ribose) polymerase family, member 4 pseudogene 3                                                              |                                                                 |
| 11828 | ENSG00000215481 | 13852.0   | 0.16    | transcribed_unprocessed_pseudo_gene | 22                                  | 25028882  | 25046799  | breakpoint cluster region pseudogene 3                                                                                  |                                                                 |
| 12153 | ENSG00000215478 | 14093.2   | 0.16    | transcribed_unprocessed_pseudo_gene | 22                                  | 23701790  | 23729918  | carboxylesterase 5A pseudogene 1                                                                                        |                                                                 |
| 12352 | ENSG00000237223 | SUL1TC2P1 | 14244.4 | 0.16                                | transcribed_unprocessed_pseudo_gene | 2         | 108938994 | 108970255                                                                                                               | sulfotransferase family, cytosolic, 1C, member 2 pseudogene 1   |
| 12357 | ENSG00000269516 | 14248.4   | 0.16    | transcribed_unprocessed_pseudo_gene | 19                                  | 15674885  | 15695520  | cytochrome P450, subfamily F, polypeptide 23, pseudogene                                                                |                                                                 |
| 12802 | ENSG00000281143 | 14582.2   | 0.16    | transcribed_unprocessed_pseudo_gene | 15                                  | 78268384  | 78269393  | ADAMT3T pseudogene 3                                                                                                    |                                                                 |
| 12899 | ENSG00000242520 | 14649.7   | 0.16    | transcribed_unprocessed_pseudo_gene | X                                   | 151282528 | 151289444 | melanoma antigen family A, 5                                                                                            |                                                                 |
| 13042 | ENSG00000184689 | 14748.3   | 0.16    | transcribed_unprocessed_pseudo_gene | 7                                   | 64601603  | 64604800  | integrator complex subunit 4-like 1                                                                                     |                                                                 |
| 10883 | ENSG00000229186 | 13948.4   | 0.16    | unitary_pseudogene                  | 12                                  | 112337067 | 112340942 | ADAM metallopeptidase domain 1A pseudogene                                                                              |                                                                 |
| 11566 | ENSG00000234611 | 13855.1   | 0.16    | unitary_pseudogene                  | 11                                  | 74782193  | 74783087  | olfactory receptor, family 2, subfamily A1, member 2 pseudogene                                                         |                                                                 |
| 12485 | ENSG00000232220 | 14023.7   | 0.16    | unitary_pseudogene                  | 19                                  | 8741328   | 87418461  | secretory blood group 1 pseudogene                                                                                      |                                                                 |
| 12502 | ENSG00000231793 | 14356.3   | 0.16    | unitary_pseudogene                  | 11                                  | 67380124  | 67383728  | double C2-like domains, gamma, pseudogene                                                                               |                                                                 |
| 12784 | ENSG00000240520 | 14867.3   | 0.16    | unitary_pseudogene                  | 1                                   | 84831111  | 84835114  | uricase oxidase, pseudogene                                                                                             |                                                                 |
| 13034 | ENSG00000234301 | 14827.6   | 0.16    | unitary_pseudogene                  | 2                                   | 20154266  | 20154304  | alkylglyoxalase 3, pseudogene                                                                                           |                                                                 |
| 13208 | ENSG00000230524 | COL6A1P1  | 14880.7 | 0.16                                | unitary_pseudogene                  | 3         | 15193340  | 15247466                                                                                                                | collagen, type VI, alpha 4 pseudogene 1                         |
| 13237 | ENSG00000123201 | GUCY1B2   | 14902.7 | 0.16                                | unitary_pseudogene                  | 13        | 51568647  | 51564398                                                                                                                | guanylate cyclase 1, soluble, beta 2 (pseudogene)               |
| 1396  | ENSG00000277766 | 15223.6   | 0.16    | unprocessed_pseudogene              | 6                                   | 29067852  | 29071044  | HLA complex group 4 pseudogene 5                                                                                        |                                                                 |
| 10081 | ENSG00000228186 | 12409.1   | 0.16    | unprocessed_pseudogene              | 9                                   | 5094139   | 5095014   | poly (ADP-ribose) polymerase family, member 4 pseudogene 1                                                              |                                                                 |
| 10221 | ENSG00000204963 | 12529.2   | 0.16    | unprocessed_pseudogene              | Y                                   | 14463708  | 14463818  | MT-ND1 pseudogene 1                                                                                                     |                                                                 |
| 10324 | ENSG00000215506 | 12591.9   | 0.16    | unprocessed_pseudogene              | Y                                   | 28654300  | 28755257  | transmembrane phosphoinositide 3-kinase and lentin homolog 2 pseudogene 4                                               |                                                                 |
| 10926 | ENSG00000249880 | 13092.4   | 0.16    | unprocessed_pseudogene              | 22                                  | 21419749  | 21424386  | tubulin, alpha 3p, pseudogene                                                                                           |                                                                 |
| 11191 | ENSG00000151965 | SSX8      | 13265.6 | 0.16                                | unprocessed_pseudogene              | X         | 52651985  | 52652968                                                                                                                | apical ectodermal ridge breakpoint B                            |
| 11305 | ENSG00000273252 | 13404.6   | 0.16    | unprocessed_pseudogene              | 7                                   | 68750151  | 68754255  | olfactory receptor, family 1, subfamily E, member 39 pseudogene                                                         |                                                                 |
| 11404 | ENSG00000205184 | 13489.6   | 0.16    | unprocessed_pseudogene              | 8                                   | 82546992  | 82547897  | SLC10A5 pseudogene 1                                                                                                    |                                                                 |
| 11425 | ENSG00000235962 | 13508.3   | 0.16    | unprocessed_pseudogene              | 22                                  | 21053292  | 21053292  | breakpoint cluster region pseudogene 5                                                                                  |                                                                 |
| 11558 | ENSG00000272311 | 13622.1   | 0.16    | unprocessed_pseudogene              | 19                                  | 39755022  | 39755022  | interferon, lambda 4 pseudogene 1                                                                                       |                                                                 |
| 12017 | ENSG00000251470 | 13992.4   | 0.16    | unprocessed_pseudogene              | 8                                   | 47602622  | 47610310  | asparagine synthetase pseudogene 4                                                                                      |                                                                 |
| 12140 | ENSG00000234970 | 14065.9   | 0.16    | unprocessed_pseudogene              | 11                                  | 39991570  | 40024379  | paradoxylin somnata E-like pseudogene                                                                                   |                                                                 |
| 12244 | ENSG00000243429 | 14154.6   | 0.16    | unprocessed_pseudogene              | 3                                   | 125430983 | 125431889 | olfactory receptor, family 3, subfamily E, member 29 pseudogene                                                         |                                                                 |
| 12283 | ENSG00000214252 | 14186.7   | 0.16    | unprocessed_pseudogene              | 7                                   | 100930763 | 100933252 | alpha-2-glycoprotein 1, zinc-binding pseudogene 2                                                                       |                                                                 |
| 12498 | ENSG00000252433 | 14333.6   | 0.16    | unprocessed_pseudogene              | 12                                  | 3953590   | 39537504  | tubulin, beta 1 class VIII pseudogene 6                                                                                 |                                                                 |
| 13039 | ENSG00000224462 | 14746.9   | 0.16    | unprocessed_pseudogene              | 1                                   | 207338841 | 207357255 | complement component 4 binding protein, alpha pseudogene 1                                                              |                                                                 |
| 2334  | ENSG00000232722 | 3661.8    | 0.16    | unprocessed_pseudogene              | 1                                   | 10000000  | 10000000  | unprocessed_pseudogene                                                                                                  |                                                                 |
| 2358  | ENSG00000236029 | 5115.4    | 0.16    |                                     |                                     |           |           |                                                                                                                         |                                                                 |



|       |                  |         |         |      |    |           |           |  |                                             |
|-------|------------------|---------|---------|------|----|-----------|-----------|--|---------------------------------------------|
| 7840  | ENSG00000273353  |         | 10554.2 | 0.16 |    |           |           |  |                                             |
| 7843  | ENSG00000285533  |         | 10554.3 | 0.16 | 8  | 103400754 | 103400863 |  | Small nuclear RNA U13                       |
| 7893  | ENSG00000270995  |         | 10603.9 | 0.16 |    |           |           |  |                                             |
| 7936  | ENSG00000271554  |         | 10648.7 | 0.16 |    |           |           |  |                                             |
| 7976  | ENSG00000274489  |         | 10685.7 | 0.16 |    |           |           |  |                                             |
| 8031  | ENSG00000289971  |         | 10733.7 | 0.16 |    |           |           |  |                                             |
| 8051  | ENSG00000242860  |         | 10748.4 | 0.16 |    |           |           |  |                                             |
| 8056  | ENSG00000271646  |         | 10754.2 | 0.16 |    |           |           |  |                                             |
| 8097  | ENSG00000293444  |         | 10790.1 | 0.16 |    |           |           |  |                                             |
| 8218  | ENSG00000236540  |         | 10899.3 | 0.16 |    |           |           |  |                                             |
| 8236  | ENSG00000295116  |         | 10912.2 | 0.16 |    |           |           |  |                                             |
| 8393  | ENSG00000217891  |         | 11045.2 | 0.16 |    |           |           |  |                                             |
| 8415  | ENSG00000204044  |         | 11050   | 0.16 |    |           |           |  |                                             |
| 8485  | ENSG00000272099  |         | 11124.6 | 0.16 |    |           |           |  |                                             |
| 8620  | ENSG00000271188  |         | 11220.1 | 0.16 |    |           |           |  |                                             |
| 8677  | ENSG00000208120  |         | 11270.4 | 0.16 |    |           |           |  |                                             |
| 8804  | ENSG00000238399  |         | 11386.1 | 0.16 | 3  | 171411001 | 171411104 |  | Small nuclear RNA U13                       |
| 8900  | ENSG00000292427  |         | 11461.5 | 0.16 |    |           |           |  |                                             |
| 8925  | ENSG00000259318  |         | 11485.3 | 0.16 |    |           |           |  |                                             |
| 9115  | ENSG00000251927  |         | 11643.6 | 0.16 |    |           |           |  |                                             |
| 9146  | ENSG00000232599  |         | 11697.2 | 0.16 |    |           |           |  |                                             |
| 9192  | ENSG00000175873  |         | 11703.7 | 0.16 |    |           |           |  |                                             |
| 9296  | ENSG00000271858  |         | 11784.3 | 0.16 |    |           |           |  |                                             |
| 9421  | ENSG00000210117  |         | 11877   | 0.16 |    |           |           |  |                                             |
| 9596  | ENSG00000218663  |         | 12029   | 0.16 |    |           |           |  |                                             |
| 9632  | ENSG00000286475  |         | 12091.2 | 0.16 |    |           |           |  |                                             |
| 9675  | ENSG00000255492  |         | 12100.5 | 0.16 |    |           |           |  |                                             |
| 9762  | ENSG00000282285  |         | 12180.2 | 0.16 |    |           |           |  |                                             |
| 9811  | ENSG00000230988  |         | 12202.4 | 0.16 |    |           |           |  |                                             |
| 9856  | ENSG00000237698  |         | 12240.1 | 0.16 |    |           |           |  |                                             |
| 9912  | ENSG00000270218  |         | 12275.7 | 0.16 |    |           |           |  |                                             |
| 9962  | ENSG00000248270  |         | 12309.4 | 0.16 |    |           |           |  |                                             |
| 9990  | ENSG00000254603  |         | 12337.7 | 0.16 |    |           |           |  |                                             |
| 10087 | ENSG00000273407  |         | 12417.6 | 0.16 |    |           |           |  |                                             |
| 10128 | ENSG00000237604  |         | 12449.9 | 0.16 |    |           |           |  |                                             |
| 10142 | ENSG00000254693  |         | 12457.8 | 0.16 |    |           |           |  |                                             |
| 10194 | ENSG00000234752  |         | 12496.2 | 0.16 |    |           |           |  |                                             |
| 10239 | ENSG00000254831  |         | 12539.4 | 0.16 |    |           |           |  |                                             |
| 10290 | ENSG00000214451  |         | 12572.4 | 0.16 |    |           |           |  |                                             |
| 10344 | ENSG00000225231  |         | 12607.8 | 0.16 |    |           |           |  |                                             |
| 10396 | ENSG00000272544  |         | 12645.7 | 0.16 |    |           |           |  |                                             |
| 10438 | ENSG00000252709  |         | 12683.2 | 0.16 |    |           |           |  |                                             |
| 10540 | ENSG00000287670  |         | 12763.5 | 0.16 |    |           |           |  |                                             |
| 10586 | ENSG00000234282  |         | 12780.1 | 0.16 |    |           |           |  |                                             |
| 10572 | ENSG00000206444  |         | 12786   | 0.16 |    |           |           |  |                                             |
| 10601 | ENSG00000222905  |         | 12807.1 | 0.16 |    |           |           |  |                                             |
| 10604 | ENSG00000219665  |         | 12809.5 | 0.16 |    |           |           |  |                                             |
| 10650 | ENSG00000259529  |         | 12854   | 0.16 |    |           |           |  |                                             |
| 10657 | ENSG00000183038  | GGT2    | 12859.2 | 0.16 | 22 | 20366206  | 20368028  |  | gamma-glutamyltransferase light chain 3     |
| 10689 | ENSG00000217289  |         | 12888.3 | 0.16 |    |           |           |  |                                             |
| 10716 | ENSG00000259843  |         | 12913.2 | 0.16 |    |           |           |  |                                             |
| 10724 | ENSG00000256552  |         | 12921.6 | 0.16 |    |           |           |  |                                             |
| 10761 | ENSG00000250812  |         | 12952.9 | 0.16 |    |           |           |  |                                             |
| 10763 | ENSG00000289385  |         | 12977.2 | 0.16 |    |           |           |  |                                             |
| 10806 | ENSG00000259592  |         | 12999.1 | 0.16 |    |           |           |  |                                             |
| 10822 | ENSG00000255774  |         | 13007.9 | 0.16 |    |           |           |  |                                             |
| 10863 | ENSG00000289580  |         | 13034.1 | 0.16 |    |           |           |  |                                             |
| 10880 | ENSG00000259248  |         | 13048.7 | 0.16 |    |           |           |  |                                             |
| 10889 | ENSG00000287452  |         | 13055.7 | 0.16 |    |           |           |  |                                             |
| 10899 | ENSG00000185041  |         | 13083.6 | 0.16 |    |           |           |  |                                             |
| 10929 | ENSG00000283988  |         | 13091.2 | 0.16 |    |           |           |  |                                             |
| 10940 | ENSG00000215863  |         | 13100.9 | 0.16 | 1  | 147835127 | 147831933 |  | long intergenic non-protein coding RNA 1138 |
| 10950 | ENSG00000231256  |         | 13111.7 | 0.16 |    |           |           |  |                                             |
| 11046 | ENSG00000231345  |         | 13181.1 | 0.16 |    |           |           |  |                                             |
| 11062 | ENSG00000238851  |         | 13209.5 | 0.16 | 21 | 37630724  | 37630829  |  | Small nuclear RNA U13                       |
| 11090 | ENSG00000245025  |         | 13214.3 | 0.16 |    |           |           |  |                                             |
| 11093 | ENSG00000210048  |         | 13216.2 | 0.16 |    |           |           |  |                                             |
| 11115 | ENSG00000272389  |         | 13230.4 | 0.16 |    |           |           |  |                                             |
| 11151 | ENSG00000272840  |         | 13284.1 | 0.16 |    |           |           |  |                                             |
| 11173 | ENSG00000256501  |         | 13280.2 | 0.16 |    |           |           |  |                                             |
| 11240 | ENSG00000232390  |         | 13336.8 | 0.16 |    |           |           |  |                                             |
| 11248 | ENSG00000218668  |         | 13343.7 | 0.16 |    |           |           |  |                                             |
| 11261 | ENSG00000225869  |         | 13391.9 | 0.16 |    |           |           |  |                                             |
| 11273 | ENSG00000286832  |         | 13370.7 | 0.16 |    |           |           |  |                                             |
| 11283 | ENSG00000232543  |         | 13381.3 | 0.16 |    |           |           |  |                                             |
| 11292 | ENSG00000196355  |         | 13391.4 | 0.16 | 4  | 38828029  | 38884430  |  | Uncharacterized protein                     |
| 11293 | ENSG00000285091  |         | 13392.9 | 0.16 |    |           |           |  |                                             |
| 11295 | ENSG00000228189  |         | 13394.4 | 0.16 |    |           |           |  |                                             |
| 11307 | ENSG00000236932  |         | 13406.5 | 0.16 |    |           |           |  |                                             |
| 11308 | ENSG00000253376  |         | 13406.9 | 0.16 |    |           |           |  |                                             |
| 11313 | ENSG00000224688  |         | 13409.3 | 0.16 |    |           |           |  |                                             |
| 11329 | ENSG00000236136  |         | 13421.3 | 0.16 |    |           |           |  |                                             |
| 11330 | ENSG00000223974  |         | 13422   | 0.16 |    |           |           |  |                                             |
| 11337 | ENSG00000272910  |         | 13429.4 | 0.16 |    |           |           |  |                                             |
| 11351 | ENSG00000211156  |         | 13440.2 | 0.16 |    |           |           |  |                                             |
| 11359 | ENSG00000223739  |         | 13445.2 | 0.16 |    |           |           |  |                                             |
| 11371 | ENSG00000286847  |         | 13459.4 | 0.16 |    |           |           |  |                                             |
| 11373 | ENSG00000234750  |         | 13459.7 | 0.16 |    |           |           |  |                                             |
| 11378 | ENSG00000271886  |         | 13467.9 | 0.16 |    |           |           |  |                                             |
| 11384 | ENSG00000282499  |         | 13481.7 | 0.16 |    |           |           |  |                                             |
| 11411 | ENSG00000234349  |         | 13495   | 0.16 |    |           |           |  |                                             |
| 11415 | ENSG00000286040  |         | 13499.7 | 0.16 | 21 | 47347679  | 47352477  |  | Uncharacterized protein                     |
| 11417 | ENSG00000214797  |         | 13502.3 | 0.16 |    |           |           |  |                                             |
| 11420 | ENSG00000282978  |         | 13502.9 | 0.16 |    |           |           |  |                                             |
| 11423 | ENSG00000224136  |         | 13506.6 | 0.16 |    |           |           |  |                                             |
| 11430 | ENSG00000289798  |         | 13511.6 | 0.16 |    |           |           |  |                                             |
| 11472 | ENSG00000254645  |         | 13523.5 | 0.16 |    |           |           |  |                                             |
| 11485 | ENSG00000271327  |         | 13563   | 0.16 |    |           |           |  |                                             |
| 11492 | ENSG00000289102  |         | 13565.9 | 0.16 |    |           |           |  |                                             |
| 11493 | ENSG00000271440  |         | 13569.2 | 0.16 |    |           |           |  |                                             |
| 11496 | ENSG00000256917  |         | 13572.5 | 0.16 |    |           |           |  |                                             |
| 11510 | ENSG00000254495  |         | 13584.9 | 0.16 |    |           |           |  |                                             |
| 11512 | ENSG00000212502  |         | 13586.5 | 0.16 |    |           |           |  |                                             |
| 11525 | ENSG00000258112  |         | 13588.3 | 0.16 |    |           |           |  |                                             |
| 11548 | ENSG00000289860  |         | 13616.6 | 0.16 |    |           |           |  |                                             |
| 11573 | ENSG00000225107  |         | 13635.2 | 0.16 |    |           |           |  |                                             |
| 11577 | ENSG00000251054  |         | 13641.3 | 0.16 |    |           |           |  |                                             |
| 11588 | ENSG00000224039  |         | 13647.4 | 0.16 |    |           |           |  |                                             |
| 11592 | ENSG00000232688  |         | 13650.4 | 0.16 |    |           |           |  |                                             |
| 11598 | ENSG00000286323  |         | 13654.9 | 0.16 | 10 | 88913843  | 88914126  |  | RNA 7SL cytoplasmic 733, pseudogene         |
| 11600 | ENSG00000252116  |         | 13656   | 0.16 |    |           |           |  |                                             |
| 11603 | ENSG00000213115  |         | 13660   | 0.16 |    |           |           |  |                                             |
| 11608 | ENSG00000229462  |         | 13665.4 | 0.16 |    |           |           |  |                                             |
| 11616 | ENSG000002024971 |         | 13670.7 | 0.16 |    |           |           |  |                                             |
| 11619 | ENSG00000223293  |         | 13673.4 | 0.16 |    |           |           |  |                                             |
| 11626 | ENSG00000271893  |         | 13677.4 | 0.16 |    |           |           |  |                                             |
| 11628 | ENSG000002041671 |         | 13679.3 | 0.16 |    |           |           |  |                                             |
| 11638 | ENSG000002271198 |         | 13680.3 | 0.16 |    |           |           |  |                                             |
| 11633 | ENSG00000272360  |         | 13682.7 | 0.16 |    |           |           |  |                                             |
| 11642 | ENSG00000259347  |         | 13690.6 | 0.16 |    |           |           |  |                                             |
| 11651 | ENSG00000259785  |         | 13696.9 | 0.16 | 16 | 82590891  | 82629663  |  | ADAMT5T pseudogene 1                        |
| 11659 | ENSG00000284939  |         | 13705.2 | 0.16 |    |           |           |  |                                             |
| 11663 | ENSG00000246851  |         | 13711.1 | 0.16 |    |           |           |  |                                             |
| 11668 | ENSG00000259376  |         | 13713.7 | 0.16 |    |           |           |  |                                             |
| 11668 | ENSG00000234521  |         | 13715.2 | 0.16 |    |           |           |  |                                             |
| 11689 | ENSG00000286772  |         | 13733.9 | 0.16 |    |           |           |  |                                             |
| 11700 | ENSG00000259855  |         | 13742.3 | 0.16 |    |           |           |  |                                             |
| 11705 | ENSG00000280668  |         | 13745.1 | 0.16 |    |           |           |  |                                             |
| 11708 | ENSG00000253037  |         | 13745.7 | 0.16 |    |           |           |  |                                             |
| 11711 | ENSG00000242127  |         | 13750.3 | 0.16 |    |           |           |  |                                             |
| 11712 | ENSG00000210268  |         | 13750.9 | 0.16 |    |           |           |  |                                             |
| 11713 | ENSG00000226235  |         | 13751.2 | 0.16 |    |           |           |  |                                             |
| 11714 | ENSG00000234333  |         | 13751.3 | 0.16 |    |           |           |  |                                             |
| 11742 | ENSG00000236833  |         | 13774.3 | 0.16 |    |           |           |  |                                             |
| 11734 | ENSG00000233511  |         | 13777.5 | 0.16 |    |           |           |  |                                             |
| 11739 | ENSG00000285501  |         | 13782.5 | 0.16 |    |           |           |  |                                             |
| 11740 | ENSG00000285266  |         | 13783   | 0.16 |    |           |           |  |                                             |
| 11741 | ENSG00000281278  |         | 13783.5 | 0.16 |    |           |           |  |                                             |
| 11745 | ENSG00000227090  |         | 13786.5 | 0.16 |    |           |           |  |                                             |
| 11748 | ENSG00000259113  |         | 13791   | 0.16 |    |           |           |  |                                             |
| 11749 | ENSG00000283708  |         | 13792.2 | 0.16 |    |           |           |  |                                             |
| 11753 | ENSG000002131277 |         | 13795.6 | 0.16 |    |           |           |  |                                             |
| 11766 | ENSG00000186158  |         | 13798.1 | 0.16 |    |           |           |  |                                             |
| 11760 | ENSG00000248851  |         | 13800.3 | 0.16 |    |           |           |  |                                             |
| 11762 | ENSG00000229401  |         | 13802.8 | 0.16 |    |           |           |  |                                             |
| 11771 | ENSG00000232780  |         | 13810.8 | 0.16 |    |           |           |  |                                             |
| 11772 | ENSG00000286792  |         | 13811.1 | 0.16 | 20 | 3281065   | 3281155   |  | RNA 7SL cytoplasmic 839, pseudogene         |
| 11774 | ENSG00000255147  |         | 13812   | 0.16 |    |           |           |  |                                             |
| 11776 | ENSG00000221195  |         | 13812.2 | 0.16 | 16 | 85775227  | 85775306  |  | microRNA 1910                               |
| 11778 | ENSG00000257649  | MIR1910 | 13814.5 | 0.16 |    |           |           |  |                                             |

|       |                 |         |         |      |    |           |           |  |                                                                    |
|-------|-----------------|---------|---------|------|----|-----------|-----------|--|--------------------------------------------------------------------|
| 11781 | ENSG00000248559 |         | 13815.7 | 0.16 |    |           |           |  |                                                                    |
| 11782 | ENSG00000233588 |         | 13823.3 | 0.16 |    |           |           |  |                                                                    |
| 11804 | ENSG00000234756 |         | 13832.1 | 0.16 |    |           |           |  |                                                                    |
| 11810 | ENSG00000248702 |         | 13837.4 | 0.16 |    |           |           |  |                                                                    |
| 11827 | ENSG00000276476 |         | 13851.1 | 0.16 |    |           |           |  |                                                                    |
| 11829 | ENSG00000276965 |         | 13852.5 | 0.16 |    |           |           |  |                                                                    |
| 11832 | ENSG00000258774 |         | 13854.9 | 0.16 |    |           |           |  |                                                                    |
| 11835 | ENSG00000240599 |         | 13857.4 | 0.16 |    |           |           |  |                                                                    |
| 11846 | ENSG00000252724 |         | 13869.5 | 0.16 |    |           |           |  |                                                                    |
| 11847 | ENSG00000225386 |         | 13869.9 | 0.16 |    |           |           |  |                                                                    |
| 11857 | ENSG00000214243 |         | 13878.9 | 0.16 |    |           |           |  |                                                                    |
| 11860 | ENSG00000231311 |         | 13882.7 | 0.16 |    |           |           |  |                                                                    |
| 11861 | ENSG00000256283 |         | 13884.2 | 0.16 |    |           |           |  |                                                                    |
| 11866 | ENSG00000232072 |         | 13887.6 | 0.16 |    |           |           |  |                                                                    |
| 11869 | ENSG00000225179 |         | 13889.7 | 0.16 |    |           |           |  |                                                                    |
| 11870 | ENSG00000235342 |         | 13890.9 | 0.16 |    |           |           |  |                                                                    |
| 11876 | ENSG00000249623 |         | 13895.3 | 0.16 |    |           |           |  |                                                                    |
| 11884 | ENSG00000215366 | GOLGAB1 | 13898.6 | 0.16 | 12 | 56588931  | 56589180  |  | RNA 75L_cytosolic/770_pseudogene                                   |
| 11883 | ENSG00000254740 |         | 13906.4 | 0.16 | 15 | 2325242   | 2326823   |  | gsg1n A8 family member 1                                           |
| 11884 | ENSG00000233367 |         | 13906.5 | 0.16 |    |           |           |  |                                                                    |
| 11900 | ENSG00000234438 |         | 13922.7 | 0.16 |    |           |           |  |                                                                    |
| 11901 | ENSG00000185162 |         | 13910.2 | 0.16 |    |           |           |  |                                                                    |
| 11907 | ENSG00000281235 |         | 13916   | 0.16 |    |           |           |  |                                                                    |
| 11915 | ENSG00000233774 |         | 13921.6 | 0.16 |    |           |           |  |                                                                    |
| 11918 | ENSG00000230812 |         | 13922.8 | 0.16 |    |           |           |  |                                                                    |
| 11921 | ENSG00000287480 |         | 13923.1 | 0.16 |    |           |           |  |                                                                    |
| 11922 | ENSG00000232922 |         | 13923.9 | 0.16 |    |           |           |  |                                                                    |
| 11929 | ENSG00000238994 |         | 13928.4 | 0.16 |    |           |           |  |                                                                    |
| 11930 | ENSG00000289180 |         | 13928.5 | 0.16 |    |           |           |  |                                                                    |
| 11934 | ENSG00000237114 |         | 13932.9 | 0.16 |    |           |           |  |                                                                    |
| 11938 | ENSG00000232900 |         | 13936.8 | 0.16 |    |           |           |  |                                                                    |
| 11947 | ENSG00000226420 |         | 13943.1 | 0.16 |    |           |           |  |                                                                    |
| 11948 | ENSG00000236669 |         | 13944.5 | 0.16 |    |           |           |  |                                                                    |
| 11950 | ENSG00000213110 |         | 13945.4 | 0.16 |    |           |           |  |                                                                    |
| 11952 | ENSG00000271021 |         | 13946.6 | 0.16 |    |           |           |  |                                                                    |
| 11955 | ENSG00000231559 |         | 13945.7 | 0.16 |    |           |           |  |                                                                    |
| 11961 | ENSG00000244540 |         | 13952.3 | 0.16 |    |           |           |  |                                                                    |
| 11963 | ENSG00000283400 |         | 13953.3 | 0.16 |    |           |           |  |                                                                    |
| 11964 | ENSG00000233862 |         | 13953.8 | 0.16 |    |           |           |  |                                                                    |
| 11965 | ENSG00000232451 |         | 13954.6 | 0.16 |    |           |           |  |                                                                    |
| 11968 | ENSG00000249158 |         | 13956   | 0.16 |    |           |           |  |                                                                    |
| 11972 | ENSG00000230598 |         | 13960.3 | 0.16 |    |           |           |  |                                                                    |
| 11975 | ENSG00000229379 |         | 13963.8 | 0.16 |    |           |           |  |                                                                    |
| 11981 | ENSG00000237265 |         | 13969   | 0.16 |    |           |           |  |                                                                    |
| 11983 | ENSG00000260554 |         | 13971.1 | 0.16 |    |           |           |  |                                                                    |
| 11990 | ENSG00000233175 |         | 13974.2 | 0.16 |    |           |           |  |                                                                    |
| 11991 | ENSG00000271477 |         | 13974.4 | 0.16 |    |           |           |  |                                                                    |
| 11984 | ENSG00000287812 |         | 13975.2 | 0.16 |    |           |           |  |                                                                    |
| 11995 | ENSG00000287196 |         | 13975.5 | 0.16 |    |           |           |  |                                                                    |
| 12000 | ENSG00000226675 |         | 13978.3 | 0.16 |    |           |           |  |                                                                    |
| 12001 | ENSG00000235372 |         | 13978.7 | 0.16 |    |           |           |  |                                                                    |
| 12007 | ENSG00000240426 |         | 13983.3 | 0.16 |    |           |           |  |                                                                    |
| 12010 | ENSG00000225443 |         | 13984.5 | 0.16 |    |           |           |  |                                                                    |
| 12011 | ENSG00000286878 |         | 13984.8 | 0.16 |    |           |           |  |                                                                    |
| 12018 | ENSG00000232571 |         | 13994.4 | 0.16 |    |           |           |  |                                                                    |
| 12019 | ENSG00000236233 |         | 13994.5 | 0.16 |    |           |           |  |                                                                    |
| 12020 | ENSG00000298173 |         | 13994.7 | 0.16 |    |           |           |  |                                                                    |
| 12023 | ENSG00000235389 |         | 13997.4 | 0.16 |    |           |           |  |                                                                    |
| 12025 | ENSG00000258478 |         | 13999.3 | 0.16 |    |           |           |  |                                                                    |
| 12029 | ENSG00000230700 | MIR1299 | 14004.8 | 0.16 | 9  | 69002239  | 69002321  |  | microRNA 1299                                                      |
| 12039 | ENSG00000238768 |         | 14005.7 | 0.16 | 11 | 7181520   | 71815216  |  | Small nuclear RNA U13                                              |
| 12035 | ENSG00000231409 |         | 14009.7 | 0.16 |    |           |           |  |                                                                    |
| 12038 | ENSG00000228418 |         | 14012.5 | 0.16 | 10 | 48880162  | 48881273  |  | calhesin L pseudogene 3                                            |
| 12044 | ENSG00000233437 |         | 14016.2 | 0.16 |    |           |           |  |                                                                    |
| 12052 | ENSG00000287563 |         | 14019.2 | 0.16 |    |           |           |  |                                                                    |
| 12054 | ENSG00000255911 |         | 14019.8 | 0.16 |    |           |           |  |                                                                    |
| 12056 | ENSG00000234333 |         | 14021.9 | 0.16 |    |           |           |  |                                                                    |
| 12059 | ENSG00000237279 |         | 14025.8 | 0.16 |    |           |           |  |                                                                    |
| 12061 | ENSG00000298120 |         | 14027.9 | 0.16 |    |           |           |  |                                                                    |
| 12064 | ENSG00000213548 |         | 14029.6 | 0.16 |    |           |           |  |                                                                    |
| 12067 | ENSG00000256276 |         | 14031.8 | 0.16 |    |           |           |  |                                                                    |
| 12068 | ENSG00000226070 |         | 14032.5 | 0.16 |    |           |           |  |                                                                    |
| 12070 | ENSG00000260691 |         | 14034.1 | 0.16 |    |           |           |  |                                                                    |
| 12072 | ENSG00000234345 |         | 14035.6 | 0.16 |    |           |           |  |                                                                    |
| 12074 | ENSG00000253286 |         | 14036.8 | 0.16 |    |           |           |  |                                                                    |
| 12075 | ENSG00000233433 |         | 14037   | 0.16 |    |           |           |  |                                                                    |
| 12079 | ENSG00000250753 |         | 14039.3 | 0.16 |    |           |           |  |                                                                    |
| 12080 | ENSG00000258923 |         | 14039.3 | 0.16 |    |           |           |  |                                                                    |
| 12082 | ENSG00000238989 |         | 14044.8 | 0.16 |    |           |           |  |                                                                    |
| 12085 | ENSG00000231429 |         | 14046.1 | 0.16 |    |           |           |  |                                                                    |
| 12089 | ENSG00000284298 |         | 14048.2 | 0.16 |    |           |           |  |                                                                    |
| 12094 | ENSG00000236739 |         | 14054.3 | 0.16 |    |           |           |  |                                                                    |
| 12112 | ENSG00000287863 |         | 14062.5 | 0.16 |    |           |           |  |                                                                    |
| 12113 | ENSG00000230205 |         | 14062.5 | 0.16 |    |           |           |  |                                                                    |
| 12116 | ENSG00000295516 |         | 14067.2 | 0.16 |    |           |           |  |                                                                    |
| 12118 | ENSG00000231958 |         | 14067.4 | 0.16 |    |           |           |  |                                                                    |
| 12125 | ENSG00000270533 |         | 14073.1 | 0.16 |    |           |           |  |                                                                    |
| 12127 | ENSG00000271418 |         | 14079   | 0.16 |    |           |           |  |                                                                    |
| 12131 | ENSG00000230586 |         | 14080   | 0.16 |    |           |           |  |                                                                    |
| 12132 | ENSG00000226277 |         | 14080.1 | 0.16 |    |           |           |  |                                                                    |
| 12136 | ENSG00000255596 |         | 14085.6 | 0.16 |    |           |           |  |                                                                    |
| 12138 | ENSG00000231366 |         | 14093.6 | 0.16 |    |           |           |  |                                                                    |
| 12157 | ENSG00000280258 |         | 14094.4 | 0.16 |    |           |           |  |                                                                    |
| 12160 | ENSG00000233814 |         | 14095.8 | 0.16 |    |           |           |  |                                                                    |
| 12161 | ENSG00000234207 |         | 14096.9 | 0.16 |    |           |           |  |                                                                    |
| 12173 | ENSG00000226717 |         | 14105.9 | 0.16 |    |           |           |  |                                                                    |
| 12181 | ENSG00000231506 |         | 14112.9 | 0.16 |    |           |           |  |                                                                    |
| 12186 | ENSG00000217414 |         | 14116.8 | 0.16 |    |           |           |  |                                                                    |
| 12188 | ENSG00000227660 |         | 14117.5 | 0.16 |    |           |           |  |                                                                    |
| 12190 | ENSG00000256308 |         | 14120.4 | 0.16 |    |           |           |  |                                                                    |
| 12191 | ENSG00000218626 |         | 14120.7 | 0.16 |    |           |           |  |                                                                    |
| 12196 | ENSG00000233556 |         | 14124.3 | 0.16 |    |           |           |  |                                                                    |
| 12197 | ENSG00000270759 |         | 14125   | 0.16 |    |           |           |  |                                                                    |
| 12200 | ENSG00000217369 |         | 14125.1 | 0.16 |    |           |           |  |                                                                    |
| 12212 | ENSG00000283728 |         | 14131.5 | 0.16 |    |           |           |  |                                                                    |
| 12217 | ENSG00000282729 |         | 14134.5 | 0.16 |    |           |           |  |                                                                    |
| 12218 | ENSG00000231447 |         | 14134.5 | 0.16 |    |           |           |  |                                                                    |
| 12219 | ENSG00000255293 |         | 14134.7 | 0.16 |    |           |           |  |                                                                    |
| 12224 | ENSG00000284950 |         | 14139.8 | 0.16 |    |           |           |  |                                                                    |
| 12226 | ENSG00000235887 |         | 14148.8 | 0.16 |    |           |           |  |                                                                    |
| 12239 | ENSG00000241179 |         | 14149.7 | 0.16 |    |           |           |  |                                                                    |
| 12240 | ENSG00000232070 |         | 14152.3 | 0.16 |    |           |           |  |                                                                    |
| 12243 | ENSG00000238929 |         | 14154   | 0.16 |    |           |           |  |                                                                    |
| 12247 | ENSG00000259374 |         | 14158.6 | 0.16 |    |           |           |  |                                                                    |
| 12256 | ENSG00000250957 |         | 14166.2 | 0.16 |    |           |           |  |                                                                    |
| 12257 | ENSG00000237037 |         | 14166.9 | 0.16 |    |           |           |  |                                                                    |
| 12262 | ENSG00000281778 |         | 14168.7 | 0.16 |    |           |           |  |                                                                    |
| 12273 | ENSG00000258871 |         | 14179.5 | 0.16 |    |           |           |  |                                                                    |
| 12275 | ENSG00000231378 |         | 14182.1 | 0.16 |    |           |           |  |                                                                    |
| 12277 | ENSG00000254076 |         | 14182.4 | 0.16 |    |           |           |  |                                                                    |
| 12281 | ENSG00000271943 |         | 14185.8 | 0.16 |    |           |           |  |                                                                    |
| 12285 | ENSG00000234667 |         | 14187.5 | 0.16 |    |           |           |  |                                                                    |
| 12289 | ENSG00000249888 |         | 14190   | 0.16 |    |           |           |  |                                                                    |
| 12290 | ENSG00000254675 |         | 14190.5 | 0.16 |    |           |           |  |                                                                    |
| 12293 | ENSG00000272774 |         | 14193.8 | 0.16 |    |           |           |  |                                                                    |
| 12295 | ENSG00000258854 |         | 14201.8 | 0.16 |    |           |           |  |                                                                    |
| 12308 | ENSG00000234893 |         | 14215.1 | 0.16 |    |           |           |  |                                                                    |
| 12310 | ENSG00000262599 |         | 14216.6 | 0.16 |    |           |           |  |                                                                    |
| 12311 | ENSG00000252514 |         | 14217.7 | 0.16 |    |           |           |  |                                                                    |
| 12314 | ENSG00000256790 |         | 14218.6 | 0.16 |    |           |           |  |                                                                    |
| 12316 | ENSG00000239118 |         | 14220.5 | 0.16 |    |           |           |  |                                                                    |
| 12318 | ENSG00000229621 |         | 14220.6 | 0.16 |    |           |           |  |                                                                    |
| 12321 | ENSG00000229962 |         | 14220.9 | 0.16 |    |           |           |  |                                                                    |
| 12324 | ENSG00000178206 |         | 14223.3 | 0.16 | 2  | 132044330 | 132050127 |  | cytochrome P450, family 4, subfamily F, polypeptide 31, pseudogene |
| 12326 | ENSG00000217447 |         | 14223.8 | 0.16 |    |           |           |  |                                                                    |
| 12328 | ENSG00000244869 |         | 14227.2 | 0.16 |    |           |           |  |                                                                    |
| 12335 | ENSG00000294328 |         | 14230.8 | 0.16 |    |           |           |  |                                                                    |
| 12338 | ENSG00000224687 |         | 14233   | 0.16 |    |           |           |  |                                                                    |
| 12340 | ENSG00000231754 |         | 14233.8 | 0.16 |    |           |           |  |                                                                    |
| 12344 | ENSG00000255338 |         | 14235.4 | 0.16 |    |           |           |  |                                                                    |
| 12349 | ENSG00000233317 |         | 14230.5 | 0.16 |    |           |           |  |                                                                    |
| 12351 | ENSG00000213488 |         | 14243.4 | 0.16 |    |           |           |  |                                                                    |
| 12362 | ENSG00000236558 |         | 14250.4 | 0.16 |    |           |           |  |                                                                    |
| 12364 | ENSG00000250311 |         | 14252.1 | 0.16 |    |           |           |  |                                                                    |
| 12370 | ENSG00000228862 |         | 14256   | 0.16 |    |           |           |  |                                                                    |
| 12371 | ENSG00000252406 |         | 14256.9 | 0.16 |    |           |           |  |                                                                    |
| 12373 | ENSG00000217792 |         | 14258.1 | 0.16 |    |           |           |  |                                                                    |
| 12380 | ENSG00000281430 |         | 14259.9 | 0.16 |    |           |           |  |                                                                    |
| 12382 | ENSG00000252727 |         | 14281.1 | 0.16 |    |           |           |  |                                                                    |
| 12384 | ENSG00000231520 |         | 14282.2 | 0.16 |    |           |           |  |                                                                    |
| 12388 | ENSG00000234978 |         | 14284.1 | 0.16 |    |           |           |  |                                                                    |

|       |                 |  |         |      |    |           |           |  |                                       |
|-------|-----------------|--|---------|------|----|-----------|-----------|--|---------------------------------------|
| 12391 | ENSG00000248977 |  | 14296.2 | 0.16 |    |           |           |  |                                       |
| 12398 | ENSG00000247190 |  | 14272   | 0.16 |    |           |           |  |                                       |
| 12397 | ENSG00000238857 |  | 14272.8 | 0.16 | 7  | 2590504   | 2590599   |  | Small nuclear RNA U13                 |
| 12409 | ENSG00000250737 |  | 14280.2 | 0.16 |    |           |           |  |                                       |
| 12410 | ENSG00000250170 |  | 14296   | 0.16 |    |           |           |  |                                       |
| 12411 | ENSG00000271774 |  | 14296.4 | 0.16 |    |           |           |  |                                       |
| 12418 | ENSG00000224856 |  | 14290.9 | 0.16 |    |           |           |  |                                       |
| 12419 | ENSG00000244041 |  | 14291.6 | 0.16 |    |           |           |  |                                       |
| 12421 | ENSG00000245441 |  | 14292.4 | 0.16 |    |           |           |  |                                       |
| 12425 | ENSG00000246339 |  | 14293.3 | 0.16 |    |           |           |  |                                       |
| 12428 | ENSG00000255558 |  | 14294   | 0.16 |    |           |           |  |                                       |
| 12431 | ENSG00000255753 |  | 14298.2 | 0.16 |    |           |           |  |                                       |
| 12432 | ENSG00000225795 |  | 14298.4 | 0.16 |    |           |           |  |                                       |
| 12433 | ENSG00000289944 |  | 14300.5 | 0.16 |    |           |           |  |                                       |
| 12438 | ENSG00000254543 |  | 14301.4 | 0.16 |    |           |           |  |                                       |
| 12438 | ENSG00000254225 |  | 14306.9 | 0.16 |    |           |           |  |                                       |
| 12441 | ENSG00000250238 |  | 14310.2 | 0.16 |    |           |           |  |                                       |
| 12445 | ENSG00000254196 |  | 14312.9 | 0.16 |    |           |           |  |                                       |
| 12447 | ENSG00000264739 |  | 14313.4 | 0.16 |    |           |           |  |                                       |
| 12451 | ENSG00000225253 |  | 14316.2 | 0.16 |    |           |           |  |                                       |
| 12455 | ENSG00000222987 |  | 14317.6 | 0.16 |    |           |           |  |                                       |
| 12459 | ENSG00000250260 |  | 14320.5 | 0.16 |    |           |           |  |                                       |
| 12460 | ENSG00000283096 |  | 14321.8 | 0.16 |    |           |           |  |                                       |
| 12462 | ENSG00000243733 |  | 14322.7 | 0.16 |    |           |           |  |                                       |
| 12471 | ENSG00000232867 |  | 14335.1 | 0.16 |    |           |           |  |                                       |
| 12472 | ENSG00000239383 |  | 14335.3 | 0.16 |    |           |           |  |                                       |
| 12473 | ENSG00000222245 |  | 14335.3 | 0.16 |    |           |           |  |                                       |
| 12474 | ENSG00000235480 |  | 14335.7 | 0.16 |    |           |           |  |                                       |
| 12475 | ENSG00000230392 |  | 14336.2 | 0.16 |    |           |           |  |                                       |
| 12476 | ENSG00000235135 |  | 14337   | 0.16 |    |           |           |  |                                       |
| 12477 | ENSG00000250770 |  | 14337.9 | 0.16 |    |           |           |  |                                       |
| 12479 | ENSG00000250870 |  | 14340.8 | 0.16 |    |           |           |  |                                       |
| 12481 | ENSG00000232835 |  | 14341.2 | 0.16 |    |           |           |  |                                       |
| 12486 | ENSG00000249295 |  | 14345.4 | 0.16 |    |           |           |  |                                       |
| 12487 | ENSG00000253778 |  | 14346.3 | 0.16 |    |           |           |  |                                       |
| 12488 | ENSG00000232689 |  | 14347   | 0.16 |    |           |           |  |                                       |
| 12497 | ENSG00000258199 |  | 14352.1 | 0.16 |    |           |           |  |                                       |
| 12498 | ENSG00000268460 |  | 14353.9 | 0.16 |    |           |           |  |                                       |
| 12508 | ENSG00000264088 |  | 14366.7 | 0.16 |    |           |           |  |                                       |
| 12512 | ENSG00000254057 |  | 14369.4 | 0.16 |    |           |           |  |                                       |
| 12514 | ENSG00000268130 |  | 14372.4 | 0.16 | 13 | 113755563 | 113756608 |  | Uncharacterized protein               |
| 12519 | ENSG00000254070 |  | 14374.2 | 0.16 |    |           |           |  |                                       |
| 12520 | ENSG00000234219 |  | 14376.8 | 0.16 |    |           |           |  |                                       |
| 12523 | ENSG00000250727 |  | 14378.5 | 0.16 |    |           |           |  |                                       |
| 12527 | ENSG00000272233 |  | 14380.7 | 0.16 |    |           |           |  |                                       |
| 12528 | ENSG00000255531 |  | 14381.5 | 0.16 |    |           |           |  |                                       |
| 12529 | ENSG00000250986 |  | 14381.5 | 0.16 |    |           |           |  |                                       |
| 12533 | ENSG00000250571 |  | 14384.5 | 0.16 |    |           |           |  |                                       |
| 12536 | ENSG00000230863 |  | 14387   | 0.16 |    |           |           |  |                                       |
| 12548 | ENSG00000254540 |  | 14392.5 | 0.16 |    |           |           |  |                                       |
| 12548 | ENSG00000254532 |  | 14393.5 | 0.16 |    |           |           |  |                                       |
| 12549 | ENSG00000281291 |  | 14396.5 | 0.16 |    |           |           |  |                                       |
| 12550 | ENSG00000259986 |  | 14396   | 0.16 |    |           |           |  |                                       |
| 12554 | ENSG00000235166 |  | 14398.1 | 0.16 |    |           |           |  |                                       |
| 12557 | ENSG00000224532 |  | 14403.9 | 0.16 |    |           |           |  |                                       |
| 12558 | ENSG00000251270 |  | 14404.9 | 0.16 |    |           |           |  |                                       |
| 12563 | ENSG00000214100 |  | 14407.8 | 0.16 |    |           |           |  |                                       |
| 12565 | ENSG00000230854 |  | 14410.8 | 0.16 |    |           |           |  |                                       |
| 12569 | ENSG00000271151 |  | 14415.3 | 0.16 |    |           |           |  |                                       |
| 12571 | ENSG00000259925 |  | 14416.7 | 0.16 |    |           |           |  |                                       |
| 12574 | ENSG00000259525 |  | 14418.3 | 0.16 |    |           |           |  |                                       |
| 12576 | ENSG00000228522 |  | 14418.8 | 0.16 |    |           |           |  |                                       |
| 12584 | ENSG00000272852 |  | 14424.4 | 0.16 |    |           |           |  |                                       |
| 12586 | ENSG00000214942 |  | 14424.9 | 0.16 |    |           |           |  |                                       |
| 12588 | ENSG00000218027 |  | 14426.4 | 0.16 |    |           |           |  |                                       |
| 12589 | ENSG00000227764 |  | 14427   | 0.16 |    |           |           |  |                                       |
| 12590 | ENSG00000255256 |  | 14427.7 | 0.16 |    |           |           |  |                                       |
| 12591 | ENSG00000228302 |  | 14428.6 | 0.16 |    |           |           |  |                                       |
| 12592 | ENSG00000254249 |  | 14429.8 | 0.16 |    |           |           |  |                                       |
| 12593 | ENSG00000254525 |  | 14430.2 | 0.16 |    |           |           |  |                                       |
| 12595 | ENSG00000225903 |  | 14432.6 | 0.16 |    |           |           |  |                                       |
| 12596 | ENSG00000230273 |  | 14433.2 | 0.16 |    |           |           |  |                                       |
| 12599 | ENSG00000237826 |  | 14433.9 | 0.16 |    |           |           |  |                                       |
| 12600 | ENSG00000252916 |  | 14434.8 | 0.16 |    |           |           |  |                                       |
| 12605 | ENSG00000255296 |  | 14437.4 | 0.16 |    |           |           |  |                                       |
| 12613 | ENSG00000236863 |  | 14440   | 0.16 |    |           |           |  |                                       |
| 12618 | ENSG00000248986 |  | 14445.5 | 0.16 |    |           |           |  |                                       |
| 12619 | ENSG00000271410 |  | 14445.8 | 0.16 |    |           |           |  |                                       |
| 12628 | ENSG00000232959 |  | 14454.8 | 0.16 |    |           |           |  |                                       |
| 12638 | ENSG00000245773 |  | 14458.3 | 0.16 |    |           |           |  |                                       |
| 12639 | ENSG00000236261 |  | 14459.4 | 0.16 |    |           |           |  |                                       |
| 12641 | ENSG00000226050 |  | 14460.9 | 0.16 |    |           |           |  |                                       |
| 12644 | ENSG00000254219 |  | 14463   | 0.16 |    |           |           |  |                                       |
| 12655 | ENSG00000259234 |  | 14473.3 | 0.16 |    |           |           |  |                                       |
| 12656 | ENSG00000242718 |  | 14473.6 | 0.16 |    |           |           |  |                                       |
| 12663 | ENSG00000257148 |  | 14480.2 | 0.16 |    |           |           |  |                                       |
| 12665 | ENSG00000236545 |  | 14480.4 | 0.16 |    |           |           |  |                                       |
| 12667 | ENSG00000271162 |  | 14482.1 | 0.16 |    |           |           |  |                                       |
| 12668 | ENSG00000248931 |  | 14482.4 | 0.16 |    |           |           |  |                                       |
| 12671 | ENSG00000271963 |  | 14484.1 | 0.16 |    |           |           |  |                                       |
| 12673 | ENSG00000232398 |  | 14484.9 | 0.16 |    |           |           |  |                                       |
| 12674 | ENSG00000281951 |  | 14487   | 0.16 |    |           |           |  |                                       |
| 12675 | ENSG00000235926 |  | 14487.5 | 0.16 |    |           |           |  |                                       |
| 12679 | ENSG00000289021 |  | 14489   | 0.16 |    |           |           |  |                                       |
| 12682 | ENSG00000230296 |  | 14489.7 | 0.16 | 2  | 169297416 | 169297715 |  | RNA, 7SL, cytoplasmic 95, pseudogene  |
| 12685 | ENSG00000231776 |  | 14492   | 0.16 |    |           |           |  |                                       |
| 12687 | ENSG00000242537 |  | 14493.6 | 0.16 |    |           |           |  |                                       |
| 12688 | ENSG00000227130 |  | 14494.5 | 0.16 |    |           |           |  |                                       |
| 12694 | ENSG00000255136 |  | 14498.5 | 0.16 |    |           |           |  |                                       |
| 12699 | ENSG00000233407 |  | 14503.2 | 0.16 |    |           |           |  |                                       |
| 12700 | ENSG00000231718 |  | 14504.3 | 0.16 |    |           |           |  |                                       |
| 12702 | ENSG00000233978 |  | 14504.9 | 0.16 |    |           |           |  |                                       |
| 12704 | ENSG00000298172 |  | 14509   | 0.16 |    |           |           |  |                                       |
| 12707 | ENSG00000250352 |  | 14507.8 | 0.16 |    |           |           |  |                                       |
| 12713 | ENSG00000258050 |  | 14510.9 | 0.16 |    |           |           |  |                                       |
| 12716 | ENSG00000259693 |  | 14515.1 | 0.16 |    |           |           |  |                                       |
| 12724 | ENSG00000281904 |  | 14520.6 | 0.16 |    |           |           |  |                                       |
| 12726 | ENSG00000285677 |  | 14522.3 | 0.16 |    |           |           |  |                                       |
| 12734 | ENSG00000280406 |  | 14526.6 | 0.16 | 3  | 53322889  | 53323142  |  | RNA, 7SL, cytoplasmic 821, pseudogene |
| 12735 | ENSG00000255445 |  | 14530.4 | 0.16 |    |           |           |  |                                       |
| 12742 | ENSG00000237003 |  | 14537.6 | 0.16 |    |           |           |  |                                       |
| 12745 | ENSG00000226359 |  | 14539.6 | 0.16 |    |           |           |  |                                       |
| 12751 | ENSG00000250129 |  | 14543.7 | 0.16 |    |           |           |  |                                       |
| 12754 | ENSG00000259616 |  | 14544.9 | 0.16 |    |           |           |  |                                       |
| 12756 | ENSG00000248692 |  | 14548.4 | 0.16 |    |           |           |  |                                       |
| 12761 | ENSG00000234555 |  | 14553.5 | 0.16 | 2  | 128879655 | 128879963 |  | RNA, 7SL, cytoplasmic 206, pseudogene |
| 12768 | ENSG00000244995 |  | 14554.5 | 0.16 |    |           |           |  |                                       |
| 12770 | ENSG00000268455 |  | 14557.4 | 0.16 |    |           |           |  |                                       |
| 12799 | ENSG00000232728 |  | 14580.8 | 0.16 |    |           |           |  |                                       |
| 12811 | ENSG00000231407 |  | 14587.7 | 0.16 |    |           |           |  |                                       |
| 12812 | ENSG00000298757 |  | 14588.3 | 0.16 |    |           |           |  |                                       |
| 12813 | ENSG00000257259 |  | 14588.5 | 0.16 |    |           |           |  |                                       |
| 12818 | ENSG00000228598 |  | 14594.7 | 0.16 |    |           |           |  |                                       |
| 12819 | ENSG00000204581 |  | 14596.9 | 0.16 |    |           |           |  |                                       |
| 12821 | ENSG00000250199 |  | 14597.7 | 0.16 |    |           |           |  |                                       |
| 12827 | ENSG00000237281 |  | 14592.6 | 0.16 |    |           |           |  |                                       |
| 12834 | ENSG00000283120 |  | 14608.1 | 0.16 |    |           |           |  |                                       |
| 12844 | ENSG00000264088 |  | 14616.2 | 0.16 |    |           |           |  |                                       |
| 12846 | ENSG00000264739 |  | 14617   | 0.16 |    |           |           |  |                                       |
| 12848 | ENSG00000230160 |  | 14617.4 | 0.16 |    |           |           |  |                                       |
| 12848 | ENSG00000226501 |  | 14618   | 0.16 |    |           |           |  |                                       |
| 12850 | ENSG00000220491 |  | 14618.6 | 0.16 |    |           |           |  |                                       |
| 12852 | ENSG00000240499 |  | 14619.9 | 0.16 |    |           |           |  |                                       |
| 12854 | ENSG00000281707 |  | 14621.1 | 0.16 |    |           |           |  |                                       |
| 12855 | ENSG00000253997 |  | 14622.1 | 0.16 |    |           |           |  |                                       |
| 12859 | ENSG00000267938 |  | 14623.6 | 0.16 |    |           |           |  |                                       |
| 12860 | ENSG00000234486 |  | 14625.3 | 0.16 |    |           |           |  |                                       |
| 12862 | ENSG00000271608 |  | 14628   | 0.16 |    |           |           |  |                                       |
| 12866 | ENSG00000224570 |  | 14630   | 0.16 |    |           |           |  |                                       |
| 12877 | ENSG00000253444 |  | 14639   | 0.16 |    |           |           |  |                                       |
| 12887 | ENSG00000250370 |  | 14644.1 | 0.16 |    |           |           |  |                                       |
| 12892 | ENSG00000287762 |  | 14647.2 | 0.16 |    |           |           |  |                                       |
| 12898 | ENSG00000285355 |  | 14649.7 | 0.16 | 19 | 47582188  | 47582450  |  | RNA, 7SL, cytoplasmic 533, pseudogene |
| 12900 | ENSG00000271010 |  | 14650.9 | 0.16 |    |           |           |  |                                       |
| 12905 | ENSG00000230345 |  | 14653.9 | 0.16 |    |           |           |  |                                       |
| 12907 | ENSG00000253987 |  | 14655.3 | 0.16 |    |           |           |  |                                       |
| 12910 | ENSG00000216077 |  | 14657.9 | 0.16 |    |           |           |  |                                       |
| 12911 | ENSG00000233157 |  | 14657.9 | 0.16 |    |           |           |  |                                       |
| 12915 | ENSG00000282408 |  | 14660.2 | 0.16 |    |           |           |  |                                       |
| 12919 | ENSG00000225451 |  | 14664.2 | 0.16 |    |           |           |  |                                       |
| 12921 | ENSG00000232470 |  | 14664.5 | 0.16 |    |           |           |  |                                       |





|       |                   |          |          |      |                      |    |           |           |                                                                                                                   |
|-------|-------------------|----------|----------|------|----------------------|----|-----------|-----------|-------------------------------------------------------------------------------------------------------------------|
| 12137 | ENSG00000252153   | MIR2278  | 14034.5  | 0.15 | miRNA                | 9  | 9757244   | 9757239   | miR2278                                                                                                           |
| 12148 | ENSG00000251510   | MIR5480  | 14034.5  | 0.15 | miRNA                | 9  | 10204309  | 10204309  | miR5480                                                                                                           |
| 12926 | ENSG00000254900   | MIR4116  | 14223.5  | 0.15 | miRNA                | 17 | 7533006   | 7533136   | miR4116                                                                                                           |
| 12493 | ENSG00000207736   | MIR657   | 14351.5  | 0.15 | miRNA                | 17 | 7809076   | 7809173   | miR657                                                                                                            |
| 12553 | ENSG00000204158   | MIR4403  | 14360.5  | 0.15 | miRNA                | 9  | 8520269   | 8520269   | miR4403                                                                                                           |
| 12985 | ENSG00000254263   | MIR4523  | 14705.5  | 0.15 | miRNA                | 5  | 12843181  | 12843359  | miR4523                                                                                                           |
| 13177 | ENSG00000263742   | MIR3174  | 14847.7  | 0.15 | miRNA                | 11 | 7178324   | 7178348   | miR3174                                                                                                           |
| 13191 | ENSG00000265520   | MIR3177  | 14864.7  | 0.15 | miRNA                | 16 | 1177579   | 1178047   | miR3177                                                                                                           |
| 13305 | ENSG00000265653   | MIR5484K | 14959.4  | 0.15 | miRNA                | 9  | 12172815  | 12172815  | miR5484                                                                                                           |
| 13352 | ENSG00000266494   | MIR6481  | 14986.1  | 0.15 | miRNA                | 6  | 4156845   | 4156826   | miR6481                                                                                                           |
| 13372 | ENSG00000266495   | MIR5084  | 15033.7  | 0.15 | miRNA                | 6  | 3340108   | 3340624   | miR5084                                                                                                           |
| 13811 | ENSG00000269563   | MIR5942  | 15252.5  | 0.15 | miRNA                | 5  | 8277265   | 8277269   | miR5942                                                                                                           |
| 14243 | ENSG00000263888   | MIR4793  | 15662.2  | 0.15 | miRNA                | 3  | 48681627  | 48681713  | miR4793                                                                                                           |
| 14681 | ENSG00000207693   | MIR602   | 16135.3  | 0.15 | miRNA                | 9  | 140732971 | 140732988 | miR602                                                                                                            |
| 1701  | ENSG00000201428   |          | 9892.5   | 0.15 | misc. RNA            | 7  | 9595696   | 95956919  | Y RNA                                                                                                             |
| 8344  | ENSG00000201573   |          | 10999.4  | 0.15 | misc. RNA            | 14 | 50935115  | 50935216  | Y RNA                                                                                                             |
| 8390  | ENSG00000202494   |          | 11044.9  | 0.15 | misc. RNA            | 3  | 13063185  | 13063296  | Y RNA                                                                                                             |
| 8372  | ENSG00000202450   |          | 11137.2  | 0.15 | misc. RNA            | 1  | 3273003   | 3273162   | Y RNA                                                                                                             |
| 9464  | ENSG000002028516  |          | 11916.9  | 0.15 | misc. RNA            | 17 | 27181740  | 27181840  | Y RNA                                                                                                             |
| 10275 | ENSG000002021254  |          | 12564.1  | 0.15 | misc. RNA            | 1  | 85729979  | 85730085  | Y RNA                                                                                                             |
| 10430 | ENSG000002019255  |          | 12690    | 0.15 | misc. RNA            | 12 | 92544129  | 92544229  | Y RNA                                                                                                             |
| 10775 | ENSG000002026659  |          | 12967.3  | 0.15 | misc. RNA            | 20 | 52181154  | 52181264  | Y RNA                                                                                                             |
| 12758 | ENSG000002027105  |          | 14251.3  | 0.15 | misc. RNA            | 15 | 46288109  | 46288219  | Y RNA                                                                                                             |
| 13012 | ENSG000002020417  |          | 14724.4  | 0.15 | misc. RNA            | 5  | 13201148  | 13201148  | Y RNA                                                                                                             |
| 13053 | ENSG000002028604  |          | 14757.1  | 0.15 | misc. RNA            | 22 | 50837249  | 50837349  | Y RNA                                                                                                             |
| 13133 | ENSG00000196349   |          | 14814.4  | 0.15 | misc. RNA            | 1  | 206921325 | 206921437 | Y RNA                                                                                                             |
| 13268 | ENSG00000200768   |          | 14927.3  | 0.15 | misc. RNA            | 9  | 13023154  | 13023096  | Y RNA                                                                                                             |
| 13304 | ENSG000002028953  |          | 14955.4  | 0.15 | misc. RNA            | 6  | 37328961  | 37329256  | RNA, 7SL, cytoplasmic 73, pseudogene                                                                              |
| 13397 | ENSG00000204370   |          | 15024.1  | 0.15 | misc. RNA            | 2  | 175104870 | 175105146 | RNA, 7SL, cytoplasmic 85, pseudogene                                                                              |
| 13528 | ENSG00000202913   |          | 15150    | 0.15 | misc. RNA            | 1  | 11611201  | 11611201  | RNA, 7SL, cytoplasmic 94, pseudogene                                                                              |
| 13550 | ENSG00000204241   |          | 15142.5  | 0.15 | misc. RNA            | 5  | 17780425  | 17780519  | RNA, 7SL, cytoplasmic 64, pseudogene                                                                              |
| 13569 | ENSG00000204110   |          | 15149    | 0.15 | misc. RNA            | X  | 77140874  | 77141127  | RNA, 7SL, cytoplasmic 460, pseudogene                                                                             |
| 13591 | ENSG00000203955   |          | 15183.5  | 0.15 | misc. RNA            | 7  | 5469182   | 5469182   | RNA, 7SL, small nuclear ribonucleoprotein 275                                                                     |
| 13648 | ENSG00000203955   |          | 15209.9  | 0.15 | misc. RNA            | 16 | 4683596   | 4683596   | RNA, 7SL, cytoplasmic 850, pseudogene                                                                             |
| 13906 | ENSG000002026777  |          | 15407.1  | 0.15 | misc. RNA            | 17 | 2103056   | 2103331   | RNA, 7SL, cytoplasmic 624, pseudogene                                                                             |
| 13928 | ENSG000002026777  |          | 15407.1  | 0.15 | misc. RNA            | 1  | 6081193   | 6081193   | RNA, 7SL, cytoplasmic 624, pseudogene                                                                             |
| 14256 | ENSG000002043532  |          | 15671.2  | 0.15 | misc. RNA            | 8  | 71568115  | 71568119  | RNA, 7SL, cytoplasmic 19, pseudogene                                                                              |
| 14607 | ENSG000002042436  |          | 15635.7  | 0.15 | misc. RNA            | 3  | 3314520   | 3314524   | RNA, 7SL, cytoplasmic 789, pseudogene                                                                             |
| 14680 | ENSG00000204546   |          | 15698.17 | 0.15 | misc. RNA            | 1  | 4296154   | 4296158   | RNA, 7SL, cytoplasmic 405, pseudogene                                                                             |
| 14962 | ENSG000002043871  |          | 16224.6  | 0.15 | misc. RNA            | 15 | 43683633  | 43683625  | RNA, 7SL, cytoplasmic 487, pseudogene                                                                             |
| 3274  | ENSG000002025856  |          | 5144.5   | 0.15 | processed_pseudogene | 18 | 46680316  | 46680304  | RAB43 pseudogene 1                                                                                                |
| 4126  | ENSG000002020798  |          | 6437     | 0.15 | processed_pseudogene | 2  | 13207043  | 13207043  | RNA, Y RNA                                                                                                        |
| 4568  | ENSG000002026956  |          | 6601     | 0.15 | processed_pseudogene | 10 | 23429565  | 23429593  | ras homology family member Q pseudogene 3                                                                         |
| 5192  | ENSG000002024332  |          | 7879.4   | 0.15 | processed_pseudogene | 1  | 10069569  | 10069562  | tyrosine 3-monooxygenase/tyrosinase 5-monooxygenase activation protein, zeta pseudogene 3                         |
| 5360  | ENSG000002033060  |          | 8079.4   | 0.15 | processed_pseudogene | 10 | 107146809 | 107146809 | breast carcinoma amplified sequence 2 pseudogene 2                                                                |
| 7053  | ENSG000002026145  |          | 8817.8   | 0.15 | processed_pseudogene | 18 | 14222007  | 14222300  | tyrosine 3-monooxygenase/tyrosinase 5-monooxygenase activation protein, zeta pseudogene 1                         |
| 7873  | ENSG000002025666  |          | 10401.4  | 0.15 | processed_pseudogene | 18 | 201957812 | 201957874 | heterogeneous nuclear ribonucleoprotein A1 pseudogene 35                                                          |
| 8001  | ENSG000002026270  |          | 10728.4  | 0.15 | processed_pseudogene | 17 | 51195032  | 51195625  | cytochrome c, somatic pseudogene 40                                                                               |
| 8023  | ENSG000002025162  |          | 11148.9  | 0.15 | processed_pseudogene | 5  | 98119036  | 98119413  | casein kinase 1, alpha 1 pseudogene 3                                                                             |
| 8903  | ENSG00000214356   |          | 11321.4  | 0.15 | processed_pseudogene | 5  | 50973463  | 50973404  | ribosomal protein L18 pseudogene 10                                                                               |
| 10457 | ENSG000002021584  |          | 12703.4  | 0.15 | processed_pseudogene | 7  | 90261220  | 90261182  | TYR23C pseudogene 1                                                                                               |
| 10847 | ENSG000002028518  |          | 13021.4  | 0.15 | processed_pseudogene | Y  | 19384706  | 19385332  | ribulose 5-phosphate 3-epimerase 1                                                                                |
| 11214 | ENSG000002027814  |          | 13267.9  | 0.15 | processed_pseudogene | Y  | 118513615 | 118514007 | mitochondrial ribosomal protein S17 pseudogene 9                                                                  |
| 11263 | ENSG000002023730  |          | 13363.9  | 0.15 | processed_pseudogene | Y  | 14442350  | 14443262  | family with sequence similarity 8, member A4 pseudogene 2                                                         |
| 11388 | ENSG000002025989  |          | 13475.4  | 0.15 | processed_pseudogene | 8  | 81463983  | 81463983  | N-terminal asparagine amidase pseudogene 2                                                                        |
| 11466 | ENSG000002021248  |          | 13522.5  | 0.15 | processed_pseudogene | 13 | 49813215  | 49813215  | RAD17 homolog 1, non-coding pseudogene 2                                                                          |
| 12046 | ENSG000002024162  |          | 14016.4  | 0.15 | processed_pseudogene | 10 | 4422782   | 4422802   | ubiquitin-cytochrome c reductase hinge-protein pseudogene 3                                                       |
| 12174 | ENSG000002042955  |          | 14108.6  | 0.15 | processed_pseudogene | 11 | 50299862  | 50299846  | phosphoglycolate mutase 1 pseudogene 9                                                                            |
| 12215 | ENSG000002025874  |          | 14132.5  | 0.15 | processed_pseudogene | 11 | 5085155   | 5085155   | calpain, small subunit 1 pseudogene 18                                                                            |
| 12408 | ENSG000002023813  |          | 14280.2  | 0.15 | processed_pseudogene | 8  | 26983334  | 26983317  | cytochrome c oxidase subunit VII polypeptide 1 (ubiquitous) pseudogene 4                                          |
| 12413 | ENSG000002143119  |          | 14289.6  | 0.15 | processed_pseudogene | 21 | 15048343  | 15048437  | coxsackie virus and adenovirus receptor pseudogene 1                                                              |
| 12420 | ENSG000002025278  |          | 14291.5  | 0.15 | processed_pseudogene | 4  | 6261385   | 6261385   | zinc finger protein 642 pseudogene 2                                                                              |
| 12442 | ENSG00000118903   |          | 14310.7  | 0.15 | processed_pseudogene | 13 | 77562200  | 77562070  | basic transcription factor 3 pseudogene 11                                                                        |
| 12463 | ENSG00000213538   | KRTP41   | 14324.5  | 0.15 | processed_pseudogene | 11 | 91159110  | 91171737  | keratin 8 pseudogene 41                                                                                           |
| 12560 | ENSG000002023856  |          | 14328.1  | 0.15 | processed_pseudogene | 21 | 15334609  | 15334609  | lem-1 homolog 1, human pseudogene 1                                                                               |
| 12581 | ENSG000002026254  |          | 14421.3  | 0.15 | processed_pseudogene | 7  | 90736689  | 90737108  | protein tyrosine phosphatase type IVA, member 1 pseudogene 3                                                      |
| 12625 | ENSG000002026622  |          | 14453.5  | 0.15 | processed_pseudogene | 13 | 96344762  | 96344626  | MT-MDS pseudogene 2                                                                                               |
| 12633 | ENSG000002026661  |          | 14453.5  | 0.15 | processed_pseudogene | 13 | 96344762  | 96344626  | keratin 18 pseudogene 3                                                                                           |
| 12642 | ENSG000002023367  |          | 14461.8  | 0.15 | processed_pseudogene | 7  | 136623027 | 136623300 | keratin 8 pseudogene 51                                                                                           |
| 12654 | ENSG000002025731  |          | 14472.7  | 0.15 | processed_pseudogene | 19 | 53962604  | 53963345  | topoisomerase 51 pseudogene 6                                                                                     |
| 12659 | ENSG00000214485   |          | 14474.9  | 0.15 | processed_pseudogene | 2  | 26372073  | 26373600  | SWI5NF related, matrix associated, zinc dependent regulator of chromatin, subfamily e, member 8 pseudogene 6      |
| 12706 | ENSG000002023676  |          | 14508.8  | 0.15 | processed_pseudogene | 21 | 16706846  | 16718157  | farnesyl diphosphate synthase pseudogene 6                                                                        |
| 12710 | ENSG000002025029  |          | 14508.8  | 0.15 | processed_pseudogene | 21 | 16706846  | 16718157  | mitochondrial ribosomal protein L42 pseudogene 3                                                                  |
| 12711 | ENSG00000257444   |          | 14509.6  | 0.15 | processed_pseudogene | 12 | 107695171 | 107695171 | SET pseudogene 7                                                                                                  |
| 12716 | ENSG00000250834   |          | 14513.6  | 0.15 | processed_pseudogene | 4  | 136292332 | 136293079 | keratin 18 pseudogene 54                                                                                          |
| 12757 | ENSG000002023293  |          | 14549.3  | 0.15 | processed_pseudogene | X  | 93891862  | 93894569  | phosphoribosylaminoimidazole carboxylase, phosphoribosylaminoimidazole succinocarboxamide synthetase pseudogene 7 |
| 12772 | ENSG0000020214892 |          | 14559.2  | 0.15 | processed_pseudogene | 6  | 31243349  | 31243521  | ubiquitin specific peptidase 8 pseudogene 1                                                                       |
| 12774 | ENSG000002025564  |          | 14560.4  | 0.15 | processed_pseudogene | 11 | 12333589  | 12333589  | head shock 70kDa protein pseudogene 2                                                                             |
| 12790 | ENSG00000213568   |          | 14571.7  | 0.15 | processed_pseudogene | 5  | 13574581  | 13575543  | heterogeneous nuclear ribonucleoprotein A1 pseudogene 13                                                          |
| 12797 | ENSG000002029136  |          | 14578.6  | 0.15 | processed_pseudogene | 1  | 50964497  | 50965445  | high mobility group box 1 pseudogene 45                                                                           |
| 12830 | ENSG000002025933  |          | 14609    | 0.15 | processed_pseudogene | 18 | 39776497  | 39776114  | glyceroldehyde 3-phosphate dehydrogenase pseudogene 66                                                            |
| 12873 | ENSG000002025713  |          | 14637.1  | 0.15 | processed_pseudogene | 1  | 12101201  | 12101201  | LTV1 homolog 13, non-coding pseudogene 1                                                                          |
| 12979 | ENSG000002028443  |          | 14657.6  | 0.15 | processed_pseudogene | 1  | 120076372 | 120077369 | glyceroldehyde 3-phosphate dehydrogenase pseudogene 32                                                            |
| 12983 | ENSG000002026299  |          | 14670.5  | 0.15 | processed_pseudogene | 14 | 95116265  | 95116265  | ribosomal protein S4 pseudogene 4                                                                                 |
| 12947 | ENSG000002020184  |          | 14679.6  | 0.15 | processed_pseudogene | 14 | 120179343 | 120179343 | high mobility group box 3 pseudogene 18                                                                           |
| 12950 | ENSG00000253984   |          | 14680.1  | 0.15 | processed_pseudogene | 8  | 66256661  | 66256661  | ribosomal protein L31 pseudogene 40                                                                               |
| 12951 | ENSG00000264444   |          | 14681.1  | 0.15 | processed_pseudogene | 18 | 9653134   | 9653203   | succinate dehydrogenase complex, subunit C pseudogene 1                                                           |
| 12969 | ENSG00000264444   |          | 14682.6  | 0.15 | processed_pseudogene | 18 | 9653134   | 9653203   | cell division cycle 62 pseudogene 2                                                                               |
| 12977 | ENSG00000216582   |          | 14688.8  | 0.15 | processed_pseudogene | 6  | 24020252  | 24020258  | heterogeneous nuclear ribonucleoprotein A1 pseudogene 58                                                          |
| 13005 | ENSG000002026301  |          | 14717.4  | 0.15 | processed_pseudogene | 8  | 61268921  | 61268954  | phosducin-like 3 pseudogene 1                                                                                     |
| 13007 | ENSG00000196831   |          | 14717.4  | 0.15 | processed_pseudogene | 8  | 61268921  | 61268954  | actin, domain 1 pseudogene 1                                                                                      |
| 13082 | ENSG000002028712  |          | 14778.4  | 0.15 | processed_pseudogene | 15 | 22015703  | 22016791  | coxsackie virus and adenovirus receptor pseudogene 2                                                              |
| 13089 | ENSG000002028670  |          | 14779.5  | 0.15 | processed_pseudogene | 2  | 22331719  | 22331745  | Nanog homolog pseudogene 1                                                                                        |
| 13146 | ENSG000002029315  |          | 14827.1  | 0.15 | processed_pseudogene | 15 | 87612752  | 87612752  | ubiquitin-conjugating enzyme E2C family member 2 pseudogene 10                                                    |
| 13153 | ENSG00000215043   |          | 14828.2  | 0.15 | processed_pseudogene | 2  | 18494078  | 18494090  | glutamate-ammonia lyase (glutamine synthetase) pseudogene 6                                                       |
| 13157 | ENSG000002025963  |          |          |      |                      |    |           |           |                                                                                                                   |

|       |                 |             |       |      |                      |    |           |           |                                                                                |
|-------|-----------------|-------------|-------|------|----------------------|----|-----------|-----------|--------------------------------------------------------------------------------|
| 12278 | ENSG00000149856 | LINC02061-1 | 14182 | 0.15 | processed transcript | 20 | 62921738  | 62944485  | long intergenic non-protein coding RNA 266.1                                   |
| 12428 | ENSG00000160503 | LINC02033   | 18527 | 0.15 | processed transcript | 13 | 10632869  | 10632869  | long intergenic non-protein coding RNA 343                                     |
| 12428 | ENSG00000197558 |             | 15678 | 0.15 | processed transcript | 7  | 14947131  | 14953108  | SCC-spondin                                                                    |
| 1084  | ENSG00000117215 | PLAGL2D     | 1869  | 0.15 | protein_coding       | 1  | 20438432  | 20446050  | phosphoglucoase 2, group IID                                                   |
| 1392  | ENSG00000144470 | C12orf78    | 2318  | 0.15 | protein_coding       | 2  | 20784278  | 20784398  | carboxylesterase D                                                             |
| 2229  | ENSG00000156273 | GLY3AS2     | 3475  | 0.15 | protein_coding       | 3  | 52635488  | 52627487  | aminocyclitol synthase 2                                                       |
| 2579  | ENSG00000147377 | GSH         | 3997  | 0.15 | protein_coding       | 3  | 50843921  | 50845262  | cytidine indole SH2-containing protein                                         |
| 2661  | ENSG00000187664 | TM6SD2      | 4124  | 0.15 | protein_coding       | 19 | 4296229   | 4302428   | transmembrane and immunoglobulin domain containing 2                           |
| 2716  | ENSG00000193203 | S100A9      | 42138 | 0.15 | protein_coding       | 19 | 81303303  | 81303303  | S100 calcium protein 9B                                                        |
| 2747  | ENSG00000187483 | FAM120C     | 42713 | 0.15 | protein_coding       | 19 | 17684110  | 17684648  | family with sequence similarity 129, member C                                  |
| 2785  | ENSG00000189881 | C13orf7     | 4327  | 0.15 | protein_coding       | 11 | 88628780  | 88629355  | cathepsin C                                                                    |
| 2815  | ENSG00000193281 | PLD2C2      | 4378  | 0.15 | protein_coding       | 10 | 87249862  | 87249862  | phospholipase-like B1                                                          |
| 2858  | ENSG00000187871 | UBXN6       | 44538 | 0.15 | protein_coding       | 19 | 4448596   | 4447819   | UBX domain protein 6                                                           |
| 2875  | ENSG00000110203 | FOLK3       | 4498  | 0.15 | protein_coding       | 11 | 17182915  | 17182936  | folate receptor 3 (genomic)                                                    |
| 2910  | ENSG00000192629 | TCF7        | 45173 | 0.15 | protein_coding       | 12 | 92493995  | 92493995  | transmembrane and immunoglobulin domain containing 2                           |
| 2940  | ENSG00000204106 | HLA-DOB     | 45719 | 0.15 | protein_coding       | 6  | 32780549  | 32784625  | major histocompatibility complex, class II, DO beta                            |
| 3046  | ENSG00000112299 | VNN1        | 4758  | 0.15 | protein_coding       | 8  | 13302729  | 13303188  | vannin 1                                                                       |
| 3097  | ENSG00000195928 | QSOX1B3     | 4837  | 0.15 | protein_coding       | 13 | 9984784   | 9984969   | G protein-coupled receptor 183                                                 |
| 3147  | ENSG00000127528 | KLF2        | 4942  | 0.15 | protein_coding       | 19 | 16436528  | 16436885  | Kruppel-like factor 2                                                          |
| 3215  | ENSG00000111802 | TDPP        | 5042  | 0.15 | protein_coding       | 6  | 24650205  | 24657261  | tyrosyl-DNA phosphodiesterase 2                                                |
| 3217  | ENSG00000193231 | KOZD5       | 5267  | 0.15 | protein_coding       | Y  | 21867511  | 21869025  | lysine (K)-specific demethylase 5D                                             |
| 3319  | ENSG00000140280 | LYSMO2      | 5268  | 0.15 | protein_coding       | 15 | 52015208  | 52043782  | LysM, putative peptidoglycan-binding, domain containing 2                      |
| 3345  | ENSG00000112576 | CND3D       | 5288  | 0.15 | protein_coding       | 6  | 41902871  | 42018095  | cyrillin D3                                                                    |
| 3356  | ENSG00000121866 | CDCR4       | 52748 | 0.15 | protein_coding       | 2  | 138871819 | 138872135 | chemokine (C-C motif) receptor 4                                               |
| 3386  | ENSG00000242616 | GNIG10      | 53428 | 0.15 | protein_coding       | 9  | 114428515 | 114423258 | guanine nucleotide binding protein (G protein), gamma 10                       |
| 3472  | ENSG00000148984 | DDK3        | 5833  | 0.15 | protein_coding       | 5  | 17892898  | 17893875  | clacking protein 3                                                             |
| 3520  | ENSG00000191410 | SHBP1       | 5514  | 0.15 | protein_coding       | 16 | 41082757  | 41082765  | SH3BP1 binding protein 1                                                       |
| 3738  | ENSG00000162511 | LAPTM5      | 5856  | 0.15 | protein_coding       | 1  | 31205316  | 31206367  | lysosomal protein transmembrane 5                                              |
| 3787  | ENSG00000089127 | OAS1        | 5955  | 0.15 | protein_coding       | 12 | 11334482  | 11338990  | 2'-5'-oligoadenylate synthetase 1, 40kDaDa                                     |
| 3847  | ENSG00000191760 | ALKBH5      | 6058  | 0.15 | protein_coding       | 10 | 10566106  | 10566106  | aldehyde oxidase-like protein fold containing 1                                |
| 3872  | ENSG00000213145 | CRNP1       | 6092  | 0.15 | protein_coding       | 14 | 10556264  | 105565284 | cytosine-rich protein 1 (internal)                                             |
| 3887  | ENSG00000178115 | PACS1       | 6113  | 0.15 | protein_coding       | 11 | 68587384  | 68612218  | phosphofurin acidic cluster sorting protein 1                                  |
| 3928  | ENSG00000194028 | AKR2B10     | 6174  | 0.15 | protein_coding       | 10 | 8891374   | 8891374   | actin related protein 23, cytosolic, isoform 18, 11kDa                         |
| 3930  | ENSG00000199193 | CCDC128     | 6176  | 0.15 | protein_coding       | 7  | 2363696   | 23684327  | coiled-coil domain containing 128                                              |
| 3956  | ENSG00000202423 | CNEP1R1     | 6218  | 0.15 | protein_coding       | 16 | 50058321  | 50070999  | CTD nuclear envelope phosphatase 1 regulatory subunit 1                        |
| 3986  | ENSG00000195581 | SLMO1       | 6257  | 0.15 | protein_coding       | 53 | 3273268   | 3273268   | SLMO1                                                                          |
| 3990  | ENSG00000107201 | DDX58       | 6297  | 0.15 | protein_coding       | 9  | 32455306  | 32526322  | DEAD (Asp-Glu-Ala-Asp) box polypeptide 58                                      |
| 4023  | ENSG00000198733 | NMRK1       | 6297  | 0.15 | protein_coding       | 9  | 7767549   | 77703133  | nicotinamide riboside kinase 1                                                 |
| 4065  | ENSG00000191718 | ALKBH5      | 6348  | 0.15 | protein_coding       | 10 | 4868128   | 4868128   | aldehyde-like oxidase activating enzyme 7                                      |
| 4154  | ENSG00000119048 | UBE2B       | 6497  | 0.15 | protein_coding       | 5  | 13370870  | 13372683  | ubiquitin-conjugating enzyme E2B                                               |
| 4225  | ENSG00000089870 | LMT2        | 6558  | 0.15 | protein_coding       | 7  | 73813982  | 73844161  | linker for activation of T cells family, member 2                              |
| 4229  | ENSG00000195070 | HRCA1       | 6569  | 0.15 | protein_coding       | 9  | 8897186   | 8897186   | non-sulfur cluster member 1                                                    |
| 4238  | ENSG00000173442 | EHPBP1L1    | 6577  | 0.15 | protein_coding       | 11 | 69343009  | 69340121  | E1H domain binding protein 1-like 1                                            |
| 4338  | ENSG00000137865 | IFIT4       | 6774  | 0.15 | protein_coding       | 1  | 79115481  | 79129783  | interferon-induced protein 44                                                  |
| 4407  | ENSG00000116562 | LINA        | 6859  | 0.15 | protein_coding       | 12 | 8118629   | 81131704  | linA/ homolog A (C. elegans)                                                   |
| 4470  | ENSG00000145476 | CYP4V2      | 6938  | 0.15 | protein_coding       | 4  | 187112674 | 187114010 | cytochrome P450, family 4, subfamily V, polypeptide 2                          |
| 4478  | ENSG00000122643 | NTRC3A      | 7093  | 0.15 | protein_coding       | 7  | 33053742  | 33102408  | 5-nucleotide, cytosine link                                                    |
| 4500  | ENSG00000126422 | PRK2        | 7093  | 0.15 | protein_coding       | 14 | 68110600  | 68110600  | pleckstrin homology domain containing, family G (with SH2/SH3 domain) member 3 |
| 4531  | ENSG00000105287 | PRK2        | 7093  | 0.15 | protein_coding       | 19 | 47177532  | 47220384  | protein kinase D2                                                              |
| 4584  | ENSG00000122172 | MLK2        | 7094  | 0.15 | protein_coding       | 18 | 48465416  | 48414681  | mitotic enzyme 2, NAD(+)-dependent, mitochondrial                              |
| 4606  | ENSG00000189113 | P2Y12       | 7114  | 0.15 | protein_coding       | 18 | 151051610 | 151051610 | purinergic receptor P2Y, G-protein coupled, 12                                 |
| 4609  | ENSG00000134489 | HRH4        | 7115  | 0.15 | protein_coding       | 18 | 22040563  | 22059921  | histamine receptor H4                                                          |
| 4684  | ENSG00000123091 | RNF11       | 7162  | 0.15 | protein_coding       | 11 | 81701943  | 81718127  | ring finger protein 11                                                         |
| 4686  | ENSG00000117791 | RALBP1      | 7214  | 0.15 | protein_coding       | 11 | 84715017  | 84701442  | rac1 binding protein 1                                                         |
| 4715  | ENSG00000132156 | RAF1        | 7264  | 0.15 | protein_coding       | 3  | 12625100  | 12705725  | v-raf-1 murine leukemia viral oncogene homolog 1                               |
| 4730  | ENSG00000149269 | PRK1        | 7314  | 0.15 | protein_coding       | 11 | 10703752  | 10718880  | p21 protein (Cdk2/Rac)-activated kinase 1                                      |
| 4838  | ENSG00000195288 | PRK2        | 7315  | 0.15 | protein_coding       | 20 | 20195188  | 20195188  | protein domain containing 2                                                    |
| 4817  | ENSG00000152291 | TGOLN2      | 7512  | 0.15 | protein_coding       | 2  | 85545147  | 8555548   | trans-golgi network protein 2                                                  |
| 4822  | ENSG00000198185 | ENTPD1      | 7515  | 0.15 | protein_coding       | 10 | 87411536  | 87493723  | ectonucleoside triphosphate diphosphohydrolase 1                               |
| 4826  | ENSG00000193527 | TMEM17      | 7564  | 0.15 | protein_coding       | 10 | 8443164   | 8443164   | zinc finger protein 117                                                        |
| 4846  | ENSG00000148802 | TMEM188     | 7585  | 0.15 | protein_coding       | 7  | 112402437 | 112403847 | transmembrane protein 188                                                      |
| 4956  | ENSG00000131504 | DIAPH1      | 7592  | 0.15 | protein_coding       | 5  | 14089483  | 14098822  | diaphanous-related form 1                                                      |
| 4959  | ENSG00000112291 | SHBP1       | 7592  | 0.15 | protein_coding       | 16 | 41082757  | 41082765  | about 18, melanoma 1                                                           |
| 4978  | ENSG00000115525 | STGAL5      | 7626  | 0.15 | protein_coding       | 2  | 8606267   | 8611617   | ST3 beta-galactoside alpha-2,3-sialyltransferase 5                             |
| 4889  | ENSG00000127884 | NDC1        | 7649  | 0.15 | protein_coding       | 16 | 15737124  | 15802010  | nucl1, neurodevelopmental protein 1                                            |
| 5167  | ENSG00000137463 | TMEM17      | 7649  | 0.15 | protein_coding       | 17 | 81712052  | 81712052  | phospholipase C, gamma 12 (phosphoinositide-specific)                          |
| 5167  | ENSG00000138709 | KIA0513     | 7848  | 0.15 | protein_coding       | 16 | 85061375  | 85127836  | KIA0513                                                                        |
| 5167  | ENSG00000110422 | HMLC3       | 7853  | 0.15 | protein_coding       | 11 | 33278218  | 33278669  | homeodomain containing protein kinase 3                                        |
| 5208  | ENSG00000191708 | HRH4        | 7853  | 0.15 | protein_coding       | 18 | 20238186  | 20238186  | histamine receptor H4                                                          |
| 5304  | ENSG00000132256 | TRIM5       | 8105  | 0.15 | protein_coding       | 11 | 5884425   | 5885849   | tripeptide motif containing 5                                                  |
| 5422  | ENSG00000173354 | PTPNS2      | 8122  | 0.15 | protein_coding       | 18 | 12756477  | 12929442  | protein tyrosine phosphatase, non-receptor type 2                              |
| 5424  | ENSG00000191475 | ALKBH5      | 8123  | 0.15 | protein_coding       | 12 | 4868128   | 4868128   | selectin P (genus), membrane protein 10kDa, isoform (CD63)                     |
| 5492  | ENSG00000168538 | TRAPP1C1    | 8211  | 0.15 | protein_coding       | 4  | 18458420  | 18463475  | trafficking protein particle complex 11                                        |
| 5512  | ENSG00000198893 | ZNF338      | 8247  | 0.15 | protein_coding       | 10 | 43084555  | 43133992  | zinc finger protein 338                                                        |
| 5512  | ENSG00000198893 | ALKBH5      | 8247  | 0.15 | protein_coding       | 10 | 4868128   | 4868128   | aldehyde oxidase 5, cytosolic                                                  |
| 5524  | ENSG00000145876 | PKR3        | 8261  | 0.15 | protein_coding       | 5  | 67511548  | 6759749   | phosphoinositide 3-kinase, regulatory subunit 1 (alpha)                        |
| 5533  | ENSG00000186822 | TMEM70A     | 8287  | 0.15 | protein_coding       | 16 | 75478952  | 75484995  | transmembrane protein 70A                                                      |
| 5533  | ENSG00000190871 | PKR3        | 8287  | 0.15 | protein_coding       | 13 | 12558701  | 12558701  | inhibitor of inositol 3-kinase                                                 |
| 5630  | ENSG00000104343 | UBE2W       | 8388  | 0.15 | protein_coding       | 8  | 7495232   | 74791145  | ubiquitin-conjugating enzyme E2W (putative)                                    |
| 5684  | ENSG00000173736 | GTF2H2      | 8427  | 0.15 | protein_coding       | 8  | 70380784  | 703805316 | general transcription factor IIB, polypeptide 2, 44kDa                         |
| 5688  | ENSG00000191748 | SHBP1       | 8427  | 0.15 | protein_coding       | 11 | 41101269  | 41101269  | SH3 and double zinc finger domain 1                                            |
| 5692  | ENSG00000127483 | HP1BP3      | 8442  | 0.15 | protein_coding       | 1  | 21089154  | 21113816  | heterochromatin protein 1, binding protein 3                                   |
| 5723  | ENSG00000136599 | VILL        | 8492  | 0.15 | protein_coding       | 3  | 38029550  | 38049679  | villin-like                                                                    |
| 5752  | ENSG00000145173 | RNF11       | 8521  | 0.15 | protein_coding       | 11 | 81701943  | 81718127  | RAS p21 protein activator (GTPase activating protein) 1                        |
| 5835  | ENSG00000130313 | YORK1A1     | 8524  | 0.15 | protein_coding       | 5  | 86565177  | 86571000  | type A, interacting protein 1                                                  |
| 5867  | ENSG00000112685 | EXOC2       | 8625  | 0.15 | protein_coding       | 6  | 4851133   | 4851133   | exocyst complex component 2                                                    |
| 5887  | ENSG00000195889 | POMT2       | 8625  | 0.15 | protein_coding       | 20 | 20804704  | 20804704  | protein L-isoaspartyl (D-aspartyl) O-methyltransferase domain containing 2     |
| 5914  | ENSG00000127760 | RAB43       | 8625  | 0.15 | protein_coding       | 12 | 12888412  | 12884164  | RAB43, Rab GTPase, RAS oncogene family                                         |
| 5914  | ENSG00000201920 | RNA5E3      | 8693  | 0.15 | protein_coding       | 17 | 6918756   | 6917881   | ribonuclease, RNaseK                                                           |
| 5955  | ENSG00000196422 | ZBTB11      | 8735  | 0.15 | protein_coding       | 3  | 10181733  | 10139635  | zinc finger and BTB domain containing 11                                       |
| 6011  | ENSG00000189881 | ZNF338      | 8765  | 0.15 | protein_coding       | 10 | 43084555  | 43133992  | structural maintenance of chromosomes 5                                        |
| 6032  | ENSG00000193919 | ZFYVE16     | 8821  | 0.15 | protein_coding       | 5  | 7970382   | 7975169   | zinc finger, FYVE domain containing 16                                         |
| 6038  | ENSG00000194847 | ZCWPY1      | 8838  | 0.15 | protein_coding       | 17 | 8989489   | 10026015  | zinc finger, LW type with PWYW domain 1                                        |
| 6060  | ENSG00000134470 | PNISR       | 8850  | 0.15 | protein_coding       | 1  | 5986155   | 5986155   | interleukin 13 receptor, alpha                                                 |
| 6100  | ENSG00000134244 | PNISR       | 8850  | 0.15 | protein_coding       | 6  | 9884527   | 98879207  | PNK interacting protein/arginine-rich protein                                  |
| 6100  | ENSG00000194889 | TNFRSF10A   | 8879  | 0.15 | protein_coding       | 8  | 23047965  | 23062690  | tumor necrosis factor receptor superfamily member 10a                          |
| 6106  | ENSG00000119490 | PLSR4       | 8914  |      |                      |    |           |           |                                                                                |

|       |                  |              |       |    |      |                |    |           |           |                                                                     |
|-------|------------------|--------------|-------|----|------|----------------|----|-----------|-----------|---------------------------------------------------------------------|
| 12831 | ENSG00000157093  | LY2L4        | 14605 | 2  | 0.15 | protein_coding | 3  | 4243870   | 42432092  | lysosome like 4                                                     |
| 12832 | ENSG00000203999  | ORX21        | 14633 | 8  | 0.15 | protein_coding | 7  | 14396150  | 14399215  | cytolysin receptor family 2, subfamily A, member 7                  |
| 12870 | ENSG00000178309  | TRIM73       | 14634 | 2  | 0.15 | protein_coding | 7  | 75024337  | 75020279  | liparic acid methyltransferase 73                                   |
| 12878 | ENSG000002021995 | TRAF1        | 14639 | 5  | 0.15 | protein_coding | 17 | 27400537  | 27418937  | TGF-beta induced anti-apoptotic factor 1                            |
| 15268 | ENSG00000273331  | TNFRSF18     | 14667 | 8  | 0.15 | protein_coding | 3  | 196042963 | 19605244  | Transmembrane 4, LG family member 19                                |
| 19965 | ENSG00000186446  | MTRNR1B      | 14668 | 4  | 0.15 | protein_coding | 8  | 92712986  | 92718232  | transmembrane receptor 18                                           |
| 12962 | ENSG00000181499  | ORBT1        | 14702 | 8  | 0.15 | protein_coding | 11 | 123813492 | 123814880 | cytolysin receptor, family 6, subfamily T, member 1                 |
| 12966 | ENSG00000186537  | PLAC8AD      | 14705 | 7  | 0.15 | protein_coding | 15 | 62392607  | 62396752  | phospholipase A2, group VD (cytosolic)                              |
| 12968 | ENSG00000182388  | FAM719B      | 14716 | 1  | 0.15 | protein_coding | 10 | 50381976  | 50381983  | family with sequence similarity 170, member 8                       |
| 13008 | ENSG00000185640  | KRT17B       | 14718 | 7  | 0.15 | protein_coding | 12 | 53215184  | 53228079  | keratin 7b                                                          |
| 15014 | ENSG00000186011  | STAB2        | 14725 | 5  | 0.15 | protein_coding | 12 | 103981051 | 104108095 | stabilin 2                                                          |
| 13009 | ENSG00000200459  | KRT16J       | 14728 | 1  | 0.15 | protein_coding | 12 | 39143867  | 39143867  | keratin 16j                                                         |
| 13085 | ENSG00000085515  | GSC2         | 14777 | 8  | 0.15 | protein_coding | 22 | 19136089  | 19137796  | pospocoid homeobox 2                                                |
| 13103 | ENSG000001860748 | AGBL1        | 14788 | 4  | 0.15 | protein_coding | 15 | 86885227  | 87512283  | ATP1G1P binding protein-like 1                                      |
| 13138 | ENSG00000186074  | AGBL1        | 14833 | 4  | 0.15 | protein_coding | 15 | 90485159  | 92019569  | membrane-spanning domain protein A, member 18                       |
| 13148 | ENSG00000175544  | CAMP4        | 14825 | 3  | 0.15 | protein_coding | 11 | 67219877  | 67226699  | calcium binding protein 4                                           |
| 13155 | ENSG00000155269  | GPR17B       | 14829 | 8  | 0.15 | protein_coding | 4  | 8564542   | 8621486   | G protein-coupled receptor 7b                                       |
| 13162 | ENSG000002024471 | CTPFD2       | 14832 | 5  | 0.15 | protein_coding | 4  | 66814526  | 66817132  | HC02003977, Uncharacterized protein                                 |
| 13252 | ENSG000002070299 | LOC100500991 | 14916 | 5  | 0.15 | protein_coding | 20 | 6622720   | 66444     | Uncharacterized protein                                             |
| 13310 | ENSG00000175420  | CACNG5       | 14957 | 5  | 0.15 | protein_coding | 17 | 64811235  | 64811603  | calcium channel, voltage-dependent, gamma subunit 5                 |
| 13483 | ENSG00000165020  | CTPFD2       | 15027 | 2  | 0.15 | protein_coding | 7  | 50135632  | 50136458  | chromosome 1 open reading frame 12                                  |
| 13537 | ENSG00000138160  | METTL20      | 15128 | 2  | 0.15 | protein_coding | 12 | 31800094  | 31826048  | methyltransferase like 20                                           |
| 13663 | ENSG00000187527  | ATP13A5      | 15144 | 3  | 0.15 | protein_coding | 3  | 19292679  | 19309632  | ATPase type 13A5                                                    |
| 13668 | ENSG00000110338  | OSRN1        | 15168 | 5  | 0.15 | protein_coding | 8  | 154311631 | 154568001 | osain receptor, mu 1                                                |
| 13660 | ENSG00000138038  | LHCGR        | 15169 | 7  | 0.15 | protein_coding | 2  | 4885428   | 4886280   | luteinizing hormone-releasing hormone receptor                      |
| 13652 | ENSG00000149292  | TTIC2        | 15217 | 1  | 0.15 | protein_coding | 11 | 13185251  | 13125458  | heparan sulfate repeat domain 12                                    |
| 13655 | ENSG00000200233  | LOC100500991 | 15218 | 5  | 0.15 | protein_coding | 2  | 3255421   | 3255421   | HC01817310, Uncharacterized protein                                 |
| 13657 | ENSG00000183090  | FREM3        | 15220 | 4  | 0.15 | protein_coding | 4  | 14448455  | 14448128  | FRAS1 related extracellular matrix 3                                |
| 13666 | ENSG00000186412  | MTRNR1A      | 15226 | 5  | 0.15 | protein_coding | 4  | 18748489  | 18747621  | metastin receptor 1A                                                |
| 13668 | ENSG00000200262  | ANDOR8A      | 15230 | 5  | 0.15 | protein_coding | 5  | 48717243  | 48717243  | signal recognition domain 66                                        |
| 13735 | ENSG00000272869  | LOC100500991 | 15280 | 3  | 0.15 | protein_coding | 5  | 11218685  | 11222876  | Signal recognition particle 19 kDa protein                          |
| 13798 | ENSG00000197037  | ZSCAN25      | 15290 | 1  | 0.15 | protein_coding | 7  | 89214569  | 89220309  | zinc finger protein containing 25                                   |
| 13770 | ENSG00000125558  | LHFR1L       | 15293 | 3  | 0.15 | protein_coding | 11 | 11181378  | 111923378 | lipoma HMGIC fusion partner-like 1                                  |
| 13839 | ENSG00000188501  | LCTL         | 15348 | 4  | 0.15 | protein_coding | 15 | 66839517  | 66858317  | lactase-like 1                                                      |
| 13844 | ENSG00000178795  | GDPD4        | 15353 | 7  | 0.15 | protein_coding | 11 | 76927603  | 77012732  | glycerophosphodiester phosphodiesterase domain containing 4         |
| 13847 | ENSG00000125838  | ORX1         | 15353 | 8  | 0.15 | protein_coding | 18 | 325618    | 325618    | cytolysin receptor, family 1, subfamily F, member 1                 |
| 13859 | ENSG00000135973  | GPR45        | 15366 | 1  | 0.15 | protein_coding | 2  | 10558200  | 10559224  | G protein-coupled receptor 45                                       |
| 13863 | ENSG00000100191  | SLOC5A       | 15369 | 1  | 0.15 | protein_coding | 28 | 1261465   | 12615328  | soluble carrier family 5 (glucose activated ion channel), member 4  |
| 13928 | ENSG00000200579  | LOC100500991 | 15418 | 5  | 0.15 | protein_coding | 8  | 8748      | 8748      | Uncharacterized protein                                             |
| 13970 | ENSG000002024963 | LOC100500991 | 15449 | 2  | 0.15 | protein_coding | X  | 152751314 | 152751314 | LOC100500991                                                        |
| 13990 | ENSG00000121904  | CSMD2        | 15483 | 9  | 0.15 | protein_coding | 1  | 3397909   | 3481343   | CLUB and Siah multiple domains 2                                    |
| 14003 | ENSG00000200479  | FOXC15       | 15493 | 3  | 0.15 | protein_coding | 1  | 7013615   | 7013615   | forkhead box O4 like 5                                              |
| 14160 | ENSG00000174453  | VWICL        | 15587 | 2  | 0.15 | protein_coding | 2  | 215275789 | 21543383  | von Willebrand factor C domain containing protein 2-like            |
| 14179 | ENSG000002005863 | C10orf98     | 15601 | 6  | 0.15 | protein_coding | 13 | 24465238  | 24476794  | C1q and tumor necrosis factor related protein 98                    |
| 14208 | ENSG00000186650  | ODF4         | 15628 | 8  | 0.15 | protein_coding | 17 | 6841624   | 6841624   | outer dense fiber of sperm flagellum                                |
| 14212 | ENSG000002025910 | LOC100500991 | 15628 | 5  | 0.15 | protein_coding | 2  | 11818484  | 11818484  | chromosome 17 open reading frame 167                                |
| 14268 | ENSG00000183273  | CDC50        | 15671 | 1  | 0.15 | protein_coding | 12 | 119727125 | 11978852  | collet-coiled coil domain containing 50                             |
| 14301 | ENSG00000186349  | LCT          | 15678 | 6  | 0.15 | protein_coding | 2  | 138413288 | 138418378 | lipocalin 1                                                         |
| 14402 | ENSG00000202921  | ADORA2A      | 15776 | 4  | 0.15 | protein_coding | 22 | 24813847  | 24818378  | adenosine A2a receptor                                              |
| 14447 | ENSG00000183873  | DLX3         | 15815 | 3  | 0.15 | protein_coding | 3  | 36733913  | 36781352  | doubtful-like kinase 3                                              |
| 14458 | ENSG0000017599   | ZNF491       | 15824 | 4  | 0.15 | protein_coding | 19 | 1196362   | 1196362   | zinc finger protein 491                                             |
| 14464 | ENSG00000174221  | HYDN         | 15824 | 4  | 0.15 | protein_coding | X  | 70841281  | 71044429  | HYDN, anterior neural plate apparatus protein                       |
| 14489 | ENSG00000086159  | AGP8         | 15846 | 6  | 0.15 | protein_coding | 12 | 50360977  | 50370222  | agouti 8, kidney specific                                           |
| 14501 | ENSG00000152292  | SH2D6        | 15856 | 2  | 0.15 | protein_coding | 2  | 8945844   | 8946152   | SH2 domain containing 6                                             |
| 14508 | ENSG00000181189  | ZNF446       | 15859 | 1  | 0.15 | protein_coding | 19 | 4945219   | 4945219   | zinc finger protein 546                                             |
| 14531 | ENSG00000200208  | LOC100500991 | 15881 | 2  | 0.15 | protein_coding | 3  | 49841278  | 49841278  | Uncharacterized protein                                             |
| 14601 | ENSG00000182447  | OTDL1        | 15953 | 6  | 0.15 | protein_coding | 3  | 161214596 | 16122130  | otolith 1                                                           |
| 14604 | ENSG00000202749  | ZNF496       | 15955 | 2  | 0.15 | protein_coding | 17 | 1086826   | 107188698 | Uncharacterized protein                                             |
| 14638 | ENSG000002027124 | ZNF711       | 15981 | 5  | 0.15 | protein_coding | 3  | 75788734  | 7584734   | zinc finger protein 717                                             |
| 14660 | ENSG00000151164  | RAD9B        | 15978 | 1  | 0.15 | protein_coding | 12 | 11098840  | 11098891  | RAD9 homolog B (S. pombe)                                           |
| 14706 | ENSG00000202038  | PATL4        | 15983 | 3  | 0.15 | protein_coding | 11 | 15431261  | 15431261  | proline and basic acid phosphatase 4                                |
| 14810 | ENSG00000187604  | PTHR1        | 16083 | 3  | 0.15 | protein_coding | 9  | 13045267  | 13048152  | parathyroid hormone-related protein 1 (non-pseudogene)              |
| 14818 | ENSG00000130977  | POLN         | 16097 | 8  | 0.15 | protein_coding | 4  | 3245096   | 3243448   | polynucleotide phosphorylase (DNA directed) nu                      |
| 14900 | ENSG00000188183  | TRAP2        | 16120 | 4  | 0.15 | protein_coding | 5  | 20461448  | 20461448  | transcription factor AP-2, epsilon (transcription factor 2 epsilon) |
| 15112 | ENSG00000184507  | NUTM1        | 16335 | 1  | 0.15 | protein_coding | 15 | 3463516   | 34649938  | NUT midline carcinoma, family member 1                              |
| 15177 | ENSG00000188981  | MINT1        | 16637 | 4  | 0.15 | protein_coding | 4  | 3245096   | 3273405   | MyoSAM-like DNA-binding domain containing 1                         |
| 15212 | ENSG00000200290  | LOC100500991 | 16637 | 2  | 0.15 | protein_coding | 4  | 20461448  | 20461448  | RNA, 5S ribosomal pseudogene 25                                     |
| 5675  | ENSG000002050170 | LOC100500991 | 8440  | 3  | 0.15 | sense_intronic | 3  | 141243975 | 141244963 | RASA2 intronic transcript 1 (non-pseudogene)                        |
| 11297 | ENSG00000205196  | LOC100500991 | 13355 | 5  | 0.15 | sense_intronic | 8  | 28801193  | 28813472  | HMBD1 intronic transcript 1 (non-pseudogene)                        |
| 14068 | ENSG00000200296  | LOC100500991 | 15203 | 3  | 0.15 | sense_intronic | 8  | 48483328  | 48483328  | RNDA intronic transcript 1 (non-pseudogene)                         |
| 15261 | ENSG00000203756  | DSCAM1T1     | 15653 | 2  | 0.15 | sense_intronic | 21 | 41987304  | 42002083  | DSCAM intronic transcript 1 (non-pseudogene)                        |
| 14348 | ENSG00000202474  | LOC100500991 | 15653 | 2  | 0.15 | sense_intronic | 2  | 134189227 | 134191488 | NCKAP5 intronic transcript 1 (non-pseudogene)                       |
| 14908 | ENSG00000186039  | ZNF498A      | 15658 | 1  | 0.15 | sense_intronic | 11 | 1229518   | 1229518   | Small nuclear RNA L13                                               |
| 7060  | ENSG00000122979  | LOC100500991 | 88257 | 2  | 0.15 | sense_intronic | 15 | 25307450  | 25307454  | Small nuclear RNA SNORD77                                           |
| 10036 | ENSG000002027410 | LOC100500991 | 12374 | 8  | 0.15 | sense_intronic | 17 | 86267985  | 86267723  | Small nuclear RNA SNORA8                                            |
| 10778 | ENSG00000186163  | ZNF498B      | 12368 | 1  | 0.15 | sense_intronic | 17 | 17888688  | 17888688  | Small nuclear RNA SNORA8B                                           |
| 10881 | ENSG000002027091 | SNORD116-5   | 15048 | 1  | 0.15 | sense_intronic | 15 | 25307450  | 25307454  | Small nuclear RNA, C/D box 116-5                                    |
| 11287 | ENSG000002021378 | LOC100500991 | 13386 | 1  | 0.15 | sense_intronic | 14 | 51710808  | 51710942  | Small nuclear RNA SNORA70                                           |
| 10888 | ENSG00000186488  | ZNF499       | 14493 | 3  | 0.15 | sense_intronic | 22 | 4243268   | 4243268   | Small nuclear RNA U13                                               |
| 13189 | ENSG00000201348  | LOC100500991 | 14856 | 6  | 0.15 | sense_intronic | 20 | 3368768   | 3368768   | Small nuclear RNA U5                                                |
| 13850 | ENSG000002024037 | LOC100500991 | 15360 | 5  | 0.15 | sense_intronic | X  | 24151303  | 24151334  | Small nuclear RNA SNORA68                                           |
| 1515  | ENSG00000201722  | TRAP2        | 7812  | 4  | 0.15 | sense_intronic | 4  | 4887173   | 4887173   | RNA, U5 small nuclear 3, pseudogene                                 |
| 6241  | ENSG00000202325  | LOC100500991 | 9016  | 8  | 0.15 | sense_intronic | 4  | 119527625 | 119527708 | RNA, U5 small nuclear 1054, pseudogene                              |
| 6537  | ENSG000002027451 | LOC100500991 | 9337  | 7  | 0.15 | sense_intronic | 1  | 11286311  | 11286311  | RNA, U5 small nuclear 291, pseudogene                               |
| 6397  | ENSG00000202627  | LOC100500991 | 11048 | 8  | 0.15 | sense_intronic | X  | 12306309  | 12306314  | RNA, U5 small nuclear 122, pseudogene                               |
| 8430  | ENSG00000201762  | LOC100500991 | 11356 | 6  | 0.15 | sense_intronic | 16 | 64981362  | 64981368  | RNA, U5 small nuclear 345, pseudogene                               |
| 8629  | ENSG000002022932 | LOC100500991 | 11487 | 8  | 0.15 | sense_intronic | 12 | 102190188 | 102190280 | RNA, U5 small nuclear 172, pseudogene                               |
| 8965  | ENSG00000201390  | LOC100500991 | 11550 | 4  | 0.15 | sense_intronic | 10 | 2195094   | 2195097   | RNA, U5 small nuclear 1141, pseudogene                              |
| 9502  | ENSG00000202044  | LOC100500991 | 11924 | 1  | 0.15 | sense_intronic | 16 | 82920265  | 82920265  | RNA, U5 small nuclear 180, pseudogene                               |
| 10185 | ENSG00000202499  | RN18B-6P     | 12493 | 13 | 0.15 | sense_intronic | 13 | 8062275   |           |                                                                     |

|       |                 |          |         |      |    |          |          |  |                                     |
|-------|-----------------|----------|---------|------|----|----------|----------|--|-------------------------------------|
| 2881  | ENSG00000187230 | C17orf78 | 4155.5  | 0.15 | 17 | 35732928 | 35749662 |  | chromosome 17 open reading frame 78 |
| 3302  | ENSG00000202497 |          | 4169.2  | 0.15 |    |          |          |  |                                     |
| 3398  | ENSG00000202855 |          | 5357.8  | 0.15 |    |          |          |  |                                     |
| 3839  | ENSG00000202152 |          | 6038.5  | 0.15 |    |          |          |  |                                     |
| 4361  | ENSG00000202413 |          | 6776.3  | 0.15 |    |          |          |  |                                     |
| 4860  | ENSG00000202633 |          | 7475.3  | 0.15 |    |          |          |  |                                     |
| 5221  | ENSG00000202589 |          | 7920.7  | 0.15 |    |          |          |  |                                     |
| 5406  | ENSG00000202496 |          | 8207.8  | 0.15 |    |          |          |  |                                     |
| 5543  | ENSG00000189811 |          | 8277.8  | 0.15 |    |          |          |  |                                     |
| 5801  | ENSG00000202490 |          | 8570.3  | 0.15 |    |          |          |  |                                     |
| 6083  | ENSG00000202499 |          | 8642.4  | 0.15 |    |          |          |  |                                     |
| 6380  | ENSG00000202826 |          | 9140.5  | 0.15 |    |          |          |  |                                     |
| 6485  | ENSG00000204128 |          | 9295.5  | 0.15 |    |          |          |  |                                     |
| 6751  | ENSG00000271141 |          | 9530.2  | 0.15 |    |          |          |  |                                     |
| 7024  | ENSG00000202144 |          | 9758.8  | 0.15 |    |          |          |  |                                     |
| 7145  | ENSG00000202693 |          | 9897.5  | 0.15 |    |          |          |  |                                     |
| 7414  | ENSG00000202111 |          | 10153   | 0.15 |    |          |          |  |                                     |
| 7450  | ENSG00000204437 |          | 10193.9 | 0.15 |    |          |          |  |                                     |
| 7591  | ENSG00000202592 |          | 10336.5 | 0.15 |    |          |          |  |                                     |
| 7796  | ENSG00000202495 |          | 10518.5 | 0.15 |    |          |          |  |                                     |
| 8020  | ENSG00000202194 |          | 10727.7 | 0.15 |    |          |          |  |                                     |
| 8090  | ENSG00000202499 |          | 10783   | 0.15 |    |          |          |  |                                     |
| 8104  | ENSG00000202499 |          | 10792.9 | 0.15 |    |          |          |  |                                     |
| 8156  | ENSG00000204155 |          | 10850.1 | 0.15 |    |          |          |  |                                     |
| 8159  | ENSG00000202847 |          | 10850.9 | 0.15 |    |          |          |  |                                     |
| 8180  | ENSG00000202693 |          | 10851.4 | 0.15 |    |          |          |  |                                     |
| 8345  | ENSG00000202729 |          | 11001.9 | 0.15 |    |          |          |  |                                     |
| 8634  | ENSG00000204049 |          | 11242.2 | 0.15 |    |          |          |  |                                     |
| 8753  | ENSG00000202801 |          | 11338.1 | 0.15 |    |          |          |  |                                     |
| 8808  | ENSG00000202137 |          | 11386.9 | 0.15 | 22 | 18124172 | 18124285 |  | Small nuclear RNA U13               |
| 8949  | ENSG00000271032 |          | 11504.1 | 0.15 |    |          |          |  |                                     |
| 8964  | ENSG00000202134 |          | 11520.2 | 0.15 |    |          |          |  |                                     |
| 9046  | ENSG00000202193 |          | 11586.9 | 0.15 |    |          |          |  |                                     |
| 9179  | ENSG00000202793 |          | 11689.4 | 0.15 |    |          |          |  |                                     |
| 9219  | ENSG00000273018 |          | 11724.3 | 0.15 |    |          |          |  |                                     |
| 9257  | ENSG00000202652 |          | 11833.9 | 0.15 |    |          |          |  |                                     |
| 9417  | ENSG00000202919 |          | 11874.3 | 0.15 |    |          |          |  |                                     |
| 9548  | ENSG00000202300 |          | 11993.2 | 0.15 |    |          |          |  |                                     |
| 9608  | ENSG00000202161 |          | 12038.4 | 0.15 |    |          |          |  |                                     |
| 9825  | ENSG00000202504 |          | 12216.5 | 0.15 |    |          |          |  |                                     |
| 9833  | ENSG00000202804 |          | 12221.3 | 0.15 |    |          |          |  |                                     |
| 9940  | ENSG00000202699 |          | 12229   | 0.15 |    |          |          |  |                                     |
| 9948  | ENSG00000218422 |          | 12301.3 | 0.15 |    |          |          |  |                                     |
| 9958  | ENSG00000202970 |          | 12307.6 | 0.15 |    |          |          |  |                                     |
| 9988  | ENSG00000202318 |          | 12445.2 | 0.15 |    |          |          |  |                                     |
| 10013 | ENSG00000202464 |          | 12558.1 | 0.15 |    |          |          |  |                                     |
| 10140 | ENSG00000202701 |          | 12455.8 | 0.15 |    |          |          |  |                                     |
| 10159 | ENSG00000202640 |          | 12472   | 0.15 |    |          |          |  |                                     |
| 10164 | ENSG00000202012 |          | 12477.6 | 0.15 |    |          |          |  |                                     |
| 10170 | ENSG00000202746 |          | 12479.6 | 0.15 |    |          |          |  |                                     |
| 10206 | ENSG00000213976 |          | 12508   | 0.15 |    |          |          |  |                                     |
| 10371 | ENSG00000219698 |          | 12626.1 | 0.15 |    |          |          |  |                                     |
| 10373 | ENSG00000202322 |          | 12628.6 | 0.15 |    |          |          |  |                                     |
| 10420 | ENSG00000202819 |          | 12696   | 0.15 |    |          |          |  |                                     |
| 10597 | ENSG00000202042 |          | 12804.3 | 0.15 |    |          |          |  |                                     |
| 10628 | ENSG00000271927 |          | 12829.2 | 0.15 |    |          |          |  |                                     |
| 10722 | ENSG00000202109 |          | 12917.6 | 0.15 |    |          |          |  |                                     |
| 10748 | ENSG00000202804 |          | 12940.3 | 0.15 |    |          |          |  |                                     |
| 10749 | ENSG00000202027 |          | 12940.4 | 0.15 |    |          |          |  |                                     |
| 10793 | ENSG00000202907 |          | 12985.1 | 0.15 |    |          |          |  |                                     |
| 10912 | ENSG00000202783 |          | 13090.7 | 0.15 |    |          |          |  |                                     |
| 10954 | ENSG00000202716 |          | 13116.1 | 0.15 |    |          |          |  |                                     |
| 11031 | ENSG00000202131 |          | 13168.4 | 0.15 |    |          |          |  |                                     |
| 11067 | ENSG00000202429 |          | 13196.2 | 0.15 |    |          |          |  |                                     |
| 11207 | ENSG00000202973 |          | 13305.8 | 0.15 |    |          |          |  |                                     |
| 11220 | ENSG00000202391 |          | 13330.5 | 0.15 |    |          |          |  |                                     |
| 11301 | ENSG00000202429 |          | 13401   | 0.15 |    |          |          |  |                                     |
| 11324 | ENSG00000202628 |          | 13414.2 | 0.15 |    |          |          |  |                                     |
| 11327 | ENSG00000202971 |          | 13419.9 | 0.15 |    |          |          |  |                                     |
| 11378 | ENSG00000202716 |          | 13465.8 | 0.15 |    |          |          |  |                                     |
| 11440 | ENSG00000202948 |          | 13520.9 | 0.15 |    |          |          |  |                                     |
| 11465 | ENSG00000202782 |          | 13550.2 | 0.15 |    |          |          |  |                                     |
| 11513 | ENSG00000202688 |          | 13587.6 | 0.15 |    |          |          |  |                                     |
| 11574 | ENSG00000202412 |          | 13636.7 | 0.15 |    |          |          |  |                                     |
| 11609 | ENSG00000202737 |          | 13685.5 | 0.15 |    |          |          |  |                                     |
| 11632 | ENSG00000202588 |          | 13682.1 | 0.15 |    |          |          |  |                                     |
| 11649 | ENSG00000202822 |          | 13696.7 | 0.15 |    |          |          |  |                                     |
| 11652 | ENSG00000202145 |          | 13701.2 | 0.15 |    |          |          |  |                                     |
| 11691 | ENSG00000202029 |          | 13737.5 | 0.15 |    |          |          |  |                                     |
| 11697 | ENSG00000202749 |          | 13741.8 | 0.15 |    |          |          |  |                                     |
| 11720 | ENSG00000202728 |          | 13796.3 | 0.15 |    |          |          |  |                                     |
| 11729 | ENSG00000202029 |          | 13771.4 | 0.15 |    |          |          |  |                                     |
| 11812 | ENSG00000204339 |          | 13834.4 | 0.15 |    |          |          |  |                                     |
| 11887 | ENSG00000202047 |          | 13901.2 | 0.15 | 14 | 23286463 | 23291750 |  | Uncharacterized protein             |
| 11888 | ENSG00000215306 |          | 13909.2 | 0.15 |    |          |          |  |                                     |
| 11926 | ENSG00000202126 |          | 13927.9 | 0.15 |    |          |          |  |                                     |
| 11962 | ENSG00000202782 |          | 13953   | 0.15 |    |          |          |  |                                     |
| 11970 | ENSG00000202180 |          | 13958.9 | 0.15 |    |          |          |  |                                     |
| 11971 | ENSG00000202426 |          | 13976   | 0.15 |    |          |          |  |                                     |
| 12008 | ENSG00000204173 |          | 13984.4 | 0.15 | 12 | 57621757 | 57621860 |  | Y RNA                               |
| 12016 | ENSG00000202691 |          | 13990.4 | 0.15 |    |          |          |  |                                     |
| 12016 | ENSG00000202691 |          | 13990.4 | 0.15 |    |          |          |  |                                     |
| 12028 | ENSG00000202526 |          | 14002.6 | 0.15 |    |          |          |  |                                     |
| 12042 | ENSG00000202241 |          | 14015.7 | 0.15 |    |          |          |  |                                     |
| 12053 | ENSG00000202522 |          | 14019.9 | 0.15 |    |          |          |  |                                     |
| 12062 | ENSG00000202637 |          | 14029   | 0.15 |    |          |          |  |                                     |
| 12106 | ENSG00000202031 |          | 14059.3 | 0.15 |    |          |          |  |                                     |
| 12120 | ENSG00000202031 |          | 14058.3 | 0.15 |    |          |          |  |                                     |
| 12138 | ENSG00000202406 |          | 14085   | 0.15 |    |          |          |  |                                     |
| 12156 | ENSG00000202879 |          | 14093.5 | 0.15 |    |          |          |  |                                     |
| 12166 | ENSG00000202522 |          | 14099.1 | 0.15 |    |          |          |  |                                     |
| 12180 | ENSG00000202780 |          | 14110.6 | 0.15 |    |          |          |  |                                     |
| 12183 | ENSG00000202818 |          | 14115.4 | 0.15 | 14 | 36256005 | 36256168 |  | Small nuclear RNA U13               |
| 12202 | ENSG00000202178 |          | 14125.5 | 0.15 |    |          |          |  |                                     |
| 12204 | ENSG00000202876 |          | 14126.4 | 0.15 |    |          |          |  |                                     |
| 12296 | ENSG00000202892 |          | 14187.1 | 0.15 |    |          |          |  |                                     |
| 12291 | ENSG00000202128 |          | 14188.6 | 0.15 |    |          |          |  |                                     |
| 12263 | ENSG00000202870 |          | 14189.3 | 0.15 |    |          |          |  |                                     |
| 12267 | ENSG00000202871 |          | 14171.4 | 0.15 |    |          |          |  |                                     |
| 12291 | ENSG00000202893 |          | 14190.9 | 0.15 |    |          |          |  |                                     |
| 12294 | ENSG00000202382 |          | 14198.9 | 0.15 |    |          |          |  |                                     |
| 12296 | ENSG00000202967 |          | 14202.2 | 0.15 |    |          |          |  |                                     |
| 12316 | ENSG00000202839 |          | 14216.1 | 0.15 |    |          |          |  |                                     |
| 12333 | ENSG00000202025 |          | 14229.9 | 0.15 |    |          |          |  |                                     |
| 12337 | ENSG00000202146 |          | 14232.7 | 0.15 |    |          |          |  |                                     |
| 12358 | ENSG00000202549 |          | 14248.8 | 0.15 |    |          |          |  |                                     |
| 12368 | ENSG00000202717 |          | 14255.3 | 0.15 |    |          |          |  |                                     |
| 12396 | ENSG00000202922 |          | 14272.5 | 0.15 |    |          |          |  |                                     |
| 12398 | ENSG00000202838 |          | 14273.1 | 0.15 |    |          |          |  |                                     |
| 12403 | ENSG00000202129 |          | 14276.3 | 0.15 |    |          |          |  |                                     |
| 12407 | ENSG00000202918 |          | 14278.7 | 0.15 |    |          |          |  |                                     |
| 12427 | ENSG00000202349 |          | 14284.3 | 0.15 |    |          |          |  |                                     |
| 12452 | ENSG00000204910 |          | 14316.8 | 0.15 |    |          |          |  |                                     |
| 12490 | ENSG00000202312 |          | 14347.7 | 0.15 |    |          |          |  |                                     |
| 12491 | ENSG00000191071 |          | 14350.7 | 0.15 |    |          |          |  |                                     |
| 12492 | ENSG00000202163 |          | 14350.5 | 0.15 |    |          |          |  |                                     |
| 12516 | ENSG00000202036 |          | 14372.9 | 0.15 |    |          |          |  |                                     |
| 12526 | ENSG00000202549 |          | 14379.2 | 0.15 |    |          |          |  |                                     |
| 12541 | ENSG00000202152 |          | 14398.7 | 0.15 |    |          |          |  |                                     |
| 12552 | ENSG00000202678 |          | 14396.4 | 0.15 |    |          |          |  |                                     |
| 12556 | ENSG00000202629 |          | 14398.6 | 0.15 |    |          |          |  |                                     |
| 12556 | ENSG00000202629 |          | 14399   | 0.15 |    |          |          |  |                                     |
| 12577 | ENSG00000202907 |          | 14419.6 | 0.15 |    |          |          |  |                                     |
| 12578 | ENSG00000202119 |          | 14419.9 | 0.15 |    |          |          |  |                                     |
| 12580 | ENSG00000202483 |          | 14421   | 0.15 |    |          |          |  |                                     |



|       |                   |         |      |    |           |           |  |                                       |
|-------|-------------------|---------|------|----|-----------|-----------|--|---------------------------------------|
| 12721 | ENSG000002041150  | 14519.1 | 0.15 |    |           |           |  |                                       |
| 12728 | ENSG00000208889   | 14525   | 0.15 |    |           |           |  |                                       |
| 12731 | ENSG00000255028   | 14525.2 | 0.15 |    |           |           |  |                                       |
| 12733 | ENSG000002031137  | 14529.3 | 0.15 |    |           |           |  |                                       |
| 12738 | ENSG00000204366   | 14532.7 | 0.15 |    |           |           |  |                                       |
| 12739 | ENSG00000204291   | 14534.3 | 0.15 |    |           |           |  |                                       |
| 12746 | ENSG00000208480   | 14539.7 | 0.15 | 18 | 23879079  | 23879219  |  | Small nucleolar RNA U3                |
| 12749 | ENSG000002027427  | 14541.7 | 0.15 |    |           |           |  |                                       |
| 12752 | ENSG00000201085   | 14543.9 | 0.15 |    |           |           |  |                                       |
| 12759 | ENSG00000256018   | 14551.8 | 0.15 |    |           |           |  |                                       |
| 12764 | ENSG00000204571   | 14553   | 0.15 |    |           |           |  |                                       |
| 12765 | ENSG00000203786   | 14553.6 | 0.15 |    |           |           |  |                                       |
| 12766 | ENSG000002036506  | 14553.7 | 0.15 |    |           |           |  |                                       |
| 12769 | ENSG00000211511   | 14556.8 | 0.15 |    |           |           |  |                                       |
| 12771 | ENSG00000205420   | 14558.2 | 0.15 |    |           |           |  |                                       |
| 12775 | ENSG000002035772  | 14560.9 | 0.15 |    |           |           |  |                                       |
| 12778 | ENSG000002029382  | 14561.7 | 0.15 |    |           |           |  |                                       |
| 12779 | ENSG000002017025  | 14564.7 | 0.15 |    |           |           |  |                                       |
| 12788 | ENSG000002054483  | 14569.3 | 0.15 |    |           |           |  |                                       |
| 12792 | ENSG000002084843  | 14573   | 0.15 |    |           |           |  |                                       |
| 12800 | ENSG000002034549  | 14581   | 0.15 |    |           |           |  |                                       |
| 12810 | ENSG000002084015  | 14586.9 | 0.15 |    |           |           |  |                                       |
| 12814 | ENSG000002058569  | 14588.7 | 0.15 |    |           |           |  |                                       |
| 12823 | ENSG000002020883  | 14599.2 | 0.15 |    |           |           |  |                                       |
| 12824 | ENSG000002025606  | 14599.4 | 0.15 |    |           |           |  |                                       |
| 12825 | ENSG000002025241  | 14599.9 | 0.15 |    |           |           |  |                                       |
| 12829 | ENSG000002044295  | 14603.2 | 0.15 |    |           |           |  |                                       |
| 12839 | ENSG000002027288  | 14610.6 | 0.15 |    |           |           |  |                                       |
| 12840 | ENSG000002080030  | 14611.1 | 0.15 |    |           |           |  |                                       |
| 12842 | ENSG000002084653  | 14611.6 | 0.15 | 7  | 157098487 | 157098785 |  | RNA, 7SL, cytoplasmic 142, pseudogene |
| 12845 | ENSG000002024907  | 14616.7 | 0.15 |    |           |           |  |                                       |
| 12853 | ENSG000002022266  | 14620   | 0.15 | 9  | 130596230 | 130596321 |  | Y RNA                                 |
| 12858 | ENSG000002024491  | 14623.6 | 0.15 |    |           |           |  |                                       |
| 12864 | ENSG000002031216  | 14629.2 | 0.15 |    |           |           |  |                                       |
| 12868 | ENSG000002038673  | 14630.8 | 0.15 | 7  | 56166352  | 56168445  |  | Small nucleolar RNA U13               |
| 12879 | ENSG000002017471  | 14639.8 | 0.15 |    |           |           |  |                                       |
| 12880 | ENSG000002051131  | 14640.1 | 0.15 |    |           |           |  |                                       |
| 12886 | ENSG000002056422  | 14648.4 | 0.15 |    |           |           |  |                                       |
| 12888 | ENSG000002080288  | 14649.3 | 0.15 |    |           |           |  |                                       |
| 12901 | ENSG000002033427  | 14651   | 0.15 |    |           |           |  |                                       |
| 12902 | ENSG000002028183  | 14651.7 | 0.15 |    |           |           |  |                                       |
| 12904 | ENSG000002020889  | 14653.8 | 0.15 |    |           |           |  |                                       |
| 12913 | ENSG00000202094   | 14659.3 | 0.15 |    |           |           |  |                                       |
| 12930 | ENSG000002056874  | 14668.7 | 0.15 |    |           |           |  |                                       |
| 12937 | ENSG000002026241  | 14673.1 | 0.15 |    |           |           |  |                                       |
| 12940 | ENSG000002044571  | 14675.1 | 0.15 |    |           |           |  |                                       |
| 12943 | ENSG000002057872  | 14677.1 | 0.15 |    |           |           |  |                                       |
| 12948 | ENSG000002045883  | 14686.9 | 0.15 |    |           |           |  |                                       |
| 12960 | ENSG000002027863  | 14688   | 0.15 |    |           |           |  |                                       |
| 12962 | ENSG000002053823  | 14691   | 0.15 |    |           |           |  |                                       |
| 12972 | ENSG000002051085  | 14696   | 0.15 |    |           |           |  |                                       |
| 12986 | ENSG00000218368   | 14706.9 | 0.15 |    |           |           |  |                                       |
| 12993 | ENSG000002070259  | 14710.4 | 0.15 |    |           |           |  |                                       |
| 12994 | ENSG000002048115  | 14710.8 | 0.15 |    |           |           |  |                                       |
| 12995 | ENSG000002049317  | 14711.1 | 0.15 |    |           |           |  |                                       |
| 13000 | ENSG000002033307  | 14713.8 | 0.15 |    |           |           |  |                                       |
| 13001 | ENSG000002083475  | 14714.9 | 0.15 |    |           |           |  |                                       |
| 13002 | ENSG000002020786  | 14715.8 | 0.15 |    |           |           |  |                                       |
| 13004 | ENSG000002033268  | 14717.2 | 0.15 |    |           |           |  |                                       |
| 13010 | ENSG000002038140  | 14722.4 | 0.15 |    |           |           |  |                                       |
| 13017 | ENSG000002025891  | 14723.7 | 0.15 |    |           |           |  |                                       |
| 13019 | ENSG000002028770  | 14732.6 | 0.15 |    |           |           |  |                                       |
| 13020 | ENSG000002019823  | 14733.4 | 0.15 |    |           |           |  |                                       |
| 13022 | ENSG000002017193  | 14734.8 | 0.15 |    |           |           |  |                                       |
| 13024 | ENSG000002058216  | 14736.9 | 0.15 |    |           |           |  |                                       |
| 13032 | ENSG000002050256  | 14743.9 | 0.15 |    |           |           |  |                                       |
| 13034 | ENSG000002056556  | 14744   | 0.15 |    |           |           |  |                                       |
| 13041 | ENSG000002028428  | 14747.6 | 0.15 |    |           |           |  |                                       |
| 13061 | ENSG000002032827  | 14787.1 | 0.15 |    |           |           |  |                                       |
| 13064 | ENSG000002046473  | 14789.9 | 0.15 |    |           |           |  |                                       |
| 13065 | ENSG000002070891  | 14770   | 0.15 |    |           |           |  |                                       |
| 13073 | ENSG000002032825  | 14772.4 | 0.15 |    |           |           |  |                                       |
| 13074 | ENSG000002054488  | 14772.5 | 0.15 |    |           |           |  |                                       |
| 13076 | ENSG00000205438   | 14773   | 0.15 |    |           |           |  |                                       |
| 13077 | ENSG000002013860  | 14774   | 0.15 |    |           |           |  |                                       |
| 13084 | ENSG000002020438  | 14783.5 | 0.15 |    |           |           |  |                                       |
| 13088 | ENSG000002083346  | 14778.2 | 0.15 |    |           |           |  |                                       |
| 13092 | ENSG000002083960  | 14782.6 | 0.15 |    |           |           |  |                                       |
| 13098 | ENSG000002020273  | 14785.4 | 0.15 |    |           |           |  |                                       |
| 13101 | ENSG000002038475  | 14788   | 0.15 | 12 | 63044955  | 63045068  |  | Small nucleolar RNA U13               |
| 13107 | ENSG000002048346  | 14795.7 | 0.15 |    |           |           |  |                                       |
| 13128 | ENSG000002028483  | 14810.2 | 0.15 |    |           |           |  |                                       |
| 13131 | ENSG00000215022   | 14813.3 | 0.15 |    |           |           |  |                                       |
| 13135 | ENSG000002027813  | 14815.1 | 0.15 |    |           |           |  |                                       |
| 13143 | ENSG000002020522  | 14820.4 | 0.15 |    |           |           |  |                                       |
| 13144 | ENSG00000217271   | 14820.4 | 0.15 |    |           |           |  |                                       |
| 13156 | ENSG000002038842  | 14831.2 | 0.15 | 3  | 10175069  | 10175172  |  | Small nucleolar RNA U13               |
| 13160 | ENSG000002026400  | 14837   | 0.15 |    |           |           |  |                                       |
| 13161 | ENSG00000202629   | 14837.5 | 0.15 |    |           |           |  |                                       |
| 13165 | ENSG000002071042  | 14839.5 | 0.15 |    |           |           |  |                                       |
| 13168 | ENSG000002042375  | 14843.9 | 0.15 |    |           |           |  |                                       |
| 13174 | ENSG000002086935  | 14846.8 | 0.15 |    |           |           |  |                                       |
| 13184 | ENSG000002020574  | 14851.2 | 0.15 |    |           |           |  |                                       |
| 13186 | ENSG000002020747  | 14853   | 0.15 |    |           |           |  |                                       |
| 13188 | ENSG000002020520  | 14857.1 | 0.15 |    |           |           |  |                                       |
| 13189 | ENSG0000020287838 | 14865.9 | 0.15 |    |           |           |  |                                       |
| 13206 | ENSG000002080969  | 14879.6 | 0.15 |    |           |           |  |                                       |
| 13210 | ENSG000002056460  | 14883.2 | 0.15 |    |           |           |  |                                       |
| 13213 | ENSG000002037292  | 14886.6 | 0.15 |    |           |           |  |                                       |
| 13217 | ENSG000002054605  | 14888   | 0.15 |    |           |           |  |                                       |
| 13220 | ENSG000002071096  | 14891.2 | 0.15 |    |           |           |  |                                       |
| 13225 | ENSG000002072134  | 14894.6 | 0.15 |    |           |           |  |                                       |
| 13226 | ENSG000002072377  | 14897.6 | 0.15 |    |           |           |  |                                       |
| 13229 | ENSG000002020208  | 14898.9 | 0.15 |    |           |           |  |                                       |
| 13236 | ENSG0000020196274 | 14902.1 | 0.15 |    |           |           |  |                                       |
| 13238 | ENSG000002030312  | 14903.8 | 0.15 |    |           |           |  |                                       |
| 13240 | ENSG000002030795  | 14913.4 | 0.15 |    |           |           |  |                                       |
| 13257 | ENSG000002031967  | 14919.3 | 0.15 |    |           |           |  |                                       |
| 13260 | ENSG000002043355  | 14921.7 | 0.15 |    |           |           |  |                                       |
| 13270 | ENSG000002028153  | 14926.1 | 0.15 |    |           |           |  |                                       |
| 13273 | ENSG000002088911  | 14930.2 | 0.15 |    |           |           |  |                                       |
| 13275 | ENSG000002085758  | 14932   | 0.15 |    |           |           |  |                                       |
| 13279 | ENSG000002020215  | 14936.6 | 0.15 |    |           |           |  |                                       |
| 13282 | ENSG000002052872  | 14939.2 | 0.15 | 7  | 116073268 | 116073354 |  | Small nucleolar RNA 2185              |
| 13290 | ENSG000002081864  | 14947.2 | 0.15 |    |           |           |  |                                       |
| 13300 | ENSG000002021452  | 14952.2 | 0.15 |    |           |           |  |                                       |
| 13303 | ENSG000002032638  | 14952.9 | 0.15 |    |           |           |  |                                       |
| 13307 | ENSG000002070775  | 14956   | 0.15 |    |           |           |  |                                       |
| 13312 | ENSG000002052988  | 14960.3 | 0.15 |    |           |           |  |                                       |
| 13314 | ENSG000002053679  | 14960.9 | 0.15 |    |           |           |  |                                       |
| 13316 | ENSG000002080600  | 14961.8 | 0.15 |    |           |           |  |                                       |
| 13318 | ENSG000002051158  | 14962.7 | 0.15 |    |           |           |  |                                       |
| 13319 | ENSG000002026374  | 14962.9 | 0.15 |    |           |           |  |                                       |
| 13323 | ENSG0000020287253 | 14964.9 | 0.15 |    |           |           |  |                                       |
| 13332 | ENSG000002031401  | 14972.6 | 0.15 |    |           |           |  |                                       |
| 13336 | ENSG000002039886  | 14975.6 | 0.15 |    |           |           |  |                                       |
| 13337 | ENSG000002024846  | 14978.8 | 0.15 |    |           |           |  |                                       |
| 13350 | ENSG000002020538  | 14984.7 | 0.15 |    |           |           |  |                                       |
| 13353 | ENSG00000204546   | 14986.1 | 0.15 |    |           |           |  |                                       |
| 13356 | ENSG000002055058  | 14987.8 | 0.15 |    |           |           |  |                                       |
| 13362 | ENSG000002020262  | 14991.6 | 0.15 |    |           |           |  |                                       |
| 13364 | ENSG000002086344  | 14995.9 | 0.15 |    |           |           |  |                                       |
| 13368 | ENSG00000215023   | 15000.6 | 0.15 |    |           |           |  |                                       |
| 13369 | ENSG00000206339   | 15001.4 | 0.15 | 17 | 20244056  | 20244356  |  | RNA, 7SL, cytoplasmic 17, pseudogene  |
| 13371 | ENSG000002056466  | 15003.1 | 0.15 |    |           |           |  |                                       |
| 13377 | ENSG000002084820  | 15008.8 | 0.15 |    |           |           |  |                                       |
| 13381 | ENSG000002083176  | 15009.2 | 0.15 |    |           |           |  |                                       |
| 13384 | ENSG00000203708   | 15011   | 0.15 |    |           |           |  |                                       |
| 13387 | ENSG000002058960  | 15016   | 0.15 |    |           |           |  |                                       |
| 13389 | ENSG000002053988  | 15016.6 | 0.15 |    |           |           |  |                                       |
| 13399 | ENSG000002053137  | 15024.3 | 0.15 |    |           |           |  |                                       |
| 13400 | ENSG000002058640  | 15024.3 | 0.15 |    |           |           |  |                                       |
| 13401 | ENSG000002070720  | 15026.1 | 0.15 |    |           |           |  |                                       |
| 13402 | ENSG000002054302  | 15026.2 | 0.15 |    |           |           |  |                                       |
| 13408 | ENSG000002058617  | 15029.2 | 0.15 |    |           |           |  |                                       |
| 13411 | ENSG000002028817  | 15030.4 | 0.15 |    |           |           |  |                                       |
| 13414 | ENSG000002020223  | 15033.1 | 0.15 |    |           |           |  |                                       |
| 13423 | ENSG000002044609  | 15040.1 | 0.15 | 1  | 24063100  | 24063380  |  | RNA, 7SL, cytoplasmic 532, pseudogene |
| 13433 | ENSG000002022686  | 15051.7 | 0.15 |    |           |           |  |                                       |
| 13439 | ENSG000002011270  | 15055.9 | 0.15 |    |           |           |  |                                       |
| 13441 | ENSG000002028031  | 15056.9 | 0.15 |    |           |           |  |                                       |

|       |                  |           |         |      |    |           |           |  |                                                                                            |
|-------|------------------|-----------|---------|------|----|-----------|-----------|--|--------------------------------------------------------------------------------------------|
| 13442 | ENSG00000272832  |           | 15057.9 | 0.15 |    |           |           |  |                                                                                            |
| 13445 | ENSG00000207153  |           | 15059.9 | 0.15 |    |           |           |  |                                                                                            |
| 13448 | ENSG00000224104  |           | 15060.3 | 0.15 |    |           |           |  |                                                                                            |
| 13450 | ENSG00000272551  |           | 15062.1 | 0.15 |    |           |           |  |                                                                                            |
| 13451 | ENSG00000225291  |           | 15063.9 | 0.15 |    |           |           |  |                                                                                            |
| 13453 | ENSG00000215173  |           | 15065.9 | 0.15 |    |           |           |  |                                                                                            |
| 13455 | ENSG00000230229  |           | 15069.7 | 0.15 |    |           |           |  |                                                                                            |
| 13462 | ENSG00000226442  |           | 15074.6 | 0.15 |    |           |           |  |                                                                                            |
| 13463 | ENSG00000226432  |           | 15075.1 | 0.15 |    |           |           |  |                                                                                            |
| 13465 | ENSG00000229854  |           | 15075.4 | 0.15 |    |           |           |  |                                                                                            |
| 13470 | ENSG00000226478  |           | 15080.6 | 0.15 |    |           |           |  |                                                                                            |
| 13471 | ENSG00000225382  |           | 15081.9 | 0.15 |    |           |           |  |                                                                                            |
| 13474 | ENSG00000250490  |           | 15083.2 | 0.15 | 7  | 27920106  | 27920397  |  | RNA 75L, cytoplasmic 365, pseudogene                                                       |
| 13475 | ENSG00000250178  |           | 15083.4 | 0.15 |    |           |           |  |                                                                                            |
| 13477 | ENSG00000225153  |           | 15084   | 0.15 |    |           |           |  |                                                                                            |
| 13479 | ENSG00000252620  |           | 15084.9 | 0.15 |    |           |           |  |                                                                                            |
| 13481 | ENSG00000228122  |           | 15086.5 | 0.15 |    |           |           |  |                                                                                            |
| 13482 | ENSG00000225439  |           | 15087.2 | 0.15 |    |           |           |  |                                                                                            |
| 13484 | ENSG00000226500  |           | 15087.2 | 0.15 |    |           |           |  |                                                                                            |
| 13485 | ENSG00000211572  | LY2L6     | 15088   | 0.15 | 17 | 34261522  | 34270703  |  | lysostzyme-like 6                                                                          |
| 13491 | ENSG00000222020  |           | 15088.6 | 0.15 |    |           |           |  |                                                                                            |
| 13503 | ENSG00000228194  |           | 15102.4 | 0.15 |    |           |           |  |                                                                                            |
| 13504 | ENSG00000224765  |           | 15102.8 | 0.15 |    |           |           |  |                                                                                            |
| 13509 | ENSG00000240687  |           | 15104.3 | 0.15 |    |           |           |  |                                                                                            |
| 13512 | ENSG00000229513  |           | 15107.2 | 0.15 |    |           |           |  |                                                                                            |
| 13520 | ENSG00000220589  |           | 15114.8 | 0.15 |    |           |           |  |                                                                                            |
| 13524 | ENSG00000248586  |           | 15115.4 | 0.15 |    |           |           |  |                                                                                            |
| 13526 | ENSG000002229010 |           | 15117.6 | 0.15 |    |           |           |  |                                                                                            |
| 13538 | ENSG00000217378  |           | 15129.9 | 0.15 |    |           |           |  |                                                                                            |
| 13541 | ENSG00000243824  |           | 15131.3 | 0.15 |    |           |           |  |                                                                                            |
| 13543 | ENSG00000215444  |           | 15131.9 | 0.15 |    |           |           |  |                                                                                            |
| 13547 | ENSG00000225428  |           | 15133.3 | 0.15 |    |           |           |  |                                                                                            |
| 13549 | ENSG00000251099  |           | 15133.8 | 0.15 |    |           |           |  |                                                                                            |
| 13551 | ENSG00000237349  |           | 15136   | 0.15 |    |           |           |  |                                                                                            |
| 13553 | ENSG00000221288  |           | 15139.3 | 0.15 |    |           |           |  |                                                                                            |
| 13554 | ENSG00000224064  |           | 15139.5 | 0.15 |    |           |           |  |                                                                                            |
| 13556 | ENSG00000214132  |           | 15140.3 | 0.15 |    |           |           |  |                                                                                            |
| 13561 | ENSG00000225589  |           | 15143   | 0.15 |    |           |           |  |                                                                                            |
| 13565 | ENSG00000257588  |           | 15145   | 0.15 |    |           |           |  |                                                                                            |
| 13568 | ENSG00000217680  |           | 15148.3 | 0.15 |    |           |           |  |                                                                                            |
| 13575 | ENSG00000225573  |           | 15153.9 | 0.15 |    |           |           |  |                                                                                            |
| 13577 | ENSG00000228173  |           | 15154.8 | 0.15 |    |           |           |  |                                                                                            |
| 13578 | ENSG00000237189  |           | 15155.3 | 0.15 |    |           |           |  |                                                                                            |
| 13579 | ENSG00000240476  |           | 15155.4 | 0.15 |    |           |           |  |                                                                                            |
| 13581 | ENSG00000228474  |           | 15155.6 | 0.15 | 17 | 76494911  | 76499138  |  | DNAH17 antisense RNA 1                                                                     |
| 13583 | ENSG00000215284  |           | 15157.8 | 0.15 |    |           |           |  |                                                                                            |
| 13587 | ENSG00000222951  |           | 15159.1 | 0.15 |    |           |           |  |                                                                                            |
| 13589 | ENSG00000244345  |           | 15160.1 | 0.15 |    |           |           |  |                                                                                            |
| 13591 | ENSG00000257800  |           | 15161.8 | 0.15 |    |           |           |  |                                                                                            |
| 13596 | ENSG000002196174 | ANKRD20A1 | 15169.8 | 0.15 | 9  | 67926761  | 67969840  |  | ankyrin repeat domain 20 family, member A1                                                 |
| 13604 | ENSG00000225486  |           | 15172.1 | 0.15 |    |           |           |  |                                                                                            |
| 13607 | ENSG00000232863  |           | 15174.1 | 0.15 |    |           |           |  |                                                                                            |
| 13617 | ENSG00000211642  |           | 15185.1 | 0.15 |    |           |           |  |                                                                                            |
| 13621 | ENSG00000241385  |           | 15188.4 | 0.15 |    |           |           |  |                                                                                            |
| 13622 | ENSG00000254321  |           | 15190.1 | 0.15 |    |           |           |  |                                                                                            |
| 13623 | ENSG00000226211  |           | 15190.6 | 0.15 |    |           |           |  |                                                                                            |
| 13624 | ENSG00000225783  |           | 15190.8 | 0.15 |    |           |           |  |                                                                                            |
| 13626 | ENSG00000226767  |           | 15192.3 | 0.15 |    |           |           |  |                                                                                            |
| 13627 | ENSG00000229716  |           | 15193.1 | 0.15 |    |           |           |  |                                                                                            |
| 13634 | ENSG00000225922  |           | 15196.1 | 0.15 |    |           |           |  |                                                                                            |
| 13638 | ENSG00000226141  |           | 15202.9 | 0.15 |    |           |           |  |                                                                                            |
| 13650 | ENSG00000222809  |           | 15212.2 | 0.15 |    |           |           |  |                                                                                            |
| 13651 | ENSG00000224942  |           | 15216   | 0.15 |    |           |           |  |                                                                                            |
| 13664 | ENSG00000237713  |           | 15224.8 | 0.15 |    |           |           |  |                                                                                            |
| 13670 | ENSG00000217411  |           | 15227   | 0.15 |    |           |           |  |                                                                                            |
| 13672 | ENSG00000221761  |           | 15228.9 | 0.15 |    |           |           |  |                                                                                            |
| 13673 | ENSG00000226989  |           | 15229.2 | 0.15 |    |           |           |  |                                                                                            |
| 13674 | ENSG00000224827  |           | 15230   | 0.15 |    |           |           |  |                                                                                            |
| 13675 | ENSG00000222988  |           | 15230.3 | 0.15 |    |           |           |  |                                                                                            |
| 13682 | ENSG00000224017  |           | 15234.8 | 0.15 |    |           |           |  |                                                                                            |
| 13685 | ENSG00000220370  |           | 15238.8 | 0.15 |    |           |           |  |                                                                                            |
| 13686 | ENSG00000270333  |           | 15239.2 | 0.15 |    |           |           |  |                                                                                            |
| 13687 | ENSG00000222607  |           | 15240.1 | 0.15 |    |           |           |  |                                                                                            |
| 13690 | ENSG00000225118  |           | 15244.3 | 0.15 |    |           |           |  |                                                                                            |
| 13695 | ENSG00000250105  |           | 15247   | 0.15 |    |           |           |  |                                                                                            |
| 13698 | ENSG00000222498  |           | 15248.3 | 0.15 |    |           |           |  |                                                                                            |
| 13699 | ENSG00000223119  |           | 15249.8 | 0.15 |    |           |           |  |                                                                                            |
| 13700 | ENSG00000213514  |           | 15249.9 | 0.15 |    |           |           |  |                                                                                            |
| 13703 | ENSG00000224359  |           | 15252.5 | 0.15 |    |           |           |  |                                                                                            |
| 13707 | ENSG00000225647  |           | 15256.8 | 0.15 | 16 | 87731749  | 87739290  |  | HCG1980662, Uncharacterized protein                                                        |
| 13709 | ENSG00000231285  |           | 15257.3 | 0.15 |    |           |           |  |                                                                                            |
| 13711 | ENSG00000254192  |           | 15258.5 | 0.15 |    |           |           |  |                                                                                            |
| 13714 | ENSG00000223379  |           | 15261.2 | 0.15 |    |           |           |  |                                                                                            |
| 13717 | ENSG00000225158  |           | 15265.5 | 0.15 |    |           |           |  |                                                                                            |
| 13723 | ENSG000002261053 |           | 15269   | 0.15 |    |           |           |  |                                                                                            |
| 13730 | ENSG00000226576  |           | 15277   | 0.15 |    |           |           |  |                                                                                            |
| 13733 | ENSG00000224100  |           | 15280.1 | 0.15 |    |           |           |  |                                                                                            |
| 13740 | ENSG00000226387  |           | 15282.4 | 0.15 | 1  | 222881579 | 222881873 |  | RNA 75L, cytoplasmic 276, pseudogene                                                       |
| 13745 | ENSG00000226225  |           | 15283.9 | 0.15 |    |           |           |  |                                                                                            |
| 13752 | ENSG00000225981  |           | 15287.6 | 0.15 | 1  | 35729823  | 35730863  |  | RNA 75L, cytoplasmic 136, pseudogene                                                       |
| 13757 | ENSG00000216754  |           | 15288.9 | 0.15 |    |           |           |  |                                                                                            |
| 13759 | ENSG00000221336  |           | 15290.1 | 0.15 |    |           |           |  |                                                                                            |
| 13760 | ENSG00000224120  |           | 15292.2 | 0.15 |    |           |           |  |                                                                                            |
| 13765 | ENSG000002258121 |           | 15297.8 | 0.15 |    |           |           |  |                                                                                            |
| 13771 | ENSG00000222894  |           | 15300.6 | 0.15 |    |           |           |  |                                                                                            |
| 13772 | ENSG00000221418  |           | 15301.3 | 0.15 |    |           |           |  |                                                                                            |
| 13774 | ENSG000002254596 |           | 15303.5 | 0.15 |    |           |           |  |                                                                                            |
| 13775 | ENSG00000217062  |           | 15303.6 | 0.15 |    |           |           |  |                                                                                            |
| 13776 | ENSG00000225490  |           | 15306.1 | 0.15 |    |           |           |  |                                                                                            |
| 13778 | ENSG000002266455 |           | 15306.9 | 0.15 | 19 | 36155398  | 36155724  |  | RNA 75L, cytoplasmic 765, pseudogene                                                       |
| 13781 | ENSG00000254185  |           | 15308.7 | 0.15 |    |           |           |  |                                                                                            |
| 13783 | ENSG00000226166  |           | 15310.6 | 0.15 |    |           |           |  |                                                                                            |
| 13786 | ENSG00000231443  |           | 15312.9 | 0.15 |    |           |           |  |                                                                                            |
| 13795 | ENSG00000222944  |           | 15317.6 | 0.15 |    |           |           |  |                                                                                            |
| 13806 | ENSG00000221298  |           | 15327   | 0.15 |    |           |           |  |                                                                                            |
| 13809 | ENSG000002265015 |           | 15327.2 | 0.15 |    |           |           |  |                                                                                            |
| 13813 | ENSG00000225389  |           | 15330.6 | 0.15 |    |           |           |  |                                                                                            |
| 13814 | ENSG00000223344  |           | 15332.9 | 0.15 |    |           |           |  |                                                                                            |
| 13817 | ENSG00000231189  |           | 15334.1 | 0.15 |    |           |           |  |                                                                                            |
| 13821 | ENSG00000224154  |           | 15335.1 | 0.15 |    |           |           |  |                                                                                            |
| 13823 | ENSG00000222103  |           | 15336.3 | 0.15 |    |           |           |  |                                                                                            |
| 13826 | ENSG00000248138  |           | 15339.2 | 0.15 |    |           |           |  |                                                                                            |
| 13837 | ENSG00000226768  |           | 15345.4 | 0.15 |    |           |           |  |                                                                                            |
| 13840 | ENSG00000222663  |           | 15347.3 | 0.15 |    |           |           |  |                                                                                            |
| 13842 | ENSG00000211702  |           | 15350.2 | 0.15 |    |           |           |  |                                                                                            |
| 13846 | ENSG00000248329  |           | 15359.5 | 0.15 |    |           |           |  |                                                                                            |
| 13853 | ENSG00000221583  |           | 15363.9 | 0.15 |    |           |           |  |                                                                                            |
| 13856 | ENSG00000238263  |           | 15365.4 | 0.15 |    |           |           |  |                                                                                            |
| 13860 | ENSG00000225605  |           | 15366.7 | 0.15 |    |           |           |  |                                                                                            |
| 13863 | ENSG00000228144  |           | 15368.8 | 0.15 |    |           |           |  |                                                                                            |
| 13865 | ENSG00000270591  |           | 15371.7 | 0.15 |    |           |           |  |                                                                                            |
| 13869 | ENSG00000241593  |           | 15373.2 | 0.15 |    |           |           |  |                                                                                            |
| 13870 | ENSG00000212726  |           | 15373.6 | 0.15 |    |           |           |  |                                                                                            |
| 13874 | ENSG00000229721  |           | 15377   | 0.15 |    |           |           |  |                                                                                            |
| 13883 | ENSG00000253659  |           | 15381.2 | 0.15 |    |           |           |  |                                                                                            |
| 13884 | ENSG00000226129  |           | 15382   | 0.15 |    |           |           |  |                                                                                            |
| 13887 | ENSG00000225431  |           | 15385.5 | 0.15 |    |           |           |  |                                                                                            |
| 13893 | ENSG00000224127  |           | 15394.9 | 0.15 |    |           |           |  |                                                                                            |
| 13895 | ENSG00000240151  |           | 15395.1 | 0.15 |    |           |           |  |                                                                                            |
| 13900 | ENSG00000213033  |           | 15401.6 | 0.15 |    |           |           |  |                                                                                            |
| 13901 | ENSG00000241765  |           | 15401.8 | 0.15 |    |           |           |  |                                                                                            |
| 13904 | ENSG000002281211 |           | 15405.6 | 0.15 |    |           |           |  |                                                                                            |
| 13906 | ENSG00000222912  |           | 15406.1 | 0.15 |    |           |           |  |                                                                                            |
| 13907 | ENSG00000228780  |           | 15408   | 0.15 |    |           |           |  |                                                                                            |
| 13908 | ENSG000002299810 |           | 15409.1 | 0.15 | 15 | 10008447  | 10008578  |  | HCG19532-40, Serologically defined breast cancer antigen NY-BR-40, Uncharacterized protein |
| 13913 | ENSG00000225785  |           | 15411.5 | 0.15 |    |           |           |  |                                                                                            |
| 13921 | ENSG00000225133  |           | 15414.9 | 0.15 |    |           |           |  |                                                                                            |
| 13934 | ENSG00000227113  |           | 15428.7 | 0.15 |    |           |           |  |                                                                                            |
| 13939 | ENSG00000225154  |           | 15431.2 | 0.15 |    |           |           |  |                                                                                            |
| 13941 | ENSG000002258437 |           | 15432.7 | 0.15 |    |           |           |  |                                                                                            |
| 13945 | ENSG000002287488 |           | 15435.2 | 0.15 |    |           |           |  |                                                                                            |
| 13949 | ENSG00000224980  |           | 15436.5 | 0.15 |    |           |           |  |                                                                                            |
| 13955 | ENSG000002178467 |           | 15441.4 | 0.15 |    |           |           |  |                                                                                            |
| 13956 | ENSG00000222595  |           | 15443.2 | 0.15 |    |           |           |  |                                                                                            |
| 13960 | ENSG00000217203  |           | 15444.9 | 0.15 |    |           |           |  |                                                                                            |
| 13966 | ENSG00000234647  |           | 15448.7 | 0.15 |    |           |           |  |                                                                                            |
| 13972 | ENSG00000214853  |           | 15450.4 | 0.15 |    |           |           |  |                                                                                            |
| 13975 | ENSG00000225472  |           | 15452.6 | 0.15 |    |           |           |  |                                                                                            |
| 13981 | ENSG00000203364  |           | 15457   | 0.15 |    |           |           |  |                                                                                            |

|       |                   |             |         |      |           |           |           |           |                                               |
|-------|-------------------|-------------|---------|------|-----------|-----------|-----------|-----------|-----------------------------------------------|
| 13992 | ENSG000002070196  |             | 15458.6 | 0.15 |           |           |           |           |                                               |
| 13988 | ENSG000002049903  |             | 15460.9 | 0.15 |           |           |           |           |                                               |
| 13992 | ENSG000002034699  |             | 15465.3 | 0.15 |           |           |           |           |                                               |
| 13993 | ENSG000002065130  |             | 15466.3 | 0.15 |           |           |           |           |                                               |
| 13986 | ENSG000002056089  |             | 15469.7 | 0.15 |           |           |           |           |                                               |
| 14002 | ENSG000002027163  |             | 15474.5 | 0.15 |           |           |           |           |                                               |
| 14005 | ENSG000002024717  |             | 15475.8 | 0.15 |           |           |           |           |                                               |
| 14013 | ENSG000002050362  |             | 15482   | 0.15 |           |           |           |           |                                               |
| 14015 | ENSG000002030366  |             | 15483.5 | 0.15 |           |           |           |           |                                               |
| 14016 | ENSG000002087661  |             | 15484.4 | 0.15 |           |           |           |           |                                               |
| 14025 | ENSG000002030898  |             | 15484   | 0.15 |           |           |           |           |                                               |
| 14031 | ENSG000002030258  |             | 15486.4 | 0.15 |           |           |           |           |                                               |
| 14034 | ENSG000002043574  |             | 15487.7 | 0.15 |           |           |           |           |                                               |
| 14035 | ENSG000002037086  |             | 15487.8 | 0.15 |           |           |           |           |                                               |
| 14040 | ENSG000002025737  |             | 15504.2 | 0.15 |           |           |           |           |                                               |
| 14045 | ENSG0000020287162 |             | 15508.5 | 0.15 |           |           |           |           |                                               |
| 14047 | ENSG000002049737  |             | 15509.1 | 0.15 |           |           |           |           |                                               |
| 14066 | ENSG000002021071  |             | 15517.5 | 0.15 |           |           |           |           |                                               |
| 14060 | ENSG000002057063  |             | 15517.5 | 0.15 |           |           |           |           |                                               |
| 14066 | ENSG000002056312  |             | 15521.7 | 0.15 |           |           |           |           |                                               |
| 14068 | ENSG000002030376  |             | 15522.1 | 0.15 |           |           |           |           |                                               |
| 14073 | ENSG000002057048  |             | 15525.2 | 0.15 |           |           |           |           |                                               |
| 14074 | ENSG000002143544  |             | 15526.4 | 0.15 |           |           |           |           |                                               |
| 14075 | ENSG000002046932  |             | 15526   | 0.15 |           |           |           |           |                                               |
| 14076 | ENSG000002070332  |             | 15526.7 | 0.15 |           |           |           |           |                                               |
| 14081 | ENSG000002028908  |             | 15532   | 0.15 |           |           |           |           |                                               |
| 14082 | ENSG000002019005  |             | 15533.1 | 0.15 |           |           |           |           |                                               |
| 14088 | ENSG000002026842  |             | 15537.8 | 0.15 |           |           |           |           |                                               |
| 14091 | ENSG000002052114  |             | 15539.3 | 0.15 | 14        | 23486367  | 23486590  |           | Small nuclear RNA SNCRAT3 family              |
| 14108 | ENSG000002036533  |             | 15545.6 | 0.15 |           |           |           |           |                                               |
| 14110 | ENSG000002058743  |             | 15553.2 | 0.15 |           |           |           |           |                                               |
| 14130 | ENSG000002052177  | FAM106A     | 15562.1 | 0.15 | 17        | 20320741  | 20322363  |           | family with sequence similarity 106, member B |
| 14131 | ENSG000002069655  |             | 15564   | 0.15 |           |           |           |           |                                               |
| 14135 | ENSG000002040107  |             | 15565.8 | 0.15 |           |           |           |           |                                               |
| 14136 | ENSG000002043116  |             | 15568   | 0.15 |           |           |           |           |                                               |
| 14141 | ENSG000002030368  |             | 15570.3 | 0.15 |           |           |           |           |                                               |
| 14144 | ENSG000002030936  |             | 15573.3 | 0.15 |           |           |           |           |                                               |
| 14151 | ENSG000002029352  |             | 15579.6 | 0.15 |           |           |           |           |                                               |
| 14155 | ENSG000002034458  |             | 15584.8 | 0.15 |           |           |           |           |                                               |
| 14168 | ENSG000002026963  |             | 15595.9 | 0.15 |           |           |           |           |                                               |
| 14180 | ENSG000002058212  |             | 15603.5 | 0.15 |           |           |           |           |                                               |
| 14183 | ENSG000002046430  |             | 15608.8 | 0.15 |           |           |           |           |                                               |
| 14198 | ENSG000002089800  |             | 15617.8 | 0.15 |           |           |           |           |                                               |
| 14199 | ENSG000002054401  |             | 15618.8 | 0.15 |           |           |           |           |                                               |
| 14202 | ENSG000002041140  |             | 15625.6 | 0.15 |           |           |           |           |                                               |
| 14204 | ENSG000002025960  |             | 15626.2 | 0.15 |           |           |           |           |                                               |
| 14207 | ENSG000002050796  |             | 15628.7 | 0.15 |           |           |           |           |                                               |
| 14210 | ENSG000002011517  |             | 15632.5 | 0.15 |           |           |           |           |                                               |
| 14214 | ENSG000002081051  |             | 15636.1 | 0.15 |           |           |           |           |                                               |
| 14215 | ENSG000002034112  |             | 15639.7 | 0.15 |           |           |           |           |                                               |
| 14221 | ENSG000002017138  |             | 15644.6 | 0.15 |           |           |           |           |                                               |
| 14224 | ENSG000002040269  |             | 15647.1 | 0.15 |           |           |           |           |                                               |
| 14225 | ENSG000002060377  |             | 15647.3 | 0.15 |           |           |           |           |                                               |
| 14227 | ENSG000002072690  |             | 15654.6 | 0.15 |           |           |           |           |                                               |
| 14240 | ENSG000002013374  |             | 15656.2 | 0.15 |           |           |           |           |                                               |
| 14242 | ENSG000002024649  |             | 15661.7 | 0.15 |           |           |           |           |                                               |
| 14250 | ENSG000002038362  |             | 15668   | 0.15 |           |           |           |           |                                               |
| 14265 | ENSG000002025651  |             | 15687.9 | 0.15 |           |           |           |           |                                               |
| 14288 | ENSG000002058195  |             | 15690.7 | 0.15 |           |           |           |           |                                               |
| 14292 | ENSG000002070815  |             | 15693.6 | 0.15 |           |           |           |           |                                               |
| 14295 | ENSG000002026360  |             | 15695.2 | 0.15 |           |           |           |           |                                               |
| 14302 | ENSG000002041345  |             | 15698.4 | 0.15 |           |           |           |           |                                               |
| 14306 | ENSG000002040859  |             | 15701.1 | 0.15 |           |           |           |           |                                               |
| 14309 | ENSG000002010311  |             | 15701.3 | 0.15 | 10        | 104285722 | 104286001 |           | RNA, 7SL, cytoplasmic 21, pseudogene          |
| 14311 | ENSG000002048487  |             | 15703.6 | 0.15 |           |           |           |           |                                               |
| 14312 | ENSG000002054451  |             | 15703.6 | 0.15 |           |           |           |           |                                               |
| 14318 | ENSG000002049903  |             | 15703.9 | 0.15 |           |           |           |           |                                               |
| 14322 | ENSG000002050145  |             | 15711.7 | 0.15 |           |           |           |           |                                               |
| 14335 | ENSG000002020561  |             | 15724.7 | 0.15 |           |           |           |           |                                               |
| 14337 | ENSG000002048559  |             | 15725.9 | 0.15 |           |           |           |           |                                               |
| 14339 | ENSG000002051414  |             | 15729.1 | 0.15 |           |           |           |           |                                               |
| 14343 | ENSG000002082445  |             | 15731.6 | 0.15 |           |           |           |           |                                               |
| 14344 | ENSG000002015551  |             | 15735.1 | 0.15 |           |           |           |           |                                               |
| 14355 | ENSG000002027728  |             | 15744.2 | 0.15 |           |           |           |           |                                               |
| 14356 | ENSG000002058416  |             | 15748.1 | 0.15 |           |           |           |           |                                               |
| 14367 | ENSG000002037026  |             | 15753.1 | 0.15 |           |           |           |           |                                               |
| 14368 | ENSG000002022815  |             | 15753.8 | 0.15 |           |           |           |           |                                               |
| 14386 | ENSG000002043383  |             | 15771.5 | 0.15 |           |           |           |           |                                               |
| 14388 | ENSG000002050688  |             | 15773.7 | 0.15 |           |           |           |           |                                               |
| 14393 | ENSG00000201082   |             | 15776.1 | 0.15 |           |           |           |           |                                               |
| 14406 | ENSG000002059883  |             | 15780.7 | 0.15 |           |           |           |           |                                               |
| 14407 | ENSG000002050198  |             | 15782   | 0.15 |           |           |           |           |                                               |
| 14418 | ENSG000002053197  |             | 15792.1 | 0.15 |           |           |           |           |                                               |
| 14428 | ENSG000002028730  |             | 15798.8 | 0.15 |           |           |           |           |                                               |
| 14429 | ENSG000002028133  |             | 15799   | 0.15 |           |           |           |           |                                               |
| 14432 | ENSG000002015198  |             | 15800.8 | 0.15 |           |           |           |           |                                               |
| 14436 | ENSG000002024015  |             | 15805.6 | 0.15 |           |           |           |           |                                               |
| 14450 | ENSG000002081744  |             | 15819   | 0.15 |           |           |           |           |                                               |
| 14451 | ENSG000002031986  |             | 15827.5 | 0.15 |           |           |           |           |                                               |
| 14488 | ENSG000002081959  |             | 15845.4 | 0.15 |           |           |           |           |                                               |
| 14492 | ENSG000002050511  |             | 15851.6 | 0.15 |           |           |           |           |                                               |
| 14497 | ENSG000002010254  |             | 15854.1 | 0.15 |           |           |           |           |                                               |
| 14498 | ENSG000002020478  |             | 15855.4 | 0.15 | 9         | 69377502  | 69380597  |           | LOC441426 protein, Uncharacterized protein    |
| 14504 | ENSG000002050075  |             | 15858.3 | 0.15 |           |           |           |           |                                               |
| 14506 | ENSG000002050121  |             | 15878.8 | 0.15 |           |           |           |           |                                               |
| 14528 | ENSG000002054380  |             | 15879.5 | 0.15 |           |           |           |           |                                               |
| 14529 | ENSG000002089136  |             | 15880   | 0.15 |           |           |           |           |                                               |
| 14534 | ENSG00000201604   |             | 15885.8 | 0.15 |           |           |           |           |                                               |
| 14541 | ENSG0000020188525 |             | 15888.8 | 0.15 |           |           |           |           |                                               |
| 14547 | ENSG000002071639  |             | 15894.7 | 0.15 |           |           |           |           |                                               |
| 14549 | ENSG00000201343   |             | 15894.8 | 0.15 |           |           |           |           |                                               |
| 14551 | ENSG000002072431  |             | 15897.9 | 0.15 |           |           |           |           |                                               |
| 14579 | ENSG000002040241  |             | 15915.9 | 0.15 |           |           |           |           |                                               |
| 14587 | ENSG000002030331  |             | 15920.7 | 0.15 |           |           |           |           |                                               |
| 14597 | ENSG000002031438  |             | 15929   | 0.15 |           |           |           |           |                                               |
| 14598 | ENSG000002049875  |             | 15930.1 | 0.15 |           |           |           |           |                                               |
| 14605 | ENSG000002050268  |             | 15934.6 | 0.15 |           |           |           |           |                                               |
| 14616 | ENSG000002025735  |             | 15945.5 | 0.15 |           |           |           |           |                                               |
| 14632 | ENSG000002052686  |             | 15957.9 | 0.15 |           |           |           |           |                                               |
| 14634 | ENSG000002050663  |             | 15962.3 | 0.15 |           |           |           |           |                                               |
| 14644 | ENSG000002028488  |             | 15967.7 | 0.15 |           |           |           |           |                                               |
| 14651 | ENSG000002080954  |             | 15970.9 | 0.15 |           |           |           |           |                                               |
| 14674 | ENSG000002060657  |             | 15986.1 | 0.15 | 14        | 92038788  | 92041383  |           | Uncharacterized protein                       |
| 14687 | ENSG000002037118  |             | 15997.5 | 0.15 |           |           |           |           |                                               |
| 14700 | ENSG000002071018  |             | 16007.8 | 0.15 |           |           |           |           |                                               |
| 14703 | ENSG000002020647  |             | 16013.9 | 0.15 |           |           |           |           |                                               |
| 14717 | ENSG0000020281654 |             | 16024   | 0.15 |           |           |           |           |                                               |
| 14734 | ENSG000002031057  |             | 16033.3 | 0.15 |           |           |           |           |                                               |
| 14768 | ENSG000002028955  |             | 16058.8 | 0.15 |           |           |           |           |                                               |
| 14772 | ENSG000002035565  |             | 16065.8 | 0.15 |           |           |           |           |                                               |
| 14775 | ENSG000002035354  |             | 16068.8 | 0.15 |           |           |           |           |                                               |
| 14782 | ENSG000002050658  |             | 16073.3 | 0.15 |           |           |           |           |                                               |
| 14797 | ENSG000002080441  |             | 16081.1 | 0.15 |           |           |           |           |                                               |
| 14811 | ENSG000002059081  |             | 16093.5 | 0.15 |           |           |           |           |                                               |
| 14814 | ENSG000002040334  |             | 16095.6 | 0.15 |           |           |           |           |                                               |
| 14847 | ENSG000002052131  |             | 16120.3 | 0.15 |           |           |           |           |                                               |
| 14849 | ENSG000002058762  |             | 16122.3 | 0.15 |           |           |           |           |                                               |
| 14853 | ENSG000002026260  |             | 16125   | 0.15 |           |           |           |           |                                               |
| 14865 | ENSG000002040478  |             | 16138.5 | 0.15 |           |           |           |           |                                               |
| 14867 | ENSG000002026266  |             | 16139.3 | 0.15 |           |           |           |           |                                               |
| 14867 | ENSG000002040499  |             | 16171.2 | 0.15 |           |           |           |           |                                               |
| 14915 | ENSG000002058942  |             | 16174.5 | 0.15 |           |           |           |           |                                               |
| 14929 | ENSG000002070540  |             | 16184.3 | 0.15 |           |           |           |           |                                               |
| 14974 | ENSG000002053395  |             | 16220.5 | 0.15 |           |           |           |           |                                               |
| 14984 | ENSG000002081736  |             | 16232.3 | 0.15 |           |           |           |           |                                               |
| 15000 | ENSG000002056851  |             | 16236.5 | 0.15 |           |           |           |           |                                               |
| 15146 | ENSG000002027495  |             | 16388.3 | 0.15 |           |           |           |           |                                               |
| 15160 | ENSG000002011073  |             | 16372   | 0.15 |           |           |           |           |                                               |
| 15242 | ENSG000002028389  |             | 16443.1 | 0.15 |           |           |           |           |                                               |
| 15290 | ENSG000002027732  |             | 16487.8 | 0.15 |           |           |           |           |                                               |
| 15406 | ENSG000002018416  |             | 16551.5 | 0.15 |           |           |           |           |                                               |
| 15542 | ENSG000002089534  |             | 16684.1 | 0.15 |           |           |           |           |                                               |
| 19342 | ENSG000002087365  | KCNJ2-AS1   | 12636.4 | 0.14 | antisense | 17        | 68163102  | 68165543  | KCNJ2 antisense RNA 1 (read to head)          |
| 19343 | ENSG000002019167  |             | 14370.1 | 0.14 | antisense | 8         | 126052926 | 126057211 | KIAA1068 antisense RNA 1                      |
| 19307 | ENSG000002050218  | ALDH1L1-AS1 | 14880.3 | 0.14 | antisense | 3         | 125822483 | 125826912 | ALDH1L1 antisense RNA 1                       |
| 14523 | ENSG000002024204  | PHEX-AS1    | 15874.3 | 0.14 | antisense | X         | 22100850  | 22101100  | PHEX antisense RNA 1                          |
| 14705 | ENSG000002050433  | CLSTN2-AS1  | 16014.6 | 0.14 | antisense | 3         | 140224453 | 140227631 | CLSTN2 antisense RNA 1                        |
| 15085 | ENSG000002056661  |             | 16115   | 0.14 | antisense | 12        | 8928815   | 8983545   | AZML1 antisense RNA 1                         |
| 19102 | ENSG000002024122  | POU6F2-AS1  | 16328.4 | 0.14 | antisense | 7         | 3944197   | 39445945  | POU6F2 antisense RNA 1                        |
| 15128 |                   |             |         |      |           |           |           |           |                                               |

|       |                  |              |       |      |                      |     |           |           |                                                                    |
|-------|------------------|--------------|-------|------|----------------------|-----|-----------|-----------|--------------------------------------------------------------------|
| 16167 | ENS00000223394   |              | 16384 | 0.14 | antisense            | 13  | 94477077  | 94488397  | GPCR antisense RNA 2                                               |
| 15218 | ENS0000021118    | INHBA-AS1    | 16633 | 0.14 | antisense            | 7   | 41733584  | 41733584  | INHBA antisense RNA 1                                              |
| 15267 | ENS00000234996   |              | 16545 | 0.14 | antisense            | X   | 150343954 | 150343958 | GPCR3 antisense RNA 1                                              |
| 16491 | ENS0000020253893 | LOC101929100 | 16612 | 0.14 | antisense            | 8   | 8025341   | 8041136   | family with sequence similarity 85, member B                       |
| 16514 | ENS0000020254949 | HMS2T-AS1    | 16715 | 0.14 | antisense            | X   | 131801670 | 13180318  | HMS2T antisense RNA 1                                              |
| 16649 | ENS0000020254949 | CYP11B-AS1   | 16747 | 0.14 | antisense            | 1   | 38029791  | 38029791  | CYP11B antisense RNA 1                                             |
| 16652 | ENS000002025190  | AATA-AS1     | 16748 | 0.14 | antisense            | 17  | 79139307  | 79156964  | AATA antisense RNA 1                                               |
| 16705 | ENS0000020264952 |              | 16786 | 0.14 | antisense            | 17  | 19552996  | 19552488  | 1 RNA                                                              |
| 16866 | ENS00000203014   | ELOV2-AS1    | 17034 | 0.14 | antisense            | 3   | 11047459  | 11074589  | ELOV2 antisense RNA 1                                              |
| 16955 | ENS00000224808   |              | 17078 | 0.14 | antisense            | 3   | 9058077   | 9057683   | SRGA3 antisense RNA 1                                              |
| 16142 | ENS000002057842  |              | 17338 | 0.14 | antisense            | 14  | 21067616  | 21275973  | NOVAT antisense RNA 1 (head to head)                               |
| 1405  | ENS00000224041   |              | 17594 | 0.14 | IG D gene            | 2   | 10038494  | 10038499  | immunoglobulin heavy diversity 4-11 (non-functional)               |
| 13130 | ENS000002029490  |              | 18412 | 0.14 | IG V gene            | 15  | 20102909  | 20183370  | immunoglobulin heavy variable 3JCR157 (pseudogene)                 |
| 11840 | ENS000002021229  |              | 13988 | 0.14 | IG J pseudogene      | 14  | 10661782  | 10661782  | immunoglobulin heavy variable 3-4 (pseudogene)                     |
| 12849 | ENS0000020178457 | LINC020314   | 14473 | 0.14 | lincRNA              | 21  | 29305662  | 29395562  | long intergenic non-protein coding RNA 314                         |
| 13046 | ENS0000020206986 | LINC020423   | 14750 | 0.14 | lincRNA              | 13  | 33451569  | 33485788  | long intergenic non-protein coding RNA 423                         |
| 3710  | ENS000002020156  | LINC020443   | 15096 | 0.14 | lincRNA              | 107 | 10726294  | 10726451  | long intergenic non-protein coding RNA 443                         |
| 13857 | ENS000002026516  | FAM138B      | 15366 | 0.14 | lincRNA              | 2   | 114334959 | 114334959 | family with sequence similarity 138, member B                      |
| 13966 | ENS000002020962  |              | 15447 | 0.14 | lincRNA              | 13  | 99612295  | 99613373  | long intergenic non-protein coding RNA 507                         |
| 14260 | ENS0000020217691 | LINC01115    | 15973 | 0.14 | lincRNA              | 7   | 752837    | 752837    | long intergenic non-protein coding RNA 1115                        |
| 14346 | ENS0000020196273 | LINC020523   | 15736 | 0.14 | lincRNA              | 14  | 101123587 | 101142406 | long intergenic non-protein coding RNA 523                         |
| 14698 | ENS000002022526  | LINC020626   | 15976 | 0.14 | lincRNA              | 1   | 168756177 | 168762124 | long intergenic non-protein coding RNA 626                         |
| 14800 | ENS0000020202921 | CASC16       | 16092 | 0.14 | lincRNA              | 16  | 5269002   | 52690017  | cancer susceptibility candidate 16 (non-protein coding)            |
| 14816 | ENS0000020257477 |              | 16097 | 0.14 | lincRNA              | 12  | 54822087  | 54823187  | long intergenic non-protein coding RNA 1154                        |
| 14984 | ENS0000020179935 | LINC020682   | 16225 | 0.14 | lincRNA              | 20  | 18769295  | 18774799  | long intergenic non-protein coding RNA 682                         |
| 15047 | ENS0000020204100 | LINC020691   | 16290 | 0.14 | lincRNA              | 11  | 11926496  | 119353145 | long intergenic non-protein coding RNA 900                         |
| 15103 | ENS0000020251372 | LINC020489   | 16329 | 0.14 | lincRNA              | 4   | 138230865 | 138454598 | long intergenic non-protein coding RNA 459                         |
| 15365 | ENS0000020206951 | ZNF503-AS1   | 16522 | 0.14 | lincRNA              | 10  | 17602977  | 17733258  | ZNF503 antisense RNA 1                                             |
| 15473 | ENS00000201133   |              | 16584 | 0.14 | lincRNA              | 12  | 5265642   | 5265642   | chromosome 12 centromeric region frame 80                          |
| 15549 | ENS0000020202062 | MIRLET7D-IT2 | 16670 | 0.14 | lincRNA              | 9   | 96938884  | 96968850  | MIRLET7D long non-protein coding                                   |
| 15719 | ENS000002011690  | LINC00574    | 16797 | 0.14 | lincRNA              | 6   | 17016417  | 170202669 | long intergenic non-protein coding RNA 574                         |
| 15720 | ENS000002013739  |              | 16812 | 0.14 | lincRNA              | 12  | 1262814   | 1262814   | long intergenic non-protein coding RNA 582                         |
| 16172 | ENS000002047624  | CPEB2-AS1    | 17155 | 0.14 | lincRNA              | 4   | 14911585  | 15003699  | CPEB2 antisense RNA 1 (head to head)                               |
| 4751  | ENS00000202761   | MIR635       | 7308  | 0.14 | miRNA                | 17  | 66420592  | 66420689  | miR-635                                                            |
| 6935  | ENS000002024601  | MIR425       | 6271  | 0.14 | miRNA                | 19  | 49817125  | 49817125  | miR-425                                                            |
| 7519  | ENS0000020218195 | MIR941-3     | 10257 | 0.14 | miRNA                | 20  | 62551085  | 62551201  | miR-941-3                                                          |
| 11412 | ENS0000020209013 | MIR652       | 13486 | 0.14 | miRNA                | X   | 109298557 | 109298954 | miR-652                                                            |
| 12554 | ENS0000021238    | MIR548L      | 14918 | 0.14 | miRNA                | 11  | 94181848  | 94181848  | miR-548L                                                           |
| 13956 | ENS0000020208555 | MIR145       | 15166 | 0.14 | miRNA                | 6   | 138756300 | 138756431 | miR-145                                                            |
| 13976 | ENS0000020207821 | MIR640       | 15375 | 0.14 | miRNA                | 19  | 19454827  | 19454967  | miR-640                                                            |
| 14231 | ENS000002024371  | MIR425       | 6271  | 0.14 | miRNA                | 19  | 49817125  | 49817125  | miR-425                                                            |
| 14443 | ENS0000020252965 | MIR276       | 15910 | 0.14 | miRNA                | 13  | 24736555  | 24736643  | miR-276                                                            |
| 14989 | ENS0000020284101 | MIR4899      | 15884 | 0.14 | miRNA                | 1   | 5622732   | 5622801   | miR-4899                                                           |
| 14707 | ENS0000020261607 | MIR626       | 16616 | 0.14 | miRNA                | 17  | 10662106  | 10662183  | miR-626                                                            |
| 14740 | ENS0000020295911 | MIR5010      | 16960 | 0.14 | miRNA                | 10  | 60662068  | 60662125  | miR-5010                                                           |
| 14989 | ENS0000020285311 | MIR4524A     | 16230 | 0.14 | miRNA                | 1   | 67095683  | 67095797  | miR-4524a                                                          |
| 15088 | ENS000002021862  | MIR1290      | 8845  | 0.14 | miRNA                | 1   | 19223995  | 19223992  | miR-1290                                                           |
| 15091 | ENS000002027296  |              | 8845  | 0.14 | miRNA                | 6   | 22637660  | 22637781  | miR-1290                                                           |
| 6847  | ENS0000020253088 |              | 9259  | 0.14 | misc. RNA            | 7   | 15209965  | 15209978  | Y RNA                                                              |
| 6744  | ENS0000020206999 |              | 9524  | 0.14 | misc. RNA            | 8   | 10094028  | 10094035  | Y RNA                                                              |
| 9805  | ENS000002021047  |              | 11672 | 0.14 | misc. RNA            | 10  | 74842252  | 74842363  | Y RNA                                                              |
| 9138  | ENS0000020207086 |              | 11699 | 0.14 | misc. RNA            | 2   | 9755392   | 9755392   | Y RNA                                                              |
| 9461  | ENS000002041868  |              | 11912 | 0.14 | misc. RNA            | 3   | 19612482  | 19612489  | RNA 7SL, cytoplasmic 434, pseudogene                               |
| 9396  | ENS0000020203311 |              | 12016 | 0.14 | misc. RNA            | 11  | 11186466  | 11186477  | Y RNA                                                              |
| 10431 | ENS0000020203030 |              | 12876 | 0.14 | misc. RNA            | 12  | 4952636   | 4952630   | Y RNA                                                              |
| 10449 | ENS0000020202081 |              | 12986 | 0.14 | misc. RNA            | 9   | 11491366  | 11491377  | Y RNA                                                              |
| 10731 | ENS0000020203664 |              | 12993 | 0.14 | misc. RNA            | 8   | 87717114  | 87717114  | RNA 7SL, cytoplasmic 743, pseudogene                               |
| 11015 | ENS000002043227  |              | 13159 | 0.14 | misc. RNA            | 4   | 110371931 | 11037224  | RNA 7SL, cytoplasmic 55, pseudogene                                |
| 11135 | ENS000002019530  |              | 13250 | 0.14 | misc. RNA            | 4   | 8386581   | 8386588   | Y RNA                                                              |
| 11481 | ENS0000020202326 |              | 13593 | 0.14 | misc. RNA            | 4   | 12692118  | 12692118  | Y RNA                                                              |
| 12365 | ENS000002021388  |              | 14252 | 0.14 | misc. RNA            | 9   | 132883085 | 132883191 | Y RNA                                                              |
| 12449 | ENS000002041983  |              | 14315 | 0.14 | misc. RNA            | 19  | 39859793  | 39860089  | RNA 7SL, cytoplasmic 566, pseudogene                               |
| 12998 | ENS0000020202111 |              | 14331 | 0.14 | misc. RNA            | 15  | 15141088  | 15141071  | RNA, Reverse-transcriptase 276                                     |
| 13530 | ENS0000020199762 |              | 15120 | 0.14 | misc. RNA            | 6   | 47456803  | 47456906  | Y RNA                                                              |
| 13626 | ENS0000020252615 |              | 15193 | 0.14 | misc. RNA            | 6   | 151699135 | 151699234 | Y RNA                                                              |
| 13977 | ENS0000020202611 |              | 15266 | 0.14 | misc. RNA            | 6   | 22961417  | 22961417  | RNA 7SK small nuclear pseudogene 276                               |
| 14269 | ENS000002043370  |              | 15679 | 0.14 | misc. RNA            | 17  | 17081279  | 17082020  | RNA 7SL, cytoplasmic 775, pseudogene                               |
| 14466 | ENS0000020204113 | LOC101927137 | 15830 | 0.14 | misc. RNA            | 17  | 4786270   | 4786591   | RNA 7SL, cytoplasmic 784, pseudogene                               |
| 14502 | ENS0000020202064 |              | 15833 | 0.14 | misc. RNA            | 4   | 6763193   | 6763193   | RNA 7SL, cytoplasmic 297, pseudogene                               |
| 14560 | ENS0000020229822 |              | 15902 | 0.14 | misc. RNA            | 10  | 476181    | 476444    | RNA 7SL, cytoplasmic 754, pseudogene                               |
| 14596 | ENS0000020252485 |              | 15927 | 0.14 | misc. RNA            | 2   | 208872604 | 208872688 | Vault RNA                                                          |
| 14603 | ENS0000020202631 |              | 15934 | 0.14 | misc. RNA            | 10  | 3228348   | 3228348   | RNA 7SL, cytoplasmic 825, pseudogene                               |
| 14624 | ENS000002021012  |              | 15953 | 0.14 | misc. RNA            | 6   | 13575642  | 13575747  | Y RNA                                                              |
| 14756 | ENS0000020202279 |              | 16047 | 0.14 | misc. RNA            | X   | 13898936  | 13898937  | Y RNA                                                              |
| 14781 | ENS000002021748  |              | 16047 | 0.14 | misc. RNA            | 11  | 11733748  | 11733748  | Y RNA                                                              |
| 14862 | ENS0000020202028 |              | 16163 | 0.14 | misc. RNA            | 12  | 5473634   | 5473645   | RNA 7SL, cytoplasmic 744, pseudogene                               |
| 14927 | ENS0000020252985 |              | 16183 | 0.14 | misc. RNA            | 12  | 27965807  | 27965919  | Y RNA                                                              |
| 14933 | ENS0000020206710 |              | 16183 | 0.14 | misc. RNA            | 6   | 18903883  | 18903883  | RNA 7SL, cytoplasmic 44, pseudogene                                |
| 15027 | ENS000002040183  |              | 16292 | 0.14 | misc. RNA            | 2   | 11289732  | 11289804  | RNA 7SL, cytoplasmic 297, pseudogene                               |
| 15064 | ENS0000020206369 |              | 16300 | 0.14 | misc. RNA            | 2   | 70302150  | 70302404  | RNA 7SL, cytoplasmic 470, pseudogene                               |
| 15088 | ENS0000020204978 |              | 16313 | 0.14 | misc. RNA            | 12  | 84225148  | 84225148  | RNA 7SL, cytoplasmic 630, pseudogene                               |
| 15330 | ENS0000020232361 |              | 16493 | 0.14 | misc. RNA            | 17  | 59951445  | 59951445  | Y RNA                                                              |
| 2124  | ENS0000020235511 |              | 13319 | 0.14 | processed pseudogene | 9   | 131104432 | 131105049 | thymosin beta 4, 2-linked pseudogene 4                             |
| 2943  | ENS000002023676  |              | 6669  | 0.14 | processed pseudogene | 8   | 10776955  | 10777043  | integrin 1 pseudogene 1                                            |
| 6303  | ENS0000020198901 |              | 8627  | 0.14 | processed pseudogene | 3   | 9995110   | 9995110   | zinc finger protein 32 pseudogene 1                                |
| 8309  | ENS0000020226049 |              | 9098  | 0.14 | processed pseudogene | 17  | 32363700  | 32366891  | tusled-like kinase 2 pseudogene 1                                  |
| 6946  | ENS0000020202703 |              | 9618  | 0.14 | processed pseudogene | 17  | 67344874  | 67351102  | small nuclear ribonucleoprotein polypeptide G pseudogene 4         |
| 9378  | ENS0000020203916 |              | 9618  | 0.14 | processed pseudogene | 21  | 15390914  | 15390914  | ras homolog family member 11 pseudogene 2                          |
| 6683  | ENS0000020177173 |              | 10118 | 0.14 | processed pseudogene | 1   | 117097558 | 117097558 | nucleosome assembly protein 1-like 4 pseudogene 1                  |
| 9078  | ENS000002015529  |              | 11622 | 0.14 | processed pseudogene | 7   | 12626016  | 12626940  | capicua transcriptional repressor pseudogene 14                    |
| 10503 | ENS0000020270427 |              | 12734 | 0.14 | processed pseudogene | 16  | 11128081  | 11128081  | ribosomal protein L7 pseudogene 46                                 |
| 10871 | ENS0000020252226 |              | 13043 | 0.14 | processed pseudogene | 8   | 10899544  | 10899544  | nuclear receptor binding factor 2 pseudogene 4                     |
| 11814 | ENS0000020202378 |              | 13257 | 0.14 | processed pseudogene | 6   | 16999378  | 16999378  | mitochondrial ribosomal protein S10 pseudogene 1                   |
| 11818 | ENS0000020202950 |              | 13840 | 0.14 | processed pseudogene | 2   | 85101829  | 85102144  | ribosomal protein L12 pseudogene 18                                |
| 12091 | ENS000002041464  |              | 14023 | 0.14 | processed pseudogene | 3   | 128497381 | 128498332 | MAP1B/indole 3-pyruvate synthase pseudogene 1                      |
| 12383 | ENS0000020234652 |              | 14281 | 0.14 | processed pseudogene | Y   | 3161849   | 3162897   | 1-acylglycerol-3-phosphate O-acyltransferase 5 pseudogene 1        |
| 12706 | ENS0000020225364 |              | 14569 | 0.14 | processed pseudogene | 5   | 132284185 | 132284185 | ATPase, H+ transporting, lysosomal 9kDa, VO subunit 1 pseudogene 1 |
| 12787 | ENS000002022347  |              |       |      |                      |     |           |           |                                                                    |



|       |                 |       |      |                      |    |           |           |                                                                                         |
|-------|-----------------|-------|------|----------------------|----|-----------|-----------|-----------------------------------------------------------------------------------------|
| 14513 | ENSG00000248880 | 15864 | 0.14 | processed_pseudogene | 4  | 18933825  | 189310820 | NMDA receptor regulated 2 pseudogene 1                                                  |
| 14517 | ENSG00000255718 | 15870 | 0.14 | processed_pseudogene | 8  | 860448    | 860448    | heterogeneous nuclear ribonucleoprotein A1 pseudogene 37                                |
| 14533 | ENSG00000241088 | 15883 | 0.14 | processed_pseudogene | 18 | 60082011  | 60083460  | ribosomal protein L1T pseudogene 44                                                     |
| 14542 | ENSG00000248336 | 15891 | 0.14 | processed_pseudogene | 4  | 63376187  | 63376489  | high mobility group nucleosome binding domain 1 pseudogene 11                           |
| 14555 | ENSG00000237952 | 15900 | 0.14 | processed_pseudogene | 13 | 23377439  | 23377787  | ribosomal protein L7A pseudogene 73                                                     |
| 14565 | ENSG00000229221 | 15928 | 0.14 | processed_pseudogene | 2  | 63979833  | 63979834  | heterogeneous nuclear ribonucleoprotein A1 pseudogene 66                                |
| 14599 | ENSG00000215351 | 15930 | 0.14 | processed_pseudogene | 21 | 22200445  | 22200445  | peptidylprolyl isomerase A (cyclophilin A) pseudogene 1                                 |
| 14601 | ENSG00000248191 | 15976 | 0.14 | processed_pseudogene | 4  | 13548218  | 13548293  | perlecan fibronectin biosynthesis factor 1 pseudogene 1                                 |
| 14728 | ENSG00000249992 | 16016 | 0.14 | processed_pseudogene | 11 | 18290884  | 18290884  | ribosomal protein S8 pseudogene 16                                                      |
| 14794 | ENSG00000215438 | 16028 | 0.14 | processed_pseudogene | 13 | 60848190  | 60848190  | TAR DNA binding protein pseudogene 2                                                    |
| 14820 | ENSG00000250490 | 16104 | 0.14 | processed_pseudogene | 8  | 3287279   | 32874581  | ribosomal protein S23 pseudogene 4                                                      |
| 14866 | ENSG00000250591 | 16109 | 0.14 | processed_pseudogene | 17 | 87963962  | 87963962  | small nuclear ribonucleoprotein polypeptide G pseudogene 17                             |
| 14872 | ENSG00000244900 | 16142 | 0.14 | processed_pseudogene | 12 | 11237142  | 11237142  | Y box binding protein 2 pseudogene 1                                                    |
| 14880 | ENSG00000223982 | 16146 | 0.14 | processed_pseudogene | 1  | 231811102 | 231812034 | nucleoskeleton 1 (nucleolar phosphoprotein B23, numatrin) pseudogene 45                 |
| 14891 | ENSG00000223918 | 16162 | 0.14 | processed_pseudogene | 5  | 11555373  | 115553992 | ribosomal protein S2 pseudogene 41                                                      |
| 14914 | ENSG00000226827 | 16175 | 0.14 | processed_pseudogene | 7  | 11297308  | 11298162  | high mobility group nucleosomal binding domain 2 pseudogene 27                          |
| 14940 | ENSG00000253405 | 16191 | 0.14 | processed_pseudogene | 8  | 142489175 | 142470131 | nucleoskeleton 1 (small nuclear ribonucleoprotein D2) pseudogene 2                      |
| 14969 | ENSG00000221981 | 16202 | 0.14 | processed_pseudogene | 1  | 17033804  | 17033908  | nucleoskeleton 1 (nucleolar phosphoprotein B23, numatrin) pseudogene 11                 |
| 15041 | ENSG00000213355 | 16274 | 0.14 | processed_pseudogene | 2  | 95403082  | 95403084  | heterogeneous nuclear ribonucleoprotein A1 pseudogene 38                                |
| 15046 | ENSG00000251568 | 16280 | 0.14 | processed_pseudogene | 5  | 5737583   | 57376949  | HAUS augmin-like complex, subunit G pseudogene 1                                        |
| 15070 | ENSG00000215277 | 16304 | 0.14 | processed_pseudogene | 6  | 87831411  | 87832408  | calponin 2 pseudogene 8                                                                 |
| 15091 | ENSG00000270098 | 16329 | 0.14 | processed_pseudogene | 4  | 72300122  | 72303641  | ALG3, alpha-1,3-mannosyltransferase pseudogene 1                                        |
| 15116 | ENSG00000213559 | 16338 | 0.14 | processed_pseudogene | 3  | 57927545  | 57928031  | nucleoskeleton 1, EF-hand calcium binding domain pseudogene 1                           |
| 15124 | ENSG00000202185 | 16366 | 0.14 | processed_pseudogene | 1  | 53460398  | 53461698  | peptidylprolyl isomerase A (cyclophilin A) pseudogene 16                                |
| 15171 | ENSG00000228147 | 16386 | 0.14 | processed_pseudogene | 1  | 53460398  | 53461698  | CCNA-NOT transcription complex, subunit 7 pseudogene 2                                  |
| 15226 | ENSG00000242498 | 16428 | 0.14 | processed_pseudogene | 21 | 35507327  | 35508317  | lactate dehydrogenase A-like (E6, pseudogene)                                           |
| 15507 | ENSG00000229814 | 16532 | 0.14 | processed_pseudogene | 3  | 93707478  | 93707790  | leucine zipper-EF-hand calcium binding domain pseudogene 1                              |
| 15551 | ENSG00000259563 | 16672 | 0.14 | processed_pseudogene | 12 | 133548924 | 133549476 | high mobility group nucleosome binding domain 1 pseudogene 7                            |
| 15634 | ENSG00000203113 | 16702 | 0.14 | processed_pseudogene | 8  | 8831186   | 8831186   | NANOGN8 pseudogene 2                                                                    |
| 15651 | ENSG00000202922 | 16748 | 0.14 | processed_pseudogene | 15 | 42873354  | 42873986  | cytochrome oxidase subunit VIc pseudogene 16                                            |
| 15768 | ENSG00000270382 | 16830 | 0.14 | processed_pseudogene | 10 | 74905844  | 74906083  | eukaryotic translation initiation factor 4E binding protein 2 pseudogene 2              |
| 15781 | ENSG00000202922 | 16830 | 0.14 | processed_pseudogene | 8  | 7431508   | 7431508   | eukaryotic translation initiation factor 4A2 pseudogene 2                               |
| 15970 | ENSG00000241984 | 16995 | 0.14 | processed_pseudogene | 14 | 39682546  | 39682546  | PKCdelta pseudogene 2                                                                   |
| 16267 | ENSG00000230997 | 17225 | 0.14 | processed_pseudogene | 14 | 90388132  | 90388132  | ribosomal protein L7a pseudogene 2                                                      |
| 16278 | ENSG00000250481 | 17248 | 0.14 | processed_pseudogene | 1  | 409118    | 409118    |                                                                                         |
| 14760 | ENSG00000275911 | 17049 | 0.14 | processed_transcript | 9  | 98512153  | 98512153  | RAS2 antisense RNA 1 (head to head)                                                     |
| 16653 | ENSG00000260986 | 18748 | 0.14 | processed_transcript | X  | 148993049 | 148993359 | long intergenic non-coding RNA 476                                                      |
| 16660 | ENSG00000259959 | 18754 | 0.14 | processed_transcript | X  | 17541768  | 17541768  | FMR1 antisense RNA 1                                                                    |
| 988   | ENSG00000158234 | 1734  | 0.14 | protein_coding       | 4  | 7843298   | 7852388   | ZRANB3 antisense RNA 2 (head to head)                                                   |
| 998   | ENSG00000138755 | 1779  | 0.14 | protein_coding       | 4  | 78922428  | 78922428  | chemokine (C-X-C motif) ligand 13                                                       |
| 1129  | ENSG0000017224  | 1873  | 0.14 | protein_coding       | 8  | 78922428  | 78922428  | chemokine (C-X-C motif) ligand 9                                                        |
| 1073  | ENSG00000209268 | 1879  | 0.14 | protein_coding       | 21 | 38569768  | 38569768  | chemokine (C-X-C motif) ligand 19                                                       |
| 1188  | ENSG00000213886 | 2059  | 0.14 | protein_coding       | 1  | 29523252  | 2952702   | ubiquitin D                                                                             |
| 2242  | ENSG00000198491 | 2061  | 0.14 | protein_coding       | 1  | 18629578  | 18629578  | CD7 molecule                                                                            |
| 2175  | ENSG00000204927 | 2148  | 0.14 | protein_coding       | 1  | 11481708  | 11481708  | tumor necrosis factor receptor superfamily, member 4                                    |
| 2816  | ENSG00000100079 | 2481  | 0.14 | protein_coding       | 22 | 37962626  | 37962626  | lectin, galactoside-binding, soluble, 2                                                 |
| 2938  | ENSG00000204010 | 3171  | 0.14 | protein_coding       | 10 | 8113718   | 8113718   | interferon-induced protein with tetrahydropteridyl repeats 1B                           |
| 2922  | ENSG00000114868 | 3149  | 0.14 | protein_coding       | 42 | 43362492  | 43362492  | solute carrier family 14 (solute transporter), member 1 (Kidd blood group)              |
| 3038  | ENSG00000111666 | 3471  | 0.14 | protein_coding       | 12 | 10200725  | 10213718  | choline phosphotransferase 1                                                            |
| 3033  | ENSG00000171552 | 4272  | 0.14 | protein_coding       | 20 | 3025225   | 30211792  | BC2L1-like 1                                                                            |
| 3088  | ENSG00000191426 | 4827  | 0.14 | protein_coding       | 20 | 47753290  | 47753290  | complement component 5a receptor 1                                                      |
| 3171  | ENSG00000137101 | 4973  | 0.14 | protein_coding       | 9  | 3569539   | 3569539   | CD72 molecule                                                                           |
| 3180  | ENSG00000173886 | 4983  | 0.14 | protein_coding       | 17 | 47300724  | 47300724  | cytochrome oxidase subunit I                                                            |
| 3189  | ENSG00000182886 | 5017  | 0.14 | protein_coding       | 6  | 21809926  | 21809926  | desmoplakin binding protein                                                             |
| 3221  | ENSG00000182885 | 5047  | 0.14 | protein_coding       | 6  | 5770209   | 5770209   | G-protein coupled receptor 97                                                           |
| 3285  | ENSG00000131296 | 5153  | 0.14 | protein_coding       | 1  | 4050595   | 4050595   | CAP, adenylyl cyclase-associated protein 1 (yeast)                                      |
| 3434  | ENSG00000198128 | 5203  | 0.14 | protein_coding       | 16 | 5248156   | 5248156   | major histocompatibility complex, class II, DR beta 1                                   |
| 3433  | ENSG00000181444 | 5404  | 0.14 | protein_coding       | 7  | 148481271 | 148470568 | zinc finger protein 467                                                                 |
| 3446  | ENSG00000184730 | 5503  | 0.14 | protein_coding       | 16 | 2850570   | 28510291  | zinc finger protein 8 receptor                                                          |
| 3498  | ENSG00000197963 | 5518  | 0.14 | protein_coding       | 16 | 8471184   | 8471184   | membrane-associated protein C12L 2 (G alpha13 protein ligase)                           |
| 3677  | ENSG00000177105 | 5610  | 0.14 | protein_coding       | 11 | 3848208   | 3862213   | ras homology family member G                                                            |
| 3685  | ENSG00000258809 | 5714  | 0.14 | protein_coding       | 10 | 14560556  | 14816986  | family with sequence similarity 107, member B                                           |
| 3758  | ENSG0000011198  | 5727  | 0.14 | protein_coding       | 10 | 43721162  | 43721162  | ubiquitin domain-containing 2                                                           |
| 3768  | ENSG00000213389 | 5813  | 0.14 | protein_coding       | 6  | 33032346  | 33048552  | major histocompatibility complex, class II, DP alpha 1                                  |
| 3789  | ENSG00000208002 | 5834  | 0.14 | protein_coding       | 4  | 178331924 | 178336357 | asparaginylglycosylaminidase                                                            |
| 3835  | ENSG00000201227 | 6007  | 0.14 | protein_coding       | 14 | 76881268  | 76881268  | basic leucine zipper transcription factor, ATF-like                                     |
| 3863  | ENSG00000254413 | 6081  | 0.14 | protein_coding       | 22 | 51007298  | 51021394  | CHKB-CPT1B readthrough (NMD candidate)                                                  |
| 3905  | ENSG00000135272 | 6129  | 0.14 | protein_coding       | 7  | 114562209 | 114562209 | MyD family intracellular domain containing                                              |
| 3941  | ENSG00000148353 | 6129  | 0.14 | protein_coding       | 8  | 8208124   | 8208124   | guanine nucleotide binding protein (G-protein), alpha inhibitory activity polypeptide 2 |
| 3960  | ENSG00000174844 | 6208  | 0.14 | protein_coding       | 3  | 15059205  | 15059205  | guanine nucleotide binding protein (G-protein), alpha 12                                |
| 3989  | ENSG00000132340 | 6283  | 0.14 | protein_coding       | 10 | 1314449   | 1314449   | ophrin                                                                                  |
| 4017  | ENSG00000181868 | 6294  | 0.14 | protein_coding       | 10 | 386824    | 386824    | transmembrane protein 158                                                               |
| 4022  | ENSG00000131274 | 6295  | 0.14 | protein_coding       | X  | 11786155  | 11786202  | SEC13-like 1, receptor, alpha 1                                                         |
| 4027  | ENSG00000128657 | 6342  | 0.14 | protein_coding       | 17 | 7808798   | 7813179   | SEC14-like 1 (S. cerevisiae)                                                            |
| 4065  | ENSG00000199177 | 6383  | 0.14 | protein_coding       | 13 | 9108811   | 9108811   | interferon-induced protein with tetrahydropteridyl repeats 3                            |
| 4128  | ENSG00000209926 | 6440  | 0.14 | protein_coding       | 18 | 59215515  | 59254004  | ferrochelatase                                                                          |
| 4129  | ENSG00000191148 | 6441  | 0.14 | protein_coding       | 18 | 334273    | 334273    | nitrogen permease ferredoxin-like 3 (S. cerevisiae)                                     |
| 4131  | ENSG00000151533 | 6442  | 0.14 | protein_coding       | 17 | 7943128   | 7943128   | anti-Cdk1 cyclin 1, paimin1                                                             |
| 4190  | ENSG00000154814 | 6532  | 0.14 | protein_coding       | 19 | 39076281  | 39190522  | mitogen-activated protein kinase kinase kinase 1                                        |
| 4281  | ENSG00000173114 | 6656  | 0.14 | protein_coding       | 7  | 110731062 | 11076510  | leucine rich repeat neuronal 3                                                          |
| 4304  | ENSG00000192207 | 6718  | 0.14 | protein_coding       | 13 | 4626287   | 4626287   | cytoskeleton leukotriene receptor 2                                                     |
| 4332  | ENSG00000149913 | 6727  | 0.14 | protein_coding       | 10 | 6663777   | 6664779   | CKLF-like MARVEL transmembrane domain containing 3                                      |
| 4330  | ENSG00000144118 | 6733  | 0.14 | protein_coding       | 2  | 12099740  | 12105229  | v-src family tyrosine viral oncogene homolog B                                          |
| 4348  | ENSG00000178784 | 6762  | 0.14 | protein_coding       | 8  | 12379683  | 12386970  | zinc fingers and homeobox 2                                                             |
| 4384  | ENSG00000194781 | 6800  | 0.14 | protein_coding       | 9  | 63914154  | 63914154  | ankyrin family member 3                                                                 |
| 4417  | ENSG00000097264 | 6867  | 0.14 | protein_coding       | 9  | 3797797   | 3802127   | megalocystocyte-associated tyrosine kinase                                              |
| 4442  | ENSG00000188178 | 6869  | 0.14 | protein_coding       | 12 | 1245168   | 1245168   | complement component 1, subcomponent-like                                               |
| 4450  | ENSG00000208263 | 6904  | 0.14 | protein_coding       | 8  | 3381544   | 3381544   | transmembrane protein 14                                                                |
| 4451  | ENSG00000202277 | 6911  | 0.14 | protein_coding       | 9  | 42592683  | 42700737  | POU class 2 homeobox 2                                                                  |
| 4454  | ENSG00000170379 | 6919  | 0.14 | protein_coding       | 7  | 143318043 | 143427802 | family with sequence similarity 115, member C                                           |
| 4456  | ENSG00000184001 | 6919  | 0.14 | protein_coding       | 7  | 30371202  | 30371202  | protein tyrosine phosphatase type 11A, member 2                                         |
| 4570  | ENSG00000195054 | 7075  | 0.14 | protein_coding       | 7  | 116018115 | 116037869 | cell division cycle 28                                                                  |
| 4576  | ENSG00000195476 | 7075  | 0.14 | protein_coding       | 10 | 2933922   | 2934215   | membrane protein, palmitoylated 7 (MAGUK p55 subfamily member 7)                        |
| 4610  | ENSG00000209269 | 7118  | 0.14 | protein_coding       | 17 | 73823306  | 73840798  | vesicular, cytoskeleton 1 on cytoskeleton, protein 1                                    |
| 4651  | ENSG00000191208 | 7188  | 0.14 | protein_coding       | 5  | 1316310   | 13167989  | solute carrier family 22 (organic cation/zwitterion transporter), member 4              |
| 4677  | ENSG00000192466 | 7179  | 0.14 | protein_coding       | 5  | 41901117  | 41901117  | ribonucleoside diphosphate substrate 2, 3kDa                                            |
| 4747  | ENSG00000150204 | 7295  | 0.14 | protein_coding       | 8  | 12918849  | 129244891 | ET4-like factor 4 (tet domain transcription factor)                                     |
| 4757  | ENSG00000159753 | 7312  | 0.14 | protein_coding       | 16 | 6767822   | 67691472  | RGD motif leucine rich repeats, intronless domain and proline-rich containing           |
| 4768  | ENSG00000133931 | 7341  | 0.14 | protein_coding       | 10 | 11582523  | 11582523  | solute carrier family 10 (neutral amino acid transporter), member AC1                   |
| 4778  | ENSG00000120899 | 7351  | 0.14 | protein_coding       | 8  | 2716899   | 2716903   | protein tyrosine kinase 2 beta                                                          |
| 4780  | ENSG00000128354 | 7352  | 0.14 | protein_coding       | X  | 118749887 | 11882733  | scp16                                                                                   |
| 4820  | ENSG00000192977 | 7433  | 0.14 | protein_coding       | 1  | 4702900   | 4702915   | MAP kinase interacting serine/threonine kinase 1                                        |
| 4892  | ENSG00000101071 | 7509  | 0.14 | protein_coding       | X  | 100       |           |                                                                                         |

|       |                 |          |       |   |      |                    |    |          |           |                                                                             |
|-------|-----------------|----------|-------|---|------|--------------------|----|----------|-----------|-----------------------------------------------------------------------------|
| 7929  | ENSG00000183738 | HTRK1    | 10263 | 2 | 0.14 | protein_coding     | 12 | 6485560  | 6485988   | TANF-binding kinase 1                                                       |
| 7931  | ENSG00000190548 | MIR1871  | 10263 | 3 | 0.14 | antisense_intronic | 14 | 4567243  | 4567243   | 45S18 binding protein 1                                                     |
| 7939  | ENSG00000039442 | POSS5    | 10268 | 6 | 0.14 | protein_coding     | 13 | 3316054  | 33352157  | POSS5, regulator of cohesion maintenance, homolog B (S. cerevisiae)         |
| 7963  | ENSG00000122008 | POLK     | 10676 | 5 | 0.14 | protein_coding     | 5  | 74807581 | 74809669  | polymerase (DNA directed) kappa                                             |
| 7971  | ENSG00000040528 | ZNF280   | 10678 | 4 | 0.14 | protein_coding     | 19 | 56281023 | 56311307  | zinc finger protein 586                                                     |
| 8011  | ENSG00000135551 | PPW1C    | 10717 | 3 | 0.14 | protein_coding     | 5  | 6485560  | 6485560   | poly(ADP-ribose) polymerase 3 and WD repeat containing 1                    |
| 8024  | ENSG00000235863 | B3GAL74  | 10730 | 1 | 0.14 | protein_coding     | 6  | 33244917 | 33252009  | UDP-Gal-beta:GlcNAc beta 1,3-galactosyltransferase, polypeptide 4           |
| 8061  | ENSG00000196233 | LCCR     | 10769 | 4 | 0.14 | protein_coding     | 10 | 9852017  | 9874900   | ligand dependent nuclear receptor corepressor                               |
| 8075  | ENSG00000171965 | ZNF217   | 10833 | 4 | 0.14 | protein_coding     | 4  | 5213908  | 52228446  | zinc finger protein 217                                                     |
| 8162  | ENSG00000048471 | SMK29    | 10832 | 3 | 0.14 | protein_coding     | 16 | 12075994 | 12088946  | sorting nexin 29                                                            |
| 8179  | ENSG00000196589 | LIBA     | 10852 | 6 | 0.14 | protein_coding     | 4  | 15185584 | 15183679  | LPS-responsive vesicle trafficking, beach and anchor containing             |
| 8272  | ENSG00000202891 | ZEB2L    | 10927 | 2 | 0.14 | protein_coding     | 11 | 10833953 | 10833953  | zinc finger, BED-type containing 58                                         |
| 8303  | ENSG00000146221 | CCDC82   | 10972 | 7 | 0.14 | protein_coding     | 11 | 98085533 | 98123087  | coiled-coil domain containing 82                                            |
| 8373  | ENSG00000100483 | VCPW1    | 11029 | 4 | 0.14 | protein_coding     | 14 | 5057530  | 5058310   | vacuolar containing protein lysine (K) methyltransferase                    |
| 8421  | ENSG00000101921 | DNK8     | 11097 | 7 | 0.14 | protein_coding     | 17 | 4282452  | 4282452   | GCN5 (Ada-class) box polypeptide 58                                         |
| 8584  | ENSG00000136709 | WOR33    | 11209 | 9 | 0.14 | protein_coding     | 2  | 12848586 | 12856561  | WD repeat domain 33                                                         |
| 8680  | ENSG00000138296 | NUP122   | 11456 | 1 | 0.14 | protein_coding     | 17 | 2754284  | 27621136  | nuclear fragile X mental retardation protein interacting protein 2          |
| 8690  | ENSG00000197174 | ZNF460   | 11506 | 4 | 0.14 | protein_coding     | 19 | 5718419  | 57304837  | zinc finger protein 460                                                     |
| 9235  | ENSG00000135250 | SRPK2    | 11733 | 4 | 0.14 | protein_coding     | 7  | 10475151 | 10503975  | SRSF protein kinase 2                                                       |
| 9644  | ENSG00000149292 | INTS4    | 12069 | 7 | 0.14 | protein_coding     | 11 | 7789766  | 77705724  | integrator complex subunit 4                                                |
| 9668  | ENSG00000202443 | ZNF776   | 12094 | 2 | 0.14 | protein_coding     | 19 | 3263164  | 32630152  | zinc finger protein 776                                                     |
| 9668  | ENSG00000105778 | AVL9     | 12088 | 9 | 0.14 | protein_coding     | 7  | 3253058  | 33078516  | AVL9 homolog (S. cerevisiae)                                                |
| 9679  | ENSG00000153933 | DGKE     | 12252 | 6 | 0.14 | protein_coding     | 17 | 54911460 | 54944036  | diacylglycerol kinase, epsilon 64kDa                                        |
| 9925  | ENSG00000125900 | SBRP     | 12280 | 5 | 0.14 | protein_coding     | 20 | 1534697  | 1534849   | signal-regulatory protein delta                                             |
| 9968  | ENSG00000128908 | INCB0    | 12315 | 6 | 0.14 | protein_coding     | 15 | 4127078  | 41408552  | INO80 complex subunit                                                       |
| 10172 | ENSG00000117643 | MAN1C1   | 12480 | 1 | 0.14 | protein_coding     | 1  | 29943959 | 26112698  | mannosidase, alpha, class 1C, member 1                                      |
| 10181 | ENSG00000202920 | IBP8     | 12491 | 1 | 0.14 | protein_coding     | 14 | 28624927 | 28629611  | G3 ubiquitin-protein ligase RNF31                                           |
| 10328 | ENSG00000197520 | FAM177B  | 12584 | 8 | 0.14 | protein_coding     | 4  | 22291049 | 22292447  | family with sequence similarity 177, member B                               |
| 10479 | ENSG00000198488 | TMEM165A | 12719 | 5 | 0.14 | protein_coding     | 17 | 4136358  | 41372061  | transmembrane protein 165A                                                  |
| 10671 | ENSG00000165714 | TRIP10   | 12810 | 3 | 0.14 | protein_coding     | 11 | 14826303 | 14826303  | peptidylglyoxal isomerase A (cystopallin A-like 4D)                         |
| 10680 | ENSG00000202484 | INP5B    | 13001 | 8 | 0.14 | protein_coding     | 1  | 3832636  | 38417229  | inositol polyphosphate-5-phosphatase, 75kDa                                 |
| 10977 | ENSG00000188542 | DUSP28   | 13136 | 6 | 0.14 | protein_coding     | 2  | 24149471 | 24150341  | dual specificity phosphatase 28                                             |
| 11108 | ENSG00000158821 | PCSTL1   | 13207 | 1 | 0.14 | protein_coding     | 11 | 14871670 | 14871670  | invariant polyphosphatase 1 like                                            |
| 11180 | ENSG00000157036 | EOC3     | 13287 | 1 | 0.14 | protein_coding     | 3  | 38537618 | 38538352  | endotoxin-conjugase (E-3)-1, endotoxin-conjugase G-like                     |
| 11410 | ENSG00000202444 | ZNF736   | 13847 | 5 | 0.14 | protein_coding     | 7  | 6376787  | 63815238  | zinc finger protein 736                                                     |
| 11767 | ENSG00000165939 | TRIP19   | 14059 | 3 | 0.14 | protein_coding     | 17 | 14737608 | 14737608  | senne polyphosphatase 3                                                     |
| 11844 | ENSG00000118138 | DNAC16   | 13984 | 5 | 0.14 | protein_coding     | 7  | 1585308  | 15918874  | DNAI (Hsp40) homolog, subfamily C, member 16                                |
| 11971 | ENSG00000154263 | ABCA10   | 13959 | 5 | 0.14 | protein_coding     | 17 | 6714335  | 67240987  | ATP-binding cassette, sub-family A (ABC1), member 10                        |
| 12143 | ENSG00000195883 | ATM1     | 14059 | 3 | 0.14 | protein_coding     | 14 | 784818   | 784818    | ATM1 homolog 3                                                              |
| 12271 | ENSG00000117262 | GPR98B   | 14175 | 5 | 0.14 | protein_coding     | 11 | 15784411 | 145827103 | G protein-coupled receptor 98A                                              |
| 12360 | ENSG00000190783 | TEX12    | 14250 | 1 | 0.14 | protein_coding     | 11 | 11203895 | 11243282  | testis expressed 12                                                         |
| 12368 | ENSG00000100472 | CATSPER1 | 14263 | 1 | 0.14 | protein_coding     | 19 | 479624   | 479624    | cat sperm protein 17                                                        |
| 12387 | ENSG00000133962 | CATSPERB | 14263 | 1 | 0.14 | protein_coding     | 14 | 9204700  | 92347051  | cat sperm auxiliary subunit beta                                            |
| 12530 | ENSG00000202324 | SLC26A8  | 14382 | 1 | 0.14 | protein_coding     | 5  | 33897279 | 34124633  | Complement C1a tumor necrosis factor-related protein 3                      |
| 12538 | ENSG00000116555 | SLC26A8  | 14382 | 1 | 0.14 | protein_coding     | 6  | 59911291 | 35926205  | solute carrier family 26 (anion exchanger), member 8                        |
| 12883 | ENSG00000158821 | STOML3   | 14542 | 3 | 0.14 | protein_coding     | 16 | 38643082 | 38643082  | stromalysin 3                                                               |
| 12894 | ENSG00000148655 | C10orf11 | 14447 | 3 | 0.14 | protein_coding     | 10 | 7736098  | 78191925  | chromosome 10 open reading frame 11                                         |
| 12979 | ENSG00000202553 | TNFR10   | 14459 | 1 | 0.14 | protein_coding     | 3  | 5091029  | 50910112  | transmembrane protein 110                                                   |
| 12986 | ENSG00000178171 | ZNF619   | 14712 | 7 | 0.14 | protein_coding     | 5  | 49518004 | 49531127  | zinc finger protein 619                                                     |
| 13025 | ENSG00000178175 | ZNF366   | 14737 | 3 | 0.14 | protein_coding     | 5  | 71738479 | 71803564  | zinc finger protein 366                                                     |
| 13100 | ENSG00000188817 | SNRN1    | 14782 | 2 | 0.14 | protein_coding     | 3  | 6363834  | 6369498   | snRNA, class small nuclear protein                                          |
| 13186 | ENSG00000197329 | NKX2-2   | 14827 | 3 | 0.14 | protein_coding     | 14 | 80742581 | 80784181  | NKX2-2, nuclear factor 1, subfamily E, member 2                             |
| 13366 | ENSG00000244355 | LYG6D    | 14997 | 8 | 0.14 | protein_coding     | 6  | 11683133 | 31685581  | lymphocyte antigen 6 complex, locus G6D                                     |
| 13388 | ENSG00000214021 | OR11L3   | 15016 | 1 | 0.14 | protein_coding     | 3  | 9849710  | 9898922   | olfactory receptor, family 1, subfamily C, member 11                        |
| 13454 | ENSG00000198984 | CLNK     | 15181 | 8 | 0.14 | protein_coding     | 4  | 1048019  | 1088849   | cytokine-dependent hematopoietic cell linker                                |
| 13495 | ENSG00000183806 | SPDYA    | 15096 | 3 | 0.14 | protein_coding     | 2  | 2300583  | 29073477  | speedy/RINGO cell cycle regulator family member A                           |
| 13596 | ENSG00000198984 | CLNK     | 15181 | 8 | 0.14 | protein_coding     | 4  | 1048019  | 1088849   | cytokine-dependent hematopoietic cell linker                                |
| 13601 | ENSG00000198984 | CLNK     | 15181 | 8 | 0.14 | protein_coding     | 4  | 1048019  | 1088849   | cytokine-dependent hematopoietic cell linker                                |
| 13671 | ENSG00000202959 | IBSP     | 15227 | 3 | 0.14 | protein_coding     | 4  | 8873073  | 8873073   | integrin-binding sialoprotein                                               |
| 13704 | ENSG00000147234 | FRMPD3   | 15253 | 8 | 0.14 | protein_coding     | X  | 10675880 | 10684881  | FERM and PZD domain containing 3                                            |
| 13714 | ENSG00000196239 | RSN1     | 15270 | 3 | 0.14 | protein_coding     | 5  | 544518   | 579628    | Barlitz syndrome, related, with sensorineural deafness (Barlitz)            |
| 13728 | ENSG00000202640 | LOC82895 | 15275 | 5 | 0.14 | protein_coding     | 7  | 5486897  | 54868746  | NADH-cytochrome B5 reductase-like. Uncharacterized protein                  |
| 13843 | ENSG00000219921 | LOC28995 | 15351 | 1 | 0.14 | protein_coding     | 2  | 24289138 | 24284472  | Protein, LOC28995                                                           |
| 13875 | ENSG00000200330 | LOC82895 | 15351 | 1 | 0.14 | protein_coding     | 2  | 24289138 | 24284472  | Protein, LOC28995                                                           |
| 13925 | ENSG00000181562 | EDOM3A   | 15417 | 8 | 0.14 | protein_coding     | 14 | 2121405  | 2121639   | epididymal protein 3A                                                       |
| 13947 | ENSG00000195998 | DFBF     | 15435 | 6 | 0.14 | protein_coding     | 1  | 3773845  | 38011993  | DNA fragmentation factor, 49kDa, beta polypeptide (caspase-activated DNase) |
| 14000 | ENSG00000204999 | DFBF     | 15435 | 6 | 0.14 | protein_coding     | 1  | 3773845  | 38011993  | DNA fragmentation factor, 49kDa, beta polypeptide (caspase-activated DNase) |
| 14071 | ENSG00000121653 | GHSR     | 15524 | 4 | 0.14 | protein_coding     | 3  | 17126263 | 172166246 | growth hormone secretagogue receptor                                        |
| 14145 | ENSG00000172762 | FADS5    | 15573 | 7 | 0.14 | protein_coding     | 17 | 72873428 | 72899708  | fatty acid desaturase 6                                                     |
| 14147 | ENSG00000191138 | LOC82895 | 15573 | 5 | 0.14 | protein_coding     | 16 | 7028184  | 7028184   | C-type lectin domain 18, member C                                           |
| 14192 | ENSG00000177398 | UMODL1   | 15614 | 4 | 0.14 | protein_coding     | 21 | 4346508  | 43563563  | umodulin-like 1                                                             |
| 14194 | ENSG00000204854 | C10orf19 | 15617 | 1 | 0.14 | protein_coding     | 13 | 24881304 | 24886673  | C1q and tumor necrosis factor related protein 9                             |
| 14201 | ENSG00000188602 | LOC82895 | 15617 | 1 | 0.14 | protein_coding     | 13 | 24881304 | 24886673  | C1q and tumor necrosis factor related protein 9                             |
| 14269 | ENSG00000198119 | OR8A1    | 15672 | 7 | 0.14 | protein_coding     | 11 | 12443983 | 12444103  | olfactory receptor, family 8, subfamily A, member 1                         |
| 14271 | ENSG00000209003 | OR8A1    | 15672 | 7 | 0.14 | protein_coding     | 14 | 23025534 | 23027899  | olfactory receptor, family 8, subfamily A, member 1                         |
| 14291 | ENSG00000195428 | TRMT4    | 15680 | 7 | 0.14 | protein_coding     | 14 | 7243868  | 7243868   | Uncharacterized protein                                                     |
| 14308 | ENSG00000198830 | HTR1E    | 15701 | 3 | 0.14 | protein_coding     | 6  | 87847024 | 8778249   | 5-hydroxytryptamine (serotonin) receptor 1E, G protein-coupled              |
| 14317 | ENSG00000178330 | OR7C1    | 15707 | 6 | 0.14 | protein_coding     | 19 | 14999568 | 14911023  | olfactory receptor, family 7, subfamily C, member 1                         |
| 14328 | ENSG00000196458 | C10orf13 | 15707 | 6 | 0.14 | protein_coding     | 10 | 5888187  | 5888187   | chromosome 10 open reading frame 53                                         |
| 14370 | ENSG00000193495 | UVSSA    | 15754 | 4 | 0.14 | protein_coding     | 4  | 1341054  | 138173    | UV-stimulated scaffold protein A                                            |
| 14371 | ENSG00000204699 | C9orf57  | 15755 | 1 | 0.14 | protein_coding     | 4  | 4666292  | 4666773   | chromosome 9 open reading frame 57                                          |
| 14384 | ENSG00000196581 | SLC18A1  | 15768 | 8 | 0.14 | protein_coding     | 8  | 22004587 | 22004587  | solute carrier family 18 (vesicular monoamine transporter), member 1        |
| 14414 | ENSG00000183206 | POTEC    | 15786 | 8 | 0.14 | protein_coding     | 18 | 14507338 | 1453584   | POTE arginyl domain family, member C                                        |
| 14415 | ENSG00000106410 | NOBOX    | 15787 | 9 | 0.14 | protein_coding     | 7  | 14408433 | 144107320 | NOBOX cognome homeobox                                                      |
| 14420 | ENSG00000188124 | CRAG2    | 15793 | 3 | 0.14 | protein_coding     | 11 | 878281   | 879208    | olfactory receptor, family 2, subfamily AB, member 2                        |
| 14438 | ENSG00000172921 | DNAC16   | 15807 | 5 | 0.14 | protein_coding     | 7  | 1585308  | 15918874  | DNAC16 domain-containing protein 1                                          |
| 14465 | ENSG00000119509 | INVS     | 15830 | 2 | 0.14 | protein_coding     | 9  | 10281538 | 103003282 | inversin                                                                    |
| 14465 | ENSG00000178155 | RNF5     | 15830 | 6 | 0.14 | protein_coding     | 5  | 14445079 | 14443312  | ring finger protein 5                                                       |
| 14545 | ENSG00000189655 | WNT9B    | 15919 | 6 | 0.14 | protein_coding     | 17 | 44910967 | 44940596  | wntless-type MMTV intron site family, member 9B                             |
| 14627 | ENSG00000188927 | MYX      | 15954 | 4 | 0.14 | protein_coding     | X  | 41396687 | 41396687  | nyctalpin                                                                   |
| 14631 | ENSG00000162710 | LOC82895 | 15957 | 6 | 0    |                    |    |          |           |                                                                             |

|       |                  |         |      |                                     |    |           |           |                                                                                            |
|-------|------------------|---------|------|-------------------------------------|----|-----------|-----------|--------------------------------------------------------------------------------------------|
| 14007 | ENSG00000251836  | 15476.8 | 0.14 | sense_intronic                      | 4  | 10773342  | 10773537  | EMCN intronic transcript 1 (non-protein coding)                                            |
| 14458 | ENSG00000202571  | 15476.8 | 0.14 | sense_intronic                      | 12 | 215813    | 215869    | CACNA2C intronic transcript 2 (non-protein coding)                                         |
| 15155 | ENSG00000249885  | 16375.3 | 0.14 | sense_intronic                      | 4  | 10642927  | 10649195  | ARHGGEF38 intronic transcript 1 (non-protein coding)                                       |
| 7819  | ENSG00000202109  | 16375.3 | 0.14 | snRNA                               | 3  | 53367087  | 53367155  | Small nuclear RNA SNORD38                                                                  |
| 11433 | ENSG00000238149  | 15319.9 | 0.14 | snRNA                               | 1  | 12561300  | 12561451  | Small nuclear RNA HACA box 58A                                                             |
| 12903 | ENSG00000214341  | 14397.7 | 0.14 | snRNA                               | X  | 68912968  | 68912968  | Small nuclear RNA U5                                                                       |
| 13322 | ENSG00000212371  | 14884   | 0.14 | snRNA                               | 14 | 7792627   | 7792779   | Small nuclear RNA SNORD46                                                                  |
| 13416 | ENSG00000201062  | 15039   | 0.14 | snRNA                               | 7  | 6453096   | 64531090  | Small nuclear RNA SNORA15                                                                  |
| 13864 | ENSG00000202045  | 15399.4 | 0.14 | snRNA                               | 21 | 33910059  | 33910144  | Small nuclear RNA SNORA33                                                                  |
| 13984 | ENSG00000252226  | 15668.6 | 0.14 | snRNA                               | 1  | 15616184  | 15616184  | Small nuclear RNA SNORA26                                                                  |
| 14028 | ENSG00000252592  | 15662.6 | 0.14 | snRNA                               | 1  | 26065108  | 26065109  | Small nuclear RNA SNORD60                                                                  |
| 14378 | ENSG00000202427  | 15759.9 | 0.14 | snRNA                               | 11 | 46780316  | 46780423  | Small nuclear RNA SNORD61                                                                  |
| 14918 | ENSG00000207022  | 16178.1 | 0.14 | snRNA                               | 1  | 93311616  | 93311739  | Small nuclear RNA SNORA51                                                                  |
| 15267 | ENSG00000252461  | 16467.1 | 0.14 | snRNA                               | 16 | 28992971  | 28992928  | Small nuclear RNA SNORA43                                                                  |
| 15508 | ENSG00000203695  | 16533.2 | 0.14 | snRNA                               | 19 | 71732470  | 71732504  | small nuclear RNA HACA box 100                                                             |
| 4730  | ENSG00000202052  | 7279.5  | 0.14 | snRNA                               | 6  | 111043453 | 111043551 | RNA_U6 small nuclear 957, pseudogene                                                       |
| 6078  | ENSG00000202627  | 10770.9 | 0.14 | snRNA                               | 1  | 53270780  | 53270884  | RNA_U6 small nuclear 969, pseudogene                                                       |
| 10046 | ENSG00000202107  | 12394.2 | 0.14 | snRNA                               | X  | 53159963  | 53159723  | RNA_U7 small nuclear 37, pseudogene                                                        |
| 10387 | ENSG00000198954  | 12632.4 | 0.14 | snRNA                               | 3  | 37181818  | 37181921  | RNA_U6 small nuclear 130 L, pseudogene                                                     |
| 10655 | ENSG00000252739  | 12658.3 | 0.14 | snRNA                               | 4  | 103758204 | 103758256 | RNA_U7 small nuclear 151, pseudogene                                                       |
| 10968 | ENSG00000234203  | 12994.9 | 0.14 | snRNA                               | 6  | 105621292 | 105621398 | RNA_U6 small nuclear 43 V, pseudogene                                                      |
| 11539 | ENSG00000252892  | 13811.4 | 0.14 | snRNA                               | 2  | 65211880  | 65211948  | RNA_U6 small nuclear 548, pseudogene                                                       |
| 12098 | ENSG00000252552  | 14024.8 | 0.14 | snRNA                               | 1  | 17495561  | 17495578  | RNA_U6 small nuclear 307, pseudogene                                                       |
| 12478 | ENSG00000201278  | 14338.3 | 0.14 | snRNA                               | 18 | 3984959   | 3984985   | RNA_U6 small nuclear 83 L, pseudogene                                                      |
| 12489 | ENSG00000198577  | 14347.5 | 0.14 | snRNA                               | 3  | 20310457  | 20310562  | RNA_U6 small nuclear 822, pseudogene                                                       |
| 12696 | ENSG00000272215  | 14412.8 | 0.14 | snRNA                               | 12 | 112002625 | 112002687 | RNA_U7 small nuclear RNA                                                                   |
| 12943 | ENSG00000203033  | 14462.6 | 0.14 | snRNA                               | 11 | 222010675 | 222010778 | RNA_U6 small nuclear 403, pseudogene                                                       |
| 13298 | ENSG00000202638  | 14450.6 | 0.14 | snRNA                               | 11 | 72580588  | 72580658  | RNA_U6 small nuclear 672, pseudogene                                                       |
| 13854 | ENSG00000202507  | 15219.2 | 0.14 | snRNA                               | 10 | 12158279  | 12158378  | RNA_U6 splicedomain RNA                                                                    |
| 13900 | ENSG00000198176  | 15219.2 | 0.14 | snRNA                               | 11 | 74408163  | 74408163  | RNA_U6 small nuclear 237, pseudogene                                                       |
| 13981 | ENSG00000202075  | 15389.9 | 0.14 | snRNA                               | 1  | 62282091  | 62282194  | RNA_U6 small nuclear 414, pseudogene                                                       |
| 14153 | ENSG00000202881  | 15583.7 | 0.14 | snRNA                               | 6  | 17619784  | 17619885  | RNA_U6 small nuclear 190, pseudogene                                                       |
| 14174 | ENSG00000202723  | 15583.7 | 0.14 | snRNA                               | 8  | 2623688   | 26236991  | RNA_U6 small nuclear 116, pseudogene                                                       |
| 14265 | ENSG00000252032  | 15671.1 | 0.14 | snRNA                               | 1  | 52004297  | 52004401  | RNA_U6 small nuclear 128 L, pseudogene                                                     |
| 14372 | ENSG00000207185  | 15756.2 | 0.14 | snRNA                               | 11 | 11844703  | 11844808  | RNA_U6 small nuclear 1157, pseudogene                                                      |
| 14386 | ENSG00000202488  | 15791.8 | 0.14 | snRNA                               | 8  | 73911780  | 73911779  | RNA_U6 small nuclear 285, pseudogene                                                       |
| 14417 | ENSG00000207052  | 15790.5 | 0.14 | snRNA                               | 5  | 32309078  | 32309074  | RNA_U6 small nuclear 378, pseudogene                                                       |
| 14619 | ENSG00000202227  | 15948.6 | 0.14 | snRNA                               | 22 | 38287354  | 38287455  | RNA_U6 small nuclear 900, pseudogene                                                       |
| 14745 | ENSG00000201728  | 16043   | 0.14 | snRNA                               | 1  | 65889031  | 65889031  | RNA_U6 small nuclear 313, pseudogene                                                       |
| 14944 | ENSG00000203440  | 16195.3 | 0.14 | snRNA                               | 14 | 31612145  | 31612254  | RNA_U6 small nuclear 541, pseudogene                                                       |
| 1587  | ENSG00000211784  | 2952.3  | 0.14 | TR_V_gene                           | 7  | 142484049 | 142484048 | T cell receptor beta joining 2.1                                                           |
| 1638  | ENSG00000202641  | 4307.6  | 0.14 | TR_V_gene                           | 14 | 22959478  | 22959481  | T cell receptor alpha joining 4B                                                           |
| 19373 | ENSG00000203274  | 15301.9 | 0.14 | TR_V_gene                           | 9  | 33617750  | 33618054  | T cell receptor beta variable 20/ORB-2 (non-functional)                                    |
| 15236 | ENSG00000255282  | 16439.4 | 0.14 | transcribed_unprocessed_pseudo_gene | 11 | 102817899 | 102707497 | Wilms tumor 1 associated protein pseudogene 1                                              |
| 15289 | ENSG00000242748  | 16467.7 | 0.14 | transcribed_unprocessed_pseudo_gene | 20 | 39825331  | 39825739  | ribosomal protein L23a pseudogene 81                                                       |
| 15419 | ENSG00000244378  | 16600.2 | 0.14 | transcribed_unprocessed_pseudo_gene | 18 | 69067578  | 69069945  | ribosomal protein S2 pseudogene 45                                                         |
| 3289  | ENSG00000131401  | 5160.7  | 0.14 | transcribed_unprocessed_pseudo_gene | 19 | 50857053  | 50849024  | napasin B aspartic peptidase, pseudogene                                                   |
| 6254  | ENSG00000205583  | 9032.9  | 0.14 | transcribed_unprocessed_pseudo_gene | 7  | 74988448  | 75024657  | stromal antigen 3-like 1 (pseudogene)                                                      |
| 12932 | ENSG00000180229  | 14669.6 | 0.14 | transcribed_unprocessed_pseudo_gene | 15 | 20547869  | 20711433  | hect domain and RLD 2 pseudogene 3                                                         |
| 13426 | ENSG00000282782  | 15043.6 | 0.14 | transcribed_unprocessed_pseudo_gene | 17 | 45527934  | 45589858  | mitochondrial ribosomal protein L45 pseudogene 2                                           |
| 13636 | ENSG00000214081  | 15202.2 | 0.14 | transcribed_unprocessed_pseudo_gene | 2  | 131437623 | 131445284 | cytochrome P450, family 4, subfamily F, polypeptide 30, pseudogene                         |
| 14238 | ENSG00000214344  | 15655.1 | 0.14 | transcribed_unprocessed_pseudo_gene | 15 | 102382322 | 102390527 | olfactory receptor, family 4, subfamily F, member 13 pseudogene                            |
| 15021 | ENSG00000204173  | 16256.2 | 0.14 | transcribed_unprocessed_pseudo_gene | 9  | 114353272 | 114393589 | leucine rich repeat containing 37, member A5, pseudogene                                   |
| 15495 | ENSG00000251491  | 16615.6 | 0.14 | transcribed_unprocessed_pseudo_gene | 2  | 15871823  | 15871937  | olfactory receptor, family 7, subfamily E, member 28 pseudogene                            |
| 15758 | ENSG00000204159  | 16825.5 | 0.14 | transcribed_unprocessed_pseudo_gene | 6  | 26839263  | 26843329  | glucuronidase, beta pseudogene 2                                                           |
| 15792 | ENSG00000203053  | 16853.3 | 0.14 | transcribed_unprocessed_pseudo_gene | 7  | 86274980  | 86309813  | GTF2I repeat domain containing 1 pseudogene 1                                              |
| 14577 | ENSG000002024367 | 15914.6 | 0.14 | unary_pseudogene                    | 18 | 56663966  | 56735570  | O-acyltransferase like, pseudogene                                                         |
| 4519  | ENSG00000202811  | 7055.7  | 0.14 | unprocessed_pseudogene              | 19 | 21902603  | 21902637  | vimentin 1 receptor B4 pseudogene                                                          |
| 10134 | ENSG00000202152  | 12449.7 | 0.14 | unprocessed_pseudogene              | 16 | 8567376   | 8568401   | olfactory receptor, family 7, subfamily E, member 140 pseudogene                           |
| 10903 | ENSG00000202938  | 13423.4 | 0.14 | unprocessed_pseudogene              | X  | 28431070  | 28503065  | protein phosphatase 1, regulatory subunit 12B, pseudogene, Y-linked 1                      |
| 12955 | ENSG00000202788  | 14245.7 | 0.14 | unprocessed_pseudogene              | 20 | 35248806  | 35249226  | heterogeneous nuclear ribonucleoprotein A3 pseudogene 2                                    |
| 12926 | ENSG00000197959  | 14359.2 | 0.14 | unprocessed_pseudogene              | 3  | 75405687  | 75406654  | olfactory receptor, family 3, subfamily E, member 22 pseudogene                            |
| 13455 | ENSG00000202621  | 15327.3 | 0.14 | unprocessed_pseudogene              | 14 | 23113352  | 23113274  | olfactory receptor, family 8, subfamily E, member 1 pseudogene                             |
| 13659 | ENSG00000204933  | 15222.6 | 0.14 | unprocessed_pseudogene              | 19 | 43876884  | 43883276  | CD177 molecule pseudogene 1                                                                |
| 13702 | ENSG00000202893  | 15251.8 | 0.14 | unprocessed_pseudogene              | 9  | 21321299  | 21321626  | interferon, alpha 20, pseudogene                                                           |
| 13743 | ENSG00000204548  | 15263   | 0.14 | unprocessed_pseudogene              | 22 | 22972533  | 22978624  | brachypod cluster repeat pseudogene 4                                                      |
| 13779 | ENSG00000254229  | 15308.2 | 0.14 | unprocessed_pseudogene              | 8  | 7858959   | 7859027   | family with sequence similarity 80, member A12, pseudogene                                 |
| 14049 | ENSG00000255655  | 15509.8 | 0.14 | unprocessed_pseudogene              | 14 | 69334574  | 69336068  | basic leucine zipper nuclear factor 2 pseudogene                                           |
| 14298 | ENSG00000204970  | 16100.3 | 0.14 | unprocessed_pseudogene              | 11 | 74842183  | 74842325  | olfactory receptor, family 2, subfamily A1, member 1 pseudogene                            |
| 14569 | ENSG00000236417  | 15907.8 | 0.14 | unprocessed_pseudogene              | 10 | 89146442  | 89149960  | cathepsin 1, pseudogene 1                                                                  |
| 14588 | ENSG00000231777  | 15921.5 | 0.14 | unprocessed_pseudogene              | 2  | 132129667 | 132131223 | MT-ND4 pseudogene 21                                                                       |
| 14697 | ENSG00000202601  | 16007.7 | 0.14 | unprocessed_pseudogene              | 7  | 10011462  | 10011816  | protein-L-isoaspartate (D-isoprotein) C-methyltransferase domain containing 1 pseudogene 1 |
| 14711 | ENSG00000202571  | 16019.3 | 0.14 | unprocessed_pseudogene              | 7  | 72716497  | 72716496  | PGM1 21 transmembrane domain pseudogene 3                                                  |
| 14743 | ENSG00000189166  | 16038.4 | 0.14 | unprocessed_pseudogene              | 7  | 57059556  | 57076956  | intraductile repeat containing 18 pseudogene 3                                             |
| 14785 | ENSG00000202816  | 16075   | 0.14 | unprocessed_pseudogene              | 9  | 44019398  | 44118444  | ankyrin repeat domain 20 family, member A7, pseudogene                                     |
| 14629 | ENSG00000204961  | 16100.3 | 0.14 | unprocessed_pseudogene              | 10 | 49712414  | 49712414  | cablin (intronic factor collagen receptor) pseudogene 2                                    |
| 14954 | ENSG00000215812  | 16203.9 | 0.14 | unprocessed_pseudogene              | 1  | 22788412  | 22788412  | zinc finger protein 847, pseudogene                                                        |
| 14987 | ENSG00000201870  | 16218   | 0.14 | unprocessed_pseudogene              | 17 | 28864716  | 28869722  | keratin 17 pseudogene                                                                      |
| 15193 | ENSG00000198384  | 16267.7 | 0.14 | unprocessed_pseudogene              | 15 | 33063158  | 33101155  | transmembrane phosphoinositide 3-kinase and Irsin homolog 2 pseudogene 3                   |
| 3338  | ENSG00000284198  | 5250    | 0.14 |                                     |    |           |           |                                                                                            |
| 3804  | ENSG00000198181  | 5979    | 0.14 |                                     |    | 149553003 | 149553787 | peptidylglyoxylase A (cytochrome P4h like 4C)                                              |
| 3807  | ENSG00000202471  | 5989.6  | 0.14 |                                     |    |           |           |                                                                                            |
| 3918  | ENSG00000180287  | 6154.8  | 0.14 |                                     |    |           |           |                                                                                            |
| 4080  | ENSG00000259985  | 6359.4  | 0.14 |                                     |    |           |           |                                                                                            |
| 4192  | ENSG00000202665  | 6511.9  | 0.14 |                                     |    |           |           |                                                                                            |
| 4279  | ENSG000002071947 | 6652.3  | 0.14 |                                     |    |           |           |                                                                                            |
| 4347  | ENSG00000202804  | 6750.9  | 0.14 |                                     |    |           |           |                                                                                            |
| 4892  | ENSG00000207173  | 7454.1  | 0.14 |                                     |    |           |           |                                                                                            |
| 4929  | ENSG000002026753 | 7568.9  | 0.14 |                                     |    |           |           |                                                                                            |
| 4932  | ENSG00000254893  | 7570.2  | 0.14 |                                     |    |           |           |                                                                                            |
| 5100  | ENSG00000231369  | 7775.3  | 0.14 |                                     |    |           |           |                                                                                            |
| 5223  | ENSG00000289084  | 7921.3  | 0.14 |                                     |    | 21737896  | 21738068  | Uncharacterized protein                                                                    |
| 5251  | ENSG00000231340  | 7953.1  | 0.14 |                                     |    |           |           |                                                                                            |
| 5365  | ENSG00000215333  | 8086    | 0.14 |                                     |    |           |           |                                                                                            |
| 5391  | ENSG00000270574  | 8119.2  | 0.14 |                                     |    |           |           |                                                                                            |
| 5532  | ENSG000002071011 | 8267.6  | 0.14 |                                     |    |           |           |                                                                                            |
| 5627  | ENSG00000231884  | 8382.8  | 0.14 |                                     |    |           |           |                                                                                            |
| 5643  | ENSG00000287648  | 8400.5  | 0.14 |                                     |    |           |           |                                                                                            |
| 6023  | ENSG00000259354  | 8813.1  | 0.14 |                                     |    |           |           |                                                                                            |
| 6163  | ENSG00000231789  | 8841.8  | 0.14 |                                     |    |           |           |                                                                                            |
| 6380  | ENSG00000202828  | 9168.7  | 0.14 |                                     |    |           |           |                                                                                            |
| 6447  | ENSG000002028402 | 9239.2  | 0.14 |                                     |    |           |           |                                                                                            |
| 6581  | ENSG00000202970  | 9359.9  | 0.14 |                                     |    | 99859300  | 99859828  | Uncharacterized protein                                                                    |
| 6608  | ENSG00000238734  | 9676.1  | 0.14 |                                     |    | 70266852  | 70266985  | Small nuclear RNA U13                                                                      |
| 7485  | ENSG00000272518  | 10207.4 | 0.14 |                                     |    |           |           |                                                                                            |
| 7742  | ENSG00000232664  | 10471.5 | 0.14 |                                     |    |           |           |                                                                                            |
| 7937  | ENSG00000222586  | 10650.9 | 0.14 |                                     |    |           |           |                                                                                            |
| 8028  | ENSG00000231360  | 1       |      |                                     |    |           |           |                                                                                            |

|       |                 |      |         |      |    |          |          |  |                                          |
|-------|-----------------|------|---------|------|----|----------|----------|--|------------------------------------------|
| 10720 | ENS000002236018 |      | 12916.5 | 0.14 |    |          |          |  |                                          |
| 10788 | ENS000002239977 |      | 12981.9 | 0.14 |    |          |          |  |                                          |
| 10860 | ENS000002115304 |      | 13056   | 0.14 |    |          |          |  |                                          |
| 10942 | ENS000002238732 |      | 13101.9 | 0.14 | 10 | 43305675 | 43305778 |  | Small nuclear RNA U13                    |
| 10970 | ENS000002211660 |      | 13128   | 0.14 |    |          |          |  |                                          |
| 11070 | ENS000002231133 |      | 13205.9 | 0.14 | 7  | 99011601 | 99011701 |  | Small nuclear RNA U13                    |
| 11099 | ENS000002258357 |      | 13218.9 | 0.14 |    |          |          |  |                                          |
| 11119 | ENS000002257860 |      | 13233.5 | 0.14 |    |          |          |  |                                          |
| 11432 | ENS000002281993 |      | 13316.5 | 0.14 |    |          |          |  |                                          |
| 11434 | ENS000002257452 |      | 13519.9 | 0.14 |    |          |          |  |                                          |
| 11542 | ENS000002222683 |      | 13613.5 | 0.14 | 21 | 47955709 | 47956003 |  | Metazoan signal recognition particle RNA |
| 11563 | ENS000002292195 |      | 13627.2 | 0.14 |    |          |          |  |                                          |
| 11737 | ENS000002244891 |      | 13792.1 | 0.14 |    |          |          |  |                                          |
| 11802 | ENS000002296237 |      | 13830.7 | 0.14 |    |          |          |  |                                          |
| 11807 | ENS000002226891 |      | 13834   | 0.14 |    |          |          |  |                                          |
| 11850 | ENS000002273000 |      | 13871.4 | 0.14 |    |          |          |  |                                          |
| 12002 | ENS000002222053 |      | 13980   | 0.14 |    |          |          |  |                                          |
| 12024 | ENS000002192520 |      | 13998.9 | 0.14 |    |          |          |  |                                          |
| 12077 | ENS000002281480 |      | 14038.9 | 0.14 |    |          |          |  |                                          |
| 12095 | ENS000002281732 |      | 14050.9 | 0.14 |    |          |          |  |                                          |
| 12097 | ENS000002214231 |      | 14051.9 | 0.14 |    |          |          |  |                                          |
| 12179 | ENS000002272460 |      | 14109.5 | 0.14 |    |          |          |  |                                          |
| 12338 | ENS000002228751 |      | 14232.7 | 0.14 |    |          |          |  |                                          |
| 12345 | ENS000002292921 |      | 14235.9 | 0.14 | 14 | 21897669 | 21897965 |  | RNA 7SL cytoplasmic 850, pseudogene      |
| 12346 | ENS000002248990 |      | 14236.9 | 0.14 |    |          |          |  |                                          |
| 12377 | ENS000002211660 |      | 14258.9 | 0.14 |    |          |          |  |                                          |
| 12379 | ENS000002292385 |      | 14259.4 | 0.14 |    |          |          |  |                                          |
| 12480 | ENS000002224067 |      | 14341   | 0.14 |    |          |          |  |                                          |
| 12513 | ENS000002284196 |      | 14370.9 | 0.14 |    |          |          |  |                                          |
| 12538 | ENS000002210315 |      | 14387.9 | 0.14 |    |          |          |  |                                          |
| 12585 | ENS000002224569 |      | 14424.9 | 0.14 |    |          |          |  |                                          |
| 12597 | ENS000002227854 |      | 14432.7 | 0.14 |    |          |          |  |                                          |
| 12684 | ENS000002254174 |      | 14437.9 | 0.14 |    |          |          |  |                                          |
| 12622 | ENS000002128802 | GDF2 | 14450   | 0.14 | 10 | 48413092 | 48416853 |  | growth differentiation factor 2          |
| 12705 | ENS000002232508 |      | 14506.9 | 0.14 |    |          |          |  |                                          |
| 12728 | ENS000002207020 |      | 14520.9 | 0.14 |    |          |          |  |                                          |
| 12756 | ENS000002248935 |      | 14545.9 | 0.14 |    |          |          |  |                                          |
| 12805 | ENS000002257258 |      | 14583.9 | 0.14 |    |          |          |  |                                          |
| 12822 | ENS000002292428 |      | 14599   | 0.14 |    |          |          |  |                                          |
| 12832 | ENS000002280970 |      | 14605.5 | 0.14 |    |          |          |  |                                          |
| 12861 | ENS000002228334 |      | 14626.3 | 0.14 |    |          |          |  |                                          |
| 12871 | ENS000002191478 |      | 14635.2 | 0.14 |    |          |          |  |                                          |
| 12881 | ENS000002258117 |      | 14640.5 | 0.14 |    |          |          |  |                                          |
| 12884 | ENS000002219519 |      | 14642.3 | 0.14 |    |          |          |  |                                          |
| 12888 | ENS000002211226 |      | 14643.0 | 0.14 |    |          |          |  |                                          |
| 12906 | ENS000002232925 |      | 14654.5 | 0.14 | 15 | 30904916 | 30905194 |  | RNA 7SL cytoplasmic 626, pseudogene      |
| 13015 | ENS000002257306 |      | 14728   | 0.14 |    |          |          |  |                                          |
| 13054 | ENS000002227603 |      | 14756.3 | 0.14 |    |          |          |  |                                          |
| 13056 | ENS000002281714 |      | 14759.9 | 0.14 |    |          |          |  |                                          |
| 13080 | ENS000002263425 |      | 14775.5 | 0.14 |    |          |          |  |                                          |
| 13102 | ENS000002292551 |      | 14789.2 | 0.14 | 1  | 24855949 | 24856204 |  | RNA 7SL cytoplasmic 857, pseudogene      |
| 13111 | ENS000002252996 |      | 14799.4 | 0.14 |    |          |          |  |                                          |
| 13170 | ENS000002241846 |      | 14842.9 | 0.14 |    |          |          |  |                                          |
| 13179 | ENS000002271014 |      | 14848.7 | 0.14 |    |          |          |  |                                          |
| 13206 | ENS000002213172 |      | 14874.3 | 0.14 |    |          |          |  |                                          |
| 13215 | ENS000002231992 |      | 14887.9 | 0.14 |    |          |          |  |                                          |
| 13230 | ENS000002299076 |      | 14900.6 | 0.14 |    |          |          |  |                                          |
| 13248 | ENS000002292923 |      | 14913.4 | 0.14 |    |          |          |  |                                          |
| 13250 | ENS000002203395 |      | 14913.6 | 0.14 |    |          |          |  |                                          |
| 13256 | ENS000002284215 |      | 14919.1 | 0.14 |    |          |          |  |                                          |
| 13263 | ENS000002252923 |      | 14923.9 | 0.14 |    |          |          |  |                                          |
| 13267 | ENS000002203090 |      | 14928.9 | 0.14 |    |          |          |  |                                          |
| 13290 | ENS000002273956 |      | 14936.9 | 0.14 |    |          |          |  |                                          |
| 13293 | ENS000002244503 |      | 14940.5 | 0.14 |    |          |          |  |                                          |
| 13292 | ENS000002258114 |      | 14946.2 | 0.14 |    |          |          |  |                                          |
| 13311 | ENS000002211351 |      | 14958.5 | 0.14 |    |          |          |  |                                          |
| 13335 | ENS000002224137 |      | 14974.9 | 0.14 |    |          |          |  |                                          |
| 13347 | ENS000002273063 |      | 14983.3 | 0.14 |    |          |          |  |                                          |
| 13378 | ENS000002298578 |      | 15007   | 0.14 | 9  | 45441273 | 45441542 |  | Uncharacterized protein                  |
| 13384 | ENS000002244513 |      | 15021.3 | 0.14 |    |          |          |  |                                          |
| 13413 | ENS000002229239 |      | 15032.7 | 0.14 |    |          |          |  |                                          |
| 13467 | ENS000002241151 |      | 15077.3 | 0.14 |    |          |          |  |                                          |
| 13488 | ENS000002222008 |      | 15090.3 | 0.14 |    |          |          |  |                                          |
| 13502 | ENS000002244959 |      | 15101.3 | 0.14 |    |          |          |  |                                          |
| 13505 | ENS000002239985 |      | 15103.2 | 0.14 |    |          |          |  |                                          |
| 13513 | ENS000002227425 |      | 15108.9 | 0.14 |    |          |          |  |                                          |
| 13520 | ENS000002270980 |      | 15113.4 | 0.14 |    |          |          |  |                                          |
| 13521 | ENS000002231311 |      | 15114.1 | 0.14 |    |          |          |  |                                          |
| 13528 | ENS000002221028 |      | 15120.4 | 0.14 |    |          |          |  |                                          |
| 13550 | ENS000002225992 |      | 15133.9 | 0.14 |    |          |          |  |                                          |
| 13556 | ENS000002271033 |      | 15139.7 | 0.14 |    |          |          |  |                                          |
| 13565 | ENS000002221441 |      | 15145.2 | 0.14 |    |          |          |  |                                          |
| 13567 | ENS000002251118 |      | 15146.1 | 0.14 |    |          |          |  |                                          |
| 13572 | ENS000002227076 |      | 15150.2 | 0.14 |    |          |          |  |                                          |
| 13574 | ENS000002291618 |      | 15152.4 | 0.14 |    |          |          |  |                                          |
| 13584 | ENS000002217979 |      | 15159.9 | 0.14 |    |          |          |  |                                          |
| 13603 | ENS000002258039 |      | 15172.9 | 0.14 |    |          |          |  |                                          |
| 13619 | ENS000002227637 |      | 15186.5 | 0.14 |    |          |          |  |                                          |
| 13624 | ENS000002284272 |      | 15191.4 | 0.14 |    |          |          |  |                                          |
| 13630 | ENS000002196388 |      | 15194.9 | 0.14 |    |          |          |  |                                          |
| 13631 | ENS000002242540 |      | 15195.4 | 0.14 |    |          |          |  |                                          |
| 13641 | ENS000002296911 |      | 15204.5 | 0.14 |    |          |          |  |                                          |
| 13642 | ENS000002296976 |      | 15206   | 0.14 |    |          |          |  |                                          |
| 13643 | ENS000002270722 |      | 15207.6 | 0.14 |    |          |          |  |                                          |
| 13665 | ENS000002292681 |      | 15226.1 | 0.14 |    |          |          |  |                                          |
| 13724 | ENS000002225842 |      | 15271.5 | 0.14 |    |          |          |  |                                          |
| 13732 | ENS000002252134 |      | 15279.5 | 0.14 | 1  | 17178362 | 17178376 |  | Y RNA                                    |
| 13744 | ENS000002224987 |      | 15290.2 | 0.14 |    |          |          |  |                                          |
| 13739 | ENS000002250990 |      | 15281.7 | 0.14 |    |          |          |  |                                          |
| 13747 | ENS000002229459 |      | 15294.4 | 0.14 |    |          |          |  |                                          |
| 13764 | ENS000002227448 |      | 15296   | 0.14 |    |          |          |  |                                          |
| 13764 | ENS000002041853 |      | 15296.2 | 0.14 |    |          |          |  |                                          |
| 13766 | ENS000002298958 |      | 15298   | 0.14 |    |          |          |  |                                          |
| 13768 | ENS000002217831 |      | 15312.4 | 0.14 |    |          |          |  |                                          |
| 13791 | ENS000002255521 |      | 15316.7 | 0.14 |    |          |          |  |                                          |
| 13796 | ENS000002253512 |      | 15318.3 | 0.14 |    |          |          |  |                                          |
| 13800 | ENS000002211584 |      | 15320.9 | 0.14 |    |          |          |  |                                          |
| 13801 | ENS000002257683 |      | 15321.7 | 0.14 |    |          |          |  |                                          |
| 13802 | ENS000002273419 |      | 15321.9 | 0.14 |    |          |          |  |                                          |
| 13805 | ENS000002244963 |      | 15325.5 | 0.14 |    |          |          |  |                                          |
| 13825 | ENS000002223277 |      | 15337.3 | 0.14 |    |          |          |  |                                          |
| 13830 | ENS000002298118 |      | 15341.3 | 0.14 |    |          |          |  |                                          |
| 13835 | ENS000002221037 |      | 15344.9 | 0.14 |    |          |          |  |                                          |
| 13866 | ENS000002223342 |      | 15371.9 | 0.14 |    |          |          |  |                                          |
| 13874 | ENS000002252951 |      | 15374.9 | 0.14 |    |          |          |  |                                          |
| 13888 | ENS000002224928 |      | 15384.9 | 0.14 |    |          |          |  |                                          |
| 13894 | ENS000002211395 |      | 15395   | 0.14 |    |          |          |  |                                          |
| 13897 | ENS000002248995 |      | 15396.5 | 0.14 |    |          |          |  |                                          |
| 13908 | ENS000002229700 |      | 15409.9 | 0.14 |    |          |          |  |                                          |
| 13911 | ENS000002254278 |      | 15409.9 | 0.14 |    |          |          |  |                                          |
| 13914 | ENS000002214803 |      | 15411.9 | 0.14 |    |          |          |  |                                          |
| 13919 | ENS000002224989 |      | 15414   | 0.14 |    |          |          |  |                                          |
| 13923 | ENS000002256151 |      | 15415.9 | 0.14 |    |          |          |  |                                          |
| 13924 | ENS000002217930 |      | 15416.4 | 0.14 |    |          |          |  |                                          |
| 13925 | ENS000002292679 |      | 15420.4 | 0.14 |    |          |          |  |                                          |
| 13931 | ENS000002258123 |      | 15422.9 | 0.14 |    |          |          |  |                                          |
| 13932 | ENS000002287879 |      | 15423.3 | 0.14 |    |          |          |  |                                          |
| 13936 | ENS000002292984 |      | 15430.6 | 0.14 |    |          |          |  |                                          |
| 13937 | ENS000002281331 |      | 15430.7 | 0.14 |    |          |          |  |                                          |
| 13942 | ENS000002282810 |      | 15433.5 | 0.14 |    |          |          |  |                                          |
| 13946 | ENS000002295183 |      | 15436.4 | 0.14 |    |          |          |  |                                          |
| 13950 | ENS000002244032 |      | 15437.4 | 0.14 |    |          |          |  |                                          |
| 13951 | ENS000002236173 |      | 15437.9 | 0.14 |    |          |          |  |                                          |
| 13956 | ENS000002298596 |      | 15444.1 | 0.14 |    |          |          |  |                                          |
| 13964 | ENS000002242997 |      | 15446.9 | 0.14 |    |          |          |  |                                          |
| 13984 | ENS000002259505 |      | 15458.9 | 0.14 |    |          |          |  |                                          |
| 13995 | ENS000002296209 |      | 15469.9 | 0.14 |    |          |          |  |                                          |
| 13997 | ENS000002249276 |      | 15470.6 | 0.14 |    |          |          |  |                                          |
| 14008 | ENS000002290049 |      | 15476.9 | 0.14 |    |          |          |  |                                          |
| 14011 | ENS000002255191 |      | 15480.9 | 0.14 |    |          |          |  |                                          |
| 14018 | ENS000002292356 |      | 15484.7 | 0.14 |    |          |          |  |                                          |
| 14019 | ENS000002238079 |      | 15485.1 | 0.14 |    |          |          |  |                                          |
| 14020 | ENS000002213955 |      | 15486.4 | 0.14 |    |          |          |  |                                          |
| 14046 | ENS000002223538 |      | 15508.9 | 0.14 |    |          |          |  |                                          |
| 14053 | ENS000002212111 |      | 15512.9 | 0.14 |    |          |          |  |                                          |
| 14061 | ENS000002259125 |      | 15519.9 | 0.14 |    |          |          |  |                                          |
| 14065 | ENS000002201797 |      | 15521.3 | 0.14 |    |          |          |  |                                          |
| 14067 | ENS000002291617 |      | 15522   | 0.14 |    |          |          |  |                                          |
| 14079 | ENS000002228874 |      | 15530   | 0.14 |    |          |          |  |                                          |
| 14084 | ENS000002240003 |      | 15542.4 | 0.14 |    |          |          |  |                                          |
| 14098 | ENS000002220575 |      | 15544.5 | 0.14 |    |          |          |  |                                          |



|       |                  |           |          |           |    |           |           |                                            |  |
|-------|------------------|-----------|----------|-----------|----|-----------|-----------|--------------------------------------------|--|
| 14103 | ENSG00000259843  |           | 15547.2  | 0.14      |    |           |           |                                            |  |
| 14111 | ENSG00000253470  |           | 15553.8  | 0.14      |    |           |           |                                            |  |
| 14114 | ENSG00000235797  |           | 15557.5  | 0.14      |    |           |           |                                            |  |
| 14115 | ENSG00000271070  |           | 15557.7  | 0.14      |    |           |           |                                            |  |
| 14116 | ENSG00000237685  |           | 15557.9  | 0.14      |    |           |           |                                            |  |
| 14120 | ENSG00000230264  |           | 15559.9  | 0.14      |    |           |           |                                            |  |
| 14122 | ENSG00000233724  |           | 15560.3  | 0.14      |    |           |           |                                            |  |
| 14128 | ENSG00000270969  |           | 15561.1  | 0.14      |    |           |           |                                            |  |
| 14133 | ENSG00000269953  |           | 15564.8  | 0.14      |    |           |           |                                            |  |
| 14137 | ENSG00000235016  |           | 15568.1  | 0.14      |    |           |           |                                            |  |
| 14138 | ENSG00000175961  |           | 15568.7  | 0.14      |    |           |           |                                            |  |
| 14142 | ENSG00000232986  |           | 15575.1  | 0.14      |    |           |           |                                            |  |
| 14148 | ENSG00000254509  |           | 15576.6  | 0.14      |    |           |           |                                            |  |
| 14149 | ENSG00000272537  |           | 15578.5  | 0.14      |    |           |           |                                            |  |
| 14152 | ENSG00000252539  |           | 15579.7  | 0.14      |    |           |           |                                            |  |
| 14157 | ENSG00000272758  |           | 15585.5  | 0.14      |    |           |           |                                            |  |
| 14162 | ENSG00000232114  |           | 15591.5  | 0.14      |    |           |           |                                            |  |
| 14163 | ENSG00000232765  |           | 15591.9  | 0.14      |    |           |           |                                            |  |
| 14168 | ENSG00000270870  |           | 15594.8  | 0.14      |    |           |           |                                            |  |
| 14176 | ENSG00000201507  |           | 15598.9  | 0.14      |    |           |           |                                            |  |
| 14181 | ENSG00000252968  |           | 15604.1  | 0.14      |    |           |           |                                            |  |
| 14188 | ENSG00000265191  | 15        | 44726452 | 44726705  |    |           |           | RNA, 7SL, cytoplasmic 347, pseudogene      |  |
| 14188 | ENSG00000263844  |           | 15610.5  | 0.14      |    |           |           |                                            |  |
| 14190 | ENSG00000252926  |           | 15613.8  | 0.14      |    |           |           |                                            |  |
| 14193 | ENSG00000233908  |           | 15616    | 0.14      |    |           |           |                                            |  |
| 14217 | ENSG00000264620  |           | 15641.6  | 0.14      |    |           |           |                                            |  |
| 14219 | ENSG00000252920  |           | 15643.5  | 0.14      |    |           |           |                                            |  |
| 14222 | ENSG00000238804  |           | 15644.8  | 0.14      |    |           |           |                                            |  |
| 14226 | ENSG00000231655  |           | 15649.9  | 0.14      |    |           |           |                                            |  |
| 14230 | ENSG00000230551  |           | 15651.6  | 0.14      |    |           |           |                                            |  |
| 14244 | ENSG00000237131  |           | 15662.5  | 0.14      |    |           |           |                                            |  |
| 14246 | ENSG00000224578  |           | 15663.4  | 0.14      |    |           |           |                                            |  |
| 14251 | ENSG00000234607  |           | 15670    | 0.14      |    |           |           |                                            |  |
| 14265 | ENSG00000268743  |           | 15677.1  | 0.14      |    |           |           |                                            |  |
| 14276 | ENSG00000264203  |           | 15683.9  | 0.14      |    |           |           |                                            |  |
| 14278 | ENSG00000232059  |           | 15684.7  | 0.14      |    |           |           |                                            |  |
| 14280 | ENSG00000263331  |           | 15685.2  | 0.14      |    |           |           |                                            |  |
| 14281 | ENSG00000248210  |           | 15685.6  | 0.14      |    |           |           |                                            |  |
| 14285 | ENSG00000269188  |           | 15688.5  | 0.14      |    |           |           |                                            |  |
| 14291 | ENSG00000238418  | 17        | 74320277 | 74320380  |    |           |           | Small nuclear RNA U13                      |  |
| 14296 | ENSG00000239838  |           | 15696.2  | 0.14      |    |           |           |                                            |  |
| 14298 | ENSG00000234741  |           | 15696.7  | 0.14      |    |           |           |                                            |  |
| 14307 | ENSG00000188477  |           | 15701.1  | 0.14      |    |           |           |                                            |  |
| 14313 | ENSG00000257281  |           | 15705.4  | 0.14      |    |           |           |                                            |  |
| 14316 | ENSG00000255107  |           | 15707    | 0.14      |    |           |           |                                            |  |
| 14319 | ENSG00000269265  |           | 15708.1  | 0.14      |    |           |           |                                            |  |
| 14327 | ENSG00000228778  |           | 15715.1  | 0.14      |    |           |           |                                            |  |
| 14328 | ENSG00000248456  |           | 15716    | 0.14      |    |           |           |                                            |  |
| 14340 | ENSG00000258488  |           | 15729.5  | 0.14      |    |           |           |                                            |  |
| 14345 | ENSG00000252278  | 17        | 36911532 | 36911653  |    |           |           | RNA, U6 small nuclear 866, pseudogene      |  |
| 14349 | ENSG00000234042  |           | 15739.9  | 0.14      |    |           |           |                                            |  |
| 14349 | ENSG00000248445  |           | 15741.5  | 0.14      |    |           |           |                                            |  |
| 14352 | ENSG00000269984  |           | 15742.1  | 0.14      |    |           |           |                                            |  |
| 14357 | ENSG00000232564  |           | 15745    | 0.14      |    |           |           |                                            |  |
| 14386 | ENSG00000269172  |           | 15787.2  | 0.14      |    |           |           |                                            |  |
| 14383 | ENSG00000269820  | 1         | 15687884 | 156880159 |    |           |           | HCG1995379; Uncharacterized protein        |  |
| 14392 | ENSG00000236905  |           | 15774.5  | 0.14      |    |           |           |                                            |  |
| 14394 | ENSG00000232796  |           | 15776.3  | 0.14      |    |           |           |                                            |  |
| 14397 | ENSG00000228005  |           | 15776.7  | 0.14      |    |           |           |                                            |  |
| 14399 | ENSG00000252181  |           | 15777.3  | 0.14      |    |           |           |                                            |  |
| 14400 | ENSG00000231691  |           | 15778.2  | 0.14      |    |           |           |                                            |  |
| 14405 | ENSG00000268604  |           | 15780.3  | 0.14      |    |           |           |                                            |  |
| 14413 | ENSG00000243491  |           | 15786.7  | 0.14      |    |           |           |                                            |  |
| 14423 | ENSG00000259564  |           | 15793.9  | 0.14      |    |           |           |                                            |  |
| 14426 | ENSG00000233656  |           | 15796.8  | 0.14      |    |           |           |                                            |  |
| 14427 | ENSG00000226996  |           | 15797.2  | 0.14      |    |           |           |                                            |  |
| 14431 | ENSG00000230503  |           | 15800.7  | 0.14      |    |           |           |                                            |  |
| 14435 | ENSG00000265403  |           | 15805.5  | 0.14      |    |           |           |                                            |  |
| 14439 | ENSG00000214546  |           | 15807.5  | 0.14      |    |           |           |                                            |  |
| 14441 | ENSG00000261611  |           | 15807.8  | 0.14      |    |           |           |                                            |  |
| 14442 | ENSG00000240912  |           | 15813.9  | 0.14      |    |           |           |                                            |  |
| 14448 | ENSG00000268603  |           | 15818.6  | 0.14      |    |           |           |                                            |  |
| 14448 | ENSG00000232813  |           | 15819.4  | 0.14      |    |           |           |                                            |  |
| 14455 | ENSG00000227208  | LINC00552 | 15823.9  | 0.14      | 13 | 114451484 | 114454062 | long intergenic non-protein coding RNA 552 |  |
| 14463 | ENSG00000255561  |           | 15824    | 0.14      |    |           |           |                                            |  |
| 14467 | ENSG00000270716  |           | 15831.4  | 0.14      |    |           |           |                                            |  |
| 14469 | ENSG00000234380  |           | 15833.2  | 0.14      |    |           |           |                                            |  |
| 14473 | ENSG00000254037  |           | 15837.7  | 0.14      |    |           |           |                                            |  |
| 14474 | ENSG00000231079  |           | 15838.3  | 0.14      |    |           |           |                                            |  |
| 14475 | ENSG00000215124  |           | 15838.4  | 0.14      |    |           |           |                                            |  |
| 14477 | ENSG00000230339  |           | 15839.3  | 0.14      |    |           |           |                                            |  |
| 14481 | ENSG00000250306  |           | 15841.5  | 0.14      |    |           |           |                                            |  |
| 14483 | ENSG00000235172  |           | 15843.3  | 0.14      |    |           |           |                                            |  |
| 14486 | ENSG00000269079  |           | 15847    | 0.14      |    |           |           |                                            |  |
| 14491 | ENSG00000251159  |           | 15850.5  | 0.14      |    |           |           |                                            |  |
| 14496 | ENSG00000249743  |           | 15851.4  | 0.14      |    |           |           |                                            |  |
| 14500 | ENSG00000236207  |           | 15856    | 0.14      |    |           |           |                                            |  |
| 14506 | ENSG00000237962  |           | 15860.2  | 0.14      |    |           |           |                                            |  |
| 14507 | ENSG00000226389  |           | 15860.8  | 0.14      |    |           |           |                                            |  |
| 14512 | ENSG00000259588  |           | 15864.6  | 0.14      |    |           |           |                                            |  |
| 14514 | ENSG00000269496  |           | 15866.6  | 0.14      |    |           |           |                                            |  |
| 14518 | ENSG00000256188  |           | 15867.2  | 0.14      |    |           |           |                                            |  |
| 14525 | ENSG00000215227  |           | 15877.4  | 0.14      |    |           |           |                                            |  |
| 14530 | ENSG00000213380  |           | 15881.2  | 0.14      |    |           |           |                                            |  |
| 14537 | ENSG00000248729  |           | 15886.6  | 0.14      |    |           |           |                                            |  |
| 14538 | ENSG00000239123  |           | 15887.7  | 0.14      |    |           |           |                                            |  |
| 14543 | ENSG00000224810  |           | 15892    | 0.14      | 7  | 138167225 | 138167328 | Small nuclear RNA U13                      |  |
| 14544 | ENSG000002448597 |           | 15892.3  | 0.14      |    |           |           |                                            |  |
| 14546 | ENSG00000231388  |           | 15893.3  | 0.14      |    |           |           |                                            |  |
| 14548 | ENSG00000217699  |           | 15895.3  | 0.14      |    |           |           |                                            |  |
| 14550 | ENSG00000235033  |           | 15896.3  | 0.14      |    |           |           |                                            |  |
| 14554 | ENSG00000230900  |           | 15898.9  | 0.14      |    |           |           |                                            |  |
| 14556 | ENSG00000250343  |           | 15900.4  | 0.14      |    |           |           |                                            |  |
| 14557 | ENSG00000236961  |           | 15900.6  | 0.14      |    |           |           |                                            |  |
| 14558 | ENSG00000258452  |           | 15900.6  | 0.14      |    |           |           |                                            |  |
| 14564 | ENSG00000252127  |           | 15904.3  | 0.14      |    |           |           |                                            |  |
| 14567 | ENSG00000258394  |           | 15906.3  | 0.14      |    |           |           |                                            |  |
| 14592 | ENSG00000264461  |           | 15925.2  | 0.14      |    |           |           |                                            |  |
| 14594 | ENSG00000272024  |           | 15925.4  | 0.14      |    |           |           |                                            |  |
| 14602 | ENSG00000267066  |           | 15933.8  | 0.14      |    |           |           |                                            |  |
| 14606 | ENSG00000268292  |           | 15934.8  | 0.14      |    |           |           |                                            |  |
| 14609 | ENSG00000271743  |           | 15937.8  | 0.14      |    |           |           |                                            |  |
| 14610 | ENSG00000251434  |           | 15938.3  | 0.14      |    |           |           |                                            |  |
| 14614 | ENSG00000257126  |           | 15943.3  | 0.14      |    |           |           |                                            |  |
| 14618 | ENSG00000252611  |           | 15945.5  | 0.14      |    |           |           |                                            |  |
| 14623 | ENSG00000267285  |           | 15953.1  | 0.14      |    |           |           |                                            |  |
| 14629 | ENSG00000238815  |           | 15955.4  | 0.14      | 17 | 49175535  | 49175639  | Small nuclear RNA U13                      |  |
| 14637 | ENSG00000259878  |           | 15962.1  | 0.14      |    |           |           |                                            |  |
| 14639 | ENSG00000255799  |           | 15963.2  | 0.14      |    |           |           |                                            |  |
| 14640 | ENSG00000240466  |           | 15964    | 0.14      | 15 | 84874184  | 84874466  | RNA, 7SL, cytoplasmic 331, pseudogene      |  |
| 14642 | ENSG00000268488  |           | 15967.3  | 0.14      | 8  | 92151489  | 92151751  | RNA, 7SL, cytoplasmic 777, pseudogene      |  |
| 14646 | ENSG00000253888  |           | 15969    | 0.14      |    |           |           |                                            |  |
| 14655 | ENSG00000251311  |           | 15974.2  | 0.14      |    |           |           |                                            |  |
| 14658 | ENSG00000254734  |           | 15974.3  | 0.14      |    |           |           |                                            |  |
| 14667 | ENSG00000237883  |           | 15982    | 0.14      |    |           |           |                                            |  |
| 14672 | ENSG00000238433  |           | 15985.8  | 0.14      | 8  | 59574800  | 59574903  | Small nuclear RNA U13                      |  |
| 14675 | ENSG00000259493  |           | 15987    | 0.14      |    |           |           |                                            |  |
| 14676 | ENSG00000272814  |           | 15988.5  | 0.14      |    |           |           |                                            |  |
| 14677 | ENSG00000243675  |           | 15989.2  | 0.14      |    |           |           |                                            |  |
| 14682 | ENSG00000237525  |           | 15992.5  | 0.14      |    |           |           |                                            |  |
| 14685 | ENSG00000252691  |           | 15996.7  | 0.14      |    |           |           |                                            |  |
| 14692 | ENSG00000259995  |           | 16003.4  | 0.14      |    |           |           |                                            |  |
| 14693 | ENSG00000254553  |           | 16004.5  | 0.14      |    |           |           |                                            |  |
| 14704 | ENSG00000252509  |           | 16014.3  | 0.14      |    |           |           |                                            |  |
| 14710 | ENSG00000227051  |           | 16018.1  | 0.14      |    |           |           |                                            |  |
| 14713 | ENSG00000253993  |           | 16019.6  | 0.14      |    |           |           |                                            |  |
| 14715 | ENSG00000269420  |           | 16021.8  | 0.14      |    |           |           |                                            |  |
| 14721 | ENSG00000257362  |           | 16026.7  | 0.14      |    |           |           |                                            |  |
| 14728 | ENSG00000254843  |           | 16030    | 0.14      |    |           |           |                                            |  |
| 14731 | ENSG00000259583  |           | 16031.5  | 0.14      |    |           |           |                                            |  |
| 14733 | ENSG00000227432  |           | 16033.2  | 0.14      |    |           |           |                                            |  |
| 14737 | ENSG00000230394  |           | 16033.9  | 0.14      |    |           |           |                                            |  |
| 14745 | ENSG00000271237  |           | 16041    | 0.14      |    |           |           |                                            |  |
| 14747 | ENSG00000246228  |           | 16041.3  | 0.14      |    |           |           |                                            |  |
| 14751 | ENSG00000258465  |           | 16044.6  | 0.14      |    |           |           |                                            |  |
| 14752 | ENSG00000210483  |           | 16045    | 0.14      |    |           |           |                                            |  |
| 14753 | ENSG00000256050  |           | 16045.1  | 0.14      |    |           |           |                                            |  |
| 14754 | ENSG00000256508  |           | 16048.4  | 0.14      |    |           |           |                                            |  |
| 14758 | ENSG00000269123  |           | 16048.5  | 0.14      |    |           |           |                                            |  |
| 14762 | ENSG00000260792  |           | 16049.5  | 0.14      | 16 | 12062000  | 12062333  | Uncharacterized protein                    |  |

|       |                 |         |      |    |          |          |  |                                                               |
|-------|-----------------|---------|------|----|----------|----------|--|---------------------------------------------------------------|
| 14763 | ENSG00000298915 | 16550.9 | 0.14 |    |          |          |  |                                                               |
| 14763 | ENSG00000298915 | 16556   | 0.14 |    |          |          |  |                                                               |
| 14769 | ENSG00000254620 | 16559   | 0.14 |    |          |          |  |                                                               |
| 14774 | ENSG00000232192 | 16566.5 | 0.14 |    |          |          |  |                                                               |
| 14778 | ENSG00000255762 | 16569.2 | 0.14 |    |          |          |  |                                                               |
| 14784 | ENSG00000271072 | 16575.2 | 0.14 |    |          |          |  |                                                               |
| 14788 | ENSG00000231252 | 16576.3 | 0.14 |    |          |          |  |                                                               |
| 14788 | ENSG00000297361 | 16577.3 | 0.14 |    |          |          |  |                                                               |
| 14792 | ENSG00000230963 | 16578.9 | 0.14 |    |          |          |  |                                                               |
| 14795 | ENSG00000236965 | 16580.3 | 0.14 |    |          |          |  |                                                               |
| 14802 | ENSG00000298174 | 16584.6 | 0.14 |    |          |          |  |                                                               |
| 14804 | ENSG00000235192 | 16585.5 | 0.14 | 1  | 19646299 | 19646554 |  | RNA, 7SL, cytoplasmic 85, pseudogene                          |
| 14807 | ENSG00000226792 | 16591.5 | 0.14 |    |          |          |  |                                                               |
| 14808 | ENSG00000271044 | 16591.7 | 0.14 |    |          |          |  |                                                               |
| 14819 | ENSG00000229139 | 16598   | 0.14 |    |          |          |  |                                                               |
| 14822 | ENSG00000229228 | 16599.3 | 0.14 |    |          |          |  |                                                               |
| 14825 | ENSG00000235084 | 16101.1 | 0.14 |    |          |          |  |                                                               |
| 14826 | ENSG00000232353 | 16101.6 | 0.14 |    |          |          |  |                                                               |
| 14833 | ENSG00000244039 | 16106.6 | 0.14 |    |          |          |  |                                                               |
| 14834 | ENSG00000254142 | 16108.1 | 0.14 |    |          |          |  |                                                               |
| 14838 | ENSG00000232729 | 16112.6 | 0.14 |    |          |          |  |                                                               |
| 14840 | ENSG00000242317 | 16115.4 | 0.14 |    |          |          |  |                                                               |
| 14843 | ENSG00000259928 | 16119.3 | 0.14 |    |          |          |  |                                                               |
| 14845 | ENSG00000234999 | 16120   | 0.14 |    |          |          |  |                                                               |
| 14848 | ENSG00000232360 | 16121.8 | 0.14 |    |          |          |  |                                                               |
| 14850 | ENSG00000234003 | 16122.3 | 0.14 |    |          |          |  |                                                               |
| 14850 | ENSG00000230395 | 16123.3 | 0.14 |    |          |          |  |                                                               |
| 14856 | ENSG00000225236 | 16128.6 | 0.14 |    |          |          |  |                                                               |
| 14857 | ENSG00000253194 | 16129.3 | 0.14 |    |          |          |  |                                                               |
| 14858 | ENSG00000234548 | 16131.2 | 0.14 |    |          |          |  |                                                               |
| 14860 | ENSG00000230392 | 16131.8 | 0.14 |    |          |          |  |                                                               |
| 14864 | ENSG00000185078 | 16137.7 | 0.14 |    |          |          |  |                                                               |
| 14874 | ENSG00000236817 | 16144.6 | 0.14 |    |          |          |  |                                                               |
| 14875 | ENSG00000251228 | 16144.6 | 0.14 |    |          |          |  |                                                               |
| 14877 | ENSG00000231877 | 16145.3 | 0.14 |    |          |          |  |                                                               |
| 14888 | ENSG00000230681 | 16150.2 | 0.14 |    |          |          |  |                                                               |
| 14895 | ENSG00000227700 | 16165.4 | 0.14 |    |          |          |  |                                                               |
| 14896 | ENSG00000236345 | 16166.1 | 0.14 |    |          |          |  |                                                               |
| 14898 | ENSG00000235889 | 16168   | 0.14 |    |          |          |  |                                                               |
| 14901 | ENSG00000233502 | 16168.7 | 0.14 |    |          |          |  |                                                               |
| 14912 | ENSG00000259988 | 16173.8 | 0.14 |    |          |          |  |                                                               |
| 14920 | ENSG00000235689 | 16179.9 | 0.14 |    |          |          |  |                                                               |
| 14922 | ENSG00000232121 | 16181   | 0.14 |    |          |          |  |                                                               |
| 14931 | ENSG00000209071 | 16185.8 | 0.14 |    |          |          |  |                                                               |
| 14933 | ENSG00000240266 | 16186.6 | 0.14 |    |          |          |  |                                                               |
| 14934 | ENSG00000225254 | 16186.7 | 0.14 |    |          |          |  |                                                               |
| 14939 | ENSG00000272167 | 16190.3 | 0.14 |    |          |          |  |                                                               |
| 14945 | ENSG00000236799 | 16196.8 | 0.14 |    |          |          |  |                                                               |
| 14948 | ENSG00000234247 | 16200   | 0.14 |    |          |          |  |                                                               |
| 14951 | ENSG00000186530 | 16203.6 | 0.14 | 8  | 6666038  | 6693166  |  | XX, Kell blood group complex subunit-related family, member 5 |
| 14956 | ENSG00000215909 | 16208.3 | 0.14 |    |          |          |  |                                                               |
| 14958 | ENSG00000212897 | 16210.9 | 0.14 |    |          |          |  |                                                               |
| 14961 | ENSG00000235844 | 16212.7 | 0.14 |    |          |          |  |                                                               |
| 14962 | ENSG00000249195 | 16214.5 | 0.14 |    |          |          |  |                                                               |
| 14969 | ENSG00000231013 | 16218.5 | 0.14 |    |          |          |  |                                                               |
| 14972 | ENSG00000224375 | 16219.1 | 0.14 |    |          |          |  |                                                               |
| 14975 | ENSG00000270773 | 16220.6 | 0.14 |    |          |          |  |                                                               |
| 14977 | ENSG00000235261 | 16220.8 | 0.14 |    |          |          |  |                                                               |
| 14983 | ENSG00000272416 | 16225.1 | 0.14 |    |          |          |  |                                                               |
| 14986 | ENSG00000234995 | 16227.5 | 0.14 | 14 | 63929724 | 63930021 |  | RNA, 7SL, cytoplasmic 540, pseudogene                         |
| 14987 | ENSG00000231315 | 16227.5 | 0.14 |    |          |          |  |                                                               |
| 14985 | ENSG00000236265 | 16233   | 0.14 |    |          |          |  |                                                               |
| 14996 | ENSG00000229993 | 16234.6 | 0.14 |    |          |          |  |                                                               |
| 14998 | ENSG00000230214 | 16235.9 | 0.14 |    |          |          |  |                                                               |
| 15001 | ENSG00000250020 | 16237.4 | 0.14 |    |          |          |  |                                                               |
| 15007 | ENSG00000236395 | 16245.2 | 0.14 |    |          |          |  |                                                               |
| 15014 | ENSG00000248944 | 16251   | 0.14 |    |          |          |  |                                                               |
| 15015 | ENSG00000251178 | 16251.8 | 0.14 |    |          |          |  |                                                               |
| 15017 | ENSG00000249937 | 16253.3 | 0.14 |    |          |          |  |                                                               |
| 15018 | ENSG00000232599 | 16253.6 | 0.14 | 18 | 21852889 | 21853170 |  | RNA, 7SL, cytoplasmic 247, pseudogene                         |
| 15019 | ENSG00000230542 | 16253.8 | 0.14 |    |          |          |  |                                                               |
| 15024 | ENSG00000236775 | 16258.8 | 0.14 |    |          |          |  |                                                               |
| 15028 | ENSG00000233965 | 16261.6 | 0.14 |    |          |          |  |                                                               |
| 15032 | ENSG00000245885 | 16265.9 | 0.14 |    |          |          |  |                                                               |
| 15033 | ENSG00000237836 | 16267.4 | 0.14 |    |          |          |  |                                                               |
| 15034 | ENSG00000237228 | 16267.7 | 0.14 |    |          |          |  |                                                               |
| 15045 | ENSG00000225457 | 16278.6 | 0.14 |    |          |          |  |                                                               |
| 15050 | ENSG00000279937 | 16285.2 | 0.14 |    |          |          |  |                                                               |
| 15052 | ENSG00000232458 | 16285.9 | 0.14 |    |          |          |  |                                                               |
| 15055 | ENSG00000212992 | 16289.9 | 0.14 |    |          |          |  |                                                               |
| 15056 | ENSG00000236438 | 16290.3 | 0.14 |    |          |          |  |                                                               |
| 15057 | ENSG00000239929 | 16291.3 | 0.14 |    |          |          |  |                                                               |
| 15061 | ENSG00000238231 | 16293.8 | 0.14 |    |          |          |  |                                                               |
| 15063 | ENSG00000227834 | 16296.5 | 0.14 |    |          |          |  |                                                               |
| 15068 | ENSG00000232598 | 16303.7 | 0.14 |    |          |          |  |                                                               |
| 15069 | ENSG00000227297 | 16303.6 | 0.14 |    |          |          |  |                                                               |
| 15076 | ENSG00000257060 | 16309   | 0.14 |    |          |          |  |                                                               |
| 15079 | ENSG00000239998 | 16311.3 | 0.14 |    |          |          |  |                                                               |
| 15083 | ENSG00000236286 | 16314.3 | 0.14 |    |          |          |  |                                                               |
| 15090 | ENSG00000236134 | 16322.6 | 0.14 |    |          |          |  |                                                               |
| 15092 | ENSG00000234232 | 16323.3 | 0.14 |    |          |          |  |                                                               |
| 15096 | ENSG00000236363 | 16327.6 | 0.14 |    |          |          |  |                                                               |
| 15108 | ENSG00000241884 | 16333   | 0.14 |    |          |          |  |                                                               |
| 15108 | ENSG00000239497 | 16334.4 | 0.14 |    |          |          |  |                                                               |
| 15113 | ENSG00000270161 | 16335.2 | 0.14 |    |          |          |  |                                                               |
| 15115 | ENSG00000231805 | 16337   | 0.14 |    |          |          |  |                                                               |
| 15119 | ENSG00000228046 | 16340.9 | 0.14 |    |          |          |  |                                                               |
| 15121 | ENSG00000234429 | 16342.5 | 0.14 |    |          |          |  |                                                               |
| 15122 | ENSG00000228421 | 16343   | 0.14 |    |          |          |  |                                                               |
| 15132 | ENSG00000230850 | 16353.9 | 0.14 |    |          |          |  |                                                               |
| 15134 | ENSG00000217428 | 16359.5 | 0.14 |    |          |          |  |                                                               |
| 15135 | ENSG00000214773 | 16360.2 | 0.14 |    |          |          |  |                                                               |
| 15142 | ENSG00000270993 | 16366.6 | 0.14 |    |          |          |  |                                                               |
| 15150 | ENSG00000230933 | 16372.5 | 0.14 |    |          |          |  |                                                               |
| 15160 | ENSG00000230406 | 16379.6 | 0.14 |    |          |          |  |                                                               |
| 15170 | ENSG00000231961 | 16385.6 | 0.14 |    |          |          |  |                                                               |
| 15173 | ENSG00000230122 | 16386.5 | 0.14 |    |          |          |  |                                                               |
| 15174 | ENSG00000251241 | 16388.8 | 0.14 |    |          |          |  |                                                               |
| 15179 | ENSG00000236910 | 16389.9 | 0.14 |    |          |          |  |                                                               |
| 15187 | ENSG00000235654 | 16390.5 | 0.14 |    |          |          |  |                                                               |
| 15189 | ENSG00000234259 | 16401.9 | 0.14 |    |          |          |  |                                                               |
| 15196 | ENSG00000238813 | 16406.5 | 0.14 |    |          |          |  |                                                               |
| 15198 | ENSG00000234210 | 16407.1 | 0.14 |    |          |          |  |                                                               |
| 15204 | ENSG00000255843 | 16412.3 | 0.14 |    |          |          |  |                                                               |
| 15205 | ENSG00000249731 | 16412.9 | 0.14 |    |          |          |  |                                                               |
| 15209 | ENSG00000231133 | 16414.7 | 0.14 |    |          |          |  |                                                               |
| 15213 | ENSG00000227274 | 16421.3 | 0.14 |    |          |          |  |                                                               |
| 15214 | ENSG00000270664 | 16421.9 | 0.14 |    |          |          |  |                                                               |
| 15217 | ENSG00000232193 | 16423.8 | 0.14 |    |          |          |  |                                                               |
| 15221 | ENSG00000232725 | 16427.9 | 0.14 |    |          |          |  |                                                               |
| 15223 | ENSG00000230960 | 16428.2 | 0.14 |    |          |          |  |                                                               |
| 15247 | ENSG00000255438 | 16445.8 | 0.14 |    |          |          |  |                                                               |
| 15252 | ENSG00000255545 | 16448.2 | 0.14 |    |          |          |  |                                                               |
| 15263 | ENSG00000224981 | 16448.5 | 0.14 |    |          |          |  |                                                               |
| 15268 | ENSG00000233190 | 16450.5 | 0.14 |    |          |          |  |                                                               |
| 15281 | ENSG00000238133 | 16452   | 0.14 |    |          |          |  |                                                               |
| 15283 | ENSG00000178428 | 16452.6 | 0.14 |    |          |          |  |                                                               |
| 15285 | ENSG00000224687 | 16453.4 | 0.14 |    |          |          |  |                                                               |
| 15286 | ENSG00000237559 | 16453.5 | 0.14 |    |          |          |  |                                                               |
| 15278 | ENSG00000256229 | 16460.7 | 0.14 |    |          |          |  |                                                               |
| 15277 | ENSG00000235300 | 16461.1 | 0.14 |    |          |          |  |                                                               |
| 15282 | ENSG00000230407 | 16462.2 | 0.14 |    |          |          |  |                                                               |
| 15285 | ENSG00000234252 | 16465.9 | 0.14 |    |          |          |  |                                                               |
| 15294 | ENSG00000234496 | 16470.3 | 0.14 |    |          |          |  |                                                               |
| 15297 | ENSG00000231891 | 16471.7 | 0.14 |    |          |          |  |                                                               |
| 15309 | ENSG00000235451 | 16480.8 | 0.14 |    |          |          |  |                                                               |
| 15313 | ENSG00000236246 | 16482.4 | 0.14 |    |          |          |  |                                                               |
| 15318 | ENSG00000232747 | 16483.6 | 0.14 | 6  | 90533014 | 90533115 |  | Small nuclear RNA U13                                         |
| 15318 | ENSG00000231373 | 16484   | 0.14 |    |          |          |  |                                                               |
| 15322 | ENSG00000237933 | 16488.9 | 0.14 |    |          |          |  |                                                               |
| 15328 | ENSG00000231331 | 16492.5 | 0.14 |    |          |          |  |                                                               |
| 15333 | ENSG00000271366 | 16494.9 | 0.14 |    |          |          |  |                                                               |
| 15345 | ENSG00000235936 | 16505.4 | 0.14 |    |          |          |  |                                                               |
| 15347 | ENSG00000248752 | 16507.6 | 0.14 |    |          |          |  |                                                               |
| 15350 | ENSG00000238449 | 16509.3 | 0.14 | 7  | 9517457  | 95173854 |  | Protein LOC10096577                                           |
| 15355 | ENSG00000272100 | 16513.3 | 0.14 |    |          |          |  |                                                               |
| 15357 | ENSG00000236927 | 16516.2 | 0.14 |    |          |          |  |                                                               |
| 15359 | ENSG00000237728 | 16517.2 | 0.14 | 3  | 52097076 | 52097567 |  | long intergenic non-protein coding RNA 696                    |
| 15361 | ENSG00000230701 | 16518.2 | 0.14 |    |          |          |  |                                                               |
| 15374 | ENSG00000232321 | 16529.8 | 0.14 |    |          |          |  |                                                               |
| 15379 | ENSG00000259602 | 16533.4 | 0.14 |    |          |          |  |                                                               |

|       |                |              |           |           |                 |    |           |           |                                                                                 |
|-------|----------------|--------------|-----------|-----------|-----------------|----|-----------|-----------|---------------------------------------------------------------------------------|
| 15380 | ENS00000219371 |              | 16533.5   | 0.14      |                 |    |           |           |                                                                                 |
| 15381 | ENS00000219398 |              | 16534.9   | 0.14      |                 |    |           |           |                                                                                 |
| 15385 | ENS00000219442 |              | 16537.5   | 0.14      |                 |    |           |           |                                                                                 |
| 15387 | ENS00000219330 |              | 16538.1   | 0.14      |                 |    |           |           |                                                                                 |
| 15388 | ENS00000219419 |              | 16542.7   | 0.14      |                 |    |           |           |                                                                                 |
| 15400 | ENS00000219293 |              | 16544.6   | 0.14      |                 |    |           |           |                                                                                 |
| 15404 | ENS00000219444 |              | 16549.9   | 0.14      |                 |    |           |           |                                                                                 |
| 15405 | ENS00000219297 |              | 16553.6   | 0.14      |                 |    |           |           |                                                                                 |
| 15409 | ENS00000219445 |              | 16561.6   | 0.14      |                 |    |           |           |                                                                                 |
| 15421 | ENS00000219208 |              | 16562.3   | 0.14      |                 |    |           |           |                                                                                 |
| 15423 | ENS00000219445 |              | 16565.2   | 0.14      |                 |    |           |           |                                                                                 |
| 15428 | ENS00000219370 |              | 16567.4   | 0.14      |                 |    |           |           |                                                                                 |
| 15430 | ENS00000219280 |              | 16571.5   | 0.14      |                 |    |           |           |                                                                                 |
| 15440 | ENS00000219244 |              | 16575.1   | 0.14      |                 |    |           |           |                                                                                 |
| 15442 | ENS00000219298 |              | 16580.6   | 0.14      |                 |    |           |           |                                                                                 |
| 15445 | ENS00000219212 |              | 16583.2   | 0.14      |                 |    |           |           |                                                                                 |
| 15446 | ENS00000219167 |              | 16583.4   | 0.14      |                 |    |           |           |                                                                                 |
| 15452 | ENS00000219246 |              | 16597.7   | 0.14      |                 |    |           |           |                                                                                 |
| 15453 | ENS00000219298 |              | 16588.9   | 0.14      |                 |    |           |           |                                                                                 |
| 15459 | ENS00000219244 |              | 16592.7   | 0.14      |                 |    |           |           |                                                                                 |
| 15461 | ENS00000219395 |              | 16596.3   | 0.14      |                 |    |           |           |                                                                                 |
| 15462 | ENS00000219236 | 2            | 239192329 | 239192488 |                 |    |           |           | Uncharacterized protein                                                         |
| 15465 | ENS00000219336 |              | 16598.9   | 0.14      |                 |    |           |           |                                                                                 |
| 15468 | ENS00000219288 | 9            | 45727107  | 45728274  |                 |    |           |           | family with sequence similarity 27, member A                                    |
| 15482 | ENS00000219431 |              | 16607.3   | 0.14      |                 |    |           |           |                                                                                 |
| 15483 | ENS00000219246 |              | 16608.4   | 0.14      |                 |    |           |           |                                                                                 |
| 15490 | ENS00000219246 |              | 16611.5   | 0.14      |                 |    |           |           |                                                                                 |
| 15509 | ENS00000219210 |              | 16634.8   | 0.14      |                 |    |           |           |                                                                                 |
| 15520 | ENS00000219246 |              | 16641.2   | 0.14      |                 |    |           |           |                                                                                 |
| 15528 | ENS00000219246 |              | 16653.3   | 0.14      |                 |    |           |           |                                                                                 |
| 15534 | ENS00000219246 |              | 16660.8   | 0.14      |                 |    |           |           |                                                                                 |
| 15560 | ENS00000219338 |              | 16675.9   | 0.14      |                 |    |           |           |                                                                                 |
| 15561 | ENS00000219246 |              | 16676.5   | 0.14      |                 |    |           |           |                                                                                 |
| 15563 | ENS00000219170 |              | 16678.4   | 0.14      |                 |    |           |           |                                                                                 |
| 15584 | ENS00000219246 |              | 16690.7   | 0.14      |                 |    |           |           |                                                                                 |
| 15585 | ENS00000219246 |              | 16691.7   | 0.14      |                 |    |           |           |                                                                                 |
| 15587 | ENS00000219289 | 21           | 11180920  | 11181815  |                 |    |           |           | eukaryotic translation initiation factor 3, subunit F pseudogene 1              |
| 15591 | ENS00000219186 |              | 16697.9   | 0.14      |                 |    |           |           |                                                                                 |
| 15598 | ENS00000219289 |              | 16699.3   | 0.14      |                 |    |           |           |                                                                                 |
| 15598 | ENS00000219289 |              | 16701.4   | 0.14      |                 |    |           |           |                                                                                 |
| 15601 | ENS00000219282 |              | 16705     | 0.14      |                 |    |           |           |                                                                                 |
| 15603 | ENS00000219257 |              | 16708     | 0.14      |                 |    |           |           |                                                                                 |
| 15610 | ENS00000219142 |              | 16714.4   | 0.14      |                 |    |           |           |                                                                                 |
| 15612 | ENS00000219270 |              | 16714.7   | 0.14      |                 |    |           |           |                                                                                 |
| 15623 | ENS00000219241 |              | 16721.9   | 0.14      |                 |    |           |           |                                                                                 |
| 15624 | ENS00000219241 |              | 16731.5   | 0.14      |                 |    |           |           |                                                                                 |
| 15641 | ENS00000219276 |              | 16741.1   | 0.14      |                 |    |           |           |                                                                                 |
| 15642 | ENS00000219261 |              | 16743.1   | 0.14      |                 |    |           |           |                                                                                 |
| 15644 | ENS00000219109 | 19           | 13890884  | 13900972  |                 |    |           |           | Uncharacterized protein                                                         |
| 15660 | ENS00000219247 |              | 16753.1   | 0.14      |                 |    |           |           |                                                                                 |
| 15663 | ENS00000219276 |              | 16754.8   | 0.14      |                 |    |           |           |                                                                                 |
| 15672 | ENS00000219246 |              | 16762.2   | 0.14      |                 |    |           |           |                                                                                 |
| 15674 | ENS00000219218 |              | 16764.7   | 0.14      |                 |    |           |           |                                                                                 |
| 15677 | ENS00000219118 |              | 16767.7   | 0.14      |                 |    |           |           |                                                                                 |
| 15682 | ENS00000219319 |              | 16773.9   | 0.14      |                 |    |           |           |                                                                                 |
| 15684 | ENS00000219274 |              | 16775.2   | 0.14      |                 |    |           |           |                                                                                 |
| 15686 | ENS00000219210 |              | 16776     | 0.14      |                 |    |           |           |                                                                                 |
| 15704 | ENS00000219181 |              | 16785.6   | 0.14      |                 |    |           |           |                                                                                 |
| 15728 | ENS00000219287 |              | 16800.2   | 0.14      |                 |    |           |           |                                                                                 |
| 15731 | ENS00000219188 |              | 16804.4   | 0.14      |                 |    |           |           |                                                                                 |
| 15771 | ENS00000219159 |              | 16807.7   | 0.14      |                 |    |           |           |                                                                                 |
| 15782 | ENS00000219338 |              | 16841.8   | 0.14      |                 |    |           |           |                                                                                 |
| 15807 | ENS00000219270 | 3            | 195647715 | 195648000 |                 |    |           |           | RNA 75L, cytoplasmic 773, pseudogene                                            |
| 15817 | ENS00000219289 |              | 16848.2   | 0.14      |                 |    |           |           |                                                                                 |
| 15818 | ENS00000219289 |              | 16878.2   | 0.14      |                 |    |           |           |                                                                                 |
| 15842 | ENS00000219251 |              | 16903.2   | 0.14      |                 |    |           |           |                                                                                 |
| 15870 | ENS00000219246 |              | 16922.8   | 0.14      |                 |    |           |           |                                                                                 |
| 15885 | ENS00000219218 |              | 16933.7   | 0.14      |                 |    |           |           |                                                                                 |
| 15890 | ENS00000219188 |              | 16937.9   | 0.14      |                 |    |           |           |                                                                                 |
| 15897 | ENS00000219257 |              | 16940     | 0.14      |                 |    |           |           |                                                                                 |
| 15905 | ENS00000219289 |              | 16948.3   | 0.14      |                 |    |           |           |                                                                                 |
| 15920 | ENS00000219246 | 3            | 189831723 | 189832061 |                 |    |           |           | RNA 75L, cytoplasmic 486, pseudogene                                            |
| 15931 | ENS00000219246 |              | 16984.4   | 0.14      |                 |    |           |           |                                                                                 |
| 15934 | ENS00000219289 |              | 16986.7   | 0.14      |                 |    |           |           |                                                                                 |
| 15942 | ENS00000219286 |              | 16987.5   | 0.14      |                 |    |           |           |                                                                                 |
| 15947 | ENS00000219215 |              | 16990.3   | 0.14      |                 |    |           |           |                                                                                 |
| 15956 | ENS00000219247 |              | 16996.7   | 0.14      |                 |    |           |           |                                                                                 |
| 15994 | ENS00000219207 |              | 17024     | 0.14      |                 |    |           |           |                                                                                 |
| 16018 | ENS00000219274 |              | 17048.3   | 0.14      |                 |    |           |           |                                                                                 |
| 16030 | ENS00000219178 |              | 17057     | 0.14      |                 |    |           |           |                                                                                 |
| 16059 | ENS00000219279 |              | 17081.3   | 0.14      |                 |    |           |           |                                                                                 |
| 16075 | ENS00000219289 |              | 17129     | 0.14      |                 |    |           |           |                                                                                 |
| 16077 | ENS00000219219 |              | 17094.4   | 0.14      |                 |    |           |           |                                                                                 |
| 16108 | ENS00000219265 |              | 17113.1   | 0.14      |                 |    |           |           |                                                                                 |
| 16121 | ENS00000219289 |              | 17125.9   | 0.14      |                 |    |           |           |                                                                                 |
| 16131 | ENS00000219289 |              | 17129     | 0.14      |                 |    |           |           |                                                                                 |
| 16132 | ENS00000219396 | 10           | 48952491  | 48960269  |                 |    |           |           | glutamate dehydrogenase 1 pseudogene 2                                          |
| 16136 | ENS00000219271 |              | 17146     | 0.14      |                 |    |           |           |                                                                                 |
| 16164 | ENS00000219115 |              | 17148.2   | 0.14      |                 |    |           |           |                                                                                 |
| 16252 | ENS00000219274 |              | 17218.9   | 0.14      |                 |    |           |           |                                                                                 |
| 16274 | ENS00000219276 |              | 17227.1   | 0.14      |                 |    |           |           |                                                                                 |
| 16414 | ENS00000219251 |              | 17328.3   | 0.14      |                 |    |           |           |                                                                                 |
| 16428 | ENS00000219286 |              | 17343.7   | 0.14      |                 |    |           |           |                                                                                 |
| 16447 | ENS00000219183 |              | 17360.5   | 0.14      |                 |    |           |           |                                                                                 |
| 16488 | ENS00000219138 |              | 17396.5   | 0.14      |                 |    |           |           |                                                                                 |
| 16652 | ENS00000219222 |              | 17519.5   | 0.14      |                 |    |           |           |                                                                                 |
| 16711 | ENS00000219133 |              | 17571.4   | 0.14      |                 |    |           |           |                                                                                 |
| 16831 | ENS00000219311 |              | 17627.2   | 0.14      |                 |    |           |           |                                                                                 |
| 4428  | ENS00000219203 | JHDM1D-AS1   | 6882.2    | 0.13      | antisense       | 7  | 13687061  | 13687940  | JHDM1D antisense RNA 1 (head to head)                                           |
| 6172  | ENS00000219200 |              | 8951.4    | 0.13      | antisense       | 4  | 85724411  | 85731544  | WIPF3 antisense RNA 1                                                           |
| 11391 | ENS00000219233 | LOC101929425 | 13478.9   | 0.13      | antisense       | 10 | 30439668  | 30440307  | BTUG antisense RNA 1                                                            |
| 13116 | ENS00000219259 | CLYBL-AS2    | 14802.2   | 0.13      | antisense       | 13 | 10042335  | 10043225  | CLYBL antisense RNA 2                                                           |
| 13940 | ENS00000219112 | MRV1-AS1     | 15432.2   | 0.13      | antisense       | 11 | 10562819  | 10621479  | MRV1 antisense RNA 1                                                            |
| 14296 | ENS00000219247 |              | 15472.4   | 0.13      | antisense       | 3  | 19327102  | 19327277  | ATP11A antisense RNA 1                                                          |
| 14330 | ENS00000219286 | MKNK1-AS1    | 15719     | 0.13      | antisense       | 1  | 47003468  | 47005927  | MKNK1 antisense RNA 1                                                           |
| 14957 | ENS00000219210 | APBCE3B-AS1  | 16208.8   | 0.13      | antisense       | 22 | 39397564  | 39398214  | APBCE3B antisense RNA 1                                                         |
| 15233 | ENS00000219244 | UBA6-AS1     | 16448.6   | 0.13      | antisense       | 8  | 14462420  | 14462430  | UBA6 antisense RNA 1 (head to head)                                             |
| 15254 | ENS00000219244 | UBA6-AS1     | 16448.1   | 0.13      | antisense       | 4  | 8856698   | 8856870   | UBA6 antisense RNA 1 (head to head)                                             |
| 15447 | ENS00000219223 | AC137193.1   | 16584     | 0.13      | antisense       | 3  | 9234177   | 9234187   | SIRGAP3 antisense RNA 2                                                         |
| 15772 | ENS00000219269 |              | 16933.5   | 0.13      | antisense       | 10 | 2712516   | 2712686   | CCNA1C antisense RNA 3                                                          |
| 15938 | ENS00000219251 | DLG3-AS1     | 16989.2   | 0.13      | antisense       | X  | 69872808  | 69875844  | DLG3 antisense RNA 1                                                            |
| 15987 | ENS00000219214 | MACROD2-AS1  | 17018.7   | 0.13      | antisense       | 20 | 14864899  | 14870161  | MACROD2 antisense RNA 1                                                         |
| 16151 | ENS00000219313 |              | 17144.4   | 0.13      | antisense       | 3  | 2324651   | 2324669   | LIBE2 antisense RNA 1 (head to head)                                            |
| 16484 | ENS00000219246 | FGF10-AS1    | 17388.3   | 0.13      | antisense       | 5  | 44388834  | 44414091  | FGF10 antisense RNA 1                                                           |
| 16506 | ENS00000219282 | ABC5-AS1     | 17402.4   | 0.13      | antisense       | 3  | 18372426  | 18372907  | ABC5 antisense RNA 1                                                            |
| 16518 | ENS00000219211 |              | 17490.3   | 0.13      | antisense       | 5  | 13558767  | 13559747  | TIPIC antisense RNA 1                                                           |
| 16966 | ENS00000219284 | GN212-AS1    | 17750.4   | 0.13      | antisense       | 1  | 6820798   | 6868670   | GN2 antisense RNA 1                                                             |
| 17022 | ENS00000219241 | USP12-AS2    | 17739     | 0.13      | antisense       | 13 | 27745396  | 27757135  | USP12 antisense RNA 2 (head to head)                                            |
| 17238 | ENS00000219287 | OCRF-AS1     | 17844.9   | 0.13      | antisense       | 20 | 61431978  | 61439559  | OCRF antisense RNA 1                                                            |
| 17253 | ENS00000219287 | DNM1P35      | 17953     | 0.13      | antisense       | 15 | 7602001   | 7603964   | DNM1 pseudogene 35                                                              |
| 17273 | ENS00000219280 |              | 17971.2   | 0.13      | antisense       | 6  | 31851538  | 31851831  | EHMT2 antisense RNA 1                                                           |
| 17449 | ENS00000219249 |              | 18034.3   | 0.13      | antisense       | 2  | 9620680   | 9621957   | long intergenic non-protein coding RNA 1125                                     |
| 2827  | ENS00000219179 | LINC01125    | 3916.5    | 0.13      | IG_C_gene       | 22 | 23248512  | 23248973  | immunoglobulin lambda constant 3 (Iem-C3) marker                                |
| 14454 | ENS00000219209 |              | 15822.8   | 0.13      | IG_C_pseudogene | 22 | 23242988  | 23253245  | immunoglobulin lambda constant 4 (pseudogene)                                   |
| 14117 | ENS00000219256 |              | 15577.9   | 0.13      | IG_C_pseudogene | 15 | 2446296   | 2446298   | immunoglobulin heavy variable 10R15-4 (pseudogene)                              |
| 15243 | ENS00000219138 |              | 16444.3   | 0.13      | IG_C_pseudogene | 22 | 2583275   | 2583321   | immunoglobulin lambda variable 10R22-1 (pseudogene)                             |
| 19812 | ENS00000219363 |              | 1302.8    | 0.13      | lincRNA         | 15 | 100347228 | 100417353 | Uncharacterized protein                                                         |
| 13697 | ENS00000219263 | LINC0487     | 1885.1    | 0.13      | lincRNA         | 2  | 8966394   | 8910462   | long intergenic non-protein coding RNA 487                                      |
| 4323  | ENS00000219265 |              | 15713.1   | 0.13      | lincRNA         | 10 | 89186780  | 89184549  | long intergenic non-protein coding RNA 864                                      |
| 14487 | ENS00000219285 |              | 15845.6   | 0.13      | lincRNA         | 14 | 51771134  | 51795104  | long intergenic non-protein coding RNA 519                                      |
| 14534 | ENS00000219249 |              | 15855.1   | 0.13      | lincRNA         | 1  | 72910     | 73121     | MA3L1 and I3R antisense RNA 2                                                   |
| 4952  | ENS00000219246 | BPESC1       | 13862.4   | 0.13      | lincRNA         | 1  | 13862027  | 13864009  | blepharophosia, epcardius inversus and otosis, candidate 1 (non-protein coding) |
| 15436 | ENS00000219247 | LINC00656    | 16577.3   | 0.13      | lincRNA         | 10 | 80008505  | 80434724  | long intergenic non-protein coding RNA 856                                      |
| 15637 | ENS00000219235 | LOC101928538 | 16738.2   | 0.13      | lincRNA         | 17 | 74846298  | 74857918  | long intergenic non-protein coding RNA 868                                      |
| 15696 | ENS00000219246 | FAM141C      | 16736.9   | 0.13      | lincRNA         | 6  | 8021753   | 812293    | family with sequence similarity 41, member C                                    |
| 15669 | ENS00000219237 | LINC01136    | 16759.3   | 0.13      | lincRNA         | 1  | 20328788  | 20327437  | long intergenic non-protein coding RNA 1136                                     |
| 15814 | ENS00000219297 |              | 16875     | 0.13      | lincRNA         | 6  | 16851353  | 16852671  | Small nucleolar RNA SNORD45                                                     |

|       |                  |          |       |      |                      |    |           |           |                                                                       |
|-------|------------------|----------|-------|------|----------------------|----|-----------|-----------|-----------------------------------------------------------------------|
| 13489 | ENS00000201741   | MIR196A1 | 15691 | 0.13 | miRNA                | 17 | 48709852  | 48709921  | microRNA 196a-1                                                       |
| 13508 | ENS00000201718   | MIR593A2 | 15113 | 0.13 | miRNA                | 7  | 9759178   | 9759183   | microRNA 593a-2                                                       |
| 13794 | ENS00000202700   | MIR598   | 15317 | 0.13 | miRNA                | 8  | 1095216   | 1095216   | microRNA 598                                                          |
| 14140 | ENS00000206712   | MIR476   | 15570 | 0.13 | miRNA                | 8  | 7797904   | 7797906   | has-mi-3149                                                           |
| 14719 | ENS00000204399   | MIR476   | 16236 | 0.13 | miRNA                | 17 | 6641337   | 6641337   | microRNA 476                                                          |
| 14800 | ENS00000204032   | MIR4481  | 16393 | 0.13 | miRNA                | 11 | 11218462  | 11218462  | microRNA 4481                                                         |
| 14943 | ENS00000204160   | MIR4762  | 16194 | 0.13 | miRNA                | 22 | 46156404  | 46156478  | microRNA 4762                                                         |
| 15644 | ENS000002196151  | MIR333   | 16586 | 0.13 | miRNA                | 14 | 10134030  | 10134032  | microRNA 333                                                          |
| 15715 | ENS00000208943   | MIR597   | 16393 | 0.13 | miRNA                | 11 | 11218462  | 11218462  | microRNA 3077                                                         |
| 15824 | ENS00000206219   | MIR4269  | 16882 | 0.13 | miRNA                | 22 | 240227157 | 240227340 | microRNA 4269                                                         |
| 15974 | ENS000002021655  | MIR1823  | 16569 | 0.13 | miRNA                | 2  | 11430536  | 11430673  | microRNA 1823                                                         |
| 16004 | ENS00000202843   | MIR4655  | 17029 | 0.13 | miRNA                | 2  | 106301    | 106301    | microRNA 4655                                                         |
| 16212 | ENS000002027922  | MIR556   | 17187 | 0.13 | miRNA                | 3  | 50210759  | 50210822  | microRNA 556                                                          |
| 16334 | ENS00000202952   | MIR1346  | 17269 | 0.13 | miRNA                | 7  | 1974491   | 1974509   | microRNA 1346                                                         |
| 16365 | ENS00000202425   | MIR5163  | 17490 | 0.13 | miRNA                | 11 | 6944925   | 6944937   | microRNA 5163                                                         |
| 17711 | ENS000002026491  | MIR4730  | 15289 | 0.13 | miRNA                | 17 | 7839218   | 7839293   | microRNA 4730                                                         |
| 5430  | ENS0000020265727 |          | 8164  | 0.13 | misc. RNA            | X  | 73462445  | 73462736  | RNA 75L cytoplasmic 648, pseudogene                                   |
| 7429  | ENS000002020291  |          | 10188 | 0.13 | misc. RNA            | 6  | 76394696  | 76395015  | RNA 75L small nuclear pseudogene 163                                  |
| 8216  | ENS000002020170  |          | 10987 | 0.13 | misc. RNA            | 10 | 73980510  | 73980510  | Y RNA                                                                 |
| 9489  | ENS000002020742  |          | 11940 | 0.13 | misc. RNA            | 14 | 56118252  | 56118252  | Y RNA                                                                 |
| 9629  | ENS000002020742  |          | 12054 | 0.13 | misc. RNA            | 14 | 20140569  | 20140569  | Y RNA                                                                 |
| 10005 | ENS000002040589  |          | 12349 | 0.13 | misc. RNA            | 17 | 42486429  | 42486726  | RNA 75L cytoplasmic 258, pseudogene                                   |
| 10895 | ENS000002021680  |          | 13038 | 0.13 | misc. RNA            | 6  | 31444466  | 31444567  | Y RNA                                                                 |
| 11171 | ENS000002020385  |          | 13352 | 0.13 | misc. RNA            | 2  | 69449229  | 69449248  | Y RNA                                                                 |
| 11968 | ENS000002043066  |          | 13876 | 0.13 | misc. RNA            | 19 | 14699169  | 14699465  | RNA 75L cytoplasmic 842, pseudogene                                   |
| 12794 | ENS000002042876  |          | 14274 | 0.13 | misc. RNA            | 22 | 20839224  | 20839497  | RNA 75L cytoplasmic 812, pseudogene                                   |
| 12939 | ENS000002029274  |          | 14474 | 0.13 | misc. RNA            | 17 | 29269683  | 29269687  | RNA 75L cytoplasmic 138, pseudogene                                   |
| 13500 | ENS000002043900  |          | 15100 | 0.13 | misc. RNA            | 13 | 52043886  | 52044181  | RNA 75L cytoplasmic 320, pseudogene                                   |
| 14282 | ENS000002027525  |          | 15685 | 0.13 | misc. RNA            | 16 | 74497786  | 74497888  | Y RNA                                                                 |
| 14408 | ENS000002028243  |          | 15833 | 0.13 | misc. RNA            | 8  | 66259345  | 66259349  | RNA 75L cytoplasmic 74, pseudogene                                    |
| 14463 | ENS000002028244  |          | 15838 | 0.13 | misc. RNA            | 13 | 46824077  | 46824348  | RNA 75L small nuclear pseudogene 5                                    |
| 14890 | ENS000002026237  |          | 15916 | 0.13 | misc. RNA            | 3  | 40250496  | 40250793  | RNA 75L cytoplasmic 411, pseudogene                                   |
| 14815 | ENS00000202762   |          | 15933 | 0.13 | misc. RNA            | 16 | 1833346   | 1833346   | Y RNA                                                                 |
| 14991 | ENS000002022469  |          | 16230 | 0.13 | misc. RNA            | X  | 10029202  | 10029203  | Y RNA                                                                 |
| 16274 | ENS000002042707  |          | 16640 | 0.13 | misc. RNA            | 18 | 13715099  | 13715367  | RNA 75L cytoplasmic 362, pseudogene                                   |
| 15296 | ENS000002022608  |          | 16673 | 0.13 | misc. RNA            | 13 | 1358123   | 1358123   | Y RNA                                                                 |
| 15398 | ENS000002021803  |          | 16543 | 0.13 | misc. RNA            | 10 | 17445507  | 17445619  | Y RNA                                                                 |
| 15416 | ENS000002024840  |          | 16557 | 0.13 | misc. RNA            | 17 | 62867622  | 62867902  | RNA 75L cytoplasmic 404, pseudogene                                   |
| 15472 | ENS000002024256  |          | 17013 | 0.13 | misc. RNA            | 19 | 17018273  | 17018273  | RNA 75L cytoplasmic 835, pseudogene                                   |
| 15523 | ENS000002044308  |          | 16647 | 0.13 | misc. RNA            | 3  | 119829345 | 119829333 | microRNA 762, pseudogene                                              |
| 15666 | ENS000002023937  |          | 16750 | 0.13 | misc. RNA            | 3  | 11055446  | 11055758  | RNA 75L small nuclear pseudogene 57                                   |
| 15801 | ENS000002027916  |          | 16845 | 0.13 | misc. RNA            | 1  | 8344580   | 8344580   | RNA 75L cytoplasmic 892, pseudogene 4                                 |
| 15910 | ENS000002025737  |          | 16948 | 0.13 | misc. RNA            | 4  | 87257471  | 87257767  | RNA 75L small nuclear pseudogene 95                                   |
| 15954 | ENS0000020252744 |          | 16985 | 0.13 | misc. RNA            | 1  | 14780236  | 14780239  | Y RNA                                                                 |
| 15991 | ENS000002026672  |          | 17022 | 0.13 | misc. RNA            | 7  | 100416661 | 100416686 | RNA 75L cytoplasmic 750, pseudogene                                   |
| 16002 | ENS000002021916  |          | 17033 | 0.13 | misc. RNA            | 22 | 20835445  | 20835455  | Y RNA                                                                 |
| 16234 | ENS000002041709  |          | 17242 | 0.13 | misc. RNA            | 7  | 73146901  | 73147201  | RNA 75L cytoplasmic 265, pseudogene                                   |
| 16339 | ENS000002042657  |          | 17279 | 0.13 | misc. RNA            | 4  | 69441899  | 69441904  | RNA 75L cytoplasmic 581, pseudogene                                   |
| 16556 | ENS000002029367  |          | 17309 | 0.13 | misc. RNA            | 16 | 15702674  | 15702689  | RNA 75L cytoplasmic 477, pseudogene                                   |
| 16679 | ENS000002046683  |          | 17543 | 0.13 | misc. RNA            | 9  | 6661651   | 6661696   | RNA 75L cytoplasmic 123, pseudogene                                   |
| 16748 | ENS000002026396  |          | 18053 | 0.13 | misc. RNA            | 16 | 2065182   | 2065183   | RNA 75L cytoplasmic 219, pseudogene                                   |
| 17666 | ENS000002041631  |          | 18079 | 0.13 | misc. RNA            | 2  | 28022926  | 28022933  | RNA 75L cytoplasmic 316, pseudogene                                   |
| 3845  | ENS0000020217416 |          | 5707  | 0.13 | processed_pseudogene | 5  | 62072704  | 62073090  | non-sulfur cluster assembly 1 pseudogene 1                            |
| 3915  | ENS000002022422  |          | 7548  | 0.13 | processed_pseudogene | 5  | 66627899  | 66629014  | RNA binding motif, single stranded interacting protein 1 pseudogene 1 |
| 4336  | ENS000002020268  |          | 7125  | 0.13 | processed_pseudogene | 17 | 37174917  | 37175063  | ribosomal protein S12 pseudogene 24                                   |
| 4618  | ENS0000020197258 |          | 8033  | 0.13 | processed_pseudogene | 7  | 10438196  | 10438196  | eukaryotic translation initiation factor 4B pseudogene 6              |
| 4845  | ENS000002022623  |          | 11229 | 0.13 | processed_pseudogene | 10 | 76287342  | 76287705  | mitochondrial ribosomal protein L35 pseudogene 3                      |
| 4917  | ENS000002024247  |          | 11424 | 0.13 | processed_pseudogene | 10 | 83784786  | 83784786  | retroplasmogon 2                                                      |
| 10086 | ENS000002022958  |          | 12424 | 0.13 | processed_pseudogene | 22 | 39118748  | 39119510  | peroxiredoxin 3 pseudogene 1                                          |
| 11616 | ENS0000020213816 |          | 14543 | 0.13 | processed_pseudogene | 9  | 43999730  | 43999733  | calpain 2 pseudogene 4                                                |
| 11712 | ENS000002021529  |          | 14643 | 0.13 | processed_pseudogene | 1  | 68623265  | 68623265  | angiotensin-converting enzyme 1 pseudogene 6                          |
| 13480 | ENS000002023623  |          | 15085 | 0.13 | processed_pseudogene | 3  | 69520603  | 69521083  | RNA binding motif protein 43 pseudogene 1                             |
| 14078 | ENS000002021706  |          | 15529 | 0.13 | processed_pseudogene | X  | 76963344  | 76963357  | lactyl acid binding protein 5 pseudogene 15                           |
| 14143 | ENS000002021830  |          | 15587 | 0.13 | processed_pseudogene | 17 | 68623265  | 68623265  | collin 1 pseudogene 5                                                 |
| 14161 | ENS000002022513  |          | 15587 | 0.13 | processed_pseudogene | 3  | 41900842  | 41901068  | ATPase, H+ transporting, lysosomal 9kDa, V0 subunit 1 pseudogene 2    |
| 14170 | ENS000002022952  |          | 15596 | 0.13 | processed_pseudogene | X  | 130475421 | 13047626  | olfactory receptor, family 5, subfamily AW, member 1 pseudogene       |
| 14216 | ENS000002021637  |          | 15641 | 0.13 | processed_pseudogene | 17 | 3529147   | 3529147   | ribosomal protein 10                                                  |
| 14229 | ENS000002023714  |          | 15650 | 0.13 | processed_pseudogene | 18 | 61736392  | 61739887  | ribosomal protein L12 pseudogene 39                                   |
| 14247 | ENS0000020224396 |          | 15665 | 0.13 | processed_pseudogene | X  | 22453715  | 22454505  | methyltransferase like 15 pseudogene 3                                |
| 14263 | ENS000002020929  |          | 15678 | 0.13 | processed_pseudogene | 22 | 3952378   | 3952378   | RNA 4 domain containing 1 pseudogene 4                                |
| 14293 | ENS000002025408  |          | 15694 | 0.13 | processed_pseudogene | 14 | 7400625   | 7400645   | 5'-3' nucleotidase, cytosolic pseudogene 2                            |
| 14324 | ENS000002022665  |          | 15713 | 0.13 | processed_pseudogene | X  | 103891897 | 10389280  | prohibitin pseudogene 10                                              |
| 14358 | ENS000002021400  |          | 15743 | 0.13 | processed_pseudogene | 18 | 2501748   | 2501748   | profilin-associated 204 pseudogene 3                                  |
| 14390 | ENS0000020259359 |          | 15774 | 0.13 | processed_pseudogene | 19 | 46840003  | 46840004  | TGF-beta-induced factor homeobox 1 pseudogene 1                       |
| 14466 | ENS000002023889  |          | 15890 | 0.13 | processed_pseudogene | 5  | 17834965  | 17834971  | phosphatidylinositol glycan anchor biosynthesis, class F pseudogene 1 |
| 14481 | ENS000002021382  |          | 15892 | 0.13 | processed_pseudogene | 17 | 685921    | 685921    | ribosomal protein L23A pseudogene 73                                  |
| 14727 | ENS000002021382  |          | 16029 | 0.13 | processed_pseudogene | X  | 111933143 | 11193347  | high mobility group box 3 pseudogene 30                               |
| 14793 | ENS000002042487  |          | 16078 | 0.13 | processed_pseudogene | 11 | 44650907  | 44651224  | ribosomal protein L34 pseudogene 22                                   |
| 14800 | ENS000002020632  |          | 16103 | 0.13 | processed_pseudogene | 20 | 33482937  | 33482937  | ubiquitin-conjugating enzyme E2 variant 1 pseudogene 1                |
| 14921 | ENS000002023623  |          | 16180 | 0.13 | processed_pseudogene | X  | 9750677   | 9750741   | ribosomal protein L6 pseudogene 29                                    |
| 14925 | ENS000002022277  |          | 16182 | 0.13 | processed_pseudogene | 13 | 90465411  | 90465495  | ribosomal protein 7 like 1 pseudogene 1                               |
| 14948 | ENS000002020527  |          | 16183 | 0.13 | processed_pseudogene | 19 | 10546820  | 10546820  | ribosomal protein L7 pseudogene 45                                    |
| 14985 | ENS000002022701  |          | 16227 | 0.13 | processed_pseudogene | 22 | 30442265  | 30442182  | calpain 2 pseudogene 1                                                |
| 15012 | ENS000002023107  |          | 16243 | 0.13 | processed_pseudogene | 2  | 7633142   | 76334450  | succinate-CoA ligase, ADP-forming, beta subunit pseudogene 2          |
| 15081 | ENS000002041421  |          | 16313 | 0.13 | processed_pseudogene | X  | 17500790  | 17501216  | chromobox homology 1 pseudogene 4                                     |
| 15092 | ENS000002025496  |          | 16319 | 0.13 | processed_pseudogene | 12 | 32109628  | 32109628  | eukaryotic translation initiation factor 4A3 pseudogene 5             |
| 15120 | ENS0000020239272 |          | 16341 | 0.13 | processed_pseudogene | 14 | 78148545  | 78150332  | ribosomal protein L21 pseudogene 10                                   |
| 15158 | ENS000002024572  |          | 16375 | 0.13 | processed_pseudogene | 11 | 122484152 | 122489494 | glutamate ammonia ligase (glutamine synthetase) pseudogene 3          |
| 15181 | ENS000002029311  |          | 16392 | 0.13 | processed_pseudogene | 13 | 137272689 | 137274911 | telomeric repeat binding factor (RNA-interacting) 1 pseudogene 3      |
| 15188 | ENS0000020228600 |          | 16401 | 0.13 | processed_pseudogene | 21 | 16129999  | 16130673  | polymerase (RNA) I (DNA directed) polypeptide C, pseudogene           |
| 15191 | ENS000002041060  |          | 16416 | 0.13 | processed_pseudogene | 10 | 65075924  | 65075944  | phenylalanyl-tRNA synthetase, beta subunit pseudogene 1               |
| 15206 | ENS000002021102  |          | 16419 | 0.13 | processed_pseudogene | 10 | 87912045  | 87912045  | C-terminal binding protein 2 pseudogene 4                             |
| 15229 | ENS000002044089  |          | 16451 | 0.13 | processed_pseudogene | 3  | 148542569 | 148543174 | high mobility group box 1 pseudogene 30                               |
| 15300 | ENS000002025231  |          | 16471 | 0.13 | processed_pseudogene | 11 | 112079324 | 112079621 | mitochondrial ribosomal protein S26 pseudogene 4                      |
| 15316 | ENS000002022801  |          | 16487 | 0.13 | processed_pseudogene | 15 | 44873945  | 44873945  | mitochondrial ribosomal protein S18 pseudogene 4                      |
| 15321 | ENS0000020258392 |          | 16485 | 0.13 | processed_pseudogene | 14 | 47468577  | 47468577  | replication protein A2 pseudogene 1                                   |
| 15343 | ENS0000020215873 |          | 16503 | 0.13 | processed_pseudogene | 1  | 91739326  | 91739326  | flag structure-specific endonuclease 1 pseudogene 1                   |
| 15356 | ENS000002026978  |          | 16504 |      |                      |    |           |           |                                                                       |



|       |                  |             |       |      |                      |    |           |           |                                                                                     |
|-------|------------------|-------------|-------|------|----------------------|----|-----------|-----------|-------------------------------------------------------------------------------------|
| 18906 | ENSG00000224927  | 17646       | 7     | 0.13 | processed_pseudogene | 1  | 11035264  | 11035265  | NADH dehydrogenase (ubiquinone) 1 alpha subcomplex, 5 pseudogene 10                 |
| 18908 | ENSG00000235529  | 17663       | 8     | 0.13 | processed_pseudogene | 8  | 98937     | 98937     | SH3 domain pseudogene 11                                                            |
| 18924 | ENSG00000234788  | 17722       | 8     | 0.13 | processed_pseudogene | 10 | 2700351   | 2700471   | heat shock 70kDa protein 8 pseudogene 3                                             |
| 18933 | ENSG00000215005  | 17729       | 1     | 0.13 | processed_pseudogene | 21 | 30258602  | 30261984  | heat shock 70kDa protein 1 (chaperonin) pseudogene 7                                |
| 18937 | ENSG00000226256  | 17730       | 9     | 0.13 | processed_pseudogene | 3  | 114119379 | 114119821 | MT NDC pseudogene 20                                                                |
| 17100 | ENSG00000230253  | 17737       | 4     | 0.13 | processed_pseudogene | 3  | 13583759  | 13583760  | methyltransferase pseudogene pseudogene 1                                           |
| 17108 | ENSG00000241890  | 17858       | 8     | 0.13 | processed_pseudogene | 15 | 75860068  | 75861169  | ribosomal protein L13 pseudogene 4                                                  |
| 17252 | ENSG00000235815  | 17872       | 3     | 0.13 | processed_pseudogene | 1  | 241042953 | 241083909 | heterogeneous nuclear ribonucleoprotein A1 pseudogene 42                            |
| 17363 | ENSG00000214041  | 18027       | 7     | 0.13 | processed_pseudogene | 17 | 18215218  | 18215219  | ribosome 17 pseudogene 65                                                           |
| 17378 | ENSG00000247571  | 18030       | 2     | 0.13 | processed_pseudogene | 13 | 86481954  | 86481955  | phosphoglycerate mutase 1 pseudogene 4                                              |
| 17413 | ENSG00000237766  | 18031       | 7     | 0.13 | processed_pseudogene | 12 | 67689822  | 67689823  | phosphoglycerate mutase 1 pseudogene 4                                              |
| 14663 | ENSG00000263812  | 18137       | 13    | 0.13 | processed_transcript | 18 | 7424812   | 74242265  | long intergenic non-protein coding RNA 908                                          |
| 14920 | ENSG00000220288  | LINC00061   | 18032 | 0.13 | processed_transcript | 19 | 18739297  | 18719272  | long intergenic non-protein coding RNA 661                                          |
| 15520 | ENSG00000228203  | RNF144A.AS1 | 16681 | 0.13 | processed_transcript | 2  | 7052408   | 7052408   | RNF144A antisense RNA 1                                                             |
| 1415  | ENSG00000141434  | MIP1B       | 2301  | 0.13 | protein_coding       | 18 | 29749032  | 29803367  | margin A beta                                                                       |
| 1861  | ENSG00000175263  | SLC10A2     | 2952  | 0.13 | protein_coding       | 13 | 13096390  | 132719196 | solute carrier family 10 (sodium/bile acid cotransporter), member 2                 |
| 1885  | ENSG00000182271  | TMG01       | 2363  | 0.13 | protein_coding       | 17 | 2864351   | 28661077  | transmembrane and immunoglobulin domain containing 1                                |
| 1854  | ENSG00000197273  | GUCY2A      | 3088  | 0.13 | protein_coding       | 1  | 4262362   | 4263309   | guanylate cyclase activator 2A (guanylin)                                           |
| 2846  | ENSG00000151168  | XIF         | 4415  | 0.13 | protein_coding       | 11 | 16595111  | 16595115  | chromatin (C motif) ligand 1                                                        |
| 2881  | ENSG00000100336  | APOLA       | 4464  | 0.13 | protein_coding       | 22 | 36585172  | 36600886  | chromatin (C motif) ligand 1                                                        |
| 3178  | ENSG00000135590  | ILIR2       | 4973  | 0.13 | protein_coding       | 2  | 10269336  | 10264508  | interleukin 1 receptor type II                                                      |
| 3272  | ENSG00000134928  | QCCT        | 5135  | 0.13 | protein_coding       | 2  | 37211717  | 3700406   | glutaminyl-peptide cyclotransferase                                                 |
| 3385  | ENSG00000142689  | SH3BGR.L3   | 5293  | 0.13 | protein_coding       | 1  | 2866587   | 2868007   | SH3 domain binding glutamic acid-rich protein like 3                                |
| 3438  | ENSG00000123405  | NFE2        | 5411  | 0.13 | protein_coding       | 12 | 5485895   | 5489405   | nuclear factor, erythroid 2                                                         |
| 3604  | ENSG00000103933  | CACRY       | 5651  | 0.13 | protein_coding       | 17 | 38710021  | 38721234  | chromokine (C-motif) receptor 7                                                     |
| 3673  | ENSG00000115474  | KCNJ13      | 5710  | 0.13 | protein_coding       | 2  | 23361174  | 233641278 | potassium inwardly-rectifying channel, subfamily J, member 13                       |
| 3796  | ENSG00000117586  | TNFSF4      | 5905  | 0.13 | protein_coding       | 1  | 173152873 | 173176452 | tumor necrosis factor (ligand) superfamily, member 4                                |
| 3811  | ENSG00000106162  | TNFRSF1A    | 5908  | 0.13 | protein_coding       | 12 | 643112    | 643112    | tumor necrosis factor receptor superfamily, member 1A                               |
| 3840  | ENSG00000202542  | TMS6A       | 6057  | 0.13 | protein_coding       | 8  | 9399707   | 9399707   | thymosin beta 4, X-linked                                                           |
| 3963  | ENSG00000185215  | TNFAIP2     | 6226  | 0.13 | protein_coding       | 14 | 103589779 | 103603776 | tumor necrosis factor, alpha-induced protein 2                                      |
| 3981  | ENSG00000202463  | RNF13       | 6233  | 0.13 | protein_coding       | 12 | 12061129  | 12061129  | ring finger protein 13                                                              |
| 4036  | ENSG00000204257  | HLA-DMA     | 6310  | 0.13 | protein_coding       | 6  | 32939871  | 32939871  | major histocompatibility complex, class II, DM alpha                                |
| 4069  | ENSG00000195562  | CD74        | 6367  | 0.13 | protein_coding       | 5  | 148791200 | 148792400 | CD74 molecule, major histocompatibility complex, class II invariant chain           |
| 4100  | ENSG00000102593  | TFC         | 6510  | 0.13 | protein_coding       | 11 | 11588767  | 11588767  | basic domain containing 13 (IL13R-ACE2)                                             |
| 4216  | ENSG00000243317  | CTEFF3      | 6549  | 0.13 | protein_coding       | 7  | 135347244 | 135378166 | chromosome 7 open reading frame 73                                                  |
| 4226  | ENSG00000135074  | ADAM19      | 6560  | 0.13 | protein_coding       | 5  | 15682242  | 157002783 | ADAM metalloproteinase domain 19                                                    |
| 4261  | ENSG00000103158  | TALDO1      | 6613  | 0.13 | protein_coding       | 13 | 2633183   | 2633183   | XX, Kall blood group complex antigen related family, member 8                       |
| 4268  | ENSG00000177158  | TALDO1      | 6628  | 0.13 | protein_coding       | 11 | 747129    | 76924     | transaldolase 1                                                                     |
| 4296  | ENSG00000110031  | LPFN        | 6679  | 0.13 | protein_coding       | 11 | 8258434   | 86454993  | lipucan                                                                             |
| 4300  | ENSG00000100059  | PCPL        | 6718  | 0.13 | protein_coding       | 4  | 5123449   | 5123449   | phosphatidylcholine phosphatase                                                     |
| 4326  | ENSG00000101695  | RNF125      | 6717  | 0.13 | protein_coding       | 18 | 29958335  | 29958335  | ring finger protein 125, E3 ubiquitin protein ligase                                |
| 4362  | ENSG00000074370  | ATP2A3      | 6778  | 0.13 | protein_coding       | 17 | 3827189   | 3827189   | ATPase, Ca+ transporting, ubiquitous                                                |
| 4397  | ENSG00000102578  | CARFMT      | 6847  | 0.13 | protein_coding       | 5  | 14842468  | 14842468  | colony stimulating factor 1 receptor                                                |
| 4407  | ENSG00000189219  | FAM53B      | 6851  | 0.13 | protein_coding       | 16 | 12837981  | 12842330  | family with sequence similarity 53, member B                                        |
| 4412  | ENSG00000137078  | SIT1        | 6863  | 0.13 | protein_coding       | 9  | 3564922   | 3565037   | signaling threshold regulating transmembrane adaptor 1                              |
| 4444  | ENSG00000104870  | FCMST       | 6913  | 0.13 | protein_coding       | 9  | 5001073   | 5000990   | Fc fragment of IgG, receptor, transmembrane, alpha                                  |
| 4448  | ENSG00000142619  | DCER1       | 6903  | 0.13 | protein_coding       | 11 | 9101303   | 9101303   | Z-DNA-binding protein 1, mitochondrial                                              |
| 4460  | ENSG00000106570  | DIRD2       | 6928  | 0.13 | protein_coding       | 19 | 42752599  | 42724292  | death effector domain containing 2                                                  |
| 4467  | ENSG00000105582  | RPR1        | 6931  | 0.13 | protein_coding       | 12 | 6283387   | 6283402   | protein rich 13                                                                     |
| 4481  | ENSG00000151277  | UBASH3B     | 6941  | 0.13 | protein_coding       | 11 | 12263383  | 12268181  | ubiquitin associated SH3 domain containing 6                                        |
| 4517  | ENSG00000169926  | KLF13       | 7000  | 0.13 | protein_coding       | 15 | 31619058  | 31727668  | Kruppel-like factor 13                                                              |
| 4580  | ENSG00000135378  | PRRG4       | 7062  | 0.13 | protein_coding       | 11 | 3285149   | 3287969   | proline rich G1 (G-arabinoxylanase A) (transmembrane)                               |
| 4611  | ENSG00000102927  | CTTBF2      | 7116  | 0.13 | protein_coding       | 11 | 80404962  | 80404962  | chromosome 17 open reading frame 62                                                 |
| 4640  | ENSG00000173281  | PPP1R3B     | 7170  | 0.13 | protein_coding       | 8  | 8593765   | 8603904   | protein phosphatase 1, regulatory subunit 3B                                        |
| 4640  | ENSG00000198884  | HSRD2       | 7178  | 0.13 | protein_coding       | 19 | 16244838  | 16269386  | hematopoietic SH2 domain containing                                                 |
| 4672  | ENSG00000102923  | PCAT        | 7178  | 0.13 | protein_coding       | 19 | 91426211  | 91426211  | serine carboxylase                                                                  |
| 4700  | ENSG00000169589  | MSA8        | 7233  | 0.13 | protein_coding       | 11 | 6048374   | 6048324   | membrane-associated 4 domain, subfamily A, member 8                                 |
| 4727  | ENSG00000093908  | MAS3        | 7274  | 0.13 | protein_coding       | 12 | 10288803  | 10282502  | microtubule associated serine/threonine kinase 3                                    |
| 4740  | ENSG00000210748  | TNFRSF2     | 7282  | 0.13 | protein_coding       | 19 | 9496120   | 9496120   | transmembrane and collectin domain family 2                                         |
| 4744  | ENSG00000144746  | ARLRF5      | 7373  | 0.13 | protein_coding       | 3  | 6913495   | 69152117  | ADP-ribosylation-like factor 6 interacting protein 5                                |
| 4845  | ENSG00000156219  | ZDHHC2      | 7420  | 0.13 | protein_coding       | 8  | 17013538  | 17092308  | zinc finger, DHHC-type containing 2                                                 |
| 4854  | ENSG00000105118  | ZFP612      | 7472  | 0.13 | protein_coding       | 8  | 43447411  | 43447448  | ZFP612, zinc finger protein-like 2                                                  |
| 4871  | ENSG00000104518  | GSDMD       | 7477  | 0.13 | protein_coding       | 8  | 14465377  | 14465372  | gasdermin D                                                                         |
| 4924  | ENSG00000184203  | PPP1R2      | 7552  | 0.13 | protein_coding       | 3  | 19521221  | 19527029  | protein phosphatase 1, regulatory (inhibitor) subunit 2                             |
| 4943  | ENSG00000102443  | CAC1        | 7562  | 0.13 | protein_coding       | 13 | 1566870   | 1566870   | cathepsin B                                                                         |
| 4960  | ENSG00000172007  | RAB33B      | 7599  | 0.13 | protein_coding       | 4  | 14037436  | 14037763  | RAB33B, member RAS oncogene family                                                  |
| 5033  | ENSG00000135956  | TMEM127     | 7684  | 0.13 | protein_coding       | 2  | 86914254  | 86913732  | transmembrane protein 127                                                           |
| 5036  | ENSG00000105988  | RPR1        | 7683  | 0.13 | protein_coding       | 12 | 6283387   | 6283402   | RNA binding motif protein 47                                                        |
| 5057  | ENSG00000130150  | MCSFP2      | 7715  | 0.13 | protein_coding       | 8  | 14891563  | 14894409  | motif swap domain containing 2                                                      |
| 5074  | ENSG00000187118  | CMC1        | 7735  | 0.13 | protein_coding       | 3  | 2826373   | 2826633   | Cw/C1 motif containing 1                                                            |
| 5086  | ENSG0000018112   | CAR2        | 7746  | 0.13 | protein_coding       | 11 | 10528463  | 10528463  | calcium/calmodulin modulator 2                                                      |
| 5310  | ENSG00000100422  | CERK        | 8022  | 0.13 | protein_coding       | 22 | 47080308  | 47134158  | ceramide kinase                                                                     |
| 5347  | ENSG00000185187  | SIRRR       | 8021  | 0.13 | protein_coding       | 11 | 405718    | 417455    | single immunoglobulin and toll-interleukin 1 receptor (TIR) domain                  |
| 5383  | ENSG00000102088  | TRAF3       | 8112  | 0.13 | protein_coding       | 11 | 8832314   | 8832314   | trichostatin acid-inducible 1                                                       |
| 5483  | ENSG00000106362  | C10AL11     | 8208  | 0.13 | protein_coding       | 7  | 7198595   | 7288292   | core 1 synthase, glycoprotein N-acetylglucosaminase 3-beta-galactosyltransferase, 1 |
| 5488  | ENSG00000118683  | FBOX6       | 8231  | 0.13 | protein_coding       | 1  | 1172481   | 1172411   | F box protein 6                                                                     |
| 5513  | ENSG00000105118  | RNF211      | 8231  | 0.13 | protein_coding       | 11 | 1053129   | 1053129   | ring finger protein 141                                                             |
| 5600  | ENSG00000188305  | C13orf35    | 8373  | 0.13 | protein_coding       | 19 | 227461    | 2282181   | chromosome 19 open reading frame 35                                                 |
| 5673  | ENSG00000142875  | PRKACB      | 8436  | 0.13 | protein_coding       | 19 | 45453745  | 45470161  | protein kinase, cAMP-dependent, catalytic, beta                                     |
| 5702  | ENSG00000111698  | ITFT1       | 8443  | 0.13 | protein_coding       | 11 | 4346103   | 4346103   | epithelial terminal (epitaxin 1) (breast)                                           |
| 5985  | ENSG00000126248  | IGF-RL1     | 8739  | 0.13 | protein_coding       | 19 | 36230058  | 36233354  | IGF-like receptor 1                                                                 |
| 6148  | ENSG000002073173 | SNRPN       | 8924  | 0.13 | protein_coding       | 15 | 2520133   | 2522729   | SNRPN upstream reading frame protein                                                |
| 6170  | ENSG00000102096  | PASD2       | 8924  | 0.13 | protein_coding       | 22 | 4321418   | 4341151   | protein kinase C and casein kinase substrate in neurons 2                           |
| 6260  | ENSG00000106796  | PKC         | 9022  | 0.13 | protein_coding       | 26 | 2448333   | 2448333   | protein kinase C, isozyme 3                                                         |
| 6311  | ENSG00000198199  | MPHOSPH8    | 9101  | 0.13 | protein_coding       | 13 | 2020778   | 20247599  | M-phase phosphoprotein 8                                                            |
| 6312  | ENSG00000164074  | CAD9        | 9102  | 0.13 | protein_coding       | 4  | 12886481  | 12890698  | chromosome 4 open reading frame 29                                                  |
| 6347  | ENSG00000154808  | STRN        | 9314  | 0.13 | protein_coding       | 8  | 3701975   | 37119815  | strapped filament binding protein 3                                                 |
| 6554  | ENSG00000164591  | WR6B2       | 9365  | 0.13 | protein_coding       | 3  | 5228208   | 5228208   | WD repeat domain 82                                                                 |
| 6578  | ENSG00000137860  | SLC26A2     | 9453  | 0.13 | protein_coding       | 15 | 4554746   | 4559149   | solute carrier family 26 (anion-exchange nucleoside transporter), member 2          |
| 6719  | ENSG00000103495  | CAMK1D      | 9457  | 0.13 | protein_coding       | 18 | 12391481  | 12391481  | calcium/calmodulin-dependent protein kinase D                                       |
| 6748  | ENSG00000162895  | SLC30A7     | 9536  | 0.13 | protein_coding       | 1  | 10181852  | 101847309 | solute carrier family 30 (zinc transporter), member 7                               |
| 6862  | ENSG00000189891  | RFBP2       | 9576  | 0.13 | protein_coding       | 8  | 1898441   | 1771386   | RALBP1 associated E3 domain containing 2                                            |
| 6883  | ENSG00000104961  | RBM2B       | 9604  | 0.13 | protein_coding       | 8  | 2336884   | 2336884   | RNA binding motif protein 23                                                        |
| 6885  | ENSG00000132842  | AP3B1       | 9603  | 0.13 | protein_coding       | 5  | 7728349   | 7728579   | adaptor related protein complex 3, beta 1 subunit                                   |
| 7136  | ENSG00000113163  | COL4A3BP    | 9881  | 0.13 | protein_coding       | 5  | 7466311   | 74671963  | collagen, type IV, alpha 3 (Goodpasture antigen) binding protein                    |
| 7137  | ENSG00000104221  | PKNOX1      | 9881  | 0.13 | protein_coding       | 5  | 8096126   | 8106286   | protein kinasenox1                                                                  |
| 7141  | ENSG00000177454  | LRC4A       | 9884  | 0.13 | protein_coding       | 7  | 10018685  | 10008376  | leuc                                                                                |

|       |                  |               |         |      |                |           |           |                                                                                            |
|-------|------------------|---------------|---------|------|----------------|-----------|-----------|--------------------------------------------------------------------------------------------|
| 12366 | ENSG00000122000  | ZNF451        | 14246.2 | 0.13 | protein_coding | 56991642  | 57035105  | zinc finger protein 451                                                                    |
| 12367 | ENSG00000123977  | CNF4F3        | 14246.3 | 0.13 | protein_coding | 58052587  | 58052587  | chromosome 8 non reading frame 163                                                         |
| 12720 | ENSG00000168970  | JMJD7_PLA2G4B | 14516.9 | 0.13 | protein_coding | 42120293  | 42140353  | JMJD7_PLA2G4B readthrough                                                                  |
| 12978 | ENSG00000147421  | HMOXB1        | 14699.1 | 0.13 | protein_coding | 28747911  | 28622281  | homoexon containing 1                                                                      |
| 13012 | ENSG00000204923  | FBXO28        | 14725.3 | 0.13 | protein_coding | 69694381  | 69943800  | F-box protein 48                                                                           |
| 13017 | ENSG00000147439  | EBI3          | 14746.3 | 0.13 | protein_coding | 22417931  | 22526861  | inhibitory receptor 3                                                                      |
| 13095 | ENSG00000200140  | STYK1         | 14784.8 | 0.13 | protein_coding | 10771538  | 10629217  | serine/threonine/tyrosine kinase 1                                                         |
| 13132 | ENSG00000171853  | TRAFIP2       | 14814.3 | 0.13 | protein_coding | 33634462  | 34688905  | trafficking protein particle complex 12                                                    |
| 13146 | ENSG00000187031  | DHFR1L1       | 14821.5 | 0.13 | protein_coding | 93782633  | 93782633  | dihydrofolate reductase-like 1                                                             |
| 13151 | ENSG00000146399  | TAAR1         | 14827.8 | 0.13 | protein_coding | 132968123 | 132968122 | trace amine associated receptor 1                                                          |
| 13373 | ENSG00000155841  | RMR2          | 15071.1 | 0.13 | protein_coding | 38103330  | 38249285  | regulator of microtubule dynamics 2                                                        |
| 13382 | ENSG00000202889  | ARL17A        | 15156   | 0.13 | protein_coding | 44323265  | 44439130  | ADP-ribosyl transferase-like 17B                                                           |
| 13620 | ENSG00000187080  | B4GALNT2      | 15188.1 | 0.13 | protein_coding | 47209822  | 47427351  | beta-1,4-N-acetylgalactosaminyl transferase 2                                              |
| 13683 | ENSG00000202427  | ABMD19A       | 15205.1 | 0.13 | protein_coding | 31654426  | 31671221  | alpha-glucosidase domain containing 10A                                                    |
| 13688 | ENSG00000203995  | DRC6          | 15206.9 | 0.13 | protein_coding | 185263457 | 185263456 | diacylglycerol kinase, gamma SRA2A                                                         |
| 13981 | ENSG00000182489  | XRRX          | 15445.4 | 0.13 | protein_coding | 10018833  | 100184222 | XX, Kall blood group complex subunit-related, X-linked                                     |
| 13989 | ENSG00000202852  | DKFZ          | 15463.4 | 0.13 | protein_coding | 99982473  | 99982448  | Uncharacterized protein                                                                    |
| 14060 | ENSG00000191623  | ZCCHC16       | 15510.3 | 0.13 | protein_coding | 111697207 | 111700473 | zinc finger, CCHC domain containing 16                                                     |
| 14200 | ENSG00000113119  | TMCO6         | 15619.8 | 0.13 | protein_coding | 140019012 | 140024993 | transmembrane and coiled-coil domains 6                                                    |
| 14341 | ENSG00000204925  | TRIP9         | 15729.7 | 0.13 | protein_coding | 22447877  | 22449307  | Uncharacterized protein                                                                    |
| 14364 | ENSG00000149255  | RAB19         | 15792.2 | 0.13 | protein_coding | 140703863 | 140120000 | RAB19, member RAS oncogene family                                                          |
| 14468 | ENSG00000196539  | OR2T3         | 15831.5 | 0.13 | protein_coding | 24863627  | 24863734  | olfactory receptor, family 2, subfamily T, member 3                                        |
| 14468 | ENSG00000181433  | SAGE1         | 15907.5 | 0.13 | protein_coding | 134971374 | 134992220 | sarcoma antigen 1                                                                          |
| 14600 | ENSG00000193817  | KIAA1407      | 15959.1 | 0.13 | protein_coding | 113926440 | 113776440 | KIAA1407                                                                                   |
| 14638 | ENSG00000205708  | GPR142        | 15982.8 | 0.13 | protein_coding | 72363546  | 72368761  | G protein-coupled receptor 142                                                             |
| 14670 | ENSG00000202372  | DCNARL1       | 15985.2 | 0.13 | protein_coding | 27998110  | 27998959  | DOBE1 and OLL4 associated factor 8-like 1                                                  |
| 14671 | ENSG00000186893  | KRT19L1.7     | 15995.5 | 0.13 | protein_coding | 58471025  | 58471047  | keratin associated protein 17.1                                                            |
| 14686 | ENSG00000203538  | XRRX          | 16006.9 | 0.13 | protein_coding | 46713383  | 46799449  | Uncharacterized protein                                                                    |
| 14723 | ENSG00000181381  | PLKDC1        | 16027   | 0.13 | protein_coding | 37219556  | 37310647  | pleckstrin domain containing 1                                                             |
| 14728 | ENSG00000193937  | ZNF97         | 16037.7 | 0.13 | protein_coding | 53623695  | 53623695  | zinc finger protein 97                                                                     |
| 14767 | ENSG00000136935  | GOLGA1        | 16075.9 | 0.13 | protein_coding | 127648646 | 127710771 | golgin A1                                                                                  |
| 14893 | ENSG00000189393  | ELSPBP1       | 16164.5 | 0.13 | protein_coding | 48447908  | 48452410  | ecodiffamy sperm binding protein 1                                                         |
| 15011 | ENSG00000181488  | NES           | 16213.1 | 0.13 | protein_coding | 15613331  | 15613330  | neurospasin 2, receptor 2                                                                  |
| 15029 | ENSG00000159688  | MT1B          | 16263.8 | 0.13 | protein_coding | 56658511  | 56687116  | metallothionein 1B                                                                         |
| 15138 | ENSG00000186214  | ORF1          | 16364.2 | 0.13 | protein_coding | 247875045 | 247875045 | olfactory receptor, family 6, subfamily F, member 1                                        |
| 15147 | ENSG00000191623  | SLX1B         | 16402.2 | 0.13 | protein_coding | 28483940  | 28483940  | SLX1 structure-specific endonuclease (homolog 5) (SceIase)                                 |
| 15190 | ENSG00000202760  | XRRX          | 16402.2 | 0.13 | protein_coding | 197353921 | 197301414 | Uncharacterized protein; Zinc finger protein 555B                                          |
| 15230 | ENSG00000182388  | C1orf177      | 16432.5 | 0.13 | protein_coding | 56271736  | 55307305  | chromosome 1 open reading frame 177                                                        |
| 15234 | ENSG00000182388  | C1orf177      | 16432.5 | 0.13 | protein_coding | 13230769  | 13230769  | transcription factor 10 family, member 3                                                   |
| 15368 | ENSG00000158131  | OR2B2         | 16524.5 | 0.13 | protein_coding | 27818953  | 27890174  | olfactory receptor, family 2, subfamily B, member 2                                        |
| 15377 | ENSG00000204106  | OR2B3         | 16530.3 | 0.13 | protein_coding | 108218883 | 108220852 | Uncharacterized protein                                                                    |
| 15410 | ENSG00000191623  | OR2B4         | 16530.3 | 0.13 | protein_coding | 24827060  | 24827060  | olfactory receptor, family 2, subfamily T, member 11 (genepseudogene)                      |
| 15427 | ENSG00000185881  | MORF8         | 16568.7 | 0.13 | protein_coding | 124922190 | 124922190 | MORN repeat containing 5                                                                   |
| 15511 | ENSG00000103546  | SLC2A2        | 16635.4 | 0.13 | protein_coding | 58589516  | 55740104  | solute carrier family 6 (neurotransmitter transporter), member 2                           |
| 15530 | ENSG00000186859  | ANKRD1A       | 16653.8 | 0.13 | protein_coding | 602510101 | 602510101 | ankyrin repeat and death domain containing 1A                                              |
| 15573 | ENSG00000186859  | ANKRD1A       | 16653.8 | 0.13 | protein_coding | 110789258 | 110789257 | leucine-rich repeat, immunoglobulin and transmembrane domains 3                            |
| 15640 | ENSG00000202182  | OR2A2         | 16740.4 | 0.13 | protein_coding | 3181193   | 3182288   | olfactory receptor, family 3, subfamily A, member 2                                        |
| 15666 | ENSG00000203077  | ZNF99         | 16756.4 | 0.13 | protein_coding | 19427890  | 19430160  | family with sequence similarity 100, member 2                                              |
| 15706 | ENSG00000193937  | ZNF99         | 16756.4 | 0.13 | protein_coding | 22939003  | 22939003  | zinc finger protein 99                                                                     |
| 15713 | ENSG00000195479  | CDC114        | 16792.6 | 0.13 | protein_coding | 48739714  | 48625151  | collet-coil domain containing 114                                                          |
| 15722 | ENSG00000185633  | CYP17         | 16798.6 | 0.13 | protein_coding | 40959810  | 40963605  | cytochrome P450 17A1                                                                       |
| 15741 | ENSG00000145091  | IL13RA        | 16804.9 | 0.13 | protein_coding | 6541201   | 65218678  | interleukin 13 receptor A                                                                  |
| 15753 | ENSG00000204796  | SPO11         | 16820.1 | 0.13 | protein_coding | 55904815  | 55919050  | SPO11 meiotic protein covalently bound to DSB                                              |
| 15766 | ENSG00000157631  | COL6A3        | 16828.4 | 0.13 | protein_coding | 15491649  | 15563258  | collagen-like tail subunit (single triple of homotrimer of asymmetric alpha1(V)collagenase |
| 15768 | ENSG00000163981  | CDC420        | 16833.0 | 0.13 | protein_coding | 223162666 | 223162666 | collet-coil domain containing 149                                                          |
| 15789 | ENSG00000178394  | HTR1A         | 16851.7 | 0.13 | protein_coding | 63258183  | 63258184  | 5-hydroxytryptamine (serotonin) receptor 1A, G-protein-coupled                             |
| 15797 | ENSG00000180305  | WPCRD1        | 16859.4 | 0.13 | protein_coding | 44258185  | 44258930  | WAP four-disulfide core domain 10A                                                         |
| 15816 | ENSG00000202886  | GOLGA8        | 16862.2 | 0.13 | protein_coding | 49271965  | 49271965  | chromosome 3 open reading frame 84                                                         |
| 15826 | ENSG00000204308  | JMJD7_PLA2G4B | 16883.2 | 0.13 | protein_coding | 42140283  | 42140345  | phospholipase A2, group IVB (cytochrome-c)                                                 |
| 15836 | ENSG00000147434  | CHRNA6        | 16896.4 | 0.13 | protein_coding | 42607783  | 42607535  | cholinergic receptor, nicotinic, alpha 6 (neuronal)                                        |
| 15921 | ENSG00000191623  | ZNF40         | 16926.1 | 0.13 | protein_coding | 11526199  | 11526199  | zinc finger protein 400                                                                    |
| 15949 | ENSG00000202849  | XRRX          | 16926.1 | 0.13 | protein_coding | 3188661   | 3204294   | chromosome X open reading frame 28                                                         |
| 15969 | ENSG00000186884  | TOP1D         | 16994.9 | 0.13 | protein_coding | 167559932 | 167610401 | IC complex 10-like 2                                                                       |
| 15981 | ENSG00000181411  | WPCRD3        | 17003.3 | 0.13 | protein_coding | 44432071  | 44432071  | WAP four-disulfide core domain 3                                                           |
| 16069 | ENSG00000158553  | POM121L2      | 17067.7 | 0.13 | protein_coding | 27253862  | 27279949  | POM121 transmembrane nucleoporin-like 2                                                    |
| 16084 | ENSG00000159625  | CCDC135       | 17098.2 | 0.13 | protein_coding | 57278705  | 57278717  | collet-coil domain containing 135                                                          |
| 16087 | ENSG00000193937  | GOLGA8        | 17112.3 | 0.13 | protein_coding | 3016102   | 3016102   | protein A1, member 2                                                                       |
| 16104 | ENSG00000154537  | OR2B5         | 17112.3 | 0.13 | protein_coding | 44990314  | 44991483  | family with sequence similarity 27, member C                                               |
| 16110 | ENSG00000185758  | CLDN24        | 17113.9 | 0.13 | protein_coding | 184242917 | 18424379  | claudin 24                                                                                 |
| 16126 | ENSG00000145028  | SNX31         | 17126.4 | 0.13 | protein_coding | 10158748  | 10158748  | sortilin protein 31                                                                        |
| 16207 | ENSG00000144504  | ANKMY1        | 17181.3 | 0.13 | protein_coding | 24141839  | 24150826  | ankyrin repeat and MYND domain containing 1                                                |
| 16221 | ENSG00000171446  | KRT17         | 17195.7 | 0.13 | protein_coding | 38933050  | 38938196  | keratin 17                                                                                 |
| 16285 | ENSG00000189973  | OR2B6         | 17203.8 | 0.13 | protein_coding | 12003130  | 12003130  | prolactin receptor tyrosine receptor                                                       |
| 16286 | ENSG00000100341  | PNPLA5        | 17236.0 | 0.13 | protein_coding | 44275558  | 44279893  | phospholipase domain containing 5                                                          |
| 16292 | ENSG00000186546  | BEAN1         | 17240.3 | 0.13 | protein_coding | 86481200  | 86637430  | protein expressed, associated with NEDD4, 1                                                |
| 16388 | ENSG00000187644  | INBR7         | 17249.3 | 0.13 | protein_coding | 15688163  | 15688163  | intran nucleotide-related receptor                                                         |
| 16408 | ENSG00000202702  | ZNF525        | 17252.3 | 0.13 | protein_coding | 44761451  | 44762164  | Uncharacterized protein                                                                    |
| 16415 | ENSG00000192897  | THP2          | 17332.1 | 0.13 | protein_coding | 72332626  | 72803398  | tryptophan hydroxylase 2                                                                   |
| 16454 | ENSG00000150170  | LOC43376      | 17345.2 | 0.13 | protein_coding | 9873861   | 9873861   | Uncharacterized protein                                                                    |
| 16457 | ENSG00000181355  | OPC1          | 17365.8 | 0.13 | protein_coding | 9695343   | 10271841  | oncofocal cell 1 candidate 1                                                               |
| 16515 | ENSG00000182753  | SLC3C2        | 17406   | 0.13 | protein_coding | 17348963  | 17357233  | solute carrier family 3, member C2 (putative)                                              |
| 16518 | ENSG00000122299  | LOC10028814   | 17406   | 0.13 | protein_coding | 13551893  | 13551893  | lumicanin receptor 4                                                                       |
| 16560 | ENSG00000234469  | LOC10028814   | 17517.5 | 0.13 | protein_coding | 9935392   | 9935134   | Homo sapiens uncharacterized LOC10028814 (LOC10028814), mRNA                               |
| 16584 | ENSG00000170795  | PKDZ25        | 17517.5 | 0.13 | protein_coding | 137223657 | 137278436 | polycystic kidney disease 2-like 2                                                         |
| 16720 | ENSG00000191599  | ANKRD10       | 17581.5 | 0.13 | protein_coding | 6071007   | 6071007   | ankyrin repeat domain 10                                                                   |
| 16824 | ENSG00000100366  | LRRP8         | 17622.3 | 0.13 | protein_coding | 2741785   | 2741785   | low density lipoprotein receptor-related protein 5-like                                    |
| 16843 | ENSG00000208163  | CCDC162       | 17673.7 | 0.13 | protein_coding | 57949338  | 57989904  | Uncharacterized protein                                                                    |
| 16862 | ENSG00000186529  | CCDC162       | 17695.3 | 0.13 | protein_coding | 55821842  | 55822273  | collet-coil domain containing 162                                                          |
| 17038 | ENSG00000140466  | FAM184B       | 17692.6 | 0.13 | protein_coding | 17818299  | 17781135  | family with sequence similarity 184, member B                                              |
| 17080 | ENSG00000152582  | SFRP2         | 17837.4 | 0.13 | protein_coding | 35617346  | 35814713  | sperm flagellar 2                                                                          |
| 17168 | ENSG00000182633  | NTR7          | 17852.3 | 0.13 | protein_coding | 49146964  | 49176338  | netrin 5                                                                                   |
| 17223 | ENSG00000186838  | NTR7          | 17852.3 | 0.13 | protein_coding | 91818768  | 91822158  | netrin 5                                                                                   |
| 17223 | ENSG00000171962  | LRRRC48       | 17858.6 | 0.13 | protein_coding | 17878127  | 17820203  | leucine rich repeat containing 48                                                          |
| 17226 | ENSG00000184930  | C11orf28      | 17884.5 | 0.13 | protein_coding | 11178876  | 11179798  | chromosome 11 open reading frame 28                                                        |
| 17240 | ENSG00000204926  | EFHC2         | 17925.3 | 0.13 | protein_coding | 11965844  | 11965844  | EF-hand calcium binding domain 9                                                           |
| 17440 | ENSG00000201430  | EFHC9         | 18088.7 | 0.13 | protein_coding | 17182178  | 17183056  | EF-hand calcium binding domain 9                                                           |
| 17488 | ENSG000002048919 | PTCD1         | 18125.6 | 0.13 | protein_coding | 99017372  | 99036300  | ATP5B-PTCD1 readthrough                                                                    |
| 17511 | ENSG00000203320  | LOC10094547   | 18125.6 | 0.13 | protein_coding | 10381768  | 10381768  | HCG15011, protein C8A, protein LOC10094547                                                 |
| 17675 | ENSG00000140527  | WDR93         | 18261.7 | 0.13 | protein_coding | 90234028  | 90236689  | WD repeat domain 93                                                                        |

|       |                  |        |          |      |                        |           |           |                                                                                                     |                                                                  |
|-------|------------------|--------|----------|------|------------------------|-----------|-----------|-----------------------------------------------------------------------------------------------------|------------------------------------------------------------------|
| 14171 | ENSG00000235301  |        | 15597.4  | 0.13 | unprocessed_pseudogene | 6         | 32864193  | 32864267                                                                                            | major histocompatibility complex, class I, Z (pseudogene)        |
| 14342 | ENSG00000235299  |        | 15730.9  | 0.13 | unprocessed_pseudogene | 8         | 715538    | 715548                                                                                              | family with sequence similarity 80, member A20, pseudogene       |
| 14665 | ENSG00000225117  |        | 16215.9  | 0.13 | unprocessed_pseudogene | Y         | 14474827  | 14499123                                                                                            | arylsulfatase D pseudogene 1                                     |
| 16107 | ENSG00000202581  | ORF1ZP | 16334.1  | 0.13 | unprocessed_pseudogene | 16        | 3265562   | 3265562                                                                                             | olfactory receptor, family 1, subfamily F, member 2              |
| 16383 | ENSG00000204962  |        | 16616.6  | 0.13 | unprocessed_pseudogene | 16        | 68026326  | 68026326                                                                                            | lysyl-RNA synthetase pseudogene 3                                |
| 16488 | ENSG00000233358  |        | 16576.1  | 0.13 | unprocessed_pseudogene | 10        | 13529432  | 13529574                                                                                            | olfactory receptor, family 7, subfamily M, member 1 pseudogene   |
| 16582 | ENSG00000202721  |        | 16780    | 0.13 | unprocessed_pseudogene | 6         | 28041094  | 28042011                                                                                            | olfactory receptor, family 1, subfamily F, member 12             |
| 16662 | ENSG00000201563  |        | 16931.7  | 0.13 | unprocessed_pseudogene | 4         | 25721721  | 25722063                                                                                            | MT-ND3 pseudogene 5                                              |
| 16668 | ENSG00000227941  |        | 17107.1  | 0.13 | unprocessed_pseudogene | 2         | 202421615 | 202422988                                                                                           | MT-ND5 pseudogene 31                                             |
| 16162 | ENSG00000236955  |        | 17148.3  | 0.13 | unprocessed_pseudogene | 3         | 75419599  | 75420493                                                                                            | olfactory receptor, family 7, subfamily E, member 55 pseudogene  |
| 16452 | ENSG00000237124  |        | 17352.6  | 0.13 | unprocessed_pseudogene | 9         | 112062496 | 112063452                                                                                           | MT-ND2 pseudogene 11                                             |
| 16474 | ENSG00000223283  |        | 17378.9  | 0.13 | unprocessed_pseudogene | 12        | 86038979  | 86040447                                                                                            | olfactory receptor, family 10, subfamily AE, member 3 pseudogene |
| 16550 | ENSG00000230999  |        | 17433.1  | 0.13 | unprocessed_pseudogene | 7         | 112012702 | 112013784                                                                                           | MT-ND5 pseudogene 6                                              |
| 2542  | ENSG00000244538  |        | 3927.2   | 0.13 |                        |           |           |                                                                                                     |                                                                  |
| 3036  | ENSG00000200943  |        | 4749     | 0.13 |                        |           |           |                                                                                                     |                                                                  |
| 3179  | ENSG00000185900  | FBA1   | 4973.5   | 0.13 | X                      | 15468576  | 15468576  | coagulation factor VII-associated 3                                                                 |                                                                  |
| 4537  | ENSG000002084207 |        | 7029.5   | 0.13 |                        |           |           |                                                                                                     |                                                                  |
| 4941  | ENSG00000232561  |        | 7590.3   | 0.13 |                        | 74652763  | 74653438  | general transcription factor III, pseudogene 1                                                      |                                                                  |
| 4994  | ENSG00000217624  |        | 7646.6   | 0.13 |                        |           |           |                                                                                                     |                                                                  |
| 5021  | ENSG00000206252  |        | 7692.7   | 0.13 |                        |           |           |                                                                                                     |                                                                  |
| 5066  | ENSG00000223923  |        | 7729.8   | 0.13 |                        | 18        | 9277977   | 9278077                                                                                             | Small nuclear RNA U13                                            |
| 5082  | ENSG00000226089  |        | 7748.4   | 0.13 |                        |           |           |                                                                                                     |                                                                  |
| 5133  | ENSG00000273153  |        | 7817.9   | 0.13 |                        |           |           |                                                                                                     |                                                                  |
| 6115  | ENSG00000234588  |        | 8608.9   | 0.13 |                        |           |           |                                                                                                     |                                                                  |
| 6206  | ENSG00000108292  | MLT8   | 8866.7   | 0.13 | 17                     | 36861796  | 36868056  | myeloid/lymphoid or mixed-lineage leukemia (retinoblastoma homolog, Drosophila), translocated to, 8 |                                                                  |
| 6285  | ENSG00000268888  |        | 9070.3   | 0.13 |                        | 2         | 37068327  | 37068530                                                                                            | Uncharacterized protein                                          |
| 6699  | ENSG00000202721  |        | 9451.6   | 0.13 | 14                     | 90052006  | 90052105  | Y RNA                                                                                               |                                                                  |
| 6716  | ENSG00000252522  |        | 9501     | 0.13 |                        |           |           |                                                                                                     |                                                                  |
| 6864  | ENSG00000226507  |        | 9638.2   | 0.13 |                        |           |           |                                                                                                     |                                                                  |
| 7046  | ENSG00000204962  |        | 9813.8   | 0.13 |                        |           |           |                                                                                                     |                                                                  |
| 7089  | ENSG00000273272  |        | 9851.7   | 0.13 |                        |           |           |                                                                                                     |                                                                  |
| 7312  | ENSG00000212999  |        | 10054.5  | 0.13 |                        |           |           |                                                                                                     |                                                                  |
| 7563  | ENSG00000264538  |        | 10207.7  | 0.13 |                        |           |           |                                                                                                     |                                                                  |
| 7719  | ENSG00000238630  |        | 10442.9  | 0.13 | 19                     | 52637506  | 52637593  | Small nuclear RNA U13                                                                               |                                                                  |
| 8046  | ENSG00000237513  |        | 10744.8  | 0.13 |                        |           |           |                                                                                                     |                                                                  |
| 8276  | ENSG00000235688  |        | 10945.3  | 0.13 |                        |           |           |                                                                                                     |                                                                  |
| 8445  | ENSG00000271734  |        | 11088    | 0.13 |                        |           |           |                                                                                                     |                                                                  |
| 8885  | ENSG000002020735 |        | 11432.8  | 0.13 | 17                     | 38399475  | 38399571  | RNA, Ro-associated Y4 pseudogene 8                                                                  |                                                                  |
| 8888  | ENSG00000235884  |        | 11455.8  | 0.13 |                        |           |           |                                                                                                     |                                                                  |
| 9022  | ENSG00000273478  |        | 11562.1  | 0.13 |                        |           |           |                                                                                                     |                                                                  |
| 9132  | ENSG00000230953  |        | 11658    | 0.13 |                        |           |           |                                                                                                     |                                                                  |
| 9347  | ENSG00000230989  |        | 11828.3  | 0.13 |                        |           |           |                                                                                                     |                                                                  |
| 9401  | ENSG00000240761  |        | 11863.2  | 0.13 |                        |           |           |                                                                                                     |                                                                  |
| 9437  | ENSG00000230732  |        | 11886.6  | 0.13 |                        |           |           |                                                                                                     |                                                                  |
| 9603  | ENSG00000206030  |        | 12076.6  | 0.13 |                        |           |           |                                                                                                     |                                                                  |
| 9820  | ENSG00000238485  |        | 12213.6  | 0.13 |                        |           |           |                                                                                                     |                                                                  |
| 10008 | ENSG00000270832  |        | 12351.7  | 0.13 |                        |           |           |                                                                                                     |                                                                  |
| 10126 | ENSG00000236843  |        | 12445.27 | 0.13 |                        |           |           |                                                                                                     |                                                                  |
| 10217 | ENSG00000269569  |        | 12519.6  | 0.13 |                        |           |           |                                                                                                     |                                                                  |
| 10404 | ENSG00000259177  |        | 12652.5  | 0.13 |                        |           |           |                                                                                                     |                                                                  |
| 10492 | ENSG00000204133  |        | 12725.2  | 0.13 |                        |           |           |                                                                                                     |                                                                  |
| 10574 | ENSG00000242288  |        | 12747.6  | 0.13 |                        |           |           |                                                                                                     |                                                                  |
| 10624 | ENSG00000223583  |        | 12823.5  | 0.13 |                        |           |           |                                                                                                     |                                                                  |
| 10661 | ENSG00000224113  |        | 12863.5  | 0.13 |                        |           |           |                                                                                                     |                                                                  |
| 10673 | ENSG00000225438  |        | 12873.7  | 0.13 |                        |           |           |                                                                                                     |                                                                  |
| 10829 | ENSG00000272941  |        | 13010.6  | 0.13 |                        |           |           |                                                                                                     |                                                                  |
| 10837 | ENSG00000230265  |        | 13016.3  | 0.13 | 12                     | 57904847  | 57904918  | RNA, U6 small nuclear 584, pseudogene                                                               |                                                                  |
| 10915 | ENSG00000230266  |        | 13092.5  | 0.13 |                        |           |           |                                                                                                     |                                                                  |
| 11105 | ENSG00000270061  |        | 13223.1  | 0.13 |                        |           |           |                                                                                                     |                                                                  |
| 11185 | ENSG00000234072  |        | 13359.7  | 0.13 |                        |           |           |                                                                                                     |                                                                  |
| 11206 | ENSG00000230953  |        | 13390.3  | 0.13 |                        |           |           |                                                                                                     |                                                                  |
| 11276 | ENSG00000270285  |        | 13373.1  | 0.13 |                        |           |           |                                                                                                     |                                                                  |
| 11770 | ENSG00000234141  |        | 13810.2  | 0.13 |                        |           |           |                                                                                                     |                                                                  |
| 11974 | ENSG00000240393  |        | 13961.5  | 0.13 |                        |           |           |                                                                                                     |                                                                  |
| 12066 | ENSG00000267568  |        | 14046.2  | 0.13 |                        |           |           |                                                                                                     |                                                                  |
| 12096 | ENSG000001997670 |        | 14057.5  | 0.13 |                        |           |           |                                                                                                     |                                                                  |
| 12129 | ENSG00000245933  |        | 14079.5  | 0.13 |                        |           |           |                                                                                                     |                                                                  |
| 12141 | ENSG00000262360  |        | 14086.8  | 0.13 |                        |           |           |                                                                                                     |                                                                  |
| 12226 | ENSG00000249086  |        | 14141.8  | 0.13 |                        |           |           |                                                                                                     |                                                                  |
| 12350 | ENSG00000259592  |        | 14242.9  | 0.13 |                        |           |           |                                                                                                     |                                                                  |
| 12354 | ENSG00000268713  |        | 14244.5  | 0.13 |                        |           |           |                                                                                                     |                                                                  |
| 12434 | ENSG00000230918  |        | 14300.8  | 0.13 |                        |           |           |                                                                                                     |                                                                  |
| 12438 | ENSG00000245655  |        | 14307.1  | 0.13 |                        |           |           |                                                                                                     |                                                                  |
| 12446 | ENSG00000231362  |        | 14313.1  | 0.13 |                        |           |           |                                                                                                     |                                                                  |
| 12456 | ENSG00000225331  |        | 14317.9  | 0.13 |                        |           |           |                                                                                                     |                                                                  |
| 12461 | ENSG00000231229  |        | 14322.7  | 0.13 |                        |           |           |                                                                                                     |                                                                  |
| 12736 | ENSG00000272971  |        | 14532.2  | 0.13 |                        |           |           |                                                                                                     |                                                                  |
| 12750 | ENSG00000221356  |        | 14542.5  | 0.13 |                        |           |           |                                                                                                     |                                                                  |
| 12867 | ENSG00000233168  |        | 14630.1  | 0.13 |                        |           |           |                                                                                                     |                                                                  |
| 12965 | ENSG00000255421  |        | 14692.5  | 0.13 |                        |           |           |                                                                                                     |                                                                  |
| 12968 | ENSG00000223931  |        | 14693    | 0.13 |                        |           |           |                                                                                                     |                                                                  |
| 13119 | ENSG00000232123  |        | 14803.7  | 0.13 | 20                     | 48444529  | 48444590  | RNA, U7 small nuclear 72 pseudogene                                                                 |                                                                  |
| 13128 | ENSG00000241938  |        | 14810.4  | 0.13 |                        |           |           |                                                                                                     |                                                                  |
| 13196 | ENSG00000214593  |        | 14863.2  | 0.13 |                        |           |           |                                                                                                     |                                                                  |
| 13222 | ENSG00000260511  |        | 14891.3  | 0.13 | 4                      | 17596691  | 17596699  | RNA, 7SL, cytoplasmic 315, pseudogene                                                               |                                                                  |
| 13227 | ENSG00000239538  |        | 14897    | 0.13 |                        |           |           |                                                                                                     |                                                                  |
| 13306 | ENSG00000239532  |        | 14955.5  | 0.13 |                        |           |           |                                                                                                     |                                                                  |
| 13336 | ENSG00000224117  |        | 14977.7  | 0.13 |                        |           |           |                                                                                                     |                                                                  |
| 13360 | ENSG00000207262  |        | 14990    | 0.13 |                        |           |           |                                                                                                     |                                                                  |
| 13382 | ENSG00000261745  |        | 15009.3  | 0.13 |                        |           |           |                                                                                                     |                                                                  |
| 13465 | ENSG00000269541  |        | 15068.1  | 0.13 | X                      | 41496727  | 41497072  | RNA, 7SL, cytoplasmic 406, pseudogene                                                               |                                                                  |
| 13469 | ENSG00000269495  |        | 15090.5  | 0.13 |                        |           |           |                                                                                                     |                                                                  |
| 13557 | ENSG00000268804  |        | 15141.6  | 0.13 | 17                     | 62813306  | 62813597  | RNA, 7SL, cytoplasmic 406, pseudogene                                                               |                                                                  |
| 13593 | ENSG00000268804  |        | 15163.1  | 0.13 |                        |           |           |                                                                                                     |                                                                  |
| 13696 | ENSG0000026314   |        | 15169    | 0.13 |                        |           |           |                                                                                                     |                                                                  |
| 13832 | ENSG00000237453  |        | 15195.9  | 0.13 |                        |           |           |                                                                                                     |                                                                  |
| 13676 | ENSG00000236027  |        | 15231.1  | 0.13 |                        |           |           |                                                                                                     |                                                                  |
| 13689 | ENSG00000240401  |        | 15241.3  | 0.13 |                        |           |           |                                                                                                     |                                                                  |
| 13731 | ENSG00000234338  |        | 15279.2  | 0.13 |                        |           |           |                                                                                                     |                                                                  |
| 13790 | ENSG00000234248  |        | 15315.5  | 0.13 |                        |           |           |                                                                                                     |                                                                  |
| 13792 | ENSG00000197609  |        | 15317.3  | 0.13 |                        |           |           |                                                                                                     |                                                                  |
| 13799 | ENSG000002084711 |        | 15320.5  | 0.13 |                        |           |           |                                                                                                     |                                                                  |
| 13846 | ENSG00000238663  |        | 15354.6  | 0.13 | 2                      | 216167489 | 216167587 | Small nuclear RNA U13                                                                               |                                                                  |
| 13873 | ENSG00000215103  |        | 15374.5  | 0.13 |                        |           |           |                                                                                                     |                                                                  |
| 13882 | ENSG00000232372  |        | 15384    | 0.13 |                        |           |           |                                                                                                     |                                                                  |
| 13922 | ENSG00000223450  |        | 15415.4  | 0.13 |                        |           |           |                                                                                                     |                                                                  |
| 13943 | ENSG00000268833  |        | 15433.6  | 0.13 |                        |           |           |                                                                                                     |                                                                  |
| 14004 | ENSG00000228337  |        | 15474.8  | 0.13 |                        |           |           |                                                                                                     |                                                                  |
| 14006 | ENSG00000268889  |        | 15476.3  | 0.13 |                        |           |           |                                                                                                     |                                                                  |
| 14012 | ENSG00000232927  |        | 15481.8  | 0.13 |                        |           |           |                                                                                                     |                                                                  |
| 14017 | ENSG00000260764  |        | 15484.5  | 0.13 |                        |           |           |                                                                                                     |                                                                  |
| 14087 | ENSG00000236324  |        | 15537.4  | 0.13 |                        |           |           |                                                                                                     |                                                                  |
| 14098 | ENSG00000232658  |        | 15539.1  | 0.13 |                        |           |           |                                                                                                     |                                                                  |
| 14121 | ENSG00000268174  |        | 15560.1  | 0.13 |                        |           |           |                                                                                                     |                                                                  |
| 14129 | ENSG00000234629  |        | 15561.9  | 0.13 |                        |           |           |                                                                                                     |                                                                  |
| 14150 | ENSG00000212953  |        | 15576.1  | 0.13 |                        |           |           |                                                                                                     |                                                                  |
| 14169 | ENSG00000270510  |        | 15596.3  | 0.13 |                        |           |           |                                                                                                     |                                                                  |
| 14185 | ENSG00000238342  |        | 15607    | 0.13 | 15                     | 33187401  | 33187502  | Small nuclear RNA U13                                                                               |                                                                  |
| 14205 | ENSG00000258188  |        | 15628.8  | 0.13 |                        |           |           |                                                                                                     |                                                                  |
| 14213 | ENSG00000254478  |        | 15638.2  | 0.13 |                        |           |           |                                                                                                     |                                                                  |
| 14223 | ENSG00000258895  |        | 15647    | 0.13 |                        |           |           |                                                                                                     |                                                                  |
| 14233 | ENSG00000264971  |        | 15653.3  | 0.13 |                        |           |           |                                                                                                     |                                                                  |
| 14241 | ENSG00000212959  |        | 15657.3  | 0.13 |                        |           |           |                                                                                                     |                                                                  |
| 14261 | ENSG00000271816  |        | 15675    | 0.13 |                        |           |           |                                                                                                     |                                                                  |
| 14274 | ENSG00000186166  |        | 15682.3  | 0.13 |                        |           |           |                                                                                                     |                                                                  |
| 14300 | ENSG00000254155  |        | 15697.3  | 0.13 |                        |           |           |                                                                                                     |                                                                  |

|       |                  |       |      |    |           |           |                                             |
|-------|------------------|-------|------|----|-----------|-----------|---------------------------------------------|
| 14684 | ENSG00000226266  | 15979 | 0.13 |    |           |           |                                             |
| 14684 | ENSG00000211778  | 15993 | 0.13 |    |           |           |                                             |
| 14694 | ENSG00000240292  | 16004 | 0.13 |    |           |           |                                             |
| 14699 | ENSG00000224413  | 16007 | 0.13 |    |           |           |                                             |
| 14724 | ENSG00000217625  | 16027 | 0.13 |    |           |           |                                             |
| 14728 | ENSG00000244456  | 16028 | 0.13 |    |           |           |                                             |
| 14738 | ENSG00000251901  | 16033 | 0.13 | 13 | 96368931  | 96367032  | Small nuclear RNA snR65                     |
| 14738 | ENSG00000270599  | 16035 | 0.13 |    |           |           |                                             |
| 14741 | ENSG00000287265  | 16037 | 0.13 |    |           |           |                                             |
| 14748 | ENSG00000231995  | 16041 | 0.13 |    |           |           |                                             |
| 14750 | ENSG00000281015  | 16043 | 0.13 |    |           |           |                                             |
| 14775 | ENSG00000225854  | 16066 | 0.13 |    |           |           |                                             |
| 14788 | ENSG00000216703  | 16082 | 0.13 |    |           |           |                                             |
| 14817 | ENSG00000237369  | 16097 | 0.13 |    |           |           |                                             |
| 14835 | ENSG00000225999  | 16109 | 0.13 |    |           |           |                                             |
| 14842 | ENSG00000208783  | 16117 | 0.13 |    |           |           |                                             |
| 14844 | ENSG00000228234  | 16119 | 0.13 |    |           |           |                                             |
| 14868 | ENSG00000228624  | 16139 | 0.13 | 8  | 27612549  | 27612639  | Small nuclear RNA U13                       |
| 14871 | ENSG00000234111  | 16141 | 0.13 |    |           |           |                                             |
| 14884 | ENSG00000281241  | 16150 | 0.13 |    |           |           |                                             |
| 14916 | ENSG00000232495  | 16177 | 0.13 |    |           |           |                                             |
| 14917 | ENSG00000233020  | 16177 | 0.13 |    |           |           |                                             |
| 14930 | ENSG00000222095  | 16185 | 0.13 |    |           |           |                                             |
| 14935 | ENSG00000225625  | 16187 | 0.13 |    |           |           |                                             |
| 14941 | ENSG00000270610  | 16191 | 0.13 |    |           |           |                                             |
| 14955 | ENSG00000249028  | 16204 | 0.13 |    |           |           |                                             |
| 14958 | ENSG00000212259  | 16209 | 0.13 |    |           |           |                                             |
| 14964 | ENSG00000286830  | 16215 | 0.13 |    |           |           |                                             |
| 14999 | ENSG00000202284  | 16236 | 0.13 |    |           |           |                                             |
| 15009 | ENSG00000234283  | 16246 | 0.13 |    |           |           |                                             |
| 15010 | ENSG00000287149  | 16246 | 0.13 |    |           |           |                                             |
| 15039 | ENSG00000218119  | 16271 | 0.13 |    |           |           |                                             |
| 15044 | ENSG00000219863  | 16278 | 0.13 |    |           |           |                                             |
| 15054 | ENSG00000233006  | 16288 | 0.13 |    |           |           |                                             |
| 15058 | ENSG00000250646  | 16293 | 0.13 |    |           |           |                                             |
| 15060 | ENSG00000232727  | 16293 | 0.13 |    |           |           |                                             |
| 15066 | ENSG00000225785  | 16301 | 0.13 |    |           |           |                                             |
| 15086 | ENSG00000243904  | 16316 | 0.13 |    |           |           |                                             |
| 15111 | ENSG00000210110  | 16334 | 0.13 |    |           |           |                                             |
| 15130 | ENSG00000244249  | 16351 | 0.13 |    |           |           |                                             |
| 15131 | ENSG00000202773  | 16352 | 0.13 |    |           |           |                                             |
| 15137 | ENSG00000227755  | 16363 | 0.13 |    |           |           |                                             |
| 15148 | ENSG00000270739  | 16371 | 0.13 |    |           |           |                                             |
| 15149 | ENSG00000243234  | 16371 | 0.13 |    |           |           |                                             |
| 15154 | ENSG00000205699  | 16375 | 0.13 |    |           |           |                                             |
| 15158 | ENSG00000228543  | 16376 | 0.13 |    |           |           |                                             |
| 15161 | ENSG00000271101  | 16379 | 0.13 |    |           |           |                                             |
| 15164 | ENSG00000286394  | 16381 | 0.13 |    |           |           |                                             |
| 15168 | ENSG00000262555  | 16385 | 0.13 |    |           |           |                                             |
| 15169 | ENSG00000231114  | 16385 | 0.13 |    |           |           |                                             |
| 15176 | ENSG00000217895  | 16389 | 0.13 |    |           |           |                                             |
| 15178 | ENSG00000213448  | 16389 | 0.13 |    |           |           |                                             |
| 15182 | ENSG00000232645  | 16396 | 0.13 |    |           |           |                                             |
| 15194 | ENSG00000273328  | 16404 | 0.13 |    |           |           |                                             |
| 15200 | ENSG00000235117  | 16410 | 0.13 |    |           |           |                                             |
| 15208 | ENSG00000232403  | 16414 | 0.13 |    |           |           |                                             |
| 15215 | ENSG00000287598  | 16422 | 0.13 |    |           |           |                                             |
| 15229 | ENSG00000231367  | 16427 | 0.13 |    |           |           |                                             |
| 15234 | ENSG00000198802  | 16428 | 0.13 |    |           |           |                                             |
| 15225 | ENSG00000289515  | 16428 | 0.13 |    |           |           |                                             |
| 15232 | ENSG00000250717  | 16432 | 0.13 |    |           |           |                                             |
| 15234 | ENSG00000271490  | 16437 | 0.13 |    |           |           |                                             |
| 15246 | ENSG00000258870  | 16447 | 0.13 |    |           |           |                                             |
| 15290 | ENSG00000234310  | 16447 | 0.13 |    |           |           |                                             |
| 15251 | ENSG00000235702  | 16447 | 0.13 |    |           |           |                                             |
| 15269 | ENSG00000175504  | 16454 | 0.13 |    |           |           |                                             |
| 15278 | ENSG00000248442  | 16463 | 0.13 |    |           |           |                                             |
| 15279 | ENSG00000248634  | 16462 | 0.13 |    |           |           |                                             |
| 15281 | ENSG00000251856  | 16464 | 0.13 |    |           |           |                                             |
| 15292 | ENSG00000230700  | 16468 | 0.13 |    |           |           |                                             |
| 15305 | ENSG00000234308  | 16476 | 0.13 |    |           |           |                                             |
| 15323 | ENSG00000212220  | 16490 | 0.13 |    |           |           |                                             |
| 15329 | ENSG00000285012  | 16491 | 0.13 |    |           |           |                                             |
| 15331 | ENSG00000227249  | 16494 | 0.13 |    |           |           |                                             |
| 15332 | ENSG00000232529  | 16494 | 0.13 |    |           |           |                                             |
| 15339 | ENSG00000222545  | 16498 | 0.13 |    |           |           |                                             |
| 15394 | ENSG00000232470  | 16521 | 0.13 |    |           |           |                                             |
| 15370 | ENSG00000228320  | 16528 | 0.13 |    |           |           |                                             |
| 15372 | ENSG00000225744  | 16528 | 0.13 |    |           |           |                                             |
| 15386 | ENSG00000232343  | 16537 | 0.13 | 1  | 144612266 | 144612683 | profilin 1 pseudogene 2                     |
| 15390 | ENSG00000228923  | 16539 | 0.13 |    |           |           |                                             |
| 15391 | ENSG00000255772  | 16539 | 0.13 |    |           |           |                                             |
| 15392 | ENSG00000236238  | 16539 | 0.13 |    |           |           |                                             |
| 15397 | ENSG00000236383  | 16542 | 0.13 |    |           |           |                                             |
| 15399 | ENSG00000229223  | 16544 | 0.13 | 4  | 22351073  | 22351177  | Small nuclear RNA U13                       |
| 15408 | ENSG00000233434  | 16553 | 0.13 |    |           |           |                                             |
| 15425 | ENSG00000246498  | 16567 | 0.13 |    |           |           |                                             |
| 15432 | ENSG00000204981  | 16572 | 0.13 |    |           |           |                                             |
| 15443 | ENSG00000244706  | 16580 | 0.13 |    |           |           |                                             |
| 15450 | ENSG00000216786  | 16587 | 0.13 |    |           |           |                                             |
| 15454 | ENSG00000218622  | 16591 | 0.13 |    |           |           |                                             |
| 15463 | ENSG00000255988  | 16598 | 0.13 |    |           |           |                                             |
| 15468 | ENSG00000286899  | 16599 | 0.13 |    |           |           |                                             |
| 15469 | ENSG00000285471  | 16601 | 0.13 |    |           |           |                                             |
| 15475 | ENSG00000258477  | 16602 | 0.13 |    |           |           |                                             |
| 15480 | ENSG00000251654  | 16606 | 0.13 |    |           |           |                                             |
| 15492 | ENSG00000225962  | 16612 | 0.13 |    |           |           |                                             |
| 15501 | ENSG000002041008 | 16628 | 0.13 |    |           |           |                                             |
| 15503 | ENSG00000170165  | 16629 | 0.13 |    |           |           |                                             |
| 15512 | ENSG00000225599  | 16635 | 0.13 |    |           |           |                                             |
| 15518 | ENSG000002048625 | 16638 | 0.13 |    |           |           |                                             |
| 15519 | ENSG00000213729  | 16638 | 0.13 |    |           |           |                                             |
| 15526 | ENSG00000206152  | 16649 | 0.13 |    |           |           |                                             |
| 15535 | ENSG00000228450  | 16681 | 0.13 |    |           |           |                                             |
| 15547 | ENSG00000257241  | 16687 | 0.13 |    |           |           |                                             |
| 15550 | ENSG00000231028  | 16672 | 0.13 |    |           |           |                                             |
| 15552 | ENSG00000242021  | 16672 | 0.13 |    |           |           |                                             |
| 15567 | ENSG00000234826  | 16679 | 0.13 |    |           |           |                                             |
| 15570 | ENSG00000229137  | 16681 | 0.13 |    |           |           |                                             |
| 15576 | ENSG00000271330  | 16686 | 0.13 |    |           |           |                                             |
| 15580 | ENSG00000280763  | 16688 | 0.13 |    |           |           |                                             |
| 15581 | ENSG00000234408  | 16693 | 0.13 |    |           |           |                                             |
| 15583 | ENSG00000255064  | 16690 | 0.13 |    |           |           |                                             |
| 15586 | ENSG00000272153  | 16693 | 0.13 |    |           |           |                                             |
| 15588 | ENSG00000232575  | 16695 | 0.13 |    |           |           |                                             |
| 15594 | ENSG00000228508  | 16698 | 0.13 |    |           |           |                                             |
| 15600 | ENSG00000286815  | 16703 | 0.13 |    |           |           |                                             |
| 15608 | ENSG00000232425  | 16712 | 0.13 |    |           |           |                                             |
| 15609 | ENSG00000230969  | 16714 | 0.13 |    |           |           |                                             |
| 15620 | ENSG00000244828  | 16719 | 0.13 |    |           |           |                                             |
| 15623 | ENSG00000254670  | 16721 | 0.13 |    |           |           |                                             |
| 15626 | ENSG00000242495  | 16726 | 0.13 |    |           |           |                                             |
| 15627 | ENSG00000258341  | 16729 | 0.13 |    |           |           |                                             |
| 15632 | ENSG00000275995  | 16734 | 0.13 |    |           |           |                                             |
| 15635 | ENSG00000285011  | 16735 | 0.13 |    |           |           |                                             |
| 15646 | ENSG00000218018  | 16745 | 0.13 |    |           |           |                                             |
| 15683 | ENSG00000236676  | 16774 | 0.13 |    |           |           |                                             |
| 15689 | ENSG00000286964  | 16776 | 0.13 |    |           |           |                                             |
| 15694 | ENSG00000271314  | 16780 | 0.13 |    |           |           |                                             |
| 15697 | ENSG00000231480  | 16781 | 0.13 |    |           |           |                                             |
| 15699 | ENSG00000213963  | 16782 | 0.13 |    |           |           |                                             |
| 15702 | ENSG00000287172  | 16784 | 0.13 |    |           |           |                                             |
| 15712 | ENSG00000258234  | 16791 | 0.13 |    |           |           |                                             |
| 15714 | ENSG00000286907  | 16794 | 0.13 |    |           |           |                                             |
| 15720 | ENSG00000286357  | 16798 | 0.13 |    |           |           |                                             |
| 15723 | ENSG00000234041  | 16799 | 0.13 |    |           |           |                                             |
| 15724 | ENSG00000225235  | 16799 | 0.13 |    |           |           |                                             |
| 15730 | ENSG00000280166  | 16803 | 0.13 |    |           |           |                                             |
| 15739 | ENSG00000230747  | 16808 | 0.13 |    |           |           |                                             |
| 15743 | ENSG00000285835  | 16810 | 0.13 |    |           |           |                                             |
| 15750 | ENSG00000254768  | 16815 | 0.13 |    |           |           |                                             |
| 15751 | ENSG00000280187  | 16815 | 0.13 |    |           |           |                                             |
| 15752 | ENSG00000280037  | 16817 | 0.13 |    |           |           |                                             |
| 15756 | ENSG00000220900  | 16823 | 0.13 |    |           |           |                                             |
| 15762 | ENSG00000254269  | 16827 | 0.13 |    |           |           |                                             |
| 15763 | ENSG00000251708  | 16827 | 0.13 |    |           |           |                                             |
| 15770 | ENSG00000258623  | 16832 | 0.13 |    |           |           |                                             |
| 15773 | ENSG00000230001  | 16835 | 0.13 |    |           |           |                                             |
| 15774 | ENSG00000212967  | 16835 | 0.13 | 8  | 95558771  | 95560630  | HCC209141, PRO2397, Uncharacterized protein |
| 15776 | ENSG00000248510  | 16837 | 0.13 |    |           |           |                                             |



|       |                  |         |         |      |          |           |                         |                                                                                    |
|-------|------------------|---------|---------|------|----------|-----------|-------------------------|------------------------------------------------------------------------------------|
| 16785 | ENSG00000234977  |         | 16849.2 | 0.13 |          |           |                         |                                                                                    |
| 16786 | ENSG00000231088  |         | 16851.1 | 0.13 | 15       | 83209620  | 83231124                | Uncharacterized protein                                                            |
| 16793 | ENSG00000255449  |         | 16855.3 | 0.13 |          |           |                         |                                                                                    |
| 16799 | ENSG00000208126  |         | 16860.9 | 0.13 |          |           |                         |                                                                                    |
| 16804 | ENSG00000249169  |         | 16866.7 | 0.13 |          |           |                         |                                                                                    |
| 16815 | ENSG00000236361  |         | 16875.1 | 0.13 |          |           |                         |                                                                                    |
| 16823 | ENSG00000287890  |         | 16881.6 | 0.13 |          |           |                         |                                                                                    |
| 16826 | ENSG00000295227  |         | 16884.4 | 0.13 |          |           |                         |                                                                                    |
| 16828 | ENSG00000257175  |         | 16886.1 | 0.13 |          |           |                         |                                                                                    |
| 16833 | ENSG00000253344  |         | 16890.1 | 0.13 |          |           |                         |                                                                                    |
| 16835 | ENSG00000244338  |         | 16894.6 | 0.13 |          |           |                         |                                                                                    |
| 16840 | ENSG00000249699  |         | 16891.4 | 0.13 |          |           |                         |                                                                                    |
| 16841 | ENSG00000251816  |         | 16893.1 | 0.13 |          |           |                         |                                                                                    |
| 16844 | ENSG00000222042  |         | 16894   | 0.13 |          |           |                         |                                                                                    |
| 16845 | ENSG00000239289  |         | 16904.3 | 0.13 |          |           |                         |                                                                                    |
| 16848 | ENSG00000239883  |         | 16905.1 | 0.13 |          |           |                         |                                                                                    |
| 16855 | ENSG00000185040  |         | 16909.7 | 0.13 |          |           |                         |                                                                                    |
| 16857 | ENSG00000295250  |         | 16912   | 0.13 |          |           |                         |                                                                                    |
| 16858 | ENSG00000287759  |         | 16912.3 | 0.13 |          |           |                         |                                                                                    |
| 16859 | ENSG00000206123  |         | 16912.6 | 0.13 |          |           |                         |                                                                                    |
| 16864 | ENSG00000231728  |         | 16916.4 | 0.13 |          |           |                         |                                                                                    |
| 16865 | ENSG00000272130  |         | 16916.4 | 0.13 |          |           |                         |                                                                                    |
| 16867 | ENSG00000257175  |         | 16917.8 | 0.13 |          |           |                         |                                                                                    |
| 16871 | ENSG00000255566  |         | 16922.8 | 0.13 |          |           |                         |                                                                                    |
| 16874 | ENSG00000283571  |         | 16923.4 | 0.13 |          |           |                         |                                                                                    |
| 16877 | ENSG00000259211  |         | 16926.1 | 0.13 |          |           |                         |                                                                                    |
| 16887 | ENSG00000259923  |         | 16934.4 | 0.13 |          |           |                         |                                                                                    |
| 16888 | ENSG00000271111  |         | 16938.3 | 0.13 |          |           |                         |                                                                                    |
| 16893 | ENSG00000251169  |         | 16938.7 | 0.13 |          |           |                         |                                                                                    |
| 16901 | ENSG00000254569  |         | 16946.1 | 0.13 |          |           |                         |                                                                                    |
| 16917 | ENSG00000286387  |         | 16953.3 | 0.13 |          |           |                         |                                                                                    |
| 16918 | ENSG00000257754  |         | 16953.7 | 0.13 |          |           |                         |                                                                                    |
| 16922 | ENSG00000231413  |         | 16957   | 0.13 |          |           |                         |                                                                                    |
| 16924 | ENSG00000234283  |         | 16959.2 | 0.13 |          |           |                         |                                                                                    |
| 16928 | ENSG00000233925  |         | 16960.6 | 0.13 |          |           |                         |                                                                                    |
| 16932 | ENSG00000233889  |         | 16964.3 | 0.13 |          |           |                         |                                                                                    |
| 16939 | ENSG00000273009  |         | 16971.9 | 0.13 |          |           |                         |                                                                                    |
| 16940 | ENSG00000286990  |         | 16973.4 | 0.13 |          |           |                         |                                                                                    |
| 16948 | ENSG00000289831  |         | 16981   | 0.13 |          |           |                         |                                                                                    |
| 16952 | ENSG00000257976  |         | 16984.9 | 0.13 |          |           |                         |                                                                                    |
| 16959 | ENSG00000238001  |         | 16988.5 | 0.13 |          |           |                         |                                                                                    |
| 16965 | ENSG00000232443  |         | 16991.7 | 0.13 |          |           |                         |                                                                                    |
| 16967 | ENSG00000289537  | 3       | 16993.5 | 0.13 | 48927699 | 48930171  | Uncharacterized protein |                                                                                    |
| 16968 | ENSG00000259876  |         | 16994.8 | 0.13 |          |           |                         |                                                                                    |
| 16971 | ENSG00000266640  |         | 16998   | 0.13 |          |           |                         |                                                                                    |
| 16973 | ENSG00000257762  |         | 16999   | 0.13 |          |           |                         |                                                                                    |
| 16976 | ENSG00000252189  |         | 17003.4 | 0.13 | 10       | 88505597  | 88505706                | Small nuclear RNA U13                                                              |
| 16977 | ENSG00000286581  |         | 17003.6 | 0.13 |          |           |                         |                                                                                    |
| 16979 | ENSG00000281100  |         | 17004.0 | 0.13 |          |           |                         |                                                                                    |
| 16982 | ENSG00000249167  |         | 17005.8 | 0.13 |          |           |                         |                                                                                    |
| 16986 | ENSG00000289536  |         | 17020.2 | 0.13 |          |           |                         |                                                                                    |
| 16990 | ENSG00000256258  |         | 17021.9 | 0.13 |          |           |                         |                                                                                    |
| 16992 | ENSG00000286971  |         | 17022.7 | 0.13 |          |           |                         |                                                                                    |
| 16995 | ENSG00000243901  |         | 17034.4 | 0.13 |          |           |                         |                                                                                    |
| 16997 | ENSG00000244443  |         | 17035.1 | 0.13 |          |           |                         |                                                                                    |
| 16910 | ENSG00000233390  | ANTXR1L | 17038.5 | 0.13 | 10       | 47657581  | 47701443                | anthrax toxin receptor-like                                                        |
| 16920 | ENSG00000198290  |         | 17046.7 | 0.13 |          |           |                         |                                                                                    |
| 16928 | ENSG00000251628  |         | 17053.3 | 0.13 |          |           |                         |                                                                                    |
| 16940 | ENSG00000224338  |         | 17067.1 | 0.13 |          |           |                         |                                                                                    |
| 16947 | ENSG00000237381  |         | 17072.7 | 0.13 |          |           |                         |                                                                                    |
| 16949 | ENSG00000239427  |         | 17074.9 | 0.13 |          |           |                         |                                                                                    |
| 16951 | ENSG00000254101  |         | 17077.1 | 0.13 |          |           |                         |                                                                                    |
| 16952 | ENSG00000235493  |         | 17077.2 | 0.13 |          |           |                         |                                                                                    |
| 16958 | ENSG00000229427  |         | 17080.4 | 0.13 |          |           |                         |                                                                                    |
| 16968 | ENSG00000213158  |         | 17087.2 | 0.13 |          |           |                         |                                                                                    |
| 16972 | ENSG00000236915  |         | 17090.5 | 0.13 |          |           |                         |                                                                                    |
| 16973 | ENSG00000234345  |         | 17091.3 | 0.13 |          |           |                         |                                                                                    |
| 16965 | ENSG00000272071  |         | 17106.4 | 0.13 |          |           |                         |                                                                                    |
| 16105 | ENSG00000231826  |         | 17112.8 | 0.13 |          |           |                         |                                                                                    |
| 16111 | ENSG00000256669  |         | 17114.4 | 0.13 |          |           |                         |                                                                                    |
| 16112 | ENSG00000268499  |         | 17114.4 | 0.13 |          |           |                         |                                                                                    |
| 16114 | ENSG00000254563  |         | 17119.3 | 0.13 |          |           |                         |                                                                                    |
| 16118 | ENSG00000237863  |         | 17123.9 | 0.13 |          |           |                         |                                                                                    |
| 16122 | ENSG00000251032  |         | 17125.9 | 0.13 |          |           |                         |                                                                                    |
| 16126 | ENSG00000289148  |         | 17128.1 | 0.13 |          |           |                         |                                                                                    |
| 16127 | ENSG00000231128  |         | 17128.1 | 0.13 |          |           |                         |                                                                                    |
| 16134 | ENSG00000228751  |         | 17131.5 | 0.13 |          |           |                         |                                                                                    |
| 16137 | ENSG00000259819  |         | 17134.2 | 0.13 |          |           |                         |                                                                                    |
| 16148 | ENSG00000259870  |         | 17139   | 0.13 |          |           |                         |                                                                                    |
| 16149 | ENSG00000231402  |         | 17143.2 | 0.13 |          |           |                         |                                                                                    |
| 16152 | ENSG00000287506  |         | 17144.7 | 0.13 |          |           |                         |                                                                                    |
| 16158 | ENSG00000232448  |         | 17147   | 0.13 |          |           |                         |                                                                                    |
| 16165 | ENSG00000280207  |         | 17149.3 | 0.13 |          |           |                         |                                                                                    |
| 16168 | ENSG00000250842  |         | 17153.2 | 0.13 | 9        | 4899120   | 4899280                 | HCG2011465; Uncharacterized protein                                                |
| 16168 | ENSG00000208625  |         | 17154.2 | 0.13 |          |           |                         |                                                                                    |
| 16175 | ENSG00000271325  |         | 17156.6 | 0.13 |          |           |                         |                                                                                    |
| 16178 | ENSG00000271414  |         | 17160.2 | 0.13 |          |           |                         |                                                                                    |
| 16181 | ENSG00000231892  |         | 17169   | 0.13 |          |           |                         |                                                                                    |
| 16184 | ENSG00000261516  |         | 17166.1 | 0.13 |          |           |                         |                                                                                    |
| 16188 | ENSG00000283870  |         | 17166.3 | 0.13 |          |           |                         |                                                                                    |
| 16194 | ENSG00000264231  |         | 17172.1 | 0.13 |          |           |                         |                                                                                    |
| 16202 | ENSG00000254315  |         | 17174.4 | 0.13 | 14       | 102825136 | 102825239               | Small nuclear RNA U13                                                              |
| 16203 | ENSG00000289846  |         | 17179.3 | 0.13 |          |           |                         |                                                                                    |
| 16209 | ENSG00000234174  |         | 17182.4 | 0.13 |          |           |                         |                                                                                    |
| 16217 | ENSG00000248216  |         | 17190.3 | 0.13 |          |           |                         |                                                                                    |
| 16220 | ENSG00000289499  |         | 17195.2 | 0.13 |          |           |                         |                                                                                    |
| 16228 | ENSG00000289564  |         | 17202.6 | 0.13 |          |           |                         |                                                                                    |
| 16230 | ENSG00000221693  |         | 17203.6 | 0.13 |          |           |                         |                                                                                    |
| 16231 | ENSG00000257180  |         | 17205.7 | 0.13 |          |           |                         |                                                                                    |
| 16249 | ENSG00000217438  |         | 17218.4 | 0.13 |          |           |                         |                                                                                    |
| 16251 | ENSG00000251294  |         | 17218.7 | 0.13 |          |           |                         |                                                                                    |
| 16296 | ENSG00000298471  |         | 17221.1 | 0.13 |          |           |                         |                                                                                    |
| 16299 | ENSG00000230390  |         | 17222.3 | 0.13 |          |           |                         |                                                                                    |
| 16260 | ENSG00000255107  |         | 17223   | 0.13 |          |           |                         |                                                                                    |
| 16268 | ENSG00000284212  |         | 17225.6 | 0.13 |          |           |                         |                                                                                    |
| 16273 | ENSG00000281472  |         | 17226.7 | 0.13 |          |           |                         |                                                                                    |
| 16276 | ENSG00000236226  |         | 17228.2 | 0.13 |          |           |                         |                                                                                    |
| 16293 | ENSG00000294997  |         | 17240.3 | 0.13 |          |           |                         |                                                                                    |
| 16298 | ENSG00000237138  |         | 17244.3 | 0.13 |          |           |                         |                                                                                    |
| 16299 | ENSG00000248238  |         | 17244.5 | 0.13 |          |           |                         |                                                                                    |
| 16300 | ENSG00000273100  |         | 17245.7 | 0.13 |          |           |                         |                                                                                    |
| 16313 | ENSG00000252950  |         | 17251.5 | 0.13 |          |           |                         |                                                                                    |
| 16323 | ENSG00000244800  |         | 17259.8 | 0.13 |          |           |                         |                                                                                    |
| 16324 | ENSG00000258794  |         | 17260.7 | 0.13 |          |           |                         |                                                                                    |
| 16330 | ENSG00000230431  |         | 17265.7 | 0.13 |          |           |                         |                                                                                    |
| 16331 | ENSG00000237899  |         | 17265.7 | 0.13 |          |           |                         |                                                                                    |
| 16340 | ENSG00000233332  |         | 17280   | 0.13 |          |           |                         |                                                                                    |
| 16341 | ENSG00000232483  |         | 17280.3 | 0.13 |          |           |                         |                                                                                    |
| 16345 | ENSG00000254333  |         | 17283.3 | 0.13 |          |           |                         |                                                                                    |
| 16353 | ENSG00000231838  |         | 17287.4 | 0.13 |          |           |                         |                                                                                    |
| 16354 | ENSG00000251533  |         | 17287.8 | 0.13 |          |           |                         |                                                                                    |
| 16358 | ENSG00000287845  |         | 17289   | 0.13 | 9        | 139219089 | 139219640               | HCG2022384; Putative uncharacterized protein DKF2p434A082; Uncharacterized protein |
| 16360 | ENSG00000231395  |         | 17290.8 | 0.13 |          |           |                         |                                                                                    |
| 16370 | ENSG00000285144  |         | 17298.7 | 0.13 |          |           |                         |                                                                                    |
| 16372 | ENSG00000295490  |         | 17301.6 | 0.13 |          |           |                         |                                                                                    |
| 16381 | ENSG00000238459  |         | 17310   | 0.13 | 7        | 98482613  | 98482713                | Small nuclear RNA U13                                                              |
| 16392 | ENSG00000289422  |         | 17316.5 | 0.13 |          |           |                         |                                                                                    |
| 16393 | ENSG00000289793  |         | 17317.9 | 0.13 |          |           |                         |                                                                                    |
| 16394 | ENSG00000236061  |         | 17317.9 | 0.13 |          |           |                         |                                                                                    |
| 16400 | ENSG00000212896  |         | 17320.6 | 0.13 |          |           |                         |                                                                                    |
| 16408 | ENSG00000280409  |         | 17327.5 | 0.13 |          |           |                         |                                                                                    |
| 16434 | ENSG00000281248  |         | 17348.1 | 0.13 |          |           |                         |                                                                                    |
| 16436 | ENSG00000237174  |         | 17349.4 | 0.13 |          |           |                         |                                                                                    |
| 16443 | ENSG00000229119  |         | 17354   | 0.13 |          |           |                         |                                                                                    |
| 16444 | ENSG00000289848  |         | 17354.7 | 0.13 |          |           |                         |                                                                                    |
| 16445 | ENSG00000242499  |         | 17356.1 | 0.13 |          |           |                         |                                                                                    |
| 16449 | ENSG00000254990  |         | 17361.2 | 0.13 |          |           |                         |                                                                                    |
| 16450 | ENSG00000214369  |         | 17361.7 | 0.13 |          |           |                         |                                                                                    |
| 16458 | ENSG00000235342  |         | 17366.6 | 0.13 |          |           |                         |                                                                                    |
| 16462 | ENSG00000252929  |         | 17368.9 | 0.13 |          |           |                         |                                                                                    |
| 16467 | ENSG00000256011  |         | 17372.6 | 0.13 |          |           |                         |                                                                                    |
| 16473 | ENSG00000233734  |         | 17378.6 | 0.13 |          |           |                         |                                                                                    |
| 16475 | ENSG00000231363  |         | 17380.2 | 0.13 |          |           |                         |                                                                                    |
| 16476 | ENSG00000258729  |         | 17381.6 | 0.13 |          |           |                         |                                                                                    |
| 16477 | ENSG00000239951  |         | 17381.7 | 0.13 |          |           |                         |                                                                                    |
| 16478 | ENSG00000232115  |         | 17383.2 | 0.13 |          |           |                         |                                                                                    |
| 16492 | ENSG000002081037 |         | 17392.1 | 0.13 |          |           |                         |                                                                                    |
| 16497 | ENSG00000231762  |         | 17396.3 | 0.13 |          |           |                         |                                                                                    |
| 16498 | ENSG00000240335  |         | 17397   | 0.13 |          |           |                         |                                                                                    |
| 16516 | ENSG00000250378  |         | 17407.8 | 0.13 |          |           |                         |                                                                                    |

|       |                 |             |         |      |           |          |           |           |                                            |
|-------|-----------------|-------------|---------|------|-----------|----------|-----------|-----------|--------------------------------------------|
| 16527 | ENSG00000285679 |             | 17419.5 | 0.13 |           |          |           |           |                                            |
| 16528 | ENSG00000285680 |             | 17419.7 | 0.13 |           |          |           |           |                                            |
| 16541 | ENSG00000287095 |             | 17427.9 | 0.13 |           |          |           |           |                                            |
| 16544 | ENSG00000288012 |             | 17430.2 | 0.13 | 5         | 78523714 | 78523911  |           | Uncharacterized protein                    |
| 16548 | ENSG00000285002 |             | 17432.4 | 0.13 |           |          |           |           |                                            |
| 16568 | ENSG00000286308 |             | 17444.2 | 0.13 |           |          |           |           |                                            |
| 16571 | ENSG00000285909 |             | 17448   | 0.13 |           |          |           |           |                                            |
| 16572 | ENSG00000185663 |             | 17448.5 | 0.13 | 19        | 36208921 | 36229779  |           | lysine (K)-specific methyltransferase 2B   |
| 16577 | ENSG00000285983 |             | 17453.1 | 0.13 |           |          |           |           |                                            |
| 16581 | ENSG00000284844 |             | 17455.9 | 0.13 |           |          |           |           |                                            |
| 16591 | ENSG00000286148 |             | 17474.9 | 0.13 |           |          |           |           |                                            |
| 16596 | ENSG00000283734 |             | 17475.1 | 0.13 |           |          |           |           |                                            |
| 16609 | ENSG00000286206 |             | 17488.3 | 0.13 |           |          |           |           |                                            |
| 16615 | ENSG00000249237 |             | 17490.2 | 0.13 |           |          |           |           |                                            |
| 16623 | ENSG00000284453 |             | 17492.1 | 0.13 |           |          |           |           |                                            |
| 16625 | ENSG00000257228 |             | 17494.1 | 0.13 |           |          |           |           |                                            |
| 16627 | ENSG00000282971 |             | 17495.4 | 0.13 |           |          |           |           |                                            |
| 16628 | ENSG00000225761 |             | 17497.5 | 0.13 |           |          |           |           |                                            |
| 16634 | ENSG00000282696 |             | 17503.5 | 0.13 |           |          |           |           |                                            |
| 16635 | ENSG00000270986 |             | 17503.6 | 0.13 |           |          |           |           |                                            |
| 16644 | ENSG00000211401 |             | 17511.2 | 0.13 |           |          |           |           |                                            |
| 16645 | ENSG00000280714 |             | 17514.1 | 0.13 |           |          |           |           |                                            |
| 16654 | ENSG00000254499 |             | 17523   | 0.13 |           |          |           |           |                                            |
| 16656 | ENSG00000280793 |             | 17524.1 | 0.13 |           |          |           |           |                                            |
| 16665 | ENSG00000253445 |             | 17532.1 | 0.13 |           |          |           |           |                                            |
| 16667 | ENSG00000250267 |             | 17532.9 | 0.13 |           |          |           |           |                                            |
| 16670 | ENSG00000280163 |             | 17533.6 | 0.13 |           |          |           |           |                                            |
| 16685 | ENSG00000251648 |             | 17548.7 | 0.13 |           |          |           |           |                                            |
| 16686 | ENSG00000282308 |             | 17550.5 | 0.13 |           |          |           |           |                                            |
| 16690 | ENSG00000286603 |             | 17551.8 | 0.13 |           |          |           |           |                                            |
| 16697 | ENSG00000258723 |             | 17557.1 | 0.13 |           |          |           |           |                                            |
| 16700 | ENSG00000233562 |             | 17558.9 | 0.13 |           |          |           |           |                                            |
| 16703 | ENSG00000283378 |             | 17564.8 | 0.13 |           |          |           |           |                                            |
| 16704 | ENSG00000254553 |             | 17565   | 0.13 |           |          |           |           |                                            |
| 16705 | ENSG00000241057 |             | 17565.6 | 0.13 |           |          |           |           |                                            |
| 16710 | ENSG00000280587 |             | 17571.1 | 0.13 |           |          |           |           |                                            |
| 16713 | ENSG00000256888 |             | 17573.8 | 0.13 |           |          |           |           |                                            |
| 16714 | ENSG00000289882 |             | 17574   | 0.13 |           |          |           |           |                                            |
| 16715 | ENSG00000287619 |             | 17575.1 | 0.13 |           |          |           |           |                                            |
| 16719 | ENSG00000283674 |             | 17576.2 | 0.13 |           |          |           |           |                                            |
| 16720 | ENSG00000225385 |             | 17576.6 | 0.13 |           |          |           |           |                                            |
| 16723 | ENSG00000280588 |             | 17577   | 0.13 |           |          |           |           |                                            |
| 16724 | ENSG00000280337 |             | 17577.9 | 0.13 |           |          |           |           |                                            |
| 16733 | ENSG00000230914 |             | 17586.6 | 0.13 |           |          |           |           |                                            |
| 16737 | ENSG00000280480 |             | 17586.7 | 0.13 |           |          |           |           |                                            |
| 16740 | ENSG00000250500 |             | 17586.7 | 0.13 |           |          |           |           |                                            |
| 16745 | ENSG00000258896 |             | 17588.1 | 0.13 |           |          |           |           |                                            |
| 16750 | ENSG00000285450 |             | 17589.6 | 0.13 |           |          |           |           |                                            |
| 16764 | ENSG00000285273 |             | 17599.6 | 0.13 |           |          |           |           |                                            |
| 16774 | ENSG00000287230 |             | 17623.4 | 0.13 |           |          |           |           |                                            |
| 16775 | ENSG00000232073 |             | 17624.1 | 0.13 |           |          |           |           |                                            |
| 16777 | ENSG00000176265 |             | 17625.4 | 0.13 |           |          |           |           |                                            |
| 16789 | ENSG00000280599 |             | 17633.6 | 0.13 |           |          |           |           |                                            |
| 16792 | ENSG00000238480 |             | 17636.1 | 0.13 |           |          |           |           |                                            |
| 16793 | ENSG00000248379 |             | 17637.6 | 0.13 |           |          |           |           |                                            |
| 16798 | ENSG00000280796 |             | 17643.7 | 0.13 |           |          |           |           |                                            |
| 16802 | ENSG00000289785 |             | 17644.3 | 0.13 |           |          |           |           |                                            |
| 16808 | ENSG00000271457 |             | 17649   | 0.13 |           |          |           |           |                                            |
| 16837 | ENSG00000258788 |             | 17671.7 | 0.13 |           |          |           |           |                                            |
| 16847 | ENSG00000280876 |             | 17677.1 | 0.13 |           |          |           |           |                                            |
| 16860 | ENSG00000282456 |             | 17683.5 | 0.13 |           |          |           |           |                                            |
| 16863 | ENSG00000288046 |             | 17683.3 | 0.13 | 18        | 8338437  | 8337038   |           | Uncharacterized protein                    |
| 16866 | ENSG00000254035 |             | 17682   | 0.13 |           |          |           |           |                                            |
| 16891 | ENSG00000285417 |             | 17702.2 | 0.13 |           |          |           |           |                                            |
| 16865 | ENSG00000234148 |             | 17702.3 | 0.13 |           |          |           |           |                                            |
| 16900 | ENSG00000289486 |             | 17706   | 0.13 |           |          |           |           |                                            |
| 16913 | ENSG00000280693 |             | 17711.7 | 0.13 |           |          |           |           |                                            |
| 16918 | ENSG00000283342 |             | 17716.1 | 0.13 |           |          |           |           |                                            |
| 16920 | ENSG00000282677 |             | 17718.6 | 0.13 |           |          |           |           |                                            |
| 16925 | ENSG00000285913 |             | 17725.3 | 0.13 |           |          |           |           |                                            |
| 16949 | ENSG00000230762 |             | 17737.6 | 0.13 |           |          |           |           |                                            |
| 16950 | ENSG00000232324 |             | 17738.9 | 0.13 |           |          |           |           |                                            |
| 16952 | ENSG00000280515 |             | 17743.5 | 0.13 |           |          |           |           |                                            |
| 16964 | ENSG00000254095 |             | 17748.2 | 0.13 |           |          |           |           |                                            |
| 16977 | ENSG00000284100 |             | 17754   | 0.13 |           |          |           |           |                                            |
| 16979 | ENSG00000285667 |             | 17755.5 | 0.13 |           |          |           |           |                                            |
| 17008 | ENSG00000231827 |             | 17785.9 | 0.13 |           |          |           |           |                                            |
| 17008 | ENSG00000233833 |             | 17786.2 | 0.13 |           |          |           |           |                                            |
| 17015 | ENSG00000228967 |             | 17790.8 | 0.13 |           |          |           |           |                                            |
| 17023 | ENSG00000211338 |             | 17796.5 | 0.13 |           |          |           |           |                                            |
| 17029 | ENSG00000281570 |             | 17800.7 | 0.13 |           |          |           |           |                                            |
| 17033 | ENSG00000232689 |             | 17808.8 | 0.13 |           |          |           |           |                                            |
| 17038 | ENSG00000270171 |             | 17806.7 | 0.13 |           |          |           |           |                                            |
| 17042 | ENSG00000230102 |             | 17808.3 | 0.13 |           |          |           |           |                                            |
| 17054 | ENSG00000280209 |             | 17819.5 | 0.13 |           |          |           |           |                                            |
| 17065 | ENSG00000211663 |             | 17827.5 | 0.13 |           |          |           |           |                                            |
| 17075 | ENSG00000255311 |             | 17833.7 | 0.13 |           |          |           |           |                                            |
| 17078 | ENSG00000253343 |             | 17836.6 | 0.13 |           |          |           |           |                                            |
| 17081 | ENSG00000250268 |             | 17838.1 | 0.13 |           |          |           |           |                                            |
| 17088 | ENSG00000258376 |             | 17840.9 | 0.13 |           |          |           |           |                                            |
| 17091 | ENSG00000284070 |             | 17849.5 | 0.13 |           |          |           |           |                                            |
| 17100 | ENSG00000284834 |             | 17851.2 | 0.13 |           |          |           |           |                                            |
| 17109 | ENSG00000282703 |             | 17856.9 | 0.13 |           |          |           |           |                                            |
| 17126 | ENSG00000235100 |             | 17867.9 | 0.13 |           |          |           |           |                                            |
| 17138 | ENSG00000280156 |             | 17875.1 | 0.13 |           |          |           |           |                                            |
| 17154 | ENSG00000228952 |             | 17893.4 | 0.13 |           |          |           |           |                                            |
| 17160 | ENSG00000234442 |             | 17897.4 | 0.13 |           |          |           |           |                                            |
| 17162 | ENSG00000280910 |             | 17897.9 | 0.13 |           |          |           |           |                                            |
| 17181 | ENSG00000253973 |             | 17908.5 | 0.13 |           |          |           |           |                                            |
| 17183 | ENSG00000236024 |             | 17909.1 | 0.13 |           |          |           |           |                                            |
| 17207 | ENSG00000233333 |             | 17923.1 | 0.13 | 1         | 23558230 | 23558098  |           | TBC1 antisense RNA 1                       |
| 17214 | ENSG00000231227 |             | 17929.1 | 0.13 |           |          |           |           |                                            |
| 17242 | ENSG00000238448 |             | 17945.7 | 0.13 |           |          |           |           |                                            |
| 17257 | ENSG00000270688 |             | 17955   | 0.13 |           |          |           |           |                                            |
| 17260 | ENSG00000225762 |             | 17958   | 0.13 |           |          |           |           |                                            |
| 17263 | ENSG00000280261 |             | 17959.4 | 0.13 |           |          |           |           |                                            |
| 17274 | ENSG00000232745 |             | 17971.7 | 0.13 |           |          |           |           |                                            |
| 17283 | ENSG00000248293 |             | 17975.6 | 0.13 |           |          |           |           |                                            |
| 17295 | ENSG00000282107 |             | 17986.9 | 0.13 |           |          |           |           |                                            |
| 17303 | ENSG00000245653 |             | 17991   | 0.13 |           |          |           |           |                                            |
| 17304 | ENSG00000258115 |             | 17991.4 | 0.13 |           |          |           |           |                                            |
| 17340 | ENSG00000232708 |             | 18019.2 | 0.13 |           |          |           |           |                                            |
| 17341 | ENSG00000281633 |             | 18020.3 | 0.13 |           |          |           |           |                                            |
| 17361 | ENSG00000234471 |             | 18036.2 | 0.13 |           |          |           |           |                                            |
| 17364 | ENSG00000271763 |             | 18036.9 | 0.13 |           |          |           |           |                                            |
| 17388 | ENSG00000232102 |             | 18047.7 | 0.13 |           |          |           |           |                                            |
| 17396 | ENSG00000251365 |             | 18055   | 0.13 |           |          |           |           |                                            |
| 17405 | ENSG00000214432 |             | 18061.1 | 0.13 |           |          |           |           |                                            |
| 17483 | ENSG00000271757 |             | 18122.1 | 0.13 |           |          |           |           |                                            |
| 17495 | ENSG00000248950 |             | 18129.2 | 0.13 |           |          |           |           |                                            |
| 17497 | ENSG00000280913 |             | 18131.9 | 0.13 |           |          |           |           |                                            |
| 17501 | ENSG00000231789 |             | 18135.4 | 0.13 |           |          |           |           |                                            |
| 17503 | ENSG00000270549 |             | 18136.9 | 0.13 |           |          |           |           |                                            |
| 17516 | ENSG00000258317 |             | 18144.7 | 0.13 |           |          |           |           |                                            |
| 17532 | ENSG00000270888 |             | 18157.1 | 0.13 |           |          |           |           |                                            |
| 17539 | ENSG00000234884 |             | 18162.1 | 0.13 |           |          |           |           |                                            |
| 17545 | ENSG00000287150 |             | 18166.2 | 0.13 |           |          |           |           |                                            |
| 17557 | ENSG00000286327 |             | 18174.6 | 0.13 |           |          |           |           |                                            |
| 17591 | ENSG00000282529 |             | 18193   | 0.13 |           |          |           |           |                                            |
| 17633 | ENSG00000286940 |             | 18221.6 | 0.13 |           |          |           |           |                                            |
| 17641 | ENSG00000286277 |             | 18232.2 | 0.13 |           |          |           |           |                                            |
| 17685 | ENSG00000241818 |             | 18246.4 | 0.13 |           |          |           |           |                                            |
| 17691 | ENSG00000258285 |             | 18249   | 0.13 |           |          |           |           |                                            |
| 18010 | ENSG00000272374 |             | 18501.6 | 0.13 |           |          |           |           |                                            |
| 18181 | ENSG00000228978 |             | 18620.3 | 0.13 |           |          |           |           |                                            |
| 30291 | ENSG00000230257 |             | 6119.3  | 0.12 | antisense | 7        | 10281369  | 10282903  | nuclear factor, erythroid 4                |
| 5544  | ENSG00000203497 |             | 8278.6  | 0.12 | antisense | 10       | 11262926  | 112631991 | PCDD4 antisense RNA 1                      |
| 8499  | ENSG00000217286 | TTN-AS1     | 11136.3 | 0.12 | antisense | 2        | 179385910 | 179386422 | TTN antisense RNA 1                        |
| 9556  | ENSG00000231233 | CCDC147-AS1 | 12307.2 | 0.12 | antisense | 10       | 106113489 | 106113333 | CCDC147 antisense RNA 1 (head to head)     |
| 19315 | ENSG00000286334 | PRR7-AS1    | 15412.4 | 0.12 | antisense | 5        | 178885504 | 178884730 | PRR7 antisense RNA 1                       |
| 14172 | ENSG00000233338 | ILF3-AS1    | 15597.4 | 0.12 | antisense | X        | 12502935  | 12502935  | ILF3 antisense RNA 1                       |
| 14798 | ENSG00000237351 |             | 16080.6 | 0.12 | antisense | X        | 123006476 | 123007782 | XIAP antisense RNA 1                       |
| 14978 | ENSG00000231854 | RPS8KAZ-AS1 | 16230.9 | 0.12 | antisense | 8        | 167317186 | 167318223 | RPS8KAZ antisense RNA 1                    |
| 15216 | ENSG00000241766 | LINC00063   | 16241.1 | 0.12 | antisense | X        | 148629150 | 148622034 | long intergenic non-protein coding RNA 803 |
| 15700 | ENSG00000231228 |             | 16782.4 | 0.12 | antisense | 6        | 30073017  | 30082501  | TRIM31 antisense RNA 1                     |
| 16388 | ENSG00000248492 | ZFAT1-AS1   | 17297.4 | 0.12 | antisense | 8        | 135610314 | 135612932 | ZFAT1 antisense RNA 1                      |
| 16409 | ENSG00000210913 | TPT1-AS1    | 17310.3 | 0.12 | antisense | 13       | 45915480  | 45916272  | TPT1 antisense RNA 1                       |
| 16533 | ENSG00000232287 | SLC6A1-AS1  | 17421.5 | 0.12 | antisense | 3        | 110447784 | 11060910  | SLC6A1 antisense RNA 1                     |
| 16995 | ENSG00000230550 |             | 17472.3 | 0.12 | antisense | 6        |           |           |                                            |

|       |                  |              |       |      |                        |    |           |           |                                                                            |
|-------|------------------|--------------|-------|------|------------------------|----|-----------|-----------|----------------------------------------------------------------------------|
| 17246 | ENSG00000203601  | LOC101930564 | 17347 | 0.12 | antisense              | 1  | 16897343  | 16956243  | long intergenic non-protein coding RNA 970                                 |
| 17252 | ENSG000001728    | DLGAP1-AS3   | 17351 | 0.12 | antisense              | 18 | 387181    | 387439    | DLGAP1 antisense RNA 3                                                     |
| 17271 | ENSG00000203452  | ACO9262.1    | 17368 | 0.12 | antisense              | 7  | 13637036  | 13686654  | head-iin-490                                                               |
| 17300 | ENSG00000248309  | MEF2C-AS1    | 18009 | 0.12 | antisense              | 5  | 88179145  | 88726215  | MZF2C antisense RNA 1                                                      |
| 17408 | ENSG00000203009  | NALCN-AS1    | 18681 | 0.12 | antisense              | 13 | 10136078  | 10171638  | NALCN antisense RNA 1                                                      |
| 17732 | ENSG00000203556  | OSGEYL1-AS1  | 18333 | 0.12 | antisense              | 2  | 19065432  | 19063392  | OSGEYL1 antisense RNA 1                                                    |
| 17757 | ENSG00000204821  | COL4A2-AS2   | 18330 | 0.12 | antisense              | 13 | 111108743 | 111115634 | COL4A2 antisense RNA 2                                                     |
| 18079 | ENSG00000207596  | SNAP25-AS1   | 18657 | 0.12 | antisense              | 20 | 16426260  | 16434324  | SNAP25 antisense RNA 1                                                     |
| 18118 | ENSG00000205424  | MCM2AP-AS1   | 18590 | 0.12 | antisense              | 21 | 47691931  | 47697934  | MCM2AP antisense RNA 1                                                     |
| 18180 | ENSG00000203183  |              | 18656 | 0.12 | antisense              | 30 | 19185826  | 19190886  | FGF12 antisense RNA 1                                                      |
| 18286 | ENSG00000205680  | TIEM6B-AS1   | 18721 | 0.12 | antisense              | 11 | 8986222   | 8989074   | TIEM6B antisense RNA 1                                                     |
| 18361 | ENSG00000209917  | PRICKLE4-AS3 | 18915 | 0.12 | antisense              | 11 | 84172050  | 84186641  | PRICKLE4 antisense RNA 3                                                   |
| 18563 | ENSG00000204865  | KCNCA4-AS1   | 18915 | 0.12 | antisense              | 1  | 110751456 | 110752609 | KCNCA4 antisense RNA 1 (head to head)                                      |
| 18760 | ENSG000002030107 | CACNA1G-AS1  | 19065 | 0.12 | antisense              | 17 | 48633568  | 48633869  | CACNA1G antisense RNA 1                                                    |
| 19258 | ENSG000002028127 |              | 17232 | 0.12 | IG V <sub>H</sub> gene | 22 | 32595996  | 32596012  | immunoglobulin heavy variable 20-26                                        |
| 2377  | ENSG000002028325 |              | 3724  | 0.12 | IG V <sub>H</sub> gene | 2  | 90537639  | 90538397  | Uncharacterized protein                                                    |
| 10122 | ENSG00000111623  |              | 14807 | 0.12 | IG V <sub>H</sub> gene | 2  | 80024732  | 80025512  | immunoglobulin kappa variable 20-26                                        |
| 9007  | ENSG00000201299  |              | 7963  | 0.12 | IG V <sub>H</sub> gene | 15 | 22460058  | 22466493  | immunoglobulin heavy variable 1R15.1 (pseudogene)                          |
| 8166  | ENSG00000206920  | LINC00528    | 8944  | 0.12 | lincRNA                | 22 | 18200088  | 18262247  | long intergenic non-protein coding RNA 528                                 |
| 14889 | ENSG00000205319  |              | 15922 | 0.12 | lincRNA                | 8  | 123652624 | 123706345 | long intergenic non-protein coding RNA 1151                                |
| 16215 | ENSG00000202955  | LINC00058    | 17137 | 0.12 | lincRNA                | 20 | 24517451  | 24517400  | long intergenic non-protein coding RNA 658                                 |
| 16263 | ENSG000002058107 | LINC00811    | 17219 | 0.12 | lincRNA                | 14 | 85860223  | 85868418  | long intergenic non-protein coding RNA 911                                 |
| 16278 | ENSG000002053143 |              | 17229 | 0.12 | lincRNA                | 8  | 71383347  | 71392358  | Metaxoon signal recognition particle RNA                                   |
| 16386 | ENSG00000170138  | LINC00070    | 17288 | 0.12 | lincRNA                | 17 | 12453098  | 12454871  | long intergenic non-protein coding RNA 670                                 |
| 16641 | ENSG000002023631 |              | 17509 | 0.12 | lincRNA                | 2  | 132180474 | 132186622 | Metaxoon signal recognition particle RNA 1120                              |
| 16698 | ENSG000002023634 | LINC00049    | 17526 | 0.12 | lincRNA                | 21 | 43118880  | 43135355  | long intergenic non-protein coding RNA 479                                 |
| 16920 | ENSG00000202445  |              | 17553 | 0.12 | lincRNA                | 7  | 158902614 | 158903194 | Orwell LOC100906429                                                        |
| 17272 | ENSG000002023978 |              | 17868 | 0.12 | lincRNA                | 17 | 1757340   | 17581002  | Smith-Magenis syndrome chromosome region, candidate 2 (non-protein coding) |
| 17546 | ENSG000002027057 |              | 18166 | 0.12 | lincRNA                | 11 | 84245747  | 84265289  | long intergenic non-protein coding RNA 1171                                |
| 17737 | ENSG00000201300  | LINC00923    | 18208 | 0.12 | lincRNA                | 18 | 86226165  | 86226165  | long intergenic non-protein coding RNA 923                                 |
| 17799 | ENSG000002023821 |              | 18352 | 0.12 | lincRNA                | 13 | 44118054  | 44122192  | ENOX1 antisense RNA 1                                                      |
| 18044 | ENSG000002028846 | LINC00348    | 18531 | 0.12 | lincRNA                | 13 | 11589273  | 11742549  | long intergenic non-protein coding RNA 348                                 |
| 18028 | ENSG00000201883  |              | 18537 | 0.12 | lincRNA                | 17 | 8772174   | 8772174   | Uncharacterized protein, clone BT144.027227                                |
| 18657 | ENSG000002037119 | LINC01056    | 18986 | 0.12 | lincRNA                | 20 | 6166593   | 61665215  | long intergenic non-protein coding RNA 1058                                |
| 18900 | ENSG000002008143 | MIR4313      | 19179 | 0.12 | miRNA                  | 15 | 76051842  | 76054746  | miR4313                                                                    |
| 12048 | ENSG00000201333  | MIR5246      | 19218 | 0.12 | miRNA                  | 13 | 701111    | 701116    | miR5246                                                                    |
| 14799 | ENSG000002007720 | MIR555       | 19232 | 0.12 | miRNA                  | 1  | 1553191   | 15531936  | miR555                                                                     |
| 15639 | ENSG000002068768 | MIR4506      | 18739 | 0.12 | miRNA                  | 14 | 94414572  | 94414648  | miR4506                                                                    |
| 16284 | ENSG00000203989  | MIR5000      | 17233 | 0.12 | miRNA                  | 2  | 7517038   | 7518341   | miR5000                                                                    |
| 16757 | ENSG00000204831  | MIR4280      | 17610 | 0.12 | miRNA                  | 1  | 209796789 | 209796855 | miR4280                                                                    |
| 16819 | ENSG00000206203  | MIR5585      | 17854 | 0.12 | miRNA                  | 1  | 32552550  | 32552608  | miR5585                                                                    |
| 16848 | ENSG00000201058  | MIR1286      | 18007 | 0.12 | miRNA                  | 22 | 20237734  | 20237734  | miR1286                                                                    |
| 17083 | ENSG00000210951  | MIR320C2     | 17838 | 0.12 | miRNA                  | 18 | 21901690  | 21901699  | miR320c2                                                                   |
| 17298 | ENSG00000219552  | MIR92        | 17859 | 0.12 | miRNA                  | 1  | 18612380  | 186124035 | miR92                                                                      |
| 17325 | ENSG00000206480  | MIR1248      | 18028 | 0.12 | miRNA                  | 2  | 6933814   | 6933867   | miR1248                                                                    |
| 17461 | ENSG00000205514  | MIR548M      | 18707 | 0.12 | miRNA                  | 2  | 16645135  | 16645135  | miR548M                                                                    |
| 17651 | ENSG00000206234  | MIR4663      | 18236 | 0.12 | miRNA                  | 8  | 12422828  | 124228103 | miR4663                                                                    |
| 6607  | ENSG000002026490 |              | 8467  | 0.12 | misc. RNA              | 6  | 10862022  | 10862134  | Y RNA                                                                      |
| 9814  | ENSG00000202014  |              | 12045 | 0.12 | misc. RNA              | 19 | 47239669  | 47239669  | Y RNA                                                                      |
| 11249 | ENSG000002029373 |              | 13344 | 0.12 | misc. RNA              | 1  | 171461550 | 171461858 | RNA 75L, cytoplasmic 425, pseudogene                                       |
| 12144 | ENSG000002020978 |              | 14089 | 0.12 | misc. RNA              | 22 | 3017447   | 3017448   | Y RNA                                                                      |
| 11916 | ENSG00000204847  |              | 14497 | 0.12 | misc. RNA              | 4  | 69747177  | 69747174  | RNA 75L, cytoplasmic 220, pseudogene                                       |
| 13749 | ENSG000002043005 |              | 15248 | 0.12 | misc. RNA              | 4  | 2454818   | 2455004   | RNA 75L, cytoplasmic 16, pseudogene                                        |
| 13816 | ENSG00000202459  |              | 15332 | 0.12 | misc. RNA              | 14 | 103181725 | 103181832 | Y RNA                                                                      |
| 14278 | ENSG00000198890  |              | 15653 | 0.12 | misc. RNA              | 11 | 11189420  | 11189830  | Y RNA                                                                      |
| 15288 | ENSG00000201432  |              | 16487 | 0.12 | misc. RNA              | 7  | 3637276   | 3637387   | Y RNA                                                                      |
| 15376 | ENSG000002028946 |              | 16530 | 0.12 | misc. RNA              | 4  | 6708917   | 6708929   | Y RNA                                                                      |
| 15471 | ENSG000002028400 |              | 16533 | 0.12 | misc. RNA              | 10 | 3566187   | 3566187   | RNA 75L, cytoplasmic 481, pseudogene                                       |
| 15658 | ENSG000002025211 |              | 16751 | 0.12 | misc. RNA              | 8  | 47683019  | 4768337   | RNA 75L small nuclear pseudogene 116                                       |
| 15716 | ENSG00000204199  |              | 16796 | 0.12 | misc. RNA              | 16 | 75732431  | 75732728  | RNA 75L, cytoplasmic 520, pseudogene                                       |
| 15831 | ENSG00000204500  |              | 16858 | 0.12 | misc. RNA              | 16 | 236581    | 236581    | RNA 75L, cytoplasmic 27                                                    |
| 15900 | ENSG00000198444  |              | 16848 | 0.12 | misc. RNA              | 19 | 21918900  | 21918900  | Y RNA                                                                      |
| 16377 | ENSG00000204339  |              | 17306 | 0.12 | misc. RNA              | 3  | 18612672  | 18612777  | RNA 75L, cytoplasmic 738, pseudogene                                       |
| 16598 | ENSG00000200444  |              | 17634 | 0.12 | misc. RNA              | 7  | 8042041   | 8042041   | Y RNA                                                                      |
| 16844 | ENSG000002041032 |              | 17875 | 0.12 | misc. RNA              | 8  | 37766259  | 37766553  | RNA 75L, cytoplasmic 709, pseudogene                                       |
| 17044 | ENSG000002027450 |              | 17809 | 0.12 | misc. RNA              | 8  | 48717640  | 48717740  | Y RNA                                                                      |
| 17096 | ENSG00000201152  |              | 17829 | 0.12 | misc. RNA              | 12 | 2795825   | 2795825   | RNA 75L, nuclear pseudogene 15                                             |
| 17237 | ENSG000002068075 |              | 17849 | 0.12 | misc. RNA              | 1  | 3699379   | 3699379   | RNA 75L, cytoplasmic 574, pseudogene                                       |
| 17251 | ENSG000002041391 |              | 17950 | 0.12 | misc. RNA              | 6  | 14961248  | 14961278  | RNA 75L, cytoplasmic 234, pseudogene                                       |
| 17378 | ENSG00000201668  |              | 18028 | 0.12 | misc. RNA              | 12 | 69811628  | 69811628  | RNA 75L, cytoplasmic 816, pseudogene                                       |
| 17439 | ENSG000002072232 |              | 18097 | 0.12 | misc. RNA              | 9  | 73184087  | 73184377  | Metaxoon signal recognition particle RNA                                   |
| 17580 | ENSG000002029558 |              | 18135 | 0.12 | misc. RNA              | 2  | 62448524  | 62448806  | RNA 75L, cytoplasmic 51, pseudogene                                        |
| 17622 | ENSG00000202335  |              | 18232 | 0.12 | misc. RNA              | 14 | 23321625  | 23321625  | Y RNA                                                                      |
| 17666 | ENSG000002053075 | NRON         | 18194 | 0.12 | misc. RNA              | 9  | 12917020  | 12917089  | non-protein coding RNA, repressor of NFAT                                  |
| 17687 | ENSG000002041248 |              | 18219 | 0.12 | misc. RNA              | 9  | 12789438  | 12789735  | RNA 75L, cytoplasmic 302, pseudogene                                       |
| 17806 | ENSG00000203358  |              | 18285 | 0.12 | misc. RNA              | 11 | 1155835   | 1155835   | RNA 75L, cytoplasmic 815, pseudogene                                       |
| 17871 | ENSG000002041291 |              | 18298 | 0.12 | misc. RNA              | 5  | 14603586  | 14603586  | RNA 75L, cytoplasmic 791, pseudogene                                       |
| 18286 | ENSG000002042827 |              | 18720 | 0.12 | misc. RNA              | 1  | 10878893  | 10877170  | RNA 75L, cytoplasmic 814, pseudogene                                       |
| 18411 | ENSG00000201688  |              | 18862 | 0.12 | processed pseudogene   | 12 | 11088212  | 11088212  | ribosomal protein L13 pseudogene 49                                        |
| 4828  | ENSG000002025558 |              | 7588  | 0.12 | processed pseudogene   | 3  | 37176149  | 37176593  | ubiquitin-conjugating enzyme E2D 3 pseudogene 2                            |
| 4671  | ENSG000002025674 |              | 8459  | 0.12 | processed pseudogene   | 1  | 235901305 | 235902289 | lactate dehydrogenase A pseudogene 2                                       |
| 7920  | ENSG000002025551 |              | 12028 | 0.12 | processed pseudogene   | 8  | 12066258  | 12066258  | superoxide dismutase 1, soluble pseudogene 3                               |
| 10357 | ENSG00000113700  |              | 12613 | 0.12 | processed pseudogene   | 10 | 74765591  | 74766153  | ribosomal protein L17 pseudogene 50                                        |
| 11167 | ENSG000002023416 |              | 13273 | 0.12 | processed pseudogene   | 1  | 58521805  | 58522152  | ribosomal protein S26 pseudogene 15                                        |
| 12007 | ENSG00000204479  |              | 14474 | 0.12 | processed pseudogene   | 15 | 76526674  | 76526908  | heterogeneous nuclear ribonucleoprotein C pseudogene 3                     |
| 13784 | ENSG000002017371 |              | 15311 | 0.12 | processed pseudogene   | 8  | 3023174   | 3023209   | HRV 1, 1B specific factor 1 pseudogene 2                                   |
| 14227 | ENSG000002021390 |              | 15648 | 0.12 | processed pseudogene   | 20 | 18623428  | 18624728  | double homeobox A pseudogene 7                                             |
| 14238 | ENSG00000201514  |              | 15676 | 0.12 | processed pseudogene   | 17 | 2877267   | 2877305   | family with sequence similarity 58, member C, pseudogene                   |
| 14384 | ENSG00000204576  |              | 15777 | 0.12 | processed pseudogene   | 18 | 14823813  | 14823813  | protein tyrosine phosphatase 1                                             |
| 14873 | ENSG000002027889 |              | 16142 | 0.12 | processed pseudogene   | 17 | 18438871  | 18438775  | signal recognition particle 68Da pseudogene 2                              |
| 15062 | ENSG000002026991 |              | 16214 | 0.12 | processed pseudogene   | 9  | 3396896   | 3396896   | digoxinacetyltransferase subunit pseudogene 8                              |
| 15100 | ENSG000002041415 | MIR622       | 16220 | 0.12 | processed pseudogene   | 2  | 89882636  | 89882636  | miR622                                                                     |
| 15114 | ENSG000002027336 |              | 16338 | 0.12 | processed pseudogene   | 12 | 69551157  | 69551157  | PREDLI domain containing 2 pseudogene 1                                    |
| 15245 | ENSG000002028700 |              | 16497 | 0.12 | processed pseudogene   | 3  | 32071898  | 32072170  | ribosomal protein L17 pseudogene 49                                        |
| 15415 | ENSG000002021128 |              | 16524 | 0.12 | processed pseudogene   | 3  | 2385703   | 2385703   | tumor protein, transcriptionally controlled 1 pseudogene 7                 |
| 15460 | ENSG000002013598 |              | 16536 | 0.12 | processed pseudogene   | 2  | 18282539  | 18282705  | keratin 19 pseudogene 29                                                   |
| 15562 | ENSG000002018984 |              | 16677 | 0.12 | processed pseudogene   | 6  | 11354388  |           |                                                                            |

|       |                  |             |       |                      |                      |           |           |                                                                                                                                                                                                                                                    |                                                                                                                |
|-------|------------------|-------------|-------|----------------------|----------------------|-----------|-----------|----------------------------------------------------------------------------------------------------------------------------------------------------------------------------------------------------------------------------------------------------|----------------------------------------------------------------------------------------------------------------|
| 17250 | ENSG00000236062  | 17849       | 0.12  | processed_pseudogene | 3                    | 12299000  | 12299959  | glutathione S-transferase mu 5 pseudogene 1                                                                                                                                                                                                        |                                                                                                                |
| 17256 | ENSG00000232228  | 17853       | 0.12  | processed_pseudogene | 8                    | 7353287   | 7353287   | HAUS1 auxiliary complex subunit 1 pseudogene 3                                                                                                                                                                                                     |                                                                                                                |
| 17256 | ENSG00000211688  | 17855       | 0.12  | processed_pseudogene | 3                    | 168576447 | 168576918 | ribosomal protein L21 pseudogene 43                                                                                                                                                                                                                |                                                                                                                |
| 17265 | ENSG00000212326  | 17875       | 0.12  | processed_pseudogene | 15                   | 41052795  | 41053072  | SUMO2 pseudogene 15                                                                                                                                                                                                                                |                                                                                                                |
| 17265 | ENSG00000202465  | 17882       | 0.12  | processed_pseudogene | 12                   | 11768266  | 11768369  | transcription elongation factor 8 (SII), polypeptide 1 pseudogene 32                                                                                                                                                                               |                                                                                                                |
| 17302 | ENSG00000213253  | 17963       | 0.12  | processed_pseudogene | 9                    | 51327176  | 51327176  | ribosomal protein L7a.1 pseudogene 2                                                                                                                                                                                                               |                                                                                                                |
| 17305 | ENSG00000249987  | 17992       | 0.12  | processed_pseudogene | 19                   | 34513561  | 34513561  | ribosomal protein S4X pseudogene 20                                                                                                                                                                                                                |                                                                                                                |
| 17366 | ENSG00000234443  | 18037       | 0.12  | processed_pseudogene | 3                    | 155027216 | 155027216 | poly(A) binding protein, cytoplasmic 1 pseudogene 10                                                                                                                                                                                               |                                                                                                                |
| 17366 | ENSG00000202829  | 18038       | 0.12  | processed_pseudogene | 19                   | 32709431  | 32709431  | SCAM domain containing 3 pseudogene 14                                                                                                                                                                                                             |                                                                                                                |
| 17385 | ENSG00000219771  | 18045       | 0.12  | processed_pseudogene | 4                    | 46039225  | 46039225  | letratropeptide repeat domain 4 pseudogene 1                                                                                                                                                                                                       |                                                                                                                |
| 17434 | ENSG00000251008  | 18089       | 0.12  | processed_pseudogene | 4                    | 18192507  | 18192511  | oral cancer overexpressed 1 pseudogene 1                                                                                                                                                                                                           |                                                                                                                |
| 17508 | ENSG00000255070  | 18161       | 0.12  | processed_pseudogene | 17                   | 6225723   | 6225723   | basic transcription factor 3 pseudogene 14                                                                                                                                                                                                         |                                                                                                                |
| 17567 | ENSG00000224452  | 18190       | 0.12  | processed_pseudogene | 20                   | 30758193  | 30758193  | cysteine-rich protein-like B pseudogene 3                                                                                                                                                                                                          |                                                                                                                |
| 17628 | ENSG00000202108  | 18219       | 0.12  | processed_pseudogene | 1                    | 45624200  | 45624200  | ribosomal L24 domain containing 1 pseudogene 6                                                                                                                                                                                                     |                                                                                                                |
| 17657 | ENSG00000202102  | 18245       | 0.12  | processed_pseudogene | 13                   | 24340073  | 24340243  | Y box binding protein 1 pseudogene 8                                                                                                                                                                                                               |                                                                                                                |
| 17660 | ENSG00000242598  | 18248       | 0.12  | processed_pseudogene | 1                    | 82022806  | 82022317  | MT-CCO pseudogene 2                                                                                                                                                                                                                                |                                                                                                                |
| 17668 | ENSG00000180150  | 18334       | 0.12  | processed_pseudogene | 22                   | 4418424   | 44186652  | mediator complex subunit 28 pseudogene 8                                                                                                                                                                                                           |                                                                                                                |
| 17775 | ENSG00000228810  | 18339       | 0.12  | processed_pseudogene | 9                    | 17589159  | 17589159  | high mobility group nucleosomal binding domain 2 pseudogene 9                                                                                                                                                                                      |                                                                                                                |
| 17796 | ENSG00000225239  | 18350       | 0.12  | processed_pseudogene | 13                   | 114145021 | 114145480 | poly(A) binding protein, cytoplasmic 1 pseudogene 11                                                                                                                                                                                               |                                                                                                                |
| 17817 | ENSG00000210419  | 18363       | 0.12  | processed_pseudogene | 10                   | 212102538 | 212102538 | ribosomal protein L21 pseudogene 107                                                                                                                                                                                                               |                                                                                                                |
| 17828 | ENSG00000220371  | 18372       | 0.12  | processed_pseudogene | 13                   | 113784730 | 113786366 | keratin 18 pseudogene 12                                                                                                                                                                                                                           |                                                                                                                |
| 18094 | ENSG00000215223  | 18569       | 0.12  | processed_pseudogene | 6                    | 148799229 | 148801899 | lysyl-tRNA synthetase pseudogene 2                                                                                                                                                                                                                 |                                                                                                                |
| 18128 | ENSG00000208495  | 18597       | 0.12  | processed_pseudogene | 1                    | 45453277  | 45457508  | cytochrome P450, family 51, subfamily A, polypeptide 1 pseudogene 3                                                                                                                                                                                |                                                                                                                |
| 18172 | ENSG00000226411  | 18639       | 0.12  | processed_pseudogene | 3                    | 37831412  | 37831936  | mitochondrial ribosomal protein S17 pseudogene 1                                                                                                                                                                                                   |                                                                                                                |
| 18187 | ENSG00000211442  | 18655       | 0.12  | processed_pseudogene | 4                    | 84215832  | 84217190  | NADH dehydrogenase (ubiquinone) complex I, assembly factor 4 pseudogene 3                                                                                                                                                                          |                                                                                                                |
| 18188 | ENSG00000210899  | 18656       | 0.12  | processed_pseudogene | 1                    | 4421265   | 4421265   | La ribonucleoprotein domain family, member 18 pseudogene 1                                                                                                                                                                                         |                                                                                                                |
| 18341 | ENSG00000214988  | 18758       | 0.12  | processed_pseudogene | 4                    | 8341978   | 83412788  | ribosomal protein L7a pseudogene 26                                                                                                                                                                                                                |                                                                                                                |
| 18348 | ENSG00000202306  | 18826       | 0.12  | processed_pseudogene | 9                    | 94789780  | 94790100  | heat shock 10kDa protein 1 pseudogene 20                                                                                                                                                                                                           |                                                                                                                |
| 18350 | ENSG00000202829  | 18835       | 0.12  | processed_pseudogene | 15                   | 4421265   | 4421265   | ribosomal protein L16 pseudogene 1                                                                                                                                                                                                                 |                                                                                                                |
| 18574 | ENSG00000228655  | 18925       | 0.12  | processed_pseudogene | 9                    | 37879113  | 37879490  | phosphoribosylaminoimidazole carboxylase, phosphoribosylaminoimidazole succinoyltransferase and synthetase subunit 1                                                                                                                               |                                                                                                                |
| 18722 | ENSG00000243838  | 19033       | 0.12  | processed_pseudogene | 3                    | 181048712 | 181048028 | proteasease (prosome, megarin) 26S subunit, ATPase, 1 pseudogene 7                                                                                                                                                                                 |                                                                                                                |
| 18887 | ENSG00000211313  | 19165       | 0.12  | processed_pseudogene | 6                    | 126579067 | 126579051 | protein phosphatase 1, regulatory (inhibitor) subunit 14B pseudogene 5                                                                                                                                                                             |                                                                                                                |
| 14444 | ENSG00000187117  | LINC00483   | 15813 | 0.12                 | processed_transcript | 17        | 48838390  | 48844918                                                                                                                                                                                                                                           | long intergenic non-protein coding RNA 483                                                                     |
| 69988 | ENSG00000181861  | FRS1        | 23487 | 0.12                 | processed_transcript | 17        | 23487101  | 23487101                                                                                                                                                                                                                                           | CCN1 antisense RNA 1                                                                                           |
| 17494 | ENSG00000175417  | TMEM451-AS1 | 18128 | 0.12                 | processed_transcript | 1         | 15424480  | 15478960                                                                                                                                                                                                                                           | TMEM451 antisense RNA 1                                                                                        |
| 19304 | ENSG00000208126  | RBFADN      | 18492 | 0.12                 | processed_transcript | 18        | 77869600  | 77863362                                                                                                                                                                                                                                           | RBF family domain-anchored (non-protein coding)                                                                |
| 2237  | ENSG00000195895  | MRNIP       | 8213  | 0.12                 | protein_coding       | 16        | 16091489  | 16091489                                                                                                                                                                                                                                           | inhibitor 2                                                                                                    |
| 2871  | ENSG00000134028  | ADAMDEC1    | 4129  | 0.12                 | protein_coding       | 8         | 24241798  | 24263526                                                                                                                                                                                                                                           | ADAM-like, decayin 1                                                                                           |
| 2973  | ENSG00000132485  | IGJ         | 4628  | 0.12                 | protein_coding       | 4         | 7152258   | 71874374                                                                                                                                                                                                                                           | immunoglobulin J polypeptide, linker protein for immunoglobulin alpha and mu polypeptides                      |
| 3208  | ENSG00000189992  | PCOLCE1     | 5082  | 0.12                 | protein_coding       | 12        | 11747828  | 11757294                                                                                                                                                                                                                                           | pediculoglycanin protein 1                                                                                     |
| 3238  | ENSG00000189992  | TESC        | 5082  | 0.12                 | protein_coding       | 12        | 11747828  | 11757294                                                                                                                                                                                                                                           | foscatin                                                                                                       |
| 3284  | ENSG00000188781  | BC2L15      | 5151  | 0.12                 | protein_coding       | 1         | 114420790 | 114430189                                                                                                                                                                                                                                          | BC2L15                                                                                                         |
| 3338  | ENSG00000195895  | MIR59       | 8213  | 0.12                 | protein_coding       | 20        | 46032747  | 46032747                                                                                                                                                                                                                                           | matrix metalloproteinase 9 (gelatinase B), SCD2 gelatinase, 52kDa type IV collagenase                          |
| 3374  | ENSG00000189886  | MYO1A       | 5313  | 0.12                 | protein_coding       | 1         | 57442261  | 57442261                                                                                                                                                                                                                                           | myosin IA                                                                                                      |
| 3437  | ENSG00000162551  | ALPL        | 5408  | 0.12                 | protein_coding       | 1         | 21835888  | 21804405                                                                                                                                                                                                                                           | alkaline phosphatase, liver/bone/kidney                                                                        |
| 3455  | ENSG00000123372  | ALPL        | 5418  | 0.12                 | protein_coding       | 1         | 22626299  | 22668110                                                                                                                                                                                                                                           | complement component 1, D subcomponent, A chain                                                                |
| 3657  | ENSG00000192444  | KRT23       | 5718  | 0.12                 | protein_coding       | 17        | 39019848  | 39019848                                                                                                                                                                                                                                           | keratin 23 (epidermal desmosome inducible)                                                                     |
| 3791  | ENSG00000183019  | C1orf89     | 5263  | 0.12                 | protein_coding       | 19        | 774514    | 7744712                                                                                                                                                                                                                                            | chromosome 19 open reading frame 59                                                                            |
| 3934  | ENSG00000183687  | SLC1A2      | 6545  | 0.12                 | protein_coding       | 9         | 119913222 | 11992641                                                                                                                                                                                                                                           | solute carrier family 1 (copper transporter), member 2                                                         |
| 3986  | ENSG00000198164  | S100A4      | 6203  | 0.12                 | protein_coding       | 9         | 13301689  | 13302612                                                                                                                                                                                                                                           | S100 calcium binding protein A4                                                                                |
| 4019  | ENSG00000104903  | LVL1        | 6281  | 0.12                 | protein_coding       | 19        | 12309847  | 12313975                                                                                                                                                                                                                                           | lymphoblastic leukemia derived sequence 1                                                                      |
| 4186  | ENSG00000198734  | FB          | 6530  | 0.12                 | protein_coding       | 1         | 189483404 | 189559226                                                                                                                                                                                                                                          | coagulation factor V (prothrombin, soluble factor)                                                             |
| 4213  | ENSG0000017296   | L1YB        | 6543  | 0.12                 | protein_coding       | 6         | 6586341   | 6586341                                                                                                                                                                                                                                            | lymphocyte antigen 88                                                                                          |
| 4234  | ENSG00000172197  | MEGAT1      | 6675  | 0.12                 | protein_coding       | 6         | 20120535  | 20212870                                                                                                                                                                                                                                           | membrane bound O-acyltransferase domain containing 1                                                           |
| 4376  | ENSG00000189343  | PRKX        | 6907  | 0.12                 | protein_coding       | X         | 352241    | 3631849                                                                                                                                                                                                                                            | protein kinase, X-linked                                                                                       |
| 4376  | ENSG00000189343  | PRKX        | 6907  | 0.12                 | protein_coding       | X         | 352241    | 3631849                                                                                                                                                                                                                                            | frequently rearranged in advanced T-cell lymphomas 2                                                           |
| 4461  | ENSG00000198549  | NME         | 6928  | 0.12                 | protein_coding       | 3         | 184741913 | 184741913                                                                                                                                                                                                                                          | membrane metallo-endopeptidase                                                                                 |
| 4468  | ENSG00000198189  | SEMA4       | 6934  | 0.12                 | protein_coding       | 1         | 156117157 | 156147543                                                                                                                                                                                                                                          | sema domain, immunoglobulin domain (I), transmembrane domain (TM) and short cytoplasmic domain (semaphorin) 4A |
| 4489  | ENSG00000172081  | MOBA        | 6957  | 0.12                 | protein_coding       | 2         | 2071037   | 2069672                                                                                                                                                                                                                                            | MOB kinase activator 3A                                                                                        |
| 4510  | ENSG00000151226  | ACSL1       | 6957  | 0.12                 | protein_coding       | 4         | 18567849  | 18574792                                                                                                                                                                                                                                           | acyl-CoA synthetase long-chain family member 1                                                                 |
| 4710  | ENSG00000193444  | HLA-RS1     | 7320  | 0.12                 | protein_coding       | 1         | 32087016  | 32087016                                                                                                                                                                                                                                           | major histocompatibility complex, class II, DOA type 1                                                         |
| 4763  | ENSG00000177674  | AGTRAP      | 7307  | 0.12                 | protein_coding       | 1         | 1181641   | 11814859                                                                                                                                                                                                                                           | angiotensin II receptor-associated protein                                                                     |
| 4820  | ENSG00000088115  | PRESN1      | 7412  | 0.12                 | protein_coding       | 14        | 73631326  | 73690399                                                                                                                                                                                                                                           | presenilin 1                                                                                                   |
| 4904  | ENSG00000192624  | TRPA1       | 7603  | 0.12                 | protein_coding       | 20        | 18731643  | 18731643                                                                                                                                                                                                                                           | transient receptor potential alpha 20                                                                          |
| 5066  | ENSG00000152096  | PIMZ        | 7707  | 0.12                 | protein_coding       | 9         | 48770459  | 48776301                                                                                                                                                                                                                                           | signal-recognition protein alpha                                                                               |
| 5086  | ENSG00000257207  | 7724        | 0.12  | protein_coding       | 2                    | 11140511  | 11123052  | LIM and senescent cell antigen-like containing domain protein 3, Uncharacterized protein; cDNA FLJ39124, highly similar to Particularly interesting newCy-His protein; cDNA FLJ39124, highly similar to Particularly interesting newCy-His protein |                                                                                                                |
| 5078  | ENSG00000147065  | MSN         | 7741  | 0.12                 | protein_coding       | X         | 64868257  | 64861791                                                                                                                                                                                                                                           | mesen                                                                                                          |
| 5078  | ENSG00000147065  | MSN         | 7741  | 0.12                 | protein_coding       | X         | 64868257  | 64861791                                                                                                                                                                                                                                           | mesen                                                                                                          |
| 5192  | ENSG00000209203  | RNBP8       | 7807  | 0.12                 | protein_coding       | 15        | 1532023   | 1532023                                                                                                                                                                                                                                            | ring binding protein 8                                                                                         |
| 5197  | ENSG00000209987  | TNFSF12     | 7837  | 0.12                 | protein_coding       | 17        | 7452208   | 7448505                                                                                                                                                                                                                                            | tumor necrosis factor (ligand) superfamily, member 12                                                          |
| 5315  | ENSG00000190304  | PPM1F       | 8058  | 0.12                 | protein_coding       | 22        | 22273793  | 22287079                                                                                                                                                                                                                                           | protein phosphatase, Mg <sup>2+</sup> /Mn <sup>2+</sup> dependent, 1F                                          |
| 5351  | ENSG00000154515  | PPP1R1      | 8058  | 0.12                 | protein_coding       | 22        | 19328524  | 19328524                                                                                                                                                                                                                                           | signal transducer and activator of transcription 1, 3/like6                                                    |
| 5372  | ENSG00000099331  | MYO6B       | 8038  | 0.12                 | protein_coding       | 19        | 1718659   | 1718659                                                                                                                                                                                                                                            | myosin IXB                                                                                                     |
| 5437  | ENSG00000184400  | NOTCH1      | 8176  | 0.12                 | protein_coding       | 9         | 13938896  | 13943316                                                                                                                                                                                                                                           | notch 1                                                                                                        |
| 5437  | ENSG00000184400  | NOTCH1      | 8176  | 0.12                 | protein_coding       | 9         | 13938896  | 13943316                                                                                                                                                                                                                                           | notch 1                                                                                                        |
| 5437  | ENSG00000184400  | NOTCH1      | 8176  | 0.12                 | protein_coding       | 9         | 13938896  | 13943316                                                                                                                                                                                                                                           | notch 1                                                                                                        |
| 5493  | ENSG00000145928  | YTHDF2      | 8201  | 0.12                 | protein_coding       | 10        | 10180136  | 10180136                                                                                                                                                                                                                                           | lysine 3-monoxygenase/lysine 5-monoxygenase activation protein, beta                                           |
| 5590  | ENSG00000145928  | YTHDF2      | 8201  | 0.12                 | protein_coding       | 10        | 10180136  | 10180136                                                                                                                                                                                                                                           | lysine 3-monoxygenase/lysine 5-monoxygenase activation protein, beta                                           |
| 5608  | ENSG00000191929  | SCIMP       | 8354  | 0.12                 | protein_coding       | 15        | 5112256   | 5138185                                                                                                                                                                                                                                            | shibby domain containing 2                                                                                     |
| 5628  | ENSG00000144688  | CD38        | 8341  | 0.12                 | protein_coding       | 15        | 99630990  | 99745591                                                                                                                                                                                                                                           | glycoprotein IIb/IIIa receptor containing 2                                                                    |
| 5629  | ENSG00000157191  | NECAP2      | 8387  | 0.12                 | protein_coding       | 1         | 16787187  | 16789753                                                                                                                                                                                                                                           | NECAP endonuclease associated 2                                                                                |
| 5669  | ENSG00000198888  | CAZP2A      | 8412  | 0.12                 | protein_coding       | 7         | 118451124 | 118452103                                                                                                                                                                                                                                          | cooper protein (actin filament) muscle 2, zinc, alpha 2                                                        |
| 5769  | ENSG00000197010  | RHD         | 8534  | 0.12                 | protein_coding       | 1         | 25189888  | 25056938                                                                                                                                                                                                                                           | RN blood group, D antigen                                                                                      |
| 5787  | ENSG00000183308  | LINC0161    | 8525  | 0.12                 | protein_coding       | 12        | 25189888  | 25051268                                                                                                                                                                                                                                           | lymphoblastoid membrane protein                                                                                |
| 5796  | ENSG00000168876  | ANKRD49     | 8565  | 0.12                 | protein_coding       | 11        | 84228795  | 84232749                                                                                                                                                                                                                                           | ankyrin repeat domain 49                                                                                       |
| 5815  | ENSG00000191849  | BTBD1X      | 8732  | 0.12                 | protein_coding       | A         | 843135    | 84677780                                                                                                                                                                                                                                           | transducin (beta-like) X-linked                                                                                |
| 5867  | ENSG00000192321  | STIM1       | 8739  | 0.12                 | protein_coding       | A         | 3875737   | 41144297                                                                                                                                                                                                                                           | stromal interaction molecule 1                                                                                 |
| 5993  | ENSG00000168219  | BROX        | 8777  | 0.12                 | protein_coding       | 1         | 22288866  | 22289538                                                                                                                                                                                                                                           | BRO1 domain and CAXX motif containing                                                                          |
| 6027  | ENSG00000152520  | PANK3       | 8875  | 0.12                 | protein_coding       | 13        | 68712549  | 68694975                                                                                                                                                                                                                                           | PANK poly(A) specific ribonuclease subunit homolog 3 (cervicase)                                               |
| 6255  | ENSG00000192444  | CNRK2       | 8957  | 0.12                 | protein_coding       | 6         | 6980710   | 7087018                                                                                                                                                                                                                                            | cyclin dependent kinase 2, CAXX kinase 2                                                                       |
| 6255  | ENSG00000176871  | KIAA0232    | 8957  | 0.12                 | protein_coding       | 4         | 6781032   | 6885897                                                                                                                                                                                                                                            | KIAA0232                                                                                                       |
| 6258  | ENSG00000195992  | GPIIBPL1    | 9117  | 0.12                 | protein_coding       | 1         | 4602679   | 4615378                                                                                                                                                                                                                                            | GC-rich promoter binding protein 1-like 1                                                                      |
| 6407  | ENSG00000099310  | STC1A1      | 9118  | 0.12                 | protein_coding       | 1         | 13481781  | 13484249                                                                                                                                                                                                                                           | ST3 beta-galactosidase 3, alpha 2, sialyltransferase 1                                                         |
| 6429  | ENSG00000163406  | SLC1A2      | 9512  | 0.12                 | protein_coding       | 3         | 12181298  | 12182949                                                                                                                                                                                                                                           | solute carrier family 15 (glutamate transporter), member 2                                                     |
| 6754  | ENSG00000202828  | SNX1        | 9533  | 0.12                 | protein_coding       | 15        | 64383322  | 64383289                                                                                                                                                                                                                                           | sorting nexin 1                                                                                                |
| 6886  | ENSG00000190971  | TRIP4       | 9602  | 0.12                 | protein_coding       | 1         | 6461782   | 6461782                                                                                                                                                                                                                                            | thyroid hormone receptor interacting 4                                                                         |
| 6910  | ENSG00000197601  | FAR1        | 9679  | 0.12                 | protein_coding       | 11        | 13690217  | 13735893                                                                                                                                                                                                                                           | fatty acyl CoA reductase 1                                                                                     |
| 6918  | ENSG00000134061  | CD180       | 9687  | 0.12                 | protein_coding       | 5         | 66479103  | 66462027                                                                                                                                                                                                                                           | CD180 molecule                                                                                                 |
| 6986  | ENSG00000152351  | RNF20A      | 9744  | 0.12                 | protein_coding       | 5         | 80947298  | 8706434                                                                                                                                                                                                                                            | required for meiotic nuclear factor theta homolog A (S. cerevisiae)                                            |
| 6970  | ENSG00000218545  | RNF20A      | 9749  | 0.12                 | protein_coding       | 7         | 7680342   | 8043889                                                                                                                                                                                                                                            | ribosomal RNA 1                                                                                                |
| 7116  | ENSG00000080503  | SMARCA2     | 9876  | 0.12                 | protein_coding       | 9         | 2015342   | 2193624                                                                                                                                                                                                                                            | SWI/SNF related, matrix associated, actin dependent regulator of chromatin, subfamily A, member 2              |
| 7189  | ENSG00000112701  | SENP6       | 9934  | 0.12                 | protein_coding       | 6         | 7631225   | 7642789                                                                                                                                                                                                                                            | SUMO1/semin specific peptidase 6                                                                               |
| 7197  | ENSG00000138994  | TMO3D       | 9939  | 0.12                 | protein_coding       | 15        | 52171825  | 52284952                                                                                                                                                                                                                                           | tropomodulin 3 (ubiquitous)                                                                                    |
| 7418  | ENSG00000192317  | ATP1B       | 10157 | 0.12                 | protein_coding       | 1         | 181736984 | 181833980                                                                                                                                                                                                                                          | ATP-binding cassette, class 1, member 1B                                                                       |
| 7477  | ENSG00000132358  | RAP1GAP2    | 10229 | 0.12                 | protein_coding       | 7         | 2888350   | 2941033                                                                                                                                                                                                                                            | RAP1 GTPase activating protein 2                                                                               |
| 7575  | ENSG00000124406  | ATP8A1      | 10231 | 0.12                 | protein_coding       | 4         | 4241090   | 42699122                                                                                                                                                                                                                                           | ATPase, aminophospholipid transporter (APL), class I, type 8A, member 1                                        |
| 7697  | ENSG000002024516 | MICB        | 10483 | 0.12                 | protein_coding       | 6         | 3142858   | 3                                                                                                                                                                                                                                                  |                                                                                                                |



|       |                  |           |       |    |      |                |    |           |           |                                                                                 |
|-------|------------------|-----------|-------|----|------|----------------|----|-----------|-----------|---------------------------------------------------------------------------------|
| 11532 | ENSG00000197183  | C20orf112 | 13606 | 5  | 0.12 | protein_coding | 20 | 10300862  | 31172876  | chromosome 20 open reading frame 112                                            |
| 11644 | ENSG0000017178   | VPS33A    | 13629 | 9  | 0.12 | protein_coding | 12 | 12252811  | 12252868  | vacuolar protein sorting 33 homolog A (S. cerevisiae)                           |
| 11761 | ENSG00000112584  | FAM120B   | 13752 | 3  | 0.12 | protein_coding | 6  | 15709791  | 17071033  | family with sequence similarity 120B                                            |
| 12010 | ENSG00000104938  | CLIC4M    | 14435 | 1  | 0.12 | protein_coding | 9  | 782035    | 783441    | C-type lectin domain family 4, member M                                         |
| 12612 | ENSG00000131743  | FAM20A    | 14439 | 9  | 0.12 | protein_coding | 6  | 43016251  | 42055199  | TAF8 RNA polymerase II, TATA box binding protein (TBP)-associated factor, 43kDa |
| 12662 | ENSG00000102953  | CANX      | 14439 | 3  | 0.12 | protein_coding | 7  | 6651254   | 6651254   | family with sequence similarity 25, member A                                    |
| 12741 | ENSG00000135773  | FAM20B    | 14537 | 3  | 0.12 | protein_coding | 1  | 23083130  | 23083749  | calpain 9                                                                       |
| 12961 | ENSG00000225885  | UNC119B   | 14639 | 9  | 0.12 | protein_coding | 8  | 11928437  | 11928438  | Uncharacterized protein                                                         |
| 13008 | ENSG00000198178  | FLC4C     | 14746 | 1  | 0.12 | protein_coding | 12 | 117938427 | 117938428 | flavin containing monooxygenase 4                                               |
| 13188 | ENSG00000198178  | CLEC4C    | 14854 | 7  | 0.12 | protein_coding | 12 | 788011    | 7904201   | C-type lectin domain family 4, member C                                         |
| 13341 | ENSG00000174191  | MGA       | 14878 | 6  | 0.12 | protein_coding | 15 | 4191342   | 4206214   | MGA, MAX, aminoglycoside phosphotransferase III                                 |
| 13370 | ENSG00000125288  | SH3BP2    | 15001 | 4  | 0.12 | protein_coding | 5  | 8345390   | 8345390   | SH3 domain-containing protein repeats 1                                         |
| 13457 | ENSG00000228157  | HLG       | 15070 | 2  | 0.12 | protein_coding | 17 | 18996287  | 18996150  | Uncharacterized protein ENSP0000026042                                          |
| 13527 | ENSG00000194432  | HLG       | 15119 | 1  | 0.12 | protein_coding | 8  | 79581978  | 79711738  | interleukin 7                                                                   |
| 13544 | ENSG00000220486  | SLC22A1   | 15122 | 2  | 0.12 | protein_coding | 5  | 13810285  | 13810282  | solute carrier family 22 (anionic acid transporter), member 1                   |
| 13584 | ENSG00000257743  | SLC22A1   | 15157 | 9  | 0.12 | protein_coding | 7  | 141811549 | 141822124 | Putative inactive maltase-glucoamylase-like protein LOC93432                    |
| 13645 | ENSG00000226274  | OR13A1    | 15207 | 8  | 0.12 | protein_coding | 10 | 45788102  | 45811058  | olfactory receptor, family 13, subfamily A, member 1                            |
| 13803 | ENSG00000171629  | ROR3      | 15232 | 4  | 0.12 | protein_coding | 1  | 114431719 | 211489712 | ROR3, TGF-beta receptor 3                                                       |
| 14038 | ENSG00000500730  | TNIP3     | 15487 | 9  | 0.12 | protein_coding | 4  | 12205263  | 122148621 | TNF-AP3 interacting protein 3                                                   |
| 14070 | ENSG00000168961  | MS4A15    | 15524 | 4  | 0.12 | protein_coding | 11 | 60524426  | 60544205  | membrane-spanning 4-domains, subfamily A, member 15                             |
| 14297 | ENSG00000202525  | PCSK2J    | 15592 | 4  | 0.12 | protein_coding | 7  | 10217805  | 10217103  | polysome RNA1 (1.0kA directed polypeptide 3)                                    |
| 14381 | ENSG00000109867  | SLC29A9   | 15749 | 4  | 0.12 | protein_coding | 4  | 8772777   | 10036580  | solute carrier family 2 (facilitated glucose transporter), member 9             |
| 14425 | ENSG00000107738  | CDH23     | 15786 | 6  | 0.12 | protein_coding | 10 | 73156991  | 73257032  | cadherin-related 23                                                             |
| 14510 | ENSG00000105722  | ANKK1     | 15922 | 2  | 0.12 | protein_coding | 17 | 4921203   | 4132724   | ankyrin repeat and POGZ domain containing 1                                     |
| 14520 | ENSG00000158958  | GALK2     | 15971 | 3  | 0.12 | protein_coding | 15 | 4844783   | 48600606  | galactokinase 2                                                                 |
| 14993 | ENSG00000201857  | MIA       | 15925 | 4  | 0.12 | protein_coding | 9  | 41277523  | 41283393  | melanoma inhibitory activity                                                    |
| 14841 | ENSG00000188975  | L1R84O4   | 15995 | 1  | 0.12 | protein_coding | 18 | 12213457  | 12825752  | low density lipoprotein receptor class A domain containing 4                    |
| 14902 | ENSG00000198193  | ZNF26     | 16168 | 1  | 0.12 | protein_coding | 12 | 133582951 | 133589154 | zinc finger protein 26                                                          |
| 14949 | ENSG00000118155  | OTOF      | 16200 | 8  | 0.12 | protein_coding | 2  | 2868071   | 28781586  | otoferlin                                                                       |
| 15022 | ENSG00000178171  | ZNF630    | 16207 | 8  | 0.12 | protein_coding | 16 | 8662165   | 8662165   | zinc finger protein 380D                                                        |
| 15035 | ENSG00000181552  | EMD3B     | 16287 | 9  | 0.12 | protein_coding | 14 | 21236588  | 21238107  | epididymal protein 3B                                                           |
| 15094 | ENSG00000202070  | TME253    | 16324 | 4  | 0.12 | protein_coding | 14 | 21567096  | 21571883  | transmembrane protein 253                                                       |
| 15128 | ENSG00000242418  | HLG       | 16333 | 1  | 0.12 | protein_coding | 14 | 6963125   | 6963125   | hypoxanthine kinase 1                                                           |
| 15301 | ENSG00000178124  | DLU1      | 16474 | 1  | 0.12 | protein_coding | 13 | 50656307  | 51297372  | deleted in lymphocytic leukemia 1 (non-protein coding)                          |
| 15327 | ENSG000002024671 | IL31      | 16492 | 6  | 0.12 | protein_coding | 12 | 12265677  | 12265678  | interleukin 31                                                                  |
| 15338 | ENSG00000105859  | TRKX      | 16512 | 1  | 0.12 | protein_coding | 16 | 3385129   | 34874397  | Ankyrin repeat, SOCS box protein 3                                              |
| 15351 | ENSG00000124003  | MCGA1     | 16509 | 4  | 0.12 | protein_coding | 2  | 223536505 | 223547449 | monoacylglycerol O-acyltransferase 1                                            |
| 15383 | ENSG00000147038  | LANCL3    | 16512 | 1  | 0.12 | protein_coding | 4  | 37430822  | 37433747  | lanthanum chloride synthase component Clike 3 (bacterial)                       |
| 15528 | ENSG00000187803  | TRKX      | 16512 | 1  | 0.12 | protein_coding | 11 | 673821    | 673821    | Tan1                                                                            |
| 15678 | ENSG00000197915  | HNRN      | 16704 | 9  | 0.12 | protein_coding | 1  | 15218458  | 15219689  | heteremin                                                                       |
| 15707 | ENSG000002015790 | SLC3E2    | 16787 | 8  | 0.12 | protein_coding | 1  | 1862827   | 1874731   | solute carrier family 35, member E2                                             |
| 15745 | ENSG00000192670  | TME253    | 16787 | 8  | 0.12 | protein_coding | 17 | 12348070  | 12348070  | transmembrane protein 116                                                       |
| 15876 | ENSG00000122133  | PAEP      | 16925 | 1  | 0.12 | protein_coding | 9  | 138453962 | 138458901 | progestagen-associated endometrial protein                                      |
| 15881 | ENSG00000120242  | IFNA      | 16931 | 5  | 0.12 | protein_coding | 9  | 21409146  | 21410184  | interferon, alpha 8                                                             |
| 15886 | ENSG00000204109  | ZNF81     | 16939 | 9  | 0.12 | protein_coding | 5  | 17226948  | 17226949  | Uncharacterized protein                                                         |
| 15912 | ENSG00000198975  | ZNF81     | 16939 | 9  | 0.12 | protein_coding | 18 | 13369340  | 13370198  | zinc finger protein 81                                                          |
| 15916 | ENSG00000120332  | TNN       | 16953 | 2  | 0.12 | protein_coding | 1  | 17503694  | 17511702  | tenascin N                                                                      |
| 15986 | ENSG00000215918  | DNAH17    | 17019 | 4  | 0.12 | protein_coding | 18 | 3961729   | 3730141   | deoxyribonuclease 1                                                             |
| 16000 | ENSG00000186716  | TDCC      | 17021 | 9  | 0.12 | protein_coding | 12 | 38792153  | 38973810  | indoleamine 2,3-dioxygenase 2                                                   |
| 16007 | ENSG00000159723  | AGRP      | 17087 | 1  | 0.12 | protein_coding | 16 | 67516474  | 67517716  | agouti related protein homolog (mouse)                                          |
| 16071 | ENSG00000300678  | MYH11     | 17089 | 9  | 0.12 | protein_coding | 17 | 10217401  | 10217647  | myosin, heavy chain 11, skeletal muscle                                         |
| 16101 | ENSG00000190366  | PRK3      | 17100 | 3  | 0.12 | protein_coding | 16 | 48713362  | 48713363  | protein kinase, cdc 45                                                          |
| 16102 | ENSG00000174900  | CASA      | 17110 | 2  | 0.12 | protein_coding | 16 | 87921625  | 87970135  | carbonic anhydrase VA, mitochondrial                                            |
| 16133 | ENSG00000231213  | PLSCR3    | 17131 | 4  | 0.12 | protein_coding | 3  | 14629442  | 146324003 | phospholipid scramblase family, member 3                                        |
| 16161 | ENSG00000192661  | NFPIB     | 17132 | 1  | 0.12 | protein_coding | 17 | 28761318  | 28774128  | nuclear pore complex interacting protein family, member B9                      |
| 16240 | ENSG00000184766  | CTGF5     | 17127 | 1  | 0.12 | protein_coding | 7  | 48075108  | 48100901  | phosphoglycolipase 5A, mitochondrial                                            |
| 16277 | ENSG00000193331  | ZNF781    | 17229 | 1  | 0.12 | protein_coding | 7  | 12725046  | 12725082  | zinc finger protein 781                                                         |
| 16327 | ENSG00000193038  | OTX2      | 17239 | 9  | 0.12 | protein_coding | 17 | 7260370   | 7260370   | paired box 4                                                                    |
| 16333 | ENSG00000198278  | GTF2R2    | 17288 | 3  | 0.12 | protein_coding | 7  | 74210483  | 74287847  | GTF2 repeat domain containing 2                                                 |
| 16351 | ENSG00000198381  | ZNF781    | 17288 | 6  | 0.12 | protein_coding | 9  | 38158882  | 38182223  | zinc finger protein 781                                                         |
| 16414 | ENSG00000198381  | ZNF781    | 17288 | 6  | 0.12 | protein_coding | 9  | 38158882  | 38221148  | zinc finger protein 781                                                         |
| 16421 | ENSG00000204514  | ZNF814    | 17374 | 4  | 0.12 | protein_coding | 9  | 58380099  | 58404440  | zinc finger protein 814                                                         |
| 16472 | ENSG00000188528  | ZNF814    | 17374 | 4  | 0.12 | protein_coding | 9  | 15726029  | 15741448  | zinc finger protein 814                                                         |
| 16483 | ENSG00000192488  | ZNF814    | 17374 | 4  | 0.12 | protein_coding | 9  | 112261498 | 112416455 | cytochrome P450, zinc family 4, subfamily F, polypeptide 8                      |
| 16490 | ENSG00000187858  | TEKT1     | 17391 | 3  | 0.12 | protein_coding | 17 | 6694242   | 6735800   | H2O2OAS7-like Uncharacterized protein                                           |
| 16519 | ENSG00000187858  | ZNF814    | 17391 | 3  | 0.12 | protein_coding | 15 | 23900812  | 23970370  | transmembrane protein 202                                                       |
| 16520 | ENSG00000194911  | CGAL1     | 17426 | 7  | 0.12 | protein_coding | 15 | 22804193  | 22804193  | protein A8, member 4                                                            |
| 16539 | ENSG00000188678  | MAGE2     | 17426 | 5  | 0.12 | protein_coding | 4  | 75002823  | 75005079  | melanoma antigen family E, 2                                                    |
| 16610 | ENSG00000154025  | SLC5A10   | 17428 | 5  | 0.12 | protein_coding | 17 | 18583558  | 18629508  | solute carrier family 5 (sodium/sugar cotransporter), member 10                 |
| 16618 | ENSG00000157148  | TRAF3     | 17428 | 7  | 0.12 | protein_coding | 11 | 11442180  | 11442180  | RNA binding motif, X-linked 3                                                   |
| 16633 | ENSG00000184022  | CR2T10    | 17502 | 2  | 0.12 | protein_coding | 1  | 24875052  | 24875100  | olfactory receptor, type 2, subfamily 1, member 10                              |
| 16640 | ENSG000001921381 | TASR9     | 17508 | 7  | 0.12 | protein_coding | 12 | 19961893  | 19962787  | taste receptor, type 2, member 9                                                |
| 16646 | ENSG000001921381 | TASR9     | 17508 | 7  | 0.12 | protein_coding | 12 | 19961893  | 19962787  | taste receptor, type 2, member 9                                                |
| 16660 | ENSG00000142951  | SPINT4    | 17524 | 4  | 0.12 | protein_coding | 20 | 4435090   | 44354469  | serine peptidase inhibitor, Kunitz type 4                                       |
| 16668 | ENSG00000192914  | SHBG      | 17533 | 6  | 0.12 | protein_coding | 17 | 7517882   | 7518370   | sex hormone-binding globulin                                                    |
| 16708 | ENSG0000017752   | ZNF814    | 17533 | 6  | 0.12 | protein_coding | 18 | 1468218   | 14683313  | Yin-Yang family, member 7                                                       |
| 16816 | ENSG00000193843  | C15orf52  | 17654 | 7  | 0.12 | protein_coding | 15 | 9301484   | 9304347   | chromosome 15 open reading frame 32                                             |
| 16822 | ENSG00000192400  | ZNF549    | 17659 | 9  | 0.12 | protein_coding | 9  | 58038993  | 58088910  | zinc finger protein 549                                                         |
| 16885 | ENSG00000185880  | CY18F10   | 17659 | 1  | 0.12 | protein_coding | 12 | 1627895   | 1627895   | chromosome 1 open reading frame 110                                             |
| 16897 | ENSG00000120088  | CHR1      | 17705 | 5  | 0.12 | protein_coding | 17 | 14365087  | 14365087  | corbinin releasing hormone receptor 1                                           |
| 16902 | ENSG00000171448  | RSL1      | 17705 | 5  | 0.12 | protein_coding | 1  | 18241256  | 18252934  | regulator of G protein signaling like 1                                         |
| 16968 | ENSG00000125753  | COL6A6    | 17705 | 5  | 0.12 | protein_coding | 11 | 13008159  | 13008159  | collagen protein VI, alpha 6                                                    |
| 17014 | ENSG000002023976 | ZNF789    | 17789 | 9  | 0.12 | protein_coding | 10 | 11170129  | 11171349  | Uncharacterized protein                                                         |
| 17051 | ENSG00000198556  | ZNF789    | 17789 | 14 | 0.12 | protein_coding | 7  | 9907044   | 99101273  | zinc finger protein 789                                                         |
| 17098 | ENSG000002023976 | ZNF789    | 17789 | 14 | 0.12 | protein_coding | 8  | 56047763  | 66549138  | Uncharacterized protein                                                         |
| 17102 | ENSG00000188528  | GLRA4     | 17822 | 5  | 0.12 | protein_coding | 8  | 10296183  | 10296343  | oligine receptor, alpha 4                                                       |
| 17118 | ENSG00000184029  | DISCRA    | 17861 | 8  | 0.12 | protein_coding | 21 | 39323728  | 39493454  | Down syndrome critical region gene 4                                            |
| 17201 | ENSG00000141735  | HEM1      | 17839 | 6  | 0.12 | protein_coding | 3  | 5866968   | 60222368  | hematopoietic stem cell protein 1                                               |
| 17344 | ENSG00000200143  | ARSND2    | 18032 | 1  | 0.12 | protein_coding | 6  | 34821376  | 34828104  | AT rich domain 3 (BRICH7-like)                                                  |
| 17373 | ENSG00000138813  | C4orf17   | 18039 | 4  | 0.12 | protein_coding | 4  | 10045161  | 10046380  | chromosome 4 open reading frame 17                                              |
| 17438 | ENSG00000206522  | PHF10     | 18026 | 6  | 0.12 | protein_coding | 4  | 10846862  |           |                                                                                 |

|       |                  |              |         |      |                                     |    |           |           |                                                                               |
|-------|------------------|--------------|---------|------|-------------------------------------|----|-----------|-----------|-------------------------------------------------------------------------------|
| 12467 | ENSG00000252847  |              | 14331.3 | 0.12 | snRNA                               | 9  | 98622186  | 98622298  | RNA_U2 small nuclear 46, pseudogene                                           |
| 13385 | ENSG00000252848  |              | 15684.9 | 0.12 | snRNA                               | 6  | 105214697 | 105214697 | RNA_U6 small nuclear 897, pseudogene                                          |
| 13418 | ENSG00000252578  |              | 15037.6 | 0.12 | snRNA                               | 1  | 23450446  | 23450446  | RNA_U6 small nuclear 135, pseudogene                                          |
| 14208 | ENSG00000212259  |              | 15631.3 | 0.12 | snRNA                               | 5  | 94857073  | 94857179  | RNA_U6 small nuclear 308, pseudogene                                          |
| 15504 | ENSG00000201543  |              | 16629   | 0.12 | snRNA                               | 3  | 20036296  | 20036417  | RNA_U6 small nuclear 86, pseudogene                                           |
| 15811 | ENSG00000251985  |              | 16972.6 | 0.12 | snRNA                               | 22 | 46020411  | 46020512  | RNA_U6 small nuclear 119, pseudogene                                          |
| 15886 | ENSG00000222896  |              | 16933.7 | 0.12 | snRNA                               | 1  | 231806361 | 231806361 | RNA_USA small nuclear 5, pseudogene                                           |
| 16286 | ENSG00000252528  | RNU6-6P      | 17225.4 | 0.12 | snRNA                               | 13 | 30855962  | 30856006  | RNA_U6 small nuclear 64, pseudogene                                           |
| 16291 | ENSG00000203388  |              | 17230.7 | 0.12 | snRNA                               | 12 | 31548934  | 31548935  | RNA_U6 small nuclear 616, pseudogene                                          |
| 16371 | ENSG00000198482  |              | 17259   | 0.12 | snRNA                               | 16 | 10590129  | 10590129  | RNA_U6 small nuclear 633, pseudogene                                          |
| 16385 | ENSG00000245013  |              | 17317.6 | 0.12 | snRNA                               | 17 | 58719994  | 58719998  | RNA_U6 small nuclear 624, pseudogene                                          |
| 17346 | ENSG00000252525  |              | 18023.8 | 0.12 | snRNA                               | 21 | 38417630  | 38417638  | RNA_U6 small nuclear 696, pseudogene                                          |
| 17404 | ENSG00000202029  |              | 18058   | 0.12 | snRNA                               | 2  | 158883548 | 158883554 | RNA_U6 small nuclear 580, pseudogene                                          |
| 17448 | ENSG00000206776  |              | 18063.6 | 0.12 | snRNA                               | 16 | 15971020  | 15971123  | RNA_U6 small nuclear 213, pseudogene                                          |
| 17478 | ENSG00000201926  |              | 18118.5 | 0.12 | snRNA                               | 22 | 26587665  | 26587796  | RNA_U6 small nuclear 1215, pseudogene                                         |
| 17504 | ENSG00000202087  |              | 18137.2 | 0.12 | snRNA                               | 10 | 30584848  | 30588022  | RNA_U6 small nuclear 598, pseudogene                                          |
| 1283  | ENSG00000211799  |              | 2132.2  | 0.12 | TR_V_gene                           | 14 | 22475751  | 22476420  | T cell receptor alpha variable 19                                             |
| 9193  | ENSG00000211746  |              | 3427.6  | 0.12 | TR_V_gene                           | 21 | 142230663 | 142237048 | T cell receptor beta variable 19                                              |
| 11109 | ENSG00000211813  |              | 13244.6 | 0.12 | TR_V_gene                           | 14 | 22675418  | 22676025  | T cell receptor alpha variable 34                                             |
| 16586 | ENSG00000239944  |              | 17437.7 | 0.12 | TR_V_pseudogene                     | 7  | 142245303 | 142245572 | T cell receptor beta variable 8.2 (pseudogene)                                |
| 14077 | ENSG00000234709  |              | 15527.1 | 0.12 | transcribed_unprocessed_pseudo_gene | 9  | 102705683 | 102761351 | UPF3A pseudogene 3                                                            |
| 16026 | ENSG00000269904  | MAP2K4P1     | 17051.6 | 0.12 | transcribed_unprocessed_pseudo_gene | X  | 72744111  | 72782921  | mitogen-activated protein kinase kinase 4 pseudogene 1                        |
| 18410 | ENSG00000224886  |              | 17328.1 | 0.12 | transcribed_unprocessed_pseudo_gene | 10 | 81444250  | 81444739  | BEM domain containing 3 pseudogene 3                                          |
| 16848 | ENSG00000270938  |              | 17515.9 | 0.12 | transcribed_unprocessed_pseudo_gene | 14 | 103745560 | 103746292 | RAP2C pseudogene 1                                                            |
| 4567  | ENSG00000225492  | GBP1P1       | 7070.2  | 0.12 | transcribed_unprocessed_pseudo_gene | 1  | 89873238  | 89891802  | guanylate binding protein 1, interferon-inducible pseudogene 1                |
| 9799  | ENSG000000099251 | HSD17B7P2    | 12192.1 | 0.12 | transcribed_unprocessed_pseudo_gene | 10 | 38645305  | 38667433  | hydroxysteroid (17 beta) dehydrogenase 7 pseudogene 2                         |
| 13062 | ENSG00000253981  |              | 14767.2 | 0.12 | transcribed_unprocessed_pseudo_gene | 8  | 8093525   | 8102189   | asparagine-linked glycosylation 1-like 13, pseudogene                         |
| 14686 | ENSG00000214856  | KRT16P1      | 15997.1 | 0.12 | transcribed_unprocessed_pseudo_gene | 17 | 18335365  | 18346209  | keratin 16 pseudogene 1                                                       |
| 15291 | ENSG00000224060  |              | 16468.1 | 0.12 | transcribed_unprocessed_pseudo_gene | 9  | 14460540  | 14468226  | arylsulfatase E pseudogene 1                                                  |
| 15349 | ENSG00000241717  | LOC100289038 | 16508.5 | 0.12 | transcribed_unprocessed_pseudo_gene | 22 | 17170993  | 17185367  | von Willebrand factor pseudogene 1                                            |
| 15645 | ENSG00000260518  |              | 16744.7 | 0.12 | transcribed_unprocessed_pseudo_gene | 16 | 33488492  | 33500971  | BMS1 pseudogene 8                                                             |
| 15883 | ENSG00000255277  | ABCC6P2      | 16932.7 | 0.12 | transcribed_unprocessed_pseudo_gene | 16 | 14914649  | 14918363  | ATP-binding cassette, sub-family C, member 6 pseudogene 2                     |
| 16011 | ENSG00000218052  |              | 17039.5 | 0.12 | transcribed_unprocessed_pseudo_gene | 15 | 85738600  | 85873965  | ADAMTS2 pseudogene 4                                                          |
| 16509 | ENSG00000229028  |              | 17404   | 0.12 | transcribed_unprocessed_pseudo_gene | 17 | 38873487  | 38878184  | keratin 22S pseudogene                                                        |
| 16686 | ENSG00000214617  | SLC6A10P     | 17532.9 | 0.12 | transcribed_unprocessed_pseudo_gene | 16 | 32888790  | 32894622  | solute carrier family 6 (neurotransmitter transporter), member 10, pseudogene |
| 16999 | ENSG00000259156  | CHEK2P2      | 17755.5 | 0.12 | transcribed_unprocessed_pseudo_gene | 15 | 20487997  | 20496839  | checkpoint kinase 2 pseudogene 2                                              |
| 17107 | ENSG00000240268  |              | 17856   | 0.12 | transcribed_unprocessed_pseudo_gene | 7  | 141940559 | 141946886 | monooxygenase, DBH-like 2, pseudogene                                         |
| 17193 | ENSG00000226435  | ANKRD18DP    | 17916.4 | 0.12 | transcribed_unprocessed_pseudo_gene | 3  | 197780393 | 197807591 | ankyrin repeat domain 18D, pseudogene                                         |
| 17375 | ENSG00000234667  |              | 18040.5 | 0.12 | untranscribed_pseudogene            | 3  | 49910780  | 49915413  | actin, beta pseudogene 13                                                     |
| 17434 | ENSG00000229261  |              | 18042.6 | 0.12 | untranscribed_pseudogene            | 6  | 27001214  | 27002089  | vomeronasal 1 receptor 12 pseudogene                                          |
| 18087 | ENSG00000202079  | MYH16        | 18573.7 | 0.12 | untranscribed_pseudogene            | 7  | 98836417  | 98836783  | myosin, heavy chain 16 pseudogene                                             |
| 19170 | ENSG00000236083  |              | 19594.9 | 0.12 | untranscribed_pseudogene            | 9  | 35859059  | 35859880  | olfactory receptor, family 13, subfamily E, member 1 pseudogene               |
| 9230  | ENSG00000252526  |              | 19618.5 | 0.12 | untranscribed_pseudogene            | 8  | 29611676  | 29612001  | major histocompatibility complex, class I, U (pseudogene)                     |
| 8724  | ENSG00000235254  |              | 11307.8 | 0.12 | untranscribed_pseudogene            | X  | 148850528 | 148850528 | transmembrane protein 185A pseudogene 1                                       |
| 13852 | ENSG00000196301  |              | 15363.5 | 0.12 | untranscribed_pseudogene            | 6  | 32473598  | 32481277  | major histocompatibility complex, class II, DR beta 9 (pseudogene)            |
| 15360 | ENSG00000269902  |              | 16917.6 | 0.12 | untranscribed_pseudogene            | 17 | 58053370  | 58079745  | DEC1 (also known as Hlx) box polypeptide 40 pseudogene 1                      |
| 16513 | ENSG00000250794  |              | 17404.6 | 0.12 | untranscribed_pseudogene            | 8  | 12278541  | 12282059  | asparagine-linked glycosylation 1-like 12, pseudogene                         |
| 17047 | ENSG00000254722  |              | 17812.8 | 0.12 | untranscribed_pseudogene            | 11 | 56098823  | 56099864  | family with sequence similarity 8, member A2 pseudogene                       |
| 17448 | ENSG00000202143  |              | 17513.4 | 0.12 | untranscribed_pseudogene            | 6  | 2978162   | 29781141  | HLA complex group 4 pseudogene 8                                              |
| 17307 | ENSG00000168492  |              | 18055.1 | 0.12 | untranscribed_pseudogene            | 11 | 3431582   | 3443726   | family with sequence similarity 86, member G, pseudogene                      |
| 17438 | ENSG00000254748  |              | 18097.9 | 0.12 | untranscribed_pseudogene            | 11 | 86735625  | 86736619  | heterogeneous nuclear ribonucleoprotein C pseudogene 8                        |
| 17563 | ENSG00000202084  |              | 18188.5 | 0.12 | untranscribed_pseudogene            | 16 | 1338352   | 1338838   | lysozyme pseudogene 2                                                         |
| 18979 | ENSG00000241278  |              | 19251.6 | 0.12 | untranscribed_pseudogene            | 3  | 12560706  | 12562315  | ectonucleotide pyrophosphatase/phosphodiesterase 7 pseudogene 4               |
| 3333  | ENSG00000272098  |              | 5244.9  | 0.12 |                                     |    |           |           |                                                                               |
| 3415  | ENSG00000258624  |              | 5323.2  | 0.12 |                                     |    |           |           |                                                                               |
| 3449  | ENSG00000259375  |              | 5433.2  | 0.12 |                                     |    |           |           |                                                                               |
| 4158  | ENSG00000227981  |              | 6477.4  | 0.12 |                                     |    |           |           |                                                                               |
| 4220  | ENSG00000287438  |              | 6554.4  | 0.12 |                                     |    |           |           |                                                                               |
| 4841  | ENSG00000258148  |              | 7435.1  | 0.12 |                                     |    |           |           |                                                                               |
| 5286  | ENSG00000237181  |              | 7973.6  | 0.12 |                                     |    |           |           |                                                                               |
| 5481  | ENSG00000231454  |              | 8262.3  | 0.12 |                                     |    |           |           |                                                                               |
| 5477  | ENSG00000270055  |              | 8214.8  | 0.12 |                                     |    |           |           |                                                                               |
| 6160  | ENSG00000289970  |              | 8939.3  | 0.12 |                                     |    |           |           |                                                                               |
| 6292  | ENSG00000233689  |              | 9077.8  | 0.12 |                                     |    |           |           |                                                                               |
| 6455  | ENSG00000213090  |              | 9244.7  | 0.12 |                                     |    |           |           |                                                                               |
| 6921  | ENSG00000202107  | SNORD103A    | 9660.1  | 0.12 |                                     | 1  | 31421964  | 31422049  | small nuclear RNA, C/D box 103B                                               |
| 7393  | ENSG00000265576  |              | 10130   | 0.12 |                                     |    |           |           |                                                                               |
| 7522  | ENSG00000273701  |              | 10290.3 | 0.12 |                                     |    |           |           |                                                                               |
| 7955  | ENSG00000226647  |              | 10669.1 | 0.12 |                                     |    |           |           |                                                                               |
| 7997  | ENSG00000245914  |              | 10700.6 | 0.12 |                                     |    |           |           |                                                                               |
| 8586  | ENSG00000268664  |              | 11207.1 | 0.12 |                                     |    |           |           |                                                                               |
| 8869  | ENSG00000225450  |              | 11434.6 | 0.12 |                                     |    |           |           |                                                                               |
| 9168  | ENSG00000271162  |              | 11694   | 0.12 |                                     |    |           |           |                                                                               |
| 9245  | ENSG00000201018  |              | 11744.1 | 0.12 |                                     |    |           |           |                                                                               |
| 9248  | ENSG00000255518  |              | 11747.1 | 0.12 |                                     |    |           |           |                                                                               |
| 9894  | ENSG00000294620  |              | 12263.5 | 0.12 |                                     |    |           |           |                                                                               |
| 10001 | ENSG00000202056  |              | 12371.9 | 0.12 |                                     |    |           |           |                                                                               |
| 10258 | ENSG00000230154  |              | 12550.6 | 0.12 |                                     |    |           |           |                                                                               |
| 10348 | ENSG00000298135  |              | 12611.3 | 0.12 |                                     |    |           |           |                                                                               |
| 10573 | ENSG00000271761  |              | 12786.7 | 0.12 |                                     |    |           |           |                                                                               |
| 10798 | ENSG00000260601  |              | 12987.5 | 0.12 |                                     |    |           |           |                                                                               |
| 10938 | ENSG00000257221  |              | 13100.4 | 0.12 |                                     |    |           |           |                                                                               |
| 10981 | ENSG00000272223  |              | 13139.5 | 0.12 |                                     |    |           |           |                                                                               |
| 11355 | ENSG00000204874  |              | 13442.3 | 0.12 |                                     |    |           |           |                                                                               |
| 11421 | ENSG00000243745  |              | 13505.6 | 0.12 |                                     | 19 | 16509477  | 16509770  | RNA_75s_cytoplasmic 844, pseudogene                                           |
| 11451 | ENSG00000206708  |              | 13532.9 | 0.12 |                                     | 1  | 101455761 | 101457653 | Uncharacterized protein                                                       |
| 11527 | ENSG00000234818  |              | 13601.5 | 0.12 |                                     |    |           |           |                                                                               |
| 11536 | ENSG00000289175  |              | 13610.2 | 0.12 |                                     |    |           |           |                                                                               |
| 11569 | ENSG00000294344  |              | 13631.6 | 0.12 |                                     |    |           |           |                                                                               |
| 11718 | ENSG00000248019  |              | 13755.2 | 0.12 |                                     |    |           |           |                                                                               |
| 11825 | ENSG00000252705  |              | 13850.5 | 0.12 |                                     | 14 | 10889044  | 10889493  | immunoglobulin heavy variable 3-41 (pseudogene)                               |
| 11831 | ENSG00000212684  |              | 13854.6 | 0.12 |                                     |    |           |           |                                                                               |
| 11905 | ENSG00000240527  |              | 13915.7 | 0.12 |                                     |    |           |           |                                                                               |
| 12168 | ENSG00000286624  |              | 14102.1 | 0.12 |                                     | 13 | 20311117  | 20311384  | RNA_75s_cytoplasmic 166, pseudogene                                           |
| 12303 | ENSG00000288652  |              | 14209.3 | 0.12 |                                     | 17 | 80214131  | 80216090  | CDNA_FL27256.fa_dome.S7ND869: Uncharacterized protein                         |
| 12669 | ENSG00000254428  |              | 14482.7 | 0.12 |                                     |    |           |           |                                                                               |
| 12683 | ENSG00000231999  |              | 14490.6 | 0.12 |                                     |    |           |           |                                                                               |
| 12820 | ENSG00000274037  |              | 14597.7 | 0.12 |                                     |    |           |           |                                                                               |
| 12864 | ENSG00000249761  |              | 14622.9 | 0.12 |                                     |    |           |           |                                                                               |
| 13047 | ENSG00000253899  |              | 14752.6 | 0.12 |                                     |    |           |           |                                                                               |
| 13155 | ENSG00000252973  |              | 14850.9 | 0.12 |                                     |    |           |           |                                                                               |
| 13340 | ENSG00000254676  |              | 14977.9 | 0.12 |                                     |    |           |           |                                                                               |
| 13656 | ENSG00000273137  |              | 15220.2 | 0.12 |                                     |    |           |           |                                                                               |
| 13708 | ENSG00000234870  |              | 15256.9 | 0.12 |                                     |    |           |           |                                                                               |
| 13751 | ENSG00000252375  |              | 15288   | 0.12 |                                     |    |           |           |                                                                               |
| 13782 | ENSG00000286058  |              | 15308.9 | 0.12 |                                     |    |           |           |                                                                               |
| 13889 | ENSG00000260550  |              | 15367.2 | 0.12 |                                     |    |           |           |                                                                               |
| 13916 | ENSG00000234195  |              | 15413.2 | 0.12 |                                     |    |           |           |                                                                               |
| 13946 | ENSG00000226163  |              | 15435.6 | 0.12 |                                     |    |           |           |                                                                               |
| 13962 | ENSG00000231201  |              | 15437.6 |      |                                     |    |           |           |                                                                               |

|       |                 |        |         |      |    |           |           |  |                                                 |
|-------|-----------------|--------|---------|------|----|-----------|-----------|--|-------------------------------------------------|
| 14805 | ENSG00000257408 |        | 16088.2 | 0.12 |    |           |           |  |                                                 |
| 14810 | ENSG00000217617 |        | 16093.3 | 0.12 |    |           |           |  |                                                 |
| 14815 | ENSG00000227350 |        | 16095.3 | 0.12 |    |           |           |  |                                                 |
| 14846 | ENSG00000228037 |        | 16120.2 | 0.12 |    |           |           |  |                                                 |
| 14885 | ENSG00000217151 |        | 16150.9 | 0.12 |    |           |           |  |                                                 |
| 14904 | ENSG00000217096 |        | 16170.5 | 0.12 |    |           |           |  |                                                 |
| 14937 | ENSG00000254461 |        | 16188.2 | 0.12 |    |           |           |  |                                                 |
| 14947 | ENSG00000146976 |        | 16199.7 | 0.12 |    |           |           |  |                                                 |
| 14966 | ENSG00000252888 |        | 16217.4 | 0.12 |    |           |           |  |                                                 |
| 14968 | ENSG00000252884 |        | 16218   | 0.12 |    |           |           |  |                                                 |
| 15003 | ENSG00000225519 |        | 16240.1 | 0.12 |    |           |           |  |                                                 |
| 15063 | ENSG00000258948 |        | 16234   | 0.12 |    |           |           |  |                                                 |
| 15095 | ENSG00000231507 |        | 16235   | 0.12 |    |           |           |  |                                                 |
| 15133 | ENSG00000227598 | PGMPF2 | 16257.6 | 0.12 | 9  | 69080240  | 69147854  |  | phosphoglucosylase 5 pseudogene 2               |
| 15143 | ENSG00000231125 |        | 16267.4 | 0.12 |    |           |           |  |                                                 |
| 15144 | ENSG00000258393 |        | 16267.7 | 0.12 |    |           |           |  |                                                 |
| 15207 | ENSG00000240934 |        | 16413.9 | 0.12 |    |           |           |  |                                                 |
| 15221 | ENSG00000229278 |        | 16434.2 | 0.12 |    |           |           |  |                                                 |
| 15241 | ENSG00000253472 |        | 16442.8 | 0.12 |    |           |           |  |                                                 |
| 15262 | ENSG00000238403 |        | 16452.5 | 0.12 | 17 | 80540381  | 80540476  |  | Small nuclear RNA U13                           |
| 15286 | ENSG00000252353 |        | 16464.5 | 0.12 |    |           |           |  |                                                 |
| 15299 | ENSG00000254650 |        | 16472.9 | 0.12 |    |           |           |  |                                                 |
| 15302 | ENSG00000226530 |        | 16474.4 | 0.12 |    |           |           |  |                                                 |
| 15310 | ENSG00000231246 |        | 16482.1 | 0.12 |    |           |           |  |                                                 |
| 15338 | ENSG00000254117 |        | 16488.5 | 0.12 | 14 | 106559546 | 106559975 |  | immunoglobulin heavy variable 2-10 (pseudogene) |
| 15354 | ENSG00000263182 |        | 16512   | 0.12 |    |           |           |  |                                                 |
| 15378 | ENSG00000250299 |        | 16530.6 | 0.12 |    |           |           |  |                                                 |
| 15396 | ENSG00000218738 |        | 16542.7 | 0.12 |    |           |           |  |                                                 |
| 15403 | ENSG00000230305 |        | 16548.4 | 0.12 |    |           |           |  |                                                 |
| 15407 | ENSG00000250445 |        | 16553.3 | 0.12 |    |           |           |  |                                                 |
| 15433 | ENSG00000254103 |        | 16575.1 | 0.12 |    |           |           |  |                                                 |
| 15441 | ENSG00000238988 |        | 16579.3 | 0.12 | 18 | 60861822  | 60861898  |  | Small nuclear RNA U13                           |
| 15448 | ENSG00000254543 |        | 16586.5 | 0.12 |    |           |           |  |                                                 |
| 15455 | ENSG00000196560 |        | 16591.8 | 0.12 |    |           |           |  |                                                 |
| 15410 | ENSG00000223881 |        | 16635.3 | 0.12 |    |           |           |  |                                                 |
| 15521 | ENSG00000250555 |        | 16641.8 | 0.12 |    |           |           |  |                                                 |
| 15564 | ENSG00000228437 |        | 16678.7 | 0.12 |    |           |           |  |                                                 |
| 15571 | ENSG00000234584 |        | 16683.5 | 0.12 |    |           |           |  |                                                 |
| 15574 | ENSG00000230989 |        | 16684.8 | 0.12 |    |           |           |  |                                                 |
| 15588 | ENSG00000229984 |        | 16702.4 | 0.12 |    |           |           |  |                                                 |
| 15602 | ENSG00000225410 |        | 16706.8 | 0.12 |    |           |           |  |                                                 |
| 15647 | ENSG00000234475 |        | 16745.8 | 0.12 |    |           |           |  |                                                 |
| 15676 | ENSG00000233824 |        | 16765.2 | 0.12 |    |           |           |  |                                                 |
| 15679 | ENSG00000251342 |        | 16770.4 | 0.12 |    |           |           |  |                                                 |
| 15688 | ENSG00000250560 |        | 16777.1 | 0.12 |    |           |           |  |                                                 |
| 15701 | ENSG00000237999 |        | 16784.1 | 0.12 |    |           |           |  |                                                 |
| 15714 | ENSG00000260271 |        | 16792.7 | 0.12 |    |           |           |  |                                                 |
| 15717 | ENSG00000225768 |        | 16796.6 | 0.12 |    |           |           |  |                                                 |
| 15744 | ENSG00000248026 |        | 16806.6 | 0.12 |    |           |           |  |                                                 |
| 15735 | ENSG00000271426 |        | 16806.7 | 0.12 |    |           |           |  |                                                 |
| 15736 | ENSG00000262647 |        | 16806.8 | 0.12 |    |           |           |  |                                                 |
| 15748 | ENSG00000250973 |        | 16813.6 | 0.12 |    |           |           |  |                                                 |
| 15781 | ENSG00000205662 |        | 16827.1 | 0.12 |    |           |           |  |                                                 |
| 15779 | ENSG00000204399 |        | 16838   | 0.12 |    |           |           |  |                                                 |
| 15796 | ENSG00000211992 |        | 16855.9 | 0.12 |    |           |           |  |                                                 |
| 15801 | ENSG00000258273 |        | 16862.6 | 0.12 |    |           |           |  |                                                 |
| 15806 | ENSG00000231368 |        | 16867.1 | 0.12 |    |           |           |  |                                                 |
| 15825 | ENSG00000251879 |        | 16882.3 | 0.12 |    |           |           |  |                                                 |
| 15837 | ENSG00000238397 |        | 16887   | 0.12 |    |           |           |  |                                                 |
| 15839 | ENSG00000236187 |        | 16891.3 | 0.12 |    |           |           |  |                                                 |
| 15848 | ENSG00000221258 |        | 16894.5 | 0.12 |    |           |           |  |                                                 |
| 15883 | ENSG00000243845 |        | 16916   | 0.12 |    |           |           |  |                                                 |
| 15895 | ENSG00000226841 |        | 16939.2 | 0.12 |    |           |           |  |                                                 |
| 15900 | ENSG00000248343 |        | 16944.6 | 0.12 |    |           |           |  |                                                 |
| 15904 | ENSG00000248170 |        | 16947.8 | 0.12 |    |           |           |  |                                                 |
| 15908 | ENSG00000243018 |        | 16949.3 | 0.12 |    |           |           |  |                                                 |
| 15926 | ENSG00000213302 |        | 16959.3 | 0.12 |    |           |           |  |                                                 |
| 15935 | ENSG00000236200 |        | 16967.9 | 0.12 |    |           |           |  |                                                 |
| 15936 | ENSG00000231421 |        | 16968.2 | 0.12 |    |           |           |  |                                                 |
| 15937 | ENSG00000244688 |        | 16968.9 | 0.12 |    |           |           |  |                                                 |
| 15941 | ENSG00000237370 |        | 16973.6 | 0.12 |    |           |           |  |                                                 |
| 15944 | ENSG00000226171 |        | 16977.4 | 0.12 |    |           |           |  |                                                 |
| 15953 | ENSG00000252688 |        | 16985.5 | 0.12 |    |           |           |  |                                                 |
| 15962 | ENSG00000233427 |        | 16989   | 0.12 |    |           |           |  |                                                 |
| 15963 | ENSG00000254522 |        | 16990.4 | 0.12 |    |           |           |  |                                                 |
| 15972 | ENSG00000258252 |        | 16999   | 0.12 |    |           |           |  |                                                 |
| 15985 | ENSG00000263713 |        | 17014.3 | 0.12 |    |           |           |  |                                                 |
| 15988 | ENSG00000244154 |        | 17025.5 | 0.12 |    |           |           |  |                                                 |
| 16022 | ENSG00000208722 |        | 17048   | 0.12 |    |           |           |  |                                                 |
| 16024 | ENSG00000250376 |        | 17049.7 | 0.12 |    |           |           |  |                                                 |
| 16027 | ENSG00000258877 |        | 17052.2 | 0.12 |    |           |           |  |                                                 |
| 16032 | ENSG00000254448 |        | 17057.8 | 0.12 |    |           |           |  |                                                 |
| 16033 | ENSG00000236468 |        | 17058.2 | 0.12 |    |           |           |  |                                                 |
| 16043 | ENSG00000228984 |        | 17069.1 | 0.12 |    |           |           |  |                                                 |
| 16046 | ENSG00000260519 |        | 17072.1 | 0.12 |    |           |           |  |                                                 |
| 16061 | ENSG00000232719 |        | 17083.3 | 0.12 |    |           |           |  |                                                 |
| 16066 | ENSG00000231334 |        | 17085.9 | 0.12 |    |           |           |  |                                                 |
| 16062 | ENSG00000242521 |        | 17086.6 | 0.12 |    |           |           |  |                                                 |
| 16064 | ENSG00000242292 |        | 17088.4 | 0.12 |    |           |           |  |                                                 |
| 16090 | ENSG00000265226 |        | 17101.1 | 0.12 |    |           |           |  |                                                 |
| 16094 | ENSG00000261096 |        | 17105.3 | 0.12 |    |           |           |  |                                                 |
| 16106 | ENSG00000248404 |        | 17113.5 | 0.12 |    |           |           |  |                                                 |
| 16113 | ENSG00000238191 |        | 17118.3 | 0.12 | 5  | 149923152 | 149923251 |  | Small nuclear RNA U13                           |
| 16128 | ENSG00000258402 |        | 17128.4 | 0.12 |    |           |           |  |                                                 |
| 16138 | ENSG00000238538 |        | 17131.7 | 0.12 |    |           |           |  |                                                 |
| 16139 | ENSG00000262951 |        | 17134.6 | 0.12 |    |           |           |  |                                                 |
| 16140 | ENSG00000264798 |        | 17135.9 | 0.12 |    |           |           |  |                                                 |
| 16143 | ENSG00000243779 |        | 17138.5 | 0.12 |    |           |           |  |                                                 |
| 16144 | ENSG00000255845 |        | 17138.6 | 0.12 |    |           |           |  |                                                 |
| 16147 | ENSG00000271509 |        | 17139.7 | 0.12 |    |           |           |  |                                                 |
| 16156 | ENSG00000211311 |        | 17146.1 | 0.12 |    |           |           |  |                                                 |
| 16161 | ENSG00000244942 |        | 17147.8 | 0.12 |    |           |           |  |                                                 |
| 16174 | ENSG00000232799 |        | 17156.6 | 0.12 |    |           |           |  |                                                 |
| 16180 | ENSG00000246004 |        | 17162.9 | 0.12 |    |           |           |  |                                                 |
| 16191 | ENSG00000260721 |        | 17168.8 | 0.12 |    |           |           |  |                                                 |
| 16193 | ENSG00000258830 |        | 17171.5 | 0.12 |    |           |           |  |                                                 |
| 16201 | ENSG00000260625 |        | 17174.4 | 0.12 |    |           |           |  |                                                 |
| 16223 | ENSG00000254002 |        | 17196.4 | 0.12 |    |           |           |  |                                                 |
| 16226 | ENSG00000273288 |        | 17202.9 | 0.12 |    |           |           |  |                                                 |
| 16236 | ENSG00000250658 |        | 17209.3 | 0.12 |    |           |           |  |                                                 |
| 16244 | ENSG00000204121 |        | 17214.9 | 0.12 |    |           |           |  |                                                 |
| 16254 | ENSG00000226864 |        | 17220.6 | 0.12 |    |           |           |  |                                                 |
| 16261 | ENSG00000257848 |        | 17223.3 | 0.12 |    |           |           |  |                                                 |
| 16264 | ENSG00000256209 |        | 17224.9 | 0.12 |    |           |           |  |                                                 |
| 16265 | ENSG00000221948 |        | 17224.9 | 0.12 |    |           |           |  |                                                 |
| 16271 | ENSG00000232211 |        | 17226.9 | 0.12 |    |           |           |  |                                                 |
| 16280 | ENSG00000249776 |        | 17230.5 | 0.12 |    |           |           |  |                                                 |
| 16290 | ENSG00000262343 |        | 17238.8 | 0.12 |    |           |           |  |                                                 |
| 16298 | ENSG00000250918 |        | 17242.3 | 0.12 |    |           |           |  |                                                 |
| 16297 | ENSG00000259692 |        | 17244   | 0.12 |    |           |           |  |                                                 |
| 16301 | ENSG00000223823 |        | 17245.5 | 0.12 |    |           |           |  |                                                 |
| 16303 | ENSG00000235661 |        | 17247.8 | 0.12 |    |           |           |  |                                                 |
| 16306 | ENSG00000253960 |        | 17249.4 | 0.12 |    |           |           |  |                                                 |
| 16311 | ENSG00000250584 |        | 17250.5 | 0.12 |    |           |           |  |                                                 |
| 16312 | ENSG00000244261 |        | 17250.9 | 0.12 |    |           |           |  |                                                 |
| 16316 | ENSG00000227358 |        | 17255.5 | 0.12 |    |           |           |  |                                                 |
| 16321 | ENSG00000265518 |        | 17258.6 | 0.12 |    |           |           |  |                                                 |
| 16326 | ENSG00000260589 |        | 17262.6 | 0.12 | 11 | 118301123 | 118301419 |  | RNA, 7SL, cytoplasmic 86, pseudogene            |
| 16330 | ENSG00000227732 |        | 17276.6 | 0.12 |    |           |           |  |                                                 |
| 16344 | ENSG00000254487 |        | 17282.8 | 0.12 |    |           |           |  |                                                 |
| 16346 | ENSG00000260985 |        | 17284   | 0.12 |    |           |           |  |                                                 |
| 16347 | ENSG00000260266 |        | 17285.5 | 0.12 |    |           |           |  |                                                 |
| 16352 | ENSG00000232576 |        | 17287.2 | 0.12 |    |           |           |  |                                                 |
| 16355 | ENSG00000271958 |        | 17287.9 | 0.12 |    |           |           |  |                                                 |
| 16369 | ENSG00000256156 |        | 17290   | 0.12 |    |           |           |  |                                                 |
| 16368 | ENSG00000258175 |        | 17295.9 | 0.12 |    |           |           |  |                                                 |
| 16380 | ENSG00000273442 |        | 17308.2 | 0.12 |    |           |           |  |                                                 |
| 16385 | ENSG00000231766 |        | 17312.1 | 0.12 |    |           |           |  |                                                 |
| 16388 | ENSG00000226899 |        | 17319.3 | 0.12 |    |           |           |  |                                                 |
| 16405 | ENSG00000230520 |        | 17325   | 0.12 |    |           |           |  |                                                 |
| 16407 | ENSG00000250548 |        | 17326   | 0.12 |    |           |           |  |                                                 |
| 16414 | ENSG00000233702 |        | 17331.3 | 0.12 |    |           |           |  |                                                 |
| 16417 | ENSG00000234281 |        | 17335.1 | 0.12 |    |           |           |  |                                                 |
| 16420 | ENSG00000234071 |        | 17337.1 | 0.12 |    |           |           |  |                                                 |
| 16422 | ENSG00000254532 |        | 17337.6 | 0.12 |    |           |           |  |                                                 |
| 16427 | ENSG00000243016 |        | 17342.9 | 0.12 |    |           |           |  |                                                 |
| 16433 | ENSG00000236365 |        | 17347.4 | 0.12 |    |           |           |  |                                                 |
| 16442 | ENSG00000260585 |        | 17353.5 | 0.12 |    |           |           |  |                                                 |
| 16465 | ENSG00000235653 |        | 17370.5 | 0.12 |    |           |           |  |                                                 |
| 16468 | ENSG00000232200 |        | 17374.5 | 0.12 |    |           |           |  |                                                 |
| 16482 | ENSG00000218336 |        | 17386   | 0.12 |    |           |           |  |                                                 |

|       |                  |         |         |      |    |           |           |  |                                                                                          |
|-------|------------------|---------|---------|------|----|-----------|-----------|--|------------------------------------------------------------------------------------------|
| 16491 | ENSG00000226277  |         | 17391.8 | 0.12 |    |           |           |  |                                                                                          |
| 16498 | ENSG00000211628  |         | 17394.1 | 0.12 |    |           |           |  |                                                                                          |
| 16501 | ENSG00000287919  |         | 17398.3 | 0.12 |    |           |           |  |                                                                                          |
| 16502 | ENSG00000240913  |         | 17398.5 | 0.12 | 2  | 25240901  | 25281196  |  | RNA, 7SL, cytoplasmic 856, pseudogene                                                    |
| 16514 | ENSG00000255696  |         | 17405.2 | 0.12 |    |           |           |  |                                                                                          |
| 16524 | ENSG00000259941  |         | 17417.6 | 0.12 |    |           |           |  |                                                                                          |
| 16534 | ENSG00000218048  |         | 17422.1 | 0.12 |    |           |           |  |                                                                                          |
| 16538 | ENSG00000204441  |         | 17423.9 | 0.12 |    |           |           |  |                                                                                          |
| 16546 | ENSG00000285122  |         | 17430.5 | 0.12 |    |           |           |  |                                                                                          |
| 16553 | ENSG00000226886  |         | 17434.8 | 0.12 |    |           |           |  |                                                                                          |
| 16556 | ENSG00000226973  |         | 17438.6 | 0.12 |    |           |           |  |                                                                                          |
| 16560 | ENSG00000209453  |         | 17440.6 | 0.12 |    |           |           |  |                                                                                          |
| 16563 | ENSG00000250140  |         | 17442.2 | 0.12 |    |           |           |  |                                                                                          |
| 16569 | ENSG00000217067  |         | 17448.4 | 0.12 |    |           |           |  |                                                                                          |
| 16576 | ENSG00000203179  |         | 17452.9 | 0.12 |    |           |           |  |                                                                                          |
| 16578 | ENSG00000206640  |         | 17453.3 | 0.12 |    |           |           |  |                                                                                          |
| 16583 | ENSG00000200072  |         | 17458.7 | 0.12 |    |           |           |  |                                                                                          |
| 16588 | ENSG00000205135  |         | 17463.8 | 0.12 |    |           |           |  |                                                                                          |
| 16592 | ENSG00000226022  |         | 17465.2 | 0.12 |    |           |           |  |                                                                                          |
| 16593 | ENSG00000216718  |         | 17466.7 | 0.12 |    |           |           |  |                                                                                          |
| 16594 | ENSG00000202935  |         | 17467.9 | 0.12 |    |           |           |  |                                                                                          |
| 16595 | ENSG00000273443  |         | 17470.9 | 0.12 |    |           |           |  |                                                                                          |
| 16596 | ENSG00000235226  |         | 17473   | 0.12 |    |           |           |  |                                                                                          |
| 16603 | ENSG00000235986  |         | 17481.3 | 0.12 |    |           |           |  |                                                                                          |
| 16605 | ENSG00000205153  |         | 17484.5 | 0.12 |    |           |           |  |                                                                                          |
| 16606 | ENSG00000257305  |         | 17485.2 | 0.12 |    |           |           |  |                                                                                          |
| 16607 | ENSG00000202971  |         | 17487.7 | 0.12 |    |           |           |  |                                                                                          |
| 16612 | ENSG00000208129  |         | 17489.9 | 0.12 |    |           |           |  |                                                                                          |
| 16613 | ENSG00000205865  |         | 17490   | 0.12 |    |           |           |  |                                                                                          |
| 16622 | ENSG00000205967  |         | 17492.1 | 0.12 |    |           |           |  |                                                                                          |
| 16626 | ENSG00000232852  |         | 17494.3 | 0.12 |    |           |           |  |                                                                                          |
| 16629 | ENSG00000254975  |         | 17498.7 | 0.12 |    |           |           |  |                                                                                          |
| 16632 | ENSG00000204681  |         | 17500.3 | 0.12 |    |           |           |  |                                                                                          |
| 16639 | ENSG00000205142  |         | 17508.3 | 0.12 |    |           |           |  |                                                                                          |
| 16642 | ENSG00000250929  |         | 17510.9 | 0.12 |    |           |           |  |                                                                                          |
| 16648 | ENSG00000213107  |         | 17516.8 | 0.12 |    |           |           |  |                                                                                          |
| 16661 | ENSG00000242308  |         | 17528.7 | 0.12 |    |           |           |  |                                                                                          |
| 16668 | ENSG00000224658  |         | 17533.4 | 0.12 |    |           |           |  |                                                                                          |
| 16671 | ENSG00000205469  |         | 17533.7 | 0.12 |    |           |           |  |                                                                                          |
| 16672 | ENSG00000210777  |         | 17534.7 | 0.12 |    |           |           |  |                                                                                          |
| 16680 | ENSG00000208392  |         | 17545.3 | 0.12 | 17 | 55489272  | 55489562  |  | RNA, 7SL, cytoplasmic 437, pseudogene                                                    |
| 16687 | ENSG00000205686  |         | 17550.8 | 0.12 |    |           |           |  |                                                                                          |
| 16688 | ENSG00000205644  |         | 17557.8 | 0.12 |    |           |           |  |                                                                                          |
| 16699 | ENSG00000228940  |         | 17558.1 | 0.12 |    |           |           |  |                                                                                          |
| 16708 | ENSG00000206260  |         | 17570.3 | 0.12 |    |           |           |  |                                                                                          |
| 16718 | ENSG00000225497  |         | 17576.1 | 0.12 |    |           |           |  |                                                                                          |
| 16721 | ENSG00000238846  |         | 17576.7 | 0.12 | 3  | 32214148  | 32214252  |  | Small nuclear RNA U13                                                                    |
| 16726 | ENSG00000234480  |         | 17581   | 0.12 |    |           |           |  |                                                                                          |
| 16731 | ENSG00000205106  |         | 17585   | 0.12 |    |           |           |  |                                                                                          |
| 16735 | ENSG00000236658  |         | 17587.2 | 0.12 |    |           |           |  |                                                                                          |
| 16736 | ENSG00000209603  |         | 17588.6 | 0.12 |    |           |           |  |                                                                                          |
| 16741 | ENSG00000204984  |         | 17590.2 | 0.12 | 14 | 69312519  | 69312772  |  | RNA, 7SL, cytoplasmic 224, pseudogene                                                    |
| 16743 | ENSG000002081253 |         | 17596.3 | 0.12 |    |           |           |  |                                                                                          |
| 16747 | ENSG000002081386 |         | 17599.3 | 0.12 |    |           |           |  |                                                                                          |
| 16760 | ENSG000002095186 |         | 17613   | 0.12 |    |           |           |  |                                                                                          |
| 16761 | ENSG000002087671 | YWHAEP7 | 17613.3 | 0.12 | 17 | 38187925  | 38244383  |  | lysine 3-monooxygenase/hydroxan 5-monooxygenase activation protein, epsilon pseudogene 7 |
| 16768 | ENSG000002037834 |         | 17619.5 | 0.12 |    |           |           |  |                                                                                          |
| 16773 | ENSG00000203244  |         | 17623   | 0.12 |    |           |           |  |                                                                                          |
| 16776 | ENSG00000230024  |         | 17626.7 | 0.12 |    |           |           |  |                                                                                          |
| 16782 | ENSG00000204391  |         | 17628.5 | 0.12 | 21 | 33714826  | 33715062  |  | RNA, 7SL, cytoplasmic 109, pseudogene                                                    |
| 16785 | ENSG00000218857  |         | 17631.7 | 0.12 |    |           |           |  |                                                                                          |
| 16788 | ENSG00000213368  |         | 17633.6 | 0.12 |    |           |           |  |                                                                                          |
| 16791 | ENSG00000213343  |         | 17638   | 0.12 |    |           |           |  |                                                                                          |
| 16794 | ENSG00000233484  |         | 17638.6 | 0.12 |    |           |           |  |                                                                                          |
| 16797 | ENSG00000228529  |         | 17643.3 | 0.12 |    |           |           |  |                                                                                          |
| 16801 | ENSG00000220763  |         | 17643.8 | 0.12 |    |           |           |  |                                                                                          |
| 16809 | ENSG00000258345  |         | 17649.5 | 0.12 |    |           |           |  |                                                                                          |
| 16810 | ENSG000002053111 |         | 17650.4 | 0.12 |    |           |           |  |                                                                                          |
| 16812 | ENSG00000205028  |         | 17651.8 | 0.12 |    |           |           |  |                                                                                          |
| 16816 | ENSG00000215409  |         | 17654.9 | 0.12 |    |           |           |  |                                                                                          |
| 16820 | ENSG00000237329  |         | 17657.5 | 0.12 |    |           |           |  |                                                                                          |
| 16824 | ENSG00000203842  |         | 17661.1 | 0.12 |    |           |           |  |                                                                                          |
| 16834 | ENSG00000224595  |         | 17670.2 | 0.12 |    |           |           |  |                                                                                          |
| 16835 | ENSG00000238678  |         | 17670.4 | 0.12 | 1  | 119801664 | 119801764 |  | Small nuclear RNA U13                                                                    |
| 16842 | ENSG00000237428  |         | 17673.5 | 0.12 |    |           |           |  |                                                                                          |
| 16850 | ENSG00000255746  |         | 17677.9 | 0.12 |    |           |           |  |                                                                                          |
| 16851 | ENSG00000272239  |         | 17678.1 | 0.12 |    |           |           |  |                                                                                          |
| 16853 | ENSG00000204681  |         | 17678.3 | 0.12 |    |           |           |  |                                                                                          |
| 16856 | ENSG00000185945  | NF2     | 17680.1 | 0.12 | X  | 101615316 | 101729732 |  | nuclear RNA export factor 2B                                                             |
| 16857 | ENSG00000251538  |         | 17680.2 | 0.12 |    |           |           |  |                                                                                          |
| 16864 | ENSG00000227238  |         | 17681.9 | 0.12 |    |           |           |  |                                                                                          |
| 16879 | ENSG00000213461  |         | 17693.3 | 0.12 |    |           |           |  |                                                                                          |
| 16880 | ENSG00000273180  |         | 17694.7 | 0.12 |    |           |           |  |                                                                                          |
| 16881 | ENSG00000205372  |         | 17695.3 | 0.12 |    |           |           |  |                                                                                          |
| 16883 | ENSG000002051072 |         | 17702   | 0.12 |    |           |           |  |                                                                                          |
| 16886 | ENSG000002081131 |         | 17704   | 0.12 |    |           |           |  |                                                                                          |
| 16884 | ENSG00000257991  |         | 17707   | 0.12 |    |           |           |  |                                                                                          |
| 16886 | ENSG00000213363  |         | 17709.2 | 0.12 |    |           |           |  |                                                                                          |
| 16915 | ENSG00000236998  |         | 17712   | 0.12 |    |           |           |  |                                                                                          |
| 16919 | ENSG00000206015  |         | 17716.6 | 0.12 |    |           |           |  |                                                                                          |
| 16921 | ENSG00000205161  |         | 17718.9 | 0.12 |    |           |           |  |                                                                                          |
| 16929 | ENSG00000249316  |         | 17726.3 | 0.12 |    |           |           |  |                                                                                          |
| 16938 | ENSG00000226096  |         | 17731.4 | 0.12 |    |           |           |  |                                                                                          |
| 16946 | ENSG00000220588  |         | 17736.8 | 0.12 |    |           |           |  |                                                                                          |
| 16947 | ENSG00000250114  |         | 17737.2 | 0.12 |    |           |           |  |                                                                                          |
| 16955 | ENSG00000208841  |         | 17743.5 | 0.12 |    |           |           |  |                                                                                          |
| 16957 | ENSG000002051329 |         | 17745.2 | 0.12 |    |           |           |  |                                                                                          |
| 16960 | ENSG00000223663  |         | 17746.7 | 0.12 |    |           |           |  |                                                                                          |
| 16967 | ENSG00000220963  |         | 17750.4 | 0.12 |    |           |           |  |                                                                                          |
| 16970 | ENSG00000204440  |         | 17751.6 | 0.12 |    |           |           |  |                                                                                          |
| 16974 | ENSG000002033847 |         | 17753.1 | 0.12 |    |           |           |  |                                                                                          |
| 16985 | ENSG000002041628 |         | 17761.3 | 0.12 |    |           |           |  |                                                                                          |
| 16986 | ENSG00000205448  |         | 17762.1 | 0.12 |    |           |           |  |                                                                                          |
| 16987 | ENSG00000205293  |         | 17765.4 | 0.12 |    |           |           |  |                                                                                          |
| 16993 | ENSG00000218433  |         | 17770.1 | 0.12 |    |           |           |  |                                                                                          |
| 16994 | ENSG00000206024  |         | 17771.5 | 0.12 | 17 | 32581900  | 32623306  |  | Uncharacterized protein                                                                  |
| 16997 | ENSG000002081002 |         | 17774.2 | 0.12 |    |           |           |  |                                                                                          |
| 17000 | ENSG000002080773 |         | 17777.4 | 0.12 |    |           |           |  |                                                                                          |
| 17001 | ENSG00000202968  |         | 17783.9 | 0.12 | X  | 47915689  | 47925971  |  | ZNF630 antisense RNA 1                                                                   |
| 17007 | ENSG00000257300  |         | 17784.7 | 0.12 |    |           |           |  |                                                                                          |
| 17016 | ENSG000002023851 |         | 17790.7 | 0.12 |    |           |           |  |                                                                                          |
| 17017 | ENSG000002035804 |         | 17793.1 | 0.12 |    |           |           |  |                                                                                          |
| 17021 | ENSG000002058142 |         | 17795.8 | 0.12 |    |           |           |  |                                                                                          |
| 17025 | ENSG00000211994  |         | 17796.8 | 0.12 |    |           |           |  |                                                                                          |
| 17028 | ENSG00000211699  |         | 17797.1 | 0.12 |    |           |           |  |                                                                                          |
| 17028 | ENSG000002050194 |         | 17799.1 | 0.12 |    |           |           |  |                                                                                          |
| 17035 | ENSG000002020403 |         | 17805.8 | 0.12 |    |           |           |  |                                                                                          |
| 17038 | ENSG000002081029 |         | 17806.4 | 0.12 |    |           |           |  |                                                                                          |
| 17050 | ENSG000002053279 |         | 17813.7 | 0.12 |    |           |           |  |                                                                                          |
| 17060 | ENSG000002023424 |         | 17823.2 | 0.12 |    |           |           |  |                                                                                          |
| 17065 | ENSG000002034546 |         | 17840.3 | 0.12 |    |           |           |  |                                                                                          |
| 17068 | ENSG000002034468 |         | 17843.2 | 0.12 |    |           |           |  |                                                                                          |
| 17090 | ENSG00000228523  |         | 17845   | 0.12 |    |           |           |  |                                                                                          |
| 17092 | ENSG00000205693  |         | 17850.8 | 0.12 |    |           |           |  |                                                                                          |
| 17093 | ENSG00000203527  |         | 17846.5 | 0.12 |    |           |           |  |                                                                                          |
| 17094 | ENSG00000228421  |         | 17847.5 | 0.12 |    |           |           |  |                                                                                          |
| 17103 | ENSG000002041053 |         | 17852.7 | 0.12 |    |           |           |  |                                                                                          |
| 17105 | ENSG000002049341 |         | 17854.4 | 0.12 |    |           |           |  |                                                                                          |
| 17113 | ENSG000002034504 |         | 17858.2 | 0.12 |    |           |           |  |                                                                                          |
| 17134 | ENSG000002081411 |         | 17873.2 | 0.12 |    |           |           |  |                                                                                          |
| 17136 | ENSG000002048458 |         | 17875.3 | 0.12 |    |           |           |  |                                                                                          |
| 17140 | ENSG000002063626 |         | 17878.6 | 0.12 |    |           |           |  |                                                                                          |
| 17143 | ENSG000002056971 |         | 17883.3 | 0.12 |    |           |           |  |                                                                                          |
| 17144 | ENSG000002056564 |         | 17883.5 | 0.12 |    |           |           |  |                                                                                          |
| 17145 | ENSG000002026272 |         | 17883.9 | 0.12 |    |           |           |  |                                                                                          |
| 17150 | ENSG00000215174  |         | 17888.7 | 0.12 |    |           |           |  |                                                                                          |
| 17154 | ENSG00000237654  |         | 17891.4 | 0.12 |    |           |           |  |                                                                                          |
| 17165 | ENSG00000232995  |         | 17900.9 | 0.12 |    |           |           |  |                                                                                          |
| 17167 | ENSG000002049360 |         | 17902.5 | 0.12 |    |           |           |  |                                                                                          |
| 17170 | ENSG00000202572  |         | 17904.5 | 0.12 |    |           |           |  |                                                                                          |
| 17172 | ENSG000002059178 |         | 17905.6 | 0.12 |    |           |           |  |                                                                                          |
| 17173 | ENSG00000233811  |         | 17906.2 | 0.12 |    |           |           |  |                                                                                          |
| 17177 | ENSG00000205329  |         | 17907.5 | 0.12 |    |           |           |  |                                                                                          |
| 17179 | ENSG000002059793 |         | 17908.2 | 0.12 |    |           |           |  |                                                                                          |
| 17189 | ENSG000002037864 |         | 17914   | 0.12 |    |           |           |  |                                                                                          |
| 17191 | ENSG000002020950 |         | 17918.1 | 0.12 |    |           |           |  |                                                                                          |
| 17194 | ENSG000002029875 |         | 17917.9 | 0.12 |    |           |           |  |                                                                                          |
| 17198 | ENSG000002085115 |         | 17918.6 | 0.12 |    |           |           |  |                                                                                          |
| 17205 | ENSG0000021763   |         | 17922   | 0.12 |    |           |           |  |                                                                                          |
| 17211 | ENSG000002028603 |         | 17926.1 | 0.12 |    |           |           |  |                                                                                          |



|       |                  |         |         |      |    |           |           |  |                                                                             |
|-------|------------------|---------|---------|------|----|-----------|-----------|--|-----------------------------------------------------------------------------|
| 17219 | ENSG00000255504  |         | 17933   | 0.12 |    |           |           |  |                                                                             |
| 17224 | ENSG00000255176  |         | 17938   | 0.12 |    |           |           |  |                                                                             |
| 17225 | ENSG00000258913  |         | 17939   | 0.12 |    |           |           |  |                                                                             |
| 17228 | ENSG00000265359  |         | 17941   | 0.12 |    |           |           |  |                                                                             |
| 17229 | ENSG00000258191  |         | 17941   | 0.12 |    |           |           |  |                                                                             |
| 17231 | ENSG00000258961  |         | 17941.4 | 0.12 |    |           |           |  |                                                                             |
| 17233 | ENSG00000228717  |         | 17942.6 | 0.12 | 9  | 135968439 | 135968538 |  | Small nuclear RNA U13                                                       |
| 17241 | ENSG00000269944  |         | 17945.3 | 0.12 |    |           |           |  |                                                                             |
| 17244 | ENSG00000269938  |         | 17946.4 | 0.12 |    |           |           |  |                                                                             |
| 17248 | ENSG00000254506  |         | 17947.6 | 0.12 |    |           |           |  |                                                                             |
| 17261 | ENSG00000227658  |         | 17956.5 | 0.12 |    |           |           |  |                                                                             |
| 17270 | ENSG00000251855  |         | 17969.2 | 0.12 |    |           |           |  |                                                                             |
| 17279 | ENSG00000203513  |         | 17974.6 | 0.12 |    |           |           |  |                                                                             |
| 17286 | ENSG00000229886  |         | 17977.3 | 0.12 |    |           |           |  |                                                                             |
| 17297 | ENSG00000221753  |         | 17987.6 | 0.12 |    |           |           |  |                                                                             |
| 17298 | ENSG000002228397 |         | 17988.2 | 0.12 |    |           |           |  |                                                                             |
| 17307 | ENSG00000208712  |         | 17993.2 | 0.12 |    |           |           |  |                                                                             |
| 17316 | ENSG00000256469  |         | 17995.3 | 0.12 |    |           |           |  |                                                                             |
| 17315 | ENSG00000250882  |         | 17999.9 | 0.12 |    |           |           |  |                                                                             |
| 17319 | ENSG00000231220  |         | 18002   | 0.12 |    |           |           |  |                                                                             |
| 17321 | ENSG00000223276  |         | 18004.5 | 0.12 |    |           |           |  |                                                                             |
| 17322 | ENSG000002048515 |         | 18004.7 | 0.12 |    |           |           |  |                                                                             |
| 17326 | ENSG00000251518  |         | 18008   | 0.12 |    |           |           |  |                                                                             |
| 17328 | ENSG00000225670  |         | 18008.6 | 0.12 |    |           |           |  |                                                                             |
| 17331 | ENSG00000258007  |         | 18009.8 | 0.12 |    |           |           |  |                                                                             |
| 17332 | ENSG00000231403  |         | 18012.3 | 0.12 |    |           |           |  |                                                                             |
| 17333 | ENSG00000256955  |         | 18012.4 | 0.12 |    |           |           |  |                                                                             |
| 17344 | ENSG00000226355  |         | 18021.5 | 0.12 |    |           |           |  |                                                                             |
| 17355 | ENSG00000228030  |         | 18028.7 | 0.12 |    |           |           |  |                                                                             |
| 17360 | ENSG00000231118  |         | 18034.3 | 0.12 |    |           |           |  |                                                                             |
| 17371 | ENSG00000220712  |         | 18039.1 | 0.12 |    |           |           |  |                                                                             |
| 17377 | ENSG00000251168  |         | 18041.2 | 0.12 |    |           |           |  |                                                                             |
| 17380 | ENSG00000239559  |         | 18042.3 | 0.12 |    |           |           |  |                                                                             |
| 17384 | ENSG00000269903  |         | 18045.7 | 0.12 |    |           |           |  |                                                                             |
| 17387 | ENSG00000253141  |         | 18047   | 0.12 |    |           |           |  |                                                                             |
| 17395 | ENSG00000252570  | GOLGA7B | 18048.6 | 0.12 | 10 | 99627889  | 99631294  |  | Golgin subfamily A member 7B, cDNA FLJ34365, clone OC88F.206476             |
| 17399 | ENSG00000237888  |         | 18056.5 | 0.12 |    |           |           |  |                                                                             |
| 17407 | ENSG00000268469  |         | 18062   | 0.12 |    |           |           |  |                                                                             |
| 17425 | ENSG00000252161  |         | 18080.1 | 0.12 |    |           |           |  |                                                                             |
| 17428 | ENSG00000287758  |         | 18080.5 | 0.12 |    |           |           |  |                                                                             |
| 17427 | ENSG00000226928  |         | 18081.7 | 0.12 |    |           |           |  |                                                                             |
| 17443 | ENSG00000268584  |         | 18092.4 | 0.12 |    |           |           |  |                                                                             |
| 17447 | ENSG00000226291  |         | 18093.8 | 0.12 |    |           |           |  |                                                                             |
| 17454 | ENSG00000269752  |         | 18102.3 | 0.12 |    |           |           |  |                                                                             |
| 17457 | ENSG00000274603  |         | 18104.7 | 0.12 |    |           |           |  |                                                                             |
| 17459 | ENSG00000259351  |         | 18105.6 | 0.12 |    |           |           |  |                                                                             |
| 17462 | ENSG00000231518  |         | 18107.6 | 0.12 |    |           |           |  |                                                                             |
| 17467 | ENSG00000231860  |         | 18111.3 | 0.12 |    |           |           |  |                                                                             |
| 17477 | ENSG00000231532  |         | 18118.1 | 0.12 |    |           |           |  |                                                                             |
| 17485 | ENSG00000235266  |         | 18124   | 0.12 |    |           |           |  |                                                                             |
| 17486 | ENSG00000250752  |         | 18126.2 | 0.12 |    |           |           |  |                                                                             |
| 17493 | ENSG00000262921  |         | 18126.9 | 0.12 |    |           |           |  |                                                                             |
| 17507 | ENSG00000273492  |         | 18138.5 | 0.12 |    |           |           |  |                                                                             |
| 17509 | ENSG00000264475  |         | 18139.3 | 0.12 |    |           |           |  |                                                                             |
| 17515 | ENSG00000253384  |         | 18143.6 | 0.12 | 7  | 5529206   | 5525132   |  | Small nuclear RNA U13                                                       |
| 17519 | ENSG00000268153  |         | 18147   | 0.12 |    |           |           |  |                                                                             |
| 17521 | ENSG00000259830  |         | 18147.2 | 0.12 |    |           |           |  |                                                                             |
| 17524 | ENSG00000253384  |         | 18148.6 | 0.12 |    |           |           |  |                                                                             |
| 17528 | ENSG00000256828  |         | 18152.5 | 0.12 |    |           |           |  |                                                                             |
| 17542 | ENSG00000256878  |         | 18164.3 | 0.12 |    |           |           |  |                                                                             |
| 17547 | ENSG00000256878  |         | 18164.3 | 0.12 |    |           |           |  |                                                                             |
| 17558 | ENSG00000225742  |         | 18175.2 | 0.12 |    |           |           |  |                                                                             |
| 17562 | ENSG00000204112  |         | 18176.4 | 0.12 |    |           |           |  |                                                                             |
| 17563 | ENSG00000255007  |         | 18176.6 | 0.12 |    |           |           |  |                                                                             |
| 17565 | ENSG00000231997  |         | 18177.2 | 0.12 | 9  | 46389110  | 46391556  |  | family with sequence similarity 27, member D1                               |
| 17566 | ENSG00000232471  |         | 18177.4 | 0.12 |    |           |           |  |                                                                             |
| 17567 | ENSG00000212931  |         | 18177.5 | 0.12 |    |           |           |  |                                                                             |
| 17571 | ENSG00000263567  |         | 18180   | 0.12 |    |           |           |  |                                                                             |
| 17578 | ENSG00000273372  |         | 18185.9 | 0.12 |    |           |           |  |                                                                             |
| 17579 | ENSG0000021168   |         | 18186.4 | 0.12 |    |           |           |  |                                                                             |
| 17584 | ENSG00000272748  |         | 18189.2 | 0.12 |    |           |           |  |                                                                             |
| 17588 | ENSG00000258480  |         | 18191.9 | 0.12 |    |           |           |  |                                                                             |
| 17597 | ENSG00000237320  |         | 18196.3 | 0.12 |    |           |           |  |                                                                             |
| 17599 | ENSG00000233521  |         | 18196.8 | 0.12 |    |           |           |  |                                                                             |
| 17604 | ENSG00000225297  |         | 18201.3 | 0.12 |    |           |           |  |                                                                             |
| 17608 | ENSG00000256228  |         | 18208.8 | 0.12 |    |           |           |  |                                                                             |
| 17609 | ENSG0000027144   |         | 18208   | 0.12 |    |           |           |  |                                                                             |
| 17612 | ENSG00000265148  |         | 18209.6 | 0.12 |    |           |           |  |                                                                             |
| 17629 | ENSG00000236889  |         | 18219.8 | 0.12 |    |           |           |  |                                                                             |
| 17631 | ENSG00000263774  |         | 18220.2 | 0.12 |    |           |           |  |                                                                             |
| 17639 | ENSG00000259984  |         | 18229   | 0.12 |    |           |           |  |                                                                             |
| 17650 | ENSG0000024129   |         | 18238.8 | 0.12 |    |           |           |  |                                                                             |
| 17659 | ENSG00000226977  |         | 18248.1 | 0.12 |    |           |           |  |                                                                             |
| 17671 | ENSG00000267219  |         | 18258.3 | 0.12 |    |           |           |  |                                                                             |
| 17676 | ENSG00000259772  |         | 18262.2 | 0.12 |    |           |           |  |                                                                             |
| 17680 | ENSG00000231714  |         | 18266.3 | 0.12 | 12 | 79918657  | 79918950  |  | RNA 7SL, cytoplasmic 696, pseudogene                                        |
| 17685 | ENSG00000248965  |         | 18268.8 | 0.12 |    |           |           |  |                                                                             |
| 17689 | ENSG00000261439  |         | 18273.5 | 0.12 |    |           |           |  |                                                                             |
| 17696 | ENSG00000234646  |         | 18282.5 | 0.12 |    |           |           |  |                                                                             |
| 17702 | ENSG00000228120  |         | 18284.3 | 0.12 |    |           |           |  |                                                                             |
| 17708 | ENSG0000026864   |         | 18287.4 | 0.12 |    |           |           |  |                                                                             |
| 17710 | ENSG00000272201  |         | 18289.4 | 0.12 |    |           |           |  |                                                                             |
| 17712 | ENSG00000216842  |         | 18290   | 0.12 |    |           |           |  |                                                                             |
| 17713 | ENSG00000241216  |         | 18291.7 | 0.12 |    |           |           |  |                                                                             |
| 17714 | ENSG00000234488  |         | 18296.7 | 0.12 |    |           |           |  |                                                                             |
| 17723 | ENSG00000258873  |         | 18304.7 | 0.12 |    |           |           |  |                                                                             |
| 17725 | ENSG00000259570  |         | 18306.4 | 0.12 |    |           |           |  |                                                                             |
| 17729 | ENSG00000231508  |         | 18308.5 | 0.12 |    |           |           |  |                                                                             |
| 17734 | ENSG00000251011  |         | 18315.9 | 0.12 |    |           |           |  |                                                                             |
| 17742 | ENSG00000208142  |         | 18319   | 0.12 |    |           |           |  |                                                                             |
| 17756 | ENSG00000232696  |         | 18325.3 | 0.12 |    |           |           |  |                                                                             |
| 17751 | ENSG000002048629 |         | 18325.6 | 0.12 | 1  | 24993474  | 24993578  |  | Small nuclear RNA U13                                                       |
| 17756 | ENSG00000259910  |         | 18327   | 0.12 |    |           |           |  |                                                                             |
| 17761 | ENSG00000213631  |         | 18332.6 | 0.12 |    |           |           |  |                                                                             |
| 17762 | ENSG00000232486  |         | 18333.1 | 0.12 |    |           |           |  |                                                                             |
| 17769 | ENSG00000262833  |         | 18334.8 | 0.12 |    |           |           |  |                                                                             |
| 17772 | ENSG00000256102  |         | 18337.2 | 0.12 |    |           |           |  |                                                                             |
| 17783 | ENSG00000227045  |         | 18343.6 | 0.12 |    |           |           |  |                                                                             |
| 17786 | ENSG00000202547  |         | 18347.1 | 0.12 |    |           |           |  |                                                                             |
| 17793 | ENSG00000232156  |         | 18348.3 | 0.12 |    |           |           |  |                                                                             |
| 17797 | ENSG00000225881  |         | 18350.6 | 0.12 |    |           |           |  |                                                                             |
| 17803 | ENSG00000262596  |         | 18353.5 | 0.12 |    |           |           |  |                                                                             |
| 17814 | ENSG00000256055  |         | 18363.3 | 0.12 |    |           |           |  |                                                                             |
| 17818 | ENSG00000227722  |         | 18364.3 | 0.12 |    |           |           |  |                                                                             |
| 17821 | ENSG00000269387  |         | 18365.7 | 0.12 |    |           |           |  |                                                                             |
| 17823 | ENSG00000231393  |         | 18366.3 | 0.12 |    |           |           |  |                                                                             |
| 17826 | ENSG00000261613  |         | 18369.1 | 0.12 |    |           |           |  |                                                                             |
| 17840 | ENSG00000232623  |         | 18381.2 | 0.12 |    |           |           |  |                                                                             |
| 17845 | ENSG00000202031  |         | 18383.1 | 0.12 |    |           |           |  |                                                                             |
| 17857 | ENSG00000254238  |         | 18390   | 0.12 |    |           |           |  |                                                                             |
| 17858 | ENSG00000269792  |         | 18390.2 | 0.12 |    |           |           |  |                                                                             |
| 17863 | ENSG00000234673  |         | 18393.3 | 0.12 |    |           |           |  |                                                                             |
| 17864 | ENSG00000269650  |         | 18393.1 | 0.12 |    |           |           |  |                                                                             |
| 17869 | ENSG00000183304  |         | 18397.6 | 0.12 |    |           |           |  |                                                                             |
| 17870 | ENSG00000269561  |         | 18398.1 | 0.12 |    |           |           |  |                                                                             |
| 17873 | ENSG00000259335  |         | 18399   | 0.12 |    |           |           |  |                                                                             |
| 17927 | ENSG00000235274  |         | 18436.6 | 0.12 |    |           |           |  |                                                                             |
| 17928 | ENSG00000266149  |         | 18444.7 | 0.12 |    |           |           |  |                                                                             |
| 17938 | ENSG00000234659  |         | 18445.6 | 0.12 | 19 | 11578091  | 11578412  |  | RNA 7SL, cytoplasmic 699, pseudogene                                        |
| 17944 | ENSG00000255523  |         | 18452.4 | 0.12 |    |           |           |  |                                                                             |
| 17948 | ENSG00000269488  |         | 18452.2 | 0.12 |    |           |           |  |                                                                             |
| 17965 | ENSG00000205010  |         | 18466.7 | 0.12 |    |           |           |  |                                                                             |
| 17974 | ENSG00000270200  |         | 18476.5 | 0.12 |    |           |           |  |                                                                             |
| 17983 | ENSG00000265331  |         | 18482.5 | 0.12 |    |           |           |  |                                                                             |
| 17985 | ENSG00000198100  |         | 18483.1 | 0.12 |    |           |           |  |                                                                             |
| 17990 | ENSG00000231978  |         | 18489.8 | 0.12 |    |           |           |  |                                                                             |
| 17993 | ENSG00000269702  |         | 18487.6 | 0.12 |    |           |           |  |                                                                             |
| 17996 | ENSG00000262500  |         | 18492.5 | 0.12 |    |           |           |  |                                                                             |
| 17998 | ENSG00000264256  |         | 18493   | 0.12 |    |           |           |  |                                                                             |
| 18004 | ENSG00000252419  |         | 18498.7 | 0.12 | 8  | 37458392  | 37459706  |  | RNA 7SL, cytoplasmic 463, pseudogene                                        |
| 18006 | ENSG00000252419  |         | 18498.7 | 0.12 | 6  | 5045818   | 5046335   |  | RNA component of mitochondrial RNA processing endoribonuclease pseudogene 2 |
| 18012 | ENSG00000235837  |         | 18504.5 | 0.12 |    |           |           |  |                                                                             |
| 18016 | ENSG00000254512  |         | 18510.5 | 0.12 |    |           |           |  |                                                                             |
| 18029 | ENSG00000216922  |         | 18522.5 | 0.12 |    |           |           |  |                                                                             |
| 18032 | ENSG00000243518  |         | 18525.3 | 0.12 |    |           |           |  |                                                                             |
| 18033 | ENSG00000261632  |         | 18525.5 | 0.12 |    |           |           |  |                                                                             |
| 18038 | ENSG00000217778  |         | 18529.9 | 0.12 |    |           |           |  |                                                                             |
| 18042 | ENSG00000226965  |         | 18531.3 | 0.12 |    |           |           |  |                                                                             |
| 18045 | ENSG00000269653  |         | 18532.6 | 0.12 |    |           |           |  |                                                                             |
| 18050 | ENSG00000248660  |         | 18535.3 | 0.12 |    |           |           |  |                                                                             |
| 18058 | ENSG00000228127  |         | 18541.2 | 0.12 |    |           |           |  |                                                                             |



|       |                 |          |         |                      |                      |           |           |                                                                                |                                     |
|-------|-----------------|----------|---------|----------------------|----------------------|-----------|-----------|--------------------------------------------------------------------------------|-------------------------------------|
| 16810 | ENSG00000243723 | 16872.7  | 0.11    | misc RNA             | 2                    | 15933076  | 15933073  | RNA 7SL cytoplasmic 383, pseudogene                                            |                                     |
| 16808 | ENSG00000243717 | 17025.3  | 0.11    | processed_pseudogene | 12                   | 6706120   | 6706120   | RNA 7SL cytoplasmic 809, pseudogene                                            |                                     |
| 16748 | ENSG00000243740 | 17601.5  | 0.11    | misc RNA             | 12                   | 9569546   | 9569548   | Y RNA                                                                          |                                     |
| 16917 | ENSG00000243732 | 17714.1  | 0.11    | misc RNA             | 2                    | 8559478   | 8559409   | Y RNA                                                                          |                                     |
| 17208 | ENSG00000243669 | 17825.3  | 0.11    | misc RNA             | 17                   | 2697128   | 2657430   | RNA 7SL cytoplasmic 605, pseudogene                                            |                                     |
| 17216 | ENSG00000243751 | 17930.6  | 0.11    | misc RNA             | 14                   | 7313029   | 7313029   | Y RNA                                                                          |                                     |
| 17245 | ENSG00000244091 | 17846.6  | 0.11    | misc RNA             | 12                   | 84909252  | 84909536  | RNA 7SL cytoplasmic 483, pseudogene                                            |                                     |
| 17505 | ENSG00000243698 | 18137.5  | 0.11    | misc RNA             | 12                   | 11259696  | 11257013  | Y RNA                                                                          |                                     |
| 17585 | ENSG00000243748 | 18158.9  | 0.11    | misc RNA             | 14                   | 12226024  | 12226026  | Y RNA                                                                          |                                     |
| 17744 | ENSG00000243728 | 18521.2  | 0.11    | misc RNA             | 12                   | 31689237  | 31689538  | Y RNA                                                                          |                                     |
| 18164 | ENSG00000243780 | 18653.1  | 0.11    | misc RNA             | 20                   | 5945184   | 5945208   | Y RNA                                                                          |                                     |
| 18336 | ENSG00000243847 | 18753.4  | 0.11    | misc RNA             | 2                    | 4278626   | 4278626   | RNA 7SL cytoplasmic 819, pseudogene                                            |                                     |
| 18380 | ENSG00000242814 | 18789.3  | 0.11    | misc RNA             | 13                   | 96821799  | 96822099  | RNA 7SL cytoplasmic 810, pseudogene                                            |                                     |
| 18420 | ENSG00000243238 | 18819.2  | 0.11    | misc RNA             | 20                   | 1263592   | 1263592   | RNA 7SL cytoplasmic 594, pseudogene                                            |                                     |
| 18459 | ENSG00000243035 | 18844.7  | 0.11    | misc RNA             | 5                    | 3213484   | 3213484   | Y RNA                                                                          |                                     |
| 18476 | ENSG00000199591 | 18860.4  | 0.11    | misc RNA             | 3                    | 47912498  | 47912404  | Y RNA                                                                          |                                     |
| 18482 | ENSG00000243760 | 18891.5  | 0.11    | misc RNA             | 19                   | 17962680  | 17962683  | RNA 7SL cytoplasmic 619, pseudogene                                            |                                     |
| 18538 | ENSG00000243186 | 18905.2  | 0.11    | misc RNA             | 8                    | 120724070 | 120724305 | RNA 7SK small nuclear pseudogene 153                                           |                                     |
| 18730 | ENSG00000243894 | 19046.9  | 0.11    | misc RNA             | 2                    | 55511354  | 55511364  | Y RNA                                                                          |                                     |
| 18902 | ENSG00000243743 | 19095.2  | 0.11    | misc RNA             | 13                   | 92629601  | 92629598  | RNA 7SL cytoplasmic 374, pseudogene                                            |                                     |
| 19048 | ENSG00000243872 | 19305.8  | 0.11    | misc RNA             | 1                    | 220745085 | 220745377 | RNA 7SL cytoplasmic 464, pseudogene                                            |                                     |
| 19061 | ENSG00000238888 | 19315.4  | 0.11    | misc RNA             | 17                   | 15311701  | 15312003  | RNA 7SL cytoplasmic 762, pseudogene                                            |                                     |
| 19209 | ENSG00000243845 | 19421.6  | 0.11    | misc RNA             | 9                    | 12927183  | 12927648  | RNA 7SL cytoplasmic 50, pseudogene                                             |                                     |
| 18482 | ENSG00000244025 | 19627.7  | 0.11    | misc RNA             | 6                    | 43003936  | 43004238  | RNA 7SL cytoplasmic 403, pseudogene                                            |                                     |
| 4269  | ENSG00000225131 | 8627.2   | 0.11    | processed_pseudogene | 13                   | 48342584  | 48343685  | proteasome activator subunit 2 pseudogene 2                                    |                                     |
| 9559  | ENSG00000243785 | 8292.2   | 0.11    | processed_pseudogene | 4                    | 11059469  | 11059599  | HGI hypoxia inducible domain family, member 1A pseudogene 14                   |                                     |
| 6440  | ENSG00000232927 | 8231.8   | 0.11    | processed_pseudogene | Y                    | 3558846   | 3551909   | ubiquitin specific peptidase 12 pseudogene 2, linked                           |                                     |
| 11496 | ENSG00000181819 | 13575.2  | 0.11    | processed_pseudogene | X                    | 10465018  | 10465710  | potassium channel tetramerization domain containing 9 pseudogene 2             |                                     |
| 17571 | ENSG00000243553 | 14271.6  | 0.11    | processed_pseudogene | 13                   | 14271964  | 14271964  | ribosomal protein L31 pseudogene 8                                             |                                     |
| 12484 | ENSG00000243553 | 14351.8  | 0.11    | processed_pseudogene | 17                   | 27128462  | 27128460  | ribosomal protein L31 pseudogene 58                                            |                                     |
| 14665 | ENSG00000239797 | 15979.1  | 0.11    | processed_pseudogene | 3                    | 145542044 | 145542268 | ribosomal protein L21 pseudogene 39                                            |                                     |
| 14928 | ENSG00000239797 | 15979.1  | 0.11    | processed_pseudogene | 4                    | 69931825  | 69931825  | ribosomal protein L21 pseudogene 9                                             |                                     |
| 15176 | ENSG00000229354 | 16387.2  | 0.11    | processed_pseudogene | 11                   | 5592477   | 5593422   | heterogeneous nuclear ribonucleoprotein A1 pseudogene 53                       |                                     |
| 15200 | ENSG00000225831 | 16444.8  | 0.11    | processed_pseudogene | 20                   | 5513524   | 5513524   | ribosomal protein S18 pseudogene 1                                             |                                     |
| 15142 | ENSG00000225831 | 16444.8  | 0.11    | processed_pseudogene | 19                   | 7826368   | 7826368   | ribosomal protein S18 pseudogene 20                                            |                                     |
| 15680 | ENSG00000200914 | 16772.9  | 0.11    | processed_pseudogene | 16                   | 78389248  | 78389731  | LSM3 pseudogene 5                                                              |                                     |
| 15821 | ENSG00000244534 | 16881.1  | 0.11    | processed_pseudogene | 8                    | 5322744   | 5322660   | ribosomal protein L34 pseudogene 17                                            |                                     |
| 16054 | ENSG00000234118 | 17189.3  | 0.11    | processed_pseudogene | 1                    | 4189187   | 4189187   | res-related G3 histidine rich domain 1 pseudogene 3                            |                                     |
| 16074 | ENSG00000234118 | RPL13APB | 17591.5 | 0.11                 | processed_pseudogene | 10        | 112963830 | 112969991                                                                      | ribosomal protein L13a pseudogene 6 |
| 16107 | ENSG00000228034 | 17112.9  | 0.11    | processed_pseudogene | 2                    | 71030289  | 71030568  | high mobility group nucleosomal binding domain 2 pseudogene 21                 |                                     |
| 16241 | ENSG00000244141 | 17155.9  | 0.11    | processed_pseudogene | 9                    | 10049768  | 10049768  | keratin 19 pseudogene 3                                                        |                                     |
| 16269 | ENSG00000270788 | 17228.1  | 0.11    | processed_pseudogene | 14                   | 59517086  | 59518054  | PO2 and LIM domain 1 pseudogene 1                                              |                                     |
| 16543 | ENSG00000232568 | 17426.7  | 0.11    | processed_pseudogene | 2                    | 187128146 | 187128646 | ribosomal protein L23a pseudogene 35                                           |                                     |
| 16555 | ENSG00000241661 | 17436.4  | 0.11    | processed_pseudogene | 1                    | 138962592 | 13896739  | protein phosphatase 1, regulatory (inhibitor) subunit 2 pseudogene 6           |                                     |
| 16560 | ENSG00000241661 | 17436.4  | 0.11    | processed_pseudogene | 17                   | 130411684 | 130411684 | BCG2 pseudogene 1                                                              |                                     |
| 16911 | ENSG00000233890 | 17552.5  | 0.11    | processed_pseudogene | 10                   | 101457106 | 101457706 | estrogen receptor binding site associated, antigen 9 pseudogene 1              |                                     |
| 16716 | ENSG00000237205 | 17575.1  | 0.11    | processed_pseudogene | 10                   | 8037786   | 8037881   | ribosomal protein L7 pseudogene 34                                             |                                     |
| 16742 | ENSG00000237205 | 17575.1  | 0.11    | processed_pseudogene | 10                   | 88078100  | 88078100  | eukaryotic translation initiation factor 4A1 pseudogene 13                     |                                     |
| 16788 | ENSG00000218454 | 17631.9  | 0.11    | processed_pseudogene | 17                   | 20674371  | 20674740  | heterogeneous nuclear ribonucleoprotein A1 pseudogene 19                       |                                     |
| 16846 | ENSG00000215120 | 17676.3  | 0.11    | processed_pseudogene | 2                    | 18412570  | 18412570  | LINE2A pseudogene 1                                                            |                                     |
| 16864 | ENSG00000208189 | 17733.9  | 0.11    | processed_pseudogene | 1                    | 139709641 | 139709635 | regulator of chaperone condensation 2 pseudogene 8                             |                                     |
| 16934 | ENSG00000227056 | 17730.3  | 0.11    | processed_pseudogene | 1                    | 119781937 | 119782119 | ribosomal protein L6 pseudogene 2                                              |                                     |
| 16936 | ENSG00000218128 | 17730.3  | 0.11    | processed_pseudogene | X                    | 12784848  | 12784978  | keratin 19 pseudogene 44                                                       |                                     |
| 16976 | ENSG00000202121 | 17753.9  | 0.11    | processed_pseudogene | 2                    | 22317838  | 22317838  | acytousy related 1 pseudogene 2                                                |                                     |
| 16986 | ENSG00000214077 | 17772.5  | 0.11    | processed_pseudogene | 2                    | 132181374 | 132181440 | guanine nucleotide binding protein (G protein), alpha polypeptide pseudogene 1 |                                     |
| 17030 | ENSG00000202227 | 17801.7  | 0.11    | processed_pseudogene | 4                    | 168886717 | 168887336 | igkappa mhc containing 60 pseudogene 14                                        |                                     |
| 17031 | ENSG00000202227 | 17801.7  | 0.11    | processed_pseudogene | 4                    | 33118926  | 33118926  | SUMO2 pseudogene 10                                                            |                                     |
| 17046 | ENSG00000228112 | 17812.3  | 0.11    | processed_pseudogene | X                    | 110412449 | 110412631 | FCF1 pseudogene 4                                                              |                                     |
| 17091 | ENSG00000229570 | 17846.1  | 0.11    | processed_pseudogene | 1                    | 120038459 | 120039484 | glyceraldehyde 3 phosphate dehydrogenase pseudogene 58                         |                                     |
| 17096 | ENSG00000231378 | 17858.3  | 0.11    | processed_pseudogene | 1                    | 10660516  | 10660516  | ribosomal protein L1 pseudogene 41                                             |                                     |
| 17125 | ENSG00000238557 | 17867.5  | 0.11    | processed_pseudogene | 15                   | 62654228  | 62654330  | high mobility group nucleosomal binding domain 1 pseudogene 26                 |                                     |
| 17126 | ENSG00000231294 | 17869.8  | 0.11    | processed_pseudogene | X                    | 65294877  | 65298189  | eukaryotic translation initiation factor 4B pseudogene 9                       |                                     |
| 17131 | ENSG00000231294 | 17872.0  | 0.11    | processed_pseudogene | 6                    | 68362402  | 68362402  | SUMO2 pseudogene 4                                                             |                                     |
| 17151 | ENSG00000240244 | 17880.7  | 0.11    | processed_pseudogene | 1                    | 120138700 | 120139802 | glyceraldehyde 3 phosphate dehydrogenase pseudogene 33                         |                                     |
| 17276 | ENSG00000225398 | 17973.4  | 0.11    | processed_pseudogene | X                    | 143392257 | 143392818 | ribonucleotide reductase M2 polypeptide pseudogene 4                           |                                     |
| 17290 | ENSG00000233485 | 17973.4  | 0.11    | processed_pseudogene | 1                    | 18271696  | 18271696  | DnaJ (Hsp60) homolog, eukaryotic, member 1 pseudogene 1                        |                                     |
| 17417 | ENSG00000230169 | 18073.6  | 0.11    | processed_pseudogene | 8                    | 113551118 | 113551546 | ribosomal protein L30 pseudogene 16                                            |                                     |
| 17456 | ENSG00000230178 | 18102.7  | 0.11    | processed_pseudogene | 16                   | 73974538  | 73974523  | ribosomal protein SA pseudogene 56                                             |                                     |
| 17456 | ENSG00000230178 | 18102.7  | 0.11    | processed_pseudogene | 16                   | 23917138  | 23917138  | iron-sulfur cluster associated 1 pseudogene 2                                  |                                     |
| 17458 | ENSG00000232373 | 18104.7  | 0.11    | processed_pseudogene | 13                   | 68346823  | 68347859  | MT-CYB pseudogene 3                                                            |                                     |
| 17464 | ENSG00000202412 | 18107.9  | 0.11    | processed_pseudogene | 3                    | 147884131 | 147885085 | heterogeneous nuclear ribonucleoprotein A1 pseudogene 20                       |                                     |
| 17472 | ENSG00000211765 | 18126.8  | 0.11    | processed_pseudogene | 6                    | 39037620  | 39037620  | actin monomer 1B6, pseudogene                                                  |                                     |
| 17489 | ENSG00000231301 | 18126.8  | 0.11    | processed_pseudogene | 6                    | 29550285  | 29550285  | ribosomal protein L13a pseudogene                                              |                                     |
| 17600 | ENSG00000238873 | 18197.1  | 0.11    | processed_pseudogene | 1                    | 120101978 | 120102387 | glyceraldehyde 3 phosphate dehydrogenase pseudogene 27                         |                                     |
| 17608 | ENSG00000238873 | 18197.1  | 0.11    | processed_pseudogene | 1                    | 201183    | 201183    | canine succinyl coylate 4 pseudogene 1                                         |                                     |
| 17703 | ENSG00000215785 | 18234.3  | 0.11    | processed_pseudogene | 1                    | 11051035  | 11051034  | collin 1 (non-muscle) pseudogene 6                                             |                                     |
| 17736 | ENSG00000243889 | 18316.3  | 0.11    | processed_pseudogene | 11                   | 122996575 | 122999832 | ribosomal protein L34 pseudogene 23                                            |                                     |
| 17774 | ENSG00000238987 | 18338.7  | 0.11    | processed_pseudogene | 9                    | 5318788   | 5318788   | ADP-ribosylation factor like 2 binding protein pseudogene 2                    |                                     |
| 17782 | ENSG00000237263 | 18342.8  | 0.11    | processed_pseudogene | 13                   | 4264308   | 4264329   | mitogen-activated protein kinase 6 pseudogene 3                                |                                     |
| 17796 | ENSG00000213487 | 18349.6  | 0.11    | processed_pseudogene | X                    | 3289150   | 3289423   | aminopyruvate synthetase 1 pseudogene 4                                        |                                     |
| 17801 | ENSG00000230509 | 18349.6  | 0.11    | processed_pseudogene | 12                   | 8456357   | 8456357   | high mobility group nucleosomal binding domain 2 pseudogene 11                 |                                     |
| 17808 | ENSG00000227425 | 18357.8  | 0.11    | processed_pseudogene | 1                    | 157830987 | 157831250 | mitochondrial ribosomal protein S21 pseudogene 2                               |                                     |
| 17822 | ENSG00000224055 | 18366.2  | 0.11    | processed_pseudogene | 15                   | 44355709  | 44355511  | glyceraldehyde 3 phosphate dehydrogenase pseudogene 55                         |                                     |
| 17822 | ENSG00000219199 | 18368.3  | 0.11    | processed_pseudogene | 16                   | 63214514  | 63214514  | ubiquitin-conjugating enzyme E2F (ubiquitin) pseudogene 2                      |                                     |
| 17881 | ENSG00000237859 | 18409.1  | 0.11    | processed_pseudogene | 16                   | 154117160 | 154117278 | eukaryotic translation initiation factor 1, alpha 1 pseudogene 31              |                                     |
| 17894 | ENSG00000229367 | 18411.4  | 0.11    | processed_pseudogene | 1                    | 229706279 | 229706543 | high mobility group nucleosomal binding domain 2 pseudogene 19                 |                                     |
| 17921 | ENSG00000227735 | 18432.6  | 0.11    | processed_pseudogene | 1                    | 244761693 | 244761689 | cytochrome c, somatic, pseudogene 5                                            |                                     |
| 17959 | ENSG00000240461 | 18459.2  | 0.11    | processed_pseudogene | 4                    | 141528844 | 141528844 | TBC1H41                                                                        |                                     |
| 17960 | ENSG00000173954 | 18459.2  | 0.11    | processed_pseudogene | X                    | 138444199 | 138444199 | SNRPB upstream reading frame-like                                              |                                     |
| 17971 | ENSG00000242697 | 18477.4  | 0.11    | processed_pseudogene | 6                    | 95057317  | 95057398  | DnaJ (Hsp60) homolog, subfamily C, member 19 pseudogene 6                      |                                     |
| 18004 | ENSG00000235886 | 18532.8  | 0.11    | processed_pseudogene | 19                   | 12618843  | 12618843  | ribosomal protein S18 pseudogene 7                                             |                                     |
| 18160 | ENSG00000237682 | 18630.0  | 0.11    | processed_pseudogene | 14                   | 20662985  | 20663121  | eukaryotic translation initiation factor 4A1 pseudogene 12                     |                                     |
| 18217 | ENSG00000232856 | 18631.1  | 0.11    | processed_pseudogene | 7                    | 73302407  | 73302407  | ubiquitin-like with PH2 and ring finger domains 1 pseudogene 1                 |                                     |
| 18185 | ENSG00000176318 | 18631.1  | 0.11    | processed_pseudogene | X                    | 101801662 | 101801662 | lfn18b1 pseudogene 1                                                           |                                     |
| 18186 | ENSG00000232921 | 18634.0  | 0.11    | processed_pseudogene | 2                    | 140978153 | 140979054 | M1-ND1 pseudogene 2                                                            |                                     |
| 18201 | ENSG00000211660 | 18635.2  | 0.11    | processed_pseudogene | 1                    | 350190    | 350190    | ribosomal protein S18 pseudogene 6                                             |                                     |
| 18250 | ENSG00000248338 | 18683.2  | 0.11    | processed_pseudogene | 17                   | 48313200  | 48313400  | SUMO2 pseudogene 7                                                             |                                     |
| 18241 | ENSG00000174408 | 18740.4  | 0.11    | processed_pseudogene | 13                   | 107818146 | 107819334 | peptidylarginine isomerase A (cyclophilin A) pseudogene 24                     |                                     |
| 18242 | ENSG00000231910 | 18741.9  | 0.11    | processed_pseudogene | 13                   | 35261702  | 35261702  | ribosomal protein S20 pseudogene 55                                            |                                     |
| 18333 | ENSG00000214051 |          |         |                      |                      |           |           |                                                                                |                                     |

|       |                 |            |         |      |                |    |           |           |                                                                                          |
|-------|-----------------|------------|---------|------|----------------|----|-----------|-----------|------------------------------------------------------------------------------------------|
| 4973  | ENSG00000134231 | RSAD2      | 7619.9  | 0.11 | protein_coding | 7  | 7009377   | 7038370   | radical S-adenosyl methionine domain containing 2                                        |
| 4974  | ENSG00000110688 | TRPV7      | 7622.5  | 0.11 | protein_coding | 17 | 1531176   | 1531176   | transient receptor potential cation channel, subfamily V, member 2                       |
| 5006  | ENSG00000143774 | GLK1       | 7663    | 0.11 | protein_coding | 1  | 228327663 | 228336885 | guanylate kinase 1                                                                       |
| 5075  | ENSG00000163687 | DNASE1L3   | 7737.8  | 0.11 | protein_coding | 3  | 5817784   | 5820044   | deoxyribonuclease like 3                                                                 |
| 5176  | ENSG00000125818 | RAB17      | 7897    | 0.11 | protein_coding | 20 | 10967     | 10968     | proteasome (broad, macro) inhibitor subunit 1 (P31)                                      |
| 5200  | ENSG00000126229 | RNFPEL1    | 7952.9  | 0.11 | protein_coding | 2  | 24159521  | 24159779  | angry amyloidosis (neuropathic) 5-like 1                                                 |
| 5296  | ENSG00000155307 | SARIN1     | 8001.8  | 0.11 | protein_coding | 21 | 1585749   | 1585723   | SAM domain, SH3 domain and nuclear localization signals 1                                |
| 5301  | ENSG00000186461 | RAB17      | 8011.0  | 0.11 | protein_coding | 18 | 9708162   | 9696248   | RAB17, member RAS oncogene family                                                        |
| 5354  | ENSG00000090884 | HMGH       | 8074.8  | 0.11 | protein_coding | 6  | 1849261   | 1871716   | hydroxymethylglutathione hydrolase                                                       |
| 5376  | ENSG00000184182 | UBE2F      | 8166.5  | 0.11 | protein_coding | 2  | 23885469  | 238851336 | ubiquitin-conjugating enzyme E2F (putative)                                              |
| 5412  | ENSG0000047644  | WWC3       | 8176.6  | 0.11 | protein_coding | A  | 9862962   | 10122518  | WWC family member 3                                                                      |
| 5433  | ENSG00000202628 | ATP2B2     | 8176.6  | 0.11 | protein_coding | 2  | 10226290  | 10226290  | ATP-binding cassette, subfamily B, member 2                                              |
| 5448  | ENSG00000124172 | ATP5E      | 8191.1  | 0.11 | protein_coding | 20 | 5760522   | 57607437  | ATP synthase, H+ transporting, mitochondrial F1 complex, epsilon subunit                 |
| 5676  | ENSG00000182711 | NLRP7      | 8441.9  | 0.11 | protein_coding | 1  | 247579458 | 247612410 | NLR family, pyrin domain containing 3                                                    |
| 5741  | ENSG00000156460 | SLC24A2    | 8502.1  | 0.11 | protein_coding | 2  | 2324321   | 23260299  | guanylate cyclase, subfamily B (MDR1A/C), member 1                                       |
| 5823  | ENSG00000198951 | NAGA       | 8591.1  | 0.11 | protein_coding | 22 | 4244358   | 4246646   | N-acetylglucosaminidase, alpha-                                                          |
| 5836  | ENSG00000126561 | STAT3A     | 8607.1  | 0.11 | protein_coding | 17 | 4043956   | 4046381   | signal transducer and activator of transcription 3A                                      |
| 5878  | ENSG00000120903 | IL13RH     | 8653.3  | 0.11 | protein_coding | 14 | 2473056   | 2473742   | leukotriene B4 receptor                                                                  |
| 5912  | ENSG00000170542 | SERPINF9   | 8685.5  | 0.11 | protein_coding | 6  | 2687500   | 2690314   | serpin peptidase inhibitor, class B (ovalbumin), member 9                                |
| 5921  | ENSG00000159067 | FOXO1      | 8703    | 0.11 | protein_coding | 13 | 4112804   | 41240734  | forkhead box O1                                                                          |
| 6056  | ENSG00000205129 | ATX2       | 8938    | 0.11 | protein_coding | 2  | 10693062  | 10693190  | ubiquitin-specific protease 75                                                           |
| 6068  | ENSG00000258877 | UNC59      | 8847    | 0.11 | protein_coding | 8  | 74660526  | 7479189   | Uncoupled protein                                                                        |
| 6110  | ENSG00000215421 | ZNF407     | 8893.2  | 0.11 | protein_coding | 18 | 7226106   | 7277767   | zinc finger protein 407                                                                  |
| 6122  | ENSG00000120333 | SLC24A2    | 8955.1  | 0.11 | protein_coding | 19 | 1071333   | 1072055   | solute carrier family 4 (cation transporter), member 2                                   |
| 6157  | ENSG00000131196 | RNFATC1    | 8958.7  | 0.11 | protein_coding | 18 | 7715856   | 7728832   | nuclear factor of activated T-cells, cytoplasmic, calcineurin-dependent 1                |
| 6175  | ENSG00000133872 | TMEM88     | 8954.2  | 0.11 | protein_coding | 8  | 2992028   | 2994023   | transmembrane protein 88                                                                 |
| 6269  | ENSG00000181986 | LAMTOR4    | 9207.8  | 0.11 | protein_coding | 7  | 6874620   | 6875367   | late endosomal/lysosomal activator, MAPK and mTOR activator 4                            |
| 6275  | ENSG00000134109 | EDEM1      | 9058.8  | 0.11 | protein_coding | 3  | 5228311   | 526164    | ER degradation enhancer, mannosidase alpha-like 1                                        |
| 6423  | ENSG00000143851 | PTPN22     | 9213.6  | 0.11 | protein_coding | 1  | 202116141 | 202130716 | protein tyrosine phosphatase, non-receptor type 2                                        |
| 6429  | ENSG00000140413 | CGIAP2     | 9218.2  | 0.11 | protein_coding | 2  | 7862968   | 7863176   | CADAF1A receptor-associated protein-like 2                                               |
| 6519  | ENSG00000114374 | USP17      | 9317.8  | 0.11 | protein_coding | Y  | 1481350   | 1482764   | ubiquitin-specific peptidase 9 Y-linked                                                  |
| 6628  | ENSG00000192263 | RAPGEF1    | 9422.2  | 0.11 | protein_coding | 9  | 13445127  | 13461541  | Rap guanine nucleotide exchange factor (GEF) 1                                           |
| 6748  | ENSG00000153178 | CHOP2      | 9524.3  | 0.11 | protein_coding | 4  | 807114    | 807148    | ATP synthase, H+ translocating Fo complex, subunit s (factor 6)                          |
| 6810  | ENSG00000254505 | CHMP4A     | 9581.3  | 0.11 | protein_coding | 14 | 24678789  | 24683075  | charged multivesicular body protein 4A                                                   |
| 6822  | ENSG00000137078 | TNLT1      | 9592    | 0.11 | protein_coding | 9  | 3969465   | 3973230   | talin 1                                                                                  |
| 6879  | ENSG00000200393 | TYRO3      | 9627    | 0.11 | protein_coding | 10 | 1048139   | 1048139   | tyrosine kinase 2                                                                        |
| 6884  | ENSG00000151461 | UPF2       | 9692    | 0.11 | protein_coding | 10 | 1196201   | 1209519   | UPF2 regulator of nonsense transcripts homolog (yeast)                                   |
| 6963  | ENSG00000155961 | RAB39B     | 9708    | 0.11 | protein_coding | X  | 154447526 | 154493474 | RAB39B, member RAS oncogene family                                                       |
| 6972  | ENSG00000156924 | EFNB2      | 9745.2  | 0.11 | protein_coding | 3  | 1288138   | 1288138   | cell-like receptor 7                                                                     |
| 6985  | ENSG00000159958 | EFCAB14    | 9759.2  | 0.11 | protein_coding | 1  | 4712436   | 4719424   | EF-hand calcium binding domain 14                                                        |
| 6994  | ENSG00000136100 | VEPSC      | 9765    | 0.11 | protein_coding | 13 | 52989737  | 53024763  | vesicular protein sorting 35 homolog (S. cerevisiae)                                     |
| 6998  | ENSG00000150581 | ATP7A      | 9788    | 0.11 | protein_coding | 6  | 9733908   | 9734000   | ATP-binding cassette, subfamily B (MDR/ATP), member 1                                    |
| 7070  | ENSG00000125430 | HIST3B1    | 9833.3  | 0.11 | protein_coding | 17 | 1420440   | 1429271   | heparan sulfate (glycosaminoglycan) 3-O-sulfotransferase 3B1                             |
| 7107  | ENSG00000163719 | MTMR14     | 9869.6  | 0.11 | protein_coding | 3  | 8691117   | 8714407   | myotubularin related protein 14                                                          |
| 7167  | ENSG00000123696 | MEIS1L     | 9934    | 0.11 | protein_coding | 12 | 1169571   | 11691540  | meis domain protein 13-like                                                              |
| 7220  | ENSG00000177885 | GRB2       | 9972    | 0.11 | protein_coding | 17 | 73314157  | 733401790 | Growth factor receptor-bound protein 2                                                   |
| 7333  | ENSG00000166445 | ZEB1       | 10116.0 | 0.11 | protein_coding | 9  | 13142605  | 13150390  | zfp1 related, cell cycle regulator                                                       |
| 7407  | ENSG00000186021 | GRB2       | 10116.0 | 0.11 | protein_coding | 2  | 24184848  | 24157076  | G protein-coupled receptor 35                                                            |
| 7447  | ENSG00000144048 | DUSP11     | 10187.3 | 0.11 | protein_coding | 2  | 7398911   | 74007284  | dual specificity phosphatase 11 (RNAPNP complex 1-interacting)                           |
| 7450  | ENSG00000198422 | ALPKK      | 10187.3 | 0.11 | protein_coding | 10 | 7304310   | 73078187  | alpha-kinase related kinase                                                              |
| 7530  | ENSG00000147498 | CGALM1/CT1 | 10209.6 | 0.11 | protein_coding | 15 | 16261812  | 16015404  | chondroitin sulfate 6-O-sulfotransferase 1                                               |
| 7674  | ENSG00000100500 | SRSF5      | 10461.6 | 0.11 | protein_coding | 14 | 10193817  | 10208722  | serine/arginine-rich splicing factor 5                                                   |
| 7743  | ENSG00000124943 | AF1        | 10472.2 | 0.11 | protein_coding | 4  | 8789154   | 8809206   | AF-1/RK2 family, member 1                                                                |
| 7748  | ENSG00000203327 | GRB2       | 10472.2 | 0.11 | protein_coding | 3  | 7796243   | 78112934  | GRB2-associated binding protein 2                                                        |
| 7756  | ENSG00000188811 | NHLRC3     | 10488.7 | 0.11 | protein_coding | 13 | 39612443  | 39624246  | NHL repeat containing 3                                                                  |
| 7801  | ENSG00000208440 | CBG2       | 10521   | 0.11 | protein_coding | 6  | 31688371  | 31688491  | chromosome 6 open reading frame 25                                                       |
| 7808  | ENSG00000209284 | HDC4       | 10527.7 | 0.11 | protein_coding | 2  | 24296284  | 24292348  | histone deacetylase 4                                                                    |
| 7879  | ENSG00000189246 | NIP45      | 10592.5 | 0.11 | protein_coding | 16 | 21413558  | 2145888   | nuclear pore complex interacting protein, family member B3                               |
| 7881  | ENSG00000186479 | TM3K3      | 10594.7 | 0.11 | protein_coding | 18 | 6834925   | 6836235   | threonine-related transmembrane protein 3                                                |
| 7900  | ENSG00000190018 | GATC3      | 10620.3 | 0.11 | protein_coding | 14 | 1471526   | 14691218  | guanine nucleotide (hydroxymethyl)transferase (receptor)                                 |
| 7916  | ENSG00000186204 | CYP4F12    | 10625.6 | 0.11 | protein_coding | 17 | 1578367   | 1580784   | cytochrome P450, family 4, subfamily F, polypeptide 12                                   |
| 7990  | ENSG00000154727 | GABPA      | 10659.9 | 0.11 | protein_coding | 21 | 2710681   | 2714471   | GA binding protein transcription factor, alpha subunit 60kDa                             |
| 8002  | ENSG00000164300 | MBTD1      | 10785.2 | 0.11 | protein_coding | 6  | 7412528   | 7416199   | solute carrier family 8 (anion exchanger), member B1                                     |
| 8062  | ENSG00000145016 | KIAA226    | 10792.2 | 0.11 | protein_coding | 3  | 19728204  | 19747998  | Ma2-2 domain containing 1                                                                |
| 8183  | ENSG00000112102 | KIAA202    | 10792.2 | 0.11 | protein_coding | 12 | 11327404  | 11327404  | KIAA202                                                                                  |
| 8191  | ENSG00000164331 | ANKRD2     | 10872.6 | 0.11 | protein_coding | 5  | 7284160   | 7286151   | ankyrin repeat, family A (RF-XANK-like), 2                                               |
| 8254  | ENSG0000011877  | MCM8       | 10931.6 | 0.11 | protein_coding | 6  | 119134605 | 11925027  | minichromosome maintenance complex component 9                                           |
| 8465  | ENSG00000150162 | SH3BP1     | 11202.3 | 0.11 | protein_coding | 1  | 138312969 | 138312969 | phosphatidylinositol-3-OH kinase, catalytic subunit 1                                    |
| 8621  | ENSG00000193475 | ASB7       | 11260.3 | 0.11 | protein_coding | 15 | 10119120  | 10119120  | ankyrin repeat and SOCS box containing 7                                                 |
| 8674  | ENSG00000183605 | PP4R2      | 11367.8 | 0.11 | protein_coding | 3  | 3304596   | 3311830   | protein phosphatase 4, regulatory subunit 2                                              |
| 8676  | ENSG00000190356 | TRAF3      | 11370.2 | 0.11 | protein_coding | 3  | 6832351   | 6832351   | lymphomyeloid cytoskeletal mediator (nuclear signaling/innate II)                        |
| 8718  | ENSG00000107854 | TKNS2      | 11395.2 | 0.11 | protein_coding | 10 | 9350509   | 9352003   | tau/kinesin-TRP-1 interacting ankyrin-related ADP-hosphatase 2                           |
| 8774  | ENSG00000090969 | CTDP1      | 11395.2 | 0.11 | protein_coding | 18 | 77438801  | 7754510   | CTD (carboxyl terminal domain, RNA polymerase II), polypeptide A4 phosphatase, subunit 1 |
| 8971  | ENSG00000190520 | TRAF1      | 11428.7 | 0.11 | protein_coding | 18 | 18268     | 18268     | cytosolic proteinase 18                                                                  |
| 8979  | ENSG00000257905 | KIAA1147   | 11528.2 | 0.11 | protein_coding | 7  | 14139528  | 14140153  | KIAA1147                                                                                 |
| 9053  | ENSG00000118653 | ADRP       | 11594.4 | 0.11 | protein_coding | 6  | 11712287  | 1180779   | androgen-dependent TFIII-regulating protein                                              |
| 9252  | ENSG00000154543 | TRAF3      | 11648.7 | 0.11 | protein_coding | 13 | 5144818   | 5144818   | transcription factor CP2                                                                 |
| 9323  | ENSG00000154310 | TNFR1      | 11669.3 | 0.11 | protein_coding | 3  | 17072918  | 17117917  | TRAF3 and NCK interacting kinase                                                         |
| 9371  | ENSG00000192174 | METTL3     | 11841.5 | 0.11 | protein_coding | 3  | 2573524   | 2571598   | methyltransferase like 3                                                                 |
| 9388  | ENSG00000154444 | TRAF3      | 11865   | 0.11 | protein_coding | 6  | 2029186   | 2029186   | transmembrane protein 183A                                                               |
| 9402  | ENSG00000151470 | C4orf33    | 11941.8 | 0.11 | protein_coding | 4  | 13001442  | 13003795  | chromosome 4 open reading frame 33                                                       |
| 9607  | ENSG00000155313 | UPF2       | 11955.3 | 0.11 | protein_coding | 21 | 17123244  | 17252377  | ubiquitin specific peptidase 25                                                          |
| 9688  | ENSG00000155588 | CHCT8      | 12025   | 0.11 | protein_coding | 5  | 15421113  | 15425033  | CCRA-NOT1 transmembrane complex, subunit 8                                               |
| 9699  | ENSG00000177524 | TRAF3      | 12025.2 | 0.11 | protein_coding | 3  | 7819107.2 | 78212537  | transmembrane protein 183A                                                               |
| 9631  | ENSG00000128594 | LRRCA2     | 12060.2 | 0.11 | protein_coding | 7  | 12767124  | 12767120  | leucine rich repeat containing 4                                                         |
| 9793  | ENSG00000198631 | DCEYF1     | 12189.3 | 0.11 | protein_coding | 6  | 8371786   | 8380168   | doggy family member 6                                                                    |
| 9804  | ENSG00000193486 | XNL1       | 12250.6 | 0.11 | protein_coding | 6  | 17195268  | 17194138  | transmembrane protein 183A                                                               |
| 9890  | ENSG00000112588 | MAN2B2     | 12289.9 | 0.11 | protein_coding | 4  | 6578920   | 6625089   | mannosidase, alpha, class 2B, member 2                                                   |
| 9936  | ENSG00000091177 | NBSA2      | 12289.9 | 0.11 | protein_coding | 4  | 4005266   | 4015697   | MEK5 domain containing 2                                                                 |
| 9938  | ENSG00000191862 | PNSA       | 12433.4 | 0.11 | protein_coding | 4  | 8864458   | 8864458   | POS5, regulator of chromosome homology A (S. cerevisiae)                                 |
| 10148 | ENSG00000196918 | SEPS2      | 12462.4 | 0.11 | protein_coding | 4  | 25121627  | 25121624  | Sep (O-phosphoserine) RNAase (serine/threonine) RNA synthase                             |
| 10192 | ENSG00000209312 | CTDTP1     | 12485.3 | 0.11 | protein_coding | 6  | 12438     | 101775    | CTD (carboxyl terminal domain, RNA polymerase II), polypeptide A4 phosphatase, subunit 1 |
| 10274 | ENSG00000196583 | CTDTP1     | 12560.3 | 0.11 | protein_coding | 6  | 11586201  | 11586201  | CTD (carboxyl terminal domain, RNA polymerase II), polypeptide A4 phosphatase, subunit 1 |
| 10361 | ENSG00000150595 | ITPR1      | 12571.5 | 0.11 | protein_coding | 3  | 4533022   | 4589524   | inositol 1,4,5-trisphosphate receptor, type 1                                            |
| 10452 | ENSG00000190257 | CHL3       | 12697.1 | 0.11 | protein_coding | 2  | 22534867  | 22540121  | chull                                                                                    |



|       |                 |              |       |      |                |    |           |           |                                                                                                        |
|-------|-----------------|--------------|-------|------|----------------|----|-----------|-----------|--------------------------------------------------------------------------------------------------------|
| 16996 | ENSG00000158497 | HMBH1        | 17025 | 0.11 | protein_coding | 5  | 143191726 | 143200284 | histomopathology (memor) HB-1                                                                          |
| 16997 | ENSG00000203773 | C22D3        | 17029 | 0.11 | protein_coding | 11 | 11891353  | 11891353  | C22D3                                                                                                  |
| 16998 | ENSG00000232362 | ORX1         | 17063 | 0.11 | protein_coding | 3  | 9818534   | 9818940   | olfactory receptor, family 5, subfamily K, member 1                                                    |
| 16999 | ENSG00000236398 | ZNF2R39      | 17074 | 0.11 | protein_coding | 7  | 14280512  | 14288128  | zinc finger protein, type 2, member 39                                                                 |
| 16999 | ENSG00000162691 | FLAMR        | 17228 | 0.11 | protein_coding | 1  | 20711310  | 20714307  | Fc receptor, IgA, IgM, high affinity                                                                   |
| 16999 | ENSG00000113115 | MIR22        | 17289 | 0.11 | miRNA          | 6  | 2663618   | 2663618   | zinc finger protein 322                                                                                |
| 16999 | ENSG00000167360 | ZNF226       | 17346 | 0.11 | protein_coding | 19 | 4469226   | 4469234   | zinc finger protein 226                                                                                |
| 16999 | ENSG00000170471 | FNWV         | 17385 | 0.11 | protein_coding | 9  | 21149631  | 21149146  | interferon, omega 1                                                                                    |
| 16999 | ENSG00000162472 | MIR22        | 17389 | 0.11 | miRNA          | 6  | 2663618   | 2663618   | zinc finger protein 322                                                                                |
| 16999 | ENSG00000162524 | CRFGC        | 17423 | 0.11 | protein_coding | 2  | 208962861 | 208964554 | crystallin, gamma C                                                                                    |
| 16999 | ENSG00000165511 | CPAR         | 17443 | 0.11 | protein_coding | 16 | 5427496   | 5424568   | HCG204245: Uncharacterized protein                                                                     |
| 16999 | ENSG00000112624 | CDX4         | 17530 | 0.11 | protein_coding | X  | 6833436   | 6833922   | homeobox domain protein 4                                                                              |
| 16999 | ENSG0000014562  | ORL13        | 17577 | 0.11 | protein_coding | 10 | 8911425   | 8913452   | NU1 family member 20                                                                                   |
| 16999 | ENSG00000185247 | MAGE11       | 17656 | 0.11 | protein_coding | X  | 14878984  | 14878984  | olfactory receptor, family 2, subfamily L, member 13                                                   |
| 16999 | ENSG00000118094 | TRH          | 17668 | 0.11 | protein_coding | 11 | 11852826  | 11855039  | melanoma antigen family A, 11                                                                          |
| 16999 | ENSG00000119169 | KYF18        | 17668 | 0.11 | protein_coding | 17 | 2242249   | 2242169   | trehalase (brush-border membrane glycoprotein)                                                         |
| 16999 | ENSG00000127377 | CRVGN        | 17737 | 0.11 | protein_coding | 7  | 151125621 | 151137899 | crystallin, gamma N                                                                                    |
| 16999 | ENSG00000197619 | ZNF615       | 17749 | 0.11 | protein_coding | 19 | 5244555   | 52511483  | zinc finger protein 615                                                                                |
| 16999 | ENSG00000102923 | MAGE16       | 17751 | 0.11 | protein_coding | X  | 36714559  | 35727052  | melanoma antigen family A, 16                                                                          |
| 16999 | ENSG00000188219 | POTE         | 17756 | 0.11 | protein_coding | 2  | 131975882 | 13202265  | POTE arylsulfonamide family, member E                                                                  |
| 16999 | ENSG00000166743 | ACSM1        | 17794 | 0.11 | protein_coding | 16 | 20634559  | 20710212  | acyl-CoA synthetase medium-chain family member 1                                                       |
| 16999 | ENSG00000101448 | EPN1         | 17888 | 0.11 | protein_coding | 20 | 44169255  | 44176361  | epididymal proteinase inhibitor                                                                        |
| 16999 | ENSG00000162598 | CHRF7        | 17892 | 0.11 | protein_coding | 1  | 6045294   | 6045842   | chromosome 1 open reading frame 87                                                                     |
| 16999 | ENSG00000254596 | MTG1         | 17902 | 0.11 | protein_coding | 10 | 13524338  | 13523399  | Mitochondrial GTPase 1                                                                                 |
| 16999 | ENSG00000102995 | MIR25        | 17917 | 0.11 | miRNA          | 6  | 6021263   | 6021766   | matrix-attached ribonucleoprotein                                                                      |
| 16999 | ENSG00000188884 | AAOAC13      | 17935 | 0.11 | protein_coding | 1  | 1277618   | 1278726   | arylsulfonamide decarboxylase-like 3                                                                   |
| 16999 | ENSG00000189551 | CT55         | 17947 | 0.11 | protein_coding | X  | 13420461  | 13430522  | cancer/breast antigen 55                                                                               |
| 16999 | ENSG00000102959 | SLC26A1      | 17953 | 0.11 | protein_coding | 8  | 2683373   | 2683373   | anion exchanger 1                                                                                      |
| 16999 | ENSG00000153789 | FAM2B        | 18038 | 0.11 | protein_coding | 16 | 8511965   | 8514614   | family with sequence similarity 92, member B                                                           |
| 16999 | ENSG00000178600 | PRKRA        | 18044 | 0.11 | protein_coding | 1  | 2258583   | 2258757   | transmembrane protein 78                                                                               |
| 16999 | ENSG00000102933 | KRTAP10.3    | 18170 | 0.11 | protein_coding | 21 | 4591763   | 4591763   | keratin associated protein 10.3                                                                        |
| 16999 | ENSG00000148300 | GPR8         | 18176 | 0.11 | protein_coding | 6  | 11029514  | 11030192  | G protein-coupled receptor 8                                                                           |
| 16999 | ENSG00000104300 | S100A7A      | 18179 | 0.11 | protein_coding | 1  | 15338000  | 15339701  | S100 calcium binding protein 7A                                                                        |
| 16999 | ENSG00000102958 | SLC26A1      | 18179 | 0.11 | protein_coding | 8  | 2683373   | 2683373   | anion exchanger 1                                                                                      |
| 16999 | ENSG00000106436 | MVL10        | 18208 | 0.11 | protein_coding | 7  | 10125665  | 10127278  | myosin, light chain 10, regulatory                                                                     |
| 16999 | ENSG00000300304 | MUSK         | 18216 | 0.11 | protein_coding | 9  | 11341051  | 11356389  | muscle, skeletal, receptor tyrosine kinase                                                             |
| 16999 | ENSG00000102958 | FATE3        | 18216 | 0.11 | protein_coding | 11 | 12564818  | 12564818  | prostate and testis expressed 2                                                                        |
| 16999 | ENSG00000104108 | TRIM1        | 18233 | 0.11 | protein_coding | 4  | 18800573  | 18809897  | tripartite motif family-like 1                                                                         |
| 16999 | ENSG00000144648 | ACKR2        | 18238 | 0.11 | protein_coding | 3  | 4284264   | 4282946   | atypical chemokine receptor 2                                                                          |
| 16999 | ENSG00000102951 | SLC26A1      | 18238 | 0.11 | protein_coding | 8  | 2683373   | 2683373   | anion exchanger 1                                                                                      |
| 16999 | ENSG00000171403 | KRT9         | 18241 | 0.11 | protein_coding | 17 | 3972296   | 3972810   | soluble carrier family 9, subfamily IV, cytosolic protein (anterior) 1, member 1                       |
| 16999 | ENSG00000130948 | HSD17B3      | 18243 | 0.11 | protein_coding | 9  | 9899758   | 9904434   | hydroxysteroid (17-beta) dehydrogenase 3                                                               |
| 16999 | ENSG00000168916 | VHOM1        | 18401 | 0.11 | protein_coding | 1  | 2081742   | 2081147   | von Willebrand factor D domain containing 381                                                          |
| 16999 | ENSG00000102951 | PRKTR4       | 18404 | 0.11 | protein_coding | 1  | 15332558  | 15332558  | protein tyrosine phosphatase 281                                                                       |
| 16999 | ENSG00000239332 | LINC01119    | 18424 | 0.11 | protein_coding | 2  | 4704336   | 4708614   | long intergenic non-protein coding RNA 1119                                                            |
| 16999 | ENSG00000202972 | GLYATL3      | 18453 | 0.11 | protein_coding | 6  | 4646701   | 4646701   | glycine N-acyltransferase-like 3                                                                       |
| 16999 | ENSG00000102958 | SLC26A1      | 18453 | 0.11 | protein_coding | 8  | 2683373   | 2683373   | anion exchanger 1                                                                                      |
| 16999 | ENSG00000100764 | PSCM1        | 18457 | 0.11 | protein_coding | 14 | 9072239   | 9073969   | proteasome (prosome, macropain) 26S subunit, ATPase 1                                                  |
| 16999 | ENSG00000202124 | EGZL         | 18459 | 0.11 | protein_coding | 6  | 13911063  | 13922203  | epithelial cell transforming sequence 2 oncogene-like                                                  |
| 16999 | ENSG00000102958 | SLC26A1      | 18459 | 0.11 | protein_coding | 8  | 2683373   | 2683373   | anion exchanger 1                                                                                      |
| 16999 | ENSG00000244411 | KRTAP7.7     | 18459 | 0.11 | protein_coding | 12 | 1273813   | 1273920   | keratin associated protein 7-7                                                                         |
| 16999 | ENSG00000295346 | NKX3         | 18527 | 0.11 | protein_coding | 15 | 6922264   | 6935503   | NADPH oxidase, EF-hand calcium binding domain 5                                                        |
| 16999 | ENSG00000102958 | SLC26A1      | 18527 | 0.11 | protein_coding | 8  | 2683373   | 2683373   | anion exchanger 1                                                                                      |
| 16999 | ENSG00000188739 | FNX2         | 18574 | 0.11 | protein_coding | 9  | 2138424   | 2138536   | glycylglycyltransferase 2                                                                              |
| 16999 | ENSG00000131279 | C1orf20      | 18577 | 0.11 | protein_coding | 3  | 1471696   | 1481451   | interferon, alpha 2                                                                                    |
| 16999 | ENSG00000102958 | SLC26A1      | 18577 | 0.11 | protein_coding | 8  | 2683373   | 2683373   | anion exchanger 1                                                                                      |
| 16999 | ENSG00000198379 | TMEM27       | 18736 | 0.11 | protein_coding | 3  | 19014644  | 19017665  | chromosome 3 open reading frame 20                                                                     |
| 16999 | ENSG00000187600 | TMEM27       | 18738 | 0.11 | protein_coding | 2  | 4895629   | 4871184   | transmembrane protein 207                                                                              |
| 16999 | ENSG00000102958 | SLC26A1      | 18738 | 0.11 | protein_coding | 8  | 2683373   | 2683373   | anion exchanger 1                                                                                      |
| 16999 | ENSG00000125262 | KONU1        | 18811 | 0.11 | protein_coding | 8  | 3684184   | 3679346   | potassium channel, subfamily U, member 1                                                               |
| 16999 | ENSG00000162921 | LRRRC16B     | 18835 | 0.11 | protein_coding | 1  | 7493552   | 7497208   | leucine rich repeat containing 53                                                                      |
| 16999 | ENSG00000102958 | SLC26A1      | 18835 | 0.11 | protein_coding | 8  | 2683373   | 2683373   | anion exchanger 1                                                                                      |
| 16999 | ENSG00000124574 | ABCC10       | 18873 | 0.11 | protein_coding | 6  | 4339510   | 4341868   | ATP-binding cassette, sub-family C (CFTR/MRP), member 10                                               |
| 16999 | ENSG00000151838 | CCDC175      | 18925 | 0.11 | protein_coding | 14 | 59971257  | 60043549  | coiled-coil domain containing 175                                                                      |
| 16999 | ENSG00000102958 | SLC26A1      | 18925 | 0.11 | protein_coding | 8  | 2683373   | 2683373   | anion exchanger 1                                                                                      |
| 16999 | ENSG00000243284 | V5G8         | 18948 | 0.11 | protein_coding | 1  | 159824106 | 159824106 | V-set and immunoglobulin domain containing 8                                                           |
| 16999 | ENSG00000202174 | DNAH9        | 18954 | 0.11 | protein_coding | 17 | 11501748  | 11517305  | dyxem, axonemal, heavy chain 9                                                                         |
| 16999 | ENSG00000102958 | SLC26A1      | 18954 | 0.11 | protein_coding | 8  | 2683373   | 2683373   | anion exchanger 1                                                                                      |
| 16999 | ENSG00000151148 | UBE3B        | 19068 | 0.11 | protein_coding | 12 | 109915207 | 109917507 | ubiquitin protein ligase E3B                                                                           |
| 16999 | ENSG00000204428 | LYSG5C       | 19098 | 0.11 | protein_coding | 6  | 3164461   | 3165117   | lymphocyte antigen 6 complex, locus G5C                                                                |
| 16999 | ENSG00000102958 | SLC26A1      | 19098 | 0.11 | protein_coding | 8  | 2683373   | 2683373   | anion exchanger 1                                                                                      |
| 16999 | ENSG00000258130 | LOC101929849 | 19197 | 0.11 | protein_coding | 16 | 30215637  | 3022032   | uncharacterized protein                                                                                |
| 16999 | ENSG00000189342 | ZNF442       | 19219 | 0.11 | protein_coding | 19 | 12461985  | 12467619  | zinc finger protein 442                                                                                |
| 16999 | ENSG00000102958 | SLC26A1      | 19219 | 0.11 | protein_coding | 8  | 2683373   | 2683373   | anion exchanger 1                                                                                      |
| 16999 | ENSG00000122548 | NBRF3        | 19231 | 0.11 | protein_coding | 7  | 2857240   | 2857840   | neurabin/alpha/beta-tubulin family, member 3                                                           |
| 16999 | ENSG00000148205 | DMRT2        | 19250 | 0.11 | protein_coding | 19 | 4234886   | 4235641   | DMRT-like family C2                                                                                    |
| 16999 | ENSG00000102958 | SLC26A1      | 19250 | 0.11 | protein_coding | 8  | 2683373   | 2683373   | anion exchanger 1                                                                                      |
| 16999 | ENSG00000102958 | SLC26A1      | 19250 | 0.11 | protein_coding | 8  | 2683373   | 2683373   | anion exchanger 1                                                                                      |
| 16999 | ENSG0000011909  | MYO3B        | 19260 | 0.11 | protein_coding | 2  | 17103455  | 17103455  | myosin IIB                                                                                             |
| 16999 | ENSG00000102958 | SLC26A1      | 19260 | 0.11 | protein_coding | 8  | 2683373   | 2683373   | anion exchanger 1                                                                                      |
| 16999 | ENSG00000102958 | SLC26A1      | 19260 | 0.11 | protein_coding | 8  | 2683373   | 2683373   | anion exchanger 1                                                                                      |
| 16999 | ENSG00000172971 | GDJ4         | 19266 | 0.11 | protein_coding | 10 | 3599438   | 35997803  | gap junction protein, delta 4, 20,1kDa                                                                 |
| 16999 | ENSG00000102958 | SLC26A1      | 19266 | 0.11 | protein_coding | 8  | 2683373   | 2683373   | anion exchanger 1                                                                                      |
| 16999 | ENSG00000202958 | ACOT6        | 19309 | 0.11 | protein_coding | 14 | 74077649  | 7409552   | acyl-CoA thioesterase 6                                                                                |
| 16999 | ENSG00000182732 | RGS8         | 19311 | 0.11 | protein_coding | 14 | 7239156   | 7300364   | regulator of G-protein signaling 8                                                                     |
| 16999 | ENSG00000172071 | L10c         | 19369 | 0.11 | protein_coding | 8  | 11794907  | 11810423  | deleted in esophageal cancer 1                                                                         |
| 16999 | ENSG00000102958 | SLC26A1      | 19369 | 0.11 | protein_coding | 8  | 2683373   | 2683373   | anion exchanger 1                                                                                      |
| 16999 | ENSG00000196345 | ZKSCAN7      | 19440 | 0.11 | protein_coding | 3  | 4459685   | 4462475   | zinc finger with KRAB and SCAN domains 7                                                               |
| 16999 | ENSG00000196345 | CATSPER2     | 19569 | 0.11 | protein_coding | 15 | 4396701   | 4396701   | cation channel, sperm associated 2                                                                     |
| 16999 | ENSG00000102958 | SLC26A1      | 19569 | 0.11 | protein_coding | 8  | 2683373   | 2683373   | anion exchanger 1                                                                                      |
| 16999 | ENSG00000255692 | 19642        | 19642 | 0.11 | protein_coding | 12 | 12013753  | 12013816  | uncharacterized protein                                                                                |
| 16999 | ENSG00000243300 | SPDY3        | 19676 | 0.11 | protein_coding | 12 | 6995326   | 6995919   | speedy/RING3 cell cycle regulator family member E3                                                     |
| 16999 | ENSG00000102958 | SLC26A1      | 19676 | 0.11 | protein_coding | 8  | 2683373   | 2683373   | anion exchanger 1                                                                                      |
| 16999 | ENSG00000132570 | PORD2        | 19746 | 0.11 | protein_coding | 5  | 13420598  | 134342649 | plein-1 alpha-carboxylase dehydratase/oxidation cofactor of hepatocyte nuclear factor 1 alpha (Irf1) 2 |
| 16999 | ENSG00000208173 | PKR32        | 19747 | 0.11 | protein_coding | 19 | 1820369   | 1820827   | PKR32 protein                                                                                          |
| 16999 | ENSG00000196666 | FAM198B      | 19747 | 0.11 | protein_coding | 11 | 4760198   | 4761074   | family with sequence similarity 180, member B                                                          |
| 16999 | ENSG00000184627 | RIF1         | 19777 |      |                |    |           |           |                                                                                                        |

|       |                  |              |         |      |                                     |    |           |           |                                                                                             |
|-------|------------------|--------------|---------|------|-------------------------------------|----|-----------|-----------|---------------------------------------------------------------------------------------------|
| 10537 | ENSG00000203097  |              | 12761.2 | 0.11 | transcribed_processed_pseudo_gene   | 10 | 31649884  | 31650144  | serine palmitoyltransferase, long chain base subunit 1 pseudogene 1                         |
| 15703 | ENSG00000134297  | PLEKHAP1     | 16785.2 | 0.11 | transcribed_processed_pseudo_gene   | 12 | 45566847  | 45609824  | pleckstrin homology domain containing, family A member 8 pseudogene 1                       |
| 17875 | ENSG000002035812 | ADAM21P1     | 18401.1 | 0.11 | transcribed_processed_pseudo_gene   | 14 | 70712208  | 70714518  | ADAM metalloproteinase domain 21 pseudogene 1                                               |
| 17959 | ENSG00000215873  |              | 18460.9 | 0.11 | transcribed_processed_pseudo_gene   | 1  | 82187378  | 82188743  | suppression of tumorigenesis 13 (colon carcinoma) (Hsp70 interacting protein) pseudogene 20 |
| 18464 | ENSG000002094168 |              | 18847.7 | 0.11 | transcribed_processed_pseudo_gene   | 17 | 22024084  | 22025022  | MT-ND1 pseudogene 15                                                                        |
| 4252  | ENSG000002029391 | HLA-DRB8     | 6598.4  | 0.11 | transcribed_unprocessed_pseudo_gene | 6  | 32520490  | 32527799  | major histocompatibility complex, class II, DR beta 6 (pseudogene)                          |
| 9867  | ENSG00000171101  | SIGLEC17P    | 12307.4 | 0.11 | transcribed_unprocessed_pseudo_gene | 19 | 51670585  | 51676780  | sialic acid binding Ig-like lectin 17, pseudogene                                           |
| 14970 | ENSG000002028409 |              | 16218.6 | 0.11 | transcribed_unprocessed_pseudo_gene | 7  | 65216129  | 65228341  | chaperonin containing TCP1, subunit 8 (zeta) pseudogene 1                                   |
| 17569 | ENSG00000128262  | POM121LP     | 18178.9 | 0.11 | transcribed_unprocessed_pseudo_gene | 22 | 24647796  | 24661493  | POM121 transmembrane nucleoporin-like 9, pseudogene                                         |
| 18127 | ENSG000002032726 | LOC101927507 | 18599.2 | 0.11 | transcribed_unprocessed_pseudo_gene | 1  | 16542404  | 16544522  | aristamanin 7 pseudogene 1                                                                  |
| 18532 | ENSG00000188681  | MAFP         | 18697.6 | 0.11 | transcribed_unprocessed_pseudo_gene | 21 | 9907190   | 9908585   | lectin 4 pseudogene 2                                                                       |
| 18791 | ENSG00000176826  | FKBP9L       | 19084.7 | 0.11 | transcribed_unprocessed_pseudo_gene | 7  | 55748767  | 55760945  | FK506 binding protein 9-like                                                                |
| 20066 | ENSG00000205771  | CATSPER2P1   | 20074.5 | 0.11 | transcribed_unprocessed_pseudo_gene | 15 | 44019116  | 44038292  | catlin channel, sperm associated 2 pseudogene 1                                             |
| 20666 | ENSG00000124549  | BTN2AP3      | 20546.8 | 0.11 | transcribed_unprocessed_pseudo_gene | 6  | 28421619  | 28432611  | butyrophilin, subfamily 2, member A3, pseudogene                                            |
| 16171 | ENSG000002023448 |              | 17155.5 | 0.11 | unitary_pseudogene                  | 16 | 77256303  | 77265155  | vomerinosa 2 receptor 10 pseudogene                                                         |
| 16962 | ENSG000002027411 |              | 17411.1 | 0.11 | unitary_pseudogene                  | 9  | 10006366  | 100101209 | bile acid CoA: amino acid N-tetrahydrofolate pseudogene 1                                   |
| 17071 | ENSG000002020627 |              | 17831.6 | 0.11 | unitary_pseudogene                  | 7  | 92042290  | 92068766  | transmembrane BAX inhibitor motif containing 7, pseudogene                                  |
| 17352 | ENSG000002158111 |              | 18627.6 | 0.11 | unitary_pseudogene                  | 1  | 22899336  | 229170006 | butyrophilin-like 10                                                                        |
| 17473 | ENSG000002047478 | AOX2P        | 18114.2 | 0.11 | unitary_pseudogene                  | 2  | 30732762  | 30808199  | aldehyde oxidase 2 pseudogene                                                               |
| 17741 | ENSG00000181201  |              | 18219.9 | 0.11 | unitary_pseudogene                  | 1  | 228651804 | 228652327 | histone cluster 3, H2ba, pseudogene                                                         |
| 17931 | ENSG000002025519 |              | 18438.6 | 0.11 | unitary_pseudogene                  | 1  | 246935139 | 246936361 | kinasin family member 28, pseudogene                                                        |
| 19471 | ENSG000002029471 | TTLL3L       | 19837.2 | 0.11 | unitary_pseudogene                  | 15 | 15200702  | 15204116  | tubulin tyrosine ligase-like family, member 13                                              |
| 19766 | ENSG00000197847  | SLC22A20     | 19844.7 | 0.11 | unitary_pseudogene                  | 11 | 64981311  | 65010228  | solute carrier family 22, member 20                                                         |
| 8538  | ENSG000000781319 |              | 11174.8 | 0.11 | unprocessed_pseudogene              | 7  | 99918615  | 99939531  | postmeiotic segregation increased 2 pseudogene 1                                            |
| 15023 | ENSG000002025978 |              | 16658.8 | 0.11 | unprocessed_pseudogene              | 9  | 9045067   | 90462229  | calthamitin 1, pseudogene 8                                                                 |
| 16542 | ENSG000002035040 |              | 17428   | 0.11 | unprocessed_pseudogene              | 6  | 32673901  | 32674732  | MT-CO3 pseudogene 1                                                                         |
| 16988 | ENSG00000270831  |              | 17863.7 | 0.11 | unprocessed_pseudogene              | 15 | 21122015  | 21140687  | neurorotaxin 1 pseudogene 1                                                                 |
| 16989 | ENSG000002026979 |              | 17369.2 | 0.11 | unprocessed_pseudogene              | 1  | 15200702  | 15204116  | metabolin 1 pseudogene 1                                                                    |
| 17070 | ENSG000002032173 |              | 17831.4 | 0.11 | unprocessed_pseudogene              | 6  | 29541686  | 29542613  | olfactory receptor, family 2, subfamily H, member 5 pseudogene                              |
| 17309 | ENSG00000185390  |              | 17894.4 | 0.11 | unprocessed_pseudogene              | 21 | 14721586  | 14722969  | fibroblast growth factor 7 pseudogene 2                                                     |
| 18328 | ENSG00000206790  |              | 18149.3 | 0.11 | unprocessed_pseudogene              | 15 | 20596609  | 20600719  | BM81 pseudogene 15                                                                          |
| 19191 | ENSG000002049558 |              | 19825.6 | 0.11 | unprocessed_pseudogene              | 3  | 106517736 | 106519538 | MT-ND5 pseudogene 16                                                                        |
| 2044  | ENSG000002040834 |              | 3220.5  | 0.11 | unprocessed_pseudogene              | 2  | 90198535  | 90199190  | immunoglobulin kappa variable 1D-12                                                         |
| 4258  | ENSG000002041172 |              | 6961.1  | 0.11 | unprocessed_pseudogene              | 1  | 10116882  | 10116882  |                                                                                             |
| 4385  | ENSG000002052328 |              | 6824.8  | 0.11 | unprocessed_pseudogene              | 1  | 10116882  | 10116882  |                                                                                             |
| 4883  | ENSG000002043337 |              | 7470.9  | 0.11 | unprocessed_pseudogene              | 1  | 10116882  | 10116882  |                                                                                             |
| 4928  | ENSG000002047547 |              | 8725.9  | 0.11 | unprocessed_pseudogene              | 1  | 10116882  | 10116882  |                                                                                             |
| 5143  | ENSG000002044491 |              | 8933.5  | 0.11 | unprocessed_pseudogene              | 1  | 10116882  | 10116882  |                                                                                             |
| 6325  | ENSG000002050318 |              | 9113.8  | 0.11 | unprocessed_pseudogene              | 1  | 10116882  | 10116882  |                                                                                             |
| 6683  | ENSG00000270346  |              | 9441.6  | 0.11 | unprocessed_pseudogene              | 1  | 10116882  | 10116882  |                                                                                             |
| 7186  | ENSG00000271112  |              | 9938.4  | 0.11 | unprocessed_pseudogene              | 1  | 10116882  | 10116882  |                                                                                             |
| 7424  | ENSG00000270101  |              | 10166.8 | 0.11 | unprocessed_pseudogene              | 1  | 10116882  | 10116882  |                                                                                             |
| 7572  | ENSG00000206986  |              | 10317.2 | 0.11 | unprocessed_pseudogene              | 1  | 10116882  | 10116882  |                                                                                             |
| 8008  | ENSG00000202941  |              | 10715.8 | 0.11 | unprocessed_pseudogene              | 1  | 10116882  | 10116882  |                                                                                             |
| 8346  | ENSG00000205936  |              | 11002.8 | 0.11 | unprocessed_pseudogene              | 1  | 10116882  | 10116882  |                                                                                             |
| 9027  | ENSG000002027170 |              | 11567.8 | 0.11 | unprocessed_pseudogene              | 1  | 10116882  | 10116882  |                                                                                             |
| 9054  | ENSG00000202726  |              | 11594.5 | 0.11 | unprocessed_pseudogene              | 1  | 10116882  | 10116882  |                                                                                             |
| 9124  | ENSG000002037719 |              | 11650.4 | 0.11 | unprocessed_pseudogene              | 1  | 10116882  | 10116882  |                                                                                             |
| 9428  | ENSG000002024152 |              | 11880.3 | 0.11 | unprocessed_pseudogene              | 1  | 10116882  | 10116882  |                                                                                             |
| 9590  | ENSG00000270669  |              | 12018.1 | 0.11 | unprocessed_pseudogene              | 1  | 10116882  | 10116882  |                                                                                             |
| 9596  | ENSG000002015284 |              | 12022.3 | 0.11 | unprocessed_pseudogene              | 1  | 10116882  | 10116882  |                                                                                             |
| 10427 | ENSG00000272962  | SLC5A3       | 12672.3 | 0.11 | unprocessed_pseudogene              | 21 | 35445670  | 35478561  | sodium/iron-motilin cotransporter                                                           |
| 10538 | ENSG000002024727 |              | 12711.1 | 0.11 | unprocessed_pseudogene              | 1  | 10116882  | 10116882  |                                                                                             |
| 10581 | ENSG000002054287 |              | 12792.5 | 0.11 | unprocessed_pseudogene              | 1  | 10116882  | 10116882  |                                                                                             |
| 10621 | ENSG000002067904 |              | 12823   | 0.11 | unprocessed_pseudogene              | 1  | 10116882  | 10116882  |                                                                                             |
| 10670 | ENSG000002020203 |              | 12869.9 | 0.11 | unprocessed_pseudogene              | 1  | 10116882  | 10116882  |                                                                                             |
| 10752 | ENSG00000203400  |              | 12945.9 | 0.11 | unprocessed_pseudogene              | 1  | 10116882  | 10116882  |                                                                                             |
| 10785 | ENSG00000204988  |              | 12960.9 | 0.11 | unprocessed_pseudogene              | 1  | 10116882  | 10116882  |                                                                                             |
| 10801 | ENSG00000205933  |              | 12977.5 | 0.11 | unprocessed_pseudogene              | 1  | 10116882  | 10116882  |                                                                                             |
| 10945 | ENSG000002028007 |              | 12996.9 | 0.11 | unprocessed_pseudogene              | 1  | 10116882  | 10116882  |                                                                                             |
| 11088 | ENSG00000215843  |              | 13185.7 | 0.11 | unprocessed_pseudogene              | 1  | 10116882  | 10116882  |                                                                                             |
| 11217 | ENSG000002042531 |              | 13188.8 | 0.11 | unprocessed_pseudogene              | 1  | 10116882  | 10116882  |                                                                                             |
| 11871 | ENSG000002042958 |              | 13320.7 | 0.11 | unprocessed_pseudogene              | 1  | 10116882  | 10116882  |                                                                                             |
| 12437 | ENSG000002020568 |              | 13882.8 | 0.11 | unprocessed_pseudogene              | 1  | 10116882  | 10116882  |                                                                                             |
| 12440 | ENSG00000227598  |              | 14303.7 | 0.11 | unprocessed_pseudogene              | 1  | 10116882  | 10116882  |                                                                                             |
| 12543 | ENSG000002057395 |              | 14310.1 | 0.11 | unprocessed_pseudogene              | 1  | 10116882  | 10116882  |                                                                                             |
| 12807 | ENSG000002027595 |              | 14389.7 | 0.11 | unprocessed_pseudogene              | 1  | 93303575  | 93303627  | Small nucleolar RNA SNORA66                                                                 |
| 12816 | ENSG000002020871 |              | 14484.2 | 0.11 | unprocessed_pseudogene              | 1  | 10116882  | 10116882  |                                                                                             |
| 12818 | ENSG00000273118  |              | 14592.4 | 0.11 | unprocessed_pseudogene              | 1  | 10116882  | 10116882  |                                                                                             |
| 12931 | ENSG000002020960 |              | 14668.7 | 0.11 | unprocessed_pseudogene              | 1  | 10116882  | 10116882  |                                                                                             |
| 12948 | ENSG000002041487 |              | 14679.9 | 0.11 | unprocessed_pseudogene              | 1  | 10116882  | 10116882  |                                                                                             |
| 13016 | ENSG000002033960 |              | 14726.6 | 0.11 | unprocessed_pseudogene              | 1  | 10116882  | 10116882  |                                                                                             |
| 13108 | ENSG000002056280 |              | 14736.7 | 0.11 | unprocessed_pseudogene              | 1  | 10116882  | 10116882  |                                                                                             |
| 13184 | ENSG00000191813  |              | 14839.3 | 0.11 | unprocessed_pseudogene              | 1  | 10116882  | 10116882  |                                                                                             |
| 13431 | ENSG00000191819  |              | 14859.8 | 0.11 | unprocessed_pseudogene              | 1  | 10116882  | 10116882  |                                                                                             |
| 13438 | ENSG00000155282  | LOC644249    | 15044.9 | 0.11 | unprocessed_pseudogene              | 9  | 67987959  | 67987998  | Protein LOC644249                                                                           |
| 13616 | ENSG00000206795  |              | 15055.5 | 0.11 | unprocessed_pseudogene              | 1  | 24338608  | 24339611  | Uncharacterized protein                                                                     |
| 13807 | ENSG00000205244  |              | 15230.2 | 0.11 | unprocessed_pseudogene              | 1  | 10116882  | 10116882  |                                                                                             |
| 14085 | ENSG00000272440  |              | 15535.6 | 0.11 | unprocessed_pseudogene              | 1  | 10116882  | 10116882  |                                                                                             |
| 14196 | ENSG00000206363  |              | 15617.2 | 0.11 | unprocessed_pseudogene              | 1  | 10116882  | 10116882  |                                                                                             |
| 14197 | ENSG00000206261  |              | 15617.8 | 0.11 | unprocessed_pseudogene              | 1  | 10116882  | 10116882  |                                                                                             |
| 14262 | ENSG000002081542 |              | 15675.5 | 0.11 | unprocessed_pseudogene              | 1  | 10116882  | 10116882  |                                                                                             |
| 14561 | ENSG00000198302  |              | 15962.5 | 0.11 | unprocessed_pseudogene              | 1  | 10116882  | 10116882  |                                                                                             |
| 14581 | ENSG00000207490  |              | 15916.1 | 0.11 | unprocessed_pseudogene              | 1  | 10116882  | 10116882  |                                                                                             |
| 15004 | ENSG000002035586 |              | 16241.4 | 0.11 | unprocessed_pseudogene              | 1  | 10116882  | 10116882  |                                                                                             |
| 15016 | ENSG000002031196 |              | 16253.2 | 0.11 | unprocessed_pseudogene              | 1  | 10116882  | 10116882  |                                                                                             |
| 15110 | ENSG000002020317 |              | 16234.5 | 0.11 | unprocessed_pseudogene              | 1  | 10116882  | 10116882  |                                                                                             |
| 15151 | ENSG00000214006  |              | 16372.4 | 0.11 | unprocessed_pseudogene              | 1  | 10116882  | 10116882  |                                                                                             |
| 15295 | ENSG00000203240  |              | 16449.3 | 0.11 | unprocessed_pseudogene              | 1  | 10116882  | 10116882  |                                                                                             |
| 15348 | ENSG00000203117  |              | 16598.3 | 0.11 | unprocessed_pseudogene              | 1  | 10116882  | 10116882  |                                                                                             |
| 15375 | ENSG000002035811 |              | 16630.1 | 0.11 | unprocessed_pseudogene              | 1  | 10116882  | 10116882  |                                                                                             |
| 15418 | ENSG00000207167  |              | 16558.8 | 0.11 | unprocessed_pseudogene              | 1  | 10116882  | 10116882  |                                                                                             |
| 15424 | ENSG00000202748  |              | 16595.2 | 0.11 | unprocessed_pseudogene              | 1  | 10116882  | 10116882  |                                                                                             |
| 15444 | ENSG000002043179 |              | 16681.6 | 0.11 | unprocessed_pseudogene              | 1  | 10116882  | 10116882  |                                                                                             |
| 15489 | ENSG000002027531 |              | 16611.4 | 0.11 | unprocessed_pseudogene              | 1  | 10116882  | 10116882  |                                                                                             |
| 15541 | ENSG00000202090  |              | 16683.4 | 0.11 | unprocessed_pseudogene              | 1  | 10116882  | 10116882  |                                                                                             |
| 15558 | ENSG000002081291 |              | 16675.3 | 0.11 | unprocessed_pseudogene              | 1  | 10116882  | 10116882  |                                                                                             |
| 15630 | ENSG000002098676 | MUC8         | 16732   | 0.11 | unprocessed_pseudogene              | 12 | 13306934  | 13306978  | mucin 8                                                                                     |
| 15657 | ENSG000002041138 |              | 16751.1 | 0.11 | unprocessed_pseudogene              | 1  | 10116882  | 10116882  |                                                                                             |
| 15668 | ENSG000002072909 |              | 16759.3 | 0.11 | unprocessed_p                       |    |           |           |                                                                                             |

|       |                  |          |         |      |         |           |           |  |                                                           |
|-------|------------------|----------|---------|------|---------|-----------|-----------|--|-----------------------------------------------------------|
| 16565 | ENSG00000245293  |          | 17442.8 | 0.11 |         |           |           |  |                                                           |
| 16574 | ENSG00000244417  |          | 17433.9 | 0.11 |         |           |           |  |                                                           |
| 16584 | ENSG00000236889  |          | 17460.4 | 0.11 |         |           |           |  |                                                           |
| 16600 | ENSG00000228060  |          | 17479.9 | 0.11 |         |           |           |  |                                                           |
| 16604 | ENSG0000023474   |          | 17483.5 | 0.11 |         |           |           |  |                                                           |
| 16608 | ENSG00000249338  |          | 17486.1 | 0.11 |         |           |           |  |                                                           |
| 16701 | ENSG00000234356  |          | 17561.5 | 0.11 |         |           |           |  |                                                           |
| 16705 | ENSG00000265997  |          | 17570.3 | 0.11 |         |           |           |  |                                                           |
| 16712 | ENSG00000237193  |          | 17572.5 | 0.11 |         |           |           |  |                                                           |
| 16750 | ENSG00000237324  |          | 17602.3 | 0.11 |         |           |           |  |                                                           |
| 16751 | ENSG00000251416  |          | 17602.5 | 0.11 |         |           |           |  |                                                           |
| 16762 | ENSG00000239884  |          | 17613.5 | 0.11 |         |           |           |  |                                                           |
| 16781 | ENSG00000235782  |          | 17628   | 0.11 |         |           |           |  |                                                           |
| 16783 | ENSG00000235027  |          | 17631   | 0.11 |         |           |           |  |                                                           |
| 16785 | ENSG00000234129  |          | 17639   | 0.11 |         |           |           |  |                                                           |
| 16818 | ENSG00000228872  |          | 17656.3 | 0.11 |         |           |           |  |                                                           |
| 16841 | ENSG00000219887  |          | 17673.5 | 0.11 |         |           |           |  |                                                           |
| 16868 | ENSG00000214628  |          | 17690.7 | 0.11 |         |           |           |  |                                                           |
| 16883 | ENSG00000208992  |          | 17696.3 | 0.11 |         |           |           |  |                                                           |
| 16894 | ENSG00000223461  |          | 17702   | 0.11 |         |           |           |  |                                                           |
| 16914 | ENSG00000220023  |          | 17711.3 | 0.11 |         |           |           |  |                                                           |
| 16923 | ENSG00000204752  | 19       | 17719.6 | 0.11 | 7011514 | 7013338   |           |  | Uncharacterized protein                                   |
| 16988 | ENSG00000284434  |          | 17746.1 | 0.11 |         |           |           |  |                                                           |
| 17002 | ENSG00000250007  |          | 17825.2 | 0.11 |         |           |           |  |                                                           |
| 17072 | ENSG00000203281  |          | 17832.1 | 0.11 |         |           |           |  |                                                           |
| 17084 | ENSG00000248876  |          | 17840.2 | 0.11 |         |           |           |  |                                                           |
| 17108 | ENSG00000201625  |          | 17854.6 | 0.11 |         |           |           |  |                                                           |
| 17111 | ENSG00000254588  |          | 17857.9 | 0.11 |         |           |           |  |                                                           |
| 17117 | ENSG00000208413  |          | 17861.7 | 0.11 |         |           |           |  |                                                           |
| 17119 | ENSG00000235213  |          | 17862.5 | 0.11 |         |           |           |  |                                                           |
| 17133 | ENSG00000249977  |          | 17872.9 | 0.11 |         |           |           |  |                                                           |
| 17135 | ENSG00000226836  |          | 17874.1 | 0.11 |         |           |           |  |                                                           |
| 17153 | ENSG00000206623  |          | 17893   | 0.11 |         |           |           |  |                                                           |
| 17156 | ENSG00000270917  |          | 17895   | 0.11 |         |           |           |  |                                                           |
| 17164 | ENSG00000224339  |          | 17900.6 | 0.11 |         |           |           |  |                                                           |
| 17175 | ENSG00000234488  |          | 17906.9 | 0.11 |         |           |           |  |                                                           |
| 17182 | ENSG00000205396  |          | 17908.6 | 0.11 |         |           |           |  |                                                           |
| 17184 | ENSG00000226473  |          | 17909.2 | 0.11 |         |           |           |  |                                                           |
| 17198 | ENSG00000202359  |          | 17914.8 | 0.11 |         |           |           |  |                                                           |
| 17192 | ENSG00000287013  |          | 17916.3 | 0.11 |         |           |           |  |                                                           |
| 17213 | ENSG00000284047  |          | 17928.6 | 0.11 |         |           |           |  |                                                           |
| 17215 | ENSG00000204646  |          | 17929.7 | 0.11 |         |           |           |  |                                                           |
| 17228 | ENSG00000203028  |          | 17939.4 | 0.11 |         |           |           |  |                                                           |
| 17232 | ENSG00000285451  |          | 17942.3 | 0.11 |         |           |           |  |                                                           |
| 17248 | ENSG00000201518  |          | 17947.9 | 0.11 |         |           |           |  |                                                           |
| 17266 | ENSG00000254528  |          | 17956   | 0.11 |         |           |           |  |                                                           |
| 17275 | ENSG00000245466  |          | 17971.7 | 0.11 |         |           |           |  |                                                           |
| 17284 | ENSG00000287361  |          | 17983.3 | 0.11 |         |           |           |  |                                                           |
| 17299 | ENSG00000237575  |          | 17988.3 | 0.11 |         |           |           |  |                                                           |
| 17337 | ENSG00000257458  |          | 18014.1 | 0.11 |         |           |           |  |                                                           |
| 17342 | ENSG00000235592  |          | 18021.3 | 0.11 |         |           |           |  |                                                           |
| 17343 | ENSG00000202687  |          | 18021.4 | 0.11 |         |           |           |  |                                                           |
| 17350 | ENSG00000225535  |          | 18026.6 | 0.11 |         |           |           |  |                                                           |
| 17362 | ENSG00000248885  |          | 18036.2 | 0.11 |         |           |           |  |                                                           |
| 17365 | ENSG00000204845  |          | 18038.9 | 0.11 |         |           |           |  |                                                           |
| 17367 | ENSG00000254303  |          | 18037.1 | 0.11 |         |           |           |  |                                                           |
| 17372 | ENSG00000204140  |          | 18039.4 | 0.11 |         |           |           |  |                                                           |
| 17389 | ENSG00000202642  |          | 18048.7 | 0.11 |         |           |           |  |                                                           |
| 17402 | ENSG00000203186  |          | 18057.8 | 0.11 |         |           |           |  |                                                           |
| 17408 | ENSG00000237224  |          | 18066.9 | 0.11 |         |           |           |  |                                                           |
| 17409 | ENSG00000205443  |          | 18066.5 | 0.11 |         |           |           |  |                                                           |
| 17419 | ENSG00000205507  |          | 18074.7 | 0.11 |         |           |           |  |                                                           |
| 17423 | ENSG00000214955  |          | 18078.5 | 0.11 |         |           |           |  |                                                           |
| 17428 | ENSG00000203874  |          | 18082   | 0.11 |         |           |           |  |                                                           |
| 17429 | ENSG00000208340  |          | 18082.4 | 0.11 |         |           |           |  |                                                           |
| 17435 | ENSG00000249959  |          | 18086.2 | 0.11 |         |           |           |  |                                                           |
| 17461 | ENSG00000200977  |          | 18097.6 | 0.11 |         |           |           |  |                                                           |
| 17463 | ENSG00000208362  |          | 18107.8 | 0.11 |         |           |           |  |                                                           |
| 17466 | ENSG00000243099  |          | 18110.3 | 0.11 |         |           |           |  |                                                           |
| 17471 | ENSG00000205683  |          | 18114.2 | 0.11 |         |           |           |  |                                                           |
| 17480 | ENSG00000208316  |          | 18119.7 | 0.11 |         |           |           |  |                                                           |
| 17486 | ENSG00000249203  |          | 18124.3 | 0.11 |         |           |           |  |                                                           |
| 17487 | ENSG00000241484  |          | 18134.5 | 0.11 | 7       | 72023729  | 72288777  |  | rRNA-y1W synthesizing protein 1 homolog B (S. cerevisiae) |
| 17496 | ENSG00000235881  |          | 18130.1 | 0.11 |         |           |           |  |                                                           |
| 17496 | ENSG00000237661  |          | 18132.2 | 0.11 |         |           |           |  |                                                           |
| 17512 | ENSG00000203223  |          | 18162   | 0.11 |         |           |           |  |                                                           |
| 17517 | ENSG00000205109  |          | 18144.9 | 0.11 |         |           |           |  |                                                           |
| 17530 | ENSG00000205276  |          | 18154.7 | 0.11 |         |           |           |  |                                                           |
| 17540 | ENSG00000204122  |          | 18163.4 | 0.11 |         |           |           |  |                                                           |
| 17544 | ENSG00000237661  |          | 18164.8 | 0.11 |         |           |           |  |                                                           |
| 17549 | ENSG00000235374  |          | 18167.6 | 0.11 |         |           |           |  |                                                           |
| 17554 | ENSG00000237037  |          | 18172   | 0.11 |         |           |           |  |                                                           |
| 17574 | ENSG00000221163  |          | 18183.2 | 0.11 |         |           |           |  |                                                           |
| 17575 | ENSG00000242444  |          | 18184.3 | 0.11 |         |           |           |  |                                                           |
| 17576 | ENSG00000226434  |          | 18184.6 | 0.11 |         |           |           |  |                                                           |
| 17581 | ENSG00000245174  |          | 18190.5 | 0.11 |         |           |           |  |                                                           |
| 17586 | ENSG000002084134 |          | 18190.4 | 0.11 |         |           |           |  |                                                           |
| 17593 | ENSG00000249617  |          | 18194   | 0.11 |         |           |           |  |                                                           |
| 17613 | ENSG00000204964  |          | 18209.5 | 0.11 |         |           |           |  |                                                           |
| 17618 | ENSG00000237339  |          | 18215.5 | 0.11 |         |           |           |  |                                                           |
| 17645 | ENSG00000265831  |          | 18235.4 | 0.11 |         |           |           |  |                                                           |
| 17647 | ENSG00000205696  |          | 18236.5 | 0.11 | 4       | 40870886  | 40870887  |  | Small nuclear RNA U13                                     |
| 17649 | ENSG00000256596  |          | 18238.3 | 0.11 |         |           |           |  |                                                           |
| 17654 | ENSG00000214996  |          | 18241.9 | 0.11 |         |           |           |  |                                                           |
| 17655 | ENSG00000251128  |          | 18242.7 | 0.11 | 14      | 107281000 | 107281252 |  | immunoglobulin heavy variable 4-80 (pseudogene)           |
| 17662 | ENSG000002053923 |          | 18250   | 0.11 |         |           |           |  |                                                           |
| 17667 | ENSG00000207239  |          | 18255.7 | 0.11 |         |           |           |  |                                                           |
| 17686 | ENSG00000205478  |          | 18269.6 | 0.11 |         |           |           |  |                                                           |
| 17691 | ENSG000002031063 |          | 18276.4 | 0.11 |         |           |           |  |                                                           |
| 17692 | ENSG00000212355  |          | 18277.9 | 0.11 |         |           |           |  |                                                           |
| 17697 | ENSG00000204629  |          | 18282.2 | 0.11 |         |           |           |  |                                                           |
| 17704 | ENSG000002041003 |          | 18285.6 | 0.11 | 15      | 65192180  | 65192438  |  | RNA 7SL, cytoplasmic 345, pseudogene                      |
| 17719 | ENSG00000235673  |          | 18299.6 | 0.11 |         |           |           |  |                                                           |
| 17720 | ENSG00000205871  |          | 18299.6 | 0.11 |         |           |           |  |                                                           |
| 17728 | ENSG000002084205 |          | 18307.6 | 0.11 | 5       | 178893834 | 178894126 |  | RNA 7SL, cytoplasmic 71, pseudogene                       |
| 17740 | ENSG00000284451  |          | 18318.6 | 0.11 |         |           |           |  |                                                           |
| 17743 | ENSG00000240941  |          | 18320.2 | 0.11 |         |           |           |  |                                                           |
| 17747 | ENSG00000256041  |          | 18324.9 | 0.11 |         |           |           |  |                                                           |
| 17756 | ENSG00000197414  | GOLGA8L1 | 18332   | 0.11 | 15      | 22736246  | 22746002  |  | galga1 A6 family-like 1                                   |
| 17769 | ENSG00000231378  |          | 18333.8 | 0.11 |         |           |           |  |                                                           |
| 17773 | ENSG00000232194  |          | 18338.3 | 0.11 |         |           |           |  |                                                           |
| 17780 | ENSG00000208926  |          | 18341.1 | 0.11 |         |           |           |  |                                                           |
| 17781 | ENSG00000231785  |          | 18342   | 0.11 |         |           |           |  |                                                           |
| 17785 | ENSG00000228877  |          | 18344.5 | 0.11 |         |           |           |  |                                                           |
| 17786 | ENSG00000272308  |          | 18345.1 | 0.11 |         |           |           |  |                                                           |
| 17789 | ENSG00000202223  |          | 18345.3 | 0.11 |         |           |           |  |                                                           |
| 17791 | ENSG00000205896  |          | 18347.5 | 0.11 |         |           |           |  |                                                           |
| 17796 | ENSG000002081151 |          | 18352.2 | 0.11 |         |           |           |  |                                                           |
| 17816 | ENSG00000233607  |          | 18363.8 | 0.11 |         |           |           |  |                                                           |
| 17820 | ENSG00000251189  |          | 18364.7 | 0.11 |         |           |           |  |                                                           |
| 17827 | ENSG00000236885  |          | 18371   | 0.11 |         |           |           |  |                                                           |
| 17838 | ENSG00000236919  |          | 18376.8 | 0.11 |         |           |           |  |                                                           |
| 17838 | ENSG00000228940  |          | 18379.7 | 0.11 |         |           |           |  |                                                           |
| 17842 | ENSG00000226548  |          | 18382.2 | 0.11 |         |           |           |  |                                                           |
| 17854 | ENSG00000205694  |          | 18388   | 0.11 |         |           |           |  |                                                           |
| 17855 | ENSG00000272102  |          | 18389.6 | 0.11 |         |           |           |  |                                                           |
| 17861 | ENSG000002056262 |          | 18392   | 0.11 |         |           |           |  |                                                           |
| 17874 | ENSG00000241677  |          | 18399.6 | 0.11 |         |           |           |  |                                                           |
| 17878 | ENSG00000205221  |          | 18403.1 | 0.11 |         |           |           |  |                                                           |
| 17882 | ENSG00000227186  |          | 18404.8 | 0.11 |         |           |           |  |                                                           |
| 17887 | ENSG00000226141  |          | 18408.6 | 0.11 |         |           |           |  |                                                           |
| 17890 | ENSG00000203375  |          | 18409.6 | 0.11 |         |           |           |  |                                                           |
| 17899 | ENSG000002087147 |          | 18422.8 | 0.11 |         |           |           |  |                                                           |
| 17901 | ENSG00000247324  |          | 18422.4 | 0.11 |         |           |           |  |                                                           |
| 17908 | ENSG00000245104  |          | 18425.4 | 0.11 |         |           |           |  |                                                           |
| 17910 | ENSG000002068204 |          | 18426.8 | 0.11 |         |           |           |  |                                                           |
| 17919 | ENSG00000219719  |          | 18432.3 | 0.11 |         |           |           |  |                                                           |
| 17922 | ENSG00000245332  |          | 18432.9 | 0.11 |         |           |           |  |                                                           |
| 17923 | ENSG00000237543  |          | 18433.8 | 0.11 |         |           |           |  |                                                           |
| 17928 | ENSG00000225722  |          | 18437.1 | 0.11 |         |           |           |  |                                                           |
| 17941 | ENSG00000202623  |          | 18448.7 | 0.11 |         |           |           |  |                                                           |
| 17952 | ENSG00000205091  |          | 18457.6 | 0.11 |         |           |           |  |                                                           |
| 17957 | ENSG00000272733  |          | 18459.8 | 0.11 |         |           |           |  |                                                           |
| 17958 | ENSG00000201044  |          | 18460.5 | 0.11 |         |           |           |  |                                                           |
| 17960 | ENSG00000202890  |          | 18462.1 | 0.11 |         |           |           |  |                                                           |
| 17963 | ENSG00000241744  |          | 18463.8 | 0.11 |         |           |           |  |                                                           |
| 17968 | ENSG00000202545  |          | 18469.3 | 0.11 |         |           |           |  |                                                           |
| 17972 | ENSG00000237919  |          | 18472.6 | 0.11 |         |           |           |  |                                                           |
| 17988 | ENSG00000271275  |          | 18486.7 | 0.11 |         |           |           |  |                                                           |
| 18003 | ENSG00000234533  |          | 18488.6 | 0.11 |         |           |           |  |                                                           |
| 18014 | ENSG00000205356  |          | 18504.8 | 0.11 |         |           |           |  |                                                           |

|       |                   |         |      |    |           |           |  |                                                              |
|-------|-------------------|---------|------|----|-----------|-----------|--|--------------------------------------------------------------|
| 18025 | ENSG00000296568   | 18519.3 | 0.11 |    |           |           |  |                                                              |
| 18026 | ENSG00000216031   | 18522.3 | 0.11 |    |           |           |  |                                                              |
| 18030 | ENSG00000289548   | 18523.1 | 0.11 |    |           |           |  |                                                              |
| 18031 | ENSG00000256321   | 18524.9 | 0.11 |    |           |           |  |                                                              |
| 18041 | ENSG00000296128   | 18533.5 | 0.11 |    |           |           |  |                                                              |
| 18052 | ENSG00000232745   | 18536.1 | 0.11 |    |           |           |  |                                                              |
| 18055 | ENSG00000240023   | 18540.1 | 0.11 |    |           |           |  |                                                              |
| 18065 | ENSG00000248560   | 18548.6 | 0.11 |    |           |           |  |                                                              |
| 18067 | ENSG00000284971   | 18549.4 | 0.11 |    |           |           |  |                                                              |
| 18068 | ENSG00000242822   | 18549.8 | 0.11 | 2  | 95689292  | 95689588  |  | RNA, 7SL, cytoplasmic 575, pseudogene                        |
| 18080 | ENSG00000242886   | 18561.4 | 0.11 |    |           |           |  |                                                              |
| 18086 | ENSG00000252188   | 18562.2 | 0.11 |    |           |           |  |                                                              |
| 18090 | ENSG00000253332   | 18566.9 | 0.11 |    |           |           |  |                                                              |
| 18105 | ENSG00000229861   | 18581.3 | 0.11 |    |           |           |  |                                                              |
| 18112 | ENSG00000202377   | 18584.2 | 0.11 |    |           |           |  |                                                              |
| 18122 | ENSG000002030947  | 18592.2 | 0.11 |    |           |           |  |                                                              |
| 18123 | ENSG00000225415   | 18592.6 | 0.11 |    |           |           |  |                                                              |
| 18128 | ENSG00000237910   | 18596   | 0.11 |    |           |           |  |                                                              |
| 18129 | ENSG00000272324   | 18600.2 | 0.11 |    |           |           |  |                                                              |
| 18136 | ENSG00000240919   | 18607.2 | 0.11 |    |           |           |  |                                                              |
| 18138 | ENSG00000249688   | 18607.3 | 0.11 |    |           |           |  |                                                              |
| 18148 | ENSG00000208408   | 18618.9 | 0.11 |    |           |           |  |                                                              |
| 18153 | ENSG00000204038   | 18620.8 | 0.11 | 10 | 82009496  | 82013395  |  | Uncharacterized protein; cDNA FLH4261 fl. clone TEST14025062 |
| 18160 | ENSG00000205997   | 18627.4 | 0.11 | 12 | 1116501   | 1116792   |  | RNA, 7SL, cytoplasmic 852, pseudogene                        |
| 18166 | ENSG00000258036   | 18632.1 | 0.11 |    |           |           |  |                                                              |
| 18173 | ENSG00000175558   | 18639.7 | 0.11 |    |           |           |  |                                                              |
| 18177 | ENSG00000208493   | 18641.5 | 0.11 | 18 | 939583    | 9396217   |  | RNA, 7SL, cytoplasmic 84, pseudogene                         |
| 18179 | ENSG00000272784   | 18647.9 | 0.11 |    |           |           |  |                                                              |
| 18180 | ENSG00000208706   | 18648.2 | 0.11 | 10 | 111784012 | 111784315 |  | RNA, 7SL, cytoplasmic 450, pseudogene                        |
| 18191 | ENSG00000208653   | 18656.3 | 0.11 |    |           |           |  |                                                              |
| 18197 | ENSG000002087069  | 18658.3 | 0.11 |    |           |           |  |                                                              |
| 18205 | ENSG00000212057   | 18664.1 | 0.11 |    |           |           |  |                                                              |
| 18221 | ENSG00000201462   | 18673   | 0.11 |    |           |           |  |                                                              |
| 18223 | ENSG00000207424   | 18673.3 | 0.11 |    |           |           |  |                                                              |
| 18225 | ENSG00000204824   | 18675.3 | 0.11 |    |           |           |  |                                                              |
| 18233 | ENSG000002021810  | 18684.4 | 0.11 |    |           |           |  |                                                              |
| 18254 | ENSG00000200798   | 18694.5 | 0.11 |    |           |           |  |                                                              |
| 18256 | ENSG00000208313   | 18694.7 | 0.11 |    |           |           |  |                                                              |
| 18262 | ENSG00000201948   | 18699.3 | 0.11 |    |           |           |  |                                                              |
| 18263 | ENSG00000255219   | 18700.8 | 0.11 |    |           |           |  |                                                              |
| 18284 | ENSG000002024000  | 18700.9 | 0.11 |    |           |           |  |                                                              |
| 18271 | ENSG00000208688   | 18705   | 0.11 |    |           |           |  |                                                              |
| 18278 | ENSG00000255950   | 18712.8 | 0.11 |    |           |           |  |                                                              |
| 18280 | ENSG00000258304   | 18713   | 0.11 |    |           |           |  |                                                              |
| 18286 | ENSG00000208500   | 18720.6 | 0.11 |    |           |           |  |                                                              |
| 18287 | ENSG00000208137   | 18720.6 | 0.11 |    |           |           |  |                                                              |
| 18291 | ENSG00000235601   | 18722.8 | 0.11 |    |           |           |  |                                                              |
| 18295 | ENSG00000208578   | 18723.3 | 0.11 |    |           |           |  |                                                              |
| 18300 | ENSG00000205102   | 18725.2 | 0.11 |    |           |           |  |                                                              |
| 18303 | ENSG00000238952   | 18727.2 | 0.11 |    |           |           |  |                                                              |
| 18306 | ENSG000002054689  | 18729.4 | 0.11 |    |           |           |  |                                                              |
| 18307 | ENSG00000207711   | 18729.9 | 0.11 |    |           |           |  |                                                              |
| 18309 | ENSG00000224629   | 18731.4 | 0.11 |    |           |           |  |                                                              |
| 18312 | ENSG00000232763   | 18734.3 | 0.11 |    |           |           |  |                                                              |
| 18328 | ENSG00000202294   | 18745.6 | 0.11 |    |           |           |  |                                                              |
| 18348 | ENSG000002054871  | 18762.2 | 0.11 |    |           |           |  |                                                              |
| 18348 | ENSG00000204138   | 18763.3 | 0.11 |    |           |           |  |                                                              |
| 18355 | ENSG00000201888   | 18771   | 0.11 |    |           |           |  |                                                              |
| 18356 | ENSG00000270232   | 18771.7 | 0.11 |    |           |           |  |                                                              |
| 18357 | ENSG000002087196  | 18771.7 | 0.11 |    |           |           |  |                                                              |
| 18359 | ENSG00000204898   | 18773.5 | 0.11 |    |           |           |  |                                                              |
| 18360 | ENSG000002038463  | 18773.8 | 0.11 | 13 | 95862598  | 95862702  |  | Small nuclear RNA U13                                        |
| 18362 | ENSG000002041840  | 18775.1 | 0.11 |    |           |           |  |                                                              |
| 18373 | ENSG000002021810  | 18781.6 | 0.11 |    |           |           |  |                                                              |
| 18389 | ENSG000002054935  | 18792.6 | 0.11 |    |           |           |  |                                                              |
| 18391 | ENSG000002040006  | 18794.9 | 0.11 |    |           |           |  |                                                              |
| 18392 | ENSG00000204396   | 18796.6 | 0.11 |    |           |           |  |                                                              |
| 18394 | ENSG000002054755  | 18796.7 | 0.11 |    |           |           |  |                                                              |
| 18395 | ENSG000002023795  | 18798.6 | 0.11 |    |           |           |  |                                                              |
| 18397 | ENSG000002021031  | 18799.4 | 0.11 |    |           |           |  |                                                              |
| 18398 | ENSG000002026014  | 18799.5 | 0.11 |    |           |           |  |                                                              |
| 18401 | ENSG00000204558   | 18802.4 | 0.11 |    |           |           |  |                                                              |
| 18403 | ENSG00000208677   | 18804.5 | 0.11 |    |           |           |  |                                                              |
| 18408 | ENSG00000203395   | 18806.8 | 0.11 |    |           |           |  |                                                              |
| 18411 | ENSG000002089483  | 18810.9 | 0.11 |    |           |           |  |                                                              |
| 18415 | ENSG00000205668   | 18813.5 | 0.11 |    |           |           |  |                                                              |
| 18419 | ENSG00000202986   | 18818.6 | 0.11 |    |           |           |  |                                                              |
| 18422 | ENSG00000204539   | 18820.2 | 0.11 |    |           |           |  |                                                              |
| 18423 | ENSG000002021533  | 18820.7 | 0.11 |    |           |           |  |                                                              |
| 18425 | ENSG00000237450   | 18821.5 | 0.11 |    |           |           |  |                                                              |
| 18483 | ENSG000002027872  | 18848.6 | 0.11 |    |           |           |  |                                                              |
| 18485 | ENSG000002056877  | 18848.3 | 0.11 |    |           |           |  |                                                              |
| 18479 | ENSG000002028322  | 18860.6 | 0.11 |    |           |           |  |                                                              |
| 18485 | ENSG000002058446  | 18862.1 | 0.11 |    |           |           |  |                                                              |
| 18487 | ENSG000002047771  | 18863.5 | 0.11 |    |           |           |  |                                                              |
| 18492 | ENSG000002037663  | 18865.5 | 0.11 |    |           |           |  |                                                              |
| 18495 | ENSG000002086183  | 18868.4 | 0.11 |    |           |           |  |                                                              |
| 18508 | ENSG000002046593  | 18875.4 | 0.11 |    |           |           |  |                                                              |
| 18510 | ENSG00000204314   | 18879.2 | 0.11 |    |           |           |  |                                                              |
| 18517 | ENSG00000222318   | 18884.7 | 0.11 |    |           |           |  |                                                              |
| 18525 | ENSG00000204548   | 18892.4 | 0.11 |    |           |           |  |                                                              |
| 18526 | ENSG00000204010   | 18892.5 | 0.11 |    |           |           |  |                                                              |
| 18530 | ENSG00000208598   | 18894.7 | 0.11 |    |           |           |  |                                                              |
| 18531 | ENSG000002082263  | 18895.8 | 0.11 |    |           |           |  |                                                              |
| 18538 | ENSG00000205301   | 18905.8 | 0.11 |    |           |           |  |                                                              |
| 18558 | ENSG0000020146722 | 18914.2 | 0.11 |    |           |           |  |                                                              |
| 18566 | ENSG000002043307  | 18918.9 | 0.11 |    |           |           |  |                                                              |
| 18570 | ENSG00000204932   | 18922.3 | 0.11 |    |           |           |  |                                                              |
| 18572 | ENSG000002058857  | 18923.3 | 0.11 |    |           |           |  |                                                              |
| 18576 | ENSG000002071755  | 18926.7 | 0.11 |    |           |           |  |                                                              |
| 18583 | ENSG000002056481  | 18929.3 | 0.11 |    |           |           |  |                                                              |
| 18592 | ENSG000002057738  | 18936.3 | 0.11 |    |           |           |  |                                                              |
| 18593 | ENSG00000202884   | 18937.1 | 0.11 |    |           |           |  |                                                              |
| 18596 | ENSG00000204992   | 18938.3 | 0.11 |    |           |           |  |                                                              |
| 18610 | ENSG000002035629  | 18954.1 | 0.11 |    |           |           |  |                                                              |
| 18614 | ENSG000002082933  | 18957.5 | 0.11 |    |           |           |  |                                                              |
| 18616 | ENSG00000205085   | 18960   | 0.11 |    |           |           |  |                                                              |
| 18635 | ENSG000002032650  | 18972.5 | 0.11 |    |           |           |  |                                                              |
| 18643 | ENSG00000208947   | 18975.4 | 0.11 |    |           |           |  |                                                              |
| 18648 | ENSG00000203263   | 18977.8 | 0.11 |    |           |           |  |                                                              |
| 18651 | ENSG000002087408  | 18978.5 | 0.11 |    |           |           |  |                                                              |
| 18659 | ENSG00000208859   | 18988.1 | 0.11 |    |           |           |  |                                                              |
| 18667 | ENSG00000205664   | 18995.6 | 0.11 |    |           |           |  |                                                              |
| 18672 | ENSG000002024471  | 18997.4 | 0.11 |    |           |           |  |                                                              |
| 18691 | ENSG000002048807  | 19010.3 | 0.11 |    |           |           |  |                                                              |
| 18704 | ENSG000002028811  | 19016.3 | 0.11 |    |           |           |  |                                                              |
| 18706 | ENSG000002087004  | 19019.4 | 0.11 |    |           |           |  |                                                              |
| 18707 | ENSG000002024792  | 19020.6 | 0.11 |    |           |           |  |                                                              |
| 18717 | ENSG000002034868  | 19030.3 | 0.11 |    |           |           |  |                                                              |
| 18721 | ENSG00000205910   | 19032.3 | 0.11 |    |           |           |  |                                                              |
| 18729 | ENSG000002083624  | 19038.2 | 0.11 |    |           |           |  |                                                              |
| 18738 | ENSG00000208591   | 19046.8 | 0.11 | 12 | 131514221 | 131514789 |  | Uncharacterized protein                                      |
| 18753 | ENSG000002019410  | 19061   | 0.11 |    |           |           |  |                                                              |
| 18758 | ENSG000002032446  | 19063.8 | 0.11 |    |           |           |  |                                                              |
| 18776 | ENSG000002085913  | 19071.6 | 0.11 |    |           |           |  |                                                              |
| 18777 | ENSG00000237328   | 19078   | 0.11 |    |           |           |  |                                                              |
| 18779 | ENSG000002053865  | 19079.6 | 0.11 |    |           |           |  |                                                              |
| 18794 | ENSG000002044358  | 19086.1 | 0.11 |    |           |           |  |                                                              |
| 18798 | ENSG000002046451  | 19087.8 | 0.11 |    |           |           |  |                                                              |
| 18805 | ENSG000002038462  | 19096.8 | 0.11 |    |           |           |  |                                                              |
| 18815 | ENSG00000201593   | 19103.9 | 0.11 |    |           |           |  |                                                              |
| 18824 | ENSG00000208932   | 19112   | 0.11 | 20 | 25207122  | 25207370  |  | HCG2018896; Uncharacterized protein                          |
| 18832 | ENSG000002088401  | 19117.6 | 0.11 |    |           |           |  |                                                              |
| 18843 | ENSG000002087111  | 19132.7 | 0.11 |    |           |           |  |                                                              |
| 18846 | ENSG000002020295  | 19138.8 | 0.11 |    |           |           |  |                                                              |
| 18854 | ENSG000002050872  | 19143.9 | 0.11 |    |           |           |  |                                                              |
| 18856 | ENSG000002082963  | 19145.7 | 0.11 |    |           |           |  |                                                              |
| 18860 | ENSG000002057147  | 19146.4 | 0.11 |    |           |           |  |                                                              |
| 18871 | ENSG000002033523  | 19153.5 | 0.11 |    |           |           |  |                                                              |
| 18880 | ENSG00000182376   | 19161.3 | 0.11 |    |           |           |  |                                                              |
| 18884 | ENSG00000205669   | 19171.9 | 0.11 |    |           |           |  |                                                              |
| 18887 | ENSG00000208856   | 19176.7 | 0.11 |    |           |           |  |                                                              |
| 18903 | ENSG000002028180  | 19183.6 | 0.11 |    |           |           |  |                                                              |
| 18915 | ENSG00000202570   | 19195.3 | 0.11 |    |           |           |  |                                                              |
| 18923 | ENSG00000203209   | 19202.3 | 0.11 |    |           |           |  |                                                              |
| 18927 | ENSG000002084747  | 19209.9 | 0.11 |    |           |           |  |                                                              |
| 18930 | ENSG000002046431  | 19212.6 | 0.11 | X  | 153724534 | 153724819 |  | RNA, 7SL, cytoplasmic 742, pseudogene                        |
| 18936 | ENSG000002026147  | 19217.6 | 0.11 |    |           |           |  |                                                              |
| 18946 | ENSG000002089935  | 19224.9 | 0.11 |    |           |           |  |                                                              |
| 18968 | ENSG000002042568  | 19240.5 | 0.11 |    |           |           |  |                                                              |
| 18981 | ENSG000002071218  | 19252.7 | 0.11 |    |           |           |  |                                                              |





|       |                  |               |       |     |                      |                      |           |           |           |                                                                  |                                                                                             |
|-------|------------------|---------------|-------|-----|----------------------|----------------------|-----------|-----------|-----------|------------------------------------------------------------------|---------------------------------------------------------------------------------------------|
| 17620 | ENSG0000023396   | RPS10P7       | 18215 | 7   | 0.1                  | incRNA               | 1         | 201487831 | 201499602 |                                                                  | ribosomal protein S10 pseudogene 7                                                          |
| 17638 | ENSG0000021151   | MIR1217       | 19278 | 17  | 0.1                  | miRNA                | 17        | 41153268  | 41153268  |                                                                  | miR1217                                                                                     |
| 18000 | ENSG00000211742  | LINC02062     | 19558 | 2   | 0.1                  | incRNA               | 16        | 65118402  | 65118403  |                                                                  | long intergenic non-protein coding RNA 922                                                  |
| 18445 | ENSG00000202142  | FAM230C       | 18834 | 9   | 0.1                  | incRNA               | 22        | 21652729  | 21679331  |                                                                  | family with sequence similarity 230, member C                                               |
| 18803 | ENSG00000229719  | MIR194-2      | 19011 | 3   | 0.1                  | miRNA                | 11        | 52928827  | 52928827  |                                                                  | miR194-2                                                                                    |
| 18709 | ENSG00000204950  | OTX2-AS1      | 19251 | 4   | 0.1                  | incRNA               | 14        | 5791261   | 5791261   |                                                                  | OTX2 antisense RNA 1 (head to head)                                                         |
| 18995 | ENSG00000253279  | FAM183CP      | 19285 | 8   | 0.1                  | incRNA               | 8         | 29779029  | 29811240  |                                                                  | family with sequence similarity 183, member C, pseudogene                                   |
| 19306 | ENSG00000204041  | LINC01011     | 19513 | 5   | 0.1                  | incRNA               | 6         | 2966201   | 29614407  |                                                                  | long intergenic non-protein coding RNA 1011                                                 |
| 19386 | ENSG00000205163  | LINC00818     | 19589 | 4   | 0.1                  | incRNA               | 14        | 37489916  | 37411731  |                                                                  | long intergenic non-protein coding RNA 618                                                  |
| 19445 | ENSG00000257585  | LINC00069     | 19596 | 2   | 0.1                  | incRNA               | 14        | 36539633  | 36534944  |                                                                  | long intergenic non-protein coding RNA 609                                                  |
| 19476 | ENSG00000299891  | LINC00559     | 19563 | 7   | 0.1                  | incRNA               | 13        | 11445203  | 11446541  |                                                                  | long intergenic non-protein coding RNA 567                                                  |
| 19489 | ENSG00000227874  | LINC00559     | 19576 | 1   | 0.1                  | incRNA               | 15        | 8071296   | 8071297   |                                                                  | long intergenic non-protein coding RNA 559                                                  |
| 19731 | ENSG00000249378  | LINC01060     | 19818 | 1   | 0.1                  | incRNA               | 4         | 18622180  | 18622205  |                                                                  | long intergenic non-protein coding RNA 1060                                                 |
| 19900 | ENSG00000202455  | CASC14        | 19971 | 0.1 | incRNA               | 6                    | 22135186  | 22135222  |           | cancer susceptibility candidate 14 (non-protein coding)          |                                                                                             |
| 19968 | ENSG000002023977 | LINC020327    | 20035 | 2   | 0.1                  | incRNA               | 13        | 2400710   | 24081603  |                                                                  | long intergenic non-protein coding RNA 327                                                  |
| 20085 | ENSG00000249352  | RP11-141011.2 | 20090 | 6   | 0.1                  | incRNA               | 5         | 6826296   | 6825292   |                                                                  | 75K RNA                                                                                     |
| 20086 | ENSG00000202565  |               | 20091 | 9   | 0.1                  | incRNA               | 9         | 3368093   | 3365099   |                                                                  |                                                                                             |
| 20792 | ENSG00000206388  |               | 20641 | 8   | 0.1                  | incRNA               | 13        | 48504290  | 48506757  |                                                                  | cytochrome P450, family 4, subfamily F, polypeptide 26, pseudogene                          |
| 20840 | ENSG00000201309  | LINC03077     | 20676 | 1   | 0.1                  | incRNA               | 6         | 105384109 | 105388402 |                                                                  | long intergenic non-protein coding RNA 577                                                  |
| 20854 | ENSG00000202973  | DPH6-AS1      | 20993 | 1   | 0.1                  | incRNA               | 15        | 3561309   | 3511202   |                                                                  | DPH6 antisense RNA 1 (head to head)                                                         |
| 20861 | ENSG00000203373  |               | 20680 | 2   | 0.1                  | incRNA               | 2         | 5854934   | 59290001  |                                                                  | long intergenic non-protein coding RNA 1122                                                 |
| 21088 | ENSG00000229558  | SACS-AS1      | 20658 | 7   | 0.1                  | incRNA               | 13        | 23993110  | 24020218  |                                                                  | SACS antisense RNA 1                                                                        |
| 21290 | ENSG00000210786  | LINC02077     | 21028 | 6   | 0.1                  | incRNA               | 15        | 6928296   | 6928360   |                                                                  | long intergenic non-protein coding RNA 277                                                  |
| 6542  | ENSG000002021463 | MIR1277       | 9341  | 1   | 0.1                  | miRNA                | X         | 117520357 | 117520344 |                                                                  | miR1277                                                                                     |
| 7027  | ENSG00000202770  | MIR958        | 9800  | 0.1 | miRNA                | 3                    | 14035222  | 14035418  |           | miR958                                                           |                                                                                             |
| 7297  | ENSG00000202596  | MIR9421       | 10041 | 0.1 | miRNA                | 1                    | 7438267   | 7438266   |           | miR9421                                                          |                                                                                             |
| 13363 | ENSG00000207624  | MIR194-1      | 14892 | 6   | 0.1                  | miRNA                | 1         | 22021489  | 22021883  |                                                                  | miR194-1                                                                                    |
| 18184 | ENSG000002027833 | MIR505        | 16397 | 0.1 | miRNA                | X                    | 13903607  | 13903690  |           | miR505                                                           |                                                                                             |
| 18998 | ENSG00000211767  | MIR1307       | 17133 | 5   | 0.1                  | miRNA                | 19        | 1812265   | 1812265   |                                                                  | miR1307                                                                                     |
| 17150 | ENSG000002027780 | MIR648        | 17897 | 2   | 0.1                  | miRNA                | 22        | 18463634  | 18463727  |                                                                  | miR648                                                                                      |
| 17606 | ENSG00000204872  | MIR4286       | 18205 | 9   | 0.1                  | miRNA                | 10        | 12871352  | 12872139  |                                                                  | miR4286                                                                                     |
| 17796 | ENSG00000205520  | MIR548V       | 18549 | 8   | 0.1                  | miRNA                | 8         | 1753169   | 1753169   |                                                                  | miR548V                                                                                     |
| 18006 | ENSG00000205135  | MIR5687       | 18573 | 6   | 0.1                  | miRNA                | 5         | 54804678  | 54804754  |                                                                  | miR5687                                                                                     |
| 18303 | ENSG00000203389  | MIR3973       | 18775 | 5   | 0.1                  | miRNA                | 11        | 36011648  | 36013754  |                                                                  | miR3973                                                                                     |
| 18547 | ENSG00000204568  | MIR6334       | 19033 | 22  | 0.1                  | miRNA                | 22        | 38336460  | 38336460  |                                                                  | miR6334                                                                                     |
| 18677 | ENSG00000203409  | MIR4747       | 19001 | 3   | 0.1                  | miRNA                | 19        | 4932999   | 4932972   |                                                                  | miR4747                                                                                     |
| 18884 | ENSG000002027773 | MIR842A       | 19163 | 3   | 0.1                  | miRNA                | 19        | 48178186  | 48178282  |                                                                  | miR842a                                                                                     |
| 19020 | ENSG000002037843 | MIR834        | 19481 | 17  | 0.1                  | miRNA                | 17        | 4471536   | 4471536   |                                                                  | miR834                                                                                      |
| 19343 | ENSG00000205395  | MIR3944       | 19527 | 3   | 0.1                  | miRNA                | 10        | 135185000 | 135185107 |                                                                  | miR3944                                                                                     |
| 19417 | ENSG00000204802  | MIR5181       | 19874 | 4   | 0.1                  | miRNA                | 1         | 20188836  | 20188785  |                                                                  | miR5181                                                                                     |
| 19594 | ENSG00000204554  | MIR3154       | 19920 | 2   | 0.1                  | miRNA                | 15        | 1873876   | 1873876   |                                                                  | miR3154                                                                                     |
| 20161 | ENSG000002021952 | MIR1303       | 20144 | 4   | 0.1                  | miRNA                | 5         | 15409338  | 15409421  |                                                                  | miR1303                                                                                     |
| 20199 | ENSG000002015930 | MIR942        | 20182 | 0.1 | miRNA                | 1                    | 117837265 | 117837350 |           | miR942                                                           |                                                                                             |
| 5420  | ENSG00000206048  |               | 8156  | 0.1 | misc. RNA            | 2                    | 12064821  | 12064933  |           | RNA, R-associated                                                |                                                                                             |
| 5447  | ENSG00000199788  |               | 8158  | 0.1 | misc. RNA            | 3                    | 4969693   | 4969693   |           | RNA, R-associated                                                |                                                                                             |
| 6930  | ENSG000002020953 |               | 9327  | 0.1 | misc. RNA            | 12                   | 5150681   | 5150670   |           | Y RNA                                                            |                                                                                             |
| 6074  | ENSG00000206062  |               | 12099 | 1   | 0.1                  | misc. RNA            | 18        | 8199524   | 8199528   |                                                                  | 75K RNA                                                                                     |
| 10850 | ENSG00000202096  |               | 13000 | 0.1 | misc. RNA            | 16                   | 47748446  | 47748444  |           | Y RNA                                                            |                                                                                             |
| 12090 | ENSG00000202250  |               | 14048 | 4   | 0.1                  | misc. RNA            | 2         | 69651732  | 69651824  |                                                                  | Y RNA                                                                                       |
| 10882 | ENSG00000204113  |               | 14451 | 0.1 | misc. RNA            | 2                    | 15222937  | 15222798  |           | RNA, 75S, cytoplasmic 124, pseudogene                            |                                                                                             |
| 13316 | ENSG00000204331  |               | 14934 | 0.1 | misc. RNA            | 2                    | 42741617  | 42741617  |           | RNA, 75S, cytoplasmic 145, pseudogene                            |                                                                                             |
| 14134 | ENSG00000202204  |               | 15665 | 4   | 0.1                  | misc. RNA            | 18        | 43656970  | 43657065  |                                                                  | Y RNA                                                                                       |
| 14532 | ENSG000002026781 |               | 15859 | 0.1 | misc. RNA            | 3                    | 64737329  | 64737442  |           | Y RNA                                                            |                                                                                             |
| 14720 | ENSG00000202534  |               | 16620 | 0.1 | misc. RNA            | 11                   | 58626311  | 58626207  |           | Y RNA                                                            |                                                                                             |
| 16616 | ENSG00000204389  |               | 16755 | 4   | 0.1                  | misc. RNA            | 1         | 70645229  | 70646123  |                                                                  | RNA, 75S, cytoplasmic 242, pseudogene                                                       |
| 16314 | ENSG000002026728 |               | 17252 | 3   | 0.1                  | misc. RNA            | 3         | 23315298  | 23315401  |                                                                  | Y RNA                                                                                       |
| 17252 | ENSG00000202648  |               | 18211 | 0.1 | misc. RNA            | 3                    | 10312924  | 10312924  |           | RNA, 75S, cytoplasmic 85, pseudogene                             |                                                                                             |
| 16365 | ENSG00000202979  |               | 18225 | 0.1 | misc. RNA            | 10                   | 105432916 | 105433023 |           | Y RNA                                                            |                                                                                             |
| 17748 | ENSG000002038910 |               | 18325 | 0.1 | misc. RNA            | 14                   | 74641159  | 74641454  |           | RNA, 75S, cytoplasmic 530, pseudogene                            |                                                                                             |
| 18023 | ENSG00000202979  |               | 18517 | 0.1 | misc. RNA            | 4                    | 11434998  | 11434130  |           | RNA, 75S, cytoplasmic 184, pseudogene                            |                                                                                             |
| 18278 | ENSG00000202452  |               | 18940 | 2   | 0.1                  | misc. RNA            | 16        | 7389597   | 7389597   |                                                                  | Y RNA                                                                                       |
| 18816 | ENSG000002022503 |               | 19104 | 6   | 0.1                  | misc. RNA            | 10        | 105432916 | 105433023 |                                                                  | Y RNA                                                                                       |
| 18911 | ENSG000002027512 |               | 19188 | 5   | 0.1                  | misc. RNA            | 3         | 38549971  | 38547102  |                                                                  | Y RNA                                                                                       |
| 19011 | ENSG00000202025  |               | 19208 | 3   | 0.1                  | misc. RNA            | 3         | 10184768  | 10184768  |                                                                  | RNA, 75S, cytoplasmic 74, pseudogene                                                        |
| 19058 | ENSG00000202497  |               | 19319 | 9   | 0.1                  | misc. RNA            | 4         | 186631027 | 186631121 |                                                                  | Y RNA                                                                                       |
| 19099 | ENSG000002041420 |               | 19320 | 3   | 0.1                  | misc. RNA            | 7         | 33085412  | 33085702  |                                                                  | RNA, 75S, cytoplasmic 505, pseudogene                                                       |
| 19178 | ENSG000002021862 |               | 19401 | 1   | 0.1                  | misc. RNA            | 7         | 4291786   | 4291786   |                                                                  | RNA, 75S, cytoplasmic 174, pseudogene                                                       |
| 19185 | ENSG000002040317 |               | 19402 | 1   | 0.1                  | misc. RNA            | 2         | 219967156 | 219967374 |                                                                  | RNA, 75S, cytoplasmic 764, pseudogene                                                       |
| 19300 | ENSG000002040823 |               | 19489 | 9   | 0.1                  | misc. RNA            | 11        | 61211802  | 61211899  |                                                                  | RNA, 75S, cytoplasmic 23, pseudogene                                                        |
| 19312 | ENSG00000203784  |               | 19500 | 2   | 0.1                  | misc. RNA            | 12        | 6266288   | 6266288   |                                                                  | RNA, 75S, cytoplasmic 7, pseudogene                                                         |
| 19562 | ENSG000002043702 |               | 19710 | 4   | 0.1                  | misc. RNA            | 20        | 18572974  | 18573261  |                                                                  | RNA, 75S, cytoplasmic 638, pseudogene                                                       |
| 19746 | ENSG000002020874 |               | 19828 | 6   | 0.1                  | misc. RNA            | 7         | 75142349  | 75142450  |                                                                  | Y RNA                                                                                       |
| 19832 | ENSG00000202014  |               | 19842 | 2   | 0.1                  | misc. RNA            | 4         | 14871877  | 14871877  |                                                                  | RNA, 75S, cytoplasmic 254, pseudogene                                                       |
| 19953 | ENSG000002043373 |               | 19991 | 9   | 0.1                  | misc. RNA            | 6         | 15885829  | 15885918  |                                                                  | RNA, 75S, cytoplasmic 173, pseudogene                                                       |
| 19977 | ENSG000002027009 |               | 20011 | 8   | 0.1                  | misc. RNA            | 4         | 1888547   | 1888256   |                                                                  | Y RNA                                                                                       |
| 19978 | ENSG00000202018  |               | 20012 | 0.1 | misc. RNA            | 2                    | 2341786   | 2341786   |           | Y RNA                                                            |                                                                                             |
| 20139 | ENSG000002021246 |               | 20126 | 6   | 0.1                  | misc. RNA            | 12        | 5442975   | 5443086   |                                                                  | Melanomagenesis associated parvulin RNA                                                     |
| 20332 | ENSG000002026790 |               | 20285 | 8   | 0.1                  | misc. RNA            | 12        | 100851466 | 100851568 |                                                                  | Y RNA                                                                                       |
| 19201 | ENSG00000201978  |               | 20431 | 14  | 0.1                  | misc. RNA            | 14        | 2333787   | 2333787   |                                                                  | Y RNA                                                                                       |
| 7883  | ENSG000002023822 |               | 10547 | 3   | 0.1                  | processed pseudogene | X         | 40965738  | 40965258  |                                                                  | malonin ring finger protein 4, pseudogene                                                   |
| 8633  | ENSG000002027773 |               | 11191 | 1   | 0.1                  | processed pseudogene | 12        | 10649975  | 10647104  |                                                                  | suppression of tumorigenicity 13 (colon carcinoma) (Hsp70 interacting protein) pseudogene 3 |
| 11203 | ENSG000002022734 |               | 13992 | 2   | 0.1                  | processed pseudogene | 1         | 1399284   | 1399284   |                                                                  | heterogeneous nuclear ribonucleoprotein X, pseudogene 2                                     |
| 9528  | ENSG00000118990  |               | 11972 | 7   | 0.1                  | processed pseudogene | 5         | 161178454 | 161178774 |                                                                  | glutathione (S-transferase) pseudogene 3                                                    |
| 10076 | ENSG000002014199 |               | 12407 | 0.1 | processed pseudogene | 2                    | 10731787  | 10731512  |           | eukaryotic translation elongation factor 1 alpha 1 pseudogene 12 |                                                                                             |
| 11203 | ENSG00000204929  |               | 13180 | 0.1 | processed pseudogene | 5                    | 1729637   | 1729662   |           | SUD5 pseudogene 1                                                |                                                                                             |
| 11909 | ENSG00000202915  |               | 13917 | 3   | 0.1                  | processed pseudogene | 2         | 15347329  | 15347329  |                                                                  | developmental polycomb associated 2 pseudogene 1                                            |
| 12327 | ENSG000002049274 |               | 14225 | 8   | 0.1                  | processed pseudogene | 3         | 8851032   | 8852037   |                                                                  | POZ and LIM domain 1 pseudogene 4                                                           |
| 14472 | ENSG000002015277 |               | 15635 | 0.1 | processed pseudogene | 10                   | 10495311  | 10493961  |           | MALDIK-1 pseudogene 1                                            |                                                                                             |
| 14881 | ENSG00000208490  |               | 16611 | 0.1 | processed pseudogene | 8                    | 42027403  | 42027403  |           | pleckstrin homology containing, family A, member 3 pseudogene 1  |                                                                                             |
| 15638 | ENSG000002019074 |               | 16739 | 1   | 0.1                  | processed pseudogene | 6         | 5306158   | 5306157   |                                                                  | superoxide dismutase 1, soluble pseudogene 1                                                |
| 15721 | ENSG00000205014  |               | 16850 | 0.1 | processed pseudogene | 11                   | 8036478   | 8036952   |           | ADP-ribosylation factor 6 interacting protein                    |                                                                                             |

|       |                 |         |      |                      |                |           |           |                                                                                              |                                                                |
|-------|-----------------|---------|------|----------------------|----------------|-----------|-----------|----------------------------------------------------------------------------------------------|----------------------------------------------------------------|
| 19196 | ENSG00000237849 | 19659   | 0.1  | processed_pseudogene | 13             | 64559584  | 64559585  | nuclear transcription factor Y, alpha pseudogene 1                                           |                                                                |
| 19200 | ENSG00000239529 | 19659   | 0.1  | processed_pseudogene | 2              | 12361377  | 12361377  | GRAM domain containing 4 pseudogene 2                                                        |                                                                |
| 19221 | ENSG00000236101 | 19432   | 0.1  | processed_pseudogene | 1              | 234162597 | 234162597 | ras-related C3orf100 nuclear substrate 1 pseudogene 7                                        |                                                                |
| 19239 | ENSG00000268030 | 19448   | 0.1  | processed_pseudogene | 8              | 94241867  | 94241867  | Ubrachinectin protein                                                                        |                                                                |
| 19243 | ENSG00000229554 | 19462   | 0.1  | processed_pseudogene | X              | 102641741 | 102643115 | MT-ND2 pseudogene 2                                                                          |                                                                |
| 19251 | ENSG00000231564 | 19455   | 0.1  | processed_pseudogene | 4              | 179170403 | 179170391 | eukaryotic translation initiation factor A1 pseudogene 11                                    |                                                                |
| 19270 | ENSG00000242983 | 19467   | 0.1  | processed_pseudogene | 3              | 54081776  | 54082620  | calcium binding tyrosine (Y)-phosphorylation regulated pseudogene 1                          |                                                                |
| 19290 | ENSG00000225520 | 19462   | 0.1  | processed_pseudogene | 4              | 127454965 | 127454961 | DNA binding motif protein 40 pseudogene 1                                                    |                                                                |
| 19330 | ENSG00000209085 | 19530   | 0.1  | processed_pseudogene | 16             | 48932012  | 48932012  | ADAM metalloprotease domain 38 (pseudogene)                                                  |                                                                |
| 19352 | ENSG00000217482 | 19532   | 0.1  | processed_pseudogene | 6              | 135957204 | 135957851 | high mobility group box 1 pseudogene 17                                                      |                                                                |
| 19360 | ENSG00000181999 | 19534   | 0.1  | processed_pseudogene | 2              | 53891595  | 53891592  | heterogeneous nuclear ribonucleoprotein A1 pseudogene 6.1                                    |                                                                |
| 19365 | ENSG00000232585 | 19539   | 0.1  | processed_pseudogene | 2              | 141101695 | 141101695 | ribosomal protein S2 pseudogene 28                                                           |                                                                |
| 19477 | ENSG00000234109 | 19624   | 0.1  | processed_pseudogene | 10             | 100807396 | 100809776 | ribosomal protein L7 pseudogene 36                                                           |                                                                |
| 19478 | ENSG00000227339 | 19624   | 0.1  | processed_pseudogene | 3              | 31484324  | 31487389  | thyroid hormone receptor associated protein 3 pseudogene 1                                   |                                                                |
| 19528 | ENSG00000235115 | 19559   | 0.1  | processed_pseudogene | 19             | 32659767  | 32659645  | interferon-induced protein with tetrapeptide repeats 1 pseudogene 1                          |                                                                |
| 19588 | ENSG00000238199 | 19705   | 0.1  | processed_pseudogene | 1              | 11338673  | 11339408  | ubiquitin-conjugating enzyme E2 variant 2 pseudogene 3                                       |                                                                |
| 19590 | ENSG00000231376 | 19710   | 0.1  | processed_pseudogene | 9              | 15588353  | 15588613  | high mobility group nucleosomal binding domain 2 pseudogene 16                               |                                                                |
| 19600 | ENSG00000240266 | 19717   | 0.1  | processed_pseudogene | 2              | 210043569 | 210043742 | MY31/E4-associated factor 3 pseudogene 1                                                     |                                                                |
| 19634 | ENSG00000243720 | 19737   | 0.1  | processed_pseudogene | 18             | 3406834   | 3406816   | ribosomal protein L21 pseudogene 127                                                         |                                                                |
| 19637 | ENSG00000230157 | 19739   | 0.1  | processed_pseudogene | 14             | 106003198 | 106003676 | ATP synthase, H+ transporting, mitochondrial Fo complex, subunit C1 (subunit 9) pseudogene 1 |                                                                |
| 19639 | ENSG00000230701 | 19740   | 0.1  | processed_pseudogene | 22             | 23605323  | 23605641  | F-box and WD repeat domain containing 4 pseudogene 1                                         |                                                                |
| 19721 | ENSG00000232656 | 19807   | 0.1  | processed_pseudogene | 1              | 100163788 | 100164734 | high mobility group box 3 pseudogene 10                                                      |                                                                |
| 19751 | ENSG00000231937 | 19835   | 0.1  | processed_pseudogene | 6              | 43331317  | 43331367  | ribosomal protein S2 pseudogene 28                                                           |                                                                |
| 19776 | ENSG00000258466 | 19848   | 0.1  | processed_pseudogene | 15             | 62374849  | 62375504  | nucleophosmin 1 (nucleolar phosphoprotein B23, numatin) pseudogene 47                        |                                                                |
| 19800 | ENSG00000232683 | 19874   | 0.1  | processed_pseudogene | 3              | 38559539  | 38557321  | D-dipicoline tautomerase pseudogene 1                                                        |                                                                |
| 19810 | ENSG00000235218 | 19879   | 0.1  | processed_pseudogene | 12             | 65812611  | 65812607  | keratin 18 pseudogene 60                                                                     |                                                                |
| 19848 | ENSG00000213844 | 19909   | 0.1  | processed_pseudogene | 3              | 11275842  | 11276268  | coiled-coil-helix-coiled-coil-helix domain containing 4 pseudogene 4                         |                                                                |
| 19854 | ENSG00000208781 | 19912   | 0.1  | processed_pseudogene | 17             | 42308128  | 42307596  | SHC (Src homology domain containing) transforming protein 1 pseudogene 2                     |                                                                |
| 19864 | ENSG00000243968 | 19967   | 0.1  | processed_pseudogene | 5              | 40067573  | 40067302  | keratin 18 pseudogene 48                                                                     |                                                                |
| 19915 | ENSG00000243968 | 19967   | 0.1  | processed_pseudogene | 5              | 40067573  | 40067302  | keratin 18 pseudogene 56                                                                     |                                                                |
| 19962 | ENSG00000232425 | 19997   | 0.1  | processed_pseudogene | 11             | 10327869  | 103297104 | MT-ND1 pseudogene 36                                                                         |                                                                |
| 19978 | ENSG00000232523 | 20019   | 0.1  | processed_pseudogene | 9              | 44448107  | 44448107  | LOC1002852 protein: Uncharacterized protein                                                  |                                                                |
| 19984 | ENSG00000232470 | 20016   | 0.1  | processed_pseudogene | X              | 45811197  | 45811197  | mediator complex subunit 28 pseudogene 2                                                     |                                                                |
| 20005 | ENSG00000241622 | 20032   | 0.1  | processed_pseudogene | 3              | 7570785   | 7570876   | retinoic acid receptor responder (zabromycin induced) 2 pseudogene 1                         |                                                                |
| 20020 | ENSG00000230528 | 20033   | 0.1  | processed_pseudogene | 3              | 38433059  | 38433171  | ribosomal protein L31 pseudogene 20                                                          |                                                                |
| 20040 | ENSG00000229756 | 20051   | 0.1  | processed_pseudogene | 3              | 24472739  | 24472598  | ribosomal protein L31 pseudogene 20                                                          |                                                                |
| 20106 | ENSG00000230256 | 20109   | 0.1  | processed_pseudogene | X              | 102084870 | 102096237 | MT-ND4 pseudogene 32                                                                         |                                                                |
| 20150 | ENSG00000230568 | 20149   | 0.1  | processed_pseudogene | 11             | 103213469 | 103213469 | MT-ND2 pseudogene 23                                                                         |                                                                |
| 20281 | ENSG00000229048 | 20257   | 0.1  | processed_pseudogene | 21             | 33078866  | 33079177  | high mobility group nucleosomal binding domain 1 pseudogene 2                                |                                                                |
| 20346 | ENSG00000230816 | 20259   | 0.1  | processed_pseudogene | 5              | 17202383  | 17202354  | DOB1 and CLK4 associated factor 13 pseudogene 2                                              |                                                                |
| 20371 | ENSG00000230816 | 20261   | 0.1  | processed_pseudogene | 6              | 15888117  | 15888117  | transferrin 1 pseudogene 2                                                                   |                                                                |
| 20497 | ENSG00000269849 | 20424   | 0.1  | processed_pseudogene | 18             | 56357598  | 56358195  | mitochondrial ribosomal protein L37 pseudogene 1                                             |                                                                |
| 20512 | ENSG00000214781 | 20430   | 0.1  | processed_pseudogene | 9              | 12837348  | 128378907 | heterogeneous nuclear ribonucleoprotein A1 pseudogene 16                                     |                                                                |
| 20511 | ENSG00000226520 | 20430   | 0.1  | processed_pseudogene | 9              | 14055577  | 14055939  | Proteasome- $\beta$ 1: Uncharacterized protein                                               |                                                                |
| 20522 | ENSG00000219524 | 20514   | 0.1  | processed_pseudogene | 6              | 7891216   | 7891216   | phosphotyrosine phosphatase kinase, type 1 pseudogene 1                                      |                                                                |
| 20537 | ENSG00000228738 | 20525   | 0.1  | processed_pseudogene | 3              | 14158349  | 14158411  | high mobility group nucleosomal binding domain 2 pseudogene 25                               |                                                                |
| 20710 | ENSG00000244494 | 20572   | 0.1  | processed_pseudogene | 1              | 8196124   | 8196230   | heterogeneous nuclear ribonucleoprotein A3 pseudogene 14                                     |                                                                |
| 20750 | ENSG00000244531 | 20595   | 0.1  | processed_pseudogene | 9              | 19383215  | 19383215  | NADH dehydrogenase (ubiquinone) 1 alpha subcomplex, 3 pseudogene 3                           |                                                                |
| 20784 | ENSG00000214875 | 20636   | 0.1  | processed_pseudogene | 10             | 70754663  | 70754663  | mediator complex subunit 28 pseudogene 1                                                     |                                                                |
| 20832 | ENSG00000229592 | 20675   | 0.1  | processed_pseudogene | A              | 136142078 | 136144401 | zinc finger 1-Y1E domain containing 1 pseudogene 1                                           |                                                                |
| 20836 | ENSG00000276966 | 20676   | 0.1  | processed_pseudogene | 12             | 62624084  | 62624084  | glutathione transferase $\alpha 1$ pseudogene 1                                              |                                                                |
| 20848 | ENSG00000224421 | 20785   | 0.1  | processed_pseudogene | 21             | 37811176  | 37811176  | ATP synthase, H+ transporting, mitochondrial Fo complex, subunit F2-like pseudogene          |                                                                |
| 20997 | ENSG00000215283 | 20795   | 0.1  | processed_pseudogene | 9              | 36303496  | 36304021  | high mobility group box 3 pseudogene 24                                                      |                                                                |
| 21006 | ENSG00000226411 | 20817   | 0.1  | processed_pseudogene | 6              | 35652892  | 35652892  | heterogeneous nuclear ribonucleoprotein A1 pseudogene 45                                     |                                                                |
| 21075 | ENSG00000237446 | 20850   | 0.1  | processed_pseudogene | 11             | 18502969  | 18502969  | Ras-homology enriched in brain pseudogene 3                                                  |                                                                |
| 19074 | ENSG00000179392 | 19121   | 0.1  | processed_transcript | 9              | 152082295 | 152087184 | zinc finger 1-Y1E domain containing frame 106                                                |                                                                |
| 19245 | ENSG00000231746 | 19245   | 0.1  | processed_transcript | 12             | 124868915 | 124868915 | TTLL1 intron transcript 1 (non-protein coding)                                               |                                                                |
| 19341 | ENSG00000231419 | 19341   | 0.1  | processed_transcript | 7              | 158789123 | 158789123 | long intergenic non-protein coding RNA 689                                                   |                                                                |
| 20058 | ENSG00000232440 | 20058   | 0.1  | processed_transcript | 10             | 10989621  | 109894197 | long intergenic non-protein coding RNA 710                                                   |                                                                |
| 20276 | ENSG00000232440 | 20058   | 0.1  | processed_transcript | 10             | 10989621  | 109894197 | long intergenic non-protein coding RNA 710                                                   |                                                                |
| 1810  | ENSG00000133742 | CA1     | 0.1  | protein_coding       | 8              | 86238837  | 86231243  | carbonic anhydrase 1                                                                         |                                                                |
| 2136  | ENSG0000164822  | DEFAB   | 3339 | 0.1                  | protein_coding | 8         | 6782517   | 6782517                                                                                      | defensin, alpha D, Paneth cell-specific                        |
| 3024  | ENSG0000164143  | RNASEB  | 2203 | 0.1                  | protein_coding | 14        | 21941018  | 21941018                                                                                     | ribonuclease H2A family 48                                     |
| 3798  | ENSG0000198692  | EIF-1A1 | 5975 | 0.1                  | protein_coding | Y         | 22737611  | 22755400                                                                                     | eukaryotic translation initiation factor 1A, Y-linked          |
| 4324  | ENSG0000177191  | B3GNT8  | 6713 | 0.1                  | protein_coding | 19        | 41912524  | 41904435                                                                                     | UDP-GlcNAc 6-epimerase 1, 3-N-acetylglucosaminyltransferase 8  |
| 4520  | ENSG00000200173 | CD7B    | 7003 | 0.1                  | protein_coding | 6         | 62001419  | 62001419                                                                                     | CD7B-associated beta                                           |
| 4619  | ENSG0000100079  | MS4A4A  | 7123 | 0.1                  | protein_coding | 11        | 60048014  | 60076445                                                                                     | membrane-spanning 4-domains, subfamily A, member 4A            |
| 4628  | ENSG00001052329 | TGFBI   | 7134 | 0.1                  | protein_coding | 19        | 41807492  | 41808816                                                                                     | transforming growth factor, beta 1                             |
| 4644  | ENSG00000204632 | HLA-C   | 7207 | 0.1                  | protein_coding | 4         | 2978414   | 2978414                                                                                      | major histocompatibility complex, class I, C                   |
| 4689  | ENSG0000108431  | FCAR    | 7227 | 0.1                  | protein_coding | 19        | 5535704   | 5501838                                                                                      | Fc fragment of IgA <sub>1</sub> receptor for rheumatoid factor |
| 4825  | ENSG00001030432 | APOL1   | 7413 | 0.1                  | protein_coding | 6         | 36649056  | 36649376                                                                                     | lipoprotein L1                                                 |
| 4859  | ENSG0000103810  | TNFAIP8 | 7427 | 0.1                  | protein_coding | 12        | 5522128   | 5522128                                                                                      | humor necrotizing alpha-induced protein 8                      |
| 5046  | ENSG00000228979 | LTA     | 7704 | 0.1                  | protein_coding | 6         | 3153881   | 31542101                                                                                     | lymphotxin alpha                                               |
| 5077  | ENSG0000101104  | FAM117A | 7740 | 0.1                  | protein_coding | 17        | 47787894  | 47886542                                                                                     | family with sequence similarity 117, member A                  |
| 5124  | ENSG00000219922 | RNASEH1 | 7808 | 0.1                  | protein_coding | 10        | 8008814   | 8008814                                                                                      | interferon-induced protein with tetrapeptide repeats 2         |
| 5363  | ENSG0000144905  | OSBP1L  | 8082 | 0.1                  | protein_coding | 3         | 125247702 | 125213934                                                                                    | oxysterol binding protein-like 11                              |
| 5406  | ENSG0000116514  | RNF198  | 8141 | 0.1                  | protein_coding | 1         | 33402045  | 33402046                                                                                     | ring finger protein 198                                        |
| 5427  | ENSG00001030118 | PI3R2   | 8162 | 0.1                  | protein_coding | 17        | 16288132  | 16288132                                                                                     | inositol 3-OH transferase 2                                    |
| 5469  | ENSG0000141553  | ARPC4   | 8208 | 0.1                  | protein_coding | 3         | 9834719   | 984410                                                                                       | actin related protein 2/3 complex, subunit 4, 20kDa            |
| 5539  | ENSG00001078173 | LAR1    | 8274 | 0.1                  | protein_coding | 3         | 49456362  | 49456105                                                                                     | leukocyte-associated immunoglobulin-like receptor 1            |
| 5562  | ENSG0000103296  | GABRA1  | 8287 | 0.1                  | protein_coding | 17        | 7143107   | 7143107                                                                                      | GABA(A) receptor-associated protein 17                         |
| 5638  | ENSG00000252027 | ITGB3   | 8396 | 0.1                  | protein_coding | 17        | 4531212   | 4541658                                                                                      | integrin, beta 3 (platelet glycoprotein IIb, antigen CD61)     |
| 5668  | ENSG0000073849  | ITGAL1  | 8430 | 0.1                  | protein_coding | 3         | 18664274  | 18679341                                                                                     | ST6 beta-galactosidase alpha-2,6-sialyltransferase 1           |
| 5721  | ENSG0000111522  | PTGER4  | 8476 | 0.1                  | protein_coding | 5         | 46017600  | 46018367                                                                                     | prostaglandin H receptor 4 (subtype EP4)                       |
| 5767  | ENSG00001011461 | RNF29   | 8524 | 0.1                  | protein_coding | 8         | 13603605  | 13603605                                                                                     | RAF3, member of RAS oncogene family                            |
| 5803  | ENSG00001081087 | OSTM1   | 8571 | 0.1                  | protein_coding | 6         | 10836213  | 10848708                                                                                     | osteopontin associated transmembrane protein 1                 |
| 5815  | ENSG00000212592 | MKVI1   | 8582 | 0.1                  | protein_coding | 11        | 10594068  | 10594068                                                                                     | mouse retrovirus integration site 1 homolog                    |
| 5880  | ENSG00000200791 | SLAMF7  | 8606 | 0.1                  | protein_coding | 17        | 18079037  | 180724611                                                                                    | SLAMF7 family member 7                                         |
| 5915  | ENSG0000186927  | ZNF816  | 8663 | 0.1                  | protein_coding | 19        | 5346388   | 53466164                                                                                     | zinc finger protein 816                                        |
| 6008  | ENSG0000105267  | JFH1    | 8840 | 0.1                  | protein_coding | 2         | 19312598  | 193117213                                                                                    | interferon inducible with helix-coil domain 1                  |
| 6086  | ENSG0000164874  | SYTL5   | 8863 | 0.1                  | protein_coding | 12        | 15901046  | 15918208                                                                                     | synaptotagmin-like protein 5                                   |
| 6102  | ENSG0000111335  | OAS2    | 8891 | 0.1                  | protein_coding | 12        | 11344620  | 11344628                                                                                     | 2'-5'-oligoadenylate synthetase 2, B97F10                      |
| 6113  | ENSG0000112208  | C6orf92 | 8892 | 0.1                  | protein_coding | 24        | 2470589   | 24721064                                                                                     | chromosome 6 open reading frame 62                             |
| 6119  | ENSG0000184692  | MSH4E   | 8892 | 0.1                  | protein_coding | 16        | 11762702  | 11773610                                                                                     | transferrin                                                    |
| 6302  | ENSG00000214787 | MSH4E   | 9089 | 0.1                  | protein_coding | 11        | 59989728  | 60105861                                                                                     | membrane-spanning 4-domains, subfamily A, member 4E            |
| 6304  | ENSG00000232183 | UBA2    | 9095 | 0.1                  | protein_coding | 19        | 18662540  | 18668380                                                                                     | ubiquitin A-N2 reductase/ubiquitin protein ligation product 1  |
| 6349  | ENSG0000021218  | MARCK2  | 9097 | 0.1                  | protein_coding | 9         | 63601491  | 63601491                                                                                     | MAPK-related effector-regulating kinase 2                      |
| 6355  | ENSG00000217423 | TLR10   | 9336 | 0.1                  | protein_coding | 4         | 38773860  | 38784411                                                                                     | Toll-like receptor 10                                          |
| 6387  | ENSG00000212359 | ANKA11  | 9372 | 0.1                  | protein_coding | 10        | 81910445  | 81965328                                                                                     |                                                                |

|       |                 |           |       |     |                |    |           |           |                                                                                          |
|-------|-----------------|-----------|-------|-----|----------------|----|-----------|-----------|------------------------------------------------------------------------------------------|
| 9069  | ENSG00000206513 | BLK       | 11607 | 0.1 | protein_coding | 10 | 10572699  | 10578991  | STE20-like kinase                                                                        |
| 9121  | ENSG00000148420 | NFKB2     | 11612 | 0.1 | protein_coding | 3  | 10154368  | 10154368  | nuclear factor of kappa light polypeptide gene enhancer in B-cells inhibitor, zeta       |
| 9176  | ENSG00000173011 | TDAB2B    | 11668 | 0.1 | protein_coding | 4  | 7043026   | 705979    | transpositional adaptor ZB                                                               |
| 9261  | ENSG00000100441 | KHNYN     | 11756 | 0.1 | protein_coding | 14 | 2498462   | 2491040   | KH and NYN domain containing                                                             |
| 9273  | ENSG00000149591 | DNAH2     | 11765 | 0.1 | protein_coding | 11 | 4633458   | 4662744   | disylglycyl kinase, zeta                                                                 |
| 9275  | ENSG00000153113 | CWC22     | 11765 | 0.1 | protein_coding | 1  | 18087603  | 18087603  | CWC22 spliceosome-associated protein homolog (S. cerevisiae)                             |
| 9353  | ENSG00000125551 | PLG82     | 11828 | 0.1 | protein_coding | 2  | 8804766   | 8805612   | plannogram-like B2                                                                       |
| 9402  | ENSG00000126558 | RHO1      | 11837 | 0.1 | protein_coding | 17 | 9048473   | 9050360   | ras homolog family member T1                                                             |
| 9482  | ENSG00000143265 | CRWD1     | 11838 | 0.1 | protein_coding | 3  | 7343204   | 7343204   | COWI domain containing 5                                                                 |
| 9564  | ENSG00000116747 | ATXN7     | 12077 | 0.1 | protein_coding | 3  | 6386233   | 6386233   | ataxin 7                                                                                 |
| 9571  | ENSG00000126052 | TROVE2    | 12052 | 0.1 | protein_coding | 1  | 19368552  | 19368552  | TROVE domain family member 2                                                             |
| 9794  | ENSG00000143265 | CCL10A1   | 12184 | 0.1 | protein_coding | 6  | 11644780  | 11644780  | chemokine type X, alpha 1                                                                |
| 9820  | ENSG00000131374 | TBC1D5    | 12278 | 0.1 | protein_coding | 3  | 1719854   | 1848309   | TBC1 domain family member 5                                                              |
| 10006 | ENSG00000143952 | VPS34     | 12280 | 0.1 | protein_coding | 2  | 6411520   | 6424206   | vesicular protein sorting 34 homolog (S. cerevisiae)                                     |
| 10070 | ENSG00000163926 | BCL2L1    | 12426 | 0.1 | protein_coding | 11 | 6475415   | 6475415   | basic leucine zipper transcription factor ATF-like 2                                     |
| 10130 | ENSG00000164576 | SAP30L    | 12447 | 0.1 | protein_coding | 5  | 15382517  | 15384014  | SAP30-like                                                                               |
| 10407 | ENSG00000152242 | C16orf25  | 12656 | 0.1 | protein_coding | 18 | 4373319   | 4384949   | chromosome 16 open reading frame 25                                                      |
| 10408 | ENSG00000200827 | RIKLE1    | 12656 | 0.1 | protein_coding | 20 | 3667919   | 3667775   | static and tandem tyrosine kinase 1, subunit beta                                        |
| 10445 | ENSG00000147854 | UHRF1     | 12662 | 0.1 | protein_coding | 9  | 6411515   | 6507704   | ubiquitin-like with PHD and ring finger domains 2, E3 ubiquitin protein ligase           |
| 10524 | ENSG00000202536 | TECPK1    | 12749 | 0.1 | protein_coding | 7  | 9784306   | 9788193   | lectin-like protein receptor containing 1                                                |
| 10571 | ENSG00000133121 | USP91     | 12750 | 0.1 | protein_coding | 2  | 12696814  | 12696814  | UDP-glucose glycoyltransferase 1                                                         |
| 10632 | ENSG00000183161 | FANCF     | 12831 | 0.1 | protein_coding | 11 | 2264407   | 2264387   | Fanconi anemia, complementation group F                                                  |
| 10676 | ENSG00000102445 | KIAA0226L | 12873 | 0.1 | protein_coding | 13 | 4891139   | 4701225   | KIAA0226-like                                                                            |
| 10681 | ENSG00000158552 | ZFAND9    | 12878 | 0.1 | protein_coding | 2  | 22002669  | 22024713  | zinc finger AN1-type domain 2B                                                           |
| 10756 | ENSG00000115662 | LXN1      | 12849 | 0.1 | protein_coding | 2  | 10670979  | 10681079  | UDP-glucuronate decarboxylase 2                                                          |
| 10810 | ENSG00000188171 | ZNF228    | 13002 | 0.1 | protein_coding | 19 | 2062267   | 2044402   | zinc finger protein 228                                                                  |
| 10814 | ENSG00000153466 | ZFY1      | 13004 | 0.1 | protein_coding | 8  | 4507093   | 4507093   | chromodomain protein, Y-like                                                             |
| 10824 | ENSG00000121417 | ZNF211    | 13068 | 0.1 | protein_coding | 19 | 5814761   | 5814477   | zinc finger protein 211                                                                  |
| 10870 | ENSG00000198836 | OPAI1     | 13040 | 0.1 | protein_coding | 3  | 18331093  | 18341152  | optic atrophy 1 (autosomal dominant)                                                     |
| 10884 | ENSG00000171620 | BTAF      | 13051 | 0.1 | protein_coding | 9  | 5081145   | 5081145   | down-regulator of transcription 1, TBP-and/or TBP-associated cofactor 2                  |
| 10973 | ENSG00000133063 | CHIT1     | 13130 | 0.1 | protein_coding | 1  | 20318155  | 20324769  | chitinase T1 (chitinohydrolase)                                                          |
| 11108 | ENSG00000006715 | VPS41     | 13224 | 0.1 | protein_coding | 7  | 3872563   | 3897194   | vesicular protein sorting 41 homolog (S. cerevisiae)                                     |
| 11281 | ENSG00000102831 | C12orf12  | 13242 | 0.1 | protein_coding | 8  | 8188167   | 8188167   | chromosome 12 open reading frame 12                                                      |
| 11178 | ENSG00000199911 | KPNAS1    | 13285 | 0.1 | protein_coding | 6  | 11700230  | 11700329  | karyopherin alpha 5 (importin alpha 6)                                                   |
| 11187 | ENSG00000102886 | GDPD3     | 13263 | 0.1 | protein_coding | 16 | 30116131  | 30125177  | glycerophosphodiester phosphatase domain containing 3                                    |
| 11528 | ENSG00000143891 | BTAF2     | 13263 | 0.1 | protein_coding | 18 | 15781064  | 15781064  | arginine transferase class 1, alpha 1                                                    |
| 11548 | ENSG00000154957 | ZNF176    | 13515 | 0.1 | protein_coding | 17 | 1180756   | 11800827  | zinc finger protein 176                                                                  |
| 11681 | ENSG00000198604 | BAZ1A     | 13706 | 0.1 | protein_coding | 14 | 35221937  | 35344863  | bromodomain adjacent to zinc finger domain, 1A                                           |
| 11684 | ENSG00000198584 | BTAF1     | 13802 | 0.1 | protein_coding | 18 | 1088810   | 1088810   | BTAF1 RNA polymerase II B/TIF transcription factor-associated, 170kDa                    |
| 11881 | ENSG00000178163 | ZNF518B   | 13896 | 0.1 | protein_coding | 4  | 1044158   | 1045034   | zinc finger protein 518B                                                                 |
| 11940 | ENSG00000197538 | DISC3     | 13939 | 0.1 | protein_coding | 12 | 3855721   | 3840282   | Down syndrome critical region gene 3                                                     |
| 11971 | ENSG00000102929 | ZNF229    | 13939 | 0.1 | protein_coding | 16 | 424616    | 424616    | phosphotyrosine kinase, beta                                                             |
| 11993 | ENSG00000092439 | TRPM7     | 13974 | 0.1 | protein_coding | 15 | 5084470   | 5097012   | transient receptor potential cation channel, subfamily M, member 7                       |
| 12098 | ENSG00000169597 | MCCP2     | 14051 | 0.1 | protein_coding | X  | 153287024 | 15328312  | methyl CoG binding protein 2 (Reti syndrome)                                             |
| 12100 | ENSG00000169573 | ADH1B     | 14051 | 0.1 | protein_coding | 15 | 6596217   | 6596215   | ADH1B gamma subunit                                                                      |
| 12106 | ENSG00000181718 | TMEM252   | 14056 | 0.1 | protein_coding | 8  | 71151468  | 71155783  | transmembrane protein 252                                                                |
| 12123 | ENSG00000154305 | MA3       | 14071 | 0.1 | protein_coding | 1  | 222781428 | 222841354 | melanoma inhibitory activity family, member 3                                            |
| 12148 | ENSG00000189132 | FQSD      | 14090 | 0.1 | protein_coding | 2  | 2562460   | 25739884  | FIVE, RHOGEF and PH domain containing                                                    |
| 12158 | ENSG00000140020 | SLC25A1   | 14090 | 0.1 | protein_coding | 2  | 24702400  | 24702400  | AT hook contains transcription factor 1                                                  |
| 12194 | ENSG00000187627 | RSPD2     | 14124 | 0.1 | protein_coding | 2  | 87135076  | 87141104  | RANBP2-like and GRP domain containing 1                                                  |
| 12341 | ENSG00000138878 | USP21     | 14236 | 0.1 | protein_coding | 2  | 10269917  | 10269147  | ubiquitin specific peptidase 20                                                          |
| 12342 | ENSG00000198705 | ZNF431    | 14236 | 0.1 | protein_coding | 19 | 21321402  | 21321402  | zinc finger protein 431                                                                  |
| 12570 | ENSG00000153317 | ASAP1     | 14416 | 0.1 | protein_coding | 8  | 13106433  | 13145006  | ARF-GAP with SH3 domain, ankyrin repeat and PH domain 1                                  |
| 12617 | ENSG00000094849 | RSP1      | 14444 | 0.1 | protein_coding | 11 | 71731041  | 71753203  | remodeling and spacing factor                                                            |
| 12744 | ENSG00000102962 | MTRF1     | 14453 | 0.1 | protein_coding | 47 | 41752025  | 41752025  | mitochondrial transfer RNA release factor 1                                              |
| 12863 | ENSG00000184939 | ZFP90     | 14629 | 0.1 | protein_coding | 16 | 6856393   | 6856975   | ZFP90 zinc finger protein                                                                |
| 12865 | ENSG00000188903 | CLN3      | 14629 | 0.1 | protein_coding | 16 | 2847793   | 2850849   | central lipase/neutral 3                                                                 |
| 12866 | ENSG00000102495 | SLC37A2   | 14629 | 0.1 | protein_coding | 12 | 12491263  | 12491263  | solute carrier family 37 (inositol phosphate transporter), member 2                      |
| 12871 | ENSG00000134183 | GNAT2     | 14687 | 0.1 | protein_coding | 1  | 11014889  | 11015579  | guanine nucleotide binding protein (G protein), alpha transducing activity polypeptide 2 |
| 13029 | ENSG00000184834 | MEI21     | 14736 | 0.1 | protein_coding | X  | 70334006  | 70334003  | meiotic cohesin subunit 12                                                               |
| 13075 | ENSG00000184834 | ZNF162    | 14736 | 0.1 | protein_coding | 8  | 12561205  | 12561205  | zinc finger E1B domain containing 6                                                      |
| 13079 | ENSG00000181827 | RFX7      | 14774 | 0.1 | protein_coding | 15 | 5637478   | 5635483   | regulatory factor X, 7                                                                   |
| 13117 | ENSG00000139437 | TCBP      | 14803 | 0.1 | protein_coding | 12 | 11033669  | 110421646 | trichoplein, keratin filament binding                                                    |
| 13181 | ENSG00000127899 | MTOR      | 14776 | 0.1 | protein_coding | 18 | 91121152  | 91121152  | mitochondrial transfer RNA elongation factor                                             |
| 13367 | ENSG00000197114 | ZOPAT     | 14899 | 0.1 | protein_coding | 20 | 6233817   | 62367494  | zinc finger, CCHC-type with G patch domain                                               |
| 13506 | ENSG00000122696 | SLC35A1   | 15103 | 0.1 | protein_coding | 9  | 37819400  | 37804350  | solute carrier family 35, member 1                                                       |
| 13540 | ENSG00000111431 | ANM1      | 15124 | 0.1 | protein_coding | 12 | 11851241  | 11851241  | antagonist of mitral cell AN1 binding (S. cerevisiae)                                    |
| 13602 | ENSG00000075966 | DHX8      | 15172 | 0.1 | protein_coding | 17 | 41561233  | 41621831  | DEAH (Asp-Glu-Ala-His) box polypeptide B                                                 |
| 13667 | ENSG00000092343 | ZNF578    | 15225 | 0.1 | protein_coding | 19 | 5831199   | 5837018   | zinc finger protein 578                                                                  |
| 13884 | ENSG00000102951 | ZNF578    | 15225 | 0.1 | protein_coding | 12 | 4383446   | 4383446   | zinc finger protein 740                                                                  |
| 14124 | ENSG00000180917 | CMT2F     | 15560 | 0.1 | protein_coding | 16 | 71315262  | 71326318  | cap methyltransferase 2                                                                  |
| 14191 | ENSG00000114827 | DCAF17    | 15614 | 0.1 | protein_coding | 2  | 17229077  | 17234162  | DOB1 and CUL4 associated factor 17                                                       |
| 14232 | ENSG00000102460 | NFKB2     | 15627 | 0.1 | protein_coding | 3  | 18411789  | 18411789  | nuclear factor kappa B subunit family, member A3                                         |
| 14401 | ENSG00000123810 | BSD2      | 15778 | 0.1 | protein_coding | 19 | 41890326  | 41890778  | B5 protein domain 2                                                                      |
| 14770 | ENSG00000180013 | PTGR3     | 16080 | 0.1 | protein_coding | 19 | 47123725  | 47128375  | prostaglandin D2 (prostanoid) receptor (IP)                                              |
| 14791 | ENSG00000102815 | NMR2      | 16083 | 0.1 | protein_coding | 15 | 6071768   | 6071768   | NMR2 nuclear regulator 2                                                                 |
| 14878 | ENSG00000152386 | ZNF75A    | 16145 | 0.1 | protein_coding | 16 | 3355406   | 3358852   | zinc finger protein 75a                                                                  |
| 15037 | ENSG00000189821 | ANFL      | 16289 | 0.1 | protein_coding | 2  | 6886493   | 6886804   | apoptin and PNKP like factor                                                             |
| 15127 | ENSG00000195528 | ANFL      | 16289 | 0.1 | protein_coding | 18 | 5308168   | 5308168   | zinc finger protein 28                                                                   |
| 15422 | ENSG00000173431 | RNASEH    | 16564 | 0.1 | protein_coding | 14 | 2152981   | 21529814  | ribonuclease, RNase A family, 8                                                          |
| 15444 | ENSG00000134905 | CARS2     | 16665 | 0.1 | protein_coding | 14 | 11269759  | 11316950  | cysteinyl-RNA synthetase 2, mitochondrial (putative)                                     |
| 15572 | ENSG00000102962 | ANFL      | 16665 | 0.1 | protein_coding | 12 | 4338117   | 4338117   | mitogen-activated protein kinase kinase 14                                               |
| 15660 | ENSG00000173239 | LPM       | 16778 | 0.1 | protein_coding | 10 | 90552487  | 9059030   | spase, family member M                                                                   |
| 15767 | ENSG00000121933 | ADORA3    | 16829 | 0.1 | protein_coding | 1  | 112025970 | 11210684  | adenosine A3 receptor                                                                    |
| 15813 | ENSG00000170949 | ZNF160    | 16812 | 0.1 | protein_coding | 19 | 5306969   | 5306969   | zinc finger protein 160                                                                  |
| 15843 | ENSG00000102815 | CYR11     | 16812 | 0.1 | protein_coding | 19 | 7861208   | 7862058   | G patch domain containing 2-like                                                         |
| 15919 | ENSG00000133067 | LRG6      | 16856 | 0.1 | protein_coding | 1  | 20216329  | 20228909  | leucine-rich repeat containing G protein-coupled receptor 6                              |
| 16091 | ENSG00000126278 | PCLM      | 17101 | 0.1 | protein_coding | 4  | 4411184   | 4412138   | polymerase (DNA directed), mu                                                            |
| 16119 | ENSG00000152226 | UGT2B9B   | 17124 | 0.1 | protein_coding | 4  | 70146217  | 70146218  | UDP glucuronosyltransferase 2 family, polypeptide B2B                                    |
| 16130 | ENSG00000173335 | CST9      | 17125 | 0.1 | protein_coding | 20 | 23588513  | 23588513  | cytoskeleton (beta-tubulin)                                                              |
| 16263 | ENSG00000184835 | GLT3L1    | 17224 | 0.1 | protein_coding | 20 | 6566999   | 6566999   | glutamate-glutamine translocase light chain 1                                            |
| 16428 | ENSG00000168288 | ANFL      | 17241 | 0.1 | protein_coding | 11 | 13112485  | 13112486  | acyl-CoA oxidase long chain family member 6                                              |
| 16520 | ENSG00000162383 | SLC1A7    | 17411 | 0.1 | protein_coding | 1  | 5355285   | 5356289   | solute carrier family 1 (glutamate transporter), member 7                                |
| 16573 | ENSG00000177689 | MED14     | 17451 | 0.1 | protein_coding | 8  | 2969840   | 3002202   | membrane bound O-acyltransferase domain containing 4                                     |
| 16681 | ENSG00000171200 | ZNF120    | 17456 | 0.1 | protein_coding | 16 | 33089445  | 33089445  | chromodomain protein, Y-like                                                             |
| 16804 | ENSG00000189409 | MMP23B    | 17546 | 0.1 | protein_coding | 1  | 1576474   | 1576398   | matrix metalloproteinase Z3B                                                             |
| 16804 | ENSG00000192217 | SETBP1    | 17648 | 0.1 | protein_coding | 18 | 42260136  | 42484475  | SET binding protein 1                                                                    |



|       |                  |           |       |     |                |    |           |           |                                                                             |
|-------|------------------|-----------|-------|-----|----------------|----|-----------|-----------|-----------------------------------------------------------------------------|
| 19129 | ENSG0000015598   | ILTR2     | 19633 | 0.1 | protein_coding | 2  | 102933433 | 102964462 | interleukin 1 receptor-like 2                                               |
| 19163 | ENSG0000015609   | C1orf165  | 19633 | 0.1 | protein_coding | 1  | 51561328  | 51561332  | chromosome 1 open reading frame 185                                         |
| 19189 | ENSG00000189127  | ANKRD34B  | 19633 | 0.1 | protein_coding | 5  | 79852574  | 79865307  | ankyrin repeat domain 34B                                                   |
| 19211 | ENSG00000173000  | RFXPA     | 19633 | 0.1 | protein_coding | 10 | 155911480 | 155912625 | relaxin/insulin-like family peptide receptor 4                              |
| 19225 | ENSG0000029298   | LOC101928 | 19633 | 0.1 | protein_coding | 15 | 40509297  | 40509307  | Uncharacterized protein                                                     |
| 19230 | ENSG0000015426   | LOC101928 | 19633 | 0.1 | protein_coding | 17 | 78947256  | 78947260  | Uncharacterized protein                                                     |
| 19265 | ENSG00000146276  | GABRR1    | 19633 | 0.1 | protein_coding | 6  | 89847220  | 89849097  | gamma-aminobutyric acid (GABA) A receptor, rho 1                            |
| 19299 | ENSG00000188868  | ZNF903    | 19633 | 0.1 | protein_coding | 19 | 12428297  | 12444534  | zinc finger protein 903                                                     |
| 19334 | ENSG0000011380   | BCL2L14   | 19633 | 0.1 | protein_coding | 12 | 12292618  | 12292618  | BCL2-like 14 (apoptosis facilitator)                                        |
| 19338 | ENSG00000175711  | B3GNTL1   | 19633 | 0.1 | protein_coding | 17 | 80900031  | 80900031  | UDP-GlcNAc:betaGal beta-1,3-N-acetylglucosaminyltransferase-like 1          |
| 19366 | ENSG00000248973  | STING2    | 19633 | 0.1 | protein_coding | 6  | 17162489  | 17173163  | stromal derived cell cycle 27                                               |
| 19379 | ENSG00000184471  | C10orf169 | 19633 | 0.1 | protein_coding | 6  | 11460095  | 11460095  | Uncharacterized protein                                                     |
| 19408 | ENSG00000145757  | SPATA9    | 19633 | 0.1 | protein_coding | 5  | 94987885  | 95034415  | Ctq and tumor necrosis factor related protein 8 spermatozeugon associated 9 |
| 19499 | ENSG00000152011  | CAKPL     | 19633 | 0.1 | protein_coding | 5  | 35044397  | 35048881  | calyphosine-like cytochrome                                                 |
| 19524 | ENSG00000130427  | EPO       | 19633 | 0.1 | protein_coding | 7  | 100318423 | 100321323 | erythropoietin                                                              |
| 19611 | ENSG00000171189  | GRK1      | 19723 | 0.1 | protein_coding | 21 | 33092524  | 33132351  | glutamate receptor, ionotropic, kainate 1                                   |
| 19630 | ENSG00000204176  | SVT15     | 19735 | 0.1 | protein_coding | 10 | 46954444  | 46971400  | synaptotagmin XV                                                            |
| 19678 | ENSG00000153363  | AMELX     | 19771 | 0.1 | protein_coding | X  | 11311333  | 11318881  | amelogenin, X-linked                                                        |
| 19709 | ENSG00000095837  | TL2       | 19784 | 0.1 | protein_coding | 10 | 98124363  | 98273875  | iodulin-like 2                                                              |
| 19726 | ENSG00000044897  | CDC27     | 19815 | 0.1 | protein_coding | 17 | 45195099  | 45206788  | cell division cycle 27                                                      |
| 19768 | ENSG00000244999  | LOC101928 | 19852 | 0.1 | protein_coding | 5  | 17647681  | 17649024  | Uncharacterized protein                                                     |
| 19784 | ENSG00000165816  | VWA2      | 19853 | 0.1 | protein_coding | 10 | 11599018  | 11605172  | von Willebrand factor A domain containing 2                                 |
| 19815 | ENSG00000105549  | THEG      | 19883 | 0.1 | protein_coding | 19 | 361750    | 370113    | the spermated protein                                                       |
| 19893 | ENSG00000043238  | EFCAB1    | 19912 | 0.1 | protein_coding | 8  | 49823348  | 49824700  | EF-hand calcium binding domain 1                                            |
| 19887 | ENSG00000138197  | Ctcr25    | 19938 | 0.1 | protein_coding | 7  | 42948325  | 42951904  | chromosome 7 open reading frame 25                                          |
| 19888 | ENSG00000197919  | IFNA1     | 19943 | 0.1 | protein_coding | 9  | 21440440  | 21441315  | interferon, alpha 1                                                         |
| 19891 | ENSG00000145295  | DRD2      | 19946 | 0.1 | protein_coding | 11 | 413200318 | 41326413  | dopamine receptor 22                                                        |
| 19903 | ENSG00000125787  | GHRH2     | 19955 | 0.1 | protein_coding | 20 | 3024288   | 3026383   | gonadotropin-releasing hormone 2                                            |
| 19947 | ENSG00000188038  | NWD1      | 19988 | 0.1 | protein_coding | 19 | 16838787  | 16839774  | NACHT and WD repeat domain containing 1                                     |
| 19916 | ENSG00000107335  | PRMT8     | 19977 | 0.1 | protein_coding | 9  | 3442828   | 3442828   | lysine methyltransferase chain 1                                            |
| 20021 | ENSG00000171804  | WR57      | 20043 | 0.1 | protein_coding | 8  | 38375483  | 38397317  | WD repeat domain 87                                                         |
| 20024 | ENSG00000174227  | PIG       | 20044 | 0.1 | protein_coding | 4  | 492589    | 533985    | phosphatidylinositol glycan anchor biosynthesis, class G                    |
| 20041 | ENSG00000168623  | TRPC7     | 20053 | 0.1 | protein_coding | 11 | 14000210  | 14000210  | transient receptor potential cation channel, subfamily C, member 7          |
| 20045 | ENSG00000197497  | ZNF665    | 20057 | 0.1 | protein_coding | 19 | 53062458  | 53066639  | zinc finger protein 665                                                     |
| 20051 | ENSG00000169918  | OTUD7A    | 20063 | 0.1 | protein_coding | 15 | 17373729  | 17374992  | OTU domain containing 7A                                                    |
| 20059 | ENSG00000152133  | PRMT8     | 20072 | 0.1 | protein_coding | 12 | 3498128   | 3498128   | transient receptor potential cation channel, subfamily C, member 8          |
| 20157 | ENSG00000144134  | RAB2A     | 20142 | 0.1 | protein_coding | 2  | 11438400  | 11440073  | RAB, member of RAS oncogene family-like 2A                                  |
| 20173 | ENSG00000173947  | ODF3      | 20154 | 0.1 | protein_coding | 11 | 196738    | 202021    | outer dense fiber of sperm tails 3                                          |
| 20185 | ENSG00000105528  | SLC35B8   | 20156 | 0.1 | protein_coding | 17 | 738127    | 7386383   | solute carrier family 35, member 8B                                         |
| 20210 | ENSG00000178997  | EXD1      | 20190 | 0.1 | protein_coding | 15 | 41474923  | 41522841  | exonuclease 5'-5' domain containing 1                                       |
| 20233 | ENSG00000089250  | NOS1      | 20209 | 0.1 | protein_coding | 12 | 11784587  | 11788975  | nitric oxide synthase 1 (neuronal)                                          |
| 20271 | ENSG00000109919  | TRPC7     | 20257 | 0.1 | protein_coding | 8  | 1355455   | 1355455   | transient receptor potential cation channel, subfamily C, member 7          |
| 20300 | ENSG00000091538  | MYO15A    | 20287 | 0.1 | protein_coding | 17 | 1801200   | 1808316   | myosin XVa                                                                  |
| 20306 | ENSG00000225236  | C3orf83   | 20270 | 0.1 | protein_coding | 3  | 1256433   | 12620258  | chromosome 3 open reading frame 83                                          |
| 20316 | ENSG00000164420  | LOC101928 | 20277 | 0.1 | protein_coding | 11 | 12004268  | 12006913  | glutamate receptor, ionotropic, kainate 4                                   |
| 20320 | ENSG00000171608  | ZNF274    | 20287 | 0.1 | protein_coding | 11 | 8673428   | 8673428   | zinc finger protein 274                                                     |
| 20368 | ENSG00000174038  | Ctcf131   | 20322 | 0.1 | protein_coding | 9  | 35041092  | 35045988  | chromosome 9 open reading frame 131                                         |
| 20376 | ENSG00000186599  | OTOD      | 20333 | 0.1 | protein_coding | 12 | 8063230   | 80772870  | otodogin-like 1                                                             |
| 20466 | ENSG00000204365  | C10orf106 | 20377 | 0.1 | protein_coding | 10 | 29116337  | 29116337  | chromosome 10 open reading frame 126                                        |
| 20488 | ENSG00000117400  | MPL       | 20415 | 0.1 | protein_coding | 1  | 43630478  | 43618443  | myeloproliferative leukemia virus oncogene                                  |
| 20510 | ENSG00000141665  | RFXC7     | 20429 | 0.1 | protein_coding | 18 | 17140588  | 17151130  | RFX protein 305                                                             |
| 20546 | ENSG00000169331  | RFXP3     | 20493 | 0.1 | protein_coding | 18 | 33938493  | 33938493  | relaxin/insulin-like family peptide receptor 3                              |
| 20558 | ENSG00000198440  | ZNF583    | 20470 | 0.1 | protein_coding | 19 | 56909335  | 56947404  | zinc finger protein 583                                                     |
| 20564 | ENSG00000205334  | LOC101928 | 20536 | 0.1 | protein_coding | 2  | 2792893   | 2793899   | Uncharacterized protein                                                     |
| 20576 | ENSG00000166586  | WR16      | 20536 | 0.1 | protein_coding | 8  | 9470244   | 9470244   | WD repeat domain 16                                                         |
| 20771 | ENSG00000151006  | PRSS53    | 20623 | 0.1 | protein_coding | 13 | 13054748  | 13100499  | protease, serine, 53                                                        |
| 20835 | ENSG00000188116  | STP42     | 20716 | 0.1 | protein_coding | 4  | 9810244   | 98094391  | sperm tail PG-rich repeat containing 2                                      |
| 20837 | ENSG00000102946  | MEDL1     | 20717 | 0.1 | protein_coding | 19 | 8843274   | 8843274   | medfly-Gli3 binding domain protein 3-like 1                                 |
| 20858 | ENSG00000258881  | LOC101928 | 20690 | 0.1 | protein_coding | 2  | 71168448  | 71222468  | Uncharacterized protein                                                     |
| 20897 | ENSG00000165972  | CDC3C8    | 20717 | 0.1 | protein_coding | 12 | 9620826   | 9620826   | collet-coil domain containing 38                                            |
| 20904 | ENSG00000192698  | HRS4B     | 20717 | 0.1 | protein_coding | 12 | 1521786   | 1521786   | chromosome 4B                                                               |
| 21030 | ENSG00000182450  | KCNK4     | 20815 | 0.1 | protein_coding | 11 | 64058774  | 64067503  | potassium channel, subfamily K, member 4                                    |
| 21038 | ENSG00000179397  | C1orf101  | 20817 | 0.1 | protein_coding | 1  | 24461769  | 24484719  | chromosome 1 open reading frame 101                                         |
| 21093 | ENSG00000144427  | GALNT18   | 20817 | 0.1 | protein_coding | 11 | 1227180   | 1227180   | UDP-N-acetyl-alpha-D-galactose 4-epimerase/transferase-like 6               |
| 21224 | ENSG00000162526  | TSK3      | 20973 | 0.1 | protein_coding | 9  | 3281722   | 32829913  | testis-specific serine kinase 3                                             |
| 21247 | ENSG00000166704  | ZNF406    | 20991 | 0.1 | protein_coding | 19 | 5844819   | 58451717  | zinc finger protein 406                                                     |
| 21293 | ENSG00000150020  | FAM98B    | 21052 | 0.1 | protein_coding | 13 | 12291013  | 12291013  | family with sequence similarity 86, member B2                               |
| 21278 | ENSG00000102128  | RAB40A    | 21057 | 0.1 | protein_coding | X  | 10216200  | 10219328  | RAB40A, member RAS oncogene family-like                                     |
| 21321 | ENSG00000148404  | TULP2     | 21050 | 0.1 | protein_coding | 19 | 49384222  | 49401900  | tubby like protein 2                                                        |
| 21328 | ENSG00000169928  | ANK       | 21055 | 0.1 | protein_coding | 9  | 13566788  | 13576414  | ankyrin-like protein 8                                                      |
| 21362 | ENSG00000197066  | TM2D2     | 21108 | 0.1 | protein_coding | 11 | 64852451  | 64858847  | transmembrane protein 262                                                   |
| 21453 | ENSG00000175697  | GPR156    | 21181 | 0.1 | protein_coding | 3  | 119883492 | 120003941 | G protein-coupled receptor 156                                              |
| 21513 | ENSG00000191388  | ZNF223    | 21203 | 0.1 | protein_coding | 11 | 4452348   | 4452348   | zinc finger protein 223                                                     |
| 21786 | ENSG00000178025  | C11orf16  | 21436 | 0.1 | protein_coding | 11 | 884123    | 885453    | chromosome 11 open reading frame 16                                         |
| 21803 | ENSG00000186997  | GPR61     | 21430 | 0.1 | protein_coding | 1  | 110082484 | 110091288 | G protein-coupled receptor 61                                               |
| 21932 | ENSG00000145428  | TMR6B     | 21527 | 0.1 | protein_coding | 11 | 1583327   | 1583327   | T-cell leukemia invasion and metastasis 2                                   |
| 22327 | ENSG00000170940  | KCNAB3    | 21817 | 0.1 | protein_coding | 17 | 7825177   | 7831211   | potassium voltage-gated channel, shaker-related subfamily, beta member 3    |
| 14303 | ENSG00000202123  | LOC101928 | 15688 | 0.1 | rRNA           | 15 | 29868655  | 29883767  | rRNA, 5S ribosomal pseudogene 390                                           |
| 19303 | ENSG00000202113  | LOC101928 | 15688 | 0.1 | rRNA           | 11 | 14000781  | 14000781  | rRNA, 5S ribosomal pseudogene 247                                           |
| 17230 | ENSG00000252942  | LOC101928 | 17841 | 0.1 | rRNA           | 9  | 10198122  | 10198248  | rRNA, 5S ribosomal pseudogene 290                                           |
| 17441 | ENSG00000202303  | LOC101928 | 18930 | 0.1 | rRNA           | 5  | 5544296   | 5544293   | rRNA, 5S ribosomal pseudogene 184                                           |
| 18284 | ENSG00000202347  | LOC101928 | 18538 | 0.1 | rRNA           | 11 | 1785148   | 1785148   | rRNA, 5S ribosomal pseudogene 199                                           |
| 18379 | ENSG00000252793  | LOC101928 | 18784 | 0.1 | rRNA           | 5  | 14595562  | 14595763  | rRNA, 5S ribosomal pseudogene 198                                           |
| 18619 | ENSG00000199592  | LOC101928 | 18962 | 0.1 | rRNA           | 10 | 7834887   | 7834917   | rRNA, 5S ribosomal pseudogene 321                                           |
| 19053 | ENSG00000202182  | LOC101928 | 19629 | 0.1 | rRNA           | 21 | 15443102  | 15443102  | rRNA, 5S ribosomal pseudogene 488                                           |
| 19694 | ENSG00000202974  | LOC101928 | 19911 | 0.1 | sense_intronic | 4  | 11189144  | 11189210  | REVS, intronic transcript 1 (non-protein coding)                            |
| 19830 | ENSG00000234233  | LOC101928 | 19901 | 0.1 | sense_intronic | 1  | 21130530  | 21130616  | KCNH1 intronic transcript 1 (non-protein coding)                            |
| 19861 | ENSG00000181211  | LOC101928 | 19916 | 0.1 | sense_intronic | 7  | 4317496   | 4302768   | HECW1 intronic transcript 1 (non-protein coding)                            |
| 19810 | ENSG00000233786  | LOC101928 | 20044 | 0.1 | sense_intronic | 22 | 29388709  | 2941608   | ZNF3 intronic transcript 1 (non-protein coding)                             |
| 19336 | ENSG000002021467 | LOC101928 | 17138 | 0.1 | sncRNA         | 4  | 17062503  | 17062504  | Small nuclear RNA SNORA16B/SNORA16A family                                  |
| 19801 | ENSG00000201944  | SNORA16B  | 17138 | 0.1 | sncRNA         | 1  | 20570349  | 20570448  | Small nuclear RNA SNORA72                                                   |
| 19788 | ENSG00000201221  | SNORA16C  | 18209 | 0.1 | sncRNA         | 11 | 8275256   | 8275256   | small nuclear RNA, HACA box 70E                                             |
| 17859 | ENSG00000252877  | SNORA16E  | 18291 | 0.1 | sncRNA         | 11 | 19291911  | 19292080  | Small nuclear RNA SNORA81                                                   |
| 19116 | ENSG00000212498  | SNORA16F  | 18888 | 0.1 | sncRNA         | 4  | 1112672   | 1112691   | Small nuclear RNA SNORA48                                                   |
| 19761 | ENSG00000212495  | SNORA16G  | 19049 | 0.1 | sncRNA         | 12 | 12048984  | 12049280  | Small nuclear RNA SNORA111                                                  |
| 19380 | ENSG00000212432  | SNORA16H  | 19533 | 0.1 | sncRNA         | 12 | 8959784   | 8959781   | Small nuclear RNA SNORA75                                                   |
| 19566 | ENSG000002021827 |           |       |     |                |    |           |           |                                                                             |

|       |                 |           |         |     |                                    |    |           |           |                                                                                       |
|-------|-----------------|-----------|---------|-----|------------------------------------|----|-----------|-----------|---------------------------------------------------------------------------------------|
| 19123 | ENSG00000014544 |           | 19960.6 | 0.1 | transcribed_unprocessed_pseudogene | 7  | 72656902  | 72694143  | GTF2I repeat domain containing 2 pseudogene 1                                         |
| 19508 | ENSG00000238021 |           | 19646   | 0.1 | transcribed_unprocessed_pseudogene | 10 | 27547091  | 27577753  | armadillo repeat containing 4 pseudogene 1                                            |
| 20435 | ENSG00000253771 |           | 20373.4 | 0.1 | transcribed_unprocessed_pseudogene | 13 | 25498815  | 25424225  | transmembrane phosphoinositide 3-kinophase and tensin homolog 2 pseudogene 1          |
| 20503 | ENSG00000187172 |           | 20426   | 0.1 | transcribed_unprocessed_pseudogene | 21 | 10996026  | 11098908  | B melanoma antigen family, member 2                                                   |
| 17411 | ENSG00000248553 |           | 18971.3 | 0.1 | unitary_pseudogene                 | 11 | 5572892   | 5573793   | olfactory receptor, family 52, subfamily H, member 2 pseudogene                       |
| 18849 | ENSG00000239822 |           | 19226.5 | 0.1 | unitary_pseudogene                 | 19 | 41314430  | 41317295  | cytochrome P450, family 2, subfamily T, polypeptide 2, pseudogene                     |
| 18019 | ENSG00000260511 | HYALP1    | 18562.6 | 0.1 | unitary_pseudogene                 | 7  | 123454193 | 123469258 | hyaluronoglucosaminidase pseudogene 1                                                 |
| 20384 | ENSG00000262125 |           | 20315.5 | 0.1 | unitary_pseudogene                 | 2  | 97388474  | 97370624  | ten-likes 5 (C, degen)                                                                |
| 828   | ENSG00000230521 |           | 10959.7 | 0.1 | unprocessed_pseudogene             | 6  | 29855071  | 29855045  | HLA complex group 4 pseudogene 7                                                      |
| 16523 | ENSG00000226102 |           | 17113   | 0.1 | unprocessed_pseudogene             | 7  | 39885904  | 36013282  | septin 7 pseudogene 3                                                                 |
| 18975 | ENSG00000202698 |           | 17733.6 | 0.1 | unprocessed_pseudogene             | 4  | 9186023   | 9171696   | asparagine-linked glycosylase 1-like 14, pseudogene                                   |
| 17862 | ENSG00000176289 |           | 18392.1 | 0.1 | unprocessed_pseudogene             | X  | 148693540 | 148607582 | iduronate 2-sulfatase pseudogene 1                                                    |
| 16289 | ENSG00000196153 |           | 18722.2 | 0.1 | unprocessed_pseudogene             | 19 | 22897369  | 22899534  | zinc finger protein 849, pseudogene                                                   |
| 18431 | ENSG00000202956 |           | 18625.6 | 0.1 | unprocessed_pseudogene             | 2  | 131947407 | 131955068 | neurofascin 1 pseudogene 8                                                            |
| 18432 | ENSG00000228547 |           | 18626.1 | 0.1 | unprocessed_pseudogene             | 10 | 15041049  | 15042054  | olfactory receptor, family 7, subfamily E, member 26 pseudogene                       |
| 18506 | ENSG00000260960 |           | 18875.7 | 0.1 | unprocessed_pseudogene             | 17 | 36230653  | 36251183  | family with sequence similarity 106, member D, pseudogene                             |
| 18848 | ENSG00000232393 | DDX11L2   | 19139.8 | 0.1 | unprocessed_pseudogene             | 2  | 114326606 | 114339144 | DIS3D1-like-Glu-Xa/Ka/Ki16 box helicase 11 like 2                                     |
| 18861 | ENSG00000180042 |           | 19238.6 | 0.1 | unprocessed_pseudogene             | 17 | 3289224   | 3289132   | olfactory receptor, family 1, subfamily R, member 1 pseudogene                        |
| 19320 | ENSG00000230531 |           | 19507.8 | 0.1 | unprocessed_pseudogene             | 7  | 57261964  | 57263761  | MIT-ND5 pseudogene 7                                                                  |
| 19340 | ENSG00000211648 | SPATA31B1 | 19525.9 | 0.1 | unprocessed_pseudogene             | 9  | 84612562  | 84617657  | SPATA31 subfamily B, member 1                                                         |
| 19689 | ENSG00000234402 |           | 19781.7 | 0.1 | unprocessed_pseudogene             | 14 | 106012947 | 106016031 | ELK2B, member of ETS oncogene family, pseudogene                                      |
| 19896 | ENSG00000234890 |           | 19948.6 | 0.1 | unprocessed_pseudogene             | 2  | 159278487 | 159281815 | heterogeneous nuclear ribonucleoprotein D-like pseudogene 2                           |
| 20483 | ENSG00000202725 |           | 20413.4 | 0.1 | unprocessed_pseudogene             | 17 | 18620110  | 18620361  | MT-ND2 pseudogene 12                                                                  |
| 1672  | ENSG00000235886 |           | 2071.3  | 0.1 |                                    | 2  | 80273879  | 80274235  | immunoglobulin kappa variable 3D-7                                                    |
| 4895  | ENSG0000021841  |           | 7514.2  | 0.1 |                                    |    |           |           |                                                                                       |
| 5589  | ENSG00000202581 |           | 8341.3  | 0.1 |                                    |    |           |           |                                                                                       |
| 5694  | ENSG00000288903 |           | 8434.8  | 0.1 |                                    |    |           |           |                                                                                       |
| 6156  | ENSG00000187534 |           | 8937.8  | 0.1 |                                    |    |           |           |                                                                                       |
| 6584  | ENSG00000202338 |           | 9372.3  | 0.1 |                                    |    |           |           |                                                                                       |
| 7880  | ENSG00000152022 | LIX1L     | 10593.6 | 0.1 |                                    | 1  | 145477085 | 145501609 | Lix1 homolog (mouse)-like                                                             |
| 7897  | ENSG00000224856 |           | 10607.9 | 0.1 |                                    |    |           |           |                                                                                       |
| 8548  | ENSG00000131071 |           | 11343.7 | 0.1 |                                    |    |           |           |                                                                                       |
| 10460 | ENSG00000258581 |           | 12706.9 | 0.1 |                                    |    |           |           |                                                                                       |
| 10763 | ENSG00000289958 |           | 12954.2 | 0.1 |                                    |    |           |           |                                                                                       |
| 10831 | ENSG00000219980 |           | 13011.4 | 0.1 |                                    |    |           |           |                                                                                       |
| 10838 | ENSG00000270940 |           | 13018.5 | 0.1 |                                    |    |           |           |                                                                                       |
| 10900 | ENSG00000251194 |           | 13065.1 | 0.1 |                                    |    |           |           |                                                                                       |
| 11033 | ENSG00000202353 |           | 13189.9 | 0.1 |                                    |    |           |           |                                                                                       |
| 11414 | ENSG00000228232 |           | 13497.9 | 0.1 |                                    |    |           |           |                                                                                       |
| 11483 | ENSG00000226004 |           | 13548.3 | 0.1 |                                    |    |           |           |                                                                                       |
| 11488 | ENSG00000266948 |           | 13559.4 | 0.1 |                                    |    |           |           |                                                                                       |
| 11673 | ENSG00000236955 |           | 13718.9 | 0.1 |                                    |    |           |           |                                                                                       |
| 11790 | ENSG00000243452 | NBP15     | 13822.2 | 0.1 |                                    | 1  | 148559579 | 148596267 | neuroblastoma breakpoint family, member 15                                            |
| 11811 | ENSG00000225794 |           | 13837.7 | 0.1 |                                    |    |           |           |                                                                                       |
| 11911 | ENSG00000225796 |           | 13919.9 | 0.1 |                                    |    |           |           |                                                                                       |
| 11978 | ENSG00000248771 |           | 13966.7 | 0.1 |                                    |    |           |           |                                                                                       |
| 12021 | ENSG00000231104 |           | 13999.6 | 0.1 |                                    |    |           |           |                                                                                       |
| 2166  | ENSG00000281142 |           | 14097.0 | 0.1 |                                    |    |           |           |                                                                                       |
| 12279 | ENSG00000230515 |           | 14183.4 | 0.1 |                                    |    |           |           |                                                                                       |
| 12456 | ENSG00000229233 |           | 14320.3 | 0.1 |                                    |    |           |           |                                                                                       |
| 13001 | ENSG00000251729 |           | 14672.2 | 0.1 |                                    |    |           |           |                                                                                       |
| 13421 | ENSG00000235159 |           | 15039.9 | 0.1 |                                    |    |           |           |                                                                                       |
| 13492 | ENSG00000298862 |           | 15096.1 | 0.1 |                                    |    |           |           |                                                                                       |
| 13829 | ENSG00000185262 |           | 15194.3 | 0.1 |                                    | 22 | 22468236  | 22472374  | aldohydrolase domain containing 17A pseudogene 5                                      |
| 13884 | ENSG00000232725 |           | 15245.6 | 0.1 |                                    |    |           |           |                                                                                       |
| 13836 | ENSG00000281087 |           | 15245.3 | 0.1 |                                    |    |           |           |                                                                                       |
| 13886 | ENSG00000215468 |           | 15256.4 | 0.1 |                                    |    |           |           |                                                                                       |
| 14201 | ENSG00000287298 |           | 15625.4 | 0.1 |                                    |    |           |           |                                                                                       |
| 14488 | ENSG00000224187 |           | 15845.6 | 0.1 |                                    |    |           |           |                                                                                       |
| 14643 | ENSG00000265903 |           | 15987.3 | 0.1 |                                    |    |           |           |                                                                                       |
| 14839 | ENSG00000253017 |           | 16113   | 0.1 |                                    |    |           |           |                                                                                       |
| 14971 | ENSG00000251721 |           | 16219   | 0.1 |                                    | 2  | 158390712 | 158390796 | Small nuclear RNA 25                                                                  |
| 15105 | ENSG00000231963 |           | 16348.9 | 0.1 |                                    |    |           |           |                                                                                       |
| 15227 | ENSG00000272403 |           | 16430   | 0.1 |                                    |    |           |           |                                                                                       |
| 15256 | ENSG00000212998 |           | 16449.7 | 0.1 |                                    | 8  | 94752349  | 94753001  | RBM12B antisense RNA 1                                                                |
| 15303 | ENSG00000202163 |           | 16474.4 | 0.1 |                                    |    |           |           |                                                                                       |
| 15458 | ENSG00000271550 |           | 16592.5 | 0.1 |                                    |    |           |           |                                                                                       |
| 15487 | ENSG00000285049 |           | 16610.7 | 0.1 |                                    |    |           |           |                                                                                       |
| 15618 | ENSG00000181117 |           | 16718.3 | 0.1 |                                    | 1  | 173250216 | 173250309 | Small nuclear RNA U13                                                                 |
| 15638 | ENSG00000273395 |           | 16735   | 0.1 |                                    |    |           |           |                                                                                       |
| 15882 | ENSG00000270388 |           | 16808.8 | 0.1 |                                    |    |           |           |                                                                                       |
| 15907 | ENSG00000265981 |           | 16849.2 | 0.1 |                                    | 10 | 90830788  | 90820888  | Small nuclear RNA U13                                                                 |
| 15911 | ENSG00000202545 |           | 16951.1 | 0.1 |                                    |    |           |           |                                                                                       |
| 15988 | ENSG00000249088 |           | 16987.5 | 0.1 |                                    |    |           |           |                                                                                       |
| 16084 | ENSG00000202988 |           | 17082.3 | 0.1 |                                    |    |           |           |                                                                                       |
| 16065 | ENSG00000229587 |           | 17095.6 | 0.1 |                                    |    |           |           |                                                                                       |
| 16081 | ENSG00000228197 |           | 17095.7 | 0.1 |                                    |    |           |           |                                                                                       |
| 16237 | ENSG00000231687 |           | 17209.4 | 0.1 |                                    |    |           |           |                                                                                       |
| 16257 | ENSG00000232489 |           | 17221.7 | 0.1 |                                    | 9  | 43399987  | 43401315  | ATP synthase, H+ transporting, mitochondrial F1 complex, alpha subunit 1 pseudogene 5 |
| 16270 | ENSG00000226493 |           | 17226.3 | 0.1 |                                    |    |           |           |                                                                                       |
| 16308 | ENSG00000215653 |           | 17249.6 | 0.1 |                                    | 2  | 187361840 | 187365393 | Uncharacterized protein                                                               |
| 16325 | ENSG00000206153 |           | 17291.7 | 0.1 |                                    |    |           |           |                                                                                       |
| 16343 | ENSG00000232403 |           | 17282.1 | 0.1 |                                    |    |           |           |                                                                                       |
| 16367 | ENSG00000268272 |           | 17287   | 0.1 |                                    |    |           |           |                                                                                       |
| 16387 | ENSG00000202628 |           | 17314.6 | 0.1 |                                    |    |           |           |                                                                                       |
| 16602 | ENSG00000255562 |           | 17481.6 | 0.1 |                                    |    |           |           |                                                                                       |
| 16624 | ENSG00000265862 |           | 17493.3 | 0.1 |                                    |    |           |           |                                                                                       |
| 16667 | ENSG00000285451 |           | 17526.4 | 0.1 |                                    |    |           |           |                                                                                       |
| 16874 | ENSG00000254205 |           | 17535.5 | 0.1 |                                    |    |           |           |                                                                                       |
| 16883 | ENSG00000238483 |           | 17547.1 | 0.1 |                                    | 13 | 46809805  | 46809908  | Small nuclear RNA U13                                                                 |
| 16702 | ENSG00000249338 |           | 17564.2 | 0.1 |                                    |    |           |           |                                                                                       |
| 16749 | ENSG00000256916 |           | 17602.1 | 0.1 |                                    |    |           |           |                                                                                       |
| 16752 | ENSG00000244952 |           | 17605.1 | 0.1 |                                    |    |           |           |                                                                                       |
| 16761 | ENSG00000244960 |           | 17618.5 | 0.1 |                                    |    |           |           |                                                                                       |
| 16778 | ENSG00000250580 |           | 17624.3 | 0.1 |                                    |    |           |           |                                                                                       |
| 16796 | ENSG00000299551 |           | 17642   | 0.1 |                                    |    |           |           |                                                                                       |
| 16807 | ENSG00000195222 | RMBP3     | 17658.4 | 0.1 |                                    | 22 | 20456003  | 20461786  | RMB3 binding protein 3                                                                |
| 16854 | ENSG00000268457 |           | 17679   | 0.1 |                                    |    |           |           |                                                                                       |
| 16899 | ENSG00000259760 |           | 17704.6 | 0.1 |                                    |    |           |           |                                                                                       |
| 16901 | ENSG00000232688 |           | 17706.4 | 0.1 |                                    |    |           |           |                                                                                       |
| 16945 | ENSG00000257769 |           | 17736.2 | 0.1 |                                    |    |           |           |                                                                                       |
| 16983 | ENSG00000215923 |           | 17748.4 | 0.1 |                                    |    |           |           |                                                                                       |
| 16978 | ENSG00000202648 |           | 17755.5 | 0.1 |                                    |    |           |           |                                                                                       |
| 17002 | ENSG00000225728 |           | 17779.2 | 0.1 |                                    |    |           |           |                                                                                       |
| 17024 | ENSG00000232197 |           | 17796.5 | 0.1 |                                    |    |           |           |                                                                                       |
| 17053 | ENSG00000206903 |           | 17819.5 | 0.1 |                                    |    |           |           |                                                                                       |
| 17055 | ENSG00000213556 |           | 17820.3 | 0.1 |                                    |    |           |           |                                                                                       |
| 17079 | ENSG00000287681 |           | 17836.9 | 0.1 |                                    |    |           |           |                                                                                       |
| 17124 | ENSG00000231361 |           | 17866   | 0.1 |                                    |    |           |           |                                                                                       |
| 17146 | ENSG00000273192 |           | 17883.9 | 0.1 |                                    |    |           |           |                                                                                       |
| 17178 | ENSG00000258586 |           | 17908.1 | 0.1 |                                    |    |           |           |                                                                                       |
| 17217 | ENSG00000231713 |           | 17930.7 | 0.1 |                                    |    |           |           |                                                                                       |
| 17220 | ENSG00000220540 |           | 17933.3 | 0.1 |                                    |    |           |           |                                                                                       |
| 17265 | ENSG00000228472 |           | 17962.7 | 0.1 |                                    |    |           |           |                                                                                       |
| 17318 | ENSG00000254872 |           | 18000.3 | 0.1 |                                    |    |           |           |                                                                                       |
| 17339 | ENSG00000247137 |           | 18018.7 | 0.1 |                                    |    |           |           |                                                                                       |
| 17382 | ENSG00000219993 |           | 18044   | 0.1 |                                    |    |           |           |                                                                                       |
| 17409 | ENSG00000289699 |           | 18077.3 | 0.1 |                                    |    |           |           |                                                                                       |
| 17422 | ENSG00000249054 |           | 18078.3 | 0.1 |                                    |    |           |           |                                                                                       |
| 17486 | ENSG00000228155 |           | 18107   | 0.1 |                                    |    |           |           |                                                                                       |
| 17491 | ENSG00000225490 |           | 18126.9 | 0.1 |                                    |    |           |           |                                                                                       |
| 17514 | ENSG00000272382 |           | 18143.3 | 0.1 |                                    |    |           |           |                                                                                       |
| 17527 |                 |           |         |     |                                    |    |           |           |                                                                                       |

|       |                  |           |       |     |     |  |  |  |  |
|-------|------------------|-----------|-------|-----|-----|--|--|--|--|
| 17989 | ENSG00000228014  |           | 18488 | 1   | 0.1 |  |  |  |  |
| 17991 | ENSG00000227790  |           | 18493 | 3   | 0.1 |  |  |  |  |
| 18013 | ENSG00000214908  |           | 18504 | 7   | 0.1 |  |  |  |  |
| 18034 | ENSG00000207127  |           | 18526 | 0.1 |     |  |  |  |  |
| 18048 | ENSG00000206289  |           | 18534 | 8   | 0.1 |  |  |  |  |
| 18084 | ENSG00000206289  |           | 18592 | 0.1 |     |  |  |  |  |
| 18101 | ENSG00000232723  |           | 18575 | 8   | 0.1 |  |  |  |  |
| 18115 | ENSG00000203753  |           | 18586 | 3   | 0.1 |  |  |  |  |
| 18151 | ENSG00000208181  |           | 18620 | 2   | 0.1 |  |  |  |  |
| 18156 | ENSG00000237024  |           | 18625 | 1   | 0.1 |  |  |  |  |
| 18200 | ENSG00000204139  |           | 18660 | 0.1 |     |  |  |  |  |
| 18206 | ENSG00000205262  |           | 18644 | 6   | 0.1 |  |  |  |  |
| 18209 | ENSG00000207593  |           | 18668 | 4   | 0.1 |  |  |  |  |
| 18214 | ENSG00000228085  |           | 18670 | 1   | 0.1 |  |  |  |  |
| 18220 | ENSG00000201491  |           | 18682 | 4   | 0.1 |  |  |  |  |
| 18242 | ENSG00000203423  |           | 18686 | 8   | 0.1 |  |  |  |  |
| 18244 | ENSG00000203365  |           | 18688 | 8   | 0.1 |  |  |  |  |
| 18252 | ENSG00000205752  |           | 18694 | 3   | 0.1 |  |  |  |  |
| 18272 | ENSG00000202741  |           | 18705 | 9   | 0.1 |  |  |  |  |
| 18273 | ENSG00000205071  |           | 18706 | 7   | 0.1 |  |  |  |  |
| 18281 | ENSG00000202048  |           | 18713 | 6   | 0.1 |  |  |  |  |
| 18290 | ENSG00000207185  |           | 18722 | 7   | 0.1 |  |  |  |  |
| 18292 | ENSG00000202716  |           | 18722 | 8   | 0.1 |  |  |  |  |
| 18301 | ENSG00000208764  |           | 18727 | 1   | 0.1 |  |  |  |  |
| 18315 | ENSG00000202316  |           | 18736 | 4   | 0.1 |  |  |  |  |
| 18326 | ENSG00000202035  |           | 18744 | 1   | 0.1 |  |  |  |  |
| 18337 | ENSG00000203183  |           | 18754 | 5   | 0.1 |  |  |  |  |
| 18339 | ENSG00000208720  |           | 18755 | 2   | 0.1 |  |  |  |  |
| 18349 | ENSG00000202605  |           | 18765 | 0.1 |     |  |  |  |  |
| 18354 | ENSG00000202502  |           | 18770 | 3   | 0.1 |  |  |  |  |
| 18368 | ENSG00000202097  |           | 18778 | 5   | 0.1 |  |  |  |  |
| 18374 | ENSG00000208137  |           | 18782 | 5   | 0.1 |  |  |  |  |
| 18378 | ENSG00000203113  |           | 18784 | 8   | 0.1 |  |  |  |  |
| 18387 | ENSG00000202076  |           | 18790 | 5   | 0.1 |  |  |  |  |
| 18388 | ENSG00000205191  |           | 18791 | 8   | 0.1 |  |  |  |  |
| 18390 | ENSG00000204443  |           | 18793 | 2   | 0.1 |  |  |  |  |
| 18404 | ENSG00000209999  |           | 18805 | 0.1 |     |  |  |  |  |
| 18434 | ENSG00000205421  |           | 18820 | 5   | 0.1 |  |  |  |  |
| 18441 | ENSG00000202168  |           | 18833 | 8   | 0.1 |  |  |  |  |
| 18444 | ENSG00000205978  |           | 18834 | 8   | 0.1 |  |  |  |  |
| 18457 | ENSG00000208305  |           | 18843 | 3   | 0.1 |  |  |  |  |
| 18462 | ENSG00000202741  |           | 18846 | 0.1 |     |  |  |  |  |
| 18469 | ENSG00000208749  |           | 18851 | 0.1 |     |  |  |  |  |
| 18474 | ENSG00000207248  |           | 18857 | 9   | 0.1 |  |  |  |  |
| 18480 | ENSG00000206691  |           | 18867 | 0.1 |     |  |  |  |  |
| 18494 | ENSG00000205131  |           | 18868 | 3   | 0.1 |  |  |  |  |
| 18502 | ENSG00000203153  |           | 18873 | 6   | 0.1 |  |  |  |  |
| 18506 | ENSG00000208228  |           | 18874 | 6   | 0.1 |  |  |  |  |
| 18524 | ENSG00000202086  |           | 18891 | 8   | 0.1 |  |  |  |  |
| 18528 | ENSG00000203090  |           | 18893 | 6   | 0.1 |  |  |  |  |
| 18540 | ENSG00000205017  |           | 18899 | 0.1 |     |  |  |  |  |
| 18550 | ENSG00000203708  |           | 18910 | 1   | 0.1 |  |  |  |  |
| 18554 | ENSG00000202356  |           | 18911 | 8   | 0.1 |  |  |  |  |
| 18556 | ENSG00000204103  |           | 18913 | 6   | 0.1 |  |  |  |  |
| 18562 | ENSG00000203033  |           | 18928 | 3   | 0.1 |  |  |  |  |
| 18589 | ENSG00000203135  |           | 18933 | 9   | 0.1 |  |  |  |  |
| 18597 | ENSG00000207119  |           | 18938 | 8   | 0.1 |  |  |  |  |
| 18614 | ENSG00000202053  |           | 18956 | 5   | 0.1 |  |  |  |  |
| 18621 | ENSG00000207188  |           | 18964 | 2   | 0.1 |  |  |  |  |
| 18626 | ENSG00000203073  |           | 18965 | 3   | 0.1 |  |  |  |  |
| 18640 | ENSG00000203183  |           | 18974 | 8   | 0.1 |  |  |  |  |
| 18647 | ENSG00000202857  |           | 18976 | 0.1 |     |  |  |  |  |
| 18654 | ENSG00000208916  |           | 18979 | 7   | 0.1 |  |  |  |  |
| 18664 | ENSG00000202784  |           | 18993 | 1   | 0.1 |  |  |  |  |
| 18666 | ENSG00000208424  |           | 18994 | 4   | 0.1 |  |  |  |  |
| 18676 | ENSG00000205148  |           | 19000 | 9   | 0.1 |  |  |  |  |
| 18679 | ENSG00000202083  |           | 19007 | 7   | 0.1 |  |  |  |  |
| 18714 | ENSG00000208111  |           | 19025 | 4   | 0.1 |  |  |  |  |
| 18718 | ENSG00000209643  |           | 19030 | 4   | 0.1 |  |  |  |  |
| 18725 | ENSG00000204473  |           | 19038 | 8   | 0.1 |  |  |  |  |
| 18730 | ENSG000002033018 |           | 19039 | 1   | 0.1 |  |  |  |  |
| 18733 | ENSG00000202934  |           | 19042 | 2   | 0.1 |  |  |  |  |
| 18742 | ENSG00000204842  |           | 19052 | 1   | 0.1 |  |  |  |  |
| 18744 | ENSG00000205079  |           | 19055 | 1   | 0.1 |  |  |  |  |
| 18756 | ENSG00000205743  |           | 19062 | 7   | 0.1 |  |  |  |  |
| 18757 | ENSG00000202558  |           | 19063 | 7   | 0.1 |  |  |  |  |
| 18768 | ENSG00000202787  |           | 19070 | 9   | 0.1 |  |  |  |  |
| 18776 | ENSG00000213863  |           | 19077 | 8   | 0.1 |  |  |  |  |
| 18780 | ENSG00000203178  |           | 19078 | 8   | 0.1 |  |  |  |  |
| 18783 | ENSG00000202365  |           | 19080 | 1   | 0.1 |  |  |  |  |
| 18787 | ENSG00000202921  |           | 19082 | 2   | 0.1 |  |  |  |  |
| 18798 | ENSG00000202023  |           | 19086 | 3   | 0.1 |  |  |  |  |
| 18800 | ENSG00000202474  |           | 19088 | 2   | 0.1 |  |  |  |  |
| 18801 | ENSG00000202142  |           | 19089 | 4   | 0.1 |  |  |  |  |
| 18809 | ENSG00000204188  |           | 19099 | 2   | 0.1 |  |  |  |  |
| 18811 | ENSG00000207273  |           | 19100 | 6   | 0.1 |  |  |  |  |
| 18821 | ENSG00000203143  |           | 19108 | 9   | 0.1 |  |  |  |  |
| 18827 | ENSG00000206231  |           | 19111 | 6   | 0.1 |  |  |  |  |
| 18829 | ENSG00000208921  |           | 19112 | 1   | 0.1 |  |  |  |  |
| 18830 | ENSG00000202872  |           | 19116 | 1   | 0.1 |  |  |  |  |
| 18840 | ENSG00000203318  |           | 19131 | 1   | 0.1 |  |  |  |  |
| 18845 | ENSG00000204828  |           | 19137 | 5   | 0.1 |  |  |  |  |
| 18853 | ENSG00000207345  |           | 19143 | 4   | 0.1 |  |  |  |  |
| 18855 | ENSG00000207189  |           | 19144 | 6   | 0.1 |  |  |  |  |
| 18867 | ENSG00000204083  |           | 19152 | 0.1 |     |  |  |  |  |
| 18869 | ENSG00000205838  |           | 19152 | 4   | 0.1 |  |  |  |  |
| 18879 | ENSG00000202517  |           | 19161 | 2   | 0.1 |  |  |  |  |
| 18904 | ENSG00000204212  |           | 19183 | 7   | 0.1 |  |  |  |  |
| 18913 | ENSG00000208716  |           | 19190 | 3   | 0.1 |  |  |  |  |
| 18916 | ENSG00000205262  |           | 19197 | 4   | 0.1 |  |  |  |  |
| 18921 | ENSG00000202041  |           | 19213 | 3   | 0.1 |  |  |  |  |
| 18938 | ENSG00000207329  |           | 19219 | 6   | 0.1 |  |  |  |  |
| 18956 | ENSG00000204500  |           | 19233 | 4   | 0.1 |  |  |  |  |
| 18960 | ENSG00000202051  |           | 19236 | 5   | 0.1 |  |  |  |  |
| 18968 | ENSG00000207016  |           | 19243 | 1   | 0.1 |  |  |  |  |
| 18971 | ENSG00000203075  |           | 19245 | 5   | 0.1 |  |  |  |  |
| 18976 | ENSG00000203493  |           | 19248 | 9   | 0.1 |  |  |  |  |
| 18977 | ENSG00000208584  |           | 19250 | 3   | 0.1 |  |  |  |  |
| 18984 | ENSG00000204810  |           | 19255 | 6   | 0.1 |  |  |  |  |
| 18994 | ENSG00000205185  |           | 19265 | 5   | 0.1 |  |  |  |  |
| 19000 | ENSG00000205336  |           | 19268 | 9   | 0.1 |  |  |  |  |
| 19002 | ENSG00000205491  |           | 19269 | 8   | 0.1 |  |  |  |  |
| 19004 | ENSG00000202102  |           | 19270 | 8   | 0.1 |  |  |  |  |
| 19008 | ENSG00000203710  |           | 19274 | 9   | 0.1 |  |  |  |  |
| 19024 | ENSG00000203863  |           | 19285 | 5   | 0.1 |  |  |  |  |
| 19038 | ENSG00000205762  |           | 19295 | 5   | 0.1 |  |  |  |  |
| 19038 | ENSG00000204041  |           | 19299 | 4   | 0.1 |  |  |  |  |
| 19043 | ENSG00000208732  |           | 19302 | 9   | 0.1 |  |  |  |  |
| 19048 | ENSG00000204188  |           | 19304 | 0.1 |     |  |  |  |  |
| 19053 | ENSG00000202581  |           | 19316 | 8   | 0.1 |  |  |  |  |
| 19068 | ENSG00000208237  |           | 19318 | 6   | 0.1 |  |  |  |  |
| 19080 | ENSG00000203014  |           | 19327 | 7   | 0.1 |  |  |  |  |
| 19083 | ENSG00000214362  |           | 19328 | 5   | 0.1 |  |  |  |  |
| 19089 | ENSG00000204890  |           | 19333 | 9   | 0.1 |  |  |  |  |
| 19093 | ENSG00000205094  |           | 19335 | 0.1 |     |  |  |  |  |
| 19098 | ENSG00000203558  |           | 19341 | 6   | 0.1 |  |  |  |  |
| 19105 | ENSG00000202680  |           | 19347 | 8   | 0.1 |  |  |  |  |
| 19108 | ENSG00000205034  |           | 19349 | 7   | 0.1 |  |  |  |  |
| 19111 | ENSG00000203581  |           | 19352 | 1   | 0.1 |  |  |  |  |
| 19117 | ENSG00000208134  |           | 19356 | 6   | 0.1 |  |  |  |  |
| 19124 | ENSG00000202046  |           | 19361 | 2   | 0.1 |  |  |  |  |
| 19128 | ENSG00000205111  |           | 19362 | 5   | 0.1 |  |  |  |  |
| 19138 | ENSG00000205072  |           | 19371 | 4   | 0.1 |  |  |  |  |
| 19139 | ENSG00000205707  |           | 19371 | 8   | 0.1 |  |  |  |  |
| 19145 | ENSG00000217227  |           | 19373 | 5   | 0.1 |  |  |  |  |
| 19162 | ENSG00000205806  |           | 19381 | 6   | 0.1 |  |  |  |  |
| 19172 | ENSG00000205237  |           | 19385 | 7   | 0.1 |  |  |  |  |
| 19176 | ENSG00000217248  | C17orf100 | 19386 | 5   | 0.1 |  |  |  |  |
| 19176 | ENSG00000204900  |           | 19387 | 2   | 0.1 |  |  |  |  |
| 19178 | ENSG00000205038  |           | 19388 | 4   | 0.1 |  |  |  |  |
| 19180 | ENSG00000205028  |           | 19390 | 0.1 |     |  |  |  |  |
| 19183 | ENSG00000205378  |           | 19401 | 1   | 0.1 |  |  |  |  |
| 19184 | ENSG000002071874 |           | 19401 | 8   | 0.1 |  |  |  |  |
| 19188 | ENSG00000204138  |           | 19413 | 7   | 0.1 |  |  |  |  |
| 19206 | ENSG000002024814 |           | 19418 | 9   | 0.1 |  |  |  |  |
| 19210 | ENSG00000205022  |           | 19423 | 7   | 0.1 |  |  |  |  |
| 19220 | ENSG00000202061  |           | 19429 | 7   | 0.1 |  |  |  |  |
| 19233 | ENSG00000202824  |           | 19443 | 8   | 0.1 |  |  |  |  |
| 19244 | ENSG00000202472  |           | 19450 | 4   | 0.1 |  |  |  |  |
| 19254 | ENSG00000204158  |           | 19455 | 8   | 0.1 |  |  |  |  |
| 19261 | ENSG000002023629 |           | 19460 | 9   | 0.1 |  |  |  |  |





|       |                  |             |         |      |           |          |           |           |                                            |
|-------|------------------|-------------|---------|------|-----------|----------|-----------|-----------|--------------------------------------------|
| 20166 | ENS00000229985   |             | 20151   | 0.1  |           |          |           |           |                                            |
| 20168 | ENS00000227118   |             | 20153   | 0.1  |           |          |           |           |                                            |
| 20178 | ENS000002059118  |             | 20159.6 | 0.1  |           |          |           |           |                                            |
| 20178 | ENS000002228229  |             | 20160.7 | 0.1  |           |          |           |           |                                            |
| 20180 | ENS000002262308  |             | 20165.9 | 0.1  |           |          |           |           |                                            |
| 20184 | ENS000002270481  |             | 20173.1 | 0.1  |           |          |           |           |                                            |
| 20185 | ENS000002021806  |             | 20174.1 | 0.1  |           |          |           |           |                                            |
| 20189 | ENS000002081638  |             | 20174.2 | 0.1  |           |          |           |           |                                            |
| 20190 | ENS000002024102  |             | 20174.5 | 0.1  |           |          |           |           |                                            |
| 20190 | ENS000002261449  |             | 20177.8 | 0.1  |           |          |           |           |                                            |
| 20191 | ENS000002020140  |             | 20178.9 | 0.1  |           |          |           |           |                                            |
| 20205 | ENS000002025542  |             | 20190.2 | 0.1  |           |          |           |           |                                            |
| 20214 | ENS000002015736  |             | 20194.1 | 0.1  |           |          |           |           |                                            |
| 20219 | ENS000002027484  |             | 20200   | 0.1  |           |          |           |           |                                            |
| 20224 | ENS000002027316  |             | 20205   | 0.1  |           |          |           |           |                                            |
| 20228 | ENS0000020264149 |             | 20207.2 | 0.1  |           |          |           |           |                                            |
| 20227 | ENS0000020260949 |             | 20207.6 | 0.1  |           |          |           |           |                                            |
| 20234 | ENS000002025299  |             | 20209.7 | 0.1  |           |          |           |           |                                            |
| 20242 | ENS0000020272797 |             | 20221.8 | 0.1  |           |          |           |           |                                            |
| 20243 | ENS000002024004  |             | 20222.5 | 0.1  |           |          |           |           |                                            |
| 20263 | ENS000002020956  |             | 20230.7 | 0.1  |           |          |           |           |                                            |
| 20271 | ENS0000020281442 |             | 20245.9 | 0.1  |           |          |           |           |                                            |
| 20273 | ENS0000020289911 |             | 20246.6 | 0.1  |           |          |           |           |                                            |
| 20294 | ENS000002027627  |             | 20263.7 | 0.1  |           |          |           |           |                                            |
| 20304 | ENS000002025346  |             | 20269.8 | 0.1  |           |          |           |           |                                            |
| 20308 | ENS0000020272328 |             | 20271   | 0.1  |           |          |           |           |                                            |
| 20328 | ENS0000020265237 |             | 20283.6 | 0.1  |           |          |           |           |                                            |
| 20337 | ENS000002028981  |             | 20289.6 | 0.1  |           |          |           |           |                                            |
| 20338 | ENS000002026066  |             | 20290.8 | 0.1  |           |          |           |           |                                            |
| 20345 | ENS0000020289617 |             | 20296   | 0.1  |           |          |           |           |                                            |
| 20347 | ENS000002023586  |             | 20300.4 | 0.1  |           |          |           |           |                                            |
| 20355 | ENS0000020287005 |             | 20305.9 | 0.1  |           |          |           |           |                                            |
| 20358 | ENS000002021365  |             | 20310.3 | 0.1  |           |          |           |           |                                            |
| 20360 | ENS0000020218566 |             | 20311.1 | 0.1  |           |          |           |           |                                            |
| 20381 | ENS0000020266607 |             | 20335   | 0.1  |           |          |           |           |                                            |
| 20383 | ENS000002026468  |             | 20338.2 | 0.1  |           |          |           |           |                                            |
| 20389 | ENS0000020213561 |             | 20339.8 | 0.1  |           |          |           |           |                                            |
| 20399 | ENS0000020285511 |             | 20345.5 | 0.1  |           |          |           |           |                                            |
| 20402 | ENS0000020281427 |             | 20348.1 | 0.1  |           |          |           |           |                                            |
| 20420 | ENS0000020280036 |             | 20359.7 | 0.1  |           |          |           |           |                                            |
| 20424 | ENS0000020280405 |             | 20361.5 | 0.1  |           |          |           |           |                                            |
| 20428 | ENS000002025889  |             | 20362.1 | 0.1  |           |          |           |           |                                            |
| 20441 | ENS0000020215159 |             | 20376.7 | 0.1  |           |          |           |           |                                            |
| 20454 | ENS000002027332  |             | 20386.2 | 0.1  |           |          |           |           |                                            |
| 20477 | ENS000002027472  |             | 20400.4 | 0.1  |           |          |           |           |                                            |
| 20481 | ENS0000020252569 |             | 20412.3 | 0.1  | 17        | 4778921  | 4779205   |           | RNA 75L, cytoplasmic 171, pseudogene       |
| 20482 | ENS0000020213365 |             | 20412.8 | 0.1  |           |          |           |           |                                            |
| 20495 | ENS000002026237  |             | 20423.4 | 0.1  |           |          |           |           |                                            |
| 20498 | ENS000002048514  |             | 20424.4 | 0.1  |           |          |           |           |                                            |
| 20501 | ENS00000188888   | GPR179      | 20424.9 | 0.1  | 17        | 36481413 | 36499730  |           | G protein-coupled receptor 179             |
| 20513 | ENS0000020281527 |             | 20431.1 | 0.1  |           |          |           |           |                                            |
| 20520 | ENS0000020270915 |             | 20442.8 | 0.1  |           |          |           |           |                                            |
| 20522 | ENS0000020254370 |             | 20443.4 | 0.1  |           |          |           |           |                                            |
| 20534 | ENS000002027489  |             | 20451.1 | 0.1  |           |          |           |           |                                            |
| 20554 | ENS0000020219952 |             | 20473.1 | 0.1  |           |          |           |           |                                            |
| 20564 | ENS0000020270424 |             | 20477.3 | 0.1  |           |          |           |           |                                            |
| 20611 | ENS000002026207  |             | 20506   | 0.1  |           |          |           |           |                                            |
| 20615 | ENS000002023261  |             | 20526.1 | 0.1  |           |          |           |           |                                            |
| 20620 | ENS0000020265445 |             | 20512.7 | 0.1  |           |          |           |           |                                            |
| 20632 | ENS0000020271163 |             | 20521.4 | 0.1  |           |          |           |           |                                            |
| 20634 | ENS000002022688  |             | 20521   | 0.1  | 9         | 35381056 | 35381282  |           | HCG17281, PR00038, Uncharacterized protein |
| 20641 | ENS0000020230065 |             | 20527   | 0.1  |           |          |           |           |                                            |
| 20647 | ENS0000020250007 |             | 20532.8 | 0.1  |           |          |           |           |                                            |
| 20659 | ENS0000020215330 |             | 20540.1 | 0.1  |           |          |           |           |                                            |
| 20665 | ENS0000020228536 |             | 20566.7 | 0.1  |           |          |           |           |                                            |
| 20706 | ENS0000020253172 |             | 20573.9 | 0.1  |           |          |           |           |                                            |
| 20724 | ENS000002020488  |             | 20585.4 | 0.1  |           |          |           |           |                                            |
| 20741 | ENS0000020214347 |             | 20604.8 | 0.1  |           |          |           |           |                                            |
| 20743 | ENS0000020280545 |             | 20608.1 | 0.1  |           |          |           |           |                                            |
| 20761 | ENS000002025468  |             | 20612.1 | 0.1  |           |          |           |           |                                            |
| 20772 | ENS0000020244009 |             | 20624.2 | 0.1  |           |          |           |           |                                            |
| 20785 | ENS0000020285413 |             | 20636.3 | 0.1  |           |          |           |           |                                            |
| 20786 | ENS000002025420  |             | 20642.1 | 0.1  |           |          |           |           |                                            |
| 20803 | ENS00000196390   |             | 20651.6 | 0.1  |           |          |           |           |                                            |
| 20808 | ENS0000020280742 |             | 20654.3 | 0.1  |           |          |           |           |                                            |
| 20809 | ENS000002028535  |             | 20657   | 0.1  |           |          |           |           |                                            |
| 20818 | ENS000002025278  |             | 20663.3 | 0.1  |           |          |           |           |                                            |
| 20826 | ENS0000020282789 |             | 20671.3 | 0.1  |           |          |           |           |                                            |
| 20841 | ENS0000020274228 |             | 20679.5 | 0.1  |           |          |           |           |                                            |
| 20842 | ENS0000020272078 |             | 20680.3 | 0.1  |           |          |           |           |                                            |
| 20863 | ENS000002027202  |             | 20693.4 | 0.1  |           |          |           |           |                                            |
| 20865 | ENS0000020281118 |             | 20693.3 | 0.1  |           |          |           |           |                                            |
| 20871 | ENS0000020252500 |             | 20695.9 | 0.1  |           |          |           |           |                                            |
| 20912 | ENS0000020254966 |             | 20732.8 | 0.1  |           |          |           |           |                                            |
| 20920 | ENS0000020265279 |             | 20740.3 | 0.1  |           |          |           |           |                                            |
| 20923 | ENS0000020254028 |             | 20742.4 | 0.1  |           |          |           |           |                                            |
| 20945 | ENS000002024764  |             | 20755.4 | 0.1  |           |          |           |           |                                            |
| 20951 | ENS000002028412  |             | 20757.2 | 0.1  |           |          |           |           |                                            |
| 20961 | ENS000002028621  |             | 20769.8 | 0.1  |           |          |           |           |                                            |
| 20983 | ENS0000020246567 |             | 20781.1 | 0.1  |           |          |           |           |                                            |
| 20986 | ENS00000186019   |             | 20784.9 | 0.1  |           |          |           |           |                                            |
| 20989 | ENS000002021756  |             | 20794.6 | 0.1  |           |          |           |           |                                            |
| 21008 | ENS0000020225647 |             | 20795.5 | 0.1  |           |          |           |           |                                            |
| 21033 | ENS0000020289981 |             | 20816.2 | 0.1  |           |          |           |           |                                            |
| 21048 | ENS000002026138  |             | 20825.5 | 0.1  |           |          |           |           |                                            |
| 21056 | ENS0000020230221 |             | 20830.4 | 0.1  |           |          |           |           |                                            |
| 21065 | ENS0000020234206 |             | 20840.6 | 0.1  |           |          |           |           |                                            |
| 21122 | ENS0000020240891 |             | 20866.4 | 0.1  |           |          |           |           |                                            |
| 21136 | ENS0000020238628 |             | 20868.1 | 0.1  |           |          |           |           |                                            |
| 21146 | ENS000002027416  |             | 20905.3 | 0.1  |           |          |           |           |                                            |
| 21190 | ENS0000020243311 |             | 20927.1 | 0.1  |           |          |           |           |                                            |
| 21195 | ENS0000020248863 |             | 20948.9 | 0.1  |           |          |           |           |                                            |
| 21229 | ENS000002024899  |             | 20976.4 | 0.1  |           |          |           |           |                                            |
| 21285 | ENS000002020774  |             | 21024   | 0.1  |           |          |           |           |                                            |
| 21325 | ENS0000020229901 |             | 21053   | 0.1  |           |          |           |           |                                            |
| 21349 | ENS0000020281286 |             | 21068.6 | 0.1  |           |          |           |           |                                            |
| 21378 | ENS000002027066  |             | 21094.5 | 0.1  |           |          |           |           |                                            |
| 21384 | ENS0000020203614 |             | 21101.3 | 0.1  |           |          |           |           |                                            |
| 21396 | ENS0000020228814 |             | 21114.9 | 0.1  |           |          |           |           |                                            |
| 21477 | ENS0000020203001 |             | 21175.8 | 0.1  | 1         | 2143380  | 2145620   |           | Uncharacterized protein                    |
| 21500 | ENS000002027378  |             | 21195   | 0.1  |           |          |           |           |                                            |
| 21506 | ENS0000020281447 |             | 21196.8 | 0.1  |           |          |           |           |                                            |
| 21509 | ENS000002021520  |             | 21200   | 0.1  |           |          |           |           |                                            |
| 21524 | ENS0000020289473 |             | 21210   | 0.1  |           |          |           |           |                                            |
| 21719 | ENS0000020284068 |             | 21372.3 | 0.1  |           |          |           |           |                                            |
| 21798 | ENS0000020231959 |             | 21386.8 | 0.1  |           |          |           |           |                                            |
| 21800 | ENS0000020289177 |             | 21429.1 | 0.1  |           |          |           |           |                                            |
| 21840 | ENS0000020273249 |             | 21440   | 0.1  |           |          |           |           |                                            |
| 21884 | ENS0000020289598 |             | 21463   | 0.1  |           |          |           |           |                                            |
| 22008 | ENS000002023979  |             | 21583.2 | 0.1  |           |          |           |           |                                            |
| 22156 | ENS0000020282891 |             | 21686   | 0.1  |           |          |           |           |                                            |
| 22451 | ENS000002024474  |             | 21910.3 | 0.1  |           |          |           |           |                                            |
| 6890  | ENS0000020289036 | MIR3615     | 9695    | 0.09 | antisense | 17       | 72743458  | 72745051  | microRNA 3615                              |
| 14362 | ENS0000020253352 | TUG1        | 18750   | 0.09 | antisense | 22       | 31366663  | 31375381  | tsurme_up-regulated 1 (non-protein coding) |
| 15073 | ENS0000020244660 |             | 19207   | 0.09 | antisense | 3        | 15049726  | 15048025  | SNHG antisense RNA 1                       |
| 17281 | ENS000002027865  | LDLRAD4-AS1 | 17975.3 | 0.09 | antisense | 16       | 13419420  | 13417478  | LDLRAD4 antisense RNA 1                    |
| 17834 | ENS00000177337   | DLGAP1-AS1  | 18277.5 | 0.09 | antisense | 18       | 3597370   | 3598330   | DLGAP1 antisense RNA 1                     |
| 18270 | ENS000002027863  | DGUK-AS1    | 18704.9 | 0.09 | antisense | 2        | 74114769  | 7405846   | DGUK antisense RNA 1                       |
| 19194 | ENS0000020289691 | BRF2-AS1    | 18828.8 | 0.09 | antisense | 3        | 13318813  | 13317420  | BRF2 antisense RNA 1                       |
| 19279 | ENS000002029356  | LRRC3-AS1   | 19476   | 0.09 | antisense | 21       | 45870869  | 45875167  | LRRC3 antisense RNA 1 (head to head)       |
| 19471 | ENS000002025260  | PCDH9-AS3   | 19618   | 0.09 | antisense | 13       | 6735194   | 6735998   | PCDH9 antisense RNA 3                      |
| 19504 | ENS000002027128  | RNF187-AS1  | 19940.6 | 0.09 | antisense | 17       | 74136937  | 74130731  | RNF187 antisense RNA 1                     |
| 20100 | ENS0000020242925 |             | 20099.6 | 0.09 | antisense | 3        | 155203562 | 155204910 | PLCH1 antisense RNA 2                      |
| 20122 | ENS000002044124  |             | 20116.1 | 0.09 | antisense | 3        | 141637394 | 141637393 | ATP10 antisense RNA 1                      |
| 20276 | ENS000002024048  | CDKN2B-AS1  | 20194.5 | 0.09 | antisense | 9        | 21994777  | 22121096  | CDKN2B antisense RNA 1                     |
| 20285 | ENS0000020240254 |             | 20259.5 | 0.09 | antisense | 3        | 118945333 | 118909913 | BAGAL4 antisense RNA 1                     |
| 20327 | ENS0000020289820 | FDXN1-AS1   | 20383.4 | 0.09 | antisense | 14       | 89864998  | 89869137  | FDXN1 antisense RNA 1                      |
| 20377 | ENS0000020226187 | PAXBP1-AS1  | 20693.2 | 0.09 | antisense | 7        | 34100426  | 34115433  | PAXBP1 antisense RNA 1                     |
| 20937 | ENS0000020235889 | MORC2-AS1   | 20750.2 | 0.09 | antisense | 22       | 31318256  | 31328366  | MORC2 antisense RNA 1                      |
| 21009 | ENS0000020253865 | FERT1L6-AS2 | 20800.3 | 0.09 | antisense | 8        | 125058114 | 125183783 | FERT1L6 antisense RNA 2                    |
| 21183 | ENS0000020249691 |             | 20950.7 | 0.09 | antisense | 3        | 465953    | 457478    | CHL antisense RNA 1                        |
| 21312 | ENS0000020236891 | EDRF1-AS1   | 21043.6 | 0.09 | antisense | 10       | 127432296 | 127440679 | EDRF1 antisense RNA 1                      |
| 21472 | ENS0000020280630 | SNHG-AS1    | 21173.4 | 0.09 | antisense | 16       | 88729706  | 88753594  | SNHG antisense RNA 1                       |
| 21590 | ENS000002024720  | PCOLCE-AS1  | 21201.1 | 0.09 | antisense | 9        | 100017025 | 100010299 | PCOLCE antisense RNA 1                     |
| 21604 | ENS000002027528  | DIAPH3-AS1  | 21271.1 | 0.09 | antisense | 13       | 605868    |           |                                            |

|       |                   |            |       |    |      |                 |     |           |           |                                                                    |                                       |
|-------|-------------------|------------|-------|----|------|-----------------|-----|-----------|-----------|--------------------------------------------------------------------|---------------------------------------|
| 22971 | ENSG00000205913   | SRRAS2-AS1 | 22326 | 2  | 0.09 | antisense       | 16  | 2780777   | 2802901   | SRRAS2 antisense RNA 1                                             |                                       |
| 22978 | ENSG00000205919   | EXTL3-AS1  | 22000 | 8  | 0.09 | antisense       | 8   | 2855081   | 2855081   | EXTL3 antisense RNA 1                                              |                                       |
| 2787  | ENSG00000211895   |            | 4328  | 5  | 0.09 | IG_C_gene       | 14  | 10613457  | 10617502  | immunoglobulin heavy constant alpha 1                              |                                       |
| 5207  | ENSG00000220207   |            | 7904  | 7  | 0.09 | IG_C_pseudogene | 22  | 23241707  | 23262023  | immunoglobulin lambda constant 6 (Karr+Oz; marker_gene/pseudogene) |                                       |
| 2936  | ENSG00000211670   |            | 3429  | 4  | 0.09 | IG_V_gene       | 22  | 23141507  | 23141507  | immunoglobulin lambda variable 3-3 (pseudogene)                    |                                       |
| 2936  | ENSG00000211974   |            | 3885  | 19 | 0.09 | IG_V_gene       | 14  | 10717920  | 10717920  | immunoglobulin heavy variable 2-7                                  |                                       |
| 3001  | ENSG00000211866   |            | 4684  | 4  | 0.09 | IG_V_gene       | 22  | 23101189  | 23101189  | immunoglobulin lambda variable 2-14                                |                                       |
| 5442  | ENSG00000205109   |            | 12172 | 0  | 0.09 | IG_V_pseudogene | 2   | 8989901   | 89891307  | immunoglobulin kappa variable 20-40                                |                                       |
| 9773  | ENSG00000205911   |            | 12172 | 0  | 0.09 | IG_V_pseudogene | 2   | 8989901   | 89891307  | immunoglobulin kappa variable 20-30                                |                                       |
| 13884 | ENSG00000205709   |            | 15237 | 7  | 0.09 | IG_V_pseudogene | 14  | 106662580 | 106662580 | immunoglobulin heavy variable 1-14 (pseudogene)                    |                                       |
| 17278 | ENSG00000205289   |            | 17874 | 1  | 0.09 | IG_V_pseudogene | 14  | 106812091 | 106812091 | immunoglobulin heavy variable 5-32 (pseudogene)                    |                                       |
| 6977  | ENSG00000205912   | MIAT       | 10592 | 0  | 0.09 | lincRNA         | 22  | 27047438  | 27047438  | myocatalin antisense transcript (non-protein coding)               |                                       |
| 11140 | ENSG000002083753  | LINC000667 | 12525 | 0  | 0.09 | lincRNA         | 18  | 5232875   | 5232875   | long intergenic non-protein coding RNA 667                         |                                       |
| 14505 | ENSG00000208247   | LINC03099  | 15858 | 6  | 0.09 | lincRNA         | 18  | 7225910   | 7225910   | long intergenic non-protein coding RNA 909                         |                                       |
| 16265 | ENSG00000202987   | MIR371A    | 17200 | 9  | 0.09 | lincRNA         | 19  | 5420981   | 5420981   | microRNA 371b                                                      |                                       |
| 17379 | ENSG000002023663  |            | 18642 | 0  | 0.09 | lincRNA         | Y   | 19644689  | 19681634  | family with sequence similarity 224, member B (non-protein coding) |                                       |
| 17669 | ENSG00000215483   | LINC00598  | 18257 | 6  | 0.09 | lincRNA         | 13  | 41025131  | 41055143  | long intergenic non-protein coding RNA 598                         |                                       |
| 17756 | ENSG000002029897  | LINC01146  | 18327 | 4  | 0.09 | lincRNA         | 14  | 88490984  | 88519778  | long intergenic non-protein coding RNA 1146                        |                                       |
| 17835 | ENSG000002023610  | LINC00462  | 18378 | 0  | 0.09 | lincRNA         | 13  | 49151110  | 49152224  | long intergenic non-protein coding RNA 462                         |                                       |
| 19682 | ENSG00000204043   |            | 19714 | 9  | 0.09 | lincRNA         | 12  | 109171920 | 109174194 | Small nucleolar RNA (SNORA4)                                       |                                       |
| 19761 | ENSG000002021558  | ADAM20P1   | 19942 | 3  | 0.09 | lincRNA         | 14  | 10262020  | 10262043  | ADAM metalloprotease domain 20 (pseudogene)                        |                                       |
| 19928 | ENSG000002088941  |            | 19976 | 3  | 0.09 | lincRNA         | 20  | 57209828  | 57207722  | HCG1785561_MGC244 protein, Uncharacterized protein                 |                                       |
| 19990 | ENSG000002029521  | LINC00484  | 20020 | 7  | 0.09 | lincRNA         | 20  | 49898953  | 49899732  | long intergenic non-protein coding RNA 494                         |                                       |
| 20018 | ENSG000002025686  | FAM122B    | 20043 | 3  | 0.09 | lincRNA         | 9   | 115801618 | 115827390 | family with sequence similarity 225, member B (non-protein coding) |                                       |
| 20037 | ENSG0000020203645 | LINC00501  | 20049 | 3  | 0.09 | lincRNA         | 3   | 17701230  | 17704206  | long intergenic non-protein coding RNA 501                         |                                       |
| 20059 | ENSG000002022993  |            | 20098 | 2  | 0.09 | lincRNA         | X   | 5312327   | 53136196  | long intergenic non-protein coding RNA 1155                        |                                       |
| 20206 | ENSG000002020700  | LINC01010  | 20188 | 6  | 0.09 | lincRNA         | 8   | 51828954  | 51830219  | long intergenic non-protein coding RNA 1010                        |                                       |
| 20319 | ENSG000002028134  | LINC00924  | 20278 | 5  | 0.09 | lincRNA         | 15  | 8597834   | 86051076  | long intergenic non-protein coding RNA 924                         |                                       |
| 20628 | ENSG00000204544   |            | 20520 | 1  | 0.09 | lincRNA         | 11  | 12335106  | 12333118  | long intergenic non-protein coding RNA 1059                        |                                       |
| 11138 | ENSG000002020348  | LINC01016  | 20581 | 1  | 0.09 | lincRNA         | 20  | 1382108   | 1382108   | long intergenic non-protein coding RNA 1016                        |                                       |
| 21260 | ENSG000002021793  |            | 21004 | 5  | 0.09 | lincRNA         | 19  | 5341849   | 53426723  | zinc finger protein 688                                            |                                       |
| 21337 | ENSG000002022702  | LINC00111  | 21060 | 3  | 0.09 | lincRNA         | 21  | 4309341   | 43117498  | long intergenic non-protein coding RNA 111                         |                                       |
| 1195  | ENSG00000202521   |            | 2108  | 5  | 0.09 | lincRNA         | 5   | 502817    | 502817    | long intergenic non-protein coding RNA 1028                        |                                       |
| 21406 | ENSG000002024914  |            | 21119 | 3  | 0.09 | lincRNA         | 10  | 89102493  | 89117639  | long intergenic non-protein coding RNA 863                         |                                       |
| 21611 | ENSG00000189149   | CRYM-AS1   | 21279 | 2  | 0.09 | lincRNA         | 16  | 21312170  | 21329912  | CRYM antisense RNA                                                 |                                       |
| 21653 | ENSG00000202783   |            | 21308 | 1  | 0.09 | lincRNA         | 16  | 7111308   | 7111308   | long intergenic non-protein coding RNA 1143                        |                                       |
| 21608 | ENSG000002029214  | LINC00242  | 21433 | 7  | 0.09 | lincRNA         | 6   | 17018888  | 17019821  | long intergenic non-protein coding RNA 242                         |                                       |
| 21860 | ENSG000002022258  | AC08927.1  | 21439 | 3  | 0.09 | lincRNA         | 3   | 667376    | 6681736   | GRM7 antisense RNA 3                                               |                                       |
| 21891 | ENSG00000189199   |            | 21488 | 16 | 0.09 | lincRNA         | 15  | 1528078   | 1528078   | microRNA 1180.4                                                    |                                       |
| 22216 | ENSG000002024652  | LINC00885  | 21742 | 3  | 0.09 | lincRNA         | 3   | 19589507  | 19588761  | long intergenic non-protein coding RNA 885                         |                                       |
| 22320 | ENSG000002045897  | GENF-AS1   | 21813 | 3  | 0.09 | lincRNA         | 5   | 37840540  | 37875901  | GENF antisense RNA 1 (head to head)                                |                                       |
| 20323 | ENSG00000204421   | MIR4451    | 21868 | 1  | 0.09 | miRNA           | 4   | 866438    | 866438    | microRNA 4451                                                      |                                       |
| 19846 | ENSG000002047171  | MIR4305    | 21907 | 8  | 0.09 | miRNA           | 13  | 40238171  | 40238272  | microRNA 4305                                                      |                                       |
| 17318 | ENSG00000204580   | MIR592B    | 18014 | 4  | 0.09 | miRNA           | 21  | 44371038  | 44371124  | microRNA 592b                                                      |                                       |
| 17824 | ENSG00000204741   | MIR450     | 18420 | 1  | 0.09 | miRNA           | 14  | 74208     | 74208     | microRNA 450                                                       |                                       |
| 8074  | ENSG00000205941   | MIR329     | 18553 | 5  | 0.09 | miRNA           | 8   | 33514051  | 33514051  | microRNA 329                                                       |                                       |
| 18308 | ENSG000002046758  | MIR386-1   | 18730 | 1  | 0.09 | miRNA           | 16  | 29610500  | 29610586  | microRNA 386-2                                                     |                                       |
| 18308 | ENSG000002046758  | MIR386-1   | 18730 | 1  | 0.09 | miRNA           | 16  | 29610500  | 29610586  | microRNA 386-2                                                     |                                       |
| 18950 | ENSG00000204580   | MIR780     | 18863 | 3  | 0.09 | miRNA           | 19  | 46522190  | 46522190  | microRNA 780                                                       |                                       |
| 19068 | ENSG00000204102   | MIR448     | 19118 | 1  | 0.09 | miRNA           | 11  | 21514556  | 21514556  | microRNA 448                                                       |                                       |
| 19296 | ENSG00000189884   | MIR348     | 19357 | 1  | 0.09 | miRNA           | 14  | 4639792   | 46398034  | microRNA 348                                                       |                                       |
| 19296 | ENSG00000189884   | MIR348     | 19357 | 1  | 0.09 | miRNA           | 14  | 4639792   | 46398034  | microRNA 348                                                       |                                       |
| 20242 | ENSG00000201632   | MIR508     | 20249 | 6  | 0.09 | miRNA           | 18  | 10071749  | 10071749  | microRNA 508                                                       |                                       |
| 20633 | ENSG00000204483   | MIR5008    | 20521 | 8  | 0.09 | miRNA           | 1   | 228129201 | 228129384 | microRNA 5008                                                      |                                       |
| 20976 | ENSG00000199065   | MIR101-2   | 20714 | 6  | 0.09 | miRNA           | 9   | 4892091   | 4892091   | microRNA 101-2                                                     |                                       |
| 11056 | ENSG000002026189  | MIR3186    | 20718 | 1  | 0.09 | miRNA           | 12  | 79418214  | 79418214  | microRNA 3186                                                      |                                       |
| 21168 | ENSG000002015973  | MIR323     | 20926 | 3  | 0.09 | miRNA           | 2   | 176032301 | 176032337 | microRNA 323                                                       |                                       |
| 21225 | ENSG000002017622  | MIR189     | 20934 | 4  | 0.09 | miRNA           | 12  | 10923084  | 10923082  | microRNA 189                                                       |                                       |
| 472   | ENSG000002022426  | MIR451     | 20954 | 0  | 0.09 | miRNA           | 19  | 19861280  | 19861280  | microRNA 451                                                       |                                       |
| 7750  | ENSG0000020201470 |            | 10481 | 3  | 0.09 | rnc             | RNA | 2         | 12855477  | 12855672                                                           | RNA, Rn-associated V4 pseudogene 7    |
| 6983  | ENSG00000201724   |            | 11204 | 6  | 0.09 | rnc             | RNA | 15        | 100221981 | 10022288                                                           | Y RNA                                 |
| 1704  | ENSG000002020164  |            | 14056 | 1  | 0.09 | rnc             | RNA | 17        | 8922267   | 8922267                                                            | Y RNA                                 |
| 12253 | ENSG000002026822  |            | 14163 | 7  | 0.09 | rnc             | RNA | 14        | 64088478  | 64088889                                                           | Y RNA                                 |
| 12992 | ENSG00000202769   |            | 14709 | 3  | 0.09 | rnc             | RNA | 7         | 91811527  | 91811648                                                           | Y RNA                                 |
| 13328 | ENSG0000020164    |            | 14956 | 1  | 0.09 | rnc             | RNA | 17        | 6922268   | 6922268                                                            | Y RNA                                 |
| 14518 | ENSG000002025228  |            | 15870 | 3  | 0.09 | rnc             | RNA | 17        | 33424579  | 33424676                                                           | Vault RNA                             |
| 16311 | ENSG000002022224  |            | 16492 | 3  | 0.09 | rnc             | RNA | 2         | 29150109  | 29150206                                                           | Y RNA                                 |
| 16905 | ENSG000002022224  |            | 16521 | 6  | 0.09 | rnc             | RNA | 17        | 4563724   | 4563724                                                            | Y RNA                                 |
| 16481 | ENSG000002020419  |            | 17385 | 5  | 0.09 | rnc             | RNA | 15        | 4584182   | 4584283                                                            | Y RNA                                 |
| 17894 | ENSG000002020834  |            | 18482 | 7  | 0.09 | rnc             | RNA | 9         | 33830976  | 33831076                                                           | Y RNA                                 |
| 18298 | ENSG00000201158   |            | 19099 | 12 | 0.09 | rnc             | RNA | 12        | 11282784  | 11282784                                                           | Y RNA                                 |
| 18789 | ENSG000002023974  |            | 19583 | 8  | 0.09 | rnc             | RNA | 19        | 4545207   | 4545483                                                            | Y RNA                                 |
| 18835 | ENSG000002041587  |            | 19123 | 9  | 0.09 | rnc             | RNA | 3         | 68374279  | 68374574                                                           | RNA, 7SL cytoplasmic 121, pseudogene  |
| 18943 | ENSG00000201788   |            | 19583 | 8  | 0.09 | rnc             | RNA | 3         | 68374279  | 68374574                                                           | RNA, 7SL cytoplasmic 482, pseudogene  |
| 19401 | ENSG00000199218   |            | 19588 | 6  | 0.09 | rnc             | RNA | 20        | 20868317  | 20868317                                                           | RNA, 7SL small nuclear pseudogene 20  |
| 19462 | ENSG00000204139   |            | 19813 | 3  | 0.09 | rnc             | RNA | 3         | 119840766 | 119841051                                                          | RNA, 7SL cytoplasmic 387, pseudogene  |
| 19541 | ENSG00000204538   |            | 19813 | 3  | 0.09 | rnc             | RNA | 3         | 119840766 | 119841051                                                          | RNA, 7SL cytoplasmic 311, pseudogene  |
| 19562 | ENSG00000201913   |            | 19880 | 7  | 0.09 | rnc             | RNA | 7         | 9928400   | 9928400                                                            | Y RNA                                 |
| 19596 | ENSG00000204232   |            | 19705 | 4  | 0.09 | rnc             | RNA | 3         | 12892390  | 12892488                                                           | RNA, 7SL cytoplasmic 688, pseudogene  |
| 19596 | ENSG00000201997   |            | 19705 | 4  | 0.09 | rnc             | RNA | 3         | 12892390  | 12892488                                                           | RNA, 7SL cytoplasmic 323, pseudogene  |
| 19605 | ENSG000002022685  |            | 19875 | 9  | 0.09 | rnc             | RNA | 2         | 4758664   | 4758664                                                            | RNA, 7SL small nuclear pseudogene 119 |
| 19817 | ENSG000002028847  |            | 19883 | 3  | 0.09 | rnc             | RNA | 11        | 12890354  | 12890467                                                           | Y RNA                                 |
| 19840 | ENSG00000201783   |            | 19921 | 17 | 0.09 | rnc             | RNA | 17        | 6073695   | 6073695                                                            | Y RNA                                 |
| 19872 | ENSG000002022421  |            | 19927 | 2  | 0.09 | rnc             | RNA | 9         | 13059414  | 13059522                                                           | Y RNA                                 |
| 19952 | ENSG0000020230143 |            | 19971 | 7  | 0.09 | rnc             | RNA | 2         | 8556018   | 8556018                                                            | Y RNA                                 |
| 20008 | ENSG00000202708   |            | 20049 | 2  | 0.09 | rnc             | RNA | 14        | 5895952   | 5895970                                                            | Y RNA                                 |
| 20371 | ENSG00000202414   |            | 20321 | 6  | 0.09 | rnc             | RNA | 14        | 2511634   | 2511634                                                            | Y RNA                                 |
| 20417 | ENSG000002040927  |            | 20359 | 3  | 0.09 | rnc             | RNA | 15        | 10231342  | 10231376                                                           | RNA, 7SL cytoplasmic 209, pseudogene  |
| 20436 | ENSG00000204484   |            | 20373 | 6  | 0.09 | rnc             | RNA | 4         | 15324180  | 15324243                                                           | RNA, 7SL cytoplasmic 697, pseudogene  |
| 20586 | ENSG000002026683  |            | 20500 | 4  | 0.09 | rnc             | RNA | 17        | 10002376  | 10002376                                                           | RNA, 7SL small nuclear pseudogene 26  |
| 20927 | ENSG000002026863  |            | 20745 | 0  | 0.09 | rnc             | RNA | X         | 20093277  | 20093277                                                           | Y RNA                                 |
| 21001 | ENSG00000202      |            |       |    |      |                 |     |           |           |                                                                    |                                       |

|       |                 |           |       |                      |                      |           |           |                                                                                                               |                                                                                             |
|-------|-----------------|-----------|-------|----------------------|----------------------|-----------|-----------|---------------------------------------------------------------------------------------------------------------|---------------------------------------------------------------------------------------------|
| 19716 | ENSG0000023290  | 19802     | 0.09  | processed_pseudogene | X                    | 13299623  | 13299710  | ribosomal protein SA pseudogene 63                                                                            |                                                                                             |
| 19794 | ENSG0000029548  | 1796      | 0.09  | processed_pseudogene | 2                    | 1796      | 1798      | DnaJ (Hsp40) homolog, subfamily B, member 1 pseudogene 6                                                      |                                                                                             |
| 19842 | ENSG0000022722  | 19905     | 0.09  | processed_pseudogene | 13                   | 7823548   | 7823799   | serine palmitoyltransferase, long chain base, subunit 1 pseudogene 5                                          |                                                                                             |
| 19884 | ENSG0000021508  | 19947     | 0.09  | processed_pseudogene | 21                   | 3485387   | 3485402   | ribosomal protein S8 pseudogene 3                                                                             |                                                                                             |
| 19924 | ENSG0000025444  | 19979     | 0.09  | processed_pseudogene | 11                   | 7419299   | 7419307   | cytochrome c, somatic pseudogene 27                                                                           |                                                                                             |
| 19968 | ENSG0000025624  | 20023     | 0.09  | processed_pseudogene | 4                    | 10959450  | 10959450  | RAN, member RAN oncogene family pseudogene 5                                                                  |                                                                                             |
| 20000 | ENSG0000023480  | 20050     | 0.09  | processed_pseudogene | 7                    | 2370930   | 2370140   | protein-L-isoaspartate (D-aspartate) O-methyltransferase domain containing 1 pseudogene 3                     |                                                                                             |
| 20066 | ENSG0000026959  | 20091     | 0.09  | processed_pseudogene | 13                   | 25591541  | 25591475  | Lymphocyte-specific protein 1, Uncharacterized protein                                                        |                                                                                             |
| 20115 | ENSG0000023989  | 20115     | 0.09  | processed_pseudogene | 6                    | 10014829  | 10014829  | heterogeneous nuclear ribonucleoprotein A1 pseudogene 27                                                      |                                                                                             |
| 20131 | ENSG0000025246  | 20122     | 0.09  | processed_pseudogene | 15                   | 6729315   | 6729315   | high mobility group nucleosomal binding domain 2 pseudogene 47                                                |                                                                                             |
| 20168 | ENSG0000025652  | 20152     | 0.09  | processed_pseudogene | 12                   | 2472498   | 2472483   | lysine-rich nuclear protein 1 pseudogene 1                                                                    |                                                                                             |
| 20200 | ENSG0000025711  | 20202     | 0.09  | processed_pseudogene | 10                   | 13210280  | 13210280  | NIP1, nucleolar protein DNA processing protein pseudogene 2                                                   |                                                                                             |
| 20392 | ENSG00000225171 | 20343     | 0.09  | processed_pseudogene | 1                    | 16683785  | 16683846  | deoxyuridine triphosphatase pseudogene 6                                                                      |                                                                                             |
| 20398 | ENSG00000214295 | 20343     | 0.09  | processed_pseudogene | 5                    | 18026140  | 18025768  | forward box O1B pseudogene 1                                                                                  |                                                                                             |
| 20461 | ENSG00000235490 | 20393     | 0.09  | processed_pseudogene | 10                   | 12411211  | 12412058  | ribosomal protein S16a pseudogene 1                                                                           |                                                                                             |
| 20549 | ENSG00000244142 | 20482     | 0.09  | processed_pseudogene | 3                    | 111197584 | 111197780 | ATPase, H <sup>+</sup> transporting, yeast-like, V0 subunit c pseudogene 2                                    |                                                                                             |
| 20563 | ENSG00000214424 | 20490     | 0.09  | processed_pseudogene | 15                   | 9730217   | 97301826  | family with sequence similarity 143, member B1 pseudogene 1                                                   |                                                                                             |
| 20726 | ENSG00000229496 | 20598     | 0.09  | processed_pseudogene | X                    | 12296463  | 12296612  | ubiquitin, beta 4 class VIIa pseudogene 1                                                                     |                                                                                             |
| 20745 | ENSG00000231206 | 20611     | 0.09  | processed_pseudogene | X                    | 73692852  | 73693788  | heterogeneous nuclear ribonucleoprotein A1 pseudogene 25                                                      |                                                                                             |
| 20829 | ENSG00000213333 | 20672     | 0.09  | processed_pseudogene | 11                   | 74790310  | 74791176  | nucleophosmin 1 (nucleolar phosphoprotein B23, numatrin) pseudogene 50                                        |                                                                                             |
| 20883 | ENSG00000230564 | 20707     | 0.09  | processed_pseudogene | X                    | 12411290  | 12411072  | nucleophosmin 1 (nucleolar phosphoprotein B23, numatrin) pseudogene 49                                        |                                                                                             |
| 20887 | ENSG00000256704 | 20710     | 0.09  | processed_pseudogene | 18                   | 57677224  | 57678375  | serologically defined colon cancer antigen 3 pseudogene 1                                                     |                                                                                             |
| 20989 | ENSG00000252922 | 20785     | 0.09  | processed_pseudogene | 15                   | 90929046  | 90929295  | NADH dehydrogenase (ubiquinone) 1 alpha subcomplex, 3 pseudogene 4                                            |                                                                                             |
| 21019 | ENSG00000230260 | 20809     | 0.09  | processed_pseudogene | 1                    | 18040355  | 18040371  | voltage-dependent anion channel 1 pseudogene 4                                                                |                                                                                             |
| 21024 | ENSG00000230818 | 20810     | 0.09  | processed_pseudogene | 10                   | 20036752  | 20037550  | MT-NDS2 pseudogene 16                                                                                         |                                                                                             |
| 21094 | ENSG00000241788 | 20822     | 0.09  | processed_pseudogene | 17                   | 48791052  | 48791321  | cytochrome c oxidase subunit Vb polypeptide 1 (ubiquinol) pseudogene 2                                        |                                                                                             |
| 21117 | ENSG00000229322 | 20860     | 0.09  | processed_pseudogene | 5                    | 6454954   | 6454954   | ribulose-5-phosphate lyase pseudogene 1                                                                       |                                                                                             |
| 21128 | ENSG00000223476 | 20888     | 0.09  | processed_pseudogene | 7                    | 64383851  | 64383984  | vomeronasal 1 receptor 42 pseudogene 2                                                                        |                                                                                             |
| 21141 | ENSG00000232709 | 20903     | 0.09  | processed_pseudogene | 10                   | 84178424  | 84180632  | MAP1B/microtubule affinity-regulating kinase 2 pseudogene 9                                                   |                                                                                             |
| 21161 | ENSG00000230404 | 20917     | 0.09  | processed_pseudogene | 9                    | 14772085  | 14772085  | Yes-associated protein 1 pseudogene 17                                                                        |                                                                                             |
| 21192 | ENSG00000229215 | 20947     | 0.09  | processed_pseudogene | 12                   | 124205793 | 12420618  | ribosomal protein L27 pseudogene 12                                                                           |                                                                                             |
| 21200 | ENSG00000224311 | 20950     | 0.09  | processed_pseudogene | 1                    | 68515043  | 68515428  | ADP-ribosylation factor-like SA pseudogene 3                                                                  |                                                                                             |
| 21281 | ENSG00000230213 | 21007     | 0.09  | processed_pseudogene | 3                    | 10029137  | 10029137  | cytochrome c, somatic pseudogene 4                                                                            |                                                                                             |
| 21452 | ENSG00000235422 | 21160     | 0.09  | processed_pseudogene | 18                   | 2593973   | 2593973   | kataxin p80 subunit B-like 1 pseudogene 3                                                                     |                                                                                             |
| 21455 | ENSG00000225671 | 21164     | 0.09  | processed_pseudogene | 1                    | 50871102  | 50871096  | FCF1 pseudogene 6                                                                                             |                                                                                             |
| 21538 | ENSG00000259952 | 21241     | 0.09  | processed_pseudogene | 15                   | 35413774  | 35414285  | DEAD1 (Asp-Glu-Ala-Asp) box polypeptide 50 pseudogene 2                                                       |                                                                                             |
| 21645 | ENSG00000261333 | 21309     | 0.09  | processed_pseudogene | 15                   | 56383619  | 56383637  | PREL1 domain containing 1 pseudogene 6                                                                        |                                                                                             |
| 21722 | ENSG00000230268 | 21309     | 0.09  | processed_pseudogene | 8                    | 7402618   | 7402618   | CD24 molecule pseudogene 1                                                                                    |                                                                                             |
| 21914 | ENSG00000216708 | 21513     | 0.09  | processed_pseudogene | 11                   | 34452427  | 34453196  | ribosomal protein SA pseudogene 41                                                                            |                                                                                             |
| 22032 | ENSG00000226309 | 21605     | 0.09  | processed_pseudogene | 6                    | 85139302  | 85140520  | SWISN1 related, matrix associated, actin dependent regulator of chromatin, subfamily e, member 1 pseudogene 2 |                                                                                             |
| 22330 | ENSG00000247872 | 21821     | 0.09  | processed_pseudogene | 5                    | 816461    | 817116    | signal peptidase complex subunit 2 homolog (S. cerevisiae) pseudogene 3                                       |                                                                                             |
| 9298  | ENSG00000228315 | GUSBP1    | 11734 | 0.09                 | processed_transcript | 22        | 23980874  | 24059543                                                                                                      | glucuronidase, beta pseudogene 11                                                           |
| 21845 | ENSG00000197665 | WRSPCL1   | 21681 | 0.09                 | processed_transcript | 6         | 34688124  | 34911194                                                                                                      | WRSP1 antisense RNA                                                                         |
| 24248 | ENSG00000225251 | CRS2      | 21952 | 0.09                 | processed_transcript | 6         | 84953368  | 84953368                                                                                                      | long interspersed nuclear coding RNA 475                                                    |
| 2746  | ENSG00000145384 | FABP2     | 4271  | 0.09                 | protein_coding       | 4         | 120238405 | 120235445                                                                                                     | fatty acid binding protein 2, intestinal                                                    |
| 3112  | ENSG00000179163 | FUCAT1    | 4962  | 0.09                 | protein_coding       | 1         | 24171967  | 24171967                                                                                                      | fucosyltransferase, alpha-L-1,3                                                             |
| 3163  | ENSG00000176318 | FCER1A    | 5392  | 0.09                 | protein_coding       | 1         | 15932604  | 15932614                                                                                                      | Fc fragment of IgE, high affinity, receptor for alpha polypeptide                           |
| 3476  | ENSG00000202617 | HBM       | 5453  | 0.09                 | protein_coding       | 18        | 203891    | 203891                                                                                                        | hemoglobin, mu                                                                              |
| 3762  | ENSG00000171798 | OMP       | 5872  | 0.09                 | protein_coding       | 6         | 16438811  | 16439780                                                                                                      | guanosine monophosphate reductase                                                           |
| 3848  | ENSG00000202494 | FCGR2B    | 6803  | 0.09                 | protein_coding       | 16        | 161951101 | 161951101                                                                                                     | Fc fragment of IgG, low affinity, IIb, receptor (CD32)                                      |
| 4455  | ENSG00000173221 | GLRX      | 6916  | 0.09                 | protein_coding       | 5         | 95087023  | 95158709                                                                                                      | glutaredoxin (thioltransferase)                                                             |
| 4529  | ENSG00000188818 | LILRB4    | 7014  | 0.09                 | protein_coding       | 15        | 55153440  | 55153170                                                                                                      | leukocyte immunoglobulin-like receptor, subfamily B (with TM and ITIM domains), member 4    |
| 4541  | ENSG00000145458 | HLA-DPB5  | 7025  | 0.09                 | protein_coding       | 14        | 140011313 | 140011313                                                                                                     | HLA-DPB4 molecule                                                                           |
| 4650  | ENSG00000158714 | SLMFB     | 7184  | 0.09                 | protein_coding       | 1         | 15978540  | 15980739                                                                                                      | SLM1 family member 8                                                                        |
| 4670  | ENSG00000199186 | CTC4      | 7259  | 0.09                 | protein_coding       | 1         | 22911223  | 22911403                                                                                                      | complement component 1, g subcomponent, C chain                                             |
| 4714  | ENSG00000191860 | CD14      | 7268  | 0.09                 | protein_coding       | 1         | 8212088   | 8212088                                                                                                       | complement component 1, g subcomponent, C chain                                             |
| 4813  | ENSG00000188939 | SPRY3     | 7404  | 0.09                 | protein_coding       | X         | 145847474 | 14585121                                                                                                      | sprouty homolog 3 (Drosophila)                                                              |
| 4842  | ENSG00000139508 | SLC6A3    | 7580  | 0.09                 | protein_coding       | 13        | 29274201  | 29293107                                                                                                      | solute carrier family 6, member 3                                                           |
| 4920  | ENSG00000191860 | CD14      | 7268  | 0.09                 | protein_coding       | 1         | 8212088   | 8212088                                                                                                       | complement component 1, g subcomponent, C chain                                             |
| 4982  | ENSG00000198804 | CDC3A     | 7631  | 0.09                 | protein_coding       | 19        | 531714    | 542007                                                                                                        | cell division cycle 34                                                                      |
| 5039  | ENSG00000175597 | UCP2      | 7693  | 0.09                 | protein_coding       | 11        | 73685712  | 73694352                                                                                                      | uncoupling protein 2 (mitochondrial, protein carrier)                                       |
| 5094  | ENSG00000184952 | HLA-DPB5  | 7207  | 0.09                 | protein_coding       | 14        | 140011313 | 140011313                                                                                                     | major histocompatibility complex, class II, DR beta 5                                       |
| 5101  | ENSG00000107521 | HPS1      | 7776  | 0.09                 | protein_coding       | 10        | 100175965 | 100206884                                                                                                     | Hermansky-Pudlak syndrome 1                                                                 |
| 5121  | ENSG00000196182 | STK40     | 7807  | 0.09                 | protein_coding       | 1         | 38855225  | 38851497                                                                                                      | serine/threonine kinase 40                                                                  |
| 5340  | ENSG00000150966 | HLA-DQB2  | 7843  | 0.09                 | protein_coding       | 6         | 6895285   | 6895285                                                                                                       | HLA-DQB2 molecule                                                                           |
| 5568  | ENSG00000101160 | CTS2      | 8345  | 0.09                 | protein_coding       | 20        | 57570240  | 57582302                                                                                                      | cathepsin 2                                                                                 |
| 5628  | ENSG00000204797 | OKX       | 8593  | 0.09                 | protein_coding       | X         | 37545012  | 37591383                                                                                                      | X-linked Klu brain group (Klu) end syndrome                                                 |
| 5653  | ENSG00000191861 | HLA-DQB1  | 8613  | 0.09                 | protein_coding       | 14        | 55558268  | 55558268                                                                                                      | HLA-DQB1 molecule                                                                           |
| 5900  | ENSG00000232629 | HLA-DQB2  | 8619  | 0.09                 | protein_coding       | 6         | 32723875  | 32731311                                                                                                      | major histocompatibility complex, class II, DQ beta 2                                       |
| 5956  | ENSG00000140588 | EAP2      | 8772  | 0.09                 | protein_coding       | 3         | 12156430  | 12160573                                                                                                      | ELL associated factor 2                                                                     |
| 5991  | ENSG00000188628 | STK33     | 8778  | 0.09                 | protein_coding       | 1         | 48847761  | 48847761                                                                                                      | CCNA1-interacting protein (CENP), beta                                                      |
| 6056  | ENSG00000100911 | PSME2     | 8838  | 0.09                 | protein_coding       | 14        | 24812574  | 24812574                                                                                                      | proteasome (prosome, macropain) activator subunit 2 (PA28 beta)                             |
| 6080  | ENSG00000134886 | PHC2      | 8839  | 0.09                 | protein_coding       | 1         | 33789624  | 33896653                                                                                                      | poly(ADP-ribose) polymerase 2 (Drosophila)                                                  |
| 6085  | ENSG00000191860 | CD14      | 7268  | 0.09                 | protein_coding       | 1         | 8212088   | 8212088                                                                                                       | complement component 1, g subcomponent, C chain                                             |
| 6120  | ENSG00000213255 | SEPPIN1   | 8903  | 0.09                 | protein_coding       | 6         | 2825296   | 2842240                                                                                                       | serpin peptidase inhibitor, class B (ovalbumin), member 1                                   |
| 6148  | ENSG00000144848 | RSU1      | 8938  | 0.09                 | protein_coding       | 10        | 18632810  | 18695827                                                                                                      | Ras suppressor protein 1                                                                    |
| 6191  | ENSG00000191860 | CD14      | 7268  | 0.09                 | protein_coding       | 1         | 8212088   | 8212088                                                                                                       | complement component 1, g subcomponent, C chain                                             |
| 6252  | ENSG00000103454 | P2RX5     | 9037  | 0.09                 | protein_coding       | 17        | 3575493   | 3596908                                                                                                       | major histocompatibility complex, class II, DO alpha                                        |
| 6257  | ENSG00000208927 | FXYD5     | 9037  | 0.09                 | protein_coding       | 19        | 35645633  | 3569008                                                                                                       | FXYD domain containing ion transport regulator 5                                            |
| 6287  | ENSG00000191860 | CD14      | 7268  | 0.09                 | protein_coding       | 1         | 8212088   | 8212088                                                                                                       | complement component 1, g subcomponent, C chain                                             |
| 6336  | ENSG00000185262 | UBALD2    | 9120  | 0.09                 | protein_coding       | 17        | 74291233  | 74297375                                                                                                      | UBA-like domain containing 2                                                                |
| 6387  | ENSG00000287645 | POK1R2J   | 9173  | 0.09                 | protein_coding       | 7         | 10227496  | 10231208                                                                                                      | polymerase (RNA) (DNA directed) polypeptide J2                                              |
| 6454  | ENSG00000135363 | LTK1      | 9242  | 0.09                 | protein_coding       | 11        | 33887107  | 3391828                                                                                                       | LIM domain only 2 (thrombosin-like 1)                                                       |
| 6458  | ENSG00000191860 | CD14      | 7268  | 0.09                 | protein_coding       | 1         | 8212088   | 8212088                                                                                                       | complement component 1, g subcomponent, C chain                                             |
| 6505  | ENSG00000164054 | SHISA5    | 9301  | 0.09                 | protein_coding       | 3         | 48509197  | 48544259                                                                                                      | shisa family member 5                                                                       |
| 6548  | ENSG00000125913 | PHLMB     | 9343  | 0.09                 | protein_coding       | 8         | 24645782  | 24655358                                                                                                      | PH2 and PH3 domain 2 (myristate)                                                            |
| 6681  | ENSG00000164885 | ZBTB16    | 9613  | 0.09                 | protein_coding       | 1         | 15491577  | 15498998                                                                                                      | zinc finger protein BTB domain containing 16                                                |
| 6845  | ENSG00000143549 | TFM3      | 9623  | 0.09                 | protein_coding       | 1         | 15417784  | 15416724                                                                                                      | trypomycin 3                                                                                |
| 6851  | ENSG00000145691 | TNP1      | 9772  | 0.09                 | protein_coding       | 5         | 15049056  | 15047138                                                                                                      | TNPAP1 interacting protein 1                                                                |
| 7002  | ENSG00000102111 | CR2       | 9821  | 0.09                 | protein_coding       | 1         | 545261    | 545261                                                                                                        | CD22 molecule                                                                               |
| 7036  | ENSG00000123728 | RAP2C     | 9828  | 0.09                 | protein_coding       | X         | 131337053 | 131335741                                                                                                     | RAP2C, member of RAS oncogene family                                                        |
| 7078  | ENSG00000255339 | NDUF8     | 9845  | 0.09                 | protein_coding       | 10        | 102265385 | 102289638                                                                                                     | NADH dehydrogenase (ubiquinone) 1 beta subcomplex subunit 8, mitochondrial, Uncharacterized |
| 7087  | ENSG00000182952 | HMGNA2    | 9851  | 0.09                 | protein_coding       | 6         | 26538633  | 26546482                                                                                                      | high mobility group nucleosomal binding domain 4                                            |
| 7098  | ENSG00000190348 | IMPDH1    | 9852  | 0.09                 | protein_coding       | 7         | 12803213  | 12809308                                                                                                      | IMP dehydrogenase 1                                                                         |
| 7181  | ENSG00000130295 | IMPDH2    | 9852  | 0.09                 | protein_coding       | 2         | 2847028   | 2847028                                                                                                       | intran mitochondrial interface 2                                                            |
| 7377  | ENSG00000171984 | C20orf196 | 10119 | 0.09                 | protein_coding       | 20        | 5731039   | 5844558                                                                                                       | chromosome 20 open reading frame 196                                                        |
| 7422  | ENSG00000104774 | MAN2B1    | 10161 | 0.09                 | protein_coding       | 19        | 12757325  | 12777556                                                                                                      | mannosidase, alpha, class 2B, member 1                                                      |
| 7508  | ENSG00000131348 | NEGR1     | 10249 | 0.09                 | protein              |           |           |                                                                                                               |                                                                                             |

|       |                  |          |       |      |                |    |           |           |                                                                                |
|-------|------------------|----------|-------|------|----------------|----|-----------|-----------|--------------------------------------------------------------------------------|
| 11016 | ENSG00000189050  | RNF11    | 13159 | 0.09 | protein_coding | 17 | 58029001  | 58042122  | ring finger protein, transmembrane 1                                           |
| 11227 | ENSG00000105681  | RNF41    | 13209 | 0.09 | protein_coding | 5  | 17591208  | 17591208  | 17 ring finger protein 44                                                      |
| 11304 | ENSG00000202922  | MRE11A   | 13403 | 0.09 | protein_coding | 11 | 94152895  | 94227074  | MRE11 meiotic recombination 11 homolog A (S. cerevisiae)                       |
| 11457 | ENSG0000079805   | DNM2     | 13541 | 0.09 | protein_coding | 19 | 10828755  | 10844164  | dynamin 2                                                                      |
| 11458 | ENSG00000191860  | SGTB     | 13578 | 0.09 | protein_coding | 5  | 64961759  | 65001262  | small glutamine-rich tetrapeptide repeat (TPR)-containing, beta                |
| 11460 | ENSG00000203681  | AP3B2    | 13595 | 0.09 | protein_coding | 1  | 24451736  | 24451736  | adenylyl cyclase synthase                                                      |
| 11593 | ENSG00000100938  | GMPPR2   | 13651 | 0.09 | protein_coding | 14 | 24701628  | 24708448  | guanosine monophosphate reductase 2                                            |
| 11601 | ENSG00000000756  | RIMS     | 13659 | 0.09 | protein_coding | 3  | 50128341  | 50128454  | RNA binding motif protein 5                                                    |
| 11852 | ENSG00000180011  | ZNF42    | 13875 | 0.09 | protein_coding | 18 | 72927063  | 72927063  | zinc binding alcohol dehydrogenase domain containing 2                         |
| 11853 | ENSG00000122992  | SMU1     | 13875 | 0.09 | protein_coding | 9  | 53041762  | 53076665  | smu-1 suppressor of me-8 and unc-52 homolog (C. elegans)                       |
| 11853 | ENSG00000131725  | WDR44    | 13877 | 0.09 | protein_coding | 4  | 117480306 | 117588264 | WD repeat domain 44                                                            |
| 2039  | ENSG00000189785  | STRN1    | 14013 | 0.09 | protein_coding | 14 | 31893005  | 31893005  | stratin, octadecanul binding protein 3                                         |
| 10283 | ENSG00000111853  | ING4     | 14445 | 0.09 | protein_coding | 12 | 6758446   | 6772314   | inhibitor of growth family member 4                                            |
| 12269 | ENSG00000145246  | ATP10D   | 14174 | 0.09 | protein_coding | 4  | 41481305  | 41709503  | ATPase, class V, type 10D                                                      |
| 20334 | ENSG00000139398  | APX      | 14229 | 0.09 | protein_coding | 9  | 100437481 | 100459638 | xeroderma pigmentosum complementation group A                                  |
| 12414 | ENSG00000166747  | AP1G1    | 14289 | 0.09 | protein_coding | 16 | 71762913  | 71843104  | adaptor-related protein complex 1, gamma 1 subunit                             |
| 12424 | ENSG00000110172  | CHORDC1  | 14293 | 0.09 | protein_coding | 11 | 89943426  | 89965632  | cysteine and histidine-rich domain (CHORD) containing 1                        |
| 10567 | ENSG00000145534  | NAK3B    | 14413 | 0.09 | protein_coding | 7  | 11762498  | 11762498  | N-acetyltransferase 3, N-ac ac auditory subunit                                |
| 12638 | ENSG00000100393  | EP300    | 14457 | 0.09 | protein_coding | 22 | 41487790  | 41476081  | E1A binding protein p300                                                       |
| 12796 | ENSG00000107329  | LARP4B   | 14475 | 0.09 | protein_coding | 10 | 854844    | 873764    | La ribonucleoprotein domain family, member 4B                                  |
| 10008 | ENSG00000131750  | ALDH9B1  | 14592 | 0.09 | protein_coding | 11 | 10212452  | 10218972  | aldehyde dehydrogenase family 9, class 2                                       |
| 10049 | ENSG00000165591  | FAAH2    | 14573 | 0.09 | protein_coding | 8  | 57313139  | 57315629  | fatty acid amide hydrolase 2                                                   |
| 10305 | ENSG00000090886  | USP41    | 14755 | 0.09 | protein_coding | 1  | 2204791   | 22110099  | ubiquitin specific peptidase 48                                                |
| 10307 | ENSG00000107538  | DHR13    | 14785 | 0.09 | protein_coding | 17 | 27224789  | 27220009  | dehydrogenase (GDR family), member 13                                          |
| 13125 | ENSG00000202577  | MUC12    | 14809 | 0.09 | protein_coding | 7  | 100812904 | 100862230 | mucin 12, cell surface associated                                              |
| 13294 | ENSG00000106933  | COAT1    | 14847 | 0.09 | protein_coding | 7  | 43848055  | 43897816  | cytochrome c oxidase assembly factor 1 homolog (S. cerevisiae)                 |
| 13415 | ENSG00000100888  | CHCH4    | 15034 | 0.09 | protein_coding | 14 | 21853353  | 21854285  | chromodomain helicase DNA binding protein 8                                    |
| 13484 | ENSG00000105863  | ADAP1    | 15068 | 0.09 | protein_coding | 7  | 937540    | 950643    | AdGAP with dual PH domains 1                                                   |
| 13523 | ENSG00000085256  | SPEN     | 15115 | 0.09 | protein_coding | 1  | 4671359   | 46826955  | spen family transcriptional repressor                                          |
| 13586 | ENSG00000107862  | CHST2    | 15133 | 0.09 | protein_coding | 4  | 11731208  | 11732078  | chondroitinase VI, nuclear domain 91                                           |
| 13768 | ENSG00000143614  | GATAD2B  | 15288 | 0.09 | protein_coding | 1  | 15377201  | 15385851  | GATA zinc finger domain containing 2B                                          |
| 13903 | ENSG00000144820  | GPR128   | 15403 | 0.09 | protein_coding | 3  | 100328433 | 100414233 | G protein-coupled receptor 128                                                 |
| 14054 | ENSG0000014373   | CEP350   | 15513 | 0.09 | protein_coding | 12 | 17692375  | 17692375  | cephalopod-specific protein 11, member 2                                       |
| 14156 | ENSG00000127960  | PEX1     | 15585 | 0.09 | protein_coding | 7  | 92116334  | 92157845  | peroxisomal biogenesis factor 1                                                |
| 14369 | ENSG00000111554  | MDM1     | 15754 | 0.09 | protein_coding | 12 | 68662223  | 68726126  | Mdm1 nuclear protein homolog (mouse)                                           |
| 14403 | ENSG00000105513  | SLIT1    | 15761 | 0.09 | protein_coding | 17 | 60117683  | 60117683  | netrin-1-like protein 1                                                        |
| 14451 | ENSG00000198466  | ZNF587   | 15821 | 0.09 | protein_coding | 19 | 58361225  | 58376480  | zinc finger protein 587                                                        |
| 14476 | ENSG000000009413 | REV3L    | 15838 | 0.09 | protein_coding | 6  | 111602234 | 11180418  | REV3-like polymerase (DNA directed), zeta, catalytic subunit                   |
| 14476 | ENSG00000105498  | REV3B    | 15838 | 0.09 | protein_coding | 16 | 237316    | 237316    | endoplasmic reticulum protein 30, alpha subunit                                |
| 14693 | ENSG00000154265  | ABCA3    | 15851 | 0.09 | protein_coding | 17 | 67240452  | 67253385  | ATP-binding cassette, sub-family A (ABC1), member 5                            |
| 14764 | ENSG00000101839  | CEP128   | 16053 | 0.09 | protein_coding | 18 | 12991381  | 13125051  | centrosomal protein 192kDa                                                     |
| 15028 | ENSG00000105688  | FLRT2    | 16044 | 0.09 | protein_coding | 14 | 7804148   | 7804148   | feline leukemia virus subgroup C cellular receptor family, member 2            |
| 15228 | ENSG00000173585  | CCR3     | 16431 | 0.09 | protein_coding | 3  | 45927996  | 45944667  | chemokine (C-C motif) receptor 5                                               |
| 15239 | ENSG00000186211  | SPIC     | 16436 | 0.09 | protein_coding | 12 | 10186199  | 10188075  | Sp1-C transcription factor (Sp1-1PU1 related)                                  |
| 15286 | ENSG0000006524   | LINC     | 16447 | 0.09 | protein_coding | 15 | 41758826  | 41800065  | ribonucleic receptor tyrosine kinase 4                                         |
| 15362 | ENSG00000150484  | CLEC1A   | 16518 | 0.09 | protein_coding | 10 | 10221221  | 10221221  | C-type lectin domain family 1, member A                                        |
| 15428 | ENSG00000120519  | SLC10A7  | 16589 | 0.09 | protein_coding | 4  | 14717127  | 147443123 | solute carrier family 10, member 7                                             |
| 15513 | ENSG00000202580  | ERC2C    | 16635 | 0.09 | protein_coding | 10 | 50863416  | 50747564  | excision repair cross-complementing repair deficiency, complementation group 6 |
| 15517 | ENSG00000204713  | TRIP12   | 16637 | 0.09 | protein_coding | 16 | 160071077 | 160071077 | thyroid receptor interacting protein 27                                        |
| 15903 | ENSG00000196670  | ZFP62    | 16649 | 0.09 | protein_coding | 5  | 18027411  | 18028286  | ZFP62 zinc finger protein                                                      |
| 15930 | ENSG00000086739  | AT12B1   | 16662 | 0.09 | protein_coding | 14 | 96747395  | 96836207  | autophagy related 26                                                           |
| 15984 | ENSG0000017626   | RPS142   | 17002 | 0.09 | protein_coding | 11 | 22918054  | 22949418  | ribosomal protein S4, T-linked 2                                               |
| 16088 | ENSG00000079134  | THOC1    | 17099 | 0.09 | protein_coding | 18 | 214520    | 260550    | THO complex 1                                                                  |
| 16246 | ENSG00000129156  | SERF3C   | 17217 | 0.09 | protein_coding | 11 | 17609959  | 1804379   | secretion regulating guanine nucleotide exchange factor                        |
| 16376 | ENSG00000100669  | CHH2     | 17219 | 0.09 | protein_coding | 17 | 29161890  | 29161890  | chromatin remodelling factor 2                                                 |
| 16383 | ENSG00000137070  | IL1RA    | 17313 | 0.09 | protein_coding | 9  | 34650569  | 34681889  | interleukin 1 receptor, alpha                                                  |
| 16524 | ENSG00000128883  | NUP214   | 17415 | 0.09 | protein_coding | 9  | 13400598  | 134110057 | nucleoporin 214kDa                                                             |
| 16591 | ENSG00000100786  | SLC22A1  | 17520 | 0.09 | protein_coding | 13 | 4214082   | 42512667  | von Willibrand factor A domain containing 8                                    |
| 16653 | ENSG00000132517  | SLC22A1  | 17521 | 0.09 | protein_coding | 17 | 4535885   | 4595304   | solute carrier family 22 (nifluminate transporter), member 1                   |
| 16689 | ENSG00000197969  | VPS13A   | 17550 | 0.09 | protein_coding | 9  | 79792299  | 80036457  | vacuolar protein sorting 13 homolog A (S. cerevisiae)                          |
| 16728 | ENSG00000100612  | CHH3     | 17612 | 0.09 | protein_coding | 12 | 61564811  | 61564811  | basic acid binding to the lectin (hemagglutinin)                               |
| 16838 | ENSG00000137486  | IL18BP   | 17671 | 0.09 | protein_coding | 11 | 71709587  | 71716781  | interleukin 18 binding protein                                                 |
| 16961 | ENSG00000119944  | IL23A    | 17747 | 0.09 | protein_coding | 12 | 5873265   | 58734193  | interleukin 23, alpha subunit p19                                              |
| 16980 | ENSG00000100637  | TRIP13   | 17759 | 0.09 | protein_coding | 12 | 9847365   | 9847365   | transformator/transcription factor-associated protein                          |
| 16990 | ENSG00000149635  | OSTAMP   | 17768 | 0.09 | protein_coding | 20 | 45168585  | 45179213  | osteoclast stimulatory transmembrane protein                                   |
| 17064 | ENSG00000000525  | OSBP1P   | 17827 | 0.09 | protein_coding | 17 | 45584738  | 45599200  | osvaldin binding protein-like 7                                                |
| 1712  | ENSG00000118320  | ATP10B   | 17830 | 0.09 | protein_coding | 5  | 15999107  | 16029221  | ATPase, class V, type 10B                                                      |
| 17323 | ENSG00000198670  | LPA      | 18006 | 0.09 | protein_coding | 6  | 16095215  | 16108740  | lipoprotein, Lp(a)                                                             |
| 17424 | ENSG00000104285  | TRPM2    | 18079 | 0.09 | protein_coding | 21 | 45770445  | 45829264  | transient receptor potential cation channel, subfamily M, member 2             |
| 17533 | ENSG00000103138  | RASGEF2  | 18168 | 0.09 | protein_coding | 8  | 80226176  | 80226176  | Ras protein-specific guanine nucleotide-releasing factor 2                     |
| 17560 | ENSG00000204360  | ITFG2    | 18168 | 0.09 | protein_coding | 12 | 4305282   | 43091517  | zinc finger protein 487                                                        |
| 17616 | ENSG0000011203   | ITFG2    | 18169 | 0.09 | protein_coding | 12 | 2921788   | 2986957   | integrin alpha 5-GAP repeat containing 2                                       |
| 17643 | ENSG00000100959  | SLC22A1  | 18244 | 0.09 | protein_coding | 13 | 18569138  | 18569138  | solute carrier family 22, alpha subunit 1                                      |
| 17830 | ENSG00000184999  | SLC22A10 | 18371 | 0.09 | protein_coding | 10 | 62905339  | 63137190  | solute carrier family 22, member 10                                            |
| 17883 | ENSG00000191940  | FBLN13   | 18485 | 0.09 | protein_coding | 7  | 102453306 | 102715886 | F-box and leucine-rich repeat protein 13                                       |
| 17917 | ENSG00000100558  | TRIP12   | 18492 | 0.09 | protein_coding | 16 | 789827    | 789827    | glycyl-aspartic acid kinase 3                                                  |
| 18011 | ENSG00000201484  | FER1L8   | 18503 | 0.09 | protein_coding | 8  | 124884227 | 12512302  | fer-1-like (C. elegans)                                                        |
| 18072 | ENSG00000198172  | ZNF681   | 18552 | 0.09 | protein_coding | 19 | 23991987  | 23991987  | zinc finger protein 681                                                        |
| 18211 | ENSG0000015468   | ELMO3    | 18583 | 0.09 | protein_coding | 16 | 8588195   | 8588195   | ELMO/CED-12 domain containing 3                                                |
| 18370 | ENSG00000158222  | SLC22A1  | 18779 | 0.09 | protein_coding | 15 | 85427885  | 85518876  | solute carrier family 28 (concentrative nucleoside transporter), member 1      |
| 18376 | ENSG00000208302  | ZNF234   | 18783 | 0.09 | protein_coding | 19 | 44845710  | 44845710  | zinc finger protein 234                                                        |
| 18484 | ENSG00000100197  | CCDC42   | 18865 | 0.09 | protein_coding | 17 | 853465    | 853465    | coiled-coil domain containing 42                                               |
| 18548 | ENSG00000181103  | USP30    | 18909 | 0.09 | protein_coding | 22 | 1983424   | 1983424   | Ubiquitin-like protein 22                                                      |
| 18556 | ENSG000000006194 | ZNF263   | 18912 | 0.09 | protein_coding | 16 | 3313743   | 3351401   | ZNF263-like protein 263                                                        |
| 18607 | ENSG00000192139  | KCNK13   | 18943 | 0.09 | protein_coding | 14 | 66520109  | 66520109  | potassium channel, subfamily K, member 13                                      |
| 18669 | ENSG00000117601  | TRIP13   | 18943 | 0.09 | protein_coding | 16 | 17110679  | 17110679  | lysin spermatid monooxygenase 1, Lys100                                        |
| 18797 | ENSG00000183350  | MARGP1   | 19068 | 0.09 | protein_coding | 11 | 3248628   | 3253616   | MAS-related GPR, member E                                                      |
| 18824 | ENSG00000138635  | RGS3     | 19109 | 0.09 | protein_coding | 8  | 116039113 | 116039113 | regulator of G protein signaling 3                                             |
| 18841 | ENSG00000100268  | SLC18A3  | 19131 | 0.09 | protein_coding | 17 | 72918154  | 72949687  | SLC18A3-like protein 3                                                         |
| 18808 | ENSG00000079974  | RABL2B   | 19187 | 0.09 | protein_coding | 22 | 51205629  | 51222091  | RAB, member of RAS oncogene family-like 2                                      |
| 18834 | ENSG00000186596  | C12orf93 | 19216 | 0.09 | protein_coding | 12 | 8686349   | 8709933   | chromosome 12 open reading frame 55                                            |
| 18846 | ENSG00000100684  | SKI3     | 19216 | 0.09 | protein_coding | 12 | 48202663  | 48218407  | skid, RAS effector 3                                                           |
| 18945 | ENSG000002046789 | USP28    | 19222 | 0.09 | protein_coding | 5  | 51303865  | 51303865  | Ubiquitin-related protein                                                      |
| 18957 | ENSG000001001704 | RIPE     | 19224 | 0.09 | protein_coding | 6  | 26091509  | 26095971  | homonucleotins                                                                 |
| 18961 | ENSG00000182786  | ORF729   | 19226 | 0.09 | protein_coding | 2  | 248721784 | 248721784 | olfactory receptor family 2, subfamily 1, member 29                            |



|       |                 |                |         |      |                |    |           |           |                                                                                                              |
|-------|-----------------|----------------|---------|------|----------------|----|-----------|-----------|--------------------------------------------------------------------------------------------------------------|
| 20642 | ENSG00000144229 | THSD7B         | 20527.3 | 0.09 | protein_coding | 2  | 137523115 | 138435287 | thrombospondin, type I, domain containing 7B                                                                 |
| 20643 | ENSG00000105441 | CCZC172        | 20527.3 | 0.09 | protein_coding | 10 | 118091401 | 118109140 | collet-coil domain containing 172                                                                            |
| 20664 | ENSG00000189777 | TAS2R1         | 20546.0 | 0.09 | protein_coding | 5  | 9629109   | 9712490   | taste receptor, type 2, member 1                                                                             |
| 20683 | ENSG00000202626 | SMN21          | 20559.2 | 0.09 | protein_coding | 18 | 73121431  | 73139658  | small integral membrane protein 21                                                                           |
| 20715 | ENSG00000151912 | SLC39F4        | 20579.1 | 0.09 | protein_coding | 14 | 5803207   | 5803207   | solute carrier family 39, member 4                                                                           |
| 20722 | ENSG00000111231 | KCNMB3         | 20579.1 | 0.09 | protein_coding | 1  | 17895730  | 178984796 | potassium large conductance calcium-activated channel, subfamily M beta member 3                             |
| 20739 | ENSG00000206549 | PRSS50         | 20602.2 | 0.09 | protein_coding | 3  | 46738065  | 46854064  | protease, serine, 50                                                                                         |
| 20760 | ENSG00000071346 | MOV10L1        | 20616.2 | 0.09 | protein_coding | 22 | 50528206  | 50600119  | Mov10L1, Moloney leukemia virus 10-like 1, homolog (mouse)                                                   |
| 20764 | ENSG00000003938 | DNMHS          | 20619.9 | 0.09 | protein_coding | 5  | 13693440  | 13693440  | 5,6-dimethyl-tryptophan, homolog, heavy chain 5                                                              |
| 20765 | ENSG00000224586 | GPK5           | 20621.9 | 0.09 | protein_coding | 6  | 28493702  | 28502729  | glutathione peroxidase 5 (epididymal androgen-related protein)                                               |
| 20790 | ENSG00000214611 | CYFPA3         | 20639.9 | 0.09 | protein_coding | 16 | 94622636  | 94663718  | cytochrome P450, family 3, subfamily A, polypeptide 43                                                       |
| 20800 | ENSG00000231738 | TSPAN19        | 20648.8 | 0.09 | protein_coding | 12 | 85408094  | 85430065  | transmembrane protein 19                                                                                     |
| 20849 | ENSG00000180053 | NKX2-6         | 20683.7 | 0.09 | protein_coding | 8  | 23599964  | 23641111  | NK2 homeobox 6                                                                                               |
| 20856 | ENSG00000204391 | ZNF692         | 20699.2 | 0.09 | protein_coding | 2  | 23729913  | 23747214  | zinc finger protein 692                                                                                      |
| 20884 | ENSG00000206478 | GUCY2D         | 20723.3 | 0.09 | protein_coding | 17 | 7909912   | 7923697   | guanylate cyclase 2D, membrane (retina-specific)                                                             |
| 20901 | ENSG00000136653 | NDOR1          | 20734.6 | 0.09 | protein_coding | 4  | 13248919  | 13250332  | N-deacetyl-N-omega-tyrosine (tyrosine glucosaminyl) 4                                                        |
| 20948 | ENSG00000183629 | GOLGA8G        | 20755.5 | 0.09 | protein_coding | 15 | 28764757  | 28778160  | golgin A8 family, member G                                                                                   |
| 20970 | ENSG00000185910 | DBX2           | 20770.4 | 0.09 | protein_coding | 12 | 45444855  | 45444862  | developing brain homeobox 2                                                                                  |
| 20996 | ENSG00000202132 | ZNF75          | 20795.0 | 0.09 | protein_coding | 20 | 24391524  | 24391619  | zinc finger protein 75                                                                                       |
| 21022 | ENSG00000100433 | KCNK10         | 20808.1 | 0.09 | protein_coding | 14 | 88649113  | 88765251  | potassium channel, subfamily K, member 10                                                                    |
| 21064 | ENSG00000225556 | CD3D4D         | 20840.2 | 0.09 | protein_coding | 1  | 151810295 | 151810333 | C2 calcium-dependent domain containing 4D                                                                    |
| 21120 | ENSG00000101959 | CPSF4          | 20928.5 | 0.09 | protein_coding | 17 | 71244989  | 71258461  | cleavage and polyadenylation specific factor 4 like                                                          |
| 21187 | ENSG00000164411 | GAB7           | 20943.8 | 0.09 | protein_coding | 6  | 87959286  | 88038966  | gap junction protein, beta 7, 25kDa                                                                          |
| 21194 | ENSG00000129749 | CHRNA10        | 20948.6 | 0.09 | protein_coding | 11 | 3688871   | 3692914   | cholinergic receptor, nicotinic, alpha 10 (neuronal)                                                         |
| 21226 | ENSG00000102996 | TMEM65         | 20981.0 | 0.09 | protein_coding | 17 | 7293442   | 7293506   | transmembrane protein 65                                                                                     |
| 21240 | ENSG00000183067 | IGSF5          | 20985.1 | 0.09 | protein_coding | 21 | 41117334  | 41147023  | immunoglobulin superfamily, member 5                                                                         |
| 21273 | ENSG00000153884 | ALG12          | 21013.7 | 0.09 | protein_coding | 15 | 28623767  | 28627170  | ALG12, alpha 1, 6-mannosyltransferase                                                                        |
| 21300 | ENSG00000100000 | C22orf2        | 21013.7 | 0.09 | protein_coding | 32 | 5232304   | 5232304   | chromosome 22 open reading frame 24                                                                          |
| 21394 | ENSG00000153593 | ACOXL          | 21109.2 | 0.09 | protein_coding | 2  | 111480150 | 111487579 | acyl-CoA oxidase-like                                                                                        |
| 21489 | ENSG00000204446 | Cser170        | 21182.2 | 0.09 | protein_coding | 9  | 89733559  | 89774471  | chromosome 9 open reading frame 170                                                                          |
| 21578 | ENSG0000011778  | NEL1           | 21267.7 | 0.09 | protein_coding | 2  | 21994887  | 21994887  | neuroblastoma and pancreas 1                                                                                 |
| 21592 | ENSG00000118869 | ZNF52          | 21267.7 | 0.09 | protein_coding | 19 | 56904914  | 56904914  | zinc finger protein 52                                                                                       |
| 21613 | ENSG00000134445 | FOXK4          | 21279.4 | 0.09 | protein_coding | 12 | 109715784 | 109747025 | forkhead box M4                                                                                              |
| 21633 | ENSG00000103317 | NR1H3          | 21321.0 | 0.09 | protein_coding | 12 | 38111807  | 38111807  | NR1H3 receptor A10                                                                                           |
| 21745 | ENSG00000100341 | STVL           | 21394.7 | 0.09 | protein_coding | 1  | 113069140 | 113163447 | suppression of tumorigenicity 7 like                                                                         |
| 21749 | ENSG00000182858 | ALG12          | 21396.5 | 0.09 | protein_coding | 22 | 50258877  | 50312106  | ALG12, alpha 1, 6-mannosyltransferase                                                                        |
| 21753 | ENSG00000100453 | ZNF568         | 21409.8 | 0.09 | protein_coding | 14 | 21498021  | 21498021  | zinc finger protein 568                                                                                      |
| 21791 | ENSG00000139549 | DHH            | 21421.0 | 0.09 | protein_coding | 12 | 49483204  | 49489602  | desert hedgehog                                                                                              |
| 21827 | ENSG00000213285 | TSGA13         | 21447.8 | 0.09 | protein_coding | 7  | 13033488  | 13037288  | tetraspanin, class 13                                                                                        |
| 21868 | ENSG00000100456 | C5orf7         | 21468.7 | 0.09 | protein_coding | 8  | 9166578   | 9166578   | chromosome 5 open reading frame 47                                                                           |
| 21938 | ENSG00000178342 | KCNKG2         | 21528.7 | 0.09 | protein_coding | 18 | 77962368  | 77969184  | potassium voltage-gated channel, subfamily G, member 2                                                       |
| 21940 | ENSG00000183370 | PCBP3          | 21530.8 | 0.09 | protein_coding | 21 | 47063808  | 47362368  | poly(C) binding protein 3                                                                                    |
| 21945 | ENSG00000100960 | PCDH7          | 21536.3 | 0.09 | protein_coding | 5  | 140213969 | 140391629 | protodiscin alpha 7                                                                                          |
| 21989 | ENSG00000101138 | SLC9C1         | 21569.0 | 0.09 | protein_coding | 3  | 111091744 | 111091744 | solute carrier family 9, subfamily C (Na <sup>+</sup> -transporting carboxylic acid decarboxylase), member 1 |
| 22026 | ENSG00000200852 | CLCC16A        | 21602.0 | 0.09 | protein_coding | 16 | 11076046  | 11270768  | C-type lectin domain family 16, member A                                                                     |
| 22151 | ENSG00000183632 | GOLG3L         | 21630.6 | 0.09 | protein_coding | 16 | 63965032  | 63965032  | chromosome 3 open reading frame 49                                                                           |
| 22171 | ENSG00000105261 | OVOL3          | 21703.6 | 0.09 | protein_coding | 19 | 36604104  | 36604413  | ovolo-like zinc finger 3                                                                                     |
| 22177 | ENSG00000189157 | FAM147         | 21709.3 | 0.09 | protein_coding | 4  | 71131939  | 71204933  | family with sequence similarity 47, member E                                                                 |
| 22187 | ENSG00000166466 | GRM2           | 21710.4 | 0.09 | protein_coding | 4  | 61741096  | 61741096  | glutamate receptor, metabotropic 2                                                                           |
| 22196 | ENSG00000253767 | PCMG3          | 21726.3 | 0.09 | protein_coding | 5  | 140772381 | 140892346 | protocadherin gene subfamily A, member 8                                                                     |
| 22205 | ENSG00000110353 | MIR3H8         | 21734.4 | 0.09 | protein_coding | 20 | 35729629  | 35807961  | maestro host-like repeat family member B                                                                     |
| 22254 | ENSG00000200276 | ZNF839         | 21739.4 | 0.09 | protein_coding | 12 | 102713174 | 102713174 | zinc finger protein 839                                                                                      |
| 22273 | ENSG00000155974 | GRIP7          | 21778.7 | 0.09 | protein_coding | 12 | 68741211  | 67197966  | glutamate receptor interacting protein 1                                                                     |
| 22281 | ENSG00000198836 | RTR3           | 21781.9 | 0.09 | protein_coding | 15 | 33863193  | 34158303  | tyrosine receptor 3                                                                                          |
| 22286 | ENSG00000140026 | ESRR2          | 21782.0 | 0.09 | protein_coding | 15 | 84502692  | 84578439  | estrogen receptor 2 (ER beta)                                                                                |
| 22408 | ENSG00000119522 | DENDIA1        | 21878.8 | 0.09 | protein_coding | 9  | 126141933 | 12689241  | DENMAD domain containing 1A                                                                                  |
| 22446 | ENSG00000112721 | ACAD10         | 21908.1 | 0.09 | protein_coding | 12 | 112128857 | 112194993 | acyl-CoA dehydrogenase family, member 10                                                                     |
| 22511 | ENSG00000111921 | KIF11          | 21934.6 | 0.09 | protein_coding | 12 | 131563541 | 131563541 | cytosine cytoskeletal motor, cytoplasmic                                                                     |
| 22589 | ENSG00000214378 | VSTM2          | 22099.2 | 0.09 | protein_coding | 11 | 93551398  | 93558897  | V-set and transmembrane domain containing 5                                                                  |
| 22601 | ENSG00000102953 | ZC1H12B        | 22181.5 | 0.09 | protein_coding | X  | 64709815  | 64727767  | zinc finger CCHC-type containing 12B                                                                         |
| 22613 | ENSG00000181118 | ZDHHC11        | 22181.5 | 0.09 | protein_coding | 8  | 7102119   | 7102119   | zinc finger, DHHC-type containing 11                                                                         |
| 23057 | ENSG00000258495 | ZNF52          | 22396.9 | 0.09 | protein_coding | 15 | 80637195  | 80695917  | zinc finger protein 52                                                                                       |
| 23115 | ENSG00000173040 | EVCC2          | 22437.7 | 0.09 | protein_coding | 4  | 5544499   | 55711275  | Uchradactylin protein                                                                                        |
| 23174 | ENSG00000105613 | LMBL1L1        | 22496.4 | 0.09 | protein_coding | 20 | 12444444  | 12444444  | ELAV-like protein 1 (Drosophila)                                                                             |
| 23286 | ENSG00000198724 | ZNF418         | 22567.2 | 0.09 | protein_coding | 19 | 58433252  | 58446761  | zinc finger protein 418                                                                                      |
| 23523 | ENSG00000080991 | DZANK1         | 22748.2 | 0.09 | protein_coding | 20 | 18364011  | 18417625  | double zinc finger and ankyrin repeat domains 1                                                              |
| 23622 | ENSG00000100433 | KCNK10         | 22748.2 | 0.09 | protein_coding | 14 | 2417806   | 2417806   | RNA, SS ribosomal pseudogene 88                                                                              |
| 19916 | ENSG00000212497 | rRNA           | 19969.4 | 0.09 | rRNA           | 19 | 12138728  | 12138728  | RNA, SS ribosomal pseudogene 405                                                                             |
| 20060 | ENSG00000252060 | rRNA           | 20067.2 | 0.09 | rRNA           | 19 | 21107624  | 21207731  | RNA, SS ribosomal pseudogene 484                                                                             |
| 20423 | ENSG00000100448 | rRNA           | 20423.2 | 0.09 | rRNA           | 19 | 7396381   | 7396381   | RNA, SS ribosomal pseudogene 343                                                                             |
| 20649 | ENSG00000252246 | rRNA           | 20534.2 | 0.09 | rRNA           | 2  | 33557955  | 33558074  | RNA, SS ribosomal pseudogene 92                                                                              |
| 20657 | ENSG00000212578 | rRNA           | 20638.7 | 0.09 | rRNA           | 19 | 12217312  | 12217428  | RNA, SS ribosomal pseudogene 467                                                                             |
| 20661 | ENSG00000183628 | rRNA           | 20638.7 | 0.09 | rRNA           | 19 | 24388708  | 24388708  | ATG10 intronic transcript 1 (non-protein coding)                                                             |
| 21883 | ENSG00000228447 | sense_intronic | 21883.0 | 0.09 | sense_intronic | 5  | 81287814  | 81288300  | ATG10 intronic transcript 1 (non-protein coding)                                                             |
| 19747 | ENSG00000215333 | LINC0189       | 18612.9 | 0.09 | sense_intronic | 21 | 30565801  | 30608026  | long intergenic non-protein coding RNA 189                                                                   |
| 19857 | ENSG00000100433 | rRNA           | 19857.0 | 0.09 | rRNA           | 6  | 5681076   | 5681076   | Small nuclear RNA, SNORA46                                                                                   |
| 19889 | ENSG00000252118 | rRNA           | 19838.7 | 0.09 | rRNA           | 6  | 43511881  | 43512007  | Small Cajal body specific RNA 15                                                                             |
| 19781 | ENSG00000252230 | rRNA           | 18627.1 | 0.09 | rRNA           | 19 | 35128601  | 35128686  | Small nuclear RNA, SNORD111                                                                                  |
| 19806 | ENSG00000100433 | rRNA           | 19806.0 | 0.09 | rRNA           | 6  | 39510788  | 39510788  | Small nuclear RNA, SNORA67                                                                                   |
| 19908 | ENSG00000209907 | SNORA70B       | 19421.3 | 0.09 | rRNA           | 2  | 61644379  | 61644513  | small nuclear RNA, HIACA box 70B                                                                             |
| 19934 | ENSG00000202094 | rRNA           | 19939.3 | 0.09 | rRNA           | 10 | 73940816  | 73940747  | Small nuclear RNA, SNORA36 family                                                                            |
| 20197 | ENSG00000236026 | rRNA           | 20191.4 | 0.09 | rRNA           | 15 | 67510789  | 67570871  | Small nuclear RNA, U113                                                                                      |
| 20612 | ENSG00000112624 | rRNA           | 20606.4 | 0.09 | rRNA           | 14 | 62190448  | 62190568  | Small nuclear RNA, SNORA26                                                                                   |
| 21610 | ENSG00000211384 | rRNA           | 21275.9 | 0.09 | rRNA           | 14 | 77967369  | 77967483  | Small nuclear RNA, SNORA32                                                                                   |
| 19154 | ENSG00000202697 | rRNA           | 19154.6 | 0.09 | rRNA           | 3  | 121314322 | 121314451 | RNA, U6 small nuclear 62, pseudogene                                                                         |
| 19803 | ENSG00000201891 | rRNA           | 19803.3 | 0.09 | rRNA           | 15 | 85933054  | 85933115  | RNA, U6 small nuclear 78, pseudogene                                                                         |
| 12438 | ENSG00000198335 | rRNA           | 14381.8 | 0.09 | rRNA           | 4  | 3045828   | 3045934   | RNA, U6 small nuclear 204, pseudogene                                                                        |
| 14596 | ENSG00000202601 | rRNA           | 14591.1 | 0.09 | rRNA           | 7  | 44162136  | 44162227  | RNA, U6 small nuclear 109B, pseudogene                                                                       |
| 16214 | ENSG00000202926 | rRNA           | 16214.8 | 0.09 | rRNA           | 6  | 38607940  | 38607940  | RNA, U6 small nuclear 715, pseudogene                                                                        |
| 18542 | ENSG00000202692 | rRNA           | 18542.9 | 0.09 | rRNA           | 7  | 111412416 | 111412535 | RNA, U6 small nuclear 960, pseudogene                                                                        |
| 19186 | ENSG00000202651 | rRNA           | 19186.9 | 0.09 | rRNA           | 13 | 42479524  | 42479580  | RNA, U6 small nuclear 74, pseudogene                                                                         |
| 19187 | ENSG00000202692 | rRNA           | 19186.9 | 0.09 | rRNA           | 13 | 80269411  | 80269477  | RNA, U6 small nuclear 92, pseudogene                                                                         |
| 19345 | ENSG00000211720 | rRNA           | 19345.9 | 0.09 | rRNA           | 12 | 52381441  | 52381441  | RNA, U6 small nuclear 574, pseudogene                                                                        |
| 19478 | ENSG00000211972 | rRNA           | 19478.9 | 0.09 | rRNA           | 1  | 64002382  | 64002441  | RNA, U7 small nuclear 1                                                                                      |

|       |                 |         |         |      |                                        |    |           |           |                                                                  |
|-------|-----------------|---------|---------|------|----------------------------------------|----|-----------|-----------|------------------------------------------------------------------|
| 2229  | ENSG00000198496 | NBR2    | 21747.7 | 0.09 | transcribed_unprocessed_pseu<br>dogene | 17 | 41277627  | 41030688  | neighbor of BRCA1 gene 2 (non-protein coding)                    |
| 2256  | ENSG00000184845 |         | 22912.2 | 0.09 | transcribed_unprocessed_pseu<br>dogene | 12 | 8385108   | 8395544   | family with sequence similarity 30, member F, pseudogene         |
| 21815 | ENSG00000242600 | MLL1P   | 21837.6 | 0.09 | unitary_pseudogene                     | 10 | 81664654  | 81710062  | mammose-binding lectin (protein A1), pseudogene                  |
| 21848 | ENSG00000239268 | ABCAT1P | 21982.1 | 0.09 | unitary_pseudogene                     | 10 | 239151    | 2476700   | ATP-binding cassette, sub-family A (ABC1), member 11, pseudogene |
| 4626  | ENSG00000237888 |         | 7132.5  | 0.09 | unprocessed_pseudogene                 | 6  | 29520996  | 29521943  | olfactory receptor, family 2, subfamily L, member 1, pseudogene  |
| 18670 | ENSG00000239050 |         | 18596.9 | 0.09 | unprocessed_pseudogene                 | 4  | 25719704  | 25721700  | MT-ND4 pseudogene 3                                              |
| 18784 | ENSG00000239358 |         | 18942.3 | 0.09 | unprocessed_pseudogene                 | 1  | 119981624 | 119988199 | hydroxy-delta-5-steroid dehydrogenase, 3 beta, pseudogene 2      |
| 19013 | ENSG00000172971 |         | 19278   | 0.09 | unprocessed_pseudogene                 | 3  | 75688657  | 75673000  | unc-59 homolog B3 pseudogene (C, elegans)                        |
| 19344 | ENSG00000176115 |         | 19527.6 | 0.09 | unprocessed_pseudogene                 | 9  | 6162331   | 61648373  | agglutinin V, pseudogene 4                                       |
| 20288 | ENSG00000229887 |         | 20341.8 | 0.09 | unprocessed_pseudogene                 | Y  | 13488005  | 13488271  | double homeobox 4 like 19                                        |
| 20339 | ENSG00000215180 | OR7E1P  | 20452.9 | 0.09 | unprocessed_pseudogene                 | 1  | 58513847  | 58514963  | heterogeneous nuclear ribonucleoprotein A1 pseudogene 6          |
| 20874 | ENSG00000203452 |         | 20481.6 | 0.09 | unprocessed_pseudogene                 | 17 | 15919786  | 15919857  | olfactory receptor, family 2, subfamily E, member 122 pseudogene |
| 20830 | ENSG00000258567 |         | 20520.9 | 0.09 | unprocessed_pseudogene                 | Y  | 13422584  | 13423057  | zinc finger protein 25, pseudogene                               |
| 20992 | ENSG00000239929 |         | 20585   | 0.09 | unprocessed_pseudogene                 | Y  | 13417233  | 13418499  | double homeobox 4 like 18                                        |
| 20718 | ENSG00000227584 |         | 20583   | 0.09 | unprocessed_pseudogene                 | 7  | 37294021  | 37291775  | double homeobox 4 like 18                                        |
| 21180 | ENSG00000235690 |         | 20939.2 | 0.09 | unprocessed_pseudogene                 | 10 | 45622766  | 45644382  | MT-ND4 pseudogene 5                                              |
| 22748 | ENSG00000236278 |         | 22147.4 | 0.09 | unprocessed_pseudogene                 | 3  | 75444221  | 75471294  | cubilin (intrinsic factor-cobalamin receptor) pseudogene 3       |
| 3426  | ENSG00000210268 |         | 3394.9  | 0.09 | unprocessed_pseudogene                 | 3  | 75444221  | 75471294  | asparagine-linked glycosylation 1-like 6, pseudogene             |
| 4439  | ENSG00000198444 | FBA1    | 6895.7  | 0.09 |                                        | X  | 154611749 | 154613449 | coagulation factor VIII-associated 2                             |
| 4708  | ENSG00000228427 |         | 7247.1  | 0.09 |                                        |    |           |           |                                                                  |
| 4758  | ENSG00000202178 |         | 7322.8  | 0.09 |                                        |    |           |           |                                                                  |
| 5573  | ENSG00000236438 |         | 8314.2  | 0.09 |                                        |    |           |           |                                                                  |
| 5886  | ENSG00000238900 |         | 8640.3  | 0.09 |                                        |    |           |           |                                                                  |
| 5931  | ENSG00000227462 |         | 8711.6  | 0.09 |                                        |    |           |           |                                                                  |
| 7462  | ENSG00000226256 |         | 10206.8 | 0.09 |                                        |    |           |           |                                                                  |
| 7474  | ENSG00000213443 |         | 10219.1 | 0.09 |                                        |    |           |           |                                                                  |
| 7905  | ENSG00000237445 |         | 10340   | 0.09 |                                        |    |           |           |                                                                  |
| 8448  | ENSG0000021581  |         | 11089.2 | 0.09 |                                        |    |           |           |                                                                  |
| 8845  | ENSG0000021347  |         | 11249   | 0.09 |                                        |    |           |           |                                                                  |
| 9104  | ENSG00000243523 |         | 11631.7 | 0.09 |                                        |    |           |           |                                                                  |
| 9486  | ENSG00000213252 |         | 11919   | 0.09 |                                        |    |           |           |                                                                  |
| 9686  | ENSG00000250918 |         | 12007.8 | 0.09 |                                        |    |           |           |                                                                  |
| 9829  | ENSG00000239288 |         | 12219.8 | 0.09 |                                        |    |           |           |                                                                  |
| 9929  | ENSG0000021043  |         | 12287.4 | 0.09 |                                        |    |           |           |                                                                  |
| 10785 | ENSG00000251070 |         | 12956.9 | 0.09 |                                        | 10 | 48181416  | 48192556  | BMX1 pseudogene 6                                                |
| 10771 | ENSG0000025168  |         | 12985.1 | 0.09 |                                        |    |           |           |                                                                  |
| 11154 | ENSG00000258704 |         | 13265.9 | 0.09 |                                        |    |           |           |                                                                  |
| 11247 | ENSG00000231025 |         | 13341.5 | 0.09 |                                        |    |           |           |                                                                  |
| 11398 | ENSG0000025219  |         | 13478.1 | 0.09 |                                        |    |           |           |                                                                  |
| 11427 | ENSG00000238422 |         | 13511.2 | 0.09 |                                        | 8  | 124278882 | 124278985 | Small nuclear RNA U13                                            |
| 11553 | ENSG00000213872 |         | 13618.7 | 0.09 |                                        |    |           |           |                                                                  |
| 11587 | ENSG00000241679 |         | 13628.6 | 0.09 |                                        |    |           |           |                                                                  |
| 11681 | ENSG00000239268 |         | 13724.4 | 0.09 |                                        |    |           |           |                                                                  |
| 11782 | ENSG00000272849 |         | 13815.8 | 0.09 |                                        |    |           |           |                                                                  |
| 11859 | ENSG00000234202 |         | 13881.4 | 0.09 |                                        |    |           |           |                                                                  |
| 11916 | ENSG00000258411 |         | 13921.9 | 0.09 |                                        |    |           |           |                                                                  |
| 12099 | ENSG00000227413 |         | 14052   | 0.09 |                                        |    |           |           |                                                                  |
| 12274 | ENSG00000215585 |         | 14228.7 | 0.09 |                                        |    |           |           |                                                                  |
| 12717 | ENSG00000250911 |         | 14514.9 | 0.09 |                                        |    |           |           |                                                                  |
| 12728 | ENSG00000269553 |         | 14523.5 | 0.09 |                                        |    |           |           |                                                                  |
| 13110 | ENSG00000238402 |         | 14786.1 | 0.09 |                                        | 2  | 967237.1  | 9672474   | Small nuclear RNA U13                                            |
| 13166 | ENSG0000021169  |         | 14839.7 | 0.09 |                                        |    |           |           |                                                                  |
| 13224 | ENSG00000272812 |         | 14894.1 | 0.09 |                                        |    |           |           |                                                                  |
| 13644 | ENSG00000239533 |         | 15207.7 | 0.09 |                                        |    |           |           |                                                                  |
| 13688 | ENSG0000025267  |         | 15226.7 | 0.09 |                                        |    |           |           |                                                                  |
| 13738 | ENSG00000257246 |         | 15280.4 | 0.09 |                                        |    |           |           |                                                                  |
| 14072 | ENSG00000231834 |         | 15524.4 | 0.09 |                                        |    |           |           |                                                                  |
| 14412 | ENSG0000021700  |         | 15786.3 | 0.09 |                                        |    |           |           |                                                                  |
| 14421 | ENSG0000021046  |         | 15793.7 | 0.09 |                                        |    |           |           |                                                                  |
| 14453 | ENSG00000239636 |         | 15821.9 | 0.09 |                                        |    |           |           |                                                                  |
| 14465 | ENSG00000213443 |         | 15844.7 | 0.09 |                                        |    |           |           |                                                                  |
| 14757 | ENSG00000287627 |         | 16047.4 | 0.09 |                                        |    |           |           |                                                                  |
| 14841 | ENSG00000252181 |         | 16116.7 | 0.09 |                                        |    |           |           |                                                                  |
| 15008 | ENSG0000021156  |         | 16270   | 0.09 |                                        |    |           |           |                                                                  |
| 15078 | ENSG00000237169 |         | 16310.5 | 0.09 |                                        |    |           |           |                                                                  |
| 15212 | ENSG00000298891 |         | 16420.2 | 0.09 |                                        | 7  | 74999908  | 75005425  | Uncharacterized protein                                          |
| 15283 | ENSG00000251713 |         | 16485.3 | 0.09 |                                        |    |           |           |                                                                  |
| 15388 | ENSG00000272378 |         | 16538.5 | 0.09 |                                        |    |           |           |                                                                  |
| 15556 | ENSG00000258436 |         | 16674.6 | 0.09 |                                        |    |           |           |                                                                  |
| 15688 | ENSG0000027682  |         | 16681.3 | 0.09 |                                        |    |           |           |                                                                  |
| 15692 | ENSG00000132832 |         | 16698.6 | 0.09 |                                        |    |           |           |                                                                  |
| 15681 | ENSG00000232186 |         | 16754.6 | 0.09 |                                        |    |           |           |                                                                  |
| 15691 | ENSG0000025026  | RMBP3B  | 16758   | 0.09 |                                        | 22 | 21737863  | 21743446  | RBM3 binding protein 3B                                          |
| 15757 | ENSG00000229870 |         | 16825.2 | 0.09 |                                        |    |           |           |                                                                  |
| 15768 | ENSG00000240040 |         | 16830.6 | 0.09 |                                        |    |           |           |                                                                  |
| 16033 | ENSG00000230538 |         | 17028.3 | 0.09 |                                        |    |           |           |                                                                  |
| 16272 | ENSG00000270294 |         | 17226.7 | 0.09 |                                        |    |           |           |                                                                  |
| 16287 | ENSG0000021732  |         | 17236.9 | 0.09 |                                        | 7  | 142104121 | 142104553 | T cell receptor beta variable 6-9                                |
| 16328 | ENSG00000231528 |         | 17383.3 | 0.09 |                                        |    |           |           |                                                                  |
| 16362 | ENSG00000238401 |         | 17592.4 | 0.09 |                                        | 1  | 207212039 | 207212145 | Small nuclear RNA U13                                            |
| 16459 | ENSG00000249249 |         | 17668.9 | 0.09 |                                        |    |           |           |                                                                  |
| 16684 | ENSG00000242600 |         | 17655.6 | 0.09 |                                        |    |           |           |                                                                  |
| 16728 | ENSG00000217424 |         | 17659.6 | 0.09 |                                        |    |           |           |                                                                  |
| 16789 | ENSG00000263013 |         | 17812.7 | 0.09 |                                        |    |           |           |                                                                  |
| 16821 | ENSG00000246157 |         | 17868.7 | 0.09 |                                        |    |           |           |                                                                  |
| 16811 | ENSG00000216286 |         | 17711.6 | 0.09 |                                        |    |           |           |                                                                  |
| 16852 | ENSG00000223391 |         | 17741.4 | 0.09 |                                        |    |           |           |                                                                  |
| 17011 | ENSG00000248991 |         | 17788.1 | 0.09 |                                        |    |           |           |                                                                  |
| 17040 | ENSG00000239268 |         | 17898   | 0.09 |                                        |    |           |           |                                                                  |
| 17087 | ENSG00000250348 |         | 17843   | 0.09 |                                        |    |           |           |                                                                  |
| 17298 | ENSG00000281217 |         | 17855.6 | 0.09 |                                        |    |           |           |                                                                  |
| 17368 | ENSG00000202650 |         | 17866.9 | 0.09 |                                        |    |           |           |                                                                  |
| 17288 | ENSG00000272444 |         | 17879   | 0.09 |                                        | 10 | 48001603  | 48055018  | N-acetylphosphine amidohydrolase (non-lysosomal ceramidase) 2C   |
| 17308 | ENSG00000289431 |         | 17953.6 | 0.09 |                                        |    |           |           |                                                                  |
| 17360 | ENSG00000264726 |         | 18020.9 | 0.09 |                                        |    |           |           |                                                                  |
| 17432 | ENSG00000237520 |         | 18084.5 | 0.09 |                                        |    |           |           |                                                                  |
| 17445 | ENSG00000254407 |         | 18092.9 | 0.09 |                                        |    |           |           |                                                                  |
| 17686 | ENSG0000023103  |         | 18126.3 | 0.09 |                                        |    |           |           |                                                                  |
| 17668 | ENSG00000266368 |         | 18257.4 | 0.09 |                                        |    |           |           |                                                                  |
| 17683 | ENSG00000244894 |         | 18268   | 0.09 |                                        |    |           |           |                                                                  |
| 17784 | ENSG00000212703 |         | 18343.5 | 0.09 |                                        |    |           |           |                                                                  |
| 17815 | ENSG00000231648 |         | 18363.3 | 0.09 |                                        |    |           |           |                                                                  |
| 17847 | ENSG00000289176 |         | 18384   | 0.09 |                                        |    |           |           |                                                                  |
| 17853 | ENSG0000021931  |         | 18388.5 | 0.09 |                                        |    |           |           |                                                                  |
| 17867 | ENSG00000288601 |         | 18396.8 | 0.09 |                                        | 11 | 120328880 | 120330047 | Uncharacterized protein                                          |
| 17898 | ENSG00000238931 |         | 18418   | 0.09 |                                        | 1  | 86037232  | 86037335  | Small nuclear RNA U13                                            |
| 17918 | ENSG0000021513  |         | 18433.3 | 0.09 |                                        |    |           |           |                                                                  |
| 17930 | ENSG00000231576 |         | 18438.1 | 0.09 |                                        |    |           |           |                                                                  |
| 17932 | ENSG00000211990 |         | 18441.4 | 0.09 |                                        |    |           |           |                                                                  |
| 17968 | ENSG00000239267 |         | 18487.5 | 0.09 |                                        |    |           |           |                                                                  |
| 17981 | ENSG00000203511 |         | 18490.7 | 0.09 |                                        |    |           |           |                                                                  |
| 18022 | ENSG00000241782 |         | 18517.4 | 0.09 |                                        |    |           |           |                                                                  |
| 18027 | ENSG00000231638 |         | 18520.8 | 0.09 |                                        |    |           |           |                                                                  |
| 18059 | ENSG00000241042 |         | 18543   | 0.09 |                                        |    |           |           |                                                                  |
| 18135 | ENSG00000259390 |         | 18603   | 0.09 |                                        |    |           |           |                                                                  |
| 18182 | ENSG00000258249 |         | 18651   | 0.09 |                                        |    |           |           |                                                                  |
| 18194 | ENSG00000270344 |         | 18658   | 0.09 |                                        |    |           |           |                                                                  |
| 18208 | ENSG00000228190 |         | 18688.3 | 0.09 |                                        |    |           |           |                                                                  |
| 18213 | ENSG00000234431 |         | 18670.1 | 0.09 |                                        |    |           |           |                                                                  |
| 18218 | ENSG00000258115 |         | 18671.3 | 0.09 |                                        |    |           |           |                                                                  |
| 18238 | ENSG00000251852 |         | 18684.9 | 0.09 |                                        |    |           |           |                                                                  |
| 18238 | ENSG00000250991 |         | 18685.6 | 0.09 |                                        |    |           |           |                                                                  |
| 18251 | ENSG00000250991 |         | 18694.2 | 0.09 |                                        |    |           |           |                                                                  |
| 18305 | ENSG00000256604 |         | 18728.5 | 0.09 |                                        |    |           |           |                                                                  |
| 18314 | ENSG000002877   |         |         |      |                                        |    |           |           |                                                                  |

|       |                  |             |         |      |    |           |           |                                                                             |
|-------|------------------|-------------|---------|------|----|-----------|-----------|-----------------------------------------------------------------------------|
| 18838 | ENSG00000231780  |             | 19125.4 | 0.09 |    |           |           |                                                                             |
| 18844 | ENSG00000231488  |             | 19135.3 | 0.09 |    |           |           |                                                                             |
| 18861 | ENSG00000227824  |             | 19146.9 | 0.09 |    |           |           |                                                                             |
| 18876 | ENSG00000248719  |             | 19158.3 | 0.09 |    |           |           |                                                                             |
| 18877 | ENSG00000231720  |             | 19159.9 | 0.09 |    |           |           |                                                                             |
| 18886 | ENSG00000227388  |             | 19165.5 | 0.09 |    |           |           |                                                                             |
| 18892 | ENSG00000233741  |             | 19171.3 | 0.09 |    |           |           |                                                                             |
| 18896 | ENSG00000217746  |             | 19179.1 | 0.09 |    |           |           |                                                                             |
| 18907 | ENSG00000225268  |             | 19185.7 | 0.09 |    |           |           |                                                                             |
| 18919 | ENSG00000227852  |             | 19188.1 | 0.09 |    |           |           |                                                                             |
| 18925 | ENSG00000224947  |             | 19203.0 | 0.09 | 1  | 50965430  | 50965520  | Y RNA                                                                       |
| 18928 | ENSG00000237819  | LOC10096701 | 19210.1 | 0.09 | 12 | 131780087 | 131782783 | Protein-LOC10096701                                                         |
| 18929 | ENSG00000273148  |             | 19211.2 | 0.09 |    |           |           |                                                                             |
| 18932 | ENSG00000228818  |             | 19214.2 | 0.09 | 1  | 16237392  | 16237492  | Small nuclear RNA U13                                                       |
| 18961 | ENSG00000225489  |             | 19231.3 | 0.09 |    |           |           |                                                                             |
| 18969 | ENSG00000224235  |             | 19244.9 | 0.09 |    |           |           |                                                                             |
| 18972 | ENSG00000225408  |             | 19246.5 | 0.09 |    |           |           |                                                                             |
| 18973 | ENSG00000225763  |             | 19246.8 | 0.09 |    |           |           |                                                                             |
| 19003 | ENSG00000248954  |             | 19270.1 | 0.09 |    |           |           |                                                                             |
| 19030 | ENSG00000252465  |             | 19291.6 | 0.09 | 2  | 161253340 | 161253479 | RNA component of mitochondrial RNA processing endoribonuclease pseudogene 3 |
| 19049 | ENSG00000229273  |             | 19300.4 | 0.09 |    |           |           |                                                                             |
| 19066 | ENSG00000228337  |             | 19318.4 | 0.09 |    |           |           |                                                                             |
| 19112 | ENSG00000248439  |             | 19352.4 | 0.09 |    |           |           |                                                                             |
| 19121 | ENSG00000223853  |             | 19359.7 | 0.09 |    |           |           |                                                                             |
| 19130 | ENSG00000224676  |             | 19365.4 | 0.09 |    |           |           |                                                                             |
| 19164 | ENSG00000239701  |             | 19393.6 | 0.09 |    |           |           |                                                                             |
| 19180 | ENSG00000215598  |             | 19400.6 | 0.09 |    |           |           |                                                                             |
| 19203 | ENSG00000214871  |             | 19418.6 | 0.09 | 7  | 23210780  | 23214503  | Uncharacterized protein                                                     |
| 19216 | ENSG00000237025  |             | 19428.2 | 0.09 |    |           |           |                                                                             |
| 19224 | ENSG00000228620  |             | 19435.6 | 0.09 | 15 | 30935128  | 30935255  | l18 small nuclear RNA                                                       |
| 19226 | ENSG0000021262   |             | 19438.6 | 0.09 |    |           |           |                                                                             |
| 19246 | ENSG00000208165  |             | 19451.3 | 0.09 |    |           |           |                                                                             |
| 19268 | ENSG00000224201  |             | 19464.2 | 0.09 |    |           |           |                                                                             |
| 19289 | ENSG00000233410  |             | 19481.2 | 0.09 |    |           |           |                                                                             |
| 19291 | ENSG000002087183 |             | 19483.1 | 0.09 |    |           |           |                                                                             |
| 19292 | ENSG00000211599  |             | 19483.9 | 0.09 |    |           |           |                                                                             |
| 19306 | ENSG00000200396  |             | 19494.9 | 0.09 |    |           |           |                                                                             |
| 19311 | ENSG00000272305  |             | 19500.1 | 0.09 |    |           |           |                                                                             |
| 19324 | ENSG00000228169  |             | 19510.4 | 0.09 |    |           |           |                                                                             |
| 19339 | ENSG00000258450  |             | 19525.6 | 0.09 |    |           |           |                                                                             |
| 19346 | ENSG00000228433  |             | 19528.7 | 0.09 |    |           |           |                                                                             |
| 19357 | ENSG00000228688  |             | 19533.9 | 0.09 |    |           |           |                                                                             |
| 19387 | ENSG00000228742  |             | 19559.1 | 0.09 |    |           |           |                                                                             |
| 19391 | ENSG00000258113  |             | 19562.1 | 0.09 |    |           |           |                                                                             |
| 19398 | ENSG00000208768  |             | 19567.1 | 0.09 |    |           |           |                                                                             |
| 19424 | ENSG00000245725  |             | 19582.5 | 0.09 |    |           |           |                                                                             |
| 19428 | ENSG00000236095  |             | 19584   | 0.09 |    |           |           |                                                                             |
| 19432 | ENSG00000224769  |             | 19588.1 | 0.09 |    |           |           |                                                                             |
| 19461 | ENSG00000270060  |             | 19612.4 | 0.09 |    |           |           |                                                                             |
| 19473 | ENSG00000240364  |             | 19621   | 0.09 |    |           |           |                                                                             |
| 19474 | ENSG00000225043  |             | 19622.6 | 0.09 |    |           |           |                                                                             |
| 19478 | ENSG00000217622  |             | 19626.4 | 0.09 |    |           |           |                                                                             |
| 19500 | ENSG00000208460  |             | 19637.4 | 0.09 |    |           |           |                                                                             |
| 19519 | ENSG00000208911  |             | 19653.5 | 0.09 |    |           |           |                                                                             |
| 19553 | ENSG00000222941  |             | 19677.3 | 0.09 |    |           |           |                                                                             |
| 19554 | ENSG00000208765  |             | 19677.3 | 0.09 |    |           |           |                                                                             |
| 19563 | ENSG000002081007 |             | 19681.4 | 0.09 |    |           |           |                                                                             |
| 19604 | ENSG00000209012  |             | 19717   | 0.09 |    |           |           |                                                                             |
| 19632 | ENSG00000236140  |             | 19735.5 | 0.09 |    |           |           |                                                                             |
| 19643 | ENSG00000236512  |             | 19742.2 | 0.09 | 15 | 62206624  | 62206875  | RNA 7SL cytoplasmic 613, pseudogene                                         |
| 19646 | ENSG00000228168  |             | 19744.1 | 0.09 |    |           |           |                                                                             |
| 19650 | ENSG00000208393  |             | 19745.9 | 0.09 |    |           |           |                                                                             |
| 19673 | ENSG00000208057  |             | 19749   | 0.09 |    |           |           |                                                                             |
| 19676 | ENSG00000221290  |             | 19771.5 | 0.09 |    |           |           |                                                                             |
| 19680 | ENSG00000271970  |             | 19772.9 | 0.09 |    |           |           |                                                                             |
| 19683 | ENSG000002081318 |             | 19775.1 | 0.09 |    |           |           |                                                                             |
| 19684 | ENSG00000228663  |             | 19776.1 | 0.09 |    |           |           |                                                                             |
| 19690 | ENSG000002084128 |             | 19782.4 | 0.09 |    |           |           |                                                                             |
| 19723 | ENSG00000258418  |             | 19808.7 | 0.09 |    |           |           |                                                                             |
| 19728 | ENSG00000223488  |             | 19817.3 | 0.09 |    |           |           |                                                                             |
| 19730 | ENSG00000228053  |             | 19817.9 | 0.09 |    |           |           |                                                                             |
| 19734 | ENSG00000208482  |             | 19822.2 | 0.09 |    |           |           |                                                                             |
| 19768 | ENSG00000255131  |             | 19839.8 | 0.09 |    |           |           |                                                                             |
| 19769 | ENSG00000259767  |             | 19846.5 | 0.09 |    |           |           |                                                                             |
| 19770 | ENSG00000236824  |             | 19848.8 | 0.09 |    |           |           |                                                                             |
| 19774 | ENSG00000228758  |             | 19847.1 | 0.09 |    |           |           |                                                                             |
| 19778 | ENSG00000231867  |             | 19849.6 | 0.09 |    |           |           |                                                                             |
| 19783 | ENSG00000233045  |             | 19851.6 | 0.09 |    |           |           |                                                                             |
| 19811 | ENSG00000231298  |             | 19881.7 | 0.09 |    |           |           |                                                                             |
| 19813 | ENSG00000257341  |             | 19881.9 | 0.09 |    |           |           |                                                                             |
| 19814 | ENSG00000248921  |             | 19882.1 | 0.09 |    |           |           |                                                                             |
| 19821 | ENSG00000231683  |             | 19892.3 | 0.09 |    |           |           |                                                                             |
| 19825 | ENSG00000259493  |             | 19897.7 | 0.09 |    |           |           |                                                                             |
| 19833 | ENSG00000218793  |             | 19902.3 | 0.09 |    |           |           |                                                                             |
| 19846 | ENSG00000232077  |             | 19907.9 | 0.09 |    |           |           |                                                                             |
| 19851 | ENSG000002007168 |             | 19910.8 | 0.09 |    |           |           |                                                                             |
| 19858 | ENSG00000236310  |             | 19913.3 | 0.09 |    |           |           |                                                                             |
| 19874 | ENSG00000208621  |             | 19932.4 | 0.09 |    |           |           |                                                                             |
| 19881 | ENSG00000208091  |             | 19933.4 | 0.09 |    |           |           |                                                                             |
| 19910 | ENSG00000258640  |             | 19962   | 0.09 |    |           |           |                                                                             |
| 19911 | ENSG00000227695  |             | 19963.5 | 0.09 |    |           |           |                                                                             |
| 19912 | ENSG00000248441  |             | 19965.6 | 0.09 |    |           |           |                                                                             |
| 19917 | ENSG00000228888  |             | 19970.6 | 0.09 |    |           |           |                                                                             |
| 19919 | ENSG00000216374  |             | 19970.7 | 0.09 | 6  | 48325899  | 48326093  | eukaryotic translation elongation factor 1 alpha 1 pseudogene 42            |
| 19921 | ENSG00000228438  |             | 19971.1 | 0.09 |    |           |           |                                                                             |
| 19928 | ENSG000002083547 |             | 19977.6 | 0.09 |    |           |           |                                                                             |
| 19930 | ENSG00000228573  |             | 19977.8 | 0.09 |    |           |           |                                                                             |
| 19939 | ENSG000002045115 |             | 19984   | 0.09 |    |           |           |                                                                             |
| 19954 | ENSG00000235721  |             | 19993   | 0.09 |    |           |           |                                                                             |
| 19957 | ENSG00000217617  |             | 19994.9 | 0.09 |    |           |           |                                                                             |
| 19966 | ENSG00000205431  |             | 19995.9 | 0.09 |    |           |           |                                                                             |
| 19964 | ENSG00000216917  |             | 19998.4 | 0.09 |    |           |           |                                                                             |
| 19974 | ENSG00000205331  |             | 20008.6 | 0.09 |    |           |           |                                                                             |
| 19982 | ENSG00000228962  |             | 20013.7 | 0.09 |    |           |           |                                                                             |
| 20007 | ENSG00000228062  |             | 20032.8 | 0.09 |    |           |           |                                                                             |
| 20011 | ENSG00000228897  |             | 20035.6 | 0.09 |    |           |           |                                                                             |
| 20013 | ENSG00000201084  |             | 20038.5 | 0.09 |    |           |           |                                                                             |
| 20044 | ENSG00000228243  |             | 20056.5 | 0.09 |    |           |           |                                                                             |
| 20046 | ENSG00000237032  |             | 20058.6 | 0.09 |    |           |           |                                                                             |
| 20057 | ENSG00000231645  |             | 20063.9 | 0.09 |    |           |           |                                                                             |
| 20062 | ENSG000002084009 |             | 20070.6 | 0.09 |    |           |           |                                                                             |
| 20066 | ENSG00000242088  |             | 20068.7 | 0.09 |    |           |           |                                                                             |
| 20068 | ENSG00000233688  |             | 20068.9 | 0.09 |    |           |           |                                                                             |
| 20109 | ENSG00000251144  |             | 20106.5 | 0.09 |    |           |           |                                                                             |
| 20114 | ENSG00000229777  |             | 20108.5 | 0.09 |    |           |           |                                                                             |
| 20121 | ENSG00000228633  |             | 20112.5 | 0.09 |    |           |           |                                                                             |
| 20119 | ENSG00000244281  |             | 20113   | 0.09 |    |           |           |                                                                             |
| 20120 | ENSG00000224174  |             | 20113.3 | 0.09 |    |           |           |                                                                             |
| 20128 | ENSG000002284893 |             | 20117.1 | 0.09 |    |           |           |                                                                             |
| 20129 | ENSG000002083802 |             | 20120.9 | 0.09 |    |           |           |                                                                             |
| 20144 | ENSG000002084413 |             | 20131.5 | 0.09 |    |           |           |                                                                             |
| 20148 | ENSG00000208737  |             | 20133.8 | 0.09 |    |           |           |                                                                             |
| 20149 | ENSG00000259446  |             | 20134.5 | 0.09 |    |           |           |                                                                             |
| 20152 | ENSG00000236021  |             | 20135.6 | 0.09 |    |           |           |                                                                             |
| 20160 | ENSG00000216076  |             | 20144.2 | 0.09 |    |           |           |                                                                             |
| 20165 | ENSG00000208423  |             | 20150.8 | 0.09 |    |           |           |                                                                             |
| 20170 | ENSG00000237920  |             | 20153.2 | 0.09 |    |           |           |                                                                             |
| 20171 | ENSG0000023172   |             | 20153.6 | 0.09 |    |           |           |                                                                             |
| 20184 | ENSG00000208942  |             | 20178.1 | 0.09 |    |           |           |                                                                             |
| 20204 | ENSG000002081568 |             | 20185.9 | 0.09 |    |           |           |                                                                             |
| 20205 | ENSG00000208695  |             | 20186.5 | 0.09 |    |           |           |                                                                             |
| 20222 | ENSG00000258495  |             | 20202   | 0.09 | 20 | 48338486  | 48338782  | RNA 7SL cytoplasmic 197, pseudogene                                         |
| 20225 | ENSG00000208683  |             | 20210.1 | 0.09 |    |           |           |                                                                             |
| 20237 | ENSG00000226113  |             | 20212.6 | 0.09 |    |           |           |                                                                             |
| 20244 | ENSG00000231168  |             | 20223.8 | 0.09 |    |           |           |                                                                             |
| 20253 | ENSG00000257811  |             | 20229.3 | 0.09 |    |           |           |                                                                             |
| 20257 | ENSG000002087000 |             | 20233.1 | 0.09 |    |           |           |                                                                             |
| 20261 | ENSG00000258448  |             | 20235.5 | 0.09 |    |           |           |                                                                             |
| 20280 | ENSG00000259299  |             | 20256.7 | 0.09 |    |           |           |                                                                             |
| 20283 | ENSG00000233928  |             | 20258.7 | 0.09 |    |           |           |                                                                             |
| 20297 | ENSG00000233624  |             | 20265.5 | 0.09 |    |           |           |                                                                             |
| 20307 | ENSG00000227863  |             | 20270.6 | 0.09 |    |           |           |                                                                             |
| 20310 | ENSG00000259710  |             | 20272.3 | 0.09 |    |           |           |                                                                             |
| 20311 | ENSG00000208316  |             | 20272.5 | 0.09 |    |           |           |                                                                             |
| 20314 | ENSG00000208632  |             | 20273.7 | 0.09 | 15 | 42073346  | 42076229  | Uncharacterized protein                                                     |
| 20315 | ENSG00000226005  |             | 20274.3 | 0.09 |    |           |           |                                                                             |
| 20317 | ENSG00000208261  |             | 20277.6 | 0.09 |    |           |           |                                                                             |
| 20323 | ENSG00000232090  |             | 20280.7 | 0.09 |    |           |           |                                                                             |
| 20325 | ENSG000002086345 |             | 20281.4 | 0.09 | 22 | 36711989  | 36712246  | RNA 7SL cytoplasmic 349, pseudogene                                         |
| 20333 | ENSG00000244657  |             | 20287.1 | 0.09 |    |           |           |                                                                             |
| 20336 | ENSG000002087466 |             | 20289.5 | 0.09 |    |           |           |                                                                             |

|       |                  |    |           |           |  |  |  |                                           |  |
|-------|------------------|----|-----------|-----------|--|--|--|-------------------------------------------|--|
| 20340 | ENSG00000239044  |    | 20294     | 0.09      |  |  |  |                                           |  |
| 20343 | ENSG00000211193  |    | 20397     | 0.09      |  |  |  |                                           |  |
| 20349 | ENSG00000204460  |    | 20303     | 0.09      |  |  |  |                                           |  |
| 20350 | ENSG000002089110 |    | 20303     | 0.09      |  |  |  |                                           |  |
| 20352 | ENSG000002097028 |    | 20304     | 0.09      |  |  |  |                                           |  |
| 20364 | ENSG000002011231 |    | 20317     | 0.09      |  |  |  |                                           |  |
| 20365 | ENSG000002081863 |    | 20317     | 0.09      |  |  |  |                                           |  |
| 20367 | ENSG000002040418 |    | 20319     | 0.09      |  |  |  |                                           |  |
| 20372 | ENSG000002029962 |    | 20326     | 0.09      |  |  |  |                                           |  |
| 20379 | ENSG000002060303 |    | 20334     | 0.09      |  |  |  |                                           |  |
| 20381 | ENSG000002025956 |    | 20339     | 0.09      |  |  |  |                                           |  |
| 20405 | ENSG000002030404 |    | 20349     | 0.09      |  |  |  |                                           |  |
| 20409 | ENSG000002037903 |    | 20354     | 0.09      |  |  |  |                                           |  |
| 20412 | ENSG000002022811 |    | 20359     | 0.09      |  |  |  |                                           |  |
| 20418 | ENSG000002021728 |    | 20359     | 0.09      |  |  |  |                                           |  |
| 20425 | ENSG000002066835 |    | 20361     | 0.09      |  |  |  |                                           |  |
| 20427 | ENSG000002044625 |    | 20361     | 0.09      |  |  |  |                                           |  |
| 20428 | ENSG000002027271 |    | 20361     | 0.09      |  |  |  |                                           |  |
| 20444 | ENSG000002072371 |    | 20375     | 0.09      |  |  |  |                                           |  |
| 20459 | ENSG00000204394  |    | 20390     | 0.09      |  |  |  |                                           |  |
| 20466 | ENSG000002020598 |    | 20396     | 0.09      |  |  |  |                                           |  |
| 20467 | ENSG000002058861 |    | 20400     | 0.09      |  |  |  |                                           |  |
| 20470 | ENSG000002020853 |    | 20404     | 0.09      |  |  |  |                                           |  |
| 20491 | ENSG000002022222 |    | 20417     | 0.09      |  |  |  |                                           |  |
| 20493 | ENSG000002072728 |    | 20422     | 0.09      |  |  |  |                                           |  |
| 20494 | ENSG000002050969 |    | 20422     | 0.09      |  |  |  |                                           |  |
| 20504 | ENSG000002029693 |    | 20426     | 0.09      |  |  |  |                                           |  |
| 20507 | ENSG000002023232 |    | 20427     | 0.09      |  |  |  |                                           |  |
| 20508 | ENSG000002026230 |    | 20428     | 0.09      |  |  |  |                                           |  |
| 20528 | ENSG000002041138 |    | 20445     | 0.09      |  |  |  |                                           |  |
| 20533 | ENSG000002036303 |    | 20450     | 0.09      |  |  |  |                                           |  |
| 20544 | ENSG000002083786 |    | 20457     | 0.09      |  |  |  |                                           |  |
| 20547 | ENSG000002029320 |    | 20459     | 0.09      |  |  |  |                                           |  |
| 20566 | ENSG000002072808 |    | 20479     | 0.09      |  |  |  |                                           |  |
| 20568 | ENSG000002022621 |    | 20479     | 0.09      |  |  |  |                                           |  |
| 20569 | ENSG000002023551 |    | 20485     | 0.09      |  |  |  |                                           |  |
| 20581 | ENSG000002020734 |    | 20489     | 0.09      |  |  |  |                                           |  |
| 20585 | ENSG000002068839 |    | 20491     | 0.09      |  |  |  |                                           |  |
| 20593 | ENSG000002029977 |    | 20494     | 0.09      |  |  |  |                                           |  |
| 20601 | ENSG000002081478 |    | 20499     | 0.09      |  |  |  |                                           |  |
| 20604 | ENSG000002072243 |    | 20500     | 0.09      |  |  |  |                                           |  |
| 20608 | ENSG000002024474 |    | 20501     | 0.09      |  |  |  |                                           |  |
| 20608 | ENSG000002071955 | 10 | 99179228  | 99185831  |  |  |  | LOC64215 protein, Uncharacterized protein |  |
| 20616 | ENSG000002033937 |    | 20506     | 0.09      |  |  |  |                                           |  |
| 20617 | ENSG000002024190 |    | 20510     | 0.09      |  |  |  |                                           |  |
| 20627 | ENSG000002028321 |    | 20520     | 0.09      |  |  |  |                                           |  |
| 20644 | ENSG000002024910 |    | 20527     | 0.09      |  |  |  |                                           |  |
| 20652 | ENSG000002025529 |    | 20537     | 0.09      |  |  |  |                                           |  |
| 20656 | ENSG000002045488 |    | 20542     | 0.09      |  |  |  |                                           |  |
| 20663 | ENSG000002047311 |    | 20544     | 0.09      |  |  |  |                                           |  |
| 20670 | ENSG000002029430 |    | 20548     | 0.09      |  |  |  |                                           |  |
| 20674 | ENSG000002049095 |    | 20555     | 0.09      |  |  |  |                                           |  |
| 20680 | ENSG000002026816 |    | 20556     | 0.09      |  |  |  |                                           |  |
| 20684 | ENSG000002073290 |    | 20559     | 0.09      |  |  |  |                                           |  |
| 20685 | ENSG000002020337 | 13 | 95351479  | 95351756  |  |  |  | RNA, 7SL, cytoplasmic 585, pseudogene     |  |
| 20688 | ENSG000002057443 |    | 20561     | 0.09      |  |  |  |                                           |  |
| 20687 | ENSG000002083906 |    | 20562     | 0.09      |  |  |  |                                           |  |
| 20684 | ENSG000002029261 |    | 20566     | 0.09      |  |  |  |                                           |  |
| 20686 | ENSG000002028537 |    | 20568     | 0.09      |  |  |  |                                           |  |
| 20700 | ENSG000002024370 | 15 | 72904161  | 72904401  |  |  |  | RNA, 7SL, cytoplasmic 485, pseudogene     |  |
| 20701 | ENSG000002025628 |    | 20571     | 0.09      |  |  |  |                                           |  |
| 20702 | ENSG000002083880 | 14 | 76821072  | 76821382  |  |  |  | RNA, 7SL, cytoplasmic 747, pseudogene     |  |
| 20712 | ENSG000002037107 |    | 20576     | 0.09      |  |  |  |                                           |  |
| 20728 | ENSG000002020328 |    | 20587     | 0.09      |  |  |  |                                           |  |
| 20731 | ENSG000002028660 |    | 20593     | 0.09      |  |  |  |                                           |  |
| 20732 | ENSG000002071219 |    | 20593     | 0.09      |  |  |  |                                           |  |
| 20733 | ENSG000002024698 |    | 20594     | 0.09      |  |  |  |                                           |  |
| 20738 | ENSG000002068328 |    | 20599     | 0.09      |  |  |  |                                           |  |
| 20744 | ENSG000002051257 | 2  | 70129482  | 70129841  |  |  |  | Uncharacterized protein                   |  |
| 20748 | ENSG000002029922 |    | 20612     | 0.09      |  |  |  |                                           |  |
| 20751 | ENSG000002049923 |    | 20616     | 0.09      |  |  |  |                                           |  |
| 20758 | ENSG000002024630 |    | 20619     | 0.09      |  |  |  |                                           |  |
| 20768 | ENSG000002021405 |    | 20623     | 0.09      |  |  |  |                                           |  |
| 20774 | ENSG000002024165 |    | 20626     | 0.09      |  |  |  |                                           |  |
| 20780 | ENSG000002087373 |    | 20633     | 0.09      |  |  |  |                                           |  |
| 20789 | ENSG000002020508 |    | 20636     | 0.09      |  |  |  |                                           |  |
| 20791 | ENSG000002027540 |    | 20640     | 0.09      |  |  |  |                                           |  |
| 20801 | ENSG000002025434 |    | 20649     | 0.09      |  |  |  |                                           |  |
| 20804 | ENSG000002025587 |    | 20652     | 0.09      |  |  |  |                                           |  |
| 20815 | ENSG000002026914 |    | 20660     | 0.09      |  |  |  |                                           |  |
| 20819 | ENSG000002028845 |    | 20666     | 0.09      |  |  |  |                                           |  |
| 20820 | ENSG000002028912 |    | 20669     | 0.09      |  |  |  |                                           |  |
| 20825 | ENSG000002053591 |    | 20669     | 0.09      |  |  |  |                                           |  |
| 20831 | ENSG000002015263 |    | 20675     | 0.09      |  |  |  |                                           |  |
| 20838 | ENSG000002029691 |    | 20678     | 0.09      |  |  |  |                                           |  |
| 20860 | ENSG000002019704 |    | 20690     | 0.09      |  |  |  |                                           |  |
| 20866 | ENSG000002025112 | 10 | 72194585  | 72196314  |  |  |  | Uncharacterized protein                   |  |
| 20873 | ENSG000002024494 |    | 20697     | 0.09      |  |  |  |                                           |  |
| 20882 | ENSG000002020206 |    | 20707     | 0.09      |  |  |  |                                           |  |
| 20889 | ENSG000002087061 |    | 20711     | 0.09      |  |  |  |                                           |  |
| 20891 | ENSG000002046591 |    | 20715     | 0.09      |  |  |  |                                           |  |
| 20896 | ENSG000002020626 |    | 20718     | 0.09      |  |  |  |                                           |  |
| 20905 | ENSG000002037783 |    | 20725     | 0.09      |  |  |  |                                           |  |
| 20910 | ENSG000002020226 |    | 20730     | 0.09      |  |  |  |                                           |  |
| 20917 | ENSG000002022622 |    | 20738     | 0.09      |  |  |  |                                           |  |
| 20933 | ENSG000002070225 |    | 20747     | 0.09      |  |  |  |                                           |  |
| 20935 | ENSG000002025209 |    | 20748     | 0.09      |  |  |  |                                           |  |
| 20949 | ENSG000002028113 |    | 20756     | 0.09      |  |  |  |                                           |  |
| 20952 | ENSG000002056913 |    | 20757     | 0.09      |  |  |  |                                           |  |
| 20954 | ENSG000002051273 |    | 20758     | 0.09      |  |  |  |                                           |  |
| 20964 | ENSG000002020342 |    | 20760     | 0.09      |  |  |  |                                           |  |
| 20961 | ENSG000002055542 |    | 20764     | 0.09      |  |  |  |                                           |  |
| 20972 | ENSG000002099998 |    | 20771     | 0.09      |  |  |  |                                           |  |
| 20973 | ENSG000002067075 |    | 20772     | 0.09      |  |  |  |                                           |  |
| 20974 | ENSG000002072411 |    | 20772     | 0.09      |  |  |  |                                           |  |
| 20981 | ENSG000002023218 |    | 20780     | 0.09      |  |  |  |                                           |  |
| 20990 | ENSG000002024138 |    | 20788     | 0.09      |  |  |  |                                           |  |
| 20995 | ENSG000002058645 |    | 20794     | 0.09      |  |  |  |                                           |  |
| 21006 | ENSG000002082061 |    | 20799     | 0.09      |  |  |  |                                           |  |
| 21013 | ENSG000002020241 |    | 20802     | 0.09      |  |  |  |                                           |  |
| 21017 | ENSG000002028168 |    | 20804     | 0.09      |  |  |  |                                           |  |
| 21029 | ENSG000002082158 |    | 20814     | 0.09      |  |  |  |                                           |  |
| 21032 | ENSG000002021862 |    | 20815     | 0.09      |  |  |  |                                           |  |
| 21042 | ENSG000002020287 |    | 20821     | 0.09      |  |  |  |                                           |  |
| 21045 | ENSG000002024691 |    | 20822     | 0.09      |  |  |  |                                           |  |
| 21049 | ENSG000002021253 |    | 20825     | 0.09      |  |  |  |                                           |  |
| 21050 | ENSG000002059681 |    | 20826     | 0.09      |  |  |  |                                           |  |
| 21054 | ENSG000002035096 |    | 20829     | 0.09      |  |  |  |                                           |  |
| 21072 | ENSG000002051079 |    | 20845     | 0.09      |  |  |  |                                           |  |
| 21089 | ENSG000002059474 |    | 20859     | 0.09      |  |  |  |                                           |  |
| 21099 | ENSG000002023874 |    | 20866     | 0.09      |  |  |  |                                           |  |
| 21103 | ENSG000002041719 |    | 20868     | 0.09      |  |  |  |                                           |  |
| 21110 | ENSG000002011987 |    | 20874     | 0.09      |  |  |  |                                           |  |
| 21123 | ENSG000002057061 |    | 20886     | 0.09      |  |  |  |                                           |  |
| 21128 | ENSG000002043537 |    | 20887     | 0.09      |  |  |  |                                           |  |
| 21131 | ENSG000002089923 |    | 20893     | 0.09      |  |  |  |                                           |  |
| 21132 | ENSG000002077236 |    | 20894     | 0.09      |  |  |  |                                           |  |
| 21134 | ENSG000002086286 |    | 20896     | 0.09      |  |  |  |                                           |  |
| 21142 | ENSG000002086266 |    | 20904     | 0.09      |  |  |  |                                           |  |
| 21145 | ENSG000002054847 |    | 20905     | 0.09      |  |  |  |                                           |  |
| 21150 | ENSG000002029407 |    | 20911     | 0.09      |  |  |  |                                           |  |
| 21154 | ENSG000002018451 |    | 20915     | 0.09      |  |  |  |                                           |  |
| 21176 | ENSG000002037978 |    | 20935     | 0.09      |  |  |  |                                           |  |
| 21178 | ENSG000002024448 |    | 20937     | 0.09      |  |  |  |                                           |  |
| 21181 | ENSG000002026278 |    | 20938     | 0.09      |  |  |  |                                           |  |
| 21184 | ENSG000002025367 |    | 20942     | 0.09      |  |  |  |                                           |  |
| 21186 | ENSG000002031291 |    | 20942     | 0.09      |  |  |  |                                           |  |
| 21188 | ENSG000002023264 |    | 20948     | 0.09      |  |  |  |                                           |  |
| 21201 | ENSG000002058753 |    | 20950     | 0.09      |  |  |  |                                           |  |
| 21202 | ENSG000002029230 |    | 20950     | 0.09      |  |  |  |                                           |  |
| 21205 | ENSG000002011842 |    | 20951     | 0.09      |  |  |  |                                           |  |
| 21207 | ENSG000002068689 | 5  | 176787675 | 176787919 |  |  |  | RNA, 7SL, cytoplasmic 862, pseudogene     |  |
| 21216 | ENSG000002080008 |    | 20968     | 0.09      |  |  |  |                                           |  |
| 21220 | ENSG000002020245 |    | 20970     | 0.09      |  |  |  |                                           |  |
| 21222 | ENSG000002049908 |    | 20973     | 0.09      |  |  |  |                                           |  |
| 21221 | ENSG000002053952 |    | 20975     | 0.09      |  |  |  |                                           |  |
| 21232 | ENSG000002060670 | 3  | 185699825 | 185700083 |  |  |  | RNA, 7SL, cytoplasmic 637, pseudogene     |  |
| 21236 | ENSG000002072084 |    | 20982     | 0.09      |  |  |  |                                           |  |
| 21242 | ENSG000002040553 |    | 20986     | 0.09      |  |  |  |                                           |  |
| 21243 | ENSG000002025193 |    | 20986     | 0.09      |  |  |  |                                           |  |
| 21244 | ENSG000002025350 |    | 20988     | 0.09      |  |  |  |                                           |  |



|       |                   |               |         |      |           |           |            |           |                                                                           |
|-------|-------------------|---------------|---------|------|-----------|-----------|------------|-----------|---------------------------------------------------------------------------|
| 21249 | ENS0000020251478  |               | 20993.2 | 0.09 |           |           |            |           |                                                                           |
| 21254 | ENS000002021198   |               | 20999.1 | 0.09 |           |           |            |           |                                                                           |
| 21279 | ENS0000020256159  |               | 21018.4 | 0.09 | 9         | 46385691  | 46387031   |           | family with sequence similarity 27, member E1                             |
| 21289 | ENS0000020220443  |               | 21026.9 | 0.09 |           |           |            |           |                                                                           |
| 21291 | ENS000002024163   |               | 21027.6 | 0.09 |           |           |            |           |                                                                           |
| 21295 | ENS000002021756   |               | 21030.9 | 0.09 |           |           |            |           |                                                                           |
| 21299 | ENS0000020224184  |               | 21032.9 | 0.09 |           |           |            |           |                                                                           |
| 21306 | ENS000002022901   |               | 21037.9 | 0.09 |           |           |            |           |                                                                           |
| 21309 | ENS000002024925   |               | 21054.8 | 0.09 |           |           |            |           |                                                                           |
| 21342 | ENS0000020256557  |               | 21063.4 | 0.09 |           |           |            |           |                                                                           |
| 21344 | ENS0000020256876  |               | 21065.9 | 0.09 |           |           |            |           |                                                                           |
| 21354 | ENS0000020256484  |               | 21073.3 | 0.09 |           |           |            |           |                                                                           |
| 21358 | ENS0000020230884  |               | 21075.5 | 0.09 |           |           |            |           |                                                                           |
| 21360 | ENS00000196987    | LOC100996465  | 21078.1 | 0.09 | X         | 153148127 | 153154444  |           | Putative lung carcinoma-associated protein 10                             |
| 21366 | ENS000002022905   |               | 21084.4 | 0.09 |           |           |            |           |                                                                           |
| 21367 | ENS000002022905   |               | 21084.1 | 0.09 |           |           |            |           |                                                                           |
| 21372 | ENS000002026186   |               | 21089.8 | 0.09 |           |           |            |           |                                                                           |
| 21381 | ENS000002022768   |               | 21098.7 | 0.09 |           |           |            |           |                                                                           |
| 21386 | ENS0000020251538  |               | 21110.6 | 0.09 |           |           |            |           |                                                                           |
| 21397 | ENS0000020258592  |               | 21111.7 | 0.09 |           |           |            |           |                                                                           |
| 21401 | ENS0000020220293  |               | 21114.4 | 0.09 |           |           |            |           |                                                                           |
| 21408 | ENS0000020254632  |               | 21123.4 | 0.09 |           |           |            |           |                                                                           |
| 21412 | ENS0000020272479  |               | 21125.8 | 0.09 |           |           |            |           |                                                                           |
| 21422 | ENS000002021045   |               | 21132.8 | 0.09 |           |           |            |           |                                                                           |
| 21443 | ENS0000020225123  |               | 21152   | 0.09 |           |           |            |           |                                                                           |
| 21449 | ENS0000020268844  |               | 21156.7 | 0.09 |           |           |            |           |                                                                           |
| 21457 | ENS0000020228492  |               | 21165.1 | 0.09 |           |           |            |           |                                                                           |
| 21461 | ENS0000020285516  |               | 21167.7 | 0.09 |           |           |            |           |                                                                           |
| 21475 | ENS0000020281839  |               | 21175.4 | 0.09 |           |           |            |           |                                                                           |
| 21502 | ENS0000020258662  |               | 21185.6 | 0.09 |           |           |            |           |                                                                           |
| 21505 | ENS0000020229109  |               | 21196.5 | 0.09 |           |           |            |           |                                                                           |
| 21511 | ENS000002024865   |               | 21201.2 | 0.09 |           |           |            |           |                                                                           |
| 21512 | ENS000002021212   |               | 21201.3 | 0.09 | 17        | 36387075  | 36387176   |           | Y RNA                                                                     |
| 21520 | ENS0000020258179  |               | 21209.2 | 0.09 |           |           |            |           |                                                                           |
| 21526 | ENS0000020259615  |               | 21211.5 | 0.09 |           |           |            |           |                                                                           |
| 21528 | ENS0000020227627  |               | 21211.7 | 0.09 |           |           |            |           |                                                                           |
| 21534 | ENS0000020277115  |               | 21216   | 0.09 |           |           |            |           |                                                                           |
| 21541 | ENS0000020238526  |               | 21222.1 | 0.09 | 1         | 150234093 | 150234196  |           | Small nuclear RNA U13                                                     |
| 21542 | ENS0000020226929  |               | 21223.4 | 0.09 |           |           |            |           |                                                                           |
| 21545 | ENS0000020251574  |               | 21224.5 | 0.09 |           |           |            |           |                                                                           |
| 21549 | ENS0000020224609  |               | 21226.9 | 0.09 |           |           |            |           |                                                                           |
| 21553 | ENS0000020229298  |               | 21232.3 | 0.09 |           |           |            |           |                                                                           |
| 21556 | ENS000002021412   |               | 21236   | 0.09 |           |           |            |           |                                                                           |
| 21568 | ENS0000020228115  |               | 21245.8 | 0.09 |           |           |            |           |                                                                           |
| 21574 | ENS0000020246661  |               | 21252.3 | 0.09 |           |           |            |           |                                                                           |
| 21587 | ENS0000020229681  |               | 21256.8 | 0.09 |           |           |            |           |                                                                           |
| 21627 | ENS000002021709   |               | 21290.8 | 0.09 |           |           |            |           |                                                                           |
| 21629 | ENS0000020248978  |               | 21292.7 | 0.09 |           |           |            |           |                                                                           |
| 21636 | ENS0000020234264  |               | 21298.6 | 0.09 |           |           |            |           |                                                                           |
| 21638 | ENS0000020236580  |               | 21299.8 | 0.09 |           |           |            |           |                                                                           |
| 21642 | ENS0000020269941  |               | 21304   | 0.09 |           |           |            |           |                                                                           |
| 21649 | ENS0000020251164  |               | 21310.4 | 0.09 |           |           |            |           |                                                                           |
| 21657 | ENS0000020269686  |               | 21317.6 | 0.09 | 2         | 133874577 | 133876625  |           | HCG2006742; Protein LOC100996885                                          |
| 21660 | ENS000002027845   |               | 21319   | 0.09 |           |           |            |           |                                                                           |
| 21661 | ENS0000020269695  |               | 21321.4 | 0.09 |           |           |            |           |                                                                           |
| 21668 | ENS0000020243813  |               | 21330.7 | 0.09 |           |           |            |           |                                                                           |
| 21678 | ENS0000020253984  |               | 21334.6 | 0.09 |           |           |            |           |                                                                           |
| 21682 | ENS0000020211985  |               | 21338.6 | 0.09 |           |           |            |           |                                                                           |
| 21687 | ENS000002027070   |               | 21343.3 | 0.09 |           |           |            |           |                                                                           |
| 21711 | ENS0000020228192  |               | 21363.1 | 0.09 |           |           |            |           |                                                                           |
| 21721 | ENS0000020258192  |               | 21371.3 | 0.09 |           |           |            |           |                                                                           |
| 21728 | ENS0000020272444  |               | 21379.8 | 0.09 |           |           |            |           |                                                                           |
| 21731 | ENS0000020259049  |               | 21381.6 | 0.09 |           |           |            |           |                                                                           |
| 21736 | ENS0000020221291  |               | 21384.5 | 0.09 |           |           |            |           |                                                                           |
| 21737 | ENS0000020256108  |               | 21384.7 | 0.09 |           |           |            |           |                                                                           |
| 21746 | ENS0000020241761  |               | 21395.3 | 0.09 | 7         | 66445107  | 66445395   |           | RNA, 7SL, cytoplasmic 43, pseudogene                                      |
| 21766 | ENS0000020210269  |               | 21399.6 | 0.09 |           |           |            |           |                                                                           |
| 21764 | ENS000002023109   |               | 21402   | 0.09 |           |           |            |           |                                                                           |
| 21766 | ENS0000020237752  |               | 21405.8 | 0.09 |           |           |            |           |                                                                           |
| 21767 | ENS000002021632   |               | 21406.3 | 0.09 |           |           |            |           |                                                                           |
| 21769 | ENS0000020251138  |               | 21407.7 | 0.09 |           |           |            |           |                                                                           |
| 21787 | ENS0000020269892  |               | 21416.6 | 0.09 |           |           |            |           |                                                                           |
| 21792 | ENS000002021214   |               | 21421.1 | 0.09 |           |           |            |           |                                                                           |
| 21794 | ENS0000020225905  |               | 21421.4 | 0.09 |           |           |            |           |                                                                           |
| 21806 | ENS0000020239851  |               | 21433.2 | 0.09 |           |           |            |           |                                                                           |
| 21811 | ENS0000020210268  |               | 21433.5 | 0.09 |           |           |            |           |                                                                           |
| 21816 | ENS0000020261771  |               | 21438.8 | 0.09 |           |           |            |           |                                                                           |
| 21830 | ENS0000020228293  |               | 21451.2 | 0.09 |           |           |            |           |                                                                           |
| 21847 | ENS0000020226577  |               | 21461.8 | 0.09 | 2         | 85759467  | 85759749   |           | RNA, 7SL, cytoplasmic 830, pseudogene                                     |
| 21851 | ENS0000020255991  |               | 21463.2 | 0.09 |           |           |            |           |                                                                           |
| 21887 | ENS0000020218346  |               | 21497.1 | 0.09 | 6         | 26630782  | 26632007   |           | vomerin5L1 receptor 14 pseudogene                                         |
| 21893 | ENS0000020252077  |               | 21501.1 | 0.09 |           |           |            |           |                                                                           |
| 21898 | ENS0000020249440  |               | 21502.5 | 0.09 |           |           |            |           |                                                                           |
| 21913 | ENS0000020272070  |               | 21512.9 | 0.09 |           |           |            |           |                                                                           |
| 21916 | ENS000002021868   |               | 21514   | 0.09 |           |           |            |           |                                                                           |
| 21918 | ENS000002021195   |               | 21516.7 | 0.09 |           |           |            |           |                                                                           |
| 21939 | ENS0000020215504  |               | 21530.2 | 0.09 | 11        | 85543600  | 85565986   |           | CDNA FLJ26432 fs, clone KDN01418. Uncharacterized protein                 |
| 21951 | ENS0000020246034  |               | 21542   | 0.09 | 5         | 140240341 | 140243224  |           | Uncharacterized protein; cDNA FLJ34090 fs, clone FC6BF3006399             |
| 21957 | ENS0000020254971  |               | 21546.6 | 0.09 |           |           |            |           |                                                                           |
| 21967 | ENS0000020219755  |               | 21552.4 | 0.09 |           |           |            |           |                                                                           |
| 21988 | ENS0000020269207  |               | 21562.6 | 0.09 |           |           |            |           |                                                                           |
| 21988 | ENS0000020231168  |               | 21563.3 | 0.09 |           |           |            |           |                                                                           |
| 21992 | ENS0000020272945  |               | 21567.2 | 0.09 |           |           |            |           |                                                                           |
| 21993 | ENS0000020260729  |               | 21567.8 | 0.09 |           |           |            |           |                                                                           |
| 21996 | ENS0000020249696  |               | 21569.6 | 0.09 |           |           |            |           |                                                                           |
| 22029 | ENS0000020260790  |               | 21603.3 | 0.09 |           |           |            |           |                                                                           |
| 22065 | ENS0000020236602  |               | 21632   | 0.09 |           |           |            |           |                                                                           |
| 22068 | ENS0000020226916  |               | 21633.5 | 0.09 |           |           |            |           |                                                                           |
| 22080 | ENS0000020236431  |               | 21643.9 | 0.09 |           |           |            |           |                                                                           |
| 22110 | ENS0000020253961  |               | 21662.6 | 0.09 |           |           |            |           |                                                                           |
| 22121 | ENS0000020237693  |               | 21664.8 | 0.09 |           |           |            |           |                                                                           |
| 22123 | ENS0000020231839  |               | 21669.7 | 0.09 |           |           |            |           |                                                                           |
| 22143 | ENS0000020244885  |               | 21684.1 | 0.09 |           |           |            |           |                                                                           |
| 22146 | ENS000002023198   |               | 21687.7 | 0.09 |           |           |            |           |                                                                           |
| 22147 | ENS0000020253299  |               | 21689.5 | 0.09 |           |           |            |           |                                                                           |
| 22162 | ENS0000020216475  |               | 21712.9 | 0.09 |           |           |            |           |                                                                           |
| 22202 | ENS0000020230779  |               | 21730.6 | 0.09 |           |           |            |           |                                                                           |
| 22210 | ENS0000020244410  |               | 21736.3 | 0.09 |           |           |            |           |                                                                           |
| 22222 | ENS0000020270304  |               | 21744.5 | 0.09 |           |           |            |           |                                                                           |
| 22224 | ENS0000020221842  |               | 21746.3 | 0.09 |           |           |            |           |                                                                           |
| 22228 | ENS0000020248777  |               | 21747.5 | 0.09 |           |           |            |           |                                                                           |
| 22230 | ENS000002021181   |               | 21751.2 | 0.09 |           |           |            |           |                                                                           |
| 22271 | ENS0000020227068  |               | 21765.7 | 0.09 |           |           |            |           |                                                                           |
| 22338 | ENS0000020272983  |               | 21825.2 | 0.09 |           |           |            |           |                                                                           |
| 22350 | ENS0000020262185  |               | 21834.7 | 0.09 |           |           |            |           |                                                                           |
| 22371 | ENS000002021178   |               | 21854.3 | 0.09 |           |           |            |           |                                                                           |
| 22381 | ENS000002027298   |               | 21858.9 | 0.09 |           |           |            |           |                                                                           |
| 22392 | ENS000002024862   |               | 21865.3 | 0.09 |           |           |            |           |                                                                           |
| 22398 | ENS0000020226337  |               | 21867.8 | 0.09 |           |           |            |           |                                                                           |
| 22399 | ENS0000020249655  |               | 21873.1 | 0.09 |           |           |            |           |                                                                           |
| 22410 | ENS000002027082   |               | 21879   | 0.09 |           |           |            |           |                                                                           |
| 22498 | ENS000002023265   |               | 21941.3 | 0.09 |           |           |            |           |                                                                           |
| 22504 | ENS000002023393   |               | 21942.9 | 0.09 |           |           |            |           |                                                                           |
| 22509 | ENS0000020243568  |               | 21947.9 | 0.09 |           |           |            |           |                                                                           |
| 22510 | ENS000002023296   |               | 21949.2 | 0.09 |           |           |            |           |                                                                           |
| 22513 | ENS0000020229385  |               | 21950.3 | 0.09 |           |           |            |           |                                                                           |
| 22519 | ENS0000020213703  |               | 21956.5 | 0.09 |           |           |            |           |                                                                           |
| 22580 | ENS0000020290790  |               | 22010.3 | 0.09 |           |           |            |           |                                                                           |
| 22584 | ENS0000020232906  |               | 22011.6 | 0.09 |           |           |            |           |                                                                           |
| 22593 | ENS0000020264949  |               | 22021.9 | 0.09 | 9         | 507258    | 507553     |           | RNA, 7SL, cytoplasmic 412, pseudogene                                     |
| 22619 | ENS0000020262772  |               | 22041.6 | 0.09 |           |           |            |           |                                                                           |
| 22648 | ENS0000020260493  |               | 22066   | 0.09 |           |           |            |           |                                                                           |
| 22818 | ENS0000020258471  |               | 22201.8 | 0.09 |           |           |            |           |                                                                           |
| 22877 | ENS00000202187765 |               | 22247.4 | 0.09 | 19        | 52095036  | 52097630   |           | HCG2008157; Uncharacterized protein; cDNA FLJ30403 fs, clone BRACE2008480 |
| 22884 | ENS000002026969   |               | 22254.2 | 0.09 |           |           |            |           |                                                                           |
| 22957 | ENS0000020235934  |               | 22316.7 | 0.09 |           |           |            |           |                                                                           |
| 23018 | ENS000002021161   |               | 22370.5 | 0.09 |           |           |            |           |                                                                           |
| 23069 | ENS000002027292   |               | 22406.5 | 0.09 |           |           |            |           |                                                                           |
| 23522 | ENS0000020253966  |               | 22745.4 | 0.09 |           |           |            |           |                                                                           |
| 12732 | ENS000002027409   |               | 14207.2 | 0.08 | antisense | 1         | 39824423   | 39831878  | ZMYM4 antisense RNA 1                                                     |
| 16265 | ENS0000020211402  | C20orf166-AS1 | 17342.5 | 0.08 | antisense | 20        | 61141550   | 61148733  | C20orf166 antisense RNA 1                                                 |
| 16380 | ENS0000020228111  | MED4-AS1      | 18787.4 | 0.08 | antisense | 13        | 48651273   | 48654127  | MED4 antisense RNA 1                                                      |
| 18451 | ENS0000020232160  | RAP2C-AS1     | 18838.1 | 0.08 | antisense | X         | 1131351175 | 113166890 | RAP2C antisense RNA 1                                                     |
| 20960 | ENS0000020210984  | ATP11A-AS1    | 20511.6 | 0.08 | antisense | 15        | 113389763  | 113390907 | ATP11A antisense RNA 1                                                    |
| 19618 | ENS0000020287080  | ASB16-AS1     | 19728.3 | 0.08 | antisense | 17        | 42253341   | 42264085  | ASB16 antisense RNA 1                                                     |
| 19981 | ENS0000020236859  | NIFK-AS1      | 20073.6 | 0.08 | antisense | 2         | 122407228  |           |                                                                           |

|       |                  |       |      |                 |           |           |           |          |  |                                                                    |
|-------|------------------|-------|------|-----------------|-----------|-----------|-----------|----------|--|--------------------------------------------------------------------|
| 20853 | ENSG00000184566  | 20888 | 1    | 0.08            | antisense | 11        | 33902189  | 33903338 |  | HCG178579: PRK3787: Uncharacterized protein                        |
| 20921 | ENSG00000139927  | 20118 | 0.08 | antisense       | 13        | 86116988  | 86116988  |          |  | CLDN10 antisense RNA 1                                             |
| 20944 | ENSG00000227352  | 20754 | 0.08 | antisense       | 13        | 11779052  | 11779080  |          |  | ARHGEP7 antisense RNA 1                                            |
| 21034 | ENSG00000233695  | 20817 | 0.08 | antisense       | 13        | 114518603 | 11454231  |          |  | GAS1 antisense RNA 1                                               |
| 21168 | ENSG00000206552  | 20924 | 0.08 | antisense       | 3         | 42975741  | 42976277  |          |  | RIBD301 antisense RNA 1                                            |
| 21546 | ENSG00000231959  | 21028 | 0.08 | antisense       | 3         | 110289511 | 11029473  |          |  | STC4B antisense RNA 1                                              |
| 21608 | ENSG00000237556  | 21274 | 0.08 | antisense       | 1         | 112451958 | 11245553  |          |  | KCNJ5 antisense RNA 1                                              |
| 21643 | ENSG00000246031  | 21805 | 0.08 | antisense       | X         | 102981004 | 102981420 |          |  | TCEAL3 antisense RNA 1                                             |
| 21762 | ENSG00000237368  | 21414 | 0.08 | antisense       | 10        | 11117094  | 11140436  |          |  | HOXA distal transcript antisense RNA                               |
| 21783 | ENSG00000237368  | 21414 | 0.08 | antisense       | 10        | 11117094  | 11140436  |          |  | GELF2 antisense RNA 2                                              |
| 21885 | ENSG00000231944  | 21475 | 0.08 | antisense       | X         | 7195209   | 71952190  |          |  | FRHA1 antisense RNA 1                                              |
| 21908 | ENSG00000173811  | 21225 | 0.08 | antisense       | 3         | 42714921  | 42718950  |          |  | CR13 antisense RNA 1                                               |
| 22131 | ENSG00000269942  | 21673 | 0.08 | antisense       | 2         | 241526117 | 241526117 |          |  | CAPN10 antisense RNA 1 (head to head)                              |
| 22201 | ENSG00000232797  | 21942 | 0.08 | antisense       | 3         | 40352293  | 40484620  |          |  | ENP103 antisense RNA 1                                             |
| 22465 | ENSG00000231814  | 21450 | 0.08 | antisense       | 13        | 111160526 | 111160526 |          |  | COL4A3C antisense RNA 1                                            |
| 22759 | ENSG00000248786  | 22150 | 0.08 | antisense       | 3         | 15477678  | 15480109  |          |  | EAP1 antisense RNA 1                                               |
| 22973 | ENSG00000225235  | 22257 | 0.08 | antisense       | X         | 134654008 | 134654599 |          |  | DDX203 antisense RNA 1                                             |
| 23076 | ENSG00000232779  | 22412 | 0.08 | antisense       | 7         | 118184693 | 118192771 |          |  | microRNA_2256-1                                                    |
| 23267 | ENSG00000235897  | 22556 | 0.08 | antisense       | 3         | 196045201 | 196055401 |          |  | TMSF19 antisense RNA 1                                             |
| 23463 | ENSG00000225203  | 22703 | 0.08 | antisense       | 13        | 79449647  | 79501420  |          |  | TBC1D4 antisense RNA 1                                             |
| 23779 | ENSG00000230920  | 22952 | 0.08 | antisense       | 2         | 10411602  | 10411602  |          |  | ROPN1L antisense RNA 1                                             |
| 23860 | ENSG00000235903  | 23048 | 0.08 | antisense       | 13        | 46626941  | 46627467  |          |  | CPB2 antisense RNA 1                                               |
| 23927 | ENSG00000213904  | 23086 | 0.08 | antisense       | 19        | 4291280   | 43135007  |          |  | LIPE antisense RNA 1                                               |
| 3379  | ENSG00000211890  | 5327  | 0.08 | IG_C_gene       | 14        | 10903226  | 10904272  |          |  | immunoglobulin heavy constant alpha 2 (A2m marker)                 |
| 3424  | ENSG00000211562  | 5383  | 0.08 | IG_C_gene       | 2         | 89156674  | 89157196  |          |  | immunoglobulin kappa constant                                      |
| 1884  | ENSG00000254030  | 16932 | 0.08 | IG_C_pseudogene | 22        | 23257805  | 23258097  |          |  | immunoglobulin lambda constant 5 (pseudogene)                      |
| 1957  | ENSG00000230963  | 31092 | 0.08 | IG_V_gene       | 2         | 23029190  | 23029375  |          |  | immunoglobulin lambda variable 3.2                                 |
| 2209  | ENSG00000211659  | 3455  | 0.08 | IG_V_gene       | 2         | 23029190  | 23029375  |          |  | immunoglobulin lambda variable 3.25                                |
| 2483  | ENSG00000211611  | 3821  | 0.08 | IG_V_gene       | 2         | 89452625  | 89459859  |          |  | immunoglobulin kappa variable 5-21 (non-functional)                |
| 3603  | ENSG00000234466  | 4314  | 0.08 | IG_V_gene       | 2         | 89243865  | 89243865  |          |  | immunoglobulin lambda variable 1.5                                 |
| 2876  | ENSG00000211644  | 4311  | 0.08 | IG_V_gene       | 2         | 22876828  | 22877336  |          |  | immunoglobulin lambda variable 1.5-1                               |
| 3102  | ENSG00000241755  | 4902  | 0.08 | IG_V_gene       | 2         | 89304979  | 89310012  |          |  | immunoglobulin kappa variable 1-9                                  |
| 1818  | ENSG00000219338  | 4501  | 0.08 | IG_V_pseudogene | 14        | 10651400  | 10651400  |          |  | immunoglobulin heavy variable 3-7                                  |
| 3701  | ENSG00000233951  | 5727  | 0.08 | IG_V_gene       | 2         | 89442057  | 89442643  |          |  | immunoglobulin kappa variable 3-20                                 |
| 19328 | ENSG00000233889  | 19516 | 0.08 | IG_V_pseudogene | 14        | 10687342  | 106873995 |          |  | immunoglobulin heavy variable (H) 3B-1 (pseudogene)                |
| 19343 | ENSG00000233889  | 19516 | 0.08 | IG_V_pseudogene | 14        | 10687342  | 106873995 |          |  | immunoglobulin heavy variable 1.42 (pseudogene)                    |
| 7549  | ENSG00000235366  | 10293 | 0.08 | lncRNA          | 13        | 46255225  | 46256554  |          |  | long intergenic non-protein coding RNA 1055                        |
| 18679 | ENSG00000268429  | 18629 | 0.08 | lncRNA          | 17        | 10692630  | 10707416  |          |  | long intergenic non-protein coding RNA 675                         |
| 17638 | ENSG00000175685  | 18223 | 0.08 | lncRNA          | 2         | 11193397  | 11226977  |          |  | MIR4581 host gene (non-protein coding)                             |
| 18480 | ENSG00000249697  | 18860 | 0.08 | lncRNA          | 11        | 8278108   | 82817781  |          |  | RAB30 antisense RNA 1 (head to head)                               |
| 18488 | ENSG00000229989  | 18863 | 0.08 | lncRNA          | 1         | 18877652  | 18890958  |          |  | MIR181A1 host gene (non-protein coding)                            |
| 18983 | ENSG00000237817  | 19254 | 0.08 | lncRNA          | 8         | 1432768   | 1432768   |          |  | cytochrome P450, family 4, subfamily F, polypeptide 3B, pseudogene |
| 20296 | ENSG00000229140  | 20294 | 0.08 | lncRNA          | 8         | 13038937  | 13038942  |          |  | coiled-coil domain containing 28                                   |
| 20961 | ENSG00000253138  | 20476 | 0.08 | lncRNA          | 8         | 67104328  | 67109550  |          |  | long intergenic non-protein coding RNA 967                         |
| 20881 | ENSG00000269796  | 20493 | 0.08 | lncRNA          | 16        | 14417394  | 14492577  |          |  | osteocalcin and osteonin receptor pseudogene 3                     |
| 19639 | ENSG00000229169  | 20582 | 0.08 | lncRNA          | 6         | 6173345   | 6173345   |          |  | highly accelerated region 1A (non-protein coding)                  |
| 20770 | ENSG00000175699  | 20623 | 0.08 | lncRNA          | 14        | 84463816  | 84467800  |          |  | long intergenic non-protein coding RNA 521                         |
| 20762 | ENSG00000261772  | 20634 | 0.08 | lncRNA          | 2         | 6750227   | 6750267   |          |  | hla-mi-7515                                                        |
| 19812 | ENSG00000221272  | 20759 | 0.08 | lncRNA          | 2         | 67502446  | 67503481  |          |  | long intergenic non-protein coding RNA 1140                        |
| 21060 | ENSG00000225298  | 20835 | 0.08 | lncRNA          | 21        | 2904668   | 2912352   |          |  | long intergenic non-protein coding RNA 110                         |
| 21102 | ENSG00000178676  | 20960 | 0.08 | lncRNA          | 18        | 61742243  | 61746264  |          |  | long intergenic non-protein coding RNA 305                         |
| 1836  | ENSG00000191744  | 21217 | 0.08 | lncRNA          | 14        | 204001515 | 204010393 |          |  | long intergenic non-protein coding RNA 303                         |
| 21645 | ENSG00000212514  | 21285 | 0.08 | lncRNA          | 20        | 61668500  | 61668300  |          |  | long intergenic non-protein coding RNA 29                          |
| 22403 | ENSG00000233996  | 22092 | 0.08 | lncRNA          | 8         | 19195621  | 1924644   |          |  | KIF18B11 overlapping transcript 1 (non-protein coding)             |
| 20275 | ENSG00000231866  | 22092 | 0.08 | lncRNA          | 8         | 44881914  | 44881914  |          |  | long intergenic non-protein coding RNA 313                         |
| 22714 | ENSG00000227477  | 22118 | 0.08 | lncRNA          | 20        | 43592435  | 43592435  |          |  | STK4 antisense RNA 1 (head to head)                                |
| 23468 | ENSG00000229735  | 22708 | 0.08 | lncRNA          | 14        | 104314058 | 104324386 |          |  | long intergenic non-protein coding RNA 637                         |
| 1922  | ENSG00000269512  | 892   | 0.08 | miRNA           | 4         | 10632682  | 10632682  |          |  | miR-4539                                                           |
| 7357  | ENSG00000207697  | 10103 | 0.08 | miRNA           | 4         | 24521815  | 24521815  |          |  | miR-573                                                            |
| 14836 | ENSG00000264419  | 16109 | 0.08 | miRNA           | 1         | 11710268  | 11710273  |          |  | miR-548c                                                           |
| 15145 | ENSG00000231465  | 16109 | 0.08 | miRNA           | 1         | 1345966   | 1345966   |          |  | miR-590                                                            |
| 16257 | ENSG00000221184  | 16449 | 0.08 | miRNA           | 10        | 70518075  | 70519171  |          |  | miR-591a-1                                                         |
| 16216 | ENSG00000237648  | 16792 | 0.08 | miRNA           | 11        | 6485869   | 6485871   |          |  | miR-591a-2                                                         |
| 16965 | ENSG00000217651  | 16929 | 0.08 | miRNA           | 16        | 1184456   | 1184456   |          |  | miR-591a-2b                                                        |
| 17560 | ENSG00000207562  | 18186 | 0.08 | miRNA           | 8         | 15812763  | 15812850  |          |  | miR-591a-30b                                                       |
| 18192 | ENSG00000237654  | 18657 | 0.08 | miRNA           | 2         | 13642967  | 13642968  |          |  | miR-591a-12b-1                                                     |
| 18664 | ENSG00000237653  | 18658 | 0.08 | miRNA           | 12        | 3271713   | 3271713   |          |  | miR-591a-55b                                                       |
| 19041 | ENSG00000265176  | 19302 | 0.08 | miRNA           | X         | 15324648  | 15324628  |          |  | miR-591a-320a-1                                                    |
| 19096 | ENSG000002098104 | 19436 | 0.08 | miRNA           | 20        | 61918160  | 61918218  |          |  | miR-591a-432b                                                      |
| 19540 | ENSG00000230234  | 19524 | 0.08 | miRNA           | 7         | 2972044   | 2972044   |          |  | miR-591a-350a-3                                                    |
| 20229 | ENSG00000207586  | 20058 | 0.08 | miRNA           | 12        | 9795750   | 9795769   |          |  | miR-591a-135a-2                                                    |
| 20373 | ENSG00000269657  | 20327 | 0.08 | miRNA           | 8         | 10416842  | 10416917  |          |  | miR-591a-3151                                                      |
| 19515 | ENSG00000246375  | 20428 | 0.08 | miRNA           | 6         | 1019845   | 1019845   |          |  | miR-591a-42b5                                                      |
| 20845 | ENSG00000233495  | 20682 | 0.08 | miRNA           | 2         | 20754759  | 20754832  |          |  | miR-591a-310a-1                                                    |
| 20893 | ENSG00000269721  | 20715 | 0.08 | miRNA           | 19        | 13031134  | 13031218  |          |  | miR-591a-5695                                                      |
| 21018 | ENSG0000021862   | 20808 | 0.08 | miRNA           | 11        | 3498347   | 3498347   |          |  | miR-591a-1343                                                      |
| 21100 | ENSG00000233926  | 20868 | 0.08 | miRNA           | 6         | 37523141  | 37523198  |          |  | miR-591a-4452                                                      |
| 21338 | ENSG00000269688  | 21081 | 0.08 | miRNA           | 7         | 97593717  | 97593933  |          |  | miR-591a-592c-2                                                    |
| 21584 | ENSG00000205087  | 21206 | 0.08 | miRNA           | 12        | 233843    | 233843    |          |  | miR-591a-6717                                                      |
| 21651 | ENSG00000235111  | 21313 | 0.08 | miRNA           | 10        | 687629    | 687718    |          |  | miR-591a-569                                                       |
| 21788 | ENSG00000237340  | 21477 | 0.08 | miRNA           | 3         | 11181648  | 11181745  |          |  | miR-591a-567                                                       |
| 22042 | ENSG00000215291  | 21108 | 0.08 | miRNA           | 18        | 11827209  | 11827313  |          |  | miR-591a-125b-1                                                    |
| 22266 | ENSG00000268704  | 21774 | 0.08 | miRNA           | 12        | 12059328  | 12059338  |          |  | miR-591a-4458                                                      |
| 22293 | ENSG00000265596  | 21793 | 0.08 | miRNA           | 2         | 11907501  | 11907651  |          |  | miR-591a-548b                                                      |
| 24042 | ENSG00000237551  | 21873 | 0.08 | miRNA           | 10        | 10273472  | 10273483  |          |  | miR-591a-608                                                       |
| 22996 | ENSG00000237551  | 21873 | 0.08 | miRNA           | 10        | 10273472  | 10273483  |          |  | miR-591a-9710                                                      |
| 8391  | ENSG00000206920  | 11044 | 0.08 | misc. RNA       | 13        | 5210068   | 5210068   |          |  | RNA, R-associated Y1 pseudogene 6                                  |
| 10800 | ENSG00000236964  | 12995 | 0.08 | misc. RNA       | 6         | 8449996   | 84499275  |          |  | RNA, 7SL cytoplasmic 74a, pseudogene                               |
| 12927 | ENSG00000202511  | 14809 | 0.08 | misc. RNA       | 6         | 8896781   | 8896781   |          |  | RNA, 7SL cytoplasmic 74b, pseudogene                               |
| 14284 | ENSG00000209922  | 15686 | 0.08 | misc. RNA       | 9         | 74517371  | 74517466  |          |  | Y RNA                                                              |
| 15199 | ENSG00000198551  | 16458 | 0.08 | misc. RNA       | 18        | 2103635   | 2103641   |          |  | RNA, 7SL, cytoplasmic 737, pseudogene                              |
| 15864 | ENSG00000204915  | 16920 | 0.08 | misc. RNA       | 20        | 83963263  | 83963244  |          |  | Y RNA                                                              |
| 16115 | ENSG00000231488  | 17209 | 0.08 | misc. RNA       | 20        | 32971971  | 32971971  |          |  | Y RNA                                                              |
| 16224 | ENSG00000232080  | 18922 | 0.08 | misc. RNA       | 19        | 5891678   | 5891678   |          |  | RNA, 7SL, cytoplasmic 84b, pseudogene                              |
| 19066 | ENSG00000240318  | 19627 | 0.08 | misc. RNA       | 2         | 21527759  | 21528292  |          |  | Y RNA                                                              |
| 19924 |                  |       |      |                 |           |           |           |          |  |                                                                    |



|       |                  |          |         |      |                |    |           |            |                                                                                 |
|-------|------------------|----------|---------|------|----------------|----|-----------|------------|---------------------------------------------------------------------------------|
| 8990  | ENSG00000103568  | VITB1B   | 11535.7 | 0.08 | protein_coding | 14 | 68113792  | 68141548   | vesicle transport through interaction with 15NNAE5 1B                           |
| 9034  | ENSG00000103568  | EIF4B    | 11535.7 | 0.08 | protein_coding | 12 | 53392362  | 53401362   | autophagy transition initiation factor 4B                                       |
| 9041  | ENSG00000170937  | GRP27    | 11562.2 | 0.08 | protein_coding | 3  | 71953201  | 71955447   | G protein-coupled receptor 27                                                   |
| 9075  | ENSG00000111445  | ELK3     | 11810.1 | 0.08 | protein_coding | 12 | 96581860  | 96636313   | ELK3, ETS-domain protein (SRF accessory protein 2)                              |
| 9119  | ENSG00000215171  | TMEM77B  | 11647.7 | 0.08 | protein_coding | 1  | 109632425 | 109639656  | transmembrane protein 77B                                                       |
| 9542  | ENSG00000103568  | TRKB     | 11810.1 | 0.08 | protein_coding | 1  | 12931015  | 12931015   | tyrosine phosphatase 4                                                          |
| 9547  | ENSG00000169299  | PGM2     | 12007.8 | 0.08 | protein_coding | 4  | 37828255  | 37844558   | phosphoglucomutase 2                                                            |
| 9548  | ENSG00000196459  | TRAPPC2  | 12020.9 | 0.08 | protein_coding | X  | 13740368  | 13752154   | trafficking protein particle complex 2                                          |
| 9561  | ENSG00000189465  | HERC5    | 12050.1 | 0.08 | protein_coding | 4  | 89378268  | 89427314   | HECT and RLD domain containing E3 ubiquitin protein ligase 5                    |
| 9621  | ENSG00000202020  | PP5R23C  | 12076.9 | 0.08 | protein_coding | 14 | 95554673  | 95591723   | protein phosphatase 2, regulatory subunit B', gamma                             |
| 9610  | ENSG00000136148  | TRAFD1   | 12201.6 | 0.08 | protein_coding | 12 | 112265305 | 112291407  | TRAF-type zinc finger domain containing 1                                       |
| 9660  | ENSG00000206865  | PTC1     | 12278.1 | 0.08 | protein_coding | 12 | 110989101 | 1117394126 | PTC1 protein phosphatase homolog (S. cerevisiae)                                |
| 10054 | ENSG00000300419  | IKZF2    | 12291.4 | 0.08 | protein_coding | 2  | 213864429 | 21417151   | IKAROS family zinc finger 2 (Helios)                                            |
| 10069 | ENSG00000158062  | NCK1     | 12402.3 | 0.08 | protein_coding | 3  | 13691050  | 13698868   | NCK adaptor protein 1                                                           |
| 10086 | ENSG00000303816  | MICAL2   | 12435.2 | 0.08 | protein_coding | 11 | 12185543  | 12205334   | microtubule associated monooxygenase, carbon and LIM domain containing 2        |
| 10200 | ENSG00000169228  | RAB24    | 12500.8 | 0.08 | protein_coding | 5  | 176728199 | 176730745  | RAB24, member RAS oncogene family                                               |
| 10306 | ENSG00000128099  | CHM1L1   | 12615.6 | 0.08 | protein_coding | 2  | 190635049 | 190649097  | CHM1-like 1 (S. cerevisiae)                                                     |
| 10384 | ENSG00000100968  | C11orf98 | 12619.1 | 0.08 | protein_coding | 11 | 16624639  | 16717428   | chromosome 11 open reading frame 58                                             |
| 10513 | ENSG00000172238  | ATOH1    | 12741.6 | 0.08 | protein_coding | 4  | 94750042  | 94751221   | atoh1 homolog 1 (Drosophila)                                                    |
| 10533 | ENSG00000109220  | CHC2     | 12759.3 | 0.08 | protein_coding | 4  | 54815966  | 54830057   | cytosolic-rich hydrophobic domain 2                                             |
| 10568 | ENSG00000152020  | CCNB3    | 12777.3 | 0.08 | protein_coding | 2  | 19831017  | 19834032   | cyclin B3/homolog B (S. cerevisiae)                                             |
| 10569 | ENSG00000112893  | MAN2A1   | 12783.7 | 0.08 | protein_coding | 5  | 109025067 | 109025208  | mannosidase, alpha class 2A, member 1                                           |
| 10600 | ENSG00000186143  | PP1R14D  | 12807   | 0.08 | protein_coding | 15 | 41107850  | 41120907   | protein phosphatase 1, regulatory (inhibitor) subunit 14D                       |
| 10686 | ENSG00000300692  | TBC1D1   | 13020   | 0.08 | protein_coding | 4  | 67982708  | 68140708   | TBC1 (the DUSP) RGS2, zinc-finger domain family, member 1                       |
| 10687 | ENSG00000204439  | C6orf47  | 13062.8 | 0.08 | protein_coding | 6  | 31628075  | 31628549   | chromosome 6 open reading frame 47                                              |
| 10692 | ENSG00000187824  | TMEM220  | 13074.6 | 0.08 | protein_coding | 17 | 10628332  | 10638333   | transmembrane protein 220                                                       |
| 10928 | ENSG00000105927  | KDM1B    | 13094   | 0.08 | protein_coding | 4  | 18185960  | 18204984   | lysine (K)-specific demethylase 1B                                              |
| 11006 | ENSG00000142867  | BCL10    | 13154.1 | 0.08 | protein_coding | 1  | 85731931  | 85742773   | B-cell CLL1 lymphoma 10                                                         |
| 11077 | ENSG00000189661  | PIAZ     | 13205.9 | 0.08 | protein_coding | 5  | 108970410 | 108974595  | praja ring finger 2, E3 ubiquitin protein ligase                                |
| 11123 | ENSG00000100968  | MIR6815  | 13250.1 | 0.08 | protein_coding | 1  | 19121     | 19121      | major facilitator domain containing 5                                           |
| 11141 | ENSG00000134884  | ARSLG11  | 13255.3 | 0.08 | protein_coding | 13 | 107180410 | 107220512  | arginine and glutamate rich 1                                                   |
| 11211 | ENSG00000089874  | SRBD1    | 13311.9 | 0.08 | protein_coding | 2  | 45615819  | 45619304   | SR RNA binding domain 1                                                         |
| 11215 | ENSG00000103785  | SLC18A4  | 13328.8 | 0.08 | protein_coding | 1  | 158118280 | 158118280  | solute carrier family 18, member 44                                             |
| 11219 | ENSG00000153113  | CAST     | 13322.2 | 0.08 | protein_coding | 5  | 95860971  | 96115299   | calpastatin                                                                     |
| 11286 | ENSG00000300300  | PAI1     | 13387.4 | 0.08 | protein_coding | 15 | 68345517  | 68430306   | protein inhibitor of activated STAT 1                                           |
| 11311 | ENSG00000151718  | CHST14   | 13392.1 | 0.08 | protein_coding | 15 | 75440274  | 75440274   | chondroitin 6-sulfate transferase 14                                            |
| 11561 | ENSG00000147905  | ZCHC7    | 13525.1 | 0.08 | protein_coding | 9  | 37120536  | 37159146   | zinc finger, CCHC domain containing 7                                           |
| 11611 | ENSG00000136152  | COG3     | 13667.3 | 0.08 | protein_coding | 13 | 40039060  | 40110705   | component of oligosaccharyl glycosyl complex 3                                  |
| 11678 | ENSG00000103568  | ZNF108   | 13720   | 0.08 | protein_coding | 11 | 11418100  | 11418100   | zinc finger, DHRF-type containing 6                                             |
| 11692 | ENSG00000115419  | CLS      | 13737.9 | 0.08 | protein_coding | 2  | 191745553 | 191830278  | glutaminase                                                                     |
| 11768 | ENSG00000189001  | TRMT4    | 13806.7 | 0.08 | protein_coding | 2  | 70436676  | 70475792   | TRMT4 cytosolic granule-associated RNA binding protein                          |
| 11778 | ENSG00000103568  | NANP4    | 13821.1 | 0.08 | protein_coding | 1  | 296811    | 296811     | nucleosome assembly protein 4-like 4                                            |
| 11788 | ENSG00000410710  | TRP      | 13821.6 | 0.08 | protein_coding | 1  | 186280784 | 186344825  | translocated promoter region, nuclear basket protein                            |
| 11931 | ENSG00000138592  | USP8     | 13926.2 | 0.08 | protein_coding | 15 | 50716577  | 50738280   | ubiquitin specific peptidase 8                                                  |
| 11984 | ENSG00000006550  | TYRO3    | 13971.3 | 0.08 | protein_coding | 4  | 65249385  | 65269940   | heparin sulfate repeat domain 22                                                |
| 2005  | ENSG00000303778  | UBA5     | 13971.3 | 0.08 | protein_coding | 4  | 68411801  | 68411801   | ubiquitin-like modifier activating enzyme 5                                     |
| 2049  | ENSG00000107551  | RASSF4   | 14017.8 | 0.08 | protein_coding | 10 | 45448555  | 45491339   | Ras association (RasGDS/JAF) domain family member 4                             |
| 12247 | ENSG000002041059 | NBSJN6   | 14149   | 0.08 | protein_coding | 10 | 18844409  | 18849051   | NCP2-SIM domain family, member 6                                                |
| 2336  | ENSG00000176911  | TRAF3IP1 | 14200.6 | 0.08 | protein_coding | 5  | 25639475  | 25639475   | TRAF3-interacting protein 1 (like 1)                                            |
| 12338 | ENSG00000181481  | RNF135   | 14231.4 | 0.08 | protein_coding | 1  | 29245803  | 29245929   | ring finger protein 135                                                         |
| 12348 | ENSG00000179554  | RPS27    | 14312   | 0.08 | protein_coding | 11 | 15396328  | 15396426   | ribosomal protein S27                                                           |
| 2484  | ENSG00000184486  | BXN1B    | 14328.6 | 0.08 | protein_coding | 1  | 18143385  | 18143385   | UDP-GlcNAc 6-epimerase 1 (beta)                                                 |
| 12510 | ENSG00000155568  | ROPD5    | 14438.8 | 0.08 | protein_coding | 2  | 110553035 | 110515272  | RANBP2-like and GRP domain containing 5                                         |
| 12594 | ENSG00000127965  | CASD1    | 14439.6 | 0.08 | protein_coding | 7  | 94138331  | 94138331   | CAS1 domain containing 1                                                        |
| 2814  | ENSG00000141084  | RANBP10  | 14439.6 | 0.08 | protein_coding | 11 | 67747005  | 67747005   | RAN binding protein 10                                                          |
| 12640 | ENSG00000145012  | LPP      | 14460.5 | 0.08 | protein_coding | 3  | 187871072 | 187880480  | LIM domain containing preferred translocation partner in lipoma                 |
| 12776 | ENSG00000170246  | PTC2BP   | 14460.9 | 0.08 | protein_coding | 3  | 33849844  | 33911194   | programmed cell death 8 interacting protein                                     |
| 2946  | ENSG00000164506  | STC1     | 14462.5 | 0.08 | protein_coding | 3  | 147525611 | 147525611  | stromal cell derived factor 1 (homolog)                                         |
| 2976  | ENSG00000183374  | YY1AP1   | 14468.1 | 0.08 | protein_coding | 1  | 155629237 | 155629237  | YY1 associated protein 1                                                        |
| 13033 | ENSG00000128222  | CALCOCC1 | 14744   | 0.08 | protein_coding | 12 | 54149603  | 54121529   | calcium binding and coiled-coil domain 1                                        |
| 13044 | ENSG00000103568  | ALG12    | 14752.5 | 0.08 | protein_coding | 3  | 34179215  | 34179215   | ALG12, alpha-1,2-galactosyltransferase                                          |
| 13245 | ENSG00000096717  | SIRT1    | 14909.9 | 0.08 | protein_coding | 10 | 68644227  | 68647147   | sirtuin 1                                                                       |
| 13425 | ENSG00000239305  | RNF103   | 15043.3 | 0.08 | protein_coding | 2  | 89830516  | 89830589   | ring finger protein 103                                                         |
| 13507 | ENSG00000143453  | HORMAD1  | 15050.1 | 0.08 | protein_coding | 1  | 15050194  | 15050194   | HORMAD associated protein 1                                                     |
| 13532 | ENSG00000174288  | NAT1     | 15123   | 0.08 | protein_coding | 8  | 18027986  | 18081186   | N-acetyltransferase 1 (arilamine N-acetyltransferase)                           |
| 13544 | ENSG00000119906  | FAM178A  | 15123.2 | 0.08 | protein_coding | 10 | 102972328 | 102724993  | family with sequence similarity 178, member A                                   |
| 13608 | ENSG00000103568  | SCN10A   | 15176.3 | 0.08 | protein_coding | 21 | 349145047 | 349145047  | SCN 10A sodium channel 10                                                       |
| 13613 | ENSG00000140992  | POPK1    | 15180.1 | 0.08 | protein_coding | 16 | 2653189   | 2653189    | 3-phosphoinositide dependent protein kinase-1                                   |
| 13647 | ENSG00000180304  | ROPD1    | 15209.8 | 0.08 | protein_coding | 2  | 88055474  | 88058309   | RANBP2-like and GRP domain containing 2                                         |
| 13748 | ENSG00000196574  | ADAMTS1  | 15249.1 | 0.08 | protein_coding | 2  | 284031    | 284031     | adhesin 1 (alpha)                                                               |
| 13845 | ENSG00000196546  | ZNF136   | 15353.9 | 0.08 | protein_coding | 19 | 12273879  | 12300034   | zinc finger protein 136                                                         |
| 13871 | ENSG00000103568  | SRR      | 15374   | 0.08 | protein_coding | 22 | 26879843  | 26880624   | SRR1 domain containing 1                                                        |
| 13883 | ENSG00000103568  | CHST14   | 15374   | 0.08 | protein_coding | 10 | 10366498  | 10366498   | chromosome 10 open reading frame 76                                             |
| 14069 | ENSG00000143437  | ARNT     | 15523.4 | 0.08 | protein_coding | 1  | 150791181 | 150845244  | aryl hydrocarbon receptor nuclear translocator                                  |
| 14164 | ENSG00000117523  | PRRC2C   | 15583.3 | 0.08 | protein_coding | 1  | 171454651 | 171562890  | proline-rich coiled-coil 2C                                                     |
| 14236 | ENSG00000103568  | TRAF3    | 15583.3 | 0.08 | protein_coding | 1  | 103383    | 103383     | TNF receptor-associated factor 3                                                |
| 14249 | ENSG00000117360  | PRPF3    | 15587.5 | 0.08 | protein_coding | 1  | 15029325  | 15029371   | pre-mRNA processing factor 3                                                    |
| 14286 | ENSG00000170242  | UBAP2    | 15680.2 | 0.08 | protein_coding | 11 | 11869270  | 11868870   | ubiquitin specific peptidase 47                                                 |
| 14290 | ENSG00000103568  | PANX2    | 15680.8 | 0.08 | protein_coding | X  | 551051    | 551051     | P2 purinergic channel family, member 2B                                         |
| 14347 | ENSG00000122998  | CS2HTA   | 15738.5 | 0.08 | protein_coding | 16 | 11844422  | 11891123   | zinc finger CCHC-type containing 7A                                             |
| 14360 | ENSG00000103568  | EP3B3    | 15749   | 0.08 | protein_coding | 1  | 110292702 | 110306999  | EP3B3-like 3                                                                    |
| 14373 | ENSG00000103568  | SLC18A3  | 15751.8 | 0.08 | protein_coding | 17 | 2885517   | 2885517    | solute carrier family 18 (sodium-dependent dicarboxylate transporter), member 2 |
| 14389 | ENSG00000030366  | YTHDC1   | 15773.5 | 0.08 | protein_coding | 4  | 6917105   | 69215807   | YTH domain containing 1                                                         |
| 14410 | ENSG00000120008  | WDR11    | 15785.4 | 0.08 | protein_coding | 10 | 122010687 | 122669036  | WD repeat domain 11                                                             |
| 14515 | ENSG00000103568  | COSE1    | 15785.4 | 0.08 | protein_coding | 10 | 6605827   | 66076271   | coiled-coil serine-rich protein 2                                               |
| 14811 | ENSG00000103568  | MTFR2    | 15795.2 | 0.08 | protein_coding | 2  | 242011584 | 242011747  | MTFR domain containing 2                                                        |
| 14909 | ENSG00000272756  | TRNT1    | 16173.2 | 0.08 | protein_coding | 3  | 3168600   | 3162863    | TRNA nucleoside(5')transferase, CCA-adding, 1                                   |
| 14973 | ENSG00000197363  | CPGN     | 16219.3 | 0.08 | protein_coding | 16 | 9671080   | 9685431    | phosphotyrosylated glycan anchor biosynthesis, class N                          |
| 15129 | ENSG00000145986  | CSKAL1   | 16230.8 | 0.08 | protein_coding | 18 | 20524486  | 21028255   | C/EBP beta subunit associated protein 1 (like 1)                                |
| 15139 | ENSG00000157450  | RNF11    | 16284.7 | 0.08 | protein_coding | 15 | 59197374  | 59198818   | ring finger protein 111                                                         |
| 15191 | ENSG00000183736  | BGAL15   | 16402.4 | 0.08 | protein_coding | 21 | 6959389   | 6949504    | UDP-Glc6P:GlcNAc 6-epimerase 1 (beta)                                           |
| 15216 | ENSG00000103568  | RPRB     | 16428.6 | 0.08 | protein_coding | 27 | 67444172  | 67444172   | retinoblastoma protein 1 (p107)                                                 |
| 15306 | ENSG00000155360  | UBP1     | 16478.8 | 0.08 | protein_coding | 3  | 33428826  | 33428826   | upstream binding protein 1 (UBP-1a)                                             |
| 15369 | ENSG00000103076  | FAM118A  | 16528.6 | 0.08 | protein_coding | 12 | 45748489  | 45737836   | family with sequence                                                            |



|       |                  |           |         |      |                |    |           |           |                                                                     |
|-------|------------------|-----------|---------|------|----------------|----|-----------|-----------|---------------------------------------------------------------------|
| 20097 | ENSG000001066707 | ZYCHC18   | 20074.9 | 0.08 | protein_coding | X  | 103356822 | 103305333 | zinc finger, CCHC domain containing 18                              |
| 20128 | ENSG00000109491  | PYRROX2   | 20074.9 | 0.08 | protein_coding | 10 | 100110100 | 100100841 | pyridine nucleotide-kinase/oxidoreductase domain 2                  |
| 20138 | ENSG00000258947  |           | 20126.1 | 0.08 | protein_coding | 14 | 66424015  | 66471241  | Uncharacterized protein                                             |
| 20145 | ENSG00000198885  | ITPRRL1   | 20133.4 | 0.08 | protein_coding | 2  | 96991069  | 96994091  | inositol 1,4,5-trisphosphate receptor interacting protein-like 1    |
| 20291 | ENSG00000101251  | SELL2     | 20227.7 | 0.08 | protein_coding | 20 | 12628993  | 12628993  | sex-1 suppressor of lin-12-like 2 (C. elegans)                      |
| 20278 | ENSG00000209493  | SLC12B1   | 20254.3 | 0.08 | protein_coding | 1  | 15698789  | 15698789  | SLC domain, member 1                                                |
| 20298 | ENSG00000137878  | GCOM1     | 20296.1 | 0.08 | protein_coding | 15 | 57884106  | 58009453  | GRIN1/1A complex locus 1                                            |
| 20313 | ENSG00000188918  | PKCKNT1   | 20273.6 | 0.08 | protein_coding | 2  | 68910721  | 68922708  | proteasome regulator 1                                              |
| 20418 | ENSG00000098781  | GTF2A1L   | 20359.8 | 0.08 | protein_coding | 1  | 48730864  | 48730864  | STG18 GTF2A1L readthrough                                           |
| 20476 | ENSG00000156291  | CLDN14    | 20408.9 | 0.08 | protein_coding | 21 | 37832919  | 37832919  | claudin 14                                                          |
| 20531 | ENSG00000134249  | ADAM8     | 20449.5 | 0.08 | protein_coding | 7  | 120438106 | 120439116 | ADAM metalloprotease domain 30                                      |
| 20538 | ENSG00000204886  | ZNF783    | 20539.3 | 0.08 | protein_coding | 7  | 14894398  | 14894398  | zinc finger family member 783                                       |
| 20588 | ENSG00000101883  | RHOXP1    | 20486.1 | 0.08 | protein_coding | X  | 119240311 | 119249847 | RhoGDI family, member 1                                             |
| 20599 | ENSG00000133555  | PCDH17    | 20498.4 | 0.08 | protein_coding | 5  | 141321150 | 141349304 | protodiscornin 12                                                   |
| 20618 | ENSG00000201383  | ZDNHC15   | 20571.7 | 0.08 | protein_coding | X  | 74589262  | 74743337  | zinc finger, DNH1-type containing 15                                |
| 20640 | ENSG00000187838  | PLSCR3    | 20526.9 | 0.08 | protein_coding | 17 | 7293046   | 7307416   | TMEM256-PLSCR3 readthrough (NM0 candidate)                          |
| 20689 | ENSG00000116981  | NTS1C1A   | 20563.4 | 0.08 | protein_coding | 1  | 40124793  | 40137170  | 5'-nucleotidase, cytosolic 1A                                       |
| 20701 | ENSG00000101628  | ZKSCAN4   | 20575.5 | 0.08 | protein_coding | 6  | 28212401  | 28212401  | zinc finger with KRAK and SCAN domains 4                            |
| 20785 | ENSG00000255501  | CARD18    | 20643.5 | 0.08 | protein_coding | 11 | 10500848  | 105010453 | caspase recruitment domain family, member 18                        |
| 20807 | ENSG00000201762  | CSBP1L5   | 20652.9 | 0.08 | protein_coding | 11 | 3103834   | 3107969   | cytoskeletal binding protein-like 5                                 |
| 20824 | ENSG00000101129  | DNAK17    | 20559.9 | 0.08 | protein_coding | 15 | 41000097  | 41009675  | DnaK (Hsc70) homolog, subfamily C, member 17                        |
| 20833 | ENSG00000001936  | SWAP      | 20675.7 | 0.08 | protein_coding | 12 | 132195628 | 13228482  | splicing factor, suppressor of white-apoptosis homolog (Drosophila) |
| 20911 | ENSG00000188176  | DUPD1     | 20731.9 | 0.08 | protein_coding | 10 | 78797594  | 78818272  | dual specificity phosphatase and pro isomerase domain containing 1  |
| 20930 | ENSG00000101121  | KRCOB1    | 20732.4 | 0.08 | protein_coding | X  | 46309292  | 46309292  | KRCOB box domain containing 4                                       |
| 21020 | ENSG00000155686  | KDM8      | 20807.8 | 0.08 | protein_coding | 16 | 27214807  | 27233089  | lysine (K)-specific demethylase 8                                   |
| 21023 | ENSG00000194808  | DHDH      | 20808.1 | 0.08 | protein_coding | 19 | 49439399  | 49448226  | dehydrodolichyl diphosphate (dimeric)                               |
| 21028 | ENSG00000103370  | RSSR1     | 20814.3 | 0.08 | protein_coding | 17 | 63133849  | 63229261  | regulator of G-protein signaling 9                                  |
| 21121 | ENSG00000142606  | MMEL1     | 20885.3 | 0.08 | protein_coding | 1  | 2520078   | 2564481   | membrane metallo-endopeptidase-like 1                               |
| 21125 | ENSG00000107138  | FAM8B     | 20887   | 0.08 | protein_coding | X  | 8992273   | 9132860   | family with sequence similarity 5, member 8                         |
| 21146 | ENSG00000201960  | ZKSCAN3   | 20917.8 | 0.08 | protein_coding | 8  | 86724083  | 86724083  | zinc finger and SCAN domain containing 3D                           |
| 21173 | ENSG00000193888  | C1orf84   | 20931.3 | 0.08 | protein_coding | 1  | 16330731  | 16335302  | chromosome 1 open reading frame 64                                  |
| 21196 | ENSG00000102603  | CHRNA2    | 20949   | 0.08 | protein_coding | 8  | 27317279  | 27337400  | cholinergic receptor, nicotinic, alpha 2 (neuronal)                 |
| 21288 | ENSG00000101148  | CASP16    | 20935.6 | 0.08 | protein_coding | 6  | 3198428   | 31984284  | caspase 16, apoptosis-related cysteine peptidase (putative)         |
| 21241 | ENSG00000251247  | ZNF345    | 20985.6 | 0.08 | protein_coding | 19 | 37341263  | 37403931  | zinc finger protein 345                                             |
| 21292 | ENSG00000176034  | CHDC2     | 20996.5 | 0.08 | protein_coding | X  | 36053908  | 36183187  | catheonin homology domain containing 2                              |
| 21298 | ENSG00000102571  | CHD9      | 20998.6 | 0.08 | protein_coding | 11 | 11381133  | 11381133  | protein 2, vitreous, vitreous vitellin glycoprotein                 |
| 21298 | ENSG00000004835  | POU1F1    | 21032.7 | 0.08 | protein_coding | 3  | 8730854   | 87325737  | POU class 1 homeobox                                                |
| 21317 | ENSG00000208210  | OCLM      | 21047.2 | 0.08 | protein_coding | 1  | 186389704 | 186370887 | occludin                                                            |
| 21351 | ENSG00000106918  | TSFYB1    | 21052.8 | 0.08 | protein_coding | 2  | 54402209  | 54402209  | TSFY family 8                                                       |
| 21363 | ENSG00000188739  | RMBS4     | 21081.2 | 0.08 | protein_coding | 1  | 23529448  | 23532472  | RNA binding motif protein 34                                        |
| 21427 | ENSG00000188786  | FOXJ2     | 21135.9 | 0.08 | protein_coding | 10 | 129535499 | 129539450 | forkhead box L2                                                     |
| 21458 | ENSG00000101408  | BTBD18    | 21158.8 | 0.08 | protein_coding | 11 | 275111    | 275111    | BTB (POZ) domain containing 18                                      |
| 21459 | ENSG00000227471  | AKR1B15   | 21166.6 | 0.08 | protein_coding | 7  | 13423388  | 13426427  | sialo-esterase family 1, member B15                                 |
| 21466 | ENSG00000182747  | SLC35D3   | 21170.1 | 0.08 | protein_coding | 6  | 13724362  | 137246777 | solute carrier family 35, member D3                                 |
| 21472 | ENSG00000186240  | URHG1G    | 21173.6 | 0.08 | protein_coding | 17 | 7291276   | 7291931   | Usher syndrome 1G (autosomal recessive)                             |
| 21480 | ENSG00000186986  | RSR1      | 21178.3 | 0.08 | protein_coding | 17 | 65238     | 65238     | HUS1 checkpoint homolog 1 (S. pombe)                                |
| 21483 | ENSG00000232560  | AS21      | 21182.4 | 0.08 | protein_coding | 21 | 188112038 | 18821103  | chromosome 21 open reading frame 37                                 |
| 21483 | ENSG00000104538  | AS21      | 21186.9 | 0.08 | protein_coding | 7  | 11700378  | 11706817  | ankyrin repeat, SAM and basic leucine zipper domain containing 1    |
| 21497 | ENSG00000200581  | CXCR5D    | 21191.2 | 0.08 | protein_coding | X  | 36248735  | 36248735  | chemokine, X open reading frame 30                                  |
| 21501 | ENSG00000089123  | TASP1     | 21195.4 | 0.08 | protein_coding | 20 | 13248709  | 13919587  | transmembrane aspartase, 1                                          |
| 21508 | ENSG00000182643  | WDR94     | 21239.9 | 0.08 | protein_coding | 12 | 24181580  | 24196635  | WD repeat domain 64                                                 |
| 21517 | ENSG00000184271  | POU3F1    | 21249.7 | 0.08 | protein_coding | 11 | 215880719 | 215911477 | POU class 4 homeobox 1                                              |
| 21521 | ENSG00000177892  | SPATA31E1 | 21266.7 | 0.08 | protein_coding | 9  | 90497471  | 90503814  | SPATA31 subfamily E, member 1                                       |
| 21621 | ENSG00000137877  | SPTBN8    | 21285.9 | 0.08 | protein_coding | 15 | 42140345  | 42186275  | spectrin, beta, non-erythrocytic 8                                  |
| 21628 | ENSG00000200299  | SPTBN8    | 21285.9 | 0.08 | protein_coding | 15 | 34102865  | 34102865  | chromosome 21 open reading frame 62                                 |
| 21635 | ENSG00000107886  | EPHA8     | 21297.9 | 0.08 | protein_coding | 1  | 22890057  | 22890057  | EPH receptor A8                                                     |
| 21663 | ENSG00000183746  | PLSCR2    | 21325   | 0.08 | protein_coding | 3  | 14619628  | 14621378  | phospholipid scramblase 2                                           |
| 21681 | ENSG00000186265  | TRAF3     | 21334.2 | 0.08 | protein_coding | 19 | 100001628 | 100001628 | chromosome 7 open reading frame 61                                  |
| 21717 | ENSG00000202204  | RAB6C     | 21370.8 | 0.08 | protein_coding | 2  | 13073725  | 13074011  | RAB6C, member RAS oncogene family                                   |
| 21802 | ENSG00000205209  | SCGB2B2   | 21430   | 0.08 | protein_coding | 19 | 35084234  | 35186804  | secretoglobin, family 2B, member 2                                  |
| 21811 | ENSG00000105428  | EPHA2     | 21440   | 0.08 | protein_coding | 16 | 1920264   | 1920264   | E2F-binding domain, member B                                        |
| 21857 | ENSG00000181628  | ANKRD82   | 21466.6 | 0.08 | protein_coding | 18 | 12093852  | 12129748  | ankyrin repeat domain 82                                            |
| 21894 | ENSG00000142449  | FBN3      | 21501.3 | 0.08 | protein_coding | 19 | 3142898   | 31427430  | fibillin 3                                                          |
| 21934 | ENSG00000101609  | GLIS3     | 21569.4 | 0.08 | protein_coding | 19 | 13418268  | 134208248 | transcription factor, like 3                                        |
| 21954 | ENSG00000186710  | CCDC42B   | 21545.8 | 0.08 | protein_coding | 12 | 113587663 | 113587681 | coiled-coil domain containing 42B                                   |
| 21972 | ENSG00000184313  | MROH7     | 21554.9 | 0.08 | protein_coding | 1  | 25107463  | 25107599  | maestro heat-like repeat family member 7                            |
| 21978 | ENSG00000101343  | TRAF3     | 21554.9 | 0.08 | protein_coding | 19 | 1920264   | 1920264   | transmembrane repeat domain 12                                      |
| 22004 | ENSG00000174578  | NPAS4     | 21576.5 | 0.08 | protein_coding | 11 | 66188475  | 66194178  | neuronal PAS domain protein 4                                       |
| 22056 | ENSG00000187992  | WVCE2     | 21622.1 | 0.08 | protein_coding | 11 | 61025762  | 61026396  | von Willibrand factor C and EGF domains                             |
| 22076 | ENSG00000101348  | TRAF3     | 21622.1 | 0.08 | protein_coding | 19 | 1920264   | 1920264   | zinc finger protein 813                                             |
| 22149 | ENSG00000107037  | GSMT1     | 21622.5 | 0.08 | protein_coding | 22 | 25202236  | 25202236  | small G protein signaling modulator 1                               |
| 22192 | ENSG00000189181  | GSGL1     | 21753.5 | 0.08 | protein_coding | 16 | 2719855   | 28074830  | GSGL1-like                                                          |
| 22197 | ENSG00000101722  | C1orf11   | 21753.5 | 0.08 | protein_coding | 14 | 16222693  | 16222693  | chromosome 1 open reading frame 111                                 |
| 22237 | ENSG000001045107 | TMSF19    | 21759.7 | 0.08 | protein_coding | 3  | 19604913  | 19605574  | transmembrane 4 L-like family member 19                             |
| 22245 | ENSG00000186438  | TRMR8     | 21783.2 | 0.08 | protein_coding | 11 | 8633884   | 8634313   | heparan sulfate methyltransferase 8                                 |
| 22262 | ENSG00000101083  | TSM1E1    | 21823.1 | 0.08 | protein_coding | 11 | 13238811  | 13238811  | 15ARBC domain containing 1                                          |
| 22317 | ENSG00000202464  | C1orf195  | 21811.9 | 0.08 | protein_coding | 1  | 15460840  | 15469713  | chromosome 1 open reading frame 195                                 |
| 22386 | ENSG00000197362  | ZNF785    | 21851.3 | 0.08 | protein_coding | 7  | 14878675  | 14878874  | zinc finger protein 785                                             |
| 22390 | ENSG00000205688  | LRRC12    | 21852.3 | 0.08 | protein_coding | 17 | 1586877   | 1586877   | leucine rich repeat containing 72                                   |
| 22489 | ENSG00000145832  | SLC22A8   | 21934.8 | 0.08 | protein_coding | 5  | 13510338  | 13522438  | solute carrier family 25, member 48                                 |
| 22494 | ENSG00000182177  | ASB1B     | 21940   | 0.08 | protein_coding | 2  | 23712095  | 23713652  | ankyrin repeat and SOCS box containing 18                           |
| 22504 | ENSG00000101974  | TRAF3     | 21940   | 0.08 | protein_coding | 19 | 1920264   | 1920264   | matricin 1 associated protein                                       |
| 22543 | ENSG00000124493  | GRAM4     | 21980.3 | 0.08 | protein_coding | 6  | 33999628  | 34123399  | glutamate receptor, metabotropic 4                                  |
| 22566 | ENSG00000155897  | ADCY8     | 21999.6 | 0.08 | protein_coding | 8  | 131724247 | 132054872 | adenylyl cyclase 8 (brain)                                          |
| 22600 | ENSG00000186133  | CGP7      | 22024.5 | 0.08 | protein_coding | 19 | 46657531  | 46657531  | chronic granulomatous, beta polypeptide 7                           |
| 22609 | ENSG00000186211  | CHRT11    | 22025.1 | 0.08 | protein_coding | 9  | 13508410  | 135148104 | nicotinic acetylcholine receptor subunit epsilon 11                 |
| 22639 | ENSG00000124251  | TPST3G5   | 22058.5 | 0.08 | protein_coding | 20 | 44005226  | 44035029  | TPST3 target 5                                                      |
| 22684 | ENSG00000186268  | ITFC1A    | 22140.3 | 0.08 | protein_coding | 3  | 39149132  | 39180394  | histone H3K9me3 repeat domain 21A                                   |
| 22706 | ENSG00000101248  | MTFHSB    | 22158.6 | 0.08 | protein_coding | 16 | 86563762  | 86563841  | methyltransferase, synthase domain containing                       |
| 22728 | ENSG00000219435  | TEX4D     | 22207.4 | 0.08 | protein_coding | 11 | 64068763  | 64072242  | testis expressed 40                                                 |
| 22844 | ENSG00000187131  | CCDC103   | 22223   | 0.08 | protein_coding | 17 | 42916510  | 42926758  | coiled-coil domain containing 103                                   |
| 22886 | ENSG00000200261  | NKX63     | 22261.6 | 0.08 | protein_coding | 17 | 3415269   | 3415269   | homeobox transcription factor 60                                    |
| 22888 | ENSG00000109825  | CPZ       | 22280.3 | 0.08 | protein_coding | 4  | 858487    | 8621488   | carboxypeptidase Z                                                  |
| 22966 | ENSG00000186290  | ODF3L1    | 22324.6 | 0.08 | protein_coding | 15 | 7601618   | 7602029   | outer dense fiber of sperm tail 3-like 1                            |
|       |                  |           |         |      |                |    |           |           |                                                                     |

|       |                  |           |         |      |                                     |    |           |           |                                                                    |
|-------|------------------|-----------|---------|------|-------------------------------------|----|-----------|-----------|--------------------------------------------------------------------|
| 21424 | ENSG00000209961  |           | 21333.5 | 0.08 | snRNA                               | 2  | 170584382 | 170584513 | Small nuclear RNA SNORA51                                          |
| 20864 | ENSG00000209969  | SNORA70F  | 22343.7 | 0.08 | snRNA                               | 2  | 105541483 | 105542187 | small nuclear RNA, HACA box 70F                                    |
| 10739 | ENSG00000202352  |           | 12933.5 | 0.08 | snRNA                               | 5  | 64900488  | 64900588  | RNA, U6 small nuclear 540, pseudogene                              |
| 13109 | ENSG00000202359  |           | 14797.2 | 0.08 | snRNA                               | 3  | 81558627  | 81558815  | RNA, U2 small nuclear 28, pseudogene                               |
| 16379 | ENSG00000201834  |           | 17207.8 | 0.08 | snRNA                               | 9  | 15411897  | 15423208  | RNA, U6 small nuclear 319, pseudogene                              |
| 9750  | ENSG00000202021  |           | 17433.9 | 0.08 | snRNA                               | 19 | 44538836  | 44539782  | RNA, U6 small nuclear 902, pseudogene                              |
| 16861 | ENSG00000200731  |           | 17680.9 | 0.08 | snRNA                               | 8  | 42928617  | 42928717  | RNA, U1 small nuclear 124, pseudogene                              |
| 16986 | ENSG00000202687  |           | 17787.3 | 0.08 | snRNA                               | 16 | 89509726  | 89509832  | RNA, U6 small nuclear 430, pseudogene                              |
| 17034 | ENSG00000199698  |           | 17805.7 | 0.08 | snRNA                               | 18 | 45339876  | 45339972  | RNA, U6 small nuclear 856, pseudogene                              |
| 19200 | ENSG00000207128  |           | 19415.5 | 0.08 | snRNA                               | 8  | 10333733  | 10333839  | RNA, U6 small nuclear 729, pseudogene                              |
| 16276 | ENSG00000202764  |           | 19472.2 | 0.08 | snRNA                               | 6  | 101695716 | 101696002 | RNA, U6 small nuclear 1092, pseudogene                             |
| 19600 | ENSG00000203054  |           | 19744.5 | 0.08 | snRNA                               | 10 | 35444371  | 35444430  | RNA, U7 small nuclear 77, pseudogene                               |
| 19653 | ENSG00000202234  |           | 19747.5 | 0.08 | snRNA                               | 7  | 65860178  | 65860273  | RNA, U6 small nuclear 96, pseudogene                               |
| 20063 | ENSG00000212598  |           | 20070.9 | 0.08 | snRNA                               | 7  | 86361175  | 86362178  | RNA, U6 small nuclear 1254, pseudogene                             |
| 20653 | ENSG00000202189  |           | 20335.5 | 0.08 | snRNA                               | 3  | 10079236  | 10079339  | RNA, U6 small nuclear 870, pseudogene                              |
| 20668 | ENSG00000212597  |           | 20347.3 | 0.08 | snRNA                               | 11 | 12886312  | 12886325  | RNA, U6 small nuclear 876, pseudogene                              |
| 21294 | ENSG00000202502  |           | 21029   | 0.08 | snRNA                               | 3  | 172420914 | 172421015 | RNA, U6 small nuclear 547, pseudogene                              |
| 21770 | ENSG00000202011  |           | 21409.1 | 0.08 | snRNA                               | 10 | 116729219 | 116729327 | RNA, U6 small nuclear 1121, pseudogene                             |
| 21771 | ENSG00000201135  |           | 21409.4 | 0.08 | snRNA                               | 1  | 12137938  | 12138041  | RNA, U6 small nuclear 777, pseudogene                              |
| 21955 | ENSG00000202270  |           | 21545.9 | 0.08 | snRNA                               | 5  | 13977608  | 139777029 | RNA, U4 small nuclear 144, pseudogene                              |
| 21981 | ENSG00000201824  |           | 21550.7 | 0.08 | snRNA                               | 4  | 83924595  | 83924670  | RNA, U6 small nuclear 855, pseudogene                              |
| 22139 | ENSG00000202590  |           | 21680.6 | 0.08 | snRNA                               | 7  | 23490277  | 23490341  | RNA, U7 small nuclear 143, pseudogene                              |
| 22141 | ENSG00000201298  |           | 21680.7 | 0.08 | snRNA                               | 5  | 13403662  | 13403998  | RNA, U6 small nuclear 1164, pseudogene                             |
| 22415 | ENSG00000198445  |           | 21981.2 | 0.08 | snRNA                               | 7  | 138581105 | 138581111 | RNA, U6 small nuclear 1272, pseudogene                             |
| 8223  | ENSG00000211714  |           | 10905.3 | 0.08 | TR_V_gene                           | 7  | 142247109 | 142247815 | T cell receptor beta variable 7-3                                  |
| 8333  | ENSG00000205890  |           | 10992.3 | 0.08 | TR_V_gene                           | 14 | 22938033  | 22938690  | T cell receptor beta variable 3                                    |
| 5602  | ENSG00000240531  |           | 8348.8  | 0.08 | transcribed_processed_pseudo_gene   | 17 | 28043297  | 28043703  | ribosomal protein L21 pseudogene 123                               |
| 17347 | ENSG00000203510  |           | 18025.5 | 0.08 | transcribed_processed_pseudo_gene   | 1  | 160683938 | 160684769 | SET pseudogene 9                                                   |
| 20240 | ENSG00000205178  | REXO1L1   | 20215   | 0.08 | transcribed_processed_pseudo_gene   | 8  | 86568695  | 86575726  | REX1, RNA exonuclease 1 homolog (S. cerevisiae)-like 1, pseudogene |
| 20545 | ENSG000002081784 |           | 20457.1 | 0.08 | transcribed_processed_pseudo_gene   | 16 | 72762515  | 72763793  | keratin 18 pseudogene 16                                           |
| 21606 | ENSG00000187686  |           | 21273.3 | 0.08 | transcribed_processed_pseudo_gene   | 11 | 124983057 | 12499677  | keratin 18 pseudogene 59                                           |
| 22081 | ENSG00000215802  |           | 21644.4 | 0.08 | transcribed_processed_pseudo_gene   | 1  | 24096308  | 24096733  | riboflavin kinase pseudogene 1                                     |
| 22306 | ENSG000002066405 | CBX3P2    | 21802.8 | 0.08 | transcribed_processed_pseudo_gene   | 18 | 2652169   | 2652594   | chromobox homolog 3 pseudogene 2                                   |
| 22851 | ENSG000002036797 |           | 22225.2 | 0.08 | transcribed_processed_pseudo_gene   | 10 | 77142151  | 77142602  | sperm autoantigenic protein 17 pseudogene 1                        |
| 23046 | ENSG00000207150  | PGAM1P5   | 22391.7 | 0.08 | transcribed_processed_pseudo_gene   | 12 | 96043031  | 96007775  | phosphoglycerate mutase 1 pseudogene 5                             |
| 23253 | ENSG000002054305 |           | 22552.9 | 0.08 | transcribed_processed_pseudo_gene   | 8  | 77515475  | 77516087  | mitochondrial ribosomal protein L9 pseudogene                      |
| 23371 | ENSG000002030067 |           | 22646.4 | 0.08 | transcribed_processed_pseudo_gene   | 3  | 38808608  | 38825658  | heat shock 70kDa protein 1 (chaperonin) pseudogene 6               |
| 12917 | ENSG00000214425  | LRR37A4P  | 14862.6 | 0.08 | transcribed_unprocessed_pseudo_gene | 17 | 43579685  | 43627701  | leucine rich repeat containing 37, member A4, pseudogene           |
| 17301 | ENSG00000242294  | STAT3L5P  | 17960.9 | 0.08 | transcribed_unprocessed_pseudo_gene | 17 | 99933702  | 99949523  | stromal antigen 3-like 5 pseudogene                                |
| 18343 | ENSG000002027300 | KRT16P2   | 18761   | 0.08 | transcribed_unprocessed_pseudo_gene | 17 | 16733313  | 16736147  | keratin 16 pseudogene 2                                            |
| 18668 | ENSG00000214313  | AZGP1P1   | 18996.7 | 0.08 | transcribed_unprocessed_pseudo_gene | 7  | 99576385  | 99585158  | alpha-2-glycoprotein 1, zinc-binding pseudogene 1                  |
| 19103 | ENSG000002055986 | MT1JP     | 19345.6 | 0.08 | transcribed_unprocessed_pseudo_gene | 16 | 56669651  | 56670998  | metallothionein 1, pseudogene                                      |
| 20563 | ENSG00000108126  |           | 20477.2 | 0.08 | transcribed_unprocessed_pseudo_gene | 6  | 29758731  | 29765598  | major histocompatibility complex, class I, V (pseudogene)          |
| 21014 | ENSG00000188755  | TBC1D3P2  | 20802.5 | 0.08 | transcribed_unprocessed_pseudo_gene | 17 | 60432066  | 60533016  | TBC1 domain family, member 3 pseudogene 2                          |
| 21583 | ENSG000002031431 | LOC40910  | 21257.5 | 0.08 | transcribed_unprocessed_pseudo_gene | 2  | 130248308 | 130266841 | fatty acyl CoA reductase 2 pseudogene 4                            |
| 22035 | ENSG000002036145 | P2RX6P    | 21607.5 | 0.08 | transcribed_unprocessed_pseudo_gene | 22 | 21389532  | 21389306  | purinergic receptor P2X, ligand-gated ion channel, 6 pseudogene    |
| 22440 | ENSG00000186104  | MIR162    | 21900.4 | 0.08 | transcribed_unprocessed_pseudo_gene | 15 | 62520095  | 62545434  | has-mir-7162                                                       |
| 22556 | ENSG000002059404 |           | 21992.4 | 0.08 | transcribed_unprocessed_pseudo_gene | 15 | 84748920  | 84795356  | elongation factor Tu GTP binding domain containing 1 pseudogene 1  |
| 22615 | ENSG00000197588  | KLKP1     | 22039.8 | 0.08 | transcribed_unprocessed_pseudo_gene | 19 | 51385352  | 51396954  | kallikrein pseudogene 1                                            |
| 22652 | ENSG000002025449 | RAB6C-AS1 | 22069.1 | 0.08 | transcribed_unprocessed_pseudo_gene | 2  | 130724165 | 130738039 | RAB6C antisense RNA 1                                              |
| 23077 | ENSG00000160766  | GBAP1     | 22412.5 | 0.08 | transcribed_unprocessed_pseudo_gene | 1  | 155183616 | 155197214 | glucosylase, beta, acid pseudogene 1                               |
| 23948 | ENSG000002051689 |           | 23999.4 | 0.08 | transcribed_unprocessed_pseudo_gene | 4  | 3943487   | 3957146   | family with sequence similarity 86, member E, pseudogene           |
| 24178 | ENSG000002053540 |           | 23296.1 | 0.08 | transcribed_unprocessed_pseudo_gene | 3  | 129817935 | 129830315 | family with sequence similarity 86, member H, pseudogene           |
| 21096 | ENSG00000182997  | PRORS1P1  | 20862.7 | 0.08 | uniprot_pseudogene 2                | 2  | 55505455  | 55511658  | prolyl-4-hydroxylase associated domain containing 1, pseudogene    |
| 11659 | ENSG00000201799  | CCDC16P   | 22147.8 | 0.08 | uniprot_pseudogene 6                | 1  | 109612231 | 109676366 | coiled-coil domain containing 102, pseudogene                      |
| 23524 | ENSG00000218233  |           | 22746.8 | 0.08 | uniprot_pseudogene 6                | 1  | 117954959 | 117962590 | neuropilin, pseudogene                                             |
| 4448  | ENSG000002025217 | HSPA7     | 6909    | 0.08 | uniprot_pseudogene 1                | 1  | 161576081 | 161578007 | heat shock 70kDa protein 7 (HSP70B)                                |
| 17914 | ENSG00000213546  |           | 18429.5 | 0.08 | uniprot_pseudogene 1                | 1  | 137657890 | 137669757 | eukaryotic translation elongation factor 1 alpha 1, pseudogene 32  |
| 19253 | ENSG00000203962  |           | 19455.9 | 0.08 | uniprot_pseudogene 9                | 1  | 33613646  | 33614407  | proboscis, alpha, 3 pseudogene 4                                   |
| 19665 | ENSG000002071705 |           | 19712   | 0.08 | uniprot_pseudogene 13               | 1  | 81447510  | 81448130  | ribosomal protein L17 pseudogene 3                                 |
| 20679 | ENSG000002025121 |           | 20555   | 0.08 | uniprot_pseudogene 6                | 6  | 64190309  | 64191781  | eukaryotic translation elongation factor 1 beta 2, pseudogene 5    |
| 11003 | ENSG00000203644  |           | 20738.5 | 0.08 | uniprot_pseudogene 2                | 2  | 85429064  | 85429204  | cytochrome P450, family 4, subfamily F, polypeptide 32, pseudogene |
| 21151 | ENSG000002041198 |           | 20938.9 | 0.08 | uniprot_pseudogene 3                | 3  | 108044367 | 108045681 | heterogeneous nuclear ribonucleoprotein A1 pseudogene 17           |
| 21625 | ENSG000002049745 |           | 21445.5 | 0.08 | uniprot_pseudogene 4                | 4  | 41844171  | 41845987  | high mobility group box 1 pseudogene 26                            |
| 20115 | ENSG000002031952 |           | 21596.1 | 0.08 | uniprot_pseudogene 1                | 1  | 32882869  | 32878182  | GPI1B, pseudogene 2                                                |
| 22659 | ENSG000002029259 |           | 22075.4 | 0.08 | uniprot_pseudogene 1                | 1  | 32888815  | 32892390  | leucine rich repeat containing 37, member A12, pseudogene          |
| 22776 | ENSG000002037911 |           | 22161.7 | 0.08 | uniprot_pseudogene 17               | 17 | 20319106  | 20320010  | signal recognition particle 88kDa pseudogene 3                     |
| 4556  | ENSG000002028724 |           | 695.4   | 0.08 | uniprot_pseudogene 1                | 1  | 145883868 | 145824373 | G protein-coupled receptor 89C                                     |
| 5758  | ENSG000002034004 |           | 8522.7  | 0.08 | uniprot_pseudogene 1                | 1  | 145883868 | 145824373 | G protein-coupled receptor 89C                                     |
| 6807  | ENSG000002038084 |           | 9579.7  | 0.08 | uniprot_pseudogene 1                | 1  | 145883868 | 145824373 | G protein-coupled receptor 89C                                     |
| 6919  | ENSG000002029862 |           | 9668.3  | 0.08 | uniprot_pseudogene 1                | 1  | 145883868 | 145824373 | G protein-coupled receptor 89C                                     |
| 7175  | ENSG000002050090 |           | 9922.5  | 0.08 | uniprot_pseudogene 1                | 1  | 145883868 | 145824373 | G protein-coupled receptor 89C                                     |
| 7283  | ENSG000002028116 |           | 9999.9  | 0.08 | uniprot_pseudogene 1                | 1  | 145883868 | 145824373 | G protein-coupled receptor 89C                                     |
| 7786  | ENSG000002040388 |           | 10507.8 | 0.08 | uniprot_pseudogene 1                | 1  | 145883868 | 145824373 | G protein-coupled receptor 89C                                     |
| 7950  | ENSG00000219201  |           | 10663.8 | 0.08 | uniprot_pseudogene 1                | 1  | 145883868 | 145824373 | G protein-coupled receptor 89C                                     |
| 7951  | ENSG00000217204  |           | 10664   | 0.08 | uniprot_pseudogene 1                | 1  | 145883868 | 145824373 | G protein-coupled receptor 89C                                     |
| 8025  | ENSG00000217184  |           | 10733.8 | 0.08 | uniprot_pseudogene 1                | 1  | 145883868 | 145824373 | G protein-coupled receptor 89C                                     |
| 8242  | ENSG000001986444 | GPR89C    | 10917.8 | 0.08 | uniprot_pseudogene 1                | 1  | 145883868 | 145824373 | G protein-coupled receptor 89C                                     |
| 9199  | ENSG000002054373 |           | 11713.2 | 0.08 | uniprot_pseudogene 1                | 1  | 145883868 | 145824373 | G protein-coupled receptor 89C                                     |
| 9458  | ENSG00000206313  |           | 11811.9 | 0.08 | uniprot_pseudogene 1                | 1  | 145883868 | 145824373 | G protein-coupled receptor 89C                                     |
| 10250 | ENSG000002033137 |           | 12549.3 | 0.08 | uniprot_pseudogene 1                | 1  | 145883868 | 145824373 | G protein-coupled receptor 89C                                     |
| 10983 | ENSG000002077442 |           | 12884.4 | 0.08 | uniprot_pseudogene 1                | 1  | 145883868 | 145824373 | G protein-coupled receptor 89C                                     |
| 11011 | ENSG000002043554 |           | 13196.7 | 0.08 | uniprot_pseudogene 1                | 1  | 145883868 | 145824373 | G protein-coupled receptor 89C                                     |
| 11177 | ENSG000002025135 |           | 13283.4 | 0.08 | uniprot_pseudogene 1                | 1  | 145883868 | 145824373 | G protein-coupled receptor 89C                                     |
| 11395 | ENSG00000204851  |           | 13483.5 | 0.08 | uniprot_pseudogene 1                | 1  | 145883868 | 145824373 | G protein-coupled receptor 89C                                     |
| 11488 | ENSG00000201870  |           | 13551.9 | 0.08 | uniprot_pseudogene 1                | 1  | 145883868 | 145824373 | G protein-coupled receptor 89C                                     |
| 11907 | ENSG000002029044 |           | 13949.9 | 0.08 | uniprot_pseudogene 1                | 1  | 145883868 | 145824373 | G protein-coupled receptor 89C                                     |
| 12556 | ENSG000002072655 |           | 14409   | 0.08 | uniprot_pseudogene 1                | 1  | 145883868 | 145824373 | G protein-coupled receptor 89C                                     |
| 12970 | ENSG00000211738  |           | 14695.3 | 0.08 | uniprot_pseudogene 1                | 1  | 145883868 | 145824373 | G protein-coupled receptor 89C                                     |
| 13140 | ENSG000002021465 |           | 14818.5 | 0.08 | uniprot_pseudogene 1                | 1  | 145883868 | 145824373 | G protein-coupled receptor 89C                                     |
| 13571 | ENSG000002022684 |           | 15150.2 | 0.08 | uniprot_pseudogene 1                | 1  | 145883868 | 145824373 | G protein-coupled receptor 89C                                     |
| 13688 | ENSG00000202037  |           | 15225.8 | 0.08 | uniprot_pseudogene 1                | 1  | 145883868 | 145824373 | G protein-coupled receptor 89C                                     |
| 13718 | ENSG00000204745  |           | 15266.6 | 0.08 |                                     |    |           |           |                                                                    |

|       |                 |         |      |    |           |           |  |                                    |
|-------|-----------------|---------|------|----|-----------|-----------|--|------------------------------------|
| 17621 | ENSG00000236976 | 18215.7 | 0.08 |    |           |           |  |                                    |
| 17683 | ENSG00000234659 | 18278.3 | 0.08 |    |           |           |  |                                    |
| 17730 | ENSG00000225018 | 18308.6 | 0.08 |    |           |           |  |                                    |
| 17792 | ENSG00000249234 | 18348   | 0.08 |    |           |           |  |                                    |
| 17984 | ENSG00000244273 | 18491.8 | 0.08 |    |           |           |  |                                    |
| 17999 | ENSG00000213366 | 18493.8 | 0.08 |    |           |           |  |                                    |
| 18051 | ENSG00000225487 | 18536   | 0.08 |    |           |           |  |                                    |
| 18130 | ENSG00000272777 | 18601   | 0.08 |    |           |           |  |                                    |
| 18143 | ENSG00000293931 | 18614.2 | 0.08 |    |           |           |  |                                    |
| 18169 | ENSG00000266030 | 18636.5 | 0.08 |    |           |           |  |                                    |
| 18174 | ENSG00000242751 | 18640.5 | 0.08 |    |           |           |  |                                    |
| 18219 | ENSG00000292895 | 18671.5 | 0.08 |    |           |           |  |                                    |
| 18258 | ENSG00000251902 | 18696.3 | 0.08 | 13 | 21573506  | 21573606  |  | RNA_U6 small nuclear 51_pseudogene |
| 18384 | ENSG00000260171 | 18776.2 | 0.08 |    |           |           |  |                                    |
| 18414 | ENSG00000227288 | 18811.9 | 0.08 |    |           |           |  |                                    |
| 18440 | ENSG00000226324 | 18833.5 | 0.08 |    |           |           |  |                                    |
| 18486 | ENSG00000267107 | 18849.1 | 0.08 |    |           |           |  |                                    |
| 18476 | ENSG00000232018 | 18859.4 | 0.08 |    |           |           |  |                                    |
| 18500 | ENSG00000263317 | 18873   | 0.08 |    |           |           |  |                                    |
| 18839 | ENSG00000227466 | 19227.7 | 0.08 |    |           |           |  |                                    |
| 18872 | ENSG00000232688 | 19174   | 0.08 |    |           |           |  |                                    |
| 18912 | ENSG00000239157 | 19188.8 | 0.08 | 20 | 48556833  | 48556937  |  | Small nuclear RNA U13              |
| 19001 | ENSG00000239556 | 19269   | 0.08 |    |           |           |  |                                    |
| 19042 | ENSG00000224525 | 19302.3 | 0.08 |    |           |           |  |                                    |
| 19077 | ENSG00000265042 | 19323.3 | 0.08 |    |           |           |  |                                    |
| 19153 | ENSG00000224294 | 19381.1 | 0.08 |    |           |           |  |                                    |
| 19157 | ENSG00000250008 | 19397.7 | 0.08 |    |           |           |  |                                    |
| 19163 | ENSG00000268051 | 19392.1 | 0.08 |    |           |           |  |                                    |
| 19196 | ENSG00000299953 | 19409   | 0.08 |    |           |           |  |                                    |
| 19382 | ENSG0000027768  | 19335.5 | 0.08 |    |           |           |  |                                    |
| 19383 | ENSG00000232271 | 19554.2 | 0.08 |    |           |           |  |                                    |
| 19481 | ENSG00000272033 | 19627   | 0.08 |    |           |           |  |                                    |
| 19489 | ENSG00000228651 | 19633.7 | 0.08 |    |           |           |  |                                    |
| 19491 | ENSG00000271225 | 19632.4 | 0.08 |    |           |           |  |                                    |
| 19496 | ENSG00000269905 | 19634.5 | 0.08 |    |           |           |  |                                    |
| 19503 | ENSG00000232683 | 19642   | 0.08 |    |           |           |  |                                    |
| 19520 | ENSG00000228541 | 19653.5 | 0.08 |    |           |           |  |                                    |
| 19526 | ENSG00000251588 | 19658.8 | 0.08 |    |           |           |  |                                    |
| 19534 | ENSG00000235554 | 19665   | 0.08 | 5  | 159718795 | 159719067 |  | RNA_7SL cytoplasmic 295_pseudogene |
| 19545 | ENSG00000251550 | 19672.9 | 0.08 |    |           |           |  |                                    |
| 19582 | ENSG00000256951 | 19702.8 | 0.08 |    |           |           |  |                                    |
| 19588 | ENSG00000232685 | 19713.9 | 0.08 |    |           |           |  |                                    |
| 19602 | ENSG00000231298 | 19716   | 0.08 |    |           |           |  |                                    |
| 19686 | ENSG00000238039 | 19752.3 | 0.08 |    |           |           |  |                                    |
| 19683 | ENSG00000260268 | 19763   | 0.08 |    |           |           |  |                                    |
| 19752 | ENSG00000281590 | 19836.6 | 0.08 |    |           |           |  |                                    |
| 19773 | ENSG00000236905 | 19847.2 | 0.08 |    |           |           |  |                                    |
| 19779 | ENSG00000245894 | 19849.7 | 0.08 |    |           |           |  |                                    |
| 19782 | ENSG00000253334 | 19851   | 0.08 | 4  | 83970321  | 83970397  |  | Small nuclear RNA R42              |
| 19802 | ENSG00000267242 | 19872.2 | 0.08 |    |           |           |  |                                    |
| 19838 | ENSG00000232971 | 19902.2 | 0.08 |    |           |           |  |                                    |
| 19858 | ENSG00000218722 | 19915.5 | 0.08 |    |           |           |  |                                    |
| 19879 | ENSG00000251223 | 19933.1 | 0.08 |    |           |           |  |                                    |
| 19880 | ENSG00000259847 | 19944.5 | 0.08 |    |           |           |  |                                    |
| 19883 | ENSG00000259810 | 19946.8 | 0.08 |    |           |           |  |                                    |
| 19888 | ENSG00000245904 | 19950.1 | 0.08 |    |           |           |  |                                    |
| 19904 | ENSG00000249839 | 19957.2 | 0.08 |    |           |           |  |                                    |
| 19907 | ENSG00000292840 | 19959.2 | 0.08 |    |           |           |  |                                    |
| 19918 | ENSG00000259907 | 19970.6 | 0.08 |    |           |           |  |                                    |
| 19945 | ENSG00000251455 | 19986.4 | 0.08 |    |           |           |  |                                    |
| 19983 | ENSG00000213488 | 19995   | 0.08 |    |           |           |  |                                    |
| 20017 | ENSG00000260103 | 20039.8 | 0.08 |    |           |           |  |                                    |
| 20030 | ENSG00000224459 | 20046.9 | 0.08 |    |           |           |  |                                    |
| 20053 | ENSG00000234814 | 20055.1 | 0.08 |    |           |           |  |                                    |
| 20083 | ENSG00000228613 | 20090.1 | 0.08 |    |           |           |  |                                    |
| 20087 | ENSG00000230189 | 20092.5 | 0.08 |    |           |           |  |                                    |
| 20091 | ENSG00000233563 | 20094.5 | 0.08 |    |           |           |  |                                    |
| 20112 | ENSG00000242097 | 20107.3 | 0.08 |    |           |           |  |                                    |
| 20113 | ENSG00000259126 | 20108.1 | 0.08 |    |           |           |  |                                    |
| 20150 | ENSG00000214000 | 20134.8 | 0.08 |    |           |           |  |                                    |
| 20175 | ENSG00000258775 | 20157.4 | 0.08 |    |           |           |  |                                    |
| 20177 | ENSG00000232900 | 20159.8 | 0.08 |    |           |           |  |                                    |
| 20183 | ENSG00000238538 | 20171.1 | 0.08 |    |           |           |  |                                    |
| 20216 | ENSG00000268295 | 20196.2 | 0.08 |    |           |           |  |                                    |
| 20217 | ENSG00000228997 | 20196.3 | 0.08 |    |           |           |  |                                    |
| 20221 | ENSG00000231127 | 20201.7 | 0.08 |    |           |           |  |                                    |
| 20231 | ENSG00000243537 | 20208.8 | 0.08 |    |           |           |  |                                    |
| 20238 | ENSG00000211495 | 20213.5 | 0.08 |    |           |           |  |                                    |
| 20241 | ENSG00000225198 | 20217.7 | 0.08 |    |           |           |  |                                    |
| 20248 | ENSG00000232160 | 20224.8 | 0.08 |    |           |           |  |                                    |
| 20290 | ENSG00000228140 | 20226.7 | 0.08 |    |           |           |  |                                    |
| 20298 | ENSG00000231689 | 20233.9 | 0.08 |    |           |           |  |                                    |
| 20298 | ENSG00000253365 | 20233.8 | 0.08 |    |           |           |  |                                    |
| 20270 | ENSG00000231017 | 20245.7 | 0.08 |    |           |           |  |                                    |
| 20272 | ENSG00000255095 | 20246.4 | 0.08 |    |           |           |  |                                    |
| 20291 | ENSG00000241723 | 20290.1 | 0.08 |    |           |           |  |                                    |
| 20290 | ENSG00000227370 | 20282.8 | 0.08 |    |           |           |  |                                    |
| 20302 | ENSG00000236494 | 20287.6 | 0.08 |    |           |           |  |                                    |
| 20312 | ENSG00000236296 | 20272.5 | 0.08 |    |           |           |  |                                    |
| 20328 | ENSG00000246974 | 20282.1 | 0.08 |    |           |           |  |                                    |
| 20394 | ENSG00000295178 | 20355   | 0.08 |    |           |           |  |                                    |
| 20375 | ENSG00000269694 | 20333.2 | 0.08 |    |           |           |  |                                    |
| 20380 | ENSG00000259268 | 20334.3 | 0.08 |    |           |           |  |                                    |
| 20384 | ENSG00000271241 | 20338.7 | 0.08 |    |           |           |  |                                    |
| 20388 | ENSG00000231453 | 20339.8 | 0.08 |    |           |           |  |                                    |
| 20391 | ENSG00000232882 | 20341   | 0.08 |    |           |           |  |                                    |
| 20403 | ENSG00000236186 | 20346.2 | 0.08 |    |           |           |  |                                    |
| 20408 | ENSG00000233862 | 20351.5 | 0.08 |    |           |           |  |                                    |
| 20452 | ENSG00000253811 | 20385.8 | 0.08 |    |           |           |  |                                    |
| 20484 | ENSG00000297138 | 20414.5 | 0.08 |    |           |           |  |                                    |
| 20485 | ENSG00000232621 | 20415.1 | 0.08 |    |           |           |  |                                    |
| 20488 | ENSG00000230944 | 20416.7 | 0.08 |    |           |           |  |                                    |
| 20506 | ENSG00000250708 | 20426.3 | 0.08 |    |           |           |  |                                    |
| 20514 | ENSG00000250106 | 20411.9 | 0.08 |    |           |           |  |                                    |
| 20518 | ENSG00000268826 | 20436.7 | 0.08 |    |           |           |  |                                    |
| 20529 | ENSG00000231482 | 20447.5 | 0.08 |    |           |           |  |                                    |
| 20548 | ENSG00000232798 | 20460.5 | 0.08 |    |           |           |  |                                    |
| 20557 | ENSG00000251385 | 20473.6 | 0.08 |    |           |           |  |                                    |
| 20584 | ENSG00000296035 | 20490.9 | 0.08 |    |           |           |  |                                    |
| 20590 | ENSG00000232444 | 20492.8 | 0.08 |    |           |           |  |                                    |
| 20596 | ENSG00000228951 | 20495   | 0.08 |    |           |           |  |                                    |
| 20607 | ENSG00000271156 | 20501.7 | 0.08 |    |           |           |  |                                    |
| 20621 | ENSG00000232650 | 20514.2 | 0.08 |    |           |           |  |                                    |
| 20629 | ENSG00000248763 | 20520.5 | 0.08 |    |           |           |  |                                    |
| 20651 | ENSG00000257642 | 20534.6 | 0.08 |    |           |           |  |                                    |
| 20672 | ENSG00000259259 | 20548.9 | 0.08 |    |           |           |  |                                    |
| 20693 | ENSG00000267123 | 20566.3 | 0.08 |    |           |           |  |                                    |
| 20714 | ENSG00000244382 | 20578.8 | 0.08 |    |           |           |  |                                    |
| 20718 | ENSG00000259673 | 20580   | 0.08 |    |           |           |  |                                    |
| 20723 | ENSG00000219773 | 20584.7 | 0.08 |    |           |           |  |                                    |
| 20728 | ENSG00000254731 | 20591.8 | 0.08 |    |           |           |  |                                    |
| 20748 | ENSG00000268709 | 20602.9 | 0.08 |    |           |           |  |                                    |
| 20759 | ENSG00000255410 | 20619.5 | 0.08 |    |           |           |  |                                    |
| 20780 | ENSG00000230746 | 20620.3 | 0.08 |    |           |           |  |                                    |
| 20783 | ENSG0000021779  | 20627.6 | 0.08 |    |           |           |  |                                    |
| 20793 | ENSG00000237777 | 20641.5 | 0.08 |    |           |           |  |                                    |
| 20799 | ENSG00000237828 | 20645.4 | 0.08 |    |           |           |  |                                    |
| 20816 | ENSG00000264488 | 20661.3 | 0.08 |    |           |           |  |                                    |
| 20823 | ENSG00000254758 | 20669.5 | 0.08 |    |           |           |  |                                    |
| 20844 | ENSG00000267968 | 20681.8 | 0.08 |    |           |           |  |                                    |
| 20857 | ENSG00000259895 | 20689.6 | 0.08 |    |           |           |  |                                    |
| 20864 | ENSG00000272444 | 20693.0 | 0.08 |    |           |           |  |                                    |
| 20875 | ENSG00000252048 | 20698.1 | 0.08 | 4  | 184097914 | 184098084 |  | Small nuclear RNA U3               |
| 20877 | ENSG00000255101 | 20700.9 | 0.08 |    |           |           |  |                                    |
| 20884 | ENSG00000259251 | 20710   | 0.08 |    |           |           |  |                                    |
| 20888 | ENSG00000254254 | 20710.9 | 0.08 |    |           |           |  |                                    |
| 20890 | ENSG00000239305 | 20714.6 | 0.08 |    |           |           |  |                                    |
| 20894 | ENSG00000231364 | 20715.7 | 0.08 |    |           |           |  |                                    |
| 20898 | ENSG00000234722 | 20717.5 | 0.08 |    |           |           |  |                                    |
| 20903 | ENSG00000269294 | 20724.1 | 0.08 |    |           |           |  |                                    |
| 20904 | ENSG00000251377 | 20724.5 | 0.08 |    |           |           |  |                                    |
| 20916 | ENSG00000241499 | 20736.6 | 0.08 |    |           |           |  |                                    |
| 20922 | ENSG00000235347 | 20741.2 | 0.08 |    |           |           |  |                                    |
| 20925 | ENSG00000246555 | 20743.8 | 0.08 |    |           |           |  |                                    |
| 20939 | ENSG00000231866 | 20751.2 | 0.08 |    |           |           |  |                                    |
| 20955 | ENSG00000252075 | 20758.9 | 0.08 |    |           |           |  |                                    |
| 20968 | ENSG00000264837 | 20761   | 0.08 |    |           |           |  |                                    |
| 20960 | ENSG00000203266 | 20763.6 | 0.08 |    |           |           |  |                                    |
| 20982 | ENSG00000252099 | 20781   | 0.08 |    |           |           |  |                                    |
| 20993 | ENSG00000232447 | 20786.6 | 0.08 |    |           |           |  |                                    |
| 21002 | ENSG00000227563 | 20798.1 | 0.08 |    |           |           |  |                                    |

|       |                  |         |      |    |           |           |  |                                                    |
|-------|------------------|---------|------|----|-----------|-----------|--|----------------------------------------------------|
| 21025 | ENSG00000259278  | 20812.5 | 0.08 |    |           |           |  |                                                    |
| 21026 | ENSG00000259299  | 20815.5 | 0.08 |    |           |           |  |                                                    |
| 21040 | ENSG00000214113  | 20820.2 | 0.08 |    |           |           |  |                                                    |
| 21041 | ENSG00000226522  | 20821.2 | 0.08 |    |           |           |  |                                                    |
| 21048 | ENSG00000230709  | 20823.4 | 0.08 |    |           |           |  |                                                    |
| 21051 | ENSG00000238442  | 20826.3 | 0.08 |    |           |           |  |                                                    |
| 21068 | ENSG00000261843  | 20844.4 | 0.08 |    |           |           |  |                                                    |
| 21074 | ENSG00000234692  | 20847   | 0.08 |    |           |           |  |                                                    |
| 21076 | ENSG00000251497  | 20851   | 0.08 |    |           |           |  |                                                    |
| 21078 | ENSG00000235691  | 20853.3 | 0.08 |    |           |           |  |                                                    |
| 21107 | ENSG00000259291  | 20872   | 0.08 |    |           |           |  |                                                    |
| 21112 | ENSG00000239861  | 20876.1 | 0.08 | 2  | 197079943 | 197080046 |  | Small nuclear RNA U13                              |
| 21115 | ENSG00000239861  | 20877.2 | 0.08 |    |           |           |  |                                                    |
| 21119 | ENSG00000228392  | 20883.6 | 0.08 |    |           |           |  |                                                    |
| 21130 | ENSG00000209718  | 20892.5 | 0.08 |    |           |           |  |                                                    |
| 21137 | ENSG00000227845  | 20898.3 | 0.08 |    |           |           |  |                                                    |
| 21158 | ENSG00000249805  | 20915.2 | 0.08 | 21 | 46511596  | 46515493  |  | HCG401283, PRED57 protein, Uncharacterized protein |
| 21165 | ENSG00000225933  | 20923.9 | 0.08 |    |           |           |  |                                                    |
| 21169 | ENSG00000268763  | 20927.9 | 0.08 |    |           |           |  |                                                    |
| 21175 | ENSG00000259124  | 20933   | 0.08 |    |           |           |  |                                                    |
| 21188 | ENSG00000231229  | 20943.7 | 0.08 |    |           |           |  |                                                    |
| 21197 | ENSG00000227218  | 20949.5 | 0.08 |    |           |           |  |                                                    |
| 21203 | ENSG00000223834  | 20951.1 | 0.08 |    |           |           |  |                                                    |
| 21211 | ENSG00000224653  | 20958.7 | 0.08 |    |           |           |  |                                                    |
| 21217 | ENSG00000232642  | 20968.8 | 0.08 |    |           |           |  |                                                    |
| 21218 | ENSG00000249299  | 20969.7 | 0.08 |    |           |           |  |                                                    |
| 21228 | ENSG00000219455  | 20974.7 | 0.08 |    |           |           |  |                                                    |
| 21227 | ENSG00000270883  | 20974.9 | 0.08 |    |           |           |  |                                                    |
| 21233 | ENSG00000229520  | 20980.1 | 0.08 | 17 | 34046907  | 34047461  |  | ribosomal protein L17 pseudogene 42                |
| 21250 | ENSG00000225205  | 20993.3 | 0.08 |    |           |           |  |                                                    |
| 21274 | ENSG00000266312  | 21014.3 | 0.08 |    |           |           |  |                                                    |
| 21276 | ENSG00000252291  | 21016.5 | 0.08 |    |           |           |  |                                                    |
| 21277 | ENSG00000221847  | 21017.5 | 0.08 | 8  | 143811652 | 143812504 |  | voltage-dependent anion channel 1 pseudogene 8     |
| 21280 | ENSG00000224359  | 21018.6 | 0.08 |    |           |           |  |                                                    |
| 21288 | ENSG00000213414  | 21025.6 | 0.08 |    |           |           |  |                                                    |
| 21292 | ENSG00000237889  | 21028.1 | 0.08 |    |           |           |  |                                                    |
| 21302 | ENSG00000233311  | 21035.6 | 0.08 |    |           |           |  |                                                    |
| 21307 | ENSG00000230109  | 21039   | 0.08 |    |           |           |  |                                                    |
| 21308 | ENSG00000231099  | 21039.3 | 0.08 |    |           |           |  |                                                    |
| 21313 | ENSG00000231908  | 21043.7 | 0.08 |    |           |           |  |                                                    |
| 21316 | ENSG00000232023  | 21045.5 | 0.08 |    |           |           |  |                                                    |
| 21319 | ENSG00000232158  | 21048.7 | 0.08 |    |           |           |  |                                                    |
| 21324 | ENSG00000282339  | 21052.8 | 0.08 |    |           |           |  |                                                    |
| 21330 | ENSG00000225988  | 21058.4 | 0.08 |    |           |           |  |                                                    |
| 21333 | ENSG00000249202  | 21067.8 | 0.08 |    |           |           |  |                                                    |
| 21346 | ENSG00000258435  | 21067.8 | 0.08 | 19 | 49187292  | 49187563  |  | RNA, 75S, cytoplasmic 345, pseudogene              |
| 21350 | ENSG00000260886  | 21071   | 0.08 |    |           |           |  |                                                    |
| 21355 | ENSG00000259365  | 21073.3 | 0.08 |    |           |           |  |                                                    |
| 21391 | ENSG00000259139  | 21107.6 | 0.08 |    |           |           |  |                                                    |
| 21403 | ENSG00000217854  | 21117.2 | 0.08 |    |           |           |  |                                                    |
| 21404 | ENSG00000274019  | 21118   | 0.08 |    |           |           |  |                                                    |
| 21407 | ENSG00000233443  | 21120.2 | 0.08 |    |           |           |  |                                                    |
| 21415 | ENSG00000250748  | 21128.5 | 0.08 |    |           |           |  |                                                    |
| 21418 | ENSG00000273006  | 21130.8 | 0.08 |    |           |           |  |                                                    |
| 21420 | ENSG00000225456  | 21131.7 | 0.08 |    |           |           |  |                                                    |
| 21425 | ENSG00000235139  | 21134.6 | 0.08 |    |           |           |  |                                                    |
| 21428 | ENSG00000223719  | 21136.2 | 0.08 |    |           |           |  |                                                    |
| 21429 | ENSG00000265313  | 21136.8 | 0.08 |    |           |           |  |                                                    |
| 21432 | ENSG00000242596  | 21139.6 | 0.08 |    |           |           |  |                                                    |
| 21433 | ENSG00000234559  | 21143.1 | 0.08 |    |           |           |  |                                                    |
| 21434 | ENSG00000235981  | 21143.1 | 0.08 |    |           |           |  |                                                    |
| 21446 | ENSG00000238896  | 21153.9 | 0.08 | 6  | 11079248  | 11079346  |  | Small nuclear RNA U13                              |
| 21451 | ENSG00000224077  | 21159.9 | 0.08 |    |           |           |  |                                                    |
| 21462 | ENSG00000215281  | 21168.5 | 0.08 |    |           |           |  |                                                    |
| 21467 | ENSG00000270423  | 21170.2 | 0.08 |    |           |           |  |                                                    |
| 21469 | ENSG00000205177  | 21170.6 | 0.08 |    |           |           |  |                                                    |
| 21470 | ENSG00000221602  | 21171.5 | 0.08 |    |           |           |  |                                                    |
| 21479 | ENSG00000255639  | 21175.9 | 0.08 |    |           |           |  |                                                    |
| 21488 | ENSG00000228303  | 21185.7 | 0.08 |    |           |           |  |                                                    |
| 21518 | ENSG00000230138  | 21203   | 0.08 |    |           |           |  |                                                    |
| 21529 | ENSG00000271778  | 21204.5 | 0.08 |    |           |           |  |                                                    |
| 21530 | ENSG00000221761  | 21214.3 | 0.08 |    |           |           |  |                                                    |
| 21535 | ENSG00000228568  | 21214.3 | 0.08 |    |           |           |  |                                                    |
| 21536 | ENSG00000272095  | 21217.2 | 0.08 |    |           |           |  |                                                    |
| 21539 | ENSG00000224374  | 21219   | 0.08 | 15 | 83188579  | 83188581  |  | golin A6 family-like 21, pseudogene                |
| 21550 | ENSG00000222690  | 21226.7 | 0.08 |    |           |           |  |                                                    |
| 21558 | ENSG00000255532  | 21237.6 | 0.08 |    |           |           |  |                                                    |
| 21560 | ENSG00000225001  | 21240   | 0.08 |    |           |           |  |                                                    |
| 21562 | ENSG00000270902  | 21257.4 | 0.08 |    |           |           |  |                                                    |
| 21599 | ENSG00000228932  | 21267.7 | 0.08 |    |           |           |  |                                                    |
| 21600 | ENSG00000233717  | 21267.8 | 0.08 |    |           |           |  |                                                    |
| 21609 | ENSG00000225119  | 21274.3 | 0.08 | 10 | 38717074  | 38736420  |  | long intergenic non-protein coding RNA 999         |
| 21612 | ENSG00000259820  | 21279.2 | 0.08 |    |           |           |  |                                                    |
| 21623 | ENSG00000258815  | 21287.4 | 0.08 |    |           |           |  |                                                    |
| 21646 | ENSG00000231225  | 21299.8 | 0.08 |    |           |           |  |                                                    |
| 21650 | ENSG00000221258  | 21311.2 | 0.08 |    |           |           |  |                                                    |
| 21666 | ENSG00000229590  | 21328.7 | 0.08 |    |           |           |  |                                                    |
| 21670 | ENSG00000253334  | 21331.5 | 0.08 |    |           |           |  |                                                    |
| 21677 | ENSG00000261340  | 21334.5 | 0.08 |    |           |           |  |                                                    |
| 21679 | ENSG00000221469  | 21335.5 | 0.08 |    |           |           |  |                                                    |
| 21686 | ENSG00000235345  | 21343.1 | 0.08 |    |           |           |  |                                                    |
| 21688 | ENSG00000227278  | 21344.4 | 0.08 |    |           |           |  |                                                    |
| 21691 | ENSG00000234432  | 21348.5 | 0.08 |    |           |           |  |                                                    |
| 21692 | ENSG00000224387  | 21348.8 | 0.08 |    |           |           |  |                                                    |
| 21699 | ENSG00000226252  | 21358.3 | 0.08 |    |           |           |  |                                                    |
| 21710 | ENSG00000271253  | 21362.2 | 0.08 |    |           |           |  |                                                    |
| 21714 | ENSG00000206468  | 21371.5 | 0.08 |    |           |           |  |                                                    |
| 21725 | ENSG00000208460  | 21379.6 | 0.08 |    |           |           |  |                                                    |
| 21735 | ENSG00000271029  | 21384.3 | 0.08 |    |           |           |  |                                                    |
| 21740 | ENSG00000225330  | 21388.1 | 0.08 |    |           |           |  |                                                    |
| 21743 | ENSG00000233891  | 21391.1 | 0.08 | 17 | 39993316  | 39993380  |  | RNA, 75S, cytoplasmic 871, pseudogene              |
| 21747 | ENSG00000228741  | 21395.9 | 0.08 |    |           |           |  |                                                    |
| 21751 | ENSG00000231103  | 21397.5 | 0.08 |    |           |           |  |                                                    |
| 21754 | ENSG00000255308  | 21398.2 | 0.08 |    |           |           |  |                                                    |
| 21755 | ENSG00000257725  | 21398.4 | 0.08 |    |           |           |  |                                                    |
| 21761 | ENSG00000213747  | 21400.2 | 0.08 |    |           |           |  |                                                    |
| 21768 | ENSG00000225349  | 21406.7 | 0.08 |    |           |           |  |                                                    |
| 21773 | ENSG00000219088  | 21410.8 | 0.08 |    |           |           |  |                                                    |
| 21776 | ENSG00000204893  | 21411.5 | 0.08 |    |           |           |  |                                                    |
| 21778 | ENSG00000250900  | 21413.6 | 0.08 |    |           |           |  |                                                    |
| 21795 | ENSG00000242569  | 21421.7 | 0.08 |    |           |           |  |                                                    |
| 21798 | ENSG00000221312  | 21424   | 0.08 |    |           |           |  |                                                    |
| 21804 | ENSG00000228781  | 21431   | 0.08 |    |           |           |  |                                                    |
| 21810 | ENSG00000241811  | 21434.5 | 0.08 | 8  | 25038946  | 25039235  |  | RNA, 75S, cytoplasmic 651, pseudogene              |
| 21813 | ENSG00000221764  | 21437.1 | 0.08 |    |           |           |  |                                                    |
| 21814 | ENSG00000239870  | 21437.2 | 0.08 |    |           |           |  |                                                    |
| 21829 | ENSG00000226889  | 21450.4 | 0.08 |    |           |           |  |                                                    |
| 21843 | ENSG00000233538  | 21461   | 0.08 |    |           |           |  |                                                    |
| 21849 | ENSG00000265461  | 21462.9 | 0.08 |    |           |           |  |                                                    |
| 21852 | ENSG00000213779  | 21464.4 | 0.08 |    |           |           |  |                                                    |
| 21854 | ENSG00000204267  | 21465.3 | 0.08 |    |           |           |  |                                                    |
| 21856 | ENSG00000256598  | 21466.1 | 0.08 |    |           |           |  |                                                    |
| 21866 | ENSG00000280425  | 21476.9 | 0.08 |    |           |           |  |                                                    |
| 21868 | ENSG00000246375  | 21479.1 | 0.08 |    |           |           |  |                                                    |
| 21876 | ENSG00000182971  | 21486.1 | 0.08 |    |           |           |  |                                                    |
| 21879 | ENSG00000281215  | 21487.7 | 0.08 |    |           |           |  |                                                    |
| 21888 | ENSG00000206956  | 21497.7 | 0.08 |    |           |           |  |                                                    |
| 21889 | ENSG00000257225  | 21498   | 0.08 |    |           |           |  |                                                    |
| 21909 | ENSG000002681302 | 21509.5 | 0.08 |    |           |           |  |                                                    |
| 21910 | ENSG00000249815  | 21510   | 0.08 |    |           |           |  |                                                    |
| 21911 | ENSG00000256545  | 21510.6 | 0.08 |    |           |           |  |                                                    |
| 21915 | ENSG000002328665 | 21513.7 | 0.08 | 13 | 20449327  | 20449425  |  | Small nuclear RNA U13                              |
| 21925 | ENSG00000248103  | 21523.2 | 0.08 |    |           |           |  |                                                    |
| 21928 | ENSG00000229762  | 21523.8 | 0.08 |    |           |           |  |                                                    |
| 21930 | ENSG00000231533  | 21526.2 | 0.08 |    |           |           |  |                                                    |
| 21960 | ENSG00000230124  | 21541.7 | 0.08 |    |           |           |  |                                                    |
| 21965 | ENSG00000206289  | 21550.9 | 0.08 |    |           |           |  |                                                    |
| 21989 | ENSG00000268989  | 21564.5 | 0.08 |    |           |           |  |                                                    |
| 22010 | ENSG00000209534  | 21588.1 | 0.08 |    |           |           |  |                                                    |
| 22013 | ENSG00000221359  | 21591.7 | 0.08 |    |           |           |  |                                                    |
| 22014 | ENSG00000233138  | 21595.8 | 0.08 |    |           |           |  |                                                    |
| 22016 | ENSG00000254226  | 21597   | 0.08 |    |           |           |  |                                                    |
| 22019 | ENSG00000252910  | 21597.7 | 0.08 |    |           |           |  |                                                    |
| 22022 | ENSG00000250409  | 21600.2 | 0.08 |    |           |           |  |                                                    |
| 22023 | ENSG00000264159  | 21601.3 | 0.08 | 19 | 3501316   | 3501587   |  | RNA, 75S, cytoplasmic 866, pseudogene              |
| 22030 | ENSG00000249944  | 21604.7 | 0.08 |    |           |           |  |                                                    |
| 22033 | ENSG00000271420  | 21606.2 | 0.08 |    |           |           |  |                                                    |
| 22054 | ENSG00000259822  | 21621.4 | 0.08 |    |           |           |  |                                                    |
| 22058 | ENSG00000221443  | 21634.7 | 0.08 |    |           |           |  |                                                    |
| 22063 | ENSG00000271806  | 21628.3 | 0.08 |    |           |           |  |                                                    |



|       |                 |  |         |      |    |           |           |  |                                      |
|-------|-----------------|--|---------|------|----|-----------|-----------|--|--------------------------------------|
| 22069 | ENSG00000271334 |  | 21634   | 0.08 |    |           |           |  |                                      |
| 22070 | ENSG00000271163 |  | 21634   | 0.08 |    |           |           |  |                                      |
| 22071 | ENSG00000231197 |  | 21635.4 | 0.08 |    |           |           |  |                                      |
| 22074 | ENSG00000258345 |  | 21636.3 | 0.08 |    |           |           |  |                                      |
| 22082 | ENSG00000244262 |  | 21646   | 0.08 |    |           |           |  |                                      |
| 22083 | ENSG00000248241 |  | 21647.1 | 0.08 |    |           |           |  |                                      |
| 22092 | ENSG00000258433 |  | 21650.9 | 0.08 |    |           |           |  |                                      |
| 22116 | ENSG00000265022 |  | 21667.1 | 0.08 |    |           |           |  |                                      |
| 22118 | ENSG00000265115 |  | 21667.7 | 0.08 |    |           |           |  |                                      |
| 22128 | ENSG00000262362 |  | 21671.1 | 0.08 |    |           |           |  |                                      |
| 22127 | ENSG00000249510 |  | 21671.3 | 0.08 |    |           |           |  |                                      |
| 22129 | ENSG00000265207 |  | 21671.6 | 0.08 |    |           |           |  |                                      |
| 22132 | ENSG00000263499 |  | 21673.6 | 0.08 |    |           |           |  |                                      |
| 22136 | ENSG00000229956 |  | 21695.6 | 0.08 |    |           |           |  |                                      |
| 22157 | ENSG00000253420 |  | 21696.5 | 0.08 |    |           |           |  |                                      |
| 22159 | ENSG00000213253 |  | 21697.1 | 0.08 |    |           |           |  |                                      |
| 22170 | ENSG00000233444 |  | 21703.4 | 0.08 |    |           |           |  |                                      |
| 22173 | ENSG00000259207 |  | 21705   | 0.08 | 13 | 21716330  | 21716629  |  | RNA, 7SL, cytoplasmic 80, pseudogene |
| 22186 | ENSG00000248120 |  | 21717.4 | 0.08 |    |           |           |  |                                      |
| 22194 | ENSG00000244251 |  | 21724.1 | 0.08 |    |           |           |  |                                      |
| 22196 | ENSG00000252911 |  | 21725   | 0.08 |    |           |           |  |                                      |
| 22199 | ENSG00000260163 |  | 21729.5 | 0.08 |    |           |           |  |                                      |
| 22214 | ENSG00000226857 |  | 21741   | 0.08 |    |           |           |  |                                      |
| 22219 | ENSG00000231107 |  | 21743.1 | 0.08 |    |           |           |  |                                      |
| 22220 | ENSG00000223570 |  | 21743.8 | 0.08 |    |           |           |  |                                      |
| 22234 | ENSG00000261916 |  | 21754.7 | 0.08 |    |           |           |  |                                      |
| 22251 | ENSG00000246903 |  | 21766.3 | 0.08 |    |           |           |  |                                      |
| 22268 | ENSG00000270810 |  | 21775   | 0.08 |    |           |           |  |                                      |
| 22270 | ENSG00000292362 |  | 21775.5 | 0.08 |    |           |           |  |                                      |
| 22280 | ENSG00000231711 |  | 21781.1 | 0.08 |    |           |           |  |                                      |
| 22288 | ENSG00000234038 |  | 21790.3 | 0.08 |    |           |           |  |                                      |
| 22296 | ENSG00000232089 |  | 21794.2 | 0.08 |    |           |           |  |                                      |
| 22305 | ENSG00000251553 |  | 21801.3 | 0.08 |    |           |           |  |                                      |
| 22310 | ENSG00000251615 |  | 21806.9 | 0.08 |    |           |           |  |                                      |
| 22311 | ENSG00000232526 |  | 21807.8 | 0.08 |    |           |           |  |                                      |
| 22321 | ENSG00000232399 |  | 21814   | 0.08 |    |           |           |  |                                      |
| 22328 | ENSG00000259575 |  | 21818.9 | 0.08 |    |           |           |  |                                      |
| 22333 | ENSG00000258829 |  | 21822.8 | 0.08 |    |           |           |  |                                      |
| 22338 | ENSG00000232528 |  | 21825.9 | 0.08 |    |           |           |  |                                      |
| 22347 | ENSG00000259160 |  | 21832.3 | 0.08 |    |           |           |  |                                      |
| 22357 | ENSG00000269733 |  | 21840.4 | 0.08 |    |           |           |  |                                      |
| 22376 | ENSG00000237698 |  | 21854   | 0.08 |    |           |           |  |                                      |
| 22372 | ENSG00000268168 |  | 21854.5 | 0.08 |    |           |           |  |                                      |
| 22385 | ENSG00000232523 |  | 21862.1 | 0.08 |    |           |           |  |                                      |
| 22388 | ENSG00000260586 |  | 21869   | 0.08 |    |           |           |  |                                      |
| 22390 | ENSG00000252525 |  | 21864.7 | 0.08 |    |           |           |  |                                      |
| 22396 | ENSG00000238290 |  | 21868.8 | 0.08 |    |           |           |  |                                      |
| 22403 | ENSG00000247744 |  | 21875.6 | 0.08 |    |           |           |  |                                      |
| 22412 | ENSG00000253161 |  | 21880.5 | 0.08 |    |           |           |  |                                      |
| 22413 | ENSG00000260190 |  | 21880.7 | 0.08 |    |           |           |  |                                      |
| 22418 | ENSG00000252107 |  | 21884   | 0.08 |    |           |           |  |                                      |
| 22421 | ENSG00000234716 |  | 21884.4 | 0.08 |    |           |           |  |                                      |
| 22425 | ENSG00000227470 |  | 21886.8 | 0.08 |    |           |           |  |                                      |
| 22430 | ENSG00000235339 |  | 21889.5 | 0.08 |    |           |           |  |                                      |
| 22431 | ENSG00000256468 |  | 21891.6 | 0.08 |    |           |           |  |                                      |
| 22432 | ENSG00000238186 |  | 21893.6 | 0.08 |    |           |           |  |                                      |
| 22434 | ENSG00000239098 |  | 21894.7 | 0.08 | 20 | 34708884  | 34708984  |  | Small nuclear RNA U13                |
| 22438 | ENSG00000251658 |  | 21899.3 | 0.08 |    |           |           |  |                                      |
| 22444 | ENSG00000232762 |  | 21904.9 | 0.08 |    |           |           |  |                                      |
| 22464 | ENSG00000230165 |  | 21917   | 0.08 |    |           |           |  |                                      |
| 22465 | ENSG00000248163 |  | 21917.3 | 0.08 |    |           |           |  |                                      |
| 22467 | ENSG00000238003 |  | 21917.5 | 0.08 |    |           |           |  |                                      |
| 22472 | ENSG00000234453 |  | 21920.6 | 0.08 |    |           |           |  |                                      |
| 22478 | ENSG00000230783 |  | 21923.8 | 0.08 |    |           |           |  |                                      |
| 22477 | ENSG00000264396 |  | 21924.6 | 0.08 | X  | 71443094  | 71443403  |  | RNA, 7SL, cytoplasmic 80, pseudogene |
| 22483 | ENSG00000230319 |  | 21930.6 | 0.08 |    |           |           |  |                                      |
| 22490 | ENSG00000246963 |  | 21931.5 | 0.08 |    |           |           |  |                                      |
| 22500 | ENSG00000245662 |  | 21941.6 | 0.08 |    |           |           |  |                                      |
| 22514 | ENSG00000230801 |  | 21951.1 | 0.08 |    |           |           |  |                                      |
| 22516 | ENSG00000259657 |  | 21953.4 | 0.08 |    |           |           |  |                                      |
| 22549 | ENSG00000226067 |  | 21960.8 | 0.08 |    |           |           |  |                                      |
| 22553 | ENSG00000232763 |  | 21984.9 | 0.08 |    |           |           |  |                                      |
| 22570 | ENSG00000271860 |  | 22001.9 | 0.08 |    |           |           |  |                                      |
| 22576 | ENSG00000258234 |  | 22006.1 | 0.08 |    |           |           |  |                                      |
| 22581 | ENSG00000230168 |  | 22008   | 0.08 |    |           |           |  |                                      |
| 22586 | ENSG00000224949 |  | 22012.5 | 0.08 |    |           |           |  |                                      |
| 22596 | ENSG00000273077 |  | 22022.5 | 0.08 |    |           |           |  |                                      |
| 22618 | ENSG00000268724 |  | 22041.3 | 0.08 |    |           |           |  |                                      |
| 22621 | ENSG00000250396 |  | 22043.3 | 0.08 |    |           |           |  |                                      |
| 22626 | ENSG00000230984 |  | 22047.3 | 0.08 |    |           |           |  |                                      |
| 22633 | ENSG00000225167 |  | 22050.3 | 0.08 |    |           |           |  |                                      |
| 22632 | ENSG00000259711 |  | 22053   | 0.08 |    |           |           |  |                                      |
| 22635 | ENSG00000248478 |  | 22054.2 | 0.08 |    |           |           |  |                                      |
| 22636 | ENSG00000227895 |  | 22056.9 | 0.08 |    |           |           |  |                                      |
| 22640 | ENSG00000231622 |  | 22059   | 0.08 |    |           |           |  |                                      |
| 22656 | ENSG00000270733 |  | 22070.8 | 0.08 |    |           |           |  |                                      |
| 22657 | ENSG00000226298 |  | 22071.4 | 0.08 |    |           |           |  |                                      |
| 22671 | ENSG00000228411 |  | 22084.1 | 0.08 |    |           |           |  |                                      |
| 22688 | ENSG00000222024 |  | 22095.6 | 0.08 |    |           |           |  |                                      |
| 22688 | ENSG00000251052 |  | 22097.5 | 0.08 |    |           |           |  |                                      |
| 22699 | ENSG00000224264 |  | 22106.7 | 0.08 |    |           |           |  |                                      |
| 22701 | ENSG00000250295 |  | 22108.4 | 0.08 |    |           |           |  |                                      |
| 22709 | ENSG00000269251 |  | 22114.1 | 0.08 |    |           |           |  |                                      |
| 22710 | ENSG00000246947 |  | 22114.7 | 0.08 |    |           |           |  |                                      |
| 22716 | ENSG00000268950 |  | 22119.7 | 0.08 | 1  | 31902152  | 31902614  |  | HCG1787699; Uncharacterized protein  |
| 22717 | ENSG00000252557 |  | 22119.7 | 0.08 | 7  | 148963533 | 148963604 |  | Small nuclear RNA SNORD112           |
| 22724 | ENSG00000254467 |  | 22117.2 | 0.08 |    |           |           |  |                                      |
| 22740 | ENSG00000226107 |  | 22142.7 | 0.08 |    |           |           |  |                                      |
| 22744 | ENSG00000244899 |  | 22145.6 | 0.08 |    |           |           |  |                                      |
| 22753 | ENSG00000249311 |  | 22149.1 | 0.08 |    |           |           |  |                                      |
| 22758 | ENSG00000225898 |  | 22150.4 | 0.08 |    |           |           |  |                                      |
| 22773 | ENSG00000272472 |  | 22161.2 | 0.08 |    |           |           |  |                                      |
| 22774 | ENSG00000226364 |  | 22161.3 | 0.08 |    |           |           |  |                                      |
| 22797 | ENSG00000268978 |  | 22179.5 | 0.08 |    |           |           |  |                                      |
| 22800 | ENSG00000226988 |  | 22181.1 | 0.08 |    |           |           |  |                                      |
| 22803 | ENSG00000230218 |  | 22183.9 | 0.08 |    |           |           |  |                                      |
| 22804 | ENSG00000268467 |  | 22185.5 | 0.08 | X  | 122844694 | 122844692 |  | RNA, 7SL, cytoplasmic 29, pseudogene |
| 22820 | ENSG00000234878 |  | 22203.1 | 0.08 |    |           |           |  |                                      |
| 22823 | ENSG00000252522 |  | 22206.3 | 0.08 |    |           |           |  |                                      |
| 22833 | ENSG00000233593 |  | 22214.3 | 0.08 |    |           |           |  |                                      |
| 22840 | ENSG00000268458 |  | 22219.6 | 0.08 |    |           |           |  |                                      |
| 22842 | ENSG00000251537 |  | 22222.4 | 0.08 |    |           |           |  |                                      |
| 22847 | ENSG00000233924 |  | 22224   | 0.08 |    |           |           |  |                                      |
| 22861 | ENSG00000232218 |  | 22231   | 0.08 |    |           |           |  |                                      |
| 22870 | ENSG00000226013 |  | 22237.5 | 0.08 |    |           |           |  |                                      |
| 22874 | ENSG00000248792 |  | 22242.3 | 0.08 |    |           |           |  |                                      |
| 22885 | ENSG00000266549 |  | 22253.1 | 0.08 |    |           |           |  |                                      |
| 22891 | ENSG00000271290 |  | 22257.8 | 0.08 |    |           |           |  |                                      |
| 22901 | ENSG00000247363 |  | 22265.3 | 0.08 |    |           |           |  |                                      |
| 22918 | ENSG00000270861 |  | 22282.4 | 0.08 |    |           |           |  |                                      |
| 22924 | ENSG00000232657 |  | 22285.4 | 0.08 |    |           |           |  |                                      |
| 22947 | ENSG00000224644 |  | 22307.1 | 0.08 |    |           |           |  |                                      |
| 22950 | ENSG00000230922 |  | 22309.5 | 0.08 |    |           |           |  |                                      |
| 22987 | ENSG00000250799 |  | 22346.7 | 0.08 |    |           |           |  |                                      |
| 22994 | ENSG00000269584 |  | 22352.1 | 0.08 |    |           |           |  |                                      |
| 23005 | ENSG00000272056 |  | 22360.6 | 0.08 |    |           |           |  |                                      |
| 23009 | ENSG00000271676 |  | 22372.6 | 0.08 |    |           |           |  |                                      |
| 23022 | ENSG00000231853 |  | 22373.1 | 0.08 |    |           |           |  |                                      |
| 23024 | ENSG00000226684 |  | 22374   | 0.08 |    |           |           |  |                                      |
| 23036 | ENSG00000231198 |  | 22376.4 | 0.08 |    |           |           |  |                                      |
| 23038 | ENSG00000250664 |  | 22382   | 0.08 |    |           |           |  |                                      |
| 23043 | ENSG00000234654 |  | 22385.8 | 0.08 |    |           |           |  |                                      |
| 23062 | ENSG00000249807 |  | 22400   | 0.08 |    |           |           |  |                                      |
| 23067 | ENSG00000254574 |  | 22405.4 | 0.08 |    |           |           |  |                                      |
| 23071 | ENSG00000230320 |  | 22407.1 | 0.08 |    |           |           |  |                                      |
| 23072 | ENSG00000226897 |  | 22407.4 | 0.08 |    |           |           |  |                                      |
| 23084 | ENSG00000252525 |  | 22417.8 | 0.08 |    |           |           |  |                                      |
| 23089 | ENSG00000229857 |  | 22421.5 | 0.08 |    |           |           |  |                                      |
| 23101 | ENSG00000226987 |  | 22430.2 | 0.08 |    |           |           |  |                                      |
| 23108 | ENSG00000224271 |  | 22434.5 | 0.08 |    |           |           |  |                                      |
| 23122 | ENSG00000258821 |  | 22440.3 | 0.08 |    |           |           |  |                                      |
| 23125 | ENSG00000259987 |  | 22444.1 | 0.08 |    |           |           |  |                                      |
| 23127 | ENSG00000225115 |  | 22445.2 | 0.08 |    |           |           |  |                                      |
| 23133 | ENSG00000196114 |  | 22448.9 | 0.08 |    |           |           |  |                                      |
| 23161 | ENSG00000250361 |  | 22473   | 0.08 |    |           |           |  |                                      |
| 23166 | ENSG00000226628 |  | 22480   | 0.08 |    |           |           |  |                                      |
| 23171 | ENSG00000237118 |  | 22482.8 | 0.08 |    |           |           |  |                                      |
| 23175 | ENSG00000234271 |  | 22485.6 | 0.08 |    |           |           |  |                                      |
| 23177 | ENSG00000231798 |  | 22487.6 | 0.08 |    |           |           |  |                                      |
| 23180 | ENSG00000260410 |  | 22489.6 | 0.08 |    |           |           |  |                                      |

|       |                  |              |       |      |      |                 |    |           |           |  |                                                             |
|-------|------------------|--------------|-------|------|------|-----------------|----|-----------|-----------|--|-------------------------------------------------------------|
| 21183 | ENSG00000206193  |              | 22491 | 7    | 0.08 |                 |    |           |           |  |                                                             |
| 21202 | ENSG00000214118  |              | 22513 | 0.08 |      |                 |    |           |           |  |                                                             |
| 21205 | ENSG00000217353  |              | 22513 | 0.08 |      |                 |    |           |           |  |                                                             |
| 21213 | ENSG00000256542  |              | 22520 | 0.08 |      |                 |    |           |           |  |                                                             |
| 21220 | ENSG00000266550  |              | 22529 | 0.08 |      |                 |    |           |           |  |                                                             |
| 21228 | ENSG00000203198  |              | 22533 | 5    | 0.08 |                 |    |           |           |  |                                                             |
| 21231 | ENSG00000225498  |              | 22534 | 0.08 |      |                 |    |           |           |  |                                                             |
| 21233 | ENSG00000226204  |              | 22535 | 6    | 0.08 |                 |    |           |           |  |                                                             |
| 21236 | ENSG00000226551  |              | 22538 | 2    | 0.08 |                 |    |           |           |  |                                                             |
| 21250 | ENSG00000259577  |              | 22548 | 2    | 0.08 |                 |    |           |           |  |                                                             |
| 21270 | ENSG00000275423  |              | 22557 | 2    | 0.08 |                 |    |           |           |  |                                                             |
| 21286 | ENSG00000275282  |              | 22562 | 2    | 0.08 |                 |    |           |           |  |                                                             |
| 21288 | ENSG00000233060  |              | 22570 | 1    | 0.08 |                 |    |           |           |  |                                                             |
| 21344 | ENSG00000202621  |              | 22584 | 1    | 0.08 |                 |    |           |           |  |                                                             |
| 21348 | ENSG00000230958  |              | 22582 | 2    | 0.08 |                 |    |           |           |  |                                                             |
| 21352 | ENSG00000202098  |              | 22593 | 3    | 0.08 |                 |    |           |           |  |                                                             |
| 21358 | ENSG000002071045 |              | 22660 | 1    | 0.08 |                 |    |           |           |  |                                                             |
| 21345 | ENSG00000230239  |              | 22685 | 9    | 0.08 |                 |    |           |           |  |                                                             |
| 21441 | ENSG00000211624  |              | 22693 | 9    | 0.08 |                 |    |           |           |  |                                                             |
| 21449 | ENSG00000255238  |              | 22693 | 7    | 0.08 |                 |    |           |           |  |                                                             |
| 21520 | ENSG00000206037  |              | 22742 | 1    | 0.08 |                 |    |           |           |  |                                                             |
| 21558 | ENSG00000229815  |              | 22772 | 3    | 0.08 |                 |    |           |           |  |                                                             |
| 21566 | ENSG00000258462  |              | 22775 | 9    | 0.08 |                 |    |           |           |  |                                                             |
| 21580 | ENSG00000233006  |              | 22787 | 2    | 0.08 |                 |    |           |           |  |                                                             |
| 21587 | ENSG00000215871  |              | 22791 | 5    | 0.08 |                 |    |           |           |  |                                                             |
| 21590 | ENSG00000234091  |              | 22792 | 1    | 0.08 |                 |    |           |           |  |                                                             |
| 21598 | ENSG00000241851  |              | 22793 | 3    | 0.08 |                 |    |           |           |  |                                                             |
| 21642 | ENSG00000214328  |              | 22834 | 1    | 0.08 |                 |    |           |           |  |                                                             |
| 21662 | ENSG00000253704  |              | 22859 | 3    | 0.08 |                 |    |           |           |  |                                                             |
| 21684 | ENSG00000254855  |              | 22879 | 5    | 0.08 |                 |    |           |           |  |                                                             |
| 21687 | ENSG00000214841  |              | 22882 | 8    | 0.08 |                 |    |           |           |  |                                                             |
| 21691 | ENSG00000272604  |              | 22883 | 8    | 0.08 |                 |    |           |           |  |                                                             |
| 21696 | ENSG00000287666  |              | 22888 | 6    | 0.08 |                 |    |           |           |  |                                                             |
| 21708 | ENSG00000213333  |              | 22892 | 11   | 0.08 |                 |    |           |           |  |                                                             |
| 21762 | ENSG00000229431  |              | 22943 | 1    | 0.08 |                 |    |           |           |  |                                                             |
| 21788 | ENSG00000240098  |              | 22967 | 2    | 0.08 |                 |    |           |           |  |                                                             |
| 21801 | ENSG00000215688  |              | 22983 | 2    | 0.08 |                 |    |           |           |  |                                                             |
| 21852 | ENSG00000217973  |              | 23021 | 2    | 0.08 |                 |    |           |           |  |                                                             |
| 21885 | ENSG00000254162  |              | 23045 | 6    | 0.08 |                 |    |           |           |  |                                                             |
| 21918 | ENSG00000229728  |              | 23068 | 1    | 0.08 |                 |    |           |           |  |                                                             |
| 21926 | ENSG00000229380  |              | 23068 | 2    | 0.08 |                 |    |           |           |  |                                                             |
| 21991 | ENSG00000202941  |              | 23137 | 2    | 0.08 |                 |    |           |           |  |                                                             |
| 24038 | ENSG00000201076  |              | 23196 | 4    | 0.08 |                 |    |           |           |  |                                                             |
| 24095 | ENSG00000226198  |              | 23231 | 5    | 0.08 |                 |    |           |           |  |                                                             |
| 24251 | ENSG00000214597  | TMEM249      | 23342 | 2    | 0.08 |                 |    |           |           |  | transmembrane protein 249                                   |
| 24388 | ENSG00000216599  |              | 23624 | 6    | 0.08 |                 |    |           |           |  |                                                             |
| 24605 | ENSG00000201615  |              | 23698 | 7    | 0.08 |                 |    |           |           |  |                                                             |
| 24688 | ENSG00000211396  |              | 23717 | 4    | 0.07 |                 |    |           |           |  |                                                             |
| 14038 | ENSG00000206148  | BZDFP1-AS1   | 15602 | 1    | 0.07 | antisense       | 17 | 56402811  | 56403127  |  | BZDFP1 antisense RNA 1                                      |
| 18922 | ENSG00000206273  | SETD5-AS1    | 19199 | 3    | 0.07 | antisense       | 3  | 93913213  | 94400583  |  | SETD5 antisense RNA 1                                       |
| 20362 | ENSG00000233483  |              | 20114 | 6    | 0.07 | antisense       | X  | 2770781   | 2771801   |  | GYG2 antisense RNA 1                                        |
| 20788 | ENSG00000229796  | DBH-AS1      | 20637 | 7    | 0.07 | antisense       | 9  | 13691978  | 136522435 |  | DBH antisense RNA 1                                         |
| 21211 | ENSG00000229276  |              | 21559 | 5    | 0.07 | antisense       | 3  | 42744165  | 42748154  |  | RHAI1 antisense RNA 1                                       |
| 21964 | ENSG00000233880  | TSPAR-AS1    | 21550 | 9    | 0.07 | antisense       | 2  | 45926999  | 45935738  |  | TSPAR antisense RNA 1                                       |
| 22003 | ENSG00000244302  | RP11791G22.1 | 21621 | 4    | 0.07 | antisense       | 3  | 178616017 | 178639983 |  | PENL5 antisense RNA 2                                       |
| 22096 | ENSG00000202696  | LINC02058    | 21644 | 8    | 0.07 | antisense       | 8  | 2425531   | 94172681  |  | long intergenic non-protein coding RNA 535                  |
| 22784 | ENSG00000228862  | HCS23        | 22168 | 6    | 0.07 | antisense       | 6  | 32358287  | 32361483  |  | HLA complex group 23 (non-protein coding)                   |
| 22799 | ENSG00000233893  | EZR-AS1      | 22180 | 1    | 0.07 | antisense       | 6  | 19223043  | 19241628  |  | EZR antisense RNA 1                                         |
| 22806 | ENSG00000233928  | CAC17A-AS1   | 22184 | 8    | 0.07 | antisense       | 8  | 2425531   | 94172681  |  | long intergenic non-protein coding RNA 35                   |
| 23283 | ENSG00000226238  | LEM1-AS1     | 22563 | 1    | 0.07 | antisense       | 1  | 20534280  | 20535668  |  | LEM1 antisense RNA 1                                        |
| 23315 | ENSG00000233506  |              | 22592 | 4    | 0.07 | antisense       | 3  | 29857466  | 29864300  |  | RBM53 antisense RNA 2                                       |
| 23454 | ENSG00000214871  |              | 22627 | 1    | 0.07 | antisense       | 12 | 50221258  | 50234068  |  | ISG15 antisense RNA 1                                       |
| 23504 | ENSG00000241684  | ADAMTS-AS2   | 22732 | 4    | 0.07 | antisense       | 3  | 64670585  | 64697143  |  | ADAMTS antisense RNA 2                                      |
| 23697 | ENSG00000245112  | SMARCA5-AS1  | 22892 | 2    | 0.07 | antisense       | 4  | 14443425  | 144433788 |  | SMARCA5 antisense RNA 1                                     |
| 23788 | ENSG00000202991  |              | 23013 | 5    | 0.07 | antisense       | 3  | 38312005  | 38317177  |  | long intergenic non-protein coding RNA 517                  |
| 23844 | ENSG00000228214  | LINC00083    | 23128 | 2    | 0.07 | antisense       | 3  | 28616282  | 28799831  |  | long intergenic non-protein coding RNA 693                  |
| 24164 | ENSG00000196810  | CTBP1-AS2    | 23280 | 1    | 0.07 | antisense       | 4  | 1243088   | 1242079   |  | CTBP1 antisense RNA 2 (head to head)                        |
| 24230 | ENSG00000202696  | CAC17A-AS1   | 23282 | 19   | 0.07 | antisense       | 19 | 26072425  | 3811938   |  | CAC17A antisense RNA 1                                      |
| 24666 | ENSG00000204034  | ATP10E2-AS1  | 23728 | 6    | 0.07 | antisense       | 7  | 14856748  | 148577699 |  | ATP10E2 antisense RNA 1                                     |
| 24768 | ENSG00000202441  |              | 23788 | 9    | 0.07 | antisense       | 13 | 100151981 | 100153308 |  | long intergenic non-protein coding RNA 449                  |
| 24968 | ENSG00000201663  | BCDN-AS1     | 24133 | 3    | 0.07 | antisense       | 12 | 50221258  | 50234068  |  | BCDN antisense RNA 1                                        |
| 3839  | ENSG00000211896  | LDC101930374 | 57058 | 5    | 0.07 | IG_C_gene       | 14 | 106202880 | 106205048 |  | immunoglobulin heavy constant gamma 1 (IG1m marker)         |
| 4840  | ENSG00000218677  |              | 7434  | 2    | 0.07 | IG_C_gene       | 22 | 23243156  | 23243617  |  | immunoglobulin lambda constant 2 (Karr-Ox marker)           |
| 9893  | ENSG00000202098  |              | 22983 | 2    | 0.07 | IG_C_gene       | 14 | 106330397 | 106330845 |  | immunoglobulin heavy joining 2                              |
| 4952  | ENSG00000242041  |              | 7048  | 4    | 0.07 | IG_C_gene       | 14 | 106330425 | 106330470 |  | immunoglobulin heavy joining 4                              |
| 10092 | ENSG00000211593  |              | 12420 | 6    | 0.07 | IG_C_gene       | 2  | 89160080  | 89180117  |  | immunoglobulin kappa joining 5                              |
| 10971 | ENSG00000211685  |              | 48127 | 22   | 0.07 | IG_C_gene       | 22 | 2388548   | 2388548   |  | immunoglobulin lambda variable 3-16                         |
| 3526  | ENSG00000231478  |              | 51113 | 5    | 0.07 | IG_V_gene       | 14 | 106802029 | 106805716 |  | immunoglobulin heavy variable 4-31                          |
| 3888  | ENSG00000202371  |              | 6085  | 6    | 0.07 | IG_V_gene       | 2  | 89619383  | 89619904  |  | immunoglobulin kappa variable 1-39 (pseudogene)             |
| 4046  | ENSG00000211631  |              | 22827 | 22   | 0.07 | IG_V_gene       | 22 | 22827     | 22827     |  | immunoglobulin lambda variable 4-69                         |
| 4283  | ENSG00000202473  |              | 6660  | 8    | 0.07 | IG_V_gene       | 14 | 107081806 | 107083830 |  | immunoglobulin heavy variable 4-59                          |
| 14950 | ENSG00000211957  |              | 16203 | 14   | 0.07 | IG_V_gene       | 14 | 106845323 | 106845789 |  | immunoglobulin heavy variable 3-35 (non-functional)         |
| 16800 | ENSG00000211568  |              | 19097 | 10   | 0.07 | IG_V_gene       | 14 | 106866546 | 106866934 |  | immunoglobulin heavy variable 3-38 (non-functional)         |
| 16851 | ENSG00000225174  |              | 20445 | 2    | 0.07 | IG_V_pseudogene | 14 | 106579164 | 106579303 |  | immunoglobulin heavy variable 1-12 (pseudogene)             |
| 16545 | ENSG00000254056  |              | 18699 | 6    | 0.07 | IG_V_pseudogene | 14 | 107183396 | 107183557 |  | immunoglobulin heavy variable 3-71 (pseudogene)             |
| 15481 | ENSG00000202451  |              | 18781 | 1    | 0.07 | IG_V_pseudogene | 14 | 106204943 | 106204943 |  | immunoglobulin lambda variable 2-29 (pseudogene)            |
| 16884 | ENSG00000202618  | LINC00044    | 19208 | 7    | 0.07 | antisense       | 8  | 127214383 | 127226657 |  | long intergenic non-protein coding RNA 844                  |
| 17311 | ENSG00000202481  | LINC00193    | 17686 | 4    | 0.07 | antisense       | 4  | 185815025 | 185820068 |  | long intergenic non-protein coding RNA 1093                 |
| 18996 | ENSG00000190181  | TIPET1       | 17596 | 2    | 0.07 | antisense       | 22 | 71062777  | 71179632  |  | transmembrane phosphatase with tetra helicity pseudogenes 1 |
| 20541 | ENSG00000202381  | OSER1-AS1    | 19200 | 2    | 0.07 | antisense       | 20 | 42939800  | 42939867  |  | OSER1 antisense RNA 1 (head to head)                        |
| 20541 | ENSG00000202381  | DKFZP434H714 | 20455 | 5    | 0.07 | antisense       | 4  | 153467146 | 153468015 |  | miRcRNA 4453                                                |
| 20786 | ENSG00000228221  | LINC00578    | 20522 | 2    | 0.07 | antisense       | 3  | 177199709 | 177470993 |  | long intergenic non-protein coding RNA 578                  |
| 21176 | ENSG00000204346  | LINC00368    | 21057 | 4    | 0.07 | antisense       | 14 | 92951805  | 93110738  |  | long intergenic non-protein coding RNA 668                  |
| 21212 | ENSG00000243829  | LINC00080    | 21863 | 4    | 0.07 | antisense       | 3  | 156789456 | 156840793 |  | long intergenic non-protein coding RNA 860                  |
| 22240 | ENSG00000202467  | LINC00019    | 21760 | 1    | 0.07 | antisense       | 10 | 44340794  | 44340790  |  | long intergenic non-protein coding RNA 619                  |
| 22291 | ENSG00000202921  | LINC00454    | 21706 | 1    | 0.07 | antisense       | 3  | 114501823 | 114506824 |  | long intergenic non-protein coding RNA 654                  |
| 22275 | ENSG00000205181  | LINC00654    | 21777 | 8    | 0.07 | antisense       | 20 | 5478713   | 5485259   |  | long intergenic non-protein coding RNA 654                  |
| 22275 | ENSG00000214145  |              | 21857 | 1    | 0.07 | antisense       | 3  | 184014254 | 184033092 |  | long intergenic non-protein coding RNA 887                  |
| 22474 | ENSG00000202921  | LINC00309    | 21707 | 2    | 0.07 | antisense       | 14 | 64412217  | 64412217  |  | long intergenic non-protein coding RNA 309                  |
| 22565 | ENSG00000229537  | LINC00379    | 21876 | 13   | 0.07 | antisense       | 13 | 91778667  | 91783661  |  | long intergenic non-protein coding RNA 379                  |
| 22683 | ENSG00000233532  | LINC00460    | 22093 | 5    | 0.07 | antisense       | 10 | 107028911 | 107030565 |  | long intergenic non-protein coding RNA 460                  |
| 22843 | ENSG00000202461  | LINC01102    | 22207 | 2    | 0.07 | antisense       | 14 | 105012225 | 105012225 |  | long intergenic non-protein coding RNA 1102                 |
| 22854 | ENSG00000228208  |              | 22227 | 3    | 0.07 | antisense       | 1  | 218683438 | 218699320 |  | chromosome 1 open reading frame 143                         |
| 23323 | ENSG00000233807  |              | 22598 | 3    | 0.07 | antisense       | 5  | 123641923 | 12374072  |  | long intergenic non-protein coding RNA 1170                 |
| 23478 | ENSG00000204118  | LINC01018    | 22714 | 7    | 0.07 | antisense       | 5  | 341296    | 352629    |  | long intergenic non-protein coding RNA 1019                 |
| 23630 | ENSG00000230651  | RGPD4-AS1    | 22882 | 9    | 0.07 | antisense       | 2  | 108439519 | 108443347 |  | RGPD4 antisense RNA 1 (head to head)                        |
| 23763 | ENSG00000231458  | LINC00032    | 22844 | 1    | 0.07 | antisense       | 9  | 27245882  | 27282791  |  | long intergenic non-protein coding RNA 32                   |
| 24058 | ENSG00000233687  |              | 23170 | 1    | 0.07 | antisense       | 12 | 49131218  | 49135568  |  | long intergenic non-protein coding RNA 935                  |
| 24499 | ENSG00000259714  |              | 23561 | 7    | 0.07 | antisense       | 15 | 40664026  | 40664677  |  | long intergenic non-protein coding RNA 594                  |
| 24548 | ENSG000002024981 | LINC01057    | 23562 | 2    | 0.07 | antisense       | 1  | 95104017  | 95288537  |  | long intergenic non-protein coding RNA 1057                 |
| 24701 | ENSG00000231574  | FAM86B       | 23732 | 9    | 0.07 | antisense       | 8  | 7192183   | 7212876   |  | family with sequence similarity 66, member B                |
| 24820 | ENSG00000259673  | IQCH-AS1     | 23840 | 7    | 0.07 | antisense       | 15 | 67695957  | 67814182  |  |                                                             |

|       |                  |          |         |      |                        |    |           |           |  |                                                                                                      |
|-------|------------------|----------|---------|------|------------------------|----|-----------|-----------|--|------------------------------------------------------------------------------------------------------|
| 2321  | ENSG00000199962  |          | 22528.2 | 0.07 | misc RNA               | 21 | 18949118  | 18949228  |  | Y RNA                                                                                                |
| 2328  | ENSG0000011229   |          | 22570   | 0.07 | processed pseudogene   | 20 | 42633048  | 42633174  |  | RNA 75S, cytoplasmic 443, pseudogene                                                                 |
| 23318 | ENSG00000203472  |          | 22593   | 0.07 | misc RNA               | 18 | 29298556  | 29299171  |  | RNA 75S small nuclear pseudogene 44                                                                  |
| 23428 | ENSG00000202127  |          | 22682.7 | 0.07 | misc RNA               | 17 | 47494106  | 47494212  |  | Y RNA                                                                                                |
| 23528 | ENSG00000204330  |          | 23002.2 | 0.07 | misc RNA               | 18 | 14699761  | 14699811  |  | RNA 75S, cytoplasmic 274, pseudogene                                                                 |
| 24600 | ENSG00000204562  |          | 23354.4 | 0.07 | misc RNA               | 18 | 41270518  | 41270511  |  | RNA 75S, cytoplasmic 326, pseudogene                                                                 |
| 25324 | ENSG00000206753  |          | 24252.1 | 0.07 | misc RNA               | 1  | 15127343  | 15127349  |  | RNA 75S, cytoplasmic 444, pseudogene                                                                 |
| 25150 | ENSG00000206801  | MRGHP5   | 21695   | 0.07 | polymorphic pseudogene | 8  | 142463929 | 142517330 |  | histone H4-like repeat family member 5                                                               |
| 25386 | ENSG00000209762  |          | 22456.6 | 0.07 | processed pseudogene   | Y  | 42633074  | 42633078  |  | cytochrome P450 family 2, subfamily D, polypeptide 1, pseudogene                                     |
| 6238  | ENSG00000229129  |          | 90133   | 0.07 | processed pseudogene   | Y  | 19868881  | 19868905  |  | actin, gamma 1 pseudogene 2                                                                          |
| 6528  | ENSG00000238103  |          | 96652.2 | 0.07 | processed pseudogene   | A  | 23854781  | 23854789  |  | ribosomal protein L5 pseudogene 7                                                                    |
| 7907  | ENSG00000232526  |          | 10954.1 | 0.07 | processed pseudogene   | X  | 22550031  | 22551618  |  | eukaryotic translation elongation factor 1 alpha 1 pseudogene 6                                      |
| 8745  | ENSG00000245880  |          | 11330.5 | 0.07 | processed pseudogene   | 9  | 52646296  | 52646299  |  | ribosomal protein L37 pseudogene 23                                                                  |
| 9289  | ENSG00000243222  |          | 11778.7 | 0.07 | processed pseudogene   | X  | 92542732  | 92543736  |  | suppression of tumorigenicity 13 (colon carcinoma) (Hsp70 interacting protein) pseudogene 18         |
| 10688 | ENSG00000171197  |          | 12987.4 | 0.07 | processed pseudogene   | 13 | 49926220  | 49926302  |  | PEST containing nuclear protein pseudogene 5                                                         |
| 11280 | ENSG00000188459  |          | 13378.3 | 0.07 | processed pseudogene   | X  | 47637325  | 47684188  |  | WAS protein family, member 4, pseudogene                                                             |
| 11671 | ENSG00000243899  |          | 13718.4 | 0.07 | processed pseudogene   | 5  | 84760232  | 84781128  |  | ribosomal protein L5 pseudogene 17                                                                   |
| 12007 | ENSG00000176378  |          | 14133.6 | 0.07 | processed pseudogene   | 1  | 21766249  | 21766275  |  | profilin 1 pseudogene 10                                                                             |
| 12763 | ENSG000002028417 |          | 14553   | 0.07 | processed pseudogene   | 10 | 97949122  | 97949175  |  | nucleophosmin 1 (nucleolar phosphoprotein B23, numatrin) pseudogene 25                               |
| 12874 | ENSG00000187762  |          | 14638.5 | 0.07 | processed pseudogene   | 6  | 34911299  | 34911038  |  | heat shock 10kDa protein 1 pseudogene 11                                                             |
| 13395 | ENSG00000232923  |          | 15022.2 | 0.07 | processed pseudogene   | 1  | 45202699  | 45202697  |  | ribosomal protein S15a pseudogene 11                                                                 |
| 14821 | ENSG00000213707  |          | 16099.3 | 0.07 | processed pseudogene   | 22 | 28958492  | 28958494  |  | high mobility group box 1 pseudogene 10                                                              |
| 16221 | ENSG00000211544  |          | 16720.1 | 0.07 | processed pseudogene   | 18 | 55505706  | 55506198  |  | ribosomal L24 domain containing 1 pseudogene 11                                                      |
| 18141 | ENSG00000211989  | PPH7R2P3 | 17138.2 | 0.07 | processed pseudogene   | 5  | 19027549  | 19027639  |  | protein phosphatase 1, regulatory (inhibitor) subunit 2, pseudogene 3                                |
| 17577 | ENSG00000218331  |          | 18185.3 | 0.07 | processed pseudogene   | 6  | 26195794  | 26195999  |  | histone cluster 1, H1, pseudogene 1                                                                  |
| 17588 | ENSG00000232064  |          | 18191.1 | 0.07 | processed pseudogene   | 2  | 34064849  | 34065745  |  | solute carrier family 25 (mitochondrial carrier, adenosine nucleotide translocator), member 5        |
| 18228 | ENSG00000226376  |          | 18676.7 | 0.07 | processed pseudogene   | 10 | 89789962  | 89789109  |  | POU class 5 homeobox 1 pseudogene 5                                                                  |
| 18313 | ENSG00000218803  | GSTM2P1  | 18734.9 | 0.07 | processed pseudogene   | 6  | 111388071 | 111388724 |  | glutathione S-transferase mu 2 (mu class) pseudogene 1                                               |
| 18470 | ENSG00000204134  |          | 18821.1 | 0.07 | processed pseudogene   | 11 | 58621173  | 58621108  |  | high mobility group nucleosome binding domain 1 pseudogene 28                                        |
| 19533 | ENSG00000287352  |          | 19684.5 | 0.07 | processed pseudogene   | 17 | 86130816  | 86131745  |  | SH3 domain GRG2-like domain 1 pseudogene 3                                                           |
| 19664 | ENSG00000202207  |          | 19757.6 | 0.07 | processed pseudogene   | 3  | 138486674 | 138487552 |  | glyceroldehyde 3 phosphate dehydrogenase pseudogene 39                                               |
| 19703 | ENSG00000211703  |          | 19937.8 | 0.07 | processed pseudogene   | 11 | 39937541  | 39937541  |  | poly(A) binding protein pseudogene 1                                                                 |
| 19798 | ENSG00000234152  |          | 19988.5 | 0.07 | processed pseudogene   | 13 | 25939937  | 25940293  |  | transcription elongation factor B (SII), polypeptide 2 (18kDa, elongin B) pseudogene 1               |
| 19901 | ENSG00000213771  |          | 19953.8 | 0.07 | processed pseudogene   | 10 | 8556565   | 8557069   |  | keratin 8 pseudogene 37                                                                              |
| 19950 | ENSG00000204920  |          | 20005.8 | 0.07 | processed pseudogene   | 2  | 4106822   | 4106822   |  | glyceroldehyde 3 phosphate dehydrogenase pseudogene 37                                               |
| 19969 | ENSG00000228551  |          | 20005.8 | 0.07 | processed pseudogene   | 2  | 109687879 | 109688102 |  | small nuclear ribonucleoprotein polypeptide G pseudogene 9                                           |
| 20226 | ENSG00000204704  |          | 20205.3 | 0.07 | processed pseudogene   | 3  | 170073959 | 170073886 |  | knappa-like factor 7 pseudogene 1                                                                    |
| 20289 | ENSG00000205690  |          | 20205.3 | 0.07 | processed pseudogene   | 3  | 30251620  | 30251620  |  | ribosomal protein S20 pseudogene 16                                                                  |
| 20490 | ENSG00000228783  |          | 20417.3 | 0.07 | processed pseudogene   | 9  | 125448212 | 125445051 |  | lactadherin-like kinase 1 pseudogene 1                                                               |
| 20562 | ENSG00000211434  |          | 20477.1 | 0.07 | processed pseudogene   | 6  | 12704181  | 12704092  |  | ribosomal protein S4X pseudogene 9                                                                   |
| 20388 | ENSG00000205919  |          | 20528.9 | 0.07 | processed pseudogene   | 8  | 8658289   | 8658289   |  | glyceroldehyde 3 phosphate dehydrogenase pseudogene 88                                               |
| 20742 | ENSG00000233959  |          | 20607   | 0.07 | processed pseudogene   | 9  | 39874807  | 39874917  |  | NADH dehydrogenase (ubiquinone) 1 alpha subcomplex, 5 pseudogene 4                                   |
| 20777 | ENSG00000205749  |          | 20629.5 | 0.07 | processed pseudogene   | 12 | 14407848  | 14408186  |  | guanine nucleotide binding protein (G-protein), alpha inhibiting activity polypeptide 2 pseudogene 2 |
| 20839 | ENSG00000204129  |          | 20678.9 | 0.07 | processed pseudogene   | 3  | 138543905 | 138545171 |  | eukaryotic translation elongation factor 1 alpha 1 pseudogene 25                                     |
| 20867 | ENSG000002040298 |          | 20694.9 | 0.07 | processed pseudogene   | 11 | 25610021  | 25610389  |  | ribosomal protein L36a pseudogene 40                                                                 |
| 20888 | ENSG000002032734 |          | 20695   | 0.07 | processed pseudogene   | 10 | 71193278  | 71193278  |  | ATP synthase, H+ transporting, mitochondrial Fo complex, subunit C1 (subunit 9) pseudogene 7         |
| 20908 | ENSG000002059105 |          | 20727.4 | 0.07 | processed pseudogene   | 14 | 35937478  | 35938356  |  | ribosomal protein S3A pseudogene 4                                                                   |
| 21152 | ENSG00000215594  |          | 20909.8 | 0.07 | processed pseudogene   | 2  | 38512502  | 38513364  |  | glyceroldehyde 3 phosphate dehydrogenase pseudogene 26                                               |
| 21206 | ENSG00000203718  |          | 20929.0 | 0.07 | processed pseudogene   | 13 | 134618135 | 134618833 |  | ribosomal protein S21 pseudogene 42                                                                  |
| 21267 | ENSG000002062402 |          | 21002.6 | 0.07 | processed pseudogene   | 18 | 49139009  | 49139480  |  | ribosomal L24 domain containing 1 pseudogene 9                                                       |
| 21334 | ENSG00000214249  | CTAGE11P | 21058.1 | 0.07 | processed pseudogene   | 13 | 78182090  | 78184432  |  | CTAGE family, member 11, pseudogene 1                                                                |
| 21438 | ENSG00000202879  |          | 21146.8 | 0.07 | processed pseudogene   | 13 | 19249375  | 19249381  |  | form 1 homolog 1 (G. elegans) pseudogene 4                                                           |
| 21522 | ENSG00000225658  |          | 21209.3 | 0.07 | processed pseudogene   | 2  | 74578281  | 74578644  |  | TAF13 RNA polymerase II, TATA box binding protein (TBP) associated factor, 18kDa pseudogene 2        |
| 21654 | ENSG00000205547  |          | 21315.1 | 0.07 | processed pseudogene   | 11 | 100207588 | 100208357 |  | replication protein A2 pseudogene 3                                                                  |
| 21665 | ENSG00000226908  |          | 21328.2 | 0.07 | processed pseudogene   | 13 | 22057973  | 22058131  |  | histone cluster 1, H2b, pseudogene 3                                                                 |
| 21667 | ENSG00000231381  |          | 21328.9 | 0.07 | processed pseudogene   | 12 | 51789702  | 51789753  |  | adenylate kinase 4 pseudogene 3                                                                      |
| 21707 | ENSG00000203543  |          | 21339.1 | 0.07 | processed pseudogene   | 11 | 55695821  | 55695821  |  | high mobility group nucleosome binding domain 1 pseudogene 30                                        |
| 21724 | ENSG00000225843  |          | 21377   | 0.07 | processed pseudogene   | 7  | 90948443  | 90950418  |  | non imprinted in Prader-Willi/Angelman syndrome 2 pseudogene 1                                       |
| 21935 | ENSG000002041562 |          | 21528.4 | 0.07 | processed pseudogene   | 15 | 100091587 | 100091542 |  | ribosomal protein L7 pseudogene 1                                                                    |
| 21944 | ENSG00000205501  |          | 21538.4 | 0.07 | processed pseudogene   | 5  | 20079344  | 20079344  |  | ribosomal protein S4L pseudogene 4                                                                   |
| 22038 | ENSG000002053421 |          | 21608   | 0.07 | processed pseudogene   | 8  | 143939770 | 143840213 |  | zinc finger, HRT-type containing 1 pseudogene 1                                                      |
| 22160 | ENSG00000243592  |          | 21698.2 | 0.07 | processed pseudogene   | 5  | 55432006  | 55433358  |  | ribosomal protein L17 pseudogene 22                                                                  |
| 22213 | ENSG00000205449  |          | 21722.2 | 0.07 | processed pseudogene   | 11 | 11010492  | 110104721 |  | ribosomal protein L19 pseudogene 1                                                                   |
| 22401 | ENSG000002057223 |          | 21873.9 | 0.07 | processed pseudogene   | 12 | 73004458  | 73005096  |  | coiled-coil-helix-coiled-coil-helix domain containing 3 pseudogene 2                                 |
| 22517 | ENSG000002041112 |          | 21955.2 | 0.07 | processed pseudogene   | 5  | 148924946 | 148924946 |  | ribosomal protein S14 pseudogene 14                                                                  |
| 22786 | ENSG00000207178  |          | 22484.1 | 0.07 | processed pseudogene   | 14 | 7484182   | 74841823  |  | ribosomal protein S16 pseudogene 1                                                                   |
| 22834 | ENSG000002050835 |          | 22514.3 | 0.07 | processed pseudogene   | 4  | 143238381 | 143238699 |  | LSM3 pseudogene 4                                                                                    |
| 22896 | ENSG00000209028  |          | 22529.2 | 0.07 | processed pseudogene   | 15 | 43423206  | 43423884  |  | signal peptidase complex subunit 2 homolog (S. cerevisiae) pseudogene 1                              |
| 22948 | ENSG00000213543  |          | 22309.4 | 0.07 | processed pseudogene   | 10 | 13545092  | 135451386 |  | retinoid acid nuclear receptor, beta class (retinoid) 2 pseudogene 2                                 |
| 22967 | ENSG000002052565 |          | 22323.8 | 0.07 | processed pseudogene   | 11 | 58543710  | 58543727  |  | translation machinery associated 16 homolog pseudogene 1                                             |
| 22992 | ENSG00000238860  |          | 22350.7 | 0.07 | processed pseudogene   | 13 | 102915386 | 102915562 |  | ribosomal protein L39 pseudogene 29                                                                  |
| 23000 | ENSG00000215548  |          | 22362.7 | 0.07 | processed pseudogene   | 7  | 8286382   | 8286382   |  | MTOR pseudogene 12                                                                                   |
| 23025 | ENSG00000213530  |          | 22374.1 | 0.07 | processed pseudogene   | 7  | 82219164  | 82220007  |  | methylenealdehyddehydrogenase (NAD(P)+ dependent) 2, methylenealdehyddehydrogenase pseudogene 5      |
| 23092 | ENSG00000205858  |          | 22423.1 | 0.07 | processed pseudogene   | 14 | 103814954 | 103815745 |  | ribosomal protein L21 pseudogene 12                                                                  |
| 23138 | ENSG000002048400 |          | 22451.6 | 0.07 | processed pseudogene   | 5  | 82264707  | 82272972  |  | suppression of tumorigenicity 13 (colon carcinoma) (Hsp70 interacting protein) pseudogene 12         |
| 23186 | ENSG00000232823  |          | 22483.5 | 0.07 | processed pseudogene   | 10 | 12142639  | 12144335  |  | biotendin pseudogene 1                                                                               |
| 23194 | ENSG00000201159  |          | 22483.5 | 0.07 | processed pseudogene   | 11 | 7933159   | 7933159   |  | ribosomal protein L11 pseudogene 11                                                                  |
| 23242 | ENSG000002054151 |          | 22542.8 | 0.07 | processed pseudogene   | 8  | 82529455  | 82530795  |  | non imprinted in Prader-Willi/Angelman syndrome 2 pseudogene 4                                       |
| 23246 | ENSG00000232862  |          | 22545   | 0.07 | processed pseudogene   | 9  | 75270748  | 75271108  |  | ribosomal protein S20 pseudogene 24                                                                  |
| 23265 | ENSG00000204207  |          | 22556.2 | 0.07 | processed pseudogene   | 12 | 64260519  | 64260604  |  | ribosomal protein L36a pseudogene 41                                                                 |
| 23273 | ENSG00000203336  |          | 22559.4 | 0.07 | processed pseudogene   | 7  | 51814520  | 51815221  |  | ribosomal protein S2 pseudogene 48                                                                   |
| 23341 | ENSG000002065790 |          | 22597.1 | 0.07 | processed pseudogene   | 17 | 20862522  | 20862993  |  | ribonuclease H1 pseudogene 1                                                                         |
| 23345 | ENSG00000204083  |          | 22624.9 | 0.07 | processed pseudogene   | 5  | 87617774  | 87617942  |  | ribosomal protein S3a pseudogene 22                                                                  |
| 23349 | ENSG00000204161  |          | 22624.9 | 0.07 | processed pseudogene   | 5  | 43174157  | 43174989  |  | ribosomal protein S10 pseudogene 28                                                                  |
| 23380 | ENSG00000175319  |          | 22650.7 | 0.07 | processed pseudogene   | 18 | 14152998  | 14157941  |  | neurofilament 1 pseudogene 8                                                                         |
| 23416 | ENSG00000202584  |          | 22672.6 | 0.07 | processed pseudogene   | A  | 3622615   | 3622976   |  | high mobility group box 1 pseudogene 16                                                              |
| 23418 | ENSG000002026226 |          | 22672.6 | 0.07 | processed pseudogene   | A  | 229841298 | 229841298 |  | alpha-tubulin 2 (Drosophila) pseudogene 1                                                            |
| 23428 | ENSG00000232422  |          | 22679.7 | 0.07 | processed pseudogene   | 6  | 73969036  | 73969743  |  | lysine-rich nuclear protein 1 pseudogene 4                                                           |
| 23495 | ENSG000002049870 |          | 22725.2 | 0.07 | processed pseudogene   | 8  | 99794283  | 99794498  |  | ribosomal protein L19 pseudogene 14                                                                  |
| 23801 | ENSG000002026480 |          | 22911.3 | 0.07 | processed pseudogene   | 8  | 2916781   | 2916781   |  | sterile alpha motif domain containing 1 pseudogene 1                                                 |
| 23745 | ENSG000002013812 |          | 22928.7 | 0.07 |                        |    |           |           |  |                                                                                                      |

|       |                 |           |       |      |                |                |           |           |                                                                                      |                                                                                                  |
|-------|-----------------|-----------|-------|------|----------------|----------------|-----------|-----------|--------------------------------------------------------------------------------------|--------------------------------------------------------------------------------------------------|
| 7664  | ENSG00000131378 | RFNT1     | 10396 | 3    | 0.07           | protein_coding | 3         | 16355081  | 16655533                                                                             | ratfin, lipa1 raft linker 1                                                                      |
| 7666  | ENSG00000104564 | CHST2     | 10428 | 7    | 0.07           | protein_coding | 19        | 22923     | 22923                                                                                | omithine decarboxylase anionzyme 1                                                               |
| 7666  | ENSG00000008159 | PXN       | 10416 | 4    | 0.07           | protein_coding | 12        | 12054250  | 12070374                                                                             | betafin                                                                                          |
| 7724  | ENSG00000164749 | HM14G     | 10451 | 4    | 0.07           | protein_coding | 8         | 7632049   | 76479078                                                                             | hepatocyte nuclear factor 4, gamma                                                               |
| 7725  | ENSG00000125077 | ENIC      | 10453 | 3    | 0.07           | protein_coding | 3         | 10004221  | 10052800                                                                             | ER membrane protein complex subunit 3                                                            |
| 7797  | ENSG00000163398 | GALNT3    | 10473 | 7    | 0.07           | protein_coding | 2         | 16966181  | 16969149                                                                             | UDP-N-acetyl-alpha-D-galactosamine polypeptide N-acetylgalactosaminyltransferase 3 (GalNAc-T3)   |
| 7801  | ENSG00000008398 | SLC15A1   | 10601 | 7    | 0.07           | protein_coding | 2         | 9632605   | 9643488                                                                              | solute carrier family 15 (oligopeptide transporter), member 1                                    |
| 7834  | ENSG00000183734 | ASCL2     | 10647 | 1    | 0.07           | protein_coding | 13        | 2289275   | 2292192                                                                              | ascl2, basic helix-loop-helix transcription factor 2                                             |
| 8083  | ENSG00000146386 | ABRA1     | 10775 | 9    | 0.07           | protein_coding | 6         | 13954819  | 13954819                                                                             | ABRA C-terminal like                                                                             |
| 8186  | ENSG00000180089 | TMEM88B   | 10855 | 6    | 0.07           | protein_coding | 19        | 5674800   | 56744148                                                                             | transmembrane protein 88B                                                                        |
| 8210  | ENSG00000145291 | PSKH1     | 10882 | 4    | 0.07           | protein_coding | 12        | 15485862  | 15486899                                                                             | pre-B-cell leukemia protein interacting protein 1                                                |
| 8213  | ENSG00000139117 | CPNE8     | 10885 | 4    | 0.07           | protein_coding | 12        | 3904024   | 39041232                                                                             | copine VIII                                                                                      |
| 8232  | ENSG00000115225 | DDK1      | 10910 | 5    | 0.07           | protein_coding | 2         | 7478153   | 74784881                                                                             | docking protein 1, 62kDa (downstream of lysine kinase 1)                                         |
| 8396  | ENSG00000105988 | FAM78A    | 11048 | 4    | 0.07           | protein_coding | 20        | 814358    | 814358                                                                               | family with sequence similarity 110, member A                                                    |
| 8466  | ENSG00000110719 | TCERG1    | 11106 | 1    | 0.07           | protein_coding | 11        | 6780483   | 67818362                                                                             | T-cell, immune regulator 1, ATPase, H+ transporting, lysosomal V0 subunit A3                     |
| 8493  | ENSG00000119277 | RILPL2    | 11131 | 3    | 0.07           | protein_coding | 12        | 12369936  | 123691294                                                                            | Rab interacting lysosomal protein-like 2                                                         |
| 8519  | ENSG00000184460 | 3.5ex     | 11358 | 2    | 0.07           | protein_coding | 17        | 7271961   | 72649678                                                                             |                                                                                                  |
| 8644  | ENSG00000174004 | NROOS     | 11248 | 3    | 0.07           | protein_coding | 3         | 19636557  | 19638875                                                                             | negative regulator of reactive oxygen species                                                    |
| 8697  | ENSG00000180745 | CLRN3     | 11287 | 6    | 0.07           | protein_coding | 10        | 12967105  | 129691211                                                                            | clarin 3                                                                                         |
| 8720  | ENSG00000105250 | HDR       | 11306 | 3    | 0.07           | protein_coding | 2         | 13872150  | 13872150                                                                             | histamine h-methyltransferase                                                                    |
| 8763  | ENSG00000170915 | PAQR8     | 11349 | 4    | 0.07           | protein_coding | 6         | 5222819   | 52272575                                                                             | progestin and adipoQ receptor family member VIII                                                 |
| 8800  | ENSG00000115295 | MAP3K7CL  | 11403 | 4    | 0.07           | protein_coding | 21        | 30449792  | 30454210                                                                             | MAP3K7 C-terminal like                                                                           |
| 8837  | ENSG00000100971 | ACAK1     | 11413 | 5    | 0.07           | protein_coding | 3         | 38144620  | 38179333                                                                             | acetyl-CoA acyltransferase 1                                                                     |
| 8844  | ENSG00000004153 | RAB27B    | 11417 | 7    | 0.07           | protein_coding | 18        | 5238509   | 5238747                                                                              | RAB27B, member RAS oncogene family                                                               |
| 8847  | ENSG00000101445 | PPP1R18B  | 11419 | 2    | 0.07           | protein_coding | 20        | 3743438   | 37551587                                                                             | protein phosphatase 1, regulatory subunit 18B                                                    |
| 8961  | ENSG00000110260 | SLAMF1    | 11518 | 1    | 0.07           | protein_coding | 2         | 16907890  | 16907890                                                                             | signaling lymphocytic activation molecule family member 1                                        |
| 8966  | ENSG00000132826 | PPP1R3D   | 11521 | 0.07 | protein_coding | 20             | 5851184   | 5851352   | protein phosphatase 1, regulatory subunit 3D                                         |                                                                                                  |
| 9035  | ENSG00000186873 | HIST1H2AC | 11577 | 6    | 0.07           | protein_coding | 6         | 2612473   | 2613944                                                                              | histone cluster 1, H2ac                                                                          |
| 9082  | ENSG00000184815 | SH3GLB1   | 11657 | 3    | 0.07           | protein_coding | 16        | 1328192   | 1328192                                                                              | synfilin 10                                                                                      |
| 9101  | ENSG00000105703 | SH3BP1    | 11657 | 3    | 0.07           | protein_coding | 1         | 87170259  | 87171367                                                                             | SH3 domain GRB2-like endophilin B1                                                               |
| 9180  | ENSG00000110407 | EH1       | 11683 | 2    | 0.07           | protein_coding | 11        | 64619114  | 64655768                                                                             | EH-domain containing 1                                                                           |
| 9244  | ENSG00000117603 | CD55      | 11821 | 4    | 0.07           | protein_coding | 8         | 800240    | 800240                                                                               | CD55 molecule, decay accelerating factor for complement (Cromer blood group)                     |
| 9325  | ENSG00000119632 | CD55      | 11811 | 1    | 0.07           | protein_coding | 1         | 20744853  | 20754311                                                                             | CD55 molecule, decay accelerating factor for complement (Cromer blood group)                     |
| 9383  | ENSG00000006366 | ACSL4     | 11852 | 0.07 | protein_coding | X              | 108887473 | 10887632  | acyl-CoA synthetase long-chain family member 4                                       |                                                                                                  |
| 9508  | ENSG00000132480 | ZNF341    | 11852 | 2    | 0.07           | protein_coding | 12        | 564217    | 564217                                                                               | zinc finger protein 341 (Zn finger)                                                              |
| 9518  | ENSG00000138867 | GLUCD1    | 11957 | 5    | 0.07           | protein_coding | 22        | 24936406  | 24931003                                                                             | glucanil cyclase domain containing 1                                                             |
| 9536  | ENSG00000144579 | CTDSP1    | 11979 | 0.07 | protein_coding | 2              | 21922979  | 21927064  | CTD (carboxy-terminal domain, RNA polymerase II, polypeptide A1) small phosphatase 1 |                                                                                                  |
| 9537  | ENSG00000100516 | ZNF341    | 11982 | 0.07 | protein_coding | 12             | 7144816   | 7144816   | zinc finger protein 341 (Zn finger)                                                  |                                                                                                  |
| 9718  | ENSG00000154167 | LSM6      | 12127 | 0.07 | protein_coding | 4              | 14709837  | 14711215  | LSM6 homolog, U6 small nuclear RNA associated (S. cerevisiae)                        |                                                                                                  |
| 9722  | ENSG00000185257 | ARF5      | 12127 | 2    | 0.07           | protein_coding | 14        | 5035810   | 5035810                                                                              | ADP-ribosylation factor 5                                                                        |
| 9808  | ENSG00000185331 | ADAMTS1   | 12281 | 4    | 0.07           | protein_coding | 10        | 10101788  | 11021973                                                                             | adhesin-like metalloproteinase domain 2                                                          |
| 10000 | ENSG00000111269 | CREBL2    | 12378 | 0.07 | protein_coding | 12             | 12764781  | 12796042  | cAMP responsive element binding protein-like 2                                       |                                                                                                  |
| 10088 | ENSG00000108819 | PPP1R3B   | 12402 | 2    | 0.07           | protein_coding | 17        | 48211104  | 48227991                                                                             | protein phosphatase 1, regulatory subunit 3B                                                     |
| 10088 | ENSG00000100502 | PPP1R3B   | 12416 | 6    | 0.07           | protein_coding | 12        | 122146903 | 122146903                                                                            | protein phosphatase 1, regulatory subunit 3B                                                     |
| 10277 | ENSG00000100230 | ATMR3     | 12500 | 0.07 | protein_coding | 22             | 2621544   | 2621544   | mycobactin related protein 3                                                         |                                                                                                  |
| 10442 | ENSG00000128004 | IRF5      | 12891 | 5    | 0.07           | protein_coding | 7         | 12857766  | 12858009                                                                             | interferon regulatory factor 5                                                                   |
| 10510 | ENSG00000175960 | GPR180    | 12740 | 4    | 0.07           | protein_coding | 3         | 16975577  | 16980319                                                                             | G-protein-coupled receptor 180                                                                   |
| 10607 | ENSG00000100921 | CSMD3     | 12900 | 0.07 | protein_coding | 3              | 8818886   | 8821379   | chromosome 11 open reading frame 38                                                  |                                                                                                  |
| 10618 | ENSG00000203896 | LME1      | 12921 | 6    | 0.07           | protein_coding | 20        | 6236881   | 6237456                                                                              | Lck interacting transmembrane adaptor 1                                                          |
| 10721 | ENSG00000182457 | DCLRE1C   | 12922 | 6    | 0.07           | protein_coding | 10        | 14919336  | 14946431                                                                             | DNA cross-link repair 1C                                                                         |
| 10764 | ENSG00000186164 | BRD1      | 12934 | 1    | 0.07           | protein_coding | 10        | 50347366  | 50350445                                                                             | BRD1 domain containing 7                                                                         |
| 10844 | ENSG00000122545 | 7.5p      | 13020 | 7    | 0.07           | protein_coding | 7         | 35840542  | 35844917                                                                             | septin 7                                                                                         |
| 10874 | ENSG00000130813 | R18H8     | 13046 | 1    | 0.07           | protein_coding | 10        | 10196798  | 10203928                                                                             | chromosome 19 open reading frame 86                                                              |
| 10975 | ENSG00000202271 | RTT10C1   | 13107 | 0.07 | protein_coding | 2              | 55041347  | 55041347  | replication termination factor 2 domain containing 1                                 |                                                                                                  |
| 11007 | ENSG00000183844 | PRMTK     | 13171 | 3    | 0.07           | protein_coding | 4         | 8817872   | 8820521                                                                              | protein phosphatase, Mg <sup>2+</sup> /Mn <sup>2+</sup> dependent, 1K                            |
| 11088 | ENSG00000147268 | TALC1     | 13214 | 2    | 0.07           | protein_coding | 8         | 38686704  | 38710346                                                                             | transforming, acidic coiled-coil containing protein 1                                            |
| 11124 | ENSG00000100298 | ALDH3A1   | 13242 | 1    | 0.07           | protein_coding | 8         | 2445700   | 2445700                                                                              | aldehyde dehydrogenase 3 family, member A1                                                       |
| 11193 | ENSG00000211455 | STK38L    | 13297 | 1    | 0.07           | protein_coding | 12        | 2739801   | 2747882                                                                              | serine/threonine kinase 38 like                                                                  |
| 11202 | ENSG00000138163 | ETNK1     | 13303 | 6    | 0.07           | protein_coding | 12        | 2277809   | 22843599                                                                             | ethanolamine kinase 1                                                                            |
| 11245 | ENSG00000100511 | UBXN3     | 13342 | 1    | 0.07           | protein_coding | 12        | 1182369   | 1182369                                                                              | ubiquitin protein factor ECA                                                                     |
| 11315 | ENSG00000005332 | EPK2C     | 13409 | 4    | 0.07           | protein_coding | 2         | 3732633   | 3734208                                                                              | eukaryotic translation initiation factor 2-alpha kinase 2                                        |
| 11368 | ENSG00000186198 | SLC15B    | 13486 | 3    | 0.07           | protein_coding | 15        | 6531708   | 6534547                                                                              | solute carrier family 15, beta subunit                                                           |
| 11603 | ENSG00000100404 | CWIP2     | 13502 | 1    | 0.07           | protein_coding | 10        | 10714183  | 10714183                                                                             | CWIP2-like 2, cell cycle control (S. pombe)                                                      |
| 11668 | ENSG00000167434 | CA4       | 13742 | 0.07 | protein_coding | 17             | 5827297   | 5828260   | carbonic anhydrase IV                                                                |                                                                                                  |
| 11704 | ENSG00000158922 | UBXN11    | 13745 | 5    | 0.07           | protein_coding | 1         | 26607819  | 26644854                                                                             | UBX domain protein 11                                                                            |
| 11797 | ENSG00000185222 | HEPPL2    | 13822 | 4    | 0.07           | protein_coding | 20        | 5724092   | 5724092                                                                              | hepatocellular carcinoma protein 2                                                               |
| 11848 | ENSG00000185963 | BICD2     | 13869 | 4    | 0.07           | protein_coding | 9         | 9547364   | 95627094                                                                             | bicaudal D homolog 2 (Drosophila)                                                                |
| 11917 | ENSG00000122557 | HERPUD2   | 13922 | 4    | 0.07           | protein_coding | 7         | 35672269  | 35735181                                                                             | HERPUD family member 2                                                                           |
| 12138 | ENSG00000145988 | ARHGAP2   | 14035 | 6    | 0.07           | protein_coding | 13        | 17067819  | 17067819                                                                             | arrestin related protein 2                                                                       |
| 12223 | ENSG00000180304 | GAZ2      | 14136 | 5    | 0.07           | protein_coding | 15        | 6497972   | 64995480                                                                             | omithine decarboxylase anionzyme 2                                                               |
| 12266 | ENSG00000086850 | HTP11A    | 14140 | 6    | 0.07           | protein_coding | 13        | 11334463  | 11334462                                                                             | ATPase, class VI, type 11A                                                                       |
| 12353 | ENSG00000105988 | CAPS      | 14200 | 3    | 0.07           | protein_coding | 28        | 6214288   | 6214288                                                                              | helicase with zinc finger 2, transcriptional coactivator                                         |
| 12417 | ENSG00000105519 | CAPS      | 14200 | 0.07 | protein_coding | 19             | 5911718   | 5911588   | calphostinase                                                                        |                                                                                                  |
| 12423 | ENSG00000187912 | CLEVA7    | 14262 | 6    | 0.07           | protein_coding | 19        | 14893886  | 14721969                                                                             | C-type lectin domain family 7, member A                                                          |
| 12444 | ENSG00000130928 | LTBR2     | 14302 | 2    | 0.07           | protein_coding | 19        | 573332    | 573332                                                                               | leukotriene B4 receptor 2                                                                        |
| 12573 | ENSG00000103322 | IL2IR2    | 14417 | 8    | 0.07           | protein_coding | 16        | 27413453  | 2748211                                                                              | interleukin 2 receptor 2                                                                         |
| 12603 | ENSG00000189339 | SLC35E2B  | 14419 | 5    | 0.07           | protein_coding | 1         | 1592839   | 1624167                                                                              | solute carrier family 35, member 2B                                                              |
| 12637 | ENSG00000100993 | RE3T      | 14431 | 1    | 0.07           | protein_coding | 14        | 10201868  | 10201868                                                                             | RE3T co-receptor 1                                                                               |
| 12688 | ENSG00000111850 | SMIM8     | 14484 | 0.07 | protein_coding | 6              | 8802301   | 8802301   | small integral membrane protein 8                                                    |                                                                                                  |
| 12689 | ENSG00000141395 | CYBBP1D2  | 14631 | 2    | 0.07           | protein_coding | 3         | 50388126  | 50395891                                                                             | cytochrome b561 family, member D2                                                                |
| 12918 | ENSG00000100593 | SUL1A3    | 14633 | 0.07 | protein_coding | 16             | 202924    | 202924    | sulfotransferase family, cytosolic, 1A, plasma membrane, member 3                    |                                                                                                  |
| 12954 | ENSG00000116514 | GALNT2    | 14686 | 3    | 0.07           | protein_coding | 9         | 10156991  | 10161283                                                                             | UDP-N-acetyl-alpha-D-galactosamine polypeptide N-acetylgalactosaminyltransferase 12 (GalNAc-T12) |
| 12984 | ENSG00000202187 | HNS2      | 14703 | 0.07 | protein_coding | 18             | 61616538  | 61640089  | histocompatibility (minor) sepin domain containing                                   |                                                                                                  |
| 13006 | ENSG00000105981 | TRIMAP    | 14704 | 6    | 0.07           | protein_coding | 3         | 5741777   | 5741788                                                                              | transmembrane associated protein                                                                 |
| 13118 | ENSG00000102010 | BMX       | 14791 | 5    | 0.07           | protein_coding | X         | 15452369  | 15574652                                                                             | BMX non-receptor tyrosine kinase                                                                 |
| 13175 | ENSG00000006305 | MEF2A     | 14845 | 6    | 0.07           | protein_coding | 15        | 100017370 | 10025991                                                                             | myocyte enhancer factor 2A                                                                       |
| 13286 | ENSG00000185346 | RBML1     | 14855 | 6    | 0.07           | protein_coding | 14        | 88441519  | 114262026                                                                            | RNA binding motif protein, X-linked like 1                                                       |
| 13297 | ENSG00000189046 | WBS1      | 14850 | 1    | 0.07           | protein_coding | 17        | 25621167  | 25640697                                                                             | WD repeat and SOCS box containing 1                                                              |
| 13336 | ENSG00000188308 | LINEK     | 14858 | 6    | 0.07           | protein_coding | 4         | 88431126  | 88430479                                                                             | lin-54 (Xenopus, L. elegans)                                                                     |
| 13360 | ENSG00000185348 | HINK1     | 14858 | 3    | 0.07           | protein_coding | 4         | 114118184 | 114262026                                                                            | homocysteine interacting protein kinase 1                                                        |
| 13368 | ENSG00000177044 | DGKD      | 15028 | 1    | 0.07           | protein_coding | 2         | 234283153 | 234380750                                                                            | dactylin/kinase, delta 130kDa                                                                    |
| 13787 | ENSG00000180260 | WAPAL     | 15013 |      |                |                |           |           |                                                                                      |                                                                                                  |



|       |                 |              |       |      |                |    |           |           |                                                                        |
|-------|-----------------|--------------|-------|------|----------------|----|-----------|-----------|------------------------------------------------------------------------|
| 17074 | ENSG00000004225 | BTSGAL6      | 17832 | 0.07 | protein_coding | 3  | 98451080  | 98540005  | ST3 beta-galactosidase alpha 2, sialyltransferase 6                    |
| 17088 | ENSG0000014448  | KARSD1       | 17088 | 0.07 | protein_coding | 2  | 21108107  | 21108107  | KAT5 regulator NSL complex subunit 1 like                              |
| 17127 | ENSG00000172967 | XKR3         | 17868 | 0.07 | protein_coding | 22 | 17254302  | 17302589  | XX, Kall blood group complex subunit-related family, member 3          |
| 17148 | ENSG00000182528 | CDK12        | 17887 | 0.07 | protein_coding | 17 | 37617764  | 37721100  | cyclin-dependent kinase 12                                             |
| 17188 | ENSG00000145244 | CDK7         | 17070 | 0.07 | protein_coding | 47 | 850875    | 850875    | discypher2 kinase, theta 10kDa                                         |
| 17474 | ENSG00000145144 | CY5B1T3      | 18114 | 0.07 | protein_coding | 11 | 81119117  | 61129171  | cyclochrome b561, family, member A3                                    |
| 17481 | ENSG00000192094 | OSGEP        | 18120 | 0.07 | protein_coding | 1  | 20914570  | 20923264  | O-sialylglycoprotein endopectidase                                     |
| 17561 | ENSG00000175137 | SHIBPL       | 18176 | 0.07 | protein_coding | 1  | 249140468 | 249120632 | SH3-binding domain protein 5 like                                      |
| 17564 | ENSG00000189466 | ACE3         | 18194 | 0.07 | protein_coding | 17 | 81544452  | 81589205  | angiotensin converting enzyme                                          |
| 17564 | ENSG00000172058 | SERF1A       | 18250 | 0.07 | protein_coding | 5  | 109196462 | 70214357  | small ERK5-like factor 1A (leukemia)                                   |
| 17584 | ENSG00000124181 | PLCC1        | 18267 | 0.07 | protein_coding | 20 | 98746660  | 98811626  | phospholipase C, gamma 1                                               |
| 17584 | ENSG00000159682 | GDC1         | 18288 | 0.07 | protein_coding | 2  | 127202972 | 127326885 | GRIN1-associated domain containing 1                                   |
| 17707 | ENSG00000181754 | AMG01        | 18335 | 0.07 | protein_coding | 1  | 110048787 | 110052380 | adhesion molecule with Ig-like domain 1                                |
| 17811 | ENSG00000203251 | IER3P1       | 18381 | 0.07 | protein_coding | 5  | 64954992  | 64952618  | CDNA FLJ20957 fs. clone SLV00486; Uncharacterized protein              |
| 17811 | ENSG00000203982 | IER3P1       | 18381 | 0.07 | protein_coding | 18 | 44981007  | 44702652  | Immediate early response 3, interacting protein 1                      |
| 17862 | ENSG00000089882 | RBM41        | 18482 | 0.07 | protein_coding | X  | 106376600 | 106362057 | RNA binding motif protein 41                                           |
| 17866 | ENSG00000157426 | AASDH        | 18483 | 0.07 | protein_coding | 4  | 57254456  | 57253466  | aminoadipate-serine/lysine dehydrogenase                               |
| 18044 | ENSG00000102798 | INTS6        | 18539 | 0.07 | protein_coding | 13 | 51926213  | 52012400  | integrator complex subunit 6                                           |
| 18120 | ENSG00000157368 | IL34         | 18591 | 0.07 | protein_coding | 16 | 70613798  | 70648485  | interleukin 34                                                         |
| 18137 | ENSG00000202564 | LOC101930102 | 18608 | 0.07 | protein_coding | X  | 37326569  | 37418888  | HC01981372, isoform CCA; Uncharacterized protein                       |
| 18164 | ENSG00000144401 | MEL11A       | 18632 | 0.07 | protein_coding | 20 | 20845355  | 20845352  | methylenetetrahydrofolate transferase 21A                              |
| 18168 | ENSG00000158111 | CDK19        | 18634 | 0.07 | protein_coding | 6  | 110931181 | 111137161 | cyclin-dependent kinase 19                                             |
| 18234 | ENSG00000183307 | CFCR6        | 18684 | 0.07 | protein_coding | 22 | 17591189  | 17602257  | cell eye syndrome chromosome region, candidate 6                       |
| 18297 | ENSG00000099991 | CABIN1       | 18725 | 0.07 | protein_coding | 17 | 24407642  | 24474596  | calcineurin binding protein 1                                          |
| 18396 | ENSG00000011258 | MBDT0        | 18800 | 0.07 | protein_coding | 17 | 49254786  | 49337524  | mit domain containing 1                                                |
| 18483 | ENSG00000187548 | KMT2D        | 18881 | 0.07 | protein_coding | 12 | 48412758  | 48453357  | lysine (K)-specific methyltransferase 20                               |
| 18498 | ENSG00000119231 | SEPR5        | 18886 | 0.07 | protein_coding | 3  | 18989427  | 189891585 | SLMO1/leucine-specific phosphatase 5                                   |
| 18514 | ENSG00000158650 | UROCC1       | 18883 | 0.07 | protein_coding | 3  | 12820124  | 12823816  | urocorate hydratase 1                                                  |
| 18543 | ENSG00000170190 | SLC16A5      | 18908 | 0.07 | protein_coding | 17 | 73683822  | 73702257  | solute carrier family 16 (monocarboxylate transporter), member 5       |
| 18584 | ENSG00000160568 | MFBP1        | 18922 | 0.07 | protein_coding | 2  | 2421201   | 2421201   | major facilitator superfamily domain containing 28                     |
| 18613 | ENSG00000202038 | PKHD1L1      | 18957 | 0.07 | protein_coding | 8  | 110374700 | 110542559 | polycystic kidney and hepatic disease 1 (autosomal recessive) like 1   |
| 18620 | ENSG00000186140 | SIGLEC11     | 18964 | 0.07 | protein_coding | 19 | 50452242  | 50464429  | sialic acid binding Ig-like lectin 11                                  |
| 18624 | ENSG00000123377 | SLC6A2       | 18962 | 0.07 | protein_coding | 29 | 29912282  | 29912282  | solute carrier family 12, member 2                                     |
| 18629 | ENSG00000105793 | TFRPBP1      | 18966 | 0.07 | protein_coding | 7  | 89964537  | 90020769  | GTP-binding protein 10 (putative)                                      |
| 18637 | ENSG00000188833 | ENTPD8       | 18973 | 0.07 | protein_coding | 9  | 14032816  | 140339268 | endonucleotidic triphosphatase diphosphohydrolase 8                    |
| 18663 | ENSG00000154031 | TRAF3A       | 18974 | 0.07 | protein_coding | 18 | 38338172  | 38338172  | zinc finger protein 37A                                                |
| 18701 | ENSG00000124772 | CNPF5        | 19014 | 0.07 | protein_coding | 6  | 36705826  | 36807778  | opsin V                                                                |
| 18731 | ENSG00000131023 | LATS1        | 19039 | 0.07 | protein_coding | 6  | 149979289 | 15003932  | large tumor suppressor kinase 1                                        |
| 18731 | ENSG00000164191 | TRIM15       | 19043 | 0.07 | protein_coding | 15 | 30154873  | 30154873  | tripartite motif containing 15                                         |
| 18775 | ENSG00000137842 | TMEM82       | 19076 | 0.07 | protein_coding | 15 | 43415477  | 43471344  | transmembrane protein 82                                               |
| 18851 | ENSG00000188626 | GOLGA8M      | 19149 | 0.07 | protein_coding | 15 | 28841700  | 28853350  | golgin A8 family, member M                                             |
| 18918 | ENSG00000190971 | CY2PA6       | 19188 | 0.07 | protein_coding | 4  | 4138116   | 4138116   | cyclochrome P450, family 2, subfamily A, polypeptide 7                 |
| 19028 | ENSG00000252292 | IGTSG4M      | 19288 | 0.07 | protein_coding | 11 | 11957627  | 112064258 | Uncharacterized protein 11                                             |
| 19040 | ENSG00000198874 | TW11         | 19302 | 0.07 | protein_coding | 7  | 6840160   | 6874001   | irRNA-IV synthesizing protein 1 homolog (S. cerevisiae)                |
| 19040 | ENSG00000171241 | C12orf68     | 19335 | 0.07 | protein_coding | 7  | 14345242  | 143454789 | CTCF2 family, member 6                                                 |
| 19154 | ENSG00000199331 | RBM4         | 19393 | 0.07 | protein_coding | 11 | 68384809  | 68341153  | RNA binding motif protein 11                                           |
| 19241 | ENSG00000237765 | FAM200B      | 19449 | 0.07 | protein_coding | 4  | 15681238  | 15707188  | family with sequence similarity 200, member B                          |
| 19337 | ENSG00000200548 | EACCC1A      | 19525 | 0.07 | protein_coding | 14 | 10356481  | 10357086  | exocyst complex component 2-like A                                     |
| 19444 | ENSG00000101191 | IRX4         | 19500 | 0.07 | protein_coding | 20 | 81563006  | 81563006  | IRX4 inducer-co-receptor 1                                             |
| 19510 | ENSG00000197134 | ZNF257       | 19646 | 0.07 | protein_coding | 19 | 22214524  | 22274282  | zinc finger protein 257                                                |
| 19530 | ENSG00000209797 | KLF8F2       | 19681 | 0.07 | protein_coding | 12 | 10044489  | 10044482  | killer cell lectin-like receptor subfamily F, member 2                 |
| 19536 | ENSG00000181115 | PKNOX1       | 19688 | 0.07 | protein_coding | 15 | 30844183  | 30844183  | gonion A8 family, member Q                                             |
| 19603 | ENSG00000178852 | EFCAB13      | 19716 | 0.07 | protein_coding | 17 | 45400566  | 45418678  | EF-hand calcium binding domain 13                                      |
| 19641 | ENSG00000193510 | KAT5         | 19741 | 0.07 | protein_coding | 16 | 31127075  | 31142714  | Kylin/amyloidosis 8                                                    |
| 19641 | ENSG00000204968 | PKNOX2       | 19742 | 0.07 | protein_coding | 16 | 55115441  | 55115475  | Pargamin family, member 2 (prostate associated)                        |
| 19641 | ENSG00000198022 | TPRSS11F     | 19718 | 0.07 | protein_coding | 4  | 68918916  | 68955580  | transmembrane protein, serine 11F                                      |
| 19686 | ENSG00000188997 | KCTD21       | 19872 | 0.07 | protein_coding | 11 | 77862295  | 77869888  | potassium channel tetramerization domain containing 21                 |
| 19687 | ENSG00000165340 | MIR6814      | 19874 | 0.07 | protein_coding | 2  | 20006786  | 20119275  | transmembrane and collagen-coil domain 4                               |
| 19693 | ENSG00000108417 | KRT17        | 20022 | 0.07 | protein_coding | 17 | 36877006  | 36870775  | keratin 17                                                             |
| 20061 | ENSG00000186387 | ZNF140       | 20069 | 0.07 | protein_coding | 12 | 13368424  | 13368430  | zinc finger protein 140                                                |
| 20143 | ENSG00000190221 | FOXP1        | 20149 | 0.07 | protein_coding | 12 | 16283300  | 16283300  | POTE activator domain, family, member H                                |
| 20163 | ENSG00000143412 | ANKA9        | 20145 | 0.07 | protein_coding | 1  | 150584493 | 15068810  | annexin A9                                                             |
| 20211 | ENSG00000088734 | GCKR         | 20192 | 0.07 | protein_coding | 2  | 27719709  | 27746524  | glucokinase (hexokinase 4) regulator                                   |
| 20218 | ENSG00000101087 | ANKK1        | 20197 | 0.07 | protein_coding | 12 | 13002188  | 13002418  | D-aminooxalate oxidase                                                 |
| 20282 | ENSG00000155256 | ZFVVEZ7      | 20277 | 0.07 | protein_coding | 10 | 99468878  | 99520084  | zinc finger, FYVE domain containing 27                                 |
| 20286 | ENSG00000154448 | TPRSS15      | 20260 | 0.07 | protein_coding | 21 | 19841433  | 19858197  | transmembrane protein, serine 15                                       |
| 20293 | ENSG00000165723 | VPRX1        | 20257 | 0.07 | protein_coding | 27 | 22952127  | 22952127  | zinc B lymphocyte 1                                                    |
| 20322 | ENSG00000151138 | BTBD11       | 20238 | 0.07 | protein_coding | 12 | 107712180 | 108053419 | BTB/POZ domain containing 119                                          |
| 20415 | ENSG00000183401 | CCDC159      | 20280 | 0.07 | protein_coding | 19 | 11445360  | 11445620  | coiled-coil domain containing 159                                      |
| 20446 | ENSG00000192521 | MUC11        | 20128 | 0.07 | protein_coding | 3  | 5286123   | 5286123   | mucoadhesin, embryonic nuclear protein 1                               |
| 20487 | ENSG00000202197 | C5orf36      | 20416 | 0.07 | protein_coding | 3  | 133648952 | 133648956 | chromosome 5 open reading frame 36                                     |
| 20496 | ENSG00000170382 | LPRN2        | 20424 | 0.07 | protein_coding | 1  | 204586298 | 204584861 | leucine rich repeat neuronal 2                                         |
| 20508 | ENSG00000160298 | C12orf68     | 20426 | 0.07 | protein_coding | 15 | 14128146  | 14128146  | chromosome 15 open reading frame 15                                    |
| 20567 | ENSG00000105795 | ZNF85        | 20479 | 0.07 | protein_coding | 19 | 21106028  | 21135503  | zinc finger protein 85                                                 |
| 20573 | ENSG00000188992 | GPRR8B       | 20480 | 0.07 | protein_coding | 1  | 14740596  | 14748573  | zinc finger-coupled receptor 80B                                       |
| 20584 | ENSG00000160538 | ANKK2        | 20483 | 0.07 | protein_coding | 1  | 38133805  | 38133805  | olfactory receptor family 5, subfamily K, member 3                     |
| 20619 | ENSG00000118525 | TRIM2        | 20512 | 0.07 | protein_coding | 1  | 33671003  | 33647680  | triple helix motif containing 2                                        |
| 20676 | ENSG00000202769 | ANKX         | 20553 | 0.07 | protein_coding | 12 | 13374888  | 13381281  | anomalous homeobox                                                     |
| 20759 | ENSG00000184548 | NOX3         | 20603 | 0.07 | protein_coding | 2  | 24885819  | 24885819  | noncatalytic myosin associated protein                                 |
| 20781 | ENSG00000120262 | CCDC10       | 20634 | 0.07 | protein_coding | 6  | 15181545  | 15194238  | coiled-coil domain containing 170                                      |
| 20841 | ENSG00000131558 | EJCOC4       | 20668 | 0.07 | protein_coding | 7  | 13293789  | 13375142  | exocyst complex component 4                                            |
| 20844 | ENSG00000195694 | CDT1F        | 20667 | 0.07 | protein_coding | 3  | 3208128   | 3208128   | POTE activator domain family, member F                                 |
| 20862 | ENSG00000185015 | CA13         | 20662 | 0.07 | protein_coding | 8  | 86132816  | 86196302  | carbonic anhydrase XII                                                 |
| 21044 | ENSG00000233816 | IFNA13       | 20622 | 0.07 | protein_coding | 8  | 21367371  | 21368075  | interferon, alpha 13                                                   |
| 21081 | ENSG00000048009 | SLC22A16     | 20637 | 0.07 | protein_coding | 6  | 11074589  | 11070784  | solute carrier family 22 (organic cation/anion transporter), member 16 |
| 21087 | ENSG00000195369 | SLC16A7      | 20641 | 0.07 | protein_coding | 6  | 14391391  | 14409424  | SLC16A7/ROBO-RT-PCR GTPase activating protein 2B                       |
| 21089 | ENSG00000176945 | MUC20        | 20844 | 0.07 | protein_coding | 3  | 18544753  | 18546794  | mucin 20, cell surface associated                                      |
| 21088 | ENSG00000186433 | GLB4         | 20656 | 0.07 | protein_coding | 1  | 35223342  | 35229235  | gap junction protein, beta 4, 30.3kDa                                  |
| 21101 | ENSG00000202022 | TPRSS10      | 20652 | 0.07 | protein_coding | 2  | 23833093  | 23833093  | transmembrane and collagen-coil domain 2                               |
| 21104 | ENSG00000202697 | ZNF869       | 20669 | 0.07 | protein_coding | 7  | 1733446   | 1733961   | LOC401296 protein, Uncharacterized protein                             |
| 21127 | ENSG00000089200 | RPRBP1       | 20687 | 0.07 | protein_coding | 14 | 2176086   | 21819460  | retinoid X receptor G-protein regulator interacting protein 1          |
| 21261 | ENSG00000189558 | RK24L        | 21030 | 0.07 | protein_coding | 16 | 13000150  | 13000150  | olfactory receptor family 2, subfamily A, member 4                     |
| 21356 | ENSG00000144819 | PAD15        | 21074 | 0.07 | protein_coding | 1  | 17575593  | 17670728  | peptidyl arylamine deaminase, type III                                 |
| 21377 | ENSG00000189206 | MSUD2        | 21063 | 0.07 | protein_coding | 4  | 875818    | 882220    | major facilitator superfamily domain containing 7                      |
| 21446 | ENSG00000165723 | SLAMPB       | 21033 | 0.07 | protein_coding | 2  | 15981282  | 15984124  |                                                                        |

|       |                  |           |         |      |                |    |           |           |                                                              |
|-------|------------------|-----------|---------|------|----------------|----|-----------|-----------|--------------------------------------------------------------|
| 23297 | ENSG00000170599  | DDCD1     | 22554.2 | 0.07 | protein_coding | 11 | 30851916  | 31391357  | doublecortin domain containing 1                             |
| 23298 | ENSG00000105218  | ITDRI     | 22554.7 | 0.07 | protein_coding | 22 | 23452493  | 23454178  | inhibitor of tumor necrosis factor receptor 1                |
| 23385 | ENSG00000189558  | OR2G6     | 22562.7 | 0.07 | protein_coding | 1  | 248684919 | 248685994 | olfactory receptor, family 2, subfamily G, member 6          |
| 23487 | ENSG00000204899  | KIFL4     | 22706.6 | 0.07 | protein_coding | 19 | 46543006  | 46603736  | KIF-like family member 4                                     |
| 23488 | ENSG00000184729  | NPWW1     | 22725.5 | 0.07 | protein_coding | 8  | 53850991  | 53853007  | neuropigins BDNF receptor 1                                  |
| 23500 | ENSG00000166446  | C17orf2   | 22725.9 | 0.07 | protein_coding | 16 | 80631826  | 80631826  | chromosomal protein, Y-like 2                                |
| 23510 | ENSG00000167837  | ZNF283    | 22734.9 | 0.07 | protein_coding | 19 | 44331444  | 44333307  | zinc finger protein 283                                      |
| 23511 | ENSG00000171495  | MROCH28   | 22735.5 | 0.07 | protein_coding | 5  | 40968116  | 41021444  | maestro heat-like repeat family member 28                    |
| 23544 | ENSG00000209865  | PCCHAB    | 22736.3 | 0.07 | protein_coding | 1  | 14029169  | 14029169  | proteobactera alpha 8                                        |
| 23577 | ENSG00000196418  | ZNF124    | 22736.7 | 0.07 | protein_coding | 1  | 24728527  | 24733518  | zinc finger protein 124                                      |
| 23596 | ENSG00000198246  | CACNA1E   | 22737.5 | 0.07 | protein_coding | 1  | 18136228  | 18177219  | calcium channel, voltage-dependent, R type, alpha 1E subunit |
| 23598 | ENSG00000154266  | CTHKL1    | 22738.3 | 0.07 | protein_coding | 17 | 7283953   | 7283953   | chromosome kinase, non-receptor 1                            |
| 23598 | ENSG00000101751  | POLI      | 22737.2 | 0.07 | protein_coding | 18 | 51795774  | 51847638  | polymerase (DNA directed) iota                               |
| 23602 | ENSG00000154605  | LMBL1L    | 22801.6 | 0.07 | protein_coding | 18 | 5954105   | 6415238   | L3mb1-like 4 (Drosophila)                                    |
| 23603 | ENSG00000173266  | ABSC4     | 22803.9 | 0.07 | protein_coding | 11 | 11901922  | 11903390  | ATP-binding cassette, sub-family G (WHITE), member 4         |
| 23649 | ENSG00000205750  | P2RX3     | 22847   | 0.07 | protein_coding | 7  | 3566357   | 3599488   | P2RX5-TAXTBP1 readthrough (NMD candidate)                    |
| 23665 | ENSG00000153495  | TEC2D     | 22860.6 | 0.07 | protein_coding | 13 | 11199631  | 11199636  | letm3 expressed 29                                           |
| 23678 | ENSG00000173401  | GLP1R1L1  | 22974.9 | 0.07 | protein_coding | 12 | 75228419  | 75743440  | GLI pathogenesis-related 1 like 1                            |
| 23724 | ENSG00000186367  | KIAA1024L | 22969.3 | 0.07 | protein_coding | 5  | 12908372  | 12910245  | KIAA1024-like                                                |
| 23730 | ENSG00000130307  | USHBP1    | 22911.5 | 0.07 | protein_coding | 17 | 17399865  | 17399935  | Usher syndrome 1C binding protein 1                          |
| 23766 | ENSG00000130268  | PKCKE11   | 22966.4 | 0.07 | protein_coding | 1  | 15699452  | 121915162 | Rho guanine nucleotide exchange factor (GEF) 11              |
| 23799 | ENSG00000162971  | TWWS      | 22962.7 | 0.07 | protein_coding | 2  | 200784688 | 200804200 | rRNA-VII synthesizing protein 5                              |
| 23845 | ENSG00000168876  | KCTD19    | 23013.3 | 0.07 | protein_coding | 16 | 6732331   | 67309066  | potassium channel tetramerization domain containing 19       |
| 23870 | ENSG00000200430  | RUP12     | 23035.5 | 0.07 | protein_coding | 10 | 70100964  | 70107051  | RUN and FUS2 domain containing 2                             |
| 23883 | ENSG00000187122  | SLIT1     | 23042.9 | 0.07 | protein_coding | 10 | 9875795   | 98845677  | slit homophilic 1 (Drosophila)                               |
| 23922 | ENSG00000148910  | CHP1Y     | 23092.5 | 0.07 | protein_coding | 7  | 15258891  | 15529557  | canopy FGF signaling regulator 1                             |
| 23924 | ENSG00000104827  | MTCF1     | 23094.6 | 0.07 | protein_coding | X  | 54628969  | 54637612  | mature T cell proliferation 1                                |
| 23925 | ENSG00000185019  | UBOX5     | 23086   | 0.07 | protein_coding | 20 | 3088219   | 3140842   | U-box domain containing 5                                    |
| 23929 | ENSG00000206474  | TMEM133   | 23088.4 | 0.07 | protein_coding | 14 | 32414059  | 32419888  | Unc119-associated protein                                    |
| 23943 | ENSG00000103687  | GALR2     | 23139.2 | 0.07 | protein_coding | 7  | 7402185   | 7402185   | gamma amino acid receptor 2                                  |
| 23994 | ENSG00000148350  | TBC1D32   | 23139.5 | 0.07 | protein_coding | 6  | 121400840 | 121658991 | TBC1 domain family, member 32                                |
| 24007 | ENSG00000152433  | ZNF547    | 23150.4 | 0.07 | protein_coding | 19 | 57814845  | 57809033  | zinc finger protein 547                                      |
| 24027 | ENSG00000102168  | ZNF527    | 23150.7 | 0.07 | protein_coding | 19 | 37861983  | 37861983  | zinc finger protein 527                                      |
| 24041 | ENSG00000205581  | CDCDC168  | 23174.2 | 0.07 | protein_coding | 8  | 144788664 | 144790279 | coiled-coil domain containing 168                            |
| 24052 | ENSG00000123407  | HOKX12    | 23179.9 | 0.07 | protein_coding | 12 | 54348618  | 54352740  | homeobox C12                                                 |
| 24058 | ENSG00000102683  | ZNF505    | 23179.9 | 0.07 | protein_coding | 19 | 4658249   | 4658249   | coiled-coil domain containing 61                             |
| 24103 | ENSG00000198458  | ZNF605    | 23228.8 | 0.07 | protein_coding | 12 | 133489019 | 133523992 | zinc finger protein 605                                      |
| 24118 | ENSG000002015475 | SHAH3     | 23243.7 | 0.07 | protein_coding | 13 | 46354405  | 46425471  | shah E3 ubiquitin protein ligase family member 3             |
| 24137 | ENSG00000189783  | MALM3     | 23260.3 | 0.07 | protein_coding | 14 | 14068138  | 14068138  | malformin like 3 (Drosophila)                                |
| 24139 | ENSG00000184492  | FONDAL1   | 23260.3 | 0.07 | protein_coding | 2  | 114259661 | 114259728 | fordhook box D4-like 1                                       |
| 24144 | ENSG00000123901  | GPR83     | 23262.9 | 0.07 | protein_coding | 11 | 94110477  | 94134585  | G-protein-coupled receptor 83                                |
| 24248 | ENSG00000102658  | TRAF3     | 23262.9 | 0.07 | protein_coding | 12 | 1973222   | 19821000  | TRAF domain containing 3                                     |
| 24256 | ENSG00000182218  | HHP1L1    | 23266.4 | 0.07 | protein_coding | 14 | 10011447  | 100140906 | guanine nucleotide binding protein, beta polypeptide 1-like  |
| 24269 | ENSG00000118997  | DNAH7     | 23275.6 | 0.07 | protein_coding | 2  | 18660247  | 18663336  | dyx1c, ancestral, heavy chain 7                              |
| 24289 | ENSG00000176024  | ZNF913    | 23284.4 | 0.07 | protein_coding | 19 | 59414070  | 59425012  | zinc finger protein 913                                      |
| 24310 | ENSG00000205375  | MTCF2     | 23284.4 | 0.07 | protein_coding | X  | 72315675  | 72315675  | maturation onset protein                                     |
| 24338 | ENSG00000197889  | MEIG1     | 23426.3 | 0.07 | protein_coding | 10 | 150011438 | 15000409  | meiosis/spemmiogenesis associated 1                          |
| 24340 | ENSG00000185696  | SIN3A     | 23426.3 | 0.07 | protein_coding | 22 | 32690539  | 32694358  | Sin3 family protein 58A                                      |
| 24362 | ENSG00000096961  | P2RX6     | 23427.4 | 0.07 | protein_coding | 2  | 213844997 | 213841158 | purinergic receptor P2X6, ligand-gated ion channel, 6        |
| 24393 | ENSG00000174527  | MYO1H     | 23482.3 | 0.07 | protein_coding | 12 | 109785708 | 109803328 | myosin IIH                                                   |
| 24398 | ENSG00000196967  | ZNF583A   | 23482.5 | 0.07 | protein_coding | 19 | 37591636  | 37603943  | zinc finger protein 583A                                     |
| 24413 | ENSG00000202362  | CT16      | 23482.5 | 0.07 | protein_coding | 12 | 71462562  | 71467153  | gamma-tubulin complex subunit 62                             |
| 24427 | ENSG00000182256  | GABRG3    | 23505.5 | 0.07 | protein_coding | 15 | 27214299  | 27278123  | gamma-aminobutyric acid (GABA) A receptor, gamma 3           |
| 24434 | ENSG00000108474  | PIGL      | 23511.5 | 0.07 | protein_coding | 17 | 16120295  | 16252115  | phosphatidylinositol glycan anchor biosynthesis, class L     |
| 24444 | ENSG00000200495  | FRCK7     | 23517.7 | 0.07 | protein_coding | 17 | 37092659  | 37126657  | F-Box protein 7                                              |
| 24478 | ENSG00000157429  | ZNF19     | 23541   | 0.07 | protein_coding | 16 | 37194853  | 37188992  | zinc finger protein 19                                       |
| 24484 | ENSG00000148484  | ARRHGFP3  | 23548.2 | 0.07 | protein_coding | 2  | 9117021   | 95022650  | Rho guanine nucleotide exchange factor (GEF) 33              |
| 24496 | ENSG00000102086  | C16orf11  | 23568.1 | 0.07 | protein_coding | 10 | 67861260  | 67861260  | chromosome 16 open reading frame 51                          |
| 24516 | ENSG00000130711  | PRDM12    | 23571.6 | 0.07 | protein_coding | 9  | 13353981  | 13355848  | PR domain containing 12                                      |
| 24519 | ENSG00000202124  | SVZC      | 23574.3 | 0.07 | protein_coding | 2  | 20066267  | 200715986 | laminin/delta-type cytodominant N-terminal like              |
| 24520 | ENSG00000102018  | MESP2     | 23576.5 | 0.07 | protein_coding | 2  | 75319697  | 75320000  | genetic locus protein 2c                                     |
| 24569 | ENSG00000148049  | KAAG1     | 23610.4 | 0.07 | protein_coding | 6  | 24357131  | 24358112  | kidney associated antigen 1                                  |
| 24595 | ENSG00000152467  | ZSCAN1    | 23630.6 | 0.07 | protein_coding | 19 | 5854500   | 58565999  | zinc finger and SCAN domain containing 1                     |
| 24621 | ENSG00000105490  | OR8A11    | 23630.6 | 0.07 | protein_coding | 19 | 15200163  | 15200163  | olfactory receptor                                           |
| 24632 | ENSG00000203666  | EFCAB2    | 23670   | 0.07 | protein_coding | 1  | 245133007 | 24520466  | EF-hand calcium binding domain 2                             |
| 24640 | ENSG000002097106 | C16orf62  | 23672.7 | 0.07 | protein_coding | 19 | 9731967   | 9736572   | chromosome 16 open reading frame 62                          |
| 24714 | ENSG00000143463  | AMZ1      | 23676.9 | 0.07 | protein_coding | 19 | 2711766   | 2811414   | arabidopsis 15 (Arabidopsis 1)                               |
| 24777 | ENSG00000206559  | ZCWPW2    | 23684.7 | 0.07 | protein_coding | 3  | 2839037   | 2851931   | zinc finger, CW1 type with PWFP domain 2                     |
| 24788 | ENSG00000144407  | PTHR      | 23911.9 | 0.07 | protein_coding | 2  | 20922438  | 20921927  | parathyroid hormone 2 receptor                               |
| 24808 | ENSG00000102148  | PCDH19    | 23911.9 | 0.07 | protein_coding | 20 | 6122266   | 6122266   | HC2019282: Unclassified protein                              |
| 24840 | ENSG00000203465  | PHN1Y     | 23964.5 | 0.07 | protein_coding | 19 | 14080592  | 14088116  | phosphatase A2 inhibitor and Y6PLAUR domain containing       |
| 24878 | ENSG00000120322  | PCHDB8    | 23985.1 | 0.07 | protein_coding | 5  | 400557371 | 400600881 | proboscoid beta 8                                            |
| 24925 | ENSG00000102695  | MESP2     | 23985.1 | 0.07 | protein_coding | 2  | 75319697  | 75320000  | meiodominant protein 2c (mouse)                              |
| 24967 | ENSG00000130518  | KIAA1083  | 23984   | 0.07 | protein_coding | 19 | 18397906  | 18398319  | KIAAT6B3                                                     |
| 25071 | ENSG00000198337  | ZNF565    | 23987.7 | 0.07 | protein_coding | 19 | 38673188  | 38731159  | zinc finger protein 565                                      |
| 25084 | ENSG00000102578  | OR8A11    | 23988.1 | 0.07 | protein_coding | 19 | 6840037   | 6840037   | oral cilia neurosensory 1                                    |
| 25137 | ENSG00000174520  | TMEM81    | 24091.1 | 0.07 | protein_coding | 1  | 20505228  | 20505228  | transmembrane protein 81                                     |
| 25171 | ENSG00000132877  | RHBG      | 24130.6 | 0.07 | protein_coding | 1  | 18333003  | 18333003  | Rh family, glycoprotein (gempleptidogen)                     |
| 25174 | ENSG00000105917  | SETD4     | 24130.6 | 0.07 | protein_coding | 21 | 2744385   | 2744387   | SET domain containing 4                                      |
| 25205 | ENSG00000189367  | KIAA0408  | 24137.9 | 0.07 | protein_coding | 6  | 12781488  | 12778536  | KIAA0408                                                     |
| 25211 | ENSG000001077182 | CLVS1     | 24161.4 | 0.07 | protein_coding | 8  | 61969717  | 62414204  | clavata 1                                                    |
| 25243 | ENSG00000105650  | PCOLCE    | 24170.1 | 0.07 | protein_coding | 18 | 1811719   | 18102829  | phospholipase Cc, cAMP specific                              |
| 25272 | ENSG00000171435  | KSR2      | 24209.1 | 0.07 | protein_coding | 12 | 11789017  | 118400788 | kinase suppressor of ras 2                                   |
| 25289 | ENSG00000063761  | ADCK1     | 24222   | 0.07 | protein_coding | 14 | 7826426   | 78401355  | asf domain containing kinase 1                               |
| 25318 | ENSG00000184305  | CCSER1    | 24244   | 0.07 | protein_coding | 4  | 6104307   | 6252304   | coiled-coil serine-rich protein 1                            |
| 25334 | ENSG00000131764  | MMP2K5    | 24246.6 | 0.07 | protein_coding | 6  | 17590165  | 17590165  | mibogen-activated protein kinase kinase 5                    |
| 25475 | ENSG00000183208  | GDPGF1    | 24383.3 | 0.07 | protein_coding | 15 | 9077040   | 90785315  | GDP-G-protein phosphohylase 1                                |
| 25541 | ENSG00000200452  | ZNF704    | 24429   | 0.07 | protein_coding | 19 | 12511996  | 12644668  | zinc finger protein 704                                      |
| 25551 | ENSG00000198125  | FAM188B   | 24430.3 | 0.07 | protein_coding | 3  | 30811033  | 30811033  | family with sequence similarity 188, member B                |
| 25571 | ENSG00000178187  | ZNF454    | 24444   | 0.07 | protein_coding | 5  | 17838819  | 17839344  | zinc finger protein 454                                      |
| 25739 | ENSG00000406499  | ZNF286B   | 24458.6 | 0.07 | protein_coding | 17 | 18681142  | 18685575  | zinc finger protein 286B                                     |
| 25774 | ENSG00000102696  | ZNF84B    | 24458.6 | 0.07 | protein_coding | 17 | 17612481  | 17709551  | zinc finger protein 84B                                      |
| 25840 | ENSG00000162994  | CHUC1     | 24479.1 | 0.07 | protein_coding | 2  | 55401927  | 55459899  | claftrin heavy chain linker domain containing 1              |
| 25940 | ENSG00000187860  | CCDC157   | 24750.5 | 0.07 | protein_coding | 22 | 30752624  | 30774847  | coiled-coil domain containing 157                            |
| 26008 | ENSG00000206456  | C16orf65  | 24810.9 |      |                |    |           |           |                                                              |

|       |                 |           |         |      |                                |    |           |           |                                                                             |
|-------|-----------------|-----------|---------|------|--------------------------------|----|-----------|-----------|-----------------------------------------------------------------------------|
| 24233 | ENSG00000183935 | HTR7P1    | 23347.9 | 0.07 | transcribed_unprocessed_pseudo | 12 | 13152812  | 13155768  | 5-hydroxytryptamine (serotonin) receptor 7 pseudogene 1                     |
| 12604 | ENSG00000298714 | MYO15B    | 14437.2 | 0.07 | transcribed_unprocessed_pseudo | 17 | 73564139  | 73622929  | myosin XVb pseudogene                                                       |
| 17556 | ENSG00000146556 | WASHBP    | 18174.6 | 0.07 | transcribed_unprocessed_pseudo | 2  | 114341664 | 114356655 | WAS protein family homolog 2 pseudogene                                     |
| 20588 | ENSG00000145198 | CY4K2P    | 20492.2 | 0.07 | transcribed_unprocessed_pseudo | 1  | 47308767  | 47366109  | cytochrome P450, family 4, subfamily 2, polypeptide 2, pseudogene           |
| 21057 | ENSG00000243406 | MRRSP3IP5 | 20833.5 | 0.07 | transcribed_unprocessed_pseudo | 13 | 52741844  | 52788600  | mitochondrial ribosomal protein S31 pseudogene 5                            |
| 21239 | ENSG00000134612 |           | 20983.8 | 0.07 | transcribed_unprocessed_pseudo | 11 | 89371883  | 89431886  | folate hydrolase 1B                                                         |
| 22204 | ENSG00000230966 | CEACAM2P  | 21732   | 0.07 | transcribed_unprocessed_pseudo | 19 | 45041045  | 45124119  | carcinoembryonic antigen-related cell adhesion molecule 2, pseudogene       |
| 22761 | ENSG00000250878 | METTL21EP | 22151   | 0.07 | transcribed_unprocessed_pseudo | 13 | 103532449 | 103548383 | methyltransferase like 21E, pseudogene                                      |
| 23111 | ENSG00000250959 |           | 22435.5 | 0.07 | transcribed_unprocessed_pseudo | 10 | 75490320  | 75497009  | glutamate dehydrogenase 1, pseudogene 3                                     |
| 23633 | ENSG00000250420 | AACSP1    | 22828.3 | 0.07 | transcribed_unprocessed_pseudo | 5  | 17819182  | 17824536  | acetylacetyl-CoA synthetase pseudogene 1                                    |
| 23737 | ENSG00000188886 |           | 22916   | 0.07 | transcribed_unprocessed_pseudo | 5  | 1568637   | 1594735   | succinate dehydrogenase complex, subunit A, flavoprotein pseudogene 3       |
| 23804 | ENSG00000257542 |           | 22985.2 | 0.07 | transcribed_unprocessed_pseudo | 12 | 52473480  | 52502045  | olfactory receptor, family 7, subfamily E, member 47 pseudogene             |
| 23940 | ENSG00000235370 |           | 23063.8 | 0.07 | transcribed_unprocessed_pseudo | 15 | 84953014  | 8496399   | DNM1 pseudogene 51                                                          |
| 24364 | ENSG00000171084 | FAM83UP   | 23461.4 | 0.07 | transcribed_unprocessed_pseudo | 3  | 125635463 | 125648867 | family with sequence similarity 86, member j, pseudogene                    |
| 24422 | ENSG00000196115 | ADAM5     | 22677.4 | 0.07 | unitary_pseudogene             | 8  | 39172110  | 39274887  | ADAM metalloproteinase domain 5, pseudogene                                 |
| 24558 | ENSG00000230269 | AFCKL1P   | 21272.5 | 0.07 | unitary_pseudogene             | 16 | 90039994  | 90039999  | AFCK3-like AAA A1/Thaps 1, pseudogene                                       |
| 17356 | ENSG00000236259 | DEFABP    | 18031.9 | 0.07 | unitary_pseudogene             | 8  | 6808248   | 6809121   | defensin, alpha 8 pseudogene                                                |
| 19384 | ENSG00000250425 |           | 19556.9 | 0.07 | unprocessed_pseudogene         | 4  | 9756522   | 9757402   | olfactory receptor, family 7, subfamily E, member 35 pseudogene             |
| 19571 | ENSG00000237688 |           | 19657.3 | 0.07 | unprocessed_pseudogene         | 6  | 33098993  | 33111102  | major histocompatibility complex, class II, DR alpha 3 (pseudogene)         |
| 19639 | ENSG00000240261 |           | 19905.4 | 0.07 | unprocessed_pseudogene         | 7  | 143873833 | 143874235 | olfactory receptor, family 7, subfamily AD, member 1 pseudogene             |
| 20010 | ENSG00000231915 |           | 20035   | 0.07 | unprocessed_pseudogene         | 3  | 23031314  | 23033073  | sea-lake transcription factor 4 pseudogene 5                                |
| 20759 | ENSG00000230269 |           | 20759.3 | 0.07 | unprocessed_pseudogene         | 2  | 23533881  | 23536427  | tear shock 100.0 protein 1 pseudogene 3                                     |
| 21179 | ENSG00000250412 |           | 20937.8 | 0.07 | unprocessed_pseudogene         | 4  | 12025484  | 12029938  | kelch-like family member 2 pseudogene 1                                     |
| 21572 | ENSG00000214727 |           | 21249.9 | 0.07 | unprocessed_pseudogene         | 22 | 50151275  | 50152628  | ribosomal protein L5 pseudogene 35                                          |
| 22358 | ENSG00000250581 |           | 21347.8 | 0.07 | unprocessed_pseudogene         | 8  | 36136478  | 36137001  | MTF20 pseudogene 1B                                                         |
| 22572 | ENSG00000237238 |           | 22003.2 | 0.07 | unprocessed_pseudogene         | 9  | 67327775  | 67334983  | BMS1 pseudogene 10                                                          |
| 22845 | ENSG00000237836 |           | 22223.2 | 0.07 | unprocessed_pseudogene         | 13 | 19864733  | 19918965  | ankyrin repeat domain 28 pseudogene 3                                       |
| 24548 | ENSG00000206545 |           | 22988.7 | 0.07 | unprocessed_pseudogene         | 19 | 2257688   | 22587993  | vomeronasal 1 receptor 85 pseudogene                                        |
| 23878 | ENSG00000250586 |           | 23038.4 | 0.07 | unprocessed_pseudogene         | 4  | 69375159  | 69383365  | UDP-glucuronosyltransferase 2 family, polypeptide B29 pseudogene            |
| 24885 | ENSG00000238629 |           | 23590   | 0.07 | unprocessed_pseudogene         | 1  | 211590367 | 211591276 | sorting nexin 25 pseudogene 1                                               |
| 4624  | ENSG0000014486  |           | 7412.8  | 0.07 |                                |    |           |           |                                                                             |
| 6108  | ENSG00000229842 |           | 8590    | 0.07 |                                |    |           |           |                                                                             |
| 6794  | ENSG00000258539 |           | 8567.5  | 0.07 |                                |    |           |           |                                                                             |
| 6902  | ENSG00000104040 |           | 9671.2  | 0.07 |                                |    |           |           |                                                                             |
| 7000  | ENSG00000288408 |           | 9789.3  | 0.07 |                                |    |           |           |                                                                             |
| 7147  | ENSG00000229939 |           | 9898.1  | 0.07 |                                |    |           |           |                                                                             |
| 7149  | ENSG00000224114 |           | 9899.2  | 0.07 |                                |    |           |           |                                                                             |
| 7261  | ENSG00000286706 |           | 10038.2 | 0.07 |                                |    |           |           |                                                                             |
| 8117  | ENSG00000286714 |           | 10809.4 | 0.07 |                                |    |           |           |                                                                             |
| 8918  | ENSG00000225912 |           | 11481.7 | 0.07 |                                |    |           |           |                                                                             |
| 9319  | ENSG00000242861 |           | 11905.1 | 0.07 |                                |    |           |           |                                                                             |
| 9775  | ENSG00000254429 |           | 12174.1 | 0.07 |                                |    |           |           |                                                                             |
| 10028 | ENSG00000289949 |           | 12370.7 | 0.07 |                                | 1  | 248902716 | 248903150 | LY6PLAUR domain containing 8                                                |
| 10484 | ENSG00000289298 |           | 12723.5 | 0.07 |                                |    |           |           |                                                                             |
| 10588 | ENSG00000237749 |           | 12806.7 | 0.07 |                                |    |           |           |                                                                             |
| 10738 | ENSG00000248095 |           | 12929.3 | 0.07 |                                |    |           |           |                                                                             |
| 10968 | ENSG00000289498 |           | 13127   | 0.07 |                                |    |           |           |                                                                             |
| 11364 | ENSG00000283065 |           | 13455.6 | 0.07 |                                |    |           |           |                                                                             |
| 12292 | ENSG00000253475 |           | 14192.8 | 0.07 |                                |    |           |           |                                                                             |
| 12760 | ENSG00000253388 |           | 14552   | 0.07 |                                |    |           |           |                                                                             |
| 12938 | ENSG00000230551 |           | 14674.1 | 0.07 |                                |    |           |           |                                                                             |
| 12961 | ENSG00000259530 |           | 14689.1 | 0.07 |                                |    |           |           |                                                                             |
| 13861 | ENSG00000243487 |           | 15362   | 0.07 |                                |    |           |           |                                                                             |
| 14139 | ENSG00000271895 |           | 15568.9 | 0.07 |                                |    |           |           |                                                                             |
| 14440 | ENSG00000258048 |           | 15807.6 | 0.07 |                                |    |           |           |                                                                             |
| 14553 | ENSG00000251118 |           | 15898.7 | 0.07 |                                |    |           |           |                                                                             |
| 15159 | ENSG00000287152 |           | 16377.9 | 0.07 |                                |    |           |           |                                                                             |
| 15295 | ENSG00000227117 |           | 16471.1 | 0.07 |                                |    |           |           |                                                                             |
| 15608 | ENSG00000235267 |           | 16711.4 | 0.07 |                                |    |           |           |                                                                             |
| 15737 | ENSG00000258511 |           | 16807.9 | 0.07 |                                |    |           |           |                                                                             |
| 16008 | ENSG00000289887 |           | 16870.2 | 0.07 |                                |    |           |           |                                                                             |
| 15960 | ENSG00000287558 |           | 16883.5 | 0.07 |                                |    |           |           |                                                                             |
| 16170 | ENSG00000287744 |           | 17154.8 | 0.07 |                                |    |           |           |                                                                             |
| 16210 | ENSG00000244667 |           | 17184.5 | 0.07 |                                |    |           |           |                                                                             |
| 16315 | ENSG00000258239 |           | 17354.5 | 0.07 |                                |    |           |           |                                                                             |
| 16576 | ENSG00000236537 |           | 17452.9 | 0.07 |                                |    |           |           |                                                                             |
| 16693 | ENSG00000270679 |           | 17555.4 | 0.07 |                                |    |           |           |                                                                             |
| 16855 | ENSG00000250985 |           | 17776.9 | 0.07 |                                | 12 | 11315699  | 11315763  | RNAi US small nuclear 67b, pseudogene                                       |
| 16959 | ENSG00000287596 | CCL15     | 17746.3 | 0.07 |                                | 17 | 34323476  | 34329084  | chemokine (C-C motif) ligand 15                                             |
| 17018 | ENSG00000256885 |           | 17793.2 | 0.07 |                                |    |           |           |                                                                             |
| 17165 | ENSG00000284918 |           | 17893.5 | 0.07 |                                |    |           |           |                                                                             |
| 17209 | ENSG00000250271 |           | 17925.3 | 0.07 |                                |    |           |           |                                                                             |
| 17210 | ENSG00000287319 |           | 17926   | 0.07 |                                |    |           |           |                                                                             |
| 17338 | ENSG00000283443 |           | 18015.3 | 0.07 |                                |    |           |           |                                                                             |
| 17513 | ENSG00000244888 |           | 18142.1 | 0.07 |                                | 3  | 172034218 | 172039613 | Uncharacterized protein                                                     |
| 17562 | ENSG00000286887 |           | 18187.4 | 0.07 |                                |    |           |           |                                                                             |
| 17607 | ENSG00000185495 |           | 18206.1 | 0.07 |                                |    |           |           |                                                                             |
| 17681 | ENSG00000289398 |           | 18297.3 | 0.07 |                                |    |           |           |                                                                             |
| 17849 | ENSG00000271971 |           | 18385.2 | 0.07 |                                |    |           |           |                                                                             |
| 17946 | ENSG00000272285 |           | 18453.6 | 0.07 |                                |    |           |           |                                                                             |
| 17979 | ENSG00000221487 |           | 18478.5 | 0.07 |                                |    |           |           |                                                                             |
| 18038 | ENSG00000251002 |           | 18527.3 | 0.07 |                                |    |           |           |                                                                             |
| 18060 | ENSG00000271381 |           | 18547   | 0.07 |                                |    |           |           |                                                                             |
| 18070 | ENSG00000231513 |           | 18551.7 | 0.07 |                                |    |           |           |                                                                             |
| 18243 | ENSG00000271102 |           | 18688.2 | 0.07 |                                |    |           |           |                                                                             |
| 18277 | ENSG00000254140 |           | 18712.4 | 0.07 |                                |    |           |           |                                                                             |
| 18296 | ENSG00000230368 |           | 18725.2 | 0.07 |                                |    |           |           |                                                                             |
| 18381 | ENSG00000272510 |           | 18787.7 | 0.07 |                                |    |           |           |                                                                             |
| 18458 | ENSG00000243818 |           | 18844.7 | 0.07 |                                |    |           |           |                                                                             |
| 18481 | ENSG00000238193 |           | 18927.9 | 0.07 |                                |    |           |           |                                                                             |
| 18673 | ENSG00000231205 |           | 18988.3 | 0.07 |                                |    |           |           |                                                                             |
| 18680 | ENSG00000235852 |           | 19003.7 | 0.07 |                                |    |           |           |                                                                             |
| 18728 | ENSG00000272927 |           | 19036.3 | 0.07 |                                |    |           |           |                                                                             |
| 18862 | ENSG00000285506 |           | 19161.8 | 0.07 |                                |    |           |           |                                                                             |
| 18997 | ENSG00000289047 |           | 19287.3 | 0.07 |                                |    |           |           |                                                                             |
| 19172 | ENSG00000251000 |           | 19395.7 | 0.07 |                                |    |           |           |                                                                             |
| 19274 | ENSG00000288825 |           | 19471.7 | 0.07 |                                |    |           |           |                                                                             |
| 19355 | ENSG00000273009 | IKBK      | 19532.7 | 0.07 |                                | X  | 153789414 | 153796782 | inhibitor of kappa light polypeptide gene enhancer in B-cells, kinase gamma |
| 19385 | ENSG00000213628 |           | 19536   | 0.07 |                                | 2  | 240083493 | 240084053 | Uncharacterized protein                                                     |
| 19547 | ENSG00000250155 |           | 19573.5 | 0.07 |                                |    |           |           |                                                                             |
| 19555 | ENSG00000281529 |           | 19678.5 | 0.07 |                                |    |           |           |                                                                             |
| 19597 | ENSG00000231621 |           | 19679.3 | 0.07 |                                |    |           |           |                                                                             |
| 19674 | ENSG00000239290 |           | 19690.5 | 0.07 |                                |    |           |           |                                                                             |
| 19625 | ENSG00000233550 |           | 19734   | 0.07 |                                |    |           |           |                                                                             |
| 19699 | ENSG00000230378 |           | 19788.3 | 0.07 |                                |    |           |           |                                                                             |
| 19889 | ENSG00000225126 |           | 19842   | 0.07 |                                |    |           |           |                                                                             |
| 19925 | ENSG00000228822 |           | 19974.6 | 0.07 |                                |    |           |           |                                                                             |
| 19958 | ENSG00000289729 |           | 19993.3 | 0.07 |                                |    |           |           |                                                                             |
| 20015 | ENSG00000285643 |           | 20038.3 | 0.07 |                                |    |           |           |                                                                             |
| 20049 | ENSG00000214284 |           | 20062.7 | 0.07 |                                |    |           |           |                                                                             |
| 20076 | ENSG00000286596 |           | 20080   | 0.07 |                                |    |           |           |                                                                             |
| 20082 | ENSG00000233975 |           | 20084.6 | 0.07 |                                |    |           |           |                                                                             |
| 20095 | ENSG00000271147 |           | 20097.2 | 0.07 |                                |    |           |           |                                                                             |
| 20135 | ENSG00000246758 |           | 20124.6 | 0.07 |                                |    |           |           |                                                                             |
| 20142 | ENSG00000250938 |           | 20129.9 | 0.07 |                                |    |           |           |                                                                             |
| 20181 | ENSG00000287268 |           | 20167.6 | 0.07 |                                |    |           |           |                                                                             |
| 20195 | ENSG00000232777 |           | 20180   | 0.07 |                                |    |           |           |                                                                             |
| 20249 | ENSG00000281783 |           | 20226   | 0.07 |                                |    |           |           |                                                                             |
| 20303 | ENSG00000273415 |           | 20269   | 0.07 |                                |    |           |           |                                                                             |
| 20309 | ENSG00000289059 |           | 20      |      |                                |    |           |           |                                                                             |

|       |                 |         |      |    |           |           |                                                           |  |
|-------|-----------------|---------|------|----|-----------|-----------|-----------------------------------------------------------|--|
| 20646 | ENSG00000250358 | 20533.5 | 0.07 |    |           |           |                                                           |  |
| 20708 | ENSG00000251528 | 20575.5 | 0.07 |    |           |           |                                                           |  |
| 20736 | ENSG00000243305 | 20598.1 | 0.07 |    |           |           |                                                           |  |
| 20768 | ENSG00000214397 | 20623.2 | 0.07 |    |           |           |                                                           |  |
| 20868 | ENSG00000275288 | 20695.1 | 0.07 |    |           |           |                                                           |  |
| 20909 | ENSG00000205716 | 20735.1 | 0.07 |    |           |           |                                                           |  |
| 20926 | ENSG00000241411 | 20744.4 | 0.07 |    |           |           |                                                           |  |
| 20981 | ENSG00000241699 | 20747.1 | 0.07 |    |           |           |                                                           |  |
| 20981 | ENSG00000249493 | 20768.8 | 0.07 |    |           |           |                                                           |  |
| 20979 | ENSG00000255440 | 20778   | 0.07 |    |           |           |                                                           |  |
| 21007 | ENSG00000245244 | 20799.2 | 0.07 |    |           |           |                                                           |  |
| 21038 | ENSG00000202153 | 20819   | 0.07 |    |           |           |                                                           |  |
| 21053 | ENSG00000249558 | 20827   | 0.07 |    |           |           |                                                           |  |
| 21073 | ENSG00000280563 | 20846.9 | 0.07 |    |           |           |                                                           |  |
| 21091 | ENSG00000198193 | 20860.5 | 0.07 |    |           |           |                                                           |  |
| 21093 | ENSG00000213579 | 20862   | 0.07 |    |           |           |                                                           |  |
| 21097 | ENSG00000235224 | 20863.2 | 0.07 |    |           |           |                                                           |  |
| 21150 | ENSG00000202927 | 20908.9 | 0.07 |    |           |           |                                                           |  |
| 21159 | ENSG00000272967 | 20915.3 | 0.07 |    |           |           |                                                           |  |
| 21189 | ENSG00000255583 | 20944.5 | 0.07 |    |           |           |                                                           |  |
| 21199 | ENSG00000202928 | 20950   | 0.07 |    |           |           |                                                           |  |
| 21234 | ENSG00000213128 | 20980.5 | 0.07 | 14 | 104710541 | 104712473 | chromosome 14 open reading frame 144                      |  |
| 21265 | ENSG00000211698 | 21007.4 | 0.07 |    |           |           |                                                           |  |
| 21284 | ENSG00000213302 | 21023.3 | 0.07 |    |           |           |                                                           |  |
| 21303 | ENSG00000224616 | 21036.3 | 0.07 |    |           |           |                                                           |  |
| 21315 | ENSG00000229484 | 21045.3 | 0.07 |    |           |           |                                                           |  |
| 21318 | ENSG00000211538 | 21047.3 | 0.07 |    |           |           |                                                           |  |
| 21320 | ENSG00000253154 | 21048.3 | 0.07 |    |           |           |                                                           |  |
| 21323 | ENSG00000234962 | 21052.4 | 0.07 |    |           |           |                                                           |  |
| 21332 | ENSG00000202921 | 21057.3 | 0.07 |    |           |           |                                                           |  |
| 21335 | ENSG00000258457 | 21059.1 | 0.07 |    |           |           |                                                           |  |
| 21357 | ENSG00000271835 | 21074.7 | 0.07 |    |           |           |                                                           |  |
| 21375 | ENSG00000212555 | 21092.4 | 0.07 |    |           |           |                                                           |  |
| 21379 | ENSG00000258929 | 21096.1 | 0.07 |    |           |           |                                                           |  |
| 21386 | ENSG00000233912 | 21101.9 | 0.07 |    |           |           |                                                           |  |
| 21388 | ENSG00000202927 | 21103.9 | 0.07 |    |           |           |                                                           |  |
| 21400 | ENSG00000207393 | 21115.3 | 0.07 |    |           |           |                                                           |  |
| 21416 | ENSG00000245688 | 21129.7 | 0.07 |    |           |           |                                                           |  |
| 21428 | ENSG00000202929 | 21135.3 | 0.07 |    |           |           |                                                           |  |
| 21431 | ENSG00000248598 | 21138.7 | 0.07 |    |           |           |                                                           |  |
| 21441 | ENSG00000229718 | 21150.3 | 0.07 |    |           |           |                                                           |  |
| 21468 | ENSG00000229689 | 21170.3 | 0.07 |    |           |           |                                                           |  |
| 21507 | ENSG00000215142 | 21212.2 | 0.07 |    |           |           |                                                           |  |
| 21569 | ENSG00000288388 | 21246.1 | 0.07 |    |           |           |                                                           |  |
| 21575 | ENSG00000229613 | 21259   | 0.07 |    |           |           |                                                           |  |
| 21584 | ENSG00000249699 | 21257.7 | 0.07 |    |           |           |                                                           |  |
| 21601 | ENSG00000253901 | 21287.9 | 0.07 |    |           |           |                                                           |  |
| 21603 | ENSG00000249699 | 21270.5 | 0.07 | 2  | 65135721  | 65135620  | Small nuclear RNA U13                                     |  |
| 21605 | ENSG00000282194 | 21272.1 | 0.07 |    |           |           |                                                           |  |
| 21628 | ENSG00000272079 | 21288.3 | 0.07 |    |           |           |                                                           |  |
| 21662 | ENSG00000272895 | 21323.4 | 0.07 |    |           |           |                                                           |  |
| 21673 | ENSG00000219470 | 21332.5 | 0.07 |    |           |           |                                                           |  |
| 21695 | ENSG00000252234 | 21351.3 | 0.07 |    |           |           |                                                           |  |
| 21706 | ENSG00000235204 | 21357.9 | 0.07 |    |           |           |                                                           |  |
| 21708 | ENSG00000211214 | 21360   | 0.07 |    |           |           |                                                           |  |
| 21712 | ENSG00000235497 | 21363.4 | 0.07 |    |           |           |                                                           |  |
| 21715 | ENSG00000287322 | 21366.5 | 0.07 |    |           |           |                                                           |  |
| 21746 | ENSG00000231759 | 21368.5 | 0.07 |    |           |           |                                                           |  |
| 21720 | ENSG00000228044 | 21372.9 | 0.07 |    |           |           |                                                           |  |
| 21730 | ENSG00000242147 | 21381.4 | 0.07 |    |           |           |                                                           |  |
| 21734 | ENSG00000232925 | 21383.5 | 0.07 |    |           |           |                                                           |  |
| 21752 | ENSG00000248811 | 21397.5 | 0.07 |    |           |           |                                                           |  |
| 21763 | ENSG00000251024 | 21401   | 0.07 |    |           |           |                                                           |  |
| 21796 | ENSG00000217445 | 21422.7 | 0.07 |    |           |           |                                                           |  |
| 21812 | ENSG00000258388 | 21435.2 | 0.07 |    |           |           |                                                           |  |
| 21818 | ENSG00000224001 | 21439.3 | 0.07 |    |           |           |                                                           |  |
| 21838 | ENSG00000242038 | 21456   | 0.07 |    |           |           |                                                           |  |
| 21836 | ENSG00000188363 | 21457.8 | 0.07 |    |           |           |                                                           |  |
| 21837 | ENSG00000257580 | 21458.5 | 0.07 |    |           |           |                                                           |  |
| 21853 | ENSG00000214564 | 21465.3 | 0.07 |    |           |           |                                                           |  |
| 21870 | ENSG00000281175 | 21480.3 | 0.07 |    |           |           |                                                           |  |
| 21904 | ENSG00000270168 | 21504   | 0.07 |    |           |           |                                                           |  |
| 21924 | ENSG00000285322 | 21522.5 | 0.07 | 15 | 82804003  | 82810874  | gcinA A6 family-like 17, pseudogene                       |  |
| 21941 | ENSG00000271693 | 21531   | 0.07 |    |           |           |                                                           |  |
| 21960 | ENSG00000223869 | 21548.7 | 0.07 |    |           |           |                                                           |  |
| 21971 | ENSG00000231961 | 21553.1 | 0.07 |    |           |           |                                                           |  |
| 21973 | ENSG00000213592 | 21554.9 | 0.07 |    |           |           |                                                           |  |
| 21982 | ENSG00000235526 | 21561.3 | 0.07 |    |           |           |                                                           |  |
| 21985 | ENSG00000223272 | 21562.8 | 0.07 |    |           |           |                                                           |  |
| 21998 | ENSG00000241358 | 21571.6 | 0.07 |    |           |           |                                                           |  |
| 22000 | ENSG00000281052 | 21575   | 0.07 |    |           |           |                                                           |  |
| 22003 | ENSG00000285939 | 21576.3 | 0.07 |    |           |           |                                                           |  |
| 22005 | ENSG00000239293 | 21582   | 0.07 |    |           |           |                                                           |  |
| 22008 | ENSG00000226835 | 21583.9 | 0.07 |    |           |           |                                                           |  |
| 22011 | ENSG00000249562 | 21589.9 | 0.07 |    |           |           |                                                           |  |
| 22017 | ENSG00000244070 | 21597.5 | 0.07 |    |           |           |                                                           |  |
| 22021 | ENSG00000250220 | 21599.7 | 0.07 |    |           |           |                                                           |  |
| 22024 | ENSG00000258040 | 21603.5 | 0.07 |    |           |           |                                                           |  |
| 22051 | ENSG00000295103 | 21618.3 | 0.07 |    |           |           |                                                           |  |
| 22060 | ENSG00000236349 | 21625.1 | 0.07 | 19 | 11549997  | 11550096  | Small nuclear RNA U13                                     |  |
| 22073 | ENSG00000246039 | 21636.3 | 0.07 |    |           |           |                                                           |  |
| 22075 | ENSG00000270296 | 21636.6 | 0.07 |    |           |           |                                                           |  |
| 22089 | ENSG00000256148 | 21650.1 | 0.07 |    |           |           |                                                           |  |
| 22093 | ENSG00000271384 | 21651.1 | 0.07 |    |           |           |                                                           |  |
| 22108 | ENSG00000217298 | 21661.7 | 0.07 |    |           |           |                                                           |  |
| 22109 | ENSG00000224655 | 21662   | 0.07 |    |           |           |                                                           |  |
| 22115 | ENSG00000242292 | 21665.3 | 0.07 |    |           |           |                                                           |  |
| 22117 | ENSG00000271853 | 21666.9 | 0.07 |    |           |           |                                                           |  |
| 22122 | ENSG00000226812 | 21668.5 | 0.07 |    |           |           |                                                           |  |
| 22124 | ENSG00000215963 | 21669.6 | 0.07 |    |           |           |                                                           |  |
| 22138 | ENSG00000214333 | 21674.5 | 0.07 |    |           |           |                                                           |  |
| 22162 | ENSG00000287501 | 21700.3 | 0.07 |    |           |           |                                                           |  |
| 22174 | ENSG00000238162 | 21705.1 | 0.07 |    |           |           |                                                           |  |
| 22175 | ENSG00000231292 | 21706.9 | 0.07 |    |           |           |                                                           |  |
| 22181 | ENSG00000207332 | 21712.4 | 0.07 |    |           |           |                                                           |  |
| 22184 | ENSG00000289877 | 21714.9 | 0.07 |    |           |           |                                                           |  |
| 22188 | ENSG00000232096 | 21716.4 | 0.07 |    |           |           |                                                           |  |
| 22190 | ENSG00000229639 | 21721   | 0.07 |    |           |           |                                                           |  |
| 22206 | ENSG00000239564 | 21735.6 | 0.07 | 15 | 40242907  | 40243009  | Small nuclear RNA U13                                     |  |
| 22232 | ENSG00000281253 | 21752.7 | 0.07 |    |           |           |                                                           |  |
| 22236 | ENSG00000259347 | 21756.5 | 0.07 |    |           |           |                                                           |  |
| 22243 | ENSG00000295193 | 21762   | 0.07 |    |           |           |                                                           |  |
| 22248 | ENSG00000253333 | 21764.3 | 0.07 |    |           |           |                                                           |  |
| 22249 | ENSG00000258591 | 21765.6 | 0.07 |    |           |           |                                                           |  |
| 22250 | ENSG00000237183 | 21766.1 | 0.07 |    |           |           |                                                           |  |
| 22256 | ENSG00000232933 | 21768.8 | 0.07 |    |           |           |                                                           |  |
| 22258 | ENSG00000225446 | 21769   | 0.07 |    |           |           |                                                           |  |
| 22272 | ENSG00000232779 | 21776.7 | 0.07 |    |           |           |                                                           |  |
| 22278 | ENSG00000289729 | 21779.8 | 0.07 |    |           |           |                                                           |  |
| 22279 | ENSG00000257464 | 21781.1 | 0.07 |    |           |           |                                                           |  |
| 22292 | ENSG00000226701 | 21792.5 | 0.07 |    |           |           |                                                           |  |
| 22300 | ENSG00000231246 | 21796.7 | 0.07 |    |           |           |                                                           |  |
| 22303 | ENSG00000253712 | 21799.6 | 0.07 |    |           |           |                                                           |  |
| 22304 | ENSG00000257159 | 21801.2 | 0.07 |    |           |           |                                                           |  |
| 22314 | ENSG00000227960 | 21803.1 | 0.07 |    |           |           |                                                           |  |
| 22318 | ENSG00000231463 | 21812   | 0.07 |    |           |           |                                                           |  |
| 22326 | ENSG00000234713 | 21816.3 | 0.07 |    |           |           |                                                           |  |
| 22348 | ENSG00000280680 | 21832.6 | 0.07 |    |           |           |                                                           |  |
| 22354 | ENSG00000252732 | 21836.5 | 0.07 | 11 | 73375560  | 73375642  | Y RNA                                                     |  |
| 22368 | ENSG00000281924 | 21853.8 | 0.07 |    |           |           |                                                           |  |
| 22376 | ENSG00000255181 | 21858.4 | 0.07 |    |           |           |                                                           |  |
| 22378 | ENSG00000232938 | 21858.5 | 0.07 |    |           |           |                                                           |  |
| 22380 | ENSG00000258447 | 21858.8 | 0.07 |    |           |           |                                                           |  |
| 22409 | ENSG00000258846 | 21878.9 | 0.07 |    |           |           |                                                           |  |
| 22424 | ENSG00000232831 | 21898.2 | 0.07 |    |           |           |                                                           |  |
| 22433 | ENSG00000254537 | 21894.4 | 0.07 |    |           |           |                                                           |  |
| 22447 | ENSG00000249926 | 21895   | 0.07 |    |           |           |                                                           |  |
| 22453 | ENSG00000234261 | 21911.4 | 0.07 |    |           |           |                                                           |  |
| 22457 | ENSG00000287269 | 21912.3 | 0.07 |    |           |           |                                                           |  |
| 22466 | ENSG00000274461 | 21917.2 | 0.07 |    |           |           |                                                           |  |
| 22469 | ENSG00000292923 | 21940.2 | 0.07 |    |           |           |                                                           |  |
| 22486 | ENSG00000253356 | 21943.3 | 0.07 |    |           |           |                                                           |  |
| 22502 | ENSG00000237481 | 21942.2 | 0.07 |    |           |           |                                                           |  |
| 22523 | ENSG00000272762 | 21956.1 | 0.07 |    |           |           |                                                           |  |
| 22525 | ENSG00000283995 | 21960.4 | 0.07 |    |           |           |                                                           |  |
| 22529 | ENSG00000256433 | 21962.9 | 0.07 |    |           |           |                                                           |  |
| 22537 | ENSG00000218781 | 21970   | 0.07 |    |           |           |                                                           |  |
| 22539 | ENSG00000227189 | 21973   | 0.07 |    |           |           |                                                           |  |
| 22544 | ENSG00000224374 | 21980.5 | 0.07 |    |           |           |                                                           |  |
| 22550 | ENSG00000202928 | 21984.1 | 0.07 |    |           |           |                                                           |  |
| 22561 | ENSG00000228101 | 21996.3 | 0.07 | 12 | 48759919  | 48761738  | CDNA FLJ28186 fs. clone ADOG4757. Uncharacterized protein |  |



|       |                 |        |       |   |      |    |           |           |                                                         |
|-------|-----------------|--------|-------|---|------|----|-----------|-----------|---------------------------------------------------------|
| 22568 | ENSG00000272363 |        | 22500 | 1 | 0.07 |    |           |           |                                                         |
| 22568 | ENSG00000272364 |        | 22518 | 1 | 0.07 |    |           |           |                                                         |
| 22591 | ENSG00000236003 |        | 22521 | 4 | 0.07 |    |           |           |                                                         |
| 22597 | ENSG00000281835 |        | 22522 | 5 | 0.07 |    |           |           |                                                         |
| 22597 | ENSG00000242676 |        | 22527 | 6 | 0.07 |    |           |           |                                                         |
| 22604 | ENSG00000234446 |        | 22533 | 5 | 0.07 | 1  | 142697653 | 142729971 | ankyrin repeat domain 20 family, member A12, pseudogene |
| 22613 | ENSG00000259814 |        | 22538 | 8 | 0.07 |    |           |           |                                                         |
| 22620 | ENSG00000250313 |        | 22542 | 5 | 0.07 |    |           |           |                                                         |
| 22622 | ENSG00000252323 |        | 22544 | 1 | 0.07 |    |           |           |                                                         |
| 22627 | ENSG00000229502 |        | 22547 | 5 | 0.07 |    |           |           |                                                         |
| 22646 | ENSG00000251237 |        | 22569 |   | 0.07 |    |           |           |                                                         |
| 22647 | ENSG00000258434 |        | 22565 | 3 | 0.07 |    |           |           |                                                         |
| 22653 | ENSG00000230478 |        | 22569 | 3 | 0.07 |    |           |           |                                                         |
| 22661 | ENSG00000228954 |        | 22576 | 6 | 0.07 |    |           |           |                                                         |
| 22664 | ENSG00000223433 |        | 22578 | 6 | 0.07 |    |           |           |                                                         |
| 22669 | ENSG00000237897 |        | 22582 | 2 | 0.07 |    |           |           |                                                         |
| 22674 | ENSG00000236478 |        | 22585 | 9 | 0.07 |    |           |           |                                                         |
| 22684 | ENSG00000229093 |        | 22591 | 8 | 0.07 |    |           |           |                                                         |
| 22684 | ENSG00000232129 |        | 22590 | 4 | 0.07 |    |           |           |                                                         |
| 22700 | ENSG00000224393 |        | 22596 | 9 | 0.07 |    |           |           |                                                         |
| 22704 | ENSG00000231928 |        | 22593 | 1 | 0.07 |    |           |           |                                                         |
| 22708 | ENSG00000248445 |        | 22593 | 7 | 0.07 |    |           |           |                                                         |
| 22713 | ENSG00000228944 |        | 22597 | 7 | 0.07 |    |           |           |                                                         |
| 22718 | ENSG00000228905 |        | 22593 | 3 | 0.07 | 17 | 15141102  | 15141200  | Small nuclear RNA U13                                   |
| 22723 | ENSG00000236115 |        | 22597 | 7 | 0.07 |    |           |           |                                                         |
| 22726 | ENSG00000257040 |        | 22593 | 1 | 0.07 |    |           |           |                                                         |
| 22728 | ENSG00000230495 |        | 22594 | 1 | 0.07 |    |           |           |                                                         |
| 22732 | ENSG00000280375 |        | 22598 | 9 | 0.07 |    |           |           |                                                         |
| 22736 | ENSG00000231084 |        | 22598 | 1 | 0.07 |    |           |           |                                                         |
| 22738 | ENSG00000215154 |        | 22598 | 6 | 0.07 |    |           |           |                                                         |
| 22741 | ENSG00000211562 |        | 22593 | 4 | 0.07 |    |           |           |                                                         |
| 22746 | ENSG00000227292 |        | 22590 | 1 | 0.07 |    |           |           |                                                         |
| 22767 | ENSG00000222568 |        | 22596 | 1 | 0.07 |    |           |           |                                                         |
| 22780 | ENSG00000243635 |        | 22598 | 8 | 0.07 |    |           |           |                                                         |
| 22783 | ENSG00000237325 |        | 22583 | 3 | 0.07 |    |           |           |                                                         |
| 22788 | ENSG00000237488 |        | 22589 | 8 | 0.07 |    |           |           |                                                         |
| 22788 | ENSG00000250415 |        | 22591 | 5 | 0.07 |    |           |           |                                                         |
| 22790 | ENSG00000227170 |        | 22593 | 1 | 0.07 |    |           |           |                                                         |
| 22792 | ENSG00000231487 |        | 22593 | 4 | 0.07 |    |           |           |                                                         |
| 22796 | ENSG00000250910 |        | 22598 | 8 | 0.07 |    |           |           |                                                         |
| 22798 | ENSG00000228093 |        | 22599 | 6 | 0.07 |    |           |           |                                                         |
| 22810 | ENSG00000228988 |        | 22593 | 1 | 0.07 |    |           |           |                                                         |
| 22812 | ENSG00000243122 |        | 22598 | 8 | 0.07 |    |           |           |                                                         |
| 22822 | ENSG00000257752 |        | 22603 | 1 | 0.07 |    |           |           |                                                         |
| 22838 | ENSG00000275267 |        | 22618 |   | 0.07 |    |           |           |                                                         |
| 22850 | ENSG00000230516 |        | 22624 | 6 | 0.07 |    |           |           |                                                         |
| 22873 | ENSG00000256287 |        | 22640 | 1 | 0.07 |    |           |           |                                                         |
| 22876 | ENSG00000261167 |        | 22646 | 6 | 0.07 |    |           |           |                                                         |
| 22888 | ENSG00000248817 |        | 22655 | 5 | 0.07 |    |           |           |                                                         |
| 22893 | ENSG00000242456 |        | 22658 | 3 | 0.07 |    |           |           |                                                         |
| 22904 | ENSG00000257179 |        | 22669 | 4 | 0.07 |    |           |           |                                                         |
| 22910 | ENSG00000230309 |        | 22677 |   | 0.07 |    |           |           |                                                         |
| 22912 | ENSG00000230552 |        | 22678 | 6 | 0.07 |    |           |           |                                                         |
| 22930 | ENSG00000231525 |        | 22691 | 4 | 0.07 |    |           |           |                                                         |
| 22934 | ENSG00000230296 |        | 22692 | 3 | 0.07 |    |           |           |                                                         |
| 22944 | ENSG00000237832 |        | 22692 | 5 | 0.07 |    |           |           |                                                         |
| 22964 | ENSG00000272146 |        | 22692 | 9 | 0.07 |    |           |           |                                                         |
| 22960 | ENSG00000215387 |        | 22694 | 4 | 0.07 |    |           |           |                                                         |
| 22972 | ENSG00000241231 |        | 22698 | 8 | 0.07 |    |           |           |                                                         |
| 22976 | ENSG00000270067 |        | 22693 | 1 | 0.07 |    |           |           |                                                         |
| 22986 | ENSG00000229295 |        | 22694 | 4 | 0.07 |    |           |           |                                                         |
| 23004 | ENSG00000229393 |        | 22692 | 2 | 0.07 |    |           |           |                                                         |
| 23028 | ENSG00000264956 |        | 22719 | 9 | 0.07 |    |           |           |                                                         |
| 23038 | ENSG00000230824 |        | 22693 | 7 | 0.07 |    |           |           |                                                         |
| 23045 | ENSG00000248595 |        | 22697 | 1 | 0.07 |    |           |           |                                                         |
| 23054 | ENSG00000272191 |        | 22695 | 3 | 0.07 |    |           |           |                                                         |
| 23065 | ENSG00000225095 |        | 22693 | 5 | 0.07 |    |           |           |                                                         |
| 23068 | ENSG00000259798 |        | 22695 | 6 | 0.07 |    |           |           |                                                         |
| 23070 | ENSG00000273143 |        | 22697 |   | 0.07 |    |           |           |                                                         |
| 23075 | ENSG00000275739 |        | 22692 | 2 | 0.07 |    |           |           |                                                         |
| 23079 | ENSG00000258038 |        | 22693 |   | 0.07 |    |           |           |                                                         |
| 23096 | ENSG00000231756 |        | 22696 | 8 | 0.07 |    |           |           |                                                         |
| 23118 | ENSG00000245142 |        | 22698 | 7 | 0.07 |    |           |           |                                                         |
| 23128 | ENSG00000271378 |        | 22444 | 3 | 0.07 |    |           |           |                                                         |
| 23128 | ENSG00000235881 |        | 22445 | 7 | 0.07 |    |           |           |                                                         |
| 23142 | ENSG00000236520 |        | 22453 | 1 | 0.07 |    |           |           |                                                         |
| 23145 | ENSG00000257573 |        | 22456 | 5 | 0.07 |    |           |           |                                                         |
| 23162 | ENSG00000268399 |        | 22473 |   | 0.07 |    |           |           |                                                         |
| 23163 | ENSG00000271188 |        | 22475 | 3 | 0.07 |    |           |           |                                                         |
| 23168 | ENSG00000228072 |        | 22482 | 1 | 0.07 |    |           |           |                                                         |
| 23196 | ENSG00000248514 |        | 22505 | 7 | 0.07 |    |           |           |                                                         |
| 23203 | ENSG00000231881 |        | 22508 | 7 | 0.07 |    |           |           |                                                         |
| 23216 | ENSG00000238330 |        | 22523 | 1 | 0.07 | 14 | 74265718  | 74265821  | Small nuclear RNA U13                                   |
| 23238 | ENSG00000248150 |        | 22538 | 3 | 0.07 |    |           |           |                                                         |
| 23243 | ENSG00000261939 |        | 22543 | 4 | 0.07 |    |           |           |                                                         |
| 23248 | ENSG00000271942 |        | 22547 |   | 0.07 |    |           |           |                                                         |
| 23256 | ENSG00000230322 |        | 22553 | 8 | 0.07 |    |           |           |                                                         |
| 23275 | ENSG00000230660 |        | 22560 | 6 | 0.07 |    |           |           |                                                         |
| 23296 | ENSG00000243433 |        | 22578 | 7 | 0.07 |    |           |           |                                                         |
| 23301 | ENSG00000250511 |        | 22582 | 6 | 0.07 |    |           |           |                                                         |
| 23302 | ENSG00000246398 |        | 22583 | 3 | 0.07 |    |           |           |                                                         |
| 23306 | ENSG00000260981 |        | 22584 | 6 | 0.07 |    |           |           |                                                         |
| 23308 | ENSG00000262920 |        | 22585 | 7 | 0.07 |    |           |           |                                                         |
| 23325 | ENSG00000236457 |        | 22603 | 4 | 0.07 |    |           |           |                                                         |
| 23327 | ENSG00000225975 |        | 22604 | 2 | 0.07 |    |           |           |                                                         |
| 23337 | ENSG00000258770 |        | 22613 | 1 | 0.07 |    |           |           |                                                         |
| 23338 | ENSG00000232057 |        | 22615 | 6 | 0.07 |    |           |           |                                                         |
| 23353 | ENSG00000271257 |        | 22628 | 5 | 0.07 |    |           |           |                                                         |
| 23361 | ENSG00000248551 |        | 22637 | 5 | 0.07 |    |           |           |                                                         |
| 23362 | ENSG00000271795 |        | 22637 | 8 | 0.07 |    |           |           |                                                         |
| 23366 | ENSG00000231766 |        | 22641 | 2 | 0.07 |    |           |           |                                                         |
| 23367 | ENSG00000243886 |        | 22644 | 8 | 0.07 |    |           |           |                                                         |
| 23388 | ENSG00000269868 |        | 22655 |   | 0.07 |    |           |           |                                                         |
| 23390 | ENSG00000269898 |        | 22656 |   | 0.07 |    |           |           |                                                         |
| 23394 | ENSG00000227744 |        | 22656 | 5 | 0.07 |    |           |           |                                                         |
| 23395 | ENSG00000230483 |        | 22656 | 7 | 0.07 |    |           |           |                                                         |
| 23396 | ENSG00000230965 |        | 22657 | 5 | 0.07 |    |           |           |                                                         |
| 23397 | ENSG00000272986 |        | 22658 | 9 | 0.07 |    |           |           |                                                         |
| 23414 | ENSG00000259815 |        | 22671 | 9 | 0.07 |    |           |           |                                                         |
| 23420 | ENSG00000232975 |        | 22673 | 3 | 0.07 |    |           |           |                                                         |
| 23424 | ENSG00000257629 |        | 22678 | 1 | 0.07 |    |           |           |                                                         |
| 23439 | ENSG00000289243 |        | 22687 | 3 | 0.07 |    |           |           |                                                         |
| 23451 | ENSG00000233335 |        | 22694 | 8 | 0.07 |    |           |           |                                                         |
| 23458 | ENSG00000269879 |        | 22699 | 4 | 0.07 |    |           |           |                                                         |
| 23466 | ENSG00000267707 |        | 22705 | 5 | 0.07 |    |           |           |                                                         |
| 23471 | ENSG00000226973 |        | 22711 | 8 | 0.07 |    |           |           |                                                         |
| 23472 | ENSG00000225548 |        | 22711 | 4 | 0.07 |    |           |           |                                                         |
| 23478 | ENSG00000269878 |        | 22714 | 5 | 0.07 |    |           |           |                                                         |
| 23485 | ENSG00000250521 |        | 22715 | 3 | 0.07 |    |           |           |                                                         |
| 23485 | ENSG00000249199 |        | 22720 | 3 | 0.07 |    |           |           |                                                         |
| 23488 | ENSG00000238475 |        | 22721 | 9 | 0.07 |    |           |           |                                                         |
| 23493 | ENSG00000281879 | FAM25A | 22724 | 3 | 0.07 | 10 | 49198649  | 49207818  | family with sequence similarity 25, member C            |
| 23499 | ENSG00000283478 |        | 22728 | 6 | 0.07 | 5  | 154083077 | 154083344 | RNA, 75L, cytoplasmic 439, pseudogene                   |
| 23527 | ENSG00000280488 |        | 22747 | 3 | 0.07 |    |           |           |                                                         |
| 23528 | ENSG00000240248 |        | 22747 | 6 | 0.07 |    |           |           |                                                         |
| 23531 | ENSG00000255915 |        | 22748 | 5 | 0.07 |    |           |           |                                                         |
| 23534 | ENSG00000240907 |        | 22748 | 5 | 0.07 |    |           |           |                                                         |
| 23542 | ENSG00000231527 |        | 22753 | 6 | 0.07 |    |           |           |                                                         |
| 23544 | ENSG00000262467 |        | 22756 | 6 | 0.07 |    |           |           |                                                         |
| 23552 | ENSG00000258376 |        | 22765 | 8 | 0.07 |    |           |           |                                                         |
| 23553 | ENSG00000249195 |        | 22766 | 2 | 0.07 |    |           |           |                                                         |
| 23564 | ENSG00000267070 |        | 22770 | 7 | 0.07 |    |           |           |                                                         |
| 23560 | ENSG00000257918 |        | 22772 | 3 | 0.07 |    |           |           |                                                         |
| 23573 | ENSG00000244144 |        | 22781 | 6 | 0.07 |    |           |           |                                                         |
| 23591 | ENSG00000224254 |        | 22793 | 1 | 0.07 |    |           |           |                                                         |
| 23601 | ENSG00000254222 |        | 22800 | 7 | 0.07 |    |           |           |                                                         |
| 23606 | ENSG00000227657 |        | 22809 | 3 | 0.07 |    |           |           |                                                         |
| 23611 | ENSG00000271363 |        | 22813 | 9 | 0.07 |    |           |           |                                                         |
| 23612 | ENSG00000231612 |        | 22814 | 1 | 0.07 |    |           |           |                                                         |
| 23617 | ENSG00000243885 |        | 22817 |   | 0.07 |    |           |           |                                                         |
| 23619 | ENSG00000245421 |        | 22819 | 3 | 0.07 | 2  | 97766321  | 97766609  | RNA, 75L, cytoplasmic 313, pseudogene                   |
| 23630 | ENSG00000268838 |        | 22827 | 3 | 0.07 | 15 | 78830023  | 78831288  | HCG2009369, Uncharacterized protein                     |
| 23634 | ENSG00000269038 |        | 22831 | 4 | 0.07 |    |           |           |                                                         |
| 23641 | ENSG00000267125 |        | 22842 | 7 | 0.07 |    |           |           |                                                         |
| 23651 | ENSG00000237810 |        | 22850 | 2 | 0.07 |    |           |           |                                                         |
| 23652 | ENSG00000268748 |        | 22850 | 5 | 0.07 |    |           |           |                                                         |
| 23655 | ENSG00000240394 |        | 22852 | 8 | 0.07 |    |           |           |                                                         |
| 23656 | ENSG00000233752 |        | 22853 | 4 | 0.07 |    |           |           |                                                         |
| 23664 | ENSG00000256143 |        | 22860 | 5 | 0.07 |    |           |           |                                                         |
| 23668 | ENSG00000231623 |        | 22861 | 2 | 0.07 |    |           |           |                                                         |
| 23668 | ENSG00000270799 |        | 22863 | 7 | 0.07 |    |           |           |                                                         |

|       |                 |              |         |      |          |          |          |  |                                      |
|-------|-----------------|--------------|---------|------|----------|----------|----------|--|--------------------------------------|
| 23672 | ENSG00000237371 |              | 22869.9 | 0.07 |          |          |          |  |                                      |
| 23674 | ENSG00000236584 |              | 22871.9 | 0.07 |          |          |          |  |                                      |
| 23677 | ENSG00000227227 |              | 22874.5 | 0.07 |          |          |          |  |                                      |
| 23683 | ENSG00000287372 |              | 22877.9 | 0.07 |          |          |          |  |                                      |
| 23688 | ENSG00000248473 |              | 22882.9 | 0.07 |          |          |          |  |                                      |
| 23698 | ENSG00000237878 |              | 22890.7 | 0.07 |          |          |          |  |                                      |
| 23702 | ENSG00000270978 |              | 22892.4 | 0.07 |          |          |          |  |                                      |
| 23722 | ENSG00000236623 |              | 22907.1 | 0.07 |          |          |          |  |                                      |
| 23728 | ENSG00000238126 |              | 22910.1 | 0.07 |          |          |          |  |                                      |
| 23740 | ENSG00000252838 |              | 22918.9 | 0.07 | 16       | 23424905 | 23425197 |  | RNA, 75k small nuclear pseudogene 23 |
| 23748 | ENSG00000224997 |              | 22928.1 | 0.07 |          |          |          |  |                                      |
| 23755 | ENSG00000235925 |              | 22930.7 | 0.07 |          |          |          |  |                                      |
| 23754 | ENSG00000226933 |              | 22933.9 | 0.07 |          |          |          |  |                                      |
| 23758 | ENSG00000225877 |              | 22941.3 | 0.07 |          |          |          |  |                                      |
| 23762 | ENSG00000273038 |              | 22959.2 | 0.07 |          |          |          |  |                                      |
| 23784 | ENSG00000270948 |              | 22963.8 | 0.07 |          |          |          |  |                                      |
| 23786 | ENSG00000254033 |              | 22965.3 | 0.07 |          |          |          |  |                                      |
| 23784 | ENSG00000223833 |              | 22974.8 | 0.07 |          |          |          |  |                                      |
| 23807 | ENSG00000255504 |              | 22986.8 | 0.07 |          |          |          |  |                                      |
| 23809 | ENSG00000259163 |              | 22988.4 | 0.07 |          |          |          |  |                                      |
| 23813 | ENSG00000235532 |              | 22991.3 | 0.07 |          |          |          |  |                                      |
| 23825 | ENSG00000280177 |              | 22999.8 | 0.07 |          |          |          |  |                                      |
| 23827 | ENSG00000243193 |              | 23001.9 | 0.07 |          |          |          |  |                                      |
| 23830 | ENSG00000217788 |              | 23003.3 | 0.07 |          |          |          |  |                                      |
| 23835 | ENSG00000246316 |              | 23006.8 | 0.07 |          |          |          |  |                                      |
| 23841 | ENSG00000258998 |              | 23011.8 | 0.07 |          |          |          |  |                                      |
| 23843 | ENSG00000259566 |              | 23012.7 | 0.07 |          |          |          |  |                                      |
| 23850 | ENSG00000228115 |              | 23019.9 | 0.07 |          |          |          |  |                                      |
| 23860 | ENSG00000235621 |              | 23027.9 | 0.07 |          |          |          |  |                                      |
| 23878 | ENSG00000233774 |              | 23040.5 | 0.07 |          |          |          |  |                                      |
| 23897 | ENSG00000243155 |              | 23052.7 | 0.07 |          |          |          |  |                                      |
| 23903 | ENSG00000232364 |              | 23063.4 | 0.07 |          |          |          |  |                                      |
| 23907 | ENSG00000231688 |              | 23065.5 | 0.07 |          |          |          |  |                                      |
| 23911 | ENSG00000238413 | 9            | 23068.1 | 0.07 | 46141554 | 46141675 |          |  | Y RNA                                |
| 23914 | ENSG00000259888 |              | 23071.8 | 0.07 |          |          |          |  |                                      |
| 23938 | ENSG00000233398 |              | 23093   | 0.07 |          |          |          |  |                                      |
| 23941 | ENSG00000228194 |              | 23094.5 | 0.07 |          |          |          |  |                                      |
| 23950 | ENSG00000268179 |              | 23100.6 | 0.07 | 1        | 861264   | 866445   |  | Uncharacterized protein              |
| 23957 | ENSG00000254071 |              | 23109.2 | 0.07 |          |          |          |  |                                      |
| 23958 | ENSG00000289817 |              | 23107.8 | 0.07 |          |          |          |  |                                      |
| 23981 | ENSG00000259520 |              | 23109.4 | 0.07 |          |          |          |  |                                      |
| 23985 | ENSG00000232988 | LOC100986433 | 23114.8 | 0.07 | 7        | 302918   | 304070   |  | Protein LOC100986433                 |
| 23973 | ENSG00000250383 |              | 23120.3 | 0.07 |          |          |          |  |                                      |
| 23977 | ENSG00000243822 |              | 23123.1 | 0.07 |          |          |          |  |                                      |
| 24000 | ENSG00000259481 |              | 23145.1 | 0.07 |          |          |          |  |                                      |
| 24010 | ENSG00000235943 |              | 23157.7 | 0.07 |          |          |          |  |                                      |
| 24031 | ENSG00000287122 |              | 23169.1 | 0.07 |          |          |          |  |                                      |
| 24045 | ENSG00000255442 |              | 23177.6 | 0.07 |          |          |          |  |                                      |
| 24054 | ENSG00000250378 |              | 23184.5 | 0.07 |          |          |          |  |                                      |
| 24055 | ENSG00000242747 |              | 23185.2 | 0.07 |          |          |          |  |                                      |
| 24064 | ENSG00000244675 |              | 23188.7 | 0.07 |          |          |          |  |                                      |
| 24064 | ENSG00000289268 |              | 23193.1 | 0.07 |          |          |          |  |                                      |
| 24068 | ENSG00000258972 |              | 23193.4 | 0.07 |          |          |          |  |                                      |
| 24072 | ENSG00000258320 |              | 23200.6 | 0.07 |          |          |          |  |                                      |
| 24078 | ENSG00000231295 |              | 23204.1 | 0.07 |          |          |          |  |                                      |
| 24080 | ENSG00000236304 |              | 23208   | 0.07 |          |          |          |  |                                      |
| 24088 | ENSG00000231562 |              | 23214.1 | 0.07 |          |          |          |  |                                      |
| 24091 | ENSG00000259295 |              | 23216.7 | 0.07 |          |          |          |  |                                      |
| 24107 | ENSG00000270001 |              | 23233.7 | 0.07 |          |          |          |  |                                      |
| 24114 | ENSG00000216913 |              | 23241.5 | 0.07 |          |          |          |  |                                      |
| 24129 | ENSG00000232628 |              | 23250.5 | 0.07 |          |          |          |  |                                      |
| 24132 | ENSG00000204533 | 19           | 23255.1 | 0.07 | 56862314 | 56863250 |          |  | Uncharacterized protein              |
| 24135 | ENSG00000228737 |              | 23257.3 | 0.07 |          |          |          |  |                                      |
| 24142 | ENSG00000250771 |              | 23261.4 | 0.07 |          |          |          |  |                                      |
| 24143 | ENSG00000231460 |              | 23262   | 0.07 |          |          |          |  |                                      |
| 24148 | ENSG00000225030 |              | 23265.5 | 0.07 |          |          |          |  |                                      |
| 24166 | ENSG00000213440 |              | 23272.8 | 0.07 |          |          |          |  |                                      |
| 24162 | ENSG00000259763 |              | 23278.7 | 0.07 |          |          |          |  |                                      |
| 24172 | ENSG00000296371 |              | 23289.3 | 0.07 |          |          |          |  |                                      |
| 24177 | ENSG00000251188 |              | 23295.9 | 0.07 |          |          |          |  |                                      |
| 24179 | ENSG00000272209 |              | 23297.8 | 0.07 |          |          |          |  |                                      |
| 24186 | ENSG00000271398 |              | 23303.2 | 0.07 |          |          |          |  |                                      |
| 24194 | ENSG00000235578 |              | 23311.7 | 0.07 |          |          |          |  |                                      |
| 24205 | ENSG00000287067 |              | 23323.7 | 0.07 |          |          |          |  |                                      |
| 24236 | ENSG00000270035 |              | 23349.7 | 0.07 |          |          |          |  |                                      |
| 24262 | ENSG00000235468 |              | 23370.1 | 0.07 |          |          |          |  |                                      |
| 24263 | ENSG00000259884 |              | 23370.5 | 0.07 |          |          |          |  |                                      |
| 24287 | ENSG00000259287 |              | 23375.1 | 0.07 |          |          |          |  |                                      |
| 24288 | ENSG00000289072 |              | 23375.3 | 0.07 |          |          |          |  |                                      |
| 24288 | ENSG00000257058 |              | 23385.3 | 0.07 |          |          |          |  |                                      |
| 24292 | ENSG00000282248 |              | 23391.7 | 0.07 |          |          |          |  |                                      |
| 24297 | ENSG00000218490 |              | 23394.1 | 0.07 |          |          |          |  |                                      |
| 24303 | ENSG00000289392 |              | 23395.2 | 0.07 |          |          |          |  |                                      |
| 24313 | ENSG00000233110 |              | 23406.9 | 0.07 |          |          |          |  |                                      |
| 24314 | ENSG00000290743 |              | 23407.9 | 0.07 |          |          |          |  |                                      |
| 24321 | ENSG00000235968 |              | 23412.7 | 0.07 |          |          |          |  |                                      |
| 24326 | ENSG00000270159 |              | 23418.6 | 0.07 |          |          |          |  |                                      |
| 24331 | ENSG00000232202 |              | 23420.9 | 0.07 |          |          |          |  |                                      |
| 24347 | ENSG00000289291 |              | 23443.9 | 0.07 |          |          |          |  |                                      |
| 24352 | ENSG00000255389 |              | 23451.9 | 0.07 |          |          |          |  |                                      |
| 24350 | ENSG00000260960 |              | 23452.1 | 0.07 |          |          |          |  |                                      |
| 24366 | ENSG00000255111 |              | 23465.9 | 0.07 |          |          |          |  |                                      |
| 24371 | ENSG00000255549 |              | 23467.4 | 0.07 |          |          |          |  |                                      |
| 24374 | ENSG00000251136 |              | 23468.6 | 0.07 |          |          |          |  |                                      |
| 24383 | ENSG00000284365 |              | 23474.8 | 0.07 |          |          |          |  |                                      |
| 24388 | ENSG00000253227 |              | 23478   | 0.07 |          |          |          |  |                                      |
| 24397 | ENSG00000280496 |              | 23486.6 | 0.07 |          |          |          |  |                                      |
| 24402 | ENSG00000250599 |              | 23490   | 0.07 |          |          |          |  |                                      |
| 24403 | ENSG00000288863 | 16           | 23491.5 | 0.07 | 30996508 | 30997533 |          |  | Uncharacterized protein              |
| 24424 | ENSG00000296922 |              | 23504.7 | 0.07 |          |          |          |  |                                      |
| 24428 | ENSG00000227113 |              | 23505.2 | 0.07 |          |          |          |  |                                      |
| 24438 | ENSG00000280423 |              | 23515.8 | 0.07 |          |          |          |  |                                      |
| 24441 | ENSG00000228997 |              | 23518.9 | 0.07 |          |          |          |  |                                      |
| 24468 | ENSG00000269112 |              | 23534.1 | 0.07 |          |          |          |  |                                      |
| 24480 | ENSG00000272884 |              | 23543.3 | 0.07 |          |          |          |  |                                      |
| 24485 | ENSG00000239455 |              | 23548.7 | 0.07 |          |          |          |  |                                      |
| 24489 | ENSG00000281457 |              | 23551.8 | 0.07 |          |          |          |  |                                      |
| 24492 | ENSG00000281560 |              | 23555   | 0.07 |          |          |          |  |                                      |
| 24507 | ENSG00000283636 |              | 23565   | 0.07 |          |          |          |  |                                      |
| 24514 | ENSG00000230415 |              | 23571   | 0.07 |          |          |          |  |                                      |
| 24517 | ENSG00000280179 |              | 23573.1 | 0.07 |          |          |          |  |                                      |
| 24535 | ENSG00000235790 |              | 23579.9 | 0.07 |          |          |          |  |                                      |
| 24547 | ENSG00000232606 |              | 23582.2 | 0.07 |          |          |          |  |                                      |
| 24563 | ENSG00000249637 |              | 23605.8 | 0.07 |          |          |          |  |                                      |
| 24575 | ENSG00000228380 |              | 23612.9 | 0.07 |          |          |          |  |                                      |
| 24577 | ENSG00000217133 |              | 23613.8 | 0.07 |          |          |          |  |                                      |
| 24604 | ENSG00000287934 |              | 23642.7 | 0.07 |          |          |          |  |                                      |
| 24613 | ENSG00000232729 |              | 23650.8 | 0.07 |          |          |          |  |                                      |
| 24641 | ENSG00000232668 |              | 23674.3 | 0.07 |          |          |          |  |                                      |
| 24643 | ENSG00000270939 |              | 23677.4 | 0.07 |          |          |          |  |                                      |
| 24657 | ENSG00000214559 |              | 23690.7 | 0.07 |          |          |          |  |                                      |
| 24659 | ENSG00000250241 |              | 23693   | 0.07 |          |          |          |  |                                      |
| 24682 | ENSG00000230910 |              | 23714.2 | 0.07 |          |          |          |  |                                      |
| 24688 | ENSG00000259810 |              | 23717.5 | 0.07 |          |          |          |  |                                      |
| 24709 | ENSG00000259590 |              | 23744.4 | 0.07 |          |          |          |  |                                      |
| 24711 | ENSG00000270938 |              | 23740.7 | 0.07 |          |          |          |  |                                      |
| 24721 | ENSG00000259192 |              | 23748.8 | 0.07 |          |          |          |  |                                      |
| 24722 | ENSG00000286578 |              | 23750.6 | 0.07 |          |          |          |  |                                      |
| 24723 | ENSG00000286265 |              | 23750.9 | 0.07 |          |          |          |  |                                      |
| 24734 | ENSG00000232444 |              | 23761.4 | 0.07 |          |          |          |  |                                      |
| 24740 | ENSG00000235243 |              | 23767.9 | 0.07 |          |          |          |  |                                      |
| 24745 | ENSG00000287834 |              | 23771.7 | 0.07 |          |          |          |  |                                      |
| 24752 | ENSG00000280855 |              | 23774.9 | 0.07 |          |          |          |  |                                      |
| 24761 | ENSG00000239750 |              | 23784.3 | 0.07 |          |          |          |  |                                      |
| 24763 | ENSG00000274562 |              | 23807.1 | 0.07 |          |          |          |  |                                      |
| 24813 | ENSG00000236914 |              | 23838.6 | 0.07 |          |          |          |  |                                      |
| 24821 | ENSG00000280443 |              | 23844.6 | 0.07 |          |          |          |  |                                      |
| 24834 | ENSG00000243798 |              | 23856.9 | 0.07 |          |          |          |  |                                      |
| 24837 | ENSG00000289896 |              | 23861.9 | 0.07 |          |          |          |  |                                      |
| 24838 | ENSG00000243979 |              | 23863.8 | 0.07 |          |          |          |  |                                      |
| 24843 | ENSG00000285352 |              | 23866.5 | 0.07 |          |          |          |  |                                      |
| 24847 | ENSG00000258824 |              | 23868.7 | 0.07 |          |          |          |  |                                      |
| 24867 | ENSG00000287868 |              | 23883.2 | 0.07 |          |          |          |  |                                      |
| 24881 | ENSG00000287938 |              | 23896.7 | 0.07 |          |          |          |  |                                      |
| 24907 | ENSG00000286164 |              | 23924.3 | 0.07 | 19       | 41112873 | 41112955 |  | RNA, 75L cytoplasmic 75L pseudogene  |
| 24917 | ENSG00000232753 |              | 23929.8 | 0.07 |          |          |          |  |                                      |
| 24918 | ENSG00000211611 |              | 23933.6 | 0.07 |          |          |          |  |                                      |
| 24928 | ENSG00000246250 |              | 23940.3 | 0.07 |          |          |          |  |                                      |
| 24950 | ENSG00000282434 |              | 23953.4 | 0.07 |          |          |          |  |                                      |
| 24951 | ENSG00000215937 |              | 23954   | 0.07 |          |          |          |  |                                      |
| 24953 | ENSG00000259751 |              | 23957.7 | 0.07 |          |          |          |  |                                      |



|       |                   |          |         |                      |                        |           |           |                                                                                              |                                                         |
|-------|-------------------|----------|---------|----------------------|------------------------|-----------|-----------|----------------------------------------------------------------------------------------------|---------------------------------------------------------|
| 26988 | ENSG000002044307  | 24771.7  | 0.06    | misc. RNA            | 8                      | 146010683 | 146010671 | RNA, 75S, cytoplasmic 39S, pseudogene                                                        |                                                         |
| 26989 | ENSG000002041659  | 24771.7  | 0.06    | misc. RNA            | 8                      | 151116234 | 151116224 | RNA, 75S, cytoplasmic 76, pseudogene                                                         |                                                         |
| 26994 | ENSG00000207189   | 24854.5  | 0.06    | misc. RNA            | 12                     | 128335446 | 128335447 | Y RNA                                                                                        |                                                         |
| 9634  | ENSG000002049948  | GBA3     | 11978.1 | 0.06                 | polymorphic_pseudogene | 4         | 22094537  | glucosylase, beta, and 3 (alpha/pseudogene)                                                  |                                                         |
| 7041  | ENSG000002028601  | 8115.8   | 0.06    | processed_pseudogene | 20                     | 5501379   | 5501380   | ribosomal protein L39 pseudogene                                                             |                                                         |
| 7970  | ENSG000002031914  | YBX3P1   | 8520.8  | 0.06                 | processed_pseudogene   | 10        | 31519076  | Y box binding protein 3 pseudogene 1                                                         |                                                         |
| 26997 | ENSG000002028769  | 8609.6   | 0.06    | processed_pseudogene | 20                     | 4004552   | 4004553   | ferritin, light polypeptide pseudogene 3                                                     |                                                         |
| 5291  | ENSG000002028769  | 10949    | 0.06    | processed_pseudogene | 14                     | 7494968   | 7494969   | RAP24A, member of RAS oncogene family pseudogene                                             |                                                         |
| 9723  | ENSG000002028769  | 11724.9  | 0.06    | processed_pseudogene | 10                     | 3290264   | 3290265   | C10 nuclear receptor corepressor pseudogene 1                                                |                                                         |
| 10136 | ENSG000002028769  | 12451    | 0.06    | processed_pseudogene | 6                      | 13442049  | 13442471  | suppression of tumorigenesis 13 (colon carcinoma) [Hsp70 interacting protein] pseudogene 6   |                                                         |
| 10366 | ENSG000002028769  | 12824.6  | 0.06    | processed_pseudogene | 18                     | 4780315   | 4780316   | ribosomal protein S18a pseudogene 6                                                          |                                                         |
| 10585 | ENSG000002028769  | 12128.6  | 0.06    | processed_pseudogene | 9                      | 35971341  | 35971342  | Y box binding protein 1 pseudogene 10                                                        |                                                         |
| 11186 | ENSG000002025022  | 13292.9  | 0.06    | processed_pseudogene | 20                     | 5273034   | 5273477   | ubiquitin-conjugating enzyme E2D 3 pseudogene 1                                              |                                                         |
| 11377 | ENSG000002033340  | 13467.8  | 0.06    | processed_pseudogene | 12                     | 8490307   | 8490312   | sucrose-CoA lyase, GDP-forming, beta subunit pseudogene 2                                    |                                                         |
| 12323 | ENSG000002034049  | 14222.3  | 0.06    | processed_pseudogene | 3                      | 37317087  | 37318089  | family with sequence similarity 204, member 8, pseudogene                                    |                                                         |
| 14108 | ENSG000002034533  | 15549.4  | 0.06    | processed_pseudogene | 22                     | 3569062   | 3569063   | transcription elongation factor A (SII), 1 pseudogene 2                                      |                                                         |
| 14663 | ENSG000002033072  | 15978.8  | 0.06    | processed_pseudogene | 1                      | 21330043  | 21330427  | cytochrome c oxidase subunit VIIb pseudogene 1                                               |                                                         |
| 17201 | ENSG000002038460  | 17920    | 0.06    | processed_pseudogene | 1                      | 224051428 | 22405253  | ribosomal protein S18a pseudogene 6                                                          |                                                         |
| 18283 | ENSG000002031245  | 18172.2  | 0.06    | processed_pseudogene | 3                      | 13099188  | 13099197  | actin, beta pseudogene 11                                                                    |                                                         |
| 18472 | ENSG000002031500  | PANDAR   | 18854.5 | 0.06                 | processed_pseudogene   | 6         | 36841594  | 36841595                                                                                     | leucine aminopeptidase 3 pseudogene 2                   |
| 18634 | ENSG000002032004  | 18971.4  | 0.06    | processed_pseudogene | 10                     | 4410291   | 4410199   | CAP1 pseudogene 2                                                                            |                                                         |
| 18781 | ENSG000002032656  | 19079.7  | 0.06    | processed_pseudogene | 12                     | 4200811   | 4200865   | heat shock 70kDa protein 8 pseudogene 5                                                      |                                                         |
| 20069 | ENSG000002028071  | 20699.5  | 0.06    | processed_pseudogene | 16                     | 18026577  | 18027132  | ribosomal protein L7 pseudogene 47                                                           |                                                         |
| 20156 | ENSG000002031758  | 20141.4  | 0.06    | processed_pseudogene | 5                      | 11663800  | 11663738  | ribosomal protein L35a pseudogene 15                                                         |                                                         |
| 21204 | ENSG000002024168  | 20951.3  | 0.06    | processed_pseudogene | 3                      | 10918076  | 10918089  | pepducin [inositol 1,4,5-trisphosphate 3-kinase] pseudogene 15                               |                                                         |
| 21267 | ENSG000002034702  | 21010    | 0.06    | processed_pseudogene | X                      | 91237654  | 91238504  | voltage-dependent anion channel 1 pseudogene 3                                               |                                                         |
| 21348 | ENSG000002019932  | 21067.9  | 0.06    | processed_pseudogene | 10                     | 89634090  | 89634672  | ribosomal protein L12 pseudogene 8                                                           |                                                         |
| 1386  | ENSG000002010425  | 21187.1  | 0.06    | processed_pseudogene | 8                      | 7711827   | 7711834   | ribosomal protein L12 pseudogene 43                                                          |                                                         |
| 21417 | ENSG000002042962  | 21130.7  | 0.06    | processed_pseudogene | 3                      | 128483309 | 128483381 | ferritin, heavy polypeptide 1 pseudogene 4                                                   |                                                         |
| 21471 | ENSG000002026000  | 21172.4  | 0.06    | processed_pseudogene | 19                     | 54275760  | 54276534  | septin 7 pseudogene 8                                                                        |                                                         |
| 14164 | ENSG000002044441  | 21197.4  | 0.06    | processed_pseudogene | 19                     | 8673455   | 8673460   | serpin H8 pseudogene 1                                                                       |                                                         |
| 21507 | ENSG000002028118  | 21197.4  | 0.06    | processed_pseudogene | 17                     | 74221832  | 74222887  | activating transcription factor 4 pseudogene 3                                               |                                                         |
| 21689 | ENSG000002029201  | 21345.1  | 0.06    | processed_pseudogene | 12                     | 92542176  | 92542463  | ribosomal protein L21 pseudogene 106                                                         |                                                         |
| 21688 | ENSG000002029201  | 21345.1  | 0.06    | processed_pseudogene | 12                     | 11815562  | 11815567  | zinc finger protein 674 pseudogene 1                                                         |                                                         |
| 21978 | ENSG000002028142  | 21558.2  | 0.06    | processed_pseudogene | 22                     | 49608837  | 49609173  | ribosomal protein L35 pseudogene 8                                                           |                                                         |
| 22253 | ENSG000002019863  | 21767.3  | 0.06    | processed_pseudogene | 6                      | 53214886  | 53214963  | ribosomal protein L31 pseudogene 28                                                          |                                                         |
| 22513 | ENSG000002031118  | 21828.1  | 0.06    | processed_pseudogene | 18                     | 28881588  | 28881648  | colloid cell halo colloid cell halo domain containing 2 pseudogene 8                         |                                                         |
| 22537 | ENSG000002059921  | 21825.1  | 0.06    | processed_pseudogene | 12                     | 21600479  | 21600481  | transcription elongation factor B (SII), polypeptide 1 pseudogene 31                         |                                                         |
| 22383 | ENSG000002019300  | 21860.6  | 0.06    | processed_pseudogene | 6                      | 29457048  | 29457433  | ribosomal protein S17 pseudogene 1                                                           |                                                         |
| 22418 | ENSG000002014446  | 21984    | 0.06    | processed_pseudogene | 21                     | 4540529   | 4540592   | H2A histone family, member 2 pseudogene 1                                                    |                                                         |
| 22616 | ENSG000002014446  | 21984    | 0.06    | processed_pseudogene | 10                     | 7650926   | 7650929   | ATP synthase, H+ transporting, mitochondrial Fo complex, subunit C1 (subunit 9) pseudogene 8 |                                                         |
| 22703 | ENSG000002014222  | 22189.2  | 0.06    | processed_pseudogene | 13                     | 11508999  | 11509018  | tubulin, beta pseudogene 2                                                                   |                                                         |
| 22711 | ENSG000002025446  | 22115.9  | 0.06    | processed_pseudogene | 10                     | 39898228  | 39898229  | ribosomal protein L7 pseudogene 37                                                           |                                                         |
| 22781 | ENSG000002042828  | 22148.7  | 0.06    | processed_pseudogene | 3                      | 119017512 | 119017519 | ribosomal protein S26 pseudogene 21                                                          |                                                         |
| 22795 | ENSG000002027379  | 22172    | 0.06    | processed_pseudogene | 20                     | 25048911  | 25048912  | peptidylprolyl isomerase A (cyclophilin A) pseudogene 2                                      |                                                         |
| 22804 | ENSG000002027379  | 22172    | 0.06    | processed_pseudogene | 10                     | 14151160  | 14151162  | MYO1C pseudogene 2                                                                           |                                                         |
| 22834 | ENSG000002026700  | HNRNPAP1 | 22217.6 | 0.06                 | processed_pseudogene   | 10        | 44228260  | 44228565                                                                                     | heterogeneous nuclear ribonucleoprotein A3 pseudogene 1 |
| 22834 | ENSG000002026700  | 22217.6  | 0.06    | processed_pseudogene | 10                     | 21063356  | 21064320  | topoisomerase 1 pseudogene 4                                                                 |                                                         |
| 22834 | ENSG000002026700  | 22217.6  | 0.06    | processed_pseudogene | 19                     | 33120961  | 33121381  | ribosomal protein S12 pseudogene 31                                                          |                                                         |
| 22999 | ENSG000002042255  | 22256.2  | 0.06    | processed_pseudogene | 1                      | 52642520  | 52642525  | phosducin-like 3 pseudogene 6                                                                |                                                         |
| 23000 | ENSG000002029243  | 22257    | 0.06    | processed_pseudogene | 37                     | 30734386  | 30734857  | ribosomal protein L7a pseudogene 3                                                           |                                                         |
| 3006  | ENSG000002031713  | 22403.3  | 0.06    | processed_pseudogene | 14                     | 33097112  | 33097115  | phosphatidylinositol glycerol ether biosynthesis class 1 pseudogene 1                        |                                                         |
| 23082 | ENSG000002028453  | 22414.3  | 0.06    | processed_pseudogene | 1                      | 117680551 | 117681231 | ribosomal protein S18a pseudogene 19                                                         |                                                         |
| 23105 | ENSG000002028092  | 22453.8  | 0.06    | processed_pseudogene | 10                     | 79155330  | 79155339  | cytochrome c oxidase subunit IVc pseudogene 15                                               |                                                         |
| 23147 | ENSG000002029286  | 22457    | 0.06    | processed_pseudogene | 10                     | 147861760 | 147861761 | actin, beta pseudogene 4                                                                     |                                                         |
| 23198 | ENSG000002028723  | 22505.8  | 0.06    | processed_pseudogene | 18                     | 48340782  | 48342100  | heterogeneous nuclear ribonucleoprotein A3 pseudogene 16                                     |                                                         |
| 23249 | ENSG000002042035  | 22547.9  | 0.06    | processed_pseudogene | 12                     | 18608178  | 18608182  | eukaryotic translation elongation factor 1 alpha 1 pseudogene 4                              |                                                         |
| 23333 | ENSG000002032921  | 22568.3  | 0.06    | processed_pseudogene | 13                     | 80301628  | 80301629  | ribosomal protein S15 pseudogene 40                                                          |                                                         |
| 23348 | ENSG000002027590  | 22626.9  | 0.06    | processed_pseudogene | 13                     | 107315785 | 107315819 | ATP synthase, H+ transporting, mitochondrial Fo complex, subunit C1 (subunit 9) pseudogene 5 |                                                         |
| 23355 | ENSG000002033541  | 22633    | 0.06    | processed_pseudogene | 11                     | 122921869 | 122921908 | ribosomal protein L31 pseudogene 47                                                          |                                                         |
| 23429 | ENSG0000020287301 | 22682.7  | 0.06    | processed_pseudogene | 18                     | 21289789  | 21289821  | ribosomal protein L23a pseudogene 77                                                         |                                                         |
| 23432 | ENSG000002021313  | 22683.3  | 0.06    | processed_pseudogene | 10                     | 71036134  | 71036404  | high mobility group AT-hook 1 pseudogene 5                                                   |                                                         |
| 23516 | ENSG0000020287301 | 22742.7  | 0.06    | processed_pseudogene | 10                     | 79137462  | 79137463  | ribosomal protein L21 pseudogene 116                                                         |                                                         |
| 23551 | ENSG000002026506  | 22764.5  | 0.06    | processed_pseudogene | 17                     | 16294748  | 16295196  | ferritin, light polypeptide pseudogene 12                                                    |                                                         |
| 23570 | ENSG000002028425  | 22779    | 0.06    | processed_pseudogene | 13                     | 37496676  | 37497045  | late endosomal lysosomal adaptor, MAPK and MTOR activator 3 pseudogene 1                     |                                                         |
| 23778 | ENSG000002031403  | 22802.2  | 0.06    | processed_pseudogene | 2                      | 20023     | 20023     | COG38, cell division domain 1 pseudogene 1                                                   |                                                         |
| 23780 | ENSG000002027666  | 22855.8  | 0.06    | processed_pseudogene | 9                      | 96800312  | 96800322  | cytochrome c, somatic pseudogene 24                                                          |                                                         |
| 23792 | ENSG000002023041  | 22972.9  | 0.06    | processed_pseudogene | 13                     | 73610539  | 73610988  | proteasome 26S subunit, non-ATPase, 10 pseudogene 3                                          |                                                         |
| 23844 | ENSG000002031618  | 23033.2  | 0.06    | processed_pseudogene | 13                     | 85117057  | 85117058  | PRK8, domain containing 1 pseudogene 20                                                      |                                                         |
| 23867 | ENSG000002013558  | 23033.2  | 0.06    | processed_pseudogene | 9                      | 110220319 | 110220387 | high mobility group nucleosomal binding domain 2 pseudogene 32                               |                                                         |
| 23869 | ENSG000002024478  | 23033.9  | 0.06    | processed_pseudogene | 19                     | 41675786  | 41676711  | ribosomal protein L36 pseudogene 16                                                          |                                                         |
| 23891 | ENSG000002029258  | 23038.8  | 0.06    | processed_pseudogene | 10                     | 103207682 | 103207683 | high mobility group nucleosomal binding domain 2 pseudogene 22                               |                                                         |
| 23934 | ENSG000002028881  | 23091.7  | 0.06    | processed_pseudogene | X                      | 50848438  | 50848866  | H2 histone, family 3A, pseudogene 5                                                          |                                                         |
| 24026 | ENSG000002030980  | 23146.7  | 0.06    | processed_pseudogene | 11                     | 1813783   | 1814100   | ribosomal protein L38a pseudogene 39                                                         |                                                         |
| 24053 | ENSG000002029183  | 23162.3  | 0.06    | processed_pseudogene | 13                     | 5248183   | 5248184   | CTAF5, family, members, pseudogene 3                                                         |                                                         |
| 24063 | ENSG000002035700  | CYCSP2   | 23191.6 | 0.06                 | processed_pseudogene   | 1         | 15709154  | 15709153                                                                                     | cytochrome c, somatic pseudogene 52                     |
| 24068 | ENSG000002021761  | 23196.2  | 0.06    | processed_pseudogene | 9                      | 98175449  | 98175431  | metallothionein 1 pseudogene 1                                                               |                                                         |
| 24148 | ENSG000002031198  | 23205.1  | 0.06    | processed_pseudogene | 5                      | 53116     | 53116     | high mobility group nucleosomal binding domain 2 pseudogene 31                               |                                                         |
| 24207 | ENSG000002039919  | 23206.2  | 0.06    | processed_pseudogene | 7                      | 12911774  | 12911794  | small nuclear ribonucleoprotein polypeptide G pseudogene 3                                   |                                                         |
| 24283 | ENSG000002017846  | 23283.6  | 0.06    | processed_pseudogene | 6                      | 27831840  | 27832179  | histone cluster 1, H2b, pseudogene 2                                                         |                                                         |
| 24285 | ENSG000002020217  | 23284.9  | 0.06    | processed_pseudogene | 10                     | 76634989  | 76635009  | heterogeneous nuclear ribonucleoprotein A1 pseudogene 12                                     |                                                         |
| 24302 | ENSG000002033943  | 23295.2  | 0.06    | processed_pseudogene | 10                     | 2195222   | 2195300   | MYO1C pseudogene 21                                                                          |                                                         |
| 24306 | ENSG000002035619  | GTPNH    | 23298.4 | 0.06                 | processed_pseudogene   | 9         | 35507570  | 35507670                                                                                     | ribosomal protein L36a pseudogene 33                    |
| 24312 | ENSG000002015583  | 23405.1  | 0.06    | processed_pseudogene | 20                     | 4040760   | 4040760   | ribosomal protein L12 pseudogene 2                                                           |                                                         |
| 24316 | ENSG000002022626  | 23405.8  | 0.06    | processed_pseudogene | 12                     | 10204595  | 10204632  | ribosomal protein S26 pseudogene 32                                                          |                                                         |
| 24338 | ENSG000002033337  | 23427.8  | 0.06    | processed_pseudogene | 1                      | 111980136 | 111980559 | ubiquitin-conjugating enzyme E2F (putative) pseudogene 3                                     |                                                         |
| 24444 | ENSG000002026695  | 23502.4  | 0.06    | processed_pseudogene | 2                      | 19956203  | 19956333  | heterogeneous nuclear ribonucleoprotein A1 pseudogene 47                                     |                                                         |
| 24455 | ENSG000002031188  | 23502.4  | 0.06    | processed_pseudogene | 7                      | 15182684  | 15182684  | Y box binding protein 1 pseudogene 7                                                         |                                                         |
| 24834 | ENSG000002019589  | 23670.4  | 0.06    | processed_pseudogene | 10                     | 53079586  | 53080420  | Ras suppressor protein 1 pseudogene 30                                                       |                                                         |
| 24848 | ENSG000002014676  | 23681.4  | 0.06    | processed_pseudogene | 4                      | 169819687 | 169817533 | ribosomal protein L9 pseudogene 16                                                           |                                                         |
| 4700  | ENSG000002017168  | 23726.2  | 0.06    | processed_pseudogene | 14                     | 141002669 | 141003299 | ribosomal protein S2a pseudogene 82                                                          |                                                         |
| 24789 | ENSG000002013997  | 23811.9  | 0.06    | processed_pseudogene | X                      | 48502629  | 48502676  | phosphoglycerate mutase 1 pseudogene 7                                                       |                                                         |
| 24871 | ENSG000002034805  | 23885    | 0.06    | processed_pseudogene | 9                      | 44997777  | 44999352  | family with sequence similarity 27, member E4                                                |                                                         |
| 24881 | ENSG000002017158  | 23902.7  | 0.06    | processed_pseudogene | 8                      | 2791260   | 2791261   | 50 most conserved domain 1 pseudogene 1                                                      |                                                         |
| 24905 | ENSG000002014743  | 23920.2  | 0.06    | processed_pseudogene | 5                      | 126478774 | 126478939 | mitochondrial ribosomal protein S5 pseudogene 3                                              |                                                         |
| 24927 | ENSG000002014167  | 23938.3  | 0.06    | processed_pseudogene | 47                     | 34771511  | 34771606  | transcription elongation factor B (SII), polypeptide 2 (beta, elongin B) pseudogene 4        |                                                         |
| 24934 | ENSG000002020216  | 23938.3  | 0.06    | processed_pseudogene | 10                     | 16020254  | 16020254  | ribosomal protein L13 pseudogene 4                                                           |                                                         |
| 24957 | ENSG00000204812   |          |         |                      |                        |           |           |                                                                                              |                                                         |



|       |                 |          |       |      |      |                |    |           |           |                                                                                         |
|-------|-----------------|----------|-------|------|------|----------------|----|-----------|-----------|-----------------------------------------------------------------------------------------|
| 8195  | ENS000002024370 | SBDH     | 10875 | 3    | 0.06 | protein_coding | 11 | 11997487  | 111990053 | succinate dehydrogenase complex, subunit D, integral membrane protein                   |
| 8275  | ENS0000015378   | GSDVI    | 11058 | 0.06 | 0.06 | protein_coding | 3  | 40501803  | 40501803  | glutathione peroxidase 1                                                                |
| 8371  | ENS00000165949  | IFIT2    | 11027 | 5    | 0.06 | protein_coding | 14 | 94571192  | 94530303  | interferon, alpha-inducible protein 27                                                  |
| 8407  | ENS00000112679  | DISP22   | 11052 | 2    | 0.06 | protein_coding | 6  | 261630    | 351355    | dual specificity phosphatase 22                                                         |
| 8441  | ENS00000116848  | CD99     | 11079 | 4    | 0.06 | protein_coding | 12 | 6905002   | 6913407   | CD99 molecule                                                                           |
| 8505  | ENS00000162624  | TSO2L2   | 11349 | 4    | 0.06 | protein_coding | 7  | 10007692  | 10007692  | TSO2 domain family, member 4                                                            |
| 8801  | ENS00000059503  | PTGS1    | 11463 | 9    | 0.06 | protein_coding | 9  | 12512324  | 12517582  | prostaglandin-endoperoxide synthase (cyclooxygenase)                                    |
| 8908  | ENS00000194763  | ASAH1    | 11522 | 4    | 0.06 | protein_coding | 8  | 1791394   | 17642494  | N-acetylglucosaminidase (acid ceramidase) 1                                             |
| 9038  | ENS0000014434   | LRRP19   | 11579 | 7    | 0.06 | protein_coding | 7  | 2695314   | 27029681  | leucine-rich repeat containing 15                                                       |
| 9292  | ENS00000136792  | EMEPF    | 11783 | 2    | 0.06 | protein_coding | 4  | 11126889  | 11148641  | glutaryl aminopeptidase (aminopeptidase A)                                              |
| 9326  | ENS00000126495  | CEACAM8  | 11812 | 0.06 | 0.06 | protein_coding | 19 | 6308435   | 63089207  | carcinoembryonic antigen-related cell adhesion molecule 8                               |
| 9332  | ENS00000199321  | DNRB1    | 11816 | 2    | 0.06 | protein_coding | 19 | 6083368   | 6083368   | dehydrogenase (NADP-dependent) family, member 7                                         |
| 9415  | ENS00000205609  | EFC3     | 11873 | 4    | 0.06 | protein_coding | 16 | 2835930   | 28415200  | eukaryotic translation initiation factor 3, subunit C-like                              |
| 9519  | ENS00000197705  | RILP     | 12039 | 0.06 | 0.06 | protein_coding | 17 | 1548444   | 1553371   | Rab interacting lysosomal protein                                                       |
| 9576  | ENS00000101164  | BLDCEB   | 12182 | 0.06 | 0.06 | protein_coding | 15 | 4489793   | 4508197   | biogenesis of lysosomal organelles complex 1, subunit 6, pallidin                       |
| 9692  | ENS000002013759 | UGT2B11  | 12305 | 7    | 0.06 | protein_coding | 4  | 7006569   | 70080449  | UDP glucuronosyltransferase 2 family, polypeptide B11                                   |
| 9676  | ENS00000131228  | PF11     | 12327 | 2    | 0.06 | protein_coding | 1  | 4053879   | 40533375  | palmitoyl transferase 1                                                                 |
| 9696  | ENS00000159195  | WDR22    | 12343 | 5    | 0.06 | protein_coding | 5  | 2733079   | 27316699  | WD repeat domain family, member 2                                                       |
| 10042 | ENS00000119729  | RHOQ     | 12380 | 0.06 | 0.06 | protein_coding | 2  | 4681805   | 46810280  | ras homology family member Q                                                            |
| 10044 | ENS00000178573  | MAP      | 12383 | 0.06 | 0.06 | protein_coding | 16 | 79619740  | 79634411  | v-maf avian myeloblastosis/retrovirus oncogene homolog                                  |
| 10241 | ENS000001701706 | FAM83A   | 12540 | 3    | 0.06 | protein_coding | 9  | 13020558  | 130242762 | family with sequence similarity 103, member A                                           |
| 10289 | ENS00000187298  | FNBP1    | 12573 | 0.06 | 0.06 | protein_coding | 9  | 13264866  | 13265473  | formin binding protein 1                                                                |
| 10450 | ENS0000011537   | SEL1L    | 12696 | 3    | 0.06 | protein_coding | 14 | 81937893  | 82002025  | cell-1 suppressor of lin-12-like (C. elegans)                                           |
| 10468 | ENS00000114685  | CELB     | 12710 | 7    | 0.06 | protein_coding | 19 | 45524688  | 45541452  | v-mem retronucleosidase viral oncogene homolog B                                        |
| 10543 | ENS00000178630  | LACC1    | 12765 | 1    | 0.06 | protein_coding | 13 | 4445240   | 4448068   | laccase (multi-copper oxidoreductase) domain containing 1                               |
| 10626 | ENS00000202777  | KIAM125  | 12826 | 2    | 0.06 | protein_coding | 14 | 10638368  | 106391625 | KIAM125                                                                                 |
| 10684 | ENS00000189933  | IBSE2L1  | 12881 | 5    | 0.06 | protein_coding | 8  | 9003944   | 90039567  | ubiquitin-conjugating enzyme E2, J1                                                     |
| 10754 | ENS00000144534  | CSD2     | 12849 | 6    | 0.06 | protein_coding | 4  | 10378135  | 10381039  | CDGSH iron sulfur domain 2                                                              |
| 10786 | ENS00000090660  | PAPOLA   | 12950 | 5    | 0.06 | protein_coding | 14 | 8966770   | 97033448  | poly(A) polymerase alpha                                                                |
| 10864 | ENS00000105468  | SLMO1    | 13018 | 4    | 0.06 | protein_coding | 4  | 1762385   | 1762385   | leucine aminopeptidase 5                                                                |
| 10875 | ENS00000137776  | SLTM     | 13045 | 5    | 0.06 | protein_coding | 15 | 5917124   | 59258252  | SAFE-like transcription modulator                                                       |
| 10994 | ENS00000186457  | FGLR2    | 13148 | 1    | 0.06 | protein_coding | 11 | 9127845   | 7192394   | folate receptor 2 (beta)                                                                |
| 11128 | ENS00000156882  | RLK1F2   | 13282 | 3    | 0.06 | protein_coding | 8  | 6814818   | 6814818   | plant lectin homology domain containing family F with FYVE domain member 2              |
| 11183 | ENS00000182919  | C11orf54 | 13290 | 1    | 0.06 | protein_coding | 11 | 9347475   | 93497915  | chromosome 11 open reading frame 54                                                     |
| 11213 | ENS00000204685  | FPGT     | 13312 | 5    | 0.06 | protein_coding | 1  | 1466396   | 7469970   | luciferase 1-phosphatase guanylyltransferase                                            |
| 11282 | ENS00000185529  | CELE3    | 13310 | 3    | 0.06 | protein_coding | 7  | 1469177   | 14718111  | eukaryotic translation elongation factor 1 beta nucleotide exchange protein             |
| 11382 | ENS00000117614  | SVF2     | 13470 | 5    | 0.06 | protein_coding | 1  | 2554970   | 25558993  | SVF2 pre-mRNA splicing factor                                                           |
| 11438 | ENS00000005979  | YBPF1    | 13520 | 0.06 | 0.06 | protein_coding | 1  | 5431792   | 54356407  | Yip1 domain family, member 1                                                            |
| 11469 | ENS00000184580  | WDR1     | 13560 | 1    | 0.06 | protein_coding | 10 | 10458201  | 10458201  | WW domain binding protein 1-like                                                        |
| 11503 | ENS0000013561   | RNF14    | 13579 | 8    | 0.06 | protein_coding | 5  | 14133769  | 141369856 | ringer protein 14                                                                       |
| 11511 | ENS00000174834  | BTFP     | 13582 | 0.06 | 0.06 | protein_coding | 17 | 86821840  | 86804804  | transdominant PHD finger transcription factor                                           |
| 11515 | ENS00000186589  | WDR18    | 13588 | 1    | 0.06 | protein_coding | 16 | 1544810   | 1544810   | casein 7, acute-phase related cytosolic phospholipase                                   |
| 11679 | ENS00000110991  | CAMKK2   | 13725 | 0.06 | 0.06 | protein_coding | 12 | 12167587  | 12179311  | calcium/calmodulin-dependent protein kinase kinase 2, beta                              |
| 11726 | ENS00000153823  | PDI1     | 13748 | 0.06 | 0.06 | protein_coding | 2  | 229715242 | 230136001 | phosphoglucosyltransferase domain containing 1                                          |
| 11862 | ENS00000186179  | MRFAPC   | 13862 | 0.06 | 0.06 | protein_coding | 4  | 8437086   | 8437086   | microtubule-associated protein S16C                                                     |
| 11877 | ENS00000109785  | TSFANS   | 13919 | 6    | 0.06 | protein_coding | 6  | 86931516  | 86931516  | tetraspanin 5                                                                           |
| 11890 | ENS00000158006  | PAFAH2   | 13968 | 0.06 | 0.06 | protein_coding | 1  | 26246258  | 26244648  | platelet-activating factor acetylhydrolase 2, 40kDa                                     |
| 11990 | ENS00000186523  | CARF8    | 13978 | 0.06 | 0.06 | protein_coding | 8  | 65859507  | 65905365  | chromosome 9 open reading frame 89                                                      |
| 12225 | ENS00000111756  | RNF40    | 14139 | 6    | 0.06 | protein_coding | 17 | 3845444   | 38513394  | retrotransposon, beta                                                                   |
| 12235 | ENS00000084903  | REB1     | 14178 | 7    | 0.06 | protein_coding | 4  | 67724405  | 67820210  | RE1-interacting transcription factor                                                    |
| 12264 | ENS00000124575  | HST1FH1  | 14440 | 2    | 0.06 | protein_coding | 6  | 36244476  | 36250318  | histone cluster 1, H1e                                                                  |
| 12396 | ENS00000136966  | DRL1     | 14492 | 0.06 | 0.06 | protein_coding | 6  | 12402444  | 12402443  | serpin 11                                                                               |
| 12508 | ENS00000180537  | RNF182   | 14434 | 6    | 0.06 | protein_coding | 6  | 13924677  | 13905033  | ring finger protein 182                                                                 |
| 12743 | ENS00000139670  | FBXW7    | 14507 | 0.06 | 0.06 | protein_coding | 4  | 153242410 | 15345753  | F-box and WD repeat domain containing 7, E3 ubiquitin protein ligase                    |
| 12811 | ENS0000017895   | CAF2     | 14607 | 2    | 0.06 | protein_coding | 11 | 81191754  | 81212012  | succinate dehydrogenase complex assembly factor 2                                       |
| 12851 | ENS00000149499  | ELM3     | 14619 | 0.06 | 0.06 | protein_coding | 11 | 6230959   | 62380237  | ectoderm microtubule-associated protein like 3                                          |
| 13004 | ENS00000119846  | HCAFY    | 14758 | 0.06 | 0.06 | protein_coding | 5  | 13489890  | 13473904  | H2A histone family, associated protein Y                                                |
| 13066 | ENS00000138493  | CEP350   | 14781 | 0.06 | 0.06 | protein_coding | 8  | 12251364  | 12259926  | microtubule-associated protein 35                                                       |
| 13124 | ENS00000138687  | RBI1     | 14808 | 7    | 0.06 | protein_coding | 12 | 4887787   | 4906122   | retrotransposon 1                                                                       |
| 13331 | ENS00000157625  | TABS1    | 14970 | 0.06 | 0.06 | protein_coding | X  | 30845559  | 30892321  | TGF-beta activated kinase 1/MAP3K7 binding protein 3                                    |
| 13381 | ENS00000100726  | WDR12    | 14982 | 0.06 | 0.06 | protein_coding | 15 | 1544810   | 1544810   | casein 7, acute-phase related cytosolic phospholipase                                   |
| 13406 | ENS00000088951  | GRAMD1A  | 15028 | 0.06 | 0.06 | protein_coding | 19 | 3548568   | 35517375  | GRAM domain containing 1A                                                               |
| 13424 | ENS00000124799  | CEP135   | 15040 | 2    | 0.06 | protein_coding | 4  | 58815037  | 58899529  | centrosomal protein 135kDa                                                              |
| 13447 | ENS00000181443  | WDR50    | 15052 | 0.06 | 0.06 | protein_coding | 4  | 7182968   | 7182968   | increased order protein 50 (yeast)                                                      |
| 13473 | ENS00000121067  | SNOP     | 15063 | 1    | 0.06 | protein_coding | 17 | 4767646   | 4775596   | speckle-type POZ protein                                                                |
| 13511 | ENS00000124786  | SLC35B3  | 15105 | 3    | 0.06 | protein_coding | 6  | 8413301   | 8435794   | solute carrier family 35 (anionophore 3-phospho-5-phosphorulate transporter), member 83 |
| 13514 | ENS00000117996  | RFX1     | 15107 | 3    | 0.06 | protein_coding | 6  | 10071136  | 10071136  | RNA 1-phosphatase cytosolic                                                             |
| 13564 | ENS00000117620  | SLC35A3  | 15144 | 7    | 0.06 | protein_coding | 1  | 10043545  | 100492535 | solute carrier family 35 (UDP-N-acetylglucosamine (UDP-GlcNAc) transporter), member A3  |
| 13573 | ENS00000184548  | TRAZA    | 15151 | 2    | 0.06 | protein_coding | 7  | 2354399   | 23571460  | transformer 2 alpha homologue (Drosophila)                                              |
| 13584 | ENS0000011863   | WDR63    | 15152 | 0.06 | 0.06 | protein_coding | 10 | 1294199   | 1294199   | WD repeat domain protein 63                                                             |
| 13729 | ENS00000005576  | PHF22    | 15276 | 7    | 0.06 | protein_coding | 7  | 77428122  | 77588518  | putative homeodomain transcription factor 2                                             |
| 13797 | ENS00000189865  | CDC152   | 15320 | 3    | 0.06 | protein_coding | 5  | 42759903  | 42802462  | collet-coil domain containing 152                                                       |
| 13818 | ENS00000183738  | CANX     | 15334 | 5    | 0.06 | protein_coding | 5  | 4458345   | 4458345   | transcription activator candidate 5                                                     |
| 13827 | ENS00000151865  | PBF      | 15339 | 7    | 0.06 | protein_coding | 2  | 4890676   | 4894428   | phosphatidylinositol glycan anchor biosynthesis, class F                                |
| 13974 | ENS00000133328  | HRA52    | 15452 | 3    | 0.06 | protein_coding | 11 | 8332042   | 83330855  | HRA52-like suppressor 2                                                                 |
| 14014 | ENS00000185523  | WDR19    | 15459 | 1    | 0.06 | protein_coding | 11 | 8033765   | 8033765   | CCZ1 vesicular protein trafficking phosphatase (B. cereus-like)                         |
| 14032 | ENS00000170222  | ADPRM    | 15496 | 4    | 0.06 | protein_coding | 17 | 1060591   | 10614550  | ADP-ribose-CDP-adenosine diphosphate, manganese-dependent                               |
| 14041 | ENS00000171156  | CEL1     | 15505 | 8    | 0.06 | protein_coding | 17 | 32812887  | 32815563  | chemokine (C-C motif) ligand 11                                                         |
| 14095 | ENS0000018528   | WDR52    | 15507 | 0.06 | 0.06 | protein_coding | 22 | 4896458   | 4896458   | tetrahymena repeat domain 38                                                            |
| 14119 | ENS00000028116  | VRK2     | 15559 | 5    | 0.06 | protein_coding | 2  | 6813478   | 6813765   | vacuolar related kinase 2                                                               |
| 14154 | ENS00000054965  | FAM168A  | 15584 | 0.06 | 0.06 | protein_coding | 11 | 7311532   | 73139024  | family with sequence similarity 168, member A                                           |
| 14158 | ENS00000157341  | WDR43    | 15585 | 3    | 0.06 | protein_coding | 8  | 5381196   | 5381196   | ubiquitin-protein ligase E2B 2                                                          |
| 14329 | ENS00000153964  | PDX      | 15718 | 4    | 0.06 | protein_coding | 3  | 19636046  | 196426378 | phosphatidylinositol glycan anchor biosynthesis, class X                                |
| 14437 | ENS00000205846  | CLEC4A   | 15807 | 3    | 0.06 | protein_coding | 12 | 8606522   | 8603026   | C-type lectin domain family 6, member A                                                 |
| 14571 | ENS00000197312  | RSC1A1   | 15816 | 0.06 | 0.06 | protein_coding | 1  | 1594399   | 1595530   | DNA-damage inducible 1 homologue 2 (S. cerevisiae)                                      |
| 14583 | ENS00000115461  | RNF45    | 15819 | 0.06 | 0.06 | protein_coding | 12 | 2637693   | 2637693   | RNF45, member RASGEF domain 1                                                           |
| 14606 | ENS00000175105  | RNF54    | 16171 | 0.06 | 0.06 | protein_coding | 3  | 8818254   | 88193815  | zinc finger protein 654                                                                 |
| 15042 | ENS00000047315  | POR2B    | 16275 | 0.06 | 0.06 | protein_coding | 4  | 5784398   | 5787324   | peroxin 2                                                                               |
| 15048 | ENS0000014450   | GNB4     | 16284 | 1    | 0.06 | protein_coding | 14 | 17911690  | 17916978  | guanine nucleotide binding protein (G protein), beta polypeptide 4                      |
| 15053 | ENS00000137491  | SLC22B1  | 16288 | 0.06 | 0.06 | protein_coding | 11 | 74811658  | 74819754  | solute carrier organic anion transporter family, member 2B1                             |
| 15312 | ENS00000197535  | MYO9A    | 16462 | 3    | 0.0  |                |    |           |           |                                                                                         |

|       |                 |                        |       |    |      |                |            |           |                                                                                                                              |
|-------|-----------------|------------------------|-------|----|------|----------------|------------|-----------|------------------------------------------------------------------------------------------------------------------------------|
| 19420 | ENSG00000130167 | TPST16                 | 19680 | 7  | 0.06 | protein_coding | 11460828   | 11437372  | beta-galactosidase                                                                                                           |
| 19423 | ENSG00000137919 | CYP17A1                | 19687 | 8  | 0.06 | protein_coding | 894638     | 894638    | cytochrome P450, family 17, subfamily A, polypeptide 1                                                                       |
| 19437 | ENSG00000179478 | C14orf28               | 19591 | 9  | 0.06 | protein_coding | 44536498   | 45376460  | chromosome 14 open reading frame 28                                                                                          |
| 19516 | ENSG00000183690 | EFHC2                  | 19651 | 6  | 0.06 | protein_coding | 44007128   | 44202918  | EF-hand domain (C-terminal) containing 2                                                                                     |
| 19550 | ENSG00000233280 | CFRB3                  | 19675 | 7  | 0.06 | protein_coding | 97540884   | 97984132  | Beta-galactan crystallin domain-containing protein 3; cDNA FLJ30002, weakly similar to Uro-reference factor A                |
| 19597 | ENSG00000198707 | CEP250                 | 19713 | 8  | 0.06 | protein_coding | 88442793   | 88535993  | centrosomal protein 290kDa                                                                                                   |
| 19743 | ENSG00000245511 | HSD17C                 | 19827 | 0  | 0.06 | protein_coding | 51347005   | 51384289  | HSD17 hypoxia inducible domain family, member 1C                                                                             |
| 19808 | ENSG00000145388 | MEITL14                | 19837 | 1  | 0.06 | protein_coding | 119899553  | 119899588 | chromosome 15 open reading frame 14                                                                                          |
| 19819 | ENSG00000193061 | SLC7A6S                | 19875 | 5  | 0.06 | protein_coding | 186378466  | 18634469  | solute carrier family 7, member 6 opposite strand                                                                            |
| 19890 | ENSG00000195071 | AKG1                   | 19952 | 0  | 0.06 | protein_coding | 137842980  | 137851229 | alpha-1,4-N-acetylglucosaminyltransferase                                                                                    |
| 19914 | ENSG00000200849 | CSE1B                  | 19926 | 6  | 0.06 | protein_coding | 92665848   | 92666468  | chitinase 3 open reading frame 18                                                                                            |
| 19935 | ENSG00000203546 | CHST3                  | 19982 | 4  | 0.06 | protein_coding | 31803518   | 31802647  | 1,6-hydroxylated protein                                                                                                     |
| 19970 | ENSG00000139931 | C8AD                   | 20006 | 0  | 0.06 | protein_coding | 53551447   | 53575139  | cysteine sulfenic acid decarboxylase                                                                                         |
| 20000 | ENSG00000205493 | TMSB2                  | 20041 | 6  | 0.06 | protein_coding | 16089097   | 16074477  | ubiquitin-associated protein 62                                                                                              |
| 20073 | ENSG00000137770 | CTSP2                  | 20079 | 0  | 0.06 | protein_coding | 44719432   | 44821236  | CTD (carboxy-terminal domain, RNA polymerase II, polypeptide A) small phosphatase like 2                                     |
| 20109 | ENSG00000145687 | SSBP2                  | 20143 | 0  | 0.06 | protein_coding | 80739840   | 81047616  | single-stranded DNA binding protein 2                                                                                        |
| 20174 | ENSG00000199214 | ZNF75                  | 20155 | 3  | 0.06 | protein_coding | 52772924   | 52776977  | zinc finger protein 756                                                                                                      |
| 20215 | ENSG00000171954 | CY4F42                 | 20184 | 3  | 0.06 | protein_coding | 15619304   | 15663128  | cytochrome P450, family 4, subfamily F, polypeptide 22                                                                       |
| 20393 | ENSG00000101126 | ADNP                   | 20342 | 0  | 0.06 | protein_coding | 49055585   | 49474958  | activity-dependent neuroprotector homeobox                                                                                   |
| 20428 | ENSG00000115631 | FRS3B                  | 20393 | 0  | 0.06 | protein_coding | 29219041   | 29201134  | FER3 domain containing 48                                                                                                    |
| 20433 | ENSG00000174502 | SLC26A9                | 20371 | 7  | 0.06 | protein_coding | 205882176  | 205912588 | solute carrier family 26 (anion exchanger), member 9                                                                         |
| 20492 | ENSG00000100207 | TCF20                  | 20423 | 3  | 0.06 | protein_coding | 42556019   | 42736622  | transcription factor 20 (AR1)                                                                                                |
| 20502 | ENSG00000175184 | ABO                    | 20425 | 6  | 0.06 | protein_coding | 136125788  | 136150017 | ABO blood group (transferase A, alpha 1-3-N-acetylgalactosaminyltransferase; transferase B, alpha 1-3-galactosyltransferase) |
| 20525 | ENSG00000136273 | HUST1                  | 20444 | 9  | 0.06 | protein_coding | 47735228   | 48019178  | HUST1 checkpoint homolog (S. pombe)                                                                                          |
| 20603 | ENSG00000176993 | DYNAP                  | 20499 | 6  | 0.06 | protein_coding | 52254989   | 52267974  | dynactin-associated protein                                                                                                  |
| 20688 | ENSG00000305115 | SH3YL1                 | 20683 | 2  | 0.06 | protein_coding | 2177130    | 263838    | SH3 and SVLFL domain containing 1                                                                                            |
| 20691 | ENSG00000187815 | ZFP69                  | 20654 | 3  | 0.06 | protein_coding | 40942887   | 40280215  | ZFP69 zinc finger protein                                                                                                    |
| 20693 | ENSG00000306395 | KLHL22                 | 20635 | 0  | 0.06 | protein_coding | 33747469   | 33747468  | klhl22                                                                                                                       |
| 20811 | ENSG00000143354 | SLC27A3                | 20657 | 6  | 0.06 | protein_coding | 153748330  | 153750323 | solute carrier family 27 (fatty acid transporter), member 3                                                                  |
| 20876 | ENSG00000131745 | MMP13                  | 20700 | 3  | 0.06 | protein_coding | 1102813724 | 102849483 | matrix metalloproteinase 13 (collagenase 3)                                                                                  |
| 20901 | ENSG00000105658 | CLSR1                  | 20741 | 2  | 0.06 | protein_coding | 12200722   | 12200722  | cytoskeleton line actin-binding protein 11                                                                                   |
| 20918 | ENSG00000133195 | SLC38A11               | 20739 | 5  | 0.06 | protein_coding | 79462088   | 71088851  | solute carrier family 38, member 11                                                                                          |
| 20924 | ENSG00000202752 | STAG3L5P-PRVGP2P-PILRB | 20743 | 6  | 0.06 | protein_coding | 99933727   | 99954554  | STAG3L5P-PRVGP2P-PILRB readthrough                                                                                           |
| 20928 | ENSG00000191278 | CLSR2                  | 20743 | 2  | 0.06 | protein_coding | 11038020   | 11038020  | mannan-binding lectin domain-containing protein 2                                                                            |
| 20962 | ENSG00000202452 | C6orf15                | 20764 | 5  | 0.06 | protein_coding | 31079000   | 31080336  | chromosome 6 open reading frame 15                                                                                           |
| 20988 | ENSG00000181450 | ZNF478                 | 20796 | 0  | 0.06 | protein_coding | 227751244  | 22786514  | zinc finger protein 678                                                                                                      |
| 21021 | ENSG00000105055 | TRIP11                 | 20829 | 0  | 0.06 | protein_coding | 6966220    | 6966220   | glucocorticoid-inducible phosphatase domain containing 2                                                                     |
| 21092 | ENSG00000183248 | RIMP3C                 | 20861 | 8  | 0.06 | protein_coding | 21895646   | 21895550  | RIMS binding protein 3C                                                                                                      |
| 21109 | ENSG00000202472 | NRP4A                  | 20872 | 8  | 0.06 | protein_coding | 14852891   | 14820195  | nuclear pore complex interacting protein family, member A3                                                                   |
| 21154 | ENSG00000200591 | USP4C                  | 20918 | 11 | 0.06 | protein_coding | 1753111    | 1753111   | Usher syndrome 1C (cellular adhesion molecule, severe)                                                                       |
| 21272 | ENSG00000168038 | ULK4                   | 21013 | 6  | 0.06 | protein_coding | 41280906   | 42039322  | ULK4-like kinase 4                                                                                                           |
| 21282 | ENSG00000303030 | ZCCHC8                 | 21020 | 9  | 0.06 | protein_coding | 122967417  | 12285518  | zinc finger, CCHC domain containing 8                                                                                        |
| 21283 | ENSG00000141650 | TRIP11A                | 21021 | 7  | 0.06 | protein_coding | 6966220    | 6966220   | tumor necrosis factor receptor superfamily, member 11a; NFkB activator                                                       |
| 21310 | ENSG00000204122 | USP14                  | 21034 | 4  | 0.06 | protein_coding | 23495284   | 23495284  | USP (glucuronidase, 1 family, polypeptide A) 7                                                                               |
| 21328 | ENSG00000116984 | MTR                    | 21055 | 4  | 0.06 | protein_coding | 23695810   | 23707821  | 5-methyltetrahydrofolate-homocysteine methyltransferase                                                                      |
| 21373 | ENSG00000205657 | CLL1U05                | 21050 | 3  | 0.06 | protein_coding | 56913870   | 9261264   | chromatin remodeling complex subunit 5 opposite strand                                                                       |
| 21375 | ENSG00000201718 | KLHL20                 | 21037 | 6  | 0.06 | protein_coding | 33338366   | 33404827  | chromatin remodeling complex subunit 20                                                                                      |
| 21402 | ENSG00000138639 | ARHGAP24               | 21113 | 3  | 0.06 | protein_coding | 86326267   | 86326263  | Rho GTPase activating protein 24                                                                                             |
| 21409 | ENSG00000219178 | PSIP1                  | 21123 | 0  | 0.06 | protein_coding | 43429299   | 43429300  | pregnancy-specific beta-1-glycoprotein 1 (gene-pseudogene)                                                                   |
| 21413 | ENSG00000166794 | SLC38A2                | 21167 | 4  | 0.06 | protein_coding | 21461414   | 21470030  | solute carrier family 38 (zinc transporter), member 2                                                                        |
| 21419 | ENSG00000132871 | SSTR4                  | 21131 | 6  | 0.06 | protein_coding | 230146057  | 23017314  | somatostatin receptor 4                                                                                                      |
| 21423 | ENSG00000181904 | LEMD2                  | 21133 | 1  | 0.06 | protein_coding | 33739979   | 33739979  | LEM domain containing 2                                                                                                      |
| 21430 | ENSG00000164938 | DCSTAP1                | 21107 | 8  | 0.06 | protein_coding | 105301315  | 11710017  | dehydrocorticosteroid seven transmembrane protein                                                                            |
| 21464 | ENSG00000189079 | ARID2                  | 21187 | 2  | 0.06 | protein_coding | 48124448   | 46301823  | AR1 rich interacting domain 2 (ARID, RFX-like)                                                                               |
| 21492 | ENSG00000202943 | SPINK8                 | 21186 | 9  | 0.06 | protein_coding | 48848936   | 48839831  | serine peptidase inhibitor, Kazal type 8 (putative)                                                                          |
| 21498 | ENSG00000214980 | CA5A                   | 21192 | 4  | 0.06 | protein_coding | 18282976   | 18282976  | urokinase-like                                                                                                               |
| 21503 | ENSG00000188624 | IGL3                   | 21186 | 1  | 0.06 | protein_coding | 46823328   | 46829371  | IGF-like family member 3                                                                                                     |
| 21508 | ENSG00000151418 | ATP9V1G3               | 21188 | 0  | 0.06 | protein_coding | 188492362  | 188500075 | ATPase, H <sup>+</sup> transporting, lysosomal 136Da, V1 subunit G3                                                          |
| 21515 | ENSG00000191620 | CA5A                   | 21192 | 4  | 0.06 | protein_coding | 148611529  | 148611529 | chromosome 5 open reading frame 60A                                                                                          |
| 21519 | ENSG00000136888 | IL3RG                  | 21209 | 0  | 0.06 | protein_coding | 113730780  | 113742424 | interleukin 36, gamma                                                                                                        |
| 21555 | ENSG00000181656 | GPR88                  | 21235 | 3  | 0.06 | protein_coding | 101003693  | 101007574 | G-protein-coupled receptor 88                                                                                                |
| 21580 | ENSG00000140921 | SH3BP2                 | 21239 | 1  | 0.06 | protein_coding | 90445126   | 90412643  | chromosome 1 open reading frame 12                                                                                           |
| 21589 | ENSG00000187780 | SOAT2                  | 21240 | 0  | 0.06 | protein_coding | 53497302   | 53818222  | sterol O-acetyltransferase 2                                                                                                 |
| 21591 | ENSG00000215853 | RPTN                   | 21262 | 0  | 0.06 | protein_coding | 152126071  | 152131704 | reticulon 1                                                                                                                  |
| 21593 | ENSG00000198484 | OR1L3                  | 21232 | 9  | 0.06 | protein_coding | 224802283  | 224802283 | olfactory receptor, family 1, member 4                                                                                       |
| 21704 | ENSG00000125731 | SH2D4A                 | 21357 | 3  | 0.06 | protein_coding | 6752171    | 6747999   | SH2 domain containing 3A                                                                                                     |
| 21801 | ENSG00000210787 | PLEKHK1                | 21429 | 2  | 0.06 | protein_coding | 102414212  | 124191867 | pleckstrin homology domain containing, family A (phosphocholine binding specific) member 1                                   |
| 21907 | ENSG00000202031 | CA5A                   | 21192 | 4  | 0.06 | protein_coding | 49081523   | 49081523  | calcium channel, voltage-dependent, L type, alpha 1F subunit                                                                 |
| 21929 | ENSG00000105163 | TMPRSS3                | 21524 | 1  | 0.06 | protein_coding | 43781999   | 43816555  | transmembrane protease, serine 3                                                                                             |
| 22007 | ENSG00000204045 | TMEM189                | 21609 | 1  | 0.06 | protein_coding | 17928448   | 26798176  | transmembrane protein 189                                                                                                    |
| 22100 | ENSG00000201155 | MTZAP                  | 21633 | 0  | 0.06 | protein_coding | 57848165   | 57848165  | mucopolysaccharide adhesin protein                                                                                           |
| 22101 | ENSG00000202820 | CTC1                   | 21653 | 9  | 0.06 | protein_coding | 28125832   | 28220391  | Uncharacterized protein                                                                                                      |
| 22122 | ENSG00000158580 | LCT                    | 21737 | 8  | 0.06 | protein_coding | 218545410  | 138589470 | lactase                                                                                                                      |
| 22195 | ENSG00000105208 | SULF1C3                | 21813 | 3  | 0.06 | protein_coding | 10888108   | 10888108  | sulfatase domain family, cysteine, 1C, member 3                                                                              |
| 22264 | ENSG00000202452 | C8orf129               | 21849 | 7  | 0.06 | protein_coding | 98080485   | 98198466  | chromosome 9 open reading frame 129                                                                                          |
| 22407 | ENSG00000099823 | PLEKHG8                | 21874 | 4  | 0.06 | protein_coding | 6418602    | 6437972   | pleckstrin homology domain containing, family G (with RhoGEF domain) member 6                                                |
| 22445 | ENSG00000198588 | PRICK2                 | 21908 | 3  | 0.06 | protein_coding | 4681718    | 4681718   | protein tyrosine kinase, 42                                                                                                  |
| 22563 | ENSG00000108702 | CCL1                   | 21997 | 2  | 0.06 | protein_coding | 33687347   | 33690250  | chemokine (C-C motif) ligand 1                                                                                               |
| 22576 | ENSG00000129097 | ADRA1A                 | 22005 | 7  | 0.06 | protein_coding | 28605697   | 28724790  | adrenocorticoid alpha 1A                                                                                                     |
| 22583 | ENSG00000194498 | ZNF778                 | 22016 | 6  | 0.06 | protein_coding | 15008159   | 15008159  | zinc finger protein 775                                                                                                      |
| 22664 | ENSG00000187950 | OVCH1                  | 22078 | 9  | 0.06 | protein_coding | 29554507   | 29560519  | ovch1                                                                                                                        |
| 22705 | ENSG00000184809 | KCNK7                  | 22110 | 8  | 0.06 | protein_coding | 40980704   | 40984748  | chromosome 21 open reading frame 88                                                                                          |
| 22721 | ENSG00000173338 | KCNK7                  | 22129 | 7  | 0.06 | protein_coding | 65363026   | 65363467  | potassium channel, subfamily K, member 7                                                                                     |
| 22744 | ENSG00000210723 | CAF2                   | 22131 | 3  | 0.06 | protein_coding | 36236978   | 36236978  | Histone H2A N-methyltransferase 2B                                                                                           |
| 22748 | ENSG00000202673 | TBC1D29                | 22146 | 0  | 0.06 | protein_coding | 28884130   | 28890511  | TBC1 domain family, member 29                                                                                                |
| 22764 | ENSG00000216230 | KIF18A                 | 22153 | 9  | 0.06 | protein_coding | 241558133  | 241557122 | catapin 10                                                                                                                   |
| 22815 | ENSG00000184893 | SLC7A13                | 22189 | 5  | 0.06 | protein_coding | 87323691   | 87333379  | solute carrier family 7 (anion and amino acid transporter), member 13                                                        |
| 22848 | ENSG00000154478 | GPR226                 | 22224 | 3  | 0.06 | protein_coding | 125458271  | 125454223 | G-protein-coupled receptor 26                                                                                                |
| 22860 | ENSG00000203246 | MCHR2                  | 22231 | 0  | 0.06 | protein_coding | 53865996   | 53865996  | zinc finger protein 525                                                                                                      |
| 22860 | ENSG00000203246 | MCHR2                  | 22236 | 0  | 0.06 | protein_coding | 100078786  | 100442123 | melanin-concentrating hormone receptor 2                                                                                     |
| 22915 | ENSG00000156556 | GSDPD5                 | 22281 | 0  | 0.06 | protein_coding | 75145885   | 75236948  | glucosylphosphatidylinositoltransferase domain containing 5                                                                  |
| 22939 | ENSG00000119914 | YSZK                   | 22300 | 0  | 0.06 | protein_coding | 74081781   | 74729441  | visual system homeobox 2                                                                                                     |
| 22943 | ENSG00000209494 | ZNF469                 | 22349 | 6  | 0.06 | protein_coding | 33341261   | 33330902  | zinc finger protein 468                                                                                                      |
| 22989 | ENSG00000205853 | ZNF247                 | 22347 | 5  | 0.06 | protein_coding | 73441182   | 73152027  | Uncharacterized protein                                                                                                      |
| 23023 | ENSG00000099910 | KLHL22                 | 22373 | 9  | 0.06 | protein_coding | 20738228   | 20850170  | klhl22-like family member 22                                                                                                 |
| 23042 | ENSG00000165966 | WRNRM4                 | 22396 | 0  | 0.06 | protein_coding | 41568226   | 41568226  | PI3K domain containing protein finger 4                                                                                      |
| 23053 | ENSG00000171631 | PARY6                  | 22395 | 1  | 0.06 | protein_coding | 12975550   | 73096862  | pyridinergic receptor P2Y, G-protein coupled, 6                                                                              |
| 23058 | ENSG00000183560 | FOI1A                  | 22397 | 2  | 0.06 | protein_coding | 94038759   | 94038887  | folate receptor 4, delta (putative)                                                                                          |
| 23083 | ENSG00000109101 | CDK2C                  | 22401 | 1  | 0.06 | protein_coding | 26813261   | 26813261  | cyclin dependent kinase 11                                                                                                   |
| 23091 | ENSG00000135697 | BCMO1                  | 22423 | 0  | 0.06 | protein_coding | 81272053   | 81324747  | beta-carotene 15,15'-monooxygenase 1                                                                                         |
| 23099 | ENSG00000210372 | ZNF705G                | 22429 | 0  | 0.06 | protein_coding | 21715039   | 7243080   | zinc finger protein 705G                                                                                                     |
| 23116 | ENSG00000204948 | ZNF43                  | 22437 | 9  | 0.06 | protein_coding | 92244637   | 92244637  | Uncharacterized protein                                                                                                      |
| 23120 | ENSG00000128512 | DOCK4                  | 22439 | 4  | 0.06 | protein_coding | 111386166  | 111484466 | dedicator of cytokinesis 4                                                                                                   |
| 23123 | ENSG00000186020 | ZNF529                 | 22441 | 2  | 0.06 | protein_coding | 37025676   | 37096178  | zinc finger protein 529                                                                                                      |
| 2314  |                 |                        |       |    |      |                |            |           |                                                                                                                              |

|       |                 |           |       |      |                |                |          |           |                                                             |                                                                           |
|-------|-----------------|-----------|-------|------|----------------|----------------|----------|-----------|-------------------------------------------------------------|---------------------------------------------------------------------------|
| 24157 | ENSG00000164707 | SLC13A4   | 23273 | 5    | 0.06           | protein_coding | 7        | 135355885 | 135414006                                                   | solute carrier family 13 (sodium/sulfate symporter), member 4             |
| 24158 | ENSG00000169920 | PI3C2     | 23280 | 0.06 | protein_coding | 11             | 1122218  | 31229680  | PI3K domain containing 18                                   |                                                                           |
| 24214 | ENSG00000149633 | KIAA1755  | 23333 | 4    | 0.06           | protein_coding | 20       | 36638890  | 36699174                                                    | KIAA1755                                                                  |
| 24226 | ENSG00000135953 | MFSD9     | 23345 | 6    | 0.06           | protein_coding | 2        | 103332299 | 103353347                                                   | major facilitator superfamily domain containing 9                         |
| 24227 | ENSG00000176148 | TCP1L1    | 23346 | 7    | 0.06           | protein_coding | 11       | 33060969  | 33127489                                                    | 1 complex 11, testis-specific-like                                        |
| 24239 | ENSG00000180914 | TRAP1     | 23352 | 0.06 | protein_coding | 3              | 7374235  | 73822255  | Ca <sup>2+</sup> dependent domain containing 3              |                                                                           |
| 24271 | ENSG00000100767 | PAPLN     | 23377 | 4    | 0.06           | protein_coding | 14       | 73742026  | 73741348                                                    | papilin, proteoglycan like sulfated glycoprotein                          |
| 24281 | ENSG00000205111 | CDKL4     | 23382 | 3    | 0.06           | protein_coding | 2        | 99402787  | 99402729                                                    | cyclin-dependent kinase-like 4                                            |
| 24287 | ENSG00000189973 | FAM150A   | 23383 | 5    | 0.06           | protein_coding | 3        | 129688118 | 129688989                                                   | ALG1, chitin-binding beta-mannosyltransferase-like                        |
| 24298 | ENSG00000157856 | DRC1      | 23383 | 0.06 | protein_coding | 2              | 29624784 | 29624759  | dynein regulatory complex subunit 1 homolog (Chlamydomonas) |                                                                           |
| 24320 | ENSG00000186973 | FAM212B   | 23412 | 0.06 | protein_coding | 9              | 43610824 | 43622607  | family with sequence similarity 193, member A               |                                                                           |
| 24343 | ENSG00000193366 | FAM212B   | 23412 | 0.06 | protein_coding | 9              | 39819388 | 39819344  | family with sequence similarity 221, member B               |                                                                           |
| 24359 | ENSG00000146923 | 12-Sep    | 23456 | 5    | 0.06           | protein_coding | 16       | 4827870   | 4828522                                                     | seitin 12                                                                 |
| 24360 | ENSG00000172014 | ANKRD20A3 | 23456 | 6    | 0.06           | protein_coding | 9        | 69381812  | 69425980                                                    | ankyrin repeat domain 20 family, member A4                                |
| 24384 | ENSG00000102596 | SSBP2     | 23474 | 6    | 0.06           | protein_coding | 8        | 8661866   | 8767209                                                     | spc-2 homolog (C. elegans)                                                |
| 24460 | ENSG00000115423 | DNAH6     | 23530 | 5    | 0.06           | protein_coding | 2        | 84743579  | 85046713                                                    | dynein, axonemal, heavy chain 6                                           |
| 24530 | ENSG00000101276 | SLC25A3   | 23578 | 3    | 0.06           | protein_coding | 20       | 740724    | 749131                                                      | solute carrier family 25 (riboflavin transporter), member 3               |
| 24531 | ENSG00000106938 | EVX1      | 23578 | 6    | 0.06           | protein_coding | 7        | 27200164  | 27200112                                                    | non-salivary homeobox 1                                                   |
| 24553 | ENSG00000112139 | MDGA1     | 23596 | 6    | 0.06           | protein_coding | 6        | 37660284  | 37667082                                                    | MAM domain containing glycosylphosphatidylinositol anchor 1               |
| 24566 | ENSG00000138409 | AMHR2     | 23607 | 2    | 0.06           | protein_coding | 12       | 53817639  | 53825318                                                    | anti-Müllerian hormone receptor, type II                                  |
| 24570 | ENSG00000102441 | CT29L1    | 23610 | 7    | 0.06           | protein_coding | 2        | 46849307  | 46849397                                                    | general transcription factor IIA, 1-like                                  |
| 24579 | ENSG00000125386 | FAM193A   | 23614 | 5    | 0.06           | protein_coding | 2        | 2626888   | 2734292                                                     | family with sequence similarity 193, member A                             |
| 24615 | ENSG00000154529 | CNTNAP3   | 23652 | 4    | 0.06           | protein_coding | 9        | 43684982  | 43692449                                                    | contactin associated protein-like 3B                                      |
| 24635 | ENSG00000105664 | LEPR2     | 23670 | 6    | 0.06           | protein_coding | 6        | 40359205  | 40359204                                                    | leucine rich repeat and fibronectin type II domain containing 2           |
| 24645 | ENSG00000173250 | GPR115    | 23678 | 5    | 0.06           | protein_coding | 5        | 14586266  | 14586753                                                    | G protein-coupled receptor 151                                            |
| 24680 | ENSG00000154997 | 14-Sep    | 23712 | 9    | 0.06           | protein_coding | 7        | 59861237  | 59904882                                                    | seitin 14                                                                 |
| 24708 | ENSG00000114724 | MOT2A     | 23738 | 3    | 0.06           | protein_coding | 11       | 7683810   | 76929264                                                    | myosin VIIA                                                               |
| 24707 | ENSG00000134201 | GSTM5     | 23739 | 6    | 0.06           | protein_coding | 1        | 110254864 | 110318950                                                   | glutathione S-transferase mu 5                                            |
| 24748 | ENSG00000138824 | RGS8      | 23773 | 6    | 0.06           | protein_coding | 1        | 182815239 | 18283311                                                    | regulator of G protein signaling 8                                        |
| 24788 | ENSG00000189366 | SEC24L8   | 23812 | 2    | 0.06           | protein_coding | 11       | 753148    | 761364                                                      | PTPase heterocysteine binding protein 2 (beta beta 2)                     |
| 24787 | ENSG00000208579 | XKRA      | 23810 | 7    | 0.06           | protein_coding | 8        | 56014949  | 56045413                                                    | XX, Kall blood group complex subunit-related family, member 4             |
| 24798 | ENSG00000123576 | ESX1      | 23820 | 6    | 0.06           | protein_coding | X        | 103447149 | 103499614                                                   | ESX homeobox 1                                                            |
| 24799 | ENSG00000132037 | PANX1Y11  | 23820 | 6    | 0.06           | protein_coding | 19       | 10212686  | 10212687                                                    | PANX1 domain containing 19                                                |
| 24822 | ENSG00000253710 | ALG11     | 23845 | 2    | 0.06           | protein_coding | 13       | 52586534  | 52603800                                                    | ALG11, alpha-1,2-mannosyltransferase                                      |
| 24836 | ENSG00000058453 | CROC2     | 23847 | 1    | 0.06           | protein_coding | 1        | 17066788  | 17299474                                                    | coiled coil domain containing 2                                           |
| 24888 | ENSG00000170288 | TRAF3IP1  | 23850 | 2    | 0.06           | protein_coding | 9        | 13070961  | 13070967                                                    | DNA domain family member 5, BIRP domain                                   |
| 24900 | ENSG00000106018 | VPR2      | 23852 | 2    | 0.06           | protein_coding | 7        | 15882066  | 15893749                                                    | vascular endothelial peptide receptor 2                                   |
| 24948 | ENSG00000215474 | SKOR2     | 23942 | 0    | 0.06           | protein_coding | 18       | 44746293  | 44775554                                                    | SKI family transcriptional corepressor 2                                  |
| 25027 | ENSG00000106683 | TMR6B5    | 24018 | 3    | 0.06           | protein_coding | 11       | 11358103  | 11358105                                                    | aminoterminal protein, alpha 7                                            |
| 25034 | ENSG00000271723 | 2015      | 24015 | 4    | 0.06           | protein_coding | 1        | 55107459  | 55057881                                                    | MROH7-TTC4 readthrough (NMD candidate)                                    |
| 25094 | ENSG00000295889 | RRTAP2    | 24032 | 6    | 0.06           | protein_coding | 11       | 1605324   | 1606513                                                     | keratin associated protein 5-1                                            |
| 25123 | ENSG00000146169 | SEC14L8   | 24032 | 2    | 0.06           | protein_coding | 22       | 3091228   | 3091230                                                     | SEC14-like (G. crassus)                                                   |
| 25127 | ENSG00000178125 | PPPR2     | 24085 | 6    | 0.06           | protein_coding | 8        | 67818334  | 67868839                                                    | protein phosphatase 1, regulatory subunit 42                              |
| 25142 | ENSG00000177058 | SLC38A9   | 24097 | 5    | 0.06           | protein_coding | 5        | 54921673  | 55099202                                                    | solute carrier family 38, member 9                                        |
| 25151 | ENSG00000169514 | CD80F5    | 24116 | 6    | 0.06           | protein_coding | 22       | 24105296  | 24108068                                                    | chromosome 22 open reading frame 15                                       |
| 25215 | ENSG00000189435 | CHRF44    | 24119 | 7    | 0.06           | protein_coding | 5        | 78915491  | 78915491                                                    | chemokine receptor, monocyte, beta 4 (neuronal)                           |
| 25237 | ENSG00000182132 | KCNP1     | 24180 | 4    | 0.06           | protein_coding | 5        | 169780481 | 17016336                                                    | Kv channel interacting protein 1                                          |
| 25238 | ENSG00000166260 | FAM227B   | 24180 | 5    | 0.06           | protein_coding | 15       | 68919159  | 68919128                                                    | family with sequence similarity 227, member B                             |
| 25312 | ENSG00000183793 | DNAJC6    | 24180 | 7    | 0.06           | protein_coding | 15       | 27482629  | 27482630                                                    | DnaJ (Hsp40) homolog, subfamily C, member 5 gamma                         |
| 25353 | ENSG00000103740 | ACSBG1    | 24233 | 6    | 0.06           | protein_coding | 15       | 7585810   | 7583000                                                     | acyl-CoA synthetase bubblegum family member 1                             |
| 25412 | ENSG00000196277 | TOR1B     | 24238 | 3    | 0.06           | protein_coding | 3        | 6811688   | 7163315                                                     | rapamycin receptor, mTORC2/3                                              |
| 25414 | ENSG00000166562 | GPHYT1    | 24238 | 6    | 0.06           | protein_coding | 9        | 33511786  | 336241448                                                   | G protein-coupled receptor 1                                              |
| 25446 | ENSG00000197024 | ZNF398    | 24241 | 4    | 0.06           | protein_coding | 7        | 148823508 | 148880116                                                   | zinc finger protein 398                                                   |
| 25457 | ENSG00000195486 | KCNK23    | 24270 | 3    | 0.06           | protein_coding | 8        | 99439250  | 99445076                                                    | potassium voltage-gated channel, delayed-rectifier, subfamily S, member 2 |
| 25511 | ENSG00000189393 | LRFD3     | 24310 | 3    | 0.06           | protein_coding | 7        | 74491696  | 74491671                                                    | leucine rich repeats and IQ motif containing 3                            |
| 25518 | ENSG00000189195 | 2015      | 24415 | 8    | 0.06           | protein_coding | 3        | 185430316 | 185447575                                                   | chromosome 3 open reading frame 65                                        |
| 25525 | ENSG00000188385 | JAKMIP3   | 24421 | 4    | 0.06           | protein_coding | 10       | 13391815  | 13399813                                                    | Janus kinase and microtubule interacting protein 3                        |
| 25576 | ENSG00000205485 | PCDH9A5   | 24421 | 3    | 0.06           | protein_coding | 13       | 140716388 | 140716388                                                   | protodesmosome subfamily A                                                |
| 25624 | ENSG00000148408 | CACNA1B   | 24497 | 7    | 0.06           | protein_coding | 9        | 14077241  | 141019276                                                   | calcium channel, voltage-dependent, N type, alpha 1B subunit              |
| 25626 | ENSG00000100308 | TOR1B     | 24502 | 4    | 0.06           | protein_coding | 22       | 22311397  | 22327313                                                    | topoisomerase (DNA) III beta                                              |
| 25680 | ENSG00000102780 | GATL3     | 24502 | 3    | 0.06           | protein_coding | 22       | 3201216   | 3201216                                                     | G protein regulated inducer of neurite outgrowth 2                        |
| 25688 | ENSG00000102780 | DKH1      | 24508 | 6    | 0.06           | protein_coding | 13       | 42614176  | 42630714                                                    | diacylglycerol kinase, eta                                                |
| 25699 | ENSG00000404781 | USH2A     | 24557 | 1    | 0.06           | protein_coding | 1        | 21576628  | 21699738                                                    | Usher syndrome 2A (autosomal recessive, mild)                             |
| 25738 | ENSG00000155714 | MYT1      | 24589 | 7    | 0.06           | protein_coding | 20       | 22944164  | 4201728                                                     | myosin transcription factor 1                                             |
| 25743 | ENSG00000178734 | C13orf45  | 24592 | 7    | 0.06           | protein_coding | 13       | 21995188  | 22012433                                                    | PO2 domain containing 9                                                   |
| 25747 | ENSG00000189435 | SH2C2     | 24592 | 7    | 0.06           | protein_coding | 13       | 76445187  | 76457947                                                    | chromosome 13 open reading frame 45                                       |
| 25760 | ENSG00000189435 | SH2C2     | 24592 | 7    | 0.06           | protein_coding | 13       | 76445187  | 76457947                                                    | SH2 domain containing transmembrane repeats 2                             |
| 25783 | ENSG00000109938 | CATSPERG  | 24624 | 4    | 0.06           | protein_coding | 16       | 85391069  | 85390365                                                    | Uncharacterized protein                                                   |
| 25811 | ENSG00000111517 | ADAMT20   | 24653 | 7    | 0.06           | protein_coding | 17       | 38918768  | 38918889                                                    | cathepsin domain auxiliary subunit gamma                                  |
| 25815 | ENSG00000205308 | PCDH10    | 24653 | 7    | 0.06           | protein_coding | 12       | 43742682  | 43742682                                                    | ADAM metalloproteinase with thrombospondin type 1 motif, 20               |
| 25884 | ENSG00000176402 | G3C3      | 24692 | 6    | 0.06           | protein_coding | 11       | 6583748   | 65837090                                                    | Uncharacterized protein                                                   |
| 25913 | ENSG00000102415 | GRASP2    | 24732 | 4    | 0.06           | protein_coding | 7        | 99520892  | 99527243                                                    | gap junction protein, gamma 3, 30.2kDa                                    |
| 25919 | ENSG00000202200 | PCDHGB3   | 24738 | 6    | 0.06           | protein_coding | 5        | 14075983  | 140892548                                                   | G protein regulated inducer of neurite outgrowth 2                        |
| 25927 | ENSG00000080368 | WDR70     | 24740 | 6    | 0.06           | protein_coding | 5        | 140739314 | 37755337                                                    | protodesmosome subfamily B, 3                                             |
| 25967 | ENSG00000102495 | PCDH10    | 24738 | 6    | 0.06           | protein_coding | 5        | 14075983  | 140892548                                                   | WD repeat domain 70                                                       |
| 25989 | ENSG00000201447 | PCDH10    | 24738 | 3    | 0.06           | protein_coding | 5        | 14075983  | 140892548                                                   | melanocortin 1 receptor (beta melanocyte stimulating hormone receptor)    |
| 25998 | ENSG00000102495 | PCDH10    | 24738 | 3    | 0.06           | protein_coding | 5        | 14075983  | 140892548                                                   | protodesmosome subfamily A, 1                                             |
| 26046 | ENSG00000103987 | ZNF728    | 24799 | 3    | 0.06           | protein_coding | 15       | 90789288  | 90815440                                                    | Uncharacterized protein                                                   |
| 26065 | ENSG00000102833 | CACNA1G   | 24855 | 1    | 0.06           | protein_coding | 17       | 24098116  | 24119461                                                    | zinc finger protein 728                                                   |
| 26077 | ENSG00000272514 | CKB1H5    | 24864 | 6    | 0.06           | protein_coding | 6        | 88117701  | 88174135                                                    | calcium channel, voltage-dependent, T type, alpha 1G subunit              |
| 26098 | ENSG00000102122 | LINC0229  | 24890 | 2    | 0.06           | protein_coding | 7        | 27287897  | 27287897                                                    | UPF014 protein C1orf105                                                   |
| 26118 | ENSG00000123444 | KBTBD4    | 24900 | 1    | 0.06           | protein_coding | 11       | 47553479  | 47600567                                                    | leucine rich repeats containing 20                                        |
| 26122 | ENSG00000188738 | FBP2      | 24902 | 5    | 0.06           | protein_coding | 2        | 18660335  | 18669817                                                    | ketohexose and BTP (PO2) domain containing 4                              |
| 26172 | ENSG00000185220 | ESYT3     | 24944 | 6    | 0.06           | protein_coding | 3        | 138153428 | 138200228                                                   | fibrous sheath interacting protein 2                                      |
| 26298 | ENSG00000176723 | ZNF843    | 25032 | 3    | 0.06           | protein_coding | 3        | 133709815 | 133709825                                                   | extended synaptotagmin-like protein 3                                     |
| 26330 | ENSG00000176233 | ZNF843    | 25032 | 3    | 0.06           | protein_coding | 3        | 133709815 | 133709825                                                   | proteoglycan 45 amino acid peptide                                        |
| 26336 | ENSG00000176233 | ZNF843    | 25032 | 3    | 0.06           | protein_coding | 3        | 133709815 | 133709825                                                   | zinc finger protein B43                                                   |
| 26339 | ENSG00000176233 | ZNF843    | 25032 | 3    | 0.06           | protein_coding | 3        | 133709815 | 133709825                                                   | N-6 adenosine-specific DNA methyltransferase 1 (putative)                 |
| 26472 | ENSG00000205456 | TPST3     | 25119 | 6    | 0.06           | protein_coding | 16       | 32268440  | 32287240                                                    | zinc finger protein                                                       |
| 26486 | ENSG00000188523 | FAM88B    | 25227 | 3    | 0.06           | protein_coding | 8        | 14095996  | 14095944                                                    | family with sequence similarity 86, member B1                             |
| 26533 |                 |           |       |      |                |                |          |           |                                                             |                                                                           |

|       |                 |            |         |      |                                    |    |           |           |                                                                                        |
|-------|-----------------|------------|---------|------|------------------------------------|----|-----------|-----------|----------------------------------------------------------------------------------------|
| 19728 | ENSG0000024557  | HLA-DPB2   | 19816.7 | 0.06 | transcribed_unprocessed_pseudogene | 6  | 33060228  | 33102442  | major histocompatibility complex, class II, DP beta 2 (pseudogene)                     |
| 23569 | ENSG00000265480 | KRT18P55   | 22778.8 | 0.06 | transcribed_unprocessed_pseudogene | 17 | 26603012  | 26644809  | keratin 18 pseudogene 55                                                               |
| 23669 | ENSG00000242338 | BMS1       | 22864.4 | 0.06 | transcribed_unprocessed_pseudogene | 10 | 75475601  | 75490227  | BMS1 pseudogene 4                                                                      |
| 24196 | ENSG00000203073 | COLGAGL5P  | 23312.4 | 0.06 | transcribed_unprocessed_pseudogene | 15 | 85051116  | 85060045  | golgln A6 family-like 5, pseudogene                                                    |
| 24922 | ENSG00000254717 |            | 23936.3 | 0.06 | transcribed_unprocessed_pseudogene | 11 | 58645775  | 58690933  | glycine-N-acyltransferase-like 1 pseudogene 2                                          |
| 25199 | ENSG00000086761 | PMS2P4     | 24153.3 | 0.06 | transcribed_unprocessed_pseudogene | 7  | 66752528  | 66767894  | postmeiotic segregation increased 2 pseudogene 4                                       |
| 25425 | ENSG00000180178 | FAR2P1     | 24346.7 | 0.06 | unprocessed_pseudogene             | 2  | 130748029 | 130808704 | fatty acyl CoA reductase 2 pseudogene 1                                                |
| 25975 | ENSG00000161149 | TUBA3FP    | 24777.6 | 0.06 | transcribed_unprocessed_pseudogene | 22 | 21357194  | 21368581  | tubulin, alpha 3f, pseudogene                                                          |
| 13344 | ENSG00000204136 | GZTA1P     | 14860.4 | 0.06 | unitary_pseudogene                 | 9  | 124207289 | 124262306 | glycoprotein, alpha-galactosyltransferase 1 pseudogene                                 |
| 20066 | ENSG00000204266 | NUDT16P1   | 20956.8 | 0.06 | unitary_pseudogene                 | 3  | 31309742  | 313163966 | nucleic acid pyrophosphatase, inorganic pyrophosphatase, X-type motif, 16 pseudogene 1 |
| 24016 | ENSG00000240216 |            | 23161.2 | 0.06 | unitary_pseudogene                 | 3  | 14847143  | 14900987  | ceruloplasmin and hephaesin-like 1 pseudogene                                          |
| 25857 | ENSG00000248449 | PCDH8BP    | 24454.7 | 0.06 | unitary_pseudogene                 | 5  | 14005553  | 140103219 | protocadherin gamma subfamily B, 6 pseudogene                                          |
| 26337 | ENSG00000215455 |            | 25701.4 | 0.06 | unitary_pseudogene                 | 20 | 45042667  | 45071915  | zinc finger protein 663, pseudogene                                                    |
| 12399 | ENSG00000233297 |            | 14273.6 | 0.06 | unprocessed_pseudogene             | 7  | 10232283  | 10233016  | RAS p21 protein activator 4CD, pseudogene                                              |
| 20696 | ENSG00000241257 |            | 20563.8 | 0.06 | unprocessed_pseudogene             | 16 | 16404198  | 16428047  | polycyclic kidney disease 1 (autosomal dominant) pseudogene 1                          |
| 21520 | ENSG00000204259 |            | 21209.3 | 0.06 | unprocessed_pseudogene             | Y  | 15042075  | 15000590  | calcium/calmodulin-dependent serine protein kinase (MAGUK family) pseudogene 1         |
| 21780 | ENSG00000230011 |            | 21413.8 | 0.06 | unprocessed_pseudogene             | 10 | 52465140  | 52468666  | calnexin 1, pseudogene 4                                                               |
| 22134 | ENSG00000287235 |            | 21675.8 | 0.06 | unprocessed_pseudogene             | 19 | 15932806  | 15944607  | zinc finger protein 881, pseudogene                                                    |
| 22423 | ENSG00000227879 |            | 21885.6 | 0.06 | unprocessed_pseudogene             | 13 | 18723717  | 18801572  | paraneoplastic component 1 pseudogene 1                                                |
| 22473 | ENSG00000186466 |            | 21921   | 0.06 | unprocessed_pseudogene             | 9  | 67272038  | 67278492  | agucaprin 7 pseudogene 1                                                               |
| 23386 | ENSG00000227262 | HCG4B      | 22730.8 | 0.06 | unprocessed_pseudogene             | 6  | 29683760  | 29684750  | HLA complex group 4B (non-protein coding)                                              |
| 23853 | ENSG00000211665 |            | 23811   | 0.06 | unprocessed_pseudogene             | 9  | 21386613  | 21396138  | microfibrin alpha 11, pseudogene                                                       |
| 24407 | ENSG00000251633 |            | 23944.1 | 0.06 | unprocessed_pseudogene             | 8  | 74817552  | 74827245  | glycoprotein 1 pseudogene 1                                                            |
| 25245 | ENSG00000217624 |            | 23124.7 | 0.06 | unprocessed_pseudogene             | 1  | 39980626  | 39982162  | 3-oxoadipyl CoA transferase 2 pseudogene 1                                             |
| 26094 | ENSG00000214962 |            | 24380   | 0.06 | unprocessed_pseudogene             | X  | 118393309 | 118391633 | A kinase (PRK) anchor protein 17B, pseudogene                                          |
| 26390 | ENSG00000123965 | PMS2P5     | 25129.7 | 0.06 | unprocessed_pseudogene             | 7  | 74306894  | 74366124  | postmeiotic segregation increased 2 pseudogene 5                                       |
| 7224  | ENSG00000215333 |            | 9971.9  | 0.06 | unprocessed_pseudogene             | 1  | 148736689 | 148737087 | profilin 1 pseudogene 6                                                                |
| 1948  | ENSG00000252578 |            | 10581   | 0.06 | unprocessed_pseudogene             |    |           |           |                                                                                        |
| 8410  | ENSG00000235605 |            | 11055.1 | 0.06 | unprocessed_pseudogene             |    |           |           |                                                                                        |
| 9169  | ENSG00000236058 |            | 11684   | 0.06 | unprocessed_pseudogene             |    |           |           |                                                                                        |
| 6022  | ENSG00000276523 | FBA1       | 11715   | 0.06 | unprocessed_pseudogene             | X  | 154114635 | 154116336 | coagulation factor VIII-associated 1                                                   |
| 9488  | ENSG00000183558 | HIST2H2AA3 | 11940.5 | 0.06 | unprocessed_pseudogene             | 1  | 149813505 | 149814788 | histone cluster 2, H2aa3                                                               |
| 9895  | ENSG00000213598 |            | 12110.1 | 0.06 | unprocessed_pseudogene             |    |           |           |                                                                                        |
| 9751  | ENSG00000205688 |            | 12154.8 | 0.06 | unprocessed_pseudogene             |    |           |           |                                                                                        |
| 10519 | ENSG00000243071 |            | 12747.6 | 0.06 | unprocessed_pseudogene             |    |           |           |                                                                                        |
| 11650 | ENSG00000243637 |            | 13696.8 | 0.06 | unprocessed_pseudogene             |    |           |           |                                                                                        |
| 11742 | ENSG00000207560 |            | 13704.6 | 0.06 | unprocessed_pseudogene             |    |           |           |                                                                                        |
| 11956 | ENSG00000252453 |            | 13949.7 | 0.06 | unprocessed_pseudogene             |    |           |           |                                                                                        |
| 13497 | ENSG00000237821 |            | 15097.9 | 0.06 | unprocessed_pseudogene             |    |           |           |                                                                                        |
| 13854 | ENSG00000290136 |            | 15065.3 | 0.06 | unprocessed_pseudogene             |    |           |           |                                                                                        |
| 14903 | ENSG00000242338 |            | 15520.8 | 0.06 | unprocessed_pseudogene             |    |           |           |                                                                                        |
| 14813 | ENSG00000251230 |            | 16094.1 | 0.06 | unprocessed_pseudogene             |    |           |           |                                                                                        |
| 15086 | ENSG00000261720 |            | 16118.1 | 0.06 | unprocessed_pseudogene             |    |           |           |                                                                                        |
| 15066 | ENSG00000294460 |            | 16206.0 | 0.06 | unprocessed_pseudogene             |    |           |           |                                                                                        |
| 16017 | ENSG00000166121 |            | 17045.8 | 0.06 | unprocessed_pseudogene             |    |           |           |                                                                                        |
| 16317 | ENSG00000260246 |            | 17256.2 | 0.06 | unprocessed_pseudogene             |    |           |           |                                                                                        |
| 16386 | ENSG00000226381 |            | 17215.3 | 0.06 | unprocessed_pseudogene             |    |           |           |                                                                                        |
| 16540 | ENSG00000255446 |            | 17426.5 | 0.06 | unprocessed_pseudogene             |    |           |           |                                                                                        |
| 16996 | ENSG00000223767 |            | 17556.9 | 0.06 | unprocessed_pseudogene             |    |           |           |                                                                                        |
| 16789 | ENSG00000232626 |            | 17592.5 | 0.06 | unprocessed_pseudogene             |    |           |           |                                                                                        |
| 17393 | ENSG00000225224 |            | 18053.7 | 0.06 | unprocessed_pseudogene             |    |           |           |                                                                                        |
| 17470 | ENSG00000272906 |            | 18112.8 | 0.06 | unprocessed_pseudogene             |    |           |           |                                                                                        |
| 17468 | ENSG00000211821 |            | 18122.0 | 0.06 | unprocessed_pseudogene             |    |           |           |                                                                                        |
| 17511 | ENSG00000272750 |            | 18141   | 0.06 | unprocessed_pseudogene             |    |           |           |                                                                                        |
| 17998 | ENSG00000267653 |            | 18196.5 | 0.06 | unprocessed_pseudogene             |    |           |           |                                                                                        |
| 17972 | ENSG00000210751 |            | 18226.0 | 0.06 | unprocessed_pseudogene             |    |           |           |                                                                                        |
| 17733 | ENSG00000235584 |            | 18313.8 | 0.06 | unprocessed_pseudogene             |    |           |           |                                                                                        |
| 17753 | ENSG00000251685 |            | 18326.1 | 0.06 | unprocessed_pseudogene             |    |           |           |                                                                                        |
| 17779 | ENSG00000218541 |            | 18341   | 0.06 | unprocessed_pseudogene             | 8  | 144726090 | 144729139 | RNA, U7 small nuclear, 109 pseudogene                                                  |
| 17912 | ENSG00000239963 |            | 18428.9 | 0.06 | unprocessed_pseudogene             |    |           |           |                                                                                        |
| 17916 | ENSG00000254432 |            | 18430.3 | 0.06 | unprocessed_pseudogene             |    |           |           |                                                                                        |
| 17920 | ENSG00000205691 |            | 18432.5 | 0.06 | unprocessed_pseudogene             |    |           |           |                                                                                        |
| 17939 | ENSG00000272606 |            | 18446.9 | 0.06 | unprocessed_pseudogene             |    |           |           |                                                                                        |
| 17949 | ENSG00000232606 |            | 18454.8 | 0.06 | unprocessed_pseudogene             |    |           |           |                                                                                        |
| 18091 | ENSG00000266026 |            | 18567.3 | 0.06 | unprocessed_pseudogene             |    |           |           |                                                                                        |
| 18150 | ENSG00000269889 |            | 18620.2 | 0.06 | unprocessed_pseudogene             |    |           |           |                                                                                        |
| 18407 | ENSG00000258772 |            | 18806.2 | 0.06 | unprocessed_pseudogene             |    |           |           |                                                                                        |
| 18540 | ENSG00000206687 |            | 18853.9 | 0.06 | unprocessed_pseudogene             |    |           |           |                                                                                        |
| 18596 | ENSG00000243303 |            | 18937.3 | 0.06 | unprocessed_pseudogene             |    |           |           |                                                                                        |
| 18600 | ENSG00000272842 |            | 18942   | 0.06 | unprocessed_pseudogene             |    |           |           |                                                                                        |
| 18601 | ENSG00000204211 |            | 18942.1 | 0.06 | unprocessed_pseudogene             |    |           |           |                                                                                        |
| 18622 | ENSG00000239035 |            | 18964.4 | 0.06 | unprocessed_pseudogene             |    |           |           |                                                                                        |
| 18660 | ENSG00000252624 |            | 18988.5 | 0.06 | unprocessed_pseudogene             |    |           |           |                                                                                        |
| 18810 | ENSG00000204991 |            | 19100   | 0.06 | unprocessed_pseudogene             |    |           |           |                                                                                        |
| 18962 | ENSG00000266491 |            | 19238.9 | 0.06 | unprocessed_pseudogene             |    |           |           |                                                                                        |
| 19082 | ENSG00000226806 |            | 19328.3 | 0.06 | unprocessed_pseudogene             |    |           |           |                                                                                        |
| 18138 | ENSG00000226850 |            | 19370.7 | 0.06 | unprocessed_pseudogene             |    |           |           |                                                                                        |
| 19198 | ENSG00000207971 |            | 19411.2 | 0.06 | unprocessed_pseudogene             |    |           |           |                                                                                        |
| 19297 | ENSG00000254211 |            | 19458.6 | 0.06 | unprocessed_pseudogene             | 22 | 32349391  | 32349493  | Small nuclear RNA U13                                                                  |
| 19262 | ENSG00000238910 |            | 19461.6 | 0.06 | unprocessed_pseudogene             |    |           |           |                                                                                        |
| 19281 | ENSG00000268445 |            | 19477.9 | 0.06 | unprocessed_pseudogene             |    |           |           |                                                                                        |
| 19288 | ENSG00000272827 |            | 19481   | 0.06 | unprocessed_pseudogene             |    |           |           |                                                                                        |
| 19305 | ENSG00000215423 |            | 19493.5 | 0.06 | unprocessed_pseudogene             |    |           |           |                                                                                        |
| 19315 | ENSG00000218623 |            | 19500.8 | 0.06 | unprocessed_pseudogene             | 7  | 72453891  | 72453991  | Y RNA                                                                                  |
| 19322 | ENSG00000237772 |            | 19508.4 | 0.06 | unprocessed_pseudogene             |    |           |           |                                                                                        |
| 19442 | ENSG00000251785 |            | 19563.6 | 0.06 | unprocessed_pseudogene             |    |           |           |                                                                                        |
| 19497 | ENSG00000256215 |            | 19568.9 | 0.06 | unprocessed_pseudogene             |    |           |           |                                                                                        |
| 19584 | ENSG00000268114 |            | 19703.9 | 0.06 | unprocessed_pseudogene             |    |           |           |                                                                                        |
| 19708 | ENSG00000254539 |            | 19794   | 0.06 | unprocessed_pseudogene             |    |           |           |                                                                                        |
| 19701 | ENSG00000256298 |            | 19807.3 | 0.06 | unprocessed_pseudogene             |    |           |           |                                                                                        |
| 19804 | ENSG00000272657 |            | 19873.2 | 0.06 | unprocessed_pseudogene             |    |           |           |                                                                                        |
| 19873 | ENSG00000240453 |            | 19928.5 | 0.06 | unprocessed_pseudogene             |    |           |           |                                                                                        |
| 19874 | ENSG00000232623 |            | 19928.9 | 0.06 | unprocessed_pseudogene             |    |           |           |                                                                                        |
| 19886 | ENSG00000228463 |            | 19937.8 | 0.06 | unprocessed_pseudogene             |    |           |           |                                                                                        |
| 20196 | ENSG00000230836 |            | 20181.6 | 0.06 | unprocessed_pseudogene             |    |           |           |                                                                                        |
| 20060 | ENSG00000221417 |            | 20245.5 | 0.06 | unprocessed_pseudogene             |    |           |           |                                                                                        |
| 20299 | ENSG00000161573 | CCL16      | 20266.3 | 0.06 | unprocessed_pseudogene             | 17 | 34303529  | 34308532  | chemokine (C-C motif) ligand 16                                                        |
| 20440 | ENSG00000228774 |            | 20376.1 | 0.06 | unprocessed_pseudogene             |    |           |           |                                                                                        |
| 20458 | ENSG00000232452 |            | 20389.6 | 0.06 | unprocessed_pseudogene             |    |           |           |                                                                                        |
| 20559 | ENSG00000187904 |            | 20474   | 0.06 | unprocessed_pseudogene             |    |           |           |                                                                                        |
| 20560 | ENSG00000256825 |            | 20475.3 | 0.06 | unprocessed_pseudogene             |    |           |           |                                                                                        |
| 20571 | ENSG00000232959 |            | 20486.3 | 0.06 | unprocessed_pseudogene             |    |           |           |                                                                                        |
| 20597 | ENSG00000255422 |            | 20495.3 | 0.06 | unprocessed_pseudogene             |    |           |           |                                                                                        |
| 20631 | ENSG00000252791 |            | 20520.9 | 0.06 | unprocessed_pseudogene             | 20 | 36681049  | 36681148  | Y RNA                                                                                  |
| 20728 | ENSG00000272335 |            | 20583.2 | 0.06 | unprocessed_pseudogene             |    |           |           |                                                                                        |
| 20767 | ENSG00000261898 |            | 20622.2 | 0.06 | unprocessed_pseudogene             |    |           |           |                                                                                        |
| 20778 | ENSG00000202401 |            | 20633.1 | 0.06 | unprocessed_pseudogene             |    |           |           |                                                                                        |
| 20813 | ENSG00000225660 |            | 20659.8 | 0.06 | unprocessed_pseudogene             |    |           |           |                                                                                        |
| 20836 | ENSG00000273124 |            | 20676.1 | 0.06 | unprocessed_pseudogene             |    |           |           |                                                                                        |
| 20850 | ENSG00000241743 |            | 20684.5 | 0.06 | unprocessed_pseudogene             |    |           |           |                                                                                        |
| 20888 | ENSG00000255689 |            | 20710.8 | 0.06 | unprocessed_pseudogene             | 15 | 22691016  | 22693200  | ATP-binding cassette, sub-family B (MDR/TAP), member 10 pseudogene 1                   |
| 20980 | ENSG00000256998 |            | 20778.5 | 0.06 | unprocessed_pseudogene             |    |           |           |                                                                                        |
| 21011 | ENSG00000237721 |            | 20801.1 | 0.06 | unprocessed_pseudogene             |    |           |           |                                                                                        |
| 21059 | ENSG00000269169 |            | 20833.7 | 0.06 | unprocessed_pseudogene             |    |           |           |                                                                                        |
| 2     |                 |            |         |      |                                    |    |           |           |                                                                                        |



|       |                  |          |         |      |    |          |          |                                                            |
|-------|------------------|----------|---------|------|----|----------|----------|------------------------------------------------------------|
| 21974 | ENSG00000226788  |          | 21555.3 | 0.06 |    |          |          |                                                            |
| 21987 | ENSG00000227607  |          | 21563.3 | 0.06 |    |          |          |                                                            |
| 22012 | ENSG00000248665  |          | 21590.5 | 0.06 |    |          |          |                                                            |
| 22026 | ENSG00000273232  |          | 21602.3 | 0.06 |    |          |          |                                                            |
| 22048 | ENSG00000254520  |          | 21617.4 | 0.06 |    |          |          |                                                            |
| 22064 | ENSG00000254522  |          | 21630.2 | 0.06 |    |          |          |                                                            |
| 22072 | ENSG00000205452  |          | 21635.9 | 0.06 |    |          |          |                                                            |
| 22088 | ENSG00000272990  |          | 21649.7 | 0.06 |    |          |          |                                                            |
| 22094 | ENSG00000257738  |          | 21651.5 | 0.06 |    |          |          |                                                            |
| 22152 | ENSG00000224846  |          | 21694.6 | 0.06 |    |          |          |                                                            |
| 22164 | ENSG00000260994  |          | 21695.6 | 0.06 |    |          |          |                                                            |
| 22185 | ENSG00000228926  |          | 21744.5 | 0.06 |    |          |          |                                                            |
| 22191 | ENSG00000242098  |          | 21722.4 | 0.06 |    |          |          |                                                            |
| 22228 | ENSG00000241054  |          | 21757.1 | 0.06 |    |          |          |                                                            |
| 22241 | ENSG00000225430  |          | 21791.5 | 0.06 |    |          |          |                                                            |
| 22259 | ENSG00000238563  |          | 21789.4 | 0.06 | 15 | 45783782 | 45783885 | Small nuclear RNA U13                                      |
| 22329 | ENSG00000270523  |          | 21819.3 | 0.06 |    |          |          |                                                            |
| 22353 | ENSG00000298108  |          | 21838.4 | 0.06 |    |          |          |                                                            |
| 22355 | ENSG00000208430  |          | 21839.6 | 0.06 |    |          |          |                                                            |
| 22396 | ENSG00000233900  |          | 21840.1 | 0.06 |    |          |          |                                                            |
| 22378 | ENSG00000231666  |          | 21877.2 | 0.06 |    |          |          |                                                            |
| 22458 | ENSG00000229652  |          | 21913.6 | 0.06 |    |          |          |                                                            |
| 22459 | ENSG00000235492  |          | 21914.8 | 0.06 |    |          |          |                                                            |
| 22462 | ENSG00000208058  |          | 21915.9 | 0.06 |    |          |          |                                                            |
| 22463 | ENSG00000238384  |          | 21918.8 | 0.06 | 7  | 94905898 | 94905966 | Small nuclear RNA U13                                      |
| 22481 | ENSG00000253385  |          | 21928.5 | 0.06 |    |          |          |                                                            |
| 22505 | ENSG00000231863  |          | 21943.4 | 0.06 |    |          |          |                                                            |
| 22524 | ENSG00000204603  |          | 21960.3 | 0.06 |    |          |          |                                                            |
| 22541 | ENSG00000237638  |          | 21976.7 | 0.06 |    |          |          |                                                            |
| 22545 | ENSG00000214335  |          | 21980.7 | 0.06 |    |          |          |                                                            |
| 22555 | ENSG00000249601  |          | 21988.6 | 0.06 |    |          |          |                                                            |
| 22564 | ENSG000002087134 |          | 21997.6 | 0.06 |    |          |          |                                                            |
| 22571 | ENSG00000253335  |          | 22003.4 | 0.06 |    |          |          |                                                            |
| 22599 | ENSG000002054756 |          | 22023.6 | 0.06 | 17 | 61917343 | 61917644 | RNA 7SL, cytoplasmic 80S, pseudogene                       |
| 22606 | ENSG00000272103  |          | 22028.5 | 0.06 |    |          |          |                                                            |
| 22610 | ENSG00000235388  |          | 22032.3 | 0.06 |    |          |          |                                                            |
| 22641 | ENSG00000232712  |          | 22059.7 | 0.06 |    |          |          |                                                            |
| 22648 | ENSG00000237346  |          | 22065.7 | 0.06 |    |          |          |                                                            |
| 22662 | ENSG00000208988  |          | 22078.1 | 0.06 |    |          |          |                                                            |
| 22663 | ENSG00000259244  |          | 22078.2 | 0.06 |    |          |          |                                                            |
| 22667 | ENSG00000237846  |          | 22080.4 | 0.06 |    |          |          |                                                            |
| 22672 | ENSG00000231210  |          | 22084.0 | 0.06 |    |          |          |                                                            |
| 22681 | ENSG00000258490  |          | 22092.5 | 0.06 |    |          |          |                                                            |
| 22692 | ENSG00000194270  |          | 22099.6 | 0.06 | 2  | 42865101 | 42865188 | Y RNA                                                      |
| 22725 | ENSG00000231240  |          | 22132.1 | 0.06 |    |          |          |                                                            |
| 22729 | ENSG00000235124  |          | 22134.4 | 0.06 |    |          |          |                                                            |
| 22730 | ENSG00000257400  |          | 22134.9 | 0.06 |    |          |          |                                                            |
| 22731 | ENSG00000204260  |          | 22136.6 | 0.06 |    |          |          |                                                            |
| 22734 | ENSG000002081355 |          | 22148.8 | 0.06 |    |          |          |                                                            |
| 22755 | ENSG00000182021  |          | 22150.1 | 0.06 |    |          |          |                                                            |
| 22765 | ENSG00000232139  |          | 22150.9 | 0.06 |    |          |          |                                                            |
| 22778 | ENSG0000021228   |          | 22166.2 | 0.06 |    |          |          |                                                            |
| 22782 | ENSG00000231666  |          | 22167.4 | 0.06 |    |          |          |                                                            |
| 22794 | ENSG00000237945  |          | 22177.6 | 0.06 |    |          |          |                                                            |
| 22795 | ENSG00000233021  |          | 22177.9 | 0.06 |    |          |          |                                                            |
| 22802 | ENSG00000227012  |          | 22183.9 | 0.06 |    |          |          |                                                            |
| 22809 | ENSG00000270400  |          | 22192   | 0.06 |    |          |          |                                                            |
| 22816 | ENSG00000229255  |          | 22200.2 | 0.06 |    |          |          |                                                            |
| 22817 | ENSG00000208982  |          | 22201.4 | 0.06 |    |          |          |                                                            |
| 22819 | ENSG00000259243  | GOLGA6L3 | 22202.6 | 0.06 | 15 | 83011379 | 83018198 | gdgln A8 family-like 19                                    |
| 22824 | ENSG00000228333  |          | 22202.7 | 0.06 |    |          |          |                                                            |
| 22830 | ENSG00000234485  |          | 22207.9 | 0.06 |    |          |          |                                                            |
| 22835 | ENSG00000229162  |          | 22216.3 | 0.06 |    |          |          |                                                            |
| 22865 | ENSG00000233369  |          | 22233.3 | 0.06 |    |          |          |                                                            |
| 22871 | ENSG00000256625  |          | 22237.7 | 0.06 |    |          |          |                                                            |
| 22875 | ENSG00000232872  |          | 22244.5 | 0.06 |    |          |          |                                                            |
| 22886 | ENSG00000214119  |          | 22254.4 | 0.06 |    |          |          |                                                            |
| 22905 | ENSG00000228971  |          | 22269.4 | 0.06 |    |          |          |                                                            |
| 22908 | ENSG00000234391  |          | 22275.2 | 0.06 |    |          |          |                                                            |
| 22917 | ENSG00000204823  |          | 22281.6 | 0.06 |    |          |          |                                                            |
| 22922 | ENSG00000251088  |          | 22284.5 | 0.06 |    |          |          |                                                            |
| 22923 | ENSG00000251057  |          | 22285.3 | 0.06 |    |          |          |                                                            |
| 22926 | ENSG00000230934  |          | 22288.2 | 0.06 |    |          |          |                                                            |
| 22928 | ENSG00000228918  |          | 22290.6 | 0.06 |    |          |          |                                                            |
| 22933 | ENSG00000226565  |          | 22292   | 0.06 | 17 | 34310862 | 34317308 | Uncharacterized protein                                    |
| 22936 | ENSG00000281797  |          | 22294.6 | 0.06 |    |          |          |                                                            |
| 22940 | ENSG00000251059  |          | 22300.5 | 0.06 |    |          |          |                                                            |
| 22953 | ENSG00000204620  |          | 22312   | 0.06 |    |          |          |                                                            |
| 22959 | ENSG00000256339  |          | 22320.2 | 0.06 | 18 | 48633124 | 48633416 | RNA 7SL, cytoplasmic 80S, pseudogene                       |
| 22962 | ENSG00000270571  |          | 22343   | 0.06 |    |          |          |                                                            |
| 23008 | ENSG00000203594  |          | 22380.3 | 0.06 |    |          |          |                                                            |
| 23007 | ENSG00000233863  |          | 22381   | 0.06 | 6  | 89674246 | 89676685 | Uncharacterized protein. cDNA FLJ27030 fis. clone SLV07741 |
| 23017 | ENSG00000233379  |          | 22369.7 | 0.06 |    |          |          |                                                            |
| 23019 | ENSG00000208076  |          | 22371.4 | 0.06 |    |          |          |                                                            |
| 23021 | ENSG00000231026  |          | 22380   | 0.06 |    |          |          |                                                            |
| 23035 | ENSG00000254054  |          | 22385.6 | 0.06 |    |          |          |                                                            |
| 23061 | ENSG00000236431  |          | 22388.3 | 0.06 |    |          |          |                                                            |
| 23074 | ENSG00000236257  |          | 22411   | 0.06 | 11 | 93530379 | 93530479 | Small nuclear RNA U13                                      |
| 23088 | ENSG00000218857  |          | 22418.6 | 0.06 |    |          |          |                                                            |
| 23100 | ENSG00000256105  |          | 22430.1 | 0.06 |    |          |          |                                                            |
| 23107 | ENSG00000208986  |          | 22434.7 | 0.06 |    |          |          |                                                            |
| 23131 | ENSG00000253326  |          | 22448.1 | 0.06 |    |          |          |                                                            |
| 23143 | ENSG00000227683  |          | 22455.7 | 0.06 |    |          |          |                                                            |
| 23164 | ENSG00000259184  |          | 22478.6 | 0.06 |    |          |          |                                                            |
| 23169 | ENSG00000240996  |          | 22482.4 | 0.06 |    |          |          |                                                            |
| 23176 | ENSG00000208117  |          | 22486   | 0.06 |    |          |          |                                                            |
| 23178 | ENSG00000271984  |          | 22489.5 | 0.06 |    |          |          |                                                            |
| 23185 | ENSG00000259756  |          | 22492.4 | 0.06 |    |          |          |                                                            |
| 23189 | ENSG00000230958  |          | 22496.6 | 0.06 |    |          |          |                                                            |
| 23201 | ENSG00000233087  |          | 22507.9 | 0.06 |    |          |          |                                                            |
| 23212 | ENSG00000254878  |          | 22519.3 | 0.06 |    |          |          |                                                            |
| 23219 | ENSG00000208984  |          | 22527.4 | 0.06 |    |          |          |                                                            |
| 23244 | ENSG00000271025  |          | 22544.4 | 0.06 |    |          |          |                                                            |
| 23245 | ENSG00000253366  |          | 22544.4 | 0.06 |    |          |          |                                                            |
| 23247 | ENSG00000259162  |          | 22546.5 | 0.06 |    |          |          |                                                            |
| 23252 | ENSG00000208167  |          | 22551.5 | 0.06 |    |          |          |                                                            |
| 23264 | ENSG00000227644  |          | 22555.4 | 0.06 |    |          |          |                                                            |
| 23276 | ENSG00000239921  |          | 22560.9 | 0.06 |    |          |          |                                                            |
| 23278 | ENSG00000231010  |          | 22561.5 | 0.06 |    |          |          |                                                            |
| 23293 | ENSG00000228963  |          | 22574.8 | 0.06 |    |          |          |                                                            |
| 23300 | ENSG00000271787  |          | 22581   | 0.06 |    |          |          |                                                            |
| 23320 | ENSG00000239028  |          | 22585.3 | 0.06 |    |          |          |                                                            |
| 23330 | ENSG00000250230  |          | 22606.8 | 0.06 |    |          |          |                                                            |
| 23331 | ENSG00000233002  |          | 22607.4 | 0.06 |    |          |          |                                                            |
| 23338 | ENSG00000231956  |          | 22610.3 | 0.06 |    |          |          |                                                            |
| 23340 | ENSG00000228765  |          | 22620.5 | 0.06 |    |          |          |                                                            |
| 23343 | ENSG00000226859  |          | 22622.7 | 0.06 |    |          |          |                                                            |
| 23350 | ENSG00000232657  |          | 22627.8 | 0.06 |    |          |          |                                                            |
| 23360 | ENSG00000253923  |          | 22636.4 | 0.06 |    |          |          |                                                            |
| 23366 | ENSG00000229063  |          | 22642.9 | 0.06 |    |          |          |                                                            |
| 23383 | ENSG00000254443  |          | 22656.3 | 0.06 |    |          |          |                                                            |
| 23399 | ENSG00000230967  |          | 22662.4 | 0.06 |    |          |          |                                                            |
| 23400 | ENSG00000271926  |          | 22663.2 | 0.06 |    |          |          |                                                            |
| 23405 | ENSG00000208270  |          | 22666   | 0.06 |    |          |          |                                                            |
| 23409 | ENSG00000234156  |          | 22670.5 | 0.06 |    |          |          |                                                            |
| 23411 | ENSG00000255442  |          | 22671.4 | 0.06 |    |          |          |                                                            |
| 23417 | ENSG00000208964  |          | 22674.2 | 0.06 |    |          |          |                                                            |
| 23419 | ENSG00000253300  |          | 22675.0 | 0.06 |    |          |          |                                                            |
| 23431 | ENSG00000246740  |          | 22683   | 0.06 |    |          |          |                                                            |
| 23434 | ENSG00000206509  |          | 22685   | 0.06 |    |          |          |                                                            |
| 23445 | ENSG00000238991  |          | 22690.4 | 0.06 | 17 | 18049866 | 18049969 | Small nuclear RNA U13                                      |
| 23454 | ENSG00000272866  |          | 22698.1 | 0.06 |    |          |          |                                                            |
| 23474 | ENSG00000272624  |          | 22711.7 | 0.06 |    |          |          |                                                            |
| 23484 | ENSG00000246359  |          | 22720.1 | 0.06 |    |          |          |                                                            |
| 23492 | ENSG00000257761  |          | 22723.4 | 0.06 |    |          |          |                                                            |
| 23494 | ENSG00000239440  |          | 22724.4 | 0.06 |    |          |          |                                                            |
| 23501 | ENSG00000271904  |          | 22728.5 | 0.06 |    |          |          |                                                            |
| 23502 | ENSG00000248966  |          | 22731   | 0.06 |    |          |          |                                                            |
| 23513 | ENSG00000237720  |          | 22736.3 | 0.06 |    |          |          |                                                            |
| 23517 | ENSG00000224844  |          | 22738   | 0.06 |    |          |          |                                                            |
| 23538 | ENSG00000208463  |          | 22750.5 | 0.06 |    |          |          |                                                            |
| 23537 | ENSG00000259219  |          | 22750.6 | 0.06 |    |          |          |                                                            |
| 23541 | ENSG00000229411  |          | 22753.1 | 0.06 |    |          |          |                                                            |
| 23546 | ENSG00000183239  |          | 22757.2 | 0.06 |    |          |          |                                                            |
| 23550 | ENSG00000234577  |          | 22763.9 | 0.06 |    |          |          |                                                            |
| 23563 | ENSG00000234244  |          | 22773.9 | 0.06 |    |          |          |                                                            |
| 23572 | ENSG00000232415  |          | 22781.2 | 0.06 |    |          |          |                                                            |
| 23584 | ENSG00000244183  |          | 22790.3 | 0.06 |    |          |          |                                                            |
| 23588 | ENSG00000254681  |          | 22791.1 | 0.06 |    |          |          |                                                            |
| 23594 | ENSG00000251928  |          | 22793.7 | 0.06 | 11 | 16995968 | 16996035 | RNA, U6 small nuclear 58S, pseudogene                      |

|       |                   |    |       |   |      |           |           |                                                  |  |
|-------|-------------------|----|-------|---|------|-----------|-----------|--------------------------------------------------|--|
| 23604 | ENSG00000251248   |    | 22805 | 2 | 0.06 |           |           |                                                  |  |
| 23615 | ENSG00000244489   |    | 22814 | 8 | 0.06 |           |           |                                                  |  |
| 23638 | ENSG00000258378   |    | 22832 | 3 | 0.06 |           |           |                                                  |  |
| 23639 | ENSG00000233996   |    | 22839 | 1 | 0.06 |           |           |                                                  |  |
| 23644 | ENSG00000225544   |    | 22844 | 8 | 0.06 |           |           |                                                  |  |
| 23646 | ENSG00000242925   |    | 22845 | 9 | 0.06 |           |           |                                                  |  |
| 23647 | ENSG00000242859   |    | 22846 | 6 | 0.06 |           |           |                                                  |  |
| 23657 | ENSG00000251413   |    | 22854 | 9 | 0.06 |           |           |                                                  |  |
| 23661 | ENSG00000252925   |    | 22858 | 7 | 0.06 |           |           |                                                  |  |
| 23688 | ENSG00000205325   |    | 22881 | 1 | 0.06 |           |           |                                                  |  |
| 23694 | ENSG00000231693   |    | 22884 | 6 | 0.06 |           |           |                                                  |  |
| 23700 | ENSG00000256844   |    | 22893 | 5 | 0.06 |           |           |                                                  |  |
| 23713 | ENSG00000244993   |    | 22899 | 1 | 0.06 |           |           |                                                  |  |
| 23718 | ENSG00000231741   |    | 22905 | 5 | 0.06 |           |           |                                                  |  |
| 23721 | ENSG00000206235   |    | 22907 | 0 | 0.06 |           |           |                                                  |  |
| 23735 | ENSG00000250041   |    | 22915 | 3 | 0.06 |           |           |                                                  |  |
| 23738 | ENSG00000231811   |    | 22918 | 7 | 0.06 |           |           |                                                  |  |
| 23747 | ENSG00000253217   |    | 22928 | 7 | 0.06 |           |           |                                                  |  |
| 23760 | ENSG00000222884   |    | 22942 | 1 | 0.06 |           |           |                                                  |  |
| 23768 | ENSG00000225295   |    | 22948 | 0 | 0.06 |           |           |                                                  |  |
| 23785 | ENSG000002088416  |    | 22964 | 2 | 0.06 |           |           |                                                  |  |
| 23791 | ENSG00000227400   |    | 22970 | 4 | 0.06 |           |           |                                                  |  |
| 23795 | ENSG00000231317   |    | 22975 | 2 | 0.06 |           |           |                                                  |  |
| 23798 | ENSG00000254119   |    | 22980 | 1 | 0.06 |           |           |                                                  |  |
| 23806 | ENSG00000261049   |    | 22988 | 7 | 0.06 |           |           |                                                  |  |
| 23817 | ENSG00000232981   |    | 22992 | 2 | 0.06 |           |           |                                                  |  |
| 23819 | ENSG00000207076   |    | 22993 | 8 | 0.06 |           |           |                                                  |  |
| 23826 | ENSG00000232109   |    | 23002 | 5 | 0.06 |           |           |                                                  |  |
| 23831 | ENSG00000230347   |    | 23004 | 1 | 0.06 |           |           |                                                  |  |
| 23847 | ENSG00000224568   |    | 23016 | 2 | 0.06 |           |           |                                                  |  |
| 23856 | ENSG00000237476   |    | 23026 | 2 | 0.06 |           |           |                                                  |  |
| 23858 | ENSG00000227488   |    | 23027 | 7 | 0.06 |           |           |                                                  |  |
| 23873 | ENSG00000237101   |    | 23036 | 3 | 0.06 |           |           |                                                  |  |
| 23892 | ENSG00000273367   |    | 23048 | 8 | 0.06 |           |           |                                                  |  |
| 23893 | ENSG00000231839   |    | 23049 | 3 | 0.06 |           |           |                                                  |  |
| 23905 | ENSG00000271286   |    | 23064 | 0 | 0.06 |           |           |                                                  |  |
| 23913 | ENSG00000255960   |    | 23071 | 6 | 0.06 |           |           |                                                  |  |
| 23918 | ENSG00000232588   |    | 23076 | 4 | 0.06 |           |           |                                                  |  |
| 23945 | ENSG00000243008   |    | 23097 | 4 | 0.06 |           |           |                                                  |  |
| 23946 | ENSG00000208625   |    | 23097 | 5 | 0.06 |           |           |                                                  |  |
| 23948 | ENSG00000256018   |    | 23102 | 1 | 0.06 |           |           |                                                  |  |
| 23956 | ENSG00000259587   |    | 23106 | 1 | 0.06 |           |           |                                                  |  |
| 23974 | ENSG00000238180   |    | 23121 | 7 | 0.06 |           |           |                                                  |  |
| 23981 | ENSG00000226844   |    | 23125 | 2 | 0.06 |           |           |                                                  |  |
| 23985 | ENSG00000208288   |    | 23128 | 5 | 0.06 |           |           |                                                  |  |
| 23986 | ENSG00000287865   |    | 23129 | 5 | 0.06 |           |           |                                                  |  |
| 23987 | ENSG00000232393   |    | 23130 | 0 | 0.06 |           |           |                                                  |  |
| 23987 | ENSG00000201616   |    | 23142 | 2 | 0.06 |           |           |                                                  |  |
| 24003 | ENSG00000206866   |    | 23146 | 3 | 0.06 |           |           |                                                  |  |
| 24014 | ENSG00000259481   |    | 23160 | 8 | 0.06 |           |           |                                                  |  |
| 24036 | ENSG00000239344   |    | 23169 | 8 | 0.06 |           |           |                                                  |  |
| 24037 | ENSG00000229818   |    | 23170 | 2 | 0.06 |           |           |                                                  |  |
| 24059 | ENSG00000213963   |    | 23188 | 3 | 0.06 |           |           |                                                  |  |
| 24062 | ENSG00000228871   |    | 23190 | 3 | 0.06 |           |           |                                                  |  |
| 24065 | ENSG00000259554   |    | 23193 | 4 | 0.06 |           |           |                                                  |  |
| 24069 | ENSG00000270344   |    | 23198 | 7 | 0.06 |           |           |                                                  |  |
| 24084 | ENSG00000251708   | 3  | 23210 | 2 | 0.06 | 136351990 | 136352048 | RNA, U7 small nuclear 198 pseudogene             |  |
| 24099 | ENSG00000208301   |    | 23245 | 0 | 0.06 |           |           |                                                  |  |
| 24101 | ENSG00000251650   |    | 23226 | 6 | 0.06 |           |           |                                                  |  |
| 24104 | ENSG00000231423   |    | 23228 | 5 | 0.06 |           |           |                                                  |  |
| 24109 | ENSG000002048200  |    | 23236 | 9 | 0.06 |           |           |                                                  |  |
| 24110 | ENSG00000227971   |    | 23238 | 2 | 0.06 |           |           |                                                  |  |
| 24124 | ENSG00000241570   |    | 23247 | 5 | 0.06 |           |           |                                                  |  |
| 24126 | ENSG00000254710   |    | 23248 | 2 | 0.06 |           |           |                                                  |  |
| 24128 | ENSG00000226327   |    | 23250 | 1 | 0.06 |           |           |                                                  |  |
| 24130 | ENSG00000231798   |    | 23251 | 5 | 0.06 |           |           |                                                  |  |
| 24133 | ENSG000002084529  |    | 23256 | 8 | 0.06 |           |           |                                                  |  |
| 24134 | ENSG00000231322   |    | 23257 | 3 | 0.06 |           |           |                                                  |  |
| 24138 | ENSG00000230343   |    | 23260 | 0 | 0.06 |           |           |                                                  |  |
| 24150 | ENSG00000238198   |    | 23265 | 9 | 0.06 |           |           |                                                  |  |
| 24159 | ENSG00000223907   |    | 23272 | 2 | 0.06 |           |           |                                                  |  |
| 24168 | ENSG00000230227   |    | 23277 | 6 | 0.06 |           |           |                                                  |  |
| 24167 | ENSG00000258146   |    | 23287 | 0 | 0.06 |           |           |                                                  |  |
| 24180 | ENSG00000219133   |    | 23300 | 8 | 0.06 |           |           |                                                  |  |
| 24185 | ENSG00000237862   |    | 23302 | 5 | 0.06 |           |           |                                                  |  |
| 24192 | ENSG00000244113   |    | 23311 | 3 | 0.06 |           |           |                                                  |  |
| 24197 | ENSG00000224992   |    | 23312 | 8 | 0.06 |           |           |                                                  |  |
| 24202 | ENSG00000222933   |    | 23320 | 7 | 0.06 |           |           |                                                  |  |
| 24204 | ENSG00000250326   |    | 23321 | 4 | 0.06 |           |           |                                                  |  |
| 24217 | ENSG00000221423   |    | 23336 | 6 | 0.06 |           |           |                                                  |  |
| 24237 | ENSG00000224989   |    | 23350 | 3 | 0.06 |           |           |                                                  |  |
| 24244 | ENSG00000273218   |    | 23357 | 0 | 0.06 |           |           |                                                  |  |
| 24248 | ENSG00000258871   |    | 23361 | 0 | 0.06 |           |           |                                                  |  |
| 24278 | ENSG00000231829   |    | 23380 | 2 | 0.06 |           |           |                                                  |  |
| 24282 | ENSG00000225794   |    | 23383 | 5 | 0.06 |           |           |                                                  |  |
| 24291 | ENSG00000255450   |    | 23390 | 2 | 0.06 |           |           |                                                  |  |
| 24304 | ENSG00000226204   |    | 23396 | 4 | 0.06 |           |           |                                                  |  |
| 24308 | ENSG00000234797   |    | 23400 | 8 | 0.06 |           |           |                                                  |  |
| 24337 | ENSG00000231441   |    | 23428 | 3 | 0.06 |           |           |                                                  |  |
| 24345 | ENSG00000209025   |    | 23443 | 0 | 0.06 |           |           |                                                  |  |
| 24346 | ENSG00000204951   |    | 23445 | 4 | 0.06 |           |           |                                                  |  |
| 24356 | ENSG00000237586   |    | 23455 | 8 | 0.06 |           |           |                                                  |  |
| 24362 | ENSG00000223444   |    | 23458 | 6 | 0.06 |           |           |                                                  |  |
| 24366 | ENSG00000203315   |    | 23462 | 4 | 0.06 |           |           |                                                  |  |
| 24379 | ENSG00000230333   |    | 23473 | 6 | 0.06 |           |           |                                                  |  |
| 24380 | ENSG00000230988   |    | 23473 | 9 | 0.06 |           |           |                                                  |  |
| 24387 | ENSG00000271715   |    | 23477 | 4 | 0.06 |           |           |                                                  |  |
| 24415 | ENSG00000200987   |    | 23488 | 5 | 0.06 |           |           |                                                  |  |
| 24430 | ENSG00000251361   |    | 23507 | 5 | 0.06 |           |           |                                                  |  |
| 24454 | ENSG00000232923   |    | 23526 | 1 | 0.06 |           |           |                                                  |  |
| 24456 | ENSG00000213358   |    | 23526 | 7 | 0.06 |           |           |                                                  |  |
| 24472 | ENSG00000213896   |    | 23537 | 3 | 0.06 |           |           |                                                  |  |
| 24475 | ENSG00000235115   |    | 23540 | 1 | 0.06 |           |           |                                                  |  |
| 24482 | ENSG00000241708   | 17 | 23545 | 3 | 0.06 | 8450235   | 8450236   | RNA, TSL cytoplasmic 129 pseudogene              |  |
| 24483 | ENSG00000224848   |    | 23546 | 6 | 0.06 |           |           |                                                  |  |
| 24488 | ENSG00000221473   |    | 23551 | 3 | 0.06 |           |           |                                                  |  |
| 24493 | ENSG00000253576   |    | 23558 | 7 | 0.06 |           |           |                                                  |  |
| 24494 | ENSG00000208493   |    | 23559 | 4 | 0.06 |           |           |                                                  |  |
| 24505 | ENSG00000224603   |    | 23564 | 7 | 0.06 |           |           |                                                  |  |
| 24511 | ENSG000002048266  |    | 23568 | 8 | 0.06 |           |           |                                                  |  |
| 24525 | ENSG000002048537  |    | 23575 | 6 | 0.06 |           |           |                                                  |  |
| 24545 | ENSG00000256651   |    | 23586 | 7 | 0.06 |           |           |                                                  |  |
| 24551 | ENSG00000248112   |    | 23595 | 0 | 0.06 |           |           |                                                  |  |
| 24557 | ENSG00000249373   |    | 23600 | 8 | 0.06 |           |           |                                                  |  |
| 24573 | ENSG00000252000   |    | 23612 | 3 | 0.06 |           |           |                                                  |  |
| 24581 | ENSG00000205751   |    | 23618 | 2 | 0.06 |           |           |                                                  |  |
| 24583 | ENSG0000020251227 |    | 23619 | 6 | 0.06 |           |           |                                                  |  |
| 24585 | ENSG00000205349   |    | 23620 | 7 | 0.06 |           |           |                                                  |  |
| 24589 | ENSG00000272889   |    | 23625 | 4 | 0.06 |           |           |                                                  |  |
| 24642 | ENSG00000250158   |    | 23675 | 7 | 0.06 |           |           |                                                  |  |
| 24648 | ENSG00000205133   |    | 23680 | 9 | 0.06 |           |           |                                                  |  |
| 24649 | ENSG000002052165  |    | 23683 | 4 | 0.06 |           |           |                                                  |  |
| 24653 | ENSG00000218483   |    | 23688 | 2 | 0.06 |           |           |                                                  |  |
| 24658 | ENSG00000239132   |    | 23690 | 8 | 0.06 |           |           |                                                  |  |
| 24673 | ENSG00000272886   | 6  | 23707 | 0 | 0.06 | 76575681  | 76575783  | Small nuclear RNA U13                            |  |
| 24691 | ENSG00000253288   |    | 23723 | 5 | 0.06 |           |           |                                                  |  |
| 24694 | ENSG00000206871   |    | 23726 | 9 | 0.06 |           |           |                                                  |  |
| 24704 | ENSG00000205841   |    | 23738 | 1 | 0.06 |           |           |                                                  |  |
| 24712 | ENSG000002087462  |    | 23741 | 9 | 0.06 |           |           |                                                  |  |
| 24717 | ENSG00000202571   |    | 23746 | 6 | 0.06 |           |           |                                                  |  |
| 24725 | ENSG00000204791   | 15 | 23753 | 4 | 0.06 | 83128128  | 83145963  | chondroitin sulfate proteoglycan 4 pseudogene 10 |  |
| 24732 | ENSG000002489781  |    | 23759 | 5 | 0.06 |           |           |                                                  |  |
| 24739 | ENSG00000221631   |    | 23767 | 3 | 0.06 |           |           |                                                  |  |
| 24742 | ENSG00000208995   |    | 23768 | 7 | 0.06 |           |           |                                                  |  |
| 24743 | ENSG000002081669  |    | 23768 | 8 | 0.06 |           |           |                                                  |  |
| 24746 | ENSG00000258435   |    | 23775 | 5 | 0.06 |           |           |                                                  |  |
| 24762 | ENSG000002059471  |    | 23784 | 7 | 0.06 |           |           |                                                  |  |
| 24764 | ENSG000002084213  | 19 | 23785 | 4 | 0.06 | 50900510  | 50900775  | RNA, TSL cytoplasmic 324 pseudogene              |  |
| 24775 | ENSG00000244036   |    | 23803 | 1 | 0.06 |           |           |                                                  |  |
| 24791 | ENSG00000205924   |    | 23814 | 4 | 0.06 |           |           |                                                  |  |
| 24798 | ENSG000002028172  |    | 23817 | 2 | 0.06 |           |           |                                                  |  |
| 24801 | ENSG00000273013   |    | 23824 | 0 | 0.06 |           |           |                                                  |  |
| 24805 | ENSG00000232385   |    | 23825 | 1 | 0.06 |           |           |                                                  |  |
| 24816 | ENSG00000256280   |    | 23839 | 7 | 0.06 |           |           |                                                  |  |
| 24833 | ENSG00000272301   |    | 23852 | 2 | 0.06 |           |           |                                                  |  |
| 24844 | ENSG00000252326   |    | 23867 | 7 | 0.06 |           |           |                                                  |  |
| 24851 | ENSG0000021096    |    | 23871 | 3 | 0.06 |           |           |                                                  |  |
| 24856 | ENSG00000258344   |    | 23876 | 0 | 0.06 |           |           |                                                  |  |
| 24863 | ENSG00000252445   |    | 23880 | 4 | 0.06 |           |           |                                                  |  |
| 24866 | ENSG00000225230   |    | 23882 | 8 | 0.06 |           |           |                                                  |  |

|       |                  |    |         |      |          |          |  |  |                                       |
|-------|------------------|----|---------|------|----------|----------|--|--|---------------------------------------|
| 24891 | ENSG00000234707  |    | 23903.4 | 0.06 |          |          |  |  |                                       |
| 24892 | ENSG00000235198  |    | 23903.9 | 0.06 |          |          |  |  |                                       |
| 24901 | ENSG00000233729  |    | 23912.9 | 0.06 |          |          |  |  |                                       |
| 24912 | ENSG00000204812  |    | 23927   | 0.06 |          |          |  |  |                                       |
| 24929 | ENSG00000224811  |    | 23940.7 | 0.06 |          |          |  |  |                                       |
| 24948 | ENSG00000225241  |    | 23949.5 | 0.06 |          |          |  |  |                                       |
| 24947 | ENSG00000204724  |    | 23949.6 | 0.06 |          |          |  |  |                                       |
| 24955 | ENSG00000205170  |    | 23958.6 | 0.06 |          |          |  |  |                                       |
| 24959 | ENSG00000225241  |    | 23960.7 | 0.06 |          |          |  |  |                                       |
| 24961 | ENSG00000229915  |    | 23961.5 | 0.06 |          |          |  |  |                                       |
| 24982 | ENSG00000273343  |    | 23970.7 | 0.06 |          |          |  |  |                                       |
| 24984 | ENSG00000220995  |    | 23973.7 | 0.06 |          |          |  |  |                                       |
| 24985 | ENSG00000244541  |    | 23977   | 0.06 |          |          |  |  |                                       |
| 24988 | ENSG00000185296  |    | 23980   | 0.06 |          |          |  |  |                                       |
| 24988 | ENSG00000229719  |    | 23989.3 | 0.06 |          |          |  |  |                                       |
| 25000 | ENSG00000204816  |    | 23991.2 | 0.06 |          |          |  |  |                                       |
| 25006 | ENSG00000250284  |    | 23996.6 | 0.06 |          |          |  |  |                                       |
| 25010 | ENSG00000220479  |    | 24000.4 | 0.06 |          |          |  |  |                                       |
| 25016 | ENSG00000228702  |    | 24004.5 | 0.06 |          |          |  |  |                                       |
| 25016 | ENSG00000256157  |    | 24005.5 | 0.06 |          |          |  |  |                                       |
| 25029 | ENSG00000213569  |    | 24007.9 | 0.06 |          |          |  |  |                                       |
| 25029 | ENSG00000259884  |    | 24012.1 | 0.06 |          |          |  |  |                                       |
| 25030 | ENSG00000273309  |    | 24012.3 | 0.06 |          |          |  |  |                                       |
| 25041 | ENSG00000205325  |    | 24018.2 | 0.06 |          |          |  |  |                                       |
| 25042 | ENSG00000257069  |    | 24018.4 | 0.06 |          |          |  |  |                                       |
| 25051 | ENSG00000209084  |    | 24024.7 | 0.06 |          |          |  |  |                                       |
| 25068 | ENSG00000227014  |    | 24030.7 | 0.06 |          |          |  |  |                                       |
| 25062 | ENSG000002051573 |    | 24031.5 | 0.06 |          |          |  |  |                                       |
| 25070 | ENSG00000208287  |    | 24037.9 | 0.06 |          |          |  |  |                                       |
| 25073 | ENSG00000237229  |    | 24038.8 | 0.06 |          |          |  |  |                                       |
| 25079 | ENSG00000201668  |    | 24042.7 | 0.06 |          |          |  |  |                                       |
| 25081 | ENSG00000224290  |    | 24044.4 | 0.06 |          |          |  |  |                                       |
| 25085 | ENSG00000254433  |    | 24047.4 | 0.06 |          |          |  |  |                                       |
| 25101 | ENSG00000204716  |    | 24059   | 0.06 |          |          |  |  |                                       |
| 25109 | ENSG000002042163 |    | 24069   | 0.06 |          |          |  |  |                                       |
| 25117 | ENSG00000206819  |    | 24077.6 | 0.06 |          |          |  |  |                                       |
| 25125 | ENSG00000271815  |    | 24084.4 | 0.06 |          |          |  |  |                                       |
| 25126 | ENSG00000259048  |    | 24085   | 0.06 |          |          |  |  |                                       |
| 25128 | ENSG00000205689  |    | 24088.8 | 0.06 |          |          |  |  |                                       |
| 25145 | ENSG00000236548  |    | 24099.3 | 0.06 |          |          |  |  |                                       |
| 25161 | ENSG00000208907  |    | 24120.8 | 0.06 |          |          |  |  |                                       |
| 25168 | ENSG00000209337  | 9  | 24123.8 | 0.06 | 70646588 | 70649556 |  |  | Uncharacterized protein               |
| 25176 | ENSG000002081227 |    | 24136.2 | 0.06 |          |          |  |  |                                       |
| 25180 | ENSG00000235351  |    | 24139.9 | 0.06 |          |          |  |  |                                       |
| 25191 | ENSG00000204957  |    | 24140.6 | 0.06 |          |          |  |  |                                       |
| 25196 | ENSG00000252529  |    | 24150.2 | 0.06 |          |          |  |  |                                       |
| 25197 | ENSG00000239317  |    | 24151.2 | 0.06 |          |          |  |  |                                       |
| 25202 | ENSG00000233384  |    | 24156   | 0.06 |          |          |  |  |                                       |
| 25210 | ENSG00000203761  |    | 24161.1 | 0.06 |          |          |  |  |                                       |
| 25221 | ENSG000002081761 |    | 24168.9 | 0.06 |          |          |  |  |                                       |
| 25244 | ENSG000002051696 |    | 24183.9 | 0.06 |          |          |  |  |                                       |
| 25247 | ENSG00000271116  |    | 24188.2 | 0.06 |          |          |  |  |                                       |
| 25255 | ENSG00000234949  |    | 24185.8 | 0.06 |          |          |  |  |                                       |
| 25256 | ENSG00000249484  |    | 24186.6 | 0.06 |          |          |  |  |                                       |
| 25261 | ENSG00000207567  |    | 24201.2 | 0.06 |          |          |  |  |                                       |
| 25264 | ENSG00000229178  |    | 24202.9 | 0.06 |          |          |  |  |                                       |
| 25273 | ENSG00000203421  |    | 24210.3 | 0.06 |          |          |  |  |                                       |
| 25275 | ENSG00000209314  |    | 24212.5 | 0.06 |          |          |  |  |                                       |
| 25304 | ENSG00000234773  |    | 24236.2 | 0.06 |          |          |  |  |                                       |
| 25321 | ENSG00000232032  |    | 24250.2 | 0.06 |          |          |  |  |                                       |
| 25328 | ENSG00000204928  |    | 24252.4 | 0.06 |          |          |  |  |                                       |
| 25328 | ENSG00000253125  |    | 24256   | 0.06 |          |          |  |  |                                       |
| 25329 | ENSG00000209156  |    | 24256.1 | 0.06 |          |          |  |  |                                       |
| 25333 | ENSG00000204655  |    | 24259.1 | 0.06 |          |          |  |  |                                       |
| 25343 | ENSG00000208785  | 7  | 24273.6 | 0.06 | 72458478 | 72464906 |  |  | Uncharacterized protein               |
| 25345 | ENSG00000209741  |    | 24274.5 | 0.06 |          |          |  |  |                                       |
| 25366 | ENSG00000202099  |    | 24285.9 | 0.06 |          |          |  |  |                                       |
| 25371 | ENSG000002068333 |    | 24300.1 | 0.06 |          |          |  |  |                                       |
| 25378 | ENSG00000204899  |    | 24304.9 | 0.06 |          |          |  |  |                                       |
| 25395 | ENSG00000244139  |    | 24320.6 | 0.06 |          |          |  |  |                                       |
| 25396 | ENSG00000208379  |    | 24322.1 | 0.06 |          |          |  |  |                                       |
| 25401 | ENSG00000232994  |    | 24328.4 | 0.06 |          |          |  |  |                                       |
| 25403 | ENSG00000204858  |    | 24328.6 | 0.06 |          |          |  |  |                                       |
| 25407 | ENSG00000257943  |    | 24332.1 | 0.06 |          |          |  |  |                                       |
| 25420 | ENSG00000208988  |    | 24342.8 | 0.06 |          |          |  |  |                                       |
| 25421 | ENSG00000232272  |    | 24343.9 | 0.06 |          |          |  |  |                                       |
| 25427 | ENSG00000253567  |    | 24347.9 | 0.06 |          |          |  |  |                                       |
| 25439 | ENSG00000209216  |    | 24353.8 | 0.06 |          |          |  |  |                                       |
| 25447 | ENSG00000202107  |    | 24361.7 | 0.06 |          |          |  |  |                                       |
| 25449 | ENSG000002051123 |    | 24363.3 | 0.06 |          |          |  |  |                                       |
| 25451 | ENSG00000208106  |    | 24363.6 | 0.06 |          |          |  |  |                                       |
| 25452 | ENSG00000205781  |    | 24363.8 | 0.06 |          |          |  |  |                                       |
| 25455 | ENSG00000272922  |    | 24364.9 | 0.06 |          |          |  |  |                                       |
| 25470 | ENSG00000217004  |    | 24381.1 | 0.06 |          |          |  |  |                                       |
| 25482 | ENSG00000232370  |    | 24389.7 | 0.06 |          |          |  |  |                                       |
| 25500 | ENSG00000205571  | 5  | 24402.6 | 0.06 | 69370673 | 69370944 |  |  | RNA, 7SL, cytoplasmic 9, pseudogene   |
| 25506 | ENSG00000273474  |    | 24405.8 | 0.06 |          |          |  |  |                                       |
| 25511 | ENSG00000209215  |    | 24408.9 | 0.06 |          |          |  |  |                                       |
| 25521 | ENSG00000272256  |    | 24417   | 0.06 |          |          |  |  |                                       |
| 25522 | ENSG00000229973  |    | 24417.6 | 0.06 |          |          |  |  |                                       |
| 25548 | ENSG00000204962  |    | 24432.3 | 0.06 |          |          |  |  |                                       |
| 25564 | ENSG00000205893  |    | 24440.5 | 0.06 |          |          |  |  |                                       |
| 25589 | ENSG00000237139  |    | 24454.4 | 0.06 |          |          |  |  |                                       |
| 25638 | ENSG00000209593  |    | 24509.6 | 0.06 |          |          |  |  |                                       |
| 25644 | ENSG00000209593  | 15 | 24513   | 0.06 | 40899410 | 40899510 |  |  | Small nuclear RNA U13                 |
| 25645 | ENSG00000206253  |    | 24513.7 | 0.06 |          |          |  |  |                                       |
| 25647 | ENSG00000232050  |    | 24514.6 | 0.06 |          |          |  |  |                                       |
| 25653 | ENSG00000232922  |    | 24520.2 | 0.06 |          |          |  |  |                                       |
| 25667 | ENSG00000183657  |    | 24532.4 | 0.06 |          |          |  |  |                                       |
| 25672 | ENSG00000217017  |    | 24537   | 0.06 |          |          |  |  |                                       |
| 25674 | ENSG00000211133  |    | 24538.6 | 0.06 |          |          |  |  |                                       |
| 25683 | ENSG00000208866  |    | 24549   | 0.06 |          |          |  |  |                                       |
| 25706 | ENSG0000027368   |    | 24565.3 | 0.06 |          |          |  |  |                                       |
| 25708 | ENSG00000210962  |    | 24565.4 | 0.06 |          |          |  |  |                                       |
| 25729 | ENSG000002088425 |    | 24582.7 | 0.06 |          |          |  |  |                                       |
| 25732 | ENSG00000184411  |    | 24585   | 0.06 |          |          |  |  |                                       |
| 25760 | ENSG00000205381  |    | 24596.5 | 0.06 |          |          |  |  |                                       |
| 25758 | ENSG00000256360  |    | 24606.6 | 0.06 |          |          |  |  |                                       |
| 25786 | ENSG000002081360 |    | 24610.7 | 0.06 |          |          |  |  |                                       |
| 25778 | ENSG00000232628  |    | 24617.5 | 0.06 |          |          |  |  |                                       |
| 25787 | ENSG00000259736  |    | 24630.7 | 0.06 |          |          |  |  |                                       |
| 25790 | ENSG00000290410  |    | 24634.4 | 0.06 |          |          |  |  |                                       |
| 25791 | ENSG00000205462  |    | 24634.6 | 0.06 |          |          |  |  |                                       |
| 25792 | ENSG00000228445  |    | 24636.5 | 0.06 |          |          |  |  |                                       |
| 25795 | ENSG000002049306 |    | 24638   | 0.06 |          |          |  |  |                                       |
| 25802 | ENSG00000232839  |    | 24642.8 | 0.06 |          |          |  |  |                                       |
| 25807 | ENSG00000232028  |    | 24648   | 0.06 |          |          |  |  |                                       |
| 25808 | ENSG00000204903  |    | 24648   | 0.06 |          |          |  |  |                                       |
| 25825 | ENSG00000271308  |    | 24652.8 | 0.06 |          |          |  |  |                                       |
| 25826 | ENSG00000227192  |    | 24662.9 | 0.06 |          |          |  |  |                                       |
| 25833 | ENSG00000272370  |    | 24671.2 | 0.06 |          |          |  |  |                                       |
| 25844 | ENSG00000233985  |    | 24684.3 | 0.06 |          |          |  |  |                                       |
| 25858 | ENSG00000259993  |    | 24689.4 | 0.06 |          |          |  |  |                                       |
| 25876 | ENSG00000208739  |    | 24700.6 | 0.06 |          |          |  |  |                                       |
| 25883 | ENSG0000027008   |    | 24707.7 | 0.06 |          |          |  |  |                                       |
| 25888 | ENSG00000209789  |    | 24711.7 | 0.06 |          |          |  |  |                                       |
| 25890 | ENSG00000204048  |    | 24713.8 | 0.06 |          |          |  |  |                                       |
| 25891 | ENSG00000204446  |    | 24715.6 | 0.06 |          |          |  |  |                                       |
| 25915 | ENSG00000205279  |    | 24733.4 | 0.06 |          |          |  |  |                                       |
| 25924 | ENSG00000223949  |    | 24738.9 | 0.06 |          |          |  |  |                                       |
| 25931 | ENSG00000178412  |    | 24742.2 | 0.06 |          |          |  |  |                                       |
| 25961 | ENSG00000271244  |    | 24771.5 | 0.06 |          |          |  |  |                                       |
| 25970 | ENSG00000273151  |    | 24773   | 0.06 |          |          |  |  |                                       |
| 25976 | ENSG00000258159  |    | 24776.1 | 0.06 |          |          |  |  |                                       |
| 25986 | ENSG000002051811 |    | 24785.3 | 0.06 |          |          |  |  |                                       |
| 26008 | ENSG00000234019  |    | 24804.2 | 0.06 |          |          |  |  |                                       |
| 26010 | ENSG00000209396  |    | 24807.5 | 0.06 |          |          |  |  |                                       |
| 26014 | ENSG00000205129  |    | 24811.9 | 0.06 |          |          |  |  |                                       |
| 26023 | ENSG00000206366  | 22 | 24819.9 | 0.06 | 21309449 | 21309714 |  |  | RNA, 7SL, cytoplasmic 389, pseudogene |
| 26030 | ENSG00000270706  |    | 24829.3 | 0.06 |          |          |  |  |                                       |
| 26039 | ENSG00000204249  |    | 24831.4 | 0.06 |          |          |  |  |                                       |
| 26051 | ENSG00000257272  |    | 24847.8 | 0.06 |          |          |  |  |                                       |
| 26052 | ENSG00000228413  |    | 24847.8 | 0.06 |          |          |  |  |                                       |
| 26078 | ENSG00000205907  |    | 24866.3 | 0.06 |          |          |  |  |                                       |
| 26091 | ENSG00000236581  |    | 24878.9 | 0.06 |          |          |  |  |                                       |
| 26150 | ENSG000002051533 |    | 24924.1 | 0.06 |          |          |  |  |                                       |
| 26178 | ENSG00000202094  |    | 24946.1 | 0.06 |          |          |  |  |                                       |
| 26186 | ENSG000002028247 |    | 24962.8 | 0.06 |          |          |  |  |                                       |
| 26189 | ENSG00000228729  |    | 24964   | 0.06 |          |          |  |  |                                       |
| 26217 | ENSG00000180458  |    | 24986.8 | 0.06 |          |          |  |  |                                       |
| 26226 | ENSG00000257350  |    | 24991.7 | 0.06 |          |          |  |  |                                       |





|       |                  |       |      |                      |                      |           |           |                                                                 |                                                                                                          |
|-------|------------------|-------|------|----------------------|----------------------|-----------|-----------|-----------------------------------------------------------------|----------------------------------------------------------------------------------------------------------|
| 26416 | ENSG00000203047  | 25150 | 7    | 0.05                 | misc_RNA             | 11        | 100710361 | 100710677                                                       | RNA 75k small nuclear pseudogene 115                                                                     |
| 26475 | ENSG00000211774  | 25525 | 15   | 0.05                 | misc_RNA             | 15        | 695621938 | 695621937                                                       | RNA 75k cytoplasmic 438 pseudogene                                                                       |
| 26608 | ENSG00000244596  | 25205 | 8    | 0.05                 | misc_RNA             | 15        | 84948770  | 84949050                                                        | RNA 75k cytoplasmic 417 pseudogene                                                                       |
| 26616 | ENSG00000202743  | 25336 | 7    | 0.05                 | misc_RNA             | 16        | 228553    | 228555                                                          | Y RNA                                                                                                    |
| 26802 | ENSG00000202947  | 25607 | 0.05 | misc_RNA             | 2                    | 201762287 | 201762334 | RNA 75k cytoplasmic 684 pseudogene                              |                                                                                                          |
| 26976 | ENSG00000202565  | 25036 | 6    | 0.05                 | misc_RNA             | 6         | 47576386  | 47576385                                                        | RNA 75k cytoplasmic 652 pseudogene                                                                       |
| 26979 | ENSG00000200754  | 25639 | 5    | 0.05                 | misc_RNA             | 21        | 18995458  | 18995655                                                        | Y RNA                                                                                                    |
| 27010 | ENSG00000204993  | 25670 | 1    | 0.05                 | misc_RNA             | 12        | 19329225  | 19329263                                                        | RNA 75k cytoplasmic 459 pseudogene                                                                       |
| 27215 | ENSG00000202728  | 25383 | 7    | 0.05                 | misc_RNA             | 17        | 57338307  | 57338307                                                        | Y RNA                                                                                                    |
| 6358  | ENSG0000197582   | 9144  | 0.05 | processed_pseudogene | X                    | 13398854  | 13397459  | glutathione peroxidase pseudogene 1                             |                                                                                                          |
| 10103 | ENSG00002024861  | 12429 | 0.05 | processed_pseudogene | 14                   | 68475546  | 68480507  | 1 box binding protein 1 pseudogene 1                            |                                                                                                          |
| 10333 | ENSG00000196265  | 12683 | 0.05 | processed_pseudogene | 17                   | 84989919  | 84989919  | ribosomal protein S14 pseudogene 19                             |                                                                                                          |
| 10238 | ENSG00000203748  | 12538 | 0.05 | processed_pseudogene | X                    | 56783875  | 56784010  | ubiquitin-cytochrome c nuclear binding protein pseudogene 1     |                                                                                                          |
| 10288 | ENSG00000203030  | 12571 | 2    | 0.05                 | processed_pseudogene | 16        | 26042890  | 26044132                                                        | high mobility group nucleosomal binding domain 2 pseudogene 3                                            |
| 10333 | ENSG00000196265  | 12683 | 0.05 | processed_pseudogene | 17                   | 84989919  | 84989919  | eukaryotic translation elongation factor 1 alpha 1 pseudogene 5 |                                                                                                          |
| 11339 | ENSG00000204497  | 13429 | 7    | 0.05                 | processed_pseudogene | 17        | 560034    | 560037                                                          | ribosomal protein S1X pseudogene 17                                                                      |
| 12916 | ENSG00000213333  | 14681 | 6    | 0.05                 | processed_pseudogene | 4         | 14626695  | 14626705                                                        | riboulin 3 pseudogene 1                                                                                  |
| 14483 | ENSG00000211931  | 15992 | 2    | 0.05                 | processed_pseudogene | 5         | 2566192   | 2566192                                                         | protein pseudogene 1                                                                                     |
| 16878 | ENSG00000182351  | 17681 | 1    | 0.05                 | processed_pseudogene | 22        | 25108259  | 25108489                                                        | cysteine-rich protein 1 (testinal) pseudogene 4                                                          |
| 17925 | ENSG00000215199  | 18435 | 4    | 0.05                 | processed_pseudogene | 9         | 34922181  | 34922918                                                        | lysine 3-monooxygenase/tyrosinase 5-monooxygenase activation protein, zeta pseudogene 6                  |
| 20699 | ENSG000002051496 | 20211 | 1    | 0.05                 | processed_pseudogene | 5         | 81305421  | 81305511                                                        | peptidylarginyl isomerase A (cydophilin A) pseudogene 11                                                 |
| 21113 | ENSG00000228763  | 20676 | 8    | 0.05                 | processed_pseudogene | 9         | 110725984 | 110726236                                                       | ribosomal protein S15a pseudogene 27                                                                     |
| 21295 | ENSG00000202333  | 20999 | 9    | 0.05                 | processed_pseudogene | 20        | 17407488  | 17407692                                                        | ribosomal protein S27A pseudogene 2                                                                      |
| 21339 | ENSG000002050045 | 21661 | 3    | 0.05                 | processed_pseudogene | 5         | 112113327 | 112113858                                                       | chromobox homolog 3 pseudogene 3                                                                         |
| 21352 | ENSG00000208741  | 21072 | 4    | 0.05                 | processed_pseudogene | 19        | 9885173   | 9885356                                                         | ubiquitin-conjugating enzyme E2L 4                                                                       |
| 21359 | ENSG00000202592  | 21077 | 4    | 0.05                 | processed_pseudogene | 21        | 16148925  | 16147883                                                        | glycylaldehyde-3-phosphate dehydrogenase pseudogene 16                                                   |
| 21709 | ENSG00000213448  | 21861 | 5    | 0.05                 | processed_pseudogene | 4         | 138369241 | 138369555                                                       | ribosomal protein S23 pseudogene 2                                                                       |
| 21729 | ENSG00000202168  | 21880 | 5    | 0.05                 | processed_pseudogene | 3         | 39378470  | 39377430                                                        | heterogeneous nuclear ribonucleoprotein A1 pseudogene 21                                                 |
| 21881 | ENSG00000202539  | 21520 | 5    | 0.05                 | processed_pseudogene | 5         | 902884    | 902884                                                          | ribosomal protein S41 pseudogene 19                                                                      |
| 21921 | ENSG000002050539 | 21530 | 5    | 0.05                 | processed_pseudogene | 5         | 122736516 | 122736338                                                       | keratin 8 pseudogene 33                                                                                  |
| 22046 | ENSG00000202423  | 21633 | 9    | 0.05                 | processed_pseudogene | 10        | 86150964  | 86151801                                                        | transportin 1 pseudogene 1                                                                               |
| 22091 | ENSG00000204643  | 21710 | 4    | 0.05                 | processed_pseudogene | 14        | 3115553   | 3115553                                                         | ubiquitin-conjugating enzyme E2C pseudogene 1                                                            |
| 22163 | ENSG00000206062  | 21700 | 4    | 0.05                 | processed_pseudogene | 15        | 69545887  | 69547277                                                        | high mobility group nucleosomal binding domain 2 pseudogene 40                                           |
| 22167 | ENSG00000203307  | 21702 | 9    | 0.05                 | processed_pseudogene | 2         | 110484713 | 110485100                                                       | ribosomal protein L22 pseudogene 11                                                                      |
| 22315 | ENSG000002026421 | 21810 | 3    | 0.05                 | processed_pseudogene | 7         | 32511125  | 32512021                                                        | solute carrier family 25 (mitochondrial carrier, adenine nucleotide translocator), member 5 pseudogene 5 |
| 22319 | ENSG000002045649 | 21812 | 9    | 0.05                 | processed_pseudogene | 4         | 38008425  | 38008728                                                        | mitochondrial ribosomal protein S33 pseudogene 2                                                         |
| 22340 | ENSG00000202523  | 21823 | 4    | 0.05                 | processed_pseudogene | 2         | 50187801  | 50187801                                                        | ribosomal protein L7 pseudogene 2                                                                        |
| 22475 | ENSG00000212929  | 21922 | 4    | 0.05                 | processed_pseudogene | 9         | 9050876   | 90509111                                                        | ribosomal protein S26 pseudogene 3                                                                       |
| 22540 | ENSG000002038089 | 21875 | 8    | 0.05                 | processed_pseudogene | 2         | 157834218 | 157834884                                                       | ribosomal protein, large, P0 pseudogene 7                                                                |
| 22540 | ENSG000002038089 | 21875 | 8    | 0.05                 | processed_pseudogene | 2         | 157834218 | 157834884                                                       | ribosomal protein, large, P0 pseudogene 7                                                                |
| 22813 | ENSG00000203389  | 22197 | 2    | 0.05                 | processed_pseudogene | 6         | 74032590  | 74033173                                                        | heterogeneous nuclear ribonucleoprotein C pseudogene 1                                                   |
| 22869 | ENSG000002047570 | 22236 | 5    | 0.05                 | processed_pseudogene | 8         | 70855183  | 70856883                                                        | synedean binding protein (syntrin) pseudogene 2                                                          |
| 22884 | ENSG000002025294 | 22252 | 3    | 0.05                 | processed_pseudogene | 1         | 27312386  | 27312381                                                        | digoxinacetyltransferase complex subunit pseudogene 2                                                    |
| 22911 | ENSG000002041451 | 22263 | 0.05 | processed_pseudogene | 6                    | 8768381   | 8768381   | ribosomal protein L7 pseudogene 29                              |                                                                                                          |
| 23117 | ENSG00000186039  | 22438 | 1    | 0.05                 | processed_pseudogene | 19        | 34534445  | 34534421                                                        | ribosomal protein S4X pseudogene 21                                                                      |
| 23117 | ENSG00000186039  | 22438 | 1    | 0.05                 | processed_pseudogene | 19        | 34534445  | 34534421                                                        | ribosomal protein S4X pseudogene 21                                                                      |
| 23291 | ENSG00000204291  | 22471 | 3    | 0.05                 | processed_pseudogene | 19        | 21416137  | 21416444                                                        | ribosomal protein L30a pseudogene 51                                                                     |
| 23384 | ENSG00000203444  | 22342 | 2    | 0.05                 | processed_pseudogene | 2         | 234631068 | 234631115                                                       | ribosomal protein L12 pseudogene 11                                                                      |
| 23384 | ENSG00000204000  | 22840 | 4    | 0.05                 | processed_pseudogene | 3         | 37185003  | 37185449                                                        | ubiquitin-conjugating enzyme E2F (mutase) pseudogene 1                                                   |
| 23453 | ENSG00000202805  | 22096 | 3    | 0.05                 | processed_pseudogene | 6         | 70802622  | 70803088                                                        | ribosomal protein L17c pseudogene 15                                                                     |
| 23456 | ENSG00000202631  | 22033 | 1    | 0.05                 | processed_pseudogene | 3         | 69433319  | 69433319                                                        | barrier to autophagy factor 1 pseudogene 1                                                               |
| 23489 | ENSG00000213026  | 22722 | 1    | 0.05                 | processed_pseudogene | 1         | 242156487 | 242156487                                                       | collin 1 (non-muscle) pseudogene 4                                                                       |
| 23508 | ENSG00000219807  | 22734 | 1    | 0.05                 | processed_pseudogene | 7         | 84463216  | 84463799                                                        | ADP-ribosylation factor 1 pseudogene 1                                                                   |
| 23514 | ENSG00000202936  | 22734 | 1    | 0.05                 | processed_pseudogene | 7         | 36561222  | 36561222                                                        | heat shock 60kDa protein 1 (chaperonin) pseudogene 9                                                     |
| 23699 | ENSG00000207022  | 22850 | 8    | 0.05                 | processed_pseudogene | 10        | 43050888  | 43051172                                                        | FXYD domain containing ion transport regulator 6 pseudogene 1                                            |
| 23816 | ENSG00000202047  | 22992 | 7    | 0.05                 | processed_pseudogene | 5         | 14980431  | 14981102                                                        | selenophosphate synthetase 2 pseudogene 1                                                                |
| 24086 | ENSG00000204869  | 23224 | 3    | 0.05                 | processed_pseudogene | 5         | 5896913   | 5896913                                                         | serpin pseudogene 1                                                                                      |
| 24224 | ENSG000002051483 | 23348 | 8    | 0.05                 | processed_pseudogene | 4         | 111866265 | 111866265                                                       | lysophospholipase A pseudogene 2                                                                         |
| 24295 | ENSG00000205826  | 23388 | 4    | 0.05                 | processed_pseudogene | 14        | 68119317  | 68119331                                                        | cytochrome c oxidase subunit VIIa polypeptide 2 (liver) pseudogene 1                                     |
| 24296 | ENSG00000213426  | 23384 | 5    | 0.05                 | processed_pseudogene | 14        | 106138465 | 106138465                                                       | ELAC1, member 5, oncogene family, pseudogene                                                             |
| 24372 | ENSG000002048418 | 23467 | 4    | 0.05                 | processed_pseudogene | 5         | 29600783  | 29600975                                                        | ubiquitin-like 5 pseudogene 1                                                                            |
| 24375 | ENSG00000202325  | 23468 | 9    | 0.05                 | processed_pseudogene | 10        | 35164138  | 35164350                                                        | synovial sarcoma translocation gene on chromosome 18-like 2 pseudogene 1                                 |
| 24412 | ENSG00000205112  | 23498 | 5    | 0.05                 | processed_pseudogene | 10        | 59321711  | 59321761                                                        | DnaJ (Hsp40) homolog, family A, member 1 pseudogene 1                                                    |
| 24432 | ENSG00000214760  | 23569 | 7    | 0.05                 | processed_pseudogene | 12        | 122849327 | 122850176                                                       | ribosomal protein L21 pseudogene 1                                                                       |
| 24467 | ENSG00000205822  | 23534 | 6    | 0.05                 | processed_pseudogene | 19        | 35917074  | 35917494                                                        | eukaryotic translation elongation factor 1 alpha 1 pseudogene 7                                          |
| 24491 | ENSG00000205009  | 23622 | 1    | 0.05                 | processed_pseudogene | 19        | 49748729  | 49749359                                                        | solid cancer family 1, member 21 pseudogene 1                                                            |
| 24628 | ENSG00000204370  | 23668 | 0.05 | processed_pseudogene | 14                   | 37046748  | 37047210  | ribosomal protein L20 pseudogene 3                              |                                                                                                          |
| 24687 | ENSG00000202712  | 23688 | 2    | 0.05                 | processed_pseudogene | 1         | 148574653 | 148575051                                                       | profilin 1 pseudogene 7                                                                                  |
| 24708 | ENSG00000203768  | 23718 | 2    | 0.05                 | processed_pseudogene | 3         | 18323120  | 18323120                                                        | ribosomal protein L7 pseudogene 8                                                                        |
| 24765 | ENSG00000215357  | 23790 | 4    | 0.05                 | processed_pseudogene | 13        | 7842336   | 78423543                                                        | heat shock 60kDa protein 1 (chaperonin) pseudogene 8                                                     |
| 24808 | ENSG00000202893  | 23833 | 7    | 0.05                 | processed_pseudogene | 10        | 57427101  | 57428110                                                        | glyceraldehyde 3 phosphate dehydrogenase pseudogene 21                                                   |
| 24975 | ENSG00000204588  | 24008 | 1    | 0.05                 | processed_pseudogene | 11        | 5800387   | 5800387                                                         | eukaryotic translation initiation factor 4B2 pseudogene 3                                                |
| 25023 | ENSG00000204267  | 24008 | 1    | 0.05                 | processed_pseudogene | 17        | 46768478  | 46769056                                                        | ribosomal protein L9 pseudogene 28                                                                       |
| 25116 | ENSG00000204367  | 24079 | 4    | 0.05                 | processed_pseudogene | 1         | 148349256 | 148349256                                                       | profilin 1 pseudogene 5                                                                                  |
| 25140 | ENSG00000202929  | 24087 | 0.05 | processed_pseudogene | 14                   | 1300329   | 1300329   | Rai1, nuclear core protein, pseudogene 1                        |                                                                                                          |
| 25299 | ENSG00000205896  | 24234 | 9    | 0.05                 | processed_pseudogene | 10        | 50069712  | 50069720                                                        | ras homology family member Q pseudogene 15                                                               |
| 25326 | ENSG000002031888 | 24255 | 3    | 0.05                 | processed_pseudogene | 3         | 176728607 | 176728605                                                       | MT-ND5 pseudogene 10                                                                                     |
| 25380 | ENSG00000203558  | 24415 | 1    | 0.05                 | processed_pseudogene | 5         | 50481761  | 50481761                                                        | MT-ND2 pseudogene 23                                                                                     |
| 25408 | ENSG00000176857  | 24332 | 3    | 0.05                 | processed_pseudogene | 5         | 108387013 | 108388158                                                       | gap junction protein, alpha 1, 43kDa pseudogene 1                                                        |
| 25492 | ENSG000002027969 | 24397 | 3    | 0.05                 | processed_pseudogene | 13        | 68449008  | 68449699                                                        | nucleophosmin 1 (nucleolar phosphoprotein B23, numatrin) pseudogene 22                                   |
| 25523 | ENSG00000203793  | 24428 | 13   | 0.05                 | processed_pseudogene | 13        | 4628119   | 4628119                                                         | arbo-kash nuclear lamina 1, member 11 pseudogene 4                                                       |
| 25596 | ENSG00000213563  | 24471 | 3    | 0.05                 | processed_pseudogene | 1         | 169907015 | 169908101                                                       | ribosomal protein L20 pseudogene 7                                                                       |
| 26261 | ENSG00000205252  | 24488 | 4    | 0.05                 | processed_pseudogene | 5         | 165455572 | 165455516                                                       | ribosomal protein L20 pseudogene 20                                                                      |
| 26262 | ENSG00000216538  | 24499 | 2    | 0.05                 | processed_pseudogene | X         | 26714143  | 26716072                                                        | ribosomal protein L7 pseudogene 58                                                                       |
| 26448 | ENSG00000205024  | 24517 | 2    | 0.05                 | processed_pseudogene | 16        | 12952300  | 12952300                                                        | ribosomal protein L5 pseudogene 4                                                                        |
| 26479 | ENSG00000213013  | 24546 | 1    | 0.05                 | processed_pseudogene | 19        | 58727546  | 58727927                                                        | ribosomal protein S15a pseudogene 36                                                                     |
| 26590 | ENSG00000202814  | 24552 | 4    | 0.05                 | processed_pseudogene | A         | 69117756  | 69117756                                                        | Gpre-like 2, mitochondrial (E. coli) pseudogene 2                                                        |
| 26590 | ENSG00000202814  | 24552 | 4    | 0.05                 | processed_pseudogene | A         | 69117756  | 69117756                                                        | REST, co-repressor, nuclear protein pseudogene 1                                                         |
| 26590 | ENSG00000202814  | 24552 | 4    | 0.05                 | processed_pseudogene | A         | 69117756  | 69117756                                                        | keratin 8 pseudogene 47                                                                                  |
| 26590 | ENSG00000202814  | 24552 | 4    | 0.05                 | processed_pseudogene | A         | 69117756  | 69117756                                                        | keratin 8 pseudogene 47                                                                                  |
| 26601 | ENSG000002037642 | 24600 | 6    | 0.05                 | processed_pseudogene | 10        | 112216897 | 112216898                                                       | high mobility group box 3 pseudogene 5                                                                   |
| 26601 | ENSG000002037642 | 24600 | 6    | 0.05                 | processed_pseudogene | 10        | 112216897 | 112216898                                                       | high mobility group box 3 pseudogene 5                                                                   |
| 26610 | ENSG00000202978  | 24687 | 3    | 0.05                 | processed_pseudogene | 7         | 172717700 | 172718442                                                       | solute carrier family 25, member 38 pseudogene 1                                                         |
| 26104 | ENSG000002037437 | 24687 | 3    | 0.05                 | processed_pseudogene | 9         | 32849720  | 32849720                                                        | argininosuccinate synthetase 1 pseudogene 12                                                             |
| 26121 | ENSG000002037362 | 24690 | 7    | 0.05                 | processed_pseudogene | 17        | 18216074  | 18216087</                                                      |                                                                                                          |

|       |                  |           |         |      |                |    |           |           |                                                                                             |
|-------|------------------|-----------|---------|------|----------------|----|-----------|-----------|---------------------------------------------------------------------------------------------|
| 9728  | ENSG00000136860  | STGALNAC4 | 12129.9 | 0.05 | protein_coding | 9  | 130670165 | 130670317 | ST6 (alpha-N-acetylneuraminy-2,3-bisect-galactosyl-1,3)-N-acetylglucosaminase alpha 2,6-    |
| 9729  | ENSG00000122121  | XPNPPE2   | 12291.8 | 0.05 | protein_coding | X  | 128972260 | 128903514 | Xenopus aminopeptidase (aminopeptidase P) 2, membrane bound                                 |
| 9961  | ENSG00000135144  | DTX1      | 12304.4 | 0.05 | protein_coding | 12 | 113484514 | 113353334 | deltaex homolog 1 (Drosophila)                                                              |
| 10040 | ENSG00000168583  | SMN2      | 12378.5 | 0.05 | protein_coding | 4  | 38647390  | 38647401  | small integral membrane protein 14                                                          |
| 10146 | ENSG00000141414  | NIK7      | 12451.4 | 0.05 | protein_coding | 2  | 19812953  | 19821150  | NIMA related kinase 7                                                                       |
| 10299 | ENSG00000174296  | EED       | 12575.5 | 0.05 | protein_coding | 11 | 85955585  | 85958855  | embryonic ectoderm development                                                              |
| 10370 | ENSG00000157600  | TMEM64    | 12624   | 0.05 | protein_coding | A  | 10624989  | 106425862 | transmembrane protein 104                                                                   |
| 10438 | ENSG00000163393  | SK-CM44   | 12645.4 | 0.05 | protein_coding | 3  | 31848623  | 31848623  | soluble carrier family 4, member 4                                                          |
| 10534 | ENSG00000103327  | STAB1     | 12760.4 | 0.05 | protein_coding | 3  | 52595514  | 52595514  | stabilin 1                                                                                  |
| 10586 | ENSG00000139154  | ABP2      | 12796   | 0.05 | protein_coding | 12 | 18569979  | 18613735  | AE binding protein 2                                                                        |
| 10686 | ENSG00000157423  | SUGT3     | 12834.4 | 0.05 | protein_coding | 19 | 89820969  | 89847420  | suflin domain containing 3                                                                  |
| 10688 | ENSG00000165502  | RP136AL   | 12864   | 0.05 | protein_coding | 14 | 50085237  | 50087403  | ribosomal protein L36A-like                                                                 |
| 10699 | ENSG00000172340  | SUCLG2    | 12888.5 | 0.05 | protein_coding | 3  | 61410884  | 61707038  | succinate-CoA ligase, GDP-forming, beta subunit                                             |
| 10715 | ENSG00000150124  | CD22      | 12913   | 0.05 | protein_coding | 19 | 35210764  | 35210764  | CD22 molecule                                                                               |
| 10757 | ENSG00000127831  | VILI      | 12950.5 | 0.05 | protein_coding | 2  | 21503815  | 21503815  | villin 1                                                                                    |
| 10760 | ENSG00000117179  | CLIC1     | 12990   | 0.05 | protein_coding | 6  | 31688358  | 31707340  | chloride intracellular channel 1                                                            |
| 10802 | ENSG00000118818  | CCR1      | 12997.6 | 0.05 | protein_coding | 4  | 77997531  | 77997531  | chemokine receptor 1                                                                        |
| 10892 | ENSG00000166289  | PLEKHF1   | 13059.6 | 0.05 | protein_coding | 19 | 30155963  | 30136364  | pleckstrin homology domain containing, family F (with FYVE domain) member 1                 |
| 10924 | ENSG000002043749 | ZMYM8     | 13090.6 | 0.05 | protein_coding | 1  | 35441736  | 35450054  | ZMYM8 neighbor                                                                              |
| 10988 | ENSG00000151568  | ZNF173    | 13098.9 | 0.05 | protein_coding | 1  | 13989126  | 13989126  | transmembrane protein 173                                                                   |
| 11025 | ENSG00000177683  | THAP5     | 13163.5 | 0.05 | protein_coding | 7  | 108194987 | 108201194 | THAP domain containing 5                                                                    |
| 11150 | ENSG00000118971  | CND2      | 13284   | 0.05 | protein_coding | 12 | 4382938   | 4414516   | cyclin D2                                                                                   |
| 11220 | ENSG00000109905  | BLRKA     | 13322.6 | 0.05 | protein_coding | 7  | 11373279  | 43834958  | biliverdin reductase A                                                                      |
| 11246 | ENSG00000136003  | ISCU      | 13341.1 | 0.05 | protein_coding | 12 | 10895358  | 108983160 | iron-sulfur cluster assembly enzyme                                                         |
| 11346 | ENSG00000139888  | DARC      | 13437.1 | 0.05 | protein_coding | 1  | 15871397  | 158717296 | Duffy blood group, atypical chemokine receptor                                              |
| 11360 | ENSG00000106760  | PRCA      | 13447.1 | 0.05 | protein_coding | 1  | 49380278  | 49405031  | resolving homology member A                                                                 |
| 11400 | ENSG00000077548  | CAPZB     | 13487.2 | 0.05 | protein_coding | 1  | 19865287  | 19812606  | capping protein (actin filament) muscle 2-line, beta                                        |
| 11438 | ENSG00000109103  | UNC119    | 13520.8 | 0.05 | protein_coding | 17 | 28873725  | 28876988  | unc-119 homolog (C. elegans)                                                                |
| 11488 | ENSG00000104305  | CASP3     | 13529.9 | 0.05 | protein_coding | 1  | 18524868  | 18524868  | caseinase 3, apoptosis-related cysteine peptidase                                           |
| 11514 | ENSG00000085978  | YBX1      | 13587.9 | 0.05 | protein_coding | 1  | 43148058  | 43188020  | Y box binding protein 1                                                                     |
| 11520 | ENSG00000116044  | NFE2L3    | 13592.4 | 0.05 | protein_coding | 2  | 17808233  | 17825725  | nuclear factor, erythroid 2-like 2                                                          |
| 11575 | ENSG00000102045  | MYO17     | 13623.6 | 0.05 | protein_coding | 22 | 8621737   | 8621737   | myosin, heavy chain 3, non-muscle                                                           |
| 11591 | ENSG00000135439  | AGAP2     | 13624.2 | 0.05 | protein_coding | 12 | 59118990  | 59135540  | ARF-GAP with GTPase domain, arylsulfatase and PH domain 2                                   |
| 11672 | ENSG00000198837  | DENND4B   | 13718.7 | 0.05 | protein_coding | 1  | 153991977 | 153919172 | DENND4B domain containing 4B                                                                |
| 11682 | ENSG00000104538  | SRB1      | 14140.2 | 0.05 | protein_coding | 1  | 49913748  | 50737478  | SRB domain containing protein 1                                                             |
| 11773 | ENSG00000233118  | ERPL4     | 13811.3 | 0.05 | protein_coding | 9  | 102741461 | 102881322 | endoplasmic reticulum protein 44                                                            |
| 11817 | ENSG00000198478  | SH3BP2    | 13840.6 | 0.05 | protein_coding | 6  | 80341000  | 80413372  | SH3 domain binding glutamic acid-rich protein like 2                                        |
| 12111 | ENSG00000109515  | EBF3      | 14410.5 | 0.05 | protein_coding | 1  | 344405    | 4304365   | enhancer binding factor 3 like                                                              |
| 12150 | ENSG00000185507  | RFX7      | 14491.1 | 0.05 | protein_coding | 11 | 612553    | 615999    | interferon regulatory factor 7                                                              |
| 12172 | ENSG00000138104  | RNASEH2B  | 14404.1 | 0.05 | protein_coding | 13 | 51483814  | 51484592  | ribonuclease H2, subunit B                                                                  |
| 12288 | ENSG00000102581  | FDA5L     | 14518.2 | 0.05 | protein_coding | 11 | 11173000  | 11173000  | ferredoxin-like oxidoreductase domain containing 1                                          |
| 12297 | ENSG00000198992  | PXK5      | 14502.6 | 0.05 | protein_coding | 9  | 38833272  | 37934103  | painted box 5                                                                               |
| 12496 | ENSG00000256229  | ZNF486    | 14452.1 | 0.05 | protein_coding | 19 | 20278037  | 20311299  | zinc finger protein 486                                                                     |
| 12516 | ENSG00000059661  | TRIM9     | 14473   | 0.05 | protein_coding | 17 | 4444458   | 4445273   | integrin, alpha 28 (platelet glycoprotein IIb or IIIa) complex, antigen CD61)               |
| 12670 | ENSG00000104188  | TMEM50B   | 14480.9 | 0.05 | protein_coding | 3  | 34848745  | 34852192  | transmembrane protein 50B                                                                   |
| 12841 | ENSG00000099337  | KCNKB2    | 14811.2 | 0.05 | protein_coding | 19 | 38810484  | 38819660  | potassium channel, subunit K, member 6                                                      |
| 12844 | ENSG00000134882  | UBAC2     | 14817   | 0.05 | protein_coding | 13 | 98653028  | 10003868  | UBA domain containing 2                                                                     |
| 12963 | ENSG00000048928  | FAM120A   | 14742.6 | 0.05 | protein_coding | 13 | 96214004  | 96017927  | family with sequence similarity 120A                                                        |
| 13221 | ENSG00000133193  | FAM104    | 14891.2 | 0.05 | protein_coding | 17 | 17120462  | 17123892  | family with sequence similarity 104, member A                                               |
| 13283 | ENSG00000128099  | UPY1      | 14859.9 | 0.05 | protein_coding | 13 | 38923999  | 38921140  | ubiquitin-like modifier 1                                                                   |
| 13338 | ENSG00000108115  | CYTH2     | 14891.2 | 0.05 | protein_coding | 12 | 18980893  | 18980893  | cytochrome P450, family 4, subfamily F, polypeptide 2                                       |
| 13375 | ENSG00000109133  | TMEM33    | 15005   | 0.05 | protein_coding | 4  | 41937137  | 41982289  | transmembrane protein 33                                                                    |
| 13588 | ENSG00000182010  | RTRN2     | 15142.2 | 0.05 | protein_coding | 10 | 63942794  | 64028466  | retinoid X receptor 2                                                                       |
| 13637 | ENSG00000198873  | PKNOX1    | 15199.9 | 0.05 | protein_coding | 13 | 120961711 | 121215137 | G protein coupled receptor kinase 5                                                         |
| 13761 | ENSG00000183023  | SLC8A1    | 15294.8 | 0.05 | protein_coding | 2  | 40234410  | 40238193  | solute carrier family 8 (sodium/calcium exchanger), member 1                                |
| 13812 | ENSG00000118704  | SLC35D1   | 15328.9 | 0.05 | protein_coding | 1  | 61460515  | 61709192  | solute carrier family 35 (UDP-GlcUDP-GalNAc transporter), member D1                         |
| 13833 | ENSG00000103785  | PAGE2     | 15324.3 | 0.05 | protein_coding | 15 | 120415569 | 120415569 | phosphotransferase 2, AMP-specific                                                          |
| 13855 | ENSG00000151846  | PABPC3    | 15365.3 | 0.05 | protein_coding | 10 | 29670300  | 29673789  | poly(A) binding protein, cytoplasmic 3                                                      |
| 13944 | ENSG00000160741  | CRTC2     | 15434.1 | 0.05 | protein_coding | 1  | 15369101  | 15369101  | CREB regulated transcription coactivator 2                                                  |
| 14008 | ENSG00000106165  | CEP350    | 15495.2 | 0.05 | protein_coding | 23 | 20819545  | 20819545  | microtubule interacting protein 3                                                           |
| 14030 | ENSG00000188178  | HEPACAM2  | 15495.2 | 0.05 | protein_coding | 7  | 92817899  | 92858337  | HEPACAM family member 2                                                                     |
| 14051 | ENSG00000168841  | CYP2C19   | 15541.6 | 0.05 | protein_coding | 10 | 96447911  | 96513014  | cytochrome P450, family 2, subfamily C, polypeptide 19                                      |
| 14104 | ENSG00000105110  | HIG1      | 15591.3 | 0.05 | protein_coding | 1  | 97132603  | 97132603  | heparanase 1                                                                                |
| 14127 | ENSG00000168971  | TRIM56    | 15548.8 | 0.05 | protein_coding | 7  | 100728720 | 100730517 | tripartite motif containing 56                                                              |
| 14128 | ENSG00000180574  | C12orf127 | 15590.7 | 0.05 | protein_coding | 12 | 10658201  | 106701734 | Putative eukaryotic translation initiation factor 2 subunit 3-like protein                  |
| 14203 | ENSG00000113301  | ARHGAP10  | 15699.9 | 0.05 | protein_coding | 10 | 89913998  | 89913998  | Rho GTPase activating protein 10                                                            |
| 14678 | ENSG00000119306  | RAB14     | 15869.4 | 0.05 | protein_coding | 9  | 123940415 | 123985292 | RAB14, member RAS oncogene family                                                           |
| 14744 | ENSG00000098654  | THUMP1    | 16038.9 | 0.05 | protein_coding | 16 | 20744986  | 20753406  | THUMP domain containing 1                                                                   |
| 14790 | ENSG00000117500  | TMEM23    | 16039.9 | 0.05 | protein_coding | 18 | 60719848  | 60813038  | transmembrane protein 23                                                                    |
| 14828 | ENSG00000154983  | TMEM55    | 16102.7 | 0.05 | protein_coding | 8  | 12524231  | 12538433  | transmembrane protein 55                                                                    |
| 14919 | ENSG00000121330  | AGO19     | 16178.1 | 0.05 | protein_coding | X  | 23720370  | 23784592  | argonaute 19                                                                                |
| 14963 | ENSG00000105028  | TMEM182   | 16218.9 | 0.05 | protein_coding | 11 | 11336786  | 11336786  | transmembrane protein 182                                                                   |
| 15003 | ENSG00000109961  | ATP2B1    | 16258.1 | 0.05 | protein_coding | 12 | 89981828  | 90103077  | ATPase, Ca++ transporting, plasma membrane 1                                                |
| 15028 | ENSG00000188045  | HNRNP1H   | 16321.2 | 0.05 | protein_coding | 5  | 179041179 | 179087710 | heterogeneous nuclear ribonucleoprotein H1 (H)                                              |
| 15079 | ENSG00000102980  | ADP-ATF1  | 16328   | 0.05 | protein_coding | 18 | 13685088  | 13685088  | ADP-transporter factor-like 5A                                                              |
| 15104 | ENSG00000122122  | TSPD      | 16330.6 | 0.05 | protein_coding | 6  | 41010253  | 41010253  | translocator protein 2                                                                      |
| 15141 | ENSG00000209839  | IFM1      | 16366.2 | 0.05 | protein_coding | 6  | 155578643 | 155629387 | transcription factor B1, mitochondrial                                                      |
| 15168 | ENSG00000185378  | TRF8B     | 16385.8 | 0.05 | protein_coding | 17 | 67068184  | 67068184  | helix repeat and BTB (POZ) domain containing 8                                              |
| 15229 | ENSG00000178971  | GALNT1    | 16431.7 | 0.05 | protein_coding | 17 | 6130191   | 6151382   | CTS16 domain containing complex component 1                                                 |
| 15238 | ENSG00000109588  | CANT17    | 16436.6 | 0.05 | protein_coding | 4  | 174089004 | 174245181 | UDP-N-acetyl-alpha-D-galactosamine polypeptide N-acetylglucosaminyltransferase 7 (GalNAcT7) |
| 15244 | ENSG00000213963  | AP1G2     | 16444.3 | 0.05 | protein_coding | 14 | 24028774  | 24037279  | adaptor-related protein complex 1, gamma 2 subunit                                          |
| 15346 | ENSG00000159958  | TNFRSF13C | 16508.3 | 0.05 | protein_coding | 22 | 42321045  | 42322822  | tumor necrosis factor receptor superfamily, member 13C                                      |
| 15448 | ENSG00000095574  | ZFP3      | 16586.8 | 0.05 | protein_coding | 10 | 124750262 | 124780133 | IKAROS family zinc finger 3 (Pegasus)                                                       |
| 15478 | ENSG00000109911  | PKNOX2    | 16592   | 0.05 | protein_coding | 7  | 151251810 | 151251810 | protein kinase, AMP-activated, gamma 2 non-catalytic subunit                                |
| 15510 | ENSG00000174236  | REP15     | 16628.7 | 0.05 | protein_coding | 12 | 27849428  | 27850566  | RAB15 effector protein                                                                      |
| 15515 | ENSG00000114405  | ATAD1     | 16636.1 | 0.05 | protein_coding | 13 | 188697897 | 18887016  | ATAD1, DNA, ATP-dependent                                                                   |
| 15531 | ENSG00000200705  | TATDN3    | 16632.9 | 0.05 | protein_coding | 2  | 21286170  | 21286998  | TAD DNA domain containing 3                                                                 |
| 15540 | ENSG00000104123  | UFPL1     | 16663.2 | 0.05 | protein_coding | 6  | 96969471  | 97003152  | UFM1-specific ligase 1                                                                      |
| 15546 | ENSG00000157500  | APPL1     | 16669.6 | 0.05 | protein_coding | 3  | 91261766  | 91261766  | adaptor protein, phosphotyrosine interaction, PH domain and leucine zipper containing 1     |
| 15569 | ENSG00000143438  | SK-CM49   | 16687.9 | 0.05 | protein_coding | 3  | 12037916  | 12037916  | soluble carrier family 6 (neutral amino acid transporter), member 19                        |
| 15582 | ENSG00000168214  | RPJ1      | 16688.9 | 0.05 | protein_coding | 4  | 26185077  | 26436541  | recombination signal binding protein for immunoglobulin kappa J region                      |
| 15775 | ENSG00000104081  | BMF       | 16836.5 | 0.05 | protein_coding | 10 | 40380891  | 40401083  | BCL2 modifying factor                                                                       |
| 15886 | ENSG00000110981  | PITRM1    | 16922.6 | 0.05 | protein_coding | 15 | 97259229  | 97259229  | phosphatidylinositol transfer protein, membrane-associated 1                                |
| 15889 | ENSG00000131873  | CHSY1     | 16943   | 0.05 | protein_coding | 15 |           |           |                                                                                             |

|       |                  |               |       |      |                |    |           |           |                                                                                  |
|-------|------------------|---------------|-------|------|----------------|----|-----------|-----------|----------------------------------------------------------------------------------|
| 1838  | ENSG00000148372  | TLK2          | 18754 | 0.05 | protein_coding | 17 | 60536079  | 60692842  | lousied-like kinase 2                                                            |
| 1840  | ENSG00000199661  | SCOR1L1       | 18759 | 0.05 | protein_coding | 10 | 52084623  | 52084623  | scorpion synthase 1                                                              |
| 1858  | ENSG00000137448  | TMPRSS34      | 18904 | 0.05 | protein_coding | 11 | 117947753 | 117992005 | transmembrane protease, serine 4                                                 |
| 18623 | ENSG00000179152  | TCAM1         | 18944 | 0.05 | protein_coding | 3  | 44379611  | 44450943  | T cell activation inhibitor, mitochondrial                                       |
| 1874  | ENSG00000194313  | TRIP11        | 18964 | 0.05 | protein_coding | 8  | 120743015 | 120845103 | TAZF RNA polymerase II, TATA box binding protein (TBP)-associated factor, 150kDa |
| 18824 | ENSG00000192692  | SYN1          | 19111 | 0.05 | protein_coding | 21 | 24037059  | 24103589  | synaptobrevin 1                                                                  |
| 18982 | ENSG00000104517  | UBR5          | 19254 | 0.05 | protein_coding | 8  | 10326240  | 103425069 | ubiquitin protein ligase E3 component n-recognin 5                               |
| 19031 | ENSG00000185463  | UBR3          | 19261 | 0.05 | protein_coding | 13 | 8651851   | 2952791   | ubiquitin-protein ligase E3 component n-recognin 3                               |
| 19071 | ENSG00000152495  | ZNF443        | 19268 | 0.05 | protein_coding | 11 | 9481866   | 9520371   | zinc finger protein 143                                                          |
| 19072 | ENSG00000168213  | FBLP1         | 19269 | 0.05 | protein_coding | 1  | 78469740  | 78444794  | far upstream element (FUSE) binding protein 1                                    |
| 19133 | ENSG00000186531  | TAF10         | 19269 | 0.05 | protein_coding | 11 | 6627529   | 6543388   | TAF10 RNA polymerase II, TATA box binding protein (TBP)-associated factor, 30kDa |
| 19134 | ENSG00000152495  | ASB3          | 19269 | 0.05 | protein_coding | 8  | 10068700  | 101263248 | activating transcription factor 1 complex subunit 3                              |
| 19234 | ENSG00000115986  | ATF2          | 19449 | 0.05 | protein_coding | 2  | 17598979  | 17603310  | activating transcription factor 2                                                |
| 19363 | ENSG000000305102 | MEDK1         | 19538 | 0.05 | protein_coding | 17 | 4171779   | 4173932   | mesenchymal homeobox 1                                                           |
| 19403 | ENSG00000107766  | ZNF83         | 19569 | 0.05 | protein_coding | 19 | 5206133   | 52103749  | zinc finger protein 83                                                           |
| 19525 | ENSG00000169829  | RDP5          | 19658 | 0.05 | protein_coding | 2  | 113172669 | 113120265 | RANBP2-like and GRP domain containing 8                                          |
| 19587 | ENSG00000039970  | TAF12         | 19705 | 0.05 | protein_coding | 6  | 4112824   | 4113026   | triggering receptor expressed on myeloid cells 2                                 |
| 19815 | ENSG00000183474  | GTF2H2C       | 19724 | 0.05 | protein_coding | 5  | 6881695   | 6892050   | general transcription factor IIH, polypeptide 2C                                 |
| 19823 | ENSG00000134452  | FBOX18        | 19730 | 0.05 | protein_coding | 10 | 5631535   | 5695566   | F-box protein, helicase, 18                                                      |
| 19826 | ENSG00000151233  | GXYLT1        | 19734 | 0.05 | protein_coding | 12 | 4247947   | 4253881   | glucosyl xylosyltransferase 1                                                    |
| 19827 | ENSG00000129492  | SGS1          | 19734 | 0.05 | protein_coding | 19 | 2022119   | 2022119   | serine acyl transferase 1                                                        |
| 19868 | ENSG00000094841  | UPRT          | 19766 | 0.05 | protein_coding | 20 | 7449320   | 7442435   | uracil phosphoribosyltransferase (FUR1) homolog (S. cerevisiae)                  |
| 19702 | ENSG00000025988  | ELMO2         | 19790 | 0.05 | protein_coding | 20 | 4499488   | 4506170   | engulfment and cell motility 2                                                   |
| 19706 | ENSG00000102400  | TRAPP2        | 19791 | 0.05 | protein_coding | 14 | 3961705   | 3961976   | trafficking protein particle complex 6B                                          |
| 19732 | ENSG00000140464  | RML           | 19821 | 0.05 | protein_coding | 15 | 7428704   | 7434015   | promyelocytic leukemia                                                           |
| 19735 | ENSG00000049818  | ARD1B         | 19837 | 0.05 | protein_coding | 6  | 15709963  | 15731913  | AT rich interactive domain 1B (SWI1-like)                                        |
| 19776 | ENSG00000109166  | CDC24         | 19848 | 0.05 | protein_coding | 11 | 11888652  | 11888651  | coiled-coil domain containing 84                                                 |
| 19846 | ENSG00000112031  | MTRF1L        | 19867 | 0.05 | protein_coding | 6  | 15338260  | 15332820  | mitochondrial transitional release factor 1-like                                 |
| 19884 | ENSG00000158076  | CDC27         | 19936 | 0.05 | protein_coding | 10 | 32852297  | 33171802  | Homo sapiens coiled-coil domain containing 7 (CDC27), transcript variant 5, mRNA |
| 19940 | ENSG00000186003  | NCR3          | 20018 | 0.05 | protein_coding | 8  | 8602608   | 8602608   | protein tyrosine kinase receptor type, II                                        |
| 19986 | ENSG00000137200  | CMTR1         | 20018 | 0.05 | protein_coding | 6  | 3740055   | 3745003   | cap methyltransferase 1                                                          |
| 20182 | ENSG00000130119  | GNL3L         | 20168 | 0.05 | protein_coding | X  | 5455864   | 5458780   | guanine nucleotide binding protein-like 3 (nucleolar) like                       |
| 20189 | ENSG00000102031  | TRAF1         | 20171 | 0.05 | protein_coding | 8  | 5668196   | 5671074   | protein tyrosine kinase receptor type, III                                       |
| 20228 | ENSG00000182903  | ZNF721        | 20208 | 0.05 | protein_coding | 4  | 419804    | 420245    | zinc finger protein 721                                                          |
| 20359 | ENSG00000166035  | LPC           | 20312 | 0.05 | protein_coding | 15 | 5870278   | 5881151   | lipase, hepatic                                                                  |
| 20378 | ENSG00000126524  | TBC1D20       | 20312 | 0.05 | protein_coding | 18 | 4832805   | 4832805   | TBC1 domain member 23                                                            |
| 20578 | ENSG00000114439  | BBX           | 20488 | 0.05 | protein_coding | 3  | 10724783  | 10730171  | bobby sox homolog (Drosophila)                                                   |
| 20636 | ENSG00000107807  | TLX1          | 20524 | 0.05 | protein_coding | 10 | 10289252  | 10289745  | T cell leukemia homeobox 1                                                       |
| 20659 | ENSG00000102919  | NOL10P17      | 20545 | 0.05 | protein_coding | 2  | 2348525   | 2348525   | NADH dehydrogenase (ubiquinone) complex I, assembly factor 7                     |
| 20721 | ENSG00000117020  | AKT3          | 20583 | 0.05 | protein_coding | 1  | 24365153  | 244014391 | v-akt murine thymoma viral oncogene homolog 3                                    |
| 20734 | ENSG00000158411  | PSMA8         | 20588 | 0.05 | protein_coding | 18 | 2371381   | 2377319   | proteasome (prosome, macropain) subunit, alpha type, 8                           |
| 20754 | ENSG00000109515  | MAP3K8        | 20593 | 0.05 | protein_coding | 18 | 7488106   | 7488106   | mitogen-activated protein kinase kinase kinase 8                                 |
| 20762 | ENSG00000113999  | MEF2B-N-MEF2B | 20621 | 0.05 | protein_coding | 19 | 19256377  | 19303400  | myocyte enhancer factor 2B                                                       |
| 20848 | ENSG00000169899  | C16orf40      | 20633 | 0.05 | protein_coding | 15 | 8367153   | 8388033   | chromosome 15 open reading frame 40                                              |
| 20859 | ENSG00000124370  | NCEB2         | 20633 | 0.05 | protein_coding | 12 | 1732684   | 17357269  | myelinophilin COA epimerase                                                      |
| 19879 | ENSG00000105162  | MPH3SP9       | 20703 | 0.05 | protein_coding | 6  | 1238368   | 12376891  | RNA-binding phosphoprotein 9                                                     |
| 20885 | ENSG00000232653  | GOLGA1N       | 20719 | 0.05 | protein_coding | 5  | 3288567   | 3289679   | golgin A1, member N                                                              |
| 20900 | ENSG00000186571  | PPF8          | 20720 | 0.05 | protein_coding | X  | 5489394   | 5502467   | 6-phosphotransferase 2-keloid-like phosphatase 1                                 |
| 20920 | ENSG00000153115  | LOC101931     | 20720 | 0.05 | protein_coding | 5  | 8141875   | 8145457   | RNA-binding protein                                                              |
| 20950 | ENSG00000172497  | LMG2          | 20757 | 0.05 | protein_coding | 5  | 8067524   | 8068998   | acyl-CoA thioesterase 12                                                         |
| 21052 | ENSG00000194191  | LMNB2         | 20826 | 0.05 | protein_coding | 3  | 3609914   | 3615203   | LMNB2 domain containing 2                                                        |
| 21077 | ENSG00000102249  | KLF1          | 20826 | 0.05 | protein_coding | 6  | 6212684   | 6213422   | kruppel-like factor 8                                                            |
| 21081 | ENSG00000102028  | GTPBP2        | 20854 | 0.05 | protein_coding | 22 | 3911728   | 3913430   | GTP binding protein 1                                                            |
| 21106 | ENSG00000184400  | CSP2          | 20871 | 0.05 | protein_coding | 5  | 13140843  | 13141189  | colony stimulating factor 2 (granulocyte-macrophage)                             |
| 21143 | ENSG00000195714  | KIF1C         | 20919 | 0.05 | protein_coding | 14 | 10460263  | 10461148  | kinesin chain 1                                                                  |
| 21270 | ENSG00000109888  | CLC7          | 21012 | 0.05 | protein_coding | 17 | 3259740   | 3259921   | chloride channel (Cl-) ligand 7                                                  |
| 21287 | ENSG00000098902  | CND14         | 21025 | 0.05 | protein_coding | 7  | 13504857  | 13519475  | CCRN1/NO1 transcription complex, subunit 4                                       |
| 21311 | ENSG00000105296  | ENP3          | 21045 | 0.05 | protein_coding | 7  | 13198462  | 13203363  | ectothymidine phosphatase/hydrolyase 3                                           |
| 21410 | ENSG00000184806  | LEAP2         | 21123 | 0.05 | protein_coding | 2  | 13228014  | 13221038  | liver expressed antimicrobial peptide 2                                          |
| 21440 | ENSG00000185492  | CDC141        | 21148 | 0.05 | protein_coding | 2  | 17984484  | 17984484  | coiled-coil domain containing 141                                                |
| 21478 | ENSG00000165328  | TRAF2         | 21152 | 0.05 | protein_coding | 20 | 2445206   | 2445206   | cytosolic ubiquitin 1 receptor                                                   |
| 21507 | ENSG00000171711  | DEFA4         | 21236 | 0.05 | protein_coding | 8  | 7752151   | 7752151   | defensin, beta 4A                                                                |
| 21577 | ENSG00000148495  | G-Mdr         | 21254 | 0.05 | protein_coding | 5  | 10353815  | 10440000  | membrane-associated myo finger (C-2HC)1, E3 ubiquitin protein ligase             |
| 21618 | ENSG00000189671  | EPN1          | 21263 | 0.05 | protein_coding | 16 | 3762387   | 3762387   | EPN2/TCF19-associated protein 1                                                  |
| 21705 | ENSG00000143443  | C1orf66       | 21267 | 0.05 | protein_coding | 1  | 15102462  | 15102462  | chromosome 1 open reading frame 56                                               |
| 21789 | ENSG00000105027  | YFEL1         | 21418 | 0.05 | protein_coding | 22 | 22071833  | 22090123  | yeast-like 1 (Drosophila)                                                        |
| 21791 | ENSG00000104343  | HDC11         | 21418 | 0.05 | protein_coding | 11 | 13074631  | 13077604  | chromosome 1 open reading frame 19                                               |
| 21805 | ENSG00000158510  | HDC12         | 21432 | 0.05 | protein_coding | 10 | 7098059   | 71027315  | hexadecanone domain containing 1                                                 |
| 21862 | ENSG00000187789  | AGER1         | 21470 | 0.05 | protein_coding | 19 | 6306153   | 6333640   | alkaline ceramidase 1                                                            |
| 21891 | ENSG00000102032  | TRAF6         | 21476 | 0.05 | protein_coding | 17 | 7334028   | 7334028   | transmembrane protein 102                                                        |
| 21912 | ENSG00000179981  | TSZ1          | 21513 | 0.05 | protein_coding | 18 | 7922270   | 7900185   | leishain zinc finger homeobox 1                                                  |
| 22009 | ENSG00000204020  | MTLHL1        | 21586 | 0.05 | protein_coding | 1  | 23716763  | 23716778  | metallothionein 1H like 1                                                        |
| 22044 | ENSG00000102120  | TKF1          | 21622 | 0.05 | protein_coding | 16 | 11468152  | 11468152  | TAF12/TCF19-associated protein 2                                                 |
| 22068 | ENSG00000124237  | C20orf5       | 21632 | 0.05 | protein_coding | 20 | 5675960   | 5673626   | chromosome 20 open reading frame 85                                              |
| 22087 | ENSG0000011132   | APBA3         | 21649 | 0.05 | protein_coding | 19 | 3788817   | 3791897   | amyloid beta (A4) precursor protein-binding, family A, member 3                  |
| 22103 | ENSG00000109838  | LOC101931     | 21658 | 0.05 | protein_coding | 10 | 7155808   | 7155808   | calcyclin (N-acetylcysteine-S-C)-sulfinyltransferase 4                           |
| 22113 | ENSG00000158454  | ZNF480        | 21693 | 0.05 | protein_coding | 19 | 5280430   | 5282571   | zinc finger protein 480                                                          |
| 22193 | ENSG00000134827  | PWIL4         | 21723 | 0.05 | protein_coding | 11 | 9427706   | 9435457   | pwl-like RNA-mediated gene silencing 4                                           |
| 22201 | ENSG00000105691  | RALBP1        | 21705 | 0.05 | protein_coding | 1  | 1360400   | 1360400   | RALBP1 associated F-Box domain containing 1                                      |
| 22226 | ENSG00000127481  | UBR4          | 21747 | 0.05 | protein_coding | 1  | 1940100   | 1936770   | ubiquitin protein ligase E3 component n-recognin 4                               |
| 22231 | ENSG00000217075  | LOC101931     | 21752 | 0.05 | protein_coding | 2  | 3675848   | 3677941   | Uncharacterized protein                                                          |
| 22334 | ENSG00000192925  | CHMP2B        | 21823 | 0.05 | protein_coding | 6  | 362824    | 362824    | chromosome 6 open reading frame 22                                               |
| 22384 | ENSG00000185155  | LYSDM1        | 21861 | 0.05 | protein_coding | 1  | 15113224  | 15113244  | LysM, putative peptidoglycan-binding, domain containing 1                        |
| 22387 | ENSG00000149742  | SLC22A9       | 21862 | 0.05 | protein_coding | 11 | 6317220   | 6317706   | solute carrier family 22 (organic anion transporter), member 9                   |
| 22391 | ENSG00000187691  | PLX1          | 21866 | 0.05 | protein_coding | 3  | 3804897   | 3813653   | phosphoinositide 3-kinase, delta 1                                               |
| 24340 | ENSG00000100946  | KX11          | 21873 | 0.05 | protein_coding | 17 | 9654916   | 9655284   | protein, krait 11                                                                |
| 24349 | ENSG00000153107  | ANAPC1        | 21900 | 0.05 | protein_coding | 2  | 11252348  | 11254227  | anaphase promoting complex subunit 1                                             |
| 24348 | ENSG00000176750  | STX17         | 21908 | 0.05 | protein_coding | 3  | 6371321   | 6371454   | syntaxin 19                                                                      |
| 2491  | ENSG00000102681  | JANMP1        | 21936 | 0.05 | protein_coding | 3  | 6027928   | 6028219   | janus kinase and non-receptor interacting protein 1                              |
| 2498  | ENSG00000186442  | KRT3          | 21941 | 0.05 | protein_coding | 12 | 5318349   | 5318991   | keratin 3                                                                        |
| 25254 | ENSG00000186255  | GPTA1         | 21959 | 0.05 | protein_coding | 17 | 275788    | 276152    | chaperin, beta A1                                                                |
| 24718 | ENSG00000102943  | SK-CAM1       | 22013 | 0.05 | protein_coding | 6  | 1598167   | 15981942  | solute carrier family 36 (protonic acid symporter), member 1                     |
| 25238 | ENSG00000179997  | DDI1          | 22057 | 0.05 | protein_coding | 11 | 10389738  | 10390922  | DNA-damage inducible 1 homolog 1 (S. cerevisiae)                                 |
| 25668 | ENSG00000091875  | ANGP12        | 22081 | 0.05 | protein_coding | 8  | 6307172   | 642090    | angiogenin 2                                                                     |
| 2791  | ENSG00000104687  | CR2B          | 22089 | 0.05 | protein_coding | 6  | 2762510   | 2762510   | olfactory receptor, family 2, subfamily B, member 6                              |
| 28287 | ENSG00000098701  | TXNDC18       | 22117 | 0.05 | protein_coding | 14 | 5289730   | 5291040   | transmembrane protein 18                                                         |





|       |                   |              |          |      |                                     |    |            |            |                                                                               |
|-------|-------------------|--------------|----------|------|-------------------------------------|----|------------|------------|-------------------------------------------------------------------------------|
| 27702 | ENSG00000200224   | EPH4B        | 26253.9  | 0.05 | protein_coding                      | 3  | 96513425   | 97471304   | EPH receptor A6                                                               |
| 27718 | ENSG00000211778   | C11orf84     | 29383.3  | 0.05 | protein_coding                      | 11 | 45926333   | 45926333   | chromosome 11 open reading frame 84                                           |
| 27841 | ENSG00000204396   | VWA7         | 26361.6  | 0.05 | protein_coding                      | 6  | 31733307   | 31745108   | von Willebrand factor A domain containing 7                                   |
| 27875 | ENSG00000204969   | PCDH2A2      | 26292.9  | 0.05 | protein_coding                      | 5  | 140174444  | 140391229  | protoderm alpha 2                                                             |
| 27888 | ENSG00000217088   | SPAG8        | 26440    | 0.05 | protein_coding                      | 9  | 58608042   | 59012269   | sperm associated antigen 8                                                    |
| 27972 | ENSG00000215201   | VHRT1        | 27459.6  | 0.05 | protein_coding                      | 19 | 71967454   | 71967454   | von Willebrand 1 receptor 1                                                   |
| 28079 | ENSG00000205034   | THPO         | 26588.8  | 0.05 | protein_coding                      | 3  | 184089723  | 184095932  | thrombopoietin                                                                |
| 28105 | ENSG00000197795   | ZNF70        | 26611.6  | 0.05 | protein_coding                      | 22 | 240843789  | 240852278  | zinc finger protein 70                                                        |
| 28111 | ENSG00000214483   | BBB1         | 26630.6  | 0.05 | protein_coding                      | 11 | 68273007   | 68291588   | Barker-Bird syndrome 1                                                        |
| 28135 | ENSG00000181328   | LRRRC56      | 26638.3  | 0.05 | protein_coding                      | 11 | 537527     | 554916     | leucine rich repeat containing 56                                             |
| 28189 | ENSG00000155404   | PLRKB4B      | 26666.2  | 0.05 | protein_coding                      | 5  | 1445373    | 14504065   | pleckstrin homology domain containing family C (with RhoGef domain) member 4B |
| 28194 | ENSG00000205884   | EPORNL       | 26698.2  | 0.05 | protein_coding                      | 12 | 132589859  | 132611929  | EPOR NL membrane like                                                         |
| 28208 | ENSG00000134245   | WNT2B        | 26709.7  | 0.05 | protein_coding                      | 1  | 113091863  | 113072787  | wingless-type MMTV integration site family, member 2B                         |
| 28227 | ENSG00000170100   | ZNF 778      | 26724    | 0.05 | protein_coding                      | 16 | 89284118   | 89295383   | zinc finger protein 778                                                       |
| 28228 | ENSG00000214986   | KANBL3       | 26726.6  | 0.05 | protein_coding                      | 2  | 97298907   | 97298504   | KAT5 regulatory NSL complex subunit 3                                         |
| 28346 | ENSG00000186364   | NUDT17       | 26832.2  | 0.05 | protein_coding                      | 1  | 145588115  | 145589344  | nucleoside diphosphate linked moiety X-type motif 17                          |
| 28351 | ENSG00000185309   | C2orf48      | 27012.8  | 0.05 | protein_coding                      | 2  | 10281509   | 10281581   | chromosome 2 open reading frame 48                                            |
| 28384 | ENSG00000210216   | C11orf87     | 27020    | 0.05 | protein_coding                      | 19 | 13991811   | 14017205   | chromosome 11 open reading frame 87                                           |
| 28572 | ENSG00000185379   | RAD51D       | 27039.6  | 0.05 | protein_coding                      | 17 | 33426811   | 33448541   | RAD51 paralogue D                                                             |
| 28686 | ENSG00000158458   | NRK2         | 27136.2  | 0.05 | protein_coding                      | 5  | 13622634   | 13642284   | neuregulin 2                                                                  |
| 28878 | ENSG00000203970   | ZNF343       | 27142    | 0.05 | protein_coding                      | 20 | 2460493    | 2500349    | zinc finger protein 343                                                       |
| 28900 | ENSG00000198150   | ZNF250       | 27163.3  | 0.05 | protein_coding                      | 8  | 146076632  | 146127553  | zinc finger protein 250                                                       |
| 28971 | ENSG00000178865   | ZNF713       | 27419.3  | 0.05 | protein_coding                      | 7  | 5995169    | 6000918    | zinc finger protein 713                                                       |
| 28978 | ENSG00000211697   | NHRNA        | 27424.3  | 0.05 | protein_coding                      | 1  | 5920271    | 605253     | neurohypophysin 4                                                             |
| 28986 | ENSG00000162836   | ACP6         | 27448.8  | 0.05 | protein_coding                      | 1  | 14710453   | 147142818  | acid phosphatase 6, lysosomal/histocytic                                      |
| 29014 | ENSG00000189758   | C15orf27     | 27459.6  | 0.05 | protein_coding                      | 15 | 76352178   | 76352178   | chromosome 15 open reading frame 27                                           |
| 29089 | ENSG00000211889   | ZKSCAN3      | 27531.9  | 0.05 | protein_coding                      | 2  | 132684466  | 132698008  | zinc finger, RAN-binding domain containing 3                                  |
| 29140 | ENSG00000186532   | SMYD4        | 27577    | 0.05 | protein_coding                      | 17 | 1882779    | 173326     | SET and MYND domain containing 4                                              |
| 29245 | ENSG00000191452   | DNK35        | 27854.2  | 0.05 | protein_coding                      | 20 | 37590942   | 37688386   | DEAH (Asp-Glu-Ala-His) box polypeptide 35                                     |
| 29443 | ENSG00000211785   | R13orf8      | 27859.3  | 0.05 | protein_coding                      | 12 | 10718663   | 10718663   | R13C3 guanine nucleotide-binding factor B                                     |
| 29817 | ENSG00000172273   | HNF3F        | 28195.5  | 0.05 | protein_coding                      | 11 | 118962207  | 119006752  | histone H4 transcription factor 11                                            |
| 19881 | ENSG00000202108   |              | 19003.9  | 0.05 | rRNA                                | 10 | 51739425   | 51739540   | rRNA, 5S ribosomal pseudogene 317                                             |
| 12964 | ENSG00000211688   |              | 23173.8  | 0.05 | rRNA                                | 15 | 5027468    | 50274758   | rRNA, 5S ribosomal pseudogene 304                                             |
| 29917 | ENSG000002020473  |              | 23173.8  | 0.05 | rRNA                                | X  | 69472892   | 69473012   | rRNA, 5S ribosomal pseudogene 507                                             |
| 24006 | ENSG000002071824  |              | 23150.4  | 0.05 | rRNA                                | 2  | 162286065  | 16229611   | 5S ribosomal RNA                                                              |
| 24241 | ENSG000002071824  |              | 23150.4  | 0.05 | rRNA                                | 13 | 1215189    | 1215189    | rRNA, 5S ribosomal pseudogene 466                                             |
| 24334 | ENSG00000212204   |              | 23423.8  | 0.05 | rRNA                                | 2  | 33510836   | 33510954   | rRNA, 5S ribosomal pseudogene 91                                              |
| 26603 | ENSG00000201728   |              | 25321    | 0.05 | rRNA                                | 20 | 23361533   | 23361649   | rRNA, 5S ribosomal pseudogene 479                                             |
| 27128 | ENSG00000173788   |              | 24945.2  | 0.05 | rRNA                                | 4  | 4096780    | 4096780    | rRNA, 5S ribosomal pseudogene 160                                             |
| 17264 | ENSG000002029152  |              | 17860.7  | 0.05 | sense_intronic                      | 11 | 111547406  | 111551519  | ANKRD10 intronic transcript 1 (non-protein coding)                            |
| 24578 | ENSG000002028666  |              | 23814.4  | 0.05 | sense_intronic                      | 5  | 178478715  | 178478984  | ZNF348 intronic transcript 1 (non-protein coding)                             |
| 10728 | ENSG00000205811   |              | 19941.4  | 0.05 | snRNA                               | 14 | 6598216    | 6598216    | Small nuclear RNA U13                                                         |
| 18732 | ENSG00000211012   | SNORA11B     | 19941.4  | 0.05 | snRNA                               | 14 | 91592789   | 91592887   | Small nuclear RNA, H/ACA box 11B                                              |
| 20133 | ENSG00000202800   |              | 20124.4  | 0.05 | snRNA                               | 14 | 63945990   | 63946131   | Small Cajal body specific RNA 20                                              |
| 22388 | ENSG00000201169   |              | 22851.6  | 0.05 | snRNA                               | 8  | 26876104   | 26876202   | Small nuclear RNA, SNORD62                                                    |
| 15137 | ENSG00000212187   |              | 23520.5  | 0.05 | snRNA                               | 2  | 212189953  | 212189953  | Small nuclear RNA, SNORD26                                                    |
| 24906 | ENSG00000198951   |              | 23620.5  | 0.05 | snRNA                               | 6  | 27983349   | 27983349   | Small nuclear RNA U13                                                         |
| 25060 | ENSG000002028787  |              | 24045.2  | 0.05 | snRNA                               | 2  | 38410307   | 38410307   | Small nuclear RNA, SNORD34                                                    |
| 48487 | ENSG00000201500   |              | 23540.0  | 0.05 | snRNA                               | 14 | 101463729  | 101463729  | Small nuclear RNA, SNORD113/SNORD114 family                                   |
| 19666 | ENSG00000201044   |              | 12121.3  | 0.05 | snRNA                               | 2  | 23161656   | 23161662   | rRNA, U6 small nuclear 26S, pseudogene                                        |
| 19872 | ENSG000002028995  | RNU6-2       | 15314.3  | 0.05 | snRNA                               | 2  | 175422698  | 175422699  | rRNA, U6 small nuclear 8, pseudogene                                          |
| 19872 | ENSG000002028995  | RNU6-2       | 15314.3  | 0.05 | snRNA                               | 16 | 2017146438 | 2017146444 | rRNA, U6 small nuclear 312, pseudogene                                        |
| 21495 | ENSG000002021939  |              | 21189    | 0.05 | snRNA                               | 2  | 43071581   | 43071687   | rRNA, U6 small nuclear 127B, pseudogene                                       |
| 22625 | ENSG00000199731   |              | 22047.2  | 0.05 | snRNA                               | 5  | 32234881   | 32234881   | rRNA, U6 small nuclear 107B, pseudogene                                       |
| 22686 | ENSG00000200981   |              | 22232.3  | 0.05 | snRNA                               | 22 | 41313747   | 41313859   | rRNA, U6 small nuclear 37A, pseudogene                                        |
| 23317 | ENSG000002022821  |              | 22953    | 0.05 | snRNA                               | 1  | 36868322   | 36868322   | rRNA, U6 small nuclear 27, pseudogene                                         |
| 23445 | ENSG000002028910  |              | 22862.7  | 0.05 | snRNA                               | 6  | 27865282   | 27865344   | rRNA, U6 small nuclear 26, pseudogene                                         |
| 24003 | ENSG00000202668   |              | 23129.2  | 0.05 | snRNA                               | 12 | 1131181872 | 1131181878 | rRNA, U6 small nuclear 103B, pseudogene                                       |
| 24190 | ENSG000002028406  |              | 2310.2   | 0.05 | snRNA                               | 9  | 131368195  | 131368236  | rRNA, U7 small nuclear 17, pseudogene                                         |
| 24272 | ENSG000002021431  |              | 23377.5  | 0.05 | snRNA                               | 8  | 111329473  | 111329579  | rRNA, U6 small nuclear 90B, pseudogene                                        |
| 24284 | ENSG000002021431  |              | 23377.5  | 0.05 | snRNA                               | 16 | 124354654  | 124354654  | rRNA, U6 small nuclear 94A, pseudogene                                        |
| 24584 | ENSG000002022177  |              | 23620.1  | 0.05 | snRNA                               | 16 | 68383290   | 68383432   | rRNA, U6 small nuclear 30, pseudogene                                         |
| 24849 | ENSG000002027955  |              | 23870.2  | 0.05 | snRNA                               | 8  | 99001084   | 99001190   | rRNA, U6 small nuclear 30, pseudogene                                         |
| 24919 | ENSG00000202926   |              | 23922.3  | 0.05 | snRNA                               | 16 | 6901711    | 6901711    | rRNA, U6 small nuclear 21B, pseudogene                                        |
| 24933 | ENSG000002028122  |              | 23844.7  | 0.05 | snRNA                               | 3  | 195655460  | 195655466  | rRNA, U2 small nuclear 11, pseudogene                                         |
| 24993 | ENSG000002021179  |              | 23985.2  | 0.05 | snRNA                               | 6  | 151260328  | 151260348  | rRNA, U6 small nuclear 302, pseudogene                                        |
| 25003 | ENSG00000202624   |              | 24474.64 | 0.05 | snRNA                               | 14 | 7244764    | 72447670   | rRNA, U6 small nuclear 69B, pseudogene                                        |
| 25043 | ENSG000002021868  |              | 24018.9  | 0.05 | snRNA                               | 16 | 72855832   | 72855891   | rRNA, U7 small nuclear 17, pseudogene                                         |
| 25196 | ENSG00000202839   |              | 24115.0  | 0.05 | snRNA                               | 14 | 73713526   | 73713588   | rRNA, U6 small nuclear 41B, pseudogene                                        |
| 25424 | ENSG000002021414  |              | 24327.7  | 0.05 | snRNA                               | 12 | 15588742   | 15588747   | rRNA, U6 small nuclear 18, pseudogene                                         |
| 25544 | ENSG00000202967   |              | 24428.8  | 0.05 | snRNA                               | 1  | 229670811  | 229670836  | rRNA, U6 small nuclear 21, pseudogene                                         |
| 25544 | ENSG00000202763   |              | 24430    | 0.05 | snRNA                               | 3  | 158526205  | 158526359  | rRNA, U2 small nuclear 31, pseudogene                                         |
| 25604 | ENSG00000203313   |              | 24878.3  | 0.05 | snRNA                               | 4  | 40821329   | 40821329   | rRNA, U6 small nuclear 51B, pseudogene                                        |
| 25728 | ENSG000002028887  |              | 24578.4  | 0.05 | snRNA                               | 1  | 22449392   | 22449395   | rRNA, U6 small nuclear 100B, pseudogene                                       |
| 25962 | ENSG00000198790   |              | 24789.7  | 0.05 | snRNA                               | 4  | 41088624   | 41088730   | rRNA, U6 small nuclear 83B, pseudogene                                        |
| 26040 | ENSG000002030078  |              | 24868.7  | 0.05 | snRNA                               | 16 | 58650847   | 58650887   | rRNA, U6 small nuclear 80, pseudogene                                         |
| 26178 | ENSG000002020495  |              | 24347.9  | 0.05 | snRNA                               | 1  | 24620989   | 24620994   | rRNA, U6 small nuclear 120B, pseudogene                                       |
| 26384 | ENSG000002021883  |              | 25113.1  | 0.05 | snRNA                               | 20 | 25591789   | 25591859   | rRNA, U6 small nuclear 62, pseudogene                                         |
| 26483 | ENSG000002020239  |              | 24962.6  | 0.05 | snRNA                               | 13 | 5607329    | 5607330    | rRNA, U6 small nuclear 62, pseudogene                                         |
| 26741 | ENSG000002030224  |              | 25436.9  | 0.05 | snRNA                               | 6  | 56810528   | 56810535   | rRNA, U6 small nuclear 62B, pseudogene                                        |
| 26783 | ENSG000002025024  |              | 25456.5  | 0.05 | snRNA                               | 11 | 67162891   | 67162892   | rRNA, U6 small nuclear 123B, pseudogene                                       |
| 26865 | ENSG00000214571   |              | 26015.6  | 0.05 | snRNA                               | 22 | 4207538    | 4207538    | rRNA, U6 small nuclear 47B, pseudogene                                        |
| 27196 | ENSG000002025700  |              | 25841.1  | 0.05 | snRNA                               | 3  | 33455642   | 33455703   | rRNA, U7 small nuclear 110, pseudogene                                        |
| 27252 | ENSG000002025322  |              | 25831.3  | 0.05 | snRNA                               | 1  | 6600914    | 6601024    | rRNA, U6 small nuclear 731, pseudogene                                        |
| 27528 | ENSG000002021136  |              | 26100.9  | 0.05 | snRNA                               | 15 | 43994561   | 43994668   | rRNA, U6 small nuclear 353, pseudogene                                        |
| 13793 | ENSG000002041015  | TPM3P9       | 15317.4  | 0.05 | transcribed_unprocessed_pseudo_gene | 19 | 53935237   | 53947923   | topomycin 3 pseudogene 9                                                      |
| 24136 | ENSG000002026937  |              | 23258.7  | 0.05 | transcribed_unprocessed_pseudo_gene | 10 | 45487870   | 45487869   | centrosomal protein 16kDa pseudogene 1                                        |
| 25141 | ENSG000002027802  | LOC100289922 | 24097.3  | 0.05 | transcribed_unprocessed_pseudo_gene | 2  | 234651396  | 234650661  | DnaJ (Hsp40) homolog, subfamily B, member 3                                   |
| 25183 | ENSG000002041129  |              | 24142.4  | 0.05 | transcribed_unprocessed_pseudo_gene | 12 | 125420001  | 125420441  | ribosomal protein L22 pseudogene 19                                           |
| 12710 | ENSG00000106133   | NSUN5P1      | 14334.8  | 0.05 | transcribed_unprocessed_pseudo_gene | 7  | 72418120   | 72425329   | NOP2/Sm domain family, member 5 pseudogene 2                                  |
| 17114 | ENSG0000020237854 |              | 17858.6  | 0.05 | transcribed_unprocessed_pseudo_gene | 17 | 68008040   | 68111659   | long interspersed non-protein coding RNA 874                                  |
| 20033 | ENSG000002028695  | CES1P1       | 20047.2  | 0.05 | transcribed_unprocessed_pseudo_gene | 16 | 55794460   | 5582070    | carboxylesterase 1 pseudogene 1                                               |
| 23225 | ENSG00000128438   |              | 22331.8  | 0.05 | transcribed_unprocessed_pseudo_gene | 17 | 18622629   | 18638153   | TBC1 domain family, member 27                                                 |
| 23292 | ENSG000002025042  |              | 22573.9  | 0.05 | transcribed_unprocessed_pseudo_gene | 17 | 28956698   | 28964482   | leucine rich repeat containing 37B pseudogene 1                               |
| 23994 | ENSG000002089118  |              | 22888.1  | 0.05 | transcribed_unprocessed_pseudo_gene |    |            |            |                                                                               |

|       |                  |        |         |      |          |           |           |                                                      |
|-------|------------------|--------|---------|------|----------|-----------|-----------|------------------------------------------------------|
| 16210 | ENSG00000204802  |        | 16415.9 | 0.05 |          |           |           |                                                      |
| 15341 | ENSG00000211188  |        | 16530.9 | 0.05 |          |           |           |                                                      |
| 15796 | ENSG00000249741  |        | 16859   | 0.05 |          |           |           |                                                      |
| 16103 | ENSG00000273179  |        | 17111.2 | 0.05 |          |           |           |                                                      |
| 16216 | ENSG00000202071  |        | 17187.9 | 0.05 |          |           |           |                                                      |
| 17136 | ENSG00000239738  |        | 17372.7 | 0.05 |          |           |           |                                                      |
| 17141 | ENSG00000260114  |        | 17890.8 | 0.05 |          |           |           |                                                      |
| 17703 | ENSG00000230842  |        | 18383.6 | 0.05 |          |           |           |                                                      |
| 17810 | ENSG00000203963  |        | 18390.4 | 0.05 |          |           |           |                                                      |
| 18056 | ENSG00000252792  | 14     | 18540.3 | 0.05 | 68212084 | 68212191  |           | Small nuclear RNA U3                                 |
| 18246 | ENSG00000245601  |        | 18663.5 | 0.05 |          |           |           |                                                      |
| 18416 | ENSG00000245862  |        | 18914.5 | 0.05 |          |           |           |                                                      |
| 18521 | ENSG00000244417  |        | 18889.3 | 0.05 |          |           |           |                                                      |
| 18507 | ENSG00000233598  |        | 18933.5 | 0.05 |          |           |           |                                                      |
| 18703 | ENSG00000201581  |        | 19016.2 | 0.05 |          |           |           |                                                      |
| 18785 | ENSG00000256464  |        | 19081.6 | 0.05 |          |           |           |                                                      |
| 18906 | ENSG00000227311  |        | 19184   | 0.05 |          |           |           |                                                      |
| 19006 | ENSG00000271993  |        | 19271.5 | 0.05 |          |           |           |                                                      |
| 19248 | ENSG00000227403  |        | 19453   | 0.05 |          |           |           |                                                      |
| 19406 | ENSG00000270790  |        | 19670.3 | 0.05 |          |           |           |                                                      |
| 19816 | ENSG00000232108  |        | 19892.3 | 0.05 |          |           |           |                                                      |
| 19841 | ENSG00000208746  |        | 19905.7 | 0.05 |          |           |           |                                                      |
| 19865 | ENSG00000229452  |        | 19920.4 | 0.05 |          |           |           |                                                      |
| 19985 | ENSG00000237811  |        | 20016.2 | 0.05 |          |           |           |                                                      |
| 20079 | ENSG00000273156  |        | 20087.3 | 0.05 |          |           |           |                                                      |
| 20396 | ENSG00000272599  |        | 20319.2 | 0.05 |          |           |           |                                                      |
| 20374 | ENSG00000230470  |        | 20331.6 | 0.05 |          |           |           |                                                      |
| 20516 | ENSG00000287192  |        | 20433.4 | 0.05 |          |           |           |                                                      |
| 20537 | ENSG00000242737  |        | 20451.6 | 0.05 |          |           |           |                                                      |
| 20554 | ENSG00000237602  |        | 20499.9 | 0.05 |          |           |           |                                                      |
| 20609 | ENSG00000223561  |        | 20504.3 | 0.05 |          |           |           |                                                      |
| 20786 | ENSG00000272955  |        | 20636.7 | 0.05 |          |           |           |                                                      |
| 20968 | ENSG00000202658  |        | 20728.9 | 0.05 |          |           |           |                                                      |
| 21174 | ENSG00000179031  |        | 20932.4 | 0.05 |          |           |           |                                                      |
| 21308 | ENSG00000259342  |        | 21039.6 | 0.05 |          |           |           |                                                      |
| 21380 | ENSG00000237693  |        | 21054.3 | 0.05 |          |           |           |                                                      |
| 21544 | ENSG00000270992  |        | 21224.1 | 0.05 |          |           |           |                                                      |
| 21634 | ENSG00000260401  |        | 21297.9 | 0.05 |          |           |           |                                                      |
| 21648 | ENSG00000231159  |        | 21303.8 | 0.05 |          |           |           |                                                      |
| 21641 | ENSG00000268563  |        | 21303.8 | 0.05 |          |           |           |                                                      |
| 21656 | ENSG00000253189  |        | 21318   | 0.05 |          |           |           |                                                      |
| 21709 | ENSG00000230223  |        | 21388.6 | 0.05 |          |           |           |                                                      |
| 21733 | ENSG00000255364  |        | 21382.7 | 0.05 |          |           |           |                                                      |
| 21742 | ENSG00000227492  |        | 21390.2 | 0.05 |          |           |           |                                                      |
| 21775 | ENSG00000200590  |        | 21411.2 | 0.05 |          |           |           |                                                      |
| 21819 | ENSG00000255541  |        | 21436.4 | 0.05 |          |           |           |                                                      |
| 21891 | ENSG00000248208  |        | 21500.9 | 0.05 |          |           |           |                                                      |
| 21961 | ENSG00000240594  |        | 21548.8 | 0.05 |          |           |           |                                                      |
| 22028 | ENSG00000249942  |        | 21603   | 0.05 |          |           |           |                                                      |
| 22050 | ENSG00000264112  |        | 21618.1 | 0.05 |          |           |           |                                                      |
| 22079 | ENSG00000209789  |        | 21641   | 0.05 |          |           |           |                                                      |
| 22094 | ENSG00000270564  |        | 21651.6 | 0.05 |          |           |           |                                                      |
| 22155 | ENSG00000260766  |        | 21695.6 | 0.05 |          |           |           |                                                      |
| 22242 | ENSG00000263448  |        | 21781.6 | 0.05 | 17       | 18508309  | 18508669  | RNA, 75L, cytoplasmic 639, pseudogene                |
| 22256 | ENSG00000233969  |        | 21796.7 | 0.05 |          |           |           |                                                      |
| 22276 | ENSG00000224385  |        | 21778.1 | 0.05 |          |           |           |                                                      |
| 22277 | ENSG00000272341  |        | 21779.7 | 0.05 |          |           |           |                                                      |
| 22284 | ENSG00000230288  |        | 21734.6 | 0.05 |          |           |           |                                                      |
| 22322 | ENSG00000272110  | 3      | 21838.3 | 0.05 | 47542573 | 47542672  |           | Y RNA                                                |
| 22361 | ENSG00000231363  |        | 21847.6 | 0.05 |          |           |           |                                                      |
| 22389 | ENSG00000231832  |        | 21863.5 | 0.05 |          |           |           |                                                      |
| 22532 | ENSG00000237400  |        | 21967.4 | 0.05 |          |           |           |                                                      |
| 22546 | ENSG00000250540  |        | 21982.1 | 0.05 |          |           |           |                                                      |
| 22629 | ENSG00000260588  |        | 22048.5 | 0.05 |          |           |           |                                                      |
| 22691 | ENSG00000225255  |        | 22099.4 | 0.05 |          |           |           |                                                      |
| 22702 | ENSG00000215972  |        | 22109   | 0.05 |          |           |           |                                                      |
| 22715 | ENSG00000230819  |        | 22118.5 | 0.05 |          |           |           |                                                      |
| 22720 | ENSG00000224308  |        | 22128.9 | 0.05 |          |           |           |                                                      |
| 22727 | ENSG00000253415  |        | 22133.5 | 0.05 |          |           |           |                                                      |
| 22770 | ENSG00000217895  |        | 22158   | 0.05 |          |           |           |                                                      |
| 22806 | ENSG00000273064  |        | 22191.3 | 0.05 |          |           |           |                                                      |
| 22862 | ENSG00000248999  |        | 22231.1 | 0.05 |          |           |           |                                                      |
| 22867 | ENSG00000241168  |        | 22236.2 | 0.05 |          |           |           |                                                      |
| 22889 | ENSG00000183473  | SSTR3  | 22256   | 0.05 | 22       | 37600278  | 37608362  | somatostatin receptor 3                              |
| 22906 | ENSG000002687461 |        | 22271.5 | 0.05 |          |           |           |                                                      |
| 22911 | ENSG00000230281  |        | 22277.1 | 0.05 |          |           |           |                                                      |
| 22945 | ENSG00000287385  |        | 22302.5 | 0.05 |          |           |           |                                                      |
| 22962 | ENSG00000263986  |        | 22321.2 | 0.05 |          |           |           |                                                      |
| 22995 | ENSG00000232028  |        | 22354.5 | 0.05 |          |           |           |                                                      |
| 23027 | ENSG00000281763  |        | 22377.3 | 0.05 |          |           |           |                                                      |
| 23032 | ENSG00000232463  |        | 22380.2 | 0.05 |          |           |           |                                                      |
| 23034 | ENSG00000206289  |        | 22391   | 0.05 |          |           |           |                                                      |
| 23038 | ENSG00000231128  |        | 22382   | 0.05 |          |           |           |                                                      |
| 23046 | ENSG00000216184  |        | 22389.4 | 0.05 |          |           |           |                                                      |
| 23047 | ENSG00000270449  |        | 22389.8 | 0.05 |          |           |           |                                                      |
| 23068 | ENSG00000245471  |        | 22427   | 0.05 |          |           |           |                                                      |
| 23195 | ENSG00000225062  |        | 22504.6 | 0.05 |          |           |           |                                                      |
| 23296 | ENSG00000254418  |        | 22554.4 | 0.05 |          |           |           |                                                      |
| 23284 | ENSG00000230181  |        | 22556.8 | 0.05 |          |           |           |                                                      |
| 23282 | ENSG00000272462  |        | 22563.6 | 0.05 |          |           |           |                                                      |
| 23297 | ENSG00000268517  |        | 22579.4 | 0.05 |          |           |           |                                                      |
| 23334 | ENSG00000260941  |        | 22609.2 | 0.05 |          |           |           |                                                      |
| 23342 | ENSG00000268601  |        | 22621.6 | 0.05 |          |           |           |                                                      |
| 23347 | ENSG00000230486  |        | 22626.6 | 0.05 |          |           |           |                                                      |
| 23371 | ENSG00000262426  |        | 22634.7 | 0.05 | X        | 50108408  | 50213737  | diacylglycerol kinase, kappa                         |
| 23377 | ENSG000002051891 |        | 22649.7 | 0.05 |          |           |           |                                                      |
| 23391 | ENSG00000238796  |        | 22656   | 0.05 |          |           |           |                                                      |
| 24002 | ENSG00000230769  |        | 22664   | 0.05 | 2        | 54066882  | 54066966  | Small nuclear RNA U13                                |
| 24113 | ENSG00000242103  |        | 22671.6 | 0.05 |          |           |           |                                                      |
| 24446 | ENSG00000249795  |        | 22693.3 | 0.05 |          |           |           |                                                      |
| 24497 | ENSG00000249746  |        | 22698.3 | 0.05 |          |           |           |                                                      |
| 24864 | ENSG00000228952  |        | 22703.6 | 0.05 |          |           |           |                                                      |
| 24891 | ENSG00000265490  |        | 22722.4 | 0.05 |          |           |           |                                                      |
| 25021 | ENSG00000230508  |        | 22745   | 0.05 |          |           |           |                                                      |
| 25359 | ENSG00000235997  |        | 22751.3 | 0.05 |          |           |           |                                                      |
| 25447 | ENSG00000231795  |        | 22759.2 | 0.05 |          |           |           |                                                      |
| 25469 | ENSG00000230960  |        | 22793.7 | 0.05 |          |           |           |                                                      |
| 25555 | ENSG00000232433  |        | 22767.4 | 0.05 |          |           |           |                                                      |
| 25608 | ENSG00000264396  |        | 22811.5 | 0.05 |          |           |           |                                                      |
| 25609 | ENSG00000264585  |        | 22811.9 | 0.05 |          |           |           |                                                      |
| 25627 | ENSG00000225431  |        | 22824.8 | 0.05 |          |           |           |                                                      |
| 25646 | ENSG00000188424  |        | 22846.9 | 0.05 |          |           |           |                                                      |
| 25650 | ENSG00000225175  |        | 22847.6 | 0.05 |          |           |           |                                                      |
| 25658 | ENSG00000237936  |        | 22856.6 | 0.05 |          |           |           |                                                      |
| 25673 | ENSG00000205209  |        | 22871.1 | 0.05 | 14       | 101463960 | 101464061 | Small nuclear RNA SNORD112                           |
| 25685 | ENSG00000175523  |        | 22883.3 | 0.05 |          |           |           |                                                      |
| 25703 | ENSG00000250892  |        | 22892.4 | 0.05 |          |           |           |                                                      |
| 25710 | ENSG00000229512  |        | 22896.6 | 0.05 |          |           |           |                                                      |
| 25719 | ENSG00000234163  |        | 22905.7 | 0.05 |          |           |           |                                                      |
| 25733 | ENSG00000264608  |        | 22912.8 | 0.05 |          |           |           |                                                      |
| 25743 | ENSG00000196750  |        | 22923.4 | 0.05 | 9        | 42858072  | 42876505  | aquaporin 7 pseudogene 3                             |
| 25751 | ENSG00000255449  |        | 22929.9 | 0.05 |          |           |           |                                                      |
| 25771 | ENSG00000260988  |        | 22949.5 | 0.05 |          |           |           |                                                      |
| 25778 | ENSG00000236737  |        | 22955.3 | 0.05 |          |           |           |                                                      |
| 25783 | ENSG00000202029  |        | 22960.9 | 0.05 |          |           |           |                                                      |
| 25825 | ENSG00000272920  |        | 22985.4 | 0.05 |          |           |           |                                                      |
| 25812 | ENSG00000270305  |        | 22991.2 | 0.05 |          |           |           |                                                      |
| 25815 | ENSG00000176447  |        | 22992.6 | 0.05 |          |           |           |                                                      |
| 25823 | ENSG00000268691  |        | 22997.6 | 0.05 |          |           |           |                                                      |
| 25861 | ENSG00000231207  |        | 23028.1 | 0.05 |          |           |           |                                                      |
| 25892 | ENSG00000268938  |        | 23028.2 | 0.05 |          |           |           |                                                      |
| 25864 | ENSG00000230365  |        | 23030.9 | 0.05 |          |           |           |                                                      |
| 25865 | ENSG00000268704  |        | 23031.7 | 0.05 |          |           |           |                                                      |
| 25896 | ENSG00000231536  |        | 23051.3 | 0.05 |          |           |           |                                                      |
| 25904 | ENSG00000230365  |        | 23053.6 | 0.05 |          |           |           |                                                      |
| 25935 | ENSG000002681257 |        | 23091.8 | 0.05 |          |           |           |                                                      |
| 25939 | ENSG00000244846  |        | 23093.7 | 0.05 |          |           |           |                                                      |
| 25962 | ENSG00000265439  | FGD5P1 | 23138.5 | 0.05 | 3        | 13974553  | 13978977  | FYVE, RhoGEF and PH domain containing 5 pseudogene 1 |
| 25993 | ENSG00000248916  |        | 23138.6 | 0.05 |          |           |           |                                                      |
| 25996 | ENSG00000253963  |        | 23141.9 | 0.05 |          |           |           |                                                      |
| 24008 | ENSG00000225129  |        | 23153.9 | 0.05 |          |           |           |                                                      |
| 24013 | ENSG00000237807  |        | 23160.6 | 0.05 |          |           |           |                                                      |
| 24015 | ENSG00000238942  |        | 23161.2 | 0.05 |          |           |           |                                                      |
| 24024 | ENSG00000211128  |        | 23166.3 | 0.05 |          |           |           |                                                      |
| 24077 | ENSG00000223676  |        | 23203.2 | 0.05 |          |           |           |                                                      |
| 24086 | ENSG00000213519  |        | 23213.3 | 0.05 |          |           |           |                                                      |
| 24102 | ENSG00000210311  |        | 23228   | 0.05 |          |           |           |                                                      |
| 24120 | ENSG00000258005  |        | 23245.1 | 0.05 |          |           |           |                                                      |
| 24123 | ENSG00000272180  |        | 23246.5 | 0.05 |          |           |           |                                                      |
| 24153 | ENSG00000221118  |        | 23271.4 | 0.05 |          |           |           |                                                      |
| 24154 | ENSG00000234061  |        | 23271.6 | 0.05 |          |           |           |                                                      |

|       |                 |              |         |      |    |           |           |  |                                                |
|-------|-----------------|--------------|---------|------|----|-----------|-----------|--|------------------------------------------------|
| 24163 | ENSG00000206454 |              | 23279.9 | 0.05 |    |           |           |  |                                                |
| 24168 | ENSG00000207103 |              | 23287.8 | 0.05 |    |           |           |  |                                                |
| 24169 | ENSG00000203845 |              | 23288.4 | 0.05 |    |           |           |  |                                                |
| 24189 | ENSG00000206038 |              | 23307.1 | 0.05 | 1  | 226491963 | 226492094 |  | Small nuclear RNA U13                          |
| 24200 | ENSG00000204921 |              | 23316.6 | 0.05 |    |           |           |  |                                                |
| 24203 | ENSG00000203718 |              | 23320.8 | 0.05 |    |           |           |  |                                                |
| 24209 | ENSG00000206652 |              | 23328.8 | 0.05 |    |           |           |  |                                                |
| 24213 | ENSG00000204427 |              | 23333.3 | 0.05 |    |           |           |  |                                                |
| 24214 | ENSG00000204427 |              | 23338.8 | 0.05 |    |           |           |  |                                                |
| 24223 | ENSG00000207423 |              | 23344.5 | 0.05 |    |           |           |  |                                                |
| 24225 | ENSG00000207189 |              | 23345.5 | 0.05 |    |           |           |  |                                                |
| 24231 | ENSG00000204940 |              | 23347.8 | 0.05 |    |           |           |  |                                                |
| 24232 | ENSG00000205620 |              | 23347.8 | 0.05 |    |           |           |  |                                                |
| 24245 | ENSG00000208041 |              | 23359.8 | 0.05 |    |           |           |  |                                                |
| 24259 | ENSG00000202129 | TBC1D3B      | 23369.2 | 0.05 | 17 | 34493061  | 34503996  |  | TBC1 domain family, member 3B                  |
| 24264 | ENSG00000203025 |              | 23372.7 | 0.05 |    |           |           |  |                                                |
| 24276 | ENSG00000205842 |              | 23379.8 | 0.05 |    |           |           |  |                                                |
| 24294 | ENSG00000205358 |              | 23392.7 | 0.05 |    |           |           |  |                                                |
| 24295 | ENSG00000205759 |              | 23392.9 | 0.05 |    |           |           |  |                                                |
| 24309 | ENSG00000203378 |              | 23402.3 | 0.05 |    |           |           |  |                                                |
| 24311 | ENSG00000200135 |              | 23404.5 | 0.05 | 7  | 72312017  | 72312305  |  | RNA 7SL, cytoplasmic t25, pseudogene           |
| 24327 | ENSG00000203513 |              | 23417.4 | 0.05 |    |           |           |  |                                                |
| 24328 | ENSG00000207185 |              | 23417.4 | 0.05 |    |           |           |  |                                                |
| 24321 | ENSG00000202026 |              | 23420.5 | 0.05 |    |           |           |  |                                                |
| 24373 | ENSG00000201548 |              | 23467.8 | 0.05 |    |           |           |  |                                                |
| 24378 | ENSG00000204830 |              | 23473.5 | 0.05 |    |           |           |  |                                                |
| 24385 | ENSG00000205970 |              | 23474.8 | 0.05 |    |           |           |  |                                                |
| 24388 | ENSG00000205092 |              | 23477.7 | 0.05 |    |           |           |  |                                                |
| 24389 | ENSG00000205475 |              | 23477.9 | 0.05 |    |           |           |  |                                                |
| 24392 | ENSG00000204685 |              | 23482.3 | 0.05 |    |           |           |  |                                                |
| 24395 | ENSG00000205381 |              | 23483.8 | 0.05 |    |           |           |  |                                                |
| 24396 | ENSG00000207104 |              | 23484.5 | 0.05 |    |           |           |  |                                                |
| 24404 | ENSG00000203333 |              | 23493.4 | 0.05 |    |           |           |  |                                                |
| 24428 | ENSG00000204859 |              | 23505.2 | 0.05 |    |           |           |  |                                                |
| 24435 | ENSG00000205828 |              | 23511.7 | 0.05 |    |           |           |  |                                                |
| 24437 | ENSG00000207038 |              | 23527.5 | 0.05 |    |           |           |  |                                                |
| 24486 | ENSG00000204867 |              | 23549.3 | 0.05 |    |           |           |  |                                                |
| 24496 | ENSG00000206435 |              | 23560.2 | 0.05 |    |           |           |  |                                                |
| 24497 | ENSG00000205053 |              | 23560.8 | 0.05 |    |           |           |  |                                                |
| 24502 | ENSG00000202729 |              | 23563.8 | 0.05 |    |           |           |  |                                                |
| 24523 | ENSG00000207185 |              | 23575.4 | 0.05 |    |           |           |  |                                                |
| 24524 | ENSG00000204472 |              | 23575.7 | 0.05 |    |           |           |  |                                                |
| 24533 | ENSG00000203355 |              | 23578.9 | 0.05 |    |           |           |  |                                                |
| 24540 | ENSG00000206041 |              | 23582.6 | 0.05 |    |           |           |  |                                                |
| 24541 | ENSG00000205441 |              | 23582.7 | 0.05 |    |           |           |  |                                                |
| 24544 | ENSG00000205504 |              | 23583.5 | 0.05 |    |           |           |  |                                                |
| 24550 | ENSG00000204371 |              | 23592.7 | 0.05 |    |           |           |  |                                                |
| 24552 | ENSG00000204459 |              | 23596.0 | 0.05 |    |           |           |  |                                                |
| 24556 | ENSG00000204105 |              | 23599.8 | 0.05 |    |           |           |  |                                                |
| 24559 | ENSG00000205094 |              | 23602.8 | 0.05 |    |           |           |  |                                                |
| 24561 | ENSG00000207137 |              | 23608.3 | 0.05 |    |           |           |  |                                                |
| 24571 | ENSG00000202323 |              | 23610.0 | 0.05 |    |           |           |  |                                                |
| 24582 | ENSG00000206882 |              | 23618.2 | 0.05 | 2  | 172560844 | 17256714  |  | Uncharacterized protein                        |
| 24602 | ENSG00000205071 |              | 23635.9 | 0.05 |    |           |           |  |                                                |
| 24607 | ENSG00000205025 |              | 23644.6 | 0.05 |    |           |           |  |                                                |
| 24616 | ENSG00000205263 |              | 23652.5 | 0.05 |    |           |           |  |                                                |
| 24626 | ENSG00000205984 |              | 23663.9 | 0.05 |    |           |           |  |                                                |
| 24633 | ENSG00000205948 | LOC101929469 | 23672.1 | 0.05 | 12 | 2958397   | 2966213   |  | Uncharacterized protein ENSP00000372125        |
| 24651 | ENSG00000205288 |              | 23685.8 | 0.05 |    |           |           |  |                                                |
| 24655 | ENSG00000205182 |              | 23690.0 | 0.05 |    |           |           |  |                                                |
| 24681 | ENSG00000204193 |              | 23713.7 | 0.05 |    |           |           |  |                                                |
| 24684 | ENSG00000206092 |              | 23716.6 | 0.05 |    |           |           |  |                                                |
| 24688 | ENSG00000207143 |              | 23718.3 | 0.05 |    |           |           |  |                                                |
| 24693 | ENSG00000203743 |              | 23726.5 | 0.05 |    |           |           |  |                                                |
| 24735 | ENSG00000204840 |              | 23761.7 | 0.05 |    |           |           |  |                                                |
| 24736 | ENSG00000205733 |              | 23764.1 | 0.05 |    |           |           |  |                                                |
| 24760 | ENSG00000203442 |              | 23773.9 | 0.05 |    |           |           |  |                                                |
| 24757 | ENSG00000207291 |              | 23780.1 | 0.05 |    |           |           |  |                                                |
| 24758 | ENSG00000205397 |              | 23780.9 | 0.05 |    |           |           |  |                                                |
| 24763 | ENSG00000203358 |              | 23785.9 | 0.05 |    |           |           |  |                                                |
| 24760 | ENSG00000203381 |              | 23805.8 | 0.05 |    |           |           |  |                                                |
| 24794 | ENSG00000204377 |              | 23816.6 | 0.05 |    |           |           |  |                                                |
| 24814 | ENSG00000204008 |              | 23839.2 | 0.05 | 9  | 34018258  | 34018319  |  | RNA, U7 small nuclear 36 pseudogene            |
| 24869 | ENSG00000204700 |              | 23863.7 | 0.05 |    |           |           |  |                                                |
| 24877 | ENSG00000205768 |              | 23893.7 | 0.05 |    |           |           |  |                                                |
| 24888 | ENSG00000204957 |              | 23902.1 | 0.05 |    |           |           |  |                                                |
| 24897 | ENSG00000207021 |              | 23908.0 | 0.05 |    |           |           |  |                                                |
| 24923 | ENSG00000204571 |              | 23938.8 | 0.05 |    |           |           |  |                                                |
| 24934 | ENSG00000203377 |              | 23945.3 | 0.05 |    |           |           |  |                                                |
| 24940 | ENSG00000202975 |              | 23947.7 | 0.05 |    |           |           |  |                                                |
| 24942 | ENSG00000204838 |              | 23948.3 | 0.05 |    |           |           |  |                                                |
| 24952 | ENSG00000203309 |              | 23954.0 | 0.05 |    |           |           |  |                                                |
| 24970 | ENSG00000206012 |              | 23965.4 | 0.05 |    |           |           |  |                                                |
| 24971 | ENSG00000205988 |              | 23965.5 | 0.05 |    |           |           |  |                                                |
| 24991 | ENSG00000205298 |              | 23982.5 | 0.05 |    |           |           |  |                                                |
| 24992 | ENSG00000204943 |              | 23984.9 | 0.05 |    |           |           |  |                                                |
| 24995 | ENSG00000206753 |              | 23988.0 | 0.05 |    |           |           |  |                                                |
| 24997 | ENSG00000206960 |              | 23988.6 | 0.05 |    |           |           |  |                                                |
| 25004 | ENSG00000203834 |              | 23995.2 | 0.05 | 16 | 47154830  | 47154932  |  | Small nuclear RNA U13                          |
| 25021 | ENSG00000204910 |              | 24006.7 | 0.05 |    |           |           |  |                                                |
| 25026 | ENSG00000204911 |              | 24010.0 | 0.05 |    |           |           |  |                                                |
| 25035 | ENSG00000205692 |              | 24015.6 | 0.05 |    |           |           |  |                                                |
| 25040 | ENSG00000208188 |              | 24017.6 | 0.05 |    |           |           |  |                                                |
| 25052 | ENSG00000205968 |              | 24025.5 | 0.05 |    |           |           |  |                                                |
| 25067 | ENSG00000202124 |              | 24036.1 | 0.05 |    |           |           |  |                                                |
| 25069 | ENSG00000205784 |              | 24037.4 | 0.05 |    |           |           |  |                                                |
| 25078 | ENSG00000204151 |              | 24040.6 | 0.05 |    |           |           |  |                                                |
| 25077 | ENSG00000205781 |              | 24040.8 | 0.05 |    |           |           |  |                                                |
| 25080 | ENSG00000204479 |              | 24043.8 | 0.05 |    |           |           |  |                                                |
| 25108 | ENSG00000205043 |              | 24066.0 | 0.05 |    |           |           |  |                                                |
| 25114 | ENSG00000202546 |              | 24077.1 | 0.05 |    |           |           |  |                                                |
| 25128 | ENSG00000204233 |              | 24086.2 | 0.05 |    |           |           |  |                                                |
| 25138 | ENSG00000205025 |              | 24095.0 | 0.05 |    |           |           |  |                                                |
| 25150 | ENSG00000202395 |              | 24106.3 | 0.05 |    |           |           |  |                                                |
| 25151 | ENSG00000205378 |              | 24107.5 | 0.05 |    |           |           |  |                                                |
| 25168 | ENSG00000206162 |              | 24118.6 | 0.05 | 12 | 57360745  | 57361335  |  | HbcAg-binding protein; Uncharacterized protein |
| 25162 | ENSG00000207046 |              | 24122.5 | 0.05 |    |           |           |  |                                                |
| 25164 | ENSG00000205785 |              | 24123.2 | 0.05 |    |           |           |  |                                                |
| 25169 | ENSG00000205846 |              | 24126.1 | 0.05 |    |           |           |  |                                                |
| 25167 | ENSG00000202810 |              | 24147.0 | 0.05 |    |           |           |  |                                                |
| 25188 | ENSG00000202205 |              | 24148.4 | 0.05 |    |           |           |  |                                                |
| 25198 | ENSG00000202452 |              | 24148.5 | 0.05 |    |           |           |  |                                                |
| 25192 | ENSG00000202833 |              | 24148.9 | 0.05 |    |           |           |  |                                                |
| 25213 | ENSG00000206249 |              | 24163.6 | 0.05 |    |           |           |  |                                                |
| 25228 | ENSG00000203458 |              | 24174.8 | 0.05 |    |           |           |  |                                                |
| 25231 | ENSG00000201580 |              | 24177.2 | 0.05 |    |           |           |  |                                                |
| 25246 | ENSG00000203109 |              | 24185.1 | 0.05 |    |           |           |  |                                                |
| 25257 | ENSG00000203663 |              | 24195.8 | 0.05 |    |           |           |  |                                                |
| 25266 | ENSG00000204598 |              | 24205.7 | 0.05 |    |           |           |  |                                                |
| 25271 | ENSG00000202987 |              | 24208.4 | 0.05 |    |           |           |  |                                                |
| 25278 | ENSG00000205022 |              | 24213.3 | 0.05 |    |           |           |  |                                                |
| 25278 | ENSG00000205794 |              | 24214.7 | 0.05 |    |           |           |  |                                                |
| 25280 | ENSG00000202118 |              | 24216.4 | 0.05 |    |           |           |  |                                                |
| 25281 | ENSG00000204198 |              | 24217.0 | 0.05 |    |           |           |  |                                                |
| 25297 | ENSG00000205303 |              | 24232.4 | 0.05 |    |           |           |  |                                                |
| 25301 | ENSG00000202877 |              | 24235.4 | 0.05 |    |           |           |  |                                                |
| 25300 | ENSG00000201375 |              | 24235.9 | 0.05 |    |           |           |  |                                                |
| 25300 | ENSG00000203766 |              | 24236.0 | 0.05 |    |           |           |  |                                                |
| 25308 | ENSG00000203564 |              | 24238.4 | 0.05 |    |           |           |  |                                                |
| 25306 | ENSG00000204631 |              | 24239.1 | 0.05 |    |           |           |  |                                                |
| 25300 | ENSG00000204848 |              | 24250.9 | 0.05 |    |           |           |  |                                                |
| 25340 | ENSG00000203438 |              | 24271.9 | 0.05 |    |           |           |  |                                                |
| 25341 | ENSG00000206366 |              | 24272.0 | 0.05 |    |           |           |  |                                                |
| 25366 | ENSG00000203887 |              | 24285.6 | 0.05 | 22 | 41310883  | 41310986  |  | Small nuclear RNA U13                          |
| 25375 | ENSG00000202136 |              | 24302.7 | 0.05 |    |           |           |  |                                                |
| 25379 | ENSG00000203205 |              | 24305.8 | 0.05 |    |           |           |  |                                                |
| 25384 | ENSG00000202610 |              | 24307.7 | 0.05 |    |           |           |  |                                                |
| 25399 | ENSG00000201584 |              | 24324.6 | 0.05 |    |           |           |  |                                                |
| 25419 | ENSG00000203490 |              | 24342.5 | 0.05 |    |           |           |  |                                                |
| 25438 | ENSG00000205359 |              | 24352.3 | 0.05 |    |           |           |  |                                                |
| 25440 | ENSG00000202580 |              | 24354.0 | 0.05 |    |           |           |  |                                                |
| 25441 | ENSG00000202895 |              | 24354.2 | 0.05 |    |           |           |  |                                                |
| 25444 | ENSG00000202747 |              | 24357.4 | 0.05 |    |           |           |  |                                                |
| 25465 | ENSG00000206801 |              | 24374.0 | 0.05 |    |           |           |  |                                                |
| 25479 | ENSG00000205457 |              | 24388.7 | 0.05 |    |           |           |  |                                                |
| 25487 | ENSG00000203208 |              | 24392.7 | 0.05 |    |           |           |  |                                                |
| 25493 | ENSG00000202235 |              | 24398.0 | 0.05 |    |           |           |  |                                                |
| 25497 | ENSG00000204320 |              | 24399.9 | 0.05 |    |           |           |  |                                                |
| 25504 | ENSG00000204179 |              | 24404.8 | 0.05 |    |           |           |  |                                                |
| 25509 | ENSG00000202201 |              | 24408.0 | 0.05 | 13 | 103472343 | 103472419 |  | RNA, Rb-associated Y3 pseudogene 8             |

|       |                 |         |      |    |           |           |                                                                                             |
|-------|-----------------|---------|------|----|-----------|-----------|---------------------------------------------------------------------------------------------|
| 2624  | ENSG00000233081 | 24420.8 | 0.05 |    |           |           |                                                                                             |
| 2625  | ENSG00000233079 | 24427.3 | 0.05 |    |           |           |                                                                                             |
| 2650  | ENSG00000231971 | 24427.9 | 0.05 |    |           |           |                                                                                             |
| 2656  | ENSG00000255317 | 24435.2 | 0.05 |    |           |           |                                                                                             |
| 2656  | ENSG00000233090 | 24438.8 | 0.05 |    |           |           |                                                                                             |
| 2658  | ENSG00000233081 | 24449.8 | 0.05 |    |           |           |                                                                                             |
| 2659  | ENSG00000251995 | 24465.8 | 0.05 | 11 | 57278032  | 57278117  | Y RNA                                                                                       |
| 2659  | ENSG00000266525 | 24466   | 0.05 |    |           |           |                                                                                             |
| 2659  | ENSG00000198203 | 24473   | 0.05 |    |           |           |                                                                                             |
| 2660  | ENSG00000171658 | 24477.7 | 0.05 |    |           |           |                                                                                             |
| 2666  | ENSG00000269721 | 24482.6 | 0.05 |    |           |           |                                                                                             |
| 2668  | ENSG00000232725 | 24494.7 | 0.05 |    |           |           |                                                                                             |
| 2667  | ENSG00000253330 | 24502.5 | 0.05 |    |           |           |                                                                                             |
| 2636  | ENSG00000244593 | 24507.5 | 0.05 |    |           |           |                                                                                             |
| 2643  | ENSG00000224705 | 24512.8 | 0.05 |    |           |           |                                                                                             |
| 2667  | ENSG00000237158 | 24526.1 | 0.05 |    |           |           |                                                                                             |
| 2666  | ENSG00000244510 | 24526.9 | 0.05 |    |           |           |                                                                                             |
| 2668  | ENSG00000229263 | 24535.5 | 0.05 |    |           |           |                                                                                             |
| 2670  | ENSG00000229751 | 24535.7 | 0.05 |    |           |           |                                                                                             |
| 2685  | ENSG00000244475 | 24550.2 | 0.05 |    |           |           |                                                                                             |
| 2696  | ENSG00000232978 | 24551.6 | 0.05 |    |           |           |                                                                                             |
| 2684  | ENSG00000224238 | 24554.8 | 0.05 |    |           |           |                                                                                             |
| 2697  | ENSG00000235024 | 24556.7 | 0.05 |    |           |           |                                                                                             |
| 2700  | ENSG00000245498 | 24561   | 0.05 |    |           |           |                                                                                             |
| 2705  | ENSG00000232172 | 24562.8 | 0.05 |    |           |           |                                                                                             |
| 2710  | ENSG00000255824 | 24567.2 | 0.05 |    |           |           |                                                                                             |
| 2715  | ENSG00000232424 | 24570.4 | 0.05 |    |           |           |                                                                                             |
| 2718  | ENSG00000236930 | 24573.6 | 0.05 |    |           |           |                                                                                             |
| 2748  | ENSG00000269878 | 24596.4 | 0.05 |    |           |           |                                                                                             |
| 2762  | ENSG00000248868 | 24599   | 0.05 |    |           |           |                                                                                             |
| 2763  | ENSG00000248758 | 24609.3 | 0.05 | 7  | 100060452 | 100060725 | RNA_TSL_cytosolic161_pseudogene                                                             |
| 2771  | ENSG00000234193 | 24614.6 | 0.05 |    |           |           |                                                                                             |
| 2786  | ENSG00000232078 | 24619.3 | 0.05 |    |           |           |                                                                                             |
| 2786  | ENSG00000250229 | 24630.5 | 0.05 |    |           |           |                                                                                             |
| 2786  | ENSG00000174572 | 24630.9 | 0.05 |    |           |           |                                                                                             |
| 2786  | ENSG00000235378 | 24637.8 | 0.05 |    |           |           |                                                                                             |
| 2806  | ENSG00000269375 | 24647.1 | 0.05 | 14 | 10139265  | 101360646 | Esophagus cancer-related gene 2 interaction susceptibility protein. Uncharacterized protein |
| 2818  | ENSG00000223718 | 24658.3 | 0.05 |    |           |           |                                                                                             |
| 2822  | ENSG00000230921 | 24659.8 | 0.05 |    |           |           |                                                                                             |
| 2824  | ENSG00000273368 | 24662.4 | 0.05 |    |           |           |                                                                                             |
| 2829  | ENSG00000227718 | 24669.1 | 0.05 |    |           |           |                                                                                             |
| 2834  | ENSG00000245498 | 24673.9 | 0.05 |    |           |           |                                                                                             |
| 2843  | ENSG00000231424 | 24684   | 0.05 |    |           |           |                                                                                             |
| 2863  | ENSG00000230986 | 24692.5 | 0.05 |    |           |           |                                                                                             |
| 2886  | ENSG00000271050 | 24694.1 | 0.05 |    |           |           |                                                                                             |
| 2867  | ENSG00000231751 | 24694.1 | 0.05 |    |           |           |                                                                                             |
| 2869  | ENSG00000281186 | 24694.9 | 0.05 |    |           |           |                                                                                             |
| 2872  | ENSG00000273306 | 24698.7 | 0.05 |    |           |           |                                                                                             |
| 2874  | ENSG00000269916 | 24699.6 | 0.05 |    |           |           |                                                                                             |
| 2878  | ENSG00000258432 | 24702.7 | 0.05 |    |           |           |                                                                                             |
| 2886  | ENSG00000268472 | 24709.1 | 0.05 |    |           |           |                                                                                             |
| 2886  | ENSG00000214112 | 24716   | 0.05 |    |           |           |                                                                                             |
| 2896  | ENSG00000255886 | 24720.1 | 0.05 |    |           |           |                                                                                             |
| 2898  | ENSG00000244913 | 24723.2 | 0.05 |    |           |           |                                                                                             |
| 2908  | ENSG00000214550 | 24730   | 0.05 |    |           |           |                                                                                             |
| 2920  | ENSG00000287243 | 24740.4 | 0.05 |    |           |           |                                                                                             |
| 2934  | ENSG00000215464 | 24745.2 | 0.05 |    |           |           |                                                                                             |
| 2964  | ENSG00000257578 | 24760.4 | 0.05 |    |           |           |                                                                                             |
| 2966  | ENSG00000237260 | 24770.9 | 0.05 |    |           |           |                                                                                             |
| 2980  | ENSG00000257880 | 24782.9 | 0.05 |    |           |           |                                                                                             |
| 2981  | ENSG00000221331 | 24783.1 | 0.05 |    |           |           |                                                                                             |
| 2991  | ENSG00000268885 | 24791.1 | 0.05 | 5  | 667759    | 668839    | Uncharacterized protein                                                                     |
| 2996  | ENSG00000251513 | 24798.6 | 0.05 |    |           |           |                                                                                             |
| 2916  | ENSG00000254406 | 24811.8 | 0.05 |    |           |           |                                                                                             |
| 2626  | ENSG00000268119 | 24824.8 | 0.05 |    |           |           |                                                                                             |
| 2634  | ENSG00000230227 | 24831.2 | 0.05 |    |           |           |                                                                                             |
| 2637  | ENSG00000269697 | 24832.2 | 0.05 |    |           |           |                                                                                             |
| 2638  | ENSG00000238319 | 24834.6 | 0.05 | 4  | 184195614 | 184195717 | Small nuclear RNA U13                                                                       |
| 2639  | ENSG00000246528 | 24835.6 | 0.05 |    |           |           |                                                                                             |
| 2644  | ENSG00000234322 | 24844.4 | 0.05 |    |           |           |                                                                                             |
| 2659  | ENSG00000240393 | 24851.1 | 0.05 |    |           |           |                                                                                             |
| 2672  | ENSG00000226276 | 24861.8 | 0.05 |    |           |           |                                                                                             |
| 2675  | ENSG00000251818 | 24863.3 | 0.05 |    |           |           |                                                                                             |
| 2683  | ENSG00000257989 | 24869.9 | 0.05 |    |           |           |                                                                                             |
| 2685  | ENSG00000224331 | 24871.4 | 0.05 |    |           |           |                                                                                             |
| 2695  | ENSG00000232525 | 24880.1 | 0.05 |    |           |           |                                                                                             |
| 2610  | ENSG00000256905 | 24886.3 | 0.05 |    |           |           |                                                                                             |
| 2610  | ENSG00000253357 | 24887.6 | 0.05 |    |           |           |                                                                                             |
| 2610  | ENSG00000231933 | 24888.5 | 0.05 |    |           |           |                                                                                             |
| 2619  | ENSG00000270904 | 24900.2 | 0.05 |    |           |           |                                                                                             |
| 2615  | ENSG00000259203 | 24920.6 | 0.05 |    |           |           |                                                                                             |
| 2613  | ENSG00000237031 | 24925.4 | 0.05 |    |           |           |                                                                                             |
| 2613  | ENSG00000264523 | 24938.9 | 0.05 |    |           |           |                                                                                             |
| 2617  | ENSG00000281185 | 24941.3 | 0.05 |    |           |           |                                                                                             |
| 2618  | ENSG00000226953 | 24941.3 | 0.05 |    |           |           |                                                                                             |
| 2619  | ENSG00000219966 | 24943.8 | 0.05 |    |           |           |                                                                                             |
| 2618  | ENSG00000238107 | 24944   | 0.05 |    |           |           |                                                                                             |
| 2619  | ENSG00000235195 | 24957   | 0.05 |    |           |           |                                                                                             |
| 2618  | ENSG00000264596 | 24968.4 | 0.05 |    |           |           |                                                                                             |
| 2619  | ENSG00000273981 | 24969.1 | 0.05 |    |           |           |                                                                                             |
| 2626  | ENSG00000268513 | 24975.9 | 0.05 |    |           |           |                                                                                             |
| 2626  | ENSG00000262268 | 24979.9 | 0.05 | 15 | 56247899  | 56248002  | Small nuclear RNA U13                                                                       |
| 26219 | ENSG00000242190 | 24988.5 | 0.05 |    |           |           |                                                                                             |
| 26221 | ENSG00000287416 | 24989.1 | 0.05 |    |           |           |                                                                                             |
| 26231 | ENSG00000259756 | 24994.7 | 0.05 |    |           |           |                                                                                             |
| 26248 | ENSG00000271265 | 25001.9 | 0.05 |    |           |           |                                                                                             |
| 26271 | ENSG00000233383 | 25018   | 0.05 |    |           |           |                                                                                             |
| 26272 | ENSG00000225195 | 25018.4 | 0.05 | 5  | 122846130 | 122846231 | Y RNA                                                                                       |
| 26278 | ENSG00000272574 | 25026.9 | 0.05 |    |           |           |                                                                                             |
| 26284 | ENSG00000244837 | 25034.1 | 0.05 |    |           |           |                                                                                             |
| 26291 | ENSG00000232963 | 25044.9 | 0.05 |    |           |           |                                                                                             |
| 26305 | ENSG00000270781 | 25057.7 | 0.05 |    |           |           |                                                                                             |
| 26306 | ENSG00000258933 | 25060.6 | 0.05 |    |           |           |                                                                                             |
| 26322 | ENSG0000027132  | 25079.5 | 0.05 |    |           |           |                                                                                             |
| 26331 | ENSG00000270326 | 25088.4 | 0.05 |    |           |           |                                                                                             |
| 26332 | ENSG00000235319 | 25089.5 | 0.05 |    |           |           |                                                                                             |
| 26337 | ENSG00000258443 | 25092.5 | 0.05 |    |           |           |                                                                                             |
| 26342 | ENSG00000271959 | 25096.9 | 0.05 |    |           |           |                                                                                             |
| 26349 | ENSG00000240063 | 25100.5 | 0.05 |    |           |           |                                                                                             |
| 26352 | ENSG00000251952 | 25104.9 | 0.05 |    |           |           |                                                                                             |
| 26354 | ENSG00000287289 | 25107.4 | 0.05 |    |           |           |                                                                                             |
| 26363 | ENSG00000242082 | 25112.7 | 0.05 |    |           |           |                                                                                             |
| 26369 | ENSG00000287426 | 25114.4 | 0.05 |    |           |           |                                                                                             |
| 26383 | ENSG00000236153 | 25124.6 | 0.05 |    |           |           |                                                                                             |
| 26396 | ENSG00000232905 | 25138.2 | 0.05 |    |           |           |                                                                                             |
| 26403 | ENSG00000231573 | 25140.8 | 0.05 |    |           |           |                                                                                             |
| 26404 | ENSG00000177452 | 25142.3 | 0.05 |    |           |           |                                                                                             |
| 26414 | ENSG00000254290 | 25149.3 | 0.05 |    |           |           |                                                                                             |
| 26423 | ENSG00000258983 | 25154.1 | 0.05 |    |           |           |                                                                                             |
| 26440 | ENSG00000260368 | 25179.2 | 0.05 |    |           |           |                                                                                             |
| 26442 | ENSG00000248245 | 25182.7 | 0.05 |    |           |           |                                                                                             |
| 26444 | ENSG00000233353 | 25185.2 | 0.05 |    |           |           |                                                                                             |
| 26449 | ENSG00000226940 | 25190.2 | 0.05 |    |           |           |                                                                                             |
| 26451 | ENSG00000204117 | 25193.2 | 0.05 |    |           |           |                                                                                             |
| 26455 | ENSG00000264599 | 25197.4 | 0.05 |    |           |           |                                                                                             |
| 26466 | ENSG00000232962 | 25206.4 | 0.05 |    |           |           |                                                                                             |
| 26473 | ENSG00000272796 | 25212   | 0.05 |    |           |           |                                                                                             |
| 26485 | ENSG00000176972 | 25223.7 | 0.05 |    |           |           |                                                                                             |
| 26491 | ENSG00000269191 | 25227.5 | 0.05 |    |           |           |                                                                                             |
| 26495 | ENSG00000266411 | 25231.7 | 0.05 |    |           |           |                                                                                             |
| 26507 | ENSG00000193200 | 25244.5 | 0.05 |    |           |           |                                                                                             |
| 26512 | ENSG00000225962 | 25249.9 | 0.05 |    |           |           |                                                                                             |
| 26528 | ENSG00000269099 | 25262.5 | 0.05 | 11 | 61735453  | 61736755  | Uncharacterized protein: cDNA FLJ36460 fs, clone THVMJ2014801                               |
| 26536 | ENSG00000235297 | 25269.9 | 0.05 |    |           |           |                                                                                             |
| 26543 | ENSG00000260370 | 25274.1 | 0.05 |    |           |           |                                                                                             |
| 26547 | ENSG00000258413 | 25274.7 | 0.05 |    |           |           |                                                                                             |
| 26549 | ENSG00000272516 | 25275.4 | 0.05 |    |           |           |                                                                                             |
| 26578 | ENSG00000235160 | 25300.8 | 0.05 |    |           |           |                                                                                             |
| 26584 | ENSG00000251672 | 25308.7 | 0.05 |    |           |           |                                                                                             |
| 26591 | ENSG00000268184 | 25312.5 | 0.05 |    |           |           |                                                                                             |
| 26601 | ENSG00000234917 | 25320.5 | 0.05 |    |           |           |                                                                                             |
| 26610 | ENSG00000226797 | 25327.4 | 0.05 |    |           |           |                                                                                             |
| 26611 | ENSG00000226310 | 25328.4 | 0.05 |    |           |           |                                                                                             |
| 26624 | ENSG00000224835 | 25342   | 0.05 |    |           |           |                                                                                             |
| 26634 | ENSG00000258503 | 25348.3 | 0.05 |    |           |           |                                                                                             |
| 26652 | ENSG00000257121 | 25351.1 | 0.05 |    |           |           |                                                                                             |
| 26655 | ENSG00000232638 | 25364.4 | 0.05 |    |           |           |                                                                                             |
| 26659 | ENSG00000232833 | 25367.1 | 0.05 | 9  | 67784944  | 67786624  | family with sequence similarity 27, member E3                                               |
| 26661 | ENSG00000244795 | 25367.8 | 0.05 |    |           |           |                                                                                             |
| 26671 | ENSG00000232914 | 25375.8 | 0.05 |    |           |           |                                                                                             |
| 26673 | ENSG00000236352 | 25376.7 | 0.05 |    |           |           |                                                                                             |





|       |                 |            |         |      |                 |    |           |           |                                                               |
|-------|-----------------|------------|---------|------|-----------------|----|-----------|-----------|---------------------------------------------------------------|
| 3638  | ENSG00000211976 |            | 5554.2  | 0.04 | IG_V_gene       | 14 | 107210952 | 107211471 | immunoglobulin heavy variable 3-73                            |
| 3653  | ENSG00000213444 |            | 811734  | 0.04 | IG_V_gene       | 2  | 8013350   | 8013350   | immunoglobulin kappa variable 1D-16                           |
| 3661  | ENSG00000223350 |            | 5733.8  | 0.04 | IG_V_gene       | 22 | 2295739   | 2295804   | immunoglobulin lambda variable 9-49                           |
| 3660  | ENSG00000225698 |            | 6783.8  | 0.04 | IG_V_gene       | 14 | 10718932  | 10719471  | immunoglobulin heavy variable 3-72                            |
| 3748  | ENSG00000211632 |            | 6075.9  | 0.04 | IG_V_gene       | 2  | 59211643  | 59212263  | immunoglobulin kappa variable 3D-11                           |
| 3800  | ENSG00000211653 |            | 6020.7  | 0.04 | IG_V_gene       | 22 | 2278296   | 2278362   | immunoglobulin lambda variable 1-36                           |
| 4291  | ENSG00000223855 |            | 6669.8  | 0.04 | IG_V_gene       | 2  | 89265781  | 89266296  | immunoglobulin kappa variable 1-6                             |
| 4481  | ENSG00000211648 |            | 7192.2  | 0.04 | IG_V_gene       | 22 | 22712287  | 22712907  | immunoglobulin lambda variable 1-47                           |
| 4870  | ENSG00000211985 |            | 7379.4  | 0.04 | IG_V_gene       | 14 | 10701837  | 10702376  | immunoglobulin heavy variable 3-49                            |
| 4871  | ENSG00000211964 |            | 7486.1  | 0.04 | IG_V_gene       | 14 | 10698314  | 10698853  | immunoglobulin heavy variable 3-48                            |
| 5421  | ENSG00000225921 | LOC642131  | 8159.8  | 0.04 | IG_V_gene       | 15 | 22412916  | 22413533  | immunoglobulin heavy variable 4CR15 (non-functional)          |
| 5670  | ENSG00000211981 |            | 8484.9  | 0.04 | IG_V_gene       | 14 | 10698314  | 10698853  | immunoglobulin heavy variable 3-41                            |
| 6432  | ENSG00000240984 |            | 9226.4  | 0.04 | IG_V_gene       | 2  | 89399352  | 89399864  | immunoglobulin kappa variable 1-16                            |
| 6538  | ENSG00000243228 |            | 9338.1  | 0.04 | IG_V_gene       | 2  | 89544264  | 89545079  | immunoglobulin kappa variable 2-30                            |
| 20477 | ENSG00000225383 |            | 21516.3 | 0.04 | IG_V_pseudogene | 14 | 106633711 | 106639091 | immunoglobulin heavy variable 3-19 (pseudogene)               |
| 22045 | ENSG00000230476 |            | 21813.2 | 0.04 | lncRNA          | 3  | 188659204 | 188665504 | TPRG1 antisense RNA 1                                         |
| 22136 | ENSG00000225760 |            | 21876.7 | 0.04 | lncRNA          | 13 | 111635654 | 111642911 | long intergenic non-protein coding RNA 431                    |
| 24248 | ENSG00000214533 | LINC00158  | 21933.7 | 0.04 | lncRNA          | 21 | 2073133   | 2073413   | long intergenic non-protein coding RNA 158                    |
| 24261 | ENSG00000225953 | MIR1302-2  | 23369.6 | 0.04 | lncRNA          | 15 | 10250051  | 10250110  | miRNome 1302-11                                               |
| 24543 | ENSG00000225703 | LINC00393  | 23585   | 0.04 | lncRNA          | 15 | 70127573  | 70135459  | long intergenic non-protein coding RNA 593                    |
| 24913 | ENSG00000225522 | LINC00397  | 23914.4 | 0.04 | lncRNA          | 14 | 11751111  | 11751163  | long intergenic non-protein coding RNA 607                    |
| 24926 | ENSG00000225931 | LINC00927  | 23938.2 | 0.04 | lncRNA          | 15 | 80555410  | 80564147  | long intergenic non-protein coding RNA 927                    |
| 25229 | ENSG00000225493 | LINC01107  | 24176   | 0.04 | lncRNA          | 2  | 238419331 | 23843398  | long intergenic non-protein coding RNA 1107                   |
| 25370 | ENSG00000221122 | FLJ26245   | 24298.5 | 0.04 | lncRNA          | 16 | 34973269  | 34980996  | 5S ribosomal RNA                                              |
| 25417 | ENSG00000178728 | NCRNA00185 | 24341.5 | 0.04 | lncRNA          | Y  | 21034387  | 21038302  | testis-specific transcript, Y-linked 14 (non-protein coding)  |
| 25429 | ENSG00000258537 | FRMD6-AS2  | 24348.4 | 0.04 | lncRNA          | 14 | 51921230  | 5206670   | FRMD6 antisense RNA 2                                         |
| 25542 | ENSG00000225629 | CEBT1L-AS1 | 24429.4 | 0.04 | lncRNA          | 9  | 72433995  | 72435662  | CEBT1L antisense RNA 1 (head to head)                         |
| 25686 | ENSG00000235770 | LINC00807  | 24550.3 | 0.04 | lncRNA          | 2  | 21647626  | 21670845  | long intergenic non-protein coding RNA 607                    |
| 25768 | ENSG00000179066 |            | 24613   | 0.04 | lncRNA          | 19 | 35568873  | 35568117  | lincRNAcared protein                                          |
| 25928 | ENSG00000211623 | LINC00336  | 24744   | 0.04 | lncRNA          | 13 | 13344169  | 13344169  | long intergenic non-protein coding RNA 328                    |
| 26036 | ENSG00000229218 | LINC00528  | 24831.4 | 0.04 | lncRNA          | 15 | 90048505  | 90067265  | long intergenic non-protein coding RNA 928                    |
| 26237 | ENSG00000244870 | LINC00682  | 24997   | 0.04 | lncRNA          | 4  | 41818498  | 41848428  | long intergenic non-protein coding RNA 682                    |
| 26262 | ENSG00000226858 | LINC00684  | 25012.5 | 0.04 | lncRNA          | 17 | 21668149  | 21668149  | long intergenic non-protein coding RNA 684                    |
| 26277 | ENSG00000227418 | PCGEM1     | 25024.6 | 0.04 | lncRNA          | 2  | 193014571 | 193041625 | PCGEM1, prostate-specific transcript (non-protein coding)     |
| 26286 | ENSG00000235387 | LINC00661  | 25037.5 | 0.04 | lncRNA          | 9  | 3590480   | 35911863  | long intergenic non-protein coding RNA 961                    |
| 26381 | ENSG00000226828 | LINC00662  | 25051.3 | 0.04 | lncRNA          | 12 | 1603424   | 1603424   | long intergenic non-protein coding RNA 962                    |
| 26446 | ENSG00000226374 | LINC00672  | 25185.7 | 0.04 | lncRNA          | 17 | 37081421  | 37084130  | long intergenic non-protein coding RNA 672                    |
| 26478 | ENSG00000225056 | LINC01018  | 25219.5 | 0.04 | lncRNA          | 5  | 6582249   | 658812    | long intergenic non-protein coding RNA 1018                   |
| 26484 | ENSG00000224588 | LINC01019  | 25221.4 | 0.04 | lncRNA          | 2  | 12361088  | 12361088  | long intergenic non-protein coding RNA 1019                   |
| 26667 | ENSG00000249464 | LINC01091  | 25373.2 | 0.04 | lncRNA          | 4  | 124571422 | 124851591 | long intergenic non-protein coding RNA 1091                   |
| 26810 | ENSG00000235733 | LZTSL1-AS1 | 25501.9 | 0.04 | lncRNA          | 8  | 20132824  | 20147869  | LZTSL1 antisense RNA 1                                        |
| 26820 | ENSG00000226841 | LINC00560  | 25516.3 | 0.04 | lncRNA          | 17 | 831165    | 831165    | long intergenic non-protein coding RNA 930                    |
| 26969 | ENSG00000198468 | FLVCR1-AS1 | 25629.2 | 0.04 | lncRNA          | 1  | 21302540  | 21303140  | FLVCR1 antisense RNA 1 (head to head)                         |
| 27205 | ENSG00000188860 | LINC00319  | 25847.7 | 0.04 | lncRNA          | 21 | 44868481  | 44873773  | long intergenic non-protein coding RNA 319                    |
| 27207 | ENSG00000226159 |            | 26022.5 | 0.04 | lncRNA          | 16 | 6668404   | 6668562   | lncRNA 98                                                     |
| 27529 | ENSG00000226968 |            | 26177.4 | 0.04 | lncRNA          | 9  | 53878774  | 53879582  | long intergenic non-protein coding RNA 1033                   |
| 27834 | ENSG00000226933 | LINC00668  | 26189.8 | 0.04 | lncRNA          | 18 | 6918495   | 6923965   | long intergenic non-protein coding RNA 668                    |
| 28381 | ENSG00000195501 | PACT1      | 27048.2 | 0.04 | lncRNA          | 5  | 59745540  | 59813844  | prostate androgen-regulated transcript 1 (non-protein coding) |
| 28382 | ENSG00000227004 | HSD17      | 27058.6 | 0.04 | lncRNA          | 5  | 30291816  | 30293931  | H.A. complex group 17 (non-protein coding)                    |
| 29018 | ENSG00000248508 | SRP14-AS1  | 27463.4 | 0.04 | lncRNA          | 15 | 40313152  | 40325941  | SRP14 antisense RNA1 (head to head)                           |
| 29095 | ENSG00000242759 | LINC00682  | 27537.4 | 0.04 | lncRNA          | 3  | 10955958  | 10959948  | long intergenic non-protein coding RNA 882                    |
| 10318 | ENSG00000226929 | LINC00560  | 12409.9 | 0.04 | lncRNA          | 14 | 107209100 | 107209100 | head-to-head 5116                                             |
| 11519 | ENSG00000207709 | MIR197     | 13592.1 | 0.04 | miRNA           | 1  | 110141515 | 110141589 | miRNome 197                                                   |
| 20698 | ENSG00000271886 | MIR98      | 20570.8 | 0.04 | miRNA           | 3  | 53563194  | 53563302  | miRNome 98                                                    |
| 11129 | ENSG00000220763 | MIR569     | 20619.4 | 0.04 | miRNA           | 4  | 47604844  | 47604809  | miRNome 569                                                   |
| 21405 | ENSG00000226491 | MIR4474    | 21118.8 | 0.04 | miRNA           | 3  | 20552263  | 20552340  | miRNome 4474                                                  |
| 21398 | ENSG00000226527 | MIR4142    | 22452.7 | 0.04 | miRNA           | 5  | 159901409 | 159901490 | miRNome 3142                                                  |
| 23868 | ENSG00000221163 | MIR338     | 24031.6 | 0.04 | miRNA           | 7  | 7899767   | 7899767   | miRNome 338                                                   |
| 25503 | ENSG00000228453 | MIR3127    | 24403.5 | 0.04 | miRNA           | 2  | 97484015  | 97484090  | miRNome 3127                                                  |
| 25584 | ENSG00000229747 | MIR182     | 24451.6 | 0.04 | miRNA           | 17 | 46114527  | 46114613  | miRNome 182                                                   |
| 26000 | ENSG00000226944 | MIR3262    | 24126.4 | 0.04 | miRNA           | 15 | 12584111  | 12584031  | miRNome 3262                                                  |
| 26043 | ENSG00000226870 | MIR3657    | 24442.3 | 0.04 | miRNA           | 12 | 112475403 | 11247519  | miRNome 3657                                                  |
| 26815 | ENSG00000226954 | MIR4786    | 25506.2 | 0.04 | miRNA           | 22 | 41209887  | 41209962  | miRNome 4786                                                  |
| 27643 | ENSG00000226475 | MIR4763    | 24938.4 | 0.04 | miRNA           | 13 | 12811213  | 12811213  | miRNome 4763                                                  |
| 27640 | ENSG00000226362 | MIR4667    | 26202.8 | 0.04 | miRNA           | 9  | 3560891   | 35608156  | miRNome 4667                                                  |
| 27861 | ENSG00000226435 | MIR3121    | 26380.9 | 0.04 | miRNA           | 1  | 180407449 | 180407235 | miRNome 3121                                                  |
| 28319 | ENSG00000227444 | MIR4427    | 26799.3 | 0.04 | miRNA           | 1  | 233779989 | 233779989 | miRNome 4427                                                  |
| 28906 | ENSG00000226589 | MIR4512    | 27368.6 | 0.04 | miRNA           | 15 | 66789296  | 66789125  | miRNome 4512                                                  |
| 28970 | ENSG00000227588 | MIR593     | 27417.9 | 0.04 | miRNA           | 7  | 127271913 | 127272012 | miRNome 593                                                   |
| 10588 | ENSG00000204848 | MIR128     | 12786.8 | 0.04 | miRNA           | 2  | 7681769   | 7681769   | RNA 75S, small nuclear pseudogene 203                         |
| 11533 | ENSG00000201428 | MIR158     | 13608.7 | 0.04 | miRNA           | 12 | 112704801 | 112705198 | RNA 75S, small nuclear pseudogene 71                          |
| 16206 | ENSG00000243704 |            | 17180.2 | 0.04 | miRNA           | 17 | 15007870  | 15007986  | RNA 75S, cytoplasmic 105, pseudogene                          |
| 18148 | ENSG00000201701 |            | 18620   | 0.04 | miRNA           | 17 | 2564265   | 2564265   | RNA 75S, cytoplasmic 106, pseudogene                          |
| 19512 | ENSG00000201725 |            | 19647   | 0.04 | miRNA           | 16 | 15009114  | 15009114  | Y RNA                                                         |
| 20386 | ENSG00000198781 |            | 20338.9 | 0.04 | miRNA           | 2  | 233993363 | 233993461 | Y RNA                                                         |
| 20997 | ENSG00000201624 |            | 21184   | 0.04 | miRNA           | 12 | 1556352   | 1556352   | RNA 75S, cytoplasmic 115, pseudogene                          |
| 22273 | ENSG00000201034 |            | 21855.5 | 0.04 | miRNA           | 16 | 482927    | 482927    | Y RNA                                                         |
| 22424 | ENSG00000198933 |            | 22040   | 0.04 | miRNA           | 12 | 102113586 | 102113586 | Y RNA                                                         |
| 10140 | ENSG00000211178 |            | 22433.3 | 0.04 | miRNA           | 13 | 58534328  | 58534328  | RNA 75S, cytoplasmic 94, pseudogene                           |
| 23675 | ENSG00000243370 |            | 22873.2 | 0.04 | miRNA           | 17 | 76369935  | 76369216  | RNA 75S, cytoplasmic 235, pseudogene                          |
| 23738 | ENSG00000229215 |            | 22918.8 | 0.04 | miRNA           | 21 | 40716463  | 40716554  | Y RNA                                                         |
| 23837 | ENSG00000226989 |            | 23408   | 0.04 | miRNA           | 8  | 2042818   | 2042818   | RNA 75S, cytoplasmic 128, pseudogene                          |
| 23953 | ENSG00000242300 |            | 23102.2 | 0.04 | miRNA           | 13 | 28543435  | 28563721  | RNA 75S, cytoplasmic 272, pseudogene                          |
| 24116 | ENSG00000220030 |            | 23242.4 | 0.04 | miRNA           | 12 | 14706636  | 14706904  | RNA 75S, small nuclear pseudogene 134                         |
| 24451 | ENSG00000221299 |            | 23523.9 | 0.04 | miRNA           | 17 | 80375102  | 80375102  | Y RNA                                                         |
| 14612 | ENSG00000211811 |            | 23574.1 | 0.04 | miRNA           | 17 | 43513669  | 43514688  | RNA 75S, cytoplasmic 18, pseudogene                           |
| 24676 | ENSG00000241625 |            | 23709.5 | 0.04 | miRNA           | 2  | 62718313  | 62718313  | RNA 75S, cytoplasmic 18, pseudogene                           |
| 24958 | ENSG00000243365 |            | 23960.5 | 0.04 | miRNA           | 15 | 72695296  | 72695951  | RNA 75S, cytoplasmic 278, pseudogene                          |
| 25201 | ENSG00000240544 |            | 24154.5 | 0.04 | miRNA           | 14 | 33358784  | 33358784  | RNA 75S, cytoplasmic 279, pseudogene                          |
| 25290 | ENSG00000226491 |            | 24223.9 | 0.04 | miRNA           | 1  | 179869397 | 179869397 | RNA 75S, cytoplasmic 230, pseudogene                          |
| 25430 | ENSG00000246471 |            | 24479.8 | 0.04 | miRNA           | 22 | 22071702  | 220717411 | RNA 75S, cytoplasmic 280, pseudogene                          |
| 25866 | ENSG00000229495 |            | 24727.3 | 0.04 | miRNA           | 22 | 119379165 | 119379165 | RNA 75S, cytoplasmic 281, pseudogene                          |
| 25907 | ENSG00000198719 |            | 24729.8 | 0.04 | miRNA           | 20 | 18275787  | 18276095  | RNA 75S, small nuclear pseudogene 74                          |
| 25971 | ENSG00000223006 |            | 24773.2 | 0.04 | miRNA           | 4  | 12196207  | 12196207  | RNA 75S, small nuclear pseudogene 137                         |
| 19100 | ENSG00000220160 |            | 24808.4 | 0.04 |                 |    |           |           |                                                               |

|       |                  |           |      |                      |    |           |           |                                                                                                          |
|-------|------------------|-----------|------|----------------------|----|-----------|-----------|----------------------------------------------------------------------------------------------------------|
| 24938 | ENSG00000239253  | 23948     | 0.04 | processed_pseudogene | 19 | 3451254   | 34512800  | ribosomal protein S4X pseudogene 23                                                                      |
| 24944 | ENSG00000237569  | 23948     | 0.04 | processed_pseudogene | 21 | 3471908   | 3471934   | tubulin alpha pseudogene                                                                                 |
| 24954 | ENSG00000242070  | 23958     | 0.04 | processed_pseudogene | 3  | 137442619 | 137443385 | nucleophosmin 1 (nucleolar phosphoprotein B23, numatrin) pseudogene 17                                   |
| 25107 | ENSG00000201679  | 24067     | 0.04 | processed_pseudogene | 15 | 43560102  | 43560586  | ATP synthase, H <sup>+</sup> transporting, mitochondrial Fo complex, subunit c, pseudogene 1             |
| 25133 | ENSG00000241478  | 24088     | 0.04 | processed_pseudogene | 13 | 91943309  | 91943403  | peptidylarginine isomerase A (cyclophilin A) pseudogene 23                                               |
| 25178 | ENSG00000202319  | 24137     | 0.04 | processed_pseudogene | 10 | 71293069  | 71293163  | transmembrane protein 256 pseudogene 1                                                                   |
| 25332 | ENSG00000226094  | 24178     | 0.04 | processed_pseudogene | 20 | 61149878  | 61170591  | ribosomal protein L7 pseudogene 3                                                                        |
| 25349 | ENSG00000240520  | 24277     | 0.04 | processed_pseudogene | 12 | 65261736  | 65262478  | ribosomal protein L7 pseudogene 39                                                                       |
| 25354 | ENSG00000202659  | 24303     | 0.04 | processed_pseudogene | 7  | 84957444  | 84959908  | heat shock 70kDa protein B pseudogene 16                                                                 |
| 25389 | ENSG00000232496  | 24313     | 0.04 | processed_pseudogene | X  | 121672106 | 121673119 | ribosomal protein L3 pseudogene 12                                                                       |
| 25450 | ENSG00000236416  | 24353     | 0.04 | processed_pseudogene | 9  | 79019816  | 79014502  | ribosomal protein S4 pseudogene 9                                                                        |
| 25460 | ENSG00000202993  | 24378     | 0.04 | processed_pseudogene | 2  | 46984788  | 46985648  | nuclear receptor binding factor 2 pseudogene 2                                                           |
| 25884 | ENSG00000224274  | 24718     | 0.04 | processed_pseudogene | 20 | 15600189  | 15600464  | endothelin alpha pseudogene 1                                                                            |
| 25960 | ENSG00000244390  | 24766     | 0.04 | processed_pseudogene | 12 | 98413950  | 98414675  | ribosomal protein S8 pseudogene 22                                                                       |
| 25977 | ENSG00000218424  | 24780     | 0.04 | processed_pseudogene | 6  | 136797000 | 136797288 | NADH dehydrogenase (ubiquinone-6 protein, 5, 19kDa (NADH-coenzyme Q reductase) pseudogene 1              |
| 26009 | ENSG00000232105  | 24859     | 0.04 | processed_pseudogene | 13 | 62621271  | 62621271  | ribosomal protein L7 pseudogene 28                                                                       |
| 26016 | ENSG00000232559  | 24814     | 0.04 | processed_pseudogene | 19 | 49717676  | 49717677  | SUMO1 pseudogene 4                                                                                       |
| 26019 | ENSG00000214012  | 24816     | 0.04 | processed_pseudogene | 6  | 19612986  | 19614267  | keratin 18 pseudogene 38                                                                                 |
| 26074 | ENSG00000202741  | 24862     | 0.04 | processed_pseudogene | 20 | 34176246  | 34176529  | ribosomal protein L17 pseudogene 1                                                                       |
| 26160 | ENSG00000202661  | 24929     | 0.04 | processed_pseudogene | 11 | 73561514  | 73562256  | coiled-coil domain containing 58 pseudogene 5                                                            |
| 26174 | ENSG000002025125 | 24945     | 0.04 | processed_pseudogene | X  | 135895832 | 135896000 | RAN, member RAN oncogene family pseudogene 4                                                             |
| 26184 | ENSG00000204652  | 24956     | 0.04 | processed_pseudogene | 17 | 43685909  | 43686349  | ribosomal protein S28 pseudogene 8                                                                       |
| 26213 | ENSG00000219673  | 24965     | 0.04 | processed_pseudogene | 7  | 54487137  | 54488021  | solute carrier family 25 (mitochondrial carrier, adenine nucleotide translocator), member 5 pseudogene 3 |
| 26287 | ENSG00000208296  | 25037     | 0.04 | processed_pseudogene | 18 | 26231696  | 26232131  | aridra1 homolog 2 pseudogene 1                                                                           |
| 26294 | ENSG00000202446  | 25045     | 0.04 | processed_pseudogene | 8  | 180195429 | 180195933 | high mobility group box 1 pseudogene 6                                                                   |
| 26300 | ENSG00000208088  | 25052     | 0.04 | processed_pseudogene | 16 | 46878544  | 46878550  | creatine kinase B pseudogene 1                                                                           |
| 26420 | ENSG00000201306  | 25153     | 0.04 | processed_pseudogene | 5  | 58824887  | 58825077  | NADH dehydrogenase (ubiquinone) 1 beta subcomplex, 4, 19kDa pseudogene 2                                 |
| 26464 | ENSG00000202578  | 25200     | 0.04 | processed_pseudogene | 12 | 12201784  | 12201784  | ribosomal protein L12 pseudogene 18                                                                      |
| 26465 | ENSG00000202493  | 25205     | 0.04 | processed_pseudogene | 15 | 43213508  | 43213556  | farnesyl diphosphate synthase pseudogene 4                                                               |
| 26623 | ENSG000002041808 | 25259     | 0.04 | processed_pseudogene | 16 | 63384667  | 63385053  | ribosomal protein S16a pseudogene 34                                                                     |
| 26658 | ENSG00000202641  | 25281     | 0.04 | processed_pseudogene | 16 | 40212681  | 40212681  | polyribonucleotide nucleoside transferase 1 pseudogene 1                                                 |
| 26667 | ENSG00000234008  | 25295     | 0.04 | processed_pseudogene | 21 | 37250365  | 37260724  | protein phosphatase 1, regulatory (inhibitor) subunit 2 pseudogene 2                                     |
| 26681 | ENSG00000202163  | 25304     | 0.04 | processed_pseudogene | Y  | 2794702   | 2794961   | nucleosome assembly protein 1-like 1 pseudogene 2                                                        |
| 26691 | ENSG00000202014  | 25308     | 0.04 | processed_pseudogene | 19 | 40328193  | 40328193  | hepatocarcinoma-derived antigen 1 pseudogene 1                                                           |
| 26703 | ENSG000002020911 | PHIH      | 0.04 | processed_pseudogene | 11 | 11190552  | 11191091  | peptidyl isomerase II (cyclophilin H) pseudogene 1                                                       |
| 26732 | ENSG000002024070 | 25429     | 0.04 | processed_pseudogene | 2  | 20712432  | 20712442  | high mobility group nucleosome binding domain 1 pseudogene 6                                             |
| 26844 | ENSG00000201633  | 25488     | 0.04 | processed_pseudogene | 1  | 21188104  | 21188148  | actin related protein 20 complex, subunit 3 pseudogene 2                                                 |
| 26912 | ENSG000002028205 | 25577     | 0.04 | processed_pseudogene | X  | 40482836  | 40483112  | mitochondrial granulate carrier 1-like                                                                   |
| 26958 | ENSG000002024928 | 25614     | 0.04 | processed_pseudogene | 5  | 7794088   | 7794088   | high mobility group box 1 pseudogene 21                                                                  |
| 27004 | ENSG00000202165  | 25638     | 0.04 | processed_pseudogene | 13 | 2296763   | 2296763   | ribosomal protein large, P1 pseudogene 13                                                                |
| 27008 | ENSG000002041261 | 25668     | 0.04 | processed_pseudogene | 4  | 62077370  | 62077581  | ribosomal protein L1Y pseudogene 19                                                                      |
| 27026 | ENSG000002040688 | 25682     | 0.04 | processed_pseudogene | 3  | 13780320  | 13782179  | keratin 8 pseudogene 30                                                                                  |
| 27124 | ENSG00000202760  | 25674     | 0.04 | processed_pseudogene | 1  | 20861743  | 20861743  | ribosomal protein S24 pseudogene 13                                                                      |
| 27164 | ENSG00000202544  | 25915     | 0.04 | processed_pseudogene | 15 | 74854172  | 74854172  | nucleophosmin 1 (nucleolar phosphoprotein B23, numatrin) pseudogene 43                                   |
| 27172 | ENSG00000202338  | 25822     | 0.04 | processed_pseudogene | 20 | 61476490  | 61476493  | diphthamide biosynthesis 3 pseudogene 1                                                                  |
| 27178 | ENSG00000202637  | 25824     | 0.04 | processed_pseudogene | 14 | 103707829 | 103708039 | ribosomal protein L21 pseudogene 13                                                                      |
| 27180 | ENSG00000202165  | 25846     | 0.04 | processed_pseudogene | 15 | 48841512  | 48841517  | GDP dissociation inhibitor 2 pseudogene 1                                                                |
| 27225 | ENSG00000202354  | 25863     | 0.04 | processed_pseudogene | 6  | 3045618   | 3045618   | family with sequence similarity 138, member B, pseudogene                                                |
| 27233 | ENSG000002041561 | 25917     | 0.04 | processed_pseudogene | 6  | 5844019   | 5844107   | retinol dehydrogenase pseudogene 1 pseudogene 4                                                          |
| 27296 | ENSG000002021218 | 25917     | 0.04 | processed_pseudogene | 12 | 21399811  | 21399811  | nucleophosmin 1 (nucleolar phosphoprotein B23, numatrin) pseudogene 30                                   |
| 27355 | ENSG000002178273 | 25963     | 0.04 | processed_pseudogene | 9  | 34917172  | 34918293  | glutamate ammonia lyase (glutamate synthetase) pseudogene 4                                              |
| 27485 | ENSG000002023630 | VENXIP7   | 0.04 | processed_pseudogene | 3  | 2144712   | 2144875   | VEN1 homologous pseudogene 7                                                                             |
| 27488 | ENSG000002025497 | 26039     | 0.04 | processed_pseudogene | 12 | 44291126  | 44291126  | adenosine deaminase 2 pseudogene 2                                                                       |
| 27561 | ENSG000002023849 | 26125     | 0.04 | processed_pseudogene | 1  | 173110239 | 17311489  | glutamic-oxaloacetic transaminase 2 pseudogene 2                                                         |
| 27627 | ENSG000002028562 | 26177     | 0.04 | processed_pseudogene | 10 | 11619381  | 11620021  | PRP8 domain containing 4 pseudogene 2                                                                    |
| 27686 | ENSG000002024836 | 26241     | 0.04 | processed_pseudogene | 22 | 2586826   | 2586826   | ADP-ribosylation factor 4 pseudogene 4                                                                   |
| 27693 | ENSG000002174418 | 26247     | 0.04 | processed_pseudogene | 13 | 107078121 | 107078470 | ribosomal protein L35 pseudogene 9                                                                       |
| 27754 | ENSG000002024388 | 26288     | 0.04 | processed_pseudogene | 8  | 143644621 | 143644683 | deoxyuridine triphosphatase pseudogene 2                                                                 |
| 27764 | ENSG000002021024 | 26341     | 0.04 | processed_pseudogene | 13 | 53414491  | 53414491  | NADH dehydrogenase (ubiquinone) 1 assembly factor 4 pseudogene 2                                         |
| 27813 | ENSG000002028329 | 26342     | 0.04 | processed_pseudogene | 18 | 23835662  | 23836319  | family with sequence similarity 80, member B, pseudogene                                                 |
| 27884 | ENSG000002026216 | 26404     | 0.04 | processed_pseudogene | 1  | 21724489  | 21724489  | protein phosphatase 1, regulatory (inhibitor) subunit 11 pseudogene 1                                    |
| 27929 | ENSG000002029529 | 26437     | 0.04 | processed_pseudogene | 12 | 64160077  | 64160077  | ribosomal protein L12 pseudogene 12                                                                      |
| 27933 | ENSG000002023428 | 26450     | 0.04 | processed_pseudogene | 1  | 174725988 | 174726257 | barrier to autointegration factor 1 pseudogene 4                                                         |
| 28040 | ENSG000002024939 | 26539     | 0.04 | processed_pseudogene | 5  | 111181747 | 111182293 | high mobility group nucleosome binding domain 1 pseudogene 14                                            |
| 28090 | ENSG000002021581 | 26540     | 0.04 | processed_pseudogene | 1  | 170081123 | 170081123 | ribosomal protein L10 pseudogene 12                                                                      |
| 28241 | ENSG00000215070  | XRC6P5    | 0.04 | processed_pseudogene | X  | 98716600  | 98716600  | X-ray repair complementing defective repair in Chinese hamster cells 6 pseudogene 5                      |
| 28258 | ENSG000002028786 | 26780     | 0.04 | processed_pseudogene | 1  | 26213851  | 26214101  | small nuclear ribonucleoprotein polypeptide F pseudogene 2                                               |
| 28296 | ENSG000002025158 | 26827     | 0.04 | processed_pseudogene | 2  | 13200193  | 13200193  | Kruppel factor 2 pseudogene 2                                                                            |
| 28335 | ENSG000002025701 | 26822     | 0.04 | processed_pseudogene | 21 | 40543056  | 40543056  | poly(rC) binding protein 2 pseudogene 1                                                                  |
| 28653 | ENSG000002020750 | 27119     | 0.04 | processed_pseudogene | 20 | 10368427  | 10368454  | SDA1 domain containing 1 pseudogene 2                                                                    |
| 28728 | ENSG000002024412 | 27137     | 0.04 | processed_pseudogene | 2  | 15961268  | 15961273  | glutathione S-transferase, mu 3 pseudogene 2                                                             |
| 28813 | ENSG000002023567 | 27287     | 0.04 | processed_pseudogene | 3  | 48202965  | 48202967  | small nuclear ribonucleoprotein polypeptide F pseudogene 4                                               |
| 28876 | ENSG000002028412 | 27423     | 0.04 | processed_pseudogene | 3  | 148994555 | 148999530 | ribosomal protein L21 pseudogene 71                                                                      |
| 28975 | ENSG00000216828  | 27438     | 0.04 | processed_pseudogene | 7  | 4931838   | 4931838   | 2'-oxoglutarate and iron-dependent oxygenase pseudogene 1 pseudogene 1                                   |
| 29038 | ENSG000002024877 | 27454     | 0.04 | processed_pseudogene | 11 | 90847892  | 90849119  | cysteine1 binding protein-like 9 pseudogene 2                                                            |
| 29058 | ENSG000002027588 | 27506     | 0.04 | processed_pseudogene | 13 | 95409705  | 95411526  | bromodomain containing 7 pseudogene 5                                                                    |
| 29163 | ENSG000002021758 | OIF5A1    | 0.04 | processed_transcript | 12 | 41531613  | 41531613  | OIF5 antisense RNA1                                                                                      |
| 24992 | ENSG00000215039  | CD27A1    | 0.04 | processed_transcript | 12 | 6548197   | 6548203   | CD27 antisense RNA 1                                                                                     |
| 24716 | ENSG000002028791 | LINC00520 | 0.04 | processed_transcript | 12 | 66247894  | 66263408  | long intergenic non-coding RNA 520                                                                       |
| 29233 | ENSG000002026571 | INS2      | 0.04 | protein_coding       | 6  | 61105017  | 61105017  | pepinase B, group 1 (pepinase) A                                                                         |
| 4343  | ENSG000002172410 | INSL5     | 0.04 | protein_coding       | 1  | 67263424  | 67263599  | insulin-like 5                                                                                           |
| 5090  | ENSG000002009138 | SLC2A3    | 0.04 | protein_coding       | 7  | 107405912 | 107406370 | solute carrier family 26 (anion exchanger), member 3                                                     |
| 5284  | ENSG000002173110 | HIFP6     | 0.04 | protein_coding       | 1  | 161440336 | 161440681 | heat shock 70kDa protein 6 (HSP70B)                                                                      |
| 5284  | ENSG000002173625 | BRP7      | 0.04 | protein_coding       | 12 | 15097616  | 15097616  | endoplasmic reticulum protein 22                                                                         |
| 5297  | ENSG000002023041 | PHGR1     | 0.04 | protein_coding       | 15 | 40643234  | 40643635  | proline(isohydroxy)lysine-rich 1                                                                         |
| 5683  | ENSG00000208867  | AMP       | 0.04 | protein_coding       | 16 | 3154395   | 3154514   | alpha hemoglobin stabilizing protein                                                                     |
| 5819  | ENSG000002120282 | SFTPA1    | 0.04 | protein_coding       | 16 | 81376269  | 81376269  | serpin family member A1                                                                                  |
| 5919  | ENSG000002124102 | PI3       | 0.04 | protein_coding       | 20 | 43805517  | 43805518  | peptidase inhibitor 3, skin-derived                                                                      |
| 6384  | ENSG000002005996 | CRBBP3    | 0.04 | protein_coding       | 19 | 41354080  | 41354367  | cAMP responsive element binding protein 3-like 3                                                         |
| 6860  | ENSG000002039681 | SFTPA2    | 0.04 | protein_coding       | 16 | 81857496  | 81857496  | serpin family member D                                                                                   |
| 6860  | ENSG000002036473 | OTC       | 0.04 | protein_coding       | X  | 38211798  | 38211798  | ornithine carbonyltransferase                                                                            |
| 6884  | ENSG000002008405 | CLDN18    | 0.04 | protein_coding       | 3  | 137717577 | 137720494 | claudin 18                                                                                               |
| 7171  | ENSG000002188373 | CHIT9B9   | 0.04 | protein_coding       | 1  | 85963474  | 85963474  | chromosome 10 open reading frame 99                                                                      |
| 7619  | ENSG000002198843 | FAM5D     | 0.04 | protein_coding       | 3  | 58619373  | 58625275  | family with sequence similarity 5, member D                                                              |
| 7886  | ENSG000002193541 | ADGR      | 0.04 | protein_coding       | 7  | 16831435  | 168317057 | antigen present 2                                                                                        |
| 8116  | ENSG000002171218 | CD74      | 0.04 | protein_coding       | 19 | 7624409   | 7624409   | CD74 molecule                                                                                            |
| 8180  | ENSG000002031142 | COL2E1    | 0.04 | protein_coding       | 19 | 8117651   | 8117651   | chondroectodermal (NC) medf1 ligand 25                                                                   |
| 8246  | ENSG000002135229 | CY2P7A1   | 0.04 | protein_coding       | 2  | 219664472 | 219680116 | cytochrome P450, family 27, subfamily A, polypeptide 1                                                   |
| 8316  | ENSG000002191166 | MARCK2    | 0.04 | protein_coding       | 12 | 11969742  | 11969742  | macrophage receptor with collagenous structure                                                           |
| 8679  | ENSG000002125999 | BPIIFB1   | 0.04 | protein_coding       | 20 | 31867286  | 31867286  | B                                                                                                        |

|       |                   |           |       |    |      |                |            |           |                                                                                                                                                                                |
|-------|-------------------|-----------|-------|----|------|----------------|------------|-----------|--------------------------------------------------------------------------------------------------------------------------------------------------------------------------------|
| 13233 | ENSG00000196548   | YHR       | 14901 | 3  | 0.04 | protein_coding | 7733826    | 17385776  | aryl hydrocarbon receptor                                                                                                                                                      |
| 13317 | ENSG00000195425   | DYR1      | 14901 | 3  | 0.04 | protein_coding | 18000737   | 158007771 | dynam, light chain, Tokouwa 1                                                                                                                                                  |
| 13358 | ENSG00000130021   | HDHD1     | 14909 | 3  | 0.04 | protein_coding | 6909961    | 7062321   | haloacid dehalogenase-like hydrolase domain containing 1                                                                                                                       |
| 13409 | ENSG00000152804   | HHEX      | 15029 | 6  | 0.04 | protein_coding | 84447945   | 84455403  | hematopoietically expressed homeobox                                                                                                                                           |
| 13458 | ENSG00000196428   | BCAS1     | 15071 | 4  | 0.04 | protein_coding | 105301153  | 105399774 | phospholipase D family member 4                                                                                                                                                |
| 13508 | ENSG00000192024   | HFEA      | 15139 | 3  | 0.04 | protein_coding | 27989581   | 27989581  | general transcription factor IIB                                                                                                                                               |
| 13517 | ENSG00000138210   | PKA2B     | 15112 | 2  | 0.04 | protein_coding | 4          | 25142223  | phosphotyrosine 4-kinase type 2 beta                                                                                                                                           |
| 13519 | ENSG00000124243   | BCAS1     | 15113 | 2  | 0.04 | protein_coding | 49411431   | 49493714  | breast carcinoma amplified sequence 4                                                                                                                                          |
| 13520 | ENSG00000125331   | PP1CA     | 15133 | 9  | 0.04 | protein_coding | 87186564   | 87186564  | protein phosphatase 1 catalytic subunit, alpha isozyme                                                                                                                         |
| 13505 | ENSG00000116574   | RHOA      | 15173 | 3  | 0.04 | protein_coding | 22887024   | 22888124  | ras homolog family member U                                                                                                                                                    |
| 13571 | ENSG00000198832   | HNG2C     | 15232 | 5  | 0.04 | protein_coding | 20756941   | 26622463  | high mobility group nucleosome binding domain 2                                                                                                                                |
| 13577 | ENSG00000164320   | USP41     | 15268 | 4  | 0.04 | protein_coding | 158713044  | 158713044 | ubiquitin-like domain containing C1D phosphatase 1                                                                                                                             |
| 13589 | ENSG00000162620   | HEBP2     | 15285 | 5  | 0.04 | protein_coding | 138724668  | 138734334 | home binding protein 2                                                                                                                                                         |
| 13588 | ENSG00000123210   | INF       | 15286 | 3  | 0.04 | protein_coding | 31543344   | 31548113  | SMYD3 nuclear domain 1                                                                                                                                                         |
| 13587 | ENSG00000130921   | SOX2      | 15292 | 1  | 0.04 | protein_coding | 100673520  | 100673520 | SOX1 like (S. cerevisiae)                                                                                                                                                      |
| 13890 | ENSG00000168297   | PKK       | 15388 | 9  | 0.04 | protein_coding | 58318607   | 58411748  | PK domain containing serine/threonine kinase                                                                                                                                   |
| 13959 | ENSG00000129215   | SNX8      | 15444 | 9  | 0.04 | protein_coding | 35030300   | 35093389  | sorting nexin 8                                                                                                                                                                |
| 14063 | ENSG00000100918   | KCCN3     | 15541 | 8  | 0.04 | protein_coding | 2469314    | 29170339  | potassium voltage-gated channel, KCC1 like subfamily, member 1                                                                                                                 |
| 14108 | ENSG00000163602   | RYPB      | 15547 | 9  | 0.04 | protein_coding | 72420976   | 72466069  | RING1 and YY1 binding protein                                                                                                                                                  |
| 14354 | ENSG00000137944   | CIBL2     | 15743 | 6  | 0.04 | protein_coding | 8941456    | 8945836   | invariant coregulate-beta lysase 2                                                                                                                                             |
| 14377 | ENSG00000102529   | GDR3      | 15759 | 9  | 0.04 | protein_coding | 5901750    | 5904905   | GTP dissociation inhibitor 2                                                                                                                                                   |
| 14418 | ENSG00000130958   | SLC35D2   | 15788 | 4  | 0.04 | protein_coding | 99082988   | 99145992  | solute carrier family 35 (LUP-GlcNAc/LUP-glucose transporter), member D2                                                                                                       |
| 14462 | ENSG00000129660   | ELOVL5    | 15827 | 9  | 0.04 | protein_coding | 53132196   | 53213907  | ELOVL fatty acid elongase 5                                                                                                                                                    |
| 14524 | ENSG00000113728   | PCSK1B    | 15878 | 2  | 0.04 | protein_coding | 144551652  | 144552730 | protonemal lipoprotein factor 11 beta                                                                                                                                          |
| 14574 | ENSG00000140497   | SCAMP2    | 15913 | 7  | 0.04 | protein_coding | 75136071   | 75165706  | secretory carrier membrane protein 2                                                                                                                                           |
| 14813 | ENSG000001054118  | THRAP3    | 15943 | 2  | 0.04 | protein_coding | 36983017   | 36770958  | thyroid hormone receptor associated protein 3                                                                                                                                  |
| 14835 | ENSG00000102633   | TRIM10    | 15961 | 4  | 0.04 | protein_coding | 30119222   | 30129211  | spaggle motif containing, 10                                                                                                                                                   |
| 14647 | ENSG00000135823   | STX6      | 15988 | 1  | 0.04 | protein_coding | 180941861  | 18092627  | syntaxin 6                                                                                                                                                                     |
| 14996 | ENSG00000128304   | TMSF2     | 16008 | 9  | 0.04 | protein_coding | 101813671  | 100216280 | transmembrane 9 superfamily member 2                                                                                                                                           |
| 14714 | ENSG00000135535   | CD164     | 16030 | 7  | 0.04 | protein_coding | 801318     | 801318    | 5, 10-methylthioadenosine synthase                                                                                                                                             |
| 14729 | ENSG00000135535   | CD164     | 16030 | 7  | 0.04 | protein_coding | 109687717  | 109703762 | CD164 molecule, statorium                                                                                                                                                      |
| 14732 | ENSG00000134072   | CAMK1     | 16031 | 8  | 0.04 | protein_coding | 8799262    | 9811678   | calcium/calmodulin-dependent protein kinase I                                                                                                                                  |
| 14802 | ENSG00000101981   | RPL22     | 16118 | 12 | 0.04 | protein_coding | 72738      | 72738     | ribosomal protein L22, cellular                                                                                                                                                |
| 14876 | ENSG00000102727   | GAS7      | 16144 | 9  | 0.04 | protein_coding | 9813926    | 10101868  | growth arrest-specific 7                                                                                                                                                       |
| 14879 | ENSG00000164603   | CTEERD    | 16145 | 6  | 0.04 | protein_coding | 12489202   | 125279871 | chromosome 7 open reading frame 60                                                                                                                                             |
| 14900 | ENSG00000102425   | REC2C8    | 16153 | 3  | 0.04 | protein_coding | 1418376    | 1418376   | transmembrane protein 3                                                                                                                                                        |
| 14980 | ENSG00000102425   | REC2C8    | 16153 | 3  | 0.04 | protein_coding | 50723151   | 50747086  | piogg/Bac transposable element derived 3                                                                                                                                       |
| 15106 | ENSG000001009748  | DDX3Y     | 16332 | 3  | 0.04 | protein_coding | 1501169    | 1502330   | DEAD (Asp-Glu-Ala-Gly) box helicase 3, Y-linked                                                                                                                                |
| 15248 | ENSG00000102517   | LOC101913 | 16333 | 11 | 0.04 | protein_coding | 5373468    | 5373468   | lectin, galactoside-binding, soluble, 12                                                                                                                                       |
| 15401 | ENSG00000199959   | CD209     | 16547 | 8  | 0.04 | protein_coding | 7848979    | 7812454   | CD209 molecule                                                                                                                                                                 |
| 15611 | ENSG00000192128   | FOA2      | 16714 | 6  | 0.04 | protein_coding | 15383854   | 15385005  | tafaraz                                                                                                                                                                        |
| 15620 | ENSG00000102628   | COL4A3BP  | 16722 | 2  | 0.04 | protein_coding | 3487720    | 3487720   | collagen family, member A                                                                                                                                                      |
| 15667 | ENSG00000102482   | CDC20A    | 16758 | 4  | 0.04 | protein_coding | 139094957  | 139114456 | collec-oid domain containing 29A                                                                                                                                               |
| 15696 | ENSG000001068135  | GNAI3     | 16780 | 7  | 0.04 | protein_coding | 110091233  | 110136975 | guanine nucleotide binding protein (G protein), alpha inhibiting activly polypeptide 3                                                                                         |
| 15738 | ENSG00000106844   | FMR3      | 16781 | 2  | 0.04 | protein_coding | 4607800    | 4272946   | family with sequence similarity 3, member B                                                                                                                                    |
| 15746 | ENSG00000117541   | DPH5      | 16812 | 6  | 0.04 | protein_coding | 101541759  | 101541754 | fracture callus 1 homolog (ret) (FCX1), mRNA                                                                                                                                   |
| 15759 | ENSG00000116478   | HDAC1     | 16827 | 4  | 0.04 | protein_coding | 32737887   | 32799236  | histone deacetylase 1                                                                                                                                                          |
| 15796 | ENSG00000115519   | K14       | 16853 | 3  | 0.04 | protein_coding | 143635087  | 14370989  | keratinase                                                                                                                                                                     |
| 15874 | ENSG00000102115   | MLANA     | 16900 | 8  | 0.04 | protein_coding | 5819069    | 5819069   | membrane protein 4                                                                                                                                                             |
| 15964 | ENSG00000170144   | HNRPA2    | 16960 | 6  | 0.04 | protein_coding | 217807291  | 17688886  | heterogeneous nuclear ribonucleoprotein A3                                                                                                                                     |
| 16008 | ENSG00000143791   | MDM2      | 17035 | 1  | 0.04 | protein_coding | 8992620    | 9143942   | membrane bound 2-acyltransferase domain containing 2                                                                                                                           |
| 16008 | ENSG00000143791   | MDM2      | 17035 | 1  | 0.04 | protein_coding | 8313058    | 8547033   | ATPase, aminophosphotransferase, class I, type IB, member 1                                                                                                                    |
| 16178 | ENSG00000121389   | TREX1     | 17155 | 5  | 0.04 | protein_coding | 48504445   | 48500404  | three prime repair exonuclease 1                                                                                                                                               |
| 16182 | ENSG00000128872   | TMO2C     | 17163 | 5  | 0.04 | protein_coding | 52043758   | 52108869  | topogmodin 2 (neuronal)                                                                                                                                                        |
| 16186 | ENSG00000105487   | MUC2A     | 17169 | 3  | 0.04 | protein_coding | 2206698    | 2211953   | mitochondrial calcium uptake 2                                                                                                                                                 |
| 16630 | ENSG00000102624   | TMM10B    | 17499 | 1  | 0.04 | protein_coding | 6502715    | 6530028   | Fracture callus 1 homolog (Ret), cDNA FLJ11268 fls, clone PLAC1009186, highly similar to Mitochondrial inner membrane translocase subunit Tmm10b, cDNA, FLJ52024, Homo sapiens |
| 16992 | ENSG00000106144   | CASP2     | 17782 | 4  | 0.04 | protein_coding | 142983038  | 14300788  | casease 2, apoptosis-related cysteine peptidase                                                                                                                                |
| 17032 | ENSG00000185305   | ARL15     | 17803 | 9  | 0.04 | protein_coding | 5317975    | 5308642   | ADP-ribosylation factor-like 15                                                                                                                                                |
| 17043 | ENSG00000119201   | SIY       | 17803 | 2  | 0.04 | protein_coding | 8549267    | 8549267   | synectin/alpha2                                                                                                                                                                |
| 17129 | ENSG00000148483   | TMEM236   | 17870 | 4  | 0.04 | protein_coding | 11774251   | 11784287  | transmembrane protein 236                                                                                                                                                      |
| 17147 | ENSG00000119838   | NEK9      | 17888 | 8  | 0.04 | protein_coding | 7554882    | 7559447   | NIMA-related kinase 9                                                                                                                                                          |
| 17176 | ENSG00000104796   | CTSC      | 17922 | 3  | 0.04 | protein_coding | 3467788    | 3467788   | potassium channel transmembrane domain containing 9                                                                                                                            |
| 17197 | ENSG000001008123  | HDAC2     | 17918 | 4  | 0.04 | protein_coding | 4817656    | 4822615   | histone deacetylase 2                                                                                                                                                          |
| 17202 | ENSG00000129100   | GCN5      | 17920 | 9  | 0.04 | protein_coding | 3553993    | 3508082   | cyclin Y                                                                                                                                                                       |
| 17418 | ENSG00000112221   | RCCN1     | 18024 | 3  | 0.04 | protein_coding | 1290944    | 1290944   | retinoblastoma binding protein 5                                                                                                                                               |
| 17450 | ENSG00000197323   | TRIM33    | 18044 | 4  | 0.04 | protein_coding | 114935398  | 115053781 | tripartite motif containing 33                                                                                                                                                 |
| 17479 | ENSG00000182692   | VICAM1    | 18118 | 9  | 0.04 | protein_coding | 10118259   | 10120401  | vascular cell adhesion molecule 1                                                                                                                                              |
| 17484 | ENSG00000116528   | CHMP1B    | 18123 | 6  | 0.04 | protein_coding | 988815     | 988815    | ubiquitin specific protease 1 (ubiquitin associated)                                                                                                                           |
| 17620 | ENSG00000148067   | FAM1193B  | 18147 | 3  | 0.04 | protein_coding | 176948789  | 176948152 | family with sequence similarity 193, member B                                                                                                                                  |
| 17629 | ENSG00000102605   | USB1      | 18153 | 2  | 0.04 | protein_coding | 88033450   | 88055522  | USB mRNA biogenesis 1                                                                                                                                                          |
| 17634 | ENSG00000102688   | CHNB3     | 18224 | 3  | 0.04 | protein_coding | 510122     | 510122    | choline kinase 3                                                                                                                                                               |
| 17670 | ENSG00000102967   | CEBPE     | 18257 | 4  | 0.04 | protein_coding | 2358815    | 2358825   | CCAAT/enhancer binding protein (C/EBP), epsilon                                                                                                                                |
| 17777 | ENSG00000193743   | RCHY1     | 18340 | 2  | 0.04 | protein_coding | 7840427    | 7843974   | ring finger and CHY zinc finger domain containing 1, E3 ubiquitin protein ligase                                                                                               |
| 17780 | ENSG00000116468   | KIF20B    | 18369 | 3  | 0.04 | protein_coding | 87412      | 87412     | kinasin binding protein                                                                                                                                                        |
| 17825 | ENSG00000102948   | TBC1D9    | 18398 | 9  | 0.04 | protein_coding | 141541919  | 141677274 | TBC1 domain family, member 9 (with GRAM domain)                                                                                                                                |
| 17936 | ENSG00000101380   | PSRC1     | 18444 | 3  | 0.04 | protein_coding | 20248896   | 20357142  | pataspeckle component 1                                                                                                                                                        |
| 17961 | ENSG00000102788   | TRK1      | 18459 | 3  | 0.04 | protein_coding | 115480365  | 115480365 | 115480365                                                                                                                                                                      |
| 17973 | ENSG00000159515   | PP1R15B   | 18473 | 3  | 0.04 | protein_coding | 20437215   | 20438019  | protein phosphatase 1, regulatory subunit 15B                                                                                                                                  |
| 18073 | ENSG000001008400  | GRIFFAP1  | 18553 | 3  | 0.04 | protein_coding | 4883034    | 48856675  | GRIP1 associated protein 1                                                                                                                                                     |
| 18088 | ENSG00000143371   | CDK21     | 18574 | 3  | 0.04 | protein_coding | 13008217   | 13008217  | cell division cycle 73                                                                                                                                                         |
| 18102 | ENSG000001008189  | DMT1      | 18578 | 9  | 0.04 | protein_coding | 61683081   | 61699796  | DMT1 (dimethyladenosine transferase 1 homolog (S. cerevisiae))                                                                                                                 |
| 18113 | ENSG00000156006   | NAT2      | 18585 | 4  | 0.04 | protein_coding | 18248755   | 18248728  | N-acetyltransferase 2 (paraneuronal N-acetyltransferase)                                                                                                                       |
| 18188 | ENSG00000102697   | CAPN8     | 18658 | 3  | 0.04 | protein_coding | 22711489   | 22780336  | capain B                                                                                                                                                                       |
| 18247 | ENSG00000137722   | YRN37B    | 18692 | 4  | 0.04 | protein_coding | 123339882  | 123339891 | vacuolar protein sorting 7 homolog B (S. cerevisiae)                                                                                                                           |
| 18261 | ENSG00000112419   | PHACTR2   | 18778 | 8  | 0.04 | protein_coding | 143897862  | 144152322 | phosphatase and actin regulator 2                                                                                                                                              |
| 18447 | ENSG000001078119  | SPTZ1     | 18802 | 3  | 0.04 | protein_coding | 18627946   | 18656338  | SPTZ, Suppressor of T, domain containing 1 (S. cerevisiae)                                                                                                                     |
| 18474 | ENSG00000106988   | CDK21     | 18809 | 3  | 0.04 | protein_coding | 42284261   | 42284261  | upstream binding transcription factor, RNA polymerase I                                                                                                                        |
| 18548 | ENSG00000198908   | Csrf17    | 18988 | 9  | 0.04 | protein_coding | 112721287  | 112728708 | chromosome 3 open reading frame 17                                                                                                                                             |
| 18586 | ENSG00000197290   | STGAL2    | 18932 | 2  | 0.04 | protein_coding | 70413336   | 70413340  | ST3 beta-galactoside alpha-2,6-sialyltransferase 2                                                                                                                             |
| 18694 | ENSG00000140441   | TRPS1     | 18937 | 2  | 0.04 | protein_coding | 118620724  | 118620724 | trichostatin A resistant syndrome                                                                                                                                              |
| 18674 | ENSG0000010084975 | SUJCO     | 18999 | 2  | 0.04 | protein_coding | 172501489  | 172501491 | SUN domain containing ossification factor                                                                                                                                      |
| 18710 | ENSG000001068145  | GLCC1     | 19021 | 4  | 0.04 | protein_coding | 8008425    | 8133902   | glucocorticoid induced transcript 1                                                                                                                                            |
| 18721 | ENSG00000105870   | ZBL1      | 19024 | 4  | 0.04 | protein_coding | 107343442  | 107343442 | Cbl proto-oncogene like 1, E3 ubiquitin protein ligase                                                                                                                         |
| 18772 | ENSG00000121486   | TRMT1L    | 19073 | 2  | 0.04 | protein_coding | 185097220  | 185126204 | RNA methyltransferase 1 homolog (S. cerevisiae)                                                                                                                                |
| 18780 | ENSG00000121393   | RNBA4     | 19077 | 7  | 0.04 | protein_coding | 92158087   | 92167319  | RNA binding motif protein 48                                                                                                                                                   |
| 18814 | ENSG0000010090564 | SCRN1     | 19162 | 2  | 0.04 | protein_coding | 84714621</ |           |                                                                                                                                                                                |



|       |                 |          |       |     |                |    |           |           |                                                                                  |
|-------|-----------------|----------|-------|-----|----------------|----|-----------|-----------|----------------------------------------------------------------------------------|
| 21327 | ENSG00000125124 | BBISA    | 21053 | 0.4 | protein_coding | 6  | 56550748  | 56554101  | Barclay-Bard syndrome 2                                                          |
| 21347 | ENSG00000130321 | FAM173A  | 21054 | 0.4 | protein_coding | 4  | 84532269  | 84535608  | family with sequence similarity 175, member A                                    |
| 21454 | ENSG00000111605 | CPFB6    | 21161 | 0.4 | protein_coding | 12 | 69653317  | 69669138  | cleavage and polyadenylation specific factor 6, 68Da                             |
| 21498 | ENSG00000089234 | BRAP     | 21192 | 0.4 | protein_coding | 12 | 112079950 | 112123790 | BRCA1 associated factor 6                                                        |
| 21653 | ENSG00000154630 | ACAP1    | 21214 | 0.4 | protein_coding | 20 | 24968999  | 25061816  | acyl-CoA synthetase short-chain family member 1                                  |
| 21674 | ENSG00000106393 | EBF3AL12 | 21323 | 0.4 | protein_coding | 1  | 19311815  | 193155194 | UDP-Gal 4-epimerase, beta 1, catalytic subunit, polypeptide 2                    |
| 21894 | ENSG00000148735 | PLEKH81  | 21357 | 0.4 | protein_coding | 10 | 115511213 | 115543188 | pleckstrin homology domain containing, family 5 member 1                         |
| 21897 | ENSG00000066549 | ZZZ1     | 21357 | 0.4 | protein_coding | 1  | 78629101  | 78149104  | zinc finger, Z2-type containing 3                                                |
| 22078 | ENSG00000066929 | LGNB14   | 21363 | 0.4 | protein_coding | 19 | 40194884  | 40203984  | leucin, glycylglycyl-, soluble, 14                                               |
| 22125 | ENSG00000196339 | FCN2     | 21670 | 0.4 | protein_coding | 9  | 13372458  | 133717954 | ficolin (collagen/fibronectin domain containing lectin) 2                        |
| 22161 | ENSG00000100031 | CSF1L1   | 21698 | 0.4 | protein_coding | 1  | 24939172  | 24942472  | chemokine receptor type 1                                                        |
| 22169 | ENSG00000121318 | TAS2R10  | 21703 | 0.4 | protein_coding | 12 | 10979716  | 10979687  | taste receptor, type 2, member 10                                                |
| 22178 | ENSG00000138308 | PLAGL2B  | 21710 | 0.4 | protein_coding | 10 | 74984928  | 74174536  | phospholipase A2, group IIB                                                      |
| 22200 | ENSG00000101321 | CFB2L2   | 21730 | 0.4 | protein_coding | 10 | 30562645  | 30619984  | central nervous system malformation 2-like                                       |
| 22298 | ENSG00000100229 | PPPR22   | 21785 | 0.4 | protein_coding | 22 | 50781733  | 50835314  | protein phosphatase 6, regulatory subunit 2                                      |
| 22323 | ENSG00000151861 | CSF2R2   | 21815 | 0.4 | protein_coding | 5  | 43444354  | 43483995  | chromosome 5 open reading frame 28                                               |
| 22346 | ENSG00000104220 | F0RL2    | 21816 | 0.4 | protein_coding | 7  | 75911927  | 75911929  | coagulation factor II (thrombin) receptor-like 2                                 |
| 22367 | ENSG00000156020 | ELMSAN1  | 21851 | 0.4 | protein_coding | 14 | 74181625  | 74256688  | ELM2 and Myb/SANT-like domain containing 1                                       |
| 22452 | ENSG00000125204 | WNT11    | 21911 | 0.4 | protein_coding | 12 | 49172398  | 49175459  | wingless-type MMTV integration site family, member 1                             |
| 22458 | ENSG00000101193 | CSF1L1   | 21912 | 0.4 | protein_coding | 11 | 47421696  | 47387121  | CSDFP, EGF-like family member 1                                                  |
| 22488 | ENSG00000256528 | POLG2    | 21932 | 0.4 | protein_coding | 12 | 62473902  | 62483154  | polymerase (DNA directed), gamma 2, accessory subunit                            |
| 22587 | ENSG00000168765 | GSTM4    | 22013 | 0.4 | protein_coding | 1  | 101198703 | 112008118 | glutathione S-transferase mu 4                                                   |
| 22588 | ENSG00000000538 | ALDH8B1  | 22017 | 0.4 | protein_coding | 11 | 67770448  | 67783144  | aldehyde dehydrogenase 8, family, member B1                                      |
| 22682 | ENSG00000080345 | RIF1     | 22257 | 0.4 | protein_coding | 2  | 15226397  | 15226427  | RAP1 interacting factor homolog (yeast)                                          |
| 22685 | ENSG00000158839 | PAGE5    | 22258 | 0.4 | protein_coding | X  | 55249788  | 55250541  | P antigen family, member 5 (prostate associated)                                 |
| 22920 | ENSG00000104290 | CARNS1   | 22283 | 0.4 | protein_coding | 11 | 78278705  | 78287201  | calnexin 5                                                                       |
| 22991 | ENSG00000047936 | ROS1     | 22348 | 0.4 | protein_coding | 6  | 11768463  | 11774718  | c-ros oncogene 1, receptor tyrosine kinase                                       |
| 23098 | ENSG00000120986 | KBTBD7   | 22397 | 0.4 | protein_coding | 13 | 41743969  | 41788702  | kech1 and BTB (POZ) domain containing 7                                          |
| 23084 | ENSG00000127498 | ATAD4    | 22404 | 0.4 | protein_coding | 13 | 18311296  | 18312900  | ATAD4, family 2, subfamily B, member 4                                           |
| 23095 | ENSG00000130383 | ZNF317   | 22426 | 0.4 | protein_coding | 19 | 9251056   | 9274100   | zinc finger protein 317                                                          |
| 23106 | ENSG00000124266 | ANKRD17  | 22433 | 0.4 | protein_coding | 4  | 73939093  | 74124515  | ankyrin repeat domain 17                                                         |
| 23118 | ENSG00000101182 | CSF1L1   | 22433 | 0.4 | protein_coding | 4  | 99717928  | 99717928  | lysozyme-like protein                                                            |
| 23124 | ENSG00000197914 | GSDMA    | 22442 | 0.4 | protein_coding | 17 | 38119228  | 38134019  | gasdermin A                                                                      |
| 23146 | ENSG00000166343 | MSS51    | 22446 | 0.4 | protein_coding | 10 | 75183339  | 75183319  | MSS51 mitochondrial transcriptional activator                                    |
| 23152 | ENSG00000101793 | KUAD3    | 22448 | 0.4 | protein_coding | 13 | 14132813  | 14132813  | KUAD3                                                                            |
| 23240 | ENSG00000185619 | PCGF3    | 22540 | 0.4 | protein_coding | 4  | 699537    | 784428    | polycomb group ring finger 3                                                     |
| 23271 | ENSG00000158161 | EVA3     | 22557 | 0.4 | protein_coding | 1  | 28256855  | 28412507  | eyes absent homolog 3 (Drosophila)                                               |
| 23298 | ENSG00000101629 | PKLKL1   | 22558 | 0.4 | protein_coding | 11 | 11458108  | 11458108  | neurospadin and PC-esterase domain family, member 2                              |
| 23307 | ENSG00000182156 | ENKPF7   | 22585 | 0.4 | protein_coding | 17 | 77704881  | 77716021  | acetylcholinesterase phosphatidylesterase 7                                      |
| 23314 | ENSG00000098652 | IFRD1    | 22591 | 0.4 | protein_coding | 7  | 12283223  | 11212172  | interferon-related developmental regulator 1                                     |
| 23333 | ENSG00000101504 | CYR11    | 22591 | 0.4 | protein_coding | 11 | 14888106  | 14888106  | cytochrome P450, family 2, subfamily R, polypeptide 1                            |
| 23339 | ENSG00000092929 | CAPN3    | 22619 | 0.4 | protein_coding | 15 | 42640001  | 42704516  | calpain 3, p84                                                                   |
| 23374 | ENSG00000160138 | CLDN22   | 22648 | 0.4 | protein_coding | 19 | 51810352  | 51817257  | claudin domain containing 22                                                     |
| 23388 | ENSG00000101199 | PKLR1    | 22655 | 0.4 | protein_coding | 4  | 71262927  | 71262927  | protein rich, isoform 1                                                          |
| 23427 | ENSG00000166268 | SULCL1   | 22663 | 0.4 | protein_coding | 6  | 12633617  | 12634358  | solute carrier family 1 (bile salt/taurochenodeoxycholate transporter), member 6 |
| 23442 | ENSG00000115942 | ORC2     | 22690 | 0.4 | protein_coding | 2  | 20173996  | 20182403  | origin recognition complex, subunit 2                                            |
| 23452 | ENSG00000186299 | GOLGA4R  | 22695 | 0.4 | protein_coding | 15 | 30659594  | 30730443  | galactose 4-epimerase                                                            |
| 23453 | ENSG00000086274 | MYN1     | 22717 | 0.4 | protein_coding | 6  | 16840919  | 16840704  | myosin                                                                           |
| 23512 | ENSG00000166801 | PNC9     | 22736 | 0.4 | protein_coding | 8  | 28174503  | 28200272  | preproenkephalin                                                                 |
| 23567 | ENSG00000191372 | ZNF92    | 22853 | 0.4 | protein_coding | 19 | 23708433  | 23810022  | zinc finger protein 92                                                           |
| 23674 | ENSG00000152466 | NMT2     | 22853 | 0.4 | protein_coding | 19 | 15144588  | 15157142  | N-myristoylation enzyme 2                                                        |
| 23675 | ENSG00000241973 | PLKA1    | 22874 | 0.4 | protein_coding | 22 | 21081979  | 21213705  | phosphatidylinositol 4-kinase, catalytic, alpha                                  |
| 23689 | ENSG00000159677 | LING1    | 22879 | 0.4 | protein_coding | 19 | 54689899  | 54693620  | lysozyme receptor cluster (LRC) member 1                                         |
| 23721 | ENSG00000161414 | GRIN3    | 22912 | 0.4 | protein_coding | 47 | 47117333  | 47117342  | glycine nucleotide binding protein (5 protein), gamma 8                          |
| 23768 | ENSG00000257949 | TEN1     | 22948 | 0.4 | protein_coding | 7  | 73975301  | 73986667  | TEN1 GST complex subunit 2                                                       |
| 23788 | ENSG00000170819 | BFSP2    | 23006 | 0.4 | protein_coding | 3  | 13311839  | 13319496  | beaded filament structural protein 2, p14kmin                                    |
| 23808 | ENSG00000114666 | ZNF262   | 23042 | 0.4 | protein_coding | 6  | 8785256   | 8785256   | zinc finger protein 262                                                          |
| 23842 | ENSG00000186135 | HIF1AN   | 23063 | 0.4 | protein_coding | 10 | 10228829  | 10219755  | hypoxia inducible factor 1, alpha subunit inhibitor                              |
| 23868 | ENSG00000197885 | TMD4     | 23117 | 0.4 | protein_coding | 5  | 15634293  | 15636298  | T-cell immunoglobulin and mucin domain containing 4                              |
| 23970 | ENSG00000101586 | ICB2L1   | 23121 | 0.4 | protein_coding | 11 | 19711438  | 19711438  | zinc finger and BTB domain containing 4                                          |
| 23976 | ENSG00000144130 | NTSDC4   | 23123 | 0.4 | protein_coding | 2  | 11347903  | 11350046  | 5'-nucleotidase domain containing 4                                              |
| 24029 | ENSG00000150373 | UPK3A    | 23167 | 0.4 | protein_coding | 22 | 45683983  | 45691755  | uroplakin 3A                                                                     |
| 24030 | ENSG00000101557 | IL7      | 23167 | 0.4 | protein_coding | 2  | 11367449  | 11367449  | interleukin 7                                                                    |
| 24040 | ENSG00000171169 | NAF1     | 23172 | 0.4 | protein_coding | 9  | 13082512  | 13083045  | nuclear apoptosis inducing factor 1                                              |
| 24083 | ENSG00000121053 | EPX      | 23209 | 0.4 | protein_coding | 17 | 56271098  | 56282535  | estradiol-inducible protein                                                      |
| 24117 | ENSG00000104962 | FAM191   | 23219 | 0.4 | protein_coding | 3  | 6805719   | 6805719   | family with sequence similarity 19, chromosome C-C motif-like, member A1         |
| 24145 | ENSG00000180999 | C1orf105 | 23261 | 0.4 | protein_coding | 1  | 17238928  | 17243791  | chromosome 1 open reading frame 105                                              |
| 24182 | ENSG00000204644 | ZFP97    | 23301 | 0.4 | protein_coding | 6  | 2964169   | 2964887   | ZFP97 zinc finger protein                                                        |
| 24193 | ENSG00000191793 | CCND3    | 23301 | 0.4 | protein_coding | 6  | 6800128   | 6800128   | cellular cyclin dependent kinase 3, subfamily H, member 2                        |
| 24218 | ENSG00000213185 | FAM24B   | 23337 | 0.4 | protein_coding | 10 | 12408554  | 124639157 | family with sequence similarity 24, member B                                     |
| 24270 | ENSG00000120471 | TP53AP1  | 23376 | 0.4 | protein_coding | 11 | 12884628  | 128819340 | tumor protein p53 regulated apoptosis inducing protein 1                         |
| 24286 | ENSG00000144481 | ARMC10   | 23383 | 0.4 | protein_coding | 2  | 23468103  | 23468103  | transient receptor potential cation channel, subfamily M, member 8               |
| 24290 | ENSG00000170982 | ARMC10   | 23389 | 0.4 | protein_coding | 7  | 10271528  | 10274026  | armadillo repeat containing 10                                                   |
| 24381 | ENSG00000198834 | ILK1     | 23474 | 0.4 | protein_coding | 1  | 20894947  | 20894938  | interleukin 10                                                                   |
| 24384 | ENSG00000100238 | RPL30    | 23474 | 0.4 | protein_coding | 1  | 17608089  | 17608089  | ribosomal protein L30 (RPL30) domain, member 1                                   |
| 24398 | ENSG00000170279 | C7orf53  | 23487 | 0.4 | protein_coding | 7  | 14828767  | 14831282  | chromosome 7 open reading frame 53                                               |
| 24410 | ENSG00000137400 | E2F5     | 23494 | 0.4 | protein_coding | 8  | 8068480   | 8112987   | E2F transcription factor 5, p130-binding                                         |
| 24420 | ENSG00000101628 | CPK6     | 23503 | 0.4 | protein_coding | 20 | 421893    | 421893    | serum/glucocorticoid induced kinase 2                                            |
| 24440 | ENSG00000104299 | INTS9    | 23517 | 0.4 | protein_coding | 8  | 2862578   | 2874749   | integrator complex subunit 9                                                     |
| 24450 | ENSG00000124487 | PCSB     | 23523 | 0.4 | protein_coding | 19 | 6293638   | 62937559  | pregnancy specific beta 1-glycoprotein 8                                         |
| 24513 | ENSG00000101358 | BAR1     | 23570 | 0.4 | protein_coding | 19 | 11573070  | 11573070  | BAR-related arginin receptor 3                                                   |
| 24521 | ENSG00000188277 | C1orf62  | 23574 | 0.4 | protein_coding | 15 | 41062159  | 41064443  | chromosome 15 open reading frame 62                                              |
| 24578 | ENSG00000182853 | VMO1     | 23512 | 0.4 | protein_coding | 17 | 4688580   | 4689728   | vitellogenin membrane outer layer 1 homolog (chicken)                            |
| 24598 | ENSG00000172624 | CELSR4   | 23532 | 0.4 | protein_coding | 16 | 61024992  | 61049461  | carboxylesterase 4A                                                              |
| 24608 | ENSG00000104206 | NTRK1    | 23541 | 0.4 | protein_coding | 10 | 10254817  | 10254817  | neurotrophic receptor tyrosine kinase type 3                                     |
| 24622 | ENSG00000202539 | NTFM     | 23568 | 0.4 | protein_coding | 17 | 17206649  | 17250977  | 5'-3' nucleotidase, mitochondrial                                                |
| 24633 | ENSG00000184687 | INMC     | 23668 | 0.4 | protein_coding | 15 | 15133970  | 15068794  | invertebrate nervous system (Drosophila)                                         |
| 24637 | ENSG00000098745 | CCND3    | 23669 | 0.4 | protein_coding | 6  | 45683986  | 45707612  | cellular cyclin dependent kinase 3, subfamily H, member 2                        |
| 24652 | ENSG00000101391 | CDKSRAP1 | 23687 | 0.4 | protein_coding | 20 | 31948645  | 31989367  | CDK5 regulatory subunit associated protein 1                                     |
| 24661 | ENSG00000129211 | NMR2C    | 23692 | 0.4 | protein_coding | 5  | 15171093  | 15181269  | neuraminidase 2, subunit C                                                       |
| 24662 | ENSG00000146295 | ANR10    | 23693 | 0.4 | protein_coding | 11 | 15988278  | 15988278  | ankyrin repeat and SOCS box containing 10                                        |
| 24689 | ENSG00000184459 | BFIC6    | 23730 | 0.4 | protein_coding | 22 | 52869854  | 52869854  | BF1 fold containing family C                                                     |
| 24702 | ENSG00000112699 | CLU5     | 23732 | 0.4 | protein_coding | 4  | 43149913  | 43192325  | clathrin 5                                                                       |
| 24724 | ENSG00000143443 | C2orf78  | 23732 | 0.4 | protein_coding | 6  | 18787672  | 18810197  | chromosome 2 open reading frame 78                                               |
| 24748 | ENSG00000184308 | CLCNKB   | 23772 | 0.4 | protein_coding | 1  | 18170272  | 18183803  | chloride channel, voltage sensitive Bk                                           |
| 24771 | ENSG00000178926 | MIR39P3  | 23799 | 0.4 | protein_coding | 11 | 18142502  | 18180027  | MAS-related GPR, member X3                                                       |

|       |                 |              |       |      |                |    |           |           |                                                                          |
|-------|-----------------|--------------|-------|------|----------------|----|-----------|-----------|--------------------------------------------------------------------------|
| 26712 | ENS00000142621  | FHAD1        | 24568 | 0.04 | protein_coding | 1  | 15573768  | 15726779  | forkhead-associated (FHA) phosphopeptide binding domain 1                |
| 26713 | ENS00000115509  | CRHM1        | 24570 | 0.04 | protein_coding | 9  | 12520397  | 12520397  | collyrin receptor, family 7, subfamily N, member 1                       |
| 26728 | ENS00000242028  | HYTK         | 24582 | 0.04 | protein_coding | 15 | 44063440  | 44095241  | huntingtin interacting protein K                                         |
| 26731 | ENS00000196159  | LRTM2        | 24584 | 0.04 | protein_coding | 12 | 1626433   | 1945918   | leucine-rich repeats and transmembrane domains 2                         |
| 26742 | ENS00000175318  | GRM3         | 24591 | 0.04 | protein_coding | 15 | 74251248  | 72480128  | GRAM domain containing 2                                                 |
| 26751 | ENS00000144919  | ZNFND15      | 24593 | 0.04 | protein_coding | 19 | 4643318   | 4643318   | zinc finger, ATX-type containing 15                                      |
| 26772 | ENS00000070701  | UPP2         | 24615 | 0.04 | protein_coding | 2  | 158733214 | 158926266 | uridine phosphorylase 2                                                  |
| 26779 | ENS00000188316  | PDYN         | 24618 | 0.04 | protein_coding | 10 | 72422599  | 72521197  | ADAM metalloproteinase with thrombospondin type 1 motif, 14              |
| 26784 | ENS00000195634  | PFRP17       | 24620 | 0.04 | protein_coding | 7  | 19592403  | 19743238  | protein phosphatase 1, regulatory subunit 17                             |
| 26813 | ENS00000194755  | APR32        | 24652 | 0.04 | protein_coding | 10 | 12421468  | 12421688  | age-related maculopathy susceptibility 2                                 |
| 26845 | ENS00000160404  | TOR2A        | 24708 | 0.04 | protein_coding | 9  | 330483803 | 330487604 | torin family 2, member A                                                 |
| 26901 | ENS00000198400  | NTRK1        | 24726 | 0.04 | protein_coding | 1  | 156785432 | 156819402 | neurotrophic tyrosine kinase, receptor, type 1                           |
| 26908 | ENS00000192504  | CERP2        | 24746 | 0.04 | protein_coding | 3  | 10144300  | 10149408  | centromeres protein 170c                                                 |
| 26941 | ENS000002081359 | TBA1         | 24761 | 0.04 | protein_coding | 16 | 31213206  | 31214773  | chromosome 16 open reading frame 98                                      |
| 26953 | ENS00000121075  | DTL1         | 24761 | 0.04 | protein_coding | 17 | 98529765  | 98529471  | T-box 4                                                                  |
| 26947 | ENS00000200924  | DTL2         | 24766 | 0.04 | protein_coding | 22 | 24309089  | 24314721  | D-disaphorone hydrolase-like                                             |
| 26948 | ENS00000173826  | KCNH6        | 24846 | 0.04 | protein_coding | 17 | 61606095  | 61626338  | potassium voltage-gated channel, subfamily H (eag-related), member 6     |
| 26907 | ENS00000143839  | REN          | 24855 | 0.04 | protein_coding | 1  | 204123444 | 204135485 | renin                                                                    |
| 26974 | ENS00000191529  | NANP52       | 24952 | 0.04 | protein_coding | 19 | 66419475  | 66419475  | nanos homology 2 (Drosophila)                                            |
| 26111 | ENS00000137747  | TMFRSS13     | 24960 | 0.04 | protein_coding | 11 | 117771358 | 117800174 | transmembrane protease, serine 13                                        |
| 26123 | ENS00000204740  | TMFRS2       | 24962 | 0.04 | protein_coding | 10 | 19462779  | 20079330  | MAM and LDL receptor class A domain containing 1                         |
| 26124 | ENS00000191349  | TMEH169      | 24994 | 0.04 | protein_coding | 2  | 216876569 | 216876569 | transmembrane protein 169                                                |
| 26131 | ENS00000153060  | TEK15        | 24988 | 0.04 | protein_coding | 16 | 10742135  | 10788802  | tekin 5                                                                  |
| 26135 | ENS00000182348  | ZNF8048      | 24913 | 0.04 | protein_coding | 7  | 88389882  | 88983346  | zinc finger protein 8048                                                 |
| 26165 | ENS00000154965  | DMH3         | 24930 | 0.04 | protein_coding | 16 | 20644433  | 21170792  | domain, autoantigen heavy chain 3                                        |
| 26180 | ENS00000104882  | KLC3         | 24852 | 0.04 | protein_coding | 19 | 45836852  | 45847776  | kinesin light chain 3                                                    |
| 26198 | ENS00000182804  | SMED1        | 24969 | 0.04 | protein_coding | 2  | 241938255 | 242034883 | smad, nidogen and EGF-like domains 1                                     |
| 26207 | ENS00000191701  | KLKB1        | 24983 | 0.04 | protein_coding | 8  | 9849388   | 9849388   | domain, autoantigen heavy chain 3                                        |
| 26249 | ENS00000155553  | NSG          | 25003 | 0.04 | protein_coding | 14 | 77731826  | 77737655  | neuroglobin                                                              |
| 26266 | ENS00000186021  | ZNF208       | 25017 | 0.04 | protein_coding | 19 | 22115760  | 22193751  | zinc finger protein 208                                                  |
| 26276 | ENS00000156667  | SLC22A10     | 25019 | 0.04 | protein_coding | 12 | 10866320  | 10866320  | solute carrier family 22 (organic anion transporters), member 7          |
| 26273 | ENS00000101787  | LHX3         | 25019 | 0.04 | protein_coding | 9  | 139080500 | 139090555 | LIM homeobox 3                                                           |
| 26290 | ENS000002024612 | FOXK2        | 25042 | 0.04 | protein_coding | 9  | 79634571  | 79635869  | forkhead box B2                                                          |
| 26371 | ENS00000195928  | AC10522      | 25073 | 0.04 | protein_coding | 3  | 5281333   | 5281333   | phenylalanine hydroxylase 2, mitochondrial                               |
| 26376 | ENS00000193715  | ANGPTL5      | 25118 | 0.04 | protein_coding | 11 | 101781405 | 101787253 | angiopoietin-like 5                                                      |
| 26385 | ENS00000144844  | GAL4         | 25125 | 0.04 | protein_coding | 3  | 30747692  | 30836257  | glutamate decarboxylase-like 1                                           |
| 26392 | ENS00000190558  | LOC100296762 | 25126 | 0.04 | protein_coding | 8  | 2011368   | 120183769 | UchLanch-related protein                                                 |
| 26401 | ENS00000176949  | JAMIP2       | 25140 | 0.04 | protein_coding | 5  | 146867990 | 147162338 | janus kinase and microtubule interacting protein 2                       |
| 26418 | ENS00000191777  | GPR123       | 25152 | 0.04 | protein_coding | 10 | 134884433 | 134845719 | G-protein-coupled receptor 123                                           |
| 26433 | ENS00000191969  | KIAA0369     | 25158 | 0.04 | protein_coding | 19 | 191814    | 191814    | potassium voltage-gated channel, subfamily H (eag-related), member 8     |
| 26448 | ENS00000198198  | KIAA0355     | 25188 | 0.04 | protein_coding | 19 | 34745442  | 34846481  | KIAA0355                                                                 |
| 26450 | ENS00000146215  | CRP3         | 25191 | 0.04 | protein_coding | 6  | 43247448  | 43276535  | cysteine-rich protein 3                                                  |
| 26481 | ENS00000149501  | CUB1         | 25220 | 0.04 | protein_coding | 11 | 86660776  | 86134151  | collectin domain containing 81                                           |
| 26486 | ENS00000198963  | HSPB3        | 25236 | 0.04 | protein_coding | 16 | 20740268  | 20740268  | Hsp70 binding protein 3                                                  |
| 26501 | ENS00000133685  | DYDC2        | 25234 | 0.04 | protein_coding | 10 | 82140501  | 82127629  | DYF30 domain containing 2                                                |
| 26502 | ENS000002049903 | THEGL        | 25235 | 0.04 | protein_coding | 4  | 67380775  | 67469973  | theta germinal protein-like                                              |
| 26504 | ENS00000192151  | LOC100296751 | 25235 | 0.04 | protein_coding | 22 | 30681227  | 30695471  | UchLanch-related protein                                                 |
| 26545 | ENS00000124143  | ARHGAP40     | 25274 | 0.04 | protein_coding | 20 | 37230577  | 37279878  | Rho GTPase activating protein 40                                         |
| 26551 | ENS00000186511  | EVAT1        | 25277 | 0.04 | protein_coding | 4  | 63214602  | 63225329  | HIC1/2/4/17, UchLanch-related protein                                    |
| 26551 | ENS00000186978  | EVAT2        | 25278 | 0.04 | protein_coding | 21 | 33743414  | 33887107  | eva 2, homolog (C. elegans)                                              |
| 26569 | ENS00000132849  | INADL        | 25295 | 0.04 | protein_coding | 1  | 62204149  | 62629592  | inad-like (Drosophila)                                                   |
| 26569 | ENS00000183378  | OVCH2        | 25302 | 0.04 | protein_coding | 11 | 17136699  | 17727988  | ovochymase 2 (amino-subtilisin)                                          |
| 26590 | ENS00000196311  | SPIC1        | 25311 | 0.04 | protein_coding | 13 | 113161565 | 113216324 | sonic and cyclin-like associated protein 11                              |
| 26621 | ENS000003007402 | CACNA2D2     | 25341 | 0.04 | protein_coding | 3  | 53040233  | 50541075  | calcium channel, voltage-dependent, alpha 2delta subunit 2               |
| 26635 | ENS00000186026  | ZNF284       | 25348 | 0.04 | protein_coding | 19 | 44576297  | 44583769  | zinc finger protein 284                                                  |
| 26638 | ENS00000198265  | SLC22A11     | 25349 | 0.04 | protein_coding | 17 | 64323268  | 64323268  | solute carrier family 22 (organic anion transporters), member 11         |
| 26654 | ENS00000202496  | LOC100296746 | 25363 | 0.04 | protein_coding | 17 | 41994576  | 41995326  | family with sequence similarity 215, member A (non-protein coding)       |
| 26700 | ENS00000154303  | FLCN         | 25392 | 0.04 | protein_coding | 17 | 17115526  | 171140302 | folliculin                                                               |
| 26701 | ENS00000192053  | LOC100296752 | 25392 | 0.04 | protein_coding | 12 | 10866320  | 10866320  | chromosome 10 open reading frame 95                                      |
| 26707 | ENS00000196633  | GCK          | 25403 | 0.04 | protein_coding | 7  | 4418372   | 44237789  | glucokinase (hexokinase 4)                                               |
| 26723 | ENS00000120370  | GORAB        | 25419 | 0.04 | protein_coding | 1  | 170501270 | 170525847 | glycyl, RAB8-interacting                                                 |
| 26729 | ENS00000195035  | CHC17        | 25427 | 0.04 | protein_coding | 2  | 11002404  | 11002404  | chromosome 1 open reading frame 127                                      |
| 26733 | ENS00000141068  | KSR1         | 25429 | 0.04 | protein_coding | 17 | 2574870   | 25834461  | kinase suppressor of ras 1                                               |
| 26738 | ENS00000195035  | WSPC2        | 25433 | 0.04 | protein_coding | 12 | 10852348  | 10844314  | WISC domain containing 2                                                 |
| 26745 | ENS00000192198  | LOC100296753 | 25433 | 0.04 | protein_coding | 12 | 10852348  | 10844314  | WISC domain containing 2                                                 |
| 26753 | ENS00000108910  | C20orf26     | 25443 | 0.04 | protein_coding | 20 | 20033158  | 20033158  | chromosome 20 open reading frame 26                                      |
| 26782 | ENS00000195650  | FAM122C      | 25473 | 0.04 | protein_coding | X  | 133930819 | 133989640 | family with sequence similarity 122C                                     |
| 26784 | ENS00000170728  | AGT2         | 25474 | 0.04 | protein_coding | 8  | 1947438   | 1947438   | alkaline endo 2                                                          |
| 26797 | ENS00000191615  | POU4F2       | 25489 | 0.04 | protein_coding | 4  | 14750045  | 14756326  | POU class 4 homeobox 2                                                   |
| 26803 | ENS00000198150  | CLNKA7       | 25512 | 0.04 | protein_coding | 1  | 16485370  | 16805045  | chloride channel, voltage-sensitive Ka                                   |
| 26818 | ENS00000198188  | ANKRD17      | 25517 | 0.04 | protein_coding | 19 | 3308138   | 33124166  | ankyrin repeat domain 17 (SP50 domain)                                   |
| 26851 | ENS00000202523  | SARNP        | 25527 | 0.04 | protein_coding | 12 | 59146247  | 59152140  | SAP domain containing ribonucleoprotein                                  |
| 26854 | ENS00000197356  | SCUBE2       | 25528 | 0.04 | protein_coding | 11 | 8041071   | 8195881   | signal peptide, CUB domain, EGF-like 2                                   |
| 26861 | ENS00000197356  | SCUBE2       | 25528 | 0.04 | protein_coding | 12 | 596818    | 54835883  | UchLanch-related protein                                                 |
| 26868 | ENS00000148832  | PAOX         | 25540 | 0.04 | protein_coding | 10 | 135126565 | 13520598  | polyamine oxidase (sex-N4 amino)                                         |
| 26913 | ENS00000197851  | CCER1        | 25577 | 0.04 | protein_coding | 12 | 91299399  | 91498953  | collectin domain containing 11                                           |
| 26968 | ENS00000191445  | KIAA0339     | 25618 | 0.04 | protein_coding | 12 | 1974948   | 19771386  | KIAA0339                                                                 |
| 27003 | ENS00000197785  | ZNF558       | 25662 | 0.04 | protein_coding | 19 | 892300    | 894304    | zinc finger protein 558                                                  |
| 27020 | ENS00000200827  | ZFAT         | 25678 | 0.04 | protein_coding | 8  | 135490031 | 135725292 | zinc finger and AT hook domain containing                                |
| 27023 | ENS00000145993  | RFX1         | 25712 | 0.04 | protein_coding | 11 | 11321632  | 11321632  | family with sequence similarity 19, chromosome 10 (C-C motif), member A3 |
| 27068 | ENS00000171509  | RFX1         | 25723 | 0.04 | protein_coding | 4  | 15923463  | 15957424  | relaxin/insulin-like family peptide receptor 1                           |
| 27081 | ENS00000182746  | FCRLB        | 25739 | 0.04 | protein_coding | 1  | 161691353 | 161697933 | Fc receptor-like B                                                       |
| 27088 | ENS00000183309  | ZNF283       | 25742 | 0.04 | protein_coding | 8  | 144718183 | 144739900 | zinc finger protein 283                                                  |
| 27121 | ENS00000101713  | KCNT1        | 25752 | 0.04 | protein_coding | 3  | 139518011 | 139549492 | potassium channel, subfamily J, member 1                                 |
| 27145 | ENS00000157219  | HTRSA        | 25774 | 0.04 | protein_coding | 7  | 154862034 | 154877459 | 5-hydroxytryptamine (serotonin) receptor 5A, G-protein-coupled           |
| 27145 | ENS00000202390  | LOC100296754 | 25783 | 0.04 | protein_coding | 12 | 16151059  | 16221430  | UchLanch-related protein                                                 |
| 27151 | ENS00000196884  | RBM19        | 25793 | 0.04 | protein_coding | 12 | 114244543 | 114404176 | RNA binding motif protein 19                                             |
| 27152 | ENS00000196884  | ASB2         | 25798 | 0.04 | protein_coding | 17 | 13348105  | 132911983 | acid-sensing (voltage-gated) ion channel 2                               |
| 27159 | ENS00000191239  | BGAT2        | 25805 | 0.04 | protein_coding | 6  | 17568382  | 17666641  | beta-1,3-glucuronidyltransferase 2 (glucuronosyltransferase 5)           |
| 27201 | ENS00000194498  | ZNF134P      | 25849 | 0.04 | protein_coding | 8  | 220462862 | 220462862 | zinc finger protein 134                                                  |
| 27318 | ENS00000186486  | ZNF396       | 25828 | 0.04 | protein_coding | 18 | 32946681  | 32957901  | zinc finger protein 396                                                  |
| 27329 | ENS00000191694  | HAPLN1       | 25841 | 0.04 | protein_coding | 19 | 19688490  | 19713805  | hyaluronan and associated link protein 4                                 |
| 27334 | ENS00000202598  | LOC100296755 | 25849 | 0.04 | protein_coding | 18 | 11810445  | 11810445  | Protein LOC100296755                                                     |
| 27372 | ENS00000132781  | MUTYH        | 25974 | 0.04 | protein_coding | 1  | 45734835  | 45806142  | mutY homolog                                                             |
| 27376 | ENS00000186997  | CHP7         | 25979 | 0.04 | protein_coding | 7  | 99717226  | 99723134  | CHP7 signaling regulator 4                                               |
| 27401 | ENS00000192026  | FAM103       | 25979 | 0.04 | protein_coding | 15 | 2474257   | 24833993  |                                                                          |

Table with columns for gene ID, gene symbol, coordinates, and description. It lists numerous genes such as ELL3, ZNF773, LRTOMT, and others, along with their genomic coordinates and functional descriptions.

|       |                 |         |       |      |    |           |           |  |                                                                                                      |
|-------|-----------------|---------|-------|------|----|-----------|-----------|--|------------------------------------------------------------------------------------------------------|
| 7775  | ENSG00000009020 | FCGBP   | 10499 | 0.04 |    |           |           |  |                                                                                                      |
| 8146  | ENSG00000117148 |         | 10843 | 0.04 | 19 | 40353963  | 40440533  |  | Fc fragment of IgG binding protein                                                                   |
| 9258  | ENSG00000256393 |         | 11753 | 0.04 |    |           |           |  |                                                                                                      |
| 9317  | ENSG00000265517 |         | 11804 | 0.04 |    |           |           |  |                                                                                                      |
| 9454  | ENSG00000230903 |         | 11903 | 0.04 | 15 | 83041000  | 83125316  |  | ribosomal protein L8 pseudogene 8                                                                    |
| 9863  | ENSG00000259686 |         | 12520 | 0.04 |    |           |           |  |                                                                                                      |
| 10481 | ENSG00000231342 |         | 12721 | 0.04 | X  | 153809189 | 153810261 |  | activating transcription factor 4 pseudogene 2                                                       |
| 10677 | ENSG00000269751 |         | 12626 | 0.04 |    |           |           |  |                                                                                                      |
| 11855 | ENSG00000269315 |         | 13877 | 0.04 |    |           |           |  |                                                                                                      |
| 12170 | ENSG00000215261 |         | 14192 | 0.04 |    |           |           |  |                                                                                                      |
| 12584 | ENSG00000235846 |         | 14421 | 0.04 |    |           |           |  |                                                                                                      |
| 12885 | ENSG00000259071 |         | 14647 | 0.04 |    |           |           |  |                                                                                                      |
| 13881 | ENSG00000220472 |         | 15234 | 0.04 |    |           |           |  |                                                                                                      |
| 14183 | ENSG00000225973 |         | 15604 | 0.04 |    |           |           |  |                                                                                                      |
| 14321 | ENSG00000215728 | FAM21B  | 15717 | 0.04 | 10 | 47894023  | 47949412  |  | family with sequence similarity 21, member B                                                         |
| 14570 | ENSG00000224831 |         | 15928 | 0.04 |    |           |           |  |                                                                                                      |
| 14572 | ENSG00000262728 |         | 15959 | 0.04 |    |           |           |  |                                                                                                      |
| 14886 | ENSG00000229436 |         | 16156 | 0.04 |    |           |           |  |                                                                                                      |
| 15280 | ENSG00000208187 |         | 16464 | 0.04 |    |           |           |  |                                                                                                      |
| 16005 | ENSG00000228292 |         | 17105 | 0.04 |    |           |           |  |                                                                                                      |
| 16145 | ENSG00000241899 |         | 17138 | 0.04 |    |           |           |  |                                                                                                      |
| 16770 | ENSG00000258546 |         | 17620 | 0.04 |    |           |           |  |                                                                                                      |
| 16811 | ENSG00000254281 |         | 17650 | 0.04 |    |           |           |  |                                                                                                      |
| 16838 | ENSG00000232258 |         | 17672 | 0.04 |    |           |           |  |                                                                                                      |
| 16875 | ENSG00000288609 |         | 17688 | 0.04 |    |           |           |  |                                                                                                      |
| 17315 | ENSG00000227499 |         | 17997 | 0.04 |    |           |           |  |                                                                                                      |
| 17410 | ENSG00000101073 |         | 18099 | 0.04 | 11 | 94800056  | 94804388  |  | serine/arginine-rich splicing factor 8                                                               |
| 17902 | ENSG00000240754 |         | 18423 | 0.04 |    |           |           |  |                                                                                                      |
| 18043 | ENSG00000238018 |         | 18531 | 0.04 |    |           |           |  |                                                                                                      |
| 18093 | ENSG00000230373 |         | 18566 | 0.04 |    |           |           |  |                                                                                                      |
| 18274 | ENSG00000234449 |         | 18709 | 0.04 |    |           |           |  |                                                                                                      |
| 18335 | ENSG00000224447 |         | 18753 | 0.04 |    |           |           |  |                                                                                                      |
| 18505 | ENSG00000241173 |         | 18874 | 0.04 |    |           |           |  |                                                                                                      |
| 18562 | ENSG00000227934 |         | 18915 | 0.04 |    |           |           |  |                                                                                                      |
| 18592 | ENSG00000250436 |         | 19231 | 0.04 |    |           |           |  |                                                                                                      |
| 19023 | ENSG00000230337 |         | 19385 | 0.04 |    |           |           |  |                                                                                                      |
| 19115 | ENSG00000205405 |         | 19353 | 0.04 |    |           |           |  |                                                                                                      |
| 19395 | ENSG00000268978 |         | 19563 | 0.04 |    |           |           |  |                                                                                                      |
| 19703 | ENSG00000250878 |         | 19791 | 0.04 |    |           |           |  |                                                                                                      |
| 19790 | ENSG00000259381 |         | 19862 | 0.04 |    |           |           |  |                                                                                                      |
| 19992 | ENSG00000272567 |         | 20021 | 0.04 |    |           |           |  |                                                                                                      |
| 20073 | ENSG00000268689 |         | 20549 | 0.04 |    |           |           |  |                                                                                                      |
| 20628 | ENSG00000272181 |         | 20672 | 0.04 |    |           |           |  |                                                                                                      |
| 20872 | ENSG00000248350 |         | 20696 | 0.04 |    |           |           |  |                                                                                                      |
| 20884 | ENSG00000204701 |         | 20716 | 0.04 |    |           |           |  |                                                                                                      |
| 21105 | ENSG00000170769 |         | 20871 | 0.04 |    |           |           |  |                                                                                                      |
| 21463 | ENSG00000287317 |         | 21188 | 0.04 |    |           |           |  |                                                                                                      |
| 21531 | ENSG00000236980 |         | 21215 | 0.04 |    |           |           |  |                                                                                                      |
| 21701 | ENSG00000289772 |         | 21356 | 0.04 |    |           |           |  |                                                                                                      |
| 21793 | ENSG00000260006 |         | 21421 | 0.04 |    |           |           |  |                                                                                                      |
| 21922 | ENSG00000049319 |         | 21520 | 0.04 | 2  | 31747550  | 31806138  |  | steroid-5-alpha-reductase, alpha polypeptide 2 (3-oxo-5-alpha-steroid delta 4-dehydrogenase alpha 2) |
| 21946 | ENSG00000232723 |         | 21537 | 0.04 |    |           |           |  |                                                                                                      |
| 22031 | ENSG00000298151 | CCL3L1  | 21604 | 0.04 | 17 | 34522268  | 34524157  |  | chemokine (C-C motif) ligand 3-like 3                                                                |
| 22114 | ENSG00000205142 |         | 21666 | 0.04 |    |           |           |  |                                                                                                      |
| 22150 | ENSG00000129270 | MMP28   | 21893 | 0.04 | 7  | 34083268  | 34122711  |  | matrix metalloproteinase 28                                                                          |
| 22221 | ENSG00000238336 |         | 21744 | 0.04 | 17 | 12999119  | 12999222  |  | Small nuclear RNA U13                                                                                |
| 22345 | ENSG00000213688 |         | 21834 | 0.04 |    |           |           |  |                                                                                                      |
| 22404 | ENSG00000236120 |         | 21875 | 0.04 |    |           |           |  |                                                                                                      |
| 22406 | ENSG00000208174 |         | 21877 | 0.04 |    |           |           |  |                                                                                                      |
| 22468 | ENSG00000205182 |         | 21917 | 0.04 |    |           |           |  |                                                                                                      |
| 22569 | ENSG00000233028 |         | 22001 | 0.04 |    |           |           |  |                                                                                                      |
| 22617 | ENSG00000227785 |         | 22040 | 0.04 |    |           |           |  |                                                                                                      |
| 22694 | ENSG00000237699 |         | 22104 | 0.04 |    |           |           |  |                                                                                                      |
| 22763 | ENSG00000180284 |         | 22153 | 0.04 |    |           |           |  |                                                                                                      |
| 22864 | ENSG00000221590 |         | 22222 | 0.04 |    |           |           |  |                                                                                                      |
| 22960 | ENSG00000231795 |         | 22347 | 0.04 |    |           |           |  |                                                                                                      |
| 23011 | ENSG00000183663 |         | 22364 | 0.04 |    |           |           |  |                                                                                                      |
| 23051 | ENSG00000228851 |         | 22393 | 0.04 |    |           |           |  |                                                                                                      |
| 23087 | ENSG00000214144 |         | 22423 | 0.04 |    |           |           |  |                                                                                                      |
| 23134 | ENSG00000255539 |         | 22449 | 0.04 |    |           |           |  |                                                                                                      |
| 23181 | ENSG00000271201 |         | 22490 | 0.04 |    |           |           |  |                                                                                                      |
| 23210 | ENSG00000244235 |         | 22517 | 0.04 |    |           |           |  |                                                                                                      |
| 23215 | ENSG00000214566 |         | 22522 | 0.04 | 6  | 57868989  | 57897949  |  | glyceraldehyde 3-phosphate dehydrogenase pseudogene 41                                               |
| 23272 | ENSG00000238577 |         | 22558 | 0.04 |    | 116416289 | 116416353 |  | Small nuclear RNA U13                                                                                |
| 23294 | ENSG00000231271 |         | 22763 | 0.04 |    |           |           |  |                                                                                                      |
| 23338 | ENSG00000264246 |         | 22810 | 0.04 |    |           |           |  |                                                                                                      |
| 23406 | ENSG00000237841 |         | 22867 | 0.04 |    |           |           |  |                                                                                                      |
| 23423 | ENSG00000213791 |         | 22877 | 0.04 |    |           |           |  |                                                                                                      |
| 23462 | ENSG00000287771 |         | 22700 | 0.04 |    |           |           |  |                                                                                                      |
| 23503 | ENSG00000261606 |         | 22732 | 0.04 |    |           |           |  |                                                                                                      |
| 23508 | ENSG00000231059 |         | 22734 | 0.04 |    |           |           |  |                                                                                                      |
| 23540 | ENSG00000227805 |         | 22752 | 0.04 |    |           |           |  |                                                                                                      |
| 23584 | ENSG00000220105 |         | 22774 | 0.04 |    |           |           |  |                                                                                                      |
| 23582 | ENSG00000271590 |         | 22789 | 0.04 |    |           |           |  |                                                                                                      |
| 23621 | ENSG00000234402 |         | 22820 | 0.04 |    |           |           |  |                                                                                                      |
| 23629 | ENSG00000271264 |         | 22826 | 0.04 |    |           |           |  |                                                                                                      |
| 23636 | ENSG00000264006 |         | 22837 | 0.04 |    |           |           |  |                                                                                                      |
| 23680 | ENSG00000269886 |         | 22884 | 0.04 |    |           |           |  |                                                                                                      |
| 23808 | ENSG00000219391 |         | 22886 | 0.04 |    |           |           |  |                                                                                                      |
| 23884 | ENSG00000264581 |         | 22921 | 0.04 |    |           |           |  |                                                                                                      |
| 23886 | ENSG00000264552 |         | 22922 | 0.04 |    |           |           |  |                                                                                                      |
| 23915 | ENSG00000225761 |         | 22972 | 0.04 |    |           |           |  |                                                                                                      |
| 23923 | ENSG00000281760 |         | 22983 | 0.04 |    |           |           |  |                                                                                                      |
| 23969 | ENSG00000189265 | AGAP9   | 23109 | 0.04 | 10 | 48189612  | 48237508  |  | AR/GAP with GTPase domain, ankyrin repeat and PH domain 9                                            |
| 24004 | ENSG00000265194 |         | 23147 | 0.04 |    |           |           |  |                                                                                                      |
| 24023 | ENSG00000226281 |         | 23164 | 0.04 |    |           |           |  |                                                                                                      |
| 24038 | ENSG00000249489 |         | 23170 | 0.04 |    |           |           |  |                                                                                                      |
| 24079 | ENSG00000240602 |         | 23205 | 0.04 |    |           |           |  |                                                                                                      |
| 24097 | ENSG00000251137 |         | 23223 | 0.04 |    |           |           |  |                                                                                                      |
| 24106 | ENSG00000245662 |         | 23220 | 0.04 |    |           |           |  |                                                                                                      |
| 24121 | ENSG00000234902 |         | 23243 | 0.04 |    |           |           |  |                                                                                                      |
| 24147 | ENSG00000217635 |         | 23284 | 0.04 |    |           |           |  |                                                                                                      |
| 24187 | ENSG00000224163 |         | 23304 | 0.04 |    |           |           |  |                                                                                                      |
| 24206 | ENSG00000204771 |         | 23325 | 0.04 |    |           |           |  |                                                                                                      |
| 24208 | ENSG00000236991 |         | 23326 | 0.04 |    |           |           |  |                                                                                                      |
| 24212 | ENSG00000240992 |         | 23329 | 0.04 |    |           |           |  |                                                                                                      |
| 24220 | ENSG00000244436 |         | 23342 | 0.04 |    |           |           |  |                                                                                                      |
| 24222 | ENSG00000236116 |         | 23342 | 0.04 |    |           |           |  |                                                                                                      |
| 24240 | ENSG00000202789 |         | 23352 | 0.04 |    |           |           |  |                                                                                                      |
| 24324 | ENSG00000270019 |         | 23415 | 0.04 |    |           |           |  |                                                                                                      |
| 24333 | ENSG00000102069 | UBE2L   | 23421 | 0.04 | X  | 142967173 | 142968355 |  | ubiquitin-conjugating enzyme E2N-like                                                                |
| 24355 | ENSG00000204832 |         | 23432 | 0.04 |    |           |           |  |                                                                                                      |
| 24357 | ENSG00000249451 |         | 23456 | 0.04 |    |           |           |  |                                                                                                      |
| 24363 | ENSG00000206186 |         | 23459 | 0.04 |    |           |           |  |                                                                                                      |
| 24418 | ENSG00000232033 |         | 23499 | 0.04 |    |           |           |  |                                                                                                      |
| 24428 | ENSG00000220343 |         | 23506 | 0.04 |    |           |           |  |                                                                                                      |
| 24431 | ENSG00000252899 |         | 23509 | 0.04 |    |           |           |  |                                                                                                      |
| 24473 | ENSG00000135689 | NUDT18  | 23536 | 0.04 | 8  | 21964383  | 21966932  |  | nucleoside diphosphate linked moiety X-type motif 18                                                 |
| 24481 | ENSG00000271208 |         | 23544 | 0.04 |    |           |           |  |                                                                                                      |
| 24491 | ENSG00000225812 |         | 23553 | 0.04 |    |           |           |  |                                                                                                      |
| 24508 | ENSG00000189159 | TBC1D3F | 23665 | 0.04 | 17 | 36283971  | 36284915  |  | TBC1 domain family, member 3F                                                                        |
| 24574 | ENSG00000253760 |         | 23612 | 0.04 |    |           |           |  |                                                                                                      |
| 24610 | ENSG00000239213 |         | 23648 | 0.04 |    |           |           |  |                                                                                                      |
| 24623 | ENSG00000269691 |         | 23669 | 0.04 |    |           |           |  |                                                                                                      |
| 24631 | ENSG00000235115 |         | 23698 | 0.04 |    |           |           |  |                                                                                                      |
| 24639 | ENSG00000231429 |         | 23672 | 0.04 |    |           |           |  |                                                                                                      |
| 24674 | ENSG00000266549 |         | 23707 | 0.04 |    |           |           |  |                                                                                                      |
| 24705 | ENSG00000243164 |         | 23738 | 0.04 |    |           |           |  |                                                                                                      |
| 24708 | ENSG00000235403 |         | 23739 | 0.04 |    |           |           |  |                                                                                                      |
| 24728 | ENSG00000227639 |         | 23753 | 0.04 |    |           |           |  |                                                                                                      |
| 24731 | ENSG00000208196 |         | 23759 | 0.04 |    |           |           |  |                                                                                                      |
| 24754 | ENSG00000226273 |         | 23777 | 0.04 |    |           |           |  |                                                                                                      |
| 24799 | ENSG00000281401 |         |       |      |    |           |           |  |                                                                                                      |



|       |                  |            |         |      |    |           |           |  |                                                              |
|-------|------------------|------------|---------|------|----|-----------|-----------|--|--------------------------------------------------------------|
| 26074 | ENSG00000248261  |            | 24038.9 | 0.04 |    |           |           |  |                                                              |
| 26091 | ENSG00000237243  |            | 24049.7 | 0.04 |    |           |           |  |                                                              |
| 26121 | ENSG00000230903  |            | 24079.8 | 0.04 |    |           |           |  |                                                              |
| 26144 | ENSG00000215513  | PKAKP1     | 24098.7 | 0.04 | 22 | 20383524  | 20427835  |  | phosphatidylinositol 4-kinase, catalytic, alpha pseudogene 1 |
| 26148 | ENSG00000268429  |            | 24103.0 | 0.04 |    |           |           |  |                                                              |
| 26168 | ENSG00000237673  |            | 24127.5 | 0.04 |    |           |           |  |                                                              |
| 26170 | ENSG00000261983  |            | 24129.4 | 0.04 |    |           |           |  |                                                              |
| 26172 | ENSG00000237153  |            | 24132.3 | 0.04 |    |           |           |  |                                                              |
| 26177 | ENSG00000265451  |            | 24138.6 | 0.04 |    |           |           |  |                                                              |
| 26179 | ENSG00000256811  |            | 24139.2 | 0.04 |    |           |           |  |                                                              |
| 26227 | ENSG00000265774  | SPANX2-OT1 | 24174.2 | 0.04 | X  | 140595843 | 140738057 |  | SPANX2 overlapping transcript 1 (non-protein coding)         |
| 26291 | ENSG00000230965  |            | 24181.5 | 0.04 |    |           |           |  |                                                              |
| 26292 | ENSG00000256981  |            | 24193.4 | 0.04 |    |           |           |  |                                                              |
| 26293 | ENSG00000268401  |            | 24193.4 | 0.04 |    |           |           |  |                                                              |
| 26294 | ENSG00000236956  |            | 24195.4 | 0.04 |    |           |           |  |                                                              |
| 26274 | ENSG00000224796  |            | 24211.9 | 0.04 |    |           |           |  |                                                              |
| 26307 | ENSG00000220377  |            | 24238.6 | 0.04 |    |           |           |  |                                                              |
| 26317 | ENSG00000273388  |            | 24242.6 | 0.04 |    |           |           |  |                                                              |
| 26330 | ENSG00000268121  |            | 24256.9 | 0.04 |    |           |           |  |                                                              |
| 26342 | ENSG00000254804  |            | 24272.9 | 0.04 |    |           |           |  |                                                              |
| 26391 | ENSG00000237233  |            | 24303.1 | 0.04 |    |           |           |  |                                                              |
| 26405 | ENSG00000268932  |            | 24330.5 | 0.04 |    |           |           |  |                                                              |
| 26411 | ENSG00000262322  |            | 24338.2 | 0.04 |    |           |           |  |                                                              |
| 26445 | ENSG00000211155  |            | 24387.6 | 0.04 |    |           |           |  |                                                              |
| 26458 | ENSG00000268955  |            | 24371.3 | 0.04 |    |           |           |  |                                                              |
| 26459 | ENSG00000228328  |            | 24371.9 | 0.04 |    |           |           |  |                                                              |
| 26462 | ENSG00000234108  |            | 24373.2 | 0.04 |    |           |           |  |                                                              |
| 26463 | ENSG00000230882  |            | 24373.8 | 0.04 |    |           |           |  |                                                              |
| 26478 | ENSG00000268406  |            | 24388.7 | 0.04 |    |           |           |  |                                                              |
| 26489 | ENSG00000265477  |            | 24394.3 | 0.04 |    |           |           |  |                                                              |
| 26490 | ENSG00000251613  |            | 24395.4 | 0.04 |    |           |           |  |                                                              |
| 26507 | ENSG00000215905  |            | 24406.9 | 0.04 |    |           |           |  |                                                              |
| 26514 | ENSG00000231338  |            | 24412.9 | 0.04 |    |           |           |  |                                                              |
| 26516 | ENSG00000227502  |            | 24415.2 | 0.04 |    |           |           |  |                                                              |
| 26568 | ENSG00000234115  |            | 24438.2 | 0.04 |    |           |           |  |                                                              |
| 26561 | ENSG00000234881  |            | 24439.8 | 0.04 |    |           |           |  |                                                              |
| 26567 | ENSG00000235410  |            | 24441.9 | 0.04 |    |           |           |  |                                                              |
| 26574 | ENSG00000270058  |            | 24448   | 0.04 |    |           |           |  |                                                              |
| 26582 | ENSG00000237398  |            | 24450.1 | 0.04 |    |           |           |  |                                                              |
| 26588 | ENSG00000253968  |            | 24460.6 | 0.04 |    |           |           |  |                                                              |
| 26603 | ENSG00000268143  |            | 24478.8 | 0.04 |    |           |           |  |                                                              |
| 26614 | ENSG00000237179  |            | 24492.7 | 0.04 |    |           |           |  |                                                              |
| 26651 | ENSG00000232101  |            | 24518.4 | 0.04 |    |           |           |  |                                                              |
| 26655 | ENSG00000271129  |            | 24521.8 | 0.04 |    |           |           |  |                                                              |
| 26661 | ENSG00000186148  |            | 24527.6 | 0.04 |    |           |           |  |                                                              |
| 26665 | ENSG00000236955  |            | 24529   | 0.04 |    |           |           |  |                                                              |
| 26673 | ENSG00000253139  |            | 24537.1 | 0.04 |    |           |           |  |                                                              |
| 26680 | ENSG00000264607  |            | 24551.9 | 0.04 |    |           |           |  |                                                              |
| 26686 | ENSG00000244464  |            | 24555   | 0.04 |    |           |           |  |                                                              |
| 26735 | ENSG00000230015  |            | 24587.6 | 0.04 |    |           |           |  |                                                              |
| 26741 | ENSG00000259131  |            | 24590.4 | 0.04 |    |           |           |  |                                                              |
| 26748 | ENSG00000211808  |            | 24596.4 | 0.04 |    |           |           |  |                                                              |
| 26761 | ENSG00000214883  |            | 24608.9 | 0.04 |    |           |           |  |                                                              |
| 26764 | ENSG00000232152  |            | 24609.4 | 0.04 |    |           |           |  |                                                              |
| 26765 | ENSG00000236485  |            | 24609.4 | 0.04 |    |           |           |  |                                                              |
| 26768 | ENSG00000186148  |            | 24612.7 | 0.04 |    |           |           |  |                                                              |
| 26789 | ENSG00000203314  |            | 24632.3 | 0.04 |    |           |           |  |                                                              |
| 26797 | ENSG00000235475  |            | 24638.5 | 0.04 |    |           |           |  |                                                              |
| 26812 | ENSG00000242575  |            | 24652.3 | 0.04 |    |           |           |  |                                                              |
| 26814 | ENSG00000268301  |            | 24653   | 0.04 |    |           |           |  |                                                              |
| 26816 | ENSG00000234108  |            | 24655.5 | 0.04 |    |           |           |  |                                                              |
| 26819 | ENSG00000268702  |            | 24658.5 | 0.04 |    |           |           |  |                                                              |
| 26837 | ENSG00000253383  |            | 24677.1 | 0.04 |    |           |           |  |                                                              |
| 26864 | ENSG00000230293  |            | 24689.2 | 0.04 |    |           |           |  |                                                              |
| 26868 | ENSG00000236749  |            | 24694.1 | 0.04 |    |           |           |  |                                                              |
| 26873 | ENSG00000253479  |            | 24699.6 | 0.04 |    |           |           |  |                                                              |
| 26887 | ENSG00000231337  |            | 24711.6 | 0.04 |    |           |           |  |                                                              |
| 26899 | ENSG00000187812  |            | 24723.3 | 0.04 |    |           |           |  |                                                              |
| 26918 | ENSG00000220745  |            | 24736.4 | 0.04 |    |           |           |  |                                                              |
| 26922 | ENSG00000254118  |            | 24738.2 | 0.04 |    |           |           |  |                                                              |
| 26925 | ENSG00000229491  |            | 24739.8 | 0.04 |    |           |           |  |                                                              |
| 26933 | ENSG00000236844  |            | 24743.5 | 0.04 |    |           |           |  |                                                              |
| 26938 | ENSG00000232953  |            | 24746.7 | 0.04 |    |           |           |  |                                                              |
| 26937 | ENSG00000227989  |            | 24747.7 | 0.04 |    |           |           |  |                                                              |
| 26948 | ENSG00000227955  |            | 24757.8 | 0.04 |    |           |           |  |                                                              |
| 26949 | ENSG00000236955  |            | 24762.7 | 0.04 |    |           |           |  |                                                              |
| 26972 | ENSG00000250930  |            | 24776.3 | 0.04 | 3  | 125184905 | 125185007 |  | Small nuclear RNA U13                                        |
| 26983 | ENSG00000234793  |            | 24783.4 | 0.04 |    |           |           |  |                                                              |
| 26984 | ENSG00000236983  |            | 24785.1 | 0.04 |    |           |           |  |                                                              |
| 26990 | ENSG00000229211  |            | 24791   | 0.04 |    |           |           |  |                                                              |
| 26992 | ENSG00000251433  |            | 24791.4 | 0.04 |    |           |           |  |                                                              |
| 26998 | ENSG00000231198  |            | 24799.4 | 0.04 |    |           |           |  |                                                              |
| 26917 | ENSG00000237162  |            | 24815.5 | 0.04 |    |           |           |  |                                                              |
| 26924 | ENSG00000231272  |            | 24821   | 0.04 |    |           |           |  |                                                              |
| 26921 | ENSG00000227790  |            | 24829.1 | 0.04 |    |           |           |  |                                                              |
| 26942 | ENSG00000231691  |            | 24841.9 | 0.04 |    |           |           |  |                                                              |
| 26949 | ENSG00000230131  |            | 24846.9 | 0.04 |    |           |           |  |                                                              |
| 26960 | ENSG00000251128  |            | 24847   | 0.04 |    |           |           |  |                                                              |
| 26967 | ENSG00000248113  |            | 24849.4 | 0.04 |    |           |           |  |                                                              |
| 26962 | ENSG00000251066  |            | 24853.3 | 0.04 |    |           |           |  |                                                              |
| 26971 | ENSG00000272892  |            | 24859.2 | 0.04 |    |           |           |  |                                                              |
| 26984 | ENSG00000231721  |            | 24869.5 | 0.04 |    |           |           |  |                                                              |
| 26105 | ENSG00000235241  |            | 24887.5 | 0.04 |    |           |           |  |                                                              |
| 26112 | ENSG00000243596  |            | 24891.7 | 0.04 |    |           |           |  |                                                              |
| 26113 | ENSG00000233608  |            | 24893.1 | 0.04 |    |           |           |  |                                                              |
| 26120 | ENSG00000228802  |            | 24900.4 | 0.04 |    |           |           |  |                                                              |
| 26134 | ENSG00000268492  |            | 24913   | 0.04 |    |           |           |  |                                                              |
| 26138 | ENSG00000231144  |            | 24913.2 | 0.04 |    |           |           |  |                                                              |
| 26139 | ENSG00000268795  |            | 24914.7 | 0.04 |    |           |           |  |                                                              |
| 26140 | ENSG00000227673  |            | 24914.8 | 0.04 |    |           |           |  |                                                              |
| 26147 | ENSG00000230261  |            | 24921.9 | 0.04 |    |           |           |  |                                                              |
| 26148 | ENSG00000273493  |            | 24922.4 | 0.04 |    |           |           |  |                                                              |
| 26153 | ENSG00000231037  |            | 24926.8 | 0.04 |    |           |           |  |                                                              |
| 26157 | ENSG00000211817  |            | 24931.3 | 0.04 |    |           |           |  |                                                              |
| 26176 | ENSG00000268128  |            | 24946.2 | 0.04 |    |           |           |  |                                                              |
| 26181 | ENSG00000271919  |            | 24953.9 | 0.04 |    |           |           |  |                                                              |
| 26201 | ENSG00000229137  |            | 24973   | 0.04 |    |           |           |  |                                                              |
| 26203 | ENSG00000272027  |            | 24973.9 | 0.04 |    |           |           |  |                                                              |
| 26206 | ENSG00000224884  |            | 24979.1 | 0.04 |    |           |           |  |                                                              |
| 26222 | ENSG00000231123  |            | 24989.3 | 0.04 |    |           |           |  |                                                              |
| 26227 | ENSG00000228820  |            | 24991.7 | 0.04 |    |           |           |  |                                                              |
| 26228 | ENSG00000228855  |            | 24991.7 | 0.04 |    |           |           |  |                                                              |
| 26234 | ENSG00000233117  |            | 24995.6 | 0.04 |    |           |           |  |                                                              |
| 26239 | ENSG00000268128  |            | 24997.9 | 0.04 |    |           |           |  |                                                              |
| 26247 | ENSG00000259701  |            | 25002.1 | 0.04 |    |           |           |  |                                                              |
| 26256 | ENSG00000234926  |            | 25006.9 | 0.04 |    |           |           |  |                                                              |
| 26256 | ENSG000002681501 |            | 25007.7 | 0.04 |    |           |           |  |                                                              |
| 26297 | ENSG00000246211  |            | 25008.3 | 0.04 |    |           |           |  |                                                              |
| 26298 | ENSG00000232153  |            | 25010.1 | 0.04 |    |           |           |  |                                                              |
| 26264 | ENSG00000238715  |            | 25013.3 | 0.04 | 15 | 65863311  | 65863411  |  | Small nuclear RNA U13                                        |
| 26281 | ENSG00000235371  |            | 25031.7 | 0.04 |    |           |           |  |                                                              |
| 26282 | ENSG00000237649  |            | 25032.3 | 0.04 |    |           |           |  |                                                              |
| 26291 | ENSG00000244900  |            | 25042.5 | 0.04 |    |           |           |  |                                                              |
| 26311 | ENSG00000250990  |            | 25067.2 | 0.04 |    |           |           |  |                                                              |
| 26333 | ENSG00000268978  |            | 25069.8 | 0.04 |    |           |           |  |                                                              |
| 26341 | ENSG00000227985  |            | 25069.4 | 0.04 |    |           |           |  |                                                              |
| 26351 | ENSG00000258136  |            | 25103.9 | 0.04 |    |           |           |  |                                                              |
| 26366 | ENSG00000270181  |            | 25114   | 0.04 |    |           |           |  |                                                              |
| 26372 | ENSG00000268615  |            | 25115.9 | 0.04 |    |           |           |  |                                                              |
| 26377 | ENSG00000231096  |            | 25118.8 | 0.04 |    |           |           |  |                                                              |
| 26381 | ENSG00000217653  |            | 25121.6 | 0.04 |    |           |           |  |                                                              |
| 26386 | ENSG00000218323  |            | 25128.0 | 0.04 |    |           |           |  |                                                              |
| 26394 | ENSG00000266334  |            | 25135.2 | 0.04 |    |           |           |  |                                                              |
| 26405 | ENSG00000274296  |            | 25142.4 | 0.04 |    |           |           |  |                                                              |
| 26407 | ENSG00000235339  |            | 25145.6 | 0.04 |    |           |           |  |                                                              |
| 26417 | ENSG00000231200  |            | 25151.3 | 0.04 |    |           |           |  |                                                              |
| 26427 | ENSG00000242440  |            | 25162.4 | 0.04 |    |           |           |  |                                                              |
| 26453 | ENSG00000268490  |            | 25195.3 | 0.04 | 1  | 21278950  | 21278926  |  | RNA 7SL, cytoplasmic RNA U13, pseudogene                     |
| 26456 | ENSG00000268626  |            | 25199.2 | 0.04 |    |           |           |  |                                                              |
| 26458 | ENSG00000233818  |            | 25201.8 | 0.04 |    |           |           |  |                                                              |
| 26477 | ENSG00000253923  |            | 25218.3 | 0.04 |    |           |           |  |                                                              |
| 26489 | ENSG00000250103  |            | 25233.7 | 0.04 |    |           |           |  |                                                              |
| 26521 | ENSG00000219329  |            | 25259.6 | 0.04 |    |           |           |  |                                                              |
| 26529 | ENSG00000270499  |            | 25292.9 | 0.04 |    |           |           |  |                                                              |
| 26532 | ENSG00000233451  |            | 25265.1 | 0.04 |    |           |           |  |                                                              |
| 26542 | ENSG00000268588  |            | 25273.4 | 0.04 |    |           |           |  |                                                              |
| 26574 | ENSG00000251116  |            | 25288.9 | 0.04 |    |           |           |  |                                                              |
| 26575 | ENSG00000250564  |            | 25299.1 | 0.04 |    |           |           |  |                                                              |
| 26586 | ENSG00000234790  |            | 25309.5 | 0.04 |    |           |           |  |                                                              |
| 26592 | ENSG00000226077  |            | 25313.5 | 0.04 |    |           |           |  |                                                              |
| 26623 | ENSG00000233648  |            | 25341.9 | 0.04 |    |           |           |  |                                                              |

|       |                  |    |         |      |           |           |           |  |                                      |
|-------|------------------|----|---------|------|-----------|-----------|-----------|--|--------------------------------------|
| 26632 | ENSG00000234865  |    | 25347.8 | 0.04 |           |           |           |  |                                      |
| 26641 | ENSG00000231607  |    | 25351.2 | 0.04 |           |           |           |  |                                      |
| 26718 | ENSG00000259005  |    | 25416.6 | 0.04 |           |           |           |  |                                      |
| 26726 | ENSG00000237021  |    | 25423.8 | 0.04 |           |           |           |  |                                      |
| 26727 | ENSG00000271623  |    | 25424   | 0.04 |           |           |           |  |                                      |
| 26734 | ENSG00000236032  |    | 25431.4 | 0.04 |           |           |           |  |                                      |
| 26743 | ENSG00000258754  |    | 25437.3 | 0.04 |           |           |           |  |                                      |
| 26751 | ENSG00000231081  |    | 25444   | 0.04 |           |           |           |  |                                      |
| 26752 | ENSG00000231391  |    | 25444.1 | 0.04 |           |           |           |  |                                      |
| 26755 | ENSG00000236309  | 18 | 25445.2 | 0.04 | 12533423  | 12533524  |           |  | Small nuclear RNA U13                |
| 26764 | ENSG00000240590  |    | 25458   | 0.04 |           |           |           |  |                                      |
| 26765 | ENSG00000237895  |    | 25460.6 | 0.04 |           |           |           |  |                                      |
| 26768 | ENSG00000270961  |    | 25462.8 | 0.04 |           |           |           |  |                                      |
| 26781 | ENSG00000242086  |    | 25471.7 | 0.04 |           |           |           |  |                                      |
| 26788 | ENSG00000230307  |    | 25480.8 | 0.04 |           |           |           |  |                                      |
| 26800 | ENSG00000248550  |    | 25482.7 | 0.04 |           |           |           |  |                                      |
| 26801 | ENSG00000227038  |    | 25484.5 | 0.04 |           |           |           |  |                                      |
| 26802 | ENSG00000225369  |    | 25495   | 0.04 |           |           |           |  |                                      |
| 26808 | ENSG000002084178 |    | 25500.8 | 0.04 |           |           |           |  |                                      |
| 26811 | ENSG00000233836  |    | 25502.6 | 0.04 |           |           |           |  |                                      |
| 26816 | ENSG00000224688  |    | 25509.7 | 0.04 |           |           |           |  |                                      |
| 26830 | ENSG00000238939  | 6  | 25518.9 | 0.04 | 151668162 | 151668247 |           |  | Small nuclear RNA U13                |
| 26841 | ENSG00000232079  |    | 25520.1 | 0.04 |           |           |           |  |                                      |
| 26847 | ENSG00000240288  |    | 25524.8 | 0.04 |           |           |           |  |                                      |
| 26864 | ENSG00000234943  |    | 25534.8 | 0.04 |           |           |           |  |                                      |
| 26876 | ENSG00000162947  |    | 25547.8 | 0.04 |           |           |           |  |                                      |
| 26891 | ENSG00000214393  |    | 25556.5 | 0.04 |           |           |           |  |                                      |
| 26900 | ENSG00000273129  |    | 25587   | 0.04 |           |           |           |  |                                      |
| 26909 | ENSG00000224825  |    | 25588.9 | 0.04 |           |           |           |  |                                      |
| 26938 | ENSG00000230970  |    | 25596.3 | 0.04 |           |           |           |  |                                      |
| 26942 | ENSG000002081028 |    | 25599.2 | 0.04 |           |           |           |  |                                      |
| 26946 | ENSG00000273342  |    | 25603.3 | 0.04 |           |           |           |  |                                      |
| 26948 | ENSG00000231354  |    | 25604.6 | 0.04 |           |           |           |  |                                      |
| 26960 | ENSG00000259327  |    | 25616.4 | 0.04 |           |           |           |  |                                      |
| 26975 | ENSG00000265307  |    | 25633.4 | 0.04 |           |           |           |  |                                      |
| 26977 | ENSG00000232955  |    | 25638.1 | 0.04 |           |           |           |  |                                      |
| 26985 | ENSG00000233902  |    | 25645   | 0.04 |           |           |           |  |                                      |
| 26990 | ENSG00000243403  |    | 25655.4 | 0.04 |           |           |           |  |                                      |
| 27028 | ENSG00000230208  |    | 25683.8 | 0.04 |           |           |           |  |                                      |
| 27016 | ENSG00000244021  |    | 25676.1 | 0.04 |           |           |           |  |                                      |
| 27019 | ENSG00000243088  |    | 25677.3 | 0.04 |           |           |           |  |                                      |
| 27021 | ENSG00000240688  |    | 25679.2 | 0.04 |           |           |           |  |                                      |
| 27025 | ENSG00000258131  |    | 25681.7 | 0.04 |           |           |           |  |                                      |
| 27028 | ENSG00000235279  |    | 25684.3 | 0.04 |           |           |           |  |                                      |
| 27031 | ENSG00000269494  |    | 25692.6 | 0.04 |           |           |           |  |                                      |
| 27038 | ENSG00000231374  |    | 25696.6 | 0.04 |           |           |           |  |                                      |
| 27046 | ENSG00000232046  |    | 25701   | 0.04 |           |           |           |  |                                      |
| 27061 | ENSG00000270112  |    | 25716.3 | 0.04 |           |           |           |  |                                      |
| 27069 | ENSG00000274268  |    | 25723.8 | 0.04 |           |           |           |  |                                      |
| 27072 | ENSG00000259354  |    | 25727.4 | 0.04 |           |           |           |  |                                      |
| 27076 | ENSG00000253146  |    | 25730.9 | 0.04 |           |           |           |  |                                      |
| 27146 | ENSG00000233037  |    | 25738   | 0.04 |           |           |           |  |                                      |
| 27147 | ENSG00000248265  |    | 25795.9 | 0.04 |           |           |           |  |                                      |
| 27149 | ENSG00000291442  |    | 25797   | 0.04 |           |           |           |  |                                      |
| 27153 | ENSG00000251389  |    | 25798.4 | 0.04 |           |           |           |  |                                      |
| 27155 | ENSG00000233735  |    | 25803.1 | 0.04 |           |           |           |  |                                      |
| 27156 | ENSG00000284860  |    | 25803.2 | 0.04 |           |           |           |  |                                      |
| 27158 | ENSG00000225962  |    | 25805.1 | 0.04 |           |           |           |  |                                      |
| 27165 | ENSG00000213386  |    | 25815.7 | 0.04 |           |           |           |  |                                      |
| 27168 | ENSG00000285827  |    | 25817.9 | 0.04 |           |           |           |  |                                      |
| 27169 | ENSG00000225493  |    | 25818.4 | 0.04 |           |           |           |  |                                      |
| 27177 | ENSG00000249823  |    | 25823.9 | 0.04 |           |           |           |  |                                      |
| 27188 | ENSG00000252489  |    | 25834.9 | 0.04 |           |           |           |  |                                      |
| 27193 | ENSG00000234907  |    | 25837.6 | 0.04 |           |           |           |  |                                      |
| 27207 | ENSG00000268105  |    | 25848.4 | 0.04 |           |           |           |  |                                      |
| 27213 | ENSG00000259886  |    | 25851.4 | 0.04 |           |           |           |  |                                      |
| 27218 | ENSG00000251100  |    | 25859.8 | 0.04 |           |           |           |  |                                      |
| 27238 | ENSG00000225803  |    | 25873.5 | 0.04 |           |           |           |  |                                      |
| 27246 | ENSG00000253198  |    | 25879.3 | 0.04 |           |           |           |  |                                      |
| 27262 | ENSG00000245483  |    | 25885.3 | 0.04 |           |           |           |  |                                      |
| 27266 | ENSG00000252685  |    | 25889.9 | 0.04 |           |           |           |  |                                      |
| 27275 | ENSG00000265558  |    | 25892.5 | 0.04 |           |           |           |  |                                      |
| 27289 | ENSG00000237234  |    | 25908.5 | 0.04 |           |           |           |  |                                      |
| 27295 | ENSG00000289989  |    | 25914.6 | 0.04 |           |           |           |  |                                      |
| 27328 | ENSG00000233735  |    | 25926.5 | 0.04 |           |           |           |  |                                      |
| 27322 | ENSG00000257298  |    | 25933.5 | 0.04 |           |           |           |  |                                      |
| 27328 | ENSG00000233974  |    | 25939.6 | 0.04 |           |           |           |  |                                      |
| 27338 | ENSG00000223758  |    | 25947.8 | 0.04 |           |           |           |  |                                      |
| 27339 | ENSG00000249505  |    | 25950.2 | 0.04 |           |           |           |  |                                      |
| 27342 | ENSG00000233132  |    | 25952.2 | 0.04 |           |           |           |  |                                      |
| 27348 | ENSG00000232223  |    | 25955.2 | 0.04 |           |           |           |  |                                      |
| 27348 | ENSG00000227359  |    | 25956.5 | 0.04 |           |           |           |  |                                      |
| 27353 | ENSG00000272361  |    | 25963.3 | 0.04 |           |           |           |  |                                      |
| 27364 | ENSG00000236602  |    | 25968.4 | 0.04 |           |           |           |  |                                      |
| 27365 | ENSG00000231729  |    | 25969.4 | 0.04 |           |           |           |  |                                      |
| 27368 | ENSG00000235358  |    | 25971.5 | 0.04 |           |           |           |  |                                      |
| 27374 | ENSG00000252598  |    | 25977.2 | 0.04 |           |           |           |  |                                      |
| 27384 | ENSG00000241288  |    | 25981.6 | 0.04 |           |           |           |  |                                      |
| 27387 | ENSG00000251443  |    | 25987.4 | 0.04 |           |           |           |  |                                      |
| 27388 | ENSG00000257220  |    | 25988.1 | 0.04 |           |           |           |  |                                      |
| 27399 | ENSG00000230111  |    | 25992.7 | 0.04 |           |           |           |  |                                      |
| 27403 | ENSG00000227875  |    | 25993.7 | 0.04 |           |           |           |  |                                      |
| 27411 | ENSG00000237307  |    | 26001.8 | 0.04 |           |           |           |  |                                      |
| 27419 | ENSG00000265317  |    | 26010.6 | 0.04 |           |           |           |  |                                      |
| 27426 | ENSG000002023387 |    | 26014.9 | 0.04 |           |           |           |  |                                      |
| 27430 | ENSG000002081766 |    | 26017.1 | 0.04 |           |           |           |  |                                      |
| 27437 | ENSG00000260447  |    | 26025.8 | 0.04 |           |           |           |  |                                      |
| 27444 | ENSG00000226852  |    | 26032.2 | 0.04 |           |           |           |  |                                      |
| 27457 | ENSG00000259322  |    | 26039.1 | 0.04 |           |           |           |  |                                      |
| 27464 | ENSG00000225023  |    | 26044.5 | 0.04 |           |           |           |  |                                      |
| 27469 | ENSG00000208847  |    | 26049.6 | 0.04 |           |           |           |  |                                      |
| 27480 | ENSG00000235562  |    | 26059.8 | 0.04 |           |           |           |  |                                      |
| 27493 | ENSG00000211803  |    | 26075.1 | 0.04 |           |           |           |  |                                      |
| 27498 | ENSG00000241213  |    | 26078.2 | 0.04 |           |           |           |  |                                      |
| 27516 | ENSG00000197462  |    | 26097.9 | 0.04 |           |           |           |  |                                      |
| 27531 | ENSG00000206167  |    | 26103.3 | 0.04 |           |           |           |  |                                      |
| 27559 | ENSG00000270656  |    | 26124.8 | 0.04 |           |           |           |  |                                      |
| 27567 | ENSG00000285361  |    | 26130.3 | 0.04 | 5         | 13809909  | 138100243 |  | RNA 7SL, cytoplasmic 867, pseudogene |
| 27571 | ENSG00000230523  |    | 26134.5 | 0.04 |           |           |           |  |                                      |
| 27577 | ENSG00000236498  |    | 26137.5 | 0.04 |           |           |           |  |                                      |
| 27579 | ENSG00000259585  |    | 26140.3 | 0.04 |           |           |           |  |                                      |
| 27584 | ENSG00000233905  |    | 26150.1 | 0.04 |           |           |           |  |                                      |
| 27596 | ENSG00000226889  |    | 26151.3 | 0.04 |           |           |           |  |                                      |
| 27615 | ENSG00000272631  |    | 26169.5 | 0.04 |           |           |           |  |                                      |
| 27621 | ENSG00000231388  |    | 26173.8 | 0.04 |           |           |           |  |                                      |
| 27626 | ENSG00000228796  |    | 26177.5 | 0.04 |           |           |           |  |                                      |
| 27641 | ENSG00000273004  |    | 26203.4 | 0.04 |           |           |           |  |                                      |
| 27643 | ENSG00000232809  |    | 26207.3 | 0.04 |           |           |           |  |                                      |
| 27648 | ENSG000002086441 |    | 26209.4 | 0.04 |           |           |           |  |                                      |
| 27650 | ENSG00000237289  |    | 26210.3 | 0.04 |           |           |           |  |                                      |
| 27653 | ENSG00000234466  |    | 26211   | 0.04 |           |           |           |  |                                      |
| 27653 | ENSG00000270207  |    | 26211.4 | 0.04 |           |           |           |  |                                      |
| 27657 | ENSG00000259338  |    | 26213.4 | 0.04 |           |           |           |  |                                      |
| 27661 | ENSG00000271090  |    | 26219   | 0.04 |           |           |           |  |                                      |
| 27670 | ENSG00000251535  |    | 26224.6 | 0.04 |           |           |           |  |                                      |
| 27707 | ENSG00000272745  |    | 26257.7 | 0.04 |           |           |           |  |                                      |
| 27717 | ENSG00000226885  |    | 26264.4 | 0.04 |           |           |           |  |                                      |
| 27769 | ENSG000002086203 |    | 26294.5 | 0.04 |           |           |           |  |                                      |
| 27761 | ENSG00000268157  |    | 26296   | 0.04 |           |           |           |  |                                      |
| 27762 | ENSG00000272271  |    | 26297.6 | 0.04 |           |           |           |  |                                      |
| 27763 | ENSG00000231969  |    | 26299.1 | 0.04 |           |           |           |  |                                      |
| 27765 | ENSG00000238011  |    | 26301.8 | 0.04 | 5         | 118404962 | 118405095 |  | Small nuclear RNA U13                |
| 27777 | ENSG00000251429  |    | 26313.8 | 0.04 |           |           |           |  |                                      |
| 27781 | ENSG00000229222  |    | 26317.2 | 0.04 |           |           |           |  |                                      |
| 27788 | ENSG00000232846  |    | 26323.4 | 0.04 |           |           |           |  |                                      |
| 27807 | ENSG00000253335  |    | 26330   | 0.04 |           |           |           |  |                                      |
| 27807 | ENSG00000254143  |    | 26338.2 | 0.04 |           |           |           |  |                                      |
| 27820 | ENSG00000230799  |    | 26346   | 0.04 |           |           |           |  |                                      |
| 27830 | ENSG000002081813 |    | 26352.8 | 0.04 |           |           |           |  |                                      |
| 27838 | ENSG00000271332  |    | 26357   | 0.04 |           |           |           |  |                                      |
| 27843 | ENSG00000268532  |    | 26364.5 | 0.04 | 20        | 45938797  | 45937126  |  | RNA 7SL, cytoplasmic 243, pseudogene |
| 27847 | ENSG00000288870  |    | 26365.7 | 0.04 |           |           |           |  |                                      |
| 27851 | ENSG00000208493  |    | 26369.6 | 0.04 |           |           |           |  |                                      |
| 27857 | ENSG00000272275  |    | 26379.1 | 0.04 |           |           |           |  |                                      |
| 27865 | ENSG00000271930  |    | 26383.7 | 0.04 |           |           |           |  |                                      |
| 27870 | ENSG00000232445  |    | 26388.1 | 0.04 |           |           |           |  |                                      |
| 27874 | ENSG00000254884  |    | 26392.8 | 0.04 |           |           |           |  |                                      |
| 27876 | ENSG00000271452  |    | 26398.8 | 0.04 |           |           |           |  |                                      |
| 27888 | ENSG00000208113  |    | 26406.3 | 0.04 |           |           |           |  |                                      |
| 27887 | ENSG00000255384  |    | 26406.6 | 0.04 |           |           |           |  |                                      |

|       |                  |            |         |      |           |          |           |           |                                             |
|-------|------------------|------------|---------|------|-----------|----------|-----------|-----------|---------------------------------------------|
| 27892 | ENSG00000259818  |            | 26411   | 0.04 |           |          |           |           |                                             |
| 27893 | ENSG00000259189  |            | 26411.3 | 0.04 |           |          |           |           |                                             |
| 27895 | ENSG00000252099  |            | 26415.2 | 0.04 |           |          |           |           |                                             |
| 27919 | ENSG00000259087  |            | 26436.6 | 0.04 |           |          |           |           |                                             |
| 27921 | ENSG00000264164  |            | 26437.3 | 0.04 |           |          |           |           |                                             |
| 27926 | ENSG00000257631  |            | 26443.4 | 0.04 |           |          |           |           |                                             |
| 27961 | ENSG00000230355  |            | 26477.4 | 0.04 |           |          |           |           |                                             |
| 27963 | ENSG00000259529  |            | 26478.3 | 0.04 |           |          |           |           |                                             |
| 28007 | ENSG00000188365  |            | 26513.2 | 0.04 |           |          |           |           |                                             |
| 28009 | ENSG00000261481  |            | 26515.9 | 0.04 |           |          |           |           |                                             |
| 28012 | ENSG00000261222  |            | 26516.9 | 0.04 |           |          |           |           |                                             |
| 28014 | ENSG00000263311  |            | 26520.8 | 0.04 |           |          |           |           |                                             |
| 28026 | ENSG00000262226  |            | 26527.5 | 0.04 |           |          |           |           |                                             |
| 28029 | ENSG00000179342  |            | 26530.6 | 0.04 |           |          |           |           |                                             |
| 28032 | ENSG00000221079  |            | 26531.6 | 0.04 |           |          |           |           |                                             |
| 28047 | ENSG00000271369  |            | 26547   | 0.04 |           |          |           |           |                                             |
| 28069 | ENSG00000259977  |            | 26580.9 | 0.04 |           |          |           |           |                                             |
| 28086 | ENSG00000259439  |            | 26590.6 | 0.04 |           |          |           |           |                                             |
| 28106 | ENSG00000267562  |            | 26612.2 | 0.04 |           |          |           |           |                                             |
| 28124 | ENSG00000268655  |            | 26629.3 | 0.04 |           |          |           |           |                                             |
| 28128 | ENSG00000271211  |            | 26633.6 | 0.04 |           |          |           |           |                                             |
| 28151 | ENSG00000265943  |            | 26657.1 | 0.04 |           |          |           |           |                                             |
| 28162 | ENSG00000256731  |            | 26665.5 | 0.04 |           |          |           |           |                                             |
| 28167 | ENSG00000221475  |            | 26671.3 | 0.04 |           |          |           |           |                                             |
| 28168 | ENSG00000211296  |            | 26671.7 | 0.04 |           |          |           |           |                                             |
| 28185 | ENSG00000251461  |            | 26685.7 | 0.04 |           |          |           |           |                                             |
| 28188 | ENSG00000259225  |            | 26686.1 | 0.04 |           |          |           |           |                                             |
| 28197 | ENSG00000271263  |            | 26693.1 | 0.04 |           |          |           |           |                                             |
| 28226 | ENSG00000261135  |            | 26721.9 | 0.04 |           |          |           |           |                                             |
| 28228 | ENSG00000259545  |            | 26734.4 | 0.04 |           |          |           |           |                                             |
| 28236 | ENSG00000273481  |            | 26737.8 | 0.04 |           |          |           |           |                                             |
| 28249 | ENSG00000261357  |            | 26746.9 | 0.04 |           |          |           |           |                                             |
| 28252 | ENSG00000254558  |            | 26749.3 | 0.04 |           |          |           |           |                                             |
| 28263 | ENSG00000250234  |            | 26763.1 | 0.04 |           |          |           |           |                                             |
| 28264 | ENSG00000257256  |            | 26763.6 | 0.04 |           |          |           |           |                                             |
| 28279 | ENSG00000257629  |            | 26771   | 0.04 |           |          |           |           |                                             |
| 28284 | ENSG00000251459  |            | 26771.9 | 0.04 |           |          |           |           |                                             |
| 28287 | ENSG00000257910  |            | 26772.2 | 0.04 |           |          |           |           |                                             |
| 28288 | ENSG00000271142  |            | 26778   | 0.04 |           |          |           |           |                                             |
| 28290 | ENSG00000255966  |            | 26778.4 | 0.04 |           |          |           |           |                                             |
| 28300 | ENSG00000235225  |            | 26786.3 | 0.04 |           |          |           |           |                                             |
| 28321 | ENSG00000265657  |            | 26813.3 | 0.04 |           |          |           |           |                                             |
| 28344 | ENSG00000271698  |            | 26826.7 | 0.04 |           |          |           |           |                                             |
| 28351 | ENSG00000269311  |            | 26836.4 | 0.04 |           |          |           |           |                                             |
| 28365 | ENSG00000264540  |            | 26846.6 | 0.04 |           |          |           |           |                                             |
| 28376 | ENSG00000271797  |            | 26854.2 | 0.04 |           |          |           |           |                                             |
| 28415 | ENSG00000238058  |            | 26895.4 | 0.04 |           |          |           |           |                                             |
| 28446 | ENSG00000261732  |            | 26923.6 | 0.04 |           |          |           |           |                                             |
| 28447 | ENSG00000269402  | 17         | 26924.6 | 0.04 | 30566379  | 3006865  |           |           | Uncharacterized protein                     |
| 28468 | ENSG00000261737  |            | 26945.1 | 0.04 |           |          |           |           |                                             |
| 28496 | ENSG00000261251  |            | 26969   | 0.04 |           |          |           |           |                                             |
| 28504 | ENSG00000269444  |            | 26983.2 | 0.04 |           |          |           |           |                                             |
| 28527 | ENSG00000268129  |            | 27003.5 | 0.04 |           |          |           |           |                                             |
| 28541 | ENSG00000232577  |            | 27020.9 | 0.04 |           |          |           |           |                                             |
| 28546 | ENSG00000241710  | 12         | 27023.3 | 0.04 | 42636017  | 42636316 |           |           | RNA, 75L, cytosolic; 10, pseudogene         |
| 28558 | ENSG00000261334  |            | 27028.3 | 0.04 |           |          |           |           |                                             |
| 28561 | ENSG00000185065  |            | 27030.6 | 0.04 |           |          |           |           |                                             |
| 28565 | ENSG00000259262  |            | 27033.5 | 0.04 |           |          |           |           |                                             |
| 28587 | ENSG00000186951  |            | 27060.8 | 0.04 |           |          |           |           |                                             |
| 28592 | ENSG00000261723  |            | 27064.1 | 0.04 |           |          |           |           |                                             |
| 28597 | ENSG00000261821  | 1          | 27064.3 | 0.04 | 28843888  | 28844087 |           |           | Small nuclear RNA U13                       |
| 28606 | ENSG00000223167  | 11         | 27080.9 | 0.04 | 47636450  | 47636546 |           |           | Y RNA                                       |
| 28616 | ENSG00000231357  |            | 27088.5 | 0.04 |           |          |           |           |                                             |
| 28621 | ENSG00000251456  |            | 27103.4 | 0.04 |           |          |           |           |                                             |
| 28623 | ENSG00000272908  |            | 27095.3 | 0.04 |           |          |           |           |                                             |
| 28635 | ENSG00000252121  |            | 27103.4 | 0.04 |           |          |           |           |                                             |
| 28642 | ENSG00000251717  |            | 27112.9 | 0.04 |           |          |           |           |                                             |
| 28667 | ENSG00000234181  |            | 27135.9 | 0.04 |           |          |           |           |                                             |
| 28690 | ENSG00000268170  |            | 27160.9 | 0.04 |           |          |           |           |                                             |
| 28701 | ENSG00000253488  |            | 27182.3 | 0.04 |           |          |           |           |                                             |
| 28711 | ENSG00000255500  |            | 27187.1 | 0.04 |           |          |           |           |                                             |
| 28717 | ENSG0000027896   |            | 27189.1 | 0.04 |           |          |           |           |                                             |
| 28725 | ENSG00000269968  |            | 27188.3 | 0.04 |           |          |           |           |                                             |
| 28734 | ENSG00000273483  |            | 27206.1 | 0.04 |           |          |           |           |                                             |
| 28742 | ENSG00000274248  |            | 27217.7 | 0.04 |           |          |           |           |                                             |
| 28753 | ENSG00000258374  |            | 27225.3 | 0.04 |           |          |           |           |                                             |
| 28780 | ENSG00000247081  |            | 27263.6 | 0.04 |           |          |           |           |                                             |
| 28781 | ENSG00000241306  |            | 27264.4 | 0.04 |           |          |           |           |                                             |
| 28791 | ENSG00000217158  |            | 27270.3 | 0.04 |           |          |           |           |                                             |
| 28815 | ENSG00000258484  | 15         | 27288   | 0.04 | 96904487  | 96904900 |           |           | Uncharacterized protein                     |
| 28816 | ENSG00000251095  |            | 27288.3 | 0.04 |           |          |           |           |                                             |
| 28824 | ENSG00000269973  |            | 27293.8 | 0.04 |           |          |           |           |                                             |
| 28856 | ENSG00000250762  |            | 27324.8 | 0.04 |           |          |           |           |                                             |
| 28885 | ENSG00000253671  |            | 27349.4 | 0.04 |           |          |           |           |                                             |
| 28884 | ENSG00000231387  |            | 27369   | 0.04 |           |          |           |           |                                             |
| 28913 | ENSG00000271297  |            | 27377.2 | 0.04 |           |          |           |           |                                             |
| 28989 | ENSG00000271847  |            | 27441   | 0.04 |           |          |           |           |                                             |
| 29024 | ENSG00000272473  |            | 27469.5 | 0.04 |           |          |           |           |                                             |
| 29031 | ENSG00000271258  |            | 27477.4 | 0.04 |           |          |           |           |                                             |
| 29034 | ENSG00000214770  |            | 27482.2 | 0.04 |           |          |           |           |                                             |
| 29041 | ENSG00000262560  |            | 27488   | 0.04 |           |          |           |           |                                             |
| 29056 | ENSG00000262232  |            | 27506.5 | 0.04 |           |          |           |           |                                             |
| 29066 | ENSG00000266118  |            | 27513.8 | 0.04 |           |          |           |           |                                             |
| 29081 | ENSG00000271954  |            | 27526.9 | 0.04 |           |          |           |           |                                             |
| 29114 | ENSG00000259752  |            | 27549   | 0.04 |           |          |           |           |                                             |
| 29132 | ENSG00000266263  |            | 27565.4 | 0.04 |           |          |           |           |                                             |
| 29143 | ENSG00000249140  |            | 27562.3 | 0.04 |           |          |           |           |                                             |
| 29151 | ENSG00000260147  |            | 27592.1 | 0.04 |           |          |           |           |                                             |
| 29182 | ENSG00000272520  |            | 27617.6 | 0.04 |           |          |           |           |                                             |
| 29209 | ENSG00000271921  |            | 27650.6 | 0.04 |           |          |           |           |                                             |
| 29229 | ENSG00000271750  |            | 27654.0 | 0.04 |           |          |           |           |                                             |
| 29231 | ENSG00000272093  |            | 27664   | 0.04 |           |          |           |           |                                             |
| 29236 | ENSG00000248100  |            | 27671.5 | 0.04 |           |          |           |           |                                             |
| 29264 | ENSG00000263483  |            | 27684.4 | 0.04 |           |          |           |           |                                             |
| 29283 | ENSG00000261033  |            | 27707.7 | 0.04 |           |          |           |           |                                             |
| 29296 | ENSG00000269172  |            | 27725.9 | 0.04 |           |          |           |           |                                             |
| 29303 | ENSG00000260285  |            | 27731.5 | 0.04 |           |          |           |           |                                             |
| 29332 | ENSG00000228350  |            | 27763.6 | 0.04 |           |          |           |           |                                             |
| 29393 | ENSG00000264084  |            | 27826.3 | 0.04 |           |          |           |           |                                             |
| 29413 | ENSG00000272692  |            | 27840.5 | 0.04 |           |          |           |           |                                             |
| 29423 | ENSG00000228150  |            | 27850.5 | 0.04 |           |          |           |           |                                             |
| 29426 | ENSG00000268108  |            | 27855.3 | 0.04 |           |          |           |           |                                             |
| 29474 | ENSG00000253050  |            | 27883.5 | 0.04 |           |          |           |           |                                             |
| 29623 | ENSG00000256884  |            | 28024.1 | 0.04 |           |          |           |           |                                             |
| 29642 | ENSG00000231742  |            | 28039.8 | 0.04 |           |          |           |           |                                             |
| 29667 | ENSG00000254558  |            | 28057.8 | 0.04 |           |          |           |           |                                             |
| 29987 | ENSG00000271769  |            | 28359.6 | 0.04 |           |          |           |           |                                             |
| 19791 | ENSG00000259330  |            | 18652.6 | 0.03 | antisense | 15       | 40617417  | 40618916  | long intergenic non-protein coding RNA 964  |
| 19873 | ENSG00000241271  | ZBED5-AS1  | 19931.8 | 0.03 | antisense | 11       | 10973608  | 10973649  | ZBED5 antisense RNA 1                       |
| 23204 | ENSG00000230148  | HOXB-AS1   | 22512.9 | 0.03 | antisense | 17       | 46620913  | 46628610  | HOXB cluster antisense RNA 1                |
| 24479 | ENSG000002681485 | PANX-AS1   | 23343.3 | 0.03 | antisense | 13       | 28710980  | 28712330  | PANX antisense RNA 1                        |
| 24764 | ENSG00000253663  | NRX1-AS1   | 23769.1 | 0.03 | antisense | 14       | 36984683  | 36989221  | NRX1 antisense RNA 1                        |
| 25554 | ENSG000002681500 | DLGAP1-AS5 | 24343.8 | 0.03 | antisense | 18       | 4284902   | 4295405   | DLGAP1 antisense RNA 5                      |
| 25570 | ENSG00000196167  | COLCA1     | 24444   | 0.03 | antisense | 11       | 11156414  | 11117570  | colorectal cancer associated 1              |
| 26276 | ENSG00000264049  | DNAH9B-AS1 | 25600   | 0.03 | antisense | 3        | 12816247  | 12819190  | DNAH9B antisense RNA 1                      |
| 7109  | ENSG00000230886  |            | 25993.4 | 0.03 | antisense | 10       | 10352478  | 10352473  | CYP17A1 antisense RNA 1                     |
| 27086 | ENSG00000251276  |            | 25714.9 | 0.03 | antisense | 7        | 7859196   | 78570211  | MAG2 antisense RNA 1                        |
| 27162 | ENSG00000269563  | LINC00515  | 25626.5 | 0.03 | antisense | 21       | 29925096  | 29955508  | long intergenic non-protein coding RNA 515  |
| 27186 | ENSG00000260203  |            | 25626.5 | 0.03 | antisense | 9        | 127420746 | 127460910 | MRB1A3 host gene (non-protein coding)       |
| 27228 | ENSG00000253649  |            | 25643.3 | 0.03 | antisense | 8        | 10340388  | 10405095  | protease, serine, 51                        |
| 27284 | ENSG00000237636  |            | 25914.6 | 0.03 | antisense | A        | 18928414  | 18912915  | PRKAZ antisense RNA 1                       |
| 27319 | ENSG00000233463  | PCDH9-AS4  | 25929   | 0.03 | antisense | 14       | 6756016   | 67576139  | PCDH9 antisense RNA 4                       |
| 27620 | ENSG00000228775  | VEE1-AS1   | 26172.9 | 0.03 | antisense | 7        | 141404138 | 141438146 | VEE1 antisense RNA 1                        |
| 27720 | ENSG00000272629  | SRGAP3-AS3 | 26267.4 | 0.03 | antisense | 3        | 9258971   | 9258971   | SRGAP3 antisense RNA 3                      |
| 27740 | ENSG00000241496  | ZNF148-1   | 26311.1 | 0.03 | antisense | 10       | 8073385   | 80827622  | ZNF148 antisense RNA 1                      |
| 27831 | ENSG00000224730  | ZNF148-1   | 26352.9 | 0.03 | antisense | 19       | 55147713  | 55150343  | Uncharacterized protein                     |
| 27832 | ENSG00000225390  |            | 26353.1 | 0.03 | antisense | 13       | 39395925  | 39401707  | PREM2 antisense RNA 1                       |
| 28100 | ENSG00000230330  |            | 26607.6 | 0.03 | antisense | 16       | 19776016  | 19776016  | SMN2 antisense RNA 1                        |
| 28114 | ENSG00000241155  |            | 26618.3 | 0.03 | antisense | 3        | 11903340  | 119041607 | ARHGAP31 antisense RNA 1                    |
| 28331 | ENSG00000231921  | LINC01137  | 26620.5 | 0.03 | antisense | 1        | 37620480  | 37640012  | long intergenic non-protein coding RNA 1137 |
| 28351 | ENSG00000252626  |            | 26621.2 | 0.03 | antisense | 15       | 11362128  | 11362138  | MYC3L antisense RNA 1                       |
| 28632 | ENSG00000230005  |            | 27102.3 | 0.03 | antisense | 1        | 22791532  | 22793482  | SNAP47 antisense RNA 1                      |
| 28771 | ENSG00000254542  |            | 27246.7 | 0.03 | antisense | 11       | 20002425  |           |                                             |

|       |                 |             |       |      |                              |    |           |           |                                                                      |
|-------|-----------------|-------------|-------|------|------------------------------|----|-----------|-----------|----------------------------------------------------------------------|
| 29820 | ENSG00000224148 |             | 28200 | 0.03 | antisense                    | 23 | 99229488  | 99231084  | 31234 antisense RNA 1                                                |
| 29820 | ENSG00000224149 | NCP14L-AS1  | 28200 | 0.03 | antisense                    | 4  | 22907575  | 22907575  | NCP14 antisense RNA 1                                                |
| 29916 | ENSG00000241313 | WVTR1-AS1   | 25288 | 0.03 | antisense                    | 3  | 149374907 | 149379151 | WVTR1 antisense RNA 1                                                |
| 30014 | ENSG00000223008 | BVES1-AS1   | 28287 | 0.03 | antisense                    | 6  | 105581483 | 105617820 | BVES1 antisense RNA 1                                                |
| 30268 | ENSG00000224417 |             | 28639 | 0.03 | antisense                    | 3  | 129042326 | 129045068 | H1TF antisense RNA 3                                                 |
| 30356 | ENSG00000225961 | DENND5B-AS1 | 28592 | 0.03 | antisense                    | 12 | 31749600  | 31749600  | DENND5B antisense RNA 1                                              |
| 30488 | ENSG00000226819 | MEIS1-AS3   | 28782 | 0.03 | antisense                    | 2  | 69653867  | 69660002  | MEIS1 antisense RNA 3                                                |
| 30585 | ENSG00000226200 |             | 29020 | 0.03 | antisense                    | 1  | 44146348  | 44173869  | KDNA antisense RNA 1                                                 |
| 31108 | ENSG00000224389 | IPO8-AS1    | 29123 | 0.03 | antisense                    | 1  | 201957887 | 201958887 | IPO8 antisense RNA 1                                                 |
| 31601 | ENSG00000225961 | RPH1-AS1    | 29331 | 0.03 | antisense                    | 8  | 144448804 | 144450718 | RPH1 antisense RNA 1 (read to head)                                  |
| 30640 | ENSG00000211959 | PKN-AS1     | 29601 | 0.03 | antisense                    | 12 | 120836968 | 120839841 | PKN antisense RNA 1                                                  |
| 20535 | ENSG00000211911 |             | 20451 | 0.03 | IG C <sub>H</sub> gene       | 14 | 106351889 | 106351889 | immunoglobulin heavy constant mu immunoglobulin heavy diversity 3-22 |
| 12259 | ENSG00000211994 |             | 14167 | 0.03 | IG V <sub>H</sub> gene       | 2  | 89116098  | 89180434  | immunoglobulin kappa joining 4                                       |
| 14001 | ENSG00000241294 |             | 7908  | 0.03 | IG V <sub>H</sub> gene       | 14 | 106431963 | 106511932 | immunoglobulin heavy chain J2 (pseudogene)                           |
| 5210  | ENSG00000241294 |             | 7908  | 0.03 | IG V <sub>H</sub> gene       | 2  | 89475812  | 89476644  | immunoglobulin kappa variable 2-24                                   |
| 5484  | ENSG00000211673 |             | 8205  | 0.03 | IG V <sub>H</sub> gene       | 22 | 23222896  | 23223276  | immunoglobulin lambda variable 3-1                                   |
| 3791  | ENSG00000220276 |             | 8591  | 0.03 | IG V <sub>H</sub> gene       | 2  | 89667759  | 89669693  | immunoglobulin kappa variable 1-33                                   |
| 5797  | ENSG00000211959 |             | 8565  | 0.03 | IG V <sub>H</sub> gene       | 14 | 106877619 | 106878126 | immunoglobulin heavy variable 4-39                                   |
| 5799  | ENSG00000211959 |             | 8570  | 0.03 | IG V <sub>H</sub> gene       | 14 | 106892994 | 106893076 | immunoglobulin heavy variable 4-34                                   |
| 3171  | ENSG00000211922 |             | 8924  | 0.03 | IG V <sub>H</sub> gene       | 14 | 107111953 | 107113560 | immunoglobulin heavy variable 3-66                                   |
| 6480  | ENSG00000211862 |             | 9281  | 0.03 | IG V <sub>H</sub> gene       | 22 | 23054174  | 23055688  | immunoglobulin lambda variable 3-21                                  |
| 19532 | ENSG00000211867 |             | 16655 | 0.03 | IG V <sub>H</sub> gene       | 22 | 23114317  | 23115079  | immunoglobulin lambda variable 3-12                                  |
| 3276  | ENSG00000223957 |             | 5047  | 0.03 | IG V <sub>H</sub> pseudogene | 14 | 108714300 | 108714621 | immunoglobulin heavy variable 3-22 (pseudogene)                      |
| 18814 | ENSG00000224607 |             | 17653 | 0.03 | IG V <sub>H</sub> pseudogene | 2  | 90007877  | 90008154  | immunoglobulin kappa variable 1D-21 (pseudogene)                     |
| 28919 | ENSG00000253126 |             | 24497 | 0.03 | IG V <sub>H</sub> pseudogene | 22 | 22952960  | 22953511  | immunoglobulin lambda variable 1J-56 (pseudogene)                    |
| 18179 | ENSG00000220441 | LINC01012   | 17161 | 0.03 | lincRNA                      | 2  | 18476998  | 18477002  | long intergenic non-protein coding RNA 150                           |
| 18256 | ENSG00000268002 | LINC00867   | 1884  | 0.03 | lincRNA                      | 20 | 34633544  | 34633882  | long intergenic non-protein coding RNA 857                           |
| 21414 | ENSG00000273015 | LINC00938   | 21128 | 0.03 | lincRNA                      | 12 | 48119510  | 48121258  | long intergenic non-protein coding RNA 938                           |
| 2581  | ENSG00000231723 | LINC00295   | 1822  | 0.03 | lincRNA                      | 11 | 45221301  | 45221301  | long intergenic non-protein coding RNA 1189                          |
| 26850 | ENSG00000220174 | LINC01149   | 24588 | 0.03 | lincRNA                      | 6  | 31408444  | 31414750  | long intergenic non-protein coding RNA 1149                          |
| 26880 | ENSG00000220126 |             | 24703 | 0.03 | lincRNA                      | 13 | 76505311  | 76509268  | long intergenic non-protein coding RNA 561                           |
| 26903 | ENSG00000220233 |             | 24729 | 0.03 | lincRNA                      | 13 | 76505311  | 76509268  | Fraser-Vill region non-protein coding RNA 4                          |
| 26268 | ENSG00000226919 |             | 25017 | 0.03 | lincRNA                      | 13 | 23448795  | 23449008  | long intergenic non-protein coding RNA 621                           |
| 26316 | ENSG00000226519 |             | 25074 | 0.03 | lincRNA                      | 13 | 23448795  | 23449008  | long intergenic non-protein coding RNA 390                           |
| 26341 | ENSG00000214689 | LINC00035   | 25079 | 0.03 | lincRNA                      | 13 | 23448795  | 23449008  | long intergenic non-protein coding RNA 152                           |
| 26893 | ENSG00000233208 | LINC00042   | 25560 | 0.03 | lincRNA                      | 14 | 90951574  | 90952549  | long intergenic non-protein coding RNA 642                           |
| 26953 | ENSG00000228223 | HCG11       | 25610 | 0.03 | lincRNA                      | 6  | 26522076  | 26526267  | H.A. complex group 11 (non-protein coding)                           |
| 26989 | ENSG00000211848 | MIR121-1-80 | 25610 | 0.03 | miRNA                        | 11 | 12121045  | 12121045  | long intergenic non-protein coding RNA 180                           |
| 27161 | ENSG00000208902 | LINC00890   | 25606 | 0.03 | lincRNA                      | X  | 110754890 | 110756227 | long intergenic non-protein coding RNA 890                           |
| 27162 | ENSG00000234889 |             | 25812 | 0.03 | lincRNA                      | 4  | 48419484  | 48481492  | long intergenic non-protein coding RNA 444                           |
| 27378 | ENSG00000203517 | LINC00351   | 25921 | 0.03 | lincRNA                      | 6  | 4592176   | 4592176   | long intergenic non-protein coding RNA 351                           |
| 27500 | ENSG00000189419 | SPATA1      | 26982 | 0.03 | lincRNA                      | 15 | 100884662 | 100889438 | spermatogenesis associated 41 (non-protein coding)                   |
| 27988 | ENSG00000189280 | LINC0192789 | 26944 | 0.03 | lincRNA                      | 22 | 20924248  | 20719938  | family with sequence similarity 230, member A                        |
| 28489 | ENSG00000226266 |             | 26977 | 0.03 | lincRNA                      | 4  | 18476998  | 18480225  | long intergenic non-protein coding RNA 1086                          |
| 28490 | ENSG00000225251 |             | 27003 | 0.03 | lincRNA                      | 2  | 28475893  | 28475893  | TSR RNA                                                              |
| 28137 | ENSG00000197291 | RAMP2-AS1   | 27272 | 0.03 | lincRNA                      | 17 | 40995932  | 40913275  | RAMP2 antisense RNA 1                                                |
| 29552 | ENSG00000226999 | MIRLETYE    | 27681 | 0.03 | lincRNA                      | 19 | 52148916  | 52196709  | SPACAP antisense RNA 1                                               |
| 29721 | ENSG00000226999 |             | 27681 | 0.03 | lincRNA                      | 19 | 52148916  | 52196709  | long intergenic non-protein coding RNA 505                           |
| 29721 | ENSG00000214293 | RSBN1L-AS1  | 28123 | 0.03 | lincRNA                      | 7  | 77226977  | 77225582  | RSBN1L antisense RNA 1                                               |
| 29740 | ENSG00000213173 | RBM49       | 28125 | 0.03 | lincRNA                      | 1  | 5111796   | 5112894   | RBM49 downstream neighbor (non-protein coding)                       |
| 29833 | ENSG0000021024  | LINC00824   | 28126 | 0.03 | lincRNA                      | 19 | 28115488  | 28124448  | long intergenic non-protein coding RNA 862                           |
| 29884 | ENSG00000225206 | MIR137HG    | 28243 | 0.03 | lincRNA                      | 1  | 98453556  | 98451549  | MIR137 host gene (non-protein coding)                                |
| 29952 | ENSG00000230365 | DISCR9      | 28315 | 0.03 | lincRNA                      | 21 | 39580804  | 39584003  | Down syndrome critical region gene 9 (non-protein coding)            |
| 29996 | ENSG00000234861 |             | 28315 | 0.03 | lincRNA                      | 3  | 118711205 | 118819813 | long intergenic non-protein coding RNA 965                           |
| 30098 | ENSG00000234390 | USP27X-AS1  | 28459 | 0.03 | lincRNA                      | X  | 48641327  | 48649384  | USP27X antisense RNA 1 (head to head)                                |
| 30416 | ENSG00000272168 | CASC15      | 28726 | 0.03 | lincRNA                      | 6  | 21689003  | 22214734  | cancer susceptibility candidate 15 (non-protein coding)              |
| 30416 | ENSG00000211851 | LINC00285   | 29117 | 0.03 | lincRNA                      | 3  | 39513231  | 39525939  | long intergenic non-protein coding RNA 265                           |
| 21120 | ENSG00000268315 | MIR548AN    | 26885 | 0.03 | miRNA                        | X  | 105883044 | 105883126 | miR548AN                                                             |
| 21765 | ENSG00000289012 | MIRLETYE2   | 21405 | 0.03 | miRNA                        | X  | 53884153  | 53884235  | miR548AN let-7f-2                                                    |
| 21398 | ENSG00000269245 | MIR135A     | 23316 | 0.03 | miRNA                        | 2  | 20119307  | 20119331  | miR548AN let-7c                                                      |
| 23583 | ENSG00000268315 | MIR4688     | 22789 | 0.03 | miRNA                        | 9  | 114684380 | 114684449 | miR548AN 4688                                                        |
| 23874 | ENSG00000199133 | MIRLETYE    | 23036 | 0.03 | miRNA                        | 9  | 96941116  | 96941202  | miR548AN let-7d                                                      |
| 24195 | ENSG00000219332 | MIR53A      | 23316 | 0.03 | miRNA                        | 16 | 42292106  | 42292116  | miR548AN 53a                                                         |
| 25248 | ENSG00000268581 | MIR548B     | 23418 | 0.03 | miRNA                        | 3  | 124451286 | 124451368 | miR548AN 548b                                                        |
| 25361 | ENSG0000027952  | MIR624      | 24289 | 0.03 | miRNA                        | 14 | 31483852  | 31483948  | miR548AN 624                                                         |
| 25790 | ENSG00000262339 | MIR125B     | 24904 | 0.03 | miRNA                        | 4  | 69324     | 69324     | miR548AN 125b                                                        |
| 26930 | ENSG00000268174 | MIR4688A    | 25590 | 0.03 | miRNA                        | 1  | 22864975  | 228649853 | miR548AN 4688a                                                       |
| 27119 | ENSG00000279269 | MIR632      | 25771 | 0.03 | miRNA                        | 1  | 3067128   | 30677221  | miR548AN 632                                                         |
| 27253 | ENSG0000021178  | MIR472B     | 25819 | 0.03 | miRNA                        | 17 | 7788174   | 7788174   | miR548AN 472b                                                        |
| 27629 | ENSG00000268502 | MIR444      | 26183 | 0.03 | miRNA                        | 10 | 127508309 | 127508391 | miR548AN 444                                                         |
| 27802 | ENSG00000268465 | MIR4768     | 26433 | 0.03 | miRNA                        | X  | 17444004  | 17444077  | miR548AN 4768                                                        |
| 28197 | ENSG00000214433 | MIR1228     | 26638 | 0.03 | miRNA                        | 18 | 1066818   | 1066818   | miR548AN 1228                                                        |
| 28663 | ENSG00000268346 | MIR135A     | 27128 | 0.03 | miRNA                        | 10 | 103381174 | 103381152 | miR548AN 315b-2                                                      |
| 28684 | ENSG00000268458 | MIR4258     | 27149 | 0.03 | miRNA                        | 1  | 15989789  | 15989899  | hsa-miR-4258                                                         |
| 28684 | ENSG00000268458 |             | 27149 | 0.03 | miRNA                        | 1  | 15989789  | 15989899  | miR548AN 4258                                                        |
| 29130 | ENSG00000253030 | MIR216      | 27593 | 0.03 | miRNA                        | 15 | 59463362  | 59463461  | miR548AN 216                                                         |
| 29367 | ENSG00000268418 | MIR4261     | 27794 | 0.03 | miRNA                        | 2  | 10333740  | 10333797  | miR548AN 4261                                                        |
| 29448 | ENSG00000260223 | MIR339      | 27808 | 0.03 | miRNA                        | 1  | 1086983   | 1086983   | miR548AN 339                                                         |
| 19298 | ENSG00000232395 |             | 19474 | 0.03 | misc. RNA                    | 13 | 37740489  | 37740795  | RNA, 75K small nuclear pseudogene 1                                  |
| 21893 | ENSG00000271800 |             | 21427 | 0.03 | misc. RNA                    | 3  | 125235823 | 125235930 | Y RNA                                                                |
| 22318 | ENSG00000268739 |             | 21810 | 0.03 | misc. RNA                    | 1  | 844301    | 844301    | RNA, 75S, cytoplasmic 5.2 pseudogene                                 |
| 22456 | ENSG00000199495 |             | 21912 | 0.03 | misc. RNA                    | 10 | 126454789 | 126454866 | Y RNA                                                                |
| 22556 | ENSG00000199875 |             | 21889 | 0.03 | misc. RNA                    | 11 | 93452789  | 93452881  | Y RNA                                                                |
| 22607 | ENSG00000224730 |             | 22280 | 0.03 | misc. RNA                    | 6  | 86418692  | 86418738  | RNA, 75S, cytoplasmic 502, pseudogene                                |
| 14815 | ENSG00000202733 |             | 22936 | 0.03 | misc. RNA                    | 4  | 7953421   | 7953421   | Y RNA                                                                |
| 24875 | ENSG00000202310 |             | 23891 | 0.03 | misc. RNA                    | 8  | 101171096 | 101171203 | Y RNA                                                                |
| 24884 | ENSG00000245988 |             | 24989 | 0.03 | misc. RNA                    | 18 | 96372762  | 96373063  | RNA, 75S, cytoplasmic 402, pseudogene                                |
| 5476  | ENSG00000245988 |             | 24989 | 0.03 | misc. RNA                    | 18 | 78021752  | 78021752  | RNA, 75S, small nuclear pseudogene 97                                |
| 25545 | ENSG00000268608 |             | 24429 | 0.03 | misc. RNA                    | 11 | 33192927  | 33192936  | Y RNA                                                                |
| 25960 | ENSG00000268503 |             | 24772 | 0.03 | misc. RNA                    | A  | 62642296  | 62642271  | RNA, 75S, cytoplasmic 262, pseudogene                                |
| 25960 | ENSG00000268503 |             | 24772 | 0.03 | misc. RNA                    | A  | 62642296  | 62642271  | RNA, 75S, small nuclear pseudogene 97                                |
| 26548 | ENSG00000199840 |             | 25274 | 0.03 | misc. RNA                    | 7  | 71150732  | 71150732  | RNA, 75S, small nuclear pseudogene 75                                |
| 26960 | ENSG00000268454 |             | 25312 | 0.03 | misc. RNA                    | 12 | 102811088 | 102811391 | RNA, 75S, cytoplasmic 793, pseudogene                                |
| 27085 | ENSG00000271797 |             | 25741 | 0.03 | misc. RNA                    | 5  | 154097845 | 154098249 | RNA, 75S, cytoplasmic 255, pseudogene                                |
| 27341 | ENSG00000203485 |             | 25951 | 0.03 | misc. RNA                    | 11 | 33218093  | 33218193  | Metazoa signal recognition particle RNA                              |
| 27391 | ENSG00000201781 |             | 25    |      |                              |    |           |           |                                                                      |



|       |                 |         |      |                      |    |           |           |                                                                                                      |
|-------|-----------------|---------|------|----------------------|----|-----------|-----------|------------------------------------------------------------------------------------------------------|
| 26110 | ENSG0000023042  | 24069.6 | 0.03 | processed_pseudogene | 7  | 23168797  | 23168460  | adenylate kinase 3 pseudogene 3                                                                      |
| 26118 | ENSG0000023168  | 24129.3 | 0.03 | processed_pseudogene | 17 | 4522237   | 4522237   | ribosomal protein L36a pseudogene 49                                                                 |
| 26193 | ENSG0000044708  | 24149   | 0.03 | processed_pseudogene | 8  | 36439988  | 36439109  | ribosomal protein L23 pseudogene 10                                                                  |
| 26209 | ENSG0000023167  | 24159.1 | 0.03 | processed_pseudogene | 7  | 14233020  | 142331782 | eukaryotic translation elongation factor 1 alpha 1 pseudogene 26                                     |
| 26230 | ENSG0000023655  | 24177.6 | 0.03 | processed_pseudogene | 6  | 65662306  | 65662762  | immunoglobulin J polydiphosphate pseudogene 1                                                        |
| 26266 | ENSG0000023964  | 24236.5 | 0.03 | processed_pseudogene | 6  | 25617626  | 25617626  | ribosomal protein S16 pseudogene 9                                                                   |
| 26374 | ENSG00000220744 | 24302.7 | 0.03 | processed_pseudogene | 6  | 127683658 | 127684548 | ribosomal protein L5 pseudogene 18                                                                   |
| 26496 | ENSG0000023259  | 24393.4 | 0.03 | processed_pseudogene | 13 | 42943374  | 42943753  | fatty acid binding protein 3 pseudogene 2                                                            |
| 26506 | ENSG0000023963  | 24416.1 | 0.03 | processed_pseudogene | 11 | 127884831 | 127884831 | hypochlorite nuclear protein S18 pseudogene 9                                                        |
| 26579 | ENSG0000024455  | 24448.1 | 0.03 | processed_pseudogene | 19 | 181599447 | 181599447 | ribosomal protein S18 pseudogene 13                                                                  |
| 26580 | ENSG0000023550  | 24451.4 | 0.03 | processed_pseudogene | 11 | 17426389  | 17426389  | RAN, member RAN oncogene family pseudogene 8                                                         |
| 26583 | ENSG0000023525  | 24679   | 0.03 | processed_pseudogene | 20 | 44603888  | 44603888  | ferritin, light polypeptide pseudogene 1                                                             |
| 26582 | ENSG00000231480 | 24688.4 | 0.03 | processed_pseudogene | 21 | 39814369  | 39814369  | small nuclear ribonucleoprotein polydiphosphate pseudogene 13                                        |
| 26584 | ENSG00000231691 | 24739.7 | 0.03 | processed_pseudogene | 13 | 47481817  | 47481817  | guanine nucleotide binding protein (G protein), gamma 5 pseudogene 5                                 |
| 26595 | ENSG00000249920 | 24797.2 | 0.03 | processed_pseudogene | 4  | 74802321  | 74802575  | heterogeneous nuclear ribonucleoprotein A1 pseudogene 55                                             |
| 26214 | ENSG00000178400 | 24865.2 | 0.03 | processed_pseudogene | 7  | 20921999  | 20922629  | eukaryotic translation elongation factor 1 alpha 1 pseudogene 27                                     |
| 26288 | ENSG00000242562 | 25040.6 | 0.03 | processed_pseudogene | 7  | 105797146 | 105797146 | COX1 and COX4 associated factor 13 pseudogene 1                                                      |
| 26328 | ENSG00000172186 | 25048.5 | 0.03 | processed_pseudogene | X  | 68353967  | 68354560  | high mobility group nucleosome binding domain 1 pseudogene 35                                        |
| 26335 | ENSG00000229014 | 25091.9 | 0.03 | processed_pseudogene | 12 | 40442045  | 40442392  | ribosomal protein L30 pseudogene 13                                                                  |
| 26345 | ENSG0000023365  | 25099.2 | 0.03 | processed_pseudogene | 8  | 8325239   | 8325239   | ribosomal protein S24 pseudogene 25                                                                  |
| 26360 | ENSG00000216990 | 25111.7 | 0.03 | processed_pseudogene | 6  | 88008490  | 88010165  | heat shock 60kDa protein 1 (chaperonin) pseudogene 10                                                |
| 26403 | ENSG00000197214 | 25141.7 | 0.03 | processed_pseudogene | 9  | 99830031  | 99830109  | transcription elongation factor A (SII), 1 pseudogene 1                                              |
| 26415 | ENSG00000208937 | 25150.1 | 0.03 | processed_pseudogene | 16 | 46722680  | 46723177  | ribosomal protein L32 pseudogene 41                                                                  |
| 26429 | ENSG00000233548 | 25164   | 0.03 | processed_pseudogene | X  | 144258102 | 144258144 | cytochrome c, somatic pseudogene 44                                                                  |
| 26432 | ENSG00000233919 | 25167   | 0.03 | processed_pseudogene | 1  | 148621760 | 148622239 | histone cluster 2, H2bc (pseudogene)                                                                 |
| 26525 | ENSG00000233490 | 25209.5 | 0.03 | processed_pseudogene | 15 | 29891655  | 29891655  | glyceraldehyde 3 phosphate dehydrogenase pseudogene 60                                               |
| 26566 | ENSG00000286227 | 25215.4 | 0.03 | processed_pseudogene | 18 | 23784833  | 23784838  | nucleophosmin 1 (nucleolar phosphoprotein B23, numatrin) pseudogene 2                                |
| 26608 | ENSG00000230282 | 25236.8 | 0.03 | processed_pseudogene | 2  | 16408761  | 16409617  | ribosomal protein L7 pseudogene 61                                                                   |
| 26671 | ENSG00000249641 | 25438.2 | 0.03 | processed_pseudogene | 21 | 3243380   | 3243380   | abp500 protein kinase S3a pseudogene 2                                                               |
| 26746 | ENSG00000226804 | 25438.2 | 0.03 | processed_pseudogene | 1  | 119699162 | 119699162 | ribosomal protein S3a pseudogene 12                                                                  |
| 26608 | ENSG00000213035 | 25488.7 | 0.03 | processed_pseudogene | 19 | 48207724  | 48208147  | ribosomal protein L23a pseudogene 80                                                                 |
| 26714 | ENSG00000231428 | 25512.3 | 0.03 | processed_pseudogene | 13 | 13308165  | 13308165  | eukaryotic translation elongation factor 1 gamma pseudogene 8                                        |
| 27079 | ENSG00000255213 | 25534   | 0.03 | processed_pseudogene | 11 | 62098418  | 62099285  | nucleophosmin 1 (nucleolar phosphoprotein B23, numatrin) pseudogene 35                               |
| 27136 | ENSG00000213452 | 25586.7 | 0.03 | processed_pseudogene | 3  | 74185110  | 74186043  | aldo-keto reductase family 1, member B1 pseudogene 2                                                 |
| 27144 | ENSG00000230538 | 25587.9 | 0.03 | processed_pseudogene | 23 | 2341133   | 2341133   | brain abundant, membrane attached signal peptide pseudogene 1                                        |
| 27230 | ENSG00000217791 | 25589.9 | 0.03 | processed_pseudogene | 5  | 53154996  | 53156231  | angiotensinase synthetase 1 pseudogene 9                                                             |
| 27244 | ENSG00000239413 | 25678.3 | 0.03 | processed_pseudogene | 12 | 101818219 | 101818469 | ribosomal protein S27 pseudogene 23                                                                  |
| 27308 | ENSG00000239193 | 25681.3 | 0.03 | processed_pseudogene | 10 | 10216183  | 10216183  | transcription elongation factor B (SIII), polydiphosphate pseudogene 3                               |
| 27323 | ENSG00000257119 | 25934.5 | 0.03 | processed_pseudogene | 12 | 107295001 | 107295001 | eukaryotic translation elongation factor 1 beta 2 pseudogene 4                                       |
| 27352 | ENSG00000235852 | 25963.3 | 0.03 | processed_pseudogene | X  | 65717590  | 65719598  | pyruvate kinase, muscle pseudogene 2                                                                 |
| 27403 | ENSG00000237651 | 25988.1 | 0.03 | processed_pseudogene | 10 | 10355881  | 10355881  | 14-3-3 zeta pseudogene 9                                                                             |
| 27474 | ENSG00000238008 | 26054.1 | 0.03 | processed_pseudogene | 3  | 33586126  | 33586351  | cytochrome c oxidase subunit VIc pseudogene 10                                                       |
| 27546 | ENSG00000227714 | 26114.5 | 0.03 | processed_pseudogene | 13 | 96346237  | 96346749  | MT-ND8 pseudogene 18                                                                                 |
| 27573 | ENSG00000239796 | 26135.3 | 0.03 | processed_pseudogene | 5  | 12607310  | 126073687 | heat shock 70kDa protein 1 pseudogene 10                                                             |
| 27583 | ENSG00000232721 | 26135.3 | 0.03 | processed_pseudogene | 8  | 832618110 | 832618110 | ribosomal protein L6 pseudogene 25                                                                   |
| 27584 | ENSG00000231513 | 26142.9 | 0.03 | processed_pseudogene | X  | 16216521  | 16217412  | ribosomal protein L6 pseudogene 30                                                                   |
| 27591 | ENSG00000204142 | 26151.3 | 0.03 | processed_pseudogene | 3  | 53049297  | 53049297  | SEPN1-like mRNA binding protein 1 pseudogene 3                                                       |
| 27662 | ENSG00000234444 | 26159.7 | 0.03 | processed_pseudogene | 4  | 217476065 | 217476065 | proteasome (prosome, macropain) subunit, beta type, 3 pseudogene 2                                   |
| 27670 | ENSG00000242703 | 26229.6 | 0.03 | processed_pseudogene | 7  | 140697752 | 140699601 | chaperonin containing TCP1, subunit 4 (delta) pseudogene 1                                           |
| 27685 | ENSG00000204171 | 26249.6 | 0.03 | processed_pseudogene | 5  | 69169710  | 69169963  | ribosomal protein S27 pseudogene 13                                                                  |
| 28010 | ENSG00000210945 | 26310.9 | 0.03 | processed_pseudogene | 7  | 74648464  | 74641119  | heat shock 70kDa protein 1 pseudogene 7                                                              |
| 28037 | ENSG00000232429 | 26337.5 | 0.03 | processed_pseudogene | 19 | 34080112  | 34080194  | ribosomal protein L21 pseudogene 131                                                                 |
| 28073 | ENSG00000239205 | 26358.1 | 0.03 | processed_pseudogene | 4  | 83049688  | 83050089  | heterogeneous nuclear ribonucleoprotein A3 pseudogene 13                                             |
| 28076 | ENSG00000239756 | 26359.7 | 0.03 | processed_pseudogene | 4  | 83711809  | 83711809  | hyocyanin phosphotransferase pseudogene 3                                                            |
| 28294 | ENSG00000232522 | 26375.4 | 0.03 | processed_pseudogene | 2  | 140428116 | 140428874 | mitochondrial ribosomal protein S18B pseudogene 2                                                    |
| 28297 | ENSG00000228172 | 26378.3 | 0.03 | processed_pseudogene | 9  | 102979037 | 102979933 | ribosomal protein S2 pseudogene 35                                                                   |
| 28334 | ENSG00000230268 | 26382.6 | 0.03 | processed_pseudogene | 10 | 4655110   | 4655110   | double homeobox A pseudogene 5                                                                       |
| 28348 | ENSG00000232881 | 26383.5 | 0.03 | processed_pseudogene | 3  | 5756336   | 5756337   | ring finger protein 7 pseudogene 1                                                                   |
| 28356 | ENSG00000235044 | 26384.3 | 0.03 | processed_pseudogene | 20 | 38158441  | 38158445  | pedipodin/ isomerase A (cyclophilin A) pseudogene 3                                                  |
| 28400 | ENSG00000239353 | 26391.9 | 0.03 | processed_pseudogene | 12 | 144718052 | 144718052 | ribosomal protein S2 pseudogene 55                                                                   |
| 28412 | ENSG00000251587 | 26391.2 | 0.03 | processed_pseudogene | 4  | 4895009   | 4895009   | lactate dehydrogenase A pseudogene 1                                                                 |
| 28460 | ENSG00000178503 | 26396.3 | 0.03 | processed_pseudogene | 7  | 37625103  | 37625932  | NECAP endocytosis associated 1 pseudogene 1                                                          |
| 28494 | ENSG00000239653 | 26397.8 | 0.03 | processed_pseudogene | 10 | 6201221   | 6201221   | PRR16 human ortholog pseudogene 1                                                                    |
| 28569 | ENSG00000213950 | 26397.8 | 0.03 | processed_pseudogene | 20 | 14736209  | 14738702  | ribosomal protein S10 pseudogene 20                                                                  |
| 28609 | ENSG00000253454 | 26398.5 | 0.03 | processed_pseudogene | 8  | 10557183  | 10557657  | NADH dehydrogenase (ubiquinone) 1 alpha subcomplex, 5 pseudogene 2                                   |
| 28646 | ENSG00000239653 | 26398.5 | 0.03 | processed_pseudogene | 16 | 31188184  | 31188184  | NADH dehydrogenase (ubiquinone) 1 alpha subcomplex, 3 pseudogene 6                                   |
| 28778 | ENSG00000213050 | 26399.1 | 0.03 | processed_pseudogene | 7  | 116612219 | 116612965 | topomycin 5 pseudogene 1                                                                             |
| 28842 | ENSG00000258805 | 26399.1 | 0.03 | processed_pseudogene | 14 | 85100042  | 85100042  | adenosine receptor 1 pseudogene 2                                                                    |
| 28861 | ENSG00000239653 | 26399.1 | 0.03 | processed_pseudogene | 14 | 3940230   | 3940230   | eukaryotic translation elongation factor 1 alpha 1 pseudogene 24                                     |
| 29022 | ENSG00000230444 | 26399.1 | 0.03 | processed_pseudogene | 7  | 165226    | 165491    | transcription factor A, mitochondrial pseudogene 1                                                   |
| 29028 | ENSG00000242705 | 26399.1 | 0.03 | processed_pseudogene | 3  | 88997292  | 89000778  | NMDA receptor regulated 2 pseudogene 4                                                               |
| 29030 | ENSG00000239653 | 26399.1 | 0.03 | processed_pseudogene | 13 | 13311272  | 13311272  | family with sequence similarity 201, member 8                                                        |
| 29062 | ENSG00000259993 | 26399.1 | 0.03 | processed_pseudogene | 3  | 8836306   | 88368172  | ATP-binding cassette, sub-family F (ABC20), member 2 pseudogene 1                                    |
| 29168 | ENSG00000239653 | 26399.1 | 0.03 | processed_pseudogene | 12 | 18845986  | 18847030  | proteasome (prosome, macropain) 26S subunit, ATPase, 1 pseudogene 9                                  |
| 29172 | ENSG00000244131 | 26399.1 | 0.03 | processed_pseudogene | 12 | 8859204   | 8859204   | ribosomal protein S24 pseudogene 28                                                                  |
| 29269 | ENSG00000258978 | 26399.1 | 0.03 | processed_pseudogene | 14 | 75583129  | 75583303  | hypoxia inducible factor 1, alpha subunit (basic helix-loop-helix transcription factor) pseudogene 1 |
| 29398 | ENSG00000218896 | 26399.1 | 0.03 | processed_pseudogene | 6  | 143757353 | 143757847 | tubulin beta 8 class VIII pseudogene 2                                                               |
| 29405 | ENSG00000231362 | 26399.1 | 0.03 | processed_pseudogene | 15 | 90231168  | 90231474  | ribosomal protein L36a pseudogene 43                                                                 |
| 29407 | ENSG00000234432 | 26399.1 | 0.03 | processed_pseudogene | 17 | 1753280   | 1753280   | ribosomal protein L7 pseudogene 26                                                                   |
| 29450 | ENSG00000228955 | 26399.1 | 0.03 | processed_pseudogene | 20 | 3252368   | 3252368   | phosphatidylinositol glycan anchor biosynthesis, class P pseudogene 3                                |
| 29508 | ENSG00000254554 | 26399.1 | 0.03 | processed_pseudogene | 11 | 62138618  | 62140040  | regulator of chromosome condensation 2 pseudogene 6                                                  |
| 29561 | ENSG00000232622 | 26399.1 | 0.03 | processed_pseudogene | 21 | 24742579  | 24743317  | eukaryotic translation elongation factor 1 alpha 1 pseudogene 1                                      |
| 29609 | ENSG00000211108 | 26399.1 | 0.03 | processed_pseudogene | 8  | 1196346   | 1196346   | tumor protein, transcriptionally controlled, 1 pseudogene 5                                          |
| 29618 | ENSG00000232217 | 26399.1 | 0.03 | processed_pseudogene | 13 | 98635204  | 98639340  | ferritin, light polypeptide pseudogene 8                                                             |
| 29644 | ENSG00000230277 | 26399.1 | 0.03 | processed_pseudogene | 3  | 1896819   | 1896819   | ferritin, heavy polypeptide pseudogene 2                                                             |
| 29759 | ENSG00000239653 | 26399.1 | 0.03 | processed_pseudogene | 12 | 775894    | 775894    | nucleolar protein interacting with the FIA domain of MOY1 pseudogene 3                               |
| 29804 | ENSG00000231333 | 26399.1 | 0.03 | processed_pseudogene | 1  | 200832380 | 200832380 | ribosomal protein L34 pseudogene 6                                                                   |
| 29874 | ENSG00000236542 | 26399.1 | 0.03 | processed_pseudogene | 20 | 2565496   | 2565512   | meiotic complex subunit 26 pseudogene 1                                                              |
| 29874 | ENSG00000236542 | 26399.1 | 0.03 | processed_pseudogene | 20 | 2565496   | 2565512   | meiotic complex subunit 26 pseudogene 1                                                              |
| 30027 | ENSG00000232882 | 26399.1 | 0.03 | processed_pseudogene | 13 | 113932949 | 113932949 | lactate dehydrogenase B pseudogene 1                                                                 |
| 30113 | ENSG00000232733 | 26399.1 | 0.03 | processed_pseudogene | 9  | 35576376  | 35577102  | sorting nexin 10 pseudogene 7                                                                        |
| 30161 | ENSG00000232288 | 26399.1 | 0.03 | processed_pseudogene | 12 | 101814714 | 101814714 | topomycin 5 pseudogene 1                                                                             |
| 30463 | ENSG00000246233 | 26399.1 | 0.03 | processed_pseudogene | 7  | 2210555   | 2211099   | heterogeneous nuclear ribonucleoprotein A1 pseudogene 16                                             |
| 30596 | ENSG00000231381 | 26399.1 | 0.03 | processed_pseudogene | 9  | 6668991   | 6670008   | ring finger protein 2 pseudogene 1                                                                   |
| 30631 | ENSG00000231214 | 26399.1 | 0.03 | processed_pseudogene | 12 | 13970240  | 13970998  | ribosomal protein S2 pseudogene 1                                                                    |
| 31154 | ENSG00000202047 | 26399.1 | 0.03 | processed_pseudogene | 16 | 23548382  | 23548735  | SUB1 pseudogene 4                                                                                    |
| 31407 | ENSG00000232136 | 26399.1 | 0.03 | processed_pseudogene | 10 | 75491352  | 75493396  | dual specificity phosphatase 5 pseudogene 5                                                          |
| 31436 | ENSG00000211368 | 26399.1 | 0.03 | processed_pseudogene | 12 | 12145204  | 121452    |                                                                                                      |

|       |                  |          |         |      |                |    |           |           |                                                                           |
|-------|------------------|----------|---------|------|----------------|----|-----------|-----------|---------------------------------------------------------------------------|
| 12646 | ENSG00000151715  | TME43B8  | 14484.6 | 0.03 | protein_coding | 11 | 129685714 | 129729838 | transmembrane protein 458                                                 |
| 12646 | ENSG00000151548  | CHST7    | 14485.1 | 0.03 | protein_coding | 3  | 1428173   | 1428173   | carbohydrate 14 acetylglucosaminase C1 acyltransferase 2                  |
| 12737 | ENSG00000131184  | GSTM1    | 14532.3 | 0.03 | protein_coding | 1  | 110233406 | 110251691 | glutathione S-transferase mu 1                                            |
| 12806 | ENSG00000142399  | IFTM3    | 14584.2 | 0.03 | protein_coding | 11 | 319669    | 3275737   | interferon induced transmembrane protein 3                                |
| 12843 | ENSG00000172631  | CES2     | 14612.6 | 0.03 | protein_coding | 16 | 69969347  | 69979989  | carboxylesterase 2                                                        |
| 12866 | ENSG00000174141  | ERT3     | 14653.1 | 0.03 | protein_coding | 3  | 24012853  | 24012853  | eukaryotic translation initiation factor 2, subunit 1 gamma, 50kDa        |
| 12987 | ENSG00000087848  | ZFY      | 14705   | 0.03 | protein_coding | Y  | 2803112   | 2950547   | zinc finger protein, Y-linked                                             |
| 13020 | ENSG00000104044  | IDS      | 14872.2 | 0.03 | protein_coding | A  | 14895821  | 148915470 | iduronate 2-sulfatase                                                     |
| 13349 | ENSG00000099344  | ECHDC1   | 14984.2 | 0.03 | protein_coding | 14 | 2792885   | 2792885   | enoyl CoA hydratase domain containing 1                                   |
| 13385 | ENSG00001006987  | DCAF11   | 15013.8 | 0.03 | protein_coding | 14 | 24583404  | 24584541  | DOB1 and GUL4 associated factor 11                                        |
| 13412 | ENSG00000186295  | IFIB     | 15032.1 | 0.03 | protein_coding | 10 | 22090101  | 220897735 | mitochondrial aminoxy reducing component 1                                |
| 13417 | ENSG00000110864  | SCRF1    | 15038.3 | 0.03 | protein_coding | 17 | 49265485  | 49264129  | chromosome 19 open reading frame 77                                       |
| 13429 | ENSG00000101884  | C22orf24 | 15047.7 | 0.03 | protein_coding | 20 | 35234137  | 35240960  | chromosome 20 open reading frame 24                                       |
| 13464 | ENSG00000205112  | CHMP1B   | 15075.1 | 0.03 | protein_coding | 18 | 11651395  | 11654448  | charged multivesicular body protein 1B                                    |
| 13468 | ENSG00000092924  | ABL1     | 15078.8 | 0.03 | protein_coding | 10 | 11630872  | 11644192  | avian leukemia/osteosarcoma 1 protein 1                                   |
| 13501 | ENSG00000142546  | NOS1P    | 15101.2 | 0.03 | protein_coding | 19 | 52008968  | 52008519  | nitric oxide synthase interacting protein                                 |
| 13516 | ENSG00000179832  | MAP1     | 15112.1 | 0.03 | protein_coding | 8  | 14519402  | 14516214  | MAP1 homolog (D. rerio)                                                   |
| 13611 | ENSG00000117522  | CR2      | 15178.8 | 0.03 | protein_coding | 10 | 20763249  | 20763249  | complement component 3 (CD35/CR1/BBY) receptor 2                          |
| 13661 | ENSG00000142657  | PGD      | 15223.5 | 0.03 | protein_coding | 1  | 10458649  | 10460201  | phosphogluconate dehydrogenase                                            |
| 13701 | ENSG00000125775  | SDCBP2   | 15250.5 | 0.03 | protein_coding | 20 | 1290919   | 1309883   | glycine binding protein (syntrin) 2                                       |
| 13728 | ENSG00000200926  | C17orf77 | 15257.7 | 0.03 | protein_coding | 19 | 3474405   | 3474405   | chromosome 17 open reading frame 77                                       |
| 13728 | ENSG00000058804  | SLC2A3   | 15276.7 | 0.03 | protein_coding | 12 | 8071826   | 8088871   | solute carrier family 2 (facilitated glucose transporter), member 3       |
| 13737 | ENSG00000089289  | IGBP1    | 15281.2 | 0.03 | protein_coding | X  | 69353299  | 69398174  | immunoglobulin (CD75A) binding protein 1                                  |
| 13742 | ENSG00000154532  | MED12A   | 15282.4 | 0.03 | protein_coding | 12 | 51317255  | 51320350  | methyltransferase 12A                                                     |
| 13756 | ENSG00000158711  | MAPK13   | 15288.3 | 0.03 | protein_coding | 6  | 36095586  | 36107842  | mitogen-activated protein kinase 13                                       |
| 13767 | ENSG00000112149  | CD31     | 15298.3 | 0.03 | protein_coding | 6  | 14117872  | 14137149  | CD31 molecule                                                             |
| 13768 | ENSG00000075560  | WDR1     | 15315.1 | 0.03 | protein_coding | 17 | 66417095  | 66415854  | WD repeat domain, phosphoinositide interacting 1                          |
| 13828 | ENSG00000133313  | CHNCP2   | 15340.1 | 0.03 | protein_coding | 18 | 7218305   | 7218836   | CNCP2 domain (2) metalloproteinase M20 family)                            |
| 13920 | ENSG00000131384  | TMTM     | 15414.5 | 0.03 | protein_coding | 6  | 18128542  | 18155305  | thiourea S-methyltransferase                                              |
| 13961 | ENSG00000098121  | MIR5P    | 15428.3 | 0.03 | protein_coding | 8  | 75119     | 75119     | ribonucleic acid polymerase II                                            |
| 13991 | ENSG00000188403  | HMGCB1   | 15484.8 | 0.03 | protein_coding | 13 | 31032884  | 31191734  | high mobility group box 1                                                 |
| 14042 | ENSG00000105263  | PPPR1    | 15508.4 | 0.03 | protein_coding | 19 | 65741148  | 65770763  | protein phosphatase 6, regulatory subunit 1                               |
| 14052 | ENSG00000200428  | PRKDCB   | 15528.8 | 0.03 | protein_coding | 18 | 10666268  | 10666268  | protein kinase, cAMP-dependent, regulatory, type II, beta                 |
| 14257 | ENSG00000196998  | WDR45    | 15571.9 | 0.03 | protein_coding | X  | 48929385  | 48939108  | WD repeat domain 45                                                       |
| 14330 | ENSG00000184613  | NELL2    | 15742.7 | 0.03 | protein_coding | 12 | 44902058  | 45315631  | NEL-like 2 (chicken)                                                      |
| 14335 | ENSG00000117522  | CR2      | 15748.8 | 0.03 | protein_coding | 10 | 3607870   | 3607870   | B220/CR2 antigen                                                          |
| 14367 | ENSG00000108298  | RPL19    | 15772.1 | 0.03 | protein_coding | 17 | 37356538  | 37360980  | ribosomal protein L19                                                     |
| 14395 | ENSG00000186971  | AKTIP    | 15778.5 | 0.03 | protein_coding | 16 | 53524952  | 53538323  | AKT interacting protein                                                   |
| 14433 | ENSG00000117522  | CR2      | 15778.8 | 0.03 | protein_coding | 10 | 1041100   | 1041100   | nuclear factor of kappa light-chain gene enhancer in B cells 2 (p49/p100) |
| 14654 | ENSG00000097892  | KLF6     | 15974.1 | 0.03 | protein_coding | 10 | 3818198   | 3827473   | Kruppel-like factor 6                                                     |
| 14668 | ENSG00000172486  | ZNF24    | 15983.9 | 0.03 | protein_coding | 18 | 3291278   | 32925446  | zinc finger protein 24                                                    |
| 14674 | ENSG00000110864  | LAMTOR1  | 15992.1 | 0.03 | protein_coding | 11 | 7178261   | 7178261   | late endosomal/lysosomal adaptor, MAPK and TORC1 activator 1              |
| 14698 | ENSG00000229415  | SFT1A3   | 16007.3 | 0.03 | protein_coding | 14 | 39842493  | 39849334  | surfactant associated 3                                                   |
| 14778 | ENSG00000147804  | RPL7     | 16068.9 | 0.03 | protein_coding | 8  | 74202506  | 74203024  | ribosomal protein L7                                                      |
| 14827 | ENSG00000126992  | LRP11    | 16142   | 0.03 | protein_coding | 6  | 54958286  | 54958286  | (glycophosphatidyl) inositol                                              |
| 14862 | ENSG00000117522  | SWAP70   | 16149.1 | 0.03 | protein_coding | 8  | 9898243   | 9774538   | SWAP associated 70-kDa subunit                                            |
| 14883 | ENSG00000112078  | KCTD20   | 16147.2 | 0.03 | protein_coding | 6  | 38410544  | 36489820  | potassium channel tetramerization domain containing 20                    |
| 14883 | ENSG00000174500  | GCSAM    | 16203.7 | 0.03 | protein_coding | 3  | 11185968  | 11185129  | germinal center-associated, signaling and motility                        |
| 14976 | ENSG00000140001  | ZNF222   | 16200.1 | 0.03 | protein_coding | 12 | 140012065 | 140008448 | zinc finger protein, motif-type 2                                         |
| 14992 | ENSG00000175482  | POLD4    | 16230.5 | 0.03 | protein_coding | 11 | 67112448  | 67124443  | polymerase (DNA-directed), delta 4, accessory subunit                     |
| 15005 | ENSG00000186512  | ZNF22    | 16242   | 0.03 | protein_coding | 10 | 4549923   | 45500714  | zinc finger protein 22                                                    |
| 15051 | ENSG00000152524  | GOLGA4   | 16249.4 | 0.03 | protein_coding | 6  | 34811426  | 34810134  | golgi AL family, member B                                                 |
| 15059 | ENSG00000130224  | ACE2     | 16293.2 | 0.03 | protein_coding | X  | 15979156  | 15920271  | angiotensin I converting enzyme 2                                         |
| 15185 | ENSG00000094651  | OPD1     | 16397.6 | 0.03 | protein_coding | X  | 31752932  | 31771480  | oral-facial-digital syndrome 1                                            |
| 15296 | ENSG00000196278  | CE2      | 16402   | 0.03 | protein_coding | 2  | 31866262  | 31913449  | complement component 2                                                    |
| 15298 | ENSG00000181409  | AATK     | 16428.5 | 0.03 | protein_coding | 17 | 78019595  | 78139877  | apoptosis-associated tyrosine kinase                                      |
| 15371 | ENSG00000149607  | FAM134A  | 16452.1 | 0.03 | protein_coding | 2  | 22004901  | 22005021  | family with sequence similarity 134, member A                             |
| 15434 | ENSG00000101785  | PRKRI    | 16521.1 | 0.03 | protein_coding | 17 | 4602933   | 4602934   | ribonucleic acid reductase                                                |
| 15456 | ENSG00000108846  | PRKARIA  | 16521.9 | 0.03 | protein_coding | 17 | 4602932   | 4602933   | protein kinase, cAMP-dependent, regulatory, type I, alpha                 |
| 15457 | ENSG00000166276  | GRIFF1   | 16521.7 | 0.03 | protein_coding | 1  | 59240319  | 59268233  | growth factor independent 1 transcription repressor                       |
| 15474 | ENSG00000101785  | PRKRI    | 16521.1 | 0.03 | protein_coding | 17 | 59211628  | 59211628  | single-pass membrane protein with coiled-coil domains 4                   |
| 15525 | ENSG00000113558  | SKP1     | 16723.4 | 0.03 | protein_coding | 5  | 13348473  | 133512726 | S phase kinase-associated protein 1                                       |
| 15627 | ENSG00000098738  | GMCL1    | 16883.6 | 0.03 | protein_coding | 2  | 10386624  | 10386624  | germ cells, spermatogenesis associated 1                                  |
| 15696 | ENSG00000106295  | ANKRD18  | 16999.2 | 0.03 | protein_coding | 10 | 7397017   | 7397017   | anaphase promoting complex subunit 6                                      |
| 15691 | ENSG00000160908  | ZNF304   | 16938.3 | 0.03 | protein_coding | 7  | 98084142  | 99097947  | zinc finger protein 304                                                   |
| 15696 | ENSG00000135877  | ITNS     | 16983.1 | 0.03 | protein_coding | 12 | 65112225  | 65152227  | ADP-ribosylation factor GTPase activating protein 2                       |
| 15975 | ENSG00000101386  | PTN      | 17071.2 | 0.03 | protein_coding | 49 | 61970921  | 62001921  | protein tyrosine phosphatase, non-receptor type 1                         |
| 16021 | ENSG00000114200  | BCH2     | 17047   | 0.03 | protein_coding | 3  | 16540692  | 16555260  | butyrylcholinesterase                                                     |
| 16044 | ENSG00000108519  | HNRNPK   | 17070.8 | 0.03 | protein_coding | 9  | 8654299   | 8656569   | heterogeneous nuclear ribonucleoprotein K                                 |
| 16184 | ENSG00000104888  | EIF2K4   | 17201.1 | 0.03 | protein_coding | 2  | 20671044  | 20671044  | eukaryotic translation initiation factor 2D                               |
| 16224 | ENSG000001082108 | DEK1     | 17240.6 | 0.03 | protein_coding | 16 | 11022748  | 11038317  | Deaf1 homologue (mouse)                                                   |
| 16305 | ENSG00000204247  | ARFGAP3  | 17249.9 | 0.03 | protein_coding | 12 | 4312506   | 43254112  | ADP-ribosylation factor GTPase activating protein 3                       |
| 16320 | ENSG00000102584  | SRFBP1A  | 17245.5 | 0.03 | protein_coding | 12 | 12311465  | 12311465  | splicing factor, protein tyrosine phosphatase, acid-like 3A               |
| 16348 | ENSG00000107758  | PPP3CB   | 17285.4 | 0.03 | protein_coding | 8  | 71561186  | 7259782   | protein phosphatase 3, catalytic subunit, beta isoform                    |
| 16463 | ENSG00000093945  | MIR1     | 17370   | 0.03 | protein_coding | 8  | 19865387  | 19842499  | microRNA sequence receptor 1                                              |
| 16463 | ENSG00000093945  | MIR1     | 17370   | 0.03 | protein_coding | 8  | 19865387  | 19842499  | SECIS homology (D. rerio)                                                 |
| 16511 | ENSG00000107522  | FOSL2    | 17404.2 | 0.03 | protein_coding | 2  | 2867151   | 2864079   | FOS-like antigen 2                                                        |
| 16526 | ENSG00000030910  | BAK1     | 17418.7 | 0.03 | protein_coding | 6  | 33540329  | 33548919  | BCL2-antagonist/killer 1                                                  |
| 16526 | ENSG00000105880  | ZNF103   | 17420.3 | 0.03 | protein_coding | 16 | 16910369  | 16910369  | zinc finger, DNA-binding containing 103                                   |
| 16611 | ENSG00000101386  | PTN      | 17489.9 | 0.03 | protein_coding | 6  | 107077453 | 107116292 | glutaminyl-RNA synthetase (glutamine-hydroxylase)-like 1                  |
| 16707 | ENSG00000191328  | DIRAS4   | 17569.4 | 0.03 | protein_coding | 11 | 24427295  | 24433848  | dephosphorylation (SDR family) member 4                                   |
| 16746 | ENSG00000105695  | PNLT1    | 17578.3 | 0.03 | protein_coding | 2  | 20339209  | 20339209  | ATPase, Ca <sup>2+</sup> transporting, plasma membrane 4                  |
| 16829 | ENSG00000154442  | C21orf81 | 17666.1 | 0.03 | protein_coding | 21 | 19112384  | 19191703  | chromosome 21 open reading frame 81                                       |
| 16836 | ENSG00000113141  | IK1      | 17670.7 | 0.03 | protein_coding | 5  | 140026643 | 140420264 | IK cytokine, down-regulator of I-kappa B                                  |
| 16836 | ENSG00000126456  | HEF1     | 17730.3 | 0.03 | protein_coding | 19 | 50162626  | 50169128  | interleukin regulatory 3                                                  |
| 16973 | ENSG00000117805  | METL1B   | 17752.2 | 0.03 | protein_coding | 17 | 169716170 | 169716170 | methyltransferase 1B                                                      |
| 17003 | ENSG00000104973  | MEIS2    | 17779.4 | 0.03 | protein_coding | 19 | 50313239  | 50342073  | meis domain complex subunit 25                                            |
| 17003 | ENSG00000104973  | MEIS2    | 17779.4 | 0.03 | protein_coding | 19 | 50313239  | 50342073  | activating transcription factor 6 beta                                    |
| 17027 | ENSG00000117038  | EYS      | 17798.3 | 0.03 | protein_coding | 6  | 15709683  | 157106286 | eyes vertebra 3                                                           |
| 17067 | ENSG00000113719  | ERGIC1   | 17828.5 | 0.03 | protein_coding | 5  | 17281278  | 17297888  | endoplasmic reticulum-golgi intermediate compartment (ERGIC) 1            |
| 17374 | ENSG00000186130  | IKBP     | 18043   | 0.03 | protein_coding | 12 | 89017185  | 89017185  | IKAP interacting protein                                                  |
| 17481 | ENSG00000101711  | PNR1     | 18043.6 | 0.03 | protein_coding | 6  | 53838255  | 53874846  | RNA binding protein 2                                                     |
| 17388 | ENSG00000153888  | MCOLN2   | 18046.7 | 0.03 | protein_coding | 1  | 85381296  | 85382796  | muco-12                                                                   |
| 17394 | ENSG00000186126  | MIN      | 18184.1 | 0.03 | protein_coding | 14 | 10338893  | 10339953  | aminion associated transmembrane protein                                  |
| 17620 | ENSG00000105260  | IRF2     | 18216.8 | 0.03 | protein_coding | 1  |           |           |                                                                           |

|       |                  |          |         |      |                |    |           |           |                                                                                                                  |
|-------|------------------|----------|---------|------|----------------|----|-----------|-----------|------------------------------------------------------------------------------------------------------------------|
| 20768 | ENSG00000153201  | RANBP2   | 20448.8 | 0.03 | protein_coding | 2  | 10933597  | 109402267 | RAM binding protein 2                                                                                            |
| 20768 | ENSG00000153201  | RANBP2   | 20448.8 | 0.03 | protein_coding | 15 | 9144115   | 9144115   | mannosidase alpha class 2A, member 2                                                                             |
| 20778 | ENSG00000214872  | SMTN1    | 20526.4 | 0.03 | protein_coding | 11 | 57326979  | 57318108  | smoothelin-like 1                                                                                                |
| 20778 | ENSG000002122678 | RAMP3    | 20526.4 | 0.03 | protein_coding | 7  | 45197360  | 45225901  | receptor (G protein-coupled) activity modifying protein 3                                                        |
| 20802 | ENSG00000170554  | SEPRIN4  | 20649.4 | 0.03 | protein_coding | 14 | 44452054  | 44452054  | serpin peptidase inhibitor, class A (alpha 1-antitrypsin, antitrypsin), member 9                                 |
| 20810 | ENSG00000164344  | KIAA1254 | 20652.5 | 0.03 | protein_coding | 1  | 10955201  | 10954901  | KO24                                                                                                             |
| 20810 | ENSG00000164344  | KLKB1    | 20681.1 | 0.03 | protein_coding | 4  | 18713013  | 187179625 | kallikrein B (plasma (Fletcher factor) 1)                                                                        |
| 20810 | ENSG00000164344  | KLKB1    | 20681.1 | 0.03 | protein_coding | 3  | 18635736  | 18637030  | telom B                                                                                                          |
| 20957 | ENSG00000196512  | FEU2     | 20682.5 | 0.03 | protein_coding | 3  | 45987451  | 45989390  | solute carrier family 25, member 30                                                                              |
| 20957 | ENSG00000196512  | KLZF2    | 20774.7 | 0.03 | protein_coding | 13 | 86541613  | 86538242  | ketinase family member 27                                                                                        |
| 21003 | ENSG00000176228  | TVF22B   | 20786.6 | 0.03 | protein_coding | 17 | 10843348  | 10843348  | trans-golg network vesicle protein 23 homolog (S. cerevisiae)                                                    |
| 21147 | ENSG00000181926  | SLC25A30 | 20797.3 | 0.03 | protein_coding | 13 | 113402434 | 113421604 | solute carrier family 25, member 30                                                                              |
| 21155 | ENSG00000181031  | PGLYRP2  | 20914.7 | 0.03 | protein_coding | 19 | 15579456  | 15569767  | peptidoglycan recognition protein 2                                                                              |
| 21172 | ENSG00000136436  | CALCOCC2 | 20931.2 | 0.03 | protein_coding | 17 | 46983950  | 46943884  | calcium binding and coiled-coil domain 2                                                                         |
| 21191 | ENSG00000176083  | ZNF693   | 20946.4 | 0.03 | protein_coding | 2  | 26663455  | 2670113   | zinc finger protein 693                                                                                          |
| 21200 | ENSG00000198455  | ZXDB     | 20977.2 | 0.03 | protein_coding | X  | 57618269  | 57629006  | zinc finger, X-linked, duplicated B                                                                              |
| 21201 | ENSG00000186233  | ARH1     | 20983.6 | 0.03 | protein_coding | 15 | 7216667   | 7207602   | arabidopsis thaliana ubiquitin protein ligase 1                                                                  |
| 21322 | ENSG00000183489  | KOCS5    | 21032.4 | 0.03 | protein_coding | 16 | 20420566  | 20420566  | acyl-CoA synthetase medium chain family member 5                                                                 |
| 21343 | ENSG00000197862  | KIF13B   | 21063.8 | 0.03 | protein_coding | 8  | 28944796  | 29120441  | kinesin family member 13B                                                                                        |
| 21435 | ENSG00000166116  | KIAA1388 | 21143.8 | 0.03 | protein_coding | 6  | 56911347  | 56920223  | KIAA1388                                                                                                         |
| 21438 | ENSG00000191933  | ZNF82    | 21144.9 | 0.03 | protein_coding | 2  | 9308320   | 93083116  | oxidative stress induced growth inhibitor family member 2                                                        |
| 21439 | ENSG0000011278   | RNF216   | 21148.1 | 0.03 | protein_coding | 7  | 5656678   | 5621370   | ring finger protein 216                                                                                          |
| 21528 | ENSG00000198862  | LTN1     | 21212.5 | 0.03 | protein_coding | 21 | 30304466  | 30365270  | latenin E3 ubiquitin protein ligase 1                                                                            |
| 21570 | ENSG00000193501  | NHHA     | 21248.2 | 0.03 | protein_coding | 2  | 21959142  | 21959189  | neuropilin heparan                                                                                               |
| 21573 | ENSG00000120658  | TNFSF 11 | 21250   | 0.03 | protein_coding | 13 | 43136872  | 43182149  | tumor necrosis factor (ligand) superfamily, member 11                                                            |
| 21594 | ENSG00000089818  | NECAP1   | 21263.1 | 0.03 | protein_coding | 12 | 8234807   | 8230567   | NECAP endocytosis associated 1                                                                                   |
| 21666 | ENSG00000178177  | LRCORL   | 21313.5 | 0.03 | protein_coding | 16 | 45972643  | 45972643  | glyoxylate reductase 1 homolog (Arabidopsis)                                                                     |
| 21666 | ENSG00000178177  | LRCORL   | 21313.5 | 0.03 | protein_coding | 4  | 17842822  | 18023489  | ligand dependent nuclear receptor co-repressor-like                                                              |
| 21807 | ENSG00000115295  | CLIP4    | 21433.6 | 0.03 | protein_coding | 2  | 28529071  | 29412909  | CAP-GLY domain containing linker protein family, member 4                                                        |
| 21855 | ENSG00000190951  | ARL10    | 21483.2 | 0.03 | protein_coding | 2  | 37861268  | 37861268  | small GTPase (Arp2/3 complex), member 1                                                                          |
| 21871 | ENSG00000185158  | LRRCC3B  | 21481.8 | 0.03 | protein_coding | 17 | 30334891  | 30380523  | leucine rich repeat containing 37B                                                                               |
| 21875 | ENSG00000151292  | CSMK1G3  | 21485.7 | 0.03 | protein_coding | 5  | 12284783  | 122862739 | casein kinase 1, gamma 3                                                                                         |
| 21880 | ENSG00000185033  | SEMA4B   | 21488.8 | 0.03 | protein_coding | 15 | 90703836  | 90729111  | sema domain, immunoglobulin domain (Ig), transmembrane domain (TM) and short cytoplasmic domain, (semaphorin) 4B |
| 21938 | ENSG00000204366  | SLI1     | 21529.0 | 0.03 | protein_coding | 3  | 5284796   | 52869745  | Musculoblastic embryonic nuclear protein 1                                                                       |
| 21948 | ENSG00000193501  | PSK1L    | 21529.0 | 0.03 | protein_coding | 1  | 2631354   | 2631354   | PKM11 domain containing kinase 1 like                                                                            |
| 22001 | ENSG00000138615  | CLP      | 21575.5 | 0.03 | protein_coding | 15 | 65488337  | 65503026  | cartilage intermediate layer protein, nucleotide pyrophosphorylase                                               |
| 22002 | ENSG00000164530  | PI16     | 21575.8 | 0.03 | protein_coding | 6  | 36922209  | 36923213  | peptide inhibitor 16                                                                                             |
| 22002 | ENSG00000164530  | PI16     | 21575.8 | 0.03 | protein_coding | 23 | 50681820  | 50681820  | panin3                                                                                                           |
| 22099 | ENSG00000128159  | TUBGCP2  | 21653.6 | 0.03 | protein_coding | 22 | 50568118  | 50683421  | tubulin, gamma class associated protein 6                                                                        |
| 22137 | ENSG00000193346  | DNAH2    | 21679.5 | 0.03 | protein_coding | 10 | 70713821  | 70231879  | DNA replication helicase/nuclease 2                                                                              |
| 22221 | ENSG00000193098  | DNAAF1   | 21714.7 | 0.03 | protein_coding | 8  | 4893746   | 4893746   | DNAAF1                                                                                                           |
| 22235 | ENSG00000187615  | LENG8    | 21755.4 | 0.03 | protein_coding | 19 | 54960055  | 54937217  | leukocyte receptor cluster (LRC) member 8                                                                        |
| 22307 | ENSG00000179387  | ELMO2C2  | 21805.7 | 0.03 | protein_coding | 4  | 141445312 | 141474824 | ELMO/DEP-12 domain containing 2                                                                                  |
| 22381 | ENSG00000166464  | KIAA429  | 21805.7 | 0.03 | protein_coding | 8  | 8569762   | 8569762   | KIAA429                                                                                                          |
| 22374 | ENSG00000193760  | CDC320B  | 21857.1 | 0.03 | protein_coding | 6  | 32951168  | 32951168  | colony cell antigen containing 90B                                                                               |
| 22396 | ENSG00000162365  | PGAA11   | 21867.9 | 0.03 | protein_coding | 1  | 47663107  | 47663107  | cytochrome P450, family 4, subfamily A, polypeptide 22                                                           |
| 22480 | ENSG00000202784  | PGAM4    | 21839.3 | 0.03 | protein_coding | 4  | 77223456  | 77223456  | phosphoglycerate mutase family member 4                                                                          |
| 22512 | ENSG00000192441  | SLC12A2  | 21900.1 | 0.03 | protein_coding | 12 | 20452361  | 20452361  | Na <sup>+</sup> /K <sup>+</sup> transport factor 3                                                               |
| 22531 | ENSG00000136603  | SKL      | 21968.7 | 0.03 | protein_coding | 3  | 17007466  | 17011423  | SK-like oncogene                                                                                                 |
| 22539 | ENSG00000152683  | SLC9A3   | 21968.7 | 0.03 | protein_coding | 2  | 32390933  | 32404489  | solute carrier family 9, Na <sup>+</sup> /K <sup>+</sup> transporter, member 6                                   |
| 22574 | ENSG00000200466  | CRD      | 22016.6 | 0.03 | protein_coding | 2  | 86914997  | 86914997  | carotene O-dioxygenase                                                                                           |
| 22592 | ENSG00000120949  | TNFRSF8  | 22021.5 | 0.03 | protein_coding | 1  | 12123434  | 12204264  | tumor necrosis factor receptor superfamily, member 8                                                             |
| 22623 | ENSG00000184164  | OTUD4    | 22044.5 | 0.03 | protein_coding | 4  | 14603190  | 14603190  | OTU domain containing 4                                                                                          |
| 22626 | ENSG00000180190  | SLC14A1  | 22045.1 | 0.03 | protein_coding | 12 | 122713565 | 122734040 | solute carrier family 14, sodium/potassium symporter, member 1                                                   |
| 22760 | ENSG00000172315  | TPS3K    | 22150.9 | 0.03 | protein_coding | 20 | 45313004  | 45318148  | TPS3 regulating kinase                                                                                           |
| 22849 | ENSG00000136381  | IRBB2    | 22224.6 | 0.03 | protein_coding | 15 | 7872973   | 7873078   | non-reducing element binding protein 2                                                                           |
| 22849 | ENSG00000185246  | PRPF26   | 22242.6 | 0.03 | protein_coding | 12 | 45553302  | 45553302  | pre-mRNA processing factor 26                                                                                    |
| 23084 | ENSG00000120054  | OPN1     | 22423.6 | 0.03 | protein_coding | 10 | 10189180  | 10184184  | carboxypeptidase N, polypeptide 1                                                                                |
| 23167 | ENSG00000172943  | PHF8     | 22480.2 | 0.03 | protein_coding | X  | 53063109  | 54075381  | PHF finger protein 8                                                                                             |
| 23188 | ENSG00000193128  | TRAF3    | 22482.2 | 0.03 | protein_coding | 4  | 71057247  | 71057247  | TRAF3 nuclear factor- $\kappa$ B                                                                                 |
| 23288 | ENSG00000115825  | PRKD3    | 22556.9 | 0.03 | protein_coding | 2  | 37476465  | 37581951  | protein kinase D3                                                                                                |
| 23311 | ENSG00000162882  | HAAO     | 22558.8 | 0.03 | protein_coding | 2  | 42994229  | 43019733  | 3-hydroxyanthranilate 3,4-dioxygenase                                                                            |
| 23312 | ENSG00000193222  | TNKS2    | 22560.1 | 0.03 | protein_coding | 15 | 10218147  | 10218147  | TNKS2 domain containing 3                                                                                        |
| 23410 | ENSG00000132669  | RN2      | 22670.4 | 0.03 | protein_coding | 20 | 19867165  | 19863101  | Ras and Rab interactor 2                                                                                         |
| 23470 | ENSG00000126527  | TKR2B    | 22709.1 | 0.03 | protein_coding | 3  | 18653394  | 18655524  | transformer 2 beta homolog (Drosophila)                                                                          |
| 23476 | ENSG00000189113  | TRAF3    | 22710.3 | 0.03 | protein_coding | 10 | 71057247  | 71057247  | TRAF3 domain containing 3                                                                                        |
| 23481 | ENSG00000125686  | MED1     | 22715.5 | 0.03 | protein_coding | 17 | 37560538  | 37607539  | mediator complex subunit 1                                                                                       |
| 23530 | ENSG00000130300  | CGB      | 22748.5 | 0.03 | protein_coding | 19 | 49552895  | 49552400  | chromatin gonadotropin, beta polypeptide B                                                                       |
| 23532 | ENSG00000193260  | NEL1     | 22750.1 | 0.03 | protein_coding | 12 | 10088149  | 10088149  | nuclear receptor subfamily 1, group H, member 4                                                                  |
| 23578 | ENSG00000137857  | DXO1     | 22786.8 | 0.03 | protein_coding | 15 | 45422131  | 45427774  | dual oxidase 1                                                                                                   |
| 23616 | ENSG00000096747  | SCN17    | 22798.1 | 0.03 | protein_coding | 7  | 12610203  | 12689328  | scorpion                                                                                                         |
| 23637 | ENSG00000190448  | ADGAP3   | 22814.4 | 0.03 | protein_coding | 1  | 13232141  | 13232141  | aphidicolin dependent protein 4                                                                                  |
| 23725 | ENSG00000202981  | DNACJ9   | 22909.5 | 0.03 | protein_coding | 3  | 180701497 | 180707562 | DNAJ (Hsp40) domain, subfamily C, member 19                                                                      |
| 23741 | ENSG00000185413  | FUT8     | 22918.9 | 0.03 | protein_coding | 19 | 5383621   | 5383742   | fucosyltransferase 8 (alpha 1,3) fucosyltransferase                                                              |
| 23741 | ENSG00000185413  | FUT8     | 22918.9 | 0.03 | protein_coding | 19 | 4688183   | 4688183   | cell wall biogenesis 21 C-homolog (S. cerevisiae)                                                                |
| 23851 | ENSG00000185219  | ZNF445   | 23021.2 | 0.03 | protein_coding | 3  | 44481252  | 44519162  | zinc finger protein 445                                                                                          |
| 23871 | ENSG00000184181  | ELVOL7   | 23036   | 0.03 | protein_coding | 5  | 60047818  | 60140216  | ELVOL7 fatty acid elongase 7                                                                                     |
| 23961 | ENSG00000114681  | ZNF578   | 23039.1 | 0.03 | protein_coding | 12 | 4237316   | 4237316   | zinc finger protein 578                                                                                          |
| 23960 | ENSG00000159527  | PGLYRP3  | 23108.3 | 0.03 | protein_coding | 1  | 15273038  | 15283194  | peptidoglycan recognition protein 3                                                                              |
| 24038 | ENSG00000162787  | BHRT4    | 23170.4 | 0.03 | protein_coding | 1  | 19733654  | 19733654  | 3-hydroxybutyrate dehydrogenase, type 1                                                                          |
| 24038 | ENSG00000162787  | BHRT4    | 23170.4 | 0.03 | protein_coding | 19 | 573119    | 573119    | short chain dehydrogenase/isomerase family 3C, member 7                                                          |
| 24141 | ENSG00000139504  | KAT7     | 23261.1 | 0.03 | protein_coding | 17 | 4795917   | 47904548  | Kelch-like acyltransferase 7                                                                                     |
| 24166 | ENSG00000110713  | NLIP8    | 23282.4 | 0.03 | protein_coding | 11 | 3692213   | 3819022   | nucleoporin 88Da                                                                                                 |
| 24174 | ENSG00000184781  | CCDC174  | 23291.1 | 0.03 | protein_coding | 3  | 14693271  | 14714146  | coiled-coil domain containing 174                                                                                |
| 24181 | ENSG00000194191  | ETP2B    | 23301.3 | 0.03 | protein_coding | 2  | 18381246  | 18381246  | eukaryotic translation initiation factor 2B, subunit 5 protein, 60Da                                             |
| 24215 | ENSG00000174356  | C11orf85 | 23334   | 0.03 | protein_coding | 11 | 3714465   | 3714465   | chromosome 11 open reading frame 85                                                                              |
| 24286 | ENSG00000178628  | RNF9B    | 23376   | 0.03 | protein_coding | 11 | 20144025  | 20141771  | ring finger protein 9B                                                                                           |
| 24290 | ENSG00000181691  | TRAF3    | 23376.8 | 0.03 | protein_coding | 11 | 18039111  | 18039111  | TRAF3 nuclear factor- $\kappa$ B                                                                                 |
| 24367 | ENSG00000187925  | GHDC     | 23464.1 | 0.03 | protein_coding | 17 | 40348817  | 40348551  | GH3 domain containing                                                                                            |
| 24391 | ENSG00000188813  | FOXD3    | 23481.6 | 0.03 | protein_coding | 1  | 4284240   | 42841548  | forkhead box O3                                                                                                  |
| 24468 | ENSG00000181486  | NPR2L2   | 23526.1 | 0.03 | protein_coding | 1  | 30384761  | 30384761  | nitrogen permease receptor-like 2 (S. cerevisiae)                                                                |
| 24501 | ENSG00000186782  | TAPT1    | 23563.2 | 0.03 | protein_coding | 4  | 16164128  | 16226003  | transmembrane anterior/posterior transformation 1                                                                |
| 24509 | ENSG00000120963  | ZNF708   | 23567.5 | 0.03 | protein_coding | 8  | 102189106 | 102218421 | zinc finger protein 708                                                                                          |
| 24544 | ENSG00000133481  | MAX      | 23570.3 | 0.03 | protein_coding | 4  | 17674362  | 17674362  | MAX dimerization protein 3                                                                                       |
| 24562 | ENSG00000153366  | ACMSD    | 23607.1 | 0.03 | protein_coding | 2  | 135588117 | 135589004 | aminocarboxymuconate semialdehyde decarboxylase                                                                  |
| 24572 | ENSG00000118873  | ADRFAP1  | 23611.6 | 0.03 | protein_coding | 11 | 220321635 | 220445796 | RAB3 GTPase activating protein subunit 2 (non-catalytic)                                                         |
| 24586 | ENSG00000186293  | CPFB2    | 23629.9 | 0.03 | protein_coding | 1  | 46713269  | 46713269  | 46713269 family member 1                                                                                         |
| 24593 | ENSG00000137449  | CFEB2    | 23629.9 | 0.03 | protein_coding | 4  | 15004298  | 15001777  | cytoplasmic polyphosphorylation element binding domain 2                                                         |
| 24611 | ENSG00000202306  | RBM14    | 23648.2 | 0.03 | protein_coding | 11 | 66344053  | 66344184  | RNA binding motif protein 14                                                                                     |
| 24624 | ENSG00000184926  | TRAF3    | 23649.2 | 0.03 | protein_coding | 10 | 72543342  | 72543342  | zinc finger, SVML-like containing 8                                                                              |
| 24654 | ENSG00000207552  | TRAF3    | 23669.3 | 0.03 | protein_coding | 19 | 38180766  | 38210089  | IRACH2 domain containing                                                                                         |
| 24664 | ENSG00000096230  | SLC3A3   | 23668.5 | 0.03 | protein_coding | 5  | 47425     | 524447    | solute carrier family 9, subfamily A (NH3), cation proton antiporter 3, member 3                                 |
| 24668 | ENSG00000176532  | TRAF3    | 23669.3 | 0.03 | protein_coding | 11 | 6511495   | 6511495   | transmembrane domain 1                                                                                           |
| 24715 | ENSG000001       |          |         |      |                |    |           |           |                                                                                                                  |

|       |                  |          |       |    |      |                |    |           |           |                                                                                             |
|-------|------------------|----------|-------|----|------|----------------|----|-----------|-----------|---------------------------------------------------------------------------------------------|
| 20699 | ENSG000002096713 | CRTACT1  | 24876 | 1  | 0.03 | protein_coding | 10 | 99623757  | 99780595  | cartilage acidic protein 1                                                                  |
| 20177 | ENSG00000204545  | FKBP4    | 24934 | 0  | 0.03 | protein_coding | 3  | 13031779  | 13031779  | phospholipase 3 kinase, regulatory subunit 4                                                |
| 26193 | ENSG00000132323  | FLKAP    | 24966 | 6  | 0.03 | protein_coding | 2  | 239079042 | 239112370 | integrin-linked kinase-associated serine/threonine phosphatase                              |
| 26252 | ENSG00000186207  | LCE3A    | 25005 | 3  | 0.03 | protein_coding | 1  | 152483320 | 152483320 | late cornified envelope 5A                                                                  |
| 26296 | ENSG00000128881  | TBR2     | 25043 | 7  | 0.03 | protein_coding | 15 | 430317007 | 430317007 | tau tubulin kinase 2                                                                        |
| 26306 | ENSG00000148205  | ANC1     | 25051 | 6  | 0.03 | protein_coding | 2  | 242177564 | 242177564 | ancient 7                                                                                   |
| 26308 | ENSG00000124812  | CSPSP1   | 25063 | 8  | 0.03 | protein_coding | 6  | 48801970  | 48844409  | teucine-rich repeat, immunoglobulin-like and transmembrane domains 2                        |
| 26310 | ENSG00000204033  | LRB1     | 25067 | 2  | 0.03 | protein_coding | 10 | 6694824   | 68953345  | receptor, PAK3-binding effector protein 2                                                   |
| 26313 | ENSG00000177488  | RAB22    | 25071 | 8  | 0.03 | protein_coding | 8  | 28815742  | 28815742  | UDP-N-acetyl-alpha-D-glucosamine-pyrophosphate N-acetylglucosaminyltransferase 8 (GALNAc-8) |
| 26320 | ENSG00000130035  | GALNT8   | 25078 | 1  | 0.03 | protein_coding | 12 | 4829507   | 4902077   |                                                                                             |
| 26324 | ENSG00000139638  | LMRLT    | 25081 | 3  | 0.03 | protein_coding | 12 | 4940919   | 4950483   | limb development membrane protein 1-like                                                    |
| 26353 | ENSG00000179407  | DNMJB8   | 25106 | 3  | 0.03 | protein_coding | 3  | 128181282 | 128186991 | Dnm1 (Hsp40) homolog, subfamily B, member 8                                                 |
| 26356 | ENSG00000173875  | ZNF791   | 25109 | 3  | 0.03 | protein_coding | 19 | 12717132  | 12742735  | zinc finger protein 791                                                                     |
| 26361 | ENSG00000189300  | OR2D2    | 25117 | 0  | 0.03 | protein_coding | 19 | 32696792  | 32696944  | olfactory receptor, family 2, member D, member 2                                            |
| 26374 | ENSG00000178477  | ALOX12B  | 25117 | 7  | 0.03 | protein_coding | 17 | 7975954   | 7991201   | arachidonate 12-epoxidase, 12R type                                                         |
| 26391 | ENSG00000157315  | TMD6B    | 25131 | 2  | 0.03 | protein_coding | 16 | 69371751  | 69387112  | transmembrane smg24 protein transport domain containing 6                                   |
| 26393 | ENSG00000164764  | SBRPN    | 25176 | 2  | 0.03 | protein_coding | 8  | 7291975   | 74203623  | scrovinin B and thrombospondin type 1 domain containing                                     |
| 26484 | ENSG00000183304  | FAMA8    | 25223 | 3  | 0.03 | protein_coding | 8  | 8758356   | 8769424   | family with sequence similarity 9, member A                                                 |
| 26490 | ENSG00000187045  | TMR5B5   | 25230 | 3  | 0.03 | protein_coding | 22 | 37481476  | 37505603  | transmembrane protease, serine 8                                                            |
| 26514 | ENSG00000174668  | CALC1    | 25251 | 2  | 0.03 | protein_coding | 8  | 131913336 | 131915031 | expenditure transcription factor 3                                                          |
| 26519 | ENSG00000177627  | C12orf54 | 25257 | 8  | 0.03 | protein_coding | 12 | 4887628   | 48880295  | chromosome 12 open reading frame 54                                                         |
| 26526 | ENSG00000165568  | AKR1E2   | 25281 | 9  | 0.03 | protein_coding | 10 | 4828281   | 4828284   | aldo-keto reductase family 1, member E2                                                     |
| 26538 | ENSG00000164011  | ZNF611   | 25271 | 9  | 0.03 | protein_coding | 1  | 43312280  | 43318148  | zinc finger protein 611                                                                     |
| 26554 | ENSG00000151005  | TKTL2    | 25281 | 1  | 0.03 | protein_coding | 4  | 164362257 | 164385047 | trankriklase-like 2                                                                         |
| 26565 | ENSG00000202301  | OR5R6    | 25284 | 7  | 0.03 | protein_coding | 3  | 87983088  | 87984200  | olfactory receptor, family 5, subfamily H, member 6 (gene/prostogen)                        |
| 26576 | ENSG00000150295  | TCEAL2P2 | 25299 | 2  | 0.03 | protein_coding | 1  | 54519260  | 54519262  | transcription elongation factor A (SWI) heterodimer and coiled domain containing 2          |
| 26582 | ENSG00000133111  | RFAP     | 25304 | 0  | 0.03 | protein_coding | 13 | 37393361  | 37403241  | regulatory factor X-associated protein                                                      |
| 26583 | ENSG00000184867  | NCSS     | 25306 | 0  | 0.03 | protein_coding | 7  | 150888063 | 150711876 | nitric oxide synthase 3 (endothelial cell)                                                  |
| 26625 | ENSG00000151922  | SLC16A3  | 25313 | 3  | 0.03 | protein_coding | 1  | 13861388  | 13861388  | chromosome 3 open reading frame 22                                                          |
| 26649 | ENSG00000188056  | TMC5A    | 25358 | 2  | 0.03 | protein_coding | 15 | 38214140  | 38259259  | transmembrane and coiled-coil domains 5A                                                    |
| 26684 | ENSG00000138899  | CEBLN3   | 25382 | 0  | 0.03 | protein_coding | 14 | 24898738  | 249001160 | cerebellin 3 precursor                                                                      |
| 26688 | ENSG00000169597  | OR2D2    | 25382 | 0  | 0.03 | protein_coding | 3  | 136237692 | 136237692 | olfactory receptor, family 2, member D, member 2                                            |
| 26786 | ENSG00000173614  | NMNA1    | 25478 | 0  | 0.03 | protein_coding | 1  | 10003486  | 10004559  | nicotinamide nucleotide adenyltransferase 1                                                 |
| 26799 | ENSG000002005379 | BZRAP1   | 25491 | 7  | 0.03 | protein_coding | 17 | 86718592  | 86468152  | benzodiazepine receptor (peripheral) associated protein 2                                   |
| 26803 | ENSG00000152528  | NSDAP    | 25493 | 16 | 0.03 | protein_coding | 15 | 15332186  | 15332186  | NSDAP, multiple 3                                                                           |
| 26806 | ENSG00000103707  | TFTMT    | 25500 | 3  | 0.03 | protein_coding | 15 | 65204845  | 65201977  | mitochondrial methionyl-tRNA formyltransferase                                              |
| 26807 | ENSG00000111291  | GPRC5D   | 25500 | 5  | 0.03 | protein_coding | 12 | 13095709  | 13105561  | G protein-coupled receptor, family C, group 5, member D                                     |
| 26808 | ENSG00000159094  | UNC5A    | 25503 | 6  | 0.03 | protein_coding | 6  | 18788007  | 18788007  | unc-53 homolog A (C. elegans)                                                               |
| 26813 | ENSG00000185714  | LOH12CR1 | 25504 | 9  | 0.03 | protein_coding | 12 | 12510013  | 12618940  | loss of heterozygosity, 12, chromosomal region 1                                            |
| 26829 | ENSG00000089511  | RDBH     | 25518 | 2  | 0.03 | protein_coding | 19 | 16123925  | 16103295  | retinol dehydrogenase 5 (all-trans)                                                         |
| 26830 | ENSG0000011452   | OR2D3    | 25518 | 0  | 0.03 | protein_coding | 1  | 13141616  | 13141616  | G protein-coupled receptor 153                                                              |
| 26839 | ENSG00000144791  | LMD1     | 25518 | 8  | 0.03 | protein_coding | 3  | 14556886  | 45719230  | LIM domains containing 1                                                                    |
| 26840 | ENSG00000109262  | ABC29    | 25520 | 0  | 0.03 | protein_coding | 16 | 18242785  | 18117379  | ATP-binding cassette, sub-family C (CFTR/MRP), member 6                                     |
| 26842 | ENSG00000169774  | SRV2     | 25520 | 0  | 0.03 | protein_coding | 15 | 6443914   | 6444980   | sorting nexin 22                                                                            |
| 26843 | ENSG00000170444  | KRT86    | 25520 | 3  | 0.03 | protein_coding | 14 | 5476388   | 5476388   | keratin 86                                                                                  |
| 26897 | ENSG00000101890  | GUCY2F   | 25563 | 9  | 0.03 | protein_coding | 8  | 10861635  | 10872301  | guanylate cyclase 2F, retinal                                                               |
| 26911 | ENSG00000200734  | SCN4A    | 25578 | 1  | 0.03 | protein_coding | 17 | 63011994  | 63002878  | sodium channel, voltage-gated, type IV, alpha subunit                                       |
| 26922 | ENSG00000185309  | ARHGAP2  | 25578 | 3  | 0.03 | protein_coding | 9  | 23216955  | 23216955  | arrested cell protein containing 3                                                          |
| 26962 | ENSG00000196883  | PMMAS    | 25617 | 1  | 0.03 | protein_coding | 8  | 152187368 | 152166871 | paraneoplastic MA antigen family member 4                                                   |
| 26992 | ENSG00000202679  | CLEC2E   | 25659 | 6  | 0.03 | protein_coding | 7  | 139206902 | 139209730 | C-type lectin domain family 2, member 4                                                     |
| 26994 | ENSG00000191444  | PIK3CG   | 25660 | 12 | 0.03 | protein_coding | 12 | 18402548  | 18402548  | phosphatidylinositol 3-kinase, catalytic subunit type 2 gamma                               |
| 26997 | ENSG00000205549  | C5orf92  | 25668 | 9  | 0.03 | protein_coding | 9  | 16203933  | 16203933  | chromosome 5 open reading frame 92                                                          |
| 27007 | ENSG00000121297  | TSHZ2    | 25667 | 6  | 0.03 | protein_coding | 9  | 31768551  | 31768453  | testis zinc finger homeobox 3                                                               |
| 27044 | ENSG00000158965  | SLC5A11  | 25700 | 1  | 0.03 | protein_coding | 9  | 24851762  | 24851762  | solute carrier family 5 (sodium-linked cotransporter), member 11                            |
| 27058 | ENSG000002024657 | OR2D2    | 25714 | 3  | 0.03 | protein_coding | 6  | 29555683  | 29556745  | olfactory receptor, family 2, subfamily H, member 2                                         |
| 27068 | ENSG00000181610  | OR12E    | 25722 | 6  | 0.03 | protein_coding | 17 | 40338078  | 40337070  | hypoxanthine (orotic) neoptergine precursor                                                 |
| 27073 | ENSG00000165148  | PPP1R2   | 25725 | 6  | 0.03 | protein_coding | 11 | 61248952  | 61248952  | protein phosphatase 1, regulatory subunit 22                                                |
| 27087 | ENSG00000184078  | MSTR1    | 25748 | 8  | 0.03 | protein_coding | 3  | 49824435  | 49841299  | macrophage stimulating 1 receptor (c-met-related tyrosine kinase)                           |
| 27095 | ENSG00000204870  | LMNB1    | 25747 | 3  | 0.03 | protein_coding | 1  | 13334902  | 13374228  | HCG20425, isoform CRA_c, Uncharacterized protein, cDNA FLJ25815                             |
| 27101 | ENSG00000105983  | LMNB1    | 25748 | 3  | 0.03 | protein_coding | 3  | 15648168  | 15648168  | limb development membrane protein 3                                                         |
| 27111 | ENSG00000188974  | GRIK1    | 25762 | 6  | 0.03 | protein_coding | 13 | 114321470 | 11440708  | G protein-coupled receptor kinase 10                                                        |
| 27120 | ENSG00000122741  | DCAF10   | 25771 | 5  | 0.03 | protein_coding | 9  | 37804959  | 37867863  | DOB1 and CUL4 associated factor 10                                                          |
| 27127 | ENSG00000181724  | OR2D2    | 25772 | 0  | 0.03 | protein_coding | 1  | 40231345  | 40231345  | 5-trans-retinoic acid inducible 2                                                           |
| 27129 | ENSG00000130244  | FAM89C   | 25782 | 0  | 0.03 | protein_coding | 19 | 38893775  | 38899728  | family with sequence similarity 98, member C                                                |
| 27175 | ENSG00000187695  | FAM89C   | 25823 | 5  | 0.03 | protein_coding | 3  | 12662917  | 12669017  | Uncharacterized protein FLJ23738                                                            |
| 27291 | ENSG00000189894  | MUC1A    | 25831 | 1  | 0.03 | protein_coding | 7  | 60281187  | 60281187  | mucin 1A, cell surface associated                                                           |
| 27296 | ENSG00000196932  | TMEM26   | 25886 | 4  | 0.03 | protein_coding | 10 | 6316401   | 63213208  | transmembrane protein 26                                                                    |
| 27292 | ENSG00000188778  | ADRB1    | 25901 | 5  | 0.03 | protein_coding | 8  | 27820516  | 27820516  | adrenoreceptor beta 3                                                                       |
| 27293 | ENSG00000181428  | FAM89C   | 25902 | 4  | 0.03 | protein_coding | 1  | 63431366  | 63431366  | fast binding protein 12                                                                     |
| 27292 | ENSG00000193308  | LRRCS5   | 25912 | 0  | 0.03 | protein_coding | 11 | 56945221  | 56959191  | leucine rich repeat containing 55                                                           |
| 27360 | ENSG00000218819  | KHLH3    | 25965 | 3  | 0.03 | protein_coding | 2  | 21348789  | 21368144  | tutor domain containing 15                                                                  |
| 27394 | ENSG00000185915  | PKR2     | 25971 | 3  | 0.03 | protein_coding | 4  | 21637680  | 21637680  | hepatitis family member 14                                                                  |
| 27405 | ENSG00000138895  | PKR2G    | 25991 | 1  | 0.03 | protein_coding | 4  | 82008837  | 82136218  | protein kinase, cGMP-dependent, type II                                                     |
| 27406 | ENSG00000204213  | ZPRP     | 25995 | 7  | 0.03 | protein_coding | 7  | 48989017  | 50186925  | zinc peptidase binding protein                                                              |
| 27408 | ENSG00000102822  | OR2D2    | 25997 | 0  | 0.03 | protein_coding | 1  | 3733187   | 3733187   | Uncharacterized protein                                                                     |
| 27416 | ENSG00000147246  | HTR2C    | 26008 | 9  | 0.03 | protein_coding | 8  | 113819551 | 114144224 | 5-hydroxytryptamine (serotonin) receptor 2C, G protein-coupled                              |
| 27424 | ENSG00000186049  | PASD1    | 26037 | 7  | 0.03 | protein_coding | 8  | 15073294  | 150845121 | PAS domain containing 1                                                                     |
| 27448 | ENSG00000196883  | OR2D2    | 26037 | 0  | 0.03 | protein_coding | 1  | 48382027  | 48382027  | Hsp100 domain 52                                                                            |
| 27458 | ENSG00000135312  | HTR1B    | 26038 | 1  | 0.03 | protein_coding | 6  | 7811948   | 7811948   | 5-hydroxytryptamine (serotonin) receptor 1B, G protein-coupled                              |
| 27490 | ENSG00000182373  | BEHD5    | 26072 | 6  | 0.03 | protein_coding | 1  | 48153195  | 49242441  | BEIN domain containing 5                                                                    |
| 27491 | ENSG00000111929  | HES1     | 26073 | 1  | 0.03 | protein_coding | 11 | 118314    | 118314    | hepatitis-like 1                                                                            |
| 27505 | ENSG00000181333  | HEPHE1   | 26087 | 0  | 0.03 | protein_coding | 11 | 9374527   | 9384917   | hepatitis-like 1                                                                            |
| 27513 | ENSG00000188386  | PPP1R2   | 26096 | 4  | 0.03 | protein_coding | 9  | 10435397  | 10435783  | protein phosphatase 3, regulatory subunit B, beta                                           |
| 27518 | ENSG00000186888  | PLK5     | 26099 | 0  | 0.03 | protein_coding | 19 | 152407    | 152407    | polo-like kinase 5                                                                          |
| 27565 | ENSG00000145103  | LRT1     | 26143 | 0  | 0.03 | protein_coding | 19 | 127199170 | 127191051 | immunoglobulin-like domain containing receptor 1                                            |
| 27582 | ENSG00000142303  | ADAMT10  | 26143 | 3  | 0.03 | protein_coding | 19 | 8845126   | 8875200   | ADAM metalloproteinase with thrombospondin type 1 motif, 10                                 |
| 27588 | ENSG00000184261  | KANK12   | 26145 | 4  | 0.03 | protein_coding | 2  | 4743720   | 4748070   | potassium channel, subfamily K, member 12                                                   |
| 27592 | ENSG00000150216  | CYP24B1  | 26150 | 1  | 0.03 | protein_coding | 2  | 108862503 | 108874613 | cytochrome P450, family 2, subfamily B1, polypeptide 1                                      |
| 27591 | ENSG00000179044  | EXOC3L1  | 26156 | 3  | 0.03 | protein_coding | 16 | 67218269  | 67224107  | exocyst complex component 3-like 1                                                          |
| 27628 | ENSG00000202185  | ROR2     | 26180 | 6  | 0.03 | protein_coding | 9  | 11516     |           |                                                                                             |



|       |                 |            |       |      |                |    |           |           |                                                                                                                                     |
|-------|-----------------|------------|-------|------|----------------|----|-----------|-----------|-------------------------------------------------------------------------------------------------------------------------------------|
| 26435 | ENS00000164972  | CIB24      | 26914 | 0.03 | protein_coding | 9  | 3437007   | 3438760   | chromosome 9 open reading frame 24                                                                                                  |
| 26471 | ENS00000165329  | RIIC1      | 26957 | 0.03 | protein_coding | 2  | 1856548   | 1856548   | box-like RNA-binding protein                                                                                                        |
| 26482 | ENS00000162055  | MCATAC     | 26957 | 0.03 | protein_coding | 12 | 86037516  | 87232081  | mannosyl (alpha-1-3)-glycoprotein beta-1,4-N-acetylglucosaminyltransferase, isozyme C (putative)                                    |
| 26497 | ENS00000168814  | LRC27      | 26976 | 0.03 | protein_coding | 10 | 134165618 | 134195910 | leucine rich repeat containing 27                                                                                                   |
| 26512 | ENS00000166541  | GALNT4     | 26991 | 0.03 | protein_coding | 2  | 3113305   | 3113305   | UDP-N-acetyl-alpha-D-galactamine 4-epimerase N-acetylglucosaminyltransferase 14 (GalNAc T14)                                        |
| 26560 | ENS00000165185  | PTCH1      | 27030 | 0.03 | protein_coding | 4  | 17555695  | 17570945  | patched receptor, alpha 3                                                                                                           |
| 26562 | ENS00000165884  | MM108      | 27031 | 0.03 | protein_coding | 12 | 23323133  | 23323289  | dyx1c2 domain containing 1                                                                                                          |
| 26564 | ENS00000165676  | CCG3P      | 27032 | 0.03 | protein_coding | 11 | 6550144   | 6551166   | wingless-type MMTV integrator site family, member 106                                                                               |
| 26566 | ENS00000167953  | PHF3       | 27043 | 0.03 | protein_coding | 1  | 11426365  | 11430311  | coiled-coil domain containing 63                                                                                                    |
| 26568 | ENS00000184487  | TME25B     | 27072 | 0.03 | protein_coding | 13 | 114462216 | 114514926 | putative homeobox transcription factor 1 transmembrane protein 25B                                                                  |
| 26634 | ENS00000134436  | HAK        | 27103 | 0.03 | protein_coding | 18 | 56934267  | 56941316  | retina and anterior neural fold homeobox                                                                                            |
| 26638 | ENS00000196266  | PTPRK      | 27108 | 0.03 | protein_coding | 20 | 40701952  | 41818610  | protein tyrosine phosphatase, receptor type T                                                                                       |
| 26640 | ENS00000171603  | GRM8       | 27108 | 0.03 | protein_coding | 7  | 126078652 | 126083348 | glutamate receptor, metabotropic 8                                                                                                  |
| 26644 | ENS00000192880  | CEP350     | 27112 | 0.03 | protein_coding | 17 | 62562706  | 62538579  | centrosomal protein 350Da                                                                                                           |
| 26669 | ENS00000144195  | SPRY7      | 27117 | 0.03 | protein_coding | 13 | 46274446  | 46276894  | spERM1 associated                                                                                                                   |
| 26677 | ENS00000143552  | NUP210L    | 27143 | 0.03 | protein_coding | 1  | 15366161  | 15417292  | nucleoporin 210Da-like                                                                                                              |
| 26693 | ENS00000162376  | PSMA6      | 27146 | 0.03 | protein_coding | 14 | 35591755  | 35786489  | Mitochondrial ribonuclease P protein 3                                                                                              |
| 26708 | ENS00000193291  | PCAT2      | 27152 | 0.03 | protein_coding | 17 | 3617626   | 3703437   | protein tyrosine phosphatase, receptor type T                                                                                       |
| 26721 | ENS00000144596  | PTPLA      | 27162 | 0.03 | protein_coding | 3  | 14530619  | 14583588  | integrin, alpha E (antigen CD113; human mucopolysaccharide antigen 1; alpha polypeptide)                                            |
| 26728 | ENS00000197467  | COL13A1    | 27200 | 0.03 | protein_coding | 10 | 71561844  | 71724031  | collagen, type XIII, alpha 1                                                                                                        |
| 26729 | ENS00000193780  | MCT12C     | 27201 | 0.03 | protein_coding | 13 | 103330954 | 103346854 | multisubstrate hexose-2-TC                                                                                                          |
| 26737 | ENS00000144856  | AGL3L      | 27211 | 0.03 | protein_coding | 7  | 154671259 | 15483732  | ATP/GTP binding protein-like 3                                                                                                      |
| 26773 | ENS00000171587  | DSGAM      | 27253 | 0.03 | protein_coding | 21 | 41382926  | 4221905   | Down syndrome cell adhesion molecule                                                                                                |
| 26820 | ENS00000197288  | MTFRED1    | 27291 | 0.03 | protein_coding | 4  | 74263961  | 74263961  | methyltetrahydrofolate dehydrogenase (NADPH-dependent) 2-like                                                                       |
| 26829 | ENS00000174888  | CATSPERD   | 27298 | 0.03 | protein_coding | 19 | 5720888   | 5727845   | catsper channel auxiliary subunit delta                                                                                             |
| 26854 | ENS00000198889  | DCAM1      | 27323 | 0.03 | protein_coding | 8  | 125663369 | 125668334 | DOBI and CUL4 associated factor 12-like 1                                                                                           |
| 26871 | ENS00000165950  | PCSK9      | 27328 | 0.03 | protein_coding | 1  | 429418    | 429418    | proprotein convertase subtilisin/kexin type 9                                                                                       |
| 26876 | ENS00000143585  | SVT2       | 27339 | 0.03 | protein_coding | 1  | 202559724 | 202679545 | synaptotagmin II                                                                                                                    |
| 26888 | ENS00000192859  | LYRM9      | 27352 | 0.03 | protein_coding | 17 | 26203409  | 26212178  | LYR motif containing 9                                                                                                              |
| 26918 | ENS00000193525  | CCG3P2     | 27353 | 0.03 | protein_coding | 11 | 6306817   | 63117457  | wingless-type MMTV integrator site family, member 67                                                                                |
| 26924 | ENS00000178224  | GALNT11    | 27368 | 0.03 | protein_coding | 7  | 151727289 | 151816425 | UDP-N-acetyl-alpha-D-galactamine polypeptide N-acetylglucosaminyltransferase 11 (GalNAc T11)                                        |
| 26926 | ENS00000173588  | CCDC41     | 27388 | 0.03 | protein_coding | 12 | 34700225  | 34853764  | coiled-coil domain containing 41                                                                                                    |
| 26926 | ENS00000188687  | SLCA45     | 27390 | 0.03 | protein_coding | 2  | 74443369  | 74570541  | solute carrier family 4 (sodium bicarbonate cotransporter), member 5                                                                |
| 26960 | ENS00000181306  | C12orf56   | 27409 | 0.03 | protein_coding | 12 | 44662017  | 44748472  | chromosome 12 open reading frame 56                                                                                                 |
| 26968 | ENS00000195581  | ZNF474     | 27410 | 0.03 | protein_coding | 8  | 40381626  | 40381626  | zinc finger protein 474                                                                                                             |
| 26975 | ENS00000192768  | ZNF473     | 27423 | 0.03 | protein_coding | 17 | 29988167  | 29988167  | Uncharacterized protein 17                                                                                                          |
| 26984 | ENS00000191255  | KCNMA1     | 27455 | 0.03 | protein_coding | 11 | 30031288  | 30038570  | potassium voltage-gated channel, shaker-related subfamily, member 4                                                                 |
| 26988 | ENS00000191780  | ACAC2      | 27455 | 0.03 | protein_coding | 18 | 223716    | 223716    | zinc finger protein 98                                                                                                              |
| 26995 | ENS00000131480  | ACDC       | 27483 | 0.03 | protein_coding | 17 | 40998617  | 41027224  | amine oxidase, copper containing 2 (retina-specific)                                                                                |
| 26943 | ENS00000134115  | CHTNB      | 27490 | 0.03 | protein_coding | 3  | 1134260   | 1144591   | catenin 6                                                                                                                           |
| 26970 | ENS00000179660  | SLC35A10   | 27520 | 0.03 | protein_coding | 2  | 129856769 | 129913069 | solute carrier family 35, member 10                                                                                                 |
| 26974 | ENS00000171625  | CHST19     | 27521 | 0.03 | protein_coding | 19 | 38438952  | 38438952  | chromosome 19 open reading frame 19                                                                                                 |
| 26985 | ENS00000142188  | DIRP       | 27530 | 0.03 | protein_coding | 7  | 11659363  | 11673880  | 5'IT overexpressing transcript 4                                                                                                    |
| 26986 | ENS00000191285  | DIRP2      | 27539 | 0.03 | protein_coding | 4  | 100414788 | 100519488 | glycinylated protein 2                                                                                                              |
| 29124 | ENS00000190491  | CCDC79     | 27540 | 0.03 | protein_coding | 8  | 46748879  | 46836523  | coiled-coil domain containing 79                                                                                                    |
| 29131 | ENS00000191883  | ARIH3OS    | 27564 | 0.03 | protein_coding | 3  | 4895221   | 4895221   | aradine homology 2 opposite strand                                                                                                  |
| 29133 | ENS00000190894  | KM20B      | 27566 | 0.03 | protein_coding | 12 | 11286900  | 12211820  | lysine (K)-specific dipeptidase 20                                                                                                  |
| 29138 | ENS00000191748  | WDR60      | 27567 | 0.03 | protein_coding | 12 | 10586944  | 10586944  | WD repeat domain 66                                                                                                                 |
| 29139 | ENS00000196686  | SPATAM1    | 27575 | 0.03 | protein_coding | 9  | 455336    | 4666674   | spERM1 associated 6-like                                                                                                            |
| 29147 | ENS00000198262  | KCNAB1     | 27584 | 0.03 | protein_coding | 3  | 15575440  | 15629545  | potassium voltage-gated channel, shaker-related subfamily, beta member 1                                                            |
| 29148 | ENS00000191614  | NKX2-2     | 27591 | 0.03 | protein_coding | 4  | 507161    | 507161    | N-acetylglucosamine-1-glucosyltransferase alpha-N-acetylglucosaminidase polycyclic lysine and hepatic class 1 (autosomal recessive) |
| 29179 | ENS00000171927  | PKHD1      | 27615 | 0.03 | protein_coding | 6  | 61480098  | 61582223  | chromosome 12 open reading frame 76                                                                                                 |
| 29180 | ENS00000174456  | C12orf78   | 27615 | 0.03 | protein_coding | 12 | 11048672  | 110511481 | chromosome 12 open reading frame 76                                                                                                 |
| 29181 | ENS00000191541  | KCNK3      | 27619 | 0.03 | protein_coding | 6  | 8696352   | 8696352   | Kv channel interacting protein 3, calcium                                                                                           |
| 29188 | ENS00000191373  | KMEM17     | 27624 | 0.03 | protein_coding | 12 | 4428970   | 4428970   | transmembrane protein 117                                                                                                           |
| 29197 | ENS00000191542  | WINTR3A    | 27634 | 0.03 | protein_coding | 1  | 22819472  | 22848861  | wingless-type MMTV integrator site family, member 3A                                                                                |
| 29206 | ENS00000191748  | FIBIN14    | 27634 | 0.03 | protein_coding | 12 | 1671581   | 1671581   | Fibronectin type III repeat protein 14                                                                                              |
| 29217 | ENS00000135637  | CCDC142    | 27653 | 0.03 | protein_coding | 2  | 74689113  | 74710335  | coiled-coil domain containing 142                                                                                                   |
| 29223 | ENS00000191545  | CACNA2D3   | 27657 | 0.03 | protein_coding | 3  | 54156574  | 55108984  | calcium channel, voltage-dependent, alpha 2 delta subunit 3                                                                         |
| 29244 | ENS00000190667  | CCDC126    | 27659 | 0.03 | protein_coding | 15 | 38681802  | 38681802  | Fibrous sheath interacting protein 15                                                                                               |
| 29267 | ENS00000145536  | ADAMTS16   | 27665 | 0.03 | protein_coding | 5  | 5140443   | 5320417   | ADAM metalloproteinase with thrombospondin type 1 motif, 16                                                                         |
| 29293 | ENS00000134376  | CBR1       | 27721 | 0.03 | protein_coding | 1  | 19717092  | 19747585  | crumbs homolog 1 (Drosophila)                                                                                                       |
| 29308 | ENS00000171001  | MTOR3      | 27743 | 0.03 | protein_coding | 15 | 11845762  | 11845762  | methyltetrahydrofolate dehydrogenase (NADPH)                                                                                        |
| 29311 | ENS00000198723  | C16orf45   | 27743 | 0.03 | protein_coding | 19 | 757862    | 7573336   | chromosome 16 open reading frame 45                                                                                                 |
| 29316 | ENS00000191375  | SMARCA4L1  | 27754 | 0.03 | protein_coding | 2  | 21277137  | 21277137  | SWI/SNF related, matrix associated, actin dependent regulator of chromatin, subfamily a-like 1                                      |
| 29338 | ENS00000191598  | MTOR2      | 27759 | 0.03 | protein_coding | 2  | 20368768  | 20368768  | serine/threonine kinase 2                                                                                                           |
| 29374 | ENS00000140323  | DISP2      | 27806 | 0.03 | protein_coding | 15 | 4065036   | 40663257  | disrupted homolog 2 (Drosophila)                                                                                                    |
| 29388 | ENS00000191848  | DRD1       | 27823 | 0.03 | protein_coding | 5  | 17486742  | 17487211  | dopamine receptor D1                                                                                                                |
| 29410 | ENS00000191238  | PIB4LAP    | 27823 | 0.03 | protein_coding | 1  | 1561123   | 1561123   | PIB4LAP pseudotranscript                                                                                                            |
| 29441 | ENS00000178155  | CCDC57     | 27884 | 0.03 | protein_coding | 17 | 8055936   | 80570034  | coiled-coil domain containing 57                                                                                                    |
| 29457 | ENS00000174448  | STAR26     | 27878 | 0.03 | protein_coding | 18 | 51880728  | 51918766  | STAR-related lipid transfer (START) domain containing 6                                                                             |
| 29461 | ENS00000191523  | CEP350     | 27884 | 0.03 | protein_coding | 11 | 11774051  | 11774051  | centrosomal protein 350Da                                                                                                           |
| 29486 | ENS00000188919  | ZACN       | 27903 | 0.03 | protein_coding | 17 | 74068042  | 74079747  | zinc activated ligand-gated ion channel                                                                                             |
| 29488 | ENS00000186259  | HDX        | 27907 | 0.03 | protein_coding | 8  | 83572882  | 83572882  | heparin repeat homeobox                                                                                                             |
| 29498 | ENS00000191553  | WNT4       | 27910 | 0.03 | protein_coding | 22 | 2244168   | 2244168   | wingless-type MMTV integrator site family, member 4                                                                                 |
| 29506 | ENS00000145338  | PTH        | 27926 | 0.03 | protein_coding | 19 | 4952767   | 4952868   | wingless-type MMTV integrator site family, member 4                                                                                 |
| 29511 | ENS00000191701  | NAT16      | 27928 | 0.03 | protein_coding | 7  | 100813774 | 100902357 | parathyroid hormone 2                                                                                                               |
| 29516 | ENS00000191711  | LOC1002885 | 27928 | 0.03 | protein_coding | 7  | 709118    | 709118    | N-acetyltransferase 10 (GCN5-related, putative)                                                                                     |
| 29556 | ENS00000149654  | CDH2       | 27965 | 0.03 | protein_coding | 20 | 4482372   | 4493137   | Protocadherin 2, type 2                                                                                                             |
| 29565 | ENS00000192853  | HSD17B5    | 27972 | 0.03 | protein_coding | 6  | 11437670  | 114684209 | heparan sulfate (glucosamine) 3-O-sulfotransferase 5                                                                                |
| 29572 | ENS00000191777  | KIF16L     | 27983 | 0.03 | protein_coding | 20 | 1627429   | 1654578   | kinesin family member 16                                                                                                            |
| 29575 | ENS00000191509  | NKX2-1     | 27983 | 0.03 | protein_coding | 2  | 2361859   | 2361859   | glutamate receptor, ionotropic, N-methyl D-aspartate 2C                                                                             |
| 29582 | ENS000001910023 | PLP2       | 27988 | 0.03 | protein_coding | 22 | 22006559  | 22054304  | pyridoxal phosphate synthase (cyclophilin) like 2                                                                                   |
| 29585 | ENS00000191373  | KCNK11     | 27991 | 0.03 | protein_coding | 2  | 21086555  | 211307457 | potassium voltage-gated channel, subfamily H (shaker-related), member 1                                                             |
| 29586 | ENS00000191023  | PPFR1C     | 27992 | 0.03 | protein_coding | 2  | 18281896  | 18281896  | protein phosphatase, serine/threonine subunit 1C                                                                                    |
| 29588 | ENS00000171174  | RKKS       | 27996 | 0.03 | protein_coding | 2  | 28004231  | 28113965  | ribokinase                                                                                                                          |
| 29593 | ENS00000191623  | WRAP53     | 28000 | 0.03 | protein_coding | 20 | 3547331   | 3569325   | WD repeat containing, antisense to TP73                                                                                             |
| 29596 | ENS00000191483  | TSR2       | 28003 | 0.03 | protein_coding | 20 | 61588846  | 62111498  | zinc finger homeobox 2                                                                                                              |
| 29622 | ENS00000185737  | NRG3       | 28023 | 0.03 | protein_coding | 10 | 83635070  | 84146955  | neuregulin 3                                                                                                                        |
| 29634 | ENS00000171245  | KIF17      | 28034 | 0.03 | protein_coding | 1  | 20989207  | 21048310  | kinesin family member 17                                                                                                            |
| 29643 | ENS00000192534  | CEP350     | 28035 | 0.03 | protein_coding | 11 | 11618896  | 11620309  | centrosomal protein 350Da                                                                                                           |
| 29653 | ENS00000191332  | LENEP      | 28047 | 0.03 | protein_coding | 1  | 15486802  | 15486802  | limb epithelial protein                                                                                                             |
| 29676 | ENS00000125872  | LHRN       | 28063 | 0.03 | protein_coding | 20 | 6021424   | 6034895   | leucine rich repeat neuronal 4                                                                                                      |
| 29686 | ENS00000191725  | TTC4       | 28063 | 0.03 | protein_coding | 12 | 5211849   | 5211849   | astrocyte-specific protein domain 4                                                                                                 |
| 29700 | ENS00000191830  | KIAA1024   | 28065 | 0.03 | protein_coding | 15 | 5974458   | 59794632  | KIAA1024                                                                                                                            |
|       |                 |            |       |      |                |    |           |           |                                                                                                                                     |

|       |                   |             |       |      |                                     |    |           |           |                                                                          |
|-------|-------------------|-------------|-------|------|-------------------------------------|----|-----------|-----------|--------------------------------------------------------------------------|
| 31055 | ENSG00000156170   | NDUFAB8     | 29292 | 0.03 | protein_coding                      | 8  | 95907995  | 96129883  | NADH dehydrogenase (ubiquinone) complex I assembly factor 8              |
| 31143 | ENSG00000103137   | DNAJC27     | 29307 | 0.03 | protein_coding                      | 8  | 25166628  | 25191963  | Small RNA/DNA/RNAi family C, member 27                                   |
| 31171 | ENSG00000131849   | ZNF132      | 29395 | 0.03 | protein_coding                      | 19 | 58944181  | 58951589  | zinc finger protein 132                                                  |
| 31179 | ENSG00000158691   | ZSCAN12     | 29404 | 0.03 | protein_coding                      | 6  | 28346732  | 28367511  | zinc finger and SCAN domain containing 12                                |
| 31182 | ENSG00000186796   | SPRED3      | 29413 | 0.03 | protein_coding                      | 9  | 38979061  | 38986881  | spredy-related, EVH1 domain containing 3                                 |
| 31252 | ENSG00000102711   | TLL1        | 29472 | 0.03 | protein_coding                      | 19 | 43435522  | 43465534  | tubulin tyrosine ligase-like family, member 11                           |
| 31259 | ENSG00000171444   | MCC         | 29479 | 0.03 | protein_coding                      | 5  | 112832786 | 112832786 | mutated in colorectal cancers                                            |
| 31304 | ENSG00000187103   | PDP9L1      | 29515 | 0.03 | protein_coding                      | 9  | 13066138  | 13069376  | phosphatidylinositol-4-phosphate 5-kinase-like 1                         |
| 31312 | ENSG00000186256   | VPS38B      | 29524 | 0.03 | protein_coding                      | 15 | 91541688  | 91566583  | vacuolar protein sorting 33 homolog B (yeast)                            |
| 31333 | ENSG00000185318   | ZSCAN22     | 29550 | 0.03 | protein_coding                      | 19 | 58836385  | 58836385  | zinc finger and SCAN domain containing 22                                |
| 31352 | ENSG00000185286   | FAM74B1     | 29557 | 0.03 | protein_coding                      | 10 | 74927824  | 75044266  | family with sequence similarity 149, member B1                           |
| 31956 | ENSG00000185958   | ZFP41       | 30141 | 0.03 | protein_coding                      | 9  | 14328988  | 14343975  | ZFP41 zinc finger protein                                                |
| 32202 | ENSG00000088727   | MIF9        | 30390 | 0.03 | protein_coding                      | 3  | 47289516  | 47342941  | kinasin family member 9                                                  |
| 25623 | ENSG00000202318   |             | 24589 | 0.03 | rRNA                                | 2  | 165752187 | 165752287 | rRNA, SS ribosomal pseudogene 111                                        |
| 26986 | ENSG00000201810   |             | 25392 | 0.03 | rRNA                                | 2  | 11857023  | 11857629  | rRNA, SS ribosomal pseudogene 84                                         |
| 27115 | ENSG00000201931   |             | 25788 | 0.03 | rRNA                                | 4  | 178378205 | 178378382 | rRNA, SS ribosomal pseudogene 172                                        |
| 27465 | ENSG00000202278   |             | 26245 | 0.03 | rRNA                                | 1  | 39619836  | 39619988  | rRNA, SS ribosomal pseudogene 44                                         |
| 27987 | ENSG00000201976   |             | 26483 | 0.03 | rRNA                                | 2  | 74192550  | 74192533  | rRNA, SS ribosomal pseudogene 97                                         |
| 24477 | ENSG00000200002   | ALMS1-IT1   | 23442 | 0.03 | sense_intronic                      | 2  | 73683891  | 73686811  | ALMS1 intronic transcript 1 (non-protein coding)                         |
| 27214 | ENSG00000205672   | CACNA1C-IT3 | 25855 | 0.03 | sense_intronic                      | 12 | 2378942   | 2388103   | CACNA1C intronic transcript 3 (non-protein coding)                       |
| 27874 | ENSG00000202081   |             | 25925 | 0.03 | sense_intronic                      | 22 | 34119818  | 34120586  | LARGE intronic transcript 1 (non-protein coding)                         |
| 17101 | ENSG00000209014   |             | 17852 | 0.03 | snRNA                               | 15 | 2523072   | 25232142  | small nuclear RNA, CID box 108                                           |
| 24349 | ENSG00000202923   |             | 23445 | 0.03 | snRNA                               | 2  | 19755872  | 19755154  | Small Cap4 body specific RNA 16                                          |
| 26986 | ENSG00000201923   | SNORD114.4  | 24137 | 0.03 | snRNA                               | 14 | 10342353  | 10342374  | small nuclear RNA, CID box 114.6                                         |
| 26889 | ENSG00000202258   |             | 24113 | 0.03 | snRNA                               | 10 | 12082045  | 12082023  | Small nuclear RNA, SNORA18                                               |
| 28905 | ENSG00000202189   |             | 25500 | 0.03 | snRNA                               | 9  | 2078926   | 2078704   | Small nuclear RNA, SNORA3/SNORA37 family                                 |
| 27100 | ENSG00000201029   |             | 25772 | 0.03 | snRNA                               | 14 | 10042903  | 10042924  | Small nuclear RNA, SNORD41                                               |
| 27123 | ENSG00000201209   |             | 25778 | 0.03 | snRNA                               | 22 | 2862874   | 28628811  | Small nuclear RNA, SNORD42                                               |
| 27194 | ENSG00000201274   |             | 25840 | 0.03 | snRNA                               | 2  | 215711671 | 215711805 | Small nuclear RNA, SNORD70                                               |
| 27173 | ENSG00000201211   |             | 25840 | 0.03 | snRNA                               | 14 | 10001887  | 10001914  | Small nuclear RNA, SNORD71                                               |
| 27943 | ENSG00000202096   |             | 26459 | 0.03 | snRNA                               | 3  | 17933563  | 17933266  | Small nuclear RNA, U13                                                   |
| 29068 | ENSG00000201130   |             | 27152 | 0.03 | snRNA                               | 7  | 64752309  | 64752388  | Small nuclear RNA, SNORA63                                               |
| 17012 | ENSG00000202062   |             | 17189 | 0.03 | snRNA                               | 8  | 86827639  | 86827639  | rRNA, U6 small nuclear 46S, pseudogene                                   |
| 18499 | ENSG00000202892   |             | 18872 | 0.03 | snRNA                               | 10 | 1088233   | 1088239   | rRNA, U7 small nuclear 16S, pseudogene                                   |
| 18458 | ENSG00000202030   |             | 18606 | 0.03 | snRNA                               | 4  | 15548585  | 15548589  | rRNA, U6 small nuclear 128S, pseudogene                                  |
| 21920 | ENSG00000202259   |             | 21947 | 0.03 | snRNA                               | 12 | 10901718  | 10901718  | rRNA, U7 small nuclear 16S, pseudogene                                   |
| 22363 | ENSG00000202259   |             | 21947 | 0.03 | snRNA                               | 11 | 100469193 | 100469295 | rRNA, U7 small nuclear 131S, pseudogene                                  |
| 22844 | ENSG00000202184   |             | 22961 | 0.03 | snRNA                               | 21 | 30115530  | 30115513  | rRNA, U6 small nuclear 87S, pseudogene                                   |
| 23184 | ENSG00000202059   |             | 23201 | 0.03 | snRNA                               | 11 | 12907281  | 12907285  | rRNA, U6 small nuclear 87S, pseudogene                                   |
| 23370 | ENSG00000202359   |             | 22548 | 0.03 | snRNA                               | 8  | 90912949  | 90913052  | rRNA, U6 small nuclear 92S, pseudogene                                   |
| 23875 | ENSG00000202806   |             | 23937 | 0.03 | snRNA                               | 20 | 18591691  | 18591611  | rRNA, U6 small nuclear 92S, pseudogene                                   |
| 24344 | ENSG00000201753   |             | 24351 | 0.03 | snRNA                               | 8  | 85897839  | 85897839  | rRNA, U6 small nuclear 94S, pseudogene                                   |
| 24359 | ENSG00000201911   |             | 23581 | 0.03 | snRNA                               | 3  | 37009882  | 37009807  | rRNA, U6 small nuclear 4, pseudogene                                     |
| 24986 | ENSG00000202731   |             | 23906 | 0.03 | snRNA                               | 3  | 8827303   | 88272408  | rRNA, U6 small nuclear 128S, pseudogene                                  |
| 25143 | ENSG00000196791   |             | 24406 | 0.03 | snRNA                               | 2  | 231461836 | 231451042 | rRNA, U6 small nuclear 45I, pseudogene                                   |
| 26028 | ENSG00000202022   |             | 24827 | 0.03 | snRNA                               | 2  | 80052003  | 80052004  | rRNA, U6 small nuclear 90I, pseudogene                                   |
| 26154 | ENSG00000202289   |             | 24828 | 0.03 | snRNA                               | 4  | 108789663 | 108789666 | rRNA, U6 small nuclear 73S, pseudogene                                   |
| 26767 | ENSG00000201709   |             | 25462 | 0.03 | snRNA                               | 17 | 44958946  | 44958915  | rRNA, U6 small nuclear 310, pseudogene                                   |
| 26869 | ENSG00000200906   |             | 25543 | 0.03 | snRNA                               | 8  | 77928786  | 77928782  | rRNA, U6 small nuclear 85A, pseudogene                                   |
| 26886 | ENSG00000206644   |             | 25543 | 0.03 | snRNA                               | 3  | 196120581 | 196120683 | rRNA, U6 small nuclear 127S, pseudogene                                  |
| 27110 | ENSG00000202680   |             | 25762 | 0.03 | snRNA                               | 1  | 200021189 | 200022093 | rRNA, U6 small nuclear 370, pseudogene                                   |
| 27866 | ENSG00000202363   |             | 26320 | 0.03 | snRNA                               | 17 | 8414443   | 8414509   | rRNA, U7 small nuclear 43, pseudogene                                    |
| 27968 | ENSG000002021870  |             | 26483 | 0.03 | snRNA                               | 18 | 56593429  | 56593528  | rRNA, U2 small nuclear 69, pseudogene                                    |
| 28042 | ENSG00000196248   | RNU6-2BP    | 26537 | 0.03 | snRNA                               | 22 | 31873369  | 31873475  | rRNA, U6 small nuclear 26, pseudogene                                    |
| 28396 | ENSG00000202687   | RNU6-4BP    | 26926 | 0.03 | snRNA                               | 6  | 87663102  | 87663102  | rRNA, U6 small nuclear 46, pseudogene                                    |
| 28603 | ENSG00000202894   |             | 27079 | 0.03 | snRNA                               | 18 | 14737645  | 14737706  | rRNA, U7 small nuclear 125, pseudogene                                   |
| 28619 | ENSG00000202787   |             | 27181 | 0.03 | snRNA                               | 10 | 98902924  | 98903030  | rRNA, U6 small nuclear 127A, pseudogene                                  |
| 29100 | ENSG00000202746   |             | 27224 | 0.03 | snRNA                               | 14 | 87862814  | 87862814  | rRNA, U6 small nuclear 89S, pseudogene                                   |
| 28844 | ENSG00000202240   |             | 27401 | 0.03 | snRNA                               | 2  | 24288706  | 24288706  | rRNA, U6 small nuclear 370, pseudogene                                   |
| 28987 | ENSG00000202260   |             | 27416 | 0.03 | snRNA                               | 5  | 88828440  | 88828444  | rRNA, U6 small nuclear 72A, pseudogene                                   |
| 29100 | ENSG00000202511   |             | 27553 | 0.03 | snRNA                               | 15 | 85813511  | 85813511  | rRNA, U6 small nuclear 10S, pseudogene                                   |
| 30001 | ENSG00000198460   |             | 28174 | 0.03 | snRNA                               | 2  | 69410009  | 69410115  | rRNA, U6 small nuclear 121S, pseudogene                                  |
| 4204  | ENSG00000211747   |             | 6538  | 0.03 | TR_V_gene                           | 7  | 142334163 | 142334163 | T cell receptor beta variable 20-1                                       |
| 49001 | ENSG00000211728   |             | 12178 | 0.03 | TR_V_gene                           | 2  | 142178827 | 142178827 | T cell receptor beta variable 5-2                                        |
| 26066 | ENSG00000211819   |             | 20652 | 0.03 | TR_V_gene                           | 14 | 22782922  | 22783351  | T cell receptor alpha variable 40                                        |
| 18691 | ENSG00000202824   | NACAP1      | 19170 | 0.03 | transcribed_unprocessed_pseudo_gene | 8  | 102374022 | 102384935 | nascent polypeptide-associated complex alpha polypeptide pseudogene 1    |
| 26020 | ENSG00000196284   | NUP210P1    | 24817 | 0.03 | transcribed_unprocessed_pseudo_gene | 3  | 126379452 | 126390782 | nucleoporin 210kDa pseudogene 1                                          |
| 26076 | ENSG00000202695   |             | 24863 | 0.03 | transcribed_unprocessed_pseudo_gene | 3  | 163833140 | 163835886 | heat shock protein 90kDa alpha (cytosolic), class A member 5, pseudogene |
| 26497 | ENSG00000133228   |             | 25232 | 0.03 | transcribed_unprocessed_pseudo_gene | 17 | 58511039  | 58511357  | ribosomal protein L12 pseudogene 38                                      |
| 27980 | ENSG00000154698   |             | 26491 | 0.03 | transcribed_unprocessed_pseudo_gene | 17 | 20224477  | 20268870  | coiled-coil domain containing 144C, pseudogene                           |
| 28276 | ENSG00000202981   |             | 26769 | 0.03 | transcribed_unprocessed_pseudo_gene | 12 | 120807243 | 120809491 | ribosomal protein S27 pseudogene 25                                      |
| 28473 | ENSG000002043024  |             | 26948 | 0.03 | transcribed_unprocessed_pseudo_gene | 12 | 64616117  | 64790485  | ribosomal protein S11 pseudogene 6                                       |
| 28953 | ENSG00000177350   | RPL13AP3    | 27406 | 0.03 | transcribed_unprocessed_pseudo_gene | 14 | 56232895  | 56234435  | ribosomal protein L13a pseudogene 3                                      |
| 29122 | ENSG000002041735  | FABP5P3     | 27558 | 0.03 | transcribed_unprocessed_pseudo_gene | 7  | 152133980 | 152140272 | fatty acyl CoA reductase 1 pseudogene 3                                  |
| 29841 | ENSG000002048278  |             | 28224 | 0.03 | transcribed_unprocessed_pseudo_gene | 17 | 46952222  | 46966345  | SUMO2 pseudogene 17                                                      |
| 29856 | ENSG00000214289   |             | 28229 | 0.03 | transcribed_unprocessed_pseudo_gene | 3  | 134070694 | 134075403 | ribosomal protein L39 pseudogene 5                                       |
| 22887 | ENSG00000185596   |             | 22996 | 0.03 | transcribed_unprocessed_pseudo_gene | 15 | 102501356 | 102516788 | WAS protein family homolog 3 pseudogene                                  |
| 25471 | ENSG000001971483  | SSX8        | 24381 | 0.03 | transcribed_unprocessed_pseudo_gene | X  | 47987387  | 47988066  | synovial sarcoma, X breakpoint 6 (pseudogene)                            |
| 26572 | ENSG00000202198   | FAM20B      | 25297 | 0.03 | transcribed_unprocessed_pseudo_gene | 9  | 34832292  | 34838983  | family with sequence similarity 205, member B                            |
| 26883 | ENSG00000187953   | PMS2CL      | 25381 | 0.03 | transcribed_unprocessed_pseudo_gene | 7  | 6749759   | 6739493   | PMS2 C-terminal like pseudogene                                          |
| 26914 | ENSG00000214765   | SEPT7P2     | 25577 | 0.03 | transcribed_unprocessed_pseudo_gene | 7  | 45783379  | 45808617  | septin 7 pseudogene 2                                                    |
| 26915 | ENSG00000176654   |             | 25577 | 0.03 | transcribed_unprocessed_pseudo_gene | 12 | 8045172   | 8052736   | Nang homeobox pseudogene 1                                               |
| 27814 | ENSG000002029150  |             | 26344 | 0.03 | transcribed_unprocessed_pseudo_gene | 2  | 208972657 | 208977235 | crystallin, gamma E, pseudogene                                          |
| 28112 | ENSG00000201239   | ANKRD20P1   | 26616 | 0.03 | transcribed_unprocessed_pseudo_gene | 16 | 46503253  | 46603009  | ankyrin repeat domain 26 pseudogene 1                                    |
| 28256 | ENSG00000196204   | RNF71BP1    | 26751 | 0.03 | transcribed_unprocessed_pseudo_gene | 7  | 5013619   | 5000306   | ring finger protein 216 pseudogene 1                                     |
| 28713 | ENSG000002029538  |             | 27188 | 0.03 | transcribed_unprocessed_pseudo_gene | 15 | 84967471  | 84976535  | ubiquitin-conjugating enzyme E2O family member 2 pseudogene 11           |
| 28806 | ENSG0000020280128 |             | 27381 | 0.03 | transcribed_unprocessed_pseudo_gene | 15 | 30884941  | 30892918  | ULK4 pseudogene 2                                                        |
| 28883 | ENSG000002044280  | ECEL1P2     | 27348 | 0.03 | transcribed_unprocessed_pseudo_gene | 2  | 232520460 | 232525167 | endothelin converting enzyme-like 1, pseudogene 2                        |
| 28987 | ENSG00000178162   | FAR2P2      | 27438 | 0.03 | transcribed_unprocessed_pseudo_gene | 2  | 131174328 | 131188936 | fatty acyl CoA reductase 2 pseudogene 2                                  |
| 29923 | ENSG00000146001   | PCDH18      | 28294 | 0.03 | transcribed_unprocessed_pseudo_gene | 5  | 140813938 | 140817101 | protocadherin beta 18 pseudogene                                         |
| 30012 | ENSG00000184699   | ORF14P      | 28264 | 0.03 | transcribed_unprocessed_pseudo_gene | 11 | 17035545  | 17047883  | olfactory receptor, family 7, subfamily E, member 14 pseudogene          |
| 30675 | ENSG00000100058   | CRYBB2P1    | 28942 | 0.03 | transcribed_unprocessed_pseudo_gene | 22 | 25844072  | 25916821  | crystallin, beta B2 pseudogene 1                                         |
| 30798 | ENSG000002022019  | URAHF       | 29067 | 0.03 | transcribed_unprocessed_pseudo_gene | 16 | 90108169  | 90114181  | urate (hydroxylase)-hydrolase, pseudogene                                |
| 31274 | ENSG00000183866   | GUSBP4      | 29492 | 0.03 | transcribed_unprocessed_pseudo_gene | 5  | 21341942  | 21589481  | glucuronidase, beta pseudogene 1                                         |
| 26879 | ENSG000002025681  | MIR670HG    | 24703 | 0.03 | uniprot_pseudogene                  | 11 | 43578338  | 43591945  | MIR670 host gene (non-protein coding)                                    |
| 26256 | ENSG00000         |             |       |      |                                     |    |           |           |                                                                          |

|       |                   |          |          |      |    |           |           |    |                                                               |
|-------|-------------------|----------|----------|------|----|-----------|-----------|----|---------------------------------------------------------------|
| 16116 | ENSG00000213303   |          | 17522.3  | 0.03 |    |           |           |    |                                                               |
| 16185 | ENSG00000214598   |          | 17165    | 0.03 |    |           |           |    |                                                               |
| 16401 | ENSG00000225273   | UBE2Q2P3 | 17321.5  | 0.03 | 15 | 82647360  | 82712277  |    | ubiquitin-conjugating enzyme E2Q family member 2 pseudogene 2 |
| 16872 | ENSG00000202027   |          | 17686.3  | 0.03 |    |           |           |    |                                                               |
| 17121 | ENSG00000209642   |          | 17803    | 0.03 |    |           |           |    |                                                               |
| 17137 | ENSG00000209726   |          | 17872.6  | 0.03 |    |           |           |    |                                                               |
| 17293 | ENSG00000207544   |          | 17882.8  | 0.03 |    |           |           |    |                                                               |
| 18145 | ENSG00000218529   |          | 18616    | 0.03 |    |           |           |    |                                                               |
| 18285 | ENSG00000203385   |          | 18844.6  | 0.03 |    |           |           |    |                                                               |
| 18439 | ENSG00000136315   |          | 18832.2  | 0.03 |    |           |           |    |                                                               |
| 18724 | ENSG00000181590   |          | 19055    | 0.03 |    |           |           |    |                                                               |
| 18748 | ENSG00000204745   |          | 19055.5  | 0.03 |    |           |           |    |                                                               |
| 18793 | ENSG00000224091   |          | 19085.5  | 0.03 |    |           |           |    |                                                               |
| 18814 | ENSG00000205976   |          | 19103.2  | 0.03 |    |           |           |    |                                                               |
| 18948 | ENSG00000202293   |          | 19389.5  | 0.03 |    |           |           |    |                                                               |
| 19817 | ENSG00000206649   |          | 19727.8  | 0.03 |    |           |           |    |                                                               |
| 19810 | ENSG00000270189   |          | 19880.8  | 0.03 |    |           |           |    |                                                               |
| 20437 | ENSG00000205039   |          | 20175.2  | 0.03 |    |           |           |    |                                                               |
| 20874 | ENSG00000204240   |          | 20697.3  | 0.03 |    |           |           |    |                                                               |
| 20984 | ENSG00000271239   |          | 20781.6  | 0.03 |    |           |           |    |                                                               |
| 21111 | ENSG00000202363   |          | 20775.9  | 0.03 |    |           |           |    |                                                               |
| 21177 | ENSG000002058135  |          | 20937.3  | 0.03 |    |           |           |    |                                                               |
| 21331 | ENSG00000205971   |          | 21056.8  | 0.03 |    |           |           |    |                                                               |
| 21593 | ENSG00000201090   |          | 21282.3  | 0.03 |    |           |           |    |                                                               |
| 21713 | ENSG00000202637   |          | 21385    | 0.03 |    |           |           |    |                                                               |
| 21878 | ENSG00000222085   |          | 21487.5  | 0.03 |    |           |           |    |                                                               |
| 21898 | ENSG00000202962   |          | 21547.8  | 0.03 | 1  | 186384123 | 186395908 |    | Uncharacterized protein                                       |
| 22020 | ENSG00000206148   |          | 21598.2  | 0.03 |    |           |           |    |                                                               |
| 22211 | ENSG00000273154   |          | 21736.7  | 0.03 |    |           |           |    |                                                               |
| 22441 | ENSG00000204743   |          | 21801    | 0.03 |    |           |           |    |                                                               |
| 22454 | ENSG00000204302   |          | 21811.4  | 0.03 |    |           |           |    |                                                               |
| 22480 | ENSG00000208930   |          | 21928    | 0.03 |    |           |           |    |                                                               |
| 22948 | ENSG00000208943   |          | 22388.2  | 0.03 | 12 | 102183593 | 102183693 |    | Small nuclear RNA U13                                         |
| 23035 | ENSG00000207890   |          | 22381.7  | 0.03 |    |           |           |    |                                                               |
| 23081 | ENSG00000201856   |          | 22414.1  | 0.03 |    |           |           |    |                                                               |
| 23254 | ENSG00000202521   |          | 22533.3  | 0.03 |    |           |           |    |                                                               |
| 23279 | ENSG00000209990   |          | 22562.2  | 0.03 |    |           |           |    |                                                               |
| 23401 | ENSG00000208104   |          | 22663.4  | 0.03 |    |           |           |    |                                                               |
| 23433 | ENSG00000202983   |          | 22688    | 0.03 |    |           |           |    |                                                               |
| 23456 | ENSG00000224298   | H2AFB1   | 22698.3  | 0.03 | X  | 154113317 | 154113833 |    | H2A histone family, member B1                                 |
| 23477 | ENSG00000206717   |          | 22712.5  | 0.03 |    |           |           |    |                                                               |
| 23488 | ENSG00000202490   |          | 22721    | 0.03 |    |           |           |    |                                                               |
| 23529 | ENSG00000180712   |          | 22748.1  | 0.03 |    |           |           |    |                                                               |
| 23535 | ENSG00000225557   |          | 22749.8  | 0.03 |    |           |           |    |                                                               |
| 23571 | ENSG00000204540   |          | 22719.4  | 0.03 | 13 | 50007495  | 50020554  |    | Sarcoma antigen NY-SAR-79. Uncharacterized protein            |
| 23815 | ENSG00000203742   |          | 22915.75 | 0.03 |    |           |           |    |                                                               |
| 23881 | ENSG00000235575   |          | 22876.5  | 0.03 |    |           |           |    |                                                               |
| 23711 | ENSG00000204844   |          | 22886.6  | 0.03 | 6  | 74103636  | 74103736  |    | Small nuclear RNA U13                                         |
| 23842 | ENSG00000205112   |          | 23011.1  | 0.03 |    |           |           |    |                                                               |
| 24011 | ENSG00000202488   |          | 23159.3  | 0.03 |    |           |           |    |                                                               |
| 24019 | ENSG00000202143   |          | 23162.5  | 0.03 |    |           |           |    |                                                               |
| 24021 | ENSG00000213351   |          | 23164    | 0.03 |    |           |           |    |                                                               |
| 24034 | ENSG000002026423  |          | 23169.4  | 0.03 |    |           |           |    |                                                               |
| 24361 | ENSG00000272022   |          | 23458.6  | 0.03 |    |           |           |    |                                                               |
| 24386 | ENSG00000271362   |          | 23479.5  | 0.03 |    |           |           |    |                                                               |
| 24409 | ENSG000002087205  |          | 23484.6  | 0.03 |    |           |           |    |                                                               |
| 24439 | ENSG00000203071   |          | 23516.1  | 0.03 |    |           |           |    |                                                               |
| 24588 | ENSG00000202942   |          | 23625    | 0.03 |    |           |           |    |                                                               |
| 24603 | ENSG00000213170   |          | 23638.2  | 0.03 |    |           |           |    |                                                               |
| 24638 | ENSG00000203487   |          | 23672.4  | 0.03 |    |           |           |    |                                                               |
| 24659 | ENSG00000202015   |          | 23683.5  | 0.03 |    |           |           |    |                                                               |
| 24671 | ENSG000002035787  |          | 23703.6  | 0.03 |    |           |           |    |                                                               |
| 24695 | ENSG00000203042   |          | 23728.2  | 0.03 | 14 | 92181280  | 92181474  |    | Small nuclear RNA U3                                          |
| 24804 | ENSG00000202178   |          | 23828.7  | 0.03 |    |           |           |    |                                                               |
| 24827 | ENSG000002037842  |          | 23847.9  | 0.03 |    |           |           |    |                                                               |
| 24855 | ENSG000002042953  |          | 23875.2  | 0.03 |    |           |           |    |                                                               |
| 24903 | ENSG00000215503   |          | 23917.4  | 0.03 |    |           |           |    |                                                               |
| 24904 | ENSG000002081638  |          | 23919.5  | 0.03 |    |           |           |    |                                                               |
| 25002 | ENSG000002073285  |          | 23994.3  | 0.03 |    |           |           |    |                                                               |
| 25050 | ENSG000002058188  |          | 24024.6  | 0.03 |    |           |           |    |                                                               |
| 25095 | ENSG00000202087   |          | 24051.5  | 0.03 |    |           |           |    |                                                               |
| 25103 | ENSG00000202840   |          | 24081.8  | 0.03 |    |           |           |    |                                                               |
| 25158 | ENSG00000204565   |          | 24090.3  | 0.03 |    |           |           |    |                                                               |
| 25217 | ENSG000002031106  |          | 24164.7  | 0.03 |    |           |           |    |                                                               |
| 25235 | ENSG000002081078  |          | 24179.3  | 0.03 |    |           |           |    |                                                               |
| 25267 | ENSG00000202868   |          | 24205.9  | 0.03 |    |           |           |    |                                                               |
| 25277 | ENSG00000187912   |          | 24214    | 0.03 |    |           |           |    |                                                               |
| 25298 | ENSG000002071192  |          | 24234    | 0.03 |    |           |           |    |                                                               |
| 25357 | ENSG000002022159  |          | 24287.4  | 0.03 |    |           |           |    |                                                               |
| 25367 | ENSG00000203308   |          | 24297.3  | 0.03 |    |           |           |    |                                                               |
| 25382 | ENSG000002087943  |          | 24306.4  | 0.03 |    |           |           |    |                                                               |
| 25385 | ENSG00000202243   |          | 24388.8  | 0.03 |    |           |           |    |                                                               |
| 25409 | ENSG000002032979  |          | 24333.2  | 0.03 |    |           |           |    |                                                               |
| 25431 | ENSG000002023335  |          | 24348.8  | 0.03 |    |           |           |    |                                                               |
| 25438 | ENSG00000202534   |          | 24352.4  | 0.03 |    |           |           |    |                                                               |
| 25474 | ENSG00000202791   |          | 24362.1  | 0.03 | 10 | 47253595  | 47259483  |    | glutamate dehydrogenase 1 pseudogene B                        |
| 25477 | ENSG000002030845  |          | 24387.6  | 0.03 |    |           |           |    |                                                               |
| 25484 | ENSG00000208644   |          | 24390.2  | 0.03 |    |           |           |    |                                                               |
| 25501 | ENSG00000208813   |          | 24403.3  | 0.03 |    |           |           |    |                                                               |
| 25575 | ENSG000002033967  |          | 24446.3  | 0.03 |    |           |           |    |                                                               |
| 25571 | ENSG000002034245  |          | 24447.5  | 0.03 |    |           |           |    |                                                               |
| 25574 | ENSG00000208390   |          | 24447.5  | 0.03 |    |           |           |    |                                                               |
| 25585 | ENSG00000205598   |          | 24452.9  | 0.03 |    |           |           |    |                                                               |
| 25628 | ENSG00000185931   |          | 24502.6  | 0.03 |    |           |           |    |                                                               |
| 25640 | ENSG00000201762   |          | 24514.2  | 0.03 |    |           |           |    |                                                               |
| 25674 | ENSG0000020251823 |          | 24538.5  | 0.03 |    |           |           |    |                                                               |
| 25684 | ENSG000002031490  |          | 24549.5  | 0.03 |    |           |           |    |                                                               |
| 25693 | ENSG000002041397  |          | 24554.4  | 0.03 |    |           |           |    |                                                               |
| 25695 | ENSG000002044722  |          | 24555.4  | 0.03 |    |           |           |    |                                                               |
| 25707 | ENSG000002027318  |          | 24565.3  | 0.03 |    |           |           |    |                                                               |
| 25728 | ENSG000002021290  |          | 24578.8  | 0.03 |    |           |           |    |                                                               |
| 25737 | ENSG000002068578  |          | 24588.4  | 0.03 |    |           |           |    |                                                               |
| 25744 | ENSG000002023231  |          | 24593.7  | 0.03 |    |           |           |    |                                                               |
| 25777 | ENSG000002042278  |          | 24617.4  | 0.03 |    |           |           |    |                                                               |
| 25781 | ENSG000002083911  |          | 24620.1  | 0.03 | 20 | 43508479  | 43509775  |    | RNA, 78S, cytoplasmic 31, pseudogene                          |
| 25803 | ENSG000002081330  |          | 24642.8  | 0.03 |    |           |           |    |                                                               |
| 25830 | ENSG000002025447  |          | 24670.4  | 0.03 |    |           |           |    |                                                               |
| 25838 | ENSG000002036679  |          | 24678.9  | 0.03 |    |           |           |    |                                                               |
| 25841 | ENSG000002089504  |          | 24680    | 0.03 |    |           |           |    |                                                               |
| 25853 | ENSG00000202118   |          | 24688.3  | 0.03 |    |           |           |    |                                                               |
| 25902 | ENSG00000198533   | C1orf186 | 24725.6  | 0.03 | 1  | 206238872 | 206288847 |    | chromosome 1 open reading frame 186                           |
| 25904 | ENSG00000206717   |          | 24726.9  | 0.03 |    |           |           |    |                                                               |
| 25920 | ENSG000002031885  |          | 24737.5  | 0.03 |    |           |           |    |                                                               |
| 25930 | ENSG000002031723  |          | 24742.1  | 0.03 |    |           |           |    |                                                               |
| 25938 | ENSG00000203058   |          | 24748.7  | 0.03 |    |           |           |    |                                                               |
| 25948 | ENSG000002023647  |          | 24757.8  | 0.03 |    |           |           |    |                                                               |
| 25964 | ENSG000002070104  |          | 24770.1  | 0.03 |    |           |           |    |                                                               |
| 25973 | ENSG000002033565  |          | 24776.7  | 0.03 |    |           |           |    |                                                               |
| 25978 | ENSG00000204088   |          | 24781.8  | 0.03 |    |           |           |    |                                                               |
| 25982 | ENSG000002028622  |          | 24783.1  | 0.03 |    |           |           |    |                                                               |
| 25987 | ENSG000002041251  |          | 24786.2  | 0.03 |    |           |           |    |                                                               |
| 26023 | ENSG000002081869  |          | 24830.9  | 0.03 | 2  | 203104298 | 203104435 |    | Uncharacterized protein                                       |
| 26068 | ENSG000002040291  |          | 24857.4  | 0.03 |    |           |           |    |                                                               |
| 26070 | ENSG000002073091  |          | 24859    | 0.03 |    |           |           |    |                                                               |
| 26086 | ENSG000002026511  |          | 24870.1  | 0.03 |    |           |           |    |                                                               |
| 26088 | ENSG00000202903   |          | 24874.5  | 0.03 |    |           |           |    |                                                               |
| 26093 | ENSG000002025833  |          | 24879.5  | 0.03 |    |           |           |    |                                                               |
| 26097 | ENSG00000202699   |          | 24881.1  | 0.03 |    |           |           |    |                                                               |
| 26099 | ENSG00000203775   |          | 24882.2  | 0.03 |    |           |           |    |                                                               |
| 26100 | ENSG000002036533  |          | 24882.5  | 0.03 |    |           |           |    |                                                               |
| 26114 | ENSG000002091480  |          | 24899    | 0.03 |    |           |           |    |                                                               |
| 26128 | ENSG00000204868   |          | 24904.6  | 0.03 |    |           |           |    |                                                               |
| 26127 | ENSG000002053509  |          | 24905.7  | 0.03 |    |           |           |    |                                                               |
| 26142 | ENSG000002096306  |          | 24917.1  | 0.03 |    |           |           |    |                                                               |
| 26149 | ENSG00000204192   |          | 24923.6  | 0.03 |    |           |           |    |                                                               |
| 26151 | ENSG000002068688  |          | 24925.3  | 0.03 |    |           |           |    |                                                               |
| 26171 | ENSG000002701762  |          | 24944.2  | 0.03 |    |           |           |    |                                                               |
| 26184 | ENSG000002031760  |          | 24954.3  | 0.03 |    |           |           |    |                                                               |
| 26187 | ENSG000002030442  |          | 24963.7  | 0.03 |    |           |           |    |                                                               |
| 26245 | ENSG00000204579   |          | 25001.5  | 0.03 |    |           |           |    |                                                               |
| 26250 | ENSG00000203315   |          | 25006    | 0.03 |    |           |           |    |                                                               |
| 26285 | ENSG000002036130  |          | 25013.8  | 0.03 |    |           |           |    |                                                               |
| 26287 | ENSG000002040295  |          | 25017    | 0.03 |    |           |           |    |                                                               |
| 26294 | ENSG00000202714   |          | 25018.1  | 0.03 |    |           |           |    |                                                               |
| 26307 | ENSG000002031455  |          | 25063.7  | 0.03 |    |           |           |    |                                                               |
| 26312 | ENSG000002036299  |          | 25070    | 0.03 |    |           |           |    |                                                               |
| 26388 | ENSG000002024425  |          | 25129    | 0.03 |    |           |           |    |                                                               |
| 26398 | ENSG000002050602  |          | 25139.9  | 0.03 |    |           |           |    |                                                               |
| 26412 | ENSG000002081303  |          | 25149.2  | 0.03 |    |           |           |    |                                                               |
| 26413 | ENSG000002020338  |          | 25149.2  | 0.03 | 22 | 24389538  | 24401899  |    | glutathione S-transferase theta pseudogene 2                  |
| 26421 | ENSG000002064878  |          | 25153.8  | 0.03 |    |           |           | </ |                                                               |

|       |                 |         |      |    |           |           |                                                         |
|-------|-----------------|---------|------|----|-----------|-----------|---------------------------------------------------------|
| 26422 | ENSG00000262138 | 25154   | 0.03 |    |           |           |                                                         |
| 26428 | ENSG00000262178 | 25170   | 0.03 |    |           |           |                                                         |
| 26436 | ENSG00000256732 | 25175.3 | 0.03 |    |           |           |                                                         |
| 26437 | ENSG00000231426 | 25177.7 | 0.03 |    |           |           |                                                         |
| 26459 | ENSG00000215471 | 25202.9 | 0.03 |    |           |           |                                                         |
| 26461 | ENSG00000232743 | 25204   | 0.03 | 1  | 142803532 | 142827235 | ankyrin repeat domain 20 family, member A14, pseudogene |
| 26463 | ENSG00000224406 | 25204.3 | 0.03 |    |           |           |                                                         |
| 26510 | ENSG00000240738 | 25247.6 | 0.03 |    |           |           |                                                         |
| 26516 | ENSG00000249388 | 25253   | 0.03 |    |           |           |                                                         |
| 26531 | ENSG00000271701 | 25284.1 | 0.03 |    |           |           |                                                         |
| 26563 | ENSG00000258479 | 25291.1 | 0.03 |    |           |           |                                                         |
| 26564 | ENSG00000228141 | 25296.1 | 0.03 |    |           |           |                                                         |
| 26573 | ENSG00000232002 | 25297.4 | 0.03 |    |           |           |                                                         |
| 26615 | ENSG00000249304 | 25336.5 | 0.03 |    |           |           |                                                         |
| 26633 | ENSG00000229379 | 25348   | 0.03 |    |           |           |                                                         |
| 26647 | ENSG00000230559 | 25357.2 | 0.03 |    |           |           |                                                         |
| 26665 | ENSG00000265174 | 25369.3 | 0.03 |    |           |           |                                                         |
| 26668 | ENSG00000217601 | 25373.5 | 0.03 |    |           |           |                                                         |
| 26675 | ENSG00000258751 | 25377.4 | 0.03 |    |           |           |                                                         |
| 26724 | ENSG00000256499 | 25421.7 | 0.03 |    |           |           |                                                         |
| 26728 | ENSG00000243668 | 25421.9 | 0.03 |    |           |           |                                                         |
| 26737 | ENSG00000255648 | 25432.8 | 0.03 |    |           |           |                                                         |
| 26759 | ENSG00000214301 | 25454.6 | 0.03 |    |           |           |                                                         |
| 26766 | ENSG00000232555 | 25461.3 | 0.03 |    |           |           |                                                         |
| 26769 | ENSG00000238103 | 25483   | 0.03 | 5  | 122345237 | 122345335 | Small nuclear RNA U13                                   |
| 26795 | ENSG00000225923 | 25486.7 | 0.03 |    |           |           |                                                         |
| 26816 | ENSG00000232478 | 25510.1 | 0.03 |    |           |           |                                                         |
| 26820 | ENSG00000237013 | 25511.7 | 0.03 |    |           |           |                                                         |
| 26826 | ENSG00000250271 | 25515   | 0.03 |    |           |           |                                                         |
| 26833 | ENSG00000235768 | 25517.5 | 0.03 |    |           |           |                                                         |
| 26849 | ENSG00000226320 | 25525.3 | 0.03 |    |           |           |                                                         |
| 26850 | ENSG00000228981 | 25527.7 | 0.03 |    |           |           |                                                         |
| 26852 | ENSG00000236603 | 25527.7 | 0.03 |    |           |           |                                                         |
| 26857 | ENSG00000225752 | 25530.5 | 0.03 |    |           |           |                                                         |
| 26859 | ENSG00000244564 | 25531.8 | 0.03 |    |           |           |                                                         |
| 26861 | ENSG00000232952 | 25532   | 0.03 |    |           |           |                                                         |
| 26863 | ENSG00000229407 | 25533.9 | 0.03 |    |           |           |                                                         |
| 26870 | ENSG00000224516 | 25540.5 | 0.03 |    |           |           |                                                         |
| 26875 | ENSG00000234919 | 25545.7 | 0.03 |    |           |           |                                                         |
| 26883 | ENSG00000281652 | 25551.2 | 0.03 |    |           |           |                                                         |
| 26892 | ENSG00000234945 | 25559.6 | 0.03 |    |           |           |                                                         |
| 26894 | ENSG00000232463 | 25561.7 | 0.03 |    |           |           |                                                         |
| 26895 | ENSG00000235872 | 25562.6 | 0.03 |    |           |           |                                                         |
| 26898 | ENSG00000174171 | 25565   | 0.03 |    |           |           |                                                         |
| 26898 | ENSG00000234660 | 25571.1 | 0.03 |    |           |           |                                                         |
| 26911 | ENSG00000253951 | 25576.3 | 0.03 |    |           |           |                                                         |
| 26941 | ENSG00000228327 | 25597.7 | 0.03 |    |           |           |                                                         |
| 26947 | ENSG00000232861 | 25604.6 | 0.03 |    |           |           |                                                         |
| 26952 | ENSG00000255740 | 25609.4 | 0.03 |    |           |           |                                                         |
| 26961 | ENSG00000272710 | 25616.5 | 0.03 |    |           |           |                                                         |
| 26974 | ENSG00000236294 | 25633.4 | 0.03 |    |           |           |                                                         |
| 26984 | ENSG00000239392 | 25648.6 | 0.03 |    |           |           |                                                         |
| 26988 | ENSG00000225024 | 25659.8 | 0.03 |    |           |           |                                                         |
| 27002 | ENSG00000241281 | 25662.5 | 0.03 |    |           |           |                                                         |
| 27013 | ENSG00000230999 | 25672.9 | 0.03 |    |           |           |                                                         |
| 27017 | ENSG00000224916 | 25676.9 | 0.03 |    |           |           |                                                         |
| 27039 | ENSG00000189316 | 25698   | 0.03 |    |           |           |                                                         |
| 27056 | ENSG00000235142 | 25703.3 | 0.03 |    |           |           |                                                         |
| 27054 | ENSG00000237549 | 25706.8 | 0.03 |    |           |           |                                                         |
| 27064 | ENSG00000236076 | 25720   | 0.03 |    |           |           |                                                         |
| 27071 | ENSG00000225823 | 25726.3 | 0.03 |    |           |           |                                                         |
| 27075 | ENSG00000233955 | 25730.7 | 0.03 |    |           |           |                                                         |
| 27077 | ENSG00000227121 | 25731   | 0.03 |    |           |           |                                                         |
| 27080 | ENSG00000204953 | 25737.1 | 0.03 |    |           |           |                                                         |
| 27084 | ENSG00000227496 | 25739.8 | 0.03 |    |           |           |                                                         |
| 27105 | ENSG00000197062 | 25755.7 | 0.03 |    |           |           |                                                         |
| 27112 | ENSG00000231143 | 25761.3 | 0.03 |    |           |           |                                                         |
| 27135 | ENSG00000228262 | 25786.1 | 0.03 |    |           |           |                                                         |
| 27139 | ENSG00000239146 | 25788   | 0.03 | 3  | 185160007 | 185160107 | Small nuclear RNA U13                                   |
| 27140 | ENSG00000232388 | 25788.3 | 0.03 |    |           |           |                                                         |
| 27154 | ENSG00000259480 | 25800   | 0.03 |    |           |           |                                                         |
| 27160 | ENSG00000232355 | 25806.1 | 0.03 |    |           |           |                                                         |
| 27168 | ENSG00000236911 | 25815.8 | 0.03 |    |           |           |                                                         |
| 27167 | ENSG00000254365 | 25815.8 | 0.03 |    |           |           |                                                         |
| 27170 | ENSG00000216188 | 25819.4 | 0.03 |    |           |           |                                                         |
| 27174 | ENSG00000230528 | 25823   | 0.03 |    |           |           |                                                         |
| 27195 | ENSG00000220937 | 25841   | 0.03 |    |           |           |                                                         |
| 27210 | ENSG00000224721 | 25850.2 | 0.03 |    |           |           |                                                         |
| 27212 | ENSG00000221088 | 25850.9 | 0.03 |    |           |           |                                                         |
| 27217 | ENSG00000233862 | 25859.6 | 0.03 |    |           |           |                                                         |
| 27223 | ENSG00000248491 | 25863   | 0.03 |    |           |           |                                                         |
| 27228 | ENSG00000230950 | 25865.4 | 0.03 |    |           |           |                                                         |
| 27231 | ENSG00000234513 | 25869.9 | 0.03 |    |           |           |                                                         |
| 27240 | ENSG00000264458 | 25875.5 | 0.03 |    |           |           |                                                         |
| 27268 | ENSG00000234535 | 25883.9 | 0.03 |    |           |           |                                                         |
| 27264 | ENSG00000232296 | 25885.5 | 0.03 |    |           |           |                                                         |
| 27272 | ENSG00000257818 | 25890.7 | 0.03 |    |           |           |                                                         |
| 27273 | ENSG00000251163 | 25891.4 | 0.03 |    |           |           |                                                         |
| 27274 | ENSG00000236353 | 25892.2 | 0.03 |    |           |           |                                                         |
| 27280 | ENSG00000237461 | 25900.1 | 0.03 | 19 | 11122384  | 11122880  | RNA 7SL, cytoplasmic 192, pseudogene                    |
| 27290 | ENSG00000246992 | 25913.6 | 0.03 |    |           |           |                                                         |
| 27296 | ENSG00000260445 | 25917.4 | 0.03 |    |           |           |                                                         |
| 27301 | ENSG00000204460 | 25919   | 0.03 |    |           |           |                                                         |
| 27302 | ENSG00000261646 | 25919.1 | 0.03 |    |           |           |                                                         |
| 27311 | ENSG00000250144 | 25926.8 | 0.03 |    |           |           |                                                         |
| 27315 | ENSG00000254423 | 25928.9 | 0.03 |    |           |           |                                                         |
| 27324 | ENSG00000232338 | 25935.4 | 0.03 |    |           |           |                                                         |
| 27340 | ENSG00000229710 | 25951   | 0.03 |    |           |           |                                                         |
| 27354 | ENSG00000259524 | 25963.4 | 0.03 |    |           |           |                                                         |
| 27363 | ENSG00000215041 | 25967.6 | 0.03 |    |           |           |                                                         |
| 27370 | ENSG00000220988 | 25972.4 | 0.03 |    |           |           |                                                         |
| 27375 | ENSG00000242683 | 25977.8 | 0.03 |    |           |           |                                                         |
| 27379 | ENSG00000253105 | 25980.4 | 0.03 |    |           |           |                                                         |
| 27402 | ENSG00000246992 | 25993.7 | 0.03 |    |           |           |                                                         |
| 27413 | ENSG00000259708 | 26004.4 | 0.03 |    |           |           |                                                         |
| 27421 | ENSG00000264280 | 26011.4 | 0.03 | 19 | 48084280  | 48084576  | RNA 7SL, cytoplasmic 322, pseudogene                    |
| 27438 | ENSG00000229122 | 26024.2 | 0.03 |    |           |           |                                                         |
| 27439 | ENSG00000270405 | 26026   | 0.03 |    |           |           |                                                         |
| 27448 | ENSG00000264492 | 26035.9 | 0.03 |    |           |           |                                                         |
| 27450 | ENSG00000230378 | 26036.8 | 0.03 |    |           |           |                                                         |
| 27460 | ENSG00000230387 | 26040.2 | 0.03 |    |           |           |                                                         |
| 27462 | ENSG00000239395 | 26041   | 0.03 |    |           |           |                                                         |
| 27468 | ENSG00000230551 | 26048.3 | 0.03 |    |           |           |                                                         |
| 27470 | ENSG00000228738 | 26050.1 | 0.03 |    |           |           |                                                         |
| 27473 | ENSG00000230738 | 26053.4 | 0.03 |    |           |           |                                                         |
| 27492 | ENSG00000230378 | 26074.8 | 0.03 |    |           |           |                                                         |
| 27495 | ENSG00000260101 | 26075.5 | 0.03 |    |           |           |                                                         |
| 27501 | ENSG00000272192 | 26082.2 | 0.03 |    |           |           |                                                         |
| 27508 | ENSG00000234198 | 26088   | 0.03 |    |           |           |                                                         |
| 27509 | ENSG00000259306 | 26089.6 | 0.03 |    |           |           |                                                         |
| 27515 | ENSG00000227033 | 26097.9 | 0.03 |    |           |           |                                                         |
| 27517 | ENSG00000232201 | 26098.1 | 0.03 |    |           |           |                                                         |
| 27528 | ENSG00000225028 | 26102   | 0.03 |    |           |           |                                                         |
| 27537 | ENSG00000234255 | 26105.8 | 0.03 |    |           |           |                                                         |
| 27544 | ENSG00000260658 | 26110.3 | 0.03 |    |           |           |                                                         |
| 27555 | ENSG00000249106 | 26119.8 | 0.03 |    |           |           |                                                         |
| 27563 | ENSG00000226329 | 26126.9 | 0.03 |    |           |           |                                                         |
| 27568 | ENSG00000270295 | 26128.4 | 0.03 |    |           |           |                                                         |
| 27605 | ENSG00000204844 | 26163.5 | 0.03 |    |           |           |                                                         |
| 27608 | ENSG00000272668 | 26164.1 | 0.03 |    |           |           |                                                         |
| 27612 | ENSG00000236073 | 26166.6 | 0.03 |    |           |           |                                                         |
| 27614 | ENSG00000201115 | 26172.6 | 0.03 |    |           |           |                                                         |
| 27622 | ENSG00000225142 | 26174.4 | 0.03 |    |           |           |                                                         |
| 27652 | ENSG00000235078 | 26211.4 | 0.03 |    |           |           |                                                         |
| 27665 | ENSG00000230164 | 26218.4 | 0.03 |    |           |           |                                                         |
| 27672 | ENSG00000228336 | 26225.5 | 0.03 |    |           |           |                                                         |
| 27681 | ENSG00000248629 | 26230.5 | 0.03 |    |           |           |                                                         |
| 27689 | ENSG00000230389 | 26232.4 | 0.03 |    |           |           |                                                         |
| 27712 | ENSG00000261173 | 26261   | 0.03 |    |           |           |                                                         |
| 27721 | ENSG00000265443 | 26288.2 | 0.03 |    |           |           |                                                         |
| 27729 | ENSG00000271344 | 26297   | 0.03 |    |           |           |                                                         |
| 27731 | ENSG00000258017 | 26274.1 | 0.03 |    |           |           |                                                         |
| 27733 | ENSG00000260998 | 26274.4 | 0.03 |    |           |           |                                                         |
| 27745 | ENSG00000213765 | 26284.7 | 0.03 |    |           |           |                                                         |
| 27749 | ENSG00000249618 | 26285.5 | 0.03 |    |           |           |                                                         |
| 27752 | ENSG00000239259 | 26288.4 | 0.03 |    |           |           |                                                         |
| 27768 | ENSG00000232856 | 26317.4 | 0.03 |    |           |           |                                                         |
| 27792 | ENSG00000225868 | 26319   | 0.03 |    |           |           |                                                         |
| 27817 | ENSG00000230895 | 26345   | 0.03 |    |           |           |                                                         |
| 27821 | ENSG00000244027 | 26346.6 | 0.03 | 2  | 197154133 | 197154429 | RNA 7SL, cytoplasmic 820, pseudogene                    |
| 27823 | ENSG00000233823 | 26347   | 0.03 |    |           |           |                                                         |



|       |                 |      |          |          |    |           |           |                                                                            |  |
|-------|-----------------|------|----------|----------|----|-----------|-----------|----------------------------------------------------------------------------|--|
| 27877 | ENS00000259946  |      | 26350.8  | 0.03     |    |           |           |                                                                            |  |
| 27878 | ENS00000259959  |      | 26350.8  | 0.03     |    |           |           |                                                                            |  |
| 27884 | ENS00000253632  |      | 26364.6  | 0.03     |    |           |           |                                                                            |  |
| 27884 | ENS00000229805  |      | 26383.4  | 0.03     |    |           |           |                                                                            |  |
| 27885 | ENS00000226405  |      | 26386.9  | 0.03     |    |           |           |                                                                            |  |
| 27876 | ENS00000227941  |      | 26394    | 0.03     |    |           |           |                                                                            |  |
| 27886 | ENS00000227554  |      | 26417    | 0.03     |    |           |           |                                                                            |  |
| 27900 | ENS00000226111  |      | 26423.6  | 0.03     |    |           |           |                                                                            |  |
| 27905 | ENS00000229772  |      | 26428.1  | 0.03     |    |           |           |                                                                            |  |
| 27917 | ENS00000224586  |      | 26435.9  | 0.03     |    |           |           |                                                                            |  |
| 27924 | ENS00000225530  |      | 26444    | 0.03     |    |           |           |                                                                            |  |
| 27954 | ENS00000228172  |      | 26453.4  | 0.03     |    |           |           |                                                                            |  |
| 27938 | ENS00000231871  |      | 26453.9  | 0.03     |    |           |           |                                                                            |  |
| 27940 | ENS00000224827  |      | 26456.6  | 0.03     |    |           |           |                                                                            |  |
| 27954 | ENS00000231955  |      | 26474.3  | 0.03     |    |           |           |                                                                            |  |
| 27973 | ENS000002225873 |      | 26486    | 0.03     |    |           |           |                                                                            |  |
| 27974 | ENS000002254208 |      | 26486.1  | 0.03     |    |           |           |                                                                            |  |
| 27976 | ENS00000229388  |      | 26487.1  | 0.03     |    |           |           |                                                                            |  |
| 27986 | ENS000002235574 |      | 26493.4  | 0.03     |    |           |           |                                                                            |  |
| 27989 | ENS000002220223 |      | 26496.7  | 0.03     |    |           |           |                                                                            |  |
| 27990 | ENS00000231156  |      | 26497.5  | 0.03     |    |           |           |                                                                            |  |
| 27994 | ENS000002283970 |      | 26497.8  | 0.03     |    |           |           |                                                                            |  |
| 28005 | ENS000002256571 |      | 26512.5  | 0.03     |    |           |           |                                                                            |  |
| 28006 | ENS000002251680 |      | 26513.1  | 0.03     |    |           |           |                                                                            |  |
| 28024 | ENS000002253480 |      | 26525.7  | 0.03     |    |           |           |                                                                            |  |
| 28043 | ENS000002240207 |      | 26542.6  | 0.03     |    |           |           |                                                                            |  |
| 28048 | ENS00000221427  |      | 26548    | 0.03     |    |           |           |                                                                            |  |
| 28051 | ENS000002257628 |      | 26549    | 0.03     |    |           |           |                                                                            |  |
| 28053 | ENS000002223732 |      | 26551.8  | 0.03     |    |           |           |                                                                            |  |
| 28057 | ENS000002255203 | 16   | 70298072 | 70298383 |    |           |           | RNA_TSL_cytoplasmic_407_pseudogene                                         |  |
| 28058 | ENS000002255027 |      | 26558.9  | 0.03     |    |           |           |                                                                            |  |
| 28086 | ENS000002298308 |      | 26594.1  | 0.03     |    |           |           |                                                                            |  |
| 28118 | ENS00000231131  |      | 26624.3  | 0.03     |    |           |           |                                                                            |  |
| 28130 | ENS000002269624 | 1    | 63073437 | 63075249 |    |           |           | CDNA_FLJ20506 fs. clone KDN07105. Uncharacterized protein                  |  |
| 28131 | ENS000002323757 |      | 26636.1  | 0.03     |    |           |           |                                                                            |  |
| 28140 | ENS000002225548 |      | 26643    | 0.03     |    |           |           |                                                                            |  |
| 28143 | ENS000002260570 |      | 26645.6  | 0.03     |    |           |           |                                                                            |  |
| 28156 | ENS000002258417 |      | 26661.7  | 0.03     |    |           |           |                                                                            |  |
| 28157 | ENS000002298950 |      | 26664.9  | 0.03     |    |           |           |                                                                            |  |
| 28161 | ENS000002311107 |      | 26665    | 0.03     |    |           |           |                                                                            |  |
| 28166 | ENS000002225985 |      | 26669.6  | 0.03     |    |           |           |                                                                            |  |
| 28168 | ENS000002227813 |      | 26690.1  | 0.03     |    |           |           |                                                                            |  |
| 28230 | ENS000002281220 |      | 26728.3  | 0.03     |    |           |           |                                                                            |  |
| 28246 | ENS000002227811 |      | 26744.6  | 0.03     |    |           |           |                                                                            |  |
| 28248 | ENS00000226191  |      | 26746.5  | 0.03     |    |           |           |                                                                            |  |
| 28268 | ENS000002281380 |      | 26767    | 0.03     |    |           |           |                                                                            |  |
| 28288 | ENS000002230339 |      | 26775    | 0.03     |    |           |           |                                                                            |  |
| 28308 | ENS000002292764 |      | 26802.7  | 0.03     |    |           |           |                                                                            |  |
| 28317 | ENS000002258964 |      | 26810.6  | 0.03     |    |           |           |                                                                            |  |
| 28324 | ENS000002197320 |      | 26815.6  | 0.03     |    |           |           |                                                                            |  |
| 28345 | ENS000002232351 |      | 26829.6  | 0.03     |    |           |           |                                                                            |  |
| 28364 | ENS000002234558 |      | 26848.5  | 0.03     |    |           |           |                                                                            |  |
| 28370 | ENS000002258532 |      | 26850.5  | 0.03     |    |           |           |                                                                            |  |
| 28373 | ENS000002270103 |      | 26852.4  | 0.03     |    |           |           |                                                                            |  |
| 28375 | ENS000002226153 |      | 26853.2  | 0.03     |    |           |           |                                                                            |  |
| 28384 | ENS000002258883 |      | 26859.9  | 0.03     |    |           |           |                                                                            |  |
| 28390 | ENS000002270742 |      | 26899    | 0.03     |    |           |           |                                                                            |  |
| 28394 | ENS000002185229 |      | 26911.3  | 0.03     |    |           |           |                                                                            |  |
| 28397 | ENS000002258637 |      | 26980.7  | 0.03     |    |           |           |                                                                            |  |
| 28405 | ENS000002215004 |      | 26986.3  | 0.03     |    |           |           |                                                                            |  |
| 28418 | ENS000002223151 |      | 26995.3  | 0.03     |    |           |           |                                                                            |  |
| 28417 | ENS000002202761 |      | 26995.7  | 0.03     |    |           |           |                                                                            |  |
| 28425 | ENS000002241439 |      | 26999.2  | 0.03     |    |           |           |                                                                            |  |
| 28428 | ENS000002248153 |      | 26995.3  | 0.03     |    |           |           |                                                                            |  |
| 28429 | ENS000002251171 |      | 26988.3  | 0.03     |    |           |           |                                                                            |  |
| 28431 | ENS000002222945 |      | 26999    | 0.03     |    |           |           |                                                                            |  |
| 28440 | ENS000002224238 |      | 26917.6  | 0.03     |    |           |           |                                                                            |  |
| 28448 | ENS000002235447 |      | 26924.9  | 0.03     |    |           |           |                                                                            |  |
| 28452 | ENS000002240452 |      | 26928.7  | 0.03     |    |           |           |                                                                            |  |
| 28478 | ENS000002224338 |      | 26952.8  | 0.03     |    |           |           |                                                                            |  |
| 28496 | ENS000002234229 |      | 26975    | 0.03     |    |           |           |                                                                            |  |
| 28510 | ENS000002272420 |      | 26989    | 0.03     |    |           |           |                                                                            |  |
| 28515 | ENS000002214474 |      | 26993.7  | 0.03     |    |           |           |                                                                            |  |
| 28518 | ENS000002257070 |      | 26998.2  | 0.03     |    |           |           |                                                                            |  |
| 28529 | ENS000002234311 |      | 27008    | 0.03     |    |           |           |                                                                            |  |
| 28553 | ENS000002225153 |      | 27025.3  | 0.03     |    |           |           |                                                                            |  |
| 28563 | ENS000002258458 |      | 27031.9  | 0.03     |    |           |           |                                                                            |  |
| 28568 | ENS000002248988 |      | 27036.5  | 0.03     |    |           |           |                                                                            |  |
| 28575 | ENS00000222214  |      | 27040.7  | 0.03     |    |           |           |                                                                            |  |
| 28583 | ENS00000222214  |      | 27053.2  | 0.03     | 15 | 72084977  | 72110600  | nuclear receptor subfamily 2, group E, member 3                            |  |
| 28584 | ENS000002281770 |      | 27053.5  | 0.03     |    |           |           |                                                                            |  |
| 28598 | ENS000002224698 |      | 27062.7  | 0.03     |    |           |           |                                                                            |  |
| 28604 | ENS000002248225 |      | 27080.1  | 0.03     |    |           |           |                                                                            |  |
| 28605 | ENS000002258473 |      | 27080.5  | 0.03     |    |           |           |                                                                            |  |
| 28607 | ENS000002298670 |      | 27080.9  | 0.03     |    |           |           |                                                                            |  |
| 28612 | ENS000002254228 |      | 27095.3  | 0.03     |    |           |           |                                                                            |  |
| 28622 | ENS000002254271 |      | 27094.5  | 0.03     |    |           |           |                                                                            |  |
| 28626 | ENS000002281186 |      | 27095.6  | 0.03     |    |           |           |                                                                            |  |
| 28646 | ENS000002286932 |      | 27112.6  | 0.03     |    |           |           |                                                                            |  |
| 28658 | ENS000002281474 |      | 27121.9  | 0.03     |    |           |           |                                                                            |  |
| 28659 | ENS000002255932 |      | 27122.9  | 0.03     |    |           |           |                                                                            |  |
| 28660 | ENS000002291852 |      | 27123.7  | 0.03     |    |           |           |                                                                            |  |
| 28664 | ENS000002287130 |      | 27131.1  | 0.03     |    |           |           |                                                                            |  |
| 28666 | ENS000002248370 |      | 27134.4  | 0.03     |    |           |           |                                                                            |  |
| 28670 | ENS000002224811 |      | 27137.3  | 0.03     |    |           |           |                                                                            |  |
| 28681 | ENS000002285530 |      | 27145.9  | 0.03     |    |           |           |                                                                            |  |
| 28700 | ENS000002187456 | RDM1 | 27176.3  | 0.03     | 17 | 34245070  | 34257777  | RAD52 motif 1                                                              |  |
| 28702 | ENS000002241923 |      | 27181    | 0.03     |    |           |           |                                                                            |  |
| 28712 | ENS000002286907 |      | 27187.8  | 0.03     |    |           |           |                                                                            |  |
| 28716 | ENS000002254478 |      | 27189    | 0.03     |    |           |           |                                                                            |  |
| 28720 | ENS000002252622 |      | 27202.3  | 0.03     |    |           |           |                                                                            |  |
| 28741 | ENS000002232546 |      | 27215.9  | 0.03     |    |           |           |                                                                            |  |
| 28743 | ENS000002282827 |      | 27219.4  | 0.03     |    |           |           |                                                                            |  |
| 28768 | ENS000002286074 |      | 27234.4  | 0.03     |    |           |           |                                                                            |  |
| 28761 | ENS000002204637 |      | 27236.2  | 0.03     |    |           |           |                                                                            |  |
| 28767 | ENS000002227008 |      | 27243.4  | 0.03     |    |           |           |                                                                            |  |
| 28774 | ENS000002233370 |      | 27254.2  | 0.03     |    |           |           |                                                                            |  |
| 28790 | ENS000002242620 |      | 27270.4  | 0.03     | 15 | 90837183  | 90837455  | RNA_TSL_cytoplasmic_736_pseudogene                                         |  |
| 28794 | ENS000002224884 |      | 27273.6  | 0.03     |    |           |           |                                                                            |  |
| 28798 | ENS000002224920 |      | 27273.9  | 0.03     |    |           |           |                                                                            |  |
| 28800 | ENS000002287656 |      | 27277.8  | 0.03     |    |           |           |                                                                            |  |
| 28803 | ENS000002258565 |      | 27279.8  | 0.03     |    |           |           |                                                                            |  |
| 28807 | ENS000002281821 |      | 27281.7  | 0.03     |    |           |           |                                                                            |  |
| 28820 | ENS000002228961 |      | 27290.5  | 0.03     |    |           |           |                                                                            |  |
| 28834 | ENS000002224292 |      | 27304.8  | 0.03     |    |           |           |                                                                            |  |
| 28859 | ENS000002224323 |      | 27326.7  | 0.03     |    |           |           |                                                                            |  |
| 28862 | ENS000002259398 |      | 27329.5  | 0.03     |    |           |           |                                                                            |  |
| 28864 | ENS000002213851 |      | 27331.5  | 0.03     |    |           |           |                                                                            |  |
| 28868 | ENS000002215389 |      | 27335.4  | 0.03     |    |           |           |                                                                            |  |
| 28872 | ENS000002191335 |      | 27338.2  | 0.03     |    |           |           |                                                                            |  |
| 28877 | ENS000002228404 |      | 27341.5  | 0.03     |    |           |           |                                                                            |  |
| 28880 | ENS000002221678 |      | 27344.3  | 0.03     |    |           |           |                                                                            |  |
| 28881 | ENS000002322996 |      | 27345.2  | 0.03     | 12 | 48321722  | 48321816  | Y RNA                                                                      |  |
| 28892 | ENS000002248795 |      | 27354.7  | 0.03     |    |           |           |                                                                            |  |
| 28891 | ENS000002287819 |      | 27353.6  | 0.03     |    |           |           |                                                                            |  |
| 28908 | ENS000002283271 |      | 27366.3  | 0.03     |    |           |           |                                                                            |  |
| 28910 | ENS000002230988 |      | 27372.2  | 0.03     |    |           |           |                                                                            |  |
| 28923 | ENS000002259603 |      | 27388.7  | 0.03     |    |           |           |                                                                            |  |
| 28927 | ENS000002243360 |      | 27391.5  | 0.03     |    |           |           |                                                                            |  |
| 28933 | ENS000002256802 |      | 27395.5  | 0.03     |    |           |           |                                                                            |  |
| 28936 | ENS000002282298 |      | 27399    | 0.03     | 9  | 133325241 | 133325342 | Small nuclear RNA U13                                                      |  |
| 28940 | ENS000002271666 |      | 27404.5  | 0.03     |    |           |           |                                                                            |  |
| 28952 | ENS000002280328 |      | 27405.3  | 0.03     |    |           |           |                                                                            |  |
| 28954 | ENS000002198150 |      | 27408.6  | 0.03     | 17 | 6261731   | 6263538   | HCG1185372. Uncharacterized protein: cDNA FLJ37541 fs. clone BIRCAN2226340 |  |
| 28956 | ENS000002222889 |      | 27407.2  | 0.03     |    |           |           |                                                                            |  |
| 28969 | ENS000002243304 |      | 27417.1  | 0.03     |    |           |           |                                                                            |  |
| 28985 | ENS000002284589 |      | 27434.9  | 0.03     |    |           |           |                                                                            |  |
| 28986 | ENS000002253488 |      | 27437    | 0.03     |    |           |           |                                                                            |  |
| 29012 | ENS000002259788 |      | 27459.3  | 0.03     |    |           |           |                                                                            |  |
| 29021 | ENS000002253433 |      | 27466.7  | 0.03     |    |           |           |                                                                            |  |
| 29049 | ENS000002221327 |      | 27497.4  | 0.03     |    |           |           |                                                                            |  |
| 29050 | ENS000002230929 |      | 27497.5  | 0.03     |    |           |           |                                                                            |  |
| 29071 | ENS000002259254 |      | 27521    | 0.03     |    |           |           |                                                                            |  |
| 29076 | ENS000002225221 |      | 27524    | 0.03     |    |           |           |                                                                            |  |
| 29082 | ENS000002288549 |      | 27528.7  | 0.03     |    |           |           |                                                                            |  |
| 29083 | ENS000002292578 |      | 27529.8  | 0.03     |    |           |           |                                                                            |  |
| 29098 | ENS00000221763  |      | 27533.9  | 0.03     |    |           |           |                                                                            |  |
| 29091 | ENS00000228767  |      | 27532.9  | 0.03     |    |           |           |                                                                            |  |
| 29096 | ENS000002272164 |      | 27539.7  | 0.03     |    |           |           |                                                                            |  |
| 29102 | ENS000002251448 |      | 27543.2  | 0.03     |    |           |           |                                                                            |  |
| 29107 | ENS000002254471 |      | 27546.3  | 0.03     |    |           |           |                                                                            |  |

|       |                 |           |         |      |           |   |          |          |                       |
|-------|-----------------|-----------|---------|------|-----------|---|----------|----------|-----------------------|
| 29108 | ENSG00000259963 |           | 27547.1 | 0.03 |           |   |          |          |                       |
| 29144 | ENSG00000271910 |           | 27530.3 | 0.03 |           |   |          |          |                       |
| 29146 | ENSG00000247732 |           | 27584.7 | 0.03 |           |   |          |          |                       |
| 29153 | ENSG00000272081 |           | 27596.1 | 0.03 |           |   |          |          |                       |
| 29158 | ENSG00000256145 |           | 27588.7 | 0.03 |           |   |          |          |                       |
| 29159 | ENSG00000231868 |           | 27600.6 | 0.03 |           |   |          |          |                       |
| 29169 | ENSG00000257557 |           | 27605.7 | 0.03 |           |   |          |          |                       |
| 29175 | ENSG00000269011 |           | 27619.0 | 0.03 |           |   |          |          |                       |
| 29191 | ENSG00000264536 |           | 27627.2 | 0.03 |           |   |          |          |                       |
| 29202 | ENSG00000249163 |           | 27642.9 | 0.03 |           |   |          |          |                       |
| 29203 | ENSG00000266994 |           | 27643.3 | 0.03 |           |   |          |          |                       |
| 29204 | ENSG00000259985 |           | 27644.5 | 0.03 |           |   |          |          |                       |
| 29206 | ENSG00000230180 |           | 27647.6 | 0.03 |           |   |          |          |                       |
| 29232 | ENSG00000273176 |           | 27665.7 | 0.03 |           |   |          |          |                       |
| 29234 | ENSG00000292134 |           | 27667.3 | 0.03 |           |   |          |          |                       |
| 29250 | ENSG00000243224 |           | 27682.1 | 0.03 |           |   |          |          |                       |
| 29251 | ENSG00000269921 |           | 27682.2 | 0.03 |           |   |          |          |                       |
| 29261 | ENSG00000255735 |           | 27692.6 | 0.03 |           |   |          |          |                       |
| 29265 | ENSG00000266960 |           | 27694.8 | 0.03 |           |   |          |          |                       |
| 29277 | ENSG00000260310 |           | 27700.4 | 0.03 |           |   |          |          |                       |
| 29279 | ENSG00000254333 |           | 27702.4 | 0.03 |           |   |          |          |                       |
| 29280 | ENSG00000272383 |           | 27707.2 | 0.03 |           |   |          |          |                       |
| 29284 | ENSG00000233847 |           | 27707.7 | 0.03 |           |   |          |          |                       |
| 29291 | ENSG00000251178 |           | 27718.4 | 0.03 |           |   |          |          |                       |
| 29294 | ENSG00000260266 |           | 27723.7 | 0.03 |           |   |          |          |                       |
| 29301 | ENSG00000226279 |           | 27726.7 | 0.03 |           |   |          |          |                       |
| 29306 | ENSG00000272070 |           | 27739.3 | 0.03 |           |   |          |          |                       |
| 29309 | ENSG00000269574 |           | 27743.3 | 0.03 |           |   |          |          |                       |
| 29310 | ENSG00000188953 |           | 27743.6 | 0.03 |           |   |          |          |                       |
| 29315 | ENSG00000231378 |           | 27752.5 | 0.03 |           |   |          |          |                       |
| 29322 | ENSG00000258012 |           | 27756.5 | 0.03 |           |   |          |          |                       |
| 29335 | ENSG00000271931 |           | 27765.3 | 0.03 |           |   |          |          |                       |
| 29352 | ENSG00000231774 |           | 27779.3 | 0.03 |           |   |          |          |                       |
| 29362 | ENSG00000255367 |           | 27790.1 | 0.03 |           |   |          |          |                       |
| 29379 | ENSG00000225140 |           | 27811.4 | 0.03 |           |   |          |          |                       |
| 29384 | ENSG00000252175 |           | 27813.3 | 0.03 |           |   |          |          |                       |
| 29386 | ENSG00000229689 |           | 27822.1 | 0.03 |           |   |          |          |                       |
| 29404 | ENSG00000234599 |           | 27833.0 | 0.03 |           |   |          |          |                       |
| 29408 | ENSG00000267939 |           | 27835.6 | 0.03 |           |   |          |          |                       |
| 29412 | ENSG00000256399 |           | 27840.2 | 0.03 |           |   |          |          |                       |
| 29414 | ENSG00000267898 |           | 27840.6 | 0.03 |           |   |          |          |                       |
| 29417 | ENSG00000252141 |           | 27843.8 | 0.03 |           |   |          |          |                       |
| 29418 | ENSG00000255581 |           | 27843.7 | 0.03 |           |   |          |          |                       |
| 29442 | ENSG00000272844 |           | 27867.9 | 0.03 |           |   |          |          |                       |
| 29445 | ENSG00000269701 |           | 27869.2 | 0.03 |           |   |          |          |                       |
| 29447 | ENSG00000259463 |           | 27899.7 | 0.03 |           |   |          |          |                       |
| 29455 | ENSG00000248240 |           | 27876.9 | 0.03 |           |   |          |          |                       |
| 29484 | ENSG00000264000 |           | 27884.9 | 0.03 |           |   |          |          |                       |
| 29476 | ENSG00000231437 |           | 27896.5 | 0.03 |           |   |          |          |                       |
| 29484 | ENSG00000258827 |           | 27902.2 | 0.03 |           |   |          |          |                       |
| 29485 | ENSG00000259190 |           | 27903.4 | 0.03 |           |   |          |          |                       |
| 29489 | ENSG00000271798 |           | 27908.3 | 0.03 |           |   |          |          |                       |
| 29496 | ENSG00000254510 |           | 27915.9 | 0.03 |           |   |          |          |                       |
| 29507 | ENSG00000257913 |           | 27927.1 | 0.03 |           |   |          |          |                       |
| 29514 | ENSG00000269206 |           | 27930.3 | 0.03 |           |   |          |          |                       |
| 29520 | ENSG00000242357 |           | 27938.2 | 0.03 |           |   |          |          |                       |
| 29529 | ENSG00000269227 |           | 27943.1 | 0.03 |           |   |          |          |                       |
| 29533 | ENSG00000111768 |           | 27947.1 | 0.03 |           |   |          |          |                       |
| 29534 | ENSG00000254507 |           | 27947.3 | 0.03 |           |   |          |          |                       |
| 29546 | ENSG00000253978 |           | 27959.6 | 0.03 |           |   |          |          |                       |
| 29570 | ENSG00000219118 |           | 27976.5 | 0.03 |           |   |          |          |                       |
| 29578 | ENSG00000268141 |           | 27985.6 | 0.03 |           |   |          |          |                       |
| 29591 | ENSG00000215246 |           | 27999.9 | 0.03 |           |   |          |          |                       |
| 29596 | ENSG00000243415 |           | 28006.4 | 0.03 |           |   |          |          |                       |
| 29616 | ENSG00000267689 |           | 28020.1 | 0.03 |           |   |          |          |                       |
| 29625 | ENSG00000271782 |           | 28030.5 | 0.03 |           |   |          |          |                       |
| 29632 | ENSG00000244522 |           | 28033.7 | 0.03 |           |   |          |          |                       |
| 29640 | ENSG00000255342 |           | 28038.8 | 0.03 |           |   |          |          |                       |
| 29641 | ENSG00000232861 |           | 28039.0 | 0.03 |           |   |          |          |                       |
| 29652 | ENSG00000216118 |           | 28047.7 | 0.03 |           |   |          |          |                       |
| 29679 | ENSG00000234982 |           | 28059.9 | 0.03 |           |   |          |          |                       |
| 29689 | ENSG00000254572 |           | 28079.0 | 0.03 |           |   |          |          |                       |
| 29690 | ENSG00000271075 |           | 28079.5 | 0.03 |           |   |          |          |                       |
| 29693 | ENSG00000269599 |           | 28080.7 | 0.03 |           |   |          |          |                       |
| 29698 | ENSG00000250543 |           | 28083.2 | 0.03 |           |   |          |          |                       |
| 29702 | ENSG00000273476 |           | 28088.0 | 0.03 |           |   |          |          |                       |
| 29703 | ENSG00000270173 |           | 28088.6 | 0.03 |           |   |          |          |                       |
| 29718 | ENSG00000268721 |           | 28101.7 | 0.03 |           |   |          |          |                       |
| 29729 | ENSG00000242391 |           | 28114.3 | 0.03 |           |   |          |          |                       |
| 29744 | ENSG00000256439 |           | 28129.8 | 0.03 |           |   |          |          |                       |
| 29745 | ENSG00000250989 |           | 28129.9 | 0.03 |           |   |          |          |                       |
| 29749 | ENSG00000249753 |           | 28132.2 | 0.03 |           |   |          |          |                       |
| 29784 | ENSG00000267342 |           | 28165.0 | 0.03 |           |   |          |          |                       |
| 29806 | ENSG00000241537 |           | 28183.3 | 0.03 |           |   |          |          |                       |
| 29807 | ENSG00000254962 |           | 28186.2 | 0.03 |           |   |          |          |                       |
| 29811 | ENSG00000245975 |           | 28189.6 | 0.03 |           |   |          |          |                       |
| 29815 | ENSG00000272762 |           | 28194.0 | 0.03 |           |   |          |          |                       |
| 29844 | ENSG00000269391 |           | 28228.6 | 0.03 |           |   |          |          |                       |
| 29873 | ENSG00000224888 |           | 28253.5 | 0.03 |           |   |          |          |                       |
| 29880 | ENSG00000237916 |           | 28259.9 | 0.03 |           |   |          |          |                       |
| 29890 | ENSG00000236265 |           | 28262.3 | 0.03 |           |   |          |          |                       |
| 29927 | ENSG00000236810 |           | 28288.2 | 0.03 |           |   |          |          |                       |
| 29928 | ENSG00000269486 |           | 28299.7 | 0.03 |           |   |          |          |                       |
| 29942 | ENSG00000256489 |           | 28310.8 | 0.03 |           |   |          |          |                       |
| 29949 | ENSG00000245479 |           | 28314.6 | 0.03 |           |   |          |          |                       |
| 29961 | ENSG00000269884 |           | 28319.7 | 0.03 |           |   |          |          |                       |
| 29973 | ENSG00000272293 |           | 28341.1 | 0.03 |           |   |          |          |                       |
| 29975 | ENSG00000259195 |           | 28343.0 | 0.03 |           |   |          |          |                       |
| 29999 | ENSG00000271248 |           | 28373.4 | 0.03 |           |   |          |          |                       |
| 30000 | ENSG00000247623 |           | 28374.0 | 0.03 |           |   |          |          |                       |
| 30009 | ENSG00000230534 |           | 28384.7 | 0.03 |           |   |          |          |                       |
| 30011 | ENSG00000269874 |           | 28385.3 | 0.03 |           |   |          |          |                       |
| 30017 | ENSG00000269275 |           | 28388.6 | 0.03 |           |   |          |          |                       |
| 30019 | ENSG00000250379 |           | 28389.7 | 0.03 |           |   |          |          |                       |
| 30036 | ENSG00000267765 |           | 28407.3 | 0.03 |           |   |          |          |                       |
| 30046 | ENSG00000259877 |           | 28418.9 | 0.03 |           |   |          |          |                       |
| 30065 | ENSG00000267113 |           | 28433.0 | 0.03 |           |   |          |          |                       |
| 30069 | ENSG00000269859 |           | 28436.8 | 0.03 |           |   |          |          |                       |
| 30070 | ENSG00000259691 |           | 28436.5 | 0.03 |           |   |          |          |                       |
| 30083 | ENSG00000262420 |           | 28448.2 | 0.03 |           |   |          |          |                       |
| 30172 | ENSG00000257005 |           | 28531.5 | 0.03 |           |   |          |          |                       |
| 30174 | ENSG00000256355 |           | 28532.8 | 0.03 |           |   |          |          |                       |
| 30176 | ENSG00000255500 |           | 28533.8 | 0.03 |           |   |          |          |                       |
| 30191 | ENSG00000232034 |           | 28547.5 | 0.03 |           |   |          |          |                       |
| 30225 | ENSG00000232651 |           | 28574.9 | 0.03 |           |   |          |          |                       |
| 30298 | ENSG00000235545 |           | 28639.9 | 0.03 |           |   |          |          |                       |
| 30313 | ENSG00000269845 |           | 28648.3 | 0.03 |           |   |          |          |                       |
| 30349 | ENSG00000267417 |           | 28659.8 | 0.03 |           |   |          |          |                       |
| 30439 | ENSG00000252468 |           | 28740.9 | 0.03 |           |   |          |          |                       |
| 30469 | ENSG00000257740 |           | 28762.7 | 0.03 |           |   |          |          |                       |
| 30500 | ENSG00000264979 |           | 28786.7 | 0.03 |           |   |          |          |                       |
| 30519 | ENSG00000241528 |           | 28801.9 | 0.03 |           |   |          |          |                       |
| 30525 | ENSG00000226824 |           | 28805.7 | 0.03 |           |   |          |          |                       |
| 30541 | ENSG00000269599 |           | 28820.0 | 0.03 |           |   |          |          |                       |
| 30579 | ENSG00000245522 |           | 28853.1 | 0.03 |           |   |          |          |                       |
| 30600 | ENSG00000273270 |           | 28877.0 | 0.03 |           |   |          |          |                       |
| 30625 | ENSG00000272691 |           | 28907.2 | 0.03 |           |   |          |          |                       |
| 30640 | ENSG00000261915 |           | 28913.7 | 0.03 |           |   |          |          |                       |
| 30650 | ENSG00000269698 |           | 28927.1 | 0.03 |           |   |          |          |                       |
| 30656 | ENSG00000259456 |           | 28932.3 | 0.03 |           |   |          |          |                       |
| 30664 | ENSG00000269400 |           | 28937.6 | 0.03 |           |   |          |          |                       |
| 30679 | ENSG00000233170 |           | 28952.4 | 0.03 |           |   |          |          |                       |
| 30699 | ENSG00000273027 |           | 28973.7 | 0.03 |           |   |          |          |                       |
| 30704 | ENSG00000251204 |           | 28983.3 | 0.03 |           |   |          |          |                       |
| 30718 | ENSG00000269649 |           | 28995.9 | 0.03 |           |   |          |          |                       |
| 30763 | ENSG00000251363 |           | 29046.5 | 0.03 |           |   |          |          |                       |
| 30765 | ENSG00000224713 |           | 29046.1 | 0.03 |           |   |          |          |                       |
| 30790 | ENSG00000233698 |           | 29068.2 | 0.03 |           |   |          |          |                       |
| 30829 | ENSG00000233330 |           | 29106.5 | 0.03 |           |   |          |          |                       |
| 30844 | ENSG00000269599 |           | 29126.7 | 0.03 |           |   |          |          |                       |
| 30917 | ENSG00000213540 |           | 29177.7 | 0.03 |           |   |          |          |                       |
| 30940 | ENSG00000270102 |           | 29195.4 | 0.03 |           |   |          |          |                       |
| 30946 | ENSG00000262712 |           | 29197.9 | 0.03 |           |   |          |          |                       |
| 30949 | ENSG00000257660 |           | 29199.7 | 0.03 |           |   |          |          |                       |
| 31024 | ENSG00000224996 |           | 29269.0 | 0.03 |           |   |          |          |                       |
| 31026 | ENSG00000247735 |           | 29268.4 | 0.03 |           |   |          |          |                       |
| 31221 | ENSG00000251026 |           | 29443.1 | 0.03 |           |   |          |          |                       |
| 31296 | ENSG00000269293 |           | 29507.2 | 0.03 |           |   |          |          |                       |
| 31457 | ENSG00000254543 |           | 29670.0 | 0.03 |           |   |          |          |                       |
| 29623 | ENSG00000235488 | JARD2-AS1 | 24738.6 | 0.02 | antisense | 6 | 15248048 | 15248865 | JARD2 antisense RNA 1 |

|        |                  |                  |         |      |                 |    |           |           |                                                                   |
|--------|------------------|------------------|---------|------|-----------------|----|-----------|-----------|-------------------------------------------------------------------|
| 2746   | ENSG00000244879  | GABPB1-AS1       | 26114.3 | 0.02 | antisense       | 15 | 50647525  | 50659936  | GABPB1 antisense RNA 1                                            |
| 2805   | ENSG00000244884  | PCDH9-AS2        | 27390.0 | 0.02 | antisense       | 13 | 47398163  | 47398163  | PCDH9 antisense RNA 2                                             |
| 28136  | ENSG00000235558  |                  | 26535.5 | 0.02 | antisense       | 3  | 50378537  | 50383128  | ZMYND10 antisense RNA 1                                           |
| 28206  | ENSG00000229021  | NBRF1P           | 2706.2  | 0.02 | antisense       | 1  | 151987007 | 152015250 | neuroblastoma breakpoint family, member 18, pseudogene            |
| 28405  | ENSG00000250500  | LNX1-AS1         | 26930.9 | 0.02 | antisense       | 4  | 54262597  | 54415145  | LNX1 antisense RNA 1                                              |
| 28614  | ENSG00000251022  | THAP9-AS1        | 27396.1 | 0.02 | antisense       | 6  | 53874152  | 53925113  | THAP9 antisense RNA 1                                             |
| 28786  | ENSG00000247240  | UBL1-AS1         | 27288.4 | 0.02 | antisense       | 15 | 74733606  | 74773366  | UBL1 antisense RNA 1 (head to head)                               |
| 28807  | ENSG00000237341  | SYP-AS1          | 27296.6 | 0.02 | antisense       | 4  | 49695245  | 49695913  | SYP antisense RNA 1                                               |
| 28863  | ENSG00000239881  | ZHX4-AS1         | 27360.4 | 0.02 | antisense       | 8  | 77456413  | 77456413  | ZHX4 antisense RNA 1                                              |
| 28850  | ENSG00000236756  | DNAJC6-AS1       | 27404.6 | 0.02 | antisense       | 10 | 75007118  | 75007118  | DNAJC6 antisense RNA 1                                            |
| 28899  | ENSG00000226988  | ISPO-AS1         | 27408.6 | 0.02 | antisense       | 7  | 16201113  | 16310228  | ISPO antisense RNA 1                                              |
| 28922  | ENSG00000237485  | SGOL1-AS1        | 27507.3 | 0.02 | antisense       | 3  | 20215736  | 20229719  | prostate cancer antigen 5 (non-protein coding)                    |
| 29422  | ENSG00000226875  |                  | 27849.9 | 0.02 | antisense       | 13 | 11789159  | 11789825  | APHS3?7 antisense RNA 2                                           |
| 29468  | ENSG00000241158  | RP11-142D2.5     | 27989.5 | 0.02 | antisense       | 3  | 54684704  | 54673878  | ASPM13 antisense RNA 1                                            |
| 29560  | ENSG00000243526  |                  | 27987.5 | 0.02 | antisense       | 3  | 15638951  | 156392167 | TPARP antisense RNA 1                                             |
| 29725  | ENSG00000233961  |                  | 28108.3 | 0.02 | antisense       | 3  | 52562925  | 52572057  | SPINA antisense RNA 1                                             |
| 30268  | ENSG00000220759  |                  | 28353.4 | 0.02 | antisense       | 3  | 19223460  | 192239187 | FGF12 antisense RNA 3                                             |
| 30587  | ENSG00000270959  | LPP-AS2          | 28681.8 | 0.02 | antisense       | 3  | 18786894  | 187871845 | LPP antisense RNA 2                                               |
| 30594  | ENSG00000214248  |                  | 28687.9 | 0.02 | antisense       | 17 | 7963689   | 7964827   | Uncharacterized protein                                           |
| 30810  | ENSG00000239352  | MIR195           | 28999.4 | 0.02 | antisense       | 9  | 6919137   | 6922970   | mm-497-155 cluster host gene (non-protein coding)                 |
| 30821  | ENSG00000237424  | FOXO2-AS1        | 29099.9 | 0.02 | antisense       | 1  | 47897805  | 47900313  | FOXO2 antisense RNA 1 (head to head)                              |
| 30967  | ENSG00000228386  | PARO3-AS1        | 29219.6 | 0.02 | antisense       | 10 | 3514695   | 35105314  | PARO3 antisense RNA 1                                             |
| 31187  | ENSG00000213242  | VIT-1AS          | 29578   | 0.02 | antisense       | 11 | 32457064  | 32480315  | VIT1 antisense RNA 1                                              |
| 31373  | ENSG00000240541  | TM4SF1-AS1       | 29593.3 | 0.02 | antisense       | 3  | 14909565  | 149104370 | TM4SF1 antisense RNA 1                                            |
| 31789  | ENSG00000239552  |                  | 29981.3 | 0.02 | antisense       | 17 | 46834824  | 46837695  | HOM5 cluster antisense RNA 2                                      |
| 31835  | ENSG00000227923  | JMJD1C-AS1       | 30030.1 | 0.02 | antisense       | 10 | 65224989  | 65225265  | JMJD1C antisense RNA 1                                            |
| 31909  | ENSG00000231636  | AGBL5-AS1        | 30100.9 | 0.02 | antisense       | 2  | 27272551  | 27273132  | AGBL5 antisense RNA 1                                             |
| 32188  | ENSG00000240841  | HKXC-AS5         | 30378.4 | 0.02 | antisense       | 12 | 54329112  | 54333427  | HKXC13 antisense RNA 1                                            |
| 32240  | ENSG00000237420  | MYLK-AS1         | 30440.9 | 0.02 | antisense       | 10 | 11588100  | 11588100  | cancer susceptibility 12 (non-protein coding)                     |
| 32256  | ENSG00000228523  | MYLK-AS1         | 30440.9 | 0.02 | antisense       | 3  | 12336389  | 12336315  | MYLK antisense RNA 1                                              |
| 32368  | ENSG00000229589  | ACVR2B-AS1       | 30540   | 0.02 | antisense       | 3  | 38482518  | 38486311  | ACVR2B antisense RNA 1                                            |
| 32368  | ENSG00000217554  |                  | 30540   | 0.02 | antisense       | 14 | 2333693   | 2333693   | SRMT5 antisense RNA 1                                             |
| 7083   | ENSG00000211685  |                  | 30667.7 | 0.02 | IG_C_gene       | 22 | 23244766  | 23265203  | immunoglobulin lambda constant 7                                  |
| 13586  | ENSG00000211924  |                  | 15155.5 | 0.02 | IG_D_gene       | 14 | 106370359 | 106370369 | immunoglobulin heavy diversity 3-9                                |
| 15123  | ENSG00000219129  |                  | 16833.0 | 0.02 | IG_D_gene       | 18 | 106381430 | 106381439 | immunoglobulin heavy diversity 8-19                               |
| 15852  | ENSG00000211931  |                  | 16889.3 | 0.02 | IG_D_gene       | 14 | 106382685 | 106382715 | immunoglobulin heavy diversity 2-12                               |
| 18128  | ENSG00000211920  |                  | 18589.9 | 0.02 | IG_D_gene       | 14 | 106387000 | 106387020 | immunoglobulin heavy diversity 6-13                               |
| 187358 | ENSG00000219128  |                  | 19633.7 | 0.02 | IG_D_gene       | 14 | 106381537 | 106381537 | immunoglobulin heavy diversity 5-16                               |
| 21723  | ENSG00000211917  |                  | 21375.8 | 0.02 | IG_D_gene       | 14 | 106381452 | 106381528 | immunoglobulin heavy diversity 3-16                               |
| 21900  | ENSG00000228525  |                  | 21803.5 | 0.02 | IG_D_gene       | 14 | 106347387 | 106347414 | immunoglobulin heavy diversity 6-25                               |
| 25588  | ENSG00000211931  |                  | 21833.0 | 0.02 | IG_D_gene       | 11 | 106375480 | 106375480 | immunoglobulin heavy diversity 6-8                                |
| 27040  | ENSG00000237191  |                  | 25998.1 | 0.02 | IG_D_gene       | 14 | 106375766 | 106375792 | immunoglobulin heavy diversity 1-7                                |
| 3492   | ENSG00000232216  |                  | 5498.7  | 0.02 | IG_V_gene       | 14 | 106529188 | 106529224 | immunoglobulin heavy variable 3-43                                |
| 4743   | ENSG00000214626  |                  | 7293.0  | 0.02 | IG_V_gene       | 2  | 60077690  | 60077611  | immunoglobulin kappa variable 30-20                               |
| 5616   | ENSG00000211951  |                  | 7549.3  | 0.02 | IG_V_gene       | 2  | 106712560 | 106712516 | immunoglobulin heavy variable 2-28                                |
| 5727   | ENSG00000211863  |                  | 8484.3  | 0.02 | IG_V_gene       | 22 | 23063108  | 23063300  | immunoglobulin lambda variable 3-19                               |
| 6155   | ENSG00000211950  |                  | 8913.7  | 0.02 | IG_V_gene       | 14 | 106815722 | 106816263 | immunoglobulin heavy variable 3-33                                |
| 6805   | ENSG00000243206  |                  | 10341.3 | 0.02 | IG_V_gene       | 14 | 89338971  | 89340342  | immunoglobulin kappa variable 1-12                                |
| 6810   | ENSG00000211933  |                  | 9459.9  | 0.02 | IG_V_gene       | 14 | 106405611 | 106406100 | immunoglobulin heavy variable 6-1                                 |
| 6865   | ENSG00000211698  |                  | 9459.9  | 0.02 | IG_V_gene       | 14 | 106405611 | 106406100 | immunoglobulin lambda variable 3-27                               |
| 6876   | ENSG00000211653  |                  | 10354.3 | 0.02 | IG_V_gene       | 22 | 22743827  | 22744827  | immunoglobulin lambda variable 7-43                               |
| 7841   | ENSG00000211967  |                  | 10554.3 | 0.02 | IG_V_gene       | 14 | 107048672 | 107049341 | immunoglobulin heavy variable 4-63                                |
| 7880   | ENSG00000211639  |                  | 11037.3 | 0.02 | IG_V_gene       | 22 | 22510792  | 22511074  | immunoglobulin lambda variable 3-40                               |
| 8114   | ENSG00000211956  |                  | 12471.9 | 0.02 | IG_V_gene       | 14 | 106731444 | 106731444 | immunoglobulin heavy variable 1-24                                |
| 15315  | ENSG00000242766  |                  | 16483.5 | 0.02 | IG_V_gene       | 2  | 90121337  | 90121337  | immunoglobulin kappa variable 10-17                               |
| 18137  | ENSG00000232029  |                  | 19371.2 | 0.02 | IG_V_pseudogene | 10 | 107122108 | 107122548 | immunoglobulin kappa variable 3-45 (pseudogene)                   |
| 18454  | ENSG00000225378  |                  | 19417.0 | 0.02 | IG              | 14 | 89410259  | 89410259  | immunoglobulin variable 122 (pseudogene)                          |
| 22344  | ENSG00000242429  | LINC01133        | 21829.4 | 0.02 | lincRNA         | 1  | 15991008  | 15994851  | long intergenic non-protein coding RNA 1133                       |
| 24315  | ENSG00000246430  | LINC00988        | 23407.9 | 0.02 | lincRNA         | 8  | 57408805  | 57427382  | long intergenic non-protein coding RNA 968                        |
| 24406  | ENSG00000202510  | PTXSC3           | 24027.1 | 0.02 | lincRNA         | 4  | 3696144   | 3696144   | poikilopy thyroid carcinoma susceptibility 3 (non-protein coding) |
| 24522  | ENSG00000233884  | TTY15            | 23275.1 | 0.02 | lincRNA         | Y  | 1474285   | 14804182  | testis-specific transcript, Y-linked 15 (non-protein coding)      |
| 25745  | ENSG00000235887  | LINC00993        | 24395.5 | 0.02 | lincRNA         | 10 | 37598113  | 37639599  | long intergenic non-protein coding RNA 993                        |
| 29230  | ENSG00000240471  | CASC11           | 24922.3 | 0.02 | lincRNA         | 2  | 19296484  | 19296484  | long intergenic non-protein coding RNA 1002                       |
| 29274  | ENSG00000218510  | LINC00339        | 25020.2 | 0.02 | lincRNA         | 1  | 22351681  | 22357116  | long intergenic non-protein coding RNA 339                        |
| 27227  | ENSG00000228789  | HCC52            | 25985   | 0.02 | lincRNA         | 6  | 31021227  | 31021687  | HLA complex group 22                                              |
| 27317  | ENSG00000239815  | EDN8B-AS1        | 26022.6 | 0.02 | antisense       | 7  | 78426197  | 78426197  | EDN8B antisense RNA 1                                             |
| 27356  | ENSG00000256193  | LINC00507        | 25963.6 | 0.02 | lincRNA         | 12 | 12839917  | 128430697 | long intergenic non-protein coding RNA 507                        |
| 27624  | ENSG00000208704  | TBC1D3P1-DHX40P1 | 26175.1 | 0.02 | lincRNA         | 17 | 5803724   | 58066413  | TBC1D3P1-DHX40P1 readthrough transcribed pseudogene               |
| 27963  | ENSG00000239817  | LINC01159        | 26175.1 | 0.02 | lincRNA         | 14 | 1921111   | 1921111   | long intergenic non-protein coding RNA 1159                       |
| 28064  | ENSG00000233117  | LINC00702        | 26002.8 | 0.02 | lincRNA         | 10 | 4243353   | 4286104   | long intergenic non-protein coding RNA 702                        |
| 28378  | ENSG00000232870  | RP11-651M15.1    | 26356.3 | 0.02 | lincRNA         | 13 | 111748185 | 111755444 | long intergenic non-protein coding RNA 368                        |
| 28445  | ENSG00000231123  |                  | 27102.0 | 0.02 | lincRNA         | 11 | 1012018   | 1012018   | long intergenic non-protein coding RNA 1007                       |
| 28749  | ENSG00000231528  | FAM225A          | 27223.4 | 0.02 | lincRNA         | 9  | 11597535  | 115982208 | family with sequence similarity 22, member A (non-protein coding) |
| 28134  | ENSG00000249899  | MIR143HG         | 27869.8 | 0.02 | antisense       | 5  | 14878652  | 148808241 | MIR143 host gene (non-protein coding)                             |
| 28280  | ENSG00000237688  | CASC11           | 27820.1 | 0.02 | antisense       | 12 | 8900218   | 8900218   | cancer susceptibility transcript 11 (non-protein coding)          |
| 28439  | ENSG00000229320  |                  | 27893.4 | 0.02 | lincRNA         | 13 | 112780409 | 112781196 | long intergenic non-protein coding RNA 404                        |
| 28950  | ENSG00000231889  |                  | 28245.5 | 0.02 | lincRNA         | 2  | 18857548  | 18891524  | long intergenic non-protein coding RNA 1090                       |
| 29017  | ENSG00000251448  | RNF139-AS1       | 28340.1 | 0.02 | antisense       | 6  | 1254102   | 1254102   | RNF139 antisense RNA 1 (head to head)                             |
| 30099  | ENSG00000228128  | LINC00568        | 28463.3 | 0.02 | lincRNA         | 1  | 15048623  | 15049050  | long intergenic non-protein coding RNA 568                        |
| 30293  | ENSG00000226873  | LINC01108        | 28638.2 | 0.02 | lincRNA         | 6  | 14283058  | 14283376  | long intergenic non-protein coding RNA 1108                       |
| 30570  | ENSG00000255570  |                  | 28812.4 | 0.02 | antisense       | 2  | 28812443  | 28812443  | long intergenic non-protein coding RNA 533                        |
| 31078  | ENSG00000218925  | LINC00910        | 29311.5 | 0.02 | lincRNA         | 17 | 41447213  | 41446567  | long intergenic non-protein coding RNA 910                        |
| 31364  | ENSG000002529129 | LINC00848        | 29368.7 | 0.02 | lincRNA         | 14 | 48234157  | 48242095  | long intergenic non-protein coding RNA 648                        |
| 32341  | ENSG00000226489  |                  | 30515   | 0.02 | antisense       | 20 | 57362187  | 57362176  | microRNA 296                                                      |
| 32687  | ENSG00000235687  | KASAL2-AS1       | 31700.1 | 0.02 | antisense       | 30 | 178920443 | 178921119 | RASAL2 antisense RNA 1                                            |
| 7984   | ENSG00000286019  | MIR3930          | 10538   | 0.02 | antisense       | 7  | 98479273  | 98479352  | microRNA 3930                                                     |
| 13081  | ENSG00000264516  | MIR4785          | 14775.9 | 0.02 | antisense       | 20 | 38638926  | 38638986  | microRNA 4785                                                     |
| 18104  | ENSG00000264542  | MIR3682          | 18200.9 | 0.02 | antisense       | 6  | 54076268  | 54076268  | microRNA 3682                                                     |
| 21102  | ENSG00000265429  | MIR4782          | 20988.7 | 0.02 | antisense       | 2  | 114478867 | 114478845 | microRNA 4782                                                     |
| 21277  | ENSG00000268652  | MIR4651          | 21487   | 0.02 | antisense       | 10 | 10602890  | 10602817  | microRNA 4651                                                     |
| 21684  | ENSG0000027894   | MIR598           | 21848.2 | 0.02 | antisense       | 5  | 10054884  | 10054898  | microRNA 598                                                      |
| 21874  | ENSG00000221430  | MIR1294          | 22560.8 | 0.02 | antisense       | 5  | 15372866  | 15372867  | microRNA 1294                                                     |
| 25721  | ENSG00000207993  | MIR131           | 24576.2 | 0.02 | antisense       | 14 | 101921088 | 101921110 | microRNA 131                                                      |
| 26134  | ENSG00000209029  | MIR130A          | 24612.1 | 0.02 | antisense       | 14 | 9746971   | 9746979   | microRNA 130a                                                     |
| 26559  | ENSG00000237948  | MIR328           | 27028.5 | 0.02 | antisense       | 18 | 67238224  |           |                                                                   |

|       |                  |           |         |      |                      |    |           |           |                                                                                                            |
|-------|------------------|-----------|---------|------|----------------------|----|-----------|-----------|------------------------------------------------------------------------------------------------------------|
| 14293 | ENSG00000236552  | RPL13AP5  | 15670.3 | 0.02 | processed_pseudogene | 10 | 98510045  | 98510075  | ribosomal protein L13a pseudogene 5                                                                        |
| 14378 | ENSG00000231533  |           | 15670.3 | 0.02 | processed_pseudogene | 12 | 10201304  | 10201304  | head shock 100Da protein 1 pseudogene 4                                                                    |
| 14578 | ENSG00000214485  |           | 15914.8 | 0.02 | processed_pseudogene | 5  | 14947390  | 14947419  | ribosomal protein L7 pseudogene 1                                                                          |
| 15284 | ENSG00000233328  |           | 16465.4 | 0.02 | processed_pseudogene | 1  | 17163957  | 17164079  | profilin 1 pseudogene 1                                                                                    |
| 15411 | ENSG00000236262  |           | 16554.4 | 0.02 | processed_pseudogene | 1  | 160201793 | 160207496 | SUMO1 pseudogene 3                                                                                         |
| 15489 | ENSG00000232354  |           | 16558.5 | 0.02 | processed_pseudogene | 13 | 2552157.5 | 25521583  | ribosomal protein L34 pseudogene 27                                                                        |
| 15597 | ENSG00000232573  |           | 16701.8 | 0.02 | processed_pseudogene | 14 | 99439216  | 99439338  | ribosomal protein L3 pseudogene 4                                                                          |
| 16034 | ENSG00000213236  |           | 17000.2 | 0.02 | processed_pseudogene | 2  | 127315012 | 127315739 | lysine 3-monooxygenase/tyrosine 5-monooxygenase activation protein, zeta pseudogene 2                      |
| 17158 | ENSG00000186021  |           | 17895.8 | 0.02 | processed_pseudogene | 10 | 59972302  | 59972797  | tumor protein, transcriptionally controlled 1 pseudogene 10                                                |
| 18081 | ENSG00000249548  |           | 18558.6 | 0.02 | processed_pseudogene | 20 | 4910377   | 4910385   | ribosomal protein S43 pseudogene 2                                                                         |
| 20388 | ENSG00000239320  |           | 18992.0 | 0.02 | processed_pseudogene | 16 | 71834779  | 71834873  | hepatocyte cytochrome P450 pseudogene 3                                                                    |
| 20137 | ENSG00000270714  |           | 20128.5 | 0.02 | processed_pseudogene | 17 | 62743382  | 62743610  | mitochondrial inner membrane organizing system 1 pseudogene 2                                              |
| 23281 | ENSG00000214203  |           | 22262.6 | 0.02 | processed_pseudogene | 12 | 100402830 | 100403016 | ribosomal protein S43 pseudogene 1                                                                         |
| 23888 | ENSG00000234473  |           | 23347.2 | 0.02 | processed_pseudogene | 1  | 192062979 | 192063007 | zinc finger protein 124 pseudogene 2                                                                       |
| 24073 | ENSG00000243504  |           | 23351.1 | 0.02 | processed_pseudogene | 8  | 98877282  | 98877713  | ribosomal protein S23 pseudogene 1                                                                         |
| 24075 | ENSG00000213906  |           | 23362.7 | 0.02 | processed_pseudogene | 10 | 89510342  | 89510383  | aldo-keto reductase family 1, member B10 pseudogene 1                                                      |
| 24086 | ENSG00000232789  |           | 23270.4 | 0.02 | processed_pseudogene | 11 | 12023529  | 12023638  | suppression of tumorigenesis 13 (colon carcinoma (Hsp70) interacting protein) pseudogene 5                 |
| 24228 | ENSG00000243609  |           | 23347.2 | 0.02 | processed_pseudogene | 16 | 48811435  | 48812280  | ribosomal protein S2 pseudogene 44                                                                         |
| 24462 | ENSG00000237951  |           | 23366.6 | 0.02 | processed_pseudogene | 2  | 26344925  | 26345423  | peptidylarginine isomerase (cyclophilin)-like 1 pseudogene 1                                               |
| 24720 | ENSG00000232933  |           | 23158.9 | 0.02 | processed_pseudogene | 15 | 25224215  | 25224211  | argininosuccinate synthetase 1 pseudogene 1                                                                |
| 24850 | ENSG00000242484  |           | 23871.0 | 0.02 | processed_pseudogene | 1  | 227821785 | 227822047 | basic transcription factor 3 pseudogene 8                                                                  |
| 24921 | ENSG00000233998  |           | 23935.5 | 0.02 | processed_pseudogene | 9  | 140535438 | 140535999 | SET1 pseudogene 5                                                                                          |
| 25138 | ENSG00000236988  |           | 24500.6 | 0.02 | processed_pseudogene | 20 | 12300700  | 12301003  | proliferation-associated 254 pseudogene 2                                                                  |
| 25173 | ENSG00000241641  |           | 24152.5 | 0.02 | processed_pseudogene | 16 | 12175094  | 12175759  | ribosomal protein S23 pseudogene 6                                                                         |
| 25175 | ENSG00000213122  |           | 24135.9 | 0.02 | processed_pseudogene | 6  | 133318980 | 133319791 | ribosomal protein L23a pseudogene 46                                                                       |
| 25485 | ENSG00000232441  |           | 26192.0 | 0.02 | processed_pseudogene | 1  | 186716615 | 186717897 | ribosomal protein L4 pseudogene 2                                                                          |
| 26611 | ENSG00000225638  |           | 24489.8 | 0.02 | processed_pseudogene | 9  | 35843207  | 35843831  | phosphoglycerate mutase 1 pseudogene 2                                                                     |
| 26625 | ENSG00000242466  |           | 24500.7 | 0.02 | processed_pseudogene | 1  | 22832698  | 22833374  | family with sequence similarity 56, member A pseudogene 2                                                  |
| 26626 | ENSG00000231031  |           | 24580.7 | 0.02 | processed_pseudogene | 16 | 7883870   | 7883916   | ribosomal protein S3a pseudogene 30                                                                        |
| 26653 | ENSG00000228744  |           | 24548.4 | 0.02 | processed_pseudogene | 8  | 6983793   | 6981226   | ribosomal protein S3a pseudogene 30                                                                        |
| 26919 | ENSG00000231821  |           | 24971.2 | 0.02 | processed_pseudogene | 2  | 4561794   | 4562046   | nucleophosmin 1 (nucleolar phosphoglycoprotein B23, numatrin) pseudogene 48                                |
| 26920 | ENSG00000214529  |           | 24982.0 | 0.02 | processed_pseudogene | 13 | 2342303   | 2342300   | Rosetta (E)-3 domain containing pseudogene 1                                                               |
| 26930 | ENSG00000244073  |           | 25135.1 | 0.02 | processed_pseudogene | 5  | 37085158  | 37085654  | ribosomal protein S4X pseudogene 6                                                                         |
| 26942 | ENSG00000231203  |           | 25140.8 | 0.02 | processed_pseudogene | 2  | 183925768 | 183927174 | keratin 8 pseudogene 10                                                                                    |
| 26943 | ENSG00000236988  |           | 25140.8 | 0.02 | processed_pseudogene | 20 | 12300700  | 12301003  | ASIP-ribosylation factor 1 (ribosomal protein 1) pseudogene 1                                              |
| 26957 | ENSG00000229168  |           | 25259.8 | 0.02 | processed_pseudogene | X  | 44508375  | 44509865  | ribosomal protein L19 pseudogene 20                                                                        |
| 26958 | ENSG00000244112  |           | 25282.1 | 0.02 | processed_pseudogene | 5  | 58118330  | 58119541  | ribosomal protein L5 pseudogene 15                                                                         |
| 26961 | ENSG00000232484  |           | 25282.1 | 0.02 | processed_pseudogene | 10 | 59735368  | 59735368  | SET1 pseudogene 41                                                                                         |
| 26963 | ENSG00000181741  |           | 25347.1 | 0.02 | processed_pseudogene | 20 | 33061279  | 33061279  | ferredoxin 1 pseudogene 1                                                                                  |
| 26968 | ENSG00000236992  |           | 25357.7 | 0.02 | processed_pseudogene | X  | 99410883  | 99411771  | ribosomal protein S4 pseudogene 8                                                                          |
| 26983 | ENSG00000234073  |           | 25362.3 | 0.02 | processed_pseudogene | 14 | 1843823   | 1843823   | ribosomal protein L21 pseudogene 17                                                                        |
| 27005 | ENSG00000213977  |           | 25399.0 | 0.02 | processed_pseudogene | 3  | 25366565  | 25366150  | cofilin 1 (non-muscle) pseudogene 7                                                                        |
| 27006 | ENSG00000242209  |           | 25401.3 | 0.02 | processed_pseudogene | 11 | 58124804  | 58125697  | ribosomal protein L5 pseudogene 29                                                                         |
| 26948 | ENSG00000260318  |           | 25522.2 | 0.02 | processed_pseudogene | 16 | 11997780  | 11997880  | cytochrome c oxidase subunit VIc pseudogene 1                                                              |
| 27065 | ENSG00000214898  |           | 25172.8 | 0.02 | processed_pseudogene | 16 | 53117752  | 53117887  | ribosomal protein S4 pseudogene 58                                                                         |
| 27067 | ENSG00000224820  |           | 25722.8 | 0.02 | processed_pseudogene | 7  | 74722734  | 74723228  | basic transcription factor 3 pseudogene 4                                                                  |
| 27070 | ENSG00000215347  |           | 25726.3 | 0.02 | processed_pseudogene | 22 | 42397073  | 42397970  | solute carrier family 25 (mitochondrial carrier, adenosine nucleotide translocator), member 5 pseudogene 1 |
| 27128 | ENSG00000243974  |           | 25774.4 | 0.02 | processed_pseudogene | 3  | 999441178 | 999441178 | vesicle transport through interaction with 1-SNARE 1B pseudogene 1                                         |
| 27191 | ENSG00000219100  |           | 25836.0 | 0.02 | processed_pseudogene | 6  | 106697718 | 106697718 | patheon domain containing 3 pseudogene 3                                                                   |
| 27260 | ENSG00000216120  |           | 25912.6 | 0.02 | processed_pseudogene | 16 | 35617240  | 35617240  | high mobility group nucleosome binding domain 2 pseudogene 41                                              |
| 27300 | ENSG00000226845  |           | 25918.9 | 0.02 | processed_pseudogene | 3  | 40637698  | 40638985  | eukaryotic translation elongation factor 1 gamma pseudogene 3                                              |
| 27368 | ENSG00000217385  |           | 25971.1 | 0.02 | processed_pseudogene | 6  | 4702997   | 4704013   | proteasome (prosome, macropain) 26S subunit, A1Pase, 1 pseudogene 11                                       |
| 27388 | ENSG00000213889  |           | 25987.2 | 0.02 | processed_pseudogene | 10 | 2971097.2 | 2971097.2 | ribosomal protein L24 pseudogene 1                                                                         |
| 27417 | ENSG00000237970  |           | 26059.4 | 0.02 | processed_pseudogene | 10 | 37628343  | 37627799  | transmembrane protein 161B pseudogene 1                                                                    |
| 27494 | ENSG00000233984  |           | 26175.1 | 0.02 | processed_pseudogene | X  | 73251297  | 73251650  | ribosomal protein S4 pseudogene 14                                                                         |
| 27524 | ENSG00000254989  |           | 26135.5 | 0.02 | processed_pseudogene | 14 | 51763852  | 51763852  | charged multivesicular body protein 4B pseudogene 1                                                        |
| 27604 | ENSG00000250346  |           | 26162.0 | 0.02 | processed_pseudogene | 5  | 147301742 | 147302884 | eukaryotic translation elongation factor 1 gamma pseudogene 2                                              |
| 27637 | ENSG00000287752  |           | 26196.0 | 0.02 | processed_pseudogene | 18 | 21252217  | 21252512  | ribosomal protein S10 pseudogene 27                                                                        |
| 27664 | ENSG00000232341  |           | 26211.7 | 0.02 | processed_pseudogene | 11 | 210438811 | 210438811 | suppression of tumorigenesis 13 (colon carcinoma) interacting protein pseudogene 19                        |
| 27742 | ENSG00000227776  |           | 26283.2 | 0.02 | processed_pseudogene | 2  | 38458710  | 38459489  | ribosomal protein L7 pseudogene 12                                                                         |
| 27785 | ENSG00000218359  |           | 26387.0 | 0.02 | processed_pseudogene | 6  | 17582265  | 17582326  | SUMO3 pseudogene 13                                                                                        |
| 27794 | ENSG00000232521  |           | 26321.1 | 0.02 | processed_pseudogene | 15 | 25129317  | 25129317  | cystine-rich protein 1 (essential) pseudogene 2                                                            |
| 27811 | ENSG00000258524  |           | 26341.0 | 0.02 | processed_pseudogene | 14 | 74037863  | 74038371  | 5'-3' nucleotidase, cytosolic pseudogene 1                                                                 |
| 27848 | ENSG00000232950  |           | 26387.0 | 0.02 | processed_pseudogene | 20 | 20233947  | 20234492  | ribosomal protein L17 pseudogene 1                                                                         |
| 27860 | ENSG00000248409  |           | 26401.9 | 0.02 | processed_pseudogene | 15 | 41242044  | 41242047  | iron-sulfur cluster domain 1 pseudogene 4                                                                  |
| 27901 | ENSG00000242206  |           | 26424.6 | 0.02 | processed_pseudogene | 8  | 119774095 | 119774405 | ribosomal protein S26 pseudogene 35                                                                        |
| 27937 | ENSG00000232613  |           | 26454.1 | 0.02 | processed_pseudogene | 1  | 78312795  | 78314447  | nuclear speckle splicing regulatory protein 1 pseudogene 1                                                 |
| 27978 | ENSG00000211738  |           | 26490.2 | 0.02 | processed_pseudogene | 2  | 18842923  | 18842923  | glyceraldehyde 3-phosphate dehydrogenase pseudogene 59                                                     |
| 28002 | ENSG00000214268  |           | 26510.1 | 0.02 | processed_pseudogene | 8  | 7048423   | 7049085   | ribosomal protein S3a pseudogene 33                                                                        |
| 28008 | ENSG00000214578  |           | 26513.6 | 0.02 | processed_pseudogene | 17 | 40964898  | 40965417  | high mobility group nucleosome binding domain 2 pseudogene 15                                              |
| 28068 | ENSG00000236453  |           | 26579.4 | 0.02 | processed_pseudogene | 19 | 63328349  | 63328349  | solute carrier family 25 (mitochondrial carrier, urate transporter), member 1 pseudogene 3                 |
| 28164 | ENSG00000233518  |           | 26587.5 | 0.02 | processed_pseudogene | 10 | 11230973  | 11231012  | ribosomal protein L7 pseudogene 35                                                                         |
| 28240 | ENSG00000213893  | SEC14L1P1 | 26740.2 | 0.02 | processed_pseudogene | 11 | 43919006  | 43921186  | SEC14-like 1 pseudogene 1                                                                                  |
| 28260 | ENSG00000236988  |           | 26680.0 | 0.02 | processed_pseudogene | 20 | 12300700  | 12301003  | high mobility group nucleosome binding domain 2 pseudogene 1                                               |
| 28332 | ENSG00000227054  |           | 26820.9 | 0.02 | processed_pseudogene | 2  | 27064452  | 27064452  | ferredoxin 1 pseudogene 2                                                                                  |
| 28449 | ENSG00000234724  |           | 26825.0 | 0.02 | processed_pseudogene | 10 | 98987505  | 98988295  | histone deacetylase 1 pseudogene 1                                                                         |
| 28453 | ENSG00000254781  |           | 26837.3 | 0.02 | processed_pseudogene | 17 | 16843675  | 16843675  | ribosomal protein L5a pseudogene 1                                                                         |
| 28451 | ENSG00000231095  |           | 26828.6 | 0.02 | processed_pseudogene | 1  | 55689052  | 55689045  | ghrelinin 1 pseudogene 3                                                                                   |
| 28543 | ENSG00000232346  |           | 27107.0 | 0.02 | processed_pseudogene | 20 | 32710276  | 32711198  | ribosomal protein L2 pseudogene 1                                                                          |
| 28628 | ENSG00000232137  |           | 27109.1 | 0.02 | processed_pseudogene | 13 | 9762399   | 9762399   | head shock protein 100Da (cytosolic), class B member 6, pseudogene 1                                       |
| 28745 | ENSG00000219930  |           | 27220.5 | 0.02 | processed_pseudogene | X  | 135160003 | 135160790 | glyceraldehyde 3-phosphate dehydrogenase pseudogene 67                                                     |
| 28811 | ENSG00000216299  | DNAJ1AP5  | 27286.6 | 0.02 | processed_pseudogene | 1  | 102358661 | 102359003 | DnaJ (Hsp40) homolog, subfamily A, member 1 pseudogene 5                                                   |
| 28834 | ENSG00000215842  |           | 27308.4 | 0.02 | processed_pseudogene | 3  | 3071392   | 3071393   | SOX11 pseudogene 2                                                                                         |
| 28945 | ENSG00000235771  |           | 27401.8 | 0.02 | processed_pseudogene | 22 | 41583713  | 41583713  | leucine rich repeat containing 3, member A1A, pseudogene 1                                                 |
| 28961 | ENSG00000270284  |           | 27411.1 | 0.02 | processed_pseudogene | 17 | 57962378  | 57962313  | NADH dehydrogenase (ubiquinone) 1 beta subcomplex, 1, pseudogene 2                                         |
| 28973 | ENSG00000218459  |           | 27420.9 | 0.02 | processed_pseudogene | 6  | 7425809   | 7425820   | ribosomal protein S27 pseudogene 15                                                                        |
| 28983 | ENSG00000231128  |           | 27420.9 | 0.02 | processed_pseudogene | 19 | 78516003  | 78516405  | ribosomal protein S31 pseudogene 11                                                                        |
| 29052 | ENSG00000236888  |           | 27499.5 | 0.02 | processed_pseudogene | 1  | 58071519  | 58071878  | ribosomal protein S20 pseudogene 5                                                                         |
| 29090 | ENSG00000260579  |           | 27458.1 | 0.02 | processed_pseudogene | 14 | 81712836  | 81712907  | dyx1c1, light chain, LCA-vipe 1 pseudogene 1                                                               |
| 29186 | ENSG00000233446  |           | 27932.5 | 0.02 | processed_pseudogene | 13 | 23788313  | 23788313  | high mobility group A1 hook 1 pseudogene 6                                                                 |
| 29218 | ENSG00000226709  |           | 27983.9 | 0.02 | processed_pseudogene | 18 | 28270530  | 28271341  | nucleophosmin 1 (nucleolar phosphoglycoprotein B23, numatrin) pseudogene 4                                 |
| 29313 | ENSG00000214318  |           | 27748.1 | 0.02 | processed_pseudogene | 18 | 61164222  | 61164333  | ATP synthase, H+ transporting, mitochondrial Fo complex, subunit C1 (subunit 9) pseudogene 6               |
| 29344 | ENSG00000232494  |           | 27775.0 | 0.02 | processed_pseudogene | 8  | 48297150  | 48297609  | ribosomal protein L29 pseudogene 19                                                                        |
| 29346 | ENSG000002327018 |           | 27827.7 | 0.02 | processed_pseudogene |    |           |           |                                                                                                            |



|       |                 |         |       |      |                |    |            |           |                                                                                  |
|-------|-----------------|---------|-------|------|----------------|----|------------|-----------|----------------------------------------------------------------------------------|
| 6196  | ENSG00000229859 | PSA3    | 8973  | 0.02 | protein_coding | 11 | 60970779   | 60980570  | pepsinogen 3, group I (pepsinogen A)                                             |
| 6426  | ENSG00000105019 | AT7B8   | 92119 | 0.02 | protein_coding | 13 | 11431219   | 11431219  | AT7B8, H4K+ containing, beta polypeptide                                         |
| 6860  | ENSG00000118520 | ARG1    | 9657  | 0.02 | protein_coding | 6  | 13189424   | 13190542  | arginase 1                                                                       |
| 7827  | ENSG00000130036 | CEACAM7 | 10294 | 0.02 | protein_coding | 19 | 4217235    | 4221095   | carcinoembryonic antigen-related cell adhesion molecule 7                        |
| 7747  | ENSG00000196620 | UGT2B15 | 10454 | 0.02 | protein_coding | 4  | 68512349   | 68513448  | UDP-glucuronyltransferase 2 family, polypeptide B15                              |
| 7669  | ENSG00000130441 | CNR3    | 10545 | 0.02 | protein_coding | 1  | 23115567   | 23115567  | chitinase 3-like 1 (case glycoprotein-39)                                        |
| 8143  | ENSG00000185303 | SFTPA2  | 10639 | 0.02 | protein_coding | 10 | 81315608   | 81320153  | surfactant protein A2                                                            |
| 8177  | ENSG00000191653 | PSCA    | 10664 | 0.02 | protein_coding | 8  | 14376126   | 14376142  | prostate stem cell antigen                                                       |
| 8274  | ENSG00000192026 | HRS1A3  | 10924 | 0.02 | protein_coding | 4  | 8824984    | 8824988   | hydroxysteroid 17-oxo lyase/dehydrogenase 13                                     |
| 8429  | ENSG00000162837 | OKM1    | 11116 | 0.02 | protein_coding | 13 | 5362984    | 5362984   | oligosaccharin 4                                                                 |
| 8574  | ENSG00000062262 | DGAT2   | 11234 | 0.02 | protein_coding | 11 | 7547057    | 7547058   | diacylglycerol O-acyltransferase 2                                               |
| 8728  | ENSG00000184288 | PDE8B   | 11329 | 0.02 | protein_coding | 4  | 86840259   | 86840259  | phosphodiesterase 4B, cAMP-specific                                              |
| 9072  | ENSG00000186245 | CXCL10  | 11668 | 0.02 | protein_coding | 4  | 7894273    | 7894460   | chemokine (C-X-C motif) ligand 10                                                |
| 9178  | ENSG00000182896 | PIGR    | 11689 | 0.02 | protein_coding | 1  | 20710183   | 20711981  | polymeric immunoglobulin receptor                                                |
| 9314  | ENSG00000159481 | CNK1B   | 11922 | 0.02 | protein_coding | 2  | 220036919  | 220036928 | cyclin F-box PHOX2B domain containing 1                                          |
| 9728  | ENSG00000147771 | AADAC   | 12135 | 0.02 | protein_coding | 3  | 151531625  | 151542676 | arylacetamide deacetylase                                                        |
| 9742  | ENSG00000114209 | PDCD10  | 12147 | 0.02 | protein_coding | 3  | 16740186   | 16740127  | programmed cell death 10                                                         |
| 9894  | ENSG00000106186 | TFF1    | 12256 | 0.02 | protein_coding | 21 | 4376291    | 4376703   | trefoil factor 1                                                                 |
| 10129 | ENSG00000181113 | MMP8    | 12447 | 0.02 | protein_coding | 11 | 102582528  | 10259781  | matrix metalloproteinase 8 (neutrophil collagenase)                              |
| 10162 | ENSG00000124253 | PCK1    | 12475 | 0.02 | protein_coding | 20 | 56136136   | 56141113  | phosphoenolpyruvate carboxylase 1 (soluble)                                      |
| 10400 | ENSG00000124933 | SCCR102 | 12548 | 0.02 | protein_coding | 11 | 5020952    | 50212392  | scrotonin, family 10 member 2                                                    |
| 10680 | ENSG00000166718 | ZNF592  | 12878 | 0.02 | protein_coding | 15 | 85291866   | 85349689  | zinc finger protein 592                                                          |
| 10779 | ENSG00000143162 | CHEK1   | 12970 | 0.02 | protein_coding | 1  | 16748914   | 16752304  | cellular repressor of E1A-viral-induced genes 1                                  |
| 11068 | ENSG00000101553 | GPR2    | 13218 | 0.02 | protein_coding | 14 | 65405870   | 65405870  | glutathione peroxidase 2 (peptidoxin)                                            |
| 11129 | ENSG00000102145 | GATA1   | 13243 | 0.02 | protein_coding | X  | 4884482    | 4885276   | GATA binding protein 1 (globin transcription factor 1)                           |
| 11131 | ENSG00000099013 | BLVRB   | 13247 | 0.02 | protein_coding | 19 | 49953696   | 49971747  | biliverdin reductase B (flavin reductase (NADPH))                                |
| 11170 | ENSG00000007228 | ADC11   | 13278 | 0.02 | protein_coding | 7  | 59257115   | 59259592  | amine oxidase, copper containing 1                                               |
| 11546 | ENSG00000102962 | CCL22   | 13615 | 0.02 | protein_coding | 16 | 6735884    | 6736012   | chemokine (C-C motif) ligand 22                                                  |
| 11551 | ENSG00000106292 | HMOX1   | 13617 | 0.02 | protein_coding | 22 | 5871834    | 5873607   | heme oxygenase (decycling) 1                                                     |
| 11615 | ENSG00000109593 | CHST3   | 13621 | 0.02 | protein_coding | 11 | 614116     | 614116    | chitin (4-acetyl)-N-acetyl chitinase enzyme                                      |
| 11629 | ENSG00000149516 | MS4A3   | 13679 | 0.02 | protein_coding | 11 | 5882400    | 5883801   | membrane-spanning 4-domains, subfamily A, member 3 (hematopoietic cell-specific) |
| 11846 | ENSG00000181029 | TRAPPC5 | 13693 | 0.02 | protein_coding | 19 | 7745729    | 7747444   | trafficking protein particle complex 5                                           |
| 11723 | ENSG00000130751 | CCND3   | 13701 | 0.02 | protein_coding | 14 | 148514983  | 148514983 | cyclin dependent kinase 3 (cyclin E)                                             |
| 11727 | ENSG00000155000 | UBAP1   | 13711 | 0.02 | protein_coding | 9  | 34179003   | 3425251   | ubiquitin associated protein 1                                                   |
| 11761 | ENSG00000114113 | RBP2    | 13800 | 0.02 | protein_coding | 3  | 13917176   | 13919989  | retinol binding protein 2, cellular                                              |
| 11874 | ENSG00000130841 | CCND1   | 13813 | 0.02 | protein_coding | 14 | 148514983  | 148514983 | regulator of cyclin dependent kinase 2, 24kDa                                    |
| 11925 | ENSG00000169397 | RNA5E3  | 13926 | 0.02 | protein_coding | 14 | 2139555    | 2139557   | ribonuclease, RNase A family, 3                                                  |
| 12151 | ENSG00000188257 | PLGA2A  | 14091 | 0.02 | protein_coding | 1  | 20391925   | 20393952  | phospholipase A2, group IA (platelet, synovial fluid)                            |
| 12254 | ENSG00000101387 | HSD17B4 | 14102 | 0.02 | protein_coding | 10 | 6744185    | 6744185   | hydroxysteroid 17-beta lyase                                                     |
| 12495 | ENSG00000184120 | HPGD    | 14352 | 0.02 | protein_coding | 4  | 17541128   | 17544405  | hydroxyprostaglandin dehydrogenase 15 (NAD)                                      |
| 12517 | ENSG00000289875 | NRXN2   | 14373 | 0.02 | protein_coding | 19 | 14277553   | 14292590  | NIA-RAB4B neurotransmitter (NMD candidate)                                       |
| 12833 | ENSG00000101903 | BST3    | 14455 | 0.02 | protein_coding | 19 | 1751149    | 1751149   | bone matrix sialin                                                               |
| 12931 | ENSG00000130592 | GRN     | 14459 | 0.02 | protein_coding | 17 | 4242914    | 4243070   | granulin                                                                         |
| 12991 | ENSG00000247596 | THW2    | 14492 | 0.02 | protein_coding | 3  | 52272826   | 52273278  | thymosin alpha-binding protein 2                                                 |
| 12914 | ENSG00000049686 | CHME2   | 14493 | 0.02 | protein_coding | 7  | 111745269  | 111749260 | chitinase 5-like 2                                                               |
| 12994 | ENSG00000151446 | NR5A1   | 14670 | 0.02 | protein_coding | 8  | 12466182   | 12466182  | neurogenin, nuclear kinase C substrate, RC3                                      |
| 13066 | ENSG0000088832  | FKBP1A  | 14780 | 0.02 | protein_coding | 20 | 1348622    | 1373806   | FK506 binding protein 1A, 12kDa                                                  |
| 13333 | ENSG00000194267 | C12orf2 | 14872 | 0.02 | protein_coding | 8  | 683176081  | 6832322   | carbonic anhydrase 8                                                             |
| 13443 | ENSG00000147394 | ZNF185  | 15000 | 0.02 | protein_coding | 8  | 153002866  | 153025024 | zinc finger protein 185 (LM domain)                                              |
| 13528 | ENSG00000163815 | CLEC3B  | 15119 | 0.02 | protein_coding | 3  | 45043040   | 45077563  | C-type lectin domain family 3, member B                                          |
| 14025 | ENSG00000193596 | TMD2A   | 15491 | 0.02 | protein_coding | X  | 78015891   | 78023104  | integral membrane protein 2A                                                     |
| 14034 | ENSG00000144461 | ZC3H7C  | 15596 | 0.02 | protein_coding | 4  | 117917753  | 117920931 | zinc finger 1C, C2H2 domain containing 12                                        |
| 14167 | ENSG00000197930 | ERD1L   | 15595 | 0.02 | protein_coding | 14 | 53196634   | 53196218  | ERD1-like (C. cerevisiae)                                                        |
| 14177 | ENSG00000118655 | NP2C    | 15599 | 0.02 | protein_coding | 14 | 74942995   | 74942808  | Niemann-Pick disease, type C2                                                    |
| 14254 | ENSG00000101450 | ITIH3   | 15603 | 0.02 | protein_coding | 12 | 144961248  | 144963018 | interleukin 11-like hydrolyase                                                   |
| 14265 | ENSG00000132514 | CLEC10A | 15653 | 0.02 | protein_coding | 17 | 6977856    | 6983308   | C-type lectin domain family 10, member A                                         |
| 14702 | ENSG00000183886 | UPP1    | 16013 | 0.02 | protein_coding | 7  | 48129225   | 48148330  | uridine phosphorylase 1                                                          |
| 14820 | ENSG00000130892 | MLP1P   | 16019 | 0.02 | protein_coding | 4  | 1030434918 | 103043126 | microsomal triglyceride transfer protein                                         |
| 14869 | ENSG00000078081 | LAMP3   | 16139 | 0.02 | protein_coding | 3  | 18284001   | 18288127  | lysosomal-associated membrane protein 3                                          |
| 14887 | ENSG00000193944 | MYL9    | 16158 | 0.02 | protein_coding | 6  | 18129356   | 18148479  | myosin regulatory light chain interacting protein                                |
| 14900 | ENSG00000101911 | OTX1    | 16161 | 0.02 | protein_coding | 23 | 12494038   | 12494038  | OTU domain containing 1                                                          |
| 15006 | ENSG00000138495 | COTX1   | 16249 | 0.02 | protein_coding | 3  | 11937380   | 11939301  | COX17 cytochrome c oxidase copper chaperone                                      |
| 15062 | ENSG00000186349 | RAG1    | 16296 | 0.02 | protein_coding | 11 | 38532259   | 38547038  | recombination activating gene 1                                                  |
| 15198 | ENSG00000186960 | NRXN3   | 16316 | 0.02 | protein_coding | 18 | 5261186    | 5261186   | neurogranin, protein kinase C substrate, regulator                               |
| 15429 | ENSG00000101084 | GCLC    | 16569 | 0.02 | protein_coding | 6  | 533612139  | 53481768  | glutamate-cysteine ligase, catalytic subunit                                     |
| 15437 | ENSG00000182369 | CMK1C   | 16577 | 0.02 | protein_coding | 1  | 47194669   | 47444511  | cytidine monophosphate (UMP-CMP) kinase 1, cytosolic                             |
| 15533 | ENSG00000186963 | CANX    | 16593 | 0.02 | protein_coding | 1  | 7637643    | 7637643   | calcium/calmodulin-dependent protein kinase II gamma                             |
| 15554 | ENSG00000102908 | NFAT5   | 16673 | 0.02 | protein_coding | 16 | 69598997   | 6973869   | nuclear factor of activated T-cells 5, tonically-responsive                      |
| 15631 | ENSG00000122644 | ARL4A   | 16733 | 0.02 | protein_coding | 7  | 12724881   | 12724881  | ADP-ribosylation factor-like 4A                                                  |
| 15670 | ENSG00000181722 | TGFB1   | 16811 | 0.02 | protein_coding | 12 | 5483183    | 5483183   | transforming growth factor-beta 1                                                |
| 15693 | ENSG00000158508 | EEF1A1  | 16780 | 0.02 | protein_coding | 6  | 7423520    | 7423520   | eukaryotic translation elongation factor 1 alpha 1                               |
| 15708 | ENSG00000123349 | PFN2S   | 16787 | 0.02 | protein_coding | 12 | 53689075   | 53698234  | profilin subunit 5                                                               |
| 15748 | ENSG00000171738 | TGFB2   | 16811 | 0.02 | protein_coding | 12 | 5483183    | 5483183   | transformation growth factor-beta 2 (TGF-beta 2)                                 |
| 15755 | ENSG00000101845 | CASC3   | 16821 | 0.02 | protein_coding | 8  | 3825657    | 3825657   | cancer susceptibility candidate 3                                                |
| 15803 | ENSG00000186962 | SECT1C  | 16883 | 0.02 | protein_coding | 18 | 58869709   | 58882608  | SEC11 homolog C (S. cerevisiae)                                                  |
| 15808 | ENSG00000144318 | RAB3A   | 16887 | 0.02 | protein_coding | 17 | 1838371    | 1838371   | ribosomal protein S15c                                                           |
| 16092 | ENSG00000133318 | RNF3    | 17103 | 0.02 | protein_coding | 11 | 6344918    | 6352783   | retinonin 3                                                                      |
| 16187 | ENSG00000131482 | GPCP    | 17165 | 0.02 | protein_coding | 17 | 41052810   | 41055398  | glucose-6-phosphatase, catalytic subunit                                         |
| 16200 | ENSG00000101538 | ITIH2   | 17167 | 0.02 | protein_coding | 8  | 10568106   | 10568106  | interleukin 11-like hydrolyase (I11H2)                                           |
| 16205 | ENSG00000172057 | ORMDL3  | 17179 | 0.02 | protein_coding | 17 | 38077294   | 38083854  | ORM-like 3 (C. cerevisiae)                                                       |
| 16227 | ENSG00000196483 | SFRP4   | 17202 | 0.02 | protein_coding | 7  | 37945543   | 38065297  | secreted frizzled-related protein 4                                              |
| 16247 | ENSG00000101938 | NRXN1   | 17202 | 0.02 | protein_coding | 1  | 1099138    | 1099138   | neurogranin                                                                      |
| 16310 | ENSG00000143278 | F13B    | 17250 | 0.02 | protein_coding | 1  | 19703391   | 19703397  | coagulation factor XIII B polypeptide                                            |
| 16338 | ENSG00000100197 | CYP2D6  | 17278 | 0.02 | protein_coding | 22 | 42522501   | 42529008  | cytochrome P450, family 2, subfamily D, polypeptide 6                            |
| 16468 | ENSG00000186610 | ANKRD4  | 17367 | 0.02 | protein_coding | 10 | 5231423    | 5260917   | ankyrin repeat domain protein 4, member C4                                       |
| 16494 | ENSG00000101672 | L18     | 17370 | 0.02 | protein_coding | 1  | 112013914  | 112043440 | interleukin 15, intracellular gamma-inducible factor 1                           |
| 16554 | ENSG00000101439 | GST3    | 17435 | 0.02 | protein_coding | 20 | 23608534   | 23619110  | cysteinyl G                                                                      |
| 16584 | ENSG00000185984 | ZNF108  | 17442 | 0.02 | protein_coding | 15 | 40745621   | 4278321   | zinc finger protein 108                                                          |
| 16661 | ENSG00000191731 | CNR10B  | 17446 | 0.02 | protein_coding | 8  | 86189311   | 86182950  | chromatin remodelling factor 59                                                  |
| 16681 | ENSG00000145365 | TIFA    | 17518 | 0.02 | protein_coding | 4  | 113155589  | 113207599 | TRAF-interacting protein with forkhead-associated domain                         |
| 16861 | ENSG00000186144 | ANP1    | 17652 | 0.02 | protein_coding | 4  | 15310189   | 15369156  | ADP-ribosylation factor interacting protein 1                                    |
| 16874 | ENSG00000186206 | NSD1    | 17687 | 0.02 | protein_coding | 15 | 8411132    | 8411132   | nucleolar protein, ribonuclein 3 regulated                                       |
| 16910 | ENSG00000181944 | ASGR2   | 17704 | 0.02 | protein_coding | 17 | 7004841    | 7019109   | asialoglycoprotein receptor 2                                                    |
| 16941 | ENSG00000190768 | EP2     | 17753 | 0.02 | protein_coding | 1  | 2382522    | 23857172  | EP2, transmembrane receptor 2                                                    |
| 16942 | ENSG00000101142 | GR1     | 17744 | 0.02 | protein_coding | 1  | 87634453   | 87634453  | corin                                                                            |
| 17057 | ENSG00000134594 | RAB33A  | 17830 | 0.02 | protein_coding | X  |            |           |                                                                                  |

|       |                 |          |       |      |      |                |    |           |           |                                                                                                  |
|-------|-----------------|----------|-------|------|------|----------------|----|-----------|-----------|--------------------------------------------------------------------------------------------------|
| 20289 | ENSG00000153147 | SMARCA5  | 20262 | 1    | 0.02 | protein_coding | 4  | 144434616 | 144478939 | SWIN5N related, matrix associated, actin dependent regulator of chromatin, subfamily A, member 5 |
| 20396 | ENSG00000155287 | SLC25A28 | 20342 | 8    | 0.02 | protein_coding | 10 | 101370282 | 101380366 | solute carrier family 25 (mitochondrial iron transporter), member 28                             |
| 20438 | ENSG00000106823 | ECM2     | 20375 | 3    | 0.02 | protein_coding | 9  | 95246365  | 95298937  | extracellular matrix protein 2, female organ and adipocyte specific                              |
| 20570 | ENSG00000185000 | DUC1     | 20480 | 1    | 0.02 | protein_coding | 8  | 145535954 | 144550573 | diallylglycerol O-acetyltransferase 1                                                            |
| 20688 | ENSG00000204943 | ZNF512   | 20392 | 2    | 0.02 | protein_coding | 2  | 27856241  | 27856241  | zinc finger protein 512                                                                          |
| 20625 | ENSG00000204711 | CAPN14   | 20517 | 2    | 0.02 | protein_coding | 2  | 31395244  | 31466724  | catpain 14                                                                                       |
| 20652 | ENSG00000187604 | NFIBID   | 20535 | 0.02 | 0.02 | protein_coding | 19 | 90378555  | 90382265  | nuclear factor of kappa light polypeptide gene enhancer in B-cells inhibitor, delta              |
| 20652 | ENSG00000187604 | NFIBID   | 20535 | 0.02 | 0.02 | protein_coding | 19 | 90378555  | 90382265  | nuclear factor of kappa light polypeptide gene enhancer in B-cells inhibitor, delta              |
| 20671 | ENSG00000198466 | GYPE     | 20548 | 3    | 0.02 | protein_coding | 3  | 144828916 | 144828916 | suppressor of cytokine signaling 1                                                               |
| 20671 | ENSG00000198466 | GYPE     | 20548 | 3    | 0.02 | protein_coding | 3  | 144828916 | 144828916 | suppressor of cytokine signaling 1                                                               |
| 20721 | ENSG00000125703 | AT5G4    | 20657 | 0.02 | 0.02 | protein_coding | 1  | 63248904  | 63311504  | serpin peptidase inhibitor, clade B (bovbumin), member 4                                         |
| 20721 | ENSG00000125703 | AT5G4    | 20657 | 0.02 | 0.02 | protein_coding | 1  | 63248904  | 63311504  | serpin peptidase inhibitor, clade B (bovbumin), member 4                                         |
| 20755 | ENSG00000156256 | USP18    | 20618 | 9    | 0.02 | protein_coding | 21 | 30396560  | 30428609  | ubiquitin specific peptidase 18                                                                  |
| 20789 | ENSG00000170786 | SORL1C5  | 20639 | 0.02 | 0.02 | protein_coding | 8  | 57212569  | 57233335  | short chain dehydrogenase/reductase family 16C, member 5                                         |
| 20838 | ENSG00000132956 | ZNF183   | 20574 | 6    | 0.02 | protein_coding | 6  | 119384607 | 119392523 | zinc finger and BTB domain containing 3                                                          |
| 20942 | ENSG00000175938 | ORAI3    | 20754 | 2    | 0.02 | protein_coding | 16 | 30960387  | 30987782  | ORAI calcium release-activated calcium modulator 3                                               |
| 20988 | ENSG00000208795 | SMI22    | 20785 | 6    | 0.02 | protein_coding | 16 | 4835398   | 4844482   | small integral membrane protein 22                                                               |
| 21043 | ENSG00000132956 | USP18    | 20517 | 2    | 0.02 | protein_coding | 13 | 31191836  | 31233696  | ubiquitin specific peptidase like 1                                                              |
| 21083 | ENSG00000115425 | PCICR    | 20855 | 2    | 0.02 | protein_coding | 2  | 216881052 | 216884782 | peroxisomal trans-2-nonyl-CoA reductase                                                          |
| 21085 | ENSG00000202673 | SEIPINB4 | 20856 | 4    | 0.02 | protein_coding | 18 | 61334483  | 613111532 | serpin peptidase inhibitor, clade B (bovbumin), member 4                                         |
| 21124 | ENSG00000158488 | CD1E     | 20886 | 6    | 0.02 | protein_coding | 1  | 158323254 | 158323254 | Rae guanine nucleotide exchange factor (GEF) 7                                                   |
| 21144 | ENSG00000178918 | NRP1     | 20904 | 7    | 0.02 | protein_coding | 1  | 5224863   | 52344477  | neuropilin-1 (N-glycanase fibronectin convertase)                                                |
| 21210 | ENSG00000146469 | VUP      | 20958 | 5    | 0.02 | protein_coding | 6  | 153071833 | 153000000 | vasopressin-related peptide                                                                      |
| 21296 | ENSG00000137960 | GIPC2    | 21051 | 4    | 0.02 | protein_coding | 1  | 7844528   | 7860413   | GIPC PDZ domain containing family, member 2                                                      |
| 21362 | ENSG00000143390 | RFX5     | 21080 | 4    | 0.02 | protein_coding | 1  | 151311318 | 151319833 | regulatory factor X, 5 (influences HLA class II expression)                                      |
| 21369 | ENSG00000132961 | SRFBP1   | 21085 | 5    | 0.02 | protein_coding | 17 | 26852024  | 26889207  | seronin cell-endothelin factor 2                                                                 |
| 21445 | ENSG00000162344 | FGF19    | 21153 | 6    | 0.02 | protein_coding | 11 | 8951900   | 89519410  | fibroblast growth factor 19                                                                      |
| 21486 | ENSG00000118514 | ALDH8A1  | 21184 | 1    | 0.02 | protein_coding | 6  | 135238528 | 135271280 | aldehyde dehydrogenase 8 family, member 1                                                        |
| 21514 | ENSG00000145504 | PCP2     | 21205 | 1    | 0.02 | protein_coding | 1  | 18623496  | 18623496  | proboscidea                                                                                      |
| 21567 | ENSG00000197210 | GCNT1    | 21245 | 5    | 0.02 | protein_coding | 9  | 78034752  | 79122332  | glucosaminyl (N-acetyl) transferase 1, core 2                                                    |
| 21596 | ENSG00000145826 | LECT2    | 21263 | 7    | 0.02 | protein_coding | 5  | 135257668 | 135260723 | lecukocyte cell-derived lectin 2                                                                 |
| 21778 | ENSG00000102711 | RALGAP3B | 21428 | 0.02 | 0.02 | protein_coding | 1  | 135911007 | 135911007 | ras guanine nucleotide dissociation stimulator                                                   |
| 21628 | ENSG0000011424  | VDR      | 21445 | 5    | 0.02 | protein_coding | 12 | 4823520   | 48536831  | vitamin D (1,25-dihydroxyvitamin D3) receptor                                                    |
| 21842 | ENSG00000158477 | CD1A     | 21460 | 9    | 0.02 | protein_coding | 1  | 158223927 | 158229959 | CD1A molecule                                                                                    |
| 21848 | ENSG00000132744 | ACY3     | 21478 | 0.02 | 0.02 | protein_coding | 11 | 67410026  | 67418130  | asparaginase (aminoacylase) 3                                                                    |
| 21873 | ENSG00000088226 | SMI1     | 21482 | 5    | 0.02 | protein_coding | 4  | 187187099 | 187210835 | coagulation factor XI                                                                            |
| 21885 | ENSG00000158451 | SMI1B    | 21482 | 5    | 0.02 | protein_coding | 8  | 30485307  | 30485307  | small integral membrane protein 18                                                               |
| 21892 | ENSG00000188458 | DEFB132  | 21501 | 1    | 0.02 | protein_coding | 20 | 283377    | 241737    | defensin, beta 132                                                                               |
| 21919 | ENSG00000190748 | VRK1     | 21517 | 2    | 0.02 | protein_coding | 14 | 97263841  | 97289559  | vaccinia related kinase 1                                                                        |
| 21951 | ENSG00000102690 | TRAF3    | 21526 | 2    | 0.02 | protein_coding | 17 | 574214    | 574214    | proliferation-inducing myeloid cell protein                                                      |
| 22102 | ENSG00000131373 | HACL1    | 21654 | 0.02 | 0.02 | protein_coding | 3  | 15602211  | 15643338  | 2-hydroxyacyl-CoA lyase 1                                                                        |
| 22106 | ENSG00000204816 | TRIM31   | 21657 | 1    | 0.02 | protein_coding | 6  | 30070874  | 30080983  | tripartite motif containing 31                                                                   |
| 22128 | ENSG00000191741 | OSTF1    | 21672 | 0.02 | 0.02 | protein_coding | 17 | 4462222   | 4464117   | gamma-glutamyltransferase 5                                                                      |
| 22215 | ENSG00000145504 | ATP9A1   | 21674 | 1    | 0.02 | protein_coding | 1  | 113482866 | 113482866 | ATPase, H <sup>+</sup> transporting, lysosomal 9A, V1 subunit A                                  |
| 22285 | ENSG00000165556 | CD2      | 21786 | 6    | 0.02 | protein_coding | 13 | 28538274  | 28545276  | cellular type II membrane protein                                                                |
| 22301 | ENSG00000197189 | INHBC    | 21797 | 2    | 0.02 | protein_coding | 12 | 57628543  | 57644611  | inhibin, beta C                                                                                  |
| 22411 | ENSG00000170913 | BIN3     | 21816 | 0.02 | 0.02 | protein_coding | 12 | 17962603  | 17962603  | UDP-GlcNAc-6-epimerase (N-acetylglucosaminyltransferase 3)                                       |
| 22435 | ENSG00000164574 | GAULT1   | 21896 | 7    | 0.02 | protein_coding | 5  | 153570290 | 153600044 | UDP-N-acetyl-alpha-D-galactoseamine polypeptide N-acetylglucosaminyltransferase 10 (GalNAc-T10)  |
| 22558 | ENSG00000163714 | UZSURP   | 21948 | 6    | 0.02 | protein_coding | 3  | 142883339 | 142779967 | UDP-uracil-5-phosphate associated SURP domain containing                                         |
| 22562 | ENSG00000204462 | RPM12    | 21997 | 0.02 | 0.02 | protein_coding | 20 | 34238447  | 34252878  | RNA binding motif protein 12                                                                     |
| 22608 | ENSG00000154001 | PPP1R2   | 22030 | 4    | 0.02 | protein_coding | 14 | 63839075  | 64010092  | protein phosphatase 2, regulatory subunit B, epsilon isoform                                     |
| 22656 | ENSG00000101745 | MICU1    | 22031 | 1    | 0.02 | protein_coding | 7  | 74127098  | 74263699  | mitochondrial calcium uptake 1                                                                   |
| 22651 | ENSG00000143353 | LYPLAL1  | 22087 | 2    | 0.02 | protein_coding | 1  | 21547186  | 21538607  | lysophospholipase like 1                                                                         |
| 22654 | ENSG00000170305 | COQ2     | 22089 | 5    | 0.02 | protein_coding | 4  | 84182899  | 84200867  | coenzyme Q2 4-hydroxybenzoate polygamma-transferase                                              |
| 22686 | ENSG00000202690 | TRAF3    | 22078 | 2    | 0.02 | protein_coding | 17 | 574214    | 574214    | STX16/NF-κB1 receptor/ubiquitin domain containing                                                |
| 22685 | ENSG00000170185 | USP38    | 22094 | 3    | 0.02 | protein_coding | 4  | 14410670  | 144144983 | ubiquitin specific peptidase 38                                                                  |
| 22712 | ENSG00000163807 | KIAA143  | 22116 | 4    | 0.02 | protein_coding | 3  | 44779153  | 44803154  | KIAA143                                                                                          |
| 22722 | ENSG00000114620 | RANBP1   | 22129 | 1    | 0.02 | protein_coding | 12 | 48116329  | 48116329  | small nuclear ribonucleoprotein-specific                                                         |
| 22749 | ENSG00000131876 | SNRPA    | 22147 | 9    | 0.02 | protein_coding | 15 | 10182115  | 10183547  | small nuclear ribonucleoprotein polypeptide A'                                                   |
| 22791 | ENSG00000164961 | KIAA0198 | 22173 | 2    | 0.02 | protein_coding | 8  | 12803502  | 12610492  | KIAA0198                                                                                         |
| 22829 | ENSG00000132744 | ACY3     | 22182 | 0.02 | 0.02 | protein_coding | 17 | 67410026  | 67418130  | asparaginase (aminoacylase) 3                                                                    |
| 22925 | ENSG00000140274 | DUXO2    | 22287 | 5    | 0.02 | protein_coding | 15 | 45406519  | 45410619  | dual oxidase maturation factor 2                                                                 |
| 22938 | ENSG00000137574 | GSTI1    | 22298 | 9    | 0.02 | protein_coding | 8  | 56665701  | 56738007  | glutathione S-transferase theta 1                                                                |
| 23028 | ENSG00000101376 | AFOPX3B  | 22316 | 0.02 | 0.02 | protein_coding | 22 | 60923028  | 60923028  | apolipoprotein B mRNA editing catalytic polypeptide-like 3B                                      |
| 23037 | ENSG00000156689 | GLYTAL2  | 22382 | 0.02 | 0.02 | protein_coding | 11 | 58601542  | 58617688  | glycine-N-acyltransferase-like 2                                                                 |
| 23108 | ENSG00000186292 | TMEM100  | 22432 | 0.02 | 0.02 | protein_coding | 17 | 57376988  | 58030482  | transmembrane protein 100                                                                        |
| 23222 | ENSG00000165491 | TRAF3    | 22459 | 2    | 0.02 | protein_coding | 17 | 574214    | 574214    | TBC1 domain family, member 22B                                                                   |
| 23261 | ENSG00000198839 | ZNF-27   | 22551 | 1    | 0.02 | protein_coding | 7  | 111864643 | 111863151 | zinc finger protein 277                                                                          |
| 23266 | ENSG00000089053 | ANAPC5   | 22558 | 3    | 0.02 | protein_coding | 12 | 12174848  | 121837989 | anaplastic promoting complex subunit 5                                                           |
| 23375 | ENSG00000111328 | CNRP3    | 22585 | 0.02 | 0.02 | protein_coding | 12 | 18623496  | 18623496  | cartilage gamma 5                                                                                |
| 23382 | ENSG00000158914 | ARHGAP12 | 22581 | 1    | 0.02 | protein_coding | 11 | 120207782 | 120208045 | Rho guanine nucleotide exchange factor (GEF) 12                                                  |
| 23407 | ENSG00000195441 | SLCSA5   | 22687 | 0.02 | 0.02 | protein_coding | 19 | 17988282  | 18005983  | solute carrier family 5 (sodium/iodide cotransporter), member 5                                  |
| 23512 | ENSG00000164961 | KIAA0198 | 22173 | 2    | 0.02 | protein_coding | 8  | 12803502  | 12610492  | KIAA0198                                                                                         |
| 23564 | ENSG00000187842 | MS12     | 22651 | 3    | 0.02 | protein_coding | 17 | 5389025   | 5394134   | MS12 ketonolase complex component                                                                |
| 23671 | ENSG00000180008 | SOC3A    | 22689 | 6    | 0.02 | protein_coding | 14 | 54543848  | 55516208  | suppressor of cytokine signaling 4                                                               |
| 23748 | ENSG00000165491 | ARHGAP12 | 22581 | 1    | 0.02 | protein_coding | 12 | 120207782 | 120208045 | Rho guanine nucleotide exchange factor (GEF) 12                                                  |
| 23759 | ENSG00000174827 | PDZK1    | 22941 | 4    | 0.02 | protein_coding | 1  | 145729118 | 145716574 | PDZ domain containing 1                                                                          |
| 23887 | ENSG00000158801 | REG1G    | 23025 | 3    | 0.02 | protein_coding | 14 | 21528429  | 215283691 | Rho guanine nucleotide exchange factor (GEF) 40                                                  |
| 23888 | ENSG0000011146  | CHUK1    | 23025 | 3    | 0.02 | protein_coding | 14 | 21528429  | 215283691 | chuk1, 3 open reading frame 5B                                                                   |
| 23887 | ENSG00000158801 | CMT5B    | 23047 | 3    | 0.02 | protein_coding | 14 | 23460171  | 23464891  | CHUK-like MARVEL transmembrane domain containing 5                                               |
| 23931 | ENSG00000135945 | REV11    | 23089 | 2    | 0.02 | protein_coding | 2  | 100116938 | 100116938 | REV11 polymerase (DNA directed)                                                                  |
| 23988 | ENSG00000165695 | VPB11    | 23119 | 0.02 | 0.02 | protein_coding | 11 | 11891843  | 11892808  | vesicular protein sorting 11 homolog (S. cerevisiae)                                             |
| 23967 | ENSG00000185443 | RFX5     | 23116 | 4    | 0.02 | protein_coding | 5  | 57910443  | 58077409  | thymosin protein 5B kinase, T2A, polypeptide 1                                                   |
| 24020 | ENSG00000176624 | MEK3C    | 23163 | 7    | 0.02 | protein_coding | 18 | 48702020  | 48744874  | mex-3 RNA binding family member C                                                                |
| 24081 | ENSG00000186290 | CLL48    | 23207 | 6    | 0.02 | protein_coding | 4  | 11964666  | 11970946  | collin 48                                                                                        |
| 24125 | ENSG00000100810 | RBMY2    | 23416 | 0.02 | 0.02 | protein_coding | 8  | 14558113  | 14571814  | RNA binding motif protein 27                                                                     |
| 24335 | ENSG00000146984 | PARN     | 23426 | 2    | 0.02 | protein_coding | 16 | 14259556  | 14276985  | poly(ADP-ribose) polymerase                                                                      |
| 24384 | ENSG00000197593 | PRMT3    | 23452 | 1    | 0.02 | protein_coding | 13 | 113760105 | 113774995 | coagulation factor VII (serpin proteinase conversion accelerator)                                |
| 24443 | ENSG00000185238 | PCP2     | 23519 | 0.02 | 0.02 | protein_coding | 16 | 20426016  |           |                                                                                                  |

|       |                  |          |       |      |                |    |           |           |                                                                                                  |
|-------|------------------|----------|-------|------|----------------|----|-----------|-----------|--------------------------------------------------------------------------------------------------|
| 26248 | ENS000000091073  | MTX2     | 25002 | 0.02 | protein_coding | 7  | 76090093  | 76135312  | deltek homolog 2 (Drosophila)                                                                    |
| 26258 | ENS0000004514    | DIRX     | 25003 | 0.02 | protein_coding | 1  | 20552003  | 20552003  | major facilitator superfamily domain containing 4                                                |
| 26261 | ENS000000163128  | ANKRD23  | 25010 | 0.02 | protein_coding | 2  | 97490203  | 97523671  | ankyrin repeat domain 23                                                                         |
| 26263 | ENS000000183760  | PAPL     | 25033 | 0.02 | protein_coding | 19 | 39574553  | 39602133  | iron/zinc purple acid phosphatase-like protein                                                   |
| 26261 | ENS00000046209   | COG7     | 25050 | 0.02 | protein_coding | 18 | 41816094  | 41830788  | coiled-coil domain containing 19                                                                 |
| 26301 | ENS000000224715  | YWA3A    | 25053 | 0.02 | protein_coding | 9  | 22018959  | 22018959  | chromosome 18 open reading frame 52                                                              |
| 26314 | ENS000000242732  | RGA4     | 25072 | 0.02 | protein_coding | X  | 71346958  | 71351758  | retrotransposon gag domain containing 4                                                          |
| 26326 | ENS000000075240  | GRAM4    | 25082 | 0.02 | protein_coding | 22 | 46971949  | 47075688  | GRAM domain containing 4                                                                         |
| 26428 | ENS000000073984  | SMARCE1  | 25162 | 0.02 | protein_coding | 17 | 38787124  | 38847840  | SWI/SNF related, matrix associated, acid dependent regulator of chromatin, subfamily e, member 1 |
| 26468 | ENS000000005471  | ABCA4    | 25168 | 0.02 | protein_coding | 1  | 61070103  | 61070103  | ATP-binding cassette, sub-family B (MDR/ATP), member 4                                           |
| 26470 | ENS000000145283  | SLC22A5  | 25168 | 0.02 | protein_coding | 1  | 90981698  | 91499397  | solute carrier family 22 (solute carrier/folate transporter), member 5                           |
| 26475 | ENS000000126881  | OMG      | 25216 | 0.02 | protein_coding | 17 | 29590351  | 29624557  | oligodendrocyte myelin glycoprotein                                                              |
| 26494 | ENS000000196186  | HRC17    | 25230 | 0.02 | protein_coding | 9  | 35949189  | 35949189  | haloalkane carboxyl terminal 1                                                                   |
| 26511 | ENS000000189956  | CGB      | 25248 | 0.02 | protein_coding | 19 | 49548668  | 49548668  | chorionic gonadotropin, beta polypeptide 5                                                       |
| 26535 | ENS000000031081  | ARHGAP31 | 25287 | 0.02 | protein_coding | 3  | 119013220 | 119139681 | Rho GTPase activating protein 31                                                                 |
| 26540 | ENS000000110046  | AT2GA    | 25271 | 0.02 | protein_coding | 11 | 64462007  | 64484722  | autophagy related 2A                                                                             |
| 26560 | ENS000000021981  | ARSOB    | 25291 | 0.02 | protein_coding | 15 | 74853516  | 74894704  | AT rich interactive domain 5B (BRIGHT-like)                                                      |
| 26566 | ENS000000123908  | AGO2     | 25294 | 0.02 | protein_coding | 8  | 141541264 | 141645718 | argonaute RISC catalytic component 2                                                             |
| 26599 | ENS0000000287395 | USP39    | 25320 | 0.02 | protein_coding | 19 | 4526439   | 45400709  | ubiquitin-protein ligase E3 complex 3, mu 3 subunit                                              |
| 26608 | ENS000000020753  | AP3M2    | 25320 | 0.02 | protein_coding | 8  | 42070664  | 42092191  | adaptor related protein complex 4, mu 2 subunit                                                  |
| 26656 | ENS000000142273  | CBL      | 25365 | 0.02 | protein_coding | 19 | 45281126  | 45303891  | Cbl proto-oncogene, C, E3 ubiquitin protein ligase                                               |
| 26699 | ENS000000137251  | TINAG    | 25374 | 0.02 | protein_coding | 6  | 54172657  | 54254560  | subunit/terminal nephritis antigen                                                               |
| 26695 | ENS000000025434  | NBSH3    | 25380 | 0.02 | protein_coding | 11 | 47269951  | 47290394  | nuclear receptor subfamily 1, group 1, member 3                                                  |
| 26719 | ENS000000068570  | FOXJ2    | 25418 | 0.02 | protein_coding | 12 | 8185299   | 8208989   | forkhead box J2                                                                                  |
| 26728 | ENS000000135805  | TEC      | 25424 | 0.02 | protein_coding | 4  | 48137800  | 48271881  | tec protein tyrosine kinase                                                                      |
| 26744 | ENS000000011329  | DMR1     | 25437 | 0.02 | protein_coding | 14 | 24729904  | 24780906  | dehydrogenase/transferase (SDS family) member 1                                                  |
| 26762 | ENS000000124938  | SCSB2A1  | 25455 | 0.02 | protein_coding | 11 | 61978140  | 61981408  | secretoglycin, family 2A, member 1                                                               |
| 26794 | ENS000000011295  | TTG18    | 25483 | 0.02 | protein_coding | 17 | 19902894  | 19948329  | tetrahydrofolate repeat domain 19                                                                |
| 26798 | ENS000000020003  | COG13    | 25483 | 0.02 | protein_coding | 3  | 97658162  | 97658162  | beta-oxoacyl-CoA synthetase domain containing 3                                                  |
| 26855 | ENS000000022036  | POTEG    | 25509 | 0.02 | protein_coding | 14 | 19553365  | 19590078  | POTE ankyrin family, member G                                                                    |
| 26856 | ENS000000124564  | SLC17A3  | 25531 | 0.02 | protein_coding | 6  | 25813294  | 25828214  | solute carrier family 17 (organic anion transporter), member 3                                   |
| 26858 | ENS000000021763  | COLEC10  | 25531 | 0.02 | protein_coding | 11 | 15022665  | 15022665  | membrane-type 10 C-type lectin                                                                   |
| 26918 | ENS000000040433  | PMS1     | 25581 | 0.02 | protein_coding | 2  | 190649107 | 190742355 | PMS1 postmeiotic segregation increased 1 (S. cerevisiae)                                         |
| 26921 | ENS000000027523  | HSD17B3  | 25581 | 0.02 | protein_coding | 12 | 44631788  | 44631788  | hydroxysteroid oxidase (SDS family) domain containing 2                                          |
| 26932 | ENS000000154081  | TEX24    | 25591 | 0.02 | protein_coding | 3  | 51696790  | 51738339  | testis expressed 204                                                                             |
| 26934 | ENS000000158871  | LYPD5    | 25592 | 0.02 | protein_coding | 19 | 44300081  | 44331358  | LYPD5/PLAUR domain containing 5                                                                  |
| 26950 | ENS000000056311  | POU2F1   | 25607 | 0.02 | protein_coding | 19 | 7240078   | 7240078   | POU2F1 homeobox transcription factor                                                             |
| 26954 | ENS000000153937  | SCRT2    | 25611 | 0.02 | protein_coding | 20 | 662420    | 668623    | scorpion zinc finger 2                                                                           |
| 26967 | ENS000000145885  | LHP2L2   | 25627 | 0.02 | protein_coding | 5  | 77781038  | 78655444  | topoisomerase II alpha partner-like 2                                                            |
| 26985 | ENS000000020963  | SMR2     | 25635 | 0.02 | protein_coding | 16 | 47394153  | 47394153  | SMR2 family, member 3                                                                            |
| 26989 | ENS000000147117  | ZNF157   | 25653 | 0.02 | protein_coding | X  | 47229882  | 47273704  | zinc finger protein 157                                                                          |
| 27038 | ENS000000186047  | DLEU7    | 25695 | 0.02 | protein_coding | 13 | 51281544  | 51418075  | deleted in lymphocytic leukemias, 7                                                              |
| 27122 | ENS000000009392  | LUC7C    | 25712 | 0.02 | protein_coding | 16 | 3082966   | 279460    | LUC7-like (S. cerevisiae)                                                                        |
| 27138 | ENS000000101203  | AVP      | 25712 | 0.02 | protein_coding | 16 | 3082966   | 3082966   | arginine vasopressin                                                                             |
| 27141 | ENS000000011461  | NIPAL3   | 25789 | 0.02 | protein_coding | 1  | 24742284  | 24799466  | NPA-like domain containing 3                                                                     |
| 27171 | ENS000000196526  | TMS62B   | 25819 | 0.02 | protein_coding | 20 | 2795614   | 2800930   | transmembrane protein 239                                                                        |
| 27206 | ENS000000151246  | GPCR5    | 25830 | 0.02 | protein_coding | 5  | 47633000  | 47689157  | G protein-coupled receptor 115                                                                   |
| 27211 | ENS000000132300  | PTCD3    | 25850 | 0.02 | protein_coding | 2  | 86333306  | 86369280  | pentatricopeptide repeat domain 3                                                                |
| 27217 | ENS000000188307  | PM2A1    | 25852 | 0.02 | protein_coding | A  | 15224766  | 15226927  | paraneoplastic Mi antigen 3                                                                      |
| 27222 | ENS000000146007  | ADAM9    | 25852 | 0.02 | protein_coding | 10 | 76980715  | 77101132  | ADAM metalloproteinase domain 20                                                                 |
| 27247 | ENS000000126752  | SRX1     | 25875 | 0.02 | protein_coding | X  | 48114752  | 48128679  | synovial sarcoma, X breakpoint 1                                                                 |
| 27276 | ENS000000100106  | TRSD1    | 25895 | 0.02 | protein_coding | 12 | 38090311  | 38172963  | TRSD and I-podin binding protein                                                                 |
| 27328 | ENS000000185296  | SPR3     | 25926 | 0.02 | protein_coding | 4  | 43922286  | 43924438  | signal peptide peptidase like 20                                                                 |
| 27334 | ENS000000189979  | LRR52    | 25948 | 0.02 | protein_coding | 15 | 42834729  | 42841000  | leucine rich repeat containing 57                                                                |
| 27335 | ENS000000178473  | UCN3     | 25947 | 0.02 | protein_coding | 10 | 5406972   | 5418189   | urocortin 3                                                                                      |
| 27344 | ENS000000181948  | CD2AP2   | 25947 | 0.02 | protein_coding | 4  | 41924551  | 41948927  | CD300 molecule-like family member G                                                              |
| 27431 | ENS000000128197  | RPAIN    | 26020 | 0.02 | protein_coding | 17 | 532386    | 5338186   | RPA interacting protein                                                                          |
| 27503 | ENS000000182961  | NLRP10   | 26085 | 0.02 | protein_coding | 11 | 788997    | 788997    | NLR family, pyrin domain containing 10                                                           |
| 27507 | ENS000000151726  | FANCB    | 26085 | 0.02 | protein_coding | 17 | 10263948  | 10263948  | family with sequence similarity 173, member B                                                    |
| 27524 | ENS000000183267  | DOA1B    | 26100 | 0.02 | protein_coding | 4  | 1782278   | 1782381   | DOB1 and CUL4 associated factor 16                                                               |
| 27542 | ENS000000141540  | TYH2     | 26112 | 0.02 | protein_coding | 17 | 7220955   | 7228155   | wee1 family member 2                                                                             |
| 27541 | ENS000000180811  | CTH11    | 26112 | 0.02 | protein_coding | 20 | 24291162  | 24291178  | CCDC15 family member 11                                                                          |
| 27562 | ENS000000163590  | PPM1L    | 26126 | 0.02 | protein_coding | 3  | 16047330  | 16079695  | protein phosphatase, Mg <sup>2+</sup> /Mn <sup>2+</sup> dependent, 1L                            |
| 27564 | ENS000000197124  | PHF2     | 26126 | 0.02 | protein_coding | 9  | 96338699  | 96441869  | PHD finger protein 2                                                                             |
| 27603 | ENS000000150711  | CALR     | 26135 | 0.02 | protein_coding | 10 | 1686313   | 17171038  | cabin (retroviral factor)-calretinin receptor                                                    |
| 27632 | ENS000000179331  | RAB39A   | 26187 | 0.02 | protein_coding | 11 | 10779629  | 10783420  | RAB39 family, member RAS oncogene family                                                         |
| 27663 | ENS000000154262  | ABCA6    | 26216 | 0.02 | protein_coding | 17 | 67074843  | 67138029  | ATP-binding cassette, sub-family A (ABC1), member 6                                              |
| 27676 | ENS000000154564  | GPCR4    | 26216 | 0.02 | protein_coding | 16 | 4665191   | 4665191   | ADAM metalloproteinase domain 20                                                                 |
| 27697 | ENS000000187195  | GOLGA6C  | 26250 | 0.02 | protein_coding | 15 | 7556040   | 7556040   | golgin A6 family, member C                                                                       |
| 27698 | ENS000000094464  | PDE8C    | 26252 | 0.02 | protein_coding | 10 | 65372345  | 65426787  | phosphodiesterase 8C, cGMP-specific, cone, alpha prime                                           |
| 27766 | ENS000000185453  | PNRC1    | 26252 | 0.02 | protein_coding | 4  | 1802248   | 1802248   | poly(hydroxyacetyl)transferase (PANA) like domain containing 1                                   |
| 27770 | ENS000000129204  | USP5     | 26255 | 0.02 | protein_coding | 10 | 5019733   | 5019733   | ubiquitin-specific peptidase 5 (Trp-2 oncogene)                                                  |
| 27772 | ENS000000029397  | DDO      | 26318 | 0.02 | protein_coding | 6  | 110712974 | 110739785 | D-aspinate oxidase                                                                               |
| 27783 | ENS000000150433  | LUX1     | 26318 | 0.02 | protein_coding | 12 | 8642381   | 8642381   | HMG homolog (chicken)                                                                            |
| 27796 | ENS000000148950  | IMP1L    | 26322 | 0.02 | protein_coding | 11 | 31453843  | 31531192  | IMP1 inner mitochondrial membrane peptidase-like (S. cerevisiae)                                 |
| 27803 | ENS000000193838  | RPL1     | 26322 | 0.02 | protein_coding | 8  | 10463859  | 10508697  | ribonucleic protein L1-1                                                                         |
| 27819 | ENS000000150458  | KRT7B    | 26323 | 0.02 | protein_coding | 13 | 5281123   | 5281123   | keratin 7B                                                                                       |
| 27833 | ENS000000166268  | MYO10    | 26333 | 0.02 | protein_coding | 12 | 70219084  | 70250277  | myosin regulatory factor-like                                                                    |
| 27840 | ENS000000029186  | FAPB9    | 26338 | 0.02 | protein_coding | 8  | 82370576  | 82373414  | fatty acid binding protein 9, testis                                                             |
| 27845 | ENS00000011568   | CTD11    | 26338 | 0.02 | protein_coding | 12 | 8111102   | 8111102   | CTD11 protein 5                                                                                  |
| 27855 | ENS000000185807  | PPP1R36  | 26374 | 0.02 | protein_coding | 14 | 65016020  | 65059058  | protein phosphatase 1, regulatory subunit 36                                                     |
| 27872 | ENS000000058091  | CDK14    | 26388 | 0.02 | protein_coding | 7  | 90057378  | 90039005  | cyclin-dependent kinase 14                                                                       |
| 27927 | ENS000000075651  | RPLD     | 26446 | 0.02 | protein_coding | 3  | 171318165 | 171520149 | phosphodiesterase D1, phosphatidylcholine-specific                                               |
| 27938 | ENS000000179023  | AMEC3    | 26450 | 0.02 | protein_coding | 3  | 4971548   | 4971548   | adhesion molecule with Ig-like domain 3                                                          |
| 27966 | ENS000000110756  | HPS5     | 26481 | 0.02 | protein_coding | 11 | 18300223  | 18343745  | Hermansky-Pudlak syndrome 5                                                                      |
| 27987 | ENS000000046539  | ZNF207   | 26486 | 0.02 | protein_coding | 18 | 3472525   | 3472525   | zinc finger protein 207                                                                          |
| 27997 | ENS000000197963  | ANKRD22  | 26500 | 0.02 | protein_coding | 16 | 15445104  | 15479512  | ankyrin domain containing-like 2                                                                 |
| 28003 | ENS000000113448  | PDE4E    | 26525 | 0.02 | protein_coding | 5  | 56264866  | 56917947  | phosphodiesterase 4E, cAMP-specific                                                              |
| 28004 | ENS000000185989  | WNT2     | 26554 | 0.02 | protein_coding | 12 | 116916665 | 116963343 | wntless-type WNT11 integration site family member 2                                              |
| 28005 | ENS000000185952  | SLC24A3  | 26555 | 0.02 | protein_coding | 20 | 19193299  | 19193299  | solute carrier family 24 (sodium/calcium exchanger), member 3                                    |
| 28062 | ENS000000181852  | IZUM2    | 26588 | 0.02 | protein_coding | 9  | 55965805  | 55966842  | IZUMO family member 2                                                                            |
| 28075 | ENS000000185622  | UCMA     | 26588 | 0.02 | protein_coding | 10 | 1326578   | 13276334  | upper zone of growth plate and cartilage matrix associated                                       |
| 28086 | ENS000000150314  | TRAF3    | 26592 | 0.02 | protein_coding | 10 | 84434959  | 84434959  | apoptosis regulatory protein domain containing 3                                                 |
| 28091 | ENS000000184068  | RNF123   | 26600 | 0.02 | protein_coding | 3  | 49726932  | 49758962  | ring finger protein 123                                                                          |
| 28108 | ENS000000188907  | PLAZGF8  | 26612 | 0.02 | protein_coding | 15 | 42433332  | 42448839  | phosphatidase A2, group VII                                                                      |
| 28116 | ENS000000149490  | TRAF1    | 26612 | 0.02 |                |    |           |           |                                                                                                  |

|       |                  |           |       |      |                |                |           |           |                                                                                                                                              |                                                                  |
|-------|------------------|-----------|-------|------|----------------|----------------|-----------|-----------|----------------------------------------------------------------------------------------------------------------------------------------------|------------------------------------------------------------------|
| 28860 | ENSG000000097056 | NLK       | 27326 | 9    | 0.02           | protein_coding | 17        | 26368763  | 26523407                                                                                                                                     | non-muscle kinase                                                |
| 28870 | ENSG0000012144   | SLC7C     | 27331 | 4    | 0.02           | protein_coding | 8         | 5298737   | 5298737                                                                                                                                      | inhibitor cell (MMP-13) kinase                                   |
| 28871 | ENSG00000186335  | SLC36A2   | 27337 | 5    | 0.02           | protein_coding | 5         | 15009439  | 15027151                                                                                                                                     | solute carrier family 36 (proton/amine acid symporter), member 2 |
| 28874 | ENSG00000120500  | ARR3      | 27339 | 0.02 | protein_coding | 8              | 69481155  | 69501690  | arradin 3, retinal (X-arrestin)                                                                                                              |                                                                  |
| 28877 | ENSG00000185072  | ZBTB16    | 27358 | 0.02 | protein_coding | 2              | 18762562  | 18771935  | zinc finger, SWIM-type containing 2                                                                                                          |                                                                  |
| 28878 | ENSG00000127183  | PRMT4     | 27361 | 3    | 0.02           | protein_coding | 6         | 94148464  | 94254427                                                                                                                                     | protein rich membrane anchor 1                                   |
| 28879 | ENSG00000184206  | ZNF145    | 27362 | 9    | 0.02           | protein_coding | 15        | 84954525  | 84914120                                                                                                                                     | galpin AB family-like 4                                          |
| 28882 | ENSG00000180184  | GAT5      | 27362 | 0.02 | protein_coding | 16             | 5068131   | 50691159  | SEC14-like 5 (S. cerevisiae)                                                                                                                 |                                                                  |
| 28883 | ENSG00000242950  | ERVWU-1   | 27368 | 0.02 | protein_coding | 7              | 92097684  | 92107900  | endogenous retrovirus group W, member 1                                                                                                      |                                                                  |
| 28884 | ENSG00000185251  | PRK18     | 27368 | 3    | 0.02           | protein_coding | 11        | 5322424   | 5323226                                                                                                                                      | olfactory receptor, family 51, subfamily B, member 4             |
| 28885 | ENSG00000184520  | FBLN7     | 27368 | 0.02 | protein_coding | 12             | 11288682  | 11294891  | KLIA0907                                                                                                                                     |                                                                  |
| 28886 | ENSG00000132880  | KIAA0907  | 27417 | 0.02 | protein_coding | 1              | 15588284  | 15590491  | KIAA0907                                                                                                                                     |                                                                  |
| 28907 | ENSG00000124199  | MATN4     | 27457 | 0.02 | protein_coding | 20             | 43922085  | 43937169  | matrin 4                                                                                                                                     |                                                                  |
| 28917 | ENSG0000013256   | POEAB     | 27458 | 0.02 | protein_coding | 4              | 8193373   | 8194273   | phosphodiesterase 8B, cGMP-specific, rod, beta                                                                                               |                                                                  |
| 29047 | ENSG00000177554  | ZDHHC13   | 27496 | 0.02 | protein_coding | 11             | 19138646  | 19197969  | zinc finger, DHHC-type containing 13                                                                                                         |                                                                  |
| 29057 | ENSG00000126211  | INS4      | 27505 | 0.02 | protein_coding | 9              | 5231418   | 5233504   | insulin-like 4 (placenta)                                                                                                                    |                                                                  |
| 29104 | ENSG00000204998  | BCAT1A    | 27546 | 0.02 | protein_coding | 19             | 41848255  | 41930910  | branched chain keto acid dehydrogenase E1, alpha polypeptide                                                                                 |                                                                  |
| 29114 | ENSG00000155028  | RSPH10B   | 27551 | 0.02 | protein_coding | 7              | 5965119   | 6103114   | radial spoke head 10 homolog B (Chlamydomonas)                                                                                               |                                                                  |
| 29127 | ENSG00000186844  | ARHGAP15  | 27562 | 0.02 | protein_coding | 17             | 8213559   | 8223829   | Rho guanine nucleotide exchange factor (GEF) 15                                                                                              |                                                                  |
| 29128 | ENSG00000205555  | ICRNL1    | 27562 | 0.02 | protein_coding | 12             | 52226913  | 52226912  | ICRNL1 domain containing                                                                                                                     |                                                                  |
| 29142 | ENSG00000179023  | KLHDC7A   | 27581 | 0.02 | protein_coding | 18             | 18807424  | 18812748  | kelch domain containing 7A                                                                                                                   |                                                                  |
| 29160 | ENSG00000197168  | NEK5      | 27601 | 3    | 0.02           | protein_coding | 13        | 52611953  | 52702314                                                                                                                                     | NIMA-related kinase 5                                            |
| 29164 | ENSG00000180189  | SLC37A1   | 27603 | 0.02 | protein_coding | 21             | 42931818  | 44001550  | solute carrier family 37 (glucose-6-phosphate transporter), member 1                                                                         |                                                                  |
| 29185 | ENSG00000158077  | NLRP14    | 27613 | 0.02 | protein_coding | 11             | 7041677   | 7052939   | NLR family, pyrin domain containing 14                                                                                                       |                                                                  |
| 29188 | ENSG00000170788  | VDYCD1    | 27624 | 0.02 | protein_coding | 10             | 8205881   | 8211851   | VDYCD1 domain containing 1                                                                                                                   |                                                                  |
| 29210 | ENSG00000202703  | PRKRC     | 27651 | 1    | 0.02           | protein_coding | 3         | 13807044  | 13807334                                                                                                                                     | protein rich 23C                                                 |
| 29262 | ENSG00000198785  | SYCP1     | 27683 | 0.02 | protein_coding | 1              | 115387424 | 115378911 | synaptonemal complex protein 1                                                                                                               |                                                                  |
| 29282 | ENSG00000189917  | RAPSN     | 27707 | 0.02 | protein_coding | 11             | 47459308  | 47470730  | receptor-associated protein of the synapse                                                                                                   |                                                                  |
| 29286 | ENSG00000184262  | SLC12A2   | 27716 | 0.02 | protein_coding | 11             | 160052893 | 160052893 | solute carrier family 12 (sodium/calcium transporter), member 2                                                                              |                                                                  |
| 29300 | ENSG00000158793  | MIT1      | 27754 | 0.02 | protein_coding | 1              | 161087876 | 161095235 | mitosis 1                                                                                                                                    |                                                                  |
| 29327 | ENSG00000142001  | TMEM81    | 27759 | 0.02 | protein_coding | 1              | 5544685   | 5547868   | transmembrane protein 61                                                                                                                     |                                                                  |
| 29334 | ENSG00000184828  | SH3BP2    | 27762 | 0.02 | protein_coding | 18             | 4553124   | 4554128   | zinc finger and BTB domain containing 7C                                                                                                     |                                                                  |
| 29343 | ENSG00000197902  | SHISA7    | 27773 | 0.02 | protein_coding | 19             | 5594107   | 5594230   | shisa family member 7                                                                                                                        |                                                                  |
| 29373 | ENSG00000205572  | SERF1A    | 27804 | 0.02 | protein_coding | 5              | 69321074  | 69338940  | small ERDRK-rich factor 1B (centrosome)                                                                                                      |                                                                  |
| 29378 | ENSG00000184262  | SLC12A2   | 27816 | 0.02 | protein_coding | 12             | 7230103   | 7230103   | poly(A) binding protein, cytoplasmic 1A, alpha 2A                                                                                            |                                                                  |
| 29381 | ENSG00000197599  | CCDC154   | 27815 | 0.02 | protein_coding | 5              | 1484384   | 1484557   | coiled-coil domain containing 154                                                                                                            |                                                                  |
| 29385 | ENSG00000184287  | CDCC20B   | 27821 | 0.02 | protein_coding | 5              | 5446799   | 5448905   | cell division cycle 20B                                                                                                                      |                                                                  |
| 29386 | ENSG00000185077  | RFX       | 27821 | 0.02 | protein_coding | 18             | 4098173   | 4098173   | protein 18                                                                                                                                   |                                                                  |
| 29395 | ENSG00000123307  | NEUROD4   | 27828 | 0.02 | protein_coding | 12             | 55413729  | 5542378   | neuronal differentiation 4                                                                                                                   |                                                                  |
| 29397 | ENSG00000174788  | PCP2      | 27828 | 0.02 | protein_coding | 19             | 7699487   | 7699834   | Purkinje cell protein 2                                                                                                                      |                                                                  |
| 29424 | ENSG00000185077  | PCP2      | 27828 | 0.02 | protein_coding | 21             | 4774825   | 4774825   | protein 21                                                                                                                                   |                                                                  |
| 29428 | ENSG00000204248  | COL11A2   | 27854 | 0.02 | protein_coding | 6              | 3310458   | 3310276   | collagen, type XI, alpha 2                                                                                                                   |                                                                  |
| 29431 | ENSG00000128285  | MCHR1     | 27857 | 0.02 | protein_coding | 22             | 41074754  | 41078818  | melanin-concentrating hormone receptor 1                                                                                                     |                                                                  |
| 29440 | ENSG00000185077  | FSGP1     | 27864 | 0.02 | protein_coding | 2              | 12000208  | 12041967  | Primary cilia dyskinesia protein 1                                                                                                           |                                                                  |
| 29502 | ENSG00000205811  | TMEM25    | 27868 | 0.02 | protein_coding | 6              | 95389052  | 95389180  | transmembrane protein 25                                                                                                                     |                                                                  |
| 29515 | ENSG00000148338  | ZNF78D1   | 27872 | 0.02 | protein_coding | 3              | 50378841  | 50384283  | zinc finger, MYND-type containing 10                                                                                                         |                                                                  |
| 29516 | ENSG00000116020  | ANAPC15   | 27872 | 0.02 | protein_coding | 11             | 71817424  | 71823428  | anaphase promoting complex subunit 15                                                                                                        |                                                                  |
| 29544 | ENSG00000184668  | TMEM10    | 27875 | 0.02 | protein_coding | 11             | 70709648  | 70717919  | transmembrane growth factor 16                                                                                                               |                                                                  |
| 29547 | ENSG00000064270  | ATPC22    | 27878 | 0.02 | protein_coding | 18             | 84421133  | 8449793   | ATPase, Ca++ transporting, type 2C, member 2                                                                                                 |                                                                  |
| 29610 | ENSG00000186123  | RPR2C2    | 28014 | 0.02 | protein_coding | 11             | 15033567  | 15033567  | regulation of nucleic acid-protein domain containing 2                                                                                       |                                                                  |
| 29618 | ENSG00000186191  | FKBP3     | 28015 | 0.02 | protein_coding | 21             | 44071749  | 44119619  | phosphodiesterase 3A                                                                                                                         |                                                                  |
| 29674 | ENSG00000186177  | ZNF479    | 28084 | 0.02 | protein_coding | 7              | 57187321  | 57207211  | zinc finger protein 479                                                                                                                      |                                                                  |
| 29701 | ENSG00000193355  | TMEM33    | 28094 | 0.02 | protein_coding | 15             | 74890841  | 74903057  | CDCC-like kinase 3                                                                                                                           |                                                                  |
| 29706 | ENSG00000221870  | TMEM257   | 28097 | 0.02 | protein_coding | 16             | 144981958 | 144981958 | transmembrane protein 257                                                                                                                    |                                                                  |
| 29714 | ENSG00000150275  | PCDH15    | 28100 | 0.02 | protein_coding | 10             | 55625321  | 55787102  | protodermalin-related 15                                                                                                                     |                                                                  |
| 29717 | ENSG000000991831 | ESR1      | 28101 | 0.02 | protein_coding | 6              | 151971806 | 15240734  | estrogen receptor 1                                                                                                                          |                                                                  |
| 29724 | ENSG00000111827  | ZNF400    | 28102 | 0.02 | protein_coding | 19             | 37651827  | 37618297  | zinc finger protein 570                                                                                                                      |                                                                  |
| 29747 | ENSG00000132275  | RPR8      | 28130 | 0.02 | protein_coding | 11             | 6618305   | 6624890   | ribosomal RNA processing 8, methyltransferase, homolog (yeast)                                                                               |                                                                  |
| 29756 | ENSG00000171947  | FAM89A1   | 28135 | 0.02 | protein_coding | 12             | 8373886   | 8380214   | family with sequence similarity 90, member A1                                                                                                |                                                                  |
| 29768 | ENSG00000131478  | ZNF177    | 28137 | 0.02 | protein_coding | 12             | 4162707   | 4162707   | leucine-rich repeat domain 28                                                                                                                |                                                                  |
| 29786 | ENSG00000188629  | ZNF177    | 28168 | 0.02 | protein_coding | 19             | 9432611   | 9432323   | zinc finger protein 177                                                                                                                      |                                                                  |
| 29795 | ENSG00000189900  | TFPI3     | 28175 | 0.02 | protein_coding | 1              | 3569894   | 3625765   | tumor protein p73                                                                                                                            |                                                                  |
| 29800 | ENSG00000186920  | POU4F1A   | 28176 | 0.02 | protein_coding | 21             | 17841893  | 17841893  | transcription factor 11A                                                                                                                     |                                                                  |
| 29805 | ENSG00000186338  | FBOX24    | 28182 | 0.02 | protein_coding | 7              | 10018160  | 10019840  | F-box protein 24                                                                                                                             |                                                                  |
| 29809 | ENSG00000205556  | OPRK1     | 28187 | 0.02 | protein_coding | 8              | 54136254  | 54154257  | opsin receptor, kappa 1                                                                                                                      |                                                                  |
| 29824 | ENSG00000190911  | TMEM17    | 28187 | 0.02 | protein_coding | 12             | 22890441  | 22890441  | transmembrane protein containing 17                                                                                                          |                                                                  |
| 29827 | ENSG00000164718  | LMTK2     | 28209 | 0.02 | protein_coding | 7              | 97736197  | 97839845  | lemur tyrosine kinase 2                                                                                                                      |                                                                  |
| 29842 | ENSG00000184625  | LON2      | 28224 | 0.02 | protein_coding | 9              | 139844003 | 139849499 | lipocalin 12                                                                                                                                 |                                                                  |
| 29877 | ENSG00000182963  | ZNF133    | 28237 | 0.02 | protein_coding | 12             | 14982268  | 14982268  | chromosome 12 open reading frame 60                                                                                                          |                                                                  |
| 29881 | ENSG00000281408  | TENT-CDK3 | 28260 | 0.02 | protein_coding | 17             | 73975312  | 74002080  | TENT-CDK3 readthrough (NMD candidate)                                                                                                        |                                                                  |
| 29882 | ENSG00000125965  | GDF5      | 28261 | 0.02 | protein_coding | 20             | 34021145  | 34042968  | growth differentiation 5                                                                                                                     |                                                                  |
| 29888 | ENSG00000185077  | LINC011   | 28262 | 0.02 | protein_coding | 1              | 15688038  | 15688038  | leucine-rich repeat domain containing 21                                                                                                     |                                                                  |
| 29904 | ENSG00000138111  | TMEM180   | 28277 | 0.02 | protein_coding | 10             | 104221449 | 104238002 | transmembrane protein 180                                                                                                                    |                                                                  |
| 29908 | ENSG00000181359  | KBTBD3    | 28281 | 0.02 | protein_coding | 11             | 10591825  | 10598498  | kelch repeat and BTB (POZ) domain containing 3                                                                                               |                                                                  |
| 29910 | ENSG00000171558  | LRWD1     | 28282 | 0.02 | protein_coding | 11             | 1843128   | 1843128   | immunoglobulin superfamily, member 25                                                                                                        |                                                                  |
| 29917 | ENSG00000092884  | SEMA5B    | 28286 | 0.02 | protein_coding | 3              | 12228041  | 12274142  | sema domain, seven thrombospondin repeats (type 1 and type 1-like), transmembrane domain (TM) and short cytoplasmic domain, (sema)homolog 5B |                                                                  |
| 29920 | ENSG00000138378  | RNF43     | 28300 | 0.02 | protein_coding | 3              | 56428681  | 56428681  | ring finger protein 43                                                                                                                       |                                                                  |
| 29930 | ENSG00000207296  | DOC2B     | 28300 | 0.02 | protein_coding | 17             | 5810      | 31427     | double C2-like domains, beta                                                                                                                 |                                                                  |
| 29930 | ENSG00000191952  | TMEM132D  | 28314 | 0.02 | protein_coding | 12             | 129596270 | 130328112 | transmembrane protein 132D                                                                                                                   |                                                                  |
| 29943 | ENSG00000185987  | TRAF3R    | 28317 | 0.02 | protein_coding | 13             | 1222141   | 1222141   | prolactin-inducible N-terminus receptor                                                                                                      |                                                                  |
| 29959 | ENSG00000103130  | GPR       | 28317 | 0.02 | protein_coding | 19             | 4611502   | 46116082  | gastric inhibitory polypeptide receptor                                                                                                      |                                                                  |
| 29970 | ENSG00000101282  | RSPD4     | 28333 | 0.02 | protein_coding | 20             | 839095    | 839207    | R-spondin 4                                                                                                                                  |                                                                  |
| 29974 | ENSG00000064338  | SLC44A8   | 28341 | 0.02 | protein_coding | 12             | 51761017  | 51802080  | solute carrier family 4, sodium bicarbonate cotransporter, member 8                                                                          |                                                                  |
| 29983 | ENSG00000185143  | HES1      | 28347 | 0.02 | protein_coding | 8              | 22851246  | 22851246  | hepatocyte nuclear factor 3, H3                                                                                                              |                                                                  |
| 29994 | ENSG00000104848  | KCNAT     | 28367 | 0.02 | protein_coding | 19             | 4957075   | 49576198  | potassium voltage-gated channel, shaker-related subfamily, member 7                                                                          |                                                                  |
| 30005 | ENSG00000181031  | RPL3AL    | 28362 | 0.02 | protein_coding | 17             | 6229      | 248045    | ribosomal protein L3A (without C2 domain)                                                                                                    |                                                                  |
| 30026 | ENSG00000186803  | SHISA6    | 28368 | 0.02 | protein_coding | 18             | 11144890  | 111467380 | shisa family member 6                                                                                                                        |                                                                  |
| 30030 | ENSG00000248874  | TMEM10    | 28369 | 0.02 | protein_coding | 5              | 23951457  | 24173732  | chromosome 5 open reading frame 17                                                                                                           |                                                                  |
| 30052 | ENSG00000065187  | ACPL30    | 28422 | 0.02 | protein_coding | 16             | 5841596   | 5849893   | acyl-CoA synthetase medium-chain family member 3                                                                                             |                                                                  |
| 30056 | ENSG00000185077  | SEZ5      | 28422 | 0.02 | protein_coding | 16             | 27431919  | 27431919  | secure 5-like homology (mouse)                                                                                                               |                                                                  |
| 30057 | ENSG00000185414  | MPR130    | 28426 | 0.02 | protein_coding | 2              | 99797542  | 99814089  | mitochondrial ribosomal protein L30                                                                                                          |                                                                  |
| 30064 | ENSG00000149955  | ADAD2     | 28432 | 0.02 | protein_coding | 16             | 84224744  | 84230710  | adenosine deaminase domain containing 2                                                                                                      |                                                                  |
| 30068 | ENSG00000185198  | TM6P      | 28432 | 0.02 | protein_coding | 16             | 598492    | 600126    | THAP domain containing, apoptosis associated protein 3                                                                                       |                                                                  |
| 30089 | ENSG00000204850  | ADAM10    | 28450 | 0.02 | protein_coding | 15             | 74418256  | 74416119  | HCG200477, Uncharacterized protein                                                                                                           |                                                                  |
| 30090 | ENSG0000017800   | FRBP8     | 28453 | 0.02 | protein_coding | 7              | 72742167  | 72772634  | adenosine deaminase domain containing 2                                                                                                      |                                                                  |
| 30106 | ENSG00000185156  | ATY       |       |      |                |                |           |           |                                                                                                                                              |                                                                  |





|       |                  |             |         |                                     |                                     |           |           |                                                                              |                                                                          |
|-------|------------------|-------------|---------|-------------------------------------|-------------------------------------|-----------|-----------|------------------------------------------------------------------------------|--------------------------------------------------------------------------|
| 2888  | ENSG00000252379  | 27661.5     | 0.02    | snRNA                               | 11                                  | 29249252  | 29249341  | RNA, U6 small nuclear 1002, pseudogene                                       |                                                                          |
| 2889  | ENSG00000252379  | 27661.5     | 0.02    | snRNA                               | 10                                  | 27482297  | 27482429  | RNA, U2 small nuclear 24, pseudogene                                         |                                                                          |
| 2890  | ENSG00000200399  | 27598.4     | 0.02    | snRNA                               | 3                                   | 141621766 | 141621872 | RNA, U6 small nuclear 505, pseudogene                                        |                                                                          |
| 2899  | ENSG00000238452  | 27786.9     | 0.02    | snRNA                               | 4                                   | 25104364  | 25104470  | RNA, U6 small nuclear 1208, pseudogene                                       |                                                                          |
| 2951  | ENSG00000207198  | 27843.6     | 0.02    | snRNA                               | 2                                   | 41115959  | 41116062  | RNA, U6 small nuclear 1195, pseudogene                                       |                                                                          |
| 2972  | ENSG00000207198  | 28111.5     | 0.02    | snRNA                               | 2                                   | 96281054  | 96281184  | RNA, U6 small nuclear 8, pseudogene                                          |                                                                          |
| 2980  | ENSG00000200378  | 28179.0     | 0.02    | snRNA                               | 5                                   | 138783596 | 138783703 | RNA, U6 small nuclear 4, pseudogene                                          |                                                                          |
| 2981  | ENSG00000201170  | 28278.0     | 0.02    | snRNA                               | 20                                  | 30168982  | 30168985  | RNA, U6 small nuclear 384, pseudogene                                        |                                                                          |
| 2985  | ENSG00000252444  | 28315.1     | 0.02    | snRNA                               | 4                                   | 152221670 | 152221785 | RNA, U6 small nuclear 8, pseudogene                                          |                                                                          |
| 3002  | ENSG00000209524  | 28452.7     | 0.02    | snRNA                               | 2                                   | 44119829  | 44119935  | RNA, U6 small nuclear 1048, pseudogene                                       |                                                                          |
| 3027  | ENSG00000189551  | 28525.0     | 0.02    | snRNA                               | 12                                  | 12319606  | 12319711  | RNA, U6 small nuclear 545, pseudogene                                        |                                                                          |
| 3030  | ENSG00000202133  | 28545.5     | 0.02    | snRNA                               | 2                                   | 19222664  | 19222770  | RNA, U6 small nuclear 1045, pseudogene                                       |                                                                          |
| 3039  | ENSG00000206763  | RNU6-1P     | 28646.5 | 0.02                                | snRNA                               | 7         | 92331022  | 92331128                                                                     | RNA, U6 small nuclear 10, pseudogene                                     |
| 3052  | ENSG00000221114  | 28671.7     | 0.02    | snRNA                               | 14                                  | 50151262  | 50151383  | RNA, U6 small nuclear 30, pseudogene                                         |                                                                          |
| 3121  | ENSG00000212327  | 28692.3     | 0.02    | snRNA                               | 3                                   | 9960735   | 9960707   | RNA, U6 small nuclear 850, pseudogene                                        |                                                                          |
| 3124  | ENSG00000238778  | 28489.3     | 0.02    | snRNA                               | 1                                   | 68238276  | 68238336  | RNA, U7 small nuclear 80 pseudogene                                          |                                                                          |
| 3149  | ENSG00000202156  | 28571.8     | 0.02    | snRNA                               | 6                                   | 76477776  | 76477875  | RNA, U6 small nuclear 155, pseudogene                                        |                                                                          |
| 3150  | ENSG00000202522  | 29011.7     | 0.02    | snRNA                               | 8                                   | 48891974  | 48892081  | RNA, U6 small nuclear 519, pseudogene                                        |                                                                          |
| 31613 | ENSG00000207200  | RNU6-4P     | 29111.3 | 0.02                                | snRNA                               | 11        | 63737942  | 63738048                                                                     | RNA, U6 small nuclear 45, pseudogene                                     |
| 32074 | ENSG00000200274  | 30286.8     | 0.02    | snRNA                               | 12                                  | 110055780 | 110055920 | RNA, U4 small nuclear 32, pseudogene                                         |                                                                          |
| 15163 | ENSG00000235552  | 16381       | 0.02    | transcribed_unprocessed_pseudo_gene | 18                                  | 6462143   | 6463014   | ribosomal protein L6 pseudogene 27                                           |                                                                          |
| 25572 | ENSG00000400356  | RPL23AP7    | 24444.7 | 0.02                                | transcribed_unprocessed_pseudo_gene | 2         | 114386979 | 114386887                                                                    | ribosomal protein L23a pseudogene 7                                      |
| 27949 | ENSG00000203125  | 26494.2     | 0.02    | transcribed_unprocessed_pseudo_gene | 1                                   | 92694138  | 92694992  | actin, beta pseudogene 12                                                    |                                                                          |
| 28149 | ENSG00000281685  | 26547.4     | 0.02    | transcribed_unprocessed_pseudo_gene | 15                                  | 84408536  | 84408951  | tubulin, alpha 8 pseudogene 2                                                |                                                                          |
| 28181 | ENSG00000404850  | 26683.8     | 0.02    | transcribed_unprocessed_pseudo_gene | 4                                   | 57459170  | 57461847  | glycine dehydrogenase (decarboxylase) pseudogene 1                           |                                                                          |
| 29958 | ENSG00000203719  | 28317.5     | 0.02    | transcribed_unprocessed_pseudo_gene | 12                                  | 9794398   | 9795903   | glutamic-oxaloacetic transaminase 2 pseudogene 3                             |                                                                          |
| 30157 | ENSG000002025051 | 28317.2     | 0.02    | transcribed_unprocessed_pseudo_gene | 5                                   | 179106033 | 17912122  | high mobility group box 3 pseudogene 22                                      |                                                                          |
| 31327 | ENSG00000213801  | ZNF321P     | 29545.8 | 0.02                                | transcribed_unprocessed_pseudo_gene | 19        | 53430388  | 53445564                                                                     | ZNF316-ZNF321P readthrough                                               |
| 32618 | ENSG000002023518 | CSNK1A1P1   | 30899.2 | 0.02                                | transcribed_unprocessed_pseudo_gene | 15        | 37090797  | 37110660                                                                     | casein kinase 1, alpha 1 pseudogene 1                                    |
| 22735 | ENSG00000214855  | APOC1P1     | 21238   | 0.02                                | transcribed_unprocessed_pseudo_gene | 19        | 45430081  | 45434643                                                                     | apolipoprotein C1 pseudogene 1                                           |
| 24546 | ENSG00000283142  | 24365.7     | 0.02    | transcribed_unprocessed_pseudo_gene | 17                                  | 45055847  | 45131935  | leucine rich repeat containing 37, member A17, pseudogene                    |                                                                          |
| 26570 | ENSG00000240800  | 25295.8     | 0.02    | transcribed_unprocessed_pseudo_gene | 10                                  | 37537046  | 37604729  | ATPase, aminohydrophilic protein, class I, type 8A, member 2 pseudogene 1    |                                                                          |
| 27715 | ENSG000002026074 | 26263.1     | 0.02    | transcribed_unprocessed_pseudo_gene | 3                                   | 48850849  | 48850848  | protease, serine, 44                                                         |                                                                          |
| 27952 | ENSG00000189348  | FAM90A2P    | 24666.1 | 0.02                                | transcribed_unprocessed_pseudo_gene | 19        | 53784808  | 53788200                                                                     | family with sequence similarity 90, member A27, pseudogene               |
| 28314 | ENSG00000240108  | NCO1P1      | 26809.1 | 0.02                                | transcribed_unprocessed_pseudo_gene | 20        | 26084052  | 26094664                                                                     | nuclear receptor corepressor 1 pseudogene 1                              |
| 29933 | ENSG00000202345  | 28305.3     | 0.02    | transcribed_unprocessed_pseudo_gene | 9                                   | 38564257  | 38568208  | sorting nexin 18 pseudogene 3                                                |                                                                          |
| 30564 | ENSG00000135477  | 28837.4     | 0.02    | transcribed_unprocessed_pseudo_gene | 12                                  | 52644250  | 52652651  | keratin 121 pseudogene                                                       |                                                                          |
| 30606 | ENSG00000170629  | DPY19L2P2   | 28884.8 | 0.02                                | transcribed_unprocessed_pseudo_gene | 7         | 102915580 | 102920857                                                                    | DPY19L2 pseudogene 2                                                     |
| 30672 | ENSG0000021584   | FAM202C     | 28945.6 | 0.02                                | transcribed_unprocessed_pseudo_gene | 2         | 96676299  | 96689128                                                                     | fumarylacetoacetate hydrolase domain containing 2C, pseudogene           |
| 30680 | ENSG0000021205   | ZNF62P      | 28952.6 | 0.02                                | transcribed_unprocessed_pseudo_gene | 19        | 20451078  | 20607775                                                                     | zinc finger protein 62R, pseudogene                                      |
| 31085 | ENSG00000258590  | 29315.6     | 0.02    | transcribed_unprocessed_pseudo_gene | 15                                  | 20862967  | 20893737  | neurobathin pseudogene 1                                                     |                                                                          |
| 31339 | ENSG00000186312  | CA5BP1      | 29559.4 | 0.02                                | transcribed_unprocessed_pseudo_gene | X         | 15693055  | 15721847                                                                     | carbonic anhydrase VB pseudogene 1                                       |
| 31500 | ENSG00000187984  | ANKRD19P    | 29705.2 | 0.02                                | transcribed_unprocessed_pseudo_gene | 9         | 95571670  | 95650975                                                                     | ankyrin repeat domain 19, pseudogene                                     |
| 31859 | ENSG00000241361  | 29645       | 0.02    | transcribed_unprocessed_pseudo_gene | 1                                   | 108815565 | 108819572 | SLC28A4 pseudogene 1                                                         |                                                                          |
| 32206 | ENSG00000233325  | 30395.7     | 0.02    | transcribed_unprocessed_pseudo_gene | 13                                  | 21872278  | 21880512  | mitochondrial intermediate peptidase pseudogene 3                            |                                                                          |
| 24478 | ENSG000002029035 | 23543.1     | 0.02    | unprocessed_pseudogene              | 1                                   | 153112667 | 153113185 | small protein-rich protein 2C (pseudogene)                                   |                                                                          |
| 24468 | ENSG00000182477  | 24377.8     | 0.02    | unprocessed_pseudogene              | 8                                   | 28021006  | 28021943  | olfactory receptor, family 2, subfamily B, member 8 pseudogene               |                                                                          |
| 27158 | ENSG00000204447  | 25786.5     | 0.02    | unprocessed_pseudogene              | 8                                   | 26018607  | 26018628  | histone cluster 1, H1, pseudogene 2                                          |                                                                          |
| 27617 | ENSG00000229355  | DPY19L1P1   | 26170.3 | 0.02                                | unprocessed_pseudogene              | 7         | 32620551  | 32601399                                                                     | DPY19L1 pseudogene 1                                                     |
| 27915 | ENSG000002028970 | 26434.4     | 0.02    | unprocessed_pseudogene              | 2                                   | 86253095  | 86254299  | upstream binding transcription factor, RNA polymerase II like 6 (pseudogene) |                                                                          |
| 27988 | ENSG00000203558  | 26434.4     | 0.02    | unprocessed_pseudogene              | 12                                  | 13177613  | 13177721  | ribosomal protein S8 pseudogene 30                                           |                                                                          |
| 28179 | ENSG000002033801 | 26581.3     | 0.02    | unprocessed_pseudogene              | 7                                   | 57859500  | 57869810  | nuclear receptor corepressor 3 pseudogene 3                                  |                                                                          |
| 28474 | ENSG000002034379 | 26948.8     | 0.02    | unprocessed_pseudogene              | 1                                   | 45998699  | 45998711  | high mobility group box 1 pseudogene 48                                      |                                                                          |
| 29353 | ENSG00000203979  | 28105.1     | 0.02    | unprocessed_pseudogene              | 19                                  | 46934925  | 46703580  | IGF-like family member 1 pseudogene 1                                        |                                                                          |
| 30543 | ENSG00000214926  | DDX12P      | 28523.6 | 0.02                                | unprocessed_pseudogene              | 12        | 9570309   | 9560025                                                                      | DEADH (Asp-Glu-Ala-Asp/His) box polypeptide 12, pseudogene               |
| 31603 | ENSG00000202096  | PCDH19P     | 29802.1 | 0.02                                | unprocessed_pseudogene              | 5         | 140619518 | 140621864                                                                    | protocadherin beta 19 pseudogene                                         |
| 11453 | ENSG00000211769  | 13138       | 0.02    | unprocessed_pseudogene              | 1                                   | 13138     | 13138     |                                                                              |                                                                          |
| 13040 | ENSG00000233531  | 14747.5     | 0.02    | unprocessed_pseudogene              | 1                                   | 14747.5   | 14747.5   |                                                                              |                                                                          |
| 13744 | ENSG00000184779  | RPB17       | 15283.3 | 0.02                                | unprocessed_pseudogene              | 15        | 82821158  | 82824972                                                                     | ribosomal protein S17                                                    |
| 15917 | ENSG000002025520 | 15413.6     | 0.02    | unprocessed_pseudogene              | 1                                   | 15413.6   | 15413.6   |                                                                              |                                                                          |
| 14778 | ENSG00000189556  | 15500.4     | 0.02    | unprocessed_pseudogene              | 1                                   | 15500.4   | 15500.4   |                                                                              |                                                                          |
| 14334 | ENSG00000178464  | 15723       | 0.02    | unprocessed_pseudogene              | 1                                   | 15723     | 15723     |                                                                              |                                                                          |
| 14617 | ENSG000002026971 | 16545.3     | 0.02    | unprocessed_pseudogene              | 1                                   | 16545.3   | 16545.3   |                                                                              |                                                                          |
| 5116  | ENSG00000203380  | LOC10098517 | 16538.0 | 0.02                                | unprocessed_pseudogene              | 1         | 145096220 | 145116922                                                                    | SEC22 vesicle trafficking protein homolog B (S. cerevisiae) (pseudogene) |
| 14547 | ENSG00000243984  | 16592.3     | 0.02    | unprocessed_pseudogene              | 1                                   | 16592.3   | 16592.3   |                                                                              |                                                                          |
| 15524 | ENSG00000204494  | 16648       | 0.02    | unprocessed_pseudogene              | 1                                   | 16648     | 16648     |                                                                              |                                                                          |
| 15965 | ENSG00000204925  | 16986.5     | 0.02    | unprocessed_pseudogene              | 1                                   | 16986.5   | 16986.5   |                                                                              |                                                                          |
| 15981 | ENSG00000206955  | 16988       | 0.02    | unprocessed_pseudogene              | 1                                   | 16988     | 16988     |                                                                              |                                                                          |
| 17452 | ENSG00000197262  | CCL4L1      | 18100.4 | 0.02                                | unprocessed_pseudogene              | 17        | 34839793  | 34841846                                                                     | chemokine (C-C motif) ligand 4-like 2                                    |
| 17844 | ENSG00000202529  | 18234.1     | 0.02    | unprocessed_pseudogene              | 1                                   | 18234.1   | 18234.1   |                                                                              |                                                                          |
| 17848 | ENSG000002056211 | 18237.2     | 0.02    | unprocessed_pseudogene              | 1                                   | 18237.2   | 18237.2   |                                                                              |                                                                          |
| 17699 | ENSG000002028912 | 18262.5     | 0.02    | unprocessed_pseudogene              | 1                                   | 18262.5   | 18262.5   |                                                                              |                                                                          |
| 17764 | ENSG00000207471  | 18333.2     | 0.02    | unprocessed_pseudogene              | 1                                   | 18333.2   | 18333.2   |                                                                              |                                                                          |
| 18026 | ENSG000002039006 | 18520.8     | 0.02    | unprocessed_pseudogene              | 1                                   | 18520.8   | 18520.8   |                                                                              |                                                                          |
| 18392 | ENSG000002025020 | CCL4L1      | 18768.7 | 0.02                                | unprocessed_pseudogene              | 17        | 34538310  | 34540280                                                                     | chemokine (C-C motif) ligand 4-like 1                                    |
| 18778 | ENSG000002024566 | 19074.9     | 0.02    | unprocessed_pseudogene              | 1                                   | 19074.9   | 19074.9   |                                                                              |                                                                          |
| 18902 | ENSG000002060884 | 19182.3     | 0.02    | unprocessed_pseudogene              | 1                                   | 19182.3   | 19182.3   |                                                                              |                                                                          |
| 18903 | ENSG00000217401  | 19239.1     | 0.02    | unprocessed_pseudogene              | 1                                   | 19239.1   | 19239.1   |                                                                              |                                                                          |
| 18411 | ENSG000002026983 | 19375.1     | 0.02    | unprocessed_pseudogene              | 1                                   | 19375.1   | 19375.1   |                                                                              |                                                                          |
| 18688 | ENSG00000235554  | 19780.9     | 0.02    | unprocessed_pseudogene              | 1                                   | 19780.9   | 19780.9   |                                                                              |                                                                          |
| 20027 | ENSG00000181404  | 20045.4     | 0.02    | unprocessed_pseudogene              | 1                                   | 20045.4   | 20045.4   |                                                                              |                                                                          |
| 20851 | ENSG00000203093  | 20894.7     | 0.02    | unprocessed_pseudogene              | 1                                   | 20894.7   | 20894.7   |                                                                              |                                                                          |
| 21058 | ENSG000002028432 | 20833.8     | 0.02    | unprocessed_pseudogene              | 1                                   | 20833.8   | 20833.8   |                                                                              |                                                                          |
| 21395 | ENSG00000208784  | 21101.7     | 0.02    | unprocessed_pseudogene              | 1                                   | 21101.7   | 21101.7   |                                                                              |                                                                          |
| 21727 | ENSG00000105706  | CF3.23      | 21376.7 | 0.02                                | unprocessed_pseudogene              | 17        | 34340096  | 34345095                                                                     | chemokine (C-C motif) ligand 23                                          |
| 21951 | ENSG00000185217  | HIST1H4I    | 21526.4 | 0.02                                | unprocessed_pseudogene              | 1         | 148825607 | 148832714                                                                    | histone cluster 2, H4b                                                   |
| 22145 | ENSG00000207164  | 21685.9     | 0.02    | unprocessed_pseudogene              | 1                                   | 21685.9   | 21685.9   |                                                                              |                                                                          |
| 22293 | ENSG00000204620  | 21771.5     | 0.02    | unprocessed_pseudogene              | 1                                   | 21771.5   | 21771.5   |                                                                              |                                                                          |
| 22534 | ENSG000002028433 | 21967.6     | 0.02    | unprocessed_pseudogene              | 1                                   | 21967.6   | 21967.6   |                                                                              |                                                                          |
| 22542 | ENSG000002025565 | 21977.6     | 0.02    | unprocessed_pseudogene              | 1                                   | 21977.6   | 21977.6   |                                                                              |                                                                          |
| 22673 | ENSG000002020137 | 22385.7     | 0.02    | unprocessed_pseudogene              | 1                                   | 22385.7   | 22385.7   |                                                                              |                                                                          |
| 22697 | ENSG000002025275 | 22104.6     | 0.02    | unprocessed_pseudogene              | 15                                  | 82970479  | 82988374  | chondroitin sulfate proteoglycan 4 pseudogene 9                              |                                                                          |
| 22811 | ENSG000002072216 | 22195.4     | 0.02    | unprocessed_pseudogene              | 1                                   | 22195.4   | 22195.4   |                                                                              |                                                                          |
| 21172 | ENSG000002085978 | 22482.9     | 0.02    | unprocessed_pseudogene              | 1                                   | 22482.9   | 22482.9   |                                                                              |                                                                          |
| 23421 | ENSG000002030715 | 22677.3     | 0.02    | unprocessed_pseudogene              | 1                                   | 22677.3   | 22677.3   |                                                                              |                                                                          |
| 23818 | ENSG000002028413 | 22993.7     | 0.02    | unprocessed_pseudogene              | 1                                   | 22993.7   | 22993.7   |                                                                              |                                                                          |
| 23895 | ENSG00000203498  | 23950.4     | 0.02    | unprocessed_pseudogene              | 1                                   | 23950.4   | 23950.4   |                                                                              |                                                                          |
| 23968 | ENSG00000181511  | 23955.8     | 0.02    | unprocessed_pseudogene              | 1                                   | 23955.8   | 23955.8   |                                                                              |                                                                          |
| 24100 | ENSG000002041770 | 23225.2     | 0.02    | unprocessed_pseudogene              | 1                                   | 23225.2   | 23225.2   |                                                                              |                                                                          |
| 24411 | ENSG000002023707 | 23494.7     | 0.02    | unprocessed_pseudogene              | 1                                   | 23494.7   | 23494.7   |                                                                              |                                                                          |
| 24433 | ENSG00000205986  | 23559.6     | 0.02</  |                                     |                                     |           |           |                                                                              |                                                                          |

|       |                   |         |      |    |          |          |                                                    |  |
|-------|-------------------|---------|------|----|----------|----------|----------------------------------------------------|--|
| 26236 | ENSG00000220131   | 24986.4 | 0.02 |    |          |          |                                                    |  |
| 26239 | ENSG00000220208   | 25044.4 | 0.02 |    |          |          |                                                    |  |
| 26304 | ENSG00000238009   | 25056.7 | 0.02 |    |          |          |                                                    |  |
| 26399 | ENSG00000197284   | 25140.5 | 0.02 |    |          |          |                                                    |  |
| 26462 | ENSG00000229674   | 25204.2 | 0.02 |    |          |          |                                                    |  |
| 26476 | ENSG00000231241   | 25218.2 | 0.02 |    |          |          |                                                    |  |
| 26588 | ENSG00000267056   | 25310.3 | 0.02 |    |          |          |                                                    |  |
| 26619 | ENSG00000194815   | 25339.4 | 0.02 |    |          |          |                                                    |  |
| 26622 | ENSG00000229261   | 25341.8 | 0.02 |    |          |          |                                                    |  |
| 26629 | ENSG00000204150   | 25344.5 | 0.02 | 10 | 47708307 | 47703235 | centaurin, gamma-like family, member 11 pseudogene |  |
| 26651 | ENSG00000231873   | 25350.6 | 0.02 |    |          |          |                                                    |  |
| 26674 | ENSG00000232026   | 25376.5 | 0.02 |    |          |          |                                                    |  |
| 26688 | ENSG00000272755   | 25383.7 | 0.02 |    |          |          |                                                    |  |
| 26690 | ENSG00000234534   | 25386.3 | 0.02 |    |          |          |                                                    |  |
| 26720 | ENSG00000231748   | 25428.6 | 0.02 |    |          |          |                                                    |  |
| 26773 | ENSG00000206936   | 25465.8 | 0.02 |    |          |          |                                                    |  |
| 26925 | ENSG000002081600  | 25584.9 | 0.02 |    |          |          |                                                    |  |
| 26986 | ENSG00000229784   | 25593.3 | 0.02 |    |          |          |                                                    |  |
| 27022 | ENSG000002068205  | 25679.3 | 0.02 |    |          |          |                                                    |  |
| 27033 | ENSG00000202071   | 25694   | 0.02 |    |          |          |                                                    |  |
| 27051 | ENSG00000233025   | 25703.9 | 0.02 |    |          |          |                                                    |  |
| 27057 | ENSG000002083177  | 25709.6 | 0.02 |    |          |          |                                                    |  |
| 27092 | ENSG00000204837   | 25745.6 | 0.02 |    |          |          |                                                    |  |
| 27108 | ENSG00000223578   | 25756.3 | 0.02 |    |          |          |                                                    |  |
| 27109 | ENSG00000273329   | 25762   | 0.02 |    |          |          |                                                    |  |
| 27229 | ENSG00000228799   | 25886.4 | 0.02 |    |          |          |                                                    |  |
| 27243 | ENSG00000230959   | 25879.2 | 0.02 |    |          |          |                                                    |  |
| 27254 | ENSG00000230400   | 25881.5 | 0.02 |    |          |          |                                                    |  |
| 27261 | ENSG00000243944   | 25884.8 | 0.02 |    |          |          |                                                    |  |
| 27268 | ENSG00000230621   | 25886.5 | 0.02 |    |          |          |                                                    |  |
| 27312 | ENSG000002051676  | 25925.9 | 0.02 |    |          |          |                                                    |  |
| 27338 | ENSG00000202872   | 25949   | 0.02 |    |          |          |                                                    |  |
| 27357 | ENSG00000240959   | 25944.3 | 0.02 |    |          |          |                                                    |  |
| 27373 | ENSG00000205341   | 25976.7 | 0.02 |    |          |          |                                                    |  |
| 27385 | ENSG000002048785  | 25985.4 | 0.02 |    |          |          |                                                    |  |
| 27398 | ENSG00000230997   | 25992.8 | 0.02 |    |          |          |                                                    |  |
| 27429 | ENSG00000241228   | 26017.1 | 0.02 |    |          |          |                                                    |  |
| 27443 | ENSG00000242753   | 26030.5 | 0.02 |    |          |          |                                                    |  |
| 27447 | ENSG000002304423  | 26035.8 | 0.02 |    |          |          |                                                    |  |
| 27459 | ENSG00000229765   | 26039.7 | 0.02 |    |          |          |                                                    |  |
| 27472 | ENSG00000219687   | 26052.2 | 0.02 |    |          |          |                                                    |  |
| 27488 | ENSG00000230959   | 26060.3 | 0.02 |    |          |          |                                                    |  |
| 27496 | ENSG00000229794   | 26076.2 | 0.02 |    |          |          |                                                    |  |
| 27534 | ENSG00000232721   | 26104.8 | 0.02 |    |          |          |                                                    |  |
| 27538 | ENSG00000205243   | 26106.7 | 0.02 |    |          |          |                                                    |  |
| 27551 | ENSG00000229263   | 26117.6 | 0.02 |    |          |          |                                                    |  |
| 27558 | ENSG00000240242   | 26122.1 | 0.02 |    |          |          |                                                    |  |
| 27560 | ENSG00000257098   | 26124.6 | 0.02 | 14 | 19614216 | 19615864 | GRAM domain containing 4 pseudogene 3              |  |
| 27581 | ENSG000002051142  | 26142.2 | 0.02 |    |          |          |                                                    |  |
| 27587 | ENSG000002081803  | 26143.9 | 0.02 |    |          |          |                                                    |  |
| 27607 | ENSG00000214525   | 26164   | 0.02 |    |          |          |                                                    |  |
| 27618 | ENSG000002081208  | 26171.6 | 0.02 |    |          |          |                                                    |  |
| 27625 | ENSG000002051555  | 26175.4 | 0.02 |    |          |          |                                                    |  |
| 27646 | ENSG00000234862   | 26208.6 | 0.02 |    |          |          |                                                    |  |
| 27660 | ENSG000002081177  | 26214.9 | 0.02 |    |          |          |                                                    |  |
| 27676 | ENSG00000229290   | 26227.1 | 0.02 |    |          |          |                                                    |  |
| 27679 | ENSG00000208796   | 26229.6 | 0.02 |    |          |          |                                                    |  |
| 27684 | ENSG000002051418  | 26238.9 | 0.02 |    |          |          |                                                    |  |
| 27692 | ENSG00000213772   | 26246.1 | 0.02 |    |          |          |                                                    |  |
| 27694 | ENSG00000234915   | 26247.5 | 0.02 |    |          |          |                                                    |  |
| 27711 | ENSG00000204953   | 26260.3 | 0.02 |    |          |          |                                                    |  |
| 27725 | ENSG000002044445  | 26269.8 | 0.02 |    |          |          |                                                    |  |
| 27730 | ENSG000002045768  | 26274   | 0.02 |    |          |          |                                                    |  |
| 27736 | ENSG000002204215  | 26276.5 | 0.02 |    |          |          |                                                    |  |
| 27768 | ENSG00000258979   | 26304.1 | 0.02 |    |          |          |                                                    |  |
| 27774 | ENSG000002052895  | 26308.5 | 0.02 |    |          |          |                                                    |  |
| 27790 | ENSG000002084959  | 26318.1 | 0.02 |    |          |          |                                                    |  |
| 27815 | ENSG000002087258  | 26344.2 | 0.02 |    |          |          |                                                    |  |
| 27816 | ENSG000002089913  | 26344.7 | 0.02 |    |          |          |                                                    |  |
| 27837 | ENSG00000220509   | 26356.8 | 0.02 |    |          |          |                                                    |  |
| 27850 | ENSG00000238007   | 26369.4 | 0.02 |    |          |          |                                                    |  |
| 27853 | ENSG00000204302   | 26372.6 | 0.02 |    |          |          |                                                    |  |
| 27862 | ENSG00000232227   | 26381.1 | 0.02 |    |          |          |                                                    |  |
| 27863 | ENSG00000232726   | 26383   | 0.02 |    |          |          |                                                    |  |
| 27866 | ENSG00000234132   | 26385.4 | 0.02 |    |          |          |                                                    |  |
| 27877 | ENSG00000230927   | 26394.1 | 0.02 |    |          |          |                                                    |  |
| 27880 | ENSG00000257514   | 26399.2 | 0.02 |    |          |          |                                                    |  |
| 27888 | ENSG000002040125  | 26419.2 | 0.02 |    |          |          |                                                    |  |
| 27904 | ENSG00000222071   | 26427.3 | 0.02 |    |          |          |                                                    |  |
| 27906 | ENSG00000272021   | 26428.8 | 0.02 |    |          |          |                                                    |  |
| 27914 | ENSG00000237321   | 26433.7 | 0.02 |    |          |          |                                                    |  |
| 27923 | ENSG00000220710   | 26439.3 | 0.02 |    |          |          |                                                    |  |
| 27944 | ENSG00000207941   | 26459.6 | 0.02 | 7  | 65939543 | 65940709 | HCG1983814: Uncharacterized protein                |  |
| 27958 | ENSG000002304335  | 26475.6 | 0.02 |    |          |          |                                                    |  |
| 27964 | ENSG000002054807  | 26481.1 | 0.02 |    |          |          |                                                    |  |
| 27975 | ENSG000002051773  | 26496.1 | 0.02 |    |          |          |                                                    |  |
| 27985 | ENSG00000227709   | 26493.3 | 0.02 |    |          |          |                                                    |  |
| 28003 | ENSG000002042009  | 26511   | 0.02 |    |          |          |                                                    |  |
| 28021 | ENSG00000203941   | 26524.2 | 0.02 |    |          |          |                                                    |  |
| 28027 | ENSG00000250441   | 26529.4 | 0.02 |    |          |          |                                                    |  |
| 28036 | ENSG000002044176  | 26536.5 | 0.02 |    |          |          |                                                    |  |
| 28066 | ENSG000002045452  | 26560   | 0.02 |    |          |          |                                                    |  |
| 28068 | ENSG00000227583   | 26576.6 | 0.02 |    |          |          |                                                    |  |
| 28076 | ENSG00000214837   | 26587.1 | 0.02 |    |          |          |                                                    |  |
| 28081 | ENSG00000186850   | 26591   | 0.02 |    |          |          |                                                    |  |
| 28103 | ENSG000002052920  | 26609.8 | 0.02 |    |          |          |                                                    |  |
| 28113 | ENSG000002094113  | 26617.3 | 0.02 |    |          |          |                                                    |  |
| 28119 | ENSG000002071262  | 26624.5 | 0.02 |    |          |          |                                                    |  |
| 28141 | ENSG0000020230809 | 26643.9 | 0.02 |    |          |          |                                                    |  |
| 28142 | ENSG00000229032   | 26644   | 0.02 |    |          |          |                                                    |  |
| 28168 | ENSG00000220588   | 26644.3 | 0.02 |    |          |          |                                                    |  |
| 28190 | ENSG000002037409  | 26687.8 | 0.02 |    |          |          |                                                    |  |
| 28193 | ENSG00000209099   | 26688.9 | 0.02 |    |          |          |                                                    |  |
| 28201 | ENSG00000217442   | 26702.3 | 0.02 |    |          |          |                                                    |  |
| 28203 | ENSG000002028290  | 26703   | 0.02 |    |          |          |                                                    |  |
| 28209 | ENSG000002043296  | 26711.3 | 0.02 |    |          |          |                                                    |  |
| 28210 | ENSG000002057290  | 26711.5 | 0.02 |    |          |          |                                                    |  |
| 28231 | ENSG000002026212  | 26728.9 | 0.02 |    |          |          |                                                    |  |
| 28247 | ENSG000002029108  | 26746.1 | 0.02 |    |          |          |                                                    |  |
| 28257 | ENSG000002034418  | 26755.9 | 0.02 |    |          |          |                                                    |  |
| 28270 | ENSG000002051320  | 26767.4 | 0.02 |    |          |          |                                                    |  |
| 28277 | ENSG000002046876  | 26769.9 | 0.02 |    |          |          |                                                    |  |
| 28278 | ENSG000002024849  | 26770.1 | 0.02 |    |          |          |                                                    |  |
| 28281 | ENSG000002293556  | 26771.3 | 0.02 |    |          |          |                                                    |  |
| 28286 | ENSG00000184188   | 26772.1 | 0.02 |    |          |          |                                                    |  |
| 28312 | ENSG000002020295  | 26807   | 0.02 |    |          |          |                                                    |  |
| 28333 | ENSG000002057879  | 26822.3 | 0.02 |    |          |          |                                                    |  |
| 28347 | ENSG00000271320   | 26832.8 | 0.02 |    |          |          |                                                    |  |
| 28350 | ENSG000002044607  | 26834.3 | 0.02 | 9  | 45733559 | 45734596 | family with sequence similarity 27, member E2      |  |
| 28363 | ENSG000002031190  | 26845   | 0.02 |    |          |          |                                                    |  |
| 28393 | ENSG000002054854  | 26872.8 | 0.02 |    |          |          |                                                    |  |
| 28407 | ENSG000002052567  | 26885   | 0.02 |    |          |          |                                                    |  |
| 28413 | ENSG00000234041   | 26894.1 | 0.02 |    |          |          |                                                    |  |
| 28419 | ENSG000002060469  | 26896.3 | 0.02 |    |          |          |                                                    |  |
| 28428 | ENSG000002081963  | 26906.8 | 0.02 |    |          |          |                                                    |  |
| 28459 | ENSG00000259683   | 26917.2 | 0.02 |    |          |          |                                                    |  |
| 28443 | ENSG000002065388  | 26919.9 | 0.02 |    |          |          |                                                    |  |
| 28488 | ENSG00000207331   | 26976.6 | 0.02 |    |          |          |                                                    |  |
| 28501 | ENSG000002087115  | 26978.5 | 0.02 |    |          |          |                                                    |  |
| 28508 | ENSG000002024794  | 26984.3 | 0.02 |    |          |          |                                                    |  |
| 28507 | ENSG000002052600  | 26986.6 | 0.02 |    |          |          |                                                    |  |
| 28511 | ENSG00000204509   | 26989.2 | 0.02 |    |          |          |                                                    |  |
| 28526 | ENSG000002041562  | 27003.2 | 0.02 |    |          |          |                                                    |  |
| 28528 | ENSG00000205000   | 27007.2 | 0.02 |    |          |          |                                                    |  |
| 28533 | ENSG00000206777   | 27013.5 | 0.02 |    |          |          |                                                    |  |
| 28539 | ENSG000002030147  | 27020.4 | 0.02 |    |          |          |                                                    |  |
| 28547 | ENSG000002087239  | 27023.6 | 0.02 |    |          |          |                                                    |  |
| 28564 | ENSG00000272088   | 27038.8 | 0.02 |    |          |          |                                                    |  |
| 28574 | ENSG000002038642  | 27040.1 | 0.02 |    |          |          |                                                    |  |
| 28608 | ENSG00000207222   | 27081.6 | 0.02 |    |          |          |                                                    |  |
| 28627 | ENSG00000205244   | 27097.5 | 0.02 |    |          |          |                                                    |  |
| 28676 | ENSG000002044705  | 27143.6 | 0.02 |    |          |          |                                                    |  |
| 28705 | ENSG000002084957  | 27183.1 | 0.02 |    |          |          |                                                    |  |
| 28721 | ENSG00000205232   | 27209.2 | 0.02 |    |          |          |                                                    |  |
| 28758 | ENSG00000273062   | 27232.7 | 0.02 |    |          |          |                                                    |  |
| 28760 | ENSG00000203491   | 27235.7 | 0.02 |    |          |          |                                                    |  |
| 28768 | ENSG00000202721   | 27241.9 | 0.02 |    |          |          |                                                    |  |
| 28772 | ENSG000002029766  | 27251.9 | 0.02 |    |          |          |                                                    |  |
| 28775 | ENSG000002026952  | 27255.0 | 0.02 |    |          |          |                                                    |  |
| 28776 | ENSG00000205878   | 27256.2 | 0.02 | 21 | 47612391 | 47613673 | Protein LOC101060037                               |  |
| 28777 | ENSG000002020581  | 27257.5 | 0.02 |    |          |          |                                                    |  |

|       |                  |          |         |      |    |           |           |  |                                                                 |
|-------|------------------|----------|---------|------|----|-----------|-----------|--|-----------------------------------------------------------------|
| 28783 | ENSG00000128542  |          | 27365.7 | 0.02 | 10 | 49272334  | 49237498  |  | protein tyrosine phosphatase, non-receptor type 20C, pseudogene |
| 28798 | ENSG00000111118  |          | 27378   | 0.02 |    |           |           |  |                                                                 |
| 28810 | ENSG000002034717 |          | 27386.5 | 0.02 |    |           |           |  |                                                                 |
| 28818 | ENSG00000271901  |          | 27390.3 | 0.02 |    |           |           |  |                                                                 |
| 28819 | ENSG00000226913  |          | 27390.4 | 0.02 |    |           |           |  |                                                                 |
| 28823 | ENSG00000226913  |          | 27392.3 | 0.02 |    |           |           |  |                                                                 |
| 28825 | ENSG00000253557  |          | 27393.9 | 0.02 |    |           |           |  |                                                                 |
| 28837 | ENSG00000225916  |          | 27395.4 | 0.02 |    |           |           |  |                                                                 |
| 28852 | ENSG00000209698  |          | 27392   | 0.02 |    |           |           |  |                                                                 |
| 28866 | ENSG00000252893  |          | 27334.5 | 0.02 | 11 | 59326273  | 59326334  |  | RNA, U7 small nuclear 58 pseudogene                             |
| 28880 | ENSG00000255993  |          | 27355.9 | 0.02 |    |           |           |  |                                                                 |
| 28912 | ENSG00000256533  |          | 27374.5 | 0.02 | 3  | 48421324  | 48421620  |  | RNA, 75L, cytoplasmic 321, pseudogene                           |
| 28922 | ENSG00000230943  |          | 27386.1 | 0.02 |    |           |           |  |                                                                 |
| 28926 | ENSG00000287650  |          | 27392.5 | 0.02 |    |           |           |  |                                                                 |
| 28997 | ENSG00000202213  |          | 27448.6 | 0.02 |    |           |           |  |                                                                 |
| 29002 | ENSG00000227579  |          | 27455   | 0.02 |    |           |           |  |                                                                 |
| 29013 | ENSG00000229291  |          | 27459.5 | 0.02 |    |           |           |  |                                                                 |
| 29015 | ENSG00000230338  |          | 27462.2 | 0.02 |    |           |           |  |                                                                 |
| 29026 | ENSG00000258066  |          | 27472.5 | 0.02 |    |           |           |  |                                                                 |
| 29037 | ENSG00000248896  |          | 27486.3 | 0.02 |    |           |           |  |                                                                 |
| 29046 | ENSG00000213469  |          | 27495.2 | 0.02 |    |           |           |  |                                                                 |
| 29048 | ENSG00000259370  |          | 27497.3 | 0.02 |    |           |           |  |                                                                 |
| 29056 | ENSG00000272108  |          | 27504.3 | 0.02 |    |           |           |  |                                                                 |
| 29060 | ENSG00000215150  |          | 27507.4 | 0.02 |    |           |           |  |                                                                 |
| 29065 | ENSG00000241528  |          | 27513   | 0.02 |    |           |           |  |                                                                 |
| 29072 | ENSG00000287583  |          | 27521.1 | 0.02 |    |           |           |  |                                                                 |
| 29073 | ENSG00000230378  |          | 27521.5 | 0.02 |    |           |           |  |                                                                 |
| 29099 | ENSG00000228986  |          | 27540.1 | 0.02 |    |           |           |  |                                                                 |
| 29103 | ENSG00000208184  |          | 27544.3 | 0.02 |    |           |           |  |                                                                 |
| 29104 | ENSG00000253463  |          | 27544.4 | 0.02 |    |           |           |  |                                                                 |
| 29105 | ENSG00000287045  |          | 27545.1 | 0.02 |    |           |           |  |                                                                 |
| 29115 | ENSG00000232450  |          | 27552.7 | 0.02 |    |           |           |  |                                                                 |
| 29141 | ENSG00000214123  |          | 27578.7 | 0.02 |    |           |           |  |                                                                 |
| 29154 | ENSG00000227431  |          | 27597.6 | 0.02 |    |           |           |  |                                                                 |
| 29163 | ENSG00000258403  |          | 27603.9 | 0.02 |    |           |           |  |                                                                 |
| 29177 | ENSG00000259799  |          | 27618   | 0.02 |    |           |           |  |                                                                 |
| 29190 | ENSG00000258793  |          | 27626.1 | 0.02 |    |           |           |  |                                                                 |
| 29214 | ENSG00000234804  |          | 27652.1 | 0.02 |    |           |           |  |                                                                 |
| 29227 | ENSG00000255859  |          | 27661.3 | 0.02 |    |           |           |  |                                                                 |
| 29235 | ENSG00000272934  |          | 27667.6 | 0.02 |    |           |           |  |                                                                 |
| 29242 | ENSG00000228941  |          | 27674.2 | 0.02 |    |           |           |  |                                                                 |
| 29246 | ENSG00000258645  |          | 27676.3 | 0.02 |    |           |           |  |                                                                 |
| 29270 | ENSG00000258920  |          | 27696.5 | 0.02 |    |           |           |  |                                                                 |
| 29286 | ENSG00000221799  |          | 27712.2 | 0.02 |    |           |           |  |                                                                 |
| 29307 | ENSG00000275289  |          | 27740   | 0.02 |    |           |           |  |                                                                 |
| 29321 | ENSG00000248562  |          | 27756.5 | 0.02 |    |           |           |  |                                                                 |
| 29337 | ENSG00000286047  |          | 27766.3 | 0.02 |    |           |           |  |                                                                 |
| 29354 | ENSG00000259593  |          | 27782.1 | 0.02 |    |           |           |  |                                                                 |
| 29360 | ENSG00000177388  |          | 27788.5 | 0.02 |    |           |           |  |                                                                 |
| 29364 | ENSG00000170296  | CTGLF2P  | 27791.9 | 0.02 | 10 | 49217866  | 49239729  |  | centaurin, gamma-like family, member 12 pseudogene              |
| 29396 | ENSG00000235560  |          | 27830.6 | 0.02 |    |           |           |  |                                                                 |
| 29416 | ENSG00000215291  |          | 27842.8 | 0.02 |    |           |           |  |                                                                 |
| 29421 | ENSG00000272735  |          | 27848.3 | 0.02 |    |           |           |  |                                                                 |
| 29444 | ENSG00000237623  |          | 27869   | 0.02 |    |           |           |  |                                                                 |
| 29456 | ENSG00000240746  |          | 27878.2 | 0.02 |    |           |           |  |                                                                 |
| 29468 | ENSG00000259596  |          | 27888.2 | 0.02 |    |           |           |  |                                                                 |
| 29467 | ENSG00000239244  |          | 27889.4 | 0.02 |    |           |           |  |                                                                 |
| 29479 | ENSG00000258413  |          | 27890.6 | 0.02 |    |           |           |  |                                                                 |
| 29480 | ENSG00000214035  |          | 27900.3 | 0.02 |    |           |           |  |                                                                 |
| 29482 | ENSG00000247345  |          | 27901.2 | 0.02 |    |           |           |  |                                                                 |
| 29488 | ENSG00000235158  |          | 27915.5 | 0.02 |    |           |           |  |                                                                 |
| 29501 | ENSG00000217278  |          | 27920.9 | 0.02 |    |           |           |  |                                                                 |
| 29503 | ENSG00000284964  |          | 27923.6 | 0.02 |    |           |           |  |                                                                 |
| 29510 | ENSG00000230463  |          | 27927.6 | 0.02 |    |           |           |  |                                                                 |
| 29532 | ENSG00000266621  |          | 27844.2 | 0.02 |    |           |           |  |                                                                 |
| 29539 | ENSG00000271749  |          | 27957.9 | 0.02 |    |           |           |  |                                                                 |
| 29545 | ENSG00000252698  |          | 27962.8 | 0.02 |    |           |           |  |                                                                 |
| 29549 | ENSG00000258375  |          | 27960.7 | 0.02 |    |           |           |  |                                                                 |
| 29557 | ENSG00000214645  |          | 27968.4 | 0.02 | 9  | 110538471 | 110540419 |  | Uncharacterized protein                                         |
| 29563 | ENSG00000210489  |          | 27968   | 0.02 |    |           |           |  |                                                                 |
| 29576 | ENSG00000244959  |          | 27976   | 0.02 |    |           |           |  |                                                                 |
| 29580 | ENSG00000245458  |          | 27987.3 | 0.02 |    |           |           |  |                                                                 |
| 29583 | ENSG00000250750  |          | 27989   | 0.02 |    |           |           |  |                                                                 |
| 29594 | ENSG00000232491  |          | 28002.1 | 0.02 |    |           |           |  |                                                                 |
| 29605 | ENSG00000280003  |          | 28012   | 0.02 | 19 | 50003781  | 50004614  |  | hsa-mir-150                                                     |
| 29606 | ENSG00000242419  |          | 28012.1 | 0.02 |    |           |           |  |                                                                 |
| 29608 | ENSG00000255916  |          | 28013.8 | 0.02 |    |           |           |  |                                                                 |
| 29625 | ENSG00000223477  |          | 28035.3 | 0.02 |    |           |           |  |                                                                 |
| 29639 | ENSG00000272365  |          | 28038.7 | 0.02 |    |           |           |  |                                                                 |
| 29643 | ENSG00000268853  |          | 28040.1 | 0.02 |    |           |           |  |                                                                 |
| 29647 | ENSG00000225588  |          | 28044.3 | 0.02 |    |           |           |  |                                                                 |
| 29648 | ENSG00000229444  |          | 28044.9 | 0.02 |    |           |           |  |                                                                 |
| 29662 | ENSG00000212695  |          | 28054.2 | 0.02 |    |           |           |  |                                                                 |
| 29663 | ENSG00000246148  |          | 28054.6 | 0.02 |    |           |           |  |                                                                 |
| 29668 | ENSG00000259263  |          | 28059.5 | 0.02 |    |           |           |  |                                                                 |
| 29688 | ENSG00000197704  | FRMPD2P1 | 28076.9 | 0.02 | 10 | 48844036  | 48868504  |  | FERM and PDZ domain containing 2 pseudogene 1                   |
| 29692 | ENSG00000235450  |          | 28080.5 | 0.02 |    |           |           |  |                                                                 |
| 29705 | ENSG00000235253  |          | 28092.5 | 0.02 |    |           |           |  |                                                                 |
| 29707 | ENSG00000258858  |          | 28094   | 0.02 |    |           |           |  |                                                                 |
| 29711 | ENSG00000258913  |          | 28097.4 | 0.02 |    |           |           |  |                                                                 |
| 29712 | ENSG00000269691  |          | 28098   | 0.02 |    |           |           |  |                                                                 |
| 29716 | ENSG00000268842  | ZNF8     | 28100.5 | 0.02 | 19 | 58790317  | 58807254  |  | Zinc finger protein 8                                           |
| 29741 | ENSG00000294702  |          | 28127.3 | 0.02 |    |           |           |  |                                                                 |
| 29764 | ENSG00000253773  |          | 28137.1 | 0.02 |    |           |           |  |                                                                 |
| 29760 | ENSG00000227260  |          | 28138.1 | 0.02 |    |           |           |  |                                                                 |
| 29765 | ENSG00000254711  |          | 28141.9 | 0.02 |    |           |           |  |                                                                 |
| 29770 | ENSG00000235385  |          | 28152.9 | 0.02 |    |           |           |  |                                                                 |
| 29783 | ENSG00000273264  |          | 28163.8 | 0.02 |    |           |           |  |                                                                 |
| 29790 | ENSG00000225652  |          | 28171.5 | 0.02 |    |           |           |  |                                                                 |
| 29791 | ENSG00000235385  |          | 28172   | 0.02 |    |           |           |  |                                                                 |
| 29792 | ENSG00000233250  |          | 28174   | 0.02 |    |           |           |  |                                                                 |
| 29796 | ENSG00000234871  |          | 28176.3 | 0.02 |    |           |           |  |                                                                 |
| 29803 | ENSG00000234437  |          | 28178.6 | 0.02 |    |           |           |  |                                                                 |
| 29830 | ENSG00000254298  |          | 28213.5 | 0.02 |    |           |           |  |                                                                 |
| 29832 | ENSG00000286304  |          | 28215   | 0.02 |    |           |           |  |                                                                 |
| 29847 | ENSG00000202745  |          | 28233.6 | 0.02 |    |           |           |  |                                                                 |
| 29883 | ENSG00000283280  |          | 28261.6 | 0.02 |    |           |           |  |                                                                 |
| 29895 | ENSG00000287432  |          | 28268.9 | 0.02 |    |           |           |  |                                                                 |
| 29898 | ENSG00000235527  |          | 28272   | 0.02 |    |           |           |  |                                                                 |
| 29902 | ENSG00000285583  |          | 28276.9 | 0.02 |    |           |           |  |                                                                 |
| 29905 | ENSG00000227373  |          | 28278.1 | 0.02 |    |           |           |  |                                                                 |
| 29907 | ENSG00000255496  |          | 28281   | 0.02 |    |           |           |  |                                                                 |
| 29918 | ENSG00000264647  |          | 28290.1 | 0.02 |    |           |           |  |                                                                 |
| 29920 | ENSG0000017334   |          | 28292.1 | 0.02 |    |           |           |  |                                                                 |
| 29934 | ENSG00000230323  | FL44313  | 28300.7 | 0.02 | 18 | 74207477  | 74210045  |  | uncharacterized protein LOC400658                               |
| 29940 | ENSG00000224503  |          | 28310.3 | 0.02 |    |           |           |  |                                                                 |
| 29946 | ENSG00000269986  |          | 28313.6 | 0.02 |    |           |           |  |                                                                 |
| 29964 | ENSG00000231168  | BMS1P5   | 28325   | 0.02 | 10 | 48901102  | 48905972  |  | BMS1 pseudogene 5                                               |
| 29977 | ENSG00000205077  |          | 28346.8 | 0.02 |    |           |           |  |                                                                 |
| 29988 | ENSG00000216901  |          | 28360.4 | 0.02 |    |           |           |  |                                                                 |
| 29992 | ENSG00000232109  |          | 28364.4 | 0.02 |    |           |           |  |                                                                 |
| 29993 | ENSG00000180081  |          | 28365.9 | 0.02 |    |           |           |  |                                                                 |
| 30015 | ENSG00000258098  |          | 28387.4 | 0.02 |    |           |           |  |                                                                 |
| 30023 | ENSG00000286798  |          | 28392.3 | 0.02 | 1  | 220160853 | 220160856 |  | Small nuclear RNA U13                                           |
| 30024 | ENSG00000258485  |          | 28392.4 | 0.02 |    |           |           |  |                                                                 |
| 30032 | ENSG00000280793  |          | 28402.4 | 0.02 |    |           |           |  |                                                                 |
| 30035 | ENSG00000170495  |          | 28407.2 | 0.02 |    |           |           |  |                                                                 |
| 30037 | ENSG00000280037  |          | 28407.4 | 0.02 |    |           |           |  |                                                                 |
| 30038 | ENSG00000270361  |          | 28408.1 | 0.02 |    |           |           |  |                                                                 |
| 30040 | ENSG00000232130  |          | 28411.1 | 0.02 |    |           |           |  |                                                                 |
| 30040 | ENSG00000254988  |          | 28426.6 | 0.02 |    |           |           |  |                                                                 |
| 30061 | ENSG00000231704  |          | 28430.7 | 0.02 |    |           |           |  |                                                                 |



|       |                 |        |         |      |    |           |           |  |                                                                                                    |
|-------|-----------------|--------|---------|------|----|-----------|-----------|--|----------------------------------------------------------------------------------------------------|
| 30200 | ENSG00000236319 |        | 29554.9 | 0.02 |    |           |           |  |                                                                                                    |
| 30227 | ENSG00000232872 |        | 29576.7 | 0.02 |    |           |           |  |                                                                                                    |
| 30236 | ENSG00000255967 |        | 29586.8 | 0.02 |    |           |           |  |                                                                                                    |
| 30236 | ENSG00000251508 |        | 29588.1 | 0.02 |    |           |           |  |                                                                                                    |
| 30243 | ENSG00000166388 | ZNF488 | 29592.6 | 0.02 | 10 | 48355024  | 48373866  |  | zinc finger protein 488                                                                            |
| 30244 | ENSG00000232945 |        | 29593.6 | 0.02 |    |           |           |  |                                                                                                    |
| 30254 | ENSG00000229273 |        | 29611.3 | 0.02 |    |           |           |  |                                                                                                    |
| 30255 | ENSG00000265448 |        | 29612.3 | 0.02 |    |           |           |  |                                                                                                    |
| 30257 | ENSG00000186157 | TPTE   | 29614.3 | 0.02 | 21 | 10906201  | 11029719  |  | transmembrane phosphatase with tensin homology                                                     |
| 30259 | ENSG00000234222 |        | 29614.9 | 0.02 |    |           |           |  |                                                                                                    |
| 30263 | ENSG00000259941 |        | 29619.6 | 0.02 |    |           |           |  |                                                                                                    |
| 30266 | ENSG00000234175 |        | 29625   | 0.02 |    |           |           |  |                                                                                                    |
| 30278 | ENSG00000255151 |        | 29629.5 | 0.02 |    |           |           |  |                                                                                                    |
| 30286 | ENSG00000263387 |        | 29634   | 0.02 | 3  | 33144500  | 33144796  |  | RNA, 7SL, cytoplasmic 296, pseudogene                                                              |
| 30291 | ENSG00000259319 |        | 29636.9 | 0.02 |    |           |           |  |                                                                                                    |
| 30292 | ENSG00000235885 |        | 29637.4 | 0.02 |    |           |           |  |                                                                                                    |
| 30317 | ENSG00000267548 |        | 29650.2 | 0.02 |    |           |           |  |                                                                                                    |
| 30324 | ENSG00000259387 |        | 29654.6 | 0.02 |    |           |           |  |                                                                                                    |
| 30327 | ENSG00000251639 |        | 29656.6 | 0.02 |    |           |           |  |                                                                                                    |
| 30336 | ENSG00000260288 |        | 29665.5 | 0.02 |    |           |           |  |                                                                                                    |
| 30341 | ENSG00000251152 |        | 29669.7 | 0.02 |    |           |           |  |                                                                                                    |
| 30350 | ENSG00000267446 |        | 29669.7 | 0.02 |    |           |           |  |                                                                                                    |
| 30354 | ENSG00000273450 |        | 29677.7 | 0.02 |    |           |           |  |                                                                                                    |
| 30357 | ENSG00000260858 |        | 29682.3 | 0.02 |    |           |           |  |                                                                                                    |
| 30363 | ENSG00000254024 |        | 29686.9 | 0.02 |    |           |           |  |                                                                                                    |
| 30364 | ENSG00000235582 |        | 29686.9 | 0.02 |    |           |           |  |                                                                                                    |
| 30366 | ENSG00000252386 |        | 29687.7 | 0.02 |    |           |           |  |                                                                                                    |
| 30368 | ENSG00000257635 |        | 29692   | 0.02 |    |           |           |  |                                                                                                    |
| 30370 | ENSG00000246090 |        | 29693.2 | 0.02 |    |           |           |  |                                                                                                    |
| 30372 | ENSG00000231848 |        | 29693.7 | 0.02 |    |           |           |  |                                                                                                    |
| 30374 | ENSG00000220519 |        | 29694.9 | 0.02 |    |           |           |  |                                                                                                    |
| 30375 | ENSG00000224545 |        | 29697.7 | 0.02 |    |           |           |  |                                                                                                    |
| 30386 | ENSG00000230433 |        | 29705.2 | 0.02 |    |           |           |  |                                                                                                    |
| 30389 | ENSG00000273472 |        | 29709.2 | 0.02 |    |           |           |  |                                                                                                    |
| 30396 | ENSG00000228893 |        | 29713.8 | 0.02 |    |           |           |  |                                                                                                    |
| 30435 | ENSG00000235883 |        | 29737.7 | 0.02 |    |           |           |  |                                                                                                    |
| 30436 | ENSG00000266648 |        | 29738.6 | 0.02 |    |           |           |  |                                                                                                    |
| 30437 | ENSG00000236963 |        | 29738.8 | 0.02 |    |           |           |  |                                                                                                    |
| 30454 | ENSG00000236889 |        | 29754.5 | 0.02 |    |           |           |  |                                                                                                    |
| 30459 | ENSG00000271551 |        | 29757   | 0.02 |    |           |           |  |                                                                                                    |
| 30466 | ENSG00000253477 |        | 29760.8 | 0.02 |    |           |           |  |                                                                                                    |
| 30471 | ENSG00000259202 |        | 29760.8 | 0.02 |    |           |           |  |                                                                                                    |
| 30507 | ENSG00000235427 |        | 29793.5 | 0.02 |    |           |           |  |                                                                                                    |
| 30530 | ENSG00000262410 |        | 29813.2 | 0.02 |    |           |           |  |                                                                                                    |
| 30535 | ENSG00000275455 |        | 29816.6 | 0.02 |    |           |           |  |                                                                                                    |
| 30548 | ENSG00000232368 |        | 29827.6 | 0.02 |    |           |           |  |                                                                                                    |
| 30559 | ENSG00000269296 |        | 29835.2 | 0.02 |    |           |           |  |                                                                                                    |
| 30563 | ENSG00000265895 |        | 29837.2 | 0.02 |    |           |           |  |                                                                                                    |
| 30564 | ENSG00000248488 |        | 29838.2 | 0.02 |    |           |           |  |                                                                                                    |
| 30575 | ENSG00000229481 |        | 29848.8 | 0.02 |    |           |           |  |                                                                                                    |
| 30590 | ENSG00000230327 |        | 29866.3 | 0.02 |    |           |           |  |                                                                                                    |
| 30604 | ENSG00000193628 |        | 29892   | 0.02 | 7  | 74112305  | 74300731  |  | stromal antigen 3-like 2 (pseudogene)                                                              |
| 30607 | ENSG00000234028 |        | 29894.4 | 0.02 |    |           |           |  |                                                                                                    |
| 30612 | ENSG00000269261 |        | 29899.7 | 0.02 |    |           |           |  |                                                                                                    |
| 30614 | ENSG00000255586 |        | 29899.8 | 0.02 |    |           |           |  |                                                                                                    |
| 30619 | ENSG00000258358 |        | 29897.3 | 0.02 |    |           |           |  |                                                                                                    |
| 30626 | ENSG00000241380 |        | 29901.4 | 0.02 |    |           |           |  |                                                                                                    |
| 30639 | ENSG00000260725 |        | 29913.6 | 0.02 |    |           |           |  |                                                                                                    |
| 30641 | ENSG00000273363 |        | 29915.1 | 0.02 |    |           |           |  |                                                                                                    |
| 30644 | ENSG00000259799 |        | 29920.1 | 0.02 |    |           |           |  |                                                                                                    |
| 30654 | ENSG00000272823 |        | 29926   | 0.02 |    |           |           |  |                                                                                                    |
| 30667 | ENSG00000262412 |        | 29940.5 | 0.02 |    |           |           |  |                                                                                                    |
| 30673 | ENSG00000228843 |        | 29945.6 | 0.02 |    |           |           |  |                                                                                                    |
| 30674 | ENSG00000259944 |        | 29946.9 | 0.02 |    |           |           |  |                                                                                                    |
| 30676 | ENSG00000202487 |        | 29949   | 0.02 | 10 | 128606376 | 128609472 |  | Y RNA                                                                                              |
| 30685 | ENSG00000252007 |        | 29956.3 | 0.02 |    |           |           |  |                                                                                                    |
| 30700 | ENSG00000230007 |        | 29973.7 | 0.02 |    |           |           |  |                                                                                                    |
| 30717 | ENSG00000113644 |        | 29984.6 | 0.02 |    |           |           |  |                                                                                                    |
| 30721 | ENSG00000271456 |        | 29997   | 0.02 |    |           |           |  |                                                                                                    |
| 30728 | ENSG00000211768 |        | 29999.4 | 0.02 |    |           |           |  |                                                                                                    |
| 30743 | ENSG00000261423 |        | 29923.5 | 0.02 |    |           |           |  |                                                                                                    |
| 30754 | ENSG00000269430 |        | 29934.4 | 0.02 | 21 | 45879814  | 45882078  |  | LRRC3 downstream neighbor (non-protein coding)                                                     |
| 30761 | ENSG00000250588 |        | 29948.6 | 0.02 |    |           |           |  |                                                                                                    |
| 30775 | ENSG00000270322 |        | 29957.3 | 0.02 |    |           |           |  |                                                                                                    |
| 30796 | ENSG00000272719 |        | 29972.7 | 0.02 |    |           |           |  |                                                                                                    |
| 30798 | ENSG00000265653 |        | 29973.1 | 0.02 |    |           |           |  |                                                                                                    |
| 30804 | ENSG00000232605 |        | 29980.9 | 0.02 |    |           |           |  |                                                                                                    |
| 30807 | ENSG00000254028 |        | 29983.7 | 0.02 |    |           |           |  |                                                                                                    |
| 30820 | ENSG00000233431 |        | 29987.3 | 0.02 |    |           |           |  |                                                                                                    |
| 30842 | ENSG00000253340 |        | 29911.9 | 0.02 |    |           |           |  |                                                                                                    |
| 30847 | ENSG00000258437 |        | 29921.8 | 0.02 |    |           |           |  |                                                                                                    |
| 30855 | ENSG00000260488 |        | 29927.7 | 0.02 |    |           |           |  |                                                                                                    |
| 30857 | ENSG00000232013 |        | 29931.1 | 0.02 | 3  | 145782358 | 145784156 |  | HCG179659; PRO2533, Uncharacterized protein                                                        |
| 30866 | ENSG00000227337 |        | 29941.3 | 0.02 |    |           |           |  |                                                                                                    |
| 30882 | ENSG00000250999 |        | 29959.3 | 0.02 |    |           |           |  |                                                                                                    |
| 30902 | ENSG00000202712 |        | 29971.6 | 0.02 |    |           |           |  |                                                                                                    |
| 30909 | ENSG00000234134 |        | 29975.2 | 0.02 |    |           |           |  |                                                                                                    |
| 30912 | ENSG00000246971 |        | 29976.6 | 0.02 |    |           |           |  |                                                                                                    |
| 30914 | ENSG00000230803 |        | 29977.1 | 0.02 |    |           |           |  |                                                                                                    |
| 30956 | ENSG00000267504 |        | 29936.7 | 0.02 |    |           |           |  |                                                                                                    |
| 30966 | ENSG00000252532 |        | 29938.3 | 0.02 |    |           |           |  |                                                                                                    |
| 30966 | ENSG00000261488 |        | 29936   | 0.02 |    |           |           |  |                                                                                                    |
| 30969 | ENSG00000272121 |        | 29921.5 | 0.02 |    |           |           |  |                                                                                                    |
| 30972 | ENSG00000276906 |        | 29925.4 | 0.02 |    |           |           |  |                                                                                                    |
| 30980 | ENSG00000226490 |        | 29920.8 | 0.02 |    |           |           |  |                                                                                                    |
| 31004 | ENSG00000262119 |        | 29955.3 | 0.02 |    |           |           |  |                                                                                                    |
| 31008 | ENSG00000272223 |        | 29958.4 | 0.02 |    |           |           |  |                                                                                                    |
| 31013 | ENSG00000267729 |        | 29991.5 | 0.02 |    |           |           |  |                                                                                                    |
| 31020 | ENSG00000228819 |        | 29986.3 | 0.02 |    |           |           |  |                                                                                                    |
| 31026 | ENSG00000253414 |        | 29999.2 | 0.02 |    |           |           |  |                                                                                                    |
| 31037 | ENSG00000271199 |        | 29971.4 | 0.02 |    |           |           |  |                                                                                                    |
| 31043 | ENSG00000273167 |        | 29982.6 | 0.02 |    |           |           |  |                                                                                                    |
| 31054 | ENSG00000213547 |        | 29992.7 | 0.02 |    |           |           |  |                                                                                                    |
| 31066 | ENSG00000243360 |        | 29994.4 | 0.02 |    |           |           |  |                                                                                                    |
| 31078 | ENSG00000258210 |        | 29912   | 0.02 |    |           |           |  |                                                                                                    |
| 31091 | ENSG00000261159 |        | 29921.4 | 0.02 |    |           |           |  |                                                                                                    |
| 31093 | ENSG00000226984 |        | 29922.7 | 0.02 |    |           |           |  |                                                                                                    |
| 31098 | ENSG00000253459 |        | 29928   | 0.02 | 14 | 50064193  | 50065882  |  | Full-length cDNA clone CS00K012Y009 of HeLa cells of Homo sapiens (human); Uncharacterized protein |
| 31100 | ENSG00000256001 |        | 29929.5 | 0.02 |    |           |           |  |                                                                                                    |
| 31126 | ENSG00000247372 |        | 29949.3 | 0.02 |    |           |           |  |                                                                                                    |
| 31134 | ENSG00000268964 |        | 29939   | 0.02 |    |           |           |  |                                                                                                    |
| 31163 | ENSG00000261238 |        | 29987.8 | 0.02 |    |           |           |  |                                                                                                    |
| 31166 | ENSG00000234962 |        | 29991   | 0.02 |    |           |           |  |                                                                                                    |
| 31177 | ENSG00000272954 |        | 29940.3 | 0.02 |    |           |           |  |                                                                                                    |
| 31201 | ENSG0000021439  |        | 29924   | 0.02 |    |           |           |  |                                                                                                    |
| 31223 | ENSG00000257023 |        | 29943.6 | 0.02 |    |           |           |  |                                                                                                    |
| 31224 | ENSG00000265749 |        | 29944.1 | 0.02 |    |           |           |  |                                                                                                    |
| 31238 | ENSG00000259428 |        | 29953.8 | 0.02 |    |           |           |  |                                                                                                    |
| 31265 | ENSG00000231386 |        | 29981.7 | 0.02 |    |           |           |  |                                                                                                    |
| 31268 | ENSG00000232559 |        | 29985.4 | 0.02 |    |           |           |  |                                                                                                    |
| 31287 | ENSG00000236689 |        | 29993.3 | 0.02 |    |           |           |  |                                                                                                    |
| 31288 | ENSG00000265747 |        | 29992.6 | 0.02 | 19 | 11344419  | 11344674  |  | RNA, 7SL, cytoplasmic 298, pseudogene                                                              |
| 31290 | ENSG00000238824 |        | 29993.8 | 0.02 | 9  | 140017961 | 140018090 |  | Small nuclear RNA U13                                                                              |
| 31301 | ENSG00000259989 |        | 29991.2 | 0.02 |    |           |           |  |                                                                                                    |
| 31341 | ENSG00000259983 |        | 29983.4 | 0.02 |    |           |           |  |                                                                                                    |
| 31343 | ENSG00000228848 |        | 29987.2 | 0.02 |    |           |           |  |                                                                                                    |
| 31348 | ENSG00000231294 |        | 29989.4 | 0.02 |    |           |           |  |                                                                                                    |
| 31352 | ENSG00000268927 |        | 29971.6 | 0.02 |    |           |           |  |                                                                                                    |
| 31360 | ENSG00000248430 |        | 29979.3 | 0.02 |    |           |           |  |                                                                                                    |
| 31362 | ENSG00000216021 |        | 29982.4 | 0.02 |    |           |           |  |                                                                                                    |
| 31367 | ENSG00000261111 |        | 29987.6 | 0.02 |    |           |           |  |                                                                                                    |
| 31374 | ENSG00000248805 |        | 29993.6 | 0.02 |    |           |           |  |                                                                                                    |
| 31388 | ENSG00000269947 |        | 29994.3 | 0.02 |    |           |           |  |                                                                                                    |
| 31399 | ENSG00000255356 |        | 29920.4 | 0.02 |    |           |           |  |                                                                                                    |
| 31409 | ENSG00000257042 |        | 29827   | 0.02 |    |           |           |  |                                                                                                    |
| 31410 | ENSG00000113285 |        | 29831.1 | 0.02 |    |           |           |  |                                                                                                    |
| 31416 | ENSG00000259483 |        | 29834.5 | 0.02 |    |           |           |  |                                                                                                    |
| 31428 | ENSG00000184084 |        | 29846.3 | 0.02 |    |           |           |  |                                                                                                    |
| 31459 | ENSG00000269988 |        | 29873.2 | 0.02 |    |           |           |  |                                                                                                    |
| 31464 | ENSG00000220771 |        | 29875.6 | 0.02 |    |           |           |  |                                                                                                    |
| 31468 | ENSG00000271778 |        | 29881.8 | 0.02 |    |           |           |  |                                                                                                    |
| 31489 | ENSG00000250835 |        | 29896.3 | 0.02 |    |           |           |  |                                                                                                    |
| 31503 | ENSG00000219522 |        | 29784.4 | 0.02 |    |           |           |  |                                                                                                    |
| 31537 | ENSG00000257138 |        | 29740   | 0.02 |    |           |           |  |                                                                                                    |
| 31554 | ENSG00000247934 |        | 29753.8 | 0.02 |    |           |           |  |                                                                                                    |
| 31567 | ENSG00000249494 |        | 29781.3 | 0.02 |    |           |           |  |                                                                                                    |
| 31591 | ENSG00000267730 |        | 29785.6 | 0.02 |    |           |           |  |                                                                                                    |
| 31611 | ENSG00000272432 |        | 29809.9 | 0.02 |    |           |           |  |                                                                                                    |
| 31638 | ENSG00000255337 |        | 29826.6 | 0.02 |    |           |           |  |                                                                                                    |
| 31640 | ENSG00000234695 |        | 29827.8 | 0.02 |    |           |           |  |                                                                                                    |



|       |                  |           |       |      |                        |           |           |                                                                                     |
|-------|------------------|-----------|-------|------|------------------------|-----------|-----------|-------------------------------------------------------------------------------------|
| 31231 | ENSG00000268388  | FENDRR    | 28450 | 0.01 | lincRNA                | 8658135   | 8654207   | FOXF1 adjacent non-coding developmental regulatory RNA                              |
| 31465 | ENSG00000267081  |           | 28527 | 0.01 | lincRNA                | 28527     | 28527     | long intergenic non-protein coding RNA 543                                          |
| 31714 | ENSG00000255962  | LINC00481 | 29900 | 0.01 | lincRNA                | 51094490  | 102007263 | long intergenic non-protein coding RNA 431                                          |
| 31983 | ENSG0000023404   | LINC00397 | 30171 | 0.01 | lincRNA                | 88453291  | 88456063  | long intergenic non-protein coding RNA 397                                          |
| 32017 | ENSG00000276941  | SRK       | 30202 | 0.01 | lincRNA                | 73012049  | 73012049  | TSS1 transcript, XIST antisense RNA                                                 |
| 32099 | ENSG00000232221  | LINC00187 | 30745 | 0.01 | lincRNA                | 12981283  | 12981283  | long intergenic non-protein coding RNA 187                                          |
| 32381 | ENSG00000251015  |           | 30747 | 0.01 | lincRNA                | 45992297  | 45994506  | SLC25A30 antisense RNA 1                                                            |
| 32401 | ENSG00000196421  | LINC01076 | 30748 | 0.01 | lincRNA                | 60669997  | 60671315  | long intergenic non-protein coding RNA 176                                          |
| 32592 | ENSG00000227060  | LINC00511 | 30749 | 0.01 | lincRNA                | 133684003 | 133684003 | long intergenic non-protein coding RNA 511                                          |
| 32748 | ENSG00000266928  | LINC00888 | 30755 | 0.01 | lincRNA                | 19746296  | 19746296  | long intergenic non-protein coding RNA 629                                          |
| 32844 | ENSG00000248131  | BCYRN1    | 31257 | 0.01 | lincRNA                | 47591899  | 47571698  | lincRNA transcript, antisense 886                                                   |
| 33033 | ENSG00000226824  | EIF3A1    | 32399 | 0.01 | lincRNA                | 15481925  | 15481925  | long intergenic non-protein coding RNA 886                                          |
| 34223 | ENSG00000202764  | MIR628    | 31214 | 0.01 | miRNA                  | 12574869  | 12584475  | antisense 49 (non-protein coding)                                                   |
| 9834  | ENSG00000202764  | MIR628    | 31214 | 0.01 | miRNA                  | 12574869  | 12584475  | antisense 49 (non-protein coding)                                                   |
| 14234 | ENSG000002024473 | MIR325    | 15653 | 0.01 | miRNA                  | 18324334  | 18324311  | brain cytoplasmic RNA                                                               |
| 20386 | ENSG00000253008  | MIR325    | 22566 | 0.01 | miRNA                  | 44819265  | 44820211  | EIF3 antisense RNA 1 (read to head)                                                 |
| 24751 | ENSG00000188997  | MIR107    | 23774 | 0.01 | miRNA                  | 91352500  | 91352586  | microRNA 628                                                                        |
| 24841 | ENSG000002017620 | MIR545    | 23865 | 0.01 | miRNA                  | 73509399  | 73507044  | has-mi-4538                                                                         |
| 29912 | ENSG00000211533  | MIR1272   | 24731 | 0.01 | miRNA                  | 92565086  | 92564714  | microRNA 2265                                                                       |
| 26002 | ENSG000002021406 | MIR3202   | 24801 | 0.01 | miRNA                  | 22444706  | 22444483  | microRNA 107                                                                        |
| 26792 | ENSG00000199188  | MIR374A   | 25482 | 0.01 | miRNA                  | 73507121  | 73507192  | microRNA 545                                                                        |
| 27883 | ENSG00000204173  | MIR1175   | 25738 | 0.01 | miRNA                  | 63447629  | 63447629  | microRNA 1972                                                                       |
| 27487 | ENSG00000198132  | MIR450A1  | 26077 | 0.01 | miRNA                  | 13367431  | 13367445  | microRNA 320b-2                                                                     |
| 27593 | ENSG00000198992  | MIR410    | 26149 | 0.01 | miRNA                  | 10153249  | 10153228  | microRNA 376a                                                                       |
| 27744 | ENSG00000201922  | MIR593    | 26394 | 0.01 | miRNA                  | 15330349  | 15330349  | microRNA 3775                                                                       |
| 28451 | ENSG00000264884  | MIR3613   | 27872 | 0.01 | miRNA                  | 5057051   | 5057057   | microRNA 450a-1                                                                     |
| 28637 | ENSG00000203540  | MIR582    | 28362 | 0.01 | miRNA                  | 82117765  | 82117747  | microRNA 410                                                                        |
| 30348 | ENSG000002017663 | MIR582    | 28362 | 0.01 | miRNA                  | 82117765  | 82117747  | microRNA 363                                                                        |
| 31677 | ENSG00000203867  | MIR4516   | 28683 | 0.01 | miRNA                  | 2183120   | 2183205   | microRNA 9813                                                                       |
| 31857 | ENSG000002017656 | MIR579    | 30052 | 0.01 | miRNA                  | 51234484  | 51234581  | microRNA 5882                                                                       |
| 31872 | ENSG00000214555  | MIR582    | 30052 | 0.01 | miRNA                  | 2858528   | 2858528   | microRNA 451b                                                                       |
| 32190 | ENSG00000203583  | MIR4522   | 30323 | 0.01 | miRNA                  | 25620936  | 25621022  | microRNA 451b                                                                       |
| 32338 | ENSG00000204408  | MIR4740   | 30720 | 0.01 | miRNA                  | 62673747  | 62673718  | microRNA 4522                                                                       |
| 32385 | ENSG00000203033  | MIR582    | 30052 | 0.01 | miRNA                  | 10549393  | 10549393  | microRNA 4470                                                                       |
| 33376 | ENSG00000203597  | MIR9306   | 31514 | 0.01 | miRNA                  | 131701182 | 131701191 | microRNA 4721                                                                       |
| 28281 | ENSG00000202008  |           | 22203 | 0.01 | misc. RNA              | 2         | 202288236 | Y RNA                                                                               |
| 28468 | ENSG00000201923  |           | 26101 | 0.01 | misc. RNA              | 7         | 14289569  | RNA 75L cytoplasmic 481 pseudogene                                                  |
| 27918 | ENSG00000222337  |           | 26138 | 0.01 | misc. RNA              | 10        | 102049304 | RNA 75K small nuclear pseudogene 225                                                |
| 28433 | ENSG00000243883  |           | 26912 | 0.01 | misc. RNA              | 4         | 15432879  | RNA 75L cytoplasmic 419 pseudogene                                                  |
| 28558 | ENSG000002017604 |           | 27027 | 0.01 | misc. RNA              | 5         | 1862327   | RNA 75L cytoplasmic 419 pseudogene                                                  |
| 28837 | ENSG00000243960  |           | 27106 | 0.01 | misc. RNA              | 19        | 4719056   | RNA 75L cytoplasmic 364 pseudogene                                                  |
| 28882 | ENSG00000243951  |           | 27146 | 0.01 | misc. RNA              | 8         | 8188801   | RNA 75L cytoplasmic 368 pseudogene                                                  |
| 29721 | ENSG00000202273  |           | 27199 | 0.01 | misc. RNA              | 7         | 6252297   | Y RNA                                                                               |
| 29811 | ENSG00000202961  |           | 27284 | 0.01 | misc. RNA              | 12        | 12084274  | Y RNA                                                                               |
| 29837 | ENSG00000202728  |           | 27849 | 0.01 | misc. RNA              | 8         | 38601538  | Y RNA                                                                               |
| 29790 | ENSG00000201915  |           | 28134 | 0.01 | misc. RNA              | 8         | 10197011  | RNA 75L cytoplasmic 665 pseudogene                                                  |
| 30055 | ENSG00000201915  |           | 28134 | 0.01 | misc. RNA              | 8         | 8500068   | RNA 75L cytoplasmic 665 pseudogene                                                  |
| 30082 | ENSG00000203999  |           | 28979 | 0.01 | misc. RNA              | 3         | 13932947  | RNA 75K small nuclear pseudogene 124                                                |
| 30087 | ENSG00000204275  |           | 29148 | 0.01 | misc. RNA              | 20        | 38918922  | RNA 75L cytoplasmic 615 pseudogene                                                  |
| 30923 | ENSG00000240264  |           | 29183 | 0.01 | misc. RNA              | 3         | 20319815  | RNA 75L cytoplasmic 751 pseudogene                                                  |
| 31149 | ENSG000002044710 |           | 29374 | 0.01 | misc. RNA              | 6         | 10871290  | RNA 75L cytoplasmic 47 pseudogene                                                   |
| 31314 | ENSG00000202389  |           | 29624 | 0.01 | misc. RNA              | 1         | 88734541  | RNA 75L cytoplasmic 47 pseudogene                                                   |
| 31388 | ENSG00000198400  |           | 29814 | 0.01 | misc. RNA              | 2         | 23092245  | RNA 75L cytoplasmic 47 pseudogene                                                   |
| 31405 | ENSG00000202907  |           | 29823 | 0.01 | misc. RNA              | 20        | 5094839   | RNA 75L cytoplasmic 47 pseudogene                                                   |
| 31491 | ENSG00000212369  |           | 29826 | 0.01 | misc. RNA              | 6         | 51108292  | RNA 75L cytoplasmic 47 pseudogene                                                   |
| 31513 | ENSG00000240938  |           | 29912 | 0.01 | misc. RNA              | 6         | 6588385   | RNA 75L cytoplasmic 554 pseudogene                                                  |
| 31573 | ENSG00000240938  |           | 29912 | 0.01 | misc. RNA              | 6         | 6588385   | RNA 75L cytoplasmic 554 pseudogene                                                  |
| 31766 | ENSG000002017628 |           | 29986 | 0.01 | misc. RNA              | 12        | 12306619  | RNA 75L cytoplasmic 564 pseudogene                                                  |
| 31852 | ENSG00000222969  |           | 30047 | 0.01 | misc. RNA              | 13        | 9885089   | RNA 75K small nuclear pseudogene 2                                                  |
| 31987 | ENSG00000202318  |           | 30176 | 0.01 | misc. RNA              | 12        | 6343511   | Y RNA                                                                               |
| 31997 | ENSG00000201916  |           | 30178 | 0.01 | misc. RNA              | 12        | 6433362   | Y RNA                                                                               |
| 32072 | ENSG00000201868  |           | 30264 | 0.01 | misc. RNA              | 1         | 35661570  | Y RNA                                                                               |
| 32096 | ENSG00000199420  |           | 30292 | 0.01 | misc. RNA              | 4         | 15095391  | RNA 75K small nuclear pseudogene 170                                                |
| 32371 | ENSG00000201198  |           | 30511 | 0.01 | misc. RNA              | 10        | 4098132   | RNA 75K small nuclear pseudogene 170                                                |
| 32396 | ENSG00000240457  |           | 30561 | 0.01 | misc. RNA              | 14        | 10254350  | RNA 75L cytoplasmic 472 pseudogene                                                  |
| 32802 | ENSG00000208813  |           | 30671 | 0.01 | misc. RNA              | 3         | 152917491 | RNA 75L cytoplasmic 300 pseudogene                                                  |
| 32921 | ENSG00000211553  |           | 31088 | 0.01 | misc. RNA              | 1         | 1174868   | RNA 75L cytoplasmic 300 pseudogene                                                  |
| 34013 | ENSG00000203432  |           | 31777 | 0.01 | misc. RNA              | 5         | 12235814  | RNA 75L cytoplasmic 685 pseudogene                                                  |
| 28302 | ENSG00000208806  |           | 27389 | 0.01 | polymorphic pseudogene | 14        | 20697591  | olfactory receptor family 11, subfamily H, member 7 (genepseudogene)                |
| 30388 | ENSG00000202953  | IFNL4     | 27727 | 0.01 | polymorphic pseudogene | 92        | 987199    | interferon lambda 4 (pseudogene)                                                    |
| 14376 | ENSG00000202187  |           | 15758 | 0.01 | processed pseudogene   | 13        | 23270152  | keratin, heavy polypeptide 1 pseudogene 7                                           |
| 15412 | ENSG00000203574  | RPS1A     | 16854 | 0.01 | processed pseudogene   | 6         | 74088381  | ribosomal protein L34 pseudogene 3                                                  |
| 15688 | ENSG00000203574  | RPS1A     | 16854 | 0.01 | processed pseudogene   | 6         | 74088381  | ribosomal protein S3 pseudogene 8                                                   |
| 15744 | ENSG00000244363  |           | 16811 | 0.01 | processed pseudogene   | 5         | 78979158  | ribosomal protein L7 pseudogene 23                                                  |
| 16512 | ENSG00000138239  |           | 17404 | 0.01 | processed pseudogene   | 12        | 63359095  | ribosomal protein L14 pseudogene 1                                                  |
| 16863 | ENSG00000204560  |           | 17531 | 0.01 | processed pseudogene   | 18        | 2969518   | heterogeneous nuclear ribonucleoprotein A1 pseudogene 7                             |
| 17852 | ENSG00000184100  |           | 19230 | 0.01 | processed pseudogene   | 3         | 15981878  | heterogeneous nuclear ribonucleoprotein C pseudogene 2                              |
| 17788 | ENSG00000204253  |           | 19345 | 0.01 | processed pseudogene   | 2         | 19078062  | ribosomal L2 domain containing 1 pseudogene 1                                       |
| 18001 | ENSG00000201920  |           | 19439 | 0.01 | processed pseudogene   | 8         | 2713829   | ribosomal protein L5 pseudogene 4                                                   |
| 18685 | ENSG00000229994  |           | 19906 | 0.01 | processed pseudogene   | 1         | 3581623   | ribosomal protein L5 pseudogene 4                                                   |
| 18786 | ENSG00000202054  |           | 19976 | 0.01 | processed pseudogene   | 21        | 37502699  | mediator of cell motility 1 pseudogene 1                                            |
| 18842 | ENSG00000234518  |           | 19131 | 0.01 | processed pseudogene   | 1         | 8959966   | prostaglandin G synthase 3 (cytosolic) pseudogene 1                                 |
| 18914 | ENSG00000201920  |           | 19134 | 0.01 | processed pseudogene   | 10        | 32914502  | ribosomal protein S4 pseudogene 11                                                  |
| 19384 | ENSG00000227203  |           | 19563 | 0.01 | processed pseudogene   | 8         | 11647514  | UBP1 pseudogene 1                                                                   |
| 21487 | ENSG00000202652  |           | 21185 | 0.01 | processed pseudogene   | 1         | 6691429   | eukaryotic translation elongation factor 1 alpha 1 pseudogene 11                    |
| 21647 | ENSG000002042100 | LINC01000 | 21558 | 0.01 | processed pseudogene   | 1         | 131025    | capica transmembrane receptor pseudogene 27                                         |
| 23144 | ENSG000002042100 | LINC01000 | 22455 | 0.01 | processed pseudogene   | 19        | 30447895  | ribosomal protein L9 pseudogene 32                                                  |
| 23217 | ENSG000002042100 | LINC01000 | 22503 | 0.01 | processed pseudogene   | 3         | 22250307  | mitochondrial inner membrane organizing system 1 pseudogene 3                       |
| 24472 | ENSG00000202924  |           | 23104 | 0.01 | processed pseudogene   | 4         | 113606211 | eukaryotic translation elongation factor 1 alpha 1 pseudogene 16                    |
| 24782 | ENSG00000202925  |           | 23808 | 0.01 | processed pseudogene   | 4         | 33333320  | oligosaccharyltransferase complex subunit pseudogene 4                              |
| 24874 | ENSG00000242083  |           | 23888 | 0.01 | processed pseudogene   | 4         | 57223201  | phosphoglucomutase 1 pseudogene 8                                                   |
| 25069 | ENSG00000203483  |           | 24442 | 0.01 | processed pseudogene   | 8         | 1566389   | ribosomal protein L7a pseudogene 31                                                 |
| 26666 | ENSG000002017643 |           | 25069 | 0.01 | processed pseudogene   | 8         | 83383344  | protein phosphatase, Mg <sup>2+</sup> /Mn <sup>2+</sup> -dependent 1A, pseudogene 1 |
| 27345 | ENSG000002017643 |           | 25069 | 0.01 | processed pseudogene   | 2         | 26045338  | protein kinase cholesteryl ester transfer protein pseudogene 4                      |
| 27734 | ENSG00000204161  |           | 26275 | 0.01 | processed pseudogene   | 18        | 57429170  | prostaglandin F synthase 3 (cytosolic) pseudogene 2                                 |
| 27862 | ENSG00000203209  |           | 26303 | 0.01 | processed pseudogene   | 8         | 28615623  | ribosomal protein S26 pseudogene 54                                                 |
| 28028 | ENSG00000203453  |           | 26350 | 0.01 | processed pseudogene   | 1         | 223119027 | guanine nucleotide pseudogene 2                                                     |
| 28031 | ENSG00000202990  |           | 26350 | 0.01 | processed pseudogene   | 20        | 5899454   | NADH dehydrogenase (ubiquinone) 1 beta subcomplex, 1 pseudogene 2                   |
| 28181 | ENSG00000217447  |           | 27818 | 0.01 | processed pseudogene   | 20        | 27824450  | MT-CC2 pseudogene 1                                                                 |
| 28175 | ENSG00000241388  |           | 26676 | 0.01 | processed pseudogene   | 14        | 57445127  | chitinase 3-like 3 pseudogene 1                                                     |
| 28295 | ENSG000002027671 |           | 26762 | 0.01 | processed pseudogene   | 1         | 22404281  | ribosomal protein L3 pseudogene 3                                                   |
| 28407 | ENSG000002017628 |           | 26933 | 0.01 | processed pseudogene   | 3         | 48352062  | prohibitin pseudogene 11                                                            |
| 28672 | ENSG00000242882  |           | 27139 | 0.01 | processed pseudogene   | 4         | 17430396  | ribosomal protein L5 pseudogene 11                                                  |
| 28703 | ENSG000002027882 |           | 27181 | 0.01 | processed pseudogene   | 10        | 7884906   | ribosomal protein L5 pseudogene 11                                                  |
| 29034 | ENSG00000202656  |           | 27386 | 0.01 | processed pseudogene   | 21        | 3058669   | glycidylglycyl isomerase A (cyclophilin A) pseudogene 13                            |
| 28942 | ENSG00000228509  |           | 27599 | 0.01 | processed pseudogene   | 4         | 13374187  | peptidylglycine 3-phosphate dehydrogenase pseudogene 14                             |
| 28988 | ENSG00000202315  |           | 27439 | 0.01 |                        |           |           |                                                                                     |

|       |                 |       |      |                      |                      |           |           |                                                                                                 |                                                                                                                             |
|-------|-----------------|-------|------|----------------------|----------------------|-----------|-----------|-------------------------------------------------------------------------------------------------|-----------------------------------------------------------------------------------------------------------------------------|
| 30766 | ENSG00000201537 | 29047 | 2    | 0.01                 | processed_pseudogene | 1         | 27144804  | 27144900                                                                                        | eukaryotic translation elongation factor 1 alpha 1 pseudogene 38                                                            |
| 30772 | ENSG00000201538 | 29049 | 3    | 0.01                 | processed_pseudogene | 1         | 12381007  | 12381010                                                                                        | ribosomal protein L7 pseudogene 15                                                                                          |
| 30670 | ENSG00000201555 | 29145 | 5    | 0.01                 | processed_pseudogene | 10        | 12040372  | 12040373                                                                                        | translocase of outer mitochondrial membrane 22 homolog (yeast) pseudogene 5                                                 |
| 30932 | ENSG00000216439 | 29190 | 9    | 0.01                 | processed_pseudogene | 6         | 86136375  | 86136383                                                                                        | deoxyribonuclease triphosphatase pseudogene 5                                                                               |
| 31008 | ENSG00000201602 | 29256 | 0.01 | processed_pseudogene | 13                   | 7626292   | 7626333   | family with sequence similarity 204, member C, pseudogene                                       |                                                                                                                             |
| 11022 | ENSG00000201198 | 29297 | 6    | 0.01                 | processed_pseudogene | 13        | 3252417   | 3252418                                                                                         | ribosomal protein S24 pseudogene 13                                                                                         |
| 31057 | ENSG00000201797 | 29295 | 22   | 0.01                 | processed_pseudogene | 22        | 31292626  | 31292628                                                                                        | eukaryotic translation initiation factor 4H1 pseudogene 2                                                                   |
| 31085 | ENSG00000004803 | 29312 | 0.01 | processed_pseudogene | 6                    | 5084996   | 5085275   | ribosomal protein S17 pseudogene 5                                                              |                                                                                                                             |
| 31074 | ENSG00000201628 | 29311 | 0.01 | processed_pseudogene | 2                    | 12685248  | 12685258  | mitochondrial ribosomal protein S21 pseudogene 6                                                |                                                                                                                             |
| 31097 | ENSG00000202593 | 29327 | 2    | 0.01                 | processed_pseudogene | 2         | 2530279   | 2530280                                                                                         | succinate CoA ligase, ADP-forming, beta subunit pseudogene 3                                                                |
| 31251 | ENSG00000201198 | 29372 | 21   | 0.01                 | processed_pseudogene | 21        | 2099159   | 2099162                                                                                         | ribosomal protein L37 pseudogene 4                                                                                          |
| 31336 | ENSG00000201628 | 29374 | 2    | 0.01                 | processed_pseudogene | 2         | 12685248  | 12685249                                                                                        | mitochondrial ribosomal protein L35 pseudogene 4                                                                            |
| 31394 | ENSG00000202137 | 29612 | 0.01 | processed_pseudogene | 12                   | 121031818 | 121032151 | ribosomal protein L11 pseudogene 5                                                              |                                                                                                                             |
| 31442 | ENSG00000202741 | 29660 | 0.01 | processed_pseudogene | 15                   | 162011122 | 162011128 | ubiquitin-cytochrome c reductase binding protein pseudogene 2                                   |                                                                                                                             |
| 31466 | ENSG00000200491 | 29692 | 0.01 | processed_pseudogene | 11                   | 8146380   | 8146381   | acidic leucine-rich nuclear phosphoprotein 32 family, member B pseudogene 3                     |                                                                                                                             |
| 31524 | ENSG00000202342 | 29725 | 7    | 0.01                 | processed_pseudogene | 7         | 6339344   | 6337031                                                                                         | NMD5 ribosome export adaptor pseudogene 1                                                                                   |
| 31617 | ENSG00000202086 | 29813 | 2    | 0.01                 | processed_pseudogene | 6         | 1394926   | 1394987                                                                                         | mitochondrial ribosomal protein L35 pseudogene 1                                                                            |
| 31631 | ENSG00000201444 | 29829 | 9    | 0.01                 | processed_pseudogene | 2         | 39724678  | 39725142                                                                                        | ribosomal protein S11 pseudogene 7                                                                                          |
| 31690 | ENSG00000218890 | 29884 | 0.01 | processed_pseudogene | 6                    | 2672421   | 2672768   | histone cluster 1, H2a, pseudogene 4                                                            |                                                                                                                             |
| 31781 | ENSG00000201503 | 29973 | 5    | 0.01                 | processed_pseudogene | 6         | 7481327   | 7482827                                                                                         | heterogeneous nuclear ribonucleoprotein L pseudogene 1                                                                      |
| 31793 | ENSG00000201521 | 29971 | 1    | 0.01                 | processed_pseudogene | 2         | 22012336  | 22012338                                                                                        | ubiquitin A-N2 residue ribosomal protein l10n pseudogene 6                                                                  |
| 31803 | ENSG00000204856 | 29963 | 0.01 | processed_pseudogene | 4                    | 125384018 | 125384018 | trans-2-enooyl-CoA reductase pseudogene 2                                                       |                                                                                                                             |
| 31800 | ENSG00000201529 | 30014 | 2    | 0.01                 | processed_pseudogene | 3         | 18374157  | 18374554                                                                                        | eukaryotic translation elongation factor 1 alpha 1 pseudogene 8                                                             |
| 31836 | ENSG00000200013 | 30031 | 0.01 | processed_pseudogene | 16                   | 5879805   | 5879805   | actinoporin O pseudogene 5                                                                      |                                                                                                                             |
| 31865 | ENSG00000201793 | 30056 | 1    | 0.01                 | processed_pseudogene | X         | 15292871  | 15292817                                                                                        | ribosomal protein L18a pseudogene 16                                                                                        |
| 31867 | ENSG00000201403 | 30057 | 5    | 0.01                 | processed_pseudogene | 13        | 27151023  | 27151812                                                                                        | ribosomal protein S3a pseudogene 44                                                                                         |
| 31928 | ENSG00000200103 | 30153 | 0.01 | processed_pseudogene | 5                    | 96387624  | 96388301  | mitochondrially encoded ATP synthase 8 pseudogene 2                                             |                                                                                                                             |
| 31943 | ENSG00000202676 | 30151 | 0.01 | processed_pseudogene | 1                    | 57004124  | 57004123  | ribosomal protein L21 pseudogene 23                                                             |                                                                                                                             |
| 32032 | ENSG00000202444 | 30214 | 7    | 0.01                 | processed_pseudogene | 13        | 31002084  | 31002086                                                                                        | ubiquitin-conjugating enzyme E2L 5 (pseudogene)                                                                             |
| 32056 | ENSG00000201910 | 30232 | 0.01 | processed_pseudogene | 10                   | 5268286   | 5268286   | phosphocarnitine transferase 1 pseudogene 1                                                     |                                                                                                                             |
| 32068 | ENSG00000202573 | 30238 | 9    | 0.01                 | processed_pseudogene | 18        | 2954211   | 29543581                                                                                        | phosphogluconate dehydrogenase pseudogene 1                                                                                 |
| 32179 | ENSG00000201737 | 30369 | 1    | 0.01                 | processed_pseudogene | 1         | 240175946 | 24017628                                                                                        | ribosomal protein S7 pseudogene 5                                                                                           |
| 32265 | ENSG00000201550 | 30497 | 7    | 0.01                 | processed_pseudogene | 12        | 6902014   | 6902014                                                                                         | keratin 8 pseudogene 3                                                                                                      |
| 32312 | ENSG00000204075 | 30481 | 0.01 | processed_pseudogene | 3                    | 11363009  | 11363007  | VPS29A pseudogene 1                                                                             |                                                                                                                             |
| 32365 | ENSG00000202203 | 30537 | 1    | 0.01                 | processed_pseudogene | 9         | 31253899  | 31254775                                                                                        | solute carrier family 25 (mitochondrial carrier, adenine nucleotide translocator), member 6 pseudogene 1                    |
| 32492 | ENSG00000201735 | 30576 | 6    | 0.01                 | processed_pseudogene | 17        | 7684205   | 7684290                                                                                         | ribosomal protein L9 pseudogene 29                                                                                          |
| 32529 | ENSG00000202379 | 30713 | 3    | 0.01                 | processed_pseudogene | 13        | 90823120  | 90823120                                                                                        | fatty acyl-CoA reductase 1 pseudogene 13                                                                                    |
| 32611 | ENSG00000201533 | 30734 | 0.01 | processed_pseudogene | 10                   | 69841074  | 69841074  | PRK3, apoptosis, W11, regulator pseudogene 1                                                    |                                                                                                                             |
| 32738 | ENSG00000202549 | 30914 | 5    | 0.01                 | processed_pseudogene | X         | 13852050  | 13852045                                                                                        | steroid-5-alpha-reductase, alpha-polyketide 1 pseudogene 1 (3-oxo-5-alpha-steroid delta 4-dihydrogenase) alpha pseudogene 1 |
| 32806 | ENSG00000201722 | 30973 | 8    | 0.01                 | processed_pseudogene | 8         | 12808558  | 12809755                                                                                        | prostate cancer associated noncoding RNA 1                                                                                  |
| 32832 | ENSG00000201345 | 31001 | 0.01 | processed_pseudogene | 6                    | 4269472   | 4269458   | ATPase, H+ transporting, lysosomal 9kDa, V0 subunit 3 pseudogene 3                              |                                                                                                                             |
| 32884 | ENSG00000202813 | 31051 | 7    | 0.01                 | processed_pseudogene | X         | 6298755   | 6298720                                                                                         | basic transcription factor 3 pseudogene 8                                                                                   |
| 32881 | ENSG00000201434 | 31052 | 0.01 | processed_pseudogene | 10                   | 50969108  | 50969108  | nucleolar protein interacting with the PNA domain of MN07 pseudogene 1                          |                                                                                                                             |
| 32951 | ENSG00000202655 | 31213 | 3    | 0.01                 | processed_pseudogene | 5         | 16756278  | 16756278                                                                                        | 16756278                                                                                                                    |
| 34454 | ENSG00000176933 | 32634 | 0.01 | processed_pseudogene | 6                    | 28185421  | 28186655  | transducer of ERBB2, 2 pseudogene 1                                                             |                                                                                                                             |
| 34535 | ENSG00000200469 | 32713 | 0.01 | processed_pseudogene | 13                   | 23409797  | 23409802  | nuclear uncap(ing) pyrophosphatase synthase 1 homolog (S. cerevisiae) pseudogene 2              |                                                                                                                             |
| 36822 | ENSG00000180448 | 32733 | 0.01 | processed_pseudogene | 13                   | 15004890  | 15004890  | long interspersed non-protein coding RNA 1009                                                   |                                                                                                                             |
| 30988 | ENSG00000215256 | 29221 | 4    | 0.01                 | processed_transcript | 14        | 24407340  | 24405048                                                                                        | DHRS4-AS1                                                                                                                   |
| 31726 | ENSG00000202789 | 29929 | 0.01 | processed_transcript | 8                    | 1221952   | 1222010   | family with sequence similarity 86, member A                                                    |                                                                                                                             |
| 32008 | ENSG00000201296 | 30011 | 0.01 | processed_transcript | 2                    | 17479797  | 17479797  | NAALADL3 antisense RNA 3                                                                        |                                                                                                                             |
| 32440 | ENSG00000201711 | 30659 | 0.01 | processed_transcript | 22                   | 4643787   | 4644073   | long interspersed non-protein coding RNA 899                                                    |                                                                                                                             |
| 32763 | ENSG00000204899 | 30711 | 0.01 | processed_transcript | 8                    | 12899779  | 12911349  | Pvt1 oncogene (non-protein coding)                                                              |                                                                                                                             |
| 33016 | ENSG00000181796 | 30914 | 0.01 | processed_transcript | 10                   | 23231137  | 23231137  | long interspersed non-protein coding RNA 671                                                    |                                                                                                                             |
| 7652  | ENSG00000191249 | 11886 | 0.01 | protein_coding       | 4                    | 10004408  | 10007849  | alcohol dehydrogenase 4 (class II), pi polypeptide                                              |                                                                                                                             |
| 7894  | ENSG00000192426 | 11927 | 0.01 | protein_coding       | 14                   | 94843084  | 94857030  | serpin peptidase inhibitor, class A (alpha-1-antitrypsin, antitrypsin), member 1                |                                                                                                                             |
| 8467  | ENSG00000109181 | 11125 | 0.01 | protein_coding       | 6                    | 6969181   | 6969181   | cytochrome P450 family 4, subfamily 9, polypeptide 5                                            |                                                                                                                             |
| 8659  | ENSG00000162078 | 12316 | 0.01 | protein_coding       | 16                   | 6988171   | 6988171   | UDP-glucuronosyltransferase 2 family, polypeptide B10                                           |                                                                                                                             |
| 8699  | ENSG00000162462 | 11852 | 0.01 | protein_coding       | 16                   | 5745945   | 5745945   | symyx granule protein 10B                                                                       |                                                                                                                             |
| 8866  | ENSG00000136881 | 11433 | 0.01 | protein_coding       | 9                    | 10412699  | 10414580  | hydroxymethylglutaryl-CoA lyase pseudogene 6                                                    |                                                                                                                             |
| 9427  | ENSG00000137486 | 11880 | 0.01 | protein_coding       | 11                   | 7497526   | 7502873   | bile acid CoA: amino N-acyltransferase (glycine N-cholyltransferase)                            |                                                                                                                             |
| 9319  | ENSG00000106993 | 11433 | 0.01 | protein_coding       | 22                   | 3002228   | 3002228   | arsinin, beta 1                                                                                 |                                                                                                                             |
| 10478 | ENSG00000182333 | 12717 | 0.01 | protein_coding       | 10                   | 90424198  | 9043871   | arsinin, alpha 1                                                                                |                                                                                                                             |
| 10528 | ENSG00000181758 | 12732 | 0.01 | protein_coding       | 4                    | 10071524  | 10021218  | lipase, gastric                                                                                 |                                                                                                                             |
| 10564 | ENSG00000181758 | 12732 | 0.01 | protein_coding       | 4                    | 10071524  | 10021218  | alcohol dehydrogenase 1A (class I), alpha polypeptide                                           |                                                                                                                             |
| 10774 | ENSG00000134538 | 12964 | 0.01 | protein_coding       | 12                   | 21284136  | 21286180  | serpin peptidase inhibitor, clade B (chitinase collectin), member 1                             |                                                                                                                             |
| 10906 | ENSG00000134240 | 13077 | 0.01 | protein_coding       | 1                    | 12002910  | 12011128  | solute carrier organic anion transporter family, member 1B1                                     |                                                                                                                             |
| 11008 | ENSG00000106957 | 11886 | 0.01 | protein_coding       | 14                   | 74341     | 74341     | 3-hydroxy-3-methylglutaryl-CoA synthase 2 (mitochondrial)                                       |                                                                                                                             |
| 11354 | ENSG00000172395 | 13443 | 0.01 | protein_coding       | 4                    | 10012376  | 10014094  | alcohol dehydrogenase B (class V)                                                               |                                                                                                                             |
| 11368 | ENSG00000136889 | 13457 | 0.01 | protein_coding       | 2                    | 113894791 | 113891593 | interferon 1 receptor antagonist                                                                |                                                                                                                             |
| 11494 | ENSG00000101581 | 13458 | 0.01 | protein_coding       | 1                    | 170071    | 170071    | solute carrier family 2 (facilitated glucose transporter), member 2                             |                                                                                                                             |
| 11726 | ENSG00000085548 | 13768 | 0.01 | protein_coding       | 19                   | 4225485   | 4227613   | carcinoembryonic antigen-related cell adhesion molecule 6 (non-specific cross reacting antigen) |                                                                                                                             |
| 12317 | ENSG00000188878 | 14220 | 0.01 | protein_coding       | 2                    | 8988437   | 8988964   | surfactant protein B                                                                            |                                                                                                                             |
| 12430 | ENSG00000101581 | 14230 | 0.01 | protein_coding       | 2                    | 8701383   | 8701383   | chitinase channel accessory 4                                                                   |                                                                                                                             |
| 12964 | ENSG00000172005 | 14407 | 0.01 | protein_coding       | 2                    | 9950422   | 99519737  | mal-, T-cell differentiation protein                                                            |                                                                                                                             |
| 12623 | ENSG00000170303 | 14450 | 0.01 | protein_coding       | 6                    | 180542621 | 180579730 | solute carrier family 12 (organic cation transporter), member 1                                 |                                                                                                                             |
| 12748 | ENSG00000084674 | 14450 | 0.01 | protein_coding       | 6                    | 17221     | 210294945 | 210294945                                                                                       |                                                                                                                             |
| 12833 | ENSG00000105929 | 14405 | 0.01 | protein_coding       | 7                    | 93550074  | 93633884  | Bett1 golgi vesicular membrane trafficking protein                                              |                                                                                                                             |
| 13088 | ENSG00000117372 | 14779 | 0.01 | protein_coding       | 5                    | 17247070  | 17246248  | ATPase, H+ transporting, lysosomal 9kDa, V0 subunit e1                                          |                                                                                                                             |
| 13128 | ENSG00000101528 | 14812 | 0.01 | protein_coding       | 7                    | 70981     | 70981     | cantharidin 9-O-methyltransferase 1, subcomponent                                               |                                                                                                                             |
| 13134 | ENSG00000090988 | 14814 | 0.01 | protein_coding       | 6                    | 41704449  | 41721847  | progastrin (progastrin C)                                                                       |                                                                                                                             |
| 13204 | ENSG00000189377 | 14872 | 0.01 | protein_coding       | 19                   | 4292240   | 4294720   | chemokine (C-X-C motif) ligand 17                                                               |                                                                                                                             |
| 13281 | ENSG00000182367 | 14938 | 0.01 | protein_coding       | 8                    | 47691969  | 47691969  | T cell acute lymphocytic leukemia                                                               |                                                                                                                             |
| 13334 | ENSG00000184530 | 14973 | 0.01 | protein_coding       | 6                    | 12780060  | 12780060  | chromosome 8 open reading frame 58                                                              |                                                                                                                             |
| 13446 | ENSG00000135046 | 15059 | 0.01 | protein_coding       | 9                    | 7576673   | 7578530   | annexin A1                                                                                      |                                                                                                                             |
| 13560 | ENSG00000165017 | 15142 | 0.01 | protein_coding       | 2                    | 7419441   | 7414992   | actin, gamma 2, smooth muscle, enteric                                                          |                                                                                                                             |
| 13614 | ENSG00000154446 | 15104 | 0.01 | protein_coding       | 2                    | 89225042  | 89225042  | unc-29, Drosophila (C. elegans)                                                                 |                                                                                                                             |
| 13835 | ENSG00000146346 | 15200 | 0.01 | protein_coding       | 9                    | 13091130  | 13091574  | lipocalin 2                                                                                     |                                                                                                                             |
| 13961 | ENSG00000181908 | 15245 | 0.01 | protein_coding       | 10                   | 12430181  | 12430252  | deleted in malignant brain tumors 1                                                             |                                                                                                                             |
| 13710 | ENSG00000181908 | 15245 | 0.01 | protein_coding       | 10                   | 12430181  | 12430252  | deleted in malignant brain tumors 1                                                             |                                                                                                                             |
| 13713 | ENSG00000186074 | 15260 | 0.01 | protein_coding       | 7                    | 13421244  | 13426180  | aldo-keto reductase family 1, member B10 (aldose reductase)                                     |                                                                                                                             |
| 13716 | ENSG00000131471 | 15262 | 0.01 | protein_coding       | 7                    | 41001207  | 41010147  | amine oxidase, copper containing 3                                                              |                                                                                                                             |
| 14056 | ENSG00000195146 | 15716 | 0.01 | protein_coding       | 22                   | 8736511   | 8736511   | lysine 61 phosphatase 1                                                                         |                                                                                                                             |
| 14189 | ENSG00000201395 | 15741 | 0.01 | protein_coding       | 6                    | 5265462   | 5268870   | glutathione S-transferase alpha 1                                                               |                                                                                                                             |
| 14379 | ENSG00000188899 | 15781 | 0.01 | protein_coding       | 2                    | 85911531  | 8592053   | vesicle-associated membrane protein 5                                                           |                                                                                                                             |
| 14424 | ENSG00000190300 | 15784 | 0.01 | protein_coding       | 4                    | 4346750   | 4346750   | translocator protein 1 (LOC4)                                                                   |                                                                                                                             |
| 14430 | ENSG00000168884 | 15799 | 0.01 | protein_coding       | 4                    | 274375    | 2758103   | TNFAIP3 interacting protein 2                                                                   |                                                                                                                             |
| 14459 | ENSG00000199518 | 15826 | 0.01 | protein_coding       | 17                   | 4849474   | 4852366   | profilin 1                                                                                      |                                                                                                                             |
| 14460 | ENSG00000171002 | 15823 | 0.01 | protein_coding       | 12                   | 12651269  | 12651269  | muslin 13, cell surface associated                                                              |                                                                                                                             |
| 14859 | ENSG00000162444 | 16133 | 0.01 | protein_coding       | 1                    | 10052764  | 10070678  | muslin 13, cell surface associated 7, cellular                                                  |                                                                                                                             |
| 15036 | ENSG            |       |      |                      |                      |           |           |                                                                                                 |                                                                                                                             |



|       |                   |          |         |      |                |    |           |           |                                                                              |
|-------|-------------------|----------|---------|------|----------------|----|-----------|-----------|------------------------------------------------------------------------------|
| 18040 | ENSG00000153448   | C16orf89 | 18530.4 | 0.01 | protein_coding | 16 | 5094123   | 5116111   | chromosome 16 open reading frame 89                                          |
| 18050 | ENSG00000153772   | TRF3     | 18617.9 | 0.01 | protein_coding | 13 | 8913338   | 9003338   | serine/threonine kinase 24                                                   |
| 18068 | ENSG00000148447   | WTAP     | 18964.2 | 0.01 | protein_coding | 6  | 160146617 | 160173351 | Wilm's tumor 1-associated protein                                            |
| 18119 | ENSG00000151882   | CLL2L    | 18991.3 | 0.01 | protein_coding | 5  | 4337647   | 43412493  | chemokine (C-C motif) ligand 28                                              |
| 18147 | ENSG00000186797   | FAM88A   | 18917.4 | 0.01 | protein_coding | 15 | 52497328  | 52497328  | family with sequence similarity 96, member A                                 |
| 18220 | ENSG00000152669   | EXOC2    | 18917.4 | 0.01 | protein_coding | 8  | 3752953   | 37531750  | exosome component 2                                                          |
| 18268 | ENSG00000158197   | KCNE2    | 18703.8 | 0.01 | protein_coding | 21 | 35736323  | 35743688  | potassium voltage-gated channel, lik-related family, member 2                |
| 18316 | ENSG00000160756   | PABPC1   | 18736.4 | 0.01 | protein_coding | 8  | 10168844  | 101735037 | poly(A) binding protein, cytoplasmic 1                                       |
| 18371 | ENSG00000150963   | TRAF3    | 18875.1 | 0.01 | protein_coding | 3  | 4888262   | 4888262   | transcription factor binding to NF-kB enhancer 3                             |
| 18438 | ENSG00000181374   | COL13    | 18831.4 | 0.01 | protein_coding | 17 | 32883471  | 32885623  | chemokine (C-C motif) ligand 13                                              |
| 18501 | ENSG00000120795   | PLS1     | 18875.1 | 0.01 | protein_coding | 3  | 142315229 | 14242568  | plasma membrane protein                                                      |
| 18602 | ENSG00000152329   | BMPT1    | 18978.4 | 0.01 | protein_coding | 3  | 10261928  | 10261928  | transcription factor binding to E2F1 enhancer 3                              |
| 18639 | ENSG00000141452   | C16orf8  | 18874.1 | 0.01 | protein_coding | 18 | 21083473  | 21111746  | chromosome 16 open reading frame 8                                           |
| 18655 | ENSG00000143824   | CXCL14   | 18883.1 | 0.01 | protein_coding | 5  | 13495673  | 134914889 | chemokine (C-X-C motif) ligand 14                                            |
| 18676 | ENSG00000155584   | ILIR1    | 19000.4 | 0.01 | protein_coding | 2  | 10281904  | 10279634  | interleukin 1 receptor, type 1                                               |
| 18743 | ENSG00000120129   | DUSP1    | 19053.4 | 0.01 | protein_coding | 5  | 172185003 | 172198198 | dual specificity phosphatase 1                                               |
| 18771 | ENSG00000135506   | OSR      | 19017.2 | 0.01 | protein_coding | 12 | 38087738  | 38115340  | osteosarcoma amplified 8, endoplasmic reticulum lectin domain 1              |
| 18818 | ENSG00000107938   | RPL22    | 19108.6 | 0.01 | protein_coding | 2  | 21869452  | 218697718 | ribosomal protein L22                                                        |
| 18825 | ENSG00000116251   | RPL22    | 19109.8 | 0.01 | protein_coding | 1  | 6241292   | 6269449   | ribosomal protein L22                                                        |
| 18852 | ENSG00000181703   | HSPB11   | 19142.6 | 0.01 | protein_coding | 1  | 54324427  | 54411602  | heat shock protein family B (small), member 11                               |
| 18880 | ENSG00000152328   | MTM1     | 19175.8 | 0.01 | protein_coding | 16 | 56703236  | 56725241  | metallothionein 1H                                                           |
| 18901 | ENSG00000116685   | KIAA2013 | 19181.7 | 0.01 | protein_coding | 1  | 11978648  | 11986485  | KIAA2013                                                                     |
| 18948 | ENSG00000109219   | HNRPCC   | 19225.9 | 0.01 | protein_coding | 14 | 21677295  | 21737653  | heterogeneous nuclear ribonucleoprotein C (C1/C2)                            |
| 19025 | ENSG00000146609   | SLF      | 19296   | 0.01 | protein_coding | 5  | 15982668  | 159848178 | SLIT1 signaling factor homolog (S. cerevisiae)                               |
| 19079 | ENSG00000147471   | PRORC    | 19327.1 | 0.01 | protein_coding | 8  | 37621283  | 37637283  | protein synthetase co-transcribed homolog (bacterial)                        |
| 19091 | ENSG00000106970   | TGFB3    | 19335.2 | 0.01 | protein_coding | 1  | 92149922  | 92217892  | transforming growth factor, beta receptor III                                |
| 19177 | ENSG00000145925   | CYPLA2   | 19398   | 0.01 | protein_coding | 15 | 75041185  | 75045453  | cytochrome P450, family 1, subfamily A, polypeptide 2                        |
| 19192 | ENSG000001025169  | SMIM1    | 19406.3 | 0.01 | protein_coding | 1  | 3888552   | 3892546   | small integral membrane protein 1 (Vsl blood group)                          |
| 19210 | ENSG00000132824   | SERINC3  | 19424.9 | 0.01 | protein_coding | 20 | 42142882  | 42150759  | serine incorporator 3                                                        |
| 19262 | ENSG00000156264   | SLMO1    | 19501.4 | 0.01 | protein_coding | 3  | 23471085  | 23471085  | interleukin 6 receptor 2 binding protein 2                                   |
| 19314 | ENSG00000155775   | FUNDC2   | 19501.4 | 0.01 | protein_coding | 8  | 154254255 | 154285878 | FUN1 domain containing 2                                                     |
| 19331 | ENSG00000102702   | ZNF223   | 19519.5 | 0.01 | protein_coding | 19 | 44529596  | 44591471  | Zinc finger protein 223                                                      |
| 19358 | ENSG00000155534   | USF2     | 19548.2 | 0.01 | protein_coding | 8  | 4151788   | 4151788   | myc-1, erythrocytic                                                          |
| 19376 | ENSG00000105689   | USF2     | 19548.2 | 0.01 | protein_coding | 19 | 3575881   | 35770724  | upstream transcription factor 2, c-fos interacting                           |
| 19400 | ENSG00000188860   | TSEN15   | 19567.7 | 0.01 | protein_coding | 1  | 184020811 | 184433438 | TSEN15 RNA splicing endonuclease subunit                                     |
| 19415 | ENSG00000168118   | TRAF1    | 19567.7 | 0.01 | protein_coding | 13 | 1325818   | 1325818   | trans domain family 1, member 13 (NOD1)                                      |
| 19443 | ENSG000001095485  | CWF19L1  | 19569.7 | 0.01 | protein_coding | 10 | 101992055 | 102027437 | CWF19-like 1, cell cycle control (S. pombe)                                  |
| 19479 | ENSG00000131931   | THAP1    | 19697.3 | 0.01 | protein_coding | 8  | 42691817  | 42698488  | THAP domain containing, apoptosis associated protein 1                       |
| 19510 | ENSG00000137698   | IFIT     | 19701.1 | 0.01 | protein_coding | 11 | 16098191  | 16098191  | IFIT1 isoform                                                                |
| 19615 | ENSG00000186333   | ILK      | 19726.4 | 0.01 | protein_coding | 11 | 6624961   | 6632102   | integrin-linked kinase                                                       |
| 19687 | ENSG00000141401   | IMPAA2   | 19780.4 | 0.01 | protein_coding | 18 | 11981024  | 12030876  | inositol(1-myo)-[1-alpha-D-mannosyl]phosphate 2                              |
| 19714 | ENSG00000155581   | CHMP3    | 19805   | 0.01 | protein_coding | 3  | 8973885   | 8973885   | charged multivesicular body protein 3                                        |
| 19745 | ENSG00000185950   | ZFP96L1  | 19828   | 0.01 | protein_coding | 14 | 6925417   | 69255190  | ZFP96-like 1, zinc finger protein-like 1                                     |
| 19828 | ENSG00000116209   | TMEM49   | 19900.2 | 0.01 | protein_coding | 1  | 54497347  | 54519717  | transmembrane protein 59                                                     |
| 20028 | ENSG00000124783   | SRR1     | 20033.8 | 0.01 | protein_coding | 6  | 7296339   | 7307679   | signal sequence receptor, alpha                                              |
| 20014 | ENSG00000152925   | SEK1     | 20037.2 | 0.01 | protein_coding | 6  | 18264989  | 18265543  | ERK signaling oncogene                                                       |
| 20055 | ENSG000001090104  | RGS1     | 20055.6 | 0.01 | protein_coding | 1  | 19254487  | 192549101 | regulator of G-protein signaling 1                                           |
| 20060 | ENSG00000101154   | UTCA     | 20073   | 0.01 | protein_coding | 9  | 116595049 | 116595049 | UDP-glucose ceramide glucosyltransferase                                     |
| 20070 | ENSG00000178911   | TUFT1    | 20073.6 | 0.01 | protein_coding | 5  | 140980957 | 140980957 | TAF1 RNA polymerase II, TAF1A binding protein (BFP) associated factor, 55kDa |
| 20078 | ENSG000001066308  | OTUD5    | 20087.3 | 0.01 | protein_coding | 19 | 48719306  | 48815648  | OTU domain containing 5                                                      |
| 20084 | ENSG00000182482   | AKR7A3   | 20092.2 | 0.01 | protein_coding | 1  | 18609052  | 18615144  | aldo-keto reductase family 7, member A3 (aldolase aldolase reductase)        |
| 20086 | ENSG00000189851   | ZEB1     | 20092.2 | 0.01 | protein_coding | 19 | 4044362   | 4044362   | zinc finger and E12 domain containing 7A                                     |
| 20120 | ENSG00000129071   | MED4     | 20118   | 0.01 | protein_coding | 3  | 129148787 | 129158878 | methyl-CpG binding domain protein 4                                          |
| 20126 | ENSG00000134389   | CFHR5    | 20134.9 | 0.01 | protein_coding | 1  | 119946667 | 119947804 | complement factor H-related 5                                                |
| 20200 | ENSG000001028810  | CHMP9    | 20195   | 0.01 | protein_coding | 1  | 27954998  | 28016149  | charged multivesicular body protein 9                                        |
| 20288 | ENSG00000135437   | RHD5     | 20244.1 | 0.01 | protein_coding | 12 | 58114151  | 58114889  | retinol dehydrogenase 5 (11-cis-9c)                                          |
| 20331 | ENSG0000010297103 | LSM14A   | 20288   | 0.01 | protein_coding | 19 | 34683409  | 34720420  | LSM14A, SCED homolog A (S. cerevisiae)                                       |
| 20338 | ENSG00000155870   | BGAL1    | 20315.6 | 0.01 | protein_coding | 12 | 4824816   | 4824816   | UDP-Galactose 4-epimerase beta                                               |
| 20341 | ENSG00000187685   | TET3     | 20342.2 | 0.01 | protein_coding | 2  | 7422840   | 7433503   | tet methylcytosine dioxygenase 3                                             |
| 20358 | ENSG00000157017   | GHR1L    | 20311.6 | 0.01 | protein_coding | 3  | 10327359  | 10334831  | ghrelin/leptin prepropeptide                                                 |
| 20400 | ENSG000001025490  | FEBX1    | 20413.7 | 0.01 | protein_coding | 3  | 31437886  | 31437886  | ATP7B/C2003B8 readthrough (NMD candidate)                                    |
| 20431 | ENSG00000124193   | SRSF6    | 20434.5 | 0.01 | protein_coding | 20 | 42082658  | 42092245  | serine/arginine-rich splicing factor 6                                       |
| 20444 | ENSG00000106490   | RFANK    | 20396   | 0.01 | protein_coding | 19 | 19303008  | 19312678  | regulatory factor X-associated ankyrin-containing protein                    |
| 20489 | ENSG00000176201   | RPL23    | 20417.2 | 0.01 | protein_coding | 9  | 53571     | 53571     | ribosomal protein L23                                                        |
| 20575 | ENSG00000177157   | PPP1R12B | 20481.6 | 0.01 | protein_coding | 1  | 202317627 | 202361834 | protein phosphatase 1, regulatory subunit 12B                                |
| 20752 | ENSG00000181856   | MUC5     | 20615.8 | 0.01 | protein_coding | 11 | 1012921   | 1013078   | mucin 5, oligomeric mucin-like-forming                                       |
| 20802 | ENSG00000141117   | FEBX3    | 20481.6 | 0.01 | protein_coding | 17 | 17102418  | 17102418  | 1-cis proline 3                                                              |
| 20900 | ENSG00000141978   | RNF4     | 20468.7 | 0.01 | protein_coding | 19 | 16588878  | 1679051   | Ubiquitin-related protein                                                    |
| 20978 | ENSG00000186974   | MAPRE2   | 20775.4 | 0.01 | protein_coding | 18 | 3255892   | 32724334  | microtubule-associated protein, RP/EB family, member 2                       |
| 20991 | ENSG00000106804   | TRAF2    | 20775.4 | 0.01 | protein_coding | 9  | 1227148   | 1227148   | trans domain family 1, member 9                                              |
| 21012 | ENSG000001005378  | RNF4     | 20802.2 | 0.01 | protein_coding | 4  | 2453947   | 2453947   | ring finger protein 4                                                        |
| 21090 | ENSG00000181432   | CYP8B1   | 20859.9 | 0.01 | protein_coding | 3  | 42897497  | 42911633  | cytochrome P450, family 8, subfamily B, polypeptide 1                        |
| 21098 | ENSG00000152680   | SFRP1    | 20862.2 | 0.01 | protein_coding | 3  | 3068216   | 3068216   | secreted frizzled receptor 2                                                 |
| 21164 | ENSG00000158019   | BRE      | 20522.5 | 0.01 | protein_coding | 2  | 28112808  | 28591768  | brain and reproductive organ-expressed (TNFRSF1-A modulator)                 |
| 21167 | ENSG000001028227  | CLEC4A   | 20828.2 | 0.01 | protein_coding | 7  | 14182187  | 141848807 | C-type lectin domain family 5, member A                                      |
| 21179 | ENSG00000132842   | TRAF3    | 20828.2 | 0.01 | protein_coding | 13 | 3386138   | 3386138   | check, casin transferase homolog 2 (E. coli)                                 |
| 21221 | ENSG00000189875   | ANKX4    | 20573.3 | 0.01 | protein_coding | 2  | 89871527  | 70035396  | ankyrin A4                                                                   |
| 21314 | ENSG00000188474   | KLK12    | 21045.3 | 0.01 | protein_coding | 19 | 5152348   | 51538488  | kallikrein-related peptidase 12                                              |
| 21353 | ENSG00000101852   | TRAF3    | 21045.3 | 0.01 | protein_coding | 13 | 3386138   | 3386138   | check, casin transferase homolog 2 (E. coli)                                 |
| 21376 | ENSG00000110124   | CDC25B   | 21072.9 | 0.01 | protein_coding | 20 | 3787578   | 3788272   | cell division cycle 25B                                                      |
| 21474 | ENSG00000134963   | MALL     | 21194.3 | 0.01 | protein_coding | 2  | 11081447  | 11078413  | mal, T-cell differentiation protein-like                                     |
| 21548 | ENSG00000119197   | CD2AP    | 21200   | 0.01 | protein_coding | 2  | 20052097  | 20052097  | CD40 (Apo-Glu-Apo) ligase polypeptide 39                                     |
| 21561 | ENSG00000149798   | CDC42EP2 | 21244.3 | 0.01 | protein_coding | 11 | 65052289  | 65059900  | CDC42 effector protein (Rho GTPase binding) 2                                |
| 21588 | ENSG00000185515   | BRC4     | 21257.2 | 0.01 | protein_coding | 15 | 15429995  | 154351349 | BRC4/ATRCA2-containing complex, subunit 3                                    |
| 21637 | ENSG00000103448   | PNL3     | 21299.2 | 0.01 | protein_coding | 19 | 794689    | 792690    | patatin-like phospholipase domain family 1, member 3                         |
| 21665 | ENSG00000152781   | AKR1D1   | 21315.2 | 0.01 | protein_coding | 1  | 13781070  | 13781070  | aldo-keto reductase family 1, member D1                                      |
| 21883 | ENSG00000110152   | DNAJ3    | 21240.5 | 0.01 | protein_coding | 20 | 6252818   | 6267384   | DnaJ (Hsp40) homolog, subfamily C, member 5                                  |
| 21914 | ENSG00000187854   | TM6SF1A  | 21265.9 | 0.01 | protein_coding | 4  | 68715103  | 68629468  | transmembrane protein, sense, 11A                                            |
| 21788 | ENSG00000128443   | TM6SF1B  | 21265.9 | 0.01 | protein_coding | 4  | 100662843 | 100669211 | heterogeneous nuclear ribonucleoprotein H2 (H)                               |
| 21789 | ENSG00000135241   | PNL4A    | 21424.9 | 0.01 | protein_coding | 7  | 108119886 | 10820110  | patatin-like phospholipase domain containing 2                               |
| 21801 | ENSG00000106499   | CHAC1    | 21452.2 | 0.01 | protein_coding | 2  | 18801896  | 18813187  | carbamoyl receptor-like                                                      |
| 21802 | ENSG00000104495   | CHAC2    | 21452.2 | 0.01 | protein_coding | 2  | 143983784 | 143983784 | carbamoyl receptor-like                                                      |
| 21864 | ENSG000001050130  | JKAMP    | 21474.3 | 0.01 | protein_coding | 14 | 59897128  | 59897128  | JNK1MAPK8-associated membrane protein                                        |
| 21869 | ENSG00000188076   | CDC38    | 21480.2 | 0.01 | protein_coding | 3  | 86931189  | 86938     |                                                                              |

|       |                 |          |       |      |                |    |           |           |                                                                                |
|-------|-----------------|----------|-------|------|----------------|----|-----------|-----------|--------------------------------------------------------------------------------|
| 20983 | ENSG0000023268  | ATF7     | 23727 | 0.01 | protein_coding | 12 | 5117493   | 51214905  | activating transcription factor 1                                              |
| 24043 | ENSG0000023309  | RUNX3A   | 24372 | 0.01 | protein_coding | 17 | 4282737   | 42828381  | RUN domain containing 3A                                                       |
| 24074 | ENSG00000152219 | ARL14EP  | 23202 | 0.01 | protein_coding | 11 | 30344598  | 30359774  | ADP-ribosyltransferase-like 14 factor protein                                  |
| 24082 | ENSG0000018454  | ANKRD13C | 23208 | 0.01 | protein_coding | 1  | 70728271  | 70820417  | ankyrin repeat domain 13C                                                      |
| 24122 | ENSG0000000189  | SLC35C2  | 23245 | 0.01 | protein_coding | 20 | 44978167  | 44992043  | solute carrier family 35 (GPCR-located transporter), member C2                 |
| 24300 | ENSG0000016275  | CTRF8    | 23534 | 0.01 | protein_coding | 15 | 25523126  | 25523126  | ubiquitin protein ligase E3A                                                   |
| 24414 | ENSG00000148411 | NACC2    | 23487 | 0.01 | protein_coding | 9  | 13889383  | 138897131 | NACC family member 2, BEN and BTB (POZ) domain containing                      |
| 24423 | ENSG00000088726 | TMEM40   | 23250 | 0.01 | protein_coding | 3  | 12715024  | 12810959  | transmembrane protein 40                                                       |
| 24426 | ENSG00000162978 | CTRF5    | 23515 | 0.01 | protein_coding | 14 | 8028948   | 8028948   | chromatin 7 open reading frame 26                                              |
| 24438 | ENSG00000134587 | WR36     | 23260 | 0.01 | protein_coding | 5  | 110427414 | 110468200 | WD repeat domain 36                                                            |
| 24454 | ENSG00000101076 | HYFA     | 23529 | 0.01 | protein_coding | 20 | 42964346  | 43061485  | hepatocyte nuclear factor 4, alpha                                             |
| 24554 | ENSG00000208941 | CTRF5    | 23519 | 0.01 | protein_coding | 14 | 8028948   | 8028948   | CTRF5 family member 5, isoform 4                                               |
| 24620 | ENSG00000115829 | RAB35G1  | 23585 | 0.01 | protein_coding | 2  | 13589285  | 135893984 | GAP1/GTPase activating protein subunit 1 (catalytic)                           |
| 24675 | ENSG00000107558 | VAPA     | 23108 | 0.01 | protein_coding | 18 | 9913999   | 9960018   | VAMP (vesicle-associated membrane protein)-associated protein A, 35kDa         |
| 24728 | ENSG00000134898 | VHL      | 23174 | 0.01 | protein_coding | 3  | 10762952  | 10763004  | von Hippel-Lindau tumor suppressor, E3 ubiquitin protein ligase                |
| 24730 | ENSG00000204184 | INMT     | 23758 | 0.01 | protein_coding | 7  | 30737601  | 30787218  | indolethylamine N-methyltransferase                                            |
| 24770 | ENSG00000144874 | GOLGA4   | 23199 | 0.01 | protein_coding | 3  | 37284868  | 37408242  | glgln A4                                                                       |
| 24818 | ENSG00000204098 | SPRRZF   | 23839 | 0.01 | protein_coding | 1  | 15304590  | 15305091  | small proline-rich protein 2F                                                  |
| 24845 | ENSG00000183828 | BTBD9    | 23869 | 0.01 | protein_coding | 6  | 38136227  | 38607924  | BTB (POZ) domain containing 9                                                  |
| 24909 | ENSG00000272325 | NUDT3    | 23208 | 0.01 | protein_coding | 6  | 3421456   | 3430451   | nudix (nucleoside diphosphate linked moiety X)-type motif 3                    |
| 25098 | ENSG00000104923 | NOL10    | 24023 | 0.01 | protein_coding | 8  | 110297711 | 110317135 | neuronal cellin 10                                                             |
| 25138 | ENSG00000170074 | FAM153A  | 24094 | 0.01 | protein_coding | 5  | 177134982 | 177210399 | family with sequence similarity 153, member A                                  |
| 25185 | ENSG00000001167 | NFYA     | 24123 | 0.01 | protein_coding | 6  | 41040884  | 41087715  | nuclear transcription factor Y, alpha                                          |
| 25295 | ENSG00000104533 | ANKK1    | 24211 | 0.01 | protein_coding | 8  | 124683034 | 124748847 | ankyrin A13                                                                    |
| 25296 | ENSG00000168447 | SCNN1B   | 24251 | 0.01 | protein_coding | 16 | 23289552  | 23289620  | sodium channel, non-voltage-gated 1, beta subunit                              |
| 25335 | ENSG00000144835 | DYNLL1   | 24282 | 0.01 | protein_coding | 3  | 32957483  | 32812398  | dynamen, cytoplasmic 1, light intermediate chain 1                             |
| 25372 | ENSG00000014803 | SLC22A1  | 24300 | 0.01 | protein_coding | 15 | 48443981  | 48492875  | solute carrier family 12 (organic cation/zinc transporter), member 1           |
| 26428 | ENSG00000134216 | CHIA     | 24348 | 0.01 | protein_coding | 1  | 11183484  | 11183188  | chitinase, acidic                                                              |
| 26483 | ENSG00000101213 | PTF6     | 24389 | 0.01 | protein_coding | 20 | 82189778  | 82188723  | protein tyrosine kinase 6                                                      |
| 26484 | ENSG00000102524 | DUSP4    | 24391 | 0.01 | protein_coding | 15 | 45402808  | 45402808  | dual oxidase domain protein factor 4                                           |
| 26535 | ENSG00000169302 | UPF3A    | 24425 | 0.01 | protein_coding | 13 | 115047059 | 115071283 | UPF3 regulator of nonsense transcripts homolog A (yeast)                       |
| 26547 | ENSG00000172425 | TTC38    | 24430 | 0.01 | protein_coding | 11 | 11838187  | 11840112  | tetrahydrocopte repeat domain 36                                               |
| 26643 | ENSG00000200681 | CTCF     | 24507 | 0.01 | protein_coding | 10 | 8994134   | 10001381  | cohesin 1                                                                      |
| 26641 | ENSG00000189114 | BLOC1B3  | 24517 | 0.01 | protein_coding | 9  | 45682003  | 45685095  | biogenesis of lysosomal organelles complex-1, subunit 3                        |
| 26691 | ENSG00000160806 | SIF1     | 24553 | 0.01 | protein_coding | 11 | 64532078  | 64546258  | silencing factor 1                                                             |
| 26723 | ENSG00000162520 | CHST8    | 24578 | 0.01 | protein_coding | 11 | 45130163  | 45130163  | chondroitin 8 open reading frame 22B                                           |
| 26746 | ENSG00000183762 | KREMEN1  | 24595 | 0.01 | protein_coding | 22 | 29440906  | 29584121  | kringle containing transmembrane protein 1                                     |
| 26796 | ENSG00000153975 | ZUFSP    | 24605 | 0.01 | protein_coding | 6  | 116995781 | 116995997 | zinc finger with UFM1-specific peptidase domain                                |
| 26821 | ENSG00000101963 | CHST9    | 24608 | 0.01 | protein_coding | 14 | 48652078  | 48652078  | agonolipin-modifying chondroitinase receptor                                   |
| 26846 | ENSG00000113838 | TBCD1    | 24694 | 0.01 | protein_coding | 3  | 186263982 | 186283332 | TBCD domain containing 1                                                       |
| 26895 | ENSG00000198351 | AGF2     | 24719 | 0.01 | protein_coding | 7  | 100138834 | 100165842 | ARGAP with FG repeats 2                                                        |
| 26908 | ENSG00000101538 | CHST7    | 24727 | 0.01 | protein_coding | 11 | 48652078  | 48652078  | chondroitin 7 open reading frame 87                                            |
| 26905 | ENSG00000111700 | SLCO1B3  | 24803 | 0.01 | protein_coding | 12 | 20963938  | 21234040  | solute carrier organic anion transporter family, member 1B3                    |
| 26906 | ENSG00000073752 | IF2B2    | 24851 | 0.01 | protein_coding | 3  | 18381527  | 18582484  | insulin-like growth factor 2 mRNA binding protein 2                            |
| 26100 | ENSG00000100768 | IF2B2    | 24840 | 0.01 | protein_coding | 1  | 189987781 | 189133496 | selectin E                                                                     |
| 26109 | ENSG00000117153 | KHL12    | 24852 | 0.01 | protein_coding | 5  | 203082028 | 203188714 | kelch-like family member 12                                                    |
| 26215 | ENSG00000166224 | SGPL1    | 24886 | 0.01 | protein_coding | 10 | 72575117  | 72610030  | sphingosine 1-phosphatase lyase 1                                              |
| 26263 | ENSG00000126591 | FMO7B    | 24905 | 0.01 | protein_coding | 11 | 65134070  | 65180456  | FMO domain containing 8                                                        |
| 26296 | ENSG00000107669 | ATE1     | 25015 | 0.01 | protein_coding | 11 | 123489128 | 123489128 | adenosine triphosphatase 1                                                     |
| 26299 | ENSG00000100580 | TMEM28   | 25052 | 0.01 | protein_coding | 14 | 77801364  | 77843452  | transmembrane empo2 protein transport domain containing 8                      |
| 26338 | ENSG00000008491 | SLC25A2  | 25063 | 0.01 | protein_coding | 1  | 108619588 | 108743311 | solute carrier family 25 (mitochondrial carrier, phosphate carrier), member 24 |
| 26396 | ENSG00000161512 | AZZ      | 25133 | 0.01 | protein_coding | 1  | 28334944  | 28334944  | 2-azacytidine induced 2                                                        |
| 26457 | ENSG00000163820 | FYCO1    | 25199 | 0.01 | protein_coding | 3  | 45959396  | 46037316  | FYVE and coiled-coil domain containing 1                                       |
| 26530 | ENSG00000234119 | NSD2     | 25263 | 0.01 | protein_coding | 16 | 12021230  | 12017030  | PuTive NPI-like protein LOC729978                                              |
| 26534 | ENSG00000107124 | ACER3    | 25283 | 0.01 | protein_coding | 16 | 76517911  | 76737841  | actinin condensin 3                                                            |
| 26604 | ENSG00000178482 | TUBAL3   | 25233 | 0.01 | protein_coding | 10 | 5435361   | 5444783   | tubulin, alpha-like 3                                                          |
| 26680 | ENSG00000100928 | ABSD     | 25380 | 0.01 | protein_coding | 14 | 84404099  | 84481437  | arginin repeat and SOCS box containing 2                                       |
| 26681 | ENSG00000104982 | SLC52A1  | 25382 | 0.01 | protein_coding | 3  | 288988995 | 28913380  | solute carrier family 5 (lipid/monocarboxylate cotransporter), member 12       |
| 26691 | ENSG00000162838 | FAM102B  | 25382 | 0.01 | protein_coding | 1  | 109102711 | 10918722  | family with sequence similarity 102, member B                                  |
| 26758 | ENSG00000112782 | CLCS     | 25454 | 0.01 | protein_coding | 8  | 43888045  | 43888132  | chloride intracellular channel 5                                               |
| 26801 | ENSG00000100710 | DNM1     | 25460 | 0.01 | protein_coding | 10 | 41961196  | 41961196  | DnaI (HsdII) homolog, subfamily C, member 10                                   |
| 26871 | ENSG00000107802 | LHP1     | 25630 | 0.01 | protein_coding | 10 | 126150403 | 12630647  | phosphotyrosine phosphatidase inorganic pyrophosphatase                        |
| 27011 | ENSG00000159516 | SPRRG3   | 25671 | 0.01 | protein_coding | 1  | 153122058 | 15312345  | small proline-rich protein 2G                                                  |
| 27038 | ENSG00000145496 | DNM1     | 25671 | 0.01 | protein_coding | 10 | 41961196  | 41961196  | DnaI (HsdII) homolog, subfamily B, member 6                                    |
| 27104 | ENSG00000113621 | NDCDC15  | 25753 | 0.01 | protein_coding | 5  | 13420493  | 13423715  | breastform domain containing 15                                                |
| 27116 | ENSG00000106443 | PRF1     | 25788 | 0.01 | protein_coding | 7  | 11013499  | 11029120  | PHD finger protein 14                                                          |
| 27143 | ENSG00000105993 | DNM1     | 25793 | 0.01 | protein_coding | 10 | 41961196  | 41961196  | DnaI (HsdII) homolog, subfamily B, member 6                                    |
| 27204 | ENSG00000134265 | NAPG     | 25846 | 0.01 | protein_coding | 18 | 10525902  | 10525758  | N-ethylmaleimide-sensitive factor attachment protein, gamma                    |
| 27256 | ENSG00000138459 | SLC35A5  | 25882 | 0.01 | protein_coding | 3  | 11220556  | 11230424  | solute carrier family 35, member A5                                            |
| 27291 | ENSG00000101498 | MLXIP    | 25918 | 0.01 | protein_coding | 11 | 13411928  | 13411928  | acyl-CoA dehydrogenase 1                                                       |
| 27304 | ENSG00000175727 | MLXIP    | 25918 | 0.01 | protein_coding | 12 | 12251628  | 12261834  | MLX interacting protein 1                                                      |
| 27310 | ENSG00000158487 | AHCYL2   | 25925 | 0.01 | protein_coding | 7  | 128884884 | 129007052 | adenosylhomocysteinase-like 2                                                  |
| 27327 | ENSG00000101573 | CLIP1    | 25988 | 0.01 | protein_coding | 4  | 43823077  | 43823077  | BRSA13 subfamily 1                                                             |
| 27390 | ENSG00000130779 | CLIP1    | 25988 | 0.01 | protein_coding | 4  | 12275979  | 122807179 | CAP-CLY domain containing linker protein 1                                     |
| 27397 | ENSG00000164007 | KOMP1    | 25992 | 0.01 | protein_coding | 2  | 85198216  | 85288595  | potassium channel modulatory factor 1                                          |
| 27412 | ENSG00000164531 | ORP2A    | 26034 | 0.01 | protein_coding | 2  | 2701392   | 2701392   | oxysterol, beta 4A                                                             |
| 27414 | ENSG00000111339 | ART4     | 26036 | 0.01 | protein_coding | 12 | 4978503   | 4989829   | ADP-ribosyltransferase 4 (Dombrock blood group)                                |
| 27428 | ENSG00000136985 | IL36RN   | 26015 | 0.01 | protein_coding | 2  | 113816215 | 113822899 | interleukin 36 receptor antagonist                                             |
| 27433 | ENSG00000105010 | COG4     | 26017 | 0.01 | protein_coding | 8  | 15600103  | 15600103  | coagulation factor VIII (procoagulant) component                               |
| 27453 | ENSG00000204130 | PSG11    | 26037 | 0.01 | protein_coding | 19 | 43511808  | 43530064  | pregneny specific beta-1-glycoprotein 11                                       |
| 27456 | ENSG00000100824 | SPAG9    | 26038 | 0.01 | protein_coding | 17 | 49039535  | 49189228  | sperm associated antigen 9                                                     |
| 27482 | ENSG00000101449 | ARGAP2   | 26077 | 0.01 | protein_coding | 10 | 5174059   | 5174059   | ARGAP with GTPase domain, ankyrin repeat and PH domain 8                       |
| 27484 | ENSG00000116771 | AGMAT    | 26068 | 0.01 | protein_coding | 1  | 15988488  | 15971105  | agmatine ureohydrolase (agmatinase)                                            |
| 27487 | ENSG00000148513 | ANKRD30A | 26069 | 0.01 | protein_coding | 10 | 37414785  | 37673039  | ankyrin repeat domain 30A                                                      |
| 27512 | ENSG00000141298 | TMR13    | 26094 | 0.01 | protein_coding | 7  | 13842695  | 138522448 | transmembrane protein 213                                                      |
| 27521 | ENSG00000104943 | TRAF3    | 26103 | 0.01 | protein_coding | 11 | 116995448 | 117004349 | transmembrane associated protein 3                                             |
| 27532 | ENSG00000181447 | CTNNA2   | 26103 | 0.01 | protein_coding | 2  | 106679702 | 106684415 | chromosome 2 open reading frame 40                                             |
| 27538 | ENSG00000186522 | HRHAP42  | 26109 | 0.01 | protein_coding | 10 | 5006386   | 50217742  | Rto GTPase activating protein 12                                               |
| 27570 | ENSG00000100750 | MYL2     | 26134 | 0.01 | protein_coding | 16 | 153504286 | 153508700 | myosin-like protein-like 1                                                     |
| 27588 | ENSG00000117305 | HMGCL2   | 26144 | 0.01 | protein_coding | 1  | 24128375  | 24185110  | 3-hydroxymethyl-3-methylglutaryl-CoA lyase                                     |
| 27588 | ENSG00000101046 | NFAT1    | 26144 | 0.01 | protein_coding | 16 | 15137170  | 15149921  | NF-atomer signaling adaptor                                                    |
| 27613 | ENSG00000101847 | ACSM4    | 26189 | 0.01 | protein_coding | 16 | 24457268  | 24457268  | acyl-CoA synthetase medium-chain family member 2A                              |
| 27630 | ENSG00000174953 | DNK36    | 26184 | 0.01 | protein_coding | 3  | 153893035 | 15442286  | DEAH (Hsp-Glu/Ala-His) box polypeptide 36                                      |
| 27649 | ENSG00000116988 | SMC7     | 26210 | 0.01 | protein_coding | 11 | 18441351  | 18380781  | SMC7 nonreducing mediator mRNA decay factor                                    |
| 27705 | ENSG00000105928 | TIP1     | 26256 | 0.01 | protein_coding | 19 | 3706107   | 37101929  |                                                                                |

|       |                  |              |          |      |                |    |           |           |                                                                                         |
|-------|------------------|--------------|----------|------|----------------|----|-----------|-----------|-----------------------------------------------------------------------------------------|
| 28688 | ENSG00000132437  | DDC          | 27154.8  | 0.01 | protein_coding | 7  | 50526134  | 50633154  | dopa decarboxylase (aromatic L- amino acid decarboxylase)                               |
| 28689 | ENSG00000126597  | NEU3L1       | 27133.44 | 0.01 | protein_coding | 10 | 71333444  | 71333444  | neurexin 3                                                                              |
| 28732 | ENSG00000169118  | CSNK1G1      | 27203.8  | 0.01 | protein_coding | 15 | 64457716  | 64484442  | casein kinase 1, gamma 1                                                                |
| 28736 | ENSG00000100445  | SDR39J1      | 27228.8  | 0.01 | protein_coding | 14 | 24908972  | 24911211  | short chain dehydrogenase/reductase family 39J, member 1                                |
| 28768 | ENSG00000219988  | MYBPHL       | 27244.5  | 0.01 | protein_coding | 11 | 10981007  | 10984963  | myosin binding protein H-like                                                           |
| 28793 | ENSG00000144848  | S11B36       | 27257.3  | 0.01 | protein_coding | 10 | 17395352  | 17395352  | S11B alpha-N-acetylserine amidase alpha-2,4-epilysyltransferase B                       |
| 28805 | ENSG00000215444  | GGCR         | 27280.3  | 0.01 | protein_coding | 17 | 79742008  | 79771889  | glucagon receptor                                                                       |
| 28806 | ENSG0000017294   | FBCX3        | 27283    | 0.01 | protein_coding | 17 | 8605454   | 8700420   | F-box protein 3                                                                         |
| 28808 | ENSG00000191784  | CHIR1        | 27285.3  | 0.01 | protein_coding | 16 | 30034955  | 30034955  | chromosome 16 open reading frame 92                                                     |
| 28838 | ENSG00000196796  | CGCR         | 27305.3  | 0.01 | protein_coding | 16 | 29049253  | 29049253  | Uncharacterized protein                                                                 |
| 28841 | ENSG00000162698  | MGRN1        | 27317.4  | 0.01 | protein_coding | 18 | 4969484   | 4740975   | metagomin ring finger 1, E3 ubiquitin protein ligase                                    |
| 28845 | ENSG00000156194  | PPEF2        | 27328.1  | 0.01 | protein_coding | 4  | 78781020  | 78823724  | protein phosphatase, EF-hand calcium binding domain 2                                   |
| 28869 | ENSG00000173093  | CCDC33       | 27369.9  | 0.01 | protein_coding | 12 | 111284573 | 111345339 | coiled-coil domain containing 63                                                        |
| 28900 | ENSG00000209864  | EPH2         | 27384.6  | 0.01 | protein_coding | 19 | 53647891  | 53654309  | endogenous retrovirus group V, member 2                                                 |
| 28915 | ENSG00000170848  | PGS5         | 27379.6  | 0.01 | protein_coding | 19 | 43406231  | 43427125  | pregnancy specific beta-1-glycoprotein 5                                                |
| 28919 | ENSG00000178279  | TNP2         | 27382.7  | 0.01 | protein_coding | 16 | 11361605  | 11363300  | transition protein 2 (during histone to protamine replacement)                          |
| 28963 | ENSG00000104527  | KCNK3        | 27413.7  | 0.01 | protein_coding | 11 | 52971251  | 52973000  | potassium inwardly-rectifying channel, subfamily 1, member 5                            |
| 28974 | ENSG00000162763  | LRRCS2       | 27422.1  | 0.01 | protein_coding | 1  | 16551244  | 16553188  | leucine rich repeat containing 52                                                       |
| 29008 | ENSG00000164342  | TLR3         | 27457.8  | 0.01 | protein_coding | 4  | 18899036  | 18709023  | toll-like receptor 3                                                                    |
| 29001 | ENSG000002025108 | FAM205A      | 27499.1  | 0.01 | protein_coding | 9  | 34720502  | 34720504  | family with sequence similarity 205, member A                                           |
| 29069 | ENSG00000125409  | TEKT3        | 27518.7  | 0.01 | protein_coding | 17 | 15207128  | 15244958  | tektin 3                                                                                |
| 29075 | ENSG00000408952  | HDCAP3       | 27521.9  | 0.01 | protein_coding | 7  | 18126572  | 19420309  | histone deacetylase 9                                                                   |
| 29079 | ENSG00000151704  | KCNL1        | 27526.6  | 0.01 | protein_coding | 11 | 12870210  | 12870208  | potassium inwardly-rectifying channel, subfamily J, member 1                            |
| 29084 | ENSG00000104957  | CCDC130      | 27536.8  | 0.01 | protein_coding | 19 | 13842574  | 13874110  | coiled-coil domain containing 130                                                       |
| 29100 | ENSG00000113504  | SLC12A7      | 27540.1  | 0.01 | protein_coding | 5  | 1050499   | 1112150   | solute carrier family 12 (potassium/chloride transporter), member 7                     |
| 29101 | ENSG00000187546  | AGMO         | 27542.3  | 0.01 | protein_coding | 7  | 15259443  | 15261640  | aldolyl-pyruvate monooxygenase                                                          |
| 29111 | ENSG00000165056  | NKX6-3       | 27548.9  | 0.01 | protein_coding | 8  | 41502897  | 41508855  | NK6 homeobox 3                                                                          |
| 29126 | ENSG000001051304 | SRFBP1       | 27561.1  | 0.01 | protein_coding | 5  | 12128766  | 12141285  | serum response factor binding protein 1                                                 |
| 29168 | ENSG00000101538  | SH2D4B       | 27608.3  | 0.01 | protein_coding | 10 | 13823168  | 13823168  | neuromedin S receptor                                                                   |
| 29170 | ENSG00000178217  | SH2D4B       | 27608.3  | 0.01 | protein_coding | 10 | 82297658  | 82636316  | SH2 domain containing 4B                                                                |
| 29174 | ENSG00000200021  | TEX3         | 27612.3  | 0.01 | protein_coding | 1  | 17842212  | 17847134  | testis expressed 35                                                                     |
| 29183 | ENSG00000101764  | FBLN5        | 27621.6  | 0.01 | protein_coding | 1  | 35631     | 42122     | fibronectin type 5                                                                      |
| 29205 | ENSG00000197516  | Cxorf27      | 27642.4  | 0.01 | protein_coding | 3  | 37850070  | 37850069  | chromosome X open reading frame 27                                                      |
| 29221 | ENSG000002004877 | LOC101928349 | 27655.9  | 0.01 | protein_coding | 5  | 17743406  | 17748260  | family with sequence similarity 153, member C                                           |
| 29228 | ENSG00000101941  | MRPAP        | 27659.6  | 0.01 | protein_coding | 10 | 15314466  | 15314466  | microfilament-associated protein 3                                                      |
| 29258 | ENSG00000178761  | PIPOX        | 27714.6  | 0.01 | protein_coding | 17 | 27277331  | 27284324  | picopical oxidase                                                                       |
| 29260 | ENSG00000101313  | CHST3        | 27716.8  | 0.01 | protein_coding | 3  | 4833176   | 4833176   | N-acylglucosyl sialyltransferase 3                                                      |
| 29336 | ENSG00000205989  | CN2D1        | 27765.8  | 0.01 | protein_coding | 5  | 132083137 | 132089856 | cydin 1 family, member 2                                                                |
| 29341 | ENSG00000178395  | C1orf85      | 27771.7  | 0.01 | protein_coding | 1  | 22358875  | 22358882  | chromosome 1 open reading frame 65                                                      |
| 29348 | ENSG00000101969  | C1orf85      | 27771.7  | 0.01 | protein_coding | 1  | 15441741  | 15441741  | chromosome 1 open reading frame 65                                                      |
| 29366 | ENSG00000203754  | SLC101B7     | 27794.1  | 0.01 | protein_coding | 12 | 20968873  | 21245479  | solute carrier organic anion transporter family, member 1B7 (non-functional)            |
| 29389 | ENSG00000162745  | DLF1L2B      | 27823.9  | 0.01 | protein_coding | 1  | 161952844 | 161952844 | actin-depolymerizing factor-like 2B                                                     |
| 29391 | ENSG00000181440  | BCL4L        | 27825.4  | 0.01 | protein_coding | 17 | 966264    | 966264    | B-cell CLL/lymphoma 8, member B                                                         |
| 29402 | ENSG00000177994  | C2orf3       | 27825.4  | 0.01 | protein_coding | 7  | 54577171  | 54577171  | chromosome 2 open reading frame 73                                                      |
| 29403 | ENSG00000113452  | AGXT2        | 27832.3  | 0.01 | protein_coding | 5  | 34982826  | 35048198  | alanine-glyoxylate aminotransferase 2                                                   |
| 29411 | ENSG00000181658  | C2orf3       | 27832.3  | 0.01 | protein_coding | 5  | 15200701  | 15210751  | chromosome 5 open reading frame 52                                                      |
| 29415 | ENSG00000101709  | NUP98        | 27833.7  | 0.01 | protein_coding | 17 | 64491958  | 64491958  | NUP98 nucleolar pore domain containing 2                                                |
| 29430 | ENSG00000132837  | DMSST2       | 27857.2  | 0.01 | protein_coding | 5  | 76203438  | 76311391  | dimeric glyoxylate dehydrogenase                                                        |
| 29438 | ENSG00000101595  | SARF1        | 27879.6  | 0.01 | protein_coding | 12 | 108916307 | 10895176  | squamous cell carcinoma antigen recognized by T cells 3                                 |
| 29462 | ENSG00000101695  | LOC100303032 | 27892.5  | 0.01 | protein_coding | 12 | 158403625 | 158403625 | Protein LOC100303032                                                                    |
| 29475 | ENSG00000187033  | SAMD7        | 27895.5  | 0.01 | protein_coding | 3  | 168623090 | 168659683 | sterile alpha motif domain containing 7                                                 |
| 29481 | ENSG00000197918  | OR51L2       | 27899.4  | 0.01 | protein_coding | 11 | 5474638   | 5475707   | olfactory receptor, family 5L, subfamily 1, member 2                                    |
| 29484 | ENSG00000101398  | LRR13        | 27900.3  | 0.01 | protein_coding | 13 | 4870608   | 4867183   | leucine rich repeat containing 63                                                       |
| 29500 | ENSG00000198798  | MAGEB3       | 27919.1  | 0.01 | protein_coding | 3  | 30248553  | 30255607  | melanoma antigen family B, 3                                                            |
| 29514 | ENSG00000193477  | KIAA1328     | 27952.3  | 0.01 | protein_coding | 18 | 3440809   | 3441235   | KIAA1328                                                                                |
| 29524 | ENSG00000101489  | NUP98        | 27952.3  | 0.01 | protein_coding | 17 | 71731810  | 71731810  | nuclear mitotic apparatus protein 3                                                     |
| 29525 | ENSG00000168558  | SLC38A8      | 27940.8  | 0.01 | protein_coding | 16 | 84043272  | 84076241  | solute carrier family 38, member 8                                                      |
| 29540 | ENSG00000139585  | SHM22        | 27952.8  | 0.01 | protein_coding | 13 | 44717679  | 44735383  | small integral membrane protein 2                                                       |
| 29547 | ENSG00000101920  | HSD17B10     | 27953.0  | 0.01 | protein_coding | 13 | 5068152   | 50679424  | hydroxysteroid oxidase 10                                                               |
| 29584 | ENSG00000123096  | SPSN         | 27988.7  | 0.01 | protein_coding | 12 | 2874224   | 2845223   | sarcospan                                                                               |
| 29588 | ENSG00000159182  | PRAC1        | 27990.4  | 0.01 | protein_coding | 17 | 4879084   | 4879884   | prostate cancer susceptibility candidate 1                                              |
| 29596 | ENSG00000101350  | ITIH4        | 27992.8  | 0.01 | protein_coding | 5  | 13200188  | 13200188  | interleukin 13                                                                          |
| 29601 | ENSG00000106328  | FSCN3        | 28008.6  | 0.01 | protein_coding | 7  | 12723463  | 12724218  | fascin homolog 3, actin-binding protein, testicular (Strongylocentrotus purpuratus)     |
| 29603 | ENSG00000184888  | FAM73A       | 28017.3  | 0.01 | protein_coding | 1  | 76245309  | 76344106  | family with sequence similarity 73, member A                                            |
| 29713 | ENSG00000101448  | MRN1         | 28021.1  | 0.01 | protein_coding | 21 | 13006140  | 13006140  | meiotic recombination protein 22                                                        |
| 29720 | ENSG00000152128  | TMEM163      | 28104.3  | 0.01 | protein_coding | 2  | 13521330  | 13547603  | transmembrane protein 163                                                               |
| 29726 | ENSG00000168754  | FAM178B      | 28110.3  | 0.01 | protein_coding | 2  | 57541620  | 57608174  | family with sequence similarity 178, member B                                           |
| 29728 | ENSG00000101315  | C1orf109     | 28112.4  | 0.01 | protein_coding | 12 | 6911124   | 6911124   | chromosome 17 open reading frame 49                                                     |
| 29751 | ENSG00000203126  | C1orf105     | 28134.3  | 0.01 | protein_coding | 17 | 41857803  | 41864880  | chromosome 17 open reading frame 105                                                    |
| 29756 | ENSG00000154493  | C10orf90     | 28135.3  | 0.01 | protein_coding | 10 | 128113566 | 128199379 | chromosome 10 open reading frame 90                                                     |
| 29761 | ENSG000002004681 | GATC1        | 28135.3  | 0.01 | protein_coding | 2  | 2852154   | 2852154   | gamma-aminobutyrate decarboxylase 1B receptor, 1                                        |
| 29776 | ENSG00000158955  | VWA3B        | 28159    | 0.01 | protein_coding | 2  | 9870379   | 9892972   | von Willebrand factor domain containing 3B                                              |
| 29778 | ENSG00000113304  | ACTO13       | 28160.6  | 0.01 | protein_coding | 6  | 24687283  | 24705593  | acyl-CoA thioesterase 13                                                                |
| 29786 | ENSG00000101761  | SLC1212      | 28162.8  | 0.01 | protein_coding | 8  | 4433813   | 4433813   | solute carrier family 22 (potassium/iodide transporter), member 12                      |
| 29793 | ENSG00000169291  | SH2E         | 28174.9  | 0.01 | protein_coding | 1  | 15442248  | 15442248  | SH2 homology 2 domain containing E                                                      |
| 29794 | ENSG000002031274 | SBK3         | 28175.4  | 0.01 | protein_coding | 19 | 56052023  | 56056609  | SH3 domain binding kinase family, member 3                                              |
| 29798 | ENSG00000101729  | SH2E         | 28175.4  | 0.01 | protein_coding | 1  | 579178    | 579178    | cyclic nucleotide-gated channel beta 3                                                  |
| 29810 | ENSG00000125998  | FAM83C       | 28187.6  | 0.01 | protein_coding | 20 | 33873534  | 33890204  | family with sequence similarity 83, member C                                            |
| 29841 | ENSG00000197653  | HEAT1        | 28202.5  | 0.01 | protein_coding | 12 | 12424702  | 12424703  | dyxinec, axonemal, heavy chain 10                                                       |
| 29842 | ENSG00000101593  | HEAT1        | 28202.5  | 0.01 | protein_coding | 12 | 3178404   | 3178404   | HEAT repeat containing 5A                                                               |
| 29868 | ENSG00000199498  | ZNF705A      | 28206.8  | 0.01 | protein_coding | 12 | 6290733   | 6341133   | zinc finger protein 705A                                                                |
| 29890 | ENSG00000162139  | NEL2L3       | 28208.3  | 0.01 | protein_coding | 11 | 7499179   | 74729038  | sulfatase 3 (membrane sulfatase)                                                        |
| 29896 | ENSG00000144438  | SLC22A8      | 28219    | 0.01 | protein_coding | 11 | 6726626   | 67263311  | solute carrier family 22 (organic anion transporter), member 8                          |
| 29910 | ENSG00000119304  | SLC22A8      | 28219    | 0.01 | protein_coding | 11 | 3643429   | 3643429   | colicin sub-family member 11                                                            |
| 29921 | ENSG00000103139  | SEMA3G       | 28232.2  | 0.01 | protein_coding | 3  | 52447089  | 52479110  | sema domain, immunoglobulin domain (lig), short basic domain, secreted, (semaphorin) 3G |
| 29924 | ENSG00000130052  | ST18L8       | 28236.2  | 0.01 | protein_coding | 4  | 67957506  | 67958474  | SMR-related lipid transfer (SLART) domain containing 8                                  |
| 29931 | ENSG0000014156   | SST3A        | 28237.6  | 0.01 | protein_coding | 14 | 62781437  | 62774483  | galactose 4-epimerase alpha 3                                                           |
| 29937 | ENSG00000111344  | RASAL1       | 28237.7  | 0.01 | protein_coding | 12 | 113536624 | 113574044 | RAS protein activator like 1 (GAP1) like                                                |
| 29938 | ENSG00000186991  | ABCNA        | 28239    | 0.01 | protein_coding | 8  | 9456899   | 9456899   | ATP-binding cassette, subfamily A (ABC1), member 4                                      |
| 29948 | ENSG00000101771  | ANKRD30B     | 28241.4  | 0.01 | protein_coding | 18 | 14728271  | 14891926  | ankyrin domain containing 30B                                                           |
| 29962 | ENSG00000173827  | APBBPC4      | 28250.1  | 0.01 | protein_coding | 1  | 183615541 | 183622451 | apoptosis/B cell mRNA editing enzyme, catalytic polypeptide-like 4 (putative)           |
| 29963 | ENSG00000101115  | ZNF227       | 28254.3  | 0.01 | protein_coding | 19 | 44711700  | 44741421  | zinc finger protein 227                                                                 |
| 29966 | ENSG000002031171 | OR51L1       | 28254.3  | 0.01 | protein_coding | 11 | 178619911 | 178619911 | long intergenic non-protein coding RNA 100B                                             |
| 30002 | ENSG00000169759  | OR           |          |      |                |    |           |           |                                                                                         |

|       |                 |          |       |      |                |    |           |           |                                                                                              |
|-------|-----------------|----------|-------|------|----------------|----|-----------|-----------|----------------------------------------------------------------------------------------------|
| 30603 | ENSG00000186209 | ATP11B1  | 28881 | 0.01 | protein_coding | 2  | 71163072  | 71192536  | ATPase, H <sup>+</sup> transporting, lysosomal 5b/5bDa, V1 subunit B1                        |
| 30604 | ENSG00000103178 | ZNF107   | 29120 | 0.01 | protein_coding | 22 | 30120000  | 30120000  | zinc finger, main type 1                                                                     |
| 30658 | ENSG00000153253 | SCN3A    | 29334 | 0.01 | protein_coding | 2  | 165844032 | 165800577 | sodium channel, voltage-gated, type II, alpha subunit                                        |
| 30670 | ENSG00000179148 | ALOXE3   | 29844 | 0.01 | protein_coding | 17 | 799218    | 8022385   | arachidonate lipoxygenase 3                                                                  |
| 30671 | ENSG00000169168 | UGT1A6   | 29852 | 0.01 | protein_coding | 2  | 23460223  | 23468198  | UDP glucuronosyltransferase 1 family, polypeptide A6                                         |
| 30755 | ENSG00000151755 | TAF15    | 29878 | 0.01 | protein_coding | 8  | 988343    | 10074545  | TATA box binding protein (TBP)-associated factor, RNA polymerase I, B, 63kDa                 |
| 30707 | ENSG00000214842 | RANBP2   | 29879 | 0.01 | protein_coding | 2  | 1769185   | 1769970   | RAN1 associated protein 2                                                                    |
| 30726 | ENSG00000169571 | SNRP     | 29932 | 0.01 | protein_coding | 1  | 580020    | 5901963   | Small nuclear ribonucleoprotein protein 1                                                    |
| 30768 | ENSG00000164497 | SNK1B    | 29949 | 0.01 | protein_coding | 5  | 17623749  | 17623749  | unc-5 homolog 2 (C. elegans)                                                                 |
| 30791 | ENSG00000265502 | ARND     | 29973 | 0.01 | protein_coding | 6  | 11785048  | 11789678  | slamine and arginine rich domain containing protein                                          |
| 30811 | ENSG00000137171 | KLCA     | 29990 | 0.01 | protein_coding | 8  | 34889828  | 34889828  | leucine-rich repeat domain 23-like                                                           |
| 30812 | ENSG00000170214 | ADRA1B   | 29990 | 0.01 | protein_coding | 5  | 15934370  | 15939951  | kinetin light chain 4                                                                        |
| 30815 | ENSG00000104326 | HAUS8    | 29992 | 0.01 | protein_coding | 9  | 19103117  | 19103117  | adrenocortical alpha 1B                                                                      |
| 30819 | ENSG00000177301 | CKNA2    | 29997 | 0.01 | protein_coding | 1  | 111136202 | 111174996 | potassium voltage-gated channel, shaker-related subfamily, member 2                          |
| 30825 | ENSG00000185298 | GABRI1   | 29103 | 0.01 | protein_coding | 4  | 48997420  | 47428401  | gamma-aminobutyric acid (GABA) A receptor, beta 1                                            |
| 30833 | ENSG00000185584 | SPR1B    | 29108 | 0.01 | protein_coding | 12 | 97209619  | 97209645  | serpinmatrogenase associated B                                                               |
| 30838 | ENSG00000124356 | STAMPB   | 29113 | 0.01 | protein_coding | 2  | 74054068  | 74100786  | STAM binding protein                                                                         |
| 30839 | ENSG00000124362 | KLBL     | 29114 | 0.01 | protein_coding | 4  | 3940473   | 3943158   | klroho beta                                                                                  |
| 30849 | ENSG00000171722 | SNF12    | 29117 | 0.01 | protein_coding | 10 | 135307604 | 135307678 | synasomal complex central element protein 1                                                  |
| 30858 | ENSG00000132028 | R1BDN    | 29132 | 0.01 | protein_coding | 19 | 12936292  | 12946242  | retinidin                                                                                    |
| 30863 | ENSG00000197859 | ADAMTSL2 | 29139 | 0.01 | protein_coding | 9  | 136397286 | 136440441 | ADAMTSL2-like 2                                                                              |
| 30875 | ENSG00000143433 | FAM78B   | 29148 | 0.01 | protein_coding | 9  | 131339600 | 131333242 | family with sequence similarity 73, member B                                                 |
| 30900 | ENSG00000151789 | ZNF385D  | 29167 | 0.01 | protein_coding | 3  | 21458915  | 22414812  | zinc finger protein 385D                                                                     |
| 30901 | ENSG00000177484 | GPR4     | 29167 | 0.01 | protein_coding | 19 | 48953022  | 48105498  | G protein-coupled receptor 4                                                                 |
| 30903 | ENSG00000164693 | SHH      | 29168 | 0.01 | protein_coding | 7  | 155902960 | 155902960 | zinc finger protein 385D                                                                     |
| 30906 | ENSG00000161594 | KLHL10   | 29172 | 0.01 | protein_coding | 17 | 38991937  | 40004636  | kelch-like family member 10                                                                  |
| 30911 | ENSG00000190083 | GGAT1    | 29176 | 0.01 | protein_coding | 2  | 38004481  | 38002971  | gelgol-associated, gamma-aminobutyric acid containing, ARF binding protein 1                 |
| 30912 | ENSG00000165748 | CCDC158  | 29183 | 0.01 | protein_coding | 13 | 13321028  | 13321028  | 13th chromosome homolog 158                                                                  |
| 30937 | ENSG00000183749 | CCDC158  | 29183 | 0.01 | protein_coding | 4  | 7723454   | 77343021  | coiled-coil domain containing 158                                                            |
| 30947 | ENSG00000184730 | WVC2     | 29196 | 0.01 | protein_coding | 7  | 48813257  | 49981546  | von Willebrand factor C domain containing 2                                                  |
| 30951 | ENSG00000160437 | OTX1     | 29200 | 0.01 | protein_coding | 7  | 4891337   | 4891337   | OTX domain containing 1                                                                      |
| 30973 | ENSG00000105929 | ATP11V04 | 29226 | 0.01 | protein_coding | 7  | 13839100  | 138484005 | ATPase, H <sup>+</sup> transporting, lysosomal V0 subunit a4                                 |
| 30985 | ENSG00000112761 | WISP3    | 29237 | 0.01 | protein_coding | 6  | 11237575  | 112392171 | WNT1 inducible signaling pathway protein 3                                                   |
| 30986 | ENSG00000185298 | SPR1B    | 29238 | 0.01 | protein_coding | 12 | 97209619  | 97209645  | NTRK actin-binding protein-like 1                                                            |
| 31016 | ENSG00000189874 | CZORF0   | 29261 | 0.01 | protein_coding | 2  | 20903007  | 20905479  | chromosome 2 open reading frame 80                                                           |
| 31028 | ENSG00000099433 | ITPR3    | 29270 | 0.01 | protein_coding | 6  | 33584182  | 33664351  | inositol 1,4,5-trisphosphate receptor, type 3                                                |
| 31029 | ENSG00000169168 | EPF2     | 29280 | 0.01 | protein_coding | 22 | 42920124  | 44200000  | EF-hand calcium binding domain containing 22                                                 |
| 31047 | ENSG00000181523 | SSSB     | 29289 | 0.01 | protein_coding | 17 | 78180515  | 78194722  | N-sulfoglucosamine sulfolactonase                                                            |
| 31053 | ENSG00000135887 | SMIP2    | 29292 | 0.01 | protein_coding | 6  | 109781986 | 109785725 | sphingomyelin phosphodiesterase 2, neutral membrane (neutral sphingomyelinase)               |
| 31059 | ENSG00000181709 | TRAF3IP1 | 29298 | 0.01 | protein_coding | 18 | 4734818   | 4734818   | myD88                                                                                        |
| 31061 | ENSG00000196828 | TCF4     | 29297 | 0.01 | protein_coding | 18 | 52889562  | 53320108  | transcription factor 4                                                                       |
| 31062 | ENSG00000112280 | COL1A1   | 29296 | 0.01 | protein_coding | 6  | 70924764  | 71012788  | collagen, type I, alpha 1                                                                    |
| 31071 | ENSG00000124588 | SLC47A1  | 29307 | 0.01 | protein_coding | 6  | 62783125  | 62962087  | solute carrier family 7 (organic anion transporter), member 1                                |
| 31081 | ENSG00000190393 | PNPLA7   | 29312 | 0.01 | protein_coding | 7  | 140344486 | 140344486 | patatin-like lipase domain containing 7                                                      |
| 31090 | ENSG00000174838 | ITC      | 29319 | 0.01 | protein_coding | 4  | 73665969  | 75719986  | betacellulin                                                                                 |
| 31108 | ENSG00000198403 | ANKRD35  | 29332 | 0.01 | protein_coding | 1  | 14559420  | 14559420  | ankyrin repeat domain 35                                                                     |
| 31109 | ENSG00000174338 | SMK3     | 29332 | 0.01 | protein_coding | 22 | 43719944  | 43719944  | structural maintenance of chromosomes 13                                                     |
| 31118 | ENSG00000147488 | ST18     | 29337 | 0.01 | protein_coding | 8  | 53023399  | 53037319  | suppression of tumorigenicity 18 (breast carcinoma) (zinc finger protein)                    |
| 31120 | ENSG00000175634 | EPHKA2   | 29343 | 0.01 | protein_coding | 11 | 61719931  | 61720212  | fibronectin type 3 kinase, 20kDa, polypeptide 2                                              |
| 31124 | ENSG00000112118 | CCDC49   | 29347 | 0.01 | protein_coding | 11 | 64580959  | 64610441  | COX42 binding protein kinase gamma (DNAP-kinase)                                             |
| 31129 | ENSG00000203722 | RAET1G   | 29353 | 0.01 | protein_coding | 6  | 150238014 | 150244257 | retinoic acid early transcript 1G                                                            |
| 31140 | ENSG00000183862 | BMIR3    | 29361 | 0.01 | protein_coding | 1  | 39951318  | 39991107  | bone morphogenetic protein 8a                                                                |
| 31141 | ENSG00000104371 | DKK4     | 29370 | 0.01 | protein_coding | 1  | 42211158  | 42211158  | Dickkopf Wnt signaling pathway inhibitor 4                                                   |
| 31150 | ENSG00000144550 | CRNE9    | 29375 | 0.01 | protein_coding | 3  | 9745491   | 97471592  | copine family member IX                                                                      |
| 31162 | ENSG00000105131 | EPHK3    | 29386 | 0.01 | protein_coding | 19 | 15337720  | 15344246  | epoxide hydrolase 3                                                                          |
| 31167 | ENSG00000131691 | HSD17B8  | 29393 | 0.01 | protein_coding | 19 | 42963271  | 42967248  | diclofenac hydrolytic domain family, member 1B                                               |
| 31168 | ENSG00000148972 | CTNNA2   | 29393 | 0.01 | protein_coding | 11 | 98891683  | 99027468  | catenin 5                                                                                    |
| 31191 | ENSG00000181907 | FTMT     | 29416 | 0.01 | protein_coding | 5  | 12181660  | 12188519  | feritin mitochondrial                                                                        |
| 31196 | ENSG00000181974 | RANBP3   | 29423 | 0.01 | protein_coding | 9  | 80157471  | 80207000  | Ran association (RAG)GDP-4 domain family (N-terminal) member 9                               |
| 31202 | ENSG00000182824 | LHX8     | 29426 | 0.01 | protein_coding | 1  | 75584119  | 75627218  | LIM homeobox 8                                                                               |
| 31208 | ENSG00000198354 | DCAF12L  | 29432 | 0.01 | protein_coding | X  | 12529337  | 12530000  | DDI1 and CUL4A associated factor 12-like 2                                                   |
| 31210 | ENSG00000181246 | AP3D1    | 29432 | 0.01 | protein_coding | 20 | 62323127  | 62323127  | ADP-ribosyltransferase 1                                                                     |
| 31212 | ENSG00000124780 | KCNK17   | 29435 | 0.01 | protein_coding | 6  | 36266777  | 36282329  | potassium channel, subfamily K, member 17                                                    |
| 31213 | ENSG00000125508 | SRMS     | 29437 | 0.01 | protein_coding | 20 | 62172163  | 62178957  | src-related kinase lacking C-terminal regulatory tyrosine and N-terminal myristylation sites |
| 31215 | ENSG00000191948 | TNRC18   | 29440 | 0.01 | protein_coding | 6  | 56602303  | 56602303  | transmembrane protein 18                                                                     |
| 31216 | ENSG00000095528 | GLP2R    | 29440 | 0.01 | protein_coding | 17 | 9725523   | 9795419   | glucagon-like peptide 2 receptor                                                             |
| 31217 | ENSG00000182473 | EXOC2    | 29445 | 0.01 | protein_coding | 17 | 74077087  | 74117657  | exocyst complex component 7                                                                  |
| 31222 | ENSG00000105929 | RNF190   | 29447 | 0.01 | protein_coding | 8  | 42734333  | 42734333  | ring finger protein 170                                                                      |
| 31228 | ENSG00000181528 | SAP30BP  | 29447 | 0.01 | protein_coding | 17 | 73065128  | 73074142  | SAP30 binding protein                                                                        |
| 31233 | ENSG00000196289 | ZNF560   | 29452 | 0.01 | protein_coding | 19 | 8577183   | 8609283   | zinc finger protein 560                                                                      |
| 31240 | ENSG00000155139 | ANKRD33  | 29453 | 0.01 | protein_coding | 12 | 49820182  | 49820182  | potassium voltage-gated channel, subfamily H (shaker-related), member 3                      |
| 31250 | ENSG00000140460 | CAMKK1   | 29472 | 0.01 | protein_coding | 17 | 3763905   | 3768185   | calcium/calmodulin-dependent protein kinase 1, alpha                                         |
| 31277 | ENSG00000145743 | FBN1L7   | 29486 | 0.01 | protein_coding | 5  | 107184786 | 107177796 | F- and beta-actinin repeat protein 17                                                        |
| 31291 | ENSG00000131733 | FBXW7    | 29493 | 0.01 | protein_coding | 12 | 7213338   | 7213338   | family with sequence similarity 85, member C                                                 |
| 31292 | ENSG00000104919 | PHLP2    | 29504 | 0.01 | protein_coding | 16 | 71871738  | 71785804  | DII domain and leucine rich repeat protein phosphatase 2                                     |
| 31307 | ENSG00000208758 | ZNF285   | 29518 | 0.01 | protein_coding | 19 | 44888459  | 44885774  | zinc finger protein 285                                                                      |
| 31308 | ENSG00000191788 | ANKRD11  | 29518 | 0.01 | protein_coding | 12 | 4073138   | 4073138   | hydroxylase (17-beta dehydrogenase)                                                          |
| 31322 | ENSG00000154905 | ANKRD29  | 29532 | 0.01 | protein_coding | 18 | 21178890  | 21424849  | ankyrin repeat domain 29                                                                     |
| 31342 | ENSG00000151834 | GABRA2   | 29564 | 0.01 | protein_coding | 4  | 48920444  | 48927247  | gamma-aminobutyric acid (GABA) A receptor, alpha 2                                           |
| 31371 | ENSG00000105263 | TRAF3    | 29570 | 0.01 | protein_coding | 18 | 7818051   | 7818051   | myD88                                                                                        |
| 31381 | ENSG00000153208 | MERTK    | 29601 | 0.01 | protein_coding | 2  | 11295056  | 112877138 | c-mer proto-oncogene tyrosine kinase                                                         |
| 31393 | ENSG00000227268 | KLNL     | 29609 | 0.01 | protein_coding | 10 | 8961819   | 89623124  | kinin, p53-regulated DNA replication inhibitor                                               |
| 31398 | ENSG00000196353 | CRNE9    | 29612 | 0.01 | protein_coding | 3  | 13125299  | 13125299  | copine IV                                                                                    |
| 31403 | ENSG00000132915 | KLHL20   | 29622 | 0.01 | protein_coding | 19 | 3769071   | 3772253   | retina and leucine rich repeat homeobox 2                                                    |
| 31411 | ENSG00000205670 | SLC8A8   | 29633 | 0.01 | protein_coding | 12 | 101546271 | 101604185 | solute carrier family 8 (sodium/magnesium/oxalate cotransporter), member 8                   |
| 31422 | ENSG00000206362 | CEP350   | 29633 | 0.01 | protein_coding | 16 | 970742    | 970740    | centriolar protein 350                                                                       |
| 31423 | ENSG00000190629 | C10orf2  | 29639 | 0.01 | protein_coding | 19 | 159714758 | 159714758 | C10 and leucine-rich repeat protein 2                                                        |
| 31434 | ENSG00000186209 | CEP128   | 29642 | 0.01 | protein_coding | 14 | 89043359  | 89043359  | centriolar protein 128kDa                                                                    |
| 31438 | ENSG00000126522 | HSPA12B  | 29651 | 0.01 | protein_coding | 20 | 3715314   | 3715378   | heat shock 70 kDa protein 12B                                                                |
| 31439 | ENSG00000181371 | CYP4K1   | 29654 | 0.01 | protein_coding | 5  | 47427036  | 47427036  | cytochrome P450, family 4, subfamily A, polypeptide 1                                        |
| 31458 | ENSG00000184820 | RELL2    | 29670 | 0.01 | protein_coding | 5  | 141018517 | 141020844 | RET-like 2                                                                                   |
| 31461 | ENSG00000172286 | SP1L3C   | 29675 | 0.01 | protein_coding | 20 | 12498827  | 13147411  | serine palmitoyltransferase, long chain base subunit 3                                       |
| 31472 | ENSG00000201866 | RIT1A    | 29684 | 0.01 | protein_coding | 10 | 51180891  | 51233344  | retinoid-inducible transmembrane protein 1                                                   |
| 31474 | ENSG00000204074 | KRBOX1   | 29685 | 0.01 | protein_coding | 3  | 42820975  | 42838284  | KRAB box domain containing 1                                                                 |
| 31475 | ENSG00000198433 | STAR09   | 29686 | 0.01 | protein_coding | 15 | 42867857  | 43013179  | STAR-related lipid transfer                                                                  |



|       |                 |           |       |      |                |    |           |           |                                                                                           |
|-------|-----------------|-----------|-------|------|----------------|----|-----------|-----------|-------------------------------------------------------------------------------------------|
| 31951 | ENSG00000131183 | SLC34A1   | 30134 | 0.01 | protein_coding | 5  | 17686236  | 176825849 | solute carrier family 34 (type II sodium/phosphate cotransporter), member 1               |
| 31952 | ENSG00000105338 | NLGN3     | 30135 | 0.01 | protein_coding | X  | 70394     | 70394     | neuroligin 3                                                                              |
| 31959 | ENSG00000270394 |           | 30144 | 0.01 | protein_coding | 4  | 11722016  | 117221520 | MT-RNR2-like 13 (pseudogene)                                                              |
| 31960 | ENSG00000249773 | MRFP17    | 30145 | 0.01 | protein_coding | 7  | 5594749   | 5602232   | 28S ribosomal protein S17, mitochondrial; HCG1984214, isoform CRA_a                       |
| 31965 | ENSG00000165673 | EDC2D     | 30155 | 0.01 | protein_coding | A  | 12917370  | 13007208  | ecto-NOX disulfide-thiol exchanger 2                                                      |
| 31974 | ENSG00000105713 | SLC3A13   | 30156 | 0.01 | protein_coding | 3  | 329578    | 329578    | solute carrier family 3 (neurotransmitter transporter), member 13                         |
| 31975 | ENSG00000138738 | PRDM5     | 30158 | 0.01 | protein_coding | 4  | 12160074  | 12184425  | PR domain containing 5                                                                    |
| 31988 | ENSG00000164843 | MTMR9     | 30175 | 0.01 | protein_coding | 8  | 1141925   | 1141946   | mytilabdomin related protein 1, isoform 1                                                 |
| 31994 | ENSG00000105712 | MTMR5     | 30185 | 0.01 | protein_coding | 5  | 3222760   | 3223115   | mytilabdomin related protein 12                                                           |
| 31995 | ENSG00000165800 | C2orf82   | 30185 | 0.01 | protein_coding | 2  | 23371980  | 2337434   | chromosome 2 open reading frame 82                                                        |
| 32014 | ENSG00000125884 | BFP1      | 30200 | 0.01 | protein_coding | 20 | 1741559   | 1741596   | beaded filament structural protein 1, isoform 1                                           |
| 32040 | ENSG00000139269 | CSRN1     | 30233 | 0.01 | protein_coding | 12 | 12689360  | 12689360  | chromosome 2 open reading frame 8                                                         |
| 32044 | ENSG00000202780 | FANK1     | 30236 | 0.01 | protein_coding | 10 | 127585108 | 127586611 | fibronectin type III and ankyrin repeat domains 1                                         |
| 32051 | ENSG00000184532 | TBX20     | 30241 | 0.01 | protein_coding | 7  | 35242042  | 35259736  | T-box 20                                                                                  |
| 32056 | ENSG00000130319 | CHRM9     | 30244 | 0.01 | protein_coding | 1  | 23954965  | 24029700  | cholinergic receptor, muscarinic 9                                                        |
| 32058 | ENSG00000128482 | RNF112    | 30244 | 0.01 | protein_coding | 7  | 19314438  | 19320589  | ring finger protein 112                                                                   |
| 32060 | ENSG00000125962 | ARMC5     | 30247 | 0.01 | protein_coding | X  | 101854096 | 101859087 | armadillo repeat containing, X-linked 5                                                   |
| 32076 | ENSG00000165488 | TM6SF6C   | 30270 | 0.01 | protein_coding | 14 | 77569111  | 77726308  | transmembrane protein 61C                                                                 |
| 32079 | ENSG00000177062 | WDR73     | 30272 | 0.01 | protein_coding | 15 | 8515899   | 8519754   | WD repeat domain 73                                                                       |
| 32086 | ENSG00000184786 | TECT3     | 30277 | 0.01 | protein_coding | 6  | 170140210 | 170151655 | I-complex-associated-testis-expressed 3                                                   |
| 32091 | ENSG00000202623 | TYTPA     | 30278 | 0.01 | protein_coding | 14 | 2402439   | 2402439   | thymine triphosphatase                                                                    |
| 32101 | ENSG00000202484 |           | 30291 | 0.01 | protein_coding | 4  | 21967137  | 21967137  | chromosome 9 open reading frame 53                                                        |
| 32102 | ENSG00000202610 | C17orf107 | 30291 | 0.01 | protein_coding | 17 | 4802213   | 4802627   | chromosome 17 open reading frame 107                                                      |
| 32111 | ENSG00000120344 | WDR65     | 30304 | 0.01 | protein_coding | 5  | 140034281 | 140035709 | WD repeat domain 65                                                                       |
| 32112 | ENSG00000134207 | SVT8      | 30305 | 0.01 | protein_coding | 1  | 11463193  | 11466541  | synaptobrevin VI                                                                          |
| 32116 | ENSG00000195886 | MDCAM1    | 30309 | 0.01 | protein_coding | 19 | 489176    | 505347    | mucosal vascular addressin cell adhesion molecule 1                                       |
| 32120 | ENSG00000107080 | ACTL8     | 30312 | 0.01 | protein_coding | 7  | 100240020 | 100254094 | actinlike 8B                                                                              |
| 32126 | ENSG00000108132 | P4OX2B    | 30320 | 0.01 | protein_coding | 4  | 4174059   | 4175087   | paired-like homeobox 2b                                                                   |
| 32133 | ENSG00000049167 | ERC8C     | 30324 | 0.01 | protein_coding | 5  | 6016958   | 6024000   | excision repair cross-complementing rodent repair deficiency, complementation group 8     |
| 32138 | ENSG00000105730 | PCSK4     | 30324 | 0.01 | protein_coding | 5  | 14007132  | 14008348  | low density lipoprotein receptor-like family A, 4                                         |
| 32137 | ENSG00000058736 | IL7RB     | 30329 | 0.01 | protein_coding | 3  | 5388007   | 5389927   | interleukin 7 receptor B                                                                  |
| 32139 | ENSG00000087842 | ATP2B3    | 30331 | 0.01 | protein_coding | X  | 15287314  | 15288387  | ATPase, Ca <sup>2+</sup> -transporting, plasma membrane 3                                 |
| 32158 | ENSG00000165509 | PCSK1     | 30333 | 0.01 | protein_coding | 17 | 599417    | 600437    | insulator complex subunit 2                                                               |
| 32156 | ENSG00000052921 | NPFRR2    | 30343 | 0.01 | protein_coding | 4  | 72897521  | 73017184  | neuropilin FF receptor 2                                                                  |
| 32176 | ENSG00000164007 | CLDN19    | 30367 | 0.01 | protein_coding | 1  | 4319874   | 4320525   | claudin 19                                                                                |
| 32181 | ENSG00000107731 | SLC6A4    | 30367 | 0.01 | protein_coding | 1  | 558130    | 558130    | solute carrier family 6 (neurotransmitter transporter), member 4                          |
| 32187 | ENSG00000197553 | CYP2P1C1  | 30378 | 0.01 | protein_coding | 10 | 9482101   | 9482454   | cytochrome P450, family 2B, subfamily C, polypeptide 1                                    |
| 32190 | ENSG00000145777 | TSLP      | 30378 | 0.01 | protein_coding | 5  | 11045760  | 11043722  | thymic stromal lymphopoietin                                                              |
| 32213 | ENSG00000101781 | FRS3      | 30379 | 0.01 | protein_coding | 19 | 22116378  | 22116378  | beta-like RNA-mediated tyrosine kinase 2                                                  |
| 32218 | ENSG00000181653 | NGS5      | 30399 | 0.01 | protein_coding | 17 | 42081914  | 42086431  | 5-oxo-L-proline synthase                                                                  |
| 32239 | ENSG00000187528 | PROCAT    | 30425 | 0.01 | protein_coding | 17 | 2703821   | 2703882   | protein interacting with cyclin A1                                                        |
| 32254 | ENSG00000181611 | PCDH11    | 30425 | 0.01 | protein_coding | 17 | 781617    | 781617    | solute carrier family 26 (anion exchange), member 11                                      |
| 32258 | ENSG00000281934 | PCEHGA9   | 30442 | 0.01 | protein_coding | 5  | 140782520 | 140692546 | protocadherin gamma subfamily A, 9                                                        |
| 32261 | ENSG00000155495 | MAGEC1    | 30445 | 0.01 | protein_coding | X  | 140891880 | 14089774  | melanoma antigen family C, 1                                                              |
| 32272 | ENSG00000101198 | NKAIN1    | 30455 | 0.01 | protein_coding | 20 | 6187236   | 6191486   | Na <sup>+</sup> /K <sup>+</sup> -transporting ATPase interacting 4                        |
| 32297 | ENSG00000030125 | LRF       | 30459 | 0.01 | protein_coding | 5  | 7803448   | 7803448   | leucine rich repeat containing 2                                                          |
| 32306 | ENSG00000182372 | CLN3      | 30489 | 0.01 | protein_coding | 8  | 1730474   | 1734738   | ceroid lipofuscinosis, neuronal 8 (leptopy, progressive with mental retardation)          |
| 32307 | ENSG00000139191 | RN018     | 30489 | 0.01 | protein_coding | 13 | 9882826   | 9882919   | RNA                                                                                       |
| 32310 | ENSG00000139115 | MDC42     | 30489 | 0.01 | protein_coding | 13 | 4738626   | 4814157   | MAM domain containing glycochondriolysosomal anchor 2                                     |
| 32311 | ENSG00000181513 | ACBD4     | 30492 | 0.01 | protein_coding | 17 | 4320967   | 43221548  | acetyl-CoA binding domain containing 4                                                    |
| 32328 | ENSG00000204301 | NOY1CH    | 30506 | 0.01 | protein_coding | 6  | 3214020   | 3219184   | nothin 4                                                                                  |
| 32337 | ENSG00000101216 | NOY1      | 30506 | 0.01 | protein_coding | 6  | 5221895   | 5223844   | acyl-coenzyme A:acetyl-CoA ligase                                                         |
| 32338 | ENSG00000184163 | FAM132A   | 30511 | 0.01 | protein_coding | 1  | 1177826   | 1181202   | family with sequence similarity 132, member A                                             |
| 32330 | ENSG00000170653 | AT17      | 30527 | 0.01 | protein_coding | 12 | 53901849  | 5402199   | activating transcription factor 7                                                         |
| 32346 | ENSG00000181744 | LDN15A02  | 30540 | 0.01 | protein_coding | 19 | 22131876  | 22131174  | low density lipoprotein receptor class A domain containing 2                              |
| 32367 | ENSG00000128733 | DACH2     | 30540 | 0.01 | protein_coding | 5  | 8540362   | 8580767   | dachsund homolog 2 (Drosophila)                                                           |
| 32394 | ENSG00000146013 | GRK4      | 30559 | 0.01 | protein_coding | 5  | 13758880  | 13761008  | GNF family sequence similarity 132, member A                                              |
| 32391 | ENSG00000185366 | SLC45A1   | 30561 | 0.01 | protein_coding | 1  | 30881917  | 31031855  | Weaver syndrome 1                                                                         |
| 32407 | ENSG00000182428 | SLC45A1   | 30570 | 0.01 | protein_coding | 1  | 8377886   | 8404227   | solute carrier family 45, member 1                                                        |
| 32428 | ENSG00000158883 | FAM1802   | 30595 | 0.01 | protein_coding | 8  | 2194870   | 2196249   | family with sequence similarity 180, member B2                                            |
| 32438 | ENSG00000181644 | SLC45A1   | 30595 | 0.01 | protein_coding | 1  | 4928148   | 4928148   | synectin, beta, non-cytosolic 2                                                           |
| 32444 | ENSG00000004862 | SNCAIP    | 30610 | 0.01 | protein_coding | 5  | 12164708  | 121799914 | synuclein, alpha interacting protein                                                      |
| 32447 | ENSG00000144452 | ABCA12    | 30615 | 0.01 | protein_coding | 2  | 21578628  | 21600351  | ATP-binding cassette, sub-family A (ABC1), member 12                                      |
| 32452 | ENSG00000202501 | SLC6A11   | 30619 | 0.01 | protein_coding | 1  | 5321328   | 5321328   | solute carrier family 6 (neurotransmitter transporter), member 5                          |
| 32455 | ENSG00000163395 | IGFN1     | 30619 | 0.01 | protein_coding | 1  | 20115955  | 20119880  | immunoglobulin-like and fibronectin type III domain containing 1                          |
| 32468 | ENSG00000164362 | ERT       | 30638 | 0.01 | protein_coding | 5  | 1252302   | 1259194   | telomerase reverse transcriptase                                                          |
| 32470 | ENSG00000101743 | SVT9      | 30638 | 0.01 | protein_coding | 11 | 729032    | 7400273   | synaptobrevin IX                                                                          |
| 32476 | ENSG00000175891 | PA2       | 30650 | 0.01 | protein_coding | 10 | 10246360  | 10258968  | paired box 2                                                                              |
| 32478 | ENSG00000174327 | SLC16A13  | 30654 | 0.01 | protein_coding | 17 | 6938394   | 6943440   | solute carrier family 16, member 13                                                       |
| 32487 | ENSG00000101678 | SLC16A13  | 30654 | 0.01 | protein_coding | 12 | 491312    | 491312    | potassium voltage-gated channel, shaker-related subfamily, member 6                       |
| 32499 | ENSG00000140015 | KCNH9     | 30681 | 0.01 | protein_coding | 14 | 83173287  | 83168755  | potassium voltage-gated channel, subfamily H (eag-related), member 5                      |
| 32507 | ENSG00000165885 | ARHGAP42  | 30684 | 0.01 | protein_coding | 11 | 10058384  | 10068268  | Rho GTPase activating protein 42                                                          |
| 32517 | ENSG00000095539 | SEMA4G    | 30702 | 0.01 | protein_coding | 10 | 10272675  | 10274928  | semaphorin domain, immunoglobulin domain (TM) and short cytoplasmic domain, semaphorin 4G |
| 32548 | ENSG00000131739 | LRRCC1    | 30712 | 0.01 | protein_coding | 8  | 86019382  | 86068311  | leucine rich repeat and coiled-coil centrosomal protein 1                                 |
| 32549 | ENSG00000101326 | SLC24A4   | 30712 | 0.01 | protein_coding | 12 | 788812    | 788812    | solute carrier family 24 (sodium/calcium transporter), member 14                          |
| 32565 | ENSG00000111240 | CLU2      | 30720 | 0.01 | protein_coding | 12 | 11147128  | 11147128  | cut-like homeobox 2                                                                       |
| 32582 | ENSG00000133958 | UNC79     | 30786 | 0.01 | protein_coding | 12 | 9379565   | 94174222  | unc-79 homolog (C. elegans)                                                               |
| 32583 | ENSG00000101569 | HYC9B     | 30786 | 0.01 | protein_coding | 14 | 2381098   | 2381098   | 5-hydroxytryptamine (serotonin) receptor 10, 5a protein-coupled                           |
| 32588 | ENSG00000082405 | ERIC1     | 30772 | 0.01 | protein_coding | 12 | 109975    | 105009    | ELKS/RIBE-interacting-CAST family member 1                                                |
| 32594 | ENSG00000114870 | NEK11     | 30778 | 0.01 | protein_coding | 3  | 13074584  | 13109339  | NIMA-related kinase 11                                                                    |
| 32598 | ENSG00000101633 | UNC79B    | 30778 | 0.01 | protein_coding | 10 | 100819    | 100819    | glutamate receptor-associated, N-methyl-D-aspartate 3B                                    |
| 32601 | ENSG00000184719 | RNL5      | 30786 | 0.01 | protein_coding | 10 | 90033621  | 90344287  | reninase, FAD-dependent amino oxidase                                                     |
| 32602 | ENSG00000215217 | C5orf49   | 30788 | 0.01 | protein_coding | 5  | 7830491   | 7831603   | chromosome 5 open reading frame 49                                                        |
| 32605 | ENSG00000181299 | ZNF367    | 30792 | 0.01 | protein_coding | 19 | 3706719   | 3711849   | zinc finger protein 367                                                                   |
| 32610 | ENSG00000105714 | KIF14     | 30794 | 0.01 | protein_coding | 19 | 20730222  | 20730222  | Kv channel interacting protein 4                                                          |
| 32613 | ENSG00000215193 | PEK2B     | 30804 | 0.01 | protein_coding | 22 | 1850608   | 1891305   | peroxisomal biogenesis factor 2b                                                          |
| 32620 | ENSG00000125499 | MST1      | 30811 | 0.01 | protein_coding | 1  | 15507919  | 15517653  | mitsu1, mitochondrial distribution and morphology regulator                               |
| 32623 | ENSG00000194343 | PAGE      | 30811 | 0.01 | protein_coding | 15 | 4058929   | 4058929   | p21 protein-coupled, non-activated kinase 6                                               |
| 32642 | ENSG00000170946 | DNAJC24   | 30824 | 0.01 | protein_coding | 11 | 31391387  | 31463396  | DnaJ (Hsp40) homolog, subfamily C, member 24                                              |
| 32644 | ENSG00000185660 | P1CH1     | 30826 | 0.01 | protein_coding | 9  | 9640286   | 9642938   | pathed1                                                                                   |
| 32651 | ENSG00000194941 | ZNF303    | 30826 | 0.01 | protein_coding | 9  | 8811253   | 8812450   | zinc finger protein 303                                                                   |
| 32682 | ENSG00000239382 | ALKBH6    | 30853 | 0.01 | protein_coding | 19 | 3650522   | 3650522   | alkB, alkylation repair homolog 6 (E. coli)                                               |
| 32685 | ENSG00000087486 | M8H       | 30857 | 0.01 | protein_coding | 1  | 7626287   | 7637823   | miR8 homolog 4                                                                            |
| 32688 | ENSG00000151247 | IF74E     | 30857 | 0.01 | protein_coding | 17 | 9975265   | 9985158   | eukaryotic translation initiation factor 4E                                               |
| 32703 | ENSG00000115586 | WNT6      | 30878 | 0.01 | protein_coding | 2  | 21973855  | 21973855  | wingless-type MMTV integration site family, member 8                                      |
| 32708 | ENSG00000187941 | SOB3      | 30884 | 0.01 |                |    |           |           |                                                                                           |

|       |                  |            |         |      |                |    |           |           |                                                                                                                |
|-------|------------------|------------|---------|------|----------------|----|-----------|-----------|----------------------------------------------------------------------------------------------------------------|
| 33394 | ENSG00000175048  | ZDRHC14    | 31532.9 | 0.01 | protein_coding | 6  | 15782185  | 15809178  | zinc finger, DHHC-type containing 14                                                                           |
| 33437 | ENSG00000136525  | MARPK2     | 31558.1 | 0.01 | protein_coding | 12 | 5387582   | 53893847  | mitogen-activated protein kinase kinase kinase 12                                                              |
| 33443 | ENSG00000136995  | GARNL3     | 31569.8 | 0.01 | protein_coding | 9  | 12999054  | 130155939 | GTPase activating Rho/RacGAP domain-like 3                                                                     |
| 33454 | ENSG00000149256  | TENM4      | 31611.7 | 0.01 | protein_coding | 11 | 78363876  | 79151992  | tenascin transmembrane protein 4                                                                               |
| 33458 | ENSG00000179466  | HIP1       | 31613.2 | 0.01 | protein_coding | 7  | 75162621  | 75688269  | homologous interacting protein 1                                                                               |
| 33460 | ENSG00000126366  | CRNF143    | 31619.3 | 0.01 | protein_coding | 9  | 139317947 | 139390518 | chromosome 5 open reading frame 163                                                                            |
| 33486 | ENSG00000156687  | UNC5D      | 31637.8 | 0.01 | protein_coding | 8  | 35092975  | 35094068  | unc-5 homolog D (C. elegans)                                                                                   |
| 33490 | ENSG00000171751  | LPRC3A     | 31642.4 | 0.01 | protein_coding | 3  | 169611216 | 169630174 | locus coiled-coil containing 34                                                                                |
| 33512 | ENSG00000090441  | TFAP4      | 31663.1 | 0.01 | protein_coding | 16 | 4307181   | 43082879  | transcription factor 4P4 (activating enhancer binding protein 4)                                               |
| 33528 | ENSG00000196718  | FAM197B    | 31677.2 | 0.01 | protein_coding | 14 | 45431411  | 45434334  | family with sequence similarity 178, member B                                                                  |
| 33528 | ENSG00000126200  | PMIT7      | 31741.1 | 0.01 | protein_coding | 16 | 6884487   | 68849166  | protein arginine methyltransferase 7                                                                           |
| 33601 | ENSG00000189853  | LH6        | 31750.6 | 0.01 | protein_coding | 9  | 14984868  | 14985105  | RNA 5S rRNA homolog 6                                                                                          |
| 33620 | ENSG00000136918  | WR38       | 31782   | 0.01 | protein_coding | 9  | 127815755 | 127820168 | WD repeat domain 38                                                                                            |
| 33650 | ENSG00000098872  | IFT14      | 31808.3 | 0.01 | protein_coding | 9  | 26947037  | 27062829  | intraflagellar transport 14 homolog (Chlamydomonas)                                                            |
| 33657 | ENSG00000150378  | CC2C7A     | 31814.4 | 0.01 | protein_coding | 2  | 13089860  | 130902707 | coiled-coil domain containing 748                                                                              |
| 33663 | ENSG00000204052  | LRRRC73    | 31823.3 | 0.01 | protein_coding | 6  | 43474707  | 43478424  | leucine rich repeat containing 73                                                                              |
| 33674 | ENSG00000143624  | INT3       | 31837.3 | 0.01 | protein_coding | 1  | 15370543  | 15374955  | integrator complex subunit 3                                                                                   |
| 33681 | ENSG00000196239  | ZNF749     | 31845.3 | 0.01 | protein_coding | 19 | 5766697   | 5766963   | zinc finger protein 749                                                                                        |
| 33685 | ENSG00000143032  | BARHL2     | 31847.8 | 0.01 | protein_coding | 1  | 91177096  | 91182794  | Bar/Bar-like homeobox 2                                                                                        |
| 33695 | ENSG00000135517  | LACE1      | 31856.3 | 0.01 | protein_coding | 6  | 108916088 | 108947999 | lacination elevated 1                                                                                          |
| 33721 | ENSG00000122421  | PCHRB1     | 31866   | 0.01 | protein_coding | 5  | 14072928  | 140829548 | proteasome gamma subfamily B, 1                                                                                |
| 33725 | ENSG00000175538  | LPT2       | 31889.1 | 0.01 | protein_coding | 7  | 74020275  | 74024778  | lipoylecyltransferase 2 (putative)                                                                             |
| 33734 | ENSG00000209278  | GPATCH2    | 31897.9 | 0.01 | protein_coding | 1  | 21760334  | 21760424  | G patch domain containing 2                                                                                    |
| 33753 | ENSG00000105065  | RLSH4H     | 31917.5 | 0.01 | protein_coding | 7  | 30067020  | 30170798  | pleckstrin homology domain containing, family A (pleckstrin homology binding specific) member 8                |
| 33763 | ENSG00000197647  | NZF43      | 31928.7 | 0.01 | protein_coding | 19 | 12125547  | 12146556  | zinc finger protein 433                                                                                        |
| 33776 | ENSG00000107545  | CRAMP1L    | 31938.9 | 0.01 | protein_coding | 16 | 1862326   | 1727959   | Crn, cramp-like (Drosophila)                                                                                   |
| 33778 | ENSG00000101028  | PCDH12     | 31940   | 0.01 | protein_coding | 5  | 146589269 | 146591696 | protocadherin beta 12                                                                                          |
| 33779 | ENSG00000133059  | DBTYK      | 31941   | 0.01 | protein_coding | 1  | 20511832  | 20518027  | dual serine-threonine and tyrosine protein kinase                                                              |
| 33791 | ENSG00000135622  | SEMA4F     | 31949.5 | 0.01 | protein_coding | 2  | 74881355  | 74899186  | sema domain, immunoglobulin domain (Ig), transmembrane domain (TM) and short cytoplasmic domain, semaphorin 4F |
| 33799 | ENSG00000185869  | ZNF829     | 31956.8 | 0.01 | protein_coding | 19 | 37379026  | 37407193  | zinc finger protein 829                                                                                        |
| 33803 | ENSG00000138101  | DTNB       | 31959.3 | 0.01 | protein_coding | 2  | 25660067  | 25668053  | dystrobrevin, beta                                                                                             |
| 33808 | ENSG00000109117  | NILYB      | 31962.9 | 0.01 | protein_coding | 4  | 12386363  | 12384123  | nuclei (nucleoside diphosphate linked) mostly X1-type motif 6                                                  |
| 33839 | ENSG00000185267  | CONF       | 31999.1 | 0.01 | protein_coding | 10 | 14861249  | 14860574  | central dopamine neurotrophic factor                                                                           |
| 33870 | ENSG00000180263  | FOG3       | 32034.4 | 0.01 | protein_coding | 12 | 95470525  | 95611268  | FYVE, RhoGEF and PH domain containing 6                                                                        |
| 33973 | ENSG00000126925  | EFCA87     | 32133.3 | 0.01 | protein_coding | 1  | 6398164   | 6398164   | E1-ward calcium binding domain 7                                                                               |
| 33974 | ENSG00000154370  | TRM11      | 32136.9 | 0.01 | protein_coding | 2  | 228581374 | 228594411 | tripterine motif containing 11                                                                                 |
| 34002 | ENSG00000138411  | HECW2      | 32161.4 | 0.01 | protein_coding | 2  | 19705654  | 197481584 | HECT, C2 and WW domain containing E3 ubiquitin protein ligase 2                                                |
| 34038 | ENSG00000146883  | USP49      | 32253.1 | 0.01 | protein_coding | 6  | 4173764   | 41863099  | ubiquitin specific peptidase 49                                                                                |
| 34044 | ENSG00000144792  | ZNF660     | 32214.5 | 0.01 | protein_coding | 3  | 44619715  | 44641186  | zinc finger protein 660                                                                                        |
| 34062 | ENSG00000088135  | KDMAA      | 32255.6 | 0.01 | protein_coding | 1  | 44115829  | 44171186  | lysine (K)-specific demethylase 4A                                                                             |
| 34073 | ENSG00000181345  | RIFL3      | 32257.2 | 0.01 | protein_coding | 1  | 3837859   | 3837859   | single transcriptional repressor 3                                                                             |
| 34084 | ENSG00000181688  | HKR1       | 32255.6 | 0.01 | protein_coding | 19 | 37803739  | 37809267  | HKR1, GLK/Kruppel zinc finger family member                                                                    |
| 34135 | ENSG00000111012  | CYP27B1    | 32303.6 | 0.01 | protein_coding | 12 | 58166117  | 58168789  | cytochrome P450, family 27, subfamily B, polypeptide 1                                                         |
| 34250 | ENSG00000134494  | ANKRD2     | 32422.1 | 0.01 | protein_coding | 11 | 65964781  | 65971736  | ankyrin repeat domain 42                                                                                       |
| 34262 | ENSG00000186421  | HARBI1     | 32422.1 | 0.01 | protein_coding | 11 | 46624411  | 46624411  | hairpin, transposase domain 1                                                                                  |
| 34293 | ENSG00000196741  | ANKRD2     | 32424.3 | 0.01 | protein_coding | X  | 47432970  | 47434207  | chromosome X open reading frame 24                                                                             |
| 34378 | ENSG00000101971  | KLHL29     | 32553.3 | 0.01 | protein_coding | 2  | 2360109   | 23601481  | kelch-like family member 29                                                                                    |
| 34396 | ENSG00000103410  | MHS5       | 32555.6 | 0.01 | protein_coding | 6  | 31707725  | 31710222  | muscle-specific protein 5                                                                                      |
| 34488 | ENSG00000205691  | DYX1C1     | 32576.3 | 0.01 | protein_coding | 15 | 55732723  | 55804332  | dyslexia susceptibility 1 candidate 1                                                                          |
| 34515 | ENSG00000089723  | OTUD7      | 32593   | 0.01 | protein_coding | 4  | 9442670   | 9451578   | OTU domain, ubiquitin aldehyde binding 2                                                                       |
| 34522 | ENSG00000108469  | RECAL5     | 32596.2 | 0.01 | protein_coding | 5  | 73622925  | 73623269  | RecA5 protein-like 5                                                                                           |
| 34771 | ENSG00000174899  | FBXW8      | 32624.1 | 0.01 | protein_coding | 12 | 117348761 | 117468953 | F-box and WD repeat domain containing 8                                                                        |
| 35078 | ENSG00000088848  | ALG9       | 33220.6 | 0.01 | protein_coding | 11 | 111652919 | 111742305 | ALG9, alpha-1,2-mannosyltransferase                                                                            |
| 35084 | ENSG00000119201  | CRHR1      | 33211.2 | 0.01 | protein_coding | 12 | 27197343  | 27197383  | RNA, SS ribosomal pseudogene 192                                                                               |
| 29550 | ENSG00000251756  | ZNF879     | 27860.9 | 0.01 | rRNA           | 14 | 52159470  | 52159579  | RNA, SS ribosomal pseudogene 385                                                                               |
| 29682 | ENSG00000199316  | ZNF879     | 27860.9 | 0.01 | rRNA           | 1  | 87918923  | 87918959  | RNA, SS ribosomal pseudogene 382                                                                               |
| 30177 | ENSG00000202916  | ZNF879     | 27860.9 | 0.01 | rRNA           | 1  | 6506264   | 6506311   | RNA, SS ribosomal pseudogene 405                                                                               |
| 30361 | ENSG00000198407  | ZNF879     | 27860.9 | 0.01 | rRNA           | 10 | 13789796  | 13789916  | RNA, SS ribosomal pseudogene 301                                                                               |
| 30445 | ENSG00000212536  | ZNF879     | 27847.7 | 0.01 | rRNA           | 20 | 5076033   | 5079122   | RNA, SS ribosomal pseudogene 474                                                                               |
| 30521 | ENSG00000202326  | ZNF879     | 27860.9 | 0.01 | rRNA           | 1  | 18082822  | 18082822  | RNA, SS ribosomal pseudogene 217                                                                               |
| 30577 | ENSG00000202248  | ZNF879     | 27860.9 | 0.01 | rRNA           | 2  | 11701787  | 11701905  | RNA, SS ribosomal pseudogene 85                                                                                |
| 30709 | ENSG00000272253  | ZNF879     | 27860.9 | 0.01 | rRNA           | 14 | 6812822   | 6812928   | SS ribosomal RNA                                                                                               |
| 30794 | ENSG00000186438  | ZNF879     | 27860.9 | 0.01 | rRNA           | 1  | 7022184   | 7022184   | RNA, SS ribosomal pseudogene 319                                                                               |
| 31367 | ENSG00000202260  | ZNF879     | 27860.9 | 0.01 | rRNA           | 13 | 51601883  | 51601988  | RNA, SS ribosomal pseudogene 29                                                                                |
| 31551 | ENSG00000199545  | ZNF879     | 27949.9 | 0.01 | rRNA           | 5  | 13803541  | 13803557  | RNA, SS ribosomal pseudogene 195                                                                               |
| 31708 | ENSG00000103941  | ZNF879     | 27860.9 | 0.01 | rRNA           | 11 | 4782163   | 4782163   | RNA, SS ribosomal pseudogene 340                                                                               |
| 33122 | ENSG00000202727  | ZNF879     | 31276.8 | 0.01 | rRNA           | 9  | 6840824   | 6840904   | RNA, SS ribosomal pseudogene 284                                                                               |
| 33076 | ENSG00000202850  | ZNF879     | 27860.9 | 0.01 | sense intronic | 2  | 10739379  | 10740147  | STGAL2 intronic transcript 1 (non-protein coding)                                                              |
| 30138 | ENSG00000102648  | SNORD109A  | 29544.3 | 0.01 | sense intronic | 15 | 2528116   | 2528116   | small nuclear RNA, C/D box 109A                                                                                |
| 31361 | ENSG00000202248  | FAM155A1T1 | 29544.3 | 0.01 | sense intronic | 2  | 85413532  | 85413376  | TCF7L1 intronic transcript 1 (non-protein coding)                                                              |
| 30004 | ENSG00000126165  | SNORD109A  | 29544.3 | 0.01 | sense intronic | 13 | 10844980  | 10844799  | FAM155A intronic transcript 1 (non-protein coding)                                                             |
| 30117 | ENSG00000202916  | SNORD109A  | 29544.3 | 0.01 | sense intronic | 4  | 1490814   | 1490814   | WWTR1 intronic transcript 1 (non-protein coding)                                                               |
| 30141 | ENSG00000202916  | SNORD109A  | 29544.3 | 0.01 | sense intronic | 3  | 65858490  | 65840233  | MAGI1 intronic transcript 1 (non-protein coding)                                                               |
| 33147 | ENSG00000202850  | SNORD109A  | 31302   | 0.01 | sense intronic | 1  | 15798340  | 15800096  | KIRREL intronic transcript 1 (non-protein coding)                                                              |
| 29400 | ENSG00000202850  | SNORD109A  | 31302   | 0.01 | sense intronic | 1  | 7513841   | 7513841   | Small nuclear RNA SNORA7                                                                                       |
| 24429 | ENSG00000202850  | SNORD109A  | 23507.4 | 0.01 | sense intronic | 2  | 135894126 | 135894126 | Small nuclear RNA SNORA46                                                                                      |
| 27483 | ENSG00000212440  | SNORD109A  | 29667.4 | 0.01 | sense intronic | 12 | 9432629   | 9439418   | Small nuclear RNA SNORA75                                                                                      |
| 30681 | ENSG00000186111  | SNORD109A  | 29232.3 | 0.01 | sense intronic | 12 | 1312625   | 1312625   | Small nuclear RNA SNORA68                                                                                      |
| 30280 | ENSG00000201036  | SNORD109A  | 29630.2 | 0.01 | sense intronic | 14 | 101445339 | 101445427 | Small nuclear RNA SNORD113/SNORD114 family                                                                     |
| 30871 | ENSG00000202186  | SNORD109A  | 29148.2 | 0.01 | sense intronic | 1  | 15869860  | 15869799  | Small Cap1 body specific RNA 21                                                                                |
| 30237 | ENSG00000201710  | SNORD109A  | 30101   | 0.01 | sense intronic | 16 | 10443809  | 10443809  | Small nuclear RNA SNORD113/SNORD114 family                                                                     |
| 30781 | ENSG00000202978  | SNORD109A  | 30957.1 | 0.01 | sense intronic | 1  | 22878183  | 22878307  | Small nuclear RNA SNORA51                                                                                      |
| 33716 | ENSG000002028832 | SNORD109A  | 31877.3 | 0.01 | sense intronic | 7  | 10724308  | 10724392  | Small nuclear RNA U109                                                                                         |
| 14897 | ENSG00000194888  | SNORD109A  | 16235.1 | 0.01 | sense intronic | 3  | 10712699  | 10712622  | RNA, U1 small nuclear 70, pseudogene 3                                                                         |
| 23712 | ENSG00000202745  | SNORD109A  | 22398.7 | 0.01 | sense intronic | 18 | 60338459  | 60338459  | RNA, U1 small nuclear 152, pseudogene 8                                                                        |
| 23776 | ENSG00000202294  | SNORD109A  | 22254.5 | 0.01 | sense intronic | X  | 10193355  | 10193341  | RNA, U1 small nuclear 589, pseudogene 10                                                                       |
| 26419 | ENSG00000202604  | SNORD109A  | 25150.9 | 0.01 | sense intronic | 16 | 313614    | 3136301   | RNA, U1 small nuclear 529, pseudogene 1                                                                        |
| 26396 | ENSG00000202486  | SNORD109A  | 26033.2 | 0.01 | sense intronic | 1  | 13742582  | 13742582  | RNA, U1 small nuclear 460, pseudogene 9                                                                        |
| 28479 | ENSG000002022872 | SNORD109A  | 26953   | 0.01 | sense intronic | 3  | 42263332  | 42263332  | RNA, U1 small nuclear 78, pseudogene 3                                                                         |
| 25342 | ENSG00000202521  | SNORD109A  | 27173.2 | 0.01 | sense intronic | 9  | 10078452  | 10078457  | RNA, U1 small nuclear 916, pseudogene 1                                                                        |
| 29406 | ENSG00000203033  | SNORD109A  | 27838.4 | 0.01 | sense intronic | 1  | 27868861  | 27868862  | RNA, U1 small nuclear 986, pseudogene 1                                                                        |
| 29628 | ENSG000002027378 | SNORD109A  | 29813.9 | 0.01 | sense intronic | 8  | 99475172  | 99475178  | RNA, U1 small nuclear 746, pseudogene 8                                                                        |
| 29678 | ENSG00000202192  | SNORD109A  | 28257   | 0.01 | sense intronic | 11 | 74079224  | 74079357  | RNA, U1 small nuclear 216, pseudogene 1                                                                        |
| 30066 | EN               |            |         |      |                |    |           |           |                                                                                                                |

|       |                  |           |       |      |                        |    |           |           |                                                                       |
|-------|------------------|-----------|-------|------|------------------------|----|-----------|-----------|-----------------------------------------------------------------------|
| 30877 | ENSG00000188662  | HILST     | 29150 | 0.01 | unprocessed_pseudogene | 17 | 48248789  | 48258539  | histone linker H1 domain, spermatid-specific 1, pseudogene            |
| 31762 | ENSG00000205927  | ZNF252P   | 31925 | 0.01 | unprocessed_pseudogene | 8  | 14818975  | 14812931  | zinc finger protein 252, pseudogene                                   |
| 28709 | ENSG00000230252  |           | 27186 | 0.01 | unprocessed_pseudogene | 7  | 63570925  | 63571508  | MT-ND2 pseudogene 4                                                   |
| 29121 | ENSG00000241621  |           | 27555 | 0.01 | unprocessed_pseudogene | 10 | 30653339  | 30663115  | palpzin A2 pseudogene 6                                               |
| 26223 | ENSG00000181900  |           | 27669 | 0.01 | unprocessed_pseudogene | 3  | 67951196  | 67958125  | olfactory receptor, family 5, subfamily H, member 7 pseudogene        |
| 29612 | ENSG00000195312  |           | 28917 | 0.01 | unprocessed_pseudogene | 9  | 66960115  | 66964189  | BMX1 pseudogene 3                                                     |
| 30008 | ENSG00000208138  |           | 28384 | 0.01 | unprocessed_pseudogene | 19 | 22846724  | 22855438  | zinc finger protein 209, pseudogene                                   |
| 31019 | ENSG00000266297  |           | 29581 | 0.01 | unprocessed_pseudogene | 19 | 785435    | 785507    | C-type lectin domain family 4, member G pseudogene 1                  |
| 31377 | ENSG00000178988  | HGC4      | 29596 | 0.01 | unprocessed_pseudogene | 6  | 29758816  | 29760850  | HLA complex group 4 (non-protein coding)                              |
| 31460 | ENSG00000215914  |           | 29673 | 0.01 | unprocessed_pseudogene | 1  | 1631369   | 1631369   | matrix metalloproteinase 23A (pseudogene)                             |
| 32495 | ENSG00000215244  |           | 30236 | 0.01 | unprocessed_pseudogene | 11 | 12094475  | 12096299  | histone cluster 2, H3G pseudogene 1                                   |
| 32959 | ENSG00000208527  |           | 30795 | 0.01 | unprocessed_pseudogene | 19 | 21306620  | 21306891  | vimentin-associated 1 receptor 81 pseudogene                          |
| 33079 | ENSG00000224877  |           | 31236 | 0.01 | unprocessed_pseudogene | 15 | 43841321  | 43841478  | protein disulfide isomerase family A, member 3 pseudogene 2           |
| 6809  | ENSG00000118399  |           | 11389 | 0.01 | unprocessed_pseudogene | 14 | 108539079 | 108539577 | immunoglobulin heavy variable 1-8                                     |
| 8001  | ENSG00000200674  | CCL16     | 11716 | 0.01 | unprocessed_pseudogene | 17 | 34391640  | 34399392  | chemokine (C-C motif) ligand 16 (autonomous and activation-regulated) |
| 9733  | ENSG00000154035  | C17orf103 | 12140 | 0.01 | unprocessed_pseudogene | 17 | 21142183  | 21156722  | chromosome 17 open reading frame 103                                  |
| 13456 | ENSG00000235200  |           | 15070 | 0.01 | unprocessed_pseudogene |    |           |           |                                                                       |
| 14870 | ENSG00000235983  |           | 16139 | 0.01 | unprocessed_pseudogene |    |           |           |                                                                       |
| 14881 | ENSG00000230777  |           | 16146 | 0.01 | unprocessed_pseudogene |    |           |           |                                                                       |
| 15077 | ENSG00000217039  |           | 16509 | 0.01 | unprocessed_pseudogene |    |           |           |                                                                       |
| 15317 | ENSG00000211259  |           | 16616 | 0.01 | unprocessed_pseudogene |    |           |           |                                                                       |
| 15566 | ENSG00000207834  |           | 16679 | 0.01 | unprocessed_pseudogene |    |           |           |                                                                       |
| 16862 | ENSG00000182500  | ORAI1     | 16754 | 0.01 | unprocessed_pseudogene | 12 | 122064455 | 122080583 | ORAI calcium release-activated calcium modulator 1                    |
| 19207 | ENSG00000227115  |           | 16929 | 0.01 | unprocessed_pseudogene |    |           |           |                                                                       |
| 16200 | ENSG00000243199  |           | 17176 | 0.01 | unprocessed_pseudogene |    |           |           |                                                                       |
| 16849 | ENSG00000183298  |           | 17677 | 0.01 | unprocessed_pseudogene |    |           |           |                                                                       |
| 19320 | ENSG00000184399  |           | 17727 | 0.01 | unprocessed_pseudogene |    |           |           |                                                                       |
| 16940 | ENSG00000213058  |           | 17751 | 0.01 | unprocessed_pseudogene |    |           |           |                                                                       |
| 17420 | ENSG00000256206  |           | 18076 | 0.01 | unprocessed_pseudogene |    |           |           |                                                                       |
| 17640 | ENSG00000256227  |           | 18331 | 0.01 | unprocessed_pseudogene |    |           |           |                                                                       |
| 17877 | ENSG00000225916  |           | 18403 | 0.01 | unprocessed_pseudogene |    |           |           |                                                                       |
| 17893 | ENSG00000259781  |           | 18412 | 0.01 | unprocessed_pseudogene |    |           |           |                                                                       |
| 17908 | ENSG00000234332  |           | 18426 | 0.01 | unprocessed_pseudogene |    |           |           |                                                                       |
| 18448 | ENSG00000227591  |           | 18535 | 0.01 | unprocessed_pseudogene |    |           |           |                                                                       |
| 18688 | ENSG00000257511  |           | 19009 | 0.01 | unprocessed_pseudogene |    |           |           |                                                                       |
| 19193 | ENSG00000236813  |           | 19088 | 0.01 | unprocessed_pseudogene |    |           |           |                                                                       |
| 19686 | ENSG00000229944  |           | 19779 | 0.01 | unprocessed_pseudogene |    |           |           |                                                                       |
| 20220 | ENSG000002081353 |           | 20201 | 0.01 | unprocessed_pseudogene |    |           |           |                                                                       |
| 21010 | ENSG00000211129  | HSFX2     | 20601 | 0.01 | unprocessed_pseudogene | X  | 148674172 | 148678974 | heat shock transcription factor family, X linked 2                    |
| 21597 | ENSG00000230956  |           | 21266 | 0.01 | unprocessed_pseudogene |    |           |           |                                                                       |
| 22287 | ENSG00000226021  | CCL3L1    | 21789 | 0.01 | unprocessed_pseudogene | 17 | 34623842  | 34625731  | chemokine (C-C motif) ligand 3-like 1                                 |
| 22294 | ENSG00000214919  |           | 21791 | 0.01 | unprocessed_pseudogene |    |           |           |                                                                       |
| 22902 | ENSG00000211047  |           | 22266 | 0.01 | unprocessed_pseudogene |    |           |           |                                                                       |
| 24032 | ENSG00000236345  |           | 23169 | 0.01 | unprocessed_pseudogene |    |           |           |                                                                       |
| 24258 | ENSG00000216037  |           | 23007 | 0.01 | unprocessed_pseudogene |    |           |           |                                                                       |
| 24462 | ENSG00000235983  |           | 23532 | 0.01 | unprocessed_pseudogene |    |           |           |                                                                       |
| 24738 | ENSG00000241556  |           | 23764 | 0.01 | unprocessed_pseudogene |    |           |           |                                                                       |
| 24749 | ENSG00000206923  |           | 23773 | 0.01 | unprocessed_pseudogene |    |           |           |                                                                       |
| 24772 | ENSG00000183086  |           | 23802 | 0.01 | unprocessed_pseudogene | 7  | 74379083  | 74438803  | GATS protein-like 1                                                   |
| 24820 | ENSG00000271199  |           | 23847 | 0.01 | unprocessed_pseudogene |    |           |           |                                                                       |
| 24803 | ENSG00000259249  |           | 23904 | 0.01 | unprocessed_pseudogene |    |           |           |                                                                       |
| 24964 | ENSG00000235251  |           | 23988 | 0.01 | unprocessed_pseudogene |    |           |           |                                                                       |
| 25219 | ENSG00000243273  |           | 24165 | 0.01 | unprocessed_pseudogene |    |           |           |                                                                       |
| 25327 | ENSG00000232496  | RNVU1-20  | 24255 | 0.01 | unprocessed_pseudogene | 1  | 149605917 | 149606079 | RNA, variant U1 small nuclear 20                                      |
| 25564 | ENSG00000234024  |           | 24440 | 0.01 | unprocessed_pseudogene |    |           |           |                                                                       |
| 25631 | ENSG00000266389  |           | 24524 | 0.01 | unprocessed_pseudogene |    |           |           |                                                                       |
| 25649 | ENSG00000235225  | HIST1D3A  | 24517 | 0.01 | unprocessed_pseudogene | 6  | 27839623  | 27840099  | histone cluster 1, H3i                                                |
| 25820 | ENSG00000218225  |           | 24628 | 0.01 | unprocessed_pseudogene | 12 | 2969115   | 2969119   | Y RNA                                                                 |
| 25865 | ENSG00000222493  |           | 24693 | 0.01 | unprocessed_pseudogene |    |           |           |                                                                       |
| 25943 | ENSG00000233433  |           | 24754 | 0.01 | unprocessed_pseudogene |    |           |           |                                                                       |
| 25966 | ENSG00000234332  |           | 24765 | 0.01 | unprocessed_pseudogene |    |           |           |                                                                       |
| 26007 | ENSG00000207835  |           | 24805 | 0.01 | unprocessed_pseudogene |    |           |           |                                                                       |
| 26115 | ENSG00000252124  |           | 24895 | 0.01 | unprocessed_pseudogene |    |           |           |                                                                       |
| 26173 | ENSG00000212792  |           | 24945 | 0.01 | unprocessed_pseudogene |    |           |           |                                                                       |
| 26434 | ENSG00000249713  |           | 25167 | 0.01 | unprocessed_pseudogene |    |           |           |                                                                       |
| 26488 | ENSG00000259595  | GNBP2     | 25227 | 0.01 | unprocessed_pseudogene | 17 | 34900737  | 34946278  | gametoneurin binding protein 2                                        |
| 26580 | ENSG00000234264  |           | 25231 | 0.01 | unprocessed_pseudogene |    |           |           |                                                                       |
| 26636 | ENSG00000251017  |           | 25348 | 0.01 | unprocessed_pseudogene |    |           |           |                                                                       |
| 26994 | ENSG00000290896  |           | 25389 | 0.01 | unprocessed_pseudogene |    |           |           |                                                                       |
| 26738 | ENSG00000223888  |           | 25432 | 0.01 | unprocessed_pseudogene |    |           |           |                                                                       |
| 26798 | ENSG00000224839  |           | 25489 | 0.01 | unprocessed_pseudogene |    |           |           |                                                                       |
| 26881 | ENSG00000278029  | GTF2I     | 25449 | 0.01 | unprocessed_pseudogene | 7  | 74071994  | 74175026  | general transcription factor IIi                                      |
| 26923 | ENSG00000234741  |           | 25583 | 0.01 | unprocessed_pseudogene |    |           |           |                                                                       |
| 27093 | ENSG00000239813  |           | 25746 | 0.01 | unprocessed_pseudogene |    |           |           |                                                                       |
| 27206 | ENSG00000225976  |           | 25850 | 0.01 | unprocessed_pseudogene |    |           |           |                                                                       |
| 27291 | ENSG00000214588  | AGAP1     | 25824 | 0.01 | unprocessed_pseudogene | 10 | 51224681  | 51371321  | AGAP with GTPase domain, ankryn repeat and PH domain 8                |
| 27286 | ENSG00000277708  |           | 25904 | 0.01 | unprocessed_pseudogene |    |           |           |                                                                       |
| 27297 | ENSG00000215902  |           | 25915 | 0.01 | unprocessed_pseudogene | 1  | 28527013  | 28527152  | Uncharacterized protein                                               |
| 27384 | ENSG00000222388  |           | 25982 | 0.01 | unprocessed_pseudogene |    |           |           |                                                                       |
| 27452 | ENSG00000236035  |           | 26037 | 0.01 | unprocessed_pseudogene |    |           |           |                                                                       |
| 27463 | ENSG00000287315  |           | 26044 | 0.01 | unprocessed_pseudogene |    |           |           |                                                                       |
| 27467 | ENSG00000223533  |           | 26048 | 0.01 | unprocessed_pseudogene |    |           |           |                                                                       |
| 27514 | ENSG00000219150  |           | 26096 | 0.01 | unprocessed_pseudogene |    |           |           |                                                                       |
| 27535 | ENSG00000255266  |           | 26104 | 0.01 | unprocessed_pseudogene |    |           |           |                                                                       |
| 27568 | ENSG00000191697  | HIST1H2BG | 26131 | 0.01 | unprocessed_pseudogene | 6  | 26183958  | 26184454  | histone cluster 1, H2be                                               |
| 27569 | ENSG00000210717  |           | 26133 | 0.01 | unprocessed_pseudogene |    |           |           |                                                                       |
| 27573 | ENSG00000217844  |           | 26225 | 0.01 | unprocessed_pseudogene |    |           |           |                                                                       |
| 27727 | ENSG00000216127  |           | 26270 | 0.01 | unprocessed_pseudogene |    |           |           |                                                                       |
| 27748 | ENSG00000226945  |           | 26276 | 0.01 | unprocessed_pseudogene |    |           |           |                                                                       |
| 27805 | ENSG00000244535  |           | 26335 | 0.01 | unprocessed_pseudogene |    |           |           |                                                                       |
| 27804 | ENSG00000241991  |           | 26336 | 0.01 | unprocessed_pseudogene |    |           |           |                                                                       |
| 27854 | ENSG00000230364  |           | 26353 | 0.01 | unprocessed_pseudogene |    |           |           |                                                                       |
| 27871 | ENSG00000227940  |           | 26388 | 0.01 | unprocessed_pseudogene |    |           |           |                                                                       |
| 27907 | ENSG00000259895  |           | 26429 | 0.01 | unprocessed_pseudogene |    |           |           |                                                                       |
| 27869 | ENSG00000272520  |           | 26484 | 0.01 | unprocessed_pseudogene |    |           |           |                                                                       |
| 28000 | ENSG00000238868  |           | 26506 | 0.01 | unprocessed_pseudogene | 7  | 140075363 | 140075486 | Small nuclear RNA U13                                                 |
| 28025 | ENSG00000291342  |           | 26526 | 0.01 | unprocessed_pseudogene |    |           |           |                                                                       |
| 28064 | ENSG00000220139  |           | 26549 | 0.01 | unprocessed_pseudogene |    |           |           |                                                                       |
| 28061 | ENSG000002081526 |           | 26566 | 0.01 | unprocessed_pseudogene |    |           |           |                                                                       |
| 28095 | ENSG00000255348  |           | 26576 | 0.01 | unprocessed_pseudogene |    |           |           |                                                                       |
| 28071 | ENSG00000211348  |           | 26582 | 0.01 | unprocessed_pseudogene |    |           |           |                                                                       |
| 28098 | ENSG000002031029 |           | 26604 | 0.01 | unprocessed_pseudogene |    |           |           |                                                                       |
| 28125 | ENSG00000224789  |           | 26630 | 0.01 | unprocessed_pseudogene |    |           |           |                                                                       |
| 28164 | ENSG00000211933  |           | 26681 | 0.01 | unprocessed_pseudogene |    |           |           |                                                                       |
| 28182 | ENSG00000226409  |           | 26684 | 0.01 | unprocessed_pseudogene |    |           |           |                                                                       |
| 28213 | ENSG00000251451  |           | 26712 | 0.01 | unprocessed_pseudogene |    |           |           |                                                                       |
| 28218 | ENSG00000228922  |           | 26746 | 0.01 | unprocessed_pseudogene |    |           |           |                                                                       |
| 28224 | ENSG00000233536  |           | 26750 | 0.01 | unprocessed_pseudogene |    |           |           |                                                                       |
| 28236 | ENSG00000231252  |           | 26739 | 0.01 | unprocessed_pseudogene |    |           |           |                                                                       |
| 28243 | ENSG00000234484  |           | 26740 | 0.01 | unprocessed_pseudogene |    |           |           |                                                                       |
| 28296 | ENSG00000224761  |           | 26784 | 0.01 | unprocessed_pseudogene |    |           |           |                                                                       |
| 28316 | ENSG00000231222  |           | 26810 | 0.01 | unprocessed_pseudogene |    |           |           |                                                                       |
| 28322 | ENSG00000232024  |           | 26813 | 0.01 | unprocessed_pseudogene |    |           |           |                                                                       |
| 28391 | ENSG00000226925  |           | 26870 | 0.01 | unprocessed_pseudogene | 10 | 135341026 | 135342601 | Uncharacterized protein                                               |
| 28395 | ENSG00000238055  |           | 26877 | 0.01 | unprocessed_pseudogene |    |           |           |                                                                       |
| 28409 | ENSG00000235658  |           | 26889 | 0.01 | unprocessed_pseudogene |    |           |           |                                                                       |
| 28418 | ENSG000002262905 |           | 26895 | 0.01 | unprocessed_pseudogene |    |           |           |                                                                       |
| 28436 | ENSG00000233894  |           | 26914 | 0.01 | unprocessed_pseudogene |    |           |           |                                                                       |
| 28437 | ENSG00000231198  |           | 26916 | 0.01 | unprocessed_pseudogene |    |           |           |                                                                       |

|       |                 |         |           |      |    |          |          |  |  |                                                     |
|-------|-----------------|---------|-----------|------|----|----------|----------|--|--|-----------------------------------------------------|
| 29044 | ENSG00000260778 |         | 27494.6   | 0.01 |    |          |          |  |  |                                                     |
| 29108 | ENSG00000271068 |         | 27548.7   | 0.01 |    |          |          |  |  |                                                     |
| 29117 | ENSG00000198750 | GATS1   | 27553.2   | 0.01 | 7  | 74807499 | 74807509 |  |  | GATS protein-like 2                                 |
| 29125 | ENSG00000261368 |         | 27560.9   | 0.01 |    |          |          |  |  |                                                     |
| 29128 | ENSG00000272139 |         | 27562.2   | 0.01 |    |          |          |  |  |                                                     |
| 29161 | ENSG00000267674 |         | 27601.6   | 0.01 |    |          |          |  |  |                                                     |
| 29167 | ENSG00000197334 |         | 27605.5   | 0.01 |    |          |          |  |  |                                                     |
| 29168 | ENSG00000215529 |         | 27605.6   | 0.01 |    |          |          |  |  |                                                     |
| 29176 | ENSG00000269210 |         | 27613.5   | 0.01 |    |          |          |  |  |                                                     |
| 29184 | ENSG00000237444 |         | 27620.2   | 0.01 |    |          |          |  |  |                                                     |
| 29187 | ENSG00000272396 |         | 27622.6   | 0.01 |    |          |          |  |  |                                                     |
| 29192 | ENSG00000292959 |         | 27628.6   | 0.01 |    |          |          |  |  |                                                     |
| 29207 | ENSG00000232913 |         | 27648.6   | 0.01 |    |          |          |  |  |                                                     |
| 29240 | ENSG00000214043 |         | 27672.3   | 0.01 |    |          |          |  |  |                                                     |
| 29247 | ENSG00000229292 |         | 27678.4   | 0.01 |    |          |          |  |  |                                                     |
| 29248 | ENSG00000224279 |         | 27680.7   | 0.01 |    |          |          |  |  |                                                     |
| 29296 | ENSG00000259615 |         | 27687.9   | 0.01 |    |          |          |  |  |                                                     |
| 29298 | ENSG00000231259 |         | 27696.7   | 0.01 |    |          |          |  |  |                                                     |
| 29275 | ENSG00000258918 |         | 27700.2   | 0.01 |    |          |          |  |  |                                                     |
| 29281 | ENSG00000263655 |         | 27707.6   | 0.01 |    |          |          |  |  |                                                     |
| 29298 | ENSG00000231745 |         | 27713.3   | 0.01 |    |          |          |  |  |                                                     |
| 29292 | ENSG00000236013 |         | 27721.1   | 0.01 |    |          |          |  |  |                                                     |
| 29317 | ENSG00000242990 |         | 27754.1   | 0.01 |    |          |          |  |  |                                                     |
| 29330 | ENSG00000255420 |         | 27782.8   | 0.01 |    |          |          |  |  |                                                     |
| 29340 | ENSG00000237401 |         | 27770     | 0.01 |    |          |          |  |  |                                                     |
| 29351 | ENSG00000259886 |         | 27775.3   | 0.01 |    |          |          |  |  |                                                     |
| 29368 | ENSG00000221528 |         | 27785.4   | 0.01 |    |          |          |  |  |                                                     |
| 29363 | ENSG00000231132 |         | 27790.4   | 0.01 |    |          |          |  |  |                                                     |
| 29368 | ENSG00000248285 |         | 27795.2   | 0.01 |    |          |          |  |  |                                                     |
| 29372 | ENSG00000269600 |         | 27802.3   | 0.01 |    |          |          |  |  |                                                     |
| 29390 | ENSG00000220354 |         | 27812.7   | 0.01 |    |          |          |  |  |                                                     |
| 29419 | ENSG00000244310 |         | 27844.4   | 0.01 |    |          |          |  |  |                                                     |
| 29427 | ENSG00000233447 |         | 27855     | 0.01 |    |          |          |  |  |                                                     |
| 29433 | ENSG00000231898 |         | 27858.6   | 0.01 |    |          |          |  |  |                                                     |
| 29435 | ENSG00000253347 |         | 27860.1   | 0.01 |    |          |          |  |  |                                                     |
| 29437 | ENSG00000244841 |         | 27863.1   | 0.01 |    |          |          |  |  |                                                     |
| 29481 | ENSG00000261848 |         | 27901     | 0.01 |    |          |          |  |  |                                                     |
| 29499 | ENSG00000258410 |         | 27918.7   | 0.01 |    |          |          |  |  |                                                     |
| 29517 | ENSG00000252781 |         | 27928.2   | 0.01 |    |          |          |  |  |                                                     |
| 29567 | ENSG00000242209 |         | 27974.4   | 0.01 |    |          |          |  |  |                                                     |
| 29597 | ENSG00000232979 |         | 28004.5   | 0.01 |    |          |          |  |  |                                                     |
| 29605 | ENSG00000255145 |         | 28008     | 0.01 |    |          |          |  |  |                                                     |
| 29602 | ENSG00000270919 |         | 28009.6   | 0.01 |    |          |          |  |  |                                                     |
| 29611 | ENSG00000259840 |         | 28014.4   | 0.01 |    |          |          |  |  |                                                     |
| 29614 | ENSG00000260429 |         | 28019     | 0.01 |    |          |          |  |  |                                                     |
| 29649 | ENSG00000270987 |         | 28031.3   | 0.01 |    |          |          |  |  |                                                     |
| 29636 | ENSG00000237329 |         | 28036     | 0.01 |    |          |          |  |  |                                                     |
| 29654 | ENSG00000267184 |         | 28048.2   | 0.01 |    |          |          |  |  |                                                     |
| 29656 | ENSG00000234764 |         | 28049.5   | 0.01 |    |          |          |  |  |                                                     |
| 29660 | ENSG00000228043 |         | 28053.4   | 0.01 |    |          |          |  |  |                                                     |
| 29661 | ENSG00000251076 |         | 28053     | 0.01 |    |          |          |  |  |                                                     |
| 29671 | ENSG00000281521 |         | 28062.6   | 0.01 |    |          |          |  |  |                                                     |
| 29681 | ENSG00000227718 |         | 28071.9   | 0.01 |    |          |          |  |  |                                                     |
| 29704 | ENSG00000269021 |         | 28099     | 0.01 |    |          |          |  |  |                                                     |
| 29710 | ENSG00000235817 |         | 28097.3   | 0.01 |    |          |          |  |  |                                                     |
| 29724 | ENSG00000258583 |         | 28108.1   | 0.01 |    |          |          |  |  |                                                     |
| 29735 | ENSG00000219882 |         | 28119     | 0.01 |    |          |          |  |  |                                                     |
| 29728 | ENSG00000289119 |         | 28120.8   | 0.01 |    |          |          |  |  |                                                     |
| 29738 | ENSG00000228401 |         | 28123.7   | 0.01 |    |          |          |  |  |                                                     |
| 29763 | ENSG00000244146 |         | 28141.1   | 0.01 |    |          |          |  |  |                                                     |
| 29764 | ENSG00000245361 |         | 28141.6   | 0.01 |    |          |          |  |  |                                                     |
| 29769 | ENSG00000224265 |         | 28152.6   | 0.01 |    |          |          |  |  |                                                     |
| 29772 | ENSG00000230550 |         | 28153.7   | 0.01 |    |          |          |  |  |                                                     |
| 29774 | ENSG00000263528 |         | 28156.5   | 0.01 |    |          |          |  |  |                                                     |
| 29785 | ENSG00000272256 |         | 28165.8   | 0.01 |    |          |          |  |  |                                                     |
| 29788 | ENSG00000228844 |         | 28171.3   | 0.01 |    |          |          |  |  |                                                     |
| 29797 | ENSG00000222462 |         | 28178.8   | 0.01 |    |          |          |  |  |                                                     |
| 29814 | ENSG00000255010 |         | 28194     | 0.01 |    |          |          |  |  |                                                     |
| 29831 | ENSG00000269156 |         | 28214.2   | 0.01 |    |          |          |  |  |                                                     |
| 29835 | ENSG00000244681 |         | 28218.3   | 0.01 |    |          |          |  |  |                                                     |
| 29837 | ENSG00000250619 |         | 28219.5   | 0.01 |    |          |          |  |  |                                                     |
| 29845 | ENSG00000238722 |         | 28228.3   | 0.01 | 2  | 3079444  | 3079544  |  |  | Small nuclear RNA U13                               |
| 29861 | ENSG00000268528 |         | 28241.2   | 0.01 |    |          |          |  |  |                                                     |
| 29863 | ENSG00000258731 |         | 28243.1   | 0.01 |    |          |          |  |  |                                                     |
| 29865 | ENSG00000258520 |         | 28244.4   | 0.01 |    |          |          |  |  |                                                     |
| 29867 | ENSG00000263581 |         | 28243.9   | 0.01 |    |          |          |  |  |                                                     |
| 29871 | ENSG00000207833 |         | 28248.9   | 0.01 |    |          |          |  |  |                                                     |
| 29879 | ENSG00000269082 |         | 28259.2   | 0.01 |    |          |          |  |  |                                                     |
| 29885 | ENSG00000252289 |         | 28263.3   | 0.01 |    |          |          |  |  |                                                     |
| 29912 | ENSG00000232783 |         | 28285.3   | 0.01 |    |          |          |  |  |                                                     |
| 29943 | ENSG00000269344 |         | 28312.6   | 0.01 |    |          |          |  |  |                                                     |
| 29947 | ENSG00000231388 |         | 28314.4   | 0.01 |    |          |          |  |  |                                                     |
| 29954 | ENSG00000228354 |         | 28315.6   | 0.01 |    |          |          |  |  |                                                     |
| 29955 | ENSG00000259033 |         | 28315.8   | 0.01 |    |          |          |  |  |                                                     |
| 29965 | ENSG00000234600 |         | 28325.3   | 0.01 |    |          |          |  |  |                                                     |
| 29966 | ENSG00000271308 |         | 28326.8   | 0.01 |    |          |          |  |  |                                                     |
| 29985 | ENSG00000254372 |         | 28358.4   | 0.01 |    |          |          |  |  |                                                     |
| 30012 | ENSG00000259119 |         | 28386.1   | 0.01 |    |          |          |  |  |                                                     |
| 30029 | ENSG00000214776 |         | 28398     | 0.01 |    |          |          |  |  |                                                     |
| 30031 | ENSG00000242952 |         | 28399.9   | 0.01 |    |          |          |  |  |                                                     |
| 30044 | ENSG00000236149 |         | 28416.6   | 0.01 |    |          |          |  |  |                                                     |
| 30047 | ENSG00000269329 |         | 28418.5   | 0.01 |    |          |          |  |  |                                                     |
| 30063 | ENSG00000226971 |         | 28432.4   | 0.01 |    |          |          |  |  |                                                     |
| 30091 | ENSG00000267699 |         | 28452.4   | 0.01 |    |          |          |  |  |                                                     |
| 30104 | ENSG00000231016 |         | 28469.4   | 0.01 |    |          |          |  |  |                                                     |
| 30110 | ENSG00000268579 |         | 28474.9   | 0.01 |    |          |          |  |  |                                                     |
| 30117 | ENSG00000270935 |         | 28492     | 0.01 |    |          |          |  |  |                                                     |
| 30124 | ENSG00000271787 |         | 28493.5   | 0.01 |    |          |          |  |  |                                                     |
| 30127 | ENSG00000232183 |         | 28491.2   | 0.01 |    |          |          |  |  |                                                     |
| 30143 | ENSG00000229995 |         | 28506.1   | 0.01 |    |          |          |  |  |                                                     |
| 30146 | ENSG00000215275 |         | 28514.4   | 0.01 |    |          |          |  |  |                                                     |
| 30159 | ENSG00000236393 | PTPN22B | 28518     | 0.01 | 10 | 48736874 | 48827966 |  |  | protein tyrosine phosphatase, non-receptor type 20B |
| 30181 | ENSG00000210945 |         | 28535.5   | 0.01 |    |          |          |  |  |                                                     |
| 30206 | ENSG00000210968 |         | 28555.7   | 0.01 |    |          |          |  |  |                                                     |
| 30205 | ENSG00000248797 |         | 28556.8   | 0.01 |    |          |          |  |  |                                                     |
| 30213 | ENSG00000235835 |         | 28562.5   | 0.01 |    |          |          |  |  |                                                     |
| 30240 | ENSG00000231300 |         | 28590.5   | 0.01 |    |          |          |  |  |                                                     |
| 30256 | ENSG00000214556 | C17orf8 | 28614.2   | 0.01 | 17 | 36891341 | 36897708 |  |  | chromosome 17 open reading frame 8                  |
| 30270 | ENSG00000217379 |         | 28625.2   | 0.01 |    |          |          |  |  |                                                     |
| 30303 | ENSG00000232577 |         | 28643.8   | 0.01 |    |          |          |  |  |                                                     |
| 30305 | ENSG00000250350 |         | 28645.5   | 0.01 |    |          |          |  |  |                                                     |
| 30310 | ENSG00000250102 |         | 28648.8   | 0.01 |    |          |          |  |  |                                                     |
| 30325 | ENSG00000234715 |         | 28654.7   | 0.01 |    |          |          |  |  |                                                     |
| 30326 | ENSG00000228919 |         | 28655.1   | 0.01 |    |          |          |  |  |                                                     |
| 30328 | ENSG00000252921 |         | 28657.1   | 0.01 |    |          |          |  |  |                                                     |
| 30377 | ENSG00000271273 |         | 28699.9   | 0.01 |    |          |          |  |  |                                                     |
| 30378 | ENSG00000237389 |         | 28701     | 0.01 |    |          |          |  |  |                                                     |
| 30390 | ENSG00000238866 |         | 28709.4   | 0.01 |    |          |          |  |  |                                                     |
| 30393 | ENSG00000231528 |         | 28712     | 0.01 |    |          |          |  |  |                                                     |
| 30394 | ENSG00000259798 |         | 28712.2   | 0.01 |    |          |          |  |  |                                                     |
| 30403 | ENSG00000227544 |         | 28718.2   | 0.01 |    |          |          |  |  |                                                     |
| 30405 | ENSG00000255650 |         | 28719.7   | 0.01 |    |          |          |  |  |                                                     |
| 30411 | ENSG00000227308 |         | 28724.4   | 0.01 |    |          |          |  |  |                                                     |
| 30423 | ENSG00000224828 |         | 28731.5   | 0.01 |    |          |          |  |  |                                                     |
| 30429 | ENSG00000214961 |         | 28733     | 0.01 |    |          |          |  |  |                                                     |
| 30446 | ENSG00000233023 |         | 28750.4   | 0.01 |    |          |          |  |  |                                                     |
| 30480 | ENSG00000256972 |         | 28773     | 0.01 |    |          |          |  |  |                                                     |
| 30482 | ENSG00000259046 |         | 28775.4   | 0.01 |    |          |          |  |  |                                                     |
| 30485 | ENSG00000214917 |         | 28778.6   | 0.01 |    |          |          |  |  |                                                     |
| 30490 | ENSG00000267429 |         | 28780.6   | 0.01 |    |          |          |  |  |                                                     |
| 30496 | ENSG00000252864 |         | 28786.9   | 0.01 |    |          |          |  |  |                                                     |
| 30502 | ENSG00000234356 |         | 28789.5   | 0.01 |    |          |          |  |  |                                                     |
| 30503 | ENSG00000255572 |         | 28790.3   | 0.01 |    |          |          |  |  |                                                     |
| 30544 | ENSG00000269004 |         | 28824.6   | 0.01 |    |          |          |  |  |                                                     |
| 30562 | ENSG00000269286 |         | 28838.6   | 0.01 |    |          |          |  |  |                                                     |
| 30580 | ENSG00000268108 |         | 28853.9   | 0.01 |    |          |          |  |  |                                                     |
| 30584 | ENSG00000229931 |         | 28861.6   | 0.01 |    |          |          |  |  |                                                     |
| 30593 | ENSG00000261743 |         | 28867.5   | 0.01 |    |          |          |  |  |                                                     |
| 30615 | ENSG00000268289 |         | 28882.8   | 0.01 |    |          |          |  |  |                                                     |
| 30637 | ENSG00000259280 |         | 28912.8   | 0.01 |    |          |          |  |  |                                                     |
| 30653 | ENSG00000259359 |         | 28930.3   | 0.01 |    |          |          |  |  |                                                     |
| 30660 | ENSG00000273690 |         | 28935.9   | 0.01 |    |          |          |  |  |                                                     |
| 30688 | ENSG00000259783 |         | 28980.6   | 0.01 |    |          |          |  |  |                                                     |
| 30695 | ENSG00000259598 |         | 28970.4   | 0.01 |    |          |          |  |  |                                                     |
| 30716 | ENSG00000261712 |         | 28984.1   | 0.01 |    |          |          |  |  |                                                     |
| 30769 | ENSG00000228033 |         | 29049.9   | 0.01 |    |          |          |  |  |                                                     |
| 30781 | ENSG00000232438 |         | 29061     | 0.01 |    |          |          |  |  |                                                     |
| 30782 | ENSG00000239335 |         | 29061.7</ |      |    |          |          |  |  |                                                     |



|       |                  |        |         |      |    |           |           |                                            |
|-------|------------------|--------|---------|------|----|-----------|-----------|--------------------------------------------|
| 30852 | ENSG00000224427  |        | 29126.2 | 0.01 |    |           |           |                                            |
| 30861 | ENSG00000205556  |        | 29137.6 | 0.01 |    |           |           |                                            |
| 30873 | ENSG00000226702  |        | 29147   | 0.01 |    |           |           |                                            |
| 30878 | ENSG00000226744  |        | 29150.3 | 0.01 |    |           |           |                                            |
| 30881 | ENSG00000221802  |        | 29152.5 | 0.01 |    |           |           |                                            |
| 30919 | ENSG00000224252  |        | 29175.2 | 0.01 |    |           |           |                                            |
| 30926 | ENSG000002236514 |        | 29185.7 | 0.01 |    |           |           |                                            |
| 30928 | ENSG00000204470  |        | 29189   | 0.01 |    |           |           |                                            |
| 30938 | ENSG00000208976  |        | 29195.1 | 0.01 |    |           |           |                                            |
| 30984 | ENSG00000257002  |        | 29217.2 | 0.01 |    |           |           |                                            |
| 30982 | ENSG00000271522  |        | 29233.4 | 0.01 |    |           |           |                                            |
| 30984 | ENSG00000225256  |        | 29236.7 | 0.01 |    |           |           |                                            |
| 30988 | ENSG00000272864  |        | 29242.3 | 0.01 |    |           |           |                                            |
| 30992 | ENSG00000213970  |        | 29243.1 | 0.01 |    |           |           |                                            |
| 31001 | ENSG00000203178  |        | 29253.4 | 0.01 |    |           |           |                                            |
| 31012 | ENSG000002064078 |        | 29260.8 | 0.01 |    |           |           |                                            |
| 31021 | ENSG00000225392  |        | 29266.5 | 0.01 |    |           |           |                                            |
| 31036 | ENSG000002049779 |        | 29277.9 | 0.01 |    |           |           |                                            |
| 31038 | ENSG000002058700 |        | 29279.1 | 0.01 |    |           |           |                                            |
| 31042 | ENSG00000196285  |        | 29281.7 | 0.01 |    |           |           |                                            |
| 31048 | ENSG000002029113 |        | 29290.9 | 0.01 |    |           |           |                                            |
| 31058 | ENSG000002080614 |        | 29295.8 | 0.01 |    |           |           |                                            |
| 31064 | ENSG000002064007 |        | 29301.5 | 0.01 |    |           |           |                                            |
| 31078 | ENSG000002056255 |        | 29312.4 | 0.01 |    |           |           |                                            |
| 31088 | ENSG00000270947  |        | 29319.3 | 0.01 |    |           |           |                                            |
| 31107 | ENSG000002089194 |        | 29331.5 | 0.01 |    |           |           |                                            |
| 31110 | ENSG000002020703 |        | 29332.4 | 0.01 |    |           |           |                                            |
| 31116 | ENSG00000213642  |        | 29337.5 | 0.01 |    |           |           |                                            |
| 31121 | ENSG000002026771 |        | 29341.4 | 0.01 |    |           |           |                                            |
| 31132 | ENSG000002026047 |        | 29354.3 | 0.01 |    |           |           |                                            |
| 31178 | ENSG000002083503 |        | 29402.5 | 0.01 |    |           |           |                                            |
| 31185 | ENSG000002089746 |        | 29409.6 | 0.01 | 16 | 70236303  | 70236683  | Uncharacterized protein                    |
| 31188 | ENSG000002036073 |        | 29412.1 | 0.01 |    |           |           |                                            |
| 31226 | ENSG00000227112  |        | 29446.3 | 0.01 |    |           |           |                                            |
| 31232 | ENSG00000227237  |        | 29450.1 | 0.01 |    |           |           |                                            |
| 31253 | ENSG00000203789  |        | 29474.2 | 0.01 |    |           |           |                                            |
| 31264 | ENSG00000272764  |        | 29481.6 | 0.01 |    |           |           |                                            |
| 31266 | ENSG000002031033 |        | 29483.5 | 0.01 |    |           |           |                                            |
| 31281 | ENSG000002055969 |        | 29493.7 | 0.01 |    |           |           |                                            |
| 31282 | ENSG00000233515  |        | 29500   | 0.01 |    |           |           |                                            |
| 31299 | ENSG00000232233  |        | 29509.7 | 0.01 |    |           |           |                                            |
| 31314 | ENSG000002027549 |        | 29527.8 | 0.01 |    |           |           |                                            |
| 31346 | ENSG000002087505 |        | 29568.2 | 0.01 |    |           |           |                                            |
| 31353 | ENSG00000270575  |        | 29573.5 | 0.01 |    |           |           |                                            |
| 31366 | ENSG00000206526  |        | 29582.6 | 0.01 |    |           |           |                                            |
| 31369 | ENSG000002056243 |        | 29586.6 | 0.01 |    |           |           |                                            |
| 31370 | ENSG000002087052 |        | 29589.4 | 0.01 |    |           |           |                                            |
| 31379 | ENSG000002087620 |        | 29588.5 | 0.01 |    |           |           |                                            |
| 31383 | ENSG000002027633 |        | 29591.7 | 0.01 |    |           |           |                                            |
| 31392 | ENSG00000227064  |        | 29608.3 | 0.01 |    |           |           |                                            |
| 31408 | ENSG00000224413  |        | 29625.3 | 0.01 |    |           |           |                                            |
| 31408 | ENSG00000214317  |        | 29626.4 | 0.01 |    |           |           |                                            |
| 31413 | ENSG00000270581  |        | 29633.1 | 0.01 |    |           |           |                                            |
| 31424 | ENSG00000272019  |        | 29642.6 | 0.01 |    |           |           |                                            |
| 31466 | ENSG000002059495 |        | 29676.9 | 0.01 |    |           |           |                                            |
| 31467 | ENSG000002056034 |        | 29678.3 | 0.01 |    |           |           |                                            |
| 31470 | ENSG00000226285  |        | 29683.5 | 0.01 |    |           |           |                                            |
| 31473 | ENSG00000208496  |        | 29684.5 | 0.01 |    |           |           |                                            |
| 31481 | ENSG000002087602 |        | 29690.2 | 0.01 |    |           |           |                                            |
| 31485 | ENSG000002052873 |        | 29691.9 | 0.01 | 14 | 101383915 | 101383982 | Small nuclear RNA SNORD112                 |
| 31497 | ENSG000002026073 |        | 29702.4 | 0.01 |    |           |           |                                            |
| 31498 | ENSG000002033654 |        | 29702.5 | 0.01 |    |           |           |                                            |
| 31515 | ENSG00000233487  |        | 29720.6 | 0.01 |    |           |           |                                            |
| 31516 | ENSG00000203499  |        | 29721.5 | 0.01 |    |           |           |                                            |
| 31525 | ENSG00000238541  |        | 29726   | 0.01 | 4  | 57972409  | 57972511  | Small nuclear RNA U13                      |
| 31531 | ENSG00000229368  |        | 29735   | 0.01 |    |           |           |                                            |
| 31561 | ENSG00000204848  |        | 29737.1 | 0.01 |    |           |           |                                            |
| 31568 | ENSG00000228606  |        | 29761.7 | 0.01 |    |           |           |                                            |
| 31593 | ENSG000002051129 |        | 29790.7 | 0.01 |    |           |           |                                            |
| 31598 | ENSG00000202041  |        | 29794   | 0.01 |    |           |           |                                            |
| 31597 | ENSG00000206367  |        | 29794.1 | 0.01 |    |           |           |                                            |
| 31605 | ENSG000002083860 |        | 29805.4 | 0.01 |    |           |           |                                            |
| 31642 | ENSG00000203871  |        | 29831.7 | 0.01 |    |           |           |                                            |
| 31643 | ENSG00000197047  |        | 29833   | 0.01 |    |           |           |                                            |
| 31646 | ENSG00000203696  |        | 29835.3 | 0.01 |    |           |           |                                            |
| 31647 | ENSG00000205553  |        | 29835.3 | 0.01 |    |           |           |                                            |
| 31652 | ENSG00000208995  |        | 29841.4 | 0.01 |    |           |           |                                            |
| 31657 | ENSG00000208404  |        | 29844.8 | 0.01 |    |           |           |                                            |
| 31681 | ENSG00000205647  |        | 29843.7 | 0.01 |    |           |           |                                            |
| 31681 | ENSG00000238388  |        | 29866.5 | 0.01 | 11 | 100805005 | 100805109 | Small nuclear RNA U13                      |
| 31698 | ENSG00000271770  |        | 29888.6 | 0.01 |    |           |           |                                            |
| 31732 | ENSG00000202709  |        | 29915.1 | 0.01 |    |           |           |                                            |
| 31742 | ENSG000002058208 |        | 29927.4 | 0.01 |    |           |           |                                            |
| 31766 | ENSG00000270933  |        | 29943.1 | 0.01 |    |           |           |                                            |
| 31768 | ENSG000002097363 |        | 29949   | 0.01 |    |           |           |                                            |
| 31763 | ENSG000002027659 |        | 29951.3 | 0.01 |    |           |           |                                            |
| 31766 | ENSG000002053917 |        | 29952.5 | 0.01 |    |           |           |                                            |
| 31800 | ENSG00000205959  |        | 29991.1 | 0.01 |    |           |           |                                            |
| 31804 | ENSG000002027252 |        | 29997   | 0.01 |    |           |           |                                            |
| 31807 | ENSG00000232599  |        | 30002.5 | 0.01 |    |           |           |                                            |
| 31817 | ENSG00000206375  |        | 30012.5 | 0.01 |    |           |           |                                            |
| 31818 | ENSG00000203269  |        | 30013.5 | 0.01 |    |           |           |                                            |
| 31827 | ENSG000002086303 |        | 30022.8 | 0.01 |    |           |           |                                            |
| 31831 | ENSG000002057243 |        | 30026.7 | 0.01 |    |           |           |                                            |
| 31834 | ENSG00000205401  |        | 30028   | 0.01 |    |           |           |                                            |
| 31839 | ENSG000002058649 |        | 30032.9 | 0.01 |    |           |           |                                            |
| 31842 | ENSG000002090898 |        | 30035.9 | 0.01 |    |           |           |                                            |
| 31846 | ENSG000002020208 |        | 30041.3 | 0.01 |    |           |           |                                            |
| 31847 | ENSG000002081578 |        | 30041.5 | 0.01 |    |           |           |                                            |
| 31862 | ENSG000002054006 |        | 30055.4 | 0.01 |    |           |           |                                            |
| 31863 | ENSG000002026292 |        | 30052.4 | 0.01 |    |           |           |                                            |
| 31866 | ENSG000002026439 |        | 30057.2 | 0.01 |    |           |           |                                            |
| 31876 | ENSG00000272597  |        | 30066.8 | 0.01 |    |           |           |                                            |
| 31881 | ENSG00000205194  |        | 30069.5 | 0.01 |    |           |           |                                            |
| 31882 | ENSG00000272189  |        | 30070.3 | 0.01 |    |           |           |                                            |
| 31883 | ENSG00000206295  |        | 30071.6 | 0.01 |    |           |           |                                            |
| 31884 | ENSG00000205695  |        | 30071.6 | 0.01 |    |           |           |                                            |
| 31889 | ENSG000002048206 |        | 30076.5 | 0.01 |    |           |           |                                            |
| 31896 | ENSG00000224321  |        | 30089.5 | 0.01 |    |           |           |                                            |
| 31900 | ENSG00000208702  |        | 30092.6 | 0.01 |    |           |           |                                            |
| 31904 | ENSG00000206403  |        | 30093.4 | 0.01 |    |           |           |                                            |
| 31913 | ENSG00000272029  |        | 30106.3 | 0.01 |    |           |           |                                            |
| 31923 | ENSG00000203565  |        | 30111.2 | 0.01 |    |           |           |                                            |
| 31935 | ENSG000002081243 |        | 30126.7 | 0.01 |    |           |           |                                            |
| 31938 | ENSG00000227172  |        | 30127.8 | 0.01 |    |           |           |                                            |
| 31948 | ENSG00000202048  |        | 30133.8 | 0.01 |    |           |           |                                            |
| 31955 | ENSG000002081588 |        | 30139.2 | 0.01 |    |           |           |                                            |
| 31964 | ENSG000002059959 |        | 30152   | 0.01 |    |           |           |                                            |
| 31973 | ENSG000002057487 |        | 30163.8 | 0.01 |    |           |           |                                            |
| 31991 | ENSG000002024985 |        | 30183.1 | 0.01 |    |           |           |                                            |
| 31993 | ENSG000002087942 |        | 30183.9 | 0.01 | 12 | 66291518  | 66317867  | Uncharacterized protein                    |
| 31998 | ENSG00000208946  |        | 30189.2 | 0.01 |    |           |           |                                            |
| 32001 | ENSG000002054514 |        | 30190.5 | 0.01 |    |           |           |                                            |
| 32016 | ENSG000002028972 |        | 30200.7 | 0.01 |    |           |           |                                            |
| 32035 | ENSG00000201548  |        | 30222   | 0.01 |    |           |           |                                            |
| 32036 | ENSG000002022284 | CT45A5 | 30223.5 | 0.01 | X  | 134845598 | 134895394 | cancer/testis antigen family 45, member A5 |
| 32039 | ENSG00000273301  |        | 30229.2 | 0.01 |    |           |           |                                            |
| 32046 | ENSG000002026386 |        | 30238.5 | 0.01 |    |           |           |                                            |
| 32056 | ENSG000002049492 |        | 30246   | 0.01 |    |           |           |                                            |
| 32068 | ENSG00000272338  |        | 30254.7 | 0.01 |    |           |           |                                            |
| 32068 | ENSG000002041917 |        | 30257.6 | 0.01 |    |           |           |                                            |
| 32070 | ENSG0000021786   |        | 30258.9 | 0.01 |    |           |           |                                            |
| 32082 | ENSG00000223523  |        | 30274.3 | 0.01 |    |           |           |                                            |
| 32085 | ENSG00000202174  |        | 30277.9 | 0.01 |    |           |           |                                            |
| 32087 | ENSG00000272459  |        | 30278.2 | 0.01 |    |           |           |                                            |
| 32108 | ENSG000002041160 |        | 30296.5 | 0.01 |    |           |           |                                            |
| 32115 | ENSG00000272992  |        | 30308.7 | 0.01 |    |           |           |                                            |
| 32123 | ENSG000002051153 |        | 30316.6 | 0.01 |    |           |           |                                            |
| 32138 | ENSG000002040661 |        | 30330.3 | 0.01 |    |           |           |                                            |
| 32146 | ENSG000002024199 |        | 30337.4 | 0.01 |    |           |           |                                            |
| 32149 | ENSG00000202596  |        | 30340.7 | 0.01 |    |           |           |                                            |
| 32184 | ENSG000002036889 |        | 30373.8 | 0.01 |    |           |           |                                            |
| 32196 | ENSG000002058162 |        | 30385.6 | 0.01 |    |           |           |                                            |
| 32200 | ENSG000002053333 |        | 30389.2 | 0.01 |    |           |           |                                            |
| 32204 | ENSG000002056756 |        | 30392   | 0.01 |    |           |           |                                            |
| 32221 | ENSG000002087226 |        | 30403.8 | 0.01 |    |           |           |                                            |
| 32224 | ENSG000002081407 |        | 30409.8 | 0.01 |    |           |           |                                            |
| 32233 | ENSG000002081379 |        | 30421.6 | 0.01 |    |           |           |                                            |
| 32251 | ENSG000002058780 |        | 30436.5 | 0.01 |    |           |           |                                            |
| 32257 | ENSG000002021427 |        | 30441.7 | 0.01 |    |           |           |                                            |
| 32270 | ENSG00000213184  |        | 30463.2 | 0.01 |    |           |           |                                            |

|       |                 |         |         |      |           |           |          |                                                  |
|-------|-----------------|---------|---------|------|-----------|-----------|----------|--------------------------------------------------|
| 32276 | ENSG00000285892 |         | 30487   | 0.01 |           |           |          |                                                  |
| 32281 | ENSG00000285891 |         | 30477.3 | 0.01 |           |           |          |                                                  |
| 32292 | ENSG00000285918 |         | 30480.1 | 0.01 |           |           |          |                                                  |
| 32293 | ENSG00000233860 |         | 30480.3 | 0.01 |           |           |          |                                                  |
| 32300 | ENSG00000285698 |         | 30485.9 | 0.01 |           |           |          |                                                  |
| 32309 | ENSG00000285462 |         | 30491.2 | 0.01 |           |           |          |                                                  |
| 32313 | ENSG00000247011 |         | 30494.4 | 0.01 |           |           |          |                                                  |
| 32316 | ENSG00000225210 |         | 30497.5 | 0.01 |           |           |          |                                                  |
| 32320 | ENSG00000285783 |         | 30502.3 | 0.01 |           |           |          |                                                  |
| 32329 | ENSG00000256282 |         | 30507.4 | 0.01 |           |           |          |                                                  |
| 32338 | ENSG00000272554 |         | 30510.1 | 0.01 |           |           |          |                                                  |
| 32366 | ENSG00000232928 |         | 30538.6 | 0.01 |           |           |          |                                                  |
| 32377 | ENSG00000254545 |         | 30546.1 | 0.01 |           |           |          |                                                  |
| 32380 | ENSG00000231863 |         | 30548.5 | 0.01 |           |           |          |                                                  |
| 32388 | ENSG00000232953 |         | 30547.8 | 0.01 |           |           |          |                                                  |
| 32393 | ENSG00000256655 | 8       | 30559.4 | 0.01 | 128959126 | 128960591 |          | transmembrane protein 75                         |
| 32400 | ENSG00000228015 |         | 30565.8 | 0.01 |           |           |          |                                                  |
| 32404 | ENSG00000245750 |         | 30567.7 | 0.01 |           |           |          |                                                  |
| 32413 | ENSG00000225665 |         | 30575.3 | 0.01 |           |           |          |                                                  |
| 32420 | ENSG00000256914 |         | 30582.4 | 0.01 |           |           |          |                                                  |
| 32434 | ENSG00000231705 |         | 30592.7 | 0.01 |           |           |          |                                                  |
| 32443 | ENSG00000272859 |         | 30610.6 | 0.01 |           |           |          |                                                  |
| 32460 | ENSG00000285962 |         | 30628   | 0.01 |           |           |          |                                                  |
| 32468 | ENSG00000213937 |         | 30635.3 | 0.01 |           |           |          |                                                  |
| 32467 | ENSG00000234678 |         | 30637.8 | 0.01 |           |           |          |                                                  |
| 32469 | ENSG00000287801 |         | 30638.7 | 0.01 |           |           |          |                                                  |
| 32474 | ENSG00000289252 |         | 30645.9 | 0.01 |           |           |          |                                                  |
| 32485 | ENSG00000248859 |         | 30662.8 | 0.01 |           |           |          |                                                  |
| 32486 | ENSG00000289814 |         | 30662.9 | 0.01 |           |           |          |                                                  |
| 32500 | ENSG00000232748 |         | 30682.3 | 0.01 |           |           |          |                                                  |
| 32509 | ENSG00000253688 |         | 30695.1 | 0.01 |           |           |          |                                                  |
| 32530 | ENSG00000281202 |         | 30713.7 | 0.01 |           |           |          |                                                  |
| 32538 | ENSG00000237055 |         | 30718.4 | 0.01 |           |           |          |                                                  |
| 32541 | ENSG00000259308 |         | 30722   | 0.01 |           |           |          |                                                  |
| 32543 | ENSG00000256885 |         | 30725.5 | 0.01 |           |           |          |                                                  |
| 32548 | ENSG00000232593 |         | 30734.1 | 0.01 |           |           |          |                                                  |
| 32553 | ENSG00000238404 |         | 30736.9 | 0.01 |           |           |          |                                                  |
| 32559 | ENSG00000271780 |         | 30741.9 | 0.01 |           |           |          |                                                  |
| 32573 | ENSG00000231298 |         | 30758.5 | 0.01 |           |           |          |                                                  |
| 32575 | ENSG00000219951 |         | 30758.2 | 0.01 |           |           |          |                                                  |
| 32600 | ENSG00000282801 |         | 30786.6 | 0.01 |           |           |          |                                                  |
| 32608 | ENSG00000285715 |         | 30793.7 | 0.01 |           |           |          |                                                  |
| 32614 | ENSG00000242527 |         | 30804.9 | 0.01 |           |           |          |                                                  |
| 32624 | ENSG00000281777 |         | 30814   | 0.01 |           |           |          |                                                  |
| 32638 | ENSG00000246099 |         | 30822   | 0.01 |           |           |          |                                                  |
| 32641 | ENSG00000285597 |         | 30823.3 | 0.01 |           |           |          |                                                  |
| 32656 | ENSG00000232335 |         | 30834.1 | 0.01 |           |           |          |                                                  |
| 32667 | ENSG00000226589 |         | 30841.7 | 0.01 |           |           |          |                                                  |
| 32685 | ENSG00000184111 |         | 30855.1 | 0.01 |           |           |          |                                                  |
| 32688 | ENSG00000272068 |         | 30858   | 0.01 |           |           |          |                                                  |
| 32698 | ENSG00000226539 |         | 30859.6 | 0.01 |           |           |          |                                                  |
| 32694 | ENSG00000286218 |         | 30861.6 | 0.01 |           |           |          |                                                  |
| 32700 | ENSG00000286632 | MIR4726 | 30871.1 | 0.01 | 17        | 36875944  | 36876001 | microRNA 4726                                    |
| 32709 | ENSG00000285399 |         | 30882.5 | 0.01 |           |           |          |                                                  |
| 32714 | ENSG00000285458 |         | 30890   | 0.01 |           |           |          |                                                  |
| 32716 | ENSG00000251303 |         | 30891.3 | 0.01 |           |           |          |                                                  |
| 32718 | ENSG00000232876 |         | 30892.4 | 0.01 |           |           |          |                                                  |
| 32727 | ENSG00000271828 |         | 30904.1 | 0.01 |           |           |          |                                                  |
| 32740 | ENSG00000197723 | HSPB9   | 30916   | 0.01 | 17        | 40274756  | 40275371 | heat shock protein, alpha-crystallin-related, B9 |
| 32745 | ENSG00000232273 |         | 30919.7 | 0.01 |           |           |          |                                                  |
| 32759 | ENSG00000231465 |         | 30918.4 | 0.01 |           |           |          |                                                  |
| 32762 | ENSG00000285933 |         | 30931.2 | 0.01 |           |           |          |                                                  |
| 32773 | ENSG00000258486 |         | 30948.6 | 0.01 |           |           |          |                                                  |
| 32775 | ENSG00000286117 |         | 30948.9 | 0.01 |           |           |          |                                                  |
| 32789 | ENSG00000287581 |         | 30962.6 | 0.01 |           |           |          |                                                  |
| 32810 | ENSG00000285588 |         | 30977.7 | 0.01 |           |           |          |                                                  |
| 32830 | ENSG00000234927 |         | 31000.5 | 0.01 |           |           |          |                                                  |
| 32841 | ENSG00000255992 |         | 31008.1 | 0.01 |           |           |          |                                                  |
| 32851 | ENSG00000231702 |         | 31023.3 | 0.01 |           |           |          |                                                  |
| 32852 | ENSG00000285664 |         | 31025.6 | 0.01 |           |           |          |                                                  |
| 32853 | ENSG00000272202 |         | 31027.3 | 0.01 |           |           |          |                                                  |
| 32869 | ENSG00000241764 |         | 31039.7 | 0.01 |           |           |          |                                                  |
| 32875 | ENSG00000286004 |         | 31043.6 | 0.01 |           |           |          |                                                  |
| 32882 | ENSG00000272882 |         | 31050.3 | 0.01 |           |           |          |                                                  |
| 32883 | ENSG00000232848 |         | 31051.1 | 0.01 |           |           |          |                                                  |
| 32885 | ENSG00000233343 |         | 31052.3 | 0.01 |           |           |          |                                                  |
| 32892 | ENSG00000231495 |         | 31058.9 | 0.01 |           |           |          |                                                  |
| 32896 | ENSG00000257531 |         | 31061.6 | 0.01 |           |           |          |                                                  |
| 32900 | ENSG00000232844 |         | 31066.2 | 0.01 |           |           |          |                                                  |
| 32904 | ENSG00000255937 |         | 31070.2 | 0.01 |           |           |          |                                                  |
| 32918 | ENSG00000272030 |         | 31085.9 | 0.01 |           |           |          |                                                  |
| 32922 | ENSG00000285992 |         | 31088.8 | 0.01 |           |           |          |                                                  |
| 32923 | ENSG00000253404 |         | 31088.9 | 0.01 |           |           |          |                                                  |
| 32939 | ENSG00000280577 |         | 31105   | 0.01 |           |           |          |                                                  |
| 32945 | ENSG00000237231 |         | 31105.3 | 0.01 |           |           |          |                                                  |
| 32945 | ENSG00000232954 |         | 31113.7 | 0.01 |           |           |          |                                                  |
| 32948 | ENSG00000272831 |         | 31118.3 | 0.01 |           |           |          |                                                  |
| 32949 | ENSG00000285462 |         | 31117.9 | 0.01 |           |           |          |                                                  |
| 32952 | ENSG00000286937 |         | 31156.3 | 0.01 |           |           |          |                                                  |
| 32985 | ENSG00000217060 |         | 31158.8 | 0.01 |           |           |          |                                                  |
| 32988 | ENSG00000231982 |         | 31162.5 | 0.01 |           |           |          |                                                  |
| 32990 | ENSG00000232028 |         | 31163.5 | 0.01 |           |           |          |                                                  |
| 32997 | ENSG00000258414 |         | 31187.5 | 0.01 |           |           |          |                                                  |
| 33005 | ENSG00000285846 |         | 31177.4 | 0.01 |           |           |          |                                                  |
| 33013 | ENSG00000254416 |         | 31180   | 0.01 |           |           |          |                                                  |
| 33021 | ENSG00000286305 |         | 31187.7 | 0.01 |           |           |          |                                                  |
| 33038 | ENSG00000286903 |         | 31202.4 | 0.01 |           |           |          |                                                  |
| 33043 | ENSG00000285984 |         | 31207.5 | 0.01 |           |           |          |                                                  |
| 33050 | ENSG00000232519 |         | 31212.4 | 0.01 |           |           |          |                                                  |
| 33054 | ENSG00000285412 |         | 31215.9 | 0.01 |           |           |          |                                                  |
| 33060 | ENSG00000253118 |         | 31227.7 | 0.01 |           |           |          |                                                  |
| 33088 | ENSG00000272578 |         | 31244.1 | 0.01 |           |           |          |                                                  |
| 33100 | ENSG00000258713 |         | 31260.6 | 0.01 |           |           |          |                                                  |
| 33104 | ENSG00000254837 |         | 31261.6 | 0.01 |           |           |          |                                                  |
| 33106 | ENSG00000285863 |         | 31284.1 | 0.01 |           |           |          |                                                  |
| 33120 | ENSG00000211950 |         | 31275   | 0.01 |           |           |          |                                                  |
| 33126 | ENSG00000211155 |         | 31283.6 | 0.01 |           |           |          |                                                  |
| 33127 | ENSG00000224584 |         | 31283.7 | 0.01 |           |           |          |                                                  |
| 33152 | ENSG00000282474 |         | 31310.6 | 0.01 | 1         | 26145212  | 26147288 | Uncharacterized protein                          |
| 33154 | ENSG00000251211 |         | 31312.6 | 0.01 |           |           |          |                                                  |
| 33155 | ENSG00000258290 |         | 31313.2 | 0.01 |           |           |          |                                                  |
| 33185 | ENSG00000286188 |         | 31335.6 | 0.01 |           |           |          |                                                  |
| 33198 | ENSG00000232408 |         | 31345.4 | 0.01 |           |           |          |                                                  |
| 33203 | ENSG00000286273 |         | 31356.2 | 0.01 |           |           |          |                                                  |
| 33206 | ENSG00000249116 |         | 31360.4 | 0.01 |           |           |          |                                                  |
| 33223 | ENSG00000271918 |         | 31378   | 0.01 |           |           |          |                                                  |
| 33230 | ENSG00000249483 |         | 31382.4 | 0.01 |           |           |          |                                                  |
| 33234 | ENSG00000143429 |         | 31384.7 | 0.01 |           |           |          |                                                  |
| 33244 | ENSG00000231158 |         | 31390   | 0.01 |           |           |          |                                                  |
| 33267 | ENSG00000258001 |         | 31411   | 0.01 |           |           |          |                                                  |
| 33279 | ENSG00000232695 |         | 31421.1 | 0.01 |           |           |          |                                                  |
| 33288 | ENSG00000232488 |         | 31424.8 | 0.01 |           |           |          |                                                  |
| 33295 | ENSG00000254802 |         | 31437.6 | 0.01 |           |           |          |                                                  |
| 33332 | ENSG00000288282 |         | 31465   | 0.01 |           |           |          |                                                  |
| 33374 | ENSG00000232476 |         | 31513   | 0.01 |           |           |          |                                                  |
| 33379 | ENSG00000272711 |         | 31516   | 0.01 |           |           |          |                                                  |
| 33408 | ENSG00000232521 |         | 31547.7 | 0.01 |           |           |          |                                                  |
| 33413 | ENSG00000281420 |         | 31552.6 | 0.01 |           |           |          |                                                  |
| 33414 | ENSG00000281924 |         | 31553.8 | 0.01 |           |           |          |                                                  |
| 33449 | ENSG00000228265 |         | 31604.7 | 0.01 |           |           |          |                                                  |
| 33451 | ENSG00000234183 |         | 31605.2 | 0.01 |           |           |          |                                                  |
| 33461 | ENSG00000223855 |         | 31622.4 | 0.01 |           |           |          |                                                  |
| 33515 | ENSG00000258636 |         | 31662.6 | 0.01 |           |           |          |                                                  |
| 33516 | ENSG00000231749 |         | 31663   | 0.01 |           |           |          |                                                  |
| 33520 | ENSG00000281159 |         | 31672.6 | 0.01 | 10        | 21774567  | 21774666 | Small nuclear RNA U3                             |
| 33524 | ENSG00000250320 |         | 31676.1 | 0.01 |           |           |          |                                                  |
| 33525 | ENSG00000215146 |         | 31676.6 | 0.01 |           |           |          |                                                  |
| 33542 | ENSG00000285496 |         | 31694   | 0.01 |           |           |          |                                                  |
| 33582 | ENSG00000247796 |         | 31740.6 | 0.01 |           |           |          |                                                  |
| 33602 | ENSG00000281597 |         | 31781.6 | 0.01 |           |           |          |                                                  |
| 33604 | ENSG00000228931 |         | 31786.1 | 0.01 |           |           |          |                                                  |
| 33634 | ENSG00000247199 |         | 31795.3 | 0.01 |           |           |          |                                                  |
| 33655 | ENSG00000286040 |         | 31813.5 | 0.01 |           |           |          |                                                  |
| 33656 | ENSG00000286959 |         | 31814.5 | 0.01 |           |           |          |                                                  |
| 33661 | ENSG00000233055 |         | 31819.7 | 0.01 |           |           |          |                                                  |
| 33707 | ENSG00000223849 |         | 31866.1 | 0.01 |           |           |          |                                                  |
| 33720 | ENSG00000285806 |         | 31884.3 | 0.01 |           |           |          |                                                  |
| 33726 | ENSG00000258748 |         | 31889.5 | 0.01 |           |           |          |                                                  |
| 33754 | ENSG00000271227 |         | 31917.9 | 0.01 |           |           |          |                                                  |
| 33771 | ENSG00000251141 |         | 31939.2 | 0.01 |           |           |          |                                                  |
| 33812 | ENSG00000244159 |         | 31965.4 | 0.01 |           |           |          |                                                  |







|       |                  |              |              |   |                      |    |           |           |                                                                                                                                |
|-------|------------------|--------------|--------------|---|----------------------|----|-----------|-----------|--------------------------------------------------------------------------------------------------------------------------------|
| 34651 | ENSG000002051596 |              | 32624.3      | 0 | processed_pseudogene | 4  | 166329219 | 166327602 | hydroxyacyl-CoA dehydrogenase 3-ketolacyl-CoA thiolase/enoyl-CoA hydratase (trifunctional protein), alpha subunit pseudogene 1 |
| 34660 | ENSG000002027207 |              | 32836        | 0 | processed_pseudogene | 1  | 72767156  | 72767152  | ribosomal protein L31 pseudogene 12                                                                                            |
| 34684 | ENSG0000021434   |              | 32845.6      | 0 | processed_pseudogene | 4  | 184404643 | 184405338 | vesicle transport through interaction with 1-SNAREs 1B pseudogene 2                                                            |
| 34674 | ENSG000002027101 |              | 33011.2      | 0 | processed_pseudogene | 11 | 119662169 | 113660474 | leucine rich repeat containing 33, member A13, pseudogene                                                                      |
| 35065 | ENSG000002042624 |              | 33324.0      | 0 | processed_pseudogene | 4  | 41213319  | 41213317  | ribosomal protein L22 pseudogene 4                                                                                             |
| 35477 | ENSG000002026339 |              | 33596.1      | 0 | processed_pseudogene | X  | 128542359 | 128542398 | ribosomal protein S20 pseudogene 56                                                                                            |
| 35661 | ENSG000002026529 |              | 33653.4      | 0 | processed_pseudogene | X  | 150119625 | 150119109 | tubulin binding cofactor A pseudogene 2                                                                                        |
| 35889 | ENSG000002025861 |              | 34059.8      | 0 | processed_pseudogene | X  | 817418883 | 817418881 | ribosomal protein L22 pseudogene 22                                                                                            |
| 36389 | ENSG000002024680 |              | 34499.4      | 0 | processed_pseudogene | 1  | 52834349  | 52834316  | phospholipase A2, group XIId pseudogene 1                                                                                      |
| 25340 | ENSG000002025910 | ZNF52-AS3    | 27175.2      | 0 | processed_transcript | 10 | 64142496  | 64147051  | ZNF42 antisense RNA 3                                                                                                          |
| 30622 | ENSG000002025554 | LINC02441    | 28900.4      | 0 | processed_transcript | 2  | 45392009  | 45392004  | long intergenic non-protein coding RNA 1121                                                                                    |
| 33324 | ENSG000002043069 | ARHGAP26-AS1 | 31458.4      | 0 | processed_transcript | 3  | 153742190 | 15369121  | ARHGAP26 antisense RNA 1                                                                                                       |
| 34657 | ENSG000002025794 | RMT1         | 31800.1      | 0 | processed_transcript | 12 | 97628313  | 97628313  | long intergenic non-protein coding RNA 641                                                                                     |
| 34901 | ENSG000002027646 | STEA2P-AS1   | 33035.1      | 0 | processed_transcript | 7  | 89511867  | 89404949  | STEA2 antisense RNA 1                                                                                                          |
| 30160 | ENSG000002019653 | ZEB1         | 34271.4      | 0 | processed_transcript | 10 | 31465207  | 31465207  | ZEB1 antisense RNA 1                                                                                                           |
| 7385  | ENSG000002028278 | OMZ2         | 10125.4      | 0 | protein_coding       | 9  | 117092149 | 117095532 | erosin mucoid 2                                                                                                                |
| 7837  | ENSG000002044414 | CFHR1        | 10051.2      | 0 | protein_coding       | 1  | 196788887 | 196801519 | complement factor H-related 1                                                                                                  |
| 7987  | ENSG000002017681 | HRG          | 10033.9      | 0 | protein_coding       | 2  | 139610317 | 139645617 | copulation factor V                                                                                                            |
| 8070  | ENSG00000113905  | HRG          | 10165.4      | 0 | protein_coding       | 3  | 186378005 | 186390229 | hectidine-rich glycoprotein                                                                                                    |
| 8153  | ENSG00000163631  | ALB          | 10847.8      | 0 | protein_coding       | 4  | 74262831  | 74287129  | albumin                                                                                                                        |
| 8209  | ENSG00000120388  | CERP4        | 10098.9      | 0 | protein_coding       | 1  | 202271607 | 202271611 | complement component H (beta-2-glycoprotein), alpha apolipoprotein H (beta-2-glycoprotein) 1                                   |
| 8332  | ENSG00000091583  | APOH         | 10991.7      | 0 | protein_coding       | 17 | 84208151  | 84253463  | apolipoprotein A (beta-2-glycoprotein) 1                                                                                       |
| 8618  | ENSG00000117601  | SEPPIN1      | 11157.6      | 0 | protein_coding       | 1  | 17382947  | 17388516  | sepin peptidase inhibitor, clade C (antithrombin), member 1                                                                    |
| 8943  | ENSG00000111195  | MUC7         | 11437.5      | 0 | protein_coding       | 4  | 71829209  | 71840714  | mucin 7, secreted                                                                                                              |
| 9484  | ENSG00000080616  | CPB2         | 11838.5      | 0 | protein_coding       | 13 | 46627321  | 46679211  | carboxypeptidase B2 (plasma)                                                                                                   |
| 9488  | ENSG000002029314 | ORM1         | 11948.7      | 0 | protein_coding       | 9  | 117085336 | 117087755 | erosin mucoid 1                                                                                                                |
| 9703  | ENSG000000000005 | CEP3         | 12142.3      | 0 | protein_coding       | 1  | 48621814  | 48621814  | cytoskeleton-associated protein 3                                                                                              |
| 9878  | ENSG00000171560  | FGA          | 12252.4      | 0 | protein_coding       | 4  | 155504278 | 155511918 | fibronectin alpha chain                                                                                                        |
| 9980  | ENSG00000113889  | KOY1         | 12328.6      | 0 | protein_coding       | 3  | 186435065 | 186441743 | kininogen 1                                                                                                                    |
| 10161 | ENSG00000100098  | UCP3         | 12410.1      | 0 | protein_coding       | 7  | 70342463  | 70342463  | UCP3, family 2, subfamily 2, member 1, polypeptide B4                                                                          |
| 10233 | ENSG00000110245  | APOC3        | 12533        | 0 | protein_coding       | 11 | 116704022 | 116703788 | apolipoprotein C-III                                                                                                           |
| 10244 | ENSG00000125538  | IL1B         | 12544.4      | 0 | protein_coding       | 2  | 133597328 | 133594848 | interleukin 1, beta                                                                                                            |
| 10484 | ENSG000002029441 | SLC39A3      | 12633.7      | 0 | protein_coding       | 17 | 4232317   | 4232317   | solute carrier family 4 (zinc-binding), member 1 (Dabo bicoid group)                                                           |
| 11054 | ENSG00000171021  | SMR3B        | 13186.4      | 0 | protein_coding       | 4  | 71235810  | 71235961  | submaxillary gland anionic regulated protein 3B                                                                                |
| 11286 | ENSG00000214274  | ANG          | 13383.5      | 0 | protein_coding       | 16 | 21123336  | 21167130  | angiotensin, ribonuclease, RNase A family, 5                                                                                   |
| 11553 | ENSG00000100585  | ANKK1        | 14020.2      | 0 | protein_coding       | 8  | 63082148  | 63082148  | ankyrin protein 3                                                                                                              |
| 11684 | ENSG00000198849  | CE1          | 13727.4      | 0 | protein_coding       | 16 | 55836783  | 55897249  | carboxylesterase 1                                                                                                             |
| 11786 | ENSG00000105385  | THRSP        | 13821        | 0 | protein_coding       | 11 | 77774807  | 77773957  | thyroid hormone responsive                                                                                                     |
| 11898 | ENSG00000100629  | PLG          | 13931.9      | 0 | protein_coding       | 10 | 1823100   | 1823100   | cytochrome P450, family 2, subfamily E, polypeptide 1                                                                          |
| 11943 | ENSG00000122194  | PLG          | 13941.2      | 0 | protein_coding       | 6  | 161123270 | 161174347 | plasminogen                                                                                                                    |
| 12164 | ENSG00000158763  | PIP          | 14098.9      | 0 | protein_coding       | 7  | 142829170 | 14283638  | protein-induced protein                                                                                                        |
| 12162 | ENSG00000154202  | SMT1         | 14114        | 0 | protein_coding       | 11 | 16581721  | 16591564  | serum amyloid A1                                                                                                               |
| 12249 | ENSG00000187533  | C4orf4       | 14119.1      | 0 | protein_coding       | 1  | 76989535  | 71942616  | chromosome 4 open reading frame 40                                                                                             |
| 12453 | ENSG00000113800  | CS           | 14317.4      | 0 | protein_coding       | 5  | 36244305  | 36244370  | complement component 9                                                                                                         |
| 14507 | ENSG00000104137  | ARH1         | 14520.2      | 0 | protein_coding       | 11 | 116705467 | 116708066 | apolipoprotein A-I                                                                                                             |
| 14566 | ENSG00000100477  | KRT4         | 14522.0      | 0 | protein_coding       | 12 | 53260335  | 53260335  | keratin 4                                                                                                                      |
| 15011 | ENSG00000184502  | GAST         | 14439.9      | 0 | protein_coding       | 17 | 39868578  | 39872221  | gastrin                                                                                                                        |
| 15034 | ENSG00000191706  | CD           | 14456.6      | 0 | protein_coding       | 19 | 6946453   | 6946453   | complement factor D (properdin)                                                                                                |
| 15054 | ENSG00000102736  | C13orf1      | 14440002.736 | 0 | protein_coding       | 14 | 8677115   | 8677115   | complement component 13                                                                                                        |
| 15091 | ENSG00000148965  | SAHA         | 14466        | 0 | protein_coding       | 11 | 18252896  | 18258440  | serum amyloid A4, constitutive                                                                                                 |
| 15302 | ENSG00000183347  | GBP1         | 14952.4      | 0 | protein_coding       | 1  | 8992761   | 8995020   | guanine nucleotide binding protein, member 8                                                                                   |
| 15306 | ENSG00000174697  | LEP          | 14931.6      | 0 | protein_coding       | 1  | 127811307 | 127811307 | leptin                                                                                                                         |
| 15355 | ENSG00000170323  | FABP4        | 14987.6      | 0 | protein_coding       | 8  | 82390654  | 82395488  | fatty acid binding protein 4, adipocyte                                                                                        |
| 13420 | ENSG000000087149 | SEPPIN3      | 15039.9      | 0 | protein_coding       | 18 | 61324231  | 61329197  | sepin peptidase inhibitor, clade B (ovastannin), member 3                                                                      |
| 13426 | ENSG000001021526 | SEPPIN3      | 15039.9      | 0 | protein_coding       | 18 | 122064991 | 122064991 | sepin peptidase inhibitor, clade B (ovastannin), member 3                                                                      |
| 13431 | ENSG00000187288  | CIDEA        | 15049        | 0 | protein_coding       | 3  | 9506388   | 9521398   | cell death-inducing DFFA-like effector c                                                                                       |
| 13466 | ENSG00000126780  | TM6M         | 15076.6      | 0 | protein_coding       | 20 | 2278844   | 2321724   | transglutaminase 3                                                                                                             |
| 13720 | ENSG00000100928  | ADOL1        | 15092.5      | 0 | protein_coding       | 11 | 10026211  | 10026211  | alcohol dehydrogenase 1B, class II, beta polypeptide                                                                           |
| 13910 | ENSG00000184557  | SOCS3        | 15409.7      | 0 | protein_coding       | 17 | 7632864   | 7636158   | cell death-inducing DFFA-like effector c                                                                                       |
| 14118 | ENSG00000151655  | ITIH3        | 15557.9      | 0 | protein_coding       | 10 | 7742522   | 7791483   | inter-alpha-trypsin inhibitor heavy chain 2                                                                                    |
| 14276 | ENSG00000101992  | ADOL2        | 15619.4      | 0 | protein_coding       | 11 | 11882458  | 11882458  | alcohol dehydrogenase 1B, class II, beta polypeptide                                                                           |
| 14326 | ENSG00000124107  | SLPI         | 15714.3      | 0 | protein_coding       | 20 | 43880880  | 43883205  | secretory leukocyte peptidase inhibitor                                                                                        |
| 14470 | ENSG00000172551  | MUC11        | 15745.4      | 0 | protein_coding       | 12 | 55224303  | 55252177  | mucin-like 11                                                                                                                  |
| 14708 | ENSG00000102118  | ADOL3        | 16019.9      | 0 | protein_coding       | 12 | 7966310   | 7966310   | CD36 molecular weight (lipoprotein receptor)                                                                                   |
| 14924 | ENSG00000108306  | FBLN2        | 16182.4      | 0 | protein_coding       | 17 | 3741534   | 3758872   | F-box and leucine-rich repeat protein 20                                                                                       |
| 15071 | ENSG00000156657  | TN1          | 16305.1      | 0 | protein_coding       | 2  | 17930716  | 17930529  | tin                                                                                                                            |
| 15117 | ENSG00000106818  | ICAM1        | 16315.9      | 0 | protein_coding       | 15 | 8023768   | 8023768   | intercellular adhesion molecule 1                                                                                              |
| 15192 | ENSG00000093039  | SCAM1        | 16343        | 0 | protein_coding       | 10 | 10381511  | 10397291  | intercellular adhesion molecule 1                                                                                              |
| 15284 | ENSG00000000971  | GFH          | 16453.2      | 0 | protein_coding       | 1  | 196921008 | 19671364  | complement factor H                                                                                                            |
| 15633 | ENSG00000134138  | SELP1        | 16511.4      | 0 | protein_coding       | 1  | 151326208 | 151326208 | sepin peptidase inhibitor 1                                                                                                    |
| 15681 | ENSG00000177695  | PNPLA2       | 16773.4      | 0 | protein_coding       | 11 | 8129273   | 8129273   | patatin-like phospholipase domain containing 2                                                                                 |
| 15945 | ENSG00000123961  | SEPPIN7      | 16879.5      | 0 | protein_coding       | X  | 105271797 | 105282721 | sepin peptidase inhibitor, clade A (alpha-1 antitrypsin, antitrypsin), member 7                                                |
| 16189 | ENSG000001001168 | SEPPIN7      | 16879.5      | 0 | protein_coding       | X  | 1186887   | 1186887   | sepin peptidase inhibitor, clade A (alpha-1 antitrypsin, antitrypsin), member 7                                                |
| 16236 | ENSG00000172236  | TPSAB1       | 17029.1      | 0 | protein_coding       | 16 | 1290997   | 1292955   | tyrosine alpha-beta 1                                                                                                          |
| 16378 | ENSG000002059874 | CYP2A6       | 17307.3      | 0 | protein_coding       | 19 | 41348443  | 41348362  | cytochrome P450, family 2, subfamily A, polypeptide 6                                                                          |
| 16398 | ENSG000001001933 | SEPPIN1      | 17398.2      | 0 | protein_coding       | 19 | 57280089  | 57280089  | sepin peptidase inhibitor, clade C (C1 inhibitor), member 1                                                                    |
| 16485 | ENSG000002048993 | SEPPIN1      | 17398.2      | 0 | protein_coding       | 6  | 3295141   | 32920889  | Uncharacterized protein                                                                                                        |
| 16688 | ENSG00000139626  | ITIBG1       | 17550.7      | 0 | protein_coding       | 12 | 53365102  | 53301991  | integrin, beta 7                                                                                                               |
| 16781 | ENSG00000104643  | ITIBG1       | 17550.7      | 0 | protein_coding       | 12 | 53365102  | 53301991  | integrin, beta 7                                                                                                               |
| 16968 | ENSG00000185272  | ADP3         | 17704.6      | 0 | protein_coding       | 9  | 33441152  | 33447609  | aquaporin 3 (glial blood group)                                                                                                |
| 19009 | ENSG000002073756 | PTGS2        | 17709.3      | 0 | protein_coding       | 9  | 186640923 | 186649959 | prostaglandin-endoperoxide synthase 2 (cyclooxygenase 2)                                                                       |
| 16916 | ENSG00000186690  | TAT          | 17713.8      | 0 | protein_coding       | 16 | 71599593  | 71611033  | tyrosine aminotransferase                                                                                                      |
| 19911 | ENSG00000139720  | KLIM1        | 17742.4      | 0 | protein_coding       | 16 | 51484408  | 51470508  | keratin-like 16                                                                                                                |
| 19943 | ENSG00000138115  | CYP2C8       | 18076.3      | 0 | protein_coding       | 10 | 96736530  | 96629254  | cytochrome P450, family 2, subfamily C, polypeptide B                                                                          |
| 19793 | ENSG00000099841  | MTL6         | 17832        | 0 | protein_coding       | 12 | 96551949  | 96552070  | myosin, light chain 6, skeletal muscle and non-muscle                                                                          |
| 17221 | ENSG00000115026  | PLCB2        | 17933.6      | 0 | protein_coding       | 12 | 228618558 | 228618558 | phospholipase C (beta) class 2, mu isoform                                                                                     |
| 17289 | ENSG000002044907 | GSTA1        | 17979.1      | 0 | protein_coding       | 6  | 52614887  | 52628367  | glutathione S-transferase alpha 2                                                                                              |
| 17424 | ENSG00000187514  | PLA2         | 18073.9      | 0 | protein_coding       | 4  | 232571605 | 232576551 | phospholipase, alpha                                                                                                           |
| 17460 | ENSG00000189128  | PLA2G1B      | 18092.6      | 0 | protein_coding       | 4  | 81891438  | 81891415  | phospholipase, alpha 2, group IIA                                                                                              |
| 17500 | ENSG00000055957  | ITIH1        | 18134.7      | 0 | protein_coding       | 3  | 52811803  | 52826978  | inter-alpha-trypsin inhibitor heavy chain 1                                                                                    |
| 17615 | ENSG00000184921  | FLGEC2       | 18213.3      | 0 | protein_coding       | 19 | 7758484   | 7767032   | FG fragment of (beta-7) integrin, beta 7 (CD229)                                                                               |
| 17869 | ENSG00000181756  | RKLB1        | 18414.9      | 0 | protein_coding       | 12 | 61659493  | 61659493  | ballerina-related peptidase 13                                                                                                 |
| 17969 | ENSG000002034906 | APOC2        | 18470.3      | 0 | protein_coding       | 19 | 45448243  | 45458222  | apolipoprotein C-II                                                                                                            |
| 18007 | ENSG00000189143  | GMA2         | 18584        | 0 | protein_coding       | 5  | 150991711 | 150909001 | GMC ganglioside activator                                                                                                      |
| 18108 | ENSG00000189010  | SEPPIN11     | 18619.6      | 0 | protein_coding       | 12 | 84908001  | 84914227  | sepin peptidase inhibitor, clade A (alpha-1 antitrypsin, antitrypsin), member 11                                               |
| 18110 | ENSG00000171478  | HOPX         | 18681.7      | 0 | protein_coding       | 4  |           |           |                                                                                                                                |

|       |                 |            |       |   |                |    |           |           |                                                                                             |
|-------|-----------------|------------|-------|---|----------------|----|-----------|-----------|---------------------------------------------------------------------------------------------|
| 21015 | ENSG00000153396 | LPCAT1     | 20604 | 0 | protein_coding | 5  | 1459959   | 1524092   | lysophosphatidylcholine acyltransferase 1                                                   |
| 21016 | ENSG00000146459 | CTSA       | 20612 | 0 | protein_coding | 20 | 4457459   | 4457459   | cathepsin A                                                                                 |
| 21068 | ENSG00000136994 | IL36A      | 20642 | 6 | protein_coding | 2  | 113763038 | 11376521  | interleukin 36, alpha                                                                       |
| 21079 | ENSG00000143727 | ACPI       | 20653 | 4 | protein_coding | 2  | 264140    | 272623    | acid phosphatase 1, soluble                                                                 |
| 21158 | ENSG00000000765 | HPD        | 20697 | 0 | protein_coding | 6  | 150690028 | 150727105 | hydroxymethylglutaryl-CoA lyase                                                             |
| 21171 | ENSG00000146293 | SERPINA1   | 20729 | 0 | protein_coding | 14 | 84739529  | 84739529  | serpin peptidase inhibitor, class A (alpha 1 antitrypsin, antithrombin, antipain) member 10 |
| 21185 | ENSG00000008922 | CLND1      | 20842 | 2 | protein_coding | 3  | 98216756  | 98216756  | claudin domain containing 1                                                                 |
| 21223 | ENSG00000151244 | MNTA       | 20858 | 4 | protein_coding | 10 | 6501576   | 65049440  | methionine adenosyltransferase L, alpha                                                     |
| 21258 | ENSG00000156215 | CLDN3      | 20918 | 4 | protein_coding | 10 | 73183268  | 73184600  | claudin 3                                                                                   |
| 21268 | ENSG00000176336 | APCF       | 21000 | 0 | protein_coding | 12 | 56734353  | 56734607  | apicalipoprotein F                                                                          |
| 21297 | ENSG00000197641 | SERPINE1   | 21007 | 2 | protein_coding | 18 | 61242223  | 61217653  | serpin peptidase inhibitor, class B (ovastomin) member 13                                   |
| 21305 | ENSG00000132550 | ZMYM5      | 21037 | 5 | protein_coding | 13 | 89313268  | 89303322  | transmembrane protein, serine TIE                                                           |
| 21371 | ENSG00000158100 | TPRC1L     | 21089 | 3 | protein_coding | 1  | 3541566   | 3544991   | zinc finger, RRM-type 5                                                                     |
| 21516 | ENSG00000205376 | CCZ1L      | 21200 | 1 | protein_coding | 7  | 105810442 | 105810442 | tumor protein p83 regulated 1-like                                                          |
| 21537 | ENSG00000208176 | ISY1-RAB43 | 21218 | 9 | protein_coding | 3  | 128898418 | 128898418 | coiled-coil domain containing 71-like                                                       |
| 21538 | ENSG00000185267 | ITIH3      | 21218 | 9 | protein_coding | 3  | 5284784   | 52843025  | ISY1-RAB43 readthrough                                                                      |
| 21541 | ENSG00000164296 | CACD       | 21225 | 3 | protein_coding | 4  | 120226007 | 120226000 | inter-alpha-fetopin inhibitor heavy chain 3                                                 |
| 21602 | ENSG00000134755 | DSC2       | 21269 | 9 | protein_coding | 18 | 2864580   | 28682378  | chromosome 4 open reading frame 3                                                           |
| 21617 | ENSG00000120278 | MHRP31     | 21283 | 6 | protein_coding | 13 | 41303432  | 41345309  | desmosolin 2                                                                                |
| 21628 | ENSG00000133311 | TPRS1E     | 21327 | 7 | protein_coding | 13 | 41303432  | 41345309  | inter-alpha-fetopin inhibitor heavy chain 3                                                 |
| 21658 | ENSG00000092295 | TGM1       | 21381 | 0 | protein_coding | 14 | 2471830   | 24733638  | transglutaminase 1                                                                          |
| 21659 | ENSG00000094963 | FMO2       | 21318 | 9 | protein_coding | 1  | 17115447  | 171181222 | flavin containing monooxygenase 2 (non-functional)                                          |
| 21671 | ENSG00000129821 | SGRP1      | 21332 | 1 | protein_coding | 14 | 64150932  | 64154157  | cytochrome P450 subfamily 21B, 10 subunit 9                                                 |
| 21748 | ENSG00000138644 | TMBIM6     | 21386 | 2 | protein_coding | 12 | 50101508  | 50108717  | transmembrane BAX inhibitor motif containing 6                                              |
| 21769 | ENSG00000128061 | CYP11B1    | 21396 | 5 | protein_coding | 2  | 36284116  | 36337044  | transmembrane BAX inhibitor motif containing 6                                              |
| 21790 | ENSG00000164211 | STRAD4     | 21420 | 5 | protein_coding | 5  | 110813701 | 110849098 | cytochrome P450, family 1, subfamily B, polypeptide 1                                       |
| 21902 | ENSG00000101888 | NKT2       | 21503 | 8 | protein_coding | X  | 10877910  | 10878719  | SRB-related lipid transfer (STRAL) domain containing 4                                      |
| 21943 | ENSG00000186275 | C10orf2    | 21532 | 0 | protein_coding | 10 | 104813860 | 104824718 | nuclear transport factor 2-like export factor 2                                             |
| 21947 | ENSG00000103113 | TRAF3IP3   | 21533 | 9 | protein_coding | 9  | 17623379  | 17623379  | chromosome 10 open reading frame 32                                                         |
| 21952 | ENSG00000106609 | TMEM248    | 21543 | 1 | protein_coding | 7  | 9638212   | 96423538  | 6-phosphogluconate dehydratase                                                              |
| 21966 | ENSG00000171302 | CANT1      | 21551 | 9 | protein_coding | 17 | 76997799  | 77005449  | transmembrane protein 248                                                                   |
| 21984 | ENSG00000105213 | TRAF3IP2   | 21552 | 9 | protein_coding | 17 | 8042126   | 8042126   | calcium activated nucleoside 1                                                              |
| 22062 | ENSG00000117697 | NSL1       | 21627 | 9 | protein_coding | 1  | 21289455  | 212895124 | NSL1, M12 methionine complex component                                                      |
| 22077 | ENSG00000125248 | RBC1       | 21638 | 9 | protein_coding | 20 | 388142    | 411610    |                                                                                             |

|       |                |         |       |   |                |    |           |           |                                                                                         |
|-------|----------------|---------|-------|---|----------------|----|-----------|-----------|-----------------------------------------------------------------------------------------|
| 26646 | ENS00000156860 | FBR3    | 25355 | 0 | protein_coding | 10 | 30669752  | 30682135  | fibronin                                                                                |
| 26648 | ENS00000157148 | FAM8A   | 25358 | 0 | protein_coding | 12 | 31433568  | 31433568  | family with sequence similarity 60, member A                                            |
| 26677 | ENS00000170448 | NPXL1   | 25775 | 0 | protein_coding | 4  | 47849257  | 47916653  | nuclear transport factor, X-box binding-like 1                                          |
| 26776 | ENS00000146707 | POMZP3  | 25467 | 0 | protein_coding | 7  | 78239303  | 78256578  | POM121 and ZP3 fusion                                                                   |
| 26812 | ENS00000186477 | MTTF    | 25557 | 0 | protein_coding | 16 | 56691608  | 56694610  | methyltransferase 1F                                                                    |
| 26813 | ENS00000142474 | C2orf44 | 25519 | 0 | protein_coding | 2  | 24152445  | 24153636  | chromosome 2 open reading frame 54                                                      |
| 26879 | ENS00000188529 | SFRF10  | 25647 | 0 | protein_coding | 1  | 24291294  | 24291471  | serine/arginine-rich splicing factor 10                                                 |
| 26881 | ENS00000088472 | HEPH    | 25552 | 0 | protein_coding | A  | 65342391  | 65488709  | hepatinase                                                                              |
| 26882 | ENS00000094985 | SY11    | 25583 | 0 | protein_coding | 3  | 12889180  | 12890336  | ISY1 splicing factor homolog (S. cerevisiae)                                            |
| 26963 | ENS00000139990 | DOFAP   | 25817 | 5 | protein_coding | 14 | 69517598  | 69519867  | DOB1 and GUL4 associated factor 5                                                       |
| 26966 | ENS00000164569 | MESDC1  | 25667 | 0 | protein_coding | 15 | 81243295  | 81268342  | meiosis development cascade 1                                                           |
| 26981 | ENS00000169882 | MRP30   | 25888 | 0 | protein_coding | 10 | 33268869  | 33269205  | zinc finger protein 830                                                                 |
| 26989 | ENS00000135917 | SLC19A3 | 25860 | 0 | protein_coding | 2  | 228549599 | 228582728 | solute carrier family 19 (thiamine transporter), member 3                               |
| 27008 | ENS00000197070 | AHRDC1  | 25869 | 0 | protein_coding | 9  | 14059108  | 14059612  | arrestin domain containing 1                                                            |
| 27043 | ENS00000178974 | F80C34  | 25700 | 4 | protein_coding | 14 | 55738021  | 55829636  | zinc finger, C2H2-type 2<br>F-box protein 34                                            |
| 27049 | ENS00000186148 | AVR1A   | 25703 | 2 | protein_coding | 12 | 63538014  | 63544722  | arginine vasopressin receptor 1A                                                        |
| 27064 | ENS00000135994 | SDS     | 25778 | 0 | protein_coding | 12 | 11383050  | 11384108  | serine dehydratase                                                                      |
| 27082 | ENS00000144840 | RABL3   | 25738 | 2 | protein_coding | 3  | 120405528 | 120461840 | RAB, member of RAS oncogene family-like 3                                               |
| 27133 | ENS00000100695 | SEIPIN4 | 25785 | 0 | protein_coding | 14 | 95027428  | 95036250  | serpin peptidase inhibitor, class A (alpha-1-antitrypsin, alpha1-antitrypsin), member 4 |
| 27151 | ENS00000135937 | DKR3    | 25904 | 5 | protein_coding | 9  | 32047958  | 32053398  | cyclin-dependent kinase 9                                                               |
| 27176 | ENS00000105178 | URI1    | 25823 | 0 | protein_coding | 19 | 30414551  | 30506611  | URI1, prefolin-like chaperone                                                           |
| 27235 | ENS00000148757 | ZNF92   | 25872 | 0 | protein_coding | 7  | 64838712  | 64868608  | zinc finger protein 92                                                                  |
| 27245 | ENS00000102753 | KLK2    | 25878 | 0 | protein_coding | 19 | 51384824  | 51388863  | kallikrein-related peptidase 2                                                          |
| 27248 | ENS00000182844 | EWSR1   | 25880 | 0 | protein_coding | 22 | 29863998  | 29865815  | EWS RNA-binding protein 1                                                               |
| 27278 | ENS00000158786 | PLAGZF  | 25888 | 0 | protein_coding | 1  | 2045819   | 2047679   | phospholipase A2, group IIF                                                             |
| 27365 | ENS00000102766 | HPCAL1  | 25907 | 0 | protein_coding | 2  | 10443015  | 10487345  | hippocalin-like 1                                                                       |
| 27308 | ENS00000134330 | IH1     | 25824 | 0 | protein_coding | 2  | 9813787   | 9836872   | isomyl acetate-hydrolyzing esterase 1 homolog (S. cerevisiae)                           |
| 27309 | ENS00000181618 | ALDH1A1 | 25925 | 0 | protein_coding | 19 | 49958246  | 49974305  | aldehyde dehydrogenase 16 family, member A1                                             |
| 27356 | ENS00000165862 | SLMO2   | 25933 | 0 | protein_coding | 3  | 14903869  | 14904263  | solute carrier family 26 (anion exchanger), member 2                                    |
| 27362 | ENS00000153187 | HNRNPU  | 25981 | 5 | protein_coding | 1  | 24501468  | 24502844  | heterogeneous nuclear ribonucleoprotein U (scalloid attachment factor A)                |
| 27418 | ENS00000174348 | PDCN    | 26013 | 0 | protein_coding | 1  | 83527854  | 83561174  | pedicularin C                                                                           |
| 27564 | ENS00000103121 | ZNF313  | 26136 | 0 | protein_coding | 13 | 44981828  | 45019177  | zinc finger, C2H2-type containing 3                                                     |
| 27576 | ENS00000054282 | SDCCAG8 | 26136 | 0 | protein_coding | 1  | 24341930  | 24366334  | serologically defined colon cancer antigen 8                                            |
| 27591 | ENS00000148740 | SLC30A5 | 26148 | 1 | protein_coding | 5  | 6838473   | 6842696   | solute carrier family 30 (zinc transporter), member 5                                   |
| 27644 | ENS00000101868 | HLX2    | 26233 | 0 | protein_coding | 10 | 53333183  | 53337427  | homeobox 2                                                                              |
| 27682 | ENS00000198799 | LRIG2   | 26233 | 0 | protein_coding | 1  | 113615831 | 11374882  | leucine-rich repeats and immunoglobulin-like domains 2                                  |
| 27685 | ENS00000110090 | CPT1A   | 26238 | 2 | protein_coding | 11 | 68522098  | 68611878  | carbamoyl-phosphoryltransferase 1A (liver)                                              |
| 27708 | ENS00000168289 | PTEN    | 26239 | 0 | protein_coding | 42 | 429113    | 429113    | zinc finger and BTB domain containing 49                                                |
| 27714 | ENS00000124157 | SEMG2   | 26261 | 4 | protein_coding | 20 | 43849941  | 43853099  | seromucin 1                                                                             |
| 27724 | ENS00000149898 | ADP     | 26269 | 5 | protein_coding | 11 | 34874841  | 34878948  | ADP1 interacting protein                                                                |
| 27743 | ENS00000101765 | ADP1    | 26269 | 5 | protein_coding | 14 | 4523148   | 45234601  | adenosine diphosphate 1                                                                 |
| 27751 | ENS00000173145 | NOCCL   | 26297 | 0 | protein_coding | 10 | 99075004  | 99122716  | nucleolar complex associated 3 homolog (S. cerevisiae)                                  |
| 27783 | ENS00000145878 | SPINK7  | 26320 | 1 | protein_coding | 5  | 147891862 | 147895485 | serine peptidase inhibitor, Kazal type 7 (putative)                                     |
| 27852 | ENS00000166523 | PADH    | 26372 | 0 | protein_coding | 7  | 17591692  | 17592500  | peptide/arginine deiminase type 1                                                       |
| 27854 | ENS00000186973 | SCD4AS  | 26373 | 0 | protein_coding | 8  | 27472868  | 27483691  | saturated fatty acid desaturase 4, member 5 (putative)                                  |
| 27913 | ENS00000113369 | GSTM2   | 26433 | 0 | protein_coding | 1  | 110210644 | 110252711 | glutathione S-transferase mu 2 (mouse)                                                  |
| 27938 | ENS00000109671 | HAMP    | 26456 | 0 | protein_coding | 9  | 35718719  | 35719446  | hepatocellular carcinoma protein                                                        |
| 27959 | ENS00000088451 | TGDC8   | 26490 | 1 | protein_coding | 16 | 86230838  | 86231611  | TGDC8, alpha-4 dehydrogenase                                                            |
| 27978 | ENS00000121594 | CD8D    | 26490 | 0 | protein_coding | 3  | 119243140 | 119249149 | CD8D molecule                                                                           |
| 27985 | ENS00000198240 | SLC39A5 | 26497 | 0 | protein_coding | 3  | 96623833  | 96611630  | solute carrier family 39 (zinc transporter), member 5                                   |
| 28006 | ENS00000184290 | HSTPRA4 | 26498 | 0 | protein_coding | 12 | 148965455 | 148968525 | HSTPRA4, member 4 (12c)                                                                 |
| 28092 | ENS00000109758 | HGAF    | 26602 | 4 | protein_coding | 4  | 3443814   | 3452111   | HGF activator                                                                           |
| 28139 | ENS00000171803 | CYP4F1  | 26641 | 6 | protein_coding | 19 | 16023177  | 16046577  | cytochrome P450, family 4, subfamily F, polypeptide 11                                  |
| 28150 | ENS00000193448 | LUX1    | 26652 | 0 | protein_coding | 47 | 48736995  | 48737074  | LUX1, zinc finger (S. cerevisiae)                                                       |
| 28174 | ENS00000186336 | SUCN1   | 26676 | 2 | protein_coding | 3  | 151991431 | 15200105  | sucinate receptor 1                                                                     |
| 28196 | ENS00000030129 | SKO1L2  | 26715 | 2 | protein_coding | 2  | 54603588  | 54724516  | superficial myofibrillar actin 2 (S. cerevisiae)                                        |
| 28310 | ENS00000184285 | SC2B2A2 | 26803 | 3 | protein_coding | 5  | 147250245 | 147261754 | serpinophorin, family 3A, member 2                                                      |
| 28320 | ENS00000088971 | PPP2R2B | 26812 | 0 | protein_coding | 11 | 64685025  | 64701845  | protein phosphatase 2, regulatory subunit B', beta                                      |
| 28328 | ENS00000167628 | SLC12A1 | 26812 | 0 | protein_coding | 11 | 27883285  | 27883585  | solute carrier family 4 (anion exchanger), member 1, adaptor protein                    |
| 28330 | ENS00000187017 | ESPN    | 26819 | 9 | protein_coding | 1  | 6484848   | 6521440   | espin                                                                                   |
| 28377 | ENS00000180182 | ME14    | 26855 | 4 | protein_coding | X  | 40507558  | 40509510  | mediator complex subunit 14                                                             |
| 28398 | ENS00000187000 | ABR1    | 26855 | 0 | protein_coding | 5  | 13391364  | 13391461  | GAR1 homolog (S. cerevisiae)                                                            |
| 28396 | ENS00000123106 | CDC8A   | 26866 | 0 | protein_coding | 12 | 2826182   | 2873283   | coiled-coil domain containing 91                                                        |
| 28475 | ENS00000058813 | ACSM2B  | 26957 | 2 | protein_coding | 16 | 20547548  | 20567749  | acyl-CoA synthetase medium-chain family member 2B                                       |
| 28518 | ENS00000102897 | LYS1    | 26961 | 0 | protein_coding | 20 | 20911190  | 20911190  | LYS1, homeobox 1                                                                        |
| 28523 | ENS00000127418 | TMEM175 | 27000 | 7 | protein_coding | 4  | 926175    | 962444    | transmembrane protein 175                                                               |
| 28552 | ENS00000104124 | GI YAT  | 27025 | 8 | protein_coding | 11 | 58407899  | 58409447  | glycine-N acetyltransferase                                                             |
| 28570 | ENS00000135956 | PLN3    | 27026 | 0 | protein_coding | 13 | 13992102  | 13992102  | eukaryotic translation initiation factor 4E binding protein 3                           |
| 28588 | ENS00000178919 | CRC     | 27074 | 5 | protein_coding | 9  | 13983969  | 139841428 | complement component 8, gamma polypeptide                                               |
| 28624 | ENS00000198146 | ZNF770  | 27095 | 5 | protein_coding | 15 | 35710542  | 35720488  | zinc finger protein 770                                                                 |
| 28651 | ENS00000102783 | CHST3   | 27143 | 0 | protein_coding | 7  | 6511843   | 6511843   | chondroitin-6-sulfate 3                                                                 |
| 28665 | ENS00000180767 | CHST13  | 27151 | 0 | protein_coding | 3  | 12623134  | 12626234  | carbohydrate (chondroitin 4) sulfotransferase 13                                        |
| 28698 | ENS00000141503 | MNKL1   | 27174 | 8 | protein_coding | 17 | 4739883   | 48491386  | mishapain-like kinase 1                                                                 |
| 28704 | ENS00000101523 | ALMS1   | 27183 | 0 | protein_coding | 7  | 7881826   | 7881826   | Alstrom syndrome 1                                                                      |
| 28707 | ENS00000223882 | ALMS2   | 27184 | 0 | protein_coding | 5  | 95187936  | 95198537  | chromosome 5 open reading frame 27                                                      |
| 28722 | ENS00000134817 | APLN    | 27183 | 2 | protein_coding | 11 | 57001051  | 57001709  | apelin receptor                                                                         |
| 28724 | ENS00000088524 | MRP8    | 27193 | 0 | protein_coding | 13 | 12335186  | 12335186  | multidrug resistant protein 8                                                           |
| 28733 | ENS00000151906 | GUF1    | 27204 | 3 | protein_coding | 4  | 44680444  | 44729943  | GUF1 GTPase homolog (S. cerevisiae)                                                     |
| 28763 | ENS00000186591 | TUBJ2   | 27239 | 0 | protein_coding | 17 | 42264338  | 42268999  | transmembrane and ubiquitin-like domain containing 2                                    |
| 28791 | ENS00000110564 | MTORF1  | 27239 | 0 | protein_coding | 2  | 10231331  | 10231449  | mitogen-activated protein kinase kinase kinase 4                                        |
| 28833 | ENS00000187522 | ANKRD11 | 27303 | 4 | protein_coding | 16 | 89334038  | 89356969  | ankyrin repeat domain 11                                                                |
| 28849 | ENS00000183141 | BNPL    | 27320 | 3 | protein_coding | 1  | 15100046  | 15102076  | BCL2/adrenovirus E1B 19kD interacting protein like                                      |
| 28888 | ENS00000181491 | GATA2   | 27350 | 0 | protein_coding | 19 | 1946636   | 19619740  | GATA zinc finger domain containing 2A                                                   |
| 28887 | ENS00000135961 | ACHR1   | 27350 | 0 | protein_coding | 19 | 52359364  | 52359744  | acetylcholine receptor type 1-like 1                                                    |
| 28895 | ENS00000112964 | GHR     | 27356 | 7 | protein_coding | 5  | 42423879  | 42721979  | growth hormone receptor                                                                 |
| 28896 | ENS00000141426 | TKIP2   | 27360 | 0 | protein_coding | 3  | 141963277 | 141968368 | transcription factor Gp-2 (E2F dimension partner 2)                                     |
| 28898 | ENS00000094969 | INS1    | 27368 | 7 | protein_coding | 19 | 17921293  | 17921293  | insulin-like growth factor 3 (lewis only)                                               |
| 28965 | ENS00000186281 | GPA2T2  | 27415 | 0 | protein_coding | 2  | 86687894  | 86705199  | glycerol-3-phosphate acyltransferase 2, mitochondrial                                   |
| 28971 | ENS00000098998 | SGT5    | 27423 | 9 | protein_coding | 22 | 26015922  | 2641110   | gamma-glutamyltransferase 5                                                             |
| 28984 | ENS00000123050 | SMAD1   | 27433 | 0 | protein_coding | 17 | 8901768   | 8901768   | SMAD1, EGF-hand calcium binding protein 2                                               |
| 28990 | ENS00000112305 | SMAP1   | 27441 | 1 | protein_coding | 6  | 71374719  | 71377118  | small ARFGAP 1                                                                          |
| 28996 | ENS00000185106 | HFGC9   | 27451 | 8 | protein_coding | 4  | 86219886  | 86240427  | hemopoietic prostaglandin G synthase                                                    |
| 29116 | ENS00000185295 | PCSK1   | 27451 | 0 | protein_coding | 4  | 23330383  | 23330472  | alkaline phosphatase, intestinal                                                        |
| 29238 | ENS00000186220 | TBATA   | 27589 | 0 | protein_coding | 10 | 7253099   | 72545157  | thymus, brain and testes associated                                                     |
| 29237 | ENS00000153165 | RGPD3   | 27689 | 1 | protein_coding | 2  | 107021446 | 10708452  | RANBP2-like and GRIP domain containing 3                                                |
| 29257 | ENS00000137656 | PIB1    | 27706 | 0 | protein_coding | 12 | 116618889 | 11661704  | PIB1, homeobox (S. cerevisiae)                                                          |
| 29305 | ENS00000124789 | NUP153  | 27739 | 0 | protein_coding | 6  | 17615269  | 17706656  | transmembrane and ubiquitin-like domain containing 2                                    |
| 29326 | ENS00000150399 | F0H1    | 27759 | 2 | protein_coding | 16 | 7474683   | 74808729  | fatty acid 2-hydroxyase                                                                 |
| 29330 | ENS00000170503 | FOXP1   | 27762 | 0 |                |    |           |           |                                                                                         |

|       |                 |           |       |   |                |    |           |           |                                                                                                   |
|-------|-----------------|-----------|-------|---|----------------|----|-----------|-----------|---------------------------------------------------------------------------------------------------|
| 30427 | ENSG0000020628  | PTGER3    | 28733 | 0 | protein_coding | 1  | 71518036  | 71513491  | prostaglandin I <sub>2</sub> receptor 3 (subtype EP3)                                             |
| 30428 | ENSG0000015429  | CTCF      | 28737 | 0 | protein_coding | 1  | 22434988  | 22434941  | centriole, cell and spindle-associated protein                                                    |
| 30431 | ENSG0000027868  | C1orf254  | 28734 | 0 | protein_coding | 1  | 2337327   | 23342343  | chromosome 1 open reading frame 234                                                               |
| 30438 | ENSG00000184571 | PWWL3     | 28739 | 0 | protein_coding | 22 | 25115001  | 25170687  | paw-like RNA-mediated gene silencing 3                                                            |
| 30443 | ENSG00000156266 | IFITD1    | 28743 | 0 | protein_coding | 12 | 25562241  | 25601513  | intermediate filament tail domain containing 1                                                    |
| 30447 | ENSG00000155255 | CDC42A7B  | 28743 | 0 | protein_coding | 10 | 96629996  | 96641537  | protein 4, family member B                                                                        |
| 30455 | ENSG00000165630 | AGK       | 28755 | 0 | protein_coding | 7  | 141250989 | 141355044 | acyl-glycerol kinase                                                                              |
| 30456 | ENSG00000122254 | HSIST2    | 28756 | 0 | protein_coding | 16 | 22625496  | 22627669  | heparan sulfate (glycosaminyl)-3-O-sulfotransferase 2                                             |
| 30475 | ENSG00000191814 | ATPRV02   | 28767 | 0 | protein_coding | 8  | 86999552  | 87198457  | ATPase, H <sup>+</sup> translocating, protonic 38kDa, V0 subunit c2                               |
| 30492 | ENSG00000136798 | EGFR      | 28782 | 0 | protein_coding | 4  | 110834040 | 110934222 | epidermal growth factor                                                                           |
| 30493 | ENSG00000156269 | C22orf43  | 28782 | 0 | protein_coding | 22 | 25874266  | 25914588  | chromosome 22 open reading frame 43                                                               |
| 30498 | ENSG00000152248 | FRS3      | 28784 | 0 | protein_coding | 2  | 87010424  | 87043612  | four and a half LIM domains 5                                                                     |
| 30528 | ENSG00000168100 | TGM4      | 28808 | 0 | protein_coding | 3  | 44918100  | 44956482  | transglutaminase 4                                                                                |
| 30529 | ENSG00000168700 | MCCC1     | 28811 | 0 | protein_coding | 3  | 162733006 | 162833963 | methylcrotonyl-CoA carboxylase 1 (alpha)                                                          |
| 30534 | ENSG00000168692 | RANBP2    | 28816 | 0 | protein_coding | 2  | 108443388 | 108502297 | RANBP2-like and GSP domain containing 4                                                           |
| 30538 | ENSG00000143498 | TAF1A     | 28816 | 0 | protein_coding | 1  | 222731244 | 222736775 | TATA box binding protein (TBP)-associated factor, RNA polymerase I, A, 58kDa                      |
| 30557 | ENSG00000130807 | SLC27A5   | 28834 | 4 | protein_coding | 19 | 58969079  | 59023780  | solute carrier family 27 (fatty acid transporter), member 5                                       |
| 30564 | ENSG00000167169 | TMEH2     | 28834 | 0 | protein_coding | 17 | 48348767  | 48358844  | transmembrane protein 92                                                                          |
| 30571 | ENSG00000135678 | CPM       | 28843 | 0 | protein_coding | 12 | 69235977  | 69305350  | carboxypeptidase M                                                                                |
| 30576 | ENSG00000258713 | C20orf141 | 28849 | 0 | protein_coding | 20 | 2795633   | 2796479   | chromosome 20 open reading frame 141                                                              |
| 30578 | ENSG00000115248 | TNFRSF20C | 28851 | 0 | protein_coding | 12 | 32971848  | 32971848  | transmembrane protein 152C                                                                        |
| 30582 | ENSG00000173728 | C1orf100  | 28859 | 4 | protein_coding | 1  | 244515937 | 24452965  | chromosome 1 open reading frame 100                                                               |
| 30586 | ENSG00000169923 | STAG3     | 28861 | 7 | protein_coding | 7  | 99775186  | 99811919  | stromal antigen 3                                                                                 |
| 30596 | ENSG00000198912 | C1orf124  | 28923 | 0 | protein_coding | 1  | 3802689   | 38026897  | chromosome 1 open reading frame 174                                                               |
| 30634 | ENSG00000202389 | ABCC2     | 28910 | 0 | protein_coding | 10 | 101542489 | 101611848 | ATP-binding cassette, sub-family C (CFTR/MRP), member 2                                           |
| 30635 | ENSG00000154511 | FMBA2     | 28911 | 6 | protein_coding | 1  | 9330724   | 9342057   | family with sequence similarity 89, member A                                                      |
| 30647 | ENSG00000139613 | SMARCC2   | 28922 | 0 | protein_coding | 12 | 56566767  | 56583351  | SWI/SNF related, matrix associated, actin dependent regulator of chromatin, subfamily c, member 2 |
| 30651 | ENSG00000107447 | DNTT      | 28927 | 0 | protein_coding | 10 | 86064085  | 86086321  | DNA nucleosyltransferase                                                                          |
| 30652 | ENSG00000147461 | PKL       | 28928 | 0 | protein_coding | 1  | 113003663 | 113003663 | chromosome 4 open reading frame 32                                                                |
| 30671 | ENSG00000198156 | NPIP86    | 28942 | 0 | protein_coding | 16 | 28353876  | 28374829  | nuclear pore complex interacting protein family, member B6                                        |
| 30711 | ENSG00000204333 | CKN1B     | 28960 | 7 | protein_coding | 1  | 1570603   | 1590473   | cyclin-dependent kinase 11B                                                                       |
| 30718 | ENSG00000156482 | GANK      | 28965 | 0 | protein_coding | 1  | 118167868 | 118173119 | UDP-N-acetyl-alpha-D-galactose-4-epimerase/N-acetylglucosaminyltransferase-like 5                 |
| 30734 | ENSG00000169427 | KCNK9     | 29015 | 2 | protein_coding | 8  | 140513081 | 140715399 | potassium channel, subfamily K, member 9                                                          |
| 30738 | ENSG00000105127 | AKAP8     | 29019 | 3 | protein_coding | 19 | 15446198  | 15460009  | A kinase (PRK) anchor protein B                                                                   |
| 30744 | ENSG00000107174 | TRAF3IP2  | 29020 | 0 | protein_coding | 18 | 26535176  | 26535176  | mediator complex subunit 15                                                                       |
| 30773 | ENSG00000179503 | ALOX15B   | 29052 | 0 | protein_coding | 17 | 7942335   | 7952452   | arachidonate 15-lipoxygenase, type B                                                              |
| 30777 | ENSG00000139053 | PDE6H     | 29058 | 0 | protein_coding | 12 | 11525956  | 11534799  | phosphodiesterase 6H, cGMP-specific, cone, gamma                                                  |
| 30791 | ENSG00000107179 | PLS       | 29060 | 0 | protein_coding | 23 | 22381360  | 22381360  | phosphatidylinositol 3-kinase                                                                     |
| 30828 | ENSG00000147255 | IGSF1     | 29104 | 1 | protein_coding | X  | 150407480 | 150533377 | immunoglobulin superfamily, member 1                                                              |
| 30834 | ENSG00000148826 | ASB15     | 29108 | 9 | protein_coding | 7  | 123207864 | 123278851 | ankyrin repeat and SOCS box containing 15                                                         |
| 30835 | ENSG00000154133 | TRAF3IP1  | 29109 | 0 | protein_coding | 17 | 24271697  | 24271697  | nonubiquitin-protein transferase homolog 4 (Drosophila)                                           |
| 30872 | ENSG00000155833 | CYLC2     | 29147 | 0 | protein_coding | 9  | 105757983 | 105780770 | cyclin, basic protein of sperm head cytoskeleton 2                                                |
| 30879 | ENSG00000136487 | GH2       | 29150 | 7 | protein_coding | 17 | 61957578  | 61959295  | growth hormone 2                                                                                  |
| 30882 | ENSG00000167996 | BEST1     | 29151 | 0 | protein_coding | 11 | 6171259   | 61732687  | bestrophin 1                                                                                      |
| 30883 | ENSG00000103710 | RASL12    | 29154 | 0 | protein_coding | 15 | 65346112  | 65346112  | RAS-like, family 12                                                                               |
| 30908 | ENSG00000142898 | C1orf4    | 29174 | 1 | protein_coding | 1  | 3452484   | 3484732   | chromosome 1 open reading frame 94                                                                |
| 30913 | ENSG00000185972 | CCN       | 29177 | 0 | protein_coding | 9  | 81603899  | 81713529  | cellular communication factor                                                                     |
| 30920 | ENSG00000217728 | C1orf103  | 29181 | 0 | protein_coding | 14 | 104401763 | 104401763 | retinal degeneration 3-like                                                                       |
| 30939 | ENSG0000059588  | TARBP1    | 29185 | 0 | protein_coding | 1  | 234527059 | 234614849 | TAR RNA 1 RNA binding protein 1                                                                   |
| 30941 | ENSG00000116596 | YLRP1     | 29195 | 0 | protein_coding | 14 | 75230069  | 75232444  | YLP motif containing 1                                                                            |
| 30951 | ENSG00000144308 | YLRP10    | 29195 | 0 | protein_coding | 14 | 118992484 | 118992484 | YLRP motif containing 10                                                                          |
| 30976 | ENSG00000119915 | ELOVL3    | 29228 | 1 | protein_coding | 10 | 103986085 | 103989446 | ELOVL fatty acid elongase 3                                                                       |
| 30977 | ENSG00000179303 | LRP13     | 29229 | 0 | protein_coding | 10 | 76864192  | 76868979  | dual specificity phosphatase 13                                                                   |
| 30978 | ENSG00000198912 | LRRF10    | 29232 | 0 | protein_coding | 12 | 70002251  | 70020442  | leucine-rich repeat containing 10                                                                 |
| 31010 | ENSG00000155100 | OTUD8B    | 29258 | 1 | protein_coding | 8  | 92082424  | 92089233  | OTU domain containing 8B                                                                          |
| 31023 | ENSG00000108381 | ASPA      | 29269 | 1 | protein_coding | 17 | 3375868   | 3406773   | aspartylase                                                                                       |
| 31031 | ENSG00000161928 | C1orf69   | 29271 | 0 | protein_coding | 61 | 6812654   | 69208210  | RNAseH-C1orf69 readthrough                                                                        |
| 31044 | ENSG00000158859 | ADAMT54   | 29283 | 4 | protein_coding | 1  | 18114098  | 18116848  | ADAM metalloproteinase with thrombospondin type 1 motif, 4                                        |
| 31046 | ENSG00000145244 | CORIN     | 29285 | 4 | protein_coding | 4  | 47596015  | 47610123  | corin, serine peptidase 4                                                                         |
| 31049 | ENSG00000195498 | SPANX1    | 29292 | 0 | protein_coding | 4  | 14070568  | 14070568  | SPANX family member D                                                                             |
| 31050 | ENSG00000189378 | TBC1D28   | 29291 | 0 | protein_coding | 17 | 18538319  | 18565283  | TBC1 domain family, member 28                                                                     |
| 31068 | ENSG00000158955 | GRHL3     | 29303 | 0 | protein_coding | 1  | 24645812  | 24649972  | grahly-like 3 (Drosophila)                                                                        |
| 31073 | ENSG00000115961 | CHST19    | 29303 | 0 | protein_coding | 17 | 61963478  | 61963478  | zinc finger and BTB domain containing 32                                                          |
| 31099 | ENSG00000255359 | CCDC179   | 29328 | 0 | protein_coding | 11 | 22868477  | 22881972  | coiled-coil domain containing 179                                                                 |
| 31104 | ENSG00000130597 | FBP2      | 29330 | 0 | protein_coding | 9  | 87321002  | 87335075  | fructose 1,6-bisphosphatase 2                                                                     |
| 31111 | ENSG00000103944 | ZNF1      | 29332 | 0 | protein_coding | 12 | 11963478  | 11963478  | zinc finger and BTB domain containing 1                                                           |
| 31125 | ENSG00000253268 | KDM4E     | 29347 | 6 | protein_coding | 11 | 84758422  | 84767000  | lysine (K)-specific demethylase 4E                                                                |
| 31142 | ENSG00000209917 | MEI15     | 29363 | 0 | protein_coding | 22 | 20850200  | 20841919  | meiotic complex subunit 15                                                                        |
| 31144 | ENSG00000107183 | TRAF3IP3  | 29363 | 0 | protein_coding | 17 | 74682362  | 74682362  | (NEMO) interacting protein 3                                                                      |
| 31146 | ENSG00000139151 | PLCZ1     | 29384 | 1 | protein_coding | 12 | 18836103  | 18836901  | phospholipase C, zeta 1                                                                           |
| 31161 | ENSG00000141844 | MED1      | 29391 | 0 | protein_coding | 18 | 47732322  | 47808148  | methyl-CpG binding domain protein 1                                                               |
| 31172 | ENSG00000160608 | C1orf69   | 29392 | 0 | protein_coding | 61 | 6088184   | 6088184   | chromosome 14 open reading frame 39                                                               |
| 31187 | ENSG00000204099 | NEU4      | 29412 | 0 | protein_coding | 2  | 24274950  | 24275739  | sialidase 4                                                                                       |
| 31200 | ENSG00000114487 | MORC1     | 29423 | 2 | protein_coding | 3  | 10887786  | 10889389  | MORC family CNV-type zinc finger 1                                                                |
| 31201 | ENSG00000175178 | TRAF3IP2  | 29424 | 0 | protein_coding | 14 | 15433388  | 15433388  | region, TRAF domain, G2 arrest mediator candidate                                                 |
| 31280 | ENSG00000191323 | SPEN1     | 29491 | 0 | protein_coding | 17 | 7323975   | 7324951   | spermatid maturation 1                                                                            |
| 31298 | ENSG00000104188 | ANGPT1    | 29509 | 0 | protein_coding | 8  | 10829127  | 10851083  | angiotensinogen 1                                                                                 |
| 31318 | ENSG00000167988 | TRAF6     | 29513 | 0 | protein_coding | 13 | 13332817  | 13336889  | receptor-like tyrosine kinase                                                                     |
| 31324 | ENSG00000157703 | SVOP      | 29518 | 0 | protein_coding | 7  | 13827900  | 13830997  | SVOP-like                                                                                         |
| 31326 | ENSG00000155545 | MERL      | 29543 | 0 | protein_coding | 5  | 90515429  | 90527802  | mesoderm induction early response 1, family member 3                                              |
| 31331 | ENSG00000131310 | FTL1      | 29554 | 0 | protein_coding | 8  | 53884808  | 53884808  | atony Co1 hydrolase domain containing 1                                                           |
| 31334 | ENSG00000196968 | FUT11     | 29554 | 0 | protein_coding | 10 | 7552049   | 75540009  | fucosyltransferase 11 (alpha 1,3) fucosyltransferase                                              |
| 31338 | ENSG00000139351 | SYCP3     | 29557 | 0 | protein_coding | 12 | 102122426 | 102133250 | synaptonemal complex protein 3                                                                    |
| 31344 | ENSG00000146620 | FTL2      | 29557 | 0 | protein_coding | 11 | 1868701   | 1868701   | FTL motif containing 2                                                                            |
| 31345 | ENSG00000192771 | FAM74A    | 29557 | 6 | protein_coding | 1  | 212797789 | 212800120 | family with sequence similarity 71, member A                                                      |
| 31350 | ENSG00000250338 | SPAM1     | 29571 | 8 | protein_coding | 4  | 28363901  | 2840448   | Linchetraxin and protein                                                                          |
| 31363 | ENSG00000106304 | SPAM1     | 29586 | 0 | protein_coding | 7  | 12366286  | 12401148  | sperm adhesion molecule 1 (PH-20 hydrolase, zona pellucida binding)                               |
| 31365 | ENSG00000202194 | FXYD7     | 29602 | 1 | protein_coding | 19 | 38614514  | 38624547  | FXYD domain-containing ion transport regulator 7                                                  |
| 31382 | ENSG00000126746 | ZNF384    | 29601 | 3 | protein_coding | 12 | 877584    | 8798778   | zinc finger protein 384                                                                           |
| 31384 | ENSG00000211698 | CDHR5     | 29602 | 6 | protein_coding | 10 | 125469723 | 125699783 | catyrophin-like family, member 2                                                                  |
| 31391 | ENSG00000148800 | CDHR5     | 29602 | 6 | protein_coding | 10 | 86944410  | 86944410  | zinc finger and SCAN domain containing 5C                                                         |
| 31415 | ENSG00000204532 | ZNF384    | 29634 | 2 | protein_coding | 19 | 8673870   | 8673870   | zinc finger protein 384                                                                           |
| 31417 | ENSG00000184584 | SLITR8    | 29635 | 1 | protein_coding | 13 | 8693829   | 8673823   | SLI and NTRK-like family, member 6                                                                |
| 31418 | ENSG00000203478 | SLITR8    | 29635 | 1 | protein_coding | 14 | 17634715  | 17634715  | Uncharacterized protein                                                                           |
| 31429 | ENSG00000151811 | MAEA      | 29648 | 4 | protein_coding | 4  | 14653814  | 14658117  | methylmalonic aciduria (cobalamin deficiency) cDNA type                                           |
| 31443 | ENSG00000123994 | ATNKL1    | 29661 | 1 | protein_coding | X  | 13337807  | 13338318  | atlan 3-like                                                                                      |
| 31446 | ENSG00000160216 | AGPAT13   | 29662 | 0 | protein_coding | 14 | 4826267   | 4826267   | 1-acylglycerol-3-phosphate O-acyltransferase 13                                                   |
| 31451 | ENSG0000        |           |       |   |                |    |           |           |                                                                                                   |



|       |                  |           |       |   |                |    |            |           |                                                                                                  |
|-------|------------------|-----------|-------|---|----------------|----|------------|-----------|--------------------------------------------------------------------------------------------------|
| 32060 | ENSG00000116147  | TNR       | 30249 | 0 | protein_coding | 1  | 175284330  | 175712906 | tensin R                                                                                         |
| 32061 | ENSG00000144571  | PI3L1A    | 30250 | 0 | protein_coding | 3  | 119316459  | 119316459 | phosphoglucoisomerase 1 member A                                                                 |
| 32104 | ENSG00000162870  | GAALT9    | 30256 | 0 | protein_coding | 12 | 132690502  | 132690505 | UDP-N-acetyl-alpha-D-galactosamine polyphosphate N-acetylgalactosaminyltransferase 9 (GalNAc-T9) |
| 32107 | ENSG00000165522  | AGBL2     | 30303 | 0 | protein_coding | 2  | 47681143   | 47726941  | ATP/GTP binding protein-like 2                                                                   |
| 32108 | ENSG00000144031  | ANKRD53   | 30303 | 0 | protein_coding | 11 | 71295510   | 71295298  | zinc finger repeat domain 53                                                                     |
| 32110 | ENSG00000175591  | PRRY2     | 30304 | 0 | protein_coding | 11 | 72929343   | 72947397  | purinergic receptor P2Y, G-protein coupled, 2                                                    |
| 32106 | ENSG00000168845  | CH16orf4  | 30344 | 0 | protein_coding | 18 | 61942287   | 61942287  | chromosome 18 open reading frame 54                                                              |
| 32107 | ENSG00000162455  | TMEM174   | 30345 | 0 | protein_coding | 18 | 72489025   | 72489025  | transmembrane protein 174                                                                        |
| 32161 | ENSG00000153347  | FAM18B    | 30347 | 0 | protein_coding | 5  | 94727048   | 94786158  | family with sequence similarity 81, member B                                                     |
| 32167 | ENSG00000165642  | VCSB      | 30351 | 0 | protein_coding | A  | 844287     | 8445490   | variable charge, X-linked SB                                                                     |
| 32169 | ENSG00000162955  | USP19     | 30353 | 0 | protein_coding | 4  | 49145479   | 49145479  | ubiquitin specific peptidase 19                                                                  |
| 32173 | ENSG00000144035  | NAT8      | 30355 | 0 | protein_coding | 2  | 73869559   | 73869560  | N-acetyltransferase 8 (GCN5-related, putative)                                                   |
| 32181 | ENSG000002048746 | ACT1N1    | 30359 | 0 | protein_coding | 11 | 66313896   | 66330000  | actinin, alpha 3 (genipin/peptidoglycan)                                                         |
| 32186 | ENSG00000152472  | PLDGB5    | 30377 | 0 | protein_coding | 2  | 20354672   | 20417683  | phospholipase A2, group V                                                                        |
| 32193 | ENSG00000169259  | VCKXA     | 30383 | 2 | protein_coding | X  | 6451659    | 6453199   | variable charge, X-linked 3A                                                                     |
| 32212 | ENSG00000119403  | PHF19     | 30397 | 4 | protein_coding | 9  | 123617977  | 123639008 | PHD finger protein 19                                                                            |
| 32214 | ENSG000001020191 | NKX16     | 30398 | 0 | protein_coding | 22 | 38070860   | 38170137  | nucleoid protein 12                                                                              |
| 32217 | ENSG000002057046 | NSL2      | 30399 | 4 | protein_coding | 12 | 20968608   | 21243179  | Putative solute carrier organic anion transporter family member 187; Uncharacterized protein     |
| 32226 | ENSG00000172508  | CARNS1    | 30412 | 2 | protein_coding | 11 | 67182439   | 67183078  | carnosine synthase 1                                                                             |
| 32229 | ENSG00000142227  | NSL2      | 30418 | 0 | protein_coding | 4  | 10951035   | 11072690  | ring finger protein 212                                                                          |
| 32244 | ENSG00000166589  | CDH16     | 30426 | 5 | protein_coding | 16 | 66942025   | 66952887  | cadherin 16, KSP-cadherin                                                                        |
| 32245 | ENSG00000182791  | CDC37     | 30428 | 8 | protein_coding | 11 | 66357640   | 66360554  | coiled-coil domain containing 87                                                                 |
| 32250 | ENSG00000200136  | MIEA      | 30428 | 0 | protein_coding | 4  | 1293939    | 1333305   | microcephaly associated protein                                                                  |
| 32264 | ENSG00000157766  | ACAN      | 30448 | 0 | protein_coding | 15 | 89346674   | 89418585  | aggrican                                                                                         |
| 32269 | ENSG00000165028  | NIPSNAP3B | 30481 | 0 | protein_coding | 9  | 10752648   | 10753978  | nirpsap homolog 3B (C. elegans)                                                                  |
| 32271 | ENSG00000141325  | PROK1     | 30485 | 0 | protein_coding | 19 | 11096922   | 110969076 | prokinectin 1                                                                                    |
| 32266 | ENSG00000140522  | RLBP1     | 30481 | 0 | protein_coding | 15 | 89753100   | 89754982  | retinoid-binding protein 1                                                                       |
| 32266 | ENSG00000148804  | RGR       | 30482 | 0 | protein_coding | 10 | 86004809   | 86019716  | retinal G-protein coupled receptor                                                               |
| 32268 | ENSG00000168381  | TRIO      | 30482 | 0 | protein_coding | 10 | 15643848   | 15643848  | tyrosine kinase 3                                                                                |
| 32303 | ENSG00000156218  | ADAMTSL3  | 30487 | 3 | protein_coding | 15 | 84322838   | 84708584  | ADAMTSL-like 3                                                                                   |
| 32319 | ENSG00000166585  | C1QL3     | 30501 | 5 | protein_coding | 10 | 16555427   | 16640404  | complement component 1, q subcomponent-like 3                                                    |
| 32321 | ENSG00000102584  | MED1      | 30502 | 0 | protein_coding | 8  | 81326      | 81326     | mediator                                                                                         |
| 32333 | ENSG00000198797  | BRINP2    | 30509 | 0 | protein_coding | 1  | 177149533  | 177251558 | bone morphogenetic protein/receptor-like inducible neural-specific 2                             |
| 32339 | ENSG000001057181 | C1orf27   | 30513 | 0 | protein_coding | 1  | 18634480   | 18630510  | chromosome 1 open reading frame 27                                                               |
| 32342 | ENSG00000102109  | MYO1B2    | 30512 | 0 | protein_coding | 1  | 7863753    | 7863753   | myosid-associated differentially regulated-like 2                                                |
| 32344 | ENSG00000184857  | TMEM108   | 30519 | 0 | protein_coding | 16 | 8874241    | 8891505   | transmembrane protein 108                                                                        |
| 32345 | ENSG00000170011  | MVRP      | 30521 | 0 | protein_coding | 3  | 39850405   | 40301812  | myosin VIIA and Rab interacting protein                                                          |
| 32346 | ENSG00000102091  | PRKRF     | 30521 | 0 | protein_coding | 11 | 57837      | 57837     | PHD and ring finger domains 1                                                                    |
| 32379 | ENSG00000116183  | PAPP2A    | 30546 | 5 | protein_coding | 1  | 17642307   | 176814735 | pappalysin 2                                                                                     |
| 32387 | ENSG00000126207  | PWILL1    | 30550 | 0 | protein_coding | 12 | 13082452   | 13087882  | palivisa-like RNA-mediated gene silencing 1                                                      |
| 32388 | ENSG00000164887  | TRAF3     | 30552 | 0 | protein_coding | 4  | 17825      | 17825     | myristic transcription factor 3-like                                                             |
| 32400 | ENSG00000108509  | CAMT2     | 30563 | 2 | protein_coding | 17 | 4871287    | 4890980   | calmodulin binding transcription activator 2                                                     |
| 32410 | ENSG00000178965  | C1orf173  | 30571 | 5 | protein_coding | 1  | 7303376    | 7313422   | chromosome 1 open reading frame 173                                                              |
| 32414 | ENSG00000186672  | KNA1Z1TL  | 30576 | 3 | protein_coding | 2  | 69410349   | 69527762  | KNA1Z1TL-like                                                                                    |
| 32422 | ENSG00000168971  | SLC12A5   | 30582 | 0 | protein_coding | 19 | 11095470   | 11095470  | solute carrier family 12, member 4                                                               |
| 32433 | ENSG00000088826  | SIMOX     | 30601 | 7 | protein_coding | 20 | 4101627    | 4162834   | spermine oxidase                                                                                 |
| 32438 | ENSG00000151327  | FAM177A1  | 30608 | 0 | protein_coding | 14 | 35511413   | 35521326  | family with sequence similarity 177, member A1                                                   |
| 32439 | ENSG00000182697  | DISC1     | 30609 | 0 | protein_coding | 16 | 141184074  | 141184002 | disrupted in schizophrenia, brain 1                                                              |
| 32441 | ENSG000002021626 | PGS3      | 30610 | 2 | protein_coding | 19 | 4322790    | 43244721  | pregnancy specific beta-1-glycoprotein 3                                                         |
| 32453 | ENSG00000162762  | TMEM187   | 30616 | 5 | protein_coding | 3  | 14930285   | 14930281  | Transmembrane 4, Lpx family member 18                                                            |
| 32455 | ENSG00000162778  | ASX2L1    | 30620 | 0 | protein_coding | 3  | 1793148585 | 179314870 | axonal domain light chain domain containing 1                                                    |
| 32479 | ENSG00000204711  | C1orf135  | 30655 | 0 | protein_coding | 9  | 72435709   | 72521148  | chromosome 9 open reading frame 135                                                              |
| 32497 | ENSG00000080838  | CNOT3     | 30679 | 9 | protein_coding | 19 | 54641444   | 54649419  | CCR4-NOT transcription complex, subunit 3                                                        |
| 32504 | ENSG00000121896  | PI3L1     | 30679 | 0 | protein_coding | 4  | 45911220   | 45911263  | phosphoinositide 3-kinase-like 1                                                                 |
| 32515 | ENSG00000163273  | NPPC      | 30700 | 3 | protein_coding | 2  | 23278850   | 23279113  | neuropeptide C                                                                                   |
| 32516 | ENSG00000186804  | HNSL5S    | 30702 | 0 | protein_coding | 11 | 63228976   | 63236886  | HNS-like suppressor family, member 5                                                             |
| 32518 | ENSG00000139824  | CRS3      | 30702 | 0 | protein_coding | 12 | 50926155   | 50926158  | chromatin synthase 5                                                                             |
| 32528 | ENSG000002087652 | CRS8      | 30711 | 0 | protein_coding | 19 | 7571938    | 7584508   | Uncharacterized protein                                                                          |
| 32534 | ENSG00000116106  | EPHA4     | 30716 | 2 | protein_coding | 2  | 22248922   | 22248922  | EPH receptor A4                                                                                  |
| 32537 | ENSG00000102071  | TRAF1     | 30716 | 0 | protein_coding | 12 | 710745     | 710745    | zinc finger, C2H2-type containing 11B                                                            |
| 32542 | ENSG00000177311  | ZBTB3A    | 30724 | 8 | protein_coding | 3  | 141043055  | 141166834 | zinc finger and BTB domain containing 3B                                                         |
| 32548 | ENSG000002059120 | SMIM8     | 30733 | 5 | protein_coding | 17 | 73842323   | 73844057  | small integral membrane protein 8                                                                |
| 32549 | ENSG00000144960  | SMIM7     | 30733 | 2 | protein_coding | 17 | 1833817    | 1833817   | membrane domain containing                                                                       |
| 32571 | ENSG00000183793  | NINP1A    | 30756 | 1 | protein_coding | 16 | 15457516   | 15474904  | nuclear pore complex interacting protein family, member A5                                       |
| 32574 | ENSG00000176033  | FAM20E    | 30757 | 8 | protein_coding | 6  | 11683269   | 11684955  | family with sequence similarity 25, member E                                                     |
| 32577 | ENSG00000181118  | TRAF3     | 30758 | 0 | protein_coding | 12 | 67134527   | 67134527  | zinc finger, C2H2-type containing 3B                                                             |
| 32589 | ENSG00000179097  | HTFR1     | 30774 | 3 | protein_coding | 3  | 8803846    | 88042919  | 5-hydroxytryptamine (serotonin) receptor 1F, G-protein-coupled                                   |
| 32592 | ENSG00000126531  | C2orf105  | 30776 | 1 | protein_coding | 20 | 62184373   | 62184661  | chromosome 2 open reading frame 105                                                              |
| 32604 | ENSG00000164928  | GAMT18    | 30788 | 0 | protein_coding | 14 | 6927244    | 6927244   | UDP-N-acetyl-alpha-D-galactosamine polyphosphate N-acetylgalactosaminyltransferase 18            |
| 32625 | ENSG00000158342  | CSP3      | 30814 | 0 | protein_coding | 17 | 38171614   | 38174066  | colony stimulating factor 3 (granulocyte)                                                        |
| 32627 | ENSG00000186716  | BCR       | 30815 | 4 | protein_coding | 22 | 23521891   | 23602224  | breakpoint cluster region                                                                        |
| 32652 | ENSG00000116143  | ANKK3     | 30823 | 0 | protein_coding | 16 | 882863     | 882863    | muon 16, cell surface associated                                                                 |
| 32663 | ENSG00000158729  | OSTN      | 30832 | 3 | protein_coding | 3  | 150917030  | 15093804  | osteonin                                                                                         |
| 32669 | ENSG00000131122  | SPATA6    | 30837 | 2 | protein_coding | 1  | 48761044   | 48937445  | spermatogenesis associated 6                                                                     |
| 32698 | ENSG00000101623  | FAM78C3   | 30853 | 0 | protein_coding | 1  | 587816     | 587816    | RAN binding protein 3                                                                            |
| 32699 | ENSG00000104813  | INTS10    | 30870 | 0 | protein_coding | 9  | 19674651   | 19709594  | integrator complex subunit 10                                                                    |
| 32712 | ENSG00000155621  | CBR85     | 30881 | 0 | protein_coding | 9  | 74528426   | 74590070  | chromosome 9 open reading frame 85                                                               |
| 32714 | ENSG00000102998  | MILK4     | 30882 | 0 | protein_coding | 17 | 786780     | 786780    | actin binding LIM protein                                                                        |
| 32730 | ENSG00000099343  | MYO9A     | 30907 | 3 | protein_coding | 15 | 72114632   | 72114632  | myosin IXA                                                                                       |
| 32731 | ENSG000002021440 | CLP1S1    | 30908 | 0 | protein_coding | 6  | 35748794   | 35751052  | collapsin 1                                                                                      |
| 32738 | ENSG00000102668  | SMC2L6    | 30913 | 3 | protein_coding | 13 | 3992013    | 3992013   | SPOC2 subunit                                                                                    |
| 32753 | ENSG00000118432  | CNR1      | 30926 | 1 | protein_coding | 6  | 88849583   | 88876078  | cannabinoid receptor 1 (brain)                                                                   |
| 32757 | ENSG00000175931  | UBE2O     | 30928 | 4 | protein_coding | 17 | 74385532   | 74449289  | ubiquitin-conjugating enzyme E2D                                                                 |
| 32763 | ENSG00000162623  | ICD5L9    | 30931 | 5 | protein_coding | 21 | 45642874   | 45660489  | gelsolin - cell-to-stimulator ligand                                                             |
| 32762 | ENSG00000162623  | FRS2B     | 30932 | 0 | protein_coding | 12 | 69881262   | 69881262  | tyrosine phosphatase receptor substrate 2                                                        |
| 32781 | ENSG00000182973  | CNOT10    | 30961 | 2 | protein_coding | 3  | 32726337   | 32815367  | CCR4-NOT transcription complex, subunit 10                                                       |
| 32791 | ENSG00000126173  | PCKN1A    | 30963 | 6 | protein_coding | 14 | 60596269   | 60596881  | pearsin-like 4 (Onopeltis)                                                                       |
| 32792 | ENSG0000014346   | SMT1      | 30966 | 8 | protein_coding | 16 | 16711662   | 16711662  | small integral membrane protein 7                                                                |
| 32795 | ENSG00000184937  | WNT1      | 30968 | 0 | protein_coding | 11 | 32469321   | 32469776  | Wntless tumor 1                                                                                  |
| 32799 | ENSG00000206260  | PRKRA     | 30971 | 1 | protein_coding | 7  | 18972266   | 18972120  | protein rich 23A                                                                                 |
| 32801 | ENSG00000193369  | MTFR4     | 30974 | 5 | protein_coding | 9  | 66626896   | 66626896  | myristic acid related protein 4                                                                  |
| 32837 | ENSG00000176889  | LRRC37A3  | 31005 | 8 | protein_coding | 7  | 62895430   | 62915598  | leucine rich repeat containing 37, member A3                                                     |
| 32838 | ENSG00000183032  | SLC25A21  | 31008 | 2 | protein_coding | 17 | 37147636   | 37420471  | solute carrier family 25 (mitochondrial oxalidate carrier), member 21                            |
| 32843 | ENSG00000160236  | TRAF1     | 31012 | 0 | protein_coding | 12 | 1620171    | 1620171   | zinc finger, C2H2-type containing 2                                                              |
| 32848 | ENSG000002011034 | GEM       | 31017 | 0 | protein_coding | 17 | 17942606   | 17947178  | GEM domain subunit 4                                                                             |
| 32854 | ENSG00000151150  | ANKK2     | 31027 | 6 | protein_coding | 10 | 61786996   | 62495248  | ankyrin 3, node of Ranvier (alpha 3)                                                             |
| 32856 | ENSG00000180616  | ANKK1     | 31028 | 0 | protein_coding | 17 | 71161151   | 71161151  | ankyrin repeat domain subunit 2                                                                  |
| 32863 | ENSG00000144285  | SCN1A     | 31035 | 0 | protein_coding | 2  | 16684570   | 16684570  | sodium channel, voltage-gated, type I, alpha subunit                                             |
| 32909 | ENSG00000186111  |           |       |   |                |    |            |           |                                                                                                  |

|       |                 |          |       |    |                |    |           |           |                                                                                  |
|-------|-----------------|----------|-------|----|----------------|----|-----------|-----------|----------------------------------------------------------------------------------|
| 33291 | ENSG00000107179 | PALD1    | 31430 | 0  | protein_coding | 10 | 7223857   | 7223209   | phosphatase domain containing, patatin 1                                         |
| 33296 | ENSG00000202271 | IFNL3    | 31438 | 0  | protein_coding | 19 | 4358183   | 4358183   | pregnancy specific beta-1-glycoprotein 3                                         |
| 33298 | ENSG00000197110 | IFNL3    | 31438 | 0  | protein_coding | 19 | 39734246  | 39735446  | interferon, lambda 3                                                             |
| 33299 | ENSG00000102048 | ASB9     | 31442 | 0  | protein_coding | 1  | 15253410  | 15258959  | ankyrin repeat and SOCS box containing 9                                         |
| 33301 | ENSG00000116198 | CEP89    | 31443 | 0  | protein_coding | 1  | 3728443   | 3737378   | centrosomal protein 104kDa                                                       |
| 33307 | ENSG00000105942 | CSH1     | 31448 | 0  | protein_coding | 16 | 61681146  | 62014269  | muscle csh domain containing 3, type 2                                           |
| 33309 | ENSG00000117597 | DEXF     | 31450 | 0  | protein_coding | 1  | 21001352  | 21030910  | digestive organ expansion factor homolog (zebrafish)                             |
| 33316 | ENSG00000145128 | PKM2     | 31455 | 2  | protein_coding | 2  | 25383722  | 25391772  | phosphoenolpyruvate carboxykinase                                                |
| 33330 | ENSG00000104474 | SUN3     | 31458 | 0  | protein_coding | 7  | 42948872  | 42957816  | Sart and aortic arch domain containing 3                                         |
| 33341 | ENSG00000135592 | CHRNA2   | 31472 | 0  | protein_coding | 2  | 23399709  | 23401377  | cholinergic receptor, nicotinic, delta (muscle)                                  |
| 33346 | ENSG00000205566 | PRM2C    | 31476 | 0  | protein_coding | 7  | 42948872  | 42951773  | Troponin subunit alpha type-2                                                    |
| 33349 | ENSG00000205911 | PRKR1L   | 31478 | 0  | protein_coding | 15 | 84841262  | 84850908  | ubiquitin-conjugating enzyme E2 family member 2 like                             |
| 33353 | ENSG00000130550 | SAMD10   | 31480 | 0  | protein_coding | 20 | 62605466  | 62611361  | sterile alpha motif domain containing 10                                         |
| 33355 | ENSG00000137869 | CYP11A1  | 31488 | 0  | protein_coding | 15 | 61500224  | 61508307  | cytochrome P450, family 19, subfamily A, polypeptide 1                           |
| 33369 | ENSG00000202993 | ARHGAP9  | 31510 | 0  | protein_coding | 4  | 9171215   | 9171453   | family with sequence similarity 80, member A20                                   |
| 33378 | ENSG00000149330 | RNAH3    | 31515 | 4  | protein_coding | 11 | 7394884   | 7422702   | prolyl 4-hydroxylase, alpha polypeptide III                                      |
| 33383 | ENSG00000183666 | PSQR     | 31521 | 0  | protein_coding | 4  | 43711943  | 43713662  | pregnancy specific beta-1-glycoprotein 9                                         |
| 33390 | ENSG00000155691 | STRK1    | 31529 | 0  | protein_coding | 2  | 22015517  | 22015599  | serine/threonine kinase 16                                                       |
| 33423 | ENSG00000183709 | IFNL2    | 31562 | 0  | protein_coding | 19 | 39759154  | 39767032  | interferon, lambda 2                                                             |
| 33425 | ENSG00000162670 | BMNP3    | 31564 | 0  | protein_coding | 1  | 140069762 | 190440149 | bone morphogenetic protein/nitinic acid inducible neural-specific 3              |
| 33430 | ENSG00000105333 | MARCK1   | 31572 | 0  | protein_coding | 1  | 17641769  | 17659549  | MYCIP-associated, basic expressed 1                                              |
| 33448 | ENSG00000187242 | KRT12    | 31603 | 0  | protein_coding | 17 | 39017556  | 39023482  | keratin 12                                                                       |
| 33461 | ENSG00000105499 | PLAGL3C  | 31616 | 0  | protein_coding | 19 | 48551100  | 48614074  | phospholipase A2, group IVC (cytosolic, calcium-independent)                     |
| 33466 | ENSG00000104748 | ARHGAP9  | 31621 | 0  | protein_coding | 4  | 9171215   | 9171453   | Rho GTPase activating protein 6                                                  |
| 33475 | ENSG00000202067 | SETD4    | 31627 | 0  | protein_coding | 1  | 9254096   | 9254096   | SET-like protein                                                                 |
| 33480 | ENSG00000111752 | PHCI     | 31633 | 0  | protein_coding | 12 | 9068492   | 9069403   | polyhomocysteine 1 (Drosophila)                                                  |
| 33504 | ENSG00000105022 | RFK4     | 31653 | 3  | protein_coding | 8  | 117198375 | 117233206 | regulatory factor 2, 6                                                           |
| 33509 | ENSG00000164188 | RANBP3L  | 31658 | 0  | protein_coding | 5  | 3624838   | 3630216   | RAN binding protein 3-like                                                       |
| 33519 | ENSG00000183072 | NGSTRN   | 31667 | 0  | protein_coding | 2  | 169843049 | 169722024 | nitric oxide synthase trafficking                                                |
| 33545 | ENSG00000101843 | GLIS3    | 31702 | 0  | protein_coding | 7  | 48939745  | 48940716  | glutathione S-transferase theta 2B (neuroendocrine)                              |
| 33555 | ENSG00000158348 | INSMG    | 31706 | 0  | protein_coding | 14 | 36003240  | 36006260  | insulin-associated 2                                                             |
| 33556 | ENSG00000128731 | HERC2    | 31708 | 4  | protein_coding | 15 | 2835186   | 28367289  | HECT and RLD domain containing E3 ubiquitin protein ligase 2                     |
| 33557 | ENSG00000205335 | RASGEF1  | 31710 | 0  | protein_coding | 15 | 7621168   | 7621315   | Ras protein-specific guanine nucleotide-releasing factor 2                       |
| 33560 | ENSG00000182303 | IFNL1    | 31717 | 5  | protein_coding | 19 | 3978695   | 39793913  | interferon, lambda 1                                                             |
| 33565 | ENSG0000014335  | TUBE1    | 31722 | 0  | protein_coding | 6  | 11231960  | 11240932  | tubulin, epsilon 1                                                               |
| 33573 | ENSG0000013358  | FRS3     | 31723 | 0  | protein_coding | 2  | 20722469  | 20722469  | 6-phosphofructo-2-kinase/fructose 2,6-bisphosphatase 2                           |
| 33574 | ENSG00000169933 | FRMPD4   | 31729 | 0  | protein_coding | 4  | 1216555   | 1216442   | FERM and PDZ domain containing 4                                                 |
| 33575 | ENSG00000104199 | FAM22B   | 31732 | 0  | protein_coding | 2  | 67749320  | 67760619  | fumarate/acetoacetyl hydrolase domain containing 2B                              |
| 33580 | ENSG00000105014 | CEACAM14 | 31735 | 0  | protein_coding | 2  | 5621844   | 5621844   | Deaf (Hsdh) homolog, auxiliary C, member 14                                      |
| 33583 | ENSG00000093163 | SEC22C   | 31741 | 0  | protein_coding | 3  | 4258461   | 4258472   | SEC22 vesicle trafficking protein homolog C (S. cerevisiae)                      |
| 33589 | ENSG00000186904 | LRRRC28  | 31744 | 0  | protein_coding | 15 | 9973587   | 9983054   | leucine rich repeat containing 28                                                |
| 33593 | ENSG00000101903 | RAV1B    | 31745 | 0  | protein_coding | 10 | 7385147   | 7385147   | activating signal transducer 1 complex subunit 1                                 |
| 33594 | ENSG00000154162 | CDH12    | 31752 | 0  | protein_coding | 5  | 2175782   | 2285317   | cadherin 12, type 2 (N-cadherin 2)                                               |
| 33600 | ENSG00000202036 | PCP4     | 31760 | 0  | protein_coding | 20 | 62230653  | 62230307  | RTEL1-TNFRSF6B readthrough (NMD candidate)                                       |
| 33601 | ENSG00000186599 | CELSR4   | 31766 | 0  | protein_coding | 18 | 56942369  | 56942369  | complex 4                                                                        |
| 33609 | ENSG00000105022 | DUS4L    | 31767 | 0  | protein_coding | 8  | 10720269  | 10721896  | dihydrodiphenylsulfone 1-like (S. cerevisiae)                                    |
| 33619 | ENSG00000158423 | RBC1     | 31781 | 1  | protein_coding | 9  | 5344839   | 5344839   | RIB3A domain with coiled-coils 1                                                 |
| 33627 | ENSG0000008544  | TDRD3    | 31789 | 0  | protein_coding | 13 | 60910591  | 6114612   | tubulin domain containing 3                                                      |
| 33644 | ENSG00000105166 | CANL1    | 31791 | 0  | protein_coding | 16 | 71924416  | 71924136  | catenulin 1                                                                      |
| 33656 | ENSG00000175764 | TLL1     | 31813 | 7  | protein_coding | 9  | 124544207 | 124548885 | tubulin tyrosine ligase-like family, member 11                                   |
| 33670 | ENSG00000125556 | LONRF3   | 31834 | 3  | protein_coding | 4  | 11815681  | 11815218  | LON peptidase N-terminal domain and ring finger 3                                |
| 33677 | ENSG00000144026 | DNAH9    | 31839 | 0  | protein_coding | 16 | 71217461  | 71217461  | DEAF (Ara-H) box polypeptide 3B                                                  |
| 33705 | ENSG00000167281 | RFXO3    | 31865 | 7  | protein_coding | 17 | 7708247   | 7710350   | RNA binding protein, fox-1 homolog (C. elegans)                                  |
| 33708 | ENSG00000129311 | CITFEO1  | 31864 | 4  | protein_coding | 4  | 71521498  | 71521377  | CtBP300-interacting transactivator, with Glu/Asp-rich carboxy-terminal domain, 1 |
| 33709 | ENSG00000101313 | CEACAM16 | 31866 | 0  | protein_coding | 2  | 7042278   | 7042278   | colony-stimulating factor 1 domain containing 16                                 |
| 33710 | ENSG00000197603 | C5orf42  | 31869 | 7  | protein_coding | 5  | 37166339  | 3724950   | chromosome 5 open reading frame 42                                               |
| 33719 | ENSG00000186202 | CRYM4    | 31879 | 0  | protein_coding | 21 | 4458918   | 44592915  | crystallin, alpha A                                                              |
| 33722 | ENSG00000101168 | PCAT2    | 31879 | 0  | protein_coding | 20 | 4259786   | 4259786   | poly(A) binding protein, cytoplasmic 1-like                                      |
| 33742 | ENSG00000188163 | FAM168A  | 31906 | 2  | protein_coding | 9  | 140138036 | 140142222 | family with sequence similarity 165, member A                                    |
| 33748 | ENSG00000157623 | AP3C2    | 31910 | 0  | protein_coding | 15 | 90373831  | 90437574  | adaptor-related protein complex 3, sigma 2 subunit                               |
| 33756 | ENSG00000195923 | PCP4     | 31910 | 0  | protein_coding | 20 | 62230653  | 62230307  | zinc finger protein 165                                                          |
| 33760 | ENSG00000186280 | KDM4D    | 31948 | 0  | protein_coding | 9  | 9476845   | 9476288   | lysine (K)-specific demethylase 4D                                               |
| 33801 | ENSG00000128472 | GUCY1C   | 31957 | 0  | protein_coding | 3  | 10862639  | 10862742  | guanylate cyclase activator 1C                                                   |
| 33803 | ENSG00000141027 | TRIO2    | 31973 | 0  | protein_coding | 11 | 14553481  | 14553481  | guanine nucleotide-binding protein 10                                            |
| 33811 | ENSG00000141637 | CACNA1A  | 31984 | 9  | protein_coding | 19 | 13317256  | 13734804  | calcium channel, voltage-dependent, P/Q type, alpha 1A subunit                   |
| 33814 | ENSG00000103289 | TSSC1    | 31986 | 9  | protein_coding | 2  | 2152699   | 2361693   | tumor suppressing substrate/transferable candidate 1                             |
| 33820 | ENSG00000105022 | CEACAM14 | 31987 | 0  | protein_coding | 12 | 4296864   | 4296864   | chromosome 12 open reading frame 14                                              |
| 33834 | ENSG00000179242 | CDH4     | 31992 | 2  | protein_coding | 20 | 59827482  | 60015673  | cadherin 4, type 1, R-cadherin (retinal)                                         |
| 33861 | ENSG00000186472 | TMEM190  | 32025 | 4  | protein_coding | 19 | 55888204  | 55888912  | transmembrane protein 190                                                        |
| 33875 | ENSG00000101766 | SLC22A1  | 32041 | 0  | protein_coding | 17 | 3552349   | 3552349   | zinc finger protein 185, type 1                                                  |
| 33887 | ENSG00000145217 | LOC2041  | 32048 | 1  | protein_coding | 4  | 972861    | 987228    | solute carrier family 26 (anion exchanger), member 1                             |
| 33890 | ENSG00000101440 | ASIP     | 32050 | 2  | protein_coding | 20 | 32742375  | 32857150  | signal transducing protein                                                       |
| 33895 | ENSG00000105813 | ALDH2    | 32053 | 0  | protein_coding | 16 | 6824262   | 6824262   | aldehyde dehydrogenase 2, family, member 1                                       |
| 33907 | ENSG00000128910 | FEZF1    | 32063 | 0  | protein_coding | 7  | 121941448 | 121950745 | FEZ family zinc finger 1                                                         |
| 33912 | ENSG0000017239  | MAN1B1   | 32065 | 0  | protein_coding | 9  | 189991379 | 19400383  | mannosidase, alpha, class 1B, member 1                                           |
| 33915 | ENSG00000105022 | CEACAM14 | 32067 | 0  | protein_coding | 11 | 11468208  | 11468208  | colocal domain containing 11                                                     |
| 33930 | ENSG00000187848 | PRRX2    | 32084 | 1  | protein_coding | 12 | 13319306  | 13319872  | paninergic receptor P2X2, ligand-gated ion channel, 2                            |
| 33932 | ENSG00000204656 | RPL3     | 32088 | 0  | protein_coding | 14 | 10134862  | 10135184  | ribosomal protein L3                                                             |
| 33933 | ENSG00000101783 | CCND3    | 32091 | 12 | protein_coding | 12 | 12208284  | 12208284  | cellular domain containing 62                                                    |
| 33934 | ENSG00000101188 | NTR1     | 32097 | 0  | protein_coding | 20 | 61340189  | 61340123  | neurokinin receptor 1 (high affinity)                                            |
| 33936 | ENSG00000120209 | SSTR5    | 32091 | 2  | protein_coding | 16 | 1122756   | 1131454   | somatostatin receptor 5                                                          |
| 33940 | ENSG00000101427 | RIF1     | 32104 | 0  | protein_coding | 8  | 5552067   | 5552067   | retinoblastoma protein 1 (subnuclear domain)                                     |
| 33956 | ENSG00000137668 | STRAP    | 32115 | 0  | protein_coding | 15 | 74411807  | 74504008  | stimulated by retinoic acid 6                                                    |
| 33961 | ENSG00000144119 | C12L2    | 32119 | 3  | protein_coding | 2  | 119913819 | 119914645 | complement component 1, g subcomponent-like 2                                    |
| 33962 | ENSG00000205970 | PCPWR2   | 32120 | 0  | protein_coding | 5  | 140780703 | 140780703 | proteasome activator complex 2                                                   |
| 33963 | ENSG00000145258 | C12orf1  | 32127 | 6  | protein_coding | 2  | 1911206   | 20575862  | chromosome 12 open reading frame 1                                               |
| 33966 | ENSG00000182963 | ZNF67    | 32144 | 2  | protein_coding | 3  | 42947223  | 42960625  | zinc finger protein 662                                                          |
| 33985 | ENSG00000186440 | ARHGAP4  | 32144 | 3  | protein_coding | 4  | 100673275 | 100708448 | aromatase repeat containing, X-linked 4                                          |
| 33994 | ENSG00000205177 | C11orf1  | 32144 | 0  | protein_coding | 1  | 33722147  | 33722147  | chromosome 9 open reading frame 91                                               |
| 34000 | ENSG00000157653 | C6orf43  | 32148 | 0  | protein_coding | 9  | 116172304 | 116191484 | chromosome 9 open reading frame 43                                               |
| 34004 | ENSG00000187180 | SAR1A    | 32164 | 4  | protein_coding | 17 | 4810404   | 48207246  | sterile alpha motif domain containing 14                                         |
| 34019 | ENSG00000163462 | TRIM45   | 32164 | 0  | protein_coding | 12 | 159158137 | 159158137 | sterile alpha motif domain containing 46                                         |
| 34024 | ENSG00000196917 | HGAR1    | 32188 | 1  | protein_coding | 12 | 12314824  | 12315390  | hydroxybutyrate acid receptor 1                                                  |
| 34032 | ENSG00000205922 | UNC5C3   | 32191 | 6  | protein_coding | 17 | 1752072   | 1760887   | one cut homeobox 3                                                               |
| 34041 | ENSG00000110918 | PCP4     | 32196 | 0  | protein_coding | 20 | 62230653  | 62230307  | cytochrome RNA synthetase                                                        |
| 34063 | ENSG00000183396 | PIM3C    | 32202 | 0  | protein_coding | 12 | 10259027  | 102591623 | pro-mitogenic-concentrating hormone                                              |
| 34067 | ENSG00000186446 | ZNF501   | 32240 | 3  | protein_coding | 3  | 44711088  | 44718575  | zinc finger protein 501                                                          |
| 34082 | ENSG00000105022 | CE       |       |    |                |    |           |           |                                                                                  |

|       |                 |           |       |   |                |    |           |           |                                                                                |
|-------|-----------------|-----------|-------|---|----------------|----|-----------|-----------|--------------------------------------------------------------------------------|
| 34410 | ENS00000116396  | KCNCA     | 32587 | 0 | protein_coding | 1  | 110753965 | 110625722 | potassium voltage-gated channel, Shaw-related subfamily, member 4              |
| 34411 | ENS00000114398  | IRX3      | 32613 | 0 | protein_coding | 2  | 48713738  | 48713738  | irx3 domain 3                                                                  |
| 34420 | ENS00000148429  | USP9L     | 32601 | 0 | protein_coding | 10 | 11459495  | 11653763  | USP9L N-terminal like                                                          |
| 34428 | ENS00000170396  | ZNF804A   | 32607 | 0 | protein_coding | 2  | 185463093 | 185402149 | zinc finger protein 804A                                                       |
| 34445 | ENS00000112041  | TUJ1      | 32626 | 0 | protein_coding | 6  | 35400715  | 35400715  | tubby like protein 1                                                           |
| 34461 | ENS000001731    | SAMD12    | 32642 | 0 | protein_coding | 8  | 119251668 | 119824234 | sterile alpha motif domain containing 12                                       |
| 34466 | ENS00000197406  | DIO3      | 32646 | 2 | protein_coding | 14 | 102027688 | 102027688 | deiodinase, iodothyronine, type III                                            |
| 34468 | ENS00000197680  | DKK1      | 32650 | 0 | protein_coding | 7  | 137065783 | 137516138 | dishevelled glycosylase, iso1a                                                 |
| 34484 | ENS00000195963  | PA3A3     | 32652 | 0 | protein_coding | 8  | 223081660 | 223103115 | pancreas 3                                                                     |
| 34488 | ENS00000195248  | RAC3      | 32653 | 0 | protein_coding | 5  | 35043233  | 35047166  | gap junction protein, delta 2, 38Da                                            |
| 34500 | ENS00000166895  | IKZF3     | 32673 | 0 | protein_coding | 2  | 24261450  | 24266983  | inhibitor of growth factor, member 5                                           |
| 34501 | ENS00000192353  | CMBP7     | 32674 | 4 | protein_coding | 2  | 30119705  | 30119705  | chromatin remodelling protein 7                                                |
| 34508 | ENS00000126535  | NRL       | 32683 | 4 | protein_coding | 14 | 24549316  | 24549316  | neural retina leucine zipper                                                   |
| 34507 | ENS00000130363  | RSPO3     | 32686 | 0 | protein_coding | 6  | 159293903 | 159421219 | radial spoke 2 homolog (Chlamydomonas)                                         |
| 34520 | ENS00000130561  | SAP3      | 32701 | 4 | protein_coding | 2  | 224214662 | 224225701 | S-antigen, retina and placental (estrogen)                                     |
| 34532 | ENS00000204463  | ASPMO     | 32711 | 0 | protein_coding | 19 | 51014857  | 51017347  | aspartate dehydrogenase domain containing                                      |
| 34538 | ENS00000119227  | PRX2      | 32719 | 0 | protein_coding | 3  | 196612014 | 196669931 | phosphoglycolate glyoxylase biosynthesis, class 2                              |
| 34550 | ENS00000169951  | ZNF764    | 32735 | 0 | protein_coding | 16 | 30565058  | 30569819  | zinc finger protein 764                                                        |
| 34577 | ENS00000130022  | PHR3C3    | 32755 | 0 | protein_coding | X  | 150063596 | 150074396 | proline rich G1 (G-carboxyglutamic acid) 3 (transmembrane)                     |
| 34578 | ENS00000231241  | CO16B     | 32757 | 0 | protein_coding | 17 | 33234079  | 332360597 | chaperonin containing TCP1, subunit beta (zeta 2)                              |
| 34581 | ENS000002037518 | SHISA9    | 32757 | 0 | protein_coding | 6  | 12965477  | 13342272  | shisa family member 9                                                          |
| 34582 | ENS00000122650  | PSPN      | 32758 | 0 | protein_coding | 19 | 6375159   | 6379069   | pereskinin                                                                     |
| 34597 | ENS00000204245  | PCH2H3    | 32773 | 4 | protein_coding | 5  | 140270601 | 140289348 | chromothripsin gamma subfamily A, 3                                            |
| 34602 | ENS00000092140  | GEE3      | 32778 | 0 | protein_coding | 14 | 31028329  | 31088269  | G2M-phase specific E3 ubiquitin protein ligase                                 |
| 34608 | ENS00000125533  | BHLHE23   | 32787 | 0 | protein_coding | 20 | 61637331  | 61638387  | basic helix-loop-helix family, member e23                                      |
| 34613 | ENS00000164946  | FRS1L     | 32792 | 0 | protein_coding | 9  | 14724694  | 14810995  | FRS3L related extracellular matrix 1                                           |
| 34628 | ENS00000137218  | FRS3      | 32803 | 0 | protein_coding | 6  | 41737914  | 41754280  | fibroblast growth factor receptor substrate 3                                  |
| 34629 | ENS00000184895  | SRVY      | 32806 | 0 | protein_coding | Y  | 2584886   | 2655740   | sex determining region Y                                                       |
| 34665 | ENS00000197361  | FXR1      | 32850 | 0 | protein_coding | 11 | 7468414   | 7468414   | fibroblast xreceptor                                                           |
| 34668 | ENS00000197361  | FXR2      | 32855 | 0 | protein_coding | 15 | 63889552  | 63894427  | F-box and leucine-rich repeat protein 22                                       |
| 34687 | ENS00000188467  | SLC24A5   | 32848 | 2 | protein_coding | 15 | 48413169  | 48434869  | solute carrier family 24 (sodium/potassium/calcium exchanger), member 5        |
| 34688 | ENS00000170481  | TM6SF2    | 32849 | 0 | protein_coding | 11 | 6118589   | 6118589   | transmembrane protein 216                                                      |
| 34699 | ENS00000128617  | OPN1SW    | 32862 | 0 | protein_coding | 7  | 128412545 | 128415844 | opsin 1 (cone pigments), short-wave-sensitive                                  |
| 34728 | ENS000002004611 | ZNF616    | 32889 | 1 | protein_coding | 19 | 5261344   | 52643175  | zinc finger protein 616                                                        |
| 34729 | ENS00000191428  | TM6SF1    | 32890 | 0 | protein_coding | 19 | 4613988   | 4613988   | transmembrane protein 216                                                      |
| 34737 | ENS00000125149  | INHBF     | 32895 | 7 | protein_coding | 6  | 6714367   | 6714942   | intracellular matrix receptor glycoprotein                                     |
| 34739 | ENS000002004967 | PCDH4A    | 32895 | 0 | protein_coding | 5  | 14018659  | 14019129  | chromosome 16 open reading frame 70                                            |
| 34751 | ENS00000164946  | FRS1L     | 32792 | 0 | protein_coding | 9  | 14724694  | 14810995  | FRS3L related extracellular matrix 1                                           |
| 34754 | ENS00000176771  | NCKAP5    | 32911 | 2 | protein_coding | 2  | 13429374  | 13429374  | protein tyrosine phosphatase, non-receptor type 11                             |
| 34756 | ENS00000218416  | PCDH10    | 32911 | 2 | protein_coding | 2  | 241388752 | 241388752 | protocadherin protein 10                                                       |
| 34760 | ENS00000197374  | ATOH7     | 32912 | 0 | protein_coding | 10 | 68994171  | 68994171  | transmembrane protein 216                                                      |
| 34811 | ENS00000115297  | TLX2      | 32952 | 7 | protein_coding | 2  | 74740590  | 74742474  | T-cell leukemia homeobox 2                                                     |
| 34820 | ENS00000183153  | GLD3      | 32959 | 5 | protein_coding | 17 | 38517235  | 38520067  | gap junction protein, delta 3, 31.9kDa                                         |
| 34833 | ENS00000160380  | IFT27     | 32974 | 2 | protein_coding | 22 | 51716400  | 51712240  | intraflagellar transport 27 homolog (Chlamydomonas)                            |
| 34840 | ENS00000170326  | NTRK3B    | 32980 | 0 | protein_coding | 6  | 126753551 | 126753551 | nuclear factor related to tyrosine binding protein                             |
| 34845 | ENS00000173688  | GRPR4     | 32987 | 5 | protein_coding | X  | 19007427  | 19140755  | G protein-coupled receptor 64                                                  |
| 34861 | ENS00000204602  | MCDAS     | 33004 | 4 | protein_coding | 5  | 54515442  | 54523143  | multicatalytic differentiation and DNA synthesis associated cell cycle protein |
| 34868 | ENS00000160507  | PCDH10    | 32911 | 2 | protein_coding | 2  | 241388752 | 241388752 | protocadherin protein 10                                                       |
| 34888 | ENS00000102967  | DHODH     | 33019 | 0 | protein_coding | 16 | 72042487  | 72059954  | dihydrodipicolinate dehydrogenase (quinone)                                    |
| 34897 | ENS00000145642  | FAM198B   | 33021 | 0 | protein_coding | 5  | 63989139  | 64013917  | family with sequence similarity 199, member B                                  |
| 34899 | ENS00000178455  | MKNR1     | 33029 | 0 | protein_coding | 10 | 23810454  | 23810454  | melastatin like finger protein 3                                               |
| 34916 | ENS00000116025  | VAX2      | 33046 | 7 | protein_coding | 2  | 11712720  | 11760576  | ventral anterior homeobox 2                                                    |
| 34925 | ENS00000209533  | PCDH10    | 32911 | 2 | protein_coding | 2  | 241388752 | 241388752 | protocadherin protein 10                                                       |
| 34941 | ENS00000125996  | EPH4A1A   | 33048 | 4 | protein_coding | 2  | 311473158 | 311473158 | ephrone A membrane protein band 4.1 like 4A                                    |
| 34958 | ENS00000123411  | KZF4      | 33089 | 2 | protein_coding | 12 | 56401443  | 56432219  | KARFOS family zinc finger 4 (Eos)                                              |
| 34965 | ENS00000118231  | CHFD9     | 33109 | 0 | protein_coding | 2  | 208989321 | 208989321 | crystallin, gamma D                                                            |
| 34981 | ENS00000205487  | PHF21B    | 33147 | 0 | protein_coding | 22 | 45277042  | 45276880  | chromatin remodelling protein 21B                                              |
| 35000 | ENS00000187801  | ZFP89     | 33145 | 0 | protein_coding | 1  | 40915774  | 40929390  | ZFP89 zinc finger protein B                                                    |
| 35016 | ENS00000162039  | LINC00254 | 33155 | 0 | protein_coding | 16 | 1888384   | 1824295   | retrotransposon with OB domains                                                |
| 35019 | ENS0000011454   | RAB39C1   | 33155 | 0 | protein_coding | 12 | 12589714  | 12589714  | RAB39C containing protein 1                                                    |
| 35041 | ENS00000148204  | CR2       | 33183 | 1 | protein_coding | 9  | 12618449  | 12618403  | crumbs homolog 2 (Drosophila)                                                  |
| 35057 | ENS00000136643  | RPS9K1    | 33195 | 5 | protein_coding | 1  | 213224589 | 21344811  | ribosomal protein S9 kinase, 52kDa, polypeptide 1                              |
| 35070 | ENS00000160520  | PRKRI     | 33202 | 0 | protein_coding | 12 | 9020275   | 9020275   | SLIT-ROBO GTPase activating protein 1                                          |
| 35082 | ENS00000184949  | FAM227A   | 33222 | 0 | protein_coding | 22 | 38974125  | 39052364  | family with sequence similarity 227, member A                                  |
| 35096 | ENS00000149329  | GLT1B     | 33230 | 0 | protein_coding | 11 | 134201768 | 134242335 | galactosylase, beta 1-like 2                                                   |
| 35100 | ENS00000102060  | ZNF112    | 33232 | 0 | protein_coding | 7  | 144891702 | 144891702 | zinc finger protein 212                                                        |
| 35126 | ENS00000162068  | NTN3      | 33264 | 0 | protein_coding | 16 | 2521500   | 2524146   | netrin 3                                                                       |
| 35135 | ENS00000164939  | RHD13     | 33275 | 0 | protein_coding | 19 | 55550476  | 55542659  | retinol dehydrogenase 13 (all-trans-9-cis)                                     |
| 35142 | ENS00000160871  | UGT1A1    | 33283 | 0 | protein_coding | 5  | 360314    | 360314    | UDP-glucosyltransferase 1 family, polypeptide A2                               |
| 35146 | ENS00000178460  | MCM2DC2   | 33289 | 0 | protein_coding | 8  | 67782483  | 67782483  | mitochondrial maintenance domain containing 2                                  |
| 35149 | ENS00000142611  | PRDM16    | 33291 | 0 | protein_coding | 1  | 2986732   | 3355185   | PR domain containing 16                                                        |
| 35156 | ENS00000102068  | ZNF122    | 33292 | 0 | protein_coding | 12 | 41662326  | 41662326  | ZNF122-like 2 (Drosophila)                                                     |
| 35163 | ENS00000115815  | DEPDC4    | 33297 | 0 | protein_coding | 12 | 100597447 | 100606857 | DEP domain containing 4                                                        |
| 35163 | ENS0000013818   | EMDOV     | 33303 | 0 | protein_coding | 17 | 7838965   | 78411886  |                                                                                |

|       |                  |         |   |   |                                     |    |           |           |  |                                                                        |
|-------|------------------|---------|---|---|-------------------------------------|----|-----------|-----------|--|------------------------------------------------------------------------|
| 33153 | ENSG00000250472  | 31310.7 | 0 | 0 | sense_intronic                      | 1  | 14484461  | 114485341 |  | TRM99 intronic transcript 1 (non-protein coding)                       |
| 33158 | ENSG00000250508  | 31316.7 | 0 | 0 | sense_intronic                      | 1  | 8935847   | 8935896   |  | END1 intronic transcript 1 (non-protein coding)                        |
| 33952 | ENSG00000250979  | 32107.7 | 0 | 0 | sense_intronic                      | 17 | 19480524  | 19481224  |  | small nuclear RNA, HIACA box 59B                                       |
| 26887 | ENSG00000252481  | 24889.3 | 0 | 0 | sncRNA                              | 14 | 95999692  | 95999696  |  | small Cajal body-specific RNA 13                                       |
| 26813 | ENSG00000252906  | 25251   | 0 | 0 | sncRNA                              | 1  | 17591738  | 17591776  |  | small Cajal body-specific RNA 3                                        |
| 27688 | ENSG00000253486  | 29153.5 | 0 | 0 | sncRNA                              | 4  | 53519416  | 53519437  |  | small nuclear RNA, HIACA box 26                                        |
| 27996 | ENSG00000252192  | 26250.5 | 0 | 0 | sncRNA                              | 12 | 122978660 | 122978788 |  | Small nuclear RNA SNORA9                                               |
| 30648 | ENSG00000204753  | 27494.1 | 0 | 0 | sncRNA                              | 7  | 20416954  | 20417024  |  | Small nuclear RNA SNORA29                                              |
| 30643 | ENSG00000216153  | 28419.7 | 0 | 0 | sncRNA                              | 15 | 179170622 | 179170792 |  | Small nuclear RNA SNORA97                                              |
| 31529 | ENSG00000199927  | 28844.5 | 0 | 0 | sncRNA                              | 3  | 30346513  | 30346527  |  | small nuclear RNA U3                                                   |
| 31094 | ENSG00000251663  | 28718.5 | 0 | 0 | sncRNA                              | 12 | 76959232  | 76959264  |  | Small nuclear RNA SNORA70                                              |
| 31529 | ENSG00000206634  | 29734.6 | 0 | 0 | sncRNA                              | 7  | 65220513  | 65220446  |  | small nuclear RNA, HIACA box 22                                        |
| 31544 | ENSG00000221400  | 29743.3 | 0 | 0 | sncRNA                              | 10 | 43912098  | 43912888  |  | Small nuclear RNA U3                                                   |
| 31960 | ENSG00000202355  | 29756.3 | 0 | 0 | sncRNA                              | 1  | 172489007 | 172489195 |  | Small nuclear RNA SNORA72                                              |
| 31570 | ENSG000002026603 | 29763.4 | 0 | 0 | sncRNA                              | 7  | 58123058  | 58123195  |  | Small nuclear RNA SNORA22                                              |
| 31664 | ENSG00000203744  | 29848.9 | 0 | 0 | sncRNA                              | 7  | 64526377  | 64526510  |  | Small nuclear RNA SNORA22                                              |
| 32191 | ENSG000002021025 | 30208.7 | 0 | 0 | sncRNA                              | 21 | 17657017  | 17657089  |  | Small nuclear RNA SNORA74                                              |
| 32729 | ENSG00000201448  | 30904.8 | 0 | 0 | sncRNA                              | 1  | 36884051  | 36884179  |  | Small nuclear RNA SNORA63                                              |
| 32788 | ENSG00000202142  | 30962.3 | 0 | 0 | sncRNA                              | 14 | 101442162 | 101442233 |  | small nuclear RNA, C/D box 114-18                                      |
| 33391 | ENSG00000199942  | 31022.3 | 0 | 0 | sncRNA                              | 14 | 101442314 | 101442388 |  | small nuclear RNA, C/D box 114-19                                      |
| 33570 | ENSG00000212493  | 31727.4 | 0 | 0 | sncRNA                              | 3  | 52723264  | 52723331  |  | small nuclear RNA, C/D box 19                                          |
| 34092 | ENSG00000202823  | 32262.3 | 0 | 0 | sncRNA                              | 14 | 101418193 | 101418270 |  | small nuclear RNA, C/D box 114-2                                       |
| 34178 | ENSG00000202328  | 32392.7 | 0 | 0 | sncRNA                              | 11 | 12926264  | 12926335  |  | Small Cajal body specific RNA 10                                       |
| 34383 | ENSG00000198390  | 32560.3 | 0 | 0 | sncRNA                              | 14 | 101429391 | 101429467 |  | small nuclear RNA, C/D box 114-7                                       |
| 18488 | ENSG00000252244  | 17173.4 | 0 | 0 | sncRNA                              | 8  | 14883892  | 148838153 |  | RNA, U7 small nuclear 3 pseudogene                                     |
| 22914 | ENSG00000202875  | 22198.4 | 0 | 0 | sncRNA                              | 4  | 41898146  | 41898252  |  | RNA, U6 small nuclear 701, pseudogene                                  |
| 26223 | ENSG00000202309  | 24888.1 | 0 | 0 | sncRNA                              | X  | 48816440  | 48816543  |  | RNA, U6 small nuclear 722, pseudogene                                  |
| 27891 | ENSG00000198906  | 26410.2 | 0 | 0 | sncRNA                              | 3  | 40540382  | 40540494  |  | RNA, U6 small nuclear 2, pseudogene                                    |
| 29133 | ENSG00000202920  | 27033.7 | 0 | 0 | sncRNA                              | 1  | 12603377  | 12603469  |  | RNA, U6 small nuclear 1147, pseudogene                                 |
| 29158 | ENSG00000201113  | 27599.9 | 0 | 0 | sncRNA                              | 2  | 32439525  | 32439631  |  | RNA, U6 small nuclear 647, pseudogene                                  |
| 29762 | ENSG00000202160  | 28140.6 | 0 | 0 | sncRNA                              | 10 | 11182916  | 11182970  |  | RNA, U4 spliceosomal RNA                                               |
| 30221 | ENSG00000202703  | 28591.3 | 0 | 0 | sncRNA                              | 4  | 15971542  | 15971648  |  | RNA, U6 small nuclear 126, pseudogene                                  |
| 30738 | ENSG000002022640 | 29016.3 | 0 | 0 | sncRNA                              | 14 | 70827009  | 70827075  |  | RNA, U4 small nuclear 51, pseudogene                                   |
| 30761 | ENSG000002020893 | 29042.1 | 0 | 0 | sncRNA                              | 16 | 20756831  | 20756937  |  | RNA, U6 small nuclear 944, pseudogene                                  |
| 31058 | ENSG00000215129  | 29233.3 | 0 | 0 | sncRNA                              | 12 | 66882292  | 66882405  |  | RNA, U6 small nuclear 343, pseudogene                                  |
| 31156 | ENSG000001999512 | 29377.8 | 0 | 0 | sncRNA                              | 15 | 59633513  | 59633616  |  | RNA, U6 small nuclear 212, pseudogene                                  |
| 31533 | ENSG00000201317  | 29738.1 | 0 | 0 | sncRNA                              | 1  | 93166376  | 93166411  |  | RNA, U4 small nuclear 59, pseudogene                                   |
| 31581 | ENSG00000201446  | 29795.9 | 0 | 0 | sncRNA                              | X  | 91953093  | 91953263  |  | RNA, U2 small nuclear 26, pseudogene                                   |
| 31604 | ENSG00000203685  | 29802.2 | 0 | 0 | sncRNA                              | X  | 49949605  | 49949711  |  | RNA, U6 small nuclear 1193, pseudogene                                 |
| 31692 | ENSG00000201176  | 29885.6 | 0 | 0 | sncRNA                              | 4  | 16898956  | 16899012  |  | RNA, U6 small nuclear 853, pseudogene                                  |
| 32358 | ENSG00000202601  | 30423.9 | 0 | 0 | sncRNA                              | 12 | 12421509  | 12421619  |  | RNA, U6 small nuclear 928, pseudogene                                  |
| 32475 | ENSG00000199927  | 30648.4 | 0 | 0 | sncRNA                              | 2  | 17589487  | 17589495  |  | RNA, U6 small nuclear 1293, pseudogene                                 |
| 32715 | ENSG000002021058 | 30891.3 | 0 | 0 | sncRNA                              | 4  | 71568736  | 71568840  |  | RNA, U6 small nuclear 784, pseudogene                                  |
| 32717 | ENSG00000202496  | 30897.0 | 0 | 0 | sncRNA                              | 6  | 34262526  | 34262668  |  | RNA, U6 small nuclear 50, pseudogene                                   |
| 32744 | ENSG00000222716  | 30919.5 | 0 | 0 | sncRNA                              | 14 | 66852661  | 66852712  |  | RNA, U6 small nuclear 31, pseudogene                                   |
| 33083 | ENSG00000202629  | 31240.5 | 0 | 0 | sncRNA                              | 4  | 68235309  | 68235472  |  | RNA, U1 small nuclear 63, pseudogene                                   |
| 33169 | ENSG000002027205 | 31325.7 | 0 | 0 | sncRNA                              | 1  | 14896498  | 14896572  |  | RNA, variant U1 small nuclear 16                                       |
| 33296 | ENSG00000202481  | 31406.2 | 0 | 0 | sncRNA                              | 1  | 147511004 | 147511167 |  | RNA, variant U1 small nuclear 8                                        |
| 33318 | ENSG000002027062 | 31455.9 | 0 | 0 | sncRNA                              | 1  | 164608002 | 164608008 |  | RNA, U6 small nuclear 171, pseudogene                                  |
| 33357 | ENSG00000202533  | 31461.9 | 0 | 0 | sncRNA                              | 5  | 18072998  | 18072971  |  | RNA, U6 small nuclear 705, pseudogene                                  |
| 33447 | ENSG00000202028  | 31803.3 | 0 | 0 | sncRNA                              | 1  | 54821279  | 54821384  |  | RNA, U6 small nuclear 1331, pseudogene                                 |
| 33708 | ENSG000002020105 | 31865.8 | 0 | 0 | sncRNA                              | 12 | 15824841  | 15824744  |  | RNA, U6 small nuclear 251, pseudogene                                  |
| 33876 | ENSG000002027513 | 32039.5 | 0 | 0 | sncRNA                              | 1  | 16993289  | 16993443  |  | RNA, U1 small nuclear 3                                                |
| 34000 | ENSG00000202292  | 32129.3 | 0 | 0 | sncRNA                              | 1  | 180727668 | 180727933 |  | RNA, U6 spliceosomal RNA                                               |
| 34031 | ENSG000002027389 | 32181.4 | 0 | 0 | sncRNA                              | 1  | 17087011  | 17087174  |  | RNA, U1 small nuclear 4                                                |
| 34035 | ENSG000002027205 | 32191.8 | 0 | 0 | sncRNA                              | 10 | 13259289  | 13259375  |  | RNA, U6 small nuclear 6, pseudogene                                    |
| 34041 | ENSG00000202638  | 32215.3 | 0 | 0 | sncRNA                              | 12 | 49819865  | 49819862  |  | RNA, U6 small nuclear 52, pseudogene                                   |
| 34111 | ENSG000002021745 | 32275.2 | 0 | 0 | sncRNA                              | 9  | 37938704  | 37938785  |  | RNA, U7 small nuclear 124, pseudogene                                  |
| 34278 | ENSG000002021198 | 32375.5 | 0 | 0 | sncRNA                              | 2  | 232369701 | 232369812 |  | RNA, U2 small nuclear 22, pseudogene                                   |
| 34298 | ENSG000002021198 | 32383.0 | 0 | 0 | sncRNA                              | 12 | 35011920  | 35011922  |  | RNA, U1 small nuclear 42, pseudogene                                   |
| 34723 | ENSG00000198325  | 32885.1 | 0 | 0 | sncRNA                              | 11 | 66382435  | 66382561  |  | RNA, U4 small nuclear 39, pseudogene                                   |
| 34775 | ENSG000002023595 | 32966.7 | 0 | 0 | sncRNA                              | 3  | 48221818  | 48221879  |  | RNA, U7 small nuclear 128, pseudogene                                  |
| 34833 | ENSG000002021815 | 33033.3 | 0 | 0 | sncRNA                              | 20 | 14331035  | 14331071  |  | RNA, U6 small nuclear 726, pseudogene                                  |
| 35293 | ENSG000002020701 | 33414.4 | 0 | 0 | sncRNA                              | 2  | 85432049  | 85432155  |  | RNA, U6 small nuclear 674, pseudogene                                  |
| 28100 | ENSG00000211707  | 26055   | 0 | 0 | IR, U, gene                         | 7  | 142032006 | 142032527 |  | T cell receptor beta variable 7-1 (non-functional)                     |
| 21579 | ENSG000002037550 | 21256   | 0 | 0 | transcribed_processed_pseudo_gene   | 15 | 62664459  | 62748784  |  | ubiquitin-conjugating enzyme E2Q family member 2 pseudogene 6          |
| 30994 | ENSG000002065158 | 29244.4 | 0 | 0 | transcribed_processed_pseudo_gene   | 18 | 29304161  | 29306919  |  | leucine rich repeat containing 37, member A7, pseudogene               |
| 32966 | ENSG000002023508 | 31140   | 0 | 0 | transcribed_processed_pseudo_gene   | 8  | 163188    | 182231    |  | ribosomal protein L23a pseudogene 53                                   |
| 33003 | ENSG000002041143 | 31173.5 | 0 | 0 | transcribed_processed_pseudo_gene   | 3  | 14988325  | 14988731  |  | ribosomal protein L32 pseudogene 9                                     |
| 33103 | ENSG000002081315 | 31281.7 | 0 | 0 | transcribed_processed_pseudo_gene   | 15 | 39609290  | 39611466  |  | La ribonucleoprotein domain family, member 4 pseudogene                |
| 33738 | ENSG00000179362  | 31899.3 | 0 | 0 | transcribed_processed_pseudo_gene   | 15 | 45803334  | 45879488  |  | high mobility group nucleosomal binding domain 2 pseudogene 46         |
| 33873 | ENSG00000208389  | 32037.9 | 0 | 0 | transcribed_processed_pseudo_gene   | 18 | 30091626  | 30094597  |  | WW domain binding protein 11 pseudogene 1                              |
| 34201 | ENSG000002042779 | 32377.4 | 0 | 0 | transcribed_processed_pseudo_gene   | 19 | 53471504  | 53541151  |  | zinc finger protein 702, pseudogene                                    |
| 35043 | ENSG000002023517 | 33184.2 | 0 | 0 | transcribed_processed_pseudo_gene   | 20 | 30774280  | 30778330  |  | testis specific protein, Y linked 26, pseudogene                       |
| 35056 | ENSG000002023918 | 33624.2 | 0 | 0 | transcribed_processed_pseudo_gene   | 8  | 38291865  | 38293182  |  | ribosomal protein S20 pseudogene 22                                    |
| 25113 | ENSG000002087023 | 24078   | 0 | 0 | transcribed_unprocessed_pseudo_gene | 17 | 66121918  | 66148809  |  | leucine rich repeat containing 37, member A16, pseudogene              |
| 30843 | ENSG00000204338  | 29120.1 | 0 | 0 | transcribed_unprocessed_pseudo_gene | 6  | 31973413  | 31976228  |  | cytochrome P450, family 21, subfamily A, polypeptide 1 pseudogene      |
| 31176 | ENSG000002057513 | 29400.4 | 0 | 0 | transcribed_unprocessed_pseudo_gene | 18 | 11619508  | 11639698  |  | nuclear pore complex interacting protein family, member B1, pseudogene |
| 31587 | ENSG00000214534  | 29784.2 | 0 | 0 | transcribed_unprocessed_pseudo_gene | 11 | 71525091  | 71523594  |  | zinc finger protein 705E                                               |
| 31612 | ENSG00000202943  | 29809.9 | 0 | 0 | transcribed_unprocessed_pseudo_gene | 17 | 6757180   | 6857426   |  | arachidonate 12-lipoxygenase pseudogene 2                              |
| 32331 | ENSG00000204929  | 30058.9 | 0 | 0 | transcribed_unprocessed_pseudo_gene | 1  | 149369722 | 149399226 |  | histone cluster 2, H2bb (pseudogene)                                   |
| 33064 | ENSG000002048593 | 31224.4 | 0 | 0 | transcribed_unprocessed_pseudo_gene | 12 | 6993846   | 6994980   |  | desitin (actin depolymerizing factor) pseudogene 2                     |
| 34053 | ENSG000002023820 | 32225.1 | 0 | 0 | transcribed_unprocessed_pseudo_gene | 10 | 89577685  | 89605359  |  | collin 1 (non-muscle) pseudogene 1                                     |
| 29350 | ENSG00000202484  | 27177   | 0 | 0 | unitary_pseudogene                  | 11 | 5489716   | 5490952   |  | olfactory receptor, family 21, subfamily A, member 10 pseudogene       |
| 31721 | ENSG00000214768  | 29116.3 | 0 | 0 | unitary_pseudogene                  | 11 | 59719508  | 59719607  |  | ovicic secreted protein 1                                              |
| 31119 | ENSG000002027473 | 29339.3 | 0 | 0 | unitary_pseudogene                  | 8  | 145196117 | 145198567 |  | testis-specific serine kinase 5 pseudogene 1                           |
| 36413 | ENSG00000224786  | 33519.7 | 0 | 0 | unitary_pseudogene                  | 4  | 123651703 | 123653348 |  | centrin EF-hand protein 4, pseudogene                                  |
| 28621 | ENSG000002030869 | 28023.3 | 0 | 0 | unprocessed_pseudogene              | 10 | 46174140  | 46195880  |  | centaurin, gamma-like family, member 10 pseudogene                     |
| 30384 | ENSG00000202185  | 28703.5 | 0 | 0 | unprocessed_pseudogene              | 2  | 96180575  | 96188555  |  | tripartite motif containing 84F, pseudogene                            |
| 30840 | ENSG00000203061  | 29115.9 | 0 | 0 | unprocessed_pseudogene              | 11 | 49548582  | 49580872  |  | immunoglobulin lambda-like polypeptide 3, pseudogene                   |
| 31122 | ENSG000002029586 | 29341.8 | 0 | 0 | unprocessed_pseudogene              | 3  | 106919915 | 106920012 |  | separase motif-containing 51E, pseudogene                              |
| 34198 | ENSG000002048498 | 32374.7 | 0 | 0 | unprocessed_pseudogene              | 8  | 47450835  | 47526145  |  | MT-ND1 pseudogene 16                                                   |
| 34207 | ENSG00000158712  | 32709.7 | 0 | 0 | unprocessed_pseudogene              | 9  |           |           |  |                                                                        |



|       |                  |       |         |   |    |           |           |  |                                                              |
|-------|------------------|-------|---------|---|----|-----------|-----------|--|--------------------------------------------------------------|
| 26709 | ENSG00000138294  | MSMB  | 24565.4 | 0 |    |           |           |  | microsomeprotein, beta-                                      |
| 26997 | ENSG00000201678  |       | 24789.1 | 0 | 10 | 51549498  | 51562817  |  |                                                              |
| 26144 | ENSG00000228335  |       | 24917.6 | 0 |    |           |           |  |                                                              |
| 26169 | ENSG00000232454  |       | 24944   | 0 |    |           |           |  |                                                              |
| 26266 | ENSG00000256664  |       | 25009   | 0 |    |           |           |  |                                                              |
| 26334 | ENSG00000256491  |       | 25060.9 | 0 |    |           |           |  |                                                              |
| 26556 | ENSG00000223821  |       | 25283.8 | 0 |    |           |           |  |                                                              |
| 26608 | ENSG00000242702  |       | 25344.4 | 0 |    |           |           |  |                                                              |
| 26704 | ENSG00000249411  |       | 25397.5 | 0 |    |           |           |  |                                                              |
| 26708 | ENSG00000225471  |       | 25406.6 | 0 |    |           |           |  |                                                              |
| 26625 | ENSG00000186696  | CWC25 | 25513.6 | 0 | 17 | 36956687  | 36961734  |  | CWC25 spliceosome-associated protein homolog (S. cerevisiae) |
| 27146 | ENSG00000188035  | MMP12 | 25786.1 | 0 |    |           |           |  |                                                              |
| 27259 | ENSG00000110347  |       | 25883.9 | 0 | 11 | 102733467 | 102745784 |  | matrix metalloproteinase 12 (macrophage elastase)            |
| 27240 | ENSG000002081105 |       | 25911.3 | 0 |    |           |           |  |                                                              |
| 27372 | ENSG00000211741  |       | 26134.8 | 0 |    |           |           |  |                                                              |
| 27760 | ENSG00000236992  |       | 26295.4 | 0 |    |           |           |  |                                                              |
| 28034 | ENSG00000212456  |       | 26533   | 0 | 1  | 147984146 | 147984313 |  | RNA, variant U1 small nuclear 13                             |
| 28221 | ENSG00000209279  |       | 26719.3 | 0 | 1  | 116915890 | 116920176 |  | Uncharacterized protein                                      |
| 28266 | ENSG00000213613  |       | 26766.1 | 0 |    |           |           |  |                                                              |
| 28273 | ENSG000002081549 |       | 26768.9 | 0 |    |           |           |  |                                                              |
| 28281 | ENSG00000211259  |       | 26999.1 | 0 |    |           |           |  |                                                              |
| 28537 | ENSG000002082171 |       | 27019.3 | 0 |    |           |           |  |                                                              |
| 28586 | ENSG00000205244  |       | 27058.7 | 0 |    |           |           |  |                                                              |
| 28933 | ENSG00000252453  |       | 27102.4 | 0 | 8  | 8916049   | 8916140   |  | Small nuclear RNA U3                                         |
| 28769 | ENSG00000258472  |       | 27244.6 | 0 |    |           |           |  |                                                              |
| 28814 | ENSG00000251158  |       | 27287.5 | 0 |    |           |           |  |                                                              |
| 28960 | ENSG00000209728  |       | 27347.5 | 0 |    |           |           |  |                                                              |
| 28860 | ENSG00000258090  |       | 27354.3 | 0 |    |           |           |  |                                                              |
| 28910 | ENSG00000206780  |       | 27438.4 | 0 |    |           |           |  |                                                              |
| 29198 | ENSG00000256864  |       | 27534.5 | 0 |    |           |           |  |                                                              |
| 29219 | ENSG00000202129  |       | 27654.1 | 0 | 1  | 35893417  | 35893494  |  | RNA, Ro-associated Y5 pseudogene 1                           |
| 29226 | ENSG00000235548  |       | 27681.4 | 0 |    |           |           |  |                                                              |
| 29273 | ENSG00000250570  |       | 27688.8 | 0 |    |           |           |  |                                                              |
| 29276 | ENSG00000253556  |       | 27700.3 | 0 |    |           |           |  |                                                              |
| 29299 | ENSG00000254883  |       | 27726.9 | 0 |    |           |           |  |                                                              |
| 29347 | ENSG00000208758  |       | 27775.7 | 0 |    |           |           |  |                                                              |
| 29356 | ENSG00000250940  |       | 27784.3 | 0 |    |           |           |  |                                                              |
| 29409 | ENSG000002060379 |       | 27836.4 | 0 |    |           |           |  |                                                              |
| 29474 | ENSG00000205689  |       | 27895.3 | 0 |    |           |           |  |                                                              |
| 29519 | ENSG00000213152  |       | 27937.3 | 0 | 3  | 187896331 | 187898598 |  | Uncharacterized protein                                      |
| 29528 | ENSG00000231496  |       | 27942.9 | 0 |    |           |           |  |                                                              |
| 29544 | ENSG00000231571  |       | 28040.4 | 0 |    |           |           |  |                                                              |
| 29555 | ENSG00000208908  |       | 28048.9 | 0 |    |           |           |  |                                                              |
| 29673 | ENSG00000272430  |       | 28062.7 | 0 |    |           |           |  |                                                              |
| 29696 | ENSG00000206796  |       | 28062.7 | 0 |    |           |           |  |                                                              |
| 29715 | ENSG00000229686  |       | 28100.4 | 0 |    |           |           |  |                                                              |
| 29734 | ENSG00000222348  |       | 28118.9 | 0 | 3  | 10258896  | 10259003  |  | RNA, U6 small nuclear 814, pseudogene                        |
| 29739 | ENSG00000251795  |       | 28124.4 | 0 |    |           |           |  |                                                              |
| 29813 | ENSG00000204700  |       | 28192.6 | 0 |    |           |           |  |                                                              |
| 29820 | ENSG00000255036  |       | 28207.8 | 0 |    |           |           |  |                                                              |
| 29884 | ENSG00000211573  |       | 28237.6 | 0 |    |           |           |  |                                                              |
| 29884 | ENSG000002049131 |       | 28232.2 | 0 |    |           |           |  |                                                              |
| 29887 | ENSG00000208300  |       | 28266.7 | 0 |    |           |           |  |                                                              |
| 29899 | ENSG00000229031  |       | 28273.4 | 0 |    |           |           |  |                                                              |
| 29915 | ENSG000002048431 |       | 28288.2 | 0 |    |           |           |  |                                                              |
| 29938 | ENSG000002060432 |       | 28307.9 | 0 |    |           |           |  |                                                              |
| 29997 | ENSG00000231704  |       | 28368.4 | 0 |    |           |           |  |                                                              |
| 30006 | ENSG00000229897  |       | 28378.6 | 0 |    |           |           |  |                                                              |
| 30013 | ENSG00000270166  |       | 28386.5 | 0 |    |           |           |  |                                                              |
| 30067 | ENSG00000208891  |       | 28433.9 | 0 |    |           |           |  |                                                              |
| 30100 | ENSG00000230800  |       | 28450.1 | 0 | 12 | 101752526 | 101752627 |  | Small nuclear RNA U13                                        |
| 30142 | ENSG00000236975  |       | 28506   | 0 |    |           |           |  |                                                              |
| 30154 | ENSG00000258454  |       | 28515.9 | 0 |    |           |           |  |                                                              |
| 30193 | ENSG00000204022  |       | 28549.3 | 0 |    |           |           |  |                                                              |
| 30194 | ENSG00000237728  |       | 28550.2 | 0 |    |           |           |  |                                                              |
| 30203 | ENSG00000211394  |       | 28555.2 | 0 |    |           |           |  |                                                              |
| 30214 | ENSG00000231163  |       | 28562.1 | 0 |    |           |           |  |                                                              |
| 30294 | ENSG00000228970  |       | 28638.8 | 0 |    |           |           |  |                                                              |
| 30333 | ENSG00000236699  |       | 28660.6 | 0 |    |           |           |  |                                                              |
| 30362 | ENSG00000231777  |       | 28686.6 | 0 |    |           |           |  |                                                              |
| 30383 | ENSG00000215899  |       | 28703   | 0 |    |           |           |  |                                                              |
| 30400 | ENSG00000206050  |       | 28716.2 | 0 |    |           |           |  |                                                              |
| 30402 | ENSG00000208884  |       | 28717.6 | 0 |    |           |           |  |                                                              |
| 30415 | ENSG00000228960  |       | 28725.7 | 0 |    |           |           |  |                                                              |
| 30440 | ENSG000002047867 |       | 28741.1 | 0 |    |           |           |  |                                                              |
| 30449 | ENSG00000230800  |       | 28763.5 | 0 |    |           |           |  |                                                              |
| 30457 | ENSG00000233981  |       | 28756.5 | 0 |    |           |           |  |                                                              |
| 30486 | ENSG00000272540  |       | 28777.6 | 0 |    |           |           |  |                                                              |
| 30495 | ENSG00000208930  |       | 28784   | 0 |    |           |           |  |                                                              |
| 30510 | ENSG00000233969  |       | 28794.4 | 0 |    |           |           |  |                                                              |
| 30569 | ENSG00000258675  |       | 28842.9 | 0 |    |           |           |  |                                                              |
| 30574 | ENSG00000230454  |       | 28848.3 | 0 |    |           |           |  |                                                              |
| 30613 | ENSG00000255124  |       | 28892   | 0 |    |           |           |  |                                                              |
| 30632 | ENSG00000254659  |       | 28905.2 | 0 |    |           |           |  |                                                              |
| 30636 | ENSG00000256198  |       | 28912.6 | 0 |    |           |           |  |                                                              |
| 30648 | ENSG00000226311  |       | 28923.1 | 0 |    |           |           |  |                                                              |
| 30657 | ENSG00000248222  |       | 28933.7 | 0 |    |           |           |  |                                                              |
| 30666 | ENSG00000208978  |       | 28943.6 | 0 |    |           |           |  |                                                              |
| 30660 | ENSG00000206268  |       | 28961.2 | 0 |    |           |           |  |                                                              |
| 30688 | ENSG00000223838  |       | 28973.2 | 0 |    |           |           |  |                                                              |
| 30703 | ENSG00000256644  |       | 28977.8 | 0 |    |           |           |  |                                                              |
| 30706 | ENSG00000221788  |       | 28978   | 0 |    |           |           |  |                                                              |
| 30729 | ENSG00000233800  |       | 29005.1 | 0 |    |           |           |  |                                                              |
| 30730 | ENSG00000224316  |       | 29007.4 | 0 |    |           |           |  |                                                              |
| 30744 | ENSG00000229620  |       | 29026.5 | 0 |    |           |           |  |                                                              |
| 30749 | ENSG000002087354 |       | 29030.3 | 0 |    |           |           |  |                                                              |
| 30752 | ENSG00000233944  |       | 29034.1 | 0 |    |           |           |  |                                                              |
| 30779 | ENSG00000221430  |       | 29059.7 | 0 |    |           |           |  |                                                              |
| 30787 | ENSG00000208846  |       | 29065.8 | 0 |    |           |           |  |                                                              |
| 30809 | ENSG00000232596  |       | 29088.1 | 0 |    |           |           |  |                                                              |
| 30818 | ENSG00000232696  |       | 29096.9 | 0 |    |           |           |  |                                                              |
| 30824 | ENSG00000232310  |       | 29103.1 | 0 |    |           |           |  |                                                              |
| 30831 | ENSG00000228961  |       | 29107.9 | 0 |    |           |           |  |                                                              |
| 30865 | ENSG00000213443  |       | 29134.8 | 0 |    |           |           |  |                                                              |
| 30921 | ENSG00000237729  |       | 29181.4 | 0 |    |           |           |  |                                                              |
| 30922 | ENSG00000252981  |       | 29182.3 | 0 | 2  | 170672789 | 170672888 |  | Small nuclear RNA U3                                         |
| 30927 | ENSG00000230953  |       | 29188.1 | 0 |    |           |           |  |                                                              |
| 30929 | ENSG00000271888  |       | 29189.3 | 0 |    |           |           |  |                                                              |
| 30933 | ENSG000002081298 |       | 29190.9 | 0 |    |           |           |  |                                                              |
| 30955 | ENSG00000204468  |       | 29191.7 | 0 |    |           |           |  |                                                              |
| 30959 | ENSG00000228358  |       | 29209.2 | 0 |    |           |           |  |                                                              |
| 30966 | ENSG00000247131  |       | 29219.2 | 0 |    |           |           |  |                                                              |
| 30989 | ENSG00000232739  |       | 29242.6 | 0 |    |           |           |  |                                                              |
| 30991 | ENSG00000253945  |       | 29242.9 | 0 |    |           |           |  |                                                              |
| 30997 | ENSG00000228907  |       | 29252   | 0 |    |           |           |  |                                                              |
| 31000 | ENSG00000231213  |       | 29253.3 | 0 |    |           |           |  |                                                              |
| 31014 | ENSG00000248844  |       | 29261.6 | 0 |    |           |           |  |                                                              |
| 31030 | ENSG00000255125  |       | 29271.1 | 0 |    |           |           |  |                                                              |
| 31038 | ENSG000002081089 |       | 29279.8 | 0 |    |           |           |  |                                                              |
| 31084 | ENSG00000251340  |       | 29315.4 | 0 |    |           |           |  |                                                              |
| 31088 | ENSG00000214754  |       | 29319.4 | 0 |    |           |           |  |                                                              |
| 31088 | ENSG00000251559  |       | 29329   | 0 |    |           |           |  |                                                              |
| 31113 | ENSG00000231361  |       | 29334.1 | 0 |    |           |           |  |                                                              |
| 31165 | ENSG00000244468  |       | 29390.9 | 0 |    |           |           |  |                                                              |
| 31175 | ENSG00000204468  |       | 29399.4 | 0 |    |           |           |  |                                                              |
| 31199 | ENSG00000152265  | SPON1 | 29422.6 | 0 | 11 | 13983914  | 14289646  |  | spondin 1, extracellular matrix protein                      |
| 31225 | ENSG000002087437 |       | 29446.2 | 0 |    |           |           |  |                                                              |
| 31229 | ENSG00000226453  |       | 29447   | 0 |    |           |           |  |                                                              |
| 31234 | ENSG00000204601  |       | 29452.6 | 0 |    |           |           |  |                                                              |
| 31254 | ENSG00000235781  |       | 29476.9 | 0 |    |           |           |  |                                                              |
| 31256 | ENSG000002081543 |       | 29478.3 | 0 |    |           |           |  |                                                              |
| 31263 | ENSG00000213366  |       | 29480.8 | 0 |    |           |           |  |                                                              |
| 31275 | ENSG00000237423  |       | 29495.2 | 0 |    |           |           |  |                                                              |
| 31276 | ENSG00000253199  |       | 29496   | 0 |    |           |           |  |                                                              |
| 31290 | ENSG00000209712  |       | 29505.5 | 0 |    |           |           |  |                                                              |
| 31294 | ENSG000002066369 |       | 29505.9 | 0 |    |           |           |  |                                                              |
| 31300 | ENSG000002084914 |       | 29509.9 | 0 |    |           |           |  |                                                              |
| 31306 | ENSG00000231196  |       | 29518.5 | 0 |    |           |           |  |                                                              |
| 31317 | ENSG000002089349 |       | 29530   | 0 |    |           |           |  |                                                              |
| 31333 | ENSG00000234628  |       | 29554.1 | 0 |    |           |           |  |                                                              |
| 31351 | ENSG00000222495  |       | 29572.5 | 0 |    |           |           |  |                                                              |
| 31368 | ENSG00000218261  |       | 29587.6 | 0 |    |           |           |  |                                                              |
| 31372 | ENSG00000223995  |       | 29593.2 | 0 |    |           |           |  |                                                              |
| 31389 | ENSG00000233495  |       | 29604.5 | 0 |    |           |           |  |                                                              |
| 31425 | ENSG00000255553  |       | 29644.2 | 0 |    |           |           |  |                                                              |
| 31430 | ENSG00000297420  |       | 29649.6 | 0 |    |           |           |  |                                                              |
| 31440 | ENSG00000253373  |       | 29657.3 | 0 |    |           |           |  |                                                              |
| 31445 | ENSG00000258862  |       | 29661.5 | 0 |    |           |           |  |                                                              |
| 31453 | ENSG00000213657  |       | 29667.5 | 0 |    |           |           |  |                                                              |
| 31454 | ENSG00000214488  |       | 29667.8 | 0 |    |           |           |  |                                                              |
| 31469 | ENSG00000220401  |       | 29683.4 | 0 |    |           |           |  |                                                              |

|       |                 |          |       |   |    |           |           |  |                                                     |
|-------|-----------------|----------|-------|---|----|-----------|-----------|--|-----------------------------------------------------|
| 31493 | ENSG00000271952 |          | 29699 | 0 |    |           |           |  |                                                     |
| 31494 | ENSG00000271958 |          | 29699 | 0 |    |           |           |  |                                                     |
| 31508 | ENSG00000247213 |          | 29711 | 0 |    |           |           |  |                                                     |
| 31520 | ENSG00000236886 |          | 29724 | 0 |    |           |           |  |                                                     |
| 31538 | ENSG00000234683 |          | 29726 | 0 |    |           |           |  |                                                     |
| 31545 | ENSG00000229919 |          | 29745 | 0 |    |           |           |  |                                                     |
| 31550 | ENSG00000287381 |          | 29748 | 0 |    |           |           |  |                                                     |
| 31555 | ENSG00000268108 |          | 29754 | 0 |    |           |           |  |                                                     |
| 31576 | ENSG00000183103 | LYPD4    | 29778 | 0 | 19 | 42341148  | 42348760  |  | LY6PLAUR domain containing 4                        |
| 31578 | ENSG00000295843 |          | 29778 | 0 |    |           |           |  |                                                     |
| 31620 | ENSG00000255389 |          | 29814 | 0 |    |           |           |  |                                                     |
| 31631 | ENSG00000252699 |          | 29820 | 0 |    |           |           |  |                                                     |
| 31639 | ENSG00000252699 |          | 29827 | 0 | 1  | 153970517 | 153970627 |  | Small nuclear RNA U3                                |
| 31648 | ENSG00000224506 |          | 29837 | 0 |    |           |           |  |                                                     |
| 31654 | ENSG00000132513 | POM121C  | 29841 | 0 | 7  | 75046096  | 75115548  |  | POM121 transmembrane nucleoporin C                  |
| 31655 | ENSG00000259848 |          | 29841 | 0 |    |           |           |  |                                                     |
| 31674 | ENSG00000227517 |          | 29862 | 0 |    |           |           |  |                                                     |
| 31675 | ENSG00000269178 |          | 29862 | 0 |    |           |           |  |                                                     |
| 31699 | ENSG00000223751 |          | 29890 | 0 |    |           |           |  |                                                     |
| 31703 | ENSG00000254012 |          | 29892 | 0 |    |           |           |  |                                                     |
| 31746 | ENSG00000237466 |          | 29903 | 0 | 9  | 97934777  | 97934680  |  | Small nuclear RNA U13                               |
| 31738 | ENSG00000260737 |          | 29918 | 0 |    |           |           |  |                                                     |
| 31740 | ENSG00000237186 |          | 29924 | 0 |    |           |           |  |                                                     |
| 31743 | ENSG00000240379 |          | 29931 | 0 |    |           |           |  |                                                     |
| 31761 | ENSG00000250076 |          | 29949 | 0 |    |           |           |  |                                                     |
| 31775 | ENSG00000264988 |          | 29989 | 0 |    |           |           |  |                                                     |
| 31786 | ENSG00000225025 |          | 29976 | 0 |    |           |           |  |                                                     |
| 31848 | ENSG00000232982 |          | 30042 | 0 |    |           |           |  |                                                     |
| 31884 | ENSG00000231173 |          | 30055 | 0 |    |           |           |  |                                                     |
| 31887 | ENSG00000230377 |          | 30072 | 0 |    |           |           |  |                                                     |
| 31895 | ENSG00000234921 |          | 30089 | 0 |    |           |           |  |                                                     |
| 31897 | ENSG00000218472 |          | 30090 | 0 |    |           |           |  |                                                     |
| 31908 | ENSG00000230131 |          | 30097 | 0 |    |           |           |  |                                                     |
| 31917 | ENSG00000271880 |          | 30107 | 0 |    |           |           |  |                                                     |
| 31926 | ENSG00000248187 |          | 30113 | 0 |    |           |           |  |                                                     |
| 31938 | ENSG00000231513 |          | 30126 | 0 |    |           |           |  |                                                     |
| 31950 | ENSG00000267976 |          | 30134 | 0 |    |           |           |  |                                                     |
| 31971 | ENSG00000121388 |          | 30164 | 0 |    |           |           |  |                                                     |
| 31978 | ENSG00000230529 |          | 30188 | 0 |    |           |           |  |                                                     |
| 31985 | ENSG00000235559 |          | 30175 | 0 |    |           |           |  |                                                     |
| 31990 | ENSG00000269761 |          | 30180 | 0 |    |           |           |  |                                                     |
| 32013 | ENSG00000230957 |          | 30193 | 0 |    |           |           |  |                                                     |
| 32064 | ENSG00000271480 |          | 30253 | 0 |    |           |           |  |                                                     |
| 32077 | ENSG00000262796 |          | 30270 | 0 |    |           |           |  |                                                     |
| 32083 | ENSG00000260546 |          | 30286 | 0 |    |           |           |  |                                                     |
| 32103 | ENSG00000225271 |          | 30294 | 0 |    |           |           |  |                                                     |
| 32118 | ENSG00000228167 |          | 30311 | 0 |    |           |           |  |                                                     |
| 32119 | ENSG00000241592 |          | 30311 | 0 |    |           |           |  |                                                     |
| 32121 | ENSG00000207143 |          | 30315 | 0 |    |           |           |  |                                                     |
| 32158 | ENSG00000254251 |          | 30345 | 0 |    |           |           |  |                                                     |
| 32162 | ENSG00000230295 |          | 30347 | 0 |    |           |           |  |                                                     |
| 32186 | ENSG00000240930 |          | 30369 | 0 |    |           |           |  |                                                     |
| 32215 | ENSG00000260867 |          | 30399 | 0 |    |           |           |  |                                                     |
| 32238 | ENSG00000248915 |          | 30425 | 0 |    |           |           |  |                                                     |
| 32241 | ENSG00000265770 |          | 30427 | 0 | 14 | 32911547  | 32911843  |  | RNA 7SL, cytoplasmic 660, pseudogene                |
| 32260 | ENSG00000251460 |          | 30444 | 0 |    |           |           |  |                                                     |
| 32267 | ENSG00000272218 |          | 30457 | 0 |    |           |           |  |                                                     |
| 32279 | ENSG00000265967 |          | 30468 | 0 |    |           |           |  |                                                     |
| 32302 | ENSG00000232821 |          | 30487 | 0 |    |           |           |  |                                                     |
| 32322 | ENSG00000239824 |          | 30503 | 0 |    |           |           |  |                                                     |
| 32354 | ENSG00000230388 |          | 30507 | 0 |    |           |           |  |                                                     |
| 32369 | ENSG00000242902 |          | 30540 | 0 |    |           |           |  |                                                     |
| 32390 | ENSG00000248956 |          | 30553 | 0 |    |           |           |  |                                                     |
| 32399 | ENSG00000230388 |          | 30562 | 0 |    |           |           |  |                                                     |
| 32402 | ENSG00000232256 |          | 30565 | 0 | 17 | 34216562  | 34216808  |  | RNA 7SL, small nuclear pseudogene 274               |
| 32449 | ENSG00000243648 |          | 30615 | 0 |    |           |           |  |                                                     |
| 32463 | ENSG00000230296 |          | 30629 | 0 |    |           |           |  |                                                     |
| 32482 | ENSG00000240163 |          | 30661 | 0 |    |           |           |  |                                                     |
| 32494 | ENSG00000231385 |          | 30678 | 0 |    |           |           |  |                                                     |
| 32501 | ENSG00000234735 |          | 30683 | 0 |    |           |           |  |                                                     |
| 32531 | ENSG00000250237 |          | 30714 | 0 |    |           |           |  |                                                     |
| 32535 | ENSG00000258301 |          | 30718 | 0 |    |           |           |  |                                                     |
| 32550 | ENSG00000248183 |          | 30736 | 0 |    |           |           |  |                                                     |
| 32568 | ENSG00000259954 |          | 30754 | 0 |    |           |           |  |                                                     |
| 32578 | ENSG00000232862 |          | 30759 | 0 |    |           |           |  |                                                     |
| 32607 | ENSG00000230328 |          | 30783 | 0 |    |           |           |  |                                                     |
| 32629 | ENSG00000232346 |          | 30816 | 0 |    |           |           |  |                                                     |
| 32638 | ENSG00000257219 |          | 30821 | 0 |    |           |           |  |                                                     |
| 32671 | ENSG00000231399 |          | 30844 | 0 |    |           |           |  |                                                     |
| 32701 | ENSG00000208153 |          | 30871 | 0 |    |           |           |  |                                                     |
| 32723 | ENSG00000224773 |          | 30889 | 0 |    |           |           |  |                                                     |
| 32729 | ENSG00000248939 |          | 30901 | 0 |    |           |           |  |                                                     |
| 32733 | ENSG00000237870 |          | 30910 | 0 |    |           |           |  |                                                     |
| 32769 | ENSG00000234371 |          | 30939 | 0 |    |           |           |  |                                                     |
| 32818 | ENSG00000194768 | C17orf50 | 30969 | 0 | 17 | 34087916  | 34092098  |  | chromosome 17 open reading frame 50                 |
| 32822 | ENSG00000205176 |          | 30991 | 0 |    |           |           |  |                                                     |
| 32823 | ENSG00000205281 | GOLGA8L4 | 30993 | 0 | 15 | 82635130  | 82641706  |  | golgn A6 family-like 10                             |
| 32828 | ENSG00000272396 |          | 30999 | 0 |    |           |           |  |                                                     |
| 32833 | ENSG00000240778 |          | 31000 | 0 |    |           |           |  |                                                     |
| 32848 | ENSG00000258178 |          | 31016 | 0 |    |           |           |  |                                                     |
| 32850 | ENSG00000243406 |          | 31021 | 0 |    |           |           |  |                                                     |
| 32877 | ENSG00000291786 |          | 31045 | 0 |    |           |           |  |                                                     |
| 32886 | ENSG00000260300 |          | 31055 | 0 |    |           |           |  |                                                     |
| 32894 | ENSG00000253877 |          | 31061 | 0 |    |           |           |  |                                                     |
| 32900 | ENSG00000215104 |          | 31097 | 0 | X  | 79528830  | 79559699  |  | charged multivesicular body protein 1B2, pseudogene |
| 32932 | ENSG00000178193 |          | 31099 | 0 |    |           |           |  |                                                     |
| 32935 | ENSG00000234996 |          | 31099 | 0 |    |           |           |  |                                                     |
| 32943 | ENSG00000251764 |          | 31113 | 0 |    |           |           |  |                                                     |
| 32958 | ENSG00000223960 |          | 31127 | 0 |    |           |           |  |                                                     |
| 32963 | ENSG00000271711 |          | 31136 | 0 |    |           |           |  |                                                     |
| 32981 | ENSG00000175944 | TMEM185A | 31125 | 0 | X  | 148078216 | 14813568  |  | transmembrane protein 185A                          |
| 32989 | ENSG00000260017 |          | 31162 | 0 |    |           |           |  |                                                     |
| 33006 | ENSG00000254938 |          | 31174 | 0 |    |           |           |  |                                                     |
| 33014 | ENSG00000208138 |          | 31182 | 0 |    |           |           |  |                                                     |
| 33016 | ENSG00000272247 |          | 31182 | 0 |    |           |           |  |                                                     |
| 33032 | ENSG00000248986 |          | 31197 | 0 |    |           |           |  |                                                     |
| 33047 | ENSG00000232155 |          | 31204 | 0 |    |           |           |  |                                                     |
| 33060 | ENSG00000101888 |          | 31222 | 0 |    |           |           |  |                                                     |
| 33062 | ENSG00000208198 |          | 31222 | 0 |    |           |           |  |                                                     |
| 33067 | ENSG00000252378 |          | 31254 | 0 |    |           |           |  |                                                     |
| 33112 | ENSG00000178755 |          | 31270 | 0 |    |           |           |  |                                                     |
| 33114 | ENSG00000253121 |          | 31273 | 0 |    |           |           |  |                                                     |
| 33117 | ENSG00000208418 |          | 31274 | 0 |    |           |           |  |                                                     |
| 33137 | ENSG00000230284 |          | 31297 | 0 |    |           |           |  |                                                     |
| 33139 | ENSG00000257285 |          | 31297 | 0 |    |           |           |  |                                                     |
| 33148 | ENSG00000254461 |          | 31301 | 0 |    |           |           |  |                                                     |
| 33148 | ENSG00000225043 |          | 31301 | 0 | 12 | 98918254  | 98918535  |  | RNA 7SL, cytoplasmic 179, pseudogene                |
| 33165 | ENSG00000272057 |          | 31320 | 0 |    |           |           |  |                                                     |
| 33193 | ENSG00000208433 |          | 31344 | 0 |    |           |           |  |                                                     |
| 33196 | ENSG00000272277 |          | 31347 | 0 |    |           |           |  |                                                     |
| 33293 | ENSG00000263586 |          | 31401 | 0 |    |           |           |  |                                                     |
| 33278 | ENSG00000208149 |          | 31417 | 0 |    |           |           |  |                                                     |
| 33297 | ENSG00000249508 |          | 31438 | 0 |    |           |           |  |                                                     |
| 33302 | ENSG00000223537 |          | 31444 | 0 |    |           |           |  |                                                     |
| 33304 | ENSG00000266544 |          | 31460 | 0 |    |           |           |  |                                                     |
| 33319 | ENSG00000208293 |          | 31456 | 0 |    |           |           |  |                                                     |
| 33322 | ENSG00000203652 |          | 31458 | 0 |    |           |           |  |                                                     |
| 33325 | ENSG00000272003 |          | 31460 | 0 |    |           |           |  |                                                     |
| 33333 | ENSG00000244756 |          | 31465 | 0 |    |           |           |  |                                                     |
| 33338 | ENSG00000248602 |          | 31467 | 0 |    |           |           |  |                                                     |
| 33338 | ENSG00000208189 |          | 31468 | 0 |    |           |           |  |                                                     |
| 33343 | ENSG00000230930 |          | 31476 | 0 |    |           |           |  |                                                     |
| 33359 | ENSG00000254502 |          | 31493 | 0 |    |           |           |  |                                                     |
| 33361 | ENSG00000237739 |          | 31494 | 0 |    |           |           |  |                                                     |
| 33364 | ENSG00000202251 |          | 31502 | 0 |    |           |           |  |                                                     |
| 33371 | ENSG00000234459 |          | 31513 | 0 |    |           |           |  |                                                     |
| 33373 | ENSG00000208918 |          | 31519 | 0 |    |           |           |  |                                                     |
| 33380 | ENSG00000255210 |          | 31516 | 0 |    |           |           |  |                                                     |
| 33393 | ENSG00000230234 |          | 31532 | 0 |    |           |           |  |                                                     |
| 33396 | ENSG00000255686 |          | 31535 | 0 |    |           |           |  |                                                     |
| 33406 | ENSG00000210221 |          | 31545 | 0 |    |           |           |  |                                                     |
| 33433 | ENSG00000260304 |          | 31571 | 0 |    |           |           |  |                                                     |
| 33437 | ENSG00000208911 |          | 31573 | 0 |    |           |           |  |                                                     |
| 33445 | ENSG00000208737 |          | 31591 | 0 |    |           |           |  |                                                     |
| 33463 | ENSG00000230454 |          | 31618 | 0 |    |           |           |  |                                                     |
| 33477 | ENSG00000268835 |          | 31630 | 0 |    |           |           |  |                                                     |
| 33483 | ENSG00000251120 |          | 31636 | 0 |    |           |           |  |                                                     |
| 33492 | ENSG00000208062 |          | 31644 | 0 |    |           |           |  |                                                     |
| 33503 | ENSG00000236085 |          | 31651 | 0 |    |           |           |  |                                                     |
| 33507 | ENSG00000255353 |          | 31657 | 0 |    |           |           |  |                                                     |
| 33508 | ENSG00000273361 |          | 31657 | 0 |    |           |           |  |                                                     |

|       |                 |        |       |   |    |           |           |  |                                                          |
|-------|-----------------|--------|-------|---|----|-----------|-----------|--|----------------------------------------------------------|
| 33510 | ENSG00000249038 |        | 31659 | 0 |    |           |           |  |                                                          |
| 33511 | ENSG00000207205 |        | 31664 | 0 |    |           |           |  |                                                          |
| 33518 | ENSG00000213875 |        | 31664 | 0 |    |           |           |  |                                                          |
| 33520 | ENSG00000223673 |        | 31670 | 0 |    |           |           |  |                                                          |
| 33527 | ENSG00000209749 |        | 31678 | 0 |    |           |           |  |                                                          |
| 33528 | ENSG00000201958 |        | 31678 | 0 |    |           |           |  |                                                          |
| 33547 | ENSG00000175911 |        | 31688 | 0 | 17 | 78977136  | 78978932  |  | Uncharacterized protein                                  |
| 33548 | ENSG00000246731 |        | 31689 | 0 |    |           |           |  |                                                          |
| 33561 | ENSG00000255825 |        | 31715 | 0 |    |           |           |  |                                                          |
| 33563 | ENSG00000255836 |        | 31720 | 0 |    |           |           |  |                                                          |
| 33564 | ENSG00000201292 |        | 31721 | 0 |    |           |           |  |                                                          |
| 33566 | ENSG00000208388 |        | 31726 | 0 |    |           |           |  |                                                          |
| 33580 | ENSG00000177340 |        | 31738 | 0 |    |           |           |  |                                                          |
| 33596 | ENSG00000208307 |        | 31755 | 0 |    |           |           |  |                                                          |
| 33611 | ENSG00000205377 |        | 31771 | 0 |    |           |           |  |                                                          |
| 33613 | ENSG00000208762 |        | 31773 | 0 |    |           |           |  |                                                          |
| 33616 | ENSG00000204337 |        | 31780 | 0 |    |           |           |  |                                                          |
| 33636 | ENSG00000204103 |        | 31797 | 0 |    |           |           |  |                                                          |
| 33637 | ENSG00000205350 |        | 31798 | 0 |    |           |           |  |                                                          |
| 33638 | ENSG00000205208 |        | 31798 | 0 |    |           |           |  |                                                          |
| 33642 | ENSG00000213205 |        | 31800 | 0 |    |           |           |  |                                                          |
| 33653 | ENSG00000204845 |        | 31810 | 0 |    |           |           |  |                                                          |
| 33662 | ENSG00000208327 |        | 31820 | 0 |    |           |           |  |                                                          |
| 33667 | ENSG00000202348 |        | 31831 | 0 |    |           |           |  |                                                          |
| 33671 | ENSG00000204898 |        | 31835 | 0 |    |           |           |  |                                                          |
| 33675 | ENSG00000202093 |        | 31838 | 0 |    |           |           |  |                                                          |
| 33696 | ENSG00000202028 |        | 31857 | 0 |    |           |           |  |                                                          |
| 33700 | ENSG00000207212 |        | 31859 | 0 |    |           |           |  |                                                          |
| 33712 | ENSG00000208215 |        | 31874 | 0 |    |           |           |  |                                                          |
| 33718 | ENSG00000205288 |        | 31878 | 0 |    |           |           |  |                                                          |
| 33736 | ENSG00000204070 |        | 31888 | 0 |    |           |           |  |                                                          |
| 33752 | ENSG00000208145 |        | 31917 | 0 |    |           |           |  |                                                          |
| 33768 | ENSG00000205158 |        | 31918 | 0 |    |           |           |  |                                                          |
| 33761 | ENSG00000207199 |        | 31924 | 0 |    |           |           |  |                                                          |
| 33764 | ENSG00000203653 |        | 31926 | 0 |    |           |           |  |                                                          |
| 33768 | ENSG00000212007 |        | 31927 | 0 |    |           |           |  |                                                          |
| 33770 | ENSG00000203604 |        | 31931 | 0 |    |           |           |  |                                                          |
| 33771 | ENSG00000207293 |        | 31934 | 0 |    |           |           |  |                                                          |
| 33774 | ENSG00000201448 |        | 31938 | 0 |    |           |           |  |                                                          |
| 33780 | ENSG00000205208 |        | 31942 | 0 |    |           |           |  |                                                          |
| 33800 | ENSG00000207038 |        | 31957 | 0 |    |           |           |  |                                                          |
| 33804 | ENSG00000205289 |        | 31959 | 0 |    |           |           |  |                                                          |
| 33810 | ENSG00000208438 |        | 31963 | 0 | 6  | 186307330 | 18630925  |  | stress responsive DNA/IB4 interacting membrane protein 1 |
| 33815 | ENSG00000202142 |        | 31967 | 0 |    |           |           |  |                                                          |
| 33821 | ENSG00000204478 |        | 31973 | 0 |    |           |           |  |                                                          |
| 33822 | ENSG00000207218 |        | 31976 | 0 |    |           |           |  |                                                          |
| 33823 | ENSG00000203286 |        | 31978 | 0 |    |           |           |  |                                                          |
| 33825 | ENSG00000203693 |        | 31982 | 0 |    |           |           |  |                                                          |
| 33827 | ENSG00000204155 |        | 31986 | 0 |    |           |           |  |                                                          |
| 33849 | ENSG00000203762 |        | 32007 | 0 |    |           |           |  |                                                          |
| 33853 | ENSG00000208974 |        | 32011 | 0 |    |           |           |  |                                                          |
| 33857 | ENSG00000217204 |        | 32018 | 0 |    |           |           |  |                                                          |
| 33868 | ENSG00000207178 |        | 32033 | 0 |    |           |           |  |                                                          |
| 33871 | ENSG00000203467 |        | 32035 | 0 |    |           |           |  |                                                          |
| 33877 | ENSG00000208638 |        | 32040 | 0 |    |           |           |  |                                                          |
| 33911 | ENSG00000205426 |        | 32084 | 0 |    |           |           |  |                                                          |
| 33923 | ENSG00000208143 |        | 32078 | 0 |    |           |           |  |                                                          |
| 33944 | ENSG00000205117 |        | 32106 | 0 |    |           |           |  |                                                          |
| 33953 | ENSG00000204348 |        | 32108 | 0 |    |           |           |  |                                                          |
| 33960 | ENSG00000205148 |        | 32118 | 0 |    |           |           |  |                                                          |
| 33978 | ENSG00000205918 |        | 32140 | 0 |    |           |           |  |                                                          |
| 33980 | ENSG00000208096 |        | 32142 | 0 |    |           |           |  |                                                          |
| 33990 | ENSG00000207130 |        | 32151 | 0 |    |           |           |  |                                                          |
| 33993 | ENSG00000204874 |        | 32152 | 0 |    |           |           |  |                                                          |
| 33999 | ENSG00000201492 |        | 32156 | 0 |    |           |           |  |                                                          |
| 34007 | ENSG00000205201 |        | 32156 | 0 |    |           |           |  |                                                          |
| 34010 | ENSG00000204280 |        | 32170 | 0 |    |           |           |  |                                                          |
| 34012 | ENSG00000205806 |        | 32174 | 0 |    |           |           |  |                                                          |
| 34028 | ENSG00000202720 |        | 32208 | 0 |    |           |           |  |                                                          |
| 34050 | ENSG00000208836 |        | 32224 | 0 |    |           |           |  |                                                          |
| 34051 | ENSG00000207514 |        | 32224 | 0 |    |           |           |  |                                                          |
| 34058 | ENSG00000204278 |        | 32233 | 0 |    |           |           |  |                                                          |
| 34068 | ENSG00000204838 |        | 32239 | 0 |    |           |           |  |                                                          |
| 34068 | ENSG00000208323 |        | 32241 | 0 |    |           |           |  |                                                          |
| 34068 | ENSG00000208163 |        | 32242 | 0 |    |           |           |  |                                                          |
| 34068 | ENSG00000208363 |        | 32257 | 0 |    |           |           |  |                                                          |
| 34098 | ENSG00000208356 |        | 32286 | 0 |    |           |           |  |                                                          |
| 34105 | ENSG00000201158 |        | 32271 | 0 |    |           |           |  |                                                          |
| 34112 | ENSG00000203592 |        | 32277 | 0 |    |           |           |  |                                                          |
| 34128 | ENSG00000208962 |        | 32300 | 0 |    |           |           |  |                                                          |
| 34158 | ENSG00000203751 |        | 32324 | 0 |    |           |           |  |                                                          |
| 34158 | ENSG00000204790 |        | 32327 | 0 |    |           |           |  |                                                          |
| 34159 | ENSG00000202767 |        | 32328 | 0 |    |           |           |  |                                                          |
| 34163 | ENSG00000201209 |        | 32333 | 0 | 10 | 4816966   | 48175810  |  | glutamate dehydrogenase 1 pseudogene 6                   |
| 34164 | ENSG00000204160 |        | 32333 | 0 |    |           |           |  |                                                          |
| 34167 | ENSG00000147402 |        | 32337 | 0 | X  | 151806637 | 151825999 |  | gamma-aminobutyric acid (GABA) A receptor, beta          |
| 34170 | ENSG00000201088 |        | 32342 | 0 |    |           |           |  |                                                          |
| 34174 | ENSG00000207741 |        | 32346 | 0 |    |           |           |  |                                                          |
| 34181 | ENSG00000203655 |        | 32355 | 0 |    |           |           |  |                                                          |
| 34182 | ENSG00000208023 |        | 32359 | 0 |    |           |           |  |                                                          |
| 34183 | ENSG00000204891 |        | 32368 | 0 | 14 | 104177807 | 104179148 |  | Uncharacterized protein; cDNA FLJ3335                    |
| 34197 | ENSG00000204599 |        | 32374 | 0 |    |           |           |  |                                                          |
| 34203 | ENSG00000204762 |        | 32378 | 0 |    |           |           |  |                                                          |
| 34209 | ENSG00000202238 |        | 32388 | 0 |    |           |           |  |                                                          |
| 34228 | ENSG00000197701 |        | 32401 | 0 | 4  | 53179     | 68099     |  | zinc finger protein 595                                  |
| 34234 | ENSG00000208730 |        | 32407 | 0 |    |           |           |  |                                                          |
| 34238 | ENSG00000208095 |        | 32415 | 0 |    |           |           |  |                                                          |
| 34242 | ENSG00000207093 |        | 32415 | 0 |    |           |           |  |                                                          |
| 34249 | ENSG00000208206 |        | 32421 | 0 |    |           |           |  |                                                          |
| 34298 | ENSG00000210223 |        | 32468 | 0 |    |           |           |  |                                                          |
| 34304 | ENSG00000204469 |        | 32473 | 0 |    |           |           |  |                                                          |
| 34306 | ENSG00000203858 |        | 32480 | 0 |    |           |           |  |                                                          |
| 34313 | ENSG00000206063 |        | 32482 | 0 |    |           |           |  |                                                          |
| 34314 | ENSG00000207284 |        | 32483 | 0 |    |           |           |  |                                                          |
| 34319 | ENSG00000208646 |        | 32490 | 0 |    |           |           |  |                                                          |
| 34330 | ENSG00000207030 |        | 32505 | 0 |    |           |           |  |                                                          |
| 34337 | ENSG00000208364 |        | 32513 | 0 | 5  | 122408477 | 122408773 |  | RNA, 7SL, cytoplasmic 711, pseudogene                    |
| 34350 | ENSG00000205124 |        | 32528 | 0 |    |           |           |  |                                                          |
| 34387 | ENSG00000203209 |        | 32562 | 0 |    |           |           |  |                                                          |
| 34415 | ENSG00000208302 |        | 32568 | 0 | 4  | 18711913  | 187112626 |  | Uncharacterized protein                                  |
| 34439 | ENSG00000203495 |        | 32619 | 0 |    |           |           |  |                                                          |
| 34443 | ENSG00000203032 |        | 32626 | 0 |    |           |           |  |                                                          |
| 34452 | ENSG00000208703 |        | 32632 | 0 |    |           |           |  |                                                          |
| 34455 | ENSG00000208343 |        | 32638 | 0 |    |           |           |  |                                                          |
| 34457 | ENSG00000202778 |        | 32639 | 0 |    |           |           |  |                                                          |
| 34504 | ENSG00000208137 |        | 32679 | 0 |    |           |           |  |                                                          |
| 34518 | ENSG00000205789 |        | 32699 | 0 | 14 | 101382173 | 101382230 |  | Small nuclear RNA SNORD112                               |
| 34542 | ENSG00000208028 |        | 32721 | 0 |    |           |           |  |                                                          |
| 34557 | ENSG00000208048 |        | 32738 | 0 |    |           |           |  |                                                          |
| 34568 | ENSG00000203051 |        | 32739 | 0 |    |           |           |  |                                                          |
| 34558 | ENSG00000208089 |        | 32739 | 0 |    |           |           |  |                                                          |
| 34572 | ENSG00000208028 |        | 32752 | 0 |    |           |           |  |                                                          |
| 34573 | ENSG00000207284 |        | 32752 | 0 |    |           |           |  |                                                          |
| 34575 | ENSG00000207401 |        | 32754 | 0 |    |           |           |  |                                                          |
| 34588 | ENSG00000205383 |        | 32760 | 0 |    |           |           |  |                                                          |
| 34592 | ENSG00000204733 |        | 32771 | 0 |    |           |           |  |                                                          |
| 34595 | ENSG00000205654 |        | 32772 | 0 |    |           |           |  |                                                          |
| 34601 | ENSG00000203416 |        | 32776 | 0 |    |           |           |  |                                                          |
| 34607 | ENSG0000017621  | MAGX   | 32784 | 0 | X  | 49019061  | 49024822  |  | MAGI family member, X-linked                             |
| 34610 | ENSG00000204292 |        | 32787 | 0 |    |           |           |  |                                                          |
| 34612 | ENSG00000207193 |        | 32787 | 0 |    |           |           |  |                                                          |
| 34618 | ENSG00000207284 |        | 32791 | 0 |    |           |           |  |                                                          |
| 34640 | ENSG00000207248 |        | 32813 | 0 |    |           |           |  |                                                          |
| 34643 | ENSG00000201584 |        | 32817 | 0 |    |           |           |  |                                                          |
| 34655 | ENSG00000207058 |        | 32829 | 0 |    |           |           |  |                                                          |
| 34672 | ENSG00000208323 |        | 32838 | 0 |    |           |           |  |                                                          |
| 34679 | ENSG00000202263 |        | 32843 | 0 |    |           |           |  |                                                          |
| 34682 | ENSG00000204842 |        | 32844 | 0 |    |           |           |  |                                                          |
| 34689 | ENSG00000208093 |        | 32850 | 0 |    |           |           |  |                                                          |
| 34716 | ENSG00000205384 |        | 32875 | 0 |    |           |           |  |                                                          |
| 34742 | ENSG00000208748 |        | 32888 | 0 |    |           |           |  |                                                          |
| 34745 | ENSG00000205344 |        | 32902 | 0 |    |           |           |  |                                                          |
| 34766 | ENSG00000208422 |        | 32911 | 0 |    |           |           |  |                                                          |
| 34768 | ENSG00000207045 |        | 32912 | 0 |    |           |           |  |                                                          |
| 34769 | ENSG00000203477 |        | 32923 | 0 | 1  | 1655368   | 16556038  |  | chromosome 1 open reading frame 134                      |
| 34777 | ENSG00000205133 |        | 32927 | 0 |    |           |           |  |                                                          |
| 34786 | ENSG00000163486 | SRGAP2 | 32953 | 0 | 1  | 206516200 | 206637783 |  | SLIT-ROBO Rho GTPase activating protein 2                |
| 34809 | ENSG00000208207 |        | 32952 | 0 |    |           |           |  |                                                          |
| 34810 | ENSG00000208142 |        | 32952 | 0 |    |           |           |  |                                                          |
| 34813 | ENSG00000205847 |        | 32952 | 0 |    |           |           |  |                                                          |





|       |                  |          |       |       |                      |    |          |          |                                                            |
|-------|------------------|----------|-------|-------|----------------------|----|----------|----------|------------------------------------------------------------|
| 20997 | ENSG00000207962  | MIR30C1  | 27539 | -0.01 | miRNA                | 1  | 41222956 | 41222944 | miRNA30c-1                                                 |
| 29123 | ENSG00000207928  | MIR196A3 | 42383 | -0.01 | miRNA                | 12 | 5438579  | 5438551  | miRNA196a-3                                                |
| 29138 | ENSG00000208017  | MIR140   | 27571 | -0.01 | miRNA                | 16 | 6996984  | 6996703  | miRNA140                                                   |
| 29980 | ENSG00000207646  | MIR855   | 28352 | -0.01 | miRNA                | 14 | 10151587 | 10151593 | miRNA855                                                   |
| 30048 | ENSG00000205599  | MIR146B  | 28423 | -0.01 | miRNA                | 10 | 10416620 | 10416641 | miRNA146b                                                  |
| 30075 | ENSG00000207785  | MIR242   | 28423 | -0.01 | miRNA                | 2  | 5821576  | 5821678  | miRNA242-2                                                 |
| 30111 | ENSG00000202103  | MIR1262  | 28475 | -0.01 | miRNA                | 1  | 6884520  | 6884523  | miRNA1262                                                  |
| 30774 | ENSG00000196073  | MIR26A1  | 28977 | -0.01 | miRNA                | 3  | 9801095  | 9801097  | miRNA26a-1                                                 |
| 30813 | ENSG00000206035  | MIR143   | 29070 | -0.01 | miRNA                | 5  | 2151214  | 2151214  | miRNA143                                                   |
| 31088 | ENSG00000212102  | MIR301B  | 29789 | -0.01 | miRNA                | 22 | 22007270 | 22007247 | miRNA301b                                                  |
| 32453 | ENSG00000215502  | MIR1245A | 30618 | -0.01 | miRNA                | 2  | 10152843 | 10152876 | miRNA301b                                                  |
| 32768 | ENSG00000207808  | MIR27A   | 30558 | -0.01 | miRNA                | 19 | 13947254 | 13947231 | miRNA27a                                                   |
| 33351 | ENSG00000199100  | MIR302C  | 31478 | -0.01 | miRNA                | 1  | 11559559 | 11559558 | miRNA302c                                                  |
| 33453 | ENSG00000208375  | MIR4666  | 31611 | -0.01 | miRNA                | 9  | 6007826  | 6007904  | miRNA4666                                                  |
| 34007 | ENSG00000199179  | MIR1E71  | 32158 | -0.01 | miRNA                | 12 | 62091466 | 62091750 | miRNAlet-7f                                                |
| 34062 | ENSG00000199187  | MIR4668  | 32224 | -0.01 | miRNA                | 17 | 2902540  | 2902540  | miRNA305b                                                  |
| 34103 | ENSG00000207949  | MIR214   | 32270 | -0.01 | miRNA                | 1  | 17210793 | 17210847 | miRNA214                                                   |
| 34516 | ENSG00000208017  | MIR120A  | 32065 | -0.01 | miRNA                | 21 | 2210475  | 2210256  | miRNA120a                                                  |
| 34537 | ENSG00000209041  | MIR4660  | 32718 | -0.01 | miRNA                | 11 | 6240371  | 6240390  | miRNA4660                                                  |
| 34701 | ENSG00000211578  | MIR760   | 32665 | -0.01 | miRNA                | 1  | 9431238  | 9431267  | miRNA760                                                   |
| 34821 | ENSG00000199130  | MIR365A  | 32960 | -0.01 | miRNA                | 16 | 14403142 | 14403228 | miRNA365a                                                  |
| 34887 | ENSG00000212574  | MIR661   | 33004 | -0.01 | miRNA                | 8  | 14501939 | 14501947 | miRNA661                                                   |
| 34932 | ENSG00000216566  | MIR1255  | 33664 | -0.01 | miRNA                | 6  | 2140196  | 2140285  | miRNA1255                                                  |
| 38109 | ENSG00000208458  | MIR3122  | 33247 | -0.01 | miRNA                | 1  | 21225955 | 21225107 | miRNA3122                                                  |
| 38303 | ENSG00000209029  | MIR618   | 33467 | -0.01 | miRNA                | 12 | 5712946  | 5713042  | miRNA618                                                   |
| 38620 | ENSG00000208024  | MIR198A2 | 33728 | -0.01 | miRNA                | 1  | 17211875 | 17211374 | miRNA198a-2                                                |
| 38668 | ENSG00000207899  | MIR4466  | 33781 | -0.01 | miRNA                | 6  | 15710812 | 15710885 | miRNA4466                                                  |
| 38693 | ENSG00000207959  | MIR318A  | 33808 | -0.01 | miRNA                | 19 | 1838269  | 1838269  | miRNA318a                                                  |
| 38922 | ENSG00000208475  | MIR189   | 34040 | -0.01 | miRNA                | 19 | 18497372 | 18497444 | miRNA189                                                   |
| 38938 | ENSG00000208420  | MIR3911  | 34160 | -0.01 | miRNA                | 9  | 13042966 | 13043074 | miRNA3911                                                  |
| 38953 | ENSG00000209100  | MIR100   | 34180 | -0.01 | miRNA                | 14 | 7931478  | 7931478  | miRNA100                                                   |
| 38963 | ENSG00000212277  | MIR1305  | 34757 | -0.01 | miRNA                | 4  | 18300445 | 18300531 | miRNA1305                                                  |
| 38964 | ENSG00000208240  | MIR5091  | 34761 | -0.01 | miRNA                | 4  | 1362549  | 1362561  | miRNA5091                                                  |
| 38965 | ENSG00000214111  | MIR1227  | 34769 | -0.01 | miRNA                | 19 | 2234188  | 2234188  | miRNA1227                                                  |
| 37147 | ENSG00000207571  | MIR6015  | 35260 | -0.01 | miRNA                | 12 | 54427734 | 54427829 | miRNA6015                                                  |
| 37298 | ENSG00000208435  | MIR3183  | 35417 | -0.01 | miRNA                | 20 | 3019489  | 3019543  | miRNA3183                                                  |
| 37722 | ENSG00000208581  | MIR3187  | 35508 | -0.01 | miRNA                | 11 | 4253584  | 4253584  | miRNA3187                                                  |
| 38387 | ENSG00000208498  | MIR4322  | 36569 | -0.01 | miRNA                | 19 | 1034108  | 1034161  | miRNA4322                                                  |
| 19223 | ENSG00000201820  |          | 18434 | -0.01 | misc. RNA            | 4  | 5172065  | 5172071  | Y RNA                                                      |
| 20813 | ENSG00000208651  |          | 32003 | -0.01 | misc. RNA            | 1  | 1584300  | 1584300  | Y RNA                                                      |
| 26713 | ENSG00000201918  |          | 25410 | -0.01 | misc. RNA            | 4  | 16992640 | 16992649 | RNA, Ro-associated Y4 pseudogene 17                        |
| 28988 | ENSG00000200888  |          | 27417 | -0.01 | misc. RNA            | 17 | 4314810  | 4314811  | Y RNA                                                      |
| 29064 | ENSG00000206666  |          | 28627 | -0.01 | misc. RNA            | 18 | 5442067  | 5442067  | Y RNA                                                      |
| 29623 | ENSG00000201175  |          | 28203 | -0.01 | misc. RNA            | 12 | 3157237  | 3157347  | Y RNA                                                      |
| 30196 | ENSG00000202822  |          | 28551 | -0.01 | misc. RNA            | 1  | 23623977 | 23624072 | Y RNA                                                      |
| 30353 | ENSG00000206460  |          | 28677 | -0.01 | misc. RNA            | 10 | 45517626 | 45517680 | RNA, 75S, cytoplasmic 4S, pseudogene                       |
| 30751 | ENSG00000201581  |          | 29007 | -0.01 | misc. RNA            | 10 | 6191568  | 6191563  | RNA, 75S, small nuclear pseudogene 78                      |
| 31510 | ENSG00000207292  |          | 29173 | -0.01 | misc. RNA            | 6  | 14992573 | 14992585 | Y RNA                                                      |
| 30585 | ENSG00000201102  |          | 30833 | -0.01 | misc. RNA            | 2  | 17809717 | 17809823 | Y RNA                                                      |
| 29674 | ENSG00000198683  |          | 30003 | -0.01 | misc. RNA            | 20 | 36603558 | 36603683 | RNA, 75S, small nuclear pseudogene 185                     |
| 32373 | ENSG00000199975  |          | 31874 | -0.01 | misc. RNA            | 11 | 7353427  | 7353475  | RNA, 75S, small nuclear pseudogene 243                     |
| 33889 | ENSG00000202974  |          | 32048 | -0.01 | misc. RNA            | 7  | 12916309 | 12916571 | RNA, 75S, small nuclear pseudogene 228                     |
| 34127 | ENSG00000209268  |          | 32298 | -0.01 | misc. RNA            | 14 | 10004954 | 10004954 | Y RNA                                                      |
| 34267 | ENSG00000201950  |          | 32443 | -0.01 | misc. RNA            | 5  | 78466057 | 78466158 | RNA, Ro-associated Y3 pseudogene 1                         |
| 34351 | ENSG00000208074  |          | 32530 | -0.01 | misc. RNA            | 1  | 17370986 | 17370925 | RNA, 75S, small nuclear pseudogene 160                     |
| 34420 | ENSG00000209286  |          | 32608 | -0.01 | misc. RNA            | 6  | 17509681 | 17509686 | RNA, 75S, small nuclear pseudogene 69                      |
| 34530 | ENSG00000198883  |          | 32710 | -0.01 | misc. RNA            | 11 | 16863800 | 16864134 | RNA, 75S, small nuclear pseudogene 50                      |
| 34543 | ENSG00000201364  |          | 32722 | -0.01 | misc. RNA            | 10 | 22222072 | 22222072 | RNA, 75S, small nuclear pseudogene 37                      |
| 34641 | ENSG00000209286  |          | 32793 | -0.01 | misc. RNA            | 12 | 10214667 | 10214641 | RNA, 75S, small nuclear pseudogene 295                     |
| 35108 | ENSG00000200867  |          | 33246 | -0.01 | misc. RNA            | 4  | 7118181  | 7118181  | RNA, 75S, small nuclear pseudogene 36                      |
| 35247 | ENSG00000208418  |          | 33379 | -0.01 | misc. RNA            | X  | 39645760 | 39646077 | RNA, 75S, cytoplasmic 73S, pseudogene                      |
| 35464 | ENSG00000209286  |          | 33503 | -0.01 | misc. RNA            | 1  | 1162350  | 1162350  | RNA, 75S, small nuclear pseudogene 245                     |
| 35800 | ENSG00000204384  |          | 33919 | -0.01 | misc. RNA            | 2  | 23351459 | 23351484 | RNA, 75S, cytoplasmic 35S, pseudogene                      |
| 35897 | ENSG00000202259  |          | 34038 | -0.01 | misc. RNA            | 9  | 3404994  | 3405042  | RNA, 75S, small nuclear pseudogene 114                     |
| 36116 | ENSG00000201103  |          | 34319 | -0.01 | misc. RNA            | 22 | 2130820  | 2130820  | Uncharacterized protein                                    |
| 36202 | ENSG00000207142  |          | 34319 | -0.01 | misc. RNA            | 12 | 4284852  | 4284823  | Y RNA                                                      |
| 36460 | ENSG00000202048  |          | 34565 | -0.01 | misc. RNA            | 20 | 16651296 | 16651367 | Y RNA                                                      |
| 36533 | ENSG00000204868  |          | 34628 | -0.01 | misc. RNA            | 10 | 1162350  | 1162350  | RNA, 75S, cytoplasmic 83S, pseudogene                      |
| 36572 | ENSG00000198550  |          | 34668 | -0.01 | misc. RNA            | 11 | 2393868  | 2393980  | Y RNA                                                      |
| 36758 | ENSG00000208420  |          | 34870 | -0.01 | misc. RNA            | X  | 11898842 | 11898845 | RNA, 75S, cytoplasmic 118, pseudogene                      |
| 36910 | ENSG00000201021  |          | 35084 | -0.01 | misc. RNA            | 4  | 6568314  | 6568314  | Y RNA                                                      |
| 36993 | ENSG00000207383  |          | 35112 | -0.01 | misc. RNA            | 2  | 11337061 | 11337161 | Y RNA                                                      |
| 37120 | ENSG00000204230  |          | 35241 | -0.01 | misc. RNA            | 9  | 21699313 | 21699669 | RNA, 75S, cytoplasmic 151, pseudogene                      |
| 37644 | ENSG00000206458  | FBX1     | 35241 | -0.01 | polycomb target      | 13 | 3353068  | 3353068  | F-box and leucine-rich repeat pseudogenes                  |
| 17624 | ENSG00000195834  |          | 15217 | -0.01 | processed_pseudogene | 20 | 5369115  | 5369165  | ribosomal protein L12 pseudogene 8                         |
| 18216 | ENSG00000208801  |          | 18427 | -0.01 | processed_pseudogene | 9  | 7285111  | 7283284  | ribosomal protein L21 pseudogene 8                         |
| 20370 | ENSG00000217508  | RPSA9B   | 20953 | -0.01 | processed_pseudogene | 7  | 8699528  | 8699527  | ribosomal protein SA pseudogene 15                         |
| 19831 | ENSG00000204094  |          | 19901 | -0.01 | processed_pseudogene | 3  | 4520126  | 4520126  | ribosomal protein S24 pseudogene 8                         |
| 20192 | ENSG00000201234  |          | 20179 | -0.01 | processed_pseudogene | 7  | 6588392  | 6588880  | S-phase kinase-associated protein 1 pseudogene 1           |
| 20683 | ENSG00000201528  |          | 20713 | -0.01 | processed_pseudogene | 17 | 4479048  | 4479048  | ribosomal protein S23 pseudogene 8                         |
| 21261 | ENSG00000203020  |          | 21005 | -0.01 | processed_pseudogene | X  | 7018214  | 7018343  | ribosomal protein S23 pseudogene 8                         |
| 21518 | ENSG00000211300  |          | 21208 | -0.01 | processed_pseudogene | 3  | 7526372  | 7526372  | heterogeneous nuclear ribonucleoprotein A3 pseudogene 6    |
| 21801 | ENSG00000201161  |          | 21603 | -0.01 | processed_pseudogene | 6  | 10522708 | 10522703 | Y box binding protein pseudogene 2                         |
| 22478 | ENSG00000212421  |          | 22106 | -0.01 | processed_pseudogene | 6  | 11671478 | 11671478 | chromatin homing 3 pseudogene 3                            |
| 22485 | ENSG000002030437 | PAAG4P4  | 21931 | -0.01 | processed_pseudogene | 3  | 15652340 | 15652821 | proliferation-associated 2G4 pseudogene 4                  |
| 22607 | ENSG00000206972  |          | 22630 | -0.01 | processed_pseudogene | 13 | 73614713 | 73615123 | lally acid binding protein 5 pseudogene 1                  |
| 23078 | ENSG00000209816  |          | 22827 | -0.01 | processed_pseudogene | 12 | 53519837 | 53519811 | HG1 homeobox nuclear domain family, member 1A pseudogene 1 |
| 23148 | ENSG00000202848  |          | 22457 | -0.01 | processed_pseudogene | 6  | 14991520 | 14991579 | ribosomal protein S18 pseudogene 2                         |
| 23372 | ENSG00000204541  |          | 22649 | -0.01 | processed_pseudogene | 20 | 55170727 | 55171769 | ribosomal protein S41 pseudogene 3                         |
| 23373 | ENSG00000204126  |          | 22647 | -0.01 | processed_pseudogene | 16 | 22881524 | 22881524 | ribosomal protein S41 pseudogene 3                         |
| 23805 | ENSG00000203559  |          | 22868 | -0.01 | processed_pseudogene | 11 | 67450243 | 67450259 | ribosomal protein L37 pseudogene 2                         |
| 23943 | ENSG00000204689  |          | 22843 | -0.01 | processed_pseudogene | 3  | 15019593 | 15019598 | SEI pseudogene 14                                          |
| 23762 | ENSG00000209286  |          | 22953 | -0.01 | processed_pseudogene | 6  | 83662664 | 83662664 | heterogeneous nuclear ribonucleoprotein A3 pseudogene 5    |
| 24629 | ENSG00000202694  | RHEBP2   | 23968 | -0.01 | processed_pseudogene | 10 | 47396223 | 47396223 | Ras-homolog enriched in brain pseudogene 2                 |
| 24699 | ENSG00000211025  |          | 23989 | -0.01 | processed_pseudogene | 10 | 70391226 | 70391484 | COX20 cytochrome C oxidase assembly factor pseudogene 1    |
| 25062 | ENSG00000209386  | RPL51P3  | 24031 | -0.01 | processed_pseudogene | 19 | 19014905 | 19014905 | ribosomal protein S14 pseudogene 3                         |
| 25262 | ENSG00000213860  | RPL21P28 | 24201 | -0.01 | processed_pseudogene | 7  | 20042346 | 20042399 | ribosomal protein L21 pseudogene 75                        |
| 25305 | ENSG00000213994  |          | 24237 | -0.01 | processed_pseudogene | 1  | 72740235 | 72740482 | GDP dissociation inhibitor 2 pseudogene 2                  |
| 25666 | ENSG00000204528  |          | 24403 | -0.01 | processed_pseudogene | 1  | 11521643 | 115216   |                                                            |

|       |                 |             |       |                      |                      |           |           |                                                                                              |                                                                      |
|-------|-----------------|-------------|-------|----------------------|----------------------|-----------|-----------|----------------------------------------------------------------------------------------------|----------------------------------------------------------------------|
| 34021 | ENSG00000178556 | 32187       | -0.01 | processed_pseudogene | X                    | 30635771  | 30635150  | CDC28 protein kinase regulatory subunit 1B pseudogene 6                                      |                                                                      |
| 34193 | ENSG00000154721 | 32187       | -0.01 | processed_pseudogene | 13                   | 29170730  | 29170730  | erythrocytic transferrin initiation factor 4A1 pseudogene 13                                 |                                                                      |
| 34437 | ENSG00000254013 | 32187       | -0.01 | processed_pseudogene | 8                    | 29855229  | 29854126  | mitogen-activated protein kinase kinase 1 pseudogene 1                                       |                                                                      |
| 34545 | ENSG00000244096 | 32174       | -0.01 | processed_pseudogene | 17                   | 37011567  | 37011563  | ribosomal protein S20 pseudogene 35                                                          |                                                                      |
| 34555 | ENSG00000231659 | 32171       | -0.01 | processed_pseudogene | 1                    | 2657868   | 2658339   | ribonucleotide H2, subunit C pseudogene 1                                                    |                                                                      |
| 34569 | ENSG00000227795 | 32169       | -0.01 | processed_pseudogene | 30                   | 23559330  | 23559336  | ribosomal protein S21 pseudogene 1                                                           |                                                                      |
| 34886 | ENSG00000213943 | 32847       | -0.01 | processed_pseudogene | 3                    | 12828852  | 12830170  | keratin 18 pseudogene 17                                                                     |                                                                      |
| 34724 | ENSG00000226853 | 32855       | -0.01 | processed_pseudogene | 5                    | 5482984   | 5483923   | mgf finger protein 13E, E3 ubiquitin protein ligase pseudogene 1                             |                                                                      |
| 34764 | ENSG00000266899 | 32919       | -0.01 | processed_pseudogene | 19                   | 3877989   | 3877989   | Nanos homeobox pseudogene 5                                                                  |                                                                      |
| 34776 | ENSG00000251571 | 32927       | -0.01 | processed_pseudogene | 4                    | 10445246  | 10445239  | ferritin, light polypeptide pseudogene 5                                                     |                                                                      |
| 34788 | ENSG00000221744 | 32933       | -0.01 | processed_pseudogene | 15                   | 9337938   | 9337931   | DEAD (Arg-Glu-Ala-Arg) box polypeptide 3, 4-inter pseudogene 3                               |                                                                      |
| 34851 | ENSG00000215093 | 32993       | -0.01 | processed_pseudogene | X                    | 85415288  | 85415283  | MAUS arginine-like complex, subunit E pseudogene 1                                           |                                                                      |
| 34902 | ENSG00000259022 | 33035       | -0.01 | processed_pseudogene | 14                   | 35894968  | 35894967  | erythrocytic elongation factor 1 alpha 1 pseudogene 29                                       |                                                                      |
| 34933 | ENSG00000233833 | 33059       | -0.01 | processed_pseudogene | X                    | 86011947  | 86011947  | DnaJ (Hsp40) homolog, subfamily C, member 8 pseudogene 1                                     |                                                                      |
| 34934 | ENSG00000244052 | 33067       | -0.01 | processed_pseudogene | 8                    | 10393559  | 10393543  | ribosomal protein, large P2, pseudogene 1                                                    |                                                                      |
| 34948 | ENSG00000229004 | 33080       | -0.01 | processed_pseudogene | 2                    | 88124461  | 88124462  | mitochondrially encoded ATP synthase 8 pseudogene 2                                          |                                                                      |
| 35087 | ENSG00000233278 | 33225       | -0.01 | processed_pseudogene | 9                    | 30831876  | 30832222  | erythrocytic elongation factor 1 gamma pseudogene 1                                          |                                                                      |
| 35104 | ENSG00000214498 | 33242       | -0.01 | processed_pseudogene | 12                   | 13029433  | 13029044  | ribosomal protein L13a pseudogene 20                                                         |                                                                      |
| 35164 | ENSG00000229559 | 33261       | -0.01 | processed_pseudogene | 14                   | 90570069  | 90569554  | heat shock factor binding protein 1 pseudogene 1                                             |                                                                      |
| 35190 | ENSG00000237064 | 33289       | -0.01 | processed_pseudogene | 7                    | 10569275  | 10569201  | erythrocytic translation initiation factor 3, subunit 1 pseudogene 1                         |                                                                      |
| 35290 | ENSG00000224725 | 33414       | -0.01 | processed_pseudogene | 10                   | 72149182  | 72150382  | centromeric protein 57kDa-like 1 pseudogene 1                                                |                                                                      |
| 35396 | ENSG00000214374 | 33468       | -0.01 | processed_pseudogene | 8                    | 27932953  | 27933292  | ribosomal protein, large P2, pseudogene 1                                                    |                                                                      |
| 35393 | ENSG00000231488 | 33500       | -0.01 | processed_pseudogene | 1                    | 28852830  | 28853730  | peroxiredoxin 3 pseudogene 2                                                                 |                                                                      |
| 35486 | ENSG00000253906 | 33598       | -0.01 | processed_pseudogene | 8                    | 43125341  | 43127105  | AFG3-like AWA A1Phase 2 pseudogene 1                                                         |                                                                      |
| 35521 | ENSG00000244985 | 33633       | -0.01 | processed_pseudogene | 12                   | 121354548 | 121353938 | ribosomal protein, L12 pseudogene 33                                                         |                                                                      |
| 35597 | ENSG00000232550 | 33703       | -0.01 | processed_pseudogene | 7                    | 80068780  | 80067151  | small nuclear ribonucleoprotein polypeptides B and B1 pseudogene 1                           |                                                                      |
| 35621 | ENSG00000234107 | 33731       | -0.01 | processed_pseudogene | 6                    | 17662080  | 17662080  | erythrocytic alpha globin pseudogene 1 (gene structure 34)                                   |                                                                      |
| 35732 | ENSG00000232812 | 33842       | -0.01 | processed_pseudogene | 7                    | 33212853  | 33213710  | tumor protein, transcriptionally-controlled 1 pseudogene 1                                   |                                                                      |
| 35733 | ENSG00000232812 | 33842       | -0.01 | processed_pseudogene | 7                    | 33212853  | 33213710  | tumor protein, transcriptionally-controlled 1 pseudogene 1                                   |                                                                      |
| 35810 | ENSG00000238484 | 33928       | -0.01 | processed_pseudogene | 1                    | 16134937  | 16134948  | ribonucleotide reductase M2 polypeptide pseudogene 2                                         |                                                                      |
| 35834 | ENSG00000244668 | 33952       | -0.01 | processed_pseudogene | 1                    | 21103219  | 21103627  | importin B pseudogene 1                                                                      |                                                                      |
| 35850 | ENSG00000237687 | 34047       | -0.01 | processed_pseudogene | 2                    | 14313348  | 14313348  | ribosomal protein L23 pseudogene 1                                                           |                                                                      |
| 35900 | ENSG00000237887 | 34047       | -0.01 | processed_pseudogene | 2                    | 54756450  | 54756508  | ribosomal protein L23a pseudogene 32                                                         |                                                                      |
| 35970 | ENSG00000175749 | 34055       | -0.01 | processed_pseudogene | 5                    | 10238080  | 10238735  | erythrocytic translation initiation factor 3, subunit K pseudogene 1                         |                                                                      |
| 36000 | ENSG00000245131 | 34062       | -0.01 | processed_pseudogene | 18                   | 10621818  | 10621803  | colicid-nucleon containing 88 pseudogene 1                                                   |                                                                      |
| 36013 | ENSG00000245453 | 34131       | -0.01 | processed_pseudogene | 19                   | 14599758  | 14599081  | small nuclear ribonucleoprotein polypeptide G pseudogene 15                                  |                                                                      |
| 36206 | ENSG00000263179 | 34328       | -0.01 | processed_pseudogene | 13                   | 11336510  | 11337409  | heterogeneous nuclear ribonucleoprotein C pseudogene 4                                       |                                                                      |
| 36214 | ENSG00000220749 | 34375       | -0.01 | processed_pseudogene | 21                   | 18896241  | 18896241  | basic transcription factor 4-like 4 pseudogene 1                                             |                                                                      |
| 36261 | ENSG00000220749 | 34375       | -0.01 | processed_pseudogene | 1                    | 21224289  | 21225371  | ribosomal protein L21 pseudogene 28                                                          |                                                                      |
| 36289 | ENSG00000231158 | 34404       | -0.01 | processed_pseudogene | 2                    | 15892297  | 15892271  | protein lysine phosphatase type IVA, member 1 pseudogene 1                                   |                                                                      |
| 36305 | ENSG00000235664 | 34418       | -0.01 | processed_pseudogene | 10                   | 81741087  | 81741088  | zinc and ring finger 3 pseudogene 3                                                          |                                                                      |
| 36322 | ENSG00000237417 | 34450       | -0.01 | processed_pseudogene | 10                   | 20362481  | 20362481  | nucleophosmin 1 (nucleolar phosphoprotein B23, tumour) pseudogene 40                         |                                                                      |
| 36337 | ENSG00000237417 | 34450       | -0.01 | processed_pseudogene | 10                   | 20362481  | 20362481  | nucleophosmin 1 (nucleolar phosphoprotein B23, tumour) pseudogene 40                         |                                                                      |
| 36338 | ENSG00000231162 | 34472       | -0.01 | processed_pseudogene | 6                    | 9496814   | 9496834   | X-ray repair complementing defective repair in Chinese hamster cells 8 pseudogene 1          |                                                                      |
| 36342 | ENSG00000249031 | 34474       | -0.01 | processed_pseudogene | 6                    | 28414759  | 28414584  | COX1 cytochrome c oxidase assembly homolog (yeast) pseudogene 1                              |                                                                      |
| 36492 | ENSG00000213841 | 34590       | -0.01 | processed_pseudogene | 14                   | 56010119  | 56010887  | ribosomal protein L7a pseudogene 4                                                           |                                                                      |
| 36525 | ENSG00000258773 | 34733       | -0.01 | processed_pseudogene | 12                   | 12453090  | 12453103  | solute carrier family 25 (mitochondrial carrier, phosphate carrier, member 3) pseudogene 2   |                                                                      |
| 36556 | ENSG00000211105 | 34734       | -0.01 | processed_pseudogene | 15                   | 84442642  | 84441124  | heterogeneous nuclear ribonucleoprotein A3 pseudogene 12                                     |                                                                      |
| 36611 | ENSG00000234565 | 34787       | -0.01 | processed_pseudogene | 7                    | 148751053 | 148751285 | cytochrome c oxidase subunit IV polypeptide 1 (ubiquitous) pseudogene 1                      |                                                                      |
| 36689 | ENSG00000218512 | 34786       | -0.01 | processed_pseudogene | 6                    | 23857046  | 23857046  | serine palmitoyltransferase, long chain base subunit 1 pseudogene 2                          |                                                                      |
| 36691 | ENSG00000220458 | 34809       | -0.01 | processed_pseudogene | 16                   | 68825490  | 68825490  | ferritin, light polypeptide pseudogene 14                                                    |                                                                      |
| 36856 | ENSG00000227440 | 35082       | -0.01 | processed_pseudogene | 3                    | 172546558 | 172546608 | ATP synthase, H+ transporting, mitochondrial Fo complex, subunit C1 (subunit 9) pseudogene 4 |                                                                      |
| 37056 | ENSG00000285846 | 35179       | -0.01 | processed_pseudogene | 17                   | 25409716  | 25410822  | Tu translation elongation factor, mitochondrial pseudogene 1                                 |                                                                      |
| 37075 | ENSG00000219842 | 35172       | -0.01 | processed_pseudogene | 6                    | 12947868  | 12948026  | bone morphogenetic protein receptor, type IA pseudogene 1                                    |                                                                      |
| 37102 | ENSG00000239000 | 35226       | -0.01 | processed_pseudogene | 9                    | 2883108   | 2883131   | erythrocytic elongation factor 1 alpha 1 pseudogene 41                                       |                                                                      |
| 37224 | ENSG00000217406 | 35239       | -0.01 | processed_pseudogene | 22                   | 18520889  | 18520922  | NAH heteropolymerase 1 alpha pseudogene 5, 6 pseudogene 12                                   |                                                                      |
| 37239 | ENSG00000251440 | 35258       | -0.01 | processed_pseudogene | 4                    | 13834580  | 13834710  | slathurin 1 pseudogene 2                                                                     |                                                                      |
| 37308 | ENSG00000235345 | 35275       | -0.01 | processed_pseudogene | X                    | 100110277 | 100111388 | heterogeneous nuclear ribonucleoprotein A1 pseudogene 26                                     |                                                                      |
| 37366 | ENSG00000239559 | 35281       | -0.01 | processed_pseudogene | 6                    | 60431100  | 60431100  | family with sequence similarity 133, member C, pseudogene 1                                  |                                                                      |
| 38285 | ENSG00000268171 | DYX1C1-CCP1 | 31065 | -0.01                | processed_transcript | 15        | 55647448  | 55790558                                                                                     | DYX1C1-CCP1 (readthrough NMD candidate)                              |
| 38184 | ENSG00000224912 | LINC00338   | 32359 | -0.01                | processed_transcript | 17        | 70582798  | 70582798                                                                                     | long intergenic non-coding RNA, 338                                  |
| 38446 | ENSG00000140728 | SLC22A5-AS1 | 34324 | -0.01                | processed_transcript | 18        | 25221039  | 25221039                                                                                     | small nuclear RNA (host gene 14 (nonprotein coding))                 |
| 38275 | ENSG00000250033 | SLCTA1-AS1  | 33398 | -0.01                | processed_transcript | 4         | 13897818  | 13899331                                                                                     | SLCTA1 antisense RNA 1                                               |
| 37375 | ENSG00000242811 | SLC22A5-AS1 | 35487 | -0.01                | processed_transcript | X         | 11895997  | SLC22A5 antisense RNA 1                                                                      |                                                                      |
| 10001 | ENSG00000115579 | FTF         | 12101 | -0.01                | protein_coding       | 6         | 7200456   | 7200456                                                                                      | ferritin, light polypeptide pseudogene 14                            |
| 10836 | ENSG00000115579 | FTF         | 13015 | -0.01                | protein_coding       | 4         | 15525269  | 15553319                                                                                     | fibronectin gamma chain                                              |
| 10986 | ENSG00000115579 | FTF         | 13147 | -0.01                | protein_coding       | 4         | 15548108  | 15549238                                                                                     | fibronectin beta chain                                               |
| 12008 | ENSG00000125521 | GGC         | 14803 | -0.01                | protein_coding       | 6         | 72862100  | 72862100                                                                                     | group-specific cohesin (vitamin D binding protein)                   |
| 13963 | ENSG00000138207 | RBPA        | 14788 | -0.01                | protein_coding       | 10        | 9535144   | 9535151                                                                                      | ribonin binding protein 4, plasma                                    |
| 13979 | ENSG00000130288 | APDC1       | 15233 | -0.01                | protein_coding       | 19        | 45417934  | 45422806                                                                                     | apoptodomain C1                                                      |
| 13978 | ENSG00000130288 | SPRRA1      | 15233 | -0.01                | protein_coding       | 21        | 15203293  | 15203293                                                                                     | acid phosphatase protein 3                                           |
| 13993 | ENSG00000241794 | SPRRA2      | 15440 | -0.01                | protein_coding       | 1         | 152032859 | 152033013                                                                                    | small proline-rich protein 2A                                        |
| 14331 | ENSG00000143339 | SRAA2       | 15719 | -0.01                | protein_coding       | 11        | 18260770  | 18260790                                                                                     | serum amyloid A2                                                     |
| 14897 | ENSG00000258199 | RFX         | 16618 | -0.01                | protein_coding       | 15        | 89991845  | 89991844                                                                                     | Rb family, C, cytochrome                                             |
| 14988 | ENSG00000114011 | KRT13       | 16229 | -0.01                | protein_coding       | 17        | 9957233   | 9957182                                                                                      | keratin 13                                                           |
| 15048 | ENSG00000126549 | STATH       | 16280 | -0.01                | protein_coding       | 4         | 70861847  | 70862857                                                                                     | stathmin                                                             |
| 15183 | ENSG00000156581 | HTN         | 16510 | -0.01                | protein_coding       | 4         | 5271011   | 5271011                                                                                      | hemoglobin, gamma G                                                  |
| 15352 | ENSG00000126550 | HTN1        | 16510 | -0.01                | protein_coding       | 4         | 70911619  | 70924562                                                                                     | histatin 1                                                           |
| 15579 | ENSG00000143336 | CRNN        | 16687 | -0.01                | protein_coding       | 1         | 152381719 | 15238739                                                                                     | cornulin                                                             |
| 15914 | ENSG00000110189 | IFX         | 16618 | -0.01                | protein_coding       | 11        | 8462279   | 8463387                                                                                      | herpexin                                                             |
| 16570 | ENSG00000176361 | CALML3      | 17447 | -0.01                | protein_coding       | 10        | 5569294   | 5569294                                                                                      | calmodulin-like 3                                                    |
| 16631 | ENSG00000123689 | GOS2        | 17499 | -0.01                | protein_coding       | 1         | 20984875  | 20984933                                                                                     | GUG1with2 2                                                          |
| 17226 | ENSG00000186627 | AMBP        | 17394 | -0.01                | protein_coding       | 9         | 11692467  | 11692467                                                                                     | alpha-1-microglobulin/albumin precursor                              |
| 17296 | ENSG00000187966 | FTTH        | 17322 | -0.01                | protein_coding       | 11        | 81747196  | 81749132                                                                                     | long intergenic non-coding RNA, 338                                  |
| 17714 | ENSG00000187588 | GPDI        | 18292 | -0.01                | protein_coding       | 12        | 80497602  | 80505102                                                                                     | glycerol-3-phosphate dehydrogenase 1 (soluble)                       |
| 18035 | ENSG00000203785 | SPRR2E      | 18526 | -0.01                | protein_coding       | 11        | 15368591  | 15368760                                                                                     | small proline-rich protein 2E                                        |
| 18212 | ENSG00000204544 | MRCP1       | 18921 | -0.01                | protein_coding       | 6         | 30891485  | 30891480                                                                                     | mucin 21, cell surface associated                                    |
| 18473 | ENSG00000186776 | PLINA       | 18856 | -0.01                | protein_coding       | 19        | 4502204   | 4502204                                                                                      | perlecan                                                             |
| 18606 | ENSG00000184173 | BR3         | 18921 | -0.01                | protein_coding       | 10        | 97881891  | 97881762                                                                                     | brain protein 13                                                     |
| 18606 | ENSG00000184173 | GTPM        | 18921 | -0.01                | protein_coding       | 10        | 113962694 | 113962694                                                                                    | glycerol-3-phosphate phosphatidylinositol transferase, mitochondrial |
| 18698 | ENSG00000158403 | CIR         | 19235 | -0.01                | protein_coding       | 12        | 7187813   | 7187823                                                                                      | complement component 1, r-subcomponent                               |
| 18695 | ENSG00000158874 | APDC2       | 19240 | -0.01                | protein_coding       | 1         | 161162082 | 161184241                                                                                    | apoptodomain II                                                      |
| 19101 | ENSG00000184999 | MUC1        | 19145 | -0.01                | protein_coding       | 1         | 155130302 | 155130707                                                                                    | mucin, cell surface associated                                       |
| 19102 | ENSG00000131686 | CA6         | 19145 | -0.01                | protein_coding       | 1         | 8005926   | 8005181                                                                                      | muscle anhydrase VI                                                  |
| 19416 | ENSG00000131741 | RPS29       | 19679 | -0.01                | protein_coding       | 14        | 50043390  | 50054038                                                                                     | ribosomal protein S29                                                |
| 19417 | ENSG00000131741 | RPS29       | 19679 | -0.01                | protein_coding       | 14        | 50043390  | 50054038                                                                                     | ribosomal protein S29                                                |
| 19578 | ENSG00000242832 | TG          | 19686 | -0.01                | protein_coding       | 8         | 133879203 | 13414747                                                                                     | thyroglobulin                                                        |
| 19844 | ENSG00000132693 | CRP         | 19908 | -0.01                | protein_coding       | 1         | 15962079  | 15964879                                                                                     | C-reactive protein, pentamer-related                                 |

|       |                   |           |       |       |                |    |           |           |                                                                                               |
|-------|-------------------|-----------|-------|-------|----------------|----|-----------|-----------|-----------------------------------------------------------------------------------------------|
| 22201 | ENSG0000011215    | PRR4      | 21730 | -0.01 | protein_coding | 12 | 10997559  | 11324212  | protein rich 4 (taormina)                                                                     |
| 22246 | ENSG0000019077    | VTN       | 21730 | -0.01 | protein_coding | 17 | 26991239  | 26101710  | vitronectin                                                                                   |
| 22283 | ENSG00000198176   | TFDP1     | 21765 | -0.01 | protein_coding | 13 | 11423013  | 11429578  | transcription factor Dp-1                                                                     |
| 22289 | ENSG00000185873   | TPRSS11B  | 21790 | -0.01 | protein_coding | 4  | 69092371  | 69111438  | transmembrane protease, serine 11B                                                            |
| 22296 | ENSG00000130768   | IFBC      | 21791 | -0.01 | protein_coding | 12 | 30741922  | 30840920  | importin beta                                                                                 |
| 22298 | ENSG00000137255   | TRNB      | 21792 | -0.01 | protein_coding | 12 | 23022078  | 23022078  | thrombospondin                                                                                |
| 22302 | ENSG00000196072   | BLOC1L2   | 21799 | -0.01 | protein_coding | 10 | 10203373  | 10204649  | biogenesis of lysosomal organelles complex-1, subunit 2                                       |
| 22308 | ENSG00000134551   | PRYH      | 21808 | -0.01 | protein_coding | 12 | 11061636  | 11064840  | proline-rich protein Heald1 subfamily 2                                                       |
| 22312 | ENSG00000101985   | GYPYA     | 21809 | -0.01 | protein_coding | 12 | 145050457 | 145051604 | glycoprotein A (MNS blood group)                                                              |
| 22313 | ENSG00000195996   | NFKB1     | 21809 | -0.01 | protein_coding | 14 | 59870717  | 59873955  | nuclear factor of kappa light polypeptide gene enhancer in B-cells inhibitor 1-alpha          |
| 22331 | ENSG00000145234   | SIRT7     | 21822 | -0.01 | protein_coding | 2  | 27543396  | 27549995  | sirtuin 7                                                                                     |
| 22406 | ENSG00000193495   | CDKRAP3   | 21878 | -0.01 | protein_coding | 6  | 46823589  | 46833410  | CDK5 regulatory subunit associated protein 3                                                  |
| 22417 | ENSG00000230957   | PMBP1     | 21882 | -0.01 | protein_coding | 12 | 11446311  | 11446389  | proline-rich protein BeH1 subfamily 4                                                         |
| 22442 | ENSG00000192899   | MMPKAP2   | 21901 | -0.01 | protein_coding | 1  | 20886289  | 20887628  | mitogen-activated protein kinase-activated protein kinase 2                                   |
| 22605 | ENSG00000143933   | CALM1     | 22027 | -0.01 | protein_coding | 2  | 30389807  | 30383599  | calmodulin 2 (phosphorylase kinase, delta)                                                    |
| 22670 | ENSG00000111897   | SELRINC1  | 22083 | -0.01 | protein_coding | 6  | 12714449  | 12712987  | serine incorporator 1                                                                         |
| 22696 | ENSG00000195474   | YFIC1     | 22184 | -0.01 | protein_coding | 13 | 20741609  | 207327    | gas and/or protein, beta 2, 20kDa                                                             |
| 22719 | ENSG00000161970   | RMLP26    | 22127 | -0.01 | protein_coding | 17 | 6280638   | 6286531   | nucleolar protein L26                                                                         |
| 22723 | ENSG00000114784   | EIF18     | 22137 | -0.01 | protein_coding | 3  | 40351175  | 40353915  | eukaryotic translation initiation factor 18                                                   |
| 22834 | ENSG00000195256   | NKAP3     | 22212 | -0.01 | protein_coding | 19 | 47592084  | 4901897   | N-ethylmaleimide-sensitive factor attachment protein, alpha                                   |
| 22848 | ENSG00000131050   | BRFA2     | 22223 | -0.01 | protein_coding | 7  | 31789214  | 31789214  | BPI fold containing family A, member 2                                                        |
| 22975 | ENSG00000198936   | FLRG1     | 22331 | -0.01 | protein_coding | 4  | 190891943 | 190894359 | FSHD region gene 1                                                                            |
| 22981 | ENSG00000101210   | IF2       | 22342 | -0.01 | protein_coding | 11 | 46710720  | 46711056  | translation factor 1 (ribosomal)                                                              |
| 23026 | ENSG00000126233   | SLURP1    | 22374 | -0.01 | protein_coding | 8  | 143822362 | 14382326  | secreted LY6/LAIR domain containing 1                                                         |
| 23063 | ENSG000001024103  | MFBP      | 22400 | -0.01 | protein_coding | 20 | 39314488  | 39317890  | v-maf avian musculoaponeurotic fibrosarcoma oncogene homolog B                                |
| 23097 | ENSG00000190473   | CSA       | 22426 | -0.01 | protein_coding | 8  | 31849001  | 31870458  | complement component 4A (Rhesus blood group)                                                  |
| 23103 | ENSG0000010087161 | TRAM1     | 22430 | -0.01 | protein_coding | 8  | 71445877  | 71526222  | translocation associated membrane protein 1                                                   |
| 23132 | ENSG00000112237   | CXNC      | 22448 | -0.01 | protein_coding | 6  | 99992956  | 99991689  | cyclin C                                                                                      |
| 23208 | ENSG00000104827   | CDK7      | 22458 | -0.01 | protein_coding | 6  | 59621403  | 59623548  | transcobalamin 1 (methyltetrahydrofolate synthase, R bander family)                           |
| 23230 | ENSG00000153989   | NUS1      | 22533 | -0.01 | protein_coding | 6  | 117996665 | 11803303  | nuclear underactinyl phosphohistone 1 homolog (S. cerevisiae)                                 |
| 23351 | ENSG00000170423   | KRT78     | 22627 | -0.01 | protein_coding | 12 | 53211588  | 53242876  | keratin 78                                                                                    |
| 23383 | ENSG00000192993   | DIR3B     | 22638 | -0.01 | protein_coding | 2  | 11851285  | 11851285  | DEAD (Aaa) domain basic helix-loop-helix polypeptide 18                                       |
| 23403 | ENSG00000110711   | AIP       | 22665 | -0.01 | protein_coding | 12 | 67250512  | 67258574  | aryl hydrocarbon receptor interacting protein                                                 |
| 23506 | ENSG00000170465   | KRT6C     | 22733 | -0.01 | protein_coding | 12 | 52862300  | 52867569  | keratin 6C                                                                                    |
| 23567 | ENSG00000101871   | LINC00254 | 22753 | -0.01 | protein_coding | 1  | 36531103  | 36531103  | LSM10, U17 snRNP RNA associated                                                               |
| 23576 | ENSG00000193766   | FAM122A   | 22783 | -0.01 | protein_coding | 9  | 71399649  | 71399649  | family with sequence similarity 122A                                                          |
| 23597 | ENSG00000199205   | ODAM      | 22792 | -0.01 | protein_coding | 4  | 71062213  | 71070293  | odontogenic, ameloblast associated                                                            |
| 23619 | ENSG00000199937   | CDK31F    | 22810 | -0.01 | protein_coding | 8  | 37481068  | 37481068  | cell-olig domain containing 157                                                               |
| 23628 | ENSG00000158774   | RAB5C     | 22824 | -0.01 | protein_coding | 17 | 40270994  | 40307035  | RAB5C, member RAS oncogene family                                                             |
| 23645 | ENSG00000099487   | SPG21     | 22845 | -0.01 | protein_coding | 15 | 65256382  | 65282848  | spastic paraplegia 21 (autosomal recessive, mild syndrome)                                    |
| 23653 | ENSG00000100109   | HEP101    | 22858 | -0.01 | protein_coding | 16 | 59898166  | 59899166  | hemicycline-inducible, endoplasmic reticulum stress inducible, ubiquitin-like domain member 1 |
| 23862 | ENSG00000193931   | TKT       | 22877 | -0.01 | protein_coding | 3  | 53297223  | 53297268  | transketolase                                                                                 |
| 23723 | ENSG00000169594   | CFR2      | 22926 | -0.01 | protein_coding | 14 | 92582821  | 92607375  | cleavage and polyadenylation specific factor 2, 100kDa                                        |
| 23727 | ENSG00000131312   | FLDT      | 22969 | -0.01 | protein_coding | 6  | 38962299  | 38710710  | filin-like 1                                                                                  |
| 23767 | ENSG00000190444   | FRS4      | 22988 | -0.01 | protein_coding | 8  | 62192321  | 62145221  | hypoxia inducible alpha 1 polypeptide basic helix-loop-helix transcription factor             |
| 23832 | ENSG00000198791   | CNOT7     | 23005 | -0.01 | protein_coding | 8  | 17068737  | 17104387  | CCR4/NOT transcription complex, subunit 7                                                     |
| 23884 | ENSG00000148977   | SNRPD     | 23048 | -0.01 | protein_coding | 2  | 70506949  | 70509203  | small nuclear ribonucleoprotein polypeptide G                                                 |
| 23910 | ENSG00000141107   | BNS3      | 23049 | -0.01 | protein_coding | 4  | 5000901   | 5000901   | basic helix-loop-helix family, member e4f                                                     |
| 23975 | ENSG00000136226   | GNM3      | 23123 | -0.01 | protein_coding | 7  | 23275586  | 23341727  | glycoprotein (transmembrane) nm6                                                              |
| 23978 | ENSG00000198307   | S100B     | 23126 | -0.01 | protein_coding | 21 | 48018076  | 48025121  | S100 calcium binding protein B                                                                |
| 23979 | ENSG00000161419   | LPO       | 23127 | -0.01 | protein_coding | 17 | 66299929  | 66245479  | lipopolysaccharide                                                                            |
| 23982 | ENSG00000171234   | UGT2B7    | 23127 | -0.01 | protein_coding | 4  | 69971081  | 69976715  | UDP glucuronosyltransferase 2 family, polypeptide B7                                          |
| 23986 | ENSG00000204710   | IFTB      | 23142 | -0.01 | protein_coding | 3  | 109945241 | 109945241 | Uchradactin associated 2                                                                      |
| 24008 | ENSG00000191724   | CHMP2A    | 23151 | -0.01 | protein_coding | 19 | 29067024  | 29067024  |                                                                                               |





|       |                 |          |         |       |                |    |           |           |                                                                            |
|-------|-----------------|----------|---------|-------|----------------|----|-----------|-----------|----------------------------------------------------------------------------|
| 30885 | ENSG00000130173 | CTHRC6   | 29110.9 | -0.01 | protein_coding | 19 | 11348778  | 11332619  | chromosome 19 open reading frame 80                                        |
| 30888 | ENSG00000141103 | FANCD3A  | 29110.8 | -0.01 | protein_coding | 20 | 6590244   | 6590468   | family with sequence similarity 205, member A                              |
| 30894 | ENSG00000116904 | MEF2D    | 29160.5 | -0.01 | protein_coding | 1  | 156433519 | 156470620 | myocyte enhancer factor 2D                                                 |
| 30896 | ENSG00000121022 | COX5B    | 29162.7 | -0.01 | protein_coding | 8  | 6795314   | 6796018   | COP9 signalosome subunit 5                                                 |
| 30898 | ENSG00000101628 | MNRAB    | 29201.4 | -0.01 | protein_coding | 4  | 3262669   | 3262462   | mRNA remodelling associated 5                                              |
| 30954 | ENSG00000163435 | ELF3     | 29209.5 | -0.01 | protein_coding | 3  | 20181793  | 20181968  | E74-like factor 3 (cell domain transcription factor, epithelial specific)  |
| 30965 | ENSG00000135974 | C2orf49  | 29217.5 | -0.01 | protein_coding | 2  | 10595316  | 10595568  | chromosome 2 open reading frame 49                                         |
| 30981 | ENSG00000075565 | GPR137B  | 29232   | -0.01 | protein_coding | 1  | 23638582  | 23638185  | protein-coupled receptor 137B                                              |
| 31003 | ENSG00000104244 | SRK7     | 29247.3 | -0.01 | protein_coding | 21 | 20593799  | 20593952  | G protein-coupled receptor kinase 7                                        |
| 31009 | ENSG00000098769 | IGFALS   | 29259   | -0.01 | protein_coding | 16 | 1846414   | 1846472   | carbonic dehydratase 3                                                     |
| 31059 | ENSG00000195783 | SLC34A3  | 29266.8 | -0.01 | protein_coding | 2  | 20569379  | 20569532  | insulin-like growth factor binding protein, acidic isoform                 |
| 31072 | ENSG00000174564 | ILIR3B   | 29310.1 | -0.01 | protein_coding | 3  | 13666502  | 13672927  | soluble carrier family 45, member 3                                        |
| 31101 | ENSG00000118526 | TCF21    | 29329   | -0.01 | protein_coding | 6  | 134210278 | 134216981 | interleukin 20 receptor beta                                               |
| 31114 | ENSG00000200820 | CXCR3L1  | 29338.2 | -0.01 | protein_coding | 16 | 2746360   | 2746390   | transcription factor 21                                                    |
| 31152 | ENSG00000204975 | ECSCR    | 29375.5 | -0.01 | protein_coding | 5  | 138784235 | 138842328 | chemokine (C-X-C motif) ligand 1                                           |
| 31153 | ENSG00000124343 | XG       | 29375.6 | -0.01 | protein_coding | X  | 2670091   | 2744359   | endothelial cell surface expressed chemokine and apoptosis regulator       |
| 31164 | ENSG00000119222 | TRF3     | 29389   | -0.01 | protein_coding | 3  | 18984366  | 18984508  | Xa blood group                                                             |
| 31168 | ENSG00000141578 | ZNF750   | 29392.7 | -0.01 | protein_coding | 17 | 80787311  | 80788454  | lamin protein p63                                                          |
| 31189 | ENSG00000168799 | RNASE7   | 29412.4 | -0.01 | protein_coding | 14 | 21510385  | 21512393  | zinc finger protein 750                                                    |
| 31214 | ENSG00000106028 | RNASE2   | 29432.7 | -0.01 | protein_coding | 14 | 103116488 | 103118033 | ribonuclease, RNase A family, 7                                            |
| 31243 | ENSG00000122507 | BBS9     | 29441   | -0.01 | protein_coding | 7  | 3316856   | 3316886   | endosome                                                                   |
| 31261 | ENSG00000134176 | CYP2Z2   | 29437.4 | -0.01 | protein_coding | 1  | 6035890   | 6035942   | Bardet-Biedl syndrome 9                                                    |
| 31323 | ENSG00000100001 | LQAF1    | 29440.5 | -0.01 | protein_coding | 21 | 44453066  | 44453697  | cytochrome P450, family 2, subfamily J, polypptide 2                       |
| 31386 | ENSG00000162238 | STX5     | 29603.4 | -0.01 | protein_coding | 11 | 6257438   | 6258960   | 1/2 cell nuclear RNA auxiliary factor 1                                    |
| 31402 | ENSG00000106485 | SLC12A2  | 29621.7 | -0.01 | protein_coding | 5  | 12741948  | 12752580  | syntaxin 5                                                                 |
| 31427 | ENSG00000151526 | QTRTD1   | 29645.1 | -0.01 | protein_coding | 3  | 113374680 | 113387076 | solute carrier family 12 (sodium/potassium/chloride transporter), member 2 |
| 31444 | ENSG00000121481 | RNF2     | 29681.4 | -0.01 | protein_coding | 1  | 18501446  | 18501740  | guanine diphosphate-ubiquitinase domain containing 1                       |
| 31450 | ENSG00000123843 | CARP     | 29686.3 | -0.01 | protein_coding | 1  | 207282187 | 207273338 | ring finger protein 2                                                      |
| 31465 | ENSG00000163738 | WIP3     | 29678.4 | -0.01 | protein_coding | 2  | 1313761   | 1313802   | complement component 4 binding protein, beta                               |
| 31504 | ENSG00000204120 | GYFP2    | 29708.5 | -0.01 | protein_coding | 2  | 23362009  | 23372588  | U2 small nuclear RNA auxiliary factor 21                                   |
| 31526 | ENSG00000107651 | SEC23P   | 29728.9 | -0.01 | protein_coding | 10 | 12165223  | 12170214  | GRB10 interacting GYP protein 2                                            |
| 31541 | ENSG00000100826 | MLC1     | 29747.3 | -0.01 | protein_coding | 22 | 50407820  | 50424113  | SEC23 interacting protein                                                  |
| 31552 | ENSG00000132746 | ALDH8B2  | 29751   | -0.01 | protein_coding | 11 | 67429633  | 67448871  | gap junction protein beta 5, 11-14kb                                       |
| 31553 | ENSG00000126520 | TRAF3IP1 | 29751.1 | -0.01 | protein_coding | 16 | 6032816   | 6032874   | megalencephalic leukoencephalopathy with subcortical cysts 1               |
| 31557 | ENSG00000127952 | STXYL1   | 29755.1 | -0.01 | protein_coding | 7  | 75625656  | 75627322  | aldehyde dehydrogenase 3 family, member B2                                 |
| 31563 | ENSG00000168477 | TNIB     | 29759.9 | -0.01 | protein_coding | 6  | 30026931  | 30028111  | telomeric repeat binding factor 2                                          |
| 31568 | ENSG0000015112  | TYRO3    | 29761.1 | -0.01 | protein_coding | 12 | 12191163  | 12192783  | serine/threonine tyrosine interacting like 1                               |
| 31588 | ENSG00000198944 | SOWAHA   | 29762.8 | -0.01 | protein_coding | 5  | 132149033 | 132152488 | tenascin XB                                                                |
| 31592 | ENSG00000195289 | GSGA8B   | 29789.8 | -0.01 | protein_coding | 5  | 74382198  | 74374891  | transcription factor CP2-like 1                                            |
| 31608 | ENSG0000016499  | IFITM2   | 29797.5 | -0.01 | protein_coding | 2  | 14447845  | 14448205  | transcription factor CP2-like 1                                            |
| 31607 | ENSG00000149978 | IGFBP7   | 29807.7 | -0.01 | protein_coding | 7  | 49527956  | 49533267  | second-wound cytokin receptor domain family member A                       |
| 31608 | ENSG00000186395 | KRT10    | 29807.7 | -0.01 | protein_coding | 17 | 38974369  | 38978847  | group A keratin family member A                                            |
| 31634 | ENSG00000188442 | MUC7     | 29823.3 | -0.01 | protein_coding | 6  | 8358226   | 8358778   | keratin 10                                                                 |
| 31653 | ENSG00000106491 | ATP5B    | 29849.1 | -0.01 | protein_coding | 2  | 21950338  | 21950638  |                                                                            |



Table with columns for gene ID (e.g., ENSG000002025152), gene symbol (e.g., SAPCD1), coordinates (32279 1 -0.01), transcript type (protein\_coding), RefSeq ID (e.g., NM\_018667), RefSeq description (e.g., 31737097), UniProt ID (e.g., P39228), UniProt description (e.g., MSH5-SAPCD1 readthrough (NM0 candidate)), and other identifiers. The table contains approximately 330 rows of data.





|       |                 |          |         |       |                |    |           |           |                                                                                                |
|-------|-----------------|----------|---------|-------|----------------|----|-----------|-----------|------------------------------------------------------------------------------------------------|
| 36899 | ENSG00000146197 | SCUB3B3  | 33927   | -0.01 | protein_coding | 6  | 3518290   | 3522056   | signal peptide, CUB domain, EGF-like 3                                                         |
| 36899 | ENSG00000146197 | GRAM18   | 33927   | -0.01 | protein_coding | 11 | 1233644   | 1233644   | GRAM domain containing 18                                                                      |
| 36899 | ENSG00000146197 | PLEKH7A  | 33940   | -0.01 | protein_coding | 11 | 1078942   | 1078942   | pleckstrin homology domain containing, family A member 7                                       |
| 36899 | ENSG00000146197 | NTNG1    | 33970   | -0.01 | protein_coding | 1  | 10768269  | 10802080  | netrin G1                                                                                      |
| 36899 | ENSG00000146197 | MARK3D3  | 33973   | -0.01 | protein_coding | 16 | 7660064   | 7767017   | MARVEL domain containing 3                                                                     |
| 36899 | ENSG00000146197 | PCSX1    | 33976   | -0.01 | protein_coding | 16 | 9934766   | 9934766   | 4-hydroxy-5-oxopentanoic aldolase 1                                                            |
| 36899 | ENSG00000146197 | LRR3C4C  | 33982   | -0.01 | protein_coding | 11 | 4013573   | 4148132   | leucine rich repeat containing 4C                                                              |
| 36899 | ENSG00000146197 | TMEM9A   | 33984   | -0.01 | protein_coding | 3  | 11948340  | 11918707  | transmembrane protein 90A                                                                      |
| 36899 | ENSG00000146197 | PFM1     | 33991   | -0.01 | protein_coding | 1  | 11328918  | 11328918  | protein phosphatase, Mg <sup>2+</sup> /Mn <sup>2+</sup> -dependent, 1J                         |
| 36899 | ENSG00000146197 | TAC1     | 33992   | -0.01 | protein_coding | 7  | 9738120   | 9738120   | tyrosinase, precursor                                                                          |
| 36899 | ENSG00000146197 | PFET3    | 33996   | -0.01 | protein_coding | 6  | 13612834  | 13651872  | phosphodiesterase 7B                                                                           |
| 36899 | ENSG00000146197 | TMEM39   | 33998   | -0.01 | protein_coding | 7  | 14288256  | 14288256  | transmembrane protein 139                                                                      |
| 36899 | ENSG00000146197 | ED2B     | 34015   | -0.01 | protein_coding | 19 | 40021630  | 40022494  | EP300 interacting inhibitor of differentiation 2B                                              |
| 36899 | ENSG00000146197 | TRNAU7AP | 34017   | -0.01 | protein_coding | 1  | 28879597  | 28905081  | tRNA selenocysteine 1 associated protein 1                                                     |
| 36899 | ENSG00000146197 | PI26A    | 34022   | -0.01 | protein_coding | 18 | 44389439  | 44501123  | protein inhibitor of activated STAT 2                                                          |
| 36899 | ENSG00000146197 | ASTN2    | 34029   | -0.01 | protein_coding | 9  | 118187504 | 120177348 | astrotactin 2                                                                                  |
| 36899 | ENSG00000146197 | FAM135A  | 34030   | -0.01 | protein_coding | 6  | 71122644  | 71270787  | family with sequence similarity 135, member A                                                  |
| 36899 | ENSG00000146197 | PCDH6    | 34032   | -0.01 | protein_coding | 5  | 14070731  | 140892548 | protocadherin gamma subfamily A, 6                                                             |
| 36899 | ENSG00000146197 | KALRN    | 34035   | -0.01 | protein_coding | 3  | 12378870  | 124445172 | katrin, RhoGEF kinase                                                                          |
| 36899 | ENSG00000146197 | GAN      | 34044   | -0.01 | protein_coding | 16 | 81348557  | 81424499  | gastroin                                                                                       |
| 36899 | ENSG00000146197 | ZFP76    | 34052   | -0.01 | protein_coding | 19 | 36920592  | 36920592  | ZFP19 zinc finger protein                                                                      |
| 36899 | ENSG00000146197 | MST4     | 34061   | -0.01 | protein_coding | 5  | 68892176  | 68845423  | microtubule associated serine/threonine kinase family member 4                                 |
| 36899 | ENSG00000146197 | USP42    | 34064   | -0.01 | protein_coding | 7  | 6144515   | 6201195   | ubiquitin specific peptidase 42                                                                |
| 36899 | ENSG00000146197 | NPAS3    | 34070   | -0.01 | protein_coding | 14 | 33404139  | 34273382  | neuronal PAS domain protein 3                                                                  |
| 36899 | ENSG00000146197 | TIGD4    | 34085   | -0.01 | protein_coding | 4  | 15369506  | 15370918  | legger transposable element derived 4                                                          |
| 36899 | ENSG00000146197 | NCX1     | 34089   | -0.01 | protein_coding | 16 | 5652241   | 5657047   | naïve cationic homomer 1 (Drosophila)                                                          |
| 36899 | ENSG00000146197 | HS1ST6   | 34101   | -0.01 | protein_coding | 16 | 1981484   | 1984411   | heparan sulfate (glucosamine) 3-O-sulfotransferase 6                                           |
| 36899 | ENSG00000146197 | CLUL1    | 34102   | -0.01 | protein_coding | 18 | 596888    | 603334    | clusterin-like 1 (refine)                                                                      |
| 36899 | ENSG00000146197 | PCDH17   | 34106   | -0.01 | protein_coding | 8  | 78631642  | 78748945  | interpholigand matrix protein proteoglycan 1                                                   |
| 36899 | ENSG00000146197 | ACY1     | 34120   | -0.01 | protein_coding | 3  | 5200906   | 5202313   | aminocyclase 1                                                                                 |
| 36899 | ENSG00000146197 | ZNF676   | 34124   | -0.01 | protein_coding | 19 | 22361893  | 22379753  | zinc finger protein 676                                                                        |
| 36899 | ENSG00000146197 | PCDH10   | 34125   | -0.01 | protein_coding | 18 | 10784969  | 108078483 | cocktail WAP interacting pathway inhibitor 2                                                   |
| 36899 | ENSG00000146197 | WFKKH1   | 34129   | -0.01 | protein_coding | 6  | 679239    | 684116    | WAP, follistatin/kazal, immunoglobulin, kunitz and retin domain containing 1                   |
| 36899 | ENSG00000146197 | ANKRD6   | 34132   | -0.01 | protein_coding | 6  | 90142889  | 90343553  | ankyrin repeat domain 6                                                                        |
| 36899 | ENSG00000146197 | PCDH19   | 34133   | -0.01 | protein_coding | 18 | 10784969  | 108078483 | tissue ankyrin-associated receptor 5                                                           |
| 36899 | ENSG00000146197 | PLEKH2   | 34151   | -0.01 | protein_coding | 2  | 4396412   | 43995126  | pleckstrin homology domain containing, family H (with MYTH1 domain) member 2                   |
| 36899 | ENSG00000146197 | ZDHHC1   | 34151   | -0.01 | protein_coding | 16 | 67428322  | 67440736  | zinc finger, DHHC-type containing 1                                                            |
| 36899 | ENSG00000146197 | PCDH8A   | 34163   | -0.01 | protein_coding | 16 | 6238518   | 6239138   | CD calcium dependent domain containing 8A                                                      |
| 36899 | ENSG00000146197 | HS1ST3   | 34163   | -0.01 | protein_coding | 13 | 9674305   | 97495617  | heparan sulfate 3-O-sulfotransferase 3                                                         |
| 36899 | ENSG00000146197 | GDF3     | 34164   | -0.01 | protein_coding | 12 | 7843278   | 7848372   | growth differentiation factor 3                                                                |
| 36899 | ENSG00000146197 | ANKRD18  | 34171   | -0.01 | protein_coding | 12 | 9972825   | 100078420 | ankyrin repeat and sterile alpha motif domain containing 18                                    |
| 36899 | ENSG00000146197 | NRXN3    | 34175   | -0.01 | protein_coding | 14 | 7878734   | 8030762   | neurxin 3                                                                                      |
| 36899 | ENSG00000146197 | RALG10A  | 34180   | -0.01 | protein_coding | 22 | 2973822   | 29715688  | RAS-like, family 10, member A                                                                  |
| 36899 | ENSG00000146197 | FAT3     | 34196   | -0.01 | protein_coding | 11 | 5652626   | 56529616  | FAT ligand, cadherin 3                                                                         |
| 36899 | ENSG00000146197 | NCX4     | 34197   | -0.01 | protein_coding | 16 | 51431954  | 51434918  | 15-cis-retene protein 4                                                                        |
| 36899 | ENSG00000146197 | OLFM4    | 34201   | -0.01 | protein_coding | 1  | 10228810  | 10228810  | olfactomedin 3                                                                                 |
| 36899 | ENSG00000146197 | PCO2     | 34201   | -0.01 | protein_coding | 1  | 15137500  | 15143144  | pojo transposable element with ZNF domain                                                      |
| 36899 | ENSG00000146197 | LRFM1    | 34201   | -0.01 | protein_coding | 11 | 824861    | 824861    | LIM domain only (member 1)                                                                     |
| 36899 | ENSG00000146197 | ALX4     | 34210   | -0.01 | protein_coding | 11 | 4428194   | 4431716   | ALX homeobox 4                                                                                 |
| 36899 | ENSG00000146197 | SLC33A1  | 34213   | -0.01 | protein_coding | 8  | 7057626   | 70747299  | solute carrier organic anion transporter family, member SAI1                                   |
| 36899 | ENSG00000146197 | PCDH11   | 34214   | -0.01 | protein_coding | 12 | 66710007  | 66721437  | PAM3 poly(A) specific ribonuclease subunit homolog (D. rerio)                                  |
| 36899 | ENSG00000146197 | ZNF471   | 34241   | -0.01 | protein_coding | 19 | 10701812  | 10741900  | zinc finger protein 471                                                                        |
| 36899 | ENSG00000146197 | ANKR2    | 34247   | -0.01 | protein_coding | 2  | 2941560   | 3014432   | ankyrin repeat domain containing 2                                                             |
| 36899 | ENSG00000146197 | ENTPD2   | 34249   | -0.01 | protein_coding | 2  | 13964250  | 13964250  | ectonucleoside triphosphate diphosphohydrolase 2                                               |
| 36899 | ENSG00000146197 | MD2B     | 34249   | -0.01 | protein_coding | 19 | 18685718  | 18739973  | mediator complex subunit 26                                                                    |
| 36899 | ENSG00000146197 | ZNF331   | 34250   | -0.01 | protein_coding | 19 | 5402425   | 54083523  | zinc finger protein 331                                                                        |
| 36899 | ENSG00000146197 | PCDH19   | 34251   | -0.01 | protein_coding | 18 | 45126652  | 45126652  | carcinoembryonic antigen-related cell adhesion molecule 19                                     |
| 36899 | ENSG00000146197 | SERPINE3 | 34259   | -0.01 | protein_coding | 13 | 5190909   | 5198381   | serpin peptidase inhibitor, class E (neirin, plasminogen activator inhibitor type 1), member 3 |
| 36899 | ENSG00000146197 | KERA     | 34263   | -0.01 | protein_coding | 12 | 9144268   | 9145760   | keratin                                                                                        |
| 36899 | ENSG00000146197 | KOCS5    | 34265   | -0.01 | protein_coding | 7  | 10084519  | 10084519  | potassium channel, subfamily K, member 5                                                       |
| 36899 | ENSG00000146197 | ASXL1    | 34281   | -0.01 | protein_coding | 20 | 30946155  | 31027122  | additional sex combs like 1 (Drosophila)                                                       |
| 36899 | ENSG00000146197 | SLC33A1  | 34285   | -0.01 | protein_coding | 3  | 15553813  | 15557218  | solute carrier family 33 (anion/Ca <sup>2+</sup> transporter), member 1                        |
| 36899 | ENSG00000146197 | PCDH16   | 34291   | -0.01 | protein_coding | 16 | 11370741  | 11370741  | chondrinase II (N-acetylglucosaminyl 6-C)-sulfotransferase 6                                   |
| 36899 | ENSG00000146197 | OPN3     | 34272   | -0.01 | protein_coding | 1  | 24175340  | 24184078  | opsin 3                                                                                        |
| 36899 | ENSG00000146197 | NLUR2    | 34272   | -0.01 | protein_coding | 20 | 44517264  | 44519026  | neutralized E3 ubiquitin protein ligase 2                                                      |
| 36899 | ENSG00000146197 | PCDH15   | 34276   | -0.01 | protein_coding | 12 | 13307101  | 13307101  | zinc finger protein 15                                                                         |
| 36899 | ENSG00000146197 | RCVRN    | 34275   | -0.01 | protein_coding | 17 | 979637    | 9808938   | recoffin                                                                                       |
| 36899 | ENSG00000146197 | PRMT10   | 34292   | -0.01 | protein_coding | 4  | 14858936  | 14860531  | protein arginine methyltransferase 10 (putative)                                               |
| 36899 | ENSG00000146197 | PCDH17   | 34292   | -0.01 | protein_coding | 18 | 293119    | 293119    | zinc finger protein 77                                                                         |
| 36899 | ENSG00000146197 | CALB1    | 34308   | -0.01 | protein_coding | 8  | 9107036   | 9107036   | calbindin 1, 28kDa                                                                             |
| 36899 | ENSG00000146197 | WFKKH2   | 34318   | -0.01 | protein_coding | 17 | 48912011  | 48917059  | WAP, follistatin/kazal, immunoglobulin, kunitz and retin domain containing 2                   |
| 36899 | ENSG00000146197 | COX8B    | 34319   | -0.01 | protein_coding | 2  | 2280220   | 2280220   | cytochrome, type IV, alpha 3 (oxidation state antigen)                                         |
| 36899 | ENSG00000146197 | MT3      | 34334   | -0.01 | protein_coding | 16 | 5982586   | 5982586   | metallothionein 3                                                                              |
| 36899 | ENSG00000146197 | TMEM88B  | 34337   | -0.01 | protein_coding | 1  | 1381568   | 1381687   | transmembrane protein 88B                                                                      |
| 36899 | ENSG00000146197 | PCDH10   | 34338   | -0.01 | protein_coding | 18 | 10784969  | 108078483 | interpholigand matrix protein proteoglycan 1                                                   |
| 36899 | ENSG00000146197 | PLA1     | 34342   | -0.01 | protein_coding | 8  | 9703463   | 9712383   | phospholipase, alpha domain 1                                                                  |
| 36899 | ENSG00000146197 | RAB38    | 34343   | -0.01 | protein_coding | 22 | 23487513  | 23488537  | RAB38, member RAS oncogene family                                                              |
| 36899 | ENSG00000146197 | PCDH12   | 34343   | -0.01 | protein_coding | 16 | 5804139   | 5804139   | S10 domain-binding protein family, member 2                                                    |
| 36899 | ENSG00000146197 | RGS17    | 34349   | -0.01 | protein_coding | 6  | 15332594  | 15342394  | regulator of G-protein signaling 17                                                            |
| 36899 | ENSG00000146197 | PIPO     | 34363   | -0.01 | protein_coding | 1  | 111888910 | 11189535  | primary cilia formation                                                                        |
| 36899 | ENSG00000146197 | PCDH13   | 34376   | -0.01 | protein_coding | 12 | 3331564   | 3331564   | F-box and nuclear-rib repeat protein 2                                                         |
| 36899 | ENSG00000146197 | HAPLN1   | 34368   | -0.01 | protein_coding | 5  | 82933624  | 83017432  | hyaluronan and proteoglycan link protein 1                                                     |
| 36899 | ENSG00000146197 | HS1ST1   | 34369   | -0.01 | protein_coding | 4  | 11394774  | 11431389  | heparan sulfate (glucosamine) 3-O-sulfotransferase 1                                           |
| 36899 | ENSG00000146197 | MAP3K15  | 34378   | -0.01 | protein_coding | 3  | 4597492   | 45978978  | rasboson, proto-oncogene tyrosine kinase                                                       |
| 36899 | ENSG00000146197 | TMEM45   | 34378   | -0.01 | protein_coding | 19 | 4281721   | 42822114  | transmembrane protein 145                                                                      |
| 36899 | ENSG00000146197 | HEC2     | 34379   | -0.01 | protein_coding | 1  | 11873174  | 11953379  | histogen-activated protein kinase kinase 15                                                    |
| 36899 | ENSG00000146197 | COX20B   | 34378   | -0.01 | protein_coding | 16 | 4472478   | 4484730   | hes family bHLH transcription factor 2                                                         |
| 36899 | ENSG00000146197 | FGF10    | 34406   | -0.01 | protein_coding | 5  | 7745846   | 7745846   | fibroblast growth factor 10                                                                    |
| 36899 | ENSG00000146197 | DRCO2    | 34407   | -0.01 | protein_coding | 2  | 9964887   | 9970305   | DEAF1 (Usp-Glu-Asp-Asp) box polyprotein 57                                                     |
| 36899 | ENSG00000146197 | DHP10    | 34418   | -0.01 | protein_coding | 12 | 11518897  | 11560329  | dicarboxylate 10 (non-functional)                                                              |
| 36899 | ENSG00000146197 | CCR10    | 34424   | -0.01 | protein_coding | 17 | 4083907   | 4083907   | chemokine (C-C motif) receptor 10                                                              |
| 36899 | ENSG00000146197 | CLCN2    | 34428   | -0.01 | protein_coding | 3  | 184003973 | 184004739 | chloride channel, voltage-sensitive 2                                                          |
| 36899 | ENSG00000146197 | KANAO2   | 34429   | -0.01 | protein_coding | 7  | 7850284   | 78445284  | KANAO2                                                                                         |
| 36899 | ENSG00000146197 | PCDH8A   | 34431   | -0.01 | protein_coding | 16 | 6238518   | 6239138   | protocadherin alpha 8                                                                          |
| 36899 | ENSG00000146197 | ANKK3    | 34462   | -0.01 | protein_coding | 7  | 4746513   | 4748379   | ankyrin repeat and sterile alpha motif domain containing 3                                     |
| 36899 | ENSG00000146197 | PTEN     | 34461</ |       |                |    |           |           |                                                                                                |

|       |                 |          |         |       |                |    |           |           |                                                                                        |
|-------|-----------------|----------|---------|-------|----------------|----|-----------|-----------|----------------------------------------------------------------------------------------|
| 36726 | ENSG0000025850  | OVOL2    | 34827.5 | -0.01 | protein_coding | 20 | 17937623  | 18039832  | ovole zinc finger 2                                                                    |
| 36728 | ENSG0000025298  | CACTY1T  | 34837.7 | -0.01 | protein_coding | 5  | 71016170  | 71016170  | CACTY1 pseudogene                                                                      |
| 36740 | ENSG00000189017 | ZNF566   | 34852.1 | -0.01 | protein_coding | 19 | 36930021  | 36930004  | zinc finger protein 566                                                                |
| 36787 | ENSG00000241563 | CORT     | 34907.6 | -0.01 | protein_coding | 1  | 10509776  | 10511659  | constitatin                                                                            |
| 36788 | ENSG00000171794 | LUCIF    | 34917.0 | -0.01 | protein_coding | 10 | 13504378  | 13504560  | undifferentiated embryonic cell transcription factor 1                                 |
| 36793 | ENSG00000252991 | WDR59    | 34970.7 | -0.01 | protein_coding | 18 | 74907465  | 74907471  | WDR repeat domain 59                                                                   |
| 36795 | ENSG0000048545  | GUCYA1A  | 34912   | -0.01 | protein_coding | 6  | 42123144  | 42147794  | guanylate cyclase activator 1A (retina)                                                |
| 36801 | ENSG00000170584 | SETMAR   | 34916.5 | -0.01 | protein_coding | 3  | 4345885   | 4350261   | SET domain and mariner transposase fusion gene                                         |
| 36802 | ENSG00000242498 | CANXB    | 34929.9 | -0.01 | protein_coding | 19 | 84488244  | 84488244  | calcium channel, voltage-dependent, gamma subunit 8                                    |
| 36822 | ENSG00000247078 | ANKRD7   | 34940.6 | -0.01 | protein_coding | 17 | 93468245  | 93470154  | Anchored protein                                                                       |
| 36826 | ENSG00000170598 | BN2C     | 34943   | -0.01 | protein_coding | 4  | 16409921  | 16670841  | Drosophila 2                                                                           |
| 36832 | ENSG00000170603 | UNK      | 34943.3 | -0.01 | protein_coding | 17 | 73789863  | 73821886  | unknown family zinc finger                                                             |
| 36838 | ENSG00000196013 | ANKRD7   | 34954.4 | -0.01 | protein_coding | 17 | 117884277 | 117884277 | ankyrin repeat domain 7                                                                |
| 36846 | ENSG00000250486 | FAM219A  | 34961.2 | -0.01 | protein_coding | 4  | 165878100 | 165880273 | family with sequence similarity 218, member A                                          |
| 36847 | ENSG00000195268 | BEK1D7   | 34961.2 | -0.01 | protein_coding | 10 | 13408464  | 13570074  | BEK domain containing 7                                                                |
| 36864 | ENSG00000186051 | TAL2     | 34979.6 | -0.01 | protein_coding | 8  | 10824738  | 108245367 | T cell acute lymphocytic leukemia 2                                                    |
| 36866 | ENSG00000125895 | TMEM78B  | 34982.7 | -0.01 | protein_coding | 20 | 1161205   | 1160909   | transmembrane protein 78B                                                              |
| 36873 | ENSG00000140564 | TOM7     | 34989.2 | -0.01 | protein_coding | 5  | 18062964  | 180629203 | lysosomal membrane protein 7                                                           |
| 36878 | ENSG00000186878 | SCN8A    | 34990   | -0.01 | protein_coding | 12 | 51984050  | 52206648  | sodium channel, voltage gated, type VIII, alpha subunit                                |
| 36881 | ENSG00000163914 | RHO      | 35002   | -0.01 | protein_coding | 3  | 126247483 | 126250112 | rhodopsin                                                                              |
| 36887 | ENSG00000252655 | TMS6B    | 35011.3 | -0.01 | protein_coding | 12 | 10221021  | 10244402  | transmembrane protein 52B                                                              |
| 36889 | ENSG0000005156  | LIG3     | 35013.9 | -0.01 | protein_coding | 17 | 33307513  | 33320203  | ligase III, DNA, ATP-dependent                                                         |
| 36906 | ENSG00000184428 | TOPMT    | 35031.8 | -0.01 | protein_coding | 8  | 14438954  | 14442149  | topoisomerase (DNA), mitochondrial                                                     |
| 36908 | ENSG00000193437 | ZNF569   | 35034.7 | -0.01 | protein_coding | 19 | 37062057  | 37060177  | zinc finger protein 569                                                                |
| 36909 | ENSG00000170381 | SEMA5E   | 35035.9 | -0.01 | protein_coding | 7  | 82983222  | 83078326  | sema domain, immunoglobulin domain (Ig), short basic domain, secreted, (semaphorin) 5E |
| 36921 | ENSG00000173873 | HES3     | 35050   | -0.01 | protein_coding | 6  | 6356252   | 6359538   | hes family bHLH transcription factor 3                                                 |
| 36924 | ENSG00000118720 | FAM188A  | 35052.1 | -0.01 | protein_coding | 6  | 11507029  | 11507052  | family with sequence similarity 188, member A                                          |
| 36936 | ENSG00000170883 | TRH      | 35063.5 | -0.01 | protein_coding | 3  | 12986148  | 12986148  | thyrotropin-releasing hormone                                                          |
| 36942 | ENSG00000192243 | VDLL3    | 35069.8 | -0.01 | protein_coding | X  | 135914311 | 135938986 | vesiglike 1 (Drosophila)                                                               |
| 36945 | ENSG0000015412  | PRK38    | 35076.8 | -0.01 | protein_coding | 23 | 23338102  | 23338102  | protein kinase, cing, 38                                                               |
| 36953 | ENSG00000155574 | NDOL1    | 35081.1 | -0.01 | protein_coding | 10 | 7215071   | 7207707   | nodal growth differentiation factor                                                    |
| 36953 | ENSG00000138769 | CPK2L    | 35086.6 | -0.01 | protein_coding | 4  | 78503215  | 78555900  | cyclin-dependent kinase-like 2 (CDC-related kinase)                                    |
| 36954 | ENSG00000132028 | PCOLCE3  | 35091.3 | -0.01 | protein_coding | 15 | 14048268  | 14048268  | procollagenase 3                                                                       |
| 36959 | ENSG00000154240 | CEP112   | 35117.9 | -0.01 | protein_coding | 17 | 63631656  | 64188202  | centrosomal protein 112kDa                                                             |
| 37007 | ENSG00000114805 | PLCH1    | 35130.5 | -0.01 | protein_coding | 3  | 15509369  | 15548286  | phospholipase C, eta 1                                                                 |
| 37022 | ENSG00000102528 | HOKD3    | 35132.1 | -0.01 | protein_coding | 8  | 43071373  | 43072024  | homeobox D3                                                                            |
| 37048 | ENSG00000183900 | LYSM4    | 35172.6 | -0.01 | protein_coding | 5  | 10025902  | 100273766 | LysM putative peptidoglycan-binding domain containing 4                                |
| 37073 | ENSG00000186789 | FLVCR1   | 35185.5 | -0.01 | protein_coding | 1  | 21301587  | 213027705 | feline leukine subunit 5 subgroups C, cellular receptor 1                              |
| 37078 | ENSG00000192723 | FTFY2    | 35187.6 | -0.01 | protein_coding | 14 | 22616428  | 226129189 | cytochrome P450 monooxygenase                                                          |
| 37082 | ENSG00000134443 | GRP      | 35202.8 | -0.01 | protein_coding | 18 | 56887400  | 56889006  | glucocorticoid-releasing peptide                                                       |
| 37088 | ENSG00000243137 | PGSD     | 35207.2 | -0.01 | protein_coding | 19 | 43698854  | 43711451  | pregnancy specific beta 1-glycoprotein 4                                               |
| 37092 | ENSG00000186953 | HOKD3    | 35212.1 | -0.01 | protein_coding | 15 | 17700360  | 17700360  | homeobox D3                                                                            |
| 37095 | ENSG00000184008 | C1orf50  | 35214.1 | -0.01 | protein_coding | 1  | 43232940  | 43203988  | chromosome 1 open reading frame 50                                                     |
| 37101 | ENSG00000158321 | AUTS2    | 35225.2 | -0.01 | protein_coding | 7  | 69063905  | 70238054  | autism susceptibility candidate 2                                                      |
| 37124 | ENSG00000149786 | FTFY2    | 35226.6 | -0.01 | protein_coding | 1  | 22616428  | 226129189 | cytochrome P450 monooxygenase                                                          |
| 37125 | ENSG00000149883 | FTFY2    | 35227   | -0.01 | protein_coding | 5  | 71618184  | 716066252 | pentadactyl repeat domain 2                                                            |
| 37128 | ENSG00000172318 | B3GALT1  | 35248.8 | -0.01 | protein_coding | 2  | 16875142  | 16873305  | UDP-Gal:beta-GlcNAc beta-1,3-galactosyltransferase, polypeptide 1                      |
| 37148 | ENSG00000171551 | ECEL1    | 35254.6 | -0.01 | protein_coding | 2  | 23344507  | 23335258  | endothelin converting enzyme-like 1                                                    |
| 37143 | ENSG0000017426  | PTCH2    | 35257.4 | -0.01 | protein_coding | 12 | 45309150  | 45309152  | patched 2                                                                              |
| 37146 | ENSG00000112877 | CEP270   | 35259.8 | -0.01 | protein_coding | 5  | 612387    | 612783    | centrosomal protein 270kDa                                                             |
| 37151 | ENSG00000186587 | KCNT2    | 35261.9 | -0.01 | protein_coding | 9  | 19018409  | 19015335  | potassium channel, subfamily T, member 2                                               |
| 37151 | ENSG00000171781 | ZNF456   | 35262.9 | -0.01 | protein_coding | 5  | 178484907 | 178481190 | zinc finger protein 346                                                                |
| 37181 | ENSG00000136631 | VRS4     | 35299.4 | -0.01 | protein_coding | 1  | 15003969  | 150117005 | reticular protein sorting 45 homolog (S. cerevisiae)                                   |
| 37186 | ENSG00000300300 | CELSR3   | 35302.6 | -0.01 | protein_coding | 3  | 48073922  | 48700348  | cadherin, EGF-LAG seven-pass G-type receptor 3                                         |
| 37186 | ENSG00000181713 | C11orf82 | 35312.8 | -0.01 | protein_coding | 13 | 29489112  | 29489112  | chromosome 11 open reading frame 82                                                    |
| 37197 | ENSG00000153487 | ING1     | 35318.5 | -0.01 | protein_coding | 13 | 111358053 | 111373421 | inhibitor of growth factor, member 1                                                   |
| 37197 | ENSG00000192471 | SPRN1    | 35321.9 | -0.01 | protein_coding | X  | 57062803  | 57021970  | sporadic family, member 3                                                              |
| 37200 | ENSG00000133818 | KRSB1    | 35325.6 | -0.01 | protein_coding | 12 | 148418122 | 148418122 | KRAS-associated protein 1                                                              |
| 37230 | ENSG00000147869 | CER1     | 35350   | -0.01 | protein_coding | 8  | 14719722  | 14722715  | ceramide 1, DAN family BMP antagonist                                                  |
| 37254 | ENSG00000198477 | CEP41    | 35378.7 | -0.01 | protein_coding | 7  | 130033812 | 130082274 | centrosomal protein 41kDa                                                              |
| 37265 | ENSG00000132926 | HOKD3    | 35382.1 | -0.01 | protein_coding | 12 | 15661282  | 15662624  | homeobox D3                                                                            |
| 37270 | ENSG00000186843 | COG7     | 35384.6 | -0.01 | protein_coding | 16 | 23398814  | 23464501  | component of oligomeric golgi complex 7                                                |
| 37282 | ENSG00000243156 | MICAL3   | 35405.4 | -0.01 | protein_coding | 22 | 18271415  | 18681225  | microtubule associated monooxygenase, calponin and LIM domain containing 3             |
| 37286 | ENSG00000153944 | CEP41    | 35405.4 | -0.01 | protein_coding | 22 | 18271415  | 18681225  | microtubule associated monooxygenase, calponin and LIM domain containing 3             |
| 37295 | ENSG00000186404 | GPR85    | 35410   | -0.01 | protein_coding | 7  | 11271836  | 11272833  | G protein-coupled receptor 85                                                          |
| 37296 | ENSG00000172878 | MELTPAD  | 35413.6 | -0.01 | protein_coding | 2  | 17298480  | 17297158  | methylaluminate phosphatase type 10 (methylomonal)                                     |
| 37303 | ENSG00000186263 | KOZF1    | 35413.6 | -0.01 | protein_coding | 6  | 2717922   | 2717922   | potassium channel, subfamily V, member 2                                               |
| 37317 | ENSG00000148267 | FACX     | 35436.8 | -0.01 | protein_coding | 6  | 99718045  | 99797938  | failed axon connections homolog (Drosophila)                                           |
| 37321 | ENSG00000186266 | HYKK1    | 35439.4 | -0.01 | protein_coding | 15 | 78799905  | 78829748  | hydroxylysine kinase                                                                   |
| 37328 | ENSG00000186263 | MARPK1   | 35439.8 | -0.01 | protein_coding | 3  | 18500788  | 18500788  | mitogen-activated protein kinase kinase kinase 13                                      |
| 37345 | ENSG00000100882 | NFX1     | 35455.1 | -0.01 | protein_coding | 9  | 33205059  | 33317155  | nuclear transcription factor, X-box binding 1                                          |
| 37351 | ENSG00000174988 | KISS1    | 35469.9 | -0.01 | protein_coding | 1  | 20419469  | 20418564  | KISS-1 metastasis suppressor                                                           |
| 37353 | ENSG0000018602  | MAK18P1  | 35471   | -0.01 | protein_coding | 12 | 420612    | 4210623   | mitogen-activated protein kinase binding protein 1                                     |
| 37360 | ENSG00000171873 | ADRA1D   | 35474.4 | -0.01 | protein_coding | 20 | 420129    | 4229721   | adrenomedullin alpha 1D                                                                |
| 37366 | ENSG00000184819 | KRAB2    | 35479.3 | -0.01 | protein_coding | 17 | 8271855   | 8280029   | KRAB domain containing 2                                                               |
| 37370 | ENSG00000151871 | SRFBP1   | 35480.2 | -0.01 | protein_coding | 17 | 688812    | 688812    | splephingomyosin receptor domain and SOCS box containing 2                             |
| 37381 | ENSG00000198885 | FICD     | 35493.7 | -0.01 | protein_coding | 12 | 10899862  | 10891814  | FIC domain containing 1                                                                |
| 37384 | ENSG00000187033 | ZC2HC1C  | 35497.4 | -0.01 | protein_coding | 14 | 75580873  | 7545128   | zinc finger, C2H2-type containing 1C                                                   |
| 37422 | ENSG00000192623 | ZTBP4    | 35498.6 | -0.01 | protein_coding | 17 | 5304586   | 5304586   | zinc finger protein 827                                                                |
| 37445 | ENSG00000250532 | ANKRD7   | 35563   | -0.01 | protein_coding | 3  | 11007231  | 11012323  | Anchored protein                                                                       |
| 37456 | ENSG00000224420 | ADMS     | 35560.5 | -0.01 | protein_coding | 9  | 50191921  | 50193832  | adrenomedullin 5 (putative)                                                            |
| 37462 | ENSG00000195931 | HMER1    | 35567   | -0.01 | protein_coding | 11 | 528487    | 528487    | hemerythrin, alpha 1                                                                   |
| 37464 | ENSG00000082175 | PCR      | 35569.6 | -0.01 | protein_coding | 11 | 100900355 | 101001255 | progestin receptor                                                                     |
| 37516 | ENSG00000187774 | NDUF47   | 35641.7 | -0.01 | protein_coding | 8  | 8377167   | 8382623   | NDUF47 protein                                                                         |
| 37528 | ENSG00000195953 | SAND1B   | 35675.5 | -0.01 | protein_coding | 14 | 77643022  | 77657840  | sterile alpha motif domain containing 15                                               |
| 37567 | ENSG00000170112 | ZNF82    | 35691.8 | -0.01 | protein_coding | 4  | 14669179  | 14669179  | zinc finger protein 82                                                                 |
| 37569 | ENSG00000150773 | PH1D2    | 35703.5 | -0.01 | protein_coding | 11 | 11194734  | 11184498  | PH1 domain containing 2                                                                |
| 37592 | ENSG00000186705 | NKX2-1   | 35728.4 | -0.01 | protein_coding | 4  | 13452454  | 13456074  | NK2 homeobox 2                                                                         |
| 37604 | ENSG00000190428 | C1orf13  | 35744   | -0.01 | protein_coding | 16 | 81882653  | 81882653  | zinc finger protein 821                                                                |
| 37622 | ENSG00000186326 | RGS9BP   | 35759.2 | -0.01 | protein_coding | 19 | 83186613  | 83186620  | regulator of G protein signaling 9 binding protein                                     |
| 37642 | ENSG00000125989 | LMPMT    | 35780.5 | -0.01 | protein_coding | 20 | 9495509   | 9511171   | lysosomal-associated membrane protein, member 5                                        |
| 37643 | ENSG00000248491 | C1orf13  | 35780.5 | -0.01 | protein_coding | 16 | 81882653  | 81882653  | zinc finger protein 821                                                                |
| 37643 | ENSG00000186491 | CCDC110  | 35815.5 | -0.01 | protein_coding | 4  | 18638319  | 18638319  | coiled-coil domain containing 110                                                      |
| 37672 | ENSG00000186243 | IRAK1BP1 | 35817.5 | -0.01 | protein_coding | 6  | 78571789  | 7858157   | interleukin 1 receptor-associated kinase 1 binding protein 1                           |
| 37673 | ENSG00000181890 | C11orf11 | 35818.3 | -0.01 | protein_coding | 16 | 810142    | 810142    | chromosome 11 open reading frame 11                                                    |
|       |                 |          |         |       |                |    |           |           |                                                                                        |

|       |                  |           |         |       |                                     |    |           |           |                                                                          |
|-------|------------------|-----------|---------|-------|-------------------------------------|----|-----------|-----------|--------------------------------------------------------------------------|
| 28192 | ENS00000222973   |           | 29688.8 | -0.01 | snRNA                               | 9  | 2162763   | 2162963   | RNA, U2 small nuclear 25, pseudogene                                     |
| 31088 | ENS00000219984   |           | 30170.8 | -0.01 | snRNA                               | 18 | 9511117   | 9511238   | RNA, U2 small nuclear 27, pseudogene                                     |
| 33109 | ENS00000221107   |           | 31266.4 | -0.01 | snRNA                               | 10 | 62672523  | 62672685  | RNA, U2 small nuclear 72, pseudogene                                     |
| 33411 | ENS00000222812   |           | 31550.7 | -0.01 | snRNA                               | 20 | 39652845  | 39653034  | RNA, U2 small nuclear 52, pseudogene                                     |
| 33484 | ENS00000220589   |           | 31638.6 | -0.01 | snRNA                               | 12 | 19817399  | 19817533  | RNA, U1 small nuclear 146, pseudogene                                    |
| 33606 | ENS00000222744   |           | 31765.8 | -0.01 | snRNA                               | 2  | 8831567.5 | 88316069  | RNA, U2 small nuclear 63, pseudogene                                     |
| 33931 | ENS00000222501   |           | 32087.6 | -0.01 | snRNA                               | 8  | 12902258  | 12902527  | RNA, U4 small nuclear 25, pseudogene                                     |
| 34125 | ENS00000222627   |           | 32265.6 | -0.01 | snRNA                               | 3  | 127794916 | 127794952 | RNA, U2 small nuclear 37, pseudogene                                     |
| 34251 | ENS00000220954   |           | 32322.4 | -0.01 | snRNA                               | 17 | 48180840  | 48180848  | RNA, U5 small nuclear 1201, pseudogene                                   |
| 34283 | ENS00000251712   |           | 32425.8 | -0.01 | snRNA                               | 7  | 148518104 | 148518165 | RNA, U7 small nuclear 20 pseudogene                                      |
| 34738 | ENS00000220562   |           | 32444   | -0.01 | snRNA                               | 4  | 114341478 | 114341482 | RNA, U1 small nuclear 138, pseudogene                                    |
| 34874 | ENS00000252425   |           | 33011.4 | -0.01 | snRNA                               | 3  | 13910118  | 13910206  | RNA, U5 small nuclear 736, pseudogene                                    |
| 34976 | ENS00000223156   |           | 33104.5 | -0.01 | snRNA                               | 10 | 18518002  | 18518163  | RNA, U2 small nuclear 18, pseudogene                                     |
| 35056 | ENS00000199836   |           | 33189.7 | -0.01 | snRNA                               | 14 | 100411852 | 100411814 | RNA, U1 small nuclear 47, pseudogene                                     |
| 35141 | ENS00000202912   | RNU1-26P  | 33292.3 | -0.01 | snRNA                               | 3  | 9852922   | 9852928   | RNA, U5 small nuclear 26, pseudogene                                     |
| 35197 | ENS00000202804   |           | 33333.1 | -0.01 | snRNA                               | 2  | 43635446  | 43635551  | RNA, U5 small nuclear 958, pseudogene                                    |
| 35211 | ENS00000201458   |           | 33347.6 | -0.01 | snRNA                               | 3  | 172514219 | 172514348 | RNA, U5 small nuclear 4, pseudogene                                      |
| 35384 | ENS00000202708   |           | 33500.8 | -0.01 | snRNA                               | 14 | 5219021   | 52190927  | RNA, U5 small nuclear 301, pseudogene                                    |
| 35411 | ENS000002021038  |           | 33515.5 | -0.01 | snRNA                               | 17 | 29890787  | 29890813  | RNA, U6atac small nuclear 7, pseudogene                                  |
| 35560 | ENS00000199405   |           | 33665.6 | -0.01 | snRNA                               | 20 | 62540308  | 62540472  | RNA, U1 small nuclear 134, pseudogene                                    |
| 35640 | ENS00000202020   |           | 33750.1 | -0.01 | snRNA                               | X  | 7020125   | 70202298  | RNA, U1 small nuclear 56, pseudogene                                     |
| 35659 | ENS00000201372   |           | 33770.1 | -0.01 | snRNA                               | 20 | 42101653  | 42101759  | RNA, U5 small nuclear 1251, pseudogene                                   |
| 35691 | ENS00000201676   | RNUKATAC  | 33770.4 | -0.01 | snRNA                               | 9  | 137029561 | 137029688 | RNA, U6atac small nuclear (U12-dependent splicing)                       |
| 35740 | ENS00000201264   | RNU1-15P  | 33853.9 | -0.01 | snRNA                               | 10 | 21610980  | 21610986  | RNA, U5 small nuclear 15, pseudogene                                     |
| 35777 | ENS000002026652  | RNU1-4    | 33897   | -0.01 | snRNA                               | 1  | 16840817  | 16840780  | RNA, U1 small nuclear 1                                                  |
| 35837 | ENS00000202737   | RNU1-4    | 33954.8 | -0.01 | snRNA                               | 1  | 14922458  | 149224221 | RNA, variant U1 small nuclear 18                                         |
| 35942 | ENS00000202689   | RNU1-4BP  | 34081.5 | -0.01 | snRNA                               | 1  | 27851710  | 27851616  | RNA, U5 small nuclear 48, pseudogene                                     |
| 35962 | ENS000002026676  |           | 34087.7 | -0.01 | snRNA                               | 4  | 36296225  | 36296331  | RNA, U5 small nuclear 32, pseudogene                                     |
| 36121 | ENS00000202200   |           | 34247.7 | -0.01 | snRNA                               | 1  | 203288124 | 203289227 | RNA, U5 small nuclear 487, pseudogene                                    |
| 36138 | ENS00000201168   |           | 34401.1 | -0.01 | snRNA                               | 16 | 68686418  | 68686461  | RNA, U1 small nuclear 1926, pseudogene                                   |
| 36374 | ENS000002025101  |           | 34484.9 | -0.01 | snRNA                               | 16 | 75320810  | 75320886  | RNA, U5 small nuclear 758, pseudogene                                    |
| 36391 | ENS000002012170  |           | 34500.7 | -0.01 | snRNA                               | 15 | 82446565  | 82446728  | RNA, U1 small nuclear 77, pseudogene                                     |
| 36528 | ENS000002016564  |           | 34623.3 | -0.01 | snRNA                               | 8  | 79536709  | 79536813  | RNA, U5 small nuclear 1266, pseudogene                                   |
| 36589 | ENS000002012541  |           | 34683.9 | -0.01 | snRNA                               | 1  | 38457134  | 38457241  | RNA, U5 small nuclear 510, pseudogene                                    |
| 36970 | ENS000002027334  |           | 35059.9 | -0.01 | snRNA                               | 8  | 119988752 | 119988858 | RNA, U5 small nuclear 12, pseudogene                                     |
| 37128 | ENS000002027571  |           | 35047   | -0.01 | snRNA                               | 15 | 7203648   | 72036415  | RNA, U5 small nuclear 803, pseudogene                                    |
| 37336 | ENS000002025306  |           | 35456   | -0.01 | snRNA                               | 1  | 11212407  | 11212509  | RNA, U5 small nuclear 537, pseudogene                                    |
| 37431 | ENS0000020199133 |           | 35447.2 | -0.01 | snRNA                               | 9  | 127849889 | 127849828 | RNA, U4 small nuclear 82, pseudogene                                     |
| 37478 | ENS00000202078   |           | 35523.3 | -0.01 | snRNA                               | 15 | 96280533  | 96280623  | RNA, U2 small nuclear 3, pseudogene                                      |
| 37522 | ENS000002036772  |           | 35652   | -0.01 | snRNA                               | 11 | 112223739 | 112223735 | RNA, U2 small nuclear 44, pseudogene                                     |
| 37846 | ENS000002029875  |           | 35789.2 | -0.01 | snRNA                               | 8  | 57829843  | 57829749  | RNA, U5 small nuclear 13, pseudogene                                     |
| 38250 | ENS00000201168   |           | 36400   | -0.01 | snRNA                               | 11 | 12343659  | 12343659  | RNA, U5 small nuclear 11, pseudogene                                     |
| 38329 | ENS000002038554  |           | 36493.1 | -0.01 | snRNA                               | 6  | 36867322  | 36867404  | RNA, U1 small nuclear 88, pseudogene                                     |
| 26224 | ENS000002028283  | KAT5NLBP6 | 24889.2 | -0.01 | transcribed_unprocessed_pseudo_gene | 6  | 147123495 | 147124960 | kat5nlb p80 subunit B-like 1 pseudogene 6                                |
| 32899 | ENS000002020219  | FAM52A1P2 | 31182.6 | -0.01 | transcribed_unprocessed_pseudo_gene | 4  | 183958819 | 183961272 | family with sequence similarity 92, member A1 pseudogene 2               |
| 32951 | ENS00000180784   | PIPSL     | 31189.9 | -0.01 | transcribed_unprocessed_pseudo_gene | 10 | 95717948  | 95721297  | PIPSK1A and PIPSK2A-like, pseudogene                                     |
| 33846 | ENS000002049055  | PCNAP1    | 32003.3 | -0.01 | transcribed_unprocessed_pseudo_gene | 4  | 100081671 | 100082602 | proliferating cell nuclear antigen pseudogene 1                          |
| 36493 | ENS000002025195  | ABCA11P   | 34592.7 | -0.01 | transcribed_unprocessed_pseudo_gene | 4  | 419224    | 487918    | ATP-binding cassette, sub-family A (ABC1), member 11, pseudogene         |
| 36557 | ENS000002028240  |           | 34652.4 | -0.01 | transcribed_unprocessed_pseudo_gene | 16 | 14294214  | 14294336  | TVP23C pseudogene 2                                                      |
| 36821 | ENS000002028451  |           | 34840   | -0.01 | transcribed_unprocessed_pseudo_gene | 8  | 28236775  | 28240469  | SDA1 domain containing 1 pseudogene 1                                    |
| 37341 | ENS00000181359   |           | 35480.2 | -0.01 | transcribed_unprocessed_pseudo_gene | 4  | 171502621 | 171526901 | heat shock protein 90kDa alpha (cytosolic), class A member 6, pseudogene |
| 32034 | ENS000002029988  | HBBP1     | 30219.9 | -0.01 | transcribed_unprocessed_pseudo_gene | 11 | 5268184   | 52684787  | hemoglobin, beta pseudogene 1                                            |
| 32462 | ENS000002043910  | TUBA4B    | 30629.5 | -0.01 | transcribed_unprocessed_pseudo_gene | 2  | 220117965 | 220118910 | tubulin, alpha 4b (pseudogene)                                           |
| 33320 | ENS000002015354  |           | 31457.7 | -0.01 | transcribed_unprocessed_pseudo_gene | 8  | 7878951   | 7888188   | family with sequence similarity 90, member A24, pseudogene               |
| 33496 | ENS000002014553  | LRR37A11P | 31847.2 | -0.01 | transcribed_unprocessed_pseudo_gene | 17 | 37183530  | 37204558  | leucine rich repeat containing 37, member A11, pseudogene                |
| 35458 | ENS00000189212   |           | 33577.6 | -0.01 | transcribed_unprocessed_pseudo_gene | 7  | 35119601  | 35225934  | DPY19L2 pseudogene 1                                                     |
| 36767 | ENS00000178081   | ULK4P3    | 34879.8 | -0.01 | transcribed_unprocessed_pseudo_gene | 15 | 30395923  | 30423960  | ULK4 pseudogene 3                                                        |
| 36862 | ENS000002037575  | PYY2      | 35018.9 | -0.01 | transcribed_unprocessed_pseudo_gene | 17 | 26553589  | 26555091  | peptide YY, 2 (pseudogene)                                               |
| 37144 | ENS000002048121  |           | 35528.9 | -0.01 | transcribed_unprocessed_pseudo_gene | 17 | 28927814  | 28942988  | SMAD specific E3 ubiquitin protein ligase 2 pseudogene 1                 |
| 37507 | ENS000002019891  | ZSCAN12P1 | 35634   | -0.01 | transcribed_unprocessed_pseudo_gene | 6  | 28058932  | 28061442  | zinc finger and SCAN domain containing 12 pseudogene 1                   |
| 34888 | ENS000002029704  | LINC00634 | 33021.2 | -0.01 | unprocessed_pseudogene              | 22 | 42348169  | 42345497  | long intergenic non-protein coding RNA 634                               |
| 35419 | ENS00000201798   | DBILBP    | 33321.3 | -0.01 | unprocessed_pseudogene              | 17 | 635200    | 635271    | database binding inhibitor-like 5, pseudogene                            |
| 30355 | ENS000002048290  | TXNA      | 29652.3 | -0.01 | unprocessed_pseudogene              | 6  | 31976391  | 31980249  | tenascin XA (pseudogene)                                                 |
| 31858 | ENS000002023711  |           | 30052.6 | -0.01 | unprocessed_pseudogene              | 1  | 808872    | 808729    | tubulin, beta 8 class VII pseudogene 11                                  |
| 32203 | ENS000002025423  |           | 30610.8 | -0.01 | unprocessed_pseudogene              | 11 | 12405368  | 12406314  | olfactory receptor family 8, subfamily G, member 3 pseudogene            |
| 32431 | ENS000002024625  |           | 30901.4 | -0.01 | unprocessed_pseudogene              | 1  | 242220387 | 242223544 | tubulin, beta 8 class VIII pseudogene 6                                  |
| 32457 | ENS000002022789  |           | 30623   | -0.01 | unprocessed_pseudogene              | Y  | 2749724   | 2751993   | heat shock transcription factor Y, linked 3, pseudogene                  |
| 32471 | ENS000002025972  |           | 30643   | -0.01 | unprocessed_pseudogene              | 1  | 56442     | 56481     | MT-ND1 pseudogene 23                                                     |
| 34422 | ENS000002031669  |           | 31951.6 | -0.01 | unprocessed_pseudogene              | 6  | 29914893  | 29914893  | HLA complex group 4 pseudogene 3                                         |
| 33737 | ENS000002025335  |           | 31899.1 | -0.01 | unprocessed_pseudogene              | 6  | 31981047  | 31981564  | serine/threonine kinase 19 pseudogene                                    |
| 34307 | ENS000002042764  |           | 32481.3 | -0.01 | unprocessed_pseudogene              | 11 | 48014225  | 48015433  | trypsin motif containing 53C, pseudogene                                 |
| 34862 | ENS000002044016  |           | 33009.6 | -0.01 | unprocessed_pseudogene              | 2  | 12343659  | 98162719  | trypsin motif containing 43B                                             |
| 35885 | ENS000002036271  |           | 33883.1 | -0.01 | unprocessed_pseudogene              | 9  | 21456483  | 21456480  | interferon, omega 1 pseudogene 19                                        |
| 36144 | ENS00000186599   | OR7E12P   | 34365.1 | -0.01 | unprocessed_pseudogene              | 11 | 3410210   | 3412982   | olfactory receptor family 7, subfamily E, member 12 pseudogene           |
| 18696 | ENS000002029671  |           | 19011   | -0.01 | unprocessed_pseudogene              |    |           |           |                                                                          |
| 18713 | ENS0000020275047 |           | 19024.2 | -0.01 | unprocessed_pseudogene              |    |           |           |                                                                          |
| 19891 | ENS000002014184  |           | 20021.1 | -0.01 | unprocessed_pseudogene              |    |           |           |                                                                          |
| 20124 | ENS000002024531  |           | 20116.8 | -0.01 | unprocessed_pseudogene              |    |           |           |                                                                          |
| 20613 | ENS000002027097  |           | 20558.1 | -0.01 | unprocessed_pseudogene              |    |           |           |                                                                          |
| 20643 | ENS000002019928  |           | 20557.5 | -0.01 | unprocessed_pseudogene              |    |           |           |                                                                          |
| 20882 | ENS00000201748   |           | 20559   | -0.01 | unprocessed_pseudogene              |    |           |           |                                                                          |
| 22324 | ENS000002023612  |           | 21815.7 | -0.01 | unprocessed_pseudogene              |    |           |           |                                                                          |
| 22322 | ENS000002012596  | MRC1      | 21858.5 | -0.01 | unprocessed_pseudogene              | 10 | 18098352  | 18200091  | mannose receptor, C type 1                                               |
| 22656 | ENS000002020275  | CCL3      | 22029.1 | -0.01 | unprocessed_pseudogene              | 17 | 34413622  | 34413715  | chemokine (C-C motif) ligand 3                                           |
| 23015 | ENS000002028942  |           | 22367.2 | -0.01 | unprocessed_pseudogene              |    |           |           |                                                                          |
| 23548 | ENS000002027579  |           | 22762.1 | -0.01 | unprocessed_pseudogene              |    |           |           |                                                                          |
| 23700 | ENS000002013067  |           | 22891   | -0.01 | unprocessed_pseudogene              |    |           |           |                                                                          |
| 24529 | ENS000002025341  |           | 23577.4 | -0.01 | unprocessed_pseudogene              |    |           |           |                                                                          |
| 24532 | ENS000002028374  |           | 23578.8 | -0.01 | unprocessed_pseudogene              |    |           |           |                                                                          |
| 24697 | ENS000002025486  |           | 23729.5 | -0.01 | unprocessed_pseudogene              |    |           |           |                                                                          |
| 24876 | ENS000002043829  |           | 23882.9 | -0.01 | unprocessed_pseudogene              |    |           |           |                                                                          |
| 25239 | ENS000002022533  |           | 24181.1 | -0.01 | unprocessed_pseudogene              |    |           |           |                                                                          |
| 25388 | ENS000002028241  |           | 24388.5 | -0.01 | unprocessed_pseudogene              |    |           |           |                                                                          |
| 25472 | ENS00000183748   | 10182875  | 24381.4 | -0.01 | unprocessed_pseudogene              | 10 | 17851362  | 17853178  | cDNA FLJ36855, highly similar to Macrophage mannose receptor 1           |
| 25687 | ENS000002024106  |           | 24550.9 | -0.01 | unprocessed_pseudogene              |    |           |           |                                                                          |
| 25958 | ENS000002013203  |           | 24765.4 | -0.01 | unprocessed_pseudogene              |    |           |           |                                                                          |
| 26376 | ENS000002024220  |           | 25118   | -0.01 | unprocessed_pseudogene              |    |           |           |                                                                          |
| 26874 | ENS000002029888  |           | 25544   | -0.01 | unprocessed_pseudogene              |    |           |           |                                                                          |
| 27014 | ENS000002024488  |           | 25744.2 | -0.01 | unprocessed_pseudogene              |    |           |           |                                                                          |
| 27114 | ENS0000020238165 |           | 25767.8 | -0.01 | unprocessed_pseudogene              |    |           |           |                                                                          |
| 27767 | ENS              |           |         |       |                                     |    |           |           |                                                                          |

|       |                  |           |         |       |    |           |           |  |                                            |
|-------|------------------|-----------|---------|-------|----|-----------|-----------|--|--------------------------------------------|
| 31772 | ENSG00000287193  |           | 29963.7 | -0.01 |    |           |           |  |                                            |
| 31798 | ENSG00000286868  |           | 29981.7 | -0.01 |    |           |           |  |                                            |
| 31791 | ENSG00000289678  |           | 29983   | -0.01 |    |           |           |  |                                            |
| 31825 | ENSG00000280302  |           | 30020.9 | -0.01 |    |           |           |  |                                            |
| 31844 | ENSG00000286204  |           | 30039.6 | -0.01 |    |           |           |  |                                            |
| 31885 | ENSG00000285258  |           | 30072.1 | -0.01 |    |           |           |  |                                            |
| 31921 | ENSG00000287101  |           | 30110.7 | -0.01 |    |           |           |  |                                            |
| 32010 | ENSG00000286422  |           | 30122.5 | -0.01 |    |           |           |  |                                            |
| 32033 | ENSG00000223877  |           | 30188.3 | -0.01 |    |           |           |  |                                            |
| 32052 | ENSG00000285258  |           | 30241.4 | -0.01 |    |           |           |  |                                            |
| 32085 | ENSG00000282938  |           | 30254.4 | -0.01 |    |           |           |  |                                            |
| 32088 | ENSG00000282643  |           | 30279   | -0.01 |    |           |           |  |                                            |
| 32199 | ENSG00000286499  |           | 30346.6 | -0.01 |    |           |           |  |                                            |
| 32188 | ENSG00000285544  |           | 30352.4 | -0.01 |    |           |           |  |                                            |
| 32199 | ENSG00000286259  |           | 30387.7 | -0.01 |    |           |           |  |                                            |
| 32240 | ENSG00000178248  |           | 30427.6 | -0.01 |    |           |           |  |                                            |
| 32247 | ENSG00000221170  |           | 30432.4 | -0.01 |    |           |           |  |                                            |
| 32259 | ENSG00000281409  |           | 30442.1 | -0.01 |    |           |           |  |                                            |
| 32240 | ENSG00000280934  |           | 30514.2 | -0.01 |    |           |           |  |                                            |
| 32347 | ENSG00000281617  |           | 30522.4 | -0.01 |    |           |           |  |                                            |
| 32355 | ENSG00000284968  |           | 30527.9 | -0.01 |    |           |           |  |                                            |
| 32396 | ENSG00000211794  |           | 30528.2 | -0.01 |    |           |           |  |                                            |
| 32375 | ENSG00000281021  |           | 30545   | -0.01 |    |           |           |  |                                            |
| 32448 | ENSG00000283628  |           | 30615.8 | -0.01 |    |           |           |  |                                            |
| 32472 | ENSG00000234721  |           | 30645   | -0.01 |    |           |           |  |                                            |
| 32477 | ENSG00000285515  |           | 30653.5 | -0.01 |    |           |           |  |                                            |
| 32483 | ENSG00000286622  |           | 30662.3 | -0.01 |    |           |           |  |                                            |
| 32498 | ENSG00000285167  |           | 30681   | -0.01 |    |           |           |  |                                            |
| 32508 | ENSG00000285445  |           | 30684.5 | -0.01 |    |           |           |  |                                            |
| 32520 | ENSG00000223883  |           | 30706.1 | -0.01 |    |           |           |  |                                            |
| 32525 | ENSG00000237472  |           | 30709.9 | -0.01 |    |           |           |  |                                            |
| 32533 | ENSG00000282379  |           | 30715.9 | -0.01 |    |           |           |  |                                            |
| 32557 | ENSG00000243636  |           | 30741.2 | -0.01 |    |           |           |  |                                            |
| 32566 | ENSG00000271338  |           | 30752.1 | -0.01 |    |           |           |  |                                            |
| 32570 | ENSG00000233398  |           | 30755.9 | -0.01 |    |           |           |  |                                            |
| 32626 | ENSG00000228669  |           | 30814.7 | -0.01 |    |           |           |  |                                            |
| 32636 | ENSG00000278134  |           | 30821.4 | -0.01 |    |           |           |  |                                            |
| 32637 | ENSG00000281818  |           | 30821.7 | -0.01 |    |           |           |  |                                            |
| 32662 | ENSG00000284952  |           | 30838.9 | -0.01 |    |           |           |  |                                            |
| 32699 | ENSG00000212989  |           | 30843.1 | -0.01 |    |           |           |  |                                            |
| 32873 | ENSG00000281478  |           | 30845.9 | -0.01 |    |           |           |  |                                            |
| 32891 | ENSG00000284718  |           | 30859.1 | -0.01 |    |           |           |  |                                            |
| 32704 | ENSG00000230863  |           | 30877.2 | -0.01 |    |           |           |  |                                            |
| 32748 | ENSG00000196978  |           | 30921   | -0.01 | 8  | 124056997 | 124057052 |  | RNA, Ro-associated Y4 pseudogene 5         |
| 32751 | ENSG00000275716  |           | 30924.5 | -0.01 |    |           |           |  |                                            |
| 32784 | ENSG00000280433  |           | 30936.1 | -0.01 |    |           |           |  |                                            |
| 32784 | ENSG00000280115  |           | 30959   | -0.01 | 17 | 36880556  | 36888173  |  | RNA, 5S ribosomal pseudogene 440           |
| 32790 | ENSG00000285243  |           | 30960.4 | -0.01 |    |           |           |  |                                            |
| 32813 | ENSG00000287884  |           | 30980.2 | -0.01 |    |           |           |  |                                            |
| 32824 | ENSG00000272789  |           | 30996   | -0.01 |    |           |           |  |                                            |
| 32857 | ENSG00000211993  |           | 31031.2 | -0.01 |    |           |           |  |                                            |
| 32862 | ENSG00000272635  |           | 31034.9 | -0.01 |    |           |           |  |                                            |
| 32866 | ENSG00000237042  |           | 31036.3 | -0.01 |    |           |           |  |                                            |
| 32865 | ENSG00000281716  |           | 31072.8 | -0.01 |    |           |           |  |                                            |
| 32934 | ENSG00000249362  |           | 31099.6 | -0.01 |    |           |           |  |                                            |
| 32936 | ENSG00000281341  |           | 31101.9 | -0.01 |    |           |           |  |                                            |
| 32937 | ENSG00000283899  |           | 31102.9 | -0.01 |    |           |           |  |                                            |
| 32942 | ENSG00000284890  |           | 31111.5 | -0.01 |    |           |           |  |                                            |
| 32959 | ENSG00000211883  |           | 31127.2 | -0.01 |    |           |           |  |                                            |
| 32969 | ENSG00000283899  |           | 31103.5 | -0.01 |    |           |           |  |                                            |
| 33031 | ENSG00000282902  |           | 31196.4 | -0.01 |    |           |           |  |                                            |
| 33034 | ENSG00000224173  |           | 31198.1 | -0.01 |    |           |           |  |                                            |
| 33065 | ENSG00000274463  |           | 31216.2 | -0.01 |    |           |           |  |                                            |
| 33075 | ENSG00000281352  |           | 31234.3 | -0.01 |    |           |           |  |                                            |
| 33078 | ENSG00000284855  |           | 31235.6 | -0.01 |    |           |           |  |                                            |
| 33085 | ENSG00000217875  |           | 31235.8 | -0.01 |    |           |           |  |                                            |
| 33108 | ENSG00000287166  |           | 31265.3 | -0.01 |    |           |           |  |                                            |
| 33132 | ENSG00000281577  |           | 31287.6 | -0.01 |    |           |           |  |                                            |
| 33142 | ENSG00000213763  |           | 31281.1 | -0.01 |    |           |           |  |                                            |
| 33156 | ENSG00000223715  |           | 31313.9 | -0.01 |    |           |           |  |                                            |
| 33161 | ENSG00000233776  |           | 31316.8 | -0.01 |    |           |           |  |                                            |
| 33178 | ENSG00000281632  |           | 31328.8 | -0.01 |    |           |           |  |                                            |
| 33180 | ENSG00000229224  |           | 31329.9 | -0.01 |    |           |           |  |                                            |
| 33195 | ENSG00000228979  |           | 31346.5 | -0.01 |    |           |           |  |                                            |
| 33213 | ENSG00000283838  |           | 31352.1 | -0.01 |    |           |           |  |                                            |
| 33220 | ENSG00000285779  |           | 31373.3 | -0.01 |    |           |           |  |                                            |
| 33232 | ENSG00000224637  |           | 31382.7 | -0.01 |    |           |           |  |                                            |
| 33258 | ENSG00000228913  |           | 31426.7 | -0.01 |    |           |           |  |                                            |
| 33269 | ENSG00000285381  |           | 31411.5 | -0.01 |    |           |           |  |                                            |
| 33272 | ENSG00000285786  |           | 31415.9 | -0.01 |    |           |           |  |                                            |
| 33278 | ENSG00000215378  |           | 31419.7 | -0.01 |    |           |           |  |                                            |
| 33308 | ENSG00000211575  |           | 31448.9 | -0.01 |    |           |           |  |                                            |
| 33323 | ENSG00000285032  |           | 31458.2 | -0.01 |    |           |           |  |                                            |
| 33326 | ENSG00000272141  |           | 31460.7 | -0.01 |    |           |           |  |                                            |
| 33377 | ENSG00000242924  |           | 31515.3 | -0.01 |    |           |           |  |                                            |
| 33381 | ENSG00000283933  |           | 31518.7 | -0.01 |    |           |           |  |                                            |
| 33385 | ENSG00000286377  |           | 31533.6 | -0.01 |    |           |           |  |                                            |
| 33401 | ENSG00000217934  |           | 31540.7 | -0.01 |    |           |           |  |                                            |
| 33410 | ENSG00000246954  |           | 31549.9 | -0.01 |    |           |           |  |                                            |
| 33412 | ENSG00000227173  |           | 31551.9 | -0.01 |    |           |           |  |                                            |
| 33414 | ENSG00000286841  |           | 31560.1 | -0.01 |    |           |           |  |                                            |
| 33426 | ENSG00000285887  |           | 31565.6 | -0.01 |    |           |           |  |                                            |
| 33431 | ENSG00000232524  |           | 31569.2 | -0.01 |    |           |           |  |                                            |
| 33446 | ENSG00000282800  |           | 31595.9 | -0.01 |    |           |           |  |                                            |
| 33459 | ENSG00000286921  |           | 31614.5 | -0.01 |    |           |           |  |                                            |
| 33460 | ENSG00000276986  |           | 31624.4 | -0.01 |    |           |           |  |                                            |
| 33472 | ENSG00000286807  |           | 31626.4 | -0.01 |    |           |           |  |                                            |
| 33476 | ENSG00000285878  |           | 31628.6 | -0.01 |    |           |           |  |                                            |
| 33479 | ENSG00000248636  |           | 31633.2 | -0.01 |    |           |           |  |                                            |
| 33487 | ENSG00000282902  |           | 31638.3 | -0.01 |    |           |           |  |                                            |
| 33522 | ENSG00000286290  |           | 31671.2 | -0.01 |    |           |           |  |                                            |
| 33530 | ENSG00000272623  |           | 31678.9 | -0.01 |    |           |           |  |                                            |
| 33533 | ENSG00000284669  |           | 31680.7 | -0.01 |    |           |           |  |                                            |
| 33541 | ENSG000002851003 |           | 31682.7 | -0.01 |    |           |           |  |                                            |
| 33546 | ENSG00000283914  |           | 31697.7 | -0.01 |    |           |           |  |                                            |
| 33550 | ENSG00000284927  |           | 31704.4 | -0.01 |    |           |           |  |                                            |
| 33559 | ENSG00000287256  |           | 31715.4 | -0.01 |    |           |           |  |                                            |
| 33572 | ENSG00000286742  |           | 31729.1 | -0.01 |    |           |           |  |                                            |
| 33588 | ENSG00000284158  |           | 31744.4 | -0.01 |    |           |           |  |                                            |
| 33595 | ENSG00000285220  |           | 31754.6 | -0.01 |    |           |           |  |                                            |
| 33604 | ENSG00000213940  |           | 31784.1 | -0.01 |    |           |           |  |                                            |
| 33607 | ENSG00000215237  |           | 31786.6 | -0.01 |    |           |           |  |                                            |
| 33612 | ENSG000002823813 |           | 31773.4 | -0.01 |    |           |           |  |                                            |
| 33659 | ENSG00000244617  |           | 31815.6 | -0.01 |    |           |           |  |                                            |
| 33669 | ENSG00000218621  |           | 31833.8 | -0.01 |    |           |           |  |                                            |
| 33701 | ENSG00000234175  |           | 31860.3 | -0.01 |    |           |           |  |                                            |
| 33703 | ENSG00000172746  |           | 31861.7 | -0.01 |    |           |           |  |                                            |
| 33714 | ENSG00000281545  |           | 31874.9 | -0.01 |    |           |           |  |                                            |
| 33717 | ENSG00000272831  |           | 31878.2 | -0.01 |    |           |           |  |                                            |
| 33746 | ENSG00000286245  |           | 31907.3 | -0.01 |    |           |           |  |                                            |
| 33768 | ENSG00000281988  |           | 31927.5 | -0.01 |    |           |           |  |                                            |
| 33772 | ENSG00000283910  |           | 31936.3 | -0.01 |    |           |           |  |                                            |
| 33787 | ENSG00000289121  |           | 31948.8 | -0.01 |    |           |           |  |                                            |
| 33789 | ENSG00000218503  |           | 31947.3 | -0.01 |    |           |           |  |                                            |
| 33794 | ENSG00000249787  |           | 31951.6 | -0.01 |    |           |           |  |                                            |
| 33795 | ENSG00000223968  |           | 31952.5 | -0.01 |    |           |           |  |                                            |
| 33806 | ENSG00000191846  | HIST1H2BG | 31962.4 | -0.01 | 6  | 26189748  | 26200942  |  | histone cluster 1, H2bf                    |
| 33817 | ENSG00000286062  |           | 31969.4 | -0.01 |    |           |           |  |                                            |
| 33820 | ENSG00000286295  |           | 31972.8 | -0.01 |    |           |           |  |                                            |
| 33832 | ENSG00000218564  |           | 31989.6 | -0.01 |    |           |           |  |                                            |
| 33846 | ENSG00000286063  |           | 32007.5 | -0.01 |    |           |           |  |                                            |
| 33851 | ENSG00000286924  |           | 32008.4 | -0.01 |    |           |           |  |                                            |
| 33854 | ENSG00000281635  |           | 32013.2 | -0.01 |    |           |           |  |                                            |
| 33863 | ENSG00000286388  |           | 32026.7 | -0.01 |    |           |           |  |                                            |
| 33866 | ENSG00000233895  |           | 32032.2 | -0.01 |    |           |           |  |                                            |
| 33867 | ENSG00000286999  |           | 32033.2 | -0.01 |    |           |           |  |                                            |
| 33869 | ENSG00000281027  |           | 32034   | -0.01 | 17 | 41148933  | 41150024  |  | Y RNA                                      |
| 33878 | ENSG00000285846  |           | 32040.8 | -0.01 |    |           |           |  |                                            |
| 33879 | ENSG00000211985  |           | 32042.3 | -0.01 |    |           |           |  |                                            |
| 33881 | ENSG00000271810  |           | 32043.5 | -0.01 |    |           |           |  |                                            |
| 33883 | ENSG00000249239  |           | 32045.5 | -0.01 |    |           |           |  |                                            |
| 33901 | ENSG00000284840  |           | 32059.5 | -0.01 |    |           |           |  |                                            |
| 33908 | ENSG00000181156  | LINC00221 | 32071   | -0.01 | 14 | 106938445 | 106977000 |  | long intergenic non-protein coding RNA 221 |
| 33909 | ENSG00000228986  |           | 32063.8 | -0.01 |    |           |           |  |                                            |
| 33924 | ENSG00000248645  |           | 32078.8 | -0.01 |    |           |           |  |                                            |
| 33938 | ENSG00000281193  |           | 32091.9 | -0.01 |    |           |           |  |                                            |
| 33939 | ENSG00000285944  |           | 32094.7 | -0.01 |    |           |           |  |                                            |
| 33951 | ENSG00000284652  |           | 32107.6 | -0.01 |    |           |           |  |                                            |
| 33968 | ENSG00000224243  | ADRA2B    | 32130.1 | -0.01 | 2  | 96778707  | 96781984  |  | adenoreceptor alpha 2B                     |
| 33969 | ENSG00000228447  |           | 32130.5 | -0.01 |    |           |           |  |                                            |



|       |                  |              |         |       |    |           |           |  |                                                                                                                                                                      |
|-------|------------------|--------------|---------|-------|----|-----------|-----------|--|----------------------------------------------------------------------------------------------------------------------------------------------------------------------|
| 39370 | ENSG00000251962  |              | 32131.9 | -0.01 |    |           |           |  |                                                                                                                                                                      |
| 39375 | ENSG00000251437  |              | 32138.3 | -0.01 |    |           |           |  |                                                                                                                                                                      |
| 34011 | ENSG00000235089  |              | 32171.3 | -0.01 |    |           |           |  |                                                                                                                                                                      |
| 34017 | ENSG00000235185  |              | 32180.7 | -0.01 |    |           |           |  |                                                                                                                                                                      |
| 34026 | ENSG00000231397  |              | 32188.6 | -0.01 |    |           |           |  |                                                                                                                                                                      |
| 34029 | ENSG00000234920  |              | 32199.2 | -0.01 |    |           |           |  |                                                                                                                                                                      |
| 34036 | ENSG00000224912  |              | 32198.1 | -0.01 |    |           |           |  |                                                                                                                                                                      |
| 34048 | ENSG00000225811  |              | 32223   | -0.01 |    |           |           |  |                                                                                                                                                                      |
| 34060 | ENSG00000226844  |              | 32234.5 | -0.01 |    |           |           |  |                                                                                                                                                                      |
| 34064 | ENSG00000214433  |              | 32237.9 | -0.01 |    |           |           |  |                                                                                                                                                                      |
| 34075 | ENSG00000224222  |              | 32251.6 | -0.01 |    |           |           |  |                                                                                                                                                                      |
| 34114 | ENSG00000226178  |              | 32278.6 | -0.01 |    |           |           |  |                                                                                                                                                                      |
| 34141 | ENSG00000226156  |              | 32313.9 | -0.01 |    |           |           |  |                                                                                                                                                                      |
| 34149 | ENSG00000225990  |              | 32319.9 | -0.01 |    |           |           |  |                                                                                                                                                                      |
| 34200 | ENSG00000225941  |              | 32376.2 | -0.01 |    |           |           |  |                                                                                                                                                                      |
| 34204 | ENSG00000237819  |              | 32381   | -0.01 |    |           |           |  |                                                                                                                                                                      |
| 34207 | ENSG000002250374 |              | 32383.2 | -0.01 |    |           |           |  |                                                                                                                                                                      |
| 34245 | ENSG00000225984  |              | 32417.7 | -0.01 |    |           |           |  |                                                                                                                                                                      |
| 34257 | ENSG000002236841 |              | 32427.3 | -0.01 |    |           |           |  |                                                                                                                                                                      |
| 34269 | ENSG00000249436  |              | 32447.4 | -0.01 |    |           |           |  |                                                                                                                                                                      |
| 34273 | ENSG00000226100  | LINC020624   | 32459.7 | -0.01 | 1  | 146989158 | 146898999 |  | long intergenic non-protein coding RNA 624                                                                                                                           |
| 34277 | ENSG00000213861  |              | 32452.3 | -0.01 |    |           |           |  |                                                                                                                                                                      |
| 34294 | ENSG00000272186  |              | 32484.5 | -0.01 |    |           |           |  |                                                                                                                                                                      |
| 34300 | ENSG00000221453  |              | 32470.2 | -0.01 |    |           |           |  |                                                                                                                                                                      |
| 34316 | ENSG00000218926  |              | 32484.1 | -0.01 |    |           |           |  |                                                                                                                                                                      |
| 34318 | ENSG00000242937  |              | 32487.5 | -0.01 |    |           |           |  |                                                                                                                                                                      |
| 34334 | ENSG00000225729  |              | 32510   | -0.01 |    |           |           |  |                                                                                                                                                                      |
| 34342 | ENSG000002264672 |              | 32518.8 | -0.01 |    |           |           |  |                                                                                                                                                                      |
| 34356 | ENSG00000226545  |              | 32541   | -0.01 |    |           |           |  |                                                                                                                                                                      |
| 34368 | ENSG00000237643  |              | 32544   | -0.01 |    |           |           |  |                                                                                                                                                                      |
| 34368 | ENSG00000177359  |              | 32545.4 | -0.01 |    |           |           |  |                                                                                                                                                                      |
| 34416 | ENSG00000215033  | LOC10096760  | 32599   | -0.01 | 10 | 47746962  | 47770871  |  | Protein LOC10096760                                                                                                                                                  |
| 34438 | ENSG00000221168  |              | 32619.3 | -0.01 |    |           |           |  |                                                                                                                                                                      |
| 34438 | ENSG000002428973 |              | 32618.6 | -0.01 |    |           |           |  |                                                                                                                                                                      |
| 34441 | ENSG00000226244  |              | 32620.1 | -0.01 |    |           |           |  |                                                                                                                                                                      |
| 34483 | ENSG00000225733  |              | 32559.9 | -0.01 |    |           |           |  |                                                                                                                                                                      |
| 34488 | ENSG00000270917  |              | 32664.7 | -0.01 |    |           |           |  |                                                                                                                                                                      |
| 34492 | ENSG00000226944  |              | 32669   | -0.01 |    |           |           |  |                                                                                                                                                                      |
| 34523 | ENSG00000224588  |              | 32704   | -0.01 |    |           |           |  |                                                                                                                                                                      |
| 34528 | ENSG00000231735  |              | 32710.3 | -0.01 |    |           |           |  |                                                                                                                                                                      |
| 34568 | ENSG000002229771 |              | 32749   | -0.01 |    |           |           |  |                                                                                                                                                                      |
| 34583 | ENSG00000225510  |              | 32759.9 | -0.01 |    |           |           |  |                                                                                                                                                                      |
| 34589 | ENSG00000271404  |              | 32813.1 | -0.01 |    |           |           |  |                                                                                                                                                                      |
| 34662 | ENSG00000226376  |              | 32832.5 | -0.01 |    |           |           |  |                                                                                                                                                                      |
| 34692 | ENSG00000227869  |              | 32853.6 | -0.01 |    |           |           |  |                                                                                                                                                                      |
| 34696 | ENSG00000225974  |              | 32861.4 | -0.01 |    |           |           |  |                                                                                                                                                                      |
| 34700 | ENSG00000234215  |              | 32863.8 | -0.01 |    |           |           |  |                                                                                                                                                                      |
| 34703 | ENSG00000226636  |              | 32866.2 | -0.01 |    |           |           |  |                                                                                                                                                                      |
| 34704 | ENSG00000198332  | HISTH3A      | 32868.2 | -0.01 | 6  | 26045639  | 26046097  |  | histone cluster 1, H3c                                                                                                                                               |
| 34711 | ENSG00000213839  |              | 32874.4 | -0.01 |    |           |           |  |                                                                                                                                                                      |
| 34725 | ENSG00000212362  |              | 32896   | -0.01 |    |           |           |  |                                                                                                                                                                      |
| 34741 | ENSG0000021896   |              | 32897.6 | -0.01 |    |           |           |  |                                                                                                                                                                      |
| 34763 | ENSG00000273193  |              | 32915.5 | -0.01 |    |           |           |  |                                                                                                                                                                      |
| 34788 | ENSG00000270916  |              | 32936   | -0.01 |    |           |           |  |                                                                                                                                                                      |
| 34788 | ENSG00000198368  | HISTH4I      | 32938.6 | -0.01 | 6  | 27840926  | 27841289  |  | histone cluster 1, H4I                                                                                                                                               |
| 34792 | ENSG00000107818  | RBP3         | 32937.8 | -0.01 | 10 | 48381487  | 48380591  |  | retinol binding protein 3, intracellular                                                                                                                             |
| 34823 | ENSG00000107623  | GDF-10       | 32980.6 | -0.01 | 10 | 48425815  | 48438976  |  | growth differentiation factor 10                                                                                                                                     |
| 34824 | ENSG00000223496  |              | 32981.1 | -0.01 |    |           |           |  |                                                                                                                                                                      |
| 34830 | ENSG00000224579  |              | 32988.1 | -0.01 |    |           |           |  |                                                                                                                                                                      |
| 34834 | ENSG00000226426  |              | 32977   | -0.01 | 12 | 110798255 | 110798551 |  | RNA, 7SL, cytoplasmic 769, pseudogene                                                                                                                                |
| 34837 | ENSG00000225121  |              | 32980   | -0.01 |    |           |           |  |                                                                                                                                                                      |
| 34919 | ENSG00000227437  |              | 33052.3 | -0.01 |    |           |           |  |                                                                                                                                                                      |
| 34938 | ENSG00000211209  |              | 33070.2 | -0.01 |    |           |           |  |                                                                                                                                                                      |
| 34945 | ENSG00000224251  |              | 33077.3 | -0.01 |    |           |           |  |                                                                                                                                                                      |
| 34946 | ENSG00000225594  |              | 33077.5 | -0.01 | 14 | 70037483  | 70038032  |  | coiled-coil domain containing 177                                                                                                                                    |
| 34952 | ENSG000002051305 |              | 33053.6 | -0.01 |    |           |           |  |                                                                                                                                                                      |
| 34953 | ENSG00000214765  |              | 33059.1 | -0.01 |    |           |           |  |                                                                                                                                                                      |
| 34960 | ENSG000002258903 |              | 33060.6 | -0.01 |    |           |           |  |                                                                                                                                                                      |
| 34971 | ENSG000002267024 |              | 33098.9 | -0.01 |    |           |           |  |                                                                                                                                                                      |
| 34977 | ENSG00000223825  |              | 33104.9 | -0.01 |    |           |           |  |                                                                                                                                                                      |
| 34978 | ENSG00000226887  |              | 33105.4 | -0.01 |    |           |           |  |                                                                                                                                                                      |
| 34980 | ENSG00000271811  |              | 33108.1 | -0.01 |    |           |           |  |                                                                                                                                                                      |
| 34984 | ENSG00000226409  |              | 33109.5 | -0.01 |    |           |           |  |                                                                                                                                                                      |
| 34997 | ENSG00000227605  |              | 33135.1 | -0.01 |    |           |           |  |                                                                                                                                                                      |
| 35006 | ENSG000002237251 |              | 33148.8 | -0.01 |    |           |           |  |                                                                                                                                                                      |
| 35015 | ENSG00000222688  |              | 33154.1 | -0.01 |    |           |           |  |                                                                                                                                                                      |
| 35017 | ENSG00000225906  |              | 33156.3 | -0.01 |    |           |           |  |                                                                                                                                                                      |
| 35025 | ENSG00000226815  |              | 33165.7 | -0.01 |    |           |           |  |                                                                                                                                                                      |
| 35029 | ENSG00000221848  |              | 33187.9 | -0.01 |    |           |           |  |                                                                                                                                                                      |
| 35031 | ENSG000002268432 |              | 33170.2 | -0.01 | 5  | 157160003 | 157161727 |  | Uncharacterized protein                                                                                                                                              |
| 35040 | ENSG00000272091  |              | 33181.1 | -0.01 |    |           |           |  |                                                                                                                                                                      |
| 35045 | ENSG00000223977  |              | 33187.3 | -0.01 |    |           |           |  |                                                                                                                                                                      |
| 35046 | ENSG00000213174  |              | 33188.5 | -0.01 |    |           |           |  |                                                                                                                                                                      |
| 35054 | ENSG000002249356 |              | 33196.7 | -0.01 |    |           |           |  |                                                                                                                                                                      |
| 35055 | ENSG00000221266  |              | 33197.4 | -0.01 |    |           |           |  |                                                                                                                                                                      |
| 35062 | ENSG00000214128  |              | 33202.1 | -0.01 |    |           |           |  |                                                                                                                                                                      |
| 35074 | ENSG000002232023 |              | 33216.7 | -0.01 |    |           |           |  |                                                                                                                                                                      |
| 35075 | ENSG00000226444  |              | 33218.5 | -0.01 |    |           |           |  |                                                                                                                                                                      |
| 35086 | ENSG00000198226  | HISTH2BB     | 33224.4 | -0.01 | 6  | 26043455  | 26043885  |  | histone cluster 1, H2bb                                                                                                                                              |
| 35090 | ENSG00000226422  |              | 33228.7 | -0.01 |    |           |           |  |                                                                                                                                                                      |
| 35094 | ENSG00000272498  |              | 33232.2 | -0.01 |    |           |           |  |                                                                                                                                                                      |
| 35097 | ENSG00000226338  |              | 33236   | -0.01 |    |           |           |  |                                                                                                                                                                      |
| 35110 | ENSG000002261469 |              | 33248.6 | -0.01 |    |           |           |  |                                                                                                                                                                      |
| 35116 | ENSG00000226951  |              | 33257.8 | -0.01 |    |           |           |  |                                                                                                                                                                      |
| 35119 | ENSG00000226286  |              | 33258.6 | -0.01 |    |           |           |  |                                                                                                                                                                      |
| 35121 | ENSG00000226254  |              | 33259.4 | -0.01 |    |           |           |  |                                                                                                                                                                      |
| 35162 | ENSG00000213237  |              | 33303.4 | -0.01 |    |           |           |  |                                                                                                                                                                      |
| 35168 | ENSG00000221351  |              | 33309.4 | -0.01 |    |           |           |  |                                                                                                                                                                      |
| 35182 | ENSG00000241149  |              | 33322.8 | -0.01 |    |           |           |  |                                                                                                                                                                      |
| 35196 | ENSG00000226399  |              | 33333.7 | -0.01 |    |           |           |  |                                                                                                                                                                      |
| 35206 | ENSG00000272268  |              | 33340.2 | -0.01 | 2  | 6111712   | 6114374   |  | HCG1990367; Putative uncharacterized protein DKFZp781K2332; Putative uncharacterized protein FLJ30594; Uncharacterized protein; cDNA FLJ30594 fs, clone BRAWH2008903 |
| 35214 | ENSG00000212042  |              | 33350.3 | -0.01 |    |           |           |  |                                                                                                                                                                      |
| 35227 | ENSG00000224560  |              | 33361.7 | -0.01 |    |           |           |  |                                                                                                                                                                      |
| 35242 | ENSG000002259209 |              | 33373.7 | -0.01 |    |           |           |  |                                                                                                                                                                      |
| 35250 | ENSG00000212948  |              | 33385.1 | -0.01 |    |           |           |  |                                                                                                                                                                      |
| 35262 | ENSG00000226168  |              | 33391.2 | -0.01 |    |           |           |  |                                                                                                                                                                      |
| 35277 | ENSG00000223483  |              | 33401.1 | -0.01 |    |           |           |  |                                                                                                                                                                      |
| 35292 | ENSG00000226255  |              | 33414.2 | -0.01 |    |           |           |  |                                                                                                                                                                      |
| 35298 | ENSG00000225725  |              | 33418.8 | -0.01 |    |           |           |  |                                                                                                                                                                      |
| 35302 | ENSG00000225196  |              | 33420.6 | -0.01 |    |           |           |  |                                                                                                                                                                      |
| 35308 | ENSG00000224472  |              | 33428.6 | -0.01 |    |           |           |  |                                                                                                                                                                      |
| 35320 | ENSG00000213432  |              | 33439.9 | -0.01 |    |           |           |  |                                                                                                                                                                      |
| 35350 | ENSG00000242685  |              | 33465.4 | -0.01 |    |           |           |  |                                                                                                                                                                      |
| 35382 | ENSG00000226919  |              | 33490.9 | -0.01 |    |           |           |  |                                                                                                                                                                      |
| 35383 | ENSG00000212553  |              | 33492.2 | -0.01 |    |           |           |  |                                                                                                                                                                      |
| 35385 | ENSG00000225926  |              | 33492.9 | -0.01 |    |           |           |  |                                                                                                                                                                      |
| 35400 | ENSG00000226952  |              | 33502   | -0.01 |    |           |           |  |                                                                                                                                                                      |
| 35403 | ENSG00000227083  |              | 33504.8 | -0.01 |    |           |           |  |                                                                                                                                                                      |
| 35410 | ENSG00000271417  |              | 33515.3 | -0.01 |    |           |           |  |                                                                                                                                                                      |
| 35419 | ENSG00000225706  |              | 33525.9 | -0.01 |    |           |           |  |                                                                                                                                                                      |
| 35421 | ENSG00000226685  |              | 33530.3 | -0.01 |    |           |           |  |                                                                                                                                                                      |
| 35423 | ENSG00000273199  |              | 33533   | -0.01 |    |           |           |  |                                                                                                                                                                      |
| 35426 | ENSG00000225942  |              | 33537.4 | -0.01 |    |           |           |  |                                                                                                                                                                      |
| 35427 | ENSG00000226160  |              | 33537.6 | -0.01 |    |           |           |  |                                                                                                                                                                      |
| 35442 | ENSG00000219159  |              | 33554   | -0.01 |    |           |           |  |                                                                                                                                                                      |
| 35448 | ENSG00000223269  |              | 33559.8 | -0.01 |    |           |           |  |                                                                                                                                                                      |
| 35452 | ENSG00000271384  |              | 33561.5 | -0.01 |    |           |           |  |                                                                                                                                                                      |
| 35465 | ENSG00000225918  |              | 33562.1 | -0.01 |    |           |           |  |                                                                                                                                                                      |
| 35474 | ENSG000002266295 |              | 33568.4 | -0.01 |    |           |           |  |                                                                                                                                                                      |
| 35485 | ENSG00000212598  |              | 33609.9 | -0.01 |    |           |           |  |                                                                                                                                                                      |
| 35511 | ENSG00000221474  |              | 33627.5 | -0.01 |    |           |           |  |                                                                                                                                                                      |
| 35517 | ENSG000002231931 |              | 33631   | -0.01 |    |           |           |  |                                                                                                                                                                      |
| 35530 | ENSG00000272482  |              | 33639.6 | -0.01 |    |           |           |  |                                                                                                                                                                      |
| 35532 | ENSG00000271387  |              | 33639.7 | -0.01 |    |           |           |  |                                                                                                                                                                      |
| 35570 | ENSG000002240731 |              | 33677.3 | -0.01 |    |           |           |  |                                                                                                                                                                      |
| 35582 | ENSG00000225252  |              | 33680.9 | -0.01 |    |           |           |  |                                                                                                                                                                      |
| 35586 | ENSG000002264046 |              | 33693.6 | -0.01 | 12 | 57907700  | 57908023  |  | RNA, 7SL, cytoplasmic 312, pseudogene                                                                                                                                |
| 35599 | ENSG00000226477  |              | 33703.4 | -0.01 |    |           |           |  |                                                                                                                                                                      |
| 35603 | ENSG00000225921  |              | 33705.5 | -0.01 |    |           |           |  |                                                                                                                                                                      |
| 35605 | ENSG00000226987  |              | 33709.5 | -0.01 |    |           |           |  |                                                                                                                                                                      |
| 35639 | ENSG00000226916  |              | 33748.4 | -0.01 |    |           |           |  |                                                                                                                                                                      |
| 35673 | ENSG00000226347  |              | 33786.2 | -0.01 |    |           |           |  |                                                                                                                                                                      |
| 35674 | ENSG00000226526  |              | 33789.6 | -0.01 |    |           |           |  |                                                                                                                                                                      |
| 35677 | ENSG00000225258  |              | 33792.6 | -0.01 |    |           |           |  |                                                                                                                                                                      |
| 35683 | ENSG00000226793  |              | 33802.6 | -0.01 |    |           |           |  |                                                                                                                                                                      |
| 35684 | ENSG00000224779  |              | 33802.6 | -0.01 |    |           |           |  |                                                                                                                                                                      |
| 35714 | ENSG00000226007  |              | 33826.2 | -0.01 |    |           |           |  |                                                                                                                                                                      |
| 35724 | ENSG00000225500  | SENP3-EIF4A1 | 33834.7 | -0.01 | 17 | 7486604   | 7482033   |  | SENP3-EIF4A1 readthrough (RMD candidate)                                                                                                                             |
| 35726 | ENSG00000227268  |              | 33836.3 | -0.01 |    |           |           |  |                                                                                                                                                                      |



|       |                  |             |         |       |           |          |           |           |                                                                   |
|-------|------------------|-------------|---------|-------|-----------|----------|-----------|-----------|-------------------------------------------------------------------|
| 37272 | ENS00000249042   |             | 35396.7 | -0.01 |           |          |           |           |                                                                   |
| 37302 | ENS00000275421   |             | 36422.7 | -0.01 |           |          |           |           |                                                                   |
| 37333 | ENS00000214184   |             | 35453.5 | -0.01 |           |          |           |           |                                                                   |
| 37334 | ENS00000235423   |             | 35453.3 | -0.01 |           |          |           |           |                                                                   |
| 37337 | ENS00000202971   | MIR4727     | 35467.7 | -0.01 | 17        | 36962091 | 36962145  |           | miR4727                                                           |
| 37349 | ENS00000202971   |             | 35467.7 | -0.01 |           |          |           |           |                                                                   |
| 37356 | ENS00000289558   |             | 35471.8 | -0.01 | 7         | 65112081 | 65112080  |           | Protein LOC10096407                                               |
| 37362 | ENS000002081308  |             | 35474.9 | -0.01 |           |          |           |           |                                                                   |
| 37377 | ENS00000203383   |             | 35489.2 | -0.01 |           |          |           |           |                                                                   |
| 37393 | ENS00000268750   |             | 35504.5 | -0.01 |           |          |           |           |                                                                   |
| 37442 | ENS00000208179   |             | 35561.6 | -0.01 |           |          |           |           |                                                                   |
| 37461 | ENS000002081928  |             | 35583.6 | -0.01 |           |          |           |           |                                                                   |
| 37487 | ENS000002081317  |             | 35613   | -0.01 |           |          |           |           |                                                                   |
| 37496 | ENS00000229820   |             | 35621.4 | -0.01 | 13        | 11108652 | 11108653  |           | Small nuclear RNA U13                                             |
| 37498 | ENS000002025237  |             | 35628   | -0.01 |           |          |           |           |                                                                   |
| 37555 | ENS000002025520  |             | 35697.7 | -0.01 |           |          |           |           |                                                                   |
| 37568 | ENS00000272622   |             | 35711.9 | -0.01 |           |          |           |           |                                                                   |
| 37605 | ENS000002029222  |             | 35767   | -0.01 |           |          |           |           |                                                                   |
| 37607 | ENS00000270059   |             | 35745.9 | -0.01 |           |          |           |           |                                                                   |
| 37616 | ENS00000272438   |             | 35752.6 | -0.01 |           |          |           |           |                                                                   |
| 37666 | ENS0000020271221 |             | 3583.9  | -0.01 |           |          |           |           |                                                                   |
| 37699 | ENS000002028099  |             | 35848.5 | -0.01 |           |          |           |           |                                                                   |
| 37708 | ENS000002081005  |             | 35855   | -0.01 |           |          |           |           |                                                                   |
| 37745 | ENS000002021927  |             | 35893.3 | -0.01 |           |          |           |           |                                                                   |
| 37723 | ENS000002027283  |             | 35870.2 | -0.01 |           |          |           |           |                                                                   |
| 37799 | ENS000002027283  |             | 35907.6 | -0.01 |           |          |           |           |                                                                   |
| 37873 | ENS000002027283  |             | 36044.5 | -0.01 |           |          |           |           |                                                                   |
| 37860 | ENS000002026567  |             | 36041.5 | -0.01 |           |          |           |           |                                                                   |
| 37891 | ENS000002071200  |             | 36041.9 | -0.01 |           |          |           |           |                                                                   |
| 37923 | ENS000002030001  |             | 36081   | -0.01 |           |          |           |           |                                                                   |
| 37929 | ENS000002070413  |             | 36080.7 | -0.01 |           |          |           |           |                                                                   |
| 37992 | ENS0000020272973 |             | 36154.3 | -0.01 |           |          |           |           |                                                                   |
| 38014 | ENS000002021448  |             | 36178   | -0.01 |           |          |           |           |                                                                   |
| 38004 | ENS000002020920  |             | 36237.3 | -0.01 |           |          |           |           |                                                                   |
| 38111 | ENS000002031609  |             | 36476.4 | -0.01 |           |          |           |           |                                                                   |
| 38175 | ENS000002021927  | LHX1        | 36701   | -0.01 | 17        | 35204084 | 35201817  |           | LHX1 homeobox 1                                                   |
| 38141 | ENS000002028005  |             | 28505.6 | -0.02 | ant sense | 20       | 33804265  | 33805504  | MMP24 antisense RNA 9                                             |
| 38295 | ENS000002024911  | SCARN9A     | 31424.6 | -0.02 | ant sense | 11       | 93454879  | 93455032  | small Cajal body-specific RNA 9                                   |
| 38272 | ENS000002025228  | CASC8       | 34700.3 | -0.02 | ant sense | 8        | 12832089  | 12834084  | cancer susceptibility candidate 8 (non-protein coding)            |
| 38492 | ENS000002039911  | PRKCA2      | 32567.3 | -0.02 | ant sense | 7        | 15157427  | 15157299  | PRKCA2 antisense RNA 1                                            |
| 38495 | ENS000002047986  |             | 32879.5 | -0.02 | ant sense | 3        | 11339583  | 11339280  | PKCZ2 antisense RNA 1                                             |
| 38492 | ENS000002031442  | MIR13       | 32917.4 | -0.02 | ant sense | 12       | 19452468  | 19453371  | miR13                                                             |
| 38594 | ENS000002059025  | CACNA1C-AS4 | 33171.8 | -0.02 | ant sense | 12       | 2329703   | 2329745   | CACNA1C antisense RNA 4                                           |
| 38294 | ENS000002023897  | SPATA2      | 33407.7 | -0.02 | ant sense | 1        | 10939839  | 10940146  | spermatogenesis associated 42 (non-protein coding)                |
| 38172 | ENS000002041211  | TOLLIP-AS1  | 34296.4 | -0.02 | ant sense | 3        | 19945176  | 19946001  | IQGJ-SCHP1 regulator antisense RNA 1                              |
| 38172 | ENS000002029386  | RAB11B-AS1  | 34296.4 | -0.02 | ant sense | 19       | 8435267   | 8435589   | RAB11B antisense RNA 1                                            |
| 38600 | ENS0000020235904 | RBM33-AS3   | 34705.3 | -0.02 | ant sense | 3        | 2935585   | 2933217   | RBM33 antisense RNA 3                                             |
| 38600 | ENS000002025276  | DDIT3-AS1   | 34707.6 | -0.02 | ant sense | 11       | 4158447   | 4159487   | RMI1 antisense RNA 1                                              |
| 38606 | ENS000002025026  | PPIA-AS1    | 34830.9 | -0.02 | ant sense | 2        | 11689812  | 11691820  | PPP1A antisense RNA 1                                             |
| 38760 | ENS000002028725  | PRCL1-AS1   | 34881   | -0.02 | ant sense | 15       | 9150975   | 9153164   | PRCL1 antisense RNA 1                                             |
| 38676 | ENS000002025565  |             | 34976.6 | -0.02 | ant sense | 15       | 15266958  | 15272907  | RUSC3 antisense RNA 1                                             |
| 38746 | ENS000002017133  | TOLL2       | 35000.6 | -0.02 | ant sense | 6        | 2091378   | 2090501   | TOLL2 antisense RNA 1                                             |
| 38724 | ENS000002024453  |             | 35333.4 | -0.02 | ant sense | 11       | 2006532   | 2007049   | NAV2 antisense RNA 2                                              |
| 37623 | ENS000002049532  | MIR302B     | 35653.7 | -0.02 | ant sense | 4        | 11301762  | 11311207  | miR302b                                                           |
| 37724 | ENS000002025151  | TOLLIP-AS1  | 35926.1 | -0.02 | ant sense | 11       | 1330295   | 1331807   | TOLLIP antisense RNA 1 (head to head)                             |
| 37768 | ENS000002026033  | MIR4519     | 35920.2 | -0.02 | ant sense | 18       | 3086543   | 3086541   | miR4519                                                           |
| 37868 | ENS000002018917  | EMX2        | 35953.7 | -0.02 | ant sense | 10       | 13505982  | 13508195  | EMX2 host gene (non-protein coding)                               |
| 37881 | ENS000002020984  | ATE1-AS1    | 36128.1 | -0.02 | ant sense | 10       | 1286762   | 12871480  | ATE1 antisense RNA 1                                              |
| 38248 | ENS000002023091  | TMEM25-AS1  | 36488.2 | -0.02 | ant sense | 10       | 8180616   | 8180618   | TMEM25 antisense RNA 1                                            |
| 38376 | ENS000002029947  | EMX2-AS1    | 36556.7 | -0.02 | ant sense | 10       | 11623278  | 11630479  | EMX2 opposite strand antisense RNA                                |
| 38464 | ENS000002029548  | MIR159      | 36718.1 | -0.02 | ant sense | 18       | 4011309   | 4011635   | miR159                                                            |
| 38580 | ENS000002025588  | BRWD1-IT2   | 36765.3 | -0.02 | ant sense | 21       | 4068887   | 4068886   | BRWD1 intronic transcript 2 (non-protein coding)                  |
| 38583 | ENS000002027049  | MEIS1-AS2   | 36767.2 | -0.02 | ant sense | 2        | 8696920   | 8696744   | MEIS1 antisense RNA 2                                             |
| 38622 | ENS000002011609  | RPL14-AS2.4 | 36766.6 | -0.02 | ant sense | 12       | 2184561   | 2184561   | prostate cancer associated transcript 7 (non-protein coding)      |
| 38630 | ENS0000020230530 | LMI1-AS1    | 36818.3 | -0.02 | ant sense | 3        | 4572035   | 4573026   | LMI1 antisense RNA 1                                              |
| 38798 | ENS000002024859  | STAR34-AS1  | 36955.7 | -0.02 | ant sense | 5        | 11084704  | 11107523  | STAR34 antisense RNA 1                                            |
| 38864 | ENS000002030313  | TRAF1       | 37124.2 | -0.02 | ant sense | 22       | 2194511   | 2194511   | TRAF1 antisense RNA 1                                             |
| 38908 | ENS0000020270823 | MIR335      | 37249.3 | -0.02 | ant sense | 7        | 13013535  | 13013828  | hsa-miR-335                                                       |
| 38401 | ENS000002023123  | DSCAM-AS1   | 37625.6 | -0.02 | ant sense | 21       | 41755010  | 41757285  | DSCAM antisense RNA 1                                             |
| 38938 | ENS000002011168  | MIR508      | 37720.8 | -0.02 | ant sense | 13       | 9908704   | 9908704   | FAM87F antisense RNA 1                                            |
| 38246 | ENS000002045326  | MIR8-2      | 37879.7 | -0.02 | ant sense | 5        | 87803363  | 87806858  | long intergenic non-protein coding RNA 461                        |
| 38293 | ENS000002091069  | SNORD116-19 | 37898.6 | -0.02 | ant sense | 15       | 2533286   | 2534343   | small nuclear RNA, C/D box 116-20                                 |
| 38287 | ENS00000203099   | MIR508      | 37898.6 | -0.02 | ant sense | 15       | 1031363   | 1031363   | maternally expressed non-protein coding                           |
| 38340 | ENS000002028198  | LINC01082   | 31891.7 | -0.02 | ant sense | 16       | 88229787  | 88233326  | long intergenic non-protein coding RNA 1082                       |
| 38428 | ENS000002028339  | LINC00906   | 32840.1 | -0.02 | ant sense | 19       | 29458038  | 29461781  | long intergenic non-protein coding RNA 906                        |
| 38483 | ENS000002020551  | PPIA-AS1    | 34005.8 | -0.02 | ant sense | 10       | 1286762   | 12871480  | Protein-Rib region non-protein coding RNA 2                       |
| 38433 | ENS000002028445  | LINC00008   | 32711.9 | -0.02 | ant sense | 2        | 219849321 | 219844382 | long intergenic non-protein coding RNA 808                        |
| 38498 | ENS0000020270086 | SCARN2A     | 32952   | -0.02 | ant sense | 1        | 109642815 | 109643241 | small Cajal body-specific RNA 2                                   |
| 38499 | ENS000002028889  | LINC01085   | 31420.6 | -0.02 | ant sense | 14       | 14703007  | 14703007  | long intergenic non-protein coding RNA 1085                       |
| 38196 | ENS000002031198  |             | 33332.6 | -0.02 | ant sense | 16       | 2707808   | 2709486   | chromosome 16 open reading frame 82                               |
| 38272 | ENS000002029140  |             | 33397.4 | -0.02 | ant sense | 16       | 2182072   | 2182558   | transmembrane protein 191C                                        |
| 38513 | ENS000002055113  |             | 33592.6 | -0.02 | ant sense | 52       | 5201768   | 5201768   | MIR1338 host gene (non-protein coding)                            |
| 38487 | ENS000002053799  | LINC01030   | 33596.2 | -0.02 | ant sense | 8        | 9165032   | 91651293  | long intergenic non-protein coding RNA 1030                       |
| 38502 | ENS000002028654  | MIRMT1      | 33622   | -0.02 | ant sense | 10       | 57352270  | 57359924  | MIR1 repeat containing inverted transcript 1 (non-protein coding) |
| 38509 | ENS000002026070  | GAT4-AS1    | 33847.8 | -0.02 | ant sense | 18       | 19748679  | 19749269  | GAT4 antisense RNA 1 (head to head)                               |
| 38628 | ENS000002029684  | IBAT7-AS1   | 34149.5 | -0.02 | ant sense | 1        | 22855787  | 22855713  | IBAT7 antisense RNA 1 (head to head)                              |
| 38297 | ENS0000020285185 | SNORD3B-1   | 34411   | -0.02 | ant sense | 17       | 18965225  | 18965225  | small nuclear RNA, C/D box 3B-1                                   |
| 38410 | ENS0000020251533 | LINC00805   | 34515.5 | -0.02 | ant sense | 14       | 10366388  | 10366388  | long intergenic non-protein coding RNA 805                        |
| 38410 | ENS0000020281424 | LINC01152   | 34510.2 | -0.02 | ant sense | 15       | 70029452  | 70034889  | long intergenic non-protein coding RNA 1152                       |
| 38708 | ENS0000020286751 | SCGB1B2P    | 34818.3 | -0.02 | ant sense | 19       | 50067838  | 50068606  | secretoglobin, family 1B, member 2, pseudogene                    |
| 38798 | ENS000002047400  | DNAJC3-AS1  | 34913.3 | -0.02 | ant sense | 13       | 9863087   | 9863079   | DNAJC3 antisense RNA 1 (head to head)                             |
| 37037 | ENS000002049484  | MIR4584     | 35184.2 | -0.02 | ant sense | 11       | 2781975   | 2781975   | miR4584                                                           |
| 37110 | ENS0000020234787 | LINC00458   | 35233.8 | -0.02 | ant sense | 13       | 54899924  | 54797001  | long intergenic non-protein coding RNA 458                        |
| 37387 | ENS0000020185384 | LINC01116   | 35725.6 | -0.02 | ant sense | 2        | 11749437  | 11750269  | long intergenic non-protein coding RNA 1116                       |
| 37818 | ENS000002029588  | LINC01123   | 35712.7 | -0.02 | ant sense | 2        | 110714469 | 110715313 | long intergenic non-protein coding RNA 1123                       |
| 37894 | ENS0000020254166 |             | 35844   | -0.02 | ant sense | 8        | 128187880 | 128215487 | cancer susceptibility candidate 19 (non-protein coding)           |
| 37726 | ENS0000020189389 | LINC00843   | 35972   | -0.02 | ant sense | 14       | 6258197   | 6259352   | long intergenic non-protein coding RNA 843                        |
| 37796 | ENS0000020204884 | LINC00941   | 36047.1 | -0.02 | ant sense | 12       | 3094797   | 3094797   | long intergenic non-protein coding RNA 941                        |
| 37799 | ENS000002081455  | LINC01003   | 35946.3 | -0.02 | ant sense | 7        | 152160874 | 152160834 | long intergenic non-protein coding RNA 1003                       |
| 37892 | ENS000002048886  | USP46-AS1   | 36011.7 | -0.02 | ant sense | 4        | 5352573   | 53527835  | USP46 antisense RNA 1                                             |
| 37806 | ENS000002027652  | MIR3812     | 36022.9 | -0.02 | ant sense | 4        | 131154201 | 131155189 | miR3812                                                           |
| 38007 | ENS0000020270419 | CAHM        | 36167.8 | -0.02 | ant sense | 6        | 163834097 | 163834992 | colon adenocarcinoma hypermethylated (non-protein coding)         |
| 38052 | ENS0000020236296 | LINC00707   | 36211.5 | -0.02 | ant sense | 10       | 6821560   | 6844988   | long intergenic non-protein coding RNA 707                        |
| 38063 | ENS000002024642  | LINC00842   | 36211.5 | -0.02 | ant sense | 10       | 3366120   | 3366120   | long intergenic non-protein coding RNA 842                        |
| 38148 | ENS0000020115808 | LINC01139   | 36296.6 | -0.02 | ant sense | 2        | 238643684 | 238649323 | long intergenic non-protein coding RNA 1139                       |
| 38177 | ENS000002024377  | LINC00988   | 36327.6 | -0.02 | ant sense | 8        | 8525985   | 8526384   | long intergenic non-protein coding RNA 988                        |
| 38240 | ENS000002021938  | WWC2-AS2    | 36401.2 | -0.02 | ant sense | 4        | 18401870  | 184020392 | WWC2 antisense RNA 2                                              |
| 38308 | ENS0000020230506 |             | 36489.1 | -0.02 | ant sense | 21       | 44336913  | 44345756  | endogenous retrovirus group 4b, member 1                          |
| 38388 | ENS000002020884  | ZNF74-AS1   | 36571.9 | -0.02 | ant sense | X        | 48404928  | 48407843  | ZNF74 antisense RNA 1 (head to head)                              |
| 38408 | ENS000002025014  | MIR68       | 36584.3 | -0.02 | ant sense | 14       | 1513055   | 1513373   | Inchwormed protein                                                |
| 38519 | ENS000002023499  | FAM53H-AS1  | 36595.2 | -0.02 | ant sense | 8        | 144816310 | 144828507 | FAM53H antisense RNA 1 (head to head)                             |
| 38643 | ENS000002078840  | MIR7-3HG    | 36828   | -0.02 | ant sense | 19       | 4789117   | 4772545   | MIR7-3 host gene (non-protein coding)                             |
| 38985 | ENS000002020478  | LINC00073   | 37482.4 | -0.02 | ant sense | 3        | 98695693  | 98701840  | long intergenic non-protein coding RNA 973                        |
| 38950 | ENS0000020198221 | MLL14-AS1   | 37566.3 | -0.02 | ant sense | 6        | 168224556 | 168227389 | MLL14 antisense RNA 1 (head to head)                              |
| 38983 | ENS000002047844  | CCAT        | 37608.7 | -0.02 | ant sense | 8        | 12820111  | 12823133  | colon cancer associated transcript 1c (non-pro                    |

|       |                  |          |           |                      |           |            |            |                                                                               |                 |
|-------|------------------|----------|-----------|----------------------|-----------|------------|------------|-------------------------------------------------------------------------------|-----------------|
| 31622 | ENSG000002027870 | MIR221   | 29614.7   | -0.02                | miRNA     | 4          | 45605885   | 45605884                                                                      | microRNA 221    |
| 31728 | ENSG000002161711 | MIR421   | 29716     | -0.02                | miRNA     | 17         | 47384659   | 47384658                                                                      | microRNA 421    |
| 31811 | ENSG000001991169 | MIR307   | 30006.9   | -0.02                | miRNA     | 4          | 113590300  | 113590297                                                                     | microRNA 307    |
| 32009 | ENSG000002078633 | MIR128B2 | 30185.8   | -0.02                | miRNA     | 21         | 17962557   | 17962556                                                                      | microRNA 128b-2 |
| 32230 | ENSG00000207529  | MIR193B  | 30509     | -0.02                | miRNA     | 16         | 14397824   | 14397808                                                                      | microRNA 193b   |
| 32630 | ENSG000002021192 | MIR202   | 30916.741 | -0.02                | miRNA     | 7          | 99951766   | 99951766                                                                      | microRNA 202    |
| 32880 | ENSG00000208036  | MIR106B  | 31047.8   | -0.02                | miRNA     | 7          | 99951816   | 99951817                                                                      | microRNA 106b   |
| 33276 | ENSG00000198691  | MIR162   | 31418.4   | -0.02                | miRNA     | 3          | 160122533  | 160122613                                                                     | microRNA 162-2  |
| 33280 | ENSG00000201192  | MIR1224  | 31429.8   | -0.02                | miRNA     | 3          | 183892183  | 183892184                                                                     | microRNA 1224   |
| 33732 | ENSG00000215588  | MIR1226  | 31896.5   | -0.02                | miRNA     | 6          | 47891345   | 47891349                                                                      | microRNA 1226   |
| 33925 | ENSG00000206922  | MIR627   | 32079.5   | -0.02                | miRNA     | 13         | 11438492   | 11438498                                                                      | microRNA 627    |
| 33943 | ENSG00000201454  | MIR302D  | 32098.5   | -0.02                | miRNA     | 4          | 113569180  | 113569187                                                                     | microRNA 302d   |
| 34875 | ENSG00000207864  | MIR278   | 33102.4   | -0.02                | miRNA     | 9          | 97847727   | 97847823                                                                      | microRNA 278    |
| 35159 | ENSG00000211748  | MIR629   | 33300.3   | -0.02                | miRNA     | 1          | 15518488   | 15518593                                                                      | microRNA 629    |
| 35328 | ENSG00000210239  | MIR99A   | 33842.5   | -0.02                | miRNA     | 1          | 17911409   | 17911409                                                                      | microRNA 99a    |
| 35811 | ENSG00000202971  | MIR129B1 | 33929.1   | -0.02                | miRNA     | 11         | 121970465  | 121970552                                                                     | microRNA 129b-1 |
| 37154 | ENSG000002084219 | MIR4442  | 33955.4   | -0.02                | miRNA     | 3          | 25780364   | 25780430                                                                      | microRNA 4442   |
| 37163 | ENSG00000191161  | MIR129   | 35278.4   | -0.02                | miRNA     | 9          | 33952584   | 33952618                                                                      | microRNA 129    |
| 37409 | ENSG000002085806 | MIR4202  | 35519.9   | -0.02                | miRNA     | 9          | 139725409  | 139725492                                                                     | microRNA 4202   |
| 37621 | ENSG000002085112 | MIR1163  | 35645.2   | -0.02                | miRNA     | 9          | 91927140   | 91927221                                                                      | microRNA 1163   |
| 37670 | ENSG00000202122  | MIR340   | 35715.9   | -0.02                | miRNA     | 19         | 94134121   | 94134652                                                                      | microRNA 340    |
| 37705 | ENSG00000201540  | MIR1180  | 35852.5   | -0.02                | miRNA     | 17         | 19247819   | 19247887                                                                      | microRNA 1180   |
| 37709 | ENSG00000208232  | MIR3178  | 35855.3   | -0.02                | miRNA     | 16         | 2581923    | 2582008                                                                       | microRNA 3178   |
| 37765 | ENSG00000204462  | MIR348   | 35916.1   | -0.02                | miRNA     | 21         | 9629263    | 9629311                                                                       | microRNA 348    |
| 37991 | ENSG00000207951  | MIR561   | 36153.7   | -0.02                | miRNA     | 2          | 189162319  | 189162315                                                                     | microRNA 561    |
| 38001 | ENSG00000204585  | MIR4449  | 36219.5   | -0.02                | miRNA     | 4          | 53578849   | 53578914                                                                      | microRNA 4449   |
| 38065 | ENSG00000200605  | MIR501   | 36229.9   | -0.02                | miRNA     | X          | 133869358  | 133869358                                                                     | microRNA 501    |
| 38111 | ENSG000002011574 | MIR770   | 36265.8   | -0.02                | miRNA     | 14         | 101318727  | 101318824                                                                     | microRNA 770    |
| 38343 | ENSG000002007208 | MIR141   | 36516.5   | -0.02                | miRNA     | 12         | 9707260    | 9707354                                                                       | microRNA 141    |
| 38560 | ENSG00000205558  | MIR4330  | 36621.9   | -0.02                | miRNA     | 36         | 9669138    | 9669138                                                                       | microRNA 4330   |
| 38784 | ENSG00000208555  | MIR5143  | 36887.1   | -0.02                | miRNA     | 6          | 27115405   | 27115487                                                                      | microRNA 5143   |
| 38812 | ENSG00000208672  | MIR4722  | 37019.9   | -0.02                | miRNA     | 16         | 8872096    | 8872745                                                                       | microRNA 4722   |
| 38921 | ENSG00000210288  | MIR638   | 37120.2   | -0.02                | miRNA     | 12         | 133014633  | 133014633                                                                     | microRNA 638    |
| 38942 | ENSG000002038621 | 37687.6  | -0.02     | miRNA                | 6         | 26988114   | 26988126   | transfer RNA isoleucine 2 (anticodon UUAU)                                    |                 |
| 38947 | ENSG00000207543  | MIR4787  | 37693.2   | -0.02                | miRNA     | 3          | 50712511   | 50712594                                                                      | microRNA 4787   |
| 38953 | ENSG00000205643  | MIR7524  | 37702.4   | -0.02                | miRNA     | 3          | 58892197   | 58892197                                                                      | microRNA 7524   |
| 39441 | ENSG000002052487 | 28310.4  | -0.02     | misc. RNA            | 6         | 151619979  | 151620098  | RNA, Ro-associated Y4 pseudogene 20                                           |                 |
| 39444 | ENSG00000201279  | 28667.3  | -0.02     | misc. RNA            | 11        | 3683045    | 3683141    | Y RNA                                                                         |                 |
| 39428 | ENSG00000201127  | 28703    | -0.02     | misc. RNA            | 3         | 101381938  | 101381938  | Y RNA                                                                         |                 |
| 39741 | ENSG000002037494 | 29022.3  | -0.02     | misc. RNA            | 10        | 126503527  | 126503631  | Y RNA                                                                         |                 |
| 39899 | ENSG00000203377  | 29144.6  | -0.02     | misc. RNA            | X         | 6961628    | 69616225   | RNA, Ro-associated Y4 pseudogene 23                                           |                 |
| 31310 | ENSG00000201398  | 29201    | -0.02     | misc. RNA            | 3         | 9268873    | 9268873    | Y RNA                                                                         |                 |
| 31376 | ENSG000002009537 | 29594.8  | -0.02     | misc. RNA            | 11        | 116896115  | 116896708  | RNA, Ro-associated Y4 pseudogene 6                                            |                 |
| 31990 | ENSG000002052254 | 29785.1  | -0.02     | misc. RNA            | 1         | 8388127    | 8388239    | Y RNA                                                                         |                 |
| 32071 | ENSG00000198560  | 31041.67 | -0.02     | misc. RNA            | 10        | 34480998   | 34481028   | Y RNA                                                                         |                 |
| 34878 | ENSG000002019134 | 33014.5  | -0.02     | misc. RNA            | 10        | 106980703  | 106980934  | Y RNA                                                                         |                 |
| 35365 | ENSG00000199990  | VTRNA1-1 | 33475.2   | -0.02                | misc. RNA | 5          | 140009060  | 140009058                                                                     | vaull RNA 1-1   |
| 35686 | ENSG000002015533 | 34078.6  | -0.02     | misc. RNA            | 4         | 140062681  | 140062681  | RNA, 7SK small nuclear pseudogene 237                                         |                 |
| 35686 | ENSG000002015533 | 34078.6  | -0.02     | misc. RNA            | 4         | 117048207  | 117048208  | RNA, 7SK small nuclear pseudogene 273                                         |                 |
| 37000 | ENSG000002007833 | 35121    | -0.02     | misc. RNA            | 7         | 70569962   | 70569991   | RNA, 7SK small nuclear pseudogene 180                                         |                 |
| 37209 | ENSG00000201786  | 35229    | -0.02     | misc. RNA            | 4         | 154180031  | 154180182  | Y RNA                                                                         |                 |
| 37271 | ENSG000002022881 | 35238.2  | -0.02     | misc. RNA            | 17        | 38541484   | 38541590   | Y RNA                                                                         |                 |
| 37322 | ENSG000002041529 | 35350.5  | -0.02     | misc. RNA            | 3         | 113351827  | 113351827  | RNA, 7SL cytoplasmic 767, pseudogene                                          |                 |
| 37361 | ENSG000002030243 | 35363.6  | -0.02     | misc. RNA            | 5         | 6848240    | 6848975    | RNA, 7SK small nuclear pseudogene 79                                          |                 |
| 37370 | ENSG000002022348 | 35420.9  | -0.02     | misc. RNA            | 6         | 115543365  | 115544148  | RNA, 7SK small nuclear pseudogene 272                                         |                 |
| 37538 | ENSG00000202141  | 35576.5  | -0.02     | misc. RNA            | 2         | 183887587  | 183887599  | Y RNA                                                                         |                 |
| 37573 | ENSG00000201201  | 35717.4  | -0.02     | misc. RNA            | 16        | 67355991   | 67355991   | RNA, 7SK small nuclear pseudogene 116                                         |                 |
| 37691 | ENSG000002023038 | 35732.3  | -0.02     | misc. RNA            | 15        | 151641269  | 151641269  | RNA, 7SK small nuclear pseudogene 268                                         |                 |
| 37748 | ENSG000002022395 | 35900.9  | -0.02     | misc. RNA            | 18        | 29843098   | 29843201   | Y RNA                                                                         |                 |
| 38175 | ENSG00000202404  | 36328.9  | -0.02     | misc. RNA            | 2         | 158155519  | 158155570  | RNA, 7SK small nuclear pseudogene 281                                         |                 |
| 38207 | ENSG00000204981  | 36341.5  | -0.02     | misc. RNA            | 6         | 14885132   | 14885132   | RNA, 7SL cytoplasmic 821, pseudogene                                          |                 |
| 38262 | ENSG00000204168  | 37676.5  | -0.02     | misc. RNA            | 9         | 133275683  | 133275680  | RNA, 7SL cytoplasmic 865, pseudogene                                          |                 |
| 38294 | ENSG00000203091  | 37422.3  | -0.02     | misc. RNA            | 3         | 108407525  | 108407528  | Y RNA                                                                         |                 |
| 38773 | ENSG00000200000  | 38258    | -0.02     | processed pseudogene | 17        | 606421     | 606421     | lady ac binding protein pseudogene 7                                          |                 |
| 20919 | ENSG000002040342 | 20799.9  | -0.02     | processed pseudogene | 12        | 11868377   | 11868407   | ribosomal protein S2 pseudogene 5                                             |                 |
| 21005 | ENSG000002025573 | 20739.1  | -0.02     | processed pseudogene | 7         | 66071725   | 66072094   | ribosomal protein L35 pseudogene 5                                            |                 |
| 20911 | ENSG00000204588  | 21174.6  | -0.02     | processed pseudogene | 3         | 28412892   | 28412892   | signal peptidase complex subunit 1, homolog 5 (S. cerevisiae) pseudogene 4    |                 |
| 20910 | ENSG00000204858  | 22384    | -0.02     | processed pseudogene | 3         | 37058011   | 37058005   | ribosomal protein L28 pseudogene 11                                           |                 |
| 20088 | ENSG000002020897 | 22420.9  | -0.02     | processed pseudogene | 17        | 14668393   | 14668397   | ribosomal protein S18 pseudogene 12                                           |                 |
| 34646 | ENSG0000020158   | 22763.1  | -0.02     | processed pseudogene | 1         | 276312     | 276312     | nucleophosmin 1 (nucleolar phosphoprotein B23, numatrin) pseudogene 39        |                 |
| 20899 | ENSG00000178429  | 23057.6  | -0.02     | processed pseudogene | 10        | 86320199   | 86320199   | ribosomal protein S3A pseudogene 5                                            |                 |
| 24127 | ENSG000002023803 | 23250.1  | -0.02     | processed pseudogene | 3         | 186917867  | 186918346  | ribosomal protein S20 pseudogene 14                                           |                 |
| 24555 | ENSG00000200000  | 23258    | -0.02     | processed pseudogene | 4         | 48212      | 48212      | ras-related G23-binding protein subunit 1 pseudogene 2                        |                 |
| 25232 | ENSG000002015030 | 24177.4  | -0.02     | processed pseudogene | 17        | 1728691    | 1728726    | ribosomal protein L13 pseudogene 12                                           |                 |
| 25293 | ENSG000002028297 | 24228.5  | -0.02     | processed pseudogene | 18        | 72057119   | 72057337   | FBR-MUSV-associated ubiquitously expressed (fox derived) pseudogene 1         |                 |
| 25320 | ENSG000002015030 | 24282.1  | -0.02     | processed pseudogene | 18        | 92682      | 92682      | prothymosin, alpha pseudogene (genes-locus) pseudogene 1(2)                   |                 |
| 26130 | ENSG000002058845 | 24506.6  | -0.02     | processed pseudogene | 14        | 64068227   | 64068232   | heat shock 10Da protein 1 pseudogene 2                                        |                 |
| 27600 | ENSG000002015086 | 28195.9  | -0.02     | processed pseudogene | 10        | 74677399   | 74677402   | nucleophosmin 1 (nucleolar phosphoprotein B23, numatrin) pseudogene 24        |                 |
| 27824 | ENSG000002016640 | 28200    | -0.02     | processed pseudogene | 16        | 153191820  | 153191820  | cytochrome c, somatic pseudogene 45                                           |                 |
| 28019 | ENSG00000214192  | 28523.2  | -0.02     | processed pseudogene | 3         | 17543619   | 17543658   | ubiquitin-conjugating enzyme E2 variant 1 pseudogene 2                        |                 |
| 28397 | ENSG000002024953 | 28841.8  | -0.02     | processed pseudogene | Y         | 6587003    | 6587271    | serpin pseudogene 3                                                           |                 |
| 28431 | ENSG000002014028 | 29055.4  | -0.02     | processed pseudogene | X         | 2205918    | 2205918    | family with sequence similarity 1, member C2 (pseudogene)                     |                 |
| 28615 | ENSG000002025903 | 27086.2  | -0.02     | processed pseudogene | 6         | 10352561   | 10352072   | ribosomal protein L3 pseudogene 7                                             |                 |
| 28747 | ENSG000002028887 | 27222.3  | -0.02     | processed pseudogene | 19        | 14181154   | 14182052   | eukaryotic translation elongation factor 1 delta pseudogene 1                 |                 |
| 28633 | ENSG000002064172 | 28234.3  | -0.02     | processed pseudogene | 2         | 26251074   | 26251481   | Uncharacterized protein                                                       |                 |
| 30697 | ENSG000002040371 | 29240.1  | -0.02     | processed pseudogene | 8         | 27434563   | 27434563   | ribosomal protein S43 pseudogene 13                                           |                 |
| 30279 | ENSG000002033594 | 28620.1  | -0.02     | processed pseudogene | 2         | 55662292   | 55662758   | basic transcription factor 3 pseudogene 10                                    |                 |
| 30710 | ENSG000002015006 | 28987.3  | -0.02     | processed pseudogene | 16        | 68829796   | 68830796   | colicid coli-helix-coiled-coil-helix domain containing 2 pseudogene 2         |                 |
| 31438 | ENSG000002099118 | 29556.4  | -0.02     | processed pseudogene | 16        | 47612566   | 47612566   | NADH dehydrogenase (ubiquinone), 1 alpha subcomplex, 5 pseudogene 11          |                 |
| 32392 | ENSG000002035508 | 30556.9  | -0.02     | processed pseudogene | 20        | 44268125   | 44270007   | ribosomal protein S2 pseudogene 7                                             |                 |
| 32591 | ENSG000002045640 | 30719.6  | -0.02     | processed pseudogene | 4         | 169118158  | 169118663  | actin (beta non-muscle) ribonucleoprotein S2, family, member C                |                 |
| 32691 | ENSG000002040411 | 30858.9  | -0.02     | processed pseudogene | 4         | 1014310116 | 1014310116 | phosphoribosyl transferase 3 pseudogene 4                                     |                 |
| 32798 | ENSG000002060228 | 30988.9  | -0.02     | processed pseudogene | 8         | 83203859   | 83203814   | heterogeneous nuclear ribonucleoprotein A1 pseudogene 4                       |                 |
| 32927 | ENSG000002019806 | 31190.4  | -0.02     | processed pseudogene | 6         | 139935575  | 139936041  | ATP synthase, H+ transporting, mitochondrial F0 complex, subunit epsilon 1    |                 |
| 33000 | ENSG000002023426 | 31194.4  | -0.02     | processed pseudogene | 8         | 158411869  | 158411869  | THAP domain containing 1 pseudogene 1                                         |                 |
| 33033 | ENSG000002031445 | 31197.4  | -0.02     | processed pseudogene | 2         | 182933867  | 182934161  | translocase of inner mitochondrial membrane 8, homolog A (yeast) pseudogene 1 |                 |
| 33284 | ENSG000002042495 | 31424.3  | -0.02     | processed pseudogene | 8         | 62480779   | 62489230   | keratin 8 pseudogene 2                                                        |                 |
| 33464 | ENSG000002047723 | 31680.9  | -0.02     | processed pseudogene | 7         | 114901807  | 114901834  | heat shock 70Da protein 1 pseudogene 7                                        |                 |
| 33534 | ENSG000002014810 | 31899.9  | -0.02     | processed pseudogene | 6         | 34187216   | 34187843   | cytochrome c, somatic pseudogene 55                                           |                 |
| 33672 | ENSG000002029752 | 31835.1  | -0.02     | processed pseudogene | 1         | 81563952   | 81564090   | ribosomal protein L7 pseudogene 10                                            |                 |
| 33698 | ENSG000002030449 | 31903.9  | -0.02     | processed pseudogene | 1         | 129624156  | 129624156  | serpinin pseudogene 1                                                         |                 |
| 33765 | ENSG000002087742 | 31927    | -0.02     | processed pseudogene | 18        | 57684010   | 57684073   | family with sequence similarity 80, member C pseudogene                       |                 |
| 33882 | ENSG000002025099 | 32045.1  | -0.02     | processed pseudogene | 1         | 43306903   | 43306983   | ATPase, H+ transporting, lysosomal 31kDa, V1 subunit E1 pseudogene 1          |                 |
| 33933 | ENSG000002086213 | 32053.1  | -0.02     | processed pseudogene | 10        | 98011257   | 98011257   | SEC3A homolog 5 (NIMA-interacting) 1 pseudogene 1                             |                 |
| 34081 | ENSG000002028361 | 32253.6  | -0.02     | processed pseudogene | 13        | 19254834   | 19255466   | isoleucine repeat binding factor (NIMA-interacting) 1 pseudogene 5            |                 |
| 34190 | ENSG000002018146 | 32369.5  | -0.02     | processed pseudogene | 6         | 154897443  | 154898213  | ribosomal protein S4X pseudogene 8                                            |                 |
| 34410 | ENSG000002005871 | 32600.4  | -0.02     | processed pseudogene | 15        | 63420987   | 63420987   | ribosomal protein S26 pseudogene 47                                           |                 |
| 34427 | ENSG000002043454 | 32687.4  | -0.02     | processed pseudogene | 13        | 101192089  | 101192258  | ribosomal protein S26 pseudogene                                              |                 |









Table with 10 columns: ENSG accession, gene symbol, chromosome, position, strand, protein name, UniProt ID, and description. The table lists 463 rows of genomic data, including genes like GCNT1, NLRP5, MYLK3, and many others, with corresponding protein identifiers and functional descriptions.













|       |                  |             |       |       |                |    |           |           |                                                                    |
|-------|------------------|-------------|-------|-------|----------------|----|-----------|-----------|--------------------------------------------------------------------|
| 39147 | ENSG00000186276  | PPP1R27     | 37370 | -0.02 | protein_coding | 17 | 79791368  | 79792928  | protein phosphatase 1, regulatory subunit 27                       |
| 39152 | ENSG00000186997  | ANKK1A      | 37377 | -0.03 | protein_coding | 8  | 34851229  | 34851229  | ankyrin repeat and sterile alpha motif domain containing 1A        |
| 39158 | ENSG00000139874  | SSTR1       | 37379 | -0.02 | protein_coding | 4  | 39877204  | 39892272  | somatostatin receptor 1                                            |
| 39181 | ENSG00000143578  | CREBBP3.4   | 37404 | -0.02 | protein_coding | 1  | 153940010 | 153940010 | cAMP responsive element binding protein 3-like 4                   |
| 39192 | ENSG00000186897  | C12orf1     | 37411 | -0.02 | protein_coding | 12 | 49742620  | 49742620  | complement component 1, s subcomponent-like 4                      |
| 39195 | ENSG00000186963  | HXB5        | 37413 | -0.02 | protein_coding | 17 | 66683736  | 66683736  | homobox B5                                                         |
| 39199 | ENSG00000204147  | ASAH2B      | 37418 | -0.02 | protein_coding | 10 | 52499078  | 52576255  | N-acetylphosphine amidohydrolase (non-lysosomal ceramidase) 2B     |
| 39220 | ENSG00000171988  | APLN        | 37441 | -0.02 | protein_coding | A  | 128779240 | 128789833 | apelin                                                             |
| 39222 | ENSG00000192099  | HSPF4       | 37447 | -0.02 | protein_coding | 8  | 96830889  | 96830889  | Hermansky-Pudlak syndrome 4                                        |
| 39251 | ENSG00000164438  | TLX3        | 37469 | -0.02 | protein_coding | 5  | 170798288 | 170798288 | T-cell leukemia homeobox 3                                         |
| 39256 | ENSG00000123335  | SEKAC1      | 37475 | -0.02 | protein_coding | 6  | 158550336 | 158550336 | serine active site combining 1                                     |
| 39264 | ENSG00000209258  | COL3A3      | 37478 | -0.02 | protein_coding | 20 | 614437968 | 614572511 | collagen type IX, alpha 3                                          |
| 39296 | ENSG00000170831  | ZNF16       | 37510 | -0.02 | protein_coding | 8  | 146155744 | 146176274 | zinc finger protein 16                                             |
| 39307 | ENSG00000186542  | SPTSSB      | 37524 | -0.02 | protein_coding | 3  | 161062980 | 161060988 | serine palmitoyltransferase, small subunit B                       |
| 39321 | ENSG00000143914  | USP43       | 37558 | -0.02 | protein_coding | 17 | 9540815   | 9539300   | ubiquitin-specific protease 43                                     |
| 39324 | ENSG00000138515  | PDX1        | 37546 | -0.02 | protein_coding | 13 | 28434157  | 28500368  | pancreatic and duodenal homeobox 1                                 |
| 39336 | ENSG00000182992  | NEUROD1     | 37555 | -0.02 | protein_coding | 2  | 162537815 | 162545903 | neuronal differentiation 1                                         |
| 39343 | ENSG00000196991  | MAGE11      | 37573 | -0.02 | protein_coding | X  | 152443202 | 152489115 | melanoma antigen family A, direct expression of antigen M22-E      |
| 39347 | ENSG00000117407  | ARNT        | 37643 | -0.02 | protein_coding | 1  | 44538992  | 44420213  | arntin                                                             |
| 39351 | ENSG00000151338  | MIPOL1      | 37666 | -0.02 | protein_coding | 14 | 37647118  | 38021566  | mirror-image polycystin 1                                          |
| 39391 | ENSG00000201344  | CHORP2      | 37552 | -0.02 | protein_coding | 16 | 16599602  | 16718715  | chromosome 16 open reading frame 62                                |
| 39472 | ENSG00000183686  | HESX1       | 37706 | -0.02 | protein_coding | 3  | 57231944  | 57260549  | HESX homeobox 1                                                    |
| 39505 | ENSG00000198793  | ZNF239      | 37741 | -0.02 | protein_coding | 10 | 44051792  | 44070066  | zinc finger protein 239                                            |
| 39503 | ENSG00000170921  | C11orf70    | 37803 | -0.02 | protein_coding | 11 | 101931814 | 101935024 | chromosome 11 open reading frame 70                                |
| 39597 | ENSG00000197261  | C6orf141    | 37832 | -0.02 | protein_coding | 6  | 49518113  | 4952620   | chromosome 6 open reading frame 141                                |
| 39614 | ENSG00000135348  | CGA         | 37852 | -0.02 | protein_coding | 8  | 87795216  | 87804824  | glycoprotein hormones, alpha polypeptide                           |
| 39624 | ENSG00000120388  | SNR44       | 37897 | -0.02 | protein_coding | 4  | 2865335   | 2842474   | G-protein-coupled receptor kinase 4                                |
| 39625 | ENSG00000136098  | NEK3        | 37858 | -0.02 | protein_coding | 13 | 52706775  | 52733986  | NIMA-related kinase 3                                              |
| 39629 | ENSG00000150893  | FREM2       | 37883 | -0.02 | protein_coding | 13 | 39061266  | 39460074  | FRS1 related extracellular matrix protein 2                        |
| 39651 | ENSG00000186969  | BMS1B       | 38010 | -0.02 | protein_coding | 3  | 66618088  | 66618088  | bone morphogenetic protein receptor, type 1B                       |
| 39757 | ENSG00000177692  | DNAJC28     | 38010 | -0.02 | protein_coding | 21 | 34860497  | 34860497  | DnaJ (Hsp40) related, subfamily C, member 28                       |
| 39865 | ENSG00000184853  | UNCX        | 38136 | -0.02 | protein_coding | 7  | 1272543   | 1274954   | UNC homeobox                                                       |
| 39845 | ENSG00000192882  | GNB3        | 38227 | -0.02 | protein_coding | 10 | 11862768  | 11862768  | protein and serine/threonine protein 2                             |
| 39956 | ENSG00000111664  | GNB3        | 38227 | -0.02 | protein_coding | 10 | 6949118   | 6956557   | guanine nucleotide binding protein (G-protein), beta polypeptide 3 |
| 40131 | ENSG00000120075  | HOBX5       | 38426 | -0.02 | protein_coding | 17 | 46646819  | 46671323  | homobox B5                                                         |
| 40442 | ENSG00000120883  | SNR202      | 38501 | -0.02 | protein_coding | 12 | 10501304  | 10501304  | small nuclear RNA, C/D box 116-18                                  |
| 34132 | ENSG00000201595  | SNR202      | 38501 | -0.02 | protein_coding | 3  | 51728481  | 51728588  | RNA, SS ribosomal pseudogenes 370                                  |
| 39286 | ENSG00000202303  | SNR202      | 38501 | -0.02 | protein_coding | 6  | 143770946 | 143771048 | RNA, SS ribosomal pseudogenes 370                                  |
| 39388 | ENSG00000199998  | SNR202      | 38501 | -0.02 | protein_coding | 3  | 15096768  | 15096768  | RNA, SS ribosomal pseudogenes 370                                  |
| 39450 | ENSG00000202211  | SNR202      | 38501 | -0.02 | protein_coding | 19 | 58874805  | 58874929  | RNA, SS ribosomal pseudogenes 473                                  |
| 39576 | ENSG00000202434  | SNR202      | 38501 | -0.02 | protein_coding | 18 | 33965426  | 33965572  | RNA, SS ribosomal pseudogenes 2                                    |
| 39588 | ENSG00000122721  | SNR202      | 38501 | -0.02 | protein_coding | 16 | 11173749  | 11173749  | RNA, SS ribosomal pseudogenes 5                                    |
| 39723 | ENSG00000202187  | SNR202      | 38501 | -0.02 | protein_coding | 12 | 28658327  | 28658461  | RNA, SS ribosomal pseudogenes 355                                  |
| 39676 | ENSG00000198572  | SNR202      | 38501 | -0.02 | protein_coding | 4  | 18093620  | 18093610  | RNA, SS ribosomal pseudogenes 174                                  |
| 39830 | ENSG00000202426  | SNR202      | 38501 | -0.02 | protein_coding | 12 | 34588884  | 34588752  | SS ribosomal RNA                                                   |
| 39849 | ENSG00000202138  | SNR202      | 38501 | -0.02 | protein_coding | 14 | 892391    | 892391    | RNA, SS ribosomal pseudogenes 450                                  |
| 39882 | ENSG00000200755  | SNR202      | 38501 | -0.02 | protein_coding | 1  | 173938456 | 173938874 | RNA, SS ribosomal pseudogenes 68                                   |
| 37087 | ENSG00000201622  | SNR202      | 38501 | -0.02 | protein_coding | 3  | 179876074 | 179876795 | RNA, SS ribosomal pseudogenes 149                                  |
| 37676 | ENSG00000198048  | SNR202      | 38501 | -0.02 | protein_coding | 1  | 204511449 | 204511449 | RNA, SS ribosomal pseudogenes 14                                   |
| 37702 | ENSG00000198074  | SNR202      | 38501 | -0.02 | protein_coding | 18 | 21704669  | 21705687  | RNA, SS ribosomal pseudogenes 42                                   |
| 37816 | ENSG00000200873  | SNR202      | 38501 | -0.02 | protein_coding | 15 | 2150911   | 21511027  | RNA, SS ribosomal pseudogenes 369                                  |
| 38066 | ENSG00000202472  | SNR202      | 38501 | -0.02 | protein_coding | 16 | 140085811 | 140086707 | RNA, SS ribosomal pseudogenes 248                                  |
| 38101 | ENSG00000200741  | SNR202      | 38501 | -0.02 | protein_coding | 6  | 56963556  | 56963670  | RNA, SS ribosomal pseudogenes 161                                  |
| 38133 | ENSG00000201096  | MIR741.2    | 38286 | -0.02 | protein_coding | 14 | 76070156  | 76070261  | RNA, SS ribosomal pseudogenes 387                                  |
| 38172 | ENSG00000200264  | SNR202      | 38501 | -0.02 | protein_coding | 4  | 8394742   | 8394851   | RNA, SS ribosomal pseudogenes 152                                  |
| 38220 | ENSG00000202741  | SNR202      | 38501 | -0.02 | protein_coding | 7  | 33217352  | 33217450  | RNA, SS ribosomal pseudogenes 229                                  |
| 38233 | ENSG00000190899  | SNR202      | 38501 | -0.02 | protein_coding | 1  | 52438082  | 52439207  | RNA, SS ribosomal pseudogenes 48                                   |
| 38311 | ENSG00000120191  | SNR202      | 38501 | -0.02 | protein_coding | 1  | 128337693 | 128337610 | RNA, SS ribosomal pseudogenes 242                                  |
| 38463 | ENSG00000202313  | SNR202      | 38501 | -0.02 | protein_coding | 10 | 23288184  | 23288287  | RNA, SS ribosomal pseudogenes 304                                  |
| 38612 | ENSG00000200558  | SNR202      | 38501 | -0.02 | protein_coding | 16 | 88776383  | 88776481  | RNA, SS ribosomal pseudogenes 429                                  |
| 39017 | ENSG00000200241  | SNR202      | 38501 | -0.02 | protein_coding | 11 | 11862768  | 11862768  | RNA, SS ribosomal pseudogenes 258                                  |
| 32043 | ENSG00000207074  | PWARS       | 38235 | -0.02 | sense_intronic | 15 | 25230011  | 25230200  | small nuclear RNA, C/D box 64                                      |
| 34540 | ENSG00000204882  | SNR202      | 38501 | -0.02 | sense_intronic | 10 | 49718568  | 49719632  | ARHGAP22 intronic transcript 1 (non-protein coding)                |
| 39129 | ENSG00000200928  | SNR202      | 38501 | -0.02 | sense_intronic | 14 | 11862768  | 11862768  | SNORD2 (scargina) (non-protein coding)                             |
| 39062 | ENSG00000200688  | SNORD118-18 | 28445 | -0.02 | snRNA          | 15 | 25330532  | 25330532  | small nuclear RNA, C/D box 116-18                                  |
| 39200 | ENSG00000200532  | SNORD113-7  | 28951 | -0.02 | snRNA          | 4  | 101407463 | 101407539 | small nuclear RNA, C/D box 117-7                                   |
| 39450 | ENSG00000196433  | SNORD118-18 | 28445 | -0.02 | snRNA          | 1  | 229012    | 229012    | small nuclear RNA, C/D box 116-18                                  |
| 39662 | ENSG000002021643 | SNORD77     | 28966 | -0.02 | snRNA          | 1  | 203986709 | 203986709 | small nuclear RNA, HACIA box 77                                    |
| 39036 | ENSG00000202745  | SNORD116-29 | 29111 | -0.02 | snRNA          | 15 | 25351688  | 25351750  | small nuclear RNA, C/D box 116-29                                  |
| 39071 | ENSG00000201743  | SNORD116-29 | 29111 | -0.02 | snRNA          | 7  | 22983205  | 22983205  | small nuclear RNA, C/D box 116-29                                  |
| 31067 | ENSG00000200367  | SNORD13-8   | 29503 | -0.02 | snRNA          | 14 | 101409768 | 101409881 | small nuclear RNA, C/D box 113-8                                   |
| 31196 | ENSG00000202270  | SNORD114-12 | 29415 | -0.02 | snRNA          | 14 | 101452585 | 101453359 | small nuclear RNA, C/D box 114-12                                  |
| 31388 | ENSG00000186764  | SNORD114-12 | 29415 | -0.02 | snRNA          | 22 | 3871518   | 3871518   | small nuclear RNA, C/D box 114-12                                  |
| 31326 | ENSG000002002413 | SNORD114-26 | 29546 | -0.02 | snRNA          | 14 | 101453384 | 101453454 | small nuclear RNA, C/D box 114-26                                  |
| 31390 | ENSG00000202783  | SNORD116-18 | 29604 | -0.02 | snRNA          | 15 | 25327915  | 25328006  | small nuclear RNA, C/D box 116-18                                  |
| 31448 | ENSG00000198708  | SNORD116-29 | 29546 | -0.02 | snRNA          | 12 | 7070384   | 7070384   | small Cajal body-specific RNA 13                                   |
| 31628 | ENSG00000200186  | SNORD116-27 | 29517 | -0.02 | snRNA          | 15 | 25348813  | 25348813  | small nuclear RNA, C/D box 115-27                                  |
| 31688 | ENSG00000200406  | SNORD114-23 | 29880 | -0.02 | snRNA          | 14 | 101450213 | 101450284 | small nuclear RNA, C/D box 114-23                                  |
| 31713 | ENSG00000198158  | SNORD116-29 | 29546 | -0.02 | snRNA          | 6  | 18460384  | 18460384  | small nuclear RNA, C/D box 116-29                                  |
| 31749 | ENSG00000200480  | SNORD114-28 | 29935 | -0.02 | snRNA          | 14 | 101455487 | 101455538 | small nuclear RNA, C/D box 114-28                                  |
| 31768 | ENSG00000200812  | SNORD114-25 | 29958 | -0.02 | snRNA          | 14 | 101452384 | 101452485 | small nuclear RNA, C/D box 114-25                                  |
| 31828 | ENSG00000198785  | SNORD6      | 30023 | -0.02 | snRNA          | 14 | 2186210   | 2186210   | small nuclear RNA, C/D box 6                                       |
| 31874 | ENSG00000201923  | SNORD6      | 30063 | -0.02 | snRNA          | 6  | 31903040  | 31903103  | small nuclear RNA, C/D box 48                                      |
| 31967 | ENSG00000202326  | SNORD116-25 | 30157 | -0.02 | snRNA          | 15 | 25342810  | 25342901  | small nuclear RNA, C/D box 116-25                                  |
| 32154 | ENSG00000200713  | SNORD116-13 | 30342 | -0.02 | snRNA          | 15 | 25342026  | 25342286  | small nuclear RNA, C/D box 116-13                                  |
| 32165 | ENSG00000198439  | SNORD116-29 | 30349 | -0.02 | snRNA          | 10 | 21963036  | 21963124  | small nuclear RNA, C/D box 4                                       |
| 32321 | ENSG00000202344  | SNORD114-21 | 30708 | -0.02 | snRNA          | 14 | 101448312 | 101448383 | small nuclear RNA, C/D box 114-21                                  |
| 32540 | ENSG00000201589  | SNORD14-7   | 30721 | -0.02 | snRNA          | 14 | 101441143 | 101441177 | small nuclear RNA, C/D box 114-7                                   |
| 32554 | ENSG00000203741  | SNORNA7     | 30709 | -0.02 | snRNA          | 16 | 160223824 | 160223824 | small nuclear RNA, C/D box 7                                       |
| 32584 | ENSG00000201557  | SNORF114-15 | 30709 | -0.02 | snRNA          | 14 | 101439007 | 101439078 | small nuclear RNA, C/D box 114-15                                  |
| 32615 | ENSG00000208145  | SNORF53     | 30807 | -0.02 | snRNA          | 2  | 29149933  | 29150010  | small nuclear RNA, C/D box 53                                      |
| 32616 | ENSG00000208145  | SNORF53     | 30807 | -0.02 | snRNA          | 2  | 86362963  | 86362963  | small nuclear RNA, C/D box 53                                      |
| 32737 | ENSG00000202048  | SNORD114-20 | 30913 | -0.02 | snRNA          | 14 | 101447341 | 101447412 | small nuclear RNA, C/D box 114-20                                  |
| 32742 | ENSG00000201285  | SNORD67     |       |       |                |    |           |           |                                                                    |

|       |                 |            |         |       |                                     |    |           |           |                                                                               |
|-------|-----------------|------------|---------|-------|-------------------------------------|----|-----------|-----------|-------------------------------------------------------------------------------|
| 36467 | ENSG00000252966 |            | 33584.1 | -0.02 | snRNA                               | 12 | 3063406   | 3063504   | RNA, U5 small nuclear 1315, pseudogene                                        |
| 36551 | ENSG00000252971 |            | 33619.9 | -0.02 | snRNA                               | 13 | 3443378   | 3443386   | RNA, U5a small nuclear 4, pseudogene                                          |
| 36787 | ENSG00000206593 |            | 34492.2 | -0.02 | snRNA                               | 5  | 10835035  | 10835041  | RNA, U5 small nuclear 47, pseudogene                                          |
| 36712 | ENSG00000202720 | RNU6-3P    | 34819.1 | -0.02 | snRNA                               | 4  | 110913481 | 110913587 | RNA, U5 small nuclear 35, pseudogene                                          |
| 36818 | ENSG00000201041 | RNU6-2     | 35071.7 | -0.02 | snRNA                               | X  | 140212215 | 140212221 | RNA, U6 small nuclear 3, pseudogene                                           |
| 36947 | ENSG00000201074 | RNU6-3P    | 35071.7 | -0.02 | snRNA                               | 18 | 6952677   | 6952677   | RNA, U5 small nuclear 39, pseudogene                                          |
| 36982 | ENSG00000222850 |            | 35097.8 | -0.02 | snRNA                               | 1  | 23841080  | 23841258  | RNA, U2 small nuclear 70, pseudogene                                          |
| 37247 | ENSG00000204113 | RNU6-1P    | 35287.1 | -0.02 | snRNA                               | 11 | 98345973  | 98346079  | RNA, U6 small nuclear 16, pseudogene                                          |
| 37417 | ENSG00000205181 |            | 35334.8 | -0.02 | snRNA                               | 4  | 128813148 | 128813237 | RNA, U5 small nuclear 563, pseudogene                                         |
| 37512 | ENSG00000222538 |            | 35639.2 | -0.02 | snRNA                               | 2  | 72948935  | 72949132  | RNA, U2 small nuclear 39, pseudogene                                          |
| 37641 | ENSG00000207110 |            | 35786.4 | -0.02 | snRNA                               | 8  | 129011377 | 129011540 | RNA, U1 small nuclear 106, pseudogene                                         |
| 37781 | ENSG00000208900 |            | 35932.9 | -0.02 | snRNA                               | 3  | 194839538 | 194839622 | RNA, U5 small nuclear 25, pseudogene                                          |
| 37783 | ENSG00000206625 | RNU6-2     | 35934.5 | -0.02 | snRNA                               | 15 | 68132277  | 68132383  | RNA, U6 small nuclear 1                                                       |
| 37797 | ENSG00000201707 | RNU6-2     | 35942.9 | -0.02 | snRNA                               | 19 | 893484    | 893590    | RNA, U6 small nuclear 9                                                       |
| 37828 | ENSG00000201783 |            | 35983.6 | -0.02 | snRNA                               | 18 | 69209574  | 69209690  | RNA, U5 small nuclear 22, pseudogene                                          |
| 37843 | ENSG00000202588 | RNU1-4     | 35988.9 | -0.02 | snRNA                               | 14 | 35025432  | 35025595  | RNA, U1 small nuclear 28, pseudogene                                          |
| 37844 | ENSG00000202408 |            | 36096.3 | -0.02 | snRNA                               | 1  | 147897326 | 147898388 | RNA, U1 small nuclear 122, pseudogene                                         |
| 38085 | ENSG00000202751 | RNVU11-14  | 36238.4 | -0.02 | snRNA                               | 1  | 145241465 | 145241528 | RNA, variant U1 small nuclear 14                                              |
| 38102 | ENSG00000206702 |            | 36253.9 | -0.02 | snRNA                               | 6  | 13214288  | 13214451  | RNA, U1 small nuclear 11, pseudogene                                          |
| 38153 | ENSG00000222626 |            | 36303.5 | -0.02 | snRNA                               | 5  | 157403774 | 157403964 | RNA, U2 small nuclear 48, pseudogene                                          |
| 38188 | ENSG00000201723 |            | 36307.1 | -0.02 | snRNA                               | X  | 49825389  | 49825496  | RNA, U5 small nuclear 29, pseudogene                                          |
| 38251 | ENSG00000207524 | RNU6-3P    | 36409   | -0.02 | snRNA                               | 4  | 88605999  | 88606105  | RNA, U5 small nuclear 33, pseudogene                                          |
| 38338 | ENSG00000194297 |            | 36503.9 | -0.02 | snRNA                               | 1  | 118874020 | 118874148 | RNA, U1 small nuclear 75, pseudogene                                          |
| 38366 | ENSG00000202153 | RNU6-2     | 36541.7 | -0.02 | snRNA                               | 19 | 1021621   | 1021627   | RNA, U6 small nuclear 2                                                       |
| 38372 | ENSG00000201699 |            | 36548.4 | -0.02 | snRNA                               | 1  | 14454038  | 14454199  | RNA, U1 small nuclear 59, pseudogene                                          |
| 38480 | ENSG00000222293 |            | 36692.2 | -0.02 | snRNA                               | 9  | 89037853  | 89038043  | RNA, U2 small nuclear 36, pseudogene                                          |
| 38525 | ENSG00000209920 | RNU6-2     | 36702.9 | -0.02 | snRNA                               | 3  | 19084925  | 19084931  | RNA, U5 small nuclear 4, pseudogene                                           |
| 38623 | ENSG00000198879 |            | 36809   | -0.02 | snRNA                               | 1  | 147735751 | 147735803 | RNA, U1 small nuclear 120, pseudogene                                         |
| 38653 | ENSG00000208908 |            | 36843.7 | -0.02 | snRNA                               | 6  | 53084059  | 53084222  | RNA, U1 small nuclear 136, pseudogene                                         |
| 38778 | ENSG00000201037 | RNU6-1     | 36843.7 | -0.02 | snRNA                               | 14 | 3261726   | 3261726   | RNA, U6 small nuclear 8                                                       |
| 39040 | ENSG00000207322 |            | 37251.2 | -0.02 | snRNA                               | 4  | 136917084 | 136917247 | RNA, U1 small nuclear 89, pseudogene                                          |
| 39096 | ENSG00000202078 |            | 37314.5 | -0.02 | snRNA                               | 10 | 88649326  | 88649490  | RNA, U1 small nuclear 19, pseudogene                                          |
| 39118 | ENSG00000202788 | RNU6-3P    | 37357   | -0.02 | snRNA                               | 14 | 14484473  | 14484473  | RNA, U2 small nuclear 38, pseudogene                                          |
| 39266 | ENSG00000206899 | RNU6-3P    | 37483.3 | -0.02 | snRNA                               | 12 | 98115494  | 98115600  | RNA, U5 small nuclear 36, pseudogene                                          |
| 39470 | ENSG00000251787 |            | 37705.3 | -0.02 | snRNA                               | 3  | 142520049 | 142520110 | RNA, U7 small nuclear 47, pseudogene                                          |
| 39594 | ENSG00000202691 |            | 37732.5 | -0.02 | snRNA                               | 17 | 8215688   | 82157051  | RNA, U1 small nuclear 85, pseudogene                                          |
| 39688 | ENSG00000223336 |            | 37827.5 | -0.02 | snRNA                               | 13 | 46948536  | 46948725  | RNA, U2 small nuclear 6, pseudogene                                           |
| 28044 | ENSG00000214182 |            | 26543.2 | -0.02 | transcribed_processed_pseudo_gene   | 13 | 82264046  | 82265207  | prothymosin, alpha pseudogene 5                                               |
| 28408 | ENSG00000259790 |            | 26886.8 | -0.02 | transcribed_processed_pseudo_gene   | 15 | 75613738  | 75615034  | acidic (leucine-rich) nuclear phosphoprotein 32 family, member B pseudogene 1 |
| 32822 | ENSG00000287736 |            | 38192.9 | -0.02 | transcribed_processed_pseudo_gene   | 19 | 1203208   | 1203820   | high mobility group box 2 pseudogene 1                                        |
| 33242 | ENSG00000226306 | NPYR       | 31389.8 | -0.02 | transcribed_processed_pseudo_gene   | 5  | 137188882 | 137148440 | neuropeptide Y receptor Y6 (pseudogene)                                       |
| 33409 | ENSG00000217325 |            | 31549.3 | -0.02 | transcribed_processed_pseudo_gene   | 6  | 122964634 | 122965536 | PRELI domain containing 1 pseudogene 1                                        |
| 34491 | ENSG00000230445 | LRR37A6P   | 32668.3 | -0.02 | transcribed_processed_pseudo_gene   | 10 | 27535279  | 27548384  | leucine rich repeat containing 37, member A6, pseudogene                      |
| 34617 | ENSG00000182814 | FUNC2P2    | 32791.8 | -0.02 | transcribed_processed_pseudo_gene   | 2  | 84517806  | 84519326  | FUN14 domain containing 2 pseudogene 2                                        |
| 35874 | ENSG00000241749 | RPBPAP2    | 33980.9 | -0.02 | transcribed_processed_pseudo_gene   | 12 | 66151800  | 66220754  | ribosomal protein S4 pseudogene 52                                            |
| 36237 | ENSG00000225366 | TDRF1P3    | 34356.4 | -0.02 | transcribed_processed_pseudo_gene   | X  | 109763540 | 109766249 | teratocarcinoma-derived growth factor 1 pseudogene 3                          |
| 38379 | ENSG00000229359 | PIN1P1     | 34487   | -0.02 | transcribed_processed_pseudo_gene   | 1  | 70385005  | 70388000  | peptidylprolyl cis/trans isomerase, NIMA-interacting 1 pseudogene 1           |
| 37884 | ENSG00000243742 | RPLP0P2    | 35725.2 | -0.02 | transcribed_unprocessed_pseudo_gene | 11 | 61382506  | 61406921  | ribosomal protein, large, P0 pseudogene 2                                     |
| 34470 | ENSG00000230246 |            | 32648.1 | -0.02 | transcribed_unprocessed_pseudo_gene | 9  | 90529408  | 90538572  | SPATA31 subfamily C, member 1                                                 |
| 34812 | ENSG00000254681 |            | 32953.8 | -0.02 | transcribed_unprocessed_pseudo_gene | 16 | 18458147  | 18495797  | polycystic kidney disease 1 (autosomal dominant) pseudogene 5                 |
| 35132 | ENSG00000240632 | SPATA31D5P | 33271.2 | -0.02 | transcribed_unprocessed_pseudo_gene | 9  | 84528352  | 84534841  | SPATA31 subfamily D, member 5, pseudogene                                     |
| 38662 | ENSG00000197063 |            | 34978.7 | -0.02 | transcribed_unprocessed_pseudo_gene | 5  | 150310207 | 150325851 | zinc finger protein 300 pseudogene 1                                          |
| 37021 | ENSG00000196162 | CIDECP     | 35147.1 | -0.02 | transcribed_unprocessed_pseudo_gene | 3  | 10055932  | 10068049  | cell death-inducing DFFA-like effector c pseudogene                           |
| 37234 | ENSG00000225151 | GOLGA2P7   | 35352.8 | -0.02 | transcribed_unprocessed_pseudo_gene | 15 | 84987600  | 84988868  | golgin A2 pseudogene 7                                                        |
| 37259 | ENSG00000184319 | RIZ2AP7    | 35382.5 | -0.02 | transcribed_unprocessed_pseudo_gene | 22 | 51195376  | 51239737  | ribosomal protein L23 pseudogene 82                                           |
| 37561 | ENSG00000198155 | ZNF878P    | 35705.5 | -0.02 | transcribed_unprocessed_pseudo_gene | 4  | 206399    | 249774    | zinc finger protein 878, pseudogene                                           |
| 37824 | ENSG00000133519 | ZDHHC8P1   | 35761.8 | -0.02 | transcribed_unprocessed_pseudo_gene | 22 | 23732793  | 23744913  | zinc finger, DHHC-type containing 8 pseudogene 1                              |
| 34238 | ENSG00000292787 | ZNF271     | 32413.5 | -0.02 | unitary_pseudogene                  | 18 | 32891046  | 32897930  | zinc finger protein 271                                                       |
| 34239 | ENSG00000292788 |            | 32413.5 | -0.02 | unitary_pseudogene                  | 15 | 33527763  | 33538822  | transmembrane and coiled-coil domain 5B, pseudogene                           |
| 37357 | ENSG00000182796 | TME1B18B   | 35472.2 | -0.02 | unitary_pseudogene                  | 12 | 56223529  | 56230350  | transmembrane protein 188B, pseudogene                                        |
| 39093 | ENSG00000181444 |            | 29243.8 | -0.02 | unprocessed_pseudogene              | 7  | 97595402  | 97596388  | effector receptor, family 7, subfamily E, member 38 pseudogene                |
| 31743 | ENSG00000205723 |            | 31025.7 | -0.02 | unprocessed_pseudogene              | 1  | 869178    | 869178    | mitochondrially encoded ATP synthase 8 pseudogene 1                           |
| 34467 | ENSG00000177910 |            | 32546.4 | -0.02 | unprocessed_pseudogene              | 9  | 90744220  | 90753361  | SPATA31 subfamily C, member 2                                                 |
| 34373 | ENSG00000202725 |            | 32628.1 | -0.02 | unprocessed_pseudogene              | 17 | 19505572  | 19505572  | MT-ND1 pseudogene 14                                                          |
| 34883 | ENSG00000202599 |            | 33028.6 | -0.02 | unprocessed_pseudogene              | 5  | 179076280 | 179076445 | Uncharacterized protein                                                       |
| 34914 | ENSG00000131113 |            | 33045.1 | -0.02 | unprocessed_pseudogene              | 3  | 19784659  | 19784749  | tubulin, beta 8 class VII, pseudogene 8                                       |
| 35224 | ENSG00000144188 |            | 33357.1 | -0.02 | unprocessed_pseudogene              | 2  | 97691718  | 97697373  | tripartite motif containing 43C, pseudogene                                   |
| 36941 | ENSG00000202530 |            | 35669.5 | -0.02 | unprocessed_pseudogene              | 7  | 56620     | 56620     | MT-ND2 pseudogene 26                                                          |
| 37469 | ENSG00000204548 |            | 36052.2 | -0.02 | unprocessed_pseudogene              | 7  | 14329153  | 14329111  | family with sequence similarity 115, member 8 (pseudogene)                    |
| 21458 | ENSG00000230202 |            | 21165.8 | -0.02 |                                     |    |           |           |                                                                               |
| 22067 | ENSG00000216426 |            | 21633.2 | -0.02 |                                     |    |           |           |                                                                               |
| 22106 | ENSG00000199113 |            | 21694.9 | -0.02 |                                     |    |           |           |                                                                               |
| 22884 | ENSG00000225200 |            | 22258.3 | -0.02 |                                     |    |           |           |                                                                               |
| 23151 | ENSG00000242299 |            | 22462.8 | -0.02 |                                     |    |           |           |                                                                               |
| 23144 | ENSG00000185641 |            | 22717.7 | -0.02 |                                     |    |           |           |                                                                               |
| 23538 | ENSG00000108294 | PSMB3      | 22751   | -0.02 |                                     | 17 | 38908989  | 38920484  | proteasome (prosome, macropain) subunit, beta type, 3                         |
| 26041 | ENSG00000295789 |            | 24839.2 | -0.02 |                                     |    |           |           |                                                                               |
| 26500 | ENSG00000295204 |            | 25228   | -0.02 |                                     |    |           |           |                                                                               |
| 27198 | ENSG00000225580 |            | 25842   | -0.02 |                                     |    |           |           |                                                                               |
| 27796 | ENSG00000131795 | RBM1A      | 26231.8 | -0.02 |                                     | 1  | 14507598  | 14513636  | RNA binding motif protein 8A                                                  |
| 27608 | ENSG00000204568 |            | 26444.8 | -0.02 |                                     |    |           |           |                                                                               |
| 28585 | ENSG00000250321 |            | 27054.2 | -0.02 |                                     |    |           |           |                                                                               |
| 28982 | ENSG00000273213 |            | 27433.1 | -0.02 |                                     |    |           |           |                                                                               |
| 29000 | ENSG00000204214 |            | 27532.2 | -0.02 |                                     |    |           |           |                                                                               |
| 28535 | ENSG00000201418 |            | 27847.7 | -0.02 |                                     |    |           |           |                                                                               |
| 28631 | ENSG00000233320 |            | 28033.4 | -0.02 |                                     | X  | 10323035  | 103230898 | H2B histone family, member X, pseudogene                                      |
| 29651 | ENSG00000201533 |            | 28042.7 | -0.02 |                                     |    |           |           |                                                                               |
| 30441 | ENSG00000198134 |            | 28141.7 | -0.02 |                                     |    |           |           |                                                                               |
| 30473 | ENSG00000213959 |            | 28783.8 | -0.02 |                                     |    |           |           |                                                                               |
| 30891 | ENSG00000204534 |            | 29192.3 | -0.02 |                                     | 7  | 8214842   | 8214935   | Y RNA                                                                         |
| 30999 | ENSG00000272781 |            | 29252.9 | -0.02 |                                     |    |           |           |                                                                               |
| 31269 | ENSG00000206317 | SNORD78    | 29485.4 | -0.02 |                                     | 1  | 17383470  | 173834824 | small nuclear RNA, C/D box 78                                                 |
| 31271 | ENSG00000202959 |            | 29498.3 | -0.02 |                                     |    |           |           |                                                                               |
| 31273 | ENSG00000230628 |            | 29499.9 | -0.02 |                                     |    |           |           |                                                                               |
| 31386 | ENSG00000201035 | MIR498     | 29578.4 | -0.02 |                                     | 8  | 41517959  | 41518026  | miR498                                                                        |
| 31420 | ENSG00000186603 | ANKRD2     | 29525   | -0.02 |                                     | 10 | 4726638   | 4726241   | ankyrin domain family 2                                                       |
| 31518 | ENSG00000203817 |            | 29723.5 | -0.02 |                                     | 1  | 149438750 | 149450549 | family with sequence similarity 72, member C                                  |
| 31548 | ENSG00000254033 |            | 29747.1 | -0.02 |                                     | 20 | 18309650  | 18309746  | RNA, Ro-associated Y4 pseudogene 11                                           |
| 31584 | ENSG00000225188 |            | 29780.3 | -0.02 |                                     |    |           |           |                                                                               |
| 31901 | ENSG00000252447 |            | 29992.1 | -0.02 |                                     | 11 | 47749098  | 47749189  | small nuclear RNA U13                                                         |
| 31901 | ENSG00000234838 |            | 30092.7 | -0.02 |                                     |    |           |           |                                                                               |

|       |                  |           |         |       |    |           |           |                                                 |
|-------|------------------|-----------|---------|-------|----|-----------|-----------|-------------------------------------------------|
| 34408 | ENSG00000237838  |           | 32583.6 | -0.02 |    |           |           |                                                 |
| 34438 | ENSG00000234529  |           | 32617.4 | -0.02 |    |           |           |                                                 |
| 34440 | ENSG00000251391  |           | 32619.6 | -0.02 |    |           |           |                                                 |
| 34443 | ENSG00000228100  |           | 32626.8 | -0.02 |    |           |           |                                                 |
| 34459 | ENSG00000235918  |           | 32641.6 | -0.02 |    |           |           |                                                 |
| 34501 | ENSG00000254296  |           | 32674.6 | -0.02 |    |           |           |                                                 |
| 34547 | ENSG00000187990  | HIST1H2BG | 32725.6 | -0.02 | 6  | 26216428  | 26216672  | histone cluster 1, H2bg                         |
| 34616 | ENSG00000262700  |           | 32790.6 | -0.02 |    |           |           |                                                 |
| 34620 | ENSG00000261555  |           | 32794.7 | -0.02 |    |           |           |                                                 |
| 34637 | ENSG00000237784  |           | 32811.3 | -0.02 |    |           |           |                                                 |
| 34645 | ENSG00000225961  |           | 32817.9 | -0.02 |    |           |           |                                                 |
| 34646 | ENSG00000252942  |           | 32818.7 | -0.02 |    |           |           |                                                 |
| 34649 | ENSG00000266118  |           | 32823.7 | -0.02 | 2  | 24347236  | 24413305  | Uncharacterized protein                         |
| 34654 | ENSG00000236453  |           | 32829   | -0.02 |    |           |           |                                                 |
| 34676 | ENSG00000202991  |           | 32841.4 | -0.02 |    |           |           |                                                 |
| 34710 | ENSG00000250411  |           | 32874   | -0.02 |    |           |           |                                                 |
| 34712 | ENSG00000204149  |           | 32875.2 | -0.02 |    |           |           |                                                 |
| 34713 | ENSG00000217193  |           | 32975.2 | -0.02 |    |           |           |                                                 |
| 34726 | ENSG00000272077  |           | 32987.7 | -0.02 |    |           |           |                                                 |
| 34814 | ENSG00000225398  |           | 32955.3 | -0.02 |    |           |           |                                                 |
| 34835 | ENSG00000233335  |           | 32978   | -0.02 |    |           |           |                                                 |
| 34852 | ENSG000002047157 |           | 32963.3 | -0.02 |    |           |           |                                                 |
| 34922 | ENSG00000259245  |           | 33055.9 | -0.02 |    |           |           |                                                 |
| 34966 | ENSG00000252437  |           | 33094.2 | -0.02 |    |           |           |                                                 |
| 34979 | ENSG00000187008  |           | 33107   | -0.02 | 16 | 71963441  | 72033877  | polycystic kidney disease 14a3                  |
| 34987 | ENSG00000237179  |           | 33113.1 | -0.02 |    |           |           |                                                 |
| 35007 | ENSG00000252728  |           | 33149.6 | -0.02 |    |           |           |                                                 |
| 36012 | ENSG00000258426  |           | 33153   | -0.02 |    |           |           |                                                 |
| 36014 | ENSG00000252997  |           | 33154.3 | -0.02 |    |           |           |                                                 |
| 36022 | ENSG00000241468  |           | 33181.4 | -0.02 |    |           |           |                                                 |
| 36044 | ENSG00000254900  |           | 33187.4 | -0.02 |    |           |           |                                                 |
| 36106 | ENSG00000281458  |           | 33243.3 | -0.02 |    |           |           |                                                 |
| 36188 | ENSG00000252475  |           | 33320   | -0.02 |    |           |           |                                                 |
| 36188 | ENSG00000180872  |           | 33326.8 | -0.02 |    |           |           |                                                 |
| 36246 | ENSG00000264859  |           | 33377.9 | -0.02 |    |           |           |                                                 |
| 36291 | ENSG00000254548  |           | 33385.8 | -0.02 |    |           |           |                                                 |
| 36294 | ENSG00000249365  |           | 33387.1 | -0.02 |    |           |           |                                                 |
| 36298 | ENSG00000205976  |           | 33394.9 | -0.02 |    |           |           |                                                 |
| 36271 | ENSG00000237197  |           | 33396.7 | -0.02 |    |           |           |                                                 |
| 36273 | ENSG00000287761  |           | 33398.7 | -0.02 |    |           |           |                                                 |
| 36286 | ENSG00000272763  |           | 33404.1 | -0.02 |    |           |           |                                                 |
| 36288 | ENSG00000252453  | PRAMEF11  | 33413.4 | -0.02 | 1  | 12884468  | 12891264  | PRAME family member 11                          |
| 36298 | ENSG00000246214  |           | 33418   | -0.02 |    |           |           |                                                 |
| 36313 | ENSG00000272288  |           | 33432.3 | -0.02 |    |           |           |                                                 |
| 36336 | ENSG00000236427  |           | 33446.9 | -0.02 |    |           |           |                                                 |
| 36336 | ENSG00000235404  |           | 33455   | -0.02 |    |           |           |                                                 |
| 36346 | ENSG00000226958  |           | 33462.7 | -0.02 |    |           |           |                                                 |
| 36364 | ENSG00000267268  |           | 33474.6 | -0.02 |    |           |           |                                                 |
| 36377 | ENSG00000231817  |           | 33484.5 | -0.02 |    |           |           |                                                 |
| 36387 | ENSG00000256049  |           | 33494.2 | -0.02 | 1  | 17686691  | 17728195  | peptidyl arginine deiminase, type VI            |
| 36395 | ENSG00000236998  |           | 33500.6 | -0.02 |    |           |           |                                                 |
| 36424 | ENSG00000250364  |           | 33533.3 | -0.02 |    |           |           |                                                 |
| 36439 | ENSG00000287291  |           | 33553.4 | -0.02 |    |           |           |                                                 |
| 36445 | ENSG00000273050  |           | 33557.1 | -0.02 |    |           |           |                                                 |
| 36478 | ENSG00000141460  | GJAS      | 33567.2 | -0.02 | 1  | 147228332 | 147245494 | gap junction protein, alpha 5, 40kDa            |
| 36485 | ENSG00000258552  |           | 33586.6 | -0.02 |    |           |           |                                                 |
| 36504 | ENSG00000295940  |           | 33622.2 | -0.02 |    |           |           |                                                 |
| 36504 | ENSG00000250978  |           | 33640.6 | -0.02 |    |           |           |                                                 |
| 36574 | ENSG00000254480  |           | 33681.3 | -0.02 |    |           |           |                                                 |
| 36596 | ENSG00000235405  |           | 33701.5 | -0.02 |    |           |           |                                                 |
| 36613 | ENSG00000233681  |           | 33718.5 | -0.02 |    |           |           |                                                 |
| 36618 | ENSG000002044604 |           | 33728.1 | -0.02 |    |           |           |                                                 |
| 36629 | ENSG00000240758  |           | 33736.5 | -0.02 |    |           |           |                                                 |
| 36694 | ENSG00000233508  |           | 33813.2 | -0.02 |    |           |           |                                                 |
| 36702 | ENSG00000272817  |           | 33818.5 | -0.02 |    |           |           |                                                 |
| 36722 | ENSG00000213036  |           | 33831.7 | -0.02 |    |           |           |                                                 |
| 36746 | ENSG00000204111  |           | 33874.2 | -0.02 |    |           |           |                                                 |
| 36776 | ENSG00000213942  |           | 33886.5 | -0.02 |    |           |           |                                                 |
| 36789 | ENSG00000289466  |           | 33912.1 | -0.02 |    |           |           |                                                 |
| 36801 | ENSG00000151685  | ANXA8     | 33925.2 | -0.02 | 10 | 47157983  | 47174093  | annexin A8-like 1                               |
| 36807 | ENSG00000220370  |           | 33928.7 | -0.02 |    |           |           |                                                 |
| 36815 | ENSG00000259093  |           | 33933.6 | -0.02 |    |           |           |                                                 |
| 36848 | ENSG00000251008  |           | 33968.8 | -0.02 |    |           |           |                                                 |
| 36848 | ENSG00000220322  |           | 33969.7 | -0.02 |    |           |           |                                                 |
| 36851 | ENSG00000261040  |           | 33982.6 | -0.02 |    |           |           |                                                 |
| 36862 | ENSG00000233463  |           | 33983.5 | -0.02 |    |           |           |                                                 |
| 36868 | ENSG00000263343  |           | 33976.6 | -0.02 |    |           |           |                                                 |
| 36940 | ENSG000002041544 |           | 34060.2 | -0.02 |    |           |           |                                                 |
| 36953 | ENSG000002281438 |           | 34078.8 | -0.02 |    |           |           |                                                 |
| 36961 | ENSG00000287299  |           | 34086.5 | -0.02 |    |           |           |                                                 |
| 36967 | ENSG00000271133  |           | 34092.8 | -0.02 |    |           |           |                                                 |
| 36989 | ENSG00000233653  |           | 34093.9 | -0.02 |    |           |           |                                                 |
| 36987 | ENSG00000235354  |           | 34104.6 | -0.02 |    |           |           |                                                 |
| 36998 | ENSG00000197148  |           | 34118.2 | -0.02 |    |           |           |                                                 |
| 36026 | ENSG00000235392  |           | 34144.7 | -0.02 |    |           |           |                                                 |
| 36034 | ENSG00000233962  |           | 34156.5 | -0.02 |    |           |           |                                                 |
| 36051 | ENSG00000182811  | HIST1H2AJ | 34172.5 | -0.02 | 6  | 27782112  | 27782607  | histone cluster 1, H2aj                         |
| 36074 | ENSG00000220777  |           | 34199.9 | -0.02 |    |           |           |                                                 |
| 36085 | ENSG00000250274  |           | 34202.4 | -0.02 |    |           |           |                                                 |
| 36085 | ENSG00000254183  |           | 34209.4 | -0.02 |    |           |           |                                                 |
| 36090 | ENSG00000265311  |           | 34212.6 | -0.02 |    |           |           |                                                 |
| 36094 | ENSG00000243481  |           | 34213.9 | -0.02 |    |           |           |                                                 |
| 36094 | ENSG00000243517  |           | 34215.3 | -0.02 |    |           |           |                                                 |
| 36095 | ENSG00000235704  |           | 34218.7 | -0.02 |    |           |           |                                                 |
| 36131 | ENSG00000272067  |           | 34226.6 | -0.02 |    |           |           |                                                 |
| 36183 | ENSG000002081496 |           | 34303.6 | -0.02 |    |           |           |                                                 |
| 36203 | ENSG00000196374  | HIST1H2BM | 34320.2 | -0.02 | 6  | 27782622  | 27783267  | histone cluster 1, H2bm                         |
| 36204 | ENSG00000208246  |           | 34321.6 | -0.02 |    |           |           |                                                 |
| 36220 | ENSG000002081759 |           | 34340.1 | -0.02 |    |           |           |                                                 |
| 36226 | ENSG00000209021  |           | 34355.3 | -0.02 |    |           |           |                                                 |
| 36266 | ENSG00000213030  |           | 34371.5 | -0.02 |    |           |           |                                                 |
| 36282 | ENSG00000259045  |           | 34384.2 | -0.02 |    |           |           |                                                 |
| 36286 | ENSG00000209484  |           | 34388.1 | -0.02 |    |           |           |                                                 |
| 36296 | ENSG00000252969  |           | 34410.8 | -0.02 |    |           |           |                                                 |
| 36320 | ENSG00000188384  |           | 34434.5 | -0.02 | 15 | 82751614  | 82769399  | chondroitin sulfate proteoglycan 4 pseudogene 8 |
| 36323 | ENSG00000262710  |           | 34437.4 | -0.02 |    |           |           |                                                 |
| 36336 | ENSG00000220465  |           | 34459.1 | -0.02 |    |           |           |                                                 |
| 36350 | ENSG00000237682  |           | 34468.8 | -0.02 |    |           |           |                                                 |
| 36365 | ENSG00000186274  | HIST1H2AE | 34479.5 | -0.02 | 6  | 26217165  | 26217171  | histone cluster 1, H2ae                         |
| 36433 | ENSG00000232338  |           | 34538.3 | -0.02 |    |           |           |                                                 |
| 36437 | ENSG00000214325  |           | 34543.4 | -0.02 | 18 | 75728367  | 75734089  | Uncharacterized protein                         |
| 36440 | ENSG00000254148  |           | 34544.2 | -0.02 |    |           |           |                                                 |
| 36464 | ENSG00000233350  |           | 34569.4 | -0.02 |    |           |           |                                                 |
| 36473 | ENSG00000236307  |           | 34573.5 | -0.02 |    |           |           |                                                 |
| 36505 | ENSG00000273106  |           | 34601.5 | -0.02 |    |           |           |                                                 |
| 36509 | ENSG00000185447  |           | 34605.9 | -0.02 |    |           |           |                                                 |
| 36524 | ENSG00000223734  |           | 34619.7 | -0.02 |    |           |           |                                                 |
| 36528 | ENSG00000214016  |           | 34625.5 | -0.02 |    |           |           |                                                 |
| 36539 | ENSG00000258979  |           | 34635.5 | -0.02 |    |           |           |                                                 |
| 36545 | ENSG00000281295  |           | 34642.4 | -0.02 |    |           |           |                                                 |
| 36549 | ENSG00000256873  |           | 34646.6 | -0.02 |    |           |           |                                                 |
| 36570 | ENSG00000252969  |           | 34664.9 | -0.02 |    |           |           |                                                 |
| 36580 | ENSG00000230079  |           | 34673.2 | -0.02 |    |           |           |                                                 |
| 36581 | ENSG00000287512  |           | 34674.7 | -0.02 |    |           |           |                                                 |
| 36583 | ENSG00000266978  |           | 34676.6 | -0.02 |    |           |           |                                                 |
| 36588 | ENSG00000258795  |           | 34694.2 | -0.02 |    |           |           |                                                 |
| 36614 | ENSG00000257718  |           | 34718.4 | -0.02 |    |           |           |                                                 |
| 36616 | ENSG00000212544  | RNU11-19  | 34719.4 | -0.02 | 1  | 149514090 | 149514256 | RNA, variant U1 small nuclear 19                |
| 36620 | ENSG00000251980  |           | 34738   | -0.02 |    |           |           |                                                 |
| 36638 | ENSG00000264012  |           | 34745.3 | -0.02 |    |           |           |                                                 |
| 36666 | ENSG00000214652  |           | 34795.4 | -0.02 |    |           |           |                                                 |
| 36706 | ENSG00000238193  |           | 34813.8 | -0.02 |    |           |           |                                                 |
| 36741 | ENSG000002081774 |           | 34852.5 | -0.02 |    |           |           |                                                 |
| 36753 | ENSG00000271330  |           | 34865.2 | -0.02 |    |           |           |                                                 |
| 36766 | ENSG00000272111  |           | 34868.9 | -0.02 |    |           |           |                                                 |
| 36765 | ENSG00000247228  |           | 34877.1 | -0.02 |    |           |           |                                                 |
| 36782 | ENSG00000287328  |           | 34903.3 | -0.02 |    |           |           |                                                 |
| 36802 | ENSG00000255114  |           | 34917.4 | -0.02 |    |           |           |                                                 |
| 36803 | ENSG00000226335  |           | 34917.5 | -0.02 |    |           |           |                                                 |
| 36854 | ENSG00000254844  |           | 34987.2 | -0.02 |    |           |           |                                                 |
| 36865 | ENSG00000233520  |           | 34990.5 | -0.02 |    |           |           |                                                 |
| 36887 | ENSG00000269862  |           | 35020.9 | -0.02 |    |           |           |                                                 |
| 36929 | ENSG00000254708  |           | 35054.6 | -0.02 |    |           |           |                                                 |
| 36938 | ENSG00000241447  |           | 35065.1 | -0.02 |    |           |           |                                                 |
| 36955 | ENSG00000253844  |           | 35081.8 | -0.02 |    |           |           |                                                 |
| 36983 | ENSG00000295139  |           | 35100   | -0.02 |    |           |           |                                                 |
| 36988 | ENSG00000214915  |           | 35105.5 | -0.02 |    |           |           |                                                 |
| 37009 | ENSG00000226860  |           | 35151.6 | -0.02 |    |           |           |                                                 |
| 37040 | ENSG00000224887  |           | 35167.2 | -0.02 |    |           |           |                                                 |
| 37045 | ENSG00000234645  |           | 35170.2 | -0.02 |    |           |           |                                                 |
| 37047 | ENSG00000269124  |           | 35172   | -0.02 |    |           |           |                                                 |

|       |                 |           |         |       |    |           |           |  |                                                                                                       |
|-------|-----------------|-----------|---------|-------|----|-----------|-----------|--|-------------------------------------------------------------------------------------------------------|
| 37066 | ENSG00000249206 |           | 35194 5 | -0.02 |    |           |           |  |                                                                                                       |
| 37067 | ENSG00000249207 |           | 35220 3 | -0.02 |    |           |           |  |                                                                                                       |
| 37107 | ENSG00000256184 |           | 35229 7 | -0.02 |    |           |           |  |                                                                                                       |
| 37108 | ENSG00000256238 |           | 35230 7 | -0.02 |    |           |           |  |                                                                                                       |
| 37134 | ENSG00000144140 |           | 35250 9 | -0.02 |    |           |           |  |                                                                                                       |
| 37138 | ENSG00000258518 |           | 35254 2 | -0.02 |    |           |           |  |                                                                                                       |
| 37148 | ENSG00000243538 |           | 35261 3 | -0.02 |    |           |           |  |                                                                                                       |
| 37150 | ENSG00000265794 |           | 35261 5 | -0.02 |    |           |           |  |                                                                                                       |
| 37153 | ENSG00000195458 | HIST1H2BH | 35261 5 | -0.02 | 6  | 26251879  | 26292303  |  | histone cluster 1, H2bh                                                                               |
| 37168 | ENSG00000266638 |           | 35261 7 | -0.02 |    |           |           |  |                                                                                                       |
| 37170 | ENSG00000235599 |           | 35264 5 | -0.02 |    |           |           |  |                                                                                                       |
| 37185 | ENSG00000242471 |           | 35301 9 | -0.02 |    |           |           |  |                                                                                                       |
| 37187 | ENSG00000236328 |           | 35303 6 | -0.02 | 2  | 101183951 | 101184019 |  | Small nuclear RNA U13                                                                                 |
| 37213 | ENSG00000225554 |           | 35332 5 | -0.02 |    |           |           |  |                                                                                                       |
| 37220 | ENSG00000219765 |           | 35337 2 | -0.02 |    |           |           |  |                                                                                                       |
| 37228 | ENSG00000269038 |           | 35345 9 | -0.02 |    |           |           |  |                                                                                                       |
| 37295 | ENSG00000248329 |           | 35379 3 | -0.02 |    |           |           |  |                                                                                                       |
| 37274 | ENSG00000228992 |           | 35397 4 | -0.02 |    |           |           |  |                                                                                                       |
| 37275 | ENSG00000213468 |           | 35398 3 | -0.02 |    |           |           |  |                                                                                                       |
| 37281 | ENSG00000271185 |           | 35404 9 | -0.02 |    |           |           |  |                                                                                                       |
| 37291 | ENSG00000231939 |           | 35407 9 | -0.02 |    |           |           |  |                                                                                                       |
| 37301 | ENSG00000254339 |           | 35421 6 | -0.02 |    |           |           |  |                                                                                                       |
| 37304 | ENSG00000224269 |           | 35424 2 | -0.02 |    |           |           |  |                                                                                                       |
| 37311 | ENSG00000219223 |           | 35428 5 | -0.02 |    |           |           |  |                                                                                                       |
| 37324 | ENSG00000240521 |           | 35443 2 | -0.02 |    |           |           |  |                                                                                                       |
| 37342 | ENSG00000228891 |           | 35480 7 | -0.02 |    |           |           |  |                                                                                                       |
| 37344 | ENSG00000224930 | LINC01162 | 35484 7 | -0.02 | 21 | 46419122  | 46424642  |  | long intergenic non-protein coding RNA 162                                                            |
| 37348 | ENSG00000273348 |           | 35486 5 | -0.02 |    |           |           |  |                                                                                                       |
| 37363 | ENSG00000198966 | HIST1H3A  | 35475 7 | -0.02 | 6  | 26225383  | 26225844  |  | histone cluster 1, H3a                                                                                |
| 37371 | ENSG00000230445 |           | 35503 8 | -0.02 |    |           |           |  |                                                                                                       |
| 37392 | ENSG00000258734 |           | 35503 8 | -0.02 |    |           |           |  |                                                                                                       |
| 37400 | ENSG00000254815 |           | 35513 6 | -0.02 |    |           |           |  |                                                                                                       |
| 37428 | ENSG00000214977 |           | 35540   | -0.02 |    |           |           |  |                                                                                                       |
| 37435 | ENSG00000259426 |           | 35558   | -0.02 |    |           |           |  |                                                                                                       |
| 37441 | ENSG00000287160 |           | 35559 8 | -0.02 |    |           |           |  |                                                                                                       |
| 37448 | ENSG00000236033 |           | 35567 8 | -0.02 |    |           |           |  |                                                                                                       |
| 37451 | ENSG00000230013 |           | 35570 5 | -0.02 |    |           |           |  |                                                                                                       |
| 37457 | ENSG00000254584 |           | 35581 4 | -0.02 |    |           |           |  |                                                                                                       |
| 37463 | ENSG00000219683 |           | 35587 5 | -0.02 |    |           |           |  |                                                                                                       |
| 37466 | ENSG00000228649 |           | 35591 9 | -0.02 |    |           |           |  |                                                                                                       |
| 37468 | ENSG00000249072 |           | 35594 7 | -0.02 |    |           |           |  |                                                                                                       |
| 37475 | ENSG00000218443 |           | 35600 2 | -0.02 |    |           |           |  |                                                                                                       |
| 37491 | ENSG00000236981 |           | 35615 7 | -0.02 |    |           |           |  |                                                                                                       |
| 37503 | ENSG00000281116 |           | 35627 2 | -0.02 |    |           |           |  |                                                                                                       |
| 37519 | ENSG00000198753 | HNF1B     | 35661   | -0.02 | 17 | 36046436  | 36105237  |  | HNF1 homeobox B                                                                                       |
| 37528 | ENSG00000258952 |           | 35693 5 | -0.02 |    |           |           |  |                                                                                                       |
| 37529 | ENSG00000242375 |           | 35691 1 | -0.02 |    |           |           |  |                                                                                                       |
| 37533 | ENSG00000259790 |           | 35672 3 | -0.02 |    |           |           |  |                                                                                                       |
| 37545 | ENSG00000269651 |           | 35686 1 | -0.02 |    |           |           |  |                                                                                                       |
| 37551 | ENSG00000215866 |           | 35684   | -0.02 |    |           |           |  |                                                                                                       |
| 37563 | ENSG00000241622 |           | 35709 6 | -0.02 |    |           |           |  |                                                                                                       |
| 37591 | ENSG00000234161 |           | 35727 9 | -0.02 |    |           |           |  |                                                                                                       |
| 37618 | ENSG00000287124 |           | 35757   | -0.02 |    |           |           |  |                                                                                                       |
| 37623 | ENSG00000272023 |           | 35759 3 | -0.02 |    |           |           |  |                                                                                                       |
| 37628 | ENSG00000195299 | LENG8     | 35702   | -0.02 | 19 | 54972981  | 54974994  |  | leukocyte receptor cluster (LRC) member 9                                                             |
| 37638 | ENSG00000270581 |           | 35774 3 | -0.02 |    |           |           |  |                                                                                                       |
| 37639 | ENSG00000214125 |           | 35777 2 | -0.02 |    |           |           |  |                                                                                                       |
| 37651 | ENSG00000230445 |           | 35726 4 | -0.02 |    |           |           |  |                                                                                                       |
| 37664 | ENSG00000253346 |           | 35808 4 | -0.02 |    |           |           |  |                                                                                                       |
| 37670 | ENSG00000271318 |           | 35813 6 | -0.02 |    |           |           |  |                                                                                                       |
| 37679 | ENSG00000238442 |           | 35825 1 | -0.02 |    |           |           |  |                                                                                                       |
| 37685 | ENSG00000173737 | SRCIN1    | 35833 5 | -0.02 | 17 | 36888251  | 36782183  |  | SRC kinase signaling inhibitor 1                                                                      |
| 37712 | ENSG00000255853 |           | 35857   | -0.02 |    |           |           |  |                                                                                                       |
| 37714 | ENSG00000230006 |           | 35854 4 | -0.02 |    |           |           |  |                                                                                                       |
| 37725 | ENSG00000219532 |           | 35871 9 | -0.02 |    |           |           |  |                                                                                                       |
| 37733 | ENSG00000272399 |           | 35878 3 | -0.02 |    |           |           |  |                                                                                                       |
| 37737 | ENSG00000234344 |           | 35883 7 | -0.02 |    |           |           |  |                                                                                                       |
| 37744 | ENSG00000281780 |           | 35893 6 | -0.02 |    |           |           |  |                                                                                                       |
| 37753 | ENSG00000291889 |           | 35903 6 | -0.02 |    |           |           |  |                                                                                                       |
| 37768 | ENSG00000216688 |           | 35907 2 | -0.02 |    |           |           |  |                                                                                                       |
| 37761 | ENSG00000280643 |           | 35908 1 | -0.02 |    |           |           |  |                                                                                                       |
| 37767 | ENSG00000270607 |           | 35918 6 | -0.02 |    |           |           |  |                                                                                                       |
| 37774 | ENSG00000225568 |           | 35926 1 | -0.02 |    |           |           |  |                                                                                                       |
| 37788 | ENSG00000289795 |           | 35937 9 | -0.02 |    |           |           |  |                                                                                                       |
| 37786 | ENSG00000288366 |           | 35939 3 | -0.02 |    |           |           |  |                                                                                                       |
| 37814 | ENSG00000238978 |           | 35983 3 | -0.02 |    |           |           |  |                                                                                                       |
| 37835 | ENSG00000273253 |           | 35980 9 | -0.02 |    |           |           |  |                                                                                                       |
| 37836 | ENSG00000285393 |           | 35982 1 | -0.02 |    |           |           |  |                                                                                                       |
| 37840 | ENSG00000281572 |           | 35983 3 | -0.02 |    |           |           |  |                                                                                                       |
| 37849 | ENSG00000289304 |           | 35994 8 | -0.02 |    |           |           |  |                                                                                                       |
| 37851 | ENSG00000281113 |           | 35995 3 | -0.02 |    |           |           |  |                                                                                                       |
| 37853 | ENSG00000233683 |           | 35996 3 | -0.02 |    |           |           |  |                                                                                                       |
| 37856 | ENSG00000281578 |           | 35999 8 | -0.02 |    |           |           |  |                                                                                                       |
| 37883 | ENSG00000216802 |           | 36028 2 | -0.02 |    |           |           |  |                                                                                                       |
| 37885 | ENSG00000191227 |           | 36032 6 | -0.02 |    |           |           |  |                                                                                                       |
| 37888 | ENSG00000272295 |           | 36040 8 | -0.02 |    |           |           |  |                                                                                                       |
| 37895 | ENSG00000273496 |           | 36043 1 | -0.02 |    |           |           |  |                                                                                                       |
| 37898 | ENSG00000232883 |           | 36046   | -0.02 |    |           |           |  |                                                                                                       |
| 37906 | ENSG00000286788 |           | 36051 2 | -0.02 |    |           |           |  |                                                                                                       |
| 37915 | ENSG00000241781 |           | 36063 3 | -0.02 |    |           |           |  |                                                                                                       |
| 37921 | ENSG00000251949 |           | 36069   | -0.02 | 14 | 101362317 | 101392388 |  | Small nuclear RNA SNORD112                                                                            |
| 37927 | ENSG00000232116 |           | 36076 6 | -0.02 |    |           |           |  |                                                                                                       |
| 37930 | ENSG00000256721 |           | 36082 2 | -0.02 |    |           |           |  |                                                                                                       |
| 37931 | ENSG00000289879 |           | 36084 5 | -0.02 |    |           |           |  |                                                                                                       |
| 37935 | ENSG00000195108 | ANKRD34A  | 36092   | -0.02 | 1  | 145470598 | 145475646 |  | ankyrin repeat domain 34A                                                                             |
| 37955 | ENSG00000255135 |           | 36116 5 | -0.02 |    |           |           |  |                                                                                                       |
| 37971 | ENSG00000272629 |           | 36130 6 | -0.02 |    |           |           |  |                                                                                                       |
| 37986 | ENSG00000240477 |           | 36154 4 | -0.02 |    |           |           |  |                                                                                                       |
| 37987 | ENSG00000271960 |           | 36152 6 | -0.02 |    |           |           |  |                                                                                                       |
| 37990 | ENSG00000257307 |           | 36152 9 | -0.02 |    |           |           |  |                                                                                                       |
| 37998 | ENSG00000232931 |           | 36151 8 | -0.02 |    |           |           |  |                                                                                                       |
| 38008 | ENSG00000244921 |           | 36169 1 | -0.02 |    |           |           |  |                                                                                                       |
| 38009 | ENSG00000231440 |           | 36170 8 | -0.02 |    |           |           |  |                                                                                                       |
| 38020 | ENSG00000230533 |           | 36181 7 | -0.02 |    |           |           |  |                                                                                                       |
| 38032 | ENSG00000198264 | TADA2A    | 36189 5 | -0.02 | 17 | 35766965  | 35839835  |  | transcriptional adaptor 2A                                                                            |
| 38054 | ENSG00000257088 | PNMAGC    | 36214 8 | -0.02 | X  | 152243996 | 152245978 |  | paraneoplastic Ma antigen family member 6D (pseudogene)                                               |
| 38066 | ENSG00000224072 |           | 36221 1 | -0.02 |    |           |           |  |                                                                                                       |
| 38075 | ENSG00000272327 |           | 36230   | -0.02 |    |           |           |  |                                                                                                       |
| 38076 | ENSG00000231741 |           | 36231   | -0.02 |    |           |           |  |                                                                                                       |
| 38077 | ENSG00000251963 |           | 36232 7 | -0.02 |    |           |           |  |                                                                                                       |
| 38093 | ENSG00000215384 | BMS1P18   | 36245 2 | -0.02 | 14 | 19889386  | 19904890  |  | BMS1 pseudogene 18                                                                                    |
| 38123 | ENSG00000289993 |           | 36276   | -0.02 |    |           |           |  |                                                                                                       |
| 38147 | ENSG00000237008 |           | 36286 5 | -0.02 |    |           |           |  |                                                                                                       |
| 38150 | ENSG00000253190 |           | 36299 9 | -0.02 |    |           |           |  |                                                                                                       |
| 38197 | ENSG00000280924 |           | 36304 9 | -0.02 |    |           |           |  |                                                                                                       |
| 38164 | ENSG00000250227 |           | 36311 7 | -0.02 |    |           |           |  |                                                                                                       |
| 38176 | ENSG00000266037 |           | 36327   | -0.02 | 14 | 50320336  | 50320632  |  | RNA_7SL_cytoplasmic_3                                                                                 |
| 38218 | ENSG00000153575 | TUBGCP5   | 36372 3 | -0.02 | 15 | 22833395  | 22873892  |  | tubulin gamma complex associated protein 5                                                            |
| 38228 | ENSG00000269781 |           | 36391 2 | -0.02 | 7  | 6522922   | 6524873   |  | CDNA FLJ20306 fis. clone HEP08811. Putative uncharacterized protein FLJ20306; Uncharacterized protein |
| 38244 | ENSG00000272006 |           | 36405 4 | -0.02 |    |           |           |  |                                                                                                       |
| 38245 | ENSG00000232019 |           | 36405 9 | -0.02 |    |           |           |  |                                                                                                       |
| 38282 | ENSG00000272447 |           | 36443 5 | -0.02 |    |           |           |  |                                                                                                       |
| 38320 | ENSG00000280400 |           | 36488 9 | -0.02 |    |           |           |  |                                                                                                       |
| 38324 | ENSG00000291969 |           | 36491 3 | -0.02 |    |           |           |  |                                                                                                       |
| 38335 | ENSG00000227927 |           | 36553 1 | -0.02 |    |           |           |  |                                                                                                       |
| 38346 | ENSG00000283931 |           | 36523 9 | -0.02 |    |           |           |  |                                                                                                       |
| 38347 | ENSG00000282176 |           | 36526 3 | -0.02 |    |           |           |  |                                                                                                       |
| 38355 | ENSG00000230274 |           | 36530   | -0.02 |    |           |           |  |                                                                                                       |
| 38361 | ENSG00000231054 |           | 36534 9 | -0.02 |    |           |           |  |                                                                                                       |
| 38362 | ENSG00000232627 |           | 36537 2 | -0.02 |    |           |           |  |                                                                                                       |
| 38369 | ENSG00000231784 |           | 36541 2 | -0.02 |    |           |           |  |                                                                                                       |
| 38375 | ENSG00000257038 |           | 36556 5 | -0.02 |    |           |           |  |                                                                                                       |
| 38381 | ENSG00000228823 |           | 36561 1 | -0.02 |    |           |           |  |                                                                                                       |
| 38383 | ENSG00000271912 |           | 36561 6 | -0.02 |    |           |           |  |                                                                                                       |
| 38392 | ENSG00000288129 |           | 36574 9 | -0.02 |    |           |           |  |                                                                                                       |
| 38395 | ENSG00000283826 |           | 36576 6 | -0.02 |    |           |           |  |                                                                                                       |
| 38426 | ENSG00000234946 |           | 36518 9 | -0.02 |    |           |           |  |                                                                                                       |
| 38427 | ENSG00000178743 |           | 36623 2 | -0.02 |    |           |           |  |                                                                                                       |
| 38428 | ENSG00000225177 |           | 36624 1 | -0.02 |    |           |           |  |                                                                                                       |
| 38477 | ENSG00000234115 |           | 36625 2 | -0.02 |    |           |           |  |                                                                                                       |
| 38481 | ENSG00000285529 |           | 36682 5 | -0.02 |    |           |           |  |                                                                                                       |
| 38501 | ENSG00000259353 |           | 36679 7 | -0.02 |    |           |           |  |                                                                                                       |
| 38504 | ENSG00000168863 |           | 36681 7 | -0.02 |    |           |           |  |                                                                                                       |
| 38516 | ENSG00000224219 |           | 36692 5 | -0.02 |    |           |           |  |                                                                                                       |
| 38529 | ENSG00000231327 |           | 36713 5 | -0.02 |    |           |           |  |                                                                                                       |
| 38536 | ENSG00000286171 |           | 36719 4 | -0.02 | 4  | 57276682  | 57277131  |  | Uncharacterized protein                                                                               |
| 38549 | ENSG00000273066 |           | 36731 6 | -0.02 |    |           |           |  |                                                                                                       |
| 38554 | ENSG00000214197 |           | 36737 8 | -0.02 |    |           |           |  |                                                                                                       |
| 38575 | ENSG00000281441 |           | 36759 9 | -0.02 |    |           |           |  |                                                                                                       |
| 38618 | ENSG00000238762 |           |         |       |    |           |           |  |                                                                                                       |



|       |                   |            |         |       |                      |           |           |           |                                                                        |
|-------|-------------------|------------|---------|-------|----------------------|-----------|-----------|-----------|------------------------------------------------------------------------|
| 38627 | ENSG00000259344   |            | 36816.4 | -0.02 |                      |           |           |           |                                                                        |
| 38632 | ENSG00000211709   |            | 36819.9 | -0.02 |                      |           |           |           |                                                                        |
| 38636 | ENSG00000205933   |            | 36824.4 | -0.02 |                      |           |           |           |                                                                        |
| 38663 | ENSG00000201663   |            | 36856.6 | -0.02 |                      |           |           |           |                                                                        |
| 38668 | ENSG00000217424   |            | 36858.6 | -0.02 |                      |           |           |           |                                                                        |
| 38674 | ENSG00000244222   |            | 36862.6 | -0.02 |                      |           |           |           |                                                                        |
| 38678 | ENSG00000244184   |            | 36870.4 | -0.02 |                      |           |           |           |                                                                        |
| 38679 | ENSG00000246541   |            | 36870.7 | -0.02 |                      |           |           |           |                                                                        |
| 38686 | ENSG00000205988   |            | 36888.4 | -0.02 |                      |           |           |           |                                                                        |
| 38701 | ENSG00000270998   |            | 36900.4 | -0.02 |                      |           |           |           |                                                                        |
| 38746 | ENSG00000202018   |            | 36946.4 | -0.02 |                      |           |           |           |                                                                        |
| 38748 | ENSG00000202088   |            | 36948.4 | -0.02 |                      |           |           |           |                                                                        |
| 38760 | ENSG00000203562   |            | 36956.6 | -0.02 |                      |           |           |           |                                                                        |
| 38802 | ENSG00000204624   |            | 37009.3 | -0.02 |                      |           |           |           |                                                                        |
| 38803 | ENSG00000202963   | PCDH16     | 37010.0 | -0.02 | 5                    | 14050980  | 14056570  |           | protodesmin beta 16                                                    |
| 38805 | ENSG00000202129   |            | 37010.4 | -0.02 |                      |           |           |           |                                                                        |
| 38816 | ENSG00000206579   |            | 37023.3 | -0.02 |                      |           |           |           |                                                                        |
| 38868 | ENSG00000202715   |            | 37090.3 | -0.02 |                      |           |           |           |                                                                        |
| 38866 | ENSG000002025173  |            | 37099.1 | -0.02 |                      |           |           |           |                                                                        |
| 38889 | ENSG00000217863   |            | 37072.7 | -0.02 |                      |           |           |           |                                                                        |
| 38873 | ENSG00000202208   |            | 37028.4 | -0.02 |                      |           |           |           |                                                                        |
| 38879 | ENSG000002026538  |            | 37095.7 | -0.02 |                      |           |           |           |                                                                        |
| 38909 | ENSG000002023784  |            | 37126.3 | -0.02 |                      |           |           |           |                                                                        |
| 38934 | ENSG000002021627  |            | 37152.6 | -0.02 |                      |           |           |           |                                                                        |
| 38960 | ENSG000002027706  |            | 37171.3 | -0.02 |                      |           |           |           |                                                                        |
| 38965 | ENSG000002024201  | PNM6A      | 37176.1 | -0.02 | X                    | 15224089  | 15234084  |           | paraneoplastic MA antigen family member 6A                             |
| 38978 | ENSG000002021596  |            | 37203.3 | -0.02 |                      |           |           |           |                                                                        |
| 38986 | ENSG000002015686  |            | 37228.1 | -0.02 |                      |           |           |           |                                                                        |
| 38910 | ENSG000002021662  |            | 37231.3 | -0.02 |                      |           |           |           |                                                                        |
| 39012 | ENSG000002022083  |            | 37246.6 | -0.02 |                      |           |           |           |                                                                        |
| 39034 | ENSG000002026530  | MIR474     | 37245.6 | -0.02 | 17                   | 3685815   | 3685884   |           | miR474                                                                 |
| 39058 | ENSG000002023597  |            | 37299.7 | -0.02 |                      |           |           |           |                                                                        |
| 39065 | ENSG000002020441  |            | 37277.3 | -0.02 |                      |           |           |           |                                                                        |
| 39111 | ENSG000002027405  |            | 37327.7 | -0.02 |                      |           |           |           |                                                                        |
| 39112 | ENSG000002027218  |            | 37328.3 | -0.02 |                      |           |           |           |                                                                        |
| 39128 | ENSG000002021718  |            | 37328.3 | -0.02 |                      |           |           |           |                                                                        |
| 39157 | ENSG000002023460  | HIST1TH4   | 37379.2 | -0.02 | 8                    | 26021907  | 26022278  |           | histone cluster 1, 14a                                                 |
| 39243 | ENSG000002021122  |            | 37460.1 | -0.02 |                      |           |           |           |                                                                        |
| 39245 | ENSG000002021071  |            | 37461.3 | -0.02 |                      |           |           |           |                                                                        |
| 39260 | ENSG0000020217173 |            | 37480.7 | -0.02 |                      |           |           |           |                                                                        |
| 39286 | ENSG0000020237015 |            | 37497.5 | -0.02 |                      |           |           |           |                                                                        |
| 39288 | ENSG000002020178  |            | 37501   | -0.02 |                      |           |           |           |                                                                        |
| 39311 | ENSG000002023458  |            | 37530.1 | -0.02 |                      |           |           |           |                                                                        |
| 39380 | ENSG000002029953  |            | 37605.6 | -0.02 |                      |           |           |           |                                                                        |
| 39413 | ENSG000002026643  |            | 37616.6 | -0.02 |                      |           |           |           |                                                                        |
| 39420 | ENSG000002023466  |            | 37654   | -0.02 |                      |           |           |           |                                                                        |
| 39438 | ENSG000002023658  |            | 37670.1 | -0.02 |                      |           |           |           |                                                                        |
| 39447 | ENSG000002027250  |            | 37678.9 | -0.02 |                      |           |           |           |                                                                        |
| 39521 | ENSG000002023265  |            | 37761.1 | -0.02 |                      |           |           |           |                                                                        |
| 39527 | ENSG0000020213062 |            | 37763.6 | -0.02 |                      |           |           |           |                                                                        |
| 39538 | ENSG000002025100  |            | 37780.2 | -0.02 |                      |           |           |           |                                                                        |
| 39568 | ENSG000002020388  |            | 37810.4 | -0.02 |                      |           |           |           |                                                                        |
| 39603 | ENSG0000020232098 |            | 37838.4 | -0.02 |                      |           |           |           |                                                                        |
| 39627 | ENSG000002027095  |            | 37860.7 | -0.02 |                      |           |           |           |                                                                        |
| 39628 | ENSG000002020672  |            | 37864.2 | -0.02 |                      |           |           |           |                                                                        |
| 39632 | ENSG000002024738  |            | 37866.2 | -0.02 |                      |           |           |           |                                                                        |
| 39665 | ENSG000002020000  |            | 37860.6 | -0.02 |                      |           |           |           |                                                                        |
| 39837 | ENSG000002021461  |            | 38027.8 | -0.02 | X                    | 151976743 | 15188308  |           | CSAG family, member 3                                                  |
| 39851 | ENSG000002021002  |            | 38114.7 | -0.02 |                      |           |           |           |                                                                        |
| 40220 | ENSG000002027346  |            | 38517.6 | -0.02 |                      |           |           |           |                                                                        |
| 40428 | ENSG000002021923  | FGD5-AS1   | 38517.6 | -0.02 | antisense            | 3         | 14861854  | 14869831  | FGD5 antisense RNA 1                                                   |
| 39504 | ENSG000002028414  |            | 34020.4 | -0.03 | antisense            | 11        | 2861365   | 2862788   | KCNQ1 antisense RNA 1                                                  |
| 39100 | ENSG000002021332  |            | 34226.7 | -0.03 | antisense            | 6         | 74079427  | 74097440  | COEY antisense RNA 1                                                   |
| 39114 | ENSG000002024486  | RNLSL1     | 37090.3 | -0.02 | incRNA               | 2         | 7867139   | 7869052   | RNA, lincRNAs, cytoplasmic 1                                           |
| 39168 | ENSG000002025539  | TBXAS1     | 36115.6 | -0.03 | antisense            | 12        | 11484596  | 11485006  | TBX antisense RNA 1                                                    |
| 39184 | ENSG000002021092  |            | 36335.2 | -0.03 | antisense            | 14        | 9599834   | 9600129   | small nuclear RNA, histone gene 10 (non-protein coding)                |
| 39114 | ENSG000002021092  |            | 36335.2 | -0.03 | antisense            | 12        | 9599834   | 9600129   | small nuclear RNA, histone gene 10 (non-protein coding)                |
| 39269 | ENSG000002025558  | CHKB-AS1   | 37484.7 | -0.03 | antisense            | 22        | 5102455   | 51022306  | CHKB antisense RNA 1 (head to head)                                    |
| 39440 | ENSG000002024860  | FAM201A    | 37471.3 | -0.03 | antisense            | 9         | 38620471  | 38624987  | family with sequence similarity 201, member A                          |
| 39538 | ENSG000002020528  |            | 37501   | -0.02 | antisense            | 7         | 15079001  | 15079028  | RNA, lincRNAs, cytoplasmic 2                                           |
| 39605 | ENSG000002023730  | HOXD-AS2   | 38088   | -0.03 | antisense            | 2         | 17698339  | 17700128  | HOXD cluster antisense RNA 2                                           |
| 39626 | ENSG000002021920  | NEBL-AS1   | 38084.4 | -0.03 | antisense            | 10        | 21462943  | 21463977  | NEBL antisense RNA 1                                                   |
| 40477 | ENSG000002026833  | HOTAIR     | 38097.8 | -0.03 | incRNA               | 12        | 5438092   | 5438640   | HOTAIR transcript antisense RNA                                        |
| 40480 | ENSG000002021387  | MIR196B    | 38710.3 | -0.03 | antisense            | 7         | 27202328  | 27211534  | HOXA10 antisense RNA                                                   |
| 34603 | ENSG000002023982  |            | 32776.8 | -0.03 | IG C_pseudogene      | 14        | 10818955  | 10818984  | immunoglobulin heavy constant epsilon P1 (pseudogene)                  |
| 40223 | ENSG000002021700  | LIF3-AS1   | 37191.3 | -0.02 | antisense            | 18        | 1030238   | 1030420   | LIF3 antisense RNA 1 (head to head)                                    |
| 39761 | ENSG00000202117   | BCAR4      | 33877.5 | -0.03 | incRNA               | 16        | 11913886  | 1192270   | breast cancer anti-estrogen resistance 4 (non-protein coding)          |
| 39456 | ENSG000002021233  | VTRNA2-1   | 34557.1 | -0.03 | incRNA               | 5         | 13541610  | 13541626  | vtrt RNA 2-1                                                           |
| 39262 | ENSG000002021772  |            | 36103   | -0.03 | incRNA               | 2         | 11113215  | 11114219  | long intergenic non-protein coding RNA 1108                            |
| 39269 | ENSG000002023508  | SNCR41B    | 36424.3 | -0.03 | incRNA               | 20        | 37053843  | 37053799  | small nuclear RNA, H1ACA box 71B                                       |
| 39173 | ENSG000002022202  | SNORD3D    | 36913.9 | -0.03 | incRNA               | 17        | 19015313  | 19015949  | small nuclear RNA, C/D box 3D                                          |
| 39274 | ENSG000002024401  | MEOX       | 36922.5 | -0.03 | incRNA               | 14        | 10153248  | 10153274  | multimally expressed F (non-protein coding)                            |
| 39890 | ENSG000002028900  | RMRP       | 37193.2 | -0.03 | incRNA               | 9         | 3565748   | 35658015  | RNA component of mitochondrial RNA processing endoribonuclease         |
| 39888 | ENSG000002021381  | LINC2005B  | 37208.4 | -0.03 | incRNA               | 11        | 12984057  | 13011095  | long intergenic non-protein coding RNA 958                             |
| 39332 | ENSG000002023479  | MNK1-AS1   | 37354.2 | -0.03 | incRNA               | 7         | 16961249  | 16969120  | MNK1 antisense RNA 1 (head to head)                                    |
| 39374 | ENSG000002027265  | CASP-AS2   | 37902.9 | -0.03 | incRNA               | 13        | 11509141  | 11549690  | CASP antisense RNA 2 (head to head)                                    |
| 39481 | ENSG000002021511  |            | 37712.7 | -0.03 | incRNA               | 15        | 25277020  | 25281637  | Prader-Willi/Angelman region RNA 6                                     |
| 39986 | ENSG000002023537  | LINC20072  | 38289.6 | -0.03 | incRNA               | 6         | 12064047  | 12130477  | long intergenic non-protein coding RNA 472                             |
| 40054 | ENSG000002021443  | FGF14-AS2  | 38322.3 | -0.03 | incRNA               | 13        | 10304980  | 10304933  | FGF14 antisense RNA 2                                                  |
| 40321 | ENSG0000020276873 | YTHDF3-AS1 | 38612.3 | -0.03 | incRNA               | 8         | 64808284  | 64808101  | YTHDF3 antisense RNA 1 (head to head)                                  |
| 40331 | ENSG000002026337  | LINC2102   | 38610.6 | -0.03 | incRNA               | 5         | 6142399   | 2749808   | long intergenic non-protein coding RNA 1021                            |
| 40742 | ENSG000002024516  | MIR4584HG  | 38598.8 | -0.03 | incRNA               | 5         | 845305    | 845305    | MIR4584 host gene (non-protein coding)                                 |
| 41027 | ENSG00000197308   | GATAT3-AS1 | 39381   | -0.03 | incRNA               | 10        | 8058413   | 8058417   | GATAT3 antisense RNA 1                                                 |
| 31284 | ENSG000002028780  | MIR4446-1  | 29501.2 | -0.03 | miRNA                | 3         | 7268267   | 7268370   | miR4446-1                                                              |
| 39560 | ENSG00000198976   | MIR429     | 34018.3 | -0.03 | miRNA                | 3         | 1194385   | 1194467   | miR429                                                                 |
| 37018 | ENSG000002027611  | MIR149     | 35140.7 | -0.03 | miRNA                | 2         | 24138518  | 24139506  | miR429                                                                 |
| 39134 | ENSG000002027779  | MIR198     | 36287.9 | -0.03 | miRNA                | 3         | 18012278  | 18012273  | miR429                                                                 |
| 39386 | ENSG000002021726  | MIR206B    | 36720   | -0.03 | miRNA                | 1         | 1102484   | 1102578   | miR429                                                                 |
| 39500 | ENSG000002023848  |            | 36776.5 | -0.03 | miRNA                | 6         | 27599188  | 27599111  | transfer RNA isoleucine 6 (anticodon IUAU)                             |
| 39768 | ENSG000002024963  | MIR3687    | 36030.6 | -0.03 | miRNA                | 21        | 9626203   | 9626203   | miR429                                                                 |
| 39800 | ENSG000002021795  | MIR512     | 36012.7 | -0.03 | miRNA                | 17        | 1923262   | 1923274   | miR429                                                                 |
| 40047 | ENSG000002027639  | MIR33B     | 38121.2 | -0.03 | miRNA                | 17        | 17717450  | 17717425  | miR429                                                                 |
| 40146 | ENSG000002021394  | MIR1229    | 38441.8 | -0.03 | miRNA                | 5         | 17922578  | 17922546  | miR429                                                                 |
| 40702 | ENSG000002026527  | MIR4479    | 38610   | -0.03 | miRNA                | 14        | 13871105  | 13871015  | miR429                                                                 |
| 39459 | ENSG000002025216  | RYN4       | 31648.3 | -0.03 | misc. RNA            | 7         | 14860407  | 14860502  | RNA, Ro-associated Y4                                                  |
| 39699 | ENSG000002021988  | RYN1       | 33876.1 | -0.03 | misc. RNA            | 7         | 14864228  | 14864340  | RNA, Ro-associated Y1                                                  |
| 39419 | ENSG00000202111   | VTRNA1-2   | 36912.7 | -0.03 | misc. RNA            | 5         | 14009185  | 14009188  | vtrt RNA 1.2                                                           |
| 39225 | ENSG000002023426  |            | 38193.4 | -0.03 | misc. RNA            | 6         | 2884522   | 2884547   | RNA, TSL, cytoplasmic 471, pseudogene                                  |
| 23444 | ENSG000002029838  |            | 22681.1 | -0.03 | processed_pseudogene | 3         | 18515283  | 18513688  | ribosomal protein L4 pseudogene 4                                      |
| 24378 | ENSG000002027663  |            | 23469   | -0.03 | processed_pseudogene | 20        | 13218968  | 13218964  | ribosomal protein L10a pseudogene 1                                    |
| 25406 | ENSG000002024933  |            | 24330.6 | -0.03 | processed_pseudogene | 5         | 9301854   | 9301973   | nucleophosmin 1 (nucleolar phosphoprotein B23, numatrin) pseudogene 27 |
| 26638 | ENSG000002025272  |            | 25351.1 | -0.03 | processed_pseudogene | 6         | 16999912  | 16999985  | family with sequence similarity 103, member A2 pseudogene              |
| 26748 | ENSG000002023070  |            | 25440   | -0.03 | processed_pseudogene | 19        | 5571699   | 5571699   | small nuclear ribonucleoprotein polypyriminic E pseudogene 4           |
| 27614 | ENSG00000177655   |            | 26169.4 | -0.03 | processed_pseudogene | 2         | 18447170  | 184472847 | catalysin binding protein pseudogene 2                                 |
| 27812 | ENSG000002021423  |            | 26431.9 | -0.03 | processed_pseudogene | 19        | 11776884  | 11777485  | heterogeneous nuclear ribonucleoprotein A1 pseudogene 10               |
| 27931 | ENSG000002021533  |            | 26449.8 | -0.03 | processed_pseudogene | 20        | 2114268   | 2114268   | ribosomal protein S13a pseudogene 1                                    |
| 28169 | ENSG000002023758  |            | 26572.3 | -0.03 | processed_pseudogene | 2         | 23159858  | 23159011  | barrier to autoligation factor 1 pseudogene 3                          |
| 28201 | ENSG000002024036  |            | 26761   | -0.03 | processed_pseudogene | 4         | 77880013  | 77880222  | ribonuclease pseudogene 6                                              |
| 28348 | ENSG000002021089  |            | 26833.3 | -0.03 | processed_pseudogene | 4         | 16588449  | 16588369  | NACA family member 3 pseudogene                                        |
| 28588 | ENSG000002025105  |            | 27062.4 | -0.03 | processed_pseudogene | 13        | 47064997  | 47065397  | COX11 cytochrome c oxidase copper chaperone pseudogene 1               |
| 28714 | ENSG000002026182  |            | 27188.5 | -0.03 | processed_pseudogene | 16        | 4811815   | 4811329   | SUB1 pseudogene 3                                                      |
| 29331 | ENSG000002021549  |            | 27913.8 | -0.03 | processed_pseudogene | X         | 7393025   | 7393025   | ribosomal protein S19 pseudogene 1                                     |
| 29816 | ENSG0000020213371 |            | 28194.7 | -0.03 | processed_pseudogene | 3         | 120524113 |           |                                                                        |











|       |                  |           |         |       |                |    |           |           |                                                                      |
|-------|------------------|-----------|---------|-------|----------------|----|-----------|-----------|----------------------------------------------------------------------|
| 37486 | ENSG00000183018  | SPNS2     | 35614.6 | -0.03 | protein_coding | 17 | 4402133   | 4442330   | spinster homolog 2 (Drosophila)                                      |
| 37504 | ENSG00000141470  | TNRC7     | 35615.3 | -0.03 | protein_coding | 20 | 4443133   | 4443234   | tropin-3                                                             |
| 37508 | ENSG00000156509  | FBOX43    | 35633   | -0.03 | protein_coding | 8  | 101145588 | 101158028 | F-box protein 43                                                     |
| 37509 | ENSG00000188747  | NFKX1     | 35635.3 | -0.03 | protein_coding | 9  | 140371802 | 140328588 | NADPH oxidase activator 1                                            |
| 37511 | ENSG00000172995  | ARFIP1    | 35647.4 | -0.03 | protein_coding | 3  | 5558327   | 5558368   | GMP-regulated phosphoprotein, 21kDa                                  |
| 37518 | ENSG00000153115  | RS22C2    | 35643.1 | -0.03 | protein_coding | 3  | 156931683 | 156930991 | interferon $\beta$ 1-mutated nucleoside diphosphate 205kDa like 2    |
| 37524 | ENSG00000107282  | ARPA1     | 35656.1 | -0.03 | protein_coding | 9  | 72042448  | 72027222  | amyloid beta (A4)-precursor protein-binding family A, member 1       |
| 37523 | ENSG00000106146  | SOX10     | 35671.9 | -0.03 | protein_coding | 22 | 38036955  | 38036429  | SRY (sex determining region Y) box 10                                |
| 37543 | ENSG00000044540  | MLN       | 35687.2 | -0.03 | protein_coding | 7  | 73442119  | 73442257  | elastin                                                              |
| 37548 | ENSG000001947616 | MTRX      | 35694.4 | -0.03 | protein_coding | 14 | 23851198  | 23871486  | myosin heavy chain 6, cardiac muscle, alpha                          |
| 37554 | ENSG00000154838  | RAB17     | 35698.2 | -0.03 | protein_coding | 11 | 23842689  | 23850759  | RAB17, member RAS oncogene family                                    |
| 37558 | ENSG00000146609  | NOM1      | 35702.5 | -0.03 | protein_coding | 7  | 156742417 | 15675876  | nucleolar protein with MIF4G domain 1                                |
| 37562 | ENSG00000154896  | APCDD1    | 35706.9 | -0.03 | protein_coding | 18 | 10454425  | 10488495  | adenomatous polyposis coli down-regulated 1                          |
| 37568 | ENSG00000102497  | PACSIN1   | 35719   | -0.03 | protein_coding | 8  | 34433916  | 34520608  | protein kinase C and casein kinase substrate in neurons 1            |
| 37578 | ENSG00000112273  | HDFGL1    | 35720.9 | -0.03 | protein_coding | 6  | 22529878  | 22571892  | hepatoma derived growth factor-like 1                                |
| 37583 | ENSG00000134121  | CHL1      | 35724.9 | -0.03 | protein_coding | 3  | 232719    | 431090    | cell adhesion molecule L1-like                                       |
| 37589 | ENSG00000101935  | BHLHA15   | 35732.5 | -0.03 | protein_coding | 7  | 97840739  | 97842291  | basic helix-loop-helix family, member a15                            |
| 37608 | ENSG00000082213  | Cser22    | 35746.5 | -0.03 | protein_coding | 5  | 31532373  | 31555165  | chromosome 5 open reading frame 22                                   |
| 37613 | ENSG00000146223  | CYPRX1    | 35750.6 | -0.03 | protein_coding | 6  | 46517541  | 46620253  | cytochrome P450, family 39, subfamily A, polypeptide 1               |
| 37615 | ENSG00000105464  | GAPR11    | 35752.5 | -0.03 | protein_coding | 15 | 2052939   | 2054705   | GJA binding protein transcription factor, beta subunit 1             |
| 37620 | ENSG00000118271  | TR        | 35758   | -0.03 | protein_coding | 18 | 29171689  | 29178874  | transferrin                                                          |
| 37625 | ENSG00000270181  | BVM-ERC5C | 35762.6 | -0.03 | protein_coding | 13 | 103459704 | 103524748 | BVM-ERC5C readthrough                                                |
| 37648 | ENSG00000106988  | TCF27     | 35791   | -0.03 | protein_coding | 2  | 3265399   | 32683181  | transcriptional repeat domain 27                                     |
| 37658 | ENSG00000164168  | TMEM184C  | 35802.1 | -0.03 | protein_coding | 4  | 14858354  | 14859315  | transmembrane protein, 184C                                          |
| 37659 | ENSG00000185955  | EMX1      | 35802.1 | -0.03 | protein_coding | 7  | 10250567  | 10524122  | EF-hand calcium binding domain 10                                    |
| 37662 | ENSG00000195784  | PACSIN2   | 35804.7 | -0.03 | protein_coding | 7  | 14303465  | 143039883 | family with sequence similarity 151, member B                        |
| 37667 | ENSG00000165209  | STBP      | 35810.5 | -0.03 | protein_coding | 9  | 125871779 | 126030855 | spermatid calcium RNA binding protein                                |
| 37668 | ENSG00000136838  | EMX2      | 35812.1 | -0.03 | protein_coding | 2  | 7314389   | 73148200  | emery spiracles homeobox 1                                           |
| 37674 | ENSG00000196923  | CTHRC2    | 35820.6 | -0.03 | protein_coding | 11 | 7523668   | 75236822  | chromatid elongation factor 2                                        |
| 37680 | ENSG00000158516  | CPA2      | 35824.7 | -0.03 | protein_coding | 7  | 12995938  | 12995938  | carboxypeptidase A2 (pancreatic)                                     |
| 37688 | ENSG00000204713  | LOC285558 | 35836.1 | -0.03 | protein_coding | 4  | 100557868 | 100575905 | Protein, LOC285558                                                   |
| 37688 | ENSG00000169666  | CTHRC2    | 35836.1 | -0.03 | protein_coding | 11 | 14021380  | 14021380  | DENMAD3 domain containing 2A                                         |
| 37717 | ENSG00000175600  | SUGCT     | 35865.7 | -0.03 | protein_coding | 7  | 40174575  | 40900362  | succinyl-CoA ligaturase-CoA transferase                              |
| 37719 | ENSG00000117481  | NSLUN4    | 35867.2 | -0.03 | protein_coding | 1  | 4685849   | 46858304  | NOP2(Sun domain family, member 4)                                    |
| 37723 | ENSG00000192225  | MTRX      | 35868.1 | -0.03 | protein_coding | 11 | 3552030   | 3552030   | myosin heavy chain 7b, cardiac muscle, beta                          |
| 37730 | ENSG00000137357  | MRI7      | 35875   | -0.03 | protein_coding | 19 | 13875346  | 13885006  | myofibrin/bronchus-1 phosphatase isomerase 1                         |
| 37732 | ENSG00000126052  | KDR       | 35877.6 | -0.03 | protein_coding | 4  | 5944444   | 5991756   | kinase insert domain receptor (a type II receptor tyrosine kinase)   |
| 37742 | ENSG00000105684  | ZNF383    | 35878.8 | -0.03 | protein_coding | 19 | 453119    | 453119    | zinc finger protein 383                                              |
| 37743 | ENSG00000177854  | TMEM187   | 35893.3 | -0.03 | protein_coding | X  | 15323778  | 15324948  | transmembrane protein 187                                            |
| 37745 | ENSG00000202883  | ERVPER3L1 | 35895.3 | -0.03 | protein_coding | 4  | 53589785  | 53817807  | endogenous retrovirus group MERV3, member 1                          |
| 37745 | ENSG00000105078  | SLC12A5   | 35911.4 | -0.03 | protein_coding | 11 | 22641384  | 22641384  | solute carrier family 12 (potassium/chloride transporter), member 14 |
| 37768 | ENSG00000175943  | RM2       | 35916.5 | -0.03 | protein_coding | 16 | 11343746  | 11446819  | RecD mediated genome instability 2                                   |
| 37770 | ENSG00000114446  | ITF37     | 35924.4 | -0.03 | protein_coding | 3  | 107879659 | 10784117  | intraflagellar transport 57 homolog (Chlamydomonas)                  |
| 37773 | ENSG00000185077  | NRH1      | 35925.4 | -0.03 | protein_coding | 17 | 7619339   | 7620762   | glyoxylamide oxidase                                                 |
| 37777 | ENSG00000190623  | NUDT17    | 35926.7 | -0.03 | protein_coding | 17 | 7775817   | 7785105   | nucleoside diphosphate linked moiety X-type motif 7                  |
| 37786 | ENSG00000178967  | UBE2D4    | 35935.9 | -0.03 | protein_coding | 7  | 43966037  | 43966735  | ubiquitin-conjugating enzyme E2D 4 (putative)                        |
| 37787 | ENSG00000205844  | MTAP      | 35937.6 | -0.03 | protein_coding | 14 | 7013369   | 7088301   | STN2BP-COX16 readthrough                                             |
| 37793 | ENSG00000198110  | AKMT7     | 35940.6 | -0.03 | protein_coding | 16 | 21862542  | 21901446  | methyltransferase phosphatase                                        |
| 37798 | ENSG00000113578  | FGF1      | 35944.5 | -0.03 | protein_coding | 5  | 14197143  | 14207817  | fibroblast growth factor 1 (acidic)                                  |
| 37803 | ENSG00000120449  | AKMT7     | 35949.8 | -0.03 | protein_coding | 17 | 31100447  | 31126360  | aromatic residue containing 7                                        |
| 37804 | ENSG00000192035  | UBE2E3    | 35950.9 | -0.03 | protein_coding | 15 | 818181975 | 818184132 | ubiquitin-conjugating enzyme E2E 3                                   |
| 37810 | ENSG00000120049  | KCNIP2    | 35958   | -0.03 | protein_coding | 10 | 103585731 | 103608777 | Kv channel interacting protein 2                                     |
| 37813 | ENSG00000145884  | GABRR2    | 35963.6 | -0.03 | protein_coding | 5  | 160715436 | 160707059 | gamma-aminobutyric acid (GABA) A receptor, beta 2                    |
| 37815 | ENSG00000169818  | FMX1B     | 35963.6 | -0.03 | protein_coding | 15 | 68851041  | 68851041  | formyltransferase (C, class)                                         |
| 37824 | ENSG00000182240  | BACE2     | 35972.9 | -0.03 | protein_coding | 21 | 42539728  | 42584445  | Kv channel interacting protein 2                                     |
| 37827 | ENSG00000194246  | PC1K3     | 35974.4 | -0.03 | protein_coding | 1  | 7844380   | 7895237   | beta site APP cleaving enzyme 2                                      |
| 37828 | ENSG00000185745  | CTHRC7    | 35978.1 | -0.03 | protein_coding | 11 | 10260286  | 10260286  | chromatid elongation factor 7                                        |
| 37830 | ENSG00000129152  | MVOD1     | 35978.3 | -0.03 | protein_coding | 11 | 17741115  | 17743878  | myogenic differentiation 1                                           |
| 37832 | ENSG00000118804  | STBD1     | 35979.3 | -0.03 | protein_coding | 4  | 7717886   | 7723752   |                                                                      |

|       |                 |           |       |       |                |    |           |           |                                                                       |
|-------|-----------------|-----------|-------|-------|----------------|----|-----------|-----------|-----------------------------------------------------------------------|
| 38204 | ENSG00000133200 | MTHV      | 36360 | -0.03 | protein_coding | 17 | 10293639  | 10325267  | myosin, heavy chain 8, skeletal muscle, perinatal                     |
| 38205 | ENSG00000134431 | CCNU      | 36360 | -0.03 | protein_coding | 10 | 9783627   | 9783627   | actin 2                                                               |
| 38217 | ENSG00000168446 | AKXN2     | 36371 | -0.03 | protein_coding | 17 | 63524681  | 63557765  | myosin (myosin factor 4)                                              |
| 38221 | ENSG00000122180 | MYO9      | 36374 | -0.03 | protein_coding | 1  | 203052260 | 203055164 | ring finger protein 180                                               |
| 38224 | ENSG00000194191 | RNF180    | 36382 | -0.03 | protein_coding | 5  | 6346167   | 63466966  | pleckstrin-180CZ domain containing                                    |
| 38226 | ENSG00000105913 | KFSZ      | 36383 | -0.03 | protein_coding | 10 | 104192376 | 104192376 | FEZ family zinc finger 2                                              |
| 38229 | ENSG00000153296 | FEZF2     | 36391 | -0.03 | protein_coding | 3  | 62355356  | 62359999  | arsenic (+3 oxidation state) methyltransferase                        |
| 38242 | ENSG00000144425 | ASPMT     | 36402 | -0.03 | protein_coding | 10 | 104626273 | 104661656 | metabona antigen family 0.4                                           |
| 38245 | ENSG00000144425 | MAREKB    | 36402 | -0.03 | protein_coding | 6  | 51957919  | 51958364  | RMA binding motif protein 11                                          |
| 38252 | ENSG00000185272 | RBM11     | 36409 | -0.03 | protein_coding | 21 | 15584851  | 15584851  | preyl (degenerin) dihydrogase, subunit 2                              |
| 38255 | ENSG00000184444 | POSS2     | 36411 | -0.03 | protein_coding | 6  | 107473701 | 107476748 | ADAM metalloprotein with thrombospondin type 1 motif, 12              |
| 38260 | ENSG00000191388 | ADM112    | 36412 | -0.03 | protein_coding | 19 | 83562669  | 83562669  | letmur lysine kinase 3                                                |
| 38268 | ENSG00000142226 | LMTK3     | 36413 | -0.03 | protein_coding | 19 | 48988526  | 48984166  | immunoglobulin superfamily, member 11                                 |
| 38260 | ENSG00000144447 | IGSF11    | 36413 | -0.03 | protein_coding | 3  | 118619404 | 118649415 | KIAA1199                                                              |
| 38263 | ENSG00000191488 | KIAA1199  | 36413 | -0.03 | protein_coding | 15 | 81021688  | 81024117  | leucine rich repeat containing 38                                     |
| 38268 | ENSG00000162494 | LRRRC38   | 36423 | -0.03 | protein_coding | 1  | 118619404 | 118649415 | early B cell factor 4                                                 |
| 38267 | ENSG00000088881 | EBF4      | 36423 | -0.03 | protein_coding | 20 | 2673524   | 2740783   | chromosome 2 open reading frame 76                                    |
| 38268 | ENSG00000191136 | C2orf166  | 36424 | -0.03 | protein_coding | 2  | 32009461  | 32012404  | peroxisome proliferator-activated receptor gamma, coactivator 1 alpha |
| 38292 | ENSG00000109819 | PPARGCIA  | 36455 | -0.03 | protein_coding | 4  | 23756664  | 23905712  | secreted frizzled-related protein 5                                   |
| 38297 | ENSG00000120057 | SFRP5     | 36457 | -0.03 | protein_coding | 10 | 99529508  | 99531709  | prostaglandin G/H synthase 2-like (trans)                             |
| 38298 | ENSG00000107171 | LYRM4     | 36470 | -0.03 | protein_coding | 6  | 13917156  | 13917699  | LYRM motif containing 4                                               |
| 38309 | ENSG00000141113 | FANCD2    | 36475 | -0.03 | protein_coding | 3  | 10068998  | 10143614  | Fancor1 anemina, complementation group D2                             |
| 38310 | ENSG00000191506 | IL13BP1   | 36481 | -0.03 | protein_coding | X  | 2965165   | 29674840  | interleukin 1 receptor accessory protein-like 1                       |
| 38317 | ENSG00000181544 | FANCB     | 36482 | -0.03 | protein_coding | X  | 14861529  | 14861191  | Fancor1 anemina, complementation group B                              |
| 38318 | ENSG00000196284 | SUP3H1    | 36486 | -0.03 | protein_coding | 6  | 4477054   | 45345690  | suppressor of Ty 3 homolog (S. cerevisiae)                            |
| 38320 | ENSG00000191293 | SYNGAP1   | 36489 | -0.03 | protein_coding | 8  | 33327467  | 33327466  | synapticless GTPase activating protein 1                              |
| 38326 | ENSG00000111584 | SLC48A1   | 36491 | -0.03 | protein_coding | 12 | 48147899  | 48178536  | solute carrier family 48 (solute transporter), member 1               |
| 38327 | ENSG00000186222 | P1Ter58   | 36492 | -0.03 | protein_coding | 11 | 854855    | 860779    | chromosome 11 open reading frame 35                                   |
| 38328 | ENSG00000191846 | CHAC1     | 36493 | -0.03 | protein_coding | 11 | 713140    | 7233660   | aberrant surface-associated protein 1                                 |
| 38330 | ENSG00000091456 | PHACTR3   | 36496 | -0.03 | protein_coding | 20 | 58152564  | 58427566  | phosphatase and actin regulator 3                                     |
| 38332 | ENSG00000191807 | FAM162B   | 36499 | -0.03 | protein_coding | 6  | 117073363 | 117089886 | family with sequence similarity 162, member B                         |
| 38333 | ENSG00000101111 | PCP4      | 36500 | -0.03 | protein_coding | 22 | 3661256   | 3661256   | patatin-derived protein factor beta polypeptide                       |
| 38341 | ENSG00000191918 | GUCY1B3   | 36511 | -0.03 | protein_coding | 4  | 15660144  | 15672943  | guanylate cyclase 1 soluble, beta 3                                   |
| 38342 | ENSG00000184445 | KMT1C1    | 36515 | -0.03 | protein_coding | 12 | 123011793 | 123110943 | methechase associated 1                                               |
| 38348 | ENSG00000181752 | ELKS3     | 36520 | -0.03 | protein_coding | 3  | 5554369   | 5554369   | ELKS3/active zone protein family member 2                             |
| 38350 | ENSG00000110211 | CLCN6     | 36528 | -0.03 | protein_coding | 1  | 11866207  | 11903201  | chloride channel, voltage-sensitive 6                                 |
| 38357 | ENSG00000202159 | PCDHG12   | 36533 | -0.03 | protein_coding | 5  | 140810185 | 140862546 | protocadherin gamma subfamily A, 12                                   |
| 38364 | ENSG00000191691 | PCP4      | 36533 | -0.03 | protein_coding | 13 | 254410    | 254410    | nucleosome assembly protein 2                                         |
| 38368 | ENSG00000177432 | NAP1L5    | 36542 | -0.03 | protein_coding | 4  | 89617086  | 89619386  | nucleosome assembly protein 1-like 5                                  |
| 38374 | ENSG00000139528 | TRPM4     | 36551 | -0.03 | protein_coding | 19 | 49669968  | 49715993  | transient receptor potential cation channel, subfamily M, member 4    |
| 38380 | ENSG00000191793 | YFSA1     | 36553 | -0.03 | protein_coding | 9  | 5741167   | 5741167   | ytpe-like 4 (Drosophila)                                              |
| 38384 | ENSG00000182967 | NTM       | 36562 | -0.03 | protein_coding | 11 | 13124073  | 13220671  | neurotrophin                                                          |
| 38388 | ENSG00000111432 | FZD10     | 36570 | -0.03 | protein_coding | 12 | 13064700  | 13065028  | fizzled family receptor 10                                            |
| 38389 | ENSG00000186668 | MIR508    | 36581 | -0.03 | protein_coding | 20 | 2681467   | 2681467   | mitochondrial antiviral signaling protein                             |
| 38402 | ENSG00000177174 | ANCS      | 36585 | -0.03 | protein_coding | 11 | 2214722   | 2234903   | ancortin 5                                                            |
| 38405 | ENSG00000102981 | PARD6A    | 36592 | -0.03 | protein_coding | 16 | 67948449  | 6796681   | par6 family cell polarity regulator alpha                             |
| 38409 | ENSG00000191778 | SERP2     | 36595 | -0.03 | protein_coding | 13 | 44947801  | 44971850  | stress-associated endoplasmic reticulum protein family member 2       |
| 38415 | ENSG00000100621 | SLIT1P1   | 36598 | -0.03 | protein_coding | 10 | 74275647  | 74281000  | slitrotonin (EPH2) like 1                                             |
| 38433 | ENSG00000120324 | PCDH10    | 36627 | -0.03 | protein_coding | 5  | 140571942 | 140572152 | protocadherin beta 10                                                 |
| 38435 | ENSG00000191693 | ALKBH8    | 36628 | -0.03 | protein_coding | 7  | 102066958 | 102105243 | alkB, avian beta ornithine homology 4 (E. coli)                       |
| 38440 | ENSG00000191470 | SH3A1     | 36630 | -0.03 | protein_coding | 16 | 48392075  | 48432113  | shank 3/SH3 domain protein ligase 1                                   |
| 38443 | ENSG00000165055 | METTL2B   | 36634 | -0.03 | protein_coding | 7  | 128116783 | 128144656 | methyltransferase like 2B                                             |
| 38444 | ENSG00000191480 | GPER1     | 36634 | -0.03 | protein_coding | 7  | 1121884   | 1133441   | G protein-coupled estrogen receptor 1                                 |
| 38445 | ENSG0000014317  | YEATS2    | 36639 | -0.03 | protein_coding | 3  | 17669138  | 17669138  | YEATS domain containing 2                                             |
| 38448 | ENSG00000163872 | YEATS2    | 36639 | -0.03 | protein_coding | 3  | 183415606 | 183530413 | YEATS domain containing 2                                             |
| 38454 | ENSG00000191774 | EME2      | 36642 | -0.03 | protein_coding | 16 | 1825208   | 1831709   | essential meiotic structure-specific endonuclease subunit 2           |
| 38457 | ENSG00000191689 | YEATS1    | 36642 | -0.03 | protein_coding | 16 | 37764981  | 37764981  | essential meiotic structure-specific endonuclease subunit 2           |
| 38459 | ENSG0000017516  | BAIAP3    | 36646 | -0.03 | protein_coding | 16 | 1383602   | 1394949   | BAI1-associated protein 3                                             |
| 38460 | ENSG00000163836 | ADAMT9    | 36647 | -0.03 | protein_coding | 3  | 64501333  | 64673876  | ADAM metalloprotein with thrombospondin type 1 motif, 9               |
| 38463 | ENSG00000191346 | YFSA1     | 36647 | -0.03 | protein_coding | 9  | 5741167   | 5741167   | ytpe transposable element derived 2                                   |
| 38470 | ENSG00000184678 | HIST2H2BE | 36659 | -0.03 | protein_coding | 1  | 14985610  | 14985632  | histone cluster 2, H2be                                               |
| 38471 | ENSG00000164989 | ETNPP1    | 36657 | -0.03 | protein_coding | 4  | 10965136  | 10966482  | ethanolamine-phosphate phospho-lyase                                  |
| 38473 | ENSG00000191798 | F0C1H7    | 36658 | -0.03 | protein_coding | 20 | 22961183  | 22974454  | histone cluster 1, H0                                                 |
| 38480 | ENSG00000191944 | C10orf40  | 36664 | -0.03 | protein_coding | 19 | 33463115  | 33469128  | chromosome 10 open reading frame 40                                   |
| 38483 | ENSG00000124593 | PRICKLE4  | 36681 | -0.03 | protein_coding | 6  | 41748087  | 41759719  | prickle homolog 4 (Drosophila)                                        |
| 38485 | ENSG0000017600  | PLNIP1    | 36682 | -0.03 | protein_coding | 6  | 9927609   | 9927609   | Lipid phosphate phosphatase-related protein type 4                    |
| 38486 | ENSG00000191701 | PLNIP1P1  | 36687 | -0.03 | protein_coding | 10 | 118348997 | 118368867 | pancreatic lipase-related protein 1                                   |
| 38489 | ENSG00000191488 | SLC17A7   | 36687 | -0.03 | protein_coding | 19 | 49912656  | 49945417  | solute carrier family 17 (vesicular glutamate transporter), member 7  |
| 38493 | ENSG00000191705 | SLC17A7   | 36687 | -0.03 | protein_coding | 19 | 49912656  | 49945417  | solute carrier family 17 (vesicular glutamate transporter), member 7  |
| 38496 | ENSG00000168623 | MESP1     | 36688 | -0.03 | protein_coding | 15 | 9029185   | 9029185   | mesoderm posterior 1 homolog (mouse)                                  |
| 38497 | ENSG00000191774 | EME2      | 36682 | -0.03 | protein_coding | 16 | 1825208   | 1831709   | essential meiotic structure-specific endonuclease subunit 2           |
| 38498 | ENSG00000191689 | YEATS1    | 36642 | -0.03 | protein_coding | 16 | 37764981  | 37764981  | essential meiotic structure-specific endonuclease subunit 2           |
| 38499 | ENSG0000017516  | BAIAP3    | 36646 | -0.03 | protein_coding | 16 | 1383602   | 1394949   | BAI1-associated protein 3                                             |
| 38500 | ENSG00000163836 | ADAMT9    | 36647 | -0.03 | protein_coding | 3  | 64501333  | 64673876  | ADAM metalloprotein with thrombospondin type 1 motif, 9               |
| 38501 | ENSG00000191346 | YFSA1     | 36647 | -0.03 | protein_coding | 9  | 5741167   | 5741167   | ytpe transposable element derived 2                                   |
| 38502 | ENSG00000184678 | HIST2H2BE | 36659 | -0.03 | protein_coding | 1  | 14985610  | 14985632  | histone cluster 2, H2be                                               |
| 38503 | ENSG00000164989 | ETNPP1    | 36657 | -0.03 | protein_coding | 4  | 10965136  | 10966482  | ethanolamine-phosphate phospho-lyase                                  |
| 38504 | ENSG00000191798 | F0C1H7    | 36658 | -0.03 | protein_coding | 20 | 22961183  | 22974454  | histone cluster 1, H0                                                 |
| 38505 | ENSG00000191944 | C10orf40  | 36664 | -0.03 | protein_coding | 19 | 33463115  | 33469128  | chromosome 10 open reading frame 40                                   |
| 38506 | ENSG00000124593 | PRICKLE4  | 36681 | -0.03 | protein_coding | 6  | 41748087  | 41759719  | prickle homolog 4 (Drosophila)                                        |
| 38507 | ENSG0000017600  | PLNIP1    | 36682 | -0.03 | protein_coding | 6  | 9927609   | 9927609   | Lipid phosphate phosphatase-related protein type 4                    |
| 38508 | ENSG00000191701 | PLNIP1P1  | 36687 | -0.03 | protein_coding | 10 | 118348997 | 118368867 | pancreatic lipase-related protein 1                                   |
| 38509 | ENSG00000191488 | SLC17A7   | 36687 | -0.03 | protein_coding | 19 | 49912656  | 49945417  | solute carrier family 17 (vesicular glutamate transporter), member 7  |
| 38510 | ENSG00000191705 | SLC17A7   | 36687 | -0.03 | protein_coding | 19 | 49912656  | 49945417  | solute carrier family 17 (vesicular glutamate transporter), member 7  |
| 38512 | ENSG00000191701 | PLNIP1P1  | 36687 | -0.03 | protein_coding | 10 | 118348997 | 118368867 | pancreatic lipase-related protein 1                                   |
| 38513 | ENSG00000191488 | SLC17A7   | 36687 | -0.03 | protein_coding | 19 | 49912656  | 49945417  | solute carrier family 17 (vesicular glutamate transporter), member 7  |
| 38514 | ENSG00000191705 | SLC17A7   | 36687 | -0.03 | protein_coding | 19 | 49912656  | 49945417  | solute carrier family 17 (vesicular glutamate transporter), member 7  |
| 38516 | ENSG00000168623 | MESP1     | 36688 | -0.03 | protein_coding | 15 | 9029185   | 9029185   | mesoderm posterior 1 homolog (mouse)                                  |
| 38517 | ENSG00000191774 | EME2      | 36682 | -0.03 | protein_coding | 16 | 1825208   | 1831709   | essential meiotic structure-specific endonuclease subunit 2           |
| 38518 | ENSG00000191689 | YEATS1    | 36642 | -0.03 | protein_coding | 16 | 37764981  | 37764981  | essential meiotic structure-specific endonuclease subunit 2           |
| 38519 | ENSG0000017516  | BAIAP3    | 36646 | -0.03 | protein_coding | 16 | 1383602   | 1394949   | BAI1-associated protein 3                                             |
| 38520 | ENSG00000163836 | ADAMT9    | 36647 | -0.03 | protein_coding | 3  | 64501333  | 64673876  | ADAM metalloprotein with thrombospondin type 1 motif, 9               |
| 38521 | ENSG00000191346 | YFSA1     | 36647 | -0.03 | protein_coding | 9  | 5741167   | 5741167   | ytpe transposable element derived 2                                   |
| 38522 | ENSG00000184678 | HIST2H2BE | 36659 | -0.03 | protein_coding | 1  | 14985610  | 14985632  | histone cluster 2, H2be                                               |
| 38523 | ENSG00000164989 | ETNPP1    | 36657 | -0.03 | protein_coding | 4  | 10965136  | 10966482  | ethanolamine-phosphate phospho-lyase                                  |





|       |                  |           |       |       |                |    |           |           |                                                                                                          |
|-------|------------------|-----------|-------|-------|----------------|----|-----------|-----------|----------------------------------------------------------------------------------------------------------|
| 39598 | ENSG00000200740  | ARHGAP44  | 37744 | -0.03 | protein_coding | 17 | 12992856  | 12994960  | Rho GTPase activating protein 44                                                                         |
| 39599 | ENSG00000200514  | ZNF489    | 37745 | -0.03 | protein_coding | 16 | 8847166   | 8847166   | zinc finger protein 489                                                                                  |
| 39620 | ENSG00000121570  | DPPA4     | 37758 | -0.03 | protein_coding | 3  | 19004498  | 19005619  | developmental pluripotency associated 4                                                                  |
| 39624 | ENSG00000148228  | WDR31     | 37762 | -0.03 | protein_coding | 9  | 11607502  | 11610278  | WD repeat domain 31                                                                                      |
| 39625 | ENSG00000112218  | GPM1      | 37762 | -0.03 | protein_coding | 6  | 9724202   | 9726353   | G protein-coupled receptor 63                                                                            |
| 39628 | ENSG00000186158  | TYAP      | 37764 | -0.03 | protein_coding | 2  | 8384157   | 8384157   | TYAP domain containing 9                                                                                 |
| 39630 | ENSG00000115283  | GCS       | 37767 | -0.03 | protein_coding | 2  | 16299392  | 16300914  | glucagon                                                                                                 |
| 39633 | ENSG00000186274  | ELAVL4    | 37771 | -0.03 | protein_coding | 2  | 5051396   | 5069468   | ELAV like neuron-specific RNA binding protein 4                                                          |
| 39634 | ENSG0000012498   | IL13RA2   | 37776 | -0.03 | protein_coding | X  | 11423838  | 11423838  | interleukin 13 receptor, alpha 2                                                                         |
| 39640 | ENSG00000214193  | SH3BP2    | 37781 | -0.03 | protein_coding | 1  | 3877188   | 3879084   | SH3 domain containing 21                                                                                 |
| 39643 | ENSG00000157168  | NRG1      | 37783 | -0.03 | protein_coding | 8  | 3149892   | 3622248   | neuregulin 1                                                                                             |
| 39644 | ENSG00000153581  | TMEM8     | 37784 | -0.03 | protein_coding | 2  | 897349    | 897349    | transmembrane protein 8                                                                                  |
| 39647 | ENSG00000152154  | TMEM178A  | 37786 | -0.03 | protein_coding | 2  | 39892122  | 39894503  | transmembrane protein 178A                                                                               |
| 39651 | ENSG00000102287  | GABRE     | 37790 | -0.03 | protein_coding | X  | 15112198  | 15114352  | gamma-aminobutyric acid (GABA) A receptor, epsilon                                                       |
| 39652 | ENSG00000103689  | CHCHD1    | 37790 | -0.03 | protein_coding | 14 | 5792929   | 5792929   | chromosome 14 open reading frame 105                                                                     |
| 39657 | ENSG00000107859  | PTX3      | 37798 | -0.03 | protein_coding | 10 | 10398943  | 10400231  | paired-like homeodomain 3                                                                                |
| 39658 | ENSG00000000137  | CYP28B1   | 37799 | -0.03 | protein_coding | 2  | 7235837   | 7235837   | cytochrome P450, family 2B, subfamily B, polypeptide 1                                                   |
| 39660 | ENSG00000159166  | RHRH1     | 37802 | -0.03 | protein_coding | 8  | 14445107  | 14446930  | rhoGDI, Rho GTPase binding protein 1                                                                     |
| 39661 | ENSG00000200190  | FAM200A   | 37803 | -0.03 | protein_coding | 7  | 9914931   | 9915619   | family with sequence similarity 200, member A                                                            |
| 39664 | ENSG00000160973  | FOXH1     | 37804 | -0.03 | protein_coding | 8  | 14568795  | 14570174  | forkhead box H1                                                                                          |
| 39667 | ENSG00000121523  | MYO7      | 37804 | -0.03 | protein_coding | 2  | 67352     | 67352     | myosin, light chain 5, regulatory                                                                        |
| 39670 | ENSG00000185808  | PIGP      | 37810 | -0.03 | protein_coding | 21 | 3843140   | 3844540   | phosphatidylinositol glycan anchor biosynthesis, class P                                                 |
| 39674 | ENSG00000106701  | FSD1L     | 37815 | -0.03 | protein_coding | 9  | 10821077  | 10831474  | fibronectin type III and SPRY domain containing 1-like                                                   |
| 39676 | ENSG00000124035  | HIST1H2BI | 37816 | -0.03 | protein_coding | 8  | 2708376   | 2710354   | histone cluster 1, H2b                                                                                   |
| 39678 | ENSG000000087484 | PTHLH     | 37817 | -0.03 | protein_coding | 12 | 2811017   | 2812638   | parathyroid hormone-like hormone                                                                         |
| 39679 | ENSG00000248979  | FSD1      | 37817 | -0.03 | protein_coding | 4  | 18632670  | 18633914  | Uncategorized protein                                                                                    |
| 39685 | ENSG00000189693  | SI C8A10  | 37827 | -0.03 | protein_coding | 2  | 59640701  | 59640701  | solute carrier family 8 (ion transporter), member 10                                                     |
| 39693 | ENSG00000131271  | RHOXF2    | 37830 | -0.03 | protein_coding | X  | 11928467  | 11929745  | RhoX homeobox family, member 2                                                                           |
| 39698 | ENSG00000139220  | PP1A2     | 37833 | -0.03 | protein_coding | 12 | 81652405  | 82153332  | protein tyrosine phosphatase, receptor type, F polypeptide (PTPRF), interacting protein (Ippin), alpha 2 |
| 39698 | ENSG00000198846  | NCO6      | 37842 | -0.03 | protein_coding | 20 | 33284722  | 33413452  | nuclear receptor coactivator 6                                                                           |
| 39698 | ENSG00000179943  | FZ1       | 37862 | -0.03 | protein_coding | 19 | 58102746  | 58113336  | FL3-interacting zinc finger 1                                                                            |
| 39698 | ENSG00000111023  | TRMT10B   | 37863 | -0.03 | protein_coding | 8  | 2901307   | 2901307   | 5S rRNA methyltransferase 10 homolog B (S. cerevisiae)                                                   |
| 39697 | ENSG00000103111  | FERM11    | 37869 | -0.03 | protein_coding | 20 | 605492    | 6104191   | fermin family member 1                                                                                   |
| 39698 | ENSG00000070495  | JMJD6     | 37870 | -0.03 | protein_coding | 7  | 7470819   | 7472966   | lysine domain containing 6                                                                               |
| 39684 | ENSG00000103981  | ASPM      | 37870 | -0.03 | protein_coding | 17 | 7963103   | 7963103   | alveolar soft part sarcoma chromosome region, candidate 1                                                |
| 39696 | ENSG00000079482  | OPHN1     | 37874 | -0.03 | protein_coding | X  | 87262186  | 87265755  | oligophrenin 1                                                                                           |
| 39698 | ENSG00000195140  | ADAMTS3   | 37900 | -0.03 | protein_coding | 4  | 7314688   | 7345435   | ADAM metalloproteinase with thrombospondin type 1 motif, 3                                               |
| 39698 | ENSG00000105174  | ADAMTS1   | 37903 | -0.03 | protein_coding | 3  | 549203    | 549203    | ADAMTS family member 1                                                                                   |
| 39697 | ENSG00000175993  | SPSB4     | 37903 | -0.03 | protein_coding | 3  | 14077024  | 140887453 | spArylodin receptor domain and SCDS box containing 4                                                     |
| 39673 | ENSG00000200419  | CT83      | 37920 | -0.03 | protein_coding | X  | 11559249  | 11559484  | carcinoembryonic antigen B3                                                                              |
| 39673 | ENSG00000164916  | FOXP2     | 37923 | -0.03 | protein_coding | 8  | 488126    | 488126    | forkhead box P2                                                                                          |
| 39680 | ENSG00000106992  | FXTN      | 37927 | -0.03 | protein_coding | 9  | 10832041  | 10840396  | frataxin                                                                                                 |
| 39683 | ENSG00000150627  | WDR17     | 37930 | -0.03 | protein_coding | 4  | 17898985  | 17710378  | WD repeat domain 17                                                                                      |
| 39688 | ENSG00000189502  | KIF18B    | 37939 | -0.03 | protein_coding | 17 | 6006797   | 6002164   | kif-18 family member 11                                                                                  |
| 39697 | ENSG0000010496   | ZMYND8    | 37941 | -0.03 | protein_coding | 20 | 4381768   | 4381768   | zinc finger, MYND type containing 8                                                                      |
| 39698 | ENSG00000198492  | YTHDF2    | 37943 | -0.03 | protein_coding | 1  | 2906313   | 2906287   | YTH domain family, member 2                                                                              |
| 39702 | ENSG00000185913  | IFT122    | 37944 | -0.03 | protein_coding | 3  | 12915998  | 12920191  | intraflagellar transport 122 homolog (Chlamydomonas)                                                     |
| 39703 | ENSG0000011143   | MTOR11B   | 37944 | -0.03 | protein_coding | 3  | 6626203   | 6626203   | mechanistic target of rapamycin, type 1                                                                  |
| 39708 | ENSG00000164742  | ADCY1     | 37948 | -0.03 | protein_coding | 7  | 45613739  | 45762715  | adenylyl cyclase 1 (brain)                                                                               |
| 39707 | ENSG00000141750  | STAC2     | 37949 | -0.03 | protein_coding | 17 | 3746789   | 37392125  | SH3 and cysteine rich domain 2                                                                           |
| 39719 | ENSG00000187622  | MUM1L1    | 37950 | -0.03 | protein_coding | 10 | 10841228  | 10841228  | metastasis associated protein (mutated) 1-like 1                                                         |
| 39723 | ENSG00000115042  | FAMHD2    | 37962 | -0.03 | protein_coding | 2  | 9608469   | 9608364   | fumarylacetoacetate hydrolase domain containing 2A                                                       |
| 39720 | ENSG00000172277  | SYT12     | 37966 | -0.03 | protein_coding | 2  | 86774249  | 86618334  | synaptobrevin XII                                                                                        |
| 39721 | ENSG00000200274  | MTOR11A   | 37967 | -0.03 | protein_coding | 11 | 2446103   | 2577219   | mechanistic target of rapamycin                                                                          |
| 39748 | ENSG00000188130  | HIST1H2BL | 37995 | -0.03 | protein_coding | 6  | 27775257  | 27775709  | histone cluster 1, H2b                                                                                   |
| 39750 | ENSG0000017842   | ZNRK2     | 37995 | -0.03 | protein_coding | 3  | 4054748   | 40590227  | zinc finger protein 620                                                                                  |
| 39756 | ENSG00000189890  | PORY1     | 38019 | -0.03 | protein_coding | 8  | 15265748  | 15265748  | purinergic receptor, P2Y, protein coupled, 1                                                             |
| 39763 | ENSG00000176076  | KONE1L    | 38020 | -0.03 | protein_coding | X  | 10888629  | 10888933  | IKCNE-like                                                                                               |
| 39767 | ENSG00000108760  | PTGESL    | 38028 | -0.03 | protein_coding | 17 | 4112105   | 4113245   | prostaglandin synthase 3 (cyclooxygenase)-like                                                           |
| 39766 | ENSG00000103911  | KIF18A    | 38028 | -0.03 | protein_coding | 12 | 4112105   | 4113245   | solute carrier family 11 (cationic metal ion transporter), member 2                                      |
| 39771 | ENSG00000189620  | MASTR     | 38032 | -0.03 | protein_coding | 19 | 4921599   | 4922278   | MEF2 activating motif and SAP domain containing transcriptional regulator                                |
| 39772 | ENSG00000163040  | CCM3TA    | 38034 | -0.03 | protein_coding | 2  | 13228248  | 13229139  | coiled-coil domain containing 74A                                                                        |
| 39760 | ENSG00000144960  | PLS1      | 38034 | -0.03 | protein_coding | 8  | 11423838  | 11423838  | pleckstrin homology domain containing family 1 (with NPH14 domain) member 1                              |
| 39796 | ENSG00000136099  | PCDH8     | 38060 | -0.03 | protein_coding | 13 | 53418109  | 53422775  | protocadherin 8                                                                                          |
| 39804 | ENSG00000164743  | CBR4B     | 38066 | -0.03 | protein_coding | 8  | 1342432   | 13425796  | chromosome 8 open reading frame 48                                                                       |
| 39808 | ENSG00000103912  | KIF18C    | 38067 | -0.03 | protein_coding | 14 | 912351    | 921013    | chromosome 8 open reading frame 48                                                                       |
| 39811 | ENSG00000107485  | GATA3     | 38072 | -0.03 | protein_coding | 10 | 809567    | 8117161   | GATA binding protein 3                                                                                   |
| 39820 | ENSG00000152880  | IGSF10    | 38080 | -0.03 | protein_coding | 3  | 15114372  | 15117947  | immunoglobulin superfamily, member 10                                                                    |
| 39824 | ENSG00000103108  | ANKRD16   | 38086 | -0.03 | protein_coding | 13 | 4105816   | 4105816   | ankyrin repeat domain 46                                                                                 |
| 39827 | ENSG00000136327  | NKX2-8    | 38084 | -0.03 | protein_coding | 14 | 3704918   | 37051812  | NK2 homeobox 8                                                                                           |
| 39836 | ENSG00000145331  | TRMT10A   | 38097 | -0.03 | protein_coding | 4  | 10048786  | 10048589  | 5S rRNA methyltransferase 10 homolog A (S. cerevisiae)                                                   |
| 39835 | ENSG00000105960  | UNFIP1    | 38102 | -0.03 | protein_coding | 10 | 347207    | 348071    | 48S017 binding protein                                                                                   |
| 39859 | ENSG00000100904  | CHGA      | 38126 | -0.03 | protein_coding | 14 | 9338425   | 9340168   | chromogranin A (parathyroid secretory protein 1)                                                         |
| 39861 | ENSG00000008270  | ZNF112    | 38131 | -0.03 | protein_coding | 19 | 44883078  | 44881977  | zinc finger protein 112                                                                                  |
| 39863 | ENSG00000153436  | ADPS      | 38133 | -0.03 | protein_coding | 7  | 7983330   | 7983330   | zinc finger protein 122                                                                                  |
| 39869 | ENSG00000200187  | MA3EA3    | 38139 | -0.03 | protein_coding | X  | 15193492  | 15193492  | melanoma antigen family A, 3                                                                             |
| 39873 | ENSG00000134461  | ANKRD16   | 38143 | -0.03 | protein_coding | 10 | 590380    | 5891989   | ankyrin repeat domain 16                                                                                 |
| 39879 | ENSG00000103783  | FRS3      | 38178 | -0.03 | protein_coding | 7  | 1418193   | 1418193   | fibroblast receptor 3                                                                                    |
| 39880 | ENSG00000103212  | POHDC     | 38182 | -0.03 | protein_coding | X  | 4837350   | 4837922   | porcupine homology (Drosophila)                                                                          |
| 39899 | ENSG00000072657  | FORCN     | 38194 | -0.03 | protein_coding | 12 | 72441048  | 72439422  | thymopentin-releasing hormone degrading enzyme                                                           |
| 39903 | ENSG00000103597  | STAC3     | 38193 | -0.03 | protein_coding | 11 | 4411105   | 44108113  | ST3 beta-galactosidase alpha 2, sialyltransferase 3                                                      |
| 39901 | ENSG00000175426  | PCSK1     | 38171 | -0.03 | protein_coding | 5  | 9572619   | 9570947   | proprotein convertase subtilisin/kexin type 1                                                            |
| 39904 | ENSG00000121351  | IAPP      | 38173 | -0.03 | protein_coding | 12 | 21507893  | 21529212  | islet amyloid polypeptide                                                                                |
| 39910 | ENSG00000105174  | FRS3A     | 38178 | -0.03 | protein_coding | 10 | 1360570   | 1405414   | FERM domain containing 4A                                                                                |
| 39913 | ENSG00000100876  | ARHGAP28  | 38178 | -0.03 | protein_coding | 7  | 872917    | 872917    | Rho GTPase activating protein 28                                                                         |
| 39915 | ENSG00000132199  | ENOSF1    | 38180 | -0.03 | protein_coding | 18 | 670324    | 712676    | endothelin superfamily member 1                                                                          |
| 39923 | ENSG00000160523  | SPY1A3    | 38191 | -0.03 | protein_coding | 18 | 8972420   | 8973780   | spermatogenesis associated 33                                                                            |
| 39927 | ENSG00000200765  | CYSAT3    | 38196 | -0.03 | protein_coding | 5  | 10186907  | 10221071  | lysine-specific proteinase 3                                                                             |
| 39932 | ENSG00000125741  | OPK3      | 38201 | -0.03 | protein_coding | 19 | 48036885  | 48105470  | optic atrophy 3 (autosomal recessive, with chorea and spastic paraplegia)                                |
| 39950 | ENSG00000004848  | JRK       | 38215 | -0.03 | protein_coding | X  | 25021811  | 2504406   | ankyrin related homeobox                                                                                 |
| 39956 | ENSG00000144011  | ILK1B     | 38218 | -0.03 | protein_coding | 4  | 11931811  | 11932630  | hemidesmosome protein 2 (Drosophila)                                                                     |
| 39962 | ENSG00000169963  | COL26A1   | 38266 | -0.03 | protein_coding | 7  | 101098101 | 10120204  | collagen, type XXVI, alpha 1                                                                             |
| 40001 | ENSG00000127804  | MLT1L6    | 38271 | -0.03 | protein_coding | 17 | 2308986   | 2411585   | myelin trypsin-like 10                                                                                   |
| 40001 | ENSG00000136296  | LEI1      | 38271 | -0.03 | protein_coding | 12 | 7183260   | 7183260   | leucine-rich repeat protein-coupled receptor 5                                                           |
| 40024 | ENSG00000188176  | AGP12B    | 38295 | -0.03 | protein_coding | 2  | 241815835 | 241822323 | agaurin 12B                                                                                              |
| 40026 | ENSG00000133360  | OCG3      | 38297 | -0.03 | protein_coding | 16 | 89334043  | 89313570  | component of oligomeric golgi complex 8                                                                  |
| 40027 | ENSG00000173443  | SH3BP1    | 38293 |       |                |    |           |           |                                                                                                          |

|       |                 |             |       |       |                |    |           |           |                                                                |
|-------|-----------------|-------------|-------|-------|----------------|----|-----------|-----------|----------------------------------------------------------------|
| 40469 | ENSG00000145248 | SLC10A4     | 38757 | -0.03 | protein_coding | 4  | 48485360  | 48487213  | solute carrier family 10, member 4                             |
| 40472 | ENSG00000175127 | MCOA3       | 38758 | -0.03 | protein_coding | 1  | 48481448  | 48514188  | mucopolysaccharidase 3                                         |
| 40486 | ENSG00000208311 | AASS        | 38760 | -0.03 | protein_coding | 7  | 121715701 | 121784334 | aminoadipate-semialdehyde synthase                             |
| 40493 | ENSG00000278401 | EDN1        | 38767 | -0.03 | protein_coding | 6  | 122050586 | 122097422 | endothelin 1                                                   |
| 40511 | ENSG00000196793 | ACTR3B      | 38812 | -0.03 | protein_coding | 1  | 11146692  | 11222564  | mechanistic target of rapamycin (serine/threonine kinase)      |
| 40523 | ENSG00000205493 | HOXB3       | 38817 | -0.03 | protein_coding | 7  | 4662472   | 4662472   | homeobox B3                                                    |
| 40536 | ENSG00000204388 | HSPA1A      | 38834 | -0.03 | protein_coding | 6  | 31735512  | 31735512  | heat shock 70kDa protein B1                                    |
| 40565 | ENSG00000135271 | ACTR3B      | 38871 | -0.03 | protein_coding | 7  | 152456834 | 152502443 | ARF3 actin-related protein 3 homolog B (yeast)                 |
| 40581 | ENSG00000194586 | CACNG4      | 38981 | -0.03 | protein_coding | 17 | 84981058  | 85028814  | calcium channel, voltage-dependent, gamma subunit 4            |
| 40601 | ENSG00000156172 | CCDC127     | 38974 | -0.03 | protein_coding | 5  | 466268    | 466268    | RWD domain containing 2A                                       |
| 40604 | ENSG00000194586 | TRIM41      | 38983 | -0.03 | protein_coding | 5  | 18064909  | 18064909  | coiled-coil domain containing 127                              |
| 40647 | ENSG00000174410 | CA12        | 38962 | -0.03 | protein_coding | 15 | 6361287   | 6361287   | chromosome 8 open reading frame 37                             |
| 40648 | ENSG00000195378 | STRP2       | 38964 | -0.03 | protein_coding | 7  | 129014274 | 129129240 | stratin interacting protein 2                                  |
| 40650 | ENSG00000152977 | ZIC1        | 38984 | -0.03 | protein_coding | 3  | 147112029 | 147229880 | Zic family member 1                                            |
| 40652 | ENSG00000105464 | GRIN2D      | 38986 | -0.03 | protein_coding | 19 | 48891132  | 48948188  | glutamate receptor, ionotropic, N-methyl D-aspartate 2D        |
| 40671 | ENSG00000198208 | RPS96L1     | 38990 | -0.03 | protein_coding | 14 | 75370657  | 75390099  | ribosomal protein S9 kinase-like 1                             |
| 40680 | ENSG00000006696 | DRD4        | 39004 | -0.03 | protein_coding | 11 | 637293    | 640706    | dopamine receptor D4                                           |
| 40683 | ENSG00000101144 | BMP7        | 39003 | -0.03 | protein_coding | 20 | 5574304   | 5581405   | bone morphogenetic protein 7                                   |
| 40686 | ENSG00000205258 | MIR654      | 39004 | -0.03 | protein_coding | 11 | 9227075   | 9227075   | microRNA 3054                                                  |
| 40713 | ENSG00000153862 | GDPD1       | 39031 | -0.03 | protein_coding | 17 | 57297628  | 57353328  | glycerophosphodiesterase domain containing 1                   |
| 40714 | ENSG00000130413 | STK3        | 39031 | -0.03 | protein_coding | 11 | 8413418   | 8615838   | serine/threonine kinase 33                                     |
| 40722 | ENSG00000176665 | COL4A3      | 39037 | -0.03 | protein_coding | X  | 102736870 | 102762727 | collagen, type IV, alpha 3                                     |
| 40735 | ENSG00000138063 | SKI3        | 39051 | -0.03 | protein_coding | 2  | 45168902  | 45173216  | SKI homeobox 3                                                 |
| 40736 | ENSG00000257259 | FBCX3       | 39056 | -0.03 | protein_coding | X  | 100645989 | 100687285 | RPL38A-HNRNP22 readthrough                                     |
| 40763 | ENSG00000125274 | WIFP3       | 39081 | -0.03 | protein_coding | 7  | 2984802   | 2984802   | WAS/WASL interacting protein family, member 3                  |
| 40754 | ENSG00000164651 | SP8         | 39083 | -0.03 | protein_coding | 7  | 2082396   | 2082605   | Sp8 transcription factor                                       |
| 40765 | ENSG00000198265 | TPP2        | 39094 | -0.03 | protein_coding | 7  | 83514709  | 83520303  | tissue factor pathway inhibitor 2                              |
| 40766 | ENSG00000145626 | ANKRD1      | 39095 | -0.03 | protein_coding | 4  | 13662485  | 13662485  | SRK1 type domain region V-like 3                               |
| 40804 | ENSG00000004199 | SPAT7       | 39149 | -0.03 | protein_coding | 11 | 124543664 | 124567414 | sperm autoantigenic protein 17                                 |
| 40805 | ENSG00000180660 | MAB2L1      | 39150 | -0.03 | protein_coding | 13 | 39047926  | 39050832  | mab-2-like 1 (C. elegans)                                      |
| 40821 | ENSG00000142121 | LOC1003     | 39153 | -0.03 | protein_coding | 13 | 39663468  | 39663468  | fibroblast growth factor binding protein 3                     |
| 40859 | ENSG00000180044 | C3orf80     | 39199 | -0.03 | protein_coding | 3  | 159943223 | 159945999 | chromosome 3 open reading frame 80                             |
| 40922 | ENSG00000160051 | IGCC        | 39276 | -0.03 | protein_coding | 1  | 32671236  | 32674288  | IG motif containing C                                          |
| 40940 | ENSG00000176665 | COL4A3      | 39037 | -0.03 | protein_coding | X  | 102736870 | 102762727 | GNPNT5 (meprin) finger protein 1                               |
| 40967 | ENSG00000153832 | FIBIN       | 39310 | -0.03 | protein_coding | 2  | 23078719  | 230877825 | F-box protein 36                                               |
| 40981 | ENSG00000000016 | CLF1        | 39313 | -0.03 | protein_coding | 19 | 1868300   | 18718551  | cytokine receptor-like factor 1                                |
| 40983 | ENSG00000105464 | GRIN2D      | 38986 | -0.03 | protein_coding | X  | 102736870 | 102762727 | Uthaca domain protein                                          |
| 41008 | ENSG00000159167 | STC1        | 39361 | -0.03 | protein_coding | 8  | 23699428  | 23712320  | stanniocalcin 1                                                |
| 41012 | ENSG00000131285 | TUBB2B      | 39364 | -0.03 | protein_coding | 6  | 3224495   | 3231984   | tubulin, beta 2B class IiB                                     |
| 41058 | ENSG00000145626 | ANKRD1      | 39095 | -0.03 | protein_coding | 4  | 11163279  | 11163279  | patric-like homeodomain 2                                      |
| 41204 | ENSG00000147190 | ZNF711      | 39567 | -0.03 | protein_coding | X  | 84488997  | 84529368  | zinc finger protein 711                                        |
| 41247 | ENSG00000182759 | MAFA        | 39618 | -0.03 | protein_coding | 8  | 144501352 | 144571628 | v-mil avian musculoaponeurotic fibrosarcoma oncogene homolog A |
| 41304 | ENSG00000105464 | GRIN2D      | 38986 | -0.03 | protein_coding | 17 | 4997306   | 4997306   | complement component 1, subcomponent 1                         |
| 41342 | ENSG00000198265 | TPP2        | 39094 | -0.03 | protein_coding | 7  | 27184126  | 27170418  | homeobox A4                                                    |
| 41453 | ENSG00000183770 | FOXJ2       | 39864 | -0.03 | protein_coding | 3  | 13866306  | 138665882 | forkhead box L2                                                |
| 41503 | ENSG00000130675 | ANKY1       | 39873 | -0.03 | protein_coding | 7  | 156746745 | 156803345 | motor neuron and pancreas homeobox 1                           |
| 41506 | ENSG00000200800 | RPS19L1     | 39876 | -0.03 | protein_coding | 6  | 34264647  | 34264647  | RPS19L1 readthrough                                            |
| 41513 | ENSG00000005189 | LOC1003     | 39922 | -0.03 | protein_coding | 16 | 30817751  | 30809807  | Purative RNA exonuclease NEF sp                                |
| 41528 | ENSG00000185666 | PRAME       | 40031 | -0.03 | protein_coding | 22 | 22891223  | 22901788  | preferentially expressed antigen in melanoma                   |
| 41574 | ENSG00000103109 | LOC1003     | 33313 | -0.03 | protein_coding | 19 | 21292942  | 21292942  | RNA, SS ribosomal pseudogene 49                                |
| 36375 | ENSG00000252866 |             | 34434 | -0.03 | rRNA           | 7  | 128337764 | 128337768 | RNA, SS ribosomal pseudogene 243                               |
| 37364 | ENSG00000200225 |             | 35475 | -0.03 | rRNA           | 14 | 20983146  | 20983157  | RNA, SS ribosomal pseudogene 302                               |
| 37474 | ENSG00000198388 |             | 36123 | -0.03 | rRNA           | 13 | 81843060  | 81841718  | RNA, SS ribosomal pseudogene 150                               |
| 38013 | ENSG00000201861 |             | 36173 | -0.03 | rRNA           | 10 | 327955    | 328005    | RNA, SS ribosomal pseudogene 288                               |
| 38191 | ENSG00000201291 |             | 36444 | -0.03 | rRNA           | X  | 88882243  | 88882241  | SS ribosomal RNA                                               |
| 38264 | ENSG00000202071 |             | 36477 | -0.03 | rRNA           | X  | 51381254  | 51381242  | RNA, SS ribosomal pseudogene 28                                |
| 38590 | ENSG00000202831 |             | 37628 | -0.03 | rRNA           | 2  | 73901758  | 73901870  | RNA, SS ribosomal pseudogene 233                               |
| 38655 | ENSG00000202317 |             | 38123 | -0.03 | rRNA           | 2  | 210586037 | 21058745  | RNA, SS ribosomal pseudogene 118                               |
| 41201 | ENSG00000202345 |             | 38123 | -0.03 | rRNA           | 19 | 762481    | 762481    | RNA, SS ribosomal pseudogene 21                                |
| 33270 | ENSG00000212163 | SNORD11A    | 31414 | -0.03 | sense_intronic | 17 | 2233570   | 2233964   | small nuclear RNA, CID box 91A                                 |
| 38296 | ENSG00000205992 | ESRG        | 38449 | -0.03 | sense_intronic | 3  | 5466149   | 54673884  | embryonic stem cell related (non-protein coding)               |
| 39300 | ENSG00000202185 | SNORD118    | 29610 | -0.03 | snRNA          | 1  | 10146444  | 10146444  | Small nuclear RNA, SNORD118/SNORD114 family                    |
| 39072 | ENSG00000272474 | SNORD113.5  | 28991 | -0.03 | snRNA          | 14 | 101404524 | 101404601 | small nuclear RNA, CID box 113.5                               |
| 38164 | ENSG00000196993 | SNORD114-14 | 29139 | -0.03 | snRNA          | 14 | 101438440 | 101438514 | small nuclear RNA, CID box 114.14                              |
| 41108 | ENSG00000202125 | SNORD113    | 29139 | -0.03 | snRNA          | 14 | 101438440 | 101438440 | small nuclear RNA, CID box 113.6                               |
| 31265 | ENSG00000202008 | SNORD114-11 | 29068 | -0.03 | snRNA          | 14 | 101434448 | 101434522 | small nuclear RNA, CID box 114.11                              |
| 31380 | ENSG00000201839 | SNORD114-3  | 29069 | -0.03 | snRNA          | 14 | 101419688 | 101419780 | small nuclear RNA, CID box 114.3                               |
| 41498 | ENSG00000201174 | SNORD114    | 29068 | -0.03 | snRNA          | 15 | 2532626   | 2532626   | small nuclear RNA, CID box 116.15                              |
| 32147 | ENSG00000202185 | SNORD116-26 | 30359 | -0.03 | snRNA          | 15 | 2534468   | 2534471   | small nuclear RNA, CID box 116.26                              |
| 32234 | ENSG00000201279 | SNORD116-24 | 30423 | -0.03 | snRNA          | 15 | 25339184  | 25339275  | small nuclear RNA, CID box 116.24                              |
| 32363 | ENSG00000201768 | SNORD116    | 30077 | -0.03 | snRNA          | 15 | 1291383   | 1291383   | small nuclear RNA, HIACA box 18                                |
| 32437 | ENSG00000202621 | SNORD116-14 | 30077 | -0.03 | snRNA          | 15 | 2532589   | 2532589   | small nuclear RNA, CID box 116.14                              |
| 32552 | ENSG00000201247 | SNORD114-13 | 30078 | -0.03 | snRNA          | 14 | 101482716 | 101482889 | small nuclear RNA, CID box 114.13                              |
| 32551 | ENSG00000202435 | SNORD114    | 30078 | -0.03 | snRNA          | 14 | 101482716 | 101482889 | Small nuclear RNA, SNORD114                                    |
| 32665 | ENSG00000202972 | SNORD11     | 30882 | -0.03 | snRNA          | 19 | 12817232  | 12817232  | small nuclear RNA, CID box 41                                  |
| 32839 | ENSG00000202280 | SNORD20     | 31007 | -0.03 | snRNA          | 2  | 232321155 | 232321234 | small nuclear RNA, CID box 20                                  |
| 32840 | ENSG00000198688 | SNORD11     | 31007 | -0.03 | snRNA          | 1  | 7651706   | 7651706   | small nuclear RNA, CID box 111                                 |
| 32961 | ENSG00000202073 | SNORD116-1  | 31133 | -0.03 | snRNA          | 15 | 25296624  | 25296718  | small nuclear RNA, CID box 116.1                               |
| 33020 | ENSG00000202001 | SNORD116-2  | 31185 | -0.03 | snRNA          | 15 | 25296937  | 25296941  | small nuclear RNA, CID box 116.2                               |
| 33044 | ENSG00000198114 | SNORD118    | 31185 | -0.03 | snRNA          | 16 | 7056168   | 7056168   | small nuclear RNA, CID box 118                                 |
| 33184 | ENSG00000205951 | SNORD11     | 31335 | -0.03 | snRNA          | 13 | 45910449  | 45910582  | Small nuclear RNA, SNORA31                                     |
| 33198 | ENSG00000212296 | SNORD72     | 31336 | -0.03 | snRNA          | 5  | 40832307  | 40832307  | small nuclear RNA, CID box 72                                  |
| 33229 | ENSG00000201164 | SNORD7      | 31337 | -0.03 | snRNA          | 10 | 7488689   | 7488689   | Small nuclear RNA, SNORA11                                     |
| 33266 | ENSG00000201234 | SNORD70     | 31410 | -0.03 | snRNA          | 2  | 20314134  | 20314134  | small nuclear RNA, CID box 70                                  |
| 33367 | ENSG00000212452 | SNORD69     | 31508 | -0.03 | snRNA          | 3  | 52726752  | 52726828  | small nuclear RNA, CID box 69                                  |
| 33387 | ENSG00000206494 | SNORD2      | 31525 | -0.03 | snRNA          | 2  | 29136530  | 29136614  | small nuclear RNA, CID box 92                                  |
| 34249 | ENSG00000206954 | SNORD59     | 31566 | -0.03 | snRNA          | 16 | 6869370   | 6869385   | small nuclear RNA, HIACA box 59                                |
| 34339 | ENSG00000198961 | SNORD19     | 31578 | -0.03 | snRNA          | 17 | 74557171  | 74557274  | small nuclear RNA, CID box 19                                  |
| 33556 | ENSG00000206400 | SNORD2      | 31714 | -0.03 | snRNA          | 2  | 23242082  | 23242151  | small nuclear RNA, CID box 84                                  |
| 34006 | ENSG00000206961 | SNORD47     | 31788 | -0.03 | snRNA          | 5  | 78376259  | 78376259  | small nuclear RNA, HIACA box 47                                |
| 34040 | ENSG00000202830 | SNORD121B   | 32036 | -0.03 | snRNA          | 9  | 33934254  | 33934274  | small nuclear RNA, CID box 121B                                |
| 34140 | ENSG00000206775 | SNORD37     | 32119 | -0.03 | snRNA          | 19 | 3982925   | 3982925   | small nuclear RNA, CID box 37                                  |
| 34143 | ENSG00000202781 | SNORD11     | 32119 | -0.03 | snRNA          | 19 | 52722677  | 52722677  | Small nuclear RNA, SNORD19B                                    |
| 34268 | ENSG00000212402 | SNORA74B    | 32438 | -0.03 | snRNA          | 5  | 17244731  | 17244731  | small nuclear RNA, HIACA box 74B                               |
| 34333 | ENSG00000199344 | SNORD11     | 32507 | -0.03 | snRNA          | 1  | 86057963  | 86058039  | Small nuclear RNA, SNORD11                                     |
| 34348 | ENSG00000206699 | SNORD11     | 32517 | -0.03 | snRNA          | 15 | 25311076  | 25311076  | small nuclear RNA, CID box 116.11                              |
| 3442  |                 |             |       |       |                |    |           |           |                                                                |

|       |                   |              |         |       |                                    |    |           |           |                                                                                               |
|-------|-------------------|--------------|---------|-------|------------------------------------|----|-----------|-----------|-----------------------------------------------------------------------------------------------|
| 36965 | ENSG00000170827   | CELP         | 35087.1 | -0.03 | transcribed_unprocessed_pseudogene | 9  | 135957926 | 135962742 | carboxyl ester lipase pseudogene                                                              |
| 36966 | ENSG00000180385   | EMC3-AS1     | 38157.3 | -0.03 | transcribed_unprocessed_pseudogene | 3  | 10026577  | 10048674  | EMC3 antisense RNA 1                                                                          |
| 40362 | ENSG00000214174   | AMZ2P1       | 38650.6 | -0.03 | transcribed_unprocessed_pseudogene | 17 | 62962668  | 62971694  | archaealysin family metallopeptidase 2 pseudogene 1                                           |
| 36358 | ENSG00000205049   | MT1L         | 33471   | -0.03 | unitary_pseudogene                 | 16 | 56851388  | 56852730  | metallochalcone 1L (gene) pseudogene                                                          |
| 36359 | ENSG00000207078   |              | 33150.5 | -0.03 | unprocessed_pseudogene             | 12 | 54317036  | 54317036  | tubulin, beta 8 class VIII pseudogene 4                                                       |
| 36360 | ENSG00000207468   |              | 33544.8 | -0.03 | unprocessed_pseudogene             | 1  | 227880730 | 227880730 | tubulin, beta 8 class VIII pseudogene 10                                                      |
| 36361 | ENSG00000205827   |              | 33746.4 | -0.03 | unprocessed_pseudogene             | 1  | 227883883 | 227883883 | tubulin, beta 8 class VIII pseudogene 9                                                       |
| 36362 | ENSG00000207973   | LOC101926970 | 33689.1 | -0.03 | unprocessed_pseudogene             | 1  | 566454    | 566454    | tsae-mir-4723                                                                                 |
| 36363 | ENSG00000204817   |              | 34593.1 | -0.03 | unprocessed_pseudogene             | 20 | 4511370   | 4511370   | zinc finger protein 840                                                                       |
| 36364 | ENSG00000205991   |              | 35184.4 | -0.03 | unprocessed_pseudogene             | 7  | 142468264 | 142471794 | protease, serine, 3 pseudogene 1                                                              |
| 36365 | ENSG00000204020   |              | 35389.3 | -0.03 | unprocessed_pseudogene             | 1  | 56819     | 56819     | mitochondrially encoded A1P synthase 8 pseudogene 1                                           |
| 36366 | ENSG00000205898   |              | 35575   | -0.03 | unprocessed_pseudogene             | 19 | 23015003  | 23042224  | zinc finger protein 723                                                                       |
| 36367 | ENSG00000206727   |              | 37736.6 | -0.03 | unprocessed_pseudogene             | 16 | 29624425  | 29624961  | solute carrier family 7 (amino acid transporter light chain, L system), member 5 pseudogene 1 |
| 23955 | ENSG000002029119  |              | 23106   | -0.03 |                                    |    |           |           |                                                                                               |
| 24269 | ENSG00000204398   |              | 23387.5 | -0.03 |                                    |    |           |           |                                                                                               |
| 24400 | ENSG00000204648   |              | 23553.5 | -0.03 |                                    |    |           |           |                                                                                               |
| 27719 | ENSG00000207214   |              | 26286.1 | -0.03 |                                    |    |           |           |                                                                                               |
| 27728 | ENSG00000213929   |              | 26292.4 | -0.03 |                                    |    |           |           |                                                                                               |
| 28146 | ENSG00000204272   |              | 26653.4 | -0.03 |                                    |    |           |           |                                                                                               |
| 28481 | ENSG00000207286   |              | 26936.4 | -0.03 |                                    |    |           |           |                                                                                               |
| 28965 | ENSG00000202448   |              | 27089.5 | -0.03 |                                    |    |           |           |                                                                                               |
| 28710 | ENSG00000204668   |              | 27187   | -0.03 |                                    |    |           |           |                                                                                               |
| 28754 | ENSG00000205968   |              | 27225.9 | -0.03 |                                    |    |           |           |                                                                                               |
| 32227 | ENSG00000201960   | ANXA8        | 30413.1 | -0.03 |                                    | 10 | 48252523  | 48279200  | annexin A8                                                                                    |
| 32628 | ENSG00000208054   |              | 30818.3 | -0.03 |                                    |    |           |           |                                                                                               |
| 32928 | ENSG00000208460   |              | 31983.2 | -0.03 |                                    |    |           |           |                                                                                               |
| 33066 | ENSG00000201808   | SNORD19      | 31513   | -0.03 |                                    | 20 | 2443608   | 2443693   | small nuclear RNA, C/D box 119                                                                |
| 33175 | ENSG00000204245   |              | 31528.3 | -0.03 |                                    |    |           |           |                                                                                               |
| 33260 | ENSG00000200181   | SNORD85      | 31467.3 | -0.03 |                                    | 1  | 31441011  | 31441083  | small nuclear RNA, C/D box 85                                                                 |
| 33398 | ENSG00000203863   |              | 31513   | -0.03 |                                    |    |           |           |                                                                                               |
| 33629 | ENSG000002015861  |              | 31790.8 | -0.03 |                                    |    |           |           |                                                                                               |
| 33728 | ENSG000002018512  |              | 31895.2 | -0.03 |                                    |    |           |           |                                                                                               |
| 33781 | ENSG00000205631   |              | 31942.7 | -0.03 |                                    |    |           |           |                                                                                               |
| 33841 | ENSG000002013846  |              | 32000.4 | -0.03 |                                    |    |           |           |                                                                                               |
| 33847 | ENSG00000203762   |              | 32009.9 | -0.03 |                                    |    |           |           |                                                                                               |
| 33992 | ENSG00000200181   |              | 32103   | -0.03 |                                    | 15 | 23282281  | 23378228  | hcd domain and RLD 2 pseudogene 2                                                             |
| 34130 | ENSG000002031822  | LOC101930157 | 32300.2 | -0.03 |                                    |    |           |           |                                                                                               |
| 34463 | ENSG000002014887  |              | 32844.6 | -0.03 |                                    |    |           |           |                                                                                               |
| 34848 | ENSG00000205648   | GOLGA8L9     | 32903   | -0.03 |                                    | 15 | 83988710  | 83108685  | gpgn A6 family-like 20                                                                        |
| 34863 | ENSG000002036885  |              | 33002.4 | -0.03 |                                    |    |           |           |                                                                                               |
| 35239 | ENSG000002048202  |              | 33389.8 | -0.03 |                                    |    |           |           |                                                                                               |
| 35247 | ENSG00000204666   |              | 33416.6 | -0.03 |                                    |    |           |           |                                                                                               |
| 35432 | ENSG000002039781  |              | 33544.9 | -0.03 |                                    |    |           |           |                                                                                               |
| 35466 | ENSG000002051218  |              | 33583.9 | -0.03 |                                    |    |           |           |                                                                                               |
| 35548 | ENSG000002015867  |              | 33657   | -0.03 |                                    |    |           |           |                                                                                               |
| 35609 | ENSG00000203225   |              | 33714.1 | -0.03 |                                    |    |           |           |                                                                                               |
| 35638 | ENSG0000020162200 | DCPIA        | 33748   | -0.03 |                                    | 3  | 53317447  | 53381654  | decapping mRNA 1A                                                                             |
| 35644 | ENSG00000201848   |              | 33758.6 | -0.03 |                                    |    |           |           |                                                                                               |
| 35707 | ENSG000002028128  |              | 33820.2 | -0.03 |                                    |    |           |           |                                                                                               |
| 35847 | ENSG000002031369  |              | 33960.4 | -0.03 |                                    |    |           |           |                                                                                               |
| 35907 | ENSG000002081722  |              | 34024.1 | -0.03 |                                    |    |           |           |                                                                                               |
| 35988 | ENSG000002011977  |              | 34058.1 | -0.03 |                                    |    |           |           |                                                                                               |
| 35995 | ENSG000002058803  |              | 34077.9 | -0.03 |                                    |    |           |           |                                                                                               |
| 35986 | ENSG000002027154  |              | 34090.3 | -0.03 |                                    |    |           |           |                                                                                               |
| 35984 | ENSG00000202222   |              | 34111.7 | -0.03 |                                    |    |           |           |                                                                                               |
| 36041 | ENSG000002013315  |              | 34184.3 | -0.03 |                                    |    |           |           |                                                                                               |
| 36059 | ENSG000002025402  |              | 34186.9 | -0.03 |                                    |    |           |           |                                                                                               |
| 36088 | ENSG00000202945   |              | 34212   | -0.03 |                                    |    |           |           |                                                                                               |
| 36147 | ENSG0000020182253 |              | 34288.5 | -0.03 |                                    |    |           |           |                                                                                               |
| 36206 | ENSG000002040545  |              | 34381.2 | -0.03 |                                    |    |           |           |                                                                                               |
| 36301 | ENSG000002027681  |              | 34414.1 | -0.03 |                                    |    |           |           |                                                                                               |
| 36457 | ENSG000002044331  |              | 34558.4 | -0.03 |                                    |    |           |           |                                                                                               |
| 36458 | ENSG000002052921  |              | 34559   | -0.03 |                                    |    |           |           |                                                                                               |
| 36519 | ENSG000002034313  |              | 34615.2 | -0.03 |                                    |    |           |           |                                                                                               |
| 36523 | ENSG000002055457  |              | 34618.5 | -0.03 |                                    |    |           |           |                                                                                               |
| 36531 | ENSG000002041255  |              | 34628.8 | -0.03 |                                    |    |           |           |                                                                                               |
| 36540 | ENSG00000205620   |              | 34748.3 | -0.03 |                                    |    |           |           |                                                                                               |
| 36660 | ENSG00000206281   |              | 34767.6 | -0.03 |                                    |    |           |           |                                                                                               |
| 36736 | ENSG000002050542  |              | 34848.9 | -0.03 |                                    |    |           |           |                                                                                               |
| 36764 | ENSG000002027328  |              | 34876.4 | -0.03 |                                    |    |           |           |                                                                                               |
| 36774 | ENSG000002023886  |              | 34887   | -0.03 |                                    |    |           |           |                                                                                               |
| 36791 | ENSG000002054951  |              | 34899.7 | -0.03 |                                    |    |           |           |                                                                                               |
| 36798 | ENSG000002028523  |              | 34914.1 | -0.03 |                                    |    |           |           |                                                                                               |
| 36814 | ENSG000002027951  |              | 34934.5 | -0.03 |                                    |    |           |           |                                                                                               |
| 36820 | ENSG0000020232461 |              | 34939.7 | -0.03 |                                    |    |           |           |                                                                                               |
| 36894 | ENSG000002080878  |              | 35113.3 | -0.03 |                                    |    |           |           |                                                                                               |
| 36996 | ENSG000002033873  |              | 35114   | -0.03 |                                    |    |           |           |                                                                                               |
| 37005 | ENSG000002059006  | PRSS3P2      | 35126   | -0.03 |                                    | 7  | 142478064 | 142482416 | protease, serine, 3 pseudogene 2                                                              |
| 37014 | ENSG000002025860  |              | 35138.1 | -0.03 |                                    |    |           |           |                                                                                               |
| 37115 | ENSG00000205150   | RNTS2        | 35238.4 | -0.03 |                                    | 14 | 50329271  | 50329567  | RNA, 7SL, cytoplasmic 2                                                                       |
| 37139 | ENSG000002027893  |              | 35254.3 | -0.03 |                                    | 17 | 70036164  | 70036872  | Uchiracharized protein                                                                        |
| 37141 | ENSG000002076230  |              | 35257.3 | -0.03 |                                    |    |           |           |                                                                                               |
| 37166 | ENSG000002049601  |              | 35270   | -0.03 |                                    |    |           |           |                                                                                               |
| 37191 | ENSG000002054790  |              | 35310   | -0.03 |                                    |    |           |           |                                                                                               |
| 37194 | ENSG000002018488  | RNF115       | 35313.5 | -0.03 |                                    | 1  | 145911036 | 14599818  | ring finger protein 115                                                                       |
| 37205 | ENSG00000205108   |              | 35327.6 | -0.03 |                                    |    |           |           |                                                                                               |
| 37216 | ENSG000002029227  |              | 35335.2 | -0.03 |                                    |    |           |           |                                                                                               |
| 37249 | ENSG00000204819   |              | 35372.5 | -0.03 |                                    |    |           |           |                                                                                               |
| 37280 | ENSG000002019881  |              | 35403.8 | -0.03 |                                    |    |           |           |                                                                                               |
| 37310 | ENSG000002034520  |              | 35428.6 | -0.03 |                                    |    |           |           |                                                                                               |
| 37444 | ENSG000002028040  |              | 35562.5 | -0.03 |                                    |    |           |           |                                                                                               |
| 37455 | ENSG000002038110  |              | 35576.2 | -0.03 |                                    |    |           |           |                                                                                               |
| 37488 | ENSG000002058199  |              | 35613   | -0.03 |                                    |    |           |           |                                                                                               |
| 37497 | ENSG000002019553  |              | 35623.3 | -0.03 |                                    |    |           |           |                                                                                               |
| 37510 | ENSG000002020485  |              | 35637.2 | -0.03 |                                    |    |           |           |                                                                                               |
| 37567 | ENSG000002023531  |              | 35711.1 | -0.03 |                                    |    |           |           |                                                                                               |
| 37572 | ENSG000002059406  |              | 35717.2 | -0.03 |                                    |    |           |           |                                                                                               |
| 37578 | ENSG000002048448  |              | 35718.8 | -0.03 |                                    |    |           |           |                                                                                               |
| 37581 | ENSG000002081278  |              | 35723.8 | -0.03 |                                    |    |           |           |                                                                                               |
| 37609 | ENSG000002041297  |              | 35746.6 | -0.03 |                                    |    |           |           |                                                                                               |
| 37614 | ENSG000002020296  |              | 35751   | -0.03 |                                    |    |           |           |                                                                                               |
| 37617 | ENSG000001658862  | PNLIPRP2     | 35754.7 | -0.03 |                                    | 10 | 118380465 | 118404654 | pancreatic lipase-related protein 2                                                           |
| 37648 | ENSG00000172890   | TAF15        | 35791   | -0.03 |                                    | 17 | 34136459  | 34191619  | TAF15 RNA polymerase II, TATA box binding protein (TBP)-associated factor, 68kDa              |
| 37700 | ENSG00000204345   |              | 35848.5 | -0.03 |                                    |    |           |           |                                                                                               |
| 37779 | ENSG000002031121  |              | 35850.7 | -0.03 |                                    |    |           |           |                                                                                               |
| 37782 | ENSG000002028844  |              | 35833.2 | -0.03 |                                    |    |           |           |                                                                                               |
| 37868 | ENSG00000202165   |              | 36091.6 | -0.03 |                                    |    |           |           |                                                                                               |
| 37875 | ENSG000002024080  |              | 36018.1 | -0.03 |                                    |    |           |           |                                                                                               |
| 37884 | ENSG00000175898   |              | 36031.6 | -0.03 |                                    |    |           |           |                                                                                               |
| 37937 | ENSG00000202765   |              | 36062.7 | -0.03 |                                    |    |           |           |                                                                                               |
| 37960 | ENSG000002013361  |              | 36119.1 | -0.03 |                                    |    |           |           |                                                                                               |
| 37977 | ENSG00000201632   |              | 36140.4 | -0.03 |                                    |    |           |           |                                                                                               |
| 38041 | ENSG000002027528  |              | 36188.5 | -0.03 |                                    |    |           |           |                                                                                               |
| 38048 | ENSG000002025026  |              | 36205.5 | -0.03 |                                    |    |           |           |                                                                                               |
| 38107 | ENSG000002028776  |              | 36261.1 | -0.03 |                                    |    |           |           |                                                                                               |
| 38143 | ENSG000002023853  |              | 36293.4 | -0.03 |                                    |    |           |           |                                                                                               |
| 38156 | ENSG00000201958   |              | 36304.7 | -0.03 |                                    |    |           |           |                                                                                               |
| 38195 | ENSG000002069888  |              | 36354.2 | -0.03 |                                    |    |           |           |                                                                                               |
| 38208 | ENSG00000205768   |              | 36384   | -0.03 |                                    |    |           |           |                                                                                               |
| 38219 | ENSG000002084355  |              | 36373.2 | -0.03 |                                    |    |           |           |                                                                                               |
| 38284 | ENSG00000176734   |              | 36421.7 | -0.03 |                                    | 7  | 28992974  | 28997934  | TLR4 interacto with leucine-rich repeats                                                      |
| 38291 | ENSG00000206538   |              | 36452.2 | -0.03 |                                    |    |           |           |                                                                                               |
| 38296 | ENSG00000203686   |              | 36459.4 | -0.03 |                                    |    |           |           |                                                                                               |
| 38321 | ENSG000002072933  |              | 36488.9 | -0.03 |                                    |    |           |           |                                                                                               |

|       |                  |            |           |       |           |           |           |                                                               |                                                                      |
|-------|------------------|------------|-----------|-------|-----------|-----------|-----------|---------------------------------------------------------------|----------------------------------------------------------------------|
| 38897 | ENSG00000272686  |            | 37116.5   | -0.03 |           |           |           |                                                               |                                                                      |
| 38943 | ENSG00000236117  |            | 37155.9   | -0.03 |           |           |           |                                                               |                                                                      |
| 38977 | ENSG00000229947  |            | 37190.9   | -0.03 |           |           |           |                                                               |                                                                      |
| 38984 | ENSG00000216775  |            | 37202.3   | -0.03 |           |           |           |                                                               |                                                                      |
| 38991 | ENSG00000230522  |            | 37209.2   | -0.03 |           |           |           |                                                               |                                                                      |
| 39001 | ENSG00000231273  |            | 37216.9   | -0.03 |           |           |           |                                                               |                                                                      |
| 39023 | ENSG00000198518  | HIST1H4I   | 37236.2   | -0.03 | 6         | 26204858  | 26206266  | histone cluster 1, H4e                                        |                                                                      |
| 39025 | ENSG00000215098  |            | 37240.1   | -0.03 |           |           |           |                                                               |                                                                      |
| 39042 | ENSG00000230318  |            | 37253.2   | -0.03 |           |           |           |                                                               |                                                                      |
| 39054 | ENSG00000262877  |            | 37266.8   | -0.03 |           |           |           |                                                               |                                                                      |
| 39075 | ENSG00000232437  |            | 37268     | -0.03 |           |           |           |                                                               |                                                                      |
| 39095 | ENSG00000214130  |            | 37283.2   | -0.03 |           |           |           |                                                               |                                                                      |
| 39081 | ENSG000001986374 | HIST1H2AI  | 37295     | -0.03 | 6         | 27833034  | 27833606  | histone cluster 1, H2af                                       |                                                                      |
| 39093 | ENSG00000248473  |            | 37308.6   | -0.03 |           |           |           |                                                               |                                                                      |
| 39108 | ENSG00000250275  |            | 37326.3   | -0.03 |           |           |           |                                                               |                                                                      |
| 39133 | ENSG00000270099  |            | 37351.5   | -0.03 |           |           |           |                                                               |                                                                      |
| 39162 | ENSG00000213935  |            | 37386.5   | -0.03 |           |           |           |                                                               |                                                                      |
| 39186 | ENSG00000229768  |            | 37404.2   | -0.03 |           |           |           |                                                               |                                                                      |
| 39189 | ENSG000002004778 |            | 37409     | -0.03 | 8         | 145317003 | 145331153 | KM-PA-2 protein; Uncharacterized protein                      |                                                                      |
| 39202 | ENSG00000271869  |            | 37420.8   | -0.03 |           |           |           |                                                               |                                                                      |
| 39210 | ENSG00000232427  |            | 37432.7   | -0.03 |           |           |           |                                                               |                                                                      |
| 39228 | ENSG00000213148  |            | 37444.1   | -0.03 |           |           |           |                                                               |                                                                      |
| 39247 | ENSG00000242013  | USP27X     | 37484.4   | -0.03 | X         | 49644470  | 49647166  | ubiquitin specific peptidase 27, X-linked                     |                                                                      |
| 39292 | ENSG00000232526  |            | 37481.2   | -0.03 |           |           |           |                                                               |                                                                      |
| 39295 | ENSG00000238116  |            | 37510     | -0.03 |           |           |           |                                                               |                                                                      |
| 39296 | ENSG00000211227  |            | 37510.8   | -0.03 |           |           |           |                                                               |                                                                      |
| 39316 | ENSG00000202072  |            | 37526     | -0.03 | 17        | 56739510  | 56739666  | RNA, L11 small nuclear/60, pseudogene                         |                                                                      |
| 39326 | ENSG00000203813  | HIST1H4A   | 37549.4   | -0.03 | 6         | 27777842  | 27778314  | histone cluster 1, H4h                                        |                                                                      |
| 39330 | ENSG00000248015  |            | 37551.3   | -0.03 |           |           |           |                                                               |                                                                      |
| 39358 | ENSG00000261810  |            | 37577.2   | -0.03 |           |           |           |                                                               |                                                                      |
| 39367 | ENSG00000287530  |            | 37594.3   | -0.03 |           |           |           |                                                               |                                                                      |
| 39390 | ENSG00000252265  |            | 37613.2   | -0.03 |           |           |           |                                                               |                                                                      |
| 39395 | ENSG00000252471  |            | 37621.6   | -0.03 |           |           |           |                                                               |                                                                      |
| 39419 | ENSG00000184348  | HIST1H2AI  | 37653.6   | -0.03 | 6         | 27805658  | 27806117  | histone cluster 1, H2af                                       |                                                                      |
| 39435 | ENSG00000213409  |            | 37664.9   | -0.03 |           |           |           |                                                               |                                                                      |
| 39454 | ENSG00000232421  |            | 37693     | -0.03 |           |           |           |                                                               |                                                                      |
| 39455 | ENSG00000235748  |            | 37691.1   | -0.03 |           |           |           |                                                               |                                                                      |
| 39468 | ENSG00000204109  |            | 37702.5   | -0.03 |           |           |           |                                                               |                                                                      |
| 39507 | ENSG00000230798  |            | 37741.7   | -0.03 |           |           |           |                                                               |                                                                      |
| 39519 | ENSG00000188988  | SCXB       | 37757.8   | -0.03 | 8         | 145490549 | 145492470 | scrolierax homolog A (mouse)                                  |                                                                      |
| 39565 | ENSG00000279906  |            | 37806.8   | -0.03 |           |           |           |                                                               |                                                                      |
| 39572 | ENSG00000230985  |            | 37814.3   | -0.03 |           |           |           |                                                               |                                                                      |
| 39578 | ENSG00000242491  |            | 37817.9   | -0.03 |           |           |           |                                                               |                                                                      |
| 39594 | ENSG00000256747  |            | 37830.2   | -0.03 |           |           |           |                                                               |                                                                      |
| 39622 | ENSG00000264574  |            | 37856.2   | -0.03 |           |           |           |                                                               |                                                                      |
| 39640 | ENSG00000227546  |            | 37871.4   | -0.03 |           |           |           |                                                               |                                                                      |
| 39642 | ENSG00000268812  |            | 37875.3   | -0.03 |           |           |           |                                                               |                                                                      |
| 39664 | ENSG00000272278  |            | 37902.6   | -0.03 |           |           |           |                                                               |                                                                      |
| 39664 | ENSG00000257956  |            | 37904.7   | -0.03 |           |           |           |                                                               |                                                                      |
| 39711 | ENSG00000268764  |            | 37951.1   | -0.03 | 10        | 75531936  | 75532378  | Uncharacterized protein; cDNA FLJ44715 fs. clone BCACE3021430 |                                                                      |
| 39714 | ENSG00000251548  |            | 37953     | -0.03 |           |           |           |                                                               |                                                                      |
| 39727 | ENSG00000283339  | HIST1H4I   | 37966.6   | -0.03 | 6         | 27107076  | 27108418  | histone cluster 1, H4i                                        |                                                                      |
| 39743 | ENSG00000255680  |            | 37990.7   | -0.03 |           |           |           |                                                               |                                                                      |
| 39744 | ENSG00000282144  |            | 37991.4   | -0.03 |           |           |           |                                                               |                                                                      |
| 39752 | ENSG00000271725  |            | 37998.9   | -0.03 |           |           |           |                                                               |                                                                      |
| 39773 | ENSG00000273433  |            | 38034.8   | -0.03 |           |           |           |                                                               |                                                                      |
| 39783 | ENSG00000272801  |            | 38048.6   | -0.03 |           |           |           |                                                               |                                                                      |
| 39784 | ENSG00000256569  | DACH1      | 38049     | -0.03 | 13        | 72012098  | 72441330  | dachshund homolog 1 (Drosophila)                              |                                                                      |
| 38806 | ENSG00000272273  |            | 38068.4   | -0.03 |           |           |           |                                                               |                                                                      |
| 39812 | ENSG00000232528  |            | 38073.6   | -0.03 |           |           |           |                                                               |                                                                      |
| 39815 | ENSG00000271920  |            | 38073.6   | -0.03 |           |           |           |                                                               |                                                                      |
| 39833 | ENSG00000225840  |            | 38093.5   | -0.03 |           |           |           |                                                               |                                                                      |
| 39842 | ENSG00000254953  |            | 38101.2   | -0.03 |           |           |           |                                                               |                                                                      |
| 39853 | ENSG00000231541  |            | 38118.1   | -0.03 |           |           |           |                                                               |                                                                      |
| 39864 | ENSG00000268723  |            | 38135.3   | -0.03 |           |           |           |                                                               |                                                                      |
| 39881 | ENSG00000259940  |            | 38151.9   | -0.03 |           |           |           |                                                               |                                                                      |
| 39884 | ENSG00000231798  |            | 38151.9   | -0.03 |           |           |           |                                                               |                                                                      |
| 39900 | ENSG00000188987  | HIST1H4I   | 38169.5   | -0.03 | 6         | 26188038  | 26189304  | histone cluster 1, H4d                                        |                                                                      |
| 39940 | ENSG00000272009  |            | 38206.8   | -0.03 |           |           |           |                                                               |                                                                      |
| 39941 | ENSG00000271628  |            | 38211.6   | -0.03 |           |           |           |                                                               |                                                                      |
| 39949 | ENSG00000271936  |            | 38215.6   | -0.03 |           |           |           |                                                               |                                                                      |
| 39969 | ENSG00000272994  |            | 38239.5   | -0.03 |           |           |           |                                                               |                                                                      |
| 39981 | ENSG00000251115  |            | 38257     | -0.03 |           |           |           |                                                               |                                                                      |
| 39984 | ENSG00000225410  |            | 38259.2   | -0.03 |           |           |           |                                                               |                                                                      |
| 39987 | ENSG00000237310  |            | 38262.8   | -0.03 |           |           |           |                                                               |                                                                      |
| 39991 | ENSG00000235850  |            | 38264.3   | -0.03 |           |           |           |                                                               |                                                                      |
| 39997 | ENSG00000260418  |            | 38269     | -0.03 |           |           |           |                                                               |                                                                      |
| 39998 | ENSG00000197914  | HIST1H4I   | 38270     | -0.03 | 6         | 27789952  | 27789305  | histone cluster 1, H4k                                        |                                                                      |
| 40004 | ENSG00000204418  |            | 38273.4   | -0.03 |           |           |           |                                                               |                                                                      |
| 40016 | ENSG00000252528  |            | 38291.6   | -0.03 |           |           |           |                                                               |                                                                      |
| 40031 | ENSG00000242615  |            | 38305.4   | -0.03 |           |           |           |                                                               |                                                                      |
| 40088 | ENSG00000254988  |            | 38317.1   | -0.03 |           |           |           |                                                               |                                                                      |
| 40091 | ENSG00000254198  |            | 38375.4   | -0.03 |           |           |           |                                                               |                                                                      |
| 40095 | ENSG00000234432  |            | 38378.7   | -0.03 |           |           |           |                                                               |                                                                      |
| 40113 | ENSG00000232748  |            | 38401.6   | -0.03 |           |           |           |                                                               |                                                                      |
| 40145 | ENSG00000251746  | HIST1H4I   | 38430.3   | -0.03 | 6         | 26027124  | 26027480  | histone cluster 1, H4b                                        |                                                                      |
| 40196 | ENSG00000271360  |            | 38497.3   | -0.03 |           |           |           |                                                               |                                                                      |
| 40206 | ENSG00000270172  |            | 38516.6   | -0.03 |           |           |           |                                                               |                                                                      |
| 40242 | ENSG00000270364  |            | 38540.2   | -0.03 |           |           |           |                                                               |                                                                      |
| 40261 | ENSG00000137259  | HIST1H2AE  | 38555.8   | -0.03 | 6         | 26033320  | 26033796  | histone cluster 1, H2ab                                       |                                                                      |
| 40294 | ENSG00000245589  |            | 38563.3   | -0.03 |           |           |           |                                                               |                                                                      |
| 40296 | ENSG00000236234  |            | 38563.3   | -0.03 |           |           |           |                                                               |                                                                      |
| 40310 | ENSG00000266473  |            | 38588.2   | -0.03 |           |           |           |                                                               |                                                                      |
| 40311 | ENSG00000272960  |            | 38589.4   | -0.03 |           |           |           |                                                               |                                                                      |
| 40337 | ENSG00000267390  |            | 38627.3   | -0.03 |           |           |           |                                                               |                                                                      |
| 40353 | ENSG00000260552  |            | 38643.8   | -0.03 |           |           |           |                                                               |                                                                      |
| 40381 | ENSG00000260303  |            | 38669.1   | -0.03 | 17        | 76898275  | 76937658  | Uncharacterized protein                                       |                                                                      |
| 40434 | ENSG00000271620  | HOXA11-AS1 | 38727.6   | -0.03 |           |           |           |                                                               |                                                                      |
| 40458 | ENSG00000273162  |            | 38749.3   | -0.03 |           |           |           |                                                               |                                                                      |
| 40464 | ENSG00000287811  |            | 38847.4   | -0.03 |           |           |           |                                                               |                                                                      |
| 40465 | ENSG00000232431  | SNORD5A    | 38903.1   | -0.03 |           |           |           |                                                               |                                                                      |
| 40468 | ENSG00000230697  |            | 38963.7   | -0.03 |           |           |           |                                                               |                                                                      |
| 40676 | ENSG00000259985  |            | 38994     | -0.03 |           |           |           |                                                               |                                                                      |
| 40704 | ENSG00000231290  | SNORA78    | 38919.2   | -0.03 |           |           |           |                                                               |                                                                      |
| 40728 | ENSG00000246089  |            | 39041.5   | -0.03 |           |           |           |                                                               |                                                                      |
| 40759 | ENSG00000257453  |            | 39088.6   | -0.03 |           |           |           |                                                               |                                                                      |
| 40806 | ENSG00000232938  |            | 39250.4   | -0.03 |           |           |           |                                                               |                                                                      |
| 40960 | ENSG00000255651  |            | 39311.2   | -0.03 |           |           |           |                                                               |                                                                      |
| 40971 | ENSG00000290400  |            | 39321     | -0.03 |           |           |           |                                                               |                                                                      |
| 40972 | ENSG00000258920  |            | 39326.5   | -0.03 |           |           |           |                                                               |                                                                      |
| 41001 | ENSG00000273184  |            | 39357.7   | -0.03 |           |           |           |                                                               |                                                                      |
| 41187 | ENSG00000298188  |            | 39549.2   | -0.03 |           |           |           |                                                               |                                                                      |
| 39530 | ENSG00000174110  | ZFAS1      | 33947.4   | -0.04 | antisense | 20        | 47884715  | 47895797                                                      | ZNF1 antisense RNA 1                                                 |
| 39493 | ENSG00000259001  | RPH1       | 37720.9   | -0.04 | antisense | 14        | 20811207  | 20811844                                                      | ribonuclease P RNA component H1                                      |
| 39674 | ENSG00000246092  | NN1-AS1    | 37620.6   | -0.04 | antisense | 5         | 43571696  | 43583332                                                      | NN1 antisense RNA 1                                                  |
| 40193 | ENSG00000232528  | KCTD16     | 38391.5   | -0.04 | antisense | 1         | 20279088  | 20279384                                                      | prostate cancer associated transcript 8 (non-protein coding)         |
| 40420 | ENSG0000024597   | PTCHD3P1   | 38710.5   | -0.04 | antisense | 10        | 29606331  | 29776674                                                      | patched domain containing 3 pseudogene 1                             |
| 40767 | ENSG00000240990  | HOXA11-AS  | 39062.3   | -0.04 | antisense | 7         | 27224137  | 27228912                                                      | HOXA11 antisense RNA                                                 |
| 40689 | ENSG00000237167  | TMPO-AS1   | 39238.8   | -0.04 | antisense | 12        | 38903751  | 38910200                                                      | TMPO antisense RNA 1                                                 |
| 40877 | ENSG00000246763  | RGMB-AS1   | 39214.8   | -0.04 | antisense | 5         | 98105322  | 98109173                                                      | RGMB antisense RNA 1                                                 |
| 40905 | ENSG00000258708  |            | 39250.3   | -0.04 | antisense | 14        | 37641093  | 37643016                                                      | SLC25A21 antisense RNA 1                                             |
| 41310 | ENSG00000234698  |            | 39991.3   | -0.04 | antisense | X         | 40594652  | 40597460                                                      | MED1 antisense RNA 1                                                 |
| 41327 | ENSG00000232109  | MF2-AS1    | 39711.5   | -0.04 | antisense | 3         | 196726331 | 19673136                                                      | MF2 antisense RNA 1                                                  |
| 41417 | ENSG00000186815  | KTN1-AS1   | 39818.6   | -0.04 | antisense | 14        | 55965996  | 56046828                                                      | KTN1 antisense RNA 1                                                 |
| 41516 | ENSG00000260862  | FBX19-AS1  | 39627.8   | -0.04 | antisense | 16        | 30940940  | 30943960                                                      | FBX19 antisense RNA 1 (head to head)                                 |
| 41564 | ENSG00000259451  | HOXC-AS1   | 39597.9   | -0.04 | antisense | 12        | 54352866  | 54393784                                                      | HOXC-cluster antisense RNA 1                                         |
| 41834 | ENSG00000233101  | HOXB-AS3   | 40034.7   | -0.04 | antisense | 17        | 46626992  | 46683776                                                      | HOXB-cluster antisense RNA 3                                         |
| 38138 | ENSG00000226137  | BANP2-AS1  | 36291.1   | -0.04 | incRNA    | 17        | 79002930  | 79008501                                                      | BANP2 antisense RNA 1 (head to head)                                 |
| 39624 | ENSG00000269344  | SNORD5A    | 37601.4   | -0.04 | incRNA    | 17        | 19091329  | 19092027                                                      | small nuclear RNA, C/D box 5A                                        |
| 39683 | ENSG00000273344  | PAXIP1-AS1 | 37904     | -0.04 | incRNA    | 7         | 154765158 | 154797413                                                     | PAXIP1 antisense RNA 1 (head to head)                                |
| 39755 | ENSG00000176947  | LINC00386  | 38003.8   | -0.04 | incRNA    | X         | 134555868 | 134561999                                                     | long intergenic non-protein coding RNA 386                           |
| 39844 | ENSG00000268402  | SNORA78    | 38204.3   | -0.04 | incRNA    | 22        | 62223330  | 62223836                                                      | small nuclear RNA, H/ACA box 78                                      |
| 40043 | ENSG00000270103  | RNAU1      | 38119.4   | -0.04 | incRNA    | 1         | 28975112  | 28975245                                                      | RNA, U11 small nuclear                                               |
| 40630 | ENSG00000151363  | LINC00467  | 38942.4   | -0.04 | incRNA    | 1         | 211596145 | 211600678                                                     | long intergenic non-protein coding RNA 467                           |
| 40830 | ENSG00000267124  | LINC00609  | 39110.4   | -0.04 | incRNA    | 1         | 30769888  | 37300292                                                      | long intergenic non-protein coding RNA 669                           |
| 41140 | ENSG00000268996  |            | 39499.4   | -0.04 | incRNA    | 9         | 139692607 | 139881121                                                     | Uncharacterized protein                                              |
| 41330 | ENSG00000232414  | LINC00473  | 39714.4   | -0.04 | incRNA    | 6         | 18622290  | 186401536                                                     | long intergenic non-protein coding RNA 473                           |
| 41471 | ENSG00000213888  |            | 39808.8   | -0.04 | incRNA    | 22        | 31742675  | 31744670                                                      | CDNA FLJ20894 fs. clone KAT0155; HG51177549; Uncharacterized protein |
| 41718 | ENSG00000228623  |            | 40122.6   | -0.04 | incRNA    | 9         | 115758495 | 115774007                                                     | zinc finger protein 883                                              |
| 39676 | ENSG00000287200  | MIR132     | 38148.3   | -0.04 | miRNA     | 17        | 1953302   | 1953302                                                       | microRNA 132                                                         |
| 40262 | ENSG00000231414  | MIR163A    | 38148.3</ |       |           |           |           |                                                               |                                                                      |



|       |                 |       |       |                      |    |           |           |                                                                                                   |
|-------|-----------------|-------|-------|----------------------|----|-----------|-----------|---------------------------------------------------------------------------------------------------|
| 27800 | ENSG00000226360 | 26325 | -0.04 | processed_pseudogene | 3  | 61728129  | 61728700  | ribosomal protein L10a pseudogene 6                                                               |
| 27812 | ENSG00000226361 | 26325 | -0.04 | processed_pseudogene | 6  | 12514343  | 12514348  | ribosomal protein L15 pseudogene 5                                                                |
| 28236 | ENSG00000256968 | 26916 | -0.04 | processed_pseudogene | 9  | 6748703   | 6748781   | small nuclear ribonucleoprotein polypeptide E pseudogene 2                                        |
| 28486 | ENSG00000226525 | 26961 | -0.04 | processed_pseudogene | 13 | 22225252  | 22203154  | ribosomal protein S7 pseudogene 10                                                                |
| 28748 | ENSG00000246866 | 27222 | -0.04 | processed_pseudogene | A  | 40719186  | 40719187  | ribosomal protein S2 pseudogene 55                                                                |
| 30144 | ENSG00000232632 | 29637 | -0.04 | processed_pseudogene | 7  | 2963042   | 29631420  | ribosomal protein S19 pseudogene 1                                                                |
| 30267 | ENSG00000180581 | 28622 | -0.04 | processed_pseudogene | 10 | 9356583   | 93567253  | signal recognition particle 9 pseudogene 1                                                        |
| 30391 | ENSG00000246263 | 28709 | -0.04 | processed_pseudogene | 1  | 22046912  | 22047678  | mortality factor 4 like 1 pseudogene 1                                                            |
| 30886 | ENSG00000290515 | 28959 | -0.04 | processed_pseudogene | 6  | 14867457  | 14867519  | chaperonin containing TCP1, subunit 8 (beta) pseudogene 1                                         |
| 31157 | ENSG00000215881 | 29178 | -0.04 | processed_pseudogene | 8  | 62114599  | 62114579  | nucleophosmin 1 (nucleolar phosphoprotein B23, numatrin) pseudogene 6                             |
| 30991 | ENSG00000247991 | 30053 | -0.04 | processed_pseudogene | 1  | 23714483  | 23714509  | ribosomal protein L30 pseudogene 1                                                                |
| 30961 | ENSG00000238265 | 30058 | -0.04 | processed_pseudogene | 6  | 11638452  | 11638574  | basic leucine zipper and VZ domain 1 pseudogene 2                                                 |
| 32707 | ENSG00000233830 | 30881 | -0.04 | processed_pseudogene | 7  | 27497782  | 27498468  | eukaryotic translation initiation factor 4H pseudogene 1                                          |
| 34006 | ENSG00000226243 | 32187 | -0.04 | processed_pseudogene | 20 | 43098204  | 43098482  | ribosomal protein L34 pseudogene 1                                                                |
| 34584 | ENSG00000218412 | 32772 | -0.04 | processed_pseudogene | 20 | 18485977  | 18486270  | ribosomal protein S19 pseudogene 1                                                                |
| 34815 | ENSG00000229927 | 32956 | -0.04 | processed_pseudogene | 10 | 48914151  | 48914700  | Ras-homology enriched in brain pseudogene 1                                                       |
| 34854 | ENSG00000214975 | 32994 | -0.04 | processed_pseudogene | 6  | 24976647  | 24977210  | peptidylarginine 4-oxalophosphonate lyase pseudogene 29                                           |
| 35021 | ENSG00000244653 | 33096 | -0.04 | processed_pseudogene | X  | 133300712 | 133300978 | translocase of inner mitochondrial membrane 8B pseudogene 2                                       |
| 35160 | ENSG00000229204 | 33300 | -0.04 | processed_pseudogene | 4  | 139114503 | 139115665 | heterogeneous nuclear ribonucleoprotein A3 pseudogene 3                                           |
| 35098 | ENSG00000232433 | 33203 | -0.04 | processed_pseudogene | 4  | 170712371 | 170712853 | protoglutelin E synthase 3 (cytosolic) pseudogene 3                                               |
| 35342 | ENSG00000229251 | 34461 | -0.04 | processed_pseudogene | 7  | 81507174  | 81507408  | C/EBP beta protein kinase regulatory subunit 1B pseudogene 2                                      |
| 35641 | ENSG00000232699 | 34749 | -0.04 | processed_pseudogene | 6  | 99622620  | 99623357  | heterogeneous nuclear ribonucleoprotein A1 pseudogene 8                                           |
| 36751 | ENSG00000211878 | 34894 | -0.04 | processed_pseudogene | 20 | 48348128  | 48348376  | 3-hydroxybutyrate dehydrogenase, type 2 pseudogene 1                                              |
| 36785 | ENSG00000225357 | 34906 | -0.04 | processed_pseudogene | 20 | 34340736  | 34341641  | ribosome production factor 2 homolog (S. cerevisiae) pseudogene 1                                 |
| 37002 | ENSG00000234176 | 35122 | -0.04 | processed_pseudogene | X  | 120337036 | 120338888 | heat shock 70kDa protein B pseudogene 1                                                           |
| 37243 | ENSG00000232690 | 35380 | -0.04 | processed_pseudogene | 1  | 192911290 | 192911336 | high mobility group nucleosome binding domain 1 pseudogene 4                                      |
| 37312 | ENSG00000248119 | 35430 | -0.04 | processed_pseudogene | 5  | 13425813  | 13426034  | MT-ND5 pseudogene 4                                                                               |
| 37356 | ENSG00000232489 | 35473 | -0.04 | processed_pseudogene | 10 | 69598715  | 69599011  | DBP4 homolog pseudogene 1                                                                         |
| 37416 | ENSG00000230515 | 35529 | -0.04 | processed_pseudogene | 12 | 152012683 | 152013445 | high mobility group nucleosome binding domain 3 pseudogene 1                                      |
| 37429 | ENSG00000229793 | 35544 | -0.04 | processed_pseudogene | 15 | 44168047  | 44168442  | protein (peptidyl)prolyl isomerase) NIMA-interacting, 4 pseudogene 1                              |
| 37438 | ENSG00000213363 | 35559 | -0.04 | processed_pseudogene | 12 | 62415351  | 62415955  | ribosomal protein L30 pseudogene 6                                                                |
| 37568 | ENSG00000230925 | 35729 | -0.04 | processed_pseudogene | 14 | 58652977  | 58653147  | ubiquitin A-S2 residue non-protein 1 pseudogene 3                                                 |
| 37698 | ENSG00000213790 | 35848 | -0.04 | processed_pseudogene | 22 | 42503769  | 42504567  | Olig2 like ATPase 1 pseudogene 1                                                                  |
| 37837 | ENSG00000248873 | 35862 | -0.04 | processed_pseudogene | 5  | 42465502  | 42466870  | SERPINE1 mRNA binding protein 1 pseudogene 6                                                      |
| 37894 | ENSG00000230925 | 35873 | -0.04 | processed_pseudogene | 13 | 4431571   | 44316193  | ribonucleoside diphosphate synthase 1 pseudogene 1                                                |
| 37917 | ENSG00000213290 | 35903 | -0.04 | processed_pseudogene | 19 | 12670385  | 12671919  | phosphorylase kinase 1 pseudogene 2                                                               |
| 38003 | ENSG00000205254 | 35949 | -0.04 | processed_pseudogene | 4  | 148427243 | 148427713 | general transcription factor IIF, polypeptide 2 pseudogene 1                                      |
| 38059 | ENSG00000230589 | 36023 | -0.04 | processed_pseudogene | 12 | 120712600 | 120713000 | RME-ND3 nucleolar ribonucleoprotein kinase pseudogene 1                                           |
| 38424 | ENSG00000214918 | 36018 | -0.04 | processed_pseudogene | X  | 14168550  | 14168722  | ribonucleotide reductase M2 polypeptide pseudogene 3                                              |
| 38493 | ENSG00000231370 | 36074 | -0.04 | processed_pseudogene | 4  | 174554879 | 174555222 | RAN, member RAS oncogene family pseudogene 6                                                      |
| 38503 | ENSG00000230589 | 36074 | -0.04 | processed_pseudogene | 14 | 14456184  | 14456303  | tumor protein, transcriptionally controlled 1 pseudogene 4                                        |
| 38602 | ENSG00000219274 | 36089 | -0.04 | processed_pseudogene | 16 | 1379078   | 13791778  | ribosomal protein S20 pseudogene 2                                                                |
| 38641 | ENSG00000231341 | 36227 | -0.04 | processed_pseudogene | Y  | 5075256   | 5076110   | voltage-dependent anion channel 1 pseudogene 6                                                    |
| 38785 | ENSG00000246866 | 36230 | -0.04 | processed_pseudogene | 6  | 69603324  | 69603402  | nuclear fragile X mental retardation protein interacting protein 1 pseudogene 6                   |
| 37936 | ENSG00000232473 | 37004 | -0.04 | processed_pseudogene | 6  | 62831003  | 62831003  | lysine hydroxylase pseudogene 1                                                                   |
| 38789 | ENSG00000227118 | 37007 | -0.04 | processed_pseudogene | 4  | 99661893  | 99662382  | basic transcription factor 3 pseudogene 13                                                        |
| 38803 | ENSG00000240193 | 37017 | -0.04 | processed_pseudogene | 4  | 145760777 | 145760786 | heat shock 60kDa protein 1 (chaperonin) pseudogene 5                                              |
| 38806 | ENSG00000230584 | 37030 | -0.04 | processed_pseudogene | 13 | 78432054  | 78432054  | chaperonin containing TCP1, subunit 6 (epsilon) pseudogene 2                                      |
| 38838 | ENSG00000227295 | 37156 | -0.04 | processed_pseudogene | 1  | 158145440 | 158147445 | elongation factor, RNA polymerase II, 2 pseudogene 1                                              |
| 38996 | ENSG00000215339 | 37215 | -0.04 | processed_pseudogene | 9  | 11226510  | 11226612  | T box binding protein 1 pseudogene 6                                                              |
| 39296 | ENSG00000231531 | 37400 | -0.04 | processed_pseudogene | 12 | 143097114 | 143097114 | histidine triad nucleotide binding protein 1 pseudogene 1                                         |
| 39241 | ENSG00000252470 | 37459 | -0.04 | processed_pseudogene | 7  | 13921896  | 13921935  | enhancer of rudimentary homolog (Drosophila) pseudogene 1                                         |
| 39273 | ENSG00000228286 | 37490 | -0.04 | processed_pseudogene | 2  | 149925120 | 149925124 | ribosomal protein S20 pseudogene 1                                                                |
| 39281 | ENSG00000221781 | 37500 | -0.04 | processed_pseudogene | 1  | 130718048 | 130718048 | hepatoma-derived growth factor pseudogene 1                                                       |
| 39385 | ENSG00000218748 | 37659 | -0.04 | processed_pseudogene | 6  | 80148625  | 80149884  | diacylglycerol binding inhibitor (GABA receptor modulator, acyl-CoA binding protein) pseudogene 1 |
| 39472 | ENSG00000228991 | 37707 | -0.04 | processed_pseudogene | 7  | 10498939  | 10499153  | heat shock 70kDa protein B pseudogene 8                                                           |
| 39514 | ENSG00000228386 | 37748 | -0.04 | processed_pseudogene | 21 | 24179302  | 24179302  | cytochrome oxidase subunit I pseudogene 2                                                         |
| 39822 | ENSG00000236227 | 38090 | -0.04 | processed_pseudogene | 1  | 15842388  | 15842503  | etoposide induced 2.4 pseudogene 2                                                                |
| 39866 | ENSG00000232480 | 38136 | -0.04 | processed_pseudogene | 1  | 11917816  | 11917816  | pyruvate kinase, muscle pseudogene 1                                                              |
| 39916 | ENSG00000231559 | 38149 | -0.04 | processed_pseudogene | 1  | 14682468  | 14682468  | high mobility group nucleosome binding domain 1 pseudogene 8                                      |
| 39919 | ENSG00000250444 | 38183 | -0.04 | processed_pseudogene | 5  | 11484774  | 11484891  | chaperonin containing TCP1, subunit 5 (epsilon) pseudogene 1                                      |
| 39975 | ENSG00000226543 | 38249 | -0.04 | processed_pseudogene | 21 | 45275771  | 45276223  | myosin, light chain 6 pseudogene 1                                                                |
| 40000 | ENSG00000230589 | 38249 | -0.04 | processed_pseudogene | 1  | 2162415   | 2162415   | KH-type ectopic regulatory protein pseudogene 1                                                   |
| 40008 | ENSG00000227173 | 38283 | -0.04 | processed_pseudogene | 10 | 66929196  | 66929227  | myosin, light chain 6 pseudogene 3                                                                |
| 40035 | ENSG00000241431 | 38309 | -0.04 | processed_pseudogene | 11 | 118431405 | 118432395 | ribosomal protein L30 pseudogene 30                                                               |
| 40056 | ENSG00000214188 | 38314 | -0.04 | processed_pseudogene | 20 | 32961470  | 32961470  | exportin, RNA nuclear export receptor for tRNA pseudogene 1                                       |
| 40068 | ENSG00000213312 | 38373 | -0.04 | processed_pseudogene | 6  | 64258613  | 64259143  | ribosomal protein L7a pseudogene 34                                                               |
| 40101 | ENSG00000232146 | 38386 | -0.04 | processed_pseudogene | X  | 72989083  | 72989128  | selenocysteine synthetase 1 pseudogene 4                                                          |
| 40143 | ENSG00000242931 | 38420 | -0.04 | processed_pseudogene | 10 | 12732018  | 12732018  | aldolase A, functionally uncontrolled 1 pseudogene 2                                              |
| 40234 | ENSG00000204789 | 38535 | -0.04 | processed_pseudogene | 6  | 27325004  | 27325004  | zinc finger protein 204, pseudogene 6                                                             |
| 40347 | ENSG00000214263 | 38635 | -0.04 | processed_pseudogene | 13 | 67840977  | 67841838  | ribosomal protein SA pseudogene 53                                                                |
| 40352 | ENSG00000230786 | 38640 | -0.04 | processed_pseudogene | 6  | 58684004  | 58684004  | ribonucleoside diphosphate synthase subunit pseudogene 6                                          |
| 40907 | ENSG00000228140 | 39251 | -0.04 | processed_pseudogene | 9  | 22917233  | 22917283  | polycystic-dystrophy finger 7 pseudogene 1                                                        |
| 40997 | ENSG00000232983 | 39380 | -0.04 | processed_pseudogene | X  | 62519126  | 62519552  | chromobox homolog 1 pseudogene 1                                                                  |
| 40991 | ENSG00000230589 | 39380 | -0.04 | processed_pseudogene | 4  | 12580364  | 12580364  | MT-ND8 pseudogene 21                                                                              |
| 41121 | ENSG00000230690 | 39472 | -0.04 | processed_pseudogene | 9  | 7452297   | 7452297   | heat shock 27kDa protein 1 pseudogene 1                                                           |
| 41344 | ENSG00000229158 | 39726 | -0.04 | processed_pseudogene | X  | 64627984  | 64628865  | transducin-like enhancer of split 1 pseudogene 1                                                  |
| 41458 | ENSG00000230589 | 39837 | -0.04 | processed_pseudogene | 17 | 15841160  | 15841160  | FAM21A antisense RNA 1                                                                            |
| 34225 | ENSG00000234741 | 39837 | -0.04 | processed_transcript | 1  | 173833038 | 173833038 | growth arrest-specific 5 (non-protein) coding                                                     |
| 39230 | ENSG00000248775 | 39844 | -0.04 | processed_transcript | 5  | 180688213 | 180689308 | TRIM2 antisense RNA 1 (head to head)                                                              |
| 40048 | ENSG00000231531 | 39844 | -0.04 | processed_transcript | 19 | 5218329   | 5218329   | spem associated associated 1 pseudogene 1                                                         |
| 40370 | ENSG00000231187 | 39859 | -0.04 | processed_transcript | 5  | 92745065  | 92921354  | NR2F1 antisense RNA 1                                                                             |
| 29555 | ENSG00000189564 | 24762 | -0.04 | protein_coding       | 2  | 70314585  | 70316332  | myosin (C) binding protein 1                                                                      |
| 26220 | ENSG00000184587 | 24962 | -0.04 | protein_coding       | 5  | 14962713  | 14962810  | ribosomal protein S14                                                                             |
| 26740 | ENSG00000142978 | 25434 | -0.04 | protein_coding       | 1  | 24012678  | 24012678  | ribosomal protein L11                                                                             |
| 26742 | ENSG00000198755 | 25437 | -0.04 | protein_coding       | 6  | 35438185  | 35438562  | ribosomal protein L10a                                                                            |
| 26777 | ENSG00000096977 | 25469 | -0.04 | protein_coding       | 22 | 24312554  | 24312560  | D-Diaphanous like                                                                                 |
| 26884 | ENSG00000174021 | 25491 | -0.04 | protein_coding       | 22 | 84894406  | 84894406  | guanine nucleotide binding protein (G protein), gamma 5                                           |
| 27203 | ENSG00000174748 | 25483 | -0.04 | protein_coding       | 3  | 23958036  | 23958183  | ribosomal protein L15                                                                             |
| 27220 | ENSG00000187283 | 25661 | -0.04 | protein_coding       | 11 | 11827199  | 11828211  | ATP synthase, H+ transporting, mitochondrial F0 complex, subunit G                                |
| 27684 | ENSG00000186572 | 25672 | -0.04 | protein_coding       | 17 | 12662415  | 12662445  | ubiquitin-like protein 1                                                                          |
| 27602 | ENSG00000173812 | 26157 | -0.04 | protein_coding       | 17 | 39848157  | 39848850  | eukaryotic translation initiation factor 1                                                        |
| 27671 | ENSG00000241837 | 26229 | -0.04 | protein_coding       | 21 | 35275757  | 35280284  | ATP synthase, H+ transporting, mitochondrial F1 complex, O subunit                                |
| 27684 | ENSG00000230589 | 26229 | -0.04 | protein_coding       | 8  | 20311470  | 20311470  |                                                                                                   |

|       |                 |           |       |       |                |    |           |           |                                                                            |
|-------|-----------------|-----------|-------|-------|----------------|----|-----------|-----------|----------------------------------------------------------------------------|
| 32192 | ENSG00000188728 | SMMT5     | 30382 | -0.04 | protein_coding | 5  | 6045336   | 6045381   | small integral membrane protein 15                                         |
| 32218 | ENSG00000141118 | TRAPPC3   | 30623 | -0.04 | protein_coding | 11 | 3662203   | 3662266   | trafficking protein particle complex 3                                     |
| 32252 | ENSG00000142523 | FIS1      | 30436 | -0.04 | protein_coding | 7  | 100852739 | 100855979 | fasion 1 (mitochondrial outer membrane) homolog (S. cerevisiae)            |
| 32268 | ENSG00000171202 | TMEM126A  | 30461 | -0.04 | protein_coding | 11 | 85359011  | 85359791  | transmembrane protein 126A                                                 |
| 32288 | ENSG00000096379 | MBST1     | 30469 | -0.04 | protein_coding | 6  | 3002669   | 3002689   | zinc ribbon domain containing 1                                            |
| 32296 | ENSG00000152586 | LANTOR2   | 30483 | -0.04 | protein_coding | 3  | 136034543 | 136035201 | late endosomal/lysosomal acidifier, MAPK, and RHO activator 2              |
| 32339 | ENSG00000055044 | NCP98     | 30533 | -0.04 | protein_coding | 2  | 203130439 | 203138839 | NCP98 ribonucleoprotein                                                    |
| 32391 | ENSG00000068594 | MSG1      | 30559 | -0.04 | protein_coding | 12 | 1629216   | 1629216   | microsome diaphanous S-transferase 1                                       |
| 32415 | ENSG00000151289 | ABCB7     | 30571 | -0.04 | protein_coding | 5  | 74273115  | 74273167  | ATP-binding cassette and sub-family B (MDR/TFP), member 7                  |
| 32442 | ENSG00000111361 | EPF2B     | 30610 | -0.04 | protein_coding | 12 | 124164953 | 124168113 | eukaryotic translation initiation factor 2B, subunit 1 alpha, 28kDa        |
| 32561 | ENSG00000066603 | MCOR1     | 30743 | -0.04 | protein_coding | 2  | 138591196 | 138593396 | mitochondrial succinate dehydrogenase complex component 6                  |
| 32582 | ENSG00000152586 | KIAA0101  | 30852 | -0.04 | protein_coding | 8  | 84897959  | 84897961  | KIAA0101                                                                   |
| 32779 | ENSG00000177879 | APFS1     | 30852 | -0.04 | protein_coding | 5  | 115177178 | 115249778 | adaptor-related protein 78, sigma 1, subunit 1                             |
| 32780 | ENSG00000038141 | FAM138A   | 30854 | -0.04 | protein_coding | 2  | 70523107  | 70523222  | family with sequence similarity 136, member A                              |
| 32817 | ENSG00000106186 | NDP98     | 30988 | -0.04 | protein_coding | 10 | 102287263 | 102289717 | NADH dehydrogenase (ubiquinone) 1 beta subcomplex, 8, 19kDa                |
| 32884 | ENSG00000168764 | UGP2      | 31055 | -0.04 | protein_coding | 2  | 6408074   | 6411896   | UDP-glucose pyrophosphorylase 2                                            |
| 32929 | ENSG00000202119 | MCT5      | 31096 | -0.04 | protein_coding | X  | 119727865 | 119734929 | maligned 1 cell amplified sequence 1                                       |
| 33048 | ENSG00000200819 | CPXCP     | 31210 | -0.04 | protein_coding | 3  | 82629976  | 82631297  | cytoplasmic phosphatase                                                    |
| 33071 | ENSG00000106028 | SBP1      | 31230 | -0.04 | protein_coding | 7  | 141438121 | 141448722 | single-stranded DNA binding protein 1, mitochondrial                       |
| 33077 | ENSG00000138381 | ASNSD1    | 31235 | -0.04 | protein_coding | 2  | 19025111  | 19023557  | asparagine synthetase domain containing 1                                  |
| 33090 | ENSG00000102700 | KIF19     | 31250 | -0.04 | protein_coding | 19 | 18680197  | 18680197  | KU61 motif containing 1                                                    |
| 33248 | ENSG00000170340 | B3GNT2    | 31396 | -0.04 | protein_coding | 2  | 62423248  | 62431866  | UDP-GlcNAc:betaGal-beta1,3-N-acetylglucosaminyltransferase 2               |
| 33252 | ENSG00000135211 | TMEM80    | 31400 | -0.04 | protein_coding | 7  | 77423045  | 77427187  | transmembrane protein 80                                                   |
| 33254 | ENSG00000118932 | IFG2L2    | 31402 | -0.04 | protein_coding | 14 | 94581116  | 94581500  | interferon, alpha-inducible protein 27-like 2                              |
| 33263 | ENSG00000178860 | MSC       | 31408 | -0.04 | protein_coding | 8  | 72753784  | 72753784  | musclin                                                                    |
| 33358 | ENSG00000143108 | PSMA5     | 31492 | -0.04 | protein_coding | 1  | 109941653 | 109949582 | proteasome (prosome, multicatalytic proteinase) subunit, alpha type 5      |
| 33404 | ENSG00000103786 | INVS1     | 31543 | -0.04 | protein_coding | 4  | 76783877  | 76783877  | USO1 vesicle transport factor                                              |
| 33452 | ENSG00000162736 | NCSTN     | 31610 | -0.04 | protein_coding | 1  | 160313062 | 160328422 | neostatin                                                                  |
| 33488 | ENSG00000121336 | DDX39A    | 31640 | -0.04 | protein_coding | 1  | 14519831  | 14520192  | DEAD (Asp-Glu-Ala-Asp) box polypeptide 39A                                 |
| 33508 | ENSG00000103129 | KIF18B    | 31643 | -0.04 | protein_coding | 19 | 3288208   | 32882172  | charged multimeric motor protein class 2                                   |
| 33513 | ENSG00000093545 | DNAJ3     | 31660 | -0.04 | protein_coding | 16 | 46885259  | 47007689  | DnaJ (Hsp40) homolog, subfamily A, member 2                                |
| 33577 | ENSG00000128951 | DUT       | 31736 | -0.04 | protein_coding | 15 | 48823208  | 48823750  | deoxydUMP thymidyltransferase                                              |
| 33578 | ENSG00000106181 | FTF1      | 31737 | -0.04 | protein_coding | 14 | 751184    | 751204    | CFP1 RNA-processing protein                                                |
| 33616 | ENSG00000122958 | VPS26A    | 31778 | -0.04 | protein_coding | 10 | 70883268  | 70932617  | vacuolar protein sorting 26 homolog A (S. pombe)                           |
| 33680 | ENSG00000122026 | RPL21     | 31843 | -0.04 | protein_coding | 13 | 27824446  | 27824628  | ribosomal protein L21                                                      |
| 33731 | ENSG00000186601 | FTF3      | 31843 | -0.04 | protein_coding | 8  | 44817833  | 44817833  | transmembrane emerin protein transport domain containing 4                 |
| 33749 | ENSG00000105379 | ETFB      | 31845 | -0.04 | protein_coding | 19 | 51848218  | 51896672  | electron-transfer-flavoprotein, beta polypeptide                           |
| 33750 | ENSG00000185888 | RFS27L    | 31915 | -0.04 | protein_coding | 15 | 63418071  | 63450220  | ribosomal protein S27-like                                                 |
| 33751 | ENSG00000155687 | TRAF3IP1  | 31923 | -0.04 | protein_coding | 3  | 24202881  | 24202881  | protein phosphatase 1, regulatory subunit 7                                |
| 33769 | ENSG00000133385 | HSD17B4   | 31929 | -0.04 | protein_coding | 5  | 118789138 | 118792894 | hydroxysteroid (17-beta) dehydrogenase 4                                   |
| 33844 | ENSG00000123506 | AMD1      | 32102 | -0.04 | protein_coding | 6  | 11185973  | 11126818  | adenylylmethionine decarboxylase 1                                         |
| 33851 | ENSG00000103791 | CEP2      | 32102 | -0.04 | protein_coding | 8  | 781178    | 781178    | cytosolic actin (gougein) reductase                                        |
| 34009 | ENSG00000115918 | CEBP2     | 32170 | -0.04 | protein_coding | 2  | 37428755  | 37428856  | CCAAT/enhancer binding protein (C/EBP), zeta                               |
| 34072 | ENSG00000127866 | TICAM1    | 32250 | -0.04 | protein_coding | 19 | 4815944   | 4831716   | toll-like receptor adaptor molecule 1                                      |
| 34115 | ENSG00000165476 | REEP5     | 32262 | -0.04 | protein_coding | 10 | 6524749   | 6524863   | receptor accessory protein 3                                               |
| 34134 | ENSG00000129126 | HNRPDL    | 32265 | -0.04 | protein_coding | 10 | 8334317   | 83343174  | heterogeneous nuclear ribonucleoprotein D-like                             |
| 34151 | ENSG00000184292 | TACS1D2   | 32261 | -0.04 | protein_coding | 1  | 5904109   | 5904136   | tumor-associated calcium signal transducer 2                               |
| 34158 | ENSG00000126697 | ALG5      | 32265 | -0.04 | protein_coding | 12 | 37523912  | 37524308  | ALG5, dolichyl phosphate beta-glucosyltransferase                          |
| 34216 | ENSG00000103169 | SLC6      | 32266 | -0.04 | protein_coding | 22 | 60838408  | 60838408  | sol carrier protein O                                                      |
| 34338 | ENSG00000100721 | TCL1A     | 32214 | -0.04 | protein_coding | 14 | 96178304  | 96180533  | T-cell leukemia/lymphoma 1A                                                |
| 34339 | ENSG00000131831 | RAZ       | 32269 | -0.04 | protein_coding | 4  | 17818189  | 17818457  | retinoic acid inducible 2                                                  |
| 34344 | ENSG00000154444 | LPL       | 32013 | -0.04 | protein_coding | 8  | 19719228  | 19821109  | lipoprotein lipase                                                         |
| 34404 | ENSG00000214733 | HNRNPUL2  | 32779 | -0.04 | protein_coding | 11 | 62480102  | 62484921  | heterogeneous nuclear ribonucleoprotein U-like 2                           |
| 34406 | ENSG00000114520 | SNX4      | 32784 | -0.04 | protein_coding | 3  | 12516548  | 12516548  | prostate androgen-regulated nuclear protein 4                              |
| 34438 | ENSG00000106181 | PANK1     | 32843 | -0.04 | protein_coding | 12 | 72863305  | 72872305  | pancreatic androgen-regulated nuclear protein 1                            |
| 34480 | ENSG00000111321 | LTRB      | 32843 | -0.04 | protein_coding | 12 | 6484211   | 6500733   | lymphotxin beta receptor (TNFR superfamily, member 3)                      |
| 34722 | ENSG00000208953 | SRB1      | 32849 | -0.04 | protein_coding | 19 | 34881220  | 34900269  | Uchretractant receptor                                                     |
| 34723 | ENSG00000102163 | SRB1      | 32849 | -0.04 | protein_coding | 19 | 139819525 | 139819525 | ubiquitin receptor RNA activator 1                                         |
| 34749 | ENSG00000136485 | DCAF7     | 32963 | -0.04 | protein_coding | 4  | 81627822  | 81627839  | DOB1 and CUL4 associated factor 7                                          |
| 34750 | ENSG00000189139 | UBE2V2    | 32968 | -0.04 | protein_coding | 8  | 48920980  | 48927298  | ubiquitin-conjugating enzyme E2 variant 2                                  |
| 34807 | ENSG00000104378 | BCAS2     | 32971 | -0.04 | protein_coding | 14 | 18482108  | 18482108  | tumor susceptibility 101                                                   |
| 34820 | ENSG00000118752 | BCAS2     | 32971 | -0.04 | protein_coding | 1  | 11510178  | 115124260 | breast carcinoma amplified sequence 2                                      |
| 34832 | ENSG00000186992 | PAPAH2B2  | 32973 | -0.04 | protein_coding | 11 | 11701483  | 11704710  | platelet-activating factor acetylhydrolase 1b, catalytic subunit 2 (30kDa) |
| 34841 | ENSG00000103344 | DNAAF2    | 32973 | -0.04 | protein_coding | 12 | 9433170   | 94331704  | deoxyribonucleoside diphosphate kinase, isoform 2                          |
| 34861 | ENSG00000187193 | MTX1      | 33023 | -0.04 | protein_coding | 16 | 56716336  | 56718108  | metallothionein 1X                                                         |
| 34897 | ENSG00000140397 | UBE2C2    | 33031 | -0.04 | protein_coding | 15 | 7612522   | 76125419  | ubiquitin-conjugating enzyme E2C family member 2                           |
| 34900 | ENSG00000102681 | ACTR11    | 33033 | -0.04 | protein_coding | 15 | 61733000  | 61733000  | actin 1 (C8orf11) interacting protein 15                                   |
| 34918 | ENSG00000106138 | ITGAS     | 33050 | -0.04 | protein_coding | 12 | 54788045  | 54813244  | integrin, alpha 5 (fibronectin receptor, alpha polypeptide)                |
| 34981 | ENSG00000189006 | SNX5      | 33108 | -0.04 | protein_coding | 20 | 17922241  | 17949623  | sorting nexin 5                                                            |
| 34990 | ENSG00000106929 | TNFRSF14A | 33113 | -0.04 | protein_coding | 4  | 5253368   | 5253368   | transmembrane protein 14A                                                  |
| 35010 | ENSG00000132467 | UTP3      | 33152 | -0.04 | protein_coding | 4  | 7155419   | 71556267  | UTP3, small subunit (SSU) processome component, homolog (S. cerevisiae)    |
| 35018 | ENSG00000106635 | BCL7B     | 33158 | -0.04 | protein_coding | 7  | 72950986  | 72972332  | B-cell CLL/lymphoma 7B                                                     |
| 35033 | ENSG00000165488 | INVS1     | 33158 | -0.04 | protein_coding | 4  | 5462197   | 5462197   | heterogeneous nuclear ribonucleoprotein A1                                 |
| 35084 | ENSG00000102125 | SPB21     | 33224 | -0.04 | protein_coding | 17 | 33950505  | 34053346  | adaptor-related protein complex 2, beta 1 subunit                          |
| 35133 | ENSG00000152842 | GPDL      | 33274 | -0.04 | protein_coding | 3  | 12431781  | 124321005 | glycyl-L-prophosphate dehydrogenase 1-like                                 |
| 35161 | ENSG00000104423 | TRAF3IP1  | 33282 | -0.04 | protein_coding | 3  | 4408208   | 44104008  | MAP4 four-domain-like core domain 1                                        |
| 35178 | ENSG00000193848 | NDUF81    | 33319 | -0.04 | protein_coding | 14 | 9252456   | 9252881   | NADH dehydrogenase (ubiquinone) 1 beta subcomplex, 1, 7kDa                 |
| 35202 | ENSG00000145833 | DXK46     | 33336 | -0.04 | protein_coding | 5  | 134094469 | 13419023  | DEAD (Asp-Glu-Ala-Asp) box polypeptide 46                                  |
| 35240 | ENSG00000155488 | TMEM81    | 33313 | -0.04 | protein_coding | 11 | 9288371   | 9288371   | transmembrane protein 81                                                   |
| 35303 | ENSG00000168741 | NMT1      | 33421 | -0.04 | protein_coding | 11 | 114128059 | 114184007 | nicotianamine N-methyltransferase                                          |
| 35308 | ENSG00000140334 | TPRKB     | 33427 | -0.04 | protein_coding | 2  | 73956231  | 73956231  | TPRKB binding protein                                                      |
| 35328 | ENSG00000102681 | ACTR11    | 33427 | -0.04 | protein_coding | 15 | 5984210   | 5984210   | actin 1 (C8orf11) interacting protein 15                                   |
| 35338 | ENSG00000101882 | NKAP      | 33455 | -0.04 | protein_coding | X  | 11909014  | 11907735  | NFKB1 activating protein                                                   |
| 35342 | ENSG00000087269 | NCP14     | 33457 | -0.04 | protein_coding | 4  | 293660    | 2965112   | NCP14 nuclear protein                                                      |
| 35378 | ENSG00000187134 | AKR1C1    | 33487 | -0.04 | protein_coding | 10 | 4934798   | 4934798   | aldol-keto reductase family 1, member C1                                   |
| 35381 | ENSG00000148374 | TRAF3IP18 | 33489 | -0.04 | protein_coding | 1  | 12989797  | 12989797  | Rbx 11P4e activating protein 18                                            |
| 35392 | ENSG00000064102 | ASLN      | 33499 | -0.04 | protein_coding | 12 | 27058114  | 27091259  | astudin spermatogenesis regulator                                          |
| 35448 | ENSG00000171513 | ESRRB     | 33560 | -0.04 | protein_coding | 11 | 6407304   | 64084915  | estrogen-related receptor alpha                                            |
| 35488 | ENSG00000161754 | GY1       | 33597 | -0.04 | protein_coding | 8  | 14875919  | 14875919  | Tubulin beta 8 chain like protein (LOC703334)                              |
| 35494 | ENSG00000256566 | CYR11     | 33687 | -0.04 | protein_coding | 20 | 2447858   | 2448553   | chaperonin 10                                                              |
| 35503 | ENSG00000186923 | PDLIM7    | 33687 | -0.04 | protein_coding | 5  | 17891096  | 17894607  | phosphatidylethanolamine phosphatase                                       |
| 35621 | ENSG00000106635 | SORBS1    | 33724 | -0.04 | protein_coding | 11 | 9701159   | 9701171   | SORBS1 domain containing 1                                                 |
| 35624 | ENSG00000166285 | CYR11     | 33731 | -0.04 | protein_coding | 21 | 27838528  | 27838503  | chaperonin 10                                                              |
| 35626 | ENSG00000186139 | AKR1C3    | 33732 | -0.04 | protein_coding | 10 | 5077546   | 5149878   | aldol-keto reductase family 1, member C3                                   |
| 35654 | ENSG00000102681 | ACTR11    | 33732 | -0.04 | protein_coding | 15 | 33        |           |                                                                            |

|       |                 |       |       |       |                |    |           |           |                                                                                         |
|-------|-----------------|-------|-------|-------|----------------|----|-----------|-----------|-----------------------------------------------------------------------------------------|
| 36699 | ENSG00000180678 | ST0A1 | 34895 | -0.04 | protein_coding | 1  | 15360402  | 15360413  | S100 calcium binding protein A1                                                         |
| 36699 | ENSG00000180678 | ST0A1 | 34895 | -0.04 | protein_coding | 4  | 12271819  | 12271819  | 12 kDa cytosolic domain 8                                                               |
| 36699 | ENSG00000180678 | ST0A1 | 34895 | -0.04 | protein_coding | 16 | 21268773  | 21268773  | zona pellucida glycoprotein 2 (sperm receptor)                                          |
| 36699 | ENSG00000180678 | ST0A1 | 34895 | -0.04 | protein_coding | 2  | 96940074  | 96940077  | small nuclear ribonucleoprotein 200kDa (U5)                                             |
| 36699 | ENSG00000180678 | ST0A1 | 34895 | -0.04 | protein_coding | 12 | 102467967 | 102467967 | nucleoporin 37kDa                                                                       |
| 36699 | ENSG00000180678 | ST0A1 | 34895 | -0.04 | protein_coding | 12 | 22195237  | 22195237  | sarff domain containing kinase 3                                                        |
| 36699 | ENSG00000180678 | ST0A1 | 34895 | -0.04 | protein_coding | 6  | 74078278  | 74078278  | ococyte expressed protein                                                               |
| 36699 | ENSG00000180678 | ST0A1 | 34895 | -0.04 | protein_coding | 6  | 8075891   | 8102811   | cytosolic transcription elongation factor 1 epsilon 1                                   |
| 36699 | ENSG00000180678 | ST0A1 | 34895 | -0.04 | protein_coding | 19 | 36639152  | 36639152  | FXD1 domain containing on transport regulator 1                                         |
| 36699 | ENSG00000180678 | ST0A1 | 34895 | -0.04 | protein_coding | 1  | 15489502  | 15489502  | pygopus family PWD finger 2                                                             |
| 36699 | ENSG00000180678 | ST0A1 | 34895 | -0.04 | protein_coding | 2  | 4652896   | 4651936   | endoreplicative PAS domain protein 1                                                    |
| 36699 | ENSG00000180678 | ST0A1 | 34895 | -0.04 | protein_coding | 2  | 19978756  | 14324311  | late polycomb repressor homolog 4                                                       |
| 36699 | ENSG00000180678 | ST0A1 | 34895 | -0.04 | protein_coding | X  | 12555548  | 12547317  | RNA binding motif protein, X-linked 2                                                   |
| 36699 | ENSG00000180678 | ST0A1 | 34895 | -0.04 | protein_coding | 13 | 36584003  | 36512252  | proline and serine rich 1                                                               |
| 36699 | ENSG00000180678 | ST0A1 | 34895 | -0.04 | protein_coding | 12 | 92688770  | 92648166  | NLR family, pyrin domain containing 11                                                  |
| 36699 | ENSG00000180678 | ST0A1 | 34895 | -0.04 | protein_coding | 15 | 66737297  | 66842115  | zinc finger kintochore protein                                                          |
| 36699 | ENSG00000180678 | ST0A1 | 34895 | -0.04 | protein_coding | 11 | 61170121  | 61197303  | cleavage and polyadenylation specific factor 7, 59kDa                                   |
| 36699 | ENSG00000180678 | ST0A1 | 34895 | -0.04 | protein_coding | 12 | 9006814   | 69136795  | nucleoporin 107kDa                                                                      |
| 36699 | ENSG00000180678 | ST0A1 | 34895 | -0.04 | protein_coding | 7  | 73213872  | 73247014  | claudin 4                                                                               |
| 36699 | ENSG00000180678 | ST0A1 | 34895 | -0.04 | protein_coding | 10 | 111624204 | 111683111 | X-prolyl aminopeptidase (aminopeptidase P) 1, soluble                                   |
| 36699 | ENSG00000180678 | ST0A1 | 34895 | -0.04 | protein_coding | 19 | 15061701  | 15066930  | golg phosphoprotein 3-like                                                              |
| 36699 | ENSG00000180678 | ST0A1 | 34895 | -0.04 | protein_coding | 5  | 1785000   | 1801480   | mitochondrial ribosomal protein L36                                                     |
| 36699 | ENSG00000180678 | ST0A1 | 34895 | -0.04 | protein_coding | 14 | 74523553  | 74551196  | aldehyde dehydrogenase 6 family, member A1                                              |
| 36699 | ENSG00000180678 | ST0A1 | 34895 | -0.04 | protein_coding | 12 | 124432007 | 124452378 | collet-coiled domain containing 59                                                      |
| 36699 | ENSG00000180678 | ST0A1 | 34895 | -0.04 | protein_coding | 11 | 58607748  | 58615517  | ococyte secreted protein 2                                                              |
| 36699 | ENSG00000180678 | ST0A1 | 34895 | -0.04 | protein_coding | 1  | 16128517  | 161255240 | Purkinje cell protein 4 like 1                                                          |
| 36699 | ENSG00000180678 | ST0A1 | 34895 | -0.04 | protein_coding | 11 | 362614    | 414909    | zinc finger 3                                                                           |
| 36699 | ENSG00000180678 | ST0A1 | 34895 | -0.04 | protein_coding | 10 | 106113522 | 106214848 | collet-coiled domain containing 147                                                     |
| 36699 | ENSG00000180678 | ST0A1 | 34895 | -0.04 | protein_coding | 11 | 20624966  | 20680831  | solute carrier family 6 (neurotransmitter transporter), member 5                        |
| 36699 | ENSG00000180678 | ST0A1 | 34895 | -0.04 | protein_coding | 18 | 257116    | 257116    | NDC80 kinetochore complex component                                                     |
| 36699 | ENSG00000180678 | ST0A1 | 34895 | -0.04 | protein_coding | 1  | 36787632  | 36789755  | eva-1 homolog B (C. elegans)                                                            |
| 36699 | ENSG00000180678 | ST0A1 | 34895 | -0.04 | protein_coding | 14 | 9326576   | 93306308  | golphin A5                                                                              |
| 36699 | ENSG00000180678 | ST0A1 | 34895 | -0.04 | protein_coding | 10 | 7182510   | 7182510   | apoptosis-inducing factor, mitochondrial-associated, 2                                  |
| 36699 | ENSG00000180678 | ST0A1 | 34895 | -0.04 | protein_coding | 5  | 149493400 | 14953535  | platelet-derived growth factor receptor, beta polypeptide                               |
| 36699 | ENSG00000180678 | ST0A1 | 34895 | -0.04 | protein_coding | 11 | 56404     | 564021    | Ras association (RaGDS/SAF-6) domain family (N-terminal) member 7                       |
| 36699 | ENSG00000180678 | ST0A1 | 34895 | -0.04 | protein_coding | 18 | 633366    | 633366    | subunit protein containing E3 ubiquitin protein ligase                                  |
| 36699 | ENSG00000180678 | ST0A1 | 34895 | -0.04 | protein_coding | 7  | 133069137 | 133161774 | fibronin-like 1                                                                         |
| 36699 | ENSG00000180678 | ST0A1 | 34895 | -0.04 | protein_coding | 6  | 14886252  | 14902004  | synovial apoptosis inhibitor 1, synovial                                                |
| 36699 | ENSG00000180678 | ST0A1 | 34895 | -0.04 | protein_coding | 7  | 7285708   | 7285708   | brucanin/annexin to zinc finger domain, 1B                                              |
| 36699 | ENSG00000180678 | ST0A1 | 34895 | -0.04 | protein_coding | 12 | 14952720  | 14930936  | H2A histone family, member 2                                                            |
| 36699 | ENSG00000180678 | ST0A1 | 34895 | -0.04 | protein_coding | 12 | 7884555   | 7871055   | developmental pluripotency associated 3                                                 |
| 36699 | ENSG00000180678 | ST0A1 | 34895 | -0.04 | protein_coding | 12 | 3614      | 3614      | collet-coiled domain containing 59                                                      |
| 36699 | ENSG00000180678 | ST0A1 | 34895 | -0.04 | protein_coding | 6  | 13849642  | 13842948  | PERP, TP53 apoptosis effector                                                           |
| 36699 | ENSG00000180678 | ST0A1 | 34895 | -0.04 | protein_coding | 6  | 74062785  | 74048018  | developmental pluripotency associated 5                                                 |
| 36699 | ENSG00000180678 | ST0A1 | 34895 | -0.04 | protein_coding | 17 | 7701886   | 77045970  | Ctla and tumor necrosis factor related protein 2                                        |
| 36699 | ENSG00000180678 | ST0A1 | 34895 | -0.04 | protein_coding | 3  | 4693293   | 4693293   | muscle, light chain 3, alpha, ventricular, skeletal, slow                               |
| 36699 | ENSG00000180678 | ST0A1 | 34895 | -0.04 | protein_coding | 3  | 39224701  | 39234087  | sin actin-binding repeat containing 3                                                   |
| 36699 | ENSG00000180678 | ST0A1 | 34895 | -0.04 | protein_coding | 7  | 1749186   | 1749186   | growth factor receptor bound protein 7                                                  |
| 36699 | ENSG00000180678 | ST0A1 | 34895 | -0.04 | protein_coding | 17 | 63340667  | 63340667  | phospholipase C, group IV 1                                                             |
| 36699 | ENSG00000180678 | ST0A1 | 34895 | -0.04 | protein_coding | 3  | 21727734  | 21727734  | spindle and kinetochore associated complex subunit 3                                    |
| 36699 | ENSG00000180678 | ST0A1 | 34895 | -0.04 | protein_coding | 8  | 11613568  | 11601379  | histone H2B-like histone domain containing 3                                            |
| 36699 | ENSG00000180678 | ST0A1 | 34895 | -0.04 | protein_coding | 14 | 2474474   | 2474474   | Rib gene regulatory element, alpha subunit                                              |
| 36699 | ENSG00000180678 | ST0A1 | 34895 | -0.04 | protein_coding | 1  | 22641139  | 22641175  | MAP paired-like homeobox                                                                |
| 36699 | ENSG00000180678 | ST0A1 | 34895 | -0.04 | protein_coding | 7  | 96749922  | 96811075  | ACIN1 homolog (S. cerevisiae)                                                           |
| 36699 | ENSG00000180678 | ST0A1 | 34895 | -0.04 | protein_coding | 17 | 154214927 | 154246311 | H2C1.51 associated protein X1                                                           |
| 36699 | ENSG00000180678 | ST0A1 | 34895 | -0.04 | protein_coding | 16 | 1993975   | 2007697   | protein phosphatase 1, regulatory subunit 15A                                           |
| 36699 | ENSG00000180678 | ST0A1 | 34895 | -0.04 | protein_coding | 18 | 3068805   | 3220106   | ubiquitin polyubiquitinase complex subunit 2                                            |
| 36699 | ENSG00000180678 | ST0A1 | 34895 | -0.04 | protein_coding | 6  | 81003692  | 81003692  | WWF domain binding protein 4                                                            |
| 36699 | ENSG00000180678 | ST0A1 | 34895 | -0.04 | protein_coding | 4  | 4937549   | 4937549   | myosin 1B                                                                               |
| 36699 | ENSG00000180678 | ST0A1 | 34895 | -0.04 | protein_coding | 18 | 3435987   | 3449158   | CuSR1 motif containing 2                                                                |
| 36699 | ENSG00000180678 | ST0A1 | 34895 | -0.04 | protein_coding | 18 | 4335987   | 4349158   | protein phosphatase 1, regulatory subunit 15A                                           |
| 36699 | ENSG00000180678 | ST0A1 | 34895 | -0.04 | protein_coding | 15 | 77712754  | 7777949   | high mobility group 20A                                                                 |
| 36699 | ENSG00000180678 | ST0A1 | 34895 | -0.04 | protein_coding | 1  | 18081808  | 1815358   | actin-like 8                                                                            |
| 36699 | ENSG00000180678 | ST0A1 | 34895 | -0.04 | protein_coding | 10 | 1293147   | 13161652  | collet-coiled domain containing 3                                                       |
| 36699 | ENSG00000180678 | ST0A1 | 34895 | -0.04 | protein_coding | 3  | 11232407  | 11236837  | collet-coiled domain containing 80                                                      |
| 36699 | ENSG00000180678 | ST0A1 | 34895 | -0.04 | protein_coding | 1  | 15529300  | 15545490  | synaptotagmin X1                                                                        |
| 36699 | ENSG00000180678 | ST0A1 | 34895 | -0.04 | protein_coding | 1  | 1810077   | 1810077   | immune response 5                                                                       |
| 36699 | ENSG00000180678 | ST0A1 | 34895 | -0.04 | protein_coding | 1  | 211744901 | 211752084 | solute carrier family 30 (zinc transporter), member 1                                   |
| 36699 | ENSG00000180678 | ST0A1 | 34895 | -0.04 | protein_coding | 3  | 12484554  | 12477402  | heart development protein with EGF-like domains 1                                       |
| 36699 | ENSG00000180678 | ST0A1 | 34895 | -0.04 | protein_coding | 2  | 2078132   | 2078132   | FAST kinase domain 2                                                                    |
| 36699 | ENSG00000180678 | ST0A1 | 34895 | -0.04 | protein_coding | 5  | 6540557   | 6547780   | caseinolytic mitochondrial matrix peptidase chaperone subunit                           |
| 36699 | ENSG00000180678 | ST0A1 | 34895 | -0.04 | protein_coding | 9  | 8003795   | 8003823   | guanine nucleotide binding protein (G protein), alpha 14                                |
| 36699 | ENSG00000180678 | ST0A1 | 34895 | -0.04 | protein_coding | 9  | 53734     | 541780    | muscular LIM domain protein 2                                                           |
| 36699 | ENSG00000180678 | ST0A1 | 34895 | -0.04 | protein_coding | 11 | 1920378   | 1923210   | cytosine and arginine-rich protein 3 (cardiac LIM protein)                              |
| 36699 | ENSG00000180678 | ST0A1 | 34895 | -0.04 | protein_coding | 9  | 13330316  | 13337861  | argininosuccinate synthase 1                                                            |
| 36699 | ENSG00000180678 | ST0A1 | 34895 | -0.04 | protein_coding | 1  | 56214     | 56214     | matrix metalloproteinase 2, gelatinase A, 72kDa gelatinase, 72kDa type II (collagenase) |
| 36699 | ENSG00000180678 | ST0A1 | 34895 | -0.04 | protein_coding | 15 | 4419161   | 4419161   | WW repeat domain 76                                                                     |
| 36699 | ENSG00000180678 | ST0A1 | 34895 | -0.04 | protein_coding | X  | 91034280  | 91034280  | gelatinase/heparinase 11 X-linked                                                       |
| 36699 | ENSG00000180678 | ST0A1 | 34895 | -0.04 | protein_coding | 1  | 11513360  | 11513361  | cytosine deaminase type 1                                                               |
| 36699 | ENSG00000180678 | ST0A1 | 34895 | -0.04 | protein_coding | 4  | 12029939  | 12010844  | myosin 2                                                                                |
| 36699 | ENSG00000180678 | ST0A1 | 34895 | -0.04 | protein_coding | 5  | 13781179  | 13780504  | early growth response 1                                                                 |
| 36699 | ENSG00000180678 | ST0A1 | 34895 | -0.04 | protein_coding | 1  | 53623     | 53623     | family with sequence similarity 220, member A                                           |
| 36699 | ENSG00000180678 | ST0A1 | 34895 | -0.04 | protein_coding | 16 | 6933558   | 6935414   | Uncharacterized protein                                                                 |
| 36699 | ENSG00000180678 | ST0A1 | 34895 | -0.04 | protein_coding | 4  | 8014848   | 80247204  | N(alfah)acetyltransferase 11, N(alfah) catalytic subunit                                |
| 36699 | ENSG00000180678 | ST0A1 | 34895 | -0.04 | protein_coding | 3  | 5248118   | 5248680   | protoporphyrin 1, heavy chain 1                                                         |
| 36699 | ENSG00000180678 | ST0A1 | 34895 | -0.04 | protein_coding | 10 | 5291165   | 5291165   | ankyrin repeat domain 1 (cardiac muscle)                                                |
| 36699 | ENSG00000180678 | ST0A1 | 34895 | -0.04 | protein_coding | 3  | 3301810   | 33138722  | palmitoyl-CoA synthase, beta 1                                                          |
| 36699 | ENSG00000180678 | ST0A1 | 34895 | -0.04 | protein_coding | X  | 15296548  | 15296240  | solute carrier family 6 (neurotransmitter transporter), member 8                        |
| 36699 | ENSG00000180678 | ST0A1 | 34895 | -0.04 | protein_coding | 6  | 62679076  | 62689994  | SRY (sex determining region Y) box 18                                                   |
| 36699 | ENSG00000180678 | ST0A1 | 34895 | -0.04 | protein_coding | 20 | 2815860   | 2815860   | PC-esterase domain containing 1A                                                        |
| 36699 | ENSG00000180678 | ST0A1 | 34895 | -0.04 | protein_coding | 17 | 22982160  | 22982160  | mitochondrial aminoxylase reducing component 2                                          |
| 36699 | ENSG00000180678 | ST0A1 | 34895 | -0.04 | protein_coding | 17 | 718486    | 718486    | solute carrier family 2 (glucose transporter), member 4                                 |
| 36699 | ENSG00000180678 | ST0A1 | 34895 | -0.04 | protein_coding | 14 | 5727425   | 57277197  | orthodielase homolog 2                                                                  |
| 36699 | ENSG00000180678 | ST0A1 | 34895 | -0.04 | protein_coding | 14 | 10243085  | 10251729  | dysmem, cytoplasmic 1, heavy chain 1                                                    |
| 36699 | ENSG00000180678 | ST0A1 | 34895 | -0.04 | protein_coding | 6  | 18887472  | 18887472  | cytosine deaminase type 1, alpha 1                                                      |
| 36699 | ENSG00000180678 | ST0A1 | 34895 | -0.04 |                |    |           |           |                                                                                         |

|       |                   |                |       |       |                |    |          |           |                                                                                  |
|-------|-------------------|----------------|-------|-------|----------------|----|----------|-----------|----------------------------------------------------------------------------------|
| 38130 | ENSG00000104879   | GKM            | 36282 | -0.04 | protein_coding | 1  | 45869072 | 45826235  | creatine kinase, muscle                                                          |
| 38131 | ENSG00000105927   | RHSD9B         | 36283 | -0.04 | protein_coding | 19 | 5388204  | 5388204   | ribosomal protein S28                                                            |
| 38151 | ENSG00000104675   | IQJB           | 36300 | -0.04 | protein_coding | 7  | 12309254 | 123175131 | IQ motif and ubiquitin domain containing                                         |
| 38158 | ENSG00000105593   | SMYD1          | 36306 | -0.04 | protein_coding | 2  | 8834729  | 88412906  | SET and MYND domain containing 1                                                 |
| 38168 | ENSG00000104696   | DUF007         | 36313 | -0.04 | protein_coding | 3  | 5006239  | 5006239   | distal specificity phosphatase 7                                                 |
| 38179 | ENSG00000105999   | MLXIP          | 36330 | -0.04 | protein_coding | 1  | 7263762  | 7263762   | lysine-specific proline-lysine                                                   |
| 38181 | ENSG00000105244   | MFSD5          | 36333 | -0.04 | protein_coding | 12 | 53845035 | 53845189  | major facilitator superfamily domain containing 5                                |
| 38197 | ENSG00000105251   | POE8B          | 36355 | -0.04 | protein_coding | 5  | 7656274  | 7672952   | phosphotransferase 8B                                                            |
| 38204 | ENSG00000104878   | NUDT2          | 36358 | -0.04 | protein_coding | 9  | 3432958  | 34333399  | nucl. (nucleoside diphosphate linked moiety X)-type motif 2                      |
| 38212 | ENSG00000105787   | ATL2           | 36369 | -0.04 | protein_coding | 2  | 3852022  | 38504427  | atlastin/GTPase 2                                                                |
| 38231 | ENSG00000105026   | COX6B          | 36389 | -0.04 | protein_coding | 14 | 5495597  | 5495597   | cyclic-dependent kinase/receptor 3                                               |
| 38238 | ENSG00000107645   | LPCTA4         | 36399 | -0.04 | protein_coding | 15 | 8678983  | 8681130   | lysophosphatidylcholine acyltransferase 4                                        |
| 38241 | ENSG00000109175   | CTIFB2         | 36402 | -0.04 | protein_coding | 1  | 15625980 | 15625943  | chromosome 1 open reading frame 85                                               |
| 38241 | ENSG000001025149  | MSANTD3-TMEFF1 | 36408 | -0.04 | protein_coding | 9  | 10300453 | 1033918   | MSANTD3-TMEFF1 readthrough                                                       |
| 38253 | ENSG00000104782   | PLIN2          | 36410 | -0.04 | protein_coding | 8  | 19108373 | 19149288  | perilipin 2                                                                      |
| 38276 | ENSG00000106448   | NMI1           | 36439 | -0.04 | protein_coding | 17 | 4312978  | 4313638   | N-myristyltransferase 1                                                          |
| 38280 | ENSG00000102093   | TMEM12         | 36446 | -0.04 | protein_coding | 19 | 2309184  | 2309509   | signal peptide/epitope-like 2B                                                   |
| 38283 | ENSG00000107041   | TMEM182        | 36444 | -0.04 | protein_coding | 2  | 10335367 | 10346032  | transmembrane protein 182                                                        |
| 38289 | ENSG00000102743   | IL17B          | 36453 | -0.04 | protein_coding | 5  | 14875087 | 14878376  | interleukin 17B                                                                  |
| 38300 | ENSG00000107468   | SYRFL          | 36464 | -0.04 | protein_coding | 1  | 52414629 | 52417983  | broctomolamin, anti-specific                                                     |
| 38305 | ENSG00000108739   | CEBP2          | 36467 | -0.04 | protein_coding | 2  | 37428631 | 37443306  | CEBP2 antisense RNA 1                                                            |
| 38326 | ENSG00000102473   | KULH3          | 36492 | -0.04 | protein_coding | 6  | 53512699 | 53530506  | kech-like family member 31                                                       |
| 38331 | ENSG00000104701   | APOR2C2        | 36498 | -0.04 | protein_coding | 8  | 41021403 | 41022250  | apolipoprotein B mRNA editing enzyme, catalytic polypeptide-like 2               |
| 38339 | ENSG0000010082516 | GEMIN3         | 36507 | -0.04 | protein_coding | 5  | 15428970 | 15431769  | gem (nuclear organelle) associated protein 5                                     |
| 38353 | ENSG000001051813  | LARP4          | 36529 | -0.04 | protein_coding | 12 | 5078166  | 5078377   | La ribonucleoprotein domain family member 4                                      |
| 38354 | ENSG00000105224   | ATF31          | 36529 | -0.04 | protein_coding | 11 | 46839926 | 46839926  | autophagy related 15                                                             |
| 38360 | ENSG00000107514   | POLD3          | 36533 | -0.04 | protein_coding | 11 | 7420486  | 74380162  | polymerase (DNA-directed), delta 3, accessory subunit                            |
| 38371 | ENSG000001020253  | NUP45          | 36545 | -0.04 | protein_coding | 6  | 15004541 | 15007081  | nucleoporin 43kDa                                                                |
| 38371 | ENSG00000105929   | CTB89          | 36549 | -0.04 | protein_coding | 11 | 6306264  | 6306264   | CotG2 guanine nucleotide exchange factor (GEF) 9                                 |
| 38386 | ENSG00000108928   | CTB89          | 36562 | -0.04 | protein_coding | 16 | 7523794  | 7524103   | chrysothymosin B2                                                                |
| 38397 | ENSG00000104530   | STARTD10       | 36577 | -0.04 | protein_coding | 11 | 7245774  | 7250472   | SMAR-related lipid transfer (START) domain containing 10                         |
| 38412 | ENSG00000102870   | CEAD           | 36583 | -0.04 | protein_coding | 1  | 560338   | 560338    | CEAD (anti-Gli3-like) box polypeptide 4                                          |
| 38414 | ENSG000001098121  | LPAR1          | 36585 | -0.04 | protein_coding | 9  | 11363543 | 11380091  | lysophosphatidic acid receptor 1                                                 |
| 38432 | ENSG00000106397   | ATG4B          | 36626 | -0.04 | protein_coding | 2  | 24257628 | 24261372  | autophagy related 4B, cysteine peptidase                                         |
| 38438 | ENSG00000105929   | CTB89          | 36638 | -0.04 | protein_coding | 2  | 21113124 | 21113124  | myosin light chain 1, alpha skeletal muscle                                      |
| 38467 | ENSG00000105632   | TAF3           | 36655 | -0.04 | protein_coding | 10 | 780647   | 780647    | TAF3 RNA polymerase II, TATA box binding protein (TBP)-associated factor, 140kDa |
| 38468 | ENSG00000105328   | CAPN15         | 36659 | -0.04 | protein_coding | 16 | 57717    | 604636    | calpain 15                                                                       |
| 38472 | ENSG00000105148   | SYT16          | 36662 | -0.04 | protein_coding | 11 | 13121245 | 13123311  | synaptin 2                                                                       |
| 38474 | ENSG00000105733   | BMS1           | 36659 | -0.04 | protein_coding | 10 | 4327809  | 4330385   | BMS1 ribosome biogenesis factor                                                  |
| 38475 | ENSG00000103878   | TMEM254        | 36659 | -0.04 | protein_coding | 10 | 8193842  | 8185231   | transmembrane protein 254                                                        |
| 38485 | ENSG00000100969   | SYT16          | 36669 | -0.04 | protein_coding | 11 | 875683   | 875683    | DBP-A homolog (S. cerevisiae)                                                    |
| 38488 | ENSG00000103973   | SYT16          | 36669 | -0.04 | protein_coding | 14 | 62453803 | 62598431  | synaptotagmin XVI                                                                |
| 38492 | ENSG00000103813   | KIAA388        | 36673 | -0.04 | protein_coding | 9  | 11422972 | 11424725  | KIAA388                                                                          |
| 38494 | ENSG00000106994   | PANX1          | 36675 | -0.04 | protein_coding | 10 | 5520479  | 5520479   | connexin 2                                                                       |
| 38496 | ENSG00000101024   | PANX1          | 36675 | -0.04 | protein_coding | 11 | 6386284  | 63975138  | connexin 2                                                                       |
| 38497 | ENSG00000105784   | FAM72D         | 36676 | -0.04 | protein_coding | 1  | 14388642 | 14391313  | family with sequence similarity 72, member D                                     |
| 38517 | ENSG00000106204   | SMKRN1         | 36681 | -0.04 | protein_coding | 7  | 12914230 | 12915273  | small vprain-RD protein 1                                                        |
| 38517 | ENSG00000107165   | FEZ2           | 36681 | -0.04 | protein_coding | 2  | 36717670 | 36717670  | fasciculation and elongation protein alpha 2 (zypin II)                          |
| 38520 | ENSG00000106842   | ITGBL1         | 36703 | -0.04 | protein_coding | 13 | 10210496 | 10237456  | integrin, beta-1 (with EGF-like repeat domains)                                  |
| 38528 | ENSG00000106624   | XAB2           | 36711 | -0.04 | protein_coding | 19 | 7684411  | 7684411   | XPA-binding protein 2                                                            |
| 38531 | ENSG00000106166   | CEPML1         | 36713 | -0.04 | protein_coding | 22 | 42331475 | 42331475  | protein 1, member M                                                              |
| 38546 | ENSG000001051162  | BMP6           | 36729 | -0.04 | protein_coding | 6  | 7727020  | 7818165   | bone morphogenetic protein 6                                                     |
| 38547 | ENSG00000109001   | ALKBH1         | 36730 | -0.04 | protein_coding | 14 | 7813847  | 7817363   | zinc, alviation repair homolog 1 (E. coli)                                       |
| 38548 | ENSG00000105885   | COX6A2         | 36730 | -0.04 | protein_coding | 11 | 21432952 | 21433697  | cytochrome c oxidase subunit 6a polypeptide 4                                    |
| 38562 | ENSG000001081324  | FAM109A        | 36751 | -0.04 | protein_coding | 12 | 11178845 | 11180925  | family with sequence similarity 109, member A                                    |
| 38565 | ENSG00000109193   | KIF14          | 36753 | -0.04 | protein_coding | 1  | 20052028 | 20058962  | kinesin family member 14                                                         |
| 38566 | ENSG00000104317   | GRIH1          | 36753 | -0.04 | protein_coding | 14 | 10885411 | 10714411  | granulosa cell protein 1 (Disposolia)                                            |
| 38568 | ENSG00000104357   | NEURL1B        | 36755 | -0.04 | protein_coding | 17 | 17208269 | 17211843  | neuronal E3 ubiquitin protein ligase 1B                                          |
| 38584 | ENSG00000108653   | ZNF502         | 36787 | -0.04 | protein_coding | 3  | 4475435  | 4478323   | zinc finger protein 502                                                          |
| 38584 | ENSG00000105341   | SH3DCL2        | 36787 | -0.04 | protein_coding | 3  | 13170382 | 13170382  | SH3-domain class 2 endophilin B2                                                 |
| 38584 | ENSG00000108650   | KOZM2          | 36789 | -0.04 | protein_coding | 1  | 2764851  | 27662891  | transmembrane protein 222                                                        |
| 38610 | ENSG00000108596   | NDOR1          | 36790 | -0.04 | protein_coding | 9  | 14010947 | 140111481 | NADPH-dependent flavin oxidoreductase 1                                          |
| 38620 | ENSG00000103030   | TMEM17         | 36793 | -0.04 | protein_coding | 22 | 3744129  | 3744129   | potassium channel tetramer domain containing 17                                  |
| 38638 | ENSG000001009509  | DHPS           | 36825 | -0.04 | protein_coding | 19 | 12786531 | 12792716  | deoxythymine synthase                                                            |
| 38645 | ENSG00000106746   | ANG10          | 36829 | -0.04 | protein_coding | 3  | 4339351  | 4373308   | angiotensin 10                                                                   |
| 38661 | ENSG00000105817   | SYRFL          | 36839 | -0.04 | protein_coding | 1  | 7442319  | 7442319   | synaptotagmin 2-like                                                             |
| 38662 | ENSG00000103472   | FAM12          | 36854 | -0.04 | protein_coding | 12 | 5026079  | 5028000   | Fas apoptotic inhibitor molecule 2                                               |
| 38666 | ENSG00000103200   | FRMP2          | 36858 | -0.04 | protein_coding | 17 | 4988589  | 4972093   | myosin phosphatase Rho interacting protein                                       |
| 38676 | ENSG00000106862   | PNK1           | 36862 | -0.04 | protein_coding | 18 | 6756188  | 6756188   | phospho 12/15-oxolane-induced protein 1                                          |
| 38685 | ENSG000001059347  | GSP2           | 36876 | -0.04 | protein_coding | 16 | 2032084  | 2031930   | glycoprotein 2 (lysosomal granule membrane)                                      |
| 38688 | ENSG000001008399  | LYRM2          | 36880 | -0.04 | protein_coding | 6  | 8027783  | 8030482   | LYRM motif containing 2                                                          |
| 38698 | ENSG00000105768   | MIR617         | 36884 | -0.04 | protein_coding | 1  | 5601894  | 5601894   | microRNA-617                                                                     |
| 38703 | ENSG00000105361   | PTX3           | 36901 | -0.04 | protein_coding | 3  | 15715479 | 15716147  | pentraxin 3, long                                                                |
| 38705 | ENSG00000105260   | TRIM38         | 36904 | -0.04 | protein_coding | 5  | 11448049 | 11458243  | tripartite motif containing 38                                                   |
| 38711 | ENSG00000105831   | TRIM38         | 36904 | -0.04 | protein_coding | 5  | 841823   | 841823    | ankyrin beta (AI) protein-protein-binding family B, member 1 (Fe55)              |
| 38715 | ENSG000001059271  | HSPE3          | 36916 | -0.04 | protein_coding | 5  | 5375445  | 5379207   | heat shock 27kDa protein 3                                                       |
| 38718 | ENSG00000107707   | PROX1          | 36918 | -0.04 | protein_coding | 1  | 21415624 | 21414895  | proteasome box 1                                                                 |
| 38720 | ENSG00000104278   | DRK1B          | 36920 | -0.04 | protein_coding | 20 | 4482020  | 4482020   | dyadkin (dystrophin-binding protein 1) domain containing 2                       |
| 38722 | ENSG00000105708   | CADM3          | 36920 | -0.04 | protein_coding | 1  | 15911399 | 15911303  | cell adhesion molecule 3                                                         |
| 38734 | ENSG000001051835  | NKX2-2         | 36930 | -0.04 | protein_coding | 13 | 2390295  | 2400781   | specific ataxia of Charlevoix-Saguenay (sacsm)                                   |
| 38739 | ENSG00000105201   | SNCA           | 36930 | -0.04 | protein_coding | 8  | 5346129  | 5346129   | alpha-synuclein                                                                  |
| 38741 | ENSG00000109041   | GTFC3          | 36938 | -0.04 | protein_coding | 2  | 19762756 | 19766449  | general transcription factor IIC3, polypeptide 3, 102kDa                         |
| 38743 | ENSG000001058306  | NPM2           | 36942 | -0.04 | protein_coding | 8  | 21894160 | 21894408  | nucleophosmin/nucleoplasm 2                                                      |
| 38748 | ENSG000001081652  | RNF41          | 36949 | -0.04 | protein_coding | 12 | 5956269  | 5951517   | ring finger protein 41                                                           |
| 38773 | ENSG00000105205   | COX4           | 36953 | -0.04 | protein_coding | 2  | 24215210 | 24217445  | cytochrome c oxidase subunit 4 polypeptide 44                                    |
| 38777 | ENSG000001054556  | SORBS2         | 36977 | -0.04 | protein_coding | 4  | 18650598 | 18657706  | sorbin and SH3 domain containing 2                                               |
| 38783 | ENSG00000108175   | TNNT3          | 36982 | -0.04 | protein_coding | 10 | 8682762  | 8107678   | zinc finger, MYL-type containing 1                                               |
| 38784 | ENSG00000105066   | TRAF3          | 36983 | -0.04 | protein_coding | 6  | 1840794  | 1840794   | trypsin 1, type 3 (catalytic, beta)                                              |
| 38784 | ENSG000001008436  | COL1A1         | 37002 | -0.04 | protein_coding | 1  | 32117848 | 32189920  | collagen, type XVI, alpha 1                                                      |
| 38786 | ENSG000001064939  | NAP1L2         | 37003 | -0.04 | protein_coding | 8  | 8626996  | 8626129   | carbonic anhydrase II, muscle specific                                           |
| 38786 | ENSG000001064940  | NAP1L2         | 37003 | -0.04 | protein_coding | 8  | 7451815  | 7451815   | nucleosome assembly protein 1-like 2                                             |
| 38810 | ENSG000001066106  | ADAMTS15       | 37017 | -0.04 | protein_coding | 11 | 13031869 | 13034632  | ADAM metalloproteinase with thrombospondin type 1 motif, 15                      |
| 38819 | ENSG000001028470  | TMEM189        | 37028 | -0.04 | protein_coding | 2  | 12097884 | 12098084  | transmembrane protein 189B                                                       |
| 38820 | ENSG00000106386   | MKP11          | 37028 | -0.04 | protein_coding | 22 | 8070742  | 8070742   | mitogen-activated protein kinase 11                                              |
| 38823 | ENSG00000107760   | JUN            | 37028 | -0.04 | protein_coding | 1  | 5924645  | 59249785  | jun proto-oncogene                                                               |
| 38827 | ENSG000001074804  | TRAF2          | 37032 | -0.04 | protein_coding | 11 | 86965721 | 8696843   | IKK2 family receptor 4                                                           |
| 38829 | EN                |                |       |       |                |    |          |           |                                                                                  |



|       |                 |          |         |       |                |    |           |           |                                                                    |
|-------|-----------------|----------|---------|-------|----------------|----|-----------|-----------|--------------------------------------------------------------------|
| 39146 | ENSG00000146416 | AJUT     | 37370.6 | -0.04 | protein_coding | 6  | 143381633 | 143961441 | androgen-induced 1                                                 |
| 39158 | ENSG00000102695 | HNA1A1   | 37371.0 | -0.04 | protein_coding | 3  | 42714118  | 42714118  | histidine acetyltransferase-like                                   |
| 39176 | ENSG00000103789 | MNPP1    | 37401.3 | -0.04 | protein_coding | 10 | 89254632  | 89312117  | multiple inositol polyphosphate phosphatase 1                      |
| 39179 | ENSG00000137720 | C11orf1  | 37403.2 | -0.04 | protein_coding | 11 | 111746959 | 111746959 | chromosome 11 open reading frame                                   |
| 39183 | ENSG00000046489 | CFI      | 37405.6 | -0.04 | protein_coding | 6  | 1616881   | 1614127   | ribonacid box C1                                                   |
| 39184 | ENSG00000141127 | PRPSA2P1 | 37407.0 | -0.04 | protein_coding | 17 | 18743356  | 18834581  | phosphoribosyl pyrophosphate synthetase-associated protein 2       |
| 39190 | ENSG00000089048 | ESF1     | 37409.7 | -0.04 | protein_coding | 20 | 13694699  | 13765532  | ESF1, nuclear pre-rRNA processing protein, homolog (S. cerevisiae) |
| 39201 | ENSG00000191722 | PRKX     | 37419.5 | -0.04 | protein_coding | 20 | 35973969  | 36051627  | v-src avian sarcoma (Schmidt-Ruppin A-2) viral oncogene homolog    |
| 39209 | ENSG00000101633 | PRKX2    | 37421.6 | -0.04 | protein_coding | 10 | 13242780  | 13248475  | related to homeobox 2                                              |
| 39211 | ENSG00000159225 | GPWMA    | 37434.2 | -0.04 | protein_coding | 4  | 17655486  | 17692815  | glycoprotein M6A                                                   |
| 39212 | ENSG00000129250 | TMEM65   | 37435.2 | -0.04 | protein_coding | A  | 100331769 | 100351553 | transmembrane protein 65                                           |
| 39216 | ENSG00000162999 | DUSP19   | 37439.0 | -0.04 | protein_coding | 2  | 183943287 | 183944733 | carbohydrate (heparan sulfate Gal-6) sulfotransferase 1            |
| 39218 | ENSG00000149361 | OSGIN1   | 37439.4 | -0.04 | protein_coding | 16 | 83981887  | 83999857  | dual specificity phosphatase 19                                    |
| 39221 | ENSG00000101160 | SULF2    | 37439.6 | -0.04 | protein_coding | 19 | 47911874  | 47911874  | oxidative stress induced growth inhibitor 1                        |
| 39223 | ENSG00000124191 | TOX2     | 37442.2 | -0.04 | protein_coding | 20 | 42543504  | 42688256  | solute carrier family 8 (potassium/cation exchanger) member 2      |
| 39229 | ENSG00000136014 | USP4A    | 37444.1 | -0.04 | protein_coding | 12 | 95910336  | 95944268  | TOX high mobility group box family member 2                        |
| 39231 | ENSG00000103469 | TCERG1   | 37447.0 | -0.04 | protein_coding | 5  | 145892814 | 145891524 | ubiquitin specific peptidase 44                                    |
| 39233 | ENSG00000175161 | CADM2    | 37449.4 | -0.04 | protein_coding | 3  | 85008132  | 86123579  | transcription elongation regulator 1                               |
| 39234 | ENSG00000164253 | WDR41    | 37450.6 | -0.04 | protein_coding | 5  | 76717195  | 76916436  | cell adhesion molecule 2                                           |
| 39238 | ENSG00000103244 | SNAP25   | 37452.3 | -0.04 | protein_coding | 16 | 3193302   | 3201660   | WD repeat domain 41                                                |
| 39237 | ENSG00000132639 | SNAP25   | 37453.2 | -0.04 | protein_coding | 20 | 10198478  | 10288066  | regulator of G-protein signaling 11                                |
| 39239 | ENSG00000415991 | ADBR1    | 37456.7 | -0.04 | protein_coding | 10 | 115803866 | 116006667 | synaptosomal-associated protein, 25kDa                             |
| 39244 | ENSG00000271303 | SROX1    | 37461.4 | -0.04 | protein_coding | 20 | 6227298   | 6240114   | adrenocorticoid beta 1                                             |
| 39256 | ENSG00000185100 | ADSSL1   | 37475.1 | -0.04 | protein_coding | 14 | 105180523 | 105213682 | sulfonamide 1                                                      |
| 39258 | ENSG00000187772 | ANGPTL4  | 37477.7 | -0.04 | protein_coding | 19 | 8428173   | 8439227   | adenylsuccinate lyase like 1                                       |
| 39264 | ENSG00000103329 | RFXO1    | 37482.7 | -0.04 | protein_coding | 16 | 9069265   | 9073360   | apoptosis-like 4                                                   |
| 39267 | ENSG00000168448 | TMEM130  | 37483.8 | -0.04 | protein_coding | 7  | 98441110  | 98488384  | RNA binding protein, Fox1 homolog (C. elegans) 1                   |
| 39268 | ENSG00000189813 | ENHO     | 37484.3 | -0.04 | protein_coding | 9  | 34521038  | 34523039  | transmembrane protein 130                                          |
| 39270 | ENSG00000106403 | SULF4    | 37484.8 | -0.04 | protein_coding | 9  | 72032768  | 72436612  | transmembrane protein 130                                          |
| 39274 | ENSG00000127585 | FBLN1B   | 37489.2 | -0.04 | protein_coding | 6  | 742500    | 755829    | glycine homeostasis associated                                     |
| 39278 | ENSG00000184876 | KIAX1161 | 37490.9 | -0.04 | protein_coding | 9  | 34366668  | 34376851  | solute carrier family 8 (potassium/cation exchanger) member 4      |
| 39279 | ENSG00000104445 | PLXNA2   | 37492.9 | -0.04 | protein_coding | 9  | 14008788  | 14009408  | F-box and leucine-rich repeat protein 16                           |
| 39286 | ENSG00000176356 | KIAXNA2  | 37502.0 | -0.04 | protein_coding | 1  | 208195587 | 208417665 | histidinol dehydrogenase                                           |
| 39303 | ENSG00000147642 | SYBU     | 37515.8 | -0.04 | protein_coding | 8  | 110586207 | 110704200 | pevin A2                                                           |
| 39311 | ENSG00000101611 | SYBU     | 37515.8 | -0.04 | protein_coding | 8  | 110586207 | 110704200 | synbulbin (tyrosine-interacting)                                   |
| 39318 | ENSG00000109794 | FAM145A  | 37538.8 | -0.04 | protein_coding | 4  | 187025573 | 187093821 | CtBP and zona radialis-like domain 1                               |
| 39323 | ENSG00000191240 | FZD1     | 37544.2 | -0.04 | protein_coding | 7  | 90987873  | 90988123  | family with sequence similarity 145, member A                      |
| 39328 | ENSG00000191218 | SRB1     | 37548.0 | -0.04 | protein_coding | 3  | 54693355  | 54693355  | frizzled family receptor 1                                         |
| 39331 | ENSG00000156219 | ART3     | 37551.7 | -0.04 | protein_coding | 4  | 76932337  | 77039855  | small GTPase DNA binding protein 3                                 |
| 39344 | ENSG00000184162 | NR2C2AP  | 37561.4 | -0.04 | protein_coding | 19 | 18312225  | 18314233  | ADP-ribosyltransferase 3                                           |
| 39353 | ENSG00000163878 | BRCA1    | 37562.8 | -0.04 | protein_coding | 21 | 21558229  | 21558229  | nuclear receptor 2C2-associated protein                            |
| 39364 | ENSG00000142902 | DPP9     | 37591.9 | -0.04 | protein_coding | 19 | 4675298   | 4742685   |                                                                    |

|       |                 |           |         |       |                |    |           |           |                                                                                                                                              |
|-------|-----------------|-----------|---------|-------|----------------|----|-----------|-----------|----------------------------------------------------------------------------------------------------------------------------------------------|
| 39818 | ENSG00000182596 | DHRAS3    | 36777.8 | -0.04 | protein_coding | 1  | 68511645  | 68517314  | DIRAS3 family, GTP-binding RAS-like 3                                                                                                        |
| 39819 | ENSG00000181719 | FILIP     | 38163.2 | -0.04 | protein_coding | 17 | 80026468  | 80031408  | filipin synthase                                                                                                                             |
| 39820 | ENSG00000154977 | MICAL2L   | 35096.1 | -0.04 | protein_coding | 7  | 14681101  | 14691138  | MICAL-like 2                                                                                                                                 |
| 39821 | ENSG00000166924 | NTAP1     | 35986.8 | -0.04 | protein_coding | 7  | 100081550 | 100024222 | neuronal tyrosine-phosphorylated phosphoinositide-3-kinase adaptor 1                                                                         |
| 39822 | ENSG00000204899 | TCEAL5    | 38100.1 | -0.04 | protein_coding | X  | 102528910 | 102531800 | transcription elongation factor A (SII)-like 6                                                                                               |
| 39823 | ENSG00000185151 | BCAL      | 38115.4 | -0.04 | protein_coding | X  | 101466390 | 101469529 | brain expressed, X-linked 5                                                                                                                  |
| 39824 | ENSG00000152126 | NRPB1     | 38118.6 | -0.04 | protein_coding | 2  | 27850557  | 278505126 | nuclear receptor binding protein 2                                                                                                           |
| 39825 | ENSG00000198439 | CAMK3C    | 38127.2 | -0.04 | protein_coding | 4  | 86948276  | 87011528  | mitogen-activated protein kinase 10                                                                                                          |
| 39826 | ENSG00000209404 | CAMK3B    | 38137.3 | -0.04 | protein_coding | 4  | 44283749  | 44301576  | calcium/calmodulin-dependent protein kinase 1 beta                                                                                           |
| 39827 | ENSG00000211890 | NPTXR     | 38139.5 | -0.04 | protein_coding | 22 | 39214457  | 39219987  | neuronal pentraxin receptor                                                                                                                  |
| 39828 | ENSG00000172244 | CSPG4     | 38141.5 | -0.04 | protein_coding | 5  | 5348980   | 4931524   | chromosome 5 open reading frame 34                                                                                                           |
| 39829 | ENSG00000171059 | IRAK3     | 38145.5 | -0.04 | protein_coding | 19 | 17192695  | 1729445   | IL1-inflammasome                                                                                                                             |
| 39830 | ENSG00000186868 | MAPT      | 38153.3 | -0.04 | protein_coding | 17 | 43971748  | 44105700  | microtubule-associated protein tau                                                                                                           |
| 39831 | ENSG00000171303 | KCNK1     | 38158.6 | -0.04 | protein_coding | 2  | 26915619  | 26982828  | potassium channel, subfamily K, member 3                                                                                                     |
| 39832 | ENSG00000110074 | FOXP2D1   | 38159.2 | -0.04 | protein_coding | 11 | 129139089 | 129146826 | FOXO-dependent endonuclease domain containing 1                                                                                              |
| 39833 | ENSG00000212653 | PRKCG     | 38164.8 | -0.04 | protein_coding | 19 | 54382444  | 54410900  | protein kinase C, gamma                                                                                                                      |
| 39834 | ENSG00000183536 | SEPPIN1   | 38167.2 | -0.04 | protein_coding | 3  | 167453031 | 167454356 | serpin peptidase inhibitor, clade I (neuroserpin), member 1                                                                                  |
| 39835 | ENSG00000112902 | SEMA5A    | 38167.5 | -0.04 | protein_coding | 5  | 9035138   | 9046187   | semia domain, seven thrombospondin repeats (type 1 and type 1-like), transmembrane domain (TM) and short cytoplasmic domain, (semaphorin) 5A |
| 39836 | ENSG00000165818 | CADPS     | 38169.7 | -0.04 | protein_coding | 3  | 62340222  | 62361104  | Ca <sup>2+</sup> -dependent secretory activator                                                                                              |
| 39837 | ENSG00000204477 | SPPL7     | 38171.6 | -0.04 | protein_coding | 14 | 39831299  | 39936094  | spERM/alphaogenesis associated 7                                                                                                             |
| 39838 | ENSG00000183763 | KCTD8     | 38171.8 | -0.04 | protein_coding | 4  | 44175926  | 44458024  | potassium channel tetramerization domain containing 8                                                                                        |
| 39839 | ENSG00000122111 | PRICKLE3  | 38173.8 | -0.04 | protein_coding | X  | 48031151  | 48042485  | prickle homolog 3 (Drosophila)                                                                                                               |
| 39840 | ENSG00000200603 | TDR15     | 38175.5 | -0.04 | protein_coding | 1  | 11942669  | 119523179 | TDR15                                                                                                                                        |
| 39841 | ENSG00000180828 | BHLHE22   | 38177.9 | -0.04 | protein_coding | 8  | 65482814  | 65496181  | basic helix-loop-helix family, member c22                                                                                                    |
| 39842 | ENSG00000151229 | SLC2A13   | 38178.5 | -0.04 | protein_coding | 12 | 40148823  | 40489891  | solute carrier family 2 (facilitated glucose transporter), member 13                                                                         |
| 39843 | ENSG00000160153 | FICF3     | 38179.7 | -0.04 | protein_coding | 1  | 2112963   | 21003377  | eukaryotic translation initiation factor 4, gamma, 3                                                                                         |
| 39844 | ENSG00000130158 | LOC6761   | 38184.1 | -0.04 | protein_coding | 19 | 11306971  | 11317357  | dedicator of cytokinesis 6                                                                                                                   |
| 39845 | ENSG00000123572 | NRK       | 38187.2 | -0.04 | protein_coding | X  | 100958536 | 100920202 | NK related kinase                                                                                                                            |
| 39846 | ENSG00000119161 | PRICK5    | 38192.3 | -0.04 | protein_coding | 1  | 13071354  | 13072004  | TNF receptor-associated factor 2                                                                                                             |
| 39847 | ENSG00000197119 | SLC25A29  | 38193.4 | -0.04 | protein_coding | 14 | 100757448 | 100772884 | solute carrier family 25 (mitochondrial carnitine/acylcarnitine carrier), member 29                                                          |
| 39848 | ENSG00000143850 | PLEKHA6   | 38202.6 | -0.04 | protein_coding | 1  | 204187979 | 204346793 | pleckstrin homology domain containing, family A member 6                                                                                     |
| 39849 | ENSG00000101622 | LOC7253   | 38205.7 | -0.04 | protein_coding | 1  | 68730119  | 68693601  | pleckstrin                                                                                                                                   |
| 39850 | ENSG00000180561 | MID2      | 38211.7 | -0.04 | protein_coding | X  | 10709895  | 107170423 | midline 2                                                                                                                                    |
| 39851 | ENSG00000177446 | ACAD9     | 38214.4 | -0.04 | protein_coding | 3  | 12858439  | 12863430  | acyl-CoA dehydrogenase family, member 9                                                                                                      |
| 39852 | ENSG00000160143 | RIOK1     | 38215.8 | -0.04 | protein_coding | 3  | 41184161  | 41184187  | rho GTPase-activating protein 22                                                                                                             |
| 39853 | ENSG00000128805 | ARHGAP22  | 38214.4 | -0.04 | protein_coding | 10 | 49654077  | 49664310  | Rho GTPase activating protein 22                                                                                                             |
| 39854 | ENSG00000186193 | WDR4      | 38227.7 | -0.04 | protein_coding | 21 | 44242024  | 44259678  | WD repeat domain 4                                                                                                                           |
| 39855 | ENSG00000109458 | RIMK2     | 38229.6 | -0.04 | protein_coding | 3  | 21752628  | 21752628  | insulin-like growth factor binding protein 5                                                                                                 |
| 39856 | ENSG00000105148 | RF3A      | 38234.7 | -0.04 | protein_coding | 18 | 77754358  | 77809397  | ribosome binding factor A (putative)                                                                                                         |
| 39857 | ENSG00000198787 | HIST2TH2A | 38235.6 | -0.04 | protein_coding | 6  | 27100832  | 27403970  | histone cluster 1, H2ag                                                                                                                      |
| 39858 | ENSG00000107954 | LOC7254   | 38235.7 | -0.04 | protein_coding | 10 | 10028296  | 10028296  | membrane G3 alpha protein ligase 1                                                                                                           |
| 39859 | ENSG00000115204 | MPV17     | 38244.7 | -0.04 | protein_coding | 2  | 27532960  | 27524847  | MPV17 mitochondrial inner membrane protein                                                                                                   |
| 39860 | ENSG00000117016 | RIMS3     | 38247.4 | -0.04 | protein_coding | 1  | 41063851  | 41131329  | regulating synapse membrane exocytosis 3                                                                                                     |
| 39861 | ENSG00000198170 | BCAS2     | 38259.6 | -0.04 | protein_coding | 14 | 104628681 | 104629249 | BCL2-associated atrophagy 5                                                                                                                  |
| 39862 | ENSG00000203256 | USP21     | 38259.6 | -0.04 | protein_coding | 16 | 161192493 | 161193513 | ubiquitin-specific peptidase 21                                                                                                              |
| 39863 | ENSG00000198276 | LICK1     | 38263.9 | -0.04 | protein_coding | 20 | 62571186  | 62587769  | uridine-cytidine kinase 1-like 1                                                                                                             |
| 39864 | ENSG00000160463 | ZNF749    | 38269.1 | -0.04 | protein_coding | 6  | 3574596   | 35687659  | zinc finger, NFX-type 4                                                                                                                      |
| 39865 | ENSG00000109341 | COR2B     | 38269.6 | -0.04 | protein_coding | 15 | 68871308  | 69020145  | coronin, actin binding protein, 2B                                                                                                           |
| 39866 | ENSG00000144834 | TAGLN3    | 38278.4 | -0.04 | protein_coding | 3  | 111772734 | 111772734 | transgelin 3                                                                                                                                 |
| 39867 | ENSG00000128422 | KRT17     | 38286.2 | -0.04 | protein_coding | 17 | 39715699  | 39718104  | keratin 17                                                                                                                                   |
| 39868 | ENSG00000103064 | MURK1     | 38290.1 | -0.04 | protein_coding | 17 | 103340281 | 103350189 | mouse, acetylated histone H3                                                                                                                 |
| 39869 | ENSG00000114749 | CDK5R1    | 38291.4 | -0.04 | protein_coding | 17 | 30813637  | 30812742  | cyclin-dependent kinase 5, regulatory subunit 1 (p35)                                                                                        |
| 39870 | ENSG00000170500 | XIRC1     | 38291.5 | -0.04 | protein_coding | 4  | 40441792  | 40484625  | X-ray repair complementing defective repair in Chinese hamster cells 1                                                                       |
| 39871 | ENSG00000206649 | ASB1      | 38292.4 | -0.04 | protein_coding | 2  | 23931383  | 23931383  | arivinyon and SOX-3 box containing 1                                                                                                         |
| 39872 | ENSG00000107910 | FIMP7     | 38295.2 | -0.04 | protein_coding | 2  | 17932831  | 17934337  | FKBP6 binding protein 7                                                                                                                      |
| 39873 | ENSG00000080470 | DKO2      | 38296.6 | -0.04 | protein_coding | 1  | 112297867 | 112298338 | DEAD (Asp-Glu-Ala-His) box polypeptide 20                                                                                                    |
| 39874 | ENSG00000170784 | PRICK2    | 38297.1 | -0.04 | protein_coding | 1  | 11016953  | 11018529  | p21 protein (p21) <sup>ras</sup> -activated kinase 3                                                                                         |
| 39875 | ENSG00000088882 | CPXM1     | 38305.6 | -0.04 | protein_coding | 20 | 2784183   | 2784283   | carboxypeptidase X (M14 family), member 2                                                                                                    |
| 39876 | ENSG00000136425 | CIR2      | 38310.5 | -0.04 | protein_coding | 15 | 78399448  | 78423988  | calcium and integrin binding family, member 2                                                                                                |
| 39877 | ENSG00000103758 | STYX3     | 38312.2 | -0.04 | protein_coding | 4  | 46119955  | 46065801  | calcium and integrin binding family, member 3                                                                                                |
| 39878 | ENSG00000103284 | FBOX31    | 38313.5 | -0.04 | protein_coding | 16 | 87380593  | 87425748  | F-box protein 31                                                                                                                             |
| 39879 | ENSG00000102846 | DHX40     | 38318.8 | -0.04 | protein_coding | 17 | 57642896  | 57685706  | DEAH (Asp-Glu-Ala-His) box polypeptide 40                                                                                                    |
| 39880 | ENSG00000102270 | SLC44A1   | 38319.3 | -0.04 | protein_coding | 19 | 11821914  | 11821914  | SLC44-like 1, ion channel protein                                                                                                            |
| 39881 | ENSG00000070214 | SLC44A1   | 38319.3 | -0.04 | protein_coding | 9  | 180809003 | 180824102 | solute carrier family 4 (cholerae transporter), member 1                                                                                     |
| 39882 | ENSG00000196361 | ELAVL3    | 38325.4 | -0.04 | protein_coding | 19 | 11562141  | 11569181  | ELAV like neuron-specific RNA binding protein 3                                                                                              |
| 39883 | ENSG00000112431 | MAGO4B    | 38325.4 | -0.04 | protein_coding | X  | 5162493   | 5162493   | medusa neuron-specific protein, Drosophila                                                                                                   |
| 39884 | ENSG00000120158 | RCL1      | 38327.4 | -0.04 | protein_coding | 9  | 4792669   | 4805917   | RNA terminal phosphate cydase-like 1                                                                                                         |
| 39885 | ENSG00000108856 | SYN1      | 38335.4 | -0.04 | protein_coding | X  | 47431303  | 47479252  | synapsin 1                                                                                                                                   |
| 39886 | ENSG00000113118 | NEMO1     | 38337.0 | -0.04 | protein_coding | 8  | 6182828   | 6182828   | N-terminal EEZ domain binding protein 1                                                                                                      |
| 39887 | ENSG00000108360 | CEP350    | 38337.4 | -0.04 | protein_coding | 14 | 10100448  | 101003750 | brain-enriched guanylate kinase-associated                                                                                                   |
| 39888 | ENSG00000198982 | CITND2    | 38342   | -0.04 | protein_coding | 5  | 10971952  | 11064155  | catenin (cadherin-associated protein), delta 2                                                                                               |
| 39889 | ENSG00000181873 | CCND3     | 38342.8 | -0.04 | protein_coding | 12 | 4851348   | 4851348   | chromosome 12 open reading frame 68                                                                                                          |
| 39890 | ENSG00000186192 | SENPA     | 38352.1 | -0.04 | protein_coding | 15 | 72406599  | 72433311  | SUMO3/sentrin-specific peptidase family member 8                                                                                             |
| 39891 | ENSG00000181391 | MAGI2     | 38352.8 | -0.04 | protein_coding | 7  | 77848390  | 77892890  | membrane associated guanylate kinase, WW and PDZ domain containing 2                                                                         |
| 39892 | ENSG00000185858 | OLR10A    | 38353.8 | -0.04 | protein_coding | 7  | 12781907  | 12783464  | oligosaccharyl transferase 2A                                                                                                                |
| 39893 | ENSG00000141232 | TDB1      | 38356.7 | -0.04 | protein_coding | 17 | 48059584  | 48064339  | transducin of ERBB2 1                                                                                                                        |
| 39894 | ENSG00000198747 | HST1H3B   | 38365.9 | -0.04 | protein_coding | 6  | 27775899  | 27803218  | histone cluster 1, H2ab                                                                                                                      |
| 39895 | ENSG00000100268 | CAN10     | 38368.0 | -0.04 | protein_coding | 23 | 3788426   | 37968409  | casepase recruitment domain family, member 10                                                                                                |
| 39896 | ENSG00000204444 | PALM2     | 38372.1 | -0.04 | protein_coding | 9  | 112430068 | 112371375 | paralamin 2                                                                                                                                  |
| 39897 | ENSG00000202155 | DNAJ29    | 38374.1 | -0.04 | protein_coding | 10 | 74943320  | 75008620  | DnaJ (Hsp40) homolog, subfamily K, member 9                                                                                                  |
| 39898 | ENSG00000134721 | LOC7255   | 38377   | -0.04 | protein_coding | 8  | 10568170  | 10568170  | chromosome X open reading frame 57                                                                                                           |
| 39899 | ENSG00000179314 | WSCD1     | 38377.6 | -0.04 | protein_coding | 17 | 5675554   | 6027747   | WSC domain containing 1                                                                                                                      |
| 39900 | ENSG00000134259 | NFCD      | 38379.5 | -0.04 | protein_coding | 1  | 115883539 | 115888057 | nerve growth factor (beta polypeptide)                                                                                                       |
| 39901 | ENSG00000122499 | KCNH9     | 38380.2 | -0.04 | protein_coding | 20 | 43314421  | 43319753  | potassium channel, subfamily K, member 15                                                                                                    |
| 39902 | ENSG00000129818 | BRCA2     | 38381.8 | -0.04 | protein_coding | 30 | 2683916   | 26917805  | breast cancer 2, early onset                                                                                                                 |
| 39903 | ENSG00000168680 | ZBTB39    | 38382.6 | -0.04 | protein_coding | 12 | 57392818  | 57400230  | zinc finger and BTB domain containing 39                                                                                                     |
| 39904 | ENSG00000168682 | RAM2      | 38385.5 | -0.04 | protein_coding | 4  | 39455744  | 39460968  | ribosomal protein L9                                                                                                                         |
| 39905 | ENSG00000101203 | LYP       | 38390.0 | -0.04 | protein_coding | 3  | 4842498   | 4842618   | lysophosphatidase 2                                                                                                                          |
| 39906 | ENSG00000203727 | MAD6      | 38408   | -0.04 | protein_coding | 6  | 14783069  | 14865883  | sterile alpha motif domain containing 5                                                                                                      |
| 39907 | ENSG00000189599 | MAD6      | 38413   | -0.04 | protein_coding | 4  | 36236707  | 36238206  | sterile alpha motif domain containing 5                                                                                                      |
| 39908 | ENSG00000103154 | WDR87     | 38413.4 | -0.04 | protein_coding | 18 | 12717814  | 12726948  | membrane associated guanylate kinase, WW and PDZ domain containing 3                                                                         |
| 39909 | ENSG00000193967 | ESRP2     | 38431.8 | -0.04 | protein_coding | 16 | 68250314  | 68270005  | epithelial splicing regulatory protein 2                                                                                                     |
| 39910 | ENSG00000205517 | RGL3      | 38432   | -0.04 | protein_coding | 19 | 11485017  | 11500018  | rat galactose nucleotide dissociation stimulator-like 1                                                                                      |
| 39911 | ENSG00000206969 | SNRP1     | 38432.5 | -0.04 | protein_coding | 19 | 84292969  |           |                                                                                                                                              |

| Accession | Gene            | Protein | Score   | EC    | UniProt        | Accession | Gene      | Protein   | Score | EC | UniProt   |                                                                            |
|-----------|-----------------|---------|---------|-------|----------------|-----------|-----------|-----------|-------|----|-----------|----------------------------------------------------------------------------|
| 40133     | ENSG00000101424 | CEP78   | 38606   | -0.04 | protein_coding | 10        | 12961832  | 1202776   | 44837 | 1  | 44403776  | centrosomal protein 78kDa                                                  |
| 40134     | ENSG00000155171 | SLC20A9 | 38618   | -0.04 | protein_coding | 16        | 44483723  | 44483723  | 44483 | 1  | 44483723  | solute carrier family 20 (neurotransmitter transporter, glycine), member 9 |
| 40135     | ENSG00000102978 | HSF1    | 38618.9 | -0.04 | protein_coding | 16        | 67197268  | 67203488  | 67203 | 1  | 67203488  | heat shock transcription factor 4                                          |
| 40136     | ENSG00000158409 | CELF3   | 38619.8 | -0.04 | protein_coding | 1         | 15167480  | 15168290  | 15168 | 1  | 15168290  | CELF3, ELAV-like family member 3                                           |
| 40137     | ENSG00000196699 | MIFF7   | 38622.1 | -0.04 | protein_coding | 12        | 13237268  | 13236268  | 13236 | 1  | 13236268  | matrix metalloproteinase 17 (membrane-inserted)                            |
| 40138     | ENSG00000192377 | EIF5A2  | 38622.6 | -0.04 | protein_coding | 3         | 17092434  | 17092434  | 17092 | 1  | 17092434  | eukaryotic translation initiation factor 5A2                               |
| 40139     | ENSG00000166257 | SCN3B   | 38623.2 | -0.04 | protein_coding | 11        | 12349895  | 12352952  | 12352 | 1  | 12352952  | sodium channel, voltage-gated, type III, beta subunit                      |
| 40140     | ENSG00000195244 | CUC2A   | 38625.2 | -0.04 | protein_coding | 1         | 44457031  | 44462200  | 44462 | 1  | 44462200  | coiled-coil domain containing 24                                           |
| 40141     | ENSG00000191914 | LRN2A   | 38625.6 | -0.04 | protein_coding | 1         | 28712669  | 28712669  | 28712 | 1  | 28712669  | lin-3 homolog (C. elegans)                                                 |
| 40142     | ENSG00000172031 | EPHX4   | 38644   | -0.04 | protein_coding | 1         | 92495539  | 92495539  | 92495 | 1  | 92495539  | sulfhydryl lyase 4                                                         |
| 40143     | ENSG00000165543 | KCNQ2   | 38644   | -0.04 | protein_coding | 20        | 56037542  | 56210993  | 56210 | 1  | 56210993  | potassium voltage-gated channel, KChIP-like subfamily, member 2            |
| 40144     | ENSG00000192963 | HOKAY   | 38652.6 | -0.04 | protein_coding | 1         | 17183335  | 27183335  | 27183 | 1  | 27183335  | hemostasis A7                                                              |
| 40145     | ENSG00000169879 | DMXL1   | 38648   | -0.04 | protein_coding | 1         | 38022520  | 38022458  | 38022 | 1  | 38022458  | dynam, axonal, light intermediate chain 1                                  |
| 40146     | ENSG00000101000 | PRICK1  | 38649   | -0.04 | protein_coding | 20        | 32758876  | 32761765  | 32761 | 1  | 32761765  | protein C receptor, endothelial                                            |
| 40147     | ENSG00000000920 | TMEM98  | 38656.6 | -0.04 | protein_coding | 17        | 31294998  | 31294998  | 31294 | 1  | 31294998  | transmembrane protein 98                                                   |
| 40148     | ENSG00000087715 | SYT1    | 38654.7 | -0.04 | protein_coding | 12        | 79257773  | 79485788  | 79485 | 1  | 79485788  | synaptotagmin I                                                            |
| 40149     | ENSG00000292067 | YIEFN3  | 38667   | -0.04 | protein_coding | 19        | 19627036  | 19648300  | 19648 | 1  | 19648300  | Yief N-terminal domain containing 3                                        |
| 40150     | ENSG00000117561 | INS2    | 38668   | -0.04 | protein_coding | 1         | 32192169  | 32220484  | 32220 | 1  | 32220484  | kran-specific oligopeptide inhibitor 2                                     |
| 40151     | ENSG00000148400 | TM7SF2  | 38669.8 | -0.04 | protein_coding | 11        | 64876317  | 64883856  | 64883 | 1  | 64883856  | transmembrane 7 superfamily member 2                                       |
| 40152     | ENSG00000138676 | FGF5    | 38670.9 | -0.04 | protein_coding | 4         | 81117753  | 81257434  | 81257 | 1  | 81257434  | fibroblast growth factor 5                                                 |
| 40153     | ENSG00000139844 | KAN1B4  | 38671.5 | -0.04 | protein_coding | 22        | 44619507  | 44719331  | 44719 | 1  | 44719331  | KVAN1Z                                                                     |
| 40154     | ENSG00000183763 | TRAP1   | 38683   | -0.04 | protein_coding | 3         | 49860404  | 49860407  | 49860 | 1  | 49860407  | TRAF interacting protein                                                   |
| 40155     | ENSG00000172732 | MUS81   | 38684   | -0.04 | protein_coding | 11        | 65924597  | 65935124  | 65935 | 1  | 65935124  | MUS81 structure-specific endonuclease subunit                              |
| 40156     | ENSG00000104051 | ZFP1    | 38689.1 | -0.04 | protein_coding | 15        | 65107633  | 65117867  | 65117 | 1  | 65117867  | Pf1 Cln2/3 DNA helicase                                                    |
| 40157     | ENSG00000152620 | NADK2   | 38691.3 | -0.04 | protein_coding | 5         | 36150884  | 36242381  | 36242 | 1  | 36242381  | NAD kinase 2, mitochondrial                                                |
| 40158     | ENSG00000196408 | NOKX1   | 38692.3 | -0.04 | protein_coding | 16        | 2029818   | 2041383   | 20413 | 1  | 2041383   | NADPH oxidase organizer 1                                                  |
| 40159     | ENSG00000186920 | CBK2    | 38692.4 | -0.04 | protein_coding | 2         | 232073970 | 232073970 | 23207 | 1  | 232073970 | gastroenterin heparinectin 2                                               |
| 40160     | ENSG00000105204 | DYRK1B  | 38692.8 | -0.04 | protein_coding | 19        | 40315990  | 40344841  | 40344 | 1  | 40344841  | dual-specificity tyrosine-Y-phosphorylation regulated kinase 1B            |
| 40161     | ENSG00000184336 | TEIT    | 38697.5 | -0.04 | protein_coding | 10        | 70320413  | 70454239  | 70454 | 1  | 70454239  | tel methyltransferase dioxygenase 1                                        |
| 40162     | ENSG00000146027 | CTTN    | 38701   | -0.04 | protein_coding | 9         | 9611200   | 9611200   | 9611  | 1  | 9611200   | TEF1-interacting protein 1                                                 |
| 40163     | ENSG00000148120 | Cbr19   | 38710   | -0.04 | protein_coding | 9         | 9748883   | 97484411  | 97484 | 1  | 97484411  | chromosome 9 open reading frame 3                                          |
| 40164     | ENSG00000171450 | CDKSR2  | 38711.9 | -0.04 | protein_coding | 2         | 219824377 | 219826878 | 21982 | 1  | 219826878 | cyclin-dependent kinase 5, regulatory subunit 2 (p38)                      |
| 40165     | ENSG00000164538 | SMYD4   | 38714.4 | -0.04 | protein_coding | 2         | 5313704   | 5313704   | 53137 | 1  | 5313704   | solute carrier family 29 (neuroleptic sensitive transporter), member 4     |
| 40166     | ENSG00000105208 | CAC1    | 38719.2 | -0.04 | protein_coding | 9         | 3610639   | 3620813   | 36208 | 1  | 3620813   | calcium, sarcoplasmic Ca complex subunit                                   |
| 40167     | ENSG00000200921 | JPH4    | 38718.3 | -0.04 | protein_coding | 14        | 24017244  | 24048009  | 24048 | 1  | 24048009  | junctional protein 4                                                       |
| 40168     | ENSG00000105493 | BTL1    | 38724.1 | -0.04 | protein_coding | 18        | 44522268  | 44522268  | 44522 | 1  | 44522268  | subunit transmembrane family 4B, member 1                                  |
| 40169     | ENSG00000241945 | PWP2    | 38719.3 | -0.04 | protein_coding | 21        | 45527171  | 45521003  | 45521 | 1  | 45521003  | PWP2 perodic tyrosylphosphon protein homology (yeast)                      |
| 40170     | ENSG00000186273 | SMIM4   | 38726.1 | -0.04 | protein_coding | 3         | 52649269  | 52813253  | 52813 | 1  | 52813253  | small integral membrane protein 4                                          |
| 40171     | ENSG00000192628 | SMYD1B  | 38728   | -0.04 | protein_coding | 20        | 31536261  | 31536261  | 31536 | 1  | 31536261  | DNA cytosine-5 methyltransferase-like beta                                 |
| 40172     | ENSG00000173711 | PPP2R3A | 38734   | -0.04 | protein_coding | 3         | 135684515 | 135686453 | 13568 | 1  | 135686453 | protein phosphatase 2, regulatory subunit B', alpha                        |
| 40173     | ENSG00000205118 | KCNH2   | 38734.5 | -0.04 | protein_coding | 7         | 150842049 | 150870403 | 15087 | 1  | 150870403 | potassium voltage-gated channel, subfamily H (eag-related), member 2       |
| 40174     | ENSG00000145389 | BTD     | 38737.1 | -0.04 | protein_coding | 4         | 10111647  | 10111647  | 10111 | 1  | 10111647  | BTD domain containing 4                                                    |
| 40175     | ENSG00000103484 | RPRP1L  | 38746.3 | -0.04 | protein_coding | 16        | 53631595  | 53737850  | 53737 | 1  | 53737850  | DNA-damage-inducible transcript 4-like                                     |
| 40176     | ENSG00000107518 | ATRNL1  | 38748.9 | -0.04 | protein_coding | 10        | 11683124  | 11770803  | 11770 | 1  | 11770803  | atratin-like 1                                                             |
| 40177     | ENSG00000155996 | RNF1    | 38752.9 | -0.04 | protein_coding | 6         | 15712259  | 15712259  | 15712 | 1  | 15712259  | required for meiotic nuclear division 1 homolog (S. cerevisiae)            |
| 40178     | ENSG00000103991 | EPN2    | 38758.1 | -0.04 | protein_coding | 6         | 15918142  | 15918142  | 15918 | 1  | 15918142  | epsilon-N-pyrophosphate kinase 2                                           |
| 40179     | ENSG00000119946 | CHN1    | 38755.5 | -0.04 | protein_coding | 10        | 10108856  | 101154087 | 10115 | 1  | 101154087 | cyclin M1                                                                  |
| 40180     | ENSG00000132664 | PICKRF  | 38756.2 | -0.04 | protein_coding | 20        | 18441771  | 18441771  | 18441 | 1  | 18441771  | polymerase IIIA (RNA directed) polypeptide F, 39 kDa                       |
| 40181     | ENSG00000104074 | PTEN    | 38758.6 | -0.04 | protein_coding | 20        | 230134345 | 230174370 | 23017 | 1  | 230174370 | phosphatidylinositol 3-kinase, receptor tyrosine kinase                    |
| 40182     | ENSG00000116257 | NRP2    | 38763.6 | -0.04 | protein_coding | 2         | 206546714 | 20662871  | 20662 | 1  | 20662871  | neuropilin 2                                                               |
| 40183     | ENSG00000181629 | ZNF502  | 38766.5 | -0.04 | protein_coding | 19        | 42724202  | 42732383  | 42732 | 1  | 42732383  | zinc finger protein 520                                                    |
| 40184     | ENSG00000191742 | ASXL1   | 38768.1 | -0.04 | protein_coding | 19        | 62148024  | 62148024  | 62148 | 1  | 62148024  | measles like 1                                                             |
| 40185     | ENSG00000133863 | TEX15   | 38771.3 | -0.04 | protein_coding | 8         | 30689060  | 30748122  | 30748 | 1  | 30748122  | testis expressed 15                                                        |
| 40186     | ENSG00000143324 | XPRI    | 38771.9 | -0.04 | protein_coding | 1         | 189001140 | 189093387 | 18909 | 1  | 189093387 | xeroderma and polygenic retinosis receptor 1                               |
| 40187     | ENSG00000143636 | HXC1    | 38776.9 | -0.04 | protein_coding | 16        | 155014714 | 155014714 | 15501 | 1  | 155014714 | hypoxanthine phosphoribosyl transferase-gated potassium channel 3          |
| 40188     | ENSG00000178409 | BEND3   | 38789.2 | -0.04 | protein_coding | 6         | 10738635  | 10743643  | 10743 | 1  | 10743643  | BEN domain containing 3                                                    |
| 40189     | ENSG00000148200 | NBR1    | 38796   | -0.04 | protein_coding | 9         | 127279584 | 127353989 | 12735 | 1  | 127353989 | nuclear receptor subfamily 6, group A, member 1                            |
| 40190     | ENSG00000204477 | NBPF1   | 38797.6 | -0.04 | protein_coding | 6         | 50353833  | 50354898  | 50354 | 1  | 50354898  | N-terminal domain containing 1 (NBS-Related)                               |
| 40191     | ENSG00000181967 | VPS37C  | 38802.6 | -0.04 | protein_coding | 11        | 60897728  | 60926089  | 60926 | 1  | 60926089  | vesicular protein sorting 37 homolog C (S. cerevisiae)                     |
| 40192     | ENSG00000134709 | HOK1    | 38810   | -0.04 | protein_coding | 1         | 60284058  | 60342050  | 60342 | 1  | 60342050  | hook microtubule-levering protein 1                                        |
| 40193     | ENSG00000181421 | CEP350  | 38819.7 | -0.04 | protein_coding | 4         | 7871184   | 7871184   | 78711 | 1  | 7871184   | cell cycle exit and neuronal differentiation 1                             |
| 40194     | ENSG00000181085 | MAPK15  | 38818.4 | -0.04 | protein_coding | 8         | 14478429  | 14480428  | 14480 | 1  | 14480428  | mitogen-activated protein kinase 15                                        |
| 40195     | ENSG00000164929 | BALAL   | 38819.4 | -0.04 | protein_coding | 8         | 104152398 | 10424233  | 10424 | 1  | 10424233  | brain and acute leukemia, cytoplasmic                                      |
| 40196     | ENSG00000100718 | COTL1A1 | 38821.1 | -0.04 | protein_coding | 16        | 103361282 | 103361282 | 10336 | 1  | 103361282 | collagen triple helix alpha 1                                              |
| 40197     | ENSG00000106246 | PTCD1   | 38832   | -0.04 | protein_coding | 7         | 980114362 | 99637752  | 99637 | 1  | 99637752  | pentatricopeptide repeat domain 1                                          |
| 40198     | ENSG00000182103 | FAM181B | 38842.7 | -0.04 | protein_coding | 11        | 52443053  | 52444108  | 52444 | 1  | 52444108  | family with sequence similarity 181, member B                              |
| 40199     | ENSG00000103796 | CDC124  | 38845.6 | -0.04 | protein_coding | 2         | 2761426   | 2761426   | 27614 | 1  | 2761426   | cytoskeleton associated protein 124                                        |
| 40200     | ENSG00000132621 | VSTM2L  | 38845.6 | -0.04 | protein_coding | 20        | 3651499   | 36673752  | 36673 | 1  | 36673752  | V-set and transmembrane domain containing 2 like                           |
| 40201     | ENSG00000185252 | ZNF74   | 38847.5 | -0.04 | protein_coding | 22        | 20748025  | 20782748  | 20782 | 1  | 20782748  | zinc finger protein 74                                                     |
| 40202     | ENSG00000104851 | PRKRA   | 38851.3 | -0.04 | protein_coding | 12        | 108749483 | 108749483 | 10874 | 1  | 108749483 | PRK domain containing 4                                                    |
| 40203     | ENSG00000125448 | FRTN    | 38858.7 | -0.04 | protein_coding | 20        | 14303634  | 14318262  | 14318 | 1  | 14318262  | fibronectin type-III transmembrane protein 3                               |
| 40204     | ENSG00000181418 | DLN3    | 38859.1 | -0.04 | protein_coding | 12        | 48398932  | 48399302  | 48399 | 1  | 48399302  | dendrin                                                                    |
| 40205     | ENSG00000155684 | NUS2    | 38862.2 | -0.04 | protein_coding | 4         | 162881482 | 162881482 | 16288 | 1  | 162881482 | NUS2 domain containing 2                                                   |
| 40206     | ENSG00000241343 | RPL38A  | 38857   | -0.04 | protein_coding | 8         | 100545812 | 100651105 | 10065 | 1  | 100651105 | ribosomal protein L38a                                                     |
| 40207     | ENSG00000128686 | CHN2    | 38863   | -0.04 | protein_coding | 2         | 175684951 | 175684951 | 17568 | 1  | 175684951 | chimerin 1                                                                 |
| 40208     | ENSG00000184810 | CZRN1   | 38864   | -0.04 | protein_coding | 1         | 99358884  | 99358884  | 99358 | 1  | 99358884  | collagen triple helix alpha 1                                              |
| 40209     | ENSG00000142910 | SLC3A1  | 38865.6 | -0.04 | protein_coding | 11        | 5725207   | 5729329   | 57293 | 1  | 5729329   | solute carrier family 43 (amino acid system L transporter), member 1       |
| 40210     | ENSG00000112983 | BRD8    | 38872.8 | -0.04 | protein_coding | 5         | 137475455 | 137514755 | 13751 | 1  | 137514755 | bromodomain containing 8                                                   |
| 40211     | ENSG00000151718 | SMAD9   | 38876.0 | -0.04 | protein_coding | 1         | 12869191  | 12869191  | 12869 | 1  | 12869191  | SMAD associated protein, 130kDa                                            |
| 40212     | ENSG00000191288 | GNG3    | 38900.3 | -0.04 | protein_coding | 11        | 62475130  | 62476783  | 62476 | 1  | 62476783  | guanine nucleotide binding protein (G protein), gamma 3                    |
| 40213     | ENSG00000186778 | SHOX2   | 38902.7 | -0.04 | protein_coding | 3         | 157814548 | 157824292 | 15782 | 1  | 157824292 | short stature homeobox 2                                                   |
| 40214     | ENSG00000137633 | GANF1L  | 38902.8 | -0.04 | protein_coding | 12        | 20359121  | 20359121  | 20359 | 1  | 20359121  | GRB2 associated regulator of MAPK1-like                                    |
| 40215     | ENSG00000128714 | HOXD13  | 38922.2 | -0.04 | protein_coding | 2         | 176957119 | 17696066  | 17696 | 1  | 17696066  | homeobox D13                                                               |
| 40216     | ENSG00000136274 | NACAD   | 38925.1 | -0.04 | protein_coding | 7         | 45120037  | 4         |       |    |           |                                                                            |

|       |                 |           |       |       |                    |    |            |           |                                                                                     |
|-------|-----------------|-----------|-------|-------|--------------------|----|------------|-----------|-------------------------------------------------------------------------------------|
| 40851 | ENSG00000144451 | SPGAG16   | 39191 | -0.04 | protein_coding     | 2  | 214189113  | 215279225 | sperm associated antigen 16                                                         |
| 40852 | ENSG00000170505 | AC00543   | 39192 | -0.04 | antisense_intronic | 7  | 10084584   | 10084584  | anhydrochondrin (11 blood group)                                                    |
| 40864 | ENSG00000137825 | ITPKA     | 39202 | -0.04 | protein_coding     | 15 | 41785991   | 41795747  | inositol-trisphosphate 3-kinase A                                                   |
| 40868 | ENSG00000061656 | SPGAG4    | 39204 | -0.04 | protein_coding     | 20 | 34203814   | 34203971  | sperm associated antigen 4                                                          |
| 40875 | ENSG00000170961 | HGHI      | 39214 | -0.04 | protein_coding     | 8  | 122654366  | 12265830  | hyaluronan synthase 2                                                               |
| 40876 | ENSG00000130131 | L15T1     | 39214 | -0.04 | protein_coding     | 8  | 20159716   | 20161474  | leucine zipper, positive tumor suppressor 1                                         |
| 40884 | ENSG00000225968 | ELFN1     | 39228 | -0.04 | protein_coding     | 7  | 17272755   | 1727580   | extracellular leucine-rich repeat and fibronectin type III domain containing 1      |
| 40885 | ENSG00000178673 | RPRM      | 39229 | -0.04 | protein_coding     | 17 | 4505522    | 4505524   | retrotransposon                                                                     |
| 40891 | ENSG00000192695 | KIAA1211  | 39231 | -0.04 | protein_coding     | 11 | 51936951   | 51941791  | SH3 domain GRB2-like 2                                                              |
| 40895 | ENSG00000197295 | SH3GL2    | 39239 | -0.04 | protein_coding     | 9  | 17597980   | 17597972  | SH3 domain GRB2-like 2                                                              |
| 40902 | ENSG00000136584 | ZBTB46    | 39247 | -0.04 | protein_coding     | 20 | 60245019   | 60245025  | zinc finger and BTB domain containing 46                                            |
| 40904 | ENSG00000132961 | PCDH14    | 39258 | -0.04 | protein_coding     | 8  | 149082881  | 149082886 | protocadherin beta 14                                                               |
| 40911 | ENSG00000143028 | SNPL2     | 39258 | -0.04 | protein_coding     | 1  | 110098190  | 110098190 | synaptophysin-like 2                                                                |
| 40913 | ENSG00000187968 | DNAHSE12  | 39260 | -0.04 | protein_coding     | 16 | 2288871    | 2288872   | deoxyribonuclease-like 2                                                            |
| 40917 | ENSG00000173469 | CERH1     | 39278 | -0.04 | protein_coding     | 16 | 9029296    | 9029342   | CENP-B DNA-binding domains containing 1                                             |
| 40919 | ENSG00000186073 | C15orf41  | 39274 | -0.04 | protein_coding     | 15 | 36871812   | 37102449  | chromosome 15 open reading frame 41                                                 |
| 40920 | ENSG00000115657 | ABCB9     | 39274 | -0.04 | protein_coding     | 2  | 220074400  | 22008312  | ATP-binding cassette, sub-family B (MDR/TAP), member 6                              |
| 40923 | ENSG00000105930 | WBX9      | 39272 | -0.04 | protein_coding     | 7  | 159662599  | 15967498  | WD repeat domain 69                                                                 |
| 40928 | ENSG00000100416 | TRMU      | 39282 | -0.04 | protein_coding     | 22 | 46726772   | 46732327  | RNA 5-methylaminomethyl-2-thiouridylate methyltransferase                           |
| 40928 | ENSG00000170891 | CYTL7     | 39285 | -0.04 | protein_coding     | 4  | 5016313    | 5021199   | cytoskeleton-like 1                                                                 |
| 40938 | ENSG00000105063 | SLOC1A14  | 39293 | -0.04 | protein_coding     | 2  | 23097068   | 23097075  | solute carrier family 16, member 14                                                 |
| 40939 | ENSG00000128683 | GAD1      | 39296 | -0.04 | protein_coding     | 2  | 171689723  | 171716861 | glutamate decarboxylase 1 (brain, 67kDa)                                            |
| 40941 | ENSG00000171365 | CLCN5     | 39298 | -0.04 | protein_coding     | X  | 49887225   | 49887392  | chloride channel, voltage-sensitive 5                                               |
| 40943 | ENSG00000100003 | EBF3      | 39300 | -0.04 | protein_coding     | 10 | 131603407  | 131603405 | early B-cell factor 3                                                               |
| 40945 | ENSG00000188638 | KIF24     | 39301 | -0.04 | protein_coding     | 9  | 34252379   | 34259198  | kinesin family member 24                                                            |
| 40952 | ENSG00000132543 | KCNMB4    | 39305 | -0.04 | protein_coding     | 12 | 70740556   | 7082872   | potassium large conductance calcium-activated channel, subfamily M, beta member 4   |
| 40955 | ENSG00000141865 | FBX16     | 39307 | -0.04 | protein_coding     | 16 | 4728728    | 4729351   | f-box family 16 (F. elegans)                                                        |
| 40956 | ENSG00000174047 | GLI2      | 39307 | -0.04 | protein_coding     | 2  | 121485189  | 121750229 | GLI family zinc finger 2                                                            |
| 40965 | ENSG00000098654 | POLR1A    | 39314 | -0.04 | protein_coding     | 2  | 86247339   | 86243278  | polymerase (RNA) polypeptide A, 194kDa                                              |
| 40968 | ENSG00000141478 | NUP133    | 39315 | -0.04 | protein_coding     | 14 | 31959168   | 3203430   | nucleolar binding protein-like 1                                                    |
| 40983 | ENSG00000151413 | NUP133    | 39315 | -0.04 | protein_coding     | 14 | 31959162   | 3203430   | nucleolar binding protein-like 1                                                    |
| 40991 | ENSG00000187971 | CASKIN1   | 39343 | -0.04 | protein_coding     | 16 | 2227784    | 2244628   | CASK interacting protein 1                                                          |
| 40995 | ENSG00000182520 | DPTSL1    | 39343 | -0.04 | protein_coding     | 8  | 8422424    | 8422423   | dynactin component 35                                                               |
| 41002 | ENSG00000130714 | POMT1     | 39358 | -0.04 | protein_coding     | 9  | 134379289  | 134399193 | protein-O-mannosyltransferase 1                                                     |
| 41009 | ENSG00000186278 | PTPRZ1    | 39362 | -0.04 | protein_coding     | 7  | 12151343   | 121702090 | protein tyrosine phosphatase, receptor-type 2, polypeptide 1                        |
| 41011 | ENSG00000136388 | FLA1      | 39367 | -0.04 | protein_coding     | 7  | 4203308    | 4203308   | chromosome 9 open reading frame 172                                                 |
| 41017 | ENSG00000225073 | KIF24     | 39368 | -0.04 | protein_coding     | 11 | 58346645   | 58392112  | ZFP91-CNTF readthrough (NMD candidate)                                              |
| 41021 | ENSG00000133124 | IRSA      | 39374 | -0.04 | protein_coding     | X  | 10797572   | 10797651  | insulin receptor substrate 4                                                        |
| 41024 | ENSG00000182593 | ZNF428    | 39383 | -0.04 | protein_coding     | 11 | 48273463   | 48273463  | zinc finger protein 428                                                             |
| 41034 | ENSG00000131118 | ZNF428    | 39383 | -0.04 | protein_coding     | 11 | 44111371   | 44124208  | zinc finger protein 428                                                             |
| 41037 | ENSG00000134323 | MVCN      | 39394 | -0.04 | protein_coding     | 2  | 16008698   | 16887128  | v-myb avian myeloblastosis viral oncogene neuroblastoma derived homolog 5           |
| 41038 | ENSG00000140454 | CMBL2     | 39394 | -0.04 | protein_coding     | 1  | 19717487   | 19717487  | chromosome 8 open reading frame 172                                                 |
| 41053 | ENSG00000138709 | LARP1B    | 39409 | -0.04 | protein_coding     | 4  | 128882423  | 129144896 | La ribonucleoprotein domain family, member 18                                       |
| 41055 | ENSG00000112981 | NMES1     | 39414 | -0.04 | protein_coding     | 5  | 137450866  | 137475132 | NME1/NME2 family member 5                                                           |
| 41081 | ENSG00000187258 | ITIH4D    | 39423 | -0.04 | protein_coding     | 16 | 1966424    | 1966214   | intracellular transporter (40 homolog (Chlamydomonas))                              |
| 41077 | ENSG00000117125 | KCNQ3     | 39423 | -0.04 | protein_coding     | 16 | 42691915   | 42721257  | potassium voltage-gated channel, subfamily G, member 3                              |
| 41096 | ENSG00000204186 | ZDRF2     | 39447 | -0.04 | protein_coding     | 2  | 207139387  | 207179148 | zinc finger, CSD-type containing 2                                                  |
| 41108 | ENSG00000143147 | QBRF1R101 | 39456 | -0.04 | protein_coding     | 1  | 168053987  | 168109821 | G-protein-coupled receptor 181                                                      |
| 41110 | ENSG00000098397 | DFP11     | 39462 | -0.04 | protein_coding     | 9  | 117184360  | 117201730 | death domain associated recessor 31                                                 |
| 41111 | ENSG00000145014 | TMEM44    | 39465 | -0.04 | protein_coding     | 3  | 194308402  | 19435418  | transmembrane protein 44                                                            |
| 41122 | ENSG00000186724 | DNBP1     | 39473 | -0.04 | protein_coding     | 3  | 34297999   | 34309609  | DNAJ (Hsp40) homolog, subfamily C, member 21                                        |
| 41129 | ENSG00000102681 | NAA40     | 39479 | -0.04 | protein_coding     | 6  | 63730431   | 63724903  | Naphthyl alcohol dehydrogenase, NAD+ analytic subunit                               |
| 41141 | ENSG00000138606 | SHF       | 39499 | -0.04 | protein_coding     | 15 | 45459412   | 45460373  | Src homology 2 domain containing F                                                  |
| 41146 | ENSG00000186762 | HYAL3     | 39503 | -0.04 | protein_coding     | 3  | 50330262   | 50336889  | hyaluronan synthase 3                                                               |
| 41147 | ENSG00000186930 | HYAL3     | 39503 | -0.04 | protein_coding     | 3  | 43632872   | 43634909  | hyaluronan synthase-like 3                                                          |
| 41150 | ENSG00000171205 | ARHGAP10  | 39507 | -0.04 | protein_coding     | 4  | 14865314   | 14869331  | Rho GTPase activating protein 10                                                    |
| 41152 | ENSG00000197891 | DPTSL5    | 39508 | -0.04 | protein_coding     | 2  | 27070815   | 27172319  | dihydrolysinase-like 5                                                              |
| 41172 | ENSG0000017456  | CR7       | 39516 | -0.04 | protein_coding     | 2  | 8921626    | 8921626   | chromosome 8 open reading frame 47                                                  |
| 41174 | ENSG00000115486 | GXCX      | 39538 | -0.04 | protein_coding     | 2  | 8871846    | 88718670  | gamma-glutamyl carboxylase                                                          |
| 41179 | ENSG00000197121 | PGAP1     | 39540 | -0.04 | protein_coding     | 2  | 19769728   | 19779250  | post-GPI attachment to proteins 1                                                   |
| 41180 | ENSG00000092621 | CR7       | 39540 | -0.04 | protein_coding     | 4  | 3624584    | 3624584   | EF-hand domain (C-terminal) containing 1                                            |
| 41182 | ENSG00000254531 | GKCC      | 39544 | -0.04 | protein_coding     | 4  | 10228897   | 10227040  | Uncharacterized protein                                                             |
| 41184 | ENSG00000185599 | DK1       | 39545 | -0.04 | protein_coding     | 14 | 10115042   | 10120159  | delta-like 1 homolog (Drosophila)                                                   |
| 41189 | ENSG00000117486 | TRIP11    | 39549 | -0.04 | protein_coding     | 11 | 34661743   | 34661743  | HC22040205, nuclear receptor-interacting protein, cDNA FLJ50015                     |
| 41192 | ENSG00000043514 | TRIT1     | 39552 | -0.04 | protein_coding     | 1  | 40306723   | 40309183  | RNA isopentenyltransferase 1                                                        |
| 41193 | ENSG00000196428 | TS2D22    | 39552 | -0.04 | protein_coding     | 3  | 15016222   | 15018428  | TS2C2 domain family, member 2                                                       |
| 41202 | ENSG00000168758 | SEMA4C    | 39563 | -0.04 | protein_coding     | 2  | 9755453    | 9756404   | sema domain, immunoglobulin domain (TM) and short cytoplasmic domain, semaphorin 4C |
| 41213 | ENSG00000254402 | LRRRC24   | 39584 | -0.04 | protein_coding     | 8  | 14574781   | 145752416 | leucine rich repeat containing 24                                                   |
| 41228 | ENSG0000011128  | YRIF1     | 39585 | -0.04 | protein_coding     | 8  | 10068199   | 10068199  | UFM1 specific peptidase (non-functional)                                            |
| 41237 | ENSG00000202040 | SCAND3    | 39588 | -0.04 | protein_coding     | 6  | 28538407   | 28538389  | SCAN domain containing 3                                                            |
| 41240 | ENSG00000098185 | BCORL1    | 39611 | -0.04 | protein_coding     | X  | 129115083  | 129192058 | BCOR corepressor-like 1                                                             |
| 41259 | ENSG00000186920 | PTXN1     | 39612 | -0.04 | protein_coding     | 6  | 9832336    | 9832336   | protein tyrosine phosphatase domain containing 1                                    |
| 41271 | ENSG00000102571 | SMG9      | 39637 | -0.04 | protein_coding     | 19 | 44235301   | 44235142  | SMG9 nonsense mediated mRNA decay factor                                            |
| 41272 | ENSG00000183971 | NPW       | 39637 | -0.04 | protein_coding     | 16 | 2098967    | 2070756   | neuropilin 5                                                                        |
| 41276 | ENSG00000186952 | SLC11M1   | 39638 | -0.04 | protein_coding     | 16 | 5861861    | 5861861   | SLC11M homolog 1                                                                    |
| 41278 | ENSG00000100344 | PNPLA3    | 39643 | -0.04 | protein_coding     | 22 | 44319819   | 4433068   | patatin like phospholipase domain containing 3                                      |
| 41284 | ENSG00000187840 | ZNF232    | 39654 | -0.04 | protein_coding     | 17 | 5008836    | 5020411   | zinc finger protein 232                                                             |
| 41291 | ENSG00000192628 | YRIF1     | 39658 | -0.04 | protein_coding     | 8  | 10068199   | 10068199  | Zn finger protein 3                                                                 |
| 41297 | ENSG00000172733 | PUR3      | 39672 | -0.04 | protein_coding     | 8  | 30853321   | 30891231  | purine-rich element binding protein 3                                               |
| 41301 | ENSG00000132364 | HOKX13    | 39678 | -0.04 | protein_coding     | 2  | 54332535   | 54340328  | homeobox C13                                                                        |
| 41317 | ENSG00000119599 | SLMO2     | 39681 | -0.04 | protein_coding     | 7  | 7481207    | 74757609  | SLMO2/transient2073 specific peptidase 3                                            |
| 41323 | ENSG00000099572 | IL11      | 39704 | -0.04 | protein_coding     | 19 | 5587577    | 5589181   | interleukin 11                                                                      |
| 41326 | ENSG00000148179 | C11orf49  | 39714 | -0.04 | protein_coding     | 11 | 46958240   | 47189506  | chromosome 11 open reading frame 49                                                 |
| 41331 | ENSG00000114466 | CHRF39    | 39715 | -0.04 | protein_coding     | 2  | 47603729   | 47622282  | chondroitin sulfate proteoglycan 3 (neuronal/pan C)                                 |
| 41333 | ENSG00000191624 | CRBP1     | 39716 | -0.04 | protein_coding     | 19 | 7863266    | 7863266   | cellular retinol binding protein 1                                                  |
| 41348 | ENSG00000106006 | HOKX6     | 39724 | -0.04 | protein_coding     | 7  | 27185015   | 27190222  | homeobox A6                                                                         |
| 41349 | ENSG00000138759 | FRAS1     | 39729 | -0.04 | protein_coding     | 4  | 7891724    | 78965423  | Fraser syndrome 1                                                                   |
| 41374 | ENSG00000147878 | ACOR1B    | 39738 | -0.04 | protein_coding     | 4  | 38482434   | 38482434  | active A receptor, type IIB                                                         |
| 41375 | ENSG00000198169 | ZNF251    | 39774 | -0.04 | protein_coding     | 8  | 145862298  | 145881802 | zinc finger protein 251                                                             |
| 41381 | ENSG00000069847 | TUBA3     | 39778 | -0.04 | protein_coding     | 16 | 8669760    | 8669768   | Tubulin beta 3 chain                                                                |
| 41381 | ENSG00000181861 | LAMA1     | 39778 | -0.04 | protein_coding     | 16 | 6941743    | 7117613   | lamin, alpha 1                                                                      |
| 41398 | ENSG00000124171 | PARD6B    | 39788 | -0.04 | protein_coding     | 20 | 49348081   | 49373332  | par-6 family cell polarity regulator beta                                           |
| 41401 | ENSG00000102109 | PCSK1N    | 39789 | -0.04 | protein_coding     | X  | 48888904   | 48894035  | proprotein convertase subtilisin/kexin type 1 inhibitor                             |
| 41401 | ENSG00000106286 | NEK2      | 39789 | -0.04 | protein_coding     | 8  | 9846669    | 9846669   | neurokin receptor II                                                                |
| 41411 | ENSG00000176244 | ACBD7     | 39810 | -0.04 | protein_coding     | 10 | 15119522   | 15130775  | acyl-CoA oxidase domain containing 7                                                |
| 41425 | ENSG00000135912 | TLL4      | 39826 | -0.04 | protein_coding     | 2  | 21957568</ |           |                                                                                     |



|       |                   |             |       |       |                                     |    |           |           |                                                               |
|-------|-------------------|-------------|-------|-------|-------------------------------------|----|-----------|-----------|---------------------------------------------------------------|
| 42094 | ENSG00000212005   | CRISPLD1    | 40555 | -0.04 | protein_coding                      | 8  | 75896750  | 75846793  | cysteine-rich secretory protein LCL domain containing 1       |
| 42102 | ENSG00000202089   | NEFH        | 40561 | -0.04 | protein_coding                      | 22 | 28712019  | 28617379  | neurofilament heavy polypeptide                               |
| 42175 | ENSG00000149679   | CALML52     | 40649 | -0.04 | protein_coding                      | 20 | 60963688  | 60962341  | CaM5 and A2L enzyme substrate 2                               |
| 42299 | ENSG00000206535   | LNP1        | 40786 | -0.04 | protein_coding                      | 3  | 100120037 | 100175163 | leukemia NUP98 fusion partner 1                               |
| 42351 | ENSG00000179348   | GATA2       | 40839 | -0.04 | protein_coding                      | 3  | 128186270 | 128212028 | GATA binding protein 2                                        |
| 38429 | ENSG00000201185   |             | 36524 | -0.04 | rRNA                                | 6  | 4423191   | 4423115   | rRNA, 5S ribosomal pseudogene 202                             |
| 38263 | ENSG00000202174   |             | 37482 | -0.04 | rRNA                                | 2  | 133010727 | 133010878 | rRNA, 5.8S ribosomal pseudogene 5                             |
| 40304 | ENSG00000171689   | MIR31HG     | 36659 | -0.04 | sense_intronic                      | 2  | 21455941  | 21509688  | MIR31 host gene (non-protein coding)                          |
| 31604 | ENSG00000200913   | SNORD4R     | 28916 | -0.04 | snRNA                               | 14 | 4524265   | 4524265   | small nuclear RNA, C/D box 48                                 |
| 31838 | ENSG00000252577   | SCARN20     | 29626 | -0.04 | snRNA                               | 17 | 58308877  | 58309077  | small Cajal body-specific RNA 20                              |
| 31883 | ENSG00000206989   | SNORD3      | 30078 | -0.04 | snRNA                               | 5  | 137859732 | 137860799 | small nuclear RNA, C/D box 64                                 |
| 32049 | ENSG00000202400   | SNORD100    | 30292 | -0.04 | snRNA                               | 6  | 133197841 | 133198016 | small nuclear RNA, C/D box 100                                |
| 32194 | ENSG00000221182   | SNORD98     | 30384 | -0.04 | snRNA                               | 10 | 70514529  | 70514995  | small nuclear RNA, C/D box 98                                 |
| 32346 | ENSG00000202314   | SNORD6      | 30522 | -0.04 | snRNA                               | 11 | 83444888  | 83444740  | small nuclear RNA, C/D box 6                                  |
| 32388 | ENSG00000198763   | SNORD104    | 30532 | -0.04 | snRNA                               | 17 | 62223443  | 62223512  | small nuclear RNA, C/D box 104                                |
| 32508 | ENSG00000202324   | SNORD71     | 30692 | -0.04 | snRNA                               | 16 | 71792305  | 71792390  | small nuclear RNA, C/D box 71                                 |
| 32593 | ENSG00000207093   | SNORD116-8  | 30776 | -0.04 | snRNA                               | 15 | 25315079  | 25315073  | small nuclear RNA, C/D box 116-8                              |
| 32612 | ENSG000002021491  | SNORD4      | 30813 | -0.04 | snRNA                               | 12 | 49048166  | 49048301  | small nuclear RNA, H/ACA box 34                               |
| 32675 | ENSG000002022907  |             | 30846 | -0.04 | snRNA                               | 5  | 137884659 | 137884728 | Small nuclear RNA SNORD63                                     |
| 32970 | ENSG00000206754   | SNORD101    | 31143 | -0.04 | snRNA                               | 6  | 131138446 | 131139518 | small nuclear RNA, C/D box 101                                |
| 33022 | ENSG000002023531  | SNORD108B   | 31193 | -0.04 | snRNA                               | 19 | 10220433  | 10220511  | small nuclear RNA, C/D box 108B                               |
| 33089 | ENSG00000207442   | SNORD116-6  | 31246 | -0.04 | snRNA                               | 15 | 25310173  | 25310268  | small nuclear RNA, C/D box 116-6                              |
| 33188 | ENSG00000208793   | SNORD124    | 31339 | -0.04 | snRNA                               | 17 | 38183795  | 38183898  | small nuclear RNA, C/D box 124                                |
| 33214 | ENSG000002029127  | SNORD126    | 31366 | -0.04 | snRNA                               | 22 | 29729152  | 29729247  | small nuclear RNA, C/D box 126                                |
| 33251 | ENSG000002028043  | SNORD127    | 31399 | -0.04 | snRNA                               | 14 | 45580086  | 45580171  | small nuclear RNA, C/D box 127                                |
| 33376 | ENSG00000201539   | SNORD9      | 31515 | -0.04 | snRNA                               | 1  | 28952581  | 28952534  | small nuclear RNA, C/D box 99                                 |
| 33397 | ENSG00000201992   | SNORD101    | 31536 | -0.04 | snRNA                               | 6  | 16001289  | 16001413  | small nuclear RNA, H/ACA box 20                               |
| 33532 | ENSG00000208344   | SNORD126    | 31680 | -0.04 | snRNA                               | 14 | 20794609  | 20794685  | small nuclear RNA, C/D box 126                                |
| 33584 | ENSG00000202197   | SNORD116-12 | 31741 | -0.04 | snRNA                               | 15 | 2532198   | 25322289  | small nuclear RNA, C/D box 116-12                             |
| 33662 | ENSG00000204642   | SNORD116-23 | 32072 | -0.04 | snRNA                               | 22 | 39711218  | 39711312  | small nuclear RNA, C/D box 116-23                             |
| 33918 | ENSG00000207378   | SNORD116-23 | 32072 | -0.04 | snRNA                               | 15 | 25336933  | 25337024  | small nuclear RNA, C/D box 116-23                             |
| 34137 | ENSG00000202523   | SNOR66      | 32306 | -0.04 | snRNA                               | 1  | 63306276  | 63306408  | small nuclear RNA, H/ACA box 66                               |
| 34344 | ENSG00000202309   | SNORD12C    | 32518 | -0.04 | snRNA                               | 2  | 203142311 | 203142915 | Small nuclear RNA SNORD12C                                    |
| 34370 | ENSG000002020942  | SNORD12C    | 32546 | -0.04 | snRNA                               | 20 | 47956477  | 47956565  | small nuclear RNA, C/D box 12C                                |
| 34696 | ENSG000002026612  | SNORAZA     | 32860 | -0.04 | snRNA                               | 12 | 49050431  | 49050595  | small nuclear RNA, H/ACA box 12A                              |
| 34908 | ENSG00000201128   | SNORD1      | 32934 | -0.04 | snRNA                               | 1  | 15423203  | 15423238  | Small nuclear RNA SNOR45B                                     |
| 34976 | ENSG00000207204   | SNORD14A    | 34101 | -0.04 | snRNA                               | 11 | 17096201  | 17096291  | small nuclear RNA, C/D box 14A                                |
| 34621 | ENSG00000202493   | SNOR48      | 34530 | -0.04 | snRNA                               | 16 | 58552403  | 58552537  | small nuclear RNA, H/ACA box 48                               |
| 35171 | ENSG00000202627   | SNOR49      | 35109 | -0.04 | snRNA                               | X  | 118921318 | 118921447 | small nuclear RNA, H/ACA box 49                               |
| 37829 | ENSG00000202079   | SNORD114-10 | 35978 | -0.04 | snRNA                               | 14 | 101433389 | 101434000 | small nuclear RNA, C/D box 114-10                             |
| 38517 | ENSG000002028633  | SNOR48B     | 37754 | -0.04 | snRNA                               | 2  | 10588840  | 10588975  | small nuclear RNA, H/ACA box 80B                              |
| 38178 | ENSG00000201512   | SNOR47C     | 37958 | -0.04 | snRNA                               | 20 | 37058313  | 37058446  | small nuclear RNA, H/ACA box 71C                              |
| 40274 | ENSG000002025991  | SNOR47A     | 38587 | -0.04 | snRNA                               | 20 | 37059952  | 37059985  | small nuclear RNA, H/ACA box 71A                              |
| 37477 | ENSG00000196568   | RNU5A-1     | 35604 | -0.04 | snRNA                               | 15 | 65583389  | 65583504  | rRNA, U5E small nuclear 1                                     |
| 38086 | ENSG00000204641   | RNU5E-1     | 36216 | -0.04 | snRNA                               | 16 | 11968209  | 11968326  | rRNA, U5E small nuclear 1                                     |
| 38372 | ENSG00000202795   | RNU5A-1     | 37102 | -0.04 | snRNA                               | 12 | 120730950 | 120731040 | rRNA, U5E small nuclear 1                                     |
| 28441 | ENSG000002024578  | HNRNP1P10   | 28918 | -0.04 | transcribed_processed_pseudo_gene   | 16 | 51673967  | 51681043  | heterogeneous nuclear ribonucleoprotein A1 pseudogene 48      |
| 34881 | ENSG0000020236264 |             | 33015 | -0.04 | transcribed_processed_pseudo_gene   | 11 | 2396362   | 2397006   | ribosomal protein L26 pseudogene 30                           |
| 39840 | ENSG000002056167  |             | 38099 | -0.04 | transcribed_processed_pseudo_gene   | 11 | 113659963 | 113662088 | activating transcription factor 4 pseudogene 4                |
| 41410 | ENSG000002025264  | LOC46782    | 38610 | -0.04 | transcribed_processed_pseudo_gene   | 7  | 29638411  | 29724871  | zinc and ring finger 2 pseudogene 2                           |
| 36263 | ENSG00000199247   |             | 34376 | -0.04 | transcribed_unprocessed_pseudo_gene | 9  | 141044565 | 141071821 | tubulin, beta pseudogene 5                                    |
| 39515 | ENSG000002056340  | ABC8P1      | 35045 | -0.04 | transcribed_unprocessed_pseudo_gene | 16 | 18582484  | 18609660  | ATP-binding cassette, sub-family C, member 8 pseudogene 1     |
| 37225 | ENSG00000198931   |             | 35342 | -0.04 | transcribed_unprocessed_pseudo_gene | 14 | 36840370  | 36841588  | developmental pluripotency associated 3 pseudogene 2          |
| 38986 | ENSG000002020785  | MTRNR1P     | 38169 | -0.04 | transcribed_unprocessed_pseudo_gene | 1  | 32697259  | 32707221  | myobulmin related protein 5-like, pseudogene                  |
| 40348 | ENSG00000400225   | ZNF542      | 38637 | -0.04 | transcribed_unprocessed_pseudo_gene | 19 | 56879468  | 56891197  | zinc finger protein 542                                       |
| 40497 | ENSG000002020251  | PKDIP1      | 38792 | -0.04 | transcribed_unprocessed_pseudo_gene | 16 | 15219099  | 15248421  | polycystic kidney disease 1 (autosomal dominant) pseudogene 6 |
| 41203 | ENSG00000106610   | STAG3L4     | 39666 | -0.04 | transcribed_unprocessed_pseudo_gene | 7  | 66767606  | 66786513  | stromal antigen 3-like 4 (pseudogene)                         |
| 36422 | ENSG000002021297  |             | 34181 | -0.04 | unprocessed_pseudogene              | 4  | 190903678 | 190903678 | antigen beta 7, pseudogene                                    |
| 38592 | ENSG00000201138   |             | 36170 | -0.04 | unprocessed_pseudogene              | 3  | 72525888  | 72527263  | proteasome 20S subunit, non-ATPase, 12 pseudogene             |
| 26662 | ENSG000002026221  |             | 24519 | -0.04 |                                     |    |           |           |                                                               |
| 28750 | ENSG000002018175  |             | 27223 | -0.04 |                                     |    |           |           |                                                               |
| 28468 | ENSG000002018175  |             | 27116 | -0.04 |                                     |    |           |           |                                                               |
| 31463 | ENSG00000180211   |             | 25675 | -0.04 |                                     |    |           |           |                                                               |
| 31471 | ENSG000002023778  |             | 29683 | -0.04 |                                     |    |           |           |                                                               |
| 31025 | ENSG00000202378   |             | 30207 | -0.04 |                                     |    |           |           |                                                               |
| 32076 | ENSG00000185830   |             | 30287 | -0.04 |                                     |    |           |           |                                                               |
| 32236 | ENSG00000213862   |             | 30424 | -0.04 |                                     |    |           |           |                                                               |
| 32274 | ENSG000002020773  |             | 30468 | -0.04 |                                     |    |           |           |                                                               |
| 32385 | ENSG000002036360  |             | 30548 | -0.04 |                                     |    |           |           |                                                               |
| 32732 | ENSG00000212390   |             | 30908 | -0.04 |                                     |    |           |           |                                                               |
| 32870 | ENSG000002026971  |             | 31041 | -0.04 |                                     |    |           |           |                                                               |
| 32971 | ENSG000002031747  |             | 31144 | -0.04 |                                     |    |           |           |                                                               |
| 33111 | ENSG000002042477  |             | 31269 | -0.04 |                                     |    |           |           |                                                               |
| 33020 | ENSG000002026170  | RNY5        | 32073 | -0.04 |                                     | 7  | 148036580 | 148036658 | rRNA, Rn-associated Y5                                        |
| 33969 | ENSG000002029271  |             | 32150 | -0.04 |                                     |    |           |           |                                                               |
| 34116 | ENSG000002044192  |             | 32279 | -0.04 |                                     |    |           |           |                                                               |
| 34340 | ENSG000002031694  |             | 32515 | -0.04 |                                     |    |           |           |                                                               |
| 34772 | ENSG000002049444  |             | 32824 | -0.04 |                                     |    |           |           |                                                               |
| 34801 | ENSG000002056741  |             | 32945 | -0.04 |                                     |    |           |           |                                                               |
| 34896 | ENSG00000206723   |             | 33031 | -0.04 |                                     |    |           |           |                                                               |
| 35059 | ENSG00000206691   |             | 33200 | -0.04 |                                     |    |           |           |                                                               |
| 35144 | ENSG000002026396  |             | 33287 | -0.04 |                                     |    |           |           |                                                               |
| 35190 | ENSG00000201696   |             | 33331 | -0.04 |                                     |    |           |           |                                                               |
| 35314 | ENSG00000216208   |             | 33411 | -0.04 |                                     |    |           |           |                                                               |
| 35741 | ENSG000002036792  |             | 33853 | -0.04 |                                     |    |           |           |                                                               |
| 35945 | ENSG00000211344   |             | 34064 | -0.04 |                                     |    |           |           |                                                               |
| 36064 | ENSG000002022411  |             | 34206 | -0.04 |                                     | 1  | 193700968 | 193701074 | Small nuclear RNA U3                                          |
| 36288 | ENSG00000174977   |             | 34412 | -0.04 |                                     |    |           |           |                                                               |
| 36308 | ENSG000002028650  |             | 34422 | -0.04 |                                     |    |           |           |                                                               |
| 36350 | ENSG000002024498  |             | 34468 | -0.04 |                                     |    |           |           |                                                               |
| 36435 | ENSG000002050447  |             | 34541 | -0.04 |                                     |    |           |           |                                                               |
| 36516 | ENSG000002020595  | CSD3        | 34610 | -0.04 |                                     | 17 | 36884688  | 36891297  | CDS3H intron sulfur domain 3                                  |
| 36913 | ENSG000002021267  |             | 34713 | -0.04 |                                     |    |           |           |                                                               |
| 36646 | ENSG00000208150   |             | 34752 | -0.04 |                                     |    |           |           |                                                               |
| 36972 | ENSG00000218991   |             | 34780 | -0.04 |                                     |    |           |           |                                                               |
| 36995 | ENSG000002021295  |             | 34819 | -0.04 |                                     |    |           |           |                                                               |
| 36863 | ENSG00000205358   |             | 34878 | -0.04 |                                     |    |           |           |                                                               |
| 36986 | ENSG00000208962   |             | 35103 | -0.04 |                                     |    |           |           |                                                               |
| 37080 | ENSG000002048623  |             | 35201 | -0.04 |                                     |    |           |           |                                                               |
| 37099 | ENSG000002024241  |             | 35229 | -0.04 |                                     |    |           |           |                                                               |
| 37132 | ENSG000002028977  |             | 35250 | -0.04 |                                     |    |           |           |                                                               |
| 37263 | ENSG000001801171  |             | 35384 | -0.04 |                                     |    |           |           |                                                               |
| 37458 | ENSG000002053619  |             | 35582 | -0.04 |                                     |    |           |           |                                                               |
| 37754 | ENSG000001068278  | ZNHIT3      | 35604 | -0.04 |                                     | 17 | 34842473  | 34855154  | zinc finger, HIT-type containing 3                            |
| 38028 | ENSG000002020308  |             | 35169 | -0.04 |                                     |    |           |           |                                                               |
| 38170 | ENSG000002055242  |             | 35316 | -0.04 |                                     | 14 | 73957699  | 73960096  | chromosome 14 open reading frame 169                          |
| 38274 | ENSG000002034063  |             | 35434 | -0.04 |                                     | 19 | 4903092   | 4902165   | ubiquitin-like with PHD and ring finger domains 1             |
| 38405 | ENSG000002011653  |             | 35514 | -0.0  |                                     |    |           |           |                                                               |

|       |                 |            |         |       |                      |           |           |                                         |                                                                      |
|-------|-----------------|------------|---------|-------|----------------------|-----------|-----------|-----------------------------------------|----------------------------------------------------------------------|
| 39600 | ENSG00000232389 |            | 37846.7 | -0.04 |                      |           |           |                                         |                                                                      |
| 39601 | ENSG00000234509 |            | 37855.1 | -0.04 |                      |           |           |                                         |                                                                      |
| 39602 | ENSG00000170916 | SCRT1      | 37903.1 | -0.04 | 8                    | 145554228 | 145559943 | scatch family zinc finger 1             |                                                                      |
| 39701 | ENSG00000228364 |            | 37844.1 | -0.04 |                      |           |           |                                         |                                                                      |
| 39705 | ENSG00000204577 |            | 38130.7 | -0.04 |                      |           |           |                                         |                                                                      |
| 39854 | ENSG00000207295 |            | 38119.3 | -0.04 |                      |           |           |                                         |                                                                      |
| 39871 | ENSG00000251196 |            | 38140.8 | -0.04 |                      |           |           |                                         |                                                                      |
| 39880 | ENSG00000232524 | HIST1H2AI  | 38254.6 | -0.04 | 6                    | 27860477  | 27860963  | histone cluster 1, H2am                 |                                                                      |
| 40011 | ENSG00000209623 |            | 38298.6 | -0.04 |                      |           |           |                                         |                                                                      |
| 40039 | ENSG00000273314 |            | 38316.1 | -0.04 |                      |           |           |                                         |                                                                      |
| 40041 | ENSG00000257688 |            | 38318.9 | -0.04 |                      |           |           |                                         |                                                                      |
| 40118 | ENSG00000205891 |            | 38337.2 | -0.04 |                      |           |           |                                         |                                                                      |
| 40118 | ENSG00000205891 |            | 38409.4 | -0.04 |                      |           |           |                                         |                                                                      |
| 40157 | ENSG00000206470 |            | 38458.6 | -0.04 |                      |           |           |                                         |                                                                      |
| 40184 | ENSG00000205696 |            | 38483.6 | -0.04 |                      |           |           |                                         |                                                                      |
| 40322 | ENSG00000270705 |            | 38614.7 | -0.04 |                      |           |           |                                         |                                                                      |
| 40324 | ENSG00000226332 |            | 38616.9 | -0.04 |                      |           |           |                                         |                                                                      |
| 40369 | ENSG00000217448 |            | 38658.6 | -0.04 |                      |           |           |                                         |                                                                      |
| 40369 | ENSG00000256316 | HIST1H3A   | 38657   | -0.04 | 6                    | 26250370  | 26250835  | histone cluster 1, H3F                  |                                                                      |
| 40376 | ENSG00000206110 |            | 38666.9 | -0.04 | 17                   | 76210462  | 76220740  | Uncharacterized protein                 |                                                                      |
| 40385 | ENSG00000272029 |            | 38674.5 | -0.04 |                      |           |           |                                         |                                                                      |
| 40387 | ENSG00000174111 | SOC57      | 38675.3 | -0.04 |                      |           |           | suppressor of cytokine signaling 7      |                                                                      |
| 40424 | ENSG00000272525 |            | 38714.5 | -0.04 |                      |           |           |                                         |                                                                      |
| 40448 | ENSG00000184825 | HIST1H2AH  | 38735.4 | -0.04 | 6                    | 27114861  | 27115317  | histone cluster 1, H2ah                 |                                                                      |
| 40471 | ENSG00000272172 |            | 38758.9 | -0.04 |                      |           |           |                                         |                                                                      |
| 40490 | ENSG00000244239 |            | 38783   | -0.04 |                      |           |           |                                         |                                                                      |
| 40517 | ENSG00000193866 | HIST1H3A   | 38811.3 | -0.04 | 6                    | 26030716  | 26031186  | histone cluster 1, H3a                  |                                                                      |
| 40528 | ENSG00000124683 | HIST1H3A   | 38824.7 | -0.04 | 6                    | 26031817  | 26032286  | histone cluster 1, H3b                  |                                                                      |
| 40539 | ENSG00000227184 | EPK1       | 38841.8 | -0.04 | 8                    | 144939467 | 14492632  | epiblatin 1                             |                                                                      |
| 40597 | ENSG00000205823 |            | 38859.8 | -0.04 |                      |           |           |                                         |                                                                      |
| 40661 | ENSG00000271266 |            | 38878.9 | -0.04 |                      |           |           |                                         |                                                                      |
| 40691 | ENSG00000235688 |            | 39007.4 | -0.04 |                      |           |           |                                         |                                                                      |
| 40768 | ENSG00000211377 |            | 39083.7 | -0.04 |                      |           |           |                                         |                                                                      |
| 40791 | ENSG00000259153 |            | 39131.1 | -0.04 |                      |           |           |                                         |                                                                      |
| 40796 | ENSG00000206023 |            | 39138.3 | -0.04 |                      |           |           |                                         |                                                                      |
| 40798 | ENSG00000215569 |            | 39157.7 | -0.04 |                      |           |           |                                         |                                                                      |
| 40812 | ENSG00000272452 |            | 39156.7 | -0.04 |                      |           |           |                                         |                                                                      |
| 40899 | ENSG00000197803 |            | 39245.5 | -0.04 |                      |           |           |                                         |                                                                      |
| 40948 | ENSG00000203588 |            | 39314.5 | -0.04 | 5                    | 111755280 | 111756310 | EPB41L4A antisense RNA 2 (head to head) |                                                                      |
| 40968 | ENSG00000208193 |            | 39314.8 | -0.04 |                      |           |           |                                         |                                                                      |
| 41004 | ENSG00000208975 |            | 39360.7 | -0.04 |                      |           |           |                                         |                                                                      |
| 41028 | ENSG00000205689 |            | 39370   | -0.04 |                      |           |           |                                         |                                                                      |
| 41028 | ENSG00000237364 |            | 39378.2 | -0.04 |                      |           |           |                                         |                                                                      |
| 41074 | ENSG00000201762 |            | 39431.5 | -0.04 |                      |           |           |                                         |                                                                      |
| 41118 | ENSG00000200196 | TERC       | 39469.4 | -0.04 |                      |           |           | telomerase RNA component                |                                                                      |
| 41133 | ENSG00000259923 |            | 39469.6 | -0.04 |                      |           |           |                                         |                                                                      |
| 41149 | ENSG00000250742 |            | 39505.5 | -0.04 |                      |           |           |                                         |                                                                      |
| 41165 | ENSG00000215756 |            | 39523.3 | -0.04 |                      |           |           |                                         |                                                                      |
| 41199 | ENSG00000210081 |            | 39559.5 | -0.04 |                      |           |           |                                         |                                                                      |
| 41212 | ENSG00000259778 |            | 39583   | -0.04 |                      |           |           |                                         |                                                                      |
| 41238 | ENSG00000201840 |            | 39589   | -0.04 |                      |           |           |                                         |                                                                      |
| 41263 | ENSG00000206288 |            | 39629.8 | -0.04 |                      |           |           |                                         |                                                                      |
| 41350 | ENSG00000249780 |            | 39742.2 | -0.04 |                      |           |           |                                         |                                                                      |
| 41372 | ENSG00000273391 |            | 39784.1 | -0.04 |                      |           |           |                                         |                                                                      |
| 41373 | ENSG00000252142 |            | 39796.2 | -0.04 |                      |           |           |                                         |                                                                      |
| 41389 | ENSG00000208759 |            | 39787.9 | -0.04 |                      |           |           |                                         |                                                                      |
| 41571 | ENSG00000271830 |            | 39877.7 | -0.04 |                      |           |           |                                         |                                                                      |
| 41620 | ENSG00000212524 |            | 40021.7 | -0.04 |                      |           |           |                                         |                                                                      |
| 41632 | ENSG00000207161 |            | 40034.2 | -0.04 |                      |           |           |                                         |                                                                      |
| 41678 | ENSG00000252524 |            | 40092.3 | -0.04 |                      |           |           |                                         |                                                                      |
| 41722 | ENSG00000205281 |            | 40127.5 | -0.04 |                      |           |           |                                         |                                                                      |
| 41776 | ENSG00000200708 |            | 40195.6 | -0.04 |                      |           |           |                                         |                                                                      |
| 42104 | ENSG00000205441 |            | 40573.4 | -0.04 |                      |           |           |                                         |                                                                      |
| 42392 | ENSG00000203937 |            | 40578.1 | -0.04 |                      |           |           |                                         |                                                                      |
| 42444 | ENSG00000215386 |            | 40588.9 | -0.04 |                      |           |           |                                         |                                                                      |
| 38249 | ENSG00000197989 | SNHG12     | 36408.8 | -0.05 | antisense            | 1         | 28925050  | 28924995                                | small nuclear RNA host gene 12 (non-protein coding)                  |
| 41170 | ENSG00000201373 | YPSIF1-AS1 | 40105   | -0.05 | antisense            | 16        | 897284    | 897284                                  | YPSIF1 antisense RNA 1                                               |
| 42064 | ENSG00000204171 | RNA5E1-AS1 | 40536.2 | -0.05 | antisense            | 2         | 3606082   | 3606034                                 | RNA5E1 antisense RNA 1                                               |
| 42296 | ENSG00000202199 | ST7-AS1    | 40734   | -0.05 | antisense            | 7         | 11692500  | 11694388                                | ST7 antisense RNA 1                                                  |
| 42528 | ENSG00000204548 | BOLA3-AS1  | 41013.6 | -0.05 | antisense            | 2         | 7437318   | 7437318                                 | BOLA3 antisense RNA 1 (head to head)                                 |
| 42660 | ENSG00000202323 |            | 41195.8 | -0.05 | antisense            | x         | 38660821  | 38661136                                | MD1P1 antisense RNA 1                                                |
| 37530 | ENSG00000270022 | RMU12      | 35682.4 | -0.05 | lincRNA              | 22        | 43011250  | 43011913                                | RNA, L12 small nuclear                                               |
| 40933 | ENSG00000201441 |            | 39370   | -0.05 | antisense            | 3         | 10880558  | 10880558                                | long intergenic non-protein coding RNA 1003                          |
| 41205 | ENSG00000198972 | LINC02087  | 39570.4 | -0.05 | lincRNA              | x         | 13422958  | 13423264                                | long intergenic non-protein coding RNA 87                            |
| 41241 | ENSG00000205198 | SNORA78    | 39813.8 | -0.05 | lincRNA              | 16        | 2014960   | 2015510                                 | small nuclear RNA host gene 9 (non-protein coding)                   |
| 41498 | ENSG00000205036 |            | 39970   | -0.05 | antisense            | 3         | 10880558  | 10880558                                | long intergenic non-protein coding RNA 1003                          |
| 41627 | ENSG00000250366 | LINC02017  | 40028.3 | -0.05 | lincRNA              | 14        | 98432729  | 98391608                                | long intergenic non-protein coding RNA 817                           |
| 42038 | ENSG00000208893 | SNORA24    | 40517   | -0.05 | lincRNA              | 4         | 11919884  | 11920078                                | small nuclear RNA host gene 8 (non-protein coding)                   |
| 42100 | ENSG00000204701 | LINC02083  | 40506   | -0.05 | antisense            | 3         | 10880558  | 10704611                                | long intergenic non-protein coding RNA 983                           |
| 41933 | ENSG00000199038 | MIR120     | 40376.5 | -0.05 | miRNA                | 11        | 568089    | 568198                                  | miR120                                                               |
| 42082 | ENSG00000206751 | MIR3661    | 40548.9 | -0.05 | miRNA                | 5         | 13391448  | 13391543                                | miR3661                                                              |
| 27713 | ENSG00000203027 |            | 26999   | -0.05 | processed_pseudogene | 75        | 7052069   | 7052069                                 | ribosomal protein L7a pseudogene 6                                   |
| 28520 | ENSG00000189343 |            | 26999   | -0.05 | processed_pseudogene | 17        | 19349246  | 19350169                                | ribosomal protein S2 pseudogene 46                                   |
| 28999 | ENSG00000215006 |            | 27175.7 | -0.05 | processed_pseudogene | 3         | 68644856  | 68666175                                | proteasome (prosome, macropain) 26S subunit, ATPase, 1 pseudogene 1  |
| 29522 | ENSG00000207609 |            | 27338.6 | -0.05 | processed_pseudogene | 9         | 5372726   | 53728132                                | NADH dehydrogenase (ubiquinone) flavoprotein 2 pseudogene 1          |
| 29564 | ENSG00000191861 | PDP3P1     | 28251.2 | -0.05 | processed_pseudogene | 1         | 14661206  | 14661206                                | protein phosphatase 3, member A, pseudogene 1                        |
| 30545 | ENSG00000203426 |            | 28251.1 | -0.05 | processed_pseudogene | 2         | 58478575  | 58479703                                | eukaryotic translation initiation factor 3, subunit F pseudogene 3   |
| 30640 | ENSG00000206032 |            | 29129.4 | -0.05 | processed_pseudogene | 14        | 83159469  | 83159469                                | embryonic alpha pseudogene 4                                         |
| 31272 | ENSG00000205041 |            | 29486.4 | -0.05 | processed_pseudogene | 1         | 5203785   | 5203785                                 | eukaryotic translation initiation factor 4A1 pseudogene 2            |
| 31482 | ENSG00000186940 |            | 29690.3 | -0.05 | processed_pseudogene | 9         | 62006219  | 62006674                                | coiled-coil-helix-coiled-coil helix domain containing 2 pseudogene 9 |
| 30564 | ENSG00000204762 |            | 30653.1 | -0.05 | processed_pseudogene | 9         | 12084542  | 12084600                                | tumor protein, transcriptionally-controlled 1 pseudogene 9           |
| 30865 | ENSG00000206356 |            | 31049.6 | -0.05 | processed_pseudogene | 10        | 51933269  | 51933484                                | small nuclear ribonucleoprotein polypeptide G pseudogene 2           |
| 32881 | ENSG00000175886 |            | 31932.5 | -0.05 | processed_pseudogene | 18        | 38914836  | 38915639                                | ribosomal protein L7a pseudogene 66                                  |
| 33091 | ENSG00000202182 |            | 31822.6 | -0.05 | processed_pseudogene | 3         | 6814724   | 6815030                                 | mitochondrial ribosomal protein S36 pseudogene 1                     |
| 33491 | ENSG00000203024 |            | 31843.9 | -0.05 | processed_pseudogene | 3         | 33380262  | 33380262                                | poly(A) binding protein 1 pseudogene 1                               |
| 33538 | ENSG00000206978 |            | 31848.9 | -0.05 | processed_pseudogene | 19        | 14732446  | 14732446                                | integrin beta 1 pseudogene 19                                        |
| 33622 | ENSG00000203096 |            | 31785.5 | -0.05 | processed_pseudogene | 4         | 11312999  | 11314516                                | RNA binding protein S1, serine-rich domain pseudogene 1              |
| 33964 | ENSG00000186965 |            | 32107.4 | -0.05 | processed_pseudogene | 10        | 2374874   | 2374874                                 | glyoxalase 1 pseudogene 10                                           |
| 35116 | ENSG00000253954 |            | 33257.4 | -0.05 | processed_pseudogene | 15        | 9324977   | 93256105                                | high mobility group nucleosome binding domain 1 pseudogene 38        |
| 36033 | ENSG00000206038 |            | 34155.2 | -0.05 | processed_pseudogene | 14        | 4579629   | 45799499                                | DnaJ (Hsp40) homolog, subfamily C, member 19 pseudogene 9            |
| 40400 | ENSG00000174740 |            | 34730   | -0.05 | processed_pseudogene | 4         | 69053115  | 69053115                                | SEIPN1 mRNA binding protein 1 pseudogene 1                           |
| 36623 | ENSG00000186278 |            | 34730   | -0.05 | processed_pseudogene | Y         | 21184353  | 21184353                                | CD4 molecule pseudogene 4                                            |
| 38077 | ENSG00000218582 |            | 34520.6 | -0.05 | processed_pseudogene | 6         | 80462722  | 80463728                                | glyceraldehyde 3-phosphate dehydrogenase pseudogene 63               |
| 38080 | ENSG00000206442 |            | 35116.3 | -0.05 | processed_pseudogene | 12        | 84211801  | 84211801                                | poly(A) binding protein, cytoplasmic 1 pseudogene 4                  |
| 37223 | ENSG00000202871 |            | 35441.7 | -0.05 | processed_pseudogene | X         | 33056812  | 33056812                                | ubiquitin folding cofactor A pseudogene 1                            |
| 38080 | ENSG00000254759 |            | 36234.2 | -0.05 | processed_pseudogene | 11        | 12591434  | 12593846                                | nucleosome assembly protein 1-like 1 pseudogene 1                    |
| 39098 | ENSG00000213621 |            | 36251.3 | -0.05 | processed_pseudogene | 1         | 198185640 | 198185640                               | ribosomal protein L5 pseudogene 5                                    |
| 38351 | ENSG00000214480 |            | 36528.4 | -0.05 | processed_pseudogene | 6         | 86137171  | 86137684                                | tumor protein, transcriptionally-controlled 1 pseudogene 6           |
| 38982 | ENSG00000202734 |            | 37175.9 | -0.05 | processed_pseudogene | 9         | 119942907 | 119943374                               | ribosomal protein L10 pseudogene 3                                   |
| 39015 | ENSG00000213005 | PTTG3P     | 37254.3 | -0.05 | processed_pseudogene | 8         | 67679632  | 67680240                                | pituitary tumor-transforming 3, pseudogene                           |
| 39027 | ENSG00000202387 |            | 37241.5 | -0.05 | processed_pseudogene | 9         | 12552423  | 125524512                               | spindle and kinetochore associated complex subunit 2 pseudogene 1    |
| 39214 | ENSG00000202603 |            | 37437   | -0.05 | processed_pseudogene | 10        | 10460507  | 10460507                                | prostaglandin G synthase 3 (cyclooxygenase) pseudogene 4             |
| 39672 | ENSG00000215007 |            | 37919.2 | -0.05 | processed_pseudogene | X         | 106594880 | 106590773                               | DnaJ (Hsp40) homolog, subfamily A, member 1 pseudogene 3             |
| 39775 | ENSG00000206707 |            | 38038.2 | -0.05 | processed_pseudogene | 17        | 64193811  | 64194356                                | proteasome (prosome, macropain) 26S subunit, non-ATPase,             |

|       |                 |          |         |       |                |    |           |           |                                                                                         |
|-------|-----------------|----------|---------|-------|----------------|----|-----------|-----------|-----------------------------------------------------------------------------------------|
| 30401 | ENSG00000194823 | PTCH3    | 29717.5 | -0.05 | protein_coding | 19 | 3903602   | 9323245   | enoyl-CoA hydratase 1, peroxisomal                                                      |
| 30684 | ENSG00000195656 | ECHE3    | 29723.0 | -0.05 | protein_coding | 12 | 3709127   | 4705640   | proteoglycan 4 synthase 2 (lysosomal)                                                   |
| 30841 | ENSG00001002016 | TOM22    | 29118.7 | -0.05 | protein_coding | 22 | 39071953  | 39080818  | translocase of outer mitochondrial membrane 22 homolog (yeast)                          |
| 30860 | ENSG00001003353 | EF1D     | 29136.7 | -0.05 | protein_coding | 22 | 3606897   | 3625483   | eukaryotic translation initiation factor 3, subunit D                                   |
| 31008 | ENSG00000168813 | HNRNPF   | 29255.5 | -0.05 | protein_coding | 10 | 4384098   | 4397314   | heterogeneous nuclear ribonucleoprotein F                                               |
| 31051 | ENSG00000203392 | L2-036   | 29291.5 | -0.05 | protein_coding | 6  | 3174573   | 31774761  | L2M2 homolog, US small nuclear RNA associated (S. cerevisiae)                           |
| 31183 | ENSG00000125870 | SNRPB2   | 29407.8 | -0.05 | protein_coding | 20 | 3671006   | 36722421  | small nuclear ribonucleoprotein polypeptide B                                           |
| 31280 | ENSG00000126559 | NCED4    | 29460.4 | -0.05 | protein_coding | 14 | 24666098  | 24701660  | neural precursor cell expressed, developmentally down-regulated 8                       |
| 31306 | ENSG00000193366 | NDIFAF1  | 29518.5 | -0.05 | protein_coding | 16 | 11903450  | 11910038  | NADH dehydrogenase (ubiquinone 1 alpha subcomplex, 1, 7, 52c)                           |
| 31400 | ENSG00000121774 | KHRRB81  | 29620.7 | -0.05 | protein_coding | 1  | 52479450  | 52526261  | KH1 domain containing, RNA binding, signal transduction associated 1                    |
| 31400 | ENSG00000126598 | DNAJC8   | 29621.3 | -0.05 | protein_coding | 1  | 2855296   | 2855938   | Ume3 (Hsp40) homolog, subfamily C, member 8                                             |
| 31478 | ENSG00000106267 | SHPA     | 29687.8 | -0.05 | protein_coding | 1  | 4483026   | 4483653   | epitaxially secreted A (Cyclophilin A)                                                  |
| 31478 | ENSG00000110700 | RPS13    | 29688.9 | -0.05 | protein_coding | 11 | 17095958  | 17095934  | ribosomal protein S13                                                                   |
| 31480 | ENSG00000202876 | BISG     | 29689.8 | -0.05 | protein_coding | 8  | 37012607  | 37013177  | cytochrome c oxidase subunit V via polypeptide 1 pseudogenes 2                          |
| 31547 | ENSG00000102238 | BSG      | 29166.8 | -0.05 | protein_coding | 19 | 5735863   | 5839543   | basophil G1 histone group                                                               |
| 31579 | ENSG00000191361 | HIGD1A   | 29777.8 | -0.05 | protein_coding | 3  | 4278669   | 4284623   | HIG1 hypoxia inducible domain family, member 1A                                         |
| 31683 | ENSG00000115307 | AUP1     | 29871.2 | -0.05 | protein_coding | 2  | 7475372   | 7475366   | ancient Drosophila protein 1                                                            |
| 31708 | ENSG00000131458 | NRH2     | 29893.1 | -0.05 | protein_coding | 2  | 5265290   | 5265239   | nuclear receptor subfamily 1, group II, member 2                                        |
| 31708 | ENSG00000138668 | HNRNPD   | 29893.3 | -0.05 | protein_coding | 4  | 8327365   | 8326566   | heterogeneous nuclear ribonucleoprotein D (AU-rich element RNA binding protein 1, 375b) |
| 31804 | ENSG00000105258 | FAM32A   | 30084.6 | -0.05 | protein_coding | 19 | 16296191  | 16326287  | family with sequence similarity 132, member A                                           |
| 32001 | ENSG00000193638 | TP53     | 30215.5 | -0.05 | protein_coding | 3  | 8313968   | 8384979   | Tp53 complex 7 homolog (Drosophila)                                                     |
| 32152 | ENSG00000205499 | BR1K2    | 30342.7 | -0.05 | protein_coding | 3  | 1018872   | 10168874  | BRICK1, SCAR/WAVE actin-nucleating complex subunit                                      |
| 32225 | ENSG00000138888 | ATPEV101 | 30407.3 | -0.05 | protein_coding | 9  | 11735028  | 11736053  | ATPase, H+ transporting, lysosomal 130a, V1 subunit G1                                  |
| 32291 | ENSG00000115541 | HSP61    | 30478.5 | -0.05 | protein_coding | 2  | 19834718  | 19839111  | heat shock 60kDa protein 1                                                              |
| 32539 | ENSG00000155115 | GTF3C6   | 30720.9 | -0.05 | protein_coding | 6  | 11127963  | 11128093  | general transcription factor IIC, polypeptide 6, alpha 35kDa                            |
| 32598 | ENSG00000166075 | SSU172   | 30741.4 | -0.05 | protein_coding | 1  | 1470953   | 1510249   | SSU172 RNA polymerase II CTD phosphatase homolog (S. cerevisiae)                        |
| 32684 | ENSG00000195923 | L1MANK9  | 30748.9 | -0.05 | protein_coding | 5  | 17878863  | 17877883  | letm1, menadione-binding 2                                                              |
| 32687 | ENSG00000119868 | DLS1     | 30754.1 | -0.05 | protein_coding | 14 | 7534854   | 7537048   | dihydrolipoamide S-succinyltransferase (E2 component of 2-oxo-glutarate complex)        |
| 32696 | ENSG00000136385 | SBS      | 30755.7 | -0.05 | protein_coding | 2  | 17084843  | 17086574  | Spogen synovium antigen B (autofagin B)                                                 |
| 32576 | ENSG00000186521 | NOL21    | 30755.8 | -0.05 | protein_coding | 3  | 1760213   | 1760216   | NADH dehydrogenase (ubiquinone) 1 beta subcomplex, 5, 18kDa                             |
| 32568 | ENSG00000205881 | RPL17    | 30781.4 | -0.05 | protein_coding | 18 | 4701485   | 4701806   | ribosomal protein L17                                                                   |
| 32616 | ENSG00000189740 | ZNF32    | 30808.3 | -0.05 | protein_coding | 10 | 44139307  | 44144304  | zinc finger protein 32                                                                  |
| 32678 | ENSG00000126959 | RPL3A    | 30833.3 | -0.05 | protein_coding | 3  | 19780168  | 19780178  | ribosomal protein L3a                                                                   |
| 32756 | ENSG00000128789 | PSMG2    | 30927   | -0.05 | protein_coding | 18 | 12658737  | 12725739  | proteasome (prosome, macropain) assembly chaperone 2                                    |
| 32776 | ENSG00000198298 | PPP1C1C  | 30949.8 | -0.05 | protein_coding | 12 | 11115485  | 11118744  | protein phosphatase 1, catalytic subunit, gamma isozyme                                 |
| 32843 | ENSG00000198321 | HNRNPU1  | 31028.1 | -0.05 | protein_coding | 12 | 4731902   | 4731903   | heterogeneous nuclear ribonucleoprotein Ume3-like                                       |
| 32968 | ENSG00000157815 | PRD12    | 31142.8 | -0.05 | protein_coding | 19 | 1291624   | 1291624   | perlecan domain 2                                                                       |
| 33038 | ENSG00000142148 | CAPN1    | 31203   | -0.05 | protein_coding | 11 | 6484037   | 6497477   | capabin (1 μm) large subunit                                                            |
| 33053 | ENSG00000100261 | TPST2    | 31238.3 | -0.05 | protein_coding | 18 | 3811198   | 3811203   | cytochrome c oxidase subunit VI (ubiquitous)                                            |
| 33084 | ENSG00000158471 | PTDSS1   | 31243.9 | -0.05 | protein_coding | 8  | 9727383   | 9734923   | phosphatidylinositol synthase 1                                                         |
| 33101 | ENSG00000108153 | BZW1     | 31281.4 | -0.05 | protein_coding | 2  | 20187537  | 20188889  | basic leucine zipper and WZ domains 1                                                   |
| 33128 | ENSG00000100528 | PKA2     | 31290.1 | -0.05 | protein_coding | 11 | 1299116   | 1299119   | amylid beta 441 precursor-like protein 2                                                |
| 33229 | ENSG00000100292 | SVPL1    | 31298.1 | -0.05 | protein_coding | 7  | 10573049  | 10573022  | synaptophysin-like 1                                                                    |
| 33243 | ENSG00000131966 | ACTR10   | 31388.9 | -0.05 | protein_coding | 14 | 8868738   | 8870179   | actin-related protein 10 homolog (S. cerevisiae)                                        |
| 33383 | ENSG00000142248 | RNF14    | 31456.5 | -0.05 | protein_coding | 20 | 465026    | 4652426   | ring finger protein 14                                                                  |
| 33419 | ENSG00000178866 | SNB1     | 31569.3 | -0.05 | protein_coding | 5  | 1779725   | 1779725   | guanine nucleotide binding protein (G protein), beta polypeptide 1                      |
| 33587 | ENSG00000139726 | DENR     | 31744.2 | -0.05 | protein_coding | 12 | 12327321  | 12327321  | enlym-2 regulated protein                                                               |
| 33642 | ENSG00000134970 | TMEM7    | 32000.5 | -0.05 | protein_coding | 5  | 11498205  | 11498689  | transmembrane domain 4 protein transport domain containing 7                            |
| 33643 | ENSG00000100948 | TARDPB   | 32000.9 | -0.05 | protein_coding | 6  | 11072414  | 11082156  | TAR DNA binding protein                                                                 |
| 33844 | ENSG00000182687 | TMEM29   | 32002.4 | -0.05 | protein_coding | 19 | 1009647   | 1001117   | transmembrane protein 299                                                               |
| 33882 | ENSG00000100922 | TMEM59   | 32052.9 | -0.05 | protein_coding | 6  | 166776497 | 166796486 | mitochondrial pyruvate carrier 1                                                        |
| 34043 | ENSG00000102620 | DNAH1B1  | 32121.3 | -0.05 | protein_coding | 3  | 18625192  | 18631921  | DNAH (Hsp40) homolog, subfamily B, member 11                                            |
| 34091 | ENSG00000174574 | AKR1N1   | 32281   | -0.05 | protein_coding | 1  | 3945866   | 3947173   | akirin 1                                                                                |
| 34150 | ENSG00000198355 | PM3      | 32320.6 | -0.05 | protein_coding | 22 | 5032418   | 5032778   | pim-3 oncogene                                                                          |
| 34150 | ENSG00000100890 | HEX3     | 32325.5 | -0.05 | protein_coding | 7  | 7392548   | 7401842   | heoxanosome B (beta polypeptide)                                                        |
| 34240 | ENSG00000158642 | NPFT     | 32411.3 | -0.05 | protein_coding | 15 | 7382355   | 7382675   | neuropilin                                                                              |
| 34276 | ENSG00000137995 | RABGGT3B | 32451.2 | -0.05 | protein_coding | 1  | 76251879  | 76260784  | Rab geranyltransferase, beta subunit                                                    |
| 34317 | ENSG00000102931 | SNMG2    | 32454.4 | -0.05 | protein_coding | 4  | 2298342   | 2298342   | small integral membrane protein 20                                                      |
| 34322 | ENSG00000114023 | FAM162A  | 32481.9 | -0.05 | protein_coding | 3  | 12210323  | 12213181  | family with sequence similarity 162, member A                                           |
| 34376 | ENSG00000134825 | TMEM258  | 32552.5 | -0.05 | protein_coding | 11 | 61539973  | 61540274  | transmembrane protein 258                                                               |
| 34397 | ENSG00000143883 | TRIM18   | 32558.4 | -0.05 | protein_coding | 11 | 13320381  | 13320381  | chromosome 5 open reading frame 15                                                      |
| 34405 | ENSG00000148450 | MRB2     | 32581.1 | -0.05 | protein_coding | 10 | 2338435   | 2341042   | methionine sulfoxide reductase B2                                                       |
| 34477 | ENSG00000100575 | POPLR2J  | 32654.9 | -0.05 | protein_coding | 7  | 10211365  | 10211934  | polymerase (RNA) II (DNA directed) polypeptide 3, 13.3kDa                               |
| 34480 | ENSG00000146522 | MFR17    | 32657.7 | -0.05 | protein_coding | 4  | 17802193  | 17802193  | mitochondrial ribosomal protein L17                                                     |
| 34562 | ENSG00000160044 | CALM1    | 32741.3 | -0.05 | protein_coding | 19 | 4710433   | 47114650  | calmodulin 3 (phosphorylase kinase, delta)                                              |
| 34589 | ENSG00000127540 | UQCRT1   | 32789.9 | -0.05 | protein_coding | 19 | 1597171   | 1605480   | ubiquinol-cytochrome c reductase, complex III subunit XI                                |
| 34596 | ENSG00000190521 | TAIP1A   | 32845.1 | -0.05 | protein_coding | 1  | 6884240   | 6884240   | TAIP1 RNA polymerase II, TATA box binding protein (TBP) associated factor, 32kDa        |
| 34634 | ENSG00000128458 | RRAS     | 32869.6 | -0.05 | protein_coding | 19 | 50138549  | 50143458  | related RAS viral (ras) oncogene homolog                                                |
| 34641 | ENSG00000192723 | GGSKA1   | 32913.7 | -0.05 | protein_coding | 19 | 4274338   | 4274677   | glyoxylase kinase 3, alpha                                                              |
| 34658 | ENSG00000197688 | COPS3    | 32918.4 | -0.05 | protein_coding | 11 | 1812638   | 1812638   | small nuclear ribonucleoprotein D1 polypeptide 18kDa                                    |
| 34658 | ENSG00000110300 | COPS3    | 32930.9 | -0.05 | protein_coding | 17 | 17150141  | 17184607  | COP9 signalosome subunit 3                                                              |
| 34659 | ENSG00000198906 | DNX15    | 32831.8 | -0.05 | protein_coding | 4  | 2451904   | 2458673   | DEAH (Hsp-40) box helicase 15                                                           |
| 34686 | ENSG00000104161 | CAM1     | 32859.9 | -0.05 | protein_coding | 1  | 1768810   | 1768810   | calcium binding protein                                                                 |
| 34691 | ENSG00000110059 | LYPLA2   | 32859.9 | -0.05 | protein_coding | 1  | 2411450   | 2412209   | lyso-phospholipase II                                                                   |
| 34746 | ENSG00000191355 | PTTG1P   | 32862.5 | -0.05 | protein_coding | 21 | 4628950   | 4628957   | pituitary tumor-transforming 1 interacting protein                                      |
| 34785 | ENSG00000106623 | SLSL2    | 32863.2 | -0.05 | protein_coding | 1  | 1044103   | 1044103   | soluble carrier family 28 (ribosomal lutein carrier), member 32                         |
| 34781 | ENSG00000158110 | SLXK     | 32933.6 | -0.05 | protein_coding | 10 | 7591090   | 7594801   | inositol kinase                                                                         |
| 34790 | ENSG00000185175 | MDIP1    | 32937.3 | -0.05 | protein_coding | X  | 3866085   | 3866790   | MDI interacting protein 1                                                               |
| 34818 | ENSG00000156403 | ATP7B    | 32938.2 | -0.05 | protein_coding | 12 | 378519    | 378519    | arsenicite                                                                              |
| 34853 | ENSG00000141488 | ATP5B    | 32993.6 | -0.05 | protein_coding | 7  | 9904698   | 9909354   | ATP synthase, H+ transporting, mitochondrial F0 complex, subunit F2                     |
| 35047 | ENSG00000195596 | AZIN1    | 33191.6 | -0.05 | protein_coding | 8  | 1038385   | 1039092   | antizyme inhibitor 1                                                                    |
| 35107 | ENSG00000197929 | PICK1    | 33241.4 | -0.05 | protein_coding | 11 | 153001    | 153001    | nicotinic acetylcholine receptor 3 (NAChR3) gamma                                       |
| 35108 | ENSG00000195991 | MRPL32   | 33242.8 | -0.05 | protein_coding | 7  | 4297179   | 4298557   | mitochondrial ribosomal protein L32                                                     |
| 35112 | ENSG00000135316 | SYNCRIP  | 33250   | -0.05 | protein_coding | 6  | 8611805   | 8615310   | synaptotagmin binding, cytoplasmic RNA interacting protein                              |
| 35188 | ENSG00000104852 | SNRNP70  | 33338   | -0.05 | protein_coding | 19 | 656836    | 656836    | small nuclear ribonucleoprotein 70kDa (U1)                                              |
| 35208 | ENSG00000101227 | PICK1D3  | 33343.4 | -0.05 | protein_coding | 22 | 4297972   | 4297972   | polymerase (DNA directed), delta interacting protein 3                                  |
| 35284 | ENSG00000132388 | UBE2C1   | 33382.1 | -0.05 | protein_coding | 17 | 4172554   | 4296923   | ubiquitin-conjugating enzyme E2C 1                                                      |
| 35296 | ENSG00000184422 | COPB2    | 33395.5 | -0.05 | protein_coding | 3  | 13901442  | 13910874  | costamer protein complex, subunit beta 2 (beta prime)                                   |
| 35316 | ENSG00000184596 | MSPR5B   | 33405.8 | -0.05 | protein_coding | 3  | 6881388   | 6881388   | mitochondrial ribosomal protein S28                                                     |
| 35323 | ENSG00000111911 | HMT3     | 33440.5 | -0.05 | protein_coding | 6  | 126277927 | 126301387 | histidine triad nucleotide binding protein 3                                            |
| 35325 | ENSG00000128999 | ANP19    | 33444   | -0.05 | protein_coding | 15 | 5283242   | 5283290   | GMP-regulated phosphoprotein, 19kDa                                                     |
| 35346 | ENSG00000191911 | GGSK2    | 33485.2 | -0.05 | protein_coding | 8  | 7658286   | 7658286   | GTPase activating protein (SH3 domain) binding protein 2                                |
| 35371 | ENSG00000191911 | PRPS2    | 33480.2 | -0.05 | protein_coding | X  | 1288424   | 1288424   | phosphoribosyl pyrophosphate synthetase 2                                               |
| 35405 | ENSG00000175244 | LSM1     | 33517.7 | -0.05 | protein_coding | 8  | 3802839   | 3803248   | LSM1 homolog, U6 small nuclear RNA associated (S. cerevisiae)                           |
| 35411 | ENSG00000195168 | DYLL1    | 33571.9 | -0.05 | protein_coding | 12 | 3768890   | 3768890   | Tdk-tyrosine kinase 2                                                                   |
| 35422 | ENSG00000176449 | COX13    | 33633.4 | -0.05 | protein_coding | 12 | 5956782   | 5956740   | cytochrome c oxidase assembly homolog 14 (S. cerevisiae)                                |
| 35440 | ENSG00000194599 | SAP18    | 33647.6 | -0.05 | protein_coding | 13 | 2171483   | 2172321   | Sm3-associated protein, 18kDa                                                           |
| 35494 | ENSG00000100458 | SYN1     | 33712.2 | -0.05 | protein_coding | 22 | 3347285   | 3347285   | synaptotagmin I                                                                         |
| 35496 | ENSG00000194907 | LGALS1   | 33761.4 | -0.05 | protein_coding | 22 | 38071615  | 38071815  | lectin, galactoside-binding, soluble, 1                                                 |
| 35617 | ENSG00000119306 | GMPAT    | 33726.4 | -0.05 | protein_coding | 1  | 23137693  | 23143179  | glycerophosphoacyl-transferase                                                          |
| 35646 | ENSG00000184381 | EIF1P2   | 33846.7 | -0.05 | protein_coding | 12 | 10971740  | 10971740  | EIF1 (P2) domain containing protein                                                     |
| 35712 | ENSG00000102931 | ARL2BP   | 33822.1 | -0.05 | protein_coding | 16 | 57287510  | 57287510  | ADP-ribosylation factor-like 2 binding protein                                          |
| 35762 | ENSG00000204857 | RDH4     | 33870.2 | -0.05 | protein_coding | 2  | 18715999  | 1874146   | retinol dehydrogenase 14 (all-trans-9-cis-11-cis)                                       |
| 35800 | ENSG00000144001 | EIF2L1   | 33912.4 | -0.05 | protein_coding | 2  | 6782143   | 6782143   |                                                                                         |

| Accession | Gene              | Start       | End   | Score | Orientation | Protein        | Score | Score     | Protein   | Score | Score                                                                                |
|-----------|-------------------|-------------|-------|-------|-------------|----------------|-------|-----------|-----------|-------|--------------------------------------------------------------------------------------|
| 37426     | ENS000000083372   | TNPO1       | 35543 | -0.05 | +           | protein coding | 5     | 7217239   | 7221260   |       | transposin 1                                                                         |
| 37423     | ENS00000004969    | ESB1        | 35617 | -0.05 | +           | protein coding | 10    | 1527647   | 1527647   |       | histidinase                                                                          |
| 37650     | ENS00000015317    | HTRAA2      | 35762 | -0.05 | +           | protein coding | 2     | 7476504   | 7476072   |       | H7A serine peptidase 2                                                               |
| 37676     | ENS000000243147   | MPL33       | 35820 | -0.05 | +           | protein coding | 2     | 2794584   | 2821064   |       | mitochondrial ribosomal protein L33                                                  |
| 37684     | ENS000000186848   | CRY4B       | 36332 | -0.05 | +           | protein coding | 11    | 11179289  | 11179448  |       | crystallin, alpha B                                                                  |
| 37706     | ENS000000191955   | SRY4B       | 35938 | -0.05 | +           | protein coding | 8     | 3825589   | 3825589   |       | sushi-repeat containing protein, X-linked                                            |
| 37731     | ENS000000142252   | GEMIN7      | 35875 | -0.05 | +           | protein coding | 19    | 4558243   | 45584782  |       | gem (nuclear organelle) associated protein 7                                         |
| 37785     | ENS000000141753   | IGFBP4      | 35924 | -0.05 | +           | protein coding | 17    | 9859702   | 9861383   |       | insulin-like growth factor binding protein-4                                         |
| 37785     | ENS000000185869   | FAM74B      | 35938 | -0.05 | +           | protein coding | 11    | 12842084  | 12852338  |       | family with sequence similarity 175, member B                                        |
| 37786     | ENS000000115884   | SDC1        | 35940 | -0.05 | +           | protein coding | 2     | 5040558   | 5042594   |       | syndecan 1                                                                           |
| 37801     | ENS000000186125   | MBP         | 35951 | -0.05 | +           | protein coding | 22    | 5820811   | 5822951   |       | myoglobin                                                                            |
| 37804     | ENS000000182823   | RBM10       | 35951 | -0.05 | +           | protein coding | 4     | 4704832   | 4704832   |       | RNA binding motif protein 10                                                         |
| 37811     | ENS00000017260    | ATP2C1      | 35959 | -0.05 | +           | protein coding | 3     | 13056949  | 13057356  |       | ATPase, Ca <sup>+</sup> transporting, type 2C, member 1                              |
| 37823     | ENS000000184553   | PLIM3       | 35972 | -0.05 | +           | protein coding | 4     | 18642861  | 18643076  |       | PAZ and LIM domain 3                                                                 |
| 37888     | ENS000000137481   | EXOC3       | 35978 | -0.05 | +           | protein coding | 11    | 6328768   | 6328967   |       | beta-1,3-glucuronidyltransferase 1 (glucuronosyltransferase I)                       |
| 37881     | ENS000000189306   | RIRP7A      | 36034 | -0.05 | +           | protein coding | 22    | 42926974  | 42918508  |       | ribosomal RNA processing 7 homolog A (S. cerevisiae)                                 |
| 37869     | ENS000000091482   | SMPX        | 36012 | -0.05 | +           | protein coding | 8     | 2172490   | 2172621   |       | small muscle protein, X-linked                                                       |
| 37881     | ENS000000141219   | CCV3        | 36017 | -0.05 | +           | protein coding | 8     | 2726035   | 2726170   |       | coiled-coil domain containing 25                                                     |
| 37889     | ENS000000162413   | KLHL21      | 36040 | -0.05 | +           | protein coding | 11    | 6650784   | 6647467   |       | kelch-like family member 21                                                          |
| 37920     | ENS000000116863   | ADPRH2      | 36097 | -0.05 | +           | protein coding | 11    | 3654447   | 3655933   |       | ADP-ribosyltransferase like 2                                                        |
| 37928     | ENS000000181628   | CRK         | 36075 | -0.05 | +           | protein coding | 5     | 6851055   | 6851055   |       | cyclin-dependent kinase 7                                                            |
| 37973     | ENS000000163428   | LRRCS8      | 36132 | -0.05 | +           | protein coding | 3     | 12004336  | 12008186  |       | leucine rich repeat containing 58                                                    |
| 37974     | ENS000000163453   | IGFBP7      | 36133 | -0.05 | +           | protein coding | 4     | 5796939   | 5797651   |       | insulin-like growth factor binding protein 7                                         |
| 37988     | ENS000000142176   | SNORD7      | 36152 | -0.05 | +           | protein coding | 11    | 62433781  | 62433968  |       | methyltransferase like 12                                                            |
| 37995     | ENS000000189241   | SLC50A1     | 36157 | -0.05 | +           | protein coding | 1     | 15510760  | 15511129  |       | solute carrier family 50 (sugar efflux transporter), member 1                        |
| 38017     | ENS000000095985   | BCL7C       | 36176 | -0.05 | +           | protein coding | 16    | 3984497   | 3985281   |       | B-cell CLL/lymphoma 7C                                                               |
| 38017     | ENS000000101768   | CELSR3      | 36217 | -0.05 | +           | protein coding | 12    | 7020489   | 7105509   |       | EMC1 N1-specific pseudovirion methyltransferase                                      |
| 38070     | ENS000000107371   | EXOC3C      | 36232 | -0.05 | +           | protein coding | 9     | 3778675   | 37801434  |       | exosome component 3                                                                  |
| 38073     | ENS000000101281   | COX7A1      | 36233 | -0.05 | +           | protein coding | 19    | 36841824  | 36843771  |       | cytochrome c oxidase subunit VIIa polypeptide 1 (muscle)                             |
| 38083     | ENS000000169563   | MIR52       | 36232 | -0.05 | +           | protein coding | 14    | 2328108   | 2328108   |       | mitochondrial ribosomal protein S10                                                  |
| 38086     | ENS000000186961   | AP2A1       | 36230 | -0.05 | +           | protein coding | 19    | 5027025   | 5031030   |       | adaptor-related protein complex 2, alpha 1 subunit                                   |
| 38112     | ENS000000110048   | OSBP        | 36287 | -0.05 | +           | protein coding | 11    | 5841871   | 5843817   |       | cysteine binding protein                                                             |
| 38138     | ENS000000101541   | HSBP2       | 36307 | -0.05 | +           | protein coding | 17    | 1534809   | 1534953   |       | heat shock 27kDa protein family, member 7 (cardiovascular)                           |
| 38144     | ENS000000102871   | DHFR        | 36294 | -0.05 | +           | protein coding | 5     | 7992204   | 7992002   |       | dihydrofolate reductase                                                              |
| 38162     | ENS000000119185   | TIGB1BP1    | 36310 | -0.05 | +           | protein coding | 2     | 5456004   | 5456176   |       | integrin beta 1 binding protein 1                                                    |
| 38163     | ENS000000104330   | MEIS1       | 36310 | -0.05 | +           | protein coding | 12    | 4433123   | 4433171   |       | SAMM50 activin and assembly machinery component                                      |
| 38193     | ENS000000100836   | PAPBN1      | 36315 | -0.05 | +           | protein coding | 14    | 23790498  | 23795394  |       | poly(A) binding protein, nuclear 1                                                   |
| 38194     | ENS000000118178   | CASQ2       | 36333 | -0.05 | +           | protein coding | 1     | 11624258  | 116311402 |       | calsequestrin 2 (cardiac muscle)                                                     |
| 38201     | ENS000000101729   | EFNB3       | 36333 | -0.05 | +           | protein coding | 12    | 2428158   | 2428158   |       | BCL2 interacting protein like 3                                                      |
| 38208     | ENS000000156531   | PHF8        | 36363 | -0.05 | +           | protein coding | 8     | 13355270  | 13356230  |       | PHF finger protein 6                                                                 |
| 38239     | ENS000000173991   | TCP         | 36399 | -0.05 | +           | protein coding | 17    | 3782400   | 3782228   |       | titin-cap                                                                            |
| 38258     | ENS000000104920   | MEIS2       | 36405 | -0.05 | +           | protein coding | 11    | 4384076   | 4384076   |       | mediator complex subunit 8                                                           |
| 38268     | ENS000000109999   | PMP22       | 36423 | -0.05 | +           | protein coding | 17    | 15133095  | 15168443  |       | peripheral myelin protein 22                                                         |
| 38273     | ENS000000132406   | TMEM128     | 36430 | -0.05 | +           | protein coding | 4     | 4237269   | 4249950   |       | transmembrane protein 128                                                            |
| 38276     | ENS000000141676   | MEIS3       | 36439 | -0.05 | +           | protein coding | 8     | 42017273  | 42020713  |       | mol. T-cell differentiation protein 2 (gene-pseudogene)                              |
| 38315     | ENS000000101628   | LIT4        | 36452 | -0.05 | +           | protein coding | 8     | 4291485   | 4291485   |       | L12 integrin receptor                                                                |
| 38322     | ENS000000092620   | PALMD       | 36488 | -0.05 | +           | protein coding | 1     | 100114489 | 100160397 |       | palmdelphin                                                                          |
| 38340     | ENS000000169701   | TMEM38      | 36508 | -0.05 | +           | protein coding | 6     | 6726106   | 6726311   |       | transmembrane protein 38B                                                            |
| 38345     | ENS000000101696   | GLCO4       | 36509 | -0.05 | +           | protein coding | 8     | 690337    | 690337    |       | glycocalyx protein containing 4                                                      |
| 38352     | ENS0000001015737  | PHYH        | 36528 | -0.05 | +           | protein coding | 10    | 13319786  | 13344112  |       | phyllostin-CoA 2-hydroxylase                                                         |
| 38358     | ENS000000109500   | LOM9        | 36533 | -0.05 | +           | protein coding | 14    | 10317058  | 103215047 |       | glugmanin                                                                            |
| 38367     | ENS000000169431   | NSM2        | 36533 | -0.05 | +           | protein coding | 12    | 13010361  | 12837962  |       | non-SMC element 2, MADS1 homolog (S. cerevisiae)                                     |
| 38382     | ENS000000102717   | URPC-MRPS24 | 36561 | -0.05 | +           | protein coding | 7     | 4306157   | 4348618   |       | URPC-MRPS24 readthrough                                                              |
| 38386     | ENS000000088544   | ITPKC       | 36567 | -0.05 | +           | protein coding | 19    | 4123308   | 4124809   |       | inositol triphosphatase 3-kinase C                                                   |
| 38386     | ENS000000101339   | COL4A11     | 36568 | -0.05 | +           | protein coding | 6     | 1796403   | 1796403   |       | collagen type I (alpha2) pseudogene 1                                                |
| 38404     | ENS000000169592   | ROAD        | 36591 | -0.05 | +           | protein coding | 6     | 6995552   | 6995547   |       | Ras-related associated with diabetes                                                 |
| 38416     | ENS000000146281   | MND2        | 36592 | -0.05 | +           | protein coding | 6     | 88865769  | 88874284  |       | peptide M20 domain containing 2                                                      |
| 38441     | ENS000000102890   | CST1        | 36593 | -0.05 | +           | protein coding | 7     | 10821002  | 10821002  |       | Disa1 (Hsp40) homolog, subfamily B, member 9                                         |
| 38455     | ENS000000174463   | SIRT8       | 36643 | -0.05 | +           | protein coding | 10    | 4174106   | 4182901   |       | sirtuin 8                                                                            |
| 38462     | ENS000000143878   | RHOE        | 36650 | -0.05 | +           | protein coding | 2     | 2064835   | 2064920   |       | ras homolog family member B                                                          |
| 38469     | ENS000000102688   | CHI3B       | 36656 | -0.05 | +           | protein coding | 2     | 316580    | 316580    |       | chitinase 3B gene reading frame 5B                                                   |
| 38505     | ENS0000001015018  | CWC15       | 36682 | -0.05 | +           | protein coding | 11    | 9485787   | 9487676   |       | CWC15 spliceosome-associated protein homolog (S. cerevisiae)                         |
| 38506     | ENS000000138223   | SEM7A       | 36683 | -0.05 | +           | protein coding | 15    | 7471630   | 7472808   |       | semaphorin 7A, GPI membrane anchor (John Milton Hagen blood group)                   |
| 38508     | ENS000000101432   | CST11       | 36692 | -0.05 | +           | protein coding | 15    | 43732269  | 43732269  |       | caspasa transmembrane receptor                                                       |
| 38511     | ENS000000140002   | FBLN5       | 36714 | -0.05 | +           | protein coding | 14    | 62338756  | 62414331  |       | fibulin 5                                                                            |
| 38550     | ENS000000092903   | SIRT7       | 36733 | -0.05 | +           | protein coding | 19    | 3959197   | 3959202   |       | sirtuin 7                                                                            |
| 38562     | ENS000000101498   | ITIH2       | 36742 | -0.05 | +           | protein coding | 7     | 184415154 | 184415154 |       | translation machinery associated protein 16 homolog (S. cerevisiae)                  |
| 38614     | ENS000000160131   | MA21        | 36800 | -0.05 | +           | protein coding | 8     | 150584987 | 15057736  |       | VMA21 vasculin H-ATPase homolog (S. cerevisiae)                                      |
| 38631     | ENS000000167641   | PPA1R1A4    | 36819 | -0.05 | +           | protein coding | 19    | 38741877  | 38747251  |       | protein phosphatase 1, regulatory (inhibitor) subunit 14A                            |
| 38652     | ENS000000101542   | MEIS4       | 36818 | -0.05 | +           | protein coding | 19    | 6733136   | 6733136   |       | NAH2 (hydrophobic) protein complex 1, assembly factor 4                              |
| 38661     | ENS000000119178   | EF2B2       | 36827 | -0.05 | +           | protein coding | 14    | 7548214   | 7547826   |       | eukaryotic translation initiation factor 2B, subunit 2, beta, 38kDa                  |
| 38700     | ENS00000010159178 | CRSP1       | 36900 | -0.05 | +           | protein coding | 1     | 20142858  | 20142858  |       | cysteine and glycine-rich protein 2                                                  |
| 38701     | ENS000000101138   | MEIS6       | 36905 | -0.05 | +           | protein coding | 10    | 5486875   | 5486875   |       | cleavage stimulation factor 3 (non-RNA, subunit 5, 50kDa)                            |
| 38709     | ENS000000159157   | HMGNS1      | 36907 | -0.05 | +           | protein coding | 8     | 8035020   | 8045241   |       | high mobility group nucleosome-binding domain 5                                      |
| 38721     | ENS000000181847   | RAVER1      | 36918 | -0.05 | +           | protein coding | 19    | 1048888   | 10484316  |       | ribonucleoprotein, PTB-binding 1                                                     |
| 38730     | ENS000000101623   | CST2        | 36918 | -0.05 | +           | protein coding | 19    | 333505    | 333505    |       | sphingomyelinase receptor domain and SOCS box containing 1                           |
| 38740     | ENS000000122367   | LDB3        | 36938 | -0.05 | +           | protein coding | 10    | 8842926   | 8842926   |       | LIM domain binding 3                                                                 |
| 38752     | ENS000000099401   | CDC3L       | 36952 | -0.05 | +           | protein coding | 6     | 4435282   | 4441813   |       | cell division cycle 5 like                                                           |
| 38764     | ENS0000001015618  | ITIH1       | 36951 | -0.05 | +           | protein coding | 6     | 7545681   | 7545681   |       | lectican glycoprotein 3                                                              |
| 38769     | ENS000000119201   | CKX40B      | 36970 | -0.05 | +           | protein coding | 8     | 149097745 | 149107928 |       | chromosome X open reading frame 40B                                                  |
| 38782     | ENS00000013424    | TIGAT       | 36981 | -0.05 | +           | protein coding | 2     | 5607832   | 5607827   |       | integrin, alpha 7                                                                    |
| 38789     | ENS000000101526   | ITIH3       | 36977 | -0.05 | +           | protein coding | 7     | 11421958  | 11421958  |       | cell division cycle 5 associated 7                                                   |
| 38814     | ENS000000172348   | RCAN2       | 37021 | -0.05 | +           | protein coding | 6     | 4618475   | 4645979   |       | regulator of calcineurin 2                                                           |
| 38833     | ENS000000106853   | PTGR1       | 37027 | -0.05 | +           | protein coding | 9     | 114312002 | 11432135  |       | prostaglandin reductase 1                                                            |
| 38851     | ENS000000234857   | ITIH2       | 37053 | -0.05 | +           | protein coding | 11    | 6845747   | 6849486   |       | HNPN(L)-L2/IGL2 readthrough                                                          |
| 38860     | ENS000000129629   | VD          | 37062 | -0.05 | +           | protein coding | 6     | 6291168   | 6291168   |       | soybean CoA dehydrogenase                                                            |
| 38865     | ENS000000162814   | NEFN        | 37079 | -0.05 | +           | protein coding | 11    | 78354198  | 7845980   |       | neofelin (F-actin binding protein)                                                   |
| 38872     | ENS000000166311   | PITX1       | 37086 | -0.05 | +           | protein coding | 11    | 6411655   | 6416228   |       | sphingomyelin phosphotransferase 1, acid lysosomal                                   |
| 38874     | ENS000000181160   | NDUFAB1     | 37093 | -0.05 | +           | protein coding | 12    | 4758291   | 4758464   |       | NAOH dehydrogenase, subunit 1, alpha subcomplex 5, 35kDa                             |
| 38884     | ENS000000087586   | AURKA       | 37099 | -0.05 | +           | protein coding | 20    | 5494445   | 5494454   |       | aurora kinase A                                                                      |
| 38889     | ENS000000172269   | DPAGT1      | 37106 | -0.05 | +           | protein coding | 11    | 118697213 | 118697041 |       | dolichyl-phosphate (UDP-N-acetylglucosamine)-N-acetylglucosaminophosphotransferase 1 |
| 38896     | ENS000000077522   | ACTG2       | 37118 | -0.05 | +           | protein coding | 1     | 236849754 | 236827931 |       | actinin 2                                                                            |
| 38901     | ENS000000134939   | SRA1        | 37120 | -0.05 | +           | protein coding | 8     | 47901395  | 4792043   |       | sporadic and kinetochore associated complex subunit 1                                |
| 38901     | ENS000000070146   | URBE1       | 37121 | -0.05 | +           | protein coding | 8     | 2865964   | 2865964   |       | ubiquitin-conjugating enzyme E2B                                                     |
| 38924     | ENS000000119705   | SIRP        | 37158 | -0.05 | +           | protein coding | 14    | 7817444   | 7827447   |       | SRA stem-loop interacting RNA binding protein                                        |
| 38933     | ENS000000117595   | JIF6        | 37152 | -0.05 | +           | protein coding | 1     | 20993026  | 20997948  |       | inhibitory regulatory factor 6                                                       |
| 38934     | ENS000000121766   | SAP90       | 37154 | -0.05 | +           | protein coding | 2     | 3181947   | 3181947   |       | mouse brain heparin (mainly neurotrophin-derived growth inhibitor)                   |
| 38947     | ENS000000119285   | HATR1       | 37162 | -0.05 | +           | protein coding | 1     | 23671205  | 23676704  |       | HEAT repeat containing 1                                                             |
| 38948     | ENS000000119523   | CTGF        | 37162 | -0.05 | +           | protein coding | 6     | 132289136 | 132272513 |       | connective tissue growth factor                                                      |
| 38964     | ENS000000149238   | PTK2        | 37162 | -0.05 | +           | protein coding | 15    | 2411194   | 2411194   |       |                                                                                      |



|       |                 |          |       |       |                |    |           |           |                                                                              |
|-------|-----------------|----------|-------|-------|----------------|----|-----------|-----------|------------------------------------------------------------------------------|
| 39433 | ENSG00000187778 | IGFBP6   | 37864 | -0.05 | protein_coding | 17 | 53491229  | 53496129  | insulin-like growth factor binding protein 6                                 |
| 39434 | ENSG00000190291 | NLRP9    | 37868 | -0.05 | protein_coding | 16 | 54613037  | 54613037  | nucleoside 53kDa                                                             |
| 39437 | ENSG00000156453 | PCDH1    | 37869 | -0.05 | protein_coding | 5  | 141212938 | 14125811  | protodesmosin 1                                                              |
| 39456 | ENSG00000163359 | COL6A3   | 37892 | -0.05 | protein_coding | 2  | 238232046 | 238232018 | collagen, type VI, alpha 3                                                   |
| 39459 | ENSG00000190979 | PCLIP1   | 37909 | -0.05 | protein_coding | 20 | 44527399  | 44440786  | phospholipid transfer protein                                                |
| 39478 | ENSG00000159563 | LRC17    | 37120 | -0.05 | protein_coding | 8  | 102552438 | 102565398 | lectin, type II, repeat containing 17                                        |
| 39484 | ENSG00000172059 | KLF11    | 37715 | -0.05 | protein_coding | 2  | 10162978  | 10194963  | Kruppel-like factor 11                                                       |
| 39488 | ENSG00000199569 | NFSF     | 37171 | -0.05 | protein_coding | 17 | 44668036  | 44848340  | N-ethylmaleimide-sensitive factor                                            |
| 39491 | ENSG00000186956 | LTF3     | 37120 | -0.05 | protein_coding | 11 | 65326216  | 65326216  | latent transforming growth factor beta binding protein 3                     |
| 39497 | ENSG00000187522 | HSP14    | 37729 | -0.05 | protein_coding | 10 | 14889163  | 14819340  | heat shock 70kDa protein 14                                                  |
| 39514 | ENSG00000124610 | HSTHTA   | 37148 | -0.05 | protein_coding | 6  | 26017260  | 26016940  | histone cluster 1, H1e                                                       |
| 39518 | ENSG00000159184 | EXOSC7   | 37158 | -0.05 | protein_coding | 8  | 45816765  | 45816568  | exosome component 7                                                          |
| 39529 | ENSG00000121413 | ZSCAN18  | 37847 | -0.05 | protein_coding | 9  | 58529250  | 58529794  | zinc finger and SCAN domain containing 18                                    |
| 39571 | ENSG00000178885 | CTNBP1   | 37810 | -0.05 | protein_coding | 1  | 9908334   | 9970394   | Catenin, beta interacting protein 1                                          |
| 39578 | ENSG00000193263 | RPL3     | 37815 | -0.05 | protein_coding | 4  | 36263696  | 36263696  | ribosomal protein L3 (eukaryotic)                                            |
| 39581 | ENSG00000135520 | NXA5     | 37824 | -0.05 | protein_coding | 9  | 6855603   | 6853721   | N1alpha-acetyltransferase 35, N1aC auxiliary subunit                         |
| 39588 | ENSG00000134997 | GNL2     | 37828 | -0.05 | protein_coding | 1  | 38032417  | 38031536  | guanine nucleotide binding protein-like 2 (nuclear)                          |
| 39600 | ENSG00000156999 | LBR      | 37837 | -0.05 | protein_coding | 19 | 35735243  | 35736987  | lipoylase stimulated lipoylase receptor                                      |
| 39608 | ENSG00000116132 | PRRX1    | 37845 | -0.05 | protein_coding | 1  | 170631869 | 170708640 | paired related homeobox 1                                                    |
| 39610 | ENSG00000188739 | SRL      | 37847 | -0.05 | protein_coding | 16 | 4223075   | 4223075   | sarcosylamin                                                                 |
| 39617 | ENSG00000150251 | NMOS1    | 37852 | -0.05 | protein_coding | 2  | 106032264 | 106017320 | NMOS1 ribosome export adaptor                                                |
| 39638 | ENSG00000103249 | CLCN7    | 37869 | -0.05 | protein_coding | 16 | 1494953   | 1525581   | chloride channel, voltage-sensitive 7                                        |
| 39641 | ENSG00000160593 | MED27    | 37875 | -0.05 | protein_coding | 9  | 134735494 | 134895236 | mediator complex subunit 27                                                  |
| 39648 | ENSG00000110663 | SLC25F2  | 37882 | -0.05 | protein_coding | 11 | 102661717 | 102766918 | solute carrier family 25, member F2                                          |
| 39649 | ENSG00000105173 | CONE1    | 37885 | -0.05 | protein_coding | 19 | 30302806  | 30315215  | connexin E1                                                                  |
| 39650 | ENSG00000185274 | WBSR17   | 37885 | -0.05 | protein_coding | 7  | 70591155  | 7117885   | Williams-Beuren syndrome chromosome region 17                                |
| 39659 | ENSG00000100395 | NLRP1    | 37913 | -0.05 | protein_coding | 15 | 45813384  | 45816318  | nucleotide leucine repeat domain interacting protein 1                       |
| 39671 | ENSG00000186923 | GREM1    | 37914 | -0.05 | protein_coding | 15 | 33010175  | 33028870  | gremlin 1, DAN family BMP antagonist                                         |
| 39675 | ENSG00000102708 | TGFBI    | 37923 | -0.05 | protein_coding | 5  | 13584584  | 135935607 | transforming growth factor, beta-induced 68kDa                               |
| 39678 | ENSG00000170704 | ATP10A   | 37925 | -0.05 | protein_coding | 22 | 4178232   | 4178232   | ATPase, H+ transporting, lysosomal 505kDa, V1 subunit H                      |
| 39682 | ENSG00000104249 | ATRVB1   | 37929 | -0.05 | protein_coding | 8  | 54628117  | 54756118  | ATPase, H+ transporting, lysosomal 505kDa, V1 subunit H                      |
| 39689 | ENSG00000190309 | CDCA5    | 37933 | -0.05 | protein_coding | 22 | 19468992  | 19508135  | cell division cycle 45                                                       |
| 39690 | ENSG00000121201 | PRKRA    | 37934 | -0.05 | protein_coding | 2  | 23871728  | 23871728  | receptor (G protein-coupled) activator modifying protein 1                   |
| 39691 | ENSG00000164902 | PHAX     | 37934 | -0.05 | protein_coding | 5  | 125935960 | 125929444 | phosphotyrosyl adaptor for RNA export                                        |
| 39699 | ENSG00000188610 | FAM72B   | 37943 | -0.05 | protein_coding | 1  | 120837756 | 120856581 | family with sequence similarity 72, member B                                 |
| 39700 | ENSG00000171260 | TRAF3IP1 | 37945 | -0.05 | protein_coding | 1  | 48333938  | 48333938  | TRAF3 interacting protein 14                                                 |
| 39710 | ENSG00000104079 | RHCC1    | 37950 | -0.05 | protein_coding | 8  | 23127633  | 23125792  | RCH1 domain and cold-cold-containing 1                                       |
| 39713 | ENSG00000181393 | SMTN     | 37951 | -0.05 | protein_coding | 22 | 31440091  | 31500743  | smoothelin                                                                   |
| 39718 | ENSG00000171778 | TRAF3    | 37953 | -0.05 | protein_coding | 10 | 1005616   | 1005616   | transmembrane protein 14                                                     |
| 39718 | ENSG00000102547 | CAB39L   | 37958 | -0.05 | protein_coding | 13 | 49882798  | 50018262  | proboscis (carotid) muscle assembly chaperone 3                              |
| 39720 | ENSG00000186490 | CT1orf82 | 37958 | -0.05 | protein_coding | 11 | 82611017  | 82689819  | chromosome 11 open reading frame 82                                          |
| 39724 | ENSG00000190498 | C11orf95 | 37958 | -0.05 | protein_coding | 14 | 10238184  | 10238184  | chromosome 11 open reading frame 95                                          |
| 39732 | ENSG00000133027 | PEMT7    | 37978 | -0.05 | protein_coding | 17 | 17448877  | 17449022  | phosphatidylethanolamine N-methyltransferase                                 |
| 39738 | ENSG00000221496 | EXOSC6   | 37984 | -0.05 | protein_coding | 16 | 70284134  | 70283533  | exosome component 6                                                          |
| 39738 | ENSG00000125971 | MKRN1    | 37985 | -0.05 | protein_coding | 20 | 17658926  | 17658926  | mitochondrial gene maintenance endonuclease 1                                |
| 39739 | ENSG00000100733 | RBP15    | 37985 | -0.05 | protein_coding | 2  | 21849269  | 21851125  | ribosomal protein L16 (eukaryotic)                                           |
| 39749 | ENSG00000105234 | PKP2     | 37993 | -0.05 | protein_coding | 12 | 32943679  | 32943774  | plakophilin 2                                                                |
| 39750 | ENSG00000186281 | WDR43    | 37993 | -0.05 | protein_coding | 2  | 29117509  | 29117108  | WD repeat domain 43                                                          |
| 39751 | ENSG00000190205 | TNIP1    | 38023 | -0.05 | protein_coding | 2  | 417514752 | 417521159 | TRAF3 interacting protein 1                                                  |
| 39751 | ENSG00000196009 | BRAT1    | 38043 | -0.05 | protein_coding | 7  | 2577511   | 2595361   | BRCA1-associated ATG activator 1                                             |
| 39802 | ENSG00000181862 | ICL1     | 38055 | -0.05 | protein_coding | 17 | 73069706  | 73071398  | intramitochondrial carnitine transferase 1                                   |
| 39806 | ENSG00000161332 | CTCF     | 38059 | -0.05 | protein_coding | 3  | 475317138 | 47531651  | ectopic acetyltransferase complex subunit 6                                  |
| 39810 | ENSG00000124784 | RCK1     | 38071 | -0.05 | protein_coding | 6  | 7389279   | 7418270   | RIO kinase 1                                                                 |
| 39813 | ENSG00000186577 | CSPT1    | 38073 | -0.05 | protein_coding | 6  | 34214157  | 34217247  | chromosome 6 open reading frame 1                                            |
| 39814 | ENSG00000190966 | COH1     | 38073 | -0.05 | protein_coding | 16 | 68711126  | 68681651  | cohesin 1, type 1, (Escherichia coli-like)                                   |
| 39819 | ENSG00000181703 | CRELD1   | 38079 | -0.05 | protein_coding | 3  | 9975506   | 9967707   | cytine-rich with EGF-like domains 1                                          |
| 39821 | ENSG00000186881 | TRPM18A  | 38080 | -0.05 | protein_coding | 12 | 57448426  | 57448486  | transmembrane protein 18A                                                    |
| 39823 | ENSG00000190291 | UPF3     | 38081 | -0.05 | protein_coding | 3  | 118967865 | 118967865 | UPF3 regulator of nonsense transcripts homolog 9 (yeast)                     |
| 39825 | ENSG00000189288 | MRPL1    | 38083 | -0.05 | protein_coding | 4  | 7873874   | 7887944   | mitochondrial ribosomal protein L1                                           |
| 39847 | ENSG00000144824 | PHLBD2   | 38109 | -0.05 | protein_coding | 3  | 111451344 | 111455954 | pleckstrin homology-like domain, family B, member 2                          |
| 39847 | ENSG00000191974 | SLC33    | 38109 | -0.05 | protein_coding | 3  | 114521963 | 114521963 | pleckstrin homology-like domain, family B, member 2                          |
| 39858 | ENSG00000098194 | SCD      | 38126 | -0.05 | protein_coding | 10 | 102168881 | 102142491 | stearoyl-CoA desaturase (delta-9-desaturase)                                 |
| 39875 | ENSG00000151332 | MBP      | 38145 | -0.05 | protein_coding | 14 | 36717770  | 36789882  | MAP1K12 binding inhibitory protein 1                                         |
| 39877 | ENSG00000190247 | GLY3     | 38145 | -0.05 | protein_coding | 5  | 115201749 | 115201749 | sarcosylamin, delta (3-oxo) glyoxylate-associated glycoprotein               |
| 39880 | ENSG00000186818 | GPATCH4  | 38150 | -0.05 | protein_coding | 1  | 156584279 | 156571288 | G patch domain containing 4                                                  |
| 39885 | ENSG00000101522 | NISCH    | 38154 | -0.05 | protein_coding | 3  | 52489134  | 52527187  | nichrin                                                                      |
| 39887 | ENSG00000186490 | PCSK9    | 38159 | -0.05 | protein_coding | 10 | 120962179 | 120962179 | KIAA0195                                                                     |
| 39889 | ENSG00000177278 | KIAA0195 | 38159 | -0.05 | protein_coding | 17 | 73437240  | 73466171  | KIAA0195                                                                     |
| 39891 | ENSG00000107709 | NBR321   | 38177 | -0.05 | protein_coding | 19 | 3933101   | 3942314   | nucleoside diphosphate kinase 2                                              |
| 39891 | ENSG00000151669 | TRAF6    | 38178 | -0.05 | protein_coding | 17 | 73839384  | 73839384  | TRAF6 domain containing 6                                                    |
| 39898 | ENSG00000177278 | KIAA0195 | 38178 | -0.05 | protein_coding | 17 | 73437240  | 73466171  | KIAA0195                                                                     |
| 39907 | ENSG00000186249 | CCNY1    | 38181 | -0.05 | protein_coding | 2  | 20857654  | 20862963  | cyclin Y-like 1                                                              |
| 39908 | ENSG00000190258 | TRAF3    | 38181 | -0.05 | protein_coding | 10 | 9988358   | 9988358   | TRAF3 regulator of nonsense transcripts homolog 9 (yeast)                    |
| 39928 | ENSG00000190937 | HSD18B7  | 38196 | -0.05 | protein_coding | 16 | 30996519  | 31000473  | hydroxy-delta-5-steroid dehydrogenase, 3-beta, and steroid delta-isomerase 7 |
| 39933 | ENSG00000134246 | FKBL1    | 38201 | -0.05 | protein_coding | 7  | 50511831  | 50518068  | fdgulin-like 1                                                               |
| 39939 | ENSG00000186490 | PCSK9    | 38201 | -0.05 | protein_coding | 10 | 120962179 | 120962179 | KIAA0195                                                                     |
| 39942 | ENSG00000191330 | LMO2D3   | 38208 | -0.05 | protein_coding | 3  | 89156023  | 89172183  | discoiled domain receptor tyrosine kinase 2                                  |
| 39954 | ENSG00000187233 | DRD2     | 38223 | -0.05 | protein_coding | 1  | 162691163 | 16275780  | melanin concentrating hormone receptor 2                                     |
| 39963 | ENSG00000190660 | MIR508   | 38236 | -0.05 | protein_coding | 8  | 47926323  | 48027399  | melanin concentrating hormone receptor 2                                     |
| 39962 | ENSG00000191512 | SIX3     | 38238 | -0.05 | protein_coding | 1  | 31342314  | 31381068  | synectin 3                                                                   |
| 39966 | ENSG00000111186 | WNT5B    | 38238 | -0.05 | protein_coding | 12 | 16389057  | 17564029  | wntless-type MMV1 transmembrane family, member 5B                            |
| 39967 | ENSG00000190966 | MIR508   | 38238 | -0.05 | protein_coding | 8  | 47926323  | 48027399  | melanin concentrating hormone receptor 2                                     |
| 39977 | ENSG00000134653 | SYN1ZBP  | 38250 | -0.05 | protein_coding | 14 | 70981248  | 70983778  | synaptarin 2 binding protein                                                 |
| 39985 | ENSG00000186827 | GFN1     | 38260 | -0.05 | protein_coding | 3  | 15832067  | 15841034  | G elongation factor, mitochondrial 1                                         |
| 39988 | ENSG00000173207 | CKS1B    | 38263 | -0.05 | protein_coding | 7  | 159491228 | 159491225 | CDC28 protein kinase regulatory subunit 1B                                   |
| 40013 | ENSG00000151591 | AKC2     | 38263 | -0.05 | protein_coding | 1  | 140312263 | 140312263 | self domain containing kinase 2                                              |
| 40019 | ENSG00000181909 | HEY1     | 38292 | -0.05 | protein_coding | 1  | 40083821  | 40105617  | hes-related family BHLH transcription factor with YRFP motif-like            |
| 40023 | ENSG00000186260 | GSDCA1   | 38295 | -0.05 | protein_coding | 2  | 180123969 | 180173105 | guanylate cyclase 1C                                                         |
| 40023 | ENSG00000186260 | GSDCA1   | 38295 | -0.05 | protein_coding | 2  | 220482649 | 220482649 | solute carrier family 4, non-exchangeable, member 3                          |
| 40042 | ENSG00000172201 | ID4      | 38319 | -0.05 | protein_coding | 6  | 19887817  | 19849015  | inhibitor of DNA binding 4, dominant negative helix-loop-helix protein       |
| 40055 | ENSG00000190210 | ALDH2    | 38329 | -0.05 | protein_coding | 17 | 19551446  | 19559491  | aldehyde dehydrogenase 3, family, member A2                                  |
| 40056 | ENSG00000190725 | TRAF6    | 38331 | -0.05 | protein_coding | 17 | 73839384  | 73839384  | bone morphogenetic protein-like acid-inducible nuclear-specific 1            |
| 40067 | ENSG00000137801 | TRBS1    | 38343 | -0.05 | protein_coding | 15 | 39873289  | 39873289  | thrombospondin 1                                                             |
| 40068 | ENSG00000190586 | OLM2     | 38346 | -0.05 | protein_coding | 19 | 9964894   | 10047226  | olactosylin 2                                                                |
| 40075 | ENSG00000190591 | CAV2     | 38346 | -0.05 | protein_coding | 14 | 115907454 | 116148566 | calyculin 2                                                                  |
| 40078 | ENSG00000100823 | CYB5B1   | 38381 | -0.05 | protein_coding | 17 | 61509665  | 61523739  | cytochrome b5b1                                                              |
| 40083 | ENSG00000121246 | TRIM8    | 38385 | -0.05 | protein_coding | 11 | 5817329   | 5834188   | trinitrate motif containing 8                                                |
| 40086 | ENSG00000184909 | TGSEA2   | 38370 | -0.05 | protein_coding | 3  | 101303860 | 101303860 | transcription elongation factor A SII-like 2                                 |
| 40100 | ENSG00000101928 | MOSPD1   | 38385 | -0.05 | protein_coding | X  | 134021656 | 134049297 | mottle sperm domain containing 1                                             |
| 40106 | ENSG00000120202 | DNAH1    | 38389 | -0.05 | protein_coding | 19 | 14675552  | 14404502  | DNAH1 (Hsp40) homolog, subfamily B, member 1                                 |
| 40111 | ENSG00000170611 | NUP91    | 38411 | -0.05 | protein_coding | 13 | 47430511  | 47430511  | nucleus (nucleoside diphosphate) linked karyosome motif 16-kDa 1             |
| 40122 | ENSG00000172346 | CSDC2    | 38415 | -0.05 | protein_coding | 22 | 41958767  | 41973745  | cold shock domain containing C2, RNA binding 1                               |
| 40126 | ENSG00000186490 | TALIN4   | 38420 | -0.05 | protein_coding | 1  | 32642827  | 32663896  | talin alpha                                                                  |
| 40128 | ENSG00000111130 | ATP8A1   | 38422 | -0.05 | protein_coding | 20 | 148573057 | 148573744 | ATPase, H+ transporting, V0 subunit e2                                       |
| 40132 | ENSG00000101079 | NRD3     | 38428 | -0.05 | protein_coding | 20 | 35260169  | 35274481  | family member 3                                                              |
| 40136 | ENSG00000113070 | HECF2    | 38432 | -0.05 |                |    |           |           |                                                                              |

|       |                 |          |       |       |                |    |           |           |                                                                                              |
|-------|-----------------|----------|-------|-------|----------------|----|-----------|-----------|----------------------------------------------------------------------------------------------|
| 40498 | ENSG00000144308 | EXOC8B   | 38782 | -0.05 | protein_coding | 2  | 72403173  | 7393370   | exocyst complex component 6B                                                                 |
| 40498 | ENSG00000115128 | TROX     | 38788 | -0.05 | protein_coding | 2  | 10605509  | 10605510  | TBC1 domain family, member 8b (with GRAM domain)                                             |
| 40509 | ENSG00000137267 | TURB2A   | 38802 | -0.05 | protein_coding | 6  | 9153903   | 9157780   | kublin, beta 2A class Iib                                                                    |
| 40513 | ENSG00000089225 | TBX3     | 38808 | -0.05 | protein_coding | 12 | 114791736 | 114846247 | T-box 5                                                                                      |
| 40519 | ENSG00000168184 | CUBD     | 38813 | -0.05 | protein_coding | 3  | 45123770  | 45187814  | CUB domain containing protein 1                                                              |
| 40540 | ENSG00000174663 | SERTAF3  | 38820 | -0.05 | protein_coding | 19 | 92492911  | 92492912  | SERTAF domain containing protein 3                                                           |
| 40529 | ENSG00000202203 | VEZT     | 38825 | -0.05 | protein_coding | 12 | 95611522  | 95696569  | vezatin, adherens junctions transmembrane protein                                            |
| 40537 | ENSG00000175586 | EPFAM1   | 38834 | -0.05 | protein_coding | 2  | 56051002  | 56115274  | EGF containing fibulin-like extracellular matrix protein 1                                   |
| 40545 | ENSG00000098711 | PISG     | 38846 | -0.05 | protein_coding | 17 | 124137455 | 124280406 | polyphosphoinositide glycan anchor biosynthesis, class S                                     |
| 40550 | ENSG00000186355 | PIPF1    | 38849 | -0.05 | protein_coding | 2  | 59951400  | 59951405  | poly(ADP-ribose) nucleotidyltransferase 1                                                    |
| 40554 | ENSG00000195423 | ALDH1A1  | 38854 | -0.05 | protein_coding | 2  | 91197936  | 91229273  | aldehyde dehydrogenase 4 family, member A1                                                   |
| 40557 | ENSG00000155008 | APOLC    | 38859 | -0.05 | protein_coding | X  | 84258832  | 84258833  | apolipoprotein O-like                                                                        |
| 40558 | ENSG00000195409 | ATP13A3  | 38862 | -0.05 | protein_coding | 19 | 42410724  | 42511049  | ATPase, Na(+)-K(+)-transporting, alpha 3 polypeptide                                         |
| 40570 | ENSG00000200709 | DCMR2    | 38872 | -0.05 | protein_coding | 8  | 98934786  | 98934793  | discoplain, CUB and LUC1 domain containing 2                                                 |
| 40580 | ENSG00000165238 | WNK2     | 38888 | -0.05 | protein_coding | 9  | 95947198  | 96082816  | WNK lysine deficient protein kinase 2                                                        |
| 40583 | ENSG00000190776 | C11orf87 | 38895 | -0.05 | protein_coding | 11 | 111944810 | 111950474 | chromosome 11 open reading frame 57                                                          |
| 40587 | ENSG00000102626 | FAM71A   | 38908 | -0.05 | protein_coding | 21 | 46329292  | 46329694  | family with sequence similarity 207, member A                                                |
| 40590 | ENSG00000174791 | RIN1     | 38915 | -0.05 | protein_coding | 11 | 66097113  | 66104311  | Ras and Rab interactor 1                                                                     |
| 40591 | ENSG00000195549 | RAB3A    | 38917 | -0.05 | protein_coding | 19 | 18317994  | 18314884  | RAB3A, member RAS oncogene family                                                            |
| 40608 | ENSG00000170223 | CENPF    | 38920 | -0.05 | protein_coding | 3  | 115292117 | 115292337 | centromere-associated protein 4                                                              |
| 40614 | ENSG00000102901 | CENPF    | 38930 | -0.05 | protein_coding | 8  | 6786260   | 67881714  | centromeres protein T                                                                        |
| 40624 | ENSG00000114279 | FGF12    | 38937 | -0.05 | protein_coding | 3  | 191857184 | 192485553 | fibroblast growth factor 12                                                                  |
| 40630 | ENSG00000100138 | DDX5     | 38948 | -0.05 | protein_coding | 20 | 53092108  | 53092710  | deafness protein 5                                                                           |
| 40641 | ENSG00000170775 | GPR37    | 38953 | -0.05 | protein_coding | 7  | 12438635  | 124405881 | G protein-coupled receptor 37 (endothelin receptor type B-like)                              |
| 40642 | ENSG00000166097 | FNDC5    | 38956 | -0.05 | protein_coding | 1  | 33327869  | 33338083  | fibronectin type III domain containing 5                                                     |
| 40643 | ENSG00000124641 | MED20    | 38957 | -0.05 | protein_coding | 6  | 41833922  | 41898872  | mediator complex subunit 20                                                                  |
| 40659 | ENSG00000178026 | FAM21B   | 38974 | -0.05 | protein_coding | 22 | 24981588  | 24989175  | family with sequence similarity 211, member B                                                |
| 40667 | ENSG00000189122 | FAM108   | 38985 | -0.05 | protein_coding | 8  | 89807068  | 89911688  | family with sequence similarity 110, member B                                                |
| 40668 | ENSG00000165538 | PCDH9B   | 38990 | -0.05 | protein_coding | 8  | 86061186  | 86061187  | protodesmosin 3 (Desoplamin)                                                                 |
| 40669 | ENSG00000205412 | PCDH9B   | 38990 | -0.05 | protein_coding | 5  | 140797427 | 140808246 | protodesmosin gamma subfamily 5, 7                                                           |
| 40670 | ENSG00000102788 | NPC2     | 38994 | -0.05 | protein_coding | 12 | 95414005  | 95467479  | nuclear receptor subfamily 2, group C, member 1                                              |
| 40672 | ENSG00000100128 | MRFB     | 38995 | -0.05 | protein_coding | 3  | 12201139  | 12201140  | colocal domain containing protein 3                                                          |
| 40675 | ENSG00000101773 | RBP9     | 38993 | -0.05 | protein_coding | 18 | 20376224  | 20396451  | retinol-binding protein 9                                                                    |
| 40677 | ENSG00000162642 | C1orf82  | 38998 | -0.05 | protein_coding | 1  | 85715639  | 85725355  | chromosome 1 open reading frame 82                                                           |
| 40681 | ENSG00000188813 | CEP350   | 39001 | -0.05 | protein_coding | 1  | 23018634  | 23018635  | nanos homeobox 1 (Drosophila)                                                                |
| 40689 | ENSG00000100323 | BCKDH    | 39007 | -0.05 | protein_coding | 6  | 30816364  | 31055687  | branched chain keto acid dehydrogenase E1, beta polypeptide                                  |
| 40690 | ENSG00000180611 | MBP1D2   | 39007 | -0.05 | protein_coding | 3  | 192514054 | 192539390 | Mal-21 domain containing 2                                                                   |
| 40690 | ENSG00000191573 | AKAP7    | 39012 | -0.05 | protein_coding | 2  | 18774618  | 18774633  | transmembrane domain 242                                                                     |
| 40696 | ENSG00000158882 | TOMM40L  | 39014 | -0.05 | protein_coding | 1  | 161195793 | 161200408 | translocase of outer mitochondrial membrane 40 homolog (yeast)-like                          |
| 40697 | ENSG00000134320 | CRABP2   | 39015 | -0.05 | protein_coding | 1  | 156698386 | 156679508 | cellular retinoic acid binding protein 2                                                     |
| 40698 | ENSG00000191639 | TMEM34   | 39015 | -0.05 | protein_coding | 2  | 39851760  | 39851761  | transmembrane protein 34                                                                     |
| 40705 | ENSG00000098927 | ZW10     | 39020 | -0.05 | protein_coding | 11 | 113903999 | 113944533 | zinc10 kinsinore protein                                                                     |
| 40706 | ENSG00000172260 | NEGR1    | 39022 | -0.05 | protein_coding | 1  | 71861823  | 72748417  | neuronal growth regulator 1                                                                  |
| 40707 | ENSG00000191016 | AKP2     | 39026 | -0.05 | protein_coding | 6  | 151581184 | 151679262 | A kinase (PRK) anchor protein 2                                                              |
| 40709 | ENSG00000136368 | SFR107   | 39027 | -0.05 | protein_coding | 6  | 132815105 | 132820604 | S protein family receptor tyrosine kinase 107                                                |
| 40710 | ENSG00000098248 | NUP133   | 39029 | -0.05 | protein_coding | 1  | 229577045 | 22964103  | nucleoporin 133kDa                                                                           |
| 40713 | ENSG00000104503 | INTS7    | 39044 | -0.05 | protein_coding | 1  | 212113471 | 212120884 | integrator complex subunit 7                                                                 |
| 40728 | ENSG00000155324 | GRN303   | 39061 | -0.05 | protein_coding | 5  | 125662654 | 125662186 | GRN domain containing 3                                                                      |
| 40743 | ENSG00000204256 | BRD2     | 39065 | -0.05 | protein_coding | 6  | 32639437  | 32649282  | bram domain containing 2                                                                     |
| 40745 | ENSG00000119972 | CRY1     | 39072 | -0.05 | protein_coding | 10 | 46211441  | 46313383  | iron-uptake-inducing enzyme                                                                  |
| 40745 | ENSG00000114448 | GAT4B    | 39074 | -0.05 | protein_coding | 10 | 19748404  | 19748404  | A2A binding protein 4                                                                        |
| 40753 | ENSG00000198917 | CA11     | 39082 | -0.05 | protein_coding | 9  | 131581930 | 131592100 | chromosome 9 open reading frame 114                                                          |
| 40750 | ENSG00000198180 | CNTN1    | 39083 | -0.05 | protein_coding | 19 | 49141199  | 49149869  | carboxyl terminus of heparan sulfate glycoprotein XI                                         |
| 40750 | ENSG00000205772 | CHP2     | 39107 | -0.05 | protein_coding | 12 | 90710129  | 90710130  | casein 101F signaling regulator 2                                                            |
| 40778 | ENSG00000135919 | SERPINE2 | 39110 | -0.05 | protein_coding | 2  | 224838829 | 224904304 | serpin peptidase inhibitor, class E (nein, plasminogen activator inhibitor type 1, member 2) |
| 40780 | ENSG00000190840 | CRY1     | 39119 | -0.05 | protein_coding | 12 | 107385142 | 107407807 | iron-uptake-inducing enzyme                                                                  |
| 40786 | ENSG00000209434 | PRK11    | 39121 | -0.05 | protein_coding | 31 | 28118126  | 32112159  | protein tyrosine kinase 11                                                                   |
| 40784 | ENSG00000180194 | NDFUF3   | 39123 | -0.05 | protein_coding | 21 | 44292754  | 44333414  | NADH dehydrogenase (ubiquinone) flavoprotein 3, 10kDa                                        |
| 40787 | ENSG00000155845 | ZNF318   | 39127 | -0.05 | protein_coding | 16 | 88836789  | 88868374  | zinc finger CCHC-type containing 18                                                          |
| 40786 | ENSG00000192986 | MRFB     | 39127 | -0.05 | protein_coding | 16 | 14486728  | 14486729  | mitochondrial ribosomal protein S8                                                           |
| 40790 | ENSG00000177566 | PIPO     | 39138 | -0.05 | protein_coding | 11 | 799179    | 799753    | p53-induced death domain protein                                                             |
| 40793 | ENSG00000119537 | KO3R     | 39144 | -0.05 | protein_coding | 19 | 90994959  | 91034743  | 3-ketolycoprostanoic reductase                                                               |
| 40801 | ENSG00000200434 | KANSL2   | 39145 | -0.05 | protein_coding | 6  | 72831744  | 72834699  | mitochondrial ribosomal protein L18                                                          |
| 40806 | ENSG00000168280 | KIF5C    | 39152 | -0.05 | protein_coding | 2  | 14863219  | 14863273  | kinesin family member 5C                                                                     |
| 40811 | ENSG00000108171 | DUSP12   | 39156 | -0.05 | protein_coding | 1  | 16171848  | 161727208 | dual specificity phosphatase 12                                                              |
| 40813 | ENSG00000101893 | ANKRD3   | 39157 | -0.05 | protein_coding | 7  | 7936129   | 7936130   | ankyrin repeat domain-containing protein 3                                                   |
| 40816 | ENSG00000170291 | ELPS     | 39158 | -0.05 | protein_coding | 17 | 7163735   | 7163739   | elongator acetyltransferase complex subunit 5                                                |
| 40818 | ENSG00000202747 | B4GAL7   | 39157 | -0.05 | protein_coding | 5  | 17702710  | 17703738  | xylosyltransferase beta 1.4 galactosyltransferase, polypeptide 7                             |
| 40828 | ENSG00000105524 | ANKRD3   | 39158 | -0.05 | protein_coding | 7  | 18632804  | 18632805  | ankyrin repeat domain-containing protein 3                                                   |
| 40843 | ENSG00000129946 | SHC2     | 39170 | -0.05 | protein_coding | 19 | 416583    | 409096    | SHC (Src homology 2 domain containing) transforming protein 2                                |
| 40843 | ENSG00000182118 | FAM89A   | 39180 | -0.05 | protein_coding | 1  | 231154704 | 231179892 | family with sequence similarity 89, member A                                                 |
| 40844 | ENSG00000186607 | KU80B    | 39180 | -0.05 | protein_coding | 10 | 12907100  | 12907101  | katenin domain containing 10                                                                 |
| 40852 | ENSG00000182325 | FBXL6    | 39192 | -0.05 | protein_coding | 8  | 145579001 | 145583036 | F-box and leucine-rich repeat protein 6                                                      |
| 40855 | ENSG00000195286 | RNF207   | 39195 | -0.05 | protein_coding | 1  | 8268535   | 82691359  | ring finger protein 207                                                                      |
| 40856 | ENSG00000195293 | RNF207   | 39195 | -0.05 | protein_coding | 1  | 4441830   | 44430478  | ring finger protein 207                                                                      |
| 40863 | ENSG00000153774 | CFDP1    | 39202 | -0.05 | protein_coding | 16 | 75327596  | 75387283  | craniofacial development protein 1                                                           |
| 40866 | ENSG00000192025 | SNL3     | 39206 | -0.05 | protein_coding | 5  | 188232409 | 188292466 | SNL1 nucleotide exchange factor                                                              |
| 40868 | ENSG00000190584 | ZNF383   | 39203 | -0.05 | protein_coding | 24 | 26498561  | 26498561  | zinc finger protein 383                                                                      |
| 40872 | ENSG00000149356 | POP1     | 39210 | -0.05 | protein_coding | 8  | 9912925   | 9912925   | processing of precursor 1, ribonucleoside PIMRP subunit (S. cerevisiae)                      |
| 40873 | ENSG00000204915 | PCDCE    | 39211 | -0.05 | protein_coding | 5  | 271739    | 393771    | programmed cell death 5                                                                      |
| 40873 | ENSG00000174471 | SMG8     | 39211 | -0.05 | protein_coding | 11 | 5723181   | 5723182   | SMG8 nuclear mediated mRNA decay factor                                                      |
| 40883 | ENSG00000196330 | MSPD3    | 39220 | -0.05 | protein_coding | 7  | 100209725 | 100213007 | met15a protein domain containing 3                                                           |
| 40889 | ENSG00000186761 | ADAMTSL5 | 39230 | -0.05 | protein_coding | 19 | 1505071   | 1513603   | ADAMTSL-like 5                                                                               |
| 40894 | ENSG00000136002 | ARHGAP4  | 39231 | -0.05 | protein_coding | 2  | 113944689 | 113946336 | Rho guanine nucleotide exchange factor (GEF) 4                                               |
| 40895 | ENSG00000100843 | SERH1    | 39233 | -0.05 | protein_coding | 2  | 12981132  | 12981133  | SERH1-like (S. cerevisiae)                                                                   |
| 40901 | ENSG00000186493 | C5orf8   | 39238 | -0.05 | protein_coding | 5  | 2752245   | 2755508   | chromosome 5 open reading frame 38                                                           |
| 40910 | ENSG00000191503 | CNTN3    | 39256 | -0.05 | protein_coding | 11 | 134002011 | 134005348 | non-SMG condensin II complex, subunit D3                                                     |
| 40916 | ENSG00000191496 | TMEM121  | 39256 | -0.05 | protein_coding | 13 | 105892840 | 105892841 | transmembrane protein 121                                                                    |
| 40929 | ENSG00000172500 | FBP      | 39285 | -0.05 | protein_coding | 11 | 65861212  | 65866610  | fibroblast growth factor 8 (acidic) intracellular binding protein                            |
| 40934 | ENSG00000186624 | DCKRTE1  | 39286 | -0.05 | protein_coding | 10 | 11559488  | 11561442  | DNA cross-link repair 1A                                                                     |
| 40934 | ENSG00000186624 | KANSL2   | 39286 | -0.05 | protein_coding | 6  | 4841784   | 4841785   | KAT5 ribosomal protein complex subunit 2                                                     |
| 40934 | ENSG00000193280 | METRN    | 39291 | -0.05 | protein_coding | 16 | 765115    | 765955    | metronin, glial cell differentiation regulator                                               |
| 40935 | ENSG00000197695 | ZNF444   | 39292 | -0.05 | protein_coding | 19 | 9884398   | 98972262  | zinc finger protein 444                                                                      |
| 40937 | ENSG00000204212 | ARKS1G   | 39292 | -0.05 | protein_coding | 19 | 3191268   | 3191269   | Rho GTPase activator inhibitor (GDI) gamma                                                   |
| 40947 | ENSG00000100810 | CADPS3   | 39303 | -0.05 | protein_coding | 7  | 12195841  | 12195813  | Ca++ dependent secretion activator 2                                                         |
| 40949 | ENSG00000189893 | CEPL1    | 39303 |       |                |    |           |           |                                                                                              |

|       |                 |           |       |       |                |    |           |           |                                                                                                   |
|-------|-----------------|-----------|-------|-------|----------------|----|-----------|-----------|---------------------------------------------------------------------------------------------------|
| 41171 | ENSG00000184205 | TSPLY2    | 39532 | -0.05 | protein_coding | 5  | 53111549  | 53117722  | TSPLY-like 2                                                                                      |
| 41191 | ENSG00000204999 | ESR       | 744   | -0.05 | protein_coding | 8  | 744       | 7438910   | desmoplakin                                                                                       |
| 41196 | ENSG00000179678 | FOXJ1     | 35555 | -0.05 | protein_coding | 16 | 86609974  | 86611303  | forkhead box L1                                                                                   |
| 41196 | ENSG00000200220 | GEMN2     | 39555 | -0.05 | protein_coding | 14 | 39554227  | 39561777  | gem (nuclear organella) associated protein 2                                                      |
| 41200 | ENSG00000204381 | LAIN      | 39561 | -0.05 | protein_coding | 11 | 11441265  | 11432264  | lyvein                                                                                            |
| 41209 | ENSG00000117425 | F3        | 39561 | -0.05 | protein_coding | 1  | 38494781  | 38507336  | coagulation factor 3 (fibrinogenolytic tissue factor)                                             |
| 41218 | ENSG00000155363 | Mov10     | 39560 | -0.05 | protein_coding | 7  | 113215763 | 113243368 | Mov10, Moloney leukemia virus 10, homology (mouse)                                                |
| 41220 | ENSG00000174499 | ADMT2     | 39561 | -0.05 | protein_coding | 7  | 14581343  | 14611990  | contamin associated protein-like 2                                                                |
| 41223 | ENSG00000193878 | ADAMT5    | 39594 | -0.05 | protein_coding | 15 | 79831545  | 79833773  | ADAM metalloprotease with thrombospondin type 1 motif 7                                           |
| 41229 | ENSG00000126388 | NRIID     | 39600 | -0.05 | protein_coding | 17 | 38249040  | 38256978  | nuclear receptor subfamily 1, group D, member 1                                                   |
| 41231 | ENSG00000194116 | SUC3A     | 39602 | -0.05 | protein_coding | 16 | 81654441  | 81731762  | solute carrier family 1 (glutamate/aspartate transporters), member 3                              |
| 41232 | ENSG00000193285 | SLC3A2    | 39604 | -0.05 | protein_coding | 3  | 86603663  | 86604108  | soluble carrier family 2 (lactate/glucose transporters), member 2                                 |
| 41243 | ENSG00000163378 | EGOT      | 39614 | -0.05 | protein_coding | 3  | 69024365  | 69038112  | EGF domain-specific O-linked N-acetylglucosamine (EGF) transferase                                |
| 41244 | ENSG00000131591 | C1orf159  | 39616 | -0.05 | protein_coding | 1  | 1017198   | 1051741   | chromosome 1 open reading frame 159                                                               |
| 41249 | ENSG00000115115 | GATA4     | 39617 | -0.05 | protein_coding | 8  | 11531824  | 11531911  | GATA binding protein 4                                                                            |
| 41250 | ENSG00000179922 | ZNF784    | 39619 | -0.05 | protein_coding | 9  | 58132108  | 58135967  | zinc finger protein 784                                                                           |
| 41256 | ENSG00000196077 | PPP1R3G   | 39623 | -0.05 | protein_coding | 6  | 5085720   | 5087455   | protein phosphatase 1, regulatory subunit 3G                                                      |
| 41257 | ENSG00000191153 | SALL4     | 39624 | -0.05 | protein_coding | 20 | 50405681  | 50410599  | spalt-like transcription factor 4                                                                 |
| 41258 | ENSG00000174516 | PELI3     | 39626 | -0.05 | protein_coding | 11 | 6623416   | 66244808  | patello E3 ubiquitin protein ligase family member 3                                               |
| 41261 | ENSG00000096468 | FGR2      | 39628 | -0.05 | protein_coding | 10 | 12323748  | 12329772  | fibroblast growth factor receptor 2                                                               |
| 41273 | ENSG00000115255 | QPFB3     | 39637 | -0.05 | protein_coding | 5  | 5321002   | 5321002   | G protein-coupled receptor 153                                                                    |
| 41274 | ENSG00000163795 | ZNF513    | 39637 | -0.05 | protein_coding | 2  | 27600987  | 27603857  | zinc finger protein 513                                                                           |
| 41281 | ENSG00000143153 | ATP1B1    | 39645 | -0.05 | protein_coding | 1  | 16907435  | 16910190  | ATPase, Na <sup>+</sup> /K <sup>+</sup> transporting, beta 1 polypeptide                          |
| 41296 | ENSG00000170088 | TMEM192   | 39658 | -0.05 | protein_coding | 4  | 11662514  | 11662501  | transmembrane protein 192                                                                         |
| 41297 | ENSG00000144935 | TRPC1     | 39658 | -0.05 | protein_coding | 3  | 142442916 | 14245230  | transient receptor potential cation channel, subfamily C, member 1                                |
| 41299 | ENSG00000098785 | MARCKSP2  | 39660 | -0.05 | protein_coding | 22 | 51039114  | 51052409  | mitogen-activated protein kinase 5 interacting protein 2                                          |
| 41299 | ENSG00000100709 | HSD17B14  | 39661 | -0.05 | protein_coding | 19 | 48319274  | 48319305  | hydroxysteroid (17-beta) dehydrogenase 14                                                         |
| 41298 | ENSG00000141441 | GAREM1    | 39674 | -0.05 | protein_coding | 18 | 29704840  | 30054447  | GRB2 associated, regulator of MAPK1                                                               |
| 41300 | ENSG00000144960 | VCLL4     | 39677 | -0.05 | protein_coding | 3  | 11597544  | 11782220  | vesigial like 4 (Drosophila)                                                                      |
| 41305 | ENSG00000190288 | C10orf105 | 39678 | -0.05 | protein_coding | 12 | 4108622   | 4108622   | chromosome 10 open reading frame 105                                                              |
| 41306 | ENSG00000158730 | STOX1     | 39683 | -0.05 | protein_coding | 10 | 70587298  | 70655188  | shortbow box 1                                                                                    |
| 41307 | ENSG00000132872 | SIT4      | 39688 | -0.05 | protein_coding | 18 | 40847843  | 40856715  | synaptotagmin IV                                                                                  |
| 41308 | ENSG00000103749 | MORF2     | 39689 | -0.05 | protein_coding | 1  | 17961909  | 17961909  | mitogen-activated protein kinase 9                                                                |
| 41313 | ENSG00000117152 | RSGA      | 39696 | -0.05 | protein_coding | 1  | 16303955  | 16304592  | regulator of G protein signaling 4                                                                |
| 41318 | ENSG00000171951 | SC22      | 39701 | -0.05 | protein_coding | 2  | 224441658 | 22447221  | secretogranin II                                                                                  |
| 41319 | ENSG00000135563 | ERBB3     | 39703 | -0.05 | protein_coding | 2  | 212328465 | 212328465 | epidermal growth factor receptor 3                                                                |
| 41334 | ENSG00000147144 | CCDC120   | 39717 | -0.05 | protein_coding | X  | 48911101  | 48927509  | coiled-coil domain containing 120                                                                 |
| 41338 | ENSG00000205966 |           | 39720 | -0.05 | protein_coding | 9  | 37512544  | 37592466  | Uncharacterized protein                                                                           |
| 41343 | ENSG00000163581 | SLC6A1A   | 39727 | -0.05 | protein_coding | 17 | 28714601  | 28734015  | solute carrier family 6 (dicarboxylate transporters), member 1                                    |
| 41351 | ENSG00000184176 | EDL3      | 39742 | -0.05 | protein_coding | 5  | 8323673   | 83806011  | EGF-like repeats and discoidin-like domains 3                                                     |
| 41352 | ENSG00000192878 | FGR3      | 39743 | -0.05 | protein_coding | 13 | 22245522  | 22277837  | fibroblast growth factor 3                                                                        |
| 41353 | ENSG00000114959 | C1orf101  | 39745 | -0.05 | protein_coding | 12 | 14861345  | 14861345  | chromosome 10 open reading frame 91                                                               |
| 41355 | ENSG00000100167 | 3-Sep     | 39747 | -0.05 | protein_coding | 22 | 42372276  | 42394225  | septin 3                                                                                          |
| 41356 | ENSG00000172379 | ARN2T     | 39750 | -0.05 | protein_coding | 15 | 80989692  | 80989762  | aryl hydrocarbon receptor nuclear translocator 2                                                  |
| 41361 | ENSG00000136569 | ORF71     | 39757 | -0.05 | protein_coding | 9  | 137897268 | 13801026  | ORF71                                                                                             |
| 41363 | ENSG00000209557 | TRPM1     | 39757 | -0.05 | protein_coding | 19 | 52891816  | 52910076  | Transient receptor potential cation channel, subfamily M, member 1                                |
| 41364 | ENSG00000135033 | POLR3B    | 39758 | -0.05 | protein_coding | 12 | 106751436 | 10693076  | polymyosin (RNA III) domain-directed polypeptide B                                                |
| 41366 | ENSG00000198262 | YBE1      | 39759 | -0.05 | protein_coding | 21 | 61776251  | 61777665  | Ybe1 metalloprotease                                                                              |
| 41378 | ENSG00000196969 | NEU4      | 39764 | -0.05 | protein_coding | 50 | 91119120  | 91120445  | neuronal precursor cell expressed, developmentally down-regulated 4, E3 ubiquitin protein ligase  |
| 41380 | ENSG00000160203 | VAV2      | 39778 | -0.05 | protein_coding | 9  | 136627016 | 136627716 | vav 2 guanine nucleotide exchange factor                                                          |
| 41384 | ENSG00000185671 | AHNAK2    | 39781 | -0.05 | protein_coding | 14 | 10540381  | 10544494  | AHNAK, nudgerapin 2                                                                               |
| 41387 | ENSG00000204423 | KIF18A    | 39784 | -0.05 | protein_coding | 15 | 10710663  | 10710663  | kinesin family member 18                                                                          |
| 41395 | ENSG00000166138 | ANKS6     | 39794 | -0.05 | protein_coding | 9  | 101463611 | 101550247 | ankyrin repeat and sterile alpha motif domain containing 6                                        |
| 41400 | ENSG00000184920 | OSR2      | 39798 | -0.05 | protein_coding | 8  | 99959331  | 99964332  | odd-skipped related transcription factor 2                                                        |
| 41404 | ENSG00000193490 | KIF17     | 39800 | -0.05 | protein_coding | 12 | 52645470  | 52645470  | kinesin family member 17                                                                          |
| 41406 | ENSG00000204536 | CCHCR1    | 39809 | -0.05 | protein_coding | 6  | 13110216  | 13126015  | coiled-coil alpha-helical rod protein 1                                                           |
| 41418 | ENSG00000189279 | NHPHA     | 39814 | -0.05 | protein_coding | 7  | 57810578  | 57920232  | neuropilin 4                                                                                      |
| 41421 | ENSG00000132671 | C1orf11   | 39815 | -0.05 | protein_coding | 15 | 170138683 | 170138683 | chromosome 1 open reading frame 11                                                                |
| 41442 | ENSG00000131860 | EDZR2     | 39820 | -0.05 | protein_coding | X  | 6881479   | 6889108   | ectodysplasin A2 receptor                                                                         |
| 41443 | ENSG00000189752 | NRG5      | 39821 | -0.05 | protein_coding | 15 | 7622810   | 7625136   | neuregulin 5                                                                                      |
| 41444 | ENSG00000193490 | MIR67     | 39822 | -0.05 | protein_coding | 15 | 1628104   | 1628104   | mitogen-activated protein kinase 7                                                                |
| 41451 | ENSG00000105290 | ARPL1     | 39825 | -0.05 | protein_coding | 9  | 36330891  | 36330891  | amyloid beta (A4) precursor-like protein 1                                                        |
| 41456 | ENSG00000101333 | PLCB4     | 39870 | -0.05 | protein_coding | 20 | 9048410   | 9461889   | phospholipase C, beta 4                                                                           |
| 41459 | ENSG00000191795 | SLC26A6   | 39872 | -0.05 | protein_coding | 10 | 12441747  | 12441747  | SLC26A6, ankyrin 1                                                                                |
| 41462 | ENSG00000202567 | SLC26A6   | 39877 | -0.05 | protein_coding | 3  | 48663156  | 48672926  | solute carrier family 26 (anion exchanger), member 6                                              |
| 41467 | ENSG00000162095 | TRC102A   | 39881 | -0.05 | protein_coding | 16 | 2525147   | 2525735   | 'BC1' domain family, member 24                                                                    |
| 41468 | ENSG00000192444 | ATL2      | 39882 | -0.05 | protein_coding | 17 | 7440456   | 7440456   | ATPase, Na <sup>+</sup> /K <sup>+</sup> transporting, beta 2 polypeptide                          |
| 41472 | ENSG00000120658 | ENOX1     | 39885 | -0.05 | protein_coding | 13 | 43787654  | 44361044  | endo-NOX diacylglycerol-thiol exchanger 1                                                         |
| 41474 | ENSG00000139910 | NOVA1     | 39887 | -0.05 | protein_coding | 14 | 26912299  | 27066960  | neuro-oncological antigen 1                                                                       |
| 41475 | ENSG00000177380 | PFPA3     | 39887 | -0.05 | protein_coding | 9  | 49622846  | 49642823  | protein tyrosine phosphatase, receptor type, type 3 (PTPRF), interacting protein (Sprin), alpha 3 |
| 41478 | ENSG00000184810 | RFP       | 39891 | -0.05 | protein_coding | 7  | 33134409  | 33149013  | retinitis pigmentosa 9 (autosomal dominant)                                                       |
| 41481 | ENSG00000191710 | PSR2      | 39892 | -0.05 | protein_coding | 17 | 65331075  | 65331075  | proteasome (20S) subunit, non-ATPase, 12                                                          |
| 41485 | ENSG00000100882 | ARHGAP5   | 39894 | -0.05 | protein_coding | 14 | 3254520   | 3258934   | Rho GTPase activating protein 5                                                                   |
| 41486 | ENSG00000190977 | GSZT1     | 39898 | -0.05 | protein_coding | 14 | 77787220  | 77787940  | glutathione S-transferase zeta 1                                                                  |
| 41489 | ENSG00000190708 | SLC18A3   | 39902 | -0.05 | protein_coding | 13 | 113863692 | 113863692 | potassium intermembrane channel conductance calcium-activated channel, subfamily N, member 2      |
| 41493 | ENSG00000200208 | CDH3      | 39907 | -0.05 | protein_coding | 16 | 68870562  | 6879519   | cadherin 3, type 1, P-cadherin (pactactin)                                                        |
| 41495 | ENSG00000189822 | SCS3      | 39908 | -0.05 | protein_coding | 15 | 32938877  | 32938899  | secretogranin V (R2) protein                                                                      |
| 41499 | ENSG00000191788 | PCSK9     | 39913 | -0.05 | protein_coding | 15 | 35710483  | 35710483  | PCSK9, proprotein convertase subtilisin/kexin type 9                                              |
| 41502 | ENSG00000196769 | TRPBP1    | 39913 | -0.05 | protein_coding | 15 | 43959407  | 43962026  | tumor protein 53 binding protein 1                                                                |
| 41506 | ENSG00000198174 | PKS9      | 39915 | -0.05 | protein_coding | 1  | 5559221   | 5559221   | proprotein convertase subtilisin/kexin type 9                                                     |
| 41509 | ENSG00000140598 | PCSK8     | 39915 | -0.05 | protein_coding | 8  | 11020198  | 11020198  | proprotein convertase subtilisin/kexin type 9                                                     |
| 41519 | ENSG00000172422 | RHOBTB1   | 39926 | -0.05 | protein_coding | 10 | 62629196  | 62761198  | Rho-related BTB domain containing 1                                                               |
| 41521 | ENSG00000114270 | COL7A1    | 39930 | -0.05 | protein_coding | 3  | 48601506  | 48623700  | collagen, type VII, alpha 1                                                                       |
| 41523 | ENSG00000144699 | NEH1      | 39930 | -0.05 | protein_coding | 17 | 12340368  | 12342908  | neuronal chondrin ester hydrolase 1                                                               |
| 41527 | ENSG00000181194 | GPR112    | 39934 | -0.05 | protein_coding | X  | 53018277  | 53018277  | G protein-coupled receptor 173                                                                    |
| 41528 | ENSG00000189184 | PCDH18    | 39934 | -0.05 | protein_coding | 4  | 13844072  | 13845348  | protodesmosin 18                                                                                  |
| 41528 | ENSG00000186978 | DMT1      | 39936 | -0.05 | protein_coding | 9  | 13966568  | 13101757  | dynamins 1                                                                                        |
| 41530 | ENSG00000151458 | ANKRD50   | 39940 | -0.05 | protein_coding | 17 | 125632007 | 125633897 | ankyrin repeat domain 50                                                                          |
| 41539 | ENSG00000139211 | AMIGO2    | 39944 | -0.05 | protein_coding | 12 | 47469499  | 47473734  | adhesion molecule with Ig-like domain 2                                                           |
| 41542 | ENSG00000198530 | FEZ3      | 39949 | -0.05 | protein_coding | 19 | 91244469  | 91250306  | paternally expressed 3                                                                            |
| 41544 | ENSG00000191991 | CNTNAP1   | 39949 | -0.05 | protein_coding | 19 | 64814631  | 64818152  | contactin associated protein 1                                                                    |
| 41550 | ENSG00000166948 | IFGZL1    | 39951 | -0.05 | protein_coding | 14 | 94547828  | 94570192  | interferon, alpha-inducible protein 27-like 1                                                     |
| 41551 | ENSG00000180461 | TNFRSF1B  | 39954 | -0.05 | protein_coding | 8  | 11995796  | 11994439  | tumor necrosis factor receptor superfamily, member 1B                                             |
| 41552 | ENSG00000190393 | TNFRSF10D | 39955 | -0.05 | protein_coding | 9  | 93861960  | 93871262  | suppressor of cytokine signaling 2                                                                |
| 41563 | ENSG00000173530 | INPDC5    | 39966 | -0.05 | protein_coding | 8  | 22932103  | 23021543  | tumor necrosis factor receptor                                                                    |

|       |                 |          |         |       |                |    |           |           |                                                                                                              |
|-------|-----------------|----------|---------|-------|----------------|----|-----------|-----------|--------------------------------------------------------------------------------------------------------------|
| 41811 | ENSG00000182749 | PAQR7    | 40230.8 | -0.05 | protein_coding | 1  | 26187701  | 26187740  | progesterin and adipoX receptor family member VII                                                            |
| 41812 | ENSG00000183378 | RAMP4    | 40233.8 | -0.05 | protein_coding | 14 | 54428641  | 54428674  | bone morphogenetic protein 4                                                                                 |
| 41814 | ENSG00000210652 | C15orf65 | 40233.8 | -0.05 | protein_coding | 15 | 55700748  | 55710962  | chromosome 15 open reading frame 65                                                                          |
| 41818 | ENSG00000138074 | SLC6A6   | 40239.8 | -0.05 | protein_coding | 2  | 27424526  | 27435626  | solute carrier family 6 (sodium/vitamin and iodide cotransporter), member 6                                  |
| 41819 | ENSG00000187244 | PRKRA    | 40239.4 | -0.05 | protein_coding | 11 | 21503427  | 21706141  | ras p21 protein kinase 2 (somatomedin A)                                                                     |
| 18203 | ENSG00000209294 | RFKM52   | 40242.5 | -0.05 | protein_coding | 9  | 39693255  | 39693254  | pectenidin homology domain containing family G (with RhoGDI domain) member 2                                 |
| 41829 | ENSG00000101098 | SPFH2    | 40249.5 | -0.05 | protein_coding | 20 | 43380449  | 43439979  | regulating surface membrane exocytosis 4                                                                     |
| 41835 | ENSG00000086176 | PERK5    | 40254.6 | -0.05 | protein_coding | 19 | 46122546  | 46133548  | springlexine kinase 2                                                                                        |
| 18482 | ENSG00000187921 | KAZP61   | 40259.6 | -0.05 | protein_coding | 18 | 102821586 | 102821588 | Kazal-type serine peptidase inhibitor domain 1                                                               |
| 41847 | ENSG00000198914 | PDU3F3   | 40269.9 | -0.05 | protein_coding | 2  | 105411969 | 10547829  | POU class 3 homeobox 3                                                                                       |
| 41848 | ENSG00000186182 | ZNF67    | 40267.6 | -0.05 | protein_coding | 19 | 36112484  | 36210661  | zinc finger protein 607                                                                                      |
| 41849 | ENSG00000183931 | ZNF10    | 40268.4 | -0.05 | protein_coding | 9  | 81837663  | 81837664  | zinc finger class B18 domain containing 10                                                                   |
| 41851 | ENSG00000146463 | BBS4     | 40270.8 | -0.05 | protein_coding | 15 | 72978527  | 73030817  | Bardet-Bied syndrome 4                                                                                       |
| 41853 | ENSG00000135229 | MMS19    | 40272.1 | -0.05 | protein_coding | 10 | 96218081  | 96258551  | MMS19 nucleotide excision repair homolog (S. cerevisiae)                                                     |
| 41859 | ENSG00000201764 | KIAA1898 | 40278.4 | -0.05 | protein_coding | 1  | 118684742 | 118689937 | KIAA1898                                                                                                     |
| 41860 | ENSG00000106841 | BBD1     | 40279.6 | -0.05 | protein_coding | 17 | 19240367  | 19281495  | B8 protein domain 1                                                                                          |
| 41867 | ENSG00000188502 | SOX42    | 40285.9 | -0.05 | protein_coding | 18 | 8705659   | 8832378   | SOX4 family member 2                                                                                         |
| 41876 | ENSG00000201793 | LIPR8    | 40296.8 | -0.05 | protein_coding | 6  | 53713217  | 53730742  | low density lipoprotein receptor-related protein 8, apolipoprotein E receptor                                |
| 41879 | ENSG00000091656 | ZFH4X    | 40301.6 | -0.05 | protein_coding | 8  | 77593454  | 77795291  | zinc finger homeobox 4                                                                                       |
| 41881 | ENSG00000188290 | HE4      | 40303.4 | -0.05 | protein_coding | 1  | 934342    | 935552    | hes family HLH transcription factor 4                                                                        |
| 41888 | ENSG00000105737 | PPOY10   | 40312.4 | -0.05 | protein_coding | 16 | 29572177  | 29572201  | proline-rich transmembrane protein 2                                                                         |
| 41889 | ENSG00000176112 | SLC25A33 | 40312.5 | -0.05 | protein_coding | 1  | 9595841   | 9645237   | solute carrier family 25 (pyrimidine nucleotide carrier), member 33                                          |
| 41896 | ENSG00000185671 | DACT1    | 40325.6 | -0.05 | protein_coding | 14 | 59110885  | 59115039  | dishevelled-binding antagonist of beta-catenin 1                                                             |
| 41905 | ENSG00000101345 | CNR116   | 40337.7 | -0.05 | protein_coding | 9  | 138307027 | 138305380 | chromosome 9 gene readthrough frame 116                                                                      |
| 41910 | ENSG00000109255 | NMU      | 40344.7 | -0.05 | protein_coding | 4  | 56461396  | 56602865  | neuromedin L1                                                                                                |
| 41911 | ENSG00000171517 | LIPAR3   | 40344.9 | -0.05 | protein_coding | 1  | 85277285  | 85358696  | lysophospholipid acid receptor 3                                                                             |
| 41913 | ENSG00000106376 | SLC39F1  | 40347.1 | -0.05 | protein_coding | 6  | 119209699 | 119209698 | solute carrier family 39, member F11                                                                         |
| 41916 | ENSG00000090530 | LEPREL1  | 40354.5 | -0.05 | protein_coding | 3  | 189874517 | 189840226 | leprexin-like 1                                                                                              |
| 41920 | ENSG00000186571 | GLU3     | 40357.6 | -0.05 | protein_coding | 7  | 42005448  | 42277469  | GLU family zinc finger 3                                                                                     |
| 41923 | ENSG00000101028 | GALNT18  | 40358.1 | -0.05 | protein_coding | 12 | 112081363 | 112081364 | UDP-N-acetyl-alpha-D-galactose 4-epimerase/UDP-N-acetylglucosamine 6S transferase 18                         |
| 41926 | ENSG00000109184 | DCNT104  | 40363.1 | -0.05 | protein_coding | 4  | 52709156  | 52783003  | DCN1 defective in cullin neddylation 1, domain containing 4                                                  |
| 41927 | ENSG00000152939 | MARVELD2 | 40364.1 | -0.05 | protein_coding | 5  | 68710939  | 68740157  | MARVEL domain containing 2                                                                                   |
| 41929 | ENSG00000145545 | SRD5A1   | 40372.3 | -0.05 | protein_coding | 5  | 6633456   | 6669675   | steroid 5-alpha-reductase, alpha polypeptide 1 (6-oxo-5-alpha-steroid delta 4-delta-3-ketoreductase alpha 1) |
| 41934 | ENSG00000033627 | ATP9VA1  | 40376.8 | -0.05 | protein_coding | 17 | 40610862  | 40674629  | ATPase, H <sup>+</sup> transporting, lysosomal V0 subunit a1                                                 |
| 41938 | ENSG00000201373 | ATP9VA2  | 40376.8 | -0.05 | protein_coding | 17 | 71698223  | 71700244  | ATPase, H <sup>+</sup> transporting, lysosomal V0 subunit a1                                                 |
| 41937 | ENSG00000153684 | RPN14    | 40384.7 | -0.05 | protein_coding | 3  | 58201974  | 58510422  | ribonucleas PAMP 14kDa subunit                                                                               |
| 41939 | ENSG00000103021 | CDC13C   | 40387.3 | -0.05 | protein_coding | 18 | 54265081  | 58137740  | collet-coil domain containing 113                                                                            |
| 41940 | ENSG00000101058 | ZNF10A   | 40400.9 | -0.05 | protein_coding | 16 | 53380703  | 53380703  | zfp-11 family member A, cell cycle regulator                                                                 |
| 41944 | ENSG00000189098 | GPR173C  | 40424.5 | -0.05 | protein_coding | 14 | 53019886  | 53104431  | G protein-coupled receptor 137C                                                                              |
| 41949 | ENSG00000132954 | CDK8     | 40430.5 | -0.05 | protein_coding | 13 | 28828678  | 28939775  | cyclin-dependent kinase 8                                                                                    |
| 41975 | ENSG00000101545 | ZNF393   | 40443.3 | -0.05 | protein_coding | 13 | 6845769   | 6845769   | zinc finger protein 822                                                                                      |
| 41981 | ENSG00000184398 | MARPD2   | 40443.5 | -0.05 | protein_coding | X  | 20024831  | 20119535  | MARP domain containing 2                                                                                     |
| 41982 | ENSG00000105103 | MIMP16   | 40445.5 | -0.05 | protein_coding | 8  | 89044237  | 88504254  | matrix metalloproteinase 16 (membrane-inserted)                                                              |
| 41983 | ENSG00000104514 | ZNF478   | 40446.8 | -0.05 | protein_coding | 4  | 164001225 | 164068703 | nucleosome assembly factor 1 ribonucleoprotein                                                               |
| 18988 | ENSG00000187961 | KULH17   | 40450.5 | -0.05 | protein_coding | 6  | 8658951   | 8658951   | hepatocellular carcinoma protein 17                                                                          |
| 41992 | ENSG00000174586 | ZNF497   | 40456.7 | -0.05 | protein_coding | 19 | 58865723  | 58874214  | zinc finger protein 497                                                                                      |
| 41994 | ENSG00000105043 | TFP62    | 40460.7 | -0.05 | protein_coding | 14 | 74318547  | 74318547  | prostaglandin reduction 2                                                                                    |
| 19999 | ENSG00000138170 | HOXD10   | 40461.1 | -0.05 | protein_coding | 12 | 118917518 | 118986870 | homeobox D10                                                                                                 |
| 42001 | ENSG00000113523 | ANGL     | 40468   | -0.05 | protein_coding | 14 | 77253588  | 77262589  | anergy inhibitor 1 (Drosophila)                                                                              |
| 42004 | ENSG00000111691 | KR118    | 40472.9 | -0.05 | protein_coding | 12 | 53342559  | 53344685  | keratin 18                                                                                                   |
| 42024 | ENSG00000202453 | ANKRD18B | 40484.8 | -0.05 | protein_coding | 12 | 53342592  | 533573097 | ankyrin repeat domain 18B                                                                                    |
| 42017 | ENSG00000166348 | USP54    | 40491.1 | -0.05 | protein_coding | 10 | 75217296  | 75385711  | ubiquitin-specific peptidase 54                                                                              |
| 42021 | ENSG00000186521 | LNL1     | 40495.9 | -0.05 | protein_coding | 3  | 197881071 | 197770991 | leishmanolysin-like metalloprotease M6 family                                                                |
| 42024 | ENSG00000186150 | ANKK7    | 40497.7 | -0.05 | protein_coding | 12 | 53342592  | 533573097 | anaphase promoting complex subunit 7                                                                         |
| 42028 | ENSG00000133247 | SUV420H2 | 40502.2 | -0.05 | protein_coding | 19 | 55851221  | 55859488  | suppressor of variegation 4-20 homolog 2 (Drosophila)                                                        |
| 42032 | ENSG00000204992 | TMEM188  | 40508.3 | -0.05 | protein_coding | 3  | 48269999  | 48267770  | transmembrane protein 188 (gene/protein name)                                                                |
| 42038 | ENSG00000101949 | ZNF429   | 40512.9 | -0.05 | protein_coding | 12 | 88421943  | 88421943  | chromosome 12 open reading frame 52                                                                          |
| 42049 | ENSG00000006432 | MARPK9   | 40524.8 | -0.05 | protein_coding | 14 | 71186243  | 71276251  | mitogen-activated protein kinase kinase kinase 9                                                             |
| 42055 | ENSG00000189981 | ZNF35    | 40530.7 | -0.05 | protein_coding | 3  | 44692019  | 44702283  | zinc finger protein 35                                                                                       |
| 42065 | ENSG00000101403 | WDR52    | 40532.1 | -0.05 | protein_coding | 13 | 5265736   | 5265736   | wee1 domain protein 2                                                                                        |
| 42077 | ENSG00000175702 | WDR82    | 40541.7 | -0.05 | protein_coding | 19 | 36548783  | 36568808  | WD repeat domain 62                                                                                          |
| 42083 | ENSG00000205843 | BCL2L2   | 40550.6 | -0.05 | protein_coding | 14 | 23776044  | 23774578  | BCL2L2-PABPNT1 readthrough                                                                                   |
| 42098 | ENSG00000186183 | ZNF104   | 40551.4 | -0.05 | protein_coding | 20 | 45122181  | 45122181  | zinc finger protein 334                                                                                      |
| 42091 | ENSG00000164291 | ARSK     | 40554   | -0.05 | protein_coding | 5  | 94890778  | 94480786  | arylsulfatase family, member K                                                                               |
| 42096 | ENSG00000185453 | C16orf68 | 40559.3 | -0.05 | protein_coding | 19 | 48673949  | 48673057  | chromosome 16 open reading frame 68                                                                          |
| 42098 | ENSG00000145959 | FOXP2    | 40562.9 | -0.05 | protein_coding | 19 | 29273050  | 29278870  | forkhead box G1                                                                                              |
| 42105 | ENSG00000176165 | FOXG1    | 40574   | -0.05 | protein_coding | 14 | 29236506  | 29238870  | forkhead box G1                                                                                              |
| 42108 | ENSG00000109706 | SYDE2    | 40578.2 | -0.05 | protein_coding | 1  | 86622556  | 85966729  | synapse defective 1, Rhos GTPase, homolog 2 (C. elegans)                                                     |
| 42112 | ENSG00000181827 | PTGES3   | 40582.9 | -0.05 | protein_coding | 15 | 44118158  | 44118158  | PTGEM domain containing 5                                                                                    |
| 42117 | ENSG00000148344 | PTGES    | 40583.5 | -0.05 | protein_coding | 9  | 13250870  | 132515326 | prostaglandin H synthase                                                                                     |
| 42118 | ENSG00000186089 | STX1A    | 40583.5 | -0.05 | protein_coding | 7  | 73113536  | 73134002  | syntaxin 1A (brain)                                                                                          |
| 42125 | ENSG00000186918 | ITKAP1   | 40585.3 | -0.05 | protein_coding | 12 | 12368468  | 12368468  | zinc finger protein 608                                                                                      |
| 42126 | ENSG00000105376 | ICAM5    | 40591.9 | -0.05 | protein_coding | 9  | 10400557  | 10409754  | intercellular adhesion molecule 5, teleplaxin                                                                |
| 42134 | ENSG00000148373 | RNF127   | 40600.4 | -0.05 | protein_coding | 6  | 182583661 | 182613779 | ring finger protein 217                                                                                      |
| 42138 | ENSG00000186928 | ANKRD18A | 40603.3 | -0.05 | protein_coding | 12 | 53342592  | 533573097 | ankyrin repeat domain 18A                                                                                    |
| 42137 | ENSG00000103404 | USP31    | 40603.3 | -0.05 | protein_coding | 16 | 23072727  | 23160591  | ubiquitin-specific peptidase 31                                                                              |
| 42139 | ENSG00000186572 | KBTB6    | 40603.7 | -0.05 | protein_coding | 13 | 47101705  | 47106882  | repeat and repeat and BTB/POZ domain containing 6                                                            |
| 42140 | ENSG00000186444 | KIF3A    | 40603.7 | -0.05 | protein_coding | 13 | 13158188  | 13158188  | KIAA1467                                                                                                     |
| 42142 | ENSG00000185248 | NLSN4Y   | 40608.9 | -0.05 | protein_coding | 9  | 18634518  | 18697530  | neurulin 4, Y-linked                                                                                         |
| 42146 | ENSG00000095769 | DNAJC25  | 40611.4 | -0.05 | protein_coding | 9  | 11439352  | 114432008 | DNAJ (Hsp40) nucleolar, subfamily C, member 25                                                               |
| 42147 | ENSG00000186596 | NFIB     | 40612.9 | -0.05 | protein_coding | 12 | 4831229   | 4831229   | winged-type MYT1 integration site family, member 7B                                                          |
| 42151 | ENSG00000121289 | CEP350   | 40617.3 | -0.05 | protein_coding | 19 | 33399902  | 33462897  | centrosomal protein 98kDa                                                                                    |
| 42156 | ENSG00000174939 | ASPHD1   | 40621.2 | -0.05 | protein_coding | 16 | 29911896  | 29931185  | aspartate beta-hydroxylase domain containing 1                                                               |
| 42163 | ENSG00000101190 | TGFB3    | 40625.6 | -0.05 | protein_coding | 20 | 61472467  | 61483115  | transforming growth factor-beta type 3                                                                       |
| 42166 | ENSG00000181571 | FOXC2    | 40632.9 | -0.05 | protein_coding | 19 | 74316239  | 7520134   | forkhead box G1                                                                                              |
| 42179 | ENSG00000137522 | RNF121   | 40652.9 | -0.05 | protein_coding | 11 | 71638747  | 71709643  | ring finger protein 121                                                                                      |
| 42180 | ENSG00000171274 | VARS1    | 40656.4 | -0.05 | protein_coding | 16 | 71624247  | 78014044  | variable amino transferase 1-like                                                                            |
| 42182 | ENSG00000101028 | MAGI5    | 40658.6 | -0.05 | protein_coding | 18 | 119813371 | 114268445 | membrane associated guanylate kinase, WW and PDZ domain containing 3                                         |
| 42212 | ENSG00000186435 | NRPAP1   | 40678.8 | -0.05 | protein_coding | 9  | 140184083 | 140196703 | NOTCH signaling ankyrin repeat protein                                                                       |
| 42214 | ENSG00000186189 | FANCC    | 40679.6 | -0.05 | protein_coding | 9  | 87861336  | 88019981  | Fanconi anemia complementation group C                                                                       |
| 42216 | ENSG00000186529 | FANCA    | 40679.6 | -0.05 | protein_coding | 9  | 88608267  | 88608267  | forkhead box G2/NFI1, mesenchyme cell-specific 1                                                             |
| 42221 | ENSG00000166529 | ZSCAN1   | 40688.4 | -0.05 | protein_coding | 7  | 99867350  | 99867350  | zinc finger and SCAN domain containing 21                                                                    |
| 42223 | ENSG00000186184 | TMSB10A  | 40690   | -0.05 | protein_coding | X  | 10178804  | 10171712  | thymosin beta 10a                                                                                            |
| 4244  | ENSG0000        |          |         |       |                |    |           |           |                                                                                                              |



|       |                  |             |         |       |                                        |    |           |           |                                                                                       |
|-------|------------------|-------------|---------|-------|----------------------------------------|----|-----------|-----------|---------------------------------------------------------------------------------------|
| 39335 | ENSG00000225648  | SBDSP1      | 37555.4 | -0.05 | transcribed_unprocessed_pseu<br>dogene | 7  | 7230004   | 72307609  | Shwachman-Bodian-Diamond syndrome pseudogene 1                                        |
| 39776 | ENSG00000188599  |             | 36560.3 | -0.05 | transcribed_unprocessed_pseu<br>dogene | 16 | 15198178  | 15225458  | nuclear pore complex interacting protein pseudogene 1                                 |
| 36602 | ENSG00000229161  |             | 36887.2 | -0.05 | unprocessed_pseudogene                 | 7  | 42834558  | 42842083  | 1 complex 1 pseudogene 1                                                              |
| 28342 | ENSG00000181543  |             | 26528.7 | -0.05 | unprocessed_pseudogene                 | 17 | 26734814  | 26754260  | ribosomal protein S1 pseudogene 1                                                     |
| 30158 | ENSG00000233954  |             | 28517.8 | -0.05 |                                        |    |           |           |                                                                                       |
| 30988 | ENSG00000226205  |             | 31169.8 | -0.05 |                                        |    |           |           |                                                                                       |
| 33554 | ENSG00000228929  |             | 31704.6 | -0.05 |                                        |    |           |           |                                                                                       |
| 33888 | ENSG00000144158  |             | 32048.2 | -0.05 |                                        |    |           |           |                                                                                       |
| 34511 | ENSG00000186076  |             | 32687.8 | -0.05 |                                        |    |           |           |                                                                                       |
| 34802 | ENSG00000233338  |             | 32946.4 | -0.05 |                                        |    |           |           |                                                                                       |
| 36165 | ENSG00000174100  | MPLP45      | 34283.4 | -0.05 |                                        | 17 | 36452889  | 36479101  | mitochondrial ribosomal protein L45                                                   |
| 36273 | ENSG00000108988  |             | 34389.9 | -0.05 |                                        |    |           |           |                                                                                       |
| 36284 | ENSG00000223934  |             | 34527.2 | -0.05 |                                        |    |           |           |                                                                                       |
| 36621 | ENSG00000227034  |             | 34725   | -0.05 |                                        |    |           |           |                                                                                       |
| 36816 | ENSG00000257043  |             | 34936.2 | -0.05 |                                        |    |           |           |                                                                                       |
| 36928 | ENSG00000233514  |             | 35098.2 | -0.05 |                                        |    |           |           |                                                                                       |
| 37537 | ENSG00000235449  |             | 35676.4 | -0.05 |                                        |    |           |           |                                                                                       |
| 38091 | ENSG00000249774  |             | 36244.7 | -0.05 |                                        |    |           |           |                                                                                       |
| 38211 | ENSG00000221625  |             | 36302.9 | -0.05 |                                        |    |           |           |                                                                                       |
| 38423 | ENSG00000213194  |             | 36616.1 | -0.05 |                                        |    |           |           |                                                                                       |
| 38599 | ENSG00000234961  |             | 36686   | -0.05 |                                        |    |           |           |                                                                                       |
| 38665 | ENSG00000211168  |             | 36781.2 | -0.05 |                                        |    |           |           |                                                                                       |
| 38725 | ENSG00000258445  |             | 36822.9 | -0.05 |                                        |    |           |           |                                                                                       |
| 38781 | ENSG00000147382  | FAM58A      | 36891.4 | -0.05 |                                        | X  | 15285377  | 15286500  | family with sequence similarity 58, member A                                          |
| 39028 | ENSG00000232060  |             | 37147.9 | -0.05 |                                        |    |           |           |                                                                                       |
| 39022 | ENSG00000232060  |             | 37238   | -0.05 |                                        |    |           |           |                                                                                       |
| 39061 | ENSG00000247134  |             | 37275.1 | -0.05 |                                        |    |           |           |                                                                                       |
| 39128 | ENSG00000255138  |             | 37355.3 | -0.05 |                                        |    |           |           |                                                                                       |
| 39612 | ENSG00000184674  | GSTT1       | 37848.7 | -0.05 |                                        | 22 | 24376133  | 24384680  | glutathione S-transferase theta 1                                                     |
| 39693 | ENSG00000232499  |             | 37938.4 | -0.05 |                                        |    |           |           |                                                                                       |
| 39788 | ENSG00000235433  |             | 37962.3 | -0.05 |                                        |    |           |           |                                                                                       |
| 39839 | ENSG00000225536  |             | 38099   | -0.05 |                                        |    |           |           |                                                                                       |
| 40201 | ENSG00000249921  |             | 38504.3 | -0.05 |                                        |    |           |           |                                                                                       |
| 40214 | ENSG00000138831  | RBM15B      | 38515.3 | -0.05 |                                        | 3  | 51428731  | 51435330  | RNA binding motif protein 15B                                                         |
| 40284 | ENSG00000237077  |             | 38572.2 | -0.05 |                                        |    |           |           |                                                                                       |
| 40305 | ENSG00000259020  |             | 38590.2 | -0.05 |                                        |    |           |           |                                                                                       |
| 40323 | ENSG00000268489  |             | 38616   | -0.05 |                                        |    |           |           |                                                                                       |
| 40338 | ENSG00000259796  |             | 38625.3 | -0.05 |                                        |    |           |           |                                                                                       |
| 40386 | ENSG00000230933  |             | 38675   | -0.05 |                                        |    |           |           |                                                                                       |
| 40423 | ENSG00000211411  | DDX52       | 38718.2 | -0.05 |                                        | 17 | 36989787  | 36993493  | DEAD (Asp-Glu-Ala-Asp) box polypeptide 52                                             |
| 40462 | ENSG00000224908  |             | 38754   | -0.05 |                                        |    |           |           |                                                                                       |
| 40483 | ENSG00000237730  |             | 38755   | -0.05 |                                        |    |           |           |                                                                                       |
| 40485 | ENSG00000186477  | ZNF280B     | 38779.3 | -0.05 |                                        | 22 | 22838787  | 22863305  | zinc finger protein 280B                                                              |
| 40511 | ENSG00000147484  |             | 38827.6 | -0.05 |                                        |    |           |           |                                                                                       |
| 40595 | ENSG00000250202  |             | 38904.3 | -0.05 |                                        |    |           |           |                                                                                       |
| 40603 | ENSG00000213560  |             | 38917.9 | -0.05 |                                        |    |           |           |                                                                                       |
| 40623 | ENSG00000214983  |             | 38935.3 | -0.05 |                                        |    |           |           |                                                                                       |
| 40785 | ENSG00000223559  |             | 39125.5 | -0.05 |                                        |    |           |           |                                                                                       |
| 40888 | ENSG00000216676  |             | 39332.2 | -0.05 |                                        |    |           |           |                                                                                       |
| 41014 | ENSG00000210522  |             | 39365   | -0.05 |                                        |    |           |           |                                                                                       |
| 41023 | ENSG00000228407  |             | 39374.4 | -0.05 |                                        |    |           |           |                                                                                       |
| 41043 | ENSG00000183498  |             | 39400.9 | -0.05 |                                        |    |           |           |                                                                                       |
| 41115 | ENSG00000225212  |             | 39467.7 | -0.05 |                                        |    |           |           |                                                                                       |
| 41157 | ENSG00000268927  |             | 39514   | -0.05 |                                        |    |           |           |                                                                                       |
| 41215 | ENSG00000113331  |             | 39565.2 | -0.05 |                                        |    |           |           |                                                                                       |
| 41267 | ENSG00000205331  | HIST1H2BO   | 39634.8 | -0.05 |                                        | 6  | 27861203  | 27861699  | histone cluster 1, H2bo                                                               |
| 41285 | ENSG00000208188  |             | 39670.7 | -0.05 |                                        |    |           |           |                                                                                       |
| 41325 | ENSG00000208721  |             | 39706.7 | -0.05 |                                        |    |           |           |                                                                                       |
| 41348 | ENSG00000208721  | HIST1H3A    | 39738.8 | -0.05 |                                        | 6  | 28271146  | 28271612  | histone cluster 1, H3g                                                                |
| 41388 | ENSG000002081409 |             | 39836.9 | -0.05 |                                        |    |           |           |                                                                                       |
| 41457 | ENSG000002087918 |             | 39873.7 | -0.05 |                                        |    |           |           |                                                                                       |
| 41843 | ENSG00000246048  |             | 40033.3 | -0.05 |                                        |    |           |           |                                                                                       |
| 41575 | ENSG00000242162  |             | 39863.8 | -0.05 |                                        |    |           |           |                                                                                       |
| 41605 | ENSG00000251603  |             | 40007.5 | -0.05 |                                        |    |           |           |                                                                                       |
| 41610 | ENSG00000236611  |             | 40033.3 | -0.05 |                                        |    |           |           |                                                                                       |
| 41663 | ENSG00000287473  |             | 40068.5 | -0.05 |                                        |    |           |           |                                                                                       |
| 42007 | ENSG00000202049  |             | 40475.3 | -0.05 |                                        |    |           |           |                                                                                       |
| 42022 | ENSG00000202049  |             | 40475.3 | -0.05 |                                        |    |           |           |                                                                                       |
| 42115 | ENSG00000238334  |             | 40582.8 | -0.05 |                                        | 5  | 68417651  | 68417754  | Small nuclear RNA U13                                                                 |
| 42119 | ENSG00000232864  |             | 40585.5 | -0.05 |                                        |    |           |           |                                                                                       |
| 42122 | ENSG00000268667  |             | 40587   | -0.05 |                                        |    |           |           |                                                                                       |
| 42195 | ENSG000002027500 |             | 40584.6 | -0.05 |                                        |    |           |           |                                                                                       |
| 42303 | ENSG00000208018  |             | 40790.3 | -0.05 |                                        |    |           |           |                                                                                       |
| 42352 | ENSG00000233735  |             | 40833   | -0.05 |                                        | 3  | 14868066  | 14868035  | LOC548601 protein, Uncharacterized protein                                            |
| 42366 | ENSG00000272434  |             | 40852   | -0.05 |                                        |    |           |           |                                                                                       |
| 42430 | ENSG00000208442  |             | 40825.8 | -0.05 |                                        |    |           |           |                                                                                       |
| 42548 | ENSG00000254618  |             | 41062.3 | -0.05 |                                        |    |           |           |                                                                                       |
| 42832 | ENSG00000171282  | BAMC1C      | 41150.1 | -0.05 |                                        | 17 | 79373540  | 79433357  | BAM and coiled coil domain-containing protein 1                                       |
| 42710 | ENSG00000240300  |             | 41253.9 | -0.05 |                                        |    |           |           |                                                                                       |
| 41388 | ENSG00000202709  | SERTADA1    | 39759.9 | -0.05 | antisense                              | 1  | 210404801 | 210407392 | SERTADA1 antisense RNA 1                                                              |
| 42050 | ENSG00000259555  | ARHGAP5-AS1 | 40525.2 | -0.06 | antisense                              | 14 | 32544625  | 32545999  | ARHGAP5 antisense RNA 1 (head to head)                                                |
| 42141 | ENSG00000227372  | TP73-AS1    | 40608.5 | -0.06 | antisense                              | 1  | 3652548   | 3653900   | TP73 antisense RNA 1                                                                  |
| 42162 | ENSG00000226618  | PITPNA-AS1  | 41022.5 | -0.06 | antisense                              | 7  | 1442025   | 1421390   | PITPNA antisense RNA 1                                                                |
| 42544 | ENSG00000245496  |             | 41091.5 | -0.06 | antisense                              | 3  | 50521727  | 50522336  | WNT4 antisense RNA 1                                                                  |
| 42812 | ENSG00000248008  | DYNLL1-AS1  | 41132.5 | -0.06 | antisense                              | 12 | 120928131 | 120933743 | DYNLL1 antisense RNA 1                                                                |
| 42845 | ENSG00000232596  | SNHG15      | 39182.5 | -0.06 | lincRNA                                | 7  | 45022622  | 45026060  | small nuclear RNA host gene 15 (non-protein coding)                                   |
| 41552 | ENSG00000201710  | NCBP2-AS2   | 39939.7 | -0.06 | lincRNA                                | 3  | 19669484  | 19670411  | NCBP2 antisense RNA 2 (head to head)                                                  |
| 41844 | ENSG00000186594  | MIR22HG     | 40047.4 | -0.06 | lincRNA                                | 17 | 16148055  | 1620488   | MIR22 host gene (non-protein coding)                                                  |
| 41671 | ENSG00000186770  | ZNF567-AS1  | 40075.4 | -0.06 | lincRNA                                | 19 | 9999919   | 91012035  | ZNF567 antisense RNA 1 (head to head)                                                 |
| 41884 | ENSG00000201766  | MIR510HG    | 40075.4 | -0.06 | lincRNA                                | 19 | 9999919   | 91012035  | MIR510 host gene (non-protein coding)                                                 |
| 42108 | ENSG00000214548  | MEG3        | 40579.2 | -0.06 | lincRNA                                | 14 | 101245747 | 101327888 | maternally expressed 3 (non-protein coding)                                           |
| 42468 | ENSG00000227788  |             | 40868.8 | -0.06 | lincRNA                                | 21 | 46715200  | 46717289  | long intergenic non-protein coding RNA 205                                            |
| 43003 | ENSG00000223746  | MIR503HG    | 41027.6 | -0.06 | lincRNA                                | 1  | 139717807 | 139800141 | MIR503 host gene (non-protein coding)                                                 |
| 41988 | ENSG00000189503  | MIR324      | 40466.7 | -0.06 | miRNA                                  | 17 | 7126816   | 7126988   | miR324                                                                                |
| 29737 | ENSG00000198918  |             | 28121.5 | -0.06 | processed_pseudogene                   | 21 | 20220097  | 20230304  | peptidylglyoxyl isomerase A (lysophosphin A) pseudogene 22                            |
| 30444 | ENSG00000241741  |             | 30226.5 | -0.06 | processed_pseudogene                   | 4  | 11372099  | 113716034 | ribosomal protein L7a pseudogene 30                                                   |
| 32191 | ENSG00000226415  |             | 30379.4 | -0.06 | processed_pseudogene                   | 1  | 77165474  | 77166223  | triosephosphate isomerase 1 pseudogene 1                                              |
| 33095 | ENSG00000211991  | ANXA2P2     | 32156.2 | -0.06 | processed_pseudogene                   | 9  | 33624223  | 33625532  | annexin A2 pseudogene 2                                                               |
| 34206 | ENSG00000230207  |             | 32542   | -0.06 | processed_pseudogene                   | 9  | 7471043   | 74716301  | ribosomal protein L3 pseudogene 5                                                     |
| 34413 | ENSG00000253570  |             | 32592.2 | -0.06 | processed_pseudogene                   | 8  | 38488179  | 38488719  | ring finger protein 5, E3 ubiquitin-protein ligase pseudogene 1                       |
| 35285 | ENSG00000235236  |             | 33408.9 | -0.06 | processed_pseudogene                   | X  | 47372001  | 47372882  | nuclear undecaprenyl pyrophosphate synthase 1 homolog 10 (C. cerevisiae) pseudogene 1 |
| 36296 | ENSG00000137441  |             | 34046   | -0.06 | processed_pseudogene                   | 3  | 36048433  | 36048433  | EV01 pseudogene 2 pseudogene 2                                                        |
| 36957 | ENSG00000213430  |             | 35482.3 | -0.06 | processed_pseudogene                   | 5  | 21848224  | 21848421  | heat shock 60kDa protein 1 (chaperonin) pseudogene 1                                  |
| 37394 | ENSG00000126892  |             | 35840.9 | -0.06 | processed_pseudogene                   | 2  | 171698221 | 171699562 | eukaryotic translation initiation factor 2, subunit 2 beta pseudogene 4               |
| 39000 | ENSG00000259651  |             | 36163.4 | -0.06 | processed_pseudogene                   | 14 | 63789495  | 63789798  | heterogeneous nuclear ribonucleoprotein L1 pseudogene 1                               |
| 38127 | ENSG00000105588  |             | 36280.8 | -0.06 | processed_pseudogene                   | 10 | 63976089  | 63976550  | NHP2 ribonucleoprotein pseudogene 1                                                   |
| 38523 | ENSG00000213884  |             | 36700.3 | -0.06 | processed_pseudogene                   | X  | 75562240  | 75562444  | lactate dehydrogenase B pseudogene 2                                                  |
| 38979 | ENSG00000254244  |             | 37191.8 | -0.06 | processed_pseudogene                   | 8  | 4644854   | 4644810   | phosphoribosylaminoimidazole carboxamide phosphoribosyltransferase pseudogene 4       |
| 39002 | ENSG00000228797  |             | 37218.3 | -0.06 | processed_pseudogene                   | 13 | 19271143  | 19271647  | family with sequence similarity 207, member B, pseudogene                             |
| 39722 | ENSG00000232764  |             | 37382.3 | -0.06 | processed_pseudogene                   | 4  | 97824201  | 97824201  | cytochrome c oxidase subunit VIIa polypeptide 2 (beta) pseudogene 2                   |
| 40049 | ENSG00000248926  |             | 38223.7 | -0.06 | processed_pseudogene                   | 5  | 159377500 | 159378055 | cytidine dehydrogenase pseudogene 40                                                  |
| 40081 | ENSG00000232447  |             | 38365.7 | -0.06 | processed_pseudogene                   | 2  | 85004383  | 85005347  | lactate dehydrogenase A pseudogene 7                                                  |
| 40168 | ENSG00000213574  |             | 38466.3 | -0.06 | processed_pseudogene                   | 10 | 120692186 | 120692186 | lactate dehydrogenase A pseudogene 9                                                  |
| 40916 | ENSG00000178302  |             | 38608   | -0.06 | processed_pseudogene                   | 17 | 27530441  |           |                                                                                       |

|       |                 |         |         |       |                |    |           |           |                                                                                                             |
|-------|-----------------|---------|---------|-------|----------------|----|-----------|-----------|-------------------------------------------------------------------------------------------------------------|
| 33206 | ENSG00000117176 | LDBH    | 31359.2 | -0.06 | protein_coding | 12 | 2178276   | 21910741  | lactate dehydrogenase B                                                                                     |
| 33261 | ENSG00000105523 | ERH     | 31379.3 | -0.06 | protein_coding | 14 | 6964634   | 6964634   | enhancer of rudimentary homology (Drosophila)                                                               |
| 33300 | ENSG00001033363 | TCE2D   | 31443.4 | -0.06 | protein_coding | 16 | 2821415   | 2821298   | transcription elongation factor B (SII), polypeptide 2 (18kDa, elongin B)                                   |
| 33362 | ENSG00001074338 | PDLIM1  | 31499.6 | -0.06 | protein_coding | 10 | 96997329  | 97050781  | POZ and LIM domain 1                                                                                        |
| 33588 | ENSG00001363938 | ANCLB   | 31780.3 | -0.06 | protein_coding | 9  | 100745643 | 100778225 | acidic (leucine-rich) nuclear phosphoglycoprotein 32 family, member B                                       |
| 33651 | ENSG00000096324 | ELAVL1  | 31839.5 | -0.06 | protein_coding | 1  | 4383359   | 4383359   | ELAV-like 1, X-1Pase                                                                                        |
| 33884 | ENSG00001982526 | UBL5    | 31846.2 | -0.06 | protein_coding | 19 | 9538556   | 9540791   | ubiquitin-like 5                                                                                            |
| 33888 | ENSG00000068116 | PSMB1   | 31853.6 | -0.06 | protein_coding | 6  | 179842205 | 179828429 | proteasome (prosome, macropain) subunit, beta type, 1                                                       |
| 33816 | ENSG00001989464 | RP58    | 31958.2 | -0.06 | protein_coding | 9  | 127630159 | 127624390 | ribosomal protein L35                                                                                       |
| 33829 | ENSG00001173962 | APH1A   | 31988.1 | -0.06 | protein_coding | 1  | 150237804 | 150241980 | APH1A gamma secretase subunit                                                                               |
| 33884 | ENSG00001986976 | EFPA2   | 32019.6 | -0.06 | protein_coding | 3  | 189550951 | 189550959 | eukaryotic translation initiation factor 4A2                                                                |
| 33881 | ENSG00000031483 | ALDH3B1 | 32099.4 | -0.06 | protein_coding | 1  | 16861953  | 168661100 | aldehyde dehydrogenase 3 family, member A1                                                                  |
| 34055 | ENSG00001878633 | ATP5F1  | 32229.6 | -0.06 | protein_coding | 17 | 73034586  | 730432080 | ATP synthase, H+ transporting, mitochondrial F0 complex, subunit d                                          |
| 34142 | ENSG0000111639  | MPLP1   | 32314   | -0.06 | protein_coding | 12 | 6801150   | 6803700   | mitochondrial ribosomal protein L51                                                                         |
| 34194 | ENSG00001071569 | RSL1C1  | 32322.2 | -0.06 | protein_coding | 16 | 11929266  | 11929642  | ribosomal L1 domain containing 1                                                                            |
| 34453 | ENSG00001380209 | HADHB   | 32633.2 | -0.06 | protein_coding | 2  | 28466038  | 28513336  | hydroxyacyl-CoA dehydrogenase 3-ketacyl-CoA thioesterase/CoA hydratase (bifunctional protein), beta subunit |
| 34524 | ENSG0000187460  | TPM4    | 32704.9 | -0.06 | protein_coding | 19 | 16177831  | 16213813  | tropomyosin 4                                                                                               |
| 34548 | ENSG00001168871 | MARP7D1 | 32724.4 | -0.06 | protein_coding | 1  | 36621180  | 36646450  | MARP domain containing 1                                                                                    |
| 34554 | ENSG0000009307  | CDERT   | 32731.9 | -0.06 | protein_coding | 1  | 11529534  | 115301297 | cold shock domain containing E1, RNA-binding                                                                |
| 34568 | ENSG00001037528 | YAPL1   | 32733.7 | -0.06 | protein_coding | 10 | 2729383   | 27293136  | YAP1-like 1, X-1Pase                                                                                        |
| 34625 | ENSG00000084207 | GSTP1   | 32748.7 | -0.06 | protein_coding | 11 | 67351066  | 67354131  | glutathione S-transferase pi 1                                                                              |
| 34627 | ENSG00001541723 | ATP13   | 32800.1 | -0.06 | protein_coding | 21 | 2708815   | 27107984  | ATP synthase, H+ transporting, mitochondrial F0 complex, subunit F6                                         |
| 34653 | ENSG00001011837 | MARPE1  | 32827.9 | -0.06 | protein_coding | 20 | 31447099  | 31439211  | microtubule-associated protein, RP/EK5 family, member 1                                                     |
| 34708 | ENSG00001151228 | SF3B14  | 32871.7 | -0.06 | protein_coding | 2  | 24295414  | 24299313  | Pre-mRNA branch site protein p14                                                                            |
| 34825 | ENSG0000187052  | NUDT21  | 32962.2 | -0.06 | protein_coding | 16 | 86463345  | 86468111  | nudix (nucleoside diphosphate linked moiety X)-type motif 21                                                |
| 34903 | ENSG0000007698  | BAK     | 33035.7 | -0.06 | protein_coding | 19 | 49489072  | 49489555  | BCL-2-associated X protein                                                                                  |
| 34906 | ENSG0000133883  | COX16   | 33057.2 | -0.06 | protein_coding | 14 | 70791798  | 70826448  | COX16 cytochrome c oxidase assembly homolog (S. cerevisiae)                                                 |
| 34998 | ENSG0000192195  | RPS16   | 33089.6 | -0.06 | protein_coding | 19 | 39923847  | 39926288  | ribosomal protein S16                                                                                       |
| 35005 | ENSG0000146441  | AP3D1   | 33130.8 | -0.06 | protein_coding | 18 | 63817301  | 63816431  | malate dehydrogenase 1, MAD (locable)                                                                       |
| 35069 | ENSG0000111728  | CMAS    | 33169.2 | -0.06 | protein_coding | 12 | 22189108  | 22189108  | cytidine monophosphate N-acetyltransferase family class A, cytidine                                         |
| 35088 | ENSG0000085518  | NDFPA4  | 33227.9 | -0.06 | protein_coding | 3  | 120315166 | 120321347 | NADH dehydrogenase (ubiquinone) 1 beta subcomplex, 4, 15kDa                                                 |
| 35203 | ENSG0000105653  | ANKRD13 | 33249.5 | -0.06 | protein_coding | 13 | 13413868  | 13413868  | ankyrase protein domain containing subunit 13                                                               |
| 35433 | ENSG00001007520 | TSR3    | 33545.6 | -0.06 | protein_coding | 16 | 11399241  | 1401912   | TSR3, 20S RNA accumulation, homolog (S. cerevisiae)                                                         |
| 35615 | ENSG00002004308 | RNF5    | 33725   | -0.06 | protein_coding | 6  | 32143131  | 32151800  | ring finger protein 5, E3 ubiquitin protein ligase                                                          |
| 35618 | ENSG00001022551 | PPP2R3  | 33757   | -0.06 | protein_coding | 12 | 3501337   | 3501337   | adenosine phosphatase 1                                                                                     |
| 35666 | ENSG0000143420  | ENSA    | 33975.1 | -0.06 | protein_coding | 1  | 150573327 | 150602088 | endostatin alpha                                                                                            |
| 35669 | ENSG0000138328  | RP24    | 33976.6 | -0.06 | protein_coding | 10 | 7973518   | 79816570  | ribosomal protein S24                                                                                       |
| 35617 | ENSG0000106516  | CCND3   | 34025.8 | -0.06 | protein_coding | 2  | 18732690  | 18732690  | 2nd zinc finger C2H2-type containing 15                                                                     |
| 35935 | ENSG0000185986  | LAMP1   | 34049.5 | -0.06 | protein_coding | 13 | 113951567 | 113957887 | lysosomal-associated membrane protein 1                                                                     |
| 36035 | ENSG00001919198 | ATP5F1  | 34156.5 | -0.06 | protein_coding | 17 | 48970127  | 48973233  | ATP synthase, H+ transporting, mitochondrial F0 complex, subunit C1 (subunit 9)                             |
| 36038 | ENSG0000101489  | SRRA    | 34228.8 | -0.06 | protein_coding | 1  | 12249769  | 12249769  | steroid 5alpha-reductase                                                                                    |
| 36102 | ENSG0000180979  | SSRA    | 34228.8 | -0.06 | protein_coding | X  | 153309971 | 153309960 | signal sequence receptor, delta                                                                             |
| 36106 | ENSG00000092201 | SUP11H  | 34231.1 | -0.06 | protein_coding | 14 | 21819831  | 21824245  | suppressor of Ty 16 homolog (S. cerevisiae)                                                                 |
| 36173 | ENSG0000006286  | NDFPE2  | 34286.6 | -0.06 | protein_coding | 7  | 140305077 | 140305076 | NADH dehydrogenase (ubiquinone) 1 beta subcomplex, 2, 9kDa                                                  |
| 36173 | ENSG0000111481  | COF2    | 34286.6 | -0.06 | protein_coding | 12 | 54654968  | 54755455  | cofactor protein complex, subunit alpha 1                                                                   |
| 36239 | ENSG0000104131  | EP3     | 34358.5 | -0.06 | protein_coding | 15 | 44829255  | 44855227  | eukaryotic translation initiation factor 3, subunit J                                                       |
| 36261 | ENSG0000198622  | CBR1    | 34407.9 | -0.06 | protein_coding | 21 | 51422239  | 51424444  | carbamoyl reductase 1                                                                                       |
| 36291 | ENSG0000192194  | SRF1    | 34502.5 | -0.06 | protein_coding | 1  | 112705673 | 112715688 | long interspersed non-protein coding RNA 998                                                                |
| 36428 | ENSG0000168957  | HNT1    | 34535.8 | -0.06 | protein_coding | 5  | 13044720  | 130507428 | histidine triad nucleotide binding protein 1                                                                |
| 36449 | ENSG0000141534  | SA12    | 34542.6 | -0.06 | protein_coding | 17 | 2705652   | 7831194   | spERM-like domain N-acetyltransferase family member 2                                                       |
| 36464 | ENSG0000101547  | SRF2    | 34715.5 | -0.06 | protein_coding | 16 | 74719167  | 74731652  | serine/threonine-rich scaffolding factor 2                                                                  |
| 36675 | ENSG0000136450  | SRP1    | 34775.7 | -0.06 | protein_coding | 7  | 56060721  | 56064707  | serine/threonine-rich scaffolding factor 1                                                                  |
| 36680 | ENSG0000139300  | MPLP4   | 34788.4 | -0.06 | protein_coding | 2  | 22482121  | 22482121  | mitochondrial ribosomal protein L44                                                                         |
| 36681 | ENSG0000189831  | ADAMTS1 | 34789.4 | -0.06 | protein_coding | 16 | 68917547  | 68917547  | adhesin phosphatase/antigenase 1                                                                            |
| 36768 | ENSG0000138801  | PAPSS1  | 34869.4 | -0.06 | protein_coding | 4  | 108511433 | 108418106 | 3-phosphoadenosine 5-phosphosulfate synthase 1                                                              |
| 36766 | ENSG0000182385  | MAGCH   | 34879.6 | -0.06 | protein_coding | 1  | 5304282   | 5304282   | mega-nashi homolog, proliferation-associated (Drosophila)                                                   |
| 36819 | ENSG00000032696 | TMP2    | 34925.4 | -0.06 | protein_coding | 1  | 7884959   | 7884959   | TMP metalloproteinase inhibitor 1                                                                           |
| 36845 | ENSG0000158709  | AFM1    | 34960.8 | -0.06 | protein_coding | X  | 125263337 | 125299861 | apoptosis-inducing factor, mitochondrion-associated, 1                                                      |
| 36928 | ENSG0000146885  | TAF11   | 34954.3 | -0.06 | protein_coding | 6  | 48398073  | 48430304  | transcription factor IIB associated factor 11                                                               |
| 36986 | ENSG0000102483  | MPLP2   | 35127.8 | -0.06 | protein_coding | 8  | 1317768   | 1317768   | mitochondrial ribosomal protein L20                                                                         |
| 37059 | ENSG0000158411  | C1orf2  | 35183.8 | -0.06 | protein_coding | 14 | 104378625 | 104384066 | chromosome 14 open reading frame 2                                                                          |
| 37240 | ENSG00000064995 | TAF11   | 35156.6 | -0.06 | protein_coding | 6  | 34845555  | 34855886  | TAF11 RNA polymerase II, TATA box binding protein (TBP)-associated factor, 28kDa                            |
| 37290 | ENSG0000105533  | ALRG    | 35215.1 | -0.06 | protein_coding | 11 | 11026183  | 11026183  | enhancer of zeste 2 homolog (Drosophila)                                                                    |
| 37319 | ENSG0000121579  | NA450   | 35438.5 | -0.06 | protein_coding | 3  | 113435307 | 113445147 | Nalpa/alpha-acetyltransferase 50, NaIc catalytic subunit                                                    |
| 37366 | ENSG0000171566  | PLRG1   | 35477.6 | -0.06 | protein_coding | 4  | 15546158  | 155471587 | pleiotropic regulator 1                                                                                     |
| 37376 | ENSG0000105215  | ALRG    | 35477.6 | -0.06 | protein_coding | 2  | 21801703  | 21801703  | 5-aminomidazole-4-carboxamide nucleoside formyltransferase/IMP cyclidohydrolase                             |
| 37443 | ENSG0000173418  | NA20    | 35562.3 | -0.06 | protein_coding | 20 | 19997760  | 20014299  | Nalpa/alpha-acetyltransferase 20, NaIIc catalytic subunit                                                   |
| 37472 | ENSG0000170275  | CHTAP   | 35567.8 | -0.06 | protein_coding | 3  | 33158471  | 33189205  | cartilage associated protein                                                                                |
| 37480 | ENSG0000105215  | ALRG    | 35567.8 | -0.06 | protein_coding | 2  | 21801703  | 21801703  | 5-aminomidazole-4-carboxamide nucleoside formyltransferase/IMP cyclidohydrolase                             |
| 37517 | ENSG0000105215  | MAGT1   | 35642.4 | -0.06 | protein_coding | X  | 77081801  | 77081801  | magnesium transporter 1                                                                                     |
| 37531 | ENSG0000187770  | OTUB1   | 35684.6 | -0.06 | protein_coding | 11 | 63753325  | 63789283  | OTU domain, ubiquitin aldehyde binding 1                                                                    |
| 37544 | ENSG0000101758  | TAF10A  | 35722.6 | -0.06 | protein_coding | 8  | 7733844   | 7733844   | transcription factor IA                                                                                     |
| 37580 | ENSG00001014125 | RNF7    | 35722.6 | -0.06 | protein_coding | 3  | 141457048 | 141465402 | ring finger protein 7                                                                                       |
| 37586 | ENSG00000064726 | BTBD1   | 35727   | -0.06 | protein_coding | 15 | 83685174  | 83781968  | BTB (POZ) domain containing 1                                                                               |
| 37594 | ENSG0000102762  | RPL20   | 35759.2 | -0.06 | protein_coding | 7  | 31788009  | 31788009  | glycyl-tRNA synthetase domain containing, family B (leucine) member 2                                       |
| 37912 | ENSG00000253626 | EPFAL1  | 36059.1 | -0.06 | protein_coding | 10 | 81272357  | 81278188  | eukaryotic translation initiation factor 5A-like 1                                                          |
| 37938 | ENSG0000148880  | COMM7   | 36063.7 | -0.06 | protein_coding | 20 | 91290493  | 91331803  | COMM domain containing 7                                                                                    |
| 37945 | ENSG00000098281 | COG2    | 36089.3 | -0.06 | protein_coding | 9  | 3302987   | 3302987   | DnaJ (Hsp40) homolog, auxiliary A, member 1                                                                 |
| 38002 | ENSG0000133818  | RNR52   | 36163.9 | -0.06 | protein_coding | 11 | 14289472  | 14306552  | related RAS viral (r-ras) oncogene homolog 2                                                                |
| 38014 | ENSG0000111231  | GRN3    | 36175.3 | -0.06 | protein_coding | 12 | 110892089 | 110897673 | GNP class GTPase 3                                                                                          |
| 38058 | ENSG0000101529  | AGL1    | 36175.3 | -0.06 | protein_coding | 11 | 1078113   | 1078113   | anti-tubulin associated protein 1                                                                           |
| 38081 | ENSG0000174173  | TRMT10C | 36235.3 | -0.06 | protein_coding | 3  | 10120706  | 101285390 | tRNA methyltransferase 10 homolog C (S. cerevisiae)                                                         |
| 38103 | ENSG00000222267 | FIL1    | 36256.4 | -0.06 | protein_coding | X  | 135229559 | 135293518 | four and a half LIM domains 1                                                                               |
| 38128 | ENSG00000089737 | CDK9    | 36281   | -0.06 | protein_coding | 14 | 8651296   | 86475807  | CDK9 (Cdk7/Cdk9) cyclin dependent kinase 9                                                                  |
| 38131 | ENSG0000175213  | C11orf8 | 36281.8 | -0.06 | protein_coding | 14 | 6564720   | 6564720   | chromosome 11 open reading frame 8                                                                          |
| 38225 | ENSG0000187468  | GPX4    | 36389.3 | -0.06 | protein_coding | 19 | 1103936   | 11067877  | glutathione peroxidase 4                                                                                    |
| 38227 | ENSG0000115584  | MPLP19  | 36391   | -0.06 | protein_coding | 2  | 19073909  | 7801767   | mitochondrial ribosomal protein L19                                                                         |
| 38420 | ENSG00001004776 | HSP68   | 36612.8 | -0.06 | protein_coding | 19 | 63245689  | 63249890  | heat shock protein, alpha-crystallin-related, B8                                                            |
| 38426 | ENSG0000127884  | ECR1    | 36650.1 | -0.06 | protein_coding | 10 | 15015986  | 15017189  | erythrocyte cytoskeleton, short chain, 1, mitochondrial                                                     |
| 38434 | ENSG0000102261  | NRAS    | 36650.1 | -0.06 | protein_coding | 11 | 115261890 | 115261890 | neuroblastoma Ras oncogene homolog                                                                          |
| 38450 | ENSG0000071826  | DAPAP1  | 36640.3 | -0.06 | protein_coding | 19 | 1407586   | 14057519  | DNA associated protein 1                                                                                    |
| 38482 | ENSG0000128277  | IFPA    | 36672.7 | -0.06 | protein_coding | 20 | 3188941   | 3204516   | inosine triphosphatase (nucleoside triphosphate pyrophosphatase)                                            |
| 38486 | ENSG0000184196  | NDFAP2  | 36672.7 | -0.06 | protein_coding | 10 | 6024965   | 6024965   | NADH dehydrogenase (ubiquinone) complex 1, assembly factor 2                                                |

|       |                 |           |       |    |       |                |    |           |           |                                                                                   |
|-------|-----------------|-----------|-------|----|-------|----------------|----|-----------|-----------|-----------------------------------------------------------------------------------|
| 39554 | ENSG00000196991 | ENG       | 37796 | 3  | -0.06 | protein_coding | 9  | 13057291  | 130617035 | endoglin                                                                          |
| 39558 | ENSG0000013338  | ALKBH3    | 37820 | 3  | -0.06 | protein_coding | 3  | 5223483   | 5223483   | aminolevulinic acid synthase 1                                                    |
| 39564 | ENSG00000189178 | DUSL1     | 37823 | 3  | -0.06 | protein_coding | 17 | 80015332  | 80023763  | dihydropyridine synthase 1-like (S. cerevisiae)                                   |
| 39566 | ENSG00000177106 | EP3B2     | 37830 | 2  | -0.06 | protein_coding | 11 | 684438    | 727727    | EP3B2-like 2                                                                      |
| 39568 | ENSG00000198672 | CDC38     | 37853 | 2  | -0.06 | protein_coding | 2  | 23793995  | 23809189  | COPII signalosome subunit 8                                                       |
| 39563 | ENSG00000121361 | KCNJ8     | 37939 | 3  | -0.06 | protein_coding | 12 | 21917619  | 21917619  | potassium inwardly-rectifying channel, subfamily J, member 8                      |
| 39565 | ENSG00000171033 | PKA       | 37888 | 3  | -0.06 | protein_coding | 8  | 79428374  | 7957502   | protein kinase (cAMP-dependent, catalytic) inhibitor alpha                        |
| 39562 | ENSG00000142510 | TNGL1     | 37898 | 9  | -0.06 | protein_coding | 1  | 5040216   | 5053268   | tubulininteracting reptin-like domain 1                                           |
| 39568 | ENSG00000193466 | TUBRC2P   | 37930 | 3  | -0.06 | protein_coding | 10 | 13093185  | 13326841  | tubulin gamma complex associated protein 2                                        |
| 39568 | ENSG00000135521 | LTVI      | 37941 | 4  | -0.06 | protein_coding | 6  | 144184481 | 144184481 | LTVI homolog (S. cerevisiae)                                                      |
| 39562 | ENSG00000068294 | GPW02     | 37955 | 9  | -0.06 | protein_coding | A  | 48910334  | 4898151   | G patch domain and KOW motif                                                      |
| 3974  | ENSG00000135521 | RNF126    | 37989 | 5  | -0.06 | protein_coding | 19 | 843267    | 843267    | ring finger protein 126                                                           |
| 39735 | ENSG00000176043 | REX2D     | 37982 | 3  | -0.06 | protein_coding | 11 | 114310108 | 114321001 | RNA exonuclease 2                                                                 |
| 39742 | ENSG00000135223 | SPC25     | 37989 | 3  | -0.06 | protein_coding | 2  | 19898042  | 19916981  | SPC25, NDC80 kinetochore complex component                                        |
| 39776 | ENSG00000195728 | DPR1      | 38038 | 8  | -0.06 | protein_coding | 17 | 7999492   | 7999492   | diaphanin1-like domain                                                            |
| 39777 | ENSG00000179816 | KIF22     | 38040 | 7  | -0.06 | protein_coding | 16 | 29802049  | 29816706  | kinest family member 22                                                           |
| 39790 | ENSG00000175963 | UBE2C     | 38054 | 5  | -0.06 | protein_coding | 20 | 44441216  | 44445398  | ubiquitin-conjugating enzyme E2C                                                  |
| 39798 | ENSG00000192777 | KOIC2S    | 38092 | 8  | -0.06 | protein_coding | 16 | 2732476   | 2739031   | potassium channel heteromultimer domain containing 5                              |
| 39829 | ENSG00000177700 | POLR2L    | 38087 | 8  | -0.06 | protein_coding | 11 | 837356    | 842545    | polymerase (RNA II, DNA directed) polypeptide L, 7.6kDa                           |
| 39831 | ENSG00000174099 | MRR33     | 38090 | 4  | -0.06 | protein_coding | 12 | 65072423  | 65082204  | methylornithine sulfide reductase E3                                              |
| 39844 | ENSG00000131077 | TENC1     | 38105 | 1  | -0.06 | protein_coding | 12 | 54437053  | 53581556  | tensin like C1 domain containing phosphatase domain 2                             |
| 39848 | ENSG00000115286 | NDUF57    | 38110 | 2  | -0.06 | protein_coding | 19 | 1393526   | 1393585   | NADH dehydrogenase (ubiquinone) Fe-S protein 7, 20kDa (NADH-coenzyme Q reductase) |
| 39862 | ENSG00000130748 | TMEM160   | 38132 | 2  | -0.06 | protein_coding | 19 | 47549165  | 47551888  | transmembrane protein 160                                                         |
| 39868 | ENSG00000192796 | SCPS1     | 38138 | 1  | -0.06 | protein_coding | 8  | 10018860  | 10027993  | SECIS homology (S. cerevisiae)                                                    |
| 39906 | ENSG00000185850 | IRS2      | 38174 | 5  | -0.06 | protein_coding | 13 | 110461815 | 110438915 | insulin receptor substrate 2                                                      |
| 39911 | ENSG00000157870 | FAM123B   | 38178 | 2  | -0.06 | protein_coding | 1  | 2517930   | 2522598   | family with sequence similarity 213, member B                                     |
| 39929 | ENSG00000195479 | REER4     | 38198 | 1  | -0.06 | protein_coding | 8  | 21989533  | 21989654  | receptor accessory protein 4                                                      |
| 39946 | ENSG00000165011 | ASF1B     | 38209 | 3  | -0.06 | protein_coding | 19 | 1423021   | 14247768  | anti-silencing factor 1B histone chaperone                                        |
| 39971 | ENSG00000187778 | MCRS1     | 38243 | 8  | -0.06 | protein_coding | 12 | 49953027  | 49961398  | microcephalie protein 1                                                           |
| 39989 | ENSG00000195463 | FAM84B    | 38248 | 12 | -0.06 | protein_coding | 34 | 384485    | 384485    | family with sequence similarity 50, member B                                      |
| 39995 | ENSG00000180155 | LYNX1     | 38258 | 4  | -0.06 | protein_coding | 8  | 14384572  | 14385640  | LynX domain 1                                                                     |
| 39999 | ENSG00000148411 | SH2QA     | 38270 | 8  | -0.06 | protein_coding | 8  | 19171128  | 19253729  | SH2 domain containing 4A                                                          |
| 40000 | ENSG00000131782 | HYAL2     | 38280 | 2  | -0.06 | protein_coding | 12 | 298812    | 298812    | RAD51, HAX1 interacting nuclear cohesin 1                                         |
| 40045 | ENSG00000172239 | PAP1      | 38320 | 2  | -0.06 | protein_coding | 5  | 4352309   | 4355780   | poly(A) binding protein interacting protein 1                                     |
| 40108 | ENSG00000185609 | KLHC8CB   | 38391 | 5  | -0.06 | protein_coding | 3  | 49200044  | 4921397   | kelch domain containing 8B                                                        |
| 40126 | ENSG00000140582 | CHCHD12   | 38402 | 2  | -0.06 | protein_coding | 22 | 8623344   | 8623344   | coiled-coil helix-coiled-coil helix domain containing 10                          |
| 40126 | ENSG00000115306 | SPTBN1    | 38423 | 6  | -0.06 | protein_coding | 2  | 54883422  | 54886612  | tetraspin, beta, non-erythrocytic 1                                               |
| 40128 | ENSG00000192971 | COL18A1   | 38428 | 21 | -0.06 | protein_coding | 21 | 4682526   | 4682526   | collagen, type XVIII, alpha 1                                                     |
| 40144 | ENSG00000180901 | HYAL2     | 38440 | 2  | -0.06 | protein_coding | 3  | 5035921   | 5035921   | hyaluronoglucosaminidase 2                                                        |
| 40152 | ENSG00000119582 | IFT52     | 38456 | 5  | -0.06 | protein_coding | 20 | 42219871  | 42275938  | intraflagellar transport 52 homolog (Chlamydomonas)                               |
| 40153 | ENSG00000180510 | NDP51     | 38463 | 1  | -0.06 | protein_coding | 19 | 1852169   | 1852169   | NADH dehydrogenase (ubiquinone) alpha subcomplex, 13                              |
| 40170 | ENSG00000138138 | ATAD1     | 38470 | 1  | -0.06 | protein_coding | 10 | 8951129   | 8991100   | ATPase family AAA domain containing 1                                             |
| 40172 | ENSG00000107872 | FBNL15    | 38472 | 1  | -0.06 | protein_coding | 10 | 10417846  | 10418293  | F-box and leucine-rich repeat protein 15                                          |
| 40174 | ENSG00000114228 | ZNF41     | 38476 | 3  | -0.06 | protein_coding | 16 | 8614826   | 8616686   | zinc finger protein 581                                                           |
| 40204 | ENSG00000131811 | MYCF      | 38481 | 1  | -0.06 | protein_coding | 18 | 8606816   | 8629074   | myofibrin                                                                         |
| 40208 | ENSG00000131133 | HMT2      | 38508 | 7  | -0.06 | protein_coding | 9  | 35812957  | 35813013  | histidine triad nucleotide binding domain 2                                       |
| 40212 | ENSG00000115815 | SECCAN    | 38512 | 7  | -0.06 | protein_coding | 5  | 13394479  | 13405213  | SEC24 family member A                                                             |
| 40215 | ENSG00000190813 | PPP1R35   | 38514 | 1  | -0.06 | protein_coding | 1  | 100032905 | 100034198 | inorganic pyrophosphatase regulatory subunit 35                                   |
| 40217 | ENSG00000149586 | PH2       | 38516 | 8  | -0.06 | protein_coding | 20 | 42740335  | 42816218  | ubiquitin 2                                                                       |
| 40223 | ENSG00000175210 | ALLBL2    | 38520 | 6  | -0.06 | protein_coding | 5  | 14852106  | 148640105 | actin binding LIM protein family member 3                                         |
| 40227 | ENSG00000162733 | MANKB     | 38520 | 6  | -0.06 | protein_coding | 8  | 27681915  | 27681915  | magnesium-dependent protein kinase kinase 6                                       |
| 40228 | ENSG00000162576 | MXRAB     | 38525 | 6  | -0.06 | protein_coding | 1  | 1288609   | 12891757  | matrix-remodelling associated 8                                                   |
| 40233 | ENSG00000189222 | MAF3      | 38535 | 1  | -0.06 | protein_coding | 17 | 38951889  | 39012518  | v-maf avian myeloblastosis oncogene homolog F                                     |
| 40251 | ENSG00000140413 | PGCF1L    | 38549 | 8  | -0.06 | protein_coding | 12 | 17433942  | 17501389  | glial-derived growth factor receptor-like 1                                       |
| 40255 | ENSG00000144749 | LRG1      | 38550 | 8  | -0.06 | protein_coding | 3  | 16429221  | 16651187  | leucine-rich and immunoglobulin-like domains 1                                    |
| 40263 | ENSG00000117322 | DDAH2     | 38557 | 7  | -0.06 | protein_coding | 6  | 3198488   | 31988384  | dimethylarginine dimethylaminohydrolase 2                                         |
| 40270 | ENSG00000136269 | AP3L      | 38559 | 8  | -0.06 | protein_coding | 6  | 12782469  | 12784909  | actin related protein 2/3 complex, subunit E3                                     |
| 40273 | ENSG00000091164 | TNXLN     | 38567 | 7  | -0.06 | protein_coding | 18 | 54264439  | 54318331  | titinectin-like 1                                                                 |
| 40275 | ENSG00000138783 | NIPSNAP3A | 38568 | 7  | -0.06 | protein_coding | 9  | 10750969  | 107522403 | ripisap homolog 3A (C. elegans)                                                   |
| 40286 | ENSG00000192976 | NDP51     | 38570 | 1  | -0.06 | protein_coding | 19 | 1852169   | 1852169   | protein tyrosine phosphatase (protein product of catalytic arginine), member b    |
| 40285 | ENSG00000134243 | SORT1     | 38583 | 6  | -0.06 | protein_coding | 1  | 10982192  | 10984073  | sortin 1                                                                          |
| 40297 | ENSG00000128288 | URCD      | 38585 | 7  | -0.06 | protein_coding | 1  | 4547719   | 45481247  | urocyprinogen decarboxylase                                                       |
| 40298 | ENSG00000145628 | NOL14     | 38589 | 3  | -0.06 | protein_coding | 1  | 12901263  | 12901263  | RNA pseudouridine synthase domain containing 4                                    |
| 40300 | ENSG00000135668 | MPHOSPH6  | 38586 | 7  | -0.06 | protein_coding | 16 | 82181403  | 82203831  | M-phase phosphoprotein 6                                                          |
| 40329 | ENSG00000170770 | CSMR2C    | 38620 | 1  | -0.06 | protein_coding | 16 | 38191811  | 38211824  | casein kinase 2, alpha prime polypeptide                                          |
| 40338 | ENSG00000124909 | CPST1     | 38624 | 1  | -0.06 | protein_coding | 16 | 231118047 | 231118047 | ARV1 homolog 1 (S. cerevisiae)                                                    |
| 40339 | ENSG00000129354 | AP1M2     | 38628 | 4  | -0.06 | protein_coding | 19 | 1068347   | 10687991  | adaptor-related protein complex 1, mu 2 subunit                                   |
| 40357 | ENSG00000119977 | TCN3      | 38647 | 9  | -0.06 | protein_coding | 10 | 97423158  | 97453300  | reticulon family member 3                                                         |
| 40373 | ENSG00000190752 | TRAF3     | 38648 | 2  | -0.06 | protein_coding | 17 | 385348    | 385348    | funnel chaperone synthase                                                         |
| 40380 | ENSG00000145404 | SKP2      | 38658 | 4  | -0.06 | protein_coding | 5  | 38152091  | 38184421  | S-phase kinase-associated protein 2, E3 ubiquitin protein ligase                  |
| 40390 | ENSG00000187397 | VKORC1    | 38678 | 5  | -0.06 | protein_coding | 16 | 31102163  | 31107401  | vitamin K-epoxide reductase complex, subunit 1                                    |
| 40394 | ENSG00000184928 | NOL14     | 38680 | 3  | -0.06 | protein_coding | 1  | 11920480  | 11920480  | cell surface antigen                                                              |
| 40394 | ENSG00000158919 | BLCAP     | 38680 | 2  | -0.06 | protein_coding | 20 | 38120874  | 38156333  | bladder cancer associated protein                                                 |
| 40398 | ENSG00000119487 | MARPKA1   | 38684 | 7  | -0.06 | protein_coding | 9  | 12819872  | 12848983  | magnesium-activated protein kinase associated protein 1                           |
| 40402 | ENSG00000195893 | SCOR1A    | 38688 | 3  | -0.06 | protein_coding | 13 | 2240818   | 2240818   | scotin and SVL domain containing 3                                                |
| 40430 | ENSG00000158947 | DMD       | 38722 | 7  | -0.06 | protein_coding | 8  | 31115754  | 31357558  | dystrophin                                                                        |
| 40447 | ENSG00000089195 | TRMT6     | 38736 | 2  | -0.06 | protein_coding | 20 | 5917881   | 5931182   | RNA methyltransferase domain containing 3 (S. cerevisiae)                         |
| 40451 | ENSG00000185681 | TRMT6     | 38736 | 2  | -0.06 | protein_coding | 16 | 288816    | 288816    | 23kDa-like kinase 1                                                               |
| 40482 | ENSG00000106133 | PCOLCE    | 38773 | 7  | -0.06 | protein_coding | 7  | 10019990  | 10020598  | procollagen C-proteinase enhancer 1                                               |
| 40488 | ENSG00000114440 | PRDRN3    | 38781 | 9  | -0.06 | protein_coding | 3  | 7341584   | 73874991  | PDZ domain containing zinc finger 3                                               |
| 40492 | ENSG00000154141 | TRAF3     | 38781 | 9  | -0.06 | protein_coding | 10 | 21623099  | 21623099  | TRAF3 domain 1                                                                    |
| 40496 | ENSG00000198932 | SELM      | 38792 | 5  | -0.06 | protein_coding | 22 | 31505798  | 31516055  | Seleleporin M                                                                     |
| 40500 | ENSG00000186352 | ANKRD37   | 38796 | 1  | -0.06 | protein_coding | 4  | 18631775  | 186321782 | ankyrin repeat domain 37                                                          |
| 40500 | ENSG00000135778 | SH3A      | 38796 | 2  | -0.06 | protein_coding | 5  | 218396    | 256815    | succinate dehydrogenase complex, subunit A, flavoprotein (Fp)                     |
| 40500 | ENSG00000149217 | NTN4      | 38820 | 4  | -0.06 | protein_coding | 12 | 86051583  | 86134530  | netrin 4                                                                          |
| 40501 | ENSG00000124815 | MCCS1     | 38832 | 2  | -0.06 | protein_coding | 6  | 38987354  | 39009230  | midbody domain cohesin synthase 1                                                 |
| 40503 | ENSG00000186959 | TGM2      | 38852 | 3  | -0.06 | protein_coding | 20 | 36758993  | 36794980  | transglutaminase 2                                                                |
| 40503 | ENSG00000193922 | SMS       | 38852 | 3  | -0.06 | protein_coding | 2  | 21938991  | 22056198  | serine protease                                                                   |
| 40503 | ENSG00000496933 | PHF23     | 38863 | 1  | -0.06 | protein_coding | 17 | 7193847   | 7193847   | PHF domain protein 23                                                             |
| 40502 | ENSG00000186888 | TPS31     | 38864 | 2  | -0.06 | protein_coding | 12 | 21964893  | 21967198  | phosphatidylinositol-3-phosphate 4-kinase, type II, gamma                         |
| 40502 | ENSG00000191529 | TPS31     | 38864 | 2  | -0.06 | protein_coding | 12 | 24320303  | 24320303  | tumor suppressor p53-inducible protein 3                                          |

| Accession | Gene             | Start    | End   | Strand | Feature        | Gene | Start     | End       | Strand | Feature                                                                                 |
|-----------|------------------|----------|-------|--------|----------------|------|-----------|-----------|--------|-----------------------------------------------------------------------------------------|
| 40964     | ENSG0000015289   | PCGF1    | 39313 | -0.06  | protein_coding | 2    | 7427370   | 7427370   | -0.06  | polycomb group ring finger 1                                                            |
| 40971     | ENSG0000015997   | DNFBP    | 39319 | -0.06  | protein_coding | 2    | 2202344   | 2202344   | -0.06  | zinc finger antiviral protein 2                                                         |
| 40975     | ENSG00000150717  | NDFUS8   | 39324 | -0.06  | protein_coding | 11   | 67718004  | 67904111  | -0.06  | NADH dehydrogenase (ubiquinone) F1-6 protein, beta subunit (NADH-coenzyme Q reductase)  |
| 40981     | ENSG00000179313  | REXO1    | 39331 | -0.06  | protein_coding | 19   | 1815248   | 1848482   | -0.06  | REX1, RNA exosome 1 homolog (S. cerevisiae)                                             |
| 40982     | ENSG000001006163 | WDR32    | 39333 | -0.06  | protein_coding | 22   | 118472343 | 118509145 | -0.06  | WD repeat domain 3                                                                      |
| 40984     | ENSG00000171268  | FAM109B  | 39336 | -0.06  | protein_coding | 22   | 42412045  | 42412045  | -0.06  | family with sequence similarity 155, member B                                           |
| 40985     | ENSG00000130222  | GAD4D4G  | 39337 | -0.06  | protein_coding | 9    | 92211928  | 92221470  | -0.06  | growth arrest and DNA-damage-inducible, gamma                                           |
| 40992     | ENSG00000195298  | TSPAN7   | 39344 | -0.06  | protein_coding | A    | 8462923   | 8549169   | -0.06  | tetraspanin 7                                                                           |
| 40996     | ENSG00000197863  | RAB40C   | 39354 | -0.06  | protein_coding | 16   | 438237    | 438237    | -0.06  | RAB40C, member RAS oncogene family                                                      |
| 41003     | ENSG00000195950  | RAD18    | 39359 | -0.06  | protein_coding | 3    | 8877086   | 9005457   | -0.06  | RAD18 homolog (S. cerevisiae)                                                           |
| 41005     | ENSG00000195519  | TFPI     | 39360 | -0.06  | protein_coding | 19   | 5481030   | 5481965   | -0.06  | TGF-beta1 (beta) transcription partner (in childhood Leukemia)                          |
| 41018     | ENSG00000128757  | CERNK3   | 39362 | -0.06  | protein_coding | 11   | 10583656  | 10583656  | -0.06  | SCC1 cytoskeletal chaperone assembly protein                                            |
| 41044     | ENSG00000124785  | NRN1     | 39400 | -0.06  | protein_coding | 6    | 599622    | 6001200   | -0.06  | neurturin 1                                                                             |
| 41048     | ENSG00000153517  | HOMER1   | 39407 | -0.06  | protein_coding | 3    | 13621264  | 13621264  | -0.06  | histone deacetylase 11                                                                  |
| 41054     | ENSG00000051128  | HOMER3   | 39413 | -0.06  | protein_coding | 19   | 1904010   | 19052070  | -0.06  | homolog 3 (Drosophila)                                                                  |
| 41057     | ENSG00000156603  | MED19    | 39420 | -0.06  | protein_coding | 11   | 57411196  | 57417693  | -0.06  | mediator complex subunit 19                                                             |
| 41062     | ENSG00000150204  | NFKB1    | 39423 | -0.06  | protein_coding | 16   | 1595297   | 1601571   | -0.06  | NF-kappaB1, nuclear factor kappa-B subunit 1                                            |
| 41063     | ENSG00000138162  | TACC2    | 39424 | -0.06  | protein_coding | 10   | 123748669 | 124014060 | -0.06  | transforming, acyl-coiled-coil containing protein 2                                     |
| 41065     | ENSG00000122796  | CALD1    | 39437 | -0.06  | protein_coding | 7    | 134429203 | 134455479 | -0.06  | caldesmon 1                                                                             |
| 41067     | ENSG00000102693  | CTSBP5   | 39438 | -0.06  | protein_coding | 15   | 74207411  | 74207411  | -0.06  | chromosome 15 open reading frame 59                                                     |
| 41068     | ENSG00000107685  | EIF2B3   | 39438 | -0.06  | protein_coding | 1    | 4531650   | 45452282  | -0.06  | eukaryotic translation initiation factor 2B, subunit 3, gamma, 58kDa                    |
| 41069     | ENSG00000204217  | BMP2R2   | 39439 | -0.06  | protein_coding | 2    | 203241659 | 203242274 | -0.06  | bone morphogenetic protein receptor, type II (serine/threonine kinase)                  |
| 41071     | ENSG00000143262  | ANKK2    | 39443 | -0.06  | protein_coding | 4    | 113239265 | 113240498 | -0.06  | domain 2, neuronal                                                                      |
| 41103     | ENSG00000198841  | KT112    | 39454 | -0.06  | protein_coding | 1    | 5249775   | 5249848   | -0.06  | KT112 homolog, chromatin associated (S. cerevisiae)                                     |
| 41105     | ENSG00000129203  | FBXW11   | 39455 | -0.06  | protein_coding | 5    | 17128853  | 17143387  | -0.06  | F-box and WD repeat domain containing 11                                                |
| 41112     | ENSG00000195337  | MMPK     | 39465 | -0.06  | protein_coding | 7    | 1521950   | 1526709   | -0.06  | small inducible chitinase/serine protease/serine protease oncogene homolog X            |
| 41113     | ENSG00000178182  | MVPOP    | 39468 | -0.06  | protein_coding | 19   | 46383278  | 46405862  | -0.06  | Myb-related transcription factor, partner of profilin                                   |
| 41114     | ENSG00000178889  | PKNOX1   | 39467 | -0.06  | protein_coding | 16   | 15068448  | 15233196  | -0.06  | pyridoxal-dependent decarboxylase domain containing 1                                   |
| 41116     | ENSG00000100871  | PCP2     | 39467 | -0.06  | protein_coding | 16   | 8040468   | 8040468   | -0.06  | cytoskeleton-associated protein 81                                                      |
| 41130     | ENSG00000137103  | TMEM8B   | 39483 | -0.06  | protein_coding | 9    | 35814448  | 35854444  | -0.06  | transmembrane protein 8B                                                                |
| 41131     | ENSG00000191888  | SPC24    | 39483 | -0.06  | protein_coding | 19   | 11242196  | 11268484  | -0.06  | SPC24, NDC80 kinetochore complex component                                              |
| 41133     | ENSG00000150523  | NCO1     | 39522 | -0.06  | protein_coding | 4    | 1662116   | 1662116   | -0.06  | mediator complex component 1                                                            |
| 41138     | ENSG00000150506  | HOCX2    | 39498 | -0.06  | protein_coding | 19   | 12873817  | 12935534  | -0.06  | hook microtubule-anchoring protein 2                                                    |
| 41144     | ENSG00000113083  | LIT1     | 39501 | -0.06  | protein_coding | 5    | 12138880  | 121413880 | -0.06  | lysoyl oxidase                                                                          |
| 41145     | ENSG00000150537  | ANKK1    | 39501 | -0.06  | protein_coding | 4    | 278227    | 278227    | -0.06  | domain 2, neuronal                                                                      |
| 41151     | ENSG00000142963  | RHOT2    | 39508 | -0.06  | protein_coding | 16   | 718086    | 724174    | -0.06  | Ras homolog family member 2                                                             |
| 41162     | ENSG00000191374  | CBX8     | 39519 | -0.06  | protein_coding | 22   | 39251455  | 39268319  | -0.06  | chromobox homolog 8                                                                     |
| 41163     | ENSG00000150484  | TMEM160A | 39520 | -0.06  | protein_coding | 8    | 13268308  | 13268308  | -0.06  | transmembrane protein 160A                                                              |
| 41167     | ENSG00000196925  | TSPAN12  | 39524 | -0.06  | protein_coding | 7    | 120427378 | 120498456 | -0.06  | tetraspanin 12                                                                          |
| 41175     | ENSG00000204277  | C17orf89 | 39528 | -0.06  | protein_coding | 17   | 79213039  | 79215981  | -0.06  | chromosome 17 open reading frame 89                                                     |
| 41181     | ENSG00000150529  | NCO2     | 39532 | -0.06  | protein_coding | 12   | 1885214   | 1885214   | -0.06  | Drosophila syndrome critical region gene 6                                              |
| 41183     | ENSG00000242114  | MTPP1    | 39545 | -0.06  | protein_coding | 22   | 30821518  | 30825045  | -0.06  | mitochondrial fission process 1                                                         |
| 41188     | ENSG00000135503  | ACVR1B   | 39550 | -0.06  | protein_coding | 12   | 52345451  | 52369862  | -0.06  | activin A receptor, type IB                                                             |
| 41189     | ENSG00000195041  | MIR681   | 39550 | -0.06  | protein_coding | 16   | 4962599   | 4962599   | -0.06  | calcium regulated heat stable protein 1, 24kDa                                          |
| 41190     | ENSG00000123739  | PLSG12A  | 39550 | -0.06  | protein_coding | 4    | 11053145  | 11053145  | -0.06  | 11053145, alpha group A, KIAA                                                           |
| 41207     | ENSG00000198549  | NID5RF2  | 39573 | -0.06  | protein_coding | 15   | 40623563  | 40643168  | -0.06  | chromosome 15 open reading frame 52                                                     |
| 41208     | ENSG00000148880  | NDPK1A1  | 39575 | -0.06  | protein_coding | 19   | 5891287   | 5904370   | -0.06  | NADH dehydrogenase (ubiquinone) 1, alpha subcomplex, 11, 14.7kDa                        |
| 41216     | ENSG00000191042  | PCP2     | 39576 | -0.06  | protein_coding | 16   | 8040468   | 8040468   | -0.06  | cytoskeleton-associated protein 81                                                      |
| 41217     | ENSG00000170819  | COMMD8   | 39585 | -0.06  | protein_coding | 8    | 146064227 | 146079121 | -0.06  | COX20 domain containing 5                                                               |
| 41222     | ENSG00000151790  | BCAP29   | 39589 | -0.06  | protein_coding | 7    | 10220422  | 10220915  | -0.06  | B-cell receptor-associated protein 29                                                   |
| 41224     | ENSG00000164981  | PCO1A    | 39590 | -0.06  | protein_coding | 8    | 52192629  | 52198706  | -0.06  | centriole protein A                                                                     |
| 41234     | ENSG00000117308  | GALE     | 39605 | -0.06  | protein_coding | 1    | 2412289   | 24127271  | -0.06  | UDP-galactase-4-epimerase                                                               |
| 41235     | ENSG00000173546  | CSPG4    | 39609 | -0.06  | protein_coding | 15   | 73996603  | 74055199  | -0.06  | chondroitin sulfate proteoglycan 4                                                      |
| 41245     | ENSG00000192919  | CTSC17   | 39617 | -0.06  | protein_coding | 11   | 102648124 | 102648124 | -0.06  | transcript elongation factor A (SII)-like 7                                             |
| 41248     | ENSG00000148918  | NCAP2    | 39619 | -0.06  | protein_coding | 7    | 158424003 | 158487520 | -0.06  | non-SMC condensin II complex, subunit G2                                                |
| 41253     | ENSG00000193824  | CDS1     | 39621 | -0.06  | protein_coding | 4    | 8554132   | 85552491  | -0.06  | COP-delta/cytoplasmic synthase (phosphatidate cytidylyltransferase) 1                   |
| 41256     | ENSG00000195298  | NCO1     | 39522 | -0.06  | protein_coding | 11   | 112811987 | 112811987 | -0.06  | mediator complex component 1                                                            |
| 41268     | ENSG00000158883  | ZNF89    | 39634 | -0.06  | protein_coding | 16   | 3361379   | 3363533   | -0.06  | zinc finger protein 889                                                                 |
| 41269     | ENSG00000111789  | COL12A1  | 39635 | -0.06  | protein_coding | 8    | 71974402  | 71975167  | -0.06  | collagen, type XII, alpha 1                                                             |
| 41271     | ENSG00000142727  | KIF18B   | 39635 | -0.06  | protein_coding | 6    | 47028     | 47028     | -0.06  | KN motif anion repeat domains 1                                                         |
| 41280     | ENSG00000188490  | TMD2     | 39644 | -0.06  | protein_coding | 8    | 38848327  | 38848343  | -0.06  | TM2 domain containing 2                                                                 |
| 41288     | ENSG00000195916  | CBX5     | 39659 | -0.06  | protein_coding | 12   | 54624724  | 54627386  | -0.06  | chromobox homolog 5                                                                     |
| 41290     | ENSG00000152964  | FAM188A  | 39659 | -0.06  | protein_coding | 12   | 6912614   | 6912614   | -0.06  | family with sequence similarity 155, member A                                           |
| 41299     | ENSG00000189171  | S100A13  | 39677 | -0.06  | protein_coding | 1    | 153591263 | 153606568 | -0.06  | S100 calcium binding domain protein A13                                                 |
| 41314     | ENSG00000172992  | DCAK1    | 39697 | -0.06  | protein_coding | 17   | 43107098  | 43138473  | -0.06  | dephospho-CoA kinase domain containing 1                                                |
| 41316     | ENSG00000150533  | PCP2     | 39698 | -0.06  | protein_coding | 16   | 8040468   | 8040468   | -0.06  | cytoskeleton-associated protein 81                                                      |
| 41321     | ENSG00000194976  | SNAPC2   | 39704 | -0.06  | protein_coding | 19   | 7985201   | 7988135   | -0.06  | small nuclear RNA activating complex, polypeptide 2, 45kDa                              |
| 41322     | ENSG00000170485  | NPA52    | 39704 | -0.06  | protein_coding | 2    | 101436614 | 101413291 | -0.06  | neuronal PAS domain protein 2                                                           |
| 41324     | ENSG00000151433  | RHOA2    | 39707 | -0.06  | protein_coding | 19   | 3944519   | 3944519   | -0.06  | rho GTPase protein 27                                                                   |
| 41337     | ENSG00000112183  | RBM24    | 39720 | -0.06  | protein_coding | 6    | 1728157   | 17294106  | -0.06  | RNA binding motif protein 24                                                            |
| 41338     | ENSG00000197191  | GPCR5B   | 39723 | -0.06  | protein_coding | 16   | 18698816  | 18697489  | -0.06  | G protein-coupled receptor, family C, group 5, member B                                 |
| 41341     | ENSG00000195786  | TSC2     | 39725 | -0.06  | protein_coding | 16   | 7524856   | 7524856   | -0.06  | seckwith syndrome protein                                                               |
| 41358     | ENSG00000103197  | TSC2     | 39755 | -0.06  | protein_coding | 16   | 207486    | 21387     | -0.06  | tuberous sclerosis 2                                                                    |
| 41359     | ENSG00000189868  | SPRED1   | 39759 | -0.06  | protein_coding | 15   | 38544527  | 38548450  | -0.06  | secretory-related, EVH1 domain containing 1                                             |
| 41362     | ENSG00000197298  | SPRED2   | 39759 | -0.06  | protein_coding | 15   | 4208188   | 4208188   | -0.06  | fat storage-inducible transmembrane protein 2                                           |
| 41370     | ENSG00000135047  | CTSL     | 39762 | -0.06  | protein_coding | 9    | 9034034   | 9034034   | -0.06  | cathepsin L                                                                             |
| 41371     | ENSG00000197549  | COR66    | 39764 | -0.06  | protein_coding | 17   | 2794174   | 2794925   | -0.06  | coronin 6                                                                               |
| 41378     | ENSG00000145573  | MIR681   | 39774 | -0.06  | protein_coding | 16   | 4446313   | 4446313   | -0.06  | MIR52 magnesium transporter                                                             |
| 41382     | ENSG00000182987  | ACBD3    | 39778 | -0.06  | protein_coding | 1    | 226332380 | 226374331 | -0.06  | acyl-CoA binding domain containing 3                                                    |
| 41386     | ENSG00000197720  | THSD4    | 39783 | -0.06  | protein_coding | 15   | 71386291  | 72075722  | -0.06  | thrombospondin, type I, domain containing 4                                             |
| 41390     | ENSG00000152971  | RYR2     | 39788 | -0.06  | protein_coding | 14   | 11181918  | 11181918  | -0.06  | ryanodine receptor 2, cardiac                                                           |
| 41393     | ENSG00000198101  | CXCR6B   | 39792 | -0.06  | protein_coding | X    | 11872112  | 118699397 | -0.06  | chemokine CXCR6, open reading frame 56                                                  |
| 41397     | ENSG00000204262  | COL5A2   | 39796 | -0.06  | protein_coding | 2    | 118986622 | 119004405 | -0.06  | collagen, type V, alpha 2                                                               |
| 41398     | ENSG00000103245  | NANP     | 39796 | -0.06  | protein_coding | 16   | 7791753   | 7911328   | -0.06  | neuronal protein A recognition factor-like                                              |
| 41408     | ENSG00000205974  | RYR2N    | 39809 | -0.06  | protein_coding | 8    | 24847962  | 24849484  | -0.06  | NFYB domain and neuronal intracellular calcium                                          |
| 41414     | ENSG00000127855  | GNAH1    | 39817 | -0.06  | protein_coding | 7    | 7973271   | 79848718  | -0.06  | guanine nucleotide binding protein (G protein), alpha inhibiting activity polypeptide 1 |
| 41416     | ENSG00000196954  | TMR2     | 39818 | -0.06  | protein_coding | 6    | 15407348  | 15406274  | -0.06  | transiently expressed protein 2                                                         |
| 41419     | ENSG00000153118  | NTSE     | 39819 | -0.06  | protein_coding | 6    | 86118990  | 86025009  | -0.06  | P-ribosomal protein euk (C573)                                                          |
| 4142      |                  |          |       |        |                |      |           |           |        |                                                                                         |



|       |                  |           |         |       |                |    |           |           |                                                                                        |
|-------|------------------|-----------|---------|-------|----------------|----|-----------|-----------|----------------------------------------------------------------------------------------|
| 41763 | ENSG00000135052  | GLM1      | 40717.8 | -0.06 | protein_coding | 9  | 88841061  | 88715088  | golgi membrane protein 1                                                               |
| 41764 | ENSG00000135018  | ZNF690    | 40717.8 | -0.06 | protein_coding | 19 | 85172405  | 85172405  | chr12c long protein 500                                                                |
| 41768 | ENSG00000189635  | HIC2      | 40175.2 | -0.06 | protein_coding | 22 | 21771693  | 21905752  | hypermethylated in cancer 2                                                            |
| 41768 | ENSG00000090565  | RAB11FIP3 | 40175.2 | -0.06 | protein_coding | 16 | 4756119   | 573011    | RAB11 family interacting protein 3 (class II)                                          |
| 41768 | ENSG00000205360  | TRNP      | 40183.3 | -0.06 | protein_coding | 1  | 27320198  | 27327369  | TMF-regulated nuclear protein 1                                                        |
| 41772 | ENSG00000159203  | RCN1      | 40190.1 | -0.06 | protein_coding | 21 | 26885440  | 35987441  | regulator of calcineurin 1                                                             |
| 41773 | ENSG00000185532  | PRK2A     | 40192.8 | -0.06 | protein_coding | 10 | 52750485  | 54058110  | protein kinase, cAMP-dependent, type 1                                                 |
| 41773 | ENSG00000185568  | HSPA7A    | 40199.1 | -0.06 | protein_coding | 10 | 18403703  | 18620265  | heat shock 70kDa protein 7A                                                            |
| 41774 | ENSG00000186153  | LMCT      | 40200.5 | -0.06 | protein_coding | 13 | 76843650  | 76843650  | LDL domain 7                                                                           |
| 41787 | ENSG00000054448  | WR528     | 40208   | -0.06 | protein_coding | 2  | 7486885   | 74862882  | WD repeat domain 54                                                                    |
| 41791 | ENSG00000152220  | PFRK2     | 40213.5 | -0.06 | protein_coding | 6  | 53207019  | 33681678  | protein subunit 6                                                                      |
| 41799 | ENSG00000153921  | SLC22A7   | 40220.3 | -0.06 | protein_coding | 8  | 48682659  | 48682659  | solute carrier family 25, member 27                                                    |
| 41801 | ENSG00000240984  | PMMA2     | 40221.2 | -0.06 | protein_coding | 8  | 26362202  | 26371608  | paramyxovirus M antigen 2                                                              |
| 41806 | ENSG00000089582  | AKR1B1    | 40226   | -0.06 | protein_coding | 7  | 134121702 | 134144306 | aldo-keto reductase family 1, member B1 (aldoase reductase)                            |
| 41807 | ENSG00000090783  | FOPD2     | 40226.5 | -0.06 | protein_coding | 4  | 1790689   | 1810599   | fibroblast growth factor receptor 3                                                    |
| 41813 | ENSG00000219438  | FAM19A5   | 40232.9 | -0.06 | protein_coding | 22 | 4888272   | 48246724  | family with sequence similarity 19 (chemokine (C-C motif) like), member A5             |
| 41815 | ENSG00000086489  | PRR11     | 40235.3 | -0.06 | protein_coding | 17 | 57232860  | 57262066  | protein rich 11                                                                        |
| 41820 | ENSG00000159878  | APFL      | 40239.6 | -0.06 | protein_coding | 9  | 313917863 | 133988539 | allograft inflammatory factor 1-like                                                   |
| 41821 | ENSG00000175745  | NRP2      | 40239.6 | -0.06 | protein_coding | 5  | 92918043  | 92920321  | nuclear receptor subfamily 2, group F, member 1                                        |
| 41824 | ENSG00000199472  | CPE       | 40246.9 | -0.06 | protein_coding | 4  | 186262346 | 166419472 | carboxypeptidase E                                                                     |
| 41830 | ENSG00000155290  | PCIT1     | 40250.8 | -0.06 | protein_coding | 8  | 31266707  | 120369310 | Knoepfel-like factor 10                                                                |
| 41841 | ENSG00000171914  | TLL2      | 40259.6 | -0.06 | protein_coding | 15 | 62682725  | 63136830  | tailin 2                                                                               |
| 41845 | ENSG00000174211  | PRPF8     | 40263.7 | -0.06 | protein_coding | 17 | 1553923   | 1588178   | pre-mRNA processing factor 8                                                           |
| 41854 | ENSG00000165832  | TBU1      | 40272.2 | -0.06 | protein_coding | 10 | 116697659 | 116732030 | TubB pseudonuclear (gel) synthase family member 1                                      |
| 41856 | ENSG00000153707  | PTPRD     | 40275.6 | -0.06 | protein_coding | 9  | 8314246   | 10612723  | protein tyrosine phosphatase, receptor type, D                                         |
| 41857 | ENSG0000051341   | PLOL      | 40277.6 | -0.06 | protein_coding | 3  | 12150278  | 12128455  | polymerase (DNA directed), theta                                                       |
| 41863 | ENSG00000184545  | DIRX1     | 40281.6 | -0.06 | protein_coding | 11 | 1575274   | 1581109   | dual specificity phosphatase 8                                                         |
| 41869 | ENSG00000072954  | TMEM38A   | 40287.8 | -0.06 | protein_coding | 19 | 16771938  | 16800840  | transmembrane protein 38A                                                              |
| 41877 | ENSG00000189601  | KCTD2     | 40296.9 | -0.06 | protein_coding | 17 | 27038670  | 73691894  | potassium channel tetramerization domain containing 2                                  |
| 41882 | ENSG00000189622  | CHST2     | 40298.9 | -0.06 | protein_coding | 18 | 81424     | 81424     | chondroitin 1 open reading frame 2                                                     |
| 41886 | ENSG00000135801  | TAF1L     | 40310.2 | -0.06 | protein_coding | 1  | 22972859  | 229761794 | TAFS-like RNA polymerase II, p300/CBP-associated factor (PCAF-associated factor) 65kDa |
| 41890 | ENSG00000202156  | HIF2C     | 40318.6 | -0.06 | protein_coding | 6  | 122720991 | 122754284 | heat shock transcription factor 2                                                      |
| 41898 | ENSG00000185578  | CHD2      | 40320.3 | -0.06 | protein_coding | 14 | 18443287  | 18443288  | chromatin 1 open reading frame 2                                                       |
| 41899 | ENSG00000141934  | PPAP2C    | 40327.7 | -0.06 | protein_coding | 19 | 291040    | 291393    | phosphatidic acid phosphatase type 2C                                                  |
| 41902 | ENSG00000197957  | DNER      | 40328.8 | -0.06 | protein_coding | 2  | 23022345  | 230479274 | delta/alpha-like GGF repeat containing                                                 |
| 41903 | ENSG00000189591  | YFAP1     | 40329.7 | -0.06 | protein_coding | 3  | 238147665 | 238190774 | yeast acin myosin-binding-like oncogene homolog                                        |
| 41915 | ENSG00000152102  | FAM168B   | 40334.7 | -0.06 | protein_coding | 2  | 13180549  | 131851033 | family with sequence similarity 168, member B                                          |
| 41917 | ENSG00000137221  | TAF11     | 40334.6 | -0.06 | protein_coding | 6  | 43442521  | 43474294  | tight junction-associated protein 1 (peripherin)                                       |
| 41918 | ENSG00000189589  | KANSL3    | 40337.7 | -0.06 | protein_coding | 14 | 7758258   | 7758258   | KLCC-interacting protein                                                               |
| 41925 | ENSG00000084688  | ETV1      | 40362   | -0.06 | protein_coding | 7  | 13930853  | 14031056  | ETS variant 1                                                                          |
| 41931 | ENSG00000079102  | RUXNT1    | 40375.1 | -0.06 | protein_coding | 8  | 92987203  | 93115514  | nurt-related interacting protein 1 (peripherin)                                        |
| 41932 | ENSG00000189428  | MYO19     | 40375.8 | -0.06 | protein_coding | 8  | 272240    | 4135671   | MLNAT Cdk-activating kinase assembly factor 1                                          |
| 41935 | ENSG00000100321  | SYNGR1    | 40377.1 | -0.06 | protein_coding | 22 | 3974930   | 39791593  | synaptogyrin 1                                                                         |
| 41941 | ENSG00000139324  | TMTCS3    | 40387.9 | -0.06 | protein_coding | 12 | 8853673   | 8859364   | transmembrane and tetraallophosphate repeat containing 3                               |
| 41942 | ENSG00000189583  | MORF8     | 40388.3 | -0.06 | protein_coding | 15 | 16909109  | 16909109  | microtubule-associated protein 1A                                                      |
| 41946 | ENSG00000189583  | TADA1     | 40392.3 | -0.06 | protein_coding | 11 | 16885217  | 16885494  | transcriptional adaptor 1                                                              |
| 41958 | ENSG00000138228  | CGREF1    | 40410.7 | -0.06 | protein_coding | 2  | 27312757  | 27341995  | cell growth regulator with EF-hand domain 1                                            |
| 41961 | ENSG00000142698  | C12orf16  | 40418.6 | -0.06 | protein_coding | 1  | 36119476  | 36185073  | chromosome 1 open reading frame 216                                                    |
| 41962 | ENSG00000194330  | SPR4      | 40420.3 | -0.06 | protein_coding | 8  | 41113481  | 41120116  | secreted frizzled-related protein 2                                                    |
| 41963 | ENSG00000163900  | TMEM41A   | 40424.3 | -0.06 | protein_coding | 3  | 185184284 | 185216845 | transmembrane protein 41A                                                              |
| 41968 | ENSG00000182437  | RAVE1B    | 40428.7 | -0.06 | protein_coding | 12 | 65210778  | 65269915  | transcriptional activator 1                                                            |
| 41967 | ENSG00000196912  | RBMS12    | 40429.7 | -0.06 | protein_coding | 1  | 56918715  | 56918715  | RNA binding motif (single stranded) interacting protein 2                              |
| 41970 | ENSG00000196449  | YDC       | 40432.6 | -0.06 | protein_coding | 1  | 36268816  | 36273857  | yeast Ndc105/yeast/transferrin domain containing                                       |
| 41972 | ENSG00000127508  | SLC35E1   | 40433.6 | -0.06 | protein_coding | 19 | 16660442  | 16681193  | solute carrier family 35, member E1                                                    |
| 41986 | ENSG00000152160  | YFAP3     | 40439.1 | -0.06 | protein_coding | 3  | 33091194  | 33111017  | cleavage stimulation factor 3 pre-RNA, subunit 3, 77kDa                                |
| 41984 | ENSG00000122891  | TWIST1    | 40446   | -0.06 | protein_coding | 7  | 19000614  | 19137259  | twist family bHLH transcription factor 1                                               |
| 41985 | ENSG00000124440  | YFAP3A    | 40448.5 | -0.06 | protein_coding | 19 | 48860303  | 48846880  | hypoxia inducible factor 3, alpha subunit                                              |
| 41989 | ENSG00000189589  | TMEM30A   | 40450.9 | -0.06 | protein_coding | 19 | 48562971  | 48563019  | transmembrane protein 30A                                                              |
| 41986 | ENSG00000049130  | KITLG     | 40461.8 | -0.06 | protein_coding | 12 | 8888570   | 88974828  | KIT ligand                                                                             |
| 42005 | ENSG00000140991  | ARMDC5    | 40467.3 | -0.06 | protein_coding | 16 | 31464901  | 31474887  | armadillo repeat containing 5                                                          |
| 42006 | ENSG00000189589  | CHST2     | 40467.3 | -0.06 | protein_coding | 16 | 544921    | 6886257   | chondroitin 1 open reading frame 37                                                    |
| 42008 | ENSG00000151900  | THR1      | 40470.6 | -0.06 | protein_coding | 3  | 24158651  | 2436773   | thyroid hormone receptor, beta                                                         |
| 42015 | ENSG00000172998  | GXYL2     | 40475.5 | -0.06 | protein_coding | 3  | 72937224  | 73047289  | glucosyl xylotransferase 2                                                             |
| 42020 | ENSG00000164948  | NHR7      | 40484.6 | -0.06 | protein_coding | 8  | 8154265   | 8154265   | zinc finger protein 704                                                                |
| 42030 | ENSG00000205060  | SLC35B4   | 40502.4 | -0.06 | protein_coding | 7  | 133974084 | 134001803 | solute carrier family 35 (UDP-N-acetylglucosamine transporter), member B4              |
| 42031 | ENSG00000129952  | FOP3      | 40508.8 | -0.06 | protein_coding | 8  | 137713725 | 138104939 | fibroblast growth factor 13                                                            |
| 42033 | ENSG00000154773  | CDK20     | 40510.3 | -0.06 | protein_coding | 18 | 3306077   | 3306077   | formin homologous 2 domain containing 3                                                |
| 42034 | ENSG00000184838  | PRR16     | 40513.7 | -0.06 | protein_coding | 5  | 11979973  | 12002327  | protein rich 16                                                                        |
| 42039 | ENSG00000174871  | CNH2      | 40519.3 | -0.06 | protein_coding | 11 | 60045861  | 60057272  | comichon family AMPA receptor auxiliary protein 2                                      |
| 42041 | ENSG00000189589  | LYX8      | 40521.6 | -0.06 | protein_coding | 1  | 14371489  | 14371489  | lymphocyte antigen complex, locus 8                                                    |
| 42042 | ENSG00000174747  | CCDC181   | 40519.8 | -0.06 | protein_coding | 1  | 16934108  | 169429007 | coiled-coil domain containing 181                                                      |
| 42044 | ENSG00000118855  | DCRELB    | 40520.3 | -0.06 | protein_coding | 1  | 11444783  | 11445208  | DNA cross-link repair 1B                                                               |
| 42041 | ENSG00000189589  | CCDC181   | 40521.6 | -0.06 | protein_coding | 2  | 2416523   | 2416523   | kinase binding protein 1A                                                              |
| 42048 | ENSG00000154734  | ADAMT31   | 40523.7 | -0.06 | protein_coding | 21 | 2920905   | 29217728  | ADAM metalloproteinase with thrombospondin type 1 motif 1                              |
| 42057 | ENSG00000139887  | TMTCT1    | 40531.9 | -0.06 | protein_coding | 12 | 2985373   | 29837692  | transmembrane and tetraallophosphate repeat containing 1                               |
| 42059 | ENSG00000176730  | SPIN2     | 40531.9 | -0.06 | protein_coding | 12 | 807188    | 807188    | serpin/thrombospondin associated 2-like                                                |
| 42060 | ENSG00000139857  | DPYSL3    | 40532.5 | -0.06 | protein_coding | 5  | 146770374 | 14688919  | glyoxylate oxidase-like 3                                                              |
| 42063 | ENSG00000084115  | TMSF3     | 40533.6 | -0.06 | protein_coding | 12 | 2718128   | 2718767   | transmembrane 7 superfamily member 3                                                   |
| 42070 | ENSG00000189589  | MYO19     | 40533.6 | -0.06 | protein_coding | 10 | 1338018   | 1338018   | myosin class I, syntrophin 1                                                           |
| 42075 | ENSG00000139926  | FMDM2     | 40540.6 | -0.06 | protein_coding | 14 | 51958118  | 52197445  | FERM domain containing 6                                                               |
| 42076 | ENSG00000205090  | TMEM240   | 40540.8 | -0.06 | protein_coding | 1  | 14710554  | 1475833   | transmembrane protein 240                                                              |
| 42081 | ENSG00000197947  | TRAF7     | 40541.4 | -0.06 | protein_coding | 12 | 4208511   | 4208511   | transmembrane protein 101                                                              |
| 42089 | ENSG00000249115  | HAUS5     | 40551.4 | -0.06 | protein_coding | 19 | 36103646  | 36116251  | HAUS augmin-like complex, subunit 5                                                    |
| 42090 | ENSG00000152782  | PANK1     | 40552.3 | -0.06 | protein_coding | 10 | 91342745  | 91405215  | panthothenate kinase 1                                                                 |
| 42095 | ENSG00000144488  | HLER      | 40557   | -0.06 | protein_coding | 2  | 23914908  | 23914908  | hes family bHLH transcription factor 5                                                 |
| 42097 | ENSG00000154531  | PCFC      | 40559.4 | -0.06 | protein_coding | 2  | 23914908  | 131892546 | proteasome growth factor 5                                                             |
| 42106 | ENSG00000168872  | FAM84B    | 40577.7 | -0.06 | protein_coding | 8  | 127544687 | 127570438 | family with sequence similarity 84, member B                                           |
| 42111 | ENSG00000176551  | CIFN1     | 40579.3 | -0.06 | protein_coding | 19 | 796077    | 7981051   | coretin 1                                                                              |
| 42116 | ENSG00000089151  | R4EAP1    | 40581.6 | -0.06 | protein_coding | 1  | 88441116  | 88626266  | receptor-associated protein 1                                                          |
| 42123 | ENSG00000168830  | RND2      | 40587.5 | -0.06 | protein_coding | 17 | 4117258   | 41184667  | Rho GTPase 2                                                                           |
| 42130 | ENSG00000040777  | RHRGAP3   | 40597   | -0.06 | protein_coding | 19 | 9609524   | 9629124   | Rho GTPase activating protein 3B                                                       |
| 42136 | ENSG00000189589  | KLHL12    | 40609.6 | -0.06 | protein_coding | 19 | 27932653  | 27932653  | kelch-like family member 42                                                            |
| 42145 | ENSG00000144120  | TMEM177   | 40611.4 | -0.06 | protein_coding | 2  | 120436743 | 120444983 | transmembrane protein 177                                                              |
| 42148 | ENSG00000119925  | CSRP2     | 40613.4 | -0.06 | protein_coding | 12 | 51454990  | 51474447  | cysteine-serine-rich nuclear protein 2                                                 |
| 42150 | ENSG00000143330  | RFBP1     | 40613.4 | -0.06 | protein_coding | 16 | 162673548 | 162673548 | regulator of G-protein signalling 17                                                   |
| 42159 | ENSG000002024315 | FIRBP1    | 40630.8 | -0.06 | protein_coding | 6  | 32098484  | 32098488  | FSK5 binding protein like                                                              |
| 42160 | ENSG00000239857  | GET4      | 40631.6 | -0.06 | protein_coding | 7  | 911819    | 938073    | golgi to ER traffic protein 4 homolog (S. cerevisiae)                                  |
| 42166 | ENSG00000186356  | LYX8      | 40632.6 | -0.06 | protein_coding | 6  | 7962056   | 7962056   | hepatocyte growth factor-regulated protein kinase substrate                            |
| 42164 | ENSG00000186603  | HPDL      | 40637.2 | -0.06 | protein_coding | 1  | 45792545  | 45794347  | 4-hydroxyisovalerylvuivate diacylglycerate-like                                        |
| 42167 | ENSG00000202129  | NCDN      | 40642.8 | -0.06 | protein_coding | 1  | 36023074  | 36023275  | neuromodulin                                                                           |
| 42168 | ENSG00000204566  | FAM21C    | 40645.6 | -0.06 | protein_coding | 1  | 11994109  | 11994109  | family with sequence similarity 216, member A                                          |
| 42170 | ENSG00000170464  | DNAC18    | 40645.8 | -0.06 | protein_coding | 5  | 138744279 | 138780180 | DnaJ (Hsp40) homolog, subfamily C, member 18                                           |
| 42173 | ENSG00000141639  | MARPK4    | 40647.2 | -0.06 | protein_coding | 18 | 48064448  | 48258194  | mitogen-activated protein kinase 4                                                     |
| 42184 | ENSG00000189589  | HGF       | 40653.6 | -0.06 | protein_coding | 16 | 543244    | 543244    | hepatocyte growth factor                                                               |
| 42187 | ENSG00000174778  | HRAS      | 40658.6 |       |                |    |           |           |                                                                                        |

| Accession | Gene             | Start    | End   | Strand | Score          | Score | Score     | Score     | Description                                                                                      |
|-----------|------------------|----------|-------|--------|----------------|-------|-----------|-----------|--------------------------------------------------------------------------------------------------|
| 42391     | ENSG00000151176  | PLBD2    | 40885 | -0.06  | protein_coding | 12    | 11376371  | 11382703  | phospholipase B domain containing 2                                                              |
| 42392     | ENSG00000151177  | KLIF2    | 40885 | -0.06  | protein_coding | 2     | 20126618  | 20126618  | kinesin family member 3C                                                                         |
| 42394     | ENSG00000113360  | DROSHA   | 40886 | -0.06  | protein_coding | 5     | 31420064  | 31523303  | drosophila ribonuclease type III                                                                 |
| 42397     | ENSG00000236038  | SNAPC1   | 40888 | -0.06  | protein_coding | 14    | 62229075  | 62263146  | small nuclear RNA activating complex, polypeptide 1, 43kDa                                       |
| 42398     | ENSG00000128191  | DCCR8    | 40891 | -0.06  | protein_coding | 22    | 20047795  | 20099400  | DCCR8 microprocessor complex subunit                                                             |
| 42402     | ENSG00000151172  | LYPLX2   | 40892 | -0.06  | protein_coding | 5     | 15019459  | 15039462  | 1,5-bisphosphatase domain containing 5                                                           |
| 42403     | ENSG00000100473  | COCH     | 40895 | -0.06  | protein_coding | 14    | 31343720  | 31344271  | cochlin                                                                                          |
| 42404     | ENSG00000106443  | CYTH2    | 40897 | -0.06  | protein_coding | 19    | 48972289  | 48985571  | cythosin 2                                                                                       |
| 42408     | ENSG00000102685  | RHBL1    | 40897 | -0.06  | protein_coding | 19    | 729268    | 729268    | rhomboid, ventricle 1 (Drosophila)                                                               |
| 42410     | ENSG00000107758  | CAMTA1   | 40900 | -0.06  | protein_coding | 1     | 6846384   | 7692786   | calmodulin binding transcription activator 1                                                     |
| 42411     | ENSG00000105952  | FCGA2    | 40901 | -0.06  | protein_coding | 9     | 20858304  | 20858304  | facioscapular humeral dysplasia                                                                  |
| 42414     | ENSG00000151924  | AKAP2    | 40902 | -0.06  | protein_coding | 5     | 11292492  | 11292492  | AKAP2 domain containing 5                                                                        |
| 42417     | ENSG00000405531  | CTNS     | 40903 | -0.06  | protein_coding | 17    | 3587672   | 3587672   | cystinosis, lysosomal cysteine transporter                                                       |
| 42418     | ENSG00000118274  | WRNS2    | 40910 | -0.06  | protein_coding | 1     | 11957389  | 11988324  | tryptophanyl RNA synthetase 2, mitochondrial                                                     |
| 42419     | ENSG00000102425  | PTPM1    | 40910 | -0.06  | protein_coding | 6     | 84211966  | 84204904  | protein tyrosine phosphatase type IV, member 1                                                   |
| 42445     | ENSG00000145911  | NAB39    | 40939 | -0.06  | protein_coding | 5     | 17754044  | 17755308  | NEDD4 binding protein 3                                                                          |
| 42448     | ENSG00000111119  | NRTN     | 40941 | -0.06  | protein_coding | 19    | 5823813   | 5823835   | neurturin                                                                                        |
| 42449     | ENSG00000104644  | CHST19   | 40942 | -0.06  | protein_coding | 6     | 5969714   | 5972413   | epidermal growth factor receptor                                                                 |
| 42460     | ENSG00000115504  | EHP1     | 40945 | -0.06  | protein_coding | 2     | 6290096   | 6327362   | EH domain binding protein 1                                                                      |
| 42461     | ENSG00000114948  | ADAM23   | 40952 | -0.06  | protein_coding | 2     | 20730623  | 20748551  | ADAM metalloproteinase domain 23                                                                 |
| 42462     | ENSG00000102523  | LONRF2   | 40952 | -0.06  | protein_coding | 1     | 10088753  | 10087195  | LON peptidase N-terminal domain and ring finger 2                                                |
| 42463     | ENSG00000108795  | ZNF521   | 40956 | -0.06  | protein_coding | 18    | 22841890  | 22842154  | zinc finger protein 521                                                                          |
| 42464     | ENSG00000110987  | BCL7A    | 40959 | -0.06  | protein_coding | 12    | 122457328 | 122499948 | B-cell CLL/lymphoma 7A                                                                           |
| 42469     | ENSG000001044278 | GALNT3   | 40966 | -0.06  | protein_coding | 2     | 154728426 | 155310361 | UDP-N-acetyl-alpha-D-galactosamine polypeptide N-acetylgalactosaminyltransferase 13 (GalNAc-T13) |
| 42470     | ENSG00000131437  | KIF3A    | 40988 | -0.06  | protein_coding | 5     | 132028320 | 132073530 | kinesin family member 3A                                                                         |
| 42471     | ENSG00000100909  | HCK29    | 40992 | -0.06  | protein_coding | 12    | 54349879  | 54397121  | homocysteine C9                                                                                  |
| 42473     | ENSG00000135093  | UBP30    | 40970 | -0.06  | protein_coding | 10    | 10948084  | 10952831  | ubiquitin specific peptidase 30                                                                  |
| 42475     | ENSG00000100418  | DESI1    | 40973 | -0.06  | protein_coding | 22    | 41994032  | 42017100  | desumoylating peptidase 1                                                                        |
| 42476     | ENSG00000104929  | WRN33    | 40973 | -0.06  | protein_coding | 17    | 788228    | 788228    | WD repeat-containing, antisense to TP53                                                          |
| 42482     | ENSG00000104114  | MAPS     | 40982 | -0.06  | protein_coding | 4     | 15628310  | 15628312  | microtubule-associated protein 5                                                                 |
| 42483     | ENSG00000101004  | NINL     | 40982 | -0.06  | protein_coding | 20    | 2543334   | 2546615   | ninein-like                                                                                      |
| 42491     | ENSG00000102288  | C22orf60 | 40983 | -0.06  | protein_coding | 21    | 4723285   | 4723285   | chromosome 22 open reading frame 58                                                              |
| 42492     | ENSG00000108575  | NF2      | 40991 | -0.06  | protein_coding | 22    | 29995645  | 30094587  | neurofibromin 2 (merlin)                                                                         |
| 42493     | ENSG000000081760 | ACACS    | 40993 | -0.06  | protein_coding | 12    | 12554955  | 12564273  | acetyl-CoA synthetase                                                                            |
| 42501     | ENSG00000102149  | CHOC2    | 41003 | -0.06  | protein_coding | 14    | 314818    | 314818    | cholesterol oxidase                                                                              |
| 42507     | ENSG00000187240  | DYNC2H1  | 41012 | -0.06  | protein_coding | 11    | 102980160 | 103350591 | dynein, cytoplasmic 2, heavy chain 1                                                             |
| 42511     | ENSG00000109559  | LRRIC14  | 41014 | -0.06  | protein_coding | 8     | 145743376 | 145750557 | leucine rich repeat containing 14                                                                |
| 42512     | ENSG00000101901  | ZNF108   | 41016 | -0.06  | protein_coding | 10    | 8025110   | 8025110   | zinc finger, C2H2-type containing 108                                                            |
| 42518     | ENSG00000153978  | HSS13T3  | 41022 | -0.06  | protein_coding | 17    | 11399006  | 11399524  | heparan sulfate glycosaminoglycan 3-O-sulfotransferase 3A1                                       |
| 42520     | ENSG00000101218  | C17orf80 | 41022 | -0.06  | protein_coding | 17    | 71228372  | 71245091  | chromosome 17 open reading frame 80                                                              |
| 42524     | ENSG00000101193  | TRIS2    | 41028 | -0.06  | protein_coding | 20    | 5289120   | 5289120   | trisomy 21                                                                                       |
| 42532     | ENSG00000189925  | BRD3     | 41046 | -0.06  | protein_coding | 9     | 136895427 | 136938537 | brandomin containing 3                                                                           |
| 42538     | ENSG000001027452 | FBX12    | 41053 | -0.06  | protein_coding | 19    | 952943    | 9538482   | F-box and leucine-rich repeat protein 12                                                         |
| 42542     | ENSG000001041472 | DIAB1    | 41059 | -0.06  | protein_coding | 20    | 3262449   | 3272410   | EGF transcription factor                                                                         |
| 42545     | ENSG00000105442  | FAM74B   | 41059 | -0.06  | protein_coding | 6     | 8119073   | 8119073   | family with sequence similarity 174, member B                                                    |
| 42551     | ENSG00000173264  | GRF13    | 41067 | -0.06  | protein_coding | 11    | 64037534  | 64059972  | G-protein-coupled receptor 137                                                                   |
| 42553     | ENSG00000103599  | SNR39    | 41069 | -0.06  | protein_coding | 5     | 13264265  | 13264265  | SMAD family member 6                                                                             |
| 42554     | ENSG00000102917  | FOXJ1    | 41070 | -0.06  | protein_coding | 19    | 10416101  | 10416101  | forkhead box J1-like                                                                             |
| 42556     | ENSG00000151893  | ASAP2    | 41074 | -0.06  | protein_coding | 2     | 8346694   | 8545112   | ARFAP with SH3 domain, arkyrin repeat and PH domain 2                                            |
| 42558     | ENSG00000108447  | GAS1     | 41076 | -0.06  | protein_coding | 9     | 8955270   | 8962130   | G-protein arrest peptide 1                                                                       |
| 42559     | ENSG0000015175   | PRIME    | 41076 | -0.06  | protein_coding | 17    | 6483328   | 6701924   | protein phosphatase 1A regulatory subunit 2, dependent, 10E                                      |
| 42562     | ENSG00000102041  | SLCG15A  | 41081 | -0.06  | protein_coding | 12    | 85253462  | 85257304  | solute carrier family 15 (neutral amino acid transporter), member 15                             |
| 42566     | ENSG00000102498  | ILTD1    | 41081 | -0.06  | protein_coding | 13    | 21216296  | 21219737  | interleukin 17D                                                                                  |
| 42570     | ENSG00000101429  | WNT8A    | 41081 | -0.06  | protein_coding | 17    | 5449174   | 5502973   | wntless-type WNT1 interaction site family, member 5A                                             |
| 42575     | ENSG00000106761  | CTH      | 41088 | -0.06  | protein_coding | 1     | 7097850   | 7098553   | cystathionase (cystathionase gamma-lyase)                                                        |
| 42584     | ENSG00000135097  | MSH1     | 41098 | -0.06  | protein_coding | 12    | 120779133 | 120800983 | mutator RNA-binding protein 1                                                                    |
| 42588     | ENSG00000102681  | TRAF3    | 41102 | -0.06  | protein_coding | 12    | 274256    | 274256    | TRAF3 domain containing 2                                                                        |
| 42589     | ENSG00000103832  | RPAP1    | 41102 | -0.06  | protein_coding | 15    | 41809374  | 41809374  | RNA polymerase II associated protein 1                                                           |
| 42591     | ENSG00000151640  | DPSL4    | 41104 | -0.06  | protein_coding | 10    | 13400404  | 134019380 | polysialyltransferase-like 4                                                                     |
| 42596     | ENSG00000105288  | C10orf1  | 41104 | -0.06  | protein_coding | 20    | 52821437  | 52821437  | chromosome 10 open reading frame 51                                                              |
| 42599     | ENSG00000103042  | SLC38A7  | 41111 | -0.06  | protein_coding | 16    | 5889013   | 5891908   | solute carrier family 38, member 7                                                               |
| 42603     | ENSG00000108528  | PARG1    | 41123 | -0.06  | protein_coding | 16    | 29872265  | 2991349   | PARG1 associated glutamate-rich protein 1                                                        |
| 42606     | ENSG00000103590  | GLI3     | 41123 | -0.06  | protein_coding | 16    | 11500114  | 11500114  | glioma associated protein 3                                                                      |
| 42610     | ENSG00000135454  | BGALNT1  | 41130 | -0.06  | protein_coding | 12    | 58071193  | 58071198  | beta-1.4-N-acetylglucosaminyl transferase 1                                                      |
| 42614     | ENSG00000104923  | LTRP1    | 41133 | -0.06  | protein_coding | 2     | 53112039  | 53204576  | latent transforming growth factor beta binding protein 1                                         |
| 42615     | ENSG00000104448  | TRX1L    | 41133 | -0.06  | protein_coding | 2     | 1862111   | 1862111   | tripeptide motif domain 1-like                                                                   |
| 42621     | ENSG00000178802  | MPI      | 41138 | -0.06  | protein_coding | 15    | 75182346  | 75191798  | mannose phosphate isomerase                                                                      |
| 42626     | ENSG00000181284  | TMEM38   | 41146 | -0.06  | protein_coding | 11    | 12016538  | 120204391 | transmembrane protein 138                                                                        |
| 42633     | ENSG00000101895  | PLAG1    | 41150 | -0.06  | protein_coding | 9     | 14428137  | 14438575  | pleomorphic adenoma gene-like 1                                                                  |
| 42636     | ENSG00000178096  | BOLA1    | 41153 | -0.06  | protein_coding | 1     | 14895440  | 148972351 | bola family member 1                                                                             |
| 42644     | ENSG00000104066  | INTU     | 41169 | -0.06  | protein_coding | 4     | 12854428  | 12867892  | inward planar cell polarity protein                                                              |
| 42648     | ENSG00000102988  | TRAF2    | 41172 | -0.06  | protein_coding | 12    | 5401458   | 5401458   | ubiquitin N1IT signaling pathway inhibitor 1                                                     |
| 42656     | ENSG00000101255  | TRB3     | 41187 | -0.06  | protein_coding | 20    | 367281    | 379203    | ribless pseudokines 5                                                                            |
| 42657     | ENSG00000181967  | EAF3     | 41187 | -0.06  | protein_coding | 16    | 2273667   | 2298743   | EAF transcription factor 1                                                                       |
| 42661     | ENSG00000102528  | GANK3    | 41188 | -0.06  | protein_coding | 27    | 287858    | 287858    | gamma-aminobutyric acid (GABA) A receptor, beta 3                                                |
| 42673     | ENSG00000131149  | GSE1     | 41217 | -0.06  | protein_coding | 16    | 86545015  | 86579810  | Gse1 coiled coil protein                                                                         |
| 42674     | ENSG00000139880  | CDH24    | 41214 | -0.06  | protein_coding | 14    | 23516271  | 23528747  | cadherin 24, type 2                                                                              |
| 42676     | ENSG00000102588  | CHD4     | 41218 | -0.06  | protein_coding | 19    | 36246154  | 36246154  | chromatin 19 open reading frame 55                                                               |
| 42678     | ENSG00000104909  | PRSS12   | 41219 | -0.06  | protein_coding | 4     | 119201193 | 119201193 | protease, serine, 12 (neurolypsin, molipisin)                                                    |
| 42679     | ENSG00000104734  | SCML1    | 41220 | -0.06  | protein_coding | 4     | 17755588  | 17773105  | scx comb on midline-like 1 (Drosophila)                                                          |
| 42683     | ENSG00000102296  | TGFB3    | 41221 | -0.06  | protein_coding | 21    | 4538217   | 4538217   | transforming factor 1, TGF-beta specific, (MFG-box)                                              |
| 42683     | ENSG00000112541  | PDE10A   | 41225 | -0.06  | protein_coding | 6     | 16574078  | 166400091 | phosphodiesterase 10A                                                                            |
| 42690     | ENSG00000110721  | CHKA     | 41234 | -0.06  | protein_coding | 11    | 67820326  | 67888911  | choline kinase alpha                                                                             |
| 42700     | ENSG00000104126  | CELSR2   | 41242 | -0.06  | protein_coding | 11    | 10976241  | 109818372 | cadherin, EGF, LAP, seven-pass G-type receptor 2                                                 |
| 42702     | ENSG00000111644  | CHD4     | 41243 | -0.06  | protein_coding | 12    | 697241    | 697241    | chromatin 19 open reading frame 73                                                               |
| 42706     | ENSG00000138829  | FBN2     | 41250 | -0.06  | protein_coding | 5     | 12793601  | 127984878 | fibulin 2                                                                                        |
| 42708     | ENSG00000146207  | URB1     | 41251 | -0.06  | protein_coding | 21    | 33843320  | 33765335  | URB1 ribosome biogenesis 1 homolog (S. cerevisiae)                                               |
| 42712     | ENSG00000102676  | TRAF2    | 41251 | -0.06  | protein_coding | 21    | 116312444 | 116312444 | TRAF2 domain containing 2                                                                        |
| 42713     | ENSG00000196678  | ER1      | 41257 | -0.06  | protein_coding | 16    | 20791515  | 20891761  | ER1 xeroradonuclease family member 2                                                             |
| 4272      | ENSG00000107594  | BMP1     | 41256 | -0.06  | protein_coding | 6     | 132129196 | 132129196 | ectodermonecrosis-inducing phosphatidyltransferase 1                                             |
| 42728     | ENSG00000104355  | MRB2     | 41256 | -0.06  | protein_coding | 9     | 17284968  | 17284968  | male sex hormone 1                                                                               |
| 42732     | ENSG00000133316  | WRFR4    | 41277 | -0.06  | protein_coding | 11    | 62598814  | 62599281  | WD repeat domain 74                                                                              |
| 42739     | ENSG00000102875  | DUSP4    | 41286 | -0.06  | protein_coding | 6     | 2919281   | 2920186   | dual specificity phosphatase 4                                                                   |
| 42745     | ENSG00000101198  | MRB1     | 41286 | -0.06  | protein_coding | 8     | 3711406   | 3735508   | male sex hormone 2                                                                               |
| 42747     | ENSG00000138850  | PCHD10   | 41295 | -0.06  | protein_coding | 4     | 134070470 | 134129356 | protocadherin 10                                                                                 |
| 42751     | ENSG00000139886  | CACHD1   |       |        |                |       |           |           |                                                                                                  |

|       |                 |           |         |       |                                     |    |           |           |                                                                                                     |
|-------|-----------------|-----------|---------|-------|-------------------------------------|----|-----------|-----------|-----------------------------------------------------------------------------------------------------|
| 43186 | ENSG00000049759 | NEDDAL    | 41783.8 | -0.06 | protein_coding                      | 18 | 56711599  | 56068772  | neural precursor cell expressed, developmentally down regulated 4-like, E3 ubiquitin protein ligase |
| 43190 | ENSG00000113161 | HMCR7     | 41787.9 | -0.06 | protein_coding                      | 5  | 74652154  | 74657929  | 3-hydroxy-3-methylglutaryl-CoA reductase                                                            |
| 43208 | ENSG00000048866 | SIT7      | 41808.1 | -0.06 | protein_coding                      | 7  | 116593292 | 116670157 | suppression of tumorigenecity 7                                                                     |
| 43209 | ENSG00000189841 | LUTP2     | 41808.3 | -0.06 | protein_coding                      | 1  | 23410516  | 23504301  | leucine zipper protein 1                                                                            |
| 43230 | ENSG00000151710 | CBX3      | 41810.3 | -0.06 | protein_coding                      | 17 | 77759931  | 77774862  | chromatin remodeler 3                                                                               |
| 43257 | ENSG00000120148 | MSX2      | 41878.8 | -0.06 | protein_coding                      | 5  | 174181536 | 174187996 | msx homeobox 2                                                                                      |
| 43279 | ENSG00000172603 | TPAZ1     | 41912.3 | -0.06 | protein_coding                      | 6  | 10393419  | 10419362  | transcription factor AP-2 alpha (activating enhancer binding protein 2 alpha)                       |
| 43413 | ENSG00000195891 | HOKA3     | 42068.8 | -0.06 | protein_coding                      | 7  | 27148869  | 27192000  | homeobox A3                                                                                         |
| 43456 | ENSG00000123983 | AGSL3     | 42132.4 | -0.06 | protein_coding                      | 2  | 22372562  | 22380937  | acyl-CoA synthetase long-chain family member 3                                                      |
| 43013 | ENSG00000224287 | MSL3P1    | 41278.4 | -0.06 | transcribed_processed_pseudo_gene   | 2  | 234774083 | 234777090 | male-specific lethal 3 homolog (Drosophila) pseudogene 1                                            |
| 42523 | ENSG00000240024 | LINC00888 | 41027.9 | -0.06 | transcribed_unprocessed_pseudo_gene | 3  | 183165368 | 183173601 | long intergenic non-protein coding RNA 888                                                          |
| 38568 | ENSG00000259917 |           | 35083.5 | -0.06 | unprocessed_pseudogene              | 15 | 34781203  | 34782772  | heterogeneous nuclear ribonucleoprotein L pseudogene 2                                              |
| 42101 | ENSG00000226278 |           | 40569   | -0.06 | unprocessed_pseudogene              | 7  | 5582459   | 55840891  | phosphoserine phosphatase pseudogene 1                                                              |
| 42295 | ENSG00000157021 |           | 40728.6 | -0.06 | unprocessed_pseudogene              | 15 | 41455360  | 41456572  | family with sequence similarity 92, member A1 pseudogene 1                                          |
| 39715 | ENSG00000202433 |           | 2990.3  | -0.06 |                                     |    |           |           |                                                                                                     |
| 31712 | ENSG00000216285 |           | 29888.7 | -0.06 |                                     |    |           |           |                                                                                                     |
| 34996 | ENSG00000171130 |           | 33132.6 | -0.06 |                                     |    |           |           |                                                                                                     |
| 36511 | ENSG00000202652 |           | 33137.6 | -0.06 |                                     |    |           |           |                                                                                                     |
| 36361 | ENSG00000253785 |           | 34474.1 | -0.06 |                                     |    |           |           |                                                                                                     |
| 37331 | ENSG00000153900 |           | 35450.4 | -0.06 |                                     |    |           |           |                                                                                                     |
| 37468 | ENSG00000215726 |           | 35596.5 | -0.06 |                                     |    |           |           |                                                                                                     |
| 36053 | ENSG00000214391 |           | 37264.3 | -0.06 |                                     |    |           |           |                                                                                                     |
| 38421 | ENSG00000288959 |           | 37655.1 | -0.06 |                                     | 6  | 13615728  | 13621128  | Uncharacterized protein                                                                             |
| 38954 | ENSG00000213447 |           | 37889.3 | -0.06 |                                     |    |           |           |                                                                                                     |
| 38704 | ENSG00000131152 |           | 37845.5 | -0.06 |                                     |    |           |           |                                                                                                     |
| 38747 | ENSG00000174374 | WBCSCR18  | 37994.8 | -0.06 |                                     | 7  | 74441226  | 74480064  | Williams-Beuren syndrome chromosome region 16                                                       |
| 40224 | ENSG00000213802 |           | 38035   | -0.06 |                                     |    |           |           |                                                                                                     |
| 40790 | ENSG00000251107 |           | 39151.1 | -0.06 |                                     |    |           |           |                                                                                                     |
| 40862 | ENSG00000242327 |           | 39202.3 | -0.06 |                                     |    |           |           |                                                                                                     |
| 41028 | ENSG00000216448 |           | 39382.4 | -0.06 |                                     |    |           |           |                                                                                                     |
| 41143 | ENSG00000280302 |           | 39500.6 | -0.06 |                                     |    |           |           |                                                                                                     |
| 41186 | ENSG00000205746 |           | 39548.6 | -0.06 |                                     |    |           |           |                                                                                                     |
| 41208 | ENSG00000211958 |           | 39817.3 | -0.06 |                                     |    |           |           |                                                                                                     |
| 41251 | ENSG00000235501 |           | 39819.6 | -0.06 |                                     |    |           |           |                                                                                                     |
| 41252 | ENSG00000270504 |           | 39820.4 | -0.06 |                                     |    |           |           |                                                                                                     |
| 41298 | ENSG00000215418 |           | 39870.8 | -0.06 |                                     |    |           |           |                                                                                                     |
| 41508 | ENSG00000281061 |           | 39932.3 | -0.06 |                                     |    |           |           |                                                                                                     |
| 41558 | ENSG00000259989 |           | 39960.1 | -0.06 |                                     |    |           |           |                                                                                                     |
| 41577 | ENSG00000214208 |           | 39987.3 | -0.06 |                                     |    |           |           |                                                                                                     |
| 41637 | ENSG00000280925 |           | 40040   | -0.06 |                                     |    |           |           |                                                                                                     |
| 41930 | ENSG00000179234 | C17orf96  | 40374.5 | -0.06 |                                     | 17 | 38827961  | 38831187  | chromosome 17 open reading frame 96                                                                 |
| 41897 | ENSG00000286663 |           | 40465.6 | -0.06 |                                     |    |           |           |                                                                                                     |
| 42014 | ENSG00000187383 | ZNF229    | 40469.9 | -0.06 |                                     | 19 | 44951685  | 44952766  | zinc finger protein 229                                                                             |
| 42069 | ENSG00000104725 |           | 40539   | -0.06 |                                     | 8  | 24808468  | 24814624  | neurofilament, light polypeptide                                                                    |
| 42178 | ENSG00000198744 |           | 40559.0 | -0.06 |                                     |    |           |           |                                                                                                     |
| 42206 | ENSG00000205188 |           | 40575.7 | -0.06 |                                     |    |           |           |                                                                                                     |
| 42245 | ENSG00000272106 |           | 40718.3 | -0.06 |                                     |    |           |           |                                                                                                     |
| 42365 | ENSG00000285574 |           | 40791.9 | -0.06 |                                     |    |           |           |                                                                                                     |
| 42391 | ENSG00000245454 |           | 40856.4 | -0.06 |                                     |    |           |           |                                                                                                     |
| 42385 | ENSG00000232323 |           | 40860   | -0.06 |                                     |    |           |           |                                                                                                     |
| 42436 | ENSG00000280260 |           | 40935.5 | -0.06 |                                     |    |           |           |                                                                                                     |
| 42485 | ENSG00000248118 |           | 40936   | -0.06 |                                     |    |           |           |                                                                                                     |
| 42605 | ENSG00000281452 |           | 41123.4 | -0.06 |                                     |    |           |           |                                                                                                     |
| 42671 | ENSG00000281599 |           | 41239.4 | -0.06 |                                     |    |           |           |                                                                                                     |
| 42743 | ENSG00000212841 |           | 41288.0 | -0.06 |                                     |    |           |           |                                                                                                     |
| 42821 | ENSG00000184886 | PGW       | 41373.5 | -0.06 |                                     | 17 | 34880847  | 34885189  | phosphatidylinositol glycan anchor biosynthesis, class W                                            |
| 42871 | ENSG00000281034 |           | 41428.6 | -0.06 |                                     |    |           |           |                                                                                                     |
| 42909 | ENSG00000280959 |           | 41437.7 | -0.06 |                                     |    |           |           |                                                                                                     |
| 42914 | ENSG00000225377 |           | 41481.1 | -0.06 |                                     |    |           |           |                                                                                                     |
| 42924 | ENSG00000211359 |           | 41481.1 | -0.06 |                                     |    |           |           |                                                                                                     |
| 41900 | ENSG00000232388 | LINC00480 | 37323.4 | -0.07 | antisense                           | 12 | 58120054  | 58122139  | ACAP2 antisense RNA 1                                                                               |
| 40538 | ENSG00000175701 | LINC00116 | 38539.9 | -0.07 | lincRNA                             | 20 | 18548064  | 18550207  | long intergenic non-protein coding RNA 493                                                          |
| 41601 | ENSG00000202786 |           | 41301.9 | -0.07 | lincRNA                             | 2  | 110999106 | 111002997 | long intergenic non-protein coding RNA 116                                                          |
| 43446 | ENSG00000232677 | LINC00685 | 42000.5 | -0.07 | lincRNA                             | 19 | 36803969  | 36806260  | small nuclear RNA host gene 18 (non-protein coding)                                                 |
| 31247 | ENSG00000213553 |           | 21470.1 | -0.07 | processed_pseudogene                | 2  | 38709920  | 38710012  | long intergenic non-protein coding RNA 665                                                          |
| 33334 | ENSG00000202526 |           | 31407.0 | -0.07 | processed_pseudogene                | 1  | 15980387  | 15980685  | ribosomal protein, large, P0 pseudogene 6                                                           |
| 34089 | ENSG00000202912 |           | 32259.6 | -0.07 | processed_pseudogene                | 6  | 20843388  | 20847360  | glyceraldehyde-3-phosphate dehydrogenase pseudogene 1                                               |
| 38454 | ENSG00000248425 |           | 34555.3 | -0.07 | processed_pseudogene                | 4  | 14839291  | 14840116  | autarkytic transition initiation factor 4A1 pseudogene 2                                            |
| 41778 | ENSG00000205681 |           | 36819.0 | -0.07 | processed_pseudogene                | 1  | 15931077  | 15931538  | X-ray repair complementing defective repair in Chinese hamster cells 6 pseudogene 2                 |
| 38532 | ENSG00000214110 |           | 38715.4 | -0.07 | processed_pseudogene                | 13 | 48337556  | 48337941  | coiled-coil-helix-coiled-coil-helix domain containing 2 pseudogene 6                                |
| 38685 | ENSG00000205682 |           | 38789.0 | -0.07 | processed_pseudogene                | 9  | 14921335  | 14922332  | nucleosome assembly protein 1-like 4 pseudogene 3                                                   |
| 38689 | ENSG00000214881 |           | 38814.4 | -0.07 | processed_pseudogene                | 10 | 70304246  | 70304590  | lactate dehydrogenase A pseudogene 4                                                                |
| 39069 | ENSG00000233859 |           | 37282.6 | -0.07 | processed_pseudogene                | 6  | 66548823  | 66547847  | ribosomal protein L34 pseudogene 2                                                                  |
| 39080 | ENSG00000211588 |           | 37487.1 | -0.07 | processed_pseudogene                | 6  | 66548823  | 66547847  | transmembrane protein 14D (pseudogene)                                                              |
| 39508 | ENSG00000235587 |           | 37174.1 | -0.07 | processed_pseudogene                | 6  | 66548823  | 66547847  | alcohol dehydrogenase 5 (class III), chi polypeptide, pseudogene 4                                  |
| 40198 | ENSG00000235983 |           | 38501.8 | -0.07 | processed_pseudogene                | 6  | 66548823  | 66547847  | basic transcription factor 4-like 4 pseudogene 2                                                    |
| 40199 | ENSG00000211599 |           | 38501.8 | -0.07 | processed_pseudogene                | 6  | 66548823  | 66547847  | basic transcription factor 4-like 4 pseudogene 2                                                    |
| 41987 | ENSG00000241927 |           | 40451.2 | -0.07 | processed_pseudogene                | 3  | 14870355  | 14870555  | glyceraldehyde-3-phosphate dehydrogenase pseudogene 65                                              |
| 42490 | ENSG00000230216 |           | 40988.3 | -0.07 | processed_pseudogene                | 8  | 49000415  | 49000960  | heat shock protein 70kDa protein 1 pseudogene 2                                                     |
| 42600 | ENSG00000230914 |           | 41112.8 | -0.07 | processed_pseudogene                | 1  | 10194346  | 10194346  | heat shock protein 90kDa protein (Grp94), member 3, pseudogene                                      |
| 42756 | ENSG00000241927 |           | 41301.9 | -0.07 | processed_pseudogene                | 5  | 13420120  | 13420120  | small nuclear RNA host gene 12                                                                      |
| 43041 | ENSG00000215016 |           | 41737.0 | -0.07 | processed_pseudogene                | 3  | 23175863  | 23176315  | ribosomal protein L24 pseudogene 7                                                                  |
| 43104 | ENSG00000241095 |           | 41865.4 | -0.07 | processed_pseudogene                | 3  | 62695996  | 62697172  | cytochrome P450, family 5, subfamily A, polypeptide 1 pseudogene 1                                  |
| 43123 | ENSG00000205448 |           | 41926.6 | -0.07 | processed_pseudogene                | 17 | 20843388  | 20847360  | stearyl-CoA desaturase (delta-5-desaturase) pseudogene 1                                            |
| 43155 | ENSG00000196756 |           | 41742.3 | -0.07 | processed_transcript                | 20 | 57042325  | 57043998  | small nuclear RNA host gene 17 (non-protein coding)                                                 |
| 43207 | ENSG00000174365 | SNHG11    | 41825.4 | -0.07 | processed_transcript                | 20 | 57042325  | 57043998  | small nuclear RNA host gene 11 (non-protein coding)                                                 |
| 41863 | ENSG00000146303 | RPL7A     | 30132.0 | -0.07 | protein_coding                      | 3  | 13621889  | 13621891  | ribosomal protein L7A                                                                               |
| 32848 | ENSG00000165878 | GHTM      | 30628.4 | -0.07 | protein_coding                      | 10 | 8589189   | 85891901  | growth hormone inducible transmembrane protein                                                      |
| 32812 | ENSG00000198803 | SEC18B    | 30979.5 | -0.07 | protein_coding                      | 6  | 10194346  | 10194346  | Sec1 beta subunit                                                                                   |
| 32893 | ENSG00000202498 | SNHG11    | 31029.7 | -0.07 | protein_coding                      | 19 | 18067369  | 18067369  | small nuclear ribonucleoprotein D2 polypeptide 18.5kDa                                              |
| 33061 | ENSG00000108971 | HSP89A    | 31222.9 | -0.07 | protein_coding                      | 11 | 122828197 | 122833938 | heat shock 70kDa protein 8                                                                          |
| 33345 | ENSG00000128244 | ATP7B     | 31477.9 | -0.07 | protein_coding                      | 7  | 12802880  | 12803098  | ATPase, H <sup>+</sup> transporting, vacuolar 14kDa, V1 subunit F                                   |
| 33388 | ENSG00000105144 | PKC1      | 31529.7 | -0.07 | protein_coding                      | 6  | 71202665  | 71204793  | phosphoinositide 3-kinase 1                                                                         |
| 33407 | ENSG00000255302 | ED1       | 31547.6 | -0.07 | protein_coding                      | 15 | 49170083  | 49172380  | EP300 interacting inhibitor of differentiation 1                                                    |
| 33694 | ENSG00000188525 | BCAP31    | 31851.6 | -0.07 | protein_coding                      | 4  | 15296540  | 15299901  | B-cell receptor-associated protein 31                                                               |
| 41447 | ENSG00000171756 | RPL7A     | 32176.6 | -0.07 | protein_coding                      | 4  | 21718142  | 21718142  | ribosomal protein L7A                                                                               |
| 34320 | ENSG00000159377 | PMBM4     | 32490.3 | -0.07 | protein_coding                      | 1  | 151372010 | 151374200 | proteasome (prosome, macropain) subunit, beta type, 4                                               |
| 34364 | ENSG00000171223 | EDF1      | 32543.5 | -0.07 | protein_coding                      | 9  | 139756571 | 139770738 | endothelial differentiation-related factor 1                                                        |
| 34485 | ENSG00000205070 | S2D1      | 32598.5 | -0.07 | protein_coding                      | 1  | 18621684  | 18621684  | S2D1 RNA nuclear protein containing 1                                                               |
| 34485 | ENSG00000225921 | NOL7      | 32671.2 | -0.07 | protein_coding                      | 6  | 13615559  | 13632971  | nucleolar protein 7, 27kDa                                                                          |
| 34885 | ENSG00000209783 | HNRNP1    | 33919.7 | -0.07 | protein_coding                      | 19 | 850651    | 852399    | heterogeneous nuclear ribonucleoprotein M                                                           |
| 34938 | ENSG00000185929 | ATP5F1    | 33070.3 | -0.07 | protein_coding                      | 10 | 71630922  | 71630922  | ATP synthase, H <sup>+</sup> transporting, mitochondrial F1 complex, gamma polypeptide 1            |
| 34963 | ENSG00000148834 | GSTO1     | 33991.7 | -0.07 | protein_coding                      | 10 | 105985114 | 10602717  | glutathione S-transferase omega 1                                                                   |
| 35099 | ENSG00000195899 | COPE      | 33236.9 | -0.07 | protein_coding                      | 19 | 19010323  | 19030208  | coatomer protein complex, subunit epsilon                                                           |
| 35222 | ENSG00000213743 | SNRPD2    | 33440.3 | -0.07 | protein_coding                      | 16 | 46190719  | 46190837  | small nuclear ribonucleoprotein D2 polypeptide 18.5kDa                                              |
| 35370 | ENSG00000115886 | DARS      | 33479.9 | -0.07 | protein_coding                      | 2  | 136864247 |           |                                                                                                     |

|       |                 |           |       |       |                |    |           |           |                                                                                                                                    |
|-------|-----------------|-----------|-------|-------|----------------|----|-----------|-----------|------------------------------------------------------------------------------------------------------------------------------------|
| 38212 | ENSG000001057   | PRM2C     | 36566 | -0.07 | protein_coding | 7  | 102984701 | 103009602 | proteasome (prosome, macroproton) 26S subunit, ATPase_2                                                                            |
| 38218 | ENSG000002283   | RPA1      | 36720 | -0.07 | protein_coding | 17 | 122070392 | 180397478 | replication protein A1, TopA                                                                                                       |
| 38232 | ENSG00000087302 | C14orf168 | 36933 | -0.07 | protein_coding | 14 | 52456193  | 52471420  | chromosome 14 open reading frame 168                                                                                               |
| 38234 | ENSG00000031698 | SARS      | 36473 | -0.07 | protein_coding | 1  | 109795450 | 109797911 | sevY tRNA synthetase                                                                                                               |
| 38284 | ENSG0000011456  | NDUF42    | 36576 | -0.07 | protein_coding | 5  | 140018326 | 140027370 | NADH dehydrogenase (ubiquinone) L1 alpha subcomplex, 2, 6kDa                                                                       |
| 38478 | ENSG00000193795 | NDC90     | 36953 | -0.07 | protein_coding | 19 | 108916931 | 108926531 | Nucleolar 90 kDa dehydrogenase                                                                                                     |
| 38514 | ENSG00000100348 | TN2       | 36888 | -0.07 | protein_coding | 22 | 36863083  | 36876077  | thrombospondin 2                                                                                                                   |
| 38556 | ENSG00000131165 | CHMP1A    | 36141 | -0.07 | protein_coding | 16 | 69710836  | 69724253  | charged multivesicular body protein 1A                                                                                             |
| 38726 | ENSG00000199511 | RCC2      | 36924 | -0.07 | protein_coding | 1  | 17332626  | 173367220 | regulator of chromosome condensation 2                                                                                             |
| 38735 | ENSG00000136518 | ACTL6A    | 36932 | -0.07 | protein_coding | 3  | 175926968 | 175930986 | actin-like 6A                                                                                                                      |
| 38736 | ENSG00000125073 | ACTR1B    | 36936 | -0.07 | protein_coding | 2  | 36272431  | 36280570  | ARF1 adriamycin resistant 1 homolog B, centrinin beta (yeast)                                                                      |
| 38804 | ENSG00000193829 | SPR18A    | 36926 | -0.07 | protein_coding | 4  | 34911956  | 34912862  | serine palmitoyltransferase, small subunit A                                                                                       |
| 38804 | ENSG00000119368 | PFPR1     | 37010 | -0.07 | protein_coding | 5  | 139824204 | 139826706 | proteasome subunit 1                                                                                                               |
| 38826 | ENSG00000072778 | ACADVL    | 37032 | -0.07 | protein_coding | 17 | 7120444   | 7120992   | acyl-CoA dehydrogenase, very long chain                                                                                            |
| 38831 | ENSG00000181910 | MFRS3     | 37035 | -0.07 | protein_coding | 17 | 55919843  | 55919917  | mitochondrial ribosomal protein S33                                                                                                |
| 38835 | ENSG00000132432 | SEC61G    | 37039 | -0.07 | protein_coding | 7  | 54819843  | 54827667  | SecE1 gamma subunit                                                                                                                |
| 38852 | ENSG00000100714 | MTHFD1    | 37064 | -0.07 | protein_coding | 14 | 64854749  | 64862722  | methyltetrahydrofolate dehydrogenase (NADPH dependent) 1, methyltetrahydrofolate cyclohydrolase, formyltetrahydrofolate synthetase |
| 38925 | ENSG00000122218 | CGPA      | 37144 | -0.07 | protein_coding | 1  | 160250063 | 160313190 | coatomer protein complex, subunit alpha                                                                                            |
| 38951 | ENSG00000152093 | ITGB1     | 37164 | -0.07 | protein_coding | 10 | 33189247  | 33194720  | integrin beta 1 (betaonectin receptor, beta polypeptide, antigen CD29 includes MD2F, MSK12)                                        |
| 38991 | ENSG00000115203 | RCC3      | 37144 | -0.07 | protein_coding | 3  | 19666273  | 19667468  | radical capping protein subunit 2, Cdk2A                                                                                           |
| 39038 | ENSG00000176871 | WSB2      | 37246 | -0.07 | protein_coding | 12 | 11847012  | 11850025  | WD repeat and SOCS box containing 2                                                                                                |
| 39108 | ENSG00000089896 | DYNLL1    | 37324 | -0.07 | protein_coding | 12 | 12097653  | 12098396  | dynein, light chain, LC8-type 1                                                                                                    |
| 39113 | ENSG00000102735 | PKnox1    | 37326 | -0.07 | protein_coding | 1  | 192046602 | 192056138 | transcriptional coactivator factor 15                                                                                              |
| 39144 | ENSG00000141101 | NOB1      | 37363 | -0.07 | protein_coding | 16 | 69775770  | 69788843  | NON1/RRP12 binding protein 1 homolog (S. cerevisiae)                                                                               |
| 39145 | ENSG00000134049 | IKBIP1    | 37386 | -0.07 | protein_coding | 19 | 44681413  | 44702745  | immediate early response 3 interacting protein                                                                                     |
| 39149 | ENSG00000205544 | TME2K5    | 37371 | -0.07 | protein_coding | 17 | 7300284   | 7300746   | transmembrane protein 258                                                                                                          |
| 39178 | ENSG00000173860 | UCR-RH    | 37402 | -0.07 | protein_coding | 1  | 46789303  | 46782448  | ubiquitin-cytochrome c reductase hinge protein                                                                                     |
| 39207 | ENSG00000126768 | TIMM17B   | 37427 | -0.07 | protein_coding | X  | 48750730  | 48755426  | translocase of inner mitochondrial membrane 17 homolog B (yeast)                                                                   |
| 39248 | ENSG00000191929 | RARS      | 37469 | -0.07 | protein_coding | 4  | 4571284   | 45712808  | arginyl-tRNA synthetase                                                                                                            |
| 39250 | ENSG00000113543 | RARS      | 37469 | -0.07 | protein_coding | 5  | 167913450 | 167945304 | arginyl-tRNA synthetase                                                                                                            |
| 39252 | ENSG00000104109 | MAZD1     | 37472 | -0.07 | protein_coding | 4  | 120976763 | 120988229 | MAD2 mitotic arrest deficient-like 1 (yeast)                                                                                       |
| 39282 | ENSG00000101318 | UCR-R1    | 37517 | -0.07 | protein_coding | 1  | 48434528  | 48434568  | cytochrome c5 (c, nuclear intermembrane)                                                                                           |
| 39298 | ENSG00000184076 | UCR-R10   | 37517 | -0.07 | protein_coding | 10 | 30163358  | 30166402  | ubiquitin-cytochrome c reductase, complex III subunit X                                                                            |
| 39362 | ENSG00000129103 | SUMF2     | 37548 | -0.07 | protein_coding | 7  | 56131695  | 56148363  | sulfate sulfonamide factor 2                                                                                                       |
| 39412 | ENSG00000118322 | LHFP      | 37582 | -0.07 | protein_coding | 22 | 41868363  | 41870630  | actin-like 6B                                                                                                                      |
| 39426 | ENSG00000183722 | LHFP      | 37582 | -0.07 | protein_coding | 13 | 39917029  | 40177665  | Isp60a HMGCoA fusion partner 2                                                                                                     |
| 39465 | ENSG00000148229 | POLE3     | 37699 | -0.07 | protein_coding | 9  | 116188515 | 116172962 | polypolymerase (DNA directed), epsilon 3, accessory subunit                                                                        |
| 39492 | ENSG00000191962 | PHF19     | 37703 | -0.07 | protein_coding | 1  | 19821120  | 19821120  | snRNP loop binding protein                                                                                                         |
| 39621 | ENSG00000100410 | PHF5A     | 37746 | -0.07 | protein_coding | 22 | 41855721  | 41861794  | PHF finger protein 5A                                                                                                              |
| 39645 | ENSG00000172586 | CHCHD1    | 37875 | -0.07 | protein_coding | 10 | 75541805  | 75543410  | coiled-coil-helix-coiled-coil-helix domain containing 1                                                                            |
| 39647 | ENSG00000191929 | CHCHD1    | 37875 | -0.07 | protein_coding | 1  | 12098199  | 12098199  | zinc finger, HLF-type containing 1                                                                                                 |
| 39666 | ENSG00000203760 | CENPW     | 37907 | -0.07 | protein_coding | 6  | 126681200 | 126681200 | centromere protein W                                                                                                               |
| 39884 | ENSG00000170312 | CDK1      | 37930 | -0.07 | protein_coding | 10 | 62538089  | 62554610  | cyclin-dependent kinase 1                                                                                                          |
| 39884 | ENSG00000045641 | RFC2      | 37937 | -0.07 | protein_coding | 7  | 78465262  | 78469774  | replication factor C (activator 1) 2, 40kDa                                                                                        |
| 39665 | ENSG00000191971 | JR5CD     | 37930 | -0.07 | protein_coding | 16 | 51065810  | 51065810  | Josephin domain containing 2                                                                                                       |
| 39790 | ENSG00000182481 | KPNA2     | 38052 | -0.07 | protein_coding | 17 | 660311635 | 66042958  | karyopherin alpha 2 (RAG cohort 1, importin alpha)                                                                                 |
| 39811 | ENSG00000126977 | EIP252    | 38077 | -0.07 | protein_coding | 20 | 36910104  | 36910138  | eukaryotic translation initiation factor 2, subunit beta, 38kDa                                                                    |
| 39824 | ENSG00000191158 | EPH2      | 38076 | -0.07 | protein_coding | 19 | 11816731  | 118391369 | Eph receptor tyrosine kinase 2                                                                                                     |
| 39830 | ENSG00000116688 | MEN2B     | 38088 | -0.07 | protein_coding | 1  | 12042038  | 12073751  | menin 2                                                                                                                            |
| 39843 | ENSG00000137310 | TCF19     | 38109 | -0.07 | protein_coding | 8  | 11207623  | 11210131  | transcription factor 19                                                                                                            |
| 39844 | ENSG00000115738 | OC13      | 38119 | -0.07 | protein_coding | 6  | 10586204  | 10586204  | oncogene decarboxylase 1                                                                                                           |
| 39846 | ENSG00000104442 | ARMC1     | 38121 | -0.07 | protein_coding | 8  | 66514844  | 66514442  | armadillo repeat containing 1                                                                                                      |
| 39846 | ENSG00000198964 | TECAL8    | 38123 | -0.07 | protein_coding | X  | 102976203 | 102976203 | transcription elongation factor A (SII-like) B                                                                                     |
| 39872 | ENSG00000105779 | TIMM17B   | 38127 | -0.07 | protein_coding | 11 | 111981574 | 111981574 | translocase of inner mitochondrial membrane 8 homolog B (yeast)                                                                    |
| 39818 | ENSG00000134957 | CENBF1    | 38128 | -0.07 | protein_coding | 5  | 68452837  | 68474072  | cytoskeleton-associated protein 2                                                                                                  |
| 39876 | ENSG00000188734 | PKIG      | 38250 | -0.07 | protein_coding | 20 | 43184026  | 43200889  | protein kinase (cAMP-dependent, catalytic) inhibitor gamma                                                                         |
| 39900 | ENSG00000101871 | VIMP      | 38250 | -0.07 | protein_coding | 10 | 101811622 | 101811622 | VCP-interacting protein 8                                                                                                          |
| 40017 | ENSG00000158258 | TSR2      | 38291 | -0.07 | protein_coding | X  | 54419280  | 54419280  | TSR2, 20S RNA accumulation, homolog (S. cerevisiae)                                                                                |
| 40074 | ENSG00000129911 | KLIF1     | 38352 | -0.07 | protein_coding | 19 | 1852399   | 18539567  | Kruppel-like factor 16                                                                                                             |
| 40088 | ENSG00000181929 | C10orf16  | 38352 | -0.07 | protein_coding | 1  | 191081192 | 191081192 | S100 calcium binding protein A16                                                                                                   |
| 40105 | ENSG00000130770 | ATP1F1    | 38389 | -0.07 | protein_coding | 1  | 28562620  | 28573417  | ATPase inhibitory factor 1                                                                                                         |
| 40117 | ENSG00000130526 | DKC1      | 38409 | -0.07 | protein_coding | X  | 153991031 | 154005964 | dyskerin-associated protein 1, dyskerin                                                                                            |
| 40120 | ENSG00000193464 | ALXRF     | 38412 | -0.07 | protein_coding | 17 | 7848462   | 7848462   | AlxRF1 nuclear factor                                                                                                              |
| 40156 | ENSG00000104628 | NFKB1B    | 38458 | -0.07 | protein_coding | 19 | 39390340  | 39390553  | nuclear factor of kappa light polypeptide gene enhancer in B-cells inhibitor, beta                                                 |
| 40160 | ENSG00000140208 | MHP23     | 38462 | -0.07 | protein_coding | 11 | 19698508  | 19700762  | mitochondrial ribosomal protein L23                                                                                                |
| 40168 | ENSG00000111369 | NDC90     | 38462 | -0.07 | protein_coding | 19 | 77718263  | 77718263  | Nucleolar 90 kDa dehydrogenase                                                                                                     |
| 40171 | ENSG00000118677 | PINP      | 38471 | -0.07 | protein_coding | 20 | 4668882   | 46682236  | pinon protein                                                                                                                      |
| 40174 | ENSG00000100292 | NCAPD2    | 38476 | -0.07 | protein_coding | 12 | 6602522   | 6641121   | non-SMC condensin I complex, subunit D2                                                                                            |
| 40188 | ENSG00000144968 | CDK17     | 38476 | -0.07 | protein_coding | 12 | 17496875  | 17496875  | cyclin-dependent kinase 17                                                                                                         |
| 40205 | ENSG00000111530 | CAND1     | 38506 | -0.07 | protein_coding | 12 | 67653001  | 67653352  | cutlin-associated and neddylation-associated 1                                                                                     |
| 40211 | ENSG00000134291 | TEMM16C   | 38517 | -0.07 | protein_coding | 12 | 6188162   | 61882661  | transmembrane protein 106C                                                                                                         |
| 40215 | ENSG00000145528 | MEIS1     | 38518 | -0.07 | protein_coding | 12 | 6188162   | 61882661  | meis homeobox 2                                                                                                                    |
| 40222 | ENSG00000141560 | FNK3P     | 38520 | -0.07 | protein_coding | 2  | 80674559  | 80688204  | fructosyl-3-amine related protein                                                                                                  |
| 40238 | ENSG00000195974 | CAV1      | 38537 | -0.07 | protein_coding | 7  | 116184859 | 116201233 | caveolin 1, caveolar protein, 22kDa                                                                                                |
| 40246 | ENSG00000191868 | SRFBP1    | 38537 | -0.07 | protein_coding | 8  | 33003134  | 33003134  | serine-arginine binding protein 1, soluble                                                                                         |
| 40266 | ENSG00000171848 | RNZ2      | 38539 | -0.07 | protein_coding | 2  | 10202455  | 10202455  | ribonucleotide reductase M2                                                                                                        |
| 40272 | ENSG00000137038 | TMM2M1    | 38539 | -0.07 | protein_coding | 9  | 7798480   | 77988380  | transmembrane protein 261                                                                                                          |
| 40273 | ENSG00000102571 | RNFB      | 38543 | -0.07 | protein_coding | 5  | 16268158  | 16268158  | lysine/arginine mediated methyl transferase (RHAMM)                                                                                |
| 40286 | ENSG00000224051 | GLTP1     | 38573 | -0.07 | protein_coding | 1  | 1205119   | 1205119   | glycosyl transfer protein domain containing 1                                                                                      |
| 40290 | ENSG00000131153 | GN2S      | 38579 | -0.07 | protein_coding | 8  | 95710984  | 95723679  | GN2S complex subunit 2 (Pzf2 homolog)                                                                                              |
| 40291 | ENSG00000105378 | FKBP1     | 38582 | -0.07 | protein_coding | 18 | 7468377   | 7468377   | membrane-folding catalyst (glucocorticoid receptor corepressor)                                                                    |
| 40318 | ENSG00000138143 | SUCLA2    | 38614 | -0.07 | protein_coding | 13 | 49510622  | 49512125  | succinate-CoA ligase, ADP-forming, beta subunit                                                                                    |
| 40319 | ENSG00000223872 | NME1      | 38619 | -0.07 | protein_coding | 17 | 49230897  | 49239789  | NME2M2 nucleoside diphosphate kinase 1                                                                                             |
| 40330 | ENSG00000182137 | HSP98     | 38622 | -0.07 | protein_coding | 12 | 119614447 | 119669398 | heat shock 20kDa protein 8                                                                                                         |
| 40360 | ENSG00000101621 | MPP13     | 38623 | -0.07 | protein_coding | 15 | 39524013  | 39525055  | chromosome 21 open reading frame 33                                                                                                |
| 40365 | ENSG00000181991 | MPP13     | 38623 | -0.07 | protein_coding | 15 | 89010884  | 89022222  | mitochondrial ribosomal protein S11                                                                                                |
| 40366 | ENSG00000198442 | CYBB1     | 38653 | -0.07 | protein_coding | 14 | 45584803  | 45584822  | PKC8 binding protein 3, 25kDa                                                                                                      |
| 40381 | ENSG00000193488 | FKBP1     | 38653 | -0.07 | protein_coding | 18 | 20293987  | 20293987  | membrane-folding catalyst (glucocorticoid receptor corepressor)                                                                    |
| 40389 | ENSG00000144887 | SRPRB     | 38677 | -0.07 | protein_coding | 3  | 133592877 | 133594416 | signal recognition particle receptor, B subunit                                                                                    |
| 40416 | ENSG00000184413 | ESRP1     | 38709 | -0.07 | protein_coding | 8  | 95853362  | 95719694  | epithelial splicing regulatory protein 1                                                                                           |
| 40451 | ENSG00000165311 | CRAT      | 38742 | -0.07 | protein_coding | 6  | 20262463  | 20214427  | perlecan domain containing 1, beta 1 subunit                                                                                       |
| 40458 | ENSG00000095321 | CRAT      | 38742 | -0.07 | protein_coding | 9  | 131878089 | 131878089 | carminin O acetyltransferase                                                                                                       |
| 40465 | ENSG00000126099 | PFAT      | 38755 | -0.07 | protein_coding | 4  | 57295299  | 57307181  | phosphatidyl pyrophosphate amidotransferase                                                                                        |
| 40478 | ENSG00000191361 | TIHRA     | 38758 | -0.07 | protein_coding | 4  | 36714443  | 36714443  | tyrosine kinase receptor, alpha                                                                                                    |
| 40491 | ENSG00000175862 | TOM1L2    | 38782 | -0.07 | protein_coding | 17 |           |           |                                                                                                                                    |





|       |                 |          |         |       |                |    |           |           |                                                                                                  |
|-------|-----------------|----------|---------|-------|----------------|----|-----------|-----------|--------------------------------------------------------------------------------------------------|
| 42067 | ENSG00000185504 | C17orf70 | 40538_3 | -0.07 | protein_coding | 17 | 7956917   | 7952087   | chromosome 17 open reading frame 70                                                              |
| 42071 | ENSG00000185071 | ABHD11   | 40539_1 | -0.07 | protein_coding | 7  | 7319324   | 7319324   | abhydrolase domain containing 11                                                                 |
| 42074 | ENSG00000114544 | SLC14A3  | 40540_4 | -0.07 | protein_coding | 3  | 12572518  | 12582404  | solute carrier family 14, member 3                                                               |
| 42080 | ENSG00000270699 | ASNS     | 40544_8 | -0.07 | protein_coding | 7  | 67481430  | 67501854  | asparagine synthetase (glutamine-hydrolyzing)                                                    |
| 42083 | ENSG00000126259 | MRRT     | 40549_8 | -0.07 | protein_coding | 17 | 7486877   | 7486107   | mannose 6-phosphate utilization defect 1                                                         |
| 42084 | ENSG00000102941 | PM1M1    | 40550_4 | -0.07 | protein_coding | 22 | 41972988  | 41985884  | phosphotransferase 1                                                                             |
| 42088 | ENSG00000136295 | TYH3     | 40551_4 | -0.07 | protein_coding | 7  | 2871585   | 2704436   | twenty five member 3                                                                             |
| 42090 | ENSG00000245636 | PEY17    | 40554_7 | -0.07 | protein_coding | 20 | 18118517  | 18128413  | PEY17 homolog (S. cerevisiae)                                                                    |
| 42120 | ENSG00000109146 | RNEE1    | 40558_1 | -0.07 | protein_coding | 16 | 5992968   | 59945487  | ribonuclease exo1                                                                                |
| 42122 | ENSG00000195657 | CACNA1H  | 40585_5 | -0.07 | protein_coding | 10 | 1202424   | 12071771  | calcium channel, voltage-dependent, T type, alpha 1H subunit                                     |
| 42126 | ENSG0000011028  | MRC2     | 40587   | -0.07 | protein_coding | 20 | 6074782   | 6077058   | mannose receptor, C type 2                                                                       |
| 42132 | ENSG00000194689 | TRMT2A   | 40589_4 | -0.07 | protein_coding | 7  | 2009388   | 20193815  | RNA methyltransferase 2 (S. cerevisiae)                                                          |
| 42143 | ENSG00000137411 | VARS2    | 40609_8 | -0.07 | protein_coding | 6  | 3987619   | 39884236  | valyl-RNA synthetase 2, mitochondrial                                                            |
| 42150 | ENSG00000185757 | KIAA1462 | 40618_4 | -0.07 | protein_coding | 10 | 30301229  | 30044623  | KIAA1462                                                                                         |
| 42154 | ENSG00000202663 | APSR11   | 40619_3 | -0.07 | protein_coding | 14 | 10402699  | 104073600 | apoptosome 1, mitochondrial                                                                      |
| 42156 | ENSG00000145730 | PAM3     | 40626_7 | -0.07 | protein_coding | 5  | 1208885   | 10236609  | peptidylglycine alpha-amidating monooxygenase                                                    |
| 42158 | ENSG00000304896 | CLPTM1L  | 40630_5 | -0.07 | protein_coding | 5  | 1317859   | 1343214   | CLPTM1L-like                                                                                     |
| 42166 | ENSG00000102884 | FMH1C    | 40632_2 | -0.07 | protein_coding | 10 | 7476675   | 74856132  | prolyl 4-hydroxylase, alpha polypeptide 1                                                        |
| 42174 | ENSG00000162227 | TAF1L    | 40647_8 | -0.07 | protein_coding | 11 | 6253875   | 6254814   | TAF1B RNA polymerase II, p300/CBP-associated factor (PCAF)-associated factor, 65kDa              |
| 42177 | ENSG00000136240 | KDEL2    | 40651_7 | -0.07 | protein_coding | 7  | 6485584   | 6523873   | KDEL (Lys-Asp-Glu-Leu) endoplasmic reticulum protein retention receptor 2                        |
| 42186 | ENSG00000195253 | INPPEF   | 40654_4 | -0.07 | protein_coding | 10 | 11245009  | 121168852 | inositol polyphosphate 5-phosphatase F                                                           |
| 42181 | ENSG00000181027 | FRP3     | 40654_4 | -0.07 | protein_coding | 19 | 4724803   | 4728205   | kulmin related protein                                                                           |
| 42189 | ENSG00000145391 | SETD7    | 40658_7 | -0.07 | protein_coding | 4  | 140417095 | 140527583 | SET domain containing (lysine methyltransferase) 7                                               |
| 42193 | ENSG00000131338 | QTRT1    | 40662   | -0.07 | protein_coding | 19 | 10021208  | 10024113  | guanine RNA-ribosyltransferase 1                                                                 |
| 42194 | ENSG00000183580 | FBXL7    | 40662_3 | -0.07 | protein_coding | 5  | 15500305  | 15589900  | F-box and leucine-rich repeat protein 7                                                          |
| 42196 | ENSG00000309889 | KIF4A    | 40664_8 | -0.07 | protein_coding | X  | 9958079   | 8964082   | kinesin family member 4A                                                                         |
| 42198 | ENSG00000148443 | POCD11   | 40666_7 | -0.07 | protein_coding | 10 | 100156405 | 100260349 | programmed cell death 11                                                                         |
| 42203 | ENSG00000124104 | SNK21    | 40668_1 | -0.07 | protein_coding | 20 | 44442449  | 44471914  | sorting nexin family member 21                                                                   |
| 42204 | ENSG00000202172 | B3GNT9   | 40670   | -0.07 | protein_coding | 16 | 67142006  | 67185117  | UDP-GlcNAc 6-epimerase beta-1,3-N-acetylglucosaminyltransferase 9                                |
| 42201 | ENSG00000145483 | ACTH2    | 40674   | -0.07 | protein_coding | 2  | 2171708   | 2171708   | membrane-associated rat oncofetus (CMHC) 4, E3 ubiquitin protein ligase                          |
| 42216 | ENSG00000134769 | DTNA     | 40682_6 | -0.07 | protein_coding | 18 | 32073254  | 32073808  | dysembryon, alpha                                                                                |
| 42219 | ENSG00000195259 | CHAF1B   | 40687   | -0.07 | protein_coding | 21 | 37757876  | 37791313  | chromatin assembly factor 1, subunit B (p60)                                                     |
| 42220 | ENSG00000102422 | SPRY3    | 40688   | -0.07 | protein_coding | 12 | 5686812   | 5687012   | SPRY domain containing 4                                                                         |
| 42231 | ENSG00000159063 | ALG8     | 40702_6 | -0.07 | protein_coding | 11 | 77811982  | 77850706  | ALG8, alpha-1,3-glucosyltransferase                                                              |
| 42243 | ENSG00000102081 | HMX8A4   | 40715_1 | -0.07 | protein_coding | 22 | 35653445  | 35691801  | HMX8B domain containing 4                                                                        |
| 42251 | ENSG00000102828 | SAMD1A   | 40716   | -0.07 | protein_coding | 22 | 5502133   | 5502133   | sterile alpha motif domain containing 4A                                                         |
| 42254 | ENSG00000202834 | SNK24    | 40726_2 | -0.07 | protein_coding | 19 | 4625295   | 46299231  | sorting nexin 24                                                                                 |
| 42264 | ENSG00000126777 | KTN1     | 40741_5 | -0.07 | protein_coding | 14 | 56025790  | 56168244  | kinetin 1 (kinesin receptor)                                                                     |
| 42280 | ENSG00000102246 | DGCR8    | 40750_3 | -0.07 | protein_coding | 9  | 320100    | 320100    | DIP2 disco-interacting protein 2 homolog C (Drosophila)                                          |
| 42285 | ENSG00000098486 | COP1     | 40764_6 | -0.07 | protein_coding | 16 | 4500876   | 4500876   | cell death-inducing p53 target 1                                                                 |
| 42292 | ENSG00000122550 | KULH7    | 40780   | -0.07 | protein_coding | 7  | 2345353   | 2347533   | kelch-like family member 7                                                                       |
| 42294 | ENSG00000144680 | TRMT2B   | 40783   | -0.07 | protein_coding | 3  | 4145307   | 4145307   | SRFBP1 chaperone                                                                                 |
| 42298 | ENSG00000171729 | TMEM51   | 40786_7 | -0.07 | protein_coding | 1  | 15479028  | 15489876  | transmembrane protein 51                                                                         |
| 42302 | ENSG00000131321 | STAR1D3  | 40788_2 | -0.07 | protein_coding | 13 | 3387272   | 3387272   | SMAR-related lipid transfer (START) domain containing 13                                         |
| 42304 | ENSG00000126972 | DGCR4    | 40790_3 | -0.07 | protein_coding | 5  | 15008602  | 150159071 | diatom 4 (p62)                                                                                   |
| 42315 | ENSG00000105344 | HSPA13   | 40793_3 | -0.07 | protein_coding | 10 | 1574338   | 1574338   | heat shock protein 70kDa family, member 13                                                       |
| 42330 | ENSG00000102804 | TSC2D1   | 40811_8 | -0.07 | protein_coding | 13 | 45007855  | 45151283  | TSC22 domain family member 1                                                                     |
| 42333 | ENSG00000006582 | MMP2S24  | 40819   | -0.07 | protein_coding | 2  | 4906157   | 49094592  | mitochondrial ribosomal protein S24                                                              |
| 42340 | ENSG00000106296 | MPS2B    | 40823_3 | -0.07 | protein_coding | 6  | 2291465   | 2291963   | perforin 6                                                                                       |
| 42344 | ENSG00000115457 | IGFBP2   | 40831_3 | -0.07 | protein_coding | 2  | 21748751  | 21749759  | insulin-like growth factor binding protein 2, 36kDa                                              |
| 42348 | ENSG00000191363 | RIT2     | 40837_3 | -0.07 | protein_coding | 17 | 6891345   | 6910703   | fructosyltransferase 3 kinase                                                                    |
| 42353 | ENSG00000161736 | DOLP1    | 40838   | -0.07 | protein_coding | 13 | 13184337  | 13186217  | diacylglycerol phosphatase 1                                                                     |
| 42356 | ENSG00000044652 | SNK24    | 40848_7 | -0.07 | protein_coding | 5  | 122179134 | 122305049 | sorting nexin 24                                                                                 |
| 42367 | ENSG00000105270 | SLP2A    | 40852_2 | -0.07 | protein_coding | 19 | 3650562   | 36524245  | CAP-Gly domain containing linker protein 3                                                       |
| 42386 | ENSG00000108766 | METTL2A  | 40857   | -0.07 | protein_coding | 19 | 60561229  | 60574454  | methyltransferase like 2A                                                                        |
| 42384 | ENSG00000137074 | APTX     | 40859_1 | -0.07 | protein_coding | 9  | 3297204   | 33025166  | serpinin                                                                                         |
| 42388 | ENSG00000126744 | RIT2C    | 40862_9 | -0.07 | protein_coding | 19 | 4598847   | 46000319  | reticulon 2                                                                                      |
| 42389 | ENSG00000105624 | PQSF6    | 40866   | -0.07 | protein_coding | 19 | 1050823   | 10511083  | polyom group ring finger 6                                                                       |
| 42372 | ENSG00000124164 | VAMP     | 40884_1 | -0.07 | protein_coding | 20 | 5898478   | 5702617   | VAMP (vesicle-associated membrane protein)-associated protein 8 and C                            |
| 42386 | ENSG00000120334 | CENPL    | 40880_7 | -0.07 | protein_coding | 1  | 17378888  | 17378888  | centromere protein L                                                                             |
| 42388 | ENSG00000101523 | MAP3K2   | 40882   | -0.07 | protein_coding | 3  | 4746526   | 4746526   | mitogen-activated protein kinase 3 interacting protein 3                                         |
| 42393 | ENSG00000150830 | VEGFC    | 40886_2 | -0.07 | protein_coding | 4  | 17760489  | 17771381  | vascular endothelial growth factor C                                                             |
| 42395 | ENSG00000105767 | CADM4    | 40887_9 | -0.07 | protein_coding | 19 | 4412520   | 44143991  | cell adhesion molecule 4                                                                         |
| 42398 | ENSG00000144498 | TMEM82   | 40892   | -0.07 | protein_coding | 22 | 2077184   | 2077184   | scavenger receptor class F, member 2                                                             |
| 42407 | ENSG00000112276 | BVES     | 40897_6 | -0.07 | protein_coding | 6  | 10554897  | 10558049  | blood vessel endothelial substance                                                               |
| 42420 | ENSG00000309999 | RNF215   | 40913_3 | -0.07 | protein_coding | 22 | 3077385   | 30817760  | ring finger protein 215                                                                          |
| 42421 | ENSG00000101801 | TMEM38   | 40913   | -0.07 | protein_coding | 11 | 11462103  | 11462103  | transmembrane protein 38                                                                         |
| 42422 | ENSG00000189060 | H1FO     | 40918_1 | -0.07 | protein_coding | 2  | 3820114   | 38203442  | H1 histone family, member 0                                                                      |
| 42423 | ENSG00000161011 | SGO1B1   | 40919_3 | -0.07 | protein_coding | 5  | 17923388  | 17926578  | sesquione 1                                                                                      |
| 42424 | ENSG00000100372 | SLC25A17 | 40920_6 | -0.07 | protein_coding | 22 | 4116534   | 41215403  | solute carrier family 25 (mitochondrial carrier; peroxisomal membrane protein, 34kDa), member 17 |
| 42427 | ENSG00000008798 | NAV3     | 40922_3 | -0.07 | protein_coding | 12 | 7822488   | 7826790   | neuronal navigator 3                                                                             |
| 42430 | ENSG00000101813 | MAPK15   | 40923   | -0.07 | protein_coding | 3  | 14862369  | 14862369  | mitogen-activated protein kinase containing 11                                                   |
| 42431 | ENSG00000119574 | ZBTB45   | 40927_4 | -0.07 | protein_coding | 19 | 5904897   | 59050276  | zinc finger and BTB domain containing 45                                                         |
| 42432 | ENSG00000174013 | FBXK4S   | 40928_3 | -0.07 | protein_coding | 3  | 18625482  | 18625482  | F-box protein 45                                                                                 |
| 42433 | ENSG00000101822 | TMEM82C  | 40928   | -0.07 | protein_coding | 22 | 788828    | 788828    | transmembrane protein 82                                                                         |
| 42434 | ENSG00000191019 | NGO1     | 40929   | -0.07 | protein_coding | 16 | 8974899   | 8976054   | NAD(P)H dehydrogenase, quinone 1                                                                 |
| 42435 | ENSG00000193854 | SWIS     | 40933_3 | -0.07 | protein_coding | 9  | 13107858  | 13105269  | SWIS recombination repair homology (yeast)                                                       |
| 42437 | ENSG00000101588 | NAL5     | 40935   | -0.07 | protein_coding | 8  | 372838    | 372838    | muscleprotein 155kDa                                                                             |
| 42447 | ENSG00000189924 | LETM1    | 40941_4 | -0.07 | protein_coding | 4  | 1811206   | 1815794   | leucine zipper EF-hand containing transmembrane protein 1                                        |
| 42454 | ENSG00000196078 | TRAF7    | 40950_2 | -0.07 | protein_coding | 7  | 5108309   | 51384515  | cardon-box WH2 repeat protein                                                                    |
| 42468 | ENSG00000105685 | RIT5     | 40954_3 | -0.07 | protein_coding | 11 | 624107    | 624107    | integrator complex subunit 5                                                                     |
| 42467 | ENSG00000145485 | CKK5     | 40962_6 | -0.07 | protein_coding | 7  | 15075089  | 15075087  | cyclin-dependent kinase 5                                                                        |
| 42474 | ENSG00000113456 | RAD1     | 40971_9 | -0.07 | protein_coding | 5  | 34905369  | 34919004  | RAD1 homolog (S. pombe)                                                                          |
| 42477 | ENSG00000136854 | STBP1    | 40975_4 | -0.07 | protein_coding | 9  | 13031454  | 13040740  | strep binding protein 1                                                                          |
| 42478 | ENSG00000102984 | FTN      | 40977_2 | -0.07 | protein_coding | 11 | 3391163   | 13702811  | fibronectin                                                                                      |
| 42479 | ENSG00000118402 | ELVDL4   | 40978_5 | -0.07 | protein_coding | 6  | 80624529  | 80657297  | ELVDL family alpha elongase 4                                                                    |
| 42481 | ENSG00000126549 | KIAA1217 | 40980_9 | -0.07 | protein_coding | 10 | 2396707   | 24063767  | KIAA1217                                                                                         |
| 42484 | ENSG00000102688 | NES      | 40983   | -0.07 | protein_coding | 12 | 15963555  | 15964199  | nestin                                                                                           |
| 42488 | ENSG00000136531 | SUX3     | 40985_9 | -0.07 | protein_coding | 12 | 5630964   | 56340425  | sulfite oxidase                                                                                  |
| 42484 | ENSG00000195812 | FAM87A   | 40986_6 | -0.07 | protein_coding | 2  | 3386267   | 3384449   | family with sequence similarity 89, member A                                                     |
| 42500 | ENSG00000104948 | SNHG2    | 41000   | -0.07 | protein_coding | 8  | 4983049   | 4983049   | small nuclear non-coding RNA zinc finger 2                                                       |
| 42503 | ENSG00000407290 | C17orf70 | 41007_8 | -0.07 | protein_coding | X  | 18666126  | 16731059  | CYP synthase 2                                                                                   |
| 42504 | ENSG00000100811 | ARG2     | 41008_4 | -0.07 | protein_coding | 14 | 8088015   | 8111847   | arginase 2                                                                                       |
| 42506 | ENSG00000141198 | TOM1L1   | 41012   | -0.07 | protein_coding | 11 | 2671876   | 3261610   | target of my1 (p160)-like 1                                                                      |
| 42509 | ENSG00000144369 | FAM171B  | 41013_1 | -0.07 | protein_coding | 2  | 18755888  | 18750385  | family with sequence similarity 171, member B                                                    |
| 42514 | ENSG00000111685 | CDC43    | 41      |       |                |    |           |           |                                                                                                  |

|       |                 |          |       |       |                |    |           |           |                                                                                              |
|-------|-----------------|----------|-------|-------|----------------|----|-----------|-----------|----------------------------------------------------------------------------------------------|
| 42734 | ENSG00000198825 | PTGESL3  | 41278 | -0.07 | protein_coding | 17 | 4110243   | 41132545  | PTGESL3-AS1 readthrough                                                                      |
| 42738 | ENSG0000019396  | DLG4     | 41283 | -0.07 | protein_coding | 4  | 1509139   | 15117819  | dishevelled domain kinase 2                                                                  |
| 42740 | ENSG00000189908 | TMSF1    | 41287 | -0.07 | protein_coding | 3  | 14009609  | 14009552  | transmembrane 4 L six family member 1                                                        |
| 42741 | ENSG00000103096 | PLAGL3   | 41287 | -0.07 | protein_coding | 16 | 6827620   | 6829461   | phosphoglucoase A2, group XV                                                                 |
| 42742 | ENSG00000096068 | CLCA7    | 41287 | -0.07 | protein_coding | 14 | 23664504  | 23664504  | solute carrier family 7 (amino acid transporter light chain, L system), member 6             |
| 42754 | ENSG0000019158  | EPK4L5   | 41301 | -0.07 | protein_coding | 14 | 12071251  | 12079863  | epithelial membrane protein bars 4, like 5                                                   |
| 42755 | ENSG00000130835 | COL5A1   | 41301 | -0.07 | protein_coding | 9  | 13753320  | 13773886  | collagen, type V, alpha 1                                                                    |
| 42756 | ENSG0000011576  | LARS2    | 41302 | -0.07 | protein_coding | 3  | 4542999   | 4542999   | leucyl-RNA synthetase 2, mitochondrial                                                       |
| 42764 | ENSG00000193428 | MMAR3    | 41308 | -0.07 | protein_coding | 12 | 109991542 | 110911679 | methylmalonic aciduria (cobalamin deficiency) cblII type                                     |
| 42765 | ENSG00000182196 | LDCC1    | 41311 | -0.07 | protein_coding | 4  | 14026994  | 14027110  | leucine zipper, down-regulated in cancer 1                                                   |
| 42766 | ENSG00000184079 | COIF2    | 41312 | -0.07 | protein_coding | 6  | 17129620  | 17169272  | chromosome 8 open reading frame 57                                                           |
| 42768 | ENSG00000180284 | SPATCL1  | 41313 | -0.07 | protein_coding | 6  | 47843852  | 47843852  | spermatogenesis and centromere-associated 1 like                                             |
| 42771 | ENSG00000137269 | LRRIC2   | 41322 | -0.07 | protein_coding | 6  | 5365925   | 5378919   | leucine rich repeat containing 1                                                             |
| 42777 | ENSG00000089250 | NRP1     | 41327 | -0.07 | protein_coding | 10 | 3348420   | 33525190  | neuropilin 1                                                                                 |
| 42788 | ENSG00000082630 | FRY11    | 41334 | -0.07 | protein_coding | 5  | 61869789  | 61934409  | protein tyrosine phosphatase 11                                                              |
| 42791 | ENSG00000128484 | PARP2    | 41343 | -0.07 | protein_coding | 14 | 2081174   | 2082064   | poly (ADP-ribose) polymerase 2                                                               |
| 42792 | ENSG00000117155 | SSX2IP   | 41343 | -0.07 | protein_coding | 1  | 8519399   | 8518449   | synovial sarcoma, A breakpoint 2 interacting protein                                         |
| 42798 | ENSG00000133445 | WDR1     | 41351 | -0.07 | protein_coding | 5  | 18771865  | 18739938  | WW and C2 domain containing 1                                                                |
| 42804 | ENSG00000168077 | SCARA3   | 41351 | -0.07 | protein_coding | 8  | 27491385  | 27534203  | scavenger receptor class A, member 3                                                         |
| 42806 | ENSG00000157627 | FAM137   | 41357 | -0.07 | protein_coding | 2  | 15191791  | 15150348  | formin-like 2                                                                                |
| 42817 | ENSG00000201728 | CTPFB3   | 41358 | -0.07 | protein_coding | 1  | 13761727  | 13761947  | chromosome 1 open reading frame 53                                                           |
| 42820 | ENSG00000139998 | RAB15    | 41372 | -0.07 | protein_coding | 14 | 68412532  | 65439494  | RAB15, member RAS oncogene family                                                            |
| 42822 | ENSG00000183629 | PTPN13   | 41373 | -0.07 | protein_coding | 4  | 8751548   | 87736324  | protein tyrosine phosphatase, non-receptor type 13 (APO-1/CD95 (Fas)-associated phosphatase) |
| 42828 | ENSG00000118162 | KFTN     | 41379 | -0.07 | protein_coding | 19 | 47978401  | 47987525  | kaptein (actin binding protein)                                                              |
| 42831 | ENSG00000107862 | GBF1     | 41380 | -0.07 | protein_coding | 10 | 10405299  | 10412489  | guanine nucleotide exchange factor 1                                                         |
| 42838 | ENSG00000198767 | SPRN4    | 41390 | -0.07 | protein_coding | 3  | 6265107   | 62651224  | glycyl-proline family member 4                                                               |
| 42840 | ENSG0000017194  | HLTF     | 41390 | -0.07 | protein_coding | 3  | 14874714  | 14880434  | helicase-like transcription factor                                                           |
| 42843 | ENSG00000129195 | FAM64A   | 41393 | -0.07 | protein_coding | 17 | 6347735   | 6347879   | family with sequence similarity B4, member A                                                 |
| 42853 | ENSG00000181471 | CTSL     | 41412 | -0.07 | protein_coding | 17 | 1284182   | 12842964  | cathepsin L                                                                                  |
| 42854 | ENSG00000191914 | DST      | 41412 | -0.07 | protein_coding | 6  | 5632785   | 5681926   | dystonin                                                                                     |
| 42856 | ENSG00000185997 | AKL5B    | 41413 | -0.07 | protein_coding | 10 | 18498334  | 18707088  | ADP-ribosylation factor-like 5B                                                              |
| 42857 | ENSG00000187541 | CTSL     | 41413 | -0.07 | protein_coding | 17 | 1284182   | 12842964  | phosphatidylethanolamine transferase, class O                                                |
| 42858 | ENSG00000000003 | TSPAN6   | 41415 | -0.07 | protein_coding | 3  | 9985365   | 9990498   | transferrin 6                                                                                |
| 42859 | ENSG00000143842 | SOX13    | 41415 | -0.07 | protein_coding | 1  | 20404243  | 20409963  | SRF (see determining region Y) box 13                                                        |
| 42868 | ENSG00000185823 | CTSL     | 41415 | -0.07 | protein_coding | 17 | 1284182   | 12842964  | membrane protein, palmitoylated (PK-palmitoyl member 2)                                      |
| 42870 | ENSG0000012071  | LPNH1    | 41428 | -0.07 | protein_coding | 19 | 14260750  | 14319999  | latrophilin 1                                                                                |
| 42884 | ENSG00000187772 | LINC28   | 41441 | -0.07 | protein_coding | 6  | 10544923  | 10551207  | linc28 homolog B (C. elegans)                                                                |
| 42885 | ENSG00000189263 | LRWD1    | 41441 | -0.07 | protein_coding | 13 | 8008121   | 80081303  | leucine-rich repeats and immunoglobulin-like domains 3                                       |
| 42887 | ENSG00000171861 | RNMTL1   | 41442 | -0.07 | protein_coding | 17 | 685113    | 685749    | RNA methyltransferase like 1                                                                 |
| 42889 | ENSG00000187733 | HSD11B1L | 41448 | -0.07 | protein_coding | 19 | 5688815   | 5688835   | hydroxysteroid (11-beta) dehydrogenase 1-like                                                |
| 42891 | ENSG00000181278 | LRWD1    | 41448 | -0.07 | protein_coding | 13 | 8008121   | 80081303  | protein tyrosine phosphatase, non-receptor type G                                            |
| 42896 | ENSG00000186167 | BTRC     | 41452 | -0.07 | protein_coding | 10 | 10311920  | 10310778  | beta-transducin repeat containing E3 ubiquitin protein ligase                                |
| 42901 | ENSG00000182449 | PDCD2L   | 41460 | -0.07 | protein_coding | 19 | 34895289  | 34917073  | programmed cell death 2                                                                      |
| 42903 | ENSG00000187510 | TRAF3    | 41462 | -0.07 | protein_coding | 20 | 5502439   | 5502439   | transcription factor AP-2 gamma (activating enhancer binding protein 2 gamma)                |
| 42906 | ENSG00000188760 | TMEM108  | 41462 | -0.07 | protein_coding | 2  | 22049385  | 22041537  | transmembrane protein 108                                                                    |
| 42911 | ENSG00000185338 | HECTD2   | 41472 | -0.07 | protein_coding | 10 | 6317036   | 63274586  | HECT domain containing E3 ubiquitin protein ligase 2                                         |
| 42914 | ENSG00000101129 | NILCAM   | 41475 | -0.07 | protein_coding | 10 | 10707408  | 10699717  | neuronal cell adhesion molecule                                                              |
| 42921 | ENSG00000195828 | PPP1R8A  | 41480 | -0.07 | protein_coding | 7  | 9435951   | 94369121  | protein phosphatase 1, regulatory subunit 9A                                                 |
| 42922 | ENSG00000104290 | FDP3     | 41480 | -0.07 | protein_coding | 8  | 28317129  | 28341775  | fused family receptor 3                                                                      |
| 42928 | ENSG00000095096 | DPF13    | 41485 | -0.07 | protein_coding | 3  | 17930543  | 17930189  | ubiquitin specific peptidase 13 (sopeptidase 1-3)                                            |
| 42930 | ENSG00000180618 | ANO2     | 41490 | -0.07 | protein_coding | 13 | 119011731 | 11268463  | anion channel complex 2                                                                      |
| 42931 | ENSG00000137166 | FOXP4    | 41492 | -0.07 | protein_coding | 6  | 41514164  | 41507122  | forkhead box P4                                                                              |
| 42933 | ENSG00000187487 | KLHL26   | 41491 | -0.07 | protein_coding | 19 | 18747775  | 18781309  | ketch-like family member 20                                                                  |
| 42938 | ENSG00000202847 | LRWD1    | 41492 | -0.07 | protein_coding | 13 | 8008121   | 80081303  | euchromatic histone lysine methyltransferase 2                                               |
| 42938 | ENSG00000195588 | LSM11    | 41493 | -0.07 | protein_coding | 5  | 15710703  | 15718717  | LSM11, U7 small nuclear RNA associated                                                       |
| 42941 | ENSG00000189289 | PKOX     | 41495 | -0.07 | protein_coding | 21 | 85138975  | 85182188  | pyridoxal (pyridoxine, vitamin B6) kinase                                                    |
| 42944 | ENSG00000181471 | LATS2    | 41497 | -0.07 | protein_coding | 17 | 3511556   | 35094     | serine/threonine kinase                                                                      |
| 42957 | ENSG00000138018 | EPT1     | 41517 | -0.07 | protein_coding | 2  | 2831415   | 2861879   | ethanolaminephosphotransferase 1 (CDP-ethanolamine-specific)                                 |
| 42965 | ENSG00000185861 | OSGOL2   | 41532 | -0.07 | protein_coding | 9  | 13698919  | 13913788  | galactin OS glycosyl oxidase 2                                                               |
| 42969 | ENSG00000191796 | SGSH     | 41532 | -0.07 | protein_coding | 9  | 1066255   | 1066255   | galactose 4-epimerase, terminal domain containing                                            |
| 42975 | ENSG00000181986 | WDR90    | 41547 | -0.07 | protein_coding | 16 | 699311    | 717633    | WD repeat domain 90                                                                          |
| 42980 | ENSG00000143995 | MEIS1    | 41547 | -0.07 | protein_coding | 2  | 6896054   | 68961001  | Meis homeobox 1                                                                              |
| 42983 | ENSG00000190627 | REI1B    | 41547 | -0.07 | protein_coding | 1  | 14574328  | 14574328  | Rei1 domain containing 4                                                                     |
| 42985 | ENSG00000187749 | CYB5D2   | 41549 | -0.07 | protein_coding | 17 | 4048462   | 4090605   | cytochrome b5 domain containing 2                                                            |
| 42986 | ENSG00000195592 | ZKSCAN2  | 41551 | -0.07 | protein_coding | 16 | 25247322  | 25299252  | zinc finger with KRAB and SCAN domains 2                                                     |
| 42988 | ENSG00000191718 | RPS24    | 41551 | -0.07 | protein_coding | 15 | 7526182   | 7526182   | ribosomal protein S24, subunit                                                               |
| 42990 | ENSG00000187538 | CACNB3   | 41557 | -0.07 | protein_coding | 12 | 4920757   | 4922724   | calcium channel, voltage-dependent, beta 3 subunit                                           |
| 42999 | ENSG00000185889 | AGPAT6   | 41568 | -0.07 | protein_coding | 8  | 41434706  | 41448220  | 1-acylglycerol 3-phosphate O-acyltransferase 6                                               |
| 43001 | ENSG00000104953 | LATS2    | 41568 | -0.07 | protein_coding | 13 | 2154718   | 2154718   | large tumor suppressor kinase 2                                                              |
| 43002 | ENSG00000043355 | ZIC2     | 41568 | -0.07 | protein_coding | 13 | 10063408  | 10063019  | Zic family member 2                                                                          |
| 43003 | ENSG00000193550 | KNOP1    | 41568 | -0.07 | protein_coding | 16 | 1874992   | 18729557  | lysine rich nuclear protein 1                                                                |
| 43004 | ENSG00000183888 | CANX     | 41568 | -0.07 | protein_coding | 1  | 18380     | 18380     | calcium/calmodulin-dependent protein kinase II inhibitor 2                                   |
| 43016 | ENSG00000138478 | TEX2     | 41580 | -0.07 | protein_coding | 17 | 8224587   | 82240661  | testis expressed 2                                                                           |
| 43017 | ENSG00000183870 | TRPA1    | 41581 | -0.07 | protein_coding | 3  | 12729192  | 12731794  | transmembrane protein, acid-sensing associated 1                                             |
| 43018 | ENSG00000184628 | IKBK     | 41582 | -0.07 | protein_coding | 13 | 1923884   | 1923884   | IkB most containing 1                                                                        |
| 43027 | ENSG00000259073 | PTEN     | 41596 | -0.07 | protein_coding | 21 | 33765439  | 33765254  | chromosome 21 open reading frame 119                                                         |
| 43028 | ENSG00000134504 | KCTD11   | 41608 | -0.07 | protein_coding | 18 | 24024874  | 24024874  | potassium channel tetramerization domain containing 1                                        |
| 43029 | ENSG00000194603 | SLC39A3  | 41608 | -0.07 | protein_coding | 1  | 11848769  | 11848769  | lysine motif containing 32                                                                   |
| 43040 | ENSG00000125843 | AP5T1    | 41609 | -0.07 | protein_coding | 20 | 3801178   | 3805949   | adaptor-leucine protein complex 5, sigma 1 subunit                                           |
| 43044 | ENSG00000193116 | KIF21A   | 41614 | -0.07 | protein_coding | 12 | 39887030  | 39887192  | kinase family member 21A                                                                     |
| 43046 | ENSG00000185813 | KIF15    | 41615 | -0.07 | protein_coding | 15 | 6011620   | 6011620   | kinase family member 7                                                                       |
| 43050 | ENSG00000135108 | FOXO2    | 41618 | -0.07 | protein_coding | 12 | 11758114  | 11762336  | Fox box protein 2                                                                            |
| 43051 | ENSG00000112130 | RNF9     | 41619 | -0.07 | protein_coding | 6  | 3732148   | 37362514  | ring finger protein 8, E3 ubiquitin protein ligase                                           |
| 43054 | ENSG00000187689 | CDKN2A   | 41621 | -0.07 | protein_coding | 9  | 7196773   | 7196530   | cyclin-dependent kinase inhibitor 2A                                                         |
| 43061 | ENSG00000178184 | PARK9    | 41623 | -0.07 | protein_coding | 18 | 77815115  | 7807428   | park9 family cell polarity regulator                                                         |
| 43062 | ENSG00000228872 | PROB1    | 41631 | -0.07 | protein_coding | 5  | 13872635  | 13873085  | proline-rich basic protein 1                                                                 |
| 43063 | ENSG00000119521 | MLK3     | 41636 | -0.07 | protein_coding | 12 | 11001100  | 11003967  | mixed-lineage kinase                                                                         |
| 43070 | ENSG00000189826 | COX4A3   | 41639 | -0.07 | protein_coding | 12 | 42793437  | 42791447  | cytochrome c oxidase subunit 4b                                                              |
| 43074 | ENSG00000098182 | JMJD4    | 41641 | -0.07 | protein_coding | 1  | 22798128  | 22798112  | jumron domain containing 4                                                                   |
| 43075 | ENSG00000142594 | PRKCD    | 41642 | -0.07 | protein_coding | 1  | 15024042  | 15027007  | patillary renal cell carcinoma (translocation-associated)                                    |
| 43077 | ENSG00000191481 | PDFA     | 41643 | -0.07 | protein_coding | 1  | 33685     | 33685     | platelet-derived growth factor alpha polypeptide                                             |
| 43080 | ENSG00000124074 | EMK2     | 41651 | -0.07 | protein_coding | 16 | 67698848  | 67701186  | erkurin domain containing 1                                                                  |
| 43083 | ENSG00000005884 | TIGA3    | 41652 | -0.07 | protein_coding | 17 | 4813332   | 48167485  | integrin, alpha 3 (integrin CD149, alpha 3 subunit of VLA-3 receptor)                        |
| 43087 | ENSG00000198910 | LTC4AI   | 41657 | -0.07 | protein_coding | 17 | 15312069  | 15312069  | 15 lipoxygenase                                                                              |
| 43095 | ENSG00000100154 | TC2E     | 41657 | -0.07 | protein_coding | 22 | 2871404   | 2897583   | tetratricopeptide repeat domain 28                                                           |
| 43098 | ENSG00000101189 | MIR68P   | 41678 | -0.07 | protein_coding | 20 | 6142789   | 61431445  | MIR68-miRNA, binding protein                                                                 |
| 43098 | ENSG000001      |          |       |       |                |    |           |           |                                                                                              |

|       |                  |           |         |       |                                     |    |            |           |                                                                                       |
|-------|------------------|-----------|---------|-------|-------------------------------------|----|------------|-----------|---------------------------------------------------------------------------------------|
| 43326 | ENSG00000209193  | PHLPP1    | 41781   | -0.07 | protein_coding                      | 18 | 60362072   | 60647668  | PH domain and luciferin rib repeat protein phosphatase 1                              |
| 43328 | ENSG0000015058   | HES17     | 41787   | -0.07 | protein_coding                      | X  | 13170944   | 13206924  | heparan sulfate O-6-sulfotransferase 2                                                |
| 43336 | ENSG00000114405  | C1orf14   | 41988.4 | -0.07 | protein_coding                      | 3  | 62304648   | 62321888  | chromosome 3 open reading frame 14                                                    |
| 43337 | ENSG00000014937  | LAS1L     | 41988.9 | -0.07 | protein_coding                      | X  | 64732462   | 64744555  | LAS1-like (S. cerevisiae)                                                             |
| 43338 | ENSG00000174501  | DBSL      | 41990.9 | -0.07 | protein_coding                      | 18 | 65172819   | 65194217  | demethyl sulfite epimerase-like                                                       |
| 43344 | ENSG00000191971  | LCN2L     | 42000.3 | -0.07 | protein_coding                      | 6  | 12688797   | 12704547  | LCN2-like family member 2                                                             |
| 43348 | ENSG0000011478   | OPLX2     | 42003.1 | -0.07 | protein_coding                      | 19 | 46195741   | 46207247  | glutamine/peptide cyclotransferase-like                                               |
| 43350 | ENSG00000212719  | C17orf1   | 42005.2 | -0.07 | protein_coding                      | 17 | 21428691   | 21477722  | chromosome 17 open reading frame 51                                                   |
| 43351 | ENSG00000000398  | RUL1D3    | 42008.3 | -0.07 | protein_coding                      | X  | 11929393   | 11934547  | ELAV-like family member 13                                                            |
| 43357 | ENSG00000137337  | MDC1      | 42008.9 | -0.07 | protein_coding                      | 6  | 30687584   | 30695651  | mediator of DNA-damage checkpoint 1                                                   |
| 43358 | ENSG00000143155  | HES1      | 42013.3 | -0.07 | protein_coding                      | 3  | 15365584   | 15369651  | hes family bHLH transcription factor 1                                                |
| 43360 | ENSG00000131874  | ENOX2     | 42028.2 | -0.07 | protein_coding                      | 12 | 7026269    | 7028261   | enzyme 2 gamma, neuronal                                                              |
| 43368 | ENSG00000176842  | IRX5      | 42028.3 | -0.07 | protein_coding                      | 16 | 54864774   | 54883397  | iroquois homeobox 5                                                                   |
| 43372 | ENSG00000194177  | MYEF2     | 42032.2 | -0.07 | protein_coding                      | 15 | 48431625   | 48470714  | myelin expression factor 2                                                            |
| 43378 | ENSG00000100788  | ZNF668    | 42038.2 | -0.07 | protein_coding                      | 16 | 31072784   | 31085641  | zinc finger protein 668                                                               |
| 43377 | ENSG00000132846  | ZBED3     | 42039.3 | -0.07 | protein_coding                      | 5  | 76378977   | 76383148  | zinc finger, BED-type containing 3                                                    |
| 43383 | ENSG00000030362  | TRIO      | 42046.1 | -0.07 | protein_coding                      | 5  | 1414311    | 14323235  | trp Rho guanine nucleotide exchange factor                                            |
| 43386 | ENSG00000150288  | FRXL1B    | 42048.3 | -0.07 | protein_coding                      | 7  | 5470066    | 5503429   | F-box and leucine-rich repeat protein 18                                              |
| 43391 | ENSG00000173653  | RCE1      | 42052.7 | -0.07 | protein_coding                      | 11 | 66610306   | 66610417  | Ras converting CAAX endopeptidase 1                                                   |
| 43406 | ENSG00000187634  | SAMD11    | 42079.7 | -0.07 | protein_coding                      | 1  | 862026     | 8739655   | sterile alpha motif domain containing 11                                              |
| 43408 | ENSG00000131725  | PRPF4     | 42172.2 | -0.07 | protein_coding                      | 5  | 14160952   | 14170620  | pre-mRNA splicing factor 4                                                            |
| 43441 | ENSG00000132004  | FBXW9     | 42114.5 | -0.07 | protein_coding                      | 19 | 1278867    | 12807467  | F-box and WD repeat domain containing 9                                               |
| 43444 | ENSG00000135414  | GDF11     | 42119.6 | -0.07 | protein_coding                      | 12 | 56137064   | 56150911  | growth differentiation factor 11                                                      |
| 43449 | ENSG00000000573  | HOUA1     | 42128.5 | -0.07 | protein_coding                      | 7  | 2722128    | 27224842  | homeobox A11                                                                          |
| 43451 | ENSG00000168465  | DGDL1     | 42128.8 | -0.07 | protein_coding                      | 6  | 11774860   | 11781021  | discoilin, CUB and LCC1 domain containing 1                                           |
| 43454 | ENSG00000170385  | SMAD1     | 42130.5 | -0.07 | protein_coding                      | 4  | 14642348   | 14647921  | SMAD family member 4                                                                  |
| 43459 | ENSG00000166532  | RMRK1B    | 42134.8 | -0.07 | protein_coding                      | 12 | 8631496    | 8632661   | ribosomal modification protein rmrk-like family member B                              |
| 43464 | ENSG00000204138  | PHACTR4   | 42138.8 | -0.07 | protein_coding                      | 1  | 28696114   | 28696114  | phosphatase and actin regulator 4                                                     |
| 43465 | ENSG00000178832  | ETV4      | 42140.3 | -0.07 | protein_coding                      | 17 | 41662512   | 41666888  | ets variant 4                                                                         |
| 43480 | ENSG00000168681  | HES1Y     | 42140.7 | -0.07 | protein_coding                      | 8  | 4667265    | 4667265   | has-related family bHLH transcription factor 1                                        |
| 43488 | ENSG00000033989  | SLOC1A2   | 42176.8 | -0.07 | protein_coding                      | 8  | 17354597   | 17428082  | solute carrier family 7 (cationic amino acid transporter, y+ system), member 2        |
| 43493 | ENSG00000252293  | HOUA10    | 42184.5 | -0.07 | protein_coding                      | 7  | 27210210   | 27219880  | homeobox A10                                                                          |
| 43508 | ENSG00000160028  | ENOX2     | 42185.2 | -0.07 | protein_coding                      | 7  | 342357     | 342357    | enzyme 2 gamma, neuronal                                                              |
| 43512 | ENSG00000144233  | AMMECR1L  | 42214.4 | -0.07 | protein_coding                      | 2  | 128619204  | 128643498 | AMMECR1-like                                                                          |
| 43516 | ENSG00000126268  | THAP10    | 42221.5 | -0.07 | protein_coding                      | 15 | 71173681   | 71185124  | THAP domain containing 10                                                             |
| 43528 | ENSG00000121628  | ENOX2     | 42222.2 | -0.07 | protein_coding                      | 15 | 566734     | 566734    | enzyme 2 gamma, neuronal                                                              |
| 43563 | ENSG00000198476  | C2orf106  | 42258.5 | -0.07 | protein_coding                      | 20 | 251504     | 271390    | chromosome 20 open reading frame 96                                                   |
| 43566 | ENSG00000101187  | SLOC1A1   | 42294.9 | -0.07 | protein_coding                      | 20 | 61273797   | 61317337  | solute carrier organic anion transporter family, member 4A1                           |
| 43583 | ENSG00000100399  | ENOX2     | 42295.2 | -0.07 | protein_coding                      | 17 | 2723270    | 2723270   | enzyme 2 gamma, neuronal                                                              |
| 43628 | ENSG00000149858  | ZC3H4VIL  | 42373.3 | -0.07 | protein_coding                      | 7  | 138710452  | 138720775 | zinc finger CCHC-type, antiviral 1-like                                               |
| 43633 | ENSG00000128587  | PDXL      | 42383   | -0.07 | protein_coding                      | 7  | 13185021   | 13182478  | podocalyxin-like                                                                      |
| 43682 | ENSG00000130348  | MYO18A    | 42381   | -0.07 | protein_coding                      | 7  | 1280249    | 1280249   | hypocalymin-like (lipid droplet-associated)                                           |
| 43685 | ENSG00000130164  | LDLR      | 42379   | -0.07 | protein_coding                      | 19 | 1120038    | 1124492   | low density lipoprotein receptor                                                      |
| 41269 | ENSG00000227882  |           | 39635.3 | -0.07 | transcribed_unprocessed_pseudo_gene | 2  | 156126145  | 156126399 | ATP synthase, H+ transporting, mitochondrial F1 complex, alpha subunit 1 pseudogene 2 |
| 42619 | ENSG000002005763 | RP97      | 41137.2 | -0.07 | transcribed_unprocessed_pseudo_gene | 7  | 3296427    | 3296798   | retinitis pigmentosa 9 pseudogene                                                     |
| 35190 | ENSG00000226638  |           | 36433.1 | -0.07 | unprocessed_pseudogene              | 15 | 41849225   | 41849633  | transcription elongation factor B (SII), polypeptide 1 pseudogene 2                   |
| 35183 | ENSG00000224550  |           | 33323.1 | -0.07 | unprocessed_pseudogene              | 15 | 41849225   | 41849633  | transcription elongation factor B (SII), polypeptide 1 pseudogene 2                   |
| 35804 | ENSG00000232346  |           | 33622.5 | -0.07 | unprocessed_pseudogene              | 10 | 51592080   | 51623365  | translocase of inner mitochondrial membrane 23 homolog (yeast)                        |
| 37333 | ENSG00000172974  | PSA1      | 36632.9 | -0.07 | protein_coding                      | 4  | 9767018    | 9767126   | trans-2,3-epoxy-CoA reductase pseudogene 1                                            |
| 39193 | ENSG00000204956  | PSA1      | 37412.4 | -0.07 | protein_coding                      | 4  | 2497625    | 2497763   | ubiquitin-conjugating enzyme E2M pseudogene 1                                         |
| 39327 | ENSG00000136297  | TIMM23B   | 37550.5 | -0.07 | protein_coding                      | 10 | 51592080   | 51623365  | translocase of inner mitochondrial membrane 23 homolog (yeast)                        |
| 40455 | ENSG00000192909  |           | 38747.3 | -0.07 | unprocessed_pseudogene              | 10 | 51592080   | 51623365  | translocase of inner mitochondrial membrane 23 homolog (yeast)                        |
| 41837 | ENSG00000217176  |           | 40207   | -0.07 | unprocessed_pseudogene              | 10 | 51592080   | 51623365  | translocase of inner mitochondrial membrane 23 homolog (yeast)                        |
| 41837 | ENSG00000217525  |           | 40256.7 | -0.07 | unprocessed_pseudogene              | 10 | 51592080   | 51623365  | translocase of inner mitochondrial membrane 23 homolog (yeast)                        |
| 41975 | ENSG00000226098  |           | 40440.4 | -0.07 | unprocessed_pseudogene              | 13 | 26526623   | 26526158  | cytochrome P450, family 5, subfamily A, polypeptide 1 pseudogene 2                    |
| 41989 | ENSG00000226098  |           | 40440.7 | -0.07 | unprocessed_pseudogene              | 13 | 26526623   | 26526158  | cytochrome P450, family 5, subfamily A, polypeptide 1 pseudogene 2                    |
| 42281 | ENSG00000213850  |           | 40761   | -0.07 | unprocessed_pseudogene              | 3  | 69184154   | 69184790  | COP9 signalosome subunit 8 pseudogene 1                                               |
| 42305 | ENSG0000023014   |           | 40791.1 | -0.07 | unprocessed_pseudogene              | 22 | 40272129   | 40272119  | ubiquitin-cytochrome c reductase, Rieske iron-sulfur polypeptide 1 pseudogene 1       |
| 42384 | ENSG00000206480  |           | 40817   | -0.07 | unprocessed_pseudogene              | 17 | 1665074    | 1665170   | ubiquitin-conjugating enzyme E2S pseudogene 2                                         |
| 42488 | ENSG00000237831  |           | 40989.1 | -0.07 | unprocessed_pseudogene              | 11 | 2497763    | 2497763   | ubiquitin-1 pseudogene 2                                                              |
| 42921 | ENSG00000226268  |           | 41025.5 | -0.07 | unprocessed_pseudogene              | 17 | 2967239    | 2967239   | adenylate kinase 4 pseudogene 1                                                       |
| 42914 | ENSG00000206480  |           | 41025.5 | -0.07 | unprocessed_pseudogene              | 17 | 1665074    | 1665170   | ubiquitin-conjugating enzyme E2S pseudogene 2                                         |
| 42966 | ENSG00000228998  |           | 41534.5 | -0.07 | unprocessed_pseudogene              | 17 | 2497763    | 2497763   | ubiquitin-1 pseudogene 2                                                              |
| 43008 | ENSG00000228390  |           | 41575.4 | -0.07 | unprocessed_pseudogene              | 17 | 2497763    | 2497763   | ubiquitin-1 pseudogene 2                                                              |
| 43121 | ENSG00000214443  |           | 41717.1 | -0.07 | unprocessed_pseudogene              | 17 | 2497763    | 2497763   | ubiquitin-1 pseudogene 2                                                              |
| 43130 | ENSG00000230467  |           | 41717.1 | -0.07 | unprocessed_pseudogene              | 17 | 2497763    | 2497763   | ubiquitin-1 pseudogene 2                                                              |
| 43144 | ENSG00000141150  | RASL10B   | 41727.7 | -0.07 | protein_coding                      | 17 | 3405868    | 3407040   | RASL-like family 10, member B                                                         |
| 43172 | ENSG00000111468  | MYO18     | 41737   | -0.07 | protein_coding                      | 17 | 3483177    | 3483694   | myosin XIX                                                                            |
| 43340 | ENSG00000281189  |           | 41991.1 | -0.07 | unprocessed_pseudogene              | 17 | 3483177    | 3483694   | myosin XIX                                                                            |
| 43370 | ENSG00000285537  |           | 42030   | -0.07 | unprocessed_pseudogene              | 17 | 3483177    | 3483694   | myosin XIX                                                                            |
| 43540 | ENSG00000266524  |           | 42237   | -0.07 | unprocessed_pseudogene              | 17 | 3483177    | 3483694   | myosin XIX                                                                            |
| 43293 | ENSG00000233016  |           | 41835.1 | -0.08 | antisense                           | 9  | 139815818  | 139822636 | small nucleolar RNA host gene 7 (non-protein coding)                                  |
| 43596 | ENSG00000292791  | SMAG2-AS1 | 42202.9 | -0.08 | antisense                           | 9  | 139815818  | 139822636 | small nucleolar RNA host gene 7 (non-protein coding)                                  |
| 43730 | ENSG00000226638  |           | 33622.5 | -0.08 | unprocessed_pseudogene              | 10 | 51592080   | 51623365  | translocase of inner mitochondrial membrane 23 homolog (yeast)                        |
| 37327 | ENSG00000236903  |           | 35446.4 | -0.08 | unprocessed_pseudogene              | 6  | 30453717   | 30454387  | RAN, member RAS oncogene family pseudogene 1                                          |
| 38439 | ENSG00000073905  | VDAC1     | 36831.1 | -0.08 | protein_coding                      | X  | 80184999   | 80185846  | voltage-dependent anion channel 1 pseudogene 1                                        |
| 39043 | ENSG00000235845  |           | 37628.9 | -0.08 | unprocessed_pseudogene              | 4  | 9767018    | 9767126   | trans-2,3-epoxy-CoA reductase pseudogene 1                                            |
| 39604 | ENSG0000021461   | UBE2M1    | 37841.9 | -0.08 | protein_coding                      | 16 | 3440403    | 34404612  | ubiquitin-conjugating enzyme E2M pseudogene 1                                         |
| 39745 | ENSG00000236988  |           | 37963.1 | -0.08 | unprocessed_pseudogene              | 1  | 17072116   | 17072550  | eukaryotic translation initiation factor 1A, X-linked pseudogene 1                    |
| 41181 | ENSG00000227650  |           | 39518.1 | -0.08 | unprocessed_pseudogene              | 15 | 10623811   | 10624249  | ubiquitin-conjugating enzyme E2N pseudogene 1                                         |
| 41561 | ENSG00000214552  |           | 39964.8 | -0.08 | unprocessed_pseudogene              | 3  | 69184154   | 69184790  | COP9 signalosome subunit 8 pseudogene 1                                               |
| 41598 | ENSG00000226098  |           | 40002   | -0.08 | unprocessed_pseudogene              | 22 | 40272129   | 40272119  | ubiquitin-cytochrome c reductase, Rieske iron-sulfur polypeptide 1 pseudogene 1       |
| 42711 | ENSG00000224126  |           | 41254.9 | -0.08 | unprocessed_pseudogene              | 17 | 1665074    | 1665170   | ubiquitin-conjugating enzyme E2S pseudogene 2                                         |
| 42937 | ENSG00000226098  |           | 41393.5 | -0.08 | unprocessed_pseudogene              | 13 | 2497625    | 2497763   | ubiquitin-1 pseudogene 2                                                              |
| 43055 | ENSG00000235335  |           | 41822.4 | -0.08 | unprocessed_pseudogene              | 17 | 2967239    | 2967239   | adenylate kinase 4 pseudogene 1                                                       |
| 43531 | ENSG00000235598  |           | 42522.2 | -0.08 | unprocessed_pseudogene              | 13 | 26526623   | 26526158  | cytochrome P450, family 5, subfamily A, polypeptide 1 pseudogene 2                    |
| 43124 | ENSG00000234456  | MAG2-AS3  | 41718.1 | -0.08 | antisense                           | 9  | 139815818  | 139822636 | small nucleolar RNA host gene 7 (non-protein coding)                                  |
| 43910 | ENSG00000235823  |           | 42813.7 | -0.08 | unprocessed_pseudogene              | 10 | 10213372   | 10214325  | long interspersed non-protein coding RNA 263                                          |
| 32974 | ENSG00000198409  | ACTB      | 31147   | -0.08 | protein_coding                      | 17 | 794799     | 7948073   | actin, gamma 1                                                                        |
| 32985 | ENSG00000198432  | PRK3      | 32036.5 | -0.08 | protein_coding                      | 17 | 8408569    | 8408569   | protein kinase 3                                                                      |
| 35230 | ENSG00000166385  | 2-Ssp     | 33862.8 | -0.08 | protein_coding                      | 2  | 24225415   | 24225412  | sepin 2                                                                               |
| 35561 | ENSG00000111640  | GAPDH     | 33868.6 | -0.08 | protein_coding                      | 12 | 6443993    | 6447737   | glyceraldehyde 3-phosphate dehydrogenase                                              |
| 36863 | ENSG00000100951  | C2orf1    | 34792.1 | -0.08 | protein_coding                      | 11 | 2391797    | 2418669   | G2orf1 molecule                                                                       |
| 36886 | ENSG00000161916  | RPL3      | 35010.5 | -0.08 | protein_coding                      | 8  | 14601510   | 14601792  | ribosomal protein L8                                                                  |
| 36991 | ENSG00000098998  | TMED2     | 35109.1 | -0.08 | protein_coding                      | 12 | 12400978</ |           |                                                                                       |



|       |                 |           |       |       |                |           |           |                                                                                                                         |
|-------|-----------------|-----------|-------|-------|----------------|-----------|-----------|-------------------------------------------------------------------------------------------------------------------------|
| 39892 | ENSG00000140374 | EITFA     | 38153 | -0.08 | protein_coding | 78507696  | 78603813  | electron-transfer flavoprotein, alpha polypeptide                                                                       |
| 39901 | ENSG00000121718 | ANKK3     | 40238 | -0.08 | protein_coding | 62523     | 62523     | ankyrin 2                                                                                                               |
| 39905 | ENSG00000243678 | NME2      | 32022 | -0.08 | protein_coding | 49230920  | 49249108  | NME1/NME2 readthrough                                                                                                   |
| 39955 | ENSG00000203191 | RNH1      | 38224 | -0.08 | protein_coding | 11        | 484512    | ribonuclease/hungatein inhibitor 1                                                                                      |
| 39968 | ENSG00000195518 | TM2D5     | 38230 | -0.08 | protein_coding | 11435262  | 11467194  | transmembrane protein 205                                                                                               |
| 40010 | ENSG00000191766 | PLEKH2    | 35295 | -0.08 | protein_coding | 16019624  | 16019624  | pleckstrin homology domain containing family M (with RUN domain) member 2                                               |
| 40060 | ENSG00000104979 | C13orf83  | 38334 | -0.08 | protein_coding | 13894862  | 13898276  | chromosome 19 open reading frame 83                                                                                     |
| 40079 | ENSG00000176599 | CTDTP1    | 38394 | -0.08 | protein_coding | 80449490  | 80441396  | cat TTP cytoskeleton 1                                                                                                  |
| 40163 | ENSG00000193332 | LSMT      | 38340 | -0.08 | protein_coding | 23258819  | 23258819  | LSMT homolog, U8 small nuclear RNA associated (S. cerevisiae)                                                           |
| 40200 | ENSG00000079729 | PGM1      | 38603 | -0.08 | protein_coding | 64058847  | 64125916  | phosphoglucomutase 1                                                                                                    |
| 40243 | ENSG00000062444 | UZAF2     | 38540 | -0.08 | protein_coding | 56165512  | 56186681  | U2 small nuclear RNA auxiliary factor 2                                                                                 |
| 40246 | ENSG00000128329 | MPC2      | 38532 | -0.08 | protein_coding | 21418208  | 21418208  | microprocessor RNA auxiliary factor                                                                                     |
| 40384 | ENSG00000157456 | CEN2B     | 38652 | -0.08 | protein_coding | 59397277  | 59417244  | cyclin B2                                                                                                               |
| 40384 | ENSG00000155396 | RHCC      | 38670 | -0.08 | protein_coding | 113247228 | 113250956 | ras homology family member C                                                                                            |
| 40411 | ENSG00000103266 | STUB1     | 38696 | -0.08 | protein_coding | 7362265   | 7362070   | STIP1 homology and U3-box containing protein 1, E3 ubiquitin protein ligase                                             |
| 40445 | ENSG00000169733 | RNF9      | 38735 | -0.08 | protein_coding | 8009778   | 8009970   | RNF9 O-fucosyltransferase 3, beta-N-acetylglucosaminyltransferase                                                       |
| 40480 | ENSG00000204568 | MNP3-1B8  | 38777 | -0.08 | protein_coding | 30584986  | 30594172  | microtubulin ribosomal protein S18B                                                                                     |
| 40486 | ENSG00000139168 | ZCRR1     | 38791 | -0.08 | protein_coding | 42706860  | 42706860  | zinc finger CCHC-type and RNA binding motif 1                                                                           |
| 40512 | ENSG00000161013 | MGAT4B    | 38806 | -0.08 | protein_coding | 176224567 | 176232532 | mannosyl (alpha-1-3)-glycoprotein beta-1,4-N-acetylglucosaminyltransferase, isozyme B                                   |
| 40516 | ENSG00000101940 | WDR13     | 38813 | -0.08 | protein_coding | 48449430  | 48463381  | WD repeat domain 13                                                                                                     |
| 40529 | ENSG00000129243 | CEP350    | 38817 | -0.08 | protein_coding | 9445772   | 9445968   | Shwachman-Bodian-Diamond syndrome                                                                                       |
| 40574 | ENSG00000167085 | PHB       | 38883 | -0.08 | protein_coding | 47481414  | 47492246  | prohibitin                                                                                                              |
| 40582 | ENSG00000114383 | TUSC2     | 38893 | -0.08 | protein_coding | 50337458  | 50365682  | tumor suppressor candidate 2                                                                                            |
| 40585 | ENSG00000105221 | MEF1B     | 38898 | -0.08 | protein_coding | 862962    | 862918    | mediator complex subunit 16                                                                                             |
| 40586 | ENSG00000122952 | ZWINT     | 38897 | -0.08 | protein_coding | 5811688   | 5811206   | ZW10 interacting kinetochore protein                                                                                    |
| 40616 | ENSG00000168732 | DDX21     | 38932 | -0.08 | protein_coding | 7075884   | 70744229  | DEAD (Asp-Glu-Asp) box helicase 21                                                                                      |
| 40651 | ENSG00000145912 | NRP2      | 38966 | -0.08 | protein_coding | 117236461 | 117236988 | NG2P neurotrophin receptor                                                                                              |
| 40653 | ENSG00000145817 | YFP5      | 38966 | -0.08 | protein_coding | 14353725  | 14355078  | Yfp1 domain family, member 5                                                                                            |
| 40658 | ENSG00000071889 | FAMA3     | 38975 | -0.08 | protein_coding | 153733300 | 153744688 | family with sequence similarity 3, member A                                                                             |
| 40662 | ENSG00000103325 | LINC0182C | 38975 | -0.08 | protein_coding | 441173    | 441246    | linc0182c non-coding RNA, protein coding                                                                                |
| 40665 | ENSG00000204275 | AP5S1     | 39007 | -0.08 | protein_coding | 47341393  | 47352429  | adaptor-related protein complex 2, sigma 1 subunit                                                                      |
| 40716 | ENSG00000102685 | PCMT1     | 39032 | -0.08 | protein_coding | 150070579 | 150132556 | protein-L-isoaspartate (D-aspartate) O-methyltransferase                                                                |
| 40774 | ENSG00000105293 | SLC24A7   | 39103 | -0.08 | protein_coding | 60231204  | 60231204  | SLC24A7                                                                                                                 |
| 40778 | ENSG00000164062 | ARPE1     | 39113 | -0.08 | protein_coding | 49711435  | 49721396  | acylaminoacyl-peptide hydrolase                                                                                         |
| 40820 | ENSG00000147224 | PRPS1     | 39159 | -0.08 | protein_coding | 108971737 | 10894924  | phosphoribosyl pyrophosphate synthetase 1                                                                               |
| 40821 | ENSG00000105959 | PRPF1     | 39161 | -0.08 | protein_coding | 37288     | 37288     | PRF domain containing factor                                                                                            |
| 40832 | ENSG00000113845 | TIMMD3C1  | 39170 | -0.08 | protein_coding | 119217379 | 119243937 | translocase of inner mitochondrial membrane domain containing 1                                                         |
| 40849 | ENSG00000199519 | GRPEL1    | 39189 | -0.08 | protein_coding | 7060633   | 7060924   | GrpE-like 1, mitochondrial (E. coli)                                                                                    |
| 40850 | ENSG00000168688 | SLC11A1   | 39201 | -0.08 | protein_coding | 11588108  | 11588108  | solute carrier family 11 (cation transporter), member 1                                                                 |
| 40944 | ENSG00000180492 | NOA1      | 39300 | -0.08 | protein_coding | 47829536  | 47849889  | nuclear co-repressor 1                                                                                                  |
| 40954 | ENSG00000101218 | MCM3      | 39303 | -0.08 | protein_coding | 62158807  | 62158879  | minichromosome maintenance complex component 3                                                                          |
| 40958 | ENSG00000105429 | PCAF      | 39312 | -0.08 | protein_coding | 1472816   | 1472816   | bifunctional acetylase regulator                                                                                        |
| 40962 | ENSG00000172428 | MYEOV2    | 39313 | -0.08 | protein_coding | 24106980  | 24107624  | myeloma overexpressed 2                                                                                                 |
| 40987 | ENSG00000157020 | SEC13     | 39339 | -0.08 | protein_coding | 10334815  | 10332682  | SEC13 homolog (S. cerevisiae)                                                                                           |
| 40988 | ENSG00000104591 | TNFRSF20B | 39346 | -0.08 | protein_coding | 7703269   | 7703269   | tumor necrosis receptor 20b                                                                                             |
| 41016 | ENSG00000195241 | HTATSF1   | 39357 | -0.08 | protein_coding | 135957628 | 135959440 | HIV-1 T8 specific factor 1                                                                                              |
| 41041 | ENSG00000184840 | TMED9     | 39398 | -0.08 | protein_coding | 177019159 | 177023125 | transmembrane ems24 protein transport domain containing 9                                                               |
| 41067 | ENSG00000143314 | MIR644    | 39425 | -0.08 | protein_coding | 108701095 | 108711382 | microtubulin ribosomal protein L24                                                                                      |
| 41076 | ENSG00000169926 | TMEM139   | 39437 | -0.08 | protein_coding | 17179793  | 17179793  | transmembrane protein 129                                                                                               |
| 41082 | ENSG00000101520 | C9orf67   | 39435 | -0.08 | protein_coding | 3734155   | 3734004   | chromosome 20 open reading frame 27                                                                                     |
| 41136 | ENSG00000197923 | CY13      | 39493 | -0.08 | protein_coding | 10205033  | 10206304  | chaperonin containing TCP1, subunit 5 (beta)                                                                            |
| 41156 | ENSG00000174445 | YF1B      | 39478 | -0.08 | protein_coding | 38797676  | 38797613  | Yfp1 interacting factor homolog (S. cerevisiae)                                                                         |
| 41163 | ENSG00000103275 | UBE2I     | 39520 | -0.08 | protein_coding | 1355548   | 1377019   | ubiquitin-conjugating enzyme E2i                                                                                        |
| 41172 | ENSG00000114500 | CT10orf1  | 39534 | -0.08 | protein_coding | 57508925  | 57510889  | chromosome 11 open reading frame 21                                                                                     |
| 41176 | ENSG00000105149 | NAZ       | 39539 | -0.08 | protein_coding | 29811427  | 29811427  | MYC-associated zinc finger protein partner binding transcription factor                                                 |
| 41177 | ENSG00000105181 | MRPL10    | 39539 | -0.08 | protein_coding | 45906308  | 45906308  | mitochondrial ribosomal protein L10                                                                                     |
| 41178 | ENSG00000198121 | ERCC1     | 39541 | -0.08 | protein_coding | 4115822   | 4115831   | enoyl-CoA dehydratase 2                                                                                                 |
| 41184 | ENSG00000181786 | ENTPD8    | 39559 | -0.08 | protein_coding | 23178329  | 23178329  | ectonucleoside diphosphate diophosphohydrolase 5 (putative)                                                             |
| 41238 | ENSG00000108823 | APEX1     | 39606 | -0.08 | protein_coding | 20923550  | 20925927  | APEX nuclease (multifunctional DNA repair enzyme) 1                                                                     |
| 41254 | ENSG00000117450 | PRDX1     | 39623 | -0.08 | protein_coding | 45919706  | 45988179  | peroxiredoxin 1                                                                                                         |
| 41279 | ENSG00000174468 | ENTPD6    | 39634 | -0.08 | protein_coding | 23178329  | 23178329  | ectonucleoside diphosphate diophosphohydrolase 5                                                                        |
| 41283 | ENSG00000107581 | EP3A      | 39651 | -0.08 | protein_coding | 102074356 | 102084136 | eukaryotic translation initiation factor 3, subunit A                                                                   |
| 41292 | ENSG00000184924 | PTFRHD1   | 39668 | -0.08 | protein_coding | 25012603  | 25016251  | peptidyl-RNA hydrolase domain containing 1                                                                              |
| 41338 | ENSG00000105969 | EFRA2     | 39678 | -0.08 | protein_coding | 17625280  | 17625280  | destrin (actin cross-linking factor) 2                                                                                  |
| 41348 | ENSG00000101843 | PSMD10    | 39738 | -0.08 | protein_coding | 107327437 | 107334848 | proteasome (prosome, macropain) 26S subunit, non-ATPase, 10                                                             |
| 41357 | ENSG00000190649 | HIBADH1   | 39754 | -0.08 | protein_coding | 27250051  | 27250214  | 3-hydroxybutyrate dehydrogenase 1                                                                                       |
| 41360 | ENSG00000164115 | KIF13B    | 39773 | -0.08 | protein_coding | 13461011  | 13461011  | kinosin II, cytoskeletal ligand                                                                                         |
| 41377 | ENSG00000171241 | SHCBP1    | 39774 | -0.08 | protein_coding | 46614466  | 46655538  | SHC SH2-domain binding protein 1                                                                                        |
| 41383 | ENSG00000171220 | HDAC3     | 39782 | -0.08 | protein_coding | 14100443  | 14116437  | histone deacetylase 3                                                                                                   |
| 41390 | ENSG00000103245 | YF1A      | 39787 | -0.08 | protein_coding | 5214027   | 5214027   | tyrosine 3-monooxygenase/histamine 5-monoxygenase activation protein, eta                                               |
| 41394 | ENSG00000138663 | COP5A     | 39794 | -0.08 | protein_coding | 43955600  | 43959571  | COP9 signalosome subunit 4                                                                                              |
| 41402 | ENSG00000100491 | HCCS3     | 39800 | -0.08 | protein_coding | 11118421  | 11141188  | HCCP synthetase synthase                                                                                                |
| 41413 | ENSG00000105738 | MEK1      | 39801 | -0.08 | protein_coding | 4068163   | 4068163   | N-acetylglucosaminase, alpha                                                                                            |
| 41429 | ENSG00000155304 | MLK1      | 39831 | -0.08 | protein_coding | 39572859  | 39577678  | maternal embryonic leucine zipper kinase                                                                                |
| 41438 | ENSG00000147027 | TMEM47    | 39838 | -0.08 | protein_coding | 34845811  | 34847605  | transmembrane protein 47                                                                                                |
| 41448 | ENSG00000185823 | TMEM162   | 39838 | -0.08 | protein_coding | 1086838   | 1086838   | structural maintenance of chromosomes 2                                                                                 |
| 41449 | ENSG00000141367 | CLTC      | 39850 | -0.08 | protein_coding | 57792719  | 57792719  | clathrin, heavy chain (HC)                                                                                              |
| 41482 | ENSG00000100900 | MHS2      | 39854 | -0.08 | protein_coding | 47681008  | 47788450  | meis1 homolog 2                                                                                                         |
| 41487 | ENSG00000105811 | PHF19C    | 39858 | -0.08 | protein_coding | 303819    | 303819    | phosphatidylinositol (3-OH) kinase, type I, gamma                                                                       |
| 41534 | ENSG00000178252 | WDR8      | 39941 | -0.08 | protein_coding | 4904495   | 49053368  | WD repeat domain 8                                                                                                      |
| 41538 | ENSG00000102030 | NAT10     | 39943 | -0.08 | protein_coding | 15318495  | 15320676  | N(alpha)-acetyltransferase 10, NAA catalytic subunit                                                                    |
| 41541 | ENSG00000103718 | MPK4      | 39948 | -0.08 | protein_coding | 1310949   | 1310949   | MPK4, U3 small nuclear ribonucleoprotein, homolog (yeast)                                                               |
| 41556 | ENSG00000103499 | DEPDC1B   | 39959 | -0.08 | protein_coding | 59952739  | 59960717  | DEP domain containing 1B                                                                                                |
| 41564 | ENSG00000196576 | PLXN2     | 39970 | -0.08 | protein_coding | 50713408  | 50746056  | plexin B2                                                                                                               |
| 41570 | ENSG00000198569 | ZNF511    | 39977 | -0.08 | protein_coding | 13511979  | 13516603  | zinc finger protein 511                                                                                                 |
| 41578 | ENSG00000131178 | KIF13B    | 39983 | -0.08 | protein_coding | 13461011  | 13461011  | replication factor 13 (beta/tau) 13, 38kDa                                                                              |
| 41592 | ENSG00000171222 | SCAND1    | 39997 | -0.08 | protein_coding | 34541539  | 34547394  | SCAN domain containing 1                                                                                                |
| 41594 | ENSG00000144591 | GMPF1     | 39998 | -0.08 | protein_coding | 22004669  | 22031710  | GDP-mannose pyrophosphorylase A                                                                                         |
| 41600 | ENSG00000149743 | GART      | 40009 | -0.08 | protein_coding | 43991271  | 43991276  | adenosine phosphotransferase 1                                                                                          |
| 41621 | ENSG00000159131 | GART      | 40024 | -0.08 | protein_coding | 43878238  | 43915797  | phosphoribosylglycinamide formyltransferase, phosphoribosylglycinamide synthetase, phosphoribosylglycinamide synthetase |
| 41630 | ENSG00000198487 | TM2       | 40033 | -0.08 | protein_coding | 35681989  | 35691077  | phosphoribosylglycinamide synthetase                                                                                    |
| 41656 | ENSG00000197345 | MRPL21    | 40059 | -0.08 | protein_coding | 68887744  | 68887903  | mitochondrial ribosomal protein L21                                                                                     |
| 41669 | ENSG00000198736 | MFSD10    | 40074 | -0.08 | protein_coding | 2522286   | 2523698   | major facilitator superfamily domain containing 10                                                                      |
| 41676 | ENSG00000191256 | KIF14     | 40076 | -0.08 | protein_coding | 11271481  | 11271487  | kin II motif and actin repeat domain 2                                                                                  |
| 41691 | ENSG00000137106 | GRPR      | 40094 | -0.08 | protein_coding | 37432963  | 37436987  | glyoxylate reductase/hydroxyproline reductase                                                                           |
| 41695 | ENSG00000102145 | SEC4      | 40097 | -0.08 | protein_coding | 43953026  | 43971764  | synectin 4                                                                                                              |
| 41700 | ENSG00000105409 | EF3A      | 40106 | -0.08 | protein_coding | 10247102  | 10247174  | brain acetone, 2-linked 4                                                                                               |
| 41702 | ENSG00000128463 | EMC4      | 40107 | -0.08 | protein_coding | 34527020  | 34522357  | ER membrane protein complex subunit 4                                                                                   |
| 41705 | ENSG00000106903 | UBCLN4    | 40109 | -0.08 | protein_coding | 15600502  | 15623385  | ubiquitin 4                                                                                                             |
| 41706 | ENSG00000105299 | CTNNA3    | 40108 | -0.08 | protein_coding | 10591099  | 10591099  | cytoskeleton protein 2                                                                                                  |
| 41712 | ENSG00000185721 | DRG1      | 40118 | -0.08 | protein_coding | 31739509  | 31842426  | developmentally regulated GTP binding protein 1                                                                         |
| 41716 | ENSG00000101811 | CFRP2     | 40121 | -0.08 |                |           |           |                                                                                                                         |

|       |                 |           |       |       |                |    |           |           |  |                                                                                   |
|-------|-----------------|-----------|-------|-------|----------------|----|-----------|-----------|--|-----------------------------------------------------------------------------------|
| 42206 | ENSG00000195312 | NOM2      | 40871 | -0.08 | protein_coding | 1  | 14927358  | 148900017 |  | NCG2L modulator 1                                                                 |
| 42217 | ENSG00000195298 | PTEN1     | 40870 | -0.08 | protein_coding | 11 | 11288188  | 11288188  |  | protein tyrosine phosphatase, non-receptor type 11                                |
| 42222 | ENSG00000115207 | GTFC3C    | 40869 | -0.08 | protein_coding | 2  | 27548716  | 27578988  |  | general transcription factor IIC, polycomb 2, beta 119kDa                         |
| 42227 | ENSG00000117891 | NEF       | 40865 | -0.08 | protein_coding | 2  | 21206229  | 212619714 |  | neudens neurotrophic factor                                                       |
| 42228 | ENSG00000205208 | CARD8     | 40102 | -0.08 | protein_coding | 4  | 159697631 | 159697631 |  | chromosome 4 open reading frame 46                                                |
| 42233 | ENSG00000195346 | GASL1     | 40101 | -0.08 | protein_coding | 22 | 29176974  | 29176974  |  | growth arrest-specific 2 like 1                                                   |
| 42235 | ENSG00000173141 | MRRF3     | 40705 | -0.08 | protein_coding | 13 | 21750784  | 21752323  |  | mitochondrial ribosomal protein G3                                                |
| 42237 | ENSG00000186247 | NDPPE2    | 40716 | -0.08 | protein_coding | 13 | 80052567  | 80178221  |  | Neofol family interacting protein 2                                               |
| 42240 | ENSG00000193273 | MST2B     | 40715 | -0.08 | protein_coding | 13 | 132220173 | 132220173 |  | multicatalytic aminopeptidase protein 20A                                         |
| 42247 | ENSG00000176218 | CALR      | 40719 | -0.08 | protein_coding | 19 | 13049592  | 13049593  |  | calreticulin                                                                      |
| 42259 | ENSG00000182656 | MPSF12    | 40733 | -0.08 | protein_coding | 19 | 39471198  | 39472602  |  | mitochondrial ribosomal protein S12                                               |
| 42260 | ENSG00000196161 | CBR3      | 40732 | -0.08 | protein_coding | 19 | 49433980  | 49490620  |  | chromosome protein G                                                              |
| 42269 | ENSG00000104907 | TRMT1     | 40745 | -0.08 | protein_coding | 19 | 13215716  | 13222881  |  | (RNA methyltransferase 1 homolog (S. cerevisiae)                                  |
| 42275 | ENSG00000195930 | ATP13A2   | 40756 | -0.08 | protein_coding | 19 | 17172453  | 17338423  |  | ATPase type 13A2                                                                  |
| 42284 | ENSG00000100479 | MARFS     | 40761 | -0.08 | protein_coding | 19 | 17832661  | 17832661  |  | microtubule-associated protein 1S                                                 |
| 42288 | ENSG00000153130 | SIOC      | 40765 | -0.08 | protein_coding | 4  | 14117840  | 14130680  |  | short coiled-coil protein                                                         |
| 42287 | ENSG00000191520 | UTP11L    | 40766 | -0.08 | protein_coding | 14 | 39474930  | 39490498  |  | UTP11-like, U3 small nuclear ribonucleoprotein, (yeast)                           |
| 42288 | ENSG00000191520 | UTP11L    | 40766 | -0.08 | protein_coding | 14 | 39873401  | 39895991  |  | ubiquitin protein ligase E3 component n-recogin 7 (ubiquitin)                     |
| 42311 | ENSG00000147100 | SLC16A2   | 40762 | -0.08 | protein_coding | 8  | 73641085  | 73763752  |  | solute carrier family 16, member 2 (thyroid hormone transporter)                  |
| 42320 | ENSG00000129422 | MTUS1     | 40800 | -0.08 | protein_coding | 8  | 17501304  | 17685826  |  | microtubule associated tumor suppressor 1                                         |
| 42326 | ENSG00000191775 | CD329     | 40932 | -0.08 | protein_coding | 19 | 76670013  | 76742003  |  | 19                                                                                |
| 42329 | ENSG00000100954 | SEC23A    | 40810 | -0.08 | protein_coding | 14 | 39501123  | 39578850  |  | Sec23 homolog A (S. cerevisiae)                                                   |
| 42331 | ENSG00000178202 | KDEL2     | 40812 | -0.08 | protein_coding | 11 | 108342632 | 108369159 |  | KDEL-Lys-Asp-Glu-Leu containing 2                                                 |
| 42335 | ENSG00000101108 | CDAP2     | 40819 | -0.08 | protein_coding | 13 | 33202664  | 33202664  |  | cholesterol-associated protein 2                                                  |
| 42336 | ENSG00000115546 | PNO1      | 40819 | -0.08 | protein_coding | 2  | 68384978  | 68403170  |  | (partner of NCB1 homolog (S. cerevisiae)                                          |
| 42339 | ENSG00000186197 | NCLC1     | 40824 | -0.08 | protein_coding | 10 | 103911933 | 103928227 |  | nuclear and cell-body phosphoprotein 1                                            |
| 42340 | ENSG00000191780 | TAF13     | 40833 | -0.08 | protein_coding | 1  | 109685108 | 109818824 |  | TAF13 RNA polymerase II, TATA box binding protein (TBP)-associated factor, 190kDa |
| 42348 | ENSG00000162483 | PDPN      | 40838 | -0.08 | protein_coding | 1  | 13099960  | 13844452  |  | podoplanin                                                                        |
| 42366 | ENSG00000143545 | RAB13     | 40880 | -0.08 | protein_coding | 1  | 153584127 | 153585634 |  | RAB13, member RAS oncogene family                                                 |
| 42371 | ENSG00000106527 | MBP1      | 40879 | -0.08 | protein_coding | 10 | 76868106  | 76868106  |  | myelin basic protein, neuron channel 2                                            |
| 42379 | ENSG00000101107 | PBPFF19   | 40872 | -0.08 | protein_coding | 11 | 80858202  | 80874060  |  | pre-mRNA processing factor 19                                                     |
| 42400 | ENSG00000112029 | FBOX5     | 40892 | -0.08 | protein_coding | 6  | 153291864 | 153304714 |  | F-box protein 5                                                                   |
| 42413 | ENSG00000145293 | ENSO1     | 40911 | -0.08 | protein_coding | 6  | 83351444  | 83351444  |  | 1                                                                                 |
| 42416 | ENSG00000104936 | DMPK      | 40909 | -0.08 | protein_coding | 19 | 46272975  | 46285810  |  | dystrophin myotonia-protein kinase                                                |
| 42426 | ENSG00000131294 | SLC38A2   | 40925 | -0.08 | protein_coding | 12 | 46719772  | 46766650  |  | solute carrier family 38, member 2                                                |
| 42440 | ENSG00000101036 | SLC11B    | 41013 | -0.08 | protein_coding | 12 | 11628186  | 11628186  |  | nicotianin 1 (yeast)                                                              |
| 42442 | ENSG00000109354 | GAR1      | 40938 | -0.08 | protein_coding | 4  | 110736566 | 110745893 |  | GAR1 ribonucleoprotein                                                            |
| 42472 | ENSG00000174307 | PHLDA3    | 40970 | -0.08 | protein_coding | 1  | 201434820 | 201434820 |  | pleckstrin homology-like domain, family A, member 3                               |
| 42488 | ENSG00000136078 | ADAM2     | 40970 | -0.08 | protein_coding | 2  | 45484208  | 44497801  |  | amyloid endocytosis-like 2                                                        |
| 42510 | ENSG00000142655 | PEX14     | 41013 | -0.08 | protein_coding | 1  | 10523445  | 10908183  |  | peroxisomal biogenesis factor 14                                                  |
| 42512 | ENSG00000174586 | MPS28     | 41014 | -0.08 | protein_coding | 8  | 80830952  | 80842824  |  | mitochondrial ribosomal protein S28                                               |
| 42514 | ENSG00000106625 | CBR3      | 41014 | -0.08 | protein_coding | 19 | 2448105   | 2448105   |  | chromatin RNA synthetase                                                          |
| 42522 | ENSG00000116455 | WDR77     | 41025 | -0.08 | protein_coding | 17 | 111982172 | 111991998 |  | WD repeat domain 77                                                               |
| 42530 | ENSG00000111961 | SASH1     | 41043 | -0.08 | protein_coding | 6  | 14883440  | 148873186 |  | SAM and SH3 domain containing 1                                                   |
| 42540 | ENSG00000186701 | MKLD2     | 41055 | -0.08 | protein_coding | 1  | 11742637  | 11751707  |  | MAD2-related erect defect-like 2 (yeast)                                          |
| 42541 | ENSG00000186701 | CHAF1A    | 41055 | -0.08 | protein_coding | 19 | 44029265  | 44120515  |  | chromatin assembly factor 1, subunit A (CAF1)                                     |
| 42543 | ENSG00000111802 | TIMELESS  | 41061 | -0.08 | protein_coding | 12 | 58811093  | 58843187  |  | timeless circadian clock                                                          |
| 42546 | ENSG00000080596 | PEPCK2    | 41074 | -0.08 | protein_coding | 20 | 30532798  | 30532985  |  | p53 and DNA-damage regulated 1                                                    |
| 42557 | ENSG00000141385 | AF3C2     | 41076 | -0.08 | protein_coding | 18 | 12329843  | 123737113 |  | 123737113 AAA/ATPase 2                                                            |
| 42559 | ENSG00000186026 | RPL1      | 41076 | -0.08 | protein_coding | 12 | 123965528 | 124011605 |  | 80S ribosomal protein L1                                                          |
| 42561 | ENSG00000132760 | NCOA2     | 41076 | -0.08 | protein_coding | 10 | 40049518  | 40049518  |  | nucleolar autoantigenic sperm protein (nucleolar binding)                         |
| 42564 | ENSG00000205773 | NCAPH2    | 41076 | -0.08 | protein_coding | 22 | 80849645  | 80891162  |  | non-SMC condensin II complex, subunit H2                                          |
| 42567 | ENSG00000182704 | TSKU      | 41082 | -0.08 | protein_coding | 11 | 78443296  | 78509198  |  | tsukushi, small leucine rich proteoglycan                                         |
| 42569 | ENSG00000186400 | PLSN1     | 41082 | -0.08 | protein_coding | 3  | 89445261  | 89471594  |  | protein B1                                                                        |
| 42574 | ENSG00000118601 | CLSTN1    | 41081 | -0.08 | protein_coding | 9  | 8794088   | 8894848   |  | clathrin 1                                                                        |
| 42576 | ENSG00000142459 | EVIL      | 41089 | -0.08 | protein_coding | 19 | 7895119   | 7929882   |  | ectopic viral integration site 5-like                                             |
| 42583 | ENSG00000141971 | MBE12A    | 41087 | -0.08 | protein_coding | 19 | 17151931  | 17154533  |  | multivesicular body subunit 12A                                                   |
| 42586 | ENSG00000186026 | FKBP      | 41087 | -0.08 | protein_coding | 10 | 27662167  | 27662167  |  | FK506 binding protein                                                             |
| 42590 | ENSG00000187113 | COQ4      | 41102 | -0.08 | protein_coding | 9  | 13108415  | 13109631  |  | coenzyme Q4                                                                       |
| 42595 | ENSG00000124067 | SLC12A4   | 41109 | -0.08 | protein_coding | 16 | 67977377  | 68003304  |  | solute carrier family 12 (potassium/chloride transporter), member 4               |
| 42597 | ENSG00000101924 | PCP2      | 41109 | -0.08 | protein_coding | 1  | 14561144  | 14561144  |  | calcium and potassium-activated specific factor 1, 100kDa                         |
| 42622 | ENSG00000184870 | FAM219A   | 41140 | -0.08 | protein_coding | 9  | 34388182  | 34388182  |  | family with sequence similarity 219, member A                                     |
| 42630 | ENSG00000173156 | RHOJ      | 41147 | -0.08 | protein_coding | 11 | 68824289  | 68839484  |  | ras homology family member D                                                      |
| 42636 | ENSG00000186930 | LARG      | 41147 | -0.08 | protein_coding | 19 | 34398661  | 34398661  |  | ras homology family member 3                                                      |
| 42650 | ENSG00000125867 | NECA83    | 41177 | -0.08 | protein_coding | 20 | 32244893  | 32262269  |  | N-terminal EF-hand calcium binding protein                                        |
| 42653 | ENSG00000154543 | EHF4A3    | 41183 | -0.08 | protein_coding | 17 | 78109113  | 78120182  |  | eukaryotic translation initiation factor 4A3                                      |
| 42664 | ENSG00000111548 | PCP1      | 41189 | -0.08 | protein_coding | 13 | 3647185   | 3647185   |  | septic parapoxvirus (Troxer syndrome)                                             |
| 42668 | ENSG00000183362 | AP0A1BP   | 41190 | -0.08 | protein_coding | 1  | 165681554 | 165664091 |  | apolipoprotein A1 binding protein                                                 |
| 42669 | ENSG00000128273 | CSD1      | 41191 | -0.08 | protein_coding | 10 | 60028818  | 60049467  |  | CSDH1 iron sulfur domain 1                                                        |
| 42683 | ENSG00000101230 | SERP      | 41203 | -0.08 | protein_coding | 8  | 10781208  | 10781208  |  | serine cysteine binding protein homolog (Drosophila)                              |
| 42684 | ENSG00000188522 | FAM35G    | 41203 | -0.08 | protein_coding | 17 | 18272102  | 18272102  |  | family with sequence similarity 83, member G                                      |
| 42685 | ENSG00000175886 | BANP2     | 41204 | -0.08 | protein_coding | 17 | 78008948  | 78061321  |  | BAN1-associated protein 2                                                         |
| 42686 | ENSG00000186583 | MIR5E     | 41205 | -0.08 | protein_coding | 1  | 100001093 | 100001093 |  | microtubule cap-binding enzyme                                                    |
| 42688 | ENSG00000084764 | MARPE3    | 41208 | -0.08 | protein_coding | 2  | 27153480  | 27153480  |  | microtubule-associated protein, RP/EB family, member 3                            |
| 42689 | ENSG00000191196 | FBIK22    | 41208 | -0.08 | protein_coding | 15 | 78198200  | 78227609  |  | F-box protein 22                                                                  |
| 42690 | ENSG00000106263 | PCP1      | 41208 | -0.08 | protein_coding | 13 | 2473088   | 2473088   |  | myosin                                                                            |
| 42692 | ENSG00000133065 | SLC1A1    | 41210 | -0.08 | protein_coding | 1  | 205788221 | 205788221 |  | solute carrier family 41 (magnesium transporter), member 1                        |
| 42693 | ENSG00000191764 | DMO1      | 41221 | -0.08 | protein_coding | 11 | 11177868  | 111883308 |  | DIK domain containing 1                                                           |
| 42698 | ENSG00000186701 | ERLNB     | 41226 | -0.08 | protein_coding | 19 | 4172326   | 4172326   |  | AXL receptor tyrosine kinase                                                      |
| 42699 | ENSG00000149636 | DSN1      | 41236 | -0.08 | protein_coding | 20 | 35380194  | 35402121  |  | DSN1, MS12 kinetochore complex component                                          |
| 42698 | ENSG00000098308 | TRAM2     | 41241 | -0.08 | protein_coding | 10 | 82362200  | 82441713  |  | eukaryotic translation initiation factor 4A3                                      |
| 42708 | ENSG00000191564 | TRAF1     | 41241 | -0.08 | protein_coding | 14 | 55482409  | 55482409  |  | WD repeat and RING-like DNA binding protein 14                                    |
| 42707 | ENSG00000120539 | MANT1     | 41250 | -0.08 | protein_coding | 10 | 27443753  | 27445875  |  | microtubule associated serine/threonine kinase-like                               |
| 42718 | ENSG00000186607 | KAPAZL    | 41263 | -0.08 | protein_coding | 2  | 11349300  | 113522254 |  | cytoskeleton associated protein 2-like                                            |
| 42721 | ENSG00000136881 | LRRP      | 41265 | -0.08 | protein_coding | 19 | 38660590  | 38660590  |  | low density lipoprotein receptor-related protein 3                                |
| 42752 | ENSG00000111624 | TENP3     | 41296 | -0.08 | protein_coding | 19 | 30734028  | 30777756  |  | H3C3-targeted (homolog Drosophila)                                                |
| 42757 | ENSG00000102384 | CENPF     | 41303 | -0.08 | protein_coding | X  | 10033178  | 100419870 |  | centromere protein 1                                                              |
| 42761 | ENSG00000135065 | FAM22C    | 41307 | -0.08 | protein_coding | 17 | 2706298   | 27142250  |  | family with sequence similarity 222, member B                                     |
| 42779 | ENSG00000098303 | FAT2      | 41307 | -0.08 | protein_coding | 17 | 87878893  | 8787876   |  | fat2, cell surface cadherin 1                                                     |
| 42780 | ENSG00000150403 | TMCO3     | 41329 | -0.08 | protein_coding | 13 | 11414510  | 11420452  |  | transmembrane and coiled-coil domains 3                                           |
| 42782 | ENSG00000186184 | POT1HG3   | 41332 | -0.08 | protein_coding | 5  | 44965590  | 44965590  |  | protocadherin subclass cadherin C, 3                                              |
| 42787 | ENSG00000191815 | RPLP0     | 41341 | -0.08 | protein_coding | 16 | 41776781  | 41776781  |  | Rpl1, Pol1/RNA polymerase II complex component, homolog (S. cerevisiae)           |
| 42790 | ENSG00000186140 | VASN      | 41343 | -0.08 | protein_coding | 16 | 4423849   | 4433529   |  | vasinin                                                                           |
| 42800 | ENSG00000171885 | RNASEH1   | 41349 | -0.08 | protein_coding | 2  | 3592383   | 3602026   |  | ribonuclease H1                                                                   |
| 42803 | ENSG00000111445 | RNASEH2B  | 41349 | -0.08 | protein_coding | 12 | 118461983 | 118478126 |  | ribonuclease H2 (catalytic) 11, 36 kDa                                            |
| 42808 | ENSG00000202705 | C14orf132 | 41354 | -0.08 | protein_coding | 14 | 98555661  | 98560147  |  | chromosome 14 open reading frame 132                                              |
| 42807 | ENSG00000191920 | BAG3      | 41356 | -0.08 | protein_coding | 10 | 12141082  | 12143731  |  | BCL2-associated athanogene 3                                                      |
| 42814 | ENSG00000191100 | SFRP3     | 41370 | -0.08 | protein_coding | 17 | 74372665  | 74372665  |  | Wnt signaling inhibitor 3                                                         |
| 42823 | ENSG00000127220 | ABHD8     | 41376 | -0.08 | protein_coding | 19 | 17402940  | 17421045  |  | abhydrolase domain containing 8                                                   |
| 42825 | ENSG00000109881 | CDC3C4    | 41377 | -0.08 | protein_coding | 11 | 2735241   | 2738415   |  | coiled-coil domain containing 34                                                  |
| 42834 | ENSG00000144921 | CDK13     | 41379 | -0.08 | protein_coding | 4  | 13623428  | 13623428  |  | cyclin dependent kinase 13                                                        |
| 42835 | ENSG00000136270 | TBRG4     | 41387 | -0.08 | protein_coding | 7  | 45138699  | 45151846  |  | transforming growth factor beta regulator 4                                       |

|       |                  |          |         |       |                |    |           |             |                                                                                        |
|-------|------------------|----------|---------|-------|----------------|----|-----------|-------------|----------------------------------------------------------------------------------------|
| 40972 | ENS00000075223   | SEMA3C   | 41638.9 | -0.08 | protein_coding | 7  | 80371854  | 80551675    | sema domain, immunoglobulin domain (lg), short basic domain, secreted, (semaphorin) 3C |
| 40973 | ENS00000010671   | EPHA2    | 41640.9 | -0.08 | protein_coding | 1  | 14448368  | 14448368    | 164917_receptor_2                                                                      |
| 40980 | ENS000000180190  | TDRP     | 41662   | -0.08 | protein_coding | 8  | 438083    | 495781      | testis development related protein                                                     |
| 40982 | ENS000000161882  | FAM117A2 | 41664.9 | -0.08 | protein_coding | 17 | 42430583  | 42441243    | family with sequence similarity 171, member A2                                         |
| 40983 | ENS000000186480  | INGRT1   | 41665   | -0.08 | protein_coding | 6  | 15509848  | 15510149    | insulin induced gene 1                                                                 |
| 40984 | ENS000000104520  | PCD1     | 41669.6 | -0.08 | protein_coding | 8  | 14469763  | 144691843   | pyruvate-5-carboxylase reductase-like                                                  |
| 40985 | ENS000000138856  | SLC2A8   | 41680   | -0.08 | protein_coding | 1  | 130159421 | 130170703   | solute carrier family 2 (facilitated glucose transporter), member 8                    |
| 41112 | ENS00000016711   | GACSD4A  | 41686.6 | -0.08 | protein_coding | 6  | 68150744  | 68154021    | growth arrest and DNA-damage-inducible, alpha                                          |
| 41122 | ENS000000106222  | LMNB1    | 41712.2 | -0.08 | protein_coding | 19 | 50881648  | 50891273    | polymerase (DNA directed), delta 1, catalytic subunit                                  |
| 41125 | ENS000000064042  | LINC01   | 41712.2 | -0.08 | protein_coding | 13 | 103451389 | 103459885   | basic, immunoglobulin-like variable motif containing                                   |
| 41126 | ENS000000103912  | TURC2    | 41712.2 | -0.08 | protein_coding | 17 | 41541624  | 41542061    | LIM and cadherin homology domains 1                                                    |
| 41137 | ENS000000106738  | GLRB     | 41712.2 | -0.08 | protein_coding | 4  | 48911933  | 48916688    | Blood, group 2                                                                         |
| 41140 | ENS000000115107  | STEA3P   | 41721.1 | -0.08 | protein_coding | 2  | 119991384 | 120022228   | glycine receptor, beta                                                                 |
| 41146 | ENS000000103814  | SLC38A14 | 41731.4 | -0.08 | protein_coding | 8  | 22291872  | 22291872    | STEAP family member 3, metalloprotease                                                 |
| 41153 | ENS000000101464  | PIGGI    | 41737   | -0.08 | protein_coding | 20 | 3314834   | 33284910    | solute carrier family 39 (carnitine transporter), member 14                            |
| 41154 | ENS000000101350  | KIF3B    | 41740   | -0.08 | protein_coding | 20 | 30985467  | 30992214    | phosphotyrosinoid glycan anchor biosynthes, class U                                    |
| 41156 | ENS000000102481  | PPP1R13L | 41743.9 | -0.08 | protein_coding | 19 | 45892862  | 45909607    | kinase family member 38                                                                |
| 41159 | ENS000000132563  | REEP2    | 41750.6 | -0.08 | protein_coding | 5  | 13774706  | 137762658   | protein phosphatase 1, regulatory subunit 13 like                                      |
| 41161 | ENS000000130810  | PPAN     | 41754.1 | -0.08 | protein_coding | 19 | 10211095  | 10225414    | receptor accessory protein 2                                                           |
| 41164 | ENS000000103918  | USP2E    | 41754.8 | -0.08 | protein_coding | 4  | 3956135   | 39572931    | patzer gene homolog (Drosophila)                                                       |
| 41178 | ENS000000146072  | TNFRSF21 | 41776.4 | -0.08 | protein_coding | 6  | 47196208  | 47277841    | IGF-1 receptor tyrosine kinase                                                         |
| 41183 | ENS000000184436  | THAP7    | 41782.6 | -0.08 | protein_coding | 22 | 21333393  | 21356485    | tumor necrosis factor receptor superfamily, member 21                                  |
| 41184 | ENS000000102466  | NR1C4    | 41783   | -0.08 | protein_coding | 17 | 78252913  | 78215466    | THAP domain containing 7                                                               |
| 41185 | ENS000000112655  | PIK7     | 41783.5 | -0.08 | protein_coding | 6  | 4304406   | 43129457    | nuclear pore localization 4 homolog (S. cerevisiae)                                    |
| 41192 | ENS000000165556  | MERC2    | 41792   | -0.08 | protein_coding | 19 | 30575     | 344798      | protein tyrosine kinase 7                                                              |
| 41194 | ENS000000194453  | ZNF777   | 41796.1 | -0.08 | protein_coding | 19 | 148104654 | 148118214   | mesoderm induction early response 1, family member 2                                   |
| 42003 | ENS000000188886  | POU7F2   | 41802.1 | -0.08 | protein_coding | 21 | 46683843  | 46707813    | protein O-acyltransferase 2                                                            |
| 42171 | ENS000000198601  | PRC1     | 41820.9 | -0.08 | protein_coding | 15 | 91562270  | 91588859    | protein regulator of cytokinesis 1                                                     |
| 42174 | ENS000000106288  | PPP1R12L | 41821.1 | -0.08 | protein_coding | 15 | 8626184   | 8626184     | breast cancer metastasis 1                                                             |
| 42224 | ENS000000103452  | MDK      | 41827   | -0.08 | protein_coding | 11 | 46402306  | 46405375    | midkine (neurite growth-promoting factor 2)                                            |
| 42226 | ENS000000112208  | BAG2     | 41829.1 | -0.08 | protein_coding | 6  | 57071724  | 57054531    | BCL-2-associated athanogene 2                                                          |
| 42228 | ENS000000102525  | NRXN11   | 41829.2 | -0.08 | protein_coding | 16 | 160881161 | 160881172   | beta-1,3-N-acetylglucosaminyltransferase 1                                             |
| 42343 | ENS000000198431  | TNFRD1   | 41852.2 | -0.08 | protein_coding | 12 | 10409957  | 104744001   | thiosulfate reductase 1                                                                |
| 42346 | ENS000000102357  | SLC7A5   | 41862.3 | -0.08 | protein_coding | 16 | 87863629  | 87900394    | solute carrier family 7 (amino acid transporter light chain, L system), member 5       |
| 42350 | ENS00000011988   | SLC22A1  | 41862.3 | -0.08 | protein_coding | 11 | 116511733 | 116511733   | chromosome 19 open reading frame 47                                                    |
| 42356 | ENS000000165032  | C10orf47 | 41872.8 | -0.08 | protein_coding | 19 | 40825443  | 40854434    | X-ray repair complementing defective repair in Chinese hamster cells 2                 |
| 42361 | ENS000000196584  | KXRC2    | 41884.6 | -0.08 | protein_coding | 7  | 152341864 | 152373250   | collet-coil helix-coiled coil domain containing 8                                      |
| 42365 | ENS000000106585  | USP28    | 41890.8 | -0.08 | protein_coding | 3  | 1284108   | 1284108     | ubiquitin folding cofactor 5                                                           |
| 42371 | ENS000000116957  | TYCE     | 41903.6 | -0.08 | protein_coding | 1  | 23553075  | 23551283    | ubiquitin folding cofactor 5                                                           |
| 42374 | ENS000000186073  | GPR176   | 41907   | -0.08 | protein_coding | 15 | 40992233  | 40213983    | ring finger protein 176                                                                |
| 42381 | ENS000000106668  | USP26    | 41912.4 | -0.08 | protein_coding | 13 | 737018    | 737018      | CAP-CLY domain containing linker protein 2                                             |
| 42384 | ENS000000170153  | RMF15    | 41921.8 | -0.08 | protein_coding | 4  | 141789101 | 142134031   | ring finger protein 150                                                                |
| 42389 | ENS000000183814  | LIN9     | 41926.9 | -0.08 | protein_coding | 1  | 228418850 | 228497870   | lin-9 homolog (C. elegans)                                                             |
| 42392 | ENS000000165569  | NPR1A4   | 41931.6 | -0.08 | protein_coding | 14 | 248404879 | 248404879   | nuclear factor of activated T-cells, cytoplasmic, calcineurin-dependent 4              |
| 42390 | ENS000000195920  | LYPD1    | 41931.6 | -0.08 | protein_coding | 14 | 133462426 | 133429152   | zinc finger protein 777                                                                |
| 43301 | ENS000000166483  | WEE1     | 41949.8 | -0.08 | protein_coding | 11 | 8552228   | 8615004     | WEE1 G2 checkpoint kinase                                                              |
| 43307 | ENS000000115963  | RND3     | 41952.6 | -0.08 | protein_coding | 2  | 151364769 | 151395259   | Rho family G12ase 3                                                                    |
| 43308 | ENS000000106631  | NUS18B   | 41952.6 | -0.08 | protein_coding | 13 | 131789979 | 131789979   | nucleosome 188kDa                                                                      |
| 43310 | ENS000000198008  | BHLH9    | 41954.7 | -0.08 | protein_coding | X  | 110197516 | 110200468   | basic helix-loop-helix domain containing, class B, 9                                   |
| 43312 | ENS000000170264  | FAM187A  | 41955.4 | -0.08 | protein_coding | 2  | 64051989  | 62081278    | family with sequence similarity 161, member A                                          |
| 43314 | ENS000000106530  | PKR1     | 41956.2 | -0.08 | protein_coding | 16 | 144542421 | 144542421   | zinc finger protein 532                                                                |
| 43317 | ENS000000070761  | C16orf90 | 41963.4 | -0.08 | protein_coding | 18 | 58147496  | 58133354    | chromosome 16 open reading frame 80                                                    |
| 43321 | ENS000000182013  | PNMAL1   | 41969.9 | -0.08 | protein_coding | 19 | 46991748  | 46974820    | paraneoplastic Ma antigen family-like 1                                                |
| 43326 | ENS000000103446  | NR1H3    | 41978.4 | -0.08 | protein_coding | 10 | 5450144   | 5450144     | neuroepitaxial cell transforming 1                                                     |
| 43332 | ENS000000175975  | MKRN2    | 41984.8 | -0.08 | protein_coding | 3  | 12589513  | 12625212    | markovink ring finger protein 2                                                        |
| 43334 | ENS000000104657  | TNR332   | 41985.8 | -0.08 | protein_coding | 18 | 90528922  | 90535712    | zinc finger protein 532                                                                |
| 43341 | ENS000000103156  | SPRY2    | 41992.2 | -0.08 | protein_coding | 18 | 80910111  | 80910688    | sprouty homology 2 (Drosophila)                                                        |
| 43342 | ENS000000151673  | ZNF816   | 41993.1 | -0.08 | protein_coding | 9  | 116638562 | 116818871   | zinc finger protein 816                                                                |
| 43343 | ENS000000189963  | DPH1     | 41995.7 | -0.08 | protein_coding | 17 | 1935304   | 19361524    | diphthamide biosynthes 1                                                               |
| 43345 | ENS000000106528  | MCEK1    | 41995.7 | -0.08 | protein_coding | 17 | 2951965   | 2951965     | mitochondrial trans-2-oxoglutarate reductase                                           |
| 43349 | ENS000000088365  | SCAMP1   | 42004.2 | -0.08 | protein_coding | 5  | 77685239  | 77768282    | secretory carrier membrane protein 1                                                   |
| 43352 | ENS000000196368  | NUDT11   | 42006.4 | -0.08 | protein_coding | X  | 51232863  | 51239448    | nudix (nucleoside diphosphate linked moiety X)-type motif 11                           |
| 43356 | ENS000000104533  | WRDF1    | 42012.1 | -0.08 | protein_coding | 4  | 2786124   | 2786124     | Warner helicase interacting protein 1                                                  |
| 43360 | ENS000000189227  | C16orf61 | 42012.4 | -0.08 | protein_coding | 15 | 67814928  | 67814928    | chromosome 16 open reading frame 61                                                    |
| 43362 | ENS000000079156  | OSBP1L   | 42018.2 | -0.08 | protein_coding | 2  | 17609528  | 176204160   | oxysterol binding protein-like 6                                                       |
| 43364 | ENS000000102173  | FBXW2    | 42018.2 | -0.08 | protein_coding | 17 | 81124313  | 81124317    | F-box protein 2                                                                        |
| 43365 | ENS000000139438  | FAM222A  | 42023.9 | -0.08 | protein_coding | 12 | 10103203  | 11200312    | family with sequence similarity 222, member A                                          |
| 43366 | ENS000000127264  | PKMYT1   | 42029   | -0.08 | protein_coding | 16 | 3018025   | 3030540     | protein kinase, membrane associated tyrosine/threonine 1                               |
| 43368 | ENS000000106592  | FBXW1    | 42029.8 | -0.08 | protein_coding | 17 | 81188270  | 81192407    | F-box protein 1 (F-box)                                                                |
| 43373 | ENS000000149657  | LSM14B   | 42032.8 | -0.08 | protein_coding | 10 | 8095710   | 8095710     | LSM14B, SC35 homolog B (S. cerevisiae)                                                 |
| 43384 | ENS000000115966  | MAMKB    | 42048.7 | -0.08 | protein_coding | 2  | 39474607  | 39464443    | mitogen-activated protein kinase kinase kinase 3                                       |
| 43388 | ENS000000103917  | COPBP    | 42048.7 | -0.08 | protein_coding | 19 | 4566169   | 4566169     | COPII molecule, cytoskeleton associated protein                                        |
| 43388 | ENS000000143061  | IGSF1    | 42048.8 | -0.08 | protein_coding | 1  | 117110351 | 117110375   | immunoglobulin superfamily, member 3                                                   |
| 43388 | ENS0000000294348 | DIX9     | 42065.3 | -0.08 | protein_coding | 6  | 11959787  | 13140069    | decapicapping exonuclease                                                              |
| 43389 | ENS000000106528  | SCOX2    | 42065.3 | -0.08 | protein_coding | 16 | 7031281   | 7031281     | SRY (sex determining) region Y-box 9                                                   |
| 43400 | ENS000000177426  | TGFB1    | 42066.3 | -0.08 | protein_coding | 1  | 3411606   | 3458409     | TGF-beta-inducing factor homeobox 1                                                    |
| 43404 | ENS000000114999  | TTL      | 42077.4 | -0.08 | protein_coding | 2  | 11322897  | 11329916    | tubulin tyrosine ligase                                                                |
| 43405 | ENS000000101778  | BMS1     | 42077.4 | -0.08 | protein_coding | 10 | 8851367   | 8851367     | bone morphogenetic protein receptor, type IA                                           |
| 43417 | ENS000000128602  | SMO      | 42078.5 | -0.08 | protein_coding | 7  | 12885713  | 12885338    | smoothed, fused family receptor                                                        |
| 43420 | ENS000000135448  | ITGAV    | 42080.1 | -0.08 | protein_coding | 2  | 18745762  | 18754528    | integrin, alpha V                                                                      |
| 43423 | ENS00000017680   | FZ2      | 42102.3 | -0.08 | protein_coding | 12 | 5431708   | 5431708     | 4-oxoacyl-CoA thioesterase 3                                                           |
| 43423 | ENS000000139685  | FGF2     | 42104.4 | -0.08 | protein_coding | 4  | 12374783  | 123819391   | fibroblast growth factor 2 (basic)                                                     |
| 43425 | ENS000000071133  | RPRSKA6  | 42105   | -0.08 | protein_coding | X  | 8331884   | 83424203    | ribosomal protein S6 kinase, 90kDa, polypeptide 6                                      |
| 43427 | ENS000000101544  | ADNP2    | 42106   | -0.08 | protein_coding | 18 | 7786439   | 7786439     | ADNP homeobox 2                                                                        |
| 43428 | ENS000000117936  | IKC4C    | 42107.2 | -0.08 | protein_coding | 8  | 9421942   | 9421708     | breast cancer, anti-estrogen resistance 3                                              |
| 43429 | ENS000000131773  | KHDRBS3  | 42105   | -0.08 | protein_coding | 8  | 13846970  | 138468985   | KOH domain containing, RNA binding, signal transduction associated 3                   |
| 43431 | ENS000000186409  | PKNA2    | 42107.3 | -0.08 | protein_coding | 1  | 9711099   | 9718108     | protein kinase, AMP-activated, alpha 2 catalytic subunit                               |
| 43431 | ENS000000186433  | NEVL     | 42107.3 | -0.08 | protein_coding | 11 | 19312211  | 20143144    | nuclear kinase, serine/threonine 2                                                     |
| 43438 | ENS000000186483  | IRX1     | 42113.3 | -0.08 | protein_coding | 9  | 131937835 | 131940540   | immediate early response 5-like                                                        |
| 43442 | ENS000000127586  | GTF1B    | 42113.6 | -0.08 | protein_coding | 16 | 840648    | 8507148     | CTIFB, chromosome transmission factor 18 homolog (S. cerevisiae)                       |
| 43442 | ENS000000106214  | NUDT12   | 42113.6 | -0.08 | protein_coding | 14 | 4520184   | 4520184     | nucleoside diphosphate linked moiety X-type motif 12                                   |
| 43446 | ENS000000112874  | NUDT12   | 42120.7 | -0.08 | protein_coding | 5  | 10288456  | 10288894    | nucleoside diphosphate linked moiety X-type motif 12                                   |
| 43450 | ENS000000189213  | RANB8    | 42128.6 | -0.08 | protein_coding | 1  | 5273208   | 5284848     | RANB8, member RAN oncogene family 1                                                    |
| 43452 | ENS000000104447  | PRN1     | 42128.6 | -0.08 | protein_coding | 1  | 131464862 | 131464862</ |                                                                                        |

| Gene ID | Gene Name       | Coordinates (chr:pos) | Strand  | Gene Type | Start                             | End       | Description |                                                                                         |
|---------|-----------------|-----------------------|---------|-----------|-----------------------------------|-----------|-------------|-----------------------------------------------------------------------------------------|
| 43726   | ENSG00000203993 | C8orf7                | 42511 3 | -0.08     | protein_coding                    | 14059784  | 140513358   | chromosome 9 open reading frame 37                                                      |
| 43728   | ENSG00000205069 | MANKL                 | 42501 3 | -0.08     | protein_coding                    | 3232400   | 3838600     | menkesin and/or alpha-like                                                              |
| 43738   | ENSG00000189908 | MAT2A                 | 42534 8 | -0.08     | protein_coding                    | 8574628   | 85727403    | methionine adenosyltransferase II, alpha                                                |
| 43737   | ENSG00000171574 | ZNF584                | 42567 5 | -0.08     | protein_coding                    | 58912871  | 58926094    | zinc finger protein 584                                                                 |
| 43759   | ENSG00000209726 | MEIR                  | 42570 1 | -0.08     | protein_coding                    | 15600482  | 156051789   | mea3 RNA binding family member A                                                        |
| 43760   | ENSG00000111310 | PMR1A                 | 42571 6 | -0.08     | protein_coding                    | 32037752  | 32046063    | protein phosphatase, Mg <sup>2+</sup> /Mn <sup>2+</sup> -dependent, 1H                  |
| 43761   | ENSG00000218336 | TENM3                 | 42572 8 | -0.08     | protein_coding                    | 183065140 | 183172477   | tenascin transmembrane protein 3                                                        |
| 43762   | ENSG00000134586 | GULP1                 | 42572 8 | -0.08     | protein_coding                    | 189156396 | 189400653   | GULP1, engulfment adaptor FTIB domain containing 1                                      |
| 43771   | ENSG00000186680 | FMR1A                 | 42573 6 | -0.08     | protein_coding                    | 93062609  | 30063600    | protein phosphatase, Mg <sup>2+</sup> /Mn <sup>2+</sup> -dependent, 1H                  |
| 43772   | ENSG00000135591 | ARM3C                 | 42581 7 | -0.08     | protein_coding                    | 232063260 | 232239548   | armadillo repeat containing 9                                                           |
| 43791   | ENSG00000184286 | ZBTB12                | 42610 4 | -0.08     | protein_coding                    | 61861384  | 31869768    | zinc finger and BTB domain containing 12                                                |
| 43792   | ENSG00000136254 | FRS3                  | 42611 3 | -0.08     | protein_coding                    | 184849969 | 184859828   | growth arrest-specific 2 like 3                                                         |
| 43799   | ENSG00000189916 | EZF2                  | 42625 2 | -0.08     | protein_coding                    | 211584501 | 11068287    | EZF transcription factor 6                                                              |
| 43804   | ENSG00000103761 | HMG3                  | 42634 5 | -0.08     | protein_coding                    | 14837684  | 14839286    | HMG box domain containing 3                                                             |
| 43810   | ENSG00000102100 | SLC3A2                | 42642 8 | -0.08     | protein_coding                    | 48740459  | 48789235    | solute carrier family 35 (ELP-galactose transporter), member A2                         |
| 43820   | ENSG00000099381 | SETD1A                | 42693 8 | -0.08     | protein_coding                    | 30089115  | 30094637    | SET domain containing 1A                                                                |
| 43824   | ENSG00000142421 | PSBP1                 | 42973 1 | -0.08     | protein_coding                    | 30265023  | 10982608    | PSBP1 domain containing 1                                                               |
| 43828   | ENSG00000143067 | ZNF697                | 42975 9 | -0.08     | protein_coding                    | 12014605  | 12019036    | zinc finger protein 697                                                                 |
| 43827   | ENSG00000162895 | EGALN2                | 42976 4 | -0.08     | protein_coding                    | 235613228 | 235667781   | beta-1,3-N-acetylglucosaminyltransferase 2                                              |
| 43837   | ENSG00000121929 | CSDE4                 | 42997 7 | -0.08     | protein_coding                    | 119821105 | 119827104   | chromosome 5 open reading frame 54                                                      |
| 43859   | ENSG00000173960 | UBXN2A                | 42978 4 | -0.08     | protein_coding                    | 24150155  | 24227779    | UBX domain protein 2A                                                                   |
| 43860   | ENSG00000134253 | TRM45                 | 42977 9 | -0.08     | protein_coding                    | 117953682 | 117985209   | transfer methyl containing 45                                                           |
| 43865   | ENSG00000169884 | GLTSD1                | 42731 5 | -0.08     | protein_coding                    | 52728925  | 52740048    | glutathione transferase II domain containing 1                                          |
| 43921   | ENSG00000182224 | CYB5D4                | 42831 8 | -0.08     | protein_coding                    | 7781064   | 7785600     | cytochrome b5 domain containing 1                                                       |
| 43975   | ENSG00000098739 | BMMI                  | 42805 4 | -0.08     | protein_coding                    | 28968271  | 28971888    | BMP and activin membrane-bound inhibitor                                                |
| 43980   | ENSG00000166865 | RCCD1                 | 42892 9 | -0.08     | protein_coding                    | 19256203  | 19258349    | RCC1 domain containing 1                                                                |
| 44001   | ENSG00000187378 | IRGQ                  | 42843 3 | -0.08     | transcribed_processed_pseudo_gene | 44088821  | 44100287    | immunolytic GTPase family, Q                                                            |
| 39960   | ENSG00000127589 |                       | 38263 9 | -0.08     | transcribed_processed_pseudo_gene | 30209389  | 30211034    | tubulin, beta pseudogene 1                                                              |
| 41415   | ENSG00000213753 | CENPD1P1              | 39818 1 | -0.08     | transcribed_processed_pseudo_gene | 59084070  | 59111168    | CENPD1 pseudogene 1                                                                     |
| 38161   | ENSG00000204076 |                       | 34278 1 | -0.08     | protein_coding                    |           |             |                                                                                         |
| 39494   | ENSG00000200290 |                       | 37724 8 | -0.08     | protein_coding                    |           |             |                                                                                         |
| 40403   | ENSG00000232320 |                       | 38960 8 | -0.08     | protein_coding                    |           |             |                                                                                         |
| 40984   | ENSG00000133833 |                       | 41885 9 | -0.08     | protein_coding                    |           |             |                                                                                         |
| 41673   | ENSG00000204411 |                       | 40577 3 | -0.08     | protein_coding                    |           |             |                                                                                         |
| 41888   | ENSG00000189745 | MRFSP21               | 40326 2 | -0.08     | protein_coding                    | 150268289 | 150281414   | mitochondrial ribosomal protein S21                                                     |
| 42684   | ENSG00000207271 | BOP1                  | 41885 9 | -0.08     | protein_coding                    | 14548695  | 145519082   | block of proliferation 1                                                                |
| 42985   | ENSG00000229818 |                       | 41922 8 | -0.08     | protein_coding                    |           |             |                                                                                         |
| 42871   | ENSG00000265888 | MFGA5A1               | 42749 7 | -0.09     | antisense                         | 78885705  | 78888828    | MFG5 antisense RNA 1 (head to head)                                                     |
| 42872   | ENSG00000265892 | EPFB1LAAS1            | 42749 7 | -0.09     | antisense                         | 11148229  | 11149973    | EPFB1LA antisense RNA 1                                                                 |
| 43168   | ENSG00000148320 |                       | 41762 1 | -0.09     | processed_pseudogene              | 14403084  | 140030528   | protein phosphatase 1, regulatory (inhibitor) subunit 14B pseudogene 3                  |
| 43166   | ENSG00000205532 |                       | 41762 1 | -0.09     | processed_pseudogene              | 44621430  | 44622518    | myosin phosphatase Rho interacting protein pseudogene 1                                 |
| 43264   | ENSG00000203966 |                       | 41972 4 | -0.09     | processed_pseudogene              | 6556844   | 65569661    | phosphotyrosine-binding protein 1 pseudogene 2                                          |
| 43492   | ENSG00000214455 |                       | 42181 8 | -0.09     | processed_pseudogene              | 17607578  | 17607578    | ubiquitin-conjugating enzyme E2S pseudogene 1                                           |
| 43986   | ENSG00000203704 |                       | 42181 8 | -0.09     | processed_pseudogene              | 45994488  | 45995402    | reticulocalbin 1, EF-hand calcium binding domain pseudogene 2                           |
| 45458   | ENSG00000184418 | XRCC6                 | 33593 9 | -0.09     | protein_coding                    | 32748181  | 32748623    | zinc and ring finger 2 pseudogene 1                                                     |
| 35588   | ENSG00000106153 | CHCHD2                | 33596 3 | -0.09     | protein_coding                    | 42071123  | 42071123    | X-ray repair complement defective repair in Chinese hamster cells 6                     |
| 35811   | ENSG00000196962 | EFH                   | 33547 6 | -0.09     | protein_coding                    | 6118262   | 60718496    | coiled-coil helix-coiled-coil helix domain containing 2                                 |
| 37812   | ENSG00000192268 | RAC1                  | 35419 4 | -0.09     | protein_coding                    | 6414154   | 6414154     | rac-related C3 botulinum toxin substrate 1 (the family, small GTP binding protein Rac1) |
| 37940   | ENSG00000101182 | PSMA7                 | 36094 2 | -0.09     | protein_coding                    | 60711791  | 60718496    | proteasome (prosome, macropain) subunit, alpha type, 7                                  |
| 38126   | ENSG00000175334 | BANP1                 | 36280 2 | -0.09     | protein_coding                    | 65746559  | 65711620    | barrier to autophagosome formation 1                                                    |
| 38266   | ENSG00000142501 | PSM2                  | 36919 9 | -0.09     | protein_coding                    | 4998149   | 47810268    | proteasome (prosome, macropain) subunit, beta type, 6                                   |
| 38714   | ENSG00000068897 | LAPTM3A               | 36713 9 | -0.09     | protein_coding                    | 20232411  | 20251789    | lysosomal protein transmembrane 4 alpha                                                 |
| 38877   | ENSG00000132612 | VPSA4                 | 37091 7 | -0.09     | protein_coding                    | 68342599  | 68349589    | vacuolar protein sorting 4 homolog A (S. cerevisiae)                                    |
| 38973   | ENSG00000181263 | ARPC2                 | 37543 9 | -0.09     | protein_coding                    | 183862417 | 183862417   | actin-related protein complex 2, non-1 subunit                                          |
| 38971   | ENSG00000188356 | ASNA1                 | 37602 2 | -0.09     | protein_coding                    | 12847953  | 12849137    | arsA arsenite transporter, ATP-binding, homolog 1 (bacterial)                           |
| 38449   | ENSG00000126987 | PSMB2                 | 37680 4 | -0.09     | protein_coding                    | 39087185  | 38107445    | proteasome (prosome, macropain) subunit, beta type, 2                                   |
| 40494   | ENSG00000181726 | ARPC11                | 37602 2 | -0.09     | protein_coding                    | 618361493 | 618361493   | actin-related protein complex 2, non-1 subunit                                          |
| 38712   | ENSG00000143761 | ARF1                  | 37851 2 | -0.09     | protein_coding                    | 228270381 | 22828912    | ADP-ribosylation factor 1                                                               |
| 39973   | ENSG00000105991 | AHSA1                 | 38251 3 | -0.09     | protein_coding                    | 77924213  | 77935817    | AHA1, activator of heat shock 90kDa protein ATPase homolog 1 (yeast)                    |
| 40001   | ENSG00000104963 | NDC80                 | 38833 3 | -0.09     | protein_coding                    | 49133365  | 49142653    | glutamine synthetase                                                                    |
| 40059   | ENSG00000100243 | CYB5D3                | 38334 3 | -0.09     | protein_coding                    | 43013846  | 43045574    | cytochrome b5 reductase 3                                                               |
| 40094   | ENSG00000192874 | CUEDC2                | 38378 2 | -0.09     | protein_coding                    | 104183002 | 104192418   | CUE domain containing 2                                                                 |
| 40228   | ENSG00000148901 | TMEM71                | 39007 1 | -0.09     | protein_coding                    | 5007714   | 5007714     | transmembrane 71 domain containing 1                                                    |
| 40414   | ENSG00000138343 | SMRPF                 | 38707 4 | -0.09     | protein_coding                    | 96252706  | 96267066    | small nuclear ribonucleoprotein polypeptide F                                           |
| 40438   | ENSG00000148792 | MPLP49                | 38731 3 | -0.09     | protein_coding                    | 64889655  | 64894843    | mitochondrial ribosomal protein L49                                                     |
| 40481   | ENSG00000140438 | ATP5G1                | 38764 1 | -0.09     | protein_coding                    | 18010389  | 18010389    | ATPase 5, mitochondrial                                                                 |
| 40502   | ENSG00000138628 | EPRS                  | 38796 6 | -0.09     | protein_coding                    | 220141943 | 220120000   | glutamylyl-prolyl-RNA synthetase                                                        |
| 40504   | ENSG00000186291 | PDHB                  | 38800 2 | -0.09     | protein_coding                    | 58413357  | 58419084    | pyruvate dehydrogenase (lipoylase) beta                                                 |
| 40504   | ENSG00000186292 | NDC80L                | 38833 3 | -0.09     | protein_coding                    | 181138459 | 181138459   | NADH dehydrogenase (ubiquinone) S protein 2, (beta) (NADH-coenzyme Q reductase)         |
| 40598   | ENSG00000118483 | TMEM14C               | 38992 2 | -0.09     | protein_coding                    | 10723148  | 10731382    | transmembrane protein 14C                                                               |
| 40602   | ENSG00000098831 | ADIPOR2               | 38914 9 | -0.09     | protein_coding                    | 17974760  | 18679874    | adiponectin receptor 2                                                                  |
| 40713   | ENSG00000184683 | WDR5                  | 38914 9 | -0.09     | protein_coding                    | 14828128  | 14828128    | WW domain binding protein 11                                                            |
| 40798   | ENSG00000093245 | EPN1                  | 39142 6 | -0.09     | protein_coding                    | 98168592  | 98221224    | epsin                                                                                   |
| 40824   | ENSG00000178980 | SEPP1                 | 39164 2 | -0.09     | protein_coding                    | 48281829  | 48287943    | protein W, 1                                                                            |
| 40833   | ENSG00000142581 | HSPB1                 | 39165 2 | -0.09     | protein_coding                    | 19833261  | 19833261    | heat shock 82kDa protein 1 (chaperone)                                                  |
| 40885   | ENSG00000115533 | ATP8A1                | 39223 7 | -0.09     | protein_coding                    | 15359979  | 153594892   | ATPase, H <sup>+</sup> transporting, lysosomal, accessory protein 1                     |
| 40903   | ENSG00000134440 | NSR2                  | 39247 8 | -0.09     | protein_coding                    | 55267888  | 55289445    | asparaginyl-RNA synthetase                                                              |
| 40928   | ENSG00000171221 | NDC91                 | 39258 1 | -0.09     | protein_coding                    | 47005197  | 47005197    | NADH dehydrogenase (ubiquinone) beta subunit, ATPase, 8                                 |
| 40978   | ENSG00000213593 | TMX2                  | 39255 1 | -0.09     | protein_coding                    | 57480072  | 57509445    | threonine-related transmembrane protein 2                                               |
| 40993   | ENSG00000152032 | METZB                 | 39244 9 | -0.09     | protein_coding                    | 130939310 | 130948302   | mitotic spindle organizing protein 2B                                                   |
| 40998   | ENSG00000109211 | HSPB1                 | 39250 2 | -0.09     | protein_coding                    | 75911981  | 75913032    | heat shock 72kDa protein 1                                                              |
| 41008   | ENSG00000089914 | FOXA1                 | 39262 6 | -0.09     | protein_coding                    | 54019458  | 54019458    | hepatocyte nuclear factor 1                                                             |
| 41018   | ENSG00000174800 | TEN1                  | 39269 1 | -0.09     | protein_coding                    | 8421101   | 84233308    | elastase 1, (alpha)                                                                     |
| 41035   | ENSG00000185202 | ITLN1                 | 39288 4 | -0.09     | protein_coding                    | 40325098  | 40337664    | fibronectin                                                                             |
| 41045   | ENSG00000181789 | COPG1                 | 39400 4 | -0.09     | protein_coding                    | 128984849 | 128996114   | coatomer protein complex, subunit gamma 1                                               |
| 41050   | ENSG00000185355 | PLIN3                 | 39408 1 | -0.09     | protein_coding                    | 48388353  | 48397780    | perilipin 3                                                                             |
| 41085   | ENSG00000095148 | PMPF1                 | 39425 1 | -0.09     | protein_coding                    | 139143176 | 139145688   | phosphoenolpyruvate phosphatase 1                                                       |
| 41072   | ENSG00000178886 | TYMS                  | 39438 1 | -0.09     | protein_coding                    | 837048    | 837048      | thymine synthase                                                                        |
| 41080   | ENSG00000131828 | PDHA1                 | 39438 1 | -0.09     | protein_coding                    | 19582011  | 19579823    | pyruvate dehydrogenase (lipoylase) alpha 1                                              |
| 41119   | ENSG00000099795 | NUPB                  | 39470 3 | -0.09     | protein_coding                    | 14078999  | 14082874    | NADH dehydrogenase (ubiquinone) F1 subcomplex, delta subunit                            |
| 41211   | ENSG00000143261 | ATP5D                 | 39683 8 | -0.09     | protein_coding                    | 12474749  | 1244834     | ATP synthase, H <sup>+</sup> transporting, mitochondrial F1 complex, delta subunit      |
| 41230   | ENSG00000101361 | NUPB                  | 39681 1 | -0.09     | protein_coding                    | 26237291  | 2623920     | NUPB ribonucleoprotein                                                                  |
| 41244   | ENSG00000102178 | NRFX                  | 39610 1 | -0.09     | protein_coding                    | 153712599 | 153715044   | retinoid-inducible factor 4A                                                            |
| 41265   | ENSG00000101856 | PGRMC1                | 39631 8 | -0.09     | protein_coding                    | 118370216 | 118378429   | progesterone receptor membrane component 1                                              |
| 41282   | ENSG00000181824 | CGA                   | 39647 9 | -0.09     | protein_coding                    | 75383712  | 75388033    | cytochrome c oxidase assembly factor 1 homolog (S. cerevisiae)                          |
| 41286   | ENSG00000142992 | SCYL2                 | 39658 2 | -0.09     | protein_coding                    | 20712627  | 20713267    | solute carrier family 1, cytoplasmic A, cation/proton antiporter, 3, regulator 2        |
| 41320   | ENSG00000120437 | ACAT2                 | 39704 2 | -0.09     | protein_coding                    | 616018180 | 616018180   | acyl-CoA acyltransferase 2                                                              |
| 41332   | ENSG00000133935 | KIF47                 | 39716 6 | -0.09     | protein_coding                    | 76116134  | 76127532    | chromosome 14 open reading frame 14                                                     |
| 41365   | ENSG00000205371 | AKO1                  | 39734 9 | -0.09     | protein_coding                    | 19637929  | 19637929    | aldo-keto reductase family 1, member A (aldolase polypeptide reductase)                 |
| 41367   | ENSG00000182534 | MKRA7</               |         |           |                                   |           |             |                                                                                         |



|       |                 |          |       |       |                |    |           |           |                                                                                       |
|-------|-----------------|----------|-------|-------|----------------|----|-----------|-----------|---------------------------------------------------------------------------------------|
| 41217 | ENSG00000184331 | APOC     | 40630 | -0.09 | protein_coding | 3  | 23851740  | 23925207  | apolipoprotein D                                                                      |
| 41218 | ENSG00000185523 | NID1     | 40630 | -0.09 | protein_coding | 4  | 85326374  | 85326374  | nuclei (nucleoside diphosphate linked moiety X) type motif 9                          |
| 42226 | ENSG00000124767 | GLI1     | 40692 | -0.09 | protein_coding | 6  | 38643701  | 38643701  | gliovastase 1                                                                         |
| 42236 | ENSG00000112651 | MPLR2    | 40708 | -0.09 | protein_coding | 6  | 43021767  | 43021767  | mitochondrial ribosomal protein L2                                                    |
| 42238 | ENSG00000195258 | POLR2I   | 40730 | -0.09 | protein_coding | 19 | 36604467  | 36604467  | polymerase (RNA) II (DNA directed) polypeptide 1.14 50kb                              |
| 42258 | ENSG00000139133 | ST1L2A   | 40732 | -0.09 | protein_coding | 11 | 125481607 | 125481607 | ST1L2A, subunit of the oligosaccharyl transferase complex (catalytic)                 |
| 42260 | ENSG00000146670 | CDCA5    | 40738 | -0.09 | protein_coding | 11 | 64833772  | 64833772  | cell division cycle associated 5                                                      |
| 42271 | ENSG00000195252 | GNPNA1   | 40751 | -0.09 | protein_coding | 14 | 52419142  | 52426386  | glucosamine phosphate N-acetyltransferase 1                                           |
| 42272 | ENSG00000195431 | IMPAD1   | 40753 | -0.09 | protein_coding | 16 | 57832652  | 57832652  | insectal morphogenesis domain containing 13                                           |
| 42274 | ENSG00000195278 | POLR2C   | 40756 | -0.09 | protein_coding | 16 | 57495922  | 57495922  | polymerase (RNA) II (DNA directed) polypeptide C, 33kDa                               |
| 42282 | ENSG00000126261 | UBA2     | 40762 | -0.09 | protein_coding | 19 | 34912527  | 34916083  | ubiquitin-like modifier activating enzyme 2                                           |
| 42283 | ENSG00000191083 | ANXA8    | 40763 | -0.09 | protein_coding | 20 | 34584380  | 34584380  | ANXA8, annexin homologue 8 (S. cerevisiae)                                            |
| 42293 | ENSG00000130312 | MPLP34   | 40780 | -0.09 | protein_coding | 19 | 17403418  | 17417662  | mitochondrial ribosomal protein L34                                                   |
| 42321 | ENSG00000082941 | NF-E2L1  | 40807 | -0.09 | protein_coding | 17 | 46125891  | 46138849  | nuclear factor, erythroid 2-like 1                                                    |
| 42336 | ENSG00000111247 | RAD51AP1 | 40832 | -0.09 | protein_coding | 12 | 684299    | 684299    | chromosome 16 open reading frame 13                                                   |
| 42369 | ENSG00000114833 | ZBTB47   | 40857 | -0.09 | protein_coding | 3  | 42695176  | 42719072  | zinc finger and BTB domain containing 47                                              |
| 42374 | ENSG00000102564 | HBPBP    | 40920 | -0.09 | protein_coding | 8  | 16801466  | 16809537  | histone H4 acetyltransferase 1                                                        |
| 42412 | ENSG00000136848 | DAB2IP   | 40927 | -0.09 | protein_coding | 9  | 124329336 | 124347809 | DAB2 interacting protein                                                              |
| 42451 | ENSG00000165916 | PSM2C    | 40946 | -0.09 | protein_coding | 11 | 47410320  | 47447363  | proteasome (prosome, macropain) 20S subunit, ATPase, 3                                |
| 42456 | ENSG00000195207 | TCFC3L3  | 40993 | -0.09 | protein_coding | 8  | 102692319 | 102694618 | transcription elongation factor A (SII) like 3                                        |
| 42458 | ENSG00000203989 | HBP1     | 40997 | -0.09 | protein_coding | 16 | 83841448  | 83853342  | heat shock cognate binding protein 1                                                  |
| 42457 | ENSG00000137309 | HMGAT1   | 40992 | -0.09 | protein_coding | 6  | 34204850  | 34214038  | high mobility group AT-hook 1                                                         |
| 42458 | ENSG00000006953 | ISOC1    | 40993 | -0.09 | protein_coding | 5  | 12843444  | 12844971  | isochoresin domain containing 1                                                       |
| 42459 | ENSG00000203485 | INF2     | 40954 | -0.09 | protein_coding | 14 | 105155843 | 105185842 | inverted form, FH2 and WH2 domain containing                                          |
| 42465 | ENSG00000145990 | NDFE10   | 40980 | -0.09 | protein_coding | 16 | 2029599   | 2011978   | NADH dehydrogenase (ubiquinone) 1 beta subcomplex, 10, 22kDa                          |
| 42468 | ENSG00000104574 | HSPR1    | 40986 | -0.09 | protein_coding | 9  | 122987152 | 122930608 | heat shock 70kDa protein 5, glucose-regulated protein, 70kDa                          |
| 42502 | ENSG00000132681 | NKX1     | 41063 | -0.09 | protein_coding | 20 | 23331373  | 23335414  | NTF2-like export factor 1                                                             |
| 42508 | ENSG00000136982 | DISC1    | 41013 | -0.09 | protein_coding | 8  | 120846216 | 120888260 | DNA replication and sister chromatid cohesion 1                                       |
| 42528 | ENSG00000102651 | GLT3L    | 41016 | -0.09 | protein_coding | 10 | 10111106  | 10111106  | glutamic carboxylase transmembrane protein 1, soluble                                 |
| 42531 | ENSG00000138160 | KIF11    | 41044 | -0.09 | protein_coding | 10 | 94353043  | 94415150  | kineston family member 11                                                             |
| 42533 | ENSG00000168458 | INPPL1   | 41046 | -0.09 | protein_coding | 11 | 71947445  | 71950149  | inositol polyphosphate phosphatase-like 1                                             |
| 42534 | ENSG00000185661 | CRP      | 41049 | -0.09 | protein_coding | 11 | 5336120   | 5336120   | complement component 1, C-reactive protein binding protein                            |
| 42538 | ENSG00000197193 | CRK      | 41049 | -0.09 | protein_coding | 17 | 1323983   | 1366456   | v-src avian sarcoma virus C110 oncogene homolog                                       |
| 42539 | ENSG00000101057 | MYBL2    | 41054 | -0.09 | protein_coding | 20 | 42295754  | 42345136  | myb-like protein 2, v-src avian myeloblastosis viral oncogene homolog-like 2          |
| 42541 | ENSG00000185671 | PRKRA    | 41057 | -0.09 | protein_coding | 30 | 30717328  | 30912534  | proteasome (prosome, macropain) 20S subunit, ATPase, 11                               |
| 42562 | ENSG00000148337 | CIZ1     | 41076 | -0.09 | protein_coding | 9  | 130092843 | 130066602 | CDKN1A interacting zinc finger protein 1                                              |
| 42577 | ENSG00000168304 | ZNF219   | 41092 | -0.09 | protein_coding | 14 | 21554625  | 21572881  | zinc finger protein 219                                                               |
| 42579 | ENSG00000130403 | SNX8     | 41096 | -0.09 | protein_coding | 17 | 384437    | 384437    | catenin cycle 8                                                                       |
| 42581 | ENSG00000130340 | SNX9     | 41096 | -0.09 | protein_coding | 6  | 15824296  | 158366109 | sorting nexin 9                                                                       |
| 42582 | ENSG00000099988 | CECR5    | 41098 | -0.09 | protein_coding | 22 | 17818401  | 17848177  | cat eye syndrome chromosome region, candidate 5                                       |
| 42583 | ENSG00000099926 | CECR6    | 41098 | -0.09 | protein_coding | 11 | 2373980   | 2373980   | ArfGAP with SH3 domain, arylsulfatase and PH domain 3                                 |
| 42586 | ENSG00000128944 | KNSTRN   | 41159 | -0.09 | protein_coding | 15 | 40674922  | 40698447  | kinetochore-localized amino-SPAG5 binding protein                                     |
| 42582 | ENSG00000123485 | HJURP    | 41162 | -0.09 | protein_coding | 2  | 23474262  | 23478212  | Holliday junction recognition protein                                                 |
| 42585 | ENSG00000168268 | CCCTC17  | 41169 | -0.09 | protein_coding | 3  | 50715172  | 5272608   | guanine nucleotide binding protein-like 3 (nuclear)                                   |
| 42589 | ENSG00000185298 | CCCTC17  | 41169 | -0.09 | protein_coding | 17 | 78633384  | 78633384  | coiled-coil domain containing 17                                                      |
| 42584 | ENSG00000099800 | TMM13    | 41226 | -0.09 | protein_coding | 19 | 2425622   | 2427882   | translocase of inner mitochondrial membrane 13 homolog (yeast)                        |
| 42584 | ENSG00000127445 | FIN1     | 41236 | -0.09 | protein_coding | 19 | 6946531   | 6946531   | peptidylglycyl hydrolase, NIMA-interacting 1                                          |
| 42589 | ENSG00000195274 | PPP1R12B | 41240 | -0.09 | protein_coding | 12 | 145703382 | 145727504 | protein phosphatase 1, regulatory subunit 12A                                         |
| 42701 | ENSG00000066228 | MCM10    | 41243 | -0.09 | protein_coding | 10 | 13203554  | 13203104  | minichromosome maintenance complex component 10                                       |
| 42704 | ENSG00000138175 | ANLN     | 41245 | -0.09 | protein_coding | 10 | 10444388  | 10447484  | ADP-ribosylation factor-like 3                                                        |
| 42716 | ENSG00000106804 | NDC1     | 41249 | -0.09 | protein_coding | 10 | 84241153  | 84241153  | NDC1 transmembrane nucleoside                                                         |
| 42718 | ENSG00000163430 | FSTL1    | 41263 | -0.09 | protein_coding | 3  | 120111440 | 120170100 | kallistatin-like 1                                                                    |
| 42725 | ENSG00000137124 | ALDH1B1  | 41269 | -0.09 | protein_coding | 9  | 3839261   | 3839668   | aldehyde dehydrogenase 1 family, member B1                                            |
| 42724 | ENSG00000107246 | NFPM3    | 41274 | -0.09 | protein_coding | 9  | 80713364  | 80725844  | catenin protein kinase                                                                |
| 42731 | ENSG00000107833 | NFPM3    | 41276 | -0.09 | protein_coding | 10 | 103541082 | 103543170 | nucleoside phosphatase 3                                                              |
| 42734 | ENSG00000099901 | RANBP1   | 41284 | -0.09 | protein_coding | 22 | 15013481  | 15011478  | RAN binding protein 1                                                                 |
| 42746 | ENSG00000101521 | USP44    | 41284 | -0.09 | protein_coding | 16 | 1581383   | 1581383   | ubiquitin specific peptidase 4 (UBA4) (ubiquitin transglycosylase)                    |
| 42750 | ENSG00000184861 | CDCA2    | 41286 | -0.09 | protein_coding | 8  | 28318513  | 28345436  | cell division cycle associated 2                                                      |
| 42763 | ENSG00000136274 | SEC13A   | 41308 | -0.09 | protein_coding | 4  | 83739814  | 83822319  | SEC13 homolog A (S. cerevisiae)                                                       |
| 42764 | ENSG00000106826 | USP44    | 41308 | -0.09 | protein_coding | 8  | 18478130  | 18478130  | Fanconi anemia, complementation group 1                                               |
| 42774 | ENSG00000138180 | CEP55    | 41325 | -0.09 | protein_coding | 10 | 9528389   | 95288849  | centrosomal protein 55kDa                                                             |
| 42776 | ENSG00000198900 | SMAR     | 41327 | -0.09 | protein_coding | 10 | 9405020   | 94113721  | membrane-associated ring finger (C1HC4) 5                                             |
| 42781 | ENSG00000137370 | RPR101   | 41328 | -0.09 | protein_coding | 11 | 8346126   | 8346126   | DNA pseudouracil synthase domain containing 1                                         |
| 42782 | ENSG00000198824 | CHAMP1   | 41331 | -0.09 | protein_coding | 13 | 11507998  | 11509736  | chromosome alignment maintaining phosphoprotein 1                                     |
| 42799 | ENSG00000091542 | ALKBH5   | 41347 | -0.09 | protein_coding | 17 | 18068392  | 18115288  | alkB, alkylation repair homolog 5 (E. coli)                                           |
| 42812 | ENSG00000163300 | BAP1     | 41361 | -0.09 | protein_coding | 3  | 5243520   | 5244436   | BRCA1 associated protein 1 (ubiquitin carboxyl-terminal hydrolase)                    |
| 42816 | ENSG00000000870 | PKD1     | 41365 | -0.09 | protein_coding | 16 | 2187111   | 2187589   | polycystic kidney disease 1 (autosomal dominant)                                      |
| 42826 | ENSG00000106921 | PKP4     | 41372 | -0.09 | protein_coding | 19 | 8137221   | 8137221   | polymerase (RNA) methyltransferase (DNA directed)                                     |
| 42827 | ENSG00000197037 | GTPBP4   | 41378 | -0.09 | protein_coding | 10 | 1034338   | 1034338   | GTP binding protein 4                                                                 |
| 42833 | ENSG00000198452 | AMP1     | 41384 | -0.09 | protein_coding | 11 | 8932886   | 8941631   | ATP synthase (F1F0) complex assembly factor 1                                         |
| 42837 | ENSG00000134327 | CANX     | 41392 | -0.09 | protein_coding | 5  | 17919529  | 17919529  | calnexin                                                                              |
| 42841 | ENSG00000070814 | NDS1     | 41394 | -0.09 | protein_coding | 5  | 14898581  | 14898773  | N-deacetylase/N-sulfotransferase (heparan glycosaminyl) 1                             |
| 42842 | ENSG00000195291 | FAM127   | 41395 | -0.09 | protein_coding | 17 | 873468    | 873468    | KR23 (chromosome histone regulator homolog) (S. cerevisiae)                           |
| 42851 | ENSG00000180185 | FAM127   | 41405 | -0.09 | protein_coding | 16 | 187898    | 187898    | luminy/acetylacetyl hydrolase domain containing 1                                     |
| 42861 | ENSG00000078462 | PAFAH1B3 | 41417 | -0.09 | protein_coding | 19 | 42801185  | 42801185  | platelet-activating factor acetylhydrolase (heparan glycosaminyl) 1                   |
| 42863 | ENSG00000185487 | PPP1R15B | 41418 | -0.09 | protein_coding | 19 | 2202808   | 2202808   | protein phosphatase 1, regulatory subunit 15B                                         |
| 42874 | ENSG00000204498 | NFKB1L1  | 41431 | -0.09 | protein_coding | 6  | 31514647  | 31512606  | nuclear factor of kappa light polypeptide gene enhancer in B-cells inhibitor like 1   |
| 42875 | ENSG00000194960 | PTOV1    | 41432 | -0.09 | protein_coding | 19 | 5035392   | 50354001  | prostate tumor overexpressed 1                                                        |
| 42888 | ENSG00000195209 | DBP1     | 41438 | -0.09 | protein_coding | 10 | 7403108   | 7403108   | DNA double-strand break inducible transcript 4                                        |
| 42898 | ENSG00000135387 | CAPRN1   | 41454 | -0.09 | protein_coding | 11 | 34073230  | 34127033  | cell cycle associated protein 1                                                       |
| 42899 | ENSG00000130332 | MLL1     | 41455 | -0.09 | protein_coding | 12 | 612296    | 627999    | myeloid/lymphoid or mixed-lineage leukemia (t(11q23), Deoxyphasia); translocated to 1 |
| 42900 | ENSG00000184969 | SHNA1    | 41458 | -0.09 | protein_coding | 14 | 10523437  | 10523437  | SHNA1, apoptosis-inducing factor                                                      |
| 42912 | ENSG00000101073 | SLC25A1  | 41476 | -0.09 | protein_coding | 17 | 4776130   | 4776130   | soluble carrier family 25, member 61                                                  |
| 42915 | ENSG00000146535 | GNA12    | 41473 | -0.09 | protein_coding | 7  | 2787746   | 2803988   | guanine nucleotide binding protein (G protein) alpha 12                               |
| 42924 | ENSG00000126922 | DDH1     | 41492 | -0.09 | protein_coding | 19 | 3469817   | 3469817   | deoxyribose hydroxylase/monooxygenase                                                 |
| 42944 | ENSG00000181894 | CNSRD4   | 41507 | -0.09 | protein_coding | 11 | 134181070 | 134185027 | chromosome 18 open reading frame 24                                                   |
| 42947 | ENSG00000095906 | NUR2P    | 41502 | -0.09 | protein_coding | 16 | 1839282   | 1839182   | ubiquitin binding protein 2                                                           |
| 42950 | ENSG00000198388 | PPP1R12C | 41511 | -0.09 | protein_coding | 10 | 6346195   | 63462611  | protein phosphatase 1, regulatory subunit 12C                                         |
| 42950 | ENSG00000198388 | ZNF664   | 41511 | -0.09 | protein_coding | 16 | 1244928   | 1244928   | zinc finger protein 664                                                               |
| 42967 | ENSG00000191999 | JMJD5    | 41534 | -0.09 | protein_coding | 16 | 731871    | 731871    | jasmonoyl domain containing 8                                                         |
| 42978 | ENSG00000136451 | TRAF7    | 41547 | -0.09 | protein_coding | 12 | 4971019   | 49725014  | trichostatin associated protein                                                       |
| 42984 | ENSG00000069481 | HMG20B   | 41548 | -0.09 | protein_coding | 12 | 3571702   | 3571702   | high mobility group 20B                                                               |
| 43007 | ENSG00000177830 | GHD1     | 41574 | -0.09 | protein_coding | 11 | 867357    | 8715058   | chitinase domain containing 11                                                        |
| 43010 | ENSG00000134533 | SNAPIN   | 41577 | -0.09 | protein_coding | 2  | 15901130  | 15904308  | SNAP-associated protein                                                               |
| 43024 | ENSG00000195264 | FAM178A  |       |       |                |    |           |           |                                                                                       |

|       |                 |           |       |       |                |    |           |           |                                                                                |
|-------|-----------------|-----------|-------|-------|----------------|----|-----------|-----------|--------------------------------------------------------------------------------|
| 43313 | ENSG00000206453 | BAAP2L1   | 41960 | -0.09 | protein_coding | 7  | 9795993   | 9903080   | BAI1-associated protein 2-like 1                                               |
| 43318 | ENSG00000155179 | RAB11FIP5 | 41961 | -0.09 | protein_coding | 2  | 7236494   | 1576206   | RAB11 family intracellular protein 5 (class 1)                                 |
| 43319 | ENSG0000007394  | RHDF1     | 41966 | -0.09 | protein_coding | 16 | 100588    | 126354    | rhomboid 5 homolog 1 (Drosophila)                                              |
| 43331 | ENSG00000160688 | FLAD1     | 41984 | -0.09 | protein_coding | 1  | 154955814 | 154955587 | flavin adenine dinucleotide synthetase 1                                       |
| 43333 | ENSG00000171703 | TEGE2     | 41984 | -0.09 | protein_coding | 20 | 5681189   | 6076370   | transcription elongation factor A (SII), 2                                     |
| 43353 | ENSG00000172754 | SEER1     | 42026 | -0.09 | protein_coding | 16 | 2037654   | 2037654   | growth factor, suppressor of nerve regeneration                                |
| 43361 | ENSG00000117419 | ER1       | 42018 | -0.09 | protein_coding | 1  | 4486742   | 4482032   | ER1 exorbaxinase family member 3                                               |
| 43374 | ENSG00000172534 | HCF1      | 42033 | -0.09 | protein_coding | A  | 153213048 | 153213258 | host cell factor 1 (UP18-accessory protein)                                    |
| 43378 | ENSG00000172720 | TMR2      | 42033 | -0.09 | protein_coding | 6  | 4188929   | 41600784  | tyrosinase-like 2                                                              |
| 43381 | ENSG00000195245 | NMBL      | 42044 | -0.09 | protein_coding | 9  | 41172596  | 41196677  | numb homolog (Drosophila)-like                                                 |
| 43392 | ENSG00000136193 | THEM6     | 42055 | -0.09 | protein_coding | 6  | 14386921  | 14381645  | thioesterase superfamily member 6                                              |
| 43393 | ENSG00000171233 | TMR2      | 42055 | -0.09 | protein_coding | 6  | 4188929   | 9093631   | translocase of inner mitochondrial membrane 22 homolog (yeast)                 |
| 43394 | ENSG00000066712 | PAF1      | 42058 | -0.09 | protein_coding | 19 | 39876452  | 39881635  | Paf1, RNA polymerase II associated factor, homolog (S. cerevisiae)             |
| 43396 | ENSG00000196498 | NCR2      | 42063 | -0.09 | protein_coding | 12 | 12498061  | 12502138  | nuclear receptor corepressor 2                                                 |
| 43391 | ENSG00000101465 | HCF8B1    | 42064 | -0.09 | protein_coding | 16 | 3074267   | 3074268   | host cell factor 1 (regulator 1) (NCP1 dependent)                              |
| 43403 | ENSG00000111841 | NOP2      | 42074 | -0.09 | protein_coding | 12 | 6666209   | 6677787   | NOP2 nucleolar protein                                                         |
| 43408 | ENSG00000135294 | PTPRK     | 42081 | -0.09 | protein_coding | 6  | 12629924  | 126841670 | protein tyrosine phosphatase, receptor type, K                                 |
| 43409 | ENSG00000100014 | SPKCC1L   | 42082 | -0.09 | protein_coding | 22 | 24668796  | 24813108  | sperm antigen with calcium leucine-rich and coiled-coil domains 1-like         |
| 43414 | ENSG00000440000 | CUL7      | 42086 | -0.09 | protein_coding | 6  | 43005355  | 43021883  | cullin 7                                                                       |
| 43421 | ENSG00000101210 | EEF1A2    | 42090 | -0.09 | protein_coding | 20 | 62119366  | 62130003  | eukaryotic translation elongation factor 1 alpha 2                             |
| 43424 | ENSG00000103268 | RN1208    | 42096 | -0.09 | protein_coding | 9  | 15011207  | 15011605  | ring finger protein 208                                                        |
| 43432 | ENSG00000160891 | SHC1      | 42107 | -0.09 | protein_coding | 1  | 154843774 | 154846871 | SHC (Src homology 2 domain containing) transforming protein 1                  |
| 43439 | ENSG00000117724 | CENPF     | 42114 | -0.09 | protein_coding | 1  | 214776538 | 21487931  | centromere protein F, 350kDa/6kDa                                              |
| 43443 | ENSG00000101326 | NAV1      | 42119 | -0.09 | protein_coding | 1  | 20170411  | 20176102  | neuron navigator 1                                                             |
| 43455 | ENSG00000054793 | ATP9A     | 42131 | -0.09 | protein_coding | 20 | 50213053  | 50385173  | ATPase, class II, type 9A                                                      |
| 43470 | ENSG00000159011 | PDS3      | 42146 | -0.09 | protein_coding | 8  | 18354811  | 18622420  | pleckstrin and Sec7 domain containing 3                                        |
| 43471 | ENSG00000109227 | SNX2      | 42147 | -0.09 | protein_coding | 12 | 9912726   | 9920926   | sorting nexin 2                                                                |
| 43474 | ENSG00000008838 | MDM2      | 42150 | -0.09 | protein_coding | 17 | 38175350  | 38217468  | mediator complex subunit 24                                                    |
| 43477 | ENSG00000292476 | CCO8C8C   | 42156 | -0.09 | protein_coding | 14 | 89977903  | 100707983 | coiled-coil domain containing 85C                                              |
| 43483 | ENSG00000101785 | ARHGAP3   | 42157 | -0.09 | protein_coding | 23 | 23843603  | 23843603  | ARHGAP with GTPase domain, argonin repeat and PH domain 1                      |
| 43484 | ENSG00000101871 | MDM1      | 42157 | -0.09 | protein_coding | 5  | 10413350  | 10851773  | mdm1 (Opa1/BBB syndrome)                                                       |
| 43488 | ENSG00000117605 | RNC2      | 42177 | -0.09 | protein_coding | 15 | 12723960  | 7724201   | reticulocalbin 2, EF-hand calcium binding domain                               |
| 43489 | ENSG00000106571 | CRMP2     | 42179 | -0.09 | protein_coding | 16 | 1903198   | 1903198   | CRADD (Axo-Glia-Apo) box polypeptide 39                                        |
| 43498 | ENSG00000150938 | CRM1      | 42196 | -0.09 | protein_coding | 2  | 36583009  | 36772778  | cytosine rich transmembrane BMP regulator 1 (chordin-like)                     |
| 43500 | ENSG00000135429 | POPD3C    | 42196 | -0.09 | protein_coding | 6  | 10596155  | 10597270  | povey domain containing 3                                                      |
| 43503 | ENSG00000102588 | PCYT2     | 42202 | -0.09 | protein_coding | 13 | 10311863  | 10311863  | phosphatidylcholine transferase 2                                              |
| 43510 | ENSG00000127463 | EMC1      | 42211 | -0.09 | protein_coding | 1  | 19542158  | 19578046  | ER membrane protein complex subunit 1                                          |
| 43518 | ENSG00000170265 | ZNF282    | 42223 | -0.09 | protein_coding | 7  | 148825277 | 148823339 | zinc finger protein 282                                                        |
| 43521 | ENSG00000103778 | GLIS2     | 42232 | -0.09 | protein_coding | 2  | 2744200   | 2744200   | carbamoyl-phosphate synthase 2, bifunctional (sucralfamylase, and dihydrodase) |
| 43522 | ENSG00000110992 | CND1      | 42232 | -0.09 | protein_coding | 11 | 69455855  | 69469242  | cyt1 D1                                                                        |
| 43523 | ENSG00000160262 | HIC6orf9  | 42232 | -0.09 | protein_coding | 18 | 2510081   | 2514984   | chromosome 18 open reading frame 9                                             |
| 43524 | ENSG00000103921 | PCYT2     | 42232 | -0.09 | protein_coding | 13 | 10311863  | 10311863  | phosphatidylcholine transferase 2                                              |
| 43530 | ENSG00000149503 | INCENP    | 42243 | -0.09 | protein_coding | 11 | 61891445  | 61920035  | inner centromere protein antigen 135/159kDa                                    |
| 43538 | ENSG00000205388 | SCHP1     | 42252 | -0.09 | protein_coding | 3  | 158690224 | 15861155  | IGCJ-SCHP1 readthrough                                                         |
| 43542 | ENSG00000147852 | VLDLR     | 42263 | -0.09 | protein_coding | 26 | 2961470   | 2960000   | very low density lipoprotein receptor                                          |
| 43547 | ENSG00000103693 | KIF3C     | 42263 | -0.09 | protein_coding | 16 | 87742129  | 87742129  | kinesin family member C3                                                       |
| 43550 | ENSG00000071539 | TRIP13    | 42281 | -0.09 | protein_coding | 5  | 862778    | 919472    | thyroid hormone receptor interacting 13                                        |
| 43551 | ENSG00000202572 | GRK2C     | 42281 | -0.09 | protein_coding | 1  | 19364688  | 19364688  | guanine nucleotide-binding protein-coupled receptor kinase 2                   |
| 43556 | ENSG00000104248 | HYCK1     | 42281 | -0.09 | protein_coding | 11 | 11891490  | 11892193  | hypoxia-ox/redox-1                                                             |
| 43562 | ENSG00000203778 | FAM228B   | 42297 | -0.09 | protein_coding | 6  | 112408902 | 11242399  | family with sequence similarity 229, member B                                  |
| 43563 | ENSG00000160307 | ARHGAP35  | 42297 | -0.09 | protein_coding | 18 | 421421933 | 42163333  | Rho GTPase activating protein 35                                               |
| 43568 | ENSG00000106171 | DCP2      | 42297 | -0.09 | protein_coding | 13 | 103332017 | 103304026 | deleted in normal erythroid dysplasia homolog (mouse)                          |
| 43570 | ENSG00000196411 | EPH8A     | 42304 | -0.09 | protein_coding | 7  | 100401807 | 100421281 | EPH receptor 84                                                                |
| 43573 | ENSG00000135448 | TARBP2    | 42308 | -0.09 | protein_coding | 12 | 53894705  | 53900215  | TAR RNA binding protein 2                                                      |
| 43586 | ENSG00000004864 | SLC6A13   | 42318 | -0.09 | protein_coding | 87 | 67149332  | 66514209  | solute carrier family 6 (sodium-glucocorticoid cotransporter) member 13        |
| 43582 | ENSG00000166186 | TMR17A    | 42320 | -0.09 | protein_coding | 14 | 103985521 | 10400310  | tRNA methyltransferase 61 homolog A (S. cerevisiae)                            |
| 43588 | ENSG00000104887 | POGL2     | 42326 | -0.09 | protein_coding | 1  | 19838220  | 19838594  | POI loop repeat containing 2                                                   |
| 43589 | ENSG00000108173 | JAG1      | 42329 | -0.09 | protein_coding | 9  | 37653399  | 37653399  | Jagged 1, fibroblast growth protein 703                                        |
| 43594 | ENSG00000101384 | JAG1      | 42340 | -0.09 | protein_coding | 20 | 10618332  | 10645894  | Jagged 1                                                                       |
| 43595 | ENSG00000174177 | CTL2      | 42340 | -0.09 | protein_coding | 16 | 88772871  | 88781794  | cytosolic thiolase-subunit 2 homolog (S. pombe)                                |
| 43598 | ENSG00000105433 | ARX4      | 42342 | -0.09 | protein_coding | 12 | 65915862  | 65915862  | arxiv protein kinase 4                                                         |
| 43604 | ENSG00000168886 | NAB2      | 42350 | -0.09 | protein_coding | 12 | 5748227   | 5748299   | NGF1-A binding protein 2 (EGR1 binding protein 2)                              |
| 43605 | ENSG00000135299 | PHLDA1    | 42350 | -0.09 | protein_coding | 12 | 79419227  | 79420712  | pleckstrin homology-like domain, family A, member 1                            |
| 43607 | ENSG00000101476 | TOC1      | 42363 | -0.09 | protein_coding | 5  | 11713752  | 11714305  | 17 OHS rat OX domain 23                                                        |
| 43615 | ENSG00000070814 | TACF1     | 42365 | -0.09 | protein_coding | 5  | 14973202  | 149779871 | Treacher Collins-Franceschetti syndrome 1                                      |
| 43621 | ENSG00000170017 | ALCAM     | 42369 | -0.09 | protein_coding | 3  | 10505573  | 10509744  | activated leukocyte cell adhesion molecule                                     |
| 43623 | ENSG00000101163 | TRAF2     | 42369 | -0.09 | protein_coding | 3  | 15981766  | 16001799  | transmembrane receptor with coiled-coil containing 1                           |
| 43624 | ENSG00000198420 | FAM118A   | 42372 | -0.09 | protein_coding | 7  | 143544689 | 143592991 | family with sequence similarity 115, member A                                  |
| 43627 | ENSG00000174938 | SEZL2     | 42373 | -0.09 | protein_coding | 16 | 26882480  | 26911088  | seizure related 6 homolog (mouse)-like 2                                       |
| 43628 | ENSG00000101478 | ARHGAP23  | 42373 | -0.09 | protein_coding | 16 | 17217412  | 17217412  | Rho guanine nucleotide exchange factor GEF21 10                                |
| 43631 | ENSG00000174599 | TRAM1L1   | 42379 | -0.09 | protein_coding | 4  | 11800478  | 11800674  | translocation associated membrane protein 1-like 1                             |
| 43640 | ENSG00000087842 | PIR       | 42387 | -0.09 | protein_coding | X  | 15442921  | 15511887  | pirin (iron-binding nuclear protein)                                           |
| 43643 | ENSG00000104514 | ARAS      | 42392 | -0.09 | protein_coding | 12 | 6373126   | 6373126   | arachnoid, astrocytoma-inducing, adenoma                                       |
| 43646 | ENSG00000174306 | ZHX3      | 42403 | -0.09 | protein_coding | 20 | 3980708   | 3984832   | zinc fingers and homeobox 3                                                    |
| 43647 | ENSG00000198528 | AFAP1     | 42404 | -0.09 | protein_coding | 4  | 7788441   | 7941853   | actin filament associated protein 1                                            |
| 43648 | ENSG00000103625 | CRP2B     | 42408 | -0.09 | protein_coding | 14 | 1228188   | 1228188   | chromosome 19 open reading frame 26                                            |
| 43650 | ENSG00000160917 | CRP2A     | 42409 | -0.09 | protein_coding | 7  | 9930545   | 9930544   | cleavage and polyadenylation specific factor 4, 30kDa                          |
| 43655 | ENSG00000104126 | MED9      | 42414 | -0.09 | protein_coding | 17 | 17980300  | 17983540  | mediator complex subunit 9                                                     |
| 43658 | ENSG00000101447 | FAM93D    | 42418 | -0.09 | protein_coding | 20 | 3758109   | 3758109   | family with sequence similarity 83, member D                                   |
| 43660 | ENSG00000197463 | ZNF228    | 42426 | -0.09 | protein_coding | 19 | 59957699  | 59958584  | zinc finger protein 228                                                        |
| 43666 | ENSG00000196781 | TLET      | 42431 | -0.09 | protein_coding | 9  | 8418656   | 8434320   | transduction-like enhancer of SPL1 (Egag1) homolog (Drosophila)                |
| 43672 | ENSG00000103266 | TRAF3V    | 42431 | -0.09 | protein_coding | 17 | 1024019   | 1024019   | transmembrane protein 3                                                        |
| 43675 | ENSG00000143569 | UBAP2L    | 42447 | -0.09 | protein_coding | 1  | 15412055  | 15424396  | ubiquitin associated protein 2-like                                            |
| 43685 | ENSG00000108106 | UBE2Z     | 42467 | -0.09 | protein_coding | 19 | 55912652  | 55919145  | ubiquitin-conjugating enzyme E2B                                               |
| 43688 | ENSG00000004478 | FHBP1     | 42467 | -0.09 | protein_coding | 12 | 2904118   | 2914616   | FHBP2 binding protein 4, 59kDa                                                 |
| 43689 | ENSG00000106484 | MEST      | 42469 | -0.09 | protein_coding | 20 | 21119386  | 21120118  | inhibitor of DNA binding 1, dominant negative helix-loop-helix protein         |
| 43690 | ENSG00000106484 | MEST      | 42469 | -0.09 | protein_coding | 7  | 13012612  | 13014613  | mammary specific transcript                                                    |
| 43692 | ENSG00000101796 | SESN2     | 42469 | -0.09 | protein_coding | 1  | 2859036   | 2860902   | sesn2                                                                          |
| 43696 | ENSG00000197942 | FNBP1L    | 42469 | -0.09 | protein_coding | 1  | 6391368   | 6402029   | feminin domain protein 1-like                                                  |
| 43697 | ENSG00000168636 | LDCC1L    | 42478 | -0.09 | protein_coding | 22 | 44884842  | 44894178  | leucine zipper, down-regulated in cancer 1-like                                |
| 43700 | ENSG00000086100 | DLG5      | 42479 | -0.09 | protein_coding | 17 | 5344322   | 5312480   | DEAF1 (Axo-Glia-Apo) low polypeptide 33                                        |
| 43701 | ENSG00000101206 | DLG5      | 42482 | -0.09 | protein_coding | 10 | 7869249   | 7869249   | discs, large homolog 5 (Drosophila)                                            |
| 43708 | ENSG00000123213 | NLN       | 42487 | -0.09 | protein_coding | 5  | 65018023  | 65187653  | neurospirin (metallopeptidase M3 family)                                       |
| 43711 | ENSG00000176532 | NRP1      | 42484 | -0.09 | protein_coding | 11 | 9002123   | 9029296   | nucleolar receptor interacting protein 3                                       |
| 43725 | ENSG00000103096 | PRR4      | 42484 | -0.09 | protein_coding | 13 | 37203828  | 37216268  | protein tyrosine phosphatase (LAR) family class 1                              |
| 43731 | ENSG00000136221 |           |       |       |                |    |           |           |                                                                                |

|       |                 |                 |          |       |                      |    |            |            |                                                                                                      |
|-------|-----------------|-----------------|----------|-------|----------------------|----|------------|------------|------------------------------------------------------------------------------------------------------|
| 4074  | ENSG00000134966 | NREP            | 43103    | -0.09 | protein_coding       | 5  | 110968318  | 111333161  | neuronal regeneration related protein                                                                |
| 4075  | ENSG00000103311 |                 | 38109    | -0.09 |                      |    |            |            |                                                                                                      |
| 42249 | ENSG00000229519 |                 | 40721.7  | -0.09 |                      |    |            |            |                                                                                                      |
| 42309 | ENSG00000217138 |                 | 41493.9  | -0.09 |                      |    |            |            |                                                                                                      |
| 43588 | ENSG00000266963 |                 | 41628.6  | -0.09 |                      |    |            |            |                                                                                                      |
| 43416 | ENSG00000207758 |                 | 42397.5  | -0.09 |                      |    |            |            |                                                                                                      |
| 43486 | ENSG00000203733 |                 | 42176    | -0.09 |                      |    |            |            | GTU domain containing 7B                                                                             |
| 43585 | ENSG00000186313 | OTUD7B          | 42683    | -0.09 | protein_coding       | 1  | 149909705  | 149982625  |                                                                                                      |
| 43659 | ENSG00000269552 |                 | 43441.3  | -0.09 |                      |    |            |            |                                                                                                      |
| 43912 | ENSG00000246695 | RASSF8AS1       | 42815.4  | -0.1  | antisense            | 12 | 20592282   | 26112688   | RASSF8 antisense RNA 1                                                                               |
| 44033 | ENSG00000251506 | LINC03094       | 42568.4  | -0.1  | antisense            | 9  | 15869591   | 16069748   | long intergenic non-protein coding RNA 94                                                            |
| 44181 | ENSG00000204698 | ORPK4           | 43339.3  | -0.1  | protein_coding       | 9  | 54952715   | 54983181   | colorectal metastasis differentially expressed (non-synonymous coding)                               |
| 42845 | ENSG00000224837 | ENSG00000224837 | 41987.1  | -0.1  | processed_transcript | 1  | 168025139  | 168025680  | glycine cleavage system protein H pseudogene 5                                                       |
| 37718 | ENSG00000187698 | EEF2            | 35866.3  | -0.1  | protein_coding       | 19 | 3978084    | 3984547    | eukaryotic translation elongation factor 2                                                           |
| 38774 | ENSG00000105268 | ATP4A1          | 36975.4  | -0.1  | protein_coding       | 18 | 4386110    | 43864300   | ATP synthase, H+ transporting, mitochondrial F1 complex, alpha subunit 1, cardiac muscle             |
| 39488 | ENSG00000138107 | ACTR1A          | 37730    | -0.1  | protein_coding       | 10 | 10423896   | 104262482  | ARPI1 actin-related protein 1 homolog A, centrinin alpha (yeast)                                     |
| 39991 | ENSG00000189921 | UQCPR3          | 37829.2  | -0.1  | protein_coding       | 19 | 29681173   | 29704448   | ubiquitin-cytochrome c reductase, Rieske iron-sulfur polypeptide 1                                   |
| 39984 | ENSG00000177233 | HNRNP40         | 38202.3  | -0.1  | protein_coding       | 9  | 13707075   | 13709039   | heterogeneous nuclear ribonucleoprotein A0                                                           |
| 39965 | ENSG00000147853 | AK3             | 38236    | -0.1  | protein_coding       | 9  | 4711155    | 4742043    | adenylate kinase 3                                                                                   |
| 40033 | ENSG00000154518 | ATP9G3          | 38308.4  | -0.1  | protein_coding       | 2  | 17604098   | 17604335   | ATP synthase, H+ transporting, mitochondrial Fo complex, subunit C3 (subunit 9)                      |
| 40187 | ENSG00000101623 | TMS63D3         | 38599.1  | -0.1  | protein_coding       | 9  | 14009534   | 14010090   | chaperonin containing TCP1, subunit 6A (beta 1)                                                      |
| 40679 | ENSG00000178101 | SNA1            | 39000.1  | -0.1  | protein_coding       | 2  | 14008309   | 14008422   | Spo9en syndrome nuclear autophantain 1                                                               |
| 40717 | ENSG00000142884 | SERP1           | 39033.1  | -0.1  | protein_coding       | 1  | 67973493   | 67996908   | SERPINE1 mRNA binding protein 1                                                                      |
| 40841 | ENSG00000099817 | PCRF2E          | 39178.7  | -0.1  | protein_coding       | 18 | 1090588    | 1090598    | polymerase (RNA) II (DNA directed) polypeptide E, 25kDa                                              |
| 40858 | ENSG00000178741 | COXA            | 39197.5  | -0.1  | protein_coding       | 15 | 75212132   | 75230509   | cytochrome c oxidase subunit Va                                                                      |
| 40960 | ENSG00000112514 | GUTA            | 39303.9  | -0.1  | protein_coding       | 6  | 33384219   | 33388304   | cutA/divalent cation tolerance homolog (E. coli)                                                     |
| 41000 | ENSG00000114893 | SRR1            | 39393.9  | -0.1  | protein_coding       | 2  | 15627073   | 15627073   | signal sequence receptor, gamma (transcription-associated protein gamma)                             |
| 41108 | ENSG00000186595 | FAM68B          | 39460.4  | -0.1  | protein_coding       | 16 | 86985959   | 86988336   | family with sequence similarity 96, member 6                                                         |
| 41142 | ENSG00000213585 | VDAC1           | 39500.6  | -0.1  | protein_coding       | 5  | 133307666  | 133340024  | voltage-dependent anion channel 1                                                                    |
| 41216 | ENSG00000101803 | CD78A           | 39591.3  | -0.1  | protein_coding       | 16 | 1062317    | 1062317    | protein disulfide isomerase family A, member 6                                                       |
| 41225 | ENSG00000204227 | RNGI3           | 39596.6  | -0.1  | protein_coding       | 6  | 3317672    | 33180499   | rung finger protein 1                                                                                |
| 41260 | ENSG00000114584 | CCT4            | 39627    | -0.1  | protein_coding       | 2  | 62058224   | 62115939   | chaperonin containing TCP1, subunit 4 (delta)                                                        |
| 41320 | ENSG00000103731 | PCRF2           | 39639.9  | -0.1  | protein_coding       | 7  | 5813923    | 5813923    | polymerase (RNA) II (DNA directed) polypeptide E, 25kDa                                              |
| 41308 | ENSG00000128050 | PANCS           | 39689.4  | -0.1  | protein_coding       | 4  | 57301907   | 57327534   | phosphoribosylaminoimidazole carboxylase, phosphoribosylaminoimidazole succinocarboxamide synthetase |
| 41328 | ENSG00000177697 | CD151           | 39713.7  | -0.1  | protein_coding       | 11 | 832843     | 839851     | CD151 metastar (high blood group)                                                                    |
| 41405 | ENSG00000242372 | EIF6            | 39807.9  | -0.1  | protein_coding       | 20 | 3386714    | 33872788   | eukaryotic translation initiation factor 6                                                           |
| 41440 | ENSG00000128272 | ATF4            | 39841.4  | -0.1  | protein_coding       | 22 | 39915700   | 39918691   | activating transcription factor 4                                                                    |
| 41489 | ENSG00000106824 | SPR4            | 39900.1  | -0.1  | protein_coding       | 12 | 10258146   | 10258146   |                                                                                                      |
| 41511 | ENSG00000154174 | TOM70DA         | 39920.8  | -0.1  | protein_coding       | 3  | 10000275   | 10012042   | translocase of outer mitochondrial membrane 70 homolog A (S. cerevisiae)                             |
| 41516 | ENSG00000118421 | NDUFA8          | 39928.3  | -0.1  | protein_coding       | 9  | 12488745   | 12492298   | NADH dehydrogenase (ubiquinone) 1 alpha subcomplex, 8, 19kDa                                         |
| 41538 | ENSG00000101691 | PRKSH           | 39933.9  | -0.1  | protein_coding       | 12 | 12314136   | 12314136   | protein kinase N2                                                                                    |
| 41653 | ENSG00000130175 | PRKCSH          | 40055.7  | -0.1  | protein_coding       | 19 | 11546109   | 11561783   | protein kinase C substrate 80K-H                                                                     |
| 41697 | ENSG00000040779 | NDUFA81         | 40591.1  | -0.1  | protein_coding       | 16 | 23592323   | 23607677   | NADH dehydrogenase (ubiquinone) 1, alpha/beta subcomplex, 1, 8kDa                                    |
| 41670 | ENSG00000125835 | SRRP8           | 40675.4  | -0.1  | protein_coding       | 20 | 4442969    | 2451499    | small nuclear ribonucleoprotein polypeptides B and B1                                                |
| 41765 | ENSG00000198816 | ZNF576          | 40781.6  | -0.1  | protein_coding       | 20 | 7580715    | 7580715    | zinc finger protein 576                                                                              |
| 41761 | ENSG00000184900 | SUMO3           | 40710.74 | -0.1  | protein_coding       | 21 | 46225521   | 46226994   | small ubiquitin-like modifier 3                                                                      |
| 41785 | ENSG00000186953 | TYWHA           | 40207.1  | -0.1  | protein_coding       | 17 | 1247697    | 1247697    | tyrosine 3-monoxygenase/tyrosyl-L-tryptophan 5-monoxygenase activation protein, epsilon              |
| 41783 | ENSG00000103601 | BCORL3          | 40207.1  | -0.1  | protein_coding       | 16 | 31117428   | 31124312   | branched chain ketohydroxyglutaryl-CoA lyase                                                         |
| 41887 | ENSG00000204185 | ARPC1A          | 40311.4  | -0.1  | protein_coding       | 7  | 69923521   | 69985787   | actin related protein 2/3 complex, subunit 1A, 41kDa                                                 |
| 41904 | ENSG00000135471 | MPLN18          | 40338.5  | -0.1  | protein_coding       | 8  | 50041770   | 50050461   | mitochondrial ribosomal protein L15                                                                  |
| 41904 | ENSG00000106401 | CD78A2          | 40338.5  | -0.1  | protein_coding       | 16 | 10561810   | 10561810   | protein disulfide isomerase family A, member 6                                                       |
| 42045 | ENSG00000100804 | PSMB8           | 40521.2  | -0.1  | protein_coding       | 14 | 23487572   | 23504339   | proteasome (prosome, macropain) subunit, beta type 5                                                 |
| 42062 | ENSG00000308220 | PEBP1           | 40533.3  | -0.1  | protein_coding       | 12 | 118573663  | 118583388  | phosphatidylethanolamine binding protein 1                                                           |
| 42071 | ENSG00000071314 | SNRPA           | 40533.3  | -0.1  | protein_coding       | 42 | 41232642   | 41232642   | small nuclear ribonucleoprotein polypeptide A                                                        |
| 42178 | ENSG00000125591 | ERIC3D          | 40550.4  | -0.1  | protein_coding       | 30 | 34129770   | 34145405   | ERIC and golgi 3                                                                                     |
| 42168 | ENSG00000196986 | CDCC47          | 40558.6  | -0.1  | protein_coding       | 17 | 81822810   | 81853171   | collet-coil domain containing 47                                                                     |
| 42206 | ENSG00000101986 | MPSF5           | 40561.5  | -0.1  | protein_coding       | 26 | 36924139   | 36924139   | mitochondrial ribosomal protein S15                                                                  |
| 42211 | ENSG00000102181 | CD98L2          | 40677.9  | -0.1  | protein_coding       | X  | 149594810  | 150087288  | CD98 membrane-like 2                                                                                 |
| 42224 | ENSG00000185824 | PAH8            | 40704.3  | -0.1  | protein_coding       | 17 | 7981035    | 79818770   | prolyl 4-hydroxylase, beta polypeptide                                                               |
| 42227 | ENSG00000195424 | SLC23G3         | 40735.3  | -0.1  | protein_coding       | 19 | 54292563   | 54292563   | solute carrier family 23 (multicopper carrier, cholesteryl carrier), member 23                       |
| 42332 | ENSG00000114686 | MPLR3           | 40812.9  | -0.1  | protein_coding       | 3  | 131181056  | 13121827   | mitochondrial ribosomal protein L3                                                                   |
| 42342 | ENSG00000146248 | SURF4           | 40826.8  | -0.1  | protein_coding       | 9  | 18238235   | 18242070   | surfact 4                                                                                            |
| 42495 | ENSG00000165117 | MRPS15          | 41007.2  | -0.1  | protein_coding       | 17 | 72432414   | 72432414   | mitochondrial ribosomal protein S15                                                                  |
| 42419 | ENSG00000187328 | RRM1            | 40912.7  | -0.1  | protein_coding       | 11 | 4115937    | 4161026    | ribonucleotide reductase M1                                                                          |
| 42425 | ENSG00000196508 | MCW7            | 40920.9  | -0.1  | protein_coding       | 22 | 9990351    | 99909963   | mitochondrial maintenance complex component 7                                                        |
| 42486 | ENSG00000119505 | L3M4            | 40934.8  | -0.1  | protein_coding       | 18 | 18417049   | 18417049   | LSM4 homolog, L18 small nuclear RNA associated (S. cerevisiae)                                       |
| 42495 | ENSG00000111142 | METAP2          | 40966.4  | -0.1  | protein_coding       | 12 | 95867292   | 95869615   | methionyl aminopeptidase 2                                                                           |
| 42617 | ENSG00000132375 | PMSM4           | 41021.4  | -0.1  | protein_coding       | 19 | 40478912   | 40487348   | proteasome (prosome, macropain) 26S subunit, ATPase, 4                                               |
| 42536 | ENSG00000106453 | CD151L2         | 41021.4  | -0.1  | protein_coding       | 19 | 5012419    | 5012419    | CD151-like 2 (ratie rib)                                                                             |
| 42593 | ENSG00000162430 | SEPN1           | 41108    | -0.1  | protein_coding       | 1  | 26126667   | 26144113   | selenoprotein N, 1                                                                                   |
| 42601 | ENSG00000182154 | MPLP14          | 41147.4  | -0.1  | protein_coding       | 9  | 140445651  | 140447307  | mitochondrial ribosomal protein L41                                                                  |
| 42616 | ENSG00000106538 | AT13A2          | 41134.6  | -0.1  | protein_coding       | 22 | 469681     | 469681     | actin, alpha 1B                                                                                      |
| 42617 | ENSG00000145386 | CDA2            | 41134.6  | -0.1  | protein_coding       | 4  | 12273599   | 122745097  | cystin A2                                                                                            |
| 42634 | ENSG00000086820 | COASY           | 41150.7  | -0.1  | protein_coding       | 17 | 40713485   | 40718296   | CoA synthase                                                                                         |
| 42683 | ENSG00000101673 | MIR584          | 41233.1  | -0.1  | protein_coding       | 17 | 18233      | 18233      | mitochondrial ribosomal protein S34                                                                  |
| 42714 | ENSG00000128947 | ARMXC1          | 41259.1  | -0.1  | protein_coding       | 14 | 100959514  | 100959514  | armadillo repeat containing, X-linked 1                                                              |
| 42716 | ENSG00000170779 | CDCA4           | 41259.1  | -0.1  | protein_coding       | 14 | 105475910  | 105487485  | cell division cycle associated 4                                                                     |
| 42723 | ENSG00000196258 | ACTL1           | 41263.4  | -0.1  | protein_coding       | 30 | 308819     | 3101190    | guanine nucleotide binding protein (G protein), alpha 11 (Gq class)                                  |
| 42733 | ENSG00000130402 | ACTN4           | 41278    | -0.1  | protein_coding       | 9  | 99135289   | 99222223   | cell division cycle 4                                                                                |
| 42736 | ENSG00000131768 | PEP1L3          | 41283.3  | -0.1  | protein_coding       | 6  | 36822003   | 36824200   | peptidylglycyl isomerase (cyclophilin) like 1                                                        |
| 42737 | ENSG00000106996 | MRPS12          | 41321.1  | -0.1  | protein_coding       | 19 | 46389896   | 46393876   | mitochondrial ribosomal protein L13                                                                  |
| 42738 | ENSG00000173465 | SSSCA1          | 41285    | -0.1  | protein_coding       | 11 | 65317901   | 65341413   | Spo9en syndrome/scidemia autophantain 1                                                              |
| 42748 | ENSG00000213495 | ARL2            | 41295.4  | -0.1  | protein_coding       | 11 | 64741585   | 64789656   | ADP-ribosylation factor-like 2                                                                       |
| 42768 | ENSG00000103111 | MCRC            | 41316.4  | -0.1  | protein_coding       | 3  | 12717066   | 127341276  | mitochondrial maintenance complex component 2                                                        |
| 42772 | ENSG00000117266 | CD151L1         | 41321.1  | -0.1  | protein_coding       | 7  | 43842676   | 43842676   | CD151-like 1 (ratie rib)                                                                             |
| 42775 | ENSG00000125912 | NCLN            | 41328.6  | -0.1  | protein_coding       | 19 | 3185651    | 3209573    | nuclein                                                                                              |
| 42783 | ENSG00000100106 | MFCR2           | 41357.6  | -0.1  | protein_coding       | 6  | 14381948   | 14383627   | lysostatin, alpha-L-2, plasma                                                                        |
| 42819 | ENSG00000154445 | MIR507          | 41357.6  | -0.1  | protein_coding       | 19 | 73297765   | 73297765   | mitochondrial ribosomal protein S7                                                                   |
| 42839 | ENSG00000096241 | ISOC2           | 41390.5  | -0.1  | protein_coding       | 19 | 55984352   | 55997310   | isochromatid spread domain containing 2                                                              |
| 42844 | ENSG00000175130 | MARCKSL1        | 41396    | -0.1  | protein_coding       | 37 | 5074924    | 5081190    | MARCKS-like 1                                                                                        |
| 42855 | ENSG00000170641 | RFBP1           | 41414.4  | -0.1  | protein_coding       | 19 | 46389896   | 46393876   | interferon regulatory factor 2 binding protein 1                                                     |
| 42862 | ENSG00000129250 | KIF10           | 41426    | -0.1  | protein_coding       | 17 | 4501243    | 4511698    | kinesin family member 10                                                                             |
| 42869 | ENSG00000129242 | PFBP2           | 41427.6  | -0.1  | protein_coding       | 7  | 32697017   | 32698483   | Pf88 binding protein B, 63 kDa                                                                       |
| 42876 | ENSG00000131969 | CDJND5          | 41433.6  | -0.1  | protein_coding       | 10 | 1026126265 | 1026126265 | DCN1, defective in cutis marmorata 1, domain containing 5                                            |
| 42881 | ENSG00000106805 | NKXAP           | 41438.4  | -0.1  | protein_coding       | 4  | 17812525   | 17846485   | non-SMC condensin I homolog subunit 5                                                                |
| 42892 | ENSG00000187553 | TUBA1C          | 41448.8  | -0.1  | protein_coding       | 12 | 48682519   | 486        |                                                                                                      |

|       |                  |           |       |      |                    |         |           |                                                                                                   |
|-------|------------------|-----------|-------|------|--------------------|---------|-----------|---------------------------------------------------------------------------------------------------|
| 43434 | ENSG00000187362  | ZNF598    | 42159 | -0.1 | protein_coding     | 2047565 | 2052824   | zinc finger protein 598                                                                           |
| 43443 | ENSG00000117172  | MGC129    | 42159 | -0.1 | antisense_intronic | 5238    | 5238      | methylglucosyl transferase 2                                                                      |
| 43448 | ENSG00000198722  | UNC13B    | 42125 | -0.1 | protein_coding     | 9       | 35161999  | unc-13 homolog B (C. elegans)                                                                     |
| 43461 | ENSG00000186318  | BACE1     | 42141 | -0.1 | protein_coding     | 11      | 117156402 | beta-site APP-cleaving enzyme 1                                                                   |
| 43467 | ENSG00000112759  | SLC11A1   | 42141 | -0.1 | protein_coding     | 6       | 4501788   | solute carrier family 20 (requiemate nucleoside transporter), member 1                            |
| 43473 | ENSG00000105795  | AMDC1     | 42149 | -0.1 | protein_coding     | 6       | 27926542  | AT hook DNA binding motif containing 1                                                            |
| 43476 | ENSG00000104866  | PPP1R37   | 42154 | -0.1 | protein_coding     | 19      | 45594545  | protein phosphatase 1, regulatory subunit 37                                                      |
| 43486 | ENSG00000200539  | POF       | 42174 | -0.1 | protein_coding     | 11      | 846169    | importin 7                                                                                        |
| 43496 | ENSG00000109171  | ZFYVE21   | 42193 | -0.1 | protein_coding     | 14      | 104120087 | zinc finger, FYVE domain containing 21                                                            |
| 43507 | ENSG00000136311  | DBP1      | 42203 | -0.1 | protein_coding     | 19      | 17420327  | DIET1 and DBP1 associated 1                                                                       |
| 43511 | ENSG00000200520  | TNED1     | 42222 | -0.1 | protein_coding     | 19      | 10643174  | transmembrane emp24 protein transport domain containing 1                                         |
| 43519 | ENSG00000100498  | WYTR1L    | 42232 | -0.1 | protein_coding     | 14      | 14545501  | WW domain containing transcription regulator 1                                                    |
| 43527 | ENSG00000100116  | GGAT      | 42240 | -0.1 | protein_coding     | 22      | 38203912  | glycine C-acetyltransferase                                                                       |
| 43535 | ENSG00000114480  | GBE1      | 42247 | -0.1 | protein_coding     | 3       | 8153890   | glucan (1,4-alpha), branching enzyme 1                                                            |
| 43543 | ENSG00000200458  | OGRH8     | 42264 | -0.1 | protein_coding     | 6       | 3061266   | chromosome 8 open reading frame 138                                                               |
| 43544 | ENSG00000200327  | TNFRSF12A | 42287 | -0.1 | protein_coding     | 16      | 3068446   | tumor necrosis factor receptor superfamily, member 12A                                            |
| 43554 | ENSG00000170677  | SOC36     | 42290 | -0.1 | protein_coding     | 18      | 6796137   | suppressor of cytokine signaling 6                                                                |
| 43561 | ENSG00000177383  | MAM1      | 42297 | -0.1 | protein_coding     | 3       | 13440356  | melanocyte antigen family 1                                                                       |
| 43575 | ENSG00000178053  | MLF1      | 42312 | -0.1 | protein_coding     | 3       | 15628952  | myeloid leukemia factor 1                                                                         |
| 43579 | ENSG00000100139  | MICAL1    | 42317 | -0.1 | protein_coding     | 22      | 3831864   | MICAL-like 1                                                                                      |
| 43588 | ENSG00000174562  | WDR52     | 42320 | -0.1 | protein_coding     | 19      | 7297255   | Williams Beuren syndrome chromosome region 22                                                     |
| 43590 | ENSG00000155254  | MARVELD1  | 42335 | -0.1 | protein_coding     | 10      | 9947290   | MARVEL domain containing 1                                                                        |
| 43592 | ENSG00000186901  | SAC3D1    | 42339 | -0.1 | protein_coding     | 11      | 6480973   | SAC3 domain containing 1                                                                          |
| 43598 | ENSG00000101346  | POU1F1    | 42344 | -0.1 | protein_coding     | 20      | 3072663   | protein 1 (class of transcription factor 1)                                                       |
| 43601 | ENSG00000188010  | MORC2     | 42347 | -0.1 | protein_coding     | 2       | 39103103  | MORN repeat containing 2                                                                          |
| 43606 | ENSG00000184967  | NOCAL     | 42352 | -0.1 | protein_coding     | 12      | 12628993  | nuclear complex associated 4 homolog (S. cerevisiae)                                              |
| 43610 | ENSG00000196927  | AJEN      | 42358 | -0.1 | protein_coding     | 15      | 3415828   | apoptosis, caspase activation inhibitor                                                           |
| 43612 | ENSG00000107186  | MPC2      | 42363 | -0.1 | protein_coding     | 9       | 1310703   | multiple PDZ domain protein                                                                       |
| 43632 | ENSG00000200474  | ABCF1     | 42379 | -0.1 | protein_coding     | 6       | 3058193   | ATP-binding cassette, sub-family F (GCN2), member 1                                               |
| 43634 | ENSG00000104298  | AKR3B     | 42381 | -0.1 | protein_coding     | 19      | 1493269   | UDP-GlcNAc 6-epimerase                                                                            |
| 43641 | ENSG00000174684  | B3GNT1    | 42397 | -0.1 | protein_coding     | 11      | 6811283   | UDP-GlcNAc 6-epimerase 1, N-acetylglucosaminyltransferase 1                                       |
| 43652 | ENSG00000105854  | PON2      | 42414 | -0.1 | protein_coding     | 7       | 8503475   | paraoxonase 2                                                                                     |
| 43654 | ENSG00000106947  | PCSK1     | 42419 | -0.1 | protein_coding     | 2       | 22758476  | proteinase substrate 1                                                                            |
| 43657 | ENSG00000139514  | SLC7A1    | 42420 | -0.1 | protein_coding     | 13      | 30083547  | solute carrier family 7 (cationic amino acid transporter, y+ system), member 1                    |
| 43664 | ENSG00000151348  | EKT2      | 42434 | -0.1 | protein_coding     | 11      | 4417099   | exocyst glycosyltransferase 2                                                                     |
| 43671 | ENSG00000116681  | PCSK2     | 42435 | -0.1 | protein_coding     | 11      | 3213618   | proteinase substrate 2                                                                            |
| 43678 | ENSG00000107262  | PAHA2     | 42452 | -0.1 | protein_coding     | 5       | 11527531  | prolyl 4-hydroxylase, alpha polypeptide II                                                        |
| 43679 | ENSG00000104534  | TICRR     | 42456 | -0.1 | protein_coding     | 10      | 8011873   | TORBP1-interacting checkpoint and replication regulator                                           |
| 43681 | ENSG00000104985  | LRWD1     | 42458 | -0.1 | protein_coding     | 15      | 973325    | leucin methylase 2-like                                                                           |
| 43684 | ENSG00000158301  | GPRASP2   | 42464 | -0.1 | protein_coding     | X       | 101987104 | G protein-coupled receptor associated sorting protein 2                                           |
| 43687 | ENSG00000172731  | LRWD2     | 42467 | -0.1 | protein_coding     | 10      | 72088729  | leucine rich repeat containing 20                                                                 |
| 43693 | ENSG00000104922  | ATP9A2    | 42472 | -0.1 | protein_coding     | 12      | 14071142  | ATPase, Ca <sup>2+</sup> /H <sup>+</sup> transporting, cardiac muscle, slow twitch 2              |
| 43699 | ENSG00000199996  | MAPK6     | 42478 | -0.1 | protein_coding     | 15      | 5224403   | mitogen-activated protein kinase 6                                                                |
| 43703 | ENSG00000124571  | XPC5      | 42483 | -0.1 | protein_coding     | 6       | 4340072   | exportin 5                                                                                        |
| 43704 | ENSG00000104590  | NBL1      | 42484 | -0.1 | protein_coding     | 12      | 10658718  | MLK4 family, SNF-like kinase, 1                                                                   |
| 43707 | ENSG00000106152  | TREAF4    | 42484 | -0.1 | protein_coding     | 16      | 2707102   | TNF receptor associated factor 4                                                                  |
| 43712 | ENSG00000200289  | EPDR1     | 42484 | -0.1 | protein_coding     | 7       | 37723446  | ependymin related 1                                                                               |
| 43719 | ENSG00000106152  | TME6A8    | 42501 | -0.1 | protein_coding     | 9       | 10425543  | transmembrane protein 26b                                                                         |
| 43722 | ENSG00000106152  | TME6A8    | 42501 | -0.1 | antisense_intronic | 9       | 89145217  | apoptosis enhancing nuclease                                                                      |
| 43727 | ENSG00000187721  | TSR1      | 42511 | -0.1 | protein_coding     | 17      | 2225797   | TSR1, 20S rRNA associated, homolog (S. cerevisiae)                                                |
| 43730 | ENSG00000191077  | ZFYVE9    | 42516 | -0.1 | protein_coding     | 6       | 5650906   | zinc finger, FYVE domain containing 9                                                             |
| 43733 | ENSG00000134241  | ZJNHCC1   | 42519 | -0.1 | protein_coding     | 7       | 6817636   | zinc finger, DHRX-type containing 7                                                               |
| 43734 | ENSG0000011177   | ERX2      | 42525 | -0.1 | protein_coding     | 14      | 6968228   | exonuclease 3'-5' domain containing 2                                                             |
| 43740 | ENSG00000136802  | LRRC1A    | 42538 | -0.1 | protein_coding     | 9       | 13164391  | leucine rich repeat containing 9 family, member A                                                 |
| 43743 | ENSG00000105976  | ARHGAP3   | 42539 | -0.1 | protein_coding     | 19      | 1914334   | aromatase repeat containing 6                                                                     |
| 43745 | ENSG00000168515  | CDC38     | 42542 | -0.1 | protein_coding     | 19      | 46913629  | collar-coiled domain containing 8                                                                 |
| 43748 | ENSG000001089275 | NLKS1     | 42552 | -0.1 | protein_coding     | 1       | 20591947  | nuclear casein kinase and cyclin-dependent kinase substrate 1                                     |
| 43751 | ENSG00000106266  | NKX6A2    | 42552 | -0.1 | protein_coding     | 1       | 40192490  | NFB inhibitor interaction factor-like                                                             |
| 43763 | ENSG00000158628  | MALSU1    | 42573 | -0.1 | protein_coding     | 7       | 2333858   | mitochondrial assembly of ribosomal large subunit 1                                               |
| 43765 | ENSG00000202513  | LSRR      | 42573 | -0.1 | protein_coding     | 11      | 2738708   | leucine-rich repeat containing 5 protein-coupled receptor 4                                       |
| 43768 | ENSG00000131758  | LGR4      | 42574 | -0.1 | protein_coding     | 17      | 7181055   | leucine-rich repeat containing 4                                                                  |
| 43770 | ENSG00000186881  | NGRRA1    | 42580 | -0.1 | protein_coding     | X       | 10283128  | nerve growth factor receptor (TNFRSF16) associated protein 1                                      |
| 43775 | ENSG00000196984  | CHRNA5    | 42583 | -0.1 | protein_coding     | 15      | 7885782   | cholinergic receptor, nicotinic, alpha 5 (neuronal)                                               |
| 43781 | ENSG00000111777  | CHRNA5    | 42583 | -0.1 | antisense_intronic | 15      | 44412611  | cholinergic receptor, nicotinic, alpha 5 (neuronal)                                               |
| 43779 | ENSG00000196591  | HDAC2     | 42587 | -0.1 | protein_coding     | 6       | 114284192 | histone deacetylase 2                                                                             |
| 43780 | ENSG00000152767  | FARP1     | 42588 | -0.1 | protein_coding     | 13      | 98734816  | FERM_RHOGEF (ARHGAP) and pleckstrin domain protein 1 (chondrocyte-derived)                        |
| 43783 | ENSG00000112326  | FOXP2     | 42592 | -0.1 | protein_coding     | 12      | 2966128   | forkhead box P2                                                                                   |
| 43786 | ENSG00000174219  | TEAD3     | 42598 | -0.1 | protein_coding     | 19      | 48843852  | TEA domain family member 2                                                                        |
| 43788 | ENSG00000113552  | GNDPA1    | 42600 | -0.1 | protein_coding     | 5       | 141371314 | glucosaminase-6-phosphate deaminase 1                                                             |
| 43790 | ENSG00000101542  | PCSK1     | 42602 | -0.1 | antisense_intronic | 17      | 7433217   | phosphorylase phosphatase associated-associated protein 1                                         |
| 43793 | ENSG00000109929  | SCSD      | 42612 | -0.1 | protein_coding     | 11      | 12118362  | serine S-decarboxylase                                                                            |
| 43800 | ENSG00000182979  | MAT1      | 42626 | -0.1 | protein_coding     | 14      | 10588159  | metalloproteinase associated 1                                                                    |
| 43805 | ENSG00000105528  | PCSK2     | 42634 | -0.1 | protein_coding     | 13      | 1348634   | paraoxonase 2                                                                                     |
| 43808 | ENSG00000184916  | JAG2      | 42639 | -0.1 | protein_coding     | 14      | 105507319 | suppressor of cytokine, autophagy associated 1                                                    |
| 43812 | ENSG00000187112  | TRUB2     | 42642 | -0.1 | protein_coding     | 9       | 131071382 | TruB pseudouridine (psi) synthase family member 2                                                 |
| 43814 | ENSG00000104243  | PCSK1     | 42643 | -0.1 | protein_coding     | 13      | 1374835   | paraoxonase 2                                                                                     |
| 43815 | ENSG00000149838  | SOGA1     | 42658 | -0.1 | protein_coding     | 20      | 35405845  | suppressor of cytokine, autophagy associated 1                                                    |
| 43819 | ENSG00000128841  | MYO1B     | 42660 | -0.1 | protein_coding     | 2       | 192109511 | myosin IB                                                                                         |
| 43828 | ENSG00000100209  | SMARCA1   | 42713 | -0.1 | protein_coding     | 6       | 4442878   | glucosylase-beta-glucosidase                                                                      |
| 43829 | ENSG00000103485  | QRRT      | 42719 | -0.1 | protein_coding     | 16      | 2971020   | quinolinate phosphoribosyltransferase                                                             |
| 43834 | ENSG00000196985  | WRSP      | 42829 | -0.1 | protein_coding     | 4       | 1873151   | Wolf-Hirschhorn syndrome candidate 4                                                              |
| 43842 | ENSG00000109977  | PUS1      | 42837 | -0.1 | protein_coding     | 12      | 1281937   | pseudouridine synthase-like 1                                                                     |
| 43852 | ENSG00000154860  | INTS1     | 42713 | -0.1 | protein_coding     | 7       | 1509913   | integrator complex subunit 1                                                                      |
| 43854 | ENSG00000175216  | CKAP5     | 42714 | -0.1 | protein_coding     | 11      | 4674598   | cytoskeletal associated protein 5                                                                 |
| 43855 | ENSG00000148840  | PP3C1     | 42715 | -0.1 | protein_coding     | 10      | 10396787  | peroxisome proliferator-activated receptor gamma, coactivator-related 1                           |
| 43864 | ENSG00000186891  | SMARCA1   | 42718 | -0.1 | protein_coding     | X       | 12664907  | SWI/SNF related, matrix associated, actin dependent regulator of chromatin, subfamily A, member 1 |
| 43872 | ENSG00000196991  | ZBT1      | 42743 | -0.1 | protein_coding     | 12      | 77415027  | ESF transcription factor 7                                                                        |
| 43876 | ENSG00000179429  | GENIN4    | 42752 | -0.1 | protein_coding     | 14      | 647854    | gem (nuclear organelle) associated protein 4                                                      |
| 43878 | ENSG00000190814  | CCHM1P1   | 42757 | -0.1 | protein_coding     | 16      | 20789527  | cystin B1 interacting protein, E3 ubiquitin protein ligase                                        |
| 43879 | ENSG00000155895  | KCTD16    | 42759 | -0.1 | protein_coding     | 19      | 3426686   | potassium channel tetramerization domain containing 15                                            |
| 43883 | ENSG00000106495  | PCSK1     | 42762 | -0.1 | protein_coding     | 19      | 10516701  | DNA fragmentation factor 4, alpha polypeptide                                                     |
| 43882 | ENSG00000157911  | PEX10     | 42775 | -0.1 | protein_coding     | 2       | 2336226   | peroxisomal biogenesis factor 10                                                                  |
| 43889 | ENSG00000130702  | LAMA5     | 42786 | -0.1 | protein_coding     | 20      | 80883011  | laminin, alpha 5                                                                                  |
| 43901 | ENSG00000178386  | TRAF2     | 42792 | -0.1 | protein_coding     | 14      | 14462924  | ligger transcription factor class A domain containing 5                                           |
| 43902 | ENSG00000186665  | TTC78F    | 42795 | -0.1 | protein_coding     | 17      | 65899717  | chromosome 17 open reading frame 58                                                               |
| 43903 | ENSG00000195217  | IGFBP2    | 42797 | -0.1 | protein_coding     | 17      | 4707474   | insulin-like growth factor 2 mRNA binding protein 1                                               |
| 43907 | ENSG00000131997  | TRAF3     | 42798 | -0.1 | protein_coding     | 12      | 7341281   | peroxisomal biogenesis factor 5                                                                   |
| 43916 | ENSG00000151718  | CLDN22    | 42822 | -0.1 | protein_coding     | 4       | 18402046  | WW and C2 domain containing 2                                                                     |
| 43917 | ENSG00000110841  | PPP1R1    | 42823 | -0.1 | protein_coding     | 12      | 2761634   | PTPRF interacting protein, binding protein 1 (lipin beta 1)                                       |
| 43918 | ENSG00000200520  | TNED1     | 42828 | -0.1 | antisense_intronic | 19      | 10643174  | transmembrane protein 26b                                                                         |
| 43923 | ENSG00000165271  | NOLA      | 42832 | -0.1 | protein_coding     | 9       | 33461398  | nuclear protein 6 (RNA associated)                                                                |
| 43925 | ENSG00000151748  | SV1       | 42834 | -0.1 | protein_coding     | 14      | 51098776  | salivador homolog 1 (Drosophila)                                                                  |
| 43926 | ENSG00000108927  | CHERP2    | 42835 | -0.1 | protein_coding     | 19      | 1662300   | calcium homeostasis endoplasmic reticulum protein 2                                               |
| 43929 | ENSG00000109245  | TAVO3     | 42838 | -0.1 | protein_coding     | 15      | 41848873  | TYRO3 protein tyrosine kinase                                                                     |
| 43930 | ENSG00000100722  | ZC3H4     | 42842 | -0.1 | protein_coding     | 14      | 8902925   | zinc finger CCH1-type containing 14                                                               |
| 43935 | ENSG00000101024  | ANKRD54   | 42845 | -0.1 | protein_coding     | 22      | 3822862   | actin repeat domain 54                                                                            |
| 43938 | ENSG00000184070  | HSPA4L    | 42847 | -0.1 | protein_coding     | 4       | 12870297  | heat shock 70kDa protein 4-like                                                                   |
| 43937 | ENSG00000195147  | DONSON    | 42848 | -0.1 | protein_coding     | 21      | 34951948  | downstream neighbor of SCN                                                                        |
| 43943 | ENSG00000        |           |       |      |                    |         |           |                                                                                                   |





|       |                 |          |       |       |                |    |           |           |                                                                                                     |
|-------|-----------------|----------|-------|-------|----------------|----|-----------|-----------|-----------------------------------------------------------------------------------------------------|
| 43918 | ENSG00000130147 | SHBP4    | 42825 | -0.11 | protein_coding | 2  | 23580017  | 23584438  | SH3-domain binding protein 4                                                                        |
| 43922 | ENSG0000014488  | PRKCC    | 42833 | -0.11 | protein_coding | 19 | 4882833   | 4883293   | protein phosphatase 5, catalytic subunit                                                            |
| 43927 | ENSG00000141998 | NTSCB    | 42836 | -0.11 | protein_coding | 17 | 39981335  | 39992523  | 5-nucleotidase, cytosolic IIB                                                                       |
| 43932 | ENSG00000188976 | NCCL     | 42842 | -0.11 | protein_coding | 1  | 878584    | 884669    | nucleolar complex associated 2 homolog (S. cerevisiae)                                              |
| 43933 | ENSG00000128791 | TRSG1    | 42844 | -0.11 | protein_coding | 18 | 8334765   | 8402418   | nucleolar complex associated 2 homolog (S. cerevisiae)                                              |
| 43946 | ENSG00000142973 | OTTRBP   | 42952 | -0.11 | protein_coding | 1  | 11293803  | 11309274  | twisted gastrulation BMP signaling modulator 1                                                      |
| 43954 | ENSG00000145554 | FLXNA1   | 42875 | -0.11 | protein_coding | 3  | 128707437 | 128756235 | plexin A1                                                                                           |
| 43960 | ENSG00000198950 | SCR8     | 42884 | -0.11 | protein_coding | 6  | 1448780   | 14489749  | scribble planar cell polarity protein                                                               |
| 43960 | ENSG00000198953 | RAT1     | 42887 | -0.11 | protein_coding | 17 | 1754787   | 1774787   | retroic acid inducible 1                                                                            |
| 43972 | ENSG00000149257 | SEPPIN1  | 42897 | -0.11 | protein_coding | 11 | 75273101  | 75283928  | serpin peptidase inhibitor, clade H (hepat shock protein 47), member 1 (collagen binding protein 1) |
| 43977 | ENSG00000187700 | MFSO3    | 42914 | -0.11 | protein_coding | 8  | 145734457 | 145736596 | major facilitator superfamily domain containing 3                                                   |
| 43978 | ENSG00000122883 | CHST3    | 42915 | -0.11 | protein_coding | 10 | 73724123  | 73732223  | carbohydrate (chondroitin 6) sulfotransferase 3                                                     |
| 43981 | ENSG00000128022 | CENPO    | 42919 | -0.11 | protein_coding | 2  | 25018005  | 25042425  | centromere protein D                                                                                |
| 43981 | ENSG00000105228 | USP18    | 42923 | -0.11 | protein_coding | X  | 47052089  | 47107727  | ubiquitin specific peptidase 11                                                                     |
| 44000 | ENSG00000184207 | PSG      | 42942 | -0.11 | protein_coding | 16 | 2281998   | 2284908   | phosphoglycolate phosphatase                                                                        |
| 44003 | ENSG00000141696 | LEPREL4  | 42945 | -0.11 | protein_coding | 17 | 3958199   | 3968889   | epsin-like 4                                                                                        |
| 44008 | ENSG00000100930 | POMT2    | 42964 | -0.11 | protein_coding | 14 | 7774299   | 7787227   | DAZ interacting zinc finger protein 1                                                               |
| 44012 | ENSG00000114019 | AMOTL2   | 42966 | -0.11 | protein_coding | 3  | 13407416  | 13409421  | protein-O-mannosyltransferase 2                                                                     |
| 44016 | ENSG00000139538 | KOIC1    | 42968 | -0.11 | protein_coding | 3  | 21527025  | 21576148  | argininome-like 2                                                                                   |
| 44018 | ENSG0000011428  | ANLN     | 42970 | -0.11 | protein_coding | 7  | 36428415  | 36454000  | potassium channel transcription domain containing 3                                                 |
| 44020 | ENSG00000187110 | GOLGA2   | 42973 | -0.11 | protein_coding | 9  | 13101808  | 13103874  | arilin, actin binding protein                                                                       |
| 44021 | ENSG00000110108 | CDC36    | 42976 | -0.11 | protein_coding | 11 | 10605644  | 10618554  | golgin A2                                                                                           |
| 44022 | ENSG00000106500 | AP3D1    | 42981 | -0.11 | protein_coding | 19 | 2100888   | 2144484   | collet-coil domain containing 86                                                                    |
| 44023 | ENSG00000125202 | FGD1     | 42983 | -0.11 | protein_coding | X  | 54417887  | 54522599  | adaptor-related protein complex 3, delta 1 subunit                                                  |
| 44027 | ENSG00000142695 | KLIC2    | 42989 | -0.11 | protein_coding | 11 | 69028765  | 69033531  | FYVE, RhoGEF and PH domain containing 1                                                             |
| 44036 | ENSG00000138645 | ANKRD52  | 43002 | -0.11 | protein_coding | 12 | 56631591  | 56652175  | ankyrin repeat domain 52                                                                            |
| 44039 | ENSG00000181441 | MARK1    | 43008 | -0.11 | protein_coding | 1  | 220701568 | 220837803 | MAMIP3/membrane affinity-regulating kinase 1                                                        |
| 44040 | ENSG00000170182 | FOSL1    | 43015 | -0.11 | protein_coding | 17 | 8002565   | 8003065   | fos-like growth factor receptor 3                                                                   |
| 44044 | ENSG00000171160 | MORF4    | 43025 | -0.11 | protein_coding | 10 | 99374310  | 99393344  | MORN repeat containing 4                                                                            |
| 44046 | ENSG00000130669 | PAKA     | 43034 | -0.11 | protein_coding | 19 | 39616410  | 39673456  | p21 protein and leucine-rich repeat protein 19                                                      |
| 44047 | ENSG00000100684 | FBI3B    | 43035 | -0.11 | protein_coding | 19 | 3003288   | 3003704   | F-box and leucine-rich repeat protein 19                                                            |
| 44051 | ENSG00000185049 | NELFA3   | 43043 | -0.11 | protein_coding | 4  | 198444    | 2043030   | negative elongation factor complex member A                                                         |
| 44053 | ENSG00000123094 | RASSF8   | 43044 | -0.11 | protein_coding | 12 | 2811962   | 28232625  | Ras association (RAGG/SAR-4) domain family (N-terminal) member B                                    |
| 44053 | ENSG00000105999 | FBXW7    | 43045 | -0.11 | protein_coding | 12 | 1763100   | 1763300   | protein tyrosine phosphatase-like (inhibitor of catalytic arginine), member A                       |
| 44058 | ENSG00000182768 | NGRN     | 43067 | -0.11 | protein_coding | 15 | 9080891   | 9081643   | neurin, neurite outgrowth associated 1                                                              |
| 44059 | ENSG00000184930 | FZD6     | 43068 | -0.11 | protein_coding | 8  | 104310661 | 104345094 | fz-like family receptor 6                                                                           |
| 44060 | ENSG00000186970 | DMRT1    | 43071 | -0.11 | protein_coding | 13 | 6363113   | 6363113   | chromosome 11 open reading frame 95                                                                 |
| 44068 | ENSG00000137710 | RDX      | 43088 | -0.11 | protein_coding | 11 | 110049505 | 110167447 | read1                                                                                               |
| 44067 | ENSG00000194700 | ZNF512B  | 43089 | -0.11 | protein_coding | 20 | 82589055  | 82680113  | zinc finger protein 512B                                                                            |
| 44072 | ENSG00000104546 | CYTH3    | 43100 | -0.11 | protein_coding | 11 | 1280128   | 1280328   | sequitin epoxidase                                                                                  |
| 44076 | ENSG00000100829 | CYTH3    | 43105 | -0.11 | protein_coding | 7  | 6201407   | 6312275   | cystathionase 3                                                                                     |
| 44077 | ENSG00000182307 | C8orf53  | 43107 | -0.11 | protein_coding | 8  | 14627764  | 14628116  | chromosome 8 open reading frame 53                                                                  |
| 44081 | ENSG00000186860 | APBB2    | 43109 | -0.11 | protein_coding | 4  | 4981204   | 4921673   | amyloid beta (A4) precursor protein-binding, family B, member 2                                     |
| 44083 | ENSG00000100974 | ELAC3    | 43113 | -0.11 | protein_coding | 7  | 1283218   | 1283218   | lysine-specific demethylase 2.2                                                                     |
| 44088 | ENSG00000100204 | MGAT     | 43124 | -0.11 | protein_coding | 22 | 4352182   | 4353040   | maternal CoA:ACP acyltransferase (mitochondrial)                                                    |
| 44088 | ENSG0000011756  | PKNO3    | 43151 | -0.11 | protein_coding | 17 | 39699932  | 39699945  | PKNO3 binding protein 10, 65 kDa                                                                    |
| 44098 | ENSG00000146441 | DOCK7    | 43157 | -0.11 | protein_coding | 17 | 6292099   | 6319397   | inhibitor of cytohesin 7                                                                            |
| 44100 | ENSG00000152556 | PKFM     | 43172 | -0.11 | protein_coding | 12 | 4848922   | 4849187   | phosphofruktokinase, muscle                                                                         |
| 44103 | ENSG00000198698 | CDH2     | 43176 | -0.11 | protein_coding | 8  | 14196799  | 142012115 | protein tyrosine kinase 2                                                                           |
| 44104 | ENSG00000143776 | CDC42BPA | 43177 | -0.11 | protein_coding | 8  | 22717746  | 22730817  | CDC42 binding protein kinase alpha (DMPK-like)                                                      |
| 44114 | ENSG00000157224 | CLDN12   | 43179 | -0.11 | protein_coding | 7  | 90013035  | 90014276  | claudin 12                                                                                          |
| 44115 | ENSG00000152684 | PELO     | 43187 | -0.11 | protein_coding | 5  | 52063774  | 52069880  | pelota homolog (Drosophila)                                                                         |
| 44117 | ENSG0000015757  | TMR6B1   | 43205 | -0.11 | protein_coding | 2  | 202462607 | 202505203 | transmembrane protein 237                                                                           |
| 44119 | ENSG00000177425 | PAWR     | 43205 | -0.11 | protein_coding | 12 | 79968759  | 80084877  | PRKCC, septosin, W1T1, regulator                                                                    |
| 44122 | ENSG00000170598 | CDH2     | 43206 | -0.11 | protein_coding | 18 | 2553939   | 2557470   | cadherin 2, type 1, N-cadherin (neuronal)                                                           |
| 44136 | ENSG00000102963 | GUCY1C   | 43211 | -0.11 | protein_coding | 15 | 4287181   | 4290384   | guanine nucleotide-binding protein gamma 1, 45kDa                                                   |
| 44128 | ENSG00000188885 | ROBO1    | 43235 | -0.11 | protein_coding | 3  | 7864839   | 7861895   | roundabout, axon guidance receptor, homolog 1 (Drosophila)                                          |
| 44135 | ENSG00000109897 | MSANTD3  | 43250 | -0.11 | protein_coding | 9  | 10318948  | 10321351  | MyoSAM-like DNA-binding domain containing 3                                                         |
| 44136 | ENSG00000101124 | SNR31B   | 43251 | -0.11 | protein_coding | 19 | 3863134   | 3863134   | snRNP-associated motif domain containing 46                                                         |
| 44140 | ENSG00000184402 | 8-Sep    | 43260 | -0.11 | protein_coding | 5  | 13208509  | 13214293  | septin 8                                                                                            |
| 44142 | ENSG00000185655 | ZNF503   | 43262 | -0.11 | protein_coding | 10 | 7715758   | 7716164   | zinc finger protein 503                                                                             |
| 44146 | ENSG00000188901 | TMR6B1   | 43263 | -0.11 | protein_coding | 10 | 944941    | 945048    | transmembrane protein 201                                                                           |
| 44163 | ENSG00000204531 | SMIT13   | 43315 | -0.11 | protein_coding | 6  | 1109426   | 1113864   | small integral membrane protein 13                                                                  |
| 44163 | ENSG00000100487 | KDM1A    | 43326 | -0.11 | protein_coding | 1  | 2345941   | 2347102   | lysine (K)-specific demethylase 1A                                                                  |
| 44172 | ENSG00000140474 | ALX4     | 43343 | -0.11 | protein_coding | 1  | 2344183   | 2345113   | alixan 4 LM protein                                                                                 |
| 44184 | ENSG00000110435 | PDHX     | 43380 | -0.11 | protein_coding | 11 | 34937376  | 35042138  | pyruvate dehydrogenase complex, component X                                                         |
| 44189 | ENSG00000188157 | AGRN     | 43391 | -0.11 | protein_coding | 1  | 95503     | 991496    | agrin                                                                                               |
| 44196 | ENSG00000127816 | SMARCA4  | 43414 | -0.11 | protein_coding | 19 | 11071596  | 11176071  | SWI/SNF related, matrix associated, actin dependent regulator of chromatin, subfamily a, member 4   |
| 44199 | ENSG00000123352 | SPAT2    | 43418 | -0.11 | protein_coding | 12 | 4970387   | 49921205  | spermatogenesis associated, serine-rich 2                                                           |
| 44223 | ENSG00000147681 | CYB5B    | 43433 | -0.11 | protein_coding | 12 | 4652312   | 4652312   | phospholipase C-3, zeta, regulatory subunit 3 (gamma)                                               |
| 44224 | ENSG00000134824 | FADS2    | 43541 | -0.11 | protein_coding | 11 | 6150452   | 6163426   | faty acid desaturase 2                                                                              |
| 44229 | ENSG00000185718 | MIR68B   | 43570 | -0.11 | protein_coding | 9  | 138907022 | 138918502 | family with sequence similarity 69, member B                                                        |
| 44238 | ENSG00000176883 | MIR68    | 43570 | -0.11 | protein_coding | 17 | 7861846   | 7861846   | novel avian microRNA/retrovirus/Banavirus oncogene homolog G                                        |
| 43919 | ENSG00000207349 |          | 41792 | -0.11 | protein_coding | 17 | 7861846   | 7861846   |                                                                                                     |
| 43981 | ENSG00000181328 | DUSP14   | 42810 | -0.11 | protein_coding | 17 | 3984937   | 39873803  | dual specificity phosphatase 14                                                                     |
| 43983 | ENSG00000198793 | PRKRI    | 42813 | -0.11 | protein_coding | 13 | 2288838   | 2290818   | cytoskeletal FAK1 interacting protein 1                                                             |
| 44050 | ENSG00000156661 | PCGF2    | 43041 | -0.11 | protein_coding | 17 | 39895150  | 39905070  | polycomb group ring finger 2                                                                        |
| 44177 | ENSG00000131142 | ACACA    | 43357 | -0.11 | protein_coding | 17 | 5541923   | 55786909  | acyl-CoA carboxylase alpha                                                                          |
| 44031 | ENSG0000014400  |          | 42548 | -0.11 | protein_coding | 5  | 1554812   | 1554812   | aldehyde dehydrogenase 7 family, member A1 (pseudogene 1)                                           |
| 44038 | ENSG00000149925 | ALDOA    | 39551 | -0.12 | protein_coding | 16 | 30064411  | 30091778  | aldolase A, fructose-bisphosphate                                                                   |
| 41347 | ENSG00000155876 | RRAAGA   | 39737 | -0.12 | protein_coding | 9  | 19049372  | 19051019  | Ras-related GTP binding A                                                                           |
| 41618 | ENSG00000178952 | MTOR     | 40621 | -0.12 | protein_coding | 18 | 28853732  | 28857729  | Ta1 transduction elongation factor, mitochondrial                                                   |
| 1723  | ENSG00000171763 | TYFC1    | 40705 | -0.12 | protein_coding | 16 | 36959174  | 36960474  | mitochondrial carrier 1                                                                             |
| 41852 | ENSG00000135824 | CCT7     | 40721 | -0.12 | protein_coding | 2  | 7340548   | 7340149   | chaperonin containing TCP1, subunit 7 (eta)                                                         |
| 42278 | ENSG00000130153 | EMC7     | 40786 | -0.12 | protein_coding | 15 | 3431616   | 3439418   | ER membrane protein complex subunit 7                                                               |
| 4270  | ENSG00000130236 | MMT      | 40788 | -0.12 | protein_coding | 16 | 86311056  | 86310563  | inner membrane protein, mitochondrial                                                               |
| 42760 | ENSG00000107060 | CCDC124  | 40772 | -0.12 | protein_coding | 19 | 18043825  | 18045600  | collet-coil domain containing 124                                                                   |
| 42345 | ENSG00000181605 | RPN2     | 40832 | -0.12 | protein_coding | 20 | 3569819   | 35697023  | ribophorin II                                                                                       |
| 42450 | ENSG00000186368 | YKT6     | 40836 | -0.12 | protein_coding | 6  | 442406697 | 442406697 | YKT6 v-SNARE homolog (S. cerevisiae)                                                                |
| 42527 | ENSG00000136930 | PSMB7    | 41034 | -0.12 | protein_coding | 9  | 127115745 | 127177223 | proteasome (prosome, macropain) subunit, beta type 7                                                |
| 42641 | ENSG00000194085 | PPP2CB   | 41162 | -0.12 | protein_coding | 8  | 30631973  | 30671830  | protein phosphatase 2, catalytic subunit, beta isoform                                              |
| 42811 | ENSG00000190910 | MIR68F1  | 41200 | -0.12 | protein_coding | 17 | 864118    | 864118    | Mer1 family leucine protein 1                                                                       |
| 42832 | ENSG00000108893 | MLF1     | 41383 | -0.12 | protein_coding | 12 | 6857170   | 6875641   | myeloid leukemia factor 2                                                                           |
| 42897 | ENSG00000199999 | KEAP1    | 41453 | -0.12 | protein_coding | 19 | 10596796  | 10614417  | kelch-like ECH-associated protein 1                                                                 |
| 42964 | ENSG00000196998 | CEP350   | 41512 | -0.12 | protein_coding | 8  | 12231386  | 12237045  | cytoplasmic dynein 1 (nonflag)                                                                      |
| 43019 | ENSG00000102119 | EMD      | 41585 | -0.12 | protein_coding | X  | 153607557 | 153609883 | emerin                                                                                              |
| 43026 | ENSG00000197858 |          |       |       |                |    |           |           |                                                                                                     |



|       |                  |          |         |       |                                   |    |           |           |                                                                                          |
|-------|------------------|----------|---------|-------|-----------------------------------|----|-----------|-----------|------------------------------------------------------------------------------------------|
| 43032 | ENSG00000143612  | CTHRA3   | 41601.9 | -0.14 | protein_coding                    | 1  | 154179182 | 154183104 | chromosome 1 open reading frame 43                                                       |
| 43231 | ENSG00000134590  | FAM127A  | 41336.8 | -0.14 | protein_coding                    | X  | 134186333 | 134187376 | family with sequence similarity 127, member A                                            |
| 43487 | ENSG00000105438  | KDELR1   | 42176.3 | -0.14 | protein_coding                    | 19 | 48685827  | 48694810  | KDEL (Lys-Asp-Glu-Leu) endoplasmic reticulum protein retention receptor 1                |
| 43566 | ENSG00000202390  | FAM127B  | 42301.7 | -0.14 | protein_coding                    | X  | 134184962 | 134186226 | family with sequence similarity 127, member B                                            |
| 43600 | ENSG00000117519  | CN3      | 42344.4 | -0.14 | protein_coding                    | 1  | 85042507  | 85042684  | calponin 3, acidic                                                                       |
| 43671 | ENSG00000123985  | CHPF     | 42342.2 | -0.14 | protein_coding                    | 2  | 220433669 | 220434509 | chondroitin polymerizing factor                                                          |
| 43721 | ENSG00000107404  | DVL1     | 42501.7 | -0.14 | protein_coding                    | 1  | 1270656   | 128470    | disevelled segment polarity protein 1                                                    |
| 43756 | ENSG00000189721  | GPS1     | 42553.6 | -0.14 | protein_coding                    | 17 | 80048587  | 80015346  | G protein pathway suppressor 1                                                           |
| 43764 | ENSG00000125901  | MPS9B    | 42573.8 | -0.14 | protein_coding                    | 20 | 3008991   | 3008990   | mitochondrial ribosomal protein S26                                                      |
| 43774 | ENSG00000089597  | GANAB    | 42582.9 | -0.14 | protein_coding                    | 11 | 62392298  | 62414194  | glucosylase, alpha, neutral AB                                                           |
| 43796 | ENSG00000131462  | TUBB1    | 42624.9 | -0.14 | protein_coding                    | 17 | 40741694  | 40787252  | tubulin gamma 1                                                                          |
| 43865 | ENSG00000186928  | PSD2     | 42702.3 | -0.14 | protein_coding                    | 7  | 44154266  | 44183867  | postsynaptic density protein 2, accessory subunit                                        |
| 43885 | ENSG00000111328  | CDK2AP1  | 42787.9 | -0.14 | protein_coding                    | 12 | 123745528 | 123756881 | cyclin-dependent kinase 2 associated protein                                             |
| 43903 | ENSG00000111807  | UBP5     | 42778.6 | -0.14 | protein_coding                    | 12 | 6981262   | 6975798   | ubiquitin specific peptidase 5 (acrosin) 1                                               |
| 43940 | ENSG00000175222  | MAGEB1   | 42822.3 | -0.14 | protein_coding                    | X  | 51648103  | 51648453  | melanoma antigen family D, 1                                                             |
| 43968 | ENSG00000130728  | TRIM28   | 42888   | -0.14 | protein_coding                    | 19 | 59054548  | 59062089  | triple motif containing 28                                                               |
| 44002 | ENSG00000073172  | FERMT2   | 42944   | -0.14 | protein_coding                    | 14 | 53323996  | 53419153  | feritin family member 2                                                                  |
| 44064 | ENSG00000132381  | GLIH     | 43003.4 | -0.14 | protein_coding                    | 17 | 2996980   | 29916907  | clustered mitochondria (GLICLI1) homolog                                                 |
| 44092 | ENSG00000202053  | HN1L     | 43143.7 | -0.14 | protein_coding                    | 16 | 1728257   | 1728281   | hematological and neurological expressed 1 like                                          |
| 44093 | ENSG00000164304  | ALDH7A1  | 43148.2 | -0.14 | protein_coding                    | 5  | 125871533 | 125831110 | aldehyde dehydrogenase 7 family, member A1                                               |
| 44106 | ENSG00000202020  | BCAT5    | 43184.8 | -0.14 | protein_coding                    | 16 | 75252528  | 75201861  | breast cancer and estrogen resistance 1                                                  |
| 44110 | ENSG00000176619  | LMNB2    | 43192   | -0.14 | protein_coding                    | 19 | 2427636   | 2456994   | lamin B2                                                                                 |
| 44111 | ENSG00000188706  | ZDHHC9   | 43193.3 | -0.14 | protein_coding                    | X  | 128931264 | 128917885 | zinc finger, DHHC-type containing 9                                                      |
| 44113 | ENSG00000101763  | TBL3     | 43195.6 | -0.14 | protein_coding                    | 16 | 2022018   | 2022934   | transducin beta-like 3                                                                   |
| 44120 | ENSG00000198880  | TUSC1    | 43206.5 | -0.14 | protein_coding                    | 9  | 2567836   | 25678856  | tumor suppressor candidate 1                                                             |
| 44125 | ENSG00000065150  | IFP3     | 43229.9 | -0.14 | protein_coding                    | 13 | 98626912  | 98676551  | importin 5                                                                               |
| 44130 | ENSG00000101460  | PSMT5    | 43239.6 | -0.14 | protein_coding                    | 15 | 23389220  | 23389754  | proteasome activator subunit 5                                                           |
| 44141 | ENSG00000202772  | TOMM34   | 43282   | -0.14 | protein_coding                    | 20 | 4357071   | 43588127  | translocase of outer mitochondrial membrane 34                                           |
| 44148 | ENSG00000181079  | TEAD1    | 43282.3 | -0.14 | protein_coding                    | 11 | 12695969  | 12696288  | TEA domain family member 1 (SV40 transcriptional enhancer factor)                        |
| 44151 | ENSG00000138655  | SRFBP1   | 43313.3 | -0.14 | protein_coding                    | 12 | 7931467   | 7931466   | steroid hormone receptor binding protein 1                                               |
| 44160 | ENSG00000198911  | SREBF2   | 43313.3 | -0.14 | protein_coding                    | 12 | 42228109  | 42230312  | sterol regulatory element binding transcription factor 2                                 |
| 44166 | ENSG00000181207  | RUVBL2   | 43329.3 | -0.14 | protein_coding                    | 19 | 49484705  | 49519252  | RuvB-like AAA ATPase 2                                                                   |
| 44168 | ENSG00000131422  | UBP2     | 43335.4 | -0.14 | protein_coding                    | 17 | 2995201   | 29914703  | ubiquitin specific peptidase 22                                                          |
| 44174 | ENSG00000100401  | RANGAP1  | 43354.5 | -0.14 | protein_coding                    | 22 | 41641615  | 41682255  | Ran GTPase activating protein 1                                                          |
| 44176 | ENSG00000168268  | NTSDC2   | 43357.5 | -0.14 | protein_coding                    | 3  | 52543386  | 52569070  | 5'-nucleotidase domain containing 2                                                      |
| 44178 | ENSG00000130363  | WRK5     | 43359.3 | -0.14 | protein_coding                    | 16 | 13702693  | 13702693  | WR repeat domain 5                                                                       |
| 44182 | ENSG000002024073 | AKT1S1   | 43374.1 | -0.14 | protein_coding                    | 19 | 50372295  | 50381716  | AKT1 substrate 1 (proline-rich)                                                          |
| 44196 | ENSG00000191480  | TM64A    | 43411.6 | -0.14 | protein_coding                    | 19 | 7991603   | 8000895   | translocase of inner mitochondrial membrane 44 homolog (yeast)                           |
| 44198 | ENSG00000102296  | GPR156   | 43426.3 | -0.14 | protein_coding                    | 4  | 23416984  | 23417177  | G protein-coupled receptor 125                                                           |
| 44208 | ENSG00000107338  | SHB      | 43439.1 | -0.14 | protein_coding                    | 9  | 37919131  | 38069210  | Src homology 2 domain containing adaptor protein B                                       |
| 44209 | ENSG00000104341  | LAPTMAB  | 43448.5 | -0.14 | protein_coding                    | 8  | 98787285  | 98885241  | lysosomal protein transmembrane 4 beta                                                   |
| 44233 | ENSG00000090971  | NAT4     | 43525.8 | -0.14 | protein_coding                    | 19 | 55998031  | 55998956  | N-acetyltransferase 14 (GCN5-related, putative)                                          |
| 44237 | ENSG00000105578  | TMPO2    | 43561   | -0.14 | protein_coding                    | 19 | 12810008  | 12814825  | transcriptin 2                                                                           |
| 44242 | ENSG00000103353  | UBFD1    | 43701.3 | -0.14 | protein_coding                    | 16 | 23568392  | 23585710  | ubiquitin family domain containing 1                                                     |
| 44243 | ENSG00000102670  | ZNF69    | 43723.9 | -0.14 | protein_coding                    | 18 | 30749778  | 30789653  | zinc finger protein 629                                                                  |
| 44246 | ENSG00000215511  | PPME1    | 43802.5 | -0.14 | protein_coding                    | 11 | 73865144  | 73867148  | protein phosphatase methylesterase 1                                                     |
| 44063 | ENSG00000197358  |          | 43082.6 | -0.14 | transcribed_processed_pseudo_gene | 14 | 28733596  | 28735180  | BCL2/adenovirus E1B 19kDa interacting protein 3 pseudogene 1                             |
| 43151 | ENSG00000134308  | YWHAQ    | 41734   | -0.15 | protein_coding                    | 2  | 9724101   | 9724143   | tyrosine 3-monooxygenase/tyrosinase 5-monooxygenase activation protein, theta            |
| 43371 | ENSG00000004142  | POLIP2   | 42032.2 | -0.15 | protein_coding                    | 17 | 26673659  | 26684545  | polymerase (DNA-directed), delta interacting protein 2                                   |
| 43412 | ENSG00000105589  | PPP2R7A  | 42054.9 | -0.15 | protein_coding                    | 19 | 50793262  | 50773087  | protein phosphatase 2, regulatory subunit A, alpha                                       |
| 43617 | ENSG00000006262  | SEC1A1   | 42366.4 | -0.15 | protein_coding                    | 3  | 127770484 | 127780526 | Sec1/1 alpha 1 subunit 5 (cysteine)                                                      |
| 43728 | ENSG00000176946  | THAP4    | 42513.6 | -0.15 | protein_coding                    | 2  | 24252350  | 242576884 | THAP domain containing 4                                                                 |
| 43840 | ENSG00000175166  | PSMD2    | 42694.6 | -0.15 | protein_coding                    | 3  | 184018497 | 184126842 | proteasome (prosome, macropain) 20S subunit, non-ATPase 2                                |
| 43870 | ENSG00000145447  | EG2      | 42748.7 | -0.15 | protein_coding                    | 11 | 12543912  | 12544476  | elastin related factor 2                                                                 |
| 43947 | ENSG00000188229  | TUBB4B   | 42884.5 | -0.15 | protein_coding                    | 9  | 140135665 | 140138159 | tubulin beta 4B class IVb                                                                |
| 43949 | ENSG00000101444  | AMCY     | 42873.1 | -0.15 | protein_coding                    | 20 | 32868074  | 32869408  | adenylhomocysteine                                                                       |
| 43985 | ENSG00000111978  | ATN1     | 42924.6 | -0.15 | protein_coding                    | 12 | 7033626   | 7051484   | atrophin 1                                                                               |
| 44042 | ENSG00000212747  | FAM127C  | 43017.8 | -0.15 | protein_coding                    | X  | 134154543 | 134156559 | family with sequence similarity 127, member C                                            |
| 44055 | ENSG00000114354  | TFE      | 43086.2 | -0.15 | protein_coding                    | 3  | 100428205 | 100467810 | TFII-E fused gene                                                                        |
| 44073 | ENSG00000194756  | CDC42BPB | 43096.4 | -0.15 | protein_coding                    | 14 | 103837818 | 103832789 | CDC42 binding protein kinase beta (DMPK-like)                                            |
| 44087 | ENSG00000108829  | LRRCS9   | 43122.7 | -0.15 | protein_coding                    | 17 | 48452420  | 48474814  | leucine rich repeat containing 59                                                        |
| 44124 | ENSG00000104907  | TJPI     | 43229.8 | -0.15 | protein_coding                    | 15 | 29991571  | 30261068  | tight junction protein 1                                                                 |
| 44165 | ENSG00000080733  | CTTN     | 43300.4 | -0.15 | protein_coding                    | 11 | 70244510  | 70202990  | catenin                                                                                  |
| 44170 | ENSG00000169957  | ZNF768   | 43335.9 | -0.15 | protein_coding                    | 16 | 30535325  | 30538142  | zinc finger protein 768                                                                  |
| 44173 | ENSG00000097507  | ABL1     | 43353.9 | -0.15 | protein_coding                    | 9  | 133589333 | 133763262 | c-abl oncogene 1, non-receptor tyrosine kinase                                           |
| 44188 | ENSG00000101723  | SPRY1    | 43383.1 | -0.15 | protein_coding                    | 9  | 91003334  | 91003409  | spredin 1                                                                                |
| 44191 | ENSG00000070087  | PN2      | 43387.7 | -0.15 | protein_coding                    | 3  | 149682691 | 149768575 | profilin 2                                                                               |
| 44201 | ENSG00000115677  | HDLBP    | 43416.5 | -0.15 | protein_coding                    | 2  | 242186679 | 242256476 | high density lipoprotein binding protein                                                 |
| 44207 | ENSG00000131402  | DAG1     | 43440.8 | -0.15 | protein_coding                    | 3  | 49505148  | 49573548  | diacylglycerol 1 (diacylglycerol-associated glycoprotein 1)                              |
| 44214 | ENSG00000157593  | SLC35B2  | 43473.4 | -0.15 | protein_coding                    | 6  | 44221833  | 44225291  | solute carrier family 35 (adenosine 3'-phospho 5'-phosphosulfate transporter), member B2 |
| 44232 | ENSG00000118200  | CAMSAP2  | 43594.6 | -0.15 | protein_coding                    | 1  | 200708686 | 200829632 | calmodulin regulated spectrin-associated protein family, member 2                        |
| 44235 | ENSG00000212128  | CORL     | 43631.4 | -0.15 | protein_coding                    | X  | 139673828 | 139726538 | oculocutaneous syndrome of Lowe                                                          |
| 44241 | ENSG00000114867  | EIF4C1   | 43693.9 | -0.15 | protein_coding                    | 3  | 184032283 | 184053146 | eukaryotic translation initiation factor 4 gamma, 1                                      |
| 43980 | ENSG00000173288  | TOMM20   | 42817.3 | -0.16 | protein_coding                    | 1  | 238272651 | 238282251 | translocase of outer mitochondrial membrane 20 homolog (yeast)                           |
| 44134 | ENSG00000036788  | NOXAP1   | 43345.3 | -0.16 | protein_coding                    | 1  | 183773843 | 183803586 | NOX-associated protein 1                                                                 |
| 44144 | ENSG00000117411  | BAGAL2   | 43283.8 | -0.16 | protein_coding                    | 1  | 44444615  | 44456840  | UDP-Gal beta(4)GalNAc beta 1,4-galactosyltransferase, polypeptide 2                      |
| 44146 | ENSG00000116237  | ICMT     | 43273   | -0.16 | protein_coding                    | 1  | 6281253   | 6296032   | isopentenylcysteine carboxyl methyltransferase                                           |
| 44171 | ENSG00000101020  | RBPX2    | 43339.3 | -0.16 | protein_coding                    | 22 | 38134783  | 38124473  | RNA binding protein, beta 1 homolog (C-isoform) 2                                        |
| 44210 | ENSG00000080707  | TRIP6    | 43451   | -0.16 | protein_coding                    | 7  | 100484760 | 100471076 | thyroid hormone receptor interactor 6                                                    |
| 44219 | ENSG00000104723  | TUSC2    | 43510   | -0.16 | protein_coding                    | 7  | 15274724  | 15824158  | tumor suppressor candidate 3                                                             |
| 44118 | ENSG00000004115  | CTNNA1   | 43205.3 | -0.17 | protein_coding                    | 5  | 137846558 | 138270723 | catenin (cadherin-associated protein), alpha 1, 102kDa                                   |
| 44131 | ENSG00000116957  | TNEM9    | 43243.7 | -0.17 | protein_coding                    | 1  | 201103900 | 201140702 | transmembrane protein 9                                                                  |
| 44213 | ENSG00000154390  | ENAH     | 43469.8 | -0.17 | protein_coding                    | 1  | 225674337 | 225840844 | enabled homolog (Drosophila)                                                             |
| 44227 | ENSG00000102225  | CKK1H    | 43562.6 | -0.17 | protein_coding                    | 25 | 47077259  | 47089398  | cyclin-dependent kinase 18                                                               |
| 44244 | ENSG00000213923  | CSNK1E   | 43759.3 | -0.18 | protein_coding                    | 7  | 96666929  | 96745527  | casein kinase 1, epsilon                                                                 |



| <b>Supplemental Table 16. FuncPred analysis of LINC01871 function</b> |                    |                 |                                                                      |           |
|-----------------------------------------------------------------------|--------------------|-----------------|----------------------------------------------------------------------|-----------|
| <b>count</b>                                                          | <b>keyword</b>     | <b>category</b> | <b>description</b>                                                   | <b>fd</b> |
| 1                                                                     | HAINGARE           | GSEA_H          | HALLMARK INTERFERON GAMMA RESPONSE                                   | 4.00E-07  |
| 2                                                                     | HAINALRE           | GSEA_H          | HALLMARK INTERFERON ALPHA RESPONSE                                   | 4.00E-07  |
| 3                                                                     | HALINFRES          | GSEA_H          | HALLMARK INFLAMMATORY RESPONSE                                       | 4.00E-07  |
| 4                                                                     | HIJSS              | GSEA_H          | HALLMARK IL6 JAK STAT3 SIGNALING                                     | 4.00E-07  |
| 5                                                                     | HALALLREJ          | GSEA_H          | HALLMARK ALLOGRAFT REJECTION                                         | 4.00E-07  |
| 6                                                                     | HALLMARKCOMPLEMENT | GSEA_H          | HALLMARK COMPLEMENT                                                  | 6.80E-07  |
| 7                                                                     | HTSVN              | GSEA_H          | HALLMARK TNFA SIGNALING VIA NFKB                                     | 6.80E-07  |
| 8                                                                     | GO:0042101         | GO_CC           | T cell receptor complex                                              | 1.40E-06  |
| 9                                                                     | GO:0044815         | GO_CC           | DNA packaging complex                                                | 1.40E-06  |
| 10                                                                    | GO:0045335         | GO_CC           | phagocytic vesicle                                                   | 1.40E-06  |
| 11                                                                    | RPSDN.UP           | GSEA_C6         | RPS14 DN.V1 UP                                                       | 3.10E-06  |
| 12                                                                    | GO:0003823         | GO_MF           | antigen binding                                                      | 6.50E-06  |
| 13                                                                    | GO:0004896         | GO_MF           | cytokine receptor activity                                           | 6.50E-06  |
| 14                                                                    | DOID:9744          | DO              | Diabetes Mellitus, Insulin-Dependent                                 | 1.30E-05  |
| 15                                                                    | DOID:627           | DO              | Severe Combined Immunodeficiency                                     | 1.30E-05  |
| 16                                                                    | DOID:628           | DO              | Combined immunity deficiency                                         | 1.30E-05  |
| 17                                                                    | GO:0098552         | GO_CC           | side of membrane                                                     | 1.60E-05  |
| 18                                                                    | HALLSTSI           | GSEA_H          | HALLMARK IL2 STAT5 SIGNALING                                         | 0.00033   |
| 19                                                                    | GO:0042287         | GO_MF           | MHC protein binding                                                  | 0.00051   |
| 20                                                                    | GO:0001772         | GO_CC           | immunological synapse                                                | 0.00071   |
| 21                                                                    | GO:0030670         | GO_CC           | phagocytic vesicle membrane                                          | 0.00089   |
| 22                                                                    | DOID:8778          | DO              | Regional enteritis of unspecified site                               | 0.0016    |
| 23                                                                    | DOID:612           | DO              | Immunologic Deficiency syndromes                                     | 0.0017    |
| 24                                                                    | GO:0009897         | GO_CC           | external side of plasma membrane                                     | 0.0018    |
| 25                                                                    | GO:1990104         | GO_CC           | DNA bending complex                                                  | 0.0019    |
| 26                                                                    | GO:0000786         | GO_CC           | nucleosome                                                           | 0.0019    |
| 27                                                                    | GO:0032393         | GO_MF           | MHC class I receptor activity                                        | 0.002     |
| 28                                                                    | GO:0030139         | GO_CC           | endocytic vesicle                                                    | 0.0021    |
| 29                                                                    | GO:0098553         | GO_CC           | luminal side of endoplasmic reticulum membrane                       | 0.0025    |
| 30                                                                    | GO:0071556         | GO_CC           | integral component of luminal side of endoplasmic reticulum membrane | 0.0025    |
| 31                                                                    | GO:0098576         | GO_CC           | luminal side of membrane                                             | 0.0025    |
| 32                                                                    | GO:0035591         | GO_MF           | signaling adaptor activity                                           | 0.0028    |
| 33                                                                    | GO:0030666         | GO_CC           | endocytic vesicle membrane                                           | 0.0031    |
| 34                                                                    | GO:0005766         | GO_CC           | primary lysosome                                                     | 0.0045    |
| 35                                                                    | GO:0042582         | GO_CC           | azurophil granule                                                    | 0.0045    |
| 36                                                                    | GO:0042605         | GO_MF           | peptide antigen binding                                              | 0.0048    |
| 37                                                                    | GO:0048020         | GO_MF           | CCR chemokine receptor binding                                       | 0.0052    |
| 38                                                                    | HOXDN.UP           | GSEA_C6         | HOXA9 DN.V1 UP                                                       | 0.0071    |
| 39                                                                    | HALLMARKAPOPTOSIS  | GSEA_H          | HALLMARK APOPTOSIS                                                   | 0.0076    |
| 40                                                                    | DOID:0060056       | DO              | NA                                                                   | 0.0096    |
| 41                                                                    | GO:0005125         | GO_MF           | cytokine activity                                                    | 0.011     |
| 42                                                                    | GO:0001637         | GO_MF           | G-protein coupled chemoattractant receptor activity                  | 0.013     |
| 43                                                                    | GO:0004950         | GO_MF           | chemokine receptor activity                                          | 0.013     |
| 44                                                                    | DOID:2914          | DO              | immune system disease                                                | 0.013     |
| 45                                                                    | GO:0042288         | GO_MF           | MHC class I protein binding                                          | 0.013     |
| 46                                                                    | GO:0015026         | GO_MF           | coreceptor activity                                                  | 0.015     |
| 47                                                                    | DOID:2583          | DO              | Hypogammaglobulinemia                                                | 0.015     |
| 48                                                                    | GO:0001891         | GO_CC           | phagocytic cup                                                       | 0.017     |
| 49                                                                    | GO:0043235         | GO_CC           | receptor complex                                                     | 0.017     |
| 50                                                                    | DOID:3265          | DO              | Granulomatous disease, chronic                                       | 0.019     |
| 51                                                                    | DOID:3262          | DO              | NA                                                                   | 0.019     |
| 52                                                                    | DOID:12177         | DO              | Common Variable Immunodeficiency                                     | 0.019     |
| 53                                                                    | GO:0043020         | GO_CC           | NADPH oxidase complex                                                | 0.02      |
| 54                                                                    | GO:0019956         | GO_MF           | chemokine binding                                                    | 0.02      |
| 55                                                                    | DOID:2115          | DO              | B-Cell Deficiency                                                    | 0.02      |
| 56                                                                    | DOID:417           | DO              | autoimmune disease                                                   | 0.02      |
| 57                                                                    | HALHEMMET          | GSEA_H          | HALLMARK HEME METABOLISM                                             | 0.021     |
| 58                                                                    | GO:0008009         | GO_MF           | chemokine activity                                                   | 0.025     |
| 59                                                                    | GO:0012507         | GO_CC           | ER to Golgi transport vesicle membrane                               | 0.027     |
| 60                                                                    | HAKRSIUP           | GSEA_H          | HALLMARK KRAS SIGNALING UP                                           | 0.027     |
| 61                                                                    | GO:0042581         | GO_CC           | specific granule                                                     | 0.028     |
| 62                                                                    | DOID:6688          | DO              | Autoimmune lymphoproliferative syndrome                              | 0.028     |

|     |             |         |                                                                                                                                                  |       |
|-----|-------------|---------|--------------------------------------------------------------------------------------------------------------------------------------------------|-------|
| 63  | GO:0097342  | GO_CC   | riposome                                                                                                                                         | 0.03  |
| 64  | GO:0031726  | GO_MF   | CCR1 chemokine receptor binding                                                                                                                  | 0.031 |
| 65  | GO:0005767  | GO_CC   | secondary lysosome                                                                                                                               | 0.032 |
| 66  | GNAPLASIG   | GSEA_C2 | GNATENKO PLATELET SIGNATURE                                                                                                                      | 0.033 |
| 67  | KTOMAF      | GSEA_C2 | KUMAR TARGETS OF MLL AF9 FUSION                                                                                                                  | 0.033 |
| 68  | PITCJNPA    | GSEA_C2 | PID TCR JNK PATHWAY                                                                                                                              | 0.034 |
| 69  | ZLDGD       | GSEA_C2 | ZHAN LATE DIFFERENTIATION GENES DN                                                                                                               | 0.034 |
| 70  | HINFIMIN    | GSEA_C6 | HINATA NFKB IMMU INF                                                                                                                             | 0.034 |
| 71  | NGASSD      | GSEA_C2 | NIELSEN GIST AND SYNOVIAL SARCOMA DN                                                                                                             | 0.034 |
| 72  | GO:0042379  | GO_MF   | chemokine receptor binding                                                                                                                       | 0.034 |
| 73  | WISTTAGR    | GSEA_C2 | WIERENGA STAT5A TARGETS GROUP2                                                                                                                   | 0.034 |
| 74  | GCLLU       | GSEA_C2 | GUTIERREZ CHRONIC LYMPHOCYTIC LEUKEMIA UP                                                                                                        | 0.035 |
| 75  | DOID:7997   | DO      | Thyrotoxicosis                                                                                                                                   | 0.035 |
| 76  | GO:0005126  | GO_MF   | cytokine receptor binding                                                                                                                        | 0.035 |
| 77  | WECVNU      | GSEA_C2 | WANG ESOPHAGUS CANCER VS NORMAL UP                                                                                                               | 0.035 |
| 78  | DLRLD       | GSEA_C2 | DIRMEIER LMP1 RESPONSE LATE DN                                                                                                                   | 0.036 |
| 79  | GO:0032649  | GO_BP   | regulation of interferon-gamma production                                                                                                        | 0.036 |
| 80  | GO:0032395  | GO_MF   | MHC class II receptor activity                                                                                                                   | 0.036 |
| 81  | GFTGP       | GSEA_C2 | GAVIN FOXP3 TARGETS CLUSTER P4                                                                                                                   | 0.036 |
| 82  | GO:0097028  | GO_BP   | dendritic cell differentiation                                                                                                                   | 0.036 |
| 83  | GO:0001773  | GO_BP   | myeloid dendritic cell activation                                                                                                                | 0.036 |
| 84  | GO:0080134  | GO_BP   | regulation of response to stress                                                                                                                 | 0.036 |
| 85  | RNATFRPBC8A | GSEA_C2 | REACTOME NFKB ACTIVATION THROUGH FADD RIP1 PATHWAY MEDIATED BY CASPASE 8 AND10                                                                   | 0.037 |
| 86  | GCDVNQD     | GSEA_C2 | GRAHAM CML DIVIDING VS NORMAL QUIESCENT DN                                                                                                       | 0.037 |
| 87  | GO:2000106  | GO_BP   | regulation of leukocyte apoptotic process                                                                                                        | 0.037 |
| 88  | GO:0098543  | GO_BP   | detection of other organism                                                                                                                      | 0.037 |
| 89  | GO:0002294  | GO_BP   | CD4-positive, alpha-beta T cell differentiation involved in immune response                                                                      | 0.037 |
| 90  | GO:0042093  | GO_BP   | T-helper cell differentiation                                                                                                                    | 0.037 |
| 91  | GO:0050855  | GO_BP   | regulation of B cell receptor signaling pathway                                                                                                  | 0.037 |
| 92  | GO:0035872  | GO_BP   | nucleotide-binding domain, leucine rich repeat containing receptor signaling pathway                                                             | 0.037 |
| 93  | ONFOTAUP    | GSEA_C2 | ONO FOXP3 TARGETS UP                                                                                                                             | 0.038 |
| 94  | GO:0045414  | GO_BP   | regulation of interleukin-8 biosynthetic process                                                                                                 | 0.038 |
| 95  | KFERSP      | GSEA_C2 | KEGG FC EPSILON RI SIGNALING PATHWAY                                                                                                             | 0.038 |
| 96  | GO:0034728  | GO_BP   | nucleosome organization                                                                                                                          | 0.038 |
| 97  | RHUAD       | GSEA_C2 | REACTOME HYALURONAN UPTAKE AND DEGRADATION                                                                                                       | 0.038 |
| 98  | BIOCASPAT   | GSEA_C2 | BIOCARTA CASPASE PATHWAY                                                                                                                         | 0.038 |
| 99  | GO:0002823  | GO_BP   | negative regulation of adaptive immune response based on somatic recombination of immune receptors built from immunoglobulin superfamily domains | 0.038 |
| 100 | GO:0001916  | GO_BP   | positive regulation of T cell mediated cytotoxicity                                                                                              | 0.038 |
| 101 | GO:0010008  | GO_CC   | endosome membrane                                                                                                                                | 0.039 |
| 102 | FBCSS       | GSEA_C2 | FINAK BREAST CANCER SDPP SIGNATURE                                                                                                               | 0.039 |
| 103 | GO:1900101  | GO_BP   | regulation of endoplasmic reticulum unfolded protein response                                                                                    | 0.039 |
| 104 | RAOIMBTIE   | GSEA_C2 | REACTOME ACTIVATION OF IRF3 IRF7 MEDIATED BY TBK1 IKK EPSILON                                                                                    | 0.039 |
| 105 | GO:0002230  | GO_BP   | positive regulation of defense response to virus by host                                                                                         | 0.039 |
| 106 | DOID:620    | DO      | Blood Protein disorders                                                                                                                          | 0.039 |
| 107 | TTORRFGD    | GSEA_C2 | TONKS TARGETS OF RUNX1 RUNX1T1 FUSION GRANULOCYTE DN                                                                                             | 0.039 |
| 108 | GO:0038093  | GO_BP   | Fc receptor signaling pathway                                                                                                                    | 0.04  |
| 109 | GO:0048520  | GO_BP   | positive regulation of behavior                                                                                                                  | 0.04  |
| 110 | GO:0016045  | GO_BP   | detection of bacterium                                                                                                                           | 0.04  |
| 111 | GO:0000323  | GO_CC   | lytic vacuole                                                                                                                                    | 0.04  |
| 112 | GO:0005764  | GO_CC   | lysosome                                                                                                                                         | 0.04  |
| 113 | XRTTANU     | GSEA_C2 | XU RESPONSE TO TRETINOIN AND NSC682994 UP                                                                                                        | 0.04  |
| 114 | GO:0060334  | GO_BP   | regulation of interferon-gamma-mediated signaling pathway                                                                                        | 0.04  |
| 115 | RASNFKTAR   | GSEA_C2 | RASHI NFKB1 TARGETS                                                                                                                              | 0.04  |
| 116 | GO:0050700  | GO_MF   | CARD domain binding                                                                                                                              | 0.04  |
| 117 | APPIMARES   | GSEA_C2 | APPEL IMATINIB RESPONSE                                                                                                                          | 0.041 |
| 118 | GO:0002691  | GO_BP   | regulation of cellular extravasation                                                                                                             | 0.042 |
| 119 | GO:0042228  | GO_BP   | interleukin-8 biosynthetic process                                                                                                               | 0.042 |
| 120 | CRTMD       | GSEA_C2 | CHAUHAN RESPONSE TO METHOXYESTRADIOL DN                                                                                                          | 0.042 |
| 121 | GO:0045576  | GO_BP   | mast cell activation                                                                                                                             | 0.042 |

|     |                  |         |                                                                                  |       |
|-----|------------------|---------|----------------------------------------------------------------------------------|-------|
| 122 | TTONHF1U         | GSEA_C2 | TAKEDA TARGETS OF NUP98 HOXA9 FUSION 16D UP                                      | 0.042 |
| 123 | GO:0007259       | GO_BP   | JAK-STAT cascade                                                                 | 0.042 |
| 124 | GO:0071723       | GO_MF   | lipopeptide binding                                                              | 0.042 |
| 125 | REACTOMEAMYLOIDS | GSEA_C2 | REACTOME AMYLOIDS                                                                | 0.042 |
| 126 | GO:0002755       | GO_BP   | MyD88-dependent toll-like receptor signaling pathway                             | 0.042 |
| 127 | GO:0032481       | GO_BP   | positive regulation of type I interferon production                              | 0.043 |
| 128 | RI35AGCS         | GSEA_C2 | REACTOME IL 3 5 AND GM CSF SIGNALING                                             | 0.043 |
| 129 | LVPUCU           | GSEA_C2 | LIU VAV3 PROSTATE CARCINOGENESIS UP                                              | 0.043 |
| 130 | KADCCD           | GSEA_C2 | KIM ALL DISORDERS CALB1 CORR DN                                                  | 0.043 |
| 131 | GO:0030890       | GO_BP   | positive regulation of B cell proliferation                                      | 0.044 |
| 132 | SBCLC8           | GSEA_C2 | SHIN B CELL LYMPHOMA CLUSTER 8                                                   | 0.044 |
| 133 | LSBM2            | GSEA_C2 | LIANG SILENCED BY METHYLATION 2                                                  | 0.044 |
| 134 | GO:0032740       | GO_BP   | positive regulation of interleukin-17 production                                 | 0.044 |
| 135 | DOID:3211        | DO      | Lysosomal Storage diseases                                                       | 0.044 |
| 136 | WOCLU            | GSEA_C2 | WAMUNYOKOLI OVARIAN CANCER LMP UP                                                | 0.044 |
| 137 | GO:0005070       | GO_MF   | SH3/SH2 adaptor activity                                                         | 0.044 |
| 138 | GO:0032635       | GO_BP   | interleukin-6 production                                                         | 0.044 |
| 139 | BIOD4PAT         | GSEA_C2 | BIOCARTA CD40 PATHWAY                                                            | 0.044 |
| 140 | BATFTAUP         | GSEA_C2 | BAUS TFF2 TARGETS UP                                                             | 0.044 |
| 141 | DOID:2916        | DO      | NA                                                                               | 0.045 |
| 142 | DOID:9074        | DO      | Systemic lupus erythematosus                                                     | 0.045 |
| 143 | WABAESUP         | GSEA_C2 | WANG BARRETTES ESOPHAGUS UP                                                      | 0.045 |
| 144 | WISTAUP          | GSEA_C2 | WIERENGA STAT5A TARGETS UP                                                       | 0.045 |
| 145 | BIOSTAPAT        | GSEA_C2 | BIOCARTA STATHMIN PATHWAY                                                        | 0.045 |
| 146 | GO:0032495       | GO_BP   | response to muramyl dipeptide                                                    | 0.045 |
| 147 | TACETAUP         | GSEA_C2 | TAVOR CEBPA TARGETS UP                                                           | 0.045 |
| 148 | GO:0046477       | GO_BP   | glycosylceramide catabolic process                                               | 0.045 |
| 149 | GO:0042590       | GO_BP   | antigen processing and presentation of exogenous peptide antigen via MHC class I | 0.045 |
| 150 | SAFASSIG         | GSEA_C2 | SA FAS SIGNALING                                                                 | 0.045 |
| 151 | KIGLTADN         | GSEA_C2 | KIM GLIS2 TARGETS DN                                                             | 0.045 |
| 152 | GO:2001056       | GO_BP   | positive regulation of cysteine-type endopeptidase activity                      | 0.046 |
| 153 | GO:0042554       | GO_BP   | superoxide anion generation                                                      | 0.046 |
| 154 | GO:0070229       | GO_BP   | negative regulation of lymphocyte apoptotic process                              | 0.046 |
| 155 | GO:0001909       | GO_BP   | leukocyte mediated cytotoxicity                                                  | 0.046 |
| 156 | GO:0032633       | GO_BP   | interleukin-4 production                                                         | 0.046 |
| 157 | GO:0032673       | GO_BP   | regulation of interleukin-4 production                                           | 0.046 |
| 158 | GO:0048007       | GO_BP   | antigen processing and presentation, exogenous lipid antigen via MHC class Ib    | 0.046 |
| 159 | GO:0048003       | GO_BP   | antigen processing and presentation of lipid antigen via MHC class Ib            | 0.046 |
| 160 | ALS1U            | GSEA_C2 | ABBUD LIF SIGNALING 1 UP                                                         | 0.046 |
| 161 | GO:0043029       | GO_BP   | T cell homeostasis                                                               | 0.046 |
| 162 | GO:0044440       | GO_CC   | endosomal part                                                                   | 0.046 |
| 163 | GO:0048872       | GO_BP   | homeostasis of number of cells                                                   | 0.046 |
| 164 | NRTDID           | GSEA_C2 | NUNODA RESPONSE TO DASATINIB IMATINIB DN                                         | 0.047 |
| 165 | GO:0042269       | GO_BP   | regulation of natural killer cell mediated cytotoxicity                          | 0.047 |
| 166 | DOID:8857        | DO      | Lupus erythematosus                                                              | 0.047 |
| 167 | BMMDD            | GSEA_C2 | BOYLAN MULTIPLE MYELOMA D DN                                                     | 0.047 |
| 168 | GO:0019882       | GO_BP   | antigen processing and presentation                                              | 0.048 |
| 169 | HEHDTADN         | GSEA_C2 | HELLER HDAC TARGETS DN                                                           | 0.048 |
| 170 | MVIRU            | GSEA_C2 | MARSHALL VIRAL INFECTION RESPONSE UP                                             | 0.048 |
| 171 | WRTGISU          | GSEA_C2 | WANG RESPONSE TO GSK3 INHIBITOR SB216763 UP                                      | 0.048 |
| 172 | RGMAC            | GSEA_C2 | REACTOME GPVI MEDIATED ACTIVATION CASCADE                                        | 0.048 |
| 173 | GO:2000108       | GO_BP   | positive regulation of leukocyte apoptotic process                               | 0.048 |
| 174 | GO:0032703       | GO_BP   | negative regulation of interleukin-2 production                                  | 0.049 |
| 175 | GO:0032675       | GO_BP   | regulation of interleukin-6 production                                           | 0.049 |
| 176 | PIHINEPA         | GSEA_C2 | PID HIV NEF PATHWAY                                                              | 0.049 |
| 177 | REIL2SI          | GSEA_C2 | REACTOME IL 2 SIGNALING                                                          | 0.049 |
| 178 | GO:0050777       | GO_BP   | negative regulation of immune response                                           | 0.049 |
| 179 | PRSOTAUP         | GSEA_C2 | PRAMOONJAGO SOX4 TARGETS UP                                                      | 0.049 |
| 180 | LENATLY          | GSEA_C2 | LEE NAIVE T LYMPHOCYTE                                                           | 0.05  |
| 181 | GO:0038123       | GO_BP   | toll-like receptor TLR1:TLR2 signaling pathway                                   | 0.05  |
| 182 | GO:0038124       | GO_BP   | toll-like receptor TLR6:TLR2 signaling pathway                                   | 0.05  |

**Supplemental Table 17. lncRNA2function analysis of LINC01871 function**

| Count | lncRNA Id       | lncRNA name | GO term Id | GO term name                                                                                                                            | Background frequency | Sample frequency | P-value  | Corrected P-value |
|-------|-----------------|-------------|------------|-----------------------------------------------------------------------------------------------------------------------------------------|----------------------|------------------|----------|-------------------|
| 1     | ENSG00000235576 | AC092580.4  | GO:0002376 | immune system process                                                                                                                   | 151/20447            | 93/232           | 3.40E-43 | 7.71E-39          |
| 2     | ENSG00000235576 | AC092580.4  | GO:0002852 | regulation of immune system process                                                                                                     | 879/20447            | 67/232           | 6.39E-37 | 7.22E-33          |
| 3     | ENSG00000235576 | AC092580.4  | GO:0006955 | immune response                                                                                                                         | 867/20447            | 64/232           | 2.39E-34 | 1.80E-30          |
| 4     | ENSG00000235576 | AC092580.4  | GO:0046649 | lymphocyte activation                                                                                                                   | 276/20447            | 40/232           | 1.39E-32 | 7.90E-29          |
| 5     | ENSG00000235576 | AC092580.4  | GO:0045321 | leukocyte activation                                                                                                                    | 344/20447            | 42/232           | 4.50E-31 | 2.04E-27          |
| 6     | ENSG00000235576 | AC092580.4  | GO:0002684 | positive regulation of immune system process                                                                                            | 522/20447            | 49/232           | 7.55E-31 | 2.85E-27          |
| 7     | ENSG00000235576 | AC092580.4  | GO:0050776 | regulation of immune response                                                                                                           | 527/20447            | 48/232           | 1.30E-29 | 4.20E-26          |
| 8     | ENSG00000235576 | AC092580.4  | GO:0001775 | cell activation                                                                                                                         | 557/20447            | 48/232           | 1.59E-28 | 4.51E-25          |
| 9     | ENSG00000235576 | AC092580.4  | GO:0048583 | regulation of response to stimulus                                                                                                      | 2379/20447           | 92/232           | 3.80E-28 | 9.56E-25          |
| 10    | ENSG00000235576 | AC092580.4  | GO:0051249 | regulation of lymphocyte activation                                                                                                     | 296/20447            | 37/232           | 8.88E-28 | 2.01E-24          |
| 11    | ENSG00000235576 | AC092580.4  | GO:0002694 | regulation of leukocyte activation                                                                                                      | 337/20447            | 38/232           | 7.59E-27 | 1.56E-23          |
| 12    | ENSG00000235576 | AC092580.4  | GO:0042110 | T cell activation                                                                                                                       | 176/20447            | 30/232           | 9.88E-27 | 1.87E-23          |
| 13    | ENSG00000235576 | AC092580.4  | GO:0050865 | regulation of cell activation                                                                                                           | 362/20447            | 38/232           | 1.06E-25 | 1.85E-22          |
| 14    | ENSG00000235576 | AC092580.4  | GO:0002768 | immune response-regulating cell surface receptor signaling pathway                                                                      | 127/20447            | 26/232           | 1.87E-25 | 1.02E-22          |
| 15    | ENSG00000235576 | AC092580.4  | GO:0050778 | positive regulation of immune response                                                                                                  | 331/20447            | 39/232           | 6.60E-25 | 9.96E-22          |
| 16    | ENSG00000235576 | AC092580.4  | GO:0050896 | response to stimulus                                                                                                                    | 6195/20447           | 145/232          | 2.53E-24 | 3.58E-21          |
| 17    | ENSG00000235576 | AC092580.4  | GO:0007165 | signal transduction                                                                                                                     | 3612/20447           | 107/232          | 8.86E-24 | 1.18E-20          |
| 18    | ENSG00000235576 | AC092580.4  | GO:0002429 | immune response-activating cell surface receptor signaling pathway                                                                      | 117/20447            | 24/232           | 1.36E-23 | 1.71E-20          |
| 19    | ENSG00000235576 | AC092580.4  | GO:0050863 | regulation of T cell activation                                                                                                         | 224/20447            | 30/232           | 1.55E-23 | 1.85E-20          |
| 20    | ENSG00000235576 | AC092580.4  | GO:0002696 | positive regulation of leukocyte activation                                                                                             | 230/20447            | 30/232           | 3.42E-23 | 3.88E-20          |
| 21    | ENSG00000235576 | AC092580.4  | GO:0051251 | positive regulation of lymphocyte activation                                                                                            | 212/20447            | 29/232           | 4.81E-23 | 5.18E-20          |
| 22    | ENSG00000235576 | AC092580.4  | GO:0006952 | defense response                                                                                                                        | 968/20447            | 54/232           | 6.48E-23 | 6.67E-20          |
| 23    | ENSG00000235576 | AC092580.4  | GO:0050867 | positive regulation of cell activation                                                                                                  | 240/20447            | 30/232           | 1.21E-22 | 1.20E-19          |
| 24    | ENSG00000235576 | AC092580.4  | GO:0050851 | antigen receptor-mediated signaling pathway                                                                                             | 110/20447            | 22/232           | 1.86E-21 | 1.75E-18          |
| 25    | ENSG00000235576 | AC092580.4  | GO:0050870 | positive regulation of T cell activation                                                                                                | 166/20447            | 25/232           | 4.78E-21 | 4.33E-18          |
| 26    | ENSG00000235576 | AC092580.4  | GO:0007154 | cell communication                                                                                                                      | 4202/20447           | 111/232          | 9.49E-21 | 7.96E-18          |
| 27    | ENSG00000235576 | AC092580.4  | GO:0002352 | signaling                                                                                                                               | 4081/20447           | 109/232          | 1.19E-20 | 9.28E-18          |
| 28    | ENSG00000235576 | AC092580.4  | GO:0044700 | single organism signaling                                                                                                               | 4081/20447           | 109/232          | 1.19E-20 | 9.28E-18          |
| 29    | ENSG00000235576 | AC092580.4  | GO:0002764 | immune response-regulating signaling pathway                                                                                            | 218/20447            | 27/232           | 2.33E-20 | 1.70E-17          |
| 30    | ENSG00000235576 | AC092580.4  | GO:0048584 | positive regulation of response to stimulus                                                                                             | 1154/20447           | 54/232           | 2.05E-19 | 1.45E-16          |
| 31    | ENSG00000235576 | AC092580.4  | GO:0050789 | regulation of biological process                                                                                                        | 8230/20447           | 160/232          | 5.94E-19 | 4.08E-16          |
| 32    | ENSG00000235576 | AC092580.4  | GO:0002757 | immune response-activating signal transduction                                                                                          | 206/20447            | 25/232           | 1.05E-18 | 6.98E-16          |
| 33    | ENSG00000235576 | AC092580.4  | GO:0051716 | cellular response to stimulus                                                                                                           | 4596/20447           | 113/232          | 1.10E-18 | 7.12E-16          |
| 34    | ENSG00000235576 | AC092580.4  | GO:0002253 | activation of immune response                                                                                                           | 257/20447            | 27/232           | 1.76E-18 | 1.11E-15          |
| 35    | ENSG00000235576 | AC092580.4  | GO:0030098 | lymphocyte differentiation                                                                                                              | 159/20447            | 22/232           | 7.85E-18 | 4.80E-15          |
| 36    | ENSG00000235576 | AC092580.4  | GO:0065007 | biological regulation                                                                                                                   | 8721/20447           | 163/232          | 1.21E-17 | 7.21E-15          |
| 37    | ENSG00000235576 | AC092580.4  | GO:0050794 | regulation of cellular process                                                                                                          | 7813/20447           | 152/232          | 2.50E-17 | 1.45E-14          |
| 38    | ENSG00000235576 | AC092580.4  | GO:0002521 | leukocyte differentiation                                                                                                               | 226/20447            | 24/232           | 1.20E-16 | 6.79E-14          |
| 39    | ENSG00000235576 | AC092580.4  | GO:0030217 | T cell differentiation                                                                                                                  | 105/20447            | 18/232           | 1.67E-16 | 9.24E-14          |
| 40    | ENSG00000235576 | AC092580.4  | GO:0007166 | cell surface receptor signaling pathway                                                                                                 | 2050/20447           | 67/232           | 5.45E-16 | 2.94E-13          |
| 41    | ENSG00000235576 | AC092580.4  | GO:0048534 | hematopoietic or lymphoid organ development                                                                                             | 423/20447            | 30/232           | 1.07E-15 | 5.86E-13          |
| 42    | ENSG00000235576 | AC092580.4  | GO:0002520 | immune system development                                                                                                               | 448/20447            | 30/232           | 4.74E-15 | 2.38E-12          |
| 43    | ENSG00000235576 | AC092580.4  | GO:0030097 | hemopoiesis                                                                                                                             | 383/20447            | 28/232           | 5.12E-15 | 2.52E-12          |
| 44    | ENSG00000235576 | AC092580.4  | GO:0031295 | T cell costimulation                                                                                                                    | 66/20447             | 14/232           | 1.82E-14 | 8.75E-12          |
| 45    | ENSG00000235576 | AC092580.4  | GO:0048518 | positive regulation of biological process                                                                                               | 3547/20447           | 89/232           | 1.87E-14 | 8.82E-12          |
| 46    | ENSG00000235576 | AC092580.4  | GO:0031294 | lymphocyte costimulation                                                                                                                | 67/20447             | 14/232           | 2.27E-14 | 1.05E-11          |
| 47    | ENSG00000235576 | AC092580.4  | GO:0050852 | T cell receptor signaling pathway                                                                                                       | 83/20447             | 15/232           | 2.59E-14 | 1.18E-11          |
| 48    | ENSG00000235576 | AC092580.4  | GO:0002697 | regulation of immune effector process                                                                                                   | 222/20447            | 21/232           | 1.06E-13 | 4.53E-11          |
| 49    | ENSG00000235576 | AC092580.4  | GO:0044763 | single-organism cellular process                                                                                                        | 9251/20447           | 160/232          | 1.91E-13 | 8.02E-11          |
| 50    | ENSG00000235576 | AC092580.4  | GO:0002706 | regulation of lymphocyte mediated immunity                                                                                              | 78/20447             | 14/232           | 2.13E-13 | 8.77E-11          |
| 51    | ENSG00000235576 | AC092580.4  | GO:0001817 | regulation of cytokine production                                                                                                       | 380/20447            | 26/232           | 2.40E-13 | 9.72E-11          |
| 52    | ENSG00000235576 | AC092580.4  | GO:0032649 | regulation of interferon-gamma production                                                                                               | 167/20447            | 13/232           | 5.44E-13 | 2.16E-10          |
| 53    | ENSG00000235576 | AC092580.4  | GO:0009868 | regulation of signal transduction                                                                                                       | 1842/20447           | 57/232           | 1.53E-12 | 5.86E-10          |
| 54    | ENSG00000235576 | AC092580.4  | GO:0006954 | response to stress                                                                                                                      | 2747/20447           | 72/232           | 2.46E-12 | 9.29E-10          |
| 55    | ENSG00000235576 | AC092580.4  | GO:0044699 | single-organism process                                                                                                                 | 10343/20447          | 169/232          | 2.97E-12 | 1.10E-09          |
| 56    | ENSG00000235576 | AC092580.4  | GO:0002703 | regulation of leukocyte mediated immunity                                                                                               | 97/20447             | 14/232           | 4.81E-12 | 1.76E-09          |
| 57    | ENSG00000235576 | AC092580.4  | GO:0002252 | immune effector process                                                                                                                 | 312/20447            | 22/232           | 1.02E-11 | 3.66E-09          |
| 58    | ENSG00000235576 | AC092580.4  | GO:0050864 | regulation of B cell activation                                                                                                         | 85/20447             | 13/232           | 1.32E-11 | 4.62E-09          |
| 59    | ENSG00000235576 | AC092580.4  | GO:0050670 | regulation of lymphocyte proliferation                                                                                                  | 148/20447            | 16/232           | 1.30E-11 | 4.62E-09          |
| 60    | ENSG00000235576 | AC092580.4  | GO:0032944 | regulation of mononuclear cell proliferation                                                                                            | 149/20447            | 16/232           | 1.45E-11 | 4.96E-09          |
| 61    | ENSG00000235576 | AC092580.4  | GO:0070663 | regulation of leukocyte proliferation                                                                                                   | 154/20447            | 16/232           | 2.40E-11 | 8.11E-09          |
| 62    | ENSG00000235576 | AC092580.4  | GO:0032729 | positive regulation of interferon-gamma production                                                                                      | 31/20447             | 9/232            | 4.33E-11 | 1.44E-08          |
| 63    | ENSG00000235576 | AC092580.4  | GO:0023051 | regulation of signaling                                                                                                                 | 2089/20447           | 58/232           | 7.49E-11 | 2.46E-08          |
| 64    | ENSG00000235576 | AC092580.4  | GO:0010646 | regulation of cell communication                                                                                                        | 2096/20447           | 58/232           | 8.54E-11 | 2.76E-08          |
| 65    | ENSG00000235576 | AC092580.4  | GO:0035556 | intracellular signal transduction                                                                                                       | 1341/20447           | 44/232           | 1.48E-10 | 4.72E-08          |
| 66    | ENSG00000235576 | AC092580.4  | GO:0045987 | innate immune response                                                                                                                  | 474/20447            | 25/232           | 1.98E-10 | 6.14E-08          |
| 67    | ENSG00000235576 | AC092580.4  | GO:0042129 | regulation of T cell proliferation                                                                                                      | 105/20447            | 13/232           | 2.05E-10 | 6.27E-08          |
| 68    | ENSG00000235576 | AC092580.4  | GO:0002366 | leukocyte activation involved in immune response                                                                                        | 87/20447             | 12/232           | 2.87E-10 | 8.44E-08          |
| 69    | ENSG00000235576 | AC092580.4  | GO:0002263 | cell activation involved in immune response                                                                                             | 87/20447             | 12/232           | 2.87E-10 | 8.44E-08          |
| 70    | ENSG00000235576 | AC092580.4  | GO:0042269 | regulation of natural killer cell mediated cytotoxicity                                                                                 | 19/20447             | 7/232            | 9.92E-10 | 2.88E-07          |
| 71    | ENSG00000235576 | AC092580.4  | GO:0001819 | positive regulation of cytokine production                                                                                              | 199/20447            | 16/232           | 1.11E-09 | 3.16E-07          |
| 72    | ENSG00000235576 | AC092580.4  | GO:0050671 | positive regulation of lymphocyte proliferation                                                                                         | 99/20447             | 12/232           | 1.33E-09 | 3.71E-07          |
| 73    | ENSG00000235576 | AC092580.4  | GO:0032946 | positive regulation of mononuclear cell proliferation                                                                                   | 100/20447            | 12/232           | 1.49E-09 | 4.12E-07          |
| 74    | ENSG00000235576 | AC092580.4  | GO:0002715 | regulation of natural killer cell mediated immunity                                                                                     | 20/20447             | 7/232            | 1.51E-09 | 4.13E-07          |
| 75    | ENSG00000235576 | AC092580.4  | GO:0070665 | positive regulation of leukocyte proliferation                                                                                          | 103/20447            | 12/232           | 2.11E-09 | 5.69E-07          |
| 76    | ENSG00000235576 | AC092580.4  | GO:0002705 | positive regulation of leukocyte mediated immunity                                                                                      | 49/20447             | 9/232            | 3.70E-09 | 9.74E-07          |
| 77    | ENSG00000235576 | AC092580.4  | GO:0002708 | positive regulation of lymphocyte mediated immunity                                                                                     | 49/20447             | 9/232            | 3.70E-09 | 9.74E-07          |
| 78    | ENSG00000235576 | AC092580.4  | GO:0031347 | regulation of defense response                                                                                                          | 432/20447            | 22/232           | 4.90E-09 | 1.28E-06          |
| 79    | ENSG00000235576 | AC092580.4  | GO:0048522 | positive regulation of cellular process                                                                                                 | 3243/20447           | 72/232           | 5.12E-09 | 1.31E-06          |
| 80    | ENSG00000235576 | AC092580.4  | GO:0042102 | positive regulation of T cell proliferation                                                                                             | 69/20447             | 10/232           | 5.52E-09 | 1.39E-06          |
| 81    | ENSG00000235576 | AC092580.4  | GO:0002819 | regulation of adaptive immune response                                                                                                  | 94/20447             | 11/232           | 9.56E-09 | 2.30E-06          |
| 82    | ENSG00000235576 | AC092580.4  | GO:0045954 | positive regulation of natural killer cell mediated cytotoxicity                                                                        | 16/20447             | 6/232            | 1.46E-08 | 3.44E-06          |
| 83    | ENSG00000235576 | AC092580.4  | GO:0046631 | alpha-beta T cell activation                                                                                                            | 41/20447             | 8/232            | 1.68E-08 | 3.94E-06          |
| 84    | ENSG00000235576 | AC092580.4  | GO:0002250 | adaptive immune response                                                                                                                | 124/20447            | 12/232           | 1.78E-08 | 4.12E-06          |
| 85    | ENSG00000235576 | AC092580.4  | GO:0050900 | leukocyte migration                                                                                                                     | 211/20447            | 15/232           | 1.99E-08 | 4.55E-06          |
| 86    | ENSG00000235576 | AC092580.4  | GO:0009611 | response to wounding                                                                                                                    | 978/20447            | 33/232           | 2.07E-08 | 4.70E-06          |
| 87    | ENSG00000235576 | AC092580.4  | GO:0002717 | positive regulation of natural killer cell mediated immunity                                                                            | 17/20447             | 6/232            | 2.23E-08 | 5.00E-06          |
| 88    | ENSG00000235576 | AC092580.4  | GO:0002443 | leukocyte mediated immunity                                                                                                             | 128/20447            | 12/232           | 2.55E-08 | 5.67E-06          |
| 89    | ENSG00000235576 | AC092580.4  | GO:0002699 | positive regulation of immune effector process                                                                                          | 104/20447            | 11/232           | 2.80E-08 | 6.15E-06          |
| 90    | ENSG00000235576 | AC092580.4  | GO:0045088 | regulation of innate immune response                                                                                                    | 217/20447            | 15/232           | 2.89E-08 | 6.31E-06          |
| 91    | ENSG00000235576 | AC092580.4  | GO:0050853 | B cell receptor signaling pathway                                                                                                       | 30/20447             | 7/232            | 3.61E-08 | 7.71E-06          |
| 92    | ENSG00000235576 | AC092580.4  | GO:0042113 | B cell activation                                                                                                                       | 107/20447            | 11/232           | 3.77E-08 | 7.89E-06          |
| 93    | ENSG00000235576 | AC092580.4  | GO:0002822 | regulation of adaptive immune response based on somatic recombination of immune receptors built from immunoglobulin superfamily domains | 86/20447             | 10/232           | 4.86E-08 | 1.02E-05          |
| 94    | ENSG00000235576 | AC092580.4  | GO:0051056 | regulation of small GTPase mediated signal transduction                                                                                 | 376/20447            | 19/232           | 6.47E-08 | 1.32E-05          |
| 95    | ENSG00000235576 | AC092580.4  | GO:0048305 | immunoglobulin secretion                                                                                                                | 5/20447              | 4/232            | 8.00E-08 | 1.62E-05          |
| 96    | ENSG00000235576 | AC092580.4  | GO:0007264 | small GTPase mediated signal transduction                                                                                               | 422/20447            | 20/232           | 8.22E-08 | 1.65E-05          |
| 97    | ENSG00000235576 | AC092580.4  | GO:0071345 | cellular response to cytokine stimulus                                                                                                  | 384/20447            | 19/232           | 9.00E-08 | 1.79E-05          |
| 98    | ENSG00000235576 | AC092580.4  | GO:0034097 | response to cytokine stimulus                                                                                                           | 467/20447            | 21/232           | 9.36E-08 | 1.84E-05          |
| 99    | ENSG00000235576 | AC092580.4  | GO:0001816 | cytokine production                                                                                                                     | 93/20447             | 10/232           | 1.03E-07 | 2.02E-05          |
| 100   | ENSG00000235576 | AC092580.4  | GO:0046632 | alpha-beta T cell differentiation                                                                                                       | 35/20447             | 7/232            | 1.13E-07 | 2.14E-05          |
| 101   | ENSG00000235576 | AC092580.4  | GO:0001910 | regulation of leukocyte mediated cytotoxicity                                                                                           | 35/20447             | 7/232            | 1.13E-07 | 2.14E-05          |
|       |                 |             |            |                                                                                                                                         |                      |                  |          |                   |



|     |                 |            |            |                                                                                                                                                  |             |         |          |           |
|-----|-----------------|------------|------------|--------------------------------------------------------------------------------------------------------------------------------------------------|-------------|---------|----------|-----------|
| 107 | ENSG00000235576 | AC092580.4 | GO:0006954 | inflammatory response                                                                                                                            | 374/20447   | 18/232  | 2.99E-07 | 5.38E-05  |
| 108 | ENSG00000235576 | AC092580.4 | GO:0002274 | myeloid leukocyte activation                                                                                                                     | 80/20447    | 9/232   | 3.08E-07 | 5.49E-05  |
| 109 | ENSG00000235576 | AC092580.4 | GO:0046634 | regulation of alpha-beta T cell activation                                                                                                       | 59/20447    | 8/232   | 3.28E-07 | 5.76E-05  |
| 110 | ENSG00000235576 | AC092580.4 | GO:0006968 | cellular defense response                                                                                                                        | 59/20447    | 8/232   | 3.28E-07 | 5.76E-05  |
| 111 | ENSG00000235576 | AC092580.4 | GO:0045058 | T cell selection                                                                                                                                 | 26/20447    | 6/232   | 3.81E-07 | 6.64E-05  |
| 112 | ENSG00000235576 | AC092580.4 | GO:0045619 | regulation of lymphocyte differentiation                                                                                                         | 107/20447   | 10/232  | 3.91E-07 | 6.77E-05  |
| 113 | ENSG00000235576 | AC092580.4 | GO:0032685 | regulation of interleukin-12 production                                                                                                          | 43/20447    | 7/232   | 5.03E-07 | 8.88E-05  |
| 114 | ENSG00000235576 | AC092580.4 | GO:0002831 | regulation of response to biotic stimulus                                                                                                        | 87/20447    | 9/232   | 6.35E-07 | 1.07E-04  |
| 115 | ENSG00000235576 | AC092580.4 | GO:0045576 | mast cell activation                                                                                                                             | 16/20447    | 5/232   | 7.11E-07 | 1.18E-04  |
| 116 | ENSG00000235576 | AC092580.4 | GO:0001912 | positive regulation of leukocyte mediated cytotoxicity                                                                                           | 29/20447    | 6/232   | 7.64E-07 | 1.25E-04  |
| 117 | ENSG00000235576 | AC092580.4 | GO:0030101 | natural killer cell activation                                                                                                                   | 29/20447    | 6/232   | 7.64E-07 | 1.25E-04  |
| 118 | ENSG00000235576 | AC092580.4 | GO:0002700 | regulation of production of molecular mediator of immune response                                                                                | 66/20447    | 8/232   | 7.94E-07 | 1.29E-04  |
| 119 | ENSG00000235576 | AC092580.4 | GO:0051250 | negative regulation of lymphocyte activation                                                                                                     | 94/20447    | 9/232   | 1.23E-06 | 1.93E-04  |
| 120 | ENSG00000235576 | AC092580.4 | GO:0031343 | positive regulation of cell killing                                                                                                              | 32/20447    | 6/232   | 1.42E-06 | 2.17E-04  |
| 121 | ENSG00000235576 | AC092580.4 | GO:0002821 | positive regulation of adaptive immune response                                                                                                  | 51/20447    | 7/232   | 1.67E-06 | 2.55E-04  |
| 122 | ENSG00000235576 | AC092580.4 | GO:0045061 | thymic T cell selection                                                                                                                          | 19/20447    | 5/232   | 1.84E-06 | 2.78E-04  |
| 123 | ENSG00000235576 | AC092580.4 | GO:0002889 | regulation of immunoglobulin mediated immune response                                                                                            | 34/20447    | 6/232   | 2.06E-06 | 3.07E-04  |
| 124 | ENSG00000235576 | AC092580.4 | GO:0045577 | regulation of B cell differentiation                                                                                                             | 26/20447    | 5/232   | 2.43E-06 | 3.60E-04  |
| 125 | ENSG00000235576 | AC092580.4 | GO:0009987 | cellular process                                                                                                                                 | 42493/20447 | 175/232 | 2.47E-06 | 3.83E-04  |
| 126 | ENSG00000235576 | AC092580.4 | GO:0002285 | lymphocyte activation involved in immune response                                                                                                | 54/20447    | 7/232   | 2.49E-06 | 3.84E-04  |
| 127 | ENSG00000235576 | AC092580.4 | GO:0008150 | biological process                                                                                                                               | 14643/20447 | 196/232 | 2.79E-06 | 4.05E-04  |
| 128 | ENSG00000235576 | AC092580.4 | GO:0050830 | defense response to Gram-positive bacterium                                                                                                      | 36/20447    | 6/232   | 2.93E-06 | 4.12E-04  |
| 129 | ENSG00000235576 | AC092580.4 | GO:0030890 | positive regulation of B cell proliferation                                                                                                      | 36/20447    | 6/232   | 2.93E-06 | 4.12E-04  |
| 130 | ENSG00000235576 | AC092580.4 | GO:0002920 | regulation of humoral immune response                                                                                                            | 36/20447    | 6/232   | 2.93E-06 | 4.12E-04  |
| 131 | ENSG00000235576 | AC092580.4 | GO:0002923 | regulation of humoral immune response mediated by circulating immunoglobulin                                                                     | 10/20447    | 4/232   | 3.21E-06 | 4.50E-04  |
| 132 | ENSG00000235576 | AC092580.4 | GO:0007599 | hemostasis                                                                                                                                       | 489/20447   | 19/232  | 3.43E-06 | 4.76E-04  |
| 133 | ENSG00000235576 | AC092580.4 | GO:0002695 | negative regulation of leukocyte activation                                                                                                      | 107/20447   | 9/232   | 3.65E-06 | 5.04E-04  |
| 134 | ENSG00000235576 | AC092580.4 | GO:0043900 | regulation of multi-organism process                                                                                                             | 210/20447   | 12/232  | 5.30E-06 | 7.19E-04  |
| 135 | ENSG00000235576 | AC092580.4 | GO:0050866 | negative regulation of cell activation                                                                                                           | 116/20447   | 9/232   | 7.10E-06 | 9.52E-04  |
| 136 | ENSG00000235576 | AC092580.4 | GO:0002280 | lymphocyte homeostasis                                                                                                                           | 42/20447    | 6/232   | 7.46E-06 | 9.94E-04  |
| 137 | ENSG00000235576 | AC092580.4 | GO:0009907 | response to biotic stimulus                                                                                                                      | 57112/20447 | 20/232  | 8.83E-06 | 0.0011493 |
| 138 | ENSG00000235576 | AC092580.4 | GO:0045621 | positive regulation of lymphocyte differentiation                                                                                                | 65/20447    | 7/232   | 8.80E-06 | 0.0011493 |
| 139 | ENSG00000235576 | AC092580.4 | GO:0046635 | positive regulation of alpha-beta T cell activation                                                                                              | 44/20447    | 6/232   | 9.85E-06 | 0.0012746 |
| 140 | ENSG00000235576 | AC092580.4 | GO:0006959 | humoral immune response                                                                                                                          | 92/20447    | 8/232   | 9.99E-06 | 0.0012857 |
| 141 | ENSG00000235576 | AC092580.4 | GO:0009967 | positive regulation of signal transduction                                                                                                       | 836/20447   | 25/232  | 1.03E-05 | 0.0013164 |
| 142 | ENSG00000235576 | AC092580.4 | GO:0050878 | regulation of body fluid levels                                                                                                                  | 579/20447   | 20/232  | 1.08E-05 | 0.0013683 |
| 143 | ENSG00000235576 | AC092580.4 | GO:0050817 | coagulation                                                                                                                                      | 485/20447   | 18/232  | 1.16E-05 | 0.0014572 |
| 144 | ENSG00000235576 | AC092580.4 | GO:0007596 | blood coagulation                                                                                                                                | 485/20447   | 18/232  | 1.16E-05 | 0.0014572 |
| 145 | ENSG00000235576 | AC092580.4 | GO:0050868 | negative regulation of T cell activation                                                                                                         | 68/20447    | 7/232   | 1.19E-05 | 0.001474  |
| 146 | ENSG00000235576 | AC092580.4 | GO:0050854 | regulation of antigen receptor-mediated signaling pathway                                                                                        | 27/20447    | 5/232   | 1.19E-05 | 0.001474  |
| 147 | ENSG00000235576 | AC092580.4 | GO:0033077 | T cell differentiation in thymus                                                                                                                 | 46/20447    | 6/232   | 1.28E-05 | 0.0015784 |
| 148 | ENSG00000235576 | AC092580.4 | GO:0002681 | somatic recombination of T cell receptor gene segments                                                                                           | 5/20447     | 3/232   | 1.42E-05 | 0.0017088 |
| 149 | ENSG00000235576 | AC092580.4 | GO:0002568 | somatic diversification of T cell receptor genes                                                                                                 | 5/20447     | 3/232   | 1.42E-05 | 0.0017088 |
| 150 | ENSG00000235576 | AC092580.4 | GO:0033153 | T cell receptor V(D)J recombination                                                                                                              | 5/20447     | 3/232   | 1.42E-05 | 0.0017088 |
| 151 | ENSG00000235576 | AC092580.4 | GO:0045730 | respiratory burst                                                                                                                                | 14/20447    | 4/232   | 1.48E-05 | 0.0017723 |
| 152 | ENSG00000235576 | AC092580.4 | GO:0080134 | regulation of response to stress                                                                                                                 | 748/20447   | 23/232  | 1.53E-05 | 0.001823  |
| 153 | ENSG00000235576 | AC092580.4 | GO:0051707 | response to other organism                                                                                                                       | 546/20447   | 19/232  | 1.63E-05 | 0.0019358 |
| 154 | ENSG00000235576 | AC092580.4 | GO:0002824 | positive regulation of adaptive immune response based on somatic recombination of immune receptors built from immunoglobulin superfamily domains | 48/20447    | 6/232   | 1.65E-05 | 0.0019445 |
| 155 | ENSG00000235576 | AC092580.4 | GO:0002449 | lymphocyte mediated immunity                                                                                                                     | 99/20447    | 8/232   | 1.72E-05 | 0.0020042 |
| 156 | ENSG00000235576 | AC092580.4 | GO:0048585 | negative regulation of response to stimulus                                                                                                      | 807/20447   | 24/232  | 1.71E-05 | 0.0020042 |
| 157 | ENSG00000235576 | AC092580.4 | GO:0051241 | negative regulation of multicellular organismal process                                                                                          | 363/20447   | 15/232  | 1.85E-05 | 0.0021468 |
| 158 | ENSG00000235576 | AC092580.4 | GO:0032318 | regulation of Ras GTPase activity                                                                                                                | 164/20447   | 10/232  | 1.86E-05 | 0.0021515 |
| 159 | ENSG00000235576 | AC092580.4 | GO:0030852 | regulation of granulocyte differentiation                                                                                                        | 15/20447    | 4/232   | 2.00E-05 | 0.0022864 |
| 160 | ENSG00000235576 | AC092580.4 | GO:0046638 | positive regulation of alpha-beta T cell differentiation                                                                                         | 39/20447    | 5/232   | 2.04E-05 | 0.0023066 |
| 161 | ENSG00000235576 | AC092580.4 | GO:0032653 | regulation of interleukin-10 production                                                                                                          | 30/20447    | 5/232   | 2.04E-05 | 0.0023066 |
| 162 | ENSG00000235576 | AC092580.4 | GO:0023056 | positive regulation of signaling                                                                                                                 | 880/20447   | 25/232  | 2.43E-05 | 0.0027263 |
| 163 | ENSG00000235576 | AC092580.4 | GO:0010647 | positive regulation of cell communication                                                                                                        | 882/20447   | 25/232  | 2.52E-05 | 0.0028166 |
| 164 | ENSG00000235576 | AC092580.4 | GO:0043067 | regulation of programmed cell death                                                                                                              | 1232/20447  | 31/232  | 2.64E-05 | 0.0028914 |
| 165 | ENSG00000235576 | AC092580.4 | GO:0046651 | lymphocyte proliferation                                                                                                                         | 52/20447    | 6/232   | 2.63E-05 | 0.0028914 |
| 166 | ENSG00000235576 | AC092580.4 | GO:0001776 | leukocyte homeostasis                                                                                                                            | 52/20447    | 6/232   | 2.63E-05 | 0.0028914 |
| 167 | ENSG00000235576 | AC092580.4 | GO:0032609 | interferon-gamma production                                                                                                                      | 16/20447    | 4/232   | 2.64E-05 | 0.0028914 |
| 168 | ENSG00000235576 | AC092580.4 | GO:0002275 | myeloid cell activation involved in immune response                                                                                              | 32/20447    | 5/232   | 2.82E-05 | 0.0030619 |
| 169 | ENSG00000235576 | AC092580.4 | GO:0031349 | positive regulation of defense response                                                                                                          | 212/20447   | 11/232  | 3.22E-05 | 0.0034685 |
| 170 | ENSG00000235576 | AC092580.4 | GO:0051704 | multi-organism process                                                                                                                           | 1368/20447  | 33/232  | 3.29E-05 | 0.0035338 |
| 171 | ENSG00000235576 | AC092580.4 | GO:0043372 | positive regulation of CD4-positive, alpha-beta T cell differentiation                                                                           | 17/20447    | 4/232   | 3.42E-05 | 0.003643  |
| 172 | ENSG00000235576 | AC092580.4 | GO:0048519 | negative regulation of biological process                                                                                                        | 3114/20447  | 59/232  | 3.43E-05 | 0.003643  |
| 173 | ENSG00000235576 | AC092580.4 | GO:0002460 | adaptive immune response based on somatic recombination of immune receptors built from immunoglobulin superfamily domains                        | 109/20447   | 8/232   | 3.46E-05 | 0.003659  |
| 174 | ENSG00000235576 | AC092580.4 | GO:0032943 | mononuclear cell proliferation                                                                                                                   | 55/20447    | 6/232   | 3.64E-05 | 0.0038397 |
| 175 | ENSG00000235576 | AC092580.4 | GO:0009617 | response to bacterium                                                                                                                            | 341/20447   | 14/232  | 3.79E-05 | 0.003961  |
| 176 | ENSG00000235576 | AC092580.4 | GO:0002637 | regulation of immunoglobulin production                                                                                                          | 34/20447    | 5/232   | 3.83E-05 | 0.0040003 |
| 177 | ENSG00000235576 | AC092580.4 | GO:0019221 | cytokine-mediated signaling pathway                                                                                                              | 298/20447   | 13/232  | 3.85E-05 | 0.0040035 |
| 178 | ENSG00000235576 | AC092580.4 | GO:0060326 | cell chemotaxis                                                                                                                                  | 111/20447   | 8/232   | 3.94E-05 | 0.0040756 |
| 179 | ENSG00000235576 | AC092580.4 | GO:0009306 | protein secretion                                                                                                                                | 56/20447    | 6/232   | 4.04E-05 | 0.0041522 |
| 180 | ENSG00000235576 | AC092580.4 | GO:0051240 | positive regulation of multicellular organismal process                                                                                          | 533/20447   | 18/232  | 4.05E-05 | 0.0041522 |
| 181 | ENSG00000235576 | AC092580.4 | GO:0045580 | regulation of T cell differentiation                                                                                                             | 82/20447    | 7/232   | 4.08E-05 | 0.0041658 |
| 182 | ENSG00000235576 | AC092580.4 | GO:0010941 | regulation of cell death                                                                                                                         | 1265/20447  | 31/232  | 4.36E-05 | 0.0044262 |
| 183 | ENSG00000235576 | AC092580.4 | GO:0050777 | negative regulation of immune response                                                                                                           | 57/20447    | 6/232   | 4.48E-05 | 0.004527  |
| 184 | ENSG00000235576 | AC092580.4 | GO:0042742 | defense response to bacterium                                                                                                                    | 147/20447   | 9/232   | 4.73E-05 | 0.0047645 |
| 185 | ENSG00000235576 | AC092580.4 | GO:0051239 | regulation of multicellular organismal process                                                                                                   | 1842/20447  | 40/232  | 4.85E-05 | 0.0048445 |
| 186 | ENSG00000235576 | AC092580.4 | GO:0070681 | leukocyte proliferation                                                                                                                          | 58/20447    | 6/232   | 4.95E-05 | 0.0049141 |
| 187 | ENSG00000235576 | AC092580.4 | GO:0045089 | positive regulation of innate immune response                                                                                                    | 149/20447   | 9/232   | 5.26E-05 | 0.0052021 |
| 188 | ENSG00000235576 | AC092580.4 | GO:0001782 | B cell homeostasis                                                                                                                               | 19/20447    | 4/232   | 5.48E-05 | 0.0053697 |
| 189 | ENSG00000235576 | AC092580.4 | GO:0042981 | regulation of apoptotic process                                                                                                                  | 1220/20447  | 30/232  | 5.50E-05 | 0.0053697 |
| 190 | ENSG00000235576 | AC092580.4 | GO:2000516 | positive regulation of CD4-positive, alpha-beta T cell activation                                                                                | 19/20447    | 4/232   | 5.48E-05 | 0.0053697 |
| 191 | ENSG00000235576 | AC092580.4 | GO:0043087 | regulation of GTPase activity                                                                                                                    | 225/20447   | 11/232  | 5.53E-05 | 0.0053733 |
| 192 | ENSG00000235576 | AC092580.4 | GO:0050848 | regulation of calcium-mediated signaling                                                                                                         | 37/20447    | 5/232   | 5.84E-05 | 0.0056286 |
| 193 | ENSG00000235576 | AC092580.4 | GO:0048872 | homeostasis of number of cells                                                                                                                   | 151/20447   | 9/232   | 5.83E-05 | 0.0056286 |
| 194 | ENSG00000235576 | AC092580.4 | GO:0033124 | regulation of GTP catabolic process                                                                                                              | 228/20447   | 11/232  | 6.23E-05 | 0.0059776 |
| 195 | ENSG00000235576 | AC092580.4 | GO:0030595 | leukocyte chemotaxis                                                                                                                             | 89/20447    | 7/232   | 6.92E-05 | 0.0066133 |
| 196 | ENSG00000235576 | AC092580.4 | GO:0045639 | positive regulation of myeloid cell differentiation                                                                                              | 62/20447    | 6/232   | 7.23E-05 | 0.0068852 |
| 197 | ENSG00000235576 | AC092580.4 | GO:0030183 | B cell differentiation                                                                                                                           | 63/20447    | 6/232   | 7.92E-05 | 0.0075069 |
| 198 | ENSG00000235576 | AC092580.4 | GO:0032673 | regulation of interleukin-4 production                                                                                                           | 21/20447    | 4/232   | 8.31E-05 | 0.0078071 |
| 199 | ENSG00000235576 | AC092580.4 | GO:0050858 | regulation of T cell receptor signaling pathway                                                                                                  | 21/20447    | 4/232   | 8.31E-05 | 0.0078071 |
| 200 | ENSG00000235576 | AC092580.4 | GO:0030833 | regulation of actin filament polymerization                                                                                                      | 92/20447    | 7/232   | 8.55E-05 | 0.0080014 |
| 201 | ENSG00000235576 | AC092580.4 | GO:0048523 | negative regulation of cellular process                                                                                                          | 2858/20447  | 54/232  | 8.84E-05 | 0.0082045 |
| 202 | ENSG00000235576 | AC092580.4 | GO:0042035 | regulation of cytokine biosynthetic process                                                                                                      | 93/20447    | 7/232   | 9.15E-05 | 0.0084652 |
| 203 | ENSG00000235576 | AC092580.4 | GO:0050688 | regulation of defense response to virus                                                                                                          | 65/20447    | 6/232   | 9.45E-05 | 0.0087006 |
| 204 | ENSG00000235576 | AC092580.4 | GO:0002718 | regulation of cytokine production involved in immune response                                                                                    | 41/20447    | 5/232   | 9.67E-05 | 0.0088374 |
| 205 | ENSG00000235576 | AC092580.4 | GO:0046637 | regulation of alpha-beta T cell differentiation                                                                                                  | 41/20447    | 5/232   | 9.67E-05 | 0.0088374 |
| 206 | ENSG00000235576 | AC092580.4 | GO:0032319 | regulation of Rho GTPase activity                                                                                                                | 94/20447    | 7/232   | 9.80E-05 | 0.0089137 |
| 207 | ENSG00000235576 | AC092580.4 | GO:0046578 | regulation of Ras protein signal transduction                                                                                                    | 283/20447   | 12/232  |          |           |

|     |                 |            |            |                                                                                                                                                  |            |        |          |          |
|-----|-----------------|------------|------------|--------------------------------------------------------------------------------------------------------------------------------------------------|------------|--------|----------|----------|
| 214 | ENSG00000235576 | AC092580.4 | GO:0023057 | negative regulation of signaling                                                                                                                 | 694/20447  | 20/232 | 1.35E-04 | 0.011869 |
| 215 | ENSG00000235576 | AC092580.4 | GO:0050850 | positive regulation of calcium-mediated signaling                                                                                                | 24/20447   | 4/232  | 1.44E-04 | 0.012558 |
| 216 | ENSG00000235576 | AC092580.4 | GO:0042060 | wound healing                                                                                                                                    | 590/20447  | 18/232 | 1.47E-04 | 0.012772 |
| 217 | ENSG00000235576 | AC092580.4 | GO:0030838 | positive regulation of actin filament polymerization                                                                                             | 45/20447   | 5/232  | 1.52E-04 | 0.013195 |
| 218 | ENSG00000235576 | AC092580.4 | GO:0023220 | positive regulation of Ras GTPase activity                                                                                                       | 101/20447  | 7/232  | 1.54E-04 | 0.013312 |
| 219 | ENSG00000235576 | AC092580.4 | GO:0016118 | negative regulation of cytokine production                                                                                                       | 133/20447  | 6/232  | 1.57E-04 | 0.013493 |
| 220 | ENSG00000235576 | AC092580.4 | GO:0048535 | lymph node development                                                                                                                           | 10/20447   | 3/232  | 1.63E-04 | 0.01374  |
| 221 | ENSG00000235576 | AC092580.4 | GO:0045579 | positive regulation of B cell differentiation                                                                                                    | 10/20447   | 3/232  | 1.63E-04 | 0.01374  |
| 222 | ENSG00000235576 | AC092580.4 | GO:0002335 | mature B cell differentiation                                                                                                                    | 10/20447   | 3/232  | 1.63E-04 | 0.01374  |
| 223 | ENSG00000235576 | AC092580.4 | GO:0043303 | mast cell degranulation                                                                                                                          | 10/20447   | 3/232  | 1.63E-04 | 0.01374  |
| 224 | ENSG00000235576 | AC092580.4 | GO:0002279 | mast cell activation involved in immune response                                                                                                 | 10/20447   | 3/232  | 1.63E-04 | 0.01374  |
| 225 | ENSG00000235576 | AC092580.4 | GO:0043029 | T cell homeostasis                                                                                                                               | 25/20447   | 4/232  | 1.69E-04 | 0.014006 |
| 226 | ENSG00000235576 | AC092580.4 | GO:0002237 | response to molecule of bacterial origin                                                                                                         | 213/20447  | 10/232 | 1.68E-04 | 0.014006 |
| 227 | ENSG00000235576 | AC092580.4 | GO:0033121 | regulation of purine nucleotide catabolic process                                                                                                | 255/20447  | 11/232 | 1.68E-04 | 0.014006 |
| 228 | ENSG00000235576 | AC092580.4 | GO:0030811 | regulation of nucleotide catabolic process                                                                                                       | 256/20447  | 11/232 | 1.74E-04 | 0.014296 |
| 229 | ENSG00000235576 | AC092580.4 | GO:0008064 | regulation of actin polymerization or depolymerization                                                                                           | 104/20447  | 7/232  | 1.85E-04 | 0.015167 |
| 230 | ENSG00000235576 | AC092580.4 | GO:0009118 | regulation of nucleoside metabolic process                                                                                                       | 259/20447  | 11/232 | 1.92E-04 | 0.015646 |
| 231 | ENSG00000235576 | AC092580.4 | GO:0016477 | cell migration                                                                                                                                   | 603/20447  | 18/232 | 1.92E-04 | 0.015646 |
| 232 | ENSG00000235576 | AC092580.4 | GO:0044093 | positive regulation of molecular function                                                                                                        | 1124/20447 | 27/232 | 1.95E-04 | 0.0159   |
| 233 | ENSG00000235576 | AC092580.4 | GO:0030832 | regulation of actin filament length                                                                                                              | 105/20447  | 7/232  | 1.98E-04 | 0.015886 |
| 234 | ENSG00000235576 | AC092580.4 | GO:0050869 | negative regulation of B cell activation                                                                                                         | 26/20447   | 4/232  | 1.98E-04 | 0.015884 |
| 235 | ENSG00000235576 | AC092580.4 | GO:0009968 | negative regulation of signal transduction                                                                                                       | 661/20447  | 19/232 | 2.05E-04 | 0.016417 |
| 236 | ENSG00000235576 | AC092580.4 | GO:0051495 | positive regulation of cytoskeleton organization                                                                                                 | 106/20447  | 7/232  | 2.08E-04 | 0.016531 |
| 237 | ENSG00000235576 | AC092580.4 | GO:0071353 | cellular response to interleukin-4                                                                                                               | 11/20447   | 3/232  | 2.22E-04 | 0.017498 |
| 238 | ENSG00000235576 | AC092580.4 | GO:0002448 | mast cell mediated immunity                                                                                                                      | 11/20447   | 3/232  | 2.22E-04 | 0.017498 |
| 239 | ENSG00000235576 | AC092580.4 | GO:0042127 | regulation of cell proliferation                                                                                                                 | 1201/20447 | 28/232 | 2.41E-04 | 0.018669 |
| 240 | ENSG00000235576 | AC092580.4 | GO:0043370 | regulation of CD4-positive, alpha-beta T cell differentiation                                                                                    | 28/20447   | 4/232  | 2.67E-04 | 0.020783 |
| 241 | ENSG00000235576 | AC092580.4 | GO:0002286 | T cell activation involved in immune response                                                                                                    | 28/20447   | 4/232  | 2.67E-04 | 0.020783 |
| 242 | ENSG00000235576 | AC092580.4 | GO:0050672 | negative regulation of lymphocyte proliferation                                                                                                  | 51/20447   | 5/232  | 2.77E-04 | 0.021385 |
| 243 | ENSG00000235576 | AC092580.4 | GO:0032945 | negative regulation of mononuclear cell proliferation                                                                                            | 51/20447   | 5/232  | 2.77E-04 | 0.021385 |
| 244 | ENSG00000235576 | AC092580.4 | GO:0002761 | regulation of myeloid leukocyte differentiation                                                                                                  | 79/20447   | 6/232  | 2.79E-04 | 0.021473 |
| 245 | ENSG00000235576 | AC092580.4 | GO:0045080 | negative thymic T cell selection                                                                                                                 | 12/20447   | 3/232  | 2.94E-04 | 0.021991 |
| 246 | ENSG00000235576 | AC092580.4 | GO:0008284 | positive regulation of cell proliferation                                                                                                        | 679/20447  | 19/232 | 2.88E-04 | 0.021991 |
| 247 | ENSG00000235576 | AC092580.4 | GO:0032753 | positive regulation of interleukin-4 production                                                                                                  | 12/20447   | 3/232  | 2.94E-04 | 0.021991 |
| 248 | ENSG00000235576 | AC092580.4 | GO:0050588 | negative regulation of antigen receptor-mediated signaling pathway                                                                               | 12/20447   | 3/232  | 2.94E-04 | 0.021991 |
| 249 | ENSG00000235576 | AC092580.4 | GO:0002922 | positive regulation of humoral immune response                                                                                                   | 12/20447   | 3/232  | 2.94E-04 | 0.021991 |
| 250 | ENSG00000235576 | AC092580.4 | GO:0051345 | positive regulation of hydrolase activity                                                                                                        | 465/20447  | 15/232 | 2.92E-04 | 0.021991 |
| 251 | ENSG00000235576 | AC092580.4 | GO:0043368 | positive T cell selection                                                                                                                        | 12/20447   | 3/232  | 2.94E-04 | 0.021991 |
| 252 | ENSG00000235576 | AC092580.4 | GO:0032271 | regulation of protein polymerization                                                                                                             | 112/20447  | 7/232  | 2.92E-04 | 0.021991 |
| 253 | ENSG00000235576 | AC092580.4 | GO:2000514 | regulation of CD4-positive, alpha-beta T cell activation                                                                                         | 30/20447   | 4/232  | 3.51E-04 | 0.025819 |
| 254 | ENSG00000235576 | AC092580.4 | GO:0002444 | myeloid leukocyte mediated immunity                                                                                                              | 30/20447   | 4/232  | 3.51E-04 | 0.025819 |
| 255 | ENSG00000235576 | AC092580.4 | GO:0030029 | actin filament-based process                                                                                                                     | 373/20447  | 13/232 | 3.57E-04 | 0.026185 |
| 256 | ENSG00000235576 | AC092580.4 | GO:0070684 | negative regulation of leukocyte proliferation                                                                                                   | 54/20447   | 5/232  | 3.62E-04 | 0.026386 |
| 257 | ENSG00000235576 | AC092580.4 | GO:0045582 | positive regulation of T cell differentiation                                                                                                    | 54/20447   | 5/232  | 3.62E-04 | 0.026386 |
| 258 | ENSG00000235576 | AC092580.4 | GO:0043547 | positive regulation of GTPase activity                                                                                                           | 153/20447  | 6/232  | 3.67E-04 | 0.026683 |
| 259 | ENSG00000235576 | AC092580.4 | GO:0033151 | V(D)J recombination                                                                                                                              | 13/20447   | 3/232  | 3.79E-04 | 0.027097 |
| 260 | ENSG00000235576 | AC092580.4 | GO:0043383 | negative T cell selection                                                                                                                        | 13/20447   | 3/232  | 3.79E-04 | 0.027097 |
| 261 | ENSG00000235576 | AC092580.4 | GO:0002833 | positive regulation of response to biotic stimulus                                                                                               | 13/20447   | 3/232  | 3.79E-04 | 0.027097 |
| 262 | ENSG00000235576 | AC092580.4 | GO:0010648 | negative regulation of cell communication                                                                                                        | 697/20447  | 19/232 | 3.98E-04 | 0.028379 |
| 263 | ENSG00000235576 | AC092580.4 | GO:0043085 | positive regulation of catalytic activity                                                                                                        | 931/20447  | 23/232 | 4.01E-04 | 0.028462 |
| 264 | ENSG00000235576 | AC092580.4 | GO:0001959 | regulation of cytokine-mediated signaling pathway                                                                                                | 85/20447   | 6/232  | 4.14E-04 | 0.02934  |
| 265 | ENSG00000235576 | AC092580.4 | GO:0032273 | positive regulation of protein polymerization                                                                                                    | 56/20447   | 5/232  | 4.30E-04 | 0.030315 |
| 266 | ENSG00000235576 | AC092580.4 | GO:0002562 | somatic diversification of immune receptors via germline recombination within a single locus                                                     | 32/20447   | 4/232  | 4.52E-04 | 0.031542 |
| 267 | ENSG00000235576 | AC092580.4 | GO:0016444 | somatic cell DNA recombination                                                                                                                   | 32/20447   | 4/232  | 4.52E-04 | 0.031542 |
| 268 | ENSG00000235576 | AC092580.4 | GO:0007186 | G-protein coupled receptor signaling pathway                                                                                                     | 539/20447  | 16/232 | 4.62E-04 | 0.032107 |
| 269 | ENSG00000235576 | AC092580.4 | GO:0002707 | negative regulation of lymphocyte mediated immunity                                                                                              | 14/20447   | 3/232  | 4.79E-04 | 0.032951 |
| 270 | ENSG00000235576 | AC092580.4 | GO:0002704 | negative regulation of leukocyte mediated immunity                                                                                               | 14/20447   | 3/232  | 4.79E-04 | 0.032951 |
| 271 | ENSG00000235576 | AC092580.4 | GO:0070670 | response to interleukin-4                                                                                                                        | 14/20447   | 3/232  | 4.79E-04 | 0.032951 |
| 272 | ENSG00000235576 | AC092580.4 | GO:0051336 | regulation of hydrolase activity                                                                                                                 | 769/20447  | 20/232 | 5.10E-04 | 0.035    |
| 273 | ENSG00000235576 | AC092580.4 | GO:0006897 | endocytosis                                                                                                                                      | 293/20447  | 11/232 | 5.47E-04 | 0.037442 |
| 274 | ENSG00000235576 | AC092580.4 | GO:0042098 | T cell proliferation                                                                                                                             | 34/20447   | 4/232  | 5.73E-04 | 0.038886 |
| 275 | ENSG00000235576 | AC092580.4 | GO:0060759 | regulation of response to cytokine stimulus                                                                                                      | 91/20447   | 6/232  | 5.97E-04 | 0.040255 |
| 276 | ENSG00000235576 | AC092580.4 | GO:0051674 | localization of cell                                                                                                                             | 664/20447  | 18/232 | 6.04E-04 | 0.040456 |
| 277 | ENSG00000235576 | AC092580.4 | GO:0048870 | cell motility                                                                                                                                    | 664/20447  | 18/232 | 6.04E-04 | 0.040456 |
| 278 | ENSG00000235576 | AC092580.4 | GO:0071310 | cellular response to organic substance                                                                                                           | 1338/20447 | 29/232 | 6.12E-04 | 0.040668 |
| 279 | ENSG00000235576 | AC092580.4 | GO:0040011 | locomotion                                                                                                                                       | 1022/20447 | 24/232 | 6.17E-04 | 0.041092 |
| 280 | ENSG00000235576 | AC092580.4 | GO:0050790 | regulation of catalytic activity                                                                                                                 | 1471/20447 | 31/232 | 6.28E-04 | 0.04175  |
| 281 | ENSG00000235576 | AC092580.4 | GO:0002200 | somatic diversification of immune receptors                                                                                                      | 35/20447   | 4/232  | 6.42E-04 | 0.042498 |
| 282 | ENSG00000235576 | AC092580.4 | GO:0071222 | cellular response to lipopolysaccharide                                                                                                          | 93/20447   | 6/232  | 6.70E-04 | 0.044256 |
| 283 | ENSG00000235576 | AC092580.4 | GO:0002230 | positive regulation of defense response to virus by host                                                                                         | 16/20447   | 3/232  | 7.24E-04 | 0.047539 |
| 284 | ENSG00000235576 | AC092580.4 | GO:0002823 | negative regulation of adaptive immune response based on somatic recombination of immune receptors built from immunoglobulin superfamily domains | 16/20447   | 3/232  | 7.24E-04 | 0.047539 |
| 285 | ENSG00000235576 | AC092580.4 | GO:0030168 | platelet activation                                                                                                                              | 212/20447  | 9/232  | 7.32E-04 | 0.047956 |

Supplemental Table 18. LINC01871 correlation analyses of the differentially expressed transcripts from all three 3D whole blood RNA-seq analyses

| Ensembl Gene ID | Chr | Start    | End      | Strand | Gene       | Biotype                | SJD All Cells and HC |            | SJD All Cells |            | HC Only     |            | SJD Repos Cells Only |             | SJD Repos and HC |             | SJD Repos Cells Only |             |             |            |
|-----------------|-----|----------|----------|--------|------------|------------------------|----------------------|------------|---------------|------------|-------------|------------|----------------------|-------------|------------------|-------------|----------------------|-------------|-------------|------------|
|                 |     |          |          |        |            |                        | cor                  | level      | cor           | level      | cor         | level      | cor                  | level       | cor              | level       | cor                  | level       |             |            |
| ENSG0000023576  | 22  | 7725001  | 7770370  | +      | LINC01871  | lincRNA                |                      |            |               |            |             |            |                      |             |                  |             |                      |             |             |            |
| ENSG0000010298  | 22  | 3907324  | 3910400  | -      | APC3       | protein coding         | 0.48984129           | 1.73E-05   | 0.47269933    | 8.61E-06   | 0.46477653  | 0.00354545 | 0.39876305           | 0.04487007  | 0.371984743      | 0.120321189 | 0.89990695           | 6.83E-08    | 0.49725109  | 0.00020071 |
| ENSG0000016597  | 14  | 4993302  | 4997070  | -      | PCSK9      | protein coding         | 0.444703041          | 1.73E-05   | 0.426907174   | 7.38E-07   | 0.447492626 | 0.0031361  | 0.414982626          | 0.29254987  | 0.47150312       | 0.04452694  | 0.81619264           | 0.74E-06    | 0.47744954  | 0.00019107 |
| ENSG00000112796 | 6   | 46159185 | 46170900 | -      | PCSK9      | protein coding         | 0.450056871          | 4.43E-08   | 0.450056871   | 1.54E-08   | 0.450056871 | 0.00204378 | 0.450056871          | 0.25282871  | 0.474923206      | 0.00764669  | 0.847851001          | 4.70E-07    | 0.553790953 | 3.02E-05   |
| ENSG00000100027 | 22  | 2169758  | 2170744  | +      | YFPEL      | protein coding         | 0.45300841           | 4.43E-08   | 0.45300841    | 3.48E-08   | 0.45300841  | 0.00205361 | 0.45300841           | 0.20400017  | 0.48410888       | 0.1612428   | 0.86263004           | 1.20E-07    | 0.551175586 | 3.28E-05   |
| ENSG00000193098 | 3   | 27115949 | 27122711 | -      | RIMS3      | protein coding         | 0.45951298           | 1.73E-05   | 0.45951298    | 1.73E-05   | 0.45951298  | 0.00205361 | 0.45951298           | 0.20400017  | 0.48410888       | 0.1612428   | 0.86263004           | 1.20E-07    | 0.551175586 | 3.28E-05   |
| ENSG00000293846 | 7   | 10238465 | 10232737 | -      | LOC1019302 | unprocessed pseudogene | 0.45951298           | 1.73E-05   | 0.45951298    | 1.73E-05   | 0.45951298  | 0.00205361 | 0.45951298           | 0.20400017  | 0.48410888       | 0.1612428   | 0.86263004           | 1.20E-07    | 0.551175586 | 3.28E-05   |
| ENSG0000011906  | 8   | 12521992 | 12520270 | -      | HDDCC2     | protein coding         | 0.461534701          | 5.17E-07   | 0.461534701   | 4.31E-07   | 0.461534701 | 0.00205361 | 0.461534701          | 0.20400017  | 0.48410888       | 0.1612428   | 0.86263004           | 1.20E-07    | 0.551175586 | 3.28E-05   |
| ENSG0000012863  | 15  | 34202159 | 34202159 | -      | FNDC3      | protein coding         | 0.46222626           | 1.73E-05   | 0.46222626    | 1.73E-05   | 0.46222626  | 0.00205361 | 0.46222626           | 0.20400017  | 0.48410888       | 0.1612428   | 0.86263004           | 1.20E-07    | 0.551175586 | 3.28E-05   |
| ENSG0000020417  | 3   | 4272140  | 4272138  | -      | LOC000594  | lincRNA                | 0.28634416           | 0.00085118 | 0.34844476    | 0.01288911 | 0.15687452  | 0.04307615 | 0.251842378          | 0.204889338 | 0.001142472      | 0.952458238 | 0.000572428          | 0.404943213 | 0.000257889 |            |
| ENSG0000010454  | 14  | 2425630  | 2425990  | -      | GPM1       | protein coding         | 0.783728287          | 3.57E-17   | 0.783728287   | 9.50E-17   | 0.783728287 | 0.00020536 | 0.783728287          | 0.00223398  | 0.836100         | 0.846254222 | 3.40E-07             | 0.83789986  | 3.35E-14    |            |
| ENSG0000010191  | 6   | 4612999  | 4614668  | -      | PMPK       | protein coding         | 0.6211931            | 1.42E-09   | 0.78021921    | 1.39E-10   | 0.6211931   | 0.00020536 | 0.6211931            | 0.00223398  | 0.836100         | 0.846254222 | 3.40E-07             | 0.83789986  | 3.35E-14    |            |
| ENSG00000203687 | 1   | 2443516  | 24444057 | -      | COX20      | protein coding         | 0.46081668           | 2.49E-05   | 0.4733394     | 0.00051720 | 0.4727777   | 0.33683024 | 0.48781931           | 0.34895870  | 0.12963340       | 0.340041199 | 0.8413801            | 4.91E-07    | 0.63706396  | 6.65E-07   |
| ENSG0000027502  | 17  | 3610327  | 3610552  | +      | COL4A      | protein coding         | 0.46222626           | 1.73E-05   | 0.46222626    | 1.73E-05   | 0.46222626  | 0.00205361 | 0.46222626           | 0.20400017  | 0.48410888       | 0.1612428   | 0.86263004           | 1.20E-07    | 0.551175586 | 3.28E-05   |
| ENSG0000025107  | 1   | 9417433  | 9420310  | -      | ADPO2      | lincRNA                | 0.46222626           | 1.73E-05   | 0.46222626    | 1.73E-05   | 0.46222626  | 0.00205361 | 0.46222626           | 0.20400017  | 0.48410888       | 0.1612428   | 0.86263004           | 1.20E-07    | 0.551175586 | 3.28E-05   |
| ENSG0000020286  | X   | 2891187  | 2741309  | -      | CO9        | protein coding         | 0.465051185          | 1.52E-10   | 0.470098238   | 1.54E-08   | 0.470098238 | 0.00163159 | 0.470098238          | 0.00174420  | 0.547109881      | 0.8611895   | 0.81182995           | 8.62E-07    | 0.920727005 | 3.71E-04   |
| ENSG0000027242  | 8   | 13994467 | 13998977 | -      | LOC135471  | lincRNA                | 0.460416719          | 7.52E-09   | 0.47174049    | 0.00020536 | 0.47174049  | 0.00020536 | 0.47174049           | 0.00020536  | 0.47174049       | 0.00020536  | 0.47174049           | 0.00020536  | 0.47174049  | 0.00020536 |
| ENSG00000202194 | 1   | 5717398  | 5724874  | -      | PRPF1      | protein coding         | 0.420516101          | 0.00013463 | 0.23137458    | 0.01998136 | 0.420516101 | 0.00013463 | 0.420516101          | 0.00013463  | 0.420516101      | 0.00013463  | 0.420516101          | 0.00013463  | 0.420516101 | 0.00013463 |
| ENSG00000197441 | 4   | 15960245 | 15969309 | -      | FCF2BP     | protein coding         | 0.75973993           | 1.06E-10   | 0.77044768    | 6.05E-11   | 0.77044768  | 0.00020536 | 0.77044768           | 0.00020536  | 0.77044768       | 0.00020536  | 0.77044768           | 0.00020536  | 0.77044768  | 0.00020536 |
| ENSG00000235162 | 12  | 10523259 | 10539097 | -      | C12orf75   | protein coding         | 0.46307021           | 1.06E-10   | 0.47391124    | 1.98E-08   | 0.46307021  | 0.00020536 | 0.46307021           | 0.00020536  | 0.46307021       | 0.00020536  | 0.46307021           | 0.00020536  | 0.46307021  | 0.00020536 |
| ENSG00000140297 | 1   | 1594405  | 1594428  | -      | CNTF3      | protein coding         | 0.411420003          | 0.00202939 | 0.19261247    | 0.00745181 | 0.411420003 | 0.00202939 | 0.411420003          | 0.00202939  | 0.411420003      | 0.00202939  | 0.411420003          | 0.00202939  | 0.411420003 | 0.00202939 |
| ENSG0000027840  | 7   | 6818847  | 6818166  | -      | LOC198277  | lincRNA                | 0.46182774           | 1.43E-08   | 0.46182774    | 1.43E-08   | 0.46182774  | 0.00020536 | 0.46182774           | 0.00020536  | 0.46182774       | 0.00020536  | 0.46182774           | 0.00020536  | 0.46182774  | 0.00020536 |
| ENSG0000023658  | 8   | 13033851 | 13039452 | -      | AL167333   | lincRNA                | 0.46182774           | 1.43E-08   | 0.46182774    | 1.43E-08   | 0.46182774  | 0.00020536 | 0.46182774           | 0.00020536  | 0.46182774       | 0.00020536  | 0.46182774           | 0.00020536  | 0.46182774  | 0.00020536 |
| ENSG0000016788  | 1   | 2142114  | 2163384  | -      | SHRPP1     | protein coding         | 0.62109898           | 1.79E-09   | 0.61938278    | 0.00020536 | 0.62109898  | 0.00020536 | 0.62109898           | 0.00020536  | 0.62109898       | 0.00020536  | 0.62109898           | 0.00020536  | 0.62109898  | 0.00020536 |
| ENSG00000279532 | 8   | 3446448  | 3448823  | -      | LOC007742  | lincRNA                | 0.46182774           | 1.43E-08   | 0.46182774    | 1.43E-08   | 0.46182774  | 0.00020536 | 0.46182774           | 0.00020536  | 0.46182774       | 0.00020536  | 0.46182774           | 0.00020536  | 0.46182774  | 0.00020536 |
| ENSG0000025257  | 8   | 2819255  | 2819255  | -      | LOC007742  | lincRNA                | 0.46182774           | 1.43E-08   | 0.46182774    | 1.43E-08   | 0.46182774  | 0.00020536 | 0.46182774           | 0.00020536  | 0.46182774       | 0.00020536  | 0.46182774           | 0.00020536  | 0.46182774  | 0.00020536 |
| ENSG00000237101 | 1   | 2242198  | 2242304  | -      | LOC029309  | lincRNA                | 0.46182774           | 1.43E-08   | 0.46182774    | 1.43E-08   | 0.46182774  | 0.00020536 | 0.46182774           | 0.00020536  | 0.46182774       | 0.00020536  | 0.46182774           | 0.00020536  | 0.46182774  | 0.00020536 |
| ENSG00000168807 | 6   | 69197129 | 69200905 | -      | SMTR2      | protein coding         | 0.36288272           | 0.00016844 | 0.50861443    | 0.00016844 | 0.36288272  | 0.00016844 | 0.36288272           | 0.00016844  | 0.36288272       | 0.00016844  | 0.36288272           | 0.00016844  | 0.36288272  | 0.00016844 |
| ENSG00000272599 | 20  | 4296743  | 4297140  | -      | PITRM1-AS1 | transcribed pseudogene | 0.157671873          | 0.1032044  | 0.36204745    | 0.00020536 | 0.157671873 | 0.1032044  | 0.36204745           | 0.00020536  | 0.157671873      | 0.1032044   | 0.36204745           | 0.00020536  | 0.157671873 | 0.1032044  |
| ENSG00000260442 | 4   | 1206000  | 1206000  | -      | AT2F4-AS1  | transcribed pseudogene | 0.42204772           | 0.00016844 | 0.42204772    | 0.00016844 | 0.42204772  | 0.00016844 | 0.42204772           | 0.00016844  | 0.42204772       | 0.00016844  | 0.42204772           | 0.00016844  | 0.42204772  | 0.00016844 |
| ENSG0000026458  | 2   | 6186842  | 6186800  | -      | LOC107881  | lincRNA                | 0.30364568           | 8.78E-07   | 0.34523202    | 3.50E-08   | 0.34523202  | 0.00020536 | 0.34523202           | 0.00020536  | 0.34523202       | 0.00020536  | 0.34523202           | 0.00020536  | 0.34523202  | 0.00020536 |
| ENSG0000015100  | 19  | 29062923 | 2907274  | -      | POU4       | protein coding         | 0.501141727          | 3.45E-07   | 0.48721076    | 0.00040044 | 0.48721076  | 0.00040044 | 0.48721076           | 0.00040044  | 0.48721076       | 0.00040044  | 0.48721076           | 0.00040044  | 0.48721076  | 0.00040044 |
| ENSG00000105374 | 1   | 1017400  | 1017400  | -      | LOC101930  | unprocessed pseudogene | 0.46182774           | 1.43E-08   | 0.46182774    | 1.43E-08   | 0.46182774  | 0.00020536 | 0.46182774           | 0.00020536  | 0.46182774       | 0.00020536  | 0.46182774           | 0.00020536  | 0.46182774  | 0.00020536 |
| ENSG0000017262  | 15  | 3845417  | 3844770  | -      | FAM58B     | protein coding         | 0.411833184          | 0.175E-04  | 0.411911477   | 0.00020536 | 0.411833184 | 0.175E-04  | 0.411911477          | 0.00020536  | 0.411833184      | 0.175E-04   | 0.411911477          | 0.00020536  | 0.411833184 | 0.175E-04  |
| ENSG0000018369  | 22  | 4253617  | 4257438  | -      | FERM3L2    | protein coding         | 0.286218519          | 0.61E-05   | 0.48034801    | 0.00041493 | 0.286218519 | 0.61E-05   | 0.48034801           | 0.00041493  | 0.286218519      | 0.61E-05    | 0.48034801           | 0.00041493  | 0.286218519 | 0.61E-05   |
| ENSG0000022701  | 1   | 1017400  | 1017400  | -      | LOC101930  | unprocessed pseudogene | 0.46182774           | 1.43E-08   | 0.46182774    | 1.43E-08   | 0.46182774  | 0.00020536 | 0.46182774           | 0.00020536  | 0.46182774       | 0.00020536  | 0.46182774           | 0.00020536  | 0.46182774  | 0.00020536 |
| ENSG00000105028 | 7   | 4173834  | 4177922  | -      | HSPB1      | protein coding         | 0.52021356           | 1.06E-10   | 0.41579357    | 0.00020536 | 0.52021356  | 1.06E-10   | 0.41579357           | 0.00020536  | 0.52021356       | 1.06E-10    | 0.41579357           | 0.00020536  | 0.52021356  | 1.06E-10   |
| ENSG00000115541 | 2   | 19790040 | 19793449 | -      | SNRPB      | protein coding         | 0.38082738           | 1.43E-07   | 0.32148919    | 0.01985856 | 0.38082738  | 1.43E-07   | 0.32148919           | 0.01985856  | 0.38082738       | 1.43E-07    | 0.32148919           | 0.01985856  | 0.38082738  | 1.43E-07   |
| ENSG00000269416 | 1   | 1017400  | 1017400  | -      | LOC101930  | unprocessed pseudogene | 0.46182774           | 1.43E-08   | 0.46182774    | 1.43E-08   | 0.46182774  | 0.00020536 | 0.46182774           | 0.00020536  | 0.46182774       | 0.00020536  | 0.46182774           | 0.00020536  | 0.46182774  | 0.00020536 |
| ENSG00000146433 | 6   | 15836346 | 15836248 | -      | TMEM181    | protein coding         | 0.57711235           | 9.29E-10   | 0.57711235    | 9.29E-10   | 0.57711235  | 9.29E-10   |                      |             |                  |             |                      |             |             |            |



Table with 15 columns: Gene ID, Chr, Start, End, RefSeq ID, Gene Name, Feature Type, Strand, Start, End, RefSeq ID, Gene Name, Feature Type, Strand, Start, End, RefSeq ID, Gene Name, Feature Type, Strand. Contains genomic coordinates and gene annotations for various genes like AC024050.3, AC024050.4, AC024050.5, etc.





Table with columns for gene ID, chromosome, coordinates, gene name, and protein type. The table lists numerous genes such as ATP11C2, ACAD10, ALKBH3, etc., with their corresponding genomic data and protein details.



Table with 10 columns: Gene ID, Gene Name, Feature, Start, End, Strand, RefSeq, Ensembl, UniProt, and other identifiers. The table lists numerous genes and their associated genomic features and coordinates.

Table with columns for gene ID, chromosome, coordinates, gene name, and protein name. The table lists numerous genes such as ENG0000014343, ENG0000014344, etc., and their corresponding protein products like JTB, AFA1, APOB, etc.



|                |    |           |           |            |                       |             |             |            |            |             |             |             |             |              |             |             |            |             |             |          |
|----------------|----|-----------|-----------|------------|-----------------------|-------------|-------------|------------|------------|-------------|-------------|-------------|-------------|--------------|-------------|-------------|------------|-------------|-------------|----------|
| ENSG0000024774 | 7  | 47052793  | 47053674  | AC004870.1 | processed_pseudogen   | 0.004388508 | 0.969715094 | 0.25975430 | 0.06802020 | 0.106301121 | 0.567842008 | -0.12818001 | 0.52416200  | -0.215180204 | 0.118120006 | 0.578293684 | 0.03774426 | 0.066203113 | 0.647113300 |          |
| ENSG0000024775 | 8  | 46527314  | 46530371  | AC004870.1 | processed_pseudogen   | 0.4127207   | 0.0001664   | 0.49531124 | 0.00000000 | 0.0047476   | 0.85671000  | 0.34246271  | 0.99866500  | 0.7156400    | 0.00000000  | 0.00000000  | 0.00000000 | 0.00000000  | 0.00000000  |          |
| ENSG0000024776 | 9  | 41014234  | 41017533  | AC004870.1 | processed_pseudogen   | 0.00000000  | 0.00000000  | 0.00000000 | 0.00000000 | 0.00000000  | 0.00000000  | 0.00000000  | 0.00000000  | 0.00000000   | 0.00000000  | 0.00000000  | 0.00000000 | 0.00000000  | 0.00000000  |          |
| ENSG0000024777 | 10 | 19869139  | 19868033  | PEBP13     | protein coding        | 0.08511699  | 0.46171109  | 0.05075897 | 0.7261477  | 0.18202618  | 0.18202618  | 0.22851357  | 0.25148389  | 0.00584979   | 0.06651544  | 0.03703309  | 0.00000000 | 0.24252333  | 0.08705145  |          |
| ENSG0000024778 | 11 | 967129    | 10027131  | PEBP13     | protein coding        | 0.58887269  | 0.00138603  | 0.41224021 | 0.00000000 | 0.11517543  | 0.57951822  | 0.12357665  | 0.53912465  | 0.06047271   | 0.15129407  | 0.57836903  | 0.00000000 | 0.46612404  | 0.00000000  |          |
| ENSG0000024779 | 12 | 387389    | 387389    | AC010365.3 | processed_pseudogen   | 0.00000000  | 0.00000000  | 0.00000000 | 0.00000000 | 0.00000000  | 0.00000000  | 0.00000000  | 0.00000000  | 0.00000000   | 0.00000000  | 0.00000000  | 0.00000000 | 0.00000000  | 0.00000000  |          |
| ENSG0000024780 | 13 | 120201291 | 12021331  | PXN-A51    | lncRNA                | 0.30116309  | 0.00777599  | 0.28667129 | 0.04432209 | 0.12136417  | 0.64662084  | 0.01251139  | 0.95618108  | 0.01344737   | 0.13327720  | 0.57836903  | 0.00000000 | 0.42382869  | 0.02226663  |          |
| ENSG0000024781 | 14 | 6634731   | 6708912   | FBCV3      | protein coding        | -0.02403855 | 0.85341097  | 0.19622567 | 0.16799310 | 0.13984491  | 0.46601048  | -0.16109786 | 0.33996545  | -0.25739004  | 0.06516219  | 0.57816156  | 0.00000000 | 0.06276145  | 0.66438993  |          |
| ENSG0000024782 | 15 | 12342188  | 12342188  | AC010365.3 | processed_pseudogen   | 0.00000000  | 0.00000000  | 0.00000000 | 0.00000000 | 0.00000000  | 0.00000000  | 0.00000000  | 0.00000000  | 0.00000000   | 0.00000000  | 0.00000000  | 0.00000000 | 0.00000000  | 0.00000000  |          |
| ENSG0000024783 | 16 | 13450552  | 13450529  | AC010365.3 | processed_pseudogen   | 0.00000000  | 0.00000000  | 0.00000000 | 0.00000000 | 0.00000000  | 0.00000000  | 0.00000000  | 0.00000000  | 0.00000000   | 0.00000000  | 0.00000000  | 0.00000000 | 0.00000000  | 0.00000000  |          |
| ENSG0000024784 | 17 | 367846    | 368446    | ID4        | protein coding        | 0.47686827  | 0.19639     | 0.58944591 | 0.228408   | 0.30862107  | 0.11572653  | 0.60265281  | 0.00428668  | 0.42893488   | 0.00121681  | 0.57799873  | 0.00000000 | 0.46202164  | 0.01031401  |          |
| ENSG0000024785 | 18 | 20171538  | 20177351  | RANP1      | protein coding        | 0.3388148   | 0.00646695  | 0.41420864 | 0.000703   | 0.02426183  | 0.13789463  | 0.27822842  | 0.13325452  | 0.27523442   | 0.00000000  | 0.57799873  | 0.00000000 | 0.41875145  | 0.01681058  |          |
| ENSG0000024786 | 19 | 1815246   | 1815873   | AC010365.3 | processed_pseudogen   | 0.00000000  | 0.00000000  | 0.00000000 | 0.00000000 | 0.00000000  | 0.00000000  | 0.00000000  | 0.00000000  | 0.00000000   | 0.00000000  | 0.00000000  | 0.00000000 | 0.00000000  | 0.00000000  |          |
| ENSG0000024787 | 20 | 1550899   | 1560192   | HML1       | protein coding        | 0.53141747  | 0.00022681  | 0.43267094 | 0.00000000 | 0.08275262  | 0.73507144  | 0.25209115  | 0.20689917  | 0.14181796   | 0.32048468  | 0.57740022  | 0.00000000 | 0.38958960  | 0.04049181  |          |
| ENSG0000024788 | 21 | 14173489  | 14174769  | RNF7       | protein coding        | 0.4520302   | 0.63829     | 0.2303768  | 0.15891122 | 0.63460768  | 0.00000000  | -0.00263191 | 0.86141072  | 0.40431336   | 0.00000000  | 0.57740022  | 0.00000000 | 0.68495112  | 0.418108    |          |
| ENSG0000024789 | 22 | 24206400  | 24202256  | MBF1B3.1   | unprocessed_pseudogen | 0.01889974  | 0.87040721  | 0.05240537 | 0.07699455 | 0.00000000  | 0.00000000  | -0.10385857 | 0.55044376  | -0.15931592  | 0.24026544  | 0.57755814  | 0.00000000 | 0.03712671  | 0.29788663  |          |
| ENSG0000024790 | 23 | 16654899  | 16648042  | AC010672.8 | processed_pseudogen   | 0.28327396  | 0.04599268  | 0.28125291 | 0.04768312 | 0.38293453  | 0.04884841  | -0.05038927 | 0.88759076  | 0.10474893   | 0.43062601  | 0.57722254  | 0.00000000 | 0.34074453  | 0.00000000  |          |
| ENSG0000024791 | 24 | 115692    | 1201384   | TMEM129    | protein coding        | 0.00372919  | 0.97432313  | 0.11390448 | 0.07490966 | 0.24294638  | 0.26077239  | 0.02001336  | 0.90099395  | -0.29776901  | 0.09670368  | 0.57709643  | 0.00000000 | 0.41875145  | 0.00000000  |          |
| ENSG0000024792 | 25 | 27582869  | 27582317  | ZNF512     | protein coding        | 0.07611174  | 0.01629682  | 0.02618229 | 0.03143786 | 0.13132882  | 0.51177395  | 0.07784201  | 0.69918106  | -0.13800781  | 0.32077634  | 0.57698868  | 0.00000000 | 0.14277444  | 0.37676974  |          |
| ENSG0000024793 | 26 | 16892886  | 16889734  | IL1333.1   | lncRNA                | 0.00400465  | 0.97204165  | 0.23126498 | 0.10314487 | 0.00841544  | 0.77326297  | -0.00381209 | 0.64102748  | -0.11761096  | 0.39070624  | 0.57649613  | 0.00000000 | 0.03712671  | 0.79431520  |          |
| ENSG0000024794 | 27 | 3004665   | 3004665   | CDORF1     | protein coding        | 0.44177977  | 0.00001802  | 0.39527456 | 0.04012222 | 0.39274794  | 0.11869222  | 0.00000000  | 0.77149631  | 0.02078161   | 0.07748686  | 0.57691814  | 0.00000000 | 0.00000000  | 0.5226929   | 0.878420 |
| ENSG0000024795 | 28 | 18123589  | 18123589  | TRIM1      | protein coding        | 0.01371814  | 0.30570678  | 0.00000000 | 0.00000000 | 0.14004534  | 0.5321189   | 0.03684781  | 0.845629712 | 0.13052116   | 0.39488761  | 0.57878289  | 0.00000000 | 0.34847655  | 0.00451932  |          |
| ENSG0000024796 | 29 | 18229156  | 18248089  | ATP9F1     | protein coding        | 0.45783152  | 0.23829     | 0.13001703 | 0.3847596  | 0.67435238  | 0.00000000  | -0.24241557 | 0.2211015   | 0.38348664   | 0.00000000  | 0.57881320  | 0.00000000 | 0.69160329  | 0.2488408   |          |
| ENSG0000024797 | 30 | 1814552   | 18151681  | AC007192.2 | lncRNA                | 0.33871474  | 0.00259491  | 0.35911276 | 0.011381   | 0.14478546  | 0.41116251  | 0.1997174   | 0.94475567  | 0.10034517   | 0.41032237  | 0.57698872  | 0.00000000 | 0.3909222   | 0.44765428  |          |
| ENSG0000024798 | 31 | 1815246   | 1815873   | CDCA7      | protein coding        | 0.38246531  | 0.00481977  | 0.00000000 | 0.00000000 | 0.17103222  | 0.48528307  | 0.44321897  | 0.00000000  | 0.33843862   | 0.33843862  | 0.57862217  | 0.00000000 | 0.3761032   | 0.0871195   |          |
| ENSG0000024799 | 32 | 99181427  | 99181028  | MTD1       | protein coding        | 0.18118155  | 0.00000000  | 0.23292272 | 0.10352624 | 0.26235474  | 0.18615587  | -0.12471699 | 0.53201858  | 0.15171029   | 0.2739193   | 0.57818054  | 0.00000000 | 0.59180252  | 0.00000000  |          |
| ENSG0000024800 | 33 | 95116420  | 95121654  | AC010365.3 | processed_pseudogen   | 0.04898704  | 0.0108924   | 0.30220111 | 0.00000000 | 0.34849493  | 0.07031358  | 0.08000000  | 0.73534678  | 0.28026264   | 0.00000000  | 0.57624262  | 0.00000000 | 0.59100295  | 0.00000000  |          |
| ENSG0000024801 | 34 | 6842331   | 6842737   | AC008033.3 | lncRNA                | 0.57028790  | 0.161808    | 0.51575423 | 2.58E-08   | 0.48213008  | 0.01522284  | 0.54111741  | 0.00000000  | 0.56037254   | 0.1628058   | 0.57818054  | 0.00000000 | 0.51906288  | 1.08E-05    |          |
| ENSG0000024802 | 35 | 14974843  | 149811420 | PCMT1      | protein coding        | 0.4225412   | 0.0001291   | 0.16795720 | 0.24953728 | 0.14727398  | 0.11812225  | 0.0023261   | 0.9936589   | 0.38444608   | 0.00000000  | 0.57604558  | 0.00000000 | 0.68992261  | 2.32E-07    |          |
| ENSG0000024803 | 36 | 10000000  | 10000000  | AC010365.3 | processed_pseudogen   | 0.00000000  | 0.00000000  | 0.00000000 | 0.00000000 | 0.00000000  | 0.00000000  | 0.00000000  | 0.00000000  | 0.00000000   | 0.00000000  | 0.00000000  | 0.00000000 | 0.00000000  | 0.00000000  |          |
| ENSG0000024804 | 37 | 21117348  | 21117348  | AC020917.1 | processed_pseudogen   | 0.52065133  | 0.950E-07   | 0.46707403 | 0.00000000 | 0.50268599  | 0.00070742  | 0.45988447  | 0.00000000  | 0.00000000   | 0.00000000  | 0.00000000  | 0.00000000 | 0.00000000  | 0.00000000  |          |
| ENSG0000024805 | 38 | 3843437   | 38435664  | RNF292P2   | transcribed_processed | 0.14174069  | 0.19137559  | 0.04701564 | 0.60274473 | 0.00214184  | 0.92056787  | -0.17151724 | 0.10866041  | -0.26745715  | 0.05998481  | 0.57894154  | 0.00000000 | 0.0709212   | 0.60034719  |          |
| ENSG0000024806 | 39 | 18123589  | 18123589  | CDCA7      | protein coding        | 0.38246531  | 0.00481977  | 0.00000000 | 0.00000000 | 0.17103222  | 0.48528307  | 0.44321897  | 0.00000000  | 0.33843862   | 0.33843862  | 0.57862217  | 0.00000000 | 0.3761032   | 0.0871195   |          |
| ENSG0000024807 | 40 | 18123589  | 18123589  | CDCA7      | protein coding        | 0.38246531  | 0.00481977  | 0.00000000 | 0.00000000 | 0.17103222  | 0.48528307  | 0.44321897  | 0.00000000  | 0.33843862   | 0.33843862  | 0.57862217  | 0.00000000 | 0.3761032   | 0.0871195   |          |
| ENSG0000024808 | 41 | 18123589  | 18123589  | CDCA7      | protein coding        | 0.38246531  | 0.00481977  | 0.00000000 | 0.00000000 | 0.17103222  | 0.48528307  | 0.44321897  | 0.00000000  | 0.33843862   | 0.33843862  | 0.57862217  | 0.00000000 | 0.3761032   | 0.0871195   |          |
| ENSG0000024809 | 42 | 18123589  | 18123589  | CDCA7      | protein coding        | 0.38246531  | 0.00481977  | 0.00000000 | 0.00000000 | 0.17103222  | 0.48528307  | 0.44321897  | 0.00000000  | 0.33843862   | 0.33843862  | 0.57862217  | 0.00000000 | 0.3761032   | 0.0871195   |          |
| ENSG0000024810 | 43 | 18123589  | 18123589  | CDCA7      | protein coding        | 0.38246531  | 0.00481977  | 0.00000000 | 0.00000000 | 0.17103222  | 0.48528307  | 0.44321897  | 0.00000000  | 0.33843862   | 0.33843862  | 0.57862217  | 0.00000000 | 0.3761032   | 0.0871195   |          |
| ENSG0000024811 | 44 | 18123589  | 18123589  | CDCA7      | protein coding        | 0.38246531  | 0.00481977  | 0.00000000 | 0.00000000 | 0.17103222  | 0.48528307  | 0.44321897  | 0.00000000  | 0.33843862   | 0.33843862  | 0.57862217  | 0.00000000 | 0.3761032   | 0.0871195   |          |
| ENSG0000024812 | 45 | 18123589  | 18123589  | CDCA7      | protein coding        | 0.38246531  | 0.00481977  | 0.00000000 | 0.00000000 | 0.17103222  | 0.48528307  | 0.44321897  | 0.00000000  | 0.33843862   | 0.33843862  | 0.57862217  | 0.00000000 | 0.3761032   | 0.0871195   |          |
| ENSG0000024813 | 46 | 18123589  | 18123589  | CDCA7      | protein coding        | 0.38246531  | 0.00481977  | 0.00000000 | 0.00000000 | 0.17103222  | 0.48528307  | 0.44321897  | 0.00000000  | 0.33843862   | 0.33843862  | 0.57862217  | 0.00000000 | 0.3761032   | 0.0871195   |          |
| ENSG0000024814 | 47 | 18123589  | 18123589  | CDCA7      | protein coding        |             |             |            |            |             |             |             |             |              |             |             |            |             |             |          |





Table with 10 columns: Gene ID, Chr, Start, End, Gene Name, Type, RefSeq ID, RefSeq Description, RefSeq Link, RefSeq Description, RefSeq Link. Contains genomic coordinates and gene annotations for various genes like TIA1, ABCD1, ABCD2, ABCD3, ABCD4, ABCD5, ABCD6, ABCD7, ABCD8, ABCD9, ABCD10, ABCD11, ABCD12, ABCD13, ABCD14, ABCD15, ABCD16, ABCD17, ABCD18, ABCD19, ABCD20, ABCD21, ABCD22, ABCD23, ABCD24, ABCD25, ABCD26, ABCD27, ABCD28, ABCD29, ABCD30, ABCD31, ABCD32, ABCD33, ABCD34, ABCD35, ABCD36, ABCD37, ABCD38, ABCD39, ABCD40, ABCD41, ABCD42, ABCD43, ABCD44, ABCD45, ABCD46, ABCD47, ABCD48, ABCD49, ABCD50, ABCD51, ABCD52, ABCD53, ABCD54, ABCD55, ABCD56, ABCD57, ABCD58, ABCD59, ABCD60, ABCD61, ABCD62, ABCD63, ABCD64, ABCD65, ABCD66, ABCD67, ABCD68, ABCD69, ABCD70, ABCD71, ABCD72, ABCD73, ABCD74, ABCD75, ABCD76, ABCD77, ABCD78, ABCD79, ABCD80, ABCD81, ABCD82, ABCD83, ABCD84, ABCD85, ABCD86, ABCD87, ABCD88, ABCD89, ABCD90, ABCD91, ABCD92, ABCD93, ABCD94, ABCD95, ABCD96, ABCD97, ABCD98, ABCD99, ABCD100.







Table with 10 columns: Gene ID, Chr, Start, End, Gene Name, Type, RefSeq ID, RefSeq Description, RefSeq Link, RefSeq Description, RefSeq Link. Contains genomic coordinates and gene annotations for various genes like ACOX1, ACOX2, ACOX3, etc.



Table with 10 columns: Gene ID, Gene Name, Feature, Start, End, Strand, RefSeq ID, RefSeq Name, RefSeq Type, RefSeq Description. The table lists numerous genes and their associated features, including protein-coding genes, lincRNAs, antisense transcripts, and pseudogenes. Each entry includes genomic coordinates and a RefSeq identifier.

|                 |    |           |           |            |                        |             |             |             |             |             |             |             |             |             |             |             |             |             |             |             |
|-----------------|----|-----------|-----------|------------|------------------------|-------------|-------------|-------------|-------------|-------------|-------------|-------------|-------------|-------------|-------------|-------------|-------------|-------------|-------------|-------------|
| ENSG00000241061 | 15 | 24099392  | 24099325  | RPLP1      | processed_pseudogene   | 0.35177685  | 0.001699741 | 0.227091045 | 0.112748340 | 0.524431317 | 0.004828743 | 0.153485847 | 0.444752948 | 0.243139111 | 0.076619927 | 0.478282621 | 0.020304897 | 0.508987701 | 0.000160310 |             |
| ENSG0000027587  | 19 | 54252678  | 54467839  | PCP2CD4    | transcribed_pseudogene | 0.10529263  | 0.065537897 | 0.135035111 | 0.358571450 | 0.024252733 | 0.0642587   | 0.262503667 | 0.202441181 | 0.4538373   | 0.266972373 | 0.47873180  | 0.020304897 | 0.508987701 | 0.000160310 |             |
| ENSG0000030398  | 14 | 141450078 | 141450114 | LRN1       | mRNA                   | 0.14728199  | 0.000000000 | 0.042721600 | 0.042721600 | 0.042721600 | 0.042721600 | 0.042721600 | 0.042721600 | 0.042721600 | 0.042721600 | 0.042721600 | 0.042721600 | 0.042721600 | 0.042721600 |             |
| ENSG00000185100 | 14 | 104724229 | 104743829 | ADSS1      | protein_coding         | 0.154446848 | 0.179298214 | 0.135805803 | 0.373424207 | 0.107899963 | 0.492224206 | 0.1734427   | 0.38694402  | 0.0316761   | 0.3107671   | 0.47873180  | 0.020304897 | 0.508987701 | 0.000160310 |             |
| ENSG0000020492  | 20 | 24845748  | 24845748  | ADSS1      | transcript_variant     | 0.18136335  | 0.155555240 | 0.307753540 | 0.026970701 | 0.026970701 | 0.026970701 | 0.026970701 | 0.026970701 | 0.026970701 | 0.026970701 | 0.026970701 | 0.026970701 | 0.026970701 | 0.026970701 | 0.026970701 |
| ENSG00000149000 | 20 | 37543489  | 37543489  | COMMD7     | transcript_variant     | 0.000000000 | 0.000000000 | 0.000000000 | 0.000000000 | 0.000000000 | 0.000000000 | 0.000000000 | 0.000000000 | 0.000000000 | 0.000000000 | 0.000000000 | 0.000000000 | 0.000000000 | 0.000000000 |             |
| ENSG0000028749  | 19 | 59898438  | 59971396  | NFE2L3P1   | transcript_variant     | 0.102746579 | 0.270870033 | 0.307753540 | 0.026970701 | 0.026970701 | 0.026970701 | 0.026970701 | 0.026970701 | 0.026970701 | 0.026970701 | 0.026970701 | 0.026970701 | 0.026970701 | 0.026970701 | 0.026970701 |
| ENSG00000146021 | 19 | 10034739  | 10036163  | TTOP       | transcript_variant     | 0.03707984  | 0.74840265  | 0.31201513  | 0.046337240 | 0.046337240 | 0.046337240 | 0.046337240 | 0.046337240 | 0.046337240 | 0.046337240 | 0.046337240 | 0.046337240 | 0.046337240 | 0.046337240 | 0.046337240 |
| ENSG00000160979 | 19 | 15398280  | 15398280  | TTOP       | transcript_variant     | 0.03707984  | 0.74840265  | 0.31201513  | 0.046337240 | 0.046337240 | 0.046337240 | 0.046337240 | 0.046337240 | 0.046337240 | 0.046337240 | 0.046337240 | 0.046337240 | 0.046337240 | 0.046337240 | 0.046337240 |
| ENSG00000298535 | 19 | 21709522  | 21710191  | MTF4P4     | processed_pseudogene   | 0.048044174 | 0.46337240  | 0.13489212  | 0.34668995  | 0.03103378  | 0.03103378  | 0.03103378  | 0.03103378  | 0.03103378  | 0.03103378  | 0.03103378  | 0.03103378  | 0.03103378  | 0.03103378  | 0.03103378  |
| ENSG0000023989  | 6  | 19881789  | 19882224  | EGR-AS1    | transcript_variant     | 0.18053137  | 0.11501118  | 0.06135739  | 0.60387490  | 0.48963500  | 0.00000000  | 0.26262600  | 0.30171528  | 0.0131158   | 0.04949499  | 0.47842211  | 0.020304897 | 0.508987701 | 0.000160310 |             |
| ENSG00000169710 | 12 | 11334888  | 11334888  | CFRP3      | protein_coding         | 0.21462434  | 0.028194324 | 0.35843694  | 0.028194324 | 0.028194324 | 0.028194324 | 0.028194324 | 0.028194324 | 0.028194324 | 0.028194324 | 0.028194324 | 0.028194324 | 0.028194324 | 0.028194324 | 0.028194324 |
| ENSG00000245888 | 1  | 17843084  | 17843084  | NR3A3      | mRNA                   | 0.19690344  | 0.08608749  | 0.03103378  | 0.03103378  | 0.03103378  | 0.03103378  | 0.03103378  | 0.03103378  | 0.03103378  | 0.03103378  | 0.03103378  | 0.03103378  | 0.03103378  | 0.03103378  | 0.03103378  |
| ENSG00000101000 | 20 | 3517202   | 35216240  | PKOXR      | protein_coding         | 0.017120719 | 0.88251437  | 0.1830894   | 0.21019624  | 0.02471758  | 0.7884751   | 0.02778238  | 0.1344478   | 0.86024514  | 0.02679134  | 0.4781300   | 0.020304897 | 0.508987701 | 0.000160310 |             |
| ENSG00000143992 | 2  | 6392146   | 64011928  | VPR4       | protein_coding         | 0.27888454  | 0.04109383  | 0.31894265  | 0.02614387  | 0.320919281 | 0.10071981  | 0.14448117  | 0.3841548   | 0.00309077  | 0.14449348  | 0.4781300   | 0.020304897 | 0.508987701 | 0.000160310 |             |
| ENSG00000286999 | 20 | 6409708   | 64101162  | LOC1125813 | mRNA                   | 0.058131716 | 0.16144283  | 0.065355227 | 0.625024340 | 0.25016754  | 0.20202691  | 0.12866981  | 0.52242038  | 0.145151517 | 0.26784994  | 0.4781300   | 0.020304897 | 0.508987701 | 0.000160310 |             |
| ENSG0000020581  | 21 | 3942415   | 39484871  | HMCN1      | protein_coding         | 0.20506194  | 0.006969339 | 0.21071035  | 0.14172830  | 0.3458386   | 0.07272262  | 0.10291720  | 0.61908898  | 0.15430648  | 0.26259004  | 0.47790437  | 0.020304897 | 0.508987701 | 0.000160310 |             |
| ENSG00000159796 | 19 | 111201704 | 111201704 | DEDD       | protein_coding         | 0.18309494  | 0.15921611  | 0.05819658  | 0.407817901 | 0.149190332 | 0.42676859  | 0.13591157  | 0.49674441  | 0.01887699  | 0.89211041  | 0.4771978   | 0.020304897 | 0.508987701 | 0.000160310 |             |
| ENSG00000116221 | 1  | 5148441   | 5242444   | MRP3       | protein_coding         | 0.170751386 | 0.11775923  | 0.25336290  | 0.07890144  | 0.04701263  | 0.71370339  | 0.017489911 | 0.93107398  | 0.03910892  | 0.72898494  | 0.4771978   | 0.020304897 | 0.508987701 | 0.000160310 |             |
| ENSG00000129116 | 4  | 16849792  | 16849792  | PALL1      | protein_coding         | 0.26698994  | 0.01091239  | 0.3464354   | 0.03047896  | 0.45899397  | 0.00693303  | 0.2537070   | 0.18999335  | 0.31913404  | 0.04184718  | 0.4771978   | 0.020304897 | 0.508987701 | 0.000160310 |             |
| ENSG00000276005 | 19 | 14337638  | 14336330  | AC09793.5  | transcript_variant     | 0.03217991  | 0.009178659 | 0.24320921  | 0.07847513  | 0.023767373 | 0.4668137   | 0.00447768  | 0.85668116  | 0.2381847   | 0.05864211  | 0.4771978   | 0.020304897 | 0.508987701 | 0.000160310 |             |
| ENSG00000280053 | 3  | 12697365  | 126987428 | AC011199.1 | transcript_variant     | 0.157181248 | 0.18795931  | 0.03007844  | 0.73076884  | 0.00360354  | 0.861203592 | 0.281078269 | 0.183838749 | 0.21869811  | 0.11292912  | 0.4771978   | 0.020304897 | 0.508987701 | 0.000160310 |             |
| ENSG00000147778 | 8  | 86434292  | 86486890  | ADHFE1     | protein_coding         | 0.28114308  | 0.01160921  | 0.3881298   | 0.0051384   | 0.19291307  | 0.3306177   | 0.2993291   | 0.12928811  | 0.18555348  | 0.17915801  | 0.47713851  | 0.020304897 | 0.508987701 | 0.000160310 |             |
| ENSG00000110009 | 1  | 17011815  | 17085511  | MYO3B      | protein_coding         | 0.027092324 | 0.53321743  | 0.38717533  | 0.0594747   | 0.03884478  | 0.8478465   | 0.4387765   | 0.07038465  | 0.10598238  | 0.98741258  | 0.47713851  | 0.020304897 | 0.508987701 | 0.000160310 |             |
| ENSG00000160051 | 1  | 3226371   | 32268862  | IOHCE      | protein_coding         | 0.03307712  | 0.11069217  | 0.15763203  | 0.24719958  | 0.00880338  | 0.70082877  | 0.03218795  | 0.47819404  | 0.01524375  | 0.04713851  | 0.020304897 | 0.508987701 | 0.000160310 | 0.000160310 |             |
| ENSG00000148574 | 7  | 6794134   | 6828770   | C12orf12   | protein_coding         | 0.3902427   | 0.00246588  | 0.3387889   | 0.01077729  | 0.02798407  | 0.91013924  | 0.1593867   | 0.45226013  | 0.15988184  | 0.2935699   | 0.4771454   | 0.020304897 | 0.508987701 | 0.000160310 |             |
| ENSG00000286996 | 1  | 42995134  | 42997440  | AC008975.2 | transcript_variant     | 0.017849271 | 0.959897892 | 0.10818468  | 0.79231995  | 0.011298984 | 0.95843438  | 0.48491987  | 0.0107698   | 0.28741982  | 0.098897945 | 0.4769873   | 0.020304897 | 0.508987701 | 0.000160310 |             |
| ENSG00000176435 | 14 | 3825400   | 3825603   | C10orf14   | protein_coding         | 0.130314608 | 0.258831316 | 0.31821665  | 0.07190808  | 0.011298984 | 0.450044681 | 0.000000000 | 0.000000000 | 0.000000000 | 0.000000000 | 0.000000000 | 0.000000000 | 0.000000000 | 0.000000000 |             |
| ENSG00000286994 | 3  | 18950936  | 18950947  | AC012484.3 | transcript_variant     | 0.047983725 | 0.07851468  | 0.1695242   | 0.24848404  | 0.09152329  | 0.848815945 | 0.14246887  | 0.9439531   | 0.03594662  | 0.7826334   | 0.47687071  | 0.020304897 | 0.508987701 | 0.000160310 |             |
| ENSG00000272792 | 19 | 54252678  | 54467839  | PCP2CD4    | transcript_variant     | 0.10529263  | 0.065537897 | 0.135035111 | 0.358571450 | 0.024252733 | 0.0642587   | 0.262503667 | 0.202441181 | 0.4538373   | 0.266972373 | 0.47873180  | 0.020304897 | 0.508987701 | 0.000160310 |             |
| ENSG0000020581  | 21 | 3942415   | 39484871  | HMCN1      | transcript_variant     | 0.20506194  | 0.006969339 | 0.21071035  | 0.14172830  | 0.3458386   | 0.07272262  | 0.10291720  | 0.61908898  | 0.15430648  | 0.26259004  | 0.47790437  | 0.020304897 | 0.508987701 | 0.000160310 |             |
| ENSG00000137492 | 11 | 7634995   | 76381132  | THAP12     | protein_coding         | 0.15584262  | 0.17633483  | 0.3032194   | 0.09319278  | 0.262626024 | 0.17607847  | 0.11692739  | 0.56135993  | 0.02144879  | 0.07855207  | 0.47650228  | 0.020304897 | 0.508987701 | 0.000160310 |             |
| ENSG00000137092 | 19 | 54252678  | 54467839  | PCP2CD4    | transcript_variant     | 0.10529263  | 0.065537897 | 0.135035111 | 0.358571450 | 0.024252733 | 0.0642587   | 0.262503667 | 0.202441181 | 0.4538373   | 0.266972373 | 0.47873180  | 0.020304897 | 0.508987701 | 0.000160310 |             |
| ENSG00000219928 | 8  | 87253242  | 87254774  | ALH187.1   | processed_pseudogene   | 0.42423746  | 0.27864276  | 0.07177930  | 0.06050204  | 0.06050204  | 0.06050204  | 0.06050204  | 0.06050204  | 0.06050204  | 0.06050204  | 0.06050204  | 0.06050204  | 0.06050204  | 0.06050204  | 0.06050204  |
| ENSG00000170099 | 20 | 2362739   | 23629207  | CC22       | transcript_variant     | 0.27243134  | 0.04148444  | 0.05564014  | 0.7011565   | 0.24578704  | 0.1642421   | 0.24568698  | 0.24734014  | 0.34532433  | 0.04029301  | 0.4763304   | 0.020304897 | 0.508987701 | 0.000160310 |             |
| ENSG00000205188 | 19 | 14337638  | 14336330  | AC09793.5  | transcript_variant     | 0.03217991  | 0.009178659 | 0.24320921  | 0.07847513  | 0.023767373 | 0.4668137   | 0.00447768  | 0.85668116  | 0.2381847   | 0.05864211  | 0.4771978   | 0.020304897 | 0.508987701 | 0.000160310 |             |
| ENSG00000131142 | 19 | 8056767   | 8062620   | COL25      | protein_coding         | 0.01805581  | 0.87036127  | 0.25548317  | 0.07135544  | 0.081985121 | 0.10785813  | 0.02015812  | 0.10602608  | 0.06050204  | 0.06050204  | 0.06050204  | 0.06050204  | 0.06050204  | 0.06050204  | 0.06050204  |
| ENSG00000164878 | 3  | 3429506   | 3434731   | NUDT2      | protein_coding         | 0.24689778  | 0.03307712  | 0.24334035  | 0.0809081   | 0.29422229  | 0.14972589  | 0.09671298  | 0.63128776  | 0.22468335  | 0.10295439  | 0.47623898  | 0.020304897 | 0.508987701 | 0.000160310 |             |
| ENSG00000244878 | 19 | 54252678  | 54467839  | PCP2CD4    | transcript_variant     | 0.10529263  | 0.065537897 | 0.135035111 | 0.358571450 | 0.024252733 | 0.0642587   | 0.262503667 | 0.202441181 | 0.4538373   | 0.266972373 | 0.47873180  | 0.020304897 | 0.508987701 | 0           |             |



Table with 10 columns: Gene ID, Chr, Start, End, Gene Name, Feature, RefSeq ID, RefSeq Name, RefSeq Description, RefSeq Accession. The table lists numerous genes and their associated features and identifiers.

Table with columns for gene ID, gene name, transcript type, coordinates, and various numerical values. The table lists numerous genes such as TOR1A-AS1, ANKRD5, and others, with their respective genomic coordinates and associated data points.





|                 |    |           |           |                     |                   |             |            |            |             |             |            |             |            |             |            |            |            |            |             |            |
|-----------------|----|-----------|-----------|---------------------|-------------------|-------------|------------|------------|-------------|-------------|------------|-------------|------------|-------------|------------|------------|------------|------------|-------------|------------|
| ENSG0000022401  | 9  | 68234709  | 98255577  | AL36081.1           | processed_pseudog | 0.04347691  | 0.70731059 | 0.14655553 | 0.309891218 | 0.19262949  | 0.32645349 | -0.10688573 | 0.58739955 | 0.01040601  | 0.94255544 | 0.47373242 | 0.03871821 | 0.06890457 | 0.584115318 |            |
| ENSG0000025038  | 11 | 16692576  | 9969881   | AC00739             | ncRNA             | 0.01570434  | 0.82471709 | 0.23312979 | 0.10318051  | 0.05543364  | 0.71429551 | -0.07151309 | 0.50711501 | 0.014889    | 0.2906168  | 0.4376701  | 0.017531   | 0.0254533  | 0.6977038   |            |
| ENSG0000026943  | 14 | 14693444  | 14693444  | NIF2L2              | ncRNA             | 0.12241862  | 0.12241862 | 0.12241862 | 0.12241862  | 0.12241862  | 0.12241862 | -0.09448781 | 0.47714849 | 0.0738924   | 0.0738924  | 0.47714849 | 0.0738924  | 0.0738924  | 0.47714849  |            |
| ENSG0000018544  | 1  | 116051197 | 116052200 | AC02336.1           | processed_pseudog | 0.48242015  | 0.8776209  | 0.25420842 | 0.07498773  | 0.05454365  | 0.00248931 | -0.07448901 | 0.70244509 | 0.00248931  | 0.00248931 | 0.70244509 | 0.00248931 | 0.00248931 | 0.70244509  |            |
| ENSG0000023268  | 1  | 8269637   | 8269637   | AC02336.1           | processed_pseudog | 0.22774805  | 0.8619516  | 0.07348365 | 0.12629689  | 0.5376966   | 0.0693766  | -0.16993174 | 0.34274689 | 0.14030927  | 0.31159184 | 0.43748503 | 0.03862627 | 0.47117994 | 0.6447336   |            |
| ENSG0000023848  | 1  | 84347248  | 84347248  | TRP3L3P3            | ncRNA             | 0.02115286  | 0.02115286 | 0.02115286 | 0.02115286  | 0.02115286  | 0.02115286 | -0.02115286 | 0.02115286 | 0.02115286  | 0.02115286 | 0.02115286 | 0.02115286 | 0.02115286 | 0.02115286  | 0.02115286 |
| ENSG0000018547  | 1  | 20753633  | 20753633  | IGRPIN3             | ncRNA             | 0.20753633  | 0.20753633 | 0.20753633 | 0.20753633  | 0.20753633  | 0.20753633 | -0.20753633 | 0.20753633 | 0.20753633  | 0.20753633 | 0.20753633 | 0.20753633 | 0.20753633 | 0.20753633  |            |
| ENSG00000270154 | 8  | 14462714  | 14462714  | AC02336.1           | processed_pseudog | 0.07068914  | 0.54472157 | 0.28932634 | 0.06103945  | -0.2304481  | 0.04835969 | -0.1651363  | 0.58213728 | 0.03955592  | 0.00274689 | 0.43729874 | 0.03861363 | 0.19014474 | 0.1959176   |            |
| ENSG00000254013 | 3  | 30922715  | 30922715  | MAP2K1P1            | ncRNA             | 0.02581479  | 0.02581479 | 0.02581479 | 0.02581479  | 0.02581479  | 0.02581479 | -0.02581479 | 0.02581479 | 0.02581479  | 0.02581479 | 0.02581479 | 0.02581479 | 0.02581479 | 0.02581479  |            |
| ENSG0000024228  | 8  | 16892914  | 16892914  | LOC100282           | ncRNA             | 0.02689712  | 0.02689712 | 0.02689712 | 0.02689712  | 0.02689712  | 0.02689712 | -0.02689712 | 0.02689712 | 0.02689712  | 0.02689712 | 0.02689712 | 0.02689712 | 0.02689712 | 0.02689712  |            |
| ENSG0000019690  | 17 | 8641818   | 8244265   | HEAD                | protein coding    | -0.05924429 | 0.14452657 | 0.2215178  | 0.1220194   | 0.18986438  | 0.9464747  | 0.1319728   | 0.5120291  | -0.12695292 | 0.3644154  | 0.4307023  | 0.00702629 | 0.1378876  | 0.5496794   |            |
| ENSG0000017848  | 12 | 5204628   | 5204628   | OTX3                | protein coding    | 0.14919583  | 0.14919583 | 0.14919583 | 0.14919583  | 0.14919583  | 0.14919583 | -0.14919583 | 0.14919583 | 0.14919583  | 0.14919583 | 0.14919583 | 0.14919583 | 0.14919583 | 0.14919583  |            |
| ENSG0000024034  | 17 | 2892249   | 2892249   | AC024267.3          | ncRNA             | 0.10158717  | 0.10158717 | 0.10158717 | 0.10158717  | 0.10158717  | 0.10158717 | -0.10158717 | 0.10158717 | 0.10158717  | 0.10158717 | 0.10158717 | 0.10158717 | 0.10158717 | 0.10158717  |            |
| ENSG0000022987  | 15 | 9219698   | 9222911   | AC12632.2           | ncRNA             | -0.03087093 | 0.78883534 | 0.1485810  | 0.0338927   | 0.17381528  | 0.49348482 | 0.1536117   | 0.4442481  | 0.00730702  | 0.0767868  | 0.4361912  | 0.00714888 | 0.16394133 | 0.25254942  |            |
| ENSG0000015711  | 1  | 2403984   | 2413777   | PCD10               | protein coding    | 0.11094144  | 0.3388955  | 0.24976474 | 0.08024365  | 0.28345492  | 0.1509189  | 0.04781157  | 0.8178103  | -0.07480774 | 0.59959921 | 0.43972878 | 0.00714888 | 0.1378876  | 0.3393291   |            |
| ENSG00000277998 | 2  | 16457314  | 16457404  | unprocessed_pseudog | ncRNA             | -0.07588887 | 0.12595138 | 0.10602275 | 0.2668490   | 0.14674891  | 0.4951032  | -0.1670264  | 0.9446958  | -0.1670264  | 0.9446958  | 0.00731951 | 0.02895014 | 0.58840203 | 0.6723584   |            |
| ENSG0000028778  | 4  | 617198    | 618492    | AC13615.2           | ncRNA             | -0.20134812 | 0.07909879 | 0.0881199  | 0.5428400   | 0.27427004  | 0.1662265  | -0.1858818  | 0.3404203  | -0.3811615  | 0.00129636 | 0.4364911  | 0.00732027 | 0.18511291 | 0.1860994   |            |
| ENSG0000011272  | 1  | 4593937   | 4603048   | CLIC4               | protein coding    | 0.17871021  | 0.09969263 | 0.1544444  | 0.1220151   | 0.14742996  | 0.4537463  | -0.0811024  | 0.8506368  | -0.2119003  | 0.0397056  | 0.4363126  | 0.00730505 | 0.21444911 | 0.1330141   |            |
| ENSG00000284235 | 18 | 3255436   | 3261850   | AP050329.1          | ncRNA             | 0.29842438  | 0.00404287 | 0.1375736  | 0.34364074  | 0.122272095 | 0.28513532 | -0.0811024  | 0.8506368  | 0.00730505  | 0.00730505 | 0.4363126  | 0.00732027 | 0.18511291 | 0.1860994   |            |
| ENSG00000157014 | 10 | 1024823   | 1024120   | TAF12D              | protein coding    | 0.27684877  | 0.0147478  | 0.3114448  | 0.0578789   | 0.08542339  | 0.80865031 | -0.2012842  | 0.3140229  | 0.14471676  | 0.2944548  | 0.43629324 | 0.00732027 | 0.18511291 | 0.1860994   |            |
| ENSG0000027408  | 1  | 3225815   | 3225444   | AC026920.2          | ncRNA             | 0.14789438  | 0.19289163 | 0.0202819  | 0.0173567   | 0.1678473   | 0.1678473  | -0.1678473  | 0.1678473  | 0.1678473   | 0.1678473  | 0.1678473  | 0.1678473  | 0.1678473  | 0.1678473   |            |
| ENSG00000125864 | 10 | 1749305   | 1758920   | BSP1                | protein coding    | 0.17348189  | 0.11831167 | 0.3140448  | 0.01426058  | 0.15778449  | 0.43190257 | -0.18481662 | 0.36607048 | 0.04018376  | 0.17379594 | 0.43026741 | 0.00732027 | 0.18511291 | 0.1860994   |            |
| ENSG00000161542 | 14 | 7639478   | 7638452   | PRPSAP1             | protein coding    | 0.33110404  | 0.00332711 | 0.31232811 | 0.0187884   | 0.34837570  | 0.0784357  | 0.0241946   | 0.64680374 | 0.15043491  | 0.07378153 | 0.43398068 | 0.00732027 | 0.18511291 | 0.1860994   |            |
| ENSG0000022662  | 3  | 1207018   | 1207198   | AC101112            | processed_pseudog | -0.11749304 | 0.30883173 | 0.10958244 | 0.5058175   | 0.00920266  | 0.7638147  | -0.16321251 | 0.51595254 | -0.213624   | 0.11115657 | 0.43511804 | 0.00732027 | 0.18511291 | 0.1860994   |            |
| ENSG0000023236  | 3  | 4897918   | 4898385   | AC137830.2          | ncRNA             | 0.2440214   | 0.00444473 | 0.1235158  | 0.3620848   | 0.18678911  | 0.50021954 | -0.23763704 | 0.23256574 | 0.02879014  | 0.07827854 | 0.43686874 | 0.00732027 | 0.18511291 | 0.1860994   |            |
| ENSG00000143954 | 2  | 7925998   | 7926885   | REC3G               | protein coding    | -0.02013287 | 0.8620270  | 0.17878970 | 0.21418559  | 0.12801254  | 0.81121418 | -0.04293209 | 0.83181982 | -0.15389551 | 0.286527   | 0.4355915  | 0.00732027 | 0.18511291 | 0.1860994   |            |
| ENSG0000030387  | 17 | 1298794   | 12413928  | MTMR7               | protein coding    | -0.02299712 | 0.8455433  | 0.16327663 | 0.10021965  | 0.10021965  | 0.10021965 | -0.10021965 | 0.10021965 | 0.10021965  | 0.10021965 | 0.10021965 | 0.10021965 | 0.10021965 | 0.10021965  |            |
| ENSG0000017307  | 1  | 15497483  | 15497483  | CR3B1               | protein coding    | 0.28028284  | 0.01332818 | 0.29783262 | 0.14372440  | 0.18261055  | 0.19633381 | -0.11542481 | 0.56841148 | 0.28147335  | 0.03326385 | 0.43587957 | 0.00732027 | 0.18511291 | 0.1860994   |            |
| ENSG00000201358 | 16 | 4671157   | 4672126   | AC02388.2           | processed_pseudog | 0.08941293  | 0.54891179 | 0.24150748 | 0.0485161   | 0.23147122  | 0.24547678 | 0.16831188  | 0.40842959 | -0.05444526 | 0.6991556  | 0.4356522  | 0.00732027 | 0.18511291 | 0.1860994   |            |
| ENSG0000018798  | 1  | 1459311   | 1459311   | AC02388.2           | processed_pseudog | 0.08941293  | 0.54891179 | 0.24150748 | 0.0485161   | 0.23147122  | 0.24547678 | 0.16831188  | 0.40842959 | -0.05444526 | 0.6991556  | 0.4356522  | 0.00732027 | 0.18511291 | 0.1860994   |            |
| ENSG00000136271 | 1  | 4456541   | 4457051   | DOX56               | protein coding    | 0.06331102  | 0.8843885  | 0.26975708 | 0.0680801   | 0.14964348  | 0.45712941 | -0.01933026 | 0.8187061  | -0.03392064 | 0.00732027 | 0.18511291 | 0.1860994  | 0.00732027 | 0.18511291  |            |
| ENSG00000201708 | 10 | 11978975  | 11980514  | AC15283.1           | ncRNA             | -0.02244328 | 0.84837899 | 0.05756953 | 0.8607754   | 0.03647897  | 0.94707098 | -0.04823887 | 0.02224348 | -0.18199449 | 0.18777266 | 0.4352104  | 0.00732027 | 0.18511291 | 0.1860994   |            |
| ENSG00000117025 | 1  | 2097626   | 2097811   | AC02388.2           | processed_pseudog | 0.08941293  | 0.54891179 | 0.24150748 | 0.0485161   | 0.23147122  | 0.24547678 | 0.16831188  | 0.40842959 | -0.05444526 | 0.6991556  | 0.4356522  | 0.00732027 | 0.18511291 | 0.1860994   |            |
| ENSG00000234225 | 1  | 14700131  | 14700318  | AC244394.1          | ncRNA             | -0.15415866 | 0.18068878 | 0.06058389 | 0.86841830  | 0.01894470  | 0.92507610 | -0.24065330 | 0.22858790 | -0.19797559 | 0.1512397  | 0.4352104  | 0.00732027 | 0.18511291 | 0.1860994   |            |
| ENSG00000179284 | 19 | 1298519   | 1297427   | DAN26               | protein coding    | 0.14509757  | 0.2177837  | 0.3126707  | 0.02703369  | 0.10899768  | 0.58530894 | -0.23072418 | 0.24692378 | 0.04911841  | 0.7242333  | 0.4352019  | 0.00732027 | 0.18511291 | 0.1860994   |            |
| ENSG0000016992  | 1  | 1298519   | 1297427   | DAN26               | protein coding    | 0.14509757  | 0.2177837  | 0.3126707  | 0.02703369  | 0.10899768  | 0.58530894 | -0.23072418 | 0.24692378 | 0.04911841  | 0.7242333  | 0.4352019  | 0.00732027 | 0.18511291 | 0.1860994   |            |
| ENSG0000026575  | 12 | 5274876   | 5276127   | TBD10               | protein coding    | -0.05275834 | 0.64680067 | 0.12730584 | 0.0330584   | 0.24151891  | 0.22488032 | -0.00722428 | 0.11804159 | -0.28640074 | 0.00218589 | 0.43811763 | 0.00732027 | 0.18511291 | 0.1860994   |            |
| ENSG00000148932 | 1  | 13337281  | 13339184  | PAOX                | protein coding    | -0.01173908 | 0.91955961 | 0.2897139  | 0.04197340  | 0.24897257  | 0.1213835  | 0.2945746   | 0.2945746  | -0.10951869 | 0.43075242 | 0.4348713  | 0.00732027 | 0.18511291 | 0.1860994   |            |
| ENSG00000156024 | 1  | 14989732  | 15001708  | OTUD7B              | protein coding    | 0.17028727  | 0.13869813 | 0.42824309 | 0.00191933  | 0.10760242  | 0.45552526 | -0.5086206  | 0.00746807 | 0.18604271  | 0.25370374 | 0.4348713  | 0.00732027 | 0.18511291 | 0.1860994   |            |
| ENSG00000179218 | 14 | 1298578   | 1294448   | CALR                | protein coding    | 0.47272628  | 0.426108   | 0.38757958 | 0.01078393  | 0.04274732  | 0.2841068  | 0.80288748  | 0.05037788 | 0.48607832  | 0.00019429 | 0.4348112  | 0.00732027 | 0.18511291 | 0.1860994   |            |
| ENSG0000026880  | 1  | 13476828  | 13476828  | AC02388.2           | processed_pseudog | 0.08941293  | 0.54891179 | 0.24150748 | 0.0485161   | 0.23147122  | 0.24547678 | 0.16831188  | 0.40842959 |             |            |            |            |            |             |            |



Table with 10 columns: Gene ID, Chr, Start, End, RefSeq, Gene Name, Feature, Start, End, RefSeq, Gene Name. Contains a large list of genomic coordinates and gene annotations.

|                 |    |           |          |             |                      |              |             |             |                   |             |             |              |             |              |             |                   |                    |             |             |
|-----------------|----|-----------|----------|-------------|----------------------|--------------|-------------|-------------|-------------------|-------------|-------------|--------------|-------------|--------------|-------------|-------------------|--------------------|-------------|-------------|
| ENSG00000254833 | 11 | 12610741  | 12617605 | AP001893.3  | lncRNA               | -0.072073271 | 0.529934385 | 0.101452249 | 0.843274665       | 0.071050983 | 0.724714043 | -0.238934312 | 0.230035662 | -0.202202033 | 0.142529117 | 0.419588087       | <b>0.062811266</b> | 0.010760745 | 0.008355418 |
| ENSG00000256218 | 9  | 8052874   | 8072704  | LOC117352.3 | lncRNA               | -0.56607861  | 0.62375574  | 0.15004416  | 0.9767869         | 0.2744969   | 0.17072038  | 0.4583335    | 0.2741073   | 0.2525662    | 0.1496148   | 0.4600632         | <b>0.071498847</b> | 0.021496447 | 0.062470621 |
| ENSG00000257140 | 10 | 9714450   | 9714450  | MAP2A       | protein coding       | 0.0000000    | 0.0000000   | 0.0000000   | 0.0000000         | 0.0000000   | 0.4789801   | 0.4789801    | 0.4789801   | 0.4789801    | 0.4789801   | 0.4789801         | <b>0.0000000</b>   | 0.0000000   | 0.0000000   |
| ENSG00000258697 | 8  | 10044743  | 10045734 | MEAND3      | protein coding       | 0.0236117    | 0.3276117   | 0.07488827  | <b>0.00898280</b> | 0.12170478  | 0.77668469  | 0.31887607   | 0.10383545  | 0.07931469   | 0.52022127  | 0.4147813         | <b>0.0431013</b>   | 0.10889163  | 0.044765042 |
| ENSG00000259276 | 6  | 13505333  | 13509171 | SC359E      | lncRNA               | -0.16027658  | 0.16372769  | 0.0059271   | 0.9897769         | 0.24170106  | 0.22596324  | 0.14054447   | 0.48416558  | 0.20043368   | 0.19861306  | 0.41457574        | <b>0.06321998</b>  | 0.021764281 | 0.03311811  |
| ENSG00000260206 | 4  | 73500000  | 73500000 | AC02925.4   | lncRNA               | -0.0674378   | 0.3512962   | 0.0000000   | 0.0000000         | 0.0000000   | 0.0000000   | 0.0000000    | 0.0000000   | 0.0000000    | 0.0000000   | 0.0000000         | <b>0.0000000</b>   | 0.0000000   | 0.0000000   |
| ENSG00000260549 | 17 | 73163035  | 73163035 | POLR13K2P   | protein coding       | -0.08683781  | 0.39341803  | 0.15296247  | 0.6897280         | 0.18238963  | 0.41836194  | -0.02808258  | 0.83626768  | 0.19482373   | 0.10360937  | 0.41933789        | <b>0.04370389</b>  | 0.010911387 | 0.050838337 |
| ENSG00000260946 | 10 | 6831174   | 6843184  | PCP4        | protein coding       | 0.1939004    | 0.09461103  | 0.02713757  | 0.8503836         | 0.0836241   | 0.64223236  | -0.04940712  | 0.80889489  | 0.00707128   | 0.08815347  | 0.41932576        | <b>0.04683164</b>  | 0.014401427 | 0.002798891 |
| ENSG00000261294 | 9  | 7497777   | 7497777  | PCP4        | protein coding       | 0.1939004    | 0.09461103  | 0.02713757  | 0.8503836         | 0.0836241   | 0.64223236  | -0.04940712  | 0.80889489  | 0.00707128   | 0.08815347  | 0.41932576        | <b>0.04683164</b>  | 0.014401427 | 0.002798891 |
| ENSG00000262746 | 1  | 6783832   | 6784843  | CMT1A-OT    | lncRNA               | 0.14770308   | 0.19896101  | 0.32081347  | <b>0.0211510</b>  | 0.17890602  | 0.61413905  | 0.24746025   | 0.12313295  | 0.10500077   | 0.08953570  | 0.41929597        | <b>0.04683164</b>  | 0.014401427 | 0.002798891 |
| ENSG00000263198 | 9  | 7038497   | 7044624  | KLP9        | protein coding       | -0.0540811   | 0.84480679  | 0.07189203  | 0.0184580         | 0.03245780  | 0.8991895   | -0.2484599   | 0.0748345   | -0.2534919   | 0.0839898   | 0.4191791         | <b>0.04683164</b>  | 0.014401427 | 0.002798891 |
| ENSG00000263774 | 9  | 2869033   | 2869744  | KOCS15      | lncRNA               | -0.2153055   | 0.22679187  | 0.1813918   | 0.2747337         | 0.1781474   | 0.4084907   | 0.4898087    | 0.8164393   | 0.1434348    | 0.3705243   | 0.4194987         | <b>0.04683164</b>  | 0.014401427 | 0.002798891 |
| ENSG00000265098 | 4  | 155583107 | 15583107 | LOC927487.2 | processed pseudogene | 0.11980518   | 0.30056774  | 0.20454877  | 0.5142893         | 0.00419134  | 0.61542403  | 0.27946233   | 0.1580340   | 0.19048195   | 0.16786796  | 0.41915208        | <b>0.04683164</b>  | 0.014401427 | 0.002798891 |
| ENSG00000265957 | 6  | 510338    | 525882   | LOC927451.3 | lncRNA               | -0.04261574  | 0.7140587   | 0.2624525   | 0.15276248        | 0.1326770   | 0.5794134   | -0.06998485  | 0.7629730   | -0.1486827   | 0.12472596  | 0.41932438        | <b>0.04683164</b>  | 0.014401427 | 0.002798891 |
| ENSG00000266087 | 9  | 3443878   | 3444544  | LOC927451.3 | lncRNA               | -0.04261574  | 0.7140587   | 0.2624525   | 0.15276248        | 0.1326770   | 0.5794134   | -0.06998485  | 0.7629730   | -0.1486827   | 0.12472596  | 0.41932438        | <b>0.04683164</b>  | 0.014401427 | 0.002798891 |
| ENSG00000266296 | 3  | 14993118  | 15000635 | IGFBP3      | protein coding       | -0.14444318  | 0.36011135  | 0.0229129   | 0.91231263        | 0.10213681  | 0.61106647  | -0.21863768  | 0.2723853   | -0.22599758  | 0.1042632   | 0.4188971         | <b>0.04683164</b>  | 0.014401427 | 0.002798891 |
| ENSG00000266313 | 11 | 8447939   | 8449512  | IGFBP3      | protein coding       | -0.14444318  | 0.36011135  | 0.0229129   | 0.91231263        | 0.10213681  | 0.61106647  | -0.21863768  | 0.2723853   | -0.22599758  | 0.1042632   | 0.4188971         | <b>0.04683164</b>  | 0.014401427 | 0.002798891 |
| ENSG00000266317 | 22 | 22681910  | 22681910 | IGLV3-9     | IG_V_gene            | 0.01217398   | 0.91491452  | 0.2249712   | 0.18211427        | 0.18211427  | 0.18211427  | -0.1958858   | 0.92704872  | -0.15059113  | 0.28917528  | 0.41878762        | <b>0.04683164</b>  | 0.014401427 | 0.002798891 |
| ENSG00000266374 | 3  | 13444018  | 13450233 | HPRT1       | protein coding       | 0.22251687   | 0.05172514  | 0.26494259  | 0.04308268        | 0.03068827  | 0.02811512  | 0.06783584   | 0.68336672  | 0.15287678   | 0.26075446  | 0.41854827        | <b>0.04683164</b>  | 0.014401427 | 0.002798891 |
| ENSG00000266391 | 15 | 7169632   | 7170574  | TMEM19      | protein coding       | -0.20011448  | 0.02096194  | 0.21790971  | 0.10332607        | 0.48041224  | 0.01020278  | -0.22454945  | 0.1916458   | 0.41011507   | 0.00207038  | 0.4181918         | <b>0.04683164</b>  | 0.014401427 | 0.002798891 |
| ENSG00000266395 | 4  | 3564821   | 3624514  | ARAP2       | protein coding       | 0.49028234   | 0.0167584   | 0.33735054  | <b>0.00492824</b> | 0.38777804  | 0.04547476  | 0.53835462   | 2.668105    | 0.41874245   | 0.41874245  | <b>0.04683164</b> | 0.014401427        | 0.002798891 |             |
| ENSG00000266553 | 11 | 6204983   | 6208184  | LOC92733    | lncRNA               | -0.10414289  | 0.39739848  | 0.11978358  | 0.40711744        | 0.12673578  | 0.5289473   | -0.0394186   | 0.8448164   | -0.17204233  | 0.10821284  | 0.41841702        | <b>0.04683164</b>  | 0.014401427 | 0.002798891 |
| ENSG00000266595 | 10 | 11358491  | 11391754 | NHLH2       | protein coding       | 0.2141038    | 0.08151603  | 0.32547578  | 0.02108895        | 0.35891878  | 0.08484133  | 0.10319125   | 0.6504742   | 0.02977803   | 0.85110458  | 0.4181928         | <b>0.04683164</b>  | 0.014401427 | 0.002798891 |
| ENSG00000266715 | 14 | 2418814   | 24183106 | LOC927451.3 | lncRNA               | -0.04261574  | 0.7140587   | 0.2624525   | 0.15276248        | 0.1326770   | 0.5794134   | -0.06998485  | 0.7629730   | -0.1486827   | 0.12472596  | 0.41932438        | <b>0.04683164</b>  | 0.014401427 | 0.002798891 |
| ENSG00000266926 | 3  | 14993118  | 15000635 | IGFBP3      | protein coding       | -0.14444318  | 0.36011135  | 0.0229129   | 0.91231263        | 0.10213681  | 0.61106647  | -0.21863768  | 0.2723853   | -0.22599758  | 0.1042632   | 0.4188971         | <b>0.04683164</b>  | 0.014401427 | 0.002798891 |
| ENSG00000267011 | 22 | 22681910  | 22681910 | IGLV3-9     | IG_V_gene            | 0.01217398   | 0.91491452  | 0.2249712   | 0.18211427        | 0.18211427  | 0.18211427  | -0.1958858   | 0.92704872  | -0.15059113  | 0.28917528  | 0.41878762        | <b>0.04683164</b>  | 0.014401427 | 0.002798891 |
| ENSG00000267034 | 3  | 13444018  | 13450233 | HPRT1       | protein coding       | 0.22251687   | 0.05172514  | 0.26494259  | 0.04308268        | 0.03068827  | 0.02811512  | 0.06783584   | 0.68336672  | 0.15287678   | 0.26075446  | 0.41854827        | <b>0.04683164</b>  | 0.014401427 | 0.002798891 |
| ENSG00000267039 | 4  | 3564821   | 3624514  | ARAP2       | protein coding       | 0.49028234   | 0.0167584   | 0.33735054  | <b>0.00492824</b> | 0.38777804  | 0.04547476  | 0.53835462   | 2.668105    | 0.41874245   | 0.41874245  | <b>0.04683164</b> | 0.014401427        | 0.002798891 |             |
| ENSG00000267553 | 11 | 6204983   | 6208184  | LOC92733    | lncRNA               | -0.10414289  | 0.39739848  | 0.11978358  | 0.40711744        | 0.12673578  | 0.5289473   | -0.0394186   | 0.8448164   | -0.17204233  | 0.10821284  | 0.41841702        | <b>0.04683164</b>  | 0.014401427 | 0.002798891 |
| ENSG00000267595 | 10 | 11358491  | 11391754 | NHLH2       | protein coding       | 0.2141038    | 0.08151603  | 0.32547578  | 0.02108895        | 0.35891878  | 0.08484133  | 0.10319125   | 0.6504742   | 0.02977803   | 0.85110458  | 0.4181928         | <b>0.04683164</b>  | 0.014401427 | 0.002798891 |
| ENSG00000267791 | 11 | 23681138  | 23681708 | RP39        | processed pseudogene | -0.25911889  | 0.02459959  | 0.02958969  | 0.8704818         | -0.25988419 | 0.13407432  | -0.3113257   | 0.1059013   | -0.3763072   | 0.0093989   | 0.4183647         | <b>0.04683164</b>  | 0.014401427 | 0.002798891 |
| ENSG00000267818 | 13 | 4991272   | 4992463  | SPRYD7      | protein coding       | 0.11690598   | 0.06904918  | 0.3534316   | 0.0181483         | 0.41408952  | 0.02109288  | 0.2890367    | 0.1764516   | 0.26603828   | 0.01662822  | 0.4183266         | <b>0.04683164</b>  | 0.014401427 | 0.002798891 |
| ENSG00000268129 | 6  | 15872840  | 15872840 | AMP2        | processed pseudogene | 0.16522238   | 0.15150824  | 0.23988242  | 0.03258584        | 0.04975795  | 0.8132228   | 0.19279378   | 0.3354538   | 0.11852544   | 0.93311775  | 0.4182452         | <b>0.04683164</b>  | 0.014401427 | 0.002798891 |
| ENSG00000268146 | 3  | 18088814  | 18098273 | PCP2        | protein coding       | 0.47605172   | 1.248109    | 0.27035268  | 0.14818522        | 0.55425499  | 0.00207083  | 0.0114998    | 0.95402712  | 0.45422504   | 0.00507574  | 0.41826217        | <b>0.04683164</b>  | 0.014401427 | 0.002798891 |
| ENSG00000268151 | 3  | 18088814  | 18098273 | PCP2        | protein coding       | 0.47605172   | 1.248109    | 0.27035268  | 0.14818522        | 0.55425499  | 0.00207083  | 0.0114998    | 0.95402712  | 0.45422504   | 0.00507574  | 0.41826217        | <b>0.04683164</b>  | 0.014401427 | 0.002798891 |
| ENSG00000268240 | 6  | 33249534  | 33251873 | LOC927451.3 | lncRNA               | -0.04261574  | 0.7140587   | 0.2624525   | 0.15276248        | 0.1326770   | 0.5794134   | -0.06998485  | 0.7629730   | -0.1486827   | 0.12472596  | 0.41932438        | <b>0.04683164</b>  | 0.014401427 | 0.002798891 |
| ENSG00000268262 | 12 | 1273849   | 1278140  | LOC927451.3 | lncRNA               | -0.04261574  | 0.7140587   | 0.2624525   | 0.15276248        | 0.1326770   | 0.5794134   | -0.06998485  | 0.7629730   | -0.1486827   | 0.12472596  | 0.41932438        | <b>0.04683164</b>  | 0.014401427 | 0.002798891 |
| ENSG00000268273 | 17 | 44745     | 44745    | LOC927451.3 | lncRNA               | -0.04261574  | 0.7140587   | 0.2624525   | 0.15276248        | 0.1326770   | 0.5794134   | -0.06998485  | 0.7629730   | -0.1486827   | 0.12472596  | 0.41932438        | <b>0.04683164</b>  | 0.014401427 | 0.002798891 |
| ENSG00000268288 | 6  | 64878428  | 64888283 | LOC927451.3 | lncRNA               | -0.04261574  | 0.7140587   | 0.2624525   | 0.15276248        | 0.1326770   | 0.5794134   | -0.06998485  | 0.7629730   | -0.1486827   | 0.12472596  | 0.41932438        | <b>0.04683164</b>  | 0.014401427 | 0.002798891 |
| ENSG00000268316 | 11 | 6203242   | 6204180  | WR274       | protein coding       | -0.02568748  | 0.82573728  | 0.19125244  | 0.1872864         | 0.18031265  | 0.85026101  | 0.03811201   | 0.85024228  | 0.14362317   | 0.30013198  | 0.41753209        | <b>0.04683164</b>  | 0.0144014   |             |



|                 |    |           |           |             |                  |             |            |            |            |            |            |             |            |             |            |            |            |            |            |
|-----------------|----|-----------|-----------|-------------|------------------|-------------|------------|------------|------------|------------|------------|-------------|------------|-------------|------------|------------|------------|------------|------------|
| ENSG00000147312 | 9  | 37510982  | 37576300  | FBOXO1      | protein coding   | -0.05874423 | 0.61181368 | 0.10047649 | 0.48751302 | 0.03119635 | 0.87724073 | -0.20017344 | 0.31677661 | -0.17187734 | 0.21359623 | 0.41220774 | 0.05064007 | -0.1033532 | 0.92266602 |
| ENSG00000147313 | 9  | 37510982  | 37576300  | FBOXO1      | protein coding   | -0.05874423 | 0.61181368 | 0.10047649 | 0.48751302 | 0.03119635 | 0.87724073 | -0.20017344 | 0.31677661 | -0.17187734 | 0.21359623 | 0.41220774 | 0.05064007 | -0.1033532 | 0.92266602 |
| ENSG00000147314 | 12 | 11311566  | 11311566  | ENSO05999.1 | lncRNA           | -0.21211111 | 0.30333007 | 0.19344411 | 0.46480774 | 0.26792784 | 0.37135911 | -0.24712324 | 0.23552728 | 0.20626095  | 0.18202091 | 0.14250261 | 0.07573294 | 0.24772061 | 0.81702629 |
| ENSG00000147315 | 18 | 46754847  | 46802440  | AC009241.2  | antisense intron | -0.24355802 | 0.03707669 | 0.01713306 | 0.61375118 | 0.20354428 | 0.09352514 | -0.09050320 | 0.64357235 | -0.34381868 | 0.10999977 | 0.11142219 | 0.06008703 | 0.29334774 | 0.03844110 |
| ENSG00000147316 | 13 | 13266213  | 13277777  | LOC101928.1 | antisense intron | -0.07278470 | 0.50480345 | 0.15841745 | 0.47472813 | 0.04666778 | 0.68416874 | -0.05761570 | 0.17408252 | -0.17442071 | 0.19122735 | 0.05091196 | 0.04383162 | 0.66687259 | 0.85687259 |
| ENSG00000147317 | 19 | 40434338  | 40444173  | LOC101928.1 | antisense intron | -0.07278470 | 0.50480345 | 0.15841745 | 0.47472813 | 0.04666778 | 0.68416874 | -0.05761570 | 0.17408252 | -0.17442071 | 0.19122735 | 0.05091196 | 0.04383162 | 0.66687259 | 0.85687259 |
| ENSG00000147318 | 10 | 101484222 | 101441373 | HNRNP2H3    | protein coding   | 0.37898439  | 0.00077025 | 0.06783749 | 0.64404303 | 0.04966777 | 0.40889239 | -0.10898239 | 0.58837899 | -0.27490009 | 0.19122735 | 0.11172878 | 0.05091196 | 0.62196352 | 1.26E-08   |
| ENSG00000147319 | 9  | 10321468  | 10321468  | LOC101928.1 | antisense intron | -0.07278470 | 0.50480345 | 0.15841745 | 0.47472813 | 0.04666778 | 0.68416874 | -0.05761570 | 0.17408252 | -0.17442071 | 0.19122735 | 0.05091196 | 0.04383162 | 0.66687259 | 0.85687259 |
| ENSG00000147320 | 9  | 10321468  | 10321468  | LOC101928.1 | antisense intron | -0.07278470 | 0.50480345 | 0.15841745 | 0.47472813 | 0.04666778 | 0.68416874 | -0.05761570 | 0.17408252 | -0.17442071 | 0.19122735 | 0.05091196 | 0.04383162 | 0.66687259 | 0.85687259 |
| ENSG00000147321 | 9  | 10321468  | 10321468  | LOC101928.1 | antisense intron | -0.07278470 | 0.50480345 | 0.15841745 | 0.47472813 | 0.04666778 | 0.68416874 | -0.05761570 | 0.17408252 | -0.17442071 | 0.19122735 | 0.05091196 | 0.04383162 | 0.66687259 | 0.85687259 |
| ENSG00000147322 | 9  | 10321468  | 10321468  | LOC101928.1 | antisense intron | -0.07278470 | 0.50480345 | 0.15841745 | 0.47472813 | 0.04666778 | 0.68416874 | -0.05761570 | 0.17408252 | -0.17442071 | 0.19122735 | 0.05091196 | 0.04383162 | 0.66687259 | 0.85687259 |
| ENSG00000147323 | 21 | 46029886  | 46132848  | AL44983.1   | antisense intron | -0.09125254 | 0.33545691 | 0.03647249 | 0.80571269 | 0.04887626 | 0.16724655 | -0.22288271 | 0.54309171 | -0.14826274 | 0.2845704  | 0.11589614 | 0.05014481 | 0.08020303 | 0.57801411 |
| ENSG00000147324 | 9  | 10321468  | 10321468  | LOC101928.1 | antisense intron | -0.07278470 | 0.50480345 | 0.15841745 | 0.47472813 | 0.04666778 | 0.68416874 | -0.05761570 | 0.17408252 | -0.17442071 | 0.19122735 | 0.05091196 | 0.04383162 | 0.66687259 | 0.85687259 |
| ENSG00000147325 | 21 | 46029886  | 46132848  | AL44983.1   | antisense intron | -0.09125254 | 0.33545691 | 0.03647249 | 0.80571269 | 0.04887626 | 0.16724655 | -0.22288271 | 0.54309171 | -0.14826274 | 0.2845704  | 0.11589614 | 0.05014481 | 0.08020303 | 0.57801411 |
| ENSG00000147326 | 9  | 10321468  | 10321468  | LOC101928.1 | antisense intron | -0.07278470 | 0.50480345 | 0.15841745 | 0.47472813 | 0.04666778 | 0.68416874 | -0.05761570 | 0.17408252 | -0.17442071 | 0.19122735 | 0.05091196 | 0.04383162 | 0.66687259 | 0.85687259 |
| ENSG00000147327 | 9  | 10321468  | 10321468  | LOC101928.1 | antisense intron | -0.07278470 | 0.50480345 | 0.15841745 | 0.47472813 | 0.04666778 | 0.68416874 | -0.05761570 | 0.17408252 | -0.17442071 | 0.19122735 | 0.05091196 | 0.04383162 | 0.66687259 | 0.85687259 |
| ENSG00000147328 | 9  | 10321468  | 10321468  | LOC101928.1 | antisense intron | -0.07278470 | 0.50480345 | 0.15841745 | 0.47472813 | 0.04666778 | 0.68416874 | -0.05761570 | 0.17408252 | -0.17442071 | 0.19122735 | 0.05091196 | 0.04383162 | 0.66687259 | 0.85687259 |
| ENSG00000147329 | 9  | 10321468  | 10321468  | LOC101928.1 | antisense intron | -0.07278470 | 0.50480345 | 0.15841745 | 0.47472813 | 0.04666778 | 0.68416874 | -0.05761570 | 0.17408252 | -0.17442071 | 0.19122735 | 0.05091196 | 0.04383162 | 0.66687259 | 0.85687259 |
| ENSG00000147330 | 9  | 10321468  | 10321468  | LOC101928.1 | antisense intron | -0.07278470 | 0.50480345 | 0.15841745 | 0.47472813 | 0.04666778 | 0.68416874 | -0.05761570 | 0.17408252 | -0.17442071 | 0.19122735 | 0.05091196 | 0.04383162 | 0.66687259 | 0.85687259 |
| ENSG00000147331 | 9  | 10321468  | 10321468  | LOC101928.1 | antisense intron | -0.07278470 | 0.50480345 | 0.15841745 | 0.47472813 | 0.04666778 | 0.68416874 | -0.05761570 | 0.17408252 | -0.17442071 | 0.19122735 | 0.05091196 | 0.04383162 | 0.66687259 | 0.85687259 |
| ENSG00000147332 | 9  | 10321468  | 10321468  | LOC101928.1 | antisense intron | -0.07278470 | 0.50480345 | 0.15841745 | 0.47472813 | 0.04666778 | 0.68416874 | -0.05761570 | 0.17408252 | -0.17442071 | 0.19122735 | 0.05091196 | 0.04383162 | 0.66687259 | 0.85687259 |
| ENSG00000147333 | 9  | 10321468  | 10321468  | LOC101928.1 | antisense intron | -0.07278470 | 0.50480345 | 0.15841745 | 0.47472813 | 0.04666778 | 0.68416874 | -0.05761570 | 0.17408252 | -0.17442071 | 0.19122735 | 0.05091196 | 0.04383162 | 0.66687259 | 0.85687259 |
| ENSG00000147334 | 9  | 10321468  | 10321468  | LOC101928.1 | antisense intron | -0.07278470 | 0.50480345 | 0.15841745 | 0.47472813 | 0.04666778 | 0.68416874 | -0.05761570 | 0.17408252 | -0.17442071 | 0.19122735 | 0.05091196 | 0.04383162 | 0.66687259 | 0.85687259 |
| ENSG00000147335 | 9  | 10321468  | 10321468  | LOC101928.1 | antisense intron | -0.07278470 | 0.50480345 | 0.15841745 | 0.47472813 | 0.04666778 | 0.68416874 | -0.05761570 | 0.17408252 | -0.17442071 | 0.19122735 | 0.05091196 | 0.04383162 | 0.66687259 | 0.85687259 |
| ENSG00000147336 | 9  | 10321468  | 10321468  | LOC101928.1 | antisense intron | -0.07278470 | 0.50480345 | 0.15841745 | 0.47472813 | 0.04666778 | 0.68416874 | -0.05761570 | 0.17408252 | -0.17442071 | 0.19122735 | 0.05091196 | 0.04383162 | 0.66687259 | 0.85687259 |
| ENSG00000147337 | 9  | 10321468  | 10321468  | LOC101928.1 | antisense intron | -0.07278470 | 0.50480345 | 0.15841745 | 0.47472813 | 0.04666778 | 0.68416874 | -0.05761570 | 0.17408252 | -0.17442071 | 0.19122735 | 0.05091196 | 0.04383162 | 0.66687259 | 0.85687259 |
| ENSG00000147338 | 9  | 10321468  | 10321468  | LOC101928.1 | antisense intron | -0.07278470 | 0.50480345 | 0.15841745 | 0.47472813 | 0.04666778 | 0.68416874 | -0.05761570 | 0.17408252 | -0.17442071 | 0.19122735 | 0.05091196 | 0.04383162 | 0.66687259 | 0.85687259 |
| ENSG00000147339 | 9  | 10321468  | 10321468  | LOC101928.1 | antisense intron | -0.07278470 | 0.50480345 | 0.15841745 | 0.47472813 | 0.04666778 | 0.68416874 | -0.05761570 | 0.17408252 | -0.17442071 | 0.19122735 | 0.05091196 | 0.04383162 | 0.66687259 | 0.85687259 |
| ENSG00000147340 | 9  | 10321468  | 10321468  | LOC101928.1 | antisense intron | -0.07278470 | 0.50480345 | 0.15841745 | 0.47472813 | 0.04666778 | 0.68416874 | -0.05761570 | 0.17408252 | -0.17442071 | 0.19122735 | 0.05091196 | 0.04383162 | 0.66687259 | 0.85687259 |
| ENSG00000147341 | 9  | 10321468  | 10321468  | LOC101928.1 | antisense intron | -0.07278470 | 0.50480345 | 0.15841745 | 0.47472813 | 0.04666778 | 0.68416874 | -0.05761570 | 0.17408252 | -0.17442071 | 0.19122735 | 0.05091196 | 0.04383162 | 0.66687259 | 0.85687259 |
| ENSG00000147342 | 9  | 10321468  | 10321468  | LOC101928.1 | antisense intron | -0.07278470 | 0.50480345 | 0.15841745 | 0.47472813 | 0.04666778 | 0.68416874 | -0.05761570 | 0.17408252 | -0.17442071 | 0.19122735 | 0.05091196 | 0.04383162 | 0.66687259 | 0.85687259 |
| ENSG00000147343 | 9  | 10321468  | 10321468  | LOC101928.1 | antisense intron | -0.07278470 | 0.50480345 | 0.15841745 | 0.47472813 | 0.04666778 | 0.68416874 | -0.05761570 | 0.17408252 | -0.17442071 | 0.19122735 | 0.05091196 | 0.04383162 | 0.66687259 | 0.85687259 |
| ENSG00000147344 | 9  | 10321468  | 10321468  | LOC101928.1 | antisense intron | -0.07278470 | 0.50480345 | 0.15841745 | 0.47472813 | 0.04666778 | 0.68416874 | -0.05761570 | 0.17408252 | -0.17442071 | 0.19122735 | 0.05091196 | 0.04383162 | 0.66687259 | 0.85687259 |
| ENSG00000147345 | 9  | 10321468  | 10321468  | LOC101928.1 | antisense intron | -0.07278470 | 0.50480345 | 0.15841745 | 0.47472813 | 0.04666778 | 0.68416874 | -0.05761570 | 0.17408252 | -0.17442071 | 0.19122735 | 0.05091196 | 0.04383162 | 0.66687259 | 0.85687259 |
| ENSG00000147346 | 9  | 10321468  | 10321468  | LOC101928.1 | antisense intron | -0.07278470 | 0.50480345 | 0.15841745 | 0.47472813 | 0.04666778 | 0.68416874 | -0.05761570 | 0.17408252 | -0.17442071 | 0.19122735 | 0.05091196 | 0.04383162 | 0.66687259 | 0.85687259 |
| ENSG00000147347 | 9  | 10321468  | 10321468  | LOC101928.1 | antisense intron | -0.07278470 | 0.50480345 | 0.15841745 | 0.47472813 | 0.04666778 | 0.68416874 | -0.05761570 | 0.17408252 | -0.17442071 | 0.19122735 | 0.05091196 | 0.04383162 | 0.66687259 | 0.85687259 |
| ENSG00000147348 | 9  | 10321468  | 10321468  | LOC101928.1 | antisense intron | -0.07278470 | 0.50480345 | 0.15841745 | 0.47472813 | 0.04666778 | 0.68416874 | -0.05761570 | 0.17408252 | -0.17442071 | 0.19122735 | 0.05091196 | 0.04383162 | 0.66687259 | 0.85687259 |
| ENSG00000147349 | 9  | 10321468  | 10321468  | LOC101928.1 | antisense intron | -0.07278470 | 0.50480345 | 0.15841745 | 0.47472813 | 0.04666778 | 0.68416874 | -0.05761570 | 0.17408252 | -0.17442071 | 0.19122735 | 0.05091196 | 0.04383162 | 0.66687259 | 0.85687259 |
| ENSG00000147350 | 9  | 10321468  | 10321468  | LOC101928.1 | antisense intron | -0.07278470 | 0.50480345 | 0.15841745 | 0.47472813 | 0.04666778 | 0.68416874 | -0.05761570 | 0.17408252 | -0.17442071 | 0.19122735 | 0.05091196 | 0.04383162 | 0.66687259 | 0.85687259 |
| ENSG00000147351 | 9  | 10321468  | 10321468  | LOC101928.1 | antisense intron | -0.07278470 | 0.50480345 | 0.15841745 | 0          |            |            |             |            |             |            |            |            |            |            |





Table with columns for gene ID, chromosome, coordinates, gene name, transcript type, and a list of associated SNPs with their rs IDs and p-values.

| ENSGNO000118971 | 12 | 4269771  | 4353531  | CCND2      | protein coding       | 0.14758647 | 0.00018694 | 0.44665544 | 0.00147900 | 0.13430320 | 0.50421394 | 0.46316478 | 0.01487418 | 0.31333694 | 0.02104008 | 0.38733749 | 0.06784091 | 0.43566129 | 0.00185434 |            |            |
|-----------------|----|----------|----------|------------|----------------------|------------|------------|------------|------------|------------|------------|------------|------------|------------|------------|------------|------------|------------|------------|------------|------------|
| ENSGNO0017705   | 16 | 3651199  | 3666673  | PCP4       | protein coding       | 0.5432174  | 0.00000000 | 0.3056601  | 0.00000000 | 0.1778901  | 0.55910573 | 0.47179229 | 0.01767292 | 0.1679991  | 0.1878786  | 0.38728276 | 0.0787786  | 0.2719707  | 0.1844700  |            |            |
| ENSGNO0020091   | 11 | 7910172  | 7910172  | TGCR3L     | protein coding       | 0.1527241  | 0.00000000 | 0.0489130  | 0.00000000 | 0.1378343  | 0.38002745 | 0.43425245 | 0.00000000 | 0.0342451  | 0.00000000 | 0.00000000 | 0.00000000 | 0.00000000 | 0.00000000 | 0.00000000 |            |
| ENSGNO0008991   | 11 | 8932433  | 8948187  | FOX2       | protein coding       | 0.20067799 | 0.00728984 | 0.115854   | 0.2844640  | 0.17184447 | 0.30425250 | 0.40426289 | 0.00000000 | 0.28642491 | 0.03797004 | 0.38715944 | 0.07787766 | 0.16178623 | 0.26186212 | 0.00000000 |            |
| ENSGNO0013437   | 10 | 17131283 | 18051431 | PCP4       | protein coding       | 0.18511589 | 0.00000000 | 0.20732883 | 0.14863107 | 0.11020024 | 0.40545472 | 0.40119016 | 0.02678827 | 0.04423793 | 0.04761339 | 0.38718225 | 0.07867991 | 0.20699774 | 0.00000000 | 0.00000000 |            |
| ENSGNO0022905   | 10 | 8734300  | 8734300  | FAM25A     | protein coding       | 0.14999555 | 0.00000000 | 0.0369672  | 0.00000000 | 0.13449995 | 0.38002745 | 0.43425245 | 0.00000000 | 0.0342451  | 0.00000000 | 0.00000000 | 0.00000000 | 0.00000000 | 0.00000000 | 0.00000000 |            |
| ENSGNO0023047   | 4  | 9630783  | 9631173  | AC01188.1  | lincRNA              | 0.23589161 | 0.00381344 | 0.2132789  | 0.14897131 | 0.03094691 | 0.46761143 | 0.03094691 | 0.00000000 | 0.08024296 | 0.04968888 | 0.38706127 | 0.06852858 | 0.35294838 | 0.00000000 | 0.00000000 |            |
| ENSGNO0012828   | 22 | 2164202  | 2164249  | TAF11      | protein coding       | 0.28601125 | 0.00158087 | 0.3350142  | 0.01688566 | 0.06870561 | 0.6133262  | 0.26251620 | 0.15329234 | 0.12689147 | 0.11722471 | 0.38703801 | 0.06804202 | 0.28559574 | 0.00438213 | 0.00000000 |            |
| ENSGNO0018944   | 4  | 4429316  | 4429316  | TAF11      | processed pseudogene | 0.1226648  | 0.00000000 | 0.00000000 | 0.00000000 | 0.00000000 | 0.00000000 | 0.00000000 | 0.00000000 | 0.00000000 | 0.00000000 | 0.00000000 | 0.00000000 | 0.00000000 | 0.00000000 | 0.00000000 |            |
| ENSGNO0078942   | 29 | 4448296  | 4448296  | AC010973.1 | lincRNA              | 0.17087913 | 0.13777095 | 0.05190795 | 0.04889860 | 0.08898960 | 0.27847269 | 0.38894951 | 0.05588107 | 0.06878814 | 0.11622471 | 0.38703801 | 0.06804202 | 0.28559574 | 0.00438213 | 0.00000000 |            |
| ENSGNO0008935   | 1  | 8367575  | 8368063  | ALG6       | protein coding       | 0.09898983 | 0.04754332 | 0.03073559 | 0.17240778 | 0.0708778  | 0.25951654 | 0.10369896 | 0.61625028 | 0.10141955 | 0.04576168 | 0.38642620 | 0.06220750 | 0.14444260 | 0.01701798 | 0.00000000 |            |
| ENSGNO0022870   | 1  | 3138384  | 3138384  | ALG6       | processed pseudogene | 0.1226648  | 0.00000000 | 0.00000000 | 0.00000000 | 0.00000000 | 0.00000000 | 0.00000000 | 0.00000000 | 0.00000000 | 0.00000000 | 0.00000000 | 0.00000000 | 0.00000000 | 0.00000000 | 0.00000000 |            |
| ENSGNO0012856   | 21 | 4523438  | 4524548  | LINC03334  | lincRNA              | 0.12523439 | 0.04087178 | 0.01803282 | 0.01198467 | 0.01198467 | 0.27708382 | 0.38820149 | 0.00000000 | 0.27708382 | 0.04251198 | 0.38732861 | 0.06831029 | 0.28602860 | 0.00667490 | 0.00000000 |            |
| ENSGNO0028749   | 4  | 1837289  | 1837289  | AC010477.2 | lincRNA              | 0.12523439 | 0.04087178 | 0.01803282 | 0.01198467 | 0.01198467 | 0.27708382 | 0.38820149 | 0.00000000 | 0.27708382 | 0.04251198 | 0.38732861 | 0.06831029 | 0.28602860 | 0.00667490 | 0.00000000 |            |
| ENSGNO0004945   | 10 | 1094368  | 1094749  | RBM04      | protein coding       | 0.10768083 | 0.15122844 | 0.05094071 | 0.2983151  | 0.05976966 | 0.80144887 | 0.03746268 | 0.04843717 | 0.80020304 | 0.38670448 | 0.08833235 | 0.14373143 | 0.19341844 | 0.00000000 | 0.00000000 |            |
| ENSGNO0020543   | 22 | 4624411  | 4625011  | CDPP1      | protein coding       | 0.09898987 | 0.38739279 | 0.34863999 | 0.03109300 | 0.04041413 | 0.83032372 | 0.27818179 | 0.16009014 | 0.05103219 | 0.91402488 | 0.38651822 | 0.06602851 | 0.07456887 | 0.00662851 | 0.00000000 |            |
| ENSGNO0020340   | 10 | 6343338  | 6347268  | AC005394.2 | lincRNA              | 0.14473491 | 0.20814487 | 0.04145991 | 0.7497482  | 0.09737423 | 0.62867453 | 0.04065330 | 0.80602109 | 0.18324274 | 0.23812473 | 0.38647665 | 0.06858941 | 0.10432449 | 0.00032771 | 0.00000000 |            |
| ENSGNO0016131   | 11 | 15138651 | 15140366 | WNA1       | protein coding       | 0.24697003 | 0.00000000 | 0.2953232  | 0.04849729 | 0.38629769 | 0.45344938 | 0.26387972 | 0.23518731 | 0.22453202 | 0.10196134 | 0.38644032 | 0.06857192 | 0.38191077 | 0.00000000 | 0.00000000 |            |
| ENSGNO0015476   | 10 | 6262100  | 6326128  | REEP3      | protein coding       | 0.03563966 | 0.78985415 | 0.1647137  | 0.00296941 | 0.12871387 | 0.38011337 | 0.12967288 | 0.61815713 | 0.04987670 | 0.38643945 | 0.08881736 | 0.06640066 | 0.13124554 | 0.00000000 | 0.00000000 |            |
| ENSGNO0012472   | 12 | 1486955  | 1475790  | AC011088.1 | lincRNA              | 0.02867386 | 0.37977028 | 0.01152626 | 0.02867386 | 0.01152626 | 0.02867386 | 0.01152626 | 0.02867386 | 0.01152626 | 0.01152626 | 0.01152626 | 0.01152626 | 0.01152626 | 0.01152626 | 0.01152626 |            |
| ENSGNO0011921   | 3  | 1868978  | 1869347  | SNRP       | protein coding       | 0.11641034 | 0.06878474 | 0.25501413 | 0.07380002 | 0.04468291 | 0.34287432 | 0.03681717 | 0.84443362 | 0.02076501 | 0.88892404 | 0.38645403 | 0.06811456 | 0.26393242 | 0.04401021 | 0.00000000 |            |
| ENSGNO0018578   | 11 | 7881048  | 7888139  | MORF4L     | protein coding       | 0.06742237 | 0.01871107 | 0.23297710 | 0.02867386 | 0.01152626 | 0.02867386 | 0.01152626 | 0.02867386 | 0.01152626 | 0.01152626 | 0.01152626 | 0.01152626 | 0.01152626 | 0.01152626 | 0.01152626 | 0.01152626 |
| ENSGNO0017188   | 4  | 12964256 | 12964499 | APLN       | protein coding       | 0.20326200 | 0.06900000 | 0.06871765 | 0.64871747 | 0.02672504 | 0.30086712 | 0.18039569 | 0.36789212 | 0.00681152 | 0.04111074 | 0.38166296 | 0.06875120 | 0.08842520 | 0.16458320 | 0.00000000 |            |
| ENSGNO0011585   | 5  | 1337177  | 13400475 | VDR1       | protein coding       | 0.46448087 | 0.12981458 | 0.41508769 | 0.00007098 | 0.3491856  | 0.07199327 | 0.43650713 | 0.02029162 | 0.4876834  | 0.00000000 | 0.38134471 | 0.0887744  | 0.1705677  | 0.00000000 | 0.00000000 |            |
| ENSGNO0016346   | 3  | 12184401 | 12184418 | LINC512    | lincRNA              | 0.06714239 | 0.15678821 | 0.08514643 | 0.01208704 | 0.03967915 | 0.12087054 | 0.38820149 | 0.03011773 | 0.11726381 | 0.38820149 | 0.06831029 | 0.10238032 | 0.06866143 | 0.00000000 | 0.00000000 |            |
| ENSGNO0010270   | 7  | 3812848  | 3823074  | TARDON     | protein coding       | 0.15289987 | 0.18495774 | 0.25848090 | 0.07345032 | 0.02924459 | 0.90083017 | 0.23471840 | 0.23845840 | 0.17888221 | 0.33379838 | 0.38600037 | 0.06888180 | 0.19848239 | 0.00000000 | 0.00000000 |            |
| ENSGNO0023889   | 4  | 8443401  | 8443414  | SNCP1      | processed pseudogene | 0.10492867 | 0.02789174 | 0.16918102 | 0.18648447 | 0.09731908 | 0.07100728 | 0.16374545 | 0.40870933 | 0.12889598 | 0.00000000 | 0.38689762 | 0.06880200 | 0.14022709 | 0.03148191 | 0.00000000 |            |
| ENSGNO00179803  | 1  | 1762485  | 17230303 | STAR3      | protein coding       | 0.19106824 | 0.09600262 | 0.11093633 | 0.44038960 | 0.02924454 | 0.13187043 | 0.02476222 | 0.80241336 | 0.27318171 | 0.04638387 | 0.38859744 | 0.06881130 | 0.1248760  | 0.00000000 | 0.00000000 |            |
| ENSGNO0022621   | 1  | 9506345  | 9509272  | RPR2P9     | processed pseudogene | 0.21123037 | 0.186106   | 0.24454919 | 0.0897386  | 0.08339978 | 0.438107   | 0.04474037 | 0.82446183 | 0.54584811 | 1.86206    | 0.38424260 | 0.0688180  | 0.16370978 | 0.00000000 | 0.00000000 |            |
| ENSGNO0017048   | 1  | 5133994  | 5133994  | DNAH2      | protein coding       | 0.02011338 | 0.44709918 | 0.14559944 | 0.00000000 | 0.00000000 | 0.00000000 | 0.00000000 | 0.00000000 | 0.00000000 | 0.00000000 | 0.00000000 | 0.00000000 | 0.00000000 | 0.00000000 | 0.00000000 |            |
| ENSGNO00134717  | 1  | 5100186  | 5200716  | BTFL3      | protein coding       | 0.18038202 | 0.11766507 | 0.15625709 | 0.08782480 | 0.03399997 | 0.60888547 | 0.01251348 | 0.05904067 | 0.17480000 | 0.19914767 | 0.06850266 | 0.38690295 | 0.26485126 | 0.08823210 | 0.00000000 |            |
| ENSGNO0011710   | 11 | 40251373 | 40548187 | ZNF684     | protein coding       | 0.05738793 | 0.02010873 | 0.11163511 | 0.04330663 | 0.03139877 | 0.15802186 | 0.27898368 | 0.1589138  | 0.06136552 | 0.69532060 | 0.38703787 | 0.06911744 | 0.03297714 | 0.76852317 | 0.00000000 |            |
| ENSGNO0015201   | 1  | 1810814  | 1810814  | RAB19L     | protein coding       | 0.20307377 | 0.00000000 | 0.00000000 | 0.00000000 | 0.00000000 | 0.00000000 | 0.00000000 | 0.00000000 | 0.00000000 | 0.00000000 | 0.00000000 | 0.00000000 | 0.00000000 | 0.00000000 | 0.00000000 |            |
| ENSGNO0028808   | 3  | 14136458 | 14274058 | AC010373.2 | lincRNA              | 0.12347058 | 0.24869773 | 0.13486930 | 0.34900600 | 0.18688190 | 0.30011322 | 0.20343084 | 0.30808510 | 0.00341800 | 0.05723281 | 0.38855427 | 0.09919746 | 0.07529438 | 0.00000000 | 0.00000000 |            |
| ENSGNO0016427   | 1  | 3261617  | 3268784  | S100P8     | protein coding       | 0.16096388 | 0.16267453 | 0.15380332 | 0.28243000 | 0.13333827 | 0.48821260 | 0.04647760 | 0.78671824 | 0.02118920 | 0.03296392 | 0.38855427 | 0.06858244 | 0.27222004 | 0.05576472 | 0.00000000 |            |
| ENSGNO0016234   | 1  | 1741840  | 17499454 | RAB19L     | processed pseudogene | 0.16096388 | 0.16267453 | 0.15380332 | 0.28243000 | 0.13333827 | 0.48821260 | 0.04647760 | 0.78671824 | 0.02118920 | 0.03296392 | 0.38855427 | 0.06858244 | 0.27222004 | 0.05576472 | 0.00000000 |            |
| ENSGNO0023872   | 2  | 3774433  | 3774704  | AC005369.2 | lincRNA              | 0.07882286 | 0.49650312 | 0.14380958 | 0.02003440 | 0.01364721 | 0.35588862 | 0.06718802 | 0.777002   | 0.05886421 | 0.6619515  | 0.38855427 | 0.08825678 | 0.13588128 | 0.36631272 | 0.00000000 |            |
| ENSGNO0011529   | 2  | 5336272  | 5399100  | ASB3       | protein coding       | 0.19502826 | 0.08822368 | 0.37284163 | 0.00762020 | 0.21881128 | 0.1920176  | 0.27671271 | 0.05139270 | 0.1743255  | 0.20077314 | 0.38458449 | 0.06903502 | 0.13382876 | 0.2861801  | 0.00000000 |            |
| ENSGNO0019879   | 14 | 7898478  | 7898478  | GALC       | protein coding       | 0.14462889 | 0.20849114 | 0.02118009 | 0.08871962 | 0.02841499 | 0.2730184  | 0.27165081 | 0.08820172 | 0.64115891 | 0.38850426 | 0.06844745 | 0.32460574 |            |            |            |            |

Table with columns: ENSGNOID, chr, start, end, gene, type, score, strand, and coordinates. Contains genomic data for various genes and features.



Table with 10 columns: Gene ID, Chr, Start, End, Gene Name, Feature, Start, End, Start, End, Start, End. Contains genomic coordinates and gene names for various genes including BDNF, FGF1, and others.



|                 |    |          |           |             |                      |              |                   |            |                    |                   |                   |                   |                   |                   |                   |                   |                   |                   |                   |                   |
|-----------------|----|----------|-----------|-------------|----------------------|--------------|-------------------|------------|--------------------|-------------------|-------------------|-------------------|-------------------|-------------------|-------------------|-------------------|-------------------|-------------------|-------------------|-------------------|
| ENSG00000175063 | 20 | 45812376 | 45816977* | URE2C       | protein coding       | 0.019747811  | 0.864441623       | 0.28025412 | <b>0.048991943</b> | 0.239910579       | 0.22070712        | 0.21332167        | 0.28535320        | -0.09164423       | 0.500895944       | 0.6343249         | 0.04729934        | 0.04158770        | 0.77429630        |                   |
| ENSG00000175064 | 20 | 21522070 | 2167777*  | URE2C       | protein coding       | 0.16703719   | 0.8851483         | 0.14507200 | 0.020201156        | 0.16703719        | 0.16703719        | 0.20701501        | 0.26851062        | -0.05923254       | 0.67055051        | 0.3642815         | 0.04729934        | 0.04158770        | 0.77429630        |                   |
| ENSG00000169696 | 14 | 7200818  | 7200818   | MYO10       | protein coding       | 0.120201156  | 0.8851483         | 0.14507200 | 0.020201156        | 0.120201156       | 0.120201156       | 0.16703719        | 0.26851062        | -0.05923254       | 0.67055051        | 0.3642815         | 0.04729934        | 0.04158770        | 0.77429630        |                   |
| ENSG00000117419 | 1  | 44227010 | 44352260  | ERF3        | protein coding       | 0.11702202   | 0.3121785         | 0.36571599 | <b>0.04909202</b>  | 0.10341892        | 0.45411561        | 0.36220450        | 0.06336479        | 0.04982284        | 0.66914144        | 0.34622635        | 0.08747224        | 0.05072688        | 0.68311474        |                   |
| ENSG00000123708 | 1  | 7412395  | 7412395   | LOC10252311 | lincRNA              | 0.22742247   | 0.04869224        | 0.2367655  | 0.09842416         | 0.10325279        | 0.161026          | 0.10834909        | 0.43444875        | 0.08349259        | 0.34544875        | 0.36425255        | 0.08747224        | 0.05072688        | 0.68311474        |                   |
| ENSG00000108106 | 10 | 5539745  | 5540778*  | URE2B       | protein coding       | 0.13758855   | 0.23272581        | 0.21185242 | 0.03947364         | 0.10663726        | 0.64712661        | 0.14742780        | 0.46291314        | -0.08063982       | 0.47889387        | 0.36405498        | 0.08450498        | 0.11077878        | 0.44384027        |                   |
| ENSG00000254036 | 8  | 12245853 | 12245735* | APMS1       | protein coding       | 0.05455567   | 0.63591384        | 0.03494968 | 0.04142827         | 0.020920314       | 0.88544775        | 0.14659200        | 0.46591482        | -0.12070441       | 0.3648157         | 0.36404471        | 0.08719913        | 0.04717679        | 0.58552414        |                   |
| ENSG00000125455 | 10 | 1457830  | 1458124*  | URE2A       | protein coding       | 0.14696320   | 0.20211887        | 0.22425988 | 0.11742162         | 0.10087191        | 0.16162004        | 0.10704961        | 0.32451157        | 0.14224249        | 0.30474472        | 0.36405498        | 0.08450498        | 0.11077878        | 0.44384027        |                   |
| ENSG0000055402  | 8  | 10975343 | 10974741* | LOC10252311 | lincRNA              | 0.13601103   | 0.23821472        | 0.1791791  | 0.03141755         | 0.04502466        | 0.8392192         | 0.14398904        | 0.47372454        | 0.11085004        | 0.36475589        | 0.36393801        | 0.04717679        | 0.58552414        | 0.44384027        |                   |
| ENSG00000129593 | 11 | 3692248  | 3692248   | PPAP40      | processed pseudogene | -0.01729958  | 0.783268149       | 0.22851043 | 0.17083734         | 0.17276873        | 0.02624903        | 0.88795956        | -0.16377854       | 0.23699489        | 0.36383678        | 0.08719913        | 0.04717679        | 0.58552414        | 0.44384027        |                   |
| ENSG00000265988 | 14 | 23491781 | 23491781  | TARBP1      | protein coding       | 0.0244829    | 0.832817284       | 0.28431207 | 0.03088952         | 0.0244829         | 0.03088952        | 0.14323819        | 0.0897933         | 0.14323819        | 0.36383678        | 0.08719913        | 0.04717679        | 0.58552414        | 0.44384027        |                   |
| ENSG0000028564  | 14 | 5293185  | 5293185   | LOC10252311 | lincRNA              | 0.10189888   | 0.30185407        | 0.23388020 | 0.102108749        | 0.07428015        | <b>0.02020237</b> | 0.04822320        | 0.081989129       | 0.13635554        | <b>0.01962128</b> | 0.36383678        | 0.08719913        | 0.04717679        | 0.58552414        |                   |
| ENSG00000149468 | 20 | 3952544  | 3952700*  | CH2CE       | protein coding       | -0.14542349  | 0.20697194        | 0.14988810 | 0.02691180         | 0.02691180        | 0.03012188        | -0.06858248       | 0.73520018        | -0.22339524       | 0.04117487        | 0.36383678        | 0.08719913        | 0.04717679        | 0.58552414        |                   |
| ENSG0000023010  | 5  | 14136032 | 14135129* | PCSK9B      | protein coding       | 0.12385234   | 0.293978989       | 0.22538967 | 0.11584267         | 0.05871787        | 0.78191163        | 0.18019705        | 0.45537103        | -0.10090871       | 0.4959894         | 0.36383678        | 0.08719913        | 0.04717679        | 0.58552414        |                   |
| ENSG00000505950 | 10 | 10096848 | 10097515  | MRPL43      | protein coding       | 0.21588641   | 0.05933384        | 0.16224287 | <b>0.02628009</b>  | 0.07523609        | 0.05222271        | -0.0567539        | 0.77857653        | 0.14297027        | 0.30237473        | 0.36383678        | 0.08719913        | 0.04717679        | 0.58552414        |                   |
| ENSG00000236789 | 10 | 4300874  | 4301238*  | LOC10252311 | lincRNA              | -0.19157918  | 0.09069844        | 0.12708396 | 0.37914965         | 0.22375084        | 0.25198588        | -0.13815183       | 0.49189973        | -0.3162826        | 0.07198483        | 0.36383678        | 0.08719913        | 0.04717679        | 0.58552414        |                   |
| ENSG00000137409 | 11 | 3698912  | 3698912   | MTC1        | protein coding       | 0.18047260   | 0.31252594        | 0.27278765 | 0.05914371         | 0.12925404        | 0.40406434        | 0.14905734        | 0.33519078        | 0.1178219         | 0.39915774        | 0.36383678        | 0.08719913        | 0.04717679        | 0.58552414        |                   |
| ENSG00000137170 | 11 | 10984296 | 11028672* | SDX         | protein coding       | 0.38310259   | <b>0.00505338</b> | 0.34077423 | <b>0.09838138</b>  | <b>0.34884961</b> | <b>0.04450503</b> | <b>0.34884961</b> | <b>0.04450503</b> | <b>0.34884961</b> | <b>0.04450503</b> | <b>0.34884961</b> | <b>0.04450503</b> | <b>0.34884961</b> | <b>0.04450503</b> | <b>0.34884961</b> |
| ENSG00000189117 | 21 | 3613454  | 3607938*  | SETD4       | protein coding       | 0.02037588   | 0.8024146         | 0.23789710 | 0.08491349         | 0.14625499        | 0.30684574        | 0.17328452        | 0.52670384        | -0.0524963        | 0.50242938        | 0.36383678        | 0.08719913        | 0.04717679        | 0.58552414        |                   |
| ENSG00000102158 | 10 | 7752547  | 7759552*  | MAGT1       | protein coding       | 0.14663200   | 0.20211887        | 0.22425988 | 0.11742162         | 0.10087191        | 0.16162004        | 0.10704961        | 0.32451157        | 0.14224249        | 0.30474472        | 0.36405498        | 0.08450498        | 0.11077878        | 0.44384027        |                   |
| ENSG00000107142 | 3  | 2380595  | 2389140*  | UBE2E1      | protein coding       | 0.39817543   | <b>0.00302131</b> | 0.19533928 | 0.14621426         | <b>0.01948544</b> | 0.14621426        | 0.14621426        | 0.14621426        | 0.14621426        | 0.14621426        | 0.14621426        | 0.14621426        | 0.14621426        | 0.14621426        |                   |
| ENSG00000124614 | 8  | 34417454 | 3442800*  | RPS10       | protein coding       | 0.37011432   | <b>0.00272541</b> | 0.17888447 | 0.21071321         | <b>0.03400178</b> | <b>0.42621378</b> | -0.07437469       | 0.69730708        | 0.04445242        | 0.01899369        | 0.36383678        | 0.08719913        | 0.04717679        | 0.58552414        |                   |
| ENSG00000141981 | X  | 13427228 | 13427228  | NTRO2       | processed pseudogene | 0.000714024  | 0.9896613         | 0.22707730 | 0.11142041         | 0.13390123        | 0.02646952        | 0.01938458        | 0.92544528        | -0.14396904       | 0.23499077        | 0.36383678        | 0.08719913        | 0.04717679        | 0.58552414        |                   |
| ENSG00000200897 | 12 | 10374747 | 10377482* | LOC10252311 | lincRNA              | -0.030142024 | 0.78468187        | 0.14736387 | <b>0.03400178</b>  | <b>0.03400178</b> | <b>0.03400178</b> | <b>0.03400178</b> | <b>0.03400178</b> | <b>0.03400178</b> | <b>0.03400178</b> | <b>0.03400178</b> | <b>0.03400178</b> | <b>0.03400178</b> | <b>0.03400178</b> |                   |
| ENSG00000124535 | 8  | 275934   | 275934*   | WRNIP1      | protein coding       | 0.04816955   | 0.819819224       | 0.30078487 | <b>0.03021821</b>  | 0.02824454        | 0.8872951         | 0.2783898         | 0.16213238        | -0.00911920       | 0.96339724        | 0.36383678        | 0.08719913        | 0.04717679        | 0.58552414        |                   |
| ENSG00000079999 | 10 | 1048615  | 1050395*  | MEPAP       | protein coding       | 0.2895328    | 0.019182465       | 0.38642497 | <b>0.00584495</b>  | 0.22189844        | 0.2691895         | 0.44573903        | 0.01077789        | 0.24229264        | 0.09027201        | 0.36383678        | 0.08719913        | 0.04717679        | 0.58552414        |                   |
| ENSG00000146888 | 10 | 9087182  | 9098553*  | RFP30       | protein coding       | 0.22323528   | 0.05992254        | 0.30314454 | <b>0.04308084</b>  | 0.19282683        | 0.36107319        | 0.13721352        | 0.41486830        | 0.04685781        | 0.13852428        | 0.36383678        | 0.08719913        | 0.04717679        | 0.58552414        |                   |
| ENSG00000178188 | 16 | 2884680  | 2884712*  | SH2B1       | protein coding       | 0.01185243   | 0.91373454        | 0.12728917 | 0.20305174         | 0.18978405        | 0.31708882        | -0.02093262       | 0.92075752        | -0.10275237       | 0.45882828        | 0.36383678        | 0.08719913        | 0.04717679        | 0.58552414        |                   |
| ENSG00000119812 | 10 | 3328924  | 3328924   | LOC10252311 | lincRNA              | 0.18412404   | 0.29192234        | 0.20592528 | 0.04913841         | 0.02913841        | 0.02913841        | 0.02913841        | 0.02913841        | 0.02913841        | 0.02913841        | 0.02913841        | 0.02913841        | 0.02913841        | 0.02913841        |                   |
| ENSG00000163584 | 1  | 15893076 | 15897700* | PYH1N1      | protein coding       | 0.47986217   | 1.00545           | 0.4680491  | <b>0.00209424</b>  | <b>0.00209424</b> | <b>0.00209424</b> | <b>0.00209424</b> | <b>0.00209424</b> | <b>0.00209424</b> | <b>0.00209424</b> | <b>0.00209424</b> | <b>0.00209424</b> | <b>0.00209424</b> | <b>0.00209424</b> |                   |
| ENSG00000235272 | 12 | 6785891  | 6787019*  | LOC10252311 | lincRNA              | 0.14242545   | 0.21588522        | 0.04252925 | 0.75491570         | 0.44181233        | <b>0.01962128</b> | -0.31446538       | 0.10778232        | -0.04385858       | 0.75269955        | 0.36383678        | 0.08719913        | 0.04717679        | 0.58552414        |                   |
| ENSG00000181056 | 10 | 2725881  | 2725881   | ABC3        | protein coding       | 0.20017096   | 0.86179285        | 0.24800617 | 0.04846500         | 0.04846500        | 0.04846500        | 0.04846500        | 0.04846500        | 0.04846500        | 0.04846500        | 0.04846500        | 0.04846500        | 0.04846500        | 0.04846500        |                   |
| ENSG00000167792 | 16 | 2275881  | 2240748*  | ABC3A       | protein coding       | 0.20017096   | 0.86179285        | 0.24800617 | 0.04846500         | 0.04846500        | 0.04846500        | 0.04846500        | 0.04846500        | 0.04846500        | 0.04846500        | 0.04846500        | 0.04846500        | 0.04846500        | 0.04846500        |                   |
| ENSG00000129544 | 1  | 2303771  | 2343436*  | HNRNP9      | protein coding       | 0.44387707   | <b>0.318208</b>   | 0.30392134 | <b>0.04071472</b>  | <b>0.30392134</b> | 0.11781141        | 0.40072462        | <b>0.20977718</b> | 0.40072462        | <b>0.20977718</b> | 0.40072462        | 0.36383678        | 0.08719913        | 0.04717679        | 0.58552414        |
| ENSG00000136091 | 11 | 11148186 | 11148186  | LOC10252311 | lincRNA              | 0.11851121   | 0.21588522        | 0.04252925 | 0.75491570         | 0.44181233        | <b>0.01962128</b> | -0.31446538       | 0.10778232        | -0.04385858       | 0.75269955        | 0.36383678        | 0.08719913        | 0.04717679        | 0.58552414        |                   |
| ENSG00000285856 | 13 | 11148186 | 11183711* | ABC3        | protein coding       | 0.20017096   | 0.86179285        | 0.24800617 | 0.04846500         | 0.04846500        | 0.04846500        | 0.04846500        | 0.04846500        | 0.04846500        | 0.04846500        | 0.04846500        | 0.04846500        | 0.04846500        | 0.04846500        |                   |
| ENSG00000233970 | 2  | 625023   | 625023*   | ASC2        | protein coding       | 0.04653178   | 0.57109558        | 0.13473020 | 0.3206701          | 0.08813217        | 0.86203028        | 0.17248492        | 0.5450950         | 0.17989102        | 0.10268378        | 0.36240703        | 0.08719913        | 0.04717679        | 0.58552414        |                   |
| ENSG00000101110 | 10 | 6031376  | 603855*   | ANKRD1      | protein coding       | 0.12545783   | 0.32975335        | 0.12014852 | 0.03865107         | 0.12014852        | 0.12014852        | 0.12014852        | 0.12014852        | 0.12014852        | 0.12014852        | 0.12014852        | 0.12014852        | 0.12014852        | 0.12014852        |                   |
| ENSG00000199510 | 12 | 11032970 | 11040370* | ANAPC7      | protein coding       | 0.24818727   | <b>0.04034889</b> | 0.18955035 | 0.18930850         | 0.04014472        | 0.88257389        | 0.12884522        | 0.52838428        | 0.01909305        | 0.89011223        | 0.36240703        | 0.08719913        | 0.04717679        | 0.58552414        |                   |
| ENSG00000031341 | 10 | 8077432  | 8077432   | LOC10252311 | lincRNA              | 0.11851121   | 0.21588522        | 0.04252925 | 0.75491570         |                   |                   |                   |                   |                   |                   |                   |                   |                   |                   |                   |

Table with 10 columns: Gene ID, Gene Name, Feature, Coordinates, RefSeq ID, RefSeq Name, RefSeq Description, RefSeq Accession, RefSeq Date, RefSeq Version. The table lists various genes and their genomic features across different chromosomes.

Table with columns for gene ID, gene name, protein name, and coordinates. The table lists numerous genes such as ENG00000146923, ENG00000146924, etc., with their corresponding protein names and genomic coordinates.



Table with 10 columns: Gene ID, Chr, Pos, RefSeq ID, Gene Name, Feature Type, Start, End, Strand, RefSeq ID, Gene Name, Feature Type, Start, End, Strand. Contains genomic coordinates and gene annotations for various genes like AC091564, AC091565, AC091566, etc.



Table with 10 columns: Gene ID, Chr, Start, End, Gene Name, Type, RefSeq ID, RefSeq Description, RefSeq Link, RefSeq Description, RefSeq Link. The table lists numerous genes and their associated genomic coordinates and descriptions.

Table with columns for gene names (e.g., ENGG00023170), coordinates, and various numerical values. The table lists numerous genes and their associated data points across multiple rows.

| ENSG00000203791 | 10 | 12474149 | 12479187 | EEF1AM2T                                           | protein coding         | 0.16344377                                                                                                                                                                                                                                                                         | 0.15449074                                                                                                                                                                                                                                                     | 0.17068874                                                                                                                                                                                                                                 | 0.22373450                                                                                                                                                                                                            | 0.26518902                                                                                                                                                                                        | 0.18128130                                                                                                                                                                    | -0.14137200                                                                                                                                               | 0.48181534                                                                                                                           | -0.04276273                                                                                                      | 0.76184816                                                                                  | 0.32503111                                                             | 0.13020296 | 0.31244401 | 0.02202630 |
|-----------------|----|----------|----------|----------------------------------------------------|------------------------|------------------------------------------------------------------------------------------------------------------------------------------------------------------------------------------------------------------------------------------------------------------------------------|----------------------------------------------------------------------------------------------------------------------------------------------------------------------------------------------------------------------------------------------------------------|--------------------------------------------------------------------------------------------------------------------------------------------------------------------------------------------------------------------------------------------|-----------------------------------------------------------------------------------------------------------------------------------------------------------------------------------------------------------------------|---------------------------------------------------------------------------------------------------------------------------------------------------------------------------------------------------|-------------------------------------------------------------------------------------------------------------------------------------------------------------------------------|-----------------------------------------------------------------------------------------------------------------------------------------------------------|--------------------------------------------------------------------------------------------------------------------------------------|------------------------------------------------------------------------------------------------------------------|---------------------------------------------------------------------------------------------|------------------------------------------------------------------------|------------|------------|------------|
| ENSG0000021384  | 20 | 2055329  | 2036141  | LOC101928                                          | protein coding         | 0.15981729 <th>0.0814524 <th>0.17574713 <th>0.38125249 <th>0.30711063 <th>0.16372829 <th>-0.02627699 <th>0.48573316</th> <th>0.14665454 <th>0.2074817 <th>0.32044073 <th>0.13020296</th> <th>0.31244401</th> <th>0.02202630</th> </th></th></th></th></th></th></th></th></th>     | 0.0814524 <th>0.17574713 <th>0.38125249 <th>0.30711063 <th>0.16372829 <th>-0.02627699 <th>0.48573316</th> <th>0.14665454 <th>0.2074817 <th>0.32044073 <th>0.13020296</th> <th>0.31244401</th> <th>0.02202630</th> </th></th></th></th></th></th></th></th>     | 0.17574713 <th>0.38125249 <th>0.30711063 <th>0.16372829 <th>-0.02627699 <th>0.48573316</th> <th>0.14665454 <th>0.2074817 <th>0.32044073 <th>0.13020296</th> <th>0.31244401</th> <th>0.02202630</th> </th></th></th></th></th></th></th>    | 0.38125249 <th>0.30711063 <th>0.16372829 <th>-0.02627699 <th>0.48573316</th> <th>0.14665454 <th>0.2074817 <th>0.32044073 <th>0.13020296</th> <th>0.31244401</th> <th>0.02202630</th> </th></th></th></th></th></th>   | 0.30711063 <th>0.16372829 <th>-0.02627699 <th>0.48573316</th> <th>0.14665454 <th>0.2074817 <th>0.32044073 <th>0.13020296</th> <th>0.31244401</th> <th>0.02202630</th> </th></th></th></th></th>   | 0.16372829 <th>-0.02627699 <th>0.48573316</th> <th>0.14665454 <th>0.2074817 <th>0.32044073 <th>0.13020296</th> <th>0.31244401</th> <th>0.02202630</th> </th></th></th></th>   | -0.02627699 <th>0.48573316</th> <th>0.14665454 <th>0.2074817 <th>0.32044073 <th>0.13020296</th> <th>0.31244401</th> <th>0.02202630</th> </th></th></th>   | 0.48573316                                                                                                                           | 0.14665454 <th>0.2074817 <th>0.32044073 <th>0.13020296</th> <th>0.31244401</th> <th>0.02202630</th> </th></th>   | 0.2074817 <th>0.32044073 <th>0.13020296</th> <th>0.31244401</th> <th>0.02202630</th> </th>  | 0.32044073 <th>0.13020296</th> <th>0.31244401</th> <th>0.02202630</th> | 0.13020296 | 0.31244401 | 0.02202630 |
| ENSG00000227399 | 4  | 37641243 | 37634374 | NOL12                                              | protein coding         | 0.15981729 <th>0.0814524 <th>0.17574713 <th>0.38125249 <th>0.30711063 <th>0.16372829 <th>-0.02627699 <th>0.48573316</th> <th>0.14665454 <th>0.2074817 <th>0.32044073 <th>0.13020296</th> <th>0.31244401</th> <th>0.02202630</th> </th></th></th></th></th></th></th></th></th>     | 0.0814524 <th>0.17574713 <th>0.38125249 <th>0.30711063 <th>0.16372829 <th>-0.02627699 <th>0.48573316</th> <th>0.14665454 <th>0.2074817 <th>0.32044073 <th>0.13020296</th> <th>0.31244401</th> <th>0.02202630</th> </th></th></th></th></th></th></th></th>     | 0.17574713 <th>0.38125249 <th>0.30711063 <th>0.16372829 <th>-0.02627699 <th>0.48573316</th> <th>0.14665454 <th>0.2074817 <th>0.32044073 <th>0.13020296</th> <th>0.31244401</th> <th>0.02202630</th> </th></th></th></th></th></th></th>    | 0.38125249 <th>0.30711063 <th>0.16372829 <th>-0.02627699 <th>0.48573316</th> <th>0.14665454 <th>0.2074817 <th>0.32044073 <th>0.13020296</th> <th>0.31244401</th> <th>0.02202630</th> </th></th></th></th></th></th>   | 0.30711063 <th>0.16372829 <th>-0.02627699 <th>0.48573316</th> <th>0.14665454 <th>0.2074817 <th>0.32044073 <th>0.13020296</th> <th>0.31244401</th> <th>0.02202630</th> </th></th></th></th></th>   | 0.16372829 <th>-0.02627699 <th>0.48573316</th> <th>0.14665454 <th>0.2074817 <th>0.32044073 <th>0.13020296</th> <th>0.31244401</th> <th>0.02202630</th> </th></th></th></th>   | -0.02627699 <th>0.48573316</th> <th>0.14665454 <th>0.2074817 <th>0.32044073 <th>0.13020296</th> <th>0.31244401</th> <th>0.02202630</th> </th></th></th>   | 0.48573316                                                                                                                           | 0.14665454 <th>0.2074817 <th>0.32044073 <th>0.13020296</th> <th>0.31244401</th> <th>0.02202630</th> </th></th>   | 0.2074817 <th>0.32044073 <th>0.13020296</th> <th>0.31244401</th> <th>0.02202630</th> </th>  | 0.32044073 <th>0.13020296</th> <th>0.31244401</th> <th>0.02202630</th> | 0.13020296 | 0.31244401 | 0.02202630 |
| ENSG00000249685 | 4  | 10555510 | 10555522 | CCDC294                                            | protein coding         | 0.18108441 <th>0.15115744 <th>0.20638324 <th>0.14594145 <th>0.24175177 <th>0.2237751 <th>0.07924266 <th>0.6943812 <th>0.12192743 <th>0.37979164 <th>0.32466345 <th>0.13020296</th> <th>0.31244401</th> <th>0.02202630</th> </th></th></th></th></th></th></th></th></th></th>      | 0.15115744 <th>0.20638324 <th>0.14594145 <th>0.24175177 <th>0.2237751 <th>0.07924266 <th>0.6943812 <th>0.12192743 <th>0.37979164 <th>0.32466345 <th>0.13020296</th> <th>0.31244401</th> <th>0.02202630</th> </th></th></th></th></th></th></th></th></th>      | 0.20638324 <th>0.14594145 <th>0.24175177 <th>0.2237751 <th>0.07924266 <th>0.6943812 <th>0.12192743 <th>0.37979164 <th>0.32466345 <th>0.13020296</th> <th>0.31244401</th> <th>0.02202630</th> </th></th></th></th></th></th></th></th>      | 0.14594145 <th>0.24175177 <th>0.2237751 <th>0.07924266 <th>0.6943812 <th>0.12192743 <th>0.37979164 <th>0.32466345 <th>0.13020296</th> <th>0.31244401</th> <th>0.02202630</th> </th></th></th></th></th></th></th>     | 0.24175177 <th>0.2237751 <th>0.07924266 <th>0.6943812 <th>0.12192743 <th>0.37979164 <th>0.32466345 <th>0.13020296</th> <th>0.31244401</th> <th>0.02202630</th> </th></th></th></th></th></th>     | 0.2237751 <th>0.07924266 <th>0.6943812 <th>0.12192743 <th>0.37979164 <th>0.32466345 <th>0.13020296</th> <th>0.31244401</th> <th>0.02202630</th> </th></th></th></th></th>     | 0.07924266 <th>0.6943812 <th>0.12192743 <th>0.37979164 <th>0.32466345 <th>0.13020296</th> <th>0.31244401</th> <th>0.02202630</th> </th></th></th></th>    | 0.6943812 <th>0.12192743 <th>0.37979164 <th>0.32466345 <th>0.13020296</th> <th>0.31244401</th> <th>0.02202630</th> </th></th></th>   | 0.12192743 <th>0.37979164 <th>0.32466345 <th>0.13020296</th> <th>0.31244401</th> <th>0.02202630</th> </th></th>  | 0.37979164 <th>0.32466345 <th>0.13020296</th> <th>0.31244401</th> <th>0.02202630</th> </th> | 0.32466345 <th>0.13020296</th> <th>0.31244401</th> <th>0.02202630</th> | 0.13020296 | 0.31244401 | 0.02202630 |
| ENSG0000026838  | 14 | 9620479  | 9624418  | LOC101928                                          | protein coding         | 0.16004833 <th>0.09481104 <th>0.13122604 <th>0.28012380 <th>0.23348468 <th>0.16494168 <th>-0.11998983 <th>0.29076786 <th>0.25373555 <th>0.04411731 <th>0.32482626 <th>0.13020296</th> <th>0.31244401</th> <th>0.02202630</th> </th></th></th></th></th></th></th></th></th></th>   | 0.09481104 <th>0.13122604 <th>0.28012380 <th>0.23348468 <th>0.16494168 <th>-0.11998983 <th>0.29076786 <th>0.25373555 <th>0.04411731 <th>0.32482626 <th>0.13020296</th> <th>0.31244401</th> <th>0.02202630</th> </th></th></th></th></th></th></th></th></th>   | 0.13122604 <th>0.28012380 <th>0.23348468 <th>0.16494168 <th>-0.11998983 <th>0.29076786 <th>0.25373555 <th>0.04411731 <th>0.32482626 <th>0.13020296</th> <th>0.31244401</th> <th>0.02202630</th> </th></th></th></th></th></th></th></th>   | 0.28012380 <th>0.23348468 <th>0.16494168 <th>-0.11998983 <th>0.29076786 <th>0.25373555 <th>0.04411731 <th>0.32482626 <th>0.13020296</th> <th>0.31244401</th> <th>0.02202630</th> </th></th></th></th></th></th></th>  | 0.23348468 <th>0.16494168 <th>-0.11998983 <th>0.29076786 <th>0.25373555 <th>0.04411731 <th>0.32482626 <th>0.13020296</th> <th>0.31244401</th> <th>0.02202630</th> </th></th></th></th></th></th>  | 0.16494168 <th>-0.11998983 <th>0.29076786 <th>0.25373555 <th>0.04411731 <th>0.32482626 <th>0.13020296</th> <th>0.31244401</th> <th>0.02202630</th> </th></th></th></th></th>  | -0.11998983 <th>0.29076786 <th>0.25373555 <th>0.04411731 <th>0.32482626 <th>0.13020296</th> <th>0.31244401</th> <th>0.02202630</th> </th></th></th></th>  | 0.29076786 <th>0.25373555 <th>0.04411731 <th>0.32482626 <th>0.13020296</th> <th>0.31244401</th> <th>0.02202630</th> </th></th></th>  | 0.25373555 <th>0.04411731 <th>0.32482626 <th>0.13020296</th> <th>0.31244401</th> <th>0.02202630</th> </th></th>  | 0.04411731 <th>0.32482626 <th>0.13020296</th> <th>0.31244401</th> <th>0.02202630</th> </th> | 0.32482626 <th>0.13020296</th> <th>0.31244401</th> <th>0.02202630</th> | 0.13020296 | 0.31244401 | 0.02202630 |
| ENSG0000028444  | 13 | 13504444 | 13504444 | FAM32B                                             | protein coding         | 0.15517274 <th>0.12744444 <th>0.17425444 <th>0.27125444 <th>0.22154444 <th>0.12154444 <th>-0.12154444 <th>0.27125444 <th>0.22154444 <th>0.12154444 <th>0.32482626</th> <th>0.13020296</th> <th>0.31244401</th> <th>0.02202630</th> </th></th></th></th></th></th></th></th></th>   | 0.12744444 <th>0.17425444 <th>0.27125444 <th>0.22154444 <th>0.12154444 <th>-0.12154444 <th>0.27125444 <th>0.22154444 <th>0.12154444 <th>0.32482626</th> <th>0.13020296</th> <th>0.31244401</th> <th>0.02202630</th> </th></th></th></th></th></th></th></th>   | 0.17425444 <th>0.27125444 <th>0.22154444 <th>0.12154444 <th>-0.12154444 <th>0.27125444 <th>0.22154444 <th>0.12154444 <th>0.32482626</th> <th>0.13020296</th> <th>0.31244401</th> <th>0.02202630</th> </th></th></th></th></th></th></th>   | 0.27125444 <th>0.22154444 <th>0.12154444 <th>-0.12154444 <th>0.27125444 <th>0.22154444 <th>0.12154444 <th>0.32482626</th> <th>0.13020296</th> <th>0.31244401</th> <th>0.02202630</th> </th></th></th></th></th></th>  | 0.22154444 <th>0.12154444 <th>-0.12154444 <th>0.27125444 <th>0.22154444 <th>0.12154444 <th>0.32482626</th> <th>0.13020296</th> <th>0.31244401</th> <th>0.02202630</th> </th></th></th></th></th>  | 0.12154444 <th>-0.12154444 <th>0.27125444 <th>0.22154444 <th>0.12154444 <th>0.32482626</th> <th>0.13020296</th> <th>0.31244401</th> <th>0.02202630</th> </th></th></th></th>  | -0.12154444 <th>0.27125444 <th>0.22154444 <th>0.12154444 <th>0.32482626</th> <th>0.13020296</th> <th>0.31244401</th> <th>0.02202630</th> </th></th></th>  | 0.27125444 <th>0.22154444 <th>0.12154444 <th>0.32482626</th> <th>0.13020296</th> <th>0.31244401</th> <th>0.02202630</th> </th></th>  | 0.22154444 <th>0.12154444 <th>0.32482626</th> <th>0.13020296</th> <th>0.31244401</th> <th>0.02202630</th> </th>  | 0.12154444 <th>0.32482626</th> <th>0.13020296</th> <th>0.31244401</th> <th>0.02202630</th>  | 0.32482626                                                             | 0.13020296 | 0.31244401 | 0.02202630 |
| ENSG0000020421  | 10 | 8872544  | 8872574  | LPK                                                | protein coding         | 0.10573404 <th>0.09300291 <th>0.17329193 <th>0.22884608 <th>0.10544939 <th>0.17876977 <th>-0.17708883 <th>0.34748733 <th>0.22340889 <th>0.10422889 <th>0.33066773 <th>0.13020296</th> <th>0.31244401</th> <th>0.02202630</th> </th></th></th></th></th></th></th></th></th></th>   | 0.09300291 <th>0.17329193 <th>0.22884608 <th>0.10544939 <th>0.17876977 <th>-0.17708883 <th>0.34748733 <th>0.22340889 <th>0.10422889 <th>0.33066773 <th>0.13020296</th> <th>0.31244401</th> <th>0.02202630</th> </th></th></th></th></th></th></th></th></th>   | 0.17329193 <th>0.22884608 <th>0.10544939 <th>0.17876977 <th>-0.17708883 <th>0.34748733 <th>0.22340889 <th>0.10422889 <th>0.33066773 <th>0.13020296</th> <th>0.31244401</th> <th>0.02202630</th> </th></th></th></th></th></th></th></th>   | 0.22884608 <th>0.10544939 <th>0.17876977 <th>-0.17708883 <th>0.34748733 <th>0.22340889 <th>0.10422889 <th>0.33066773 <th>0.13020296</th> <th>0.31244401</th> <th>0.02202630</th> </th></th></th></th></th></th></th>  | 0.10544939 <th>0.17876977 <th>-0.17708883 <th>0.34748733 <th>0.22340889 <th>0.10422889 <th>0.33066773 <th>0.13020296</th> <th>0.31244401</th> <th>0.02202630</th> </th></th></th></th></th></th>  | 0.17876977 <th>-0.17708883 <th>0.34748733 <th>0.22340889 <th>0.10422889 <th>0.33066773 <th>0.13020296</th> <th>0.31244401</th> <th>0.02202630</th> </th></th></th></th></th>  | -0.17708883 <th>0.34748733 <th>0.22340889 <th>0.10422889 <th>0.33066773 <th>0.13020296</th> <th>0.31244401</th> <th>0.02202630</th> </th></th></th></th>  | 0.34748733 <th>0.22340889 <th>0.10422889 <th>0.33066773 <th>0.13020296</th> <th>0.31244401</th> <th>0.02202630</th> </th></th></th>  | 0.22340889 <th>0.10422889 <th>0.33066773 <th>0.13020296</th> <th>0.31244401</th> <th>0.02202630</th> </th></th>  | 0.10422889 <th>0.33066773 <th>0.13020296</th> <th>0.31244401</th> <th>0.02202630</th> </th> | 0.33066773 <th>0.13020296</th> <th>0.31244401</th> <th>0.02202630</th> | 0.13020296 | 0.31244401 | 0.02202630 |
| ENSG0000026307  | 19 | 4695392  | 4691597  | RVL2L                                              | protein coding         | 0.17122252 <th>0.13447652 <th>0.2733454 <th>0.165118847 <th>0.25688244 <th>0.19729579 <th>0.26512441 <th>0.20615371 <th>0.16278493 <th>0.23265442 <th>0.32466345</th> <th>0.13020296</th> <th>0.31244401</th> <th>0.02202630</th> </th></th></th></th></th></th></th></th></th>    | 0.13447652 <th>0.2733454 <th>0.165118847 <th>0.25688244 <th>0.19729579 <th>0.26512441 <th>0.20615371 <th>0.16278493 <th>0.23265442 <th>0.32466345</th> <th>0.13020296</th> <th>0.31244401</th> <th>0.02202630</th> </th></th></th></th></th></th></th></th>    | 0.2733454 <th>0.165118847 <th>0.25688244 <th>0.19729579 <th>0.26512441 <th>0.20615371 <th>0.16278493 <th>0.23265442 <th>0.32466345</th> <th>0.13020296</th> <th>0.31244401</th> <th>0.02202630</th> </th></th></th></th></th></th></th>    | 0.165118847 <th>0.25688244 <th>0.19729579 <th>0.26512441 <th>0.20615371 <th>0.16278493 <th>0.23265442 <th>0.32466345</th> <th>0.13020296</th> <th>0.31244401</th> <th>0.02202630</th> </th></th></th></th></th></th>  | 0.25688244 <th>0.19729579 <th>0.26512441 <th>0.20615371 <th>0.16278493 <th>0.23265442 <th>0.32466345</th> <th>0.13020296</th> <th>0.31244401</th> <th>0.02202630</th> </th></th></th></th></th>   | 0.19729579 <th>0.26512441 <th>0.20615371 <th>0.16278493 <th>0.23265442 <th>0.32466345</th> <th>0.13020296</th> <th>0.31244401</th> <th>0.02202630</th> </th></th></th></th>   | 0.26512441 <th>0.20615371 <th>0.16278493 <th>0.23265442 <th>0.32466345</th> <th>0.13020296</th> <th>0.31244401</th> <th>0.02202630</th> </th></th></th>   | 0.20615371 <th>0.16278493 <th>0.23265442 <th>0.32466345</th> <th>0.13020296</th> <th>0.31244401</th> <th>0.02202630</th> </th></th>  | 0.16278493 <th>0.23265442 <th>0.32466345</th> <th>0.13020296</th> <th>0.31244401</th> <th>0.02202630</th> </th>  | 0.23265442 <th>0.32466345</th> <th>0.13020296</th> <th>0.31244401</th> <th>0.02202630</th>  | 0.32466345                                                             | 0.13020296 | 0.31244401 | 0.02202630 |
| ENSG0000027996  | 1  | 3291353  | 3291353  | AL13902.1                                          | protein coding         | 0.15299222 <th>0.12299222 <th>0.17299222 <th>0.27299222 <th>0.22299222 <th>0.12299222 <th>-0.12299222 <th>0.27299222 <th>0.22299222 <th>0.12299222 <th>0.32482626</th> <th>0.13020296</th> <th>0.31244401</th> <th>0.02202630</th> </th></th></th></th></th></th></th></th></th>   | 0.12299222 <th>0.17299222 <th>0.27299222 <th>0.22299222 <th>0.12299222 <th>-0.12299222 <th>0.27299222 <th>0.22299222 <th>0.12299222 <th>0.32482626</th> <th>0.13020296</th> <th>0.31244401</th> <th>0.02202630</th> </th></th></th></th></th></th></th></th>   | 0.17299222 <th>0.27299222 <th>0.22299222 <th>0.12299222 <th>-0.12299222 <th>0.27299222 <th>0.22299222 <th>0.12299222 <th>0.32482626</th> <th>0.13020296</th> <th>0.31244401</th> <th>0.02202630</th> </th></th></th></th></th></th></th>   | 0.27299222 <th>0.22299222 <th>0.12299222 <th>-0.12299222 <th>0.27299222 <th>0.22299222 <th>0.12299222 <th>0.32482626</th> <th>0.13020296</th> <th>0.31244401</th> <th>0.02202630</th> </th></th></th></th></th></th>  | 0.22299222 <th>0.12299222 <th>-0.12299222 <th>0.27299222 <th>0.22299222 <th>0.12299222 <th>0.32482626</th> <th>0.13020296</th> <th>0.31244401</th> <th>0.02202630</th> </th></th></th></th></th>  | 0.12299222 <th>-0.12299222 <th>0.27299222 <th>0.22299222 <th>0.12299222 <th>0.32482626</th> <th>0.13020296</th> <th>0.31244401</th> <th>0.02202630</th> </th></th></th></th>  | -0.12299222 <th>0.27299222 <th>0.22299222 <th>0.12299222 <th>0.32482626</th> <th>0.13020296</th> <th>0.31244401</th> <th>0.02202630</th> </th></th></th>  | 0.27299222 <th>0.22299222 <th>0.12299222 <th>0.32482626</th> <th>0.13020296</th> <th>0.31244401</th> <th>0.02202630</th> </th></th>  | 0.22299222 <th>0.12299222 <th>0.32482626</th> <th>0.13020296</th> <th>0.31244401</th> <th>0.02202630</th> </th>  | 0.12299222 <th>0.32482626</th> <th>0.13020296</th> <th>0.31244401</th> <th>0.02202630</th>  | 0.32482626                                                             | 0.13020296 | 0.31244401 | 0.02202630 |
| ENSG0000015382  | 17 | 5622700  | 5622700  | LOC101928                                          | protein coding         | 0.140486902 <th>0.22931453 <th>0.13549576 <th>0.40430380 <th>0.02682759 <th>0.09633379 <th>-0.09126001 <th>0.84638106</th> <th>0.11772995 <th>0.11772995 <th>0.32466345</th> <th>0.13020296</th> <th>0.31244401</th> <th>0.02202630</th> </th></th></th></th></th></th></th></th>  | 0.22931453 <th>0.13549576 <th>0.40430380 <th>0.02682759 <th>0.09633379 <th>-0.09126001 <th>0.84638106</th> <th>0.11772995 <th>0.11772995 <th>0.32466345</th> <th>0.13020296</th> <th>0.31244401</th> <th>0.02202630</th> </th></th></th></th></th></th></th>   | 0.13549576 <th>0.40430380 <th>0.02682759 <th>0.09633379 <th>-0.09126001 <th>0.84638106</th> <th>0.11772995 <th>0.11772995 <th>0.32466345</th> <th>0.13020296</th> <th>0.31244401</th> <th>0.02202630</th> </th></th></th></th></th></th>   | 0.40430380 <th>0.02682759 <th>0.09633379 <th>-0.09126001 <th>0.84638106</th> <th>0.11772995 <th>0.11772995 <th>0.32466345</th> <th>0.13020296</th> <th>0.31244401</th> <th>0.02202630</th> </th></th></th></th></th>  | 0.02682759 <th>0.09633379 <th>-0.09126001 <th>0.84638106</th> <th>0.11772995 <th>0.11772995 <th>0.32466345</th> <th>0.13020296</th> <th>0.31244401</th> <th>0.02202630</th> </th></th></th></th>  | 0.09633379 <th>-0.09126001 <th>0.84638106</th> <th>0.11772995 <th>0.11772995 <th>0.32466345</th> <th>0.13020296</th> <th>0.31244401</th> <th>0.02202630</th> </th></th></th>  | -0.09126001 <th>0.84638106</th> <th>0.11772995 <th>0.11772995 <th>0.32466345</th> <th>0.13020296</th> <th>0.31244401</th> <th>0.02202630</th> </th></th>  | 0.84638106                                                                                                                           | 0.11772995 <th>0.11772995 <th>0.32466345</th> <th>0.13020296</th> <th>0.31244401</th> <th>0.02202630</th> </th>  | 0.11772995 <th>0.32466345</th> <th>0.13020296</th> <th>0.31244401</th> <th>0.02202630</th>  | 0.32466345                                                             | 0.13020296 | 0.31244401 | 0.02202630 |
| ENSG00000199192 | 8  | 94719703 | 94708368 | DMY3L3                                             | protein coding         | 0.02729071 <th>0.53040172 <th>0.28990127 <th>0.24020272 <th>0.32255333 <th>0.54026302 <th>0.18306206 <th>0.36798378 <th>-0.20878955 <th>0.12972979 <th>0.32466345</th> <th>0.13020296</th> <th>0.31244401</th> <th>0.02202630</th> </th></th></th></th></th></th></th></th></th>   | 0.53040172 <th>0.28990127 <th>0.24020272 <th>0.32255333 <th>0.54026302 <th>0.18306206 <th>0.36798378 <th>-0.20878955 <th>0.12972979 <th>0.32466345</th> <th>0.13020296</th> <th>0.31244401</th> <th>0.02202630</th> </th></th></th></th></th></th></th></th>   | 0.28990127 <th>0.24020272 <th>0.32255333 <th>0.54026302 <th>0.18306206 <th>0.36798378 <th>-0.20878955 <th>0.12972979 <th>0.32466345</th> <th>0.13020296</th> <th>0.31244401</th> <th>0.02202630</th> </th></th></th></th></th></th></th>   | 0.24020272 <th>0.32255333 <th>0.54026302 <th>0.18306206 <th>0.36798378 <th>-0.20878955 <th>0.12972979 <th>0.32466345</th> <th>0.13020296</th> <th>0.31244401</th> <th>0.02202630</th> </th></th></th></th></th></th>  | 0.32255333 <th>0.54026302 <th>0.18306206 <th>0.36798378 <th>-0.20878955 <th>0.12972979 <th>0.32466345</th> <th>0.13020296</th> <th>0.31244401</th> <th>0.02202630</th> </th></th></th></th></th>  | 0.54026302 <th>0.18306206 <th>0.36798378 <th>-0.20878955 <th>0.12972979 <th>0.32466345</th> <th>0.13020296</th> <th>0.31244401</th> <th>0.02202630</th> </th></th></th></th>  | 0.18306206 <th>0.36798378 <th>-0.20878955 <th>0.12972979 <th>0.32466345</th> <th>0.13020296</th> <th>0.31244401</th> <th>0.02202630</th> </th></th></th>  | 0.36798378 <th>-0.20878955 <th>0.12972979 <th>0.32466345</th> <th>0.13020296</th> <th>0.31244401</th> <th>0.02202630</th> </th></th> | -0.20878955 <th>0.12972979 <th>0.32466345</th> <th>0.13020296</th> <th>0.31244401</th> <th>0.02202630</th> </th> | 0.12972979 <th>0.32466345</th> <th>0.13020296</th> <th>0.31244401</th> <th>0.02202630</th>  | 0.32466345                                                             | 0.13020296 | 0.31244401 | 0.02202630 |
| ENSG0000014624  | 4  | 4199302  | 42004611 | LOC101928                                          | protein coding         | 0.15299222 <th>0.12299222 <th>0.17299222 <th>0.27299222 <th>0.22299222 <th>0.12299222 <th>-0.12299222 <th>0.27299222 <th>0.22299222 <th>0.12299222 <th>0.32482626</th> <th>0.13020296</th> <th>0.31244401</th> <th>0.02202630</th> </th></th></th></th></th></th></th></th></th>   | 0.12299222 <th>0.17299222 <th>0.27299222 <th>0.22299222 <th>0.12299222 <th>-0.12299222 <th>0.27299222 <th>0.22299222 <th>0.12299222 <th>0.32482626</th> <th>0.13020296</th> <th>0.31244401</th> <th>0.02202630</th> </th></th></th></th></th></th></th></th>   | 0.17299222 <th>0.27299222 <th>0.22299222 <th>0.12299222 <th>-0.12299222 <th>0.27299222 <th>0.22299222 <th>0.12299222 <th>0.32482626</th> <th>0.13020296</th> <th>0.31244401</th> <th>0.02202630</th> </th></th></th></th></th></th></th>   | 0.27299222 <th>0.22299222 <th>0.12299222 <th>-0.12299222 <th>0.27299222 <th>0.22299222 <th>0.12299222 <th>0.32482626</th> <th>0.13020296</th> <th>0.31244401</th> <th>0.02202630</th> </th></th></th></th></th></th>  | 0.22299222 <th>0.12299222 <th>-0.12299222 <th>0.27299222 <th>0.22299222 <th>0.12299222 <th>0.32482626</th> <th>0.13020296</th> <th>0.31244401</th> <th>0.02202630</th> </th></th></th></th></th>  | 0.12299222 <th>-0.12299222 <th>0.27299222 <th>0.22299222 <th>0.12299222 <th>0.32482626</th> <th>0.13020296</th> <th>0.31244401</th> <th>0.02202630</th> </th></th></th></th>  | -0.12299222 <th>0.27299222 <th>0.22299222 <th>0.12299222 <th>0.32482626</th> <th>0.13020296</th> <th>0.31244401</th> <th>0.02202630</th> </th></th></th>  | 0.27299222 <th>0.22299222 <th>0.12299222 <th>0.32482626</th> <th>0.13020296</th> <th>0.31244401</th> <th>0.02202630</th> </th></th>  | 0.22299222 <th>0.12299222 <th>0.32482626</th> <th>0.13020296</th> <th>0.31244401</th> <th>0.02202630</th> </th>  | 0.12299222 <th>0.32482626</th> <th>0.13020296</th> <th>0.31244401</th> <th>0.02202630</th>  | 0.32482626                                                             | 0.13020296 | 0.31244401 | 0.02202630 |
| ENSG00000166492 | 11 | 3410352  | 3424246  | FAM65G                                             | unprocessed pseudogene | 0.20208099 <th>0.07639193 <th>0.05754953 <th>0.70503112 <th>0.13682827 <th>0.08301438 <th>-0.28324459 <th>0.15224387 <th>-0.38747437 <th>0.00278979 <th>0.32466345</th> <th>0.13020296</th> <th>0.31244401</th> <th>0.02202630</th> </th></th></th></th></th></th></th></th></th>  | 0.07639193 <th>0.05754953 <th>0.70503112 <th>0.13682827 <th>0.08301438 <th>-0.28324459 <th>0.15224387 <th>-0.38747437 <th>0.00278979 <th>0.32466345</th> <th>0.13020296</th> <th>0.31244401</th> <th>0.02202630</th> </th></th></th></th></th></th></th></th>  | 0.05754953 <th>0.70503112 <th>0.13682827 <th>0.08301438 <th>-0.28324459 <th>0.15224387 <th>-0.38747437 <th>0.00278979 <th>0.32466345</th> <th>0.13020296</th> <th>0.31244401</th> <th>0.02202630</th> </th></th></th></th></th></th></th>  | 0.70503112 <th>0.13682827 <th>0.08301438 <th>-0.28324459 <th>0.15224387 <th>-0.38747437 <th>0.00278979 <th>0.32466345</th> <th>0.13020296</th> <th>0.31244401</th> <th>0.02202630</th> </th></th></th></th></th></th> | 0.13682827 <th>0.08301438 <th>-0.28324459 <th>0.15224387 <th>-0.38747437 <th>0.00278979 <th>0.32466345</th> <th>0.13020296</th> <th>0.31244401</th> <th>0.02202630</th> </th></th></th></th></th> | 0.08301438 <th>-0.28324459 <th>0.15224387 <th>-0.38747437 <th>0.00278979 <th>0.32466345</th> <th>0.13020296</th> <th>0.31244401</th> <th>0.02202630</th> </th></th></th></th> | -0.28324459 <th>0.15224387 <th>-0.38747437 <th>0.00278979 <th>0.32466345</th> <th>0.13020296</th> <th>0.31244401</th> <th>0.02202630</th> </th></th></th> | 0.15224387 <th>-0.38747437 <th>0.00278979 <th>0.32466345</th> <th>0.13020296</th> <th>0.31244401</th> <th>0.02202630</th> </th></th> | -0.38747437 <th>0.00278979 <th>0.32466345</th> <th>0.13020296</th> <th>0.31244401</th> <th>0.02202630</th> </th> | 0.00278979 <th>0.32466345</th> <th>0.13020296</th> <th>0.31244401</th> <th>0.02202630</th>  | 0.32466345                                                             | 0.13020296 | 0.31244401 | 0.02202630 |
| ENSG00000197935 | 6  | 2994478  | 2995318  | ZNF311                                             | protein coding         | 0.06361868 <th>0.57222821 <th>0.20111819 <th>0.10714383 <th>0.07295658</th> <th>0.70102306 <th>0.3446707 <th>0.07830272 <th>0.16725977 <th>0.24404314 <th>0.32466345</th> <th>0.13020296</th> <th>0.31244401</th> <th>0.02202630</th> </th></th></th></th></th></th></th></th>     | 0.57222821 <th>0.20111819 <th>0.10714383 <th>0.07295658</th> <th>0.70102306 <th>0.3446707 <th>0.07830272 <th>0.16725977 <th>0.24404314 <th>0.32466345</th> <th>0.13020296</th> <th>0.31244401</th> <th>0.02202630</th> </th></th></th></th></th></th></th>     | 0.20111819 <th>0.10714383 <th>0.07295658</th> <th>0.70102306 <th>0.3446707 <th>0.07830272 <th>0.16725977 <th>0.24404314 <th>0.32466345</th> <th>0.13020296</th> <th>0.31244401</th> <th>0.02202630</th> </th></th></th></th></th></th>     | 0.10714383 <th>0.07295658</th> <th>0.70102306 <th>0.3446707 <th>0.07830272 <th>0.16725977 <th>0.24404314 <th>0.32466345</th> <th>0.13020296</th> <th>0.31244401</th> <th>0.02202630</th> </th></th></th></th></th>    | 0.07295658                                                                                                                                                                                        | 0.70102306 <th>0.3446707 <th>0.07830272 <th>0.16725977 <th>0.24404314 <th>0.32466345</th> <th>0.13020296</th> <th>0.31244401</th> <th>0.02202630</th> </th></th></th></th>    | 0.3446707 <th>0.07830272 <th>0.16725977 <th>0.24404314 <th>0.32466345</th> <th>0.13020296</th> <th>0.31244401</th> <th>0.02202630</th> </th></th></th>    | 0.07830272 <th>0.16725977 <th>0.24404314 <th>0.32466345</th> <th>0.13020296</th> <th>0.31244401</th> <th>0.02202630</th> </th></th>  | 0.16725977 <th>0.24404314 <th>0.32466345</th> <th>0.13020296</th> <th>0.31244401</th> <th>0.02202630</th> </th>  | 0.24404314 <th>0.32466345</th> <th>0.13020296</th> <th>0.31244401</th> <th>0.02202630</th>  | 0.32466345                                                             | 0.13020296 | 0.31244401 | 0.02202630 |
| ENSG00000152399 | 5  | 7874124  | 7871448  | POCS                                               | protein coding         | 0.27987077 <th>0.01307933 <th>0.22951517 <th>0.10896742 <th>0.00906795 <th>0.76920453 <th>0.14069074 <th>0.31020296 <th>0.32466345</th> <th>0.13020296</th> <th>0.31244401</th> <th>0.02202630</th> <th>0.31244401</th> <th>0.02202630</th> </th></th></th></th></th></th></th>    | 0.01307933 <th>0.22951517 <th>0.10896742 <th>0.00906795 <th>0.76920453 <th>0.14069074 <th>0.31020296 <th>0.32466345</th> <th>0.13020296</th> <th>0.31244401</th> <th>0.02202630</th> <th>0.31244401</th> <th>0.02202630</th> </th></th></th></th></th></th>    | 0.22951517 <th>0.10896742 <th>0.00906795 <th>0.76920453 <th>0.14069074 <th>0.31020296 <th>0.32466345</th> <th>0.13020296</th> <th>0.31244401</th> <th>0.02202630</th> <th>0.31244401</th> <th>0.02202630</th> </th></th></th></th></th>    | 0.10896742 <th>0.00906795 <th>0.76920453 <th>0.14069074 <th>0.31020296 <th>0.32466345</th> <th>0.13020296</th> <th>0.31244401</th> <th>0.02202630</th> <th>0.31244401</th> <th>0.02202630</th> </th></th></th></th>   | 0.00906795 <th>0.76920453 <th>0.14069074 <th>0.31020296 <th>0.32466345</th> <th>0.13020296</th> <th>0.31244401</th> <th>0.02202630</th> <th>0.31244401</th> <th>0.02202630</th> </th></th></th>   | 0.76920453 <th>0.14069074 <th>0.31020296 <th>0.32466345</th> <th>0.13020296</th> <th>0.31244401</th> <th>0.02202630</th> <th>0.31244401</th> <th>0.02202630</th> </th></th>   | 0.14069074 <th>0.31020296 <th>0.32466345</th> <th>0.13020296</th> <th>0.31244401</th> <th>0.02202630</th> <th>0.31244401</th> <th>0.02202630</th> </th>   | 0.31020296 <th>0.32466345</th> <th>0.13020296</th> <th>0.31244401</th> <th>0.02202630</th> <th>0.31244401</th> <th>0.02202630</th>   | 0.32466345                                                                                                       | 0.13020296                                                                                  | 0.31244401                                                             | 0.02202630 | 0.31244401 | 0.02202630 |
| ENSG00000171877 | 17 | 4378071  | 4418521  | ZNF315                                             | protein coding         | 0.23223927 <th>0.04028129 <th>0.04028129</th> <th>0.77962828</th> <th>0.22999932 <th>0.51493933</th> <th>-0.31745111 <th>0.10663095</th> <th>0.10663095</th> <th>0.10663095</th> <th>0.32466345</th> <th>0.13020296</th> <th>0.31244401</th> <th>0.02202630</th> </th></th></th>   | 0.04028129 <th>0.04028129</th> <th>0.77962828</th> <th>0.22999932 <th>0.51493933</th> <th>-0.31745111 <th>0.10663095</th> <th>0.10663095</th> <th>0.10663095</th> <th>0.32466345</th> <th>0.13020296</th> <th>0.31244401</th> <th>0.02202630</th> </th></th>   | 0.04028129                                                                                                                                                                                                                                 | 0.77962828                                                                                                                                                                                                            | 0.22999932 <th>0.51493933</th> <th>-0.31745111 <th>0.10663095</th> <th>0.10663095</th> <th>0.10663095</th> <th>0.32466345</th> <th>0.13020296</th> <th>0.31244401</th> <th>0.02202630</th> </th>  | 0.51493933                                                                                                                                                                    | -0.31745111 <th>0.10663095</th> <th>0.10663095</th> <th>0.10663095</th> <th>0.32466345</th> <th>0.13020296</th> <th>0.31244401</th> <th>0.02202630</th>   | 0.10663095                                                                                                                           | 0.10663095                                                                                                       | 0.10663095                                                                                  | 0.32466345                                                             | 0.13020296 | 0.31244401 | 0.02202630 |
| ENSG00000252402 | 12 | 3271587  | 3271653  | RCC12P                                             | protein coding         | 0.14401537 <th>0.15177489 <th>0.03636234 <th>0.80261017 <th>0.18135374 <th>0.98311608 <th>-0.18607764 <th>0.27292891 <th>-0.74941043 <th>0.04144881 <th>0.32482626</th> <th>0.13020296</th> <th>0.31244401</th> <th>0.02202630</th> </th></th></th></th></th></th></th></th></th>  | 0.15177489 <th>0.03636234 <th>0.80261017 <th>0.18135374 <th>0.98311608 <th>-0.18607764 <th>0.27292891 <th>-0.74941043 <th>0.04144881 <th>0.32482626</th> <th>0.13020296</th> <th>0.31244401</th> <th>0.02202630</th> </th></th></th></th></th></th></th></th>  | 0.03636234 <th>0.80261017 <th>0.18135374 <th>0.98311608 <th>-0.18607764 <th>0.27292891 <th>-0.74941043 <th>0.04144881 <th>0.32482626</th> <th>0.13020296</th> <th>0.31244401</th> <th>0.02202630</th> </th></th></th></th></th></th></th>  | 0.80261017 <th>0.18135374 <th>0.98311608 <th>-0.18607764 <th>0.27292891 <th>-0.74941043 <th>0.04144881 <th>0.32482626</th> <th>0.13020296</th> <th>0.31244401</th> <th>0.02202630</th> </th></th></th></th></th></th> | 0.18135374 <th>0.98311608 <th>-0.18607764 <th>0.27292891 <th>-0.74941043 <th>0.04144881 <th>0.32482626</th> <th>0.13020296</th> <th>0.31244401</th> <th>0.02202630</th> </th></th></th></th></th> | 0.98311608 <th>-0.18607764 <th>0.27292891 <th>-0.74941043 <th>0.04144881 <th>0.32482626</th> <th>0.13020296</th> <th>0.31244401</th> <th>0.02202630</th> </th></th></th></th> | -0.18607764 <th>0.27292891 <th>-0.74941043 <th>0.04144881 <th>0.32482626</th> <th>0.13020296</th> <th>0.31244401</th> <th>0.02202630</th> </th></th></th> | 0.27292891 <th>-0.74941043 <th>0.04144881 <th>0.32482626</th> <th>0.13020296</th> <th>0.31244401</th> <th>0.02202630</th> </th></th> | -0.74941043 <th>0.04144881 <th>0.32482626</th> <th>0.13020296</th> <th>0.31244401</th> <th>0.02202630</th> </th> | 0.04144881 <th>0.32482626</th> <th>0.13020296</th> <th>0.31244401</th> <th>0.02202630</th>  | 0.32482626                                                             | 0.13020296 | 0.31244401 | 0.02202630 |
| ENSG00000177725 | 25 | 4926138  | 4911712  | AC10508.1                                          | protein coding         | 0.14182115 <th>0.15494269 <th>0.08507091 <th>0.16761415 <th>0.31022779 <th>0.15170707 <th>-0.11340062 <th>0.61494841 <th>-0.21700789 <th>0.09192793 <th>0.32466345</th> <th>0.13020296</th> <th>0.31244401</th> <th>0.02202630</th> </th></th></th></th></th></th></th></th></th>  | 0.15494269 <th>0.08507091 <th>0.16761415 <th>0.31022779 <th>0.15170707 <th>-0.11340062 <th>0.61494841 <th>-0.21700789 <th>0.09192793 <th>0.32466345</th> <th>0.13020296</th> <th>0.31244401</th> <th>0.02202630</th> </th></th></th></th></th></th></th></th>  | 0.08507091 <th>0.16761415 <th>0.31022779 <th>0.15170707 <th>-0.11340062 <th>0.61494841 <th>-0.21700789 <th>0.09192793 <th>0.32466345</th> <th>0.13020296</th> <th>0.31244401</th> <th>0.02202630</th> </th></th></th></th></th></th></th>  | 0.16761415 <th>0.31022779 <th>0.15170707 <th>-0.11340062 <th>0.61494841 <th>-0.21700789 <th>0.09192793 <th>0.32466345</th> <th>0.13020296</th> <th>0.31244401</th> <th>0.02202630</th> </th></th></th></th></th></th> | 0.31022779 <th>0.15170707 <th>-0.11340062 <th>0.61494841 <th>-0.21700789 <th>0.09192793 <th>0.32466345</th> <th>0.13020296</th> <th>0.31244401</th> <th>0.02202630</th> </th></th></th></th></th> | 0.15170707 <th>-0.11340062 <th>0.61494841 <th>-0.21700789 <th>0.09192793 <th>0.32466345</th> <th>0.13020296</th> <th>0.31244401</th> <th>0.02202630</th> </th></th></th></th> | -0.11340062 <th>0.61494841 <th>-0.21700789 <th>0.09192793 <th>0.32466345</th> <th>0.13020296</th> <th>0.31244401</th> <th>0.02202630</th> </th></th></th> | 0.61494841 <th>-0.21700789 <th>0.09192793 <th>0.32466345</th> <th>0.13020296</th> <th>0.31244401</th> <th>0.02202630</th> </th></th> | -0.21700789 <th>0.09192793 <th>0.32466345</th> <th>0.13020296</th> <th>0.31244401</th> <th>0.02202630</th> </th> | 0.09192793 <th>0.32466345</th> <th>0.13020296</th> <th>0.31244401</th> <th>0.02202630</th>  | 0.32466345                                                             | 0.13020296 | 0.31244401 | 0.02202630 |
| ENSG00000202666 | 6  | 5641390  | 5642133  | KCTD29                                             | unprocessed pseudogene | 0.00976985 <th>0.93279989 <th>0.19850229 <th>0.25245482 <th>0.19850229 <th>0.19850229 <th>-0.19850229 <th>0.19850229 <th>0.19850229 <th>0.19850229</th> <th>0.32466345</th> <th>0.13020296</th> <th>0.31244401</th> <th>0.02202630</th> </th></th></th></th></th></th></th></th>   | 0.93279989 <th>0.19850229 <th>0.25245482 <th>0.19850229 <th>0.19850229 <th>-0.19850229 <th>0.19850229 <th>0.19850229 <th>0.19850229</th> <th>0.32466345</th> <th>0.13020296</th> <th>0.31244401</th> <th>0.02202630</th> </th></th></th></th></th></th></th>   | 0.19850229 <th>0.25245482 <th>0.19850229 <th>0.19850229 <th>-0.19850229 <th>0.19850229 <th>0.19850229 <th>0.19850229</th> <th>0.32466345</th> <th>0.13020296</th> <th>0.31244401</th> <th>0.02202630</th> </th></th></th></th></th></th>   | 0.25245482 <th>0.19850229 <th>0.19850229 <th>-0.19850229 <th>0.19850229 <th>0.19850229 <th>0.19850229</th> <th>0.32466345</th> <th>0.13020296</th> <th>0.31244401</th> <th>0.02202630</th> </th></th></th></th></th>  | 0.19850229 <th>0.19850229 <th>-0.19850229 <th>0.19850229 <th>0.19850229 <th>0.19850229</th> <th>0.32466345</th> <th>0.13020296</th> <th>0.31244401</th> <th>0.02202630</th> </th></th></th></th>  | 0.19850229 <th>-0.19850229 <th>0.19850229 <th>0.19850229 <th>0.19850229</th> <th>0.32466345</th> <th>0.13020296</th> <th>0.31244401</th> <th>0.02202630</th> </th></th></th>  | -0.19850229 <th>0.19850229 <th>0.19850229 <th>0.19850229</th> <th>0.32466345</th> <th>0.13020296</th> <th>0.31244401</th> <th>0.02202630</th> </th></th>  | 0.19850229 <th>0.19850229 <th>0.19850229</th> <th>0.32466345</th> <th>0.13020296</th> <th>0.31244401</th> <th>0.02202630</th> </th>  | 0.19850229 <th>0.19850229</th> <th>0.32466345</th> <th>0.13020296</th> <th>0.31244401</th> <th>0.02202630</th>   | 0.19850229                                                                                  | 0.32466345                                                             | 0.13020296 | 0.31244401 | 0.02202630 |
| ENSG00000145191 | 3  | 18413638 | 18414287 | EPB2                                               | protein coding         | 0.14747374 <th>0.21063790 <th>0.10717813 <th>0.03202912 <th>0.04414054 <th>0.84136163 <th>0.25320071 <th>0.20141638</th> <th>0.00044246 <th>0.14472529 <th>0.32482626</th> <th>0.13020296</th> <th>0.31244401</th> <th>0.02202630</th> </th></th></th></th></th></th></th></th>    | 0.21063790 <th>0.10717813 <th>0.03202912 <th>0.04414054 <th>0.84136163 <th>0.25320071 <th>0.20141638</th> <th>0.00044246 <th>0.14472529 <th>0.32482626</th> <th>0.13020296</th> <th>0.31244401</th> <th>0.02202630</th> </th></th></th></th></th></th></th>    | 0.10717813 <th>0.03202912 <th>0.04414054 <th>0.84136163 <th>0.25320071 <th>0.20141638</th> <th>0.00044246 <th>0.14472529 <th>0.32482626</th> <th>0.13020296</th> <th>0.31244401</th> <th>0.02202630</th> </th></th></th></th></th></th>    | 0.03202912 <th>0.04414054 <th>0.84136163 <th>0.25320071 <th>0.20141638</th> <th>0.00044246 <th>0.14472529 <th>0.32482626</th> <th>0.13020296</th> <th>0.31244401</th> <th>0.02202630</th> </th></th></th></th></th>   | 0.04414054 <th>0.84136163 <th>0.25320071 <th>0.20141638</th> <th>0.00044246 <th>0.14472529 <th>0.32482626</th> <th>0.13020296</th> <th>0.31244401</th> <th>0.02202630</th> </th></th></th></th>   | 0.84136163 <th>0.25320071 <th>0.20141638</th> <th>0.00044246 <th>0.14472529 <th>0.32482626</th> <th>0.13020296</th> <th>0.31244401</th> <th>0.02202630</th> </th></th></th>   | 0.25320071 <th>0.20141638</th> <th>0.00044246 <th>0.14472529 <th>0.32482626</th> <th>0.13020296</th> <th>0.31244401</th> <th>0.02202630</th> </th></th>   | 0.20141638                                                                                                                           | 0.00044246 <th>0.14472529 <th>0.32482626</th> <th>0.13020296</th> <th>0.31244401</th> <th>0.02202630</th> </th>  | 0.14472529 <th>0.32482626</th> <th>0.13020296</th> <th>0.31244401</th> <th>0.02202630</th>  | 0.32482626                                                             | 0.13020296 | 0.31244401 | 0.02202630 |
| ENSG00000226494 | 3  | 37197817 | 37197817 | AC00808.4                                          | protein coding         | 0.10696397 <th>0.35265174 <th>0.08349749 <th>0.58319723 <th>0.05623571 <th>0.78004292 <th>0.04933022 <th>0.80963060</th> <th>-0.10191325 <th>0.04698158 <th>0.32466345</th> <th>0.13020296</th> <th>0.31244401</th> <th>0.02202630</th> </th></th></th></th></th></th></th></th>   | 0.35265174 <th>0.08349749 <th>0.58319723 <th>0.05623571 <th>0.78004292 <th>0.04933022 <th>0.80963060</th> <th>-0.10191325 <th>0.04698158 <th>0.32466345</th> <th>0.13020296</th> <th>0.31244401</th> <th>0.02202630</th> </th></th></th></th></th></th></th>   | 0.08349749 <th>0.58319723 <th>0.05623571 <th>0.78004292 <th>0.04933022 <th>0.80963060</th> <th>-0.10191325 <th>0.04698158 <th>0.32466345</th> <th>0.13020296</th> <th>0.31244401</th> <th>0.02202630</th> </th></th></th></th></th></th>   | 0.58319723 <th>0.05623571 <th>0.78004292 <th>0.04933022 <th>0.80963060</th> <th>-0.10191325 <th>0.04698158 <th>0.32466345</th> <th>0.13020296</th> <th>0.31244401</th> <th>0.02202630</th> </th></th></th></th></th>  | 0.05623571 <th>0.78004292 <th>0.04933022 <th>0.80963060</th> <th>-0.10191325 <th>0.04698158 <th>0.32466345</th> <th>0.13020296</th> <th>0.31244401</th> <th>0.02202630</th> </th></th></th></th>  | 0.78004292 <th>0.04933022 <th>0.80963060</th> <th>-0.10191325 <th>0.04698158 <th>0.32466345</th> <th>0.13020296</th> <th>0.31244401</th> <th>0.02202630</th> </th></th></th>  | 0.04933022 <th>0.80963060</th> <th>-0.10191325 <th>0.04698158 <th>0.32466345</th> <th>0.13020296</th> <th>0.31244401</th> <th>0.02202630</th> </th></th>  | 0.80963060                                                                                                                           | -0.10191325 <th>0.04698158 <th>0.32466345</th> <th>0.13020296</th> <th>0.31244401</th> <th>0.02202630</th> </th> | 0.04698158 <th>0.32466345</th> <th>0.13020296</th> <th>0.31244401</th> <th>0.02202630</th>  | 0.32466345                                                             | 0.13020296 | 0.31244401 | 0.02202630 |
| ENSG0000023202  | 2  | 4282632  | 4282716  | CHORDC1P                                           | protein coding         | 0.07840878 <th>0.48785165 <th>0.05528373 <th>0.15564389 <th>0.08945552 <th>0.66587597 <th>-0.18471037 <th>0.33026136 <th>-0.11990314 <th>0.38729527 <th>0.32466345</th> <th>0.13020296</th> <th>0.31244401</th> <th>0.02202630</th> </th></th></th></th></th></th></th></th></th>  | 0.48785165 <th>0.05528373 <th>0.15564389 <th>0.08945552 <th>0.66587597 <th>-0.18471037 <th>0.33026136 <th>-0.11990314 <th>0.38729527 <th>0.32466345</th> <th>0.13020296</th> <th>0.31244401</th> <th>0.02202630</th> </th></th></th></th></th></th></th></th>  | 0.05528373 <th>0.15564389 <th>0.08945552 <th>0.66587597 <th>-0.18471037 <th>0.33026136 <th>-0.11990314 <th>0.38729527 <th>0.32466345</th> <th>0.13020296</th> <th>0.31244401</th> <th>0.02202630</th> </th></th></th></th></th></th></th>  | 0.15564389 <th>0.08945552 <th>0.66587597 <th>-0.18471037 <th>0.33026136 <th>-0.11990314 <th>0.38729527 <th>0.32466345</th> <th>0.13020296</th> <th>0.31244401</th> <th>0.02202630</th> </th></th></th></th></th></th> | 0.08945552 <th>0.66587597 <th>-0.18471037 <th>0.33026136 <th>-0.11990314 <th>0.38729527 <th>0.32466345</th> <th>0.13020296</th> <th>0.31244401</th> <th>0.02202630</th> </th></th></th></th></th> | 0.66587597 <th>-0.18471037 <th>0.33026136 <th>-0.11990314 <th>0.38729527 <th>0.32466345</th> <th>0.13020296</th> <th>0.31244401</th> <th>0.02202630</th> </th></th></th></th> | -0.18471037 <th>0.33026136 <th>-0.11990314 <th>0.38729527 <th>0.32466345</th> <th>0.13020296</th> <th>0.31244401</th> <th>0.02202630</th> </th></th></th> | 0.33026136 <th>-0.11990314 <th>0.38729527 <th>0.32466345</th> <th>0.13020296</th> <th>0.31244401</th> <th>0.02202630</th> </th></th> | -0.11990314 <th>0.38729527 <th>0.32466345</th> <th>0.13020296</th> <th>0.31244401</th> <th>0.02202630</th> </th> | 0.38729527 <th>0.32466345</th> <th>0.13020296</th> <th>0.31244401</th> <th>0.02202630</th>  | 0.32466345                                                             | 0.13020296 | 0.31244401 | 0.02202630 |
| ENSG0000023390  | 27 | 3761432  | 3768377  | PDPX2P                                             | protein coding         | 0.03361121 <th>0.33119683 <th>0.05881841 <th>0.88849841 <th>0.12115302 <th>0.28961197 <th>-0.13334488 <th>0.50731262 <th>-0.04488157 <th>0.04265503 <th>0.3247075</th> <th>0.13020296</th> <th>0.31244401</th> <th>0.02202630</th> </th></th></th></th></th></th></th></th></th>   | 0.33119683 <th>0.05881841 <th>0.88849841 <th>0.12115302 <th>0.28961197 <th>-0.13334488 <th>0.50731262 <th>-0.04488157 <th>0.04265503 <th>0.3247075</th> <th>0.13020296</th> <th>0.31244401</th> <th>0.02202630</th> </th></th></th></th></th></th></th></th>   | 0.05881841 <th>0.88849841 <th>0.12115302 <th>0.28961197 <th>-0.13334488 <th>0.50731262 <th>-0.04488157 <th>0.04265503 <th>0.3247075</th> <th>0.13020296</th> <th>0.31244401</th> <th>0.02202630</th> </th></th></th></th></th></th></th>   | 0.88849841 <th>0.12115302 <th>0.28961197 <th>-0.13334488 <th>0.50731262 <th>-0.04488157 <th>0.04265503 <th>0.3247075</th> <th>0.13020296</th> <th>0.31244401</th> <th>0.02202630</th> </th></th></th></th></th></th>  | 0.12115302 <th>0.28961197 <th>-0.13334488 <th>0.50731262 <th>-0.04488157 <th>0.04265503 <th>0.3247075</th> <th>0.13020296</th> <th>0.31244401</th> <th>0.02202630</th> </th></th></th></th></th>  | 0.28961197 <th>-0.13334488 <th>0.50731262 <th>-0.04488157 <th>0.04265503 <th>0.3247075</th> <th>0.13020296</th> <th>0.31244401</th> <th>0.02202630</th> </th></th></th></th>  | -0.13334488 <th>0.50731262 <th>-0.04488157 <th>0.04265503 <th>0.3247075</th> <th>0.13020296</th> <th>0.31244401</th> <th>0.02202630</th> </th></th></th>  | 0.50731262 <th>-0.04488157 <th>0.04265503 <th>0.3247075</th> <th>0.13020296</th> <th>0.31244401</th> <th>0.02202630</th> </th></th>  | -0.04488157 <th>0.04265503 <th>0.3247075</th> <th>0.13020296</th> <th>0.31244401</th> <th>0.02202630</th> </th>  | 0.04265503 <th>0.3247075</th> <th>0.13020296</th> <th>0.31244401</th> <th>0.02202630</th>   | 0.3247075                                                              | 0.13020296 | 0.31244401 | 0.02202630 |
| ENSG0000020476  | 2  | 1901578  | 1902252  | AC10794.4                                          | protein coding         | 0.07118842 <th>0.33851107 <th>0.07112578 <th>0.46564449 <th>0.15438412 <th>0.33387876 <th>-0.00891265 <th>0.48883968 <th>-0.15591639 <th>0.15625770 <th>0.32421449</th> <th>0.13020296</th> <th>0.31244401</th> <th>0.02202630</th> </th></th></th></th></th></th></th></th></th>  | 0.33851107 <th>0.07112578 <th>0.46564449 <th>0.15438412 <th>0.33387876 <th>-0.00891265 <th>0.48883968 <th>-0.15591639 <th>0.15625770 <th>0.32421449</th> <th>0.13020296</th> <th>0.31244401</th> <th>0.02202630</th> </th></th></th></th></th></th></th></th>  | 0.07112578 <th>0.46564449 <th>0.15438412 <th>0.33387876 <th>-0.00891265 <th>0.48883968 <th>-0.15591639 <th>0.15625770 <th>0.32421449</th> <th>0.13020296</th> <th>0.31244401</th> <th>0.02202630</th> </th></th></th></th></th></th></th>  | 0.46564449 <th>0.15438412 <th>0.33387876 <th>-0.00891265 <th>0.48883968 <th>-0.15591639 <th>0.15625770 <th>0.32421449</th> <th>0.13020296</th> <th>0.31244401</th> <th>0.02202630</th> </th></th></th></th></th></th> | 0.15438412 <th>0.33387876 <th>-0.00891265 <th>0.48883968 <th>-0.15591639 <th>0.15625770 <th>0.32421449</th> <th>0.13020296</th> <th>0.31244401</th> <th>0.02202630</th> </th></th></th></th></th> | 0.33387876 <th>-0.00891265 <th>0.48883968 <th>-0.15591639 <th>0.15625770 <th>0.32421449</th> <th>0.13020296</th> <th>0.31244401</th> <th>0.02202630</th> </th></th></th></th> | -0.00891265 <th>0.48883968 <th>-0.15591639 <th>0.15625770 <th>0.32421449</th> <th>0.13020296</th> <th>0.31244401</th> <th>0.02202630</th> </th></th></th> | 0.48883968 <th>-0.15591639 <th>0.15625770 <th>0.32421449</th> <th>0.13020296</th> <th>0.31244401</th> <th>0.02202630</th> </th></th> | -0.15591639 <th>0.15625770 <th>0.32421449</th> <th>0.13020296</th> <th>0.31244401</th> <th>0.02202630</th> </th> | 0.15625770 <th>0.32421449</th> <th>0.13020296</th> <th>0.31244401</th> <th>0.02202630</th>  | 0.32421449                                                             | 0.13020296 | 0.31244401 | 0.02202630 |
| ENSG00000284292 | 7  | 9525289  | 9526343  | AC004822.1                                         | protein coding         | 0.11203712 <th>0.37119763 <th>0.11791706 <th>0.41481121 <th>0.06873348 <th>0.74127971 <th>-0.13417685 <th>0.5041823 <th>-0.05874732 <th>0.03730289 <th>0.3241132</th> <th>0.13020296</th> <th>0.31244401</th> <th>0.02202630</th> </th></th></th></th></th></th></th></th></th>    | 0.37119763 <th>0.11791706 <th>0.41481121 <th>0.06873348 <th>0.74127971 <th>-0.13417685 <th>0.5041823 <th>-0.05874732 <th>0.03730289 <th>0.3241132</th> <th>0.13020296</th> <th>0.31244401</th> <th>0.02202630</th> </th></th></th></th></th></th></th></th>    | 0.11791706 <th>0.41481121 <th>0.06873348 <th>0.74127971 <th>-0.13417685 <th>0.5041823 <th>-0.05874732 <th>0.03730289 <th>0.3241132</th> <th>0.13020296</th> <th>0.31244401</th> <th>0.02202630</th> </th></th></th></th></th></th></th>    | 0.41481121 <th>0.06873348 <th>0.74127971 <th>-0.13417685 <th>0.5041823 <th>-0.05874732 <th>0.03730289 <th>0.3241132</th> <th>0.13020296</th> <th>0.31244401</th> <th>0.02202630</th> </th></th></th></th></th></th>   | 0.06873348 <th>0.74127971 <th>-0.13417685 <th>0.5041823 <th>-0.05874732 <th>0.03730289 <th>0.3241132</th> <th>0.13020296</th> <th>0.31244401</th> <th>0.02202630</th> </th></th></th></th></th>   | 0.74127971 <th>-0.13417685 <th>0.5041823 <th>-0.05874732 <th>0.03730289 <th>0.3241132</th> <th>0.13020296</th> <th>0.31244401</th> <th>0.02202630</th> </th></th></th></th>   | -0.13417685 <th>0.5041823 <th>-0.05874732 <th>0.03730289 <th>0.3241132</th> <th>0.13020296</th> <th>0.31244401</th> <th>0.02202630</th> </th></th></th>   | 0.5041823 <th>-0.05874732 <th>0.03730289 <th>0.3241132</th> <th>0.13020296</th> <th>0.31244401</th> <th>0.02202630</th> </th></th>   | -0.05874732 <th>0.03730289 <th>0.3241132</th> <th>0.13020296</th> <th>0.31244401</th> <th>0.02202630</th> </th>  | 0.03730289 <th>0.3241132</th> <th>0.13020296</th> <th>0.31244401</th> <th>0.02202630</th>   | 0.3241132                                                              | 0.13020296 | 0.31244401 | 0.02202630 |
| ENSG0000019851  | 8  | 15732258 | 15737311 | HL17344.1                                          | protein coding         | 0.00713458 <th>0.95898563 <th>0.21821516 <th>0.12801155 <th>0.08993014 <th>0.80274453 <th>0.12187888 <th>0.54471125 <th>-0.00089393 <th>0.17919671 <th>0.32421449</th> <th>0.13020296</th> <th>0.31244401</th> <th>0.02202630</th> </th></th></th></th></th></th></th></th></th>   | 0.95898563 <th>0.21821516 <th>0.12801155 <th>0.08993014 <th>0.80274453 <th>0.12187888 <th>0.54471125 <th>-0.00089393 <th>0.17919671 <th>0.32421449</th> <th>0.13020296</th> <th>0.31244401</th> <th>0.02202630</th> </th></th></th></th></th></th></th></th>   | 0.21821516 <th>0.12801155 <th>0.08993014 <th>0.80274453 <th>0.12187888 <th>0.54471125 <th>-0.00089393 <th>0.17919671 <th>0.32421449</th> <th>0.13020296</th> <th>0.31244401</th> <th>0.02202630</th> </th></th></th></th></th></th></th>   | 0.12801155 <th>0.08993014 <th>0.80274453 <th>0.12187888 <th>0.54471125 <th>-0.00089393 <th>0.17919671 <th>0.32421449</th> <th>0.13020296</th> <th>0.31244401</th> <th>0.02202630</th> </th></th></th></th></th></th>  | 0.08993014 <th>0.80274453 <th>0.12187888 <th>0.54471125 <th>-0.00089393 <th>0.17919671 <th>0.32421449</th> <th>0.13020296</th> <th>0.31244401</th> <th>0.02202630</th> </th></th></th></th></th>  | 0.80274453 <th>0.12187888 <th>0.54471125 <th>-0.00089393 <th>0.17919671 <th>0.32421449</th> <th>0.13020296</th> <th>0.31244401</th> <th>0.02202630</th> </th></th></th></th>  | 0.12187888 <th>0.54471125 <th>-0.00089393 <th>0.17919671 <th>0.32421449</th> <th>0.13020296</th> <th>0.31244401</th> <th>0.02202630</th> </th></th></th>  | 0.54471125 <th>-0.00089393 <th>0.17919671 <th>0.32421449</th> <th>0.13020296</th> <th>0.31244401</th> <th>0.02202630</th> </th></th> | -0.00089393 <th>0.17919671 <th>0.32421449</th> <th>0.13020296</th> <th>0.31244401</th> <th>0.02202630</th> </th> | 0.17919671 <th>0.32421449</th> <th>0.13020296</th> <th>0.31244401</th> <th>0.02202630</th>  | 0.32421449                                                             | 0.13020296 | 0.31244401 | 0.02202630 |
| ENSG00000287789 | 19 | 8115160  | 8115384  | AC00719.9                                          | protein coding         | 0.12981899 <th>0.27298234 <th>0.10774091 <th>0.48937441 <th>0.115469929 <th>0.66918494 <th>-0.38289781 <th>0.08538412 <th>-0.0320141 <th>0.05933407 <th>0.32466345</th> <th>0.13020296</th> <th>0.31244401</th> <th>0.02202630</th> </th></th></th></th></th></th></th></th></th>  | 0.27298234 <th>0.10774091 <th>0.48937441 <th>0.115469929 <th>0.66918494 <th>-0.38289781 <th>0.08538412 <th>-0.0320141 <th>0.05933407 <th>0.32466345</th> <th>0.13020296</th> <th>0.31244401</th> <th>0.02202630</th> </th></th></th></th></th></th></th></th>  | 0.10774091 <th>0.48937441 <th>0.115469929 <th>0.66918494 <th>-0.38289781 <th>0.08538412 <th>-0.0320141 <th>0.05933407 <th>0.32466345</th> <th>0.13020296</th> <th>0.31244401</th> <th>0.02202630</th> </th></th></th></th></th></th></th>  | 0.48937441 <th>0.115469929 <th>0.66918494 <th>-0.38289781 <th>0.08538412 <th>-0.0320141 <th>0.05933407 <th>0.32466345</th> <th>0.13020296</th> <th>0.31244401</th> <th>0.02202630</th> </th></th></th></th></th></th> | 0.115469929 <th>0.66918494 <th>-0.38289781 <th>0.08538412 <th>-0.0320141 <th>0.05933407 <th>0.32466345</th> <th>0.13020296</th> <th>0.31244401</th> <th>0.02202630</th> </th></th></th></th></th> | 0.66918494 <th>-0.38289781 <th>0.08538412 <th>-0.0320141 <th>0.05933407 <th>0.32466345</th> <th>0.13020296</th> <th>0.31244401</th> <th>0.02202630</th> </th></th></th></th>  | -0.38289781 <th>0.08538412 <th>-0.0320141 <th>0.05933407 <th>0.32466345</th> <th>0.13020296</th> <th>0.31244401</th> <th>0.02202630</th> </th></th></th>  | 0.08538412 <th>-0.0320141 <th>0.05933407 <th>0.32466345</th> <th>0.13020296</th> <th>0.31244401</th> <th>0.02202630</th> </th></th>  | -0.0320141 <th>0.05933407 <th>0.32466345</th> <th>0.13020296</th> <th>0.31244401</th> <th>0.02202630</th> </th>  | 0.05933407 <th>0.32466345</th> <th>0.13020296</th> <th>0.31244401</th> <th>0.02202630</th>  | 0.32466345                                                             | 0.13020296 | 0.31244401 | 0.02202630 |
| ENSG0000046604  | 18 | 3148817  | 3149008  | DSG2                                               | protein coding         | 0.26329367 <th>0.01856478 <th>0.11225439 <th>0.44179322 <th>0.38993382 <th>0.66073878 <th>-0.08074337 <th>0.76343318 <th>-0.32882579 <th>0.01510267 <th>0.32466345</th> <th>0.13020296</th> <th>0.31244401</th> <th>0.02202630</th> </th></th></th></th></th></th></th></th></th>  | 0.01856478 <th>0.11225439 <th>0.44179322 <th>0.38993382 <th>0.66073878 <th>-0.08074337 <th>0.76343318 <th>-0.32882579 <th>0.01510267 <th>0.32466345</th> <th>0.13020296</th> <th>0.31244401</th> <th>0.02202630</th> </th></th></th></th></th></th></th></th>  | 0.11225439 <th>0.44179322 <th>0.38993382 <th>0.66073878 <th>-0.08074337 <th>0.76343318 <th>-0.32882579 <th>0.01510267 <th>0.32466345</th> <th>0.13020296</th> <th>0.31244401</th> <th>0.02202630</th> </th></th></th></th></th></th></th>  | 0.44179322 <th>0.38993382 <th>0.66073878 <th>-0.08074337 <th>0.76343318 <th>-0.32882579 <th>0.01510267 <th>0.32466345</th> <th>0.13020296</th> <th>0.31244401</th> <th>0.02202630</th> </th></th></th></th></th></th> | 0.38993382 <th>0.66073878 <th>-0.08074337 <th>0.76343318 <th>-0.32882579 <th>0.01510267 <th>0.32466345</th> <th>0.13020296</th> <th>0.31244401</th> <th>0.02202630</th> </th></th></th></th></th> | 0.66073878 <th>-0.08074337 <th>0.76343318 <th>-0.32882579 <th>0.01510267 <th>0.32466345</th> <th>0.13020296</th> <th>0.31244401</th> <th>0.02202630</th> </th></th></th></th> | -0.08074337 <th>0.76343318 <th>-0.32882579 <th>0.01510267 <th>0.32466345</th> <th>0.13020296</th> <th>0.31244401</th> <th>0.02202630</th> </th></th></th> | 0.76343318 <th>-0.32882579 <th>0.01510267 <th>0.32466345</th> <th>0.13020296</th> <th>0.31244401</th> <th>0.02202630</th> </th></th> | -0.32882579 <th>0.01510267 <th>0.32466345</th> <th>0.13020296</th> <th>0.31244401</th> <th>0.02202630</th> </th> | 0.01510267 <th>0.32466345</th> <th>0.13020296</th> <th>0.31244401</th> <th>0.02202630</th>  | 0.32466345                                                             | 0.13020296 | 0.31244401 | 0.02202630 |
| ENSG00000225246 | 20 | 3412270  | 3412270  | RPS1P                                              | protein coding         | 0.04807106 <th>0.67022908 <th>0.14483793 <th>0.15207533 <th>0.25471109 <th>0.19406746 <th>-0.16812299 <th>0.40750968 <th>-0.38888858 <th>0.04297196 <th>0.3238695</th> <th>0.13020296</th> <th>0.31244401</th> <th>0.02202630</th> </th></th></th></th></th></th></th></th></th>   | 0.67022908 <th>0.14483793 <th>0.15207533 <th>0.25471109 <th>0.19406746 <th>-0.16812299 <th>0.40750968 <th>-0.38888858 <th>0.04297196 <th>0.3238695</th> <th>0.13020296</th> <th>0.31244401</th> <th>0.02202630</th> </th></th></th></th></th></th></th></th>   | 0.14483793 <th>0.15207533 <th>0.25471109 <th>0.19406746 <th>-0.16812299 <th>0.40750968 <th>-0.38888858 <th>0.04297196 <th>0.3238695</th> <th>0.13020296</th> <th>0.31244401</th> <th>0.02202630</th> </th></th></th></th></th></th></th>   | 0.15207533 <th>0.25471109 <th>0.19406746 <th>-0.16812299 <th>0.40750968 <th>-0.38888858 <th>0.04297196 <th>0.3238695</th> <th>0.13020296</th> <th>0.31244401</th> <th>0.02202630</th> </th></th></th></th></th></th>  | 0.25471109 <th>0.19406746 <th>-0.16812299 <th>0.40750968 <th>-0.38888858 <th>0.04297196 <th>0.3238695</th> <th>0.13020296</th> <th>0.31244401</th> <th>0.02202630</th> </th></th></th></th></th>  | 0.19406746 <th>-0.16812299 <th>0.40750968 <th>-0.38888858 <th>0.04297196 <th>0.3238695</th> <th>0.13020296</th> <th>0.31244401</th> <th>0.02202630</th> </th></th></th></th>  | -0.16812299 <th>0.40750968 <th>-0.38888858 <th>0.04297196 <th>0.3238695</th> <th>0.13020296</th> <th>0.31244401</th> <th>0.02202630</th> </th></th></th>  | 0.40750968 <th>-0.38888858 <th>0.04297196 <th>0.3238695</th> <th>0.13020296</th> <th>0.31244401</th> <th>0.02202630</th> </th></th>  | -0.38888858 <th>0.04297196 <th>0.3238695</th> <th>0.13020296</th> <th>0.31244401</th> <th>0.02202630</th> </th>  | 0.04297196 <th>0.3238695</th> <th>0.13020296</th> <th>0.31244401</th> <th>0.02202630</th>   | 0.3238695                                                              | 0.13020296 | 0.31244401 | 0.02202630 |
| ENSG0000025445  | 18 | 1029222  | 1029222  | AC004822.1                                         | protein coding         | 0.12981899 <th>0.27298234 <th>0.10774091 <th>0.48937441 <th>0.115469929 <th>0.66918494 <th>-0.38289781 <th>0.08538412 <th>-0.0320141 <th>0.05933407 <th>0.32466345</th> <th>0.13020296</th> <th>0.31244401</th> <th>0.02202630</th> </th></th></th></th></th></th></th></th></th>  | 0.27298234 <th>0.10774091 <th>0.48937441 <th>0.115469929 <th>0.66918494 <th>-0.38289781 <th>0.08538412 <th>-0.0320141 <th>0.05933407 <th>0.32466345</th> <th>0.13020296</th> <th>0.31244401</th> <th>0.02202630</th> </th></th></th></th></th></th></th></th>  | 0.10774091 <th>0.48937441 <th>0.115469929 <th>0.66918494 <th>-0.38289781 <th>0.08538412 <th>-0.0320141 <th>0.05933407 <th>0.32466345</th> <th>0.13020296</th> <th>0.31244401</th> <th>0.02202630</th> </th></th></th></th></th></th></th>  | 0.48937441 <th>0.115469929 <th>0.66918494 <th>-0.38289781 <th>0.08538412 <th>-0.0320141 <th>0.05933407 <th>0.32466345</th> <th>0.13020296</th> <th>0.31244401</th> <th>0.02202630</th> </th></th></th></th></th></th> | 0.115469929 <th>0.66918494 <th>-0.38289781 <th>0.08538412 <th>-0.0320141 <th>0.05933407 <th>0.32466345</th> <th>0.13020296</th> <th>0.31244401</th> <th>0.02202630</th> </th></th></th></th></th> | 0.66918494 <th>-0.38289781 <th>0.08538412 <th>-0.0320141 <th>0.05933407 <th>0.32466345</th> <th>0.13020296</th> <th>0.31244401</th> <th>0.02202630</th> </th></th></th></th>  | -0.38289781 <th>0.08538412 <th>-0.0320141 <th>0.05933407 <th>0.32466345</th> <th>0.13020296</th> <th>0.31244401</th> <th>0.02202630</th> </th></th></th>  | 0.08538412 <th>-0.0320141 <th>0.05933407 <th>0.32466345</th> <th>0.13020296</th> <th>0.31244401</th> <th>0.02202630</th> </th></th>  | -0.0320141 <th>0.05933407 <th>0.32466345</th> <th>0.13020296</th> <th>0.31244401</th> <th>0.02202630</th> </th>  | 0.05933407 <th>0.32466345</th> <th>0.13020296</th> <th>0.31244401</th> <th>0.02202630</th>  | 0.32466345                                                             | 0.13020296 | 0.31244401 | 0.02202630 |
| ENSG0000026086  | 16 | 6895106  | 6895106  | AC12373.5                                          | unprocessed pseudogene | 0.27110610 <th>0.14692097 <th>0.0553634 <th>0.70151043 <th>0.38378993 <th>0.40570001 <th>-0.24943128 <th>0.76195148 <th>-0.03385658 <th>0.3238695</th> <th>0.13020296</th> <th>0.31244401</th> <th>0.02202630</th> <th>0.02202630</th> </th></th></th></th></th></th></th></th>    | 0.14692097 <th>0.0553634 <th>0.70151043 <th>0.38378993 <th>0.40570001 <th>-0.24943128 <th>0.76195148 <th>-0.03385658 <th>0.3238695</th> <th>0.13020296</th> <th>0.31244401</th> <th>0.02202630</th> <th>0.02202630</th> </th></th></th></th></th></th></th>    | 0.0553634 <th>0.70151043 <th>0.38378993 <th>0.40570001 <th>-0.24943128 <th>0.76195148 <th>-0.03385658 <th>0.3238695</th> <th>0.13020296</th> <th>0.31244401</th> <th>0.02202630</th> <th>0.02202630</th> </th></th></th></th></th></th>    | 0.70151043 <th>0.38378993 <th>0.40570001 <th>-0.24943128 <th>0.76195148 <th>-0.03385658 <th>0.3238695</th> <th>0.13020296</th> <th>0.31244401</th> <th>0.02202630</th> <th>0.02202630</th> </th></th></th></th></th>  | 0.38378993 <th>0.40570001 <th>-0.24943128 <th>0.76195148 <th>-0.03385658 <th>0.3238695</th> <th>0.13020296</th> <th>0.31244401</th> <th>0.02202630</th> <th>0.02202630</th> </th></th></th></th>  | 0.40570001 <th>-0.24943128 <th>0.76195148 <th>-0.03385658 <th>0.3238695</th> <th>0.13020296</th> <th>0.31244401</th> <th>0.02202630</th> <th>0.02202630</th> </th></th></th>  | -0.24943128 <th>0.76195148 <th>-0.03385658 <th>0.3238695</th> <th>0.13020296</th> <th>0.31244401</th> <th>0.02202630</th> <th>0.02202630</th> </th></th>  | 0.76195148 <th>-0.03385658 <th>0.3238695</th> <th>0.13020296</th> <th>0.31244401</th> <th>0.02202630</th> <th>0.02202630</th> </th>  | -0.03385658 <th>0.3238695</th> <th>0.13020296</th> <th>0.31244401</th> <th>0.02202630</th> <th>0.02202630</th>   | 0.3238695                                                                                   | 0.13020296                                                             | 0.31244401 | 0.02202630 | 0.02202630 |
| ENSG00000258177 | 12 | 9622719  | 9622719  | AC004819.1                                         | protein coding         | 0.02145718 <th>0.85136788 <th>-0.00441677 <th>0.99729115 <th>0.09248987 <th>0.54832025 <th>-0.24395719 <th>0.22009334 <th>-0.12725251 <th>0.32320191 <th>0.32402081 <th>0.13020296</th> <th>0.31244401</th> <th>0.02202630</th> </th></th></th></th></th></th></th></th></th></th> | 0.85136788 <th>-0.00441677 <th>0.99729115 <th>0.09248987 <th>0.54832025 <th>-0.24395719 <th>0.22009334 <th>-0.12725251 <th>0.32320191 <th>0.32402081 <th>0.13020296</th> <th>0.31244401</th> <th>0.02202630</th> </th></th></th></th></th></th></th></th></th> | -0.00441677 <th>0.99729115 <th>0.09248987 <th>0.54832025 <th>-0.24395719 <th>0.22009334 <th>-0.12725251 <th>0.32320191 <th>0.32402081 <th>0.13020296</th> <th>0.31244401</th> <th>0.02202630</th> </th></th></th></th></th></th></th></th> | 0.99729115 <th>0.09248987 <th>0.54832025 <th>-0.24395719 <th>0.22009334 <th>-0.12725251 <th>0.32320191 <th>0.32402081 <th>0.13020296</th> <th>0.31244401</th> <th>0.02202630</th> </th></th></th></th></th></th></th> | 0.09248987 <th>0.54832025 <th>-0.24395719 <th>0.22009334 <th>-0.12725251 <th>0.32320191 <th>0.32402081 <th>0.13020296</th> <th>0.31244401</th> <th>0.02202630</th> </th></th></th></th></th></th> | 0.54832025 <th>-0.24395719 <th>0.22009334 <th>-0.12725251 <th>0.32320191 <th>0.32402081 <th>0.13020296</th> <th>0.31244401</th> <th>0.02202630</th> </th></th></th></th></th> | -0.24395719 <th>0.22009334 <th>-0.12725251 <th>0.32320191 <th>0.32402081 <th>0.13020296</th> <th>0.31244401</th> <th>0.02202630</th> </th></th></th></th> | 0.22009334 <th>-0.12725251 <th>0.32320191 <th>0.32402081 <th>0.13020296</th> <th>0.31244401</th> <th>0.02202630</th> </th></th></th> | -0.12725251 <th>0.32320191 <th>0.32402081 <th>0.13020296</th> <th>0.31244401</th> <th>0.02202630</th> </th></th> | 0.32320191 <th>0.32402081 <th>0.13020296</th> <th>0.31244401</th> <th>0.02202630</th> </th> | 0.32402081 <th>0.13020296</th> <th>0.31244401</th> <th>0.02202630</th> | 0.13020296 | 0.31244401 | 0.02202630 |
| ENSG00000174489 | 17 | 1772722  | 1772722  | AC00808.4                                          | protein coding         | 0.04084895 <th>0.93091391 <th>0.23040209 <th>0.10338566 <th>0.47786672 <th>0.91134292 <th>0.07912222 <th>0.69412672 <th>0.36417992 <th>0.02992622 <th>0.3247124</th> <th>0.13020296</th> <th>0.31244401</th> <th>0.02202630</th> </th></th></th></th></th></th></th></th></th>     | 0.93091391 <th>0.23040209 <th>0.10338566 <th>0.47786672 <th>0.91134292 <th>0.07912222 <th>0.69412672 <th>0.36417992 <th>0.02992622 <th>0.3247124</th> <th>0.13020296</th> <th>0.31244401</th> <th>0.02202630</th> </th></th></th></th></th></th></th></th>     | 0.23040209 <th>0.10338566 <th>0.47786672 <th>0.91134292 <th>0.07912222 <th>0.69412672 <th>0.36417992 <th>0.02992622 <th>0.3247124</th> <th>0.13020296</th> <th>0.31244401</th> <th>0.02202630</th> </th></th></th></th></th></th></th>     | 0.10338566 <th>0.47786672 <th>0.91134292 <th>0.07912222 <th>0.69412672 <th>0.36417992 <th>0.02992622 <th>0.3247124</th> <th>0.13020296</th> <th>0.31244401</th> <th>0.02202630</th> </th></th></th></th></th></th>    | 0.47786672 <th>0.91134292 <th>0.07912222 <th>0.69412672 <th>0.36417992 <th>0.02992622 <th>0.3247124</th> <th>0.13020296</th> <th>0.31244401</th> <th>0.02202630</th> </th></th></th></th></th>    | 0.91134292 <th>0.07912222 <th>0.69412672 <th>0.36417992 <th>0.02992622 <th>0.3247124</th> <th>0.13020296</th> <th>0.31244401</th> <th>0.02202630</th> </th></th></th></th>    | 0.07912222 <th>0.69412672 <th>0.36417992 <th>0.02992622 <th>0.3247124</th> <th>0.13020296</th> <th>0.31244401</th> <th>0.02202630</th> </th></th></th>    | 0.69412672 <th>0.36417992 <th>0.02992622 <th>0.3247124</th> <th>0.13020296</th> <th>0.31244401</th> <th>0.02202630</th> </th></th>   | 0.36417992 <th>0.02992622 <th>0.3247124</th> <th>0.13020296</th> <th>0.31244401</th> <th>0.02202630</th> </th>   | 0.02992622 <th>0.3247124</th> <th>0.13020296</th> <th>0.31244401</th> <th>0.02202630</th>   | 0.3247124                                                              | 0.13020296 | 0.31244401 | 0.02202630 |
| ENSG00000145457 | 17 | 3714628  | 3801188  | ITGA5                                              | protein coding         | 0.15708348 <th>0.17624523 <th>0.06168583 <th>0.68067660 <th>0.25968628 <th>0.91455545 <th>-0.20048228 <th>0.14611504 <th>-0.04488157 <th>0.04265503 <th>0.3247124</th> <th>0.13020296</th> <th>0.31244401</th> <th>0.02202630</th> </th></th></th></th></th></th></th></th></th>   | 0.17624523 <th>0.06168583 <th>0.68067660 <th>0.25968628 <th>0.91455545 <th>-0.20048228 <th>0.14611504 <th>-0.04488157 <th>0.04265503 <th>0.3247124</th> <th>0.13020296</th> <th>0.31244401</th> <th>0.02202630</th> </th></th></th></th></th></th></th></th>   | 0.06168583 <th>0.68067660 <th>0.25968628 <th>0.91455545 <th>-0.20048228 <th>0.14611504 <th>-0.04488157 <th>0.04265503 <th>0.3247124</th> <th>0.13020296</th> <th>0.31244401</th> <th>0.02202630</th> </th></th></th></th></th></th></th>   | 0.68067660 <th>0.25968628 <th>0.91455545 <th>-0.20048228 <th>0.14611504 <th>-0.04488157 <th>0.04265503 <th>0.3247124</th> <th>0.13020296</th> <th>0.31244401</th> <th>0.02202630</th> </th></th></th></th></th></th>  | 0.25968628 <th>0.91455545 <th>-0.20048228 <th>0.14611504 <th>-0.04488157 <th>0.04265503 <th>0.3247124</th> <th>0.13020296</th> <th>0.31244401</th> <th>0.02202630</th> </th></th></th></th></th>  | 0.91455545 <th>-0.20048228 <th>0.14611504 <th>-0.04488157 <th>0.04265503 <th>0.3247124</th> <th>0.13020296</th> <th>0.31244401</th> <th>0.02202630</th> </th></th></th></th>  | -0.20048228 <th>0.14611504 <th>-0.04488157 <th>0.04265503 <th>0.3247124</th> <th>0.13020296</th> <th>0.31244401</th> <th>0.02202630</th> </th></th></th>  | 0.14611504 <th>-0.04488157 <th>0.04265503 <th>0.3247124</th> <th>0.13020296</th> <th>0.31244401</th> <th>0.02202630</th> </th></th>  | -0.04488157 <th>0.04265503 <th>0.3247124</th> <th>0.13020296</th> <th>0.31244401</th> <th>0.02202630</th> </th>  | 0.04265503 <th>0.3247124</th> <th>0.13020296</th> <th>0.31244401</th> <th>0.02202630</th>   | 0.3247124                                                              | 0.13020296 | 0.31244401 | 0.02202630 |
| ENSG00000159966 | 2  | 17502750 | 17516382 | ATF2                                               | protein coding         | 0.40048495 <th>0.03091391 <th>0.23040209 <th>0.10338566 <th>0.47786672 <th>0.91134292 <th>0.07912222 <th>0.69412672 <th>0.36417992 <th>0.02992622 <th>0.3247124</th> <th>0.13020296</th> <th>0.31244401</th> <th>0.02202630</th> </th></th></th></th></th></th></th></th></th>     | 0.03091391 <th>0.23040209 <th>0.10338566 <th>0.47786672 <th>0.91134292 <th>0.07912222 <th>0.69412672 <th>0.36417992 <th>0.02992622 <th>0.3247124</th> <th>0.13020296</th> <th>0.31244401</th> <th>0.02202630</th> </th></th></th></th></th></th></th></th>     | 0.23040209 <th>0.10338566 <th>0.47786672 <th>0.91134292 <th>0.07912222 <th>0.69412672 <th>0.36417992 <th>0.02992622 <th>0.3247124</th> <th>0.13020296</th> <th>0.31244401</th> <th>0.02202630</th> </th></th></th></th></th></th></th>     | 0.10338566 <th>0.47786672 <th>0.91134292 <th>0.07912222 <th>0.69412672 <th>0.36417992 <th>0.02992622 <th>0.3247124</th> <th>0.13020296</th> <th>0.31244401</th> <th>0.02202630</th> </th></th></th></th></th></th>    | 0.47786672 <th>0.91134292 <th>0.07912222 <th>0.69412672 <th>0.36417992 <th>0.02992622 <th>0.3247124</th> <th>0.13020296</th> <th>0.31244401</th> <th>0.02202630</th> </th></th></th></th></th>    | 0.91134292 <th>0.07912222 <th>0.69412672 <th>0.36417992 <th>0.02992622 <th>0.3247124</th> <th>0.13020296</th> <th>0.31244401</th> <th>0.02202630</th> </th></th></th></th>    | 0.07912222 <th>0.69412672 <th>0.36417992 <th>0.02992622 <th>0.3247124</th> <th>0.13020296</th> <th>0.31244401</th> <th>0.02202630</th> </th></th></th>    | 0.69412672 <th>0.36417992 <th>0.02992622 <th>0.3247124</th> <th>0.13020296</th> <th>0.31244401</th> <th>0.02202630</th> </th></th>   | 0.36417992 <th>0.02992622 <th>0.3247124</th> <th>0.13020296</th> <th>0.31244401</th> <th>0.02202630</th> </th>   | 0.02992622 <th>0.3247124</th> <th>0.13020296</th> <th>0.31244401</th> <th>0.02202630</th>   | 0.3247124                                                              | 0.13020296 | 0.31244401 | 0.02202630 |
| ENSG00000250132 | 1  | 1170124  | 1170124  | AC00808.4                                          | protein coding         | 0.12981899 <th>0.27298234 <th>0.10774091 <th>0.48937441 <th>0.115469929 <th>0.66918494 <th>-0.38289781 <th>0.08538412 <th>-0.0320141 <th>0.05933407 <th>0.32466345</th> <th>0.13020296</th> <th>0.31244401</th> <th>0.02202630</th> </th></th></th></th></th></th></th></th></th>  | 0.27298234 <th>0.10774091 <th>0.48937441 <th>0.115469929 <th>0.66918494 <th>-0.38289781 <th>0.08538412 <th>-0.0320141 <th>0.05933407 <th>0.32466345</th> <th>0.13020296</th> <th>0.31244401</th> <th>0.02202630</th> </th></th></th></th></th></th></th></th>  | 0.10774091 <th>0.48937441 <th>0.115469929 <th>0.66918494 <th>-0.38289781 <th>0.08538412 <th>-0.0320141 <th>0.05933407 <th>0.32466345</th> <th>0.13020296</th> <th>0.31244401</th> <th>0.02202630</th> </th></th></th></th></th></th></th>  | 0.48937441 <th>0.115469929 <th>0.66918494 <th>-0.38289781 <th>0.08538412 <th>-0.0320141 <th>0.05933407 <th>0.32466345</th> <th>0.13020296</th> <th>0.31244401</th> <th>0.02202630</th> </th></th></th></th></th></th> | 0.115469929 <th>0.66918494 <th>-0.38289781 <th>0.08538412 <th>-0.0320141 <th>0.05933407 <th>0.32466345</th> <th>0.13020296</th> <th>0.31244401</th> <th>0.02202630</th> </th></th></th></th></th> | 0.66918494 <th>-0.38289781 <th>0.08538412 <th>-0.0320141 <th>0.05933407 <th>0.32466345</th> <th>0.13020296</th> <th>0.31244401</th> <th>0.02202630</th> </th></th></th></th>  | -0.38289781 <th>0.08538412 <th>-0.0320141 <th>0.05933407 <th>0.32466345</th> <th>0.13020296</th> <th>0.31244401</th> <th>0.02202630</th> </th></th></th>  | 0.08538412 <th>-0.0320141 <th>0.05933407 <th>0.32466345</th> <th>0.13020296</th> <th>0.31244401</th> <th>0.02202630</th> </th></th>  | -0.0320141 <th>0.05933407 <th>0.32466345</th> <th>0.13020296</th> <th>0.31244401</th> <th>0.02202630</th> </th>  | 0.05933407 <th>0.32466345</th> <th>0.13020296</th> <th>0.31244401</th> <th>0.02202630</th>  | 0.32466345                                                             | 0.13020296 | 0.31244401 | 0.02202630 |
| ENSG00000265511 | 17 | 1750731  | 1750814  | ZNF158                                             | protein coding         | 0.15708348 <th>0.17624523 <th>0.06168583 <th>0.68067660 <th>0.25968628 <th>0.91455545 <th>-0.20048228 <th>0.14611504 <th>-0.04488157 <th>0.04265503 <th>0.3247124</th> <th>0.13020296</th> <th>0.31244401</th> <th>0.02202630</th> </th></th></th></th></th></th></th></th></th>   | 0.17624523 <th>0.06168583 <th>0.68067660 <th>0.25968628 <th>0.91455545 <th>-0.20048228 <th>0.14611504 <th>-0.04488157 <th>0.04265503 <th>0.3247124</th> <th>0.13020296</th> <th>0.31244401</th> <th>0.02202630</th> </th></th></th></th></th></th></th></th>   | 0.06168583 <th>0.68067660 <th>0.25968628 <th>0.91455545 <th>-0.20048228 <th>0.14611504 <th>-0.04488157 <th>0.04265503 <th>0.3247124</th> <th>0.13020296</th> <th>0.31244401</th> <th>0.02202630</th> </th></th></th></th></th></th></th>   | 0.68067660 <th>0.25968628 <th>0.91455545 <th>-0.20048228 <th>0.14611504 <th>-0.04488157 <th>0.04265503 <th>0.3247124</th> <th>0.13020296</th> <th>0.31244401</th> <th>0.02202630</th> </th></th></th></th></th></th>  | 0.25968628 <th>0.91455545 <th>-0.20048228 <th>0.14611504 <th>-0.04488157 <th>0.04265503 <th>0.3247124</th> <th>0.13020296</th> <th>0.31244401</th> <th>0.02202630</th> </th></th></th></th></th>  | 0.91455545 <th>-0.20048228 <th>0.14611504 <th>-0.04488157 <th>0.04265503 <th>0.3247124</th> <th>0.13020296</th> <th>0.31244401</th> <th>0.02202630</th> </th></th></th></th>  | -0.20048228 <th>0.14611504 <th>-0.04488157 <th>0.04265503 <th>0.3247124</th> <th>0.13020296</th> <th>0.31244401</th> <th>0.02202630</th> </th></th></th>  | 0.14611504 <th>-0.04488157 <th>0.04265503 <th>0.3247124</th> <th>0.13020296</th> <th>0.31244401</th> <th>0.02202630</th> </th></th>  | -0.04488157 <th>0.04265503 <th>0.3247124</th> <th>0.13020296</th> <th>0.31244401</th> <th>0.02202630</th> </th>  | 0.04265503 <th>0.3247124</th> <th>0.13020296</th> <th>0.31244401</th> <th>0.02202630</th>   | 0.3247124                                                              | 0.13020296 | 0.31244401 | 0.02202630 |
| ENSG00000171204 | 11 | 1582573  | 1582573  | TMEM258                                            | protein coding         | 0.34832403 <th>0.00119207 <th>0.06999274 <th>0.84038464 <th>0.07829706 <th>0.3016202 <th>-0.252701078 <th>0.1951209 <th>0.30429077 <th>0.02113268 <th>0.32356405</th> <th>0.13020296</th> <th>0.31244401</th> <th>0.02202630</th> </th></th></th></th></th></th></th></th></th>    | 0.00119207 <th>0.06999274 <th>0.84038464 <th>0.07829706 <th>0.3016202 <th>-0.252701078 <th>0.1951209 <th>0.30429077 <th>0.02113268 <th>0.32356405</th> <th>0.13020296</th> <th>0.31244401</th> <th>0.02202630</th> </th></th></th></th></th></th></th></th>    | 0.06999274 <th>0.84038464 <th>0.07829706 <th>0.3016202 <th>-0.252701078 <th>0.1951209 <th>0.30429077 <th>0.02113268 <th>0.32356405</th> <th>0.13020296</th> <th>0.31244401</th> <th>0.02202630</th> </th></th></th></th></th></th></th>    | 0.84038464 <th>0.07829706 <th>0.3016202 <th>-0.252701078 <th>0.1951209 <th>0.30429077 <th>0.02113268 <th>0.32356405</th> <th>0.13020296</th> <th>0.31244401</th> <th>0.02202630</th> </th></th></th></th></th></th>   | 0.07829706 <th>0.3016202 <th>-0.252701078 <th>0.1951209 <th>0.30429077 <th>0.02113268 <th>0.32356405</th> <th>0.13020296</th> <th>0.31244401</th> <th>0.02202630</th> </th></th></th></th></th>   | 0.3016202 <th>-0.252701078 <th>0.1951209 <th>0.30429077 <th>0.02113268 <th>0.32356405</th> <th>0.13020296</th> <th>0.31244401</th> <th>0.02202630</th> </th></th></th></th>   | -0.252701078 <th>0.1951209 <th>0.30429077 <th>0.02113268 <th>0.32356405</th> <th>0.13020296</th> <th>0.31244401</th> <th>0.02202630</th> </th></th></th>  | 0.1951209 <th>0.30429077 <th>0.02113268 <th>0.32356405</th> <th>0.13020296</th> <th>0.31244401</th> <th>0.02202630</th> </th></th>   | 0.30429077 <th>0.02113268 <th>0.32356405</th> <th>0.13020296</th> <th>0.31244401</th> <th>0.02202630</th> </th>  | 0.02113268 <th>0.32356405</th> <th>0.13020296</th> <th>0.31244401</th> <th>0.02202630</th>  | 0.32356405                                                             | 0.13020296 | 0.31244401 | 0.02202630 |
| ENSG0000028781  | 1  | 1000000  | 1000000  | AC004822.1                                         | protein coding         | 0.12981899 <th>0.27298234 <th>0.10774091 <th>0.48937441 <th>0.115469929 <th>0.66918494 <th>-0.38289781 <th>0.08538412 <th>-0.0320141 <th>0.05933407 <th>0.32466345</th> <th>0.13020296</th> <th>0.31244401</th> <th>0.02202630</th> </th></th></th></th></th></th></th></th></th>  | 0.27298234 <th>0.10774091 <th>0.48937441 <th>0.115469929 <th>0.66918494 <th>-0.38289781 <th>0.08538412 <th>-0.0320141 <th>0.05933407 <th>0.32466345</th> <th>0.13020296</th> <th>0.31244401</th> <th>0.02202630</th> </th></th></th></th></th></th></th></th>  | 0.10774091 <th>0.48937441 <th>0.115469929 <th>0.66918494 <th>-0.38289781 <th>0.08538412 <th>-0.0320141 <th>0.05933407 <th>0.32466345</th> <th>0.13020296</th> <th>0.31244401</th> <th>0.02202630</th> </th></th></th></th></th></th></th>  | 0.48937441 <th>0.115469929 <th>0.66918494 <th>-0.38289781 <th>0.08538412 <th>-0.0320141 <th>0.05933407 <th>0.32466345</th> <th>0.13020296</th> <th>0.31244401</th> <th>0.02202630</th> </th></th></th></th></th></th> | 0.115469929 <th>0.66918494 <th>-0.38289781 <th>0.08538412 <th>-0.0320141 <th>0.05933407 <th>0.32466345</th> <th>0.13020296</th> <th>0.31244401</th> <th>0.02202630</th> </th></th></th></th></th> | 0.66918494 <th>-0.38289781 <th>0.08538412 <th>-0.0320141 <th>0.05933407 <th>0.32466345</th> <th>0.13020296</th> <th>0.31244401</th> <th>0.02202630</th> </th></th></th></th>  | -0.38289781 <th>0.08538412 <th>-0.0320141 <th>0.05933407 <th>0.32466345</th> <th>0.13020296</th> <th>0.31244401</th> <th>0.02202630</th> </th></th></th>  | 0.08538412 <th>-0.0320141 <th>0.05933407 <th>0.32466345</th> <th>0.13020296</th> <th>0.31244401</th> <th>0.02202630</th> </th></th>  | -0.0320141 <th>0.05933407 <th>0.32466345</th> <th>0.13020296</th> <th>0.31244401</th> <th>0.02202630</th> </th>  | 0.05933407 <th>0.32466345</th> <th>0.13020296</th> <th>0.31244401</th> <th>0.02202630</th>  | 0.32466345                                                             | 0.13020296 | 0.31244401 | 0.02202630 |
| ENSG00000233885 | 3  | 18306457 | 18307163 | ITGA5                                              | protein coding         | 0.15708348 <th>0.17624523 <th>0.06168583 <th>0.68067660 <th>0.25968628 <th>0.91455545 <th>-0.20048228 <th>0.14611504 <th>-0.04488157 <th>0.04265503 <th>0.3247124</th> <th>0.13020296</th> <th>0.31244401</th> <th>0.02202630</th> </th></th></th></th></th></th></th></th></th>   | 0.17624523 <th>0.06168583 <th>0.68067660 <th>0.25968628 <th>0.91455545 <th>-0.20048228 <th>0.14611504 <th>-0.04488157 <th>0.04265503 <th>0.3247124</th> <th>0.13020296</th> <th>0.31244401</th> <th>0.02202630</th> </th></th></th></th></th></th></th></th>   | 0.06168583 <th>0.68067660 <th>0.25968628 <th>0.91455545 <th>-0.20048228 <th>0.14611504 <th>-0.04488157 <th>0.04265503 <th>0.3247124</th> <th>0.13020296</th> <th>0.31244401</th> <th>0.02202630</th> </th></th></th></th></th></th></th>   | 0.68067660 <th>0.25968628 <th>0.91455545 <th>-0.20048228 <th>0.14611504 <th>-0.04488157 <th>0.04265503 <th>0.3247124</th> <th>0.13020296</th> <th>0.31244401</th> <th>0.02202630</th> </th></th></th></th></th></th>  | 0.25968628 <th>0.91455545 <th>-0.20048228 <th>0.14611504 <th>-0.04488157 <th>0.04265503 <th>0.3247124</th> <th>0.13020296</th> <th>0.31244401</th> <th>0.02202630</th> </th></th></th></th></th>  | 0.91455545 <th>-0.20048228 <th>0.14611504 <th>-0.04488157 <th>0.04265503 <th>0.3247124</th> <th>0.13020296</th> <th>0.31244401</th> <th>0.02202630</th> </th></th></th></th>  | -0.20048228 <th>0.14611504 <th>-0.04488157 <th>0.04265503 <th>0.3247124</th> <th>0.13020296</th> <th>0.31244401</th> <th>0.02202630</th> </th></th></th>  | 0.14611504 <th>-0.04488157 <th>0.04265503 <th>0.3247124</th> <th>0.13020296</th> <th>0.31244401</th> <th>0.02202630</th> </th></th>  | -0.04488157 <th>0.04265503 <th>0.3247124</th> <th>0.13020296</th> <th>0.31244401</th> <th>0.02202630</th> </th>  | 0.04265503 <th>0.3247124</th> <th>0.13020296</th> <th>0.31244401</th> <th>0.02202630</th>   | 0.3247124                                                              | 0.13020296 | 0.31244401 | 0.02202630 |
| ENSG00000163376 | 3  | 6699897  | 67011210 | KIF20B <th>protein coding</th> <th>0.01027828</th> | protein coding         | 0.01027828                                                                                                                                                                                                                                                                         | 0.98714                                                                                                                                                                                                                                                        |                                                                                                                                                                                                                                            |                                                                                                                                                                                                                       |                                                                                                                                                                                                   |                                                                                                                                                                               |                                                                                                                                                           |                                                                                                                                      |                                                                                                                  |                                                                                             |                                                                        |            |            |            |







Table with 10 columns: Gene ID, Chr, Pos, RefSeq ID, Gene Name, Feature, Start, End, Strand, and various numerical values. The table lists numerous genes such as ALKBH7, ALKBH8, ALKBH9, ALKBH10, ALKBH11, ALKBH12, ALKBH13, ALKBH14, ALKBH15, ALKBH16, ALKBH17, ALKBH18, ALKBH19, ALKBH20, ALKBH21, ALKBH22, ALKBH23, ALKBH24, ALKBH25, ALKBH26, ALKBH27, ALKBH28, ALKBH29, ALKBH30, ALKBH31, ALKBH32, ALKBH33, ALKBH34, ALKBH35, ALKBH36, ALKBH37, ALKBH38, ALKBH39, ALKBH40, ALKBH41, ALKBH42, ALKBH43, ALKBH44, ALKBH45, ALKBH46, ALKBH47, ALKBH48, ALKBH49, ALKBH50, ALKBH51, ALKBH52, ALKBH53, ALKBH54, ALKBH55, ALKBH56, ALKBH57, ALKBH58, ALKBH59, ALKBH60, ALKBH61, ALKBH62, ALKBH63, ALKBH64, ALKBH65, ALKBH66, ALKBH67, ALKBH68, ALKBH69, ALKBH70, ALKBH71, ALKBH72, ALKBH73, ALKBH74, ALKBH75, ALKBH76, ALKBH77, ALKBH78, ALKBH79, ALKBH80, ALKBH81, ALKBH82, ALKBH83, ALKBH84, ALKBH85, ALKBH86, ALKBH87, ALKBH88, ALKBH89, ALKBH90, ALKBH91, ALKBH92, ALKBH93, ALKBH94, ALKBH95, ALKBH96, ALKBH97, ALKBH98, ALKBH99, ALKBH100.







Table with 10 columns: Gene ID, Chr, Start, End, RefSeq ID, Gene Name, Feature Type, Strand, Start, End, RefSeq ID, Gene Name, Feature Type, Strand, Start, End, RefSeq ID, Gene Name, Feature Type, Strand. Contains genomic coordinates and gene annotations for various genes like AC092771, AC092772, AC092773, etc.







|                 |    |           |           |             |                      |              |             |              |             |             |             |             |            |              |             |            |             |             |             |            |
|-----------------|----|-----------|-----------|-------------|----------------------|--------------|-------------|--------------|-------------|-------------|-------------|-------------|------------|--------------|-------------|------------|-------------|-------------|-------------|------------|
| ENSG0000028271  | 17 | 5343131   | 5343298   | AC090709.1  | processed_pseudogene | -0.1200718   | 0.29816174  | -0.09118915  | 0.5288186   | 0.008494159 | 0.656907003 | -0.3268951  | 0.06637826 | -0.209907414 | 0.172659169 | 0.28153814 | 0.19311147  | 0.032056159 | 0.833128971 |            |
| ENSG0000028272  | 17 | 12620310  | 12621830  | TM18.1      | lncRNA               | 0.03038093   | 0.64222769  | -0.14428971  | 0.42561760  | 0.02127253  | 0.58515510  | -0.16491390 | 0.41106790 | -0.11181960  | 0.27478160  | 0.28153814 | 0.19311147  | 0.032056159 | 0.833128971 |            |
| ENSG0000046471  | 17 | 836220    | 836220    | TM18.1      | lncRNA               | 0.03038093   | 0.64222769  | -0.14428971  | 0.42561760  | 0.02127253  | 0.58515510  | -0.16491390 | 0.41106790 | -0.11181960  | 0.27478160  | 0.28153814 | 0.19311147  | 0.032056159 | 0.833128971 |            |
| ENSG0000018810  | 17 | 3478174   | 34783630  | GUB3        | protein_coding       | -0.30074460  | 0.07076473  | -0.01688970  | 0.40748810  | 0.36245783  | 0.06310140  | -0.13578970 | 0.49862167 | -0.36883334  | 0.00601952  | 0.24172496 | 0.18227436  | 0.20277447  | 0.01442077  | 0.0142077  |
| ENSG0000029227  | 17 | 46597819  | 46612130  | ADAMTS1     | lncRNA               | 0.050272984  | 0.42767070  | -0.11044229  | 0.44514669  | 0.03202964  | 0.63033305  | -0.15913460 | 0.42747453 | -0.04400000  | 0.52320044  | 0.28146819 | 0.18227436  | 0.20277447  | 0.01442077  | 0.0142077  |
| ENSG00000138116 | 17 | 70744511  | 70744511  | ADAMTS1     | lncRNA               | 0.050272984  | 0.42767070  | -0.11044229  | 0.44514669  | 0.03202964  | 0.63033305  | -0.15913460 | 0.42747453 | -0.04400000  | 0.52320044  | 0.28146819 | 0.18227436  | 0.20277447  | 0.01442077  | 0.0142077  |
| ENSG00000203173 | 17 | 127455394 | 127514623 | AC010976.1  | lncRNA               | -0.10528200  | 0.19043173  | -0.09368040  | 0.51781548  | 0.101995545 | 0.921301354 | -0.39996357 | 0.05750590 | -0.23668881  | 0.08689263  | 0.21482302 | 0.10265112  | 0.06512188  | 0.63260688  |            |
| ENSG00000300374 | 17 | 11766268  | 117710189 | RP1.093     | processed_pseudogene | 0.042729544  | 0.01077690  | 0.22498110   | 0.11621590  | 0.34455555  | 0.1224734   | 0.14278070  | 0.47442078 | 0.23295737   | 0.08655142  | 0.28139795 | 0.18334360  | 0.33714440  | 0.01342640  |            |
| ENSG00000100023 | 17 | 21966909  | 21971574  | RP1.093     | processed_pseudogene | 0.042729544  | 0.01077690  | 0.22498110   | 0.11621590  | 0.34455555  | 0.1224734   | 0.14278070  | 0.47442078 | 0.23295737   | 0.08655142  | 0.28139795 | 0.18334360  | 0.33714440  | 0.01342640  |            |
| ENSG00000125999 | 17 | 33273480  | 33309871  | BP1F1       | protein_coding       | -0.33582113  | 0.02068890  | -0.06916293  | 0.56513058  | 0.404202973 | 0.033919624 | -0.22692661 | 0.13088010 | -0.47884660  | 0.00249443  | 0.28139795 | 0.18334360  | 0.33714440  | 0.01342640  | 0.01342640 |
| ENSG0000024016  | 17 | 1074252   | 10769889  | AC015938.3  | lncRNA               | -0.12226278  | 0.13397013  | -0.07191057  | 0.49370180  | 0.18389560  | 0.24277791  | -0.17890336 | 0.2718903  | -0.26981215  | 0.04671088  | 0.28139795 | 0.18334360  | 0.33714440  | 0.01342640  |            |
| ENSG0000015398  | 17 | 2901121   | 2901121   | AC015938.1  | lncRNA               | -0.06917471  | 0.16548512  | -0.04263263  | 0.46929264  | 0.18389560  | 0.24277791  | -0.17890336 | 0.2718903  | -0.26981215  | 0.04671088  | 0.28139795 | 0.18334360  | 0.33714440  | 0.01342640  |            |
| ENSG00000134160 | 17 | 31001981  | 31161273  | TRPM1       | protein_coding       | -0.212510264 | 0.063521393 | -0.022232269 | 0.597723154 | -0.12844411 | 0.522994373 | -0.17320360 | 0.37608388 | -0.2728125   | 0.04647160  | 0.28111684 | 0.19338889  | 0.20998218  | 0.01342640  | 0.01342640 |
| ENSG00000106258 | 17 | 9648194   | 9667969   | CPV2A       | protein_coding       | -0.217078429 | 0.09359869  | -0.04119246  | 0.73868877  | -0.22273915 | 0.264113327 | -0.10703807 | 0.24801192 | -0.26734904  | 0.02481043  | 0.28116817 | 0.19338889  | 0.20998218  | 0.01342640  | 0.01342640 |
| ENSG00000141492 | 17 | 14483180  | 144908514 | ANAPC10     | protein_coding       | 0.18789864   | 0.04814937  | 0.14320914   | 0.31121865  | 0.3873498   | 0.04983630  | 0.19223326  | 0.43483888 | 0.28709020   | 0.03480378  | 0.28116817 | 0.19338889  | 0.20998218  | 0.01342640  | 0.01342640 |
| ENSG00000141295 | 17 | 47837692  | 47841289  | SNRN2       | protein_coding       | 0.012872033  | 0.91153210  | 0.23157074   | 0.10568312  | -0.24896905 | 0.21441900  | -0.11215876 | 0.25700514 | -0.12320110  | 0.11281356  | 0.28121070 | 0.19338889  | 0.20998218  | 0.01342640  | 0.01342640 |
| ENSG00000272719 | 17 | 5356731   | 5357243   | AC004843.2  | lncRNA               | -0.13184342  | 0.25264710  | -0.14507012  | 0.31217006  | 0.05859914  | 0.78310712  | -0.26897540 | 0.12979648 | -0.14468227  | 0.24681584  | 0.28116817 | 0.19338889  | 0.20998218  | 0.01342640  | 0.01342640 |
| ENSG00000119650 | 17 | 7093200   | 7093495   | IFIT3       | protein_coding       | -0.20011461  | 0.07193944  | -0.09005370  | 0.49579141  | 0.15239320  | 0.53331961  | -0.24589191 | 0.20009631 | -0.23849414  | 0.28116817  | 0.19338889 | 0.20998218  | 0.01342640  | 0.01342640  | 0.01342640 |
| ENSG00000256053 | 17 | 10586260  | 103607523 | COA8        | protein_coding       | 0.08718836   | 0.45079784  | 0.07978130   | 0.79978130  | 0.08078136  | 0.88788571  | -0.00400389 | 0.99719201 | -0.00400389  | 0.99719201  | 0.19338889 | 0.20998218  | 0.01342640  | 0.01342640  | 0.01342640 |
| ENSG00000231439 | 17 | 2210      | 25121     | WDR32       | protein_coding       | -0.18053084  | 0.09898513  | -0.07292304  | 0.6126230   | 0.12591057  | 0.53379013  | -0.07144687 | 0.1190826  | -0.3741542   | 0.00618336  | 0.2810630  | 0.18424849  | -0.130229   | 0.38715433  |            |
| ENSG00000164615 | 17 | 13473846  | 13475127  | CAML3       | protein_coding       | 0.12702852   | 0.13833156  | 0.18467434   | 0.19911975  | 0.28431271  | 0.14899781  | 0.09603905  | 0.74344165 | 0.11793102   | 0.36971218  | 0.28084207 | 0.19428722  | 0.22739238  | 0.11276693  |            |
| ENSG00000260889 | 17 | 4684263   | 4684418   | CKBP1       | processed_pseudogene | -0.23244758  | 0.01303292  | -0.0283410   | 0.9283410   | -0.04359391 | 0.02533601  | -0.13244518 | 0.0145314  | -0.40360752  | 0.07079255  | 0.28083461 | 0.19427190  | 0.17788528  | 0.21622182  |            |
| ENSG00000113911 | 17 | 5388447   | 5389198   | SELECN2     | protein_coding       | 0.28931512   | 0.01782929  | 0.17772584   | 0.14745684  | 0.18633307  | 0.04665874  | 0.11397350  | 0.57138951 | 0.29507173   | 0.03030074  | 0.28013492 | 0.19439934  | 0.29822577  | 0.02056763  |            |
| ENSG00000256336 | 17 | 4207451   | 4209518   | HSP68A      | processed_pseudogene | 0.01120008   | 0.92268294  | 0.17496901   | 0.24897768  | 0.12489743  | 0.14114011  | 0.19289473  | 0.38116204 | -0.10192631  | 0.99703370  | 0.28090181 | 0.19432941  | 0.09454956  | 0.42041451  |            |
| ENSG00000163017 | 17 | 7389214   | 73919885  | ACTG2       | protein_coding       | -0.18372802  | 0.10971132  | -0.04302425  | 0.21675488  | 0.14833307  | 0.141273584 | -0.08099922 | 0.67830514 | -0.17634070  | 0.20210396  | 0.28079276 | 0.19434844  | 0.21345844  | 0.10163374  |            |
| ENSG00000287814 | 17 | 17247824  | 17258484  | AD011407.1  | lncRNA               | 0.19105912   | 0.86986538  | 0.21400776   | 0.12230540  | 0.12771824  | 0.52629269  | 0.01012834  | 0.90011434 | -0.16855058  | 0.22929274  | 0.28071922 | 0.19437873  | 0.04711497  | 0.74545498  |            |
| ENSG00000230709 | 17 | 7149895   | 71007784  | ZKSCAN5-AS1 | lncRNA               | 0.07698989   | 0.51192714  | 0.02744569   | 0.48891492  | 0.18671292  | 0.30278678  | -0.10330101 | 0.40098414 | 0.02779201   | 0.67191426  | 0.28073968 | 0.19434844  | 0.16193735  | 0.26583001  |            |
| ENSG00000254367 | 17 | 66143634  | 66154381  | AC012839.4  | processed_pseudogene | 0.13608114   | 0.123790504 | 0.13287391   | 0.63831110  | 0.04602804  | 0.31328028  | 0.16428589  | 0.38859400 | 0.02014372   | 0.14433388  | 0.28071922 | 0.19434844  | 0.16193735  | 0.26583001  |            |
| ENSG00000099599 | 17 | 30215953  | 30220008  | MAGE2       | protein_coding       | -0.02763384  | 0.18144953  | -0.02872618  | 0.51259204  | -0.20795452 | 0.29725759  | -0.16396396 | 0.41466855 | -0.12683831  | 0.11101079  | 0.28046434 | 0.19459272  | 0.03279256  | 0.74011891  |            |
| ENSG00000186982 | 17 | 10492383  | 10492383  | AC012839.1  | processed_pseudogene | 0.13608114   | 0.123790504 | 0.13287391   | 0.63831110  | 0.04602804  | 0.31328028  | 0.16428589  | 0.38859400 | 0.02014372   | 0.14433388  | 0.28071922 | 0.19434844  | 0.16193735  | 0.26583001  |            |
| ENSG00000234367 | 17 | 58996734  | 59009383  | OACYE1      | transcribed_unit     | -0.21831242  | 0.05881444  | -0.10691121  | 0.48508266  | -0.12696463 | 0.41818589  | -0.08427236 | 0.24056205 | -0.34016471  | 0.00601952  | 0.28091925 | 0.19271023  | 0.12906633  | 0.31172244  |            |
| ENSG00000184601 | 17 | 10459794  | 10459915  | CTCF        | protein_coding       | -0.14852114  | 0.20562993  | -0.0219175   | 0.44746577  | -0.38395460 | 0.04084843  | -0.21253383 | 0.20267228 | -0.34814935  | 0.00979119  | 0.28082626 | 0.19448874  | 0.20267228  | 0.01342640  | 0.01342640 |
| ENSG00000244718 | 17 | 22826288  | 22826288  | IGLV2-5     | lncRNA               | 0.04544544   | 0.68219518  | 0.03766400   | 0.79510250  | 0.18071099  | 0.36704241  | 0.06560219  | 0.74510570 | -0.04849788  | 0.99719201  | 0.19434844 | 0.16193735  | 0.26583001  | 0.01342640  | 0.01342640 |
| ENSG00000275196 | 17 | 22826288  | 22826288  | IGLV2-5     | lncRNA               | 0.04544544   | 0.68219518  | 0.03766400   | 0.79510250  | 0.18071099  | 0.36704241  | 0.06560219  | 0.74510570 | -0.04849788  | 0.99719201  | 0.19434844 | 0.16193735  | 0.26583001  | 0.01342640  | 0.01342640 |
| ENSG00000172900 | 17 | 71326001  | 71324232  | ACT1P       | transcribed_unit     | -0.14862057  | 0.09886207  | -0.14961462  | 0.43291688  | -0.14721783 | 0.16617950  | -0.05244447 | 0.88982624 | -0.28778289  | 0.02918949  | 0.28042524 | 0.19436881  | 0.24602221  | 0.08252364  |            |
| ENSG00000205791 | 17 | 10778294  | 10778294  | ACT1P       | transcribed_unit     | -0.14862057  | 0.09886207  | -0.14961462  | 0.43291688  | -0.14721783 | 0.16617950  | -0.05244447 | 0.88982624 | -0.28778289  | 0.02918949  | 0.28042524 | 0.19436881  | 0.24602221  | 0.08252364  |            |
| ENSG00000098335 | 17 | 34977839  | 34983831  | ZNF302      | protein_coding       | 0.21015884   | 0.066575681 | 0.14520009   | 0.10143677  | 0.24261136  | 0.01219192  | -0.14875802 | 0.70885191 | -0.43581284  | 0.28114850  | 0.28040038 | 0.19436881  | 0.24602221  | 0.08252364  |            |
| ENSG00000268167 | 17 | 44300845  | 44308301  | LYAL        | protein_coding       | -0.13442510  | 0.24378314  | -0.05814618  | 0.58625570  | -0.30398897 | 0.11179300  | -0.19714674 | 0.32426022 | -0.30417911  | 0.02633717  | 0.28053137 | 0.19505135  | 0.104062163 | 0.48773723  |            |
| ENSG00000178386 | 17 | 10498320  | 10498320  | AC010933.1  | lncRNA               | -0.08678317  | 0.5524248   | -0.13649844  | 0.28685150  | 0.00780791  | 0.91878542  | -0.10414603 | 0.45587247 | -0.04384587  | 0.28053137  | 0.19505135 | 0.104062163 | 0.48773723  |             |            |
| ENSG00000199445 | 17 | 15187086  | 15199637  | THEM4       | protein_coding       | 0.067285     |             |              |             |             |             |             |            |              |             |            |             |             |             |            |



Table with 12 columns: Gene ID, Chr, Start, End, RefSeq ID, Gene Name, Feature, RefSeq ID, Gene Name, Feature, RefSeq ID, Gene Name, Feature. Contains genomic coordinates and gene annotations for various genes like UHRF2, PRR11, PRR12, etc.







|                 |    |          |          |              |                                |              |                   |             |                   |                   |                   |              |             |              |                    |             |            |             |                |
|-----------------|----|----------|----------|--------------|--------------------------------|--------------|-------------------|-------------|-------------------|-------------------|-------------------|--------------|-------------|--------------|--------------------|-------------|------------|-------------|----------------|
| ENSG00000164109 | 4  | 12005623 | 12006898 | MAD2L1       | protein coding                 | -0.024475155 | 0.8326301         | 0.004414109 | 0.514283704       | -0.37205557       | 0.052427375       | -0.25642894  | 0.196279127 | -0.34344817  | <b>0.011002366</b> | 0.260337828 | 0.23024266 | 0.083531077 | 0.864116414    |
| ENSG00000192959 | 3  | 7444678  | 7444678  | PPP1R1B      | transcribed unprocessed intron | -0.05698705  | 0.62307353        | -0.19587714 | 0.45956748        | 0.03260074        | 0.846613381       | -0.26033381  | -0.7010638  | -0.16572505  | 0.02598186         | 0.260337828 | 0.23024266 | 0.083531077 | 0.864116414    |
| ENSG00000227139 | 3  | 31445020 | 31445024 | THSD4        | protein coding                 | -0.0144239   | 0.9823493         | 0.0000000   | 0.0000000         | 0.0000000         | 0.0000000         | 0.0000000    | 0.0000000   | 0.0000000    | 0.0000000          | 0.0000000   | 0.0000000  | 0.0000000   | 0.0000000      |
| ENSG00000077585 | 1  | 23614205 | 23621861 | GPIIIBP7     | protein coding                 | -0.17847844  | 0.10217421        | 0.19521234  | 0.17248730        | 0.02304862        | 0.707788705       | -0.25898203  | 0.19048799  | -0.25898203  | 0.05981694         | 0.26017025  | 0.23053367 | 0.126049776 | 0.383074258    |
| ENSG00000178622 | 1  | 42611467 | 42611467 | HTI          | protein coding                 | -0.08618187  | 0.80728122        | -0.02782122 | 0.14712102        | 0.15863705        | 0.00050027        | -0.00050027  | 0.07652662  | -0.16295135  | <b>0.001666682</b> | 0.26017025  | 0.23053367 | 0.126049776 | 0.383074258    |
| ENSG00000174743 | 1  | 16279753 | 16279753 | PCNA         | transcribed unprocessed intron | -0.0000000   | 0.0000000         | 0.0000000   | 0.0000000         | 0.0000000         | 0.0000000         | 0.0000000    | 0.0000000   | 0.0000000    | 0.0000000          | 0.0000000   | 0.0000000  | 0.0000000   | 0.0000000      |
| ENSG00000231018 | 8  | 112713   | 113754   | LINC01389    | transcribed unprocessed intron | -0.134240418 | 0.24448138        | 0.011316069 | 0.87378121        | -0.13374783       | 0.506011307       | -0.06422098  | 0.750304268 | -0.16550586  | 0.273861193        | 0.26017025  | 0.23053367 | 0.126049776 | 0.383074258    |
| ENSG0000025210  | 1  | 1555651  | 15560133 | L121692.3    | transcribed unprocessed intron | -0.01585278  | 0.94204004        | 0.2598485   | 0.06891739        | 0.06826300        | 0.66699914        | 0.25234721   | 0.28941587  | -0.01739695  | 0.02707525         | 0.26017025  | 0.23053367 | 0.126049776 | 0.383074258    |
| ENSG00000209992 | 1  | 12336912 | 12333318 | PCNA         | transcribed unprocessed intron | -0.04481483  | 0.69874402        | -0.02029712 | 0.18279335        | 0.04474765        | 0.81373041        | -0.16771777  | 0.45596218  | -0.07717956  | 0.6885357          | 0.25981367  | 0.23053367 | 0.126049776 | 0.383074258    |
| ENSG00000151997 | 10 | 4677421  | 4677421  | ALX1F3.1     | transcribed unprocessed intron | -0.13787651  | 0.23280051        | 0.09272505  | 0.54889252        | -0.13311299       | 0.54254268        | -0.26718907  | 0.13215258  | -0.34728904  | <b>0.009599419</b> | 0.26036087  | 0.23062449 | 0.08505293  | 0.82027670     |
| ENSG00000198980 | 14 | 3639828  | 3640072  | LINC01268    | transcribed unprocessed intron | -0.11972927  | 0.28989569        | 0.12543740  | 0.3894339         | 0.13719495        | 0.60403403        | -0.03528626  | 0.78949133  | 0.12742984   | 0.35846113         | 0.26011089  | 0.23062449 | 0.08505293  | 0.82027670     |
| ENSG00000208904 | 19 | 491745   | 491745   | AC05253.2    | transcribed unprocessed intron | -0.00524448  | 0.97678989        | 0.10020071  | 0.48871863        | 0.02870566        | 0.19383938        | -0.03689891  | 0.76434368  | -0.02689264  | 0.61989379         | 0.25981367  | 0.23062449 | 0.08505293  | 0.82027670     |
| ENSG00000100629 | 14 | 80409829 | 80395517 | CEP128       | protein coding                 | 0.140548725  | 0.222764939       | 0.004009118 | 0.76383992        | 0.044882238       | <b>0.00734312</b> | -0.22798428  | 0.25290345  | 0.02688148   | 0.83118636         | 0.25290345  | 0.23062449 | 0.08505293  | 0.82027670     |
| ENSG00000226384 | 2  | 704529   | 707195   | AC058841.1   | transcribed unprocessed intron | -0.17245641  | 0.1186550         | 0.12629592  | 0.4033373         | 0.14349488        | 0.41791574        | -0.26281249  | 0.25146281  | -0.16975759  | 0.22247407         | 0.23062449  | 0.08505293 | 0.82027670  |                |
| ENSG00000134901 | 13 | 10274943 | 10274943 | POLG1L7      | protein coding                 | -0.12417708  | 0.29192811        | 0.14616281  | 0.11113907        | -0.2317378        | 0.24474112        | 0.10248769   | 0.61897637  | -0.17789774  | 0.19820934         | 0.25979166  | 0.23134351 | 0.20474698  | 0.15371704     |
| ENSG00000205758 | 21 | 3358341  | 3364326  | CRYZL1       | protein coding                 | -0.00432865  | 0.96975301        | 0.10724651  | 0.50858335        | 0.2812779         | 0.18655416        | -0.12078699  | 0.54583481  | -0.11758604  | 0.22048707         | 0.25979166  | 0.23134351 | 0.20474698  | 0.15371704     |
| ENSG00000174528 | 18 | 52017187 | 52018032 | ENSG007670.2 | transcribed unprocessed intron | -0.17938131  | 0.11811462        | 0.03420114  | 0.18332810        | -0.17122606       | 0.79520001        | -0.07441617  | 0.71220758  | -0.1030834   | 0.11102616         | 0.25972976  | 0.23133799 | 0.19066839  | 0.84126784     |
| ENSG00000107443 | 15 | 4603334  | 4606087  | ENSG007670.2 | transcribed unprocessed intron | -0.07144447  | 0.84909014        | 0.21118103  | 0.1037957         | 0.020415393       | 0.70770973        | -0.02407869  | 0.30724317  | -0.01108738  | 0.93657173         | 0.25989114  | 0.23144796 | 0.20522929  | 0.71664794     |
| ENSG00000105849 | 7  | 15905161 | 15905161 | POLR1F       | protein coding                 | -0.18381922  | 0.14684811        | 0.154664392 | 0.25081187        | 0.12444442        | 0.21155452        | 0.03898083   | 0.85426491  | 0.138551587  | 0.17327003         | 0.26017025  | 0.23062449 | 0.08505293  | 0.82027670     |
| ENSG00000286742 | 7  | 6264786  | 6269708  | AC020065.1   | transcribed unprocessed intron | -0.05892621  | 0.611031474       | 0.19593994  | 0.17265449        | 0.00984848        | 0.64013385        | -0.16483403  | 0.41187058  | 0.03139937   | 0.82172685         | 0.25948457  | 0.23152844 | 0.20241156  | 0.858692335    |
| ENSG00000272523 | 5  | 19717275 | 19717275 | LINC01192    | transcribed unprocessed intron | -0.04481483  | 0.69874402        | -0.02029712 | 0.18279335        | 0.04474765        | 0.81373041        | -0.16771777  | 0.45596218  | -0.07717956  | 0.6885357          | 0.25981367  | 0.23062449 | 0.08505293  | 0.82027670     |
| ENSG00000229863 | 20 | 50813171 | 50114411 | PSMD19P3     | transcribed unprocessed intron | -0.1464666   | 0.35674933        | 0.20090889  | 0.15101904        | 0.13033313        | 0.5083735         | 0.06666794   | 0.77890403  | -0.05845893  | 0.54372948         | 0.25972538  | 0.23152844 | 0.20241156  | 0.858692335    |
| ENSG00000111420 | 12 | 13078900 | 13082898 | SPIN2        | protein coding                 | 0.15331387   | 0.18393974        | 0.33375292  | <b>0.01789289</b> | 0.2884382         | 0.19358451        | 0.34233827   | 0.08047871  | 0.06505956   | 0.63791871         | 0.2584283   | 0.23152844 | 0.20241156  | 0.858692335    |
| ENSG00000248127 | 5  | 7691846  | 7691846  | AC020774.1   | transcribed unprocessed intron | -0.03819304  | 0.74162495        | 0.03010118  | 0.80877975        | 0.03889436        | 0.44724948        | -0.28971456  | 0.23487048  | -0.0172273   | 0.14333224         | 0.25911833  | 0.23152844 | 0.20241156  | 0.858692335    |
| ENSG00000166453 | 1  | 1358345  | 13617957 | FOXP2        | protein coding                 | -0.23079908  | <b>0.03598748</b> | 0.04478122  | 0.75747228        | -0.0505887        | 0.80211959        | -0.17008471  | 0.38631601  | -0.2421988   | 0.67914718         | 0.25841163  | 0.23152844 | 0.20241156  | 0.858692335    |
| ENSG00000186328 | 3  | 12024259 | 12034838 | LINC8        | protein coding                 | -0.04002397  | 0.72954168        | 0.13288982  | 0.38752349        | 0.02407308        | 0.84011702        | -0.18920263  | 0.32711838  | -0.20381781  | 0.07833541         | 0.25937873  | 0.23152844 | 0.20241156  | 0.858692335    |
| ENSG00000213989 | 2  | 2002726  | 2003034  | RIP1         | transcribed unprocessed intron | -0.1824691   | 0.478267          | 0.21093448  | 0.14203141        | 0.09808869        | 0.616612          | -0.11117486  | 0.6185908   | 0.08502601   | 0.3181496          | 0.25929073  | 0.23059593 | 0.162248933 | 0.7196148      |
| ENSG00000197581 | 9  | 4128916  | 4127389  | L121692.3    | transcribed unprocessed intron | -0.01742784  | 0.8841594         | 0.1839881   | 0.38567634        | 0.02800378        | 0.51162881        | -0.0837368   | 0.64203326  | -0.0870171   | 0.61851013         | 0.25822428  | 0.23062449 | 0.08505293  | 0.82027670     |
| ENSG00000288683 | 12 | 5329424  | 5330714  | AC073161.1   | transcribed unprocessed intron | -0.17843921  | 0.12045781        | 0.01359592  | 0.92923122        | -0.34397201       | 0.17489424        | -0.11448275  | 0.1174951   | -0.38125256  | <b>0.00445028</b>  | 0.25912935  | 0.23137097 | 0.11007881  | 0.42328871     |
| ENSG00000279087 | 10 | 1633849  | 1633849  | AC073161.1   | transcribed unprocessed intron | -0.17843921  | 0.12045781        | 0.01359592  | 0.92923122        | -0.34397201       | 0.17489424        | -0.11448275  | 0.1174951   | -0.38125256  | <b>0.00445028</b>  | 0.25912935  | 0.23137097 | 0.11007881  | 0.42328871     |
| ENSG00000290005 | 10 | 2889996  | 2889996  | ENSG011993   | transcribed unprocessed intron | -0.39575904  | <b>0.01103167</b> | 0.01433804  | 0.91216222        | <b>0.78826058</b> | 0.078426          | -0.178384706 | 0.73181274  | 0.38686790   | <b>0.00733826</b>  | 0.25914624  | 0.23059593 | 0.59709107  | <b>4.7E-05</b> |
| ENSG00000162437 | 1  | 64745096 | 6483532  | RAVE1B       | protein coding                 | 0.11224104   | 0.31118119        | 0.05877143  | 0.88517342        | 0.25401162        | 0.21096748        | -0.27955808  | 0.164018417 | -0.079721748 | 0.56681769         | 0.25912421  | 0.23059593 | 0.59709107  | 0.42328871     |
| ENSG00000249114 | 1  | 14620394 | 14620394 | AC073161.1   | transcribed unprocessed intron | -0.17843921  | 0.12045781        | 0.01359592  | 0.92923122        | -0.34397201       | 0.17489424        | -0.11448275  | 0.1174951   | -0.38125256  | <b>0.00445028</b>  | 0.25912935  | 0.23137097 | 0.11007881  | 0.42328871     |
| ENSG00000279878 | 11 | 6152670  | 6152662  | AC09108.5    | transcribed unprocessed intron | -0.15873529  | 0.16788193        | 0.07498251  | 0.90260802        | -0.25236304       | 0.20415383        | -0.08279871  | 0.7556607   | -0.24520020  | 0.37107606         | 0.25930235  | 0.23062449 | 0.08505293  | 0.82027670     |
| ENSG00000250550 | 8  | 14337430 | 14337379 | AC07303.4    | transcribed unprocessed intron | -0.10114146  | 0.72059681        | 0.06692276  | 0.36936341        | -0.10300423       | 0.60189977        | -0.12712274  | 0.82747878  | -0.07363977  | 0.547526309        | 0.25891027  | 0.23062449 | 0.08505293  | 0.82027670     |
| ENSG00000141453 | 10 | 10200000 | 10200000 | AC07303.4    | transcribed unprocessed intron | -0.10114146  | 0.72059681        | 0.06692276  | 0.36936341        | -0.10300423       | 0.60189977        | -0.12712274  | 0.82747878  | -0.07363977  | 0.547526309        | 0.25891027  | 0.23062449 | 0.08505293  | 0.82027670     |
| ENSG00000197854 | 10 | 1224688  | 1224688  | ZNF44        | protein coding                 | 0.04142087   | 0.17055811        | 0.08711997  | 0.52474332        | 0.02474236        | 0.27426276        | -0.04645281  | 0.84741104  | 0.25891027   | 0.23062449         | 0.08505293  | 0.82027670 | 0.383074258 | 0.15371704     |
| ENSG00000156887 | 8  | 35235475 | 35278500 | LINC50       | transcribed unprocessed intron | -0.11461013  | 0.32094233        | 0.09535739  | 0.88433891        | 0.00400724        | 0.74774174        | -0.04262925  | 0.78804518  | -0.14755921  | 0.28653748         | 0.25977168  | 0.23278597 | 0.12471885  | 0.38113637     |
| ENSG00000204030 | 7  | 10278299 | 10278299 | VARS4        | protein coding                 | -0.12638722  | 0.263611518       | 0.08199198  | 0.57837652        | 0.14612005        | 0.46092932        | -0.13962457  | 0.48729438  | -0.2841291   | 0.09585427         | 0.25890823  | 0.23062449 | 0.08505293  | 0.82027670     |
| ENSG00000164844 | 8  | 9448789  | 9453329  | ENSG007670.2 | transcribed unprocessed intron | -0.21304455  | 0.05980454        | 0.2762379   | 0.92104334        | -0.09757609       | 0.62853318        | 0.24833932   | 0.19955122  | 0.122886     |                    |             |            |             |                |







Table with 10 columns: Gene ID, Chromosome, Start, End, Strand, Gene Name, Feature, Start, End, Strand, Gene Name. Contains a comprehensive list of gene annotations with coordinates and names.

Table with columns for gene ID, gene name, gene type, and coordinates. The table lists numerous genes such as HPC4L4, NCF3, NCF3, NCF3, NCF3, etc., with their corresponding genomic coordinates and gene types (e.g., protein coding, lincRNA, miRNA, etc.).

|                |    |          |          |            |                       |             |            |             |            |             |            |             |            |             |            |            |            |             |            |            |            |
|----------------|----|----------|----------|------------|-----------------------|-------------|------------|-------------|------------|-------------|------------|-------------|------------|-------------|------------|------------|------------|-------------|------------|------------|------------|
| ENSG0000027287 | 20 | 323705   | 324532   | AL109976.1 | lncRNA                | -0.10889717 | 0.34581028 | 0.02960125  | 0.83834950 | 0.05399354  | 0.78910118 | -0.14097608 | 0.48337603 | -0.1480123  | 0.28547022 | 0.23868742 | 0.70208597 | -0.08557729 | 0.55483820 |            |            |
| ENSG0000018108 | 17 | 9133774  | 9134031  | AC045452   | lncRNA                | 0.00663309  | 0.04722959 | 0.00919607  | 0.68727200 | 0.01732336  | 0.99230303 | -0.27278731 | 0.13853770 | -0.0438572  | 0.26747202 | 0.23864227 | 0.27031297 | 0.00000000  | 0.00000000 | 0.37053431 |            |
| ENSG0000022580 | 10 | 3644900  | 3649100  | AC045452   | lncRNA                | 0.00000000  | 0.00000000 | 0.00000000  | 0.00000000 | 0.00000000  | 0.00000000 | 0.00000000  | 0.00000000 | 0.00000000  | 0.00000000 | 0.00000000 | 0.00000000 | 0.00000000  | 0.00000000 | 0.00000000 |            |
| ENSG0000019544 | 17 | 8180432  | 8184400  | AC045452   | lncRNA                | 0.00000000  | 0.00000000 | 0.00000000  | 0.00000000 | 0.00000000  | 0.00000000 | 0.00000000  | 0.00000000 | 0.00000000  | 0.00000000 | 0.00000000 | 0.00000000 | 0.00000000  | 0.00000000 | 0.00000000 |            |
| ENSG0000019293 | 17 | 8691553  | 8691553  | AC045452   | lncRNA                | 0.00000000  | 0.00000000 | 0.00000000  | 0.00000000 | 0.00000000  | 0.00000000 | 0.00000000  | 0.00000000 | 0.00000000  | 0.00000000 | 0.00000000 | 0.00000000 | 0.00000000  | 0.00000000 | 0.00000000 |            |
| ENSG0000014804 | 9  | 12336170 | 12338034 | CCR        | protein coding        | -0.2776605  | 0.01442291 | -0.09994338 | 0.48888128 | -0.37030366 | 0.50102091 | -0.40382765 | 0.00327278 | -0.48582765 | 0.00115384 | 0.29718082 | 0.07059337 | 0.22718275  | 0.01148671 | 0.12443641 |            |
| ENSG0000016405 | 3  | 4815748  | 4818814  | CD2A       | protein coding        | 0.20653951  | 0.07151607 | 0.14208769  | 0.42496447 | -0.43070187 | 0.60715033 | 0.04243345  | 0.04653956 | -0.51397816 | 0.00007073 | 0.29718082 | 0.07059337 | 0.22718275  | 0.01148671 | 0.12443641 |            |
| ENSG0000020878 | 17 | 32097890 | 32097890 | CEP350     | protein coding        | 0.00623187  | 0.00623187 | 0.00623187  | 0.00623187 | 0.00623187  | 0.00623187 | 0.00623187  | 0.00623187 | 0.00623187  | 0.00623187 | 0.00623187 | 0.00623187 | 0.00623187  | 0.00623187 | 0.00623187 | 0.00623187 |
| ENSG0000022005 | 17 | 8159449  | 8163546  | VAMP2      | protein coding        | 0.030414724 | 0.7890101  | 0.19806444  | 0.06775992 | 0.25239314  | 0.18463979 | 0.11961904  | 0.05521655 | -0.09383178 | 0.00007380 | 0.29718082 | 0.07059337 | 0.22718275  | 0.01148671 | 0.12443641 |            |
| ENSG0000017230 | 17 | 7301419  | 7301419  | AC020441   | lncRNA                | 0.19673477  | 0.17426293 | 0.08627938  | 0.48724213 | -0.30421984 | 0.59773988 | -0.02144961 | 0.81684178 | 0.08627938  | 0.08627938 | 0.29718082 | 0.07059337 | 0.22718275  | 0.01148671 | 0.12443641 |            |
| ENSG0000011186 | 12 | 1292891  | 1292891  | WNT5B      | protein coding        | -0.18045893 | 0.11548472 | 0.09654603  | 0.65322918 | -0.10310246 | 0.11548472 | -0.20959416 | 0.30043631 | -0.37429217 | 0.00004389 | 0.29718082 | 0.07059337 | 0.22718275  | 0.01148671 | 0.12443641 |            |
| ENSG0000022391 | 2  | 24806115 | 24806972 | AC10489.1  | lncRNA                | -0.24307317 | 0.03692488 | 0.07122461  | 0.61675424 | 0.28110548  | 0.15466213 | 0.05076898  | 0.80136208 | -0.28663215 | 0.01299784 | 0.29718082 | 0.07059337 | 0.22718275  | 0.01148671 | 0.12443641 |            |
| ENSG0000015193 | 17 | 863877   | 874768   | TME6B      | protein coding        | 0.05209107  | 0.05209107 | 0.05209107  | 0.05209107 | 0.05209107  | 0.05209107 | 0.05209107  | 0.05209107 | 0.05209107  | 0.05209107 | 0.05209107 | 0.05209107 | 0.05209107  | 0.05209107 | 0.05209107 | 0.05209107 |
| ENSG0000020730 | 2  | 10562146 | 10563637 | AC01892.2  | lncRNA                | -0.13767680 | 0.23246505 | 0.06122446  | 0.67775843 | 0.19844446  | 0.07785893 | 0.19844446  | 0.07785893 | 0.19844446  | 0.07785893 | 0.29718082 | 0.07059337 | 0.22718275  | 0.01148671 | 0.12443641 |            |
| ENSG0000023435 | 3  | 3120522  | 3120523  | RP504P1.1  | transcribed processed | 0.05270003  | 0.04698494 | 0.00709512  | 0.80069602 | 0.27819933  | 0.18609914 | -0.24574848 | 0.13412028 | -0.02472436 | 0.50013508 | 0.23696901 | 0.27089844 | 0.22057099  | 0.12372626 | 0.03362044 |            |
| ENSG0000025308 | 17 | 2718693  | 2718693  | AC04080.2  | lncRNA                | -0.03904403 | 0.74707039 | 0.13422564  | 0.51984631 | 0.19614833  | 0.10234515 | -0.14690371 | 0.46468974 | -0.24697073 | 0.07296786 | 0.23696901 | 0.27089844 | 0.22057099  | 0.12372626 | 0.03362044 |            |
| ENSG0000022494 | 4  | 45150774 | 45160175 | RP524P8    | transcribed processed | 0.37168858  | 0.00937437 | 0.02836356  | 0.80656052 | 0.62780743  | 0.00196529 | -0.00625288 | 0.63279118 | 0.39570424  | 0.03055497 | 0.23696901 | 0.27089844 | 0.22057099  | 0.12372626 | 0.03362044 |            |
| ENSG0000019949 | 11 | 58204    | 58240    | RXCF1      | protein coding        | -0.04503739 | 0.69174441 | 0.20013208  | 0.19346700 | 0.30399383  | 0.48862158 | 0.15001360  | 0.43639359 | -0.07869218 | 0.04687628 | 0.23696901 | 0.27089844 | 0.22057099  | 0.12372626 | 0.03362044 |            |
| ENSG0000017254 | 7  | 902657   | 918987   | AC04482.2  | lncRNA                | 0.04655217  | 0.04655217 | 0.04655217  | 0.04655217 | 0.04655217  | 0.04655217 | 0.04655217  | 0.04655217 | 0.04655217  | 0.04655217 | 0.04655217 | 0.04655217 | 0.04655217  | 0.04655217 | 0.04655217 | 0.04655217 |
| ENSG0000018937 | 11 | 4242878  | 4244248  | RXCF17     | protein coding        | -0.10911848 | 0.34485278 | -0.00000455 | 0.86997844 | 0.03823748  | 0.87181505 | -0.27885785 | 0.15741836 | -0.20137449 | 0.14684768 | 0.23696901 | 0.27089844 | 0.22057099  | 0.12372626 | 0.03362044 |            |
| ENSG0000022886 | 1  | 2102728  | 2112078  | PRELHP1    | transcribed processed | -0.03692023 | 0.74887868 | -0.03033927 | 0.79141389 | 0.13667711  | 0.48998884 | -0.24572003 | 0.21689331 | -0.15500049 | 0.02037728 | 0.23696901 | 0.27089844 | 0.22057099  | 0.12372626 | 0.03362044 |            |
| ENSG0000017432 | 17 | 3392627  | 3392627  | CAS1       | protein coding        | -0.18913891 | 0.09251121 | 0.09251121  | 0.09251121 | 0.09251121  | 0.09251121 | 0.09251121  | 0.09251121 | 0.09251121  | 0.09251121 | 0.09251121 | 0.09251121 | 0.09251121  | 0.09251121 | 0.09251121 | 0.09251121 |
| ENSG0000022982 | 8  | 6202682  | 6053561  | AC06338.1  | lncRNA                | -0.12537628 | 0.27738628 | 0.12764326  | 0.33703810 | 0.10667514  | 0.80014478 | -0.18031837 | 0.42440003 | -0.22193071 | 0.02677891 | 0.23696901 | 0.27089844 | 0.22057099  | 0.12372626 | 0.03362044 |            |
| ENSG0000020812 | 3  | 3239588  | 3222578  | AC07839.1  | lncRNA                | 0.01764333  | 0.87895854 | 0.15495922  | 0.1757938  | 0.03344710  | 0.88028294 | 0.36045584  | 0.07307716 | 0.13388878  | 0.3349167  | 0.23696901 | 0.27089844 | 0.22057099  | 0.12372626 | 0.03362044 |            |
| ENSG0000027287 | 20 | 323705   | 324532   | AL109976.1 | lncRNA                | -0.10889717 | 0.34581028 | 0.02960125  | 0.83834950 | 0.05399354  | 0.78910118 | -0.14097608 | 0.48337603 | -0.1480123  | 0.28547022 | 0.23868742 | 0.70208597 | -0.08557729 | 0.55483820 |            |            |
| ENSG0000018108 | 17 | 9133774  | 9134031  | AC045452   | lncRNA                | 0.00663309  | 0.04722959 | 0.00919607  | 0.68727200 | 0.01732336  | 0.99230303 | -0.27278731 | 0.13853770 | -0.0438572  | 0.26747202 | 0.23864227 | 0.27031297 | 0.00000000  | 0.00000000 | 0.37053431 |            |
| ENSG0000022580 | 10 | 3644900  | 3649100  | AC045452   | lncRNA                | 0.00000000  | 0.00000000 | 0.00000000  | 0.00000000 | 0.00000000  | 0.00000000 | 0.00000000  | 0.00000000 | 0.00000000  | 0.00000000 | 0.00000000 | 0.00000000 | 0.00000000  | 0.00000000 | 0.00000000 |            |
| ENSG0000019544 | 17 | 8180432  | 8184400  | AC045452   | lncRNA                | 0.00000000  | 0.00000000 | 0.00000000  | 0.00000000 | 0.00000000  | 0.00000000 | 0.00000000  | 0.00000000 | 0.00000000  | 0.00000000 | 0.00000000 | 0.00000000 | 0.00000000  | 0.00000000 | 0.00000000 |            |
| ENSG0000019293 | 17 | 8691553  | 8691553  | AC045452   | lncRNA                | 0.00000000  | 0.00000000 | 0.00000000  | 0.00000000 | 0.00000000  | 0.00000000 | 0.00000000  | 0.00000000 | 0.00000000  | 0.00000000 | 0.00000000 | 0.00000000 | 0.00000000  | 0.00000000 | 0.00000000 |            |
| ENSG0000014804 | 9  | 12336170 | 12338034 | CCR        | protein coding        | -0.2776605  | 0.01442291 | -0.09994338 | 0.48888128 | -0.37030366 | 0.50102091 | -0.40382765 | 0.00327278 | -0.48582765 | 0.00115384 | 0.29718082 | 0.07059337 | 0.22718275  | 0.01148671 | 0.12443641 |            |
| ENSG0000016405 | 3  | 4815748  | 4818814  | CD2A       | protein coding        | 0.20653951  | 0.07151607 | 0.14208769  | 0.42496447 | -0.43070187 | 0.60715033 | 0.04243345  | 0.04653956 | -0.51397816 | 0.00007073 | 0.29718082 | 0.07059337 | 0.22718275  | 0.01148671 | 0.12443641 |            |
| ENSG0000020878 | 17 | 32097890 | 32097890 | CEP350     | protein coding        | 0.00623187  | 0.00623187 | 0.00623187  | 0.00623187 | 0.00623187  | 0.00623187 | 0.00623187  | 0.00623187 | 0.00623187  | 0.00623187 | 0.00623187 | 0.00623187 | 0.00623187  | 0.00623187 | 0.00623187 | 0.00623187 |
| ENSG0000022005 | 17 | 8159449  | 8163546  | VAMP2      | protein coding        | 0.030414724 | 0.7890101  | 0.19806444  | 0.06775992 | 0.25239314  | 0.18463979 | 0.11961904  | 0.05521655 | -0.09383178 | 0.00007380 | 0.29718082 | 0.07059337 | 0.22718275  | 0.01148671 | 0.12443641 |            |
| ENSG0000017230 | 17 | 7301419  | 7301419  | AC020441   | lncRNA                | 0.19673477  | 0.17426293 | 0.08627938  | 0.48724213 | -0.30421984 | 0.59773988 | -0.02144961 | 0.81684178 | 0.08627938  | 0.08627938 | 0.29718082 | 0.07059337 | 0.22718275  | 0.01148671 | 0.12443641 |            |
| ENSG0000011186 | 12 | 1292891  | 1292891  | WNT5B      | protein coding        | -0.18045893 | 0.11548472 | 0.09654603  | 0.65322918 | -0.10310246 | 0.11548472 | -0.20959416 | 0.30043631 | -0.37429217 | 0.00004389 | 0.29718082 | 0.07059337 | 0.22718275  | 0.01148671 | 0.12443641 |            |
| ENSG0000022391 | 2  | 24806115 | 24806972 | AC10489.1  | lncRNA                | -0.24307317 | 0.03692488 | 0.07122461  | 0.61675424 | 0.28110548  | 0.15466213 | 0.05076898  | 0.80136208 | -0.28663215 | 0.01299784 | 0.29718082 | 0.07059337 | 0.22718275  | 0.01148671 | 0.12443641 |            |
| ENSG0000015193 | 17 | 863877   | 874768   | TME6B      | protein coding        | 0.05209107  | 0.05209107 | 0.05209107  | 0.05209107 | 0.05209107  | 0.05209107 | 0.05209107  | 0.05209107 | 0.05209107  | 0.05209107 | 0.05209107 | 0.05209107 | 0.05209107  | 0.05209107 | 0.05209107 | 0.05209107 |
| ENSG0000020730 | 2  | 10562146 | 10563637 | AC01892.2  | lncRNA                | -0.13767680 | 0.23246505 | 0.06122446  | 0.67775843 | 0.19844446  | 0.07785893 | 0.19844446  | 0.07785893 | 0.19844446  | 0.07785893 | 0.29718082 | 0.07059337 | 0.22718275  | 0.01148671 | 0.12443641 |            |
| ENSG0000023435 | 3  | 312      |          |            |                       |             |            |             |            |             |            |             |            |             |            |            |            |             |            |            |            |



Table with columns for gene ID, chromosome, coordinates, gene name, transcript type, and coordinates. The table lists numerous genes such as RTN3, RTN3-AS1, RTN3-AS2, etc., with their respective genomic locations and transcript details.



Table with 10 columns: Gene ID, Chr, Start, End, Strand, Feature, RefSeq ID, RefSeq Name, RefSeq Description, RefSeq Type, RefSeq Category, RefSeq Class, RefSeq Subclass, RefSeq Source, RefSeq Date, RefSeq Version, RefSeq Accession, RefSeq URL, RefSeq Comment, RefSeq History, RefSeq Status, RefSeq Notes, RefSeq Links, RefSeq Images, RefSeq Downloads, RefSeq Annotations, RefSeq Metadata, RefSeq Statistics, RefSeq Summary, RefSeq Details, RefSeq Tables, RefSeq Figures, RefSeq Videos, RefSeq Audio, RefSeq Other.

|                  |    |          |           |            |                                    |             |            |             |            |             |            |             |            |              |             |            |            |            |            |            |            |
|------------------|----|----------|-----------|------------|------------------------------------|-------------|------------|-------------|------------|-------------|------------|-------------|------------|--------------|-------------|------------|------------|------------|------------|------------|------------|
| ENSG0000000695   | 9  | 33249479 | 33262071  | CHMP5      | protein coding                     | 0.14256888  | 0.21602371 | 0.14242827  | 0.32358923 | 0.39306252  | 0.04263628 | -0.2499866  | 0.20857672 | 0.20194411   | 0.14298808  | 0.22124007 | 0.29951440 | 0.42000265 | 0.00238310 |            |            |
| ENSG0000000781   | 11 | 67112357 | 67173937  | ADAMTS-1   | processed pseudogene               | -0.29943718 | 0.04672177 | 0.04672177  | 0.04672177 | 0.15451737  | 0.15061405 | -0.1684116  | 0.46452533 | -0.36985551  | 0.09891169  | 0.22608236 | 0.29955572 | 0.29955572 | 0.29955572 | 0.29955572 |            |
| ENSG0000000471   | 17 | 37641254 | 37641254  | AP3D2      | protein coding                     | 0.03929746  | 0.78944474 | -0.00064499 | 0.98512047 | 0.04707837  | 0.80581021 | -0.12945210 | 0.51588810 | -0.37311202  | 0.59271825  | 0.22608236 | 0.22608236 | 0.22608236 | 0.22608236 | 0.22608236 |            |
| ENSG0000002581   | 14 | 10036628 | 10036628  | LA157713   | processed pseudogene               | -0.00064499 | 0.98512047 | -0.00064499 | 0.98512047 | 0.04707837  | 0.80581021 | -0.12945210 | 0.51588810 | -0.37311202  | 0.59271825  | 0.22608236 | 0.22608236 | 0.22608236 | 0.22608236 | 0.22608236 |            |
| ENSG0000001922   | 4  | 5160307  | 5160307   | MDM2       | protein coding                     | 0.07420712  | 0.52128343 | 0.16339477  | 0.25896429 | 0.16339477  | 0.25896429 | -0.04423641 | 0.82649138 | -0.20002323  | 0.14702313  | 0.22608236 | 0.22608236 | 0.22608236 | 0.22608236 | 0.22608236 |            |
| ENSG0000002407   | 34 | 34535524 | 34535524  | PACST4     | protein coding                     | 0.07420712  | 0.52128343 | 0.16339477  | 0.25896429 | 0.16339477  | 0.25896429 | -0.04423641 | 0.82649138 | -0.20002323  | 0.14702313  | 0.22608236 | 0.22608236 | 0.22608236 | 0.22608236 | 0.22608236 |            |
| ENSG00000014523  | 4  | 4078284  | 4078284   | DISP2      | protein coding                     | 0.14724258  | 0.2007598  | 0.04701622  | 0.62701818 | 0.24841461  | 0.23876812 | -0.02238121 | 0.81197843 | -0.26810225  | 0.13485294  | 0.22608236 | 0.22608236 | 0.22608236 | 0.22608236 | 0.22608236 | 0.22608236 |
| ENSG00000022605  | 10 | 159788   | 159788    | hcrnA      | protein coding                     | -0.17150338 | 0.33688451 | 0.03555147  | 0.40423461 | -0.16211022 | 0.41899951 | -0.06252325 | 0.88227595 | -0.28490001  | 0.03120876  | 0.22608236 | 0.22608236 | 0.22608236 | 0.22608236 | 0.22608236 | 0.22608236 |
| ENSG00000026994  | 21 | 459398   | 459398    | hcrnA      | protein coding                     | -0.22918908 | 0.16510353 | 0.16510353  | 0.16510353 | 0.16510353  | 0.16510353 | -0.04423641 | 0.82649138 | -0.20002323  | 0.14702313  | 0.22608236 | 0.22608236 | 0.22608236 | 0.22608236 | 0.22608236 | 0.22608236 |
| ENSG00000013686  | 10 | 7318114  | 7318114   | FAM1891A   | protein coding                     | 0.137401267 | 0.23496153 | 0.039551201 | 0.49884262 | 0.137401267 | 0.23496153 | -0.03907956 | 0.86465451 | -0.07760373  | 0.57476953  | 0.22608236 | 0.22608236 | 0.22608236 | 0.22608236 | 0.22608236 | 0.22608236 |
| ENSG00000027139  | 17 | 4819427  | 4819427   | MIR303     | miRNA                              | -0.04284517 | 0.81349674 | 0.01175495  | 0.98512047 | -0.10319193 | 0.60813538 | -0.16203803 | 0.81212918 | -0.137401267 | 0.23496153  | 0.22608236 | 0.22608236 | 0.22608236 | 0.22608236 | 0.22608236 | 0.22608236 |
| ENSG00000016478  | 13 | 4992032  | 4992032   | MIR318     | miRNA                              | -0.15811441 | 0.16810353 | 0.16810353  | 0.16810353 | 0.16810353  | 0.16810353 | -0.04423641 | 0.82649138 | -0.20002323  | 0.14702313  | 0.22608236 | 0.22608236 | 0.22608236 | 0.22608236 | 0.22608236 | 0.22608236 |
| ENSG00000014524  | 4  | 988887   | 988887    | MGK3       | protein coding                     | 0.007375938 | 0.94539622 | 0.22988445  | 0.11955783 | 0.10346913  | 0.84687783 | 0.07488212  | 0.21269507 | 0.28986152   | 0.02629303  | 0.65111234 | 0.22608236 | 0.22608236 | 0.22608236 | 0.22608236 | 0.22608236 |
| ENSG00000016453  | 8  | 8901349  | 8901349   | OSGYP      | protein coding                     | 0.00343549  | 0.96373292 | -0.10233635 | 0.48857233 | 0.08017702  | 0.76330488 | -0.08686756 | 0.17541207 | -0.05172639  | 0.12689168  | 0.22608236 | 0.22608236 | 0.22608236 | 0.22608236 | 0.22608236 | 0.22608236 |
| ENSG00000025954  | 17 | 3642618  | 3642618   | TSC10F     | protein coding                     | -0.03817707 | 0.44573931 | 0.02489578  | 0.88741923 | 0.02762763  | 0.71681168 | -0.27421433 | 0.15897828 | -0.1739581   | 0.18436407  | 0.22608236 | 0.22608236 | 0.22608236 | 0.22608236 | 0.22608236 | 0.22608236 |
| ENSG00000025737  | 12 | 5727261  | 5727261   | ADAP1-AS1  | protein coding                     | 0.00954404  | 0.93804294 | 0.2582841   | 0.11554273 | 0.07173121  | 0.61923258 | 0.14418316  | 0.43705933 | -0.00069267  | 0.95995889  | 0.22608236 | 0.22608236 | 0.22608236 | 0.22608236 | 0.22608236 | 0.22608236 |
| ENSG00000020482  | 30 | 30115213 | 30115213  | SNORD33A   | snoRNA                             | 0.00023447  | 0.99989888 | -0.10476569 | 0.47115011 | 0.04445180  | 0.74943443 | -0.27337861 | 0.16768308 | -0.14429635  | 0.29781454  | 0.22608236 | 0.22608236 | 0.22608236 | 0.22608236 | 0.22608236 | 0.22608236 |
| ENSG00000022176  | 6  | 3402451  | 3402451   | RPL32P1    | processed pseudogene               | -0.00064499 | 0.98512047 | -0.00064499 | 0.98512047 | 0.04707837  | 0.80581021 | -0.12945210 | 0.51588810 | -0.37311202  | 0.59271825  | 0.22608236 | 0.22608236 | 0.22608236 | 0.22608236 | 0.22608236 | 0.22608236 |
| ENSG00000012707  | 4  | 13945322 | 139478609 | RNAB38     | protein coding                     | -0.19045632 | 0.35732881 | -0.10476569 | 0.47115011 | 0.04445180  | 0.74943443 | -0.27337861 | 0.16768308 | -0.14429635  | 0.29781454  | 0.22608236 | 0.22608236 | 0.22608236 | 0.22608236 | 0.22608236 | 0.22608236 |
| ENSG00000014078  | 18 | 4808108  | 4818910   | ABC-12     | protein coding                     | -0.27387408 | 0.01989227 | -0.04471512 | 0.78447860 | 0.02664919  | 0.62681247 | -0.24484874 | 0.21519014 | -0.32342895  | 0.01708226  | 0.22608236 | 0.22608236 | 0.22608236 | 0.22608236 | 0.22608236 | 0.22608236 |
| ENSG00000017814  | 19 | 1225498  | 12277595  | COXA       | protein coding                     | -0.22918908 | 0.16510353 | 0.16510353  | 0.16510353 | 0.16510353  | 0.16510353 | -0.04423641 | 0.82649138 | -0.20002323  | 0.14702313  | 0.22608236 | 0.22608236 | 0.22608236 | 0.22608236 | 0.22608236 | 0.22608236 |
| ENSG000000136518 | 3  | 17956288 | 17958487  | ACTL8A     | protein coding                     | 0.11661838  | 0.13247816 | 0.13381169  | 0.35785117 | 0.02696175  | 0.23003454 | -0.01106416 | 0.93446894 | 0.02863801   | 0.18350131  | 0.22608236 | 0.22608236 | 0.22608236 | 0.22608236 | 0.22608236 | 0.22608236 |
| ENSG00000023432  | 7  | 5426277  | 5428927   | AC092171.3 | protein coding                     | -0.05515895 | 0.96453708 | 0.03003389  | 0.8039881  | 0.04782078  | 0.61279358 | -0.04702426 | 0.81978903 | -0.0118484   | 0.3419963   | 0.22608236 | 0.22608236 | 0.22608236 | 0.22608236 | 0.22608236 | 0.22608236 |
| ENSG00000013424  | 12 | 4653818  | 46377123  | SLC9A2     | protein coding                     | -0.17249454 | 0.13345034 | 0.10611581  | 0.43208383 | 0.01259878  | 0.10259892 | -0.2699178  | 0.17422833 | -0.26511888  | 0.02526827  | 0.30400703 | 0.22608236 | 0.22608236 | 0.22608236 | 0.22608236 | 0.22608236 |
| ENSG00000027729  | 18 | 9912316  | 9912480   | MIR62      | miRNA                              | -0.06819207 | 0.55562845 | 0.08277933  | 0.83584148 | 0.04307885  | 0.81454793 | -0.16023119 | 0.24773211 | 0.14305798   | -0.00224122 | 0.25686284 | 0.22608236 | 0.22608236 | 0.22608236 | 0.22608236 | 0.22608236 |
| ENSG00000024156  | 2  | 9004797  | 9005952   | IGFBP-2A   | IGF V gene                         | 0.12347052  | 0.28898784 | 0.32381320  | 0.07197188 | -0.1882235  | 0.40105894 | 0.48621278  | 0.10780777 | 0.126381079  | 0.36248749  | 0.22608236 | 0.22608236 | 0.22608236 | 0.22608236 | 0.22608236 | 0.22608236 |
| ENSG00000034773  | 12 | 1218915  | 12237764  | AC012918.3 | transcribed unprocessed pseudogene | -0.13889324 | 0.22892287 | 0.04892027  | 0.44680293 | 0.04249320  | 0.92335767 | -0.18182423 | 0.10410087 | -0.24362895  | 0.07894716  | 0.22608236 | 0.22608236 | 0.22608236 | 0.22608236 | 0.22608236 | 0.22608236 |
| ENSG00000017406  | 11 | 21292182 | 21301587  | ANGEL2     | protein coding                     | 0.33584177  | 0.00281633 | 0.36795941  | 0.00778826 | 0.24662334  | 0.02647801 | 0.47341181  | 0.01282440 | 0.3688812    | 0.30071789  | 0.22608236 | 0.22608236 | 0.22608236 | 0.22608236 | 0.22608236 | 0.22608236 |
| ENSG00000015112  | 2  | 12121857 | 12128202  | TPP1C1     | protein coding                     | -0.02822887 | 0.97143347 | 0.05927861  | 0.8909787  | 0.18807057  | 0.43594688 | -0.16977068 | 0.30722811 | -0.17026338  | 0.12835412  | 0.22608236 | 0.22608236 | 0.22608236 | 0.22608236 | 0.22608236 | 0.22608236 |
| ENSG00000009103  | 4  | 5000000  | 5000000   | SLF102.2   | processed pseudogene               | -0.14727212 | 0.19571706 | 0.1853131   | 0.3870941  | 0.05842041  | 0.74471320 | -0.08671898 | 0.13092822 | -0.0989045   | 0.3525336   | 0.22608236 | 0.22608236 | 0.22608236 | 0.22608236 | 0.22608236 | 0.22608236 |
| ENSG00000024960  | 4  | 15058145 | 15058145  | AC110813.1 | protein coding                     | -0.12455248 | 0.27664459 | 0.05982778  | 0.51674288 | 0.28919868  | 0.19703345 | -0.08363318 | 0.73582704 | -0.22498184  | 0.30088184  | 0.22608236 | 0.22608236 | 0.22608236 | 0.22608236 | 0.22608236 | 0.22608236 |
| ENSG00000020469  | 9  | 72051376 | 7207271   | C1orf97    | protein coding                     | -0.19739608 | 0.08478197 | -0.11067440 | 0.44447471 | 0.10199123  | 0.94351561 | -0.25920251 | 0.19198247 | -0.24489383  | 0.10268485  | 0.22608236 | 0.22608236 | 0.22608236 | 0.22608236 | 0.22608236 | 0.22608236 |
| ENSG00000025124  | 11 | 3474451  | 3474451   | hcrnA      | protein coding                     | -0.14727212 | 0.19571706 | 0.1853131   | 0.3870941  | 0.05842041  | 0.74471320 | -0.08671898 | 0.13092822 | -0.0989045   | 0.3525336   | 0.22608236 | 0.22608236 | 0.22608236 | 0.22608236 | 0.22608236 | 0.22608236 |
| ENSG00000028108  | 20 | 2107800  | 2109911   | hcrnA      | protein coding                     | -0.04649272 | 0.68059243 | 0.11897825  | 0.8946454  | 0.01158008  | 0.96456232 | -0.15521484 | 0.34848066 | -0.13131214  | 0.03426688  | 0.22608236 | 0.22608236 | 0.22608236 | 0.22608236 | 0.22608236 | 0.22608236 |
| ENSG00000012647  | 19 | 49737373 | 49737336  | MIR52      | miRNA                              | -0.18292468 | 0.11130149 | -0.01052946 | 0.51466707 | 0.07494345  | 0.72301202 | -0.16833030 | 0.40705378 | -0.21207020  | 0.10422762  | 0.22608236 | 0.22608236 | 0.22608236 | 0.22608236 | 0.22608236 | 0.22608236 |
| ENSG00000018921  | 11 | 17874474 | 17874474  | TRAF8      | protein coding                     | 0.1853131   | 0.09275957 | 0.09275957  | 0.09275957 | 0.09275957  | 0.09275957 | -0.04423641 | 0.82649138 | -0.20002323  | 0.14702313  | 0.22608236 | 0.22608236 | 0.22608236 | 0.22608236 | 0.22608236 | 0.22608236 |
| ENSG00000019779  | 11 | 6889176  | 6890338   | MIR51      | miRNA                              | -0.05515895 | 0.96453708 | 0.03003389  | 0.8039881  | 0.04782078  | 0.61279358 | -0.04702426 | 0.81978903 | -0.0118484   | 0.3419963   | 0.22608236 | 0.22608236 | 0          |            |            |            |

Table with 10 columns: Gene ID, Chr, Start, End, Strand, Feature, Start, End, Strand, Feature. Contains genomic coordinates and gene annotations for various genes including AC023343, AC023344, AC023345, etc.



Table with 10 columns: Gene ID, Chr, Start, End, Strand, Feature, RefSeq ID, RefSeq Name, RefSeq Type, RefSeq Description. Contains genomic coordinates and gene annotations for various genes including LINC02354, LINC02355, LINC02356, etc.





| ENSG00000211093 | X  | 145623218 | 145623274 | AL381756.1 | processed_pseudogene   | -0.150268416 | 0.102700909 | -0.02066844  | 0.886792960 | -0.267719008 | 0.176990003 | -0.18261828  | 0.335727638 | -0.243305851 | 0.072925699 | 0.205031140 | 0.339713286 | -0.139530903 | 0.333828272 |
|-----------------|----|-----------|-----------|------------|------------------------|--------------|-------------|--------------|-------------|--------------|-------------|--------------|-------------|--------------|-------------|-------------|-------------|--------------|-------------|
| ENSG00000211094 | 15 | 65117280  | 65117280  | LOC101928  | transcript             | -0.01713858  | 0.8668880   | -0.1558961   | 0.2921791   | -0.07076114  | 0.772730273 | -0.14071561  | 0.48346989  | -0.04715655  | 0.73406463  | 0.20464308  | 0.3067336   | -0.07076114  | 0.60642164  |
| ENSG00000211095 | 17 | 85000000  | 85000000  | LOC101928  | transcript             | -0.04031790  | 0.94987273  | -0.04987273  | 0.94987273  | -0.04031790  | 0.94987273  | -0.04031790  | 0.94987273  | -0.04031790  | 0.94987273  | 0.20464308  | 0.3067336   | -0.07076114  | 0.60642164  |
| ENSG00000211096 | 17 | 7309282   | 7309282   | ENSO508B.1 | ncRNA                  | -0.12947588  | 0.26547074  | -0.0213009   | 0.8028720   | -0.02387842  | 0.32988654  | -0.12781207  | 0.54480360  | -0.21278613  | 0.11442248  | 0.20464308  | 0.3067336   | -0.07076114  | 0.60642164  |
| ENSG00000211097 | 20 | 5052039   | 5052039   | LOC101928  | transcript             | -0.05991788  | 0.60426139  | -0.05991788  | 0.60426139  | -0.05991788  | 0.60426139  | -0.05991788  | 0.60426139  | -0.05991788  | 0.60426139  | 0.20464308  | 0.3067336   | -0.07076114  | 0.60642164  |
| ENSG00000211098 | 15 | 4457286   | 4457286   | NRN1A.1    | lincRNA                | -0.147891423 | 0.192982747 | -0.07345147  | 0.6409126   | -0.02958497  | 0.68922208  | -0.19102705  | 0.19447121  | -0.19102705  | 0.19447121  | 0.20464308  | 0.3067336   | -0.07076114  | 0.60642164  |
| ENSG00000211099 | 17 | 3819380   | 3819380   | LINC01948  | transcript             | -0.147891423 | 0.192982747 | -0.07345147  | 0.6409126   | -0.02958497  | 0.68922208  | -0.19102705  | 0.19447121  | -0.19102705  | 0.19447121  | 0.20464308  | 0.3067336   | -0.07076114  | 0.60642164  |
| ENSG00000211100 | 15 | 6141655   | 6141655   | AL389676.1 | ncRNA                  | -0.08651533  | 0.43439651  | -0.04199429  | 0.77220136  | -0.00811759  | 0.8975905   | -0.27051876  | 0.1723352   | -0.00811759  | 0.8975905   | 0.20464308  | 0.3067336   | -0.07076114  | 0.60642164  |
| ENSG00000211101 | 15 | 8855596   | 8855596   | LOC101928  | transcript             | -0.09108365  | 0.53733369  | -0.09108365  | 0.53733369  | -0.09108365  | 0.53733369  | -0.09108365  | 0.53733369  | -0.09108365  | 0.53733369  | 0.20464308  | 0.3067336   | -0.07076114  | 0.60642164  |
| ENSG00000211102 | 17 | 6555288   | 6555288   | REMP25     | processed_pseudogene   | -0.09108365  | 0.53733369  | -0.09108365  | 0.53733369  | -0.09108365  | 0.53733369  | -0.09108365  | 0.53733369  | -0.09108365  | 0.53733369  | 0.20464308  | 0.3067336   | -0.07076114  | 0.60642164  |
| ENSG00000211103 | 15 | 9652738   | 9652738   | HSPH92P    | processed_pseudogene   | -0.11124930  | 0.33844173  | -0.08194108  | 0.67158847  | -0.01545894  | 0.9619888   | -0.04542626  | 0.65422204  | -0.12863256  | 0.37220501  | 0.20464308  | 0.3067336   | -0.07076114  | 0.60642164  |
| ENSG00000211104 | 17 | 3601833   | 3601833   | MM1        | processed_pseudogene   | -0.03084918  | 0.48479704  | -0.03084918  | 0.48479704  | -0.03084918  | 0.48479704  | -0.03084918  | 0.48479704  | -0.03084918  | 0.48479704  | 0.20464308  | 0.3067336   | -0.07076114  | 0.60642164  |
| ENSG00000211105 | 12 | 12713005  | 12727706  | ENSO948.3  | ncRNA                  | -0.024610452 | 0.831751502 | -0.024610452 | 0.831751502 | -0.024610452 | 0.831751502 | -0.024610452 | 0.831751502 | -0.024610452 | 0.831751502 | 0.20464308  | 0.3067336   | -0.07076114  | 0.60642164  |
| ENSG00000211106 | 17 | 8721158   | 8721158   | CGZ2       | processed_pseudogene   | -0.29220584  | 0.008917269 | -0.13918501  | 0.40791381  | -0.18134134  | 0.38789792  | -0.17101818  | 0.10730376  | -0.06911848  | 0.00704524  | 0.20464308  | 0.3067336   | -0.07076114  | 0.60642164  |
| ENSG00000211107 | 4  | 1630748   | 16308174  | ENSO447.1  | processed_pseudogene   | -0.19520437  | 0.009182921 | -0.00710713  | 0.98903043  | -0.19274831  | 0.53189465  | -0.13562481  | 0.44998847  | -0.22846589  | 0.10399127  | 0.20464308  | 0.3067336   | -0.07076114  | 0.60642164  |
| ENSG00000211108 | 19 | 4231194   | 42395530  | PSG3       | processed_pseudogene   | -0.29055543  | 0.01029247  | -0.05461262  | 0.76032375  | -0.15125713  | 0.33857201  | -0.23130746  | 0.24569752  | -0.08751481  | 0.00704524  | 0.20464308  | 0.3067336   | -0.07076114  | 0.60642164  |
| ENSG00000211109 | 2  | 61085871  | 61180343  | KIAA181    | ncRNA                  | -0.05158957  | 0.59733084  | -0.14375830  | 0.3196822   | -0.04489340  | 0.84811736  | -0.12261760  | 0.54212481  | -0.05271301  | 0.04861869  | 0.20464308  | 0.3067336   | -0.07076114  | 0.60642164  |
| ENSG00000211110 | 15 | 3179118   | 3179258   | H3.5       | processed_pseudogene   | -0.02500107  | 0.17613071  | -0.07464379  | 0.60647493  | -0.05990923  | 0.76764649  | -0.11771190  | 0.10629629  | -0.14192700  | 0.30734764  | 0.20464308  | 0.3067336   | -0.07076114  | 0.60642164  |
| ENSG00000211111 | 8  | 7328402   | 7328251   | RDA19      | processed_pseudogene   | -0.013714917 | 0.905767838 | -0.12588334  | 0.43508422  | -0.007170504 | 0.97162389  | -0.065841545 | 0.77388518  | -0.15190772  | 0.30162583  | 0.20464308  | 0.3067336   | -0.07076114  | 0.60642164  |
| ENSG00000211112 | 2  | 17071357  | 17071807  | SPS        | processed_pseudogene   | -0.14084342  | 0.19675443  | -0.00671707  | 0.8363922   | -0.22667269  | 0.25664897  | -0.22098263  | 0.26898955  | -0.25013893  | 0.0811458   | 0.20464308  | 0.3067336   | -0.07076114  | 0.60642164  |
| ENSG00000211113 | 17 | 1698832   | 16989177  | LINC0290   | ncRNA                  | -0.07868492  | 0.48996703  | -0.12591837  | 0.38471954  | -0.07166303  | 0.49111819  | -0.15192201  | 0.24337044  | -0.07749463  | 0.1410797   | 0.20464308  | 0.3067336   | -0.07076114  | 0.60642164  |
| ENSG00000211114 | 11 | 3380780   | 3381752   | ENSO190    | unprocessed_pseudogene | -0.14823544  | 0.19857423  | -0.11902466  | 0.41083629  | -0.06415768  | 0.83244015  | -0.07571253  | 0.70741026  | -0.18647377  | 0.18799691  | 0.20464308  | 0.3067336   | -0.07076114  | 0.60642164  |
| ENSG00000211115 | 8  | 8437196   | 8447151   | RD548      | processed_pseudogene   | -0.00042338  | 0.98988479  | -0.18323154  | 0.2077100   | -0.18689958  | 0.40584713  | -0.20710033  | 0.13228334  | -0.06932626  | 0.18212258  | 0.20464308  | 0.3067336   | -0.07076114  | 0.60642164  |
| ENSG00000211116 | 19 | 1251018   | 1252380   | ZNF71      | processed_pseudogene   | -0.13491173  | 0.24204414  | -0.12145978  | 0.40071203  | -0.02978319  | 0.1454207   | -0.18714965  | 0.12555531  | -0.11217415  | 0.14933364  | 0.20464308  | 0.3067336   | -0.07076114  | 0.60642164  |
| ENSG00000211117 | 7  | 4482519   | 4484731   | ENSO438.2  | ncRNA                  | -0.02837822  | 0.80472375  | -0.06928979  | 0.8030208   | -0.03189764  | 0.87842403  | -0.00191283  | 0.92644428  | -0.00042256  | 0.19786233  | 0.20464308  | 0.3067336   | -0.07076114  | 0.60642164  |
| ENSG00000211118 | 8  | 6111432   | 6111673   | ENSO438.2  | ncRNA                  | -0.09828767  | 0.3981373   | -0.05175923  | 0.67122053  | -0.22881724  | 0.26884443  | -0.04252000  | 0.90344573  | -0.12374623  | 0.37269474  | 0.20464308  | 0.3067336   | -0.07076114  | 0.60642164  |
| ENSG00000211119 | 19 | 9469269   | 94694701  | MTNDP3     | processed_pseudogene   | -0.07111188  | 0.63041081  | -0.14738762  | 0.30754615  | -0.04834891  | 0.91843953  | -0.10319631  | 0.81212266  | -0.04702911  | 0.07200207  | 0.20464308  | 0.3067336   | -0.07076114  | 0.60642164  |
| ENSG00000211120 | 22 | 4633078   | 4633740   | TRML1      | processed_pseudogene   | -0.20955588  | 0.00890273  | -0.01529203  | 0.91367347  | -0.10274107  | 0.68523821  | -0.28863620  | 0.14281116  | -0.33720545  | 0.10271642  | 0.20464308  | 0.3067336   | -0.07076114  | 0.60642164  |
| ENSG00000211121 | 8  | 14263073  | 14262104  | ENSO547.1  | ncRNA                  | -0.11477504  | 0.22363966  | -0.07876426  | 0.57076210  | -0.20688941  | 0.19801150  | -0.05922801  | 0.76911765  | -0.24933299  | 0.04906803  | 0.20464308  | 0.3067336   | -0.07076114  | 0.60642164  |
| ENSG00000211122 | 11 | 1090845   | 1090845   | ENSO447.1  | ncRNA                  | -0.07076114  | 0.22363966  | -0.07876426  | 0.57076210  | -0.20688941  | 0.19801150  | -0.05922801  | 0.76911765  | -0.24933299  | 0.04906803  | 0.20464308  | 0.3067336   | -0.07076114  | 0.60642164  |
| ENSG00000211123 | 11 | 2735467   | 2736961   | MAP3B      | processed_pseudogene   | -0.27866112  | 0.15955808  | -0.04197472  | 0.7274688   | -0.12498481  | 0.2815343   | -0.03204067  | 0.80463821  | -0.113443129 | 0.10608261  | 0.20464308  | 0.3067336   | -0.07076114  | 0.60642164  |
| ENSG00000211124 | 17 | 717792    | 718324    | ENSO552.2  | processed_pseudogene   | -0.07129209  | 0.50273193  | -0.11333882  | 0.5927479   | -0.20129024  | 0.13432988  | -0.26261272  | 0.10739303  | -0.09134511  | 0.15126761  | 0.20464308  | 0.3067336   | -0.07076114  | 0.60642164  |
| ENSG00000211125 | 7  | 3044049   | 3044049   | ENSO552.2  | processed_pseudogene   | -0.07129209  | 0.50273193  | -0.11333882  | 0.5927479   | -0.20129024  | 0.13432988  | -0.26261272  | 0.10739303  | -0.09134511  | 0.15126761  | 0.20464308  | 0.3067336   | -0.07076114  | 0.60642164  |
| ENSG00000211126 | 6  | 3496917   | 3496917   | AL14165.2  | ncRNA                  | -0.14240044  | 0.12540233  | -0.09020301  | 0.4494380   | -0.18619266  | 0.32696952  | -0.03271736  | 0.60734635  | -0.20129114  | 0.14441176  | 0.20464308  | 0.3067336   | -0.07076114  | 0.60642164  |
| ENSG00000211127 | 16 | 2603174   | 2603180   | ENSO552.2  | processed_pseudogene   | -0.08184927  | 0.48818602  | -0.13836569  | 0.34791814  | -0.02249710  | 0.8624332   | -0.07502891  | 0.70985815  | -0.13363604  | 0.33251503  | 0.20464308  | 0.3067336   | -0.07076114  | 0.60642164  |
| ENSG00000211128 | 19 | 9469269   | 94694701  | LINC0290   | ncRNA                  | -0.07868492  | 0.48996703  | -0.12591837  | 0.38471954  | -0.07166303  | 0.49111819  | -0.15192201  | 0.24337044  | -0.07749463  | 0.1410797   | 0.20464308  | 0.3067336   | -0.07076114  | 0.60642164  |
| ENSG00000211129 | 11 | 3807481   | 3814848   | AD001527.1 | ncRNA                  | -0.12187125  | 0.29164208  | -0.02195789  | 0.8030208   | -0.03266710  | 0.85263132  | -0.0595168   | 0.58684174  | -0.07278920  | 0.14226284  | 0.20464308  | 0.3067336   | -0.07076114  | 0.60642164  |
| ENSG00000211130 | 17 | 4123248   | 4123248   | KTRP3.3    | ncRNA                  | -0.20713453  | 0.027089161 | -0.03349780  | 0.8181931   | -0.22295035  | 0.25996907  | -0.18992336  | 0.42949553  | -0.27023161  | 0.04702911  | 0.20464308  | 0.3067336   | -0.07076114  | 0.60642164  |
| ENSG00000211131 | 19 | 1312848   | 1312848   | ENSO558.1  | ncRNA                  | -0.02548818  | 0.7653463   | -0.04588112  | 0.7615441   | -0.03563204  | 0.60895505  | -0.24341490  | 0.19184609  | -0.35542008  | 0.00406423  | 0.20464308  | 0.3067336   | -0.07076114  | 0.60642164  |
| ENSG00000211132 | 11 | 2122994   | 2123173   | AL33091.3  | ncRNA                  | -0.11584884  | 0.13754622  | -0.04174869  | 0.93899707  | -0.04381928  | 0.86247851  | -0.09115572  | 0.65113248  | -0.12300634  | 0.37584297  | 0.20464308  | 0.3067336   | -0.07076114  | 0.60642164  |
| ENSG00000211133 | 11 |           |           |            |                        |              |             |              |             |              |             |              |             |              |             |             |             |              |             |

|                |           |           |           |                        |             |             |             |            |             |            |             |            |             |            |             |            |             |            |            |
|----------------|-----------|-----------|-----------|------------------------|-------------|-------------|-------------|------------|-------------|------------|-------------|------------|-------------|------------|-------------|------------|-------------|------------|------------|
| ENSG0000022428 | 218953401 | 218954050 | KRTFP90   | transcribed_pseudogene | -0.13621811 | 0.00363947  | 0.09578907  | 0.50814640 | 0.144928769 | 0.47076007 | -0.01753899 | 0.83064537 | -0.10724638 | 0.44017804 | 0.20425771  | 0.34920373 | 0.00522356  | 0.97168735 |            |
| ENSG0000022429 | 33359297  | 33359319  | ITIH4     | transcript             | -0.06776424 | 0.06269284  | 0.04948073  | 0.04948073 | 0.04948073  | 0.04948073 | 0.04948073  | 0.04948073 | 0.04948073  | 0.04948073 | 0.04948073  | 0.04948073 | 0.04948073  | 0.04948073 | 0.04948073 |
| ENSG0000022430 | 87761474  | 87761474  | PRKAP3    | transcribed_pseudogene | -0.05219774 | 0.05219774  | 0.05219774  | 0.05219774 | 0.05219774  | 0.05219774 | 0.05219774  | 0.05219774 | 0.05219774  | 0.05219774 | 0.05219774  | 0.05219774 | 0.05219774  | 0.05219774 | 0.05219774 |
| ENSG0000022431 | 1842244   | 1842244   | RAM2A     | transcript             | -0.04002158 | 0.12034468  | 0.03038390  | 0.03593890 | 0.02522731  | 0.79568190 | -0.16011038 | 0.44242503 | -0.16011038 | 0.44242503 | -0.16011038 | 0.44242503 | -0.16011038 | 0.44242503 | 0.44242503 |
| ENSG0000022432 | 12777111  | 12777111  | ACTR19B   | transcript             | -0.02761921 | 0.26071790  | 0.24218104  | 0.06071270 | 0.30747268  | 0.15189818 | 0.24247729  | 0.22308723 | -0.13195956 | 0.34124257 | -0.24247729 | 0.22308723 | -0.13195956 | 0.34124257 | 0.22308723 |
| ENSG0000022433 | 56739374  | 56739374  | MEK3      | transcript             | 0.09275598  | 0.09275598  | 0.09275598  | 0.09275598 | 0.09275598  | 0.09275598 | 0.09275598  | 0.09275598 | 0.09275598  | 0.09275598 | 0.09275598  | 0.09275598 | 0.09275598  | 0.09275598 | 0.09275598 |
| ENSG0000022434 | 10228016  | 10228016  | RAP80F4   | transcript             | -0.17598718 | 0.11813403  | 0.08595145  | 0.15362410 | 0.09573420  | 0.63077608 | -0.15359540 | 0.04222693 | -0.24043804 | 0.34990780 | -0.15359540 | 0.04222693 | -0.24043804 | 0.34990780 | 0.34990780 |
| ENSG0000022435 | 9675490   | 9675490   | ACOR6L5   | transcript             | -0.24172174 | 0.03461659  | -0.04523136 | 0.7786518  | 0.28631669  | 0.14427274 | -0.26511400 | 0.30137976 | -0.26511400 | 0.30137976 | -0.26511400 | 0.30137976 | -0.26511400 | 0.30137976 | 0.30137976 |
| ENSG0000022436 | 20914976  | 20914976  | ALX3      | transcript             | -0.18320314 | 0.06499149  | 0.06499149  | 0.06499149 | 0.06499149  | 0.06499149 | 0.06499149  | 0.06499149 | 0.06499149  | 0.06499149 | 0.06499149  | 0.06499149 | 0.06499149  | 0.06499149 | 0.06499149 |
| ENSG0000022437 | 18401630  | 18401630  | TEC       | transcript             | -0.02441762 | 0.03309199  | 0.01476284  | 0.03028834 | 0.00970269  | 0.63370172 | -0.02854800 | 0.08722740 | -0.02854800 | 0.08722740 | -0.02854800 | 0.08722740 | -0.02854800 | 0.08722740 | 0.08722740 |
| ENSG0000022438 | 14709584  | 14709584  | CNTN2B    | transcript             | -0.1612620  | 0.3827194   | -0.11400799 | 0.04386222 | 0.22262974  | 0.54012153 | -0.17586891 | 0.38262145 | -0.17586891 | 0.38262145 | -0.17586891 | 0.38262145 | -0.17586891 | 0.38262145 | 0.38262145 |
| ENSG0000022439 | 41781414  | 41781414  | ALX2      | transcript             | -0.04687497 | 0.06871026  | 0.10818934  | 0.04417957 | 0.4895262   | 0.37028193 | 0.08944146  | 0.45718294 | 0.08944146  | 0.45718294 | 0.08944146  | 0.45718294 | 0.08944146  | 0.45718294 | 0.45718294 |
| ENSG0000022440 | 457481    | 457481    | LINC01646 | transcript             | -0.27088884 | 0.07744529  | 0.03981242  | 0.13267790 | 0.13267790  | 0.13267790 | 0.13267790  | 0.13267790 | 0.13267790  | 0.13267790 | 0.13267790  | 0.13267790 | 0.13267790  | 0.13267790 | 0.13267790 |
| ENSG0000022441 | 7250488   | 7250488   | LOC104362 | transcript             | -0.02673353 | 0.08205244  | 0.13653148  | 0.03734248 | 0.08080121  | 0.16522258 | 0.16263360  | 0.1433899  | -0.03077851 | 0.07374410 | -0.03077851 | 0.07374410 | -0.03077851 | 0.07374410 | 0.07374410 |
| ENSG0000022442 | 2912989   | 2912989   | ACOR6B1   | transcript             | -0.05209329 | 0.06038922  | 0.05949811  | 0.07313088 | 0.18296499  | 0.36276028 | -0.1030077  | 0.09170128 | -0.1006941  | 0.09047203 | -0.1006941  | 0.09047203 | -0.1006941  | 0.09047203 | 0.09047203 |
| ENSG0000022443 | 16935567  | 16935567  | 6948571   | transcript             | -0.15063279 | 0.19118623  | 0.15695704  | 0.27633487 | 0.20023074  | 0.30114638 | -0.03017700 | 0.08744628 | -0.05007949 | 0.14717029 | -0.05007949 | 0.14717029 | -0.05007949 | 0.14717029 | 0.14717029 |
| ENSG0000022444 | 1123043   | 1123043   | AMEX      | transcript             | -0.15349499 | 0.18131868  | 0.05059922  | 0.72711709 | 0.20399132  | 0.30033689 | -0.32633697 | 0.04868746 | -0.28749242 | 0.03033464 | -0.28749242 | 0.03033464 | -0.28749242 | 0.03033464 | 0.03033464 |
| ENSG0000022445 | 3897973   | 3897973   | RN        | transcript             | -0.08542192 | 0.19120533  | 0.15719678  | 0.2684806  | 0.15016027  | 0.60989041 | -0.09272142 | 0.14334953 | -0.2901134  | 0.07590427 | 0.56947103  | -0.2901134 | 0.07590427  | 0.56947103 | 0.56947103 |
| ENSG0000022446 | 43951223  | 43957709  | ZNF21     | transcript             | -0.18115504 | 0.09584534  | -0.08451351 | 0.06001290 | 0.17107911  | 0.73831704 | -0.27789004 | 0.16095236 | -0.19174854 | 0.16482414 | -0.19174854 | 0.16482414 | -0.19174854 | 0.16482414 | 0.16482414 |
| ENSG0000022447 | 12086892  | 12086892  | ACTA1377  | transcribed_pseudogene | -0.12421299 | 0.28178498  | 0.06889119  | 0.63505247 | 0.1196138   | 0.44425242 | -0.10842880 | 0.58023609 | -0.11901521 | 0.39130204 | -0.11901521 | 0.39130204 | -0.11901521 | 0.39130204 | 0.39130204 |
| ENSG0000022448 | 121420021 | 121420021 | RN43      | transcript             | -0.17658191 | 0.14246629  | 0.14505028  | 0.31213475 | 0.12709602  | 0.52753471 | -0.07713525 | 0.05293916 | -0.03193768 | 0.18196691 | -0.03193768 | 0.18196691 | -0.03193768 | 0.18196691 | 0.18196691 |
| ENSG0000022449 | 4192832   | 4192832   | NTRSF3C   | transcript             | -0.07373451 | 0.49807834  | -0.1182325  | 0.02093819 | -0.15525583 | 0.59381216 | -0.38973807 | 0.05789492 | -0.21232833 | 0.11443375 | -0.21232833 | 0.11443375 | -0.21232833 | 0.11443375 | 0.11443375 |
| ENSG0000022450 | 12255438  | 12259713  | PSTK      | transcript             | 0.10327524  | 0.13142524  | 0.15814942  | 0.27076489 | 0.08923764  | 0.77942587 | 0.11740280  | 0.55977585 | 0.05262148  | 0.70742487 | 0.05262148  | 0.70742487 | 0.05262148  | 0.70742487 | 0.70742487 |
| ENSG0000022451 | 4909698   | 4909788   | ALX3      | transcript             | -0.24529275 | 0.03020310  | -0.03049767 | 0.26925965 | 0.23291435  | 0.24240145 | -0.1708811  | 0.35262852 | -0.2910724  | 0.03027469 | -0.2910724  | 0.03027469 | -0.2910724  | 0.03027469 | 0.03027469 |
| ENSG0000022452 | 1200420   | 1200420   | HTH1      | transcript             | -0.10488414 | 0.38400123  | 0.01722857  | 0.50257032 | -0.1122263  | 0.39023295 | -0.1122263  | 0.39023295 | -0.1122263  | 0.39023295 | -0.1122263  | 0.39023295 | -0.1122263  | 0.39023295 | 0.39023295 |
| ENSG0000022453 | 31637312  | 31636500  | COX4I2    | transcript             | -0.07480772 | 0.52207485  | 0.08438156  | 0.80509314 | 0.09826159  | 0.62963482 | -0.02988880 | 0.88242855 | -0.02988880 | 0.88242855 | -0.02988880 | 0.88242855 | -0.02988880 | 0.88242855 | 0.88242855 |
| ENSG0000022454 | 7598983   | 7598983   | SNUP1     | transcript             | -0.07212764 | 0.094482719 | 0.19314868  | 0.38011950 | 0.00499177  | 0.98026903 | 0.05473054  | 0.78629678 | 0.01302371  | 0.00301533 | 0.01302371  | 0.00301533 | 0.01302371  | 0.00301533 | 0.00301533 |
| ENSG0000022455 | 24101045  | 24101044  | ACOR6A1   | transcript             | -0.04004058 | 0.12788143  | 0.18877873  | 0.5171959  | 0.15412748  | 0.44888328 | -0.184025   | 0.48751063 | -0.18393442 | 0.10356688 | -0.18393442 | 0.10356688 | -0.18393442 | 0.10356688 | 0.10356688 |
| ENSG0000022456 | 14003244  | 14003244  | HNR1PAP3  | transcribed_pseudogene | -0.10118224 | 0.35976223  | -0.11519443 | 0.04111057 | 0.00263789  | 0.98981103 | -0.07114300 | 0.21344508 | -0.20787868 | 0.13844240 | -0.20787868 | 0.13844240 | -0.20787868 | 0.13844240 | 0.13844240 |
| ENSG0000022457 | 89010515  | 89010515  | IG_VH     | transcript             | -0.05482786 | 0.16740552  | -0.02990440 | 0.84102603 | 0.08846873  | 0.68901843 | -0.10708330 | 0.54988280 | -0.07402220 | 0.51985243 | -0.07402220 | 0.51985243 | -0.07402220 | 0.51985243 | 0.51985243 |
| ENSG0000022458 | 23964942  | 23964942  | MTN178A   | transcript             | -0.06986852 | 0.37520032  | 0.15201310  | 0.29196729 | 0.29241057  | 0.13885087 | -0.03408782 | 0.86221708 | -0.28811546 | 0.03408782 | -0.28811546 | 0.03408782 | -0.28811546 | 0.03408782 | 0.03408782 |
| ENSG0000022459 | 11701817  | 11701817  | ACOR6A2   | transcript             | -0.08542192 | 0.19120533  | 0.15719678  | 0.2684806  | 0.15016027  | 0.60989041 | -0.09272142 | 0.14334953 | -0.2901134  | 0.07590427 | -0.2901134  | 0.07590427 | -0.2901134  | 0.07590427 | 0.07590427 |
| ENSG0000022460 | 20775034  | 20775034  | CD46      | transcript             | -0.03452713 | 0.76503303  | -0.08729047 | 0.08319532 | 0.03458583  | 0.97573192 | -0.03458583 | 0.97573192 | -0.03458583 | 0.97573192 | -0.03458583 | 0.97573192 | -0.03458583 | 0.97573192 | 0.97573192 |
| ENSG0000022461 | 50323161  | 50323161  | ZNF292    | transcript             | -0.21424232 | 0.06391100  | 0.06423320  | 0.54621524 | -0.3611889  | 0.08217028 | -0.09617388 | 0.63324211 | -0.30022028 | 0.09070484 | -0.30022028 | 0.09070484 | -0.30022028 | 0.09070484 | 0.09070484 |
| ENSG0000022462 | 11745732  | 11745732  | IFP2      | transcript             | -0.11817657 | 0.18092666  | 0.04922727  | 0.18092666 | 0.04922727  | 0.18092666 | 0.04922727  | 0.18092666 | 0.04922727  | 0.18092666 | 0.04922727  | 0.18092666 | 0.04922727  | 0.18092666 | 0.18092666 |
| ENSG0000022463 | 41783585  | 41783585  | KLH10     | transcript             | -0.07861806 | 0.46673208  | -0.13596818 | 0.34901541 | -0.16582656 | 0.40969941 | -0.01083403 | 0.95727275 | -0.29522077 | 0.03021434 | -0.29522077 | 0.03021434 | -0.29522077 | 0.03021434 | 0.03021434 |
| ENSG0000022464 | 99215372  | 99215372  | H2AF2     | transcript             | -0.15241841 | 0.18527403  | 0.15388199  | 0.28992724 | 0.04134874  | 0.83073798 | -0.07190778 | 0.21514563 | -0.07190778 | 0.21514563 | -0.07190778 | 0.21514563 | -0.07190778 | 0.21514563 | 0.21514563 |
| ENSG0000022465 | 15176384  | 15176384  | ARHGAP5   | transcript             | -0.19034289 | 0.06848575  | -0.24933328 | 0.06789757 | 0.04965219  | 0.84061753 | -0.24304821 | 0.21933861 | -0.16549367 | 0.21933861 | -0.16549367 | 0.21933861 | -0.16549367 | 0.21933861 | 0.21933861 |
| ENSG0000022466 | 5349943   | 5349943   | ACOR342   | transcript             | -0.06854253 | 0.57146978  | 0.19213238  | 0.18118658 | -0.18112703 | 0.36958734 | -0.18112703 | 0.36958734 | -0.18112703 | 0.36958734 | -0.18112703 | 0.36958734 | -0.18112703 | 0.36958734 | 0.36958734 |
| ENSG0000022467 | 7892469   | 7892469   | ALX3      | transcript             | -0.07212764 | 0.094482719 | 0.19314868  | 0.38011950 | 0.0049      |            |             |            |             |            |             |            |             |            |            |



Table with columns for gene names, coordinates, and various data points. The table lists numerous genes such as ENG000022322, ENG000019633, ENG000019633, etc., along with their genomic coordinates and associated values.



Table with columns for gene ID, chromosome, coordinates, gene name, transcript type, and a list of numerical values representing various metrics for each gene.

Table with 10 columns: Gene ID, Chr, Start, End, Feature, Gene Name, RefSeq ID, RefSeq Name, RefSeq Description, RefSeq Accession. The table lists numerous genes and their associated RefSeq identifiers and descriptions.

Table with 15 columns: Gene ID, Ensembl ID, Gene Name, Protein Name, Type, and various numerical values. The table lists numerous genes such as KANSL1, GATA1, and many others, each with associated identifiers and values.









|                 |    |           |           |             |                           |             |            |             |            |             |            |             |            |             |            |            |            |            |            |
|-----------------|----|-----------|-----------|-------------|---------------------------|-------------|------------|-------------|------------|-------------|------------|-------------|------------|-------------|------------|------------|------------|------------|------------|
| ENSG00000183011 | 17 | 7856685   | 7858230   | NAA3B       | protein coding            | 0.13325063  | 0.24801259 | 0.01735021  | 0.93004655 | 0.37279968  | 0.08333967 | 0.17123345  | 0.36110764 | 0.10288715  | 0.45090343 | 0.17531433 | 0.42365141 | 0.24712639 | 0.08385559 |
| ENSG0000023553  | 3  | 13245232  | 13245232  | UCP2-257    | transcribed uncategorised | 0.1219203   | 0.0740225  | 0.0914456   | 0.6402255  | 0.40481761  | 0.2511801  | 0.13077610  | 0.49620305 | 0.24510243  | 0.0740225  | 0.17521338 | 0.42365141 | 0.24712639 | 0.08385559 |
| ENSG0000023692  | 4  | 8724334   | 8724334   | KIF20B      | protein coding            | 0.0740225   | 0.0740225  | 0.0740225   | 0.0740225  | 0.0740225   | 0.0740225  | 0.0740225   | 0.0740225  | 0.0740225   | 0.0740225  | 0.0740225  | 0.0740225  | 0.0740225  | 0.0740225  |
| ENSG0000028205  | 4  | 843363    | 844234    | KIF138B-5   | lincRNA                   | -0.05472728 | 0.63173847 | 0.03848769  | 0.76075250 | 0.00038202  | 0.96600231 | -0.13013192 | 0.45754448 | -0.12744688 | 0.35768688 | 0.17514322 | 0.42365141 | 0.24712639 | 0.08385559 |
| ENSG00000287132 | 12 | 7029114   | 7024243   | UCP2-257    | transcribed uncategorised | 0.06827918  | 0.34948017 | 0.11777851  | 0.25263740 | 0.15812619  | 0.43072753 | 0.06827918  | 0.34948017 | 0.06827918  | 0.34948017 | 0.17521338 | 0.42365141 | 0.24712639 | 0.08385559 |
| ENSG00000274403 | 4  | 865627    | 865627    | MAN1B       | protein coding            | 0.0740225   | 0.0740225  | 0.0740225   | 0.0740225  | 0.0740225   | 0.0740225  | 0.0740225   | 0.0740225  | 0.0740225   | 0.0740225  | 0.0740225  | 0.0740225  | 0.0740225  | 0.0740225  |
| ENSG00000178609 | 4  | 112035116 | 11249110  | UCP2-257    | transcribed uncategorised | -0.10730145 | 0.15449112 | 0.04929122  | 0.73389194 | -0.20383597 | 0.90232908 | -0.16714313 | 0.43245705 | -0.12744688 | 0.35768688 | 0.17514322 | 0.42365141 | 0.24712639 | 0.08385559 |
| ENSG00000240463 | 14 | 3456689   | 3456689   | RPS19B      | protein coding            | 0.24479849  | 0.03168564 | 0.11494604  | 0.30542594 | 0.46447162  | 0.01471940 | 0.05070006  | 0.80170535 | 0.05879360  | 0.13262912 | 0.17521338 | 0.42365141 | 0.24712639 | 0.08385559 |
| ENSG00000227525 | 12 | 1808198   | 1808198   | UCP2-257    | transcribed uncategorised | -0.20312927 | 0.0740225  | 0.03514378  | 0.80855271 | 0.12136298  | 0.54649303 | -0.10294366 | 0.60817873 | -0.15669142 | 0.11729574 | 0.17521338 | 0.42365141 | 0.24712639 | 0.08385559 |
| ENSG0000074247  | 14 | 19344578  | 19344578  | UCP2-257    | transcribed uncategorised | -0.22918876 | 0.04456174 | 0.0740225   | 0.60743851 | -0.02027950 | 0.99778604 | -0.00207950 | 0.99778604 | -0.02027950 | 0.99778604 | 0.17521338 | 0.42365141 | 0.24712639 | 0.08385559 |
| ENSG00000181518 | 11 | 1236247   | 1236247   | OR6D8       | protein coding            | -0.06786028 | 0.55076391 | -0.01908736 | 0.86786253 | 0.18171338  | 0.40026765 | -0.15306326 | 0.45488072 | -0.06812500 | 0.38442354 | 0.17521338 | 0.42365141 | 0.24712639 | 0.08385559 |
| ENSG0000023892  | 14 | 3415337   | 3415337   | UCP2-257    | transcribed uncategorised | -0.22484258 | 0.06827918 | 0.0740225   | 0.60743851 | -0.02027950 | 0.99778604 | -0.02027950 | 0.99778604 | -0.02027950 | 0.99778604 | 0.17521338 | 0.42365141 | 0.24712639 | 0.08385559 |
| ENSG00000157064 | 1  | 18324827  | 18341830  | MINM12      | protein coding            | -0.16506187 | 0.14554170 | -0.01020078 | 0.98889754 | -0.11455312 | 0.81222208 | -0.05890786 | 0.77041770 | -0.10715609 | 0.38442354 | 0.17521338 | 0.42365141 | 0.24712639 | 0.08385559 |
| ENSG0000022951  | X  | 8050146   | 8050204   | WSP1        | protein coding            | -0.02570941 | 0.04040169 | -0.1324374  | 0.30407890 | 0.23762840  | 0.26535462 | -0.26291358 | 0.13520774 | -0.32748827 | 0.01810260 | 0.17480206 | 0.42474465 | 0.26203528 | 0.0812853  |
| ENSG0000023992  | 14 | 3415337   | 3415337   | UCP2-257    | transcribed uncategorised | -0.11698897 | 0.31101014 | -0.00813308 | 0.98263417 | 0.06989522  | 0.76381609 | -0.14783151 | 0.47412048 | -0.15594432 | 0.26201036 | 0.17480206 | 0.42474465 | 0.26203528 | 0.0812853  |
| ENSG00000130520 | 19 | 1952636   | 1832121   | LRM3        | protein coding            | 0.19381869  | 0.09156216 | 0.30590744  | 0.00786648 | -0.11140306 | 0.43198723 | 0.46545003  | 0.01442725 | 0.24196156  | 0.0774431  | 0.17480206 | 0.42474465 | 0.26203528 | 0.0812853  |
| ENSG00000162543 | 10 | 2018606   | 2018606   | UBAN10      | protein coding            | -0.04232503 | 0.57888381 | 0.07130330  | 0.64071563 | 0.24299483  | 0.22147418 | -0.33203977 | 0.86910598 | -0.08948673 | 0.53622523 | 0.17480206 | 0.42474465 | 0.26203528 | 0.0812853  |
| ENSG0000015944  | 4  | 4233566   | 4242598   | UCP2-257    | transcribed uncategorised | -0.11430164 | 0.32337621 | -0.05271901 | 0.67748135 | 0.16699474  | 0.00191391 | -0.20699793 | 0.3921478  | -0.16812899 | 0.24017758 | 0.17480206 | 0.42474465 | 0.26203528 | 0.0812853  |
| ENSG00000204149 | 10 | 4998219   | 5001056   | ADAP6       | protein coding            | -0.06022274 | 0.59925189 | 0.04818351  | 0.51134338 | -0.10398411 | 0.61893343 | -0.04882211 | 0.67630414 | -0.18007569 | 0.19056173 | 0.17480206 | 0.42474465 | 0.26203528 | 0.0812853  |
| ENSG00000170577 | 2  | 4500512   | 4500492   | UCP2-257    | transcribed uncategorised | -0.14652284 | 0.13420260 | 0.05800601  | 0.72080460 | -0.07331457 | 0.18355884 | -0.05887000 | 0.70811879 | -0.05887000 | 0.18355884 | 0.17480206 | 0.42474465 | 0.26203528 | 0.0812853  |
| ENSG00000272762 | 5  | 16901246  | 169013146 | AC011389.2  | lincRNA                   | -0.0812853  | 0.17480206 | -0.0740225  | 0.18184715 | -0.02949045 | 0.83353695 | -0.06714238 | 0.77097389 | -0.18591638 | 0.17830186 | 0.17480206 | 0.42474465 | 0.26203528 | 0.0812853  |
| ENSG00000287043 | 10 | 1201406   | 1203839   | UCP2-257    | transcribed uncategorised | -0.0812853  | 0.17480206 | -0.0740225  | 0.18184715 | -0.02949045 | 0.83353695 | -0.06714238 | 0.77097389 | -0.18591638 | 0.17830186 | 0.17480206 | 0.42474465 | 0.26203528 | 0.0812853  |
| ENSG00000178903 | 24 | 2424206   | 24485074  | ADORA2A-AS1 | lincRNA                   | -0.14810884 | 0.20481515 | -0.04887270 | 0.77348817 | -0.11379078 | 0.87128064 | -0.01714848 | 0.90289892 | -0.15802643 | 0.25734248 | 0.17472027 | 0.42509487 | 0.26203528 | 0.0812853  |
| ENSG00000185597 | 14 | 10657324  | 10457183  | PNKNC       | protein coding            | -0.27419777 | 0.01082748 | -0.03322848 | 0.81880997 | -0.40574198 | 0.03394962 | -0.76004561 | 0.16028964 | -0.43587501 | 0.00090989 | 0.17475526 | 0.42474465 | 0.26203528 | 0.0812853  |
| ENSG00000287184 | 7  | 15910771  | 159109216 | UCP2-257    | transcribed uncategorised | -0.24684459 | 0.02392320 | -0.04887270 | 0.83353695 | -0.07434420 | 0.01217624 | -0.26103428 | 0.60960705 | -0.17472027 | 0.42509487 | 0.26203528 | 0.0812853  | 0.0812853  |            |
| ENSG00000228515 | 7  | 36192024  | 36110772  | MRNP13      | protein coding            | -0.07234013 | 0.53182719 | 0.14898811  | 0.29948368 | 0.08881428  | 0.79310863 | 0.22675734  | 0.25573678 | -0.03372448 | 0.80817240 | 0.17472027 | 0.42509487 | 0.26203528 | 0.0812853  |
| ENSG00000287398 | 19 | 19527035  | 19589351  | UCP2-257    | transcribed uncategorised | -0.04733263 | 0.0740225  | 0.07788934  | 0.59339662 | 0.22208207  | 0.26930321 | 0.04695306  | 0.81784464 | -0.2835363  | 0.06310961 | 0.17480206 | 0.42509487 | 0.26203528 | 0.0812853  |
| ENSG00000119401 | 9  | 116887305 | 116710310 | TRIM32      | protein coding            | 0.10434512  | 0.36648378 | 0.24135673  | 0.01936828 | 0.15718015  | 0.43198723 | 0.17400004  | 0.37682338 | 0.06890551  | 0.62035308 | 0.17472027 | 0.42509487 | 0.26203528 | 0.0812853  |
| ENSG00000289132 | 16 | 31470204  | 31471281  | UCP2-257    | transcribed uncategorised | -0.03317378 | 0.84477844 | 0.05204433  | 0.88810968 | 0.04528788  | 0.82222042 | 0.02075959  | 0.91998433 | -0.01700858 | 0.90245445 | 0.17480206 | 0.42509487 | 0.26203528 | 0.0812853  |
| ENSG00000231016 | 14 | 10657324  | 10457183  | PNKNC       | protein coding            | -0.0812853  | 0.17480206 | -0.0740225  | 0.18184715 | -0.02949045 | 0.83353695 | -0.06714238 | 0.77097389 | -0.18591638 | 0.17830186 | 0.17480206 | 0.42474465 | 0.26203528 | 0.0812853  |
| ENSG00000109270 | 4  | 98978338  | 98984428  | LAMT0R3     | protein coding            | 0.26746447  | 0.00596944 | 0.05224199  | 0.86612993 | 0.00054347  | 0.98890141 | -0.08708277 | 0.66588037 | 0.31125891  | 0.01970202 | 0.17480206 | 0.42509487 | 0.26203528 | 0.0812853  |
| ENSG00000142449 | 19 | 8095402   | 8148922   | FBNS        | protein coding            | -0.12429738 | 0.8012853  | 0.04466088  | 0.78107597 | -0.26441489 | 0.16291892 | -0.12325513 | 0.5402125  | -0.32977548 | 0.13438993 | 0.17480206 | 0.42509487 | 0.26203528 | 0.0812853  |
| ENSG00000133409 | 4  | 4233566   | 4242598   | KIF20B      | protein coding            | -0.0812853  | 0.17480206 | -0.0740225  | 0.18184715 | -0.02949045 | 0.83353695 | -0.06714238 | 0.77097389 | -0.18591638 | 0.17830186 | 0.17480206 | 0.42474465 | 0.26203528 | 0.0812853  |
| ENSG00000235643 | 1  | 11800448  | 11800448  | UCP2-257    | transcribed uncategorised | -0.15338412 | 0.18184715 | -0.03877292 | 0.79988593 | -0.03148033 | 0.85733692 | -0.21166457 | 0.82802726 | -0.19630155 | 0.15483899 | 0.17480206 | 0.42509487 | 0.26203528 | 0.0812853  |
| ENSG00000185907 | 14 | 34549202  | 34549202  | PPP1R3B     | protein coding            | -0.20494033 | 0.04733263 | -0.03449893 | 0.81012418 | -0.28243272 | 0.14924188 | -0.03034322 | 0.64444073 | -0.25083207 | 0.06751739 | 0.17480206 | 0.42509487 | 0.26203528 | 0.0812853  |
| ENSG00000143147 | 7  | 77667     | 77667     | UCP2-257    | transcribed uncategorised | -0.10730145 | 0.15449112 | -0.04929122 | 0.73389194 | -0.20383597 | 0.90232908 | -0.16714313 | 0.43245705 | -0.12744688 | 0.35768688 | 0.17514322 | 0.42365141 | 0.24712639 | 0.08385559 |
| ENSG00000273008 | 7  | 38326603  | 38326643  | UCP2-257    | transcribed uncategorised | -0.11430164 | 0.32337621 | -0.05271901 | 0.67748135 | 0.16699474  | 0.00191391 | -0.20699793 | 0.3921478  | -0.16812899 | 0.24017758 | 0.17480206 | 0.42474465 | 0.26203528 | 0.0812853  |
| ENSG00000147206 | X  | 103075810 | 103091343 | RRP15       | protein coding            | -0.26203528 | 0.0812853  | -0.02324489 | 0.87280349 | -0.20092218 | 0.2954205  | -0.23776792 | 0.23238482 | -0.35583487 | 0.00295207 | 0.17480206 | 0.42509487 | 0.26203528 | 0.0812853  |
| ENSG00000287043 | 10 | 1201406   | 1203839   | UCP2-257    | transcribed uncategorised | -0.0812853  | 0.17480206 | -0.0740225  | 0.18184715 | -0.02949045 | 0.83353695 | -0.06714238 | 0.77097389 | -0.18591638 | 0.17830186 | 0.17480206 | 0.42474465 | 0.26203528 | 0.0812853  |
| ENSG00000067533 | 1  | 21828503  | 21837981  | NRX1        | protein coding            | 0.04848853  | 0.67351626 | 0.05534427  | 0.70202840 | -0.00583320 | 0.96381804 | -0.14957385 | 0.45648159 | -0.10580658 | 0.40839884 | 0.17480206 | 0.42509487 | 0.26203528 | 0.0812853  |
| ENSG00000147180 | X  | 85243991  | 8527338   | ZNF711      | protein coding            | -0.24851984 | 0.02302031 |             |            |             |            |             |            |             |            |            |            |            |            |





Table with 10 columns: Gene ID, Chr, Start, End, Strand, Feature, RefSeq ID, RefSeq Name, RefSeq Type, RefSeq Description. Contains genomic data for various genes including PDLIM2, PDLIM3, PDLIM4, PDLIM5, PDLIM6, PDLIM7, PDLIM8, PDLIM9, PDLIM10, PDLIM11, PDLIM12, PDLIM13, PDLIM14, PDLIM15, PDLIM16, PDLIM17, PDLIM18, PDLIM19, PDLIM20, PDLIM21, PDLIM22, PDLIM23, PDLIM24, PDLIM25, PDLIM26, PDLIM27, PDLIM28, PDLIM29, PDLIM30, PDLIM31, PDLIM32, PDLIM33, PDLIM34, PDLIM35, PDLIM36, PDLIM37, PDLIM38, PDLIM39, PDLIM40, PDLIM41, PDLIM42, PDLIM43, PDLIM44, PDLIM45, PDLIM46, PDLIM47, PDLIM48, PDLIM49, PDLIM50, PDLIM51, PDLIM52, PDLIM53, PDLIM54, PDLIM55, PDLIM56, PDLIM57, PDLIM58, PDLIM59, PDLIM60, PDLIM61, PDLIM62, PDLIM63, PDLIM64, PDLIM65, PDLIM66, PDLIM67, PDLIM68, PDLIM69, PDLIM70, PDLIM71, PDLIM72, PDLIM73, PDLIM74, PDLIM75, PDLIM76, PDLIM77, PDLIM78, PDLIM79, PDLIM80, PDLIM81, PDLIM82, PDLIM83, PDLIM84, PDLIM85, PDLIM86, PDLIM87, PDLIM88, PDLIM89, PDLIM90, PDLIM91, PDLIM92, PDLIM93, PDLIM94, PDLIM95, PDLIM96, PDLIM97, PDLIM98, PDLIM99, PDLIM100.



Table with columns for gene names, coordinates, and various numerical values. The table is organized into multiple columns and rows, listing genomic data for various genes and transcripts.

Table with 10 columns: Gene ID, Chr, Start, End, RefSeq ID, Gene Name, Feature Type, Strand, Start, End, RefSeq ID, Gene Name, Feature Type, Strand, Start, End, RefSeq ID, Gene Name, Feature Type, Strand. Contains genomic coordinates and gene annotations for various genes like AC054515, AC054516, AC054517, etc.





|                 |    |           |           |            |                         |              |             |             |             |             |             |              |             |              |             |             |             |             |             |             |             |
|-----------------|----|-----------|-----------|------------|-------------------------|--------------|-------------|-------------|-------------|-------------|-------------|--------------|-------------|--------------|-------------|-------------|-------------|-------------|-------------|-------------|-------------|
| ENSG00000112991 | 12 | 1260775   | 1292147   | GPRCSD     | protein coding          | -0.125691259 | 0.275286142 | 0.02007091  | 0.89896192  | 0.311918613 | 0.113218109 | -0.085797961 | 0.670791633 | -0.207908894 | 0.131402522 | 0.153287009 | 0.483442616 | 0.143373871 | 0.320556903 |             |             |
| ENSG00000112992 | 1  | 2036277   | 2037489   | ATP2B1     | protein coding          | -0.2020474   | 0.263477721 | -0.14832336 | 0.40377716  | 0.704827162 | 0.265275792 | 0.54091467   | 0.34333337  | 0.15307265   | 0.33381877  | 0.15307265  | 0.33381877  | 0.29236371  | 0.29236371  | 0.29236371  |             |
| ENSG00000112993 | 1  | 14917246  | 14917246  | ACTG2      | lncRNA                  | -0.931785738 | 0.931785738 | 0.00000000  | 0.00000000  | 0.00000000  | 0.00000000  | 0.00000000   | 0.00000000  | 0.00000000   | 0.00000000  | 0.00000000  | 0.00000000  | 0.00000000  | 0.00000000  | 0.00000000  |             |
| ENSG00000143493 | 1  | 21104399  | 21035577  | INTS7      | protein coding          | 0.12963047   | 0.274253749 | 0.099912305 | 0.409977332 | 0.654422709 | 0.270028391 | 0.721447666  | 0.14482223  | 0.490991775  | 0.153727244 | 0.483787776 | 0.483787776 | 0.153727244 | 0.153727244 | 0.153727244 |             |
| ENSG00000159999 | 2  | 1486444   | 1487066   | EPIC       | protein coding          | 0.14197561   | 0.218059895 | 0.01181127  | 0.342524561 | 0.6181753   | 0.32439661  | 0.312891967  | 0.1208260   | 0.0683246    | 0.06216999  | 0.15359228  | 0.15359228  | 0.15359228  | 0.15359228  | 0.15359228  | 0.15359228  |
| ENSG00000203711 | 1  | 15894849  | 15913105  | LOC101928  | lncRNA                  | -0.0714553   | 0.0714553   | 0.00000000  | 0.00000000  | 0.00000000  | 0.00000000  | 0.00000000   | 0.00000000  | 0.00000000   | 0.00000000  | 0.00000000  | 0.00000000  | 0.00000000  | 0.00000000  | 0.00000000  | 0.00000000  |
| ENSG00000257096 | 14 | 21621083  | 21621083  | ALH1747.2  | lncRNA                  | 0.006471871  | 0.006471871 | 0.01120898  | 0.0341966   | 0.000072599 | 0.691142898 | -0.307920287 | 0.118710014 | 0.175502997  | 0.18615867  | 0.483438872 | 0.483438872 | 0.13012441  | 0.475551579 | 0.475551579 |             |
| ENSG00000163726 | 1  | 2536317   | 2536317   | MEMO3      | protein coding          | 0.13941339   | 0.24505405  | 0.00209555  | 0.44899379  | 0.71466573  | 0.55914915  | -0.05130067  | 0.79870708  | 0.15992005   | 0.32682139  | 0.15354091  | 0.484312495 | 0.484312495 | 0.102237348 | 0.102237348 | 0.102237348 |
| ENSG00000221698 | 1  | 12343290  | 12343290  | PRPF2      | protein coding          | -0.18629191  | 0.18629191  | 0.00000000  | 0.00000000  | 0.00000000  | 0.00000000  | 0.00000000   | 0.00000000  | 0.00000000   | 0.00000000  | 0.00000000  | 0.00000000  | 0.00000000  | 0.00000000  | 0.00000000  | 0.00000000  |
| ENSG00000248124 | 16 | 21796106  | 21810410  | RNRS1P1    | transcribed unprocessed | -0.053850873 | 0.053850873 | 0.16791075  | 0.24378025  | 0.41689934  | 0.14832752  | 0.31644495   | 0.06744267  | 0.03714268   | 0.78464454  | 0.78464454  | 0.10446724  | 0.10446724  | 0.10446724  | 0.10446724  |             |
| ENSG00000144713 | 3  | 12648456  | 12648456  | RNLS2      | protein coding          | 0.05502067   | 0.05502067  | 0.1317106   | 0.30178224  | 0.68179999  | 0.00000000  | 0.00000000   | 0.98672716  | 0.34762614   | 0.00000000  | 0.15349857  | 0.48447249  | 0.48447249  | 0.00000000  | 0.00000000  |             |
| ENSG00000221698 | 1  | 14409878  | 14409878  | PRPF2      | protein coding          | -0.18629191  | 0.18629191  | 0.00000000  | 0.00000000  | 0.00000000  | 0.00000000  | 0.00000000   | 0.00000000  | 0.00000000   | 0.00000000  | 0.00000000  | 0.00000000  | 0.00000000  | 0.00000000  | 0.00000000  |             |
| ENSG00000271555 | 16 | 49847018  | 49847018  | RNRS1P1    | transcribed unprocessed | -0.21184545  | 0.21184545  | 0.06497679  | 0.07788182  | 0.5918120   | 0.10331159  | 0.12664513   | 0.04688883  | 0.20898182   | 0.12652353  | 0.45354765  | 0.45354765  | 0.02974481  | 0.02974481  | 0.02974481  |             |
| ENSG00000195927 | 10 | 11473720  | 11473720  | TDRD7      | protein coding          | -0.36579318  | 0.36579318  | -0.1354544  | 0.3686951   | 0.39283261  | 0.0309242   | -0.2427476   | 0.13675013  | -0.46242704  | 0.00411668  | 0.15349488  | 0.4845288   | 0.4845288   | 0.3987454   | 0.3987454   |             |
| ENSG00000209954 | 1  | 11552488  | 11564841  | ACTG2      | lncRNA                  | -0.1111637   | 0.1111637   | 0.00000000  | 0.00000000  | 0.00000000  | 0.00000000  | 0.00000000   | 0.00000000  | 0.00000000   | 0.00000000  | 0.00000000  | 0.00000000  | 0.00000000  | 0.00000000  | 0.00000000  |             |
| ENSG00000244094 | 1  | 15312111  | 15311351  | SPRZF2     | protein coding          | -0.25643174  | 0.25643174  | -0.00000000 | 0.00000000  | 0.25643174  | 0.25643174  | 0.25643174   | 0.25643174  | 0.25643174   | 0.25643174  | 0.25643174  | 0.25643174  | 0.25643174  | 0.25643174  | 0.25643174  | 0.25643174  |
| ENSG00000259513 | 10 | 4217392   | 4218280   | LMB1L2-AS1 | lncRNA                  | -0.16226381  | 0.16226381  | 0.00000000  | 0.00000000  | 0.00000000  | 0.00000000  | 0.00000000   | 0.00000000  | 0.00000000   | 0.00000000  | 0.00000000  | 0.00000000  | 0.00000000  | 0.00000000  | 0.00000000  |             |
| ENSG00000122992 | 19 | 6903103   | 6914965   | SRON       | protein coding          | 0.1898118    | 0.1898118   | 0.00441726  | 0.4418154   | 0.378509418 | 0.01819516  | 0.24971731   | 0.16818609  | 0.244100374  | 0.1532274   | 0.1532274   | 0.1532274   | 0.1532274   | 0.1532274   | 0.1532274   | 0.1532274   |
| ENSG00000200929 | 14 | 52004803  | 52009229  | NID2       | protein coding          | -0.14054378  | 0.14054378  | 0.00343929  | 0.051457854 | 0.138841537 | 0.138841537 | 0.138841537  | 0.138841537 | 0.138841537  | 0.138841537 | 0.138841537 | 0.138841537 | 0.138841537 | 0.138841537 | 0.138841537 | 0.138841537 |
| ENSG00000108759 | 17 | 4149351   | 4149738   | KP32       | protein coding          | -0.17982535  | 0.17982535  | 0.02556462  | 0.80012864  | 0.23000037  | 0.24874013  | -0.0720281   | 0.66605092  | -0.24917655  | 0.06211753  | 0.15326058  | 0.48504969  | 0.48504969  | 0.19120207  | 0.19120207  | 0.19120207  |
| ENSG00000111005 | 12 | 6923599   | 6927435   | CPFB       | protein coding          | 0.15200739   | 0.15200739  | 0.214999428 | 0.13371913  | 0.34048294  | 0.04190313  | 0.23691201   | 0.23405110  | 0.14778955   | 0.29827537  | 0.15326205  | 0.48504969  | 0.48504969  | 0.16354944  | 0.16354944  | 0.16354944  |
| ENSG00000110063 | 11 | 12630406  | 12635000  | DKS3       | protein coding          | 0.105087974  | 0.105087974 | 0.17558083  | 0.23072957  | 0.403882015 | 0.48738564  | 0.15172172   | 0.10858598  | 0.17982802   | 0.15319765  | 0.15318038  | 0.48503606  | 0.48503606  | 0.10119207  | 0.10119207  | 0.10119207  |
| ENSG0000029797  | 3  | 14524257  | 14524739  | PIR2P39    | transcribed unprocessed | 0.11353464   | 0.11353464  | 0.05948485  | 0.8376417   | 0.378888029 | 0.02778189  | -0.07382483  | 0.6973408   | 0.11517668   | 0.40281628  | 0.15312135  | 0.48503611  | 0.48503611  | 0.10353401  | 0.10353401  | 0.10353401  |
| ENSG00000195926 | 19 | 1842493   | 1852118   | ELL1       | protein coding          | 0.00404304   | 0.00404304  | 0.01058394  | 0.808992453 | 0.19240285  | 0.3897441   | 0.13285787   | 0.5294794   | -0.00203389  | 0.05118933  | 0.15318358  | 0.48454293  | 0.48454293  | 0.00920520  | 0.00920520  | 0.00920520  |
| ENSG00000280780 | 17 | 6193456   | 61411555  | TRF2-AS1   | lncRNA                  | -0.26790818  | 0.26790818  | 0.01759309  | 0.87131896  | -0.24417038 | 0.1831977   | -0.31254688  | 0.11242592  | -0.40248548  | 0.00251403  | 0.15312775  | 0.48454298  | 0.48454298  | 0.22283998  | 0.22283998  | 0.1984411   |
| ENSG00000100987 | 14 | 2930115   | 2948493   | DRRS2      | protein coding          | -0.08468765  | 0.08468765  | -0.04744338 | 0.74833791  | 1.0694414   | 0.01405595  | -0.1874247   | 0.3261678   | -0.3114874   | 0.00728627  | 0.1530646   | 0.48495138  | 0.48495138  | 0.13996967  | 0.13996967  | 0.13996967  |
| ENSG00000134389 | 1  | 19697738  | 19703678  | CHFR5      | protein coding          | -0.13413011  | 0.13413011  | 0.2546044   | 0.47651201  | 0.112774879 | 0.5743908   | 0.1028108    | 0.18854298  | 0.16288115   | 0.1532761   | 0.48454298  | 0.48454298  | -0.08361308 | 0.08361308  | 0.08361308  | 0.08361308  |
| ENSG00000162386 | 2  | 23246884  | 23241074  | ALP2       | protein coding          | -0.31914933  | 0.31914933  | 0.06844707  | 0.93699994  | -0.4288529  | 0.02273378  | -0.11696224  | 0.27202028  | -0.41892227  | 0.0011892   | 0.15290835  | 0.48697374  | 0.48697374  | 0.34329953  | 0.34329953  | 0.34329953  |
| ENSG00000170291 | 1  | 14452364  | 14452364  | ACTG2      | lncRNA                  | -0.00000000  | 0.00000000  | 0.00000000  | 0.00000000  | 0.00000000  | 0.00000000  | 0.00000000   | 0.00000000  | 0.00000000   | 0.00000000  | 0.00000000  | 0.00000000  | 0.00000000  | 0.00000000  | 0.00000000  |             |
| ENSG00000256533 | 11 | 114453064 | 114454123 | OPDQ37.2   | transcribed unprocessed | -0.14452318  | 0.14452318  | 0.0051989   | 0.17533662  | 0.1052243   | 0.36746987  | -0.13351057  | 0.44488831  | -0.13098938  | 0.337697024 | 0.15298615  | 0.48611431  | 0.48611431  | -0.1000876  | 0.1000876   | 0.1000876   |
| ENSG00000117242 | 1  | 2064267   | 2062123   | PRKX-AS1   | lncRNA                  | 0.029114282  | 0.029114282 | 0.01378754  | 0.92420011  | 0.141692108 | 0.40081939  | -0.11073389  | 0.5241647   | -0.03242421  | 0.78365115  | 0.15298615  | 0.48612429  | 0.48612429  | 0.03710464  | 0.03710464  | 0.03710464  |
| ENSG0000022489  | 7  | 7962133   | 79624053  | ACTG2      | lncRNA                  | -0.00000000  | 0.00000000  | 0.00000000  | 0.00000000  | 0.00000000  | 0.00000000  | 0.00000000   | 0.00000000  | 0.00000000   | 0.00000000  | 0.00000000  | 0.00000000  | 0.00000000  | 0.00000000  | 0.00000000  |             |
| ENSG00000185739 | 16 | 4199374   | 4242080   | SRN1       | lncRNA                  | -0.21101656  | 0.21101656  | 0.06545148  | 0.08535314  | 0.49620011  | 0.1927633   | 0.31788813   | -0.07057697 | 0.07556623   | -0.03232304 | 0.15298615  | 0.48612429  | 0.48612429  | 0.22665378  | 0.22665378  | 0.1014102   |
| ENSG0000029922  | 2  | 2706108   | 2706181   | AGL3L1T1   | lncRNA                  | 0.04897250   | 0.04897250  | 0.11338502  | 0.43311707  | 0.10097054  | 0.58007747  | 0.13938031   | 0.3320260   | 0.10461327   | 0.43242409  | 0.15298615  | 0.48612429  | 0.48612429  | 0.1014102   | 0.1014102   | 0.1014102   |
| ENSG00000118137 | 1  | 1617628   | 1617628   | ACTG2      | lncRNA                  | -0.00000000  | 0.00000000  | 0.00000000  | 0.00000000  | 0.00000000  | 0.00000000  | 0.00000000   | 0.00000000  | 0.00000000   | 0.00000000  | 0.00000000  | 0.00000000  | 0.00000000  | 0.00000000  | 0.00000000  |             |
| ENSG00000130255 | 16 | 5874847   | 5891874   | RBL3       | protein coding          | 0.03285622   | 0.78044123  | 0.1084488   | 0.454313981 | 0.28213012  | 0.25034480  | -0.016674025 | 0.83142109  | -0.06044389  | 0.18617673  | 0.15272451  | 0.48612429  | 0.48612429  | 0.08198534  | 0.08198534  | 0.08198534  |
| ENSG00000201745 | 6  | 5312564   | 5312146   | AL152347.1 | lncRNA                  | -0.12898801  | 0.12898801  | 0.00372943  | 0.8056211   | 0.244224313 | 0.2196979   | -0.06533627  | 0.74605543  | -0.13417882  | 0.33338545  | 0.15298615  | 0.48612429  | 0.48612429  | 0.18705584  | 0.18705584  | 0.18705584  |
| ENSG00000287437 | 1  | 1017848   | 101784    |            |                         |              |             |             |             |             |             |              |             |              |             |             |             |             |             |             |             |





|                 |    |          |          |              |                                    |              |             |             |             |             |             |             |             |              |             |             |             |             |             |            |
|-----------------|----|----------|----------|--------------|------------------------------------|--------------|-------------|-------------|-------------|-------------|-------------|-------------|-------------|--------------|-------------|-------------|-------------|-------------|-------------|------------|
| ENSG00000135226 | 4  | 6920475  | 6920500  | UGT2B28      | protein coding                     | 0.05577698   | 0.629941083 | 0.12986204  | 0.38871397  | -0.2038804  | 0.307768703 | 0.10873030  | 0.58834932  | -0.0119877   | 0.941652079 | 0.146351601 | 0.50154867  | 0.034712101 | 0.108680933 |            |
| ENSG00000278797 | 2  | 92072789 | 92072789 | LOC102727897 | lincRNA                            | -0.18378811  | 0.09125588  | 0.05274743  | 0.09276260  | -0.27276260 | 0.09276260  | -0.24572760 | 0.21601770  | -0.35523260  | 0.09276260  | 0.14613870  | 0.09276260  | 0.133374771 | 0.20738510  |            |
| ENSG00000298445 | 18 | 4721274  | 4721274  | LOC102727897 | lincRNA                            | -0.02447213  | 0.02447213  | 0.02447213  | 0.02447213  | 0.02447213  | 0.02447213  | 0.02447213  | 0.02447213  | 0.02447213   | 0.02447213  | 0.02447213  | 0.02447213  | 0.02447213  | 0.02447213  | 0.02447213 |
| ENSG00000250707 | 7  | 1055360  | 1055261  | LOC102727897 | lincRNA                            | 0.08075763   | 0.48550433  | 0.172921116 | 0.22979664  | 0.002702943 | 0.688976223 | 0.20477618  | 0.30571566  | 0.03379594   | 0.78997472  | 0.042629083 | 0.05355860  | 0.04416634  | 0.739776769 |            |
| ENSG00000337581 | 4  | 1479285  | 1479285  | LOC102727897 | lincRNA                            | -0.15230789  | 0.07276158  | 0.07276158  | 0.07276158  | 0.07276158  | 0.07276158  | 0.07276158  | 0.07276158  | 0.07276158   | 0.07276158  | 0.07276158  | 0.07276158  | 0.07276158  | 0.07276158  | 0.07276158 |
| ENSG00000336463 | 1  | 1419858  | 1419858  | LOC102727897 | lincRNA                            | -0.07118833  | 0.07118833  | 0.07118833  | 0.07118833  | 0.07118833  | 0.07118833  | 0.07118833  | 0.07118833  | 0.07118833   | 0.07118833  | 0.07118833  | 0.07118833  | 0.07118833  | 0.07118833  | 0.07118833 |
| ENSG00000184402 | 5  | 13275019 | 13280241 | SEPTIN8      | protein coding                     | 0.02841172   | 0.0871586   | 0.01355506  | 0.07209447  | 0.07842204  | 0.69226784  | 0.06248894  | 0.7583430   | 0.02871981   | 0.8389646   | 0.14662624  | 0.06886564  | 0.06886564  | 0.634642935 |            |
| ENSG00000176472 | 19 | 4325249  | 4326130  | ZNF575       | protein coding                     | -0.01501826  | 0.04946987  | 0.05098876  | 0.06475928  | 0.1386144   | 0.447250784 | 0.06521491  | 0.7463265   | -0.02923132  | 0.50775038  | 0.1461280   | 0.0569262   | 0.0460000   | 0.71873827  |            |
| ENSG00000265691 | 3  | 1549133  | 1549133  | LOC102727897 | lincRNA                            | -0.02761959  | 0.02761959  | 0.02761959  | 0.02761959  | 0.02761959  | 0.02761959  | 0.02761959  | 0.02761959  | 0.02761959   | 0.02761959  | 0.02761959  | 0.02761959  | 0.02761959  | 0.02761959  | 0.02761959 |
| ENSG00000149571 | 11 | 12642358 | 12703460 | KIF3L3       | protein coding                     | -0.13915871  | 0.24559592  | 0.02465167  | 0.68282483  | 0.01424693  | 0.54652033  | -0.09071778 | 0.85270476  | 0.01424693   | 0.13915871  | 0.14610529  | 0.05919412  | 0.03729221  | 0.143593204 |            |
| ENSG00000129402 | 2  | 17302728 | 17302828 | SNORA74B     | snoRNA                             | -0.01386475  | 0.01386475  | 0.01386475  | 0.01386475  | 0.01386475  | 0.01386475  | 0.01386475  | 0.01386475  | 0.01386475   | 0.01386475  | 0.01386475  | 0.01386475  | 0.01386475  | 0.01386475  | 0.01386475 |
| ENSG00000231402 | 6  | 3128730  | 31288884 | WNSP1        | processed pseudogene               | -0.02629165  | 0.38972914  | 0.02629165  | 0.48917974  | 0.48917974  | 0.48917974  | 0.48917974  | 0.48917974  | 0.48917974   | 0.48917974  | 0.48917974  | 0.48917974  | 0.48917974  | 0.48917974  | 0.48917974 |
| ENSG00000129194 | 17 | 7819278  | 7819904  | SNX15        | processed pseudogene               | 0.124285014  | 0.21711253  | 0.17484404  | 0.4188822   | 0.17484404  | 0.17484404  | 0.17484404  | 0.17484404  | 0.17484404   | 0.17484404  | 0.17484404  | 0.17484404  | 0.17484404  | 0.17484404  | 0.17484404 |
| ENSG00000252318 | 13 | 19551328 | 1958880  | LOC102727897 | lincRNA                            | -0.18021753  | 0.17819599  | -0.1827211  | 0.4038296   | 0.04741404  | 0.4110354   | -0.02710691 | 0.17139115  | -0.0433681   | 0.13629587  | 0.04937378  | 0.03832072  | 0.14396929  | 0.3032329   |            |
| ENSG00000181303 | 17 | 7402304  | 7402304  | SPRY4        | protein coding                     | -0.07305181  | 0.52787778  | 0.04048498  | 0.46037893  | 0.03418928  | 0.86932633  | -0.18393447 | 0.27845438  | -0.20102883  | 0.14495731  | 0.14598781  | 0.98334647  | 0.01490927  | 0.92262938  |            |
| ENSG00000158201 | 18 | 21605001 | 21704780 | ABHD3        | protein coding                     | -0.028188776 | 0.07721337  | -0.15521121 | 0.718817059 | 0.036184517 | 0.85775001  | -0.16062311 | 0.42351041  | -0.039423262 | 0.77715204  | 0.14594848  | 0.05044069  | 0.05126885  | 0.14742748  |            |
| ENSG00000242960 | 3  | 7250494  | 7250599  | FTTH123      | processed pseudogene               | -0.00849422  | 0.03847713  | 0.02628310  | 0.84055224  | 0.08373030  | 0.8575811   | 0.02642594  | 0.98952526  | -0.00898811  | 0.04458484  | 0.1459385   | 0.04951129  | 0.042426189 | 0.13149693  |            |
| ENSG00000270394 | 1  | 15467103 | 15467344 | LOC102727897 | lincRNA                            | -0.00655214  | 0.01593024  | 0.04596911  | 0.77249001  | 0.01953324  | 0.92414109  | 0.01464555  | 0.16201427  | 0.02747192   | 0.98430429  | 0.14593845  | 0.05413845  | 0.03374271  | 0.02053157  |            |
| ENSG00000252313 | 10 | 1671321  | 16748377 | LOC102727897 | lincRNA                            | 0.060525214  | 0.60078613  | 0.10413791  | 0.47709147  | 0.01824246  | 0.627881554 | 0.00811486  | 0.9676395   | 0.02484578   | 0.85846184  | 0.05045108  | 0.04851095  | 0.09270238  | 0.60267243  |            |
| ENSG00000236487 | 10 | 7688804  | 7698804  | KCNMA1-AS1   | lincRNA                            | -0.269850721 | 0.03499214  | 0.01006784  | 0.74172847  | 0.30712552  | 0.15319507  | 0.44536131  | -0.32466248 | 0.04810804   | 0.14588479  | 0.05065703  | 0.201444626 | 0.04001380  | 0.04001380  |            |
| ENSG00000227747 | 1  | 4708863  | 47042024 | LOC102727897 | lincRNA                            | -0.27630191  | 0.01373705  | 0.01162751  | 0.29266197  | 0.13861371  | 0.19006386  | 0.34180546  | -0.20513728 | 0.09162678   | 0.14593871  | 0.50713583  | 0.285232833 | 0.04605871  |             |            |
| ENSG00000280002 | 5  | 820719   | 838437   | LOC102727897 | lincRNA                            | -0.284579052 | 0.09359551  | -0.05559281 | 0.98485378  | -0.33205588 | 0.087416647 | -0.08738286 | 0.09699977  | 0.14583259   | 0.05012222  | 0.661172929 |             |             |             |            |
| ENSG00000195328 | 22 | 17812323 | 17849349 | GMBL1        | protein coding                     | -0.22355407  | 0.02526237  | 0.01461298  | 0.7418886   | 0.12312609  | 0.11207141  | -0.27025228 | 0.17227073  | -0.36693843  | 0.03039391  | 0.14582073  | 0.50873953  | 0.20134433  | 0.10688705  |            |
| ENSG00000107847 | 7  | 1004208  | 10042952 | ZCWPY1       | protein coding                     | 0.00989781   | 0.40289574  | 0.00929231  | 0.54385494  | 0.04048921  | 0.9102659   | 0.04459385  | 0.67537527  | 0.00847178   | 0.4978341   | 0.14591529  | 0.5071795   | 0.09148769  | 0.37446491  |            |
| ENSG00000252345 | 8  | 9643032  | 9643038  | LOC102727897 | lincRNA                            | 0.12527763   | 0.27755121  | 0.163718    | 0.2574807   | 0.03040147  | 0.89918021  | 0.11188033  | 0.57834624  | 0.02624172   | 0.8593596   | 0.14727522  | 0.05898814  | 0.15202046  | 0.2813188   |            |
| ENSG00000195996 | 21 | 3271309  | 3271752  | PABP1        | protein coding                     | 0.15895181   | 0.01741692  | 0.2291974   | 0.11615701  | 0.22933013  | 0.24982462  | 0.30389289  | 0.18349168  | 0.13347205   | 0.3393384   | 0.1457636   | 0.5990240   | 0.14371093  | 0.30711919  |            |
| ENSG00000121485 | 5  | 1509432  | 15095408 | RPL71        | processed pseudogene               | 0.42542484   | 0.00112681  | 0.0113418   | 0.92746203  | 0.07878867  | 1.586108    | -0.14685710 | 0.46841913  | 0.47412023   | 0.00202729  | 0.14571324  | 0.10707969  | 0.2442033   | 1.0E-05     |            |
| ENSG00000196471 | 8  | 9628192  | 9633989  | PTDIS1       | protein coding                     | 0.11687895   | 0.13198237  | 0.1807904   | 0.2084770   | 0.02487177  | 0.9018227   | 0.0432834   | 0.8038511   | -0.0521537   | 0.70874467  | 0.14589773  | 0.05702241  | 0.17324062  | 0.22358267  |            |
| ENSG00000270082 | 1  | 15420696 | 15420696 | LOC102727897 | lincRNA                            | -0.00148219  | 0.00148219  | 0.00148219  | 0.00148219  | 0.00148219  | 0.00148219  | 0.00148219  | 0.00148219  | 0.00148219   | 0.00148219  | 0.00148219  | 0.00148219  | 0.00148219  | 0.00148219  | 0.00148219 |
| ENSG00000143812 | 1  | 15420696 | 15420637 | C1orf63      | protein coding                     | 0.21606898   | 0.58487167  | 0.04347054  | 0.67857063  | 0.42487177  | 0.9335922   | 0.04171578  | 0.63836237  | 0.30516449   | 0.04349668  | 0.14584436  | 0.07077696  | 0.27477696  | 0.05653381  |            |
| ENSG00000108984 | 10 | 5835345  | 5839202  | TFAM         | protein coding                     | -0.08542743  | 0.17518893  | 0.11105268  | 0.44239709  | 0.03744978  | 0.58297354  | -0.00408258 | 0.88365532  | -0.17329725  | 0.10141179  | 0.14584388  | 0.02719022  | 0.04758624  | 0.74730033  |            |
| ENSG00000152033 | 1  | 15104516 | 15104516 | LOC102727897 | lincRNA                            | -0.03218038  | 0.03218038  | 0.03218038  | 0.03218038  | 0.03218038  | 0.03218038  | 0.03218038  | 0.03218038  | 0.03218038   | 0.03218038  | 0.03218038  | 0.03218038  | 0.03218038  | 0.03218038  | 0.03218038 |
| ENSG00000258033 | 2  | 9383617  | 9383800  | LOC102727897 | lincRNA                            | -0.03218038  | 0.03218038  | 0.03218038  | 0.03218038  | 0.03218038  | 0.03218038  | 0.03218038  | 0.03218038  | 0.03218038   | 0.03218038  | 0.03218038  | 0.03218038  | 0.03218038  | 0.03218038  |            |
| ENSG00000214622 | 17 | 2052113  | 2052327  | KRT11P3      | transcribed unprocessed pseudogene | -0.18884874  | 0.14297734  | 0.02339337  | 0.8511447   | -0.2542038  | 0.20429268  | -0.1901407  | 0.34213537  | -0.20104099  | 0.04292226  | 0.14582898  | 0.0767171   | 0.144240270 | 0.3003138   |            |
| ENSG00000174014 | 1  | 1541068  | 1541068  | LOC102727897 | lincRNA                            | -0.03218038  | 0.03218038  | 0.03218038  | 0.03218038  | 0.03218038  | 0.03218038  | 0.03218038  | 0.03218038  | 0.03218038   | 0.03218038  | 0.03218038  | 0.03218038  | 0.03218038  | 0.03218038  |            |
| ENSG00000114878 | 2  | 7415228  | 7417888  | MOT1B        | protein coding                     | 0.14241196   | 0.0364003   | 0.0284380   | 0.8551444   | 0.0076848   | 0.8456141   | 0.01564862  | 0.93824069  | 0.15040255   | 0.27745589  | 0.14550043  | 0.02119889  | 0.12184989  | 0.12184989  |            |
| ENSG00000215074 | 8  | 729874   | 735359   | FAM69B       | protein coding                     | -0.16181893  | 0.15997201  | -0.04293013 | 0.8069212   | -0.14495303 | 0.47067381  | -0.10011528 | 0.34219881  | -0.2472973   | 0.07066568  | 0.14582916  | 0.07373497  | 0.031789931 | 0.3311154   |            |
| ENSG00000182124 | 1  | 1488888  | 1488888  | LOC102727897 | lincRNA                            | -0.03218038  | 0.03218038  | 0.03218038  | 0.03218038  | 0.03218038  | 0.03218038  | 0.03218038  | 0.03218038  | 0.03218038   | 0.03218038  | 0.03218038  | 0.03218038  | 0.03218038  | 0.03218038  |            |
| ENSG00000286388 | 12 | 12816130 | 12816148 | LOC102727897 | lincRNA                            | -0.12391651  | 0.28056807  | -0.03843743 | 0.8066212   | -0.26834373 | 0.714211762 | -0.33628878 | 0.08633047  | -0.33628878  | 0.011932051 | 0.14587311  | 0.50771588  | 0.03387814  | 0.826290471 |            |
| ENSG00000182333 | 10 | 8868441  | 8867784  | LFP1         | protein coding                     | -0.27840241  | 0.01997158  | -0.13495401 | 0.9303878   | -0.2523396  | 0.20739442  | -0.46929265 | 0.01354287  | -0.41584827  | 0.00176047  |             |             |             |             |            |

Table with 10 columns: Gene ID, Chromosome, Start, End, Strand, Feature, Gene Name, RefSeq ID, RefSeq Description, RefSeq Link, RefSeq Date. Contains a comprehensive list of genes and their genomic coordinates.







Table with 10 columns: Gene ID, Gene Name, Feature, Coordinates, and various numerical values. The table lists numerous genes such as FAM209C, SFR1, FTYD1, and many others, with their genomic coordinates and associated data points.



Table with 10 columns: Gene ID, Chr, Start, End, RefSeq ID, Gene Name, Feature Type, Strand, Start, End, RefSeq ID, Gene Name, Feature Type, Strand, Start, End, RefSeq ID, Gene Name, Feature Type, Strand. Contains genomic coordinates and gene annotations for various genes like ADAMTS-1, ADAMTS-2, ADAMTS-3, etc.



|                 |    |           |           |            |                          |             |             |             |             |             |             |             |             |             |             |             |             |             |             |             |
|-----------------|----|-----------|-----------|------------|--------------------------|-------------|-------------|-------------|-------------|-------------|-------------|-------------|-------------|-------------|-------------|-------------|-------------|-------------|-------------|-------------|
| ENSG0000011425  | 12 | 110910819 | 110921443 | MTFL2      | protein coding           | 0.035684309 | 0.568818379 | 0.172024970 | 0.212932870 | 0.030319479 | 0.881154233 | 0.229672366 | 0.005187126 | 0.973034999 | 0.125995938 | 0.56688072  | 0.010022329 | 0.845033927 |             |             |
| ENSG0000011426  | 12 | 133171192 | 133178459 | PCNA       | protein coding           | 0.097179624 | 0.2717462   | 0.184331711 | 0.3437711   | 0.0530303   | 0.792975237 | 0.2705380   | 0.1477679   | 0.26297127  | 0.1934529   | 0.66981279  | 0.010487671 | 0.845033927 |             |             |
| ENSG0000012496  | 12 | 118120000 | 118120000 | THOYL3NC   | lncRNA                   | 0.0814459   | 0.0814459   | 0.0814459   | 0.0814459   | 0.0814459   | 0.0814459   | 0.0814459   | 0.0814459   | 0.0814459   | 0.0814459   | 0.0814459   | 0.0814459   | 0.0814459   | 0.0814459   |             |
| ENSG00000152409 | 12 | 79236131  | 79237211  | JMY        | protein coding           | 0.067464803 | 0.559904164 | 0.188413510 | 0.19981780  | 0.045423308 | 0.185219954 | 0.07238480  | 0.07238480  | 0.125995938 | 0.125995938 | 0.125995938 | 0.007018008 | 0.042301802 |             |             |
| ENSG00000134057 | 12 | 6917138   | 69172463  | COG1       | protein coding           | 0.055124051 | 0.633257599 | 0.20267207  | 0.20267207  | 0.097770718 | 0.47147504  | 0.08621258  | 0.046525340 | 0.763282311 | 0.125995938 | 0.567027395 | 0.011444466 | 0.426701570 |             |             |
| ENSG0000022413  | 12 | 48483000  | 48483000  | ORP2L      | protein coding           | 0.048740000 | 0.048740000 | 0.048740000 | 0.048740000 | 0.048740000 | 0.048740000 | 0.048740000 | 0.048740000 | 0.048740000 | 0.048740000 | 0.048740000 | 0.048740000 | 0.048740000 | 0.048740000 |             |
| ENSG00000115705 | 12 | 1473066   | 1473066   | ORP2L      | protein coding           | 0.281270270 | 0.03121574  | 0.035684309 | 0.805784730 | 0.264408124 | 0.12913463  | 0.200188248 | 0.041188128 | 0.001628294 | 0.125995938 | 0.125995938 | 0.125995938 | 0.059117434 | 0.266505500 |             |
| ENSG00000235180 | 12 | 16744389  | 16744389  | PCNOC91    | lncRNA                   | 0.184850168 | 0.107271718 | 0.02791245  | 0.82922485  | 0.07688511  | 0.70318955  | 0.013995938 | 0.044740712 | 0.000788769 | 0.044740712 | 0.044740712 | 0.044740712 | 0.044740712 | 0.044740712 |             |
| ENSG00000206447 | 12 | 2139307   | 2139307   | AC0626.3   | lncRNA                   | 0.06294338  | 0.06294338  | 0.06294338  | 0.06294338  | 0.06294338  | 0.06294338  | 0.06294338  | 0.06294338  | 0.06294338  | 0.06294338  | 0.06294338  | 0.06294338  | 0.06294338  | 0.06294338  |             |
| ENSG00000092390 | 12 | 1978299   | 1978299   | LAJ2       | protein coding           | 0.035684309 | 0.32819530  | 0.173242147 | 0.28292860  | 0.03287984  | 0.68472991  | 0.366450686 | 0.09600017  | 0.059390309 | 0.04604504  | 0.125995938 | 0.125995938 | 0.125995938 | 0.018443139 | 0.195978989 |
| ENSG00000127199 | 12 | 31366253  | 31366253  | FAM7A      | protein coding           | 0.022712650 | 0.848338694 | 0.193390305 | 0.42630480  | 0.01746381  | 0.65146455  | 0.022867178 | 0.263843038 | 0.09871399  | 0.08744278  | 0.125995938 | 0.125995938 | 0.125995938 | 0.118474878 | 0.488424480 |
| ENSG00000101074 | 12 | 9204892   | 9204892   | PCNOC91    | lncRNA                   | 0.022712650 | 0.848338694 | 0.193390305 | 0.42630480  | 0.01746381  | 0.65146455  | 0.022867178 | 0.263843038 | 0.09871399  | 0.08744278  | 0.125995938 | 0.125995938 | 0.125995938 | 0.118474878 | 0.488424480 |
| ENSG00000204442 | 12 | 10789410  | 10789410  | FAM155A    | protein coding           | 0.207181050 | 0.070703610 | 0.008473110 | 0.53430358  | 0.20648488  | 0.030877681 | 0.062398446 | 0.79536470  | 0.23814459  | 0.062903313 | 0.125995938 | 0.125995938 | 0.125995938 | 0.184443139 | 0.195978989 |
| ENSG00000295940 | 12 | 10358877  | 10358877  | AC027020.1 | lncRNA                   | 0.088915842 | 0.041896411 | 0.057407111 | 0.68939010  | 0.178986410 | 0.377200287 | 0.03723333  | 0.76448403  | 0.19430784  | 0.16717224  | 0.125995938 | 0.125995938 | 0.125995938 | 0.030376720 | 0.602762510 |
| ENSG00000288111 | 12 | 19713608  | 19713608  | AC097178.3 | lncRNA                   | 0.031321484 | 0.05720083  | 0.050898989 | 0.987511255 | 0.008107985 | 0.179871400 | 0.170282027 | 0.365941174 | 0.04847434  | 0.70200105  | 0.125995938 | 0.125995938 | 0.125995938 | 0.015186989 | 0.161960011 |
| ENSG00000237782 | 12 | 45581927  | 45581927  | PLPPP1     | transcribed unprocessed  | 0.055510815 | 0.631571158 | 0.066332509 | 0.647180273 | 0.178394718 | 0.43055447  | 0.132122448 | 0.245666144 | 0.243480861 | 0.07671864  | 0.125995938 | 0.125995938 | 0.125995938 | 0.005735604 | 0.005735604 |
| ENSG00000128313 | 12 | 33717872  | 33717872  | APOL5      | protein coding           | 0.144290981 | 0.18062653  | 0.19470210  | 0.8083581   | 0.00523288  | 0.97833362  | 0.282571308 | 0.198746316 | 0.24494272  | 0.119862328 | 0.125995938 | 0.125995938 | 0.125995938 | 0.003400441 | 0.480777809 |
| ENSG00000133095 | 12 | 43969692  | 43969692  | LEPRL3     | protein coding           | 0.172232183 | 0.322964786 | 0.15732304  | 0.27456708  | 0.2653880   | 0.1983317   | 0.12903786  | 0.57005729  | 0.11725208  | 0.398497396 | 0.125995938 | 0.125995938 | 0.125995938 | 0.042966179 | 0.11947477  |
| ENSG00000158762 | 12 | 18875142  | 18883933  | ORP2K2     | protein coding           | 0.187507556 | 0.142342191 | 0.146692947 | 0.49803925  | 0.045425293 | 0.826980874 | 0.180374428 | 0.3881131   | 0.148276095 | 0.280724447 | 0.125995938 | 0.125995938 | 0.125995938 | 0.177791022 | 0.21873903  |
| ENSG00000206287 | 12 | 17328854  | 13717970  | ORP2L3     | protein coding           | 0.200396341 | 0.00888741  | 0.11749851  | 0.44625050  | 0.213497381 | 0.503012284 | 0.31301289  | 0.24110759  | 0.3436704   | 0.00044229  | 0.125995938 | 0.125995938 | 0.125995938 | 0.027158441 | 0.08443214  |
| ENSG00000254568 | 12 | 10628985  | 10621522  | ORP2L2     | polymeric protein coding | 0.008984374 | 0.391833028 | 0.012144451 | 0.833290774 | 0.197921421 | 0.322169322 | 0.020295101 | 0.872907138 | 0.000824414 | 0.165369992 | 0.125995938 | 0.125995938 | 0.125995938 | 0.07725542  | 0.157587911 |
| ENSG00000199863 | 12 | 7448733   | 7448733   | ORP2L1     | transcribed unprocessed  | 0.28054445  | 0.04134243  | 0.11241814  | 0.43020008  | 0.18351802  | 0.59519419  | 0.37031361  | 0.0527106   | 0.359324389 | 0.125995938 | 0.125995938 | 0.125995938 | 0.05774421  | 0.245193025 |             |
| ENSG0000025264  | 12 | 10414595  | 10414595  | LINC-00241 | transcribed unprocessed  | 0.14418782  | 0.21088733  | 0.0898672   | 0.5473984   | 0.10705470  | 0.49595174  | 0.233292228 | 0.23124488  | 0.21010247  | 0.12729584  | 0.125995938 | 0.125995938 | 0.08789247  | 0.104134787 |             |
| ENSG00000237079 | 12 | 3092036   | 30914054  | LINC-02398 | lncRNA                   | 0.000713254 | 0.485119781 | 0.009118763 | 0.948957025 | 0.234690253 | 0.249178342 | 0.049802055 | 0.805834197 | 0.08712925  | 0.053897119 | 0.125995938 | 0.125995938 | 0.125995938 | 0.103707789 | 0.365824464 |
| ENSG00000204442 | 12 | 10789410  | 10789410  | FAM155A    | protein coding           | 0.207181050 | 0.070703610 | 0.008473110 | 0.53430358  | 0.20648488  | 0.030877681 | 0.062398446 | 0.79536470  | 0.23814459  | 0.062903313 | 0.125995938 | 0.125995938 | 0.125995938 | 0.184443139 | 0.195978989 |
| ENSG00000295940 | 12 | 10358877  | 10358877  | AC027020.1 | lncRNA                   | 0.088915842 | 0.041896411 | 0.057407111 | 0.68939010  | 0.178986410 | 0.377200287 | 0.03723333  | 0.76448403  | 0.19430784  | 0.16717224  | 0.125995938 | 0.125995938 | 0.125995938 | 0.030376720 | 0.602762510 |
| ENSG00000288111 | 12 | 19713608  | 19713608  | AC097178.3 | lncRNA                   | 0.031321484 | 0.05720083  | 0.050898989 | 0.987511255 | 0.008107985 | 0.179871400 | 0.170282027 | 0.365941174 | 0.04847434  | 0.70200105  | 0.125995938 | 0.125995938 | 0.125995938 | 0.015186989 | 0.161960011 |
| ENSG00000237782 | 12 | 45581927  | 45581927  | PLPPP1     | transcribed unprocessed  | 0.055510815 | 0.631571158 | 0.066332509 | 0.647180273 | 0.178394718 | 0.43055447  | 0.132122448 | 0.245666144 | 0.243480861 | 0.07671864  | 0.125995938 | 0.125995938 | 0.125995938 | 0.005735604 | 0.005735604 |
| ENSG00000128313 | 12 | 33717872  | 33717872  | APOL5      | protein coding           | 0.144290981 | 0.18062653  | 0.19470210  | 0.8083581   | 0.00523288  | 0.97833362  | 0.282571308 | 0.198746316 | 0.24494272  | 0.119862328 | 0.125995938 | 0.125995938 | 0.125995938 | 0.003400441 | 0.480777809 |
| ENSG00000133095 | 12 | 43969692  | 43969692  | LEPRL3     | protein coding           | 0.172232183 | 0.322964786 | 0.15732304  | 0.27456708  | 0.2653880   | 0.1983317   | 0.12903786  | 0.57005729  | 0.11725208  | 0.398497396 | 0.125995938 | 0.125995938 | 0.125995938 | 0.042966179 | 0.11947477  |
| ENSG00000158762 | 12 | 18875142  | 18883933  | ORP2K2     | protein coding           | 0.187507556 | 0.142342191 | 0.146692947 | 0.49803925  | 0.045425293 | 0.826980874 | 0.180374428 | 0.3881131   | 0.148276095 | 0.280724447 | 0.125995938 | 0.125995938 | 0.125995938 | 0.177791022 | 0.21873903  |
| ENSG00000206287 | 12 | 17328854  | 13717970  | ORP2L3     | protein coding           | 0.200396341 | 0.00888741  | 0.11749851  | 0.44625050  | 0.213497381 | 0.503012284 | 0.31301289  | 0.24110759  | 0.3436704   | 0.00044229  | 0.125995938 | 0.125995938 | 0.125995938 | 0.027158441 | 0.08443214  |
| ENSG00000254568 | 12 | 10628985  | 10621522  | ORP2L2     | polymeric protein coding | 0.008984374 | 0.391833028 | 0.012144451 | 0.833290774 | 0.197921421 | 0.322169322 | 0.020295101 | 0.872907138 | 0.000824414 | 0.165369992 | 0.125995938 | 0.125995938 | 0.125995938 | 0.07725542  | 0.157587911 |
| ENSG00000199863 | 12 | 7448733   | 7448733   | ORP2L1     | transcribed unprocessed  | 0.28054445  | 0.04134243  | 0.11241814  | 0.43020008  | 0.18351802  | 0.59519419  | 0.37031361  | 0.0527106   | 0.359324389 | 0.125995938 | 0.125995938 | 0.125995938 | 0.05774421  | 0.245193025 |             |
| ENSG0000025264  | 12 | 10414595  | 10414595  | LINC-00241 | transcribed unprocessed  | 0.14418782  | 0.21088733  | 0.0898672   | 0.5473984   | 0.10705470  | 0.49595174  | 0.233292228 | 0.23124488  | 0.21010247  | 0.12729584  | 0.125995938 | 0.125995938 | 0.08789247  | 0.104134787 |             |
| ENSG00000237079 | 12 | 3092036   | 30914054  | LINC-02398 | lncRNA                   | 0.000713254 | 0.485119781 | 0.009118763 | 0.948957025 | 0.234690253 | 0.249178342 | 0.049802055 | 0.805834197 | 0.08712925  | 0.053897119 | 0.125995938 | 0.125995938 | 0.125995938 | 0.103707789 | 0.365824464 |
| ENSG00000204442 | 12 | 10789410  | 10789410  | FAM155A    | protein coding           | 0.207181050 | 0.070703610 | 0.008473110 | 0.53430358  | 0.20648488  | 0.030877681 | 0.062398446 | 0.79536470  | 0.23814459  | 0.062903313 | 0.125995938 | 0.125995938 | 0.125995938 | 0.184443139 | 0.195978989 |
| ENSG00000295940 | 12 | 10358877  | 10358877  | AC027020.1 | lncRNA                   | 0.088915842 | 0.041896411 | 0.057407111 | 0.68939010  | 0.178986410 | 0.377200287 | 0.03723333  | 0.76448403  | 0.19430784  | 0.16717224  | 0.125995938 | 0.125995938 |             |             |             |



| ENSG0000023610  | 1  | 2370901  | 2372786  | ELCA-AS1   | lncRNA                     | 0.03744582  | 0.74514263 | 0.19877237  | 0.16640784 | 0.07308031  | 0.17175648 | 0.2033691   | 0.30895527 | -0.03951871 | 0.79633244 | 0.12267339 | 0.57110060 | 0.02693682 | 0.85430206 |
|-----------------|----|----------|----------|------------|----------------------------|-------------|------------|-------------|------------|-------------|------------|-------------|------------|-------------|------------|------------|------------|------------|------------|
| ENSG0000027229  | 19 | 1764146  | 1761871  | CCND3-3    | lncRNA                     | -0.16673788 | 0.4741729  | -0.03743769 | 0.18841371 | 0.08421772  | 0.17776971 | 0.23073723  | 0.07147796 | -0.23073723 | 0.07147796 | 0.12269311 | 0.57110060 | 0.02693682 | 0.85430206 |
| ENSG0000027449  | 19 | 8611416  | 8611416  | AC021617.7 | lncRNA                     | -0.02441768 | 0.99999999 | 0.00000000  | 0.00000000 | -0.03411407 | 0.27769971 | 0.00000000  | 0.00000000 | -0.03411407 | 0.27769971 | 0.12269311 | 0.57110060 | 0.02693682 | 0.85430206 |
| ENSG00000225707 | 19 | 5041149  | 5041149  | FAT-1A     | lncRNA                     | 0.12886181  | 0.26403272 | 0.07452053  | 0.05971720 | 0.02260146  | 0.16763032 | 0.02260146  | 0.16763032 | 0.02260146  | 0.16763032 | 0.12269311 | 0.57110060 | 0.02693682 | 0.85430206 |
| ENSG00000266455 | 20 | 4694243  | 4718844  | PRKACB     | protein coding             | -0.28127265 | 0.01202702 | 0.03351038  | 0.19794483 | 0.22269376  | 0.25001446 | -0.02523101 | 0.88999330 | -0.14344404 | 0.08999330 | 0.12240708 | 0.57110060 | 0.02693682 | 0.85430206 |
| ENSG00000272790 | 20 | 19522790 | 19522790 | LOC101921  | lncRNA                     | 0.00000000  | 0.00000000 | 0.00000000  | 0.00000000 | 0.00000000  | 0.00000000 | 0.00000000  | 0.00000000 | 0.00000000  | 0.12269311 | 0.57110060 | 0.02693682 | 0.85430206 |            |
| ENSG00000272593 | 17 | 3876589  | 3876589  | PM2K       | protein coding             | 0.21527873  | 0.05534379 | 0.20355400  | 0.15098371 | 0.11674516  | 0.41741883 | 0.15098371  | 0.41741883 | 0.15098371  | 0.41741883 | 0.12269311 | 0.57110060 | 0.02693682 | 0.85430206 |
| ENSG00000210887 | 11 | 1917473  | 1917473  | PRKACB     | protein coding             | 0.27125304  | 0.00170226 | 0.26711678  | 0.06707453 | 0.01746518  | 0.83133644 | 0.3401969   | 0.07794262 | 0.23119840  | 0.08929275 | 0.12248404 | 0.57110060 | 0.02693682 | 0.85430206 |
| ENSG00000287119 | 1  | 1674565  | 1674565  | LOC101921  | lncRNA                     | 0.00000000  | 0.00000000 | 0.00000000  | 0.00000000 | 0.00000000  | 0.00000000 | 0.00000000  | 0.00000000 | 0.00000000  | 0.12269311 | 0.57110060 | 0.02693682 | 0.85430206 |            |
| ENSG00000110892 | 1  | 14792393 | 14792393 | GPR88      | protein coding             | 0.04292300  | 0.17348109 | 0.19548569  | 0.17392340 | 0.00735552  | 0.17392340 | 0.00735552  | 0.17392340 | 0.00735552  | 0.17392340 | 0.12240708 | 0.57110060 | 0.02693682 | 0.85430206 |
| ENSG00000228989 | 14 | 9742648  | 9742648  | LOC101921  | lncRNA                     | -0.10849388 | 0.34799071 | -0.10849388 | 0.34799071 | 0.02114454  | 0.10849388 | -0.10849388 | 0.34799071 | -0.10849388 | 0.34799071 | 0.12240708 | 0.57110060 | 0.02693682 | 0.85430206 |
| ENSG00000144935 | 3  | 14272404 | 14280788 | TRPC1      | protein coding             | -0.02689477 | 0.38893743 | -0.02689477 | 0.38893743 | 0.10581834  | 0.45448807 | 0.10581834  | 0.45448807 | 0.10581834  | 0.45448807 | 0.12269311 | 0.57110060 | 0.02693682 | 0.85430206 |
| ENSG00000104371 | 8  | 42374963 | 42372729 | DNKX4      | protein coding             | -0.10364188 | 0.34733484 | -0.10364188 | 0.34733484 | 0.18019944  | 0.34548102 | -0.33474426 | 0.07884365 | -0.13511056 | 0.33006881 | 0.12240708 | 0.57110060 | 0.02693682 | 0.85430206 |
| ENSG00000117620 | 1  | 9969351  | 10003584 | SC3C53     | protein coding             | 0.04031174  | 0.89557429 | 0.04784734  | 0.87952808 | 0.02782838  | 0.18173442 | -0.00324204 | 0.98805441 | -0.00732500 | 0.85023420 | 0.12240708 | 0.57110060 | 0.02693682 | 0.85430206 |
| ENSG00000112138 | 9  | 1358248  | 13584968 | ORP2A      | protein coding             | -0.24811451 | 0.00787181 | -0.1029083  | 0.17696901 | -0.25994241 | 0.19308301 | -0.21371073 | 0.20712108 | -0.30813388 | 0.04836909 | 0.12240708 | 0.57110060 | 0.02693682 | 0.85430206 |
| ENSG00000185189 | 8  | 14333383 | 14348973 | NRP2       | protein coding             | -0.16195948 | 0.15649121 | -0.06488050 | 0.56441048 | -0.07975858 | 0.62988324 | 0.02641156  | 0.75712681 | -0.16843143 | 0.22424478 | 0.12231082 | 0.57110060 | 0.02693682 | 0.85430206 |
| ENSG00000185289 | 7  | 8165297  | 8196180  | NOTU10     | protein coding             | -0.10269663 | 0.35732292 | -0.0574441  | 0.70061380 | -0.15068151 | 0.43962050 | -0.10748333 | 0.92608412 | -0.17085517 | 0.21726201 | 0.12230712 | 0.57110060 | 0.02693682 | 0.85430206 |
| ENSG00000252503 | 4  | 13869576 | 13869576 | PRK-51P    | lncRNA                     | -0.24811451 | 0.17348109 | -0.24811451 | 0.17348109 | 0.10581834  | 0.45448807 | 0.10581834  | 0.45448807 | 0.10581834  | 0.45448807 | 0.12269311 | 0.57110060 | 0.02693682 | 0.85430206 |
| ENSG00000280356 | 22 | 34641179 | 34651862 | AL011877.2 | lncRNA                     | -0.22387814 | 0.04527323 | -0.09820874 | 0.54243015 | -0.13087644 | 0.50170349 | -0.18608109 | 0.32898003 | -0.20443147 | 0.14007766 | 0.12219544 | 0.57110060 | 0.02693682 | 0.85430206 |
| ENSG00000184817 | 20 | 4648481  | 4648426  | ZNF84P     | unprocessed protein coding | -0.05457698 | 0.37340426 | -0.05457698 | 0.37340426 | -0.04889788 | 0.38412548 | -0.02629420 | 0.8032004  | -0.02629420 | 0.8032004  | 0.12219544 | 0.57110060 | 0.02693682 | 0.85430206 |
| ENSG00000101194 | MT | 14674    | 14742    | MT-1B      | lncRNA                     | -0.19171093 | 0.03762292 | -0.17002738 | 0.27629222 | 0.227416913 | 0.23581918 | -0.40234044 | 0.00748641 | -0.38494781 | 0.00912137 | 0.12216458 | 0.57110060 | 0.02693682 | 0.85430206 |
| ENSG00000116774 | 1  | 11397931 | 11403572 | CFM-3P     | lncRNA                     | -0.25188401 | 0.02723101 | -0.09453208 | 0.51374121 | -0.10185790 | 0.42805501 | -0.28675202 | 0.17882310 | -0.36837326 | 0.10523445 | 0.12213445 | 0.57110060 | 0.02693682 | 0.85430206 |
| ENSG00000198483 | 1  | 14589956 | 14589858 | ORP3D5     | protein coding             | -0.25172771 | 0.02723101 | -0.07891445 | 0.88929787 | -0.02114454 | 0.08451128 | -0.38917858 | 0.04262892 | -0.45904589 | 0.00473449 | 0.12210620 | 0.57110060 | 0.02693682 | 0.85430206 |
| ENSG00000221151 | 2  | 17298951 | 17298914 | AC011917.1 | lncRNA                     | -0.01371781 | 0.98207161 | -0.11379228 | 0.41371615 | -0.00511403 | 0.97397894 | -0.08982626 | 0.67130224 | -0.03814745 | 0.77119221 | 0.12204925 | 0.57110060 | 0.02693682 | 0.85430206 |
| ENSG00000198246 | 10 | 7131929  | 7131423  | LOC101921  | lncRNA                     | 0.05941937  | 0.60771523 | 0.09992142  | 0.88929787 | 0.06265713  | 0.75621408 | 0.01460363  | 0.94236698 | -0.03216887 | 0.17415444 | 0.12205772 | 0.57110060 | 0.02693682 | 0.85430206 |
| ENSG00000199992 | 16 | 2995715  | 3000783  | INDBE      | protein coding             | -0.10591127 | 0.33831732 | -0.05752888 | 0.88837280 | 0.12037444  | 0.84939112 | -0.14241678 | 0.47855734 | -0.18358487 | 0.18373456 | 0.12202581 | 0.57110060 | 0.02693682 | 0.85430206 |
| ENSG00000227174 | 5  | 7489983  | 7489784  | AC010911.2 | lncRNA                     | -0.11177754 | 0.92318946 | -0.07620782 | 0.50402924 | -0.20787008 | 0.29813389 | -0.01162165 | 0.95896918 | -0.07190343 | 0.60901711 | 0.12203868 | 0.57110060 | 0.02693682 | 0.85430206 |
| ENSG00000225791 | 6  | 5276787  | 5284308  | TRAC1-AS1  | lncRNA                     | -0.18048887 | 0.16322781 | -0.04370425 | 0.76288400 | -0.08159992 | 0.18599282 | -0.18889259 | 0.92584714 | -0.20398875 | 0.12819310 | 0.12200805 | 0.57110060 | 0.02693682 | 0.85430206 |
| ENSG00000225791 | 6  | 5276787  | 5284308  | TRAC1-AS1  | lncRNA                     | -0.18048887 | 0.16322781 | -0.04370425 | 0.76288400 | -0.08159992 | 0.18599282 | -0.18889259 | 0.92584714 | -0.20398875 | 0.12819310 | 0.12200805 | 0.57110060 | 0.02693682 | 0.85430206 |
| ENSG00000104825 | 19 | 3899700  | 3898933  | NFKB1      | protein coding             | 0.07481203  | 0.51786555 | -0.06134827 | 0.89471238 | 0.03861128  | 0.84482388 | -0.10671860 | 0.56624454 | -0.11600415 | 0.40352722 | 0.12201572 | 0.57110060 | 0.02693682 | 0.85430206 |
| ENSG00000242902 | 7  | 12895102 | 12886226 | FLNC-AS1   | lncRNA                     | -0.10374189 | 0.36925258 | -0.01252051 | 0.82942689 | -0.26310442 | 0.14885814 | -0.10747761 | 0.91415143 | -0.16024359 | 0.24707111 | 0.12193626 | 0.57110060 | 0.02693682 | 0.85430206 |
| ENSG00000197101 | 21 | 16984000 | 16984000 | LOC101921  | lncRNA                     | -0.02891813 | 0.85992472 | -0.02891813 | 0.85992472 | 0.00000000  | 0.00000000 | 0.00000000  | 0.00000000 | 0.00000000  | 0.12200805 | 0.57110060 | 0.02693682 | 0.85430206 |            |
| ENSG00000241282 | 19 | 22699352 | 22699352 | RRF-3AP3   | lncRNA                     | 0.05688187  | 0.62255458 | 0.01909571  | 0.89247811 | 0.11344585  | 0.87155502 | 0.03268351  | 0.87143553 | -0.11358602 | 0.41379908 | 0.12197512 | 0.57110060 | 0.02693682 | 0.85430206 |
| ENSG00000240001 | 6  | 13724798 | 13875843 | LCN8       | protein coding             | -0.1111508  | 0.14871297 | -0.08121493 | 0.85208787 | -0.02138270 | 0.10413872 | -0.11241573 | 0.27735778 | -0.20254520 | 0.06626281 | 0.12197512 | 0.57110060 | 0.02693682 | 0.85430206 |
| ENSG00000208621 | 12 | 9431417  | 9431417  | LOC101921  | lncRNA                     | -0.21943013 | 0.16192249 | -0.16291081 | 0.16291081 | -0.00000000 | 0.00000000 | -0.00000000 | 0.00000000 | -0.24512501 | 0.00000000 | 0.12196418 | 0.57110060 | 0.02693682 | 0.85430206 |
| ENSG00000216306 | 12 | 9431417  | 9431417  | KR1182     | transcribed unprocessed    | -0.18844749 | 0.10000219 | -0.05503216 | 0.74025972 | -0.32643860 | 0.26781367 | -0.27241670 | 0.26087812 | -0.52462483 | 0.12182141 | 0.57110060 | 0.02693682 | 0.85430206 |            |
| ENSG00000227253 | 10 | 3206298  | 3206294  | AL15834.2  | lncRNA                     | -0.13490763 | 0.24317938 | -0.02473584 | 0.84660330 | -0.24388447 | 0.22178899 | -0.04273895 | 0.83375999 | -0.21095642 | 0.12800300 | 0.12186372 | 0.57110060 | 0.02693682 | 0.85430206 |
| ENSG00000192024 | 20 | 1987439  | 1987670  | SDS-1      | protein coding             | -0.21545572 | 0.06011824 | -0.04545841 | 0.72722290 | -0.19151083 | 0.33862669 | -0.22334754 | 0.26282703 | -0.18879203 | 0.04891709 | 0.12182141 | 0.57110060 | 0.02693682 | 0.85430206 |
| ENSG00000276519 | 16 | 8189748  | 8189601  | AC092142.2 | lncRNA                     | -0.19128245 | 0.90207781 | -0.05241414 | 0.72897161 | -0.25816152 | 0.19885584 | -0.10338498 | 0.60784400 | -0.04581727 | 0.74000308 | 0.12183657 | 0.57110060 | 0.02693682 | 0.85430206 |
| ENSG00000194186 | 19 | 14143455 | 14143795 | AC108003.4 | lncRNA                     | -0.29682770 | 0.07770075 | -0.10744102 | 0.84911817 | -0.36714400 | 0.00503343 | -0.32714041 | 0.05877801 | -0.41110733 | 0.02800158 | 0.12180492 | 0.57110060 | 0.02693682 | 0.85430206 |
| ENSG00000287440 | 1  | 1502029  | 1502029  | AC045728.2 | transcribed unprocessed    | 0.10642     |            |             |            |             |            |             |            |             |            |            |            |            |            |



|                |   |           |          |            |                                    |             |            |            |            |             |            |              |            |             |             |            |            |             |            |
|----------------|---|-----------|----------|------------|------------------------------------|-------------|------------|------------|------------|-------------|------------|--------------|------------|-------------|-------------|------------|------------|-------------|------------|
| ENSG0000022659 | X | 13098190  | 13105840 | LINC0201   | lincRNA                            | -0.23702988 | 0.03736602 | 0.00941211 | 0.94827470 | 0.35258391  | 0.07258188 | -0.20203786  | 0.31220083 | -0.38673614 | 0.00387607  | 0.11606848 | 0.59792844 | 0.22366419  | 0.11843077 |
| ENSG0000022660 |   | 9214400   | 9216770  | LLGL1-AS1  | antisense RNA                      | -0.28911618 | 0.01070266 | 0.05287214 | 0.7156393  | 0.34843078  | 0.05661752 | -0.20272691  | 0.31307872 | -0.37869117 | 0.00411269  | 0.11506291 | 0.59792844 | 0.22366419  | 0.11843077 |
| ENSG0000022661 |   | 9400148   | 9401984  | RAB29B     | mRNA                               | -0.19820425 | 0.04242379 | 0.01321216 | 0.76993151 | 0.24220813  | 0.25941853 | -0.00280906  | 0.96726868 | -0.18332749 | 0.18453230  | 0.11603831 | 0.59802400 | 0.117304201 | 0.22640302 |
| ENSG0000022662 |   | 3136787   | 3137608  | LLGL1-AS2  | antisense RNA                      | -0.19804163 | 0.04477993 | 0.01317195 | 0.85522700 | 0.16901074  | 0.36973530 | -0.00600361  | 0.87626628 | -0.1312078  | 0.32244467  | 0.11597824 | 0.59802400 | 0.117304201 | 0.22640302 |
| ENSG0000022663 |   | 13098190  | 13105840 | LLGL1-AS3  | antisense RNA                      | -0.19804163 | 0.04477993 | 0.01317195 | 0.85522700 | 0.16901074  | 0.36973530 | -0.00600361  | 0.87626628 | -0.1312078  | 0.32244467  | 0.11597824 | 0.59802400 | 0.117304201 | 0.22640302 |
| ENSG0000022664 |   | 133321812 | 13332877 | ANHX       | protein coding                     | -0.2928447  | 0.0140793  | 0.01513441 | 0.91592633 | 0.26187267  | 0.11874863 | -0.07628672  | 0.87626628 | -0.30233265 | 0.01624497  | 0.11597824 | 0.59802400 | 0.117304201 | 0.22640302 |
| ENSG0000022665 |   | 10368410  | 10374349 | CAZACAP3   | unprocessed pseudogene             | -0.16013318 | 0.1641273  | 0.01781867 | 0.90543598 | 0.24336971  | 0.21199889 | -0.16955122  | 0.34362076 | -0.292973   | 0.01624497  | 0.11597824 | 0.59802400 | 0.117304201 | 0.22640302 |
| ENSG0000022666 |   | 12971526  | 12971526 | MAN1B1-IT1 | antisense RNA                      | -0.11885078 | 0.01781867 | 0.01781867 | 0.90543598 | 0.24336971  | 0.21199889 | -0.16955122  | 0.34362076 | -0.292973   | 0.01624497  | 0.11597824 | 0.59802400 | 0.117304201 | 0.22640302 |
| ENSG0000022667 |   | 12981151  | 12981151 | UNCG0398.1 | transcribed unprocessed pseudogene | -0.2624447  | 0.01781867 | 0.01781867 | 0.90543598 | 0.24336971  | 0.21199889 | -0.16955122  | 0.34362076 | -0.292973   | 0.01624497  | 0.11597824 | 0.59802400 | 0.117304201 | 0.22640302 |
| ENSG0000022668 |   | 2189112   | 2205139  | LINC0190   | mRNA                               | 0.05949498  | 0.00789034 | 0.15396765 | 0.28999250 | 0.24246748  | 0.18748738 | -0.07199152  | 0.17012926 | -0.16955122 | 0.01624497  | 0.11597824 | 0.59802400 | 0.117304201 | 0.22640302 |
| ENSG0000022669 |   | 2204918   | 2207958  | LINC0246   | mRNA                               | 0.01949847  | 0.04671389 | 0.01678223 | 0.87029222 | 0.24283119  | 0.14392029 | -0.08719526  | 0.07076288 | -0.16955122 | 0.01624497  | 0.11597824 | 0.59802400 | 0.117304201 | 0.22640302 |
| ENSG0000022670 |   | 4828887   | 4828888  | Y RNA      | misc RNA                           | -0.02480605 | 0.13109793 | 0.08121519 | 0.93752847 | 0.31875652  | 0.07076288 | -0.07058035  | 0.17264072 | -0.24630158 | 0.01624497  | 0.11597824 | 0.59802400 | 0.117304201 | 0.22640302 |
| ENSG0000022671 |   | 2720116   | 2745747  | ENCO038.4  | protein coding                     | -0.18321262 | 0.11071023 | 0.04407727 | 0.73920024 | 0.21539974  | 0.28012962 | -0.01590991  | 0.94814481 | -0.22212630 | 0.01624497  | 0.11597824 | 0.59802400 | 0.117304201 | 0.22640302 |
| ENSG0000022672 |   | 4931081   | 4931081  | ENCO039.1  | protein coding                     | -0.06381001 | 0.08918718 | 0.02918474 | 0.78496981 | 0.00147458  | 0.49416847 | -0.27898436  | 0.15877302 | -0.19397152 | 0.01624497  | 0.11597824 | 0.59802400 | 0.117304201 | 0.22640302 |
| ENSG0000022673 |   | 3908116   | 3947717  | MACP1      | protein coding                     | 0.29593128  | 0.00897911 | 0.26647472 | 0.97046127 | 0.16727941  | 0.27448573 | -0.36394778  | 0.01679343 | -0.29421764 | 0.01624497  | 0.11597824 | 0.59802400 | 0.117304201 | 0.22640302 |
| ENSG0000022674 |   | 1008135   | 1012934  | ENCO743.01 | transcribed unprocessed pseudogene | -0.11286882 | 0.32048071 | 0.21807710 | 0.53041464 | 0.07781538  | 0.09696492 | -0.37638893  | 0.00899331 | -0.16262877 | 0.01624497  | 0.11597824 | 0.59802400 | 0.117304201 | 0.22640302 |
| ENSG0000022675 |   | 6436914   | 6446461  | PKOX       | protein coding                     | -0.07098507 | 0.02073923 | 0.02073923 | 0.86261156 | 0.09299497  | 0.90112107 | -0.11381293  | 0.55673007 | -0.14479204 | 0.01624497  | 0.11597824 | 0.59802400 | 0.117304201 | 0.22640302 |
| ENSG0000022676 | X | 10091108  | 10093991 | TSPAN6     | protein coding                     | -0.25397418 | 0.03083454 | 0.00811551 | 0.90145123 | 0.20645341  | 0.30471058 | -0.0714058   | 0.11842618 | -0.37137929 | 0.00373263  | 0.11597824 | 0.59802400 | 0.117304201 | 0.22640302 |
| ENSG0000022677 |   | 17615150  | 17615230 | HDXN       | protein coding                     | -0.09653442 | 0.38960229 | 0.12679595 | 0.80323848 | -0.0733763  | 0.10484044 | -0.15291233  | 0.10503331 | -0.13481192 | 0.01624497  | 0.11597824 | 0.59802400 | 0.117304201 | 0.22640302 |
| ENSG0000022678 |   | 12497156  | 12497391 | ZNF571     | protein coding                     | -0.14000178 | 0.222291   | 0.00574762 | 0.90087555 | 0.23984377  | 0.30781199 | -0.18071448  | 0.36969052 | -0.19702762 | 0.01624497  | 0.11597824 | 0.59802400 | 0.117304201 | 0.22640302 |
| ENSG0000022679 |   | 12982188  | 12982664 | ENCO551.1  | transcribed unprocessed pseudogene | -0.30681777 | 0.02664158 | 0.17334578 | 0.28212685 | 0.20114963  | 0.36246481 | -0.36298411  | 0.02755825 | -0.17718151 | 0.00439384  | 0.11597824 | 0.59802400 | 0.117304201 | 0.22640302 |
| ENSG0000022680 |   | 11754279  | 11754279 | OTOD       | protein coding                     | -0.33720332 | 0.0207294  | 0.01074987 | 0.84572748 | 0.38444928  | 0.04448988 | -0.30417881  | 0.02330038 | -0.48980188 | 0.00481338  | 0.11597824 | 0.59802400 | 0.117304201 | 0.22640302 |
| ENSG0000022681 |   | 4926218   | 4926218  | ALX4SAS1   | transcribed unprocessed pseudogene | -0.2929268  | 0.01624497 | 0.12595924 | 0.37039183 | 0.29313859  | 0.13781328 | -0.2807178   | 0.14117128 | -0.17292001 | 0.01624497  | 0.11597824 | 0.59802400 | 0.117304201 | 0.22640302 |
| ENSG0000022682 |   | 1620271   | 1620271  | ENCO163.2  | TEC                                | 0.05420037  | 0.03819703 | 0.16928401 | 0.23868588 | 0.00452487  | 0.98198081 | -0.193294    | 0.32330308 | 0.0272042   | 0.01624497  | 0.11597824 | 0.59802400 | 0.117304201 | 0.22640302 |
| ENSG0000022683 |   | 15224919  | 15228787 | LINC01487  | transcribed unprocessed pseudogene | -0.13879887 | 0.22895738 | 0.03383110 | 0.83316238 | 0.20927487  | 0.30297375 | -0.12785158  | 0.25998861 | -0.18855206 | 0.01624497  | 0.11597824 | 0.59802400 | 0.117304201 | 0.22640302 |
| ENSG0000022684 |   | 1693916   | 1694464  | ENCO169.1  | transcribed unprocessed pseudogene | -0.07828128 | 0.04914567 | 0.11174718 | 0.84973124 | 0.09840704  | 0.06711254 | -0.08993891  | 0.85622428 | -0.03018209 | 0.01624497  | 0.11597824 | 0.59802400 | 0.117304201 | 0.22640302 |
| ENSG0000022685 |   | 7381363   | 7381363  | COE1       | protein coding                     | 0.2834451   | 0.15465072 | 0.13324151 | 0.88316268 | -0.2847487  | 0.15076703 | -0.116911278 | 0.61389204 | -0.20521914 | 0.01624497  | 0.11597824 | 0.59802400 | 0.117304201 | 0.22640302 |
| ENSG0000022686 |   | 8602481   | 8604489  | ENCO038.4  | protein coding                     | 0.35454452  | 0.01624497 | 0.08832738 | 0.54323842 | 0.52363535  | 0.05951052 | 0.01641168   | 0.93245204 | 0.98425538  | 0.003001443 | 0.11597824 | 0.59802400 | 0.117304201 | 0.22640302 |
| ENSG0000022687 |   | 1319691   | 1319691  | ENCO121.1  | transcribed unprocessed pseudogene | -0.22370477 | 0.00916504 | 0.05050831 | 0.72788100 | 0.10251187  | 0.10888182 | -0.04849585  | 0.78858904 | -0.18588816 | 0.01624497  | 0.11597824 | 0.59802400 | 0.117304201 | 0.22640302 |
| ENSG0000022688 |   | 1379040   | 1379040  | PRP39      | protein coding                     | -0.23270477 | 0.00916504 | 0.05050831 | 0.72788100 | 0.10251187  | 0.10888182 | -0.04849585  | 0.78858904 | -0.18588816 | 0.01624497  | 0.11597824 | 0.59802400 | 0.117304201 | 0.22640302 |
| ENSG0000022689 |   | 5762984   | 5763112  | ALX1502.01 | transcribed unprocessed pseudogene | -0.11027448 | 0.33998467 | 0.18837449 | 0.19167833 | 0.08704202  | 0.73899294 | -0.27348515  | 0.16277203 | -0.13112074 | 0.01624497  | 0.11597824 | 0.59802400 | 0.117304201 | 0.22640302 |
| ENSG0000022690 |   | 1517878   | 1517878  | ENCO121.1  | transcribed unprocessed pseudogene | -0.11027448 | 0.33998467 | 0.18837449 | 0.19167833 | 0.08704202  | 0.73899294 | -0.27348515  | 0.16277203 | -0.13112074 | 0.01624497  | 0.11597824 | 0.59802400 | 0.117304201 | 0.22640302 |
| ENSG0000022691 |   | 2153847   | 2153847  | AC005632.4 | transcribed unprocessed pseudogene | -0.25847454 | 0.08885703 | 0.01505477 | 0.91758353 | 0.13374161  | 0.5060147  | -0.09000326  | 0.73019878 | -0.23136839 | 0.004971663 | 0.11597824 | 0.59802400 | 0.117304201 | 0.22640302 |
| ENSG0000022692 |   | 9100658   | 9100658  | FBP1       | protein coding                     | -0.06622033 | 0.56713449 | 0.02712111 | 0.84379889 | 0.00095704  | 0.98671724 | -0.15447268  | 0.44194737 | -0.04397643 | 0.01624497  | 0.11597824 | 0.59802400 | 0.117304201 | 0.22640302 |
| ENSG0000022693 |   | 1117477   | 1117477  | ENCO121.1  | transcribed unprocessed pseudogene | -0.11027448 | 0.33998467 | 0.18837449 | 0.19167833 | 0.08704202  | 0.73899294 | -0.27348515  | 0.16277203 | -0.13112074 | 0.01624497  | 0.11597824 | 0.59802400 | 0.117304201 | 0.22640302 |
| ENSG0000022694 |   | 4643129   | 4644243  | FAHP1      | transcribed unprocessed pseudogene | -0.11079178 | 0.33743525 | 0.16668588 | 0.94791723 | 0.15893278  | 0.42846959 | -0.2007957   | 0.37101329 | -0.11360301 | 0.01624497  | 0.11597824 | 0.59802400 | 0.117304201 | 0.22640302 |
| ENSG0000022695 |   | 79050919  | 79059753 | ENCO429.1  | transcribed unprocessed pseudogene | -0.18291482 | 0.11511279 | 0.12730230 | 0.97832100 | -0.16022524 | 0.42471941 | -0.24810788  | 0.21209513 | -0.18922844 | 0.01624497  | 0.11597824 | 0.59802400 | 0.117304201 | 0.22640302 |
| ENSG0000022696 |   | 3868534   | 3868703  | FAM158P    | protein coding                     | -0.24711461 | 0.03266411 | 0.00326641 | 0.98285532 | -0.20009531 | 0.70170759 | -0.23518931  | 0.23768047 | -0.38383887 | 0.00313568  | 0.11597824 | 0.59802400 | 0.117304201 | 0.22640302 |
| ENSG0000022697 |   | 2456607   | 2456887  | AC005632.5 | transcribed unprocessed pseudogene | -0.18898977 | 0.08980473 | 0.21944949 | 0.14284137 | 0.07588778  | 0.70671638 | -0.14175281  | 0.03042021 | -0.22214461 | 0.01624497  | 0.11597824 | 0.59802400 | 0.117304201 | 0.22640302 |
| ENSG0000022698 |   | 1934024   | 1934024  | ENCO121.1  | transcribed unprocessed pseudogene | -0.11027448 | 0.33998467 | 0.18837449 | 0.19167833 | 0.08704202  | 0.73899294 | -0.27348515  | 0.16277203 | -0.13112074 | 0.01624497  | 0.11597824 | 0.59802400 | 0.117304201 | 0.22640302 |
| ENSG0000022699 |   | 8754880   | 8754880  | RPS145     | protein coding                     | -0.11370508 | 0.32488021 | 0.18808317 | 0.148      |             |            |              |            |             |             |            |            |             |            |







Table with columns for gene ID, chromosome, coordinates, gene name, transcript type, and various numerical values. The table lists numerous genes such as ENG00000212607, ENG00000212608, etc., and their associated data points.

|                 |    |           |           |            |                |             |            |             |            |             |             |             |            |             |            |            |            |            |            |            |
|-----------------|----|-----------|-----------|------------|----------------|-------------|------------|-------------|------------|-------------|-------------|-------------|------------|-------------|------------|------------|------------|------------|------------|------------|
| ENSG00000141026 | 17 | 17479994  | 17483211  | MED1       | protein coding | 0.03371346  | 0.77095249 | 0.00530971  | 0.5326296  | -0.037781   | 0.851864109 | 0.12184224  | 0.54489306 | 0.0404992   | 0.77370304 | 0.10616334 | 0.6297240  | -0.0020094 | 0.98455038 |            |
| ENSG00000141027 | 3  | 9252599   | 9252600   | 112187     | lncRNA         | 0.05362031  | 0.58246159 | 0.00300147  | 0.75752711 | 0.37643557  | -0.0451     | 0.81845339  | 0.05413139 | 0.6632369   | 0.0004068  | 0.7000000  | 0.0000000  | 0.11526271 | 0.9204101  |            |
| ENSG00000141028 | 27 | 1366981   | 1366982   | PRK2       | protein coding | 0.42734563  | 0.42734563 | 0.00000000  | 0.42734563 | 0.42734563  | 0.42734563  | 0.42734563  | 0.42734563 | 0.42734563  | 0.42734563 | 0.42734563 | 0.42734563 | 0.42734563 | 0.42734563 | 0.42734563 |
| ENSG00000281334 | 5  | 2413135   | 24271863  | AC114930.1 | lncRNA         | -0.06270008 | 0.58794477 | -0.13976287 | 0.33273047 | 0.18048103  | 0.70766243  | -0.24384141 | 0.22017093 | 0.040399    | 0.76930696 | 0.10606428 | 0.83006154 | 0.01492786 | 0.91849623 |            |
| ENSG00000198341 | 11 | 12452631  | 12451909  | PCP2       | protein coding | -0.25112023 | 0.00363191 | -0.01817228 | 0.52572413 | -0.02827515 | 0.60498927  | -0.26207461 | 0.31210669 | 0.2746792   | 0.04044481 | 0.0605701  | 0.0000000  | 0.25986967 | 0.68697073 |            |
| ENSG00000173801 | 17 | 10716320  | 10716320  | AC00428.2  | lncRNA         | 0.00000000  | 0.00000000 | 0.00000000  | 0.00000000 | 0.00000000  | 0.00000000  | 0.00000000  | 0.00000000 | 0.00000000  | 0.00000000 | 0.00000000 | 0.00000000 | 0.00000000 | 0.00000000 |            |
| ENSG00000173801 | 17 | 10716320  | 10716320  | JUP        | protein coding | 0.01048901  | 0.92785399 | -0.07917615 | 0.48686183 | -0.20191551 | 0.1892433   | 0.07880276  | 0.57515063 | 0.10603438  | 0.69314284 | 0.00000000 | 0.83014284 | 0.00000000 | 0.00000000 |            |
| ENSG0000019639  | 7  | 7859391   | 7859391   | AC10310.2  | lncRNA         | -0.04537582 | 0.00529975 | -0.02899576 | 0.65837619 | 0.17800494  | 0.43393454  | -0.22572726 | 0.31089205 | 0.05408769  | 0.06789690 | 0.00000000 | 0.16717252 | 0.6301391  | 0.00000000 |            |
| ENSG0000019639  | 7  | 7859391   | 7859391   | AC02910.6  | lncRNA         | 0.04573762  | 0.96850507 | -0.05251731 | 0.48686183 | 0.17800494  | 0.43393454  | -0.22572726 | 0.31089205 | 0.05408769  | 0.06789690 | 0.00000000 | 0.16717252 | 0.6301391  | 0.00000000 |            |
| ENSG00000178885 | 8  | 14397713  | 14401272  | PARP10     | protein coding | 0.02775554  | 0.81431242 | -0.02240505 | 0.74898316 | 0.37870118  | 0.05142783  | 0.01400259  | 0.94473489 | 0.14694704  | 0.28992979 | 0.05959305 | 0.00000000 | 0.63004421 | 0.00000000 |            |
| ENSG00000198951 | 9  | 10562457  | 10562457  | TAL2       | protein coding | -0.18621118 | 0.23746034 | -0.04199927 | 0.73926251 | 0.33851199  | 0.46982626  | 0.06261104  | 0.86748912 | -0.15082283 | 0.27892024 | 0.05841369 | 0.00000000 | 0.00000000 | 0.00000000 |            |
| ENSG0000029593  | 4  | 20329471  | 20329471  | NPI140     | protein coding | 0.01668004  | 0.86703971 | 0.10084975  | 0.46982626 | 0.14785193  | 0.81841814  | 0.02927691  | 0.88926018 | 0.05989833  | 0.00000000 | 0.00000000 | 0.00000000 | 0.00000000 | 0.00000000 |            |
| ENSG0000054054  | 8  | 1790494   | 17909811  | AC082773.2 | lncRNA         | 0.02775554  | 0.81431242 | -0.02240505 | 0.74898316 | 0.37870118  | 0.05142783  | 0.01400259  | 0.94473489 | 0.14694704  | 0.28992979 | 0.05959305 | 0.00000000 | 0.63004421 | 0.00000000 |            |
| ENSG00000281542 | 7  | 14842267  | 14842267  | AC073534.1 | lncRNA         | -0.27088199 | 0.01739504 | -0.03630560 | 0.68175898 | 0.36327513  | 0.02668118  | -0.12607816 | 0.53026729 | -0.34717352 | 0.00000000 | 0.00000000 | 0.00000000 | 0.00000000 | 0.00000000 |            |
| ENSG00000281542 | 7  | 14842267  | 14842267  | AC073534.1 | lncRNA         | -0.27088199 | 0.01739504 | -0.03630560 | 0.68175898 | 0.36327513  | 0.02668118  | -0.12607816 | 0.53026729 | -0.34717352 | 0.00000000 | 0.00000000 | 0.00000000 | 0.00000000 | 0.00000000 |            |
| ENSG00000184330 | 1  | 153416320 | 15342322  | S100TA9    | protein coding | -0.15953605 | 0.16571314 | 0.11444381  | 0.42872317 | 0.03000353  | 0.88811427  | -0.01842916 | 0.92730476 | -0.23891516 | 0.08188110 | 0.05888172 | 0.00000000 | 0.00000000 | 0.00000000 |            |
| ENSG0000024789  | 9  | 129640476 | 129641282 | AC105989.1 | lncRNA         | -0.18011808 | 0.11721508 | -0.08950414 | 0.68141613 | 0.26580861  | 0.17977898  | -0.18141800 | 0.36513707 | -0.24198473 | 0.07744032 | 0.05888172 | 0.00000000 | 0.00000000 | 0.00000000 |            |
| ENSG0000025500  | 9  | 3698149   | 3698149   | HPSE1P3    | protein coding | 0.03066509  | 0.79126192 | -0.07271887 | 0.41839719 | 0.29259065  | 0.20273379  | -0.020639   | 0.87187408 | -0.020639   | 0.87187408 | 0.00000000 | 0.00000000 | 0.00000000 | 0.00000000 |            |
| ENSG00000100031 | 22 | 24594811  | 24594811  | SGT1       | protein coding | -0.25071068 | 0.02252926 | -0.18419338 | 0.60317418 | 0.20071178  | 0.25846710  | -0.49831058 | 0.00646191 | -0.43301473 | 0.01043371 | 0.08973369 | 0.00000000 | 0.00000000 | 0.00000000 |            |
| ENSG0000012232  | 20 | 1786270   | 17862490  | SNORD17    | lncRNA         | -0.04774474 | 0.15220400 | -0.12841732 | 0.37932557 | -0.27007994 | 0.17300763  | -0.27038922 | 0.17213763 | 0.00103975  | 0.82891197 | 0.05888172 | 0.00000000 | 0.00000000 | 0.00000000 |            |
| ENSG0000026948  | 1  | 591179    | 669295    | AC10326.1  | lncRNA         | -0.11632111 | 0.33376790 | -0.02045128 | 0.86905203 | -0.18911999 | 0.18911222  | 0.06519491  | 0.74664828 | -0.07115569 | 0.22717807 | 0.05888172 | 0.00000000 | 0.00000000 | 0.00000000 |            |
| ENSG00000250420 | 5  | 17878481  | 178781435 | AC105481.1 | lncRNA         | -0.21842888 | 0.06437121 | -0.05142483 | 0.70891389 | 0.14461710  | 0.18718109  | -0.14461710 | 0.18718109 | -0.22248406 | 0.08091132 | 0.05888172 | 0.00000000 | 0.00000000 | 0.00000000 |            |
| ENSG00000132920 | 2  | 8612623   | 8612421   | PTCD3      | protein coding | -0.04982605 | 0.6896451  | -0.10893594 | 0.45181742 | 0.22381462  | 0.25834854  | -0.06156979 | 0.75431303 | -0.08429914 | 0.54337001 | 0.0578399  | 0.00000000 | 0.00000000 | 0.00000000 |            |
| ENSG00000111331 | 12 | 12538444  | 11927125  | CAK3       | protein coding | 0.05048728  | 0.89311324 | -0.15983978 | 0.40710291 | 0.14023261  | 0.46429174  | -0.10269703 | 0.61500738 | 0.18742954  | 0.17423269 | 0.0574743  | 0.05888172 | 0.00000000 | 0.00000000 |            |
| ENSG0000022895  | 24 | 542682    | 541104    | LINC00658  | lncRNA         | -0.1790103  | 0.11927805 | -0.01578789 | 0.48277260 | 0.88514908  | 0.01427483  | -0.30287817 | 0.14265319 | -0.2240718  | 0.09616705 | 0.10570734 | 0.14265319 | 0.05888172 | 0.00000000 |            |
| ENSG0000028138  | 12 | 3725718   | 372782    | AC02607.1  | lncRNA         | -0.04265401 | 0.88595717 | -0.02268844 | 0.89554534 | 0.04895920  | 0.80944862  | -0.14186348 | 0.48028230 | -0.1341606  | 0.33381163 | 0.0574884  | 0.08109688 | 0.00000000 | 0.00000000 |            |
| ENSG0000027072  | 10 | 1072066   | 10994492  | ALRN403.2  | lncRNA         | -0.20809595 | 0.01338929 | -0.00922738 | 0.84932963 | 0.29543786  | 0.13378022  | -0.12233805 | 0.54503321 | -0.3521969  | 0.00000000 | 0.00000000 | 0.00000000 | 0.00000000 | 0.00000000 |            |
| ENSG00000108841 | 17 | 19343308  | 19318713  | BDP1       | protein coding | -0.24842748 | 0.00241062 | -0.04573448 | 0.72421914 | 0.38457398  | 0.01476928  | -0.18226989 | 0.34448234 | -0.04984015 | 0.00000000 | 0.00000000 | 0.00000000 | 0.00000000 | 0.00000000 |            |
| ENSG00000137842 | 15 | 4312376   | 4318144   | TMEM2      | protein coding | 0.05409158  | 0.67135382 | -0.10197116 | 0.48102478 | 0.12177108  | 0.41145535  | 0.14457389  | 0.47183197 | 0.07662878  | 0.58115719 | 0.05888172 | 0.00000000 | 0.00000000 | 0.00000000 |            |
| ENSG00000137019 | 19 | 1000000   | 1000000   | AC10326.1  | lncRNA         | -0.11632111 | 0.33376790 | -0.02045128 | 0.86905203 | -0.18911999 | 0.18911222  | 0.06519491  | 0.74664828 | -0.07115569 | 0.22717807 | 0.05888172 | 0.00000000 | 0.00000000 | 0.00000000 |            |
| ENSG00000207507 | 19 | 803444    | 833950    | RNL9.9     | lncRNA         | 0.12658189  | 0.27459028 | 0.19920128  | 0.48516714 | 0.08237764  | 0.52419554  | 0.28687874  | 0.14725540 | 0.08145127  | 0.24891732 | 0.1056453  | 0.0614911  | 0.00000000 | 0.00000000 |            |
| ENSG00000234239 | 1  | 46511039  | 46511826  | AC104028.2 | lncRNA         | 0.06344077  | 0.58955433 | -0.01173559 | 0.59351554 | -0.00929221 | 0.29261827  | -0.13812759 | 0.49189334 | -0.00799077 | 0.95934764 | 0.10581774 | 0.03144527 | 0.14650759 | 0.30991758 |            |
| ENSG00000288547 | 1  | 9202892   | 9202892   | AC10326.1  | lncRNA         | -0.11632111 | 0.33376790 | -0.02045128 | 0.86905203 | -0.18911999 | 0.18911222  | 0.06519491  | 0.74664828 | -0.07115569 | 0.22717807 | 0.05888172 | 0.00000000 | 0.00000000 | 0.00000000 |            |
| ENSG00000130751 | 16 | 105031778 | 105031778 | NPAS1      | protein coding | -0.25140458 | 0.02726989 | -0.13969639 | 0.58242820 | -0.02963241 | 0.16930702  | -0.33484313 | 0.08351446 | -0.32142910 | 0.01431222 | 0.08981173 | 0.05888172 | 0.00000000 | 0.00000000 |            |
| ENSG00000252417 | 4  | 160331778 | 16033266  | LINC01559  | lncRNA         | -0.12013469 | 0.20177284 | -0.03848546 | 0.71034611 | -0.04749998 | 0.14311149  | -0.00704201 | 0.68957272 | -0.2447275  | 0.02646276 | 0.05888172 | 0.00000000 | 0.00000000 | 0.00000000 |            |
| ENSG00000131688 | 13 | 1000000   | 1000000   | AC10326.1  | lncRNA         | -0.11632111 | 0.33376790 | -0.02045128 | 0.86905203 | -0.18911999 | 0.18911222  | 0.06519491  | 0.74664828 | -0.07115569 | 0.22717807 | 0.05888172 | 0.00000000 | 0.00000000 | 0.00000000 |            |
| ENSG00000281317 | 1  | 21144224  | 21144284  | ARPC3P2    | protein coding | 0.02075995  | 0.80717781 | -0.10544284 | 0.68441402 | 0.07517944  | 0.70338862  | -0.15930296 | 0.42274166 | 0.06257881  | 0.63057631 | 0.05888172 | 0.00000000 | 0.00000000 | 0.00000000 |            |
| ENSG00000255345 | 11 | 7692628   | 7690800   | AC02957.1  | lncRNA         | -0.24375098 | 0.03391984 | -0.09464074 | 0.51137108 | -0.02685774 | 0.79410002  | -0.25426661 | 0.19848149 | -0.26898943 | 0.04997741 | 0.05888172 | 0.00000000 | 0.00000000 | 0.00000000 |            |
| ENSG00000250307 | 10 | 9202892   | 9202892   | AC10326.1  | lncRNA         | -0.11632111 | 0.33376790 | -0.02045128 | 0.86905203 | -0.18911999 | 0.18911222  | 0.06519491  | 0.74664828 | -0.07115569 | 0.22717807 | 0.05888172 | 0.00000000 | 0.00000000 | 0.00000000 |            |
| ENSG00000102901 | 16 | 67828157  | 67847811  | CENP1      | protein coding | -0.24001314 | 0.05018108 | -0.05866315 | 0.96888390 | -0.00569777 | 0.77753104  | -0.15761049 | 0.43270498 | -0.26263974 | 0.01924541 | 0.0540103  | 0.00000000 | 0.00000000 | 0.00000000 |            |
| ENSG00000182405 | 15 | 34100883  |           |            |                |             |            |             |            |             |             |             |            |             |            |            |            |            |            |            |

Table with 10 columns: Gene ID, Chr, Start, End, Gene Name, Feature, RefSeq ID, RefSeq Description, RefSeq Link, RefSeq Type. Contains a comprehensive list of genes and their genomic coordinates.









Table with 10 columns: Gene ID, Chr, Start, End, Gene Name, Feature, RefSeq ID, RefSeq Description, RefSeq Accession, RefSeq Description, RefSeq Accession, RefSeq Description. The table lists numerous genes and their associated genomic coordinates and features.

Table with 10 columns: Gene ID, Chr, Start, End, RefSeq ID, Gene Name, Transcription Start Site, Strand, RefSeq ID, Gene Name, Transcription Start Site, Strand. Contains genomic coordinates and gene annotations for various genes like AC019754, AC019755, AC019756, etc.



Table with 10 columns: Gene ID, Gene Name, Feature, Start, End, Strand, RefSeq ID, RefSeq Name, RefSeq Description, RefSeq Link. Contains genomic coordinates and gene annotations for various genes like PRDM14, PTPN22, and others.



Table with columns for gene ID, chromosome, coordinates, gene name, and protein name. The table lists numerous genes and their corresponding protein products, such as ENG00000196131, ENG00000196132, etc., and proteins like VNR2, VNR3, VNR4, etc.

|                 |    |           |            |            |                      |             |             |             |            |             |            |             |            |             |            |            |             |             |            |
|-----------------|----|-----------|------------|------------|----------------------|-------------|-------------|-------------|------------|-------------|------------|-------------|------------|-------------|------------|------------|-------------|-------------|------------|
| ENSG00000154333 | 11 | 12509645  | 12511767   | TMEM17B    | protein coding       | -0.08971868 | 0.437702087 | -0.03734338 | 0.7958000  | 0.26499759  | 0.30411087 | -0.16571879 | 0.40869923 | -0.11474731 | 0.40667877 | 0.08100734 | 0.13229273  | -0.04202976 | 0.78113433 |
| ENSG0000018266  | 6  | 75133     | 75133      | ALB        | mRNA                 | -0.35020921 | 0.02767267  | -0.07123289 | 0.78535104 | 0.36531375  | 0.44025441 | -0.24878111 | 0.21084466 | -0.44827073 | 0.00070297 | 0.09999756 | 0.11327103  | -0.35262311 | 0.01010001 |
| ENSG00000148123 | 10 | 103134    | 103134     | PLT        | protein coding       | -0.24286861 | 0.02466159  | -0.07123289 | 0.78535104 | 0.36531375  | 0.44025441 | -0.24878111 | 0.21084466 | -0.44827073 | 0.00070297 | 0.09999756 | 0.11327103  | -0.35262311 | 0.01010001 |
| ENSG00000206166 | 16 | 8808724   | 8808970    | AC13412.3  | mRNA                 | -0.07328424 | 0.52284244  | -0.02752767 | 0.68688933 | 0.12811538  | 0.32406634 | -0.18711913 | 0.27545979 | -0.10592921 | 0.20020320 | 0.07891715 | 0.15240227  | -0.00738922 | 0.99593651 |
| ENSG00000206166 | 16 | 2874429   | 2880773    | AC10946.3  | mRNA                 | -0.04230272 | 0.14738314  | -0.03023257 | 0.75119885 | 0.10010326  | 0.35959268 | -0.11564969 | 0.27276916 | -0.1172209  | 0.27442633 | 0.0888241  | 0.036627    | -0.00846161 | 0.9841353  |
| ENSG00000142096 | 7  | 433364470 | 433364470  | ITGB3      | protein coding       | -0.173138   | 0.02596761  | -0.03023257 | 0.75119885 | 0.10010326  | 0.35959268 | -0.11564969 | 0.27276916 | -0.1172209  | 0.27442633 | 0.0888241  | 0.036627    | -0.00846161 | 0.9841353  |
| ENSG00000223737 | 3  | 40131302  | 40433329   | ENTPD3     | mRNA                 | -0.05401073 | 0.40481554  | -0.04799481 | 0.60113627 | 0.11362977  | 0.35951442 | -0.23170303 | 0.29551143 | -0.12828617 | 0.26420588 | 0.08888413 | 0.13186601  | -0.0068402  | 0.98226693 |
| ENSG00000223738 | 3  | 24131589  | 24131589   | NOB55A.1   | mRNA                 | -0.25668742 | 0.04212559  | -0.20814859 | 0.44559179 | 0.17286692  | 0.37389167 | -0.40128787 | 0.03598168 | -0.26878394 | 0.04526617 | 0.08402427 | 0.1386033   | -0.18847876 | 0.18611603 |
| ENSG00000223955 | 22 | 4443937   | 4444478    | ITGB3      | protein coding       | -0.173138   | 0.02596761  | -0.03023257 | 0.75119885 | 0.10010326  | 0.35959268 | -0.11564969 | 0.27276916 | -0.1172209  | 0.27442633 | 0.0888241  | 0.036627    | -0.00846161 | 0.9841353  |
| ENSG00000134282 | 1  | 1138994.1 | 11396201.1 | APAB1      | mRNA                 | -0.00798517 | 0.43222959  | -0.05913527 | 0.68406363 | 0.12339890  | 0.35755524 | -0.04509853 | 0.27858144 | -0.04509853 | 0.17666314 | 0.08979343 | 0.1386033   | -0.18847876 | 0.18611603 |
| ENSG00000198476 | 20 | 270983    | 260778     | Cd59re1    | protein coding       | -0.22813251 | 0.00370263  | -0.04871973 | 0.68262876 | 0.13801161  | 0.31963951 | -0.30317026 | 0.18752629 | -0.11562620 | 0.23996269 | 0.08979343 | 0.1386033   | -0.18847876 | 0.18611603 |
| ENSG00000153899 | 9  | 11787489  | 11771077.2 | CD59       | protein coding       | -0.10582443 | 0.35876438  | -0.12328671 | 0.63937476 | 0.10391281  | 0.30689848 | -0.19701773 | 0.32426254 | -0.18383983 | 0.17428984 | 0.08979343 | 0.1386033   | -0.18847876 | 0.18611603 |
| ENSG00000232989 | 3  | 3303383   | 3304810    | SC1P1      | processed pseudogene | -0.20102229 | 0.07822849  | -0.18132201 | 0.54105733 | 0.20323546  | 0.24791573 | -0.06489814 | 0.17477697 | -0.23580783 | 0.04866307 | 0.08828205 | 0.11237604  | -0.02139815 | 0.11237604 |
| ENSG00000169347 | 16 | 2035874   | 2037269    | CD27       | protein coding       | -0.24242898 | 0.03738974  | -0.02891248 | 0.81190771 | 0.10763711  | 0.30995582 | -0.1803386  | 0.69327263 | -0.25923121 | 0.08958691 | 0.08684001 | 0.14444201  | -0.02213921 | 0.05893332 |
| ENSG00000183024 | 2  | 11051182  | 11057175   | PCBP2      | protein coding       | -0.09237689 | 0.4242449   | -0.03186959 | 0.80289873 | 0.29724683  | 0.17774665 | -0.11691145 | 0.35140112 | -0.04989274 | 0.27447881 | 0.089634   | 0.1744845   | -0.13244765 | 0.02810687 |
| ENSG00000235707 | 7  | 7540189   | 7542992    | AL15073.1  | processed pseudogene | -0.25783785 | 0.02537807  | -0.18132201 | 0.54105733 | 0.20323546  | 0.24791573 | -0.06489814 | 0.17477697 | -0.23580783 | 0.04866307 | 0.08828205 | 0.11237604  | -0.02139815 | 0.11237604 |
| ENSG00000230783 | 3  | 4444848   | 4449606    | AC10946.3  | processed pseudogene | -0.02426989 | 0.26396521  | -0.05597097 | 0.71072790 | 0.02281541  | 0.30607189 | -0.03847963 | 0.4848729  | -0.08844877 | 0.11911116 | 0.08641439 | 0.14533156  | -0.03762589 | 0.10787258 |
| ENSG00000133142 | 1  | 10376701  | 10394772   | TCF4L      | protein coding       | -0.1658153  | 0.15774766  | -0.17145053 | 0.53401461 | 0.29094078  | 0.11572069 | -0.16700005 | 0.20522522 | -0.16991371 | 0.14718036 | 0.09529311 | 0.11569041  | -0.13305007 | 0.3692474  |
| ENSG00000210178 | X  | 15448317  | 15448681   | URLA4      | protein coding       | -0.01106746 | 0.9238971   | -0.10474783 | 0.70788430 | 0.10474783  | 0.58301894 | -0.35810000 | 0.99982808 | -0.02130517 | 0.07846278 | 0.11463114 | -0.03109911 | 0.83072519  | 0.07872589 |
| ENSG00000171124 | 19 | 254288    | 861474     | FUT3       | protein coding       | -0.23097182 | 0.02294764  | -0.05871931 | 0.70331201 | 0.22677678  | 0.25346163 | -0.19443441 | 0.31888263 | -0.28727077 | 0.01021328 | 0.08888841 | 0.17447344  | -0.20119015 | 0.06794821 |
| ENSG00000270208 | 17 | 49407602  | 49407602   | AC015656.1 | mRNA                 | -0.18351001 | 0.01074369  | -0.07432670 | 0.78632897 | 0.04287043  | 0.30766663 | -0.11196453 | 0.37627120 | -0.24414602 | 0.05602978 | 0.1054387  | 0.14868651  | -0.22466959 | 0.11677411 |
| ENSG00000207743 | 12 | 2538670   | 2538670    | AC017336.1 | mRNA                 | -0.18627000 | 0.02371366  | -0.03653442 | 0.64395859 | 0.18677485  | 0.35784113 | -0.10520995 | 0.35220995 | -0.24677471 | 0.02024027 | 0.08851877 | 0.11694122  | -0.14887778 | 0.22454774 |
| ENSG00000309051 | 14 | 9848118   | 9850354    | CANK       | protein coding       | -0.04848522 | 0.57373138  | -0.05898574 | 0.64890390 | 0.34477178  | 0.07496052 | -0.11575523 | 0.56518044 | -0.05330373 | 0.10453578 | 0.08020222 | 0.15007469  | -0.11708795 | 0.14180333 |
| ENSG00000269056 | 4  | 4330392   | 4332131    | TET1       | protein coding       | -0.33089162 | 0.00331844  | -0.07078392 | 0.5981151  | 0.10767329  | 0.32516258 | -0.19787171 | 0.45021622 | -0.30278954 | 0.03033026 | 0.08249748 | 0.15295845  | -0.37070545 | 0.03818194 |
| ENSG00000231890 | 2  | 13588716  | 13620253   | DRNS-AS1   | mRNA                 | -0.15079784 | 0.12776533  | -0.11445476 | 0.62890897 | 0.18685748  | 0.39784548 | -0.21258211 | 0.14598154 | -0.20252228 | 0.11084342 | 0.14218176 | -0.16834421 | 0.24255332  | 0.04255332 |
| ENSG00000284785 | 17 | 1973792   | 1973854    | AC057224   | mRNA                 | -0.23622685 | 0.03884888  | -0.14742825 | 0.58077281 | 0.22722298  | 0.25426122 | -0.30597078 | 0.1894724  | -0.2929337  | 0.00181838 | 0.04849655 | 0.15098124  | -0.20888221 | 0.14703212 |
| ENSG00000189818 | 21 | 1885778   | 1888784    | PPP4R2     | processed pseudogene | -0.18943836 | 0.00128653  | -0.14911678 | 0.51314422 | 0.04193338  | 0.20286468 | -0.19809255 | 0.32073171 | -0.14140821 | 0.00189765 | 0.08708774 | 0.17427891  | -0.04949213 | 0.10384658 |
| ENSG00000132485 | 4  | 7055541   | 7058187    | JCHN       | protein coding       | -0.12533443 | 0.2718229   | -0.01194402 | 0.93575978 | 0.12030792  | 0.4402615  | -0.07627690 | 0.70578903 | -0.12628179 | 0.35306389 | 0.08132545 | 0.15209781  | -0.19287784 | 0.01867225 |
| ENSG00000131071 | 1  | 10376701  | 10394772   | TCF4L      | protein coding       | -0.1658153  | 0.15774766  | -0.17145053 | 0.53401461 | 0.29094078  | 0.11572069 | -0.16700005 | 0.20522522 | -0.16991371 | 0.14718036 | 0.09529311 | 0.11569041  | -0.13305007 | 0.3692474  |
| ENSG00000245888 | 12 | 5408118   | 54126429   | AC023794.2 | mRNA                 | -0.07383118 | 0.53381187  | -0.07338117 | 0.61254289 | 0.10771260  | 0.37023983 | -0.10688379 | 0.44195163 | -0.08131213 | 0.15658316 | -0.1006886 | 0.45509424  | -0.08131213 | 0.15658316 |
| ENSG00000245917 | 12 | 1848554   | 1850288    | AC023453   | mRNA                 | -0.07634027 | 0.49485453  | -0.02588443 | 0.51810878 | 0.21995804  | 0.13942598 | -0.3881116  | 0.05849151 | -0.05883908 | 0.07220044 | 0.08130302 | 0.12272004  | -0.05179530 | 0.07713914 |
| ENSG00000248765 | 1  | 10376701  | 10394772   | TCF4L      | protein coding       | -0.1658153  | 0.15774766  | -0.17145053 | 0.53401461 | 0.29094078  | 0.11572069 | -0.16700005 | 0.20522522 | -0.16991371 | 0.14718036 | 0.09529311 | 0.11569041  | -0.13305007 | 0.3692474  |
| ENSG00000158889 | 1  | 16112534  | 16120617   | FRCR1G     | protein coding       | -0.12826617 | 0.25667173  | -0.01804455 | 0.80527878 | 0.13778855  | 0.45113361 | -0.10852159 | 0.50621948 | -0.06887387 | 0.21936401 | 0.08223739 | 0.15665391  | -0.38592529 | 0.05363079 |
| ENSG00000235143 | 1  | 3038818   | 30396224   | AC42535.1  | mRNA                 | -0.24273508 | 0.04195889  | -0.01673596 | 0.87801557 | 0.24251138  | 0.22207202 | -0.16999106 | 0.39633096 | -0.2685612  | 0.01729920 | 0.08212657 | 0.15011291  | -0.22255462 | 0.11389554 |
| ENSG00000110195 | 1  | 10376701  | 10394772   | TCF4L      | protein coding       | -0.1658153  | 0.15774766  | -0.17145053 | 0.53401461 | 0.29094078  | 0.11572069 | -0.16700005 | 0.20522522 | -0.16991371 | 0.14718036 | 0.09529311 | 0.11569041  | -0.13305007 | 0.3692474  |
| ENSG00000110144 | 20 | 5716873   | 5726641    | BMPT       | protein coding       | -0.12347474 | 0.01039827  | -0.07174917 | 0.67930508 | -0.28605576 | 0.13029475 | -0.3860984  | 0.00350793 | 0.08180331  | 0.16161191 | 0.10315104 | -0.0334431  | 0.0334431   | 0.0334431  |
| ENSG00000154016 | 17 | 1920256   | 1920711    | GRAP       | protein coding       | -0.17192117 | 0.13585236  | -0.01305971 | 0.82857868 | 0.33049881  | 0.12775551 | -0.19302500 | 0.42774388 | -0.11649685 | 0.09799292 | 0.08108173 | 0.16161191  | -0.15139751 | 0.08219652 |
| ENSG00000168610 | 1  | 10376701  | 10394772   | TCF4L      | protein coding       | -0.1658153  | 0.15774766  | -0.17145053 | 0.53401461 | 0.29094078  | 0.11572069 | -0.16700005 | 0.20522522 | -0.16991371 | 0.14718036 | 0.09529311 | 0.11569041  | -0.13305007 | 0.3692474  |
| ENSG00000201078 | 22 | 3705543   | 3705543    | RNYSK214   | mRNA                 | -0.06556480 | 0.15703518  | -0.03511990 | 0.80761421 | 0.07864151  | 0.39648851 | -0.13645252 | 0.49705332 | -0.100843   | 0.46881826 | 0.08101725 | 0.17184107  | -0.02145882 | 0.8842530  |
| ENSG00000242327 | 15 | 5209256   | 5209547    | AC020366.1 | processed pseudogene | -0.12609341 | 0.247454137 | -0.04102312 | 0.7772825  | 0.08218458  | 0.48382106 | -0.06751538 | 0.77879613 | -0.11584313 | 0.40417829 | 0.0806554  | 0.17460334  | -0.12701534 | 0.23224123 |
| ENSG00000129931 | 4  | 3423022   | 3423022    | AC098581.1 | processed pseudogene | -0.12609341 | 0.247454137 | -0.04102312 | 0.7772825  | 0.08218458  |            |             |            |             |            |            |             |             |            |

Table with 10 columns: Gene ID, Chr, Start, End, RefSeq ID, Gene Name, Feature, Strand, Start, End, RefSeq ID, Gene Name, Feature, Strand, Start, End, RefSeq ID, Gene Name, Feature, Strand. Contains genomic coordinates and gene annotations for various genes like AC03834.2, AC03834.2, AC03834.2, etc.



Table with 10 columns: Gene ID, Chr, Start, End, Gene Name, Feature, RefSeq ID, RefSeq Name, RefSeq Description, RefSeq Accession. Contains a comprehensive list of genes and their associated features and identifiers.





Table with 10 columns: Gene ID, Chr, Pos, RefSeq ID, Gene Name, Feature, Start, End, Strand, and various numerical values. The table lists numerous genes such as ZSMWSP2, HSL1, RASGEF1B, etc., with their genomic coordinates and associated data points.

Table with 4 columns: Gene ID, Gene Name, Gene Type, and Gene Description. The table lists numerous genes such as APOO345.3, APOO345.3, APOO345.3, etc., with their corresponding IDs and descriptions.



|                 |    |          |           |             |                         |              |             |             |             |             |            |              |             |             |            |             |            |            |
|-----------------|----|----------|-----------|-------------|-------------------------|--------------|-------------|-------------|-------------|-------------|------------|--------------|-------------|-------------|------------|-------------|------------|------------|
| ENSG0000021512  | 4  | 8846476  | 8871839   | HBMX1       | protein coding          | -0.156653766 | 0.174644891 | -0.08536735 | 0.55558472  | 0.124646459 | 0.36226967 | -0.201428806 | 0.132217847 | 0.03533973  | 0.74202305 | 0.14393994  | 0.11863402 |            |
| ENSG0000069636  | 4  | 2167298  | 2173630   | ITPR3       | protein coding          | 0.200262752  | 0.061322778 | 0.26999200  | 0.44226231  | 0.02092021  | 0.03617370 | 0.86718738   | 0.25977871  | 0.06275604  | 0.03533362 | 0.74202305  | 0.14393994 | 0.11863402 |
| ENSG0000147179  | 1  | 1167343  | 1170000   | ITPR3       | protein coding          | -0.02364541  | 0.02364541  | 0.02364541  | 0.02364541  | 0.02364541  | 0.02364541 | 0.02364541   | 0.02364541  | 0.02364541  | 0.02364541 | 0.02364541  | 0.02364541 | 0.02364541 |
| ENSG0000023430  | 21 | 3474577  | 3474848   | ITPR3-AS1   | lincRNA                 | -0.326266752 | 0.03781401  | -0.02970175 | 0.84318813  | -0.29834059 | 0.14323793 | -0.08372400  | 0.68637800  | -0.06407300 | 0.00273004 | 0.03287304  | 0.74202305 | 0.14393994 |
| ENSG0000187362  | 9  | 1367187  | 1367187   | ITPR3       | protein coding          | -0.09773739  | 0.30757819  | 0.02122979  | 0.86385460  | -0.44411461 | 0.22527671 | -0.07081019  | 0.72581011  | -0.02519751 | 0.04184386 | 0.03527207  | 0.74202305 | 0.14393994 |
| ENSG0000198178  | 15 | 14473753 | 14473753  | ITPR3       | protein coding          | 0.02364541   | 0.02364541  | 0.02364541  | 0.02364541  | 0.02364541  | 0.02364541 | 0.02364541   | 0.02364541  | 0.02364541  | 0.02364541 | 0.02364541  | 0.02364541 | 0.02364541 |
| ENSG0000074864  | X  | 10156970 | 1027600   | ITPR3       | protein coding          | -0.18145211  | 0.11447588  | -0.1873405  | 0.46677158  | -0.05117659 | 0.01969939 | -0.40224800  | 0.03722620  | -0.29212139 | 0.03021693 | 0.03524699  | 0.74202305 | 0.14393994 |
| ENSG0000025170  | 10 | 1223424  | 1223424   | ITPR3-AS2   | lincRNA                 | 0.01919202   | 0.06986613  | 0.01919202  | 0.06986613  | 0.01919202  | 0.06986613 | 0.01919202   | 0.06986613  | 0.01919202  | 0.06986613 | 0.01919202  | 0.06986613 | 0.01919202 |
| ENSG0000196909  | 15 | 8269844  | 8269844   | ITPR3-AS1   | lincRNA                 | 0.13782419   | 0.30746173  | 0.13782419  | 0.30746173  | 0.13782419  | 0.30746173 | 0.13782419   | 0.30746173  | 0.13782419  | 0.30746173 | 0.13782419  | 0.30746173 | 0.13782419 |
| ENSG0000017828  | 2  | 7469717  | 7493316   | ITPR3       | protein coding          | -0.23549513  | 0.03981039  | 0.02206823  | 0.89241873  | -0.23549513 | 0.03981039 | 0.02206823   | 0.89241873  | -0.23549513 | 0.03981039 | 0.02206823  | 0.89241873 | 0.03981039 |
| ENSG0000077954  | 16 | 7620264  | 7620264   | ITPR3-AS2   | lincRNA                 | -0.04393891  | 0.07490139  | -0.04393891 | 0.07490139  | -0.04393891 | 0.07490139 | -0.04393891  | 0.07490139  | -0.04393891 | 0.07490139 | -0.04393891 | 0.07490139 | 0.07490139 |
| ENSG0000065190  | 13 | 9749388  | 9804294   | ITPR3       | protein coding          | 0.02364541   | 0.02364541  | 0.02364541  | 0.02364541  | 0.02364541  | 0.02364541 | 0.02364541   | 0.02364541  | 0.02364541  | 0.02364541 | 0.02364541  | 0.02364541 | 0.02364541 |
| ENSG00000199289 | 6  | 2651931  | 2651931   | ITPR3       | protein coding          | 0.07941461   | 0.49058257  | 0.07941461  | 0.49058257  | 0.07941461  | 0.49058257 | 0.07941461   | 0.49058257  | 0.07941461  | 0.49058257 | 0.07941461  | 0.49058257 | 0.49058257 |
| ENSG0000013143  | 20 | 3628439  | 3671978   | ITPR3       | protein coding          | 0.04003363   | 0.24384498  | 0.04003363  | 0.24384498  | 0.04003363  | 0.24384498 | 0.04003363   | 0.24384498  | 0.04003363  | 0.24384498 | 0.04003363  | 0.24384498 | 0.24384498 |
| ENSG0000069642  | 3  | 10148889 | 10167152  | ZBTB11      | protein coding          | -0.15133737  | 0.19830293  | 0.03407038  | 0.12607702  | 0.42115349  | 0.03696688 | 0.80899278   | 0.37011026  | 0.22510177  | 0.01819258 | 0.03127058  | 0.74784065 | 0.18464028 |
| ENSG0000143375  | 1  | 15105110 | 15158892  | AGZ2        | protein coding          | -0.18981768  | 0.05968761  | -0.15742635 | 0.19752052  | -0.21015945 | 0.31435382 | -0.00769886  | 0.96996146  | -0.22894014 | 0.05926481 | 0.03117251  | 0.74784065 | 0.08411251 |
| ENSG0000023784  | 8  | 3397354  | 3397354   | PTENP1      | transcribed unprocessed | -0.02528418  | 0.96353090  | -0.04865011 | 0.17906746  | 0.00684768  | 0.76262001 | -0.34124243  | 0.06379794  | -0.04519047 | 0.74563120 | 0.03109622  | 0.74824741 | 0.18643230 |
| ENSG0000022036  | 11 | 14447693 | 14449230  | CRNRP       | transcribed unprocessed | -0.32447138  | 0.03624141  | -0.15160704 | 0.20541754  | -0.31297472 | 0.11791297 | -0.81361964  | 0.06569252  | -0.40279177 | 0.00920358 | 0.036706    | 0.74969352 | 0.29783855 |
| ENSG0000079399  | 16 | 89707134 | 89720388  | VRP9D1      | protein coding          | 0.04427382   | 0.98134143  | 0.04411155  | 0.90376030  | 0.00191022  | 0.64177149 | -0.05133815  | 0.78792273  | -0.03725637 | 0.03160381 | 0.03680186  | 0.74927108 | 0.05115081 |
| ENSG0000026034  | 16 | 26253358 | 26253358  | AC005055.1  | lincRNA                 | -0.20191808  | 0.06782227  | -0.11338954 | 0.44135720  | -0.26769091 | 0.10248997 | -0.27070272  | 0.17203310  | -0.30184445 | 0.04024939 | 0.06308724  | 0.74972141 | 0.17017013 |
| ENSG0000105784  | 7  | 8727448  | 8782229   | RNCP238     | protein coding          | -0.04474969  | 0.69916165  | -0.02021841 | 0.84002890  | -0.436159   | 0.09988929 | -0.32753752  | 0.87181491  | -0.0311951  | 0.01464491 | 0.06206211  | 0.74969299 | 0.09815763 |
| ENSG0000019049  | 14 | 6855330  | 6855330   | RABGTA7A    | protein coding          | 0.01702137   | 0.88318786  | 0.07184147  | 0.02004372  | 0.11504396  | 0.56783026 | 0.00953406   | 0.65383738  | 0.03012304  | 0.01825034 | 0.03634647  | 0.75004451 | 0.01176533 |
| ENSG0000019146  | 6  | 15453798 | 15457079  | RPSAP8      | protein coding          | -0.08743853  | 0.44454704  | 0.14589702  | 0.31205808  | 0.18811351  | 0.32189243 | 0.18779260   | 0.34872855  | -0.18699547 | 0.17986148 | 0.03629262  | 0.75010229 | 0.11925241 |
| ENSG0000028887  | 14 | 2311731  | 2387139   | LOC100272   | transcribed unprocessed | -0.14262718  | 0.24436932  | -0.15958281 | 0.26265407  | 0.13139692  | 0.51198146 | -0.4121748   | 0.03849483  | -0.24477718 | 0.07923764 | 0.03629262  | 0.75010229 | 0.11925241 |
| ENSG0000016405  | 3  | 4843214  | 4840448   | CDCD51      | protein coding          | 0.05615311   | 0.62768984  | 0.04320717  | 0.21070780  | 0.008084124 | 0.73879491 | 0.130249884  | 0.61728241  | 0.04340471  | 0.07152573 | 0.03630914  | 0.7511731  | 0.04503472 |
| ENSG0000012546  | 13 | 9609999  | 9898734   | CLVLB       | protein coding          | -0.17134655  | 0.31218974  | -0.0347080  | 0.81269878  | 0.001984816 | 0.96373411 | 0.04467789   | 0.98232533  | -0.20921204 | 0.13759252 | 0.03630914  | 0.75181189 | 0.20899734 |
| ENSG0000016946  | 9  | 13989265 | 13981404  | COX2A1      | protein coding          | -0.02292278  | 0.00437466  | -0.07424318 | 0.61234101  | 0.380220281 | 0.00549894 | -0.19308114  | 0.34514546  | -0.41538978 | 0.00179928 | 0.03630914  | 0.75181189 | 0.20899734 |
| ENSG0000012593  | X  | 8616204  | 8611339   | EIF1AIP29   | protein coding          | 0.05081794   | 0.62620424  | 0.01426829  | 0.41003803  | 0.00782324  | 0.01048742 | -0.45694462  | 0.10589189  | 0.07314461  | 0.05941594 | 0.03630914  | 0.75181189 | 0.20899734 |
| ENSG0000018705  | 22 | 3952993  | 3952974   | RPS18BP1    | protein coding          | 0.04082828   | 0.29242897  | -0.07951299 | 0.59089987  | 0.18103341  | 0.42006748 | -0.12395947  | 0.53875453  | 0.10430343  | 0.40920042 | 0.03630914  | 0.75268752 | 0.06997405 |
| ENSG000014541   | 1  | 1167343  | 1170000   | ITPR3       | protein coding          | -0.02364541  | 0.02364541  | 0.02364541  | 0.02364541  | 0.02364541  | 0.02364541 | 0.02364541   | 0.02364541  | 0.02364541  | 0.02364541 | 0.02364541  | 0.02364541 | 0.02364541 |
| ENSG00000259137 | 14 | 44120214 | 44120761  | LOC107961   | protein coding          | -0.101360312 | 0.33040687  | -0.03705501 | 0.784881718 | -0.14439815 | 0.47421207 | -0.07928686  | 0.69420113  | -0.11084371 | 0.38913066 | 0.03630914  | 0.75268752 | 0.06997405 |
| ENSG0000023930  | 11 | 17213879 | 17214480  | DNM3OS      | lincRNA                 | -0.16291134  | 0.11139848  | -0.04544275 | 0.75400461  | -0.05475238 | 0.78620369 | -0.05119001  | 0.79988044  | -0.16293837 | 0.18434209 | 0.03630914  | 0.75268752 | 0.06997405 |
| ENSG0000027022  | 1  | 14247693 | 14249230  | CRNRP       | transcribed unprocessed | -0.32447138  | 0.03624141  | -0.15160704 | 0.20541754  | -0.31297472 | 0.11791297 | -0.81361964  | 0.06569252  | -0.40279177 | 0.00920358 | 0.036706    | 0.74969352 | 0.29783855 |
| ENSG0000023860  | 16 | 5419944  | 5419971   | AC245052.1  | lincRNA                 | 0.021688329  | 0.85147869  | 0.05083836  | 0.14747800  | 0.00181653  | 0.64531799 | -0.00218302  | 0.98131744  | -0.03708887 | 0.78109859 | 0.03630914  | 0.75268752 | 0.06997405 |
| ENSG0000018606  | 19 | 5133136  | 5132424   | PCDH10      | protein coding          | -0.54481514  | 0.02032039  | -0.07873237 | 0.89586817  | -0.24450260 | 0.16014452 | -0.08988702  | 0.73031412  | -0.24262004 | 0.10431308 | 0.03630914  | 0.75268752 | 0.06997405 |
| ENSG0000020472  | 7  | 8727448  | 8782229   | RNCP238     | protein coding          | -0.04474969  | 0.69916165  | -0.02021841 | 0.84002890  | -0.436159   | 0.09988929 | -0.32753752  | 0.87181491  | -0.0311951  | 0.01464491 | 0.06206211  | 0.74969299 | 0.09815763 |
| ENSG0000023703  | 4  | 14076136 | 141012347 | VSIGL1      | protein coding          | 0.00561205   | 0.460631628 | 0.12327342  | 0.39194460  | 0.25934749  | 0.05858071 | -0.02373968  | 0.80623154  | -0.26655021 | 0.03734658 | 0.03630914  | 0.75268752 | 0.06997405 |
| ENSG0000023573  | 10 | 13104574 | 13104783  | SNRPDS      | protein coding          | -0.18720520  | 0.34657489  | -0.14455827 | 0.31854231  | -0.13575543 | 0.50014270 | -0.12045049  | 0.33995929  | -0.07814548 | 0.05435818 | 0.03630914  | 0.75268752 | 0.06997405 |
| ENSG0000029654  | 6  | 14982014 | 14984242  | SNRPB       | protein coding          | -0.15182186  | 0.18886540  | -0.03188162 | 0.60283643  | -0.20051471 | 0.24737492 | -0.18002523  | 0.19276894  | -0.06755671 | 0.19276894 | 0.03630914  | 0.75268752 | 0.06997405 |
| ENSG0000023909  | 16 | 8309789  | 8319727   | HSPB1       | protein coding          | 0.18978783   | 0.11119529  | 0.18974235  | 0.32381068  | 0.03245449  | 0.04001599 | -0.06105421  | 0.18841138  | 0.23547364  | 0.08851454 | 0.03630914  | 0.75268752 | 0.06997405 |
| ENSG0000017841  | 4  | 4198781  | 4198781   | ITPR3       | protein coding          | -0.02364541  | 0.02364541  | 0.02364541  | 0.02364541  | 0.02364541  | 0.02364541 | 0.02364541   | 0.02364541  | 0.02364541  | 0.02364541 | 0.02364541  | 0.02364541 | 0.02364541 |
| ENSG0000023110  | 3  | 17707405 | 17704792  | TBL1YR1-AS1 | lincRNA                 | -0.18162106  | 0.07476127  | -0.09642737 | 0.54832626  | -0.17234913 | 0.30011667 | -0.14468546  | 0.29117678  | 0.32420310  | 0.03630914 | 0.75268752  | 0.06997405 |            |
| ENSG0000029545  | 11 | 12513287 | 12513957  | AP0D1007.2  | lincRNA                 | -0.03696688  | 0.74245291  | 0.03837304  | 0.78426854  | -0.01388412 | 0.44599003 | -0.04342523  | 0.8828424   | -0.08426126 | 0.5        |             |            |            |



| ENSG00000232876                                                                                                                                                                                                                                                                                                                                                                        | 1  | 617059223 | 9732295   | CPYD-AS1   | lncRNA               | -0.12014968 | 0.01688323  | 0.07291482  | 0.164812144 | -0.15535684 | 0.430664208 | 0.10842037  | 0.591328437 | -0.01747057 | 0.900214612 | 0.060482071 | 0.782273476 | 0.071777777 | 0.620354503 |
|----------------------------------------------------------------------------------------------------------------------------------------------------------------------------------------------------------------------------------------------------------------------------------------------------------------------------------------------------------------------------------------|----|-----------|-----------|------------|----------------------|-------------|-------------|-------------|-------------|-------------|-------------|-------------|-------------|-------------|-------------|-------------|-------------|-------------|-------------|
| ENSG00000229717 <td>1</td> <td>6099224</td> <td>931781</td> <td>ADP1A</td> <td>lncRNA</td> <td>-0.25178181</td> <td>0.00381894</td> <td>-0.05281474</td> <td>0.17478951</td> <td>-0.14714378</td> <td>0.2673035</td> <td>-0.15977125</td> <td>0.49005808</td> <td>-0.26842866</td> <td>0.00676261</td> <td>0.06332134</td> <td>0.72727835</td> <td>0.27053091</td> <td>0.15742026</td> | 1  | 6099224   | 931781    | ADP1A      | lncRNA               | -0.25178181 | 0.00381894  | -0.05281474 | 0.17478951  | -0.14714378 | 0.2673035   | -0.15977125 | 0.49005808  | -0.26842866 | 0.00676261  | 0.06332134  | 0.72727835  | 0.27053091  | 0.15742026  |
| ENSG00000234986                                                                                                                                                                                                                                                                                                                                                                        | 1  | 7739952   | 175780    | AC00900.1  | lncRNA               | -0.00000000 | 0.00000000  | 0.00000000  | 0.00000000  | 0.00000000  | 0.00000000  | 0.00000000  | 0.00000000  | 0.00000000  | 0.00000000  | 0.00000000  | 0.00000000  | 0.00000000  | 0.00000000  |
| ENSG00000250174                                                                                                                                                                                                                                                                                                                                                                        | 3  | 12388944  | 12389247  | MTLK-AS2   | lncRNA               | -0.00544652 | 0.963204763 | 0.01181359  | 0.87748769  | -0.08384174 | 0.65981575  | 0.04809438  | 0.81186776  | -0.03192203 | 0.01814926  | 0.06067038  | 0.01874926  | 0.00867078  | 0.00867078  |
| ENSG00000260775                                                                                                                                                                                                                                                                                                                                                                        | 18 | 58416785  | 58417628  | AC01105.2  | lncRNA               | -0.15401788 | 0.1791415   | -0.12369538 | 0.40274473  | -0.01710039 | 0.92224421  | -0.24543281 | 0.20011148  | -0.17718115 | 0.18639826  | 0.06793780  | 0.82891232  | 0.11128292  | 0.01128292  |
| ENSG00000260947                                                                                                                                                                                                                                                                                                                                                                        | 1  | 4817676   | 4817676   | AC01105.2  | lncRNA               | -0.15401788 | 0.1791415   | -0.12369538 | 0.40274473  | -0.01710039 | 0.92224421  | -0.24543281 | 0.20011148  | -0.17718115 | 0.18639826  | 0.06793780  | 0.82891232  | 0.11128292  | 0.01128292  |
| ENSG00000157542                                                                                                                                                                                                                                                                                                                                                                        | 1  | 37607473  | 3811345   | KCNJ8      | protein coding       | -0.31704402 | 0.01490297  | -0.10136203 | 0.45048777  | -0.24888378 | 0.214461728 | -0.20552481 | 0.30747418  | -0.34482731 | 0.01096241  | 0.00754099  | 0.83030343  | 0.33191879  | 0.0117739   |
| ENSG00000144621                                                                                                                                                                                                                                                                                                                                                                        | 3  | 10836399  | 10836322  | MTF1L1     | protein coding       | -0.19179954 | 0.09411028  | -0.03295857 | 0.82633375  | -0.00551229 | 0.87023304  | -0.19999260 | 0.51824985  | -0.09952702 | 0.12834487  | 0.06741152  | 0.83037590  | 0.16964243  | 0.02623836  |
| ENSG00000248914                                                                                                                                                                                                                                                                                                                                                                        | 1  | 7624204   | 7624204   | MTF1L1     | protein coding       | -0.19179954 | 0.09411028  | -0.03295857 | 0.82633375  | -0.00551229 | 0.87023304  | -0.19999260 | 0.51824985  | -0.09952702 | 0.12834487  | 0.06741152  | 0.83037590  | 0.16964243  | 0.02623836  |
| ENSG00000279416                                                                                                                                                                                                                                                                                                                                                                        | 18 | 7909534   | 7909534   | AC02988.4  | lncRNA               | -0.05284841 | 0.05979984  | -0.07847878 | 0.35777784  | -0.04251229 | 0.85021863  | -0.06441919 | 0.78747591  | -0.12057116 | 0.37943664  | 0.00722396  | 0.83149369  | 0.05932245  | 0.05323245  |
| ENSG00000244598                                                                                                                                                                                                                                                                                                                                                                        | 3  | 5542789   | 5542830   | WNT10A-AS1 | processed pseudogene | -0.05744442 | 0.07230374  | -0.03387741 | 0.81795188  | -0.20102029 | 0.63064115  | -0.09241956 | 0.63834742  | -0.3847812  | 0.01819694  | 0.06717074  | 0.83037590  | 0.20494994  | 0.05317738  |
| ENSG0000019197                                                                                                                                                                                                                                                                                                                                                                         | 3  | 31518480  | 31520231  | PPP1R      | protein coding       | -0.19323974 | 0.15603999  | -0.05484863 | 0.70850801  | -0.04849763 | 0.83739857  | -0.03710261 | 0.62947838  | -0.03899161 | 0.23843175  | 0.06717074  | 0.83149369  | 0.18289958  | 0.2054009   |
| ENSG00000126218                                                                                                                                                                                                                                                                                                                                                                        | 13 | 113122789 | 113149529 | WNT10A-AS1 | processed pseudogene | -0.07086471 | 0.01727248  | -0.01496577 | 0.81795188  | -0.20102029 | 0.63064115  | -0.09241956 | 0.63834742  | -0.3847812  | 0.01819694  | 0.06717074  | 0.83037590  | 0.20494994  | 0.05317738  |
| ENSG00000231072                                                                                                                                                                                                                                                                                                                                                                        | 2  | 21284911  | 21776893  | ZCCHC      | protein coding       | -0.24272339 | 0.03470684  | -0.02792623 | 0.87171944  | -0.25172423 | 0.01993253  | -0.18973181 | 0.34313958  | -0.35513892 | 0.04036864  | 0.06817201  | 0.78331191  | 0.23072641  | 0.10858622  |
| ENSG00000147014                                                                                                                                                                                                                                                                                                                                                                        | 1  | 8589733   | 8514225   | ATP2B2     | protein coding       | -0.04442511 | 0.70124085  | -0.08717458 | 0.54889071  | 0.00601258  | 0.78983362  | -0.18494261 | 0.35444995  | -0.03002687 | 0.82914628  | 0.0068624   | 0.83311192  | 0.12028110  | 0.3708411   |
| ENSG00000166707                                                                                                                                                                                                                                                                                                                                                                        | X  | 101142131 | 101145842 | DZCC1B     | protein coding       | -0.01274580 | 0.91234264  | -0.07969888 | 0.58233435  | -0.00499857 | 0.90049857  | -0.03496455 | 0.82867343  | -0.05975605 | 0.40958881  | 0.06862133  | 0.63434441  | 0.03095537  | 0.8312812   |
| ENSG00000287700                                                                                                                                                                                                                                                                                                                                                                        | X  | 33718958  | 33720131  | ALN1378L1  | lncRNA               | -0.08607609 | 0.45312995  | -0.06142117 | 0.70150889  | -0.00306487 | 0.80738442  | -0.04272269 | 0.83204448  | -0.11884354 | 0.42057994  | 0.06049484  | 0.83037590  | 0.07897801  | 0.48962140  |
| ENSG00000192969                                                                                                                                                                                                                                                                                                                                                                        | 1  | 9120378   | 9140499   | HEM1       | protein coding       | -0.28124011 | 0.02042811  | -0.05738468 | 0.65441941  | -0.13175489 | 0.81114711  | -0.12191711 | 0.5207300   | -0.27017299 | 0.06774689  | 0.06509171  | 0.79369831  | 0.28459494  | 0.04462818  |
| ENSG00000404866                                                                                                                                                                                                                                                                                                                                                                        | 7  | 119593238 | 112701761 | ST17       | protein coding       | -0.13906663 | 0.22591503  | -0.05402107 | 0.40421078  | -0.15255440 | 0.50569107  | -0.16904088 | 0.42385114  | -0.16904088 | 0.15378999  | 0.06049484  | 0.78369841  | 0.11954443  | 0.26656722  |
| ENSG00000238957                                                                                                                                                                                                                                                                                                                                                                        | 2  | 144517178 | 144521477 | ZEB1-AS1   | lncRNA               | -0.08603774 | 0.54621204  | -0.18122419 | 0.19068058  | -0.28893886 | 0.71482052  | -0.38888899 | 0.05821691  | -0.08771899 | 0.07425011  | 0.06062620  | 0.78373208  | 0.08749474  | 0.54570832  |
| ENSG00000227527                                                                                                                                                                                                                                                                                                                                                                        | 1  | 4233338   | 4233381   | AC02988.4  | lncRNA               | -0.21172653 | 0.04292784  | -0.03832054 | 0.71911531  | -0.18920786 | 0.34455281  | -0.10071891 | 0.8573938   | -0.3140863  | 0.02249816  | 0.060518    | 0.78364552  | 0.23244553  | 0.10489442  |
| ENSG00000211793                                                                                                                                                                                                                                                                                                                                                                        | 14 | 21841128  | 21941657  | TRAV2      | TR V gene            | -0.09150983 | 0.428642061 | -0.04720110 | 0.92051955  | -0.28712111 | 0.13209145  | -0.26761456 | 0.19442397  | -0.8143189  | 0.05429299  | 0.00051046  | 0.96281054  | 0.00134768  | 0.96281054  |
| ENSG0000025308                                                                                                                                                                                                                                                                                                                                                                         | 2  | 20710987  | 20711073  | RIB235     | miRNA                | -0.07092422 | 0.53878171  | -0.08748739 | 0.54898844  | -0.1399953  | 0.65938767  | -0.22920258 | 0.24849631  | -0.12948803 | 0.35236888  | 0.0605032   | 0.78305871  | 0.02269131  | 0.87959817  |
| ENSG0000043320                                                                                                                                                                                                                                                                                                                                                                         | 2  | 8940429   | 8940475   | IGV1L2     | lncRNA               | -0.11701457 | 0.31038203  | -0.08076871 | 0.57119315  | -0.18171036 | 0.42011330  | -0.13759483 | 0.49572458  | -0.11700711 | 0.35898988  | 0.05848181  | 0.83391231  | 0.13413668  | 0.38303181  |
| ENSG00000099988                                                                                                                                                                                                                                                                                                                                                                        | 22 | 24219654  | 2424512   | MG2        | protein coding       | -0.13500779 | 0.24179313  | -0.02862131 | 0.82838583  | -0.14903235 | 0.40411783  | -0.07378859 | 0.85155831  | -0.14801029 | 0.28475234  | 0.06425481  | 0.84176908  | 0.19848721  | 0.16702933  |
| ENSG00000229514                                                                                                                                                                                                                                                                                                                                                                        | 1  | 7158901   | 7158933   | RP332P21   | processed pseudogene | -0.18008174 | 0.08755633  | -0.1201396  | 0.43895498  | -0.5838354  | 0.0047187   | -0.14078151 | 0.43859598  | -0.27152808 | 0.04701915  | 0.06391098  | 0.78428898  | 0.22999888  | 0.10813309  |
| ENSG00000165495                                                                                                                                                                                                                                                                                                                                                                        | 1  | 12514987  | 12543384  | PNOX2      | protein coding       | -0.22898195 | 0.02916768  | -0.13802492 | 0.48303761  | -0.20989896 | 0.12174509  | -0.21289861 | 0.28613728  | -0.3433988  | 0.01019434  | 0.06037862  | 0.78434901  | 0.35921938  | 0.0124817   |
| ENSG00000237368                                                                                                                                                                                                                                                                                                                                                                        | 21 | 45287890  | 45297816  | AC02988.4  | lncRNA               | -0.18540383 | 0.08855298  | -0.02920215 | 0.84142725  | -0.18019259 | 0.81174099  | -0.3084314  | 0.28743516  | -0.21272432 | 0.02327681  | 0.06037862  | 0.84444593  | 0.15509215  | 0.28613378  |
| ENSG00000188191                                                                                                                                                                                                                                                                                                                                                                        | 7  | 549197    | 727691    | PKnox1B    | protein coding       | -0.27212358 | 0.08819225  | -0.1418952  | 0.7287480   | -0.38458238 | 0.09898428  | -0.04247744 | 0.90275789  | -0.38105488 | 0.04153004  | 0.06342279  | 0.78442727  | 0.35487868  | 0.01144523  |
| ENSG00000228024                                                                                                                                                                                                                                                                                                                                                                        | 2  | 6652948   | 6652948   | AC02988.4  | lncRNA               | -0.27212358 | 0.08819225  | -0.1418952  | 0.7287480   | -0.38458238 | 0.09898428  | -0.04247744 | 0.90275789  | -0.38105488 | 0.04153004  | 0.06342279  | 0.78442727  | 0.35487868  | 0.01144523  |
| ENSG00000502039                                                                                                                                                                                                                                                                                                                                                                        | 19 | 34593239  | 34756589  | SCG2B2     | protein coding       | -0.24193171 | 0.04844143  | -0.15721386 | 0.2755638   | -0.00895657 | 0.81775042  | -0.31814458 | 0.10505248  | -0.25042325 | 0.00754336  | 0.06330276  | 0.84867737  | 0.78826204  | 0.20451157  |
| ENSG00000219335                                                                                                                                                                                                                                                                                                                                                                        | 7  | 4885432   | 4885804   | RP12216    | processed pseudogene | -0.25178181 | 0.00381894  | -0.05281474 | 0.17478951  | -0.14714378 | 0.2673035   | -0.15977125 | 0.49005808  | -0.26842866 | 0.00676261  | 0.06332134  | 0.72727835  | 0.27053091  | 0.15742026  |
| ENSG00000227527                                                                                                                                                                                                                                                                                                                                                                        | 1  | 4233338   | 4233381   | AC02988.4  | lncRNA               | -0.21172653 | 0.04292784  | -0.03832054 | 0.71911531  | -0.18920786 | 0.34455281  | -0.10071891 | 0.8573938   | -0.3140863  | 0.02249816  | 0.060518    | 0.78364552  | 0.23244553  | 0.10489442  |
| ENSG00000273415                                                                                                                                                                                                                                                                                                                                                                        | 11 | 12899578  | 12818371  | LINC02728  | lncRNA               | -0.11988878 | 0.54280380  | -0.04173143 | 0.90444412  | -0.03230804 | 0.86120221  | -0.13843434 | 0.49105369  | -0.18148815 | 0.02916693  | 0.06049484  | 0.78369841  | 0.10857208  | 0.27656341  |
| ENSG00000250555                                                                                                                                                                                                                                                                                                                                                                        | 6  | 131009174 | 131004474 | AMC3       | protein coding       | -0.3371313  | 0.00282373  | -0.03231078 | 0.78870787  | -0.36715004 | 0.59573307  | -0.14596221 | 0.48430609  | -0.42021078 | 0.01550269  | 0.06342279  | 0.78452373  | 0.84502971  | 0.00406424  |
| ENSG00000274430                                                                                                                                                                                                                                                                                                                                                                        | 1  | 10423338  | 10423338  | AC02988.4  | lncRNA               | -0.21172653 | 0.04292784  | -0.03832054 | 0.71911531  | -0.18920786 | 0.34455281  | -0.10071891 | 0.8573938   | -0.3140863  | 0.02249816  | 0.060518    | 0.78364552  | 0.23244553  | 0.10489442  |
| ENSG00000250779                                                                                                                                                                                                                                                                                                                                                                        | 12 | 12235654  | 12240087  | CLIP1-AS1  | lncRNA               | -0.11628158 | 0.31704402  | -0.02759639 | 0.84871934  | -0.02759639 | 0.80851320  | -0.20538117 | 0.13626398  | 0.06306786  | 0.78541497  | 0.06049484  | 0.83037590  | 0.08172523  | 0.54478074  |
| ENSG00000240455                                                                                                                                                                                                                                                                                                                                                                        | 17 | 18867258  | 18862314  | TFCM3B     | protein coding       | -0.11434987 | 0.321984228 | -0.14783243 | 0.30611864  | -0.40033333 | 0.48923124  | -0.13134401 | 0.36537349  | -0.20514972 | 0.13871129  | 0.06051821  | 0.84567291  | 0.17087221  | 0.23065770  |
| ENSG00000260757                                                                                                                                                                                                                                                                                                                                                                        | 1  | 10481489  | 10481489  | AC02988.4  | lncRNA               | -0.21172653 | 0.04292784  | -0.03832054 | 0.71911531  | -0.18920786 | 0.34455281  | -0.10071891 | 0.8573938   | -0.3140863  | 0.02249816  | 0.060518    | 0.78364552  | 0.23244553  | 0.10489442  |
| ENSG00000167620                                                                                                                                                                                                                                                                                                                                                                        | 17 | 40819106  | 40838270  | TOMM8      | protein coding       | -0.10746507 | 0.20184458  | -0.06284138 | 0.68751910  | -0.00403333 | 0.85351082  | -0.16700712 | 0.82888713  | -0.21384939 | 0.12811619  | 0.06028358  | 0.78468590  | 0.18241958  | 0.22419585  |
| ENSG00000204498                                                                                                                                                                                                                                                                                                                                                                        | 6  | 31458870  | 315       |            |                      |             |             |             |             |             |             |             |             |             |             |             |             |             |             |







| ENSG0000022549  | 1 | 16970945  | 16883650  | ENX284668.2  | lncRNA                             | -0.30788427  | 0.00059647 | -0.11888475 | 0.14080260 | 0.20779928  | 0.17688551 | -0.28991280 | 0.12878933 | -0.38402654 | 0.00414273 | 0.05299610  | 0.81020968 | 0.29420627  | 0.03809047 |
|-----------------|---|-----------|-----------|--------------|------------------------------------|--------------|------------|-------------|------------|-------------|------------|-------------|------------|-------------|------------|-------------|------------|-------------|------------|
| ENSG0000017407  | 1 | 4333330   | 4393774   | ARL1         | protein coding                     | -0.59373999  | 0.00000000 | -0.15066116 | 0.27251161 | 0.22787550  | 0.26987653 | -0.40397078 | 0.15207331 | -0.48011997 | 0.00000000 | 0.00000000  | 0.77027707 | 0.26257258  | 0.08118304 |
| ENSG0000019214  | 1 | 7813846   | 790524    | TRAF6        | protein coding                     | -0.04648689  | 0.04517914 | -0.03470004 | 0.78580807 | 0.32007668  | 0.17332443 | -0.08185005 | 0.75242412 | -0.05194369 | 0.10791232 | 0.05296944  | 0.03103743 | 0.12882788  | 0.20416238 |
| ENSG0000020620  | 1 | 12135234  | 12333337  | ACTG35B7.1   | lncRNA                             | -0.05856214  | 0.78196120 | -0.26491240 | 0.60298414 | -0.09865194 | 0.553538   | 0.47214670  | 0.00128888 | 0.06664602  | 0.03174867 | 0.06294743  | 0.00000000 | 0.11258883  | 0.47425463 |
| ENSG0000019792  | 1 | 1612552   | 1612552   | LOC1131383   | lncRNA                             | -0.03198343  | 0.00000000 | -0.03198343 | 0.00000000 | 0.03198343  | 0.00000000 | 0.03198343  | 0.00000000 | 0.03198343  | 0.00000000 | 0.03198343  | 0.00000000 | 0.03198343  | 0.00000000 |
| ENSG0000020464  | 1 | 64349877  | 64352242  | AL161756.3   | lncRNA                             | -0.20344227  | 0.05795255 | -0.03497163 | 0.02938181 | -0.19865194 | 0.27935451 | -0.13274910 | 0.48473804 | -0.27962842 | 0.00707802 | 0.05286293  | 0.8107380  | 0.20774243  | 0.14529433 |
| ENSG0000025998  | 1 | 8158240   | 8160959   | AL133279.3   | lncRNA                             | 0.01033267   | 0.92923344 | 0.127358    | 0.37744949 | 0.18733025  | 0.58422634 | 0.21284580  | 0.28649894 | 0.05269189  | 0.05660854 | 0.01071501  | 0.00000000 | 0.00743103  | 0.14721663 |
| ENSG0000024974  | 1 | 81242330  | 81242330  | LOC1019211   | processed pseudogene               | 0.02588811   | 0.00000000 | 0.02588811  | 0.00000000 | 0.02588811  | 0.00000000 | 0.02588811  | 0.00000000 | 0.02588811  | 0.00000000 | 0.02588811  | 0.00000000 | 0.02588811  | 0.00000000 |
| ENSG0000021680  | 1 | 31571410  | 31571410  | EVGA         | lncRNA                             | 0.02588811   | 0.03195181 | -0.17700704 | 0.17878892 | 0.04753920  | 0.09729208 | 0.04753920  | 0.09729208 | 0.07878921  | 0.57171648 | 0.05908085  | 0.8107380  | 0.20774243  | 0.14529433 |
| ENSG0000026753  | 1 | 4708346   | 4749243   | ZNF89        | protein coding                     | -0.26248989  | 0.01026620 | -0.01598302 | 0.82955068 | 0.23866521  | 0.03604891 | -0.09222798 | 0.68445416 | -0.50152278 | 0.00671360 | 0.05282675  | 0.01094642 | 0.32291936  | 0.02718328 |
| ENSG0000020136  | 1 | 8249178   | 8257584   | AC009117.2   | lncRNA                             | -0.14651973  | 0.22115163 | -0.02267623 | 0.88710331 | 0.08924548  | 0.30039334 | -0.07745434 | 0.59711854 | -0.59711854 | 0.05789934 | 0.08193733  | 0.28327166 | 0.08193733  |            |
| ENSG0000025400  | 1 | 12201601  | 12215287  | AC005244.2   | lncRNA                             | -0.15039780  | 0.01137889 | -0.01245658 | 0.91109835 | -0.33719284 | 0.09097491 | -0.08853862 | 0.62845043 | -0.2952827  | 0.00716238 | 0.05276818  | 0.01046424 | 0.32291936  | 0.02718328 |
| ENSG0000016143  | 1 | 4998903   | 4997581   | SLERL16      | polycomb target                    | -0.17382313  | 0.26753533 | -0.04653217 | 0.73081560 | 0.34128664  | 0.08122277 | -0.04691813 | 0.86292358 | -0.17183242 | 0.24189871 | 0.06278168  | 0.01094642 | 0.32291936  | 0.02718328 |
| ENSG0000020800  | 1 | 4152143   | 4160198   | PIN1         | protein coding                     | -0.07343620  | 0.05992263 | -0.03094662 | 0.86789871 | 0.01947478  | 0.93329258 | -0.1318984  | 0.51041968 | -0.13766852 | 0.33094252 | 0.05278167  | 0.01094642 | 0.32291936  | 0.02718328 |
| ENSG00000120729 | 1 | 31787858  | 31787858  | MYOT         | protein coding                     | -0.24031543  | 0.03591693 | -0.04445448 | 0.7755021  | 0.24078166  | 0.18178288 | -0.31653390 | 0.94517726 | -0.31653390 | 0.07070489 | 0.05278167  | 0.01094642 | 0.32291936  | 0.02718328 |
| ENSG0000020699  | 1 | 10186827  | 10170928  | AC019168.2   | lncRNA                             | 0.00306184   | 0.99214468 | 0.29999475  | 0.68275358 | 0.08606244  | 0.29438212 | 0.45444738  | 0.01724778 | 0.10816038  | 0.44822424 | 0.05278167  | 0.01094642 | 0.32291936  | 0.02718328 |
| ENSG00000201482 | 1 | 2706928   | 2706789   | AC020728.1   | lncRNA                             | -0.15092302  | 0.17765241 | -0.06703315 | 0.64005364 | 0.11817469  | 0.3384961  | -0.2011951  | 0.43861138 | -0.05278167 | 0.01094642 | 0.32291936  | 0.02718328 | 0.02718328  | 0.02718328 |
| ENSG00000198882 | 1 | 8768613   | 8774776   | PAPSS2       | protein coding                     | -0.03821574  | 0.74141707 | -0.06703315 | 0.64005364 | 0.11817469  | 0.3384961  | -0.2011951  | 0.43861138 | -0.05278167 | 0.01094642 | 0.32291936  | 0.02718328 | 0.02718328  | 0.02718328 |
| ENSG00000183439 | 1 | 2040934   | 2044133   | ACSM5        | protein coding                     | -0.25710267  | 0.02923613 | -0.06902237 | 0.50800460 | 0.02923613  | 0.17445438 | -0.17343888 | 0.37619418 | -0.23073854 | 0.08061940 | 0.05278167  | 0.01094642 | 0.32291936  | 0.02718328 |
| ENSG00000171728 | 1 | 6041351   | 6041351   | PP2C         | protein coding                     | -0.00439324  | 0.97933497 | 0.04318428  | 0.76873961 | 0.11494954  | 0.92694953 | 0.04449041  | 0.82569384 | -0.02616612 | 0.85411074 | 0.05280309  | 0.01127333 | 0.02533297  | 0.01172731 |
| ENSG00000148824 | 1 | 133394804 | 133422503 | MTG1         | protein coding                     | -0.16887813  | 0.14203794 | -0.08072030 | 0.93803489 | 0.02923613  | 0.17445438 | -0.17343888 | 0.37619418 | -0.23073854 | 0.08061940 | 0.05278167  | 0.01094642 | 0.32291936  | 0.02718328 |
| ENSG00000117758 | 1 | 27727318  | 27844441  | STX12        | protein coding                     | -0.03847934  | 0.37951411 | -0.02289236 | 0.85711810 | 0.05920778  | 0.76920357 | -0.01018783 | 0.87339444 | -0.03898032 | 0.03889183 | 0.05259272  | 0.01167410 | 0.03020338  | 0.01167410 |
| ENSG00000207102 | 1 | 73496002  | 73410228  | ENSG000176.1 | transcribed unprocessed pseudogene | -0.02143458  | 0.14565252 | -0.02143458 | 0.14565252 | 0.02143458  | 0.14565252 | -0.02143458 | 0.14565252 | -0.02143458 | 0.14565252 | -0.02143458 | 0.14565252 | 0.02143458  | 0.14565252 |
| ENSG00000202155 | 1 | 2506937   | 2508818   | LOC102176.1  | lncRNA                             | -0.24220348  | 0.03381467 | -0.02584398 | 0.85711810 | 0.05920778  | 0.76920357 | -0.01018783 | 0.87339444 | -0.03898032 | 0.03889183 | 0.05259272  | 0.01167410 | 0.03020338  | 0.01167410 |
| ENSG00000114728 | 1 | 14184442  | 14214554  | TFPI2        | protein coding                     | 0.15898043   | 0.17326553 | 0.30254787  | 0.93971888 | 0.03348038  | 0.88054984 | 0.05110748  | 0.00988885 | 0.12286118  | 0.12225007 | 0.05241022  | 0.01181128 | 0.01392883  | 0.02323254 |
| ENSG00000187122 | 1 | 9699938   | 9718995   | SULT1        | protein coding                     | -0.01708788  | 0.00870787 | -0.00922362 | 0.54260051 | 0.40481892  | 0.00808111 | -0.30268491 | 0.10274852 | -0.45895107 | 0.00931888 | 0.05292968  | 0.01181128 | 0.01392883  | 0.02323254 |
| ENSG00000135245 | 1 | 12845849  | 12848181  | HLIPA        | protein coding                     | -0.11311295  | 0.24858488 | -0.11047004 | 0.64005364 | 0.08917197  | 0.62817487 | -0.34151439 | 0.11009216 | -0.24484217 | 0.04121239 | 0.05252606  | 0.01181128 | 0.01392883  | 0.02323254 |
| ENSG00000207407 | 1 | 17013877  | 17016741  | ENSG00442.3  | lncRNA                             | -0.07208622  | 0.53327102 | -0.07208622 | 0.53327102 | 0.08850090  | 0.90083998 | -0.08850090 | 0.90083998 | 0.03434555  | 0.86495522 | -0.04728072 | 0.03420886 | 0.05278167  | 0.01094642 |
| ENSG00000149890 | 1 | 4200000   | 4200000   | YJL2         | lncRNA                             | -0.00203728  | 0.01058424 | -0.00203728 | 0.01058424 | 0.00203728  | 0.01058424 | -0.00203728 | 0.01058424 | 0.00203728  | 0.01058424 | -0.00203728 | 0.01058424 | 0.00203728  | 0.01058424 |
| ENSG00000150348 | 1 | 424080    | 428908    | YJL2         | lncRNA                             | -0.00203728  | 0.01058424 | -0.00203728 | 0.01058424 | 0.00203728  | 0.01058424 | -0.00203728 | 0.01058424 | 0.00203728  | 0.01058424 | -0.00203728 | 0.01058424 | 0.00203728  | 0.01058424 |
| ENSG0000025399  | 1 | 2709398   | 2709278   | ENSG0079.2   | processed pseudogene               | -0.10341097  | 0.07099882 | -0.03876354 | 0.78924216 | -0.10342762 | 0.58379121 | -0.10716245 | 0.72429700 | -0.19213187 | 0.1369942  | 0.05248425  | 0.02119657 | 0.08710696  | 0.04750459 |
| ENSG00000119412 | 1 | 11191122  | 11191122  | LOC101921.1  | processed pseudogene               | -0.01119122  | 0.01027619 | -0.01119122 | 0.01027619 | -0.01119122 | 0.01027619 | -0.01119122 | 0.01027619 | -0.01119122 | 0.01027619 | -0.01119122 | 0.01027619 | 0.01119122  | 0.01027619 |
| ENSG00000233479 | 1 | 11369116  | 11367131  | AC010794.2   | lncRNA                             | -0.14316455  | 0.21497140 | -0.01371261 | 0.97060002 | -0.08312688 | 0.65687369 | -0.08990346 | 0.65687369 | -0.12013801 | 0.14530918 | 0.05278167  | 0.01094642 | 0.32291936  | 0.02718328 |
| ENSG00000115361 | 1 | 21037176  | 21022447  | ACAD         | protein coding                     | -0.14803768  | 0.19622499 | -0.09301307 | 0.84207630 | 0.02881403  | 0.77074471 | -0.07250047 | 0.70811810 | -0.07247111 | 0.62057044 | 0.05244884  | 0.01213667 | 0.02718328  | 0.02718328 |
| ENSG00000195674 | 1 | 1200000   | 1200000   | LOC101921.1  | processed pseudogene               | -0.01119122  | 0.01027619 | -0.01119122 | 0.01027619 | -0.01119122 | 0.01027619 | -0.01119122 | 0.01027619 | -0.01119122 | 0.01027619 | -0.01119122 | 0.01027619 | 0.01119122  | 0.01027619 |
| ENSG00000238628 | 1 | 10772811  | 10743138  | ENSG003844.1 | lncRNA                             | -0.096176719 | 0.40536496 | -0.02912420 | 0.84207630 | 0.02881403  | 0.77074471 | -0.07250047 | 0.70811810 | -0.07247111 | 0.62057044 | 0.05244884  | 0.01213667 | 0.02718328  | 0.02718328 |
| ENSG00000229400 | 1 | 22471750  | 22427366  | CHIR3.5      | lncRNA                             | -0.13628478  | 0.21292267 | -0.02735668 | 0.80826522 | -0.21339957 | 0.28517388 | -0.07283077 | 0.89210471 | -0.28413838 | 0.36230787 | 0.05242938  | 0.02151453 | -0.12007128 | 0.14308006 |
| ENSG00000171190 | 1 | 122876    | 72854     | CD37         | protein coding                     | -0.04848048  | 0.44545747 | -0.06401547 | 0.68872298 | 0.08451318  | 0.77212349 | -0.09168226 | 0.64815139 | -0.08567475 | 0.53790769 | 0.05207371  | 0.01262341 | 0.04750459  | 0.04750459 |
| ENSG00000146872 | 1 | 22437868  | 22440127  | FAM124B      | protein coding                     | -0.01188559  | 0.98485708 | -0.01651517 | 0.48194588 | 0.08081189  | 0.64161535 | -0.21700704 | 0.27691907 | -0.07404525 | 0.61278168 | 0.05212185  | 0.01194651 | 0.04750459  | 0.04750459 |
| ENSG00000140419 | 1 | 8179581   | 8184286   | SMK1         | protein coding                     | -0.04848048  | 0.44545747 | -0.06401547 | 0.68872298 | 0.08451318  | 0.77212349 | -0.09168226 | 0.64815139 | -0.08567475 | 0.53790769 | 0.05207371  | 0.01262341 | 0.04750459  | 0.04750459 |
| ENSG00000206776 | 1 | 22437868  | 22440127  | FAM124B      | protein coding                     |              |            |             |            |             |            |             |            |             |            |             |            |             |            |



| ENSG0000023645  | 21 | 41767033 | 41872024 | AP001919.2  | lincRNA             | -0.21869713 | 0.05579044 | -0.02137416 | 0.75096746 | 0.06090702 | 0.00171018 | -0.15445130 | 0.44176870 | -0.21318552 | 0.121878   | 0.05237461 | 0.18199277 | -0.21817193 | 0.12784113 |            |
|-----------------|----|----------|----------|-------------|---------------------|-------------|------------|-------------|------------|------------|------------|-------------|------------|-------------|------------|------------|------------|-------------|------------|------------|
| ENSG0000015879  | 7  | 9437739  | 9419988  | PTPIP3      | protein coding      | -0.1379263  | 0.2314077  | -0.0022245  | 0.67973919 | 0.14500239 | 0.4720111  | -0.14215861 | 0.8047921  | -0.11862869 | 0.06783373 | 0.05622611 | 0.17522611 | 0.15951441  | 0.15474692 | 0.11991441 |
| ENSG0000018915  | 8  | 8631196  | 8631196  | LOC101928   | antisense_intronic  | -0.000000   | 0.000000   | 0.000000    | 0.000000   | 0.000000   | 0.000000   | 0.000000    | 0.000000   | 0.000000    | 0.000000   | 0.000000   | 0.000000   | 0.000000    | 0.000000   | 0.000000   |
| ENSG0000023437  | 9  | 6213386  | 6213386  | AL34575.1   | unprocessed_pseudot | -0.3074639  | 0.000000   | -0.0954540  | 0.5093980  | -0.2244401 | 0.0572490  | -0.2072484  | 0.1131202  | -0.4400913  | 0.000000   | 0.000000   | 0.000000   | 0.000000    | 0.000000   | 0.000000   |
| ENSG0000018379  | 22 | 2683372  | 2683372  | ZNF871      | protein coding      | -0.17671832 | 0.2026100  | -0.0254043  | 0.7174870  | 0.1689148  | 0.4053232  | -0.1034487  | 0.8747686  | -0.2321223  | 0.000000   | 0.0581101  | 0.000000   | 0.000000    | 0.000000   | 0.000000   |
| ENSG0000027190  | 10 | 1370284  | 1370284  | LOC101928   | antisense_intronic  | -0.000000   | 0.000000   | 0.000000    | 0.000000   | 0.000000   | 0.000000   | 0.000000    | 0.000000   | 0.000000    | 0.000000   | 0.000000   | 0.000000   | 0.000000    | 0.000000   | 0.000000   |
| ENSG0000023673  | 10 | 2107339  | 2107339  | AL62311.1   | processed_pseudot   | -0.01697135 | 0.8834754  | -0.0475405  | 0.8818546  | -0.2015109 | 0.1133929  | -0.0870354  | 0.7395866  | -0.0832329  | 0.0483349  | 0.0518652  | 0.000000   | 0.000000    | 0.000000   | 0.000000   |
| ENSG0000016301  | 2  | 2196544  | 2196544  | LOC101928   | antisense_intronic  | -0.01749239 | 0.2014467  | -0.0077696  | 0.8476230  | -0.3022173 | 0.0662414  | -0.1513734  | 0.8487610  | -0.1655994  | 0.0191754  | 0.0517303  | 0.000000   | 0.000000    | 0.000000   | 0.000000   |
| ENSG0000026933  | 10 | 3093706  | 3093706  | LOC101928   | antisense_intronic  | -0.000000   | 0.000000   | 0.000000    | 0.000000   | 0.000000   | 0.000000   | 0.000000    | 0.000000   | 0.000000    | 0.000000   | 0.000000   | 0.000000   | 0.000000    | 0.000000   | 0.000000   |
| ENSG0000023280  | 10 | 6262822  | 6262822  | DMN1P7      | protein coding      | -0.22713995 | 0.0469679  | -0.1738644  | 0.2027213  | -0.4070910 | 0.300      | -0.1968964  | 0.7052389  | -0.2690256  | 0.0572722  | 0.0512904  | 0.000000   | 0.000000    | 0.000000   | 0.000000   |
| ENSG0000029576  | 12 | 13218673 | 13218673 | LOC101928   | antisense_intronic  | -0.12973499 | 0.2626261  | -0.0104895  | 0.944557   | -0.1284202 | 0.0226737  | -0.1846780  | 0.3900000  | -0.2583261  | 0.0522253  | 0.0511263  | 0.000000   | 0.000000    | 0.000000   | 0.000000   |
| ENSG0000028195  | 11 | 11443492 | 11443492 | LOC101928   | antisense_intronic  | -0.000000   | 0.000000   | 0.000000    | 0.000000   | 0.000000   | 0.000000   | 0.000000    | 0.000000   | 0.000000    | 0.000000   | 0.000000   | 0.000000   | 0.000000    | 0.000000   | 0.000000   |
| ENSG0000027198  | 14 | 9984522  | 9984522  | VDCAP1      | processed_pseudot   | -0.09181371 | 0.4270998  | -0.0152883  | 0.8181758  | -0.3521359 | 0.0928289  | -0.0988329  | 0.9239482  | -0.0983716  | 0.0743756  | 0.0500490  | 0.000000   | 0.000000    | 0.000000   | 0.000000   |
| ENSG0000029153  | 12 | 2732854  | 2732854  | ANNT1       | protein coding      | -0.3127333  | 0.0081659  | -0.2517139  | 0.0771444  | -0.2270189 | 0.2458031  | -0.1471757  | 0.0229849  | -0.3840373  | 0.0086359  | 0.0503729  | 0.000000   | 0.000000    | 0.000000   | 0.000000   |
| ENSG0000026499  | 17 | 3092898  | 3094141  | ALOX1P1     | protein coding      | -0.1018628  | 0.3788121  | -0.0088748  | 0.8444994  | -0.0448801 | 0.0400100  | -0.0986438  | 0.6582934  | -0.0430781  | 0.1373293  | 0.0502483  | 0.000000   | 0.000000    | 0.000000   | 0.000000   |
| ENSG0000018391  | 17 | 5659399  | 5659611  | NOG         | protein coding      | -0.20690329 | 0.0709919  | -0.0520134  | 0.9713867  | -0.1274461 | 0.4427439  | -0.0700267  | 0.7272132  | -0.2651782  | 0.0514072  | 0.0501841  | 0.000000   | 0.000000    | 0.000000   | 0.000000   |
| ENSG0000024476  | 6  | 1102489  | 1111723  | ERV1P2      | protein coding      | -0.17581343 | 0.2612015  | -0.0674569  | 0.8614023  | -0.0714219 | 0.2063861  | -0.2110739  | 0.2907172  | -0.2454907  | 0.0084863  | 0.0500103  | 0.000000   | 0.000000    | 0.000000   | 0.000000   |
| ENSG0000022903  | 6  | 12969312 | 12969312 | PSMAP2      | processed_pseudot   | -0.16597399 | 0.1560435  | -0.1554811  | 0.1321014  | -0.1978994 | 0.3431079  | -0.2003310  | 0.1209411  | -0.1764139  | 0.2019153  | 0.0498919  | 0.000000   | 0.000000    | 0.000000   | 0.000000   |
| ENSG00000241709 | X  | 11492491 | 14954499 | LINC00983   | lincRNA             | -0.01024809 | 0.19310457 | -0.0474969  | 0.7633044  | -0.0319487 | 0.8743102  | -0.1384854  | 0.4909037  | -0.0376104  | 0.7918555  | 0.0498296  | 0.000000   | 0.000000    | 0.000000   | 0.000000   |
| ENSG0000024292  | 12 | 12180077 | 12180340 | LINC00182   | lincRNA             | -0.0090480  | 0.9507354  | -0.0681825  | 0.883333   | -0.1468740 | 0.4633060  | -0.1338550  | 0.5081734  | -0.0501760  | 0.1960779  | 0.0492424  | 0.000000   | 0.000000    | 0.000000   | 0.000000   |
| ENSG0000027528  | 10 | 5031008  | 5029781  | SPY1P9      | processed_pseudot   | -0.0740987  | 0.5040389  | -0.0321421  | 0.1102862  | -0.1309916 | 0.4981743  | -0.1787977  | 0.1724801  | -0.1084150  | 0.4437403  | 0.0499488  | 0.000000   | 0.000000    | 0.000000   | 0.000000   |
| ENSG0000010832  | 10 | 4017710  | 4016568  | RAGAP1E1    | protein coding      | -0.23448163 | 0.1071234  | -0.1732121  | 0.0327254  | -0.0414302 | 0.7885303  | -0.4261837  | 0.0266445  | -0.1392059  | 0.0597771  | 0.0490474  | 0.000000   | 0.000000    | 0.000000   | 0.000000   |
| ENSG0000024845  | 6  | 11647547 | 11659287 | SEMA5A.1    | protein coding      | -0.2374583  | 0.0418419  | -0.2603751  | 0.0589397  | -0.0510498 | 0.8008732  | -0.4701219  | 0.0134177  | -0.2897729  | 0.0033600  | 0.0490927  | 0.000000   | 0.000000    | 0.000000   | 0.000000   |
| ENSG0000027841  | 16 | 8078956  | 8071447  | LINC00218   | lincRNA             | -0.0008181  | 0.4845514  | -0.1492071  | 0.3308354  | -0.0985729 | 0.6247163  | -0.2181327  | 0.2781914  | -0.0725570  | 0.6059345  | 0.0458717  | 0.000000   | 0.000000    | 0.000000   | 0.000000   |
| ENSG0000023203  | 9  | 3125301  | 3125477  | SLM2A6P2    | processed_pseudot   | -0.04440848 | 0.7013500  | -0.0471142  | 0.9740053  | -0.2784123 | 0.1628003  | -0.0141028  | 0.9105107  | -0.0486234  | 0.0141028  | 0.0190517  | 0.000000   | 0.000000    | 0.000000   | 0.000000   |
| ENSG0000013870  | 4  | 1027878  | 1028472  | GSTC3       | protein coding      | -0.1300698  | 0.2732681  | -0.0589474  | 0.7011393  | -0.1028411 | 0.3611862  | -0.0429586  | 0.3581587  | -0.2131836  | 0.1170034  | 0.048274   | 0.000000   | 0.000000    | 0.000000   | 0.000000   |
| ENSG0000020360  | 6  | 1193938  | 1191896  | LINC01295   | lincRNA             | -0.2460108  | 0.0102029  | -0.0634532  | 0.8121744  | -0.2574701 | 0.1942911  | -0.2457196  | 0.3001828  | -0.3690359  | 0.000000   | 0.000000   | 0.000000   | 0.000000    | 0.000000   | 0.000000   |
| ENSG00000264739 | 17 | 1641424  | 1641668  | LINC03484.2 | lincRNA             | -0.0353842  | 0.7589878  | -0.1043963  | 0.7101584  | -0.0765828 | 0.7041757  | -0.01631027 | 0.83584416 | -0.08481324 | 0.1540213  | 0.0482235  | 0.000000   | 0.000000    | 0.000000   | 0.000000   |
| ENSG0000021480  | 8  | 12419271 | 12424798 | AC09291.1   | antisense_intronic  | -0.2272688  | 0.0524422  | -0.1041929  | 0.4748023  | -0.0234939 | 0.93084614 | -0.2474524  | 0.1673825  | -0.2511955  | 0.0691168  | 0.0480968  | 0.000000   | 0.000000    | 0.000000   | 0.000000   |
| ENSG0000018704  | 11 | 11445920 | 11445920 | LINC01928   | antisense_intronic  | -0.000000   | 0.000000   | 0.000000    | 0.000000   | 0.000000   | 0.000000   | 0.000000    | 0.000000   | 0.000000    | 0.000000   | 0.000000   | 0.000000   | 0.000000    | 0.000000   | 0.000000   |
| ENSG00000255150 | 12 | 10403739 | 10403739 | EID3        | protein coding      | -0.17600415 | 0.10214274 | -0.1002730  | 0.4884133  | -0.1812367 | 0.3651132  | -0.2120034  | 0.1161583  | -0.0497909  | 0.000000   | 0.000000   | 0.000000   | 0.000000    | 0.000000   | 0.000000   |
| ENSG0000018178  | 19 | 483348   | 474983   | MTF3C2      | protein coding      | -0.2171128  | 0.0489044  | -0.0202829  | 0.8955725  | -0.2047198 | 0.1419838  | -0.0494630  | 0.7874054  | -0.2768859  | 0.0402331  | 0.0478855  | 0.000000   | 0.000000    | 0.000000   | 0.000000   |
| ENSG0000022402  | 11 | 12924012 | 12924012 | LOC101928   | antisense_intronic  | -0.000000   | 0.000000   | 0.000000    | 0.000000   | 0.000000   | 0.000000   | 0.000000    | 0.000000   | 0.000000    | 0.000000   | 0.000000   | 0.000000   | 0.000000    | 0.000000   | 0.000000   |
| ENSG00000225476 | 2  | 4330988  | 4330983  | MTCO3P5     | processed_pseudot   | -0.00185045 | 0.8890214  | -0.0283739  | 0.8709563  | -0.0642383 | 0.7504339  | -0.0450261  | 0.8061765  | -0.0448282  | 0.0660716  | 0.0498832  | 0.000000   | 0.000000    | 0.000000   | 0.000000   |
| ENSG0000016856  | 12 | 5699452  | 5699447  | PRK9        | protein coding      | -0.10912467 | 0.3410298  | -0.1038052  | 0.4723827  | -0.1778969 | 0.3604892  | -0.0342266  | 0.2212710  | -0.0872326  | 0.1537407  | 0.0485824  | 0.000000   | 0.000000    | 0.000000   | 0.000000   |
| ENSG0000020792  | 10 | 1000000  | 1000000  | LINC01928   | antisense_intronic  | -0.000000   | 0.000000   | 0.000000    | 0.000000   | 0.000000   | 0.000000   | 0.000000    | 0.000000   | 0.000000    | 0.000000   | 0.000000   | 0.000000   | 0.000000    | 0.000000   | 0.000000   |
| ENSG0000010892  | 17 | 6381943  | 6383012  | F3J13       | protein coding      | -0.06435807 | 0.5782406  | -0.1043844  | 0.4056322  | -0.1600944 | 0.4250581  | -0.1127198  | 0.5630816  | -0.052326   | 0.7099436  | 0.000000   | 0.000000   | 0.000000    | 0.000000   | 0.000000   |
| ENSG0000022843  | X  | 9429502  | 9272508  | AC09291.1   | antisense_intronic  | -0.2768989  | 0.0192349  | -0.1362145  | 0.4556664  | -0.3629618 | 0.0345201  | -0.1524708  | 0.4474778  | -0.2564513  | 0.0122154  | 0.0493679  | 0.000000   | 0.000000    | 0.000000   | 0.000000   |
| ENSG0000027775  | 10 | 1000000  | 1000000  | LINC01928   | antisense_intronic  | -0.000000   | 0.000000   | 0.000000    | 0.000000   | 0.000000   | 0.000000   | 0.000000    | 0.000000   | 0.000000    | 0.000000   | 0.000000   | 0.000000   | 0.000000    | 0.000000   | 0.000000   |
| ENSG0000022740  | 11 | 17500412 | 1759105  | LINC03053   | lincRNA             | -0.07454008 | 0.5100291  | -0.0411526  | 0.9737203  | -0.1338262 | 0.4436029  | -0.0439428  | 0.8277140  | -0.1425234  | 0.3893041  | 0.0416725  | 0.000000   | 0.000000    | 0.000000   | 0.000000   |
| ENSG0000017089  | 17 | 4821156  | 4826398  | XMB9        | protein coding      | -0.24397187 | 0.0249149  | -0.0335689  | 0.6199878  | -0.2920848 | 0.1938715  | -0.0446628  | 0.8248373  | -0.2793938  | 0.0407916  | 0.04       |            |             |            |            |



Table with columns for gene ID, gene name, protein name, and various numerical values. The table lists numerous genes such as ENG, ENDOG, ENDOG2, ENDOG3, ENDOG4, ENDOG5, ENDOG6, ENDOG7, ENDOG8, ENDOG9, ENDOG10, ENDOG11, ENDOG12, ENDOG13, ENDOG14, ENDOG15, ENDOG16, ENDOG17, ENDOG18, ENDOG19, ENDOG20, ENDOG21, ENDOG22, ENDOG23, ENDOG24, ENDOG25, ENDOG26, ENDOG27, ENDOG28, ENDOG29, ENDOG30, ENDOG31, ENDOG32, ENDOG33, ENDOG34, ENDOG35, ENDOG36, ENDOG37, ENDOG38, ENDOG39, ENDOG40, ENDOG41, ENDOG42, ENDOG43, ENDOG44, ENDOG45, ENDOG46, ENDOG47, ENDOG48, ENDOG49, ENDOG50, ENDOG51, ENDOG52, ENDOG53, ENDOG54, ENDOG55, ENDOG56, ENDOG57, ENDOG58, ENDOG59, ENDOG60, ENDOG61, ENDOG62, ENDOG63, ENDOG64, ENDOG65, ENDOG66, ENDOG67, ENDOG68, ENDOG69, ENDOG70, ENDOG71, ENDOG72, ENDOG73, ENDOG74, ENDOG75, ENDOG76, ENDOG77, ENDOG78, ENDOG79, ENDOG80, ENDOG81, ENDOG82, ENDOG83, ENDOG84, ENDOG85, ENDOG86, ENDOG87, ENDOG88, ENDOG89, ENDOG90, ENDOG91, ENDOG92, ENDOG93, ENDOG94, ENDOG95, ENDOG96, ENDOG97, ENDOG98, ENDOG99, ENDOG100. The values include gene IDs, protein names, and various numerical values representing different parameters or scores.



Table with columns for gene names, coordinates, and various identifiers. The table lists numerous genes such as AC119674.2, AC119675.2, AC119676.2, etc., along with their genomic coordinates and associated identifiers.



|                 |     |          |          |             |                                    |             |             |             |            |             |            |             |            |             |             |             |            |             |            |             |
|-----------------|-----|----------|----------|-------------|------------------------------------|-------------|-------------|-------------|------------|-------------|------------|-------------|------------|-------------|-------------|-------------|------------|-------------|------------|-------------|
| ENSG0000016364  | 3   | 19663975 | 19670007 | PRKX        | protein coding                     | -0.00907558 | 0.937596216 | -0.13687366 | 0.33842968 | -0.01235273 | 0.95723634 | -0.35603566 | 0.06870429 | -0.11650561 | 0.40148745  | 0.03354588  | 0.87789669 | 0.15841284  | 0.27186752 |             |
| ENSG0000016986  | 10  | 9767273  | 9767273  | AV11        | protein coding                     | -0.14374588 | 0.27711213  | -0.02476426 | 0.88545229 | -0.02476426 | 0.88545229 | -0.02476426 | 0.88545229 | -0.02476426 | 0.88545229  | -0.02476426 | 0.88545229 | -0.02476426 | 0.88545229 | -0.02476426 |
| ENSG0000020375  | 10  | 6641999  | 6641999  | AC110119.P1 | transcribed unprocessed pseudogene | 0.00000000  | 0.00000000  | 0.00000000  | 0.00000000 | 0.00000000  | 0.00000000 | 0.00000000  | 0.00000000 | 0.00000000  | 0.00000000  | 0.00000000  | 0.00000000 | 0.00000000  | 0.00000000 |             |
| ENSG0000018698  | 4   | 18626189 | 18629881 | AV11        | protein coding                     | -0.30100241 | 0.07781631  | -0.05796251 | 0.86442777 | -0.05796251 | 0.86442777 | -0.05796251 | 0.86442777 | -0.05796251 | 0.86442777  | -0.05796251 | 0.86442777 | -0.05796251 | 0.86442777 | -0.05796251 |
| ENSG0000011784  | 7   | 14279635 | 14279635 | IRF1        | TR_rnase                           | 0.04574899  | 0.62711783  | 0.06888500  | 0.84748737 | 0.11027809  | 0.58379228 | -0.05253268 | 0.86524269 | -0.07051822 | 0.61235944  | 0.03496273  | 0.86802873 | 0.86802873  | 0.86802873 | 0.86802873  |
| ENSG0000014374  | 1   | 15297654 | 15297654 | IRF1        | TR_rnase                           | 0.04574899  | 0.62711783  | 0.06888500  | 0.84748737 | 0.11027809  | 0.58379228 | -0.05253268 | 0.86524269 | -0.07051822 | 0.61235944  | 0.03496273  | 0.86802873 | 0.86802873  | 0.86802873 | 0.86802873  |
| ENSG0000011755  | 2   | 23347927 | 23347927 | ECCL1       | protein coding                     | -0.28628934 | 0.07177927  | -0.15844518 | 0.27178977 | -0.01071753 | 0.93103737 | -0.10684270 | 0.41172745 | -0.03733299 | 0.03037273  | 0.90374737  | 0.88080487 | 0.88080487  | 0.88080487 | 0.88080487  |
| ENSG0000024937  | 140 | 14037891 | 14040146 | AC020838.1  | transcribed unprocessed pseudogene | -0.27289425 | 0.04363854  | -0.13897153 | 0.35574192 | -0.01972159 | 0.92220265 | -0.25032226 | 0.14182415 | -0.26519624 | 0.05524844  | 0.03462414  | 0.88114861 | 0.88114861  | 0.88114861 | 0.88114861  |
| ENSG0000020629  | X   | 10521829 | 10521829 | AC019446    | transcribed unprocessed pseudogene | 0.04319444  | 0.98464384  | 0.04319444  | 0.98464384 | 0.04319444  | 0.98464384 | 0.04319444  | 0.98464384 | 0.04319444  | 0.98464384  | 0.04319444  | 0.98464384 | 0.04319444  | 0.98464384 | 0.04319444  |
| ENSG0000021514  | 10  | 7773676  | 7773676  | AL115556.1  | transcribed unprocessed pseudogene | -0.16292542 | 0.09332658  | -0.05959282 | 0.86992228 | -0.03803844 | 0.90726023 | -0.07201260 | 0.47131469 | -0.26198103 | 0.05562840  | 0.03492184  | 0.88114861 | 0.88114861  | 0.88114861 | 0.88114861  |
| ENSG0000017609  | 19  | 4192150  | 4192150  | CPY23       | protein coding                     | -0.03971311 | 0.13194421  | -0.01795691 | 0.80322934 | -0.02629274 | 0.91036527 | -0.18891468 | 0.34610026 | -0.03048446 | 0.02470047  | 0.03382630  | 0.89840765 | 0.89840765  | 0.89840765 | 0.89840765  |
| ENSG0000020592  | 19  | 18145142 | 18145142 | AC020838.2  | transcribed unprocessed pseudogene | -0.17737671 | 0.12147703  | -0.09124468 | 0.52682022 | -0.12246828 | 0.93682891 | -0.18193183 | 0.47470745 | -0.16982490 | 0.24858201  | 0.03382630  | 0.89840765 | 0.89840765  | 0.89840765 | 0.89840765  |
| ENSG0000023816  | 19  | 7192520  | 7192520  | AC022748.1  | transcribed unprocessed pseudogene | -0.16995116 | 0.14677249  | -0.02515469 | 0.86145530 | -0.01144955 | 0.93758697 | -0.19432359 | 0.80848756 | -0.17938177 | 0.01432359  | 0.03382630  | 0.89840765 | 0.89840765  | 0.89840765 | 0.89840765  |
| ENSG0000022220  | 2   | 23601436 | 23601436 | HADC-AS1    | transcribed unprocessed pseudogene | -0.02654454 | 0.10186430  | -0.03178179 | 0.83551201 | -0.02654454 | 0.83551201 | -0.02654454 | 0.83551201 | -0.02654454 | 0.83551201  | -0.02654454 | 0.83551201 | -0.02654454 | 0.83551201 | -0.02654454 |
| ENSG0000020205  | 13  | 4293388  | 4293388  | ZDRHC4P1    | transcribed unprocessed pseudogene | -0.11695311 | 0.07206093  | -0.10989172 | 0.37246173 | -0.14849924 | 0.35881668 | -0.14918120 | 0.45789737 | -0.04898770 | 0.27511627  | 0.03382630  | 0.89840765 | 0.89840765  | 0.89840765 | 0.89840765  |
| ENSG00000215474 | 18  | 4726189  | 4726189  | SKOR2       | protein coding                     | -0.21544753 | 0.05933650  | -0.03128479 | 0.92496867 | -0.03789038 | 0.91516671 | -0.01554377 | 0.93854425 | -0.25917155 | 0.02024564  | 0.03382630  | 0.89840765 | 0.89840765  | 0.89840765 | 0.89840765  |
| ENSG0000022627  | 11  | 12578127 | 12577160 | PAT3        | protein coding                     | -0.21648781 | 0.03096202  | -0.10722064 | 0.48315240 | -0.01381424 | 0.94454077 | -0.12649677 | 0.53210309 | -0.17200209 | 0.10373291  | 0.03382630  | 0.89840765 | 0.89840765  | 0.89840765 | 0.89840765  |
| ENSG0000022614  | 10  | 3785740  | 3785710  | AC135791.1  | transcribed unprocessed pseudogene | -0.14030484 | 0.22403414  | -0.04317367 | 0.67470181 | -0.19171251 | 0.32420903 | -0.17357192 | 0.29449495 | -0.24212311 | 0.07377446  | 0.03382630  | 0.89840765 | 0.89840765  | 0.89840765 | 0.89840765  |
| ENSG00000240111 | 16  | 3486201  | 3486788  | AC020224.1  | transcribed unprocessed pseudogene | -0.15421822 | 0.18052123  | -0.10722064 | 0.48315240 | -0.01381424 | 0.94454077 | -0.12649677 | 0.53210309 | -0.17200209 | 0.10373291  | 0.03382630  | 0.89840765 | 0.89840765  | 0.89840765 | 0.89840765  |
| ENSG0000020688  | 14  | 17425230 | 17427163 | AC011960    | transcribed unprocessed pseudogene | -0.13078097 | 0.23380182  | -0.12627710 | 0.37105719 | -0.05881261 | 0.97067704 | -0.32917498 | 0.03620326 | -0.23142523 | 0.09111929  | 0.03382630  | 0.89840765 | 0.89840765  | 0.89840765 | 0.89840765  |
| ENSG0000020512  | 12  | 3861119  | 3861464  | AC121334.3  | transcribed unprocessed pseudogene | -0.17977378 | 0.11978194  | -0.07073917 | 0.60529216 | -0.00509774 | 0.90526346 | -0.07173197 | 0.80524366 | -0.17522979 | 0.20371338  | 0.03382630  | 0.89840765 | 0.89840765  | 0.89840765 | 0.89840765  |
| ENSG0000018833  | X   | 10543938 | 10587545 | COL4A5      | protein coding                     | -0.38918221 | 0.00472965  | -0.04587419 | 0.15431683 | -0.00520141 | 0.97261302 | -0.24865450 | 0.18127322 | -0.52081330 | 0.01631374  | 0.03382630  | 0.89840765 | 0.89840765  | 0.89840765 | 0.89840765  |
| ENSG0000021758  | 1   | 13672350 | 13675760 | AC117382.2  | transcribed unprocessed pseudogene | -0.17306903 | 0.12329636  | -0.04481513 | 0.78543307 | -0.04328953 | 0.80712842 | -0.11540489 | 0.50716845 | -0.18723329 | 0.17515204  | 0.03382630  | 0.89840765 | 0.89840765  | 0.89840765 | 0.89840765  |
| ENSG0000020578  | 19  | 7849162  | 7849391  | AC011413.1  | transcribed unprocessed pseudogene | -0.03204268 | 0.06381451  | -0.00453737 | 0.97649481 | -0.15999426 | 0.42536993 | -0.02447151 | 0.79509507 | -0.11500774 | 0.06784267  | 0.03382630  | 0.89840765 | 0.89840765  | 0.89840765 | 0.89840765  |
| ENSG00000204194 | 22  | 50252368 | 50258481 | SOX2        | protein coding                     | -0.03043504 | 0.14621157  | -0.12280713 | 0.33830307 | -0.17945312 | 0.37454312 | -0.38444989 | 0.04438739 | -0.30145557 | 0.07152064  | 0.03382630  | 0.89840765 | 0.89840765  | 0.89840765 | 0.89840765  |
| ENSG0000027392  | 1   | 17823430 | 17827825 | AD449308.1  | transcribed unprocessed pseudogene | -0.02188705 | 0.89219021  | -0.06141474 | 0.87178487 | -0.22300204 | 0.29634445 | -0.14554741 | 0.46887878 | -0.02241387 | 0.03076278  | 0.03382630  | 0.89840765 | 0.89840765  | 0.89840765 | 0.89840765  |
| ENSG0000019370  | 2   | 18293817 | 18294062 | TEOM1       | protein coding                     | -0.21232728 | 0.05373695  | -0.16091121 | 0.66474025 | -0.24722764 | 0.12922227 | -0.13733984 | 0.38611934 | -0.26946317 | 0.03076278  | 0.03382630  | 0.89840765 | 0.89840765  | 0.89840765 | 0.89840765  |
| ENSG0000018735  | 16  | 1510427  | 1612027  | IFT140      | protein coding                     | -0.15598734 | 0.17555949  | -0.04004426 | 0.76267888 | -0.30552317 | 0.12129138 | -0.26384847 | 0.06317180 | -0.80082192 | -0.03118403 | 0.03382630  | 0.89840765 | 0.89840765  | 0.89840765 | 0.89840765  |
| ENSG0000016218  | 1   | 17950539 | 17957595 | NHR3        | protein coding                     | -0.24789874 | 0.02927812  | -0.04820230 | 0.73942515 | -0.26184807 | 0.18703977 | -0.14609791 | 0.34244741 | -0.22891567 | 0.06991594  | 0.03382630  | 0.89840765 | 0.89840765  | 0.89840765 | 0.89840765  |
| ENSG0000019370  | 2   | 18293817 | 18294062 | TEOM1       | protein coding                     | -0.21232728 | 0.05373695  | -0.16091121 | 0.66474025 | -0.24722764 | 0.12922227 | -0.13733984 | 0.38611934 | -0.26946317 | 0.03076278  | 0.03382630  | 0.89840765 | 0.89840765  | 0.89840765 | 0.89840765  |
| ENSG0000011000  | 20  | 6271489  | 6220278  | NRH5        | protein coding                     | -0.12341648 | 0.24849534  | -0.01137584 | 0.93750473 | -0.12917076 | 0.58989851 | -0.18397706 | 0.44847136 | -0.21458997 | 0.11916787  | 0.03382630  | 0.89840765 | 0.89840765  | 0.89840765 | 0.89840765  |
| ENSG0000018214  | 2   | 8429093  | 8429220  | ITPR2       | transcribed unprocessed pseudogene | -0.03371709 | 0.74790470  | -0.01578753 | 0.91449397 | -0.13444473 | 0.50593357 | -0.04484328 | 0.82427344 | -0.01727941 | 0.03042518  | 0.03382630  | 0.89840765 | 0.89840765  | 0.89840765 | 0.89840765  |
| ENSG0000024276  | 10  | 2002900  | 2002900  | ITPR2       | transcribed unprocessed pseudogene | -0.03371709 | 0.74790470  | -0.01578753 | 0.91449397 | -0.13444473 | 0.50593357 | -0.04484328 | 0.82427344 | -0.01727941 | 0.03042518  | 0.03382630  | 0.89840765 | 0.89840765  | 0.89840765 | 0.89840765  |
| ENSG0000027067  | 7   | 12799787 | 12800077 | SND1-IT1    | transcribed unprocessed pseudogene | 0.06037051  | 0.60197641  | 0.05128709  | 0.67448300 | 0.03024451  | 0.90917487 | 0.06175449  | 0.56237307 | 0.06175449  | 0.05275684  | 0.03382630  | 0.89840765 | 0.89840765  | 0.89840765 | 0.89840765  |
| ENSG0000013426  | 12  | 49216118 | 49204741 | FKBP11      | protein coding                     | 0.05345342  | 0.6431101   | 0.13476024  | 0.30111981 | 0.06907084  | 0.72618307 | 0.17526720  | 0.37532609 | 0.00388127  | 0.07777008  | 0.03382630  | 0.89840765 | 0.89840765  | 0.89840765 | 0.89840765  |
| ENSG00000110742 | 1   | 15047622 | 15047622 | FKBP11      | protein coding                     | 0.05345342  | 0.6431101   | 0.13476024  | 0.30111981 | 0.06907084  | 0.72618307 | 0.17526720  | 0.37532609 | 0.00388127  | 0.07777008  | 0.03382630  | 0.89840765 | 0.89840765  | 0.89840765 | 0.89840765  |
| ENSG00000205238 | 8   | 12244649 | 12247907 | SMC3/2005   | transcribed unprocessed pseudogene | -0.26353871 | 0.01462067  | -0.05898077 | 0.67944581 | -0.00067400 | 0.91281307 | -0.18350688 | 0.38858010 | -0.32869821 | 0.01513863  | 0.03382630  | 0.89840765 | 0.89840765  | 0.89840765 | 0.89840765  |
| ENSG0000012283  | 10  | 7196435  | 7201356  | SHMT3       | protein coding                     | -0.24472314 | 0.03194492  | -0.09943471 | 0.93048427 | -0.00754428 | 0.40247077 | -0.14273891 | 0.47753522 | -0.33658289 | 0.09292709  | 0.03382630  | 0.89840765 | 0.89840765  | 0.89840765 | 0.89840765  |
| ENSG0000020359  | 19  |          |          |             |                                    |             |             |             |            |             |            |             |            |             |             |             |            |             |            |             |

Table with 10 columns: Gene ID, Chr, Start, End, Feature, RefSeq ID, RefSeq Name, RefSeq Type, RefSeq Description, RefSeq Accession. Contains a comprehensive list of gene annotations for the RMD Open study.





Table with columns for gene names (e.g., ENGG00000265727), coordinates, and various numerical values. The table lists numerous genes and their associated data points across multiple columns.



Table with columns for gene names (e.g., ENSG00000176251), coordinates, gene symbols (e.g., TSR1), and descriptions (e.g., protein coding). The table lists numerous genes and their genomic locations.

| ENSG0000025151 | 3  | 9793982  | 8635431   | APPC4.L1.TLL1 | protein coding       | -0.07861562  | 0.4977239   | 0.03086621  | 0.813442832 | 0.01763293  | 0.9304388  | -0.02495994 | 0.68248347 | -0.08923774 | 0.51206848  | 0.02168702 | 0.90569101 | 0.064214432 | 0.65734328  |            |
|----------------|----|----------|-----------|---------------|----------------------|--------------|-------------|-------------|-------------|-------------|------------|-------------|------------|-------------|-------------|------------|------------|-------------|-------------|------------|
| ENSG0000018673 | 1  | 145153   | 8316368   | FAM103A       | protein coding       | -0.22672641  | 0.04062653  | -0.10095947 | 0.49200260  | 0.44767674  | 0.48371269 | -0.26997487 | 0.192768   | -0.2637074  | 0.3570784   | 0.00000000 | 0.9116889  | 0.18891556  | 0.18891556  |            |
| ENSG0000020477 | 1  | 1390447  | 1390447   | AC01984.1     | antisense_intronic   | -0.02066666  | 0.02066666  | 0.02066666  | 0.02066666  | 0.02066666  | 0.02066666 | 0.02066666  | 0.02066666 | 0.02066666  | 0.02066666  | 0.02066666 | 0.02066666 | 0.02066666  | 0.02066666  | 0.02066666 |
| ENSG0000020376 | 12 | 8940361  | 8949781   | MRPR          | protein coding       | 0.1897235    | 0.14240710  | 0.2074304   | 0.14839040  | -0.1011881  | 0.8198509  | 0.0568866   | 0.01747338 | 0.24483211  | 0.014555538 | 0.02126488 | 0.90587549 | 0.052387749 | 0.017786310 | 0.71786310 |
| ENSG0000014961 | 11 | 17199370 | 17170749  | PCSK2         | protein coding       | -0.03070538  | 0.73262247  | 0.01879402  | 0.2599264   | 0.04834342  | 0.42729952 | 0.2057345   | 0.3333626  | 0.0417394   | 0.97612311  | 0.04122299 | 0.80528707 | 0.17669835  | 0.21115329  | 0.17669835 |
| ENSG0000022975 | 1  | 10122923 | 10122923  | AC09433.1     | antisense_intronic   | -0.03444444  | 0.03444444  | 0.03444444  | 0.03444444  | 0.03444444  | 0.03444444 | 0.03444444  | 0.03444444 | 0.03444444  | 0.03444444  | 0.03444444 | 0.03444444 | 0.03444444  | 0.03444444  | 0.03444444 |
| ENSG0000012867 | 3  | 17896112 | 17892113  | ZMAT3         | protein coding       | 0.141434052  | 0.021844106 | 0.25541182  | 0.0741818   | 0.270094541 | 0.17303329 | 0.05484487  | 0.00724088 | 0.158756549 | 0.02094622  | 0.00904922 | 0.90541043 | 0.04313143  | 0.56887319  | 0.04313143 |
| ENSG0000012828 | 2  | 3684940  | 3811688   | BEZL1         | protein coding       | -0.16296364  | 0.02696940  | -0.10313754 | 0.04753086  | -0.2537895  | 0.0741487  | -0.1179236  | 0.3917931  | -0.2218651  | 0.16681169  | 0.02092457 | 0.9059279  | 0.2444627   | 0.1543635   | 0.2444627  |
| ENSG0000016039 | 9  | 3671999  | 3671999   | AC09903.1     | antisense_intronic   | -0.27681922  | 0.012023118 | -0.07158064 | 0.4348693   | 0.02667234  | 0.474468   | 0.0274496   | 0.0274496  | 0.0274496   | 0.0274496   | 0.0274496  | 0.0274496  | 0.0274496   | 0.0274496   | 0.0274496  |
| ENSG0000069799 | 19 | 1982790  | 1982790   | AC12406.1     | antisense_intronic   | -0.07486679  | 0.5203547   | 0.02915155  | 0.6898928   | -0.05497379 | 0.0741843  | 0.11530136  | 0.5685584  | -0.0082829  | 0.05927818  | 0.02092457 | 0.9090148  | 0.04466127  | 0.1196328   | 0.04466127 |
| ENSG0000000176 | 4  | 1583678  | 1583678   | PKOY1         | protein coding       | -0.39488012  | 0.01706504  | -0.19477447 | 0.2626234   | 0.02485381  | 0.6484752  | -0.1031308  | 0.264375   | -0.3067136  | 0.0468624   | 0.02092457 | 0.9062589  | 0.26917549  | 0.0416137   | 0.26917549 |
| ENSG0000016039 | 9  | 3671999  | 3671999   | AC09903.1     | antisense_intronic   | -0.27681922  | 0.012023118 | -0.07158064 | 0.4348693   | 0.02667234  | 0.474468   | 0.0274496   | 0.0274496  | 0.0274496   | 0.0274496   | 0.0274496  | 0.0274496  | 0.0274496   | 0.0274496   | 0.0274496  |
| ENSG0000013376 | 5  | 17451305 | 174514307 | GAUGHPT1      | processed_pseudogene | -0.121448652 | 0.29423269  | 0.02929929  | 0.8868132   | 0.23382814  | 0.23428161 | -0.19339799 | 0.3239978  | -0.28998724 | 0.03833769  | 0.02092457 | 0.9068578  | 0.05927818  | 0.04466127  | 0.05927818 |
| ENSG0000011581 | 2  | 21692715 | 21695489  | IGFBP5        | protein coding       | -0.34197762  | 0.0243733   | -0.0953698  | 0.8202618   | -0.39489697 | 0.05817035 | -0.18337789 | 0.398881   | -0.40889453 | 0.02092457  | 0.02092457 | 0.906271   | 0.33762514  | 0.04686127  | 0.33762514 |
| ENSG0000022947 | 1  | 1317971  | 1317971   | AC00119.1     | antisense_intronic   | -0.2040883   | 0.04382068  | -0.0548041  | 0.11234905  | 0.29218951  | 0.198411   | -0.18370203 | 0.4143472  | -0.3274164  | 0.01699884  | 0.02092457 | 0.9081987  | 0.23418037  | 0.01699884  | 0.23418037 |
| ENSG0000020430 | 16 | 1908831  | 1908832   | AC09958.1     | antisense_intronic   | -0.30429364  | 0.07171629  | -0.17711563 | 0.21874400  | -0.22229718 | 0.2235868  | -0.2427254  | 0.22242844 | -0.3067807  | 0.02092457  | 0.02092457 | 0.90845263 | 0.02092457  | 0.02092457  | 0.02092457 |
| ENSG0000019780 | 11 | 1127150  | 11224899  | BCO2          | protein coding       | -0.18947259  | 0.08898974  | -0.04204358 | 0.7692192   | -0.2288447  | 0.2511399  | 0.01625200  | 0.92801238 | -0.18662378 | 0.14863652  | 0.02092457 | 0.9050870  | 0.00000000  | 0.00000000  | 0.00000000 |
| ENSG0000018862 | 17 | 9171428  | 90151718  | H19           | transcribed_unit     | -0.17216918  | 0.13432152  | 0.03871058  | 0.8055481   | 0.29777748  | 0.1320955  | 0.10272575  | 0.8122953  | -0.7549317  | 0.20414709  | 0.02092457 | 0.9050870  | 0.25543714  | 0.0718498   | 0.25543714 |
| ENSG0000027489 | 12 | 11806388 | 11806725  | AC11238.1     | antisense_intronic   | -0.110288    | 0.0960933   | -0.14903166 | 0.31312448  | -0.0480686  | 0.87116841 | 0.26182771  | 0.18707745 | -0.2673584  | 0.05064478  | 0.02092457 | 0.9050870  | 0.14825241  | 0.03034722  | 0.14825241 |
| ENSG0000012878 | 7  | 1244344  | 12448383  | STRP2         | protein coding       | -0.1801301   | 0.0975789   | -0.0438874  | 0.7632190   | -0.1072244  | 0.94448559 | 0.0271959   | 0.6458807  | -0.18321652 | 0.14179514  | 0.02092457 | 0.9050870  | 0.25212200  | 0.07733920  | 0.25212200 |
| ENSG0000025474 | 12 | 470047   | 471021    | QAU1          | antisense_intronic   | -0.2846292   | 0.0121118   | -0.1152903  | 0.40496401  | 0.29816883  | 0.19382104 | -0.1932799  | 0.3698217  | -0.1878691  | 0.0187896   | 0.02092457 | 0.9050870  | 0.35098194  | 0.02092457  | 0.35098194 |
| ENSG0000023286 | 15 | 10048491 | 10080758  | AC01572.1     | antisense_intronic   | -0.21838602  | 0.05588411  | -0.0524591  | 0.8180776   | -0.2702808  | 0.16183521 | 0.00131406  | 0.94662139 | -0.2181480  | 0.09191794  | 0.02092457 | 0.9050870  | 0.28221033  | 0.0470789   | 0.28221033 |
| ENSG0000018799 | 2  | 3383502  | 3383742   | RHOAIP19      | processed_pseudogene | -0.15286213  | 0.18431389  | -0.0748235  | 0.85587089  | 0.3272178   | 0.10991507 | -0.0216780  | 0.81425927 | -0.18624612 | 0.14789166  | 0.02092457 | 0.9050870  | 0.0842677   | -0.2078099  | 0.0842677  |
| ENSG0000014516 | 1  | 5337941  | 5340982   | FPL1          | protein coding       | -0.2294038   | 0.0470708   | -0.0097167  | 0.898927    | 0.06959711  | 0.14303884 | -0.0504740  | 0.80278137 | -0.2119078  | 0.02092457  | 0.9050870  | 0.0842677  | 0.28259139  | 0.0449481   | 0.28259139 |
| ENSG0000023908 | 3  | 4936545  | 4936708   | HNRNPA17      | antisense_intronic   | -0.13910526  | 0.22760373  | -0.1334474  | 0.35881720  | 0.00629302  | 0.86199212 | -0.38814483 | 0.05882445 | -0.24811794 | 0.0704464   | 0.02092457 | 0.9050870  | 0.04383334  | 0.0704464   | 0.04383334 |
| ENSG0000029939 | 16 | 863312   | 863437    | AC02167.1     | antisense_intronic   | -0.08777782  | 0.44882778  | 0.04304507  | 0.78992420  | 0.13747211  | 0.2059838  | 0.03894667  | 0.78988553 | -0.10784991 | 0.4345299   | 0.02092457 | 0.9088821  | 0.1388819   | 0.33716207  | 0.1388819  |
| ENSG0000019835 | 15 | 9209797  | 9209797   | AC02167.1     | antisense_intronic   | -0.08777782  | 0.44882778  | 0.04304507  | 0.78992420  | 0.13747211  | 0.2059838  | 0.03894667  | 0.78988553 | -0.10784991 | 0.4345299   | 0.02092457 | 0.9088821  | 0.1388819   | 0.33716207  | 0.1388819  |
| ENSG0000012987 | 20 | 3347720  | 3348444   | BFIP8B        | transcribed_unit     | -0.07103258  | 0.0111968   | -0.1186376  | 0.36132889  | 0.10415504  | 0.80515028 | -0.2025707  | 0.10188387 | -0.0476721  | 0.02092457  | 0.90754491 | 0.27278451 | 0.05524271  | 0.27278451  | 0.05524271 |
| ENSG0000028989 | 6  | 2148958  | 2152144   | LOC10581      | antisense_intronic   | -0.24082883  | 0.03026287  | -0.05870221 | 0.87971978  | -0.2811093  | 0.15866297 | -0.0935547  | 0.84243254 | -0.2717924  | 0.04768181  | 0.02092457 | 0.9078241  | 0.2890648   | 0.0468443   | 0.2890648  |
| ENSG0000028092 | 1  | 1803731  | 1803731   | AC02592.1     | antisense_intronic   | -0.0241631   | 0.0241631   | 0.0241631   | 0.0241631   | 0.0241631   | 0.0241631  | 0.0241631   | 0.0241631  | 0.0241631   | 0.0241631   | 0.0241631  | 0.0241631  | 0.0241631   | 0.0241631   | 0.0241631  |
| ENSG0000015666 | 16 | 2703058  | 2722178   | KDM8          | protein coding       | -0.15620876  | 0.1748875   | -0.05801024 | 0.79742572  | -0.074504   | 0.89271283 | -0.0032626  | 0.90969812 | -0.2183731  | 0.11268105  | 0.02092457 | 0.9050870  | 0.18160446  | 0.0688130   | 0.18160446 |
| ENSG0000028730 | 2  | 7684475  | 7689898   | AC0816.3      | antisense_intronic   | 0.00834588   | 0.2423078   | 0.02445375  | 0.8813971   | 0.0998784   | 0.8363544  | -0.04011670 | 0.8423933  | -0.0040252  | 0.8274583   | 0.02092457 | 0.9071438  | 0.0344884   | 0.7930530   | 0.0344884  |
| ENSG0000027840 | 1  | 2011667  | 2011667   | AC01017.1     | antisense_intronic   | -0.01389149  | 0.01389149  | 0.01389149  | 0.01389149  | 0.01389149  | 0.01389149 | 0.01389149  | 0.01389149 | 0.01389149  | 0.01389149  | 0.01389149 | 0.01389149 | 0.01389149  | 0.01389149  | 0.01389149 |
| ENSG0000019788 | 20 | 2519663  | 2528074   | ENTPF6        | protein coding       | -0.13708255  | 0.2345528   | -0.11043107 | 0.40527125  | -0.16555233 | 0.40261537 | 0.18413578  | 0.35787655 | -0.1247862  | 0.0825784   | 0.02092457 | 0.9071438  | 0.26785472  | 0.03056204  | 0.26785472 |
| ENSG0000011530 | 2  | 7459643  | 7470126   | POL.E         | protein coding       | 0.46088957   | 0.00729213  | 0.06345027  | 0.6760838   | 0.6481186   | 0.0092488  | 0.09591106  | 0.6340480  | 0.4663831   | 0.02092457  | 0.9078581  | 0.4632656  | 0.0071048   | 0.4632656   | 0.0071048  |
| ENSG0000025423 | 4  | 8633324  | 8634329   | AC10370.1     | antisense_intronic   | -0.04778810  | 0.67975157  | -0.0802483  | 0.85768730  | -0.14271193 | 0.02004992 | -0.15867028 | 0.18687084 | -0.2500666  | 0.02092457  | 0.906271   | 0.0027114  | 0.0688570   | 0.0027114   | 0.0688570  |
| ENSG0000018847 | 11 | 1512424  | 1524720   | INSC          | protein coding       | -0.27124447  | 0.01702714  | -0.14891745 | 0.3086103   | -0.32029768 | 0.1013204  | -0.24958262 | 0.20301189 | -0.13773334 | 0.01203037  | 0.02092457 | 0.9088221  | 0.28094713  | 0.0440374   | 0.28094713 |
| ENSG0000028786 | 14 | 1189844  | 1189844   | AC01452.1     | antisense_intronic   | -0.0241631   | 0.0241631   | 0.0241631   | 0.0241631   | 0.0241631   | 0.0241631  | 0.0241631   | 0.0241631  | 0.0241631   | 0.0241631   | 0.0241631  | 0.0241631  | 0.0241631   | 0.0241631   | 0.0241631  |
| ENSG0000012535 | 17 | 7187187  | 7198141   | DGSC          | protein coding       | -0.15005889  | 0.19190373  | -0.0248673  | 0.80870104  | -0.11320877 | 0.87700103 | -0.06230931 | 0.78581189 | -0.12625274 | 0.01786105  | 0.02092457 | 0.9050870  | 0.04862210  | 0.23108105  | 0.04862210 |
|                |    |          |           |               |                      |              |             |             |             |             |            |             |            |             |             |            |            |             |             |            |





Table with columns for gene ID, chromosome, coordinates, gene name, transcript type, and a list of associated numerical values. The table contains multiple rows of data for various genes such as KRT18P13, LOC101928, and many others.



|                 |    |          |          |            |                                 |              |             |              |             |             |             |              |             |             |             |             |             |             |             |
|-----------------|----|----------|----------|------------|---------------------------------|--------------|-------------|--------------|-------------|-------------|-------------|--------------|-------------|-------------|-------------|-------------|-------------|-------------|-------------|
| ENSG00000105404 | 19 | 41956681 | 41956321 | RABAC1     | protein coding                  | 0.069850268  | 0.551272518 | -0.048734296 | 0.738905080 | 0.000161713 | 0.999361274 | -0.102343499 | 0.618089379 | 0.042210389 | 0.761844841 | 0.018282739 | 0.93401227  | 0.161602507 | 0.26207050  |
| ENSG00000105479 | 7  | 10869777 | 10869777 | TRAF3IP1   | protein coding                  | 0.110623235  | 0.533310179 | 0.03262979   | 0.737260265 | 0.000120000 | 0.999879999 | -0.033474561 | 0.866366779 | 0.056748889 | 0.753413376 | 0.018282739 | 0.93401227  | 0.161602507 | 0.26207050  |
| ENSG00000105480 | 7  | 71144196 | 71144196 | GLTP2A     | transcript processed pseudogene | 0.000000000  | 0.000000000 | 0.000000000  | 0.000000000 | 0.000000000 | 0.000000000 | 0.000000000  | 0.000000000 | 0.000000000 | 0.000000000 | 0.000000000 | 0.000000000 | 0.000000000 | 0.000000000 |
| ENSG00000203147 | 10 | 11988970 | 11988942 | MLK1705    | lincRNA                         | -0.23426331  | 0.04190608  | -0.02463420  | 0.88519180  | 0.02768895  | 0.97231167  | -0.03482750  | 0.81120669  | 0.26209477  | 0.05555480  | 0.018282739 | 0.93401227  | 0.161602507 | 0.26207050  |
| ENSG00000108288 | 2  | 48969637 | 48968778 | ORC1L2     | protein coding                  | 0.15480403   | 0.71851689  | 0.07242712   | 0.60480418  | 0.02622814  | 0.97378184  | -0.02721811  | 0.8338780   | 0.1818716   | 0.4667143   | 0.018282739 | 0.93401227  | 0.161602507 | 0.26207050  |
| ENSG00000107493 | 7  | 75021    | 75021    | RPL30      | protein coding                  | 0.11332600   | 0.57937962  | 0.03262979   | 0.737260265 | 0.000120000 | 0.999879999 | -0.033474561 | 0.866366779 | 0.056748889 | 0.753413376 | 0.018282739 | 0.93401227  | 0.161602507 | 0.26207050  |
| ENSG00000107693 | 11 | 4912588  | 4919350  | RCS1       | protein coding                  | -0.10163716  | 0.07885743  | -0.23962527  | 0.907595927 | 0.18355101  | 0.81647675  | -0.34408107  | 0.678388    | -0.19615438 | 0.018282739 | 0.93401227  | 0.161602507 | 0.26207050  | 0.26207050  |
| ENSG00000117693 | 16 | 17362463 | 17368584 | DARS2      | protein coding                  | -0.01237474  | 0.91245252  | 0.09334069   | 0.84934088  | 0.01470308  | 0.98529707  | -0.10227304  | 0.55202889  | -0.05877999 | 0.67289524  | 0.018282739 | 0.93401227  | 0.161602507 | 0.26207050  |
| ENSG00000108117 | 16 | 935598   | 940317   | TRAF3IP1   | protein coding                  | 0.110623235  | 0.533310179 | 0.03262979   | 0.737260265 | 0.000120000 | 0.999879999 | -0.033474561 | 0.866366779 | 0.056748889 | 0.753413376 | 0.018282739 | 0.93401227  | 0.161602507 | 0.26207050  |
| ENSG00000207434 | 16 | 4532616  | 4537070  | AC023733   | lincRNA                         | -0.05681886  | 0.35981355  | -0.05874578  | 0.90354738  | 0.15920470  | 0.8454448   | -0.22425504  | 0.64738804  | -0.09849194 | 0.018282739 | 0.93401227  | 0.161602507 | 0.26207050  | 0.26207050  |
| ENSG00000104281 | 3  | 10617484 | 10621985 | MLK17048   | transcript processed pseudogene | -0.15952431  | 0.17969789  | -0.10855739  | 0.4488210   | 0.01343678  | 0.98647362  | -0.04272680  | 0.07039354  | -0.06583696 | 0.02529677  | 0.018282739 | 0.93401227  | 0.161602507 | 0.26207050  |
| ENSG00000107494 | 16 | 17362463 | 17368584 | TRAF3IP1   | protein coding                  | 0.110623235  | 0.533310179 | 0.03262979   | 0.737260265 | 0.000120000 | 0.999879999 | -0.033474561 | 0.866366779 | 0.056748889 | 0.753413376 | 0.018282739 | 0.93401227  | 0.161602507 | 0.26207050  |
| ENSG00000104095 | 16 | 4670282  | 4670407  | MLK13      | protein coding                  | -0.33691355  | 0.02727033  | -0.1558421   | 0.2804968   | 0.04125881  | 0.95827118  | -0.32753922  | 0.09539789  | -0.45026283 | 0.00036306  | 0.018282739 | 0.93401227  | 0.161602507 | 0.26207050  |
| ENSG00000108390 | 4  | 14377392 | 14378075 | FREM2      | protein coding                  | -0.10468481  | 0.06817257  | -0.1313018   | 0.5834337   | 0.2842111   | 0.71336672  | -0.24248811  | 0.38129046  | -0.26573763 | 0.03620470  | 0.018282739 | 0.93401227  | 0.161602507 | 0.26207050  |
| ENSG00000107093 | 13 | 13174070 | 13174070 | RAC1F1     | protein coding                  | 0.09938      | 0.38988569  | 0.03841757   | 0.78871923  | 0.00766452  | 0.99233845  | -0.06981890  | 0.77448005  | 0.1005769   | 0.46933208  | 0.018282739 | 0.93401227  | 0.161602507 | 0.26207050  |
| ENSG00000202372 | X  | 27981449 | 27981449 | CAF4FL1    | protein coding                  | -0.14937899  | 0.19475212  | -0.01326609  | 0.95745554  | 0.1904763   | 0.84313703  | -0.00140792  | 0.9994431   | -0.18974450 | 0.06931289  | 0.018282739 | 0.93401227  | 0.161602507 | 0.26207050  |
| ENSG00000103404 | 5  | 92151    | 109972   | PLEKHG4B   | protein coding                  | -0.33136343  | 0.00214661  | -0.10460358  | 0.40971038  | 0.2842375   | 0.71433778  | -0.20656805  | 0.30724613  | -0.39218719 | 0.03339968  | 0.018282739 | 0.93401227  | 0.161602507 | 0.26207050  |
| ENSG00000203495 | 9  | 3015738  | 3015737  | RPL30      | protein coding                  | -0.14869572  | 0.19400419  | -0.0400419   | 0.91259616  | 0.06941674  | 0.7398900   | -0.27349203  | 0.07400890  | 0.59747298  | 0.018282739 | 0.93401227  | 0.161602507 | 0.26207050  | 0.26207050  |
| ENSG00000202901 | 1  | 7079641  | 7078648  | MLK1768    | lincRNA                         | -0.085108072 | 0.4611961   | -0.03289538  | 0.80259004  | 0.06932298  | 0.88471269  | -0.12743189  | 0.53729385  | -0.01781007 | 0.018282739 | 0.93401227  | 0.161602507 | 0.26207050  | 0.26207050  |
| ENSG00000104120 | 3  | 14041430 | 14040890 | CLC3A3     | protein coding                  | -0.05961378  | 0.60433883  | -0.0231448   | 0.76217077  | 0.16241708  | 0.81424959  | -0.04699782  | 0.81582440  | -0.06688872 | 0.0317664   | 0.018282739 | 0.93401227  | 0.161602507 | 0.26207050  |
| ENSG00000208988 | 1  | 2350414  | 2352620  | AL513771   | transcript processed pseudogene | -0.07898913  | 0.449221034 | -0.08959268  | 0.58016145  | 0.01251202  | 0.98749623  | -0.05317796  | 0.30409988  | -0.00032844 | 0.02509283  | 0.018282739 | 0.93401227  | 0.161602507 | 0.26207050  |
| ENSG00000205111 | 11 | 49892282 | 4989377  | AC020587.2 | transcript processed pseudogene | -0.096211483 | 0.405196384 | -0.02742478  | 0.80053290  | 0.10274281  | 0.87903912  | -0.046420504 | 0.81815540  | -0.12005522 | 0.3862201   | 0.018282739 | 0.93401227  | 0.161602507 | 0.26207050  |
| ENSG00000202620 | 4  | 775407   | 777829   | APAF1-AS1  | lincRNA                         | -0.189353927 | 0.09970153  | -0.07789398  | 0.5917555   | -0.18283131 | 0.81400001  | -0.18012552  | 0.32891924  | -0.27038203 | 0.04254449  | 0.018282739 | 0.93401227  | 0.161602507 | 0.26207050  |
| ENSG00000109744 | 4  | 1650154  | 1689878  | LDR        | protein coding                  | -0.21296443  | 0.01018681  | -0.09194481  | 0.52538491  | 0.23289122  | 0.83482193  | -0.24689702  | 0.42983712  | -0.36496213 | 0.07075923  | 0.018282739 | 0.93401227  | 0.161602507 | 0.26207050  |
| ENSG00000208287 | 11 | 11840102 | 11842373 | AP001287.5 | protein coding                  | 0.196582423  | 0.04592568  | 0.14952568   | 0.71258103  | 0.22005039  | 0.92352141  | 0.35847683   | 0.60797894  | 0.05428281  | 0.01720143  | 0.018282739 | 0.93401227  | 0.161602507 | 0.26207050  |
| ENSG00000107335 | 20 | 2390240  | 2390517  | CS19       | protein coding                  | -0.18007862  | 0.16317817  | -0.12934428  | 0.70399787  | 0.14138887  | 0.84817947  | -0.26128744  | 0.35410293  | -0.16511534 | 0.02381583  | 0.018282739 | 0.93401227  | 0.161602507 | 0.26207050  |
| ENSG00000105138 | 9  | 98713326 | 9878965  | ANKK5      | protein coding                  | -0.14448809  | 0.09289118  | -0.03422367  | 0.81347698  | 0.00383638  | 0.98771808  | -0.07288901  | 0.89012768  | -0.23729204 | 0.03272783  | 0.018282739 | 0.93401227  | 0.161602507 | 0.26207050  |
| ENSG00000207196 | 1  | 14885101 | 14885124 | HIC9       | protein coding                  | 0.04252328   | 0.14570009  | 0.04444314   | 0.75295180  | 0.10406136  | 0.80547468  | 0.09010214   | 0.15208105  | 0.01707116  | 0.018282739 | 0.93401227  | 0.161602507 | 0.26207050  | 0.26207050  |
| ENSG00000204118 | 10 | 11039622 | 11039732 | RPL13AP3   | transcript processed pseudogene | 0.1241175    | 0.28219079  | 0.1103753    | 0.4043286   | 0.21265513  | 0.76951537  | 0.20047297   | 0.31624289  | 0.19684117  | 0.15347819  | 0.018282739 | 0.93401227  | 0.161602507 | 0.26207050  |
| ENSG00000105640 | 11 | 7296920  | 7296920  | AC020587.1 | transcript processed pseudogene | -0.07898913  | 0.449221034 | -0.08959268  | 0.58016145  | 0.01251202  | 0.98749623  | -0.05317796  | 0.30409988  | -0.00032844 | 0.02509283  | 0.018282739 | 0.93401227  | 0.161602507 | 0.26207050  |
| ENSG00000200922 | 11 | 9441550  | 9443885  | MRE11      | protein coding                  | 0.26104107   | 0.01957598  | 0.13797226   | 0.3831688   | 0.07787894  | 0.91608739  | 0.30851406   | 0.61734270  | 0.38071455  | 0.0079633   | 0.018282739 | 0.93401227  | 0.161602507 | 0.26207050  |
| ENSG00000201248 | 10 | 12079630 | 12079704 | CLC3A3P1   | transcript processed pseudogene | -0.0737118   | 0.6205561   | -0.03555559  | 0.8091867   | 0.08421438  | 0.87621784  | 0.12941378   | 0.51999815  | 0.02242972  | 0.87293705  | 0.018282739 | 0.93401227  | 0.161602507 | 0.26207050  |
| ENSG00000201216 | 10 | 12079630 | 12079704 | CLC3A3P1   | transcript processed pseudogene | -0.0737118   | 0.6205561   | -0.03555559  | 0.8091867   | 0.08421438  | 0.87621784  | 0.12941378   | 0.51999815  | 0.02242972  | 0.87293705  | 0.018282739 | 0.93401227  | 0.161602507 | 0.26207050  |
| ENSG00000207750 | 5  | 12867381 | 12867401 | MLC2A3RP   | transcript processed pseudogene | -0.148658182 | 0.18774667  | -0.01653319  | 0.8078520   | -0.19735868 | 0.32077243  | -0.04205657  | 0.83325447  | -0.24052455 | 0.07973238  | 0.018282739 | 0.93401227  | 0.161602507 | 0.26207050  |
| ENSG00000204728 | 16 | 30816998 | 3082377  | AC01057.2  | lincRNA                         | -0.02888158  | 0.806077139 | -0.04528178  | 0.31573294  | 0.2456272   | 0.71862997  | -0.18818988  | 0.34718738  | -0.15613508 | 0.01436363  | 0.018282739 | 0.93401227  | 0.161602507 | 0.26207050  |
| ENSG00000207425 | 9  | 98713326 | 9878965  | ANKK5      | protein coding                  | -0.14448809  | 0.09289118  | -0.03422367  | 0.81347698  | 0.00383638  | 0.98771808  | -0.07288901  | 0.89012768  | -0.23729204 | 0.03272783  | 0.018282739 | 0.93401227  | 0.161602507 | 0.26207050  |
| ENSG00000204883 | 8  | 4246540  | 4246888  | SERP1P     | transcript processed pseudogene | -0.04354586  | 0.70688767  | -0.0278618   | 0.84766703  | 0.04562772  | 0.78168857  | -0.04747504  | 0.61409487  | -0.0262013  | 0.8008183   | 0.018282739 | 0.93401227  | 0.161602507 | 0.26207050  |
| ENSG00000208735 | 14 | 10384721 | 10389040 | MLK10637   | lincRNA                         | -0.14567181  | 0.06994248  | -0.10128785  | 0.48009288  | 0.20135474  | 0.82873151  | -0.2224731   | 0.26499919  | -0.28828219 | 0.04517507  | 0.018282739 | 0.93401227  | 0.161602507 | 0.26207050  |
| ENSG00000208514 | 4  | 7348175  | 7348001  | AFM        | protein coding                  | -0.15688853  | 0.16538193  | -0.06245288  | 0.67865480  | 0.00062055  | 0.90211339  | -0.1827648   | 0.522110776 | -0.17852362 | 0.01470403  | 0.018282739 | 0.93401227  | 0.161602507 | 0.26207050  |
| ENSG00000208555 | 11 | 7288958  | 7289582  | AP003085.1 | lincRNA                         | -0.04758909  | 0.68120953  | -0.01848918  | 0.84158668  | -0.138586   | 0.9098607   | -0.16009157  | 0.42055871  | -0.05042488 | 0.01747183  | 0.0         |             |             |             |

Table with 10 columns: Gene ID, Chr, Start, End, Gene Name, Feature, RefSeq ID, RefSeq Description, RefSeq Accession, RefSeq Description. The table lists numerous genes and their associated features, such as AC004169.1, AC004170.1, AC004171.1, etc., with their respective genomic coordinates and descriptions.

|                 |    |          |          |             |                      |             |            |             |            |             |            |             |            |             |            |            |            |            |            |            |
|-----------------|----|----------|----------|-------------|----------------------|-------------|------------|-------------|------------|-------------|------------|-------------|------------|-------------|------------|------------|------------|------------|------------|------------|
| ENSG0000010714  | 9  | 5299964  | 5304716  | RIN2        | protein coding       | -0.00320515 | 0.97714067 | 0.02426072  | 0.86718550 | 0.18161527  | 0.36407905 | 0.00526778  | 0.87919534 | 0.00353762  | 0.97974508 | 0.01289173 | 0.95362670 | 0.02340853 | 0.87116941 |            |
| ENSG0000010719  | 11 | 5274472  | 5284771  | RPL1        | protein coding       | -0.19910084 | 0.90404261 | -0.14457071 | 0.11687811 | 0.16325907  | 0.49718554 | -0.23700307 | 0.23903300 | -0.34918699 | 0.96652627 | 0.01296331 | 0.95372706 | 0.03572706 | 0.33571504 | 0.85342923 |
| ENSG0000020093  | X  | 2401274  | 2401274  | LOC10820.4  | transcript processed | -0.23667279 | 0.93829531 | -0.13309169 | 0.25683891 | 0.42318879  | 0.28133303 | -0.24999477 | 0.20827429 | -0.30226695 | 0.02324427 | 0.01283291 | 0.95363801 | 0.02324427 | 0.10903353 | 0.85342923 |
| ENSG0000024214  | 2  | 5300423  | 5300423  | SERPIN3P1   | protein coding       | -0.15085181 | 0.90363614 | -0.01708307 | 0.62439650 | -0.11607154 | 0.34787426 | 0.07134507  | 0.73508861 | -0.22658414 | 0.05881503 | 0.01283291 | 0.95363801 | 0.02324427 | 0.03626923 | 0.85342923 |
| ENSG0000016613  | 11 | 5650789  | 5650789  | LOC101928.1 | transcript processed | -0.17514232 | 0.91781952 | -0.02843814 | 0.29843814 | 0.02843814  | 0.29843814 | 0.02843814  | 0.29843814 | 0.02843814  | 0.02843814 | 0.01283291 | 0.95363801 | 0.02324427 | 0.36381123 | 0.85342923 |
| ENSG0000019854  | 11 | 10434286 | 10436936 | CASP4       | protein coding       | -0.09351584 | 0.94042358 | -0.15668025 | 0.17714442 | 0.12121713  | 0.64405566 | -0.26660480 | 0.19634134 | 0.07932783  | 0.05881503 | 0.01283291 | 0.95363801 | 0.02324427 | 0.32460233 | 0.85342923 |
| ENSG0000025919  | 6  | 7676142  | 7676243  | THAP2P7     | transcript processed | -0.10512345 | 0.91692141 | -0.04701758 | 0.17698546 | 0.02162629  | 0.62147295 | -0.06038001 | 0.78478078 | -0.09266265 | 0.03139430 | 0.01283291 | 0.95363801 | 0.02324427 | 0.64134959 | 0.85342923 |
| ENSG0000017246  | 9  | 32485149 | 32485149 | LOC101928.1 | transcript processed | -0.10512345 | 0.91692141 | -0.04701758 | 0.17698546 | 0.02162629  | 0.62147295 | -0.06038001 | 0.78478078 | -0.09266265 | 0.03139430 | 0.01283291 | 0.95363801 | 0.02324427 | 0.64134959 | 0.85342923 |
| ENSG0000018201  | 16 | 2569199  | 2569199  | HSS1A7      | protein coding       | -0.17029372 | 0.13880249 | -0.01920574 | 0.91572900 | 0.06139292  | 0.52364678 | -0.24239910 | 0.07211032 | -0.24239910 | 0.07211032 | 0.01283291 | 0.95363801 | 0.02324427 | 0.19184542 | 0.85342923 |
| ENSG0000017049  | 7  | 761259   | 761259   | KCNAB5      | protein coding       | -0.14651968 | 0.92339662 | -0.08189362 | 0.63085185 | -0.07390173 | 0.15988811 | -0.16781962 | 0.62726481 | -0.01894145 | 0.14399594 | 0.01283291 | 0.95363801 | 0.02324427 | 0.95402873 | 0.85342923 |
| ENSG0000017594  | 19 | 1502825  | 1502825  | CYFP22      | protein coding       | -0.09648839 | 0.94038473 | -0.11432827 | 0.42927459 | 0.07649574  | 0.70451681 | -0.36011779 | 0.07333512 | -0.27223831 | 0.01283291 | 0.95363801 | 0.02324427 | 0.95402873 | 0.85342923 |            |
| ENSG0000028717  | 10 | 8703717  | 8703818  | SL15893.2   | transcript processed | -0.06167480 | 0.94427172 | -0.07282974 | 0.63340224 | -0.13131059 | 0.38129133 | -0.08943868 | 0.67300591 | -0.06493404 | 0.96283369 | 0.01283291 | 0.95363801 | 0.02324427 | 0.95402873 | 0.85342923 |
| ENSG0000015103  | 4  | 14801826 | 14844468 | NBC2L       | protein coding       | -0.15692911 | 0.10909201 | -0.09373763 | 0.69589141 | -0.18980537 | 0.32069362 | -0.01692291 | 0.93323254 | -0.28117722 | 0.03689791 | 0.01283291 | 0.95363801 | 0.02324427 | 0.95402873 | 0.85342923 |
| ENSG0000018786  | 11 | 12511311 | 12512671 | KRT18BP5    | transcript processed | -0.32088585 | 0.00334073 | -0.17228921 | 0.29387500 | -0.17318540 | 0.40257547 | -0.23028734 | 0.27844529 | -0.32088585 | 0.00334073 | 0.01283291 | 0.95363801 | 0.02324427 | 0.32088585 | 0.85342923 |
| ENSG0000024238  | 3  | 12627238 | 12691838 | LINC0214.4  | transcript processed | -0.22673078 | 0.94479861 | -0.01941586 | 0.96097279 | -0.28692768 | 0.14383552 | -0.23099997 | 0.24634348 | -0.42809788 | 0.00212689 | 0.01283291 | 0.95363801 | 0.02324427 | 0.19053491 | 0.85342923 |
| ENSG0000020771  | 22 | 2195270  | 2195270  | LOC101928.1 | transcript processed | -0.14041310 | 0.92150418 | -0.06473178 | 0.65513311 | -0.22974913 | 0.21193195 | -0.13532705 | 0.50515956 | -0.10713965 | 0.15240489 | 0.01283291 | 0.95363801 | 0.02324427 | 0.14158697 | 0.85342923 |
| ENSG0000018113  | 12 | 5032383  | 5032383  | LARP4       | protein coding       | -0.08040474 | 0.46231184 | -0.01926988 | 0.52881422 | -0.22728513 | 0.18689195 | -0.16488407 | 0.41242451 | -0.19077884 | 0.31887783 | 0.01283291 | 0.95363801 | 0.02324427 | 0.95402873 | 0.85342923 |
| ENSG0000025337  | 11 | 10424919 | 10424920 | AP0183.1    | transcript processed | -0.00781271 | 0.94796743 | -0.08428020 | 0.68898284 | -0.07279643 | 0.71217687 | -0.08068190 | 0.74700873 | -0.01851813 | 0.88851466 | 0.01283291 | 0.95363801 | 0.02324427 | 0.00851006 | 0.85342923 |
| ENSG0000023932  | 12 | 3028117  | 3028962  | CAT01.1     | transcript processed | -0.03244732 | 0.78734386 | -0.12154418 | 0.40519641 | 0.05911033  | 0.71766297 | -0.07476693 | 0.29962654 | -0.02103811 | 0.15446681 | 0.01283291 | 0.95363801 | 0.02324427 | 0.02303054 | 0.85342923 |
| ENSG0000025224  | 7  | 15719236 | 15719237 | RN72AP12    | transcript processed | -0.06628758 | 0.56903592 | -0.04553334 | 0.78387817 | -0.13182627 | 0.51216948 | -0.16417384 | 0.41195880 | -0.10402165 | 0.45412801 | 0.01283291 | 0.95363801 | 0.02324427 | 0.01174629 | 0.85342923 |
| ENSG0000023701  | 2  | 365726   | 367124   | LINC02304   | transcript processed | -0.20527275 | 0.97330562 | -0.04734880 | 0.74146801 | -0.15340758 | 0.44468787 | -0.00764251 | 0.86981076 | -0.15998420 | 0.24801784 | 0.01283291 | 0.95363801 | 0.02324427 | 0.95402873 | 0.85342923 |
| ENSG0000025274  | 3  | 18912094 | 19014517 | PDR-AS1     | transcript processed | -0.17924207 | 0.11879572 | -0.12130171 | 0.40139077 | -0.03376824 | 0.97187444 | -0.18871366 | 0.33039263 | -0.17231879 | 0.21276624 | 0.01283291 | 0.95363801 | 0.02324427 | 0.95402873 | 0.85342923 |
| ENSG0000025276  | 3  | 15343290 | 15343844 | CROCCP1     | transcript processed | -0.23241268 | 0.04274077 | -0.09786693 | 0.49894847 | -0.33485116 | 0.10243368 | -0.44863648 | 0.02416768 | -0.40806346 | 0.02416768 | 0.01283291 | 0.95363801 | 0.02324427 | 0.95402873 | 0.85342923 |
| ENSG0000028522  | 6  | 2601396  | 2602389  | LOC101928.1 | transcript processed | -0.07148147 | 0.53881958 | -0.14262555 | 0.71944414 | -0.10309207 | 0.42389738 | -0.33177846 | 0.09009201 | -0.04824574 | 0.72361777 | 0.01283291 | 0.95363801 | 0.02324427 | 0.95402873 | 0.85342923 |
| ENSG0000027791  | 9  | 9200545  | 92008403 | RN72S.57P   | transcript processed | -0.13703813 | 0.22982949 | -0.00071337 | 0.98614924 | -0.08949387 | 0.90198901 | -0.07029280 | 0.87242718 | -0.14419903 | 0.29891201 | 0.01283291 | 0.95363801 | 0.02324427 | 0.95402873 | 0.85342923 |
| ENSG0000029932  | 9  | 3948896  | 3958841  | DLL3        | protein coding       | -0.15110421 | 0.13838892 | -0.05290053 | 0.71496227 | -0.15044208 | 0.43582503 | -0.18595491 | 0.55970761 | -0.19494451 | 0.18582029 | 0.01283291 | 0.95363801 | 0.02324427 | 0.95402873 | 0.85342923 |
| ENSG0000020017  | 11 | 12021217 | 12021217 | LOC101928.1 | transcript processed | -0.02848361 | 0.94349691 | -0.02848361 | 0.94349691 | -0.02848361 | 0.94349691 | -0.02848361 | 0.94349691 | -0.02848361 | 0.94349691 | 0.01283291 | 0.95363801 | 0.02324427 | 0.95402873 | 0.85342923 |
| ENSG0000028056  | 11 | 9842048  | 9842311  | LOC101928.1 | transcript processed | -0.04713924 | 0.68330307 | -0.04088827 | 0.71624241 | -0.27076609 | 0.23380481 | -0.12944223 | 0.51988801 | -0.03872449 | 0.78184203 | 0.01283291 | 0.95363801 | 0.02324427 | 0.95402873 | 0.85342923 |
| ENSG0000021644  | 22 | 2322472  | 2322929  | IGLV1.51    | transcript processed | -0.18101181 | 0.11395739 | -0.24445042 | 0.90710425 | -0.06828231 | 0.71336959 | -0.35396807 | 0.07079221 | -0.12404716 | 0.36932740 | 0.01283291 | 0.95363801 | 0.02324427 | 0.14202997 | 0.85342923 |
| ENSG0000023442  | 11 | 9840831  | 9840831  | LOC101928.1 | transcript processed | -0.04713924 | 0.68330307 | -0.04088827 | 0.71624241 | -0.27076609 | 0.23380481 | -0.12944223 | 0.51988801 | -0.03872449 | 0.78184203 | 0.01283291 | 0.95363801 | 0.02324427 | 0.95402873 | 0.85342923 |
| ENSG00000249175 | 5  | 9478879  | 9478879  | LOC101928.1 | transcript processed | -0.27359734 | 0.01543344 | -0.18446474 | 0.17624128 | -0.32062513 | 0.29704031 | -0.40036941 | 0.03857041 | -0.36060917 | 0.02026011 | 0.01283291 | 0.95363801 | 0.02324427 | 0.2817866  | 0.85342923 |
| ENSG0000021658  | 17 | 3124254  | 3226374  | RHOT1       | protein coding       | -0.04387426 | 0.70631461 | -0.13970738 | 0.48602661 | -0.33384267 | 0.62272194 | -0.18931336 | 0.34472954 | -0.00715833 | 0.66274143 | 0.01283291 | 0.95363801 | 0.02324427 | 0.01292603 | 0.85342923 |
| ENSG0000023390  | 11 | 94811914 | 94811914 | LOC101928.1 | transcript processed | -0.04387426 | 0.70631461 | -0.13970738 | 0.48602661 | -0.33384267 | 0.62272194 | -0.18931336 | 0.34472954 | -0.00715833 | 0.66274143 | 0.01283291 | 0.95363801 | 0.02324427 | 0.01292603 | 0.85342923 |
| ENSG00000213601 | 2  | 1891131  | 1891137  | KRT18BP1    | protein coding       | -0.02804946 | 0.80065856 | -0.03114133 | 0.80065856 | -0.21674047 | 0.26602100 | -0.12930068 | 0.52360628 | -0.03954204 | 0.71896233 | 0.01283291 | 0.95363801 | 0.02324427 | 0.16441793 | 0.85342923 |
| ENSG0000010497  | 19 | 49621037 | 4962922  | PTWD1       | protein coding       | -0.04728534 | 0.62899363 | -0.01339539 | 0.81972934 | -0.02845934 | 0.68551707 | -0.07196816 | 0.72130477 | -0.08951868 | 0.61971767 | 0.01283291 | 0.95363801 | 0.02324427 | 0.95402873 | 0.85342923 |
| ENSG0000014826  | 11 | 9089292  | 9089292  | LOC101928.1 | transcript processed | -0.04728534 | 0.62899363 | -0.01339539 | 0.81972934 | -0.02845934 | 0.68551707 | -0.07196816 | 0.72130477 | -0.08951868 | 0.61971767 | 0.01283291 | 0.95363801 | 0.02324427 | 0.95402873 | 0.85342923 |
| ENSG00000232882 | 1  | 10089292 | 10089292 | LOC101928.1 | transcript processed | -0.04728534 | 0.62899363 | -0.01339539 | 0.81972934 | -0.02845934 | 0.68551707 | -0.07196816 | 0.72130477 | -0.08951868 | 0.61971767 | 0.01283291 | 0.95363801 | 0.02324427 | 0.95402873 | 0.85342923 |
| ENSG0000011264  | 6  | 3904871  | 3904871  | GLIPI1      | protein coding       | -0.30711101 | 0.00591291 | -0.17072242 | 0.25873778 | -0.13660399 | 0.68383941 | -0.08780571 | 0.45359971 | -0.38999516 | 0.00030767 | 0.01283291 | 0.95363801 | 0.02324427 | 0.95402873 | 0.85342923 |
| ENSG0000029887  | 11 | 12981587 | 12981587 | LOC101928.1 | transcript processed | -0.04728534 | 0.62899    |             |            |             |            |             |            |             |            |            |            |            |            |            |



Table with 10 columns: Gene ID, Chr, Start, End, Gene Name, Transcription Start Site, Strand, Feature, RefSeq ID, RefSeq Name, RefSeq Description, RefSeq Accession. The table lists numerous genes and their associated genomic coordinates and features.





Table with 10 columns: Gene ID, Chr, Start, End, Gene Name, Feature, RefSeq ID, RefSeq Description, RefSeq Accession, RefSeq Description, RefSeq Accession, RefSeq Description. The table lists numerous genes and their associated genomic coordinates and features.





Table with 15 columns: Gene ID, Chr, Start, End, Strand, Feature, RefSeq ID, RefSeq Name, RefSeq Description, RefSeq Type, RefSeq Class, RefSeq Category, RefSeq Subcategory, RefSeq Subtype, RefSeq Subclass, RefSeq Subgroup. The table lists various genes and their associated features across different chromosomes.





Table with 10 columns: Gene ID, Chr, Position, Gene Name, Type, and a list of 100 numerical values. The table contains 100 rows of data, each representing a different gene and its associated values.





Table with 10 columns: Gene ID, Chr, Start, End, RefSeq ID, Gene Name, Feature Type, Strand, Start, End, RefSeq ID, Gene Name, Feature Type, Strand, Start, End, RefSeq ID, Gene Name, Feature Type, Strand. Contains genomic coordinates and gene annotations for various genes like SEC13B, GSK3B, RAB11B, etc.



|                |    |          |          |              |                                 |             |            |             |            |             |            |             |            |             |            |             |             |             |            |            |
|----------------|----|----------|----------|--------------|---------------------------------|-------------|------------|-------------|------------|-------------|------------|-------------|------------|-------------|------------|-------------|-------------|-------------|------------|------------|
| ENSG0000007910 | 9  | 3573666  | 3574223  | GBA2         | protein coding                  | -0.08207032 | 0.47186659 | 0.05967636  | 0.50715550 | 0.20040347  | 0.31611370 | 0.16298396  | 0.38643368 | -0.11376132 | 0.41274743 | -0.01512324 | 0.95120631  | 0.16354071  | 0.25642933 |            |
| ENSG0000017725 | 8  | 24792489 | 24793333 | GLI1         | protein coding                  | -0.20654235 | 0.27154327 | -0.19156968 | 0.46878774 | -0.07481241 | 0.48124333 | 0.21144811  | 0.56964031 | -0.27429273 | 0.31812627 | -0.01535620 | 0.81412320  | 0.15220937  | 0.18671729 |            |
| ENSG0000007913 | 4  | 3371754  | 3371814  | ALG3         | mRNA                            | 0.00000000  | 0.00000000 | 0.00000000  | 0.00000000 | 0.00000000  | 0.00000000 | 0.00000000  | 0.00000000 | 0.00000000  | 0.00000000 | 0.00000000  | 0.00000000  | 0.00000000  | 0.00000000 |            |
| ENSG0000008356 | 20 | 31944337 | 31952040 | PER1         | protein coding                  | -0.00246773 | 0.94325231 | 0.05242491  | 0.68611794 | 0.08454277  | 0.67883021 | 0.19318742  | 0.33432060 | 0.04045775  | 0.80718625 | -0.01539773 | 0.95110764  | 0.02520031  | 0.17140353 |            |
| ENSG0000009529 | 6  | 6924629  | 6925111  | USP105B2     | mRNA                            | -0.15376342 | 0.11001149 | -0.10552452 | 0.46567069 | -0.04704298 | 0.71023301 | -0.27373937 | 0.23293260 | -0.25565073 | 0.02602676 | -0.15550030 | 0.80769368  | 0.14260000  | 0.33170248 |            |
| ENSG0000015374 | 8  | 88726294 | 88726294 | RP23-282A1   | transcript processed pseudogene | 0.19432000  | 0.00000000 | 0.19432000  | 0.00000000 | 0.19432000  | 0.00000000 | 0.19432000  | 0.00000000 | 0.19432000  | 0.00000000 | 0.19432000  | 0.00000000  | 0.19432000  | 0.00000000 | 0.19432000 |
| ENSG0000012449 | 47 | 4371676  | 43720021 | IRGC         | protein coding                  | -0.08028204 | 0.48763184 | -0.07748010 | 0.77480710 | -0.10749450 | 0.40487408 | -0.04832363 | 0.81028463 | -0.08039444 | 0.55068687 | -0.01375654 | 0.95768546  | -0.10370708 | 0.45371749 |            |
| ENSG0000015639 | 11 | 5834095  | 5834215  | GLATL2       | mRNA                            | -0.05549348 | 0.40436909 | -0.05094242 | 0.65734401 | -0.13786111 | 0.45426303 | -0.04561820 | 0.82124793 | -0.17348781 | 0.14343690 | -0.01360390 | 0.95058953  | -0.01013639 | 0.57443340 |            |
| ENSG0000016432 | 14 | 18699314 | 18699314 | LOC101928662 | transcript processed pseudogene | -0.03202000 | 0.00000000 | -0.03202000 | 0.00000000 | -0.03202000 | 0.00000000 | -0.03202000 | 0.00000000 | -0.03202000 | 0.00000000 | -0.03202000 | 0.00000000  | -0.03202000 | 0.00000000 |            |
| ENSG0000009586 | 10 | 4675919  | 4676070  | SLU12P2      | transcript processed pseudogene | -0.13350315 | 0.24701709 | -0.07754441 | 0.60573444 | -0.10749450 | 0.40487408 | -0.04832363 | 0.81028463 | -0.08039444 | 0.55068687 | -0.01375654 | 0.95768546  | -0.10370708 | 0.45371749 |            |
| ENSG0000018898 | 19 | 12317477 | 12317477 | ZNF363       | protein coding                  | -0.08849494 | 0.44436221 | -0.08612421 | 0.64791483 | -0.12121262 | 0.50669703 | -0.12720260 | 0.27468794 | -0.18863604 | 0.31373554 | -0.01364573 | 0.95027248  | -0.02496534 | 0.86828460 |            |
| ENSG0000002589 | 11 | 1270444  | 1271811  | BRP1A3       | protein coding                  | -0.08849494 | 0.44436221 | -0.08612421 | 0.64791483 | -0.12121262 | 0.50669703 | -0.12720260 | 0.27468794 | -0.18863604 | 0.31373554 | -0.01364573 | 0.95027248  | -0.02496534 | 0.86828460 |            |
| ENSG0000016686 | 12 | 5741259  | 5741759  | MARS1        | protein coding                  | -0.18313937 | 0.14336206 | -0.11233395 | 0.43784701 | -0.14732111 | 0.40417658 | -0.10718469 | 0.33787488 | -0.20161474 | 0.10481103 | -0.01370499 | 0.95027248  | -0.15420768 | 0.28461123 |            |
| ENSG0000042507 | 20 | 3562082  | 3562082  | FOXP401.1    | transcript processed pseudogene | -0.06996349 | 0.54521763 | -0.03895242 | 0.78121423 | -0.12333320 | 0.56695313 | -0.10075598 | 0.68908448 | -0.02619526 | 0.73391222 | -0.01212459 | 0.94024597  | -0.03663368 | 0.53134111 |            |
| ENSG0000012878 | 11 | 17192448 | 17192448 | HAT1         | protein coding                  | -0.34983273 | 0.00049178 | -0.05204207 | 0.54549511 | -0.02818088 | 0.716066   | -0.07307851 | 0.29533928 | -0.40711891 | 0.00021098 | -0.01372838 | 0.86047861  | -0.04341112 | 0.00018889 |            |
| ENSG0000023743 | 3  | 17137317 | 17137365 | AC086759.1   | mRNA                            | 0.0121201   | 0.92292007 | 0.12725441  | 0.37748580 | 0.12933328  | 0.33476155 | 0.13422599  | 0.25003284 | 0.14510191  | 0.13422599 | 0.03391224  | -0.01373765 | 0.94077244  | 0.52544401 |            |
| ENSG0000018818 | 11 | 22613749 | 22613749 | SNIP         | protein coding                  | 0.00663767  | 0.56813777 | -0.14204738 | 0.32511207 | 0.48934246  | 0.09383104 | -0.38145501 | 0.06868078 | 0.01198854  | 0.74931379 | -0.01747374 | 0.95304633  | -0.14443444 | 0.06663430 |            |
| ENSG0000020337 | 10 | 15612747 | 15617742 | PNP1R3       | protein coding                  | -0.08740304 | 0.42620701 | -0.11339666 | 0.64897761 | -0.03114497 | 0.6743001  | -0.20297474 | 0.13989129 | -0.02097117 | 0.96973698 | -0.01772781 | 0.95120631  | -0.13970474 | 0.13970474 |            |
| ENSG0000028570 | 12 | 30696121 | 30700203 | AC012673.1   | mRNA                            | -0.08386841 | 0.47202153 | -0.05016899 | 0.67241536 | -0.10749450 | 0.40487408 | -0.04832363 | 0.81028463 | -0.08039444 | 0.55068687 | -0.01375654 | 0.95768546  | -0.10370708 | 0.45371749 |            |
| ENSG0000028935 | 14 | 9057486  | 9059970  | ALN9869.1    | mRNA                            | -0.19689589 | 0.00712009 | -0.11744573 | 0.41832927 | -0.08729129 | 0.66351881 | -0.14124170 | 0.48222908 | -0.17111193 | 0.12459300 | -0.01381025 | 0.95013806  | -0.23252778 | 0.10416411 |            |
| ENSG0000027248 | 19 | 4507449  | 4507449  | AC010332.1   | mRNA                            | -0.14748166 | 0.20091495 | -0.02071718 | 0.49303495 | -0.29897473 | 0.14371075 | -0.17162031 | 0.54562520 | -0.27189196 | 0.04669891 | -0.01381025 | 0.95013806  | -0.23252778 | 0.10416411 |            |
| ENSG0000022748 | 11 | 11338517 | 11342402 | NCAM1-AS1    | mRNA                            | -0.25086565 | 0.02689297 | -0.15534497 | 0.41832927 | -0.11745170 | 0.59594446 | -0.22897044 | 0.25481037 | -0.25635364 | 0.06113884 | -0.01381025 | 0.95013806  | -0.23252778 | 0.10416411 |            |
| ENSG0000020461 | 11 | 52113091 | 52113091 | ZNF16        | protein coding                  | -0.10940410 | 0.92801743 | -0.19134028 | 0.18320140 | -0.26071508 | 0.1892025  | -0.486221   | 0.01012588 | -0.13811851 | 0.31845528 | -0.01381025 | 0.95013806  | -0.23252778 | 0.10416411 |            |
| ENSG0000022693 | 11 | 24671735 | 24671735 | CP1184P1     | transcript processed pseudogene | -0.07852527 | 0.61122027 | -0.01386035 | 0.42481761 | -0.25274828 | 0.20019629 | -0.10240005 | 0.49573872 | -0.02607051 | 0.70598108 | -0.01381025 | 0.95013806  | -0.23252778 | 0.10416411 |            |
| ENSG0000016686 | 12 | 5741259  | 5741759  | MARS1        | protein coding                  | -0.18313937 | 0.14336206 | -0.11233395 | 0.43784701 | -0.14732111 | 0.40417658 | -0.10718469 | 0.33787488 | -0.20161474 | 0.10481103 | -0.01370499 | 0.95027248  | -0.15420768 | 0.28461123 |            |
| ENSG0000027838 | 17 | 3704528  | 3702889  | AC042935.5   | mRNA                            | -0.27393788 | 0.01928811 | -0.17352827 | 0.21741897 | -0.11314712 | 0.58042678 | -0.28441228 | 0.15048799 | -0.28472873 | 0.00210788 | -0.01381025 | 0.94989294  | -0.25809783 | 0.07286538 |            |
| ENSG0000017943 | 11 | 11189198 | 11189844 | RP3736P9     | transcript processed pseudogene | -0.01382129 | 0.94918197 | -0.01709314 | 0.01017045 | -0.01381025 | 0.49693954 | -0.10293361 | 0.61083740 | -0.07363611 | 0.95999624 | -0.01381025 | 0.94989294  | -0.25809783 | 0.07286538 |            |
| ENSG0000023242 | 22 | 2331225  | 2330302  | IGLL1        | protein coding                  | -0.31827733 | 0.00341261 | -0.18899536 | 0.19669203 | -0.03110261 | 0.40100400 | -0.36971635 | 0.05744202 | -0.10119173 | 0.02624108 | -0.01381025 | 0.94989294  | -0.25809783 | 0.07286538 |            |
| ENSG0000027186 | 4  | 5359223  | 5359341  | MIRR8        | mRNA                            | 0.00094643  | 0.99335768 | 0.11415048  | 0.42991594 | 0.12635994  | 0.44581041 | 0.22407129  | 0.26191312 | -0.11744551 | 0.39889274 | -0.01381025 | 0.94989294  | -0.25809783 | 0.07286538 |            |
| ENSG0000015144 | 11 | 11982564 | 11982564 | PCMA1P1      | transcript processed pseudogene | -0.01382129 | 0.94918197 | -0.01709314 | 0.01017045 | -0.01381025 | 0.49693954 | -0.10293361 | 0.61083740 | -0.07363611 | 0.95999624 | -0.01381025 | 0.94989294  | -0.25809783 | 0.07286538 |            |
| ENSG0000023270 | 24 | 21098811 | 21103724 | TMEM53       | protein coding                  | -0.20081728 | 0.10784481 | -0.03987128 | 0.40104422 | -0.10263196 | 0.59163317 | -0.07019505 | 0.71855729 | -0.24752627 | 0.01144098 | -0.01381025 | 0.94989294  | -0.25809783 | 0.07286538 |            |
| ENSG0000022581 | 17 | 2052629  | 2056630  | AC05730.1    | transcript processed pseudogene | -0.16718941 | 0.14167974 | -0.05166010 | 0.47150126 | -0.22028397 | 0.26555748 | -0.13134037 | 0.51793354 | -0.23117558 | 0.08792223 | -0.01402817 | 0.94343441  | -0.17179191 | 0.23280205 |            |
| ENSG0000014750 | 19 | 14689474 | 14689474 | PCMA1P1      | transcript processed pseudogene | -0.01382129 | 0.94918197 | -0.01709314 | 0.01017045 | -0.01381025 | 0.49693954 | -0.10293361 | 0.61083740 | -0.07363611 | 0.95999624 | -0.01381025 | 0.94989294  | -0.25809783 | 0.07286538 |            |
| ENSG0000014099 | 14 | 91866412 | 91947987 | FBN3         | protein coding                  | -0.08537373 | 0.44480710 | -0.11153630 | 0.44019680 | -0.24556782 | 0.20635109 | -0.46658812 | 0.46558688 | -0.21332100 | 0.12413523 | -0.01402817 | 0.94343441  | -0.17179191 | 0.23280205 |            |
| ENSG0000023230 | 7  | 36011117 | 36055431 | AC03384.2    | mRNA                            | -0.12010038 | 0.29814819 | -0.01533262 | 0.51571782 | -0.02151356 | 0.51924417 | -0.12671199 | 0.52826469 | -0.04653077 | 0.73009064 | -0.01402817 | 0.94343441  | -0.17179191 | 0.23280205 |            |
| ENSG0000027949 | 10 | 4211142  | 4211142  | TEC          | protein coding                  | 0.44767642  | 0.00000000 | 0.44767642  | 0.00000000 | 0.44767642  | 0.00000000 | 0.44767642  | 0.00000000 | 0.44767642  | 0.00000000 | 0.44767642  | 0.00000000  | 0.44767642  | 0.00000000 |            |
| ENSG0000024473 | 4  | 6189257  | 6190171  | ATXN3S       | mRNA                            | -0.03750550 | 0.74576414 | -0.01064401 | 0.60186401 | -0.05853399 | 0.37532326 | -0.08526328 | 0.63835124 | -0.06106387 | 0.68098158 | -0.01411808 | 0.90671182  | -0.11252748 | 0.18120400 |            |
| ENSG0000025842 | 8  | 7199097  | 7199097  | CA3          | protein coding                  | -0.20344820 | 0.27015618 | -0.16000508 | 0.43530181 | -0.26385399 | 0.18038487 | -0.38334551 | 0.04927238 | -0.39388077 | 0.00012999 | -0.01411808 | 0.90671182  | -0.11252748 | 0.18120400 |            |
| ENSG0000025957 | 8  | 7689180  | 7688337  | PCP3         | transcript processed pseudogene | -0.01382129 | 0.94918197 | -0.01709314 | 0.01017045 | -0.01381025 | 0.49693954 | -0.10293361 | 0.61083740 | -0.07363611 | 0.95999624 | -0.01381025 | 0.94989294  | -0.25809783 | 0.07286538 |            |
| ENSG0000023429 | 7  | 27095647 | 27102025 | HOXA10P1     | transcript processed pseudogene | -0.15222988 | 0.17744606 | -0.18810787 | 0.19389092 | -0.13968787 | 0.48988774 | -0.38079791 | 0.04829283 | -0.20571841 | 0.13662738 | -0.01487278 | 0.94891869  | -0.13206115 | 0.36613969 |            |
| ENSG0000010312 | 10 | 10140333 | 10140333 | B            |                                 |             |            |             |            |             |            |             |            |             |            |             |             |             |            |            |



|                 |    |          |           |                        |                        |             |            |             |            |             |            |             |            |             |             |             |            |             |             |            |
|-----------------|----|----------|-----------|------------------------|------------------------|-------------|------------|-------------|------------|-------------|------------|-------------|------------|-------------|-------------|-------------|------------|-------------|-------------|------------|
| ENSG00000142988 | 1  | 31466883 | 34219111  | C1orf67                | protein coding         | -0.32098048 | 0.00747139 | -0.05133039 | 0.72332610 | -0.1107049  | 1.1433311  | -0.00800304 | 0.96640513 | -0.29274674 | 0.026906168 | -0.01588488 | 0.9329237  | 0.39043112  | 0.005060704 |            |
| ENSG00000142989 | 1  | 26748130 | 26867272  | CDR1A                  | protein coding         | -0.19775158 | 0.00747139 | -0.19775158 | 0.33572694 | -0.19775158 | 0.33572694 | -0.19775158 | 0.33572694 | -0.19775158 | 0.33572694  | -0.19775158 | 0.33572694 | -0.19775158 | 0.33572694  | 0.00747139 |
| ENSG00000142990 | 14 | 19178333 | 19178333  | CDR1B                  | protein coding         | -0.19775158 | 0.00747139 | -0.19775158 | 0.33572694 | -0.19775158 | 0.33572694 | -0.19775158 | 0.33572694 | -0.19775158 | 0.33572694  | -0.19775158 | 0.33572694 | -0.19775158 | 0.33572694  | 0.00747139 |
| ENSG00000237360 | 7  | 26551486 | 26558880  | AC004741               | lincRNA                | -0.33547171 | 0.00282344 | -0.21540617 | 0.13920709 | 0.03622009  | 0.46882240 | -0.40310250 | 0.07308417 | -0.37113829 | 0.04093262  | -0.01868756 | 0.93268007 | 0.30002163  | 0.03406810  |            |
| ENSG00000227742 | 1  | 5161186  | 5169489   | transcript unannotated | transcript unannotated | -0.16692322 | 0.00602014 | -0.01596801 | 0.05714624 | -0.06657000 | 0.17516204 | -0.06657000 | 0.17516204 | -0.06657000 | 0.17516204  | -0.06657000 | 0.17516204 | -0.06657000 | 0.17516204  |            |
| ENSG00000265989 | 1  | 1438294  | 1438294   | AC01917.2              | transcript unannotated | -0.1438294  | 0.00000000 | -0.1438294  | 0.00000000 | -0.1438294  | 0.00000000 | -0.1438294  | 0.00000000 | -0.1438294  | 0.00000000  | -0.1438294  | 0.00000000 | -0.1438294  | 0.00000000  |            |
| ENSG0000025912  | 1  | 2635976  | 2891717   | ITIC34                 | protein coding         | -0.18444704 | 0.00505032 | -0.0790178  | 0.52682830 | -0.04143210 | 1.01007051 | -0.14698854 | 0.46439908 | -0.37516803 | 0.04691859  | -0.01709222 | 0.95220622 | 0.3466632   | 0.01584230  |            |
| ENSG00000228004 | 3  | 18702313 | 18737388  | LOC70222.1             | protein coding         | -0.269254   | 0.01466758 | -0.1538174  | 0.286195   | -0.33760891 | 0.08483765 | -0.2657405  | 0.1830050  | -0.34212967 | 0.01642681  | -0.0174154  | 0.93246766 | 0.28001165  | 0.02453410  |            |
| ENSG00000181895 | 8  | 14371683 | 14372458  | RNAP1B                 | protein coding         | -0.1737483  | 0.13307843 | -0.0370943  | 0.7081103  | 0.8428912   | 0.3732549  | -0.1426986  | 0.5258987  | -0.2456153  | 0.08112228  | -0.01754387 | 0.90231369 | 0.11788037  | 0.03448024  |            |
| ENSG0000025551  | 8  | 7526326  | 7542540   | PRR2AD1                | protein coding         | -0.15080797 | 0.19048584 | -0.0568207  | 0.69687637 | -0.0568207  | 0.73500907 | -0.06292340 | 0.46478787 | -0.16158886 | 0.02282153  | -0.01748482 | 0.92323374 | 0.15429213  | 0.04786208  |            |
| ENSG0000011839  | 14 | 2448893  | 2448893   | ITKASO                 | lincRNA                | -0.04488003 | 0.08746015 | -0.1307121  | 0.41890717 | -0.07038607 | 0.2868630  | -0.0826630  | 0.1757847  | -0.0836305  | 0.0437658   | -0.0170751  | 0.92323374 | 0.28001165  | 0.02453410  |            |
| ENSG00000243447 | 2  | 25996196 | 25996196  | transcript unannotated | transcript unannotated | -0.1737483  | 0.13307843 | -0.0370943  | 0.7081103  | 0.8428912   | 0.3732549  | -0.1426986  | 0.5258987  | -0.2456153  | 0.08112228  | -0.01754387 | 0.90231369 | 0.11788037  | 0.03448024  |            |
| ENSG0000025551  | 8  | 7526326  | 7542540   | PRR2AD1                | protein coding         | -0.15080797 | 0.19048584 | -0.0568207  | 0.69687637 | -0.0568207  | 0.73500907 | -0.06292340 | 0.46478787 | -0.16158886 | 0.02282153  | -0.01748482 | 0.92323374 | 0.15429213  | 0.04786208  |            |
| ENSG0000011839  | 14 | 2448893  | 2448893   | ITKASO                 | lincRNA                | -0.04488003 | 0.08746015 | -0.1307121  | 0.41890717 | -0.07038607 | 0.2868630  | -0.0826630  | 0.1757847  | -0.0836305  | 0.0437658   | -0.0170751  | 0.92323374 | 0.28001165  | 0.02453410  |            |
| ENSG0000016678  | 11 | 9639534  | 9639534   | ZNF143                 | protein coding         | -0.0034189  | 0.87991191 | -0.0892628  | 0.55280068 | -0.09814303 | 0.49029028 | -0.1747431  | 0.4942642  | -0.01435882 | 0.91786718  | -0.0176307  | 0.9329237  | 0.09109233  | 0.71919148  |            |
| ENSG00000130985 | X  | 47215128 | 47215128  | ATBVE1                 | protein coding         | -0.02373907 | 0.83762332 | -0.05989758 | 0.60937566 | -0.03354101 | 0.08882757 | -0.15712342 | 0.46830078 | -0.12782225 | 0.35714724  | -0.0187626  | 0.92323374 | 0.09109233  | 0.71919148  |            |
| ENSG00000179297 | 8  | 51612529 | 5206713   | PHD1                   | protein coding         | -0.28982217 | 0.00195828 | -0.0833227  | 0.58487369 | -0.1444504  | 0.41217225 | -0.08911916 | 0.68910204 | -0.2634447  | 0.00443137  | -0.0177213  | 0.92323374 | 0.09109233  | 0.71919148  |            |
| ENSG00000207092 | 10 | 3029112  | 3029112   | rRNA                   | transcript unannotated | -0.3029112  | 0.4496136  | -0.11446678 | 0.47029737 | -0.13063387 | 0.34630389 | -0.14446678 | 0.47029737 | -0.13063387 | 0.34630389  | -0.14446678 | 0.47029737 | -0.13063387 | 0.34630389  |            |
| ENSG00000104369 | 8  | 7424300  | 7424300   | JPH1                   | protein coding         | -0.12450460 | 0.09234373 | -0.0797294  | 0.59611792 | -0.05817593 | 0.0092912  | -0.30611506 | 0.06947059 | -0.08188776 | 0.03192878  | -0.01588488 | 0.9329237  | 0.15285321  | 0.03228703  |            |
| ENSG00000227817 | 1  | 13132818 | 13133087  | ARGGAP2P               | transcript unannotated | -0.2299173  | 0.04819762 | -0.1420744  | 0.42971308 | -0.12026928 | 0.5047740  | -0.1272444  | 0.2762813  | -0.2734551  | 0.04216889  | -0.0187320  | 0.9329237  | 0.15285321  | 0.03228703  |            |
| ENSG00000132921 | 29 | 3790311  | 3794553   | VSTK1                  | protein coding         | -0.174037   | 0.09118167 | -0.02971168 | 0.65446523 | -0.11603153 | 0.1190252  | -0.02921131 | 0.46359288 | -0.2471878  | 0.01152910  | -0.0119138  | 0.9329237  | 0.15285321  | 0.03228703  |            |
| ENSG00000148154 | 1  | 11088814 | 11193589  | UCR3                   | protein coding         | -0.16888037 | 0.14179927 | -0.22530041 | 0.1150840  | -0.0041484  | 0.9413016  | -0.35464815 | 0.06850481 | -0.21291491 | 0.12215312  | -0.0187320  | 0.9329237  | 0.15285321  | 0.03228703  |            |
| ENSG00000145346 | 8  | 3005056  | 3200845   | CTP11A1P               | transcript unannotated | -0.1030630  | 0.36885572 | -0.0041628  | 0.97119230 | -0.10714481 | 0.92930358 | -0.02037467 | 0.81982488 | -0.18621272 | 0.17577299  | -0.0187320  | 0.9329237  | 0.15285321  | 0.03228703  |            |
| ENSG00000145346 | 8  | 3005056  | 3200845   | CTP11A1P               | transcript unannotated | -0.1030630  | 0.36885572 | -0.0041628  | 0.97119230 | -0.10714481 | 0.92930358 | -0.02037467 | 0.81982488 | -0.18621272 | 0.17577299  | -0.0187320  | 0.9329237  | 0.15285321  | 0.03228703  |            |
| ENSG00000259120 | 17 | 75648243 | 75647975  | SMY2                   | protein coding         | -0.00211897 | 0.00293131 | 0.02093031  | 0.89293191 | 0.3077455   | 0.11832003 | -0.01409597 | 0.94432758 | -0.30974384 | 0.00293131  | -0.01696205 | 0.9329237  | 0.15285321  | 0.03228703  |            |
| ENSG0000020247  | 8  | 6997186  | 6999186   | DEF1A                  | protein coding         | -0.1991155  | 0.08702038 | -0.08971258 | 0.5335417  | -0.0091164  | 0.9004742  | -0.08622407 | 0.69889292 | -0.00218876 | 0.81278615  | -0.0148885  | 0.9329237  | 0.15285321  | 0.03228703  |            |
| ENSG0000020247  | 8  | 6997186  | 6999186   | DEF1A                  | protein coding         | -0.1991155  | 0.08702038 | -0.08971258 | 0.5335417  | -0.0091164  | 0.9004742  | -0.08622407 | 0.69889292 | -0.00218876 | 0.81278615  | -0.0148885  | 0.9329237  | 0.15285321  | 0.03228703  |            |
| ENSG00000279981 | 16 | 17816117 | 17816814  | LOC100404.1            | lincRNA                | -0.18206003 | 0.09333738 | -0.10873382 | 0.41512884 | -0.04813048 | 0.81517673 | -0.07874000 | 0.68621338 | -0.10873382 | 0.41512884  | -0.01898343 | 0.9329237  | 0.15285321  | 0.03228703  |            |
| ENSG00000130309 | 19 | 17555844 | 17581824  | COLGAL2                | protein coding         | -0.03603458 | 0.74210958 | -0.05981153 | 0.86100343 | -0.13368272 | 0.48178859 | -0.10172284 | 0.87518488 | -0.01590009 | 0.90989228  | -0.01699223 | 0.9329237  | 0.15285321  | 0.03228703  |            |
| ENSG00000290705 | 19 | 17555844 | 17581824  | COLGAL2                | protein coding         | -0.03603458 | 0.74210958 | -0.05981153 | 0.86100343 | -0.13368272 | 0.48178859 | -0.10172284 | 0.87518488 | -0.01590009 | 0.90989228  | -0.01699223 | 0.9329237  | 0.15285321  | 0.03228703  |            |
| ENSG00000148248 | 8  | 5208744  | 5208744   | ENSO007.2              | lincRNA                | -0.14979518 | 0.15348748 | -0.13698076 | 0.34416370 | -0.00949152 | 0.6623377  | -0.22501781 | 0.24642248 | -0.15368559 | 0.02174663  | -0.01893497 | 0.9329237  | 0.15285321  | 0.03228703  |            |
| ENSG00000148248 | 8  | 5208744  | 5208744   | ENSO007.2              | lincRNA                | -0.14979518 | 0.15348748 | -0.13698076 | 0.34416370 | -0.00949152 | 0.6623377  | -0.22501781 | 0.24642248 | -0.15368559 | 0.02174663  | -0.01893497 | 0.9329237  | 0.15285321  | 0.03228703  |            |
| ENSG00000258791 | 1  | 13339145 | 13337618  | SLURF4                 | protein coding         | -0.2291543  | 0.05027152 | -0.2514448  | 0.0716427  | -0.1001721  | 0.92689789 | -0.10184229 | 0.60047748 | -0.30712443 | 0.02888109  | -0.01405457 | 0.9329237  | 0.15285321  | 0.03228703  |            |
| ENSG00000143768 | 1  | 22903658 | 229041383 | LEIF2                  | protein coding         | -0.24064587 | 0.03050294 | -0.05449549 | 0.40707880 | -0.13170323 | 0.10418024 | -0.03792571 | 0.8510109  | -0.23976901 | 0.00786194  | -0.01405457 | 0.9329237  | 0.15285321  | 0.03228703  |            |
| ENSG0000026973  | 1  | 7200841  | 7203692   | UCR3                   | protein coding         | -0.19621243 | 0.08721149 | -0.05372242 | 0.11021242 | -0.11491587 | 0.55274954 | -0.13121261 | 0.81389650 | -0.24712362 | 0.04262764  | -0.0170751  | 0.9329237  | 0.15285321  | 0.03228703  |            |
| ENSG00000198218 | 1  | 4082746  | 4082746   | UCR3                   | protein coding         | -0.2291543  | 0.05027152 | -0.2514448  | 0.0716427  | -0.1001721  | 0.92689789 | -0.10184229 | 0.60047748 | -0.30712443 | 0.02888109  | -0.01405457 | 0.9329237  | 0.15285321  | 0.03228703  |            |
| ENSG00000122896 | 8  | 3978740  | 3980423   | SLC25A51               | protein coding         | -0.00038247 | 0.99533489 | -0.00712343 | 0.10068210 | -0.1657379  | 0.40689191 | -0.04041604 | 0.84181162 | -0.0540202  | 0.69997664  | -0.01893497 | 0.9329237  | 0.15285321  | 0.03228703  |            |
| ENSG00000111404 | 12 | 1808089  | 1830107   | RRERG                  | protein coding         | -0.0932923  | 0.41702118 | -0.0520125  | 0.71396784 | -0.04811377 | 0.88176263 | -0.18561465 | 0.35369091 | -0.1518902  | 0.22997442  | -0.01893497 | 0.9329237  | 0.15285321  | 0.03228703  |            |
| ENSG00000212176 | 7  | 42328287 | 42328287  | TRBV1                  | lincRNA                | -0.02858556 | 0.4751921  | -0.02858556 | 0.4751921  | -0.02858556 | 0.4751921  | -0.02858556 | 0.4751921  | -0.02858556 | 0.4751921   | -0.02858556 | 0.4751921  | -0.02858556 | 0.4751921   |            |
| ENSG00000282995 | 20 | 29480147 | 29497179  | FRG1EP                 | protein coding         | -0.2283759  | 0.04877188 | -0.11189625 | 0.49319887 | -0.10207408 | 0.9082321  | -0.14348767 | 0.31729505 | -0.2874382  | 0.03838794  | -0.01742026 | 0.9329237  | 0.15285321  | 0.03228703  |            |
| ENSG00000163884 | 3  | 18263263 | 18263740  | KLIF5                  | protein coding         | -0.14780172 | 0.19956184 | -0.02634392 | 0.6048392  | -0.21870302 | 0.73389102 | -0.10268237 |            |             |             |             |            |             |             |            |



Table with 10 columns: Gene ID, Chr, Start, End, Gene Name, Type, RefSeq ID, RefSeq Name, RefSeq Description, RefSeq Accession. Contains a comprehensive list of genes and their associated genomic coordinates and descriptions.





Table with 10 columns: Gene ID, Chr, Pos, RefSeq ID, Gene Name, Transcription Start Site (TSS), Strand, Feature Type, Feature Start, Feature End, Feature Score, Feature Type, Feature Start, Feature End, Feature Score. The table lists genomic features for various genes across chromosomes 12, 13, 14, 15, 16, 17, 18, 19, 20, 21, 22, and X.

Table with 10 columns: Gene ID, Gene Name, Feature, Coordinates, Strand, RefSeq ID, RefSeq Name, RefSeq Description, RefSeq Type, RefSeq Source. The table lists numerous genes and their associated features, including protein-coding genes, lincRNAs, antisenseRNAs, and miRNAs, with their genomic coordinates and RefSeq identifiers.



Table with columns for gene names (e.g., ENG000009106), coordinates, gene symbols (e.g., NRC2), descriptions (e.g., protein coding), and numerical values. The table lists numerous genes and their associated data points.



Table with 10 columns: Gene ID, Chr, Start, End, Strand, Feature, RefSeq ID, RefSeq Name, RefSeq Type, RefSeq Description. Contains a comprehensive list of genomic features and their associated RefSeq identifiers.







Table with 15 columns: Gene ID, Chr, Position, Gene Name, Feature, RefSeq ID, RefSeq Description, RefSeq Type, RefSeq Accession, RefSeq Description, RefSeq Type, RefSeq Accession, RefSeq Description, RefSeq Type, RefSeq Accession. The table lists various genes and their associated features and RefSeq identifiers.



Table with 10 columns: Gene ID, Gene Name, Feature, Start, End, Strand, RefSeq ID, RefSeq Name, RefSeq Description, RefSeq Accession. The table lists numerous genes and their associated features, such as C6orf206, C6orf207, C6orf208, etc., with their genomic coordinates and RefSeq identifiers.

Table with columns for gene ID, chromosome, coordinates, gene name, transcript type, and coordinates. It lists numerous genes such as ENG0000017479, ENG0000017480, etc., with their respective genomic locations and transcript details.









Table with 10 columns: Gene ID, Chr, Start, End, Gene Name, Feature, RefSeq ID, RefSeq Link, RefSeq Description, RefSeq Type. The table lists numerous genes and their genomic coordinates across various chromosomes (1-22, X, Y).

| ENSG0000022150 | 1  | 9942329  | 9499774  | AL357140.2 | lncRNA                 | -0.15536675  | 0.177260377 | -0.203911277 | 0.155489964 | 0.0609978407 | 0.762544334 | -0.2879111  | 0.145365507 | -0.140169219 | 0.132059199 | -0.055819684 | 0.800292267 | 0.121470311 | 0.400730723 |             |
|----------------|----|----------|----------|------------|------------------------|--------------|-------------|--------------|-------------|--------------|-------------|-------------|-------------|--------------|-------------|--------------|-------------|-------------|-------------|-------------|
| ENSG0000024874 | 1  | 10034152 | 15217292 | LOC101928  | lncRNA                 | -0.09681364  | 0.44336183  | 0.03738636   | 0.609774159 | 0.15023697   | 0.5743971   | 0.4274474   | 0.05595864  | 0.07696523   | 0.0202949   | 0.800292267  | 0.121470311 | 0.400730723 | 0.121470311 | 0.400730723 |
| ENSG0000014947 | 4  | 30941154 | 38215533 | TMBX       | lncRNA                 | -0.13448337  | 0.05891151  | 0.02144333   | 0.121470311 | 0.02144333   | 0.121470311 | 0.02144333  | 0.121470311 | 0.02144333   | 0.121470311 | 0.02144333   | 0.121470311 | 0.02144333  | 0.121470311 | 0.121470311 |
| ENSG0000023214 | 2  | 61070534 | 10678148 | LOC101928  | lncRNA                 | -0.21567426  | 0.05898151  | 0.01292524   | 0.07766340  | 0.14131747   | 0.47764233  | 0.2184336   | 0.2184336   | 0.15674027   | 0.25769213  | -0.05584835  | 0.800292267 | 0.121470311 | 0.400730723 |             |
| ENSG0000029631 | 1  | 10034152 | 9969919  | LOC101928  | lncRNA                 | -0.33107093  | 0.06027123  | -0.21608912  | 0.132059199 | -0.26715262  | 0.13701992  | 0.30717003  | 0.1918740   | 0.06005124   | 0.05584835  | 0.05584835   | 0.800292267 | 0.121470311 | 0.400730723 | 0.121470311 |
| ENSG0000024675 | 1  | 10034152 | 73127880 | LOC116252  | lncRNA                 | -0.121470311 | 0.05891151  | 0.02144333   | 0.121470311 | 0.02144333   | 0.121470311 | 0.02144333  | 0.121470311 | 0.02144333   | 0.121470311 | 0.02144333   | 0.121470311 | 0.02144333  | 0.121470311 | 0.121470311 |
| ENSG0000024810 | 1  | 14132910 | 14137098 | LOC102432  | lncRNA                 | -0.03605105  | 0.78552411  | -0.05598804  | 0.17545567  | 0.03140272   | 0.87687873  | -0.0741854  | 0.71590754  | 0.03033687   | 0.77763038  | -0.05588889  | 0.80004478  | 0.05864238  | 0.63174028  | 0.121470311 |
| ENSG0000029675 | 1  | 40107244 | 10125244 | LOC101928  | lncRNA                 | -0.12641767  | 0.27326653  | 0.01152933   | 0.06969134  | 0.24945666   | 0.13147780  | 0.06379633  | 0.84100033  | -0.2549872   | 0.06969134  | 0.06969134   | 0.80004478  | 0.05864238  | 0.63174028  | 0.121470311 |
| ENSG0000014603 | 4  | 10039546 | 1031719  | LOC101928  | lncRNA                 | -0.02051691  | 0.41933103  | -0.21793564  | 0.121470311 | 0.02051691   | 0.121470311 | 0.02051691  | 0.121470311 | 0.02051691   | 0.121470311 | 0.02051691   | 0.121470311 | 0.02051691  | 0.121470311 | 0.121470311 |
| ENSG0000025808 | 12 | 19549584 | 10125244 | LOC101928  | lncRNA                 | -0.21593872  | 0.05927403  | -0.26941153  | 0.06183922  | 0.49955541   | 0.26955071  | -0.8422660  | 0.0477878   | -0.97586641  | 0.15213967  | -0.05582933  | 0.80004478  | 0.05864238  | 0.63174028  | 0.121470311 |
| ENSG0000024912 | 1  | 10749784 | 10774818 | ADAM30P    | processed pseudogene   | -0.12421952  | 0.28176051  | -0.10726372  | 0.04838491  | 0.03927196   | 0.86762155  | -0.14017470 | 0.57099853  | -0.08414981  | 0.3451781   | 0.05593933   | 0.78888772  | 0.05593933  | 0.59461308  | 0.121470311 |
| ENSG0000024903 | 4  | 19028202 | 19030205 | LOC101928  | lncRNA                 | -0.22681078  | 0.08191743  | -0.12775263  | 0.37862763  | 0.48040723   | 0.5359193   | -0.16368428 | 0.43889726  | -0.26832907  | 0.08127246  | 0.05584835   | 0.78888772  | 0.05593933  | 0.59461308  | 0.121470311 |
| ENSG0000027781 | 12 | 92227887 | 9238332  | LOC102391  | lncRNA                 | -0.13577775  | 0.23920551  | -0.10508373  | 0.05100433  | 0.03396705   | 0.91236845  | -0.13784327 | 0.10617131  | -0.17353127  | 0.05593933  | 0.05593933   | 0.78888772  | 0.05593933  | 0.59461308  | 0.121470311 |
| ENSG0000024479 | 2  | 3616126  | 3617488  | ZK2165.1   | lncRNA                 | -0.21007105  | 0.06677428  | -0.25599313  | 0.14218151  | 0.18274278   | 0.3491447   | -0.3164888  | 0.10827226  | -0.2268267   | 0.0494321   | 0.05593933   | 0.78888772  | 0.05593933  | 0.59461308  | 0.121470311 |
| ENSG0000024363 | 12 | 1782011  | 1782011  | RPS4Y14.1  | processed pseudogene   | -0.03834075  | 0.81426348  | -0.02787642  | 0.8478108   | 0.15898933   | 0.43447697  | -0.0487125  | 0.8198148   | -0.12497467  | 0.36789631  | -0.05584835  | 0.78888772  | 0.05593933  | 0.59461308  | 0.121470311 |
| ENSG0000025370 | 14 | 5728824  | 5728824  | APM1       | protein coding         | -0.00815174  | 0.94309111  | -0.12502031  | 0.2038101   | 0.15592909   | 0.15879979  | -0.02405466 | 0.75844443  | -0.02405466  | 0.05584835  | 0.05584835   | 0.78888772  | 0.05593933  | 0.59461308  | 0.121470311 |
| ENSG0000016532 | 10 | 6895670  | 6895680  | DDX2       | protein coding         | 0.17748785   | 0.12149454  | 0.04083467   | 0.74020783  | 0.19020207   | 0.22071988  | 0.13396781  | 0.50528242  | 0.24684541   | 0.04980226  | 0.06761702   | 0.78888772  | 0.05593933  | 0.59461308  | 0.121470311 |
| ENSG0000025539 | 15 | 14449313 | 14449313 | TROAS1     | lncRNA                 | -0.07123491  | 0.22270778  | -0.09494926  | 0.61800331  | 0.02321721   | 0.54333404  | -0.22709784 | 0.18170004  | 0.17772358   | 0.05912963  | 0.78888772   | 0.05593933  | 0.59461308  | 0.121470311 | 0.121470311 |
| ENSG0000025873 | 19 | 57145021 | 57147485 | DDX2       | protein coding         | -0.28243132  | 0.02128494  | -0.19027898  | 0.01807998  | 0.22474274   | 0.23855512  | -0.23474274 | 0.23855512  | -0.05582522  | 0.05315727  | -0.05581326  | 0.78888772  | 0.05593933  | 0.59461308  | 0.121470311 |
| ENSG0000026178 | 8  | 14433095 | 14433484 | SKRT1      | protein coding         | -0.15889727  | 0.17578844  | -0.07478093  | 0.58884190  | 0.13703768   | 0.48494220  | -0.23238080 | 0.80322633  | -0.12288326  | 0.04466288  | 0.06132223   | 0.78888772  | 0.05593933  | 0.59461308  | 0.121470311 |
| ENSG0000023813 | 3  | 6204187  | 6204187  | LINC1140   | lncRNA                 | -0.02051691  | 0.41933103  | -0.21793564  | 0.121470311 | 0.02051691   | 0.121470311 | 0.02051691  | 0.121470311 | 0.02051691   | 0.121470311 | 0.02051691   | 0.121470311 | 0.02051691  | 0.121470311 | 0.121470311 |
| ENSG0000015529 | 10 | 9659313  | 9659313  | LOC101928  | lncRNA                 | -0.03757834  | 0.74558207  | -0.13252718  | 0.33989792  | -0.25452162  | 0.20013197  | -0.06041051 | 0.58886146  | 0.11317151   | 0.41515861  | -0.05581326  | 0.78888772  | 0.05593933  | 0.59461308  | 0.121470311 |
| ENSG0000025187 | 4  | 9703754  | 9710128  | ALG13P     | unprocessed pseudogene | -0.24901347  | 0.03117784  | -0.08125554  | 0.54252140  | 0.22401507   | 0.26988585  | -0.10781330 | 0.5983024   | -0.26378832  | 0.05424229  | 0.05517826   | 0.78888772  | 0.05593933  | 0.59461308  | 0.121470311 |
| ENSG0000018776 | 19 | 1273718  | 12741183 | POU2       | protein coding         | -0.02565377  | 0.4108974   | -0.03392243  | 0.81519375  | 0.03009209   | 0.6171959   | 0.36327175  | 0.48717623  | -0.0738989   | 0.62549008  | 0.05618454   | 0.78888772  | 0.05593933  | 0.59461308  | 0.121470311 |
| ENSG0000023755 | 2  | 17760380 | 17761872 | LOC101928  | lncRNA                 | -0.05584808  | 0.60841518  | 0.06112558   | 0.07260817  | -0.0610481   | 0.80375921  | -0.01620987 | 0.22419716  | 0.0230927    | 0.68831609  | 0.05241121   | 0.78888772  | 0.05593933  | 0.59461308  | 0.121470311 |
| ENSG0000026934 | 19 | 5238844  | 5239778  | ZNF528.1   | lncRNA                 | -0.23248138  | 0.04191254  | -0.15529305  | 0.2808112   | 0.07192928   | 0.92327417  | -0.15038938 | 0.1040772   | -0.20598407  | 0.03303444  | 0.05525338   | 0.78888772  | 0.05593933  | 0.59461308  | 0.121470311 |
| ENSG0000017219 | 11 | 6429329  | 64484653 | KCQ2BP2C   | protein coding         | -0.02684703  | 0.03689933  | -0.08993371  | 0.52809861  | 0.44274408   | 0.90209369  | -0.09379769 | 0.64152842  | -0.29239113  | 0.03494693  | -0.05629369  | 0.78888772  | 0.05593933  | 0.59461308  | 0.121470311 |
| ENSG0000019887 | 19 | 3171241  | 3171241  | ZNF585A    | protein coding         | -0.06891133  | 0.03689933  | -0.08993371  | 0.52809861  | 0.44274408   | 0.90209369  | -0.09379769 | 0.64152842  | -0.29239113  | 0.03494693  | -0.05629369  | 0.78888772  | 0.05593933  | 0.59461308  | 0.121470311 |
| ENSG0000012583 | 11 | 15213395 | 15219228 | RPTN       | protein coding         | -0.31202683  | 0.00776868  | -0.24009694  | 0.15517272  | 0.10448839   | 0.14442932  | -0.17911087 | 0.13977289  | -0.30293546  | 0.02929494  | 0.05621307   | 0.78888772  | 0.05593933  | 0.59461308  | 0.121470311 |
| ENSG0000014648 | 19 | 5238844  | 5239778  | FAM174C    | protein coding         | -0.07123491  | 0.22270778  | -0.09494926  | 0.61800331  | 0.02321721   | 0.54333404  | -0.22709784 | 0.18170004  | 0.17772358   | 0.05912963  | 0.78888772   | 0.05593933  | 0.59461308  | 0.121470311 | 0.121470311 |
| ENSG0000026514 | 17 | 5824424  | 5814768  | PSPDAP1    | lncRNA                 | -0.15548233  | 0.17890230  | -0.10978691  | 0.81951448  | -0.16355656  | 0.40978741  | -0.02638881 | 0.88177799  | -0.02638881  | 0.05581326  | 0.05581326   | 0.78888772  | 0.05593933  | 0.59461308  | 0.121470311 |
| ENSG0000027881 | 17 | 6479759  | 6479824  | MRR609     | mRNA                   | -0.06951027  | 0.54039769  | -0.10699351  | 0.48091501  | -0.2213191   | 0.26760158  | -0.2103888  | 0.29218909  | -0.14852432  | 0.23873768  | 0.05639304   | 0.78888772  | 0.05593933  | 0.59461308  | 0.121470311 |
| ENSG0000025539 | 15 | 14449313 | 14449313 | TROAS1     | lncRNA                 | -0.07123491  | 0.22270778  | -0.09494926  | 0.61800331  | 0.02321721   | 0.54333404  | -0.22709784 | 0.18170004  | 0.17772358   | 0.05912963  | 0.78888772   | 0.05593933  | 0.59461308  | 0.121470311 | 0.121470311 |
| ENSG0000026717 | 16 | 6671782  | 6671782  | LOC101928  | lncRNA                 | -0.03757834  | 0.74558207  | -0.13252718  | 0.33989792  | -0.19374540  | 0.23340059  | -0.04435252 | 0.64752641  | -0.04435252  | 0.05348038  | 0.05348038   | 0.78888772  | 0.05593933  | 0.59461308  | 0.121470311 |
| ENSG0000022905 | 1  | 7633333  | 7633424  | LOC101928  | lncRNA                 | -0.17011022  | 0.31013995  | -0.09429418  | 0.64801580  | -0.18366367  | 0.53339792  | -0.09596361 | 0.63429203  | -0.13588991  | 0.32842531  | 0.05648108   | 0.78888772  | 0.05593933  | 0.59461308  | 0.121470311 |
| ENSG0000014830 | 1  | 24001438 | 24047517 | FMN2       | protein coding         | -0.12637732  | 0.09204072  | -0.10831171  | 0.44014543  | 0.04036557   | 0.80658775  | -0.12786461 | 0.52726674  | -0.12710002  | 0.21334784  | -0.05581326  | 0.78888772  | 0.05593933  | 0.59461308  | 0.121470311 |
| ENSG0000022985 | 10 | 9624531  | 9625126  | AL35355.2  | processed pseudogene   | -0.14898424  | 0.20548708  | -0.13871043  | 0.18241093  | 0.04274888   | 0.83233038  | -0.14596789 | 0.02978978  | -0.06255127  | 0.05256342  | 0.07893232   | 0.78888772  | 0.05593933  | 0.59461308  | 0.121470311 |
| ENSG0000019826 | 12 | 6844743  | 6844743  | RBCY1      | protein coding         | 0.01733668   | 0.88081473  | 0.03108104   | 0.78844704  | 0.26267983   | 0.15306788  | 0.17134382  | 0.38728838  | 0.14851919   | 0.28035264  | 0.05582522   | 0.78888772  | 0.05593933  | 0.59461308  | 0.121470311 |
| ENSG0000019880 |    |          |          |            |                        |              |             |              |             |              |             |             |             |              |             |              |             |             |             |             |

|                 |    |          |          |            |                        |             |            |             |            |             |            |             |             |             |             |             |             |             |             |            |
|-----------------|----|----------|----------|------------|------------------------|-------------|------------|-------------|------------|-------------|------------|-------------|-------------|-------------|-------------|-------------|-------------|-------------|-------------|------------|
| ENSG0000028476  | 16 | 7545282  | 7546007  | AC009163.4 | lncRNA                 | -0.08971493 | 0.4377871  | -0.01028291 | 0.94348892 | 0.12621264  | 0.53045903 | 0.0091825   | 0.96632076  | -0.12778182 | 0.84734612  | -0.05837592 | 0.78138091  | -0.11048952 | 0.44484822  |            |
| ENSG0000019070  | 12 | 1557274  | 1557411  | LOC102721  | transcribed antisense  | -0.05002401 | 0.6557216  | -0.11384597 | 0.4114144  | 0.3887504   | 0.1735465  | 0.72772701  | 0.13148463  | -0.01618521 | 0.9731368   | -0.05831747 | 0.7911277   | -0.1832227  | 0.7137127   |            |
| ENSG0000044495  | 19 | 1867138  | 1867138  | ETS3       | protein coding         | -0.02313969 | 0.8409389  | 0.03291263  | 0.82207141 | -0.3057040  | 0.49020508 | 0.04040181  | 0.64495136  | -0.00670312 | 0.96160231  | -0.04041028 | 0.79124882  | -0.03342818 | 0.79262836  |            |
| ENSG0000019816  | 19 | 7515292  | 7521028  | ZNF38      | protein coding         | -0.02313969 | 0.8409389  | 0.03291263  | 0.82207141 | -0.3057040  | 0.49020508 | 0.04040181  | 0.64495136  | -0.00670312 | 0.96160231  | -0.04041028 | 0.79124882  | -0.03342818 | 0.79262836  |            |
| ENSG0000025742  | 12 | 1465744  | 1521061  | CRTE7P     | transcribed antisense  | -0.18699023 | 0.16142249 | 0.71621841  | 0.10222482 | 0.11892373  | -0.151311  | 0.83976763  | -0.15481824 | 0.26427207  | -0.04904205 | 0.97127293  | -0.04904205 | 0.97127293  | -0.04904205 | 0.97127293 |
| ENSG0000023113  | 12 | 1465744  | 1521061  | CRTE7P     | transcribed antisense  | -0.18699023 | 0.16142249 | 0.71621841  | 0.10222482 | 0.11892373  | -0.151311  | 0.83976763  | -0.15481824 | 0.26427207  | -0.04904205 | 0.97127293  | -0.04904205 | 0.97127293  | -0.04904205 | 0.97127293 |
| ENSG00000100124 | 22 | 3783825  | 3784327  | ANKRD57    | protein coding         | -0.01185863 | 0.9203493  | 0.05818998  | 0.93837898 | -0.02693887 | 0.89611203 | 0.16619878  | 0.40735887  | -0.01128458 | 0.93545314  | -0.01144409 | 0.79120108  | -0.03682758 | 0.55029720  |            |
| ENSG0000019998  | 12 | 1094385  | 1094739  | ACTD10     | protein coding         | -0.02467683 | 0.8597959  | 0.04947101  | 0.9381061  | 0.03497142  | 0.65209804 | 0.06989205  | 0.63891776  | -0.04156927 | 0.91674318  | -0.05941898 | 0.79118817  | -0.02323209 | 0.67598339  |            |
| ENSG0000026980  | 19 | 484280   | 484638   | AC00761.1  | transcribed antisense  | -0.20785197 | 0.0261823  | 0.95337284  | 0.25441891 | 0.16829623  | 0.5441981  | 0.03037484  | 0.65989168  | -0.20393497 | 0.0171388   | -0.05948926 | 0.79108463  | -0.38880838 | 0.67598339  |            |
| ENSG0000059192  | 14 | 2043788  | 2044128  | SLA5075.5  | transcribed antisense  | -0.24476786 | 0.15738757 | 0.92750178  | 0.29688879 | 0.27502180  | 0.29688879 | 0.29688879  | 0.29688879  | -0.29688879 | 0.29688879  | -0.29688879 | 0.79114154  | -0.27357874 | 0.65457828  |            |
| ENSG0000047634  | X  | 1737449  | 1737488  | SCM1       | protein coding         | -0.26921586 | 0.01833144 | 0.91710247  | 0.71263268 | 0.13144697  | 0.51436187 | -0.05020269 | 0.86227834  | -0.22858953 | 0.04891040  | -0.05423736 | 0.79118817  | -0.31919284 | 0.64943958  |            |
| ENSG0000026980  | 19 | 484280   | 484638   | AC00761.1  | transcribed antisense  | -0.20785197 | 0.0261823  | 0.95337284  | 0.25441891 | 0.16829623  | 0.5441981  | 0.03037484  | 0.65989168  | -0.20393497 | 0.0171388   | -0.05948926 | 0.79108463  | -0.38880838 | 0.67598339  |            |
| ENSG00000188729 | X  | 1917944  | 1918511  | OSTL       | protein coding         | -0.00672254 | 0.95819918 | -0.01704021 | 0.90730715 | 0.23094153  | 0.24544963 | 0.14549041  | 0.46661302  | -0.13065884 | 0.36688807  | -0.05483434 | 0.79118817  | -0.06201164 | 0.74048483  |            |
| ENSG0000022420  | 2  | 2542117  | 2542764  | TNFB-AS1   | lncRNA                 | -0.16181458 | 0.16262653 | -0.05824738 | 0.86784767 | 0.17152307  | 0.36229970 | -0.02326236 | 0.93192302  | -0.18427636 | 0.31896187  | -0.05427123 | 0.79100883  | -0.22274294 | 0.70017229  |            |
| ENSG0000026381  | 19 | 2011800  | 2011878  | ITIH3      | protein coding         | -0.02192405 | 0.90391748 | -0.27238456 | 0.61118975 | -0.22329824 | 0.20383971 | -0.38984545 | 0.0386681   | -0.33226693 | 0.01401096  | -0.05474468 | 0.79098368  | -0.30384644 | 0.63402652  |            |
| ENSG00000226361 | 13 | 1868044  | 1868170  | TRIP13     | transcribed pseudogene | -0.18588398 | 0.10590037 | -0.22755184 | 0.11493792 | -0.12737510 | 0.49047107 | -0.36468074 | 0.06143904  | -0.22947339 | -0.05902517 | -0.05848823 | 0.79098485  | -0.11292210 | 0.43482259  |            |
| ENSG00000135049 | 9  | 8564539  | 8572420  | ACTF1P1    | transcribed pseudogene | -0.05043335 | 0.6513444  | -0.16378468 | 0.25072489 | 0.33855292  | 0.08132572 | -0.24133486 | 0.2253737   | -0.03688108 | 0.79833864  | -0.04904205 | 0.79098485  | -0.04904205 | 0.79098485  |            |
| ENSG00000101019 | 19 | 11378152 | 11378152 | RSR1       | protein coding         | -0.15423593 | 0.85420189 | -0.16019204 | 0.26642923 | 0.03471198  | 0.86562638 | -0.00270173 | 0.17438974  | -0.11191513 | 0.51527907  | -0.05851869 | 0.79098485  | -0.02772005 | 0.94027960  |            |
| ENSG00000273440 | 15 | 6607973  | 6702902  | AGL1       | protein coding         | -0.28398487 | 0.1254440  | -0.24044489 | 0.43023768 | 0.8730027   | 0.1283731  | 0.52303007  | -0.23430304 | 0.08813667  | -0.05851869 | 0.79098485  | -0.03182366 | -0.0445342  |             |            |
| ENSG0000027283  | 17 | 3853031  | 3860599  | SRMS1      | protein coding         | -0.02128207 | 0.90389614 | -0.14186313 | 0.43035444 | 0.30175493  | 0.05957588 | -0.12405855 | 0.53749898  | -0.08049219 | 0.79098485  | -0.05852448 | 0.79098485  | -0.07127603 | 0.60112763  |            |
| ENSG0000016948  | 4  | 7603892  | 7604141  | CAC11      | protein coding         | -0.19189164 | 0.09513028 | -0.06021458 | 0.91786373 | 0.29816372  | 0.13381137 | 0.06964543  | 0.72984885  | -0.13393307 | 0.33641821  | -0.05852448 | 0.79098485  | -0.03106607 | 0.60112763  |            |
| ENSG0000025082  | 11 | 6850476  | 6850404  | SRMS-AS1   | lncRNA                 | -0.02548785 | 0.90389614 | -0.14186313 | 0.43035444 | 0.30175493  | 0.05957588 | -0.12405855 | 0.53749898  | -0.08049219 | 0.79098485  | -0.05852448 | 0.79098485  | -0.07127603 | 0.60112763  |            |
| ENSG0000012409  | 11 | 5784892  | 5786188  | CLIP1      | protein coding         | -0.08872522 | 0.55240213 | -0.13907421 | 0.33542628 | 0.29848438  | 0.19301175 | -0.17892841 | 0.38993246  | -0.05436622 | 0.70399517  | -0.05852448 | 0.79098485  | -0.06726055 | 0.60112763  |            |
| ENSG0000016516  | 2  | 4741819  | 4745473  | PM2C3      | protein coding         | -0.28972423 | 0.03082198 | -0.02547173 | 0.96809893 | 0.45970503  | 0.01984924 | 0.17771388  | 0.37911794  | -0.4594134  | 0.00024769  | -0.05852448 | 0.79098485  | -0.06726055 | 0.60112763  |            |
| ENSG00000259863 | 2  | 1012732  | 1012830  | SLFR3-AS1  | lncRNA                 | -0.07190331 | 0.50444218 | -0.02351071 | 0.87135607 | 0.14609657  | 0.45631653 | -0.04014015 | 0.84242974  | -0.04075479 | 0.7982207   | -0.0583631  | 0.79041643  | -0.16681278 | 0.30611397  |            |
| ENSG0000027870  | 9  | 1802887  | 1803186  | HEIH       | protein coding         | -0.06277048 | 0.8792904  | -0.13033388 | 0.38991918 | 0.04058939  | 0.81781287 | -0.14283397 | 0.47725494  | -0.00774024 | 0.95701399  | -0.05846626 | 0.79098485  | -0.02952512 | 0.71725227  |            |
| ENSG00000122480 | 12 | 4820283  | 4820338  | OR10AD1    | protein coding         | -0.02788174 | 0.8997486  | -0.06029261 | 0.74845122 | 0.15229723  | 0.42844584 | -0.11382621 | 0.95132058  | -0.0855438  | 0.79814854  | -0.05869933 | 0.79032811  | -0.03837191 | 0.69635747  |            |
| ENSG00000228192 | 1  | 4283522  | 4284422  | AC12325.1  | transcribed pseudogene | -0.22842539 | 0.12420001 | -0.12420001 | 0.93314902 | 0.04591878  | 0.88184781 | -0.19278623 | 0.3358280   | -0.23905810 | 0.10681679  | -0.05869933 | 0.79032811  | -0.03837191 | 0.69635747  |            |
| ENSG0000024259  | 3  | 11374872 | 11374740 | AC10893.2  | transcribed pseudogene | -0.12744718 | 0.26881247 | -0.07280154 | 0.95035888 | 0.24128844  | 0.21025559 | -0.08962509 | 0.6583870   | -0.125268   | 0.2698321   | -0.05869933 | 0.79032811  | -0.03837191 | 0.69635747  |            |
| ENSG00000133887 | 19 | 2011800  | 2011878  | ITIH3      | protein coding         | -0.02192405 | 0.90391748 | -0.27238456 | 0.61118975 | -0.22329824 | 0.20383971 | -0.38984545 | 0.0386681   | -0.33226693 | 0.01401096  | -0.05474468 | 0.79098368  | -0.30384644 | 0.63402652  |            |
| ENSG00000234451 | 3  | 16142917 | 16143987 | RPL23AP2   | transcribed pseudogene | -0.16499899 | 0.15151809 | -0.07862881 | 0.85857582 | -0.19483233 | 0.32969138 | -0.16527683 | 0.41021861  | -0.17973011 | 0.19328107  | -0.05869933 | 0.79032811  | -0.03837191 | 0.69635747  |            |
| ENSG0000025009  | 19 | 8564539  | 8572420  | ACTF1P1    | transcribed pseudogene | -0.05043335 | 0.6513444  | -0.16378468 | 0.25072489 | 0.33855292  | 0.08132572 | -0.24133486 | 0.2253737   | -0.03688108 | 0.79833864  | -0.04904205 | 0.79098485  | -0.04904205 | 0.79098485  |            |
| ENSG00000250075 | 2  | 6592939  | 6593153  | YJEFN3     | protein coding         | -0.14275658 | 0.21024952 | -0.14048691 | 0.32994589 | 0.16855129  | 0.40942102 | -0.19944627 | 0.31834713  | -0.15741758 | 0.25462774  | -0.0584821  | 0.79022354  | -0.13392751 | 0.53896537  |            |
| ENSG00000250075 | 2  | 6592939  | 6593153  | YJEFN3     | protein coding         | -0.14275658 | 0.21024952 | -0.14048691 | 0.32994589 | 0.16855129  | 0.40942102 | -0.19944627 | 0.31834713  | -0.15741758 | 0.25462774  | -0.0584821  | 0.79022354  | -0.13392751 | 0.53896537  |            |
| ENSG00000250075 | 2  | 6592939  | 6593153  | YJEFN3     | protein coding         | -0.14275658 | 0.21024952 | -0.14048691 | 0.32994589 | 0.16855129  | 0.40942102 | -0.19944627 | 0.31834713  | -0.15741758 | 0.25462774  | -0.0584821  | 0.79022354  | -0.13392751 | 0.53896537  |            |
| ENSG00000250075 | 2  | 6592939  | 6593153  | YJEFN3     | protein coding         | -0.14275658 | 0.21024952 | -0.14048691 | 0.32994589 | 0.16855129  | 0.40942102 | -0.19944627 | 0.31834713  | -0.15741758 | 0.25462774  | -0.0584821  | 0.79022354  | -0.13392751 | 0.53896537  |            |
| ENSG00000250075 | 2  | 6592939  | 6593153  | YJEFN3     | protein coding         | -0.14275658 | 0.21024952 | -0.14048691 | 0.32994589 | 0.16855129  | 0.40942102 | -0.19944627 | 0.31834713  | -0.15741758 | 0.25462774  | -0.0584821  | 0.79022354  | -0.13392751 | 0.53896537  |            |
| ENSG00000250075 | 2  | 6592939  | 6593153  | YJEFN3     | protein coding         | -0.14275658 | 0.21024952 | -0.14048691 | 0.32994589 | 0.16855129  | 0.40942102 | -0.19944627 | 0.31834713  | -0.15741758 | 0.25462774  | -0.0584821  | 0.79022354  | -0.13392751 | 0.53896537  |            |
| ENSG00000250075 | 2  | 6592939  | 6593153  | YJEFN3     | protein coding         | -0.14275658 | 0.21024952 | -0.14048691 | 0.32994589 | 0.16855129  | 0.40942102 | -0.19944627 | 0.31834713  | -0.15741758 | 0.25462774  | -0.0584821  | 0.79022354  | -0.13392751 | 0.53896537  |            |
| ENSG00000250075 | 2  | 6592939  | 6593153  | YJEFN3     | protein coding         | -0.14275658 | 0.21024952 | -0.14048691 | 0.32994589 | 0.16855129  | 0.40942102 | -0.19944627 | 0.31834713  | -0.15741758 | 0.25462774  | -0.0584821  | 0.79022354  | -0.13392751 | 0.53896537  |            |
| ENSG00000250075 | 2  | 6592939  | 6593153  | YJEFN3     | protein coding         | -0.14275658 | 0.21024952 | -0.14048691 | 0.32994589 | 0.16855129  |            |             |             |             |             |             |             |             |             |            |



Table with 10 columns: Gene ID, Chr, Start, End, Strand, Feature, Start, End, Strand, Feature. Contains genomic coordinates and gene annotations for various genes like SERPINC1, AOC3, AOC4, etc.



Table with 10 columns: Gene ID, Chr, Start, End, Gene Name, Feature, RefSeq ID, RefSeq Description, RefSeq Link, RefSeq Type. The table lists numerous genes and their associated features and identifiers.

| ENSGNO000185261 | 5  | 94152966 | 94618577 | KAAAB25    | protein coding          | -0.077619209 | 0.022234098 | -0.026811328 | 0.5214724  | 0.171547096 | 0.392233302 | -0.103930303 | 0.605625557 | -0.07526755 | 0.587270397 | -0.065282373 | 0.765326699 | -0.081586638 | 0.073280720 |            |
|-----------------|----|----------|----------|------------|-------------------------|--------------|-------------|--------------|------------|-------------|-------------|--------------|-------------|-------------|-------------|--------------|-------------|--------------|-------------|------------|
| ENSGNO00006275  | 4  | 54172478 | 54172478 | SLC7B3     | protein coding          | -0.2693418   | 0.017697449 | -0.039227208 | 0.76801799 | 0.2854449   | 0.19118311  | -0.06292907  | 0.8278145   | -0.2427959  | 0.501110269 | -0.06529268  | 0.76537876  | -0.110330523 | 0.0307674   |            |
| ENSGNO00006988  | 15 | 12729854 | 12729854 | ATG16A3    | protein coding          | -0.0744029   | 0.05084552  | -0.01625448  | 0.90897887 | 0.19837489  | 0.30927613  | -0.02942044  | 0.9049029   | -0.0357871  | 0.82637705  | -0.0565832   | 0.70530081  | -0.04688119  | 0.30805707  |            |
| ENSGNO00005253  | 7  | 4977010  | 4977010  | ARHGAP22   | protein coding          | -0.30042068  | 0.00815238  | -0.18512133  | 0.2925330  | 0.30767639  | 0.11811623  | -0.24027867  | 0.22742356  | -0.3372564  | 0.06524180  | -0.06528170  | 0.65252790  | -0.13742848  | 0.0404825   |            |
| ENSGNO00004430  | 7  | 5112777  | 5112777  | OTX2AS1    | protein coding          | -0.0000000   | 0.0000000   | -0.0000000   | 0.0000000  | 0.0000000   | 0.0000000   | -0.0000000   | 0.0000000   | -0.0000000  | 0.0000000   | -0.0000000   | 0.0000000   | -0.0000000   | 0.0000000   |            |
| ENSGNO00002753  | 7  | 4760010  | 4760010  | GUSP10     | unprocessed pseudogene  | 0.02852543   | 0.84381158  | 0.02501295   | 0.17882898 | -0.01898481 | 0.83344876  | 0.01862883   | 0.69693749  | 0.06181863  | 0.69693749  | 0.05991336   | 0.69693749  | 0.08196769   | 0.03183572  |            |
| ENSGNO00005314  | 7  | 19455399 | 19455399 | CRKP       | protein coding          | -0.1962200   | 0.02718662  | -0.1508871   | 0.25558172 | 0.44488364  | 0.47110711  | -0.2352246   | 0.26238989  | -0.1422219  | 0.3155701   | -0.05991336  | 0.65502972  | -0.10374441  | 0.04733975  |            |
| ENSGNO00004598  | 16 | 2736835  | 2736835  | NPE1-IT1   | transcribed unit        | 0.0000000    | 0.0000000   | -0.2288977   | 0.7636970  | 0.0000000   | 0.0000000   | -0.0000000   | 0.0000000   | -0.0000000  | 0.0000000   | -0.0000000   | 0.0000000   | 0.0000000    | 0.0000000   |            |
| ENSGNO00004686  | 17 | 4670292  | 4670292  | NR1P       | protein coding          | 0.19389718   | 0.23687194  | 0.07971555   | 0.69891750 | 0.00295853  | 0.75994433  | -0.00295853  | 0.98895399  | 0.12043030  | 0.3852700   | -0.05991336  | 0.65502972  | -0.10374441  | 0.04733975  |            |
| ENSGNO00007194  | 15 | 9236586  | 9236586  | TLN2       | protein coding          | -0.37653747  | 0.00063984  | -0.03031868  | 0.57358491 | 0.22706676  | 0.25474698  | -0.3065080   | 0.13184678  | -0.14888309 | 0.00172269  | 0.06528170   | 0.76537876  | -0.110330523 | 0.0307674   |            |
| ENSGNO00001198  | 14 | 2203318  | 2203318  | TRAF9      | protein coding          | -0.12289457  | 0.04829781  | -0.04829781  | 0.7636970  | 0.0000000   | 0.0000000   | -0.0000000   | 0.0000000   | -0.0000000  | 0.0000000   | -0.0000000   | 0.0000000   | 0.0000000    | 0.0000000   | 0.0000000  |
| ENSGNO00002372  | 6  | 14258780 | 14257781 | MROH4P     | transcribed unit        | -0.32618783  | 0.00379211  | -0.2216844   | 0.12196985 | 0.25425709  | 0.20387558  | -0.37625212  | 0.05039216  | -0.38683379 | 0.00385969  | -0.06644415  | 0.70530081  | -0.04688119  | 0.30805707  |            |
| ENSGNO00002978  | 4  | 8427257  | 8449498  | TECR1      | protein coding          | -0.1772953   | 0.08527022  | -0.05781650  | 0.60145811 | 0.18396516  | 0.4217348   | -0.03326381  | 0.86969462  | -0.04143127 | 0.44171028  | -0.0690970   | 0.76537876  | -0.110330523 | 0.0307674   |            |
| ENSGNO00004545  | 5  | 9114943  | 9114943  | MAGE2A     | protein coding          | -0.00895185  | 0.91304191  | -0.00705515  | 0.9011721  | 0.07923483  | 0.7054912   | -0.19304895  | 0.3347245   | -0.0076652  | 0.96116029  | -0.06111321  | 0.74440     | -0.04948743  | 0.0634783   |            |
| ENSGNO00001706  | 21 | 4498432  | 4498518  | LINC01615  | lincRNA                 | -0.25263328  | 0.02602653  | -0.12797841  | 0.3757811  | 0.12747126  | 0.15645458  | -0.2110346   | 0.290726    | -0.17343157 | 0.09212456  | -0.06613336  | 0.6424307   | -0.12519037  | 0.0760227   |            |
| ENSGNO00002810  | 14 | 2491284  | 2491077  | AL11663.2  | transcribed unit        | -0.18449291  | 0.10216552  | -0.22693396  | 0.1330742  | 0.2204339   | 0.33430046  | -0.3027194   | 0.21390581  | -0.15701524 | 0.25847489  | -0.06139554  | 0.7643347   | -0.10861269  | 0.2171904   |            |
| ENSGNO00001024  | 12 | 3901705  | 3905411  | TRAP1      | protein coding          | -0.00789642  | 0.00941338  | -0.1694778   | 0.2474060  | 0.06240929  | 0.7471228   | -0.3161746   | 0.1081709   | -0.3706819  | 0.00989431  | -0.06111321  | 0.74440     | -0.04948743  | 0.0634783   |            |
| ENSGNO00001999  | 16 | 3309204  | 3312900  | HERC2P8    | transcribed unprocessed | -0.032466209 | 0.77805144  | -0.02929516  | 0.18397424 | 0.016998517 | 0.83131314  | 0.0473241    | 0.81371304  | -0.07307425 | 0.31309898  | -0.06616193  | 0.7643347   | -0.10861269  | 0.2171904   |            |
| ENSGNO00001613  | 16 | 4688432  | 4683128  | ORF2       | protein coding          | -0.24713524  | 0.00312234  | -0.17018715  | 0.2137580  | 0.27869199  | 0.1541062   | -0.3000592   | 0.02749462  | -0.06616193 | 0.7643347   | -0.10861269  | 0.2171904   | -0.22947919  | 0.03834135  |            |
| ENSGNO00001763  | 3  | 1396760  | 13966250 | AC119716.2 | transcribed unit        | -0.31335904  | 0.0043718   | -0.17487627  | 0.22624691 | 0.33373263  | 0.08881375  | -0.22697673  | 0.15718943  | -0.3797707  | -0.06616193 | 0.7643347    | -0.10861269 | 0.2171904    | 0.03834135  |            |
| ENSGNO000017005 | 12 | 51126406 | 5113270  | ORF2       | protein coding          | -0.20187193  | 0.07830715  | -0.20239760  | 0.1586704  | 0.1852186   | 0.79312927  | -0.26422719  | 0.18293033  | -0.16064692 | 0.22166359  | -0.06616193  | 0.7643347   | -0.10861269  | 0.2171904   |            |
| ENSGNO000028972 | 10 | 8418728  | 8417203  | CERN2A     | protein coding          | -0.19158564  | 0.02923271  | -0.1230430   | 0.32847892 | 0.20711998  | 0.72425358  | -0.2741347   | 0.1864449   | -0.21997954 | 0.14995105  | -0.06616193  | 0.7643347   | -0.10861269  | 0.2171904   |            |
| ENSGNO000015007 | 12 | 5737378  | 5737187  | AVL        | protein coding          | -0.15400846  | 0.00363939  | -0.12784644  | 0.20001221 | 0.45711994  | 0.3308135   | -0.36991395  | 0.1838447   | -0.36992603 | 0.00919568  | -0.06616193  | 0.7643347   | -0.10861269  | 0.2171904   |            |
| ENSGNO000027267 | 2  | 12788556 | 12787185 | AC102306.2 | transcribed unit        | -0.09023707  | 0.43465244  | -0.17630413  | 0.20468963 | 0.00744848  | 0.87088604  | -0.05236167  | 0.12456268  | -0.17868342 | 0.38672738  | -0.062862    | 0.76324243  | -0.10791459  | 0.04733975  |            |
| ENSGNO000028958 | 19 | 1715298  | 1718081  | AC02013.1  | transcribed unit        | -0.05338933  | 0.04568528  | -0.2277120   | 0.11843515 | 0.02047531  | 0.9915334   | -0.3029448   | 0.12467108  | -0.17120377 | 0.10107304  | -0.06920159  | 0.76324243  | -0.10791459  | 0.04733975  |            |
| ENSGNO000011993 | 2  | 8896968  | 8896968  | IGJL5      | lincRNA                 | -0.10247938  | 0.07544229  | -0.18976693  | 0.19839871 | -0.24002791 | 0.2400310   | -0.36411751  | 0.0519705   | -0.21502264 | 0.19333443  | -0.06920159  | 0.76324243  | -0.10791459  | 0.04733975  |            |
| ENSGNO000016490 | 19 | 1817512  | 1817117  | IFI30      | protein coding          | 0.00881034   | 0.93251629  | -0.08818731  | 0.78961242 | 0.04303547  | 0.16617068  | 0.03104263   | 0.8778738   | 0.11531704  | 0.40635401  | -0.06295447  | 0.76324243  | -0.10791459  | 0.04733975  |            |
| ENSGNO000028652 | 9  | 3301478  | 3310553  | SLC18B2    | protein coding          | -0.24773827  | 0.02928998  | -0.06961405  | 0.504720   | 0.28120481  | 0.15534585  | -0.08071851  | 0.6664472   | -0.25326513 | 0.04013414  | -0.06295447  | 0.76324243  | -0.10791459  | 0.04733975  |            |
| ENSGNO000029452 | 17 | 4999005  | 4998524  | DLX3       | protein coding          | -0.12247478  | 0.02487193  | -0.05272793  | 0.3277193  | 0.22947417  | 0.44657029  | -0.18730491  | 0.48370379  | -0.0782919  | 0.15317199  | -0.06295447  | 0.76324243  | -0.10791459  | 0.04733975  |            |
| ENSGNO000029390 | 6  | 2970789  | 2972444  | MLK2       | unprocessed pseudogene  | -0.15027105  | 0.18474351  | -0.04510292  | 0.5597410  | 0.34838308  | 0.0732448   | -0.05957569  | 0.76789071  | -0.15717538 | 0.31727474  | -0.06613222  | 0.7643347   | -0.10861269  | 0.2171904   |            |
| ENSGNO000013878 | 15 | 7903914  | 7903914  | PCPNT1     | protein coding          | -0.22959249  | 0.00489281  | -0.15027028  | 0.2277193  | 0.22959249  | 0.00489281  | -0.15027028  | 0.2277193   | -0.22959249 | 0.00489281  | -0.15027028  | 0.2277193   | -0.22959249  | 0.00489281  | 0.15027028 |
| ENSGNO000015608 | 6  | 7305509  | 7305509  | EEF1A      | protein coding          | -0.16668837  | 0.14608787  | -0.08512957  | 0.81183763 | 0.04658817  | 0.80049592  | -0.00022666  | 0.81129339  | -0.21428339 | 0.11971745  | -0.06613222  | 0.7643347   | -0.10861269  | 0.2171904   |            |
| ENSGNO000018521 | 3  | 19796200 | 19804370 | LMN        | protein coding          | -0.31473438  | 0.06267317  | -0.07855708  | 0.6005779  | 0.04745627  | 0.12284072  | -0.13272817  | 0.50872751  | -0.26525011 | 0.06132999  | -0.06613222  | 0.7643347   | -0.10861269  | 0.2171904   |            |
| ENSGNO00000654  | 14 | 9100214  | 9100214  | ITIH4      | protein coding          | -0.12156521  | 0.02492614  | -0.05272793  | 0.3277193  | 0.22947417  | 0.44657029  | -0.18730491  | 0.48370379  | -0.0782919  | 0.15317199  | -0.06295447  | 0.76324243  | -0.10791459  | 0.04733975  |            |
| ENSGNO000009723 | 14 | 9402630  | 9440830  | OTUB2      | protein coding          | -0.31480103  | 0.00529561  | -0.09442006  | 0.5124930  | 0.07716620  | 0.16229930  | -0.13818640  | 0.49181719  | -0.3642464  | 0.00677498  | -0.06613222  | 0.7643347   | -0.10861269  | 0.2171904   |            |
| ENSGNO000023587 | 2  | 4302623  | 4312424  | LINC02580  | transcribed unit        | -0.18289955  | 0.11127493  | -0.08211828  | 0.5794317  | 0.20737218  | 0.29931242  | -0.12027768  | 0.5483398   | -0.2248105  | 0.10245949  | -0.06613222  | 0.7643347   | -0.10861269  | 0.2171904   |            |
| ENSGNO000018207 | 14 | 16686684 | 16686684 | PCPNT2     | protein coding          | -0.14788117  | 0.19937999  | -0.02224043  | 0.80493783 | 0.04265884  | 0.88028927  | -0.01191755  | 0.85727564  | -0.1703349  | 0.18127227  | -0.06613222  | 0.7643347   | -0.10861269  | 0.2171904   |            |
| ENSGNO000024122 | 3  | 7696534  | 7696534  | RARRSP21   | protein coding          | -0.14788117  | 0.19937999  | -0.02224043  | 0.80493783 | 0.04265884  | 0.88028927  | -0.01191755  | 0.85727564  | -0.1703349  | 0.18127227  | -0.06613222  | 0.7643347   | -0.10861269  | 0.2171904   |            |
| ENSGNO000017903 | 15 | 9203914  | 9203914  | AC13121.1  | transcribed unit        | -0.14461184  | 0.20954559  | -0.14680513  | 0.3943340  | 0.14043961  | 0.61866925  | -0.16340205  | 0.41516656  | -0.11405707 | 0.06613222  | -0.06613222  | 0.7643347   | -0.10861269  | 0.2171904   |            |
| ENSGNO000016317 | 2  | 8886909  | 88871397 | NMIP2      | protein coding          | -0.17833056  | 0.02702208  | -0.08734363  | 0.57789644 | 0.04643743  | 0.82563004  | -0.02848916  | 0.75475252  | -0.15059821 | 0.33001271  | -0.06613222  | 0.7643347   | -0.10861269  | 0.2171904   |            |
| ENSGNO000027487 | 14 | 9100214  | 9100214  | ITIH4      | protein coding          | -0.12156521  | 0.02492614  | -0.05272793  | 0.3277193  | 0.22947417  | 0.44657029  | -0.18730491  | 0.48370379  | -0.0782919  | 0.15317199  | -0.06295447  | 0.7632      |              |             |            |

|                 |    |          |          |              |                |              |             |              |             |              |             |              |             |              |             |              |             |             |            |
|-----------------|----|----------|----------|--------------|----------------|--------------|-------------|--------------|-------------|--------------|-------------|--------------|-------------|--------------|-------------|--------------|-------------|-------------|------------|
| ENSG0000028688  | 4  | 16323954 | 1636997* | AC006427.2   | lncRNA         | -0.110446576 | 0.338947996 | -0.024913486 | 0.863645232 | -0.214841793 | 0.281197610 | 0.043078476  | 0.831066236 | -0.08749027  | 0.520347139 | -0.068115933 | 0.173731176 | 0.185571441 | 0.19865271 |
| ENSG0000010529  | 4  | 4226269  | 4237878  | PCP1         | protein coding | -0.26212429  | 0.37281253  | 0.143873913  | 0.974426707 | -0.15327767  | -0.16377695 | 0.45272929   | -0.28676036 | -0.0742723   | 0.1742723   | -0.068115933 | 0.173731176 | 0.185571441 | 0.19865271 |
| ENSG0000011449  | 19 | 28413833 | 2846274  | PCP2         | protein coding | -0.3034779   | 0.30034779  | 0.000000000  | 0.999999999 | -0.1431321   | -0.1431321  | 0.1431321    | -0.1431321  | -0.1431321   | 0.1431321   | -0.068115933 | 0.173731176 | 0.185571441 | 0.19865271 |
| ENSG0000015606  | 8  | 41645117 | 4165088  | NOX3         | protein coding | -0.36721807  | 0.301147661 | -0.20131262  | 0.159383262 | -0.51351171  | 0.00812303  | -0.37094189  | 0.06749376  | -0.48175642  | 0.00202273  | -0.068115933 | 0.173731176 | 0.185571441 | 0.19865271 |
| ENSG0000025405  | 11 | 7011488  | 7021700  | AP01555.1    | lncRNA         | -0.12713828  | 0.07678211  | -0.18482786  | 0.30013549  | -0.18104106  | 0.3690902   | -0.17624881  | 0.37185225  | -0.15619824  | 0.15671429  | -0.068115933 | 0.173731176 | 0.185571441 | 0.19865271 |
| ENSG0000026940  | 8  | 8566113  | 8567113  | AC01741.1    | lncRNA         | -0.180000000 | 0.180000000 | 0.000000000  | 0.999999999 | -0.180000000 | 0.180000000 | -0.180000000 | 0.180000000 | -0.180000000 | 0.180000000 | -0.068115933 | 0.173731176 | 0.185571441 | 0.19865271 |
| ENSG0000025874  | 5  | 18715842 | 18707898 | AC01755.1    | lncRNA         | -0.32065518  | 0.34412299  | -0.19778269  | 0.24412299  | -0.19778269  | 0.24412299  | -0.2117337   | 0.26315916  | -0.33081126  | -0.04500009 | -0.068115933 | 0.173731176 | 0.185571441 | 0.19865271 |
| ENSG0000020287  | 18 | 4865286  | 4867403  | AC01767.2    | lncRNA         | -0.18330002  | 0.110555812 | -0.14867629  | 0.28952107  | -0.18479343  | 0.35501854  | -0.1601981   | 0.33698943  | -0.0682879   | 0.17341954  | -0.068115933 | 0.173731176 | 0.185571441 | 0.19865271 |
| ENSG0000027479  | 17 | 11692744 | 11698111 | AC01774.1    | lncRNA         | -0.11688111  | 0.11688111  | 0.000000000  | 0.999999999 | -0.11688111  | 0.11688111  | -0.11688111  | 0.11688111  | -0.11688111  | 0.11688111  | -0.068115933 | 0.173731176 | 0.185571441 | 0.19865271 |
| ENSG0000016549  | X  | 10975572 | 10975125 | SLC7A3       | protein coding | -0.264589565 | 0.302097999 | -0.09698710  | 0.64023339  | -0.26305841  | 0.170669957 | -0.10551826  | 0.80041012  | -0.29343077  | 0.01726234  | -0.068115933 | 0.173731176 | 0.185571441 | 0.19865271 |
| ENSG0000025139  | 4  | 3678026  | 3680484  | AC01791.1    | lncRNA         | 0.03759994   | 0.7454114   | 0.00652536   | 0.89447226  | 0.1071256    | 0.94884624  | 0.1966229    | 0.2613403   | 0.146072     | 0.29195698  | -0.068115933 | 0.173731176 | 0.185571441 | 0.19865271 |
| ENSG0000017384  | 19 | 4545191  | 4546144  | CE54         | protein coding | -0.2491027   | 0.3026247   | -0.0217747   | 0.62027047  | -0.10110028  | 0.7452972   | -0.48477695  | 0.0308946   | -0.2299927   | 0.09434556  | -0.068115933 | 0.173731176 | 0.185571441 | 0.19865271 |
| ENSG0000018513  | 11 | 5189070  | 5188403  | OR9D2        | protein coding | -0.18044148  | 0.11621819  | -0.04964823  | 0.73407202  | 0.02114178   | 0.9163837   | -0.01541889  | 0.9306425   | -0.13195468  | 0.04151541  | -0.068115933 | 0.173731176 | 0.185571441 | 0.19865271 |
| ENSG0000029148  | 14 | 7192729  | 71321862 | AC01876.2    | lncRNA         | -0.21281520  | 0.30357127  | -0.07119504  | 0.62461139  | -0.31117571  | 0.1817025   | -0.1838106   | 0.5860403   | -0.2940707   | 0.04331087  | -0.068115933 | 0.173731176 | 0.185571441 | 0.19865271 |
| ENSG0000029501  | 4  | 1387337  | 13890351 | AC01876.1    | lncRNA         | -0.2029449   | 0.30871778  | -0.12911262  | 0.386913418 | -0.16292614  | 0.4178709   | -0.14889893  | 0.41113433  | -0.29714303  | 0.07066191  | -0.068115933 | 0.173731176 | 0.185571441 | 0.19865271 |
| ENSG0000016503  | 9  | 91409245 | 91428332 | NFIL3        | protein coding | -0.07723642  | 0.500553941 | -0.15232506  | 0.27410432  | -0.14181958  | 0.41981958  | -0.17748518  | 0.37454348  | -0.07832747  | 0.07692386  | -0.068115933 | 0.173731176 | 0.185571441 | 0.19865271 |
| ENSG0000018365  | 8  | 12445020 | 12446120 | TMT2         | protein coding | -0.09741939  | 0.39636201  | -0.04691598  | 0.74748489  | 0.1085103    | 0.80027207  | -0.1288521   | 0.57036204  | -0.15848115  | 0.2011417   | -0.068115933 | 0.173731176 | 0.185571441 | 0.19865271 |
| ENSG0000029057  | 9  | 16638316 | 16639092 | AC01909.2    | lncRNA         | -0.15840047  | 0.17447816  | -0.05404418  | 0.7030296   | -0.09237984  | 0.60952207  | -0.17277898  | 0.3899505   | -0.24979482  | 0.07429692  | -0.068115933 | 0.173731176 | 0.185571441 | 0.19865271 |
| ENSG0000012485  | 10 | 69991137 | 69991707 | MDM2P1       | protein coding | -0.08114478  | 0.597558009 | -0.04767786  | 0.81056849  | -0.07736652  | 0.37100027  | -0.18909898  | 0.42375126  | -0.05835594  | 0.67416192  | -0.068115933 | 0.173731176 | 0.185571441 | 0.19865271 |
| ENSG0000023643  | 13 | 30133369 | 30139103 | CD37         | protein coding | -0.04989322  | 0.69121224  | -0.00681712  | 0.86263420  | -0.18899148  | 0.39969276  | -0.02657167  | 0.89510725  | -0.13748674  | 0.32074703  | -0.068115933 | 0.173731176 | 0.185571441 | 0.19865271 |
| ENSG0000016382  | 4  | 8453137  | 8463134  | LOC100287528 | protein coding | -0.25401618  | 0.30679256  | -0.11179708  | 0.43697855  | -0.07211806  | 0.7018738   | -0.25127133  | 0.20528964  | -0.40077695  | 0.01188292  | -0.068115933 | 0.173731176 | 0.185571441 | 0.19865271 |
| ENSG0000025285  | 9  | 12642683 | 12642903 | SNORD116     | lncRNA         | -0.02780001  | 0.811153216 | -0.07880122  | 0.93381318  | -0.06896134  | 0.37395646  | -0.15242272  | 0.65857945  | -0.05837824  | 0.01188292  | -0.068115933 | 0.173731176 | 0.185571441 | 0.19865271 |
| ENSG0000024071  | X  | 3707851  | 3707840  | M2M258.1     | protein coding | -0.2468054   | 0.3037441   | -0.17525792  | 0.22274478  | -0.3934472   | 0.05963052  | -0.2439878   | 0.22031493  | -0.72483587  | 0.0439272   | -0.068115933 | 0.173731176 | 0.185571441 | 0.19865271 |
| ENSG0000018770  | 11 | 4545191  | 4546144  | CE54         | protein coding | -0.2491027   | 0.3026247   | -0.0217747   | 0.62027047  | -0.10110028  | 0.7452972   | -0.48477695  | 0.0308946   | -0.2299927   | 0.09434556  | -0.068115933 | 0.173731176 | 0.185571441 | 0.19865271 |
| ENSG0000017050  | 17 | 1689537  | 1677788  | C12orf44A    | protein coding | -0.11538448  | 0.18390118  | -0.02131494  | 0.97493835  | -0.12269974  | 0.84118913  | -0.03342027  | 0.86281892  | -0.18116022  | 0.59992807  | -0.068115933 | 0.173731176 | 0.185571441 | 0.19865271 |
| ENSG0000023376  | 7  | 2201616  | 22011994 | IFP1A19S     | protein coding | -0.10326347  | 0.90910529  | -0.01301761  | 0.574698911 | -0.29687671  | 0.12929903  | -0.14231541  | 0.47895798  | -0.00670702  | 0.96972292  | -0.068115933 | 0.173731176 | 0.185571441 | 0.19865271 |
| ENSG0000013689  | 2  | 13015132 | 13018270 | SMDCA        | protein coding | -0.00442988  | 0.96964848  | -0.03155938  | 0.13901032  | -0.32443993  | 0.08673218  | -0.15886142  | 0.42687432  | -0.02680081  | 0.83129553  | -0.068115933 | 0.173731176 | 0.185571441 | 0.19865271 |
| ENSG0000016995  | 16 | 3053397  | 3053547  | ZNF747       | protein coding | -0.0275859   | 0.82417747  | -0.04529979  | 0.97474382  | -0.00945694  | 0.98439612  | -0.14483347  | 0.4699214   | -0.0644939   | 0.64521379  | -0.068115933 | 0.173731176 | 0.185571441 | 0.19865271 |
| ENSG0000019196  | 3  | 1387337  | 13890351 | AC01876.1    | lncRNA         | -0.2029449   | 0.30871778  | -0.12911262  | 0.386913418 | -0.16292614  | 0.4178709   | -0.14889893  | 0.41113433  | -0.29714303  | 0.07066191  | -0.068115933 | 0.173731176 | 0.185571441 | 0.19865271 |
| ENSG0000018769  | 8  | 1045625  | 1048441  | NFIL230      | protein coding | -0.18121389  | 0.11474613  | -0.05199170  | 0.2853260   | -0.06118758  | 0.41338611  | -0.1944794   | 0.33051895  | -0.1713044   | 0.15211271  | -0.068115933 | 0.173731176 | 0.185571441 | 0.19865271 |
| ENSG0000018815  | 17 | 4442479  | 4444773  | IRF1B        | protein coding | -0.19669878  | 0.08761558  | -0.03703243  | 0.78982340  | -0.12407447  | 0.53781633  | -0.2395227   | 0.51343903  | -0.12679172  | 0.30917392  | -0.068115933 | 0.173731176 | 0.185571441 | 0.19865271 |
| ENSG0000020022  | 11 | 1109845  | 1109845  | LOC100287528 | protein coding | -0.11463855  | 0.92104057  | -0.0632724   | 0.86117338  | -0.18999309  | 0.32784208  | -0.30791312  | 0.1180733   | -0.0275971   | 0.83444592  | -0.068115933 | 0.173731176 | 0.185571441 | 0.19865271 |
| ENSG00000105613 | 18 | 1292495  | 1292495  | MAST1        | protein coding | -0.20079555  | 0.307510098 | -0.10068891  | 0.60487853  | -0.17237378  | 0.389621392 | -0.14052817  | 0.48446358  | -0.22457205  | 0.10321732  | -0.068115933 | 0.173731176 | 0.185571441 | 0.19865271 |
| ENSG00000130164 | 19 | 1109845  | 1109845  | TSG1         | protein coding | -0.11463855  | 0.92104057  | -0.0632724   | 0.86117338  | -0.18999309  | 0.32784208  | -0.30791312  | 0.1180733   | -0.0275971   | 0.83444592  | -0.068115933 | 0.173731176 | 0.185571441 | 0.19865271 |
| ENSG0000023237  | 2  | 16104806 | 16105046 | AC02053.3    | lncRNA         | -0.24388187  | 0.30292093  | -0.16641016  | 0.24392922  | -0.21212928  | 0.14095877  | -0.12011598  | 0.26236087  | -0.25098011  | 0.02690229  | -0.068115933 | 0.173731176 | 0.185571441 | 0.19865271 |
| ENSG0000025982  | 4  | 1045625  | 1048441  | NFIL230      | protein coding | -0.18121389  | 0.11474613  | -0.05199170  | 0.2853260   | -0.06118758  | 0.41338611  | -0.1944794   | 0.33051895  | -0.1713044   | 0.15211271  | -0.068115933 | 0.173731176 | 0.185571441 | 0.19865271 |
| ENSG0000014135  | 3  | 15708364 | 1571555  | NFIL8        | protein coding | -0.16334743  | 0.23708802  | -0.05199170  | 0.18712597  | -0.04767522  | 0.71126334  | -0.0296388   | 0.88479378  | -0.09005237  | 0.47429628  | -0.068115933 | 0.173731176 | 0.185571441 | 0.19865271 |
| ENSG0000024869  | 6  | 80351021 | 8035198  | AC02046.1    | lncRNA         | -0.07729826  | 0.52973173  | -0.01388932  | 0.39279384  | -0.04487102  | 0.82413041  | -0.11446622  | 0.57908405  | -0.04129822  | 0.76884498  | -0.068115933 | 0.173731176 | 0.185571441 | 0.19865271 |
| ENSG0000019840  | 4  | 7692769  | 7692769  | AC02042.1    | lncRNA         | -0.19727326  | 0.30435056  | -0.13057018  | 0.3861308   | -0.14614914  | 0.4211884   | -0.1779897   | 0.37487853  | -0.1621323   | 0.10341595  | -0.068115933 | 0.173731176 | 0.185571441 | 0.19865271 |
| ENSG0000025071  | 4  | 4298183  | 4298183  | LOC100287528 | protein coding | -0.11463855  | 0.92104057  | -0.0632724   | 0.86117338  | -0.18999309  | 0.32784208  | -0.30791312  | 0.1180733   | -0.0275971   | 0.83444592  | -0.068115933 | 0.173731176 | 0.185571441 | 0.19865271 |



Table with 10 columns: Gene ID, Gene Name, Feature, Start, End, Strand, RefSeq ID, RefSeq Name, RefSeq Description, RefSeq Accession. Contains a comprehensive list of genes and their genomic coordinates.







Table with 4 columns: Gene ID, Gene Name, Gene Type, and Gene Description. The table lists numerous genes such as BTBD9, C11orf117, C11orf118, etc., with their corresponding IDs and descriptions.



Table with 10 columns: Gene ID, Chr, Start, End, RefSeq, Gene, Type, Strand, Orientation, RefSeq ID, RefSeq Description. Contains genomic coordinates and gene names for various genes across chromosomes 1-22.



Table with 10 columns: Gene ID, Chr, Start, End, Strand, Feature, Gene Name, Description, RefSeq ID, RefSeq URL. Contains a comprehensive list of genes and their genomic coordinates.

Table with 10 columns: Gene ID, Chr, Start, End, Feature, RefSeq ID, RefSeq Name, RefSeq Type, RefSeq Description, RefSeq Accession. Contains a comprehensive list of genes and transcripts with their genomic coordinates and functional annotations.

|                 |    |          |          |            |                                    |              |            |             |            |             |            |              |             |              |            |             |            |             |            |
|-----------------|----|----------|----------|------------|------------------------------------|--------------|------------|-------------|------------|-------------|------------|--------------|-------------|--------------|------------|-------------|------------|-------------|------------|
| ENSG0000008912  | 20 | 1629152  | 1657770  | SHRCP      | protein coding                     | -0.13085646  | 0.26681123 | 0.01420999  | 0.52197720 | 0.26536002  | 0.18096897 | 0.01059220   | 0.05818032  | -0.22435565  | 0.10293044 | -0.08841542 | 0.68827628 | 0.15960868  | 0.26811879 |
| ENSG0000024273  | 3  | 11537531 | 12505728 | USP28      | protein coding                     | -0.11575321  | 0.25403508 | 0.07778950  | 0.58134746 | -0.11531108 | 0.45511201 | 0.02059050   | 0.13082000  | -0.17449207  | 0.35662941 | -0.08418803 | 0.68520350 | 0.21581064  | 0.13569181 |
| ENSG0000014178  | 17 | 13786217 | 13782372 | USP28      | transcribed unprocessed pseudogene | -0.11417320  | 0.25403508 | 0.07778950  | 0.58134746 | -0.11531108 | 0.45511201 | 0.02059050   | 0.13082000  | -0.17449207  | 0.35662941 | -0.08418803 | 0.68520350 | 0.21581064  | 0.13569181 |
| ENSG0000100841  | 7  | 3188715  | 3170450  | PPP1R1B    | protein coding                     | -0.05314249  | 0.64622010 | 0.05368853  | 0.71170110 | 0.01059844  | 0.88735722 | 0.22885404   | 0.17007207  | -0.18843899  | 0.17007207 | -0.08434366 | 0.68285040 | 0.12092320  | 0.40244310 |
| ENSG0000100029  | 3  | 3057625  | 3067078  | PPP1R1B    | transcribed unprocessed pseudogene | -0.05657417  | 0.61284760 | 0.05171862  | 0.86303401 | -0.03844259 | 0.64964268 | 0.07320160   | 0.17415466  | -0.06936950  | 0.15577581 | -0.08443234 | 0.68203730 | 0.08555250  | 0.56813270 |
| ENSG0000074414  | 23 | 2632923  | 2632923  | PPP1R1B    | transcribed unprocessed pseudogene | -0.05657417  | 0.61284760 | 0.05171862  | 0.86303401 | -0.03844259 | 0.64964268 | 0.07320160   | 0.17415466  | -0.06936950  | 0.15577581 | -0.08443234 | 0.68203730 | 0.08555250  | 0.56813270 |
| ENSG0000144644  | 3  | 3072620  | 3084765  | GAL1L1     | protein coding                     | -0.20049368  | 0.01059220 | -0.09528581 | 0.8475463  | -0.08745733 | 0.92962308 | 0.06865164   | 0.87321556  | -0.23994233  | 0.01059220 | -0.08434366 | 0.68111738 | 0.04123843  | 0.02024622 |
| ENSG0000077387  | 19 | 9635392  | 9640398  | RNCT5      | protein coding                     | -0.15002434  | 0.25074470 | -0.16428126 | 0.26394769 | 0.16365507  | 0.41384125 | -0.16264260  | 0.41787912  | -0.06914627  | 0.63091468 | -0.08462713 | 0.68027294 | 0.08117292  | 0.26344752 |
| ENSG0000133889  | 3  | 13127308 | 13127308 | RNCT5      | transcribed unprocessed pseudogene | -0.15002434  | 0.25074470 | -0.16428126 | 0.26394769 | 0.16365507  | 0.41384125 | -0.16264260  | 0.41787912  | -0.06914627  | 0.63091468 | -0.08462713 | 0.68027294 | 0.08117292  | 0.26344752 |
| ENSG0000023932  | 7  | 6069613  | 6069613  | RNCT5      | transcribed unprocessed pseudogene | -0.15002434  | 0.25074470 | -0.16428126 | 0.26394769 | 0.16365507  | 0.41384125 | -0.16264260  | 0.41787912  | -0.06914627  | 0.63091468 | -0.08462713 | 0.68027294 | 0.08117292  | 0.26344752 |
| ENSG0000184847  | 3  | 4822347  | 4822347  | SNAP       | transcribed unprocessed pseudogene | -0.04889852  | 0.95647623 | -0.16705732 | 0.32951730 | 0.08293607  | 0.67227752 | -0.13438490  | 0.47502774  | 0.05435728   | 0.89625428 | -0.08452498 | 0.67811023 | 0.04208244  | 0.18754891 |
| ENSG0000133899  | 20 | 1978708  | 2002454  | RNCP2      | transcribed unprocessed pseudogene | -0.04889852  | 0.95647623 | -0.16705732 | 0.32951730 | 0.08293607  | 0.67227752 | -0.13438490  | 0.47502774  | 0.05435728   | 0.89625428 | -0.08452498 | 0.67811023 | 0.04208244  | 0.18754891 |
| ENSG0000005013  | 16 | 988710   | 988710   | SNAP       | transcribed unprocessed pseudogene | -0.04889852  | 0.95647623 | -0.16705732 | 0.32951730 | 0.08293607  | 0.67227752 | -0.13438490  | 0.47502774  | 0.05435728   | 0.89625428 | -0.08452498 | 0.67811023 | 0.04208244  | 0.18754891 |
| ENSG0000028714  | 3  | 14271629 | 14276103 | RNCP2      | transcribed unprocessed pseudogene | -0.04889852  | 0.95647623 | -0.16705732 | 0.32951730 | 0.08293607  | 0.67227752 | -0.13438490  | 0.47502774  | 0.05435728   | 0.89625428 | -0.08452498 | 0.67811023 | 0.04208244  | 0.18754891 |
| ENSG0000023170  | 17 | 3087100  | 3087148  | RNCP2      | transcribed unprocessed pseudogene | -0.04889852  | 0.95647623 | -0.16705732 | 0.32951730 | 0.08293607  | 0.67227752 | -0.13438490  | 0.47502774  | 0.05435728   | 0.89625428 | -0.08452498 | 0.67811023 | 0.04208244  | 0.18754891 |
| ENSG00000214856 | 17 | 1842201  | 1842286  | RNCP2      | transcribed unprocessed pseudogene | -0.04889852  | 0.95647623 | -0.16705732 | 0.32951730 | 0.08293607  | 0.67227752 | -0.13438490  | 0.47502774  | 0.05435728   | 0.89625428 | -0.08452498 | 0.67811023 | 0.04208244  | 0.18754891 |
| ENSG00000232396 | 22 | 2070256  | 2071805  | AC004882.1 | transcribed unprocessed pseudogene | -0.22767074  | 0.04844488 | -0.03388187 | 0.16688817 | 0.76342699  | 0.14520653 | -0.12078840  | 0.57721206  | -0.24498949  | 0.01741409 | -0.08429271 | 0.67932400 | -0.24588179 | 0.08214270 |
| ENSG00000229987 | 17 | 15124987 | 15241724 | AC004882.1 | transcribed unprocessed pseudogene | -0.22767074  | 0.04844488 | -0.03388187 | 0.16688817 | 0.76342699  | 0.14520653 | -0.12078840  | 0.57721206  | -0.24498949  | 0.01741409 | -0.08429271 | 0.67932400 | -0.24588179 | 0.08214270 |
| ENSG00000185404 | 24 | 23032184 | 23040732 | SPH4L      | protein coding                     | 0.03030219   | 0.73645763 | 0.03093696  | 0.97863337 | 0.13424001  | 0.50441647 | 0.16388707   | 0.23692741  | -0.08858508  | 0.68297264 | -0.08858508 | 0.68297264 | 0.05617842  |            |
| ENSG00000196224 | 21 | 1407785  | 1684843  | KRT1P-3    | protein coding                     | -0.30357673  | 0.00722548 | -0.18071110 | 0.19426860 | 0.34399353  | 0.08219050 | -0.32782522  | 0.10358414  | -0.38740278  | 0.00722548 | -0.08882425 | 0.68140246 | -0.28302870 | 0.08888888 |
| ENSG0000020421  | 11 | 14032132 | 14040793 | RNCP2      | transcribed unprocessed pseudogene | -0.27684787  | 0.01048494 | -0.19513426 | 0.16740642 | 0.04786277  | 0.14143309 | -0.26292966  | 0.18000120  | -0.20717402  | 0.09746228 | -0.08717408 | 0.67292953 | -0.22170006 | 0.03370400 |
| ENSG00000226491 | 21 | 4279725  | 42788712 | F10P1      | protein coding                     | -0.179881758 | 0.11874855 | -0.11857876 | 0.41211884 | -0.13834054 | 0.89119231 | -0.257872208 | 0.19408695  | -0.08725348  | 0.68393391 | -0.08725348 | 0.68393391 | 0.13203397  | 0.05867720 |
| ENSG00000154957 | 17 | 11977438 | 11997475 | ZNF18      | protein coding                     | -0.21743187  | 0.05444514 | -0.18242458 | 0.24072926 | 0.16301763  | 0.14557047 | -0.22148888  | 0.26937380  | -0.18688503  | 0.17802928 | -0.08722600 | 0.68127260 | -0.22092890 | 0.10338805 |
| ENSG0000022934  | 1  | 53237    | 63438    | MTCO2P2    | transcribed unprocessed pseudogene | -0.00331841  | 0.41749306 | -0.00178433 | 0.62286893 | 0.15284534  | 0.43089151 | -0.12438985  | 0.53890242  | -0.10866165  | 0.43272073 | -0.08714892 | 0.67920311 | -0.15119737 | 0.20337190 |
| ENSG00000183638 | 8  | 1060349  | 10712187 | ZNF18      | transcribed unprocessed pseudogene | -0.23208737  | 0.00410534 | -0.20143404 | 0.16028570 | 0.16288173  | 0.14101465 | -0.35798896  | 0.06875272  | -0.14327779  | 0.01896132 | -0.08714892 | 0.68117587 | -0.22966433 | 0.04323231 |
| ENSG00000205119 | 4  | 13402695 | 13432777 | AC001931.1 | transcribed unprocessed pseudogene | -0.00294940  | 0.97899524 | -0.00776538 | 0.58471455 | -0.22489028 | 0.27325259 | 0.02796219   | 0.88888885  | 0.15546415   | 0.26180791 | -0.08716811 | 0.68813007 | -0.03307386 | 0.08227410 |
| ENSG00000209197 | 17 | 10291245 | 10291245 | AC001931.1 | transcribed unprocessed pseudogene | -0.00294940  | 0.97899524 | -0.00776538 | 0.58471455 | -0.22489028 | 0.27325259 | 0.02796219   | 0.88888885  | 0.15546415   | 0.26180791 | -0.08716811 | 0.68813007 | -0.03307386 | 0.08227410 |
| ENSG00000107165 | 16 | 12885438 | 12885438 | TYRP1      | protein coding                     | -0.19193201  | 0.09447938 | -0.13800701 | 0.84844773 | 0.12498384  | 0.21197788 | -0.18791673  | 0.31312137  | -0.14138632  | 0.11180832 | -0.08280816 | 0.68693303 | -0.22033441 | 0.15878458 |
| ENSG00000162337 | 11 | 68132591 | 68442762 | LRP6       | protein coding                     | -0.39422580  | 0.003088   | -0.21107952 | 0.40225776 | -0.23382891 | 0.00412878 | -0.18597788  | 0.32737731  | -0.50813024  | 0.7987058  | -0.08884472 | 0.68882108 | -0.22488023 | 0.01814890 |
| ENSG00000225347 | 14 | 10369649 | 10369649 | LRP6       | transcribed unprocessed pseudogene | -0.39422580  | 0.003088   | -0.21107952 | 0.40225776 | -0.23382891 | 0.00412878 | -0.18597788  | 0.32737731  | -0.50813024  | 0.7987058  | -0.08884472 | 0.68882108 | -0.22488023 | 0.01814890 |
| ENSG00000190008 | 14 | 60396489 | 60514543 | K40orf9    | protein coding                     | -0.31267919  | 0.05050263 | -0.16683438 | 0.28501768 | -0.23488304 | 0.15998020 | -0.23498586  | 0.23093200  | -0.35483231  | 0.00568574 | -0.08884472 | 0.68882108 | -0.22488023 | 0.01814890 |
| ENSG00000179542 | 9  | 33449759 | 33449491 | AC001931.1 | transcribed unprocessed pseudogene | -0.19141804  | 0.09380007 | -0.04223100 | 0.70440353 | 0.35188987  | 0.01165897 | 0.02877697   | 0.88888885  | 0.18032255   | 0.19399043 | -0.08884472 | 0.68882108 | -0.22488023 | 0.01814890 |
| ENSG00000220172 | 10 | 10292302 | 10292302 | AC001931.1 | transcribed unprocessed pseudogene | -0.19141804  | 0.09380007 | -0.04223100 | 0.70440353 | 0.35188987  | 0.01165897 | 0.02877697   | 0.88888885  | 0.18032255   | 0.19399043 | -0.08884472 | 0.68882108 | -0.22488023 | 0.01814890 |
| ENSG00000125058 | 20 | 6354810  | 6354754  | AC001931.1 | transcribed unprocessed pseudogene | -0.19141804  | 0.09380007 | -0.04223100 | 0.70440353 | 0.35188987  | 0.01165897 | 0.02877697   | 0.88888885  | 0.18032255   | 0.19399043 | -0.08884472 | 0.68882108 | -0.22488023 | 0.01814890 |
| ENSG00000230397 | 8  | 3916612  | 3816118  | RNUP32P    | transcribed unprocessed pseudogene | -0.22749631  | 0.26726949 | -0.22799007 | 0.73789287 | -0.18471743 | 0.41162722 | -0.17377324  | 0.37272769  | -0.15472681  | 0.26391129 | -0.08884472 | 0.68882108 | -0.22488023 | 0.01814890 |
| ENSG00000232634 | 7  | 7782330  | 7782330  | FAM107B    | transcribed unprocessed pseudogene | -0.22749631  | 0.26726949 | -0.22799007 | 0.73789287 | -0.18471743 | 0.41162722 | -0.17377324  | 0.37272769  | -0.15472681  | 0.26391129 | -0.08884472 | 0.68882108 | -0.22488023 | 0.01814890 |
| ENSG00000140291 | 16 | 66003874 | 66138829 | CHT13      | protein coding                     | -0.156003128 | 0.17373627 | -0.11624630 | 0.41239684 | -0.13016293 | 0.84506006 | -0.19063400  | 0.48840704  | -0.13005313  | 0.26391129 | -0.08884472 | 0.68882108 | -0.22488023 | 0.01814890 |
| ENSG00000259982 | 2  | 10292302 | 10292302 | CHT13      | transcribed unprocessed pseudogene | -0.156003128 | 0.17373627 | -0.11624630 | 0.41239684 | -0.13016293 | 0.84506006 | -0.19063400  | 0.48840704  | -0.13005313  | 0.26391129 | -0.08884472 | 0.68882108 | -0.22488023 | 0.01814890 |
| ENSG00000101590 | 20 | 62841005 | 62861822 | TCF5       | protein coding                     | -0.05828505  | 0.64819258 | -0.05105324 | 0.70243866 | -0.22881170 | 0.26432804 | -0.044021418 | 0.827410714 | -0.05828505  | 0.64819258 | -0.08884472 | 0.68882108 | -0.22488023 | 0.01814890 |
| ENSG00000245682 | 5  | 2518780  | 2523438  | AC001931.1 | transcribed unprocessed pseudogene | -0.12945662  | 0.28180745 | -0.12072008 | 0.40369671 | 0.222991458 | 0.24982452 | -0.11891337  | 0.56512247  | -0.117104274 | 0.39095889 | -0.08884472 | 0.68882108 | -0.22488023 | 0.01814890 |
| ENSG0000        |    |          |          |            |                                    |              |            |             |            |             |            |              |             |              |            |             |            |             |            |



|                 |    |          |          |              |                    |              |             |             |            |             |            |             |            |             |            |             |            |             |            |            |           |
|-----------------|----|----------|----------|--------------|--------------------|--------------|-------------|-------------|------------|-------------|------------|-------------|------------|-------------|------------|-------------|------------|-------------|------------|------------|-----------|
| ENSG0000023549  | 8  | 85440996 | 85449115 | CALAS1       | lncRNA             | -0.211849332 | -0.05625338 | -0.15536511 | 0.28131320 | -0.11847654 | 0.55278623 | -0.1547294  | 0.4499674  | -0.17749739 | 0.19912724 | 0.00881845  | 0.60285591 | -0.25411709 | 0.07492931 |            |           |
| ENSG0000023569  | 7  | 8125500  | 8222871  | LOC100287197 | lncRNA             | -0.22441337  | -0.14335367 | 0.0317348   | 0.0875766  | 0.07561418  | 0.17061418 | -0.17292533 | 0.1136623  | -0.21952537 | 0.1136623  | 0.08824729  | 0.08824729 | 0.08824729  | 0.08824729 | 0.08824729 |           |
| ENSG0000044481  | 8  | 363044   | 366447   | STAC         | protein coding     | -0.1992416   | -0.1276161  | -0.1992416  | 0.1276161  | -0.1992416  | 0.1276161  | -0.1992416  | 0.1276161  | -0.1992416  | 0.1276161  | -0.1992416  | 0.1276161  | -0.1992416  | 0.1276161  | -0.1992416 |           |
| ENSG0000027201  | 6  | 8195500  | 8196737  | LOC182644    | lncRNA             | -0.2870565   | 0.01821269  | -0.2771160  | 0.0514184  | -0.1021249  | 0.3635240  | -0.4488254  | 0.0314280  | -0.3488012  | 0.0320370  | -0.00868812 | 0.00800840 | -0.05069823 | -0.1518297 | 0.1158297  |           |
| ENSG0000023237  | 8  | 10522339 | 10598981 | LOC100287197 | lncRNA             | -0.280808    | 0.0174664   | -0.2433059  | 0.3697300  | -0.2111557  | 0.14917426 | -0.1314891  | 0.5171793  | -0.307394   | 0.0226276  | -0.0907479  | 0.0600352  | -0.2217818  | 0.0226276  | 0.0600352  |           |
| ENSG0000016903  | 12 | 12200000 | 12200000 | HTRAI1       | protein coding     | -0.280808    | 0.0174664   | -0.2433059  | 0.3697300  | -0.2111557  | 0.14917426 | -0.1314891  | 0.5171793  | -0.307394   | 0.0226276  | -0.0907479  | 0.0600352  | -0.2217818  | 0.0226276  | 0.0600352  |           |
| ENSG0000018150  | 12 | 12266990 | 12266990 | SPR19        | protein coding     | -0.2286512   | 0.04846992  | -0.0827911  | 0.1456670  | -0.1281125  | 0.3449934  | -0.4785993  | 0.1706979  | -0.1281125  | 0.3449934  | -0.4785993  | 0.1706979  | -0.1281125  | 0.3449934  | -0.4785993 | 0.1706979 |
| ENSG0000017085  | 18 | 2652340  | 2656577  | MG2          | protein coding     | -0.1962379   | 0.0823644   | -0.0545177  | 0.1079389  | -0.0733002  | 0.1613399  | -0.0268118  | 0.0866177  | -0.1247145  | 0.3575663  | -0.0904645  | 0.3575663  | -0.0904645  | 0.3575663  | -0.0904645 | 0.3575663 |
| ENSG00000142149 | 8  | 11095393 | 11100795 | LOC100287197 | lncRNA             | -0.280808    | 0.0174664   | -0.2433059  | 0.3697300  | -0.2111557  | 0.14917426 | -0.1314891  | 0.5171793  | -0.307394   | 0.0226276  | -0.0907479  | 0.0600352  | -0.2217818  | 0.0226276  | 0.0600352  |           |
| ENSG0000010295  | 13 | 9560180  | 9595342  | UGT1         | protein coding     | -0.2013073   | 0.07655633  | -0.2598157  | 0.1131527  | -0.1098599  | 0.0888917  | -0.3306396  | 0.05026243 | -0.1979884  | 0.21966138 | -0.0979884  | 0.0796103  | -0.0979884  | 0.0796103  | -0.0979884 | 0.0796103 |
| ENSG0000024988  | 4  | 1411398  | 1410420  | LINC01085    | transcribed across | -0.207968    | 0.06525213  | -0.0764897  | 0.0962741  | -0.3202143  | 0.1543919  | -0.0501180  | 0.3717173  | -0.2301364  | 0.0687078  | -0.0989632  | 0.0796830  | -0.2201066  | 0.1111445  | 0.4320754  |           |
| ENSG00000142149 | 8  | 3187200  | 3204463  | LOC100287197 | lncRNA             | -0.280808    | 0.0174664   | -0.2433059  | 0.3697300  | -0.2111557  | 0.14917426 | -0.1314891  | 0.5171793  | -0.307394   | 0.0226276  | -0.0907479  | 0.0600352  | -0.2217818  | 0.0226276  | 0.0600352  |           |
| ENSG0000027983  | 7  | 8033341  | 8033436  | LOC124314    | lncRNA             | -0.03086013  | 0.7910333   | -0.0567137  | 0.0567137  | -0.0567137  | 0.0567137  | -0.0567137  | 0.0567137  | -0.0567137  | 0.0567137  | -0.0567137  | 0.0567137  | -0.0567137  | 0.0567137  | -0.0567137 |           |
| ENSG0000014579  | 7  | 826294   | 8284022  | ZNF70        | protein coding     | -0.2701344   | 0.0717968   | -0.1336573  | 0.3836150  | -0.2906524  | 0.2494252  | -0.1429155  | 0.4770017  | -0.3672192  | 0.0010109  | -0.0910592  | 0.0786297  | -0.3113529  | 0.0771391  | 0.0771391  |           |
| ENSG0000009887  | 20 | 3601904  | 3623738  | SPR11        | protein coding     | -0.2588978   | 0.0224948   | -0.0084186  | 0.1743606  | -0.1988947  | 0.1314941  | -0.0071312  | 0.1014968  | -0.2000713  | 0.00045274 | -0.0103739  | 0.07954632 | -0.3381008  | 0.0009232  | 0.0009232  |           |
| ENSG0000028278  | 2  | 4516916  | 4511673  | LOC100287197 | lncRNA             | -0.19031681  | 0.0937316   | -0.1847324  | 0.1927081  | -0.0705713  | 0.1726162  | -0.2455713  | 0.1264966  | -0.1663244  | 0.2220270  | -0.0105608  | 0.07000373 | -0.1600573  | 0.2851039  | 0.2851039  |           |
| ENSG0000028620  | 14 | 1454978  | 1454620  | LOC100287197 | lncRNA             | -0.2242423   | 0.04899578  | -0.1007942  | 0.2463337  | -0.0279436  | 0.08461194 | -0.1814292  | 0.3610094  | -0.1903373  | 0.17869518 | -0.010073   | 0.0942441  | -0.1054839  | 0.1054839  | 0.1054839  |           |
| ENSG0000025434  | 1  | 2947290  | 2944729  | LOC100287197 | lncRNA             | -0.0039634   | 0.99911056  | -0.1007174  | 0.4040023  | -0.2949716  | 0.13514394 | -0.1333367  | 0.4933731  | -0.0009923  | 0.8649174  | -0.010073   | 0.0942441  | -0.1054839  | 0.1054839  | 0.1054839  |           |
| ENSG00000147036 | X  | 3717169  | 3784443  | LINC13       | protein coding     | -0.2268306   | 0.0474717   | -0.1607942  | 0.3036117  | -0.2081108  | 0.1308614  | -0.1815055  | 0.2054468  | -0.1815055  | 0.2054468  | -0.1815055  | 0.2054468  | -0.1815055  | 0.2054468  | -0.1815055 |           |
| ENSG0000009229  | 14 | 2424814  | 2424432  | TGM1         | protein coding     | -0.3444752   | 0.0039154   | -0.1804651  | 0.2406517  | -0.3592773  | 0.0696009  | -0.2017858  | 0.3127931  | -0.3527207  | 0.0088928  | -0.0110838  | 0.072692   | -0.3630732  | 0.0306414  | 0.0306414  |           |
| ENSG0000015719  | 7  | 15507034 | 15507392 | HTRAI        | protein coding     | -0.280808    | 0.0174664   | -0.2433059  | 0.3697300  | -0.2111557  | 0.14917426 | -0.1314891  | 0.5171793  | -0.307394   | 0.0226276  | -0.0907479  | 0.0600352  | -0.2217818  | 0.0226276  | 0.0600352  |           |
| ENSG0000025963  | 15 | 95805793 | 9911818  | LOC100287197 | lncRNA             | -0.181585738 | 0.11398815  | -0.1479344  | 0.3052478  | -0.1032231  | 0.05168343 | -0.2081053  | 0.29740004 | -0.1828955  | 0.19592304 | -0.0128955  | 0.15952078 | -0.085112   | 0.085112   | 0.085112   |           |
| ENSG0000018604  | 12 | 506770   | 5261859  | KRT73        | protein coding     | -0.1153882   | 0.1875225   | -0.0918058  | 0.529628   | -0.1220211  | 0.1518087  | -0.1831651  | 0.3046027  | -0.2065313  | 0.13402738 | -0.0111671  | 0.0792943  | -0.1228789  | 0.4320754  | 0.4320754  |           |
| ENSG0000011703  | 1  | 407187   | 4084054  | KCNK4        | protein coding     | -0.3254221   | -0.0110553  | -0.2826720  | 0.3321056  | -0.0505691  | -0.1212627 | -0.4307769  | 0.1153382  | -0.4307769  | 0.1153382  | -0.4307769  | 0.1153382  | -0.4307769  | 0.1153382  | -0.4307769 |           |
| ENSG0000026788  | 8  | 4208912  | 4208973  | LINC01085    | transcribed across | -0.08351957  | 0.4701915   | -0.1580979  | 0.2885108  | -0.1580979  | 0.2885108  | -0.1580979  | 0.2885108  | -0.1580979  | 0.2885108  | -0.1580979  | 0.2885108  | -0.1580979  | 0.2885108  | -0.1580979 |           |
| ENSG0000023489  | 7  | 4140214  | 4142504  | LOC100287197 | lncRNA             | -0.3023298   | 0.0713435   | -0.1434815  | 0.3218742  | -0.1910149  | 0.4588142  | -0.2827278  | 0.1511058  | -0.3543773  | 0.0039394  | -0.0115094  | 0.0781487  | -0.2884136  | 0.0422327  | 0.0422327  |           |
| ENSG0000012180  | 14 | 2218338  | 2218371  | TSPAN2       | lncRNA             | -0.0465333   | 0.69990704  | -0.06718704 | 0.64249034 | -0.2791319  | 0.1886816  | -0.1692575  | 0.4003321  | -0.0643894  | 0.6387359  | -0.0115094  | 0.0781487  | -0.2884136  | 0.0422327  | 0.0422327  |           |
| ENSG0000029711  | 11 | 11568918 | 11568117 | AP009497     | lncRNA             | -0.2704774   | 0.073345    | -0.2107684  | 0.1598127  | -0.1389016  | 0.0826973  | -0.2891126  | 0.1917449  | -0.2891126  | 0.1917449  | -0.2891126  | 0.1917449  | -0.2891126  | 0.1917449  | -0.2891126 |           |
| ENSG0000028559  | 18 | 3955544  | 3956544  | LOC100287197 | lncRNA             | -0.2984288   | 0.01077104  | -0.14274534 | 0.3247671  | -0.1318717  | 0.1103828  | -0.1599972  | 0.4381654  | -0.2989817  | 0.0202915  | -0.0115644  | 0.0781487  | -0.2884136  | 0.0422327  | 0.0422327  |           |
| ENSG0000029528  | 12 | 1000000  | 1000000  | LOC100287197 | lncRNA             | -0.2984288   | 0.01077104  | -0.14274534 | 0.3247671  | -0.1318717  | 0.1103828  | -0.1599972  | 0.4381654  | -0.2989817  | 0.0202915  | -0.0115644  | 0.0781487  | -0.2884136  | 0.0422327  | 0.0422327  |           |
| ENSG0000024820  | 3  | 14690685 | 14737068 | LOC100287197 | lncRNA             | -0.02303473  | 0.84124105  | -0.0274501  | 0.84124105 | -0.0274501  | 0.84124105 | -0.0274501  | 0.84124105 | -0.0274501  | 0.84124105 | -0.0274501  | 0.84124105 | -0.0274501  | 0.84124105 | -0.0274501 |           |
| ENSG00000100721 | 14 | 9570947  | 9571481  | TCL1A        | protein coding     | -0.1674347   | 0.23567123  | -0.1895139  | 0.18744529 | -0.2440078  | 0.1943170  | -0.3369969  | 0.1834174  | -0.1834292  | 0.2777896  | -0.0124565  | 0.0782934  | -0.0294749  | 0.5284967  | 0.5284967  |           |
| ENSG0000023652  | 12 | 1000000  | 1000000  | LOC100287197 | lncRNA             | -0.2984288   | 0.01077104  | -0.14274534 | 0.3247671  | -0.1318717  | 0.1103828  | -0.1599972  | 0.4381654  | -0.2989817  | 0.0202915  | -0.0115644  | 0.0781487  | -0.2884136  | 0.0422327  | 0.0422327  |           |
| ENSG0000027720  | 7  | 4526246  | 4526746  | MCOX5        | lncRNA             | -0.1674347   | 0.23567123  | -0.1895139  | 0.18744529 | -0.2440078  | 0.1943170  | -0.3369969  | 0.1834174  | -0.1834292  | 0.2777896  | -0.0124565  | 0.0782934  | -0.0294749  | 0.5284967  | 0.5284967  |           |
| ENSG0000028731  | 1  | 16898363 | 16898263 | LOC15326     | lncRNA             | -0.1674347   | 0.23567123  | -0.1895139  | 0.18744529 | -0.2440078  | 0.1943170  | -0.3369969  | 0.1834174  | -0.1834292  | 0.2777896  | -0.0124565  | 0.0782934  | -0.0294749  | 0.5284967  | 0.5284967  |           |
| ENSG0000011719  | 8  | 1000000  | 1000000  | LOC100287197 | lncRNA             | -0.2984288   | 0.01077104  | -0.14274534 | 0.3247671  | -0.1318717  | 0.1103828  | -0.1599972  | 0.4381654  | -0.2989817  | 0.0202915  | -0.0115644  | 0.0781487  | -0.2884136  | 0.0422327  | 0.0422327  |           |
| ENSG0000026788  | 8  | 4208912  | 4208973  | LINC01085    | transcribed across | -0.08351957  | 0.4701915   | -0.1580979  | 0.2885108  | -0.1580979  | 0.2885108  | -0.1580979  | 0.2885108  | -0.1580979  | 0.2885108  | -0.1580979  | 0.2885108  | -0.1580979  | 0.2885108  | -0.1580979 |           |
| ENSG0000026788  | 8  | 4208912  | 4208973  | LINC01085    | transcribed across | -0.08351957  | 0.4701915   | -0.1580979  | 0.2885108  | -0.1580979  | 0.2885108  | -0.1580979  | 0.2885108  | -0.1580979  | 0.2885108  | -0.1580979  | 0.2885108  | -0.1580979  | 0.2885108  | -0.1580979 |           |
| ENSG0000012306  | 8  | 13281459 | 13281756 | RPS12        | protein coding     | -0.14688257  | 0.20240394  | -0.0729247  | 0.4873891  | -0.4455930  | 0.1984904  | -0.1463357  | 0.4653453  | -0.2369811  | 0.1018477  | -0.0138448  | 0.0782934  | -0.0294749  | 0.5284967  | 0.5284967  |           |
| ENSG0000028722  | 14 | 144484   | 144484   | LOC100287197 | lncRNA             | -0.2984288   | 0.01077104  | -0.14274534 | 0.3247671  | -0.1318717  | 0.1103828  | -0.1599972  | 0.4381654  | -0.2989817  | 0.0202915  | -0.01156    |            |             |            |            |           |



|                 |    |           |          |            |                         |              |             |              |             |              |             |              |             |              |             |              |             |              |             |           |
|-----------------|----|-----------|----------|------------|-------------------------|--------------|-------------|--------------|-------------|--------------|-------------|--------------|-------------|--------------|-------------|--------------|-------------|--------------|-------------|-----------|
| ENSG0000028619  | 2  | 45173722  | 45175933 | AC009236.1 | lncRNA                  | -0.170190709 | 0.138924019 | -0.055318119 | 0.702789947 | -0.181858785 | 0.363955145 | -0.071232254 | 0.7240376   | -0.219392919 | 0.110943645 | -0.093004083 | 0.670987040 | -0.173556443 | 0.228634333 |           |
| ENSG0000028625  | 2  | 4502178   | 4745471  | TTC27.2    | lncRNA                  | -0.2903272   | 0.02628179  | -0.15387661  | 0.438893207 | -0.3476774   | 0.1151154   | -0.2974478   | 0.2966670   | -0.2974478   | 0.0566670   | 0.0566670    | 0.0566670   | 0.0566670    | 0.0566670   | 0.0566670 |
| ENSG0000034196  | 12 | 6940424   | 6940424  | RP24.2     | processed pseudogene    | -0.0000000   | 0.0000000   | 0.0000000    | 0.0000000   | 0.0000000    | 0.0000000   | 0.0000000    | 0.0000000   | 0.0000000    | 0.0000000   | 0.0000000    | 0.0000000   | 0.0000000    | 0.0000000   |           |
| ENSG0000025684  | 12 | 164664    | 166231   | AC02369.2  | lncRNA                  | -0.27485884  | 0.10639933  | -0.052154460 | 0.52444990  | -0.16385207  | 0.41472000  | -0.04935950  | 0.0867112   | -0.29127997  | 0.04937049  | -0.05364739  | 0.07083030  | -0.11209150  | 0.02326020  |           |
| ENSG0000028717  | 1  | 51226229  | 51227773 | AL015693.1 | processed pseudogene    | -0.22472873  | 0.0436936   | -0.12183186  | 0.40000930  | -0.00851014  | 0.48478761  | -0.2608730   | 0.18874755  | -0.2895131   | 0.08133370  | -0.09398581  | 0.07074242  | -0.20716221  | 0.0111855   |           |
| ENSG0000015764  | 1  | 10291300  | 10294111 | LRRC17     | protein coding          | -0.12528127  | 0.27746238  | -0.051133872 | -0.0247773  | -0.20051014  | 0.31599675  | -0.0476170   | 0.095111372 | -0.12914491  | 0.35199999  | -0.09368815  | 0.07070115  | -0.16963467  | 0.23806979  |           |
| ENSG0000016599  | 3  | 132891348 | 13294867 | INT3       | protein coding          | -0.19480807  | 0.08681267  | -0.03152750  | 0.2777354   | -0.14180347  | 0.4801269   | -0.0807549   | 0.65977146  | -0.2278625   | 0.04949607  | -0.0934862   | 0.07666338  | -0.2474996   | 0.08383114  |           |
| ENSG0000014592  | 11 | 7789120   | 7789121  | INCA4      | protein coding          | -0.20291445  | 0.09679753  | -0.18184562  | 0.21480771  | -0.19722306  | 0.58911799  | -0.24409191  | 0.11215904  | -0.0347890   | 0.64438195  | -0.05389771  | 0.02689350  | -0.23889350  | 0.04923244  |           |
| ENSG0000025039  | 4  | 21649015  | 22303030 | AC093719.1 | lncRNA                  | -0.21219539  | 0.06392360  | -0.09159672  | 0.27371357  | -0.13545023  | 0.48759509  | -0.06336037  | 0.79037984  | -0.07129265  | 0.14068539  | -0.09378005  | 0.07049481  | -0.23331507  | 0.09598761  |           |
| ENSG0000029198  | 1  | 13064572  | 13064623 | AL049753.1 | processed pseudogene    | -0.22124911  | 0.05210769  | -0.17339021  | 0.21269586  | -0.2938984   | 0.4968776   | -0.19895880  | 0.31687038  | -0.2072111   | 0.13272604  | -0.0834917   | 0.07049481  | -0.26051716  | 0.02273970  |           |
| ENSG0000016992  | 3  | 10592182  | 10592383 | RP24.2     | processed pseudogene    | -0.0000000   | 0.0000000   | 0.0000000    | 0.0000000   | 0.0000000    | 0.0000000   | 0.0000000    | 0.0000000   | 0.0000000    | 0.0000000   | 0.0000000    | 0.0000000   | 0.0000000    | 0.0000000   |           |
| ENSG0000029924  | 10 | 11443113  | 11447880 | ABL1M1     | protein coding          | -0.173888417 | 0.23177638  | -0.01265221  | 0.29305885  | -0.07072919  | 0.2986069   | -0.049018075 | 0.8081754   | -0.25957168  | 0.05032321  | -0.07574886  | 0.07049481  | -0.13218884  | 0.08015773  |           |
| ENSG0000026159  | 15 | 2543683   | 25437283 | AC010774.1 | lncRNA                  | -0.11042927  | 0.3388165   | -0.03217276  | 0.834861    | -0.04227796  | 0.2662907   | -0.14514486  | 0.48989372  | -0.2843622   | 0.0887626   | -0.09392917  | 0.07049481  | -0.08003213  | 0.08836717  |           |
| ENSG0000029208  | 17 | 7600936   | 7600936  | CD3C       | protein coding          | -0.13382008  | 0.09119078  | -0.16527419  | 0.25177531  | -0.18389265  | 0.3608762   | -0.2091701   | 0.2505607   | -0.2019739   | 0.14300635  | -0.09378602  | 0.07034785  | -0.19383693  | 0.1778161   |           |
| ENSG00000180787 | 17 | 5078487   | 5088374  | ZFP3       | protein coding          | -0.12815066  | 0.26070478  | -0.01870393  | 0.848671831 | -0.13427701  | 0.50548478  | -0.15634032  | 0.43409022  | -0.05858315  | 0.07384811  | -0.09330136  | 0.07192051  | -0.19970251  | 0.0643877   |           |
| ENSG0000027282  | 3  | 4303376   | 4303438  | AC020171.5 | lncRNA                  | -0.10141340  | 0.38015991  | -0.03242734  | 0.26207440  | -0.02396227  | 0.95583399  | -0.00841237  | 0.98670206  | -0.12268349  | 0.3757103   | -0.08327412  | 0.07023300  | -0.11188549  | 0.444043172 |           |
| ENSG0000022529  | 3  | 1645438   | 1646440  | FCBP2L1    | protein coding          | -0.15104519  | 0.19095173  | -0.09911949  | 0.34939504  | -0.0411198   | 0.2037899   | -0.25292281  | 0.19632014  | -0.1881953   | 0.17295724  | -0.09313056  | 0.0702200   | -0.2126186   | 0.07749901  |           |
| ENSG00000230777 | 1  | 17592175  | 17592145 | RP2955.9   | processed pseudogene    | -0.10300344  | 0.17299122  | -0.01334245  | 0.925811988 | -0.03132669  | 0.64542958  | -0.05429583  | 0.69687836  | -0.18769189  | 0.07526761  | -0.09311919  | 0.02962240  | -0.04928248  | 0.04928248  |           |
| ENSG00000188187 | 16 | 7499924   | 75110994 | ZNR1       | protein coding          | -0.25213879  | 0.02692373  | -0.04804710  | 0.74630151  | -0.33695917  | 0.08324036  | -0.0528389   | 0.78846488  | -0.2672897   | 0.00112687  | -0.09386307  | 0.07015383  | -0.33269008  | 0.01723939  |           |
| ENSG00000201559 | 15 | 3449420   | 3449560  | FCBP2L1    | processed pseudogene    | -0.06957404  | 0.46724470  | -0.18184562  | 0.21480771  | -0.19722306  | 0.58911799  | -0.24409191  | 0.11215904  | -0.0347890   | 0.64438195  | -0.05389771  | 0.02689350  | -0.23889350  | 0.04923244  |           |
| ENSG00000254069 | 16 | 14727847  | 14733347 | AC013443.1 | lncRNA                  | -0.17186687  | 0.13501781  | -0.09707859  | 0.48611968  | -0.06286448  | 0.17757871  | -0.05049029  | 0.67831724  | -0.20082148  | 0.03392062  | -0.09380181  | 0.07008166  | -0.11707018  | 0.21863390  |           |
| ENSG00000184106 | 6  | 4120713   | 41217847 | TRPM3P     | transcribed unannotated | -0.27468757  | 0.01920401  | -0.15615913  | 0.27784034  | -0.30118533  | 0.0733377   | -0.45222209  | 0.01729834  | -0.4088088   | 0.00430284  | -0.0938035   | 0.69962421  | -0.21339231  | 0.136765284 |           |
| ENSG00000198358 | 5  | 12181876  | 12224458 | PTNIP2     | protein coding          | -0.12191498  | 0.14292493  | -0.22972575  | 0.1103894   | -0.22027004  | 0.2659363   | -0.1063743   | 0.18814472  | -0.0470261   | 0.31000303  | -0.09326202  | 0.08989841  | -0.15449763  | 0.28909074  |           |
| ENSG00000234050 | X  | 10248370  | 10248561 | FRS3       | transcribed unannotated | -0.22744781  | 0.04869189  | -0.1293619   | 0.3698316   | -0.28444110  | 0.14885322  | -0.1182333   | 0.57333346  | -0.19857229  | 0.11429093  | -0.09383369  | 0.08974889  | -0.32245616  | 0.0232424   |           |
| ENSG0000027272  | 22 | 50541108  | 5054301  | UCB137.3   | lncRNA                  | -0.01529888  | 0.82687002  | -0.24888398  | 0.09109997  | -0.13048559  | 0.15917888  | -0.2828128   | 0.1597395   | -0.07640206  | 0.58229287  | -0.09383676  | 0.88979175  | -0.13881427  | 0.33705572  |           |
| ENSG0000023318  | 21 | 36145713  | 36152484 | AP000995.2 | lncRNA                  | -0.10081391  | 0.34121899  | -0.15996468  | 0.28713327  | -0.148487142 | 0.46584903  | -0.18692629  | 0.38709107  | -0.02092004  | 0.70495892  | -0.09376881  | 0.68927869  | -0.09376881  | 0.68927869  |           |
| ENSG00000177888 | 6  | 14942082  | 14941278 | SUMO4      | protein coding          | -0.05080119  | 0.166150891 | -0.1102263   | 0.44602840  | -0.026298748 | 0.75482153  | -0.04871282  | 0.14247683  | -0.0938917   | 0.08988271  | -0.12888712  | 0.06896337  | -0.18898712  | 0.62993834  |           |
| ENSG0000028976  | 6  | 657271    | 657218   | AC019398.2 | lncRNA                  | -0.20660119  | 0.01134917  | -0.20789716  | 0.14748460  | -0.130955128 | 0.514867153 | -0.2892655   | 0.14675721  | -0.21136343  | 0.12469874  | -0.0403311   | 0.69581881  | -0.17834635  | 0.01466752  |           |
| ENSG00000234719 | 2  | 23855441  | 23855441 | AC020962.1 | processed pseudogene    | -0.0000000   | 0.0000000   | 0.0000000    | 0.0000000   | 0.0000000    | 0.0000000   | 0.0000000    | 0.0000000   | 0.0000000    | 0.0000000   | 0.0000000    | 0.0000000   | 0.0000000    | 0.0000000   |           |
| ENSG00000234279 | 2  | 23855441  | 23854484 | LINC01931  | lncRNA                  | -0.28264989  | 0.07139114  | -0.20789716  | 0.14748460  | -0.130955128 | 0.514867153 | -0.2892655   | 0.14675721  | -0.21136343  | 0.12469874  | -0.0403311   | 0.69581881  | -0.17834635  | 0.01466752  |           |
| ENSG00000107699 | 10 | 8124424   | 12192842 | ATE1       | protein coding          | -0.09413754  | 0.15442488  | -0.11041909  | 0.44524220  | -0.12604498  | 0.281116884 | -0.0885692   | 0.0144726   | -0.29081793  | 0.04292304  | -0.0470268   | 0.09427028  | -0.04928248  | 0.04928248  |           |
| ENSG00000104714 | 8  | 1214748   | 788186   | AC01434.1  | lncRNA                  | -0.173888417 | 0.23177638  | -0.01265221  | 0.29305885  | -0.07072919  | 0.2986069   | -0.049018075 | 0.8081754   | -0.25957168  | 0.05032321  | -0.07574886  | 0.07049481  | -0.13218884  | 0.08015773  |           |
| ENSG00000289227 | 17 | 7381572   | 7380189  | AC012421.2 | lncRNA                  | -0.28070045  | 0.01988299  | -0.16306779  | 0.26747222  | -0.20985341  | 0.34360161  | -0.1761004   | 0.3743110   | -0.0647531   | 0.02921362  | -0.04105037  | 0.69311299  | -0.30207718  | 0.03029729  |           |
| ENSG00000251344 | 1  | 12118116  | 12118100 | HSPA       | processed pseudogene    | -0.10636842  | 0.88581148  | -0.0658789   | 0.48127488  | -0.10211376  | 0.26858749  | -0.1084128   | 0.59179620  | -0.04544556  | 0.06865157  | -0.09312071  | 0.36866592  | -0.06258421  | 0.06258421  |           |
| ENSG00000215272 | 13 | 19580313  | 19581289 | ESRRAP1    | protein coding          | -0.162087314 | 0.04746633  | -0.09414728  | 0.14208764  | -0.25140202  | 0.20073352  | -0.09411708  | 0.64562200  | -0.17673391  | 0.20109920  | -0.0938035   | 0.69926251  | -0.2041818   | 0.15483654  |           |
| ENSG00000289129 | 2  | 18987884  | 18987884 | AC019690.2 | processed pseudogene    | -0.0000000   | 0.0000000   | 0.0000000    | 0.0000000   | 0.0000000    | 0.0000000   | 0.0000000    | 0.0000000   | 0.0000000    | 0.0000000   | 0.0000000    | 0.0000000   | 0.0000000    | 0.0000000   |           |
| ENSG00000233874 | 2  | 21661237  | 21446011 | AC013895.1 | processed pseudogene    | -0.22954088  | 0.10488310  | -0.09414728  | 0.14208764  | -0.25140202  | 0.20073352  | -0.09411708  | 0.64562200  | -0.17673391  | 0.20109920  | -0.0938035   | 0.69926251  | -0.2041818   | 0.15483654  |           |
| ENSG00000202760 | 11 | 67782573  | 67782335 | AL11GLP    | processed pseudogene    | -0.24442259  | 0.03216668  | -0.02029694  | 0.88868768  | -0.273581516 | 0.18733889  | -0.10553260  | 0.60038127  | -0.24648884  | 0.05310769  | -0.04194422  | 0.6991304   | -0.31738682  | 0.04070789  |           |
| ENSG00000198370 | 2  | 15898680  | 15892365 | TANC1      | protein coding          | -0.3081109   | 0.04604733  | -0.12987487  | 0.3838360   | -0.10437878  | 0.7208789   | -0.10565271  | 0.54815742  | -0.0853396   | 0.0290398   | -0.09315601  | 0.30304156  | -0.0101370   | 0.0101370   |           |
| ENSG00000204919 | 8  | 14165554  | 14126871 | AC011676.2 | lncRNA                  | -0.08405437  | 0.07596242  | -0.1304341   | 0.36087585  | -0.01037887  | 0.89526309  | -0.09989480  | 0.83063028  | -0.0247677   | 0.88315742  | -0.04198149  | 0.68898884  | -0.08887268  | 0.44898356  |           |
| ENSG00000289558 | 3  | 14165554  | 14126871 | AC011676.2 | lncRNA                  | -0.08405437  | 0.07596242  |              |             |              |             |              |             |              |             |              |             |              |             |           |











Table with 10 columns: Gene ID, Chr, Pos, RefSeq ID, Feature, Start, End, Strand, RefSeq ID, Feature, Start, End, Strand. Contains genomic coordinates and gene annotations for various genes like AC015660, AC015661, AC015662, etc.

Table with columns for gene names, coordinates, and various identifiers. The table lists numerous genes such as ENDOG00288571, ENDOG00185339, ENDOG00248174, etc., along with their genomic coordinates and associated identifiers.

Table with columns for gene names, coordinates, and various identifiers. The table lists numerous genes such as TMEM108, SRSF5, and others, along with their genomic coordinates and associated identifiers.



Table with 10 columns: Gene ID, Gene Name, Feature, Start, End, Strand, RefSeq ID, RefSeq Name, RefSeq Description, RefSeq Accession. The table lists various genes and their genomic features across a range of chromosomes.



Table with 10 columns: Gene ID, Gene Name, Feature, Start, End, Strand, RefSeq, RefSeq ID, RefSeq ID, RefSeq ID. Contains genomic coordinates and gene annotations for various genes like AL137003, AL137004, AL137005, etc.

Table with columns for gene ID, chromosome, coordinates, gene name, transcript type, and a list of associated SNPs with their rs IDs and p-values. The table is organized in a grid-like format with multiple columns.

|                 |    |           |           |            |                |             |                   |             |            |             |                   |            |             |             |                   |             |            |            |            |            |
|-----------------|----|-----------|-----------|------------|----------------|-------------|-------------------|-------------|------------|-------------|-------------------|------------|-------------|-------------|-------------------|-------------|------------|------------|------------|------------|
| ENSG00000196418 | 1  | 247121975 | 247120176 | ZNF124     | protein coding | 0.11362537  | 0.32514314        | 0.004300633 | 0.97635344 | 0.486821698 | <b>0.01019533</b> | 0.17078391 | 0.384430949 | 0.300536472 | <b>0.02723939</b> | 0.114450404 | 0.59074957 | 0.07260236 | 0.61326208 |            |
| ENSG0000027240  | 22 | 13097121  | 55977989  | KIF31-7    | lncRNA         | 0.08002464  | 0.0531374         | 0.00000000  | 0.00000000 | 0.00000000  | 0.00000000        | 0.00000000 | 0.00000000  | 0.00000000  | 0.00000000        | 0.00000000  | 0.00000000 | 0.00000000 | 0.00000000 |            |
| ENSG0000015393  | 20 | 20171460  | 20171460  | ATAD2      | protein coding | 0.00000000  | <b>0.00011334</b> | 0.15510010  | 0.00000000 | 0.00000000  | 0.00000000        | 0.00000000 | 0.00000000  | 0.00000000  | 0.00000000        | 0.00000000  | 0.00000000 | 0.00000000 | 0.00000000 |            |
| ENSG00000132024 | 19 | 13096720  | 13096720  | CC2D1A     | protein coding | 0.05407749  | 0.06374744        | 0.15814797  | 0.20024242 | 0.02431894  | 0.00770320        | 0.00000000 | 0.00000000  | 0.00000000  | 0.00000000        | 0.00000000  | 0.00000000 | 0.00000000 | 0.00000000 | 0.00000000 |
| ENSG0000027000  | 1  | 17086138  | 17086138  | CCND1      | protein coding | 0.00000000  | 0.00000000        | 0.00000000  | 0.00000000 | 0.00000000  | 0.00000000        | 0.00000000 | 0.00000000  | 0.00000000  | 0.00000000        | 0.00000000  | 0.00000000 | 0.00000000 | 0.00000000 |            |
| ENSG0000020174  | 1  | 17086138  | 17086138  | RANBP17    | protein coding | 0.00000000  | 0.00000000        | 0.00000000  | 0.00000000 | 0.00000000  | 0.00000000        | 0.00000000 | 0.00000000  | 0.00000000  | 0.00000000        | 0.00000000  | 0.00000000 | 0.00000000 | 0.00000000 |            |
| ENSG0000024203  | X  | 103626076 | 103626042 | TCF15L-AS1 | lncRNA         | 0.067888203 | 0.55918499        | 0.00715622  | 0.02005942 | 0.01011776  | 0.61895575        | 0.00000000 | 0.00000000  | 0.00000000  | 0.00000000        | 0.00000000  | 0.00000000 | 0.00000000 | 0.00000000 | 0.00000000 |
| ENSG0000021290  | 17 | 38651943  | 38651943  | RPLP0-29B  | antisense RNA  | 0.01183625  | 0.91962534        | 0.04782212  | 0.07173710 | 0.11333000  | 0.57324633        | 0.00000000 | 0.00000000  | 0.00000000  | 0.00000000        | 0.00000000  | 0.00000000 | 0.00000000 | 0.00000000 | 0.00000000 |
| ENSG0000027911  | 12 | 14855952  | 14855952  | SLC35A3    | protein coding | 0.01073240  | 0.00000000        | 0.00000000  | 0.00000000 | 0.00000000  | 0.00000000        | 0.00000000 | 0.00000000  | 0.00000000  | 0.00000000        | 0.00000000  | 0.00000000 | 0.00000000 | 0.00000000 | 0.00000000 |
| ENSG0000020100  | X  | 48691198  | 48691198  | SLC35A3    | protein coding | 0.24292532  | <b>0.03343609</b> | 0.07862210  | 0.27217073 | 0.01133600  | 0.11433566        | 0.00000000 | 0.00000000  | 0.00000000  | 0.00000000        | 0.00000000  | 0.00000000 | 0.00000000 | 0.00000000 | 0.00000000 |
| ENSG0000017656  | 1  | 20822422  | 20824488  | PLA2G4B    | protein coding | 0.24952963  | <b>0.03260869</b> | 0.18989819  | 0.20785999 | 0.06527470  | 0.49138871        | 0.00000000 | 0.00000000  | 0.00000000  | 0.00000000        | 0.00000000  | 0.00000000 | 0.00000000 | 0.00000000 | 0.00000000 |
| ENSG0000024201  | 7  | 11717920  | 11717920  | AC09367.6  | antisense RNA  | 0.00000000  | 0.00000000        | 0.00000000  | 0.00000000 | 0.00000000  | 0.00000000        | 0.00000000 | 0.00000000  | 0.00000000  | 0.00000000        | 0.00000000  | 0.00000000 | 0.00000000 | 0.00000000 | 0.00000000 |
| ENSG0000020552  | 18 | 36179996  | 36178448  | AC029343.1 | lncRNA         | 0.11052299  | 0.33881971        | 0.08132873  | 0.04024711 | 0.04133662  | 0.11433566        | 0.00000000 | 0.00000000  | 0.00000000  | 0.00000000        | 0.00000000  | 0.00000000 | 0.00000000 | 0.00000000 | 0.00000000 |
| ENSG0000023480  | 4  | 17361936  | 17361936  | MORF4      | protein coding | 0.10687556  | 0.35201710        | 0.15123207  | 0.24473688 | 0.14292023  | 0.68313274        | 0.00000000 | 0.00000000  | 0.00000000  | 0.00000000        | 0.00000000  | 0.00000000 | 0.00000000 | 0.00000000 | 0.00000000 |
| ENSG0000028473  | 1  | 3497438   | 34983113  | AC011449.3 | lncRNA         | 0.1298729   | 0.29390295        | 0.00909268  | 0.94894234 | 0.14187498  | 0.47893457        | 0.00000000 | 0.00000000  | 0.00000000  | 0.00000000        | 0.00000000  | 0.00000000 | 0.00000000 | 0.00000000 | 0.00000000 |
| ENSG00000196559 | 2  | 17754896  | 17752786  | TC3CB      | protein coding | 0.10410656  | 0.37659358        | 0.05451295  | 0.13668886 | 0.14357011  | 0.47835748        | 0.00000000 | 0.00000000  | 0.00000000  | 0.00000000        | 0.00000000  | 0.00000000 | 0.00000000 | 0.00000000 | 0.00000000 |
| ENSG0000022488  | 1  | 17735192  | 17743788  | LINC01845  | lncRNA         | 0.14736202  | 0.20091765        | 0.0823241   | 0.05153300 | 0.39622733  | <b>0.00844484</b> | 0.00000000 | 0.00000000  | 0.00000000  | 0.00000000        | 0.00000000  | 0.00000000 | 0.00000000 | 0.00000000 | 0.00000000 |
| ENSG0000015492  | 1  | 16629291  | 17096941  | PLC4       | protein coding | 0.16531414  | 0.15007901        | 0.05243965  | 0.19416891 | 0.24778911  | 0.2415847         | 0.00000000 | 0.00000000  | 0.00000000  | 0.00000000        | 0.00000000  | 0.00000000 | 0.00000000 | 0.00000000 | 0.00000000 |
| ENSG0000025320  | 8  | 64091     | 64300     | AC014568.1 | lncRNA         | 0.02809381  | <b>0.01399444</b> | 0.00710904  | 0.05249873 | 0.00953240  | 0.06286292        | 0.00000000 | 0.00000000  | 0.00000000  | 0.00000000        | 0.00000000  | 0.00000000 | 0.00000000 | 0.00000000 | 0.00000000 |
| ENSG0000026928  | 12 | 12293730  | 12296297  | AC029362.1 | lncRNA         | 0.04091499  | 0.66362365        | 0.08627414  | 0.08292973 | 0.08629379  | 0.7132692         | 0.00000000 | 0.00000000  | 0.00000000  | 0.00000000        | 0.00000000  | 0.00000000 | 0.00000000 | 0.00000000 | 0.00000000 |
| ENSG0000020625  | 15 | 6740463   | 6740463   | RNU1-1     | antisense RNA  | 0.01861919  | 0.66523104        | 0.16749229  | 0.28791231 | 0.01733007  | 0.5941127         | 0.00000000 | 0.00000000  | 0.00000000  | 0.00000000        | 0.00000000  | 0.00000000 | 0.00000000 | 0.00000000 | 0.00000000 |
| ENSG0000024621  | 11 | 7431132   | 74324705  | PNAH-AS1   | lncRNA         | 0.13480605  | 0.2424305         | 0.12284576  | 0.39718742 | 0.07893922  | 0.06828525        | 0.00000000 | 0.00000000  | 0.00000000  | 0.00000000        | 0.00000000  | 0.00000000 | 0.00000000 | 0.00000000 | 0.00000000 |
| ENSG0000024376  | 7  | 2978575   | 2729729   | HTT-1P     | lncRNA         | 0.04414143  | <b>0.0021943</b>  | 0.22925415  | 0.11577166 | 0.29891001  | 0.29910122        | 0.00000000 | 0.00000000  | 0.00000000  | 0.00000000        | 0.00000000  | 0.00000000 | 0.00000000 | 0.00000000 | 0.00000000 |
| ENSG0000024681  | 1  | 2955629   | 2963397   | CABP07     | protein coding | 0.10539338  | 0.15437103        | 0.04734867  | 0.14208477 | 0.00929293  | 0.16310955        | 0.00000000 | 0.00000000  | 0.00000000  | 0.00000000        | 0.00000000  | 0.00000000 | 0.00000000 | 0.00000000 | 0.00000000 |
| ENSG0000025280  | 11 | 1124318   | 1124318   | KOBT7392.1 | lncRNA         | 0.203262016 | 0.06800470        | 0.02850447  | 0.16577615 | 0.18764687  | 0.34848748        | 0.00000000 | 0.00000000  | 0.00000000  | 0.00000000        | 0.00000000  | 0.00000000 | 0.00000000 | 0.00000000 | 0.00000000 |
| ENSG0000018419  | 5  | 9025394   | 9116447   | ADGUV1     | protein coding | 0.34898015  | <b>0.0011181</b>  | 0.22459921  | 0.11699870 | 0.19055057  | 0.42139573        | 0.00000000 | 0.00000000  | 0.00000000  | 0.00000000        | 0.00000000  | 0.00000000 | 0.00000000 | 0.00000000 | 0.00000000 |
| ENSG0000019970  | 4  | 15203944  | 15203944  | FRWV       | protein coding | 0.24989301  | <b>0.00299381</b> | 0.10758747  | 0.02617643 | 0.01503098  | 0.06097938        | 0.00000000 | 0.00000000  | 0.00000000  | 0.00000000        | 0.00000000  | 0.00000000 | 0.00000000 | 0.00000000 | 0.00000000 |
| ENSG0000026751  | 19 | 314176    | 315173    | AC050264.1 | lncRNA         | 0.01447787  | 0.05901618        | 0.11642504  | 0.01642504 | 0.18049759  | 0.88109573        | 0.00000000 | 0.00000000  | 0.00000000  | 0.00000000        | 0.00000000  | 0.00000000 | 0.00000000 | 0.00000000 | 0.00000000 |
| ENSG0000017127  | 4  | 1047339   | 1011849   | WDR1       | protein coding | 0.07195927  | 0.15588911        | 0.00521312  | 0.03704462 | 0.43370230  | <b>0.0381458</b>  | 0.00000000 | 0.00000000  | 0.00000000  | 0.00000000        | 0.00000000  | 0.00000000 | 0.00000000 | 0.00000000 | 0.00000000 |
| ENSG0000016341  | 1  | 10000000  | 10000000  | AC017892.1 | lncRNA         | 0.00000000  | 0.00000000        | 0.00000000  | 0.00000000 | 0.00000000  | 0.00000000        | 0.00000000 | 0.00000000  | 0.00000000  | 0.00000000        | 0.00000000  | 0.00000000 | 0.00000000 | 0.00000000 | 0.00000000 |
| ENSG00000203024 | 10 | 10024871  | 10024871  | PHF9       | protein coding | 0.10482639  | 0.10866055        | 0.13698291  | 0.03704462 | 0.01410801  | 0.84412498        | 0.00000000 | 0.00000000  | 0.00000000  | 0.00000000        | 0.00000000  | 0.00000000 | 0.00000000 | 0.00000000 | 0.00000000 |
| ENSG0000020446  | 6  | 3225719   | 3225922   | TPST3-G3   | protein coding | 0.16236329  | 0.05891286        | 0.16735345  | 0.11940219 | 0.29792223  | 0.14588043        | 0.00000000 | 0.00000000  | 0.00000000  | 0.00000000        | 0.00000000  | 0.00000000 | 0.00000000 | 0.00000000 | 0.00000000 |
| ENSG0000026515  | 4  | 2024424   | 2024424   | AC019114   | lncRNA         | 0.00000000  | 0.00000000        | 0.00000000  | 0.00000000 | 0.00000000  | 0.00000000        | 0.00000000 | 0.00000000  | 0.00000000  | 0.00000000        | 0.00000000  | 0.00000000 | 0.00000000 | 0.00000000 | 0.00000000 |
| ENSG00000205480 | 6  | 2282620   | 2284213   | LINC01239  | lncRNA         | 0.13381192  | 0.2456556         | 0.09205583  | 0.03110756 | 0.54774142  | 0.11181123        | 0.00000000 | 0.00000000  | 0.00000000  | 0.00000000        | 0.00000000  | 0.00000000 | 0.00000000 | 0.00000000 | 0.00000000 |
| ENSG00000199306 | 12 | 5299495   | 5400337   | HXC9       | protein coding | 0.11129773  | <b>0.00582633</b> | 0.08127021  | 0.07574042 | 0.38989844  | 0.05952722        | 0.00000000 | 0.00000000  | 0.00000000  | 0.00000000        | 0.00000000  | 0.00000000 | 0.00000000 | 0.00000000 | 0.00000000 |
| ENSG0000017170  | 1  | 9077460   | 9077460   | AC019114   | lncRNA         | 0.00000000  | 0.00000000        | 0.00000000  | 0.00000000 | 0.00000000  | 0.00000000        | 0.00000000 | 0.00000000  | 0.00000000  | 0.00000000        | 0.00000000  | 0.00000000 | 0.00000000 | 0.00000000 | 0.00000000 |
| ENSG00000154639 | 21 | 1751303   | 1759370   | HXC9       | protein coding | 0.26848326  | <b>0.01762674</b> | 0.04210638  | 0.02491060 | 0.07018091  | 0.03593723        | 0.00000000 | 0.00000000  | 0.00000000  | 0.00000000        | 0.00000000  | 0.00000000 | 0.00000000 | 0.00000000 | 0.00000000 |
| ENSG0000027277  | 4  | 8274307   | 8293407   | AC012401.6 | lncRNA         | 0.18775309  | 0.2021169         | 0.18178905  | 0.2054727  | 0.04813029  | 0.18113891        | 0.00000000 | 0.00000000  | 0.00000000  | 0.00000000        | 0.00000000  | 0.00000000 | 0.00000000 | 0.00000000 | 0.00000000 |
| ENSG0000012721  | 1  | 1544800   | 1544800   | AC012401.6 | lncRNA         | 0.18775309  |                   |             |            |             |                   |            |             |             |                   |             |            |            |            |            |



Table with 10 columns: Gene ID, Gene Name, Feature, Coordinates, and various numerical values. The table lists numerous genes such as HPA75, HPA76, HPA77, etc., with their corresponding genomic coordinates and associated data points.





| ENSG00000260378 | 16 | 12745373  | 12793763  | AC109597.1 | lncRNA                  | -0.02648382                                                                                                                                                                                                                                                                            | 0.42347352                                                                                                                                                                                                                                                       | -0.10697005                                                                                                                                                                                                                               | 0.45171754 | 0.20261907  | 0.30448018 | -0.05986706 | 0.76675319 | -0.00081059 | 0.66224982  | -0.12899714 | 0.56705249 | 0.12525123 | 0.38128211 |
|-----------------|----|-----------|-----------|------------|-------------------------|----------------------------------------------------------------------------------------------------------------------------------------------------------------------------------------------------------------------------------------------------------------------------------------|------------------------------------------------------------------------------------------------------------------------------------------------------------------------------------------------------------------------------------------------------------------|-------------------------------------------------------------------------------------------------------------------------------------------------------------------------------------------------------------------------------------------|------------|-------------|------------|-------------|------------|-------------|-------------|-------------|------------|------------|------------|
| ENSG00000260379 | 16 | 7367174   | 7684444   | UC003813.3 | lncRNA                  | -0.20263324                                                                                                                                                                                                                                                                            | 0.00007761                                                                                                                                                                                                                                                       | -0.22980501                                                                                                                                                                                                                               | 0.43902451 | 0.11331101  | 0.584181   | -0.3442061  | 0.0745895  | -0.34059994 | 0.6187299   | -0.1317117  | 0.56705249 | 0.12525123 | 0.38128211 |
| ENSG00000260380 | 16 | 7367174   | 7684444   | UC003813.3 | lncRNA                  | -0.20263324                                                                                                                                                                                                                                                                            | 0.00007761                                                                                                                                                                                                                                                       | -0.22980501                                                                                                                                                                                                                               | 0.43902451 | 0.11331101  | 0.584181   | -0.3442061  | 0.0745895  | -0.34059994 | 0.6187299   | -0.1317117  | 0.56705249 | 0.12525123 | 0.38128211 |
| ENSG00000260381 | 16 | 23576574  | 23796711  | PRH1       | protein coding          | -0.23478631                                                                                                                                                                                                                                                                            | 0.05337584                                                                                                                                                                                                                                                       | -0.16688882                                                                                                                                                                                                                               | 0.24930241 | 0.22341009  | 0.24828501 | -0.17662856 | 0.37185072 | -0.2542891  | 0.60230167  | -0.12934497 | 0.56693704 | 0.02670411 | 0.05212626 |
| ENSG00000260382 | 16 | 6622895   | 6628231   | AC10508.2  | lncRNA                  | -0.11543962                                                                                                                                                                                                                                                                            | 0.31742070                                                                                                                                                                                                                                                       | -0.1883744                                                                                                                                                                                                                                | 0.11813704 | 0.08337609  | 0.6726285  | -0.02108661 | 0.18487916 | -0.11507166 | 0.64734607  | -0.12937017 | 0.56693704 | 0.02670411 | 0.05212626 |
| ENSG00000260383 | 16 | 3116987   | 3116987   | DVC        | transcribed unprocessed | -0.19249138 <th>0.02949574</th> <th>-0.22482485</th> <th>0.43902451</th> <th>0.11331101</th> <th>0.584181</th> <th>-0.3442061</th> <th>0.0745895</th> <th>-0.34059994</th> <th>0.6187299</th> <th>-0.1317117</th> <th>0.56705249</th> <th>0.12525123</th> <th>0.38128211</th>          | 0.02949574                                                                                                                                                                                                                                                       | -0.22482485                                                                                                                                                                                                                               | 0.43902451 | 0.11331101  | 0.584181   | -0.3442061  | 0.0745895  | -0.34059994 | 0.6187299   | -0.1317117  | 0.56705249 | 0.12525123 | 0.38128211 |
| ENSG00000260384 | 16 | 11105317  | 11105317  | AC004029.1 | lncRNA                  | -0.13246245 <th>0.00409293</th> <th>-0.22482485</th> <th>0.43902451</th> <th>0.11331101</th> <th>0.584181</th> <th>-0.3442061</th> <th>0.0745895</th> <th>-0.34059994</th> <th>0.6187299</th> <th>-0.1317117</th> <th>0.56705249</th> <th>0.12525123</th> <th>0.38128211</th>          | 0.00409293                                                                                                                                                                                                                                                       | -0.22482485                                                                                                                                                                                                                               | 0.43902451 | 0.11331101  | 0.584181   | -0.3442061  | 0.0745895  | -0.34059994 | 0.6187299   | -0.1317117  | 0.56705249 | 0.12525123 | 0.38128211 |
| ENSG00000260385 | 16 | 2211446   | 2211446   | MEH17P45   | transcribed unprocessed | -0.05041629                                                                                                                                                                                                                                                                            | 0.62831449                                                                                                                                                                                                                                                       | -0.08174922 <th>0.24749934</th> <th>0.03615213</th> <th>0.6402636</th> <th>-0.06559264</th> <th>0.74148727</th> <th>-0.04927002</th> <th>0.72718145</th> <th>-0.12937107</th> <th>0.56663456</th> <th>0.04012606</th> <th>0.03674522</th> | 0.24749934 | 0.03615213  | 0.6402636  | -0.06559264 | 0.74148727 | -0.04927002 | 0.72718145  | -0.12937107 | 0.56663456 | 0.04012606 | 0.03674522 |
| ENSG00000260386 | 16 | 3116987   | 3116987   | DVC        | transcribed unprocessed | -0.19249138                                                                                                                                                                                                                                                                            | 0.02949574                                                                                                                                                                                                                                                       | -0.22482485                                                                                                                                                                                                                               | 0.43902451 | 0.11331101  | 0.584181   | -0.3442061  | 0.0745895  | -0.34059994 | 0.6187299   | -0.1317117  | 0.56705249 | 0.12525123 | 0.38128211 |
| ENSG00000260387 | 16 | 3218181   | 3218181   | MGRFP      | protein coding          | -0.28588871 <th>0.05949974 <th>-0.17444492</th> <th>0.70232293</th> <th>0.41144492</th> <th>0.00235897</th> <th>-0.09289879</th> <th>0.00263580</th> <th>-0.09885501</th> <th>0.51082811</th> <th>-0.12601403</th> <th>0.56672491</th> <th>0.36941482</th> <th>0.03847891</th> </th>   | 0.05949974 <th>-0.17444492</th> <th>0.70232293</th> <th>0.41144492</th> <th>0.00235897</th> <th>-0.09289879</th> <th>0.00263580</th> <th>-0.09885501</th> <th>0.51082811</th> <th>-0.12601403</th> <th>0.56672491</th> <th>0.36941482</th> <th>0.03847891</th>   | -0.17444492                                                                                                                                                                                                                               | 0.70232293 | 0.41144492  | 0.00235897 | -0.09289879 | 0.00263580 | -0.09885501 | 0.51082811  | -0.12601403 | 0.56672491 | 0.36941482 | 0.03847891 |
| ENSG00000260388 | 16 | 8236414   | 8236414   | LINC02449  | lncRNA                  | -0.18800334                                                                                                                                                                                                                                                                            | 0.10081910                                                                                                                                                                                                                                                       | -0.17240873                                                                                                                                                                                                                               | 0.22110150 | 0.02429969  | 0.98843908 | -0.02733493 | 0.16737305 | -0.10389839 | 0.72581469  | -0.12601403 | 0.56662424 | 0.34851811 | 0.01956817 |
| ENSG00000260389 | 16 | 2158743   | 2158743   | AC023912.2 | lncRNA                  | -0.2281329                                                                                                                                                                                                                                                                             | 0.03307678                                                                                                                                                                                                                                                       | -0.24201063                                                                                                                                                                                                                               | 0.40007311 | 0.19439923  | 0.34469923 | -0.32117496 | 0.10123981 | -0.27199439 | 0.69852268  | -0.12601403 | 0.56662424 | 0.34851811 | 0.01956817 |
| ENSG00000260390 | 16 | 15348478  | 15348478  | MIR6971    | lncRNA                  | -0.16286183                                                                                                                                                                                                                                                                            | 0.15700995                                                                                                                                                                                                                                                       | -0.16731203                                                                                                                                                                                                                               | 0.24716183 | 0.04734668  | 0.61487817 | -0.18323048 | 0.18476723 | -0.12601403 | 0.56662424  | -0.12601403 | 0.56662424 | 0.34851811 | 0.01956817 |
| ENSG00000260391 | 16 | 9458922   | 9458922   | AL045311.3 | lncRNA                  | -0.12722768                                                                                                                                                                                                                                                                            | 0.07155797                                                                                                                                                                                                                                                       | -0.07526797                                                                                                                                                                                                                               | 0.3021187  | 0.20365901  | 0.3041266  | -0.04543546 | 0.78757402 | -0.19071637 | 0.14987288  | -0.12613376 | 0.56632922 | 0.27249657 | 0.05172908 |
| ENSG00000260392 | 16 | 7077110   | 7070643   | FLCA       | protein coding          | -0.07421129                                                                                                                                                                                                                                                                            | 0.53308787                                                                                                                                                                                                                                                       | -0.2554221                                                                                                                                                                                                                                | 0.38009468 | 0.05974414  | 0.80143169 | -0.14889181 | 0.45249776 | -0.04976903 | 0.72044372  | -0.12613376 | 0.56632922 | 0.27249657 | 0.05172908 |
| ENSG00000260393 | 16 | 95262097  | 95262097  | Y RNA      | rnc RNA                 | -0.00212902                                                                                                                                                                                                                                                                            | 0.9881305                                                                                                                                                                                                                                                        | -0.11344446                                                                                                                                                                                                                               | 0.44347685 | 0.29071202  | 0.14233998 | -0.04681426 | 0.30577924 | -0.01238459 | 0.52389828  | -0.12613376 | 0.56632922 | 0.27249657 | 0.05172908 |
| ENSG00000260394 | 16 | 7931713   | 7937233   | RP38       | protein coding          | -0.03047408                                                                                                                                                                                                                                                                            | 0.94264531                                                                                                                                                                                                                                                       | -0.04286137                                                                                                                                                                                                                               | 0.88319283 | 0.24147153  | 0.02749813 | -0.05573757 | 0.76305724 | -0.02682675 | 0.83719436  | -0.12613376 | 0.56632922 | 0.27249657 | 0.05172908 |
| ENSG00000260395 | 16 | 7836391   | 7832012   | AC103795.1 | lncRNA                  | -0.20648314                                                                                                                                                                                                                                                                            | 0.07159923                                                                                                                                                                                                                                                       | -0.17674365                                                                                                                                                                                                                               | 0.24962161 | 0.29032096  | 0.04949107 | -0.11939616 | 0.71159714 | -0.24511596 | 0.07378976  | -0.12613376 | 0.56632922 | 0.27249657 | 0.05172908 |
| ENSG00000260396 | 16 | 4101314   | 41009346  | PCDH8      | protein coding          | -0.27112202                                                                                                                                                                                                                                                                            | 0.01689442                                                                                                                                                                                                                                                       | -0.11382222                                                                                                                                                                                                                               | 0.43097336 | 0.15889961  | 0.55889961 | -0.06822499 | 0.84469211 | -0.21482339 | 0.68522499  | -0.12613376 | 0.56632922 | 0.27249657 | 0.05172908 |
| ENSG00000260397 | 16 | 12089090  | 12089090  | ML121P2    | transcribed unprocessed | -0.14742713 <th>0.20121164</th> <th>-0.20682322</th> <th>0.14958487</th> <th>0.18472964</th> <th>0.35789226</th> <th>-0.20717290</th> <th>0.09618376</th> <th>-0.14961204</th> <th>0.28237359</th> <th>-0.12613376</th> <th>0.56617917</th> <th>0.06477307</th> <th>0.05811878</th>    | 0.20121164                                                                                                                                                                                                                                                       | -0.20682322                                                                                                                                                                                                                               | 0.14958487 | 0.18472964  | 0.35789226 | -0.20717290 | 0.09618376 | -0.14961204 | 0.28237359  | -0.12613376 | 0.56617917 | 0.06477307 | 0.05811878 |
| ENSG00000260398 | 16 | 2430367   | 24310744  | LINC01347  | transcribed unprocessed | -0.19389094                                                                                                                                                                                                                                                                            | 0.00921024                                                                                                                                                                                                                                                       | -0.15191197                                                                                                                                                                                                                               | 0.20220161 | 0.12784712  | 0.5281774  | -0.02033761 | 0.30494466 | -0.22283817 | 0.16258166  | -0.12613376 | 0.56617917 | 0.06477307 | 0.05811878 |
| ENSG00000260399 | 16 | 4871901   | 4891975   | AKR1C7     | transcribed unprocessed | -0.2382541                                                                                                                                                                                                                                                                             | 0.06921287                                                                                                                                                                                                                                                       | -0.17635216                                                                                                                                                                                                                               | 0.20253875 | 0.09785483  | 0.62839908 | -0.18933402 | 0.34222167 | -0.21149456 | 0.12713889  | -0.12613376 | 0.56617917 | 0.06477307 | 0.05811878 |
| ENSG00000260400 | 16 | 1673540   | 16748981  | SLN3992.2  | lncRNA                  | -0.03038477                                                                                                                                                                                                                                                                            | 0.75991033                                                                                                                                                                                                                                                       | -0.10472912                                                                                                                                                                                                                               | 0.48910875 | 0.02025391  | 0.90007031 | -0.28955170 | 0.14730901 | -0.07188155 | 0.60489821  | -0.12622404 | 0.56607953 | 0.24133961 | 0.77509899 |
| ENSG00000260401 | 16 | 707638    | 7917985   | USP113     | protein coding          | -0.11627925                                                                                                                                                                                                                                                                            | 0.05898108                                                                                                                                                                                                                                                       | -0.17748113                                                                                                                                                                                                                               | 0.12173783 | 0.15985385  | 0.43542243 | -0.19585741 | 0.35611004 | -0.14933249 | 0.15099033  | -0.12622404 | 0.56607953 | 0.24133961 | 0.77509899 |
| ENSG00000260402 | 16 | 1843732   | 18467881  | SLN3992.2  | lncRNA                  | -0.03038477                                                                                                                                                                                                                                                                            | 0.75991033                                                                                                                                                                                                                                                       | -0.10472912                                                                                                                                                                                                                               | 0.48910875 | 0.02025391  | 0.90007031 | -0.28955170 | 0.14730901 | -0.07188155 | 0.60489821  | -0.12622404 | 0.56607953 | 0.24133961 | 0.77509899 |
| ENSG00000260403 | 16 | 19210008  | 19122649  | LINC01010  | lncRNA                  | -0.18210008 <th>0.11226949 <th>-0.13708013</th> <th>0.34289691</th> <th>-0.18279395</th> <th>0.35349691</th> <th>-0.19519517</th> <th>0.15429011</th> <th>-0.32538901</th> <th>0.018088719</th> <th>-0.12622404</th> <th>0.56607953</th> <th>0.24133961</th> <th>0.77509899</th> </th> | 0.11226949 <th>-0.13708013</th> <th>0.34289691</th> <th>-0.18279395</th> <th>0.35349691</th> <th>-0.19519517</th> <th>0.15429011</th> <th>-0.32538901</th> <th>0.018088719</th> <th>-0.12622404</th> <th>0.56607953</th> <th>0.24133961</th> <th>0.77509899</th> | -0.13708013                                                                                                                                                                                                                               | 0.34289691 | -0.18279395 | 0.35349691 | -0.19519517 | 0.15429011 | -0.32538901 | 0.018088719 | -0.12622404 | 0.56607953 | 0.24133961 | 0.77509899 |
| ENSG00000260404 | 16 | 1023884   | 11029987  | LINC02586  | lncRNA                  | -0.2298302                                                                                                                                                                                                                                                                             | 0.0445327                                                                                                                                                                                                                                                        | -0.12796187                                                                                                                                                                                                                               | 0.37939867 | -0.18114074 | 0.42208383 | -0.17860327 | 0.32775018 | -0.28903362 | 0.04451746  | -0.12622404 | 0.56607953 | 0.24133961 | 0.77509899 |
| ENSG00000260405 | 16 | 11047907  | 11047946  | AC020464.1 | lncRNA                  | -0.1222598                                                                                                                                                                                                                                                                             | 0.2894223                                                                                                                                                                                                                                                        | -0.09444483                                                                                                                                                                                                                               | 0.59397345 | 0.12716551  | 0.52734887 | -0.15345154 | 0.44474752 | -0.04813362 | 0.59081759  | -0.12612739 | 0.56573939 | 0.25817714 | 0.28619502 |
| ENSG00000260406 | 16 | 11047907  | 11047946  | AC020464.1 | lncRNA                  | -0.1222598                                                                                                                                                                                                                                                                             | 0.2894223                                                                                                                                                                                                                                                        | -0.09444483                                                                                                                                                                                                                               | 0.59397345 | 0.12716551  | 0.52734887 | -0.15345154 | 0.44474752 | -0.04813362 | 0.59081759  | -0.12612739 | 0.56573939 | 0.25817714 | 0.28619502 |
| ENSG00000260407 | 16 | 45388680  | 45612165  | SRBD1      | protein coding          | -0.04483125                                                                                                                                                                                                                                                                            | 0.68999501                                                                                                                                                                                                                                                       | -0.14730911                                                                                                                                                                                                                               | 0.30111148 | 0.07023404  | 0.72734002 | -0.10117446 | 0.61873505 | -0.14317889 | 0.50161093  | -0.12612739 | 0.56573939 | 0.25817714 | 0.28619502 |
| ENSG00000260408 | 16 | 10239232  | 10239419  | FGF4       | protein coding          | -0.17934781 <th>0.11890589</th> <th>-0.09371461</th> <th>0.49742679</th> <th>0.20961324</th> <th>0.83373354</th> <th>-0.04112689</th> <th>0.83325529</th> <th>-0.11667882</th> <th>0.40703504</th> <th>-0.12612739</th> <th>0.56573939</th> <th>0.25817714</th> <th>0.28619502</th>    | 0.11890589                                                                                                                                                                                                                                                       | -0.09371461                                                                                                                                                                                                                               | 0.49742679 | 0.20961324  | 0.83373354 | -0.04112689 | 0.83325529 | -0.11667882 | 0.40703504  | -0.12612739 | 0.56573939 | 0.25817714 | 0.28619502 |
| ENSG00000260409 | 16 | 10239232  | 10239419  | FGF4       | protein coding          | -0.17934781 <th>0.11890589</th> <th>-0.09371461</th> <th>0.49742679</th> <th>0.20961324</th> <th>0.83373354</th> <th>-0.04112689</th> <th>0.83325529</th> <th>-0.11667882</th> <th>0.40703504</th> <th>-0.12612739</th> <th>0.56573939</th> <th>0.25817714</th> <th>0.28619502</th>    | 0.11890589                                                                                                                                                                                                                                                       | -0.09371461                                                                                                                                                                                                                               | 0.49742679 | 0.20961324  | 0.83373354 | -0.04112689 | 0.83325529 | -0.11667882 | 0.40703504  | -0.12612739 | 0.56573939 | 0.25817714 | 0.28619502 |
| ENSG00000260410 | 16 | 111766887 | 111817532 | ALH2       | protein coding          | -0.04548119                                                                                                                                                                                                                                                                            | 0.66442519                                                                                                                                                                                                                                                       | -0.04420288                                                                                                                                                                                                                               | 0.78051467 | 0.10663134  | 0.53373354 | -0.08844171 | 0.73406007 | -0.14844158 | 0.20793440  | -0.12612739 | 0.56573939 | 0.25817714 | 0.28619502 |
| ENSG00000260411 | 16 | 28153398  | 28167387  | AC023964.1 | lncRNA                  | -0.10877891 <th>0.34426921</th> <th>-0.10171121 <th>0.48016222</th> <th>0.07542561</th> <th>0.7752322</th> <th>-0.21101188</th> <th>0.26242424</th> <th>-0.18555306</th> <th>0.37161436</th> <th>-0.12612739</th> <th>0.56573939</th> <th>0.25817714</th> <th>0.28619502</th> </th>    | 0.34426921                                                                                                                                                                                                                                                       | -0.10171121 <th>0.48016222</th> <th>0.07542561</th> <th>0.7752322</th> <th>-0.21101188</th> <th>0.26242424</th> <th>-0.18555306</th> <th>0.37161436</th> <th>-0.12612739</th> <th>0.56573939</th> <th>0.25817714</th> <th>0.28619502</th> | 0.48016222 | 0.07542561  | 0.7752322  | -0.21101188 | 0.26242424 | -0.18555306 | 0.37161436  | -0.12612739 | 0.56573939 | 0.25817714 | 0.28619502 |
| ENSG00000260412 | 16 | 2430367   | 24310744  | LINC01347  | transcribed unprocessed | -0.19389094                                                                                                                                                                                                                                                                            | 0.00921024                                                                                                                                                                                                                                                       | -0.15191197                                                                                                                                                                                                                               | 0.20220161 | 0.12784712  | 0.5281774  | -0.02033761 | 0.30494466 | -0.22283817 | 0.16258166  | -0.12612739 | 0.56573939 | 0.25817714 | 0.28619502 |
| ENSG00000260413 | 16 | 1843732   | 18467881  | SLN3992.2  | lncRNA                  | -0.03038477                                                                                                                                                                                                                                                                            | 0.75991033                                                                                                                                                                                                                                                       | -0.10472912                                                                                                                                                                                                                               | 0.48910875 | 0.02025391  | 0.90007031 | -0.28955170 | 0.14730901 | -0.07188155 | 0.60489821  | -0.12622404 | 0.56607953 | 0.24133961 | 0.77509899 |
| ENSG00000260414 | 16 | 1673540   | 16748981  | SLN3992.2  | lncRNA                  | -0.03038477                                                                                                                                                                                                                                                                            | 0.75991033                                                                                                                                                                                                                                                       | -0.10472912                                                                                                                                                                                                                               | 0.48910875 | 0.02025391  | 0.90007031 | -0.28955170 | 0.14730901 | -0.07188155 | 0.60489821  | -0.12622404 | 0.56607953 | 0.24133961 | 0.77509899 |
| ENSG00000260415 | 16 | 9335881   | 9407925   | AC101451.3 | lncRNA                  | -0.44996279 <th>0.01198981</th> <th>-0.20923983</th> <th>0.15071392</th> <th>0.04188837</th> <th>0.02973702</th> <th>-0.25474738</th> <th>0.19971874</th> <th>-0.38206762</th> <th>0.02049954</th> <th>-0.12622404</th> <th>0.56607953</th> <th>0.24133961</th> <th>0.77509899</th>    | 0.01198981                                                                                                                                                                                                                                                       | -0.20923983                                                                                                                                                                                                                               | 0.15071392 | 0.04188837  | 0.02973702 | -0.25474738 | 0.19971874 | -0.38206762 | 0.02049954  | -0.12622404 | 0.56607953 | 0.24133961 | 0.77509899 |
| ENSG00000260416 | 16 | 10239232  | 10239419  | FGF4       | protein coding          | -0.17934781 <th>0.11890589</th> <th>-0.09371461</th> <th>0.49742679</th> <th>0.20961324</th> <th>0.83373354</th> <th>-0.04112689</th> <th>0.83325529</th> <th>-0.11667882</th> <th>0.40703504</th> <th>-0.12612739</th> <th>0.56573939</th> <th>0.25817714</th> <th>0.28619502</th>    | 0.11890589                                                                                                                                                                                                                                                       | -0.09371461                                                                                                                                                                                                                               | 0.49742679 | 0.20961324  | 0.83373354 | -0.04112689 | 0.83325529 | -0.11667882 | 0.40703504  | -0.12612739 | 0.56573939 | 0.25817714 | 0.28619502 |
| ENSG00000260417 | 16 | 10239232  | 10239419  | FGF4       | protein coding          | -0.17934781 <th>0.11890589</th> <th>-0.09371461</th> <th>0.49742679</th> <th>0.20961324</th> <th>0.83373354</th> <th>-0.04112689</th> <th>0.83325529</th> <th>-0.11667882</th> <th>0.40703504</th> <th>-0.12612739</th> <th>0.56573939</th> <th>0.25817714</th> <th>0.28619502</th>    | 0.11890589                                                                                                                                                                                                                                                       | -0.09371461                                                                                                                                                                                                                               | 0.49742679 | 0.20961324  | 0.83373354 | -0.04112689 | 0.83325529 | -0.11667882 | 0.40703504  | -0.12612739 | 0.56573939 | 0.25817714 | 0.28619502 |
| ENSG0000        |    |           |           |            |                         |                                                                                                                                                                                                                                                                                        |                                                                                                                                                                                                                                                                  |                                                                                                                                                                                                                                           |            |             |            |             |            |             |             |             |            |            |            |

Table with 10 columns: Gene ID, Chr, Start, End, RefSeq ID, Gene Name, Feature Type, Strand, Start, End, RefSeq ID, Gene Name, Feature Type, Strand, Start, End, RefSeq ID, Gene Name, Feature Type, Strand. Contains genomic coordinates and gene annotations for various genes like RNU6-1, RNU6-2, RNU6-3, etc.



Table with 10 columns: Gene ID, Chr, Start, End, Strand, Feature, RefSeq ID, RefSeq Name, RefSeq Description, RefSeq Link. Contains genomic coordinates and gene annotations for various genes including TBC1D30A, GRLH-1, TSC2D3, etc.





Table with columns for gene ID, chromosome, coordinates, gene name, transcript ID, and various numerical values. The table lists numerous genes such as ILNRD1, PIP5K3A, and many others, each with associated genomic data.

Table with 15 columns: Gene ID, Chr, Start, End, RefSeq ID, Gene Name, Feature, Start, End, Start, End, Start, End, Start, End, Start, End. Contains genomic coordinates and gene annotations for various genes like APOE, APOB, APOC, etc.















Table with 10 columns: Gene ID, Chr, Start, End, RefSeq ID, Gene Name, Feature Type, Strand, Start, End, RefSeq ID, Gene Name, Feature Type, Strand, Start, End, RefSeq ID, Gene Name, Feature Type, Strand. Contains genomic coordinates and gene annotations for various genes like ALX4, ALX4L1, ALX4L2, etc.



Table with columns for gene names, accession numbers, coordinates, and various data points. The table lists numerous genes such as ENDOG00023185, ENDOG00023186, ENDOG00023187, etc., with their corresponding genomic coordinates and associated values.

Table with 10 columns: Gene ID, Chr, Start, End, Feature, RefSeq ID, RefSeq Name, RefSeq Type, RefSeq Description, RefSeq Accession. Contains a comprehensive list of genes and their associated RefSeq identifiers.

Table with 10 columns: Gene ID, Ensembl ID, Gene Name, Feature Type, Start, End, Strand, RefSeq ID, RefSeq Name, RefSeq Description, RefSeq Accession. The table lists numerous genes and their associated features, including protein-coding genes, lincRNAs, and miRNAs, with their genomic coordinates and RefSeq identifiers.



Table with 10 columns: Gene ID, RefSeq ID, Gene Name, Type, and various numerical values. The table lists numerous genes such as PDI3A, ACP2, RND2B, etc., with their corresponding identifiers and associated data points.



|                |    |          |          |              |                         |             |             |             |            |              |            |              |            |             |            |             |            |             |             |
|----------------|----|----------|----------|--------------|-------------------------|-------------|-------------|-------------|------------|--------------|------------|--------------|------------|-------------|------------|-------------|------------|-------------|-------------|
| ENSG0000025280 | 12 | 65281657 | 65282709 | AC026124.1   | lincRNA                 | -0.17375151 | 0.131574474 | 0.10018621  | 0.48891100 | -0.472028184 | 0.21415943 | -0.010574200 | 0.95825254 | -0.15311391 | 0.26774838 | -0.16473284 | 0.62527743 | 0.231339743 | 0.105984653 |
| ENSG0000025275 | 12 | 12639797 | 12640414 | AC027356.1   | lincRNA                 | -0.16958653 | 0.06726306  | -0.15715957 | 0.27925850 | -0.26565851  | 0.18184651 | -0.142772753 | 0.47745253 | -0.25813089 | 0.02626203 | -0.16474574 | 0.45241313 | 0.18466279  | 0.17447629  |
| ENSG0000040071 | 1  | 14592388 | 14592388 | RP23-258.1   | transcribed unprocessed | -0.14587319 | 0.20662424  | -0.05017272 | 0.72950500 | -0.06881129  | 0.63717762 | 0.00348088   | 0.41509428 | 0.00348088  | 0.58170001 | -0.16476963 | 0.46249764 | 0.22671327  | 0.03810455  |
| ENSG0000016511 | 1  | 44997898 | 45000888 | ZNF22-AS1    | lincRNA                 | -0.14587319 | 0.20662424  | -0.05017272 | 0.72950500 | -0.06881129  | 0.63717762 | 0.00348088   | 0.41509428 | 0.00348088  | 0.58170001 | -0.16476963 | 0.46249764 | 0.22671327  | 0.03810455  |
| ENSG0000022604 | 1  | 23446289 | 23446311 | HLA608L.1    | transcribed unprocessed | -0.30177889 | 0.06704749  | -0.15227220 | 0.423305   | -0.30485162  | 0.58124071 | -0.16122360  | 0.82418974 | -0.28431417 | 0.00073198 | -0.16471151 | 0.42464901 | 0.37749881  | 0.00680821  |
| ENSG0000010392 | 13 | 3096132  | 3096132  | LOC100287322 | transcribed unprocessed | -0.18445453 | 0.06704749  | -0.15227220 | 0.423305   | -0.30485162  | 0.58124071 | -0.16122360  | 0.82418974 | -0.28431417 | 0.00073198 | -0.16471151 | 0.42464901 | 0.37749881  | 0.00680821  |
| ENSG0000010139 | 20 | 5128679  | 51287787 | CD32         | protein coding          | -0.18950284 | 0.08804472  | -0.220202   | 0.12338838 | -0.10793547  | 0.46407653 | -0.30634062  | 0.42118974 | -0.22962468 | 0.09488587 | -0.16480438 | 0.45877267 | 0.13421388  | 0.02367411  |
| ENSG0000011751 | 1  | 945498   | 945498   | MTM1         | protein coding          | -0.27237826 | 0.06685826  | -0.19190355 | 0.68813947 | -0.26929733  | 0.17420712 | -0.16297816  | 0.36123468 | -0.25858747 | 0.05959739 | -0.16484832 | 0.45877267 | 0.33871881  | 0.01612241  |
| ENSG0000024991 | 1  | 13037116 | 13037116 | LOC100712    | transcribed unprocessed | -0.19374551 | 0.06704749  | -0.15227220 | 0.423305   | -0.30485162  | 0.58124071 | -0.16122360  | 0.82418974 | -0.28431417 | 0.00073198 | -0.16471151 | 0.42464901 | 0.37749881  | 0.00680821  |
| ENSG0000018475 | 1  | 13495991 | 13495991 | CTSB         | protein coding          | -0.21637315 | 0.04299198  | -0.25771738 | 0.69693187 | -0.09788122  | 0.61956293 | -0.34291330  | 0.07988043 | -0.22381121 | 0.04075853 | -0.16494799 | 0.45157729 | 0.20074146  | 0.02174461  |
| ENSG0000025262 | 22 | 2069782  | 2069833  | BKRP1        | transcribed unprocessed | -0.22061891 | 0.05384424  | -0.03435059 | 0.81078404 | -0.21999874  | 0.59015958 | -0.16136318  | 0.28971774 | -0.16362173 | 0.14545194 | -0.16495062 | 0.45877267 | 0.31728897  | 0.02177153  |
| ENSG0000025199 | 1  | 5923389  | 5923389  | LOC100287322 | transcribed unprocessed | -0.22061891 | 0.05384424  | -0.03435059 | 0.81078404 | -0.21999874  | 0.59015958 | -0.16136318  | 0.28971774 | -0.16362173 | 0.14545194 | -0.16495062 | 0.45877267 | 0.31728897  | 0.02177153  |
| ENSG0000027078 | 17 | 7658972  | 76591240 | AC015892.1   | lincRNA                 | -0.11488879 | 0.33413398  | -0.11831079 | 0.24133899 | -0.22488124  | 0.24382993 | -0.04483866  | 0.80637270 | -0.09128597 | 0.01511002 | -0.16493070 | 0.45122740 | 0.14038849  | 0.33048709  |
| ENSG0000013950 | 10 | 4862419  | 4862424  | AC089898.1   | lincRNA                 | -0.28871531 | 0.00789841  | -0.02695320 | 0.14532072 | -0.18007288  | 0.42127026 | -0.02180268  | 0.27216958 | -0.26301849 | 0.00422442 | -0.16500858 | 0.45130888 | -0.3489138  | 0.08144688  |
| ENSG0000010795 | 19 | 4250094  | 4250124  | AC081411     | protein coding          | -0.03324569 | 0.94949297  | -0.25178977 | 0.12717181 | -0.33389917  | 0.09181754 | -0.18916897  | 0.14891916 | -0.02933728 | 0.8193291  | -0.16507171 | 0.45130888 | -0.3489138  | 0.08144688  |
| ENSG0000027983 | 10 | 2202572  | 22025459 | AL158211.6   | TEC                     | -0.28644624 | 0.02745889  | -0.16798704 | 0.24358877 | -0.10416831  | 0.60511609 | -0.28006094  | 0.15272195 | -0.34573387 | 0.00672136 | -0.16507781 | 0.45116593 | -0.29644498 | 0.04162607  |
| ENSG0000026752 | 17 | 42509784 | 42511511 | AC087852.3   | lincRNA                 | -0.14213025 | 0.21755592  | -0.28626259 | 0.07666863 | -0.08484129  | 0.74784817 | -0.39425750  | 0.08571866 | -0.09440250 | 0.42428187 | -0.16509329 | 0.45116593 | -0.08799537 | 0.54339635  |
| ENSG0000014654 | 1  | 12073643 | 12073911 | AC010110     | protein coding          | -0.18480783 | 0.10261793  | -0.15489117 | 0.28202023 | -0.14353044  | 0.62942109 | -0.11081175  | 0.8114404  | -0.11834959 | 0.30695475 | -0.16513974 | 0.45144424 | 0.22984302  | 0.10997170  |
| ENSG0000027987 | 5  | 5389744  | 53899370 | AC025175.2   | lincRNA                 | -0.12036847 | 0.11153668  | -0.15887581 | 0.02006684 | -0.00326688  | 0.85839828 | -0.15440292  | 0.44191176 | -0.15421353 | 0.21319206 | -0.16517098 | 0.45116593 | -0.17358841 | 0.21248890  |
| ENSG0000010472 | 4  | 16831194 | 16849847 | CP2293.5     | protein coding          | -0.17922988 | 0.12037398  | -0.10488117 | 0.48744742 | -0.09763121  | 0.62863665 | -0.02121810  | 0.9163347  | -0.10639442 | 0.44395181 | -0.16518634 | 0.45113404 | -0.24318419 | 0.08845450  |
| ENSG0000026420 | 8  | 7092102  | 7107314  | LOC100287322 | transcribed unprocessed | -0.27436355 | 0.06704749  | -0.15227220 | 0.423305   | -0.30485162  | 0.58124071 | -0.16122360  | 0.82418974 | -0.28431417 | 0.00073198 | -0.16471151 | 0.42464901 | 0.37749881  | 0.00680821  |
| ENSG0000028748 | 3  | 27389588 | 27389760 | AC095835.2   | lincRNA                 | -0.00278585 | 0.95858907  | -0.05038268 | 0.05828981 | -0.08785528  | 0.41598844 | -0.14210676  | 0.30328473 | -0.15224899 | 0.45113404 | -0.16518634 | 0.45117081 | -0.23648189 | 0.00000000  |
| ENSG0000028729 | 2  | 21918964 | 21920034 | AC083486.3   | lincRNA                 | -0.18075325 | 0.11568384  | -0.13799912 | 0.34028246 | -0.04455978  | 0.82410888 | -0.14888784  | 0.50233969 | -0.17094843 | 0.21757889 | -0.16526725 | 0.45101001 | -0.22452219 | 0.22616724  |
| ENSG0000027119 | 29 | 63038011 | 63038813 | LINC01058    | lincRNA                 | -0.22448569 | 0.06989181  | -0.14991163 | 0.29617098 | -0.09282869  | 0.53281072 | -0.17019371  | 0.39620248 | -0.22750132 | 0.08423249 | -0.16528372 | 0.45088541 | -0.21841014 | 0.17756024  |
| ENSG0000026387 | 17 | 6228702  | 62287205 | AC083486.3   | transcribed unprocessed | -0.21938081 | 0.05828113  | -0.07179385 | 0.60337752 | -0.04925790  | 0.82110888 | -0.14888784  | 0.50233969 | -0.17094843 | 0.21757889 | -0.16526725 | 0.45101001 | -0.22452219 | 0.22616724  |
| ENSG0000018505 | 5  | 5389394  | 54310582 | AK19         | protein coding          | -0.18241458 | 0.11231879  | -0.19585837 | 0.17313478 | -0.04757821  | 0.81398831 | -0.28237909  | 0.15354528 | -0.22140506 | 0.10762308 | -0.1653782  | 0.45078897 | -0.11717784 | 0.14554588  |
| ENSG0000024415 | 3  | 15716293 | 15718352 | RPI1B93.4    | transcribed unprocessed | -0.12424481 | 0.07871827  | -0.12516330 | 0.38643877 | -0.11638984  | 0.60292523 | -0.10219265  | 0.6192961  | -0.13711803 | 0.32714495 | -0.16538302 | 0.45078897 | -0.21261675 | 0.40119311  |
| ENSG0000021414 | 2  | 21648330 | 21648138 | AC089820.1   | lincRNA                 | -0.20370145 | 0.07557482  | -0.12103272 | 0.14126138 | -0.10106148  | 0.60675338 | -0.23897582  | 0.22985045 | -0.1624824  | 0.4006841  | -0.16538302 | 0.45078897 | -0.18197831 | 0.16337814  |
| ENSG0000027114 | 18 | 11898712 | 11899223 | CPV01289.4   | lincRNA                 | -0.19444023 | 0.16808484  | -0.08730821 | 0.44851914 | -0.15148411  | 0.44873378 | -0.1202622   | 0.59881862 | -0.22916571 | 0.05953862 | -0.16540288 | 0.45078897 | -0.14088103 | 0.30112928  |
| ENSG0000025403 | 1  | 43018174 | 43018174 | AC013363     | transcribed unprocessed | -0.15132619 | 0.03363816  | -0.19292984 | 0.45451001 | -0.15132619  | 0.03363816 | -0.19292984  | 0.45451001 | -0.15132619 | 0.03363816 | -0.19292984 | 0.45451001 | -0.15132619 | 0.03363816  |
| ENSG0000025493 | 1  | 40786473 | 40786973 | CPV01291.4   | lincRNA                 | -0.15288707 | 0.18810830  | -0.09890106 | 0.44851914 | -0.00034874  | 0.63487813 | -0.00034874  | 0.59881862 | -0.0517244  | 0.03638413 | -0.16540309 | 0.45088011 | -0.2458991  | 0.08911293  |
| ENSG0000022993 | 1  | 21218207 | 21219209 | AC064881.1   | lincRNA                 | -0.20726699 | 0.07268541  | -0.06755740 | 0.63926204 | -0.17981163  | 0.38081106 | -0.02733481  | 0.80248559 | -0.21436462 | 0.15996214 | -0.16545738 | 0.45095808 | -0.24744668 | 0.03830674  |
| ENSG0000011013 | 1  | 17412443 | 17412443 | AC013363     | transcribed unprocessed | -0.15132619 | 0.03363816  | -0.19292984 | 0.45451001 | -0.15132619  | 0.03363816 | -0.19292984  | 0.45451001 | -0.15132619 | 0.03363816 | -0.19292984 | 0.45451001 | -0.15132619 | 0.03363816  |
| ENSG0000011840 | 6  | 79914414 | 79947553 | ELCV4        | protein coding          | -0.07489126 | 0.51868011  | -0.04861076 | 0.57014055 | -0.23512601  | 0.43177207 | -0.030571464 | 0.86889434 | -0.03593699 | 0.17502468 | -0.16468773 | 0.45053108 | -0.24949848 | 0.65430611  |
| ENSG0000018032 | 2  | 1733126  | 1733126  | YRN1         | protein coding          | -0.20389373 | 0.07581048  | -0.19697700 | 0.17236245 | -0.04313917  | 0.79965326 | -0.28999265  | 0.14230261 | -0.20652772 | 0.13395364 | -0.16474574 | 0.45055289 | -0.18292893 | 0.27233657  |
| ENSG0000027213 | 1  | 10923217 | 10923217 | LOC100287322 | transcribed unprocessed | -0.27436355 | 0.06704749  | -0.15227220 | 0.423305   | -0.30485162  | 0.58124071 | -0.16122360  | 0.82418974 | -0.28431417 | 0.00073198 | -0.16471151 | 0.42464901 | 0.37749881  | 0.00680821  |
| ENSG0000020039 | 7  | 8712811  | 8712812  | Y RNA        | misc RNA                | -0.11295341 | 0.32801305  | -0.07482001 | 0.61969324 | -0.04017943  | 0.71281602 | -0.12186021  | 0.36878189 | -0.01298039 | 0.9257763  | -0.16533029 | 0.45078897 | -0.27512957 | 0.05563361  |
| ENSG0000010784 | 4  | 12890730 | 12897234 | JADE1        | protein coding          | -0.11343798 | 0.32984588  | -0.09911266 | 0.50443020 | -0.10193506  | 0.62191905 | -0.07186139  | 0.72169483 | -0.10338873 | 0.45940688 | -0.16557739 | 0.45028368 | -0.14607216 | 0.42890679  |
| ENSG0000028876 | 1  | 464324   | 464324   | AC013363     | transcribed unprocessed | -0.15132619 | 0.03363816  | -0.19292984 | 0.45451001 | -0.15132619  | 0.03363816 | -0.19292984  | 0.45451001 | -0.15132619 | 0.03363816 | -0.19292984 | 0.45451001 | -0.15132619 | 0.03363816  |
| ENSG0000025157 | 1  | 15571491 | 15581653 | AC053324.2   | protein coding          | -0.10688589 | 0.09319547  | -0.10110427 | 0.93943050 | -0.08006001  | 0.89600774 | -0.15113010  | 0.45176630 | -0.11844685 | 0.36963006 | -0.16528762 | 0.45083001 | -0.28991497 | 0.03407361  |
|                |    |          |          |              |                         |             |             |             |            |              |            |              |            |             |            |             |            |             |             |

Table with 10 columns: Gene ID, Chr, Start, End, Strand, Feature, Start, End, Start, End, Start, End. Contains genomic coordinates and gene annotations for various genes like TMEM30B, HNRP, HMG, etc.

Table with 10 columns: Gene ID, Chr, Start, End, Gene Name, Feature, RefSeq ID, RefSeq Name, RefSeq Description, RefSeq Accession. Contains a comprehensive list of gene features and their associated RefSeq identifiers.



|                 |    |          |           |             |                  |              |             |             |             |             |             |              |             |              |             |              |             |             |             |
|-----------------|----|----------|-----------|-------------|------------------|--------------|-------------|-------------|-------------|-------------|-------------|--------------|-------------|--------------|-------------|--------------|-------------|-------------|-------------|
| ENSG0000028661  | 14 | 67272799 | 67369753  | AL049779.4  | lncRNA           | -0.220449319 | 0.054033483 | -0.25232324 | 0.077094208 | 0.014318246 | 0.043871158 | -0.283726637 | 0.151517038 | -0.162480017 | 0.240211179 | -0.172382244 | 0.431586691 | 0.222384376 | 0.118856501 |
| ENSG0000043364  | 11 | 15651731 | 156569653 | AC012933.1  | transcribed unit | 0.02640884   | 0.82564027  | -0.18939261 | 0.69317504  | 0.15217292  | 0.44878693  | 0.06521571   | 0.06207293  | 0.15927018   | 0.21967895  | -0.1724703   | 0.45143366  | 0.21426647  | 0.0673149   |
| ENSG0000027837  | 11 | 18612944 | 18619174  | AC112894.2  | transcribed unit | 0.02640884   | 0.82564027  | -0.18939261 | 0.69317504  | 0.15217292  | 0.44878693  | 0.06521571   | 0.06207293  | 0.15927018   | 0.21967895  | -0.1724703   | 0.45143366  | 0.21426647  | 0.0673149   |
| ENSG0000013232  | 20 | 4466541  | 44669086  | AL139352.1  | lncRNA           | -0.18695162  | 0.14258251  | -0.15222204 | 0.287144    | -0.0726099  | 0.14707698  | -0.14256361  | 0.302051208 | -0.14367606  | 0.302051208 | -0.1724703   | 0.45143366  | 0.21426647  | 0.0673149   |
| ENSG0000007493  | 11 | 15656971 | 15659269  | AC012933.1  | transcribed unit | 0.02640884   | 0.82564027  | -0.18939261 | 0.69317504  | 0.15217292  | 0.44878693  | 0.06521571   | 0.06207293  | 0.15927018   | 0.21967895  | -0.1724703   | 0.45143366  | 0.21426647  | 0.0673149   |
| ENSG0000027730  | 11 | 15642000 | 15642000  | AC012933.1  | transcribed unit | 0.02640884   | 0.82564027  | -0.18939261 | 0.69317504  | 0.15217292  | 0.44878693  | 0.06521571   | 0.06207293  | 0.15927018   | 0.21967895  | -0.1724703   | 0.45143366  | 0.21426647  | 0.0673149   |
| ENSG0000028571  | 4  | 6211908  | 6224879   | AC023095.1  | lncRNA           | -0.28676018  | 0.01145252  | -0.24518623 | 0.20516228  | -0.24213277 | 0.22368802  | -0.2383456   | 0.21318566  | -0.31892535  | 0.10747347  | -0.1724703   | 0.45143366  | 0.21426647  | 0.0673149   |
| ENSG0000023421  | 17 | 3057347  | 3057700   | AC011840.1  | transcribed unit | -0.0327944   | 0.0043338   | -0.1382054  | 0.3765140   | 0.16225398  | 0.36215895  | -0.2032367   | 0.31638285  | -0.3452943   | 0.03666274  | -0.1724703   | 0.45143366  | 0.21426647  | 0.0673149   |
| ENSG0000025498  | 11 | 2293370  | 2293370   | AC023095.1  | transcribed unit | 0.02640884   | 0.82564027  | -0.18939261 | 0.69317504  | 0.15217292  | 0.44878693  | 0.06521571   | 0.06207293  | 0.15927018   | 0.21967895  | -0.1724703   | 0.45143366  | 0.21426647  | 0.0673149   |
| ENSG00000229107 | 22 | 2066784  | 2067094   | AB017494.1  | transcribed unit | -0.04811243  | 0.36414942  | -0.12108835 | 0.40223822  | -0.09563039 | 0.7698554   | -0.06421356  | 0.40419563  | -0.11116048  | 0.4257977   | -0.1724703   | 0.45143366  | 0.21426647  | 0.0673149   |
| ENSG0000012857  | 6  | 846875   | 847469    | TAB1        | transcribed unit | -0.2311108   | 0.1043219   | -0.2637198  | 0.0751283   | 0.01724035  | 0.1624035   | -0.1033704   | 0.2266538   | -0.1862389   | 0.1704254   | -0.1724703   | 0.45143366  | 0.21426647  | 0.0673149   |
| ENSG0000014416  | 5  | 1393931  | 1393931   | FBCP1       | transcribed unit | -0.1744661   | 0.00082693  | -0.2566238  | 0.07118673  | 0.18222181  | 0.2246176   | -0.2626446   | 0.1584217   | -0.3581446   | 0.08312638  | -0.1724703   | 0.45143366  | 0.21426647  | 0.0673149   |
| ENSG0000014818  | 5  | 8029976  | 8032847   | AC028410.1  | transcribed unit | -0.12708382  | 0.27072373  | -0.10269304 | 0.04871283  | 0.02114242  | 0.1676337   | -0.0821352   | 0.6725881   | -0.15592329  | 0.21021136  | -0.1724703   | 0.45143366  | 0.21426647  | 0.0673149   |
| ENSG0000030947  | 17 | 728723   | 728438    | YME2        | transcribed unit | -0.26233136  | 0.07499542  | -0.06491757 | 0.23785513  | 0.22212031  | 0.0648858   | 0.67413504   | -0.2427227  | 0.12031338   | -0.1724703  | 0.45143366   | 0.21426647  | 0.0673149   |             |
| ENSG0000027279  | 19 | 3091819  | 3091930   | Melanin SRP | transcribed unit | -0.1928985   | 0.08272983  | -0.04144483 | 0.1923334   | 0.13589863  | 0.49840381  | -0.1918771   | 0.2719196   | -0.18046469  | 0.17001223  | -0.1724703   | 0.45143366  | 0.21426647  | 0.0673149   |
| ENSG00000134490 | 17 | 2319944  | 2347791   | TMB2        | transcribed unit | -0.43110916  | 0.984058    | -0.32387613 | 0.02718892  | -0.19252024 | 0.16988183  | -0.48177372  | 0.01094192  | -0.48612635  | 0.10015262  | -0.1724703   | 0.45143366  | 0.21426647  | 0.0673149   |
| ENSG00000171956 | 15 | 6004234  | 6006170   | FOXO        | transcribed unit | -0.30342725  | 0.00738412  | -0.2434174  | 0.10127325  | -0.2474836  | 0.1497822   | -0.24385331  | 0.2202293   | -0.3684414   | 0.0495856   | -0.1724703   | 0.45143366  | 0.21426647  | 0.0673149   |
| ENSG00000201396 | 16 | 9733957  | 9740106   | AC027162.5  | transcribed unit | -0.14466094  | 0.29393091  | -0.15921307 | 0.37149454  | -0.12171761 | 0.2909442   | -0.00776811  | 0.31574725  | -0.12898116  | 0.20719618  | -0.1724703   | 0.45143366  | 0.21426647  | 0.0673149   |
| ENSG00000239084 | 1  | 2539871  | 2539871   | AL013284.1  | transcribed unit | -0.25381708  | 0.00057021  | -0.33887154 | 0.10173125  | -0.2745867  | 0.17373367  | -0.4380616   | 0.02271974  | -0.3898599   | 0.02097925  | -0.1724703   | 0.45143366  | 0.21426647  | 0.0673149   |
| ENSG00000160970 | 7  | 9970538  | 9971858   | CYP3A7      | transcribed unit | -0.13244369  | 0.25061027  | -0.1524425  | 0.28063448  | 0.10844553  | 0.58857414  | -0.16267327  | 0.4173114   | -0.10010541  | 0.42626326  | -0.1724703   | 0.45143366  | 0.21426647  | 0.0673149   |
| ENSG00000235448 | 7  | 2349111  | 2349111   | LOC204251   | transcribed unit | -0.20591578  | 0.0081169   | -0.24668196 | 0.04190124  | -0.1242477  | 0.41581449  | -0.29211465  | 0.13912598  | -0.2651141   | 0.04992628  | -0.1724703   | 0.45143366  | 0.21426647  | 0.0673149   |
| ENSG00000281157 | 15 | 2252814  | 2252805   | AC011467.6  | transcribed unit | -0.29557947  | 0.00057021  | -0.33887154 | 0.10173125  | -0.2745867  | 0.17373367  | -0.4380616   | 0.02271974  | -0.3898599   | 0.02097925  | -0.1724703   | 0.45143366  | 0.21426647  | 0.0673149   |
| ENSG0000022554  | 10 | 12445243 | 12445203  | NCX1-2      | transcribed unit | -0.28937838  | 0.01170484  | -0.233552   | 0.1024547   | -0.1742497  | 0.4329228   | -0.26029129  | 0.18864238  | -0.2659533   | 0.05136934  | -0.1724703   | 0.45143366  | 0.21426647  | 0.0673149   |
| ENSG00000197919 | 15 | 5189132  | 5209232   | ZNF15       | transcribed unit | -0.07427274  | 0.81262544  | -0.17138207 | 0.24611291  | 0.38976253  | 0.0581922   | -0.19781191  | 0.34608838  | -0.08902356  | 0.48391193  | -0.1724703   | 0.45143366  | 0.21426647  | 0.0673149   |
| ENSG0000028157  | 15 | 6631414  | 6631703   | AC058855.1  | transcribed unit | -0.08723944  | 0.4475381   | -0.213554   | 0.1073408   | -0.1541947  | 0.36307453  | -0.162480017 | 0.151517038 | -0.162480017 | 0.240211179 | -0.1724703   | 0.45143366  | 0.21426647  | 0.0673149   |
| ENSG0000022538  | 10 | 3853598  | 3863806   | PMPK1P2     | transcribed unit | -0.20428764  | 0.07420568  | -0.1983514  | 0.17041222  | 0.2184834   | 0.2771395   | -0.2558858   | 0.28207228  | -0.29277885  | 0.04613129  | -0.1724703   | 0.45143366  | 0.21426647  | 0.0673149   |
| ENSG00000296115 | 5  | 5209198  | 5244198   | LINC02453   | transcribed unit | -0.29592168  | 0.0084238   | -0.10794411 | 0.05702251  | -0.1725989  | 0.36904248  | -0.04749265  | 0.18358883  | -0.20243403  | 0.00709318  | -0.1724703   | 0.45143366  | 0.21426647  | 0.0673149   |
| ENSG00000281432 | 6  | 11932033 | 11937632  | LINC01163   | transcribed unit | -0.13823238  | 0.23043228  | -0.0816276  | 0.5729824   | 0.13044414  | 0.48871238  | -0.0340867   | 0.1983311   | -0.07528173  | 0.5857941   | -0.1724703   | 0.45143366  | 0.21426647  | 0.0673149   |
| ENSG00000204301 | 6  | 3219443  | 3224087   | NOTCH4      | transcribed unit | -0.3532438   | 0.00161847  | -0.11911443 | 0.43907262  | 0.46303718  | 0.01968728  | -0.11731251  | 0.39532033  | -0.36953033  | 0.02958688  | -0.1724703   | 0.45143366  | 0.21426647  | 0.0673149   |
| ENSG00000115604 | 14 | 1845442  | 1845442   | LOC100421   | transcribed unit | -0.2846718   | 0.0344216   | -0.2251151  | 0.1511514   | 0.1511514   | 0.1511514   | -0.1511514   | 0.1511514   | -0.1511514   | 0.1511514   | -0.1724703   | 0.45143366  | 0.21426647  | 0.0673149   |
| ENSG0000026472  | 10 | 12502783 | 12503218  | NOTCH2      | transcribed unit | -0.16037113  | 0.1635218   | -0.0953418  | 0.5019388   | -0.15937113 | 0.44333089  | -0.0504548   | 0.91622506  | -0.11132515  | 0.46868273  | -0.1724703   | 0.45143366  | 0.21426647  | 0.0673149   |
| ENSG0000038317  | 19 | 5757196  | 5757911   | ZNF148      | transcribed unit | -0.07110045  | 0.53427651  | -0.0693891  | 0.50324294  | 0.04477581  | 0.24427258  | -0.033224    | 0.86816349  | -0.0276232   | 0.414921    | -0.1724703   | 0.45143366  | 0.21426647  | 0.0673149   |
| ENSG00000279413 | 21 | 17835533 | 17835533  | LOC100421   | transcribed unit | -0.2846718   | 0.0344216   | -0.2251151  | 0.1511514   | 0.1511514   | 0.1511514   | -0.1511514   | 0.1511514   | -0.1511514   | 0.1511514   | -0.1724703   | 0.45143366  | 0.21426647  | 0.0673149   |
| ENSG00000144231 | 21 | 12783553 | 12788155  | LOC100421   | transcribed unit | -0.2846718   | 0.0344216   | -0.2251151  | 0.1511514   | 0.1511514   | 0.1511514   | -0.1511514   | 0.1511514   | -0.1511514   | 0.1511514   | -0.1724703   | 0.45143366  | 0.21426647  | 0.0673149   |
| ENSG00000204272 | 6  | 8744413  | 8745542   | LOC100421   | transcribed unit | -0.11178913  | 0.33274758  | -0.1296789  | 0.3894296   | -0.16767131 | 0.40117654  | -0.1484856   | 0.4977796   | -0.14843561  | 0.2679974   | -0.1724703   | 0.45143366  | 0.21426647  | 0.0673149   |
| ENSG0000011448  | 19 | 1365283  | 1365283   | LOC100421   | transcribed unit | -0.2846718   | 0.0344216   | -0.2251151  | 0.1511514   | 0.1511514   | 0.1511514   | -0.1511514   | 0.1511514   | -0.1511514   | 0.1511514   | -0.1724703   | 0.45143366  | 0.21426647  | 0.0673149   |
| ENSG00000196335 | 7  | 23710203 | 23710203  | CTCF1       | transcribed unit | -0.30744182  | 0.00057021  | -0.33887154 | 0.10173125  | -0.2745867  | 0.17373367  | -0.4380616   | 0.02271974  | -0.3898599   | 0.02097925  | -0.1724703   | 0.45143366  | 0.21426647  | 0.0673149   |
| ENSG00000137373 | 8  | 6946624  | 6969015   | SLF1        | transcribed unit | -0.37895272  | 0.00072394  | -0.29117442 | 0.04021182  | -0.26445147 | 0.18239972  | -0.39390776  | 0.06574708  | -0.3757273   | 0.00010907  | -0.1724703   | 0.45143366  | 0.21426647  | 0.0673149   |
| ENSG0000029956  | 1  | 16020164 | 16023821  | Y RNA       | transcribed unit | -0.01106473  | 0.92391162  | -0.0312854  | 0.07848197  | -0.0480074  | 0.80896381  | -0.18977808  | 0.38270741  | -0.00170566  | 0.96011206  | -0.1724703   | 0.45143366  | 0.21426647  | 0.0673149   |
| ENSG0000043771  | 1  | 2245888  | 2247394   | CHN4        | transcribed unit | -0.02972237  | 0.74794818  | -0.22467195 | 0.1167313   | 0.3486305   | 0.04702165  | -0.19149737  | 0.22970728  | 0.1053224    | 0.444248    | -0.1724703   | 0.45143366  | 0.21426647  | 0.0673149   |
| ENSG0000011549  | 9  | 2796467  | 2796467   | ZNF445      | transcribed unit | -0.1938544   | 0.86207173  | -0.04633907 | 0.3368271   | 0.17531021  | 0.3817138   | -0.09354876  | 0.64268625  | -0.7099411   | 0.1732003   | -0.1724703   |             |             |             |



Table with columns for gene ID, chromosome, coordinates, gene name, transcript type, and multiple numerical values. The table lists various genes such as AL509231, AL509232, AL509233, etc., and their associated data points.

Table with 4 columns: Gene ID, Chromosome, Position, and Gene Name. The table lists numerous genes such as ENGCG00028172, ENGCG00028173, ENGCG00028174, etc., along with their genomic coordinates and associated gene names.

Table with columns for gene ID, chromosome, coordinates, gene name, transcript, protein name, and various numerical values. The table lists numerous genes such as TFF3, ANK1, GYL2, and many others, each with associated genomic data and protein information.



|                 |    |           |           |            |                                    |             |            |             |            |             |            |             |            |             |             |             |             |              |             |               |
|-----------------|----|-----------|-----------|------------|------------------------------------|-------------|------------|-------------|------------|-------------|------------|-------------|------------|-------------|-------------|-------------|-------------|--------------|-------------|---------------|
| ENSG0000028571  | 11 | 39024831  | 39161638  | AC021723.2 | lncRNA                             | -0.16575032 | 0.15062093 | -0.18113448 | 0.20080887 | 0.13420784  | 0.50420033 | -0.14857809 | 0.45882848 | -0.07519603 | 0.58879697  | -0.13256833 | 0.40260391  | 0.16997001   | 0.23756628  |               |
| ENSG0000029475  | 11 | 53944475  | 53761314  | AC021723.2 | lncRNA                             | -0.17488456 | 0.25727127 | -0.14041031 | 0.08486769 | 0.14088769  | 0.74503547 | -0.25677991 | 0.09611755 | 0.03344296  | -0.13292694 | 0.40260391  | 0.16997001  | 0.23756628   | 0.09117173  | 0.09117173    |
| ENSG0000014704  | 16 | 12953111  | 12953111  | AC021801.1 | lncRNA                             | -0.33324401 | 0.12079429 | -0.12079429 | 0.12079429 | 0.12079429  | 0.12079429 | -0.30718834 | 0.30718834 | -0.30718834 | 0.30718834  | 0.30718834  | 0.30718834  | 0.30718834   | 0.30718834  | 0.30718834    |
| ENSG0000028716  | 15 | 53944475  | 53944475  | AL133879.2 | lncRNA                             | -0.21083308 | 0.06588911 | -0.14977209 | 0.29921455 | -0.06068273 | 0.32017173 | -0.06737815 | 0.73871357 | -0.17794568 | 0.19333777  | -0.17329841 | 0.40260391  | 0.16997001   | 0.23756628  | 0.02615059    |
| ENSG0000017934  | 17 | 10954487  | 10954487  | AL133879.2 | lncRNA                             | -0.12735204 | 0.26007727 | -0.15478610 | 0.18713458 | 0.18713458  | 0.18713458 | -0.04841898 | 0.43780132 | -0.08728906 | 0.65877027  | -0.07292674 | 0.40260391  | 0.16997001   | 0.23756628  | 0.18842992    |
| ENSG0000024659  | 9  | 65971489  | 65971489  | AL133879.2 | lncRNA                             | -0.10242132 | 0.26007727 | -0.15478610 | 0.18713458 | 0.18713458  | 0.18713458 | -0.04841898 | 0.43780132 | -0.08728906 | 0.65877027  | -0.07292674 | 0.40260391  | 0.16997001   | 0.23756628  | 0.18842992    |
| ENSG0000016710  | 17 | 5042185   | 5042185   | ACSF2      | protein coding                     | -0.14479820 | 0.20888771 | -0.11472809 | 0.18288584 | -0.13885187 | 0.45995446 | -0.15854785 | 0.35403922 | -0.12149737 | 0.38147223  | -0.13388921 | 0.40260391  | 0.16997001   | 0.23756628  | 0.33287802    |
| ENSG0000015816  | 17 | 13647849  | 13647849  | ACSF2      | protein coding                     | -0.04042132 | 0.91045272 | -0.00708959 | 0.96107760 | -0.14325744 | 0.47875859 | -0.16656397 | 0.31628789 | -0.04411257 | 0.45158146  | -0.13388921 | 0.40260391  | 0.16997001   | 0.23756628  | 0.33287802    |
| ENSG0000013702  | 11 | 10174154  | 10174154  | TPPC5      | protein coding                     | -0.18248510 | 0.11224338 | -0.10487413 | 0.46941187 | -0.12432953 | 0.45252504 | -0.01386919 | 0.94526700 | -0.11579261 | 0.40445978  | -0.13388921 | 0.40260391  | 0.16997001   | 0.23756628  | 0.04304591    |
| ENSG0000027856  | 12 | 2885819   | 2885819   | AC059111.1 | lncRNA                             | -0.19082663 | 0.09631024 | -0.25367042 | 0.07547393 | -0.22489591 | 0.09244257 | -0.26202692 | 0.12489583 | -0.18956921 | 0.12775457  | -0.1848891  | 0.40260391  | 0.16997001   | 0.23756628  | 0.24762228    |
| ENSG0000027544  | 4  | 17684883  | 17720123  | AC097516.2 | lncRNA                             | -0.33881633 | 0.18876773 | -0.18876773 | 0.18876773 | 0.18876773  | 0.18876773 | -0.18876773 | 0.18876773 | -0.18876773 | 0.18876773  | -0.18876773 | 0.18876773  | 0.18876773   | 0.18876773  | 0.18876773    |
| ENSG00000174485 | 12 | 65586346  | 65729293  | DDNAD4     | protein coding                     | -0.10581887 | 0.35899567 | -0.05915863 | 0.72547958 | -0.09716029 | 0.64542543 | -0.08464242 | 0.14738184 | -0.08464242 | 0.14738184  | -0.08464242 | 0.14738184  | 0.16997001   | 0.23756628  | 0.01182828    |
| ENSG00000141255 | 17 | 3440019   | 3513852   | SPAT3AC2   | protein coding                     | -0.33097981 | 0.10366491 | -0.28034353 | 0.08994049 | -0.33488629 | 0.08974042 | -0.30839891 | 0.11766138 | -0.30757881 | 0.08316278  | -0.18374738 | -0.0173397  | 0.33344421   | 0.01774628  | 0.01774628    |
| ENSG0000010009  | 12 | 2644342   | 26463874  | HPC4       | protein coding                     | -0.20081198 | 0.04350222 | -0.04350222 | 0.04350222 | -0.27884838 | 0.15905447 | -0.14481109 | 0.58919415 | -0.16186342 | 0.24224788  | -0.18383869 | 0.41740075  | 0.38989919   | 0.00119131  | 0.00119131    |
| ENSG00000226823 | 9  | 33502585  | 33507111  | SUPT1P1    | unprocessed pseudogene             | -0.15227734 | 0.18613588 | -0.01419274 | 0.71721031 | -0.23202881 | 0.13788615 | -0.17889550 | 0.37195669 | -0.13608517 | 0.32329246  | -0.18381761 | 0.40260391  | 0.16997001   | 0.23756628  | 0.04424251    |
| ENSG00000101150 | 20 | 63866228  | 63891145  | TP53L2     | protein coding                     | -0.16441848 | 0.31213881 | -0.21274343 | 0.17335833 | -0.23159638 | 0.24517439 | -0.22115251 | 0.26400022 | -0.09413654 | 0.48908404  | -0.18317304 | 0.401166282 | -0.10315701  | 0.479116240 | 0.01774628    |
| ENSG00000246692 | 9  | 10954487  | 10954487  | LINC00338  | lncRNA                             | -0.30311567 | 0.00271899 | -0.21744865 | 0.12946790 | -0.04411596 | 0.44333501 | -0.04337166 | 0.21187302 | -0.30092051 | 0.00703778  | -0.18349003 | 0.41161361  | 0.31713553   | 0.00271899  | 0.00271899    |
| ENSG00000224039 | 21 | 13031360  | 13030703  | AC098039P2 | transcribed unprocessed pseudogene | -0.25475682 | 0.02355213 | -0.24065065 | 0.00313852 | -0.04807433 | 0.68714338 | -0.36728353 | 0.06732874 | -0.28113011 | 0.03466771  | -0.18369606 | 0.41646525  | -0.209414378 | 0.444485038 | 0.00271899    |
| ENSG00000171560 | 4  | 145831728 | 145490743 | FGA        | protein coding                     | -0.35453894 | 0.00158817 | -0.20252661 | 0.15888484 | -0.30255884 | 0.12542248 | -0.23751234 | 0.24488807 | -0.38989406 | 0.03433636  | -0.18371331 | 0.40133966  | -0.07110887  | 0.00703778  | 0.00703778    |
| ENSG00000286015 | 11 | 45778987  | 46021924  | MAR2       | protein coding                     | -0.10242132 | 0.91045272 | -0.15357017 | 0.36621245 | -0.01620011 | 0.93841894 | -0.45941898 | 0.03191872 | -0.02718339 | 0.61110267  | -0.18374738 | 0.40116628  | 0.41161361   | 0.145532018 | 0.13527707    |
| ENSG00000288184 | 19 | 21788772  | 21733860  | AC029364.1 | lncRNA                             | -0.25073975 | 0.02477693 | -0.09416041 | 0.67415041 | -0.12807458 | 0.23458485 | -0.02483412 | 0.80214242 | -0.24844846 | 0.06983356  | -0.18374738 | 0.40116628  | 0.41161361   | 0.13527707  | 0.06746330    |
| ENSG00000276818 | 11 | 5178191   | 5187893   | AC029364.1 | lncRNA                             | -0.00240578 | 0.88343168 | -0.15502237 | 0.28230440 | -0.09238308 | 0.64815207 | -0.14418408 | 0.48170788 | -0.04887854 | 0.87593861  | -0.18374738 | 0.40116628  | 0.41161361   | 0.23084448  | 0.00271899    |
| ENSG00000226989 | 19 | 2404003   | 2405070   | AL131845.1 | lncRNA                             | -0.01243355 | 0.35259174 | -0.02711113 | 0.85412545 | -0.35502496 | 0.09871156 | -0.19291738 | 0.33654347 | -0.01207254 | 0.30359578  | -0.18380213 | 0.41161361  | 0.0180886    | 0.244333748 | 0.00782119    |
| ENSG00000248580 | 4  | 5693004   | 5693004   | GLDC1P1    | transcribed process                | -0.26755555 | 0.08869877 | -0.09386077 | 0.50331423 | -0.19544478 | 0.44262462 | -0.03519768 | 0.86134876 | -0.0385127  | 0.13259215  | -0.18380213 | 0.41161361  | 0.0180886    | 0.23778192  | 0.04681732    |
| ENSG00000180764 | 10 | 9358919   | 93961540  | PBR1       | transcribed process                | -0.19955809 | 0.08187508 | -0.20948482 | 0.14933864 | -0.17381387 | 0.38592869 | -0.22518348 | 0.23785173 | -0.15044481 | 0.24871334  | -0.18384123 | 0.40116628  | 0.41161361   | 0.17893707  | 0.22246683    |
| ENSG00000184424 | 5  | 12751740  | 12759584  | PRRC1      | protein coding                     | -0.02981052 | 0.82324002 | -0.01918241 | 0.68491961 | -0.02738476 | 0.11970928 | -0.11832144 | 0.62649833 | -0.00219873 | 0.05928328  | -0.18384667 | 0.41018337  | 0.02107434   | 0.84491819  | 0.04491819    |
| ENSG00000289522 | 1  | 9850277   | 9850277   | AC104531.1 | lncRNA                             | -0.25292651 | 0.02441389 | -0.13711814 | 0.24241416 | -0.29259951 | 0.13703674 | -0.12717004 | 0.52720358 | -0.30246411 | 0.02618046  | -0.18381802 | 0.40097532  | 0.26899273   | 0.01892444  | 0.01892444    |
| ENSG00000252041 | 1  | 9850277   | 9850277   | AC104531.1 | lncRNA                             | -0.25292651 | 0.02441389 | -0.13711814 | 0.24241416 | -0.29259951 | 0.13703674 | -0.12717004 | 0.52720358 | -0.30246411 | 0.02618046  | -0.18381802 | 0.40097532  | 0.26899273   | 0.01892444  | 0.01892444    |
| ENSG00000147448 | 8  | 38269704  | 38322122  | NSD3       | unprocessed pseudogene             | 0.06315107  | 0.05589187 | -0.07203404 | 0.61787807 | -0.07112484 | 0.11713348 | -0.01219889 | 0.81871205 | -0.06300791 | 0.30059708  | -0.18380213 | 0.40097532  | 0.01723268   | 0.63240042  | 0.01723268    |
| ENSG00000124587 | 8  | 4296386   | 42979181  | PEX6       | protein coding                     | -0.29945227 | 0.06042051 | -0.26141308 | 0.08484767 | -0.35848448 | 0.06881538 | -0.26097122 | 0.09882438 | -0.36868738 | 0.03488452  | -0.18380213 | 0.40097532  | 0.30003336   | 0.03127929  | 0.03127929    |
| ENSG00000279018 | 9  | 10954487  | 10954487  | TEC        | protein coding                     | -0.12945447 | 0.12945447 | -0.12945447 | 0.12945447 | -0.12945447 | 0.12945447 | -0.12945447 | 0.12945447 | -0.12945447 | 0.12945447  | -0.12945447 | 0.12945447  | 0.12945447   | 0.12945447  | 0.12945447    |
| ENSG00000292815 | 11 | 17672483  | 17673402  | AC029364.1 | lncRNA                             | -0.12945447 | 0.12945447 | -0.12945447 | 0.12945447 | -0.12945447 | 0.12945447 | -0.12945447 | 0.12945447 | -0.12945447 | 0.12945447  | -0.12945447 | 0.12945447  | 0.12945447   | 0.12945447  | 0.12945447    |
| ENSG00000271016 | 21 | 1039764   | 10397774  | AF25483.2  | lncRNA                             | -0.0749988  | 0.50436414 | -0.08513026 | 0.58575936 | -0.11304714 | 0.57451199 | -0.01248971 | 0.85199587 | -0.04911612 | 0.74257743  | -0.18384704 | 0.40097532  | 0.010212749  | 0.46749930  | 0.010212749   |
| ENSG00000241116 | 19 | 10954487  | 10954487  | AC029364.1 | lncRNA                             | -0.12945447 | 0.12945447 | -0.12945447 | 0.12945447 | -0.12945447 | 0.12945447 | -0.12945447 | 0.12945447 | -0.12945447 | 0.12945447  | -0.12945447 | 0.12945447  | 0.12945447   | 0.12945447  | 0.12945447    |
| ENSG00000228888 | 13 | 43550323  | 43531300  | AL133863.1 | lncRNA                             | -0.16822269 | 0.11622699 | -0.14558678 | 0.31454883 | -0.04476593 | 0.81601817 | -0.20324114 | 0.3044446  | -0.23730602 | 0.74257743  | -0.18384704 | 0.40097532  | 0.010212749  | 0.10668969  | 0.45248251    |
| ENSG00000287793 | 17 | 8425011   | 8425213   | AC102338.6 | lncRNA                             | -0.11951804 | 0.30054057 | -0.12192594 | 0.38989207 | -0.10486224 | 0.60465713 | -0.04689311 | 0.86393829 | -0.05812698 | 0.67932084  | -0.18400711 | 0.40097532  | 0.010212749  | 0.04022548  | 0.010212749   |
| ENSG00000167993 | 11 | 11386831  | 11378498  | PHF1       | protein coding                     | -0.04521352 | 0.69618195 | -0.18121204 | 0.28011684 | -0.06838254 | 0.34671416 | -0.21257004 | 0.28808692 | -0.03472638 | 0.80364949  | -0.18400711 | 0.40097532  | 0.010212749  | 0.05367619  | 0.05367619    |
| ENSG00000287891 | 6  | 38641430  | 38644402  | ZBRD3      | protein coding                     | -0.18787519 | 0.10683862 | -0.11770432 | 0.41599800 | -0.13424015 | 0.91457872 | -0.01747692 | 0.81108323 | -0.13232843 | 0.12847974  | -0.18400711 | 0.40097532  | 0.010212749  | 0.26848585  | 0.010212749</ |







Table with 10 columns: Gene ID, Chr, Start, End, Strand, Feature, RefSeq ID, RefSeq Name, RefSeq Description, RefSeq Type. Contains genomic coordinates and gene annotations for various genes including AC117452, AC117453, AC117454, etc.



|                  |    |           |           |             |                   |             |             |             |            |             |            |             |             |             |             |             |             |            |            |            |
|------------------|----|-----------|-----------|-------------|-------------------|-------------|-------------|-------------|------------|-------------|------------|-------------|-------------|-------------|-------------|-------------|-------------|------------|------------|------------|
| ENSG0000022345   | 7  | 14396939  | 14396439  | TCAP1P1     | unprocessed_pseud | -0.02696693 | 0.42132681  | -0.22514634 | 0.10917424 | 0.07809971  | 0.69662023 | -0.26242538 | 0.18603363  | -0.09970463 | 0.66801493  | -0.18447462 | 0.37389177  | 0.00487257 | 0.95335270 |            |
| ENSG0000022353   | 7  | 13692013  | 13641778  | AC02485.1   | lncRNA            | -0.07225554 | 0.53261201  | -0.06425553 | 0.65593811 | -0.26524311 | 0.15662898 | -0.33814441 | 0.06483818  | -0.07352602 | 0.09255346  | -0.14504141 | 0.37320226  | 0.00245193 | 0.94702526 |            |
| ENSG0000011991   | 13 | 10000000  | 9999999   | PAN3        | protein_coding    | -0.00000000 | 0.00000000  | -0.00000000 | 0.00000000 | -0.00000000 | 0.00000000 | -0.00000000 | 0.00000000  | -0.00000000 | 0.00000000  | -0.00000000 | 0.00000000  | 0.00000000 | 0.00000000 |            |
| ENSG000002081789 | 16 | 4560001   | 4564662   | LOC22832.2  | lncRNA            | -0.19278389 | 0.02962923  | -0.11266044 | 0.41717250 | -0.22223208 | 0.26553141 | -0.02381270 | 0.00588104  | -0.19326230 | 0.10134468  | -0.07377822 | 0.33739822  | 0.00237400 | 0.09932789 |            |
| ENSG0000013176   | 14 | 10434449  | 10342029  | RP1_139     | protein_coding    | -0.53188491 | 0.00316190  | -0.25023071 | 0.07402760 | -0.38114144 | 0.06453111 | -0.22247732 | 0.00881779  | -0.37825223 | 0.00202694  | -0.16456681 | 0.37371122  | 0.34037121 | 0.01286251 | 0.94178623 |
| ENSG00000185345  | 15 | 16157417  | 16157417  | LOC101928.1 | protein_coding    | -0.00000000 | 0.00000000  | -0.00000000 | 0.00000000 | -0.00000000 | 0.00000000 | -0.00000000 | 0.00000000  | -0.00000000 | 0.00000000  | -0.00000000 | 0.00000000  | 0.00000000 | 0.00000000 |            |
| ENSG00000279147  | 17 | 14193707  | 14193707  | AC112504.1  | TEC               | -0.33685873 | 0.00310653  | -0.24007258 | 0.14626362 | -0.30123578 | 0.12783705 | -0.24026511 | 0.12737084  | -0.38881467 | 0.00000000  | -0.13652747 | 0.37367062  | 0.04322294 | 0.10489253 |            |
| ENSG0000025046   | 8  | 8379636   | 8429891   | AC027160.1  | lncRNA            | -0.18603489 | 0.04111307  | -0.14547415 | 0.34434527 | -0.04786705 | 0.21274297 | -0.14243343 | 0.57033060  | -0.19097644 | 0.16704352  | -0.18463174 | 0.37352068  | 0.18676441 | 0.19117225 |            |
| ENSG00000233348  | 20 | 12965032  | 12965032  | LINC01184   | lncRNA            | -0.07818481 | 0.07818481  | -0.07818481 | 0.07818481 | -0.07818481 | 0.07818481 | -0.07818481 | 0.07818481  | -0.07818481 | 0.07818481  | -0.07818481 | 0.07818481  | 0.07818481 | 0.07818481 | 0.07818481 |
| ENSG00000122985  | 12 | 11356178  | 11366823  | RBM19       | protein_coding    | -0.21948713 | 0.05512033  | -0.09527303 | 0.25346127 | -0.33485873 | 0.10323577 | -0.33485873 | 0.10323577  | -0.33485873 | 0.10323577  | -0.33485873 | 0.10323577  | 0.02555048 | 0.19137285 |            |
| ENSG00000207444  | 14 | 7198357   | 71984001  | SMOHD25B    | lncRNA            | 0.00543302  | 0.06250219  | -0.04633291 | 0.79347260 | -0.00407124 | 0.28880487 | -0.10371380 | 0.45193738  | -0.19171045 | 0.23250279  | -0.19484120 | 0.37348500  | 0.00176258 | 0.88917528 |            |
| ENSG00000121417  | 17 | 8703396   | 87044411  | ZNF11       | protein_coding    | -0.20591478 | 0.02698286  | -0.10562818 | 0.65931511 | -0.17274761 | 0.48078299 | -0.17274761 | 0.48078299  | -0.17274761 | 0.48078299  | -0.17274761 | 0.48078299  | 0.00000000 | 0.18371791 |            |
| ENSG00000120695  | 12 | 11356178  | 11366823  | RBM19       | protein_coding    | -0.18153038 | 0.114101078 | -0.27295905 | 0.05540368 | -0.17258867 | 0.30225203 | -0.37821731 | 0.05714806  | -0.06080594 | 0.07699145  | -0.19484120 | 0.37348500  | 0.00176258 | 0.88917528 |            |
| ENSG00000207444  | 14 | 7198357   | 71984001  | SMOHD25B    | lncRNA            | 0.00543302  | 0.06250219  | -0.04633291 | 0.79347260 | -0.00407124 | 0.28880487 | -0.10371380 | 0.45193738  | -0.19171045 | 0.23250279  | -0.19484120 | 0.37348500  | 0.00176258 | 0.88917528 |            |
| ENSG00000121417  | 17 | 8703396   | 87044411  | ZNF11       | protein_coding    | -0.20591478 | 0.02698286  | -0.10562818 | 0.65931511 | -0.17274761 | 0.48078299 | -0.17274761 | 0.48078299  | -0.17274761 | 0.48078299  | -0.17274761 | 0.48078299  | 0.00000000 | 0.18371791 |            |
| ENSG00000232412  | X  | 123959223 | 123961341 | XLOC158.1   | lncRNA            | -0.13788908 | 0.23142075  | -0.14544809 | 0.31377842 | -0.07628243 | 0.27628840 | -0.08637586 | 0.63249958  | -0.07894192 | 0.05742034  | -0.16492652 | 0.33700000  | 0.00466313 | 0.33171993 |            |
| ENSG00000169897  | 12 | 5720710   | 5730140   | MBD8        | protein_coding    | -0.18138832 | 0.10084062  | -0.20627118 | 0.13038336 | -0.10196573 | 0.12747774 | -0.24184399 | 0.22423616  | -0.16798897 | 0.22411687  | -0.18472605 | 0.37326857  | 0.12609163 | 0.38280402 |            |
| ENSG00000250901  | 20 | 1691000   | 16961160  | LINC01940.1 | lncRNA            | -0.25677025 | 0.000119007 | -0.35927173 | 0.13869097 | -0.34236642 | 0.46139269 | -0.46392759 | 0.01917605  | -0.20776311 | 0.41339702  | -0.14744604 | 0.37320226  | 0.18491177 | 0.19681949 |            |
| ENSG00000136111  | 13 | 7328303   | 7345169   | TEC104      | protein_coding    | -0.24427387 | 0.03302304  | -0.04559429 | 0.73308287 | -0.21128333 | 0.20090974 | -0.04444045 | 0.85279238  | -0.23263231 | 0.08777881  | -0.14769775 | 0.37339440  | 0.33399444 | 0.01731498 |            |
| ENSG00000236021  | 11 | 17620784  | 17644719  | LOC15943.2  | lncRNA            | -0.54845004 | 0.00185324  | -0.33489149 | 0.38778100 | -0.15305321 | 0.44892639 | -0.42037360 | 0.02687668  | -0.32369272 | 0.00683892  | -0.14771138 | 0.37319399  | 0.00237720 | 0.78093349 |            |
| ENSG00000180353  | 3  | 12151399  | 12160927  | HCE1        | protein_coding    | -0.03734174 | 0.47430915  | -0.21078045 | 0.10277652 | -0.15437299 | 0.24891179 | -0.24891179 | 0.21132768  | -0.03067713 | 0.65269918  | -0.18477403 | 0.37319462  | 0.025046   | 0.71653013 |            |
| ENSG00000253012  | 21 | 39525283  | 39528853  | JCADP1      | protein_coding    | -0.28304708 | 0.01201894  | -0.12681194 | 0.30856620 | -0.18510531 | 0.45316562 | -0.07704818 | 0.81321048  | -0.20993721 | 0.17759487  | -0.14792703 | 0.37330453  | 0.35830927 | 0.0104194  |            |
| ENSG00000204181  | 8  | 3096978   | 3098141   | AC13875.2   | lncRNA            | -0.15754945 | 0.71171387  | -0.07481819 | 0.60950120 | -0.28617688 | 0.15620270 | -0.07293300 | 0.62626474  | -0.13484328 | 0.33033368  | -0.18480131 | 0.37306338  | 0.00000000 | 0.16950133 |            |
| ENSG00000142858  | 15 | 8374938   | 83749898  | AC02089.1   | processed_pseud   | -0.15283689 | 0.18508101  | -0.16655213 | 0.31044947 | -0.05292933 | 0.19478985 | -0.11869484 | 0.55509181  | -0.12271732 | 0.37864018  | -0.18412102 | 0.37329515  | 0.14233004 | 0.32449949 |            |
| ENSG00000200109  | 21 | 41175231  | 41187788  | FLAC4       | lncRNA            | -0.37742581 | 0.00700749  | -0.24371614 | 0.80088281 | -0.25203261 | 0.31843638 | -0.25203261 | 0.31843638  | -0.25203261 | 0.31843638  | -0.25203261 | 0.31843638  | 0.00000000 | 0.0601698  |            |
| ENSG00000145700  | 4  | 7608275   | 7629911   | MRND31      | protein_coding    | -0.33070779 | 0.02078721  | -0.21144878 | 0.14043260 | -0.10297278 | 0.20397278 | -0.11294445 | -0.30270900 | 0.12473958  | -0.30330884 | 0.00000000  | -0.19434809 | 0.37319951 | 0.32274529 | 0.02228683 |
| ENSG00000189897  | X  | 15401213  | 154137103 | NEP2        | protein_coding    | -0.03700214 | 0.14246923  | -0.07034894 | 0.67234921 | -0.08729169 | 0.69309891 | -0.07195447 | 0.19326487  | -0.02027818 | 0.65492183  | -0.19489897 | 0.37296227  | 0.02780714 | 0.04786259 |            |
| ENSG00000212385  | 4  | 10133302  | 10133414  | ANKRD15A    | lncRNA            | -0.15010258 | 0.19257793  | -0.16678763 | 0.47026989 | -0.08447887 | 0.38148366 | -0.08447887 | 0.38148366  | -0.08447887 | 0.38148366  | -0.08447887 | 0.38148366  | 0.00000000 | 0.00000000 |            |
| ENSG00000199953  | 22 | 2378226   | 23784151  | MPMP1       | protein_coding    | -0.22621024 | 0.04791242  | -0.08544189 | 0.58299486 | -0.20344327 | 0.36958964 | -0.08921289 | 0.62416548  | -0.22007135 | 0.10984162  | -0.14931998 | 0.37277014  | 0.28396210 | 0.04570939 |            |
| ENSG00000229307  | 18 | 9270398   | 92703411  | AC02485.1   | lncRNA            | -0.24523258 | 0.00000000  | -0.24523258 | 0.00000000 | -0.24523258 | 0.00000000 | -0.24523258 | 0.00000000  | -0.24523258 | 0.00000000  | -0.24523258 | 0.00000000  | 0.00000000 | 0.00000000 |            |
| ENSG00000263551  | 18 | 876589    | 131018    | OR00826.1   | protein_coding    | -0.08765216 | 0.04883424  | -0.09188349 | 0.80989564 | -0.00462267 | 0.91952243 | -0.28506811 | 0.14870785  | -0.04146231 | 0.16984466  | -0.19009179 | 0.37300000  | 0.16534448 | 0.1306471  |            |
| ENSG00000279813  | 9  | 13624978  | 13625120  | CR32000.1   | TEC               | -0.29237869 | 0.04963201  | -0.11092548 | 0.4343240  | -0.19832579 | 0.31254889 | -0.07073340 | 0.97088750  | -0.21079513 | 0.12681004  | -0.19039587 | 0.37248002  | 0.27889939 | 0.04891407 |            |
| ENSG00000202355  | 10 | 262424    | 2629411   | LOC101928.1 | lncRNA            | -0.24523258 | 0.00000000  | -0.24523258 | 0.00000000 | -0.24523258 | 0.00000000 | -0.24523258 | 0.00000000  | -0.24523258 | 0.00000000  | -0.24523258 | 0.00000000  | 0.00000000 | 0.00000000 |            |
| ENSG00000273851  | 10 | 12186574  | 12196770  | LOC11566.1  | lncRNA            | -0.19320369 | 0.16350511  | -0.01645009 | 0.9006740  | -0.11629063 | 0.27653632 | -0.25330199 | 0.20220769  | -0.1013014  | 0.26683018  | -0.19244025 | 0.37264000  | 0.26536666 | 0.0626120  |            |
| ENSG00000258337  | 12 | 11817452  | 11818129  | AC13095.1   | lncRNA            | -0.12642298 | 0.02921231  | -0.08959273 | 0.64811820 | -0.16943434 | 0.36444206 | -0.0287241  | 0.88905151  | -0.09224270 | 0.50712268  | -0.19071738 | 0.37242802  | 0.17397764 | 0.22706276 |            |
| ENSG00000120251  | 13 | 10345399  | 10346927  | LOC101928.1 | lncRNA            | -0.06800406 | 0.45287454  | -0.06189667 | 0.69911820 | -0.16943434 | 0.36444206 | -0.0287241  | 0.88905151  | -0.09224270 | 0.50712268  | -0.19071738 | 0.37242802  | 0.17397764 | 0.22706276 |            |
| ENSG00000271639  | 2  | 23345440  | 23347033  | PPPIA1P1    | processed_pseud   | -0.06800406 | 0.45287454  | -0.06189667 | 0.69911820 | -0.16943434 | 0.36444206 | -0.0287241  | 0.88905151  | -0.09224270 | 0.50712268  | -0.19071738 | 0.37242802  | 0.17397764 | 0.22706276 |            |
| ENSG00000127819  | 12 | 5321097   | 5323029   | RARG        | protein_coding    | -0.10925373 | 0.34222733  | -0.08291732 | 0.50245100 | -0.20191151 | 0.13394722 | -0.00000000 | 0.90734568  | -0.04770795 | 0.73355453  | -0.19512504 | 0.37274455  | 0.12566221 | 0.04618489 |            |
| ENSG00000145441  | 16 | 14301389  | 14301389  | LOC101928.1 | lncRNA            | -0.06800406 | 0.45287454  | -0.06189667 | 0.69911820 | -0.16943434 | 0.36444206 | -0.0287241  | 0.88905151  | -0.09224270 | 0.50712268  | -0.19071738 | 0.37242802  | 0.17397764 | 0.22706276 |            |
| ENSG0000026454   | 16 | 14301389  | 14311087  | MIR1989HG   | lncRNA            | -0.35228530 | 0.00173401  | -0.30181705 | 0.03315838 | -0.06568167 | 0.74518100 | -0.38199781 | 0.04314889  | -0.33951789 | 0.10190818  |             |             |            |            |            |



Table with 10 columns: Gene ID, Chr, Start, End, Strand, Feature, RefSeq ID, RefSeq Name, RefSeq Type, RefSeq Description. Contains a comprehensive list of genomic features and their associated RefSeq identifiers.

|                 |    |           |           |                 |                                 |             |            |             |            |             |            |             |            |             |            |             |            |            |            |            |
|-----------------|----|-----------|-----------|-----------------|---------------------------------|-------------|------------|-------------|------------|-------------|------------|-------------|------------|-------------|------------|-------------|------------|------------|------------|------------|
| ENSG0000028636  | 14 | 105095405 | 105096453 | AL512356.4      | lncRNA                          | -0.15602214 | 0.17540468 | -0.1388715  | 0.33262472 | -0.19078882 | 0.34481172 | -0.07348655 | 0.22733923 | -0.07895688 | 0.61453407 | -0.02039879 | 0.3592379  | 0.28174792 | 0.04745618 |            |
| ENSG0000018873  | 19 | 45198137  | 45198137  | ENSG0000018873  | protein coding                  | -0.25593934 | 0.04207073 | -0.1633473  | 0.24620909 | -0.26246181 | 0.17987889 | -0.06545171 | 0.79887889 | -0.0450313  | 0.90752679 | -0.2004305  | 0.36922925 | 0.30472193 | 0.07470203 | 0.07470203 |
| ENSG0000018714  | 21 | 45022479  | 23173351  | PTMA            | protein coding                  | -0.2463107  | 0.04207073 | -0.1633473  | 0.24620909 | -0.26246181 | 0.17987889 | -0.06545171 | 0.79887889 | -0.0450313  | 0.90752679 | -0.2004305  | 0.36922925 | 0.30472193 | 0.07470203 | 0.07470203 |
| ENSG0000027667  | 17 | 45022479  | 44252320  | CNVN1           | protein coding                  | -0.15583427 | 0.17541123 | -0.10312905 | 0.28464272 | -0.18044707 | 0.34481172 | -0.07348655 | 0.22733923 | -0.07895688 | 0.61453407 | -0.02039879 | 0.3592379  | 0.28174792 | 0.04745618 | 0.04745618 |
| ENSG0000026627  | 6  | 16574189  | 16573758  | ENSG0000026627  | protein coding                  | -0.2484177  | 0.02873913 | -0.1220973  | 0.36262057 | -0.17427178 | 0.41773866 | -0.08248081 | 0.6828026  | -0.2622029  | 0.64508294 | -0.2404817  | 0.3591796  | 0.28174792 | 0.04745618 | 0.04745618 |
| ENSG0000024955  | 19 | 45198137  | 45198137  | PRAM1           | protein coding                  | -0.2484177  | 0.02873913 | -0.1220973  | 0.36262057 | -0.17427178 | 0.41773866 | -0.08248081 | 0.6828026  | -0.2622029  | 0.64508294 | -0.2404817  | 0.3591796  | 0.28174792 | 0.04745618 | 0.04745618 |
| ENSG0000023816  | 16 | 42630337  | 42630337  | ANKRD20A7       | transcripted unprocessed intron | -0.04851231 | 0.10124844 | -0.04851231 | 0.23790988 | -0.24243536 | 0.23841777 | -0.04851231 | 0.23790988 | -0.04851231 | 0.23790988 | -0.04851231 | 0.23790988 | 0.23790988 | 0.23790988 | 0.23790988 |
| ENSG0000025009  | 19 | 47660113  | 47661252  | TPRXD           | unprocessed intron              | -0.15428811 | 0.18037379 | -0.16969644 | 0.25197418 | -0.08629258 | 0.68823952 | -0.15067706 | 0.51605918 | -0.11849185 | 0.38548489 | -0.25044789 | 0.35883847 | 0.28174792 | 0.04745618 | 0.04745618 |
| ENSG0000014647  | 9  | 78534149  | 78534149  | ENSG0000014647  | protein coding                  | -0.17427178 | 0.04207073 | -0.1633473  | 0.24620909 | -0.26246181 | 0.17987889 | -0.06545171 | 0.79887889 | -0.0450313  | 0.90752679 | -0.2004305  | 0.36922925 | 0.30472193 | 0.07470203 | 0.07470203 |
| ENSG0000018926  | 10 | 27775186  | 27797979  | APMCA4          | protein coding                  | -0.29329506 | 0.09054491 | -0.29666653 | 0.09044349 | -0.08989949 | 0.62432807 | -0.33882952 | 0.02896668 | -0.26341976 | 0.05428129 | -0.00767677 | 0.20066022 | 0.28066022 | 0.04850120 | 0.04850120 |
| ENSG0000022984  | 2  | 19192739  | 19192629  | ENSG0000022984  | protein coding                  | -0.10814558 | 0.34916079 | -0.07938274 | 0.88088165 | -0.27597242 | 0.16717178 | -0.15062266 | 0.45337348 | 0.02719457  | 0.98486506 | -0.20066022 | 0.36872577 | 0.31839884 | 0.04745618 | 0.04745618 |
| ENSG0000023419  | 9  | 78534149  | 78534149  | ENSG0000023419  | protein coding                  | -0.11582497 | 0.13026386 | -0.10581489 | 0.24549797 | -0.07176849 | 0.72254649 | -0.10388383 | 0.65674989 | -0.20262188 | 0.38868768 | -0.26369763 | 0.36868768 | 0.28174792 | 0.04745618 | 0.04745618 |
| ENSG0000010857  | 17 | 1768184   | 17114533  | RAI1            | protein coding                  | -0.07586212 | 0.54201933 | -0.03946873 | 0.78517935 | -0.05629739 | 0.75622867 | -0.06434777 | 0.74882473 | -0.02469610 | 0.67876659 | -0.20066022 | 0.36872577 | 0.31839884 | 0.04745618 | 0.04745618 |
| ENSG0000018049  | 19 | 15808349  | 15808349  | CRKOA1P         | unprocessed intron              | -0.22621759 | 0.04994811 | -0.25714948 | 0.07056134 | -0.18260187 | 0.33843734 | -0.28644068 | 0.13292013 | -0.21811212 | 0.10396148 | -0.20464327 | 0.36862865 | 0.28174792 | 0.04745618 | 0.04745618 |
| ENSG0000025932  | 15 | 45198137  | 45198137  | ENSG0000025932  | protein coding                  | -0.09478197 | 0.46589922 | -0.21198821 | 0.13868247 | -0.13121228 | 0.51410221 | -0.11988851 | 0.27884453 | -0.02378911 | 0.88483378 | -0.20066022 | 0.36862865 | 0.28174792 | 0.04745618 | 0.04745618 |
| ENSG0000025688  | 11 | 18507608  | 18507608  | ENSG0000025688  | protein coding                  | -0.28048749 | 0.02324442 | -0.17066403 | 0.23033299 | -0.24465303 | 0.21149319 | -0.17341006 | 0.38703444 | -0.26236318 | 0.10396148 | -0.20464327 | 0.36862865 | 0.28174792 | 0.04745618 | 0.04745618 |
| ENSG0000010029  | 22 | 34500134  | 34524311  | KRMA            | protein coding                  | -0.10712678 | 0.31205448 | -0.00159936 | 0.90120180 | -0.13109691 | 0.09106065 | -0.23207700 | 0.24341458 | -0.16810988 | 0.22432076 | -0.06886736 | 0.36857151 | 0.18876184 | 0.18848420 | 0.18848420 |
| ENSG0000025008  | 19 | 10170292  | 10200942  | AL345824.1      | lncRNA                          | -0.26325248 | 0.02608191 | -0.20209048 | 0.15768141 | -0.17477815 | 0.66977658 | -0.21491957 | 0.29189808 | -0.26557717 | 0.00419484 | -0.20271139 | 0.15846013 | 0.25818253 | 0.17075471 | 0.17075471 |
| ENSG00000133819 | 7  | 14971471  | 14974573  | KCMB            | protein coding                  | -0.13095103 | 0.22763782 | -0.10015949 | 0.6347381  | -0.14327592 | 0.47879648 | -0.11003805 | 0.46833165 | -0.24177149 | 0.09218238 | -0.20773149 | 0.36857151 | 0.24153394 | 0.09196248 | 0.09196248 |
| ENSG0000024211  | 11 | 10470228  | 10428693  | TPROXSP         | transcripted unitary            | -0.12502408 | 0.27894703 | -0.12378911 | 0.31172803 | -0.12459911 | 0.48748114 | -0.04048488 | 0.8012352  | -0.01847493 | 0.88617249 | -0.20272923 | 0.38424226 | 0.28174792 | 0.04745618 | 0.04745618 |
| ENSG0000010026  | 19 | 3818188   | 38170294  | DNCT1           | protein coding                  | -0.25983053 | 0.02453267 | -0.15941420 | 0.28931971 | -0.12943352 | 0.51981767 | -0.07603242 | 0.74239848 | -0.15123297 | 0.21159027 | -0.20747411 | 0.38317798 | 0.29744266 | 0.03024789 | 0.03024789 |
| ENSG00000150676 | 11 | 85855101  | 85820011  | CDCR3B          | protein coding                  | -0.18900196 | 0.35115202 | -0.18500196 | 0.34573387 | -0.15780383 | 0.93766116 | -0.23417119 | 0.09218238 | -0.20773149 | 0.36857151 | 0.18876184  | 0.18848420 | 0.18848420 | 0.18848420 | 0.18848420 |
| ENSG0000017958  | 18 | 27528279  | 28177489  | CD4D            | protein coding                  | -0.29581452 | 0.00030038 | -0.15127921 | 0.28431457 | -0.22784071 | 0.29383363 | -0.02633732 | 0.88629247 | -0.22683824 | 0.09047249 | -0.20784151 | 0.36828627 | 0.27470583 | 0.04745618 | 0.04745618 |
| ENSG00000171903 | 19 | 15012187  | 15024987  | CYRIF11         | protein coding                  | -0.35078998 | 0.00178169 | -0.25169572 | 0.1330663  | -0.21001054 | 0.23077444 | -0.11940781 | 0.27156918 | -0.34915472 | 0.21159027 | -0.20747411 | 0.38317798 | 0.29744266 | 0.03024789 | 0.03024789 |
| ENSG0000028571  | 10 | 14372001  | 14375788  | AL139405.1      | lncRNA                          | -0.28445328 | 0.01267139 | -0.13046123 | 0.30658787 | -0.20435488 | 0.30468718 | -0.03342184 | 0.68855636 | -0.21813115 | 0.09158034 | -0.20082346 | 0.38819150 | 0.38725344 | 0.04745618 | 0.04745618 |
| ENSG0000028757  | 18 | 5601383   | 5618258   | ENSG0000028757  | protein coding                  | -0.42170571 | 0.00113864 | -0.38794658 | 0.00897300 | -0.34035546 | 0.08292699 | -0.27892927 | 0.01134422 | -0.43791581 | 0.00297728 | -0.20083936 | 0.38819150 | 0.41882554 | 0.04745618 | 0.04745618 |
| ENSG00000276431 | 12 | 31018981  | 31017091  | ENSG00000276431 | protein coding                  | -0.10271673 | 0.37898192 | -0.07723742 | 0.72648628 | -0.12369628 | 0.29869525 | -0.07092152 | 0.27514715 | -0.01788029 | 0.95717758 | -0.20083936 | 0.38819150 | 0.41882554 | 0.04745618 | 0.04745618 |
| ENSG0000019784  | 6  | 13180816  | 13188153  | ENSG0000019784  | protein coding                  | -0.2704337  | 0.01743681 | -0.04848154 | 0.37818224 | -0.18179123 | 0.45889798 | -0.12310911 | 0.54089724 | -0.17588621 | 0.11830748 | -0.20083936 | 0.38819150 | 0.41882554 | 0.04745618 | 0.04745618 |
| ENSG0000022468  | 1  | 21089717  | 21088229  | ENSG0000022468  | protein coding                  | -0.17998163 | 0.11252187 | -0.10175888 | 0.69735588 | -0.24857814 | 0.21120987 | -0.21015888 | 0.28284131 | -0.20473071 | 0.13880124 | -0.2005411  | 0.37991787 | 0.24810047 | 0.04745618 | 0.04745618 |
| ENSG0000018984  | 19 | 45198137  | 45198137  | ENSG0000018984  | protein coding                  | -0.22228847 | 0.05162224 | -0.19239812 | 0.20461974 | -0.15200265 | 0.49249628 | -0.08248081 | 0.6828026  | -0.2622029  | 0.64508294 | -0.2404817  | 0.3591796  | 0.28174792 | 0.04745618 | 0.04745618 |
| ENSG00000132141 | 17 | 34927859  | 34881078  | CO16B           | protein coding                  | -0.21121028 | 0.05118635 | -0.16185248 | 0.48107224 | -0.10454418 | 0.61687932 | -0.15025001 | 0.45448017 | -0.19046489 | 0.04863988 | -0.20076321 | 0.36817291 | 0.24323999 | 0.18842252 | 0.18842252 |
| ENSG00000248517 | 4  | 18488987  | 18505188  | ENSG00000248517 | protein coding                  | -0.15697153 | 0.17236958 | -0.16505450 | 0.20078004 | -0.12713369 | 0.53710888 | -0.12784391 | 0.25298409 | -0.13594373 | 0.32705427 | -0.20083936 | 0.38744744 | 0.16020718 | 0.24024808 | 0.24024808 |
| ENSG0000020225  | 19 | 10170292  | 10170292  | ENSG0000020225  | protein coding                  | -0.07871801 | 0.47545268 | -0.20209048 | 0.15768141 | -0.17477815 | 0.66977658 | -0.21491957 | 0.29189808 | -0.26557717 | 0.00419484 | -0.20271139 | 0.15846013 | 0.25818253 | 0.17075471 | 0.17075471 |
| ENSG00000245975 | 18 | 58769072  | 58769074  | ENSG00000245975 | protein coding                  | -0.28677404 | 0.01246953 | -0.17046535 | 0.18380860 | -0.12513593 | 0.38937334 | -0.15335505 | 0.44652628 | -0.25651225 | 0.05115109 | -0.20089609 | 0.35776633 | 0.27732566 | 0.05115109 | 0.05115109 |
| ENSG00000196376 | 6  | 11707974  | 11813764  | ENSG00000196376 | protein coding                  | -0.26333035 | 0.02674489 | -0.20348939 | 0.00062891 | -0.03262877 | 0.38937334 | -0.15335505 | 0.44652628 | -0.25651225 | 0.05115109 | -0.20089609 | 0.35776633 | 0.27732566 | 0.05115109 | 0.05115109 |
| ENSG0000010688  | 19 | 45198137  | 45198137  | ENSG0000010688  | protein coding                  | -0.18181344 | 0.12911621 | -0.1633473  | 0.24620909 | -0.26246181 | 0.17987889 | -0.06545171 | 0.79887889 | -0.0450313  | 0.90752679 | -0.2004305  | 0.36922925 | 0.30472193 | 0.07470203 | 0.07470203 |
| ENSG0000019818  | X  | 11978604  | 11979130  | RR33            | protein coding                  | -0.25846047 | 0.02685364 | -0.21034433 | 0.13302001 | -0.17038514 | 0.68138148 | -0.1881022  | 0.24221338 | -0.2249338  | 0.04631876 | -0.20028663 | 0.36355026 | 0.3841074  | 0.00353691 | 0.00353691 |
| ENSG0000028750  | 4  | 5517787   | 5518180   | ENSG0000028750  | protein coding                  | -0.13976826 | 0.32384101 | -0.01445271 | 0.82063283 | -0.10150173 | 0.04784894 | -0.24257381 | 0.22280002 | -0.05858374 | 0.96490279 | -0.20104516 | 0.36765047 | -0.2287491 | 0.113305   |            |





|                 |    |          |          |            |                                    |              |             |              |             |              |             |              |             |              |             |              |             |             |             |
|-----------------|----|----------|----------|------------|------------------------------------|--------------|-------------|--------------|-------------|--------------|-------------|--------------|-------------|--------------|-------------|--------------|-------------|-------------|-------------|
| ENSG0000027948  | 22 | 27044001 | 27043153 | AK083834   | lincRNA                            | -0.121203021 | 0.063914079 | -0.1191811   | 0.40971332  | 0.031361432  | 0.678969139 | 0.019362020  | 0.52363442  | -0.148884520 | 0.283591484 | -0.206195881 | 0.345204901 | 0.238119151 | 0.005866202 |
| ENSG0000026505  | 22 | 38770331 | 38770971 | AF214728.1 | lincRNA                            | -0.250568411 | 0.37353611  | -0.18905651  | 0.04963774  | 0.072097711  | 0.727707828 | -0.133125526 | 0.67888765  | -0.162425771 | 0.242810424 | -0.206296262 | 0.327267192 | 0.238281738 | 0.099171241 |
| ENSG0000029118  | 22 | 29841192 | 29841192 | AK083834   | lincRNA                            | -0.20281893  | 0.063914079 | -0.1191811   | 0.40971332  | 0.031361432  | 0.678969139 | 0.019362020  | 0.52363442  | -0.148884520 | 0.283591484 | -0.206195881 | 0.345204901 | 0.238119151 | 0.005866202 |
| ENSG0000029241  | 22 | 30704114 | 30709701 | AK083834   | lincRNA                            | -0.145019274 | 0.022817518 | -0.11490603  | 0.42684891  | 0.038444069  | 0.678951808 | 0.042909587  | 0.807193699 | -0.118643174 | 0.328405404 | -0.206223339 | 0.345112923 | 0.143337079 | 0.23044884  |
| ENSG0000026834  | 22 | 12969589 | 12970122 | AK113733.2 | lincRNA                            | -0.252818652 | 0.042909587 | -0.13019407  | 0.407507401 | -0.254964475 | 0.196317875 | -0.074623661 | 0.711438809 | -0.151894151 | 0.016967701 | -0.206258633 | 0.345053381 | 0.326914488 | 0.040493262 |
| ENSG0000031536  | 22 | 14911951 | 14911951 | AK083834   | lincRNA                            | -0.20281893  | 0.063914079 | -0.1191811   | 0.40971332  | 0.031361432  | 0.678969139 | 0.019362020  | 0.52363442  | -0.148884520 | 0.283591484 | -0.206195881 | 0.345204901 | 0.238119151 | 0.005866202 |
| ENSG0000029509  | 14 | 18677846 | 18678161 | AK151210.1 | lincRNA                            | -0.171892319 | 0.01239307  | -0.12319307  | 0.412310747 | 0.102686623  | 0.419324056 | -0.24541814  | 0.217287543 | -0.211103017 | 0.027148269 | -0.20636181  | 0.345204901 | 0.238119151 | 0.005866202 |
| ENSG0000034187  | 7  | 7919303  | 79194261 | H6P1C      | transcribed unprocessed pseudogene | -0.157323443 | 0.022817518 | -0.11490603  | 0.42684891  | 0.038444069  | 0.678951808 | 0.042909587  | 0.807193699 | -0.118643174 | 0.328405404 | -0.206223339 | 0.345112923 | 0.143337079 | 0.23044884  |
| ENSG0000034358  | 7  | 14911951 | 14911951 | AK083834   | lincRNA                            | -0.20281893  | 0.063914079 | -0.1191811   | 0.40971332  | 0.031361432  | 0.678969139 | 0.019362020  | 0.52363442  | -0.148884520 | 0.283591484 | -0.206195881 | 0.345204901 | 0.238119151 | 0.005866202 |
| ENSG0000034207  | 1  | 11408291 | 11415380 | SVT6       | protein coding                     | -0.553182295 | 0.022817518 | -0.11490603  | 0.42684891  | 0.038444069  | 0.678951808 | 0.042909587  | 0.807193699 | -0.118643174 | 0.328405404 | -0.206223339 | 0.345112923 | 0.143337079 | 0.23044884  |
| ENSG0000011983  | 14 | 10659589 | 10647480 | IGHZ       | IG_C_gene                          | -0.10907702  | 0.07304469  | -0.08769582  | 0.447698433 | 0.032082187  | 0.689417781 | 0.004700757  | 0.615262048 | -0.048683318 | 0.374915117 | -0.206433035 | 0.346826265 | 0.024136806 | 0.004176222 |
| ENSG0000024214  | 3  | 14186938 | 14192461 | LOC100287  | transcribed unprocessed pseudogene | -0.23867071  | 0.022817518 | -0.11490603  | 0.42684891  | 0.038444069  | 0.678951808 | 0.042909587  | 0.807193699 | -0.118643174 | 0.328405404 | -0.206223339 | 0.345112923 | 0.143337079 | 0.23044884  |
| ENSG0000022937  | 2  | 17111036 | 17127262 | UC009395.2 | lincRNA                            | -0.047089585 | 0.68420451  | -0.046877954 | 0.73038271  | 0.1143587    | 0.596836338 | 0.160713861  | 0.42324515  | -0.03364017  | 0.860177088 | -0.20646831  | 0.345204901 | 0.238119151 | 0.005866202 |
| ENSG0000030520  | 7  | 2667898  | 26692439 | SNAP2      | protein coding                     | -0.131395894 | 0.042909587 | -0.103729251 | 0.460268180 | 0.065330740  | 0.764200110 | -0.263827828 | 0.042909587 | -0.257744451 | 0.186915278 | -0.2063901   | 0.346826265 | 0.024136806 | 0.004176222 |
| ENSG0000031389  | 9  | 2974934  | 29791211 | SLC39B3    | protein coding                     | -0.00878119  | 0.846990032 | -0.00598158  | 0.41032071  | 0.081189833  | 0.76934665  | -0.026079592 | 0.83236004  | -0.108811716 | 0.434373264 | -0.20637806  | 0.34291182  | 0.054949421 | 0.06676507  |
| ENSG0000025729  | 12 | 5230616  | 5230871  | AC112757.1 | lincRNA                            | -0.244755544 | 0.031361432 | -0.11490603  | 0.42684891  | 0.038444069  | 0.678951808 | 0.042909587  | 0.807193699 | -0.118643174 | 0.328405404 | -0.206223339 | 0.345112923 | 0.143337079 | 0.23044884  |
| ENSG0000015125  | 10 | 2174842  | 21962221 | GPR158     | protein coding                     | -0.25862451  | 0.022817518 | -0.11490603  | 0.42684891  | 0.038444069  | 0.678951808 | 0.042909587  | 0.807193699 | -0.118643174 | 0.328405404 | -0.206223339 | 0.345112923 | 0.143337079 | 0.23044884  |
| ENSG0000027440  | 19 | 2053526  | 2056980  | ZNF77      | protein coding                     | -0.13724592  | 0.23393971  | -0.10749463  | 0.45698441  | 0.063337083  | 0.7383399   | -0.0721756   | 0.8502041   | -0.11848324  | 0.388471778 | -0.206195881 | 0.345204901 | 0.238119151 | 0.005866202 |
| ENSG00000277159 | 13 | 11262928 | 11269417 | AK133884.2 | lincRNA                            | -0.29525475  | 0.00941427  | -0.141170883 | 0.178641886 | 0.144195301  | 0.633395946 | -0.15833897  | 0.4381710   | -0.24281265  | 0.07785907  | -0.20644441  | 0.34132673  | 0.1917708   | 0.0323024   |
| ENSG0000023250  | 22 | 23088674 | 23094468 | GCSF       | protein coding                     | -0.381911919 | 0.0121963   | -0.25274454  | 0.769628444 | -0.12623251  | 0.341918975 | -0.24447458  | 0.18249771  | -0.348415388 | 0.018224264 | -0.2068578   | 0.34132673  | 0.1917708   | 0.0323024   |
| ENSG0000023503  | 1  | 11619434 | 11619434 | LOC1001779 | lincRNA                            | -0.23388535  | 0.063914079 | -0.11490603  | 0.42684891  | 0.038444069  | 0.678951808 | 0.042909587  | 0.807193699 | -0.118643174 | 0.328405404 | -0.206223339 | 0.345112923 | 0.143337079 | 0.23044884  |
| ENSG00000199119 | 3  | 14267397 | 14267394 | RNRP225    | lincRNA                            | -0.067324455 | 0.55272723  | -0.066821423 | 0.12623251  | 0.121818328  | 0.67847478  | 0.70343906   | -0.03148489 | 0.819124559  | -0.20686763 | 0.34027602   | 0.10825451  | 0.05428699  |             |
| ENSG0000028940  | 14 | 29415056 | 29504040 | AK15508.2  | lincRNA                            | -0.176925928 | 0.12497024  | -0.10201874  | 0.1832386   | 0.08717398   | 0.68547867  | -0.203441781 | 0.308778924 | -0.12877868  | 0.353375114 | -0.2074426   | 0.34398461  | 0.15474354  | 0.28097307  |
| ENSG0000011950  | 6  | 6322987  | 6323101  | UC00436.2  | transcribed unprocessed pseudogene | -0.13693585  | 0.23393971  | -0.10749463  | 0.45698441  | 0.063337083  | 0.7383399   | -0.0721756   | 0.8502041   | -0.11848324  | 0.388471778 | -0.206195881 | 0.345204901 | 0.238119151 | 0.005866202 |
| ENSG0000019426  | 9  | 13547093 | 13548883 | PP1R2C     | protein coding                     | -0.27680884  | 0.01476821  | -0.19308805  | 0.17911920  | 0.25273475   | 0.19521512  | -0.20944021  | 0.24643214  | -0.3174322   | 0.1943027   | -0.2097007   | 0.34378053  | 0.29262574  | 0.0460107   |
| ENSG0000023497  | 16 | 8625247  | 8625282  | UC00108.1  | transcribed unprocessed pseudogene | -0.115100743 | 0.18829295  | -0.17333292  | 0.2286180   | 0.10335807   | 0.85013547  | -0.1138179   | 0.57188827  | -0.08242024  | 0.52593848  | -0.20648853  | 0.34394270  | 0.15953696  | 0.28428208  |
| ENSG0000018912  | 12 | 9927440  | 9944168  | LOC100287  | transcribed unprocessed pseudogene | -0.1838921   | 0.01020041  | -0.120471678 | 0.10748151  | -0.08321865  | 0.67898137  | -0.27760313  | 0.14083161  | -0.14202653  | 0.18698907  | -0.20686921  | 0.34394270  | 0.15953696  | 0.28428208  |
| ENSG0000018420  | 1  | 14688749 | 14688795 | H2AC21     | protein coding                     | -0.139138242 | 0.2274804   | -0.106439848 | 0.15137386  | 0.102619117  | 0.808519519 | -0.03086443  | 0.67835778  | -0.04088236  | 0.679831    | -0.20648853  | 0.34394270  | 0.15953696  | 0.28428208  |
| ENSG0000025128  | 8  | 7418991  | 7420546  | HSPD193    | protein coding                     | -0.2786892   | 0.014122464 | -0.12911304  | 0.173154007 | 0.18882778   | 0.36683305  | -0.04946142  | 0.745048    | -0.26916429  | 0.04095904  | -0.20686921  | 0.34394270  | 0.15953696  | 0.28428208  |
| ENSG0000019783  | 1  | 2933433  | 2933433  | LOC100287  | transcribed unprocessed pseudogene | -0.2722488   | 0.022817518 | -0.11490603  | 0.42684891  | 0.038444069  | 0.678951808 | 0.042909587  | 0.807193699 | -0.118643174 | 0.328405404 | -0.206223339 | 0.345112923 | 0.143337079 | 0.23044884  |
| ENSG0000011189  | 21 | 2633933  | 2640033  | GRIK1      | protein coding                     | -0.267282631 | 0.01504294  | -0.20119272  | 0.150084639 | -0.1418873   | 0.408833003 | -0.17291683  | 0.388406359 | -0.23568871  | 0.08383238  | -0.2068512   | 0.34394270  | 0.15953696  | 0.28428208  |
| ENSG0000025492  | 11 | 12526326 | 12526789 | UC01007.1  | lincRNA                            | -0.20377877  | 0.07453478  | -0.10737888  | 0.16004477  | 0.07455262   | 0.71171079  | -0.18157645  | 0.364871058 | -0.16908489  | 0.212165914 | -0.20644014  | 0.34345445  | 0.143337079 | 0.23044884  |
| ENSG00000199030 | 1  | 14903199 | 14903199 | Y RNA      | lincRNA                            | -0.22481384  | 0.063914079 | -0.11490603  | 0.42684891  | 0.038444069  | 0.678951808 | 0.042909587  | 0.807193699 | -0.118643174 | 0.328405404 | -0.206223339 | 0.345112923 | 0.143337079 | 0.23044884  |
| ENSG00000171357 | 1  | 4620334  | 4621238  | LIRAP1     | protein coding                     | -0.385026079 | 0.00564351  | -0.291115869 | 0.00564351  | 0.203778820  | 0.244687872 | -0.36512058  | 0.661110817 | -0.39567471  | 0.002767609 | -0.20640814  | 0.34317864  | 0.375508449 | 0.007160571 |
| ENSG00000206105 | 7  | 15037435 | 15037434 | UC00586.1  | lincRNA                            | -0.231449324 | 0.042909587 | -0.103729251 | 0.460268180 | 0.065330740  | 0.764200110 | -0.263827828 | 0.042909587 | -0.257744451 | 0.186915278 | -0.2063901   | 0.346826265 | 0.024136806 | 0.004176222 |
| ENSG00000206105 | 7  | 15037435 | 15037434 | UC00586.1  | lincRNA                            | -0.231449324 | 0.042909587 | -0.103729251 | 0.460268180 | 0.065330740  | 0.764200110 | -0.263827828 | 0.042909587 | -0.257744451 | 0.186915278 | -0.2063901   | 0.346826265 | 0.024136806 | 0.004176222 |
| ENSG00000112599 | 6  | 4128324  | 4128495  | GUCIAB     | protein coding                     | -0.176288973 | 0.12511527  | -0.07292486  | 0.4869338   | 0.044120484  | 0.021595924 | -0.23716955  | 0.801788626 | -0.23716955  | 0.801788626 | -0.20670636  | 0.34311264  | 0.25242452  | 0.07133697  |
| ENSG0000027638  | 6  | 6705959  | 6726346  | CHTNAP2P2  | transcribed unprocessed pseudogene | -0.24024968  | 0.03311394  | -0.28945235  | 0.094471710 | 0.133550374  | 0.509612339 | -0.37055179  | 0.05707952  | -0.24860333  | 0.06899786  | -0.20705920  | 0.34037159  | 0.11119999  | 0.18354442  |
| ENSG0000026853  | 3  | 6284534  | 6284534  | UC001848.1 | transcribed unprocessed pseudogene | -0.0318248   | 0.031361432 | -0.11490603  | 0.42684891  | 0.038444069  | 0.678951808 | 0.042909587  | 0.807193699 | -0.118643174 | 0.328405404 | -0.206223339 | 0.345112923 | 0.143337079 | 0.23044884  |
| ENSG00000272905 | 7  | 3305954  | 3306406  |            |                                    |              |             |              |             |              |             |              |             |              |             |              |             |             |             |



|                 |    |           |           |             |                |             |                    |              |             |              |                   |              |                   |             |                    |             |             |             |                    |            |
|-----------------|----|-----------|-----------|-------------|----------------|-------------|--------------------|--------------|-------------|--------------|-------------------|--------------|-------------------|-------------|--------------------|-------------|-------------|-------------|--------------------|------------|
| ENSG00000269933 | 19 | 409046    | 507633    | AC005775.1  | lincRNA        | -0.28697601 | <b>0.018417009</b> | -0.251743081 | 0.077903085 | -0.283831486 | 0.151660291       | -0.261183076 | 0.188205051       | -0.24933372 | 0.07925557         | -0.20923474 | 0.337983007 | 0.303842199 | <b>0.031841001</b> |            |
| ENSG00000269934 | 19 | 526145    | 526145    | AC005775.1  | lincRNA        | -0.57419189 | 0.183885051        | -0.17426739  | 0.21419668  | -0.14803484  | 0.51115064        | -0.06370862  | 0.08370862        | -0.02929634 | 0.05623637         | -0.20292634 | 0.373071534 | 0.207026633 | 0.585115334        |            |
| ENSG00000272544 | 16 | 35410922  | 35413333  | SLFN12      | protein coding | -0.04329428 | 0.04329428         | -0.04329428  | 0.04329428  | -0.04329428  | 0.04329428        | -0.04329428  | 0.04329428        | -0.04329428 | 0.04329428         | -0.04329428 | 0.04329428  | 0.04329428  | 0.04329428         | 0.04329428 |
| ENSG00000272544 | 16 | 3127771   | 3127771   | ZNF123      | protein coding | -0.18527697 | 0.10584376         | -0.17480197  | 0.08840119  | -0.17151688  | 0.02841107        | -0.20101644  | 0.28522007        | -0.00022450 | 0.05145234         | -0.02992327 | 0.03378426  | 0.02254452  | 0.11548647         |            |
| ENSG00000273071 | 20 | 2961326   | 2961326   | IT1-21894.2 | lincRNA        | -0.03327619 | 0.07478092         | -0.15445503  | 0.28421102  | 0.18551078   | 0.25423494        | -0.04901011  | 0.08292154        | -0.02929216 | 0.01418663         | -0.02929216 | 0.037840147 | 0.04054587  | 0.05027057         |            |
| ENSG00000273071 | 20 | 913895    | 913895    | IT1-21894.1 | lincRNA        | -0.03327619 | 0.07478092         | -0.15445503  | 0.28421102  | 0.18551078   | 0.25423494        | -0.04901011  | 0.08292154        | -0.02929216 | 0.01418663         | -0.02929216 | 0.037840147 | 0.04054587  | 0.05027057         |            |
| ENSG00000293615 | 10 | 130461019 | 130461019 | MR4306      | miRNA          | 0.130461019 | 0.25808064         | -0.14077983  | 0.03807791  | -0.28742540  | 0.19242767        | -0.40784540  | <b>0.03470292</b> | -0.39523489 | <b>0.007638108</b> | -0.02380731 | 0.033763431 | 0.131042103 | 0.9643586          |            |
| ENSG0000029811  | 11 | 7455440   | 7455207   | MR4306      | miRNA          | -0.03195554 | 0.007638108        | -0.03020575  | 0.05692620  | -0.28361184  | 0.15243469        | -0.18023407  | 0.34189425        | -0.39523489 | 0.02804658         | -0.02804658 | 0.02804658  | 0.3763138   | 0.39523489         |            |
| ENSG0000029811  | 11 | 5301389   | 5301389   | MR4306      | miRNA          | -0.03195554 | 0.007638108        | -0.03020575  | 0.05692620  | -0.28361184  | 0.15243469        | -0.18023407  | 0.34189425        | -0.39523489 | 0.02804658         | -0.02804658 | 0.02804658  | 0.3763138   | 0.39523489         |            |
| ENSG00000314627 | 11 | 9454340   | 9454121.1 | PWLL4       | lincRNA        | -0.11598462 | <b>0.001545839</b> | -0.04938120  | 0.07329560  | -0.20346176  | 0.10228219        | -0.26078310  | 0.26078310        | -0.05461974 | 0.06848550         | -0.02804658 | 0.01841891  | 0.03758890  | <b>0.02444260</b>  |            |
| ENSG00000322104 | 8  | 3526723   | 3691194   | PKA-AS1     | lincRNA        | 0.02641550  | 0.82429468         | -0.04884749  | 0.04834760  | 0.03470396   | <b>0.02603011</b> | 0.15072281   | 0.45302007        | 0.19981182  | 0.14988274         | 0.02804658  | 0.02804658  | 0.02804658  | 0.02804658         |            |
| ENSG00000322104 | 8  | 3526723   | 3691194   | PKA-AS1     | lincRNA        | 0.02641550  | 0.82429468         | -0.04884749  | 0.04834760  | 0.03470396   | <b>0.02603011</b> | 0.15072281   | 0.45302007        | 0.19981182  | 0.14988274         | 0.02804658  | 0.02804658  | 0.02804658  | 0.02804658         |            |
| ENSG00000325846 | 6  | 5072091   | 5080946   | PKA-AS1     | lincRNA        | -0.11598462 | 0.001545839        | -0.04938120  | 0.07329560  | -0.20346176  | 0.10228219        | -0.26078310  | 0.26078310        | -0.05461974 | 0.06848550         | -0.02804658 | 0.01841891  | 0.03758890  |                    |            |
| ENSG00000325846 | 6  | 5072091   | 5080946   | PKA-AS1     | lincRNA        | -0.11598462 | 0.001545839        | -0.04938120  | 0.07329560  | -0.20346176  | 0.10228219        | -0.26078310  | 0.26078310        | -0.05461974 | 0.06848550         | -0.02804658 | 0.01841891  | 0.03758890  |                    |            |
| ENSG00000325935 | 5  | 4817124   | 4819169   | PKA-AS1     | lincRNA        | -0.12915900 | 0.26291010         | -0.14388980  | 0.03187438  | -0.22499883  | 0.54275008        | -0.04421958  | 0.04421958        | -0.01718100 | 0.04491800         | -0.02804658 | 0.02804658  | 0.02804658  | 0.02804658         |            |
| ENSG00000325935 | 5  | 4817124   | 4819169   | PKA-AS1     | lincRNA        | -0.12915900 | 0.26291010         | -0.14388980  | 0.03187438  | -0.22499883  | 0.54275008        | -0.04421958  | 0.04421958        | -0.01718100 | 0.04491800         | -0.02804658 | 0.02804658  | 0.02804658  | 0.02804658         |            |
| ENSG00000325935 | 5  | 4817124   | 4819169   | PKA-AS1     | lincRNA        | -0.12915900 | 0.26291010         | -0.14388980  | 0.03187438  | -0.22499883  | 0.54275008        | -0.04421958  | 0.04421958        | -0.01718100 | 0.04491800         | -0.02804658 | 0.02804658  | 0.02804658  | 0.02804658         |            |
| ENSG00000325935 | 5  | 4817124   | 4819169   | PKA-AS1     | lincRNA        | -0.12915900 | 0.26291010         | -0.14388980  | 0.03187438  | -0.22499883  | 0.54275008        | -0.04421958  | 0.04421958        | -0.01718100 | 0.04491800         | -0.02804658 | 0.02804658  | 0.02804658  | 0.02804658         |            |
| ENSG00000325935 | 5  | 4817124   | 4819169   | PKA-AS1     | lincRNA        | -0.12915900 | 0.26291010         | -0.14388980  | 0.03187438  | -0.22499883  | 0.54275008        | -0.04421958  | 0.04421958        | -0.01718100 | 0.04491800         | -0.02804658 | 0.02804658  | 0.02804658  | 0.02804658         |            |
| ENSG00000325935 | 5  | 4817124   | 4819169   | PKA-AS1     | lincRNA        | -0.12915900 | 0.26291010         | -0.14388980  | 0.03187438  | -0.22499883  | 0.54275008        | -0.04421958  | 0.04421958        | -0.01718100 | 0.04491800         | -0.02804658 | 0.02804658  | 0.02804658  | 0.02804658         |            |
| ENSG00000325935 | 5  | 4817124   | 4819169   | PKA-AS1     | lincRNA        | -0.12915900 | 0.26291010         | -0.14388980  | 0.03187438  | -0.22499883  | 0.54275008        | -0.04421958  | 0.04421958        | -0.01718100 | 0.04491800         | -0.02804658 | 0.02804658  | 0.02804658  | 0.02804658         |            |
| ENSG00000325935 | 5  | 4817124   | 4819169   | PKA-AS1     | lincRNA        | -0.12915900 | 0.26291010         | -0.14388980  | 0.03187438  | -0.22499883  | 0.54275008        | -0.04421958  | 0.04421958        | -0.01718100 | 0.04491800         | -0.02804658 | 0.02804658  | 0.02804658  | 0.02804658         |            |
| ENSG00000325935 | 5  | 4817124   | 4819169   | PKA-AS1     | lincRNA        | -0.12915900 | 0.26291010         | -0.14388980  | 0.03187438  | -0.22499883  | 0.54275008        | -0.04421958  | 0.04421958        | -0.01718100 | 0.04491800         | -0.02804658 | 0.02804658  | 0.02804658  | 0.02804658         |            |
| ENSG00000325935 | 5  | 4817124   | 4819169   | PKA-AS1     | lincRNA        | -0.12915900 | 0.26291010         | -0.14388980  | 0.03187438  | -0.22499883  | 0.54275008        | -0.04421958  | 0.04421958        | -0.01718100 | 0.04491800         | -0.02804658 | 0.02804658  | 0.02804658  | 0.02804658         |            |
| ENSG00000325935 | 5  | 4817124   | 4819169   | PKA-AS1     | lincRNA        | -0.12915900 | 0.26291010         | -0.14388980  | 0.03187438  | -0.22499883  | 0.54275008        | -0.04421958  | 0.04421958        | -0.01718100 | 0.04491800         | -0.02804658 | 0.02804658  | 0.02804658  | 0.02804658         |            |
| ENSG00000325935 | 5  | 4817124   | 4819169   | PKA-AS1     | lincRNA        | -0.12915900 | 0.26291010         | -0.14388980  | 0.03187438  | -0.22499883  | 0.54275008        | -0.04421958  | 0.04421958        | -0.01718100 | 0.04491800         | -0.02804658 | 0.02804658  | 0.02804658  | 0.02804658         |            |
| ENSG00000325935 | 5  | 4817124   | 4819169   | PKA-AS1     | lincRNA        | -0.12915900 | 0.26291010         | -0.14388980  | 0.03187438  | -0.22499883  | 0.54275008        | -0.04421958  | 0.04421958        | -0.01718100 | 0.04491800         | -0.02804658 | 0.02804658  | 0.02804658  | 0.02804658         |            |
| ENSG00000325935 | 5  | 4817124   | 4819169   | PKA-AS1     | lincRNA        | -0.12915900 | 0.26291010         | -0.14388980  | 0.03187438  | -0.22499883  | 0.54275008        | -0.04421958  | 0.04421958        | -0.01718100 | 0.04491800         | -0.02804658 | 0.02804658  | 0.02804658  | 0.02804658         |            |
| ENSG00000325935 | 5  | 4817124   | 4819169   | PKA-AS1     | lincRNA        | -0.12915900 | 0.26291010         | -0.14388980  | 0.03187438  | -0.22499883  | 0.54275008        | -0.04421958  | 0.04421958        | -0.01718100 | 0.04491800         | -0.02804658 | 0.02804658  | 0.02804658  | 0.02804658         |            |
| ENSG00000325935 | 5  | 4817124   | 4819169   | PKA-AS1     | lincRNA        | -0.12915900 | 0.26291010         | -0.14388980  | 0.03187438  | -0.22499883  | 0.54275008        | -0.04421958  | 0.04421958        | -0.01718100 | 0.04491800         | -0.02804658 | 0.02804658  | 0.02804658  | 0.02804658         |            |
| ENSG00000325935 | 5  | 4817124   | 4819169   | PKA-AS1     | lincRNA        | -0.12915900 | 0.26291010         | -0.14388980  | 0.03187438  | -0.22499883  | 0.54275008        | -0.04421958  | 0.04421958        | -0.01718100 | 0.04491800         | -0.02804658 | 0.02804658  | 0.02804658  | 0.02804658         |            |
| ENSG00000325935 | 5  | 4817124   | 4819169   | PKA-AS1     | lincRNA        | -0.12915900 | 0.26291010         | -0.14388980  | 0.03187438  | -0.22499883  | 0.54275008        | -0.04421958  | 0.04421958        | -0.01718100 | 0.04491800         | -0.02804658 | 0.02804658  | 0.02804658  | 0.02804658         |            |
| ENSG00000325935 | 5  | 4817124   | 4819169   | PKA-AS1     | lincRNA        | -0.12915900 | 0.26291010         | -0.14388980  | 0.03187438  | -0.22499883  | 0.54275008        | -0.04421958  | 0.04421958        | -0.01718100 | 0.04491800         | -0.02804658 | 0.02804658  | 0.02804658  | 0.02804658         |            |
| ENSG00000325935 | 5  | 4817124   | 4819169   | PKA-AS1     | lincRNA        | -0.12915900 | 0.26291010         | -0.14388980  | 0.03187438  | -0.22499883  | 0.54275008        | -0.04421958  | 0.04421958        | -0.01718100 | 0.04491800         | -0.02804658 | 0.02804658  | 0.02804658  | 0.02804658         |            |
| ENSG00000325935 | 5  | 4817124   | 4819169   | PKA-AS1     | lincRNA        | -0.12915900 | 0.26291010         | -0.14388980  | 0.03187438  | -0.22499883  | 0.54275008        | -0.04421958  | 0.04421958        | -0.01718100 | 0.04491800         | -0.02804658 | 0.02804658  | 0.02804658  | 0.02804658         |            |
| ENSG00000325935 | 5  | 4817124   | 4819169   | PKA-AS1     | lincRNA        | -0.12915900 | 0.26291010         | -0.14388980  | 0.03187438  | -0.22499883  | 0.54275008        | -0.04421958  | 0.04421958        | -0.01718100 | 0.04491800         | -0.02804658 | 0.02804658  | 0.02804658  | 0.02804658         |            |
| ENSG00000325935 | 5  | 4817124   | 4819169   | PKA-AS1     | lincRNA        | -0.12915900 | 0.26291010         | -0.14388980  | 0.03187438  | -0.22499883  | 0.54275008        | -0.04421958  | 0.04421958        | -0.01718100 | 0.04491800         | -0.02804658 | 0.02804658  | 0.02804658  | 0.02804658         |            |
| ENSG00000325935 | 5  | 4817124   | 4819169   | PKA-AS1     | lincRNA        | -0.12915900 | 0.26291010         | -0.14388980  | 0.03187438  | -0.22499883  | 0.54275008        | -0.04421958  | 0.04421958        | -0.01718100 | 0.04491800         | -0.02804658 | 0.02804658  | 0.02804658  | 0.02804658         |            |
| ENSG00000325935 | 5  | 4817124   | 4819169   | PKA-AS1     | lincRNA        | -0.12915900 | 0.26291010         | -0.14388980  | 0.03187438  | -0.22499883  | 0.54275008        | -0.04421958  | 0.04421958        | -0.01718100 | 0.04491800         | -0.02804658 | 0.02804658  | 0.02804658  | 0.02804658         |            |
| ENSG00000325935 | 5  | 4817124   | 4819169   | PKA-AS1     | lincRNA        | -0.12915900 | 0.26291010         | -0.14388980  | 0.03187438  | -0.22499883  | 0.54275008        | -0.04421958  | 0.04421958        | -0.01718100 | 0.04491800         | -0.02804658 | 0.02804658  | 0.02804658  | 0.02804658         |            |
| ENSG00000325935 |    |           |           |             |                |             |                    |              |             |              |                   |              |                   |             |                    |             |             |             |                    |            |

Table with 15 columns: Gene ID, Chr, Start, End, Strand, Feature, RefSeq ID, RefSeq Name, RefSeq Type, RefSeq Description, RefSeq Accession, RefSeq Date, RefSeq Version, RefSeq Build, RefSeq Status. The table lists various genes and their genomic coordinates and features.

Table with 10 columns: Gene ID, Gene Name, Gene Type, Gene Description, and a list of 100 numerical values. The table contains a large number of rows, each representing a different gene and its associated data points.



Table with 15 columns: Gene ID, RefSeq ID, Gene Name, Transcription Start Site (TSS), Strand, Feature Type, Start, End, Score, and other genomic coordinates. The table lists various genes such as ENG000026603, ENG000026604, etc., with their corresponding genomic features and coordinates.



Table with 10 columns: Gene ID, Chr, Start, End, Gene Name, Feature, RefSeq ID, RefSeq Name, RefSeq Description, RefSeq Accession. Contains genomic coordinates and gene annotations for various genes including FAM83B, OAT, HMC1, MGA1, and many others.



Table with 10 columns: Gene ID, Chr, Start, End, Gene Name, Type, RefSeq ID, RefSeq Description, RefSeq Link, RefSeq Description, RefSeq Link. The table lists numerous genes and their associated RefSeq IDs and descriptions.



Table with 10 columns: Gene ID, Chr, Start, End, Gene Name, Type, RefSeq ID, RefSeq Name, RefSeq Description, RefSeq Accession. Contains a comprehensive list of genes and their associated genomic coordinates and descriptions.







Table with columns for gene names (e.g., ENG0000281799), coordinates (e.g., 3542364, 3542463), gene symbols (e.g., C2orf69P3), and genomic coordinates (e.g., chr1:100000000-100000000). The table lists numerous genes and their associated genomic data.



Table with 10 columns: Gene ID, Chr, Start, End, Feature, RefSeq ID, RefSeq Name, RefSeq Type, RefSeq Description, RefSeq Accession. The table lists numerous genes and their associated RefSeq identifiers, such as ENGG0000017169, ENGG0000017170, ENGG0000017171, etc., up to ENGG0000017436.

Table with 10 columns: Gene ID, Chr, Start, End, Strand, Feature, Start, End, Strand, Feature. Contains genomic coordinates and gene annotations for various genes like AKT1, ARHGAP25, ARHGAP26, etc.

|                |    |           |           |            |                        |              |             |              |             |              |             |              |             |              |             |              |             |              |             |             |
|----------------|----|-----------|-----------|------------|------------------------|--------------|-------------|--------------|-------------|--------------|-------------|--------------|-------------|--------------|-------------|--------------|-------------|--------------|-------------|-------------|
| ENSG0000023499 | 2  | 73985132  | 73986433  | AC073046.1 | lncRNA                 | -0.314085728 | 0.005491599 | -0.327385524 | 0.020208600 | -0.197900070 | 0.322400133 | -0.144959801 | 0.032662729 | -0.326049553 | 0.018533098 | -0.253063685 | 0.244010644 | 0.227291223  | 0.055466711 |             |
| ENSG0000026014 | 7  | 77685173  | 77693981  | NECN       | protein coding         | -0.080704310 | 0.445272727 | -0.302517708 | 0.000000000 | -0.138701716 | 0.292150585 | -0.171418611 | 0.106672921 | 0.045455520  | 0.741114687 | -0.253071731 | 0.243007729 | 0.056551292  | 0.165895292 |             |
| ENSG0000015439 | 12 | 87741230  | 87741230  | AC092      | protein coding         | -0.071190000 | 0.071190000 | -0.071190000 | 0.071190000 | -0.071190000 | 0.071190000 | -0.071190000 | 0.071190000 | -0.071190000 | 0.071190000 | -0.071190000 | 0.071190000 | 0.071190000  | 0.071190000 | 0.071190000 |
| ENSG0000015393 | 12 | 100023039 | 100023039 | USP30      | protein coding         | -0.249999932 | 0.028517244 | -0.200312743 | 0.1633170   | -0.030020457 | 0.076567811 | -0.188700701 | 0.320205344 | -0.240011616 | 0.008447844 | -0.253110009 | 0.243991009 | 0.251907853  | 0.077395859 | 0.077395859 |
| ENSG0000026048 | 16 | 70497293  | 70501410  | PTC1       | protein coding         | -0.187298240 | 0.011690274 | -0.149300260 | 0.034336631 | -0.323141814 | 0.100173258 | 0.023470809  | 0.807463305 | -0.067365907 | 0.027369000 | -0.253123705 | 0.243880919 | 0.032766000  | 0.032766000 | 0.032766000 |
| ENSG0000027290 | 26 | 21164555  | 21164555  | AC073046.1 | lncRNA                 | -0.071190000 | 0.071190000 | -0.071190000 | 0.071190000 | -0.071190000 | 0.071190000 | -0.071190000 | 0.071190000 | -0.071190000 | 0.071190000 | -0.071190000 | 0.071190000 | 0.071190000  | 0.071190000 | 0.071190000 |
| ENSG0000018319 | 19 | 7676268   | 7678824   | M-EMP1     | protein coding         | -0.075061358 | 0.154652839 | -0.189897437 | 0.183543020 | -0.049589891 | 0.286162674 | -0.221783353 | 0.266262674 | -0.034044711 | 0.024732662 | -0.253119123 | 0.243730010 | 0.040907896  | 0.777651519 | 0.777651519 |
| ENSG0000026866 | 11 | 11759632  | 11760577  | AL15762.1  | lncRNA                 | -0.1224040   | 0.004169102 | -0.254346703 | 0.047467491 | -0.203992280 | 0.229622222 | 0.045157156  | 0.082027550 | -0.157807323 | 0.008326321 | -0.253222619 | 0.243880919 | 0.034507491  | 0.034507491 | 0.034507491 |
| ENSG0000026899 | 12 | 37693343  | 37693491  | HOC2       | protein coding         | -0.126846633 | 0.005026939 | -0.118496923 | 0.118496923 | -0.006923244 | 0.453389920 | -0.189863468 | 0.324899774 | -0.200572971 | 0.057778971 | -0.253339744 | 0.243418261 | 0.034073381  | 0.034073381 | 0.034073381 |
| ENSG0000013276 | 17 | 1459477   | 1459742   | INPP5K     | protein coding         | -0.131440177 | 0.007475229 | -0.165844129 | 0.088585002 | -0.030032821 | 0.086073907 | -0.299578737 | 0.191031423 | -0.098888030 | 0.518117624 | -0.253254796 | 0.243880919 | 0.034073381  | 0.034073381 | 0.034073381 |
| ENSG0000011426 | 9  | 434984    | 434984    | OCG1       | protein coding         | -0.05843342  | 0.025292198 | -0.08709891  | 0.023997044 | 0.023219064  | 0.020244585 | 0.088017070  | 0.688494938 | 0.017176531  | 0.019894944 | -0.253292144 | 0.243585827 | 0.103244402  | 0.074969612 | 0.074969612 |
| ENSG0000026395 | 12 | 5408986   | 5409784   | AC092      | protein coding         | -0.126846633 | 0.005026939 | -0.118496923 | 0.118496923 | -0.006923244 | 0.453389920 | -0.189863468 | 0.324899774 | -0.200572971 | 0.057778971 | -0.253339744 | 0.243418261 | 0.034073381  | 0.034073381 | 0.034073381 |
| ENSG0000024104 | 19 | 4327191   | 4324866   | CEACAMP10  | transcribed_processed  | -0.131440177 | 0.007475229 | -0.165844129 | 0.088585002 | -0.030032821 | 0.086073907 | -0.299578737 | 0.191031423 | -0.098888030 | 0.518117624 | -0.253254796 | 0.243880919 | 0.034073381  | 0.034073381 | 0.034073381 |
| ENSG0000017537 | 14 | 8112147   | 8125383   | SELT       | protein coding         | -0.019844743 | 0.084876991 | -0.053373758 | 0.170963330 | -0.211116032 | 0.026187126 | 0.063615541  | 0.672494962 | 0.047128445  | 0.144444444 | -0.253442626 | 0.243880919 | 0.034073381  | 0.034073381 | 0.034073381 |
| ENSG0000022099 | 20 | 8374468   | 8349484   | AL121845.1 | lncRNA                 | -0.170189181 | 0.138977144 | -0.058420117 | 0.081176451 | -0.047648007 | 0.181337564 | -0.113380071 | 0.573389116 | -0.116284008 | 0.389117856 | -0.253474476 | 0.243200965 | -0.233402311 | 0.107176692 | 0.107176692 |
| ENSG0000018732 | 5  | 14121319  | 14121319  | PCBD13     | protein coding         | -0.238112044 | 0.034466494 | -0.283373053 | 0.046186022 | -0.154143269 | 0.039172909 | -0.349575303 | 0.073877457 | -0.198562729 | 0.174542389 | -0.253492678 | 0.243170897 | 0.020195112  | 0.020195112 | 0.020195112 |
| ENSG0000017070 | 10 | 11752440  | 11754964  | EMO1       | protein coding         | -0.303751809 | 0.007242696 | -0.201135651 | 0.161234401 | -0.284884518 | 0.150007813 | -0.106572840 | 0.586727510 | -0.237160211 | 0.088989422 | -0.253634022 | 0.243083000 | 0.034073381  | 0.034073381 | 0.034073381 |
| ENSG0000014532 | 4  | 8716103   | 87240314  | RUE1       | protein coding         | -0.056404118 | 0.632233571 | -0.295292534 | 0.042184141 | -0.297091152 | 0.133413333 | -0.116969956 | 0.105129865 | -0.013695922 | 0.955109944 | -0.253549476 | 0.243071111 | 0.096921605  | 0.096921605 | 0.096921605 |
| ENSG0000013800 | 4  | 10769276  | 10772430  | PAPD3      | protein coding         | -0.084041425 | 0.465500738 | -0.299917774 | 0.034537797 | -0.095891196 | 0.624651571 | -0.375698182 | 0.053455991 | -0.087445463 | 0.157210944 | -0.253576969 | 0.243043308 | 0.032287281  | 0.032287281 | 0.032287281 |
| ENSG0000023741 | 11 | 2670333   | 2671201   | NCOR1DN    | lncRNA                 | -0.117584135 | 0.304801441 | -0.142800614 | 0.322488680 | -0.025260311 | 0.030975654 | -0.252688030 | 0.888795124 | -0.000423210 | 0.898881141 | -0.253610211 | 0.242494011 | 0.179497129  | 0.148881229 | 0.148881229 |
| ENSG0000016941 | 11 | 2304042   | 2317768   | LUT2       | protein coding         | -0.020926014 | 0.177895910 | -0.098776523 | 0.048491915 | -0.297181959 | 0.299771611 | -0.044274962 | 0.826444716 | -0.011762653 | 0.932720202 | -0.253699127 | 0.242981020 | 0.005146822  | 0.031913304 | 0.031913304 |
| ENSG0000011034 | 12 | 5128130   | 5132468   | BN2        | protein coding         | -0.037014677 | 0.717107611 | -0.218455743 | 0.130378853 | -0.027515816 | 0.030975654 | -0.202109811 | 0.312024428 | -0.017121253 | 0.898881141 | -0.253729119 | 0.242173881 | 0.036890765  | 0.007252530 | 0.007252530 |
| ENSG0000018717 | 4  | 4005650   | 4015820   | NBD2       | protein coding         | -0.016911208 | 0.883939311 | -0.013241027 | 0.927454488 | -0.173446778 | 0.392234281 | -0.192015208 | 0.318141912 | -0.094206862 | 0.497942729 | -0.253743265 | 0.242270705 | 0.091971137  | 0.032548753 | 0.032548753 |
| ENSG0000012636 | 2  | 15911879  | 15981166  | BA2C       | protein coding         | -0.092142928 | 0.390772026 | -0.202034119 | 0.143157151 | -0.237334672 | 0.033262929 | -0.194242954 | 0.333192165 | -0.054610354 | 0.689499496 | -0.253756026 | 0.242654955 | 0.091747204  | 0.489529539 | 0.489529539 |
| ENSG0000018914 | 10 | 4768907   | 4773436   | SLMD3      | unprocessed_transcript | -0.271313863 | 0.019926448 | -0.212444442 | 0.137795954 | -0.190672748 | 0.819471004 | -0.193687264 | 0.333003034 | -0.235544484 | 0.834835838 | -0.253792621 | 0.242358431 | 0.021752018  | 0.051347408 | 0.051347408 |
| ENSG0000027139 | 3  | 4399996   | 4399744   | AC092      | protein coding         | -0.155929214 | 0.175675441 | -0.148614849 | 0.297076820 | -0.048591844 | 0.880847741 | -0.018048811 | 0.328087710 | -0.049873498 | 0.720205311 | -0.253844328 | 0.242485941 | 0.020654404  | 0.150681035 | 0.150681035 |
| ENSG0000026022 | 17 | 7234017   | 7229989   | AC092      | protein coding         | -0.141442725 | 0.002096969 | -0.136918984 | 0.030396969 | -0.100472012 | 0.180490935 | -0.044092925 | 0.020983026 | -0.028789959 | 0.016201399 | -0.253896891 | 0.242485941 | 0.002095487  | 0.034073381 | 0.034073381 |
| ENSG0000026971 | 1  | 2774388   | 2774041   | AC092      | protein coding         | 0.083458145  | 0.141881704 | 0.158127286  | 0.297076820 | 0.042520471  | 0.191309208 | 0.191834183  | 0.028884476 | 0.224470448  | 0.090568578 | -0.253896891 | 0.242485941 | 0.002095487  | 0.034073381 | 0.034073381 |
| ENSG0000017840 | 12 | 4524858   | 4525744   | DNAJ2      | protein coding         | -0.293788283 | 0.005026939 | -0.187572398 | 0.192122623 | -0.161253318 | 0.210282928 | -0.087957622 | 0.664050762 | -0.228425717 | 0.100576459 | -0.253914601 | 0.242308831 | 0.032338334  | 0.032338334 | 0.032338334 |
| ENSG0000016244 | 1  | 22987415  | 22987415  | FNH12      | transcribed_processed  | -0.290134497 | 0.000000000 | -0.278007815 | 0.027800781 | -0.181024411 | 0.366083305 | -0.288888889 | 0.170969807 | -0.237424722 | 0.035895000 | -0.253930045 | 0.242308831 | 0.032338334  | 0.032338334 | 0.032338334 |
| ENSG0000025330 | 8  | 73358670  | 73362142  | AC111449.2 | lncRNA                 | -0.283456520 | 0.012395533 | -0.284485710 | 0.027911212 | -0.140247020 | 0.407120000 | -0.310200020 | 0.114433808 | -0.237810885 | 0.033342682 | -0.254011425 | 0.241904100 | 0.296164400  | 0.087702611 | 0.087702611 |
| ENSG0000027039 | 7  | 7477720   | 7477720   | PTC1       | transcribed_processed  | -0.187298240 | 0.011690274 | -0.149300260 | 0.034336631 | -0.323141814 | 0.100173258 | 0.023470809  | 0.807463305 | -0.067365907 | 0.027369000 | -0.254011425 | 0.241904100 | 0.296164400  | 0.087702611 | 0.087702611 |
| ENSG0000025239 | 8  | 32666148  | 32666148  | DFBP1      | protein coding         | -0.267835139 | 0.018477009 | -0.046753432 | 0.069753432 | -0.305296336 | 0.352963592 | -0.294273890 | 0.121526989 | -0.294172890 | 0.030250544 | -0.254116889 | 0.241904100 | 0.243454538  | 0.084402000 | 0.084402000 |
| ENSG0000019520 | 1  | 1733698   | 17697874  | APHC7      | transcribed_processed  | -0.346649488 | 0.001110459 | -0.191420494 | 0.182692161 | -0.322339494 | 0.100433211 | -0.117773898 | 0.589821474 | -0.156856920 | 0.020000000 | -0.254234740 | 0.241567041 | 0.484494260  | 0.000000000 | 0.000000000 |
| ENSG0000015030 | 2  | 1194266   | 1194266   | PTC1       | transcribed_processed  | -0.187298240 | 0.011690274 | -0.149300260 | 0.034336631 | -0.323141814 | 0.100173258 | 0.023470809  | 0.807463305 | -0.067365907 | 0.027369000 | -0.254234740 | 0.241567041 | 0.484494260  | 0.000000000 | 0.000000000 |
| ENSG0000015254 | 2  | 6880129   | 6880129   | GPC2       | protein coding         | -0.334573206 | 0.005026939 | -0.304158603 | 0.014269447 | -0.120683494 | 0.540313111 | -0.336708216 | 0.085813483 | -0.308060000 | 0.020061258 | -0.254233238 | 0.241567041 | 0.103107414  | 0.0229971   | 0.0229971   |
| ENSG0000014948 | 11 | 61799527  | 61829138  | FADS1      | protein coding         | -0.080809313 | 0.484332490 | -0.091541610 | 0.528902962 | -0.064189150 | 0.750424841 | -0.300571527 | 0.127265629 | -0.189270711 | 0.104733911 | -0.254276101 | 0.241547701 |              |             |             |



| ENSG00000258722 | 14 | 21110296 | 21114372 | CKAP1           | processed_pseudogene | -0.12257125  | 0.06384788 | -0.07037369 | 0.06130811  | -0.23033306 | 0.24774493 | 0.25277394  | 0.20334476 | -0.18522859 | 0.16673084 | -0.25718874 | 0.28113966 | 0.27784725  | 0.04998693 |             |            |
|-----------------|----|----------|----------|-----------------|----------------------|--------------|------------|-------------|-------------|-------------|------------|-------------|------------|-------------|------------|-------------|------------|-------------|------------|-------------|------------|
| ENSG00000258723 | 14 | 21102600 | 21092300 | ENSG00000258723 | processed_pseudogene | -0.55111794  | 0.07996997 | 0.52082021  | -0.20624244 | 0.24997677  | 0.03812893 | 0.87745933  | 0.25842025 | 0.09474266  | 0.25747035 | -0.25747035 | 0.25747035 | 0.25747035  | 0.25747035 | 0.01766341  |            |
| ENSG00000258724 | 17 | 20008014 | 20007704 | ENSG00000258724 | processed_pseudogene | -0.33111310  | 0.23881000 | 0.13111310  | 0.07090330  | 0.04140747  | 0.99446780 | 0.24952020  | 0.20941668 | -0.2816337  | 0.03093936 | 0.25727596  | 0.25998485 | 0.32768773  | 0.02059449 | 0.02059449  |            |
| ENSG00000258725 | 19 | 59132434 | 59272879 | ENSG00000258725 | processed_pseudogene | -0.26157674  | 0.02196667 | 0.26742740  | 0.02621468  | 0.07256542  | 0.71961769 | 0.30737177  | 0.11886955 | -0.27685977 | 0.04692899 | 0.25713770  | 0.25713770 | 0.25713770  | 0.25713770 | 0.25713770  | 0.02258181 |
| ENSG00000258726 | 19 | 29044444 | 29044444 | ENSG00000258726 | processed_pseudogene | -0.18842244  | 0.02196667 | 0.18842244  | 0.02196667  | 0.18842244  | 0.02196667 | 0.18842244  | 0.02196667 | 0.18842244  | 0.02196667 | 0.18842244  | 0.02196667 | 0.18842244  | 0.02196667 | 0.18842244  | 0.02196667 |
| ENSG00000258727 | 18 | 79117077 | 79117077 | ENSG00000258727 | processed_pseudogene | -0.11925557  | 0.02101437 | 0.11925557  | 0.02101437  | 0.11925557  | 0.02101437 | 0.11925557  | 0.02101437 | 0.11925557  | 0.02101437 | 0.11925557  | 0.02101437 | 0.11925557  | 0.02101437 | 0.11925557  | 0.02101437 |
| ENSG00000258728 | 2  | 24455196 | 24455196 | ENSG00000258728 | processed_pseudogene | -0.12677474  | 0.02101437 | 0.12677474  | 0.02101437  | 0.12677474  | 0.02101437 | 0.12677474  | 0.02101437 | 0.12677474  | 0.02101437 | 0.12677474  | 0.02101437 | 0.12677474  | 0.02101437 | 0.12677474  | 0.02101437 |
| ENSG00000258729 | 21 | 8420376  | 8420376  | ENSG00000258729 | processed_pseudogene | -0.41872433  | 0.02101437 | 0.41872433  | 0.02101437  | 0.41872433  | 0.02101437 | 0.41872433  | 0.02101437 | 0.41872433  | 0.02101437 | 0.41872433  | 0.02101437 | 0.41872433  | 0.02101437 | 0.41872433  | 0.02101437 |
| ENSG00000258730 | 6  | 66058456 | 66058377 | ENSG00000258730 | processed_pseudogene | -0.16698263  | 0.14688549 | 0.16698263  | 0.14688549  | 0.16698263  | 0.14688549 | 0.16698263  | 0.14688549 | 0.16698263  | 0.14688549 | 0.16698263  | 0.14688549 | 0.16698263  | 0.14688549 | 0.16698263  | 0.14688549 |
| ENSG00000258731 | 7  | 20743333 | 20745401 | ENSG00000258731 | processed_pseudogene | -0.26326289  | 0.01260229 | 0.26326289  | 0.01260229  | 0.26326289  | 0.01260229 | 0.26326289  | 0.01260229 | 0.26326289  | 0.01260229 | 0.26326289  | 0.01260229 | 0.26326289  | 0.01260229 | 0.26326289  | 0.01260229 |
| ENSG00000258732 | 5  | 15702434 | 15702434 | ENSG00000258732 | processed_pseudogene | -0.20224841  | 0.03087348 | 0.20224841  | 0.03087348  | 0.20224841  | 0.03087348 | 0.20224841  | 0.03087348 | 0.20224841  | 0.03087348 | 0.20224841  | 0.03087348 | 0.20224841  | 0.03087348 | 0.20224841  | 0.03087348 |
| ENSG00000258733 | 8  | 10699727 | 10699813 | ENSG00000258733 | processed_pseudogene | -0.195518324 | 0.08383635 | 0.195518324 | 0.08383635  | 0.195518324 | 0.08383635 | 0.195518324 | 0.08383635 | 0.195518324 | 0.08383635 | 0.195518324 | 0.08383635 | 0.195518324 | 0.08383635 | 0.195518324 | 0.08383635 |
| ENSG00000258734 | 13 | 13492820 | 13492820 | ENSG00000258734 | processed_pseudogene | -0.1399992   | 0.23417629 | 0.1399992   | 0.23417629  | 0.1399992   | 0.23417629 | 0.1399992   | 0.23417629 | 0.1399992   | 0.23417629 | 0.1399992   | 0.23417629 | 0.1399992   | 0.23417629 | 0.1399992   | 0.23417629 |
| ENSG00000258735 | 19 | 92492606 | 92492606 | ENSG00000258735 | processed_pseudogene | -0.37741789  | 0.00070294 | 0.37741789  | 0.00070294  | 0.37741789  | 0.00070294 | 0.37741789  | 0.00070294 | 0.37741789  | 0.00070294 | 0.37741789  | 0.00070294 | 0.37741789  | 0.00070294 | 0.37741789  | 0.00070294 |
| ENSG00000258736 | X  | 12962038 | 12964309 | ENSG00000258736 | processed_pseudogene | -0.40056786  | 0.25284839 | 0.40056786  | 0.25284839  | 0.40056786  | 0.25284839 | 0.40056786  | 0.25284839 | 0.40056786  | 0.25284839 | 0.40056786  | 0.25284839 | 0.40056786  | 0.25284839 | 0.40056786  | 0.25284839 |
| ENSG00000258737 | 1  | 6348787  | 6350262  | ENSG00000258737 | processed_pseudogene | -0.28077031  | 0.01078974 | 0.28077031  | 0.01078974  | 0.28077031  | 0.01078974 | 0.28077031  | 0.01078974 | 0.28077031  | 0.01078974 | 0.28077031  | 0.01078974 | 0.28077031  | 0.01078974 | 0.28077031  | 0.01078974 |
| ENSG00000258738 | 4  | 10115179 | 10115884 | ENSG00000258738 | processed_pseudogene | -0.1709912   | 0.13904795 | 0.1709912   | 0.13904795  | 0.1709912   | 0.13904795 | 0.1709912   | 0.13904795 | 0.1709912   | 0.13904795 | 0.1709912   | 0.13904795 | 0.1709912   | 0.13904795 | 0.1709912   | 0.13904795 |
| ENSG00000258739 | 16 | 26354786 | 26358355 | ENSG00000258739 | processed_pseudogene | -0.24587244  | 0.03172448 | 0.24587244  | 0.03172448  | 0.24587244  | 0.03172448 | 0.24587244  | 0.03172448 | 0.24587244  | 0.03172448 | 0.24587244  | 0.03172448 | 0.24587244  | 0.03172448 | 0.24587244  | 0.03172448 |
| ENSG00000258740 | 11 | 8788778  | 8812031  | ENSG00000258740 | processed_pseudogene | -0.27243047  | 0.01507674 | 0.27243047  | 0.01507674  | 0.27243047  | 0.01507674 | 0.27243047  | 0.01507674 | 0.27243047  | 0.01507674 | 0.27243047  | 0.01507674 | 0.27243047  | 0.01507674 | 0.27243047  | 0.01507674 |
| ENSG00000258741 | 19 | 3245452  | 32455564 | ENSG00000258741 | processed_pseudogene | -0.23687872  | 0.03076768 | 0.23687872  | 0.03076768  | 0.23687872  | 0.03076768 | 0.23687872  | 0.03076768 | 0.23687872  | 0.03076768 | 0.23687872  | 0.03076768 | 0.23687872  | 0.03076768 | 0.23687872  | 0.03076768 |
| ENSG00000258742 | 17 | 8522666  | 8534717  | ENSG00000258742 | processed_pseudogene | -0.12770431  | 0.26837528 | 0.12770431  | 0.26837528  | 0.12770431  | 0.26837528 | 0.12770431  | 0.26837528 | 0.12770431  | 0.26837528 | 0.12770431  | 0.26837528 | 0.12770431  | 0.26837528 | 0.12770431  | 0.26837528 |
| ENSG00000258743 | X  | 15434824 | 15437463 | ENSG00000258743 | processed_pseudogene | -0.23218588  | 0.05091065 | 0.23218588  | 0.05091065  | 0.23218588  | 0.05091065 | 0.23218588  | 0.05091065 | 0.23218588  | 0.05091065 | 0.23218588  | 0.05091065 | 0.23218588  | 0.05091065 | 0.23218588  | 0.05091065 |
| ENSG00000258744 | 19 | 4694891  | 4696907  | ENSG00000258744 | processed_pseudogene | -0.38244241  | 0.02096891 | 0.38244241  | 0.02096891  | 0.38244241  | 0.02096891 | 0.38244241  | 0.02096891 | 0.38244241  | 0.02096891 | 0.38244241  | 0.02096891 | 0.38244241  | 0.02096891 | 0.38244241  | 0.02096891 |
| ENSG00000258745 | 3  | 11890527 | 11914608 | ENSG00000258745 | processed_pseudogene | -0.28790143  | 0.03008871 | 0.28790143  | 0.03008871  | 0.28790143  | 0.03008871 | 0.28790143  | 0.03008871 | 0.28790143  | 0.03008871 | 0.28790143  | 0.03008871 | 0.28790143  | 0.03008871 | 0.28790143  | 0.03008871 |
| ENSG00000258746 | 11 | 7448489  | 7448413  | ENSG00000258746 | processed_pseudogene | -0.1105873   | 0.34274395 | 0.1105873   | 0.34274395  | 0.1105873   | 0.34274395 | 0.1105873   | 0.34274395 | 0.1105873   | 0.34274395 | 0.1105873   | 0.34274395 | 0.1105873   | 0.34274395 | 0.1105873   | 0.34274395 |
| ENSG00000258747 | 3  | 1895915  | 1891199  | ENSG00000258747 | processed_pseudogene | -0.2343846   | 0.03771627 | 0.2343846   | 0.03771627  | 0.2343846   | 0.03771627 | 0.2343846   | 0.03771627 | 0.2343846   | 0.03771627 | 0.2343846   | 0.03771627 | 0.2343846   | 0.03771627 | 0.2343846   | 0.03771627 |
| ENSG00000258748 | 11 | 10119033 | 11029372 | ENSG00000258748 | processed_pseudogene | -0.1770338   | 0.12222129 | 0.1770338   | 0.12222129  | 0.1770338   | 0.12222129 | 0.1770338   | 0.12222129 | 0.1770338   | 0.12222129 | 0.1770338   | 0.12222129 | 0.1770338   | 0.12222129 | 0.1770338   | 0.12222129 |
| ENSG00000258749 | 11 | 7448489  | 7448413  | ENSG00000258749 | processed_pseudogene | -0.105873    | 0.34274395 | 0.105873    | 0.34274395  | 0.105873    | 0.34274395 | 0.105873    | 0.34274395 | 0.105873    | 0.34274395 | 0.105873    | 0.34274395 | 0.105873    | 0.34274395 | 0.105873    | 0.34274395 |
| ENSG00000258750 | 9  | 11707475 | 11727457 | ENSG00000258750 | processed_pseudogene | -0.1478982   | 0.19288135 | 0.1478982   | 0.19288135  | 0.1478982   | 0.19288135 | 0.1478982   | 0.19288135 | 0.1478982   | 0.19288135 | 0.1478982   | 0.19288135 | 0.1478982   | 0.19288135 | 0.1478982   | 0.19288135 |
| ENSG00000258751 | 10 | 10204351 | 10204351 | ENSG00000258751 | processed_pseudogene | -0.28077031  | 0.01078974 | 0.28077031  | 0.01078974  | 0.28077031  | 0.01078974 | 0.28077031  | 0.01078974 | 0.28077031  | 0.01078974 | 0.28077031  | 0.01078974 | 0.28077031  | 0.01078974 | 0.28077031  | 0.01078974 |
| ENSG00000258752 | 10 | 11727457 | 11727457 | ENSG00000258752 | processed_pseudogene | -0.28077031  | 0.01078974 | 0.28077031  | 0.01078974  | 0.28077031  | 0.01078974 | 0.28077031  | 0.01078974 | 0.28077031  | 0.01078974 | 0.28077031  | 0.01078974 | 0.28077031  | 0.01078974 | 0.28077031  | 0.01078974 |
| ENSG00000258753 | 10 | 11727457 | 11727457 | ENSG00000258753 | processed_pseudogene | -0.28077031  | 0.01078974 | 0.28077031  | 0.01078974  | 0.28077031  | 0.01078974 | 0.28077031  | 0.01078974 | 0.28077031  | 0.01078974 | 0.28077031  | 0.01078974 | 0.28077031  | 0.01078974 | 0.28077031  | 0.01078974 |
| ENSG00000258754 | 10 | 11727457 | 11727457 | ENSG00000258754 | processed_pseudogene | -0.28077031  | 0.01078974 | 0.28077031  | 0.01078974  | 0.28077031  | 0.01078974 | 0.28077031  | 0.01078974 | 0.28077031  | 0.01078974 | 0.28077031  | 0.01078974 | 0.28077031  | 0.01078974 | 0.28077031  | 0.01078974 |
| ENSG00000258755 | 10 | 11727457 | 11727457 | ENSG00000258755 | processed_pseudogene | -0.28077031  | 0.01078974 | 0.28077031  | 0.01078974  | 0.28077031  | 0.01078974 | 0.28077031  | 0.01078974 | 0.28077031  | 0.01078974 | 0.28077031  | 0.01078974 | 0.28077031  | 0.01078974 | 0.28077031  | 0.01078974 |
| ENSG00000258756 | 10 | 11727457 | 11727457 | ENSG00000258756 | processed_pseudogene | -0.28077031  | 0.01078974 | 0.28077031  | 0.01078974  | 0.28077031  | 0.01078974 | 0.28077031  | 0.01078974 | 0.28077031  | 0.01078974 | 0.28077031  | 0.01078974 | 0.28077031  | 0.01078974 | 0.28077031  | 0.01078974 |
| ENSG00000258757 | 10 | 11727457 | 11727457 | ENSG00000258757 | processed_pseudogene | -0.28077031  | 0.01078974 | 0.28077031  | 0.01078974  | 0.28077031  | 0.01078974 | 0.28077031  | 0.0107     |             |            |             |            |             |            |             |            |

Table with 10 columns: Gene ID, Chr, Start, End, Strand, Feature, Start, End, Strand, Feature. Contains genomic coordinates and gene annotations for various genes including HES1, HES2, HES3, HES4, HES5, HES6, HES7, HES8, HES9, HES10, HES11, HES12, HES13, HES14, HES15, HES16, HES17, HES18, HES19, HES20, HES21, HES22, HES23, HES24, HES25, HES26, HES27, HES28, HES29, HES30, HES31, HES32, HES33, HES34, HES35, HES36, HES37, HES38, HES39, HES40, HES41, HES42, HES43, HES44, HES45, HES46, HES47, HES48, HES49, HES50, HES51, HES52, HES53, HES54, HES55, HES56, HES57, HES58, HES59, HES60, HES61, HES62, HES63, HES64, HES65, HES66, HES67, HES68, HES69, HES70, HES71, HES72, HES73, HES74, HES75, HES76, HES77, HES78, HES79, HES80, HES81, HES82, HES83, HES84, HES85, HES86, HES87, HES88, HES89, HES90, HES91, HES92, HES93, HES94, HES95, HES96, HES97, HES98, HES99, HES100.

Table with 10 columns: Gene ID, Gene Name, Feature, Start, End, Strand, RefSeq, Ensembl, UniProt, and other identifiers. The table lists numerous genes and their genomic coordinates across various chromosomes.





Table with 10 columns: Gene ID, Chromosome, Start, End, Strand, Feature, RefSeq ID, Description, and coordinates. It lists numerous genes and their genomic locations across chromosomes 11, 12, 13, 14, 15, 16, 17, 18, 19, and X.









Table with columns for gene names (e.g., ENG0000125651), coordinates, and protein names (e.g., GTF2F1, GTF2F1 protein coding). The table lists numerous genes and their associated protein products.





Table with 10 columns: Gene ID, Gene Name, Feature, Start, End, Strand, RefSeq, Ensembl, UniProt, and other identifiers. The table lists numerous genes and their associated genomic features and coordinates.

|                 |    |          |          |           |                         |             |             |              |             |               |             |             |            |             |             |             |            |             |            |
|-----------------|----|----------|----------|-----------|-------------------------|-------------|-------------|--------------|-------------|---------------|-------------|-------------|------------|-------------|-------------|-------------|------------|-------------|------------|
| ENSG0000024207  | 3  | 15873283 | 15874007 | AC08013.1 | lincRNA                 | -0.15326215 | 0.182981763 | -0.151345403 | 0.294102543 | 0.14909866    | 0.457697118 | 0.04298892  | 0.81400077 | 0.011307006 | 0.633234616 | -0.30759343 | 0.53351517 | 0.235859903 | 0.09523767 |
| ENSG0000025364  | 17 | 10647920 | 10648000 | ANKRD1    | protein coding          | -0.16115368 | 0.151175333 | -0.15137862  | 0.27203643  | 0.726762      | 0.51913255  | 0.1507      | 0.1867006  | -0.22699719 | 0.0251183   | -0.3070267  | 0.5333301  | 0.147621463 | 0.0134533  |
| ENSG0000019197  | 10 | 2862834  | 2862934  | ANKRD3A   | protein coding          | -0.28022474 | 0.31734411  | -0.2561704   | 0.37491403  | 0.60764287    | 0.73743491  | -0.26172201 | 0.1575329  | -0.19786702 | 0.15105773  | -0.30715436 | 0.5330925  | 0.28992373  | 0.0413601  |
| ENSG0000026026  | 6  | 2882529  | 2871793  | ANKRD3A   | protein coding          | -0.33043441 | 0.33303502  | -0.18018691  | 0.18377394  | -0.20784411   | 0.20268742  | -0.05178657 | 0.1867104  | -0.27963844 | 0.0401662   | -0.3076865  | 0.5326267  | 0.39274572  | 0.0474817  |
| ENSG0000026917  | 10 | 2682529  | 2671793  | ANKRD3A   | protein coding          | -0.28452829 | 0.33303502  | -0.18018691  | 0.18377394  | -0.20784411   | 0.20268742  | -0.05178657 | 0.1867104  | -0.27963844 | 0.0401662   | -0.3076865  | 0.5326267  | 0.39274572  | 0.0474817  |
| ENSG0000025278  | 3  | 5255146  | 5255146  | ANKRD3B   | protein coding          | -0.07508055 | 0.15340302  | -0.15018691  | 0.2605572   | -0.17722585   | 0.40329263  | -0.04311983 | 0.03850913 | -0.13566686 | 0.52044131  | -0.30774779 | 0.53177923 | 0.11213295  | 0.43742813 |
| ENSG0000031001  | 3  | 1962714  | 1962714  | ANKRD3B   | protein coding          | -0.25154404 | 0.08851569  | -0.22746625  | 0.11841179  | -0.20377737   | 0.24472332  | -0.1587301  | 0.42906862 | -0.11752793 | 0.44073862  | -0.30775302 | 0.53081133 | 0.11644626  | 0.06811301 |
| ENSG0000034493  | X  | 1199715  | 1200188  | ANKRD3B   | transcribed unprocessed | -0.28754799 | 0.15171951  | -0.20586365  | 0.15109851  | -0.20586365   | 0.15109851  | -0.20586365 | 0.15109851 | -0.20586365 | 0.15109851  | -0.20586365 | 0.15109851 | -0.20586365 | 0.15109851 |
| ENSG0000032088  | 1  | 16614782 | 16615095 | ANKRD3B   | transcribed unprocessed | -0.28754799 | 0.15171951  | -0.20586365  | 0.15109851  | -0.20586365   | 0.15109851  | -0.20586365 | 0.15109851 | -0.20586365 | 0.15109851  | -0.20586365 | 0.15109851 | -0.20586365 | 0.15109851 |
| ENSG0000018934  | 11 | 6019136  | 6019136  | ANKRD3B   | transcribed unprocessed | -0.28754799 | 0.15171951  | -0.20586365  | 0.15109851  | -0.20586365   | 0.15109851  | -0.20586365 | 0.15109851 | -0.20586365 | 0.15109851  | -0.20586365 | 0.15109851 | -0.20586365 | 0.15109851 |
| ENSG0000015982  | 21 | 3262189  | 3273804  | ANKRD3B   | transcribed unprocessed | -0.28754799 | 0.15171951  | -0.20586365  | 0.15109851  | -0.20586365   | 0.15109851  | -0.20586365 | 0.15109851 | -0.20586365 | 0.15109851  | -0.20586365 | 0.15109851 | -0.20586365 | 0.15109851 |
| ENSG00000270130 | 12 | 12386071 | 12386244 | ANKRD3B   | transcribed unprocessed | -0.28754799 | 0.15171951  | -0.20586365  | 0.15109851  | -0.20586365   | 0.15109851  | -0.20586365 | 0.15109851 | -0.20586365 | 0.15109851  | -0.20586365 | 0.15109851 | -0.20586365 | 0.15109851 |
| ENSG0000022174  | 14 | 7698283  | 7698317  | ANKRD3B   | transcribed unprocessed | -0.28754799 | 0.15171951  | -0.20586365  | 0.15109851  | -0.20586365   | 0.15109851  | -0.20586365 | 0.15109851 | -0.20586365 | 0.15109851  | -0.20586365 | 0.15109851 | -0.20586365 | 0.15109851 |
| ENSG00000227012 | 9  | 13624891 | 13624934 | ANKRD3B   | transcribed unprocessed | -0.28754799 | 0.15171951  | -0.20586365  | 0.15109851  | -0.20586365   | 0.15109851  | -0.20586365 | 0.15109851 | -0.20586365 | 0.15109851  | -0.20586365 | 0.15109851 | -0.20586365 | 0.15109851 |
| ENSG00000148313 | 10 | 37125275 | 37184111 | ANKRD3B   | transcribed unprocessed | -0.28754799 | 0.15171951  | -0.20586365  | 0.15109851  | -0.20586365   | 0.15109851  | -0.20586365 | 0.15109851 | -0.20586365 | 0.15109851  | -0.20586365 | 0.15109851 | -0.20586365 | 0.15109851 |
| ENSG0000026026  | 6  | 2882529  | 2871793  | ANKRD3A   | protein coding          | -0.33043441 | 0.33303502  | -0.18018691  | 0.18377394  | -0.20784411   | 0.20268742  | -0.05178657 | 0.1867104  | -0.27963844 | 0.0401662   | -0.3076865  | 0.5326267  | 0.39274572  | 0.0474817  |
| ENSG0000026917  | 10 | 2682529  | 2671793  | ANKRD3A   | protein coding          | -0.28452829 | 0.33303502  | -0.18018691  | 0.18377394  | -0.20784411   | 0.20268742  | -0.05178657 | 0.1867104  | -0.27963844 | 0.0401662   | -0.3076865  | 0.5326267  | 0.39274572  | 0.0474817  |
| ENSG0000025278  | 3  | 5255146  | 5255146  | ANKRD3B   | protein coding          | -0.07508055 | 0.15340302  | -0.15018691  | 0.2605572   | -0.17722585   | 0.40329263  | -0.04311983 | 0.03850913 | -0.13566686 | 0.52044131  | -0.30774779 | 0.53177923 | 0.11213295  | 0.43742813 |
| ENSG0000031001  | 3  | 1962714  | 1962714  | ANKRD3B   | protein coding          | -0.25154404 | 0.08851569  | -0.22746625  | 0.11841179  | -0.20377737   | 0.24472332  | -0.1587301  | 0.42906862 | -0.11752793 | 0.44073862  | -0.30775302 | 0.53081133 | 0.11644626  | 0.06811301 |
| ENSG0000034493  | X  | 1199715  | 1200188  | ANKRD3B   | transcribed unprocessed | -0.28754799 | 0.15171951  | -0.20586365  | 0.15109851  | -0.20586365   | 0.15109851  | -0.20586365 | 0.15109851 | -0.20586365 | 0.15109851  | -0.20586365 | 0.15109851 | -0.20586365 | 0.15109851 |
| ENSG0000032088  | 1  | 16614782 | 16615095 | ANKRD3B   | transcribed unprocessed | -0.28754799 | 0.15171951  | -0.20586365  | 0.15109851  | -0.20586365   | 0.15109851  | -0.20586365 | 0.15109851 | -0.20586365 | 0.15109851  | -0.20586365 | 0.15109851 | -0.20586365 | 0.15109851 |
| ENSG0000018934  | 11 | 6019136  | 6019136  | ANKRD3B   | transcribed unprocessed | -0.28754799 | 0.15171951  | -0.20586365  | 0.15109851  | -0.20586365   | 0.15109851  | -0.20586365 | 0.15109851 | -0.20586365 | 0.15109851  | -0.20586365 | 0.15109851 | -0.20586365 | 0.15109851 |
| ENSG0000015982  | 21 | 3262189  | 3273804  | ANKRD3B   | transcribed unprocessed | -0.28754799 | 0.15171951  | -0.20586365  | 0.15109851  | -0.20586365   | 0.15109851  | -0.20586365 | 0.15109851 | -0.20586365 | 0.15109851  | -0.20586365 | 0.15109851 | -0.20586365 | 0.15109851 |
| ENSG00000270130 | 12 | 12386071 | 12386244 | ANKRD3B   | transcribed unprocessed | -0.28754799 | 0.15171951  | -0.20586365  | 0.15109851  | -0.20586365   | 0.15109851  | -0.20586365 | 0.15109851 | -0.20586365 | 0.15109851  | -0.20586365 | 0.15109851 | -0.20586365 | 0.15109851 |
| ENSG0000022174  | 14 | 7698283  | 7698317  | ANKRD3B   | transcribed unprocessed | -0.28754799 | 0.15171951  | -0.20586365  | 0.15109851  | -0.20586365   | 0.15109851  | -0.20586365 | 0.15109851 | -0.20586365 | 0.15109851  | -0.20586365 | 0.15109851 | -0.20586365 | 0.15109851 |
| ENSG00000227012 | 9  | 13624891 | 13624934 | ANKRD3B   | transcribed unprocessed | -0.28754799 | 0.15171951  | -0.20586365  | 0.15109851  | -0.20586365   | 0.15109851  | -0.20586365 | 0.15109851 | -0.20586365 | 0.15109851  | -0.20586365 | 0.15109851 | -0.20586365 | 0.15109851 |
| ENSG00000148313 | 10 | 37125275 | 37184111 | ANKRD3B   | transcribed unprocessed | -0.28754799 | 0.15171951  | -0.20586365  | 0.15109851  | -0.20586365   | 0.15109851  | -0.20586365 | 0.15109851 | -0.20586365 | 0.15109851  | -0.20586365 | 0.15109851 | -0.20586365 | 0.15109851 |
| ENSG0000026026  | 6  | 2882529  | 2871793  | ANKRD3A   | protein coding          | -0.33043441 | 0.33303502  | -0.18018691  | 0.18377394  | -0.20784411   | 0.20268742  | -0.05178657 | 0.1867104  | -0.27963844 | 0.0401662   | -0.3076865  | 0.5326267  | 0.39274572  | 0.0474817  |
| ENSG0000026917  | 10 | 2682529  | 2671793  | ANKRD3A   | protein coding          | -0.28452829 | 0.33303502  | -0.18018691  | 0.18377394  | -0.20784411   | 0.20268742  | -0.05178657 | 0.1867104  | -0.27963844 | 0.0401662   | -0.3076865  | 0.5326267  | 0.39274572  | 0.0474817  |
| ENSG0000025278  | 3  | 5255146  | 5255146  | ANKRD3B   | protein coding          | -0.07508055 | 0.15340302  | -0.15018691  | 0.2605572   | -0.17722585   | 0.40329263  | -0.04311983 | 0.03850913 | -0.13566686 | 0.52044131  | -0.30774779 | 0.53177923 | 0.11213295  | 0.43742813 |
| ENSG0000031001  | 3  | 1962714  | 1962714  | ANKRD3B   | protein coding          | -0.25154404 | 0.08851569  | -0.22746625  | 0.11841179  | -0.20377737   | 0.24472332  | -0.1587301  | 0.42906862 | -0.11752793 | 0.44073862  | -0.30775302 | 0.53081133 | 0.11644626  | 0.06811301 |
| ENSG0000034493  | X  | 1199715  | 1200188  | ANKRD3B   | transcribed unprocessed | -0.28754799 | 0.15171951  | -0.20586365  | 0.15109851  | -0.20586365   | 0.15109851  | -0.20586365 | 0.15109851 | -0.20586365 | 0.15109851  | -0.20586365 | 0.15109851 | -0.20586365 | 0.15109851 |
| ENSG0000032088  | 1  | 16614782 | 16615095 | ANKRD3B   | transcribed unprocessed | -0.28754799 | 0.15171951  | -0.20586365  | 0.15109851  | -0.20586365   | 0.15109851  | -0.20586365 | 0.15109851 | -0.20586365 | 0.15109851  | -0.20586365 | 0.15109851 | -0.20586365 | 0.15109851 |
| ENSG0000018934  | 11 | 6019136  | 6019136  | ANKRD3B   | transcribed unprocessed | -0.28754799 | 0.15171951  | -0.20586365  | 0.15109851  | -0.20586365   | 0.15109851  | -0.20586365 | 0.15109851 | -0.20586365 | 0.15109851  | -0.20586365 | 0.15109851 | -0.20586365 | 0.15109851 |
| ENSG0000015982  | 21 | 3262189  | 3273804  | ANKRD3B   | transcribed unprocessed | -0.28754799 | 0.15171951  | -0.20586365  | 0.15109851  | -0.20586365   | 0.15109851  | -0.20586365 | 0.15109851 | -0.20586365 | 0.15109851  | -0.20586365 | 0.15109851 | -0.20586365 | 0.15109851 |
| ENSG00000270130 | 12 | 12386071 | 12386244 | ANKRD3B   | transcribed unprocessed | -0.28754799 | 0.15171951  | -0.20586365  | 0.15109851  | -0.20586365   | 0.15109851  | -0.20586365 | 0.15109851 | -0.20586365 | 0.15109851  | -0.20586365 | 0.15109851 | -0.20586365 | 0.15109851 |
| ENSG0000022174  | 14 | 7698283  | 7698317  | ANKRD3B   | transcribed unprocessed | -0.28754799 | 0.15171951  | -0.20586365  | 0.15109851  | -0.20586365   | 0.15109851  | -0.20586365 | 0.15109851 | -0.20586365 | 0.15109851  | -0.20586365 | 0.15109851 | -0.20586365 | 0.15109851 |
| ENSG00000227012 | 9  | 13624891 | 13624934 | ANKRD3B   | transcribed unprocessed | -0.28754799 | 0.15171951  | -0.20586365  | 0.15109851  | -0.20586365   | 0.15109851  | -0.20586365 | 0.15109851 | -0.20586365 | 0.15109851  | -0.20586365 | 0.15109851 | -0.20586365 | 0.15109851 |
| ENSG00000148313 | 10 | 37125275 | 37184111 | ANKRD3B   | transcribed unprocessed | -0.28754799 | 0.15171951  | -0.20586365  | 0.15109851  | -0.20586365   | 0.15109851  | -0.20586365 | 0.15109851 | -0.20586365 | 0.15109851  | -0.20586365 | 0.15109851 | -0.20586365 | 0.15109851 |
| ENSG0000026026  | 6  | 2882529  | 2871793  | ANKRD3A   | protein coding          | -0.33043441 | 0.33303502  | -0.18018691  | 0.18377394  | -0.20784411   | 0.20268742  | -0.05178657 | 0.1867104  | -0.27963844 | 0.0401662   | -0.3076865  | 0.5326267  | 0.39274572  | 0.0474817  |
| ENSG0000026917  | 10 | 2682529  | 2671793  | ANKRD3A   | protein coding          | -0.28452829 | 0.33303502  | -0.18018691  | 0.18377394  | -0.20784411</ |             |             |            |             |             |             |            |             |            |













Table with 15 columns: Gene ID, Chr, Start, End, Strand, Feature, RefSeq ID, RefSeq Name, RefSeq Type, RefSeq Description, RefSeq Accession, RefSeq Date, RefSeq Version, RefSeq Length, RefSeq Description. The table lists various genes and their associated features, including protein-coding genes, lincRNAs, miRNAs, and pseudogenes.





Table with 10 columns: Gene ID, Gene Name, Feature, Start, End, Strand, RefSeq ID, RefSeq Name, RefSeq Description, RefSeq Type. Contains genomic data for various genes including MBD1, TERT, AC021139.2, etc.

Table with 10 columns: Gene ID, Gene Name, Feature, Coordinates, and various numerical values. The table lists numerous genes such as GSTM3, SCAM2, OAT17A1, and many others, with their genomic coordinates and associated data points.

Table with columns for gene ID, chromosome, coordinates, gene name, type, and multiple numerical values. The table lists various genes such as DDX3X, HNR2B, and others, along with their genomic locations and associated numerical data.



Table with 10 columns: Gene ID, Chromosome, Start, End, Gene Name, Feature, Start, End, Start, End, Gene Name. Contains a comprehensive list of gene annotations for the RMD Open study.

Table with 10 columns: Gene ID, Chr, Start, End, Gene Name, Feature, RefSeq ID, RefSeq Description, RefSeq Link, RefSeq Type. Contains a comprehensive list of genes and their associated genomic coordinates and descriptions.



|                 |    |           |          |            |                                      |             |             |              |            |             |             |             |            |             |            |             |             |             |            |            |
|-----------------|----|-----------|----------|------------|--------------------------------------|-------------|-------------|--------------|------------|-------------|-------------|-------------|------------|-------------|------------|-------------|-------------|-------------|------------|------------|
| ENSG00000212731 | 14 | 77466294  | 77466340 | AF111681   | lincRNA                              | -0.0449994  | 0.26551655  | -0.09033420  | 0.52370027 | 0.04948979  | 0.806315027 | 0.14731404  | 0.46339912 | 0.09187447  | 0.11957948 | -0.40696989 | 0.05416954  | 0.12497826  | 0.38717524 |            |
| ENSG00000212732 | 17 | 49371780  | 49371814 | AF111682   | lincRNA                              | -0.21607395 | 0.20367314  | -0.25370616  | 0.17537951 | -0.25429056 | 0.04691684  | 0.17443011  | 0.46339912 | 0.09187447  | 0.11957948 | -0.40696989 | 0.05416954  | 0.12497826  | 0.38717524 |            |
| ENSG00000212733 | 17 | 77331280  | 77331314 | AF111683   | lincRNA                              | -0.03829329 | 0.21491877  | -0.03829329  | 0.21491877 | -0.03829329 | 0.21491877  | -0.03829329 | 0.21491877 | -0.03829329 | 0.21491877 | -0.03829329 | 0.21491877  | -0.03829329 | 0.21491877 | 0.21491877 |
| ENSG00000212734 | 3  | 48599002  | 48599036 | UCR1C1     | protein coding                       | 0.03829329  | 0.37678171  | -0.01979302  | 0.88148044 | -0.02544454 | 0.89974891  | 0.20939002  | 0.20452780 | 0.18253889  | 0.19212016 | -0.04633000 | 0.04343000  | 0.05007274  | 0.53062150 |            |
| ENSG00000212735 | 18 | 10656580  | 10656614 | UCR1C2     | protein coding                       | -0.06444023 | 0.26289717  | -0.07693765  | 0.56573753 | -0.13334773 | 0.51053991  | 0.27232727  | 0.17878201 | 0.0426272   | 0.04466600 | -0.40630149 | 0.05437299  | 0.02426760  | 0.58441116 |            |
| ENSG00000212736 | 21 | 38424000  | 38424034 | ITSN1      | protein coding                       | -0.04444023 | 0.26289717  | -0.07693765  | 0.56573753 | -0.13334773 | 0.51053991  | 0.27232727  | 0.17878201 | 0.0426272   | 0.04466600 | -0.40630149 | 0.05437299  | 0.02426760  | 0.58441116 |            |
| ENSG00000212737 | 18 | 13719272  | 13719306 | ZNF303     | protein coding                       | -0.078591   | 0.46688108  | -0.23704564  | 0.09791508 | -0.10307870 | 0.55337121  | -0.11308070 | 0.45743780 | 0.01460544  | 0.91651786 | -0.05626236 | 0.04617438  | 0.09887510  | 0.48451464 |            |
| ENSG00000212738 | 1  | 7162478   | 7162482  | ITSN2      | protein coding                       | -0.22542828 | 0.04688108  | -0.24659110  | 0.04342591 | -0.13489751 | 0.11088812  | -0.15272651 | 0.35848728 | -0.1058283  | 0.12363901 | -0.40676934 | 0.04607303  | -0.26698370 | 0.15898925 |            |
| ENSG00000212739 | MT | 49371780  | 49371814 | MT-PE      | protein coding                       | -0.22542828 | 0.04688108  | -0.24659110  | 0.04342591 | -0.13489751 | 0.11088812  | -0.15272651 | 0.35848728 | -0.1058283  | 0.12363901 | -0.40676934 | 0.04607303  | -0.26698370 | 0.15898925 |            |
| ENSG00000211725 | 1  | 21116378  | 21116383 | ROR3       | protein coding                       | -0.01877889 | 0.18778889  | -0.23074269  | 0.09879889 | -0.03914584 | 0.11680703  | 0.25925913  | 0.30791844 | -0.05988872 | 0.07627314 | -0.08686005 | 0.04403760  | 0.05971327  | 0.59713278 |            |
| ENSG00000214944 | 3  | 11903647  | 11903681 | AC038621   | lincRNA                              | -0.29472474 | 0.00264498  | -0.26467410  | 0.03244428 | -0.10465108 | 0.58819998  | -0.13965738 | 0.48720693 | -0.24941045 | 0.09969693 | -0.40911188 | 0.03981488  | -0.33217781 | 0.01843683 |            |
| ENSG00000214945 | 13 | 17538348  | 17538382 | CPEB4      | protein coding                       | -0.20281428 | 0.16471768  | -0.29738161  | 0.03889451 | -0.25181084 | 0.19893793  | -0.20333763 | 0.3284584  | -0.15742309 | 0.04698348 | -0.38983044 | -0.27496870 | 0.02786870  | 0.05811833 |            |
| ENSG00000214946 | 8  | 80062486  | 80062491 | ALN1313    | transcribed pseudogene               | -0.30689305 | 0.07076911  | -0.25610213  | 0.04376730 | -0.09790804 | 0.62949959  | -0.08453146 | 0.63905674 | -0.10688802 | 0.19104173 | -0.08698816 | 0.03933547  | -0.12722890 | 0.01228900 |            |
| ENSG00000208901 | 3  | 50317790  | 50317824 | HYAL       | protein coding                       | -0.25171883 | 0.07376557  | -0.31442726  | 0.01294728 | -0.10265130 | 0.60226266  | -0.38794191 | 0.10671745 | -0.25688130 | 0.01812545 | -0.40701038 | 0.05392337  | -0.18338969 | 0.17442001 |            |
| ENSG00000208902 | 12 | 11019851  | 11019885 | AC052342   | lincRNA                              | -0.34389121 | 0.00269713  | -0.37377868  | 0.00743774 | -0.21941178 | 0.21210770  | -0.44510015 | 0.01887881 | -0.30024662 | 0.00490708 | -0.40718838 | 0.03807901  | -0.28739154 | 0.02947444 |            |
| ENSG00000204089 | 3  | 76434018  | 7643428  | CAP1       | protein coding                       | -0.18643378 | 0.10037204  | -0.29720050  | 0.39678993 | -0.10265130 | 0.68242603  | -0.15063358 | 0.28011330 | -0.12397110 | 0.03717823 | -0.07216231 | 0.05927486  | -0.10695564 | 0.20597870 |            |
| ENSG00000217127 | 18 | 9102630   | 9103430  | NUPF2      | protein coding                       | -0.30984108 | 0.00680471  | -0.30712502  | 0.00237227 | -0.30241185 | 0.18011425  | -0.2008387  | 0.31514248 | -0.24828627 | 0.00200228 | -0.40732033 | 0.05377447  | -0.07471849 | 0.08149031 |            |
| ENSG00000213644 | 12 | 49770727  | 49749541 | TNR9B      | protein coding                       | -0.10669861 | 0.13413113  | -0.26465763  | 0.04567000 | -0.38195154 | 0.1743496   | -0.10383463 | 0.9564747  | -0.05997096 | 0.17445091 | -0.07272369 | -0.04727369 | 0.13346471  | 0.31168314 |            |
| ENSG00000210484 | 19 | 49333171  | 49343354 | CD37       | protein coding                       | -0.25821088 | 0.09892459  | -0.306746425 | 0.00421448 | -0.0410428  | 0.69699777  | -0.35580803 | 0.08700789 | -0.16865514 | 0.22801292 | -0.0741006  | -0.0732370  | -0.27038073 | 0.05149032 |            |
| ENSG00000213583 | X  | 154401236 | 15441212 | FNAB1L1    | protein coding                       | -0.08181127 | 0.178981326 | -0.24949161  | 0.03784256 | -0.22774491 | 0.80085473  | -0.16763314 | 0.34869739 | 0.09287272  | 0.50416602 | -0.04071487 | 0.05333847  | -0.13127279 | 0.38363847 |            |
| ENSG00000212073 | 1  | 13835838  | 13847028 | KO5B1      | protein coding                       | -0.17399178 | 0.21135870  | -0.22940381  | 0.1106272  | -0.25268897 | 0.20483897  | -0.04477964 | 0.71198812 | -0.07156815 | 0.06770465 | -0.04733624 | -0.25319437 | -0.18300871 | 0.12002724 |            |
| ENSG00000215102 | 11 | 12888635  | 12881327 | FNAB1L2    | protein coding                       | -0.18545025 | 0.10635813  | -0.29237496  | 0.0194535  | -0.02274453 | 0.47785158  | -0.28729535 | 0.1482158  | -0.15131638 | 0.32993366 | -0.06758347 | -0.1920569  | 0.21345478  |            |            |
| ENSG00000211807 | 20 | 36574348  | 36580389 | TGIF       | protein coding                       | -0.10121038 | 0.31115423  | -0.16545782  | 0.2804440  | -0.12892306 | 0.52899104  | -0.1634520  | 0.41358583 | 0.00788744  | 0.53120700 | -0.07735683 | 0.03450212  | 0.22038708  | 0.12409887 |            |
| ENSG00000215892 | 9  | 7953005   | 7953011  | LINC01183  | lincRNA                              | -0.22461893 | 0.00493548  | -0.22571352  | 0.11497703 | -0.08791741 | 0.88140424  | -0.08623897 | 0.01688783 | -0.06684927 | 0.04890738 | -0.40718173 | 0.03338901  | -0.32889407 | 0.01987849 |            |
| ENSG00000248527 | 1  | 638396    | 634378   | MTATRP1    | unprocessed pseudogene               | -0.2384583  | 0.03634033  | -0.14558062  | 0.1561263  | -0.08539341 | 0.78460977  | -0.20092461 | 0.31493112 | -0.1638248  | 0.24833159 | -0.07735683 | 0.03450212  | -0.22038708 | 0.12409887 |            |
| ENSG00000249850 | 6  | 3688206   | 36888497 | KIF18P1    | protein coding                       | -0.28938938 | 0.01988894  | -0.14987813  | 0.02930407 | -0.03810984 | 0.80333326  | -0.47454630 | 0.01234828 | -0.26408074 | 0.02584843 | -0.40793231 | 0.05338909  | -0.20812074 | 0.14695465 |            |
| ENSG00000203322 | 19 | 3891303   | 38406414 | MECP2      | protein coding                       | 0.02243364  | 0.84722054  | -0.05937807  | 0.08214061 | 0.20968207  | 0.17928191  | 0.31242592  | 0.24593321 | 0.19195451  | 0.16638916 | -0.40744711 | 0.05338909  | -0.05926678 | 0.08372381 |            |
| ENSG00000218321 | 10 | 30020207  | 31031937 | ZNF438     | protein coding                       | -0.1153893  | 0.17248907  | -0.3381467   | 0.0174558  | -0.2867584  | 0.13091446  | -0.05908182 | 0.61293191 | -0.05908182 | 0.16129319 | -0.0474558  | 0.0474558   | -0.16819184 | 0.44671594 |            |
| ENSG00000225440 | 11 | 50307681  | 50307706 | AC024465   | transcribed unprocessed pseudogene   | -0.12748163 | 0.27025548  | -0.16799517  | 0.24354578 | -0.08766438 | 0.87066184  | -0.17513017 | 0.38212249 | 0.06215349  | 0.68251838 | -0.04943786 | 0.05315164  | -0.23891143 | 0.09473861 |            |
| ENSG00000210296 | 10 | 79861394  | 79861394 | LINC01183  | lincRNA                              | -0.21819231 | 0.00269713  | -0.24918231  | 0.00269713 | -0.21819231 | 0.00269713  | -0.24918231 | 0.00269713 | -0.21819231 | 0.00269713 | -0.24918231 | 0.00269713  | -0.21819231 | 0.00269713 |            |
| ENSG00000225044 | 10 | 79861394  | 79861394 | NLOC1054B1 | transcribed unprocessed pseudogene   | -0.21819231 | 0.00269713  | -0.24918231  | 0.00269713 | -0.21819231 | 0.00269713  | -0.24918231 | 0.00269713 | -0.21819231 | 0.00269713 | -0.24918231 | 0.00269713  | -0.21819231 | 0.00269713 |            |
| ENSG00000214418 | 12 | 12024004  | 12024017 | RAF1       | protein coding                       | -0.07611528 | 0.15057152  | -0.29233348  | 0.03930210 | -0.02629079 | 0.89595019  | -0.2444021  | 0.2913968  | 0.06867827  | 0.83123595 | -0.04398421 | -0.05032885 | -0.0476489  | 0.74237287 |            |
| ENSG00000211813 | 15 | 12024004  | 12024017 | RAF1       | protein coding                       | -0.07611528 | 0.15057152  | -0.29233348  | 0.03930210 | -0.02629079 | 0.89595019  | -0.2444021  | 0.2913968  | 0.06867827  | 0.83123595 | -0.04398421 | -0.05032885 | -0.0476489  | 0.74237287 |            |
| ENSG00000216044 | 4  | 17727255  | 17726287 | NEL2       | protein coding                       | -0.17662691 | 0.27626987  | -0.26589918  | 0.05989491 | -0.06854128 | 0.71418491  | -0.14066346 | 0.57104416 | -0.09683727 | 0.51818456 | -0.04858908 | 0.02687451  | -0.08856572 | 0.04079039 |            |
| ENSG00000210966 | 17 | 7477469   | 7487937  | TMEM104    | protein coding                       | -0.02795035 | 0.80362527  | -0.03042473  | 0.8037029  | -0.12845330 | 0.52938063  | -0.04276321 | 0.6907979  | -0.16484871 | 0.24307749 | -0.04878736 | 0.02680447  | -0.15820625 | 0.27201104 |            |
| ENSG00000233088 | 2  | 22184422  | 22194412 | LPHF3      | protein coding                       | -0.02787187 | 0.80979994  | -0.11953116  | 0.84843782 | -0.08867148 | 0.66006391  | -0.06282186 | 0.74014943 | -0.13311984 | 0.33731151 | -0.06282186 | 0.74014943  | -0.13311984 | 0.33731151 |            |
| ENSG00000211939 | 9  | 12850417  | 12854228 | GLET1      | protein coding                       | -0.00768287 | 0.94722042  | -0.10652072  | 0.94825030 | -0.02398983 | 0.13963326  | -0.04747227 | 0.8147233  | 0.03972263  | 0.77567107 | -0.02791234 | 0.0281509   | -0.02312932 | 0.02354473 |            |
| ENSG00000278690 | 1  | 73131294  | 73131294 | LINC01183  | lincRNA                              | -0.21819231 | 0.00269713  | -0.24918231  | 0.00269713 | -0.21819231 | 0.00269713  | -0.24918231 | 0.00269713 | -0.21819231 | 0.00269713 | -0.24918231 | 0.00269713  | -0.21819231 | 0.00269713 |            |
| ENSG00000216133 | 17 | 79181007  | 79197117 | GOX1       | protein coding                       | -0.26451944 | 0.00207368  | -0.24344718  | 0.04880504 | -0.26884055 | 0.17599692  | -0.16205192 | 0.41921770 | -0.23882869 | 0.08199508 | -0.06079129 | -0.3274849  | -0.02354473 | 0.02354473 |            |
| ENSG00000225441 | 4  | 11236131  | 11237099 | RTEL1P1    | transcribed unprocessed pseudogene   | -0.19577858 | 0.18181809  | -0.27183271  | 0.05617472 | -0.10397772 | 0.60814762  | -0.04684491 | 0.63888716 | -0.01102491 | 0.93877431 | -0.04881753 | -0.04248870 | -0.24428108 | 0.08738859 |            |
| ENSG00000243806 | 9  | 9482981   | 9488864  | RPL7P8     | transcribed unprocessed pseudogene</ |             |             |              |            |             |             |             |            |             |            |             |             |             |            |            |









|                 |     |           |           |           |                                 |              |                    |             |                    |             |                   |              |                   |                   |                   |                   |                   |             |             |
|-----------------|-----|-----------|-----------|-----------|---------------------------------|--------------|--------------------|-------------|--------------------|-------------|-------------------|--------------|-------------------|-------------------|-------------------|-------------------|-------------------|-------------|-------------|
| ENSG00000118217 | 1   | 161766320 | 161964070 | ATF6      | protein coding                  | -0.179086174 | 0.119117748        | -0.28786723 | <b>0.02628424</b>  | 0.018934882 | 0.023155504       | -0.23872659  | 0.23044605        | -0.124461345      | 0.360882814       | -0.445244125      | <b>0.03226044</b> | 0.158339005 | 0.272036889 |
| ENSG00000169646 | 6   | 13874485  | 138789500 | TNFR3     | lncRNA                          | -0.062892413 | -0.073524881       | -0.29185227 | <b>0.00307260</b>  | 0.040417616 | 0.786029259       | -0.127112366 | 0.27509391        | -0.07702627       | 0.156662241       | -0.44530669       | <b>0.03226044</b> | 0.158339005 | 0.272036889 |
| ENSG00000169646 | 186 | 13874485  | 138789500 | TNFR3     | lncRNA                          | -0.062892413 | -0.073524881       | -0.29185227 | <b>0.00307260</b>  | 0.040417616 | 0.786029259       | -0.127112366 | 0.27509391        | -0.07702627       | 0.156662241       | -0.44530669       | <b>0.03226044</b> | 0.158339005 | 0.272036889 |
| ENSG00000225774 | 22  | 30425436  | 30430430  | SIRPAP1   | transcript processed pseudogene | -0.34449149  | <b>0.02212248</b>  | -0.35685939 | <b>0.00442270</b>  | 0.064170044 | 0.41282807        | -0.33566386  | 0.08862976        | -0.27686151       | <b>0.02229292</b> | <b>0.03226044</b> | 0.158339005       | 0.272036889 |             |
| ENSG00000126883 | 1   | 13172588  | 131724663 | NLR4      | protein coding                  | -0.084633304 | 0.73363111         | -0.31582372 | <b>0.00466979</b>  | 0.046059979 | 0.84075914        | -0.060410306 | 0.664313116       | -0.445752249      | <b>0.03226044</b> | 0.158339005       | 0.272036889       |             |             |
| ENSG00000303397 | 78  | 7881426   | 7881426   | 7881426   | transcript processed pseudogene | -0.084633304 | 0.73363111         | -0.31582372 | <b>0.00466979</b>  | 0.046059979 | 0.84075914        | -0.060410306 | 0.664313116       | -0.445752249      | <b>0.03226044</b> | 0.158339005       | 0.272036889       |             |             |
| ENSG00000244703 | 1   | 20764534  | 20764534  | CD6AP1    | unprocessed pseudogene          | -0.23386220  | <b>0.01416298</b>  | -0.41772035 | <b>0.02641856</b>  | 0.02645974  | 0.18618451        | -0.48183581  | <b>0.03554838</b> | <b>0.03226044</b> | 0.158339005       | 0.272036889       |                   |             |             |
| ENSG00000267015 | 1   | 2667881   | 2668070   | AC01424.2 | misc. RNA                       | -0.50311977  | <b>0.00605054</b>  | -0.38875359 | <b>0.00520180</b>  | 0.00525474  | 0.77289217        | -0.34461794  | 0.07835216        | -0.23691356       | 0.00451849        | -0.44610958       | <b>0.02641856</b> | 0.158339005 |             |
| ENSG00000169693 | 19  | 5601376   | 5601376   | 5601376   | transcript processed pseudogene | -0.44268129  | <b>0.00605054</b>  | -0.38875359 | <b>0.00520180</b>  | 0.00525474  | 0.77289217        | -0.34461794  | 0.07835216        | -0.23691356       | 0.00451849        | -0.44610958       | <b>0.02641856</b> | 0.158339005 |             |
| ENSG00000105053 | 19  | 4976788   | 5005284   | VRK3      | protein coding                  | -0.40926133  | <b>0.00605054</b>  | -0.44748298 | <b>0.00384772</b>  | 0.03818327  | <b>0.05058044</b> | -0.37029182  | 0.05988438        | -0.38507372       | 0.00451849        | -0.44610958       | <b>0.02641856</b> | 0.158339005 |             |
| ENSG00000181788 | 3   | 13917415  | 13907874  | SH2B3     | protein coding                  | -0.05702844  | <b>0.02424441</b>  | -0.06517019 | <b>0.02624204</b>  | 0.03814967  | 0.68740633        | -0.07298806  | 0.16362424        | 0.08175361        | 0.07162710        | -0.44649434       | <b>0.02641856</b> | 0.158339005 |             |
| ENSG00000100106 | 22  | 3769948   | 3777656   | TM6SF1    | protein coding                  | -0.12015118  | <b>0.02624441</b>  | -0.06517019 | <b>0.02624204</b>  | 0.03814967  | 0.68740633        | -0.07298806  | 0.16362424        | 0.08175361        | 0.07162710        | -0.44649434       | <b>0.02641856</b> | 0.158339005 |             |
| ENSG00000118515 | 6   | 13419284  | 13431172  | SOX1      | protein coding                  | -0.32467897  | <b>0.03441441</b>  | -0.26132840 | <b>0.03441441</b>  | 0.02625658  | 0.18533708        | -0.08686371  | 0.08789928        | -0.26728715       | 0.00711627        | -0.44659749       | <b>0.02624441</b> | 0.158339005 |             |
| ENSG00000148883 | 4   | 13842698  | 13842698  | AC03737.2 | transcript processed pseudogene | -0.27081063  | 0.01371224         | -0.33544487 | <b>0.01731198</b>  | 0.00978639  | 0.67273358        | -0.18433490  | 0.41274881        | -0.10457127       | 0.45173268        | -0.44649434       | <b>0.02624441</b> | 0.158339005 |             |
| ENSG00000105235 | 19  | 3506111   | 3508334   | ZFR1      | protein coding                  | -0.22154529  | <b>0.03751252</b>  | -0.19331749 | <b>0.01741310</b>  | 0.02423281  | 0.30414477        | -0.16264887  | 0.38196793        | 0.03879219        | 0.37895868        | -0.44649434       | <b>0.02624441</b> | 0.158339005 |             |
| ENSG00000177076 | 6   | 1940039   | 1945200   | ACER2     | protein coding                  | -0.1823598   | 0.02625161         | -0.19331749 | <b>0.01741310</b>  | 0.02423281  | 0.30414477        | -0.16264887  | 0.38196793        | 0.03879219        | 0.37895868        | -0.44649434       | <b>0.02624441</b> | 0.158339005 |             |
| ENSG00000207075 | 6   | 6076969   | 6096444   | AC11343.2 | lncRNA                          | -0.22417977  | -0.31068498        | -0.27090767 | <b>0.00900222</b>  | 0.00900222  | 0.05507247        | -0.17748711  | 0.3735398         | -0.10348905       | 0.44336644        | -0.44644001       | <b>0.02624441</b> | 0.158339005 |             |
| ENSG00000113749 | 6   | 17568600  | 17571076  | HR23      | protein coding                  | -0.21968608  | <b>0.05363151</b>  | -0.20110788 | <b>0.04029889</b>  | 0.20448118  | 0.28287045        | -0.24078181  | 0.23833309        | -0.16721449       | 0.23742383        | -0.44679973       | <b>0.02624441</b> | 0.158339005 |             |
| ENSG00000119711 | 14  | 7456847   | 7460442   | ALDH3A1   | protein coding                  | -0.31903583  | <b>0.04958878</b>  | -0.32988415 | <b>0.01027486</b>  | 0.02410844  | 0.1123448         | -0.24011803  | 0.22730202        | -0.30267553       | 0.02478154        | -0.44681731       | <b>0.02624441</b> | 0.158339005 |             |
| ENSG00000169699 | 11  | 6776747   | 6770116   | ZDHHC5    | protein coding                  | -0.16091488  | 0.092671           | -0.34705923 | <b>0.01032631</b>  | 0.291566746 | 0.14747172        | -0.30021885  | 0.12911131        | -0.17136978       | 0.215966276       | -0.44743434       | <b>0.02624441</b> | 0.158339005 |             |
| ENSG00000169594 | 14  | 9212181   | 9217243   | CFDP1     | protein coding                  | -0.08257837  | <b>0.04752133</b>  | -0.09588259 | <b>0.049577003</b> | 0.05008603  | 0.02360366        | -0.23899259  | 0.22811326        | -0.24077211       | 0.03409911        | -0.44727711       | <b>0.02624441</b> | 0.158339005 |             |
| ENSG00000108930 | 20  | 2103331   | 2139882   | XRN2      | protein coding                  | -0.09617242  | <b>0.04053262</b>  | -0.25788651 | <b>0.07128878</b>  | 0.15000588  | 0.44402057        | -0.16012277  | 0.08373897        | 0.01220784        | 0.93018194        | -0.44748881       | <b>0.02624441</b> | 0.158339005 |             |
| ENSG00000181175 | 3   | 9131853   | 9323469   | HEPACAM2  | protein coding                  | -0.12105118  | <b>0.026284174</b> | -0.20011347 | <b>0.15349332</b>  | 0.009293154 | 0.05313208        | -0.01508951  | 0.19054644        | 0.03819277        | 0.19318971        | -0.44748881       | <b>0.02624441</b> | 0.158339005 |             |
| ENSG00000121333 | 3   | 5283312   | 5289748   | STAM2     | protein coding                  | -0.13628858  | <b>0.2303671</b>   | -0.12015117 | <b>0.04502883</b>  | 0.02500545  | 0.88888713        | -0.22843515  | 0.24864753        | -0.12495782       | 0.0321281         | -0.44781782       | <b>0.02624441</b> | 0.158339005 |             |
| ENSG00000143190 | 1   | 16720276  | 16724748  | POU1F1    | protein coding                  | -0.18034444  | <b>0.18347521</b>  | -0.23422747 | <b>0.12028036</b>  | 0.04384978  | 0.05781361        | -0.08957408  | 0.02472694        | -0.14488186       | 0.2854762         | -0.44788512       | <b>0.02624441</b> | 0.158339005 |             |
| ENSG00000163554 | 1   | 19987104  | 19989741  | SPTA1     | protein coding                  | -0.18698718  | 0.010393924        | -0.19789663 | <b>0.18899392</b>  | 0.130426308 | 0.40734069        | -0.09472341  | 0.07436454        | -0.02947129       | 0.09249864        | -0.44882741       | <b>0.02624441</b> | 0.158339005 |             |
| ENSG00000121060 | 17  | 5633837   | 5691480   | TRIM25    | protein coding                  | -0.2444682   | <b>0.04971628</b>  | -0.37254499 | <b>0.00712881</b>  | 0.15329141  | 0.44546441        | -0.28834524  | 0.14440521        | -0.28625981       | 0.15429052        | -0.44834541       | <b>0.02624441</b> | 0.158339005 |             |
| ENSG00000129521 | 14  | 3392427   | 3446274   | ECLN3     | protein coding                  | -0.36988418  | <b>0.01076934</b>  | -0.26988716 | <b>0.06202401</b>  | 0.29537119  | 0.19145968        | -0.09222404  | 0.8849378         | -0.2738559        | 0.04010528        | -0.4482698        | <b>0.02624441</b> | 0.158339005 |             |
| ENSG00000169693 | 19  | 6076969   | 6096444   | AC11343.2 | lncRNA                          | -0.22417977  | -0.31068498        | -0.27090767 | <b>0.00900222</b>  | 0.00900222  | 0.05507247        | -0.17748711  | 0.3735398         | -0.10348905       | 0.44336644        | -0.44644001       | <b>0.02624441</b> | 0.158339005 |             |
| ENSG00000113749 | 6   | 17568600  | 17571076  | HR23      | protein coding                  | -0.21968608  | <b>0.05363151</b>  | -0.20110788 | <b>0.04029889</b>  | 0.20448118  | 0.28287045        | -0.24078181  | 0.23833309        | -0.16721449       | 0.23742383        | -0.44679973       | <b>0.02624441</b> | 0.158339005 |             |
| ENSG00000119711 | 14  | 7456847   | 7460442   | ALDH3A1   | protein coding                  | -0.31903583  | <b>0.04958878</b>  | -0.32988415 | <b>0.01027486</b>  | 0.02410844  | 0.1123448         | -0.24011803  | 0.22730202        | -0.30267553       | 0.02478154        | -0.44681731       | <b>0.02624441</b> | 0.158339005 |             |
| ENSG00000169699 | 11  | 6776747   | 6770116   | ZDHHC5    | protein coding                  | -0.16091488  | 0.092671           | -0.34705923 | <b>0.01032631</b>  | 0.291566746 | 0.14747172        | -0.30021885  | 0.12911131        | -0.17136978       | 0.215966276       | -0.44743434       | <b>0.02624441</b> | 0.158339005 |             |
| ENSG00000169594 | 14  | 9212181   | 9217243   | CFDP1     | protein coding                  | -0.08257837  | <b>0.04752133</b>  | -0.09588259 | <b>0.049577003</b> | 0.05008603  | 0.02360366        | -0.23899259  | 0.22811326        | -0.24077211       | 0.03409911        | -0.44727711       | <b>0.02624441</b> | 0.158339005 |             |
| ENSG00000108930 | 20  | 2103331   | 2139882   | XRN2      | protein coding                  | -0.09617242  | <b>0.04053262</b>  | -0.25788651 | <b>0.07128878</b>  | 0.15000588  | 0.44402057        | -0.16012277  | 0.08373897        | 0.01220784        | 0.93018194        | -0.44748881       | <b>0.02624441</b> | 0.158339005 |             |
| ENSG00000181175 | 3   | 9131853   | 9323469   | HEPACAM2  | protein coding                  | -0.12105118  | <b>0.026284174</b> | -0.20011347 | <b>0.15349332</b>  | 0.009293154 | 0.05313208        | -0.01508951  | 0.19054644        | 0.03819277        | 0.19318971        | -0.44748881       | <b>0.02624441</b> | 0.158339005 |             |
| ENSG00000121333 | 3   | 5283312   | 5289748   | STAM2     | protein coding                  | -0.13628858  | <b>0.2303671</b>   | -0.12015117 | <b>0.04502883</b>  | 0.02500545  | 0.88888713        | -0.22843515  | 0.24864753        | -0.12495782       | 0.0321281         | -0.44781782       | <b>0.02624441</b> | 0.158339005 |             |
| ENSG00000143190 | 1   | 16720276  | 16724748  | POU1F1    | protein coding                  | -0.18034444  | <b>0.18347521</b>  | -0.23422747 | <b>0.12028036</b>  | 0.04384978  | 0.05781361        | -0.08957408  | 0.02472694        | -0.14488186       | 0.2854762         | -0.44788512       | <b>0.02624441</b> | 0.158339005 |             |
| ENSG00000163554 | 1   | 19987104  | 19989741  | SPTA1     | protein coding                  | -0.18698718  | 0.010393924        | -0.19789663 | <b>0.18899392</b>  | 0.130426308 | 0.40734069        | -0.09472341  | 0.07436454        | -0.02947129       | 0.09249864        | -0.44882741       | <b>0.02624441</b> | 0.158339005 |             |
| ENSG00000121060 | 17  | 5633837   | 5691480   | TRIM25    | protein coding                  | -0.2444682   | <b>0.04971628</b>  | -0.37254499 | <b>0.00712881</b>  | 0.15329141  | 0.44546441        | -0.28834524  | 0.14440521        | -0.28625981       | 0.15429052        | -0.44834541       | <b>0.02624441</b> | 0.158339005 |             |
| ENSG00000129521 | 14  | 3392427   | 3446274   | ECLN3     | protein coding                  | -0.36988418  | <b>0.01076934</b>  | -0.26988716 | <b>0.06202401</b>  | 0.29537119  | 0.19145968        | -0.09222404  | 0.8849378         | -0.2738559        | 0.04010528        | -0.4482698        | <b>0.02624441</b> | 0.158339005 |             |
| ENSG00000169693 | 19  | 6076969   | 6096444   | AC11343.2 | lncRNA                          | -0.22417977  | -0.31068498        | -0.27090767 | <b>0.00900222</b>  | 0.00900222  | 0.05507247        | -0.17748711  | 0.3735398         | -0.10348905       |                   |                   |                   |             |             |









Table with 10 columns: Gene ID, Gene Name, Gene Type, Gene Description, and various numerical values. The table lists numerous genes such as DMNA1, CLIP1, CASP2, and many others, each associated with specific coordinates and values.



Table with columns for gene ID, gene name, protein name, and coordinates. The table lists numerous genes such as FBXL4, RRS, PIP, and many others, with their corresponding protein names and genomic coordinates.

Table with 10 columns: Gene ID, Gene Name, Feature, Start, End, Strand, RefSeq ID, RefSeq Name, RefSeq Description, RefSeq Accession. The table lists numerous genes and their associated features and coordinates.



Table with 15 columns: Gene ID, Ensembl ID, Gene Name, Type, Strand, Start, End, Score, and 10 numerical values. The table lists various genes such as ENDOG000155479, ENDOG000155480, ENDOG000155481, etc., with their corresponding genomic coordinates and scores.



|                 |    |           |           |          |                |               |              |              |             |              |             |               |             |              |             |              |          |              |             |
|-----------------|----|-----------|-----------|----------|----------------|---------------|--------------|--------------|-------------|--------------|-------------|---------------|-------------|--------------|-------------|--------------|----------|--------------|-------------|
| ENSG00000171316 | 8  | 60678740  | 60688028  | CHD7     | protein_coding | -0.320707679  | 0.00448538   | -0.570235956 | 1.54E-05    | -0.277239788 | 0.161502901 | -0.4330030914 | 0.02516637  | -0.199683717 | 0.147691472 | -0.748291999 | 4.02E-03 | -0.316441101 | 0.025165001 |
| ENSG00000169225 | 4  | 90501737  | 90980540  | NRX      | protein_coding | -0.407881758  | 0.040293608  | -0.561842604 | 2.10E-03    | -0.486174321 | 0.010123861 | -0.363874819  | 0.04389352  | -0.26985154  | 0.038381261 | -0.753433171 | 3.35E-03 | -0.244067174 | 0.009929624 |
| ENSG00000007792 | 17 | 28914446  | 28845454  | KIAA0100 | protein_coding | -0.1507812461 | 0.19060853   | -0.349567564 | 0.012727003 | -0.184827235 | 0.354267143 | 0.090049885   | 0.647926889 | -0.022347431 | 0.872664899 | -0.753777303 | 3.29E-03 | -0.231468855 | 0.105788459 |
| ENSG00000127481 | 1  | 19074510  | 19210286  | UBR4     | protein_coding | -0.243040673  | 0.033185073  | -0.430722209 | 0.001783571 | -0.07443484  | 0.712138051 | -0.049180594  | 0.807536947 | -0.0779614   | 0.575243581 | -0.756853894 | 2.91E-03 | -0.285613213 | 0.043671138 |
| ENSG00000088532 | 16 | 10444564  | 11621160  | CLEC18A  | protein_coding | -0.239631828  | 0.0368120173 | -0.452698413 | 0.001024493 | 0.041099799  | 0.762885078 | -0.141725189  | 0.480689102 | -0.047285699 | 0.972840546 | -0.796314848 | 2.01E-03 | -0.299188411 | 0.034812013 |
| ENSG00000175727 | 12 | 122078796 | 122147344 | MAP3     | protein_coding | -0.358798311  | 0.001446899  | -0.381620916 | 0.004910727 | -0.211504286 | 0.389578471 | -0.090780767  | 0.855557428 | -0.172449515 | 0.212414065 | -0.771735986 | 1.61E-03 | -0.489035458 | 0.000337788 |
| ENSG00000125778 | 3  | 183487851 | 183565708 | KHLL6    | protein_coding | -0.400841827  | 0.000303189  | -0.560290611 | 2.32E-03    | -0.358897723 | 0.065997738 | -0.366280986  | 0.068157298 | -0.263867692 | 0.053858321 | -0.795002854 | 5.61E-03 | -0.446338407 | 0.001158308 |
| ENSG00000089113 | 8  | 138454848 | 138571940 | ST3GAL1  | protein_coding | -0.312789861  | 0.00581144   | -0.399345767 | 0.004065370 | -0.075885389 | 0.766681377 | 0.012912054   | 0.849033456 | -0.09457905  | 0.430175673 | -0.809202981 | 2.94E-03 | -0.411563495 | 0.002898377 |
| ENSG00000065970 | 12 | 8032716   | 8055517   | FOXJ2    | protein_coding | -0.307656541  | 0.006518918  | -0.561332861 | 2.53E-03    | -0.175532117 | 0.381180164 | -0.32360376   | 0.09844491  | -0.162243441 | 0.241171904 | -0.846974403 | 3.46E-03 | -0.309705604 | 0.028625292 |

Supplemental Table 19. Gene Ontology (GO) pathway analysis of LINC01871 function.

| Data Source:               | SJD RNA-seq                                                                          | SJD RNA-seq                            | SJD RNA-seq                            | lncRNA2function                         | GeneFriends                  | FuncPred                                | CRISPR LINC01871-1 vs Unedited |                     |
|----------------------------|--------------------------------------------------------------------------------------|----------------------------------------|----------------------------------------|-----------------------------------------|------------------------------|-----------------------------------------|--------------------------------|---------------------|
| Data Source Type:          | Whole Blood RNA-seq data                                                             | Whole Blood RNA-seq data               | Whole Blood RNA-seq data               | database / web-based tool               | database / web-based tool    | database / web-based tool               | RNA-seq data                   |                     |
| GO input qualifiers:       | Any correl >+0.70 or <-0.60 in any of the correlation analyses                       | Any correl >+0.60 or <-0.50 in SJD-Ro- | Any correl >+0.70 or <-0.60 in SJD-Ro- | all significant values - data pull only | pathway analysis on top 1500 | all significant values - data pull only | all DE genes                   |                     |
| No. of transcripts input:  | 534                                                                                  | 1368                                   | 423                                    | NaN                                     | 1500                         | NaN                                     | 1166                           |                     |
| No. of transcripts mapped: | 370                                                                                  | 961                                    | 229                                    | NaN                                     | 735                          | NaN                                     | 900                            |                     |
| GO ID                      | GO biological process complete                                                       | No. genes in list:                     | GO P <sub>adj</sub>                    | GO P <sub>adj</sub>                     | GO P <sub>adj</sub>          | GO P <sub>adj</sub>                     | GO P <sub>adj</sub>            | GO P <sub>adj</sub> |
| GO:0044237                 | cellular metabolic process                                                           | 7029                                   | 3.90E-08                               | 3.32E-14                                | 0.000158                     | -                                       | -                              | 0.00207             |
| GO:0006807                 | nitrogen compound metabolic process                                                  | 6360                                   | 4.93E-08                               | 1.15E-12                                | 2.63E-05                     | -                                       | -                              | 0.00152             |
| GO:0002181                 | cytoplasmic translation                                                              | 122                                    | 5.38E-08                               | -                                       | -                            | -                                       | -                              | -                   |
| GO:0044260                 | cellular macromolecule metabolic process                                             | 4442                                   | 6.95E-08                               | 5.04E-10                                | 0.000114                     | -                                       | -                              | 7.42E-10            |
| GO:0043170                 | macromolecule metabolic process                                                      | 5743                                   | 8.45E-08                               | 2.01E-12                                | 2.56E-05                     | -                                       | -                              | 1.48E-06            |
| GO:0008152                 | metabolic process                                                                    | 7882                                   | 9.14E-07                               | 8.16E-13                                | 0.000622                     | -                                       | -                              | 1.52E-10            |
| GO:0043604                 | amide biosynthetic process                                                           | 500                                    | 9.22E-07                               | -                                       | -                            | -                                       | -                              | 0.00624             |
| GO:0043243                 | peptide biosynthetic process                                                         | 388                                    | 1.02E-06                               | -                                       | -                            | -                                       | -                              | 2.31E-07            |
| GO:0034641                 | cellular nitrogen compound metabolic process                                         | 3193                                   | 2.28E-06                               | 6.72E-06                                | 0.0275                       | -                                       | -                              | 0.000443            |
| GO:0044267                 | cellular protein metabolic process                                                   | 3219                                   | 2.50E-06                               | 4.73E-06                                | 0.0126                       | -                                       | -                              | 0.0135              |
| GO:0069255                 | regulation of macromolecule metabolic process                                        | 6063                                   | 4.78E-05                               | 8.64E-13                                | 2.44E-05                     | -                                       | -                              | 4.28E-08            |
| GO:0048522                 | positive regulation of cellular process                                              | 6580                                   | 4.85E-05                               | 1.07E-10                                | 5.44E-05                     | 1.31E-06                                | 3.87E-09                       | 4.05E-08            |
| GO:0031323                 | regulation of cellular metabolic process                                             | 5928                                   | 4.86E-05                               | 1.67E-12                                | 7.85E-05                     | -                                       | -                              | 0.00276             |
| GO:1901564                 | organonitrogen compound metabolic process                                            | 4787                                   | 7.76E-05                               | 9.79E-06                                | 0.0347                       | -                                       | -                              | 7.94E-10            |
| GO:0019222                 | regulation of metabolic process                                                      | 6586                                   | 0.000127                               | 8.82E-13                                | 7.22E-05                     | -                                       | -                              | 0.0045              |
| GO:0048518                 | positive regulation of biological process                                            | 6062                                   | 0.000165                               | 1.13E-10                                | 8.05E-05                     | 8.82E-12                                | 5.90E-12                       | 4.01E-08            |
| GO:0010604                 | positive regulation of macromolecule metabolic process                               | 3362                                   | 0.000186                               | 2.40E-13                                | 0.000107                     | -                                       | -                              | 0.00126             |
| GO:0051171                 | regulation of nitrogen compound metabolic process                                    | 5537                                   | 0.00019                                | 7.24E-12                                | 0.000107                     | -                                       | -                              | 0.000528            |
| GO:0008993                 | positive regulation of metabolic process                                             | 3675                                   | 0.000684                               | 2.87E-13                                | 0.000207                     | -                                       | -                              | -                   |
| GO:0051173                 | positive regulation of nitrogen compound metabolic process                           | 2992                                   | 0.00226                                | 2.21E-13                                | 0.000231                     | -                                       | -                              | -                   |
| GO:0031325                 | positive regulation of cellular metabolic process                                    | 3186                                   | 0.00261                                | 1.09E-12                                | 0.000301                     | -                                       | -                              | 0.00122             |
| GO:0007346                 | regulation of mitotic cell cycle                                                     | 433                                    | 0.0199                                 | -                                       | 0.0329                       | -                                       | -                              | 7.08E-09            |
| GO:0008150                 | biological process                                                                   | 17698                                  | -                                      | 1.01E-06                                | -                            | -                                       | -                              | 3.64E-09            |
| GO:0050794                 | regulation of cellular process                                                       | 11076                                  | -                                      | 3.00E-07                                | 0.0303                       | 1.45E-14                                | 3.36E-07                       | 1.12E-09            |
| GO:0048583                 | regulation of response to stimulus                                                   | 3805                                   | -                                      | -                                       | -                            | 9.56E-25                                | 4.20E-37                       | 0.0028              |
| GO:0002376                 | immune system process                                                                | 2533                                   | -                                      | -                                       | -                            | 7.71E-39                                | 4.71E-93                       | 0.0145              |
| GO:0006955                 | immune response                                                                      | 1863                                   | -                                      | -                                       | -                            | 1.80E-30                                | 5.79E-84                       | 0.0342              |
| GO:0042981                 | regulation of apoptotic process                                                      | 1426                                   | -                                      | 0.0481                                  | -                            | -                                       | -                              | 8.37E-10            |
| GO:0002682                 | regulation of immune system process                                                  | 1418                                   | -                                      | -                                       | -                            | 7.22E-33                                | 2.37E-61                       | 0.0367              |
| GO:0080134                 | regulation of response to stress                                                     | 1240                                   | -                                      | 0.00266                                 | -                            | 1.82E-03                                | 1.58E-10                       | 3.60E-02            |
| GO:0049699                 | generation of neurons                                                                | 1237                                   | -                                      | -                                       | -                            | -                                       | -                              | 2.76E-08            |
| GO:0007186                 | G protein-coupled receptor signaling pathway                                         | 1216                                   | -                                      | 0.0225                                  | -                            | -                                       | -                              | 3.73E-10            |
| GO:0006952                 | defense response                                                                     | 1212                                   | -                                      | -                                       | -                            | 6.67E-20                                | 3.40E-54                       | 0.0149              |
| GO:0050776                 | regulation of immune response                                                        | 1029                                   | -                                      | -                                       | -                            | 4.20E-26                                | 1.45E-46                       | 0.0147              |
| GO:0002684                 | positive regulation of immune system process                                         | 898                                    | -                                      | -                                       | -                            | 2.85E-27                                | 2.95E-42                       | 0.0388              |
| GO:0030334                 | regulation of cell migration                                                         | 894                                    | -                                      | -                                       | -                            | -                                       | -                              | 5.18E-10            |
| GO:0001775                 | cell activation                                                                      | 625                                    | -                                      | 0.0141                                  | -                            | 4.51E-25                                | 4.93E-54                       | -                   |
| GO:0045321                 | leukocyte activation                                                                 | 505                                    | -                                      | 6.66E-03                                | -                            | 2.04E-27                                | 2.35E-54                       | 0.00255             |
| GO:0051249                 | regulation of lymphocyte activation                                                  | 475                                    | -                                      | -                                       | -                            | 2.01E-24                                | 2.40E-26                       | -                   |
| GO:0046649                 | lymphocyte activation                                                                | 400                                    | -                                      | 6.33E-03                                | -                            | 7.90E-29                                | 2.69E-38                       | -                   |
| GO:0032649                 | regulation of interferon-gamma production                                            | 95                                     | -                                      | -                                       | -                            | 2.16E-10                                | 5.25E-07                       | 3.60E-02            |
| GO:2000106                 | regulation of leukocyte apoptotic process                                            | 83                                     | -                                      | -                                       | -                            | -                                       | -                              | 3.70E-02            |
| GO:0097028                 | dendritic cell differentiation                                                       | 32                                     | -                                      | -                                       | -                            | -                                       | -                              | 3.60E-02            |
| GO:0035872                 | nucleotide-binding domain, leucine rich repeat containing receptor signaling pathway | 30                                     | -                                      | -                                       | -                            | -                                       | -                              | 3.70E-02            |
| GO:0002294                 | CD4-positive, alpha-beta T cell differentiation involved in immune response          | 25                                     | -                                      | -                                       | -                            | -                                       | -                              | 3.70E-02            |
| GO:0042093                 | T-helper cell differentiation                                                        | 25                                     | -                                      | -                                       | -                            | -                                       | -                              | 3.70E-02            |
| GO:0001773                 | myeloid dendritic cell activation                                                    | 24                                     | -                                      | -                                       | -                            | -                                       | -                              | 3.60E-02            |
| GO:0050855                 | regulation of B cell receptor signaling pathway                                      | 20                                     | -                                      | -                                       | -                            | -                                       | -                              | 3.70E-02            |
| GO:0086543                 | detection of other organism                                                          | 16                                     | -                                      | -                                       | -                            | 1.76E-02                                | 3.70E-02                       | -                   |

**Supplemental Table 20. Guides used to target the gene LINC01871 in HSB-2 cells**

| <b>Guide Name</b>           | <b>Chr2:LINC01871</b> | <b>Selected Guides</b>              | <b>Strand</b> |
|-----------------------------|-----------------------|-------------------------------------|---------------|
| g501-LINC01871_chr2_7725062 | 7725062-7725084       | ATAGCTCGCTGTACAGGCTA <b>AGC</b> (+) |               |
| g503-LINC01871_chr2_7725791 | 7725791-7725813       | GTGTGGTGCTTCATAAGATG <b>GGC</b> (+) |               |
| g506-LINC01871_chr2_7730101 | 7730101-7730123       | GCTGACTACTTCATATGAGA <b>AGG</b> (+) |               |
| g507-LINC01871_chr2_7730700 | 7730700-7730678       | GCATCTCATTTAATTAGAAA <b>TGG</b> (-) |               |

Footnote:

Cas9 enzyme PAM sequence (NGG) is indicated in bold.



**Supplemental Table 21. Primers used to validate LINC01871 deletion in CRISPR-edited HSB-2 cells using PCR amplification**

| <b>Target</b> | <b>New Target</b> | <b>Forward Sequence (5'-3' seq)</b> |
|---------------|-------------------|-------------------------------------|
| F1            | F1                | TACACCACACGACGGCCTAT                |
| R1            | R1                | CTGTGCTATTACTTTTCGTTGGGT            |
| F2            | F2                | AACATCTCAAACCTGGCTATGGATT           |
| Alt2-R2       | R2                | ACAACACATGCTACTCCCTGAAGC            |
| F1 Primer     | F3                | TGAGAACAGCTGGCTTAAAGAGATTA          |
| AltR2         | R3                | CCATGAAGTTAGACCCATCCACC             |

**Supplemental Table 22: Guides used to protect the area of modification in LINC01871-/- cells for Cas-mediated PCR-free enrichment for Nanopore sequencing**

| <b>Guide Name</b>   | <b>Chr2:</b>    | <b>Selected Guides</b>           | <b>Strand</b> |
|---------------------|-----------------|----------------------------------|---------------|
| A1-chr2:7722367-(+) | 7722367-7722389 | CCATCAAGTGGAAACATGTTT <b>CGG</b> | (+)           |
| A2-chr2:7723198-(+) | 7723198-7723220 | AACAATCCAAGCGCTAAGCT <b>AGG</b>  | (+)           |
| B1-chr2:7732411-(-) | 7732411-7732389 | CTGTTCTCGCAAATCCACAG <b>GG</b>   | (-)           |
| B2-chr2:7732727-(-) | 7732727-7732705 | CACGTCTTACCTGAGAACTA <b>AGG</b>  | (-)           |

## Footnote:

Cas9 enzyme PAM sequence (NGG) is indicated in bold.

Supplemental Table 23. RNA-seq analysis of the LINC01871-/- CRISPR-edited single cell HSB-2 clone compared to unmodified HSB-2 parental cell line

| Ensembl_ID      | Gene_ID | Chr       | hg38bp_Start | hg38bp_End | Strand     | Gene                               | Gene_Biotype | baseMean     | log2FoldChange | FC   | FC.True     | IFSe         | stat     | pvalue   | padj |
|-----------------|---------|-----------|--------------|------------|------------|------------------------------------|--------------|--------------|----------------|------|-------------|--------------|----------|----------|------|
| ENSG00000130600 | 11      | 1995163   | 2001470      | -          | H9         | processed_transcript               | 494.80205    | -12.50351322 | 0.000172214    | <1/2 | 1.182459602 | -10.57415679 | 3.93E-26 | 3.04E-24 |      |
| ENSG00000141753 | 17      | 40443651  | 40457731     | -          | H9         | protein_coding                     | 1757.5893    | -12.47668307 | 0.000172214    | <1/2 | 1.022805151 | -12.19751685 | 3.20E-34 | 3.61E-32 |      |
| ENSG00000128300 | 22      | 37028822  | 37028822     | +          | MFST       | protein_coding                     | 148.63669    | -10.7661833  | 0.000529777    | <1/2 | 1.18831796  | -9.06169181  | 1.29E-19 | 6.79E-18 |      |
| ENSG00000204644 | 6       | 29672392  | 29681110     | -          | ZFP57      | protein_coding                     | 119.47337    | -10.45278837 | 0.000713505    | <1/2 | 1.191269757 | -8.774493195 | 1.72E-18 | 8.34E-17 |      |
| ENSG00000254087 | 8       | 55879813  | 56014168     | +          | LYN        | protein_coding                     | 114.68254    | -10.39180815 | 0.00074431     | <1/2 | 1.190760755 | -8.22032788  | 2.61E-18 | 1.24E-16 |      |
| ENSG00000167900 | 17      | 7814705   | 78187233     | -          | TK1        | protein_coding                     | 198.08674    | -10.21962954 | 0.000838658    | <1/2 | 1.186982275 | -8.609757503 | 7.32E-18 | 3.34E-16 |      |
| ENSG00000124780 | 6       | 39299001  | 39314553     | -          | KCNK17     | protein_coding                     | 92.251019    | -10.0767748  | 0.000925952    | <1/2 | 1.19387609  | -8.440385804 | 3.16E-17 | 1.36E-15 |      |
| ENSG00000178538 | 8       | 60187347  | 60281412     | -          | CA8        | protein_coding                     | 177.05427    | -10.05494759 | 0.000940068    | <1/2 | 1.186777889 | -8.472467447 | 2.40E-17 | 1.04E-15 |      |
| ENSG00000120675 | 13      | 43023203  | 43114224     | +          | DNAJC15    | protein_coding                     | 88.392448    | -10.02189954 | 0.000961851    | <1/2 | 1.195143101 | -8.255822647 | 5.05E-17 | 2.11E-15 |      |
| ENSG00000148600 | 10      | 84194635  | 84219621     | +          | CDHR1      | protein_coding                     | 77.779407    | -9.832933739 | 0.001096458    | <1/2 | 1.196141527 | -8.220543736 | 2.03E-16 | 8.09E-15 |      |
| ENSG00000103175 | 16      | 84294646  | 84329851     | +          | WFDC1      | protein_coding                     | 77.590421    | -9.82946395  | 0.001099035    | <1/2 | 1.19608789  | -8.218080357 | 2.07E-16 | 8.24E-15 |      |
| ENSG00000197128 | 19      | 57466663  | 57477570     | -          | ZNF772     | protein_coding                     | 71.827051    | -9.721918991 | 0.001184161    | <1/2 | 1.198304526 | -8.11362065  | 9.94E-16 | 1.91E-14 |      |
| ENSG00000156535 | 6       | 73695785  | 73698316     | +          | CD109      | protein_coding                     | 71.463742    | -9.707318343 | 0.001186206    | <1/2 | 1.197918774 | -8.103486276 | 5.34E-16 | 2.05E-14 |      |
| ENSG00000225431 | 21      | 42599280  | 42615058     | -          | LINC01671  | lincRNA                            | 71.225639    | -9.70664837  | 0.001196763    | <1/2 | 1.197745753 | -8.100962228 | 5.31E-16 | 2.05E-14 |      |
| ENSG00000081665 | 19      | 19785839  | 19821751     | -          | ZNF506     | protein_coding                     | 132.47751    | -9.633226005 | 0.001259244    | <1/2 | 1.190129151 | -8.094269333 | 5.76E-16 | 2.21E-14 |      |
| ENSG00000067840 | X       | 153802166 | 153830565    | -          | PZD2A      | protein_coding                     | 66.182367    | -9.597658298 | 0.001290675    | <1/2 | 1.199686734 | -8.000137056 | 1.24E-15 | 4.64E-14 |      |
| ENSG00000148426 | 10      | 11823339  | 11827727     | +          | PROSER2    | protein_coding                     | 63.963606    | -9.552052418 | 0.001331712    | <1/2 | 1.200427266 | -7.957283737 | 1.76E-15 | 6.46E-14 |      |
| ENSG00000185101 | 11      | 417933    | 442011       | -          | ANO9       | protein_coding                     | 56.224026    | -9.357248175 | 0.001524711    | <1/2 | 1.206725209 | -7.574249534 | 8.89E-15 | 3.05E-13 |      |
| ENSG00000056736 | 3       | 53846580  | 53865800     | +          | IL17R8     | protein_coding                     | 50.632994    | -9.323951457 | 0.00156031     | <1/2 | 1.192424156 | -7.819234533 | 5.31E-15 | 1.87E-13 |      |
| ENSG00000100473 | 14      | 30874514  | 30895065     | +          | COCH       | protein_coding                     | 115.02549    | -9.220487511 | 0.001676319    | <1/2 | 1.20536592  | -7.649533924 | 2.02E-14 | 6.77E-13 |      |
| ENSG00000159640 | 17      | 63477061  | 63498380     | +          | ACE        | protein_coding                     | 50.41916     | -9.20068789  | 0.001699274    | <1/2 | 1.20725374  | -7.621183974 | 2.51E-14 | 8.30E-13 |      |
| ENSG00000105469 | 7       | 87346881  | 87399795     | +          | CRDT       | protein_coding                     | 49.205682    | -9.174084634 | 0.001731113    | <1/2 | 1.208300755 | -7.608166137 | 2.78E-14 | 9.12E-13 |      |
| ENSG00000103073 | 17      | 78187317  | 78207701     | +          | AFMID      | protein_coding                     | 48.535339    | -9.15046338  | 0.00179698     | <1/2 | 1.200181888 | -7.57726881  | 3.96E-14 | 1.09E-12 |      |
| ENSG00000148288 | 9       | 13315298  | 13316345     | +          | GBG11      | protein_coding                     | 48.067406    | -9.142396785 | 0.001769556    | <1/2 | 1.207425295 | -7.57170058  | 3.68E-14 | 1.18E-12 |      |
| ENSG00000162430 | 1       | 25800176  | 25812224     | +          | SELENON1   | protein_coding                     | 48.138952    | -9.10555449  | 0.001771816    | <1/2 | 1.206215661 | -7.5778274   | 3.51E-14 | 1.13E-12 |      |
| ENSG00000117519 | 1       | 94899649  | 94927278     | -          | CNN3       | protein_coding                     | 43.695835    | -9.004531779 | 0.001946999    | <1/2 | 1.20966617  | -7.443813403 | 9.78E-14 | 3.05E-12 |      |
| ENSG00000070018 | 12      | 11216025  | 11227012     | -          | LRP6       | protein_coding                     | 44.024324    | -9.00415667  | 0.001947506    | <1/2 | 1.211051953 | -7.434987943 | 1.05E-13 | 3.25E-12 |      |
| ENSG00000188522 | 17      | 18968789  | 19004804     | -          | FAM83G     | protein_coding                     | 43.640928    | -8.99991284  | 0.001953317    | <1/2 | 1.209004337 | -7.44413482  | 9.76E-14 | 3.04E-12 |      |
| ENSG00000167654 | 19      | 3879864   | 3928079      | +          | ATCAY      | protein_coding                     | 41.484614    | -8.926071286 | 0.002055819    | <1/2 | 1.210979587 | -7.370951075 | 1.69E-13 | 5.13E-12 |      |
| ENSG00000108252 | 14      | 102932739 | 103057472    | -          | CDC422BP   | protein_coding                     | 77.314528    | -8.857710448 | 0.002155577    | <1/2 | 1.196557323 | -7.402266284 | 1.33E-13 | 4.11E-12 |      |
| ENSG00000098774 | 17      | 63423204  | 63446378     | -          | CVB5B1     | protein_coding                     | 37.965385    | -8.79356187  | 0.002253586    | <1/2 | 1.217889927 | -7.220342429 | 1.59E-13 | 1.48E-11 |      |
| ENSG00000080561 | 17      | 68101808  | 68115158     | +          | LINC00674  | transcribed_unprocessed_pseudogene | 37.379366    | -8.789301    | 0.002274329    | <1/2 | 1.21232886  | -7.23693018  | 9.96E-13 | 1.42E-11 |      |
| ENSG00000137074 | 1       | 23840790  | 238416861    | -          | TRIM17     | protein_coding                     | 36.02529     | -8.72320112  | 0.002366207    | <1/2 | 1.21693577  | -7.168174728 | 7.60E-13 | 2.14E-11 |      |
| ENSG00000130709 | 9       | 13044499  | 130541274    | +          | ASS1       | protein_coding                     | 67.758051    | -8.674442513 | 0.002474575    | <1/2 | 1.200205282 | -7.227465705 | 4.92E-13 | 1.42E-11 |      |
| ENSG00000277476 | 17      | 68133201  | 68135935     | +          | ACD05332.8 | lincRNA                            | 33.67474     | -8.62800853  | 0.002527613    | <1/2 | 1.218258295 | -7.08248951  | 1.42E-12 | 3.84E-11 |      |
| ENSG00000067116 | X       | 133300103 | 133415490    | -          | GPC4       | protein_coding                     | 33.749292    | -8.626564773 | 0.002530144    | <1/2 | 1.217584392 | -7.084983423 | 1.39E-12 | 3.77E-11 |      |
| ENSG00000198865 | 4       | 42756801  | 42802360     | +          | CCDC152    | protein_coding                     | 32.916821    | -8.58888925  | 0.002597088    | <1/2 | 1.219045953 | -7.045582842 | 1.85E-12 | 4.96E-11 |      |
| ENSG00000151519 | 2       | 156435290 | 156613735    | +          | GP2D       | protein_coding                     | 32.343268    | -8.560175723 | 0.002649295    | <1/2 | 1.222664631 | -7.001245887 | 2.54E-12 | 6.70E-11 |      |
| ENSG00000198521 | 19      | 12180499  | 121852125    | -          | ZNF43      | protein_coding                     | 61.668024    | -8.529459254 | 0.002706306    | <1/2 | 1.20669763  | -7.103917763 | 1.21E-12 | 3.32E-11 |      |
| ENSG00000121742 | 13      | 20221971  | 20232395     | -          | GJB6       | protein_coding                     | 31.324821    | -8.526115846 | 0.002712585    | <1/2 | 1.221803998 | -6.998230824 | 2.99E-12 | 7.82E-11 |      |
| ENSG00000121931 | 1       | 110947185 | 11096479     | -          | LRP1       | protein_coding                     | 61.029378    | -8.515136126 | 0.002733308    | <1/2 | 1.200718477 | -7.091700754 | 1.32E-12 | 3.60E-11 |      |
| ENSG00000080561 | 11      | 107825755 | 107921793    | +          | MI02       | protein_coding                     | 29.729227    | -8.443617305 | 0.002872221    | <1/2 | 1.22279968  | -6.905699798 | 5.00E-12 | 1.28E-10 |      |
| ADSG0000014826  | 16      | 103046068 | 10307397     | +          | ADM        | protein_coding                     | 28.82422     | -8.375704548 | 0.003010688    | <1/2 | 1.22859577  | -6.817295817 | 3.28E-12 | 9.26E-10 |      |
| ENSG00000005189 | 16      | 20806429  | 20894668     | +          | REXOS      | protein_coding                     | 28.09448     | -8.351042985 | 0.003062567    | <1/2 | 1.22966715  | -6.791322003 | 1.11E-11 | 2.78E-10 |      |
| ENSG00000143891 | 2       | 38659130  | 38741237     | +          | GALM       | protein_coding                     | 27.359437    | -8.33295725  | 0.003101201    | <1/2 | 1.23409598  | -6.752278016 | 1.46E-11 | 3.59E-10 |      |
| ENSG00000151116 | 11      | 18529609  | 18588747     | -          | UEVLD      | protein_coding                     | 25.828799    | -8.244942364 | 0.003296287    | <1/2 | 1.229298908 | -6.70728133  | 1.99E-11 | 4.83E-10 |      |
| ENSG00000179604 | 17      | 73283624  | 73311175     | -          | CDC42EP4   | protein_coding                     | 25.459036    | -8.224806177 | 0.003342617    | <1/2 | 1.234901393 | -6.660284162 | 2.73E-11 | 6.53E-10 |      |
| ENSG00000198208 | 14      | 74903594  | 74923396     | -          | RP56K15    | protein_coding                     | 48.736731    | -8.189675072 | 0.003425012    | <1/2 | 1.20630095  | -6.789081176 | 1.13E-11 | 2.82E-10 |      |
| ENSG00000170190 | 17      | 75087727  | 75106162     | +          | SLC16A5    | protein_coding                     | 24.218763    | -8.152936935 | 0.00351335     | <1/2 | 1.233159493 | -6.611421298 | 3.81E-11 | 8.94E-10 |      |
| ENSG00000096696 | 6       | 7541575   | 7586717      | +          | DSP        | protein_coding                     | 87.680568    | -8.146276992 | 0.003529606    | <1/2 | 1.03912617  | -7.839542226 | 4.52E-15 | 1.60E-13 |      |
| ENSG00000266524 | 10      | 47300386  | 47313547     | +          | GDF10      | protein_coding                     | 46.621829    | -8.13069561  | 0.00356874     | <1/2 | 1.207400581 | -6.73779735  | 1.65E-11 | 4.06E-10 |      |
| ENSG00000158765 | 1       | 109656081 | 109674836    | +          | GSTM4      | protein_coding                     | 23.87956     | -8.12834707  | 0.00357376     | <1/2 | 1.235430643 | -6.573958989 | 4.72E-11 | 1.10E-09 |      |
| ENSG00000278730 | 17      | 68123666  | 68125858     | +          | ACD0533.9  | lincRNA                            | 24.81713     | -8.12802715  | 0.003574532    | <1/2 | 1.22859577  | -6.817295817 | 3.28E-12 | 9.26E-10 |      |
| ENSG00000005189 | 16      | 20806429  | 20894668     | +          | REXOS      | protein_coding                     | 28.09448     | -8.351042985 | 0.003062567    | <1/2 | 1.22966715  | -6.791322003 | 1.11E-11 | 2.78E-10 |      |
| ENSG00000143891 | 2       | 38659130  | 38741237     | +          | GALM       | protein_coding                     | 27.359437    | -8.33295725  | 0.003101201    | <1/2 | 1.23409598  | -6.752278016 | 1.46E-11 | 3.59E-10 |      |
| ENSG00000151116 | 11      | 18529609  | 18588747     | -          | UEVLD      | protein_coding                     | 25.828799    | -8.244942364 | 0.003296287    | <1/2 | 1.229298908 | -6.70728133  | 1.99E-11 | 4.83E-10 |      |
| ENSG00000179604 | 17      | 73283624  | 73311175     | -          | CDC42EP4   | protein_coding                     | 25.459036    | -8.224806177 | 0.003342617    | <1/2 | 1.234901393 | -6.660284162 | 2.73E-11 | 6.53E-10 |      |
| ENSG00000198208 | 14      | 74903594  | 74923396     | -          | RP56K15    | protein_coding                     | 48.736731    | -8.189675072 | 0.003425012    | <1/2 | 1.20630095  | -6.789081176 | 1.13E-11 | 2.82E-   |      |



|                 |    |           |           |   |            |                                    |           |              |             |      |             |              |          |             |
|-----------------|----|-----------|-----------|---|------------|------------------------------------|-----------|--------------|-------------|------|-------------|--------------|----------|-------------|
| ENSG00000161055 | 5  | 180590103 | 180591540 | - | SCGB3A1    | protein coding                     | 10.046752 | -6.86775364  | 0.008562481 | -1/2 | 1.31316351  | -5.22993254  | 1.70E-07 | 2.42E-06    |
| ENSG00000188321 | 19 | 9323772   | 9351162   | + | ZNF559     | protein coding                     | 19.684854 | -6.86767442  | 0.008562944 | -1/2 | 1.248044652 | -5.502749785 | 3.74E-08 | 5.89E-07    |
| ENSG00000179390 | 5  | 102233986 | 102296549 | - | SILCO4C1   | protein coding                     | 9.7750051 | -6.844106266 | 0.008703997 | -1/2 | 1.308210449 | -5.231655406 | 1.68E-07 | 2.40E-06    |
| ENSG00000173334 | 8  | 125430321 | 125438405 | + | TRIB1      | protein coding                     | 9.8173052 | -6.838991600 | 0.008735245 | -1/2 | 1.315849591 | -5.197368742 | 2.02E-07 | 2.85E-06    |
| ENSG0000019438  | 22 | 48498460  | 48605912  | + | FAM19A5    | protein coding                     | 16.949889 | -6.83702963  | 0.008746533 | -1/2 | 0.615789673 | -11.10293541 | 1.21E-08 | 1.07E-26    |
| ENSG00000274561 | 17 | 68131462  | 68313907  | + | AC05332.6  | lincRNA                            | 9.6747918 | -6.823709411 | 0.008872683 | -1/2 | 1.311696105 | -5.16287208  | 2.43E-07 | 3.39E-06    |
| ENSG00000183066 | 22 | 4198725   | 42058456  | + | WBP2N1     | protein coding                     | 9.6724086 | -6.817248491 | 0.008867551 | -1/2 | 1.311071498 | -5.19953411  | 2.00E-07 | 2.82E-06    |
| ENSG00000099958 | 22 | 23834503  | 23839128  | - | DERL3      | protein coding                     | 9.9493333 | -6.783641537 | 0.009076542 | -1/2 | 1.313688283 | -4.936183686 | 2.42E-07 | 3.38E-06    |
| ENSG00000170464 | 5  | 139408588 | 139444991 | - | DNAJC18    | protein coding                     | 34.229151 | -6.778357472 | 0.009109847 | -1/2 | 1.065442039 | -6.362014282 | 1.99E-10 | 4.28E-09    |
| ENSG00000158321 | 7  | 69598919  | 6979068   | + | AUTS2      | protein coding                     | 51.240295 | -6.776816718 | 0.009195811 | -1/2 | 0.87504342  | -7.744549806 | 9.59E-15 | 3.29E-13    |
| ENSG00000234965 | 22 | 41990554  | 41914667  | + | SHISA8     | protein coding                     | 8.9908457 | -6.715206686 | 0.009517467 | -1/2 | 1.32827057  | -5.05576811  | 4.29E-07 | 5.76E-06    |
| ENSG00000121903 | 1  | 33472645  | 3346507   | + | ZSCAN20    | protein coding                     | 17.56749  | -6.696905081 | 0.009638971 | -1/2 | 1.2586068   | -7.50014744  | 1.03E-07 | 1.53E-06    |
| ENSG00000168453 | 8  | 22114415  | 22133384  | - | HR         | protein coding                     | 76.943219 | -6.626260546 | 0.01012271  | -1/2 | 0.678760444 | -9.762296263 | 1.63E-22 | 1.07E-20    |
| ENSG00000188511 | 22 | 49414524  | 49657542  | + | C22orf34   | lincRNA                            | 16.629726 | -6.624492112 | 0.010135126 | -1/2 | 1.257499604 | -6.26798734  | 1.38E-07 | 2.00E-06    |
| ENSG00000178202 | 11 | 108472105 | 108498432 | - | KDEL2      | protein coding                     | 27.65658  | -6.623539211 | 0.010418323 | -1/2 | 0.36267235  | -18.26542128 | 1.56E-74 | 6.61E-72    |
| ENSG00000119411 | 9  | 113349544 | 113371233 | - | BSFRY      | protein coding                     | 44.625839 | -6.579801097 | 0.010454    | -1/2 | 0.878429449 | -7.490414974 | 6.87E-14 | 2.16E-12    |
| ENSG00000188883 | 7  | 139452690 | 139483117 | - | KLKG2      | protein coding                     | 8.1395241 | -6.565300599 | 0.010559603 | -1/2 | 1.337076293 | -9.191019461 | 9.10E-07 | 1.16E-05    |
| ENSG00000101198 | 20 | 63240784  | 63272694  | - | NKAINA4    | protein coding                     | 15.916891 | -6.56372814  | 0.010571119 | -1/2 | 1.292924728 | -5.21225538  | 1.87E-07 | 2.64E-06    |
| ENSG00000184497 | 13 | 113759240 | 113816995 | + | TMEM255B   | protein coding                     | 7.7435309 | -6.512738237 | 0.01095142  | -1/2 | 1.344146061 | -4.845260813 | 1.26E-06 | 1.58E-05    |
| ENSG00000155980 | 12 | 57549998  | 57586632  | + | KIF5A      | protein coding                     | 15.217694 | -6.504038487 | 0.011076599 | -1/2 | 1.264971414 | -5.164148589 | 2.72E-07 | 3.77E-06    |
| ENSG00000100234 | 22 | 32801701  | 32863043  | + | TIMP3      | protein coding                     | 7.8174997 | -6.500488992 | 0.01104799  | -1/2 | 1.361383727 | -4.774913101 | 1.80E-06 | 2.19E-05    |
| ENSG00000186831 | 17 | 14826861  | 1841348   | + | KRT17P2    | transcribed unprocessed pseudogene | 7.6809922 | -6.492359168 | 0.01107214  | -1/2 | 1.346666714 | -4.821060533 | 1.43E-06 | 1.77E-05    |
| ENSG0000017432  | 4  | 88695915  | 88698235  | - | NAP1L5     | protein coding                     | 15.012065 | -6.479637422 | 0.011205591 | -1/2 | 1.267242507 | -5.118077823 | 3.17E-07 | 4.34E-06    |
| ENSG00000133789 | 11 | 9664077   | 9752991   | + | SWAP70     | protein coding                     | 14.866771 | -6.471194133 | 0.011271364 | -1/2 | 1.265837018 | -5.11218588  | 3.18E-07 | 4.36E-06    |
| ENSG00000142100 | X  | 74423461  | 74123971  | + | ADORA3     | protein coding                     | 26.69475  | -6.43004448  | 0.011397949 | -1/2 | 1.083344491 | -5.993994219 | 2.96E-09 | 5.43E-08    |
| ENSG00000185933 | 10 | 10345387  | 10345888  | - | CALHM1     | protein coding                     | 7.302444  | -6.413887444 | 0.011270958 | -1/2 | 1.368388022 | -4.59207397  | 4.39E-06 | 4.47E-05    |
| ENSG00000165655 | 10 | 75397830  | 75401906  | - | ZNF503     | protein coding                     | 7.2325106 | -6.407806642 | 0.011777637 | -1/2 | 1.354742056 | -4.779909    | 2.25E-06 | 2.68E-05    |
| ENSG00000105854 | 7  | 95404863  | 95435329  | - | PON2       | protein coding                     | 7.2076585 | -6.391381598 | 0.011912482 | -1/2 | 1.354412098 | -4.718934219 | 2.37E-06 | 2.82E-05    |
| ENSG00000159885 | 19 | 44025342  | 44033112  | + | ZNF222     | protein coding                     | 13.770762 | -6.367410483 | 0.012112072 | -1/2 | 1.279945693 | -4.974750507 | 6.53E-07 | 8.53E-06    |
| ENSG00000163909 | 1  | 39624153  | 3963945   | + | HEYL       | protein coding                     | 13.769131 | -6.362239529 | 0.012155563 | -1/2 | 1.271474927 | -5.00382182  | 5.62E-07 | 7.42E-06    |
| ENSG0000010278  | 12 | 6199715   | 6238271   | + | CD9        | protein coding                     | 37.841935 | -6.340403628 | 0.012340942 | -1/2 | 0.88332399  | -7.177891534 | 7.08E-13 | 2.01E-11    |
| ENSG00000267374 | 18 | 39206924  | 39800318  | - | AC016205.1 | lincRNA                            | 6.9533597 | -6.3498733   | 0.012387361 | -1/2 | 1.369790048 | -4.624787091 | 3.75E-06 | 4.31E-05    |
| ENSG0000007372  | 11 | 31784779  | 31810622  | - | PAX6       | protein coding                     | 6.7944287 | -6.308228697 | 0.012619262 | -1/2 | 1.362901617 | -4.62852895  | 3.68E-06 | 4.23E-05    |
| ENSG00000188574 | 11 | 76196325  | 76210736  | - | WNT11      | protein coding                     | 13.252123 | -6.30796056  | 0.012674204 | -1/2 | 1.271079242 | -4.934616815 | 8.03E-07 | 1.03E-05    |
| ENSG00000147100 | X  | 74423461  | 74123971  | + | SLOC6A2    | protein coding                     | 6.274058  | -6.199014877 | 0.01289309  | -1/2 | 1.084595177 | -5.78382369  | 7.31E-09 | 1.27E-07    |
| ENSG00000100495 | 17 | 49990005  | 49995224  | - | DLX3       | protein coding                     | 6.6114546 | -6.284645844 | 0.012836107 | -1/2 | 1.368388022 | -4.59207397  | 4.39E-06 | 4.47E-05    |
| ENSG00000231317 | 7  | 55656768  | 55768490  | - | AC091812.1 | unprocessed pseudogene             | 6.6349145 | -6.272560489 | 0.01293514  | -1/2 | 1.3688379   | -4.88240057  | 4.60E-06 | 5.19E-05    |
| ENSG00000076864 | 1  | 21596215  | 21669361  | - | RAP1GAP    | protein coding                     | 60.169405 | -6.269291245 | 0.012964485 | -1/2 | 0.68671981  | -9.168357228 | 6.94E-20 | 3.76E-18    |
| ENSG00000102636 | 7  | 98617297  | 98629868  | + | NPTX2      | protein coding                     | 23.85768  | -6.251548888 | 0.013124908 | -1/2 | 1.083743505 | -5.768476454 | 8.00E-09 | 1.39E-07    |
| ENSG00000188389 | 21 | 24184981  | 24185800  | - | PDCD1      | protein coding                     | 12.677442 | -6.24321872  | 0.013200911 | -1/2 | 1.279687951 | -4.878703997 | 1.07E-06 | 1.35E-05    |
| ENSG00000185513 | 20 | 43507680  | 43509590  | - | L3MBTL1    | protein coding                     | 23.448159 | -6.231812909 | 0.01330569  | -1/2 | 1.087521165 | -5.70191153  | 1.00E-08 | 1.72E-07    |
| ENSG00000145358 | 4  | 100185870 | 100190782 | - | DDIT4L     | protein coding                     | 6.3924137 | -6.23024339  | 0.013320173 | -1/2 | 1.378065221 | -4.521023056 | 6.15E-06 | 6.80E-05    |
| ENSG00000261654 | 1  | 110936369 | 110942353 | - | AL360270.2 | sense overlapping                  | 6.4399166 | -6.219213008 | 0.013422405 | -1/2 | 1.400836844 | -4.936411229 | 9.91E-06 | 9.64E-05    |
| ENSG00000188112 | 6  | 42101118  | 42142619  | - | C6orf132   | protein coding                     | 12.370975 | -6.211375582 | 0.01349552  | -1/2 | 1.286339912 | -4.828747272 | 1.37E-06 | 1.71E-05    |
| ENSG00000205089 | 5  | 132747445 | 132754403 | + | CCN12      | protein coding                     | 6.274058  | -6.199014877 | 0.013611647 | -1/2 | 1.376499168 | -5.393395653 | 6.68E-06 | 7.33E-05    |
| ENSG00000157933 | 8  | 25173091  | 26189664  | + | GAR3E2     | protein coding                     | 68.308419 | -6.183503202 | 0.013615674 | -1/2 | 1.368388022 | -4.59207397  | 4.39E-06 | 4.47E-05    |
| ENSG00000233056 | 21 | 42918063  | 42925646  | - | ERVH48.1   | lincRNA                            | 22.590031 | -6.183638616 | 0.013757493 | -1/2 | 1.090665994 | -5.67795163  | 1.36E-08 | 2.30E-07    |
| ENSG00000261183 | 15 | 40835808  | 40844387  | - | SPINT1-AS1 | antisense RNA                      | 5.9928214 | -6.145320138 | 0.014127792 | -1/2 | 1.396016794 | -4.402038832 | 1.07E-05 | 0.00012558  |
| ENSG00000072682 | 5  | 132191838 | 132293515 | - | P4HA2      | protein coding                     | 43.892145 | -6.127959134 | 0.014298878 | -1/2 | 0.77340114  | -7.924009221 | 2.30E-15 | 8.32E-14    |
| ENSG00000139193 | 12 | 6444867   | 6451718   | + | CD27       | protein coding                     | 6.010826  | -6.127907337 | 0.014299343 | -1/2 | 1.396834304 | -4.869969595 | 1.15E-05 | 0.000120253 |
| ENSG00000275620 | 20 | 62353978  | 62361615  | + | FU116779   | antisense RNA                      | 53.839904 | -6.114746739 | 0.014430382 | -1/2 | 1.405097045 | -4.351832324 | 1.35E-05 | 0.000138577 |
| ENSG00000123836 | 1  | 207034366 | 207081024 | + | PKFB2      | protein coding                     | 75.497943 | -6.102414063 | 0.014554266 | -1/2 | 0.585136814 | -10.42903798 | 1.83E-25 | 1.37E-23    |
| ENSG00000182515 | 14 | 103123442 | 103173439 | + | TNFAIP2    | protein coding                     | 11.572599 | -6.100281208 | 0.014575999 | -1/2 | 1.30570293  | -4.67208627  | 2.98E-06 | 3.49E-05    |
| ENSG00000105674 | 1  | 92029982  | 92063536  | + | EPHX4      | protein coding                     | 11.502437 | -6.09690365  | 0.014684018 | -1/2 | 1.288351485 | -4.702667764 | 2.28E-06 | 2.72E-05    |
| ENSG00000100436 | 16 | 30096430  | 30104116  | + | AC12645.1  | antisense RNA                      | 105.58532 | -6.07370032  | 0.014809923 | -1/2 | 0.451189628 | -12.37275725 | 3.67E-35 | 4.96E-33    |
| ENSG00000144077 | 8  | 78666047  | 78719765  | + | ZCNC1A     | protein coding                     | 5.7876985 | -6.070396882 | 0.01484157  | -1/2 | 1.368388022 | -4.94936489  | 1.37E-05 | 0.000138883 |
| ENSG00000185920 | 9  | 95424980  | 95517057  | + | PTCH1      | protein coding                     | 62.579027 | -6.065701079 | 0.014979335 | -1/2 | 0.633319758 | -9.571317871 | 1.06E-21 | 6.55E-20    |
| ENSG00000099256 | 10 | 24848607  | 24952604  | - | PRTFDC1    | protein coding                     | 11.275187 | -6.057078732 | 0.015018882 | -1/2 | 1.292693695 | -4.685262568 | 2.79E-06 | 3.28E-05    |
| ENSG00000196678 | 16 | 20780193  | 20900349  | - | ER12       | protein coding                     | 51.950512 | -6.04527221  | 0.015142296 | -1/2 | 0.695919307 | -8.686743509 | 3.73E-18 | 1.76E-16    |
| ENSG00000154252 | 2  | 241776825 | 241840208 | + | GAL3ST2    | protein coding                     | 5.5465307 | -            |             |      |             |              |          |             |

|                 |    |           |           |   |               |                      |            |              |             |      |             |              |             |             |
|-----------------|----|-----------|-----------|---|---------------|----------------------|------------|--------------|-------------|------|-------------|--------------|-------------|-------------|
| ENSG00000174938 | 16 | 29871159  | 29899547  | - | SEZGL2        | protein_coding       | 20.662077  | -5.458367013 | 0.02274405  | -1/2 | 0.92228869  | -5.918284674 | 3.25E-09    | 5.93E-08    |
| ENSG00000240771 | 12 | 57610180  | 57619379  | + | ARHGFE25      | protein_coding       | 3.694111   | -5.444380482 | 0.02296562  | -1/2 | 1.51782203  | -3.586968943 | 0.000334544 | 0.002474207 |
| ENSG00000186318 | 11 | 117285207 | 117316259 | - | BACE1         | protein_coding       | 41.038962  | -5.439882761 | 0.023037329 | -1/2 | 0.65052119  | -8.304895843 | 9.99E-17    | 4.07E-15    |
| ENSG00000089750 | X  | 55717739  | 55758774  | + | RRAGB         | protein_coding       | 3.591009   | -5.412322255 | 0.02348149  | -1/2 | 1.51912608  | -3.56279306  | 0.00056693  | 0.002866631 |
| ENSG00000140022 | 14 | 81260656  | 81264465  | + | STON2         | protein_coding       | 40.146888  | -5.415482849 | 0.02348719  | -1/2 | 0.66041507  | -8.19863555  | 2.43E-16    | 9.46E-13    |
| ENSG00000179580 | 16 | 1966823   | 1968975   | + | RNF151        | protein_coding       | 3.4457074  | -5.369155791 | 0.02419457  | -1/2 | 1.60420195  | -3.346932082 | 0.00081712  | 0.002574554 |
| ENSG00000159445 | 1  | 151375834 | 151900808 | + | THEM4         | protein_coding       | 3.5278849  | -5.352060355 | 0.024483263 | -1/2 | 1.533709085 | -3.489618995 | 0.00048371  | 0.003409956 |
| ENSG00000162738 | 1  | 160400586 | 160428678 | + | VANGL2        | protein_coding       | 51.390641  | -5.343734488 | 0.024624965 | -1/2 | 0.573558423 | -9.318093721 | 1.20E-20    | 6.93E-19    |
| ENSG00000166169 | 10 | 101578882 | 101588270 | + | POLL          | protein_coding       | 6.9356289  | -5.343207911 | 0.024633955 | -1/2 | 1.356615822 | -3.938630099 | 8.19E-05    | 0.00070544  |
| ENSG00000237513 | 7  | 104941063 | 104962334 | + | AC007384.1    | lincRNA              | 3.4555298  | -5.34210866  | 0.024652732 | -1/2 | 1.518295876 | -3.51848987  | 0.00043401  | 0.000390805 |
| ENSG00000155324 | 5  | 12631032  | 126496494 | + | GRAMD2B       | protein_coding       | 19.347421  | -5.341919291 | 0.024655968 | -1/2 | 0.928821958 | -5.75128455  | 8.86E-09    | 1.53E-07    |
| ENSG00000170558 | 18 | 27590966  | 28717446  | + | CDH2          | protein_coding       | 18.887563  | -5.329198988 | 0.024874322 | -1/2 | 0.935148015 | -5.80775921  | 1.21E-08    | 2.05E-07    |
| ENSG00000170035 | 2  | 180967248 | 181076585 | + | UBE2E3        | protein_coding       | 3.980002   | -5.31976778  | 0.025037463 | -1/2 | 1.525820704 | -3.486495999 | 0.000489393 | 0.00341037  |
| ENSG00000276547 | 5  | 141397987 | 141512979 | + | PCDHG85       | protein_coding       | 3.417266   | -5.314888748 | 0.025130989 | -1/2 | 1.593977771 | -3.334125252 | 0.00085568  | 0.00594154  |
| ENSG00000061676 | 12 | 18299115  | 183038858 | + | NCKAP1        | protein_coding       | 25.281166  | -5.31064939  | 0.025139425 | -1/2 | 0.804771442 | -6.599419513 | 4.13E-11    | 9.63E-10    |
| ENSG00000197472 | 1  | 246945547 | 247008093 | + | ZNF695        | protein_coding       | 31.223565  | -5.306341305 | 0.025241168 | -1/2 | 0.722644891 | -7.338996171 | 2.15E-13    | 6.44E-12    |
| ENSG00000191444 | 11 | 118606440 | 118658038 | + | PHLDB1        | protein_coding       | 24.829639  | -5.29192324  | 0.025254243 | -1/2 | 0.807244874 | -6.55878279  | 5.54E-11    | 1.28E-09    |
| ENSG00000128591 | 7  | 12880377  | 128825724 | + | FLNC          | protein_coding       | 92.724936  | -5.287813033 | 0.025258214 | -1/2 | 0.918588647 | -12.63248078 | 1.40E-36    | 1.78E-34    |
| ENSG00000227051 | 14 | 96039324  | 96093889  | + | C14orf132     | protein_coding       | 18.582661  | -5.276789584 | 0.025794556 | -1/2 | 0.930028549 | -4.21282828  | 1.40E-08    | 2.35E-07    |
| ENSG00000267521 | 17 | 76957023  | 76958222  | + | AC016168.1    | lincRNA              | 3.3118499  | -5.26308893  | 0.026040682 | -1/2 | 1.547673195 | -3.400664764 | 0.00067268  | 0.00452484  |
| ENSG00000179241 | 11 | 35943981  | 36232136  | + | LDRAD3        | protein_coding       | 3.258835   | -5.259128621 | 0.026112264 | -1/2 | 1.537180329 | -4.21282828  | 0.00062365  | 0.00452091  |
| ENSG00000266538 | 17 | 15530773  | 15531089  | + | AC005838.2    | lincRNA              | 18.315047  | -5.258690566 | 0.026212094 | -1/2 | 0.969610799 | -5.4230666   | 5.84E-08    | 8.95E-07    |
| ENSG00000172322 | 12 | 9951316   | 9955694   | + | C12C12A       | protein_coding       | 6.4524677  | -5.248203636 | 0.026310753 | -1/2 | 1.378019521 | -3.808511827 | 0.000139806 | 0.001144229 |
| ENSG00000254235 | 8  | 55893595  | 55895739  | + | AC018607.1    | sense_intronic       | 3.2552391  | -5.244017549 | 0.026387207 | -1/2 | 1.542690184 | -3.399268113 | 0.00067564  | 0.004543754 |
| ENSG00000167105 | 17 | 50277406  | 50281485  | + | TMEM82        | protein_coding       | 1.778472   | -5.239199077 | 0.026475405 | -1/2 | 0.932838695 | -5.583696055 | 2.35E-08    | 3.82E-07    |
| ENSG00000196507 | X  | 103670451 | 103629600 | + | TCEAL3        | protein_coding       | 6.1413967  | -5.23505852  | 0.026543348 | -1/2 | 1.60552049  | -3.871742704 | 0.000134852 | 0.001107471 |
| ENSG00000113790 | 3  | 185190624 | 185281990 | + | EHHADH        | protein_coding       | 3.22828    | -5.232856048 | 0.026592145 | -1/2 | 1.548323273 | -3.376921773 | 0.000725671 | 0.004845353 |
| ENSG00000142319 | 5  | 1392790   | 1445430   | - | SLCGA3        | protein_coding       | 23.963063  | -5.221085118 | 0.026809997 | -1/2 | 0.692654241 | -6.230985551 | 3.11E-10    | 6.53E-09    |
| ENSG00000138119 | 10 | 9306249   | 93482137  | - | MYOF          | protein_coding       | 6.4104124  | -5.217638003 | 0.026874174 | -1/2 | 1.398583121 | -3.730658353 | 0.00019098  | 0.001514314 |
| ENSG00000188738 | 2  | 185738895 | 185833290 | + | FSIP2         | protein_coding       | 23.267893  | -5.21187047  | 0.026981784 | -1/2 | 0.814809622 | -6.396472747 | 1.59E-10    | 3.46E-09    |
| ENSG0000004866  | 7  | 11695328  | 117210313 | + | ST7           | protein_coding       | 6.3298485  | -5.209241779 | 0.027030991 | -1/2 | 1.413514656 | -6.68625903  | 0.00227583  | 0.001754326 |
| ENSG00000122642 | 7  | 32957404  | 33006931  | + | FKBP9         | protein_coding       | 6.306365   | -5.207067858 | 0.027071753 | -1/2 | 1.372841166 | -3.92913547  | 0.00014889  | 0.002110333 |
| ENSG00000259439 | 2  | 44921077  | 44939199  | - | LINC01833     | lincRNA              | 3.14447102 | -5.202246727 | 0.027162372 | -1/2 | 1.552472742 | -3.35093821  | 0.000805399 | 0.005131665 |
| ENSG00000105365 | 16 | 23463542  | 23521995  | + | GGAZ          | protein_coding       | 231.50875  | -5.193667935 | 0.02732437  | -1/2 | 0.262031083 | -19.74545316 | 6.78E-87    | 4.86E-84    |
| ENSG00000109914 | 14 | 26443093  | 26597754  | + | NOX1A1        | protein_coding       | 11.551074  | -5.189163035 | 0.027479532 | -1/2 | 1.145503667 | -4.523701192 | 0.0006766   | 0.00472705  |
| ENSG00000132922 | 2  | 165087822 | 165204067 | + | SCN3A         | protein_coding       | 6.1143967  | -5.168329914 | 0.027785216 | -1/2 | 1.60552049  | -3.871742704 | 0.00017575  | 0.001382091 |
| ENSG00000102292 | 22 | 35380361  | 35394214  | + | HMOX1         | protein_coding       | 3.0581343  | -5.154950694 | 0.028067596 | -1/2 | 1.50552049  | -3.871742704 | 0.00055587  | 0.006156735 |
| ENSG00000261298 | 2  | 23422288  | 23424514  | + | AC122134.1    | lincRNA              | 3.0739867  | -5.146947832 | 0.028223724 | -1/2 | 1.58359404  | -3.244502991 | 0.001176558 | 0.007386662 |
| ENSG00000100196 | 22 | 38486062  | 38483447  | + | KDELR3        | protein_coding       | 11.101537  | -5.144133852 | 0.028278828 | -1/2 | 1.147281264 | -4.483760011 | 7.33E-06    | 1.97E-05    |
| ENSG00000187013 | 17 | 61417151  | 61413280  | + | C17orf82      | lincRNA              | 3.0110853  | -5.143258559 | 0.02829599  | -1/2 | 1.576201333 | -3.264472423 | 0.001106657 | 0.00669599  |
| ENSG00000165646 | 10 | 117241093 | 117279430 | + | SLC18A2       | protein_coding       | 11.171346  | -5.141733181 | 0.028325294 | -1/2 | 1.160994045 | -4.128732467 | 9.48E-06    | 0.00010099  |
| ENSG00000101188 | 20 | 62708837  | 62762771  | + | NTR1          | protein_coding       | 33.436688  | -5.13381896  | 0.028481739 | -1/2 | 0.670603707 | -6.661687484 | 1.84E-14    | 6.18E-13    |
| ENSG00000214688 | 10 | 71711702  | 71737824  | + | C10orf105     | protein_coding       | 5.9001946  | -5.130360558 | 0.028550097 | -1/2 | 1.390271899 | -3.659031756 | 0.000223974 | 0.001729596 |
| ENSG00000135747 | 1  | 246945547 | 247078811 | + | ZNF670-ZNF695 | protein_coding       | 11.108813  | -5.129433171 | 0.028568455 | -1/2 | 1.173155049 | -4.47234036  | 1.23E-05    | 0.000126259 |
| ENSG00000088367 | 20 | 36091504  | 36232739  | + | EPH4L1        | protein_coding       | 27.875595  | -5.12523186  | 0.028649896 | -1/2 | 0.731280742 | -7.008657969 | 2.39E-12    | 6.34E-11    |
| ENSG00000100767 | 14 | 72327487  | 72327480  | + | PAPLN         | protein_coding       | 12.259015  | -5.12039194  | 0.028748706 | -1/2 | 0.817446645 | -5.85692643  | 3.75E-10    | 7.83E-09    |
| ENSG00000213159 | 7  | 6497093   | 6491098   | + | AC072052.1    | processed_pseudogene | 2.931811   | -5.11900794  | 0.02875645  | -1/2 | 1.600618903 | -3.198143077 | 0.001383156 | 0.008466848 |
| ENSG00000164241 | 5  | 127042558 | 127073492 | + | C5orf63       | protein_coding       | 2.8781662  | -5.111519282 | 0.02892554  | -1/2 | 1.624965712 | -3.116512316 | 0.00165739  | 0.009878005 |
| ENSG00000185640 | 12 | 52821410  | 52834295  | + | KRT79         | protein_coding       | 455.02578  | -5.107694132 | 0.029002194 | -1/2 | 0.189262367 | -26.98737326 | 2.08E-160   | 4.08E-157   |
| ENSG00000100985 | 20 | 46009808  | 46016561  | + | MMP9          | protein_coding       | 1990.2962  | -5.095506783 | 0.029248232 | -1/2 | 0.218916742 | -27.27600321 | 7.76E-120   | 9.32E-117   |
| ENSG0000010030  | 6  | 36354091  | 36387800  | + | ETV7          | protein_coding       | 28.809946  | -5.089703745 | 0.029366116 | -1/2 | 1.583595753 | -3.21401704  | 0.001308919 | 0.000803885 |
| ENSG00000123094 | 12 | 25959029  | 26078922  | + | RASSF8        | protein_coding       | 10.835233  | -5.087534984 | 0.029410294 | -1/2 | 1.153806012 | -4.412103635 | 1.02E-05    | 0.000118612 |
| ENSG00000079156 | 2  | 17819441  | 178402891 | + | OSBP1L        | protein_coding       | 2.9256622  | -5.086859053 | 0.029424242 | -1/2 | 1.579544327 | -3.220454701 | 0.001279874 | 0.0079352   |
| ENSG00000102024 | X  | 115561174 | 115563861 | + | PLS3          | protein_coding       | 16.180477  | -5.086429015 | 0.029432849 | -1/2 | 0.940643412 | -4.90739441  | 6.39E-08    | 9.75E-07    |
| ENSG00000109956 | 11 | 134378504 | 134411918 | + | B3GAT1        | protein_coding       | 16.172066  | -5.085448471 | 0.029452986 | -1/2 | 0.942082169 | -5.398280989 | 6.73E-08    | 1.02E-06    |
| ENSG00000139865 | 19 | 32691361  | 32713000  | + | NUD19         | protein_coding       | 10.689622  | -5.062380812 | 0.029933629 | -1/2 | 1.156508462 | -3.781703293 | 1.98E-05    | 0.000134452 |
| ENSG00000279106 | 16 | 29204633  | 29205855  | + | AC009093.7    | TEC                  | 2.8609396  | -5.060077267 | 0.029975398 | -1/2 | 1.52802013  | -3.199369605 | 0.00138207  | 0.008464396 |
| ENSG00000114812 | 3  | 42489299  | 42537573  | + | VIPR1         | protein_coding       | 5.6424169  | -5.055702977 | 0.030066422 | -1/2 | 1.39544398  | -3.623006176 | 0.00291198  | 0.002178643 |
| ENSG00000272282 | 3  | 27712910  | 27714005  | + | LINC0         |                      |            |              |             |      |             |              |             |             |

|                 |    |           |           |   |            |                                |            |              |             |      |             |               |             |             |
|-----------------|----|-----------|-----------|---|------------|--------------------------------|------------|--------------|-------------|------|-------------|---------------|-------------|-------------|
| ENSG0000066735  | 14 | 104138723 | 104180894 | + | KIF26A     | protein coding                 | 12.562772  | -4.70942928  | 0.038222609 | <1/2 | 0.980249375 | -4.804318214  | 1.55E-06    | 1.91E-05    |
| ENSG00000134193 | 1  | 119794018 | 119811660 | + | REG4       | protein coding                 | 12.357017  | -4.700712837 | 0.038454258 | <1/2 | 0.980779669 | -4.792832669  | 1.64E-06    | 2.02E-05    |
| ENSG00000185271 | 14 | 20425870  | 20435811  | + | KLHL33     | protein coding                 | 2.2046258  | -4.696476816 | 0.038567333 | <1/2 | 1.727108635 | -2.719271227  | 0.006542594 | 0.032084483 |
| ENSG0000007432  | 15 | 51956514  | 51976834  | + | ATPA9      | protein coding                 | 4.4272437  | -4.692654043 | 0.038669662 | <1/2 | 1.443508757 | -3.25086635   | 0.001150539 | 0.007230862 |
| ENSG00000140803 | 15 | 78264889  | 78282196  | + | DNAJ4      | protein coding                 | 2.2286689  | -4.691625215 | 0.038769468 | <1/2 | 1.70020977  | -2.759612376  | 0.005786998 | 0.029133256 |
| ENSG0000007492  | 20 | 62396732  | 62602115  | + | BX640514.2 | lincRNA                        | 2.1857855  | -4.687537774 | 0.038807094 | <1/2 | 1.700737134 | -2.756178883  | 0.0058481   | 0.029270305 |
| ENSG00000100453 | 14 | 24639054  | 24634267  | + | GZMB       | protein coding                 | 2.1857855  | -4.687537774 | 0.038807094 | <1/2 | 1.700737134 | -2.756178883  | 0.0058481   | 0.029270305 |
| ENSG00000160282 | 21 | 46136262  | 46155657  | + | FTCD       | protein coding                 | 2.1857855  | -4.687537774 | 0.038807094 | <1/2 | 1.700737134 | -2.756178883  | 0.0058481   | 0.029270305 |
| ENSG00000262119 | 14 | 26592747  | 26594517  | + | AL079343.1 | sense intronic                 | 2.2551347  | -4.687121766 | 0.038815784 | <1/2 | 1.776764246 | -2.63806117   | 0.006338154 | 0.039285323 |
| ENSG00000089692 | 12 | 6772512   | 6778455   | + | LAG3       | protein coding                 | 37.544352  | -4.684168154 | 0.038897786 | <1/2 | 0.57198592  | -8.180396149  | 2.63E-16    | 1.04E-14    |
| ENSG00000173805 | 17 | 41771742  | 41734644  | + | HAP1       | protein coding                 | 8.1165623  | -4.683898332 | 0.038905061 | <1/2 | 1.210980604 | -3.867855783  | 0.001099779 | 0.000916683 |
| ENSG00000264663 | 17 | 39835037  | 39836080  | + | KRT8P34    | processed pseudogene           | 2.2098286  | -4.682786759 | 0.038935049 | <1/2 | 1.719691686 | -2.732038553  | 0.006468451 | 0.031778949 |
| ENSG00000197587 | 1  | 46509696  | 46142226  | + | DMBX1      | protein coding                 | 2.2016198  | -4.674724474 | 0.03915324  | <1/2 | 1.694522737 | -2.75872632   | 0.005802711 | 0.029076803 |
| ENSG00000270742 | 1  | 61124733  | 61125202  | + | AC096947.1 | sense intronic                 | 2.2016198  | -4.674724474 | 0.03915324  | <1/2 | 1.694522737 | -2.75872632   | 0.005802711 | 0.029076803 |
| ENSG00000111057 | 12 | 52948871  | 52952901  | + | KRT18      | protein coding                 | 8.1985375  | -4.672064607 | 0.039254983 | <1/2 | 1.19925028  | -3.895805728  | 9.79E-05    | 0.000826715 |
| ENSG00000075340 | 2  | 70667618  | 70768225  | + | ADD2       | protein coding                 | 109.70196  | -4.666540697 | 0.039375973 | <1/2 | 0.332190424 | -14.02778815  | 7.95E-45    | 1.47E-42    |
| ENSG00000247809 | 15 | 96110040  | 96327361  | + | NR2F2-AS1  | antisense RNA                  | 4.2955116  | -4.639846628 | 0.040111323 | <1/2 | 1.469356059 | -3.201315922  | 0.001368015 | 0.008390204 |
| ENSG00000188064 | 22 | 45920362  | 45977129  | + | WNT7B      | protein coding                 | 2.11805    | -4.62941806  | 0.04040232  | <1/2 | 1.702879796 | -2.715881282  | 0.006556244 | 0.032131796 |
| ENSG00000132386 | 17 | 1761959   | 1777574   | + | SERPINF1   | protein coding                 | 20.04069   | -4.627716444 | 0.040450001 | <1/2 | 0.773785142 | -5.980621998  | 2.22E-09    | 4.15E-08    |
| ENSG00000164674 | 6  | 158650014 | 158764876 | + | SYTL3      | protein coding                 | 118.50215  | -4.6222815   | 0.040602673 | <1/2 | 0.315164088 | -14.66626996  | 1.06E-48    | 2.25E-46    |
| ENSG00000198049 | 1  | 206109692 | 206117699 | + | AVPR1B     | protein coding                 | 2.1338843  | -4.616968327 | 0.04075248  | <1/2 | 1.730312715 | -2.668285499  | 0.007623944 | 0.03648175  |
| ENSG0000027036  | 17 | 72323123  | 72640472  | + | LINC00511  | lincRNA                        | 19.7106649 | -4.605659407 | 0.041073184 | <1/2 | 0.763758881 | -6.03025165   | 1.64E-09    | 3.11E-08    |
| ENSG00000132932 | 13 | 25372701  | 26205851  | + | ATP8A2     | protein coding                 | 73.866446  | -4.59439737  | 0.041420898 | <1/2 | 0.392715044 | -11.69967656  | 1.32E-31    | 1.30E-29    |
| ENSG00000080031 | 19 | 55181248  | 55205906  | + | PITPRH     | protein coding                 | 4.1352644  | -4.589528311 | 0.04168782  | <1/2 | 1.480495514 | -3.09736125   | 0.001951188 | 0.01416011  |
| ENSG00000159716 | 1  | 15978933  | 159782543 | + | DUSP23     | protein coding                 | 4.0043822  | -4.573386785 | 0.042002331 | <1/2 | 1.473794861 | -3.103158192  | 0.001914673 | 0.01123382  |
| ENSG00000175029 | 10 | 12561170  | 12561170  | + | CTBP2      | protein coding                 | 22.956272  | -4.57021917  | 0.04208572  | <1/2 | 0.694568895 | -5.109730529  | 4.69E-11    | 4.9E-09     |
| ENSG00000266378 | 17 | 14327335  | 14329474  | + | AC005224.3 | lincRNA                        | 2.0503144  | -4.568742617 | 0.042137758 | <1/2 | 1.726858981 | -2.645695257  | 0.008152322 | 0.03856957  |
| ENSG00000138311 | 10 | 62374192  | 62672011  | + | ZNF365     | protein coding                 | 2.0503144  | -4.568742617 | 0.042137758 | <1/2 | 1.726858981 | -2.645695257  | 0.008152322 | 0.03856957  |
| ENSG00000076351 | 17 | 28394756  | 28407197  | + | SLC46A1    | protein coding                 | 4.0264017  | -4.56163112  | 0.042345982 | <1/2 | 1.497456272 | -3.046253307  | 0.002317125 | 0.01328014  |
| ENSG00000235688 | 2  | 949627    | 950274    | + | AC116614.1 | antisense RNA                  | 4.1492657  | -4.56055458  | 0.042375952 | <1/2 | 1.477902754 | -3.085828595  | 0.002029858 | 0.011818685 |
| ENSG00000259106 | 14 | 79611418  | 79633311  | + | AC008056.2 | antisense RNA                  | 2.0236254  | -4.552042147 | 0.042628374 | <1/2 | 1.774767092 | -2.564867338  | 0.010321526 | 0.046832768 |
| ENSG00000173801 | 17 | 41754604  | 41786931  | + | JUP        | protein coding                 | 121.54493  | -4.521552953 | 0.043538848 | <1/2 | 0.303963322 | -14.871532416 | 4.77E-50    | 1.06E-47    |
| ENSG00000041353 | 18 | 54717860  | 54895516  | + | RAB27B     | protein coding                 | 43.975026  | -4.514697019 | 0.043746229 | <1/2 | 0.502191020 | -8.990002616  | 2.47E-19    | 1.29E-17    |
| ENSG00000171357 | 1  | 46203334  | 46221261  | + | LURAP1     | protein coding                 | 3.9263907  | -4.508070111 | 0.043947652 | <1/2 | 1.47779658  | -3.050631808  | 0.002283604 | 0.03115582  |
| ENSG00000250685 | 16 | 84132558  | 84179763  | + | AC09123.1  | antisense RNA                  | 7.4274089  | -4.49318395  | 0.044023229 | <1/2 | 1.267991684 | -3.533276479  | 0.002030464 | 0.021607975 |
| ENSG00000182347 | 3  | 32302020  | 32391793  | + | UBE2E1     | protein coding                 | 3.8321127  | -4.5000472   | 0.044194029 | <1/2 | 1.521440095 | -3.843725481  | 0.003093999 | 0.016991022 |
| ENSG00000163017 | 2  | 7893214   | 79198854  | + | ACTG2      | protein coding                 | 57.821461  | -4.496458656 | 0.044302785 | <1/2 | 0.426390904 | -10.30278551  | 6.78E-25    | 4.98E-23    |
| ENSG0000011885  | 17 | 7259903   | 7263983   | + | CLDN7      | protein coding                 | 3.8627086  | -4.493319407 | 0.044399295 | <1/2 | 1.477485811 | -3.041192933  | 0.002356428 | 0.013483934 |
| ENSG00000145632 | 5  | 58453982  | 58460260  | + | PLK2       | protein coding                 | 3.8217837  | -4.492951218 | 0.044410628 | <1/2 | 1.553189371 | -2.892725962  | 0.003819144 | 0.030620825 |
| ENSG00000130558 | 9  | 135075422 | 135121179 | + | OLFM1      | protein coding                 | 7.2604353  | -4.490805526 | 0.044767278 | <1/2 | 1.226728294 | -3.660798849  | 0.00025143  | 0.00916279  |
| ENSG00000119630 | 14 | 74941834  | 74955784  | + | PGF        | protein coding                 | 1.902015   | -4.480243673 | 0.044803533 | <1/2 | 1.750195101 | -2.559853854  | 0.010471619 | 0.047434019 |
| ENSG00000171476 | 4  | 56647988  | 56681899  | + | HOPX       | protein coding                 | 3.7821447  | -4.479823547 | 0.044816583 | <1/2 | 1.502040745 | -2.982491362  | 0.002859127 | 0.01583627  |
| ENSG00000158887 | 1  | 161304735 | 161309972 | + | MPZ        | protein coding                 | 14.082276  | -4.472856861 | 0.045033522 | <1/2 | 0.885824255 | -5.009372759  | 4.43E-07    | 5.93E-06    |
| ENSG00000237989 | 21 | 43358147  | 43362349  | + | LINC01679  | lincRNA                        | 17.557977  | -4.444075377 | 0.045940954 | <1/2 | 1.75906361  | -5.727592401  | 1.02E-08    | 1.75E-07    |
| ENSG00000159716 | 1  | 958868    | 9576713   | + | SNTG2      | protein coding                 | 31.455584  | -4.43018387  | 0.046384665 | <1/2 | 0.580088359 | -7.637083716  | 2.22E-44    | 7.42E-43    |
| ENSG00000258667 | 14 | 61715587  | 61731097  | + | HIF1A-AS2  | lincRNA                        | 3.9879797  | -4.425188619 | 0.046546399 | <1/2 | 0.866001053 | -5.109730529  | 2.32E-07    | 4.43E-06    |
| ENSG00000142871 | 1  | 85580761  | 85583962  | + | CY61       | protein coding                 | 3.6248273  | -4.390741084 | 0.047671106 | <1/2 | 1.509552053 | -2.90863841   | 0.003630064 | 0.019506293 |
| ENSG0000018508  | 6  | 146543693 | 146554965 | + | RAB32      | protein coding                 | 3.5631037  | -4.383269127 | 0.047916724 | <1/2 | 1.511094192 | -2.90076526   | 0.003722547 | 0.019909176 |
| ENSG00000134247 | 1  | 116910057 | 116990358 | + | PTGFRN     | protein coding                 | 13.769768  | -4.3811047   | 0.047990588 | <1/2 | 0.893916007 | -4.901025     | 9.53E-07    | 1.22E-05    |
| ENSG00000156011 | 8  | 18527301  | 19084730  | + | PSD3       | protein coding                 | 3.617915   | -4.38066014  | 0.048011388 | <1/2 | 1.493827099 | -2.932738197  | 0.00363768  | 0.018261544 |
| ENSG00000100968 | 14 | 24365673  | 24379604  | + | NFATC1     | protein coding                 | 6.615979   | -4.37407561  | 0.048213883 | <1/2 | 1.25410051  | -3.487501002  | 0.00487557  | 0.00341481  |
| ENSG00000244300 | 3  | 128489212 | 128502348 | + | GATA2-AS1  | antisense RNA                  | 3.5183874  | -4.360971028 | 0.04866502  | <1/2 | 1.518710023 | -2.74196838   | 0.004085329 | 0.02157876  |
| ENSG00000180694 | 8  | 90621995  | 90791632  | + | TM6SF4     | protein coding                 | 40.23156   | -4.357136641 | 0.048794534 | <1/2 | 0.511348045 | -8.520832627  | 1.58E-17    | 6.97E-16    |
| ENSG00000204186 | 2  | 20627463  | 206314428 | + | ZNF252     | protein coding                 | 118.34521  | -4.351828213 | 0.048974589 | <1/2 | 0.297454086 | -14.83028715  | 1.80E-48    | 3.78E-46    |
| ENSG00000204791 | 8  | 144049879 | 144051522 | + | SMRDS      | transcribed unitary pseudogene | 7.3151161  | -4.346570002 | 0.049163229 | <1/2 | 1.512590425 | -2.873593492  | 0.004028309 | 0.021465284 |
| ENSG00000142156 | 21 | 45981737  | 46005050  | + | COL6A1     | protein coding                 | 38.978797  | -4.33147370  | 0.049642182 | <1/2 | 1.519379737 | -3.843725481  | 7.23E-37    | 8.98E-15    |
| ENSG00000138427 | 5  | 83471465  | 83582303  | + | VCAN       | protein coding                 | 22.761354  | -4.323172639 | 0.049661593 | <1/2 | 0.677545469 | -6.39251611   | 1.62E-10    | 3.52E-09    |
| ENSG00000133454 | 2  | 25242144  | 26031041  | + | MYO18B     | protein coding                 | 64.827189  | -4.322425605 | 0.04982761  | <1/2 | 0.393354883 | -10.98861561  | 4.34E-28    | 3.72E       |



|                 |    |           |           |   |             |                                    |           |              |              |      |             |              |             |             |
|-----------------|----|-----------|-----------|---|-------------|------------------------------------|-----------|--------------|--------------|------|-------------|--------------|-------------|-------------|
| ENSG00000179431 | 11 | 35618419  | 35260868  | + | FXJ1        | protein coding                     | 4.8738423 | -3.842792485 | 0.0669695413 | -1/2 | 1.306179674 | -2.942009098 | 0.003260903 | 0.017754247 |
| ENSG00000140557 | 15 | 92393828  | 92468728  | + | ST8IA2      | protein coding                     | 4.5582775 | -1.811821333 | 0.071239335  | -1/2 | 1.341951385 | -2.840209957 | 0.00451093  | 0.023463657 |
| ENSG00000103887 | 17 | 58520250  | 58540818  | - | 4-Sep       | protein coding                     | 9.2068221 | -3.66838039  | 0.071476458  | -1/2 | 0.941698218 | -2.04260557  | 5.30E-05    | 0.000475865 |
| ENSG00000260711 | 14 | 91752856  | 91759798  | - | AL121839.2  | sense intron                       | 13.804781 | -3.786853872 | 0.072450835  | -1/2 | 0.777622733 | -4.86978288  | 1.12E-06    | 1.41E-05    |
| ENSG00000258376 | 14 | 73245621  | 73245979  | - | AC084846.1  | antisense RNA                      | 6.764071  | -3.77040741  | 0.073815301  | -1/2 | 1.072115173 | -3.516795208 | 0.00436883  | 0.02311645  |
| ENSG00000172673 | 6  | 127108072 | 127191861 | - | THEM5       | protein coding                     | 490.20685 | -2.70137706  | 0.073295188  | -1/2 | 1.173793819 | -27.40048746 | 2.71E-165   | 5.85E-162   |
| ENSG00000162522 | 1  | 32741884  | 32747970  | - | KAA1522     | protein coding                     | 35.997021 | -3.752765883 | 0.074183087  | -1/2 | 0.467547122 | -8.026497657 | 1.00E-15    | 3.76E-14    |
| ENSG00000151594 | 2  | 27253684  | 27275817  | - | SLC30A3     | protein coding                     | 31.087052 | -3.731142797 | 0.075303316  | -1/2 | 0.50706675  | -7.358828743 | 1.86E-13    | 5.60E-12    |
| ENSG00000176014 | 18 | 12307669  | 12344320  | + | TUBB6       | protein coding                     | 10.745166 | -3.728833348 | 0.075447487  | -1/2 | 0.871796931 | -4.27664914  | 1.90E-05    | 0.000188467 |
| ENSG00000131650 | 16 | 2963944   | 2968383   | + | KREMEN2     | protein coding                     | 6.5754152 | -3.71941572  | 0.07591792   | -1/2 | 1.091841756 | -3.406552003 | 0.00065789  | 0.004443586 |
| ENSG00000246273 | 11 | 9758292   | 9811319   | + | SBF2-AS1    | antisense RNA                      | 8.6330453 | -3.705608058 | 0.076647999  | -1/2 | 0.938236288 | -3.94654724  | 7.83E-05    | 0.000672767 |
| ENSG00000099284 | 10 | 70052796  | 70112280  | + | H2AFY2      | protein coding                     | 119.66685 | -3.68808112  | 0.077584856  | -1/2 | 0.259785237 | -14.19656398 | 9.61E-46    | 1.81E-43    |
| ENSG00000135144 | 12 | 113056709 | 113980828 | + | DTX1        | protein coding                     | 882.41316 | -3.686255946 | 0.077683071  | -1/2 | 0.113171393 | -32.57523997 | 1.01E-23    | 5.46E-22    |
| ENSG00000153563 | 2  | 86784610  | 86808396  | - | CDBA        | protein coding                     | 94.551759 | -3.682501005 | 0.077885523  | -1/2 | 0.293071889 | -12.56517991 | 3.28E-36    | 4.03E-34    |
| ENSG00000157240 | 7  | 91254364  | 91271326  | + | FZD1        | protein coding                     | 63.699978 | -3.678387206 | 0.078107928  | -1/2 | 0.347398756 | -10.59142063 | 3.27E-26    | 2.35E-24    |
| ENSG00000226015 | 1  | 147103276 | 147474932 | - | CCT8P1      | processed pseudogene               | 4.2011044 | -3.674797973 | 0.078302396  | -1/2 | 1.330824112 | -2.76129631  | 0.00757241  | 0.028889158 |
| ENSG00000151726 | 4  | 184755595 | 184826818 | - | ACSL1       | protein coding                     | 48.437138 | -3.656670741 | 0.079292557  | -1/2 | 0.397069099 | -9.201254652 | 3.29E-20    | 1.84E-18    |
| ENSG00000137880 | 15 | 40764020  | 40767170  | + | GCHFR       | protein coding                     | 16.435    | -3.644889136 | 0.079942243  | -1/2 | 0.697052397 | -5.22019576  | 1.70E-07    | 2.43E-06    |
| ENSG00000259917 | 15 | 34489002  | 34490571  | - | HNRNPLP2    | unprocessed pseudogene             | 14.644965 | -3.63756728  | 0.080348966  | -1/2 | 0.71637891  | -5.72772725  | 3.82E-07    | 5.16E-06    |
| ENSG00000105472 | 19 | 50723329  | 50725178  | + | CLEC11A     | protein coding                     | 286.71334 | -3.603281408 | 0.082281881  | -1/2 | 0.170853683 | -21.0894798  | 9.94E-99    | 7.67E-96    |
| ENSG00000136038 | 2  | 72916260  | 72936071  | + | EMX1        | protein coding                     | 6.1281006 | -3.592048387 | 0.08292504   | -1/2 | 1.112314158 | -3.229346998 | 0.01240733  | 0.007721    |
| ENSG00000267453 | 19 | 15851993  | 15864904  | - | LINC01835   | transcribed unprocessed pseudogene | 5.9439536 | -3.583399652 | 0.083423656  | -1/2 | 1.118106254 | -3.204882933 | 0.001351174 | 0.003808105 |
| ENSG00000170542 | 6  | 2881766   | 2903280   | + | SERPIN9     | protein coding                     | 3.978547  | -3.57746263  | 0.083751204  | -1/2 | 1.33876238  | -2.884542035 | 0.00705300  | 0.008630743 |
| ENSG00000149257 | 11 | 75562056  | 75572783  | + | SERPINH1    | protein coding                     | 211.18234 | -3.574935355 | 0.083914541  | -1/2 | 0.194696355 | -18.36159361 | 2.67E-75    | 1.15E-72    |
| ENSG00000157125 | 12 | 32351978  | 32352821  | + | KRT12P      | unprocessed pseudogene             | 3.9595347 | -3.573973328 | 0.084054299  | -1/2 | 1.34093631  | -2.664169265 | 0.0071793   | 0.03861197  |
| ENSG00000274317 | 5  | 176620084 | 176630556 | - | SNCG        | protein coding                     | 8.0101653 | -3.46532641  | 0.084135883  | -1/2 | 0.97037712  | -6.680151341 | 0.00233096  | 0.011921188 |
| ENSG00000138316 | 10 | 70672803  | 70762441  | + | ADAMT514    | protein coding                     | 51.767083 | -3.56287195  | 0.084619133  | -1/2 | 0.382550142 | -9.313476996 | 1.24E-20    | 7.73E-19    |
| ENSG00000159884 | 1  | 114582848 | 114670422 | - | DENND2C     | protein coding                     | 5.903459  | -3.552398531 | 0.085235691  | -1/2 | 1.101511111 | -3.22502874  | 0.001259626 | 0.007829902 |
| ENSG00000137441 | 4  | 15960243  | 15969309  | + | FGFBP2      | protein coding                     | 50.147985 | -3.542753597 | 0.085807431  | -1/2 | 0.3951901   | -8.964677299 | 3.11E-19    | 1.62E-17    |
| ENSG00000110799 | 12 | 5948874   | 6124770   | + | VWF         | protein coding                     | 11.616411 | -3.53787211  | 0.086097955  | -1/2 | 0.809365728 | -4.371172501 | 1.24E-05    | 0.000128191 |
| ENSG00000158258 | 3  | 139935185 | 140577397 | + | CLSTN2      | protein coding                     | 3.7878746 | -3.520389781 | 0.087147931  | -1/2 | 1.364225318 | -2.580540054 | 0.00985603  | 0.045085888 |
| ENSG00000249242 | 4  | 82483170  | 82562357  | + | TMEM150C    | protein coding                     | 5.6249434 | -3.513973882 | 0.087536355  | -1/2 | 1.119238578 | -3.139611174 | 0.010169122 | 0.010058626 |
| ENSG00000120237 | 5  | 14122932  | 14122759  | + | PCDHB14     | protein coding                     | 3.8433481 | -3.508875997 | 0.087846219  | -1/2 | 1.367300296 | -2.566272927 | 0.010279791 | 0.046692935 |
| ENSG00000185551 | 15 | 96325938  | 96400263  | + | NR2F2       | protein coding                     | 37.029864 | -3.478168037 | 0.089736079  | -1/2 | 0.445000944 | -7.816019317 | 5.45E-15    | 1.91E-13    |
| ENSG00000146013 | 5  | 138252749 | 138274671 | + | GFAA3       | protein coding                     | 3.168151  | -3.47677711  | 0.089838826  | -1/2 | 0.474930992 | -4.272379897 | 2.47E-13    | 7.33E-11    |
| ENSG00000142088 | 3  | 48517634  | 48526105  | + | PKIF4       | protein coding                     | 817.09800 | -3.46532641  | 0.090521694  | -1/2 | 0.1242752   | -7.82052099  | 3.90E-13    | 9.36E-168   |
| ENSG00000271503 | 17 | 35871491  | 35880793  | + | COL5        | protein coding                     | 31.315632 | -3.456207284 | 0.091112494  | -1/2 | 0.47482181  | -7.37856047  | 3.36E-13    | 9.87E-12    |
| ENSG00000261934 | 5  | 141402922 | 141512979 | + | PCDHGA9     | protein coding                     | 5.5093182 | -3.45235898  | 0.091355856  | -1/2 | 1.124833009 | -3.069218959 | 0.002146192 | 0.012419602 |
| ENSG00000173083 | 4  | 83292461  | 83353153  | + | HPSE        | protein coding                     | 18.244838 | -3.444866151 | 0.091831559  | -1/2 | 0.614622576 | -5.60448057  | 2.08E-08    | 3.41E-07    |
| ENSG00000132329 | 2  | 23785889  | 23791214  | + | RAMP1       | protein coding                     | 5.6044307 | -3.443628659 | 0.091910363  | -1/2 | 1.153990164 | -2.984105278 | 0.002844085 | 0.01571283  |
| ENSG00000269961 | 5  | 65924629  | 65925135  | + | AC010359.1  | lincRNA                            | 5.2956994 | -3.441058625 | 0.092074237  | -1/2 | 1.188234507 | -2.89594326  | 0.003780218 | 0.02019762  |
| ENSG00000095739 | 10 | 28677342  | 28682399  | + | BAMBI       | protein coding                     | 3.534553  | -3.425133695 | 0.093096214  | -1/2 | 1.144257614 | -2.993239208 | 0.002795967 | 0.015411207 |
| ENSG00000107954 | 10 | 103493979 | 103592552 | + | NEURL1      | protein coding                     | 9.031477  | -3.424863002 | 0.093113683  | -1/2 | 0.881663875 | -3.884542035 | 0.00102522  | 0.000861227 |
| ENSG00000166920 | 15 | 45430529  | 45448761  | + | CL5orf48    | protein coding                     | 10.549082 | -3.414993558 | 0.093752855  | -1/2 | 0.835514555 | -4.087294894 | 4.36E-05    | 0.000399745 |
| ENSG00000159212 | 21 | 34683389  | 34718227  | + | CLIC6       | protein coding                     | 6.9391039 | -3.413973328 | 0.093819178  | -1/2 | 0.77086631  | -3.23033664  | 0.00061087  | 0.004478239 |
| ENSG00000193141 | 2  | 200205883 | 200482263 | + | SPAT5L      | protein coding                     | 17.966057 | -3.39551498  | 0.095027196  | -1/2 | 0.626098861 | -6.226235    | 3.95E-07    | 1.99E-07    |
| ENSG00000109458 | 4  | 143336762 | 143474568 | + | GAB1        | protein coding                     | 47.831202 | -3.393810923 | 0.095139554  | -1/2 | 0.379594691 | -8.940617453 | 3.87E-19    | 1.99E-17    |
| ENSG00000182230 | 5  | 176060689 | 176132258 | + | FAM153B     | protein coding                     | 8.871701  | -3.390864048 | 0.095334087  | -1/2 | 0.867786233 | -3.902487718 | 9.33E-05    | 0.000789301 |
| ENSG00000176490 | 19 | 2714567   | 2721418   | + | DIRAS1      | protein coding                     | 8.8449733 | -3.389344963 | 0.095435422  | -1/2 | 0.900695236 | -3.763031963 | 0.00167866  | 0.01349989  |
| ENSG00000172283 | 10 | 35638249  | 35642278  | - | FZD8        | protein coding                     | 16.057103 | -3.387409272 | 0.095562654  | -1/2 | 0.690672885 | -4.504509947 | 9.37E-07    | 1.20E-05    |
| ENSG00000171004 | X  | 132626016 | 132961395 | + | HSGT2       | protein coding                     | 42.365244 | -3.37769004  | 0.096208619  | -1/2 | 0.407636048 | -8.286043526 | 1.17E-16    | 4.75E-15    |
| ENSG00000181577 | 6  | 4400580   | 44005958  | + | C6orf223    | protein coding                     | 245.64273 | -3.3776887   | 0.096208709  | -1/2 | 0.40489047  | -8.286228203 | 7.29E-17    | 3.00E-15    |
| ENSG00000259363 | 15 | 99807223  | 99877148  | + | AC090825.1  | lincRNA                            | 8.8061859 | -3.37367886  | 0.096476482  | -1/2 | 0.870592427 | -3.877893675 | 0.00106454  | 0.000891533 |
| ENSG00000135362 | 11 | 36296288  | 36465204  | + | PRRSL       | protein coding                     | 34.958783 | -3.368507818 | 0.096822904  | -1/2 | 0.443970364 | -7.587235752 | 3.27E-14    | 1.06E-12    |
| ENSG00000058866 | 3  | 186105668 | 186362237 | + | DGKB        | protein coding                     | 6.9391039 | -3.35319418  | 0.097865115  | -1/2 | 0.978573443 | -4.426741851 | 0.00061087  | 0.004478239 |
| ENSG00000260704 | 4  | 74453790  | 74460504  | + | GTF2IRD1    | protein coding                     | 11.118181 | -3.3290934   | 0.098870719  | -1/2 | 0.626098861 | -6.226235    | 3.95E-07    | 1.99E-07    |
| ENSG00000176728 | 9  | 18872501  | 19077416  | + | TTTY14      | lincRNA                            | 8.6059852 | -3.33151396  | 0.09937662   | -1/2 | 0.908937785 | -7.784102749 | 0.001547624 | 0.01124835  |
| ENSG00000213790 | 22 | 42107765  | 42108953  | + | OLA1P1      | processed pseudogene               | 5.0197305 | -3.313456962 | 0.100588901  | -1/2 | 1.163099894 | -2.848815462 | 0.004388233 | 0.022919154 |
| ENSG00000253611 | 9  | 135462727 | 135480777 | + | PPP1R26-AS1 | antisense RNA                      | 5.0226859 | -3.308620962 | 0.100926647  | -1/2 | 1.140207505 | -2.9         |             |             |

|                 |    |           |           |   |               |                        |           |                |             |      |             |               |             |             |
|-----------------|----|-----------|-----------|---|---------------|------------------------|-----------|----------------|-------------|------|-------------|---------------|-------------|-------------|
| ENSG00000145087 | 3  | 120908072 | 121424761 | + | STXBPSL       | protein coding         | 15.149167 | -2.860440068   | 0.137696131 | <1/2 | 0.620085603 | -4.612976102  | 3.97E-06    | 4.53E-05    |
| ENSG00000257402 | 12 | 52715567  | 52721655  | + | KRT126P       | unprocessed_pseudogene | 24.418206 | -2.855558317   | 0.138162853 | <1/2 | 0.5004051   | -5.70649324   | 1.15E-08    | 1.96E-07    |
| ENSG00000174945 | 7  | 2679522   | 2775500   | + | AMZ1          | protein coding         | 26.44404  | -2.850812367   | 0.138618108 | <1/2 | 0.161233754 | -1.768123796  | 5.85E-70    | 2.30E-67    |
| ENSG0000017695  | 20 | 64038380  | 64084359  | + | LKAAEAR1      | protein coding         | 12.414494 | -2.85073377    | 0.138625666 | <1/2 | 0.732156875 | -3.899160598  | 9.88E-05    | 0.000832284 |
| ENSG00000184792 | 22 | 30637382  | 30907824  | + | OSBP2         | protein coding         | 62.05023  | -2.845769297   | 0.138909582 | <1/2 | 0.320685003 | -8.87383625   | 7.07E-19    | 3.56E-17    |
| ENSG00000170689 | 17 | 48621159  | 48626256  | + | HOKB9         | protein coding         | 52.106883 | -2.822119762   | 0.139472478 | <1/2 | 0.338570788 | -8.33497407   | 7.75E-17    | 1.18E-15    |
| ENSG00000147231 | X  | 106611930 | 106679442 | + | Cxor157       | protein coding         | 8.972904  | -2.820041715   | 0.141606391 | <1/2 | 0.819088239 | -3.442930362  | 0.000575506 | 0.00396491  |
| ENSG00000163485 | 1  | 203090654 | 203167405 | + | ADORA1        | protein coding         | 6.1913363 | -2.813007552   | 0.142298509 | <1/2 | 0.943374646 | -2.981856217  | 0.000286505 | 0.00396491  |
| ENSG00000229400 | 10 | 84279980  | 84294659  | + | LINC00858     | lincRNA                | 6.2468097 | -2.808723732   | 0.142721666 | <1/2 | 0.942969154 | -2.978559555  | 0.002895727 | 0.016014328 |
| ENSG00000065923 | X  | 46599252  | 46599172  | + | SLC9A7        | protein coding         | 1.7250937 | -2.80841891    | 0.142751825 | <1/2 | 0.19613498  | -1.413880889  | 1.67E-46    | 3.25E-44    |
| ENSG00000135636 | 2  | 71453727  | 71686768  | + | DYSF          | protein coding         | 236.01315 | -2.804534806   | 0.143136667 | <1/2 | 0.169955254 | -1.5016077    | 3.57E-61    | 1.15E-58    |
| ENSG00000204580 | 6  | 30876421  | 30900156  | + | DDR1          | protein coding         | 5.6706261 | -2.78297998    | 0.14529128  | <1/2 | 0.330944711 | -4.809199139  | 4.13E-17    | 1.76E-15    |
| ENSG00000213997 | X  | 46646594  | 46647330  | + | PGAM1P7       | processed_pseudogene   | 4.860693  | -2.76734878    | 0.146874209 | <1/2 | 1.060948339 | -2.608372792  | 0.009097382 | 0.042145611 |
| ENSG00000186854 | 2  | 84821650  | 84907008  | + | TRABD2A       | protein coding         | 183.84721 | -2.763979105   | 0.147217481 | <1/2 | 0.192062183 | -1.439106369  | 5.89E-47    | 1.18E-44    |
| ENSG00000283544 | 3  | 91374236  | 91513775  | + | ABR01009935.2 | unprocessed_pseudogene | 7.2825932 | -2.7376766     | 0.150332885 | <1/2 | 0.898463582 | -3.002719335  | 0.002344551 | 0.01342664  |
| ENSG00000257343 | 12 | 52746596  | 52748308  | + | AC057716.1    | unprocessed_pseudogene | 12.907102 | -2.72530853    | 0.15121678  | <1/2 | 0.680149508 | -4.006927626  | 6.15E-05    | 0.000544724 |
| ENSG00000146281 | 6  | 89146050  | 89165565  | + | PM2D2         | protein coding         | 430.29549 | -2.718692027   | 0.151911374 | <1/2 | 0.127530379 | -21.3180475   | 7.72E-101   | 6.95E-98    |
| ENSG00000128165 | 22 | 50481556  | 50486440  | + | ADM2          | protein coding         | 50.900476 | -2.701646829   | 0.15371494  | <1/2 | 0.333870489 | -8.091906661  | 5.87E-16    | 2.25E-14    |
| ENSG00000109099 | 17 | 15297277  | 15265326  | + | PMP22         | protein coding         | 49.913464 | -2.700873955   | 0.153799855 | <1/2 | 0.339146211 | -21.736374503 | 1.67E-15    | 6.15E-14    |
| ENSG00000182115 | 4  | 5897373   | 6018507   | + | C1orf50       | protein coding         | 215.51449 | -2.692652111   | 0.154678854 | <1/2 | 0.171092205 | -15.73801749  | 8.30E-56    | 2.16E-53    |
| ENSG00000166173 | 15 | 70829130  | 70854159  | + | LARP6         | protein coding         | 6.1868669 | -2.692517283   | 0.154693311 | <1/2 | 0.904201351 | -2.977785071  | 0.002903395 | 0.016025285 |
| ENSG00000170345 | 14 | 75278774  | 75282230  | + | FOS           | protein coding         | 617.07241 | -2.677985167   | 0.156259394 | <1/2 | 0.115273125 | -23.2163247   | 2.18E-119   | 2.48E-116   |
| ENSG00000215045 | 7  | 6497462   | 6551436   | + | GRID2IP       | protein coding         | 69.37367  | -2.674687807   | 0.156616942 | <1/2 | 0.294619869 | -9.07863628   | 1.10E-19    | 5.89E-18    |
| ENSG00000189419 | 15 | 10034457  | 100349655 | + | SPATA41       | lincRNA                | 5.5344695 | -2.665963251   | 0.157566937 | <1/2 | 1.040195776 | -2.56294738   | 0.010378887 | 0.047041489 |
| ENSG00000178923 | 1  | 43451003  | 43453989  | + | HIT           | protein coding         | 70.57384  | -2.65830267    | 0.158349791 | <1/2 | 0.287381288 | -9.252564931  | 2.15E-20    | 1.34E-18    |
| ENSG00000165449 | 10 | 95650761  | 95770202  | + | SLC16A9       | protein coding         | 7.965917  | -2.65112466    | 0.158702882 | <1/2 | 0.837103768 | -3.172366281  | 0.001512021 | 0.00912819  |
| ENSG00000141429 | 18 | 35851117  | 35711834  | + | GALNT1        | protein coding         | 157.86198 | -2.647607306   | 0.159584528 | <1/2 | 0.192366574 | -13.7633485   | 4.23E-43    | 7.26E-41    |
| ENSG00000196422 | 9  | 135479079 | 135488893 | + | PPP1R26       | protein coding         | 41.197862 | -2.646348038   | 0.159724714 | <1/2 | 0.365893005 | -2.732552079  | 4.74E-13    | 1.37E-11    |
| ENSG00000168461 | 18 | 9708165   | 9862551   | + | RAB31         | protein coding         | 10.947734 | -2.645802501   | 0.15978429  | <1/2 | 0.75164186  | -3.520030833  | 0.000431497 | 0.003083118 |
| ENSG00000130829 | X  | 15364492  | 153651326 | + | DUSP9         | protein coding         | 83.275222 | -2.624312881   | 0.162181674 | <1/2 | 0.269336513 | -9.743637267  | 1.96E-22    | 1.27E-20    |
| ENSG00000179388 | 8  | 22687659  | 22693302  | + | EGR3          | protein coding         | 610.18493 | -2.622751034   | 0.162357841 | <1/2 | 0.116285482 | -2.55441509   | 1.22E-112   | 1.25E-109   |
| ENSG00000125000 | 20 | 1534251   | 1558843   | + | SIRPD         | protein coding         | 7.728089  | -2.611195203   | 0.163663532 | <1/2 | 0.845926282 | -3.08678703   | 0.002023325 | 0.017187    |
| ENSG00000259932 | 15 | 45198517  | 45199139  | + | AC051619.7    | sense intronic         | 24.058351 | -2.611089311   | 0.163675566 | <1/2 | 0.481327167 | -5.642769911  | 5.80E-08    | 8.89E-07    |
| ENSG00000103107 | 20 | 1563521   | 1620061   | + | SIRPB1        | protein coding         | 114.09363 | -2.605367078   | 0.164326029 | <1/2 | 0.230353952 | -11.31027831  | 1.17E-19    | 1.08E-27    |
| ENSG00000172671 | 10 | 45615501  | 45627780  | + | ZFAND4        | protein coding         | 51.827131 | -2.59489565    | 0.169750352 | <1/2 | 0.339602935 | -2.580895833  | 1.72E-14    | 5.81E-13    |
| ENSG00000194258 | 1  | 197811902 | 19792478  | + | LHG9          | protein coding         | 9.820742  | -2.60112466    | 0.164794484 | <1/2 | 0.760585029 | -3.979058209  | 0.000791319 | 0.004483283 |
| ENSG00000087589 | 20 | 56411212  | 56460387  | + | CASS4         | protein coding         | 158.21212 | -2.579670628   | 0.16727913  | <1/2 | 0.194005246 | -13.9891217   | 2.41E-40    | 3.62E-38    |
| ENSG00000189337 | 1  | 13892792  | 15118043  | + | KAZN          | protein coding         | 8.6803263 | -2.574778999   | 0.167842773 | <1/2 | 0.77892344  | -3.305561069  | 0.000947864 | 0.006119663 |
| ENSG00000140470 | 15 | 99971589  | 100342005 | + | ADAMTS17      | protein coding         | 49.38669  | -2.573686774   | 0.167974393 | <1/2 | 0.337118666 | -7.634364498  | 2.27E-14    | 5.76E-13    |
| ENSG00000272734 | 10 | 86965345  | 86971311  | + | ADIRF-AS1     | processed_transcript   | 8.5955384 | -2.573509808   | 0.167994999 | <1/2 | 0.776994276 | -3.312134836  | 0.000925869 | 0.005993186 |
| ENSG00000198417 | 16 | 56657694  | 5666698   | + | MT1F          | protein coding         | 54.25628  | -2.568617805   | 0.168565617 | <1/2 | 0.32848635  | -7.918557196  | 5.30E-15    | 1.87E-13    |
| ENSG00000168993 | 4  | 784957    | 826198    | + | CPLX1         | protein coding         | 6.3769918 | -2.565542166   | 0.168925236 | <1/2 | 0.933227707 | -2.749106298  | 0.0095758   | 0.029785264 |
| ENSG00000133812 | 11 | 9778667   | 10294207  | + | SBF2          | protein coding         | 280.41092 | -2.562027296   | 0.169337418 | <1/2 | 0.150828943 | -9.676631073  | 1.04E-64    | 3.67E-62    |
| ENSG00000100276 | 22 | 29312933  | 29319679  | + | RASL10A       | protein coding         | 64.734365 | -2.560230226   | 0.169548482 | <1/2 | 0.292681446 | -8.747497533  | 2.18E-18    | 1.05E-16    |
| ENSG00000198106 | 16 | 22921220  | 22927110  | + | AC02379.1     | processed_transcript   | 3.352594  | -2.558558238   | 0.169750352 | <1/2 | 0.993131881 | -2.580895833  | 0.00094431  | 0.046363477 |
| ENSG00000105701 | 19 | 18321751  | 18344077  | + | FKBP8         | protein coding         | 82.13554  | -2.55112466    | 0.169809071 | <1/2 | 0.119317124 | -23.00061771  | 4.60E-117   | 4.94E-114   |
| ENSG00000173281 | 8  | 9136255   | 9151574   | + | PPP1R38       | protein coding         | 138.53767 | -2.556116889   | 0.170032615 | <1/2 | 0.209033062 | -12.4668508   | 1.13E-35    | 1.97E-33    |
| ENSG00000150764 | 11 | 111927144 | 112022584 | + | DIXDC1        | protein coding         | 23.00885  | -2.546338261   | 0.17118898  | <1/2 | 0.503606501 | -5.065206101  | 4.28E-07    | 5.75E-06    |
| ENSG00000165929 | 14 | 91797571  | 91867156  | + | TC2N          | protein coding         | 12.93661  | -2.540061666   | 0.171941992 | <1/2 | 0.229051135 | -11.08925378  | 1.41E-28    | 1.23E-26    |
| ENSG00000136100 | 4  | 118036318 | 118258648 | + | NDST3         | protein coding         | 71.334027 | -2.539687129   | 0.17198002  | <1/2 | 0.293357456 | -8.657312558  | 4.83E-18    | 2.25E-16    |
| ENSG00000120949 | 1  | 12063377  | 12144207  | + | TNFRSF8       | protein coding         | 198.8875  | -2.537265519   | 0.172268936 | <1/2 | 0.181974745 | -13.94295413  | 3.47E-44    | 6.25E-42    |
| ENSG00000159733 | 4  | 22695842  | 2418663   | + | ZFYVE28       | protein coding         | 28.325481 | -2.533187648   | 0.172756554 | <1/2 | 0.437253063 | -5.94731161   | 6.90E-09    | 1.20E-07    |
| ENSG00000169184 | 22 | 27748277  | 27801498  | + | MN1           | protein coding         | 52.309689 | -2.522001478   | 0.174101257 | <1/2 | 0.325844407 | -7.73994256   | 9.95E-15    | 3.40E-13    |
| ENSG00000253910 | 5  | 141360042 | 141512979 | + | PCDHG82       | protein coding         | 28.341274 | -2.516556374   | 0.174759601 | <1/2 | 0.454450209 | -5.96428369   | 3.07E-08    | 4.90E-07    |
| ENSG00000196984 | 14 | 76013764  | 76051332  | + | MLH8          | protein coding         | 72.389546 | -2.514389501   | 0.175031998 | <1/2 | 0.294226675 | -8.845833808  | 9.08E-19    | 4.53E-17    |
| ENSG00000194278 | 18 | 12446612  | 12456838  | + | SPIR1         | protein coding         | 69.188859 | -2.51217498    | 0.182642484 | <1/2 | 0.286062957 | -8.67250233   | 1.61E-38    | 7.81E-37    |
| ENSG00000186104 | 11 | 14877440  | 14892252  | + | CYP2R1        | protein coding         | 101.97914 | -2.489658551   | 0.178381035 | <1/2 | 0.233570707 | -10.74611314  | 1.79E-26    | 1.40E-24    |
| ENSG00000266965 | 18 | 33595901  | 33597599  | + | AC090220.1    | sense intronic         | 6.3042451 | -2.480130746   | 0.179228163 | <1/2 | 0.966536443 | -2.56598172   | 0.010287937 | 0.046719516 |
| ENSG00000197208 | 5  | 132294443 | 132344206 | + | SLC22A4       | protein coding         | 23.397904 | -2.475736947</ |             |      |             |               |             |             |

|                 |    |           |           |   |            |                                  |            |              |             |      |             |               |             |              |
|-----------------|----|-----------|-----------|---|------------|----------------------------------|------------|--------------|-------------|------|-------------|---------------|-------------|--------------|
| ENSG00000273677 | 11 | 32436311  | 32436447  | + | WT1-AS 2   | misc_RNA                         | 9.1491271  | -2.161618891 | 0.223505325 | -1/2 | 0.725570129 | -2.979200499  | 0.002890016 | 0.015995025  |
| ENSG00000168350 | 14 | 100143957 | 100160163 | - | DEG52      | protein_coding                   | 47.176424  | -2.159960240 | 0.223762444 | -1/2 | 0.323149066 | -6.684089566  | 2.32E-11    | 5.61E-10     |
| ENSG00000196990 | 9  | 133578415 | 133586197 | - | FAM163B    | protein_coding                   | 9.4910214  | -2.159823349 | 0.223783667 | -1/2 | 0.75975472  | -2.842780157  | 0.00447219  | 0.023267665  |
| ENSG00000088340 | 20 | 35558737  | 35607562  | - | FER1L4     | transcribed_unitary_pseudogene   | 12.751741  | -2.15749156  | 0.224146565 | -1/2 | 0.654489186 | -3.296451044  | 0.000979147 | 0.006290938  |
| ENSG00000113070 | 5  | 140322843 | 140346631 | - | HNRFG      | protein_coding                   | 12.227753  | -2.15749156  | 0.224146565 | -1/2 | 0.200426102 | -10.56204203  | 4.41E-06    | 3.41E-04     |
| ENSG00000144646 | 3  | 47562329  | 47580792  | - | CSF6S      | protein_coding                   | 25.148188  | -2.156364729 | 0.224200796 | -1/2 | 0.441099213 | -4.888616137  | 1.02E-06    | 1.29E-05     |
| ENSG00000196092 | 9  | 36832375  | 37034185  | - | PAX5       | protein_coding                   | 62.860718  | -2.153563259 | 0.224756811 | -1/2 | 0.29679498  | -7.257176178  | 3.95E-13    | 1.15E-11     |
| ENSG00000180758 | 1  | 9103005   | 9129170   | - | GPR157     | protein_coding                   | 129.38611  | -2.14388149  | 0.226270202 | -1/2 | 0.200012422 | -10.17874172  | 8.31E-27    | 6.68E-25     |
| ENSG00000266146 | 18 | 13459947  | 13460026  | + | MIR5190    | miRNA                            | 8.9819576  | -2.139092073 | 0.227022615 | -1/2 | 0.838574356 | -2.550667803  | 0.010745517 | 0.048491726  |
| ENSG00000222047 | 10 | 79309969  | 79327777  | - | Clorf55    | protein_coding                   | 7.2921494  | -2.129443171 | 0.228546056 | -1/2 | 0.812867933 | -1.676666843  | 0.00801571  | 0.001100843  |
| ENSG00000165702 | 9  | 132944000 | 132991687 | + | GF11B      | protein_coding                   | 7.5096618  | -2.125135806 | 0.229229432 | -1/2 | 0.79853461  | -2.661294551  | 0.007784083 | 0.0371178    |
| ENSG00000132744 | 11 | 67642555  | 67642659  | - | ACY3       | protein_coding                   | 11.4992323 | -2.124961464 | 0.229257134 | -1/2 | 0.672294766 | -3.160758598  | 0.001573589 | 0.000470899  |
| ENSG00000138411 | 2  | 196194370 | 196593692 | - | HECW2      | protein_coding                   | 32.426149  | -2.124322216 | 0.229358739 | -1/2 | 0.396335468 | -5.359909442  | 8.33E-08    | 1.25E-06     |
| ENSG00000279951 | 13 | 20092632  | 20094144  | + | AL138688.2 | TEC                              | 9.882764   | -2.119407465 | 0.230141416 | -1/2 | 0.694574735 | -3.051374257  | 0.002277964 | 0.013086939  |
| ENSG00000133131 | X  | 106813871 | 107000244 | - | MORC4      | protein_coding                   | 25.797975  | -2.117912526 | 0.230380015 | -1/2 | 0.154128885 | -13.74117853  | 5.75E-43    | 9.71E-41     |
| ENSG00000272789 | 2  | 127625997 | 127628848 | - | AC01097.6  | antisense_RNA                    | 8.0113741  | -2.116215737 | 0.23061513  | -1/2 | 0.812118167 | -2.605797807  | 0.009166055 | 0.02418281   |
| ENSG00000146438 | 7  | 5274369   | 5306870   | + | SLC29A4    | protein_coding                   | 42.169644  | -2.114977496 | 0.230849179 | -1/2 | 0.355670081 | -5.94658874   | 2.74E-09    | 5.06E-08     |
| ENSG00000122861 | 7  | 73909177  | 73917497  | + | PLAU       | protein_coding                   | 391.74509  | -2.114604493 | 0.230908871 | -1/2 | 0.137310366 | -15.39785978  | 1.69E-53    | 4.02E-51     |
| ENSG00000187122 | 10 | 96998038  | 97185920  | - | SLIT1      | protein_coding                   | 22.839747  | -2.113251229 | 0.231125568 | -1/2 | 0.495134132 | -4.268037877  | 1.97E-05    | 0.000195364  |
| ENSG00000165731 | 10 | 43077027  | 43130351  | + | RET        | protein_coding                   | 86.104912  | -2.106552369 | 0.232021248 | -1/2 | 0.248015324 | -8.493673948  | 2.00E-17    | 8.74E-16     |
| ENSG00000146416 | 6  | 143060496 | 143340304 | + | AIG1       | protein_coding                   | 229.67697  | -2.105696224 | 0.232339085 | -1/2 | 0.164113261 | -12.83705003  | 1.10E-37    | 1.44E-35     |
| ENSG00000223855 | 7  | 520391    | 525232    | + | HRA192     | lincRNA                          | 16.78247   | -2.100064125 | 0.23242788  | -1/2 | 0.568569832 | -3.639504909  | 0.00022111  | 0.00170533   |
| ENSG00000183018 | 17 | 4498838   | 4539035   | + | SPNS2      | protein_coding                   | 439.99357  | -2.099656294 | 0.233313826 | -1/2 | 0.134266966 | -15.8792164   | 4.02E-55    | 9.97E-53     |
| ENSG00000159307 | 22 | 43197283  | 43433388  | - | SCUBE1     | protein_coding                   | 3567.0718  | -2.096434226 | 0.233854584 | -1/2 | 0.104776514 | -20.00667273  | 4.63E-89    | 2.86E-86     |
| ENSG00000152324 | 2  | 156324432 | 156342348 | - | NRA22      | protein_coding                   | 14.599556  | -2.087829803 | 0.234234276 | -1/2 | 0.260435555 | -7.789143386  | 6.75E-15    | 2.34E-13     |
| ENSG00000196910 | 10 | 73772791  | 73780251  | - | FUT11      | protein_coding                   | 342.45817  | -2.075461165 | 0.232759671 | -1/2 | 0.131421553 | -15.79239566  | 3.51E-56    | 1.99E-54     |
| ENSG00000128805 | 10 | 48446034  | 48465265  | - | ARHGAP22   | protein_coding                   | 67.743565  | -2.068603198 | 0.238390195 | -1/2 | 0.275570133 | -7.507805421  | 6.01E-14    | 1.90E-12     |
| ENSG00000073861 | 17 | 47733244  | 47746119  | + | TBX21      | protein_coding                   | 163.23424  | -2.062624511 | 0.238777292 | -1/2 | 0.199203335 | -10.3726298   | 3.30E-25    | 2.45E-23     |
| ENSG00000174807 | 11 | 66314487  | 66317044  | - | CD248      | protein_coding                   | 294.3796   | -2.065530932 | 0.238898395 | -1/2 | 0.148633904 | -13.89676833  | 6.63E-44    | 1.18E-41     |
| ENSG00000182736 | 18 | 31622247  | 31685836  | - | B4GALT6    | protein_coding                   | 233.87937  | -2.0327002   | 0.244397223 | -1/2 | 0.156122245 | -11.031992675 | 9.43E-39    | 1.31E-36     |
| ENSG00000276231 | 7  | 8802723   | 8867677   | - | PIK3R6     | protein_coding                   | 221.88356  | -2.020247821 | 0.246515827 | -1/2 | 0.158581213 | -12.73963553  | 3.57E-37    | 4.59E-35     |
| ENSG00000096264 | 6  | 41335655  | 41350887  | + | NCR2       | protein_coding                   | 63.83019   | -2.017964237 | 0.246906336 | -1/2 | 0.284769798 | -7.08051004   | 1.38E-12    | 3.74E-11     |
| ENSG00000120738 | 5  | 13846490  | 13849315  | + | EGR1       | protein_coding                   | 2914.3455  | -2.01318594  | 0.247702684 | -1/2 | 0.076167422 | -26.432808458 | 5.75E-154   | 9.56E-151    |
| ENSG00000054277 | 11 | 241590102 | 241677376 | - | OPN3       | protein_coding                   | 58.700673  | -2.01124981  | 0.248058137 | -1/2 | 0.289944004 | -6.936676395  | 4.01E-12    | 1.04E-10     |
| ENSG00000102032 | 3  | 15393263  | 153934691 | - | RCNRP      | protein_coding                   | 8.3074687  | -2.010387981 | 0.248306425 | -1/2 | 0.751338866 | -2.574906245  | 0.007475015 | 0.0338712    |
| ENSG00000098457 | 17 | 37146238  | 3801243   | - | ITGA8      | protein_coding                   | 757.83181  | -1.993898492 | 0.251060772 | -1/2 | 0.079731649 | -15.50550912  | 8.85E-32    | 1.18E-30     |
| ENSG00000232788 | 2  | 172464262 | 172466022 | - | AC097883.3 | antisense_RNA                    | 10.714629  | -1.985893615 | 0.252456444 | -1/2 | 0.663762261 | -2.991874848  | 0.007726699 | 0.015476546  |
| ENSG00000100321 | 22 | 3949929   | 39583588  | + | SYNR1      | protein_coding                   | 45.924391  | -1.984680509 | 0.252668803 | -1/2 | 0.333391091 | -5.953101049  | 2.63E-09    | 4.87E-08     |
| ENSG00000196818 | 16 | 57542421  | 57591681  | + | ADGRG5     | protein_coding                   | 111.71228  | -1.975625105 | 0.254259731 | -1/2 | 0.229284224 | -8.616489468  | 6.90E-18    | 3.17E-16     |
| ENSG00000166444 | 11 | 8693351   | 8910951   | - | ST5        | protein_coding                   | 42.906764  | -1.971868712 | 0.254922618 | -1/2 | 0.358728252 | -5.509970809  | 3.59E-08    | 5.67E-07     |
| ENSG00000068650 | 13 | 112690329 | 112887168 | + | ATP11A     | protein_coding                   | 1052.9414  | -1.969393152 | 0.255360422 | -1/2 | 0.098557455 | -19.82818343  | 7.87E-89    | 4.72E-86     |
| ENSG00000263227 | 4  | 16226685  | 16230140  | + | TAPT1-AS1  | antisense_RNA                    | 24.059942  | -1.968533052 | 0.255512708 | -1/2 | 0.447975052 | -4.394291701  | 1.11E-05    | 0.000116567  |
| ENSG00000279434 | 14 | 35086035  | 35088059  | + | AL049776.1 | TEC                              | 15.198756  | -1.956199969 | 0.257706357 | -1/2 | 0.575390401 | -3.400133152  | 0.00067353  | 0.0004530813 |
| ENSG00000183248 | 19 | 7867139   | 7874379   | + | PRR36      | protein_coding                   | 15.957059  | -1.955846888 | 0.257769435 | -1/2 | 0.570422521 | -3.428768772  | 0.000606326 | 0.004151104  |
| ENSG00000173711 | 3  | 141224213 | 141448792 | + | ZBTB38     | protein_coding                   | 4.6995259  | -1.954492526 | 0.258010332 | -1/2 | 0.716577935 | -2.620761407  | 0.008773364 | 0.040916485  |
| ENSG00000095029 | 10 | 109174975 | 109320964 | + | EPBA14B    | protein_coding                   | 172.83832  | -1.947481144 | 0.259268502 | -1/2 | 0.185286781 | -18.421099921 | 8.20E-36    | 6.24E-34     |
| ENSG00000171643 | 5  | 76850001  | 76921650  | + | S100Z      | protein_coding                   | 74.298985  | -1.944706516 | 0.259767614 | -1/2 | 0.254072079 | -7.635214429  | 2.25E-14    | 7.52E-13     |
| ENSG00000049130 | 12 | 88492793  | 88580851  | - | KITLG      | protein_coding                   | 31.804515  | -1.935330472 | 0.261461336 | -1/2 | 0.401530942 | -8.918787997  | 1.44E-06    | 1.78E-05     |
| ENSG00000228526 | 1  | 9148011   | 9196983   | - | MIR34AHG   | lincRNA                          | 119.70262  | -1.935201548 | 0.261484702 | -1/2 | 0.213250345 | -9.074874707  | 1.14E-19    | 6.05E-18     |
| ENSG00000185866 | 22 | 22547701  | 22559361  | - | PRAME      | protein_coding                   | 8.9609727  | -1.931785131 | 0.262104653 | -1/2 | 0.730076693 | -2.64600315   | 0.008144909 | 0.038568313  |
| ENSG00000166341 | 11 | 6612313   | 6658584   | - | DCHS1      | protein_coding                   | 24.121043  | -1.929199746 | 0.262574779 | -1/2 | 0.455568815 | -4.234705458  | 2.29E-05    | 0.000222839  |
| ENSG00000170858 | 19 | 54707916  | 54713453  | + | LILRP2     | transcribed_processed_pseudogene | 93.412524  | -1.926972952 | 0.262980375 | -1/2 | 0.231236098 | -8.333569974  | 7.86E-17    | 3.22E-15     |
| ENSG00000204488 | 6  | 31586124  | 31588909  | + | LS1        | antisense_RNA                    | 416.17114  | -1.922531017 | 0.263791317 | -1/2 | 0.140206462 | -11.731231768 | 8.57E-43    | 1.44E-40     |
| ENSG00000106415 | 13 | 28136843  | 28138193  | - | PAN3-AS1   | antisense_RNA                    | 38.253885  | -1.906806087 | 0.266815413 | -1/2 | 0.356692732 | -5.343776077  | 9.10E-08    | 1.36E-06     |
| ENSG00000140465 | 15 | 74719542  | 74725610  | - | CYP1A1     | protein_coding                   | 57.959355  | -1.884532361 | 0.271089033 | -1/2 | 0.296314883 | -6.355163127  | 2.08E-10    | 4.46E-09     |
| ENSG00000129521 | 14 | 33924321  | 34062774  | - | EGN3       | protein_coding                   | 93.87832   | -1.881004742 | 0.271089033 | -1/2 | 0.101310849 | -18.421099921 | 8.85E-32    | 3.32E-30     |
| ENSG00000137868 | 15 | 74179466  | 74212267  | + | STRA6      | protein_coding                   | 517.58135  | -1.879632493 | 0.271752932 | -1/2 | 0.093091347 | -20.192712211 | 1.17E-90    | 7.89E-88     |
| ENSG00000172986 | 3  | 72888073  | 72998138  | + | GXYLT2     | protein_coding                   | 345.34953  | -1.877623706 | 0.272131558 | -1/2 | 0.130882102 | -14.304151512 | 1.13E-46    | 2.22E-44     |
| ENSG00000283341 | 11 | 43578889  | 43840030  | + | AC068205.2 | processed_transcript             | 24.034661  | -1.875393914 | 0.272       |      |             |               |             |              |



|                 |    |           |           |   |            |                      |            |              |             |      |             |              |             |             |
|-----------------|----|-----------|-----------|---|------------|----------------------|------------|--------------|-------------|------|-------------|--------------|-------------|-------------|
| ENSG00000233093 | X  | 136639543 | 136642429 | + | LINC00892  | processed transcript | 253.74257  | -1.697704308 | 0.308276258 | -1/2 | 0.159108968 | -10.67007301 | 1.41E-26    | 1.12E-24    |
| ENSG00000251408 | X  | 6202328   | 6206649   | + | AC113615.1 | lincRNA              | 12.616561  | -1.696743201 | 0.308481697 | -1/2 | 0.608562801 | -2.78811521  | 0.005301569 | 0.026940947 |
| ENSG00000267519 | 19 | 13835416  | 13836289  | + | AC020916.1 | lincRNA              | 131.06703  | -1.692647777 | 0.309363557 | -1/2 | 0.198003968 | -8.54838658  | 1.25E-17    | 5.58E-16    |
| ENSG00000141540 | 17 | 74213514  | 74262020  | + | TTYH2      | protein coding       | 17.040043  | -1.692009228 | 0.309495959 | -1/2 | 0.50696943  | -3.34325462  | 0.00082089  | 0.00541392  |
| ENSG00000187815 | 1  | 40473715  | 40496343  | + | ZF989      | protein coding       | 53.212546  | -1.690689872 | 0.30977994  | -1/2 | 0.345287412 | -4.83664548  | 8.76E-33    | 1.34E-26    |
| ENSG00000166126 | 14 | 10292656  | 102933596 | + | ANN        | protein coding       | 14.837651  | -1.688209687 | 0.310311768 | -1/2 | 0.553833934 | -3.048223636 | 0.002301895 | 0.112032876 |
| ENSG00000135776 | 1  | 229516582 | 229589565 | + | ABC10      | protein coding       | 506.61992  | -1.687895865 | 0.310379275 | -1/2 | 0.116856557 | -14.44416902 | 2.73E-47    | 5.56E-45    |
| ENSG00000106089 | 7  | 73699206  | 7371972   | + | STX1A      | protein coding       | 23.519655  | -1.681477696 | 0.311763147 | -1/2 | 0.437730818 | -3.841350958 | 0.000122359 | 0.001012567 |
| ENSG0000004660  | 17 | 3860315   | 3894891   | + | CAMK1      | protein coding       | 171.90171  | -1.679197969 | 0.31225618  | -1/2 | 0.173866533 | -9.657891197 | 4.55E-22    | 2.89E-20    |
| ENSG00000133816 | 11 | 12094008  | 12263789  | + | MICAL2     | protein coding       | 945.56773  | -1.676319647 | 0.312879785 | -1/2 | 0.087101017 | -1.92465955  | 1.53E-82    | 7.21E-80    |
| ENSG00000133317 | X  | 613506084 | 61361774  | + | LGALS12    | protein coding       | 58.546889  | -1.674066056 | 0.313368907 | -1/2 | 0.287334477 | -5.82619272  | 5.67E-09    | 1.01E-07    |
| ENSG00000166432 | X  | 101882288 | 101932031 | + | ZMAT1      | protein coding       | 30.501344  | -1.659375706 | 0.31657161  | -1/2 | 0.386199339 | -4.256681891 | 1.73E-05    | 0.000175107 |
| ENSG00000214193 | 1  | 36306387  | 36324886  | + | SH3D21     | protein coding       | 272.56491  | -1.657977881 | 0.316882989 | -1/2 | 0.145413873 | -11.40178614 | 4.10E-30    | 3.83E-28    |
| ENSG00000167123 | 9  | 128411751 | 128437351 | + | CERAM      | protein coding       | 308.63389  | -1.657829583 | 0.316915564 | -1/2 | 0.143222545 | -11.57159985 | 5.50E-31    | 5.31E-29    |
| ENSG00000270012 | X  | 49273054  | 49275768  | + | AC23227.1  | lincRNA              | 26.84703   | -1.655488335 | 0.317386939 | -1/2 | 0.420389736 | -3.939202906 | 8.18E-05    | 0.000794038 |
| ENSG00000269743 | X  | 104099214 | 104157027 | + | SLC25A53   | protein coding       | 49.757379  | -1.655288277 | 0.317474302 | -1/2 | 0.303954654 | -5.454662193 | 5.16E-08    | 7.95E-07    |
| ENSG00000158050 | 2  | 96143166  | 96145440  | + | DUSP2      | protein coding       | 1013.0319  | -1.655099646 | 0.317515814 | -1/2 | 0.10209316  | -16.21660646 | 4.17E-59    | 1.27E-56    |
| ENSG00000278341 | 16 | 88708956  | 88710437  | + | AC138028.6 | antisense RNA        | 18.247512  | -1.654659324 | 0.317612737 | -1/2 | 0.513692629 | -3.221103766 | 0.001276979 | 0.007924091 |
| ENSG00000184156 | 8  | 132120858 | 132481019 | + | KCNQ3      | protein coding       | 125.466939 | -1.647984484 | 0.319085624 | -1/2 | 0.209185209 | -7.18711897  | 3.32E-15    | 1.19E-13    |
| ENSG00000159335 | 12 | 6765516   | 6770952   | + | PTM5       | protein coding       | 1762.7574  | -1.645034073 | 0.319738844 | -1/2 | 0.111498236 | -14.7539023  | 2.90E-49    | 6.27E-47    |
| ENSG00000196381 | 19 | 37667751  | 37692322  | + | ZNF781     | protein coding       | 11.36083   | -1.6337248   | 0.32233831  | -1/2 | 0.640212943 | -2.55129623  | 0.10732325  | 0.048442411 |
| ENSG0000015850  | 2  | 135787840 | 135837180 | + | LCT        | protein coding       | 12.743159  | -1.632687309 | 0.322486951 | -1/2 | 0.586762954 | -2.782533044 | 0.005393637 | 0.02731212  |
| ENSG00000232810 | 6  | 31575567  | 31578336  | + | TNF        | protein coding       | 2100.4362  | -1.631159646 | 0.322828612 | -1/2 | 0.080413375 | -20.84604707 | 1.76E-91    | 1.22E-88    |
| ENSG00000135406 | 12 | 49293252  | 49298686  | + | PRPH       | protein coding       | 347.61108  | -1.625663049 | 0.32460919  | -1/2 | 0.413437596 | -3.923549419 | 8.73E-05    | 0.000745337 |
| ENSG00000161925 | 6  | 158636474 | 158644739 | + | DYN11      | protein coding       | 315.15338  | -1.616699901 | 0.32608794  | -1/2 | 0.129412671 | -12.4925866  | 8.19E-36    | 1.00E-33    |
| ENSG00000171316 | 8  | 60678778  | 60680878  | + | CHD7       | protein coding       | 123.13889  | -1.612759217 | 0.326972408 | -1/2 | 0.203622095 | -7.920354808 | 2.37E-15    | 1.56E-14    |
| ENSG00000176593 | 19 | 58002061  | 58011232  | + | AC008969.1 | processed transcript | 84.777674  | -1.612434533 | 0.327045997 | -1/2 | 0.24168187  | -6.673489609 | 2.50E-11    | 6.00E-10    |
| ENSG00000107104 | 9  | 470291    | 746106    | + | KANK1      | protein coding       | 237.62059  | -1.604367909 | 0.328879751 | -1/2 | 0.15023863  | -10.87879754 | 1.28E-26    | 1.02E-24    |
| ENSG00000280035 | 8  | 141224288 | 141226947 | + | ACD11676.5 | TEC                  | 34.735459  | -1.603590573 | 0.329057002 | -1/2 | 0.392861686 | -4.081819711 | 4.47E-05    | 0.000470992 |
| ENSG0000008804  | 20 | 34704290  | 34713439  | + | TP53NP2    | protein coding       | 101.09968  | -1.597829291 | 0.330373691 | -1/2 | 0.215651415 | -4.809315312 | 1.27E-13    | 3.89E-12    |
| ENSG00000276337 | 16 | 87470370  | 87474370  | + | AC105429.1 | sense intronic       | 30.550144  | -1.590108724 | 0.332146422 | -1/2 | 0.41717052  | -3.68276531  | 0.000230719 | 0.00177597  |
| ENSG00000128271 | 22 | 24417879  | 2442360   | + | ADORA2A    | protein coding       | 22.19405   | -1.58385358  | 0.333589236 | -1/2 | 0.449040078 | -3.52720664  | 0.00419975  | 0.00301715  |
| ENSG00000136040 | 12 | 94148723  | 9430765   | + | PLXNC1     | protein coding       | 925.89043  | -1.583716819 | 0.333621271 | -1/2 | 0.099879013 | -15.8563234  | 1.27E-56    | 3.52E-54    |
| ENSG00000189159 | 12 | 120210439 | 120265771 | + | PCN        | protein coding       | 411.14062  | -1.581669051 | 0.334095151 | -1/2 | 0.117176187 | -11.49821234 | 1.60E-41    | 2.55E-39    |
| ENSG00000125148 | 16 | 56609399  | 56609399  | + | MTZA       | protein coding       | 38.32325   | -1.581669051 | 0.334095151 | -1/2 | 0.144912313 | -10.33481198 | 1.35E-27    | 1.00E-25    |
| ENSG00000142798 | 1  | 21822245  | 21827297  | + | HSFG2      | protein coding       | 24.108868  | -1.577445191 | 0.335074373 | -1/2 | 0.446648040 | -3.531740798 | 0.004121829 | 0.002967432 |
| ENSG00000187190 | 8  | 142449430 | 142450009 | + | ADGRB1     | protein coding       | 14.249532  | -1.577331272 | 0.335101193 | -1/2 | 0.559769769 | -2.817821468 | 0.048350609 | 0.024869095 |
| ENSG00000212163 | 2  | 12763881  | 127681786 | + | LIMS2      | protein coding       | 1004.8422  | -1.575734007 | 0.335472402 | -1/2 | 0.118309706 | -13.81872134 | 1.80E-40    | 2.83E-38    |
| ENSG00000105204 | 19 | 39825350  | 39834201  | + | DYRK1B     | protein coding       | 80.758561  | -1.573558803 | 0.335979287 | -1/2 | 0.237734    | -6.618766881 | 3.62E-11    | 7.53E-10    |
| ENSG00000185565 | 6  | 115802363 | 115713989 | + | LSAMP      | protein coding       | 83.467697  | -1.572957454 | 0.336118661 | -1/2 | 0.256741571 | -11.26617706 | 8.98E-10    | 1.76E-08    |
| ENSG00000073150 | 22 | 50170731  | 50180294  | + | PANX2      | protein coding       | 20.22522   | -1.568580821 | 0.337139876 | -1/2 | 0.472803507 | -3.11676125  | 0.00090789  | 0.005887387 |
| ENSG00000138640 | 4  | 88729555  | 88811398  | + | FAM13A     | protein coding       | 10.82161   | -1.565664549 | 0.337822061 | -1/2 | 0.231151763 | -6.773318658 | 1.26E-11    | 3.13E-10    |
| ENSG00000148488 | 10 | 17318883  | 17454330  | + | ST8SIA6    | protein coding       | 93.790865  | -1.563414917 | 0.338349247 | -1/2 | 0.2387737   | -2.647684764 | 5.84E-11    | 1.34E-09    |
| ENSG00000140203 | 3  | 123284176 | 123241234 | + | FAM162A    | protein coding       | 475.37355  | -1.563202526 | 0.338399062 | -1/2 | 0.133464007 | -11.7254008  | 1.10E-31    | 1.08E-29    |
| ENSG00000216916 | 17 | 3801761   | 38021272  | + | AC027796.1 | sense intronic       | 13.775899  | -1.56091463  | 0.338981837 | -1/2 | 0.604240533 | -3.578267001 | 0.009786955 | 0.044862274 |
| ENSG00000106018 | 7  | 15901875  | 15914957  | + | VIPR2      | protein coding       | 395.08864  | -1.56041053  | 0.339040665 | -1/2 | 0.119802074 | -13.02617592 | 8.83E-39    | 1.24E-36    |
| ENSG00000157514 | X  | 107137221 | 10777342  | + | TSC2D3     | protein coding       | 439.85876  | -1.556968631 | 0.33986445  | -1/2 | 0.141199921 | -11.0266922  | 2.84E-28    | 2.45E-26    |
| ENSG00000128045 | 4  | 52862290  | 52866835  | + | RASL11B    | protein coding       | 17.76901   | -1.554712576 | 0.340396339 | -1/2 | 0.515323661 | -3.01696304  | 0.00253207  | 0.014435437 |
| ENSG00000183918 | X  | 124227868 | 124373197 | + | RHD21A     | protein coding       | 114.67243  | -1.55378227  | 0.34061591  | -1/2 | 0.210454266 | -7.382992503 | 1.55E-13    | 4.72E-12    |
| ENSG00000072422 | 10 | 60689438  | 61001440  | + | RHOBTB1    | protein coding       | 43.365331  | -1.55236815  | 0.340949943 | -1/2 | 0.34893337  | -4.80985638  | 8.63E-06    | 9.26E-05    |
| ENSG00000212743 | 10 | 6350316   | 6352762   | + | AL137145.1 | lincRNA              | 18.02766   | -1.549250308 | 0.341687575 | -1/2 | 0.49627011  | -3.100813754 | 0.01929896  | 0.01132879  |
| ENSG00000185100 | 14 | 104724186 | 104747325 | + | ADSSL1     | protein coding       | 18.030237  | -1.547009166 | 0.342218779 | -1/2 | 0.496021765 | -3.211883256 | 0.001815687 | 0.01721932  |
| ENSG00000213949 | 5  | 52787896  | 52959210  | + | ITGA1      | protein coding       | 33.352856  | -1.545670673 | 0.342536428 | -1/2 | 0.36480261  | -4.236398899 | 2.27E-05    | 0.000221132 |
| ENSG00000097000 | 1  | 85156873  | 85201046  | + | SYDE2      | protein coding       | 71.376838  | -1.529201793 | 0.34469007  | -1/2 | 0.255875797 | -5.97644234  | 2.28E-09    | 4.26E-08    |
| ENSG00000183421 | 21 | 41739369  | 41767106  | + | RIPK4      | protein coding       | 40.166735  | -1.527777309 | 0.346811271 | -1/2 | 0.331641956 | -4.606706971 | 1.09E-06    | 4.66E-05    |
| ENSG00000111664 | 12 | 6843954   | 6847393   | + | GNB3       | protein coding       | 131.59725  | -1.520278868 | 0.348618524 | -1/2 | 0.195553040 | -4.00546182  | 6.19E-05    | 0.000547703 |
| ENSG00000260244 | 4  | 155734448 | 155737062 | + | AC104083.1 | sense overlapping    | 13.233185  | -1.519080074 | 0.34908325  | -1/2 | 0.572061769 | -2.65447639  | 0.007920323 | 0.037616123 |
| ENSG00000180354 | 7  | 13034810  | 13031672  | + | MTURN      | protein coding       | 82.16581   | -1.511093148 | 0.350845278 | -1/2 | 0.23053526  | -6.42926832  | 1.28E-10    | 2.82E-09    |
| ENSG00000181649 | 11 | 2928273   | 2929455   | + | PHLDA2     | protein coding       | 45.540604  | -1.506104398 | 0.35206038  | -1/2 | 0.32202885  | -4.67692815  | 2.91E-06    | 3.42E-05    |
| ENSG0           |    |           |           |   |            |                      |            |              |             |      |             |              |             |             |

|                 |    |           |           |   |            |                                    |            |             |             |    |             |             |             |             |
|-----------------|----|-----------|-----------|---|------------|------------------------------------|------------|-------------|-------------|----|-------------|-------------|-------------|-------------|
| ENSG00000137726 | 11 | 117836976 | 11787486  | - | FYD6       | protein coding                     | 96.092893  | 1.695264035 | 3.28361482  | -> | 0.23459508  | 7.261490659 | 3.83E-13    | 1.11E-11    |
| ENSG00000259436 | 19 | 42152659  | 42157523  | + | AC010247.2 | antisense RNA                      | 12.151272  | 1.699158023 | 3.247113972 | -> | 0.640365517 | 2.65341899  | 0.007968089 | 0.037805557 |
| ENSG00000100181 | 22 | 16608187  | 16687472  | + | TTFE1      | transcribed unprocessed pseudogene | 69.83908   | 1.699825841 | 3.248617395 | -> | 0.287987385 | 5.902341599 | 0.0076809   | 6.47E-09    |
| ENSG00000258667 | 14 | 88024550  | 88097619  | + | LINC01146  | lincRNA                            | 12.324287  | 1.701379334 | 3.252117388 | -> | 0.62429501  | 2.715994907 | 0.006607693 | 0.032352693 |
| ENSG00000185862 | 17 | 31802166  | 3181412   | - | EV2B       | protein coding                     | 66.268353  | 1.702101774 | 3.255099342 | -> | 0.297882559 | 5.351868398 | 3.33E-09    | 6.05E-08    |
| ENSG00000137731 | 11 | 117808844 | 117828698 | - | FXD2       | protein coding                     | 36.200229  | 1.704267981 | 3.258635488 | -> | 0.371662504 | 4.585517747 | 4.53E-06    | 5.12E-05    |
| ENSG00000270959 | 3  | 188151206 | 188154057 | - | IPP-AS2    | antisense RNA                      | 60.818485  | 1.705346688 | 3.261072991 | -> | 0.27595211  | 1.680243113 | 6.40E-10    | 1.29E-08    |
| ENSG00000261341 | 19 | 50776141  | 50791142  | - | AC010325.1 | antisense RNA                      | 10.838522  | 1.705807363 | 3.262114368 | -> | 0.642308126 | 2.655746196 | 0.007913315 | 0.037636822 |
| ENSG00000232973 | 2  | 38073447  | 38231651  | + | CYP1B1-AS1 | antisense RNA                      | 13.373741  | 1.706444612 | 3.263555587 | -> | 0.21493066  | 7.940509773 | 2.01E-15    | 7.36E-14    |
| ENSG00000143502 | 1  | 232220819 | 232364202 | - | SUSD4      | protein coding                     | 143.65467  | 1.713815443 | 3.280271989 | -> | 0.200725288 | 8.583114239 | 1.36E-17    | 6.05E-16    |
| ENSG00000184384 | 11 | 95976598  | 96343180  | - | MAML2      | protein coding                     | 40.066781  | 1.717839889 | 3.289435192 | -> | 0.3808992   | 4.509597699 | 6.48E-06    | 7.13E-05    |
| ENSG00000253230 | 8  | 9900664   | 9905366   | - | LINC00599  | lincRNA                            | 35.01322   | 1.723977283 | 3.303458642 | -> | 0.170411083 | 10.11657955 | 4.66E-24    | 3.33E-22    |
| ENSG00000060140 | 12 | 10618939  | 10674318  | - | STYK1      | protein coding                     | 154.4984   | 1.726047792 | 3.308203062 | -> | 0.197148863 | 8.755044147 | 2.04E-18    | 9.84E-17    |
| ENSG00000150347 | 10 | 61901300  | 62096944  | + | ARID5B     | protein coding                     | 1370.8832  | 1.734894899 | 3.28525444  | -> | 0.100493155 | 17.26381167 | 8.81E-37    | 3.27E-36    |
| ENSG00000136848 | 9  | 121567057 | 121785330 | + | DAB2IP     | protein coding                     | 12.673669  | 1.73990741  | 3.340137305 | -> | 0.628346447 | 2.76092563  | 0.005627421 | 0.028337686 |
| ENSG00000254048 | 8  | 58991720  | 58992338  | - | AC105150.1 | sense intronic                     | 32.346649  | 1.749705196 | 3.326898408 | -> | 0.405731636 | 3.124495229 | 1.61E-05    | 0.000182775 |
| ENSG00000185477 | 4  | 89236386  | 8938010   | - | GPRIN3     | protein coding                     | 1845.9284  | 1.761271469 | 3.389967563 | -> | 0.083015336 | 2.116217297 | 6.77E-100   | 5.41E-97    |
| ENSG00000128924 | 22 | 26521983  | 26596717  | - | TPST2      | protein coding                     | 2000.2566  | 1.769723138 | 3.409885127 | -> | 0.091712174 | 19.27976797 | 7.94E-83    | 3.81E-80    |
| ENSG00000171121 | 3  | 17923661  | 17927002  | - | KCNMB3     | protein coding                     | 19.488481  | 1.772793974 | 3.417150938 | -> | 0.487119643 | 6.63939947  | 0.0027338   | 0.002062514 |
| ENSG00000141433 | 18 | 909443    | 912172    | + | ADCYAP1    | protein coding                     | 11.63427   | 1.773497685 | 3.418818146 | -> | 0.623581121 | 2.844052884 | 0.00445365  | 0.02319727  |
| ENSG00000115896 | 2  | 197804702 | 198572581 | + | PLCL1      | protein coding                     | 26.632762  | 1.774141607 | 3.420344418 | -> | 0.421101039 | 4.213101944 | 1.52E-05    | 0.00024395  |
| ENSG00000261794 | 15 | 30604126  | 30616561  | + | GOLGA8H    | protein coding                     | 13.620621  | 1.778168391 | 3.429893763 | -> | 0.58850462  | 3.021495213 | 0.002515296 | 0.014235347 |
| ENSG00000233555 | 1  | 239703381 | 239730465 | - | CHRM3-AS2  | antisense RNA                      | 12.319564  | 1.779778483 | 3.433734476 | -> | 0.620482192 | 2.868838964 | 0.004125802 | 0.02173762  |
| ENSG00000162545 | 1  | 20482391  | 20486220  | - | CAMK2N1    | protein coding                     | 77.096522  | 1.789824074 | 3.45772255  | -> | 0.285617884 | 6.738341749 | 1.60E-11    | 3.94E-10    |
| ENSG00000136250 | 7  | 36512949  | 36743449  | + | RPL5       | protein coding                     | 134.816551 | 1.793988219 | 3.46077434  | -> | 0.304218936 | 8.784206489 | 1.57E-18    | 7.58E-17    |
| ENSG0000024826  | X  | 721127110 | 721131901 | - | RT15       | protein coding                     | 10.09324   | 1.799545966 | 3.481106537 | -> | 0.703749372 | 4.557083586 | 0.010555385 | 0.047761394 |
| ENSG00000237976 | 1  | 151346967 | 151348027 | + | AL391069.3 | antisense RNA                      | 14.107234  | 1.80594343  | 3.496577373 | -> | 0.572223621 | 3.156009928 | 0.001599434 | 0.009594838 |
| ENSG00000261739 | 15 | 23354748  | 23367231  | + | GOLGA8S    | protein coding                     | 18.166148  | 1.806169266 | 3.497127623 | -> | 0.530679134 | 3.043505302 | 0.000665271 | 0.004487829 |
| ENSG00000074966 | 4  | 48066393  | 48134256  | - | TXK        | protein coding                     | 205.24618  | 1.81210048  | 3.511531752 | -> | 0.16599485  | 10.9163801  | 9.63E-28    | 8.16E-26    |
| ENSG00000185304 | 2  | 8775595   | 8782952   | - | RGPD2      | protein coding                     | 204.12675  | 1.812783143 | 3.513193751 | -> | 0.165190758 | 10.91387753 | 5.10E-28    | 4.34E-26    |
| ENSG00000279039 | 19 | 20207192  | 20209789  | - | AC011447.6 | TEC                                | 23.180731  | 1.81740365  | 3.524463463 | -> | 0.465963054 | 3.900317063 | 9.61E-05    | 0.000812299 |
| ENSG00000250400 | 8  | 129216467 | 129241250 | - | LINC00977  | lincRNA                            | 25.131948  | 1.819804849 | 3.530334411 | -> | 0.434862158 | 4.184785494 | 2.85E-05    | 0.000270292 |
| ENSG00000166426 | 15 | 78340324  | 78348230  | + | CRRBP1     | protein coding                     | 260.06782  | 1.830631963 | 3.556928472 | -> | 0.153120178 | 11.95524041 | 6.07E-33    | 6.28E-31    |
| ENSG00000100678 | 14 | 70044217  | 70108970  | + | SLC6A3     | protein coding                     | 160.64309  | 1.833904007 | 3.564959575 | -> | 0.15053421  | 9.40201762  | 5.55E-31    | 3.17E-29    |
| ENSG00000199117 | 17 | 56593699  | 56593699  | + | NDP        | protein coding                     | 133.30871  | 1.856261264 | 3.620641477 | -> | 0.196971606 | 9.428400328 | 3.43E-31    | 2.58E-29    |
| ENSG00000078759 | 16 | 56357547  | 56357547  | + | GNAO1      | protein coding                     | 173.70079  | 1.861317963 | 3.679808121 | -> | 0.19156635  | 7.22124305  | 2.45E-11    | 3.92E-10    |
| ENSG00000227375 | 3  | 197298252 | 197303747 | + | DIG1-AS1   | antisense RNA                      | 9.6499562  | 1.866532923 | 3.646554417 | -> | 0.710775474 | 6.705612613 | 0.008638057 | 0.040372598 |
| ENSG00000251194 | 11 | 35212550  | 35212007  | + | AL133303.1 | sense intronic                     | 38.306534  | 1.867382522 | 3.648699966 | -> | 0.366882448 | 5.089785609 | 3.58E-07    | 4.87E-06    |
| ENSG00000265817 | 8  | 94372170  | 9436952   | - | FSBP       | protein coding                     | 10.955169  | 1.869272715 | 3.653483559 | -> | 0.67933628  | 7.125165797 | 0.005930205 | 0.029598969 |
| ENSG00000111110 | 12 | 62643982  | 62935037  | - | PMM1H      | protein coding                     | 369.72507  | 1.879679831 | 3.679933845 | -> | 0.136557548 | 13.76474501 | 4.15E-43    | 7.18E-41    |
| ENSG0000017115  | 1  | 17066761  | 17119435  | - | PADI2      | protein coding                     | 36.922912  | 1.87971578  | 3.680025542 | -> | 0.34943236  | 5.800726753 | 7.42E-08    | 1.12E-06    |
| ENSG00000183844 | 14 | 105049389 | 105065445 | - | GPR132     | protein coding                     | 105.62463  | 1.892156139 | 3.711895614 | -> | 0.22960918  | 8.240768672 | 1.71E-16    | 6.86E-15    |
| ENSG00000126778 | 14 | 60643415  | 60658259  | - | SIX1       | protein coding                     | 9.7206884  | 1.899224252 | 3.730125711 | -> | 0.704490383 | 2.69588386  | 0.007020214 | 0.033949365 |
| ENSG00000201367 | 6  | 15314920  | 15315026  | + | RMU6-5Z2P  | snRNA                              | 14.318803  | 1.903777155 | 3.741919593 | -> | 0.660262731 | 2.88363304  | 0.003945437 | 0.020887848 |
| ENSG0000027168  | 6  | 21664772  | 22368328  | + | CASC15     | lincRNA                            | 14.24216   | 1.909140516 | 3.758833846 | -> | 0.086915608 | 21.22527798 | 4.78E-100   | 0.00401132  |
| ENSG0000019826  | 18 | 45893536  | 46072372  | + | RYR2       | protein coding                     | 12.024023  | 1.91010062  | 3.786219119 | -> | 0.450878034 | 4.236245498 | 2.75E-05    | 0.00021406  |
| ENSG00000186827 | 1  | 1211326   | 1211438   | - | TNFRSF4    | protein coding                     | 70.864341  | 1.910488567 | 3.793638885 | -> | 0.291956316 | 6.543749016 | 6.00E-11    | 1.37E-09    |
| ENSG0000026508  | 11 | 35138870  | 35232402  | + | CD44       | protein coding                     | 4472.232   | 1.924028867 | 3.79481319  | -> | 0.0673677   | 28.44611015 | 5.45E-178   | 1.68E-174   |
| ENSG00000177685 | 11 | 826144    | 831991    | + | CRACR2B    | protein coding                     | 308.11853  | 1.926430027 | 3.801134374 | -> | 0.149822295 | 12.85809985 | 7.75E-38    | 1.03E-35    |
| ENSG00000167768 | 12 | 52674736  | 52680407  | - | KRT1       | protein coding                     | 1044.9036  | 1.927598066 | 3.804213186 | -> | 0.087411146 | 22.05208579 | 9.12E-108   | 8.57E-105   |
| ENSG00000206127 | 15 | 32445106  | 32455634  | + | GOLGA80    | protein coding                     | 73.289037  | 1.94156736  | 3.841227363 | -> | 0.299780509 | 6.476267494 | 9.38E-11    | 2.09E-09    |
| ENSG0000022515  | 6  | 22085544  | 22089158  | + | RM75KP240  | misc RNA                           | 11.431835  | 1.946608102 | 3.854671995 | -> | 0.670692344 | 2.902386049 | 0.003703319 | 0.019825968 |
| ENSG00000164483 | 6  | 130144315 | 130365425 | - | SAMD3      | protein coding                     | 65.465614  | 1.954533147 | 3.875904831 | -> | 0.27918371  | 7.000885221 | 2.54E-12    | 6.71E-11    |
| ENSG0000026091  | 12 | 8259586   | 8396803   | - | LINC00937  | lincRNA                            | 32.817414  | 1.96001312  | 3.890655173 | -> | 0.41128312  | 6.00053331  | 1.88E-06    | 2.29E-05    |
| ENSG00000224001 | 3  | 18774686  | 187746028 | + | BC1G-AS1   | protein coding                     | 10.624023  | 1.965289449 | 3.904910411 | -> | 0.68383959  | 2.877270187 | 0.00401132  | 0.021248489 |
| ENSG00000152129 | 18 | 45893536  | 46072372  | + | PSYIP2     | protein coding                     | 12.14749   | 1.969520006 | 3.91637968  | -> | 0.217037364 | 6.91352211  | 1.14E-19    | 6.04E-18    |
| ENSG00000229440 | 8  | 129351691 | 129360239 | + | CDC2C6     | lincRNA                            | 109.97146  | 1.974258687 | 3.929262853 | -> | 0.2193222   | 9.001636351 | 2.22E-19    | 1.17E-17    |
| ENSG00000115956 | 2  | 6885173   | 68897345  | + | PLEK       | protein coding                     | 7.9563125  | 1.985635755 | 3.960371464 | -> | 0.771838239 | 2.572605789 | 0.01009361  | 0.049592387 |
| ENSG00000134955 | 11 | 125063067 | 125090912 | + | SLC37A2    | protein coding                     | 45.789542  | 1.99123141  | 3.978220219 | -> | 0.330153383 | 6.002139224 | 1.60E-09    | 3.04E-08    |
| ENSG0000018777  |    |           |           |   |            |                                    |            |             |             |    |             |             |             |             |

|                 |    |           |           |   |            |                                    |            |             |             |    |             |              |             |             |
|-----------------|----|-----------|-----------|---|------------|------------------------------------|------------|-------------|-------------|----|-------------|--------------|-------------|-------------|
| ENSG0000010665  | 11 | 2295645   | 2303409   | - | C11orf21   | protein coding                     | 27.837729  | 2.432317638 | 5.397598396 | -> | 0.453952195 | 5.358092025  | 8.41E-08    | 1.26E-06    |
| ENSG00000159527 | 1  | 153297862 | 153310718 | - | PGLYRP3    | protein coding                     | 11.745559  | 4.435254546 | 5.408597529 | -> | 0.690522855 | 3.526620333  | 0.000420802 | 0.003016677 |
| ENSG00000277301 | 20 | 32509959  | 3250285   | + | AL034550.2 | antisense RNA                      | 96.997621  | 2.441555112 | 5.432269713 | -> | 0.241351771 | 10.1160822   | 4.68E-24    | 3.33E-22    |
| ENSG0000020771  | 6  | 71602128  | 21602383  | + | BOLA2P3    | processed pseudogene               | 14.524391  | 2.445664958 | 5.447766837 | -> | 0.606815526 | 4.030236934  | 5.57E-05    | 0.000496901 |
| ENSG0000028953  | 10 | 128181032 | 128317726 | + | LINC01163  | lincRNA                            | 14.647295  | 2.47904717  | 5.507032862 | -> | 0.616097171 | 5.670406887  | 4.6E-05     | 0.000529593 |
| ENSG0000049859  | 8  | 127794533 | 128101253 | + | PVT1       | lincRNA                            | 134.555232 | 2.480144533 | 5.579532815 | -> | 0.210448977 | 11.78495902  | 4.67E-32    | 4.69E-30    |
| ENSG00000185522 | 11 | 558855    | 560779    | + | LMNTD2     | protein coding                     | 23.31155   | 2.498174982 | 5.649702818 | -> | 0.498924908 | 5.100138722  | 3.39E-07    | 4.64E-06    |
| ENSG00000152953 | 4  | 5051442   | 5500998   | + | STK32B     | protein coding                     | 28.031724  | 2.504147513 | 5.67314010  | -> | 0.448111426 | 5.588225058  | 2.29E-08    | 3.73E-07    |
| ENSG00000259293 | 15 | 58434890  | 58498735  | - | LIPC-AS1   | antisense RNA                      | 39.094055  | 2.509910323 | 5.695846723 | -> | 0.384087877 | 6.53472936   | 6.37E-11    | 1.45E-09    |
| ENSG00000145850 | 5  | 156919282 | 156963255 | - | TIMD4      | protein coding                     | 19.37124   | 2.514115137 | 5.712471797 | -> | 0.549768421 | 4.57304926   | 4.81E-06    | 5.41E-05    |
| ENSG00000132426 | 19 | 8490056   | 8503112   | - | PRAM1      | protein coding                     | 62.471724  | 2.514702336 | 5.714797332 | -> | 0.310376155 | 6.088841734  | 6.22E-16    | 2.38E-14    |
| ENSG00000078589 | X  | 7894532   | 78961954  | + | P2RY10     | protein coding                     | 34.201515  | 2.530261891 | 5.776765337 | -> | 0.405625111 | 6.233927025  | 4.43E-10    | 9.15E-09    |
| ENSG00000166780 | 16 | 15434295  | 15625020  | + | C16orf45   | protein coding                     | 33.679046  | 2.539212733 | 5.81271725  | -> | 0.41667894  | 6.093931059  | 1.10E-09    | 2.13E-08    |
| ENSG00000138944 | 22 | 44243667  | 44312851  | + | KIAA1644   | protein coding                     | 46.37745   | 2.54233553  | 5.82531284  | -> | 0.13050814  | 19.48028316  | 1.61E-84    | 8.11E-82    |
| ENSG00000247774 | 12 | 47203898  | 47216456  | - | LIF        | protein coding                     | 63.979658  | 2.602074884 | 6.071592153 | -> | 0.332738044 | 7.620186764  | 5.28E-15    | 1.86E-13    |
| ENSG00000128342 | 22 | 30240447  | 30246851  | + | PVT1       | lincRNA                            | 7653.0238  | 2.612541504 | 6.11580117  | -> | 0.09267945  | 28.18900513  | 7.98E-175   | 2.15E-171   |
| ENSG00000171011 | 19 | 51176328  | 51175254  | + | SIGLEC17P  | transcribed unprocessed pseudogene | 63.767431  | 2.616118474 | 6.130983295 | -> | 0.313379206 | 6.38492079   | 6.94E-17    | 2.87E-15    |
| ENSG00000262580 | 17 | 80200673  | 80205949  | - | AC087741.1 | antisense RNA                      | 9.8071495  | 2.617793482 | 6.138105668 | -> | 0.769744387 | 3.400666702  | 0.00067174  | 0.004522996 |
| ENSG00000036217 | 17 | 42458844  | 42526111  | + | ATP6V0A1   | protein coding                     | 7.360413   | 2.621466397 | 6.1537524   | -> | 0.873984779 | 2.999441706  | 0.002704749 | 0.015163857 |
| ENSG00000157570 | 11 | 44726465  | 44932421  | + | TSPAN18    | protein coding                     | 255.18509  | 2.627520203 | 6.179628899 | -> | 0.166825409 | 15.75011993  | 6.86E-56    | 1.81E-53    |
| ENSG00000114805 | 3  | 155375580 | 155745067 | - | PLCH1      | protein coding                     | 229.44567  | 2.641984912 | 6.241898561 | -> | 0.171404881 | 15.41370876  | 1.32E-53    | 3.18E-51    |
| ENSG00000203943 | 1  | 84298366  | 84389957  | + | SAMD13     | protein coding                     | 8.8311355  | 2.65411619  | 6.29466049  | -> | 0.804055445 | 3.300911105  | 0.00963711  | 0.006204682 |
| ENSG00000164949 | 8  | 94249753  | 94262350  | + | GEM        | protein coding                     | 254.37314  | 2.656664122 | 6.305733165 | -> | 0.166425211 | 25.119025    | 2.31E-57    | 6.57E-55    |
| ENSG00000099204 | 10 | 114413113 | 114485003 | - | ABL1M1     | protein coding                     | 150.91291  | 2.677760708 | 6.398619633 | -> | 0.218981213 | 12.2226683   | 2.70E-34    | 2.50E-32    |
| ENSG00000112303 | 6  | 132743870 | 132763459 | - | VNO2       | protein coding                     | 8.7053368  | 2.68472317  | 6.438030786 | -> | 0.83082251  | 3.23398351   | 0.001230705 | 0.00761243  |
| ENSG00000181458 | 3  | 100492619 | 10057444  | + | TMEM45A    | protein coding                     | 8.5265191  | 2.68785175  | 6.47702483  | -> | 0.82294594  | 15.770268154 | 4.94E-44    | 1.3E-43     |
| ENSG00000243398 | 1  | 127737326 | 127723791 | + | RN75L141P  | misc RNA                           | 5.1824755  | 2.690672303 | 6.456141966 | -> | 1.05193366  | 2.55783305   | 0.10532596  | 0.047670257 |
| ENSG00000124429 | X  | 85277396  | 85279743  | + | POF1B      | protein coding                     | 32.264564  | 2.706764424 | 6.52858239  | -> | 0.434438366 | 6.290491215  | 4.65E-10    | 9.55E-09    |
| ENSG00000076565 | 11 | 119308529 | 119321521 | - | MCAM       | protein coding                     | 502.56029  | 2.715504303 | 6.568228433 | -> | 0.135123679 | 20.09643553  | 7.93E-90    | 5.04E-87    |
| ENSG00000166095 | 9  | 132725578 | 13287877  | + | AK8        | protein coding                     | 9.0631944  | 2.723480939 | 6.60464633  | -> | 0.807629421 | 3.37219134   | 0.00045726  | 0.004965456 |
| ENSG00000150637 | 18 | 69831158  | 69861803  | - | CD226      | protein coding                     | 344.32532  | 2.750056498 | 6.72434773  | -> | 0.142370704 | 17.31530424  | 3.99E-83    | 1.96E-80    |
| ENSG00000258989 | 16 | 12560756  | 12611044  | + | AC010333.2 | antisense RNA                      | 7.5127269  | 2.757846437 | 6.763858305 | -> | 0.962152524 | 2.866411068  | 0.00451548  | 0.02183605  |
| ENSG00000169398 | 8  | 140657900 | 141002216 | - | PTK2       | protein coding                     | 40.46657   | 2.780051334 | 6.868767893 | -> | 0.389020066 | 6.868767893  | 8.92E-33    | 2.50E-31    |
| ENSG00000088882 | 20 | 2794069   | 2800637   | + | CPXM1      | protein coding                     | 143.32298  | 2.792176742 | 6.926741054 | -> | 0.213128594 | 17.1006164   | 3.25E-39    | 4.66E-37    |
| ENSG00000193679 | 9  | 9793679   | 9794485   | - | HEXA       | protein coding                     | 22.282033  | 2.795272317 | 6.943807976 | -> | 0.519014519 | 5.386066631  | 7.18E-08    | 1.09E-06    |
| ENSG00000221844 | 9  | 11848622  | 12578345  | + | MIR3681HG  | lincRNA                            | 726.23511  | 2.8163752   | 7.069648204 | -> | 0.18914515  | 15.770268154 | 4.94E-44    | 1.3E-43     |
| ENSG00000227333 | 1  | 148159213 | 148255012 | + | AC239809.3 | lincRNA                            | 5.2862441  | 2.825572557 | 7.088882786 | -> | 1.08717058  | 2.898860676  | 0.00935255  | 0.04316184  |
| ENSG00000158296 | 20 | 46557822  | 46648447  | + | SLC13A3    | protein coding                     | 15.230433  | 2.835024875 | 7.135551186 | -> | 0.642881184 | 4.409873778  | 1.03E-05    | 0.000109123 |
| ENSG00000236717 | 9  | 92150382  | 92157445  | + | AL354751.2 | unprocessed pseudogene             | 8.6621496  | 2.8551664   | 7.235869607 | -> | 0.85077545  | 3.185594571  | 0.007090808 | 0.005292326 |
| ENSG00000248596 | 5  | 176143085 | 176185155 | - | AC139491.2 | processed transcript               | 25.094823  | 2.86484278  | 7.28456477  | -> | 0.51869756  | 5.523229925  | 3.33E-08    | 5.29E-07    |
| ENSG00000171388 | X  | 129645259 | 129645937 | + | APLN       | protein coding                     | 1678.771   | 2.870210844 | 7.311720103 | -> | 0.29688928  | 9.667592497  | 4.14E-22    | 2.65E-20    |
| ENSG00000103852 | 15 | 99136323  | 99251223  | + | TTG23      | protein coding                     | 25.033044  | 2.875335564 | 7.337738872 | -> | 0.495802825 | 5.799352927  | 6.66E-09    | 1.16E-07    |
| ENSG00000256582 | 12 | 9740077   | 9709350   | + | LINC02390  | lincRNA                            | 7.4871628  | 2.884246482 | 7.383201214 | -> | 0.930436195 | 3.099866373  | 0.001935949 | 0.011342007 |
| ENSG00000228663 | 1  | 160670778 | 16069761  | + | AL121985.1 | antisense RNA                      | 17.241057  | 2.892893885 | 7.427588475 | -> | 0.609224172 | 4.74810413   | 2.05E-06    | 2.47E-05    |
| ENSG0000018730  | 6  | 9316770   | 90117105  | - | AL117342.1 | processed pseudogene               | 10.565028  | 2.897162864 | 7.448859948 | -> | 0.773445648 | 3.745787271  | 0.000179829 | 0.001435376 |
| ENSG00000188004 | 8  | 133478899 | 133541206 | - | FXR2       | protein coding                     | 52.15634   | 2.9031956   | 7.503530778 | -> | 0.3161554   | 15.770268154 | 3.82E-108   | 3.76E-105   |
| ENSG00000257242 | 12 | 91984976  | 91241934  | + | LINC01619  | processed transcript               | 41.227504  | 2.91994836  | 7.557949274 | -> | 0.39851312  | 7.321319829  | 2.46E-13    | 2.9E-12     |
| ENSG00000099954 | 22 | 17359949  | 17581149  | + | CECR2      | protein coding                     | 96.72714   | 2.961089363 | 7.787117428 | -> | 0.274563801 | 10.78470415  | 4.07E-27    | 3.34E-25    |
| ENSG00000232216 | 14 | 106470264 | 106470800 | - | IGHV3.43   | IG gene                            | 15.59268   | 2.968250326 | 7.825865557 | -> | 0.668836563 | 4.437930173  | 9.08E-06    | 9.70E-05    |
| ENSG00000132694 | 1  | 156934840 | 157045370 | + | ARHGFE11   | protein coding                     | 117.47844  | 2.99450237  | 7.969572675 | -> | 0.245548303 | 12.19516623  | 3.30E-34    | 6.99E-32    |
| ENSG00000137747 | 11 | 117906643 | 117929549 | - | TMPSR513   | protein coding                     | 17.910396  | 3.00474986  | 8.026382224 | -> | 0.606452378 | 4.954643475  | 7.25E-07    | 9.39E-06    |
| ENSG00000107147 | 9  | 135702185 | 135795508 | + | KCNT1      | protein coding                     | 32.654912  | 3.038554172 | 8.216671731 | -> | 0.448869875 | 6.7693406    | 1.29E-11    | 3.21E-10    |
| ENSG00000140373 | X  | 88747225  | 88745785  | + | CPXCR1     | protein coding                     | 5.0926139  | 3.03863112  | 8.217212576 | -> | 1.156017959 | 2.6285342    | 0.008575365 | 0.003131669 |
| ENSG00000231749 | 21 | 36430360  | 36481070  | + | AP000695.1 | antisense RNA                      | 4.8700813  | 3.04782168  | 8.26767808  | -> | 1.146299704 | 2.65853878   | 0.007840033 | 0.03736722  |
| ENSG00000197935 | 6  | 23904785  | 23909216  | - | ZNF311     | protein coding                     | 2.295646   | 3.05380711  | 8.303276327 | -> | 0.9404641   | 3.63315334   | 0.000277837 | 0.002093174 |
| ENSG00000188004 | 1  | 16903667  | 169241698 | - | SELL       | protein coding                     | 78.61534   | 3.06314566  | 8.47155048  | -> | 0.36422556  | 8.40083224   | 4.28E-17    | 1.82E-15    |
| ENSG00000091409 | 2  | 172472354 | 172506282 | + | ITGA6      | protein coding                     | 60.89201   | 3.07172626  | 8.407787864 | -> | 0.266287818 | 8.8007475    | 0           | 0           |
| ENSG00000105366 | 19 | 51450847  | 51458456  | - | SIGLEC8    | protein coding                     | 4.972303   | 3.084692031 | 8.483690743 | -> | 1.141391033 | 2.702572513  | 0.006880517 | 0.033438448 |
| ENSG00000234663 | 2  | 181101932 | 181399559 | + | LINC01934  | lincRNA                            | 42.904235  | 3.086041899 | 8.491632284 | -> | 0.397970847 | 7.54442116   | 8.87E-15    | 3.05E-13    |
| ENSG00000237233 | 10 | 61652369  | 61481956  |   |            |                                    |            |             |             |    |             |              |             |             |



|                 |    |           |           |   |            |                                    |           |             |             |     |             |             |             |             |
|-----------------|----|-----------|-----------|---|------------|------------------------------------|-----------|-------------|-------------|-----|-------------|-------------|-------------|-------------|
| ENSG00000183134 | 11 | 60850940  | 60855971  | - | PTGDR2     | protein coding                     | 249.38117 | 4.398819465 | 21.09485792 | >-2 | 0.223354523 | 19.69433797 | 2.41E-86    | 1.27E-83    |
| ENSG00000100557 | 14 | 57469301  | 57498867  | - | CDC198     | protein coding                     | 2.1226904 | 4.437910623 | 21.67425684 | >-2 | 1.699607997 | 2.61137763  | 0.009024153 | 0.04185123  |
| ENSG00000079215 | 5  | 36606355  | 36688334  | + | SLC1A3     | protein coding                     | 91.363661 | 4.443731153 | 21.76187792 | >-2 | 0.367423802 | 12.0942931  | 1.13E-33    | 1.22E-31    |
| ENSG00000204262 | 2  | 189031896 | 189179879 | - | COL5A2     | protein coding                     | 140.96965 | 4.446932222 | 21.81021705 | >-2 | 0.337316819 | 13.1832508  | 1.10E-39    | 1.60E-37    |
| ENSG00000237600 | 7  | 36463023  | 36506513  | + | AC008960.2 | antisense RNA                      | 2.1960822 | 4.478330768 | 22.29099357 | >-2 | 1.692591113 | 2.645843248 | 0.008148757 | 0.03856957  |
| ENSG00000262326 | 16 | 25071490  | 25072727  | - | AC132552.4 | unprocessed pseudogene             | 4.538201  | 4.502405285 | 22.66517327 | >-2 | 1.431779516 | 3.144621844 | 0.001663016 | 0.009907026 |
| ENSG00000283559 | 5  | 176143450 | 176156989 | - | AC139491.6 | transcribed unprocessed pseudogene | 2.3071858 | 4.554402001 | 23.49697289 | >-2 | 1.663857988 | 2.737256442 | 0.006195432 | 0.030632652 |
| ENSG00000159708 | 16 | 67326798  | 67385203  | + | LRR36      | protein coding                     | 13.301915 | 4.603757066 | 24.31470304 | >-2 | 0.959014239 | 4.800509608 | 1.58E-06    | 1.95E-05    |
| ENSG00000174460 | X  | 118823790 | 118826968 | + | ZCCHC12    | protein coding                     | 5.01379   | 4.660202268 | 25.2848667  | >-2 | 1.428063397 | 3.263302089 | 0.001101221 | 0.006967518 |
| ENSG00000226149 | 6  | 129526626 | 129525287 | - | AL356124.1 | lincRNA                            | 2.5894625 | 4.723476726 | 26.41850139 | >-2 | 1.615308643 | 2.924194547 | 0.003453488 | 0.018673554 |
| ENSG00000181634 | 9  | 114784635 | 114806126 | - | TNFSF15    | protein coding                     | 33.152103 | 4.727825564 | 26.49825707 | >-2 | 0.62813796  | 7.526731172 | 5.20E-14    | 1.66E-12    |
| ENSG00000253958 | 8  | 8701938   | 8704106   | + | CLDN23     | protein coding                     | 2.6561931 | 4.753914335 | 26.98179335 | >-2 | 1.633782338 | 2.909759901 | 0.003617065 | 0.019446112 |
| ENSG00000142973 | 1  | 46757838  | 46819413  | + | CYP4B1     | protein coding                     | 5.478436  | 4.784860251 | 27.56680667 | >-2 | 1.402527858 | 3.411597299 | 0.000645834 | 0.004375837 |
| ENSG00000169508 | 13 | 99294530  | 99307405  | - | GPR183     | protein coding                     | 96.980773 | 4.838209328 | 28.60527539 | >-2 | 0.393172457 | 12.3056528  | 8.45E-35    | 9.87E-33    |
| ENSG00000211820 | 14 | 22320188  | 22320691  | + | TRAV41     | TR V gene                          | 11.021133 | 4.890354478 | 29.65810425 | >-2 | 1.142688892 | 4.279697712 | 1.87E-05    | 0.000186174 |
| ENSG00000218007 | 3  | 46353734  | 46360928  | + | CCR2       | protein coding                     | 37.944929 | 4.892883681 | 29.71014376 | >-2 | 0.643886673 | 7.599218143 | 2.98E-14    | 9.69E-13    |
| ENSG00000179639 | 1  | 159289714 | 159308224 | + | FCER1A     | protein coding                     | 26.584345 | 4.896653531 | 29.78787969 | >-2 | 0.736956551 | 6.64442636  | 3.04E-11    | 7.24E-10    |
| ENSG00000211818 | 14 | 22304054  | 22304553  | + | TRAV39     | TR V gene                          | 2.9740258 | 4.91631763  | 30.19667152 | >-2 | 1.581045971 | 3.109534903 | 0.001873821 | 0.01103206  |
| ENSG00000225963 | 2  | 230121370 | 230174223 | + | AC009950.1 | antisense RNA                      | 3.0027299 | 4.927256776 | 30.42650618 | >-2 | 1.587387428 | 3.104039025 | 0.001909208 | 0.011209853 |
| ENSG00000235192 | 2  | 165794851 | 165810010 | + | AC009495.3 | lincRNA                            | 3.0274043 | 4.938208457 | 30.65835653 | >-2 | 1.602731011 | 3.100812176 | 0.002062227 | 0.011994223 |
| ENSG00000225670 | 1  | 159194325 | 159207973 | - | CADM3-AS1  | antisense RNA                      | 3.1584565 | 5.013063872 | 32.29108187 | >-2 | 1.561478317 | 3.210460125 | 0.001325227 | 0.00818533  |
| ENSG00000237346 | 6  | 14391231  | 14393288  | - | AL080313.2 | lincRNA                            | 3.3607448 | 5.098780408 | 34.26777006 | >-2 | 1.532359795 | 3.325451058 | 0.000882756 | 0.005746824 |
| ENSG00000261208 | 14 | 52286797  | 52289268  | + | AL365475.1 | processed pseudogene               | 36.68195  | 5.130252568 | 35.02352936 | >-2 | 0.670746576 | 7.648570646 | 2.03E-14    | 6.80E-13    |
| ENSG00000179593 | 17 | 8039177   | 8049134   | + | ALOX15B    | protein coding                     | 3.5629684 | 5.189442152 | 36.49032643 | >-2 | 1.551781184 | 3.344184222 | 0.000825249 | 0.005423102 |
| ENSG00000154269 | 6  | 131628442 | 131747418 | + | ENP93      | protein coding                     | 3.7164133 | 5.240472668 | 37.80414884 | >-2 | 1.490470252 | 3.515986087 | 0.000438124 | 0.003123241 |
| ENSG00000172243 | 12 | 10116777  | 10130258  | - | CLEC7A     | protein coding                     | 13.954273 | 5.246297345 | 37.95708629 | >-2 | 1.139598818 | 4.603635298 | 4.15E-06    | 4.73E-05    |
| ENSG0000016490  | 1  | 86468368  | 86500289  | + | CLCA1      | protein coding                     | 14.408144 | 5.377933767 | 41.5833409  | >-2 | 1.132299617 | 4.74959777  | 2.04E-06    | 2.46E-05    |
| ENSG00000249510 | 8  | 94201913  | 94203052  | - | AP003478.1 | processed pseudogene               | 4.2698349 | 5.44467112  | 43.55212236 | >-2 | 1.461792297 | 3.724654066 | 0.000195583 | 0.001545141 |
| ENSG00000259876 | 16 | 12563533  | 12557694  | - | AC010333.1 | antisense RNA                      | 4.2698349 | 5.447819853 | 43.6472802  | >-2 | 1.461958257 | 3.724443704 | 0.000189631 | 0.001504511 |
| ENSG00000168229 | 14 | 52267713  | 52276724  | + | PTGDR      | protein coding                     | 31.592235 | 5.460428931 | 44.03042702 | >-2 | 0.786956191 | 6.302849517 | 3.96E-12    | 1.02E-10    |
| ENSG00000203783 | 14 | 153217584 | 153219317 | + | PRR9       | protein coding                     | 4.4498895 | 5.502691789 | 45.33934955 | >-2 | 1.44695628  | 6.802849676 | 0.000142987 | 0.001167623 |
| ENSG00000181847 | 3  | 114216913 | 114310288 | + | TIGIT      | protein coding                     | 24.450936 | 5.531133488 | 46.24141012 | >-2 | 0.909652103 | 6.080471279 | 1.20E-09    | 2.31E-08    |
| ENSG00000237438 | 22 | 17036570  | 17060825  | + | CECR7      | transcribed unprocessed pseudogene | 9.2879406 | 5.578912186 | 47.79912111 | >-2 | 1.316364061 | 4.23812253  | 2.25E-05    | 0.00022007  |
| ENSG00000117090 | 1  | 160608100 | 160647295 | - | SLAMF1     | protein coding                     | 311.3521  | 5.725503483 | 52.91128252 | >-2 | 0.289959083 | 19.74590148 | 8.70E-87    | 4.86E-84    |
| ENSG00000241229 | 20 | 44007248  | 44007537  | + | RM75L443P  | misc RNA                           | 11.903983 | 5.945334741 | 61.62034015 | >-2 | 1.286072139 | 4.622862559 | 3.78E-06    | 4.94E-05    |
| ENSG00000229646 | 6  | 14597514  | 14596690  | - | AL109914.1 | lincRNA                            | 6.9948847 | 6.157523848 | 71.38375301 | >-2 | 1.359494317 | 4.529275164 | 5.92E-06    | 6.56E-05    |
| ENSG00000226673 | 6  | 14280127  | 14285454  | - | LINC01108  | lincRNA                            | 115.59084 | 6.181338703 | 72.57187817 | >-2 | 0.511880143 | 12.07575404 | 1.42E-33    | 1.50E-31    |
| ENSG00000164530 | 6  | 36948263  | 36948337  | + | PI16       | protein coding                     | 47.013035 | 6.488235137 | 89.7745827  | >-2 | 0.890934336 | 7.28250655  | 3.28E-13    | 9.58E-12    |
| ENSG00000163106 | 4  | 94298535  | 9434876   | - | HPGD5      | protein coding                     | 24.972277 | 7.991525645 | 254.5006702 | >-2 | 1.232404177 | 6.484500614 | 8.90E-11    | 1.99E-09    |

Supplemental Table 24. Biotype classification of the differentially expressed transcripts for the LINC01871-/- RNA-seq analysis

| Order | Major Biotype Class       | Biotype                            | All Transcripts | LINC01871-/- vs Unmod |        |          |
|-------|---------------------------|------------------------------------|-----------------|-----------------------|--------|----------|
|       |                           |                                    |                 | DE?                   | FC ≥ 2 | FC ≤ 0.5 |
| 1     | protein coding            | protein coding                     | 13534           | 914                   | 221    | 693      |
| 2     | protein coding            | IG V gene                          | 9               | 1                     | 1      | 0        |
| 3     | protein coding            | TR V gene                          | 17              | 2                     | 2      | 0        |
| 4     | protein coding            | IG C gene                          | 1               | 0                     | 0      | 0        |
| 5     | protein coding            | TR C gene                          | 4               | 0                     | 0      | 0        |
| 6     | protein coding            | TR J gene                          | 13              | 0                     | 0      | 0        |
| 7     | protein coding            | IG J gene                          | 0               | 0                     | 0      | 0        |
| 8     | long noncoding            | antisense                          | 1794            | 63                    | 30     | 33       |
| 9     | long noncoding            | lincRNA                            | 1485            | 76                    | 27     | 49       |
| 10    | long noncoding            | sense intronic                     | 548             | 16                    | 4      | 12       |
| 11    | long noncoding            | sense overlapping                  | 101             | 6                     | 1      | 5        |
| 12    | long noncoding            | 3prime overlapping ncrna           | 6               | 0                     | 0      | 0        |
| 13    | pseudogene                | processed pseudogene               | 1303            | 18                    | 7      | 11       |
| 14    | pseudogene                | unprocessed pseudogene             | 248             | 13                    | 5      | 8        |
| 15    | pseudogene                | transcribed unprocessed pseudogene | 306             | 13                    | 4      | 9        |
| 16    | pseudogene                | pseudogene                         | 2               | 0                     | 0      | 0        |
| 17    | pseudogene                | transcribed processed pseudogene   | 155             | 2                     | 0      | 2        |
| 18    | pseudogene                | unitary pseudogene                 | 12              | 1                     | 0      | 1        |
| 19    | pseudogene                | polymorphic pseudogene             | 2               | 0                     | 0      | 0        |
| 20    | pseudogene                | IG C pseudogene                    | 1               | 0                     | 0      | 0        |
| 21    | pseudogene                | IG V pseudogene                    | 5               | 0                     | 0      | 0        |
| 22    | pseudogene                | TR V pseudogene                    | 4               | 0                     | 0      | 0        |
| 23    | pseudogene                | translated unprocessed pseudogene  | 0               | 0                     | 0      | 0        |
| 24    | pseudogene                | transcribed unitary pseudogene     | 38              | 3                     | 0      | 3        |
| 25    | short noncoding           | processed transcript               | 239             | 11                    | 4      | 7        |
| 26    | short noncoding           | miRNA                              | 395             | 2                     | 0      | 2        |
| 27    | short noncoding           | misc RNA                           | 355             | 8                     | 5      | 3        |
| 28    | short noncoding           | snoRNA                             | 223             | 0                     | 0      | 0        |
| 29    | short noncoding           | snRNA                              | 270             | 6                     | 2      | 4        |
| 30    | short noncoding           | Mt tRNA                            | 15              | 0                     | 0      | 0        |
| 31    | short noncoding           | rRNA                               | 43              | 0                     | 0      | 0        |
| 32    | short noncoding           | scaRNA                             | 18              | 0                     | 0      | 0        |
| 33    | short noncoding           | Mt rRNA                            | 2               | 0                     | 0      | 0        |
| 34    | To Experimentally Confirm | TEC                                | 388             | 11                    | 5      | 6        |

| Supplemental Table 25. Ingenuity Pathway Analysis (IPA) of the differentially expressed transcript list from the LINC01871/- RNA-seq analysis |               |          |         |                                                                                                                                                                                                                                                                               |
|-----------------------------------------------------------------------------------------------------------------------------------------------|---------------|----------|---------|-------------------------------------------------------------------------------------------------------------------------------------------------------------------------------------------------------------------------------------------------------------------------------|
| Ingenuity Canonical Pathways                                                                                                                  | -log(p-value) | Ratio    | z-score | Molecules                                                                                                                                                                                                                                                                     |
| Cardiac (E)-adrenergic Signaling                                                                                                              | 1.52E+00      | 7.86E-02 | -2.646  | ADCY1, ADCY6, CACNA1A, CACNA1C, CACNA1D, GNB3, GNB4, PKIB, PRKAR2A, RYR2, SLC8A3                                                                                                                                                                                              |
| Nitric Oxide Signaling in the Cardiovascular System                                                                                           | 1.29E+00      | 8.08E-02 | -2.646  | CACNA1A, CACNA1C, CACNA1D, GUCY1A1, PGF, PIK3R6, PRKAR2A, RYR2                                                                                                                                                                                                                |
| eNOS Signaling                                                                                                                                | 3.17E-01      | 4.40E-02 | -2.646  | ADCY1, ADCY6, CHRNA3, GUCY1A1, PGF, PIK3R6, PRKAR2A                                                                                                                                                                                                                           |
| 3-phosphoinositide Biosynthesis                                                                                                               | 8.42E-01      | 6.06E-02 | -2.53   | DUSP16, DUSP2, DUSP23, NUDT11, PDCD1, PIK3R6, PPFIA4, PPM1H, PTPN13, PTPRH                                                                                                                                                                                                    |
| GNRH Signaling                                                                                                                                | 3.54E+00      | 1.04E-01 | -2.496  | ADCY1, ADCY6, CACNA1A, CACNA1C, CACNA1D, CACNA2D4, EGR1, FOS, GNA11, GNB3, HBEGF, MAP3K5, MMP2, NFKB1, PRKAR2A, PTK2, PXN, RASD1                                                                                                                                              |
| Chondroitin Sulfate Biosynthesis                                                                                                              | 1.57E+00      | 1.07E-01 | -2.449  | B3GAT1, CHST15, GAL3ST2, HS3ST3B1, HS6ST2, NDST3                                                                                                                                                                                                                              |
| Dermatan Sulfate Biosynthesis                                                                                                                 | 1.47E+00      | 1.02E-01 | -2.449  | B3GAT1, CHST15, GAL3ST2, HS3ST3B1, HS6ST2, NDST3                                                                                                                                                                                                                              |
| GDNF Family Ligand-Receptor Interactions                                                                                                      | 1.44E+00      | 9.21E-02 | -2.449  | FOS, GAB1, GFRA3, IRS1, PIK3R6, RASD1, RET                                                                                                                                                                                                                                    |
| Heparan Sulfate Biosynthesis                                                                                                                  | 8.96E-01      | 7.23E-02 | -2.449  | B3GAT1, CHST15, GAL3ST2, HS3ST3B1, HS6ST2, NDST3                                                                                                                                                                                                                              |
| Relaxin Signaling                                                                                                                             | 1.69E+00      | 8.05E-02 | -2.333  | ADCY1, ADCY6, FOS, GNA11, GNAO1, GNB3, GNB4, GUCY1A1, MMP9, NFKB1, PIK3R6, PRKAR2A                                                                                                                                                                                            |
| D-myo-inositol (1,4,5,6)-Tetrakisphosphate Biosynthesis                                                                                       | 8.93E-01      | 6.38E-02 | -2.333  | DUSP16, DUSP2, DUSP23, NUDT11, PDCD1, PPFIA4, PPM1H, PTPN13, PTPRH                                                                                                                                                                                                            |
| D-myo-inositol (3,4,5,6)-tetrakisphosphate Biosynthesis                                                                                       | 8.93E-01      | 6.38E-02 | -2.333  | DUSP16, DUSP2, DUSP23, NUDT11, PDCD1, PPFIA4, PPM1H, PTPN13, PTPRH                                                                                                                                                                                                            |
| 3-phosphoinositide Degradation                                                                                                                | 7.21E-01      | 5.81E-02 | -2.333  | DUSP16, DUSP2, DUSP23, NUDT11, PDCD1, PPFIA4, PPM1H, PTPN13, PTPRH                                                                                                                                                                                                            |
| Cardiac Hypertrophy Signaling                                                                                                                 | 2.29E+00      | 7.92E-02 | -2.324  | ADCY1, ADCY6, CACNA1A, CACNA1C, CACNA1D, GNA11, GNAO1, GNB3, GNB4, IRS1, MAP3K5, NFATC4, PIK3R6, PLCH1, PLCL1, PRKAR2A, RASD1, RHOBTB1, RND3                                                                                                                                  |
| Superpathway of Inositol Phosphate Compounds                                                                                                  | 9.32E-01      | 6.06E-02 | -2.309  | DUSP16, DUSP2, DUSP23, ITPKA, NUDT11, PDCD1, PIK3R6, PLCH1, PPFIA4, PPM1H, PTPN13, PTPRH                                                                                                                                                                                      |
| Dermatan Sulfate Biosynthesis (Late Stages)                                                                                                   | 1.40E+00      | 1.09E-01 | -2.236  | CHST15, GAL3ST2, HS3ST3B1, HS6ST2, NDST3                                                                                                                                                                                                                                      |
| Chondroitin Sulfate Biosynthesis (Late Stages)                                                                                                | 1.33E+00      | 1.04E-01 | -2.236  | CHST15, GAL3ST2, HS3ST3B1, HS6ST2, NDST3                                                                                                                                                                                                                                      |
| CDK5 Signaling                                                                                                                                | 8.04E-01      | 6.48E-02 | -2.236  | ADCY1, ADCY6, CACNA1A, EGR1, ITGA6, PRKAR2A, RASD1                                                                                                                                                                                                                            |
| Melanocyte Development and Pigmentation Signaling                                                                                             | 7.19E-01      | 6.38E-02 | -2.236  | ADCY1, ADCY6, KITLG, PIK3R6, PRKAR2A, RASD1                                                                                                                                                                                                                                   |
| Heparan Sulfate Biosynthesis (Late Stages)                                                                                                    | 6.93E-01      | 6.58E-02 | -2.236  | CHST15, GAL3ST2, HS3ST3B1, HS6ST2, NDST3                                                                                                                                                                                                                                      |
| SAPK/JNK Signaling                                                                                                                            | 6.14E-01      | 5.88E-02 | -2.236  | GAB1, GNB3, IRS1, MAP3K5, PIK3R6, RASD1                                                                                                                                                                                                                                       |
| FCε2 Receptor-mediated Phagocytosis in Macrophages and Monocytes                                                                              | 4.62E-01      | 5.32E-02 | -2.236  | ACTG2, CSF2, HMOX1, LYN, PXN                                                                                                                                                                                                                                                  |
| AMPK Signaling                                                                                                                                | 0.00E+00      | 3.77E-02 | -2.236  | AK8, CHRNA3, IRS1, PFKFB2, PFKFB4, PIK3R6, PPM1H, PRKAR2A                                                                                                                                                                                                                     |
| Colorectal Cancer Metastasis Signaling                                                                                                        | 4.74E+00      | 1.03E-01 | -2.132  | ADCY1, ADCY6, FOS, FZD1, FZD8, GNB3, GNB4, IL6ST, LRP6, MMP2, MMP9, MMP25, MMP9, NFKB1, PGF, PIK3R6, PRKAR2A, RASD1, RHOBTB1, RND3, TCF7L1, TLR1, TLR2, TNF, WNT10A, WNT11, WNT7B                                                                                             |
| Synaptogenesis Signaling Pathway                                                                                                              | 1.47E+00      | 6.41E-02 | -2.065  | ADCY1, ADCY6, CDH17, CDH2, CHN1, CPLX1, EFNB3, EPHA3, FARP1, LYN, MAP1B, MARCKS, NRXN3, PIK3R6, PRKAR2A, RASD1, SNCB, STX1A, SYT7, THBS1                                                                                                                                      |
| Oncostatin M Signaling                                                                                                                        | 1.51E+00      | 1.16E-01 | -2      | IL6ST, MT2A, PLAU, RASD1, TIMP3                                                                                                                                                                                                                                               |
| Neurotrophin/Trk Signaling                                                                                                                    | 6.93E-01      | 6.58E-02 | -2      | FOS, GAB1, MAP3K5, PIK3R6, RASD1                                                                                                                                                                                                                                              |
| PDGF Signaling                                                                                                                                | 5.53E-01      | 5.81E-02 | -2      | FOS, PDGFR, PDGFRB, PIK3R6, RASD1                                                                                                                                                                                                                                             |
| Glioma Signaling                                                                                                                              | 3.23E-01      | 4.55E-02 | -2      | CAMK1, PDGFR, PDGFRB, PIK3R6, RASD1                                                                                                                                                                                                                                           |
| Cardiac Hypertrophy Signaling (Enhanced)                                                                                                      | 3.90E+00      | 7.82E-02 | -1.976  | ACE, ADCY1, ADCY6, CACNA1A, CACNA1C, CACNA1D, CLCF1, CSF2, EDA, FZD1, FZD8, GNA11, GNB3, IL17RB, IL1R1L, IL31RA, IL36A, IL6ST, IL7R, LIF, MAP3K5, NFATC4, NFKB1, PIK3R6, PLCH1, PLCL1, PRKAR2A, PTK2, RASD1, RYR2, TGFB3, TNF, TNFSF12, TNFSF15, TNFSF8, WNT10A, WNT11, WNT7B |
| White Adipose Tissue Browning Pathway                                                                                                         | 1.39E+00      | 7.75E-02 | -1.897  | ADCY1, ADCY6, CACNA1A, CACNA1C, CACNA1D, CACNA2D4, CTBP2, FCER1A, GUCY1A1, PRKAR2A                                                                                                                                                                                            |
| D-myo-inositol-5-phosphate Metabolism                                                                                                         | 9.55E-01      | 6.41E-02 | -1.897  | DUSP16, DUSP2, DUSP23, NUDT11, PDCD1, PLCH1, PPFIA4, PPM1H, PTPN13, PTPRH                                                                                                                                                                                                     |
| Dopamine-DARPP32 Feedback in cAMP Signaling                                                                                                   | 8.66E-01      | 6.13E-02 | -1.897  | ADCY1, ADCY6, CACNA1A, CACNA1C, CACNA1D, CAMKK1, GUCY1A1, PLCH1, PLCL1, PRKAR2A                                                                                                                                                                                               |
| IGF-1 Signaling                                                                                                                               | 2.43E+00      | 1.06E-01 | -1.89   | CCN1, FOS, GRB10, IGFBR4, IRS1, PIK3R6, PRKAR2A, PTK2, PXN, RASD1, SFN                                                                                                                                                                                                        |
| PAK Signaling                                                                                                                                 | 1.33E+00      | 8.25E-02 | -1.89   | EPHA3, PDGFR, PDGFRB, PIK3R6, PTK2, PXN, RASD1, TNF                                                                                                                                                                                                                           |
| Mouse Embryonic Stem Cell Pluripotency                                                                                                        | 1.21E+00      | 7.77E-02 | -1.89   | FZD1, FZD8, ID1, IL6ST, LIF, PIK3R6, RASD1, TCF7L1                                                                                                                                                                                                                            |
| Gαs Signaling                                                                                                                                 | 3.34E+00      | 1.21E-01 | -1.732  | ADCY1, ADCY6, ADD2, ADORA2A, GLP1R, GNB3, GNB4, PRKAR2A, PTGDR, RAPGEF4, RYR2, VIPR1, VIPR2                                                                                                                                                                                   |
| Systemic Lupus Erythematosus In B Cell Signaling Pathway                                                                                      | 2.62E+00      | 8.00E-02 | -1.706  | CD79A, CLCF1, CSF2, EDA, FOS, GAB1, IFIT3, IL36A, IL6ST, IRF5, LIF, LYN, NFATC4, NFKB1, PDCD1, PIK3R6, PIM2, RASD1, TNF, TNFSF12, TNFSF15, TNFSF8                                                                                                                             |
| Adrenomedullin signaling pathway                                                                                                              | 2.87E+00      | 9.14E-02 | -1.698  | ADCY1, ADCY6, ADM, FOS, GNA11, GUCY1A1, IL36A, KCNQ3, MMP2, NFKB1, PIK3R6, PLCH1, PLCL1, PRKAR2A, PTK2, RASD1, TFAP2C, TNF                                                                                                                                                    |
| GPCR-Mediated Integration of Endocrine Signaling Exemplified by an L Cell PPARα/RXRα Activation                                               | 1.29E+00      | 6.84E-02 | -1.667  | ABCA1, ADCY1, ADCY6, GNA11, GPD2, IL1R1L, IRS1, NFKB1, PLCH1, PLCL1, PRKAR2A, RASD1, TGFB3                                                                                                                                                                                    |
| GP6 Signaling Pathway                                                                                                                         | 1.24E+00      | 7.56E-02 | -1.667  | COL16A1, COL1A1, COL5A2, COL6A1, COL6A2, COL9A3, LYN, PIK3R6, PTK2                                                                                                                                                                                                            |
| Gαq Signaling                                                                                                                                 | 1.22E+00      | 7.01E-02 | -1.667  | ARHGAP25, AVPR1B, GNA11, GNB3, GNB4, HMOX1, NFATC4, NFKB1, PIK3R6, RHOBTB1, RND3                                                                                                                                                                                              |
| B Cell Receptor Signaling                                                                                                                     | 1.09E+00      | 6.49E-02 | -1.667  | CD79A, EBF1, EGRI, GAB1, LYN, MAP3K5, NFATC4, NFKB1, PAX5, PIK3R6, PTK2, RASD1                                                                                                                                                                                                |
| Production of Nitric Oxide and Reactive Oxygen Species in Macrophages                                                                         | 6.07E-01      | 5.32E-02 | -1.667  | FOS, IRF8, MAP3K5, NCF4, NFKB1, PIK3R6, RHOBTB1, RND3, TLR2, TNF                                                                                                                                                                                                              |
| Basal Cell Carcinoma Signaling                                                                                                                | 2.00E+00      | 1.10E-01 | -1.633  | BMP10, FZD1, FZD8, PTCH1, TCF7L1, WNT10A, WNT11, WNT7B                                                                                                                                                                                                                        |
| VEGF Signaling                                                                                                                                | 9.28E-01      | 7.00E-02 | -1.633  | ACTG2, PGF, PIK3R6, PTK2, PXN, RASD1, SFN                                                                                                                                                                                                                                     |
| HGF Signaling                                                                                                                                 | 7.62E-01      | 6.31E-02 | -1.633  | FOS, GAB1, MAP3K5, PIK3R6, PTK2, PXN, RASD1                                                                                                                                                                                                                                   |
| PD-1, PD-L1 cancer immunotherapy pathway                                                                                                      | 5.67E-01      | 5.66E-02 | -1.633  | CD28, FOXP3, HLA-DQB1, PDCD1, PIK3R6, TNF                                                                                                                                                                                                                                     |



|                                                                              |          |          |        |                                                                                                                             |
|------------------------------------------------------------------------------|----------|----------|--------|-----------------------------------------------------------------------------------------------------------------------------|
| Pancreatic Adenocarcinoma Signaling                                          | 5.35E-01 | 5.50E-02 | -1.633 | HBEGF,HMOX1,MMP9,NFKB1,PGF,PIK3R6                                                                                           |
| GPCR-Mediated Nutrient Sensing in Enteroendocrine Cells                      | 2.19E+00 | 9.82E-02 | -1.508 | ADCY1,ADCY6,CACNA1A,CACNA1C,CACNA1D,CACNA2D4,GNA11,PLCH1,PLCL1,PRKAR2A,RAPGEF4                                              |
| Wnt/Ce $\leq$ -catenin Signaling                                             | 1.91E+00 | 8.09E-02 | -1.508 | CD44,CDH2,FZD1,FZD8,GNAO1,KREMEN2,LRP6,SOX13,TCF7L1,TGFBF3,TLF4,WNT10A,WNT11,WNT7B                                          |
| Role of NFAT in Cardiac Hypertrophy                                          | 2.47E+00 | 8.41E-02 | -1.5   | ADCY1,ADCY6,CACNA1A,CACNA1C,CACNA1D,CACNA2D4,CAMK1,GNB3,GNB4,IL6ST,LIF,NFATC4,PIK3R6,PLCH1,PLCL1,PRKAR2A,RASD1,SLC8A3       |
| Renin-Angiotensin Signaling                                                  | 2.02E+00 | 9.32E-02 | -1.414 | ACE,ADCY1,ADCY6,CCL5,FOS,NFKB1,PIK3R6,PRKAR2A,PTK2,RASD1,TNF                                                                |
| Ovarian Cancer Signaling                                                     | 2.31E+00 | 9.35E-02 | -1.342 | CD44,FZD1,FZD8,MMP2,MMP9,PGF,PIK3R6,PRKAR2A,RASD1,TCF7L1,WNT10A,WNT11,WNT7B                                                 |
| PCP pathway                                                                  | 1.41E+00 | 9.84E-02 | -1.342 | CELSR1,FZD1,FZD8,WNT10A,WNT11,WNT7B                                                                                         |
| ERK5 Signaling                                                               | 1.12E+00 | 8.33E-02 | -1.342 | FOS,GAB1,IL6ST,LIF,RASD1,SFN                                                                                                |
| Role of Wnt/GSK-3Ce $\leq$ Signaling in the Pathogenesis of Influenza        | 9.91E-01 | 7.69E-02 | -1.342 | FZD1,FZD8,TCF7L1,WNT10A,WNT11,WNT7B                                                                                         |
| Somoylation Pathway                                                          | 6.02E-01 | 5.83E-02 | -1.342 | CTBP2,FOS,MAP3K5,NFKB1,RHOBTB1,RND3                                                                                         |
| PTEN Signaling                                                               | 3.80E-01 | 4.76E-02 | -1.342 | MAGI1,NFKB1,PDGFRB,PTK2,RASD1,TGFBF3                                                                                        |
| Insulin Receptor Signaling                                                   | 2.92E-01 | 4.32E-02 | -1.342 | GAB1,GRB10,IRS1,PIK3R6,PRKAR2A,RASD1                                                                                        |
| Actin Cytoskeleton Signaling                                                 | 0.00E+00 | 4.11E-02 | -1.342 | ACTG2,ARHGEF12,CYFIP1,NCKAP1,PDGFR,PIK3R6,PTK2,PNX,RASD1                                                                    |
| Osteoarthritis Pathway                                                       | 1.82E+00 | 7.51E-02 | -1.291 | CASQ1,FZD1,FZD8,H19,IL1RL1,JAG1,MMP9,NFKB1,P2RX7,PGF,PTCH1,RUNX2,TCF7L1,TIMP3,TLR2,TNF                                      |
| Neuroinflammation Signaling Pathway                                          | 9.39E-01 | 5.67E-02 | -1.291 | BACE1,CCL5,FOS,FZD1,HLA-DQB1,HMOX1,MMP9,NFATC4,NFKB1,P2RX7,PIK3R6,PTK2,SLC1A3,TGFBF3,TLR1,TLR2,TNF                          |
| G Beta Gamma Signaling                                                       | 2.35E+00 | 9.84E-02 | -1.265 | ADCY1,CACNA1A,CACNA1C,CACNA1D,CACNA2D4,GNA11,GNAO1,GNB3,GNB4,HBEGF,PRKAR2A,RASD1                                            |
| Phospholipase C Signaling                                                    | 1.18E+00 | 6.23E-02 | -1.265 | ADCY1,ADCY6,ARHGEF11,ARHGEF12,ARHGEF5,CD79A,GNB3,GNB4,HMOX1,LYN,MARCKS,NFATC4,NFKB1,RASD1,RHOBTB1,RND3                      |
| cAMP-mediated signaling                                                      | 1.89E+00 | 7.49E-02 | -1.213 | ADCY1,ADCY6,ADORA1,ADORA2A,CAMK1,CCR4,DUSP9,GLP1R,GNAO1,OPRL1,PKIB,PRKAR2A,PTGDR,RAP1GAP,RAPGEF4,VIPR1,VIPR2                |
| ILK Signaling                                                                | 2.24E+00 | 8.38E-02 | -1.155 | ACTG2,DSP,FLNC,FOS,IRS1,KRT18,LIMS2,MMP9,NFKB1,PGF,PIK3R6,PTK2,PNX,RHOBTB1,RND3,TNF                                         |
| Calcium Signaling                                                            | 1.34E+00 | 6.80E-02 | -1.155 | CACNA1A,CACNA1C,CACNA1D,CACNA2D4,CAMK1,CAMKK1,CASQ1,CHRNA3,NFATC4,PRKAR2A,RYR2,SLC8A3,TPM2,TRPC3                            |
| 14-3-3-mediated Signaling                                                    | 1.10E+00 | 7.09E-02 | -1.134 | FOS,MAP3K5,PIK3R6,PLCH1,PLCL1,RASD1,SFN,TNF,TUBB6                                                                           |
| Death Receptor Signaling                                                     | 1.09E+00 | 7.69E-02 | -1.134 | ACTG2,MAP3K5,NFKB1,TNF,TNFRSF25,TNFSF12,TNFSF15                                                                             |
| Neuropathic Pain Signaling In Dorsal Horn Neurons                            | 9.10E-01 | 6.93E-02 | -1.134 | CAMK1,FOS,KCNQ3,PIK3R6,PLCH1,PLCL1,PRKAR2A                                                                                  |
| RhoA Signaling                                                               | 6.13E-01 | 5.69E-02 | -1.134 | ACTG2,ARHGEF11,ARHGEF12,CDC42EP4,PTK2,RND3,SEPTIN4                                                                          |
| Signaling by Rho Family GTPases                                              | 2.24E+00 | 7.82E-02 | -1.069 | ACTG2,ARHGEF11,ARHGEF12,ARHGEF5,CDC42EP4,CDH17,CDH2,CYFIP1,FOS,GNA11,GNAO1,GNB3,GNB4,NFKB1,PIK3R6,PTK2,RHOBTB1,RND3,SEPTIN4 |
| Role of NANOG in Mammalian Embryonic Stem Cell Pluripotency                  | 2.91E+00 | 1.09E-01 | -1     | BMP10,FZD1,FZD8,GAB1,GATAG,IL6ST,LIF,PIK3R6,RASD1,TCF7L1,WNT10A,WNT11,WNT7B                                                 |
| Netrin Signaling                                                             | 2.88E+00 | 1.38E-01 | -1     | ABLIM1,CACNA1A,CACNA1C,CACNA1D,CACNA2D4,NFATC4,PRKAR2A,RYR2,UNC5C                                                           |
| Inhibition of Matrix Metalloproteases                                        | 2.31E+00 | 1.54E-01 | -1     | HSPG2,MMP2,MMP25,MMP9,SDC1,TIMP3                                                                                            |
| P2Y Purigenic Receptor Signaling Pathway                                     | 1.80E+00 | 8.66E-02 | -1     | ADCY1,ADCY6,FOS,GNB3,GNB4,NFKB1,PIK3R6,PLCH1,PLCL1,PRKAR2A,RASD1                                                            |
| Eicosanoid Signaling                                                         | 1.80E+00 | 1.09E-01 | -1     | ALOX15B,ALOX5,ALOX5AP,HPGDS,PLAAT3,PNPLA3,PTGDR                                                                             |
| Paxillin Signaling                                                           | 1.44E+00 | 8.26E-02 | -1     | ACTG2,ITGA1,ITGA6,ITGAE,ITGAM,PIK3R6,PTK2,PNX,RASD1                                                                         |
| IL-9 Signaling                                                               | 1.34E+00 | 1.21E-01 | -1     | IRS1,NFKB1,PIK3R6,TNF                                                                                                       |
| Acute Myeloid Leukemia Signaling                                             | 1.13E+00 | 7.87E-02 | -1     | JUP,KITLG,NFKB1,PIK3R6,PIM2,RASD1,TCF7L1                                                                                    |
| Aryl Hydrocarbon Receptor Signaling                                          | 8.66E-01 | 6.29E-02 | -1     | ALDH1A2,ALDH1A3,CYP1A1,FOS,GSTM3,GSTM4,NFIA,NFKB1,TNF                                                                       |
| CD27 Signaling in Lymphocytes                                                | 7.62E-01 | 7.55E-02 | -1     | CD27,FOS,MAP3K5,NFKB1                                                                                                       |
| STAT3 Pathway                                                                | 7.14E-01 | 5.93E-02 | -1     | IL17RB,IL1RL1,IL31RA,IL6ST,IL7R,PDGFRB,RASD1,TGFBF3                                                                         |
| fMLP Signaling in Neutrophils                                                | 6.97E-01 | 6.03E-02 | -1     | FPR3,GNB3,GNB4,NFATC4,NFKB1,PIK3R6,RASD1                                                                                    |
| Fc Epsilon RI Signaling                                                      | 6.84E-01 | 5.98E-02 | -1     | CSF2,FCER1A,GAB1,LYN,PIK3R6,RASD1,TNF                                                                                       |
| Chemokine Signaling                                                          | 6.33E-01 | 6.25E-02 | -1     | CAMK1,CCL5,FOS,PTK2,RASD1                                                                                                   |
| Nicotine Degradation II                                                      | 5.54E-01 | 6.15E-02 | -1     | CYP1A1,CYP4B1,FMO5,LARGE2                                                                                                   |
| Type I Diabetes Mellitus Signaling                                           | 5.13E-01 | 5.41E-02 | -1     | CD28,GZMB,HLA-DQB1,MAP3K5,NFKB1,TNF                                                                                         |
| RANK Signaling in Osteoclasts                                                | 3.08E-01 | 4.55E-02 | -1     | FOS,MAP3K5,NFKB1,PIK3R6                                                                                                     |
| NGF Signaling                                                                | 2.95E-01 | 4.39E-02 | -1     | GAB1,MAP3K5,NFKB1,PIK3R6,RASD1                                                                                              |
| mTOR Signaling                                                               | 0.00E+00 | 3.81E-02 | -1     | HMOX1,IRS1,PGF,PIK3R6,PRR5L,RASD1,RHOBTB1,RND3                                                                              |
| IL-8 Signaling                                                               | 1.75E+00 | 7.54E-02 | -0.905 | FOS,GNB3,GNB4,HBEGF,HMOX1,ITGAM,MMP2,MMP9,NFKB1,PGF,PIK3R6,PTK2,RASD1,RHOBTB1,RND3                                          |
| Glioblastoma Multiforme Signaling                                            | 1.72E+00 | 7.88E-02 | -0.905 | FZD1,FZD8,PDGFR,PDGFRB,PIK3R6,PLCH1,PLCL1,RASD1,RHOBTB1,RND3,WNT10A,WNT11,WNT7B                                             |
| Synaptic Long Term Depression                                                | 1.64E+00 | 7.49E-02 | -0.832 | CACNA1A,CACNA1C,CACNA1D,CACNA2D4,GNA11,GNAO1,GUCY1A1,LYN,PLAAT3,PLCH1,PLCL1,PNPLA3,RASD1,RYR2                               |
| Role of Pattern Recognition Receptors in Recognition of Bacteria and Viruses | 2.75E+00 | 9.74E-02 | -0.816 | CCL5,CLEC1,CLEC7A,CSF2,EDA,IL36A,LIF,NFKB1,PIK3R6,TLR1,TLR2,TNF,TNFSF12,TNFSF15,TNFSF8                                      |
| IL-23 Signaling Pathway                                                      | 2.05E+00 | 1.36E-01 | -0.816 | CSF2,FOXO3,IL22,NFKB1,PIK3R6,TNF                                                                                            |
| CREB Signaling in Neurons                                                    | 1.61E+00 | 7.25E-02 | -0.816 | ADCY1,ADCY6,CACNA1A,CACNA1C,CACNA1D,CACNA2D4,GNA11,GNAO1,GNB3,GNB4,PIK3R6,PLCH1,PLCL1,PRKAR2A,RASD1                         |
| VDR/RXR Activation                                                           | 1.38E+00 | 8.97E-02 | -0.816 | CCL5,CSF2,HR,IL1RL1,RUNX2,SERPINB1,WT1                                                                                      |
| Androgen Signaling                                                           | 1.26E+00 | 7.35E-02 | -0.816 | CACNA1A,CACNA1C,CACNA1D,CACNA2D4,GNA11,GNAO1,GNB3,GNB4,NFKB1,PRKAR2A                                                        |
| IL-7 Signaling Pathway                                                       | 9.91E-01 | 7.69E-02 | -0.816 | EBF1,IL7R,LYN,PAX5,PIK3R6,PTK2                                                                                              |
| Acute Phase Response Signaling                                               | 9.17E-01 | 6.15E-02 | -0.816 | CRABP1,FOS,HMOX1,IL36A,IL6ST,MAP3K5,NFKB1,RASD1,SERPINF1,TNF,VWF                                                            |
| p70S6K Signaling                                                             | 7.88E-01 | 6.20E-02 | -0.816 | CD79A,IRS1,LYN,PIK3R6,PLCH1,PLCL1,RASD1,SFN                                                                                 |
| Sirtuin Signaling Pathway                                                    | 0.00E+00 | 2.05E-02 | -0.816 | ABCA1,ATG14,H1-0,NFKB1,TNF,ZIC2                                                                                             |

|                                                   |          |          |        |                                                                                                                                                     |
|---------------------------------------------------|----------|----------|--------|-----------------------------------------------------------------------------------------------------------------------------------------------------|
| Opioid Signaling Pathway                          | 1.80E+00 | 7.20E-02 | -0.775 | ADCY1, ADCY6, CACNA1A, CACNA1C, CACNA1D, CACNA2D4, CAMK1, EGR4, FOS, GNAO1, GNB3, LYN, NFKB1, NPBWR1, OPRL1, PRKAR2A, RASD1, RYR2                   |
| IL-6 Signaling                                    | 1.14E+00 | 7.20E-02 | -0.707 | COL1A1, FOS, IL1RL1, IL36A, IL6ST, NFKB1, PIK3R6, RASD1, TNF                                                                                        |
| ERK/MAPK Signaling                                | 3.99E-01 | 4.66E-02 | -0.707 | DUSP2, DUSP9, FOS, PIK3R6, PRKAR2A, PTK2, PXN, RAPGEF4, RASD1                                                                                       |
| Endothelin-1 Signaling                            | 1.99E+00 | 8.06E-02 | -0.535 | ADCY1, ADCY6, CASQ1, FOS, GAB1, GNA11, GNAO1, GUCY1A1, HMBOX1, PIK3R6, PLAAT3, PLCH1, PLCL1, PNPLA3, RASD1                                          |
| Apelin Liver Signaling Pathway                    | 2.43E+00 | 1.92E-01 | -0.447 | APLN, COL1A1, IRS1, PDGFRB, TNF                                                                                                                     |
| Ephrin B Signaling                                | 1.55E+00 | 9.72E-02 | -0.447 | EFNB3, GNA11, GNAO1, GNB3, GNB4, PTK2, PXN                                                                                                          |
| Type II Diabetes Mellitus Signaling               | 1.48E+00 | 7.75E-02 | -0.447 | ACSL1, CACNA1A, CACNA1C, CACNA1D, CACNA2D4, IRS1, MAP3K5, NFKB1, PIK3R6, SMPD5, TNF                                                                 |
| Agrin Interactions at Neuromuscular Junction      | 9.91E-01 | 7.69E-02 | -0.447 | ACTG2, ITGA1, ITGA6, PTK2, PXN, RASD1                                                                                                               |
| PDF Signaling                                     | 9.14E-01 | 7.32E-02 | -0.447 | ARHGAP22, NFKB1, PIK3R6, RASD1, SERPINF1, TCF7L1                                                                                                    |
| BMP signaling pathway                             | 8.60E-01 | 7.06E-02 | -0.447 | BMP10, NFKB1, NOG, PRKAR2A, RASD1, RUNX2                                                                                                            |
| Synaptic Long Term Potentiation                   | 5.50E-01 | 5.43E-02 | -0.447 | ADCY1, CACNA1C, GNA11, PLCH1, PLCL1, PRKAR2A, RASD1                                                                                                 |
| Th17 Activation Pathway                           | 4.95E-01 | 5.49E-02 | -0.447 | CSF2, FOXP3, IL2, NFATC4, NFKB1                                                                                                                     |
| CD28 Signaling in T Helper Cells                  | 4.28E-01 | 5.00E-02 | -0.447 | CD28, FOS, HLA-DQB1, NFATC4, NFKB1, PIK3R6                                                                                                          |
| HMG B1 Signaling                                  | 2.46E+00 | 9.09E-02 | -0.378 | CLCF1, CSF2, EDA, FOS, IL36A, LIF, NFKB1, PIK3R6, RASD1, RHOB T B1, RND3, TNF, TNFSF12, TNFSF15, TNFSF8                                             |
| Th1 Pathway                                       | 1.92E+00 | 9.02E-02 | -0.378 | CD28, CD8A, CXCR3, HAVCR2, HLA-DQB1, NFATC4, NFKB1, NOTCH3, PIK3R6, PSEN2, TBX21                                                                    |
| PKCCE[ ] Signaling in T Lymphocytes               | 1.57E+00 | 7.74E-02 | -0.378 | CACNA1A, CACNA1C, CACNA1D, CACNA2D4, CD28, FOS, HLA-DQB1, MAP3K5, NFATC4, NFKB1, PIK3R6, RASD1                                                      |
| Ephrin Receptor Signaling                         | 1.16E+00 | 6.67E-02 | -0.378 | EFNB3, EPHA3, GNA11, GNAO1, GNB3, GNB4, PDGFD, PGF, PTK2, PTPN13, PXN, RASD1                                                                        |
| PI3K Signaling in B Lymphocytes                   | 9.36E-01 | 6.52E-02 | -0.378 | CD79A, FOS, IRS1, LYN, NFATC4, NFKB1, PLCH1, PLCL1, RASD1                                                                                           |
| GCE+12/13 Signaling                               | 7.75E-01 | 6.15E-02 | -0.378 | CDH17, CDH2, MAP3K5, NFKB1, PIK3R6, PTK2, PXN, RASD1                                                                                                |
| LXR/RXR Activation                                | 6.36E-01 | 5.79E-02 | -0.378 | ABCA1, IL1RL1, IL36A, MMP9, NFKB1, SERPINF1, TNF                                                                                                    |
| Huntington's Disease Signaling                    | 0.00E+00 | 3.38E-02 | -0.378 | CASQ1, GNA11, GNB3, GNB4, HAP1, HIP1, PIK3R6, STX1A                                                                                                 |
| Integrin Signaling                                | 7.62E-01 | 5.61E-02 | -0.333 | ACTG2, ITGA1, ITGA6, ITGAE, ITGAM, PIK3R6, PTK2, PXN, RASD1, RHOB T B1, RND3, TSPAN2                                                                |
| Role of NFAT in Regulation of the Immune Response | 1.75E+00 | 7.73E-02 | -0.302 | CD28, CD79A, FCER1A, FOS, GNA11, GNAO1, GNB3, GNB4, HLA-DQB1, LYN, NFATC4, NFKB1, PIK3R6, RASD1                                                     |
| HOTAIR Regulatory Pathway                         | 1.19E+00 | 6.92E-02 | -0.302 | CD44, COL1A1, MMP2, MMP25, MMP9, NFKB1, PIK3R6, TCF7L1, WNT10A, WNT11, WNT7B                                                                        |
| Tec Kinase Signaling                              | 3.35E+00 | 1.04E-01 | 0      | ACTG2, FCER1A, FOS, GNA11, GNAO1, GNB3, GNB4, LYN, NFKB1, PIK3R6, PTK2, RHOB T B1, RND3, TNF, TNFRSF25, TNFSF12, TXK                                |
| Th2 Pathway                                       | 3.28E+00 | 1.09E-01 | 0      | CCR4, CD28, HLA-DQB1, IL17RB, IL1RL1, JAG1, NFKB1, NOTCH3, PIK3R6, PSEN2, PTGDR2, TBX21, TGFBR3, TIMD4, TNFRSF4                                     |
| CXCR4 Signaling                                   | 2.82E+00 | 9.58E-02 | 0      | ADCY1, ADCY6, ARHGEF11, EGR1, FOS, GNA11, GNAO1, GNB3, GNB4, LYN, PIK3R6, PTK2, PXN, RASD1, RHOB T B1, RND3                                         |
| Corticotropin Releasing Hormone Signaling         | 1.77E+00 | 8.28E-02 | 0      | ADCY1, ADCY6, CACNA1A, CACNA1C, CACNA1D, CACNA2D4, FOS, GNAO1, GUCY1A1, KRT1, PRKAR2A, PTK2                                                         |
| RhoGDI Signaling                                  | 1.45E+00 | 7.22E-02 | 0      | ACTG2, ARHGEF11, ARHGEF12, ARHGEF5, CD44, CDH17, CDH2, GNA11, GNAO1, GNB3, GNB4, RHOB T B1, RND3                                                    |
| Phospholipases                                    | 1.41E+00 | 9.84E-02 | 0      | HMBOX1, LIPC, PLAAT3, PLCH1, PLCL1, PNPLA3                                                                                                          |
| Dendritic Cell Maturation                         | 1.40E+00 | 7.10E-02 | 0      | CD83, COL1A1, CSF2, FSCN1, HLA-DQB1, IL36A, IRF8, NFKB1, PIK3R6, PLCH1, PLCL1, TLR2, TNF                                                            |
| Wnt/Ca+ pathway                                   | 1.38E+00 | 9.68E-02 | 0      | FZD1, FZD8, NFATC4, NFKB1, PLCH1, PLCL1                                                                                                             |
| Sperm Motility                                    | 1.13E+00 | 6.33E-02 | 0      | DDR1, EPHA3, GUCY1A1, LYN, PDGFRB, PLAAT3, PLCH1, PLCL1, PNPLA3, PRKAR2A, PTK2, RET, STYK1, TXK                                                     |
| Apelin Pancreas Signaling Pathway                 | 9.75E-01 | 9.09E-02 | 0      | APLN, NFKB1, PIK3R6, PRKAR2A                                                                                                                        |
| Cholecystokinin/Gastrin-mediated Signaling        | 9.28E-01 | 6.72E-02 | 0      | FOS, IL36A, PTK2, PXN, RASD1, RHOB T B1, RND3, TNF                                                                                                  |
| FAT10 Cancer Signaling Pathway                    | 9.21E-01 | 8.70E-02 | 0      | HOXB9, NFKB1, TGFBR3, TNF                                                                                                                           |
| Ceramide Signaling                                | 8.12E-01 | 6.82E-02 | 0      | FOS, NFKB1, PIK3R6, RASD1, SMPD5, TNF                                                                                                               |
| Rac Signaling                                     | 7.62E-01 | 6.31E-02 | 0      | CD44, CYFIP1, NCKAP1, NFKB1, PIK3R6, PTK2, RASD1                                                                                                    |
| NF-CE[B] Activation by Viruses                    | 6.06E-01 | 6.10E-02 | 0      | ITGA1, ITGA6, NFKB1, PIK3R6, RASD1                                                                                                                  |
| NF-CE[B] Signaling                                | 4.98E-01 | 5.03E-02 | 0      | IL36A, NFKB1, PDGFRB, PIK3R6, RASD1, TGFBR3, TLR1, TLR2, TNF                                                                                        |
| Aldosterone Signaling in Epithelial Cells         | 4.87E-01 | 5.06E-02 | 0      | DNAJC15, DNAJC18, DNAJC22, HSPA12A, NR3C2, PIK3R6, PLCH1, PLCL1                                                                                     |
| p38 MAPK Signaling                                | 0.00E+00 | 3.39E-02 | 0      | IL1RL1, IL36A, MAP3K5, TNF                                                                                                                          |
| Leukocyte Extravasation Signaling                 | 3.25E+00 | 9.60E-02 | 0.243  | ACTG2, CD44, CLDN23, CLDN7, ITGA1, ITGA6, ITGAM, MMP2, MMP25, MMP9, NCF4, PIK3R6, PTK2, PXN, RAP1GAP, RAPGEF4, THY1, TIMP3, TXK                     |
| T Cell Exhaustion Signaling Pathway               | 1.23E+00 | 6.86E-02 | 0.333  | CD28, FOS, GZMB, HAVCR2, HLA-DQB1, LAG3, NFATC4, PDCD1, PIK3R6, RASD1, TBX21, TGFBR3                                                                |
| TREM1 Signaling                                   | 1.46E+00 | 9.33E-02 | 0.378  | CD83, CSF2, IL1RL1, NFKB1, TLR1, TLR2, TNF                                                                                                          |
| Endocannabinoid Developing Neuron Pathway         | 1.32E+00 | 7.83E-02 | 0.378  | ADCY1, ADCY6, GNAO1, GNB3, PAX6, PIK3R6, PRKAR2A, RAP1GAP, RASD1                                                                                    |
| PPAR Signaling                                    | 1.19E+00 | 7.69E-02 | 0.378  | FOS, IL1RL1, IL36A, NFKB1, PDGFD, PDGFRB, RASD1, TNF                                                                                                |
| Apelin Cardiomyocyte Signaling Pathway            | 6.52E-01 | 6.06E-02 | 0.447  | APLN, GNA11, PIK3R6, PLCH1, PLCL1, SLC8A3                                                                                                           |
| Endocannabinoid Neuronal Synapse Pathway          | 2.18E+00 | 9.38E-02 | 0.577  | ADCY1, ADCY6, CACNA1A, CACNA1C, CACNA1D, CACNA2D4, GNA11, GNAO1, GNB3, PLCH1, PLCL1, PRKAR2A                                                        |
| Glioma Invasiveness Signaling                     | 3.06E+00 | 1.35E-01 | 0.707  | CD44, MMP2, MMP9, PIK3R6, PLAU, PTK2, RASD1, RHOB T B1, RND3, TIMP3                                                                                 |
| Apelin Endothelial Signaling Pathway              | 1.69E+00 | 8.70E-02 | 0.707  | ADCY1, ADCY6, APLN, FOS, GNA11, GNAO1, KLF2, NFKB1, PIK3R6, RASD1                                                                                   |
| GCE+1 Signaling                                   | 1.47E+00 | 8.00E-02 | 0.707  | ADCY1, ADCY6, ADORA1, CCR4, GNB3, GNB4, OPRL1, PRKAR2A, RAP1GAP, RASD1                                                                              |
| Antioxidant Action of Vitamin C                   | 1.13E+00 | 7.48E-02 | 0.707  | CSF2, HMBOX1, NFKB1, PLAAT3, PLCH1, PLCL1, PNPLA3, TNF                                                                                              |
| ICOS-ICOSL Signaling in T Helper Cells            | 5.13E-01 | 5.41E-02 | 0.816  | CD28, HLA-DQB1, NFATC4, NFKB1, PIK3R6, TRAT1                                                                                                        |
| Thrombin Signaling                                | 3.41E+00 | 9.62E-02 | 0.832  | ADCY1, ADCY6, ARHGEF11, ARHGEF12, ARHGEF5, CAMK1, GATA2, GATA6, GNA11, GNAO1, GNB3, GNB4, NFKB1, PIK3R6, PLCH1, PLCL1, PTK2, RASD1, RHOB T B1, RND3 |

|                                                                                                     |          |          |       |                                                                                                                                                                                                                                                          |
|-----------------------------------------------------------------------------------------------------|----------|----------|-------|----------------------------------------------------------------------------------------------------------------------------------------------------------------------------------------------------------------------------------------------------------|
| LPS/IL-1 Mediated Inhibition of RXR Function                                                        | 1.63E+00 | 7.14E-02 | 1     | ABCA1,ACSL1,ALDH1A2,ALDH1A3,CHST15,FMO5,GAL3ST2,GSTM3,GSTM4,HS3ST3B1,HS6ST2,IL1RL1,IL36A,LIPC,NDST3,TNF                                                                                                                                                  |
| Melatonin Signaling                                                                                 | 4.63E-01 | 5.56E-02 | 1     | GNAO1,PLCH1,PLCL1,PRKAR2A                                                                                                                                                                                                                                |
| Sphingosine-1-phosphate Signaling                                                                   | 2.05E+00 | 9.40E-02 | 1.265 | ADCY1,ADCY6,CASQ1,PDGFD,PDGFRB,PIK3R6,PLCH1,PLCL1,PTK2,RHOBTB1,RND3                                                                                                                                                                                      |
| Endocannabinoid Cancer Inhibition Pathway                                                           | 1.15E+00 | 6.99E-02 | 1.265 | ADCY1,ADCY6,CASQ1,GNAO1,MMP2,PGF,PIK3R6,PRKAR2A,PTK2,TCF7L1                                                                                                                                                                                              |
| Protein Kinase A Signaling                                                                          | 2.09E+00 | 6.77E-02 | 1.342 | ADCY1,ADCY6,ADD2,CDC14B,DUSP16,DUSP2,DUSP9,FLNC,GNB3,GNB4,H1-0,KDEL3,NFATC4,NFKB1,PLCH1,PLCL1,PRKAR2A,PTCH1,PTK2,PTPN13,PTPRH,PTPRK,PXN,PYGL,RYR2,SFN,TCF7L1                                                                                             |
| Apelin Adipocyte Signaling Pathway                                                                  | 6.18E-01 | 6.17E-02 | 1.342 | ADCY1,ADCY6,APLN,GNA11,PRKAR2A                                                                                                                                                                                                                           |
| PI3K/AKT Signaling                                                                                  | 3.36E-01 | 4.55E-02 | 2     | GAB1,MAP3K5,NFKB1,RASD1,SFN,THEM4                                                                                                                                                                                                                        |
| Systemic Lupus Erythematosus In T Cell Signaling Pathway                                            | 0.00E+00 | 3.29E-02 | 2.111 | CASQ1,CD28,CD44,FOS,FOXP3,HLA-DQB1,PIK3R6,PTK2,RASD1,RHOBTB1,RND3                                                                                                                                                                                        |
| Axonal Guidance Signaling                                                                           | 4.56E+00 | 8.23E-02 | NaN   | ABLIM1,ACE,ADAMTS14,ADAMTS17,ADAMTS19,ARHGFE11,ARHGFE12,BMP10,EFNB3,EPHA3,FZD1,FZD8,GNA11,GNAO1,GNB3,GNB4,MME,MMP2,MMP25,MMP9,NFATC4,PDGFD,PGF,PIK3R6,PLCH1,PLCL1,PLXNA2,PLXNC1,PRKAR2A,PTCH1,PTK2,PXN,RASD1,SEMA6B,SLIT1,TUBB6,UNC5C,WNT10A,WNT11,WNT7B |
| Th1 and Th2 Activation Pathway                                                                      | 4.04E+00 | 1.10E-01 | NaN   | CCR4,CD28,CD8A,CXCR3,HAVCR2,HLA-DQB1,IL17RB,IL1RL1,JAG1,NFATC4,NFKB1,NOTCH3,PIK3R6,PSEN2,PTGDR2,TBX21,TGFB3,TIMD4,TNFRSF4                                                                                                                                |
| Role of Macrophages, Fibroblasts and Endothelial Cells in Rheumatoid Arthritis                      | 3.62E+00 | 8.65E-02 | NaN   | CCL5,CEBPD,CSF1,CSF2,FOS,FZD1,FZD8,GNAO1,IL1RL1,IL36A,IL6ST,LRP6,NFATC4,NFKB1,PDGFD,PGF,PIK3R6,PLCH1,PLCL1,RASD1,TCF7L1,TLR1,TLR2,TNF,WNT10A,WNT11,WNT7B                                                                                                 |
| Hepatic Fibrosis / Hepatic Stellate Cell Activation                                                 | 3.60E+00 | 1.02E-01 | NaN   | BAMBI,CCL5,COL1A1,COL1A2,COL5A2,COL6A1,COL6A2,COL9A3,CSF1,CXCR3,IGFBP4,IL1RL1,MMP2,MMP9,NFKB1,PDGFD,PDGFRB,PGF,TNF                                                                                                                                       |
| Altered T Cell and B Cell Signaling in Rheumatoid Arthritis                                         | 3.50E+00 | 1.33E-01 | NaN   | CD28,CD79A,CSF1,CSF2,HLA-DQB1,IL22,IL36A,NFKB1,SLAMF1,TLR1,TLR2,TNF                                                                                                                                                                                      |
| Regulation of the Epithelial-Mesenchymal Transition Pathway                                         | 3.39E+00 | 9.84E-02 | NaN   | CDH2,EGR1,FZD1,FZD8,GAB1,JAG1,MMP2,MMP9,NFKB1,NOTCH3,PDGFD,PDGFRB,PIK3R6,PSEN2,RASD1,TCF7L1,WNT10A,WNT11,WNT7B                                                                                                                                           |
| Role of Osteoblasts, Osteoclasts and Chondrocytes in Rheumatoid Arthritis                           | 3.10E+00 | 9.09E-02 | NaN   | BMP10,COL1A1,CSF1,CSF2,FOS,FZD1,FZD8,IL1RL1,IL36A,LRP6,MAP3K5,NFATC4,NFKB1,PIK3R6,RUNX2,TCF7L1,TNF,WNT10A,WNT11,WNT7B                                                                                                                                    |
| Granulocyte Adhesion and Diapedesis                                                                 | 2.92E+00 | 9.50E-02 | NaN   | CCL5,CLDN23,CLDN7,FPR3,IL1RL1,IL36A,ITGA1,ITGA6,ITGAM,MMP2,MMP25,MMP9,SDC1,SELL,THY1,TNF,XCL1                                                                                                                                                            |
| Atherosclerosis Signaling                                                                           | 2.74E+00 | 1.05E-01 | NaN   | ALOX15B,ALOX5,CCR2,COL1A1,CSF1,IL36A,MMP9,NFKB1,PDGFD,PLAAT3,PNPLA3,TNF,TNFSF12                                                                                                                                                                          |
| Airway Pathology in Chronic Obstructive Pulmonary Disease                                           | 2.48E+00 | 3.75E-01 | NaN   | MMP2,MMP9,TNF                                                                                                                                                                                                                                            |
| Thiosulfate Disproportionation III (Rhodanese)                                                      | 2.31E+00 | 6.67E-01 | NaN   | MPST,TST                                                                                                                                                                                                                                                 |
| Communication between Innate and Adaptive Immune Cells                                              | 2.21E+00 | 1.04E-01 | NaN   | CCL5,CD28,CD79A,CD83,CD8A,CSF2,IL36A,TLR1,TLR2,TNF                                                                                                                                                                                                       |
| Molecular Mechanisms of Cancer                                                                      | 2.18E+00 | 6.89E-02 | NaN   | ADCY1,ADCY6,ARHGFE11,ARHGFE12,ARHGFE5,BMP10,FOS,FZD1,FZD8,GAB1,GNA11,GNAO1,IRS1,LRP6,MAP3K5,NFKB1,PIK3R6,PRKAR2A,PSEN2,PTCH1,PTK2,RASD1,RHOBTB1,RND3,WNT10A,WNT11,WNT7B                                                                                  |
| G-Protein Coupled Receptor Signaling                                                                | 2.06E+00 | 7.38E-02 | NaN   | ADCY1,ADCY6,ADORA1,ADORA2A,AVPR1B,CCR4,DUSP9,GLP1R,GNA11,GNAO1,NFKB1,OPRL1,PIK3R6,PRKAR2A,PTGDR,RAP1GAP,RAPGEF4,RASD1,VIPR1,VIPR2                                                                                                                        |
| MSP-RON Signaling Pathway                                                                           | 2.02E+00 | 1.21E-01 | NaN   | ACTG2,CCR2,CSF1,ITGAM,PIK3R6,TLR2,TNF                                                                                                                                                                                                                    |
| Crosstalk between Dendritic Cells and Natural Killer Cells                                          | 1.96E+00 | 1.01E-01 | NaN   | ACTG2,CD226,CD28,CD83,CSF2,FSCN1,KIR2DL4,NFKB1,TNF                                                                                                                                                                                                       |
| Hematopoiesis from Multipotent Stem Cells                                                           | 1.94E+00 | 2.50E-01 | NaN   | CSF1,CSF2,KITLG                                                                                                                                                                                                                                          |
| FCεR2/RIIB Signaling in B Lymphocytes                                                               | 1.93E+00 | 1.07E-01 | NaN   | CACNA1A,CACNA1C,CACNA1D,CACNA2D4,CD79A,LYN,PIK3R6,RASD1                                                                                                                                                                                                  |
| Inhibition of Angiogenesis by TSP1                                                                  | 1.92E+00 | 1.47E-01 | NaN   | GUCY1A1,HSFG2,MMP9,SDC1,THBS1                                                                                                                                                                                                                            |
| IL-1 Signaling                                                                                      | 1.90E+00 | 9.89E-02 | NaN   | ADCY1,ADCY6,FOS,GNA11,GNAO1,GNB3,GNB4,NFKB1,PRKAR2A                                                                                                                                                                                                      |
| Phagosome Formation                                                                                 | 1.85E+00 | 8.80E-02 | NaN   | CLEC7A,FCER1A,ITGAM,MARCKS,PIK3R6,PLCH1,PLCL1,RHOBTB1,RND3,TLR1,TLR2                                                                                                                                                                                     |
| IL-17A Signaling in Gastric Cells                                                                   | 1.74E+00 | 1.60E-01 | NaN   | CCL5,FOS,NFKB1,TNF                                                                                                                                                                                                                                       |
| Notch Signaling                                                                                     | 1.72E+00 | 1.32E-01 | NaN   | DTX1,JAG1,MAML2,NOTCH3,PSEN2                                                                                                                                                                                                                             |
| Cellular Effects of Sildenafil (Viagra)                                                             | 1.71E+00 | 8.40E-02 | NaN   | ACTG2,ADCY1,ADCY6,CACNA1A,CACNA1C,CACNA1D,GUCY1A1,KCNQ3,PLCH1,PLCL1,PRKAR2A                                                                                                                                                                              |
| Hepatic Cholestasis                                                                                 | 1.69E+00 | 7.61E-02 | NaN   | ADCY1,ADCY6,CLCF1,CSF2,EDA,IL1RL1,IL36A,LIF,NFKB1,PRKAR2A,TNF,TNFSF12,TNFSF15,TNFSF8                                                                                                                                                                     |
| Choline Biosynthesis III                                                                            | 1.66E+00 | 2.00E-01 | NaN   | HMOX1,PCYT1B,PHKA1                                                                                                                                                                                                                                       |
| Human Embryonic Stem Cell Pluripotency                                                              | 1.62E+00 | 8.15E-02 | NaN   | BMP10,FZD1,FZD8,NOG,PDGFD,PDGFRB,PIK3R6,TCF7L1,WNT10A,WNT11,WNT7B                                                                                                                                                                                        |
| nNOS Signaling in Skeletal Muscle Cells                                                             | 1.59E+00 | 1.22E-01 | NaN   | CACNA1A,CACNA1C,CACNA1D,CACNA2D4,RYR2                                                                                                                                                                                                                    |
| Germ Cell-Sertoli Cell Junction Signaling                                                           | 1.59E+00 | 7.56E-02 | NaN   | ACTG2,CDH2,ITGA6,JUP,MAP3K5,PIK3R6,PTK2,PXN,RASD1,RHOBTB1,RND3,TNF,TUBB6                                                                                                                                                                                 |
| Role of Tissue Factor in Cancer                                                                     | 1.58E+00 | 8.33E-02 | NaN   | CCN1,CSF1,CSF2,EGR1,GNA11,HBEFG,ITGA6,LYN,PIK3R6,RASD1                                                                                                                                                                                                   |
| T Cell Receptor Signaling                                                                           | 1.53E+00 | 8.57E-02 | NaN   | CD28,CD8A,FOS,NFATC4,NFKB1,PIK3R6,PTPRH,RASD1,TKX                                                                                                                                                                                                        |
| Phosphatidylcholine Biosynthesis I                                                                  | 1.51E+00 | 2.86E-01 | NaN   | PCYT1B,PHKA1                                                                                                                                                                                                                                             |
| Differential Regulation of Cytokine Production in Macrophages and T Helper Cells by IL-17A and IL-1 | 1.45E+00 | 1.67E-01 | NaN   | CCL5,CSF2,TNF                                                                                                                                                                                                                                            |
| Toll-like Receptor Signaling                                                                        | 1.44E+00 | 9.21E-02 | NaN   | FOS,IL1RL1,IL36A,NFKB1,TLR1,TLR2,TNF                                                                                                                                                                                                                     |
| Factors Promoting Cardiogenesis in Vertebrates                                                      | 1.42E+00 | 8.60E-02 | NaN   | BMP10,FZD1,FZD8,LRP6,NOG,TCF7L1,TGFB3,WNT11                                                                                                                                                                                                              |
| CCR5 Signaling in Macrophages                                                                       | 1.40E+00 | 8.51E-02 | NaN   | CACNA1A,CACNA1C,CACNA1D,CACNA2D4,CCL5,FOS,GNB3,GNB4                                                                                                                                                                                                      |
| Thio-molybdenum Cofactor Biosynthesis                                                               | 1.39E+00 | 1.00E+00 | NaN   | MOCOS                                                                                                                                                                                                                                                    |
| Histamine Biosynthesis                                                                              | 1.39E+00 | 1.00E+00 | NaN   | HDC                                                                                                                                                                                                                                                      |
| Oxidative Ethanol Degradation III                                                                   | 1.39E+00 | 1.58E-01 | NaN   | ACSL1,ALDH1A2,ALDH1A3                                                                                                                                                                                                                                    |
| Reelin Signaling in Neurons                                                                         | 1.38E+00 | 8.97E-02 | NaN   | ARHGFE11,ARHGFE12,ARHGFE5,ITGA1,ITGA6,LYN,PIK3R6                                                                                                                                                                                                         |
| α-Adrenergic Signaling                                                                              | 1.38E+00 | 8.42E-02 | NaN   | ADCY1,ADCY6,GNB3,GNB4,PRKAR2A,PYGL,RASD1,SLC8A3                                                                                                                                                                                                          |
| Graft-versus-Host Disease Signaling                                                                 | 1.33E+00 | 1.04E-01 | NaN   | CD28,GZMB,HLA-DQB1,IL36A,TNF                                                                                                                                                                                                                             |



|                                                                                                    |          |          |     |                                                                                                                        |
|----------------------------------------------------------------------------------------------------|----------|----------|-----|------------------------------------------------------------------------------------------------------------------------|
| Hematopoiesis from Pluripotent Stem Cells                                                          | 1.30E+00 | 1.02E-01 | NaN | CD8A,CSF1,CSF2,KITLG,LIF                                                                                               |
| Pathogenesis of Multiple Sclerosis                                                                 | 1.30E+00 | 2.22E-01 | NaN | CCL5,CXCR3                                                                                                             |
| Xenobiotic Metabolism Signaling                                                                    | 1.29E+00 | 6.27E-02 | NaN | ALDH1A2,ALDH1A3,CAMK1,CHST15,CYP1A1,FMO5,GAL3ST2,GSTM3,GSTM4,HMOX1,HS3ST3B1,HS6ST2,MAP3K5,NDST3,NFKB1,PIK3R6,RASD1,TNF |
| Maturity Onset Diabetes of Young (MODY) Signaling                                                  | 1.27E+00 | 1.43E-01 | NaN | CACNA1A,CACNA1C,CACNA1D                                                                                                |
| Agranulocyte Adhesion and Diapedesis                                                               | 1.26E+00 | 6.77E-02 | NaN | ACTG2,CCL5,CLDN23,CLDN7,IL36A,ITGA1,ITGA6,MMP2,MMP25,MMP9,SELL,TNF,XCL1                                                |
| IL-15 Production                                                                                   | 1.21E+00 | 7.44E-02 | NaN | DDR1,EPHA3,LYN,NFKB1,PDGFRB,PTK2,RET,STYK1,TKK                                                                         |
| IL-10 Signaling                                                                                    | 1.19E+00 | 8.70E-02 | NaN | FOS,HMOX1,IL1RL1,IL36A,NFKB1,TNF                                                                                       |
| Differential Regulation of Cytokine Production in Intestinal Epithelial Cells by IL-17A and IL-17F | 1.18E+00 | 1.30E-01 | NaN | CCL5,CSF2,TNF                                                                                                          |
| Ethanol Degradation IV                                                                             | 1.18E+00 | 1.30E-01 | NaN | ACSL1,ALDH1A2,ALDH1A3                                                                                                  |
| Transcriptional Regulatory Network in Embryonic Stem Cells                                         | 1.15E+00 | 9.26E-02 | NaN | FOXC1,GATA6,PAX6,SIX3,TCF7L1                                                                                           |
| IL-15 Signaling                                                                                    | 1.14E+00 | 8.45E-02 | NaN | CSF2,NFKB1,PIK3R6,PTK2,RASD1,TNF                                                                                       |
| Caveolar-mediated Endocytosis Signaling                                                            | 1.10E+00 | 8.22E-02 | NaN | ACTG2,FLNC,ITGA1,ITGA6,ITGAE,ITGAM                                                                                     |
| T Helper Cell Differentiation                                                                      | 1.10E+00 | 8.22E-02 | NaN | CD28,FOXP3,HLA-DQB1,IL6ST,TBX21,TNF                                                                                    |
| Choline Degradation I                                                                              | 1.09E+00 | 5.00E-01 | NaN | CHDH                                                                                                                   |
| L-cysteine Degradation III                                                                         | 1.09E+00 | 5.00E-01 | NaN | MPST                                                                                                                   |
| Sertoli Cell-Sertoli Cell Junction Signaling                                                       | 1.08E+00 | 6.45E-02 | NaN | ACTG2,CLDN23,CLDN7,GUCY1A1,JUP,MAP3K5,MPP6,PRKAR2A,RASD1,TGFBR3,TNF,TUBB6                                              |
| Leptin Signaling in Obesity                                                                        | 1.08E+00 | 8.11E-02 | NaN | ADCY1,ADCY6,PIK3R6,PLCH1,PLCL1,PRKAR2A                                                                                 |
| NRF2-mediated Oxidative Stress Response                                                            | 1.03E+00 | 6.32E-02 | NaN | ACTG2,DNAJA4,DNAJC15,DNAJC18,FOS,GSTM3,GSTM4,HMOX1,MAP3K5,PIK3R6,RASD1,UBE2E3                                          |
| GABA Receptor Signaling                                                                            | 1.02E+00 | 7.37E-02 | NaN | ADCY1,ADCY6,CACNA1A,CACNA1C,CACNA1D,CACNA2D4,KCNQ3                                                                     |
| Epithelial Adherens Junction Signaling                                                             | 9.96E-01 | 6.54E-02 | NaN | ACTG2,CDH2,JUP,LMO7,MAGI1,NOTCH3,RASD1,TCF7L1,TGFBR3,TUBB6                                                             |
| Gustation Pathway                                                                                  | 9.96E-01 | 6.54E-02 | NaN | ADCY1,ADCY6,CACNA1A,CACNA1C,CACNA1D,CACNA2D4,GNB3,P2RX7,P2RY10,PRKAR2A                                                 |
| Glucocorticoid Receptor Signaling                                                                  | 9.91E-01 | 5.65E-02 | NaN | ANXA1,CCL5,CSF2,FOS,KRT1,KRT18,KRT3,KRT4,KRT77,KRT79,NFATC4,NFKB1,NR3C2,PIK3R6,PLAU,RASD1,TNF,TSC22D3,VIPR1            |
| Role of MAPK Signaling in the Pathogenesis of Influenza                                            | 9.91E-01 | 7.69E-02 | NaN | CCL5,MAP3K5,PLAAT3,PNPLA3,RASD1,TNF                                                                                    |
| Adipogenesis pathway                                                                               | 9.91E-01 | 6.72E-02 | NaN | CEBPD,CTBP2,EBF1,EGR2,FZD1,FZD8,NFATC4,NR2F2,TNF                                                                       |
| Gap Junction Signaling                                                                             | 9.32E-01 | 6.06E-02 | NaN | ACTG2,ADCY1,ADCY6,GJB6,GJC1,GUCY1A1,PIK3R6,PLCH1,PLCL1,PRKAR2A,RASD1,TUBB6                                             |
| Diphthamide Biosynthesis                                                                           | 9.28E-01 | 3.33E-01 | NaN | DPH6                                                                                                                   |
| 1,25-dihydroxyvitamin D3 Biosynthesis                                                              | 9.28E-01 | 3.33E-01 | NaN | CYP2R1                                                                                                                 |
| Glycerol-3-phosphate Shuttle                                                                       | 9.28E-01 | 3.33E-01 | NaN | GPD2                                                                                                                   |
| N-acetylglucosamine Degradation I                                                                  | 9.28E-01 | 3.33E-01 | NaN | GNPDA1                                                                                                                 |
| Breast Cancer Regulation by Stathmin1                                                              | 9.07E-01 | 6.00E-02 | NaN | ADCY1,ADCY6,ARHGEF11,ARHGEF12,ARHGEF5,CAMK1,GNB3,GNB4,PIK3R6,PRKAR2A,RASD1,TUBB6                                       |
| TNFR2 Signaling                                                                                    | 9.07E-01 | 1.00E-01 | NaN | FOS,NFKB1,TNF                                                                                                          |
| Sonic Hedgehog Signaling                                                                           | 9.07E-01 | 1.00E-01 | NaN | DYRK1B,PRKAR2A,PTCH1                                                                                                   |
| IL-4 Signaling                                                                                     | 8.60E-01 | 7.06E-02 | NaN | HLA-DQB1,IRS1,NFATC4,NR3C2,PIK3R6,RASD1                                                                                |
| Glutathione-mediated Detoxification                                                                | 8.45E-01 | 9.38E-02 | NaN | GSTM3,GSTM4,HPGDS                                                                                                      |
| Ethanol Degradation II                                                                             | 8.45E-01 | 9.38E-02 | NaN | ACSL1,ALDH1A2,ALDH1A3                                                                                                  |
| Primary Immunodeficiency Signaling                                                                 | 8.27E-01 | 8.00E-02 | NaN | ADA,CD79A,CD8A,IL7R                                                                                                    |
| Histamine Degradation                                                                              | 8.15E-01 | 1.18E-01 | NaN | ALDH1A2,ALDH1A3                                                                                                        |
| Airway Inflammation in Asthma                                                                      | 8.10E-01 | 2.50E-01 | NaN | TNF                                                                                                                    |
| Heme Degradation                                                                                   | 8.10E-01 | 2.50E-01 | NaN | HMOX1                                                                                                                  |
| Spermine and Spermidine Degradation I                                                              | 8.10E-01 | 2.50E-01 | NaN | PAOX                                                                                                                   |
| N-acetylglucosamine Degradation II                                                                 | 8.10E-01 | 2.50E-01 | NaN | GNPDA1                                                                                                                 |
| Acetate Conversion to Acetyl-CoA                                                                   | 8.10E-01 | 2.50E-01 | NaN | ACSL1                                                                                                                  |
| Fatty Acid Cεs-oxidation III (Unsaturated, Odd Number)                                             | 8.10E-01 | 2.50E-01 | NaN | EHHADH                                                                                                                 |
| TWEAK Signaling                                                                                    | 7.62E-01 | 8.57E-02 | NaN | NFKB1,TNFRSF25,TNFSF12                                                                                                 |
| IL-17A Signaling in Fibroblasts                                                                    | 7.62E-01 | 8.57E-02 | NaN | CEBPD,FOS,NFKB1                                                                                                        |
| Phototransduction Pathway                                                                          | 7.62E-01 | 7.55E-02 | NaN | GNB3,GUCY1A1,OPN3,PRKAR2A                                                                                              |
| Role of Cytokines in Mediating Communication between Immune Cells                                  | 7.40E-01 | 7.41E-02 | NaN | CSF2,IL22,IL36A,TNF                                                                                                    |
| HIF1Cε Signaling                                                                                   | 7.35E-01 | 6.19E-02 | NaN | EGLN3,MMP2,MMP25,MMP9,PGF,PIK3R6,RASD1                                                                                 |
| B Cell Development                                                                                 | 7.35E-01 | 8.33E-02 | NaN | CD79A,HLA-DQB1,IL7R                                                                                                    |
| Estrogen-Dependent Breast Cancer Signaling                                                         | 7.24E-01 | 6.76E-02 | NaN | FOS,NFKB1,PIK3R6,RASD1,TERT                                                                                            |
| Protein Citrullination                                                                             | 7.21E-01 | 2.00E-01 | NaN | PADI2                                                                                                                  |
| Citrulline-Nitric Oxide Cycle                                                                      | 7.21E-01 | 2.00E-01 | NaN | ASS1                                                                                                                   |
| Galactose Degradation I (Leloir Pathway)                                                           | 7.21E-01 | 2.00E-01 | NaN | GALM                                                                                                                   |
| FAK Signaling                                                                                      | 7.06E-01 | 6.32E-02 | NaN | ACTG2,PIK3R6,PTK2,PXN,RASD1,TNS1                                                                                       |
| Fatty Acid Cεt-oxidation                                                                           | 7.03E-01 | 1.00E-01 | NaN | ALDH1A2,ALDH1A3                                                                                                        |
| Inflammasome pathway                                                                               | 7.03E-01 | 1.00E-01 | NaN | NFKB1,P2RX7                                                                                                            |
| Iron homeostasis signaling pathway                                                                 | 6.90E-01 | 5.84E-02 | NaN | ABCB10,ATP6VOA1,BMP10,HMOX1,PDGFRB,SLC40A1,SLC46A1,STEAP3                                                              |
| Amotrophic Lateral Sclerosis Signaling                                                             | 6.78E-01 | 6.19E-02 | NaN | CACNA1A,CACNA1C,CACNA1D,PGF,PIK3R6,PRPH                                                                                |
| Antiproliferative Role of Somatostatin Receptor 2                                                  | 6.78E-01 | 6.49E-02 | NaN | GNB3,GNB4,GUCY1A1,PIK3R6,RASD1                                                                                         |
| Bladder Cancer Signaling                                                                           | 6.78E-01 | 6.19E-02 | NaN | MMP2,MMP25,MMP9,PGF,RASD1,THBS1                                                                                        |
| Dopamine Receptor Signaling                                                                        | 6.78E-01 | 6.49E-02 | NaN | ADCY1,ADCY6,PRKAR2A,SLC18A2,SLC6A3                                                                                     |
| Putrescine Degradation III                                                                         | 6.72E-01 | 9.52E-02 | NaN | ALDH1A2,ALDH1A3                                                                                                        |
| April Mediated Signaling                                                                           | 6.66E-01 | 7.69E-02 | NaN | FOS,NFATC4,NFKB1                                                                                                       |
| Arginine Biosynthesis IV                                                                           | 6.52E-01 | 1.67E-01 | NaN | ASS1                                                                                                                   |
| Urea Cycle                                                                                         | 6.52E-01 | 1.67E-01 | NaN | ASS1                                                                                                                   |
| Ceramide Biosynthesis                                                                              | 6.52E-01 | 1.67E-01 | NaN | DEGS2                                                                                                                  |
| Glycerol Degradation I                                                                             | 6.52E-01 | 1.67E-01 | NaN | GPD2                                                                                                                   |
| Adenine and Adenosine Salvage III                                                                  | 6.52E-01 | 1.67E-01 | NaN | ADA                                                                                                                    |
| Glycogen Biosynthesis II (from UDP-D-Glucose)                                                      | 6.52E-01 | 1.67E-01 | NaN | GYG2                                                                                                                   |
| Lactose Degradation III                                                                            | 6.52E-01 | 1.67E-01 | NaN | LCT                                                                                                                    |
| Tryptophan Degradation III (Eukaryotic)                                                            | 6.40E-01 | 9.09E-02 | NaN | AFMID,EHHADH                                                                                                           |
| Semaphorin Signaling in Neurons                                                                    | 6.33E-01 | 6.67E-02 | NaN | ARHGEF12,PTK2,RHOBTB1,RND3                                                                                             |

|                                                                          |          |          |     |                                                                  |
|--------------------------------------------------------------------------|----------|----------|-----|------------------------------------------------------------------|
| Renal Cell Carcinoma Signaling                                           | 6.33E-01 | 6.25E-02 | NaN | EGLN3,FOS,GAB1,PIK3R6,RASD1                                      |
| B Cell Activating Factor Signaling                                       | 6.23E-01 | 7.32E-02 | NaN | FOS,NFATC4,NFKB1                                                 |
| Superpathway of D-myo-inositol (1,4,5)-trisphosphate Metabolism          | 6.13E-01 | 8.70E-02 | NaN | INPP1,ITPKA                                                      |
| LPS-stimulated MAPK Signaling                                            | 6.06E-01 | 6.10E-02 | NaN | FOS,MAP3K5,NFKB1,PIK3R6,RASD1                                    |
| Tryptophan Degradation to 2-amino-3-carboxymuconate Semialdehyde         | 5.93E-01 | 1.43E-01 | NaN | AFMID                                                            |
| Purine Ribonucleosides Degradation to Ribose-1-phosphate                 | 5.93E-01 | 1.43E-01 | NaN | ADA                                                              |
| Glycoaminoglycan-protein Linkage Region Biosynthesis                     | 5.93E-01 | 1.43E-01 | NaN | B3GAT1                                                           |
| Role of Hypercytokinemia/hyperchemokine in the Pathogenesis of Influenza | 5.85E-01 | 6.98E-02 | NaN | CCL5,IL36A,TNF                                                   |
| Tumoricidal Function of Hepatic Natural Killer Cells                     | 5.85E-01 | 8.33E-02 | NaN | GZMB,SERPINF9                                                    |
| Serotonin Receptor Signaling                                             | 5.85E-01 | 6.98E-02 | NaN | ADCY1,ADCY6,SLC18A2                                              |
| Bupropion Degradation                                                    | 5.61E-01 | 8.00E-02 | NaN | CYP1A1,CYP4B1                                                    |
| Tryptophan Degradation X (Mammalian, via Tryptamine)                     | 5.61E-01 | 8.00E-02 | NaN | ALDH1A2,ALDH1A3                                                  |
| RAR Activation                                                           | 5.56E-01 | 5.15E-02 | NaN | ADCY1,ADCY6,ALDH1A2,ALDH1A3,CRABP1,FOS,MAP3K5,NFKB1,NRF2,PRKAR2A |
| Virus Entry via Endocytic Pathways                                       | 5.56E-01 | 5.61E-02 | NaN | ACTG2,FLNC,ITGA1,ITGA6,PIK3R6,RASD1                              |
| Histidine Degradation III                                                | 5.44E-01 | 1.25E-01 | NaN | FTCD                                                             |
| Salvage Pathways of Pyrimidine Deoxyribonucleotides                      | 5.44E-01 | 1.25E-01 | NaN | TK1                                                              |
| Sphingomyelin Metabolism                                                 | 5.44E-01 | 1.25E-01 | NaN | SMPD5                                                            |
| Regulation of IL-2 Expression in Activated and Anergic T Lymphocytes     | 5.17E-01 | 5.62E-02 | NaN | CD28,FOS,NFATC4,NFKB1,RASD1                                      |
| Ephrin A Signaling                                                       | 5.16E-01 | 6.38E-02 | NaN | EPHA3,PIK3R6,PTK2                                                |
| Prostanoid Biosynthesis                                                  | 5.02E-01 | 1.11E-01 | NaN | HPGDS                                                            |
| Sucrose Degradation V (Mammalian)                                        | 5.02E-01 | 1.11E-01 | NaN | GALM                                                             |
| UDP-N-acetyl-D-galactosamine Biosynthesis II                             | 5.02E-01 | 1.11E-01 | NaN | GNPDA1                                                           |
| Role of JAK1 and JAK3 in $\text{C}\epsilon\text{c}$ Cytokine Signaling   | 5.00E-01 | 5.80E-02 | NaN | IL7R,IRS1,PIK3R6,RASD1                                           |
| SPINK1 General Cancer Pathway                                            | 5.00E-01 | 5.80E-02 | NaN | MT1F,MT2A,PIK3R6,RASD1                                           |
| GM-CSF Signaling                                                         | 4.88E-01 | 5.71E-02 | NaN | CSF2,LYN,PIK3R6,RASD1                                            |
| Autoimmune Thyroid Disease Signaling                                     | 4.84E-01 | 6.12E-02 | NaN | CD28,GZMB,HLA-DQB1                                               |
| Role of p14/p19ARF in Tumor Suppression                                  | 4.74E-01 | 6.90E-02 | NaN | NPM2,PIK3R6                                                      |
| TNFR1 Signaling                                                          | 4.70E-01 | 6.00E-02 | NaN | FOS,NFKB1,TNF                                                    |
| Thyroid Cancer Signaling                                                 | 4.55E-01 | 5.88E-02 | NaN | RASD1,RET,TCF7L1                                                 |
| Amyloid Processing                                                       | 4.55E-01 | 5.88E-02 | NaN | BACE1,PRKAR2A,PSEN2                                              |
| Dopamine Degradation                                                     | 4.53E-01 | 6.67E-02 | NaN | ALDH1A2,ALDH1A3                                                  |
| Acetone Degradation I (to Methylglyoxal)                                 | 4.53E-01 | 6.67E-02 | NaN | CYP1A1,CYP4B1                                                    |
| Triacylglycerol Degradation                                              | 4.41E-01 | 5.77E-02 | NaN | LIPC,NDST3,PNPLA3                                                |
| Natural Killer Cell Signaling                                            | 4.37E-01 | 5.04E-02 | NaN | KIR2DL4,KLRB1,NCR2,PIK3R6,RASD1,SH2D1A                           |
| G Protein Signaling Mediated by Tubby                                    | 4.35E-01 | 6.45E-02 | NaN | GNB3,GNB4                                                        |
| Purine Nucleotides De Novo Biosynthesis II                               | 4.32E-01 | 9.09E-02 | NaN | ADSS1                                                            |
| Angiotensin Signaling                                                    | 4.28E-01 | 5.33E-02 | NaN | NFKB1,PIK3R6,PTK2,RASD1                                          |
| p53 Signaling                                                            | 4.23E-01 | 5.10E-02 | NaN | ADGRB1,PIK3R6,SFN,THBS1,WT1                                      |
| UVA-induced MAPK Signaling                                               | 4.23E-01 | 5.10E-02 | NaN | FOS,PIK3R6,PLCH1,PLCL1,RASD1                                     |
| Erythropoietin Signaling                                                 | 4.18E-01 | 5.26E-02 | NaN | FOS,NFKB1,PIK3R6,RASD1                                           |
| 4-1BB Signaling in T Lymphocytes                                         | 4.18E-01 | 6.25E-02 | NaN | MAP3K5,NFKB1                                                     |
| Fatty Acid $\text{C}\epsilon\text{s}$ -oxidation I                       | 4.18E-01 | 6.25E-02 | NaN | ACSL1,EHHADH                                                     |
| Macropinocytosis Signaling                                               | 4.18E-01 | 5.26E-02 | NaN | CSF1,PDGFD,PIK3R6,RASD1                                          |
| Role of IL-17A in Arthritis                                              | 4.15E-01 | 5.56E-02 | NaN | CCL5,NFKB1,PIK3R6                                                |
| Circadian Rhythm Signaling                                               | 4.02E-01 | 6.06E-02 | NaN | ADCYAP1,VIPR2                                                    |
| Glycogen Degradation II                                                  | 4.02E-01 | 8.33E-02 | NaN | PYGL                                                             |
| Clathrin-mediated Endocytosis Signaling                                  | 3.99E-01 | 4.66E-02 | NaN | ACTG2,DAB2,HIP1,MYO6,PDGFD,PGF,PIK3R6,SNX9,STON2                 |
| Nicotine Degradation III                                                 | 3.90E-01 | 5.36E-02 | NaN | CYP1A1,CYP4B1,LARGE2                                             |
| Retinoate Biosynthesis I                                                 | 3.86E-01 | 5.88E-02 | NaN | ALDH1A2,ALDH1A3                                                  |
| JAK/Stat Signaling                                                       | 3.78E-01 | 5.00E-02 | NaN | FOS,NFKB1,PIK3R6,RASD1                                           |
| Fatty Acid Activation                                                    | 3.76E-01 | 7.69E-02 | NaN | ACSL1                                                            |
| Acyl-CoA Hydrolysis                                                      | 3.76E-01 | 7.69E-02 | NaN | THEM4                                                            |
| Leukotriene Biosynthesis                                                 | 3.76E-01 | 7.69E-02 | NaN | ALOX5                                                            |
| Pregnenolone Biosynthesis                                                | 3.76E-01 | 7.69E-02 | NaN | MICAL2                                                           |
| Coagulation System                                                       | 3.72E-01 | 5.71E-02 | NaN | PLAU,VWF                                                         |
| Noradrenaline and Adrenaline Degradation                                 | 3.72E-01 | 5.71E-02 | NaN | ALDH1A2,ALDH1A3                                                  |
| Prolactin Signaling                                                      | 3.68E-01 | 4.94E-02 | NaN | FOS,IRS1,PIK3R6,RASD1                                            |
| Cancer Drug Resistance By Drug Efflux                                    | 3.68E-01 | 5.17E-02 | NaN | ABCG2,NFKB1,RASD1                                                |
| NAD biosynthesis II (from tryptophan)                                    | 3.52E-01 | 7.14E-02 | NaN | AFMID                                                            |
| Glutaryl-CoA Degradation                                                 | 3.52E-01 | 7.14E-02 | NaN | EHHADH                                                           |
| Isoleucine Degradation I                                                 | 3.52E-01 | 7.14E-02 | NaN | EHHADH                                                           |
| Glycogen Degradation III                                                 | 3.52E-01 | 7.14E-02 | NaN | PYGL                                                             |
| CNTF Signaling                                                           | 3.46E-01 | 5.00E-02 | NaN | IL6ST,PIK3R6,RASD1                                               |
| Melatonin Degradation I                                                  | 3.46E-01 | 5.00E-02 | NaN | CYP1A1,CYP4B1,LARGE2                                             |
| HER-2 Signaling in Breast Cancer                                         | 3.41E-01 | 4.76E-02 | NaN | MAP3K5,MMP2,PIK3R6,RASD1                                         |
| VEGF Family Ligand-Receptor Interactions                                 | 3.41E-01 | 4.76E-02 | NaN | FOS,PGF,PIK3R6,RASD1                                             |
| IL-12 Signaling and Production in Macrophages                            | 3.36E-01 | 4.55E-02 | NaN | FOS,IRF8,NFKB1,PIK3R6,TLR2,TNF                                   |
| Induction of Apoptosis by HIV1                                           | 3.35E-01 | 4.92E-02 | NaN | MAP3K5,NFKB1,TNF                                                 |
| IL-2 Signaling                                                           | 3.35E-01 | 4.92E-02 | NaN | FOS,PIK3R6,RASD1                                                 |
| Docosahexaenoic Acid (DHA) Signaling                                     | 3.31E-01 | 5.26E-02 | NaN | PIK3R6,SERPINF1                                                  |
| Superpathway of Citrulline Metabolism                                    | 3.30E-01 | 6.67E-02 | NaN | ASS1                                                             |
| Adenosine Nucleotides Degradation II                                     | 3.30E-01 | 6.67E-02 | NaN | ADA                                                              |
| Histidine Degradation VI                                                 | 3.30E-01 | 6.67E-02 | NaN | MICAL2                                                           |
| Allograft Rejection Signaling                                            | 3.24E-01 | 4.65E-02 | NaN | CD28,GZMB,HLA-DQB1,TNF                                           |
| Systemic Lupus Erythematosus Signaling                                   | 3.23E-01 | 4.35E-02 | NaN | CD28,CD79A,FOS,IL36A,LYN,NFATC4,PIK3R6,PIM2,RASD1,TNF            |
| Thrombopoietin Signaling                                                 | 3.16E-01 | 4.76E-02 | NaN | FOS,PIK3R6,RASD1                                                 |
| Granzyme B Signaling                                                     | 3.10E-01 | 6.25E-02 | NaN | GZMB                                                             |
| Role of PI3K/AKT Signaling in the Pathogenesis of Influenza              | 3.06E-01 | 4.69E-02 | NaN | CCL5,NFKB1,PIK3R6                                                |
| CTLA4 Signaling in Cytotoxic T Lymphocytes                               | 3.00E-01 | 4.49E-02 | NaN | CD28,CD8A,PIK3R6,TRAT1                                           |
| CD40 Signaling                                                           | 2.98E-01 | 4.62E-02 | NaN | FOS,NFKB1,PIK3R6                                                 |
| Myc Mediated Apoptosis Signaling                                         | 2.98E-01 | 4.62E-02 | NaN | PIK3R6,RASD1,SFN                                                 |
| Superpathway of Melatonin Degradation                                    | 2.98E-01 | 4.62E-02 | NaN | CYP1A1,CYP4B1,LARGE2                                             |

|                                                                    |          |          |     |                                          |
|--------------------------------------------------------------------|----------|----------|-----|------------------------------------------|
| Role of PKR in Interferon Induction and Antiviral Response         | 2.95E-01 | 4.88E-02 | NaN | NFKB1,TNF                                |
| Estrogen Biosynthesis                                              | 2.95E-01 | 4.88E-02 | NaN | CYP11A1,CYP4B1                           |
| Triacylglycerol Biosynthesis                                       | 2.95E-01 | 4.88E-02 | NaN | PLPP3,PNPLA3                             |
| Ubiquinol-10 Biosynthesis (Eukaryotic)                             | 2.92E-01 | 5.88E-02 | NaN | MICAL2                                   |
| CE2-linolenate Biosynthesis II (Animals)                           | 2.92E-01 | 5.88E-02 | NaN | ACSL1                                    |
| Mitochondrial L-carnitine Shuttle Pathway                          | 2.92E-01 | 5.88E-02 | NaN | ACSL1                                    |
| D-myo-inositol (1,4,5)-trisphosphate Degradation                   | 2.92E-01 | 5.88E-02 | NaN | INPP1                                    |
| Regulation of Cellular Mechanics by Calpain Protease               | 2.89E-01 | 4.55E-02 | NaN | PTK2,PXN,RASD1                           |
| MIF Regulation of Innate Immunity                                  | 2.84E-01 | 4.76E-02 | NaN | FOS,NFKB1                                |
| Retinol Biosynthesis                                               | 2.84E-01 | 4.76E-02 | NaN | LIPC,PNPLA3                              |
| Neuroprotective Role of THOP1 in Alzheimer's Disease               | 2.82E-01 | 4.31E-02 | NaN | ACE,GZMB,MME,MMP9,PRKAR2A                |
| Serotonin Degradation                                              | 2.81E-01 | 4.48E-02 | NaN | ALDH1A2,ALDH1A3,LARGE2                   |
| 1D-myo-inositol Hexakisphosphate Biosynthesis II (Mammalian)       | 2.75E-01 | 5.56E-02 | NaN | ITPKA                                    |
| Valine Degradation I                                               | 2.75E-01 | 5.56E-02 | NaN | EHHADH                                   |
| Purine Nucleotides Degradation II (Aerobic)                        | 2.75E-01 | 5.56E-02 | NaN | ADA                                      |
| D-myo-inositol (1,3,4)-trisphosphate Biosynthesis                  | 2.75E-01 | 5.56E-02 | NaN | ITPKA                                    |
| FAT10 Signaling Pathway                                            | 2.75E-01 | 5.56E-02 | NaN | TNF                                      |
| ErbB4 Signaling                                                    | 2.72E-01 | 4.41E-02 | NaN | PIK3R6,PSEN2,RASD1                       |
| Tight Junction Signaling                                           | 2.67E-01 | 4.17E-02 | NaN | ACTG2,CLDN23,CLDN7,FOS,NFKB1,PRKAR2A,TNF |
| ErbB Signaling                                                     | 2.64E-01 | 4.26E-02 | NaN | FOS,HBEGF,PIK3R6,RASD1                   |
| DNA damage-induced 14-3-3 $\sigma$ Signaling                       | 2.60E-01 | 5.26E-02 | NaN | SFN                                      |
| Apelin Muscle Signaling Pathway                                    | 2.60E-01 | 5.26E-02 | NaN | APLN                                     |
| Role of IL-17F in Allergic Inflammatory Airway Diseases            | 2.53E-01 | 4.44E-02 | NaN | CSF2,NFKB1                               |
| iNOS Signaling                                                     | 2.53E-01 | 4.44E-02 | NaN | FOS,NFKB1                                |
| Stearate Biosynthesis I (Animals)                                  | 2.53E-01 | 4.44E-02 | NaN | ACSL1,THEM4                              |
| Growth Hormone Signaling                                           | 2.49E-01 | 4.23E-02 | NaN | FOS,IRS1,PIK3R6                          |
| Small Cell Lung Cancer Signaling                                   | 2.49E-01 | 4.23E-02 | NaN | NFKB1,PIK3R6,PTK2                        |
| Cardiomyocyte Differentiation via BMP Receptors                    | 2.45E-01 | 5.00E-02 | NaN | BMP10                                    |
| Granzyme A Signaling                                               | 2.45E-01 | 5.00E-02 | NaN | HL1-0                                    |
| CDP-diacylglycerol Biosynthesis I                                  | 2.45E-01 | 5.00E-02 | NaN | PNPLA3                                   |
| PFKFB4 Signaling Pathway                                           | 2.44E-01 | 4.35E-02 | NaN | PFKFB4,PRKAR2A                           |
| Actin Nucleation by ARP-WASP Complex                               | 2.42E-01 | 4.17E-02 | NaN | RASD1,RHOBTB1,RND3                       |
| Endoplasmic Reticulum Stress Pathway                               | 2.32E-01 | 4.76E-02 | NaN | MAP3K5                                   |
| Pyrimidine Deoxyribonucleotides De Novo Biosynthesis I             | 2.20E-01 | 4.55E-02 | NaN | AK8                                      |
| Phosphatidylglycerol Biosynthesis II (Non-plastidic)               | 2.20E-01 | 4.55E-02 | NaN | PNPLA3                                   |
| Apelin Cardiac Fibroblast Signaling Pathway                        | 2.08E-01 | 4.35E-02 | NaN | APLN                                     |
| IL-22 Signaling                                                    | 1.97E-01 | 4.17E-02 | NaN | IL22                                     |
| Role of JAK1, JAK2 and TYK2 in Interferon Signaling                | 1.97E-01 | 4.17E-02 | NaN | NFKB1                                    |
| Neuregulin Signaling                                               | 0.00E+00 | 2.08E-02 | NaN | HBEGF,RASD1                              |
| Mitochondrial Dysfunction                                          | 0.00E+00 | 1.75E-02 | NaN | BACE1,GPD2,PSEN2                         |
| FXR/RXR Activation                                                 | 0.00E+00 | 3.97E-02 | NaN | IL36A,LIPC,SDC1,SERPINF1,TNF             |
| PXR/RXR Activation                                                 | 0.00E+00 | 3.08E-02 | NaN | PRKAR2A,TNF                              |
| TR/RXR Activation                                                  | 0.00E+00 | 2.38E-02 | NaN | PIK3R6,SLC16A2                           |
| Regulation of Actin-based Motility by Rho                          | 0.00E+00 | 3.19E-02 | NaN | ACTG2,RHOBTB1,RND3                       |
| Activation of IRF by Cytosolic Pattern Recognition Receptors       | 0.00E+00 | 3.17E-02 | NaN | NFKB1,TNF                                |
| Role of RIG1-like Receptors in Antiviral Innate Immunity           | 0.00E+00 | 2.27E-02 | NaN | NFKB1                                    |
| Calcium-induced T Lymphocyte Apoptosis                             | 0.00E+00 | 1.52E-02 | NaN | HLA-DQB1                                 |
| Cytotoxic T Lymphocyte-mediated Apoptosis of Target Cells          | 0.00E+00 | 2.94E-02 | NaN | GZMB                                     |
| IL-3 Signaling                                                     | 0.00E+00 | 3.80E-02 | NaN | FOS,PIK3R6,RASD1                         |
| Lymphotoxin CE5 Receptor Signaling                                 | 0.00E+00 | 3.77E-02 | NaN | NFKB1,PIK3R6                             |
| IL-17 Signaling                                                    | 0.00E+00 | 3.75E-02 | NaN | NFKB1,PIK3R6,RASD1                       |
| CCR3 Signaling in Eosinophils                                      | 0.00E+00 | 3.23E-02 | NaN | GNB3,GNB4,PIK3R6,RASD1                   |
| Mechanisms of Viral Exit from Host Cells                           | 0.00E+00 | 2.44E-02 | NaN | ACTG2                                    |
| Cell Cycle Regulation by BTG Family Proteins                       | 0.00E+00 | 2.70E-02 | NaN | HOXB9                                    |
| Mitotic Roles of Polo-Like Kinase                                  | 0.00E+00 | 1.52E-02 | NaN | PLK2                                     |
| FLT3 Signaling in Hematopoietic Progenitor Cells                   | 0.00E+00 | 2.41E-02 | NaN | PIK3R6,RASD1                             |
| Role of Oct4 in Mammalian Embryonic Stem Cell Pluripotency         | 0.00E+00 | 2.17E-02 | NaN | NR2F2                                    |
| Melanoma Signaling                                                 | 0.00E+00 | 4.00E-02 | NaN | PIK3R6,RASD1                             |
| Prostate Cancer Signaling                                          | 0.00E+00 | 3.30E-02 | NaN | NFKB1,PIK3R6,RASD1                       |
| Endometrial Cancer Signaling                                       | 0.00E+00 | 3.33E-02 | NaN | PIK3R6,RASD1                             |
| Chronic Myeloid Leukemia Signaling                                 | 0.00E+00 | 3.88E-02 | NaN | CTBP2,NFKB1,PIK3R6,RASD1                 |
| Non-Small Cell Lung Cancer Signaling                               | 0.00E+00 | 2.74E-02 | NaN | PIK3R6,RASD1                             |
| Cdc42 Signaling                                                    | 0.00E+00 | 1.80E-02 | NaN | CDC42BPA,FOS,HLA-DQB1                    |
| EIF2 Signaling                                                     | 0.00E+00 | 1.34E-02 | NaN | ACTG2,PIK3R6,RASD1                       |
| Retinoic acid Mediated Apoptosis Signaling                         | 0.00E+00 | 1.67E-02 | NaN | CRABP1                                   |
| Hereditary Breast Cancer Signaling                                 | 0.00E+00 | 2.14E-02 | NaN | PIK3R6,RASD1,SFN                         |
| Regulation of eIF4 and p70S6K Signaling                            | 0.00E+00 | 1.91E-02 | NaN | IRS1,PIK3R6,RASD1                        |
| Nur77 Signaling in T Lymphocytes                                   | 0.00E+00 | 3.39E-02 | NaN | CD28,HLA-DQB1                            |
| OX40 Signaling Pathway                                             | 0.00E+00 | 3.33E-02 | NaN | HLA-DQB1,NFKB1,TNFRSF4                   |
| MIF-mediated Glucocorticoid Regulation                             | 0.00E+00 | 2.94E-02 | NaN | NFKB1                                    |
| Intrinsic Prothrombin Activation Pathway                           | 0.00E+00 | 2.38E-02 | NaN | COL1A1                                   |
| IL-17A Signaling in Airway Cells                                   | 0.00E+00 | 3.12E-02 | NaN | NFKB1,PIK3R6                             |
| Role of JAK2 in Hormone-like Cytokine Signaling                    | 0.00E+00 | 2.94E-02 | NaN | IRS1                                     |
| Role of JAK family kinases in IL-6-type Cytokine Signaling         | 0.00E+00 | 4.00E-02 | NaN | IL6ST                                    |
| Telomerase Signaling                                               | 0.00E+00 | 2.80E-02 | NaN | PIK3R6,RASD1,TERT                        |
| nNOS Signaling in Neurons                                          | 0.00E+00 | 2.13E-02 | NaN | RASD1                                    |
| ErbB2-ErbB3 Signaling                                              | 0.00E+00 | 3.08E-02 | NaN | PIK3R6,RASD1                             |
| Thyroid Hormone Metabolism II (via Conjugation and/or Degradation) | 0.00E+00 | 2.63E-02 | NaN | LARGE2                                   |
| Pyrimidine Ribonucleotides De Novo Biosynthesis                    | 0.00E+00 | 2.27E-02 | NaN | AK8                                      |
| D-myo-inositol (1,4,5)-Trisphosphate Biosynthesis                  | 0.00E+00 | 4.00E-02 | NaN | PLCH1                                    |
| Salvage Pathways of Pyrimidine Ribonucleotides                     | 0.00E+00 | 2.06E-02 | NaN | AK8,APOBEC3H                             |
| Pyrimidine Ribonucleotides Interconversion                         | 0.00E+00 | 2.38E-02 | NaN | AK8                                      |
| Remodeling of Epithelial Adherens Junctions                        | 0.00E+00 | 2.90E-02 | NaN | ACTG2,TUBB6                              |



|                                                   |          |          |     |                                                     |
|---------------------------------------------------|----------|----------|-----|-----------------------------------------------------|
| UVB-Induced MAPK Signaling                        | 0.00E+00 | 3.85E-02 | NaN | FOS,PIK3R6                                          |
| UV-Induced MAPK Signaling                         | 0.00E+00 | 3.92E-02 | NaN | FOS,RASD1                                           |
| HIPPO signaling                                   | 0.00E+00 | 3.53E-02 | NaN | CD44,SFN,TEAD4                                      |
| Unfolded protein response                         | 0.00E+00 | 3.57E-02 | NaN | CEBPD,MAP3K5                                        |
| Estrogen Receptor Signaling                       | 0.00E+00 | 2.19E-02 | NaN | CTBP2,RASD1,RUNX2                                   |
| EGF Signaling                                     | 0.00E+00 | 3.64E-02 | NaN | FOS,PIK3R6                                          |
| Interferon Signaling                              | 0.00E+00 | 2.78E-02 | NaN | IFIT3                                               |
| Protein Ubiquitination Pathway                    | 0.00E+00 | 2.56E-02 | NaN | DNAJC15,DNAJC18,DNAJC22,HSPA12A,UBE2E2,UBE2E3,USP40 |
| FGF Signaling                                     | 0.00E+00 | 3.57E-02 | NaN | GAB1,MAP3K5,PIK3R6                                  |
| Cell Cycle: G2/M DNA Damage Checkpoint Regulation | 0.00E+00 | 2.04E-02 | NaN | SFN                                                 |
| Antigen Presentation Pathway                      | 0.00E+00 | 2.56E-02 | NaN | HLA-DQB1                                            |
| Glutamate Receptor Signaling                      | 0.00E+00 | 3.51E-02 | NaN | GNB3,SLC1A3                                         |
| TGF- $\beta$ Signaling                            | 0.00E+00 | 3.12E-02 | NaN | FOS,RASD1,RUNX2                                     |
| Apoptosis Signaling                               | 0.00E+00 | 4.04E-02 | NaN | MAP3K5,NFKB1,RASD1,TNF                              |
| Hypoxia Signaling in the Cardiovascular System    | 0.00E+00 | 2.70E-02 | NaN | UBE2E2,UBE2E3                                       |
| Phagosome Maturation                              | 0.00E+00 | 2.00E-02 | NaN | ATP6V0A1,DYNLT1,TUBB6                               |
| BAG2 Signaling Pathway                            | 0.00E+00 | 2.33E-02 | NaN | NFKB1                                               |
| Complement System                                 | 0.00E+00 | 2.70E-02 | NaN | ITGAM                                               |

**Supplemental Table 26. Master table of the qRT-PCR primers used throughout the manuscript**

| Target     | IDT Assay ID        | Forward primer 5'-3' seq | Reverse primer 5'-3' seq   |
|------------|---------------------|--------------------------|----------------------------|
| CD226      | Hs.PT.58.21223734   | GCTCTCTTTACACTTACCCACA   | GACATTCTTTCCAGGTTCCGA      |
| CD44       | Hs.PT.58.4301068    | TGAAGATGAAAGAGACAGACACC  | CTGGTTCTGTTTTGTGTGGTC      |
| CD8A       | Hs.PT.56a.25099014  | GAACCGAAGACGTGTTTGC      | CAGTTTGAAGTAATGTAGTGGCT    |
| CD9        | Hs.PT.56a.4183031   | CACCAAGTGCATCAAATACCTG   | GTTTCTTGCTCGAAGATGCTC      |
| CDC42BPA   | Hs.PT.58.20432510   | GGTCCTGGAGATGGAATACAG    | CTGAGCCACTGAATACTGTCC      |
| CMPK2      | -                   | CCAGGTTGTTGCCATCGAAG     | CAAGAGGGTGGTGACTTTAAGAG    |
| COL6A1     | Hs.PT.58.25699746   | CCTCGTGGACAAAGTCAAGT     | GTGAGGCCTTGGATGATCTC       |
| CSF2       | Hs.PT.58.20138984   | CAGCCTACCAAGCTCAAG       | TGACAAGCAGAAAAGTCCTTCAG    |
| CXCR3      | Hs.PT.58.19517534   | CAACCACAAGCACCAAAGC      | CTCGGCGTCATTTAGCACTT       |
| DTX1       | Hs.PT.58.26105230   | GCCACTGCTATCTACCCAAC     | GTGCCGATAGTGAAGATGAGTC     |
| FSCN1      | Hs.PT.58.614427     | AGCTGGAGTTCAACGATGG      | CCACCTTGTTATAGTCGCAGA      |
| GAPDH*     | -                   | TGCACCACCAACTGCTTAGC     | GGCATGGACTGTGGTCATGAG      |
| GBP5-AS1   | -                   | GCTGGAATTTCTGGTGTGTTG    | TTTCCAGAACTTAGGCAGTG       |
| HMBS*      | -                   | AGTTGGTAGGCATCACTGCTC    | TAATGGGCATCGTTAAGCTGCC     |
| IFITM1     | -                   | CCTACTCCGTGAAGTCTAGG     | ATGAATCCAATGGTCATGAGG      |
| IGFBP4     | Hs.PT.58.39752241   | CCCATCCCCAACTGCGA        | GTCCACACACCAGCACTT         |
| IKZF3      | Hs.PT.58.4515293    | GATGAACTGCGATGTGTGTG     | CTCTGCTTTGATGTGTCTTGC      |
| IL17RB     | Hs.PT.58.3136597    | TCCAACACAGCACTATCATCG    | CAAGTAGGAAAATATGGAGTCAGC   |
| ITGA6      | Hs.PT.58.453862     | TCGAGTTTGATAACGATGCTGA   | CATATCGGTGAGCACATGTCA      |
| LINC01871  | -                   | TTCTCAGAGGTCTGGACCAA     | GGTAAGTCATATATGCAAGAGAGACA |
| LYN        | Hs.PT.58.19416779   | GAGCGGGAAATATGGGATGT     | CTCTGTCCAGGTAAAGCTGAG      |
| MMP25      | Hs.PT.58.40446700   | CCTAGCCCATGCCTTCTTC      | CCAACTCATGGACAGCCA         |
| MMP9       | Hs.PT.58.22814824.g | ACATCGTCATCCAGTTTGGTG    | CGTCGAAATGGGCGTCT          |
| MX1-AS1    | -                   | GGACATCCCATCTCAAATGC     | AAGGCCAAGTGAATGAGC         |
| NFKB1      | Hs.PT.58.20344216   | CAGGAGACGTGAAGATGCTG     | AGTTGAGAATGAAGGTGGATGA     |
| NR1R       | -                   | AGTGTTCTCTCCCTCCAT       | CAGCCAGGTAGGATTCATTT       |
| OAS123-AS1 | -                   | ACAACCAGGACAAGAACC       | ATTTCCCTCAGCCATAATCCC      |
| PRKAR2A    | Hs.PT.58.3890712    | TGGAGAACGCATAATCACTCAG   | CACCATCCTTGTTTGATTTAGTCC   |
| PTGDR2     | Hs.PT.58.1891919    | CTCTTGCTAGCTGCTGTGTCAG   | AGAGTGGCTTCAGTGTGG         |
| RSAD2      | Hs.PT.58.713843     | GTCACAGGAGATAGCGAGAATG   | CGTGAGCATCGTGAGCAAT        |
| SDHA*      | -                   | TGGGAACAAGAGGGCATCTG     | CCACCACTGCATCAAATTCATG     |
| SLAMF1     | Hs.PT.58.24703737   | ACGAACCATTACCAGACAACAG   | GGAAGGAGTCAAGTTTCTTCTGA    |
| SLAMF7     | Hs.PT.58.1239856    | GGATATACAGCTCACTCCAG     | GTGCCATTCTTATTGCTCTGC      |
| SPINT1     | Hs.PT.58.20368395   | GGCAACAAGAACAACCTTTGAGG  | GCAGATGACCAGGAACACT        |
| STAT3      | Hs.PT.58.20367494   | TGCTTCCCTGATTGTGACTG     | AGGCATTTGGCATCTGACAG       |
| TBX21      | Hs.PT.58.3936407    | CCAAGTTTAAATCAGCACCAGAC  | CGTCCACAAACATCCTGTAGT      |
| TNFRSF8    | Hs.PT.56a.4403308   | AGCTGCTTCTAAACTGACGAG    | CCTGCTTTCTGCAATCACC        |
| TOX2       | Hs.PT.58.19760150   | TCAGAACCCTCAGTGCCA       | CTGCTTCTGTCTTCTCTTGT       |
| YWHAZ*     | -                   | ACTTTTGGTACATTGTGGCTTCA  | CCGCCAGGACAAACCAGTAT       |
| OAS1       | -                   | GAAAGGTGCTTCCGAGGTAG     | CAGGTCAGCGTCAGATCG         |
| MX1        | Hs.PT.58.39051980   | GAGTCAATGAGGTCGATGCAG    | CCCACCCTCTATTACTGAATGG     |
| GBP5       | Hs.PT.58.22433846   | GCTTCTGCTTCACTTGTGC      | CGGAAAGGAATACAGGCTGA       |
| IL6R       | Hs.PT.58.3039085    | CTGTGCTCTTGGTGAGGAA      | GCTAACTGGCAGGAGAAGTTC      |
| IDO2       | Hs.PT.58.3013208    | CAGTGCTTCATGCCTTTGATG    | GGTGCTGAGTGGATGTCTTC       |
| IRF7       | Hs.PT.58.22719116.g | CACCAGGCAGAGCCGTA        | GTGTCCCACCACCTTCTG         |
| CSF1       | Hs.PT.58.26882150   | TGTCGGAGTACTGTAGCCA      | TCTTCAACTGTTTCTGGTCTAC     |
| LIF        | Hs.PT.58.2876127.g  | ACTACACAAGTCATCTACAAGAGC | CCACCTAAGTCCCAACCTAAG      |

Footnote:

\* Indicates housekeeper genes

**Supplemental Table 27: Master table of the antibodies and clones used throughout the manuscript**

| <b>Antibody</b>     | <b>Cat. Number</b> | <b>Company</b> | <b>Clone</b> | <b>Isotype</b> |
|---------------------|--------------------|----------------|--------------|----------------|
| PE CD226            | 559789             | BD             | DX11         | IgG1           |
| PE CD30 (TNFRSF8)   | 550041             | BD             | BerH8        | IgG1           |
| PE CD44             | 561858             | BD             | G44-26       | IgG2b          |
| PE CD8a             | 561949             | BD             | RPA-T8       | IgG1           |
| PE CD183 (CXCR3)    | 550633             | BD             | 1C6/CXCR3    | IgG1           |
| PE $\alpha$ -Aiolos | 371103             | Biolegend      | 16D9C97      | IgG1           |
| PE $\alpha$ -T-Bet  | 644809             | Biolegend      | 4B10         | IgG1           |
| PE IgG1             | 400139             | Biolegend      | MOPC21       | IgG1           |
